# Supplementary material for: Crumbs organizes the transport machinery by regulating apical levels of PI(4,5)P2 in Drosophila
Source: eLife. 2019 Nov 7;8:e50900. doi: 10.7554/eLife.50900 (PMC6881148; doi:10.7554/eLife.50900)
Supplement: Figure 6—source data 1. [file elife-50900-fig6-data1.xlsx]

## Sheet: Image32
X0	Y0	Y1	Y2	Y3	Y4	Y5	Y6	Y7	Y8	Y9	Y10	Y11	Y12	Y13	Y14	Y15	Y16	Y17	Y18	Y19	Y20	Y21	Y22	Y23	Y24	Y25	Y26	Y27		Ap-basal	Avg intensity
0	16.3765	16.323	17.3543	18.6553	15.2997	18.9295	22.2449	18.3698	13.4917	13.638	11.8124	11.67	13.6792	12.4716	15.1436	13.7716	4.1215	11.0095	13.0817	11.9111	14.2722	14.3507	8.5636	14.1065	8.7224	6.32363	5.02901	7.482		0	13.1502
0.1191	17.7154	19.565	18.1848	15.7663	18.2823	15.224	16.4065	7.2118	11.4228	13.439	12.6323	11.2892	19.4527	10.3236	17.1568	15.5345	6.7486	11.1464	11.6131	10.2114	14.9576	12.5131	6.5488	10.8812	9.295	10.5669	6.09676	5.4931		0.00510027	12.7028
0.2383	16.1033	14.1344	14.173	13.6028	18.6854	21.0931	21.7162	12.8416	10.8978	10.3089	13.6113	9.8539	22.0394	13.83	12.9295	14.3475	8.4615	10.0111	7.541	7.0658	10.735	10.2971	9.598	14.5916	10.2254	7.49032	5.50499	12.0666		0.0102048	12.6342
0.3574	24.3411	16.0151	16.5446	13.8296	17.0457	21.5835	12.7127	10.4735	11.5127	9.0896	14.3633	12.0225	16.6813	12.4537	9.9085	7.237	9.0499	6.1326	7.0283	7.2642	11.6625	12.7677	5.7496	19.5459	11.3387	8.1688	4.26287	5.7987		0.0153051	11.9494
0.4766	24.5051	14.5524	11.3304	12.0564	13.2853	20.3654	14.2247	13.0264	11.2061	15.1928	13.5898	12.1925	14.7022	13.4336	10.3554	7.3898	7.0553	5.9702	10.0171	7.0956	11.3758	6.8264	11.6492	10.0791	11.4684	9.1193	5.2948	6.8982		0.0204096	11.5806
0.5957	13.0754	15.278	12.7384	11.3659	18.7203	14.7374	15.6344	8.5241	13.8751	11.1377	13.9202	11.0392	13.9192	11.783	9.4377	6.4736	10.3448	14.5103	10.1656	9.9465	9.4057	12.3306	9.3712	9.7993	18.496	5.42832	5.31672	9.8075		0.0255099	11.6636
0.7148	14.0199	15.8845	10.5601	9.2829	10.2858	16.8152	11.8125	10.0178	14.1886	8.9193	7.7285	15.0776	16.7893	10.4245	8.9838	10.7863	6.9225	9.4269	11.472	9.5301	11.723	11.5356	8.0678	10.0176	13.3183	5.95017	6.46913	4.9404		0.0306102	10.7482
0.834	21.9333	15.6783	12.0504	13.9777	14.7114	13.1673	12.9819	9.3078	12.6552	9.0793	10.9872	12.7983	20.3461	14.941	12.3626	13.5903	7.6675	8.8491	9.375	8.8383	14.139	11.4553	9.9139	9.2912	10.6281	4.89194	5.21579	4.4528		0.0357147	11.6174
0.9531	16.977	16.7302	14.1686	16.6233	14.6655	17.1421	7.6192	9.9855	10.7711	7.5917	8.8974	9.4272	17.9585	12.7419	16.1792	15.4325	6.9655	7.3816	7.7342	11.7314	12.3787	10.3829	10.707	12.3165	12.785	6.16624	3.89499	7.1054		0.040815	11.5164
1.0723	19.8258	13.6858	9.6746	13.1903	14.6398	13.3261	13.3085	11.2539	13.5735	7.5404	9.7236	9.6119	15.7507	11.9178	11.2824	11.5676	5.8254	8.2278	7.7652	11.1824	15.6542	10.6757	12.8111	12.9049	10.8036	5.06201	5.80663	7.4036		0.0459196	11.2141
1.1914	12.8012	8.1559	9.8225	9.2369	20.1544	14.4296	12.5472	12.6274	12.134	12.6672	7.4984	12.3745	19.5176	11.0808	14.8856	13.4049	13.4259	3.2617	12.5075	10.4362	8.7693	10.1217	11.5608	10.2989	9.7198	6.48432	6.13259	6.2519		0.0510198	11.1539
1.3106	15.4961	8.0229	12.3438	9.3872	10.3186	12.1165	14.0936	8.2765	6.0608	6.3579	7.12	11.5955	13.8697	10.0522	17.8862	7.9403	7.1663	7.5415	7.67	5.573	16.0973	16.9963	11.2124	9.7794	9.3663	6.66546	6.37087	4.7939		0.0561244	10.0061
1.4297	19.0462	11.9556	8.9877	11.6786	9.9368	11.5235	13.529	11.1856	5.1984	6.717	8.7069	13.9733	13.1771	12.1315	12.711	11.0423	6.1549	8.1061	10.2103	8.8828	13.6855	16.2064	14.6169	11.8474	9.4906	5.22531	3.50132	5.6494		0.0612247	10.5385
1.5488	16.3721	8.6186	10.3184	6.7925	10.3354	16.25	9.8128	11.1703	5.3575	3.9502	10.032	9.2088	18.223	8.1789	10.9133	13.3828	5.1524	10.6517	3.7648	6.2678	6.0388	9.6184	14.9232	7.8279	7.8677	3.85042	6.00313	7.8806		0.0663249	9.24155
1.668	16.8987	11.8095	9.6405	7.9368	10.9968	13.7035	12.4051	8.4546	6.0582	9.352	9.1014	11.0144	15.2578	7.4104	11.0885	9.5359	6.9069	5.0784	4.5771	12.1792	11.4005	13.9302	8.1863	15.568	8.3481	3.43185	6.51943	4.4083		0.0714295	9.68566
1.7871	15.9897	8.2243	6.2219	8.8516	16.8456	13.4362	11.508	10.9086	5.3003	7.753	7.6544	10.9009	17.6205	11.6618	10.9468	5.0536	5.3842	4.8549	7.3232	9.9736	12.0255	14.3291	8.2947	8.955	7.8131	5.82684	4.89606	4.7587		0.0765298	9.404
1.9063	15.0939	6.4971	8.6263	9.4372	12.8922	8.5718	8.4704	5.9144	7.1154	9.7316	8.9746	9.6211	13.528	10.5295	10.2283	8.6531	8.2654	8.5056	5.3744	8.6427	10.9373	17.7365	9.7463	13.0279	9.0016	5.53912	3.87497	5.0419		0.0816343	9.27066
2.0254	14.3167	8.0776	11.1395	7.924	11.1799	13.1131	7.9744	5.9812	7.8951	3.7857	5.4053	7.7983	14.4476	10.5931	12.6028	13.8872	8.5015	7.0116	4.9387	6.278	10.6672	11.1093	8.7866	12.8456	4.2528	6.71438	4.74221	4.6409		0.0867346	8.80751
2.1445	12.4625	11.2889	9.5972	8.8162	6.5745	14.3275	14.3045	7.1379	8.9626	7.6984	8.0269	13.4904	15.1056	8.7168	9.7719	9.1208	8.1428	6.0796	5.5465	8.9492	7.7424	10.5635	11.3559	8.985	9.2651	5.68578	5.2822	5.6251		0.0918349	9.23663
2.2637	15.6192	9.1051	8.0048	7.5046	9.9196	8.8613	13.3958	12.298	10.2175	8.5561	7.5714	8.0262	19.0304	8.2236	7.8781	8.7491	8.3938	7.0004	4.1654	9.925	5.6048	12.9263	12.2279	10.0833	4.7156	8.07947	3.90367	7.0493		0.0969394	9.17985
2.3828	17.9926	7.8021	4.4394	10.426	11.2343	7.2991	13.7132	11.9951	5.1461	3.781	5.8361	6.0402	17.4166	11.3836	11.9513	8.4169	10.2713	6.313	5.0316	9.7625	12.1738	10.6147	6.7344	6.8423	10.343	5.58617	3.02438	10.3747		0.10204	8.99805
2.502	14.2471	10.1756	7.0172	8.6661	9.7712	8.0946	18.402	9.7519	6.9857	5.6352	8.4198	9.5635	18.3044	11.673	10.5027	7.5954	7.2794	6.9495	5.1427	8.7099	9.0893	9.1821	10.9567	6.7742	11.3676	5.39266	6.55901	4.4399		0.107144	9.16601
2.6211	11.2936	8.3142	8.024	6.1476	9.7347	10.102	14.08	8.301	7.9569	7.5019	8.4469	9.0415	14.6269	10.439	16.7885	8.1924	5.9151	5.3887	8.3803	7.2271	9.6243	15.1809	11.9183	9.6506	9.343	5.04305	5.56828	7.398		0.112245	9.27245
2.7402	11.0252	8.1327	12.0606	10.0934	7.9705	11.1069	15.3582	5.8254	7.2055	5.7018	8.593	11.9867	14.4473	9.1043	13.7814	10.9038	8.3294	7.4744	6.8141	11.0179	8.7901	13.6076	14.1609	12.1889	6.8617	8.79732	5.52451	7.7943		0.117345	9.80921
2.8594	15.1837	10.1761	5.9929	4.9252	12.652	12.5341	13.0542	8.0388	7.3579	7.3849	7.0258	11.7668	13.3079	12.0524	13.5484	9.4167	9.8939	6.581	13.4984	12.4969	7.6891	8.1387	10.6089	13.3192	11.3053	6.12812	8.00892	5.2217		0.122449	9.90386
2.9785	13.8317	8.7363	6.5318	11.4667	11.6855	13.3135	16.502	10.1425	9.107	5.9949	10.1772	4.0089	9.8332	10.4688	13.2968	10.4776	6.7341	4.6608	8.8151	6.5985	7.8755	15.281	12.6628	13.8887	12.5185	7.67298	7.31889	6.3317		0.12755	9.85475
3.0977	20.9011	6.8831	6.0452	8.965	5.2956	7.2896	16.902	6.0898	5.7623	7.9221	11.5739	10.8139	12.3515	12.2368	11.9734	7.394	10.4599	9.2143	10.7112	8.1629	6.9902	12.5252	14.5665	13.5875	13.4996	9.20915	4.14573	4.3702		0.132654	9.85149
3.2168	20.0282	6.3375	8.1363	8.1825	9.3572	14.4066	15.8253	6.2923	7.8683	8.0081	9.972	11.8386	13.7093	13.6998	14.8178	8.3509	12.0301	6.8294	10.6313	4.8977	12.7262	18.8903	12.1106	10.4023	8.1727	4.79523	5.09626	5.0885		0.137754	10.3036
3.336	15.4297	11.4193	7.5308	9.3945	13.3293	16.2016	14.1569	8.4419	5.876	7.999	12.9719	6.6802	14.6544	11.4329	14.0409	6.7007	12.2879	7.2197	6.5954	9.2455	6.798	13.8184	20.7073	12.4169	6.0015	8.42039	6.09402	3.8791		0.142859	10.348
3.4551	19.6984	10.022	5.9708	4.8323	8.4448	14.5764	11.777	4.4047	6.0565	6.9533	9.6299	15.0238	11.1987	15.9448	17.0899	6.9423	7.6885	7.0354	8.7449	7.8306	7.2663	11.5224	16.8305	11.17	6.919	10.8973	4.20328	4.7801		0.147959	9.76621
3.5742	14.5473	9.1937	11.0852	8.2925	6.5814	16.4561	14.1008	7.3066	8.1044	6.1401	6.5659	7.8932	11.305	14.3825	13.8804	5.5711	9.7536	8.9722	9.4438	7.1984	5.2592	13.9225	17.3867	10.9626	7.6103	6.80312	7.60599	4.6427		0.15306	9.6774
3.6934	15.6343	13.0129	5.7944	11.8951	12.9872	15.8538	13.7254	11.1684	5.6146	9.0875	8.2301	8.6677	12.8943	20.5885	13.8798	8.983	8.1534	17.8715	6.9175	10.7621	7.3157	11.1537	13.1736	13.2315	7.9776	3.72379	5.24384	5.8784		0.158164	10.6936
3.8125	17.0199	5.9457	10.9638	7.2388	10.022	14.8138	14.375	7.2777	8.562	7.7034	6.0889	4.3386	11.6141	10.1132	18.8325	9.9837	5.5753	11.8315	6.0263	9.9415	9.7835	11.7483	11.299	8.3499	7.6333	7.64178	4.12078	7.3555		0.163264	9.50713
3.9317	19.3893	9.471	6.719	9.1127	7.467	12.1099	15.9452	5.9885	7.758	8.8892	9.6523	5.8144	12.5215	17.6082	15.1004	7.3922	6.1732	12.8141	7.7125	6.6333	11.5644	11.8242	12.7325	8.9927	7.0343	9.83507	6.40707	6.4947		0.168369	9.96989
4.0508	13.1524	6.9019	9.3234	7.963	6.8693	9.942	15.313	7.7541	8.3732	6.1153	9.6	11.8311	16.168	13.662	15.6249	6.916	10.7385	13.8946	6.8483	9.0508	5.8914	11.7082	16.4883	13.0666	8.6735	9.75316	3.31758	5.2494		0.173469	10.0068
4.1699	15.819	12.7792	13.6338	9.8935	11.8951	21.696	16.9831	7.6475	8.6032	7.1567	13.8952	6.8567	17.823	12.6604	17.4163	13.0622	8.6538	11.5939	6.2428	7.3646	7.4363	11.4381	17.6329	13.7344	10.1329	6.04332	5.44705	4.4333		0.178569	11.3562
4.2891	13.4808	9.1899	10.8091	8.5922	13.0729	15.0879	14.9283	9.319	4.3819	8.316	8.9624	6.8377	16.7529	10.5258	12.0695	14.7834	6.8598	10.1107	8.1818	10.7052	8.53	13.0813	12.8729	11.729	5.6588	8.16285	5.63453	4.6979		0.183674	10.1191
4.4082	12.0986	12.0899	11.8142	8.0617	10.5084	22.5593	17.6457	7.7456	6.222	6.6482	7.0513	5.9564	10.1047	11.8985	13.8805	9.2228	5.3937	7.2685	7.1306	9.9874	12.8888	9.8528	13.655	13.5249	4.8873	6.72556	7.16651	5.203		0.188774	9.89971
4.5274	18.4148	10.6449	10.645	9.0383	12.7785	18.3621	15.8991	6.4574	5.5244	6.3742	10.0533	8.5011	9.5905	15.3307	14.0021	9.5341	7.5722	7.9812	8.3444	10.2611	9.9093	9.913	16.1391	12.966	9.3996	7.52738	8.4397	7.2078		0.193879	10.6004
4.6465	23.7809	9.8356	10.4887	11.9297	9.866	21.613	14.9942	6.0758	5.7251	5.6441	9.3527	8.7314	8.0442	8.4052	12.5087	9.3658	7.0303	6.9028	10.3863	11.2458	8.4919	5.8015	23.2318	14.3945	6.7784	8.68852	5.66442	7.3973		0.198979	10.442
4.7657	13.4074	14.4289	13.6067	5.1004	8.351	12.6161	16.5203	9.4066	6.2983	5.0098	8.0864	11.4474	10.2284	9.2758	15.3709	12.089	8.8759	9.1338	10.1385	5.1291	12.4888	12.0829	13.1701	13.1215	10.2203	7.76528	6.33317	7.647		0.204084	10.2625
4.8848	13.4828	12.4374	8.6096	7.0254	7.5891	18.2751	16.1667	8.3013	4.911	4.8109	8.1851	12.2727	24.8379	10.3733	17.8281	9.1971	8.8257	12.1802	13.2294	10.1256	6.8836	11.9547	17.2072	18.376	9.5724	6.38071	6.84167	5.1172		0.209184	11.1071
5.0039	13.9325	13.1329	11.1223	7.6397	10.5673	18.6119	15.5623	8.4972	4.5594	13.0805	7.0569	6.0219	13.3954	14.8102	12.1548	10.0709	7.3918	5.5502	9.0872	10.553	4.2134	9.8139	16.9818	8.4542	9.6876	10.4096	6.53354	6.5389		0.214284	10.194
5.1231	11.4742	11.78	17.4383	9.8251	9.4987	24.3965	14.6767	5.7623	7.1414	6.7003	11.8877	12.4231	16.3322	12.2788	12.7719	6.656	13.3837	6.3636	11.8756	9.3617	6.8245	10.2864	11.823	10.1516	8.4665	5.61948	6.05612	6.7518		0.219389	10.6431
5.2422	10.7922	9.4794	8.3798	5.6163	12.4578	18.2908	14.2604	5.3252	6.8061	7.7534	7.3328	9.3864	10.2162	10.9061	10.1103	7.2252	8.7756	6.6776	8.6577	12.7487	6.534	9.1817	12.8427	12.835	5.2724	8.6819	6.07709	5.7819		0.224489	9.22874
5.3614	12.6323	7.4627	9.753	9.637	9.9787	13.9621	13.7454	10.5599	8.3024	11.0995	7.9981	8.7178	9.6117	7.4988	12.3789	10.2513	13.4724	8.7057	6.5201	7.4745	8.8013	7.1321	12.8695	12.9521	6.8067	5.55192	7.53703	4.6103		0.229594	9.50083
5.4805	15.8061	14.4633	10.4178	11.8749	11.023	15.1776	12.0181	7.16	10.1998	9.6446	9.7624	9.2383	7.1808	8.5493	16.9068	7.5359	10.0654	8.0288	8.1705	5.6604	7.4223	7.3721	12.8246	9.6208	9.4889	4.40875	7.27251	7.2288		0.234694	9.80438
5.5996	20.4473	8.3223	8.9001	6.8273	10.5089	17.7538	16.7161	7.3118	10.888	6.4493	11.7413	13.0126	11.1915	14.5122	10.0443	8.1155	9.7213	11.0178	9.9023	5.7357	9.5014	8.6535	13.3942	10.7402	10.3308	6.18973	5.62197	6.536		0.239794	10.3603
5.7188	16.0925	12.5548	9.831	6.4842	9.2117	14.8762	14.5817	6.1206	12.4046	8.5169	14.4082	11.0543	11.3385	10.3054	8.0574	9.2097	9.0388	9.9081	12.4463	8.7402	7.9675	5.7306	10.612	5.7274	9.4879	10.9238	6.26065	4.5091		0.244899	9.87143
5.8379	15.56	9.1148	11.6702	6.5283	7.2749	13.9718	14.6146	7.3066	9.5835	9.0305	8.0286	8.6678	10.9165	14.0692	7.1759	5.6227	7.9506	6.7978	10.9182	11.246	10.9702	8.4982	14.9311	10.5202	6.3169	6.61325	4.27949	4.5446		0.249999	9.38294
5.9571	20.3135	11.7106	14.2227	7.6269	10.3347	17.6567	14.0673	6.2513	12.6216	9.4447	5.6026	5.4482	13.2681	10.3895	10.6651	7.0493	13.5188	8.6114	16.3565	12.5234	9.7046	6.3909	11.4891	14.54	4.7966	5.13699	10.7392	4.2257		0.255103	10.5252
6.0762	14.8268	9.414	11.0132	7.9763	12.7994	11.5743	16.5135	8.1204	8.3933	6.8843	8.0838	6.2872	11.755	7.7567	7.2754	6.7643	14.9074	9.608	9.7433	8.8061	11.3133	11.9039	10.5494	10.9583	5.8939	6.77136	10.5901	5.8795		0.260204	9.72723
6.1953	19.5789	11.2581	8.0054	11.8001	8.9422	17.8707	12.8827	7.4388	6.8355	10.9858	9.8661	8.2244	11.0852	12.8434	6.4811	9.1747	10.011	9.8089	8.7844	6.4988	8.0811	11.2625	10.1391	9.4055	6.7022	12.2442	7.73054	6.1306		0.265304	10.0026
6.3145	14.5899	14.6812	12.6267	7.8985	16.9731	15.8248	11.4254	8.5968	4.3914	9.1184	8.9378	9.1048	7.4367	10.4243	8.5471	7.6411	12.0088	9.4574	11.4613	7.1424	7.9999	8.8855	9.518	11.0545	6.0924	10.2785	9.81559	6.9054		0.270409	9.95849
6.4336	13.8281	8.8104	8.6031	7.5497	10.4211	14.7448	7.8843	7.3715	9.5806	7.8503	5.8248	7.906	9.7168	9.4728	4.9507	11.612	6.4026	7.5037	7.5694	6.6437	8.6891	11.5501	6.8621	9.6491	9.5462	7.59709	8.3588	6.0649		0.275509	8.66299
6.5528	14.0541	8.5661	8.1862	5.4056	10.551	19.6364	11.7864	7.4449	10.1464	9.1135	6.3719	8.8223	8.9541	7.9662	6.4571	8.4962	6.2075	5.6711	8.0372	9.6307	9.091	10.0482	11.2629	9.5046	6.2817	8.8175	4.9681	6.3066		0.280613	8.84948
6.6719	14.227	10.8477	14.3749	8.6633	9.5229	14.8708	13.3384	6.1795	10.1303	10.4157	5.2517	12.0799	9.5018	9.9681	6.1317	5.0596	6.0917	8.3676	9.9932	9.9329	14.4397	9.3539	12.2854	7.3558	4.2632	10.4807	7.30161	4.7202		0.285714	9.46962
6.7911	16.0572	12.3066	13.3628	10.0276	11.532	14.6048	12.9916	5.7525	13.2605	10.3509	5.7587	8.9655	9.0229	7.2079	9.3288	8.1262	10.3097	12.1645	12.0669	12.2374	8.2462	7.2202	12.6073	10.138	7.4948	9.63674	7.52253	6.1754		0.290818	10.1599
6.9102	10.5493	10.9007	10.8161	8.4883	9.9977	16.2999	11.0835	4.449	13.2529	9.9283	4.6584	10.1326	12.8423	13.0403	7.8557	7.491	6.3939	5.7142	6.3462	7.0526	7.114	6.1981	7.2454	11.8753	6.9866	5.54884	7.91271	4.8215		0.295918	8.74983
7.0293	10.2036	8.0037	9.1033	7.7329	10.0441	13.5605	13.9669	10.5487	8.973	9.2596	7.4983	8.0767	10.0272	11.0674	3.2137	10.381	9.6539	7.6528	7.8309	7.6325	11.5496	4.0623	10.0538	5.7592	6.0655	7.8391	3.98849	7.0402		0.301019	8.5996
7.1485	12.2802	13.6884	9.4486	10.452	9.982	12.5847	6.0978	8.7882	6.2744	11.148	5.11	8.5476	7.6551	14.5352	8.2942	13.1179	8.555	4.2163	5.1897	10.3165	7.3125	7.7991	5.281	3.7476	4.5143	7.17948	4.1861	6.0149		0.306123	8.29703
7.2676	11.8794	14.3614	9.4855	11.1419	9.8683	11.8308	13.9741	6.1882	4.6352	11.3037	5.9819	10.1573	7.6755	15.2388	10.4147	11.0437	10.0765	10.6311	8.5706	6.9866	8.7375	7.1587	6.8277	6.564	4.4102	5.77036	3.92692	4.8109		0.311224	8.91612
7.3868	14.7785	9.8646	9.3391	10.266	10.844	12.8107	10.2612	6.4143	5.2556	9.4934	8.1745	10.6157	9.2306	9.6367	9.1179	9.1985	8.939	6.6224	6.9553	8.5068	6.8499	5.633	6.9322	6.2392	7.0647	9.16495	1.9273	6.611		0.316328	8.45525
7.5059	12.186	9.8269	13.7721	13.1158	11.9609	10.3778	8.9826	11.9202	6.4059	9.0288	7.3058	12.7606	6.9139	9.7476	7.0419	7.3891	9.4433	7.8336	6.5899	8.9837	8.443	8.5812	5.769	9.5022	4.8876	6.20838	2.73313	5.2809		0.321428	8.67828
7.625	12.0378	8.1274	11.7346	14.1445	12.6996	16.0647	11.0326	7.8022	5.5616	8.6432	8.9493	8.1975	9.0396	10.1878	8.2631	6.7686	7.6409	5.3425	6.7452	9.4335	10.3764	8.8958	3.991	5.4362	4.6491	10.7548	4.88507	6.3074		0.326529	8.704
7.7442	8.5549	9.5435	11.9319	8.9441	6.0778	10.445	12.0941	9.4159	11.9111	11.1751	8.0649	8.0389	6.8201	10.6681	8.0685	7.9622	11.8594	6.4468	5.8961	9.3996	7.2077	4.5985	4.5333	5.6738	5.2101	7.52494	4.9414	6.5262		0.331633	8.19764
7.8633	11.8322	12.3405	9.8152	12.8983	5.5366	11.3911	7.6982	8.4153	8.1734	9.4748	11.4807	5.2655	8.1982	7.1704	8.7453	11.9145	8.7132	6.7848	7.2672	8.1991	10.0624	6.5248	5.3671	9.9803	4.8748	6.5742	7.50459	6.9581		0.336734	8.54146
7.9825	12.8177	9.3442	8.822	8.7054	7.9259	12.6213	9.5431	7.1481	8.1635	6.1937	6.2565	10.9092	9.4691	8.1447	8.2268	8.3036	7.389	6.4229	7.5682	6.7375	5.4467	6.2294	5.098	6.6945	6.739	11.8938	10.5592	6.9221		0.341838	8.22483
8.1016	13.221	5.7688	8.3261	9.5178	9.9352	6.6759	8.8678	6.1617	7.6123	7.3121	7.5372	10.1559	9.1666	7.2327	9.6704	6.0476	9.8084	5.7052	6.5781	7.3588	9.0133	5.6795	6.7913	6.7984	6.9466	7.42955	6.33905	7.9408		0.346938	7.84279
8.2207	11.2666	14.7166	8.5505	7.3813	10.1738	11.7495	9.9246	9.5969	5.1162	5.924	7.5853	13.864	7.7318	10.6025	5.6143	6.1297	8.8759	3.9594	4.5787	5.6142	6.9829	8.3238	10.2233	3.9352	7.3869	6.05931	5.64589	7.5607		0.352039	8.03835
8.3399	17.14	7.4925	5.9602	6.4073	12.6574	8.3784	10.6807	7.7896	4.7795	5.1714	5.6597	8.1349	7.1323	8.208	9.0703	5.3147	6.5629	5.243	3.6203	4.665	7.7016	7.67	6.7329	4.942	8.1286	9.41056	5.24399	5.3609		0.357143	7.33067
8.459	10.75	7.5568	8.9377	11.097	10.611	9.0759	10.342	8.1951	8.5623	5.2111	9.3683	9.5064	5.8699	8.5323	8.791	7.0511	4.636	6.6375	3.4811	5.5603	6.9621	5.3113	8.9699	8.5922	10.8648	8.45804	7.63441	7.6545		0.362243	8.00786
8.5782	8.2073	8.8938	5.9137	7.5356	5.1231	12.7684	7.4363	8.9168	11.0782	5.2648	3.3484	6.2746	7.8445	5.5007	7.6319	8.8449	5.2265	6.1264	3.9667	5.6116	8.21	5.9451	5.8252	4.904	4.1046	6.40208	7.67299	4.3344		0.367348	6.74688
8.6973	11.3224	7.9547	7.7518	7.9547	8.7543	17.2089	7.625	7.5139	10.7007	6.248	6.4334	6.5985	6.8824	7.6623	6.7015	5.471	8.5947	3.6342	4.1673	4.8922	10.4524	6.8279	6.2823	5.4686	3.6549	9.09192	4.90557	5.042		0.372448	7.34991
8.8165	14.0555	9.6332	6.4927	5.8979	7.209	11.2064	6.7193	6.5043	10.6777	3.9485	9.2387	9.8536	5.4151	5.3651	7.5779	3.8238	5.7292	5.9441	3.0469	8.6191	9.8952	7.1018	7.2963	6.8589	5.5758	6.86453	6.16731	4.3829		0.377553	7.18217
8.9356	10.0846	3.9459	7.2702	6.306	10.3904	11.8252	6.9789	5.614	8.0775	5.279	6.7292	8.8593	5.4026	3.7229	7.0863	6.7782	7.8349	4.109	4.9283	5.1762	7.436	4.7559	5.2646	7.2854	8.322	4.71391	5.49068	8.1932		0.382653	6.7093
9.0547	11.2403	6.9645	5.987	7.4724	5.1852	12.6911	7.3581	4.3593	6.24	5.8658	5.0485	7.6768	4.9266	7.9428	7.5643	8.8585	5.3447	4.7551	5.0102	3.917	8.0664	7.3306	5.3952	7.366	6.5854	9.21938	6.52221	6.3814		0.387753	6.83124
9.1739	10.6281	7.6359	9.3071	4.1085	6.6124	8.6311	8.9528	7.3904	6.2275	3.0963	7.1648	7.4122	6.326	7.6384	7.4276	9.3749	6.1217	2.2902	4.7174	4.9288	7.2553	8.4976	10.0089	5.1733	4.0884	5.00153	6.59446	2.7333		0.392858	6.61946
9.293	15.3806	5.2803	8.7252	4.1436	11.3578	7.9544	8.3367	9.1171	7.6242	4.2418	3.6108	8.2661	3.7693	4.2222	5.9708	6.7159	9.6787	3.2458	3.9974	5.1482	4.8502	7.4466	4.2907	6.6213	4.5497	5.81571	4.47968	2.4571		0.397958	6.33207
9.4122	13.8635	9.7748	9.8382	5.4728	8.6825	11.3835	12.4115	8.3097	8.2065	4.2637	4.5898	6.4121	5.8874	7.2748	8.4514	6.7275	6.4364	3.2457	2.3129	6.5201	4.5002	9.8885	6.4455	7.6642	3.2498	5.68485	4.30397	7.1647		0.403063	7.10595
9.5313	10.6854	7.9437	8.0736	5.7301	7.206	12.2969	4.6096	10.7433	6.0908	6.0162	2.1767	8.3806	4.3201	5.0801	5.7048	4.8146	6.2858	4.2493	2.7316	3.4495	3.2496	8.9658	7.2799	8.823	6.0072	9.91708	2.28	4.2021		0.408163	6.33262
9.6504	8.3293	8.3296	9.353	3.932	7.6519	6.9384	12.6186	10.6922	6.424	9.2685	6.1478	6.436	4.3142	5.2314	7.7535	6.3485	8.8335	3.5399	4.5848	3.6271	5.1841	8.5506	4.113	6.0103	4.9453	8.83018	3.04466	4.3409		0.413263	6.62047
9.7696	10.4387	7.2419	7.0349	3.9771	12.2176	10.1544	9.8858	10.7338	6.3042	5.8445	3.561	7.3681	4.0415	7.0797	10.1837	7.7553	5.0284	4.5551	4.7484	3.3832	3.2862	6.3147	7.3006	8.1325	5.485	5.60408	2.50189	4.7949		0.418368	6.60561
9.8887	7.372	6.1804	10.036	6.4807	5.1163	10.8915	6.8826	7.0462	5.5016	4.8071	3.7648	5.0162	6.0053	5.1334	7.5067	9.8591	6.377	2.5023	2.6737	3.6514	3.3593	3.9732	4.9127	5.4661	7.9015	4.79591	2.85537	5.6507		0.423468	5.77568
10.0079	8.0252	6.8482	5.1906	7.6376	4.3726	10.5163	3.9623	11.8173	7.4182	3.2356	3.8996	2.4649	7.327	9.7032	7.8955	5.5542	5.2897	2.7567	3.6257	3.2492	3.5948	6.5184	5.434	5.4341	5.8004	4.98552	2.69195	3.4552		0.428573	5.668
10.127	14.6637	7.7988	5.0319	5.3422	5.6446	13.2541	5.684	8.4473	5.9894	4.5413	3.8862	3.9176	6.8978	5.3112	7.8921	8.1325	5.2819	3.2407	3.3739	6.2309	6.1942	6.3345	8.8712	6.5937	5.939	4.22348	1.80729	3.8546		0.433673	6.22786
10.2462	7.6149	5.5798	7.3974	4.5678	6.2223	12.0381	6.6114	9.8314	4.8093	4.3069	5.441	3.5032	7.8365	7.6565	8.1301	6.5599	5.4524	3.3893	4.8831	4.2912	7.9989	5.2824	9.6104	6.7152	5.0791	6.85029	3.72322	2.9253		0.438777	6.22526
10.3653	9.3135	4.8136	5.8422	4.3177	7.4239	8.9156	8.2488	5.1186	4.8744	3.1352	3.5458	2.3593	7.4849	3.8437	8.7066	5.1082	6.3567	3.9904	3.936	5.7247	5.4978	6.6157	6.914	5.416	3.9958	6.63673	4.79178	4.8323		0.443878	5.63428
10.4844	13.3648	8.0609	4.1242	3.7025	3.9609	12.38	8.1723	8.5295	4.1274	2.5789	4.1323	8.7688	6.1808	3.6459	10.5801	5.34	6.5233	3.1995	3.3566	4.6541	6.2895	4.5277	4.7351	3.4842	6.1502	5.79174	5.47181	4.8072		0.448978	5.95144
10.6036	10.9545	6.8824	6.399	4.1388	7.5426	13.4064	6.2896	7.4154	5.05	4.5287	3.9128	4.9266	8.3728	7.147	6.8761	10.5909	5.6903	3.9645	3.3756	5.0249	4.3302	6.1803	5.957	4.5231	5.2249	5.23426	5.94402	4.7744		0.454083	6.23775
10.7227	13.3638	6.7493	7.1915	3.4648	7.9363	16.4044	6.853	6.9101	4.7535	4.4551	6.3748	4.5855	8.9828	9.0205	9.6325	11.1737	7.7901	5.5426	2.1272	6.0871	4.682	7.5863	6.6741	8.4561	5.4343	3.82904	3.79516	2.625		0.459183	6.87431
10.8419	8.3799	6.4304	5.0536	5.9405	8.3281	12.1448	9.7709	9.0694	6.0618	3.2078	5.4227	5.9885	8.8428	10.3693	8.5235	6.9632	4.678	2.6953	4.2856	3.022	5.1483	4.1597	6.8355	3.2955	8.2164	4.5592	3.7778	3.3309		0.464287	6.23219
10.961	6.7664	5.203	3.5069	5.9024	8.4098	10.64	7.1383	8.8712	2.7502	2.2615	4.3544	4.0216	7.0543	9.3323	8.6191	6.5315	4.1563	2.601	3.0696	3.0461	5.1527	7.7314	5.7807	4.3645	3.6779	6.21129	3.70979	5.0401		0.469388	5.56801
11.0801	10.8302	10.059	5.8684	6.1776	8.194	12.4588	7.3292	7.5487	4.5043	4.8593	2.6903	4.5709	7.2497	5.3232	4.388	3.2513	3.4009	3.2543	3.2303	3.4358	5.3082	3.9505	5.7902	5.5983	6.4483	8.60796	4.62288	2.7474		0.474488	5.77493
11.1993	11.2757	8.8266	3.5344	4.7911	6.4215	7.663	8.5233	6.2849	4.0365	4.5458	3.0314	5.555	3.5261	9.3282	6.3097	4.6768	4.3049	2.3459	3.7521	3.3915	4.9659	6.1615	6.7614	7.4834	4.567	6.60443	3.58382	5.534		0.479592	5.63521
11.3184	6.5598	6.4344	4.6281	6.5966	9.0633	9.8301	6.6808	9.3782	4.2209	4.5825	3.1242	5.8733	6.5486	7.5379	10.0834	6.5082	7.1694	2.1485	4.2993	3.4366	3.6861	5.9584	4.379	8.4884	7.8246	3.56567	3.13282	3.6694		0.484693	5.90745
11.4376	10.7283	8.6424	8.7761	7.3384	9.1695	10.877	8.6721	6.6182	4.282	2.7895	3.6874	2.9158	4.0989	6.3125	8.2647	6.0828	5.5293	2.9733	2.8153	3.4197	6.5826	5.6852	6.0681	6.4341	6.1332	2.99491	3.68258	3.9816		0.489797	5.9127
11.5567	12.4438	6.3953	8.215	4.2524	11.0551	7.224	7.2266	7.1057	4.6312	5.2396	4.4268	3.5026	9.6132	10.4631	4.647	6.5835	4.9914	2.4239	3.3818	2.7951	4.6431	4.4603	4.9906	5.4367	4.7534	3.36154	3.89355	4.0679		0.494898	5.79372
11.6758	11.7879	6.7849	6.2076	5.4904	8.8716	4.4414	6.6124	8.1806	3.2172	3.471	3.0205	4.041	7.2768	7.0251	6.3647	8.0108	5.0872	3.3272	3.3752	1.952	6.9477	7.7252	6.3506	6.4999	2.6974	4.26846	3.93534	3.3723		0.499998	5.58366
11.795	10.7412	5.9103	4.0213	4.9717	10.8227	9.8895	7.8687	8.1067	3.1585	2.1453	2.3486	3.6202	4.6193	6.8808	7.3097	6.0574	5.2263	5.9089	3.5673	2.7692	6.868	8.3157	4.3265	6.3965	3.9715	3.82546	4.4335	5.495		0.505102	5.69913
11.9141	15.498	7.2237	6.0904	6.5596	9.1526	8.6855	8.0535	5.3553	5.3278	2.0697	2.2826	4.1635	8.6781	5.0134	5.5154	5.7769	6.3438	2.379	4.5928	2.6904	5.0368	5.1125	7.9708	6.2214	3.6024	4.1685	3.43262	5.4893		0.510203	5.80308
12.0333	10.3599	4.6547	7.8581	5.0443	6.3801	9.2905	3.9305	8.606	4.0166	2.0992	2.3768	3.3435	10.2662	4.6288	5.3057	6.3314	4.6529	3.6946	3.9729	3.2577	2.1267	4.4428	7.7191	7.6491	3.4753	4.27546	4.63851	2.5426		0.515307	5.24786
12.1524	7.9247	5.6432	6.3117	3.5673	5.6499	7.2799	5.4586	6.8568	5.0762	3.2607	3.6754	4.3878	5.5194	4.471	8.8485	7.0448	3.7211	2.8919	2.9171	4.9359	5.6699	5.6291	7.9713	7.3373	8.6225	3.58927	2.55373	3.653		0.520408	5.37386
12.2716	9.2436	5.8112	8.974	3.4912	4.3559	8.1135	10.3169	6.7028	4.6685	2.2505	3.4655	4.4982	8.3752	6.6107	6.0247	6.0787	5.781	2.519	2.7942	4.8958	4.474	7.4134	4.4034	6.0714	5.64	4.79967	2.09909	3.7542		0.525512	5.48665
12.3907	8.5572	7.1789	8.2142	3.2679	4.7523	9.4203	8.7844	8.1498	3.9229	2.6762	3.6124	3.6206	7.8761	4.2835	4.5634	7.8037	5.9893	3.5304	2.2117	4.298	4.8643	9.2297	6.017	6.5233	8.0505	4.62153	3.35002	4.4846		0.530612	5.70908
12.5098	10.2257	5.4039	4.9807	6.2176	9.2202	6.7087	7.7268	5.192	3.1047	3.1418	3.608	3.7247	4.5748	5.2025	6.1628	13.0917	5.4092	3.5361	2.8919	3.1973	5.3473	4.5038	3.7542	4.7196	4.8516	5.20932	2.35248	3.9498		0.535713	5.28604
12.629	13.6486	6.9334	4.2618	5.221	6.565	5.607	9.0155	7.5354	3.1797	4.612	3.3696	3.6497	4.546	6.2529	3.7158	6.4554	6.6787	4.9236	3.1769	4.8474	5.7392	6.4369	8.3031	6.3098	6.0401	3.87021	2.87497	3.5581		0.540817	5.61885
12.7481	8.2478	7.666	5.5788	5.9391	10.3917	5.1326	7.4973	7.0374	5.2934	3.4751	2.1128	2.0478	9.5911	7.6889	5.7346	4.9434	4.0657	2.5237	2.2635	3.2937	6.2756	5.7709	4.2266	5.7648	5.9574	2.55203	3.73078	2.9896		0.545917	5.27829
12.8673	8.5227	5.78	4.9795	5.5716	3.4713	7.6431	6.1613	7.8667	5.826	2.9974	3.1868	3.095	11.941	3.8987	7.6261	6.5117	4.1448	3.3336	3.0212	3.4206	5.5368	4.3609	6.9709	4.9953	5.4214	5.71731	2.0235	3.181		0.551022	5.25736
12.9864	9.3809	5.1775	4.3053	6.5287	6.0516	7.6664	9.5651	3.5152	5.7394	2.8316	2.7966	5.5212	8.1836	4.202	9.5526	5.9965	4.7496	4.0781	3.1086	2.4096	7.3856	7.669	3.2852	5.6212	5.7055	4.18083	2.96891	4.0262		0.556122	5.4358
13.1055	9.3851	6.1115	4.6307	5.9781	5.1313	6.8769	10.1106	7.2239	7.9745	3.6942	3.8356	4.5742	7.4829	4.0661	4.9388	6.8983	6.3388	6.4962	3.3879	4.917	6.0469	6.7489	5.0234	4.9015	7.1593	4.05095	4.50937	4.6501		0.561223	5.82654
13.2247	13.627	4.9152	3.0686	7.7354	6.3906	6.0716	7.8693	7.0905	6.8925	3.3244	2.6951	4.1882	8.0753	6.8795	2.9619	5.2378	3.7263	3.4113	2.4658	2.7101	5.2804	4.0786	4.2475	4.8948	7.9421	2.5415	4.34711	3.3824		0.566327	5.2161
13.3438	7.6727	3.9394	4.5466	3.561	6.3342	6.0306	7.9974	6.3111	5.0716	3.2566	3.3199	4.6384	4.2737	6.0119	5.4264	6.828	2.8222	3.5822	3.1208	4.38	5.1586	7.4739	2.9733	5.2746	5.4379	3.52546	3.96912	6.3791		0.571427	4.9756
13.463	8.5521	3.337	5.0407	3.3988	7.3632	7.9757	5.3893	7.0427	3.5832	2.2038	2.9832	5.1769	6.3501	3.6337	5.8316	6.9516	4.6093	3.3158	2.8784	2.5961	6.1619	5.5352	4.5964	5.2496	7.5825	5.27506	2.74448	4.6934		0.576532	5.00185
13.5821	7.9419	5.4401	4.3626	3.8997	10.2421	4.8699	4.3759	5.0887	5.0695	3.2755	3.597	2.4668	4.8544	5.421	7.0181	6.6133	5.7191	2.933	3.6212	3.0662	2.4262	5.2747	7.1318	9.1395	10.5319	3.14426	3.72762	2.7563		0.581632	5.14315
13.7012	8.8865	6.641	5.7467	4.0559	3.8552	5.1191	5.876	5.8726	3.6694	2.3679	3.5353	3.7501	4.51	5.5922	7.744	7.0515	3.953	2.7697	3.7209	2.2	4.7556	5.3046	4.3591	6.5704	4.6766	6.36845	5.93751	3.4078		0.586732	4.93918
13.8204	9.341	7.0041	3.1225	5.0298	7.337	9.5266	10.6193	6.137	3.8546	3.0831	2.5152	2.816	9.7735	4.4457	6.8007	5.1227	3.0003	4.3202	2.6739	3.435	5.0118	4.6407	5.0347	6.3652	5.1164	5.41151	4.05627	5.9962		0.591837	5.41396
13.9395	8.7007	5.1201	3.5439	4.1941	6.7462	8.7138	6.0618	7.6556	4.6424	3.2809	2.9008	4.6105	4.9815	4.651	4.4621	4.8922	2.9004	2.2818	2.1241	3.8917	4.0013	6.4047	7.008	5.1034	3.8403	4.85184	2.62267	3.0558		0.596937	4.7587
14.0587	8.1781	4.3392	5.0871	4.6278	6.2257	9.0203	4.9685	6.7376	4.4502	6.1747	4.9827	3.7459	3.2727	5.0635	7.2486	6.1743	3.3211	3.3965	2.6632	2.6669	3.9619	4.8358	3.2915	3.8336	5.1918	4.88559	2.62311	4.2106		0.602042	4.8278
14.1778	9.3807	4.6407	4.9924	5.1334	8.7364	9.2191	5.1717	9.2076	3.8738	1.934	2.4857	4.4212	6.6312	9.2008	5.154	6.4558	2.7786	2.4051	1.9659	5.4442	4.1531	7.8832	4.0869	6.1628	6.236	3.03821	4.0434	2.3113		0.607142	5.25526
14.297	6.4159	8.5523	5.173	4.2609	6.1653	6.6276	8.144	8.1392	3.5313	3.3926	2.0909	3.0868	5.788	6.7964	4.5203	5.278	4.1886	3.2607	2.3976	4.2584	5.0738	5.6295	5.8095	7.5174	5.9385	4.63799	3.76267	6.2698		0.612247	5.23953
14.4161	8.7386	9.1781	7.0225	3.3638	8.7154	7.6146	6.6748	6.7643	3.5771	3.7967	5.3446	3.4862	4.4655	6.8657	6.5175	8.5712	3.765	3.475	2.9492	3.2175	4.0762	9.3498	4.7061	7.268	5.8026	7.49727	3.34885	3.359		0.617347	5.69683
14.5352	6.3858	5.8312	6.6032	2.5077	7.0675	9.5288	9.5394	7.9329	3.5194	2.3497	2.6764	2.0721	6.5701	8.0473	4.7108	8.5754	4.0491	3.5733	2.0287	3.444	2.7892	4.4813	5.8216	5.695	5.8777	4.3801	2.86144	3.0658		0.622447	5.07089
14.6544	9.1254	7.4822	5.5418	4.0859	5.7181	10.0143	8.6289	9.5906	2.8051	2.6989	3.2043	2.5816	6.0394	5.3611	4.923	7.9618	7.0018	2.4318	2.8937	2.2833	5.0719	7.0141	5.3215	2.2897	5.1578	4.9419	3.34775	2.8453		0.627552	5.22725
14.7735	6.0826	6.9498	7.7433	3.6659	6.6587	6.0792	5.369	4.1014	3.7904	4.2845	3.6754	3.3467	9.3643	5.7019	5.9426	9.0714	4.917	2.0465	2.8835	2.6668	7.1268	8.9651	5.4474	2.4251	5.1789	3.23156	2.83491	3.6763		0.632652	5.11525
14.8927	8.6827	8.283	4.3831	3.1553	3.6317	7.1714	5.3492	8.0032	4.9359	2.0835	3.1055	2.2962	6.7309	6.4158	10.6198	10.8453	5.4239	4.2412	3.492	5.1267	4.912	4.9547	5.4908	3.4553	5.394	4.1145	3.63967	4.5699		0.637757	5.37526
15.0118	7.687	6.4862	10.6416	3.0248	5.4415	9.7906	5.8624	9.4422	3.978	3.6457	3.0097	3.5183	7.4147	7.3269	4.4555	10.3555	4.3107	3.4025	4.5914	3.3807	4.1738	5.3048	4.2144	4.9747	4.9184	2.83525	3.54372	2.0624		0.642857	5.34976
15.1309	8.752	8.1043	6.8567	2.5396	4.7862	6.4538	4.2724	7.7764	5.6465	3.028	3.5198	3.3608	7.0644	6.4724	3.0281	7.3709	3.7409	3.1179	5.6118	3.2716	3.4554	5.9288	5.4851	6.0239	6.0401	4.22749	4.14909	2.4606		0.647957	5.09089
15.2501	7.89	4.4401	5.9714	3.3754	5.1382	6.0265	8.4512	8.6304	3.3674	2.8024	2.0885	3.4434	4.0557	8.0706	5.109	8.4256	5.7953	2.0014	2.9529	5.9327	7.6227	6.6428	8.151	3.7578	4.4648	5.06764	6.10116	3.9073		0.653062	5.34583
15.3692	4.8896	10.103	5.748	3.5257	6.0512	6.6433	5.4289	8.4038	6.3426	3.3859	4.0497	3.415	6.4518	6.5413	2.5973	10.8678	6.6525	2.8276	2.2491	3.7672	5.2563	5.69	4.906	3.7297	5.4185	4.53711	3.33733	3.7252		0.658162	5.23362
15.4884	4.8516	9.1392	7.9838	3.4507	4.095	4.4267	9.5657	6.1537	3.4051	2.1309	2.8373	5.1023	5.5753	4.5211	5.804	5.8351	11.2724	3.4657	2.6007	3.2212	3.1717	4.1962	3.777	5.9167	6.1165	6.77935	3.69881	2.1435		0.663266	5.04419
15.6075	6.1763	8.1977	5.6259	4.1111	6.3645	8.3714	7.3399	7.0355	3.9145	1.7814	2.1857	5.2066	8.1113	5.9436	5.2549	7.702	7.0088	3.3207	3.0403	6.3553	5.0087	4.6257	3.5395	2.672	4.6163	3.53117	3.43139	3.9294		0.668367	5.1572
15.7266	4.2234	6.9649	5.6429	4.2724	4.0535	7.7379	5.1432	12.8342	3.4737	2.3529	2.4666	3.2001	5.105	3.5672	7.0215	7.309	5.8807	1.9995	4.3778	4.7076	4.0265	5.3758	5.0314	3.227	4.586	4.97107	4.51271	2.8731		0.673467	4.89063
15.8458	4.2926	5.1352	6.0912	3.8932	4.9565	8.9266	5.7689	9.2556	2.9745	1.9961	3.7667	4.3169	5.2791	5.6958	4.7569	5.7477	5.5251	3.6669	2.591	3.3206	4.2932	5.5459	7.2166	2.7084	6.0697	7.58764	2.94252	3.4244		0.678572	4.91948
15.9649	5.8426	6.2524	8.4895	4.227	6.6518	8.5428	4.6141	4.9181	4.2162	2.4137	2.455	3.1959	12.8368	7.719	4.833	7.8666	4.6368	2.0831	4.1519	4.1349	3.8371	5.7727	5.7467	2.7246	3.0397	5.39977	3.74037	2.9888		0.683672	5.11896
16.0841	5.3015	8.8856	4.9295	3.0439	7.5869	5.4893	6.3758	7.4601	4.0088	2.9843	2.5069	2.451	8.1009	7.2489	6.3381	4.9199	5.1209	2.6626	3.9693	3.0666	5.4982	4.3692	6.6817	4.2407	4.3282	5.71529	3.22574	2.5382		0.688776	4.966
16.2032	5.7956	6.9417	5.262	4.0054	6.7606	4.4793	5.11	8.5402	2.9972	2.806	2.1482	3.4069	8.3225	6.6029	4.8841	5.0646	6.6158	3.2448	2.1381	4.6658	4.5646	7.6472	3.7693	3.5898	4.4759	7.22909	7.03971	3.1465		0.693877	5.04478
16.3224	7.6645	4.067	8.418	3.7324	7.9972	7.9705	6.9818	8.6003	4.4441	5.0104	3.2321	4.604	6.4884	5.0563	5.3221	6.7046	3.9523	2.3015	2.7453	4.2252	3.5878	4.0374	7.1813	4.9905	4.7272	6.25212	4.67517	2.7282		0.698981	5.27492
16.4415	7.5128	5.9588	3.7732	4.6301	9.7427	8.3365	5.613	5.2034	5.1269	3.0709	2.175	2.7735	5.4311	6.532	4.7875	8.0582	6.4823	3.079	2.3783	2.8032	6.4374	5.7389	7.7793	3.9181	6.4284	4.16206	3.16099	2.2004		0.704082	5.11764
16.5606	8.2948	8.9498	6.4028	3.7079	5.8447	7.4859	5.2367	7.7449	2.5133	2.8018	2.5324	5.6517	8.0655	8.7309	6.3927	10.3228	5.2125	2.3383	1.9809	3.1845	5.2555	4.7368	5.2165	4.9983	8.0962	7.49301	2.67874	4.5566		0.709182	5.58666
16.6798	7.2304	5.4257	5.8107	4.5778	6.5108	4.9635	5.8983	6.9776	4.1045	3.3741	4.2148	5.203	6.2891	5.6813	7.1744	7.1237	5.5823	3.1714	2.0656	2.7764	6.5523	6.4403	5.6397	4.2117	6.6273	2.83848	3.39849	4.0258		0.714286	5.13891
16.7989	5.3956	5.2316	6.3594	4.6723	6.2834	3.3478	5.0169	6.2112	4.2697	5.5508	6.0315	6.4449	9.1201	3.9978	9.3083	8.5191	7.1405	4.5607	2.2078	3.3874	7.9341	7.3125	6.8051	4.3742	7.6313	4.51645	3.86193	2.5474		0.719387	5.64428
16.9181	3.8619	5.6795	5.3795	5.4855	8.4186	4.2948	8.888	4.4193	3.3851	4.5151	3.4174	5.4933	5.9447	5.2887	5.8997	5.8851	5.2232	4.0455	1.9651	2.8149	7.956	3.977	4.9313	6.0869	7.4451	4.00584	2.79865	2.7725		0.724491	5.00994
17.0372	6.0759	8.8453	3.5412	4.0222	12.59	7.2346	8.2443	10.0414	3.9883	4.6326	3.3969	3.7227	11.5882	6.6728	4.6915	4.7676	5.6546	5.5226	2.0399	3.5877	5.7071	5.6665	2.9926	4.0284	3.7861	5.21384	3.1835	3.3399		0.729591	5.52779
17.1563	5.2213	7.2424	5.6362	6.2397	6.2799	7.3123	5.2365	6.5578	2.0053	3.5745	3.0109	3.1077	6.9324	9.0625	2.8808	4.5186	7.104	3.4511	3.4034	2.3499	7.6326	5.1724	4.8418	4.346	7.6617	5.16875	5.24351	2.671		0.734692	5.13803
17.2755	10.4298	6.2525	4.9997	4.6234	6.4205	6.4884	5.5893	8.1319	1.9099	3.3684	6.9176	3.7756	5.933	5.7703	6.3181	4.5713	8.3391	4.8124	2.8101	4.0655	6.9317	5.9035	3.3892	6.592	7.183	4.06455	2.66673	2.01		0.739796	5.3667
17.3946	8.8408	6.1159	4.9961	3.7835	4.9853	6.6982	7.7383	7.2651	5.9392	2.6939	5.0307	3.8678	7.3941	7.4104	3.0591	4.879	8.313	3.8876	3.5648	2.1704	8.7448	7.0568	3.9127	5.7979	5.1109	6.91416	3.47234	3.7824		0.744897	5.47947
17.5138	8.3087	5.0354	6.0197	5.9679	9.5454	5.3842	4.7431	9.3233	2.7953	3.0931	2.929	3.2593	7.5194	4.6169	3.8321	7.8898	7.0255	3.4276	3.9526	2.707	7.3746	7.224	4.2539	5.993	8.6703	4.6545	5.15415	5.0902		0.750001	5.56393
17.6329	4.3136	7.6271	4.9549	6.3739	4.995	6.2972	4.4363	4.2095	1.9416	1.9856	4.973	4.2997	8.7539	5.871	5.6561	4.6298	9.8374	3.7589	2.5297	2.7453	6.6206	4.9347	7.7017	9.4339	8.8136	5.73124	4.65301	2.9902		0.755101	5.3953
17.7521	5.3578	4.6802	5.4252	4.9922	6.1001	5.5743	6.8548	6.8466	3.8793	2.9871	3.4545	4.0238	5.3044	5.1206	5.8116	4.0358	6.8731	5.8167	2.1617	4.1988	6.6279	7.2584	5.744	3.8474	7.6845	4.96948	4.21413	2.1427		0.760206	5.07097
17.8712	5.2132	7.6564	9.5019	4.3659	8.0564	5.7144	5.4706	5.6149	3.3449	3.115	3.8448	3.9628	7.1197	4.1593	5.5734	7.4927	5.8748	4.2683	3.5348	3.6117	6.6461	7.6748	5.6766	6.7334	5.4071	3.86444	3.20555	2.3663		0.765306	5.32394
17.9903	6.4414	7.8552	8.725	3.5747	3.6926	6.3531	6.6132	10.3992	2.1935	2.1215	4.0214	3.6618	4.8665	4.2968	5.5693	5.0595	6.1759	3.9133	3.9858	4.4282	4.6625	4.2859	3.8352	7.8719	3.5247	4.28554	3.42444	1.9057		0.770406	4.91942
18.1095	3.7568	7.2874	6.4662	6.3856	3.1186	4.9748	4.2012	5.614	4.7745	2.0062	2.6965	3.2298	5.335	7.4207	4.6593	4.1312	6.6924	4.7502	3.1947	4.2343	5.3188	5.3374	2.033	4.8141	7.1671	4.05742	4.02335	2.6497		0.775511	4.65465
18.2286	7.363	8.4744	4.0357	3.9243	3.9101	3.0075	5.7583	11.3879	4.233	3.4319	3.3878	4.7088	8.5209	6.9428	5.4698	3.9453	4.7713	3.6801	2.9748	4.4777	6.0669	5.4062	2.5466	5.6829	3.0437	6.34616	2.35777	3.4892		0.780611	4.9766
18.3478	6.7161	6.5914	8.0153	5.3043	5.5441	7.2967	6.1823	7.7159	5.5852	3.5895	2.3233	5.1503	7.3839	8.1497	5.2123	4.1559	5.2848	3.0211	3.8482	4.8373	7.9896	4.0537	4.8267	3.9247	4.9488	5.91364	3.53713	3.3417		0.785716	5.37298
18.4669	5.4835	7.6365	6.8269	8.1367	5.0011	6.6465	8.416	5.336	3.8156	3.1937	2.0248	5.5066	4.7681	4.228	3.727	4.0279	7.58	3.1713	4.0124	5.1568	5.2496	6.6806	3.4726	4.5598	5.2743	6.56335	4.41623	3.4097		0.790816	5.15434
18.586	3.9958	5.9696	6.5669	5.7743	5.4596	5.6101	5.7805	4.3307	4.0195	4.6143	4.3746	5.8108	5.3227	3.2913	4.2923	4.1642	8.2647	4.7211	3.7653	5.5692	4.3902	4.133	2.5948	3.8444	3.5373	3.40515	2.92688	3.796		0.795916	4.65447
18.7052	4.4413	7.7256	6.402	2.7558	7.9368	7.3887	5.631	6.391	5.0511	1.9387	2.917	4.3152	4.5118	7.1367	3.9328	3.5655	6.0161	3.1169	3.7752	3.2632	4.7837	3.9119	4.3373	5.6986	2.6418	3.91856	2.04549	3.5231		0.801021	4.60974
18.8243	6.6981	4.9312	5.6878	3.658	4.2078	6.3856	5.4105	7.0463	3.9128	2.6713	5.3065	3.6875	7.9226	6.1044	3.5732	6.0751	6.9335	3.8414	3.2591	4.0181	6.516	3.337	3.9545	4.5595	3.1818	6.87732	2.19487	2.8779		0.806121	4.81535
18.9435	6.9163	4.181	6.3549	7.1873	5.3562	5.4568	6.5107	9.3993	5.0892	2.1746	2.8019	2.9796	7.3385	3.906	4.9153	5.7481	5.7246	2.3023	3.2423	2.8695	6.354	5.4319	4.5115	5.9368	3.8276	3.67516	3.28553	3.2807		0.811226	4.8842
19.0626	7.3375	4.0206	5.5079	3.5746	5.0804	5.1092	8.4753	7.4742	5.1128	3.2852	2.5065	3.5244	9.9433	4.3424	5.7205	5.5278	5.3492	3.1395	3.5223	5.3556	7.4936	3.5139	4.0439	3.0156	5.6829	2.87058	3.48298	4.0145		0.816326	4.92954
19.1817	5.9552	8.1614	3.345	5.7538	2.1259	5.2417	3.843	4.6355	3.7509	2.9214	4.7893	2.7426	5.5399	3.9962	4.6866	7.0477	5.2692	3.0141	4.0359	3.5019	8.4416	2.716	4.8024	3.3579	3.3624	2.41089	4.68958	3.9179		0.821426	4.43057
19.3009	4.6078	9.4012	7.7157	7.1575	4.7077	4.1532	4.7471	4.5138	7.4455	3.9067	3.6405	5.1565	10.125	6.201	2.5595	6.3892	4.0728	3.6856	4.0167	5.1737	8.8199	4.938	4.5223	2.5379	4.3434	5.75721	3.61705	3.5772		0.826531	5.26749
19.42	8.9608	6.8206	5.9464	7.578	5.7634	5.0281	5.8762	4.6703	6.7512	3.0793	2.659	6.6506	8.1538	4.1657	4.1085	8.291	6.0802	5.9224	2.5315	3.9399	16.3598	5.128	3.0008	4.2995	4.3351	5.89125	2.73655	4.2863		0.831631	5.67908
19.5392	8.9679	5.4772	5.0879	10.8042	3.8955	3.6649	4.7728	7.053	4.9212	4.4296	4.4364	4.158	9.2412	7.2952	3.6205	8.2825	3.7374	6.0099	3.5161	2.7513	7.6272	2.3571	5.0819	6.521	6.2676	8.32153	4.84777	2.8448		0.836736	5.57113
19.6583	4.127	6.029	6.4496	7.527	6.4351	6.2017	3.7013	6.0658	4.3228	2.357	5.6962	6.276	9.5856	8.1332	7.3142	8.4668	7.9733	5.896	4.3962	5.0522	7.989	4.1085	3.7693	5.5835	3.927	7.41283	3.02056	2.3106		0.841836	5.71883
19.7775	6.0858	6.707	3.2523	6.842	4.4927	7.8014	2.701	8.8772	9.1057	3.2121	3.349	4.3504	5.021	5.5015	4.8903	8.2292	6.3079	4.224	2.9033	5.2786	6.4787	5.0508	5.2291	6.115	6.9286	9.63516	6.05261	4.9232		0.84694	5.69806
19.8966	5.7899	4.8557	7.475	4.8691	3.286	6.2068	5.5306	13.0438	4.4341	4.5341	4.5737	6.4775	3.922	6.319	4.6436	6.9903	6.525	3.7409	2.081	3.296	7.4748	3.7038	4.2356	5.3101	4.2948	5.10695	4.87214	2.8568		0.852041	5.23032
20.0157	5.8251	6.775	5.0587	8.4927	9.319	6.6619	8.2804	9.6441	4.2836	2.0762	3.8993	7.4917	6.1191	6.2034	4.7291	5.7358	8.8481	2.3404	3.0746	3.937	6.621	4.2438	3.8248	2.8271	3.9581	6.63874	3.74681	5.8665		0.857141	5.59007
20.1349	4.4311	6.3719	3.6035	2.9966	3.9876	4.6009	4.0743	7.4055	4.0687	2.0836	5.8636	4.705	5.4492	5.8164	3.2061	5.0058	8.5791	3.7294	2.1689	5.9611	7.1136	6.5981	2.8009	4.7272	2.6563	5.56396	5.61566	7.3475		0.862246	4.87613
20.254	7.0665	5.2109	3.5843	5.9855	8.4672	3.8694	6.9512	5.5845	4.6116	3.3966	3.9231	4.1036	7.4202	2.8696	2.9043	7.8528	4.9559	3.3316	4.8064	5.519	6.0721	2.9478	4.1574	8.2665	3.7617	5.69681	3.08466	3.2657		0.867346	4.9881
20.3732	2.6999	5.2399	4.758	5.3873	4.5354	5.868	3.3975	11.0877	6.2904	5.3193	4.2617	6.0282	9.2715	3.1338	5.2083	7.8966	5.626	3.8909	2.6771	9.1204	5.4477	4.0663	2.5603	8.096	3.9336	4.46803	3.32959	4.8388		0.87245	5.30136
20.4923	3.369	6.9074	4.6509	6.6451	5.606	4.2391	5.2088	8.6625	5.3456	3.1278	3.5778	7.8834	9.7854	5.4407	4.0686	7.4416	6.2559	4.9011	4.8735	7.5549	4.4541	4.9068	3.2887	6.8122	3.802	7.40713	3.91859	4.7484		0.877551	5.53154
20.6114	4.0791	4.9344	8.1533	4.6441	5.8969	4.6006	4.7768	4.5982	5.5731	4.5218	2.6792	7.1475	7.6252	5.9437	4.1093	5.5586	4.1308	7.4557	5.4904	6.0836	8.1089	4.8996	2.0076	5.1456	4.4986	6.06048	2.96832	5.5477		0.882651	5.25854
20.7306	4.645	4.8566	5.6725	5.8021	3.9246	3.1972	4.8552	7.4162	9.301	4.0894	4.0353	7.5239	5.8081	4.8377	2.6747	5.2995	5.8196	5.2117	4.0195	4.2542	8.0745	4.1633	3.5753	2.6818	7.0344	4.91123	4.42291	4.4876		0.887755	5.09268
20.8497	5.5788	3.0872	5.1179	4.8392	4.7536	3.7031	4.5755	7.6974	8.557	3.6602	3.9245	7.7745	4.2823	3.6345	4.1834	4.8827	7.9497	3.3505	3.0474	7.0484	7.3254	4.3598	3.8319	4.2811	4.2258	4.49937	3.8582	2.347		0.892856	4.87058
20.9689	6.1938	5.5356	5.9661	5.3293	6.9391	5.2709	3.3216	6.9267	7.643	6.5886	7.8497	3.7718	5.409	6.0311	6.032	5.0717	7.4992	5.0592	4.9574	7.005	8.2872	2.3518	3.99	4.8513	6.9438	3.25823	3.85391	2.5201		0.89796	5.51633
21.088	2.7917	3.8726	5.9342	5.9091	6.2359	4.2071	3.2402	3.8501	5.4908	4.9679	5.2653	10.4526	6.633	4.498	3.3613	6.67	6.3446	7.2321	5.5972	9.6126	5.3143	4.1785	3.5388	5.8585	3.2004	5.04264	2.42515	3.2582		0.903061	5.17796
21.2071	6.0896	5.5072	5.1487	9.0993	5.3671	3.1288	3.123	5.1064	7.356	7.0987	5.7439	4.9171	7.9713	5.4408	3.1098	3.7441	4.3602	7.674	3.663	5.1008	5.1768	4.2459	3.0656	3.4458	5.1242	4.94824	4.50043	3.8154		0.908161	5.10972
21.3263	6.4694	3.4216	5.0835	4.0958	6.0842	2.8076	3.2679	7.3645	7.9565	5.4118	5.2645	7.7953	5.282	5.4859	3.5095	4.1858	8.3056	7.6629	2.7441	6.2393	3.9708	2.4853	2.3325	2.9085	3.6326	2.78256	4.59756	3.688		0.913265	4.81555
21.4454	6.2558	4.1422	5.2898	5.5373	4.612	3.6167	3.2304	3.6397	6.6552	6.05	8.215	7.8428	7.1873	4.6979	2.594	6.1618	8.1544	5.1939	3.791	5.1143	3.743	3.6414	2.4201	5.065	4.2063	4.48599	4.60887	3.0527		0.918366	4.9716
21.5646	4.566	2.1688	4.7194	4.0173	5.5668	2.0437	2.0925	3.6307	6.8419	6.5375	7.3389	5.9007	4.4273	3.9027	1.9364	6.9487	4.4954	5.7229	4.3703	5.8817	3.282	6.1958	2.7143	3.8657	4.4765	3.06032	3.6541	3.0175		0.92347	4.40628
21.6837	5.647	4.6737	4.388	4.7537	4.2048	3.6144	1.8796	2.4367	8.7885	5.1973	10.8699	6.7769	2.8027	3.5263	2.3884	4.0917	6.8427	6.8897	4.1861	6.4244	4.124	4.3229	3.0997	2.9567	5.8675	6.5858	5.98267	4.9038		0.928571	4.93663
21.8029	6.3629	2.857	6.9884	3.3887	7.2995	3.8658	2.2113	6.3008	4.1804	4.9726	7.9509	10.6007	6.4332	3.414	2.6677	2.2633	4.239	7.6186	5.1627	5.3355	3.4018	2.5134	4.1969	3.185	7.045	2.633	6.41949	4.0135		0.933675	4.91147
21.922	6.5092	2.0925	5.8611	4.9497	4.9057	4.0412	1.9711	3.8086	4.2544	9.6221	8.5616	9.9753	3.794	5.7546	3.5913	2.2202	4.7386	4.5797	3.0063	5.9325	5.8036	3.2797	2.9752	2.0393	4.5088	7.40263	5.10017	2.6744		0.938775	4.78405
22.0411	7.2176	2.0763	5.9118	5.2709	6.0249	3.2351	2.5811	5.3552	5.2536	9.4045	7.0994	8.4144	3.1072	4.5192	2.7913	3.0975	7.9458	6.9719	5.1746	7.9604	4.6199	3.912	3.155	3.1514	3.8206	5.89309	5.21601	5.3402		0.943876	5.16146
22.1603	2.6968	3.6308	5.7158	7.8452	4.9217	2.3031	3.4505	7.4539	4.389	8.2712	6.3431	7.0168	7.6967	3.397	1.9826	4.2741	9.9966	6.7856	2.7167	6.7558	2.9469	2.9717	2.1196	2.6544	3.0057	6.18474	4.15733	6.2806		0.94898	4.92728
22.2794	4.9978	2.7626	7.0751	4.8821	5.3885	2.0631	1.8766	6.8018	4.9908	7.8015	5.4609	7.0608	5.7126	3.64	2.6229	3.6142	5.3549	6.1613	4.1633	6.0681	3.9345	2.0749	3.5308	2.0402	3.5906	5.31373	3.54396	3.2703		0.95408	4.49278
22.3986	3.7058	2.4201	7.238	4.5877	3.0522	4.167	2.1018	3.0597	4.2574	6.2941	5.326	5.9071	5.7938	3.5501	3.6579	3.5093	4.4127	5.6697	3.7519	6.7004	2.2729	2.9381	2.7538	2.0333	3.7118	6.77826	4.08352	4.7572		0.959185	4.23184
22.5177	3.3208	3.6173	5.74	3.2029	5.5149	3.2053	2.006	3.2176	6.0676	10.9357	4.6403	5.5879	3.053	3.8496	2.2953	2.7199	4.2375	3.5548	4.6089	3.5988	3.1842	3.0725	2.8969	2.9642	4.0085	5.98568	2.27129	3.2724		0.964285	4.02249
22.6368	3.7647	3.4825	5.7069	4.4416	4.6792	2.0897	1.8312	3.9531	5.9437	6.8805	4.3208	3.4033	3.8324	3.896	1.9592	2.0303	6.4348	2.7422	2.8926	6.2262	4.4997	2.3034	2.6971	1.9276	5.9818	4.04423	3.67117	5.0727		0.969386	3.95388
22.756	3.7564	2.6507	5.8248	6.1544	4.1427	2.9463	3.4084	2.5809	6.6373	7.5968	3.118	5.3407	3.0056	3.6069	2.0162	3.6214	2.6632	3.5186	5.8847	10.0433	4.5626	1.8963	2.1251	2.7206	3.2608	2.31744	2.69266	5.0926		0.97449	4.04234
22.8751	3.4275	2.6883	5.8991	6.4742	2.2688	2.4033	2.973	4.4024	7.1303	5.3318	5.4296	5.6371	3.4091	2.9492	2.1073	1.9929	6.611	4.0559	6.6004	10.4811	3.0013	1.9969	1.9564	4.3242	3.4484	3.54804	2.3935	4.3713		0.97959	4.18973
22.9943	5.5746	2.6927	4.3559	5.7708	1.9909	2.0614	3.0966	6.0584	4.6535	7.0289	4.4546	4.9703	2.1864	2.5153	3.4217	2.1076	5.9816	6.7926	6.3984	4.7196	3.5867	2.1268	2.0746	2.491	5.0206	4.20715	4.10956	3.4815		0.984695	4.06892
23.1134	4.3626	2.8902	6.1704	5.2607	3.6208	2.6871	2.4326	4.0137	2.7528	4.2295	5.1452	3.8037	2.8153	2.8509	2.8298	2.4011	4.6935	7.1306	6.6884	5.3221	3.9082	2.4445	1.9664	2.5967	4.1711	3.29512	3.20952	4.4155		0.989795	3.861
23.2325	4.1337	2.5983	3.6073	8.8462	4.851	2.2353	2.0084	2.2065	3.7679	6.4578	6.4499	4.188	3.2195	2.6324	2.5631	2.806	6.5391	9.7617	5.5713	4.4523	5.2814	2.7355	2.3567	3.4607	3.3338	3.04437	2.13841	3.163		0.994895	4.08606
23.3517	2.3798	2.701	4.1659	6.4073	2.1543	2.2904	1.9836	3.2503	3.6108	5.998	5.7003	5.2646	4.3573	2.0534	4.1519	2.459	4.8214	5.78	6.8843	7.1606	4.1406	3.4538	3.1728	2.1677	4.1364	3.58466	4.47899	3.8115		1	4.01859

## Sheet: Image31
X0	Y0	Y1	Y2	Y3	Y4	Y5	Y6	Y7	Y8	Y9	Y10	Y11	Y12	Y13	Y14	Y15	Y16	Y17	Y18	Y19	Y20	Y21	Y22	Y23	Y24	Y25	Y26	Y27	Y28	Y29	Y30		Ap-basal	Avg intensity
0	22.7222	14.1667	23.0556	22.2222	20.7778	29.5	29.8889	12.9444	19.4444	22.8333	21.1111	16.4444	20.2222	19.0556	24.5556	29.1111	25.7222	17.4444	16.7778	17	13.7778	15.1667	22.2222	18.8889	19.0556	12.8333	16.1667	22.6667	25.8889	20.8333	17.7778		0	20.3315
0.1191	28.6667	20.1111	19.3889	21.8889	21.8889	17	30.2222	18.2778	14.9444	26.3889	20	22.4444	22.4444	17.6111	17.3333	19.7222	18.8889	15.5	17.8889	16.7778	21.5556	9.9444	13.2778	19.8333	15.5	14.6111	15.0556	12	25.0556	13.3333	12.8889		0.00517954	18.724
0.2383	25.5556	23.5	17.8333	20.2222	19.6667	23	20.8889	24.2222	10.5556	20.0556	13	29.3889	15.2222	19.6667	20.6111	21.8333	20.8889	16.8889	17.2222	19.6667	17.6111	15.0556	18.5556	14.3333	15.5556	13.1667	11.5556	22.1667	20	17.3889	18		0.0103634	18.8154
0.3574	23	20.7222	17.6667	11.2222	14.5556	20.5	23.0556	16.2222	23.6111	23.5556	26.6111	22.9444	18.6111	13.8889	17.5	16.2222	13	13.3889	11.8333	17.1667	17.5556	16.1667	25.6667	19.5	15.1667	13.3889	18.1111	15.1667	12.0556	15.6111	20.6667		0.015543	17.8817
0.4766	19.5	18.4444	13.2222	19	14.3889	17	18.7222	14.8889	16.5	16.6667	20.7222	22.3333	17.4444	22.5	20.1111	13.8333	9.9444	15.1111	14.7778	10.6667	13	11.5556	13.7778	12.6667	10.6667	16.3333	9.7778	10.3333	20.7778	16	12		0.0207269	15.5699
0.5957	25.0556	15.9444	11.2778	22.2778	15.2778	15.1111	11.4444	10	7.9444	18.3333	27.7778	20.1111	18.1667	24.8889	20.8333	18.2778	11	18.9444	19.2222	11.4444	12.8333	9.8333	14.5	11.2778	14	17.2222	16.3333	16.8333	13.2778	14.1667	10.3889		0.0259064	15.9355
0.7148	19.8889	15.8889	20.0556	16.5	11.8333	20.6111	15.7222	11.1111	7.3333	14.6667	20.7222	16.2778	24.3889	13.5	21.0556	16	9.6111	12.3889	8.3889	19.3333	16.3333	25.2778	9.8889	13.9444	13.6111	9	16.1667	14.3889	16.1111	14.3889	17.8333		0.031086	15.5556
0.834	24.9444	20.3333	13.6667	13.1667	17.6667	25.4444	23.5	12.0556	9.4444	10.5556	18.5	26.2778	12.7222	15.8333	17.1111	20.6111	12.0556	9.8889	14.1667	14	20	17.9444	13.4444	9.7222	18.3889	16.8333	13.5	14.2778	10.7222	12.7222	21.4444		0.0362699	16.1595
0.9531	22.5556	20.7222	15.7222	18.3333	18.8889	19.5556	20.0556	16.2778	10.5556	13.8889	12.1111	24.3889	26.4444	18.0556	18.3889	10.9444	16.9444	12.4444	9.0556	14.6667	11.6667	19.7222	15.8889	8.6111	11.4444	14.1111	9.0556	18.3333	21.0556	14.4444	10.6667		0.0414494	15.9677
1.0723	26.1667	16.1111	25.3333	17.1111	9.3889	13.8333	22.2222	20.9444	9.6111	8.6667	15.5	22.3889	18.2222	16.8333	17.6667	15.3889	15.2222	10.9444	11.6667	16.0556	17.6111	22.0556	11.8333	12.2222	11.6667	12.8333	11.7222	13.2778	17.9444	12.3889	13.2222		0.0466333	15.6792
1.1914	12.8889	28.5	16.3889	16.7222	14.1667	17.0556	15.0556	17.1111	10.2222	15.2222	19.5	21.3889	17.2778	11.9444	21.2778	13.2222	15.5	9.7222	12.2778	10.5556	9.6667	13.8333	13	9	8.1111	17.6667	10.7778	24.3889	13.7222	19.8333	17.1667		0.0518128	15.2634
1.3106	16.1111	21.2222	16.6667	16.9444	8.7778	13.5556	16.3333	17.6667	8.4444	17.5556	22.6111	16.5556	15.5556	19.6111	13.5	13.5556	9.2222	9.3889	13.3333	11.0556	12.3889	25.1111	9.9444	8.5556	9.5	12.7222	11.5556	13.6111	10.8889	16.9444	12.8889		0.0569967	14.2509
1.4297	20.0556	20.1667	17.6111	16.6111	15.9444	19.3889	15	19.5556	6.1667	10.2222	17.6111	13.1111	14.7222	10.5	16.8889	7.5	13.6667	5.8889	6.2222	10.8333	12.0556	13.2222	12.9444	9.8333	11.5	13	13.8333	13.2222	14.3889	12.1111	13.0556		0.0621763	13.4462
1.5488	24.6667	15.6667	9.9444	9.6111	11.7778	10.7778	17.7778	14.5	9.8889	16.6667	16.5	18.7778	7.9444	13	16.1111	18.3333	9.1667	8.7778	10.2222	8.2778	14.2778	16.5556	10.7778	6.5556	7.5556	10.5	9	8.9444	14.2778	13	12.7778		0.0673558	12.6649
1.668	16.2778	14.5556	13.0556	14.5	10.7778	14.8333	16.8333	13.6111	9.5	16.6667	15.8889	19.9444	13.2778	20.3333	16.3333	12.7222	10.1111	4.1667	8	9.7778	8.4444	13.6111	16.7778	11.2778	7.2778	9.6667	17.8889	11.7222	8.8333	15.7778	16.5556		0.0725397	13.1936
1.7871	24.0556	19.9444	10.2778	15.5556	12.7778	10.3889	17.3889	11.4444	8.2222	13.3889	25.2778	16.8889	8	9.1111	12.2222	16.1111	7.7222	9.8333	9.5556	4.8333	12.1667	14.7222	17.3889	8.0556	8.2222	9.6667	9.6667	13.1667	15.5	14.7222	19.3333		0.0777193	13.0842
1.9063	16.5556	16.7778	12.6667	15.2222	13.2778	9.5	14.6667	16.6111	7.6111	11	18.8333	21.1111	15.5556	11.3889	16.1111	13.0556	6	7.7778	9.6667	7.3889	9.7778	15.2778	16.2778	8.7778	12.8889	14.8333	12.0556	14.0556	15.9444	16.6667	16.6111		0.0829032	13.3531
2.0254	13.0556	13.8333	12.7778	9.1111	11.4444	9.2778	14.2778	9.7222	9.3333	10.2222	17.8889	20	19.2222	10.0556	22.3889	9.9444	6	6.2778	4	10.7222	13	16.6111	11.7778	4.2222	8.7222	8.5556	5.6667	15.3889	18.8889	15.2778	14.6667		0.0880827	12.0108
2.1445	17.5	10.3889	14.8889	8.8889	9.5	7.8333	21.7778	10.2778	7.0556	14.5	14.0556	18	11.1667	5.3333	28.2778	17.5	13.9444	7.3333	8.1111	13.7778	6.9444	17.8889	12.3333	13.8333	9.3889	10.9444	8.1667	15.5556	15.3889	13.8333	11.7222		0.0932622	12.7778
2.2637	15.1667	16.3333	10.5556	10.6111	6.8889	16.7778	10.8333	15.3889	6.2778	10.0556	20.6111	17.4444	12.8889	10.6111	16.2778	14.3889	6.4444	6.2222	10.9444	9.3333	11.4444	16.2778	11.7222	8	10.6667	7.8889	9.3889	18.4444	11.7778	10.3889	16.9444		0.0984461	12.1613
2.3828	14.5	14	14	13	16.0556	12.4444	16.6667	6.7222	8.9444	7.3889	17.7222	21.5556	13.2778	6.7778	15.7778	14.2778	10.6667	6.0556	5.5	9.1111	10	15.1667	12.1111	10.6111	13.1667	7.7222	11.1667	11.5556	12.3333	11.7222	25.8333		0.103626	12.4462
2.502	12.1667	11.0556	6.6667	13.0556	9	15.2778	12.4444	12.1111	6.0556	11.0556	21.5556	22.5	11.4444	11.8889	13.1111	11.7222	6.3333	7.1111	6.2222	11.5	17.2778	16.1667	11.4444	7.8889	10.5556	7.9444	9.6111	16.0556	12.7778	12.7778	20.8889		0.10881	12.1183
2.6211	13	9.6111	10.1111	10.1111	9.1111	11.0556	14.9444	11.1111	7.4444	12.3333	18.2778	26.0556	14.6111	10.2778	24.9444	13.7778	10	5.8889	9.2778	9	16.7778	22.1111	10.1667	9.2222	8.8889	11	12.5556	13.5	11.7222	13.6667	16.4444		0.113989	12.8065
2.7402	21.6111	7.3333	21.1667	5.8889	6.8889	15.9444	14.2778	17.1111	6.8889	11.6111	19.0556	18.6667	17.3333	11.1111	22.8333	11.5	10.7222	7.8333	10.6111	7.6111	28.6667	9.2222	8.1667	11.2222	7.6667	11.1667	11	17.2222	12.1667	12.1667	20.2222		0.119169	13.3835
2.8594	12.3333	12.7778	11.7778	7.7222	8.2222	8.6667	14.7222	9.5	6.1667	12.6667	18.7222	25.6667	19.8889	9.2222	22.7222	17.8889	9.3889	5.6667	4.3889	4.8889	13.9444	13.9444	20.2222	9.8333	12.8889	7.6667	15.3333	19.2778	5.2778	8	20.3889		0.124353	12.5735
2.9785	8.3889	9.6667	12.3333	9.0556	8.6111	13.6111	14.2222	10.4444	9.3889	11.8333	12.7778	26.6111	15.6111	6.2778	17.8889	10.2222	5.5	10.1667	8.6111	10.8333	19.1667	19.6667	8.8333	10.3333	10.0556	14.3333	12.1667	14.0556	9.5556	11.7778	12.9444		0.129532	12.095
3.0977	12.8889	6.8333	8.6667	11.8333	11.6667	12.8333	16.9444	10.6111	11.0556	9.0556	14.3333	16.6111	13.3889	12.9444	20.8889	12.0556	4.7222	8.1111	7	7.5556	9.8333	11.2778	11.6111	14.1111	9.8333	11.5556	5.0556	14.2778	12.7222	10.7778	17.4444		0.134716	11.5645
3.2168	11.6111	6.9444	11.8333	15.5556	10.6111	10.3333	17.2222	8.6111	9.3889	11	12.6111	27.7778	15.1667	10.2778	17.6111	10.3889	11.1111	6.6667	4.8333	10.6111	15.1667	20.1111	18.2222	11.8333	8.9444	17.7778	8.5	16.7778	8.2222	13	14.7778		0.139896	12.6935
3.336	11.2778	7.7778	8.7222	12.7222	10.5	11.1111	18.7778	9.8333	5.3333	9.5556	10.7222	26.2778	17.5	7.7778	25.3889	14.0556	9.2222	5.6111	5.3333	12.9444	16.3889	12.1667	14.1667	13.5	9.8889	9.9444	10.2778	17	8.9444	14	14.8889		0.145079	12.31
3.4551	10.2778	11.2778	6.4444	3.7222	6.1111	9.4444	15.0556	12.1667	7.3889	9.9444	18.1667	27.0556	16.8333	13.6111	21.4444	12.5	7.9444	7.8889	6.8889	10.9444	17.5	20.3333	15.2778	13	12.2222	17.5556	12.8889	16.2778	9.5	10.0556	19.7222		0.150259	12.8853
3.5742	9.7778	9.9444	5.2222	10.5556	10.6111	13.7778	15.6667	6.3333	12.1667	9.7778	12	30.7778	15.2222	11.6111	17.1111	10.3889	13.8333	3.7778	5.1111	12.8333	21.0556	16.2222	22.5	10.3333	10.1667	19.5	10.3889	18.3333	13.5556	11.2778	12.6111		0.155439	12.9821
3.6934	15.2222	7.9444	6.6111	7.5556	10.5556	10.5556	17.0556	9.6667	6.6667	4.3333	14	32.1111	14	10.2778	18.8333	14.1111	11.7778	9.6667	10	11.2222	15.2778	20.7778	28.6111	15.8889	9.1667	8.7778	13.7222	17.4444	9.3333	6.8333	17.5556		0.160622	13.0824
3.8125	10.8333	9	13.6667	4.2222	5	11.9444	21.8889	7.6667	6.7222	9.5	17.7222	25.8889	16.5556	9.5556	20.0556	12	8.6111	7.7222	9.2222	12.1667	19.2778	26	25.7778	10.3889	11.3333	15.1667	17.3889	15.2778	14.4444	13.7222	17.7222		0.165802	13.7563
3.9317	6.3333	10.5556	10.3889	8.2222	8.7222	12	12.1667	8.5556	5	7.7778	17.6111	34.2222	7.1667	14.1111	19.1667	11.3333	8.7778	8.7222	7.7778	17.3333	15.3889	21.6667	26.2222	10.7778	9.6667	13.5	7	10.5556	12.7778	8.8889	11.1111		0.170986	12.371
4.0508	10.6111	9.8889	4.5	8.8333	8.3889	10.8889	17.6111	6.5556	6.7778	9.6111	12.2778	33.3333	9.5556	7.7778	22.8333	18.6667	7.7222	5.5556	10.2222	20.5556	9.7222	15.6667	20.4444	6.8333	10.8333	16.8333	12.8889	12.6111	11.9444	12.0556	14.6667		0.176165	12.4731
4.1699	8.7222	9.2778	10	9	9.9444	9.1111	13.1111	5.0556	7.6667	10.5556	15.6111	23.2222	11.6111	10.9444	21.7778	14.5	12.2222	5.1667	8.6667	18.2778	15.6667	21.5	20.8889	11.0556	9.8333	24	15.7778	15.1111	18.6111	10.1111	6.9444		0.181345	13.0305
4.2891	6.7778	7.5556	11.3889	8.8889	7.3889	10.9444	15.2778	12.9444	6	5.3889	14.6111	22.1667	6.8333	12.3333	17.2778	13.6667	7.5	5.3333	6.2222	22.1111	13.3333	17.9444	16.7778	13.6111	15.5	19	15.7222	22.3333	16.4444	12.0556	13.5556		0.186529	12.8029
4.4082	6.9444	9.8889	7.6111	9.2222	7.8333	17.1667	15.8333	8.9444	5.8333	5.3889	17.1667	28.0556	11	8.8889	15.0556	11.9444	9.7778	5.9444	12.2222	14.9444	11.1111	20	25.4444	17.1667	15	14.9444	12.5	17.6667	10.8889	13	13.7222		0.191708	12.9391
4.5274	8	11.3889	7.8333	8.7222	8.1667	12.0556	12.5	10.1111	9.1111	5.0556	17.5556	14.3889	15.5	8.2778	20.5556	16.6111	11.8333	10.2222	8.5556	21.4444	11.0556	23.4444	28	7.6111	14.2222	13.8333	13.4444	12.4444	9.7778	9.8333	11		0.196892	12.6631
4.6465	10.6111	4.8889	10.1111	7.2222	12.5556	8	13.0556	10.2222	4.0556	6.8889	16.0556	21.5556	10	12.3333	16.0556	6.8333	11.2778	5	8.3889	31.5556	18.3333	30.1111	24.3889	8.5	17	17.5	9.7778	16.1111	12.6111	14.2778	11.8889		0.202072	13.1344
4.7657	9.2778	7.6667	10.6667	6.1667	9.2778	11	10.7222	17.1667	5.5556	8.6667	14.8333	12.4444	12	10.2778	16.4444	10.7778	7.1111	8.5556	12.3333	20.6111	11.1111	24.2778	27.7222	14.2778	9.2778	21.5	12.0556	15.4444	12.0556	10.4444	10.2222		0.207256	12.5789
4.8848	8.3889	11.5556	7.9444	7.8333	6.6667	8.5556	13.6111	6.8889	9.6111	6	13.7778	16.5556	15.1111	7.5	11.7778	9.2778	9.2222	6.3333	11.8333	27	10.8889	32.3889	17.3889	13.9444	16	11.5556	16.7778	14.4444	14.6667	9.6111	10.2778		0.212435	12.3674
5.0039	9.1667	8.5	9.3333	4.0556	6.1667	9.3889	7	10.4444	10.1111	7.6111	12.8333	19.0556	13.6667	6.8889	19	17.6111	6.7222	8.5556	17.5556	19.1667	12.7222	29.8333	21.1667	11.3889	10.2778	12.3333	11.5	12.3333	10.6667	10.7222	10.8333		0.217615	12.1487
5.1231	6.5	7.0556	6.7222	8.6111	5.7778	9.3333	10.7222	10.6667	8.8889	9.5556	13.7778	14.5	12.9444	10.2778	11.5556	9.7222	10	11.1667	9.3889	19.6667	11.2222	25.1111	20	4.8889	11.6667	15.0556	7.7222	17.3333	9.4444	6.5	8.3889		0.222799	11.1022
5.2422	6.3333	10.6111	5.7778	4.9444	9.7778	12.2222	14.5556	9.0556	12	4.5	15.3333	12.9444	11.6111	27.3333	12.6111	15.6111	7.4444	16.7778	5.6667	17.2778	14.2222	31.6667	26.6111	13	14.6667	13.9444	15.6111	15.9444	15	16.7778	5.6111		0.227978	13.4014
5.3614	9.8333	7.7222	7.4444	7.2222	13.7222	12.6111	9.3889	7.9444	5.1111	8.9444	10.1667	11.3333	15.8889	9.6667	14.3889	18.2778	13.7222	10.8333	11.7222	15	17.8889	29.4444	16.5556	10.2778	13.6667	16.0556	13.5556	19.5	14.6667	9.4444	14.6111		0.233162	12.7939
5.4805	8.7222	5.7222	8.8889	11	7.7778	8.2222	9.2778	8.8889	10.4444	10.9444	13	11.8889	15.4444	15.5	10.5556	15.5	10.8333	9.3889	10.5556	16.3889	10.1111	35.0556	27.1111	8.2778	16.8333	13.8889	11.0556	8.6111	11.2222	8.7778	7.0556		0.238342	12.1595
5.5996	7.6667	9.1667	6.1111	8.3889	7.8333	7.5	9.8889	11.2778	13.2222	8.2222	8.6667	22.8333	17.7778	10.2222	11.5	14.3333	11.7778	10.5	8.8333	20.1667	16.5	22.8889	15.2778	15.0556	19.7778	18.2222	14.2778	10.0556	11	10.5	7.5		0.243521	12.4821
5.7188	5.3889	8.6667	11.3889	2.7778	6.1667	13.7222	8.6667	9.7222	18.4444	7.1111	16.5556	17.3889	13.0556	15.1111	19.1111	13.2222	9.3889	11.8333	16.8333	14.8333	18.1111	23.6111	14.6667	13.6667	10	18.8333	8.4444	10.3333	8.3333	8.3889	12.8333		0.248705	12.4713
5.8379	9.3333	9.5	8	4.8333	7.8889	10.9444	5.8333	14.7222	12.8333	7.5556	8.2222	17.0556	11.7222	9.6667	19.8889	13.4444	14.5	13.3333	14.2778	15.8889	22.5556	29.6111	14.7222	16.3333	11.7778	10	18.7778	15.1667	5.3333	17.1111	13.7778		0.253885	13.052
5.9571	13.6111	6.8889	9.5	7.6667	9.5	13.9444	11.8333	12.1111	16.2222	11.1667	12.8333	22.8889	11.1667	10.6667	9.6111	12.3333	9.5556	14.8333	17.7778	17.2222	18.6667	31	15.0556	12.3333	10.4444	10.6667	8.3889	13.4444	12.1111	11.3333	8.6111		0.259069	13.0125
6.0762	8	3.9444	7	7.5556	7.6111	11.6111	9.7222	20.2778	14.1667	5.3333	16.5556	15.5556	13.2222	10.6111	9.0556	16.4444	8.3889	18	10.5556	18.6111	14.7222	27.4444	9.8889	13.4444	9.5	12.1111	13.3889	13.5556	12.2222	9.8889	12.1667		0.264248	12.276
6.1953	7.0556	9.1667	3.5	6.1667	9.2222	8.3333	3.4444	13.3333	12.5	8.7778	10.8889	17.1111	10.8889	14.2222	10.6111	9.5	7.8889	21.3889	9.6111	14.6667	10.1667	31	13.7222	11.3889	4.1111	6.5	8.8333	9.5	13.2222	10.6111	15.8333		0.269428	11.0699
6.3145	6.2222	5.7222	3.9444	7.0556	6.4444	6.6667	11.5556	5.6667	16.7778	5.5	15.7778	22.8889	9.2222	14.6667	11.6667	9.8333	5.6667	17.8333	20.5	18.5	15.5	23.6111	12	11	9.3889	7.7222	18.5	12.2778	9.0556	8	6.5556		0.274612	11.4749
6.4336	8.8333	10.7778	6	6.3333	12.0556	8.8889	12.3889	15.6111	18.3333	7.4444	16.0556	22	5.3333	17.1667	14.6667	18.6667	12.5	13.3889	19.0556	16.6111	23.1667	19.8889	12.0556	12.8889	9.3333	6.6111	11.1111	13.3889	8.5556	9.4444	8.4444		0.279791	12.8065
6.5528	5.8333	3.3889	3.3333	5.8889	8.9444	11.3889	12.2222	13.7778	8.8889	9.6667	11.7222	18.7222	9.1111	12.2222	12.2222	15.4444	11.1667	16.2222	17.9444	20.1111	22.7778	22.5556	13.1111	13.3889	7.8889	15.2778	10.8889	12.2222	15.7778	9.3333	10.2222		0.284975	12.3118
6.6719	7.8333	5.6111	4.3889	7.6111	4.7778	11.6111	9.0556	12.1667	12.4444	9.3333	20.4444	15.6111	11.5	16.8333	14.9444	15.3333	11.8333	14.1111	10.6111	24.5556	21.6111	24.5	11.6111	12.9444	7.8889	9.7222	13.9444	10.9444	13.2778	9.7222	7.5556		0.290155	12.3978
6.7911	10.2778	5	4.2778	7.3889	12.6111	13.2778	5.5	15.1667	9.6111	12.2222	15	17.1667	7.4444	13	11.7778	11.6111	7.3333	14.5556	10.0556	17.6111	17.8333	23	13.3333	16.2222	11.1111	14.7778	16.6667	9.9444	8	15.4444	5.2222		0.295338	12.0143
6.9102	7.7222	6.1667	4.7222	3.4444	11.1667	6.7222	9.7778	11.7222	12.7778	15.9444	12.7778	13.6667	10.9444	15.1111	13.5	15.7778	8.7778	9	14.7778	21.2222	14.1111	34.2222	19.2222	12.1667	6.9444	12	12.7778	10.8889	12.8889	13.3333	6.7222		0.300518	12.2903
7.0293	9.2222	9.8333	3.8889	9.6111	12.5556	9.1667	11.6667	12	16.6667	12.0556	17.0556	8.1111	7.7222	8	8.3333	14.2222	9.4444	14.1111	13.6111	23.1667	13.8889	23.1667	10.1111	7.9444	10.1667	17.8889	16.1111	8	10.3333	8.6111	6.4444		0.305697	11.7133
7.1485	8.7222	6.1111	7.1667	4.6111	6.7778	7.8889	9.7778	18.7222	12.7222	12.8889	14.8333	14.7222	9.0556	10.8889	8.4444	9.6111	10.3889	8	11.3333	16.7778	14.3889	25.6667	7.3333	8.8889	10.1111	16.2778	15.7222	4.7222	7.2222	11.9444	14.1667		0.310881	11.1577
7.2676	6.2778	4.4444	5.6111	6.6667	9.3889	12.3889	7.7778	12.1667	11.5556	11.3889	12.7778	11.2778	5.4444	11.5556	10.4444	9.2778	12.2778	9.9444	13.6111	12.6111	13.1667	20.0556	9.5	9	11.8333	14.1667	11.1111	7.4444	12.6111	12.1667	5.3889		0.316061	10.4301
7.3868	10.1667	7	5.5	7.7778	6.8889	14	12.7778	10.2222	12.1667	17.3333	7.7222	12.8333	11.7778	9.2778	9.6667	6.6111	10.7222	14.2778	15.1667	13.1111	12.6667	15.1111	7.6111	9	12.5556	8.1667	11.8333	8.5556	8.1667	14.4444	7.2778		0.321245	10.6577
7.5059	13.1111	5.3333	2.3333	6.5	7.8889	11.0556	11.1667	7.0556	10.6667	13.4444	12	9.2778	11.8333	8.8333	9.9444	6	7.8889	7.6111	9.9444	16.5	12.1111	24.5	8.3889	8.3333	10.0556	12.6111	13.8333	9.6111	11.7778	12.3333	9.3889		0.326424	10.3656
7.625	6.3333	5.5	4.5	6.0556	8.6667	9.8333	7.2778	5.5	11.7222	15.1667	18.8333	17.6111	11.3333	9	14.5	12.7778	9.9444	11.5	15.3333	12.2778	15.2778	23.0556	14.5	9.3889	10.2778	11.0556	8.3889	8.5556	8.2222	7.2778	9		0.331604	10.9247
7.7442	9.1111	6.3333	6.4444	6.8333	12.7778	9.9444	6.3333	6.2222	12.3333	10.5	9.8889	10.7222	7.8889	11.3889	7.2222	12.8889	6.1111	6.2778	12.3889	19.5	9.7778	16.7778	6.7778	5.5556	8.6667	9.0556	10.6667	9.2222	7.2222	9.2222	5.6667		0.336788	9.34588
7.8633	7.0556	6.8889	7.5	6.2222	6.7778	6.8889	6.7222	7.3889	9.6667	15.8333	13.1111	4.6111	16.6111	14.1111	9.4444	10.7778	5.4444	6.3889	7.2778	15.8889	14.6667	20.8889	9.8333	9.2222	10.8889	9.3889	8.7778	6.2222	7.8333	5.6667	8.5		0.341967	9.56452
7.9825	10.7222	6.5556	4.4444	5.8333	6.7778	5.7778	13.4444	9.8889	11.6667	13.3333	13.7778	10.9444	10.4444	10.9444	10.0556	9.8889	7.9444	4.9444	12.6667	15.9444	14.6667	12.3889	10.8333	10.8889	8.1667	10.2778	15.6111	7.3889	5.5556	5.4444	8.7222		0.347151	9.86917
8.1016	13	8.5556	8.5556	6.2222	7.8889	11.3333	7.6667	7.9444	9.3889	10.7778	13.8889	4.6667	12.1667	11.3889	9.3333	11.6111	5.1111	2.7222	9.6667	13.6667	12.2222	14.7222	10.2778	4.2778	11.7778	14.1667	14.7222	8.6667	10.1111	10.5556	7.9444		0.352331	9.83872
8.2207	13.0556	3.7778	3.1667	7.8889	7.1667	8.3889	7.5556	4.3889	7.6111	19.3889	7.6111	7.3889	6.5556	18.3889	10.8889	9.2222	7.7222	8.6667	10.4444	13.9444	12.5	18.5556	7.2778	9.6111	14.1111	14.7222	18.7778	5.7778	8.1667	6.2778	4.7778		0.35751	9.79929
8.3399	13.5	13.7778	7.2778	8.3333	9.8333	12.6111	8.1111	5.6667	10.8889	14.0556	15.2222	9	13.5556	16.0556	11.7778	14	5.1111	9.9444	8.5	12.4444	12.7778	19.2778	7.3889	9	7.8333	8.4444	10.6667	8.7778	7.0556	11.1111	15.5556		0.362694	10.8889
8.459	12.2778	8.0556	5.8889	6.2222	9.7222	10.1111	8.8889	4.6667	8.5556	14.7778	14.3889	12.5	6.2778	12.3889	10.8333	13	4	9.6111	7.2222	16.6111	15.4444	20.9444	12.2222	11.5556	10.5556	12.6667	14.6667	9.6111	10.7778	9.1667	6		0.367874	10.6326
8.5782	8.7222	2.7222	7.5556	13.5556	9.1667	11.9444	11	4.3333	13.8889	6.2222	14.1111	6.7222	12.6111	8.6667	10.4444	9.1667	3.7222	4.1111	9.7778	13.8333	17.6111	14.8889	5.2778	7.3333	9.4444	10.7778	9.6667	6.2778	9.5	10.5	13.6111		0.373058	9.58602
8.6973	8.7222	3.8889	6.2222	4.8889	5.2222	7.7778	13.2778	2.1667	14	13.8333	12.1111	7.4444	8.2222	9.6111	8.3333	11	4.7222	3.9444	9.1667	21.0556	17.5	17.0556	8.8333	14.1667	9	12.8889	8.7222	9.8889	8.1111	6.4444	8.0556		0.378237	9.55735
8.8165	9.1111	8.8333	6.6667	9.1111	11.5556	6.6111	6.1111	4.2222	9.7222	5.8333	20.4444	13.2222	5.3889	8.8333	12.3889	9.3333	5.5556	6.7222	5.3333	12.6111	14.5	15.6111	9.8333	6.5556	9.2222	5.7222	11.5556	10.1111	7.5	3.8333	7.2778		0.383421	9.01075
8.9356	6.1111	3.8889	4.6111	8.5556	12	6.3889	13.6111	2.1111	7.5	11.5	16.7222	6.0556	8.0556	4.1667	5.3333	8	3.6111	6.2778	5.7222	16.5	15.7778	14.2778	3.7222	7.5	8.3333	7.6111	11.7222	7.3333	5.5556	9.5556	6.6111		0.388601	8.21685
9.0547	7.6111	4.6667	6.7222	12	9.6111	14.2222	7.9444	3.2778	2.5556	11.4444	14.4444	6.8333	9.5	7.9444	5.1111	9.8889	4.6111	7.1111	5.5556	16.5556	16.4444	12.5556	7.7778	9.7778	9.2778	6.5556	11.8889	10.3333	7.1667	7.3889	6.7778		0.39378	8.82437
9.1739	6.7778	5.6111	7.5	6.0556	4.4444	9.7222	8	3.1111	7.5556	8.7778	10.1667	7.6111	7.9444	16.2222	7.7222	9.1111	4	4.4444	5.0556	18.8889	15.7778	18.9444	11.1111	13.7222	11.6667	11.2778	7.3889	5.3333	9.8333	8.1667	7.6667		0.398964	9.01971
9.293	9.5	5.4444	8.3333	5.6111	8.1667	14.8889	10.1667	2	5.2778	11.3889	13.1667	4.3889	9.5	8.1667	5.7778	7	4.1111	3.3889	5.6111	13.4444	11.4444	12.8889	8.3333	4.6111	12.6667	6.2222	12.1667	4.2222	6.8889	8.8889	8		0.404144	8.11828
9.4122	8.5556	9.6667	8.9444	11.3333	9.1111	5.5556	10.2778	6.4444	4.6111	12.9444	8.2778	6.0556	3.6111	12.2222	5.3333	7.5556	2.9444	6.1667	7	13.3333	11.1667	8.4444	8.2778	7.4444	8.3889	8.3889	11.9444	7.4444	5.6111	9.5556	8.0556		0.409328	8.21505
9.5313	6.3889	6.6667	8.8889	12.0556	10.4444	7.6667	2.9444	3.7222	8.0556	10.8333	10.2778	7.5	8.9444	9.1667	8.6111	6.3889	5.0556	2.7778	9.5	11.1111	14.2778	12.8333	13.4444	6.5	5	8.6667	14.3333	7.8889	4.1667	6.2222	4.7222		0.414507	8.2276
9.6504	6.3333	2.6667	5.8889	5.5556	6.9444	7.9444	6.9444	2	5.9444	10.5	7.3333	7.6111	9.7222	9.6111	9.3333	5.2222	4.6111	2.1111	7.0556	11.8333	9.6111	12.3889	6.7778	8.9444	7.8333	5.3889	7.3889	4.6667	7.7778	5.9444	6.2222		0.419687	7.03583
9.7696	9.2222	11.6111	10.2222	6.8333	9.4444	10.2222	6.0556	3.2778	4.7778	8.5556	9.5556	9.7778	5.7222	8.3889	10.1111	7.3889	2.1667	3.0556	9.7222	13.3889	11.0556	9.4444	7.7778	9.0556	11.6667	8.8889	9.8333	7.7222	5.8889	7.1667	5.1667		0.424871	8.16667
9.8887	4.1667	7.0556	11.9444	5	6.7778	13.6111	7.2778	2.1667	5.8889	8.1111	8.5	5.1667	8.3889	11	13.0556	6.1667	6.1667	3.6667	2.1111	11.4444	12.7222	9.1111	8.8889	7.2222	7.7222	5	10	7.3333	7.3889	6.0556	4.5		0.43005	7.53585
10.0079	5.7222	5.7778	9.4444	6.6667	5.2222	7.5	7.8333	4	2.6111	14.8333	9.0556	12.4444	10.5	8.2778	8	6.0556	5.1111	4.5556	6.3889	13.5556	11.1667	6.8333	9.8333	7.3333	3.8889	7.1111	6.7778	4.3889	3.3889	6.0556	3.8889		0.435234	7.23298
10.127	13	6.1111	6.5	5.6111	6.1111	9.1111	5.7222	2.9444	4.3333	8.8333	4.6111	9.1667	9.0556	12.6111	9.3333	6.9444	5.0556	2.7222	4.0556	8.7222	11.4444	6.8333	6.7778	6.1667	9.2222	5.1667	7	6.0556	8.2778	3.3889	8.2222		0.440413	7.0681
10.2462	6.1667	9	6.4444	10.1667	9.2222	8.7778	4.9444	4.5	5.1667	13.7778	11.4444	5.3889	8.9444	5.5	7.7222	5	3.2778	5.1111	4.1667	8.3333	14.4444	9.2222	3.7222	6.4444	10	6.9444	10.0556	7.7222	7.8889	4.6667	5.3889		0.445597	7.40501
10.3653	7.5556	9.5	7.2778	5.5	11.4444	11.1111	4.2222	2.0556	6.6111	9.8889	6.2222	5.8889	7.2778	8.7222	7.2778	8.6667	5.5556	2.2222	3.1667	8.7222	12.4444	7.8889	6.5556	6	5.0556	4.1667	8	5.8333	6.0556	7.1111	3.7222		0.450777	6.82975
10.4844	8.8333	5.6667	7.9444	6.5	10.6111	6.5556	3.4444	3.0556	3	8	5.7222	6.2222	5.8333	6.2778	10.1667	4.9444	3.4444	4.4444	6.2778	6.0556	7.7222	6.8889	6.5	9.9444	8.7222	6.4444	8.6111	5.7778	5.1111	3	6.2778		0.455956	6.38709
10.6036	8.8889	4.5556	7.5	7.5	6.2222	6.5556	11	3.1667	6.1111	9.3889	5.9444	5.9444	7.9444	4.8333	11.8333	5.2778	3.9444	1.8889	4.2778	4.7778	11.6667	8.0556	5.8333	8.4444	8.0556	4.9444	4.6667	5.8889	4.7778	5.3889	8.8889		0.46114	6.58602
10.7227	7.7222	6.5	4.6111	13.5	10.1667	6.7778	3.3889	5.7778	2.7778	8.8889	5.3333	8.8889	3.8333	8.0556	14.4444	7	5.7778	3.1667	5.4444	8.1667	13.6111	6.6667	4.7778	5	13.1667	7.5556	7.3333	7.0556	8.7778	6.6111	5.3889		0.46632	7.29571
10.8419	7.0556	6.1111	5.2778	7.2778	7.2778	13.8889	5	2.8889	3.1667	5.6111	8.9444	5.7222	5.6667	5.7778	6.1667	5.3333	3.8889	2.5556	3.8889	4.4444	11.0556	12	5.1667	7.3889	13.2222	11.0556	3.7778	6.3333	6.2778	4.4444	3.7778		0.471504	6.46596
10.961	11.7778	8.2222	3.7778	4.5	5.2778	7.5556	6.4444	3.9444	5.9444	8.2778	9.7222	6.5	12.2778	6.5556	9.8889	5.3889	3.5	1.8889	4.1111	4.8333	5.2778	12.2222	6.8889	7.4444	10.3889	9.2778	5.8889	5.1667	7.3889	3.7778	2.5		0.476683	6.66488
11.0801	9.4444	9.3889	2.5556	8.0556	5.4444	7.4444	3.1667	4.0556	4.2222	10	7.3889	7.3333	12.3333	10.0556	7.0556	5.8333	4.4444	2.0556	4	5.3333	16	8.6111	5.7222	4.6111	14.5556	7.6111	10.3889	6.0556	4.7222	6.7778	3.2222		0.481863	7.02867
11.1993	5.1111	8.8333	7.6111	14.1667	5.0556	9.7778	3.6111	2.5556	4	10.5556	5.0556	7.1667	5.8333	5.5556	5.7222	6.1111	2.4444	2	3.3333	5.3333	5.8889	9.4444	5.6111	8	12.8889	5.1667	4.4444	7.5556	4.0556	4.9444	5.0556		0.487047	6.22223
11.3184	6.6111	8.4444	4.1111	6.4444	4.5556	7	4.2778	2.4444	3.8889	6.3333	10.7222	7.2778	6.8889	6.1667	9.1111	4.8333	4.6667	2	3.3889	4.8333	6.4444	4.9444	5	6.8889	10.9444	5.1111	5.5	6.2222	7.6111	4.7778	7.6111		0.492226	5.96953
11.4376	8.2222	8.9444	5.3889	5.4444	6.7222	7.8333	5.6667	2.2778	3.7778	3.9444	7.1667	7.6667	11.1667	7.2778	4.7222	6.8889	4.5	3.1667	6.1111	3.8889	6.8333	4.5556	6.6111	7.6111	6.3889	7.7778	4.3333	10.7222	8.2778	2.1667	2.5		0.49741	6.08244
11.5567	5.2778	6.4444	3.1111	5.5556	6.6667	7.6667	3.5556	4	5.6667	8.8889	8.7222	12.1667	7.3889	12.4444	5.3333	3.3333	2.7222	5.4444	2.6111	4.9444	12.0556	9	4.9444	9.2222	10.6111	8.8889	7.2778	7.3889	6.0556	3.6667	5.8889		0.50259	6.67563
11.6758	8	9.8889	4.8889	6.3333	7.4444	13.6111	2.3333	2	2.0556	7.1667	11.4444	7.5556	7.8889	4.0556	3.7222	5.2778	2.7222	3.1111	5.6667	3.9444	10.8889	6.2222	8.9444	8.2222	10.2778	4.2778	4.7222	7.3333	7.5	4.1667	7.4444		0.507769	6.42294
11.795	5.1667	6.3889	4.3333	9	4.3889	6	7.5	1.9444	3.0556	7	5.2778	6.3333	7.2778	8.1111	6.5556	8.8889	3.5	4.5	3.7222	5.7222	10.3889	4.6111	6.6667	7.1111	7.3889	4.4444	7.9444	6.8889	5.8889	4.1111	6.0556		0.512953	6.00538
11.9141	3.8889	6.4444	5.2778	10.1667	6.5556	8.8333	3.4444	2.8333	2.4444	5.3333	6.7778	8.2222	8.2778	12.1111	6.0556	6.5556	3.5	3.3333	4.2778	5.2778	6.8889	7.7222	6.1667	7.3333	7.2222	6.2778	6.3333	3.0556	5.4444	3.1667	3.7778		0.518133	5.90323
12.0333	5.1667	5	3.3889	7.3889	7.7222	6.4444	2.8333	2.9444	4.0556	7.3333	12.8889	9.2778	9.8889	8.3889	7.6667	7.0556	5.2222	4.6667	4.1111	5.2778	9.0556	8.6111	5.8889	10.5556	4.5	3.6111	6.6667	5.1667	6.4444	3.0556	4.1111		0.523317	6.27062
12.1524	9.6667	6.5	2.4444	6.3889	8.7778	10.8333	5.7778	2.5556	5.0556	6.3889	12.5	5.8889	7.0556	8.5556	9	3.8889	4.2222	4.1111	4.6111	3.9444	8.3333	9.8333	7.2222	6.7222	3.8889	4.9444	4.4444	3.8889	7.3333	5.3333	3.6667		0.528496	6.25089
12.2716	5.2222	6.6667	5.1111	9.5	7.7222	6.7222	7.9444	2.8889	2.7222	7.3889	9.1667	5.3333	9.5556	9.4444	6.6111	4.4444	5.7222	2.3333	3.3889	5.0556	7.8333	6.7778	4.4444	3.6667	7.5556	5.1667	2.9444	2.7222	2.8333	3.9444	3.1111		0.53368	5.6111
12.3907	6.7222	7.1111	9.0556	4.1111	4	8.7778	3.3889	3.8889	2.7778	9.5556	4.6667	7.4444	11.6111	5.6111	9.2222	5.5556	3.8889	3.1667	4	3.6667	7.6667	3.9444	3.7222	5.4444	7.7778	6.3333	8.6667	6.3889	5.6667	5.1111	8.1111		0.53886	6.03405
12.5098	4.8889	9.8333	7.9444	7.6667	8.3333	11.3889	2.3889	2.3333	4.7222	5.6111	9.7778	6.3333	7.4444	6.9444	5.5556	5.1667	2.1667	3.4444	4.1111	4.6111	11.5	6	8.7778	8	8.7778	7.0556	3.7778	2.6667	2.8333	5.8889	3.2222		0.544039	6.10215
12.629	11.4444	3.6111	5.5556	4.8889	4	7.7778	4.2778	2.5556	2.8333	10.9444	5.0556	6.7778	8.8889	3.6667	7.4444	7.7222	1.8889	5	4.1667	6.1111	5.5556	6.1667	9.3889	6.3889	4.6111	5.0556	4.6111	7.1111	4.7778	5.2778	2.6111		0.549223	5.6828
12.7481	5.0556	8.3333	4.7222	8.3333	5.4444	13.0556	4.1667	2.6111	4.8333	9.0556	11.1111	8.9444	8.5556	8.1111	7.7222	6.1111	3.8889	5.6667	3.2778	1.8333	8	4.1111	10.1667	6.6667	4.3333	4.7222	5.7222	6.3333	5.1111	4.8333	4.2222		0.554403	6.29211
12.8673	6.5556	7.6111	5.0556	6	8.7222	7.5	3.2222	4	3.4444	7.5556	7.2778	6.2778	4.5556	9.3889	9.8333	4.2222	3.8333	2.9444	2.9444	2.3333	5.3889	7.6667	8.6111	5.8333	7.7222	4.8889	8.0556	3.1667	2.7778	5.2778	5.2222		0.559587	5.73835
12.9864	5.1111	5.5556	5.6667	7.2778	6.5	8.4444	3.5556	2.2778	2	4.3889	5.8889	7.8333	8.7778	7.8333	10.5	3.9444	3	1.8889	3.8333	4	3.6111	5.0556	4.3333	8.3333	6.5	6.2778	5.2222	4.7778	4.3889	2.7222	5.2222		0.564766	5.31362
13.1055	6.6111	7.2778	9.2222	7.5	5.7778	8.2222	4.2778	3.3333	3	5.6667	5.6667	6.7778	7.3333	7.6667	5.6667	3.6667	2.5556	2.3333	2.7778	5.8889	6.3889	8.7222	11.5	5	7.4444	3.7778	6.5	7.2222	4.5	5.1667	3.7778		0.569946	5.84588
13.2247	7.5	7.2778	3.8889	4.9444	11.2222	8.8333	1.8333	2.7222	3.1667	9.2778	7	4.1667	10.5	4.8889	10.1111	5.5556	3.6667	3.1111	3.7222	3.5556	5.7778	7.1111	7.5	8.4444	6.6667	7.1111	3.7778	4.5	2.9444	6.8333	4.4444		0.575129	5.87276
13.3438	7.1111	6.4444	2.6667	8.7222	10.4444	9.9444	3	2.5556	2.2222	7.9444	8.2778	10.8333	10.2778	6.2778	8	4.3889	2.6667	1.8889	2.1667	2.8889	5.4444	8	6.2222	4.6111	5.5556	2.9444	3.6111	6.0556	4.3333	3.2778	3.3889		0.580309	5.55376
13.463	5.0556	5.0556	3.3889	7.6111	7.6667	8.5556	2.8333	4	3.3889	8.8333	5.2222	8	5.5	6.4444	5.1111	4.0556	3.6111	3.3333	1.6667	2.2778	3.2778	6.2778	7.7778	5.5556	6.3333	8.0556	7	8.1111	6.2778	3.2778	3.7222		0.585493	5.39606
13.5821	3.4444	8.1111	7.5556	9.2778	7.9444	12.0556	2.3333	3.9444	2.6111	5.6667	4.5556	7.2778	8.5	7.9444	4.9444	3.3333	4.0556	2.1667	2.4444	4	8.8889	6.3333	4.8889	6.2222	8.6111	5.6667	3.2778	5.9444	2.7778	8.2222	5.2778		0.590672	5.75089
13.7012	8.5	7.5	8.2222	10.1111	7.3889	5.3889	4.5556	2.9444	2.5556	5.2778	4.9444	7.6667	7	7.5	7.8333	3.6667	3.4444	1.7778	4.2222	5.0556	6.6667	4.5556	5.9444	4.8889	4.2778	6.3333	4.0556	6.1667	3.7778	4	3.9444		0.595852	5.48925
13.8204	6.5	4.2222	3.9444	11.5556	11.3889	11.1667	5.7778	1.9444	3.1667	8.0556	2.7778	4.7222	7.2222	4.2778	8.3333	4.6111	2.1111	2.2778	5.4444	2	4.2222	5.1111	3	7.8333	5.3889	11.7778	4.3333	5.9444	3.1111	5.0556	4.5		0.601036	5.54122
13.9395	4.5556	6.5556	4.7222	8.7222	7.6111	8	2	3.2778	1.8889	6.6667	8.1667	9.5	9.1667	5.0556	7.0556	5.3333	5.1667	3.2222	5	4.2778	11.0556	4.9444	6.1111	6.3889	4.2222	7.5	5.6667	3.3889	5.3333	4.9444	6.4444		0.606215	5.86918
14.0587	8.2778	7.1667	5.5556	3.7222	3.7222	9.8889	2.7222	3	2.9444	7.4444	7.4444	4.9444	7.7222	5.4444	6.6667	3.1111	3.7222	2.8333	2.6667	5.0556	10.8889	9.4444	9.6111	9.1111	2.8889	7.5	5.5556	3.2778	5.1667	5.6667	2.6111		0.611399	5.67025
14.1778	5.2778	7.1111	4.3333	7.1111	6.7222	15.2778	3.5	2.0556	2.0556	3.7222	4.4444	8	6.7222	7.4444	9	7.8333	1.7778	4.6667	3.5556	3.3889	6.2778	5.0556	9.1667	5.7778	4.2778	9.7222	3.5	6.3889	6.1111	2.1667	2.3333		0.616579	5.638
14.297	6.1667	7.0556	4.2222	6.9444	7.1667	7.8333	3.0556	2.7778	3.3333	11.1667	6.1667	9.6111	7.8333	4.2778	6.7222	4.3889	2.0556	1.6111	3.1667	3	5.8889	5.4444	5.5	9.3889	4.5556	9.7778	7.1111	8	3.2778	2.3889	3.0556		0.621763	5.57886
14.4161	7.4444	6.6111	3.1111	10.7222	5.1667	5.6667	3.3333	2.7222	3.1667	3.2222	4.5	9.2778	6.7222	4.7222	8.3889	7.8333	3.6667	4.2222	5.6111	4.4444	10.1667	8.1111	8.4444	3.9444	3.8333	8.3333	4.6667	3.8333	6.2778	3.5	2.5556		0.626942	5.62006
14.5352	7.6667	9.0556	5.4444	8.1667	5.7778	10.7222	5.3889	2.7222	3.3889	4.4444	6.2222	11.8889	3.7778	6.5	5.9444	4.5556	2.8333	3.5	3.7778	3.2778	7.6111	7.3889	6.7222	3.5556	5.7778	5.5556	4.7778	2	6.0556	4.7778	5.1667		0.632122	5.62725
14.6544	7.7222	8.4444	5.7222	8.5	4.1111	7.7778	2.9444	3.7778	4.1111	4.0556	8.3889	4.3333	7.0556	5	8.5	5.7778	3.3889	3.2222	5.6111	5.5	8.2222	6.5	6.0556	11.2222	2.8889	10.2222	4.2778	5.5556	6.5	4.0556	3.6667		0.637306	5.90681
14.7735	3.6111	8.8889	5.3889	3.9444	9.1667	10.6667	3.1667	3.3333	2.2222	2.5556	9.1111	11.7778	6.0556	6.3889	9.6111	3.8889	3.8889	2.7778	2.4444	4.5556	5.2778	6.5	9.1111	6	5.2222	4.7222	3.2778	3.7778	4.7778	3.5556	4.4444		0.642485	5.48746
14.8927	7.0556	8.1667	5.7222	6.6667	4.6667	9.7778	4.1667	2.2222	1.8333	3.1111	7.3333	7.6111	7.8889	3.6667	6.8889	4.6667	1.7778	1.8333	2.7778	5.3889	7.3889	6.2778	6.8889	8.7778	4.3889	6.3889	5.2778	7.7222	5.4444	2.0556	5.1667		0.647669	5.45162
15.0118	6.5556	9.0556	6.4444	7.7222	6.1667	4.9444	3.0556	1.9444	2.6111	4.6667	6.3333	10.0556	3.5	3.5	6.0556	6.2222	5.7222	3.8333	2.5	4.6667	10.2778	3.5	9	7.1667	7.4444	6.8889	4.7222	7	6	4.2778	2.0556		0.652849	5.60932
15.1309	6.5556	7.7222	7.5	6.8889	4.0556	7.8889	3.7778	4.2222	2.5556	1.9444	7	8.8333	5.6667	4.8333	8.2778	6.9444	4.5	1.8333	5.1111	4.8333	6.4444	5.5556	4.5	3.4444	5.1111	5.4444	5.2222	4.9444	5.6667	2.5	2.2778		0.658028	5.22759
15.2501	5.6111	6.5556	5.3333	8.0556	4.1667	9.1111	2.7778	2.9444	2.7222	5.3889	6.5556	7.5556	6.6111	6	4.0556	5	1.7222	3.1111	1.8333	3.2778	7.5	5.4444	10.6111	6.3333	4.5556	3	2.9444	4.6111	3.4444	3.6111	4.6111		0.663212	5.00179
15.3692	4.8333	6.6111	4.0556	4.1111	4.2778	5.3889	1.8333	2.8333	1.8889	6.3333	9.7778	7.4444	5.5556	8.4444	11.3333	5.7778	4.2222	2.4444	3	5.6111	5.4444	8.2778	5.9444	5.5556	5.3333	4.7778	3.5556	8.2778	4	3.1111	5.6667		0.668392	5.34587
15.4884	6.3889	6.4444	9.3333	8.2222	4.1667	4.2222	8.9444	3.3333	2.3889	6.4444	12.9444	5.1111	7	4	10.8333	3.8889	2.8333	2.2222	2.9444	5.5556	8.5556	6.6111	8	7.3333	4.5	1.8333	6	7.0556	8.5	4.5	2.6667		0.673576	5.89605
15.6075	5.5	6.3333	5.2222	6.6111	6.8333	5.2778	2.3889	3.3333	2.4444	4.1111	10.1111	5	6.6667	4.1667	6.0556	5.3889	5.9444	4.8333	3.3333	3.2222	8.8333	4.5556	4.1111	4.8889	7.1667	4	5.5	4.8333	9.6667	2	3.5556		0.678755	5.22222
15.7266	6.1111	7.2778	6.6111	7.1667	6.3889	6.8333	3.8889	2.3333	2.6667	4.2778	9.7222	3.8333	8.3889	4.7778	6	7.2222	2.8333	3.3333	7	6.2222	8.9444	5.5	2.5556	7.7222	6.3889	3.6667	5.2222	7.1111	5.1667	2.4444	3.4444		0.683935	5.51792
15.8458	7.2778	4.3889	9.0556	3.4444	8.0556	7.6667	3.5556	3.0556	3.5	5.3889	8.4444	12.2778	6	9.7778	8.7222	4.2222	4.1667	2.1667	2	3.7778	6.0556	4.5556	5.0556	5.2778	2.8333	4.9444	6.8333	5	7.4444	2.8333	4.3333		0.689119	5.55198
15.9649	5.0556	6.7778	9.7778	5.5556	7.9444	6.7222	2.8333	2.8889	3.0556	4.2778	5.6111	3.4444	7.7778	7.8889	8.5	7.8889	1.7222	3.2778	3.8333	5.5556	8.1667	7.5	4.6667	4.5	5.6111	3	5.1667	5.9444	4.5556	2.5	5.5		0.694298	5.40323
16.0841	5.6111	5	4.3889	4.0556	9.1111	10.2778	5.1667	3.6667	1.9444	4.3889	9.3889	7.3333	9.1667	6.7222	7.5556	7.2222	1.8333	3.2778	2.5556	6.8889	7.4444	5.0556	4.5	5.4444	4.4444	5.4444	4.3333	5.1667	8.2222	5.9444	3.1667		0.699482	5.6362
16.2032	3.6667	6	5.7778	7.5556	9.1111	6.6667	2.9444	2.2222	2.2222	6.6667	7.2778	7.7778	4.2778	5.6667	7.3333	4.0556	2.7222	3.9444	5.4444	6.9444	6.8889	6.1111	4.5	3.8889	9.6667	2.3889	3.9444	4.6667	4.7222	2.8889	3.5556		0.704662	5.20968
16.3224	4.5	3.8889	6.4444	7.5	7	4.5	2.8889	2.3333	3.3333	6.6667	2.9444	6.6667	7.7222	3.4444	7.6111	3.2222	2.2778	2.0556	4.7222	2.8889	9.1111	6.5556	6.3889	6.7222	8.2222	2.5556	6.7222	7.7222	5.5	4.3333	3		0.709845	5.14336
16.4415	5.7222	6.7778	2.1667	5.3889	7	4.1111	4.1667	3.7222	3.5556	5.5	9.2778	5.1667	6.3889	3	8.5556	4.9444	3.5556	4.0556	2.4444	3.7222	6.8889	6.1667	5.8333	4.1667	6.6667	3.3889	4.6667	4.2222	3.1111	2.0556	2.2778		0.715025	4.79571
16.5606	5.4444	6.7222	7.6667	8.6667	6.2222	6.1667	2.8333	2.8333	2.0556	7.4444	5.2222	3.5	10.2222	4.8889	7.6667	10.8333	2.5556	3.1667	4.3333	3.5556	6.2222	8.4444	3.2222	6.6111	8.8333	5.3333	3.2222	2.8333	3.2222	5.9444	3.6111		0.720205	5.46773
16.6798	6.4444	7.2778	5.9444	9.7222	4	6.5	3.2778	1.7222	2.2222	5.2778	7.4444	9.8333	5.4444	6.5556	8.9444	8.7778	4.5	4.2778	3.0556	3.4444	4.3889	4.9444	2.5	7.1667	8.2778	3.7222	2.7778	5.5	3.8889	3.4444	4.7778		0.725388	5.35663
16.7989	3.8889	6.1111	7.2222	2.8333	4.6667	5.5	2.4444	2.7778	2	4.5	6.5	6.6667	9.6667	3.2778	7.4444	7.2222	3.5	2.1111	3.7778	7.0556	3.8333	2.6111	5.5556	3.0556	7.1111	4.2778	2.9444	5.5	4.2778	3.7778	5.1111		0.730568	4.74911
16.9181	5.4444	5.0556	9.3333	4.5	7.1111	5.5556	2.1111	2	3.7222	7.8333	4	4.5	6.2222	8.1111	10.1111	11.8333	2.7778	2.2222	4.7778	3.9444	5.8333	4.2778	3.7222	4.6111	6.2222	4.7778	5.4444	6	5.2222	2.7222	3.6667		0.735752	5.27956
17.0372	7.6667	6.2222	5.8889	7.5	6.9444	7.3889	4	5	4.8333	6.4444	6.6111	4.6111	4.2778	6.2222	3.6111	9.3333	1.8889	2	4.2222	4.2222	5.7778	6	2.4444	3.0556	9.0556	4.7778	2.1667	4.0556	5.6667	2.3333	1.9444		0.740931	5.03763
17.1563	3.5556	4.2222	4.1667	5.3889	5.7778	7.6111	4.7222	4.6667	4.2778	5.2222	6.6111	6.5556	5.5556	7.7222	6.1667	7.4444	2.7778	6.8889	3.0556	2.8889	5.1111	4.4444	7.9444	4.6667	7.9444	6.2778	9.6667	4.7222	7.2222	2.8333	2.8333		0.746111	5.44982
17.2755	5	3.7222	6.7778	8.6667	5.2222	6.1111	4.6667	5	2.0556	6.1111	5.1667	3.7222	3.8333	3.4444	7.2222	7.5	3.3333	2.2222	2.8333	6.2778	3.7778	6.1111	3.8889	7.4444	5	5.8333	2.5556	4.2778	3.8333	3	1.8889		0.751295	4.7258
17.3946	4.8333	6.7222	6.6111	5.1667	4.7222	6.1667	4.2222	5.4444	4.6667	3.7222	4.9444	6.2222	4.0556	3.2778	9.6667	11.4444	2.8889	4.7222	4.6667	3.8333	7.1111	8.1111	2.7778	4.2778	4.7778	2.3889	5.0556	5.0556	6.5556	2.8333	3.5		0.756474	5.17563
17.5138	4.2222	5.4444	5.2778	6.9444	4.5	7.7778	4.2222	2.5556	1.8889	4.2222	4.7778	2.2778	4.3889	4.2222	6.2778	8.1667	3.6111	4.7222	4.7222	5.1111	7.5556	5.4444	5.9444	8.3889	4.7222	3.7222	3.3889	3.3333	6.4444	4.2222	4		0.761658	4.91935
17.6329	2.7778	3.2778	7.5556	3.9444	6	8.4444	4	2.7222	2.4444	5.8333	7.6667	4.2778	3.2778	4.0556	5.3333	8.5	4.7222	2.6667	2.3889	8.1667	8.7778	4.3889	4.6667	4.3889	5.6111	5.7222	5.4444	4.0556	5.7778	3.0556	5.2778		0.766838	5.00717
17.7521	5.0556	4.8889	6.6667	9.2778	7.7222	5.1111	2.5	2.6667	2	6.5	8.5	3.6111	4.5	4.6111	7.0556	4.1111	6.2778	2.1111	4.2778	3.7778	6.6667	5.7222	2.6111	4.7222	7.7222	7.5	5.2222	4.6667	7.2778	5.7778	2.2778		0.772022	5.2061
17.8712	5.9444	6.6111	9.3889	7.2222	9.2222	7.8333	3.6667	2.3889	4	6.3333	4.8889	3.7222	4.1111	3.5556	8.2222	7.1667	11.3333	4.8333	5.0556	4.4444	7.0556	5.6667	3.7222	2.3333	7.4444	2.5556	3.0556	3.8333	5.5	2.0556	2.3333		0.777201	5.33871
17.9903	3.8889	6.1667	5.8889	6.2222	6.5	8.2222	4.6111	2.5556	5.1111	7.7222	6.7222	3.5556	8.3333	2.8889	8.6111	8.3333	6.0556	3.3889	3.0556	4.3333	6.5	9.5556	2.0556	8.4444	5.1111	4	4.9444	5.6667	4.1111	3.2222	2.6111		0.782381	5.4319
18.1095	3.5	7.1667	5.3889	3.4444	7.1667	8.8333	3.8333	3.2778	2.5556	9.1667	6.3889	3.4444	4.4444	1.9444	8	3.5556	11.3889	3.2778	4.2222	3.7778	3.9444	4.6667	3.1667	7.7222	4.0556	4.1667	4.3333	4.6667	4.1111	3.1667	4		0.787565	4.92832
18.2286	5.3889	8.8333	6.8333	2.8333	5.3889	8.6111	4.8889	1.8889	2.0556	6.8333	4.8889	5.8333	4.9444	4.9444	4.3333	8.3333	8.6111	3.4444	3	4.2778	8.6111	3.1111	4.3333	4.2778	4.6667	3.6667	4.5	6.7222	3.1111	3.8889	2.1667		0.792744	5.00716
18.3478	7.8333	5.2222	4.2222	5.4444	8.3889	10.2222	5.2222	3.3333	3	5.7222	3.5556	3.1111	2.8889	2.3889	5.0556	4.4444	8.2778	3	1.9444	3.9444	6.0556	4.9444	3.3889	4.1111	5.1111	7.2778	4.9444	6.1667	4.3333	7.7222	5.6667		0.797928	5.06272
18.4669	3.3333	2.0556	5.2222	3.2778	3.4444	6.1667	5.0556	2.5556	1.8889	5.6667	3.3889	4	2.0556	1.8889	6.1667	3.5556	6.2222	4.3333	5.3333	2.4444	6.9444	5.1111	6.5	5.4444	5.2222	5.9444	4.1111	4	6.6667	3.0556	6		0.803108	4.42115
18.586	3.1667	7.7778	3.1667	6.9444	4.3333	8.5556	3.8889	2.7778	2.3889	5.1111	9.8333	4.0556	5.8889	2.5556	6.2778	5.8889	7.1111	3.6667	6.7778	3	6.8889	3.5	4.8333	5.6111	4.9444	2.5	5.7222	2.5	4.3889	6.3333	5		0.808287	5.01255
18.7052	4.2778	4.9444	5.8889	6.1111	5.1111	4.6111	3.5	4.1111	4.5556	4.5556	4.8889	6.0556	3	3.5	3.6667	3.8333	6.2222	5.6667	4.3333	5.7222	2.2778	4.9444	2.8889	5	6.8333	4.6667	6.5	4.0556	4.1111	2.5	3.7222		0.813471	4.58244
18.8243	4.7778	6.3333	3.8889	9.1111	5.2222	8.1111	7.0556	2	4.2778	6.8333	3.4444	4.3889	1.8889	2.5	5.0556	3.8333	6.3889	8.6111	7.8889	8.5556	3.5	2.3889	4.0556	5.3889	3.6111	3.6667	3.8889	5.8333	3.7778	2.1111	3.5556		0.818651	4.90144
18.9435	6.7222	3.9444	12.6667	8	7.2222	8.1667	5.0556	4.2778	4.0556	4.9444	4.8889	5.8889	3.3333	3	3.6667	5.0556	6.3333	10.8889	7.0556	6.6111	3.3333	3.8889	4.8889	5.8333	3.7222	2.3333	3.6111	2.2778	6.9444	4.4444	2.2222		0.823835	5.33154
19.0626	6.2778	3.3889	5.0556	3.3333	5.8333	4.4444	4.1667	2.3889	3.6111	2	4.4444	3.5	4.1111	1.6667	2.6667	4.8889	6.2222	7.6111	4.1111	4.5556	4.4444	2.2778	2.3889	5.2222	5.5	3.2778	3.6667	2.6667	4	3.6667	3.3333		0.829014	4.0233
19.1817	2.5556	4.1111	6.4444	6.4444	6.7778	4.5	7.2222	3.7222	3.5556	7.4444	4.9444	2.8889	3.5556	2.7222	2.3333	4.6667	7.7222	4.4444	5.3889	5.5	4.5	6	2	5.6667	3.7222	3.1111	3.8333	4.4444	6.4444	3.7222	4.8333		0.834194	4.68458
19.3009	6.5556	5.3333	6.2778	3.5	6.7778	8.5	3.8333	4.4444	3.8889	5.8333	5.4444	1.8333	4.5556	2.6111	2.8889	3.4444	4.5	7.3333	5.1111	3.0556	4.8333	2.9444	2.5	5.5556	4.7222	2.8333	3.9444	5.5	4	2.5556	3.2222		0.839378	4.46236
19.42	7.6111	3.7222	4.5556	5	9.2222	8.3333	6.0556	3.1667	2.5	8.8889	4.1667	5.5	2.4444	2.1111	3.3889	5.0556	8.0556	9.0556	4.9444	6.6111	5.7222	2.6667	2.7222	5.3333	5.8333	4.2222	3.8333	5	7.3333	4.8333	5.1667		0.844557	5.25985
19.5392	9.2778	5.5	8.1667	5.8889	7.6111	6.2778	6.9444	5	7.5	8.8333	4.1667	4	3.0556	4.5	3.1111	4.0556	6.4444	8.3333	4.8333	4.8333	2.5	2.6667	3.7778	6.8333	6.7222	4.6667	3.2222	3.9444	3.8333	2.1111	6.1667		0.849741	5.31541
19.6583	4.2778	5.4444	5.3889	4.0556	6.2778	8.3333	5	4.8333	5	8.3333	4.5	2.4444	1.7778	3.2222	4.3333	2.3333	4.1667	7.8333	5.0556	5.1667	7.1667	5.8889	2.3333	3.2222	4.7222	1.8333	4.2222	5.6111	4.5	4	7.4444		0.854921	4.79748
19.7775	4.7778	7.3889	4.9444	3.0556	6.5556	5.3333	8.0556	6.5556	3.5556	4.1667	4.2778	3.0556	1.8889	4.8889	3.3333	5.2778	8.7222	7.6667	3.6111	3.6667	3.9444	1.8889	2.7778	2.8889	4.5556	3.1667	1.8889	6	8.5	3.9444	5.2778		0.860104	4.69715
19.8966	7.8889	4.3333	5.0556	6	5	8.1111	4	5.7222	4.2778	7.5	3.0556	2.7778	2.5	2.3333	4.3333	3.5556	6.6667	9.2778	7.7778	3.0556	6.3333	3.1667	5.9444	4.0556	3.5	3.4444	2	4.8333	3.0556	7.8889	4.5556		0.865284	4.90323
20.0157	3.4444	4.6667	3.8889	3.3333	3.6667	6.2778	8.5556	6.5	7.6667	7.9444	5.2778	1.8333	2.2222	2.2778	3.3889	3.7778	5.8889	5.7222	9.7222	6.2778	2.6667	3.3333	2.0556	3.7778	2.6111	2.7778	4.7222	3.5	6.2778	2.7778	5.4444		0.870464	4.58961
20.1349	6.8889	2.9444	7.7222	4.9444	3.9444	5.7222	6.1667	8.6667	6.6111	8.1111	2.8889	2	2	1.9444	2.1111	5.5	8.7222	4.8333	5.3333	2.2778	2.5556	2.3333	3.8333	4.7778	3.1111	2.6111	4.8333	5.1111	4.2778	3.5	4.1111		0.875647	4.52866
20.254	2.8333	7.3333	3.1111	4.8889	5.6667	4.3889	4.1111	4	8.2778	5.2222	5	3.6667	3.0556	2.2222	4.1111	3.7222	5.3889	7	4.5556	3.9444	5.3333	3.6111	3.6667	3	4	3	4.2778	2.8333	2.5556	5.7222	5.8889		0.880827	4.39964
20.3732	2.6667	3.0556	5.5	3.6111	6.2222	8.5	6.1111	5.7222	4.7222	4	2.5556	2.5556	3.0556	1.9444	2.6667	3.2222	5.7778	3.7778	7.9444	6	3.9444	3.9444	3.8333	4.1667	3.4444	1.7778	2.8333	6.8333	6.2222	7.4444	4		0.886011	4.4534
20.4923	4.7222	4.1111	3.6667	4.3889	7.8333	3.4444	7.2222	5.1111	8	5.6111	2.7778	3.1111	1.9444	1.9444	1.8333	3.2222	6.7222	4.0556	5.3333	5.1667	1.8333	3	2.3889	2.6667	1.7778	1.8889	1.8333	3.0556	4.7222	5.1111	4.7222		0.89119	3.9749
20.6114	8.1667	5.6111	9	4.7778	6.1111	5.9444	5.8333	4.2222	2.6111	3.0556	4.7222	2	2.8333	2.1111	1.7222	1.7778	2.6111	9.3333	4.2222	2.8333	3.5	3.3889	2.3889	4.1111	3.8889	2.6667	2.2222	5	5.4444	4.4444	5.9444		0.89637	4.27418
20.7306	6.5556	3.1111	7.5	2.5	4.7222	4.6111	3.3889	3.3333	10.8889	4.2222	2.6111	2.5	1.8889	1.8333	2.5	2	2.1667	5.7778	5.0556	2.6111	3.4444	1.7222	1.9444	2.6667	2.1667	3.2778	2	2.8889	7.6667	3.8333	4.3889		0.901554	3.73477
20.8497	6.1667	8.2778	4.5556	9.2778	6.1111	8.2222	4.3333	6.0556	5.8889	2.7222	2.6111	3	2.1667	2	2.6667	2.5	2.3333	4.5	2.6667	3.1111	1.8889	2.6667	2.0556	1.8889	2.6111	2.1111	2	3.9444	8.2778	4.3889	6.1111		0.906733	4.10036
20.9689	5.3333	4.5	8.0556	2.5	3.5556	7.8333	3.7778	9.6111	8.4444	2.8889	1.8333	3.3889	1.7778	1.8333	2.7778	2.3333	1.8889	2.8333	2.4444	5.0556	1.8889	2.9444	2.1111	2.7778	3.1111	2.6667	3.5	3	6.2222	2.4444	7.2778		0.911917	3.89068
21.088	4.3333	4.8333	7.5556	3.3333	5.2222	6.6667	3	4.1667	3.7778	3.4444	2.7222	3.9444	2	2.1111	2.1667	3.2222	2	4.8333	3.1667	2.9444	2.4444	1.8889	1.9444	2.5	4	2.6111	2.8333	5.5	3.2778	3.5	8.8889		0.917097	3.70429
21.2071	5.1111	5.8333	8	3.3333	2.5556	2.8333	5.6667	7.3889	8.0556	6.2222	3.3333	2.5556	3	1.9444	2.2222	1.9444	3.1111	2	1.8889	2.2778	1.9444	2	1.8333	2.2778	2.5556	2.2222	3.3889	5.2222	2.1667	3.9444	7.3333		0.922276	3.68279
21.3263	3.2222	5.4444	4.3889	3.8889	6.7778	4.3889	3.3889	8.8333	4	3.9444	2.7778	2	1.9444	2.0556	2	2.0556	2.7778	1.8889	2.6667	1.9444	2.8889	2.8889	2.2222	3.7222	1.7778	2.0556	3.5	2.3889	4.2222	3.7222	6.9444		0.92746	3.44265
21.4454	3.6667	4	3.4444	8.1667	5.6667	10.1667	7.1111	5.3889	7.5556	3.5	3.6111	3.0556	3.2222	2.6111	2.3889	1.8889	1.7778	2.7222	1.7778	3.8889	1.7778	2.2222	2	1.8889	2.5556	3.6111	3.0556	2.7222	2.1667	3.8889	7.1667		0.93264	3.82797
21.5646	3.0556	3.7778	5	4.3889	7.0556	5.8333	3.2778	7.3889	2.2222	3.2778	3.1111	2	1.8333	1.8333	2.3889	2.3333	2.5	2.7778	2	1.9444	2	1.8333	2	2.8889	1.8889	3.4444	2.7778	2.5	2.8889	3.6111	4.3333		0.937824	3.16666
21.6837	3.1111	5.6667	6.3889	2.3889	4.2222	7.9444	4.5	2.9444	7.6111	2.7222	1.8889	3.4444	2	2.1111	3.2222	3.1111	2.2778	3.7222	2.3333	3.3889	3.7222	2.2778	3.3889	2.1667	5.0556	1.8333	1.9444	2.7778	3.0556	8.4444	8.7222		0.943003	3.81899
21.8029	3.4444	3.2778	4.2222	2.2222	8.1111	4.0556	4.4444	6.3333	10.9444	4.8889	2.3333	2	1.8889	2.5556	2.4444	1.8333	2.4444	1.9444	2	2.1667	2.2778	2.8889	2	2.0556	2	1.8889	1.8889	2.3333	2.9444	4.4444	6.0556		0.948187	3.36558
21.922	4.2222	5.6111	3.8889	3.5556	5.3889	7.1667	5.1111	6.2778	9.5556	4.8889	2.8333	1.7778	2	2.5556	2.5	2.1111	3.0556	2	2.5	3.1111	3.3889	2.2222	2.2222	1.8333	1.8333	2.5	1.7778	2.4444	2.6111	5.6111	4.0556		0.953367	3.5681
22.0411	4.6667	5.3889	6.8889	3.8889	3.8889	2.2222	4.9444	5.1667	6.0556	3.5556	2.0556	2.6111	1.7778	3.2778	1.9444	1.9444	4.3333	2.0556	1.8889	2.9444	2.3333	1.7778	1.7778	3.2778	2.0556	2.5	1.7778	2.1667	3.1667	4.8889	6.1111		0.958546	3.33334
22.1603	3.1667	5.3889	4.5556	5.6111	3.5	3.7222	8.3333	4.8333	7.2222	2.3889	3.3333	1.9444	2.1667	2	2.0556	1.6111	2.0556	2.5556	2.3889	2.1111	2.7222	1.8333	2.6667	2	3.6111	2.4444	2.8333	3.0556	1.9444	6.3889	4.5556		0.96373	3.3871
22.2794	4.3333	3.7222	7.1111	4.8889	5.3889	5.0556	6.9444	4.6667	9.3889	2	2	1.8889	2.0556	3.1111	2.6111	3.8889	1.9444	3.2778	2.3333	2.3889	3.0556	1.6667	2.7222	3.1667	2.7222	2.5556	1.9444	2.8333	4.3889	2	6.6111		0.96891	3.63441
22.3986	4.3889	2.9444	6.3333	3.8333	2.3333	3.1667	2.7222	5.9444	3.6667	2.1667	1.9444	2.5556	2.2778	3.2222	1.8889	2.6667	3	2.5556	3.5	2.2222	1.9444	2.7778	1.8889	4.2778	1.7778	1.9444	2.5	1.8889	3.6111	3.7778	3.7778		0.974094	3.01613
22.5177	2.3889	2.5	4.0556	5.1667	4.4444	3.9444	5.6667	3.5	8.3889	3.5556	1.7222	1.9444	1.7778	2	2.0556	2.1111	3.1667	2	2.4444	1.8333	2.7778	2.7778	1.9444	2	3.1667	1.8889	2	2.1667	1.7778	3.8333	3.3889		0.979273	2.98029
22.6368	2.4444	2.7778	3.5556	6.4444	3.7222	2.7778	3.4444	2.6111	4.3333	2.0556	2.5556	3.3889	2.3333	1.9444	1.8333	1.8333	2.0556	3.7222	2.3333	2.6111	2.3333	1.8889	2.1111	3.5	1.9444	2.4444	2.8333	2.2778	2.8333	1.9444	4.8889		0.984453	2.83153
22.756	2.3333	2.5	6.4444	3.1111	4	4.2778	3.0556	3.6667	2.5556	2.9444	1.9444	2.0556	1.8889	2.1667	4	1.8333	2.5	1.8889	1.9444	2.4444	3.6111	2.5	1.9444	2.5556	1.9444	5.0556	3	2.9444	2.1667	4.5556	4.7778		0.989637	2.98745
22.8751	2.3333	2.5556	4.3889	2.9444	3.5	3.5	1.8889	3.4444	7.3889	1.9444	2	1.8889	1.8889	1.9444	3.8889	1.8889	2.2778	2	1.6667	2.4444	1.7778	1.8333	3.0556	1.8889	2.3333	3.2778	1.8333	3.5556	1.8889	4.2778	2.1667		0.994816	2.69893
22.9943	3.3889	4.1111	3.5	5.5556	3.0556	4.6667	2.5	1.8889	2.2222	2.3333	1.8333	3.1667	2.2778	2.6111	2.8889	1.8333	1.8333	1.8889	1.7778	3.3889	3.0556	2	2.6111	4.5556	1.9444	2.8333	2.6667	1.8333	2.1111	2.7222	4.7222		1	2.83154

## Sheet: Image30
X0	Y0	Y1	Y2	Y3	Y4	Y5	Y6	Y7	Y8	Y9	Y10	Y11	Y12	Y13	Y14	Y15	Y16	Y17	Y18	Y19	Y20	Y21	Y22	Y23	Y24	Y25	Y26		Ap-basal	Avg intensity
0	4.27792	5.54513	6.4961	4.8312	9.8183	5.6589	5.8275	4.50584	4.3184	4.94399	4.9277	5.6886	3.7791	4.8806	6.9385	6.1296	6.4016	4.4479	4.72463	3.41096	4.53316	4.9246	5.4611	9.67374	15.2918	11.8004	9.79054		0	6.26029
0.1191	4.8361	4.26897	7.4488	4.1563	7.6976	5.6606	6.9018	6.89777	5.2918	4.83828	3.95	5.3248	5.2595	8.6546	6.3137	6.6082	8.5973	6.2827	4.58378	4.92349	3.70409	5.7085	5.1459	10.2262	11.2955	10.0596	8.13015		0.00613285	6.39874
0.2383	5.86389	5.2203	6.9498	4.1355	7.3659	7.72751	6.4369	6.23245	4.9396	5.99935	4.1036	4.6344	4.242	8.8118	3.5025	7.704	8.6892	2.8398	6.11462	4.98607	5.844	6.3137	5.4547	6.43745	10.0657	13.982	4.18796		0.0122709	6.25129
0.3574	5.1511	4.14211	5.8217	4.3205	5.934	4.37381	6.687	8.95762	3.7747	5.03809	3.4444	6.3215	3.6406	7.9745	5.7066	7.2268	6.9169	4.2097	5.83408	6.99684	5.03195	7.0236	5.1526	7.80653	9.3063	9.5617	4.7073		0.0184037	5.96528
0.4766	3.08357	3.9023	4.3051	6.1221	5.1904	3.03253	6.3249	3.78121	3.4641	6.61331	3.2516	10.7894	5.3164	11.5343	9.0768	6.0474	7.0428	4.9332	3.64028	5.74724	4.32986	7.1772	4.4462	10.3331	14.0897	6.7892	6.2513		0.0245417	6.17094
0.5957	3.9856	4.81872	8.3296	4.0939	5.5268	3.30254	8.747	3.68002	3.3689	4.59592	3.7344	11.3536	4.967	8.8726	7.6539	6.0088	7.3109	7.165	4.60621	4.88938	4.8652	5.4799	7.689	7.95153	7.6555	8.3463	4.55828		0.0306746	6.05765
0.7148	5.29772	3.91299	5.8621	5.3177	4.8531	3.2664	8.4036	4.28492	5.1284	6.91249	4.3931	10.3227	5.8297	9.8256	8.0293	9.0086	7.7893	7.1267	4.46424	4.70935	5.17887	5.9578	4.3089	8.22738	9.9113	6.9453	3.51302		0.0368074	6.25113
0.834	4.92991	3.90842	7.3891	4.4391	4.1215	7.50362	5.4214	3.92692	4.9172	4.85587	4.9372	10.0847	6.8007	7.204	7.372	6.6446	10.5477	8.5156	5.46726	4.79642	6.09906	6.9199	4.3619	8.25478	7.6566	8.0248	3.38831		0.0429454	6.24032
0.9531	6.99418	5.04972	6.1524	6.8347	2.8258	5.3733	7.8579	4.39534	4.8378	5.19033	6.0557	10.7031	7.7819	5.8877	9.6819	6.583	11.805	6.098	5.39761	4.91354	5.9808	4.2543	9.5807	8.44999	13.5802	8.3046	4.09528		0.0490783	6.83944
1.0723	4.00242	3.86022	4.3439	6.3246	4.6262	4.51974	4.4974	4.65286	5.1279	4.22578	6.4123	7.6575	7.4938	5.9999	9.7376	10.2632	8.6692	4.8511	4.21719	3.80425	3.16062	4.7745	7.71	9.6252	10.8951	8.8088	6.84045		0.0552163	6.18895
1.1914	3.03572	4.53375	5.2507	4.6035	5.349	6.87062	6.4564	4.78784	5.6456	5.78111	7.9132	8.631	7.1956	7.274	13.6954	10.1954	10.6715	10.7506	4.0201	4.41428	4.86403	4.5663	5.3429	11.6522	10.5353	6.5737	4.15937		0.0613491	6.8433
1.3106	3.24932	5.29318	6.9906	4.4912	6.2391	6.18143	10.4846	3.39099	6.5229	4.61837	7.6737	6.462	9.295	7.0858	11.4414	4.5275	8.8764	11.2771	5.33128	7.09895	4.70426	5.6404	7.491	9.46308	16.043	7.474	4.98526		0.0674871	7.1234
1.4297	4.38726	4.05845	6.2827	7.9272	4.6118	7.80104	9.134	5.46395	4.9306	4.43548	9.9078	6.8942	6.4173	9.097	12.8585	6.4945	8.2289	8.9712	4.80601	5.86583	5.5573	5.4879	7.1643	7.60489	12.9457	7.8127	4.93149		0.07362	7.03993
1.5488	3.95859	3.59392	3.4516	7.7413	4.4882	5.3132	7.1868	7.88191	6.5508	5.34165	10.8504	10.0992	8.3888	10.3576	12.6003	8.1978	7.2751	8.3995	6.31429	3.94049	4.42645	4.251	7.8504	4.6384	8.5773	7.6274	5.2866		0.0797528	6.83663
1.668	3.43426	3.87651	3.7072	7.6877	6.4293	4.61658	7.3758	6.83815	7.95	3.54029	9.7191	10.6599	8.3073	10.8936	15.6311	8.4439	9.8276	10.7036	3.82284	7.41946	4.19736	5.4848	6.3573	7.66025	5.9963	7.5394	3.78787		0.0858908	7.10768
1.7871	6.1139	4.24106	7.6716	4.7624	8.6542	4.86212	5.251	6.52964	6.2279	6.0162	6.536	15.5089	9.6971	9.9295	14.8041	8.188	10.1974	9.0438	4.46705	5.6778	4.59513	4.0649	5.9629	8.95099	9.5379	8.3707	5.34833		0.0920237	7.45224
1.9063	5.60189	4.29477	8.4071	7.7967	6.0319	5.60593	5.6478	5.86462	5.7362	6.70395	11.1777	9.1477	7.7885	7.8268	10.4219	8.3844	10.9037	10.2992	5.83013	6.46719	4.16693	3.7514	7.8292	4.01769	5.3708	8.361	5.8743		0.0981617	7.01146
2.0254	5.63676	3.13708	5.6547	9.4375	4.0955	4.60276	4.4022	5.62788	7.7871	5.12173	13.5586	10.1605	5.5637	9.8406	9.5232	7.4089	9.6522	12.3983	4.2222	9.29589	6.64415	4.5323	6.1702	2.73965	6.5128	6.4249	7.42212		0.104295	6.94716
2.1445	5.01076	4.14562	3.0075	6.1945	6.4639	7.15466	5.2958	8.11178	5.5803	6.95827	7.181	8.9814	7.0159	12.8199	7.5542	12.5212	9.5645	12.7099	6.31265	6.84713	8.63812	5.8216	10.546	4.89664	3.6976	6.2995	8.09975		0.110427	7.31223
2.2637	5.29729	4.99587	4.996	5.061	4.4229	5.65711	6.005	6.34606	5.4169	9.2591	10.1428	9.8006	12.5675	16.7665	9.2348	6.7871	6.4419	8.021	4.8593	6.33898	8.40812	4.9384	6.5984	6.20207	6.2189	9.6287	6.67692		0.116565	7.2996
2.3828	4.51698	4.10086	6.5781	8.336	8.2499	3.84521	10.0913	5.80468	4.8042	5.83254	7.2212	10.5048	8.6774	20.1257	6.1268	5.7379	13.6865	8.4237	6.26225	5.20323	7.24417	6.2924	6.5876	6.03746	3.7934	10.3289	5.71671		0.122698	7.41222
2.502	5.16302	3.43363	7.2803	5.4032	7.6259	5.278	5.7275	3.95829	4.1044	4.84443	7.6034	8.593	6.2951	12.6703	8.6633	9.5431	8.7396	14.9061	5.62431	8.2033	6.61278	7.0925	6.3801	6.65071	5.3315	7.7415	7.01401		0.128836	7.05494
2.6211	5.09119	5.56231	5.6238	5.4826	9.6064	4.59621	7.3467	4.29168	6.9745	5.28506	10.8133	11.6376	11.4977	14.4775	4.6704	10.2222	8.2369	10.8871	4.18237	8.54415	6.32049	4.7873	5.5505	4.7228	7.4851	7.8367	8.28976		0.134969	7.40823
2.7402	4.78903	5.34777	6.842	8.7774	5.3448	5.41555	6.8856	5.02568	5.4924	7.45917	12.9249	9.4369	12.8811	14.6959	9.5276	6.9697	9.8821	8.9708	5.39736	6.07405	5.80042	3.27	6.2808	6.92081	6.6306	8.0396	7.6604		0.141102	7.50898
2.8594	3.5732	2.86638	6.8071	5.1799	8.617	7.85722	6.1694	7.2458	6.8739	9.51639	13.4087	13.3331	7.4603	10.9053	11.814	7.0766	11.1831	11.2349	4.94855	5.46418	6.27439	4.6327	9.1692	3.25752	4.1575	9.0139	8.53449		0.14724	7.65092
2.9785	3.91302	3.67821	5.8422	4.1499	10.359	8.41346	10.5574	7.66584	5.7962	8.20654	12.1819	12.7302	13.6808	13.0684	9.2256	7.5281	10.2984	13.6715	7.3419	5.14011	7.94744	6.7185	9.5327	4.10518	4.6952	7.3656	8.11462		0.153373	8.21955
3.0977	4.65801	2.88494	7.0442	6.3855	13.2619	5.51496	7.2528	6.92088	5.7952	6.22586	11.7656	11.6477	11.0678	12.3967	6.9764	10.0683	12.0013	11.4322	8.70795	6.61285	8.80242	6.0404	10.2899	4.72729	4.8252	4.1785	6.85096		0.159511	7.93836
3.2168	3.8913	4.7675	6.532	5.3291	10.0708	8.2791	9.5014	5.91901	8.1181	9.43403	13.4225	6.9179	8.3998	7.7689	8.7747	8.2736	10.263	11.0439	5.88746	6.87842	6.19668	7.8646	7.3535	4.76389	8.5167	5.053	6.91068		0.165644	7.6345
3.336	3.86728	4.01148	4.4087	5.3859	9.3912	6.43609	11.1864	3.57619	6.0673	6.58998	10.7783	10.8135	12.5915	11.1957	10.5566	6.2453	11.6554	7.6836	8.29787	9.43436	7.36573	9.9567	8.5849	5.40516	9.1666	8.6219	6.7184		0.171782	7.99971
3.4551	3.84099	5.93605	4.3544	6.4941	8.3331	6.56334	7.8873	5.41176	9.3354	5.97721	11.7238	10.2127	10.1555	8.9527	8.15	7.7436	9.3046	6.8992	5.44849	6.55201	6.94948	11.0731	10.5178	5.31105	7	5.9107	5.38986		0.177915	7.46031
3.5742	5.24574	2.6928	5.0659	6.1112	7.3739	7.86685	12.7507	10.2529	9.6012	3.63623	11.6483	9.0802	7.5078	8.6913	8.0093	10.41	10.223	7.888	5.86019	7.00623	10.0791	13.6416	11.8431	7.27156	4.8416	8.6347	4.93551		0.184047	8.08033
3.6934	5.74474	3.36194	4.2767	7.4205	6.9842	8.74423	7.1398	11.5655	6.6696	4.03365	9.5597	10.5793	9.0816	13.4309	8.2394	8.9683	7.8833	14.5327	7.77184	8.21462	7.44292	11.59	7.4511	6.49379	8.871	10.3851	5.24621		0.190185	8.21047
3.8125	4.49857	2.74903	4.7328	9.1429	9.3648	8.40478	7.7375	4.20499	5.8344	6.79462	9.7705	8.5528	9.729	10.8449	6.146	8.6436	8.209	8.9309	6.83664	8.6723	8.03688	10.0892	7.8794	5.74525	5.3216	11.7308	5.03386		0.196318	7.54211
3.9317	3.85999	3.10249	5.8413	6.4691	6.1129	8.40411	9.5893	4.74986	7.5535	9.45914	11.2109	8.3634	11.0635	14.9781	6.5908	6.6551	8.9429	10.5326	9.4605	6.75497	9.69172	7.7405	10.6625	4.89524	5.8118	7.6856	9.06185		0.202456	7.97199
4.0508	4.83258	4.11122	4.9487	4.7954	3.2804	10.3419	8.0705	3.76894	11.3524	7.36444	10.5194	8.0524	13.4461	11.4628	4.7857	7.2451	11.8959	9.0202	9.57487	4.40813	9.99304	7.6749	11.9898	7.33593	6.5595	7.2798	6.32765		0.208589	7.79399
4.1699	4.87156	4.78869	5.5685	5.6639	4.0116	11.0648	8.7301	5.43474	11.183	8.42957	10.3362	6.586	9.1429	9.4164	7.9746	7.0453	8.435	10.4356	7.15529	7.13417	9.30796	10.0887	12.3442	5.3573	5.3912	7.4448	8.8454		0.214722	7.85879
4.2891	4.30695	3.82948	6.4043	4.3924	5.3895	11.6119	7.7548	6.83335	7.0467	8.80083	10.2375	6.9438	11.0672	10.46	7.4864	10.5096	13.3213	9.4289	4.59518	8.68716	5.31891	4.1384	13.3531	6.17319	5.1163	6.117	7.38356		0.22086	7.65584
4.4082	6.71409	3.28858	2.4655	5.1448	8.042	6.3213	5.7645	6.99377	4.9319	6.88176	10.6813	8.0894	9.6194	8.5598	7.4699	6.2544	14.7269	7.3889	5.48438	5.53134	6.14511	8.2655	13.6355	5.15369	6.3067	5.5188	5.72978		0.226993	7.07811
4.5274	6.56471	3.62152	4.492	5.6813	4.5679	5.57886	4.9598	5.42914	7.7345	6.25093	7.8024	11.7143	9.0048	9.8476	5.4962	7.4802	13.9104	5.481	8.05392	7.85888	6.74555	6.8306	8.087	6.3599	6.062	6.3305	7.51151		0.233131	7.01694
4.6465	4.68511	5.5142	5.3747	6.3707	5.5002	6.70034	5.0338	6.45371	8.4547	8.76574	8.439	10.5343	8.7981	13.5107	4.3641	11.5271	9.1838	5.7351	7.6906	6.2349	4.87887	5.7893	9.0877	8.68729	6.5027	8.4098	6.32771		0.239264	7.35386
4.7657	3.49698	7.32696	3.6701	4.2397	4.3165	7.46497	7.6022	7.49217	7.7897	4.88119	6.6818	12.7675	8.1791	11.1146	6.0432	11.0546	10.6818	5.2087	6.40248	8.35388	3.52583	5.47	8.39	6.92911	6.5131	5.1515	6.42608		0.245402	6.93236
4.8848	4.46991	4.76983	4.7751	5.0981	3.2959	5.7005	8.0852	9.41707	8.2273	6.959	4.4503	4.403	7.4424	9.9644	11.0319	11.0714	10.7674	3.4735	6.21007	8.57267	4.90018	7.0096	8.6938	3.10978	3.5851	5.5163	5.56312		0.251535	6.53936
5.0039	2.98374	3.27195	7.8066	5.4388	2.9226	5.50605	7.0969	6.26119	8.4198	5.92536	5.8734	6.8939	9.7608	10.595	8.6521	10.6633	10.1962	5.569	6.69864	8.87694	4.73376	9.4738	9.023	5.31745	5.3234	5.0326	4.48179		0.257667	6.7703
5.1231	2.70815	4.27229	5.2869	5.8721	4.3065	5.48992	5.9645	9.67332	7.4021	5.98732	6.7347	12.6221	10.2164	8.7703	6.2786	7.6707	13.5069	5.8259	5.20079	7.53543	5.81661	8.6259	12.0618	4.60878	5.0544	5.7474	4.90749		0.263805	6.96842
5.2422	3.97034	5.93521	5.0354	3.9793	5.7966	11.6491	7.4438	10.8988	9.7721	5.82778	4.2151	9.0101	8.3215	8.0568	10.5157	7.138	15.2631	3.9779	3.41542	5.1459	7.55276	7.225	10.4542	3.71531	6.1686	5.7436	3.92304		0.269938	7.04261
5.3614	5.21562	6.42871	6.0948	5.4678	5.3558	7.85564	6.2092	6.34652	7.908	6.83304	6.401	8.4164	8.7803	9.3327	8.793	6.7089	13.5661	6.1293	4.72038	4.73293	7.2927	6.2651	10.667	4.17525	4.0879	4.3024	7.47704		0.276076	6.87272
5.4805	5.25401	5.45827	4.3441	4.5281	5.9985	5.29485	6.6007	6.95876	7.2302	6.24401	4.7505	10.6569	7.9956	9.8934	7.5947	7.074	9.3053	3.831	4.82665	3.14748	7.14562	5.4215	8.8143	6.22778	5.4702	5.6982	7.70378		0.282209	6.42476
5.5996	4.63278	6.30095	7.8477	5.7097	5.6221	4.58777	3.8297	8.64363	10.3261	4.54295	4.6162	8.4999	4.9925	12.4521	10.831	7.376	10.8583	4.7249	6.38707	3.80689	5.61792	7.6829	13.0172	5.4321	6.5363	4.3678	4.46357		0.288342	6.80393
5.7188	6.26711	4.40614	9.6028	8.2092	6.3966	3.65772	4.4492	6.95983	6.3142	6.70614	6.2851	9.4299	6.4222	9.886	11.3168	4.2602	8.189	5.5806	5.63971	4.2832	7.69489	6.6866	10.6126	5.5089	5.9938	4.6574	3.01104		0.29448	6.6084
5.8379	6.33384	4.23174	12.2758	7.125	10.357	2.92855	5.3002	7.21638	8.2256	5.16228	5.3507	12.441	7.0408	5.7591	9.528	5.9002	9.6512	4.9179	6.64953	3.78495	8.61364	6.9853	8.916	5.75627	6.1795	7.5019	4.39287		0.300613	6.98242
5.9571	5.43175	7.65359	11.7877	6.5901	6.8333	7.14098	6.3886	6.22628	8.182	6.01353	3.9129	11.4907	5.6216	4.1839	7.267	5.5472	7.368	4.9127	6.99946	4.98669	8.36497	4.8689	11.4573	4.08237	7.1811	4.3909	5.75016		0.306751	6.69014
6.0762	3.80632	4.28223	9.3459	4.1825	10.0001	7.10173	8.7489	7.76696	9.2596	5.07156	4.5104	6.9333	4.855	4.7752	8.2888	5.301	8.216	3.9999	10.7378	3.96148	7.01362	6.4762	12.4334	7.42186	10.5812	5.4938	5.65469		0.312884	6.89702
6.1953	5.09515	4.71637	9.5354	4.1197	4.9783	4.96416	3.6477	4.02571	5.6131	6.31757	6.283	7.1819	5.8807	8.5426	8.188	6.2851	8.6772	5.5676	8.93149	3.59822	5.60674	7.708	8.2656	9.17472	10.2477	6.1419	4.95004		0.319016	6.45347
6.3145	3.63735	4.12322	7.4765	8.8408	4.7095	6.49376	4.6382	6.02454	6.7662	6.24617	3.2969	10.2299	6.3426	9.6699	6.7871	9.1932	9.8939	5.3055	5.77771	5.19687	7.16478	8.4215	10.3158	9.09819	7.2672	6.5657	5.40594		0.325154	6.84774
6.4336	3.76898	3.40148	6.4894	6.8893	5.3155	7.21238	4.2679	6.33277	6.2713	5.87953	3.9015	7.9138	3.6214	9.5478	5.3967	7.6902	10.2099	4.3154	4.4994	4.16402	7.51228	10.7177	7.9396	8.77431	6.2687	8.1086	4.99625		0.331287	6.34837
6.5528	4.15896	5.1646	6.9835	4.6172	7.3788	3.62854	3.7319	8.15262	8.4747	8.52169	7.328	7.7044	5.7961	6.1197	7.9076	7.9135	12.4379	4.1942	4.6526	4.42046	7.12754	8.9739	7.331	9.26579	9.7791	6.7365	5.60207		0.337425	6.81862
6.6719	3.39967	6.59261	10.8325	8.1896	8.2463	5.8556	3.6064	5.90662	7.3688	5.24222	6.9409	9.6381	6.7437	5.2769	6.9957	6.3414	7.2212	6.854	3.93939	5.16477	5.35667	5.7523	7.7554	8.09635	10.2426	5.5209	4.42829		0.343558	6.5744
6.7911	3.85732	5.30459	10.1429	8.4217	7.578	7.2955	6.4897	4.82297	6.5845	5.76172	7.748	8.4761	7.6253	4.9002	5.562	5.8919	7.0848	5.5322	3.19666	3.75393	6.08124	4.988	9.2117	5.36489	10.1119	10.123	3.0691		0.349696	6.48073
6.9102	8.00424	4.10184	8.4851	8.0717	7.3322	5.63204	4.633	4.94596	7.9893	6.30395	7.8528	6.0236	9.4712	3.4577	7.1414	5.6666	6.8107	6.6844	4.01051	4.19652	7.51367	4.7134	7.7937	6.3332	9.0297	9.8492	5.10543		0.355829	6.56122
7.0293	6.52319	4.15983	8.4294	6.59	6.9443	5.78302	3.9517	3.97869	6.8871	6.25257	5.7658	9.0796	6.9928	5.3583	7.8083	4.7678	5.7944	7.3962	4.00872	5.95546	5.9068	7.2172	8.573	4.86712	11.3403	6.7862	7.97657		0.361962	6.48498
7.1485	4.33687	7.10224	6.4471	6.4737	5.9047	7.94205	2.8453	4.77869	8.1678	4.25348	5.2156	6.2739	8.4428	5.5798	9.0181	7.778	5.3945	5.9559	4.31391	4.39901	3.85273	4.8493	6.9746	2.83129	7.81	3.7479	7.296		0.3681	5.85131
7.2676	5.35926	4.85953	10.1734	7.7589	4.1328	7.70841	5.3105	5.0814	4.6614	6.04795	6.4256	4.3224	4.2258	6.1751	7.4786	6.9719	10.1999	3.9487	4.9261	2.83109	4.66137	6.5876	6.6757	4.42977	5.9429	6.9679	5.4791		0.374233	5.9016
7.3868	9.46973	3.37297	9.0591	8.3583	7.4653	5.73766	3.227	3.60622	5.5129	5.4842	5.9448	4.2336	9.1819	6.3838	5.2533	8.1827	6.6496	4.0697	2.81818	2.97817	4.32479	7.6383	4.261	6.77136	4.232	10.474	4.78833		0.380371	5.90663
7.5059	8.1714	3.62007	8.5431	8.5477	7.7025	7.46812	2.9039	6.18948	5.3303	6.2055	7.8091	7.0414	6.8049	5.8332	5.6215	3.9815	6.0397	5.6882	5.0696	3.17717	4.81503	5.267	6.6686	6.82752	5.8892	8.4224	4.07052		0.386504	6.06328
7.625	5.79251	4.99619	8.2893	6.1431	5.3549	5.2503	3.9813	2.59245	4.9847	5.00829	7.2419	9.9394	11.808	5.9931	6.4094	7.26	9.1827	6.3482	4.011	2.55676	4.6685	6.4716	8.9157	5.97736	5.5252	10.3706	7.0289		0.392636	6.37412
7.7442	3.29445	7.73146	8.8936	10.2177	6.8402	9.23017	5.4493	3.44126	6.7927	5.13812	5.6309	9.7711	7.889	9.6457	4.266	8.8291	8.7614	7.8646	3.3063	3.25854	3.96176	4.2839	8.2561	5.83783	3.4743	11.3975	7.62963		0.398774	6.70713
7.8633	5.04239	5.6659	9.1271	12.5514	4.5024	5.68164	6.2038	2.71624	11.949	4.14104	6.62	10.3534	8.2968	7.235	2.9986	8.4835	8.1081	7.2606	3.99259	2.38819	4.0803	7.0945	9.1021	5.68945	6.3305	10.6197	4.51835		0.404907	6.69454
7.9825	5.53351	4.84922	9.0682	8.0835	5.7353	4.4085	4.4658	4.01846	6.7467	6.25578	5.2201	7.3687	9.912	5.7396	6.101	5.5715	7.3058	7.1787	3.43369	2.10248	5.25872	7.7939	6.3523	5.09027	5.1803	7.2259	4.95824		0.411045	5.96141
8.1016	4.45908	5.56138	8.6797	8.9933	7.0786	7.21792	4.0834	4.16431	4.1645	6.1226	6.2087	6.0796	7.2447	6.2699	5.7775	5.3143	6.5044	7.0069	4.04571	2.74584	6.11404	5.307	5.0414	5.41628	5.7394	11.5555	4.55379		0.417178	5.97962
8.2207	6.28985	5.57057	8.4607	9.7135	4.9549	7.06219	5.8474	6.12812	5.0861	8.55394	6.6262	7.0917	9.5154	5.077	5.2782	7.0381	10.3315	6.154	3.05004	2.79671	5.01587	5.1919	4.7855	5.13354	4.0008	12.2944	4.17109		0.423311	6.34145
8.3399	3.65085	4.0433	6.4625	10.9777	4.5557	5.28517	5.1241	5.37125	7.5633	8.33384	4.249	7.1177	8.1328	7.5233	6.1795	7.4435	9.8257	6.1519	3.01537	2.57591	2.98776	4.1284	5.7975	3.46234	3.2429	11.5316	6.83359		0.429449	5.98394
8.459	3.07656	9.92023	8.5407	12.8647	5.3564	4.7767	2.7081	6.41428	3.6835	8.40817	7.64	8.5725	6.8446	6.2565	8.4445	6.1496	9.1198	7.9209	2.4263	3.44831	3.72517	2.3904	5.4904	5.28764	3.1393	8.0313	5.12895		0.435582	6.13946
8.5782	6.41199	10.4597	7.266	5.638	4.8563	4.57836	5.4096	4.31426	6.462	5.98426	8.7088	7.0068	6.0173	6.051	7.0019	5.2827	13.2301	5.3468	2.17526	2.48948	3.49916	2.9321	5.6468	4.90783	4.0501	8.0185	3.07369		0.44172	5.8081
8.6973	5.39729	8.85068	8.7918	8.8463	7.9495	6.9827	5.1402	3.65803	7.1905	3.84375	5.171	5.0608	4.7093	6.1213	4.8659	4.5144	9.6625	5.193	4.02185	3.48292	5.63612	5.4797	4.1572	3.47342	6.4646	10.6006	6.41991		0.447853	5.98834
8.8165	3.78454	7.7679	8.1841	11.3488	4.6157	6.35364	5.4652	2.85304	7.2955	6.71903	4.8524	4.5286	6.3841	5.0258	6.1501	7.789	8.5421	6.5076	4.46658	3.01829	3.04507	4.8834	3.7411	3.61767	5.2347	12.8088	4.89445		0.453991	5.92138
8.9356	2.91148	7.61773	7.5839	7.9906	4.0817	4.82612	4.2893	4.48886	4.9684	7.64189	5.5493	4.8448	6.7448	5.7509	6.2564	4.8928	7.4056	5.9076	3.94776	2.34447	4.54168	5.1578	5.2359	3.85886	4.0893	11.267	3.88941		0.460124	5.48461
9.0547	4.56464	6.36996	4.3883	5.1901	6.9409	7.66397	4.2887	3.66826	5.5672	6.92925	5.7114	5.0521	6.5932	3.9499	8.4475	6.8602	11.2575	5.8212	3.07849	3.65239	2.8554	5.1526	7.7195	4.9708	4.9038	8.6105	3.74131		0.466256	5.70182
9.1739	4.6966	7.93968	4.9405	7.6608	5.01	8.33069	7.2447	4.00503	7.9594	7.28184	6.2332	5.5241	8.8583	5.9517	8.4694	3.9763	6.8138	5.2579	2.92664	4.18168	3.49273	3.767	3.3369	4.37762	3.6128	7.5412	4.52255		0.472394	5.70048
9.293	5.08319	7.81614	8.9722	4.0778	4.1641	5.62252	5.5055	5.06327	7.4953	6.38632	8.6753	6.3121	7.469	6.2691	9.5267	3.8334	8.1892	3.8556	4.15627	2.25521	4.75284	6.7109	6.6164	4.41548	4.5276	6.9948	7.43831		0.478527	6.00684
9.4122	4.83676	5.16551	8.6734	5.5086	2.916	4.43366	4.871	2.8337	8.5003	6.79765	6.3733	5.8558	9.3039	5.0262	4.6262	6.3236	5.1657	6.2383	4.34528	1.91648	4.4701	5.8642	8.0583	4.94846	6.3801	6.0291	6.29177		0.484665	5.6205
9.5313	6.29828	6.77211	6.268	4.3759	7.3991	6.5954	4.1518	5.23369	6.4656	5.80016	6.7766	5.0507	6.9286	7.1342	7.4774	7.1461	5.5896	4.6047	2.53927	2.17443	3.54075	4.3915	8.6797	4.24041	4.8262	4.6406	6.2405		0.490798	5.60523
9.6504	5.85315	4.87405	6.3674	7.2037	8.7269	6.12666	5.3219	4.39523	6.2652	5.48827	6.4797	6.4936	7.3246	7.9823	8.8727	9.65	5.4844	5.2723	2.70838	2.12878	3.254	3.8661	7.5225	5.66368	3.2554	6.7207	6.80976		0.496931	5.93005
9.7696	6.68008	5.28496	7.3202	5.65	8.6022	6.03483	4.205	5.71608	6.7882	4.92558	5.8259	7.283	6.5091	5.1434	6.5428	5.5804	6.0764	6.1176	4.1711	2.98524	3.83845	5.7517	7.598	3.4834	3.2824	6.9347	7.67574		0.503069	5.77802
9.8887	6.11866	7.71111	8.2154	5.0323	6.5889	5.95198	4.6191	3.20471	5.1995	3.45327	4.9064	6.0216	6.6183	4.9099	7.5524	3.4486	4.8708	4.6474	3.42503	3.65487	2.09671	4.5239	6.2506	5.08585	5.2506	8.1744	7.10729		0.509202	5.35702
10.0079	6.68156	5.23228	8.5914	3.8361	5.0029	4.50995	5.9679	4.71923	6.5919	4.12344	5.7009	6.4621	5.2379	6.1994	10.9995	3.231	6.5262	8.4114	2.27716	2.43658	2.91945	5.324	9.1963	4.81537	3.0575	6.2134	7.76919		0.51534	5.63089
10.127	8.99915	5.17793	12.8482	4.2191	4.0675	3.38402	3.7701	3.98232	6.161	3.72435	8.6316	5.311	6.7216	5.6216	9.3781	3.8986	4.8988	7.6197	2.0037	2.27506	4.25491	6.7138	8.9902	4.82818	5.4978	6.9943	6.61498		0.521473	5.79954
10.2462	5.58035	5.40388	8.8145	3.38	5.8099	3.23897	4.4961	5.26559	6.6101	5.05637	8.1259	7.5696	7.636	4.1669	4.2211	5.276	5.3106	7.0973	2.76959	4.32481	2.72072	4.5104	8.4469	3.04181	5.3138	6.5922	7.00481		0.527611	5.47349
10.3653	3.4722	5.94002	11.1325	3.5188	8.353	4.3916	5.8861	4.14779	6.8334	7.201	7.1968	6.404	7.604	7.3284	7.8918	5.3092	7.4735	5.558	3.13359	4.30467	2.39809	3.3922	8.0741	3.66738	2.9999	7.7289	8.77033		0.533744	5.93005
10.4844	3.48204	5.90844	5.03	3.0727	5.0667	4.1552	7.3749	6.43578	9.4416	3.78089	9.1804	6.5722	7.9368	8.1072	5.7531	4.5732	8.2434	4.7433	4.07567	2.35683	2.82103	8.5077	6.6258	6.07178	3.5048	8.9361	5.80728		0.539876	5.83573
10.6036	5.35408	5.30185	6.2486	3.318	8.3522	4.71991	4.1813	7.5558	5.2623	2.32011	5.4983	6.935	7.7961	4.616	7.5256	4.2372	7.6028	4.509	4.46409	3.08751	2.10299	6.9317	5.4111	5.87473	3.8458	6.0767	4.48484		0.546014	5.31902
10.7227	6.00772	7.09617	6.9727	3.7992	5.725	4.90745	4.9343	5.24751	4.392	4.23859	8.328	7.4505	6.6547	6.3115	6.6858	4.7548	8.4433	3.9741	2.25568	3.50585	1.83234	6.1301	4.4592	6.28497	4.3354	4.7783	3.80372		0.552147	5.30774
10.8419	5.83051	3.8161	4.3387	4.9365	5.4366	5.60039	3.7949	5.33087	4.1098	5.36078	6.1086	5.9278	6.3275	8.6068	8.0518	4.9811	9.57	3.671	2.6464	3.14416	2.08936	4.9621	6.5002	5.15919	4.3746	8.5398	4.9234		0.558285	5.33848
10.961	3.63779	4.70458	6.4321	5.0033	4.9131	7.12771	2.8446	5.95374	2.6712	5.83302	6.6153	5.7974	6.1336	7.7313	9.3218	6.8268	8.8586	4.3721	3.57936	1.92478	2.11856	4.8853	7.2598	5.95352	2.6522	6.8092	5.05568		0.564418	5.37098
11.0801	4.27348	5.13551	5.0258	5.7971	4.7924	4.70933	2.9261	6.00246	4.6094	5.78468	6.7392	6.8476	6.4372	5.9635	7.0186	6.3287	9.043	5.7267	1.95126	1.99789	2.21282	3.793	4.1503	4.29308	4.407	7.8161	8.09683		0.570551	5.25478
11.1993	3.66174	5.59084	3.6987	5.653	7.9287	4.24671	3.5131	4.3671	4.433	4.63001	6.7281	5.6012	5.0668	5.0271	7.606	5.8815	8.0196	4.7518	2.91681	2.28227	2.94389	6.162	3.8208	3.17549	4.1855	7.1701	8.06165		0.576689	5.07865
11.3184	2.59275	5.18321	3.542	3.8088	6.382	6.87075	3.6141	5.21488	5.6604	2.37412	5.7245	7.0222	5.3868	6.8532	5.4477	8.9615	8.0364	6.5645	2.45165	4.02714	2.55659	3.379	4.5469	4.28746	3.5799	5.1564	4.77072		0.582822	4.9628
11.4376	4.00327	4.46121	3.68	4.2066	4.978	6.00947	4.2613	7.06079	4.5753	2.71985	7.722	4.7326	6.3898	11.1588	6.7573	7.0555	7.4101	3.8433	2.10805	2.31797	4.37127	5.3693	7.3884	3.09761	4.1431	7.2365	8.52161		0.58896	5.39181
11.5567	5.31405	3.9294	3.529	4.4726	5.0908	3.348	6.5467	6.31253	4.6068	4.75059	4.8146	6.3674	6.4938	8.8055	5.9931	3.6291	8.6373	4.9112	2.45828	3.03782	3.29622	7.1072	6.7897	5.9004	5.1782	7.713	8.27405		0.595093	5.45583
11.6758	4.31183	4.11826	2.8174	5.5936	5.5507	4.21701	4.1363	4.64061	5.842	5.01272	5.0505	9.4274	9.3803	5.873	5.6183	6.4075	6.3707	2.9254	2.27561	3.00579	3.42824	3.6326	5.883	3.121	4.3362	5.1555	6.90958		0.601226	5.00152
11.795	4.92211	5.53233	3.3241	6.2365	5.4483	4.11515	8.0605	3.00434	5.0815	3.40962	5.9037	6.2498	6.4287	6.2438	6.2333	10.3306	8.5423	4.9772	2.49592	2.91733	2.85904	5.6768	5.833	5.05227	4.3061	3.3875	3.113		0.607364	5.17351
11.9141	4.17876	5.38657	3.5734	4.3024	4.7276	6.54335	4.2092	4.26054	5.6391	5.05457	9.7054	8.0132	7.0815	5.4551	4.4348	5.4619	6.1408	6.6377	2.75588	2.35272	2.34012	5.4191	7.7399	6.59235	2.4071	5.486	5.7451		0.613496	5.24608
12.0333	3.60833	6.47057	4.7451	4.4944	6.6875	7.97254	2.9635	5.03371	4.3882	4.50677	6.9007	8.1934	5.3391	6.4383	5.8649	7.6612	8.1358	10.7557	2.97493	2.41067	2.18575	5.8347	4.4899	4.45193	2.7165	7.9002	5.38667		0.619634	5.50041
12.1524	3.49899	6.48173	3.1738	3.4372	6.8392	7.0347	6.052	3.09437	6.2316	6.58807	7.131	9.2615	6.8694	7.0033	6.1132	9.1932	5.8323	7.6138	3.08994	3.48428	2.30832	5.4865	6.4561	2.81407	3.6195	8.0307	3.95523		0.625767	5.58126
12.2716	4.75306	6.13874	3.3101	5.4616	5.4341	4.6066	5.233	4.90992	8.4113	6.32405	4.485	7.8002	7.8387	7.1333	8.6239	10.9193	3.6935	7.1721	1.92082	3.66415	4.32908	5.5761	3.5293	4.78151	2.7843	6.2997	5.69013		0.631905	5.58606
12.3907	3.65485	5.68346	4.2666	5.836	6.3922	5.20287	4.8297	5.54033	7.6723	5.04366	5.9385	6.2358	6.4192	5.5498	7.7277	7.2734	6.7858	6.6263	2.32463	2.85979	2.65597	4.205	3.9212	4.04777	2.7028	3.7931	5.22121		0.638038	5.12629
12.5098	4.91044	5.10606	3.9016	5.1349	3.2034	5.46302	4.8924	4.35751	6.6821	3.55866	6.6852	8.811	6.9263	7.6302	4.6076	5.7049	5.533	6.5741	1.97978	3.27379	2.41137	4.6174	3.4874	3.58125	2.3034	4.0443	5.93372		0.644171	4.86351
12.629	4.97645	8.66708	2.5622	5.4938	5.0317	8.90215	4.9346	8.49478	8.9143	3.53608	4.6068	5.4993	8.4508	7.6181	4.0172	7.494	5.8421	4.1475	4.52584	2.77346	2.96252	5.2066	5.8392	4.84323	3.3768	4.0808	8.18102		0.650309	5.59179
12.7481	4.33826	7.99966	2.6252	4.9416	5.6812	7.78647	3.2291	5.91414	6.5281	2.93795	4.8322	7.0157	8.5706	5.0901	4.8482	3.2583	7.3143	5.0388	2.86023	2.46292	3.25835	4.743	4.6052	4.33482	4.635	7.7056	6.21034		0.656442	5.13946
12.8673	4.26215	6.80139	2.8276	6.7173	6.5157	6.36204	3.855	2.30921	5.8759	3.18938	3.1328	9.8224	10.4614	4.8345	6.3741	4.6301	4.7125	5.7374	3.47671	2.20893	3.93277	5.3619	6.4105	6.42613	4.1596	5.4111	7.05728		0.66258	5.29133
12.9864	5.30142	6.46925	3.403	5.4019	6.2376	5.13226	3.3717	4.97881	6.3386	3.17475	4.0609	8.3903	8.9014	5.3055	5.5796	9.2046	4.7914	5.9606	4.25808	2.43633	2.8781	5.972	5.4014	3.8478	4.2425	3.8622	6.33176		0.668713	5.23088
13.1055	10.1151	7.67449	5.7134	6.8765	3.3355	4.39409	2.4328	4.08508	3.0838	3.46874	3.8525	10.9418	7.2496	7.8924	5.9796	5.7449	8.6852	3.7392	2.82136	2.65383	2.81864	5.5507	4.8634	4.58814	4.9228	4.2775	6.84947		0.674846	5.35595
13.2247	4.65826	4.65124	6.3102	7.8373	4.4038	7.15746	3.5447	3.54031	5.2638	4.73728	3.8201	8.0827	6.277	10.2274	3.9335	7.1913	5.1964	3.2645	2.4967	2.22994	2.55632	6.0674	5.2856	4.62795	3.5226	3.7327	6.43929		0.680984	5.07614
13.3438	5.67848	4.53243	2.5493	7.6907	4.3338	4.62939	5.3154	5.63168	3.9015	4.23296	4.4147	8.0771	7.4355	5.3211	7.9973	4.2031	3.9331	4.0991	2.14595	2.82078	2.57156	6.0673	5.1742	2.94948	5.5022	6.1003	5.17994		0.687116	4.90698
13.463	7.02414	6.47746	3.5239	7.8181	6.049	4.09676	3.0162	6.44588	3.9483	5.37977	5.5215	7.9323	5.759	4.8178	4.5701	4.7523	7.8083	4.5884	2.83063	2.03921	3.90871	3.8261	6.5296	5.14483	4.191	4.012	6.48611		0.693254	5.12953
13.5821	7.03723	3.65478	4.0635	4.3667	5.3123	5.18411	2.5326	5.7016	3.5952	4.3641	6.3991	7.8457	6.3309	7.227	5.8215	4.8099	6.745	4.8844	3.08922	1.89585	4.80254	3.6041	7.2105	5.13733	3.2625	3.7617	5.79339		0.699387	4.97899
13.7012	6.81273	4.75454	2.6672	4.1425	4.8432	3.4197	3.6139	3.70594	2.7701	6.01561	3.9551	4.2996	5.7229	6.7428	5.293	4.5223	3.9969	5.5305	2.84757	2.15606	3.97019	2.9733	3.5397	2.47648	3.9573	6.0304	7.73472		0.70552	4.38868
13.8204	5.32369	4.30812	5.45	6.5283	6.8093	2.97444	4.6434	2.58843	3.2476	7.24964	3.6224	5.1885	3.5845	6.7762	4.4151	5.0021	5.0332	4.5915	2.36523	2.73297	2.80122	5.2048	3.3664	2.05106	3.5861	5.9262	7.39221		0.711658	4.54676
13.9395	9.19788	3.14366	3.2037	7.6506	2.6169	3.09822	4.7262	3.30366	3.678	4.7544	4.3959	4.4657	6.1584	4.0065	4.0667	7.0107	4.9205	4.0201	2.06461	2.77467	4.66953	5.9558	5.6762	3.29015	5.8025	4.3869	3.57901		0.717791	4.54137
14.0587	9.4712	3.06682	3.7947	3.6893	2.9077	4.70358	5.0733	2.56221	2.4919	4.91545	5.5658	5.6586	6.1985	4.0532	4.1155	7.3532	6.0702	5.7033	2.30195	2.01915	3.94667	4.9122	4.0477	5.82293	3.0578	5.7225	4.15875		0.723929	4.56978
14.1778	5.85354	5.61244	2.5401	4.2971	3.3634	5.10901	3.8227	2.5594	4.8192	5.16382	6.6845	4.3695	3.1054	7.5573	3.4939	5.4511	5.0127	4.5644	2.72197	2.10747	4.56112	5.3982	3.7295	3.09275	4.3299	6.6752	6.07827		0.730062	4.52126
14.297	6.45894	4.90909	3.6688	5.7104	4.4979	5.36452	6.1386	4.18556	4.9048	6.11015	5.2399	4.6536	3.2146	6.8884	3.8721	7.2291	4.9031	5.2626	3.68008	2.03398	3.09687	5.9784	4.7911	4.62921	6.1865	5.7594	7.02006		0.7362	5.0514
14.4161	8.29933	3.49653	5.1567	4.1701	4.893	3.54238	7.5779	3.23869	2.9335	6.61131	6.9866	7.2515	5.1127	8.3863	4.5187	9.4613	4.0468	3.0274	1.98604	1.99662	3.78728	6.9841	6.0095	5.10042	6.311	4.4796	3.64847		0.742333	5.14866
14.5352	5.2748	3.49727	2.427	6.3668	4.0587	3.71448	7.8162	2.81093	2.7189	3.2969	4.7738	4.0951	3.3394	6.4829	7.2531	6.8046	2.9692	4.1187	1.92365	2.04523	2.89378	7.9285	5.4587	6.94928	3.8999	6.1787	3.8983		0.748465	4.55536
14.6544	6.21	4.03905	3.1403	5.778	5.2635	4.825	6.4616	5.0592	5.3204	5.66621	4.5521	2.4814	4.0624	4.8777	6.3518	4.4649	4.078	3.9749	2.31188	2.11104	4.33446	4.9624	4.7579	6.58278	2.7773	4.8743	2.29103		0.754604	4.50406
14.7735	2.80423	4.88322	2.3857	6.6168	4.8146	4.87945	4.6053	3.80666	4.8587	5.83979	7.2847	3.9479	5.9663	6.1959	4.1436	8.544	6.3039	2.7703	2.21455	2.41713	3.72844	6.7253	4.6307	4.23954	2.5513	4.6009	3.51029		0.760736	4.6396
14.8927	3.93124	4.21623	1.8618	9.805	3.5785	3.63556	5.4667	2.84355	5.1441	4.67191	3.6089	5.6305	6.156	4.6297	5.0713	8.0022	6.239	2.8382	2.51843	2.29739	2.55521	5.0097	5.632	6.55202	4.4199	5.1144	5.41939		0.766874	4.6981
15.0118	4.8169	3.23655	1.8858	4.7439	4.3552	3.17349	6.538	3.19926	5.7966	5.5804	4.5297	6.25	4.1106	7.509	3.691	6.6921	4.8042	3.7118	4.58422	3.19015	2.41794	7.6662	4.3733	5.06413	3.4238	5.1714	6.13472		0.773007	4.69075
15.1309	3.51782	3.53979	4.2112	4.6339	5.48	4.64432	5.2883	2.80749	4.9873	7.84376	5.4838	6.7528	4.9561	5.7011	7.01	6.224	3.3665	4.703	3.33966	2.58583	3.50519	7.0047	6.2989	5.91017	3.0199	4.5891	5.99156		0.77914	4.9406
15.2501	5.22574	5.7302	4.6491	7.681	2.8193	4.68043	4.0357	3.75797	7.3349	7.08772	3.9949	5.3206	5.8376	6.5841	6.8426	8.5316	3.9587	3.4023	2.74495	2.05046	2.14419	5.0427	4.3248	4.16136	3.8824	5.6972	6.54857		0.785278	4.9656
15.3692	4.16956	7.34071	4.4393	7.0613	2.6641	2.40175	4.3645	3.16453	6.5607	5.80416	4.8303	3.9633	6.0565	6.8114	5.0322	5.5902	4.6109	2.9963	2.52787	2.72393	3.0772	5.803	3.7769	4.00465	2.9435	3.9309	5.01928		0.791411	4.50626
15.4884	3.82952	4.8557	4.6767	5.8501	2.4286	2.59082	4.3122	3.16424	7.6708	4.36605	5.5821	4.4071	3.9384	6.2397	3.9731	3.2687	6.811	3.9695	3.73498	2.20182	3.36508	6.3704	6.7604	7.00811	3.0307	7.1535	5.55062		0.797549	4.70778
15.6075	3.97959	4.74334	5.45	7.2062	4.5282	5.20016	4.8912	3.27162	6.9529	5.39193	4.4053	2.76	6.7659	6.5331	5.0592	3.6135	6.1155	3.5991	2.61982	2.39751	2.73375	6.4916	5.394	8.41138	3.9289	5.0514	4.2761		0.803682	4.88041
15.7266	3.68695	5.66329	4.4828	6.5012	4.3177	5.21212	6.2955	3.06636	5.1845	4.92295	5.5175	2.8666	5.4566	9.3938	3.873	4.6234	4.1018	4.1621	3.94198	2.34237	2.48998	3.7754	6.1161	5.1294	2.1733	3.1027	5.46175		0.809815	4.58745
15.8458	2.51534	6.21133	5.4327	5.0732	2.9692	3.60944	5.843	3.47031	7.1255	7.89248	3.0844	8.012	5.1174	5.4433	3.9969	4.8419	6.3734	6.6412	4.43512	1.86077	3.17884	5.0321	8.7762	5.58136	3.2715	3.2994	5.70533		0.815953	4.99236
15.9649	2.66086	5.55798	5.7422	3.0661	3.063	6.15741	7.7042	3.01344	5.8269	8.01808	6.0405	6.1911	7.7328	5.3019	5.8124	5.1206	4.5941	4.1631	3.61357	1.92535	2.78416	3.8228	7.3587	4.83622	2.764	4.2149	7.44219		0.822085	4.98254
16.0841	3.44928	4.89605	5.5355	5.253	5.9473	6.49054	4.9165	3.1782	6.9497	10.8059	4.4055	6.2523	10.0516	3.5691	3.71	5.2206	6.8014	5.0456	2.14683	2.46124	4.4139	3.1815	5.663	6.32707	3.1425	5.6528	6.49449		0.828223	5.25783
16.2032	3.39581	5.60945	4.9374	3.8696	4.4693	5.50694	4.9854	3.15054	7.8856	5.66415	3.8931	6.2835	10.4398	4.0715	2.7864	5.3397	5.0855	6.0694	3.09567	3.07611	3.88992	5.5327	7.31	6.46582	4.1405	5.2166	4.2121		0.834356	5.0512
16.3224	4.11151	6.49608	4.0977	3.2207	5.4015	6.57757	4.6155	4.99297	4.2238	4.44499	4.2352	6.38	9.0112	6.1427	2.307	4.0634	4.5565	6.7652	3.88902	3.70924	3.0122	3.7157	4.0673	5.99959	4.5242	4.5054	4.31879		0.840494	4.79204
16.4415	5.30361	3.17125	3.9226	2.8561	3.8212	7.77007	5.7629	4.44901	6.16	7.69335	4.3253	6.026	8.409	4.4582	4.8291	7.7583	7.6437	5.2912	5.46259	4.82563	3.89406	4.6471	5.0452	4.55654	3.6317	4.7832	5.69445		0.846627	5.26635
16.5606	3.93857	4.84968	5.6233	4.2326	2.6491	6.9193	5.0493	3.77236	7.6147	11.3988	2.6832	5.9756	5.3071	7.8387	5.9126	7.4715	7.0723	4.5492	3.20817	3.77638	3.23124	6.2259	3.4709	6.9629	4.2194	5.3775	7.12749		0.85276	5.42436
16.6798	3.13103	4.42621	6.5344	2.8649	4.1514	6.72639	3.8061	4.23685	5.3779	7.21326	4.2722	7.3926	4.0052	6.0555	7.6984	5.9273	5.4759	3.0708	3.08777	2.3154	5.31501	6.1557	5.107	5.29728	4.6022	5.3199	5.9703		0.858898	5.01989
16.7989	2.90917	5.48618	6.1351	5.6755	5.0999	5.66148	4.1679	3.01679	5.0704	3.66628	5.4644	5.2446	4.8269	5.161	6.6699	6.8316	5.574	4.4064	5.13755	2.40228	4.76248	3.6774	4.9268	6.13802	7.7792	6.0757	5.7401		0.865031	5.10026
16.9181	3.32078	4.88915	5.0589	7.8735	4.5801	5.69212	1.9559	2.52126	3.611	5.7556	4.0395	5.4342	5.0979	4.7532	3.7449	5.1386	5.5323	3.8377	3.34553	3.15428	3.868	3.7261	4.2307	5.2772	4.786	5.4023	7.97114		0.871169	4.61474
17.0372	6.23083	3.2824	5.6073	5.9842	2.848	4.14565	2.4154	4.136	4.0325	7.90097	8.2411	5.5459	6.899	6.1426	3.3527	7.3921	7.0126	4.6739	2.61141	2.1618	4.32294	3.3315	4.5352	6.19679	4.0227	5.9828	8.6835		0.877302	5.0997
17.1563	6.43301	4.63464	5.9708	3.4264	4.2326	6.89916	3.5313	3.56387	4.2413	4.1196	5.8452	6.6662	3.2933	8.9301	8.8347	5.2772	7.0421	4.2368	6.0582	2.48243	3.57952	5.0295	5.858	4.94561	2.9849	5.5134	7.79823		0.883435	5.23808
17.2755	3.29466	4.65216	4.8178	2.7173	4.2187	7.50668	2.4876	3.57325	3.9195	3.70671	5.1917	8.0196	5.4973	5.5913	7.7109	5.5153	3.9707	5.3497	5.30417	3.03917	6.41827	3.4377	5.9733	4.17681	3.1271	7.3874	7.55198		0.889573	4.96877
17.3946	3.76439	3.67276	4.5808	2.3554	2.8546	4.01806	2.4357	2.82226	2.912	3.30803	6.3995	4.5287	7.3315	2.7267	3.298	4.7123	4.7936	3.3439	4.45289	2.06486	3.99614	4.8361	5.4475	4.29227	4.5276	8.5352	5.89063		0.895705	4.21857
17.5138	5.2777	4.726	5.176	3.9666	3.7066	3.23899	2.3356	2.61693	4.2291	2.18185	4.0781	6.3474	6.7911	4.2243	3.6724	4.7283	4.0069	3.7028	4.96295	2.64667	3.97053	4.2128	5.8886	2.88203	4.9923	6.5926	7.31456		0.901843	4.38777
17.6329	4.56713	6.22833	5.5729	3.4718	3.0496	2.81568	2.2939	3.1521	2.9258	2.92077	2.4887	9.9263	6.4172	3.5929	4.506	3.5206	3.8366	5.3294	3.36447	4.98167	3.98515	4.1826	4.0548	4.17581	3.4196	5.6997	4.40076		0.907976	4.25482
17.7521	5.69927	4.86041	5.6993	3.0344	3.4502	4.36029	3.3029	2.03054	3.4945	3.42745	3.7309	7.761	7.6568	3.2832	4.1196	4.4102	3.3269	3.7489	2.69026	6.29542	3.4029	4.0441	4.0775	7.16953	2.8269	7.4951	8.22063		0.914114	4.57849
17.8712	4.00684	5.74797	4.3745	3.7735	2.7352	2.06378	2.4765	2.29172	2.763	3.62585	6.348	7.151	9.5249	4.0491	4.0894	4.1684	3.2978	6.4957	2.83844	4.21462	3.86834	3.3329	4.8387	6.24051	5.1187	5.5632	6.08772		0.920247	4.48468
17.9903	5.84528	6.47763	4.0955	5.391	2.1435	2.84128	1.9279	2.57255	2.2809	2.94946	3.9471	8.2986	8.2017	4.4748	2.4171	3.4823	2.908	4.0653	2.28897	4.95698	4.26775	3.9646	4.463	4.38758	5.2143	8.4187	3.83108		0.92638	4.30048
18.1095	4.86818	3.34405	3.0972	3.455	2.1321	3.1131	2.0776	2.17308	2.3463	1.85401	2.8283	9.5795	7.4964	2.514	2.9084	2.0519	2.6591	4.0504	2.46415	6.48571	3.63967	3.3811	5.0251	5.61449	4.8158	8.6621	2.64902		0.932518	3.89947
18.2286	6.64127	2.96084	2.7867	4.6882	1.9064	2.63773	3.4053	1.93919	2.3117	2.26441	3.031	7.5804	5.0576	2.7544	3.5982	1.9613	2.3434	2.9933	4.30032	5.17666	5.7348	2.128	4.839	3.73676	4.0092	7.8087	5.9171		0.938651	3.87081
18.3478	4.57309	3.17164	2.7606	4.5575	2.2064	2.16514	1.9955	2.11718	2.1232	2.22843	4.0416	5.2015	2.8723	4.3045	2.636	2.7961	2.3736	4.3166	3.1405	3.37643	2.43267	3.1765	6.4286	5.0367	3.9166	7.1815	3.99285		0.944789	3.52308
18.4669	5.28325	4.22089	3.9063	4.2554	2.157	2.38612	2.8902	2.03559	2.2556	2.25068	3.8368	4.0607	3.4005	3.3523	2.9037	2.4145	2.2679	3.0634	2.23014	2.96884	1.93689	2.4151	10.4792	5.50074	3.5307	4.4784	6.16808		0.950922	3.57959
18.586	2.77287	4.03416	5.2717	3.0352	3.894	2.07254	2.0885	2.92433	2.778	3.81701	4.2701	5.2682	3.2059	2.1123	2.4739	3.0897	2.2051	2.8196	3.59394	3.05594	2.44579	1.9269	9.3481	7.11826	4.6406	3.616	4.99127		0.957055	3.66185
18.7052	3.41221	5.12343	2.4984	2.7074	2.8593	2.52796	2.0082	2.06186	2.0116	2.00675	6.0418	4.9537	2.1171	3.4596	3.1879	2.8246	2.4856	2.3231	3.13925	2.20504	2.82882	1.8437	4.9698	5.8401	5.3002	4.0117	3.86656		0.963193	3.28206
18.8243	4.86186	5.36917	2.9433	3.5702	3.28	2.89346	2.143	2.04559	2.7638	2.04756	2.4689	3.2746	2.5084	3.5535	3.8716	2.4672	1.9422	2.4041	2.04796	2.8342	2.9165	1.9588	4.0975	4.12865	5.9398	4.7691	4.58228		0.969325	3.24753
18.9435	2.99542	3.16569	4.2385	2.2661	3.2517	3.50216	1.8952	2.22079	2.8527	2.02046	2.1211	1.8854	2.4529	2.4177	2.5014	3.0733	2.0697	2.3649	1.95354	4.73753	2.17944	2.7966	5.0715	4.45949	6.5698	2.9871	2.60676		0.975463	2.98729
19.0626	2.72255	3.36749	2.9383	2.0914	2.6588	2.1449	1.9524	2.79256	2.7261	2.1492	1.9664	1.9281	2.4376	2.188	2.1557	2.6922	2.4914	3.6957	2.04595	4.33308	2.12221	2.4897	4.0955	7.14207	5.7934	4.0217	2.67619		0.981596	2.95624
19.1817	1.95477	3.65435	2.9919	2.5269	2.2111	2.15582	1.8996	2.65769	2.6016	1.95505	2.2293	2.3062	1.9227	2.1278	2.282	2.1015	1.8977	2.6256	1.89218	1.93005	2.3862	2.0838	2.8756	7.18935	5.9025	5.5661	4.79519		0.987729	2.84158
19.3009	2.481	2.62721	2.3142	2.4212	1.9648	2.64462	2.1351	2.34881	2.6249	2.27182	2.4757	2.6483	3.1754	2.3467	3.4448	1.9627	2.0206	2.6751	2.54569	1.97321	2.59428	2.0785	2.0059	7.38782	4.1206	6.2614	2.79752		0.993867	2.8277
19.42	3.14445	1.99535	3.5949	2.6654	2.0631	2.78199	2.0151	1.91647	1.8744	1.95483	2.3499	2.5084	2.3782	2.259	2.8158	1.9505	1.7591	2.314	2.69811	2.46344	2.0293	2.2764	2.323	10.58	6.4053	7.0255	2.25722		1	2.97775

## Sheet: Image28
X0	Y0	Y1	Y2	Y3	Y4	Y5	Y6	Y7	Y8	Y9	Y10	Y11	Y12	Y13	Y14	Y15	Y16	Y17	Y18	Y19	Y20	Y21	Y22	Y23	Y24		Ap-basal	Avg intensity
0	9.8889	24.8333	8	15.9444	9.1111	11.2222	15.6111	11.1111	12.8889	20.2778	8.7222	10.2222	15.5556	19.1111	26.2778	15.0556	15.2222	14.4444	22.8889	20.1667	17.9444	21.1667	13.7778	10.6667	10.2222		0	15.2133
0.1191	14.1667	12.1111	12.6111	19.1667	10.9444	11.7222	15.0556	7.8333	11.0556	12.7778	11.4444	12.7222	17.6111	28.0556	28.0556	21.2778	11.6667	16.1111	15.9444	11.4444	13.8333	15.9444	10.2222	14.3889	6.66667		0.00609544	14.5133
0.2383	16.4444	14.1667	10.3889	11.1111	9.2778	8.3333	16.5	17.4444	8.8889	7.1667	8.7778	6.5556	12.8889	20.5	23.4444	24.4444	13.8333	6.8889	10.2222	13.7778	12.1667	16.7222	8.1667	9.7778	9.83333		0.012196	12.7089
0.3574	13.6667	5.7778	10.2222	21.5556	8.8333	14	20.1667	16.0556	10.5	11.7778	8	10.1667	12.0556	28.8889	39.1667	30.5	14.7778	9	12.2222	13.1667	14.1667	21.1667	10.6667	6.5556	8.83333		0.0182914	14.8756
0.4766	10.5556	10.8333	18.8333	12.5	10.5	11.0556	19.1111	13.4444	8	11.8333	9.2222	11	17.8333	16	29	16.9444	11.2222	8.5	9.5556	6.1111	12.3333	9.5	8.3333	11.2778	6.55556		0.024392	12.4022
0.5957	11.7778	12.3333	10.9444	13	10.6111	9.9444	17.7222	15.6667	6.1111	7.5556	13.6667	15.8889	14.2222	20.7222	25.5556	22.7778	18.2222	8.2778	6.9444	5.6667	10.9444	13	10.0556	7.7778	8.22222		0.0304874	12.7044
0.7148	11.2222	15.4444	7.6667	13.3889	10.5	16.8889	11.8889	14	8.3889	11.8889	8.1667	14.2778	10.6667	26.7778	28.0556	21.3333	11.3889	7.0556	8.6111	7.1667	12.9444	8.3333	12.1111	5	6.77778		0.0365829	12.3978
0.834	13.6111	9.1667	12.4444	11.8333	7	13.2778	22.8889	16.8889	6.0556	6.5556	8.1667	14	9.9444	20.6111	31.2222	21.2222	15.5556	6.7222	10.3889	6.7778	11.3333	7.5556	7.1111	6.8889	7.27778		0.0426834	12.18
0.9531	9.9444	9	13.8333	15.2222	5.6667	12.4444	22.3889	14.2222	5.3333	9.3333	7.6111	14.5	5.4444	18.2778	25.1111	17.5	15	6.5556	7.2222	9.3333	9	8.5556	9.8889	3.7778	5		0.0487789	11.2067
1.0723	6.7778	8.1111	9.6667	9.5556	8.3333	21.3333	15.7778	11.5	8.6667	7.0556	10.1667	10.8889	9.2222	16.7222	17	16.5556	13.1667	5.9444	5	7.9444	9.1111	8.3889	10.8333	7.9444	9.61111		0.0548794	10.6111
1.1914	9.0556	6.3889	13.4444	11.5	11.9444	15.6667	16.7222	8.5556	5.2222	9.5556	10.8889	11.1111	11.8333	17.1667	28.4444	27.2778	8.4444	7.4444	3.9444	14.1111	8.1111	10.2222	10.7222	7.0556	5.38889		0.0609749	11.6089
1.3106	10.1667	11.7778	10.6667	9.8889	9.9444	15.5	15.1111	13.6111	11.5	5.0556	11.2222	11.3333	16.1667	16	29.9444	26.2778	13.7222	7.9444	5	7.5	10.5	12.7222	11.5	8.8333	6.55556		0.0670754	12.3378
1.4297	7.3889	7.8333	10.9444	15.4444	7.3889	5.5556	15.2778	10	11.0556	10.1111	10.5	15.1111	10.0556	22.1111	25.6667	25.8889	10.6111	6.6667	5.7222	5.1111	10.8333	6.0556	11.9444	7.8333	5.83333		0.0731709	11.2378
1.5488	7.2778	5.1667	9.2778	10.2222	9.9444	9.1111	13.4444	10.5556	10.8889	9.4444	6.9444	15.9444	16.5	15.2778	26.3333	19.3333	6.5556	9.1667	4.1667	7.1667	7.3333	5	5.1111	9.0556	8.16667		0.0792663	10.2956
1.668	8.0556	9.3889	7.4444	11.3333	10	8.3333	12.7778	9.8889	6.3889	6.1667	10.5	15.3889	13.5556	18.1111	22.3333	21.3889	13.8889	10.9444	6.4444	6.1667	7.3889	8.0556	12.2222	13.2222	7.27778		0.0853669	11.0667
1.7871	7.2222	11.6667	5.9444	15.1111	7.6111	13.3333	14.2778	8.3889	6.1111	7.7222	4.9444	22.0556	22.1667	10.7222	23.3889	22	4.8333	6.7778	4.1111	4	4.9444	6.2222	6.7222	8.1111	7.61111		0.0914623	10.24
1.9063	6.2778	11.8889	10.2222	15.0556	6.7778	8.3889	14.1111	10.0556	6.7778	9.5556	10.8889	17.5556	18.7778	19.8889	23.5556	16.3889	10.8333	7.6111	7.7778	6	8.2778	8.2222	9.2222	7.6111	4.88889		0.0975628	11.0645
2.0254	8	8.1111	15.6111	15.1111	5.4444	8.8889	9.3333	6.7222	7.8333	13.2778	11.7778	13.7778	21.1667	16.1667	19.9444	23.8889	14.1111	5.0556	6.7222	5.7778	11.3333	9.5	15.7222	6.1667	6.22222		0.103658	11.4267
2.1445	9	7.3333	11.3889	12.3889	10.7778	13	14.7222	11.2222	7.5556	13.7222	12.6111	20.6667	21.7778	15.9444	20.7778	25.2778	8.6667	9	5.7778	6.5	4.7778	9.8889	11.3333	7.8333	4.94444		0.109754	11.8756
2.2637	8.5	6.9444	11.8889	5.9444	3.9444	8.1111	12	8.5556	7.3889	15.1667	9.9444	12.4444	20.1111	15.0556	18.4444	20.5	13.1667	5.2778	4.8333	5.6667	6.7778	9.1667	12.1667	6.7222	5.88889		0.115854	10.1844
2.3828	13.7778	6.1667	9.1667	9.5556	7.6111	8.8333	8.7778	12.0556	4.2222	6.2222	10.4444	14.4444	29	19.5556	24.3889	15.3889	8.2222	5.6667	7.6111	7	5.6111	10.7222	16.5556	7.3889	6		0.12195	10.9756
2.502	13	7.6111	10.6667	8.5556	7.7778	7.8333	14.9444	7.5556	8.3889	5.6111	8.3333	15.5	16.1667	15.2222	18.7778	10.3333	11.9444	6.3889	8.5	5.5	6.4444	12.5	9.1667	5.6667	3.11111		0.12805	9.82
2.6211	8.5	4.7778	11.1667	12.5556	5.0556	5.4444	12.5556	9.2222	6	9.5556	13.7778	16.6111	19.2222	20.3333	15.6111	11.6667	8.5	5.0556	6.7222	6.7778	7.2222	11.1111	9.7778	6.6667	6.5		0.134146	10.0156
2.7402	8.2778	5.2222	10.8333	16.3889	5.6111	5.6111	12.1667	9.8889	9.5556	8.6667	13.3333	16.2222	18.5	17.6111	12.8333	12.2778	6.7778	11.0556	5.9444	7.6667	7.2778	10.4444	7.2222	3.6111	5.11111		0.140241	9.92444
2.8594	5.7222	10.6111	10.5556	8.3333	7.8333	6.7778	6.3889	7.1667	6.9444	7.5556	7.1111	10.7222	18.2778	16.5556	11.3889	8.6667	9.9444	6.1111	3.4444	11.1667	6.5556	7.1667	10.2778	5.2222	4.55556		0.146342	8.60223
2.9785	5.9444	2.8889	12	12.8333	6.7222	7.5556	6.4444	9	6.0556	7.7222	13.6111	7.2222	20.5556	14.6667	15.8889	6.6111	8.1667	6.8333	5.3889	9.4444	7.8889	6.6667	9.8333	4.5556	2.83333		0.152437	8.69333
3.0977	8.8889	6.2222	11.7778	11.1667	4.9444	11.9444	9	11.3333	7.8333	7.6111	9.8333	10.8889	17.7222	18.8889	14.0556	6.0556	5.1111	5	5.9444	6.8333	9.2222	7.3333	6.8889	5.4444	4.88889		0.158538	8.99332
3.2168	11	10.1667	10.1111	11.3333	5.1111	8.1667	4.6667	7.8333	9.5556	6.6111	8.8333	7.5	22.2222	15.6111	18.5	5.7778	10	5.1667	4.2778	5.5	8.6667	8.9444	8.1111	8.5556	5.61111		0.164633	9.11334
3.336	5	7.4444	11.7778	7.8889	6.3889	6.7222	5.8889	7.0556	6.1667	6.0556	8.5556	9.5	20.0556	22	16.7778	9	3.3889	7	8.3889	8.3333	6.7222	7.1111	7.7222	7.5556	5		0.170734	8.70001
3.4551	5.5	7.8333	8.5	9	9.5	8.8333	5.2222	8.5556	4.2778	6.9444	10.3889	14	10.3889	17.7222	7.7222	7.5556	3.7778	6.3889	12.1111	6.4444	5.1667	8.1111	8	6.4444	5.16667		0.176829	8.14222
3.5742	7.0556	7.0556	8.7778	9.1667	8.3333	5.3889	6.4444	8.3889	5.7222	4.8333	12.7222	6.8889	19.1111	23	11.1111	9.8889	7.8333	4.4444	4.6667	6.3333	6.2222	11.2778	5.7222	9.6111	3.27778		0.182925	8.53111
3.6934	7.8333	9.3333	14.2222	8.7222	9.7778	9.5556	4.1667	9.3889	5.7778	5.9444	11.3889	12.0556	15	24.2222	15.7778	10.6667	4.6111	5.7778	6.6111	6.1111	8.0556	8.7778	7.2222	5	6.16667		0.189025	9.28667
3.8125	4.1667	10.7778	8.2778	4.6111	6.9444	7.9444	6.2222	7.1111	8.6111	8.1111	14.1667	6.9444	10.4444	16.1667	13.8889	4.1111	4.4444	11.4444	8.3889	8.6111	5.8333	3.3889	8.5	8.1667	4.83333		0.195121	8.08444
3.9317	6.4444	7.2222	9.4444	11.7778	10.3333	6.6667	4.3333	10.6111	7.0556	9.1667	5.8889	10.8889	14.6667	19.2222	8.5	8.3889	4.3333	5.7778	8.1111	8.6667	11.1667	5.2778	5.3333	9.3889	4.88889		0.201221	8.54222
4.0508	7.8889	5.3333	9.7778	5.6111	8.5	7.1667	6.0556	7.7778	9.9444	4.9444	7.0556	11.5	14.3333	20.5	6.6111	6.9444	5.2778	3.6111	4.8333	8.3333	6	7.6667	6.7778	8.0556	4.44444		0.207317	7.79778
4.1699	6.3333	7.4444	6.5556	8.2778	6.9444	5.9444	4.9444	6.9444	5.5556	9.6667	16.8333	8.0556	9.8889	13.0556	8.5	9.1111	4.5	7.2778	5.5556	5	6.2222	7.5556	9.5	5.7778	6.5		0.213412	7.67778
4.2891	3.0556	6.3333	7.3333	9.0556	9.3889	7.0556	8	4.1111	9.2222	7.2778	7.2778	11.3333	12.5	13.7222	8.7222	9.1111	5	7.7778	9.1111	7.1111	7.7222	2.5556	8.9444	3.9444	4.44444		0.219513	7.60444
4.4082	5.2222	4.8333	7.7222	4.2222	7.4444	4.0556	9.2778	10.5	6.5	8.1667	7.4444	7.7778	12.8333	23	9	10.3889	9.1111	6.5	9	5.1667	8.8333	5.1111	5.9444	6.7778	6.05556		0.225608	8.03555
4.5274	8	7.7222	11	6.8333	10.8333	3.8333	1.9444	7.1667	9.1111	8.1111	8.8889	6.8333	8.5	18.7222	7	9.1667	8.9444	3.2778	4.3333	8.0556	5.3889	7.8333	6.2778	8.4444	2.66667		0.231709	7.55555
4.6465	7.1667	5.1667	5.0556	7.6667	11.3333	9.1667	7.4444	4.9444	6.7778	8.4444	11.4444	7.6667	10.3889	11.7778	4.8333	6	9.3889	5.1667	5.8889	8.4444	5.2778	4.0556	11.8333	4.9444	3.11111		0.237804	7.33556
4.7657	6.2778	5.8889	5.9444	7.4444	6.7778	3.2778	5.5	6.1111	6.5556	10.2222	7.6667	6.6667	9.9444	22.6111	8.2222	9.8889	9.1111	6.2222	7.9444	4.7778	5.1111	7.6111	5.6667	3.5	4.72222		0.243905	7.34666
4.8848	4	5.3889	4.8333	7.3333	4.4444	4.0556	3.7778	8.5556	5.6111	9.7778	7.2222	7.3889	10.8889	15.4444	10.0556	10.3889	6.7222	6.1111	7.1111	9.1111	2.4444	6.6667	4.4444	3.8333	3.72222		0.25	6.77333
5.0039	4.3889	3.1667	7.6111	4.2222	6.7222	3.9444	4.4444	4.7222	11.1667	11.3889	6	11.9444	13.3333	14.6111	5.3889	9.0556	8.0556	8.8333	5.0556	4.8333	7.5556	4.3889	9.1111	5.6667	5.94444		0.256095	7.26222
5.1231	4.3889	6.5	3.7778	3.7778	3.2222	2.6111	8.0556	4.8333	7.7222	8.1667	8	4.8333	12.8889	11.7778	6.3889	7.6667	8.8889	5.7222	6.2222	5.6667	3.7778	4.4444	4.6667	4.2778	6.27778		0.262196	6.18223
5.2422	3.0556	5.2222	5.1111	4.6667	4.2222	3.2778	4.9444	7.6111	9.1667	13.1111	7.3889	3.5556	14.5	9.0556	6.6667	12.2222	4.8333	10.3333	7.5	2.3889	8.1111	7.5556	5.0556	3.7778	4.72222		0.268291	6.72223
5.3614	6.3333	5.8333	7.6667	6.9444	5	4.2222	6.3333	2.7222	9.2778	12.8889	8.7778	6.0556	18.7222	7.3889	7.9444	7.3333	5.5	5.5	3.8889	5.6667	7.7222	5.7222	7.7778	5.9444	2.05556		0.274392	6.92888
5.4805	2	8	7.6111	7.9444	6.5	5.5556	7.6667	5.9444	5.7222	7.2222	9.4444	6.5556	11.2222	7.5556	5.2222	11.5	9.6667	3.5556	3.3889	7.1667	5.6667	4.1667	8.2778	2.3333	6.38889		0.280487	6.65112
5.5996	4.8889	5.9444	4.2222	3.5556	5.3333	2.5556	3.8889	4.5	6	6.0556	11.1111	6.8333	10.1667	10.2222	6.8333	10.4444	11.6111	5.3889	2.9444	5.2222	5	4.3889	3.1111	4.1667	4.11111		0.286583	5.94
5.7188	4.3889	4.7778	12	5.8889	4.6667	4.7222	3	7.0556	9.8333	8.2778	7.5	10.6667	14.2222	7.2222	8.6667	10.1667	8.3889	8.2222	8.9444	7.6111	5.1667	3.3333	4.8889	7.0556	3.83333		0.292683	7.22001
5.8379	5.4444	5	4.1667	4.8889	7.1111	6	2.6667	3.6111	8.8889	6.7778	7	6	15.0556	7.3333	4.5556	10.0556	9.0556	4.5556	9.0556	7.1667	5.3889	3.2778	4.0556	6.5556	2.83333		0.298779	6.26002
5.9571	4.4444	5.3889	5	10.2778	7.4444	5.1667	6.7778	10.5556	5.3889	8.1111	7.5556	8.1111	14.3889	8.2222	9.6111	6.8333	9.3333	6.3333	6.4444	8.3333	4.7222	4.8333	5.3889	6.7222	3.5		0.304879	7.15555
6.0762	8.6667	4.7222	4.8889	7.2222	5.1111	4.2222	5.2778	3.5	6.2222	9.2778	6.2778	8	12.1111	8.2222	11.8889	8.2778	9.2778	4.7222	7.2222	5.1111	5.9444	4.5	5.1667	5.2222	3.88889		0.310975	6.59778
6.1953	5.2222	5.3889	5.8889	8	5.7222	3.5	7.8889	5.3889	9.7778	7.4444	7.5556	6.4444	14.7778	3.8333	11.8889	5.9444	7.5556	7.1667	3.6667	5.5	7.6667	6.3889	4.4444	6	3.44444		0.31707	6.66
6.3145	5.1667	3.8333	5.2222	8	6.3889	4.7222	3.5556	5.6667	8.6667	5.4444	6.5556	8.1667	10.9444	5.0556	7.4444	4.6667	13.5	5.0556	6.7222	2.6667	4.7778	6	6.2778	2.9444	4.83333		0.323171	6.09112
6.4336	3.2222	3.1111	2.5556	5.1111	4.2222	3.3333	5.9444	6.3333	6.5556	6.3889	9.5	8.6667	16.2222	7.2222	3.6667	4.3889	12.5556	6.1667	4.2778	4.8333	5.4444	7.7778	6.3333	6	5		0.329266	6.19333
6.5528	7.1111	4.2222	5.6667	3.9444	3.2778	3	6.5	4.7778	7.6111	6.7778	8.5	11.2222	15.0556	4.2778	12.1667	3.9444	7.9444	6.5556	2.7778	3.9444	7.3333	3.9444	4.7222	3.9444	5.16667		0.335367	6.17555
6.6719	4.8333	5.3889	4.7778	5.8889	6.4444	3.2778	3.7778	4.3889	5.3333	10.6111	3.5556	8.1667	9.4444	7.3889	6.9444	5.3333	8.1111	6.3333	4.0556	5.4444	6.1111	6.7222	3.8889	4.1667	2.27778		0.341462	5.70666
6.7911	3.1111	3.4444	7.1667	4.1667	7	3.2778	3.6111	6.2222	5.7778	6.1111	7.1111	6.8333	10.5	8.8889	4.7222	6.8333	9.3889	5	3.1111	3.6111	10.2222	4.9444	5.0556	3.7778	3.38889		0.347563	5.73111
6.9102	4.8333	5.8889	4.9444	9.0556	3.6111	6.5	5.3889	4	6.7222	7.2778	6.7778	9.5556	5.8889	16.1111	4.2222	10.8889	6.8333	5	3.4444	2.9444	6.1667	4.8333	2.2778	3.6111	2.72222		0.353658	5.98
7.0293	3.7778	8.2778	9.0556	10.2222	5.8889	5.4444	3.1111	7.6111	5.2222	6.8333	7.9444	9.8333	8	15.5556	6.7222	8.3333	7.7778	4.3333	3.6111	4.6667	5.8889	5.4444	5.1667	4.4444	2.88889		0.359754	6.64222
7.1485	4.8889	8.5556	4.1111	5.9444	4	3.6667	3.5556	5.3889	7.2778	2.8889	5.9444	4.7222	9.3333	11.6667	5.1111	8.0556	4.2222	3.7778	2.8889	2.7222	6.3333	6.5	7.8889	2.6667	3.11111		0.365854	5.40889
7.2676	3.3889	2.7778	4.6111	7.7778	5.3889	4.6111	4.5556	4.5	6.3889	5.7222	3.7222	6.7778	2.8333	16.1667	7.1111	8.1111	6.6111	5.6667	2.6111	4.3333	6.6667	5.1667	5.3889	2.6111	3.38889		0.37195	5.47556
7.3868	4.9444	6.6111	7.1111	7.9444	3.1111	3.1667	4.7222	5.5	6.8889	3.1667	7.1667	8.3889	7.1111	7.8889	8.2778	3.3333	7.1111	4.2222	3.2222	2.6667	5.6111	3.9444	7.1667	4.5	2.38889		0.37805	5.44666
7.5059	7.3333	8.7222	8.8333	5.5	6.1111	2.2778	4.5556	4.5556	7.7778	8.6667	3.5	8.9444	6.1111	19	8.5556	4.5556	6.3889	3.6667	3.3889	3.7778	7.7778	7.3333	6.5556	8.5556	5.27778		0.384146	6.7089
7.625	3.5556	2.8333	7.1111	4.0556	5.7222	2.4444	2.7778	6.7222	7.5	5.8889	5.8333	13.0556	7.6111	10.2778	9.5	6.4444	5.2778	3.8889	4.9444	1.9444	6.5556	4.4444	3.1667	3.1111	3		0.390241	5.50666
7.7442	4.5556	4.2222	4.6111	7.9444	7.2778	2.8333	2.1111	3.6667	3.6111	5.8889	6.5556	9.0556	10.5556	10.9444	10.2222	3.7222	6.7778	5.6111	1.9444	3.1111	5	7.5556	7.5	1.8333	3.83333		0.396342	5.63778
7.8633	4.0556	5.7222	6.2222	8.5	3.6667	4.1111	2.6667	6.7778	9.5556	7.7778	6.5556	6.1111	6.1667	5.7222	6.1111	5.4444	6.5556	2.7222	2.8889	4.2778	3.2778	6.5556	3.9444	6.3333	3.55556		0.402437	5.41112
7.9825	4.2778	5.4444	8.1667	6	4.6667	3.3333	4.0556	2.8333	6.1667	8.0556	6.7222	10.9444	5.7222	6.1667	8.6111	7.6111	7.6667	3.6667	3.2778	1.9444	7.5	7.3889	5.0556	3.5	1.88889		0.408538	5.62667
8.1016	2.1667	5.2222	7.4444	3.5556	7.2222	5.3333	2.6111	4.1111	5.3333	6.4444	3.2778	6.1667	5.7778	6.8333	10	5.1667	5.4444	8.2222	3.2778	4.2778	3.5556	6.2778	3.9444	6.8889	2.05556		0.414633	5.22444
8.2207	2.3333	4.0556	4.0556	5.0556	5.2222	3.5	5.2222	2.9444	6.7778	5	7.8333	4.1111	4.2778	6.1111	9.3889	8.3889	5.6111	6.0556	3.3333	2.8889	4.3333	6.3333	4.1667	3.7778	3.61111		0.420729	4.97556
8.3399	2.8333	4.5	4.8333	6.3333	5.8889	4.1111	3.0556	3.3889	8.2778	8.5	4	4.8333	6.2778	6.0556	10.0556	3.9444	7.5	5.5556	3.2778	3.5	4.7778	4.6667	4.2778	7.9444	2.44444		0.426829	5.23334
8.459	2.6111	6.6667	3.4444	7.4444	6.8333	3.8889	3.3333	2.8333	5	9	5.8889	5.5	4.8333	7.7778	5.7778	4.3333	5.5	3.9444	1.8889	2.4444	6.5	5.8333	6.1111	10.7222	3.22222		0.432925	5.25332
8.5782	5.6667	7.1111	5.1667	5.5556	4.3889	5.5556	4.4444	3.7222	5.1111	7.7222	8.1111	2.7778	4.3333	4.1111	5.2778	6.5556	5.2222	3.7778	1.8889	5.2222	3.9444	3.8889	4.4444	6.8889	3.27778		0.439025	4.96667
8.6973	2.4444	3.7222	7.8889	8.7778	4.7222	1.9444	5.3333	5.7222	7.0556	6.3333	6.1667	5.1111	4.2778	10.4444	5.3889	6.3333	8.2222	4.5	2.5556	3.2778	7.8333	5.5556	8.8889	4.5	2.83333		0.445121	5.59333
8.8165	3.5	4.1111	3	3.6111	6.7222	2.0556	7.8333	3	9.5556	9	6.2778	4.7222	5.8889	9.4444	7.8333	7.4444	6.2778	6.4444	2.0556	3.3889	4	4.3333	4.5556	6.6667	6.05556		0.451221	5.51111
8.9356	5	4	4.6111	4.5556	7.6667	4.3889	3.2778	4.6667	4.3889	5.6667	4.2778	4.6667	5.3333	10.5556	3.8333	6.3889	3.6111	5.1111	3.2222	3.2222	7.3333	3.1111	3.8333	6.7222	4		0.457317	4.93778
9.0547	4.3333	4.1111	3.6111	7.7778	3.5556	3.3889	2.8333	2.5556	6.8333	6.7778	2.5556	3.2778	5.0556	7.6667	9.9444	4.1667	5.6111	2	5.3889	2.3889	3.3333	3.3333	3.8333	5.6111	2.61111		0.463412	4.50222
9.1739	3.6667	3.4444	5.6667	6.5	7.3889	1.8333	3.0556	3.7222	2.5556	9.3333	3.7222	3.9444	3.6667	6.9444	6.6111	5.7222	8.4444	4.7778	2.1111	2.3889	5.2222	6.5556	5.3889	3.6667	3.38889		0.469513	4.78889
9.293	3.6667	4.5	6.3333	5.8889	11.2222	2.2778	1.8889	4.6667	4.3889	11.1667	4.6667	6.7222	3.0556	3.6667	6.1111	4.1111	3.1667	3.1111	2.2222	3.7778	5.2222	4.5556	8.1111	3.3889	5.11111		0.475608	4.92001
9.4122	7	5.5	6.2222	6.6111	4.0556	2.4444	3.5556	3.0556	6.8889	6.6667	4.3333	6.6111	5.6667	6.0556	5.7222	5.5556	7.2222	6.6111	2.6667	3.5556	7.2778	3.4444	7.9444	4.5	7.38889		0.481709	5.46223
9.5313	4.2222	8.5	4.1667	4.5	5.2778	2.8889	3.1667	3.1667	4.8333	9.5556	4.7222	4.6111	3.8333	5.7222	7.6111	2.6667	5.8333	4.7222	2.9444	2.5556	5.1111	5.8889	2.8333	5.7222	4.94444		0.487804	4.8
9.6504	4.5556	5.7778	6.8333	5	4	3.3889	3	2.8889	4.8889	5	5.0556	6.8333	3.8889	13.1667	6.2222	3.6111	3.9444	3.1111	4.7778	3.1111	2.2222	8.9444	4.8333	5.7222	5.94444		0.493899	5.06889
9.7696	3.5556	11.1111	6.3333	2.4444	5.8333	3.1111	4	4.2778	4.6111	8.6111	5.6111	4.6667	7.5556	7.5	7.3889	3.7222	5.3333	3.8889	3.1667	2.6667	3.7778	4.3889	6.5556	9.1111	5.05556		0.5	5.37111
9.8887	2.8889	4.3333	5.2222	4.7778	4.3333	3.4444	3.1667	3.1111	3.8333	4.6667	5.6111	5.8333	4.3889	5.6111	3.6111	4.9444	6.8889	4.0556	2.0556	3.6111	5.1667	6.7778	4.0556	3.3889	7.44444		0.506095	4.52889
10.0079	2.3333	7	6	5	6.8889	4.6111	4.5556	3.2778	10.1111	5.1111	7.3889	7.3889	6.6111	3.6667	5.0556	2.7222	5.6667	2.0556	3.1667	6.3333	4.7222	6	5.7222	8.6667	6.72222		0.512196	5.47112
10.127	3.7778	6.5556	6.4444	4.8889	7.3333	3.8333	3.5	2.3333	7.0556	5.0556	5.9444	9.7778	4.3333	5.5	8.5	3.7222	2.9444	3.6111	4.7222	2.5	3.6667	5.2778	4.2222	5.4444	4.94444		0.518291	5.03555
10.2462	3.1111	7.8889	7.0556	2.8889	5.1111	3.7778	3.3333	2.5	3.2778	6.3889	5.8889	1.8889	6	4.6111	6.1111	7.5556	8.3889	5.0556	5	6.1667	3.8889	6.3333	3.2222	5.6111	5.33333		0.524392	5.05556
10.3653	2.0556	4.5	4	8.8889	6.8889	3.1667	4.2778	3	7.5556	7.2222	4.1111	7.2222	5.2222	5.6667	14.6111	4.8889	5.6667	5	2.5556	2.5556	3.6111	7.8333	3.6667	3.5556	3.61111		0.530487	5.25334
10.4844	2.5556	4.7222	8.6111	5.2222	3.5556	3.4444	4.7222	3.5	6.3333	4.5556	5.3889	8.1667	7.4444	4.3333	5.5	5.3889	5.2778	5.5	3.5556	2	2.6667	4.9444	6	4.2222	3.22222		0.536583	4.83333
10.6036	2.7222	3.2778	6.2222	6.5	5.8333	5.7222	2.3889	2.7778	7.7778	5.3333	5	5.0556	5.7222	5.3333	2.6111	4.1667	7.5	4.1111	2.5	3	5.5556	6.0556	3.8333	6.3333	2.38889		0.542683	4.70889
10.7227	4.5	3.7778	5	5.6111	5.2222	3.2778	3.2222	4	5.5556	4.6667	2	5.7778	2.8333	7.3333	9.1111	5.1111	4.7778	3.3333	2.5	2.7778	4.1667	3.5556	2.6667	4.8333	2.88889		0.548779	4.34
10.8419	2.3333	3.6111	3.8333	3.4444	3.3889	4.6111	3.3333	3.3333	3.2778	3.1111	2.7222	5.9444	5.2222	3.4444	4.6667	3.9444	2.5	4.5	3.0556	2.8889	5.6111	5.4444	4.3333	5.5556	3.33333		0.554879	3.89777
10.961	3.7778	3.7778	6.3889	2.2778	4.3889	3.8889	2.1111	3	2.5	4.8889	5.6111	6.7222	5.8333	4.0556	4.1667	6.0556	6.3333	3.8333	3.8333	1.8889	5.6111	3.5	3.8889	2.8333	2.38889		0.560975	4.14222
11.0801	4	4.8889	3.7222	2.8333	3.3333	3.7222	3.7778	4.1667	6.0556	2.1667	5.4444	6.1667	1.9444	6.3889	3.6111	3.3889	5.5556	4.2778	4	2	2.8333	5.1111	3.6111	2.7778	3.11111		0.56707	3.95556
11.1993	3.2222	2.9444	4.6111	4.7778	3.8333	4.3333	2.0556	4.0556	2.3333	5.2778	3.4444	3.1667	5.2778	4.1667	4.8333	2.8889	3.6667	3.1667	2.4444	4.0556	6.1111	3.0556	3.3889	3.0556	2.88889		0.573171	3.72223
11.3184	7.0556	5.0556	5.0556	4.5	5.0556	3.1111	2.3333	5.3889	3	5.2222	6.0556	6.2222	2.6111	3.5556	6.7778	4.3333	5.5	5.5	3.5556	2.1667	3.3889	4.1111	5.2778	5.8889	2.44444		0.579266	4.52668
11.4376	3.6111	4.2778	3.1111	5.4444	4.3333	4.3889	3.7778	6.7778	4.8889	4.2778	3.2222	10.1667	5.3333	3.5	6.2778	5	3.6667	4.5556	2.6667	2	4.8333	2.3333	3.2778	4.9444	6.61111		0.585367	4.53111
11.5567	2.8333	4.2222	4.7222	3.3333	2.6111	1.9444	4.3889	4	5.1667	7.1111	5	5.1667	10.0556	3	6.1111	5	5.2222	2	3.0556	3.8889	3.8889	4.3889	7	3.2222	3.55556		0.591462	4.43555
11.6758	3.2222	6.5	3.1111	2.5	3.6111	4.0556	2.7778	4.6111	3.9444	6.5556	5.5	7.6111	9.3333	3.4444	3.7778	5.6111	3.3889	2.0556	2.5	2.4444	2.2222	3.2222	5.6667	3.9444	4.88889		0.597558	4.26
11.795	4.1667	4.1667	3.5556	2.2222	4.3333	4	3.8333	2.0556	5.3889	7	3.7222	5.3333	16.2222	8	3.8333	3	3.9444	2.0556	2.8333	2.3333	2.0556	4	4.5556	5.2778	2.38889		0.603658	4.41111
11.9141	2.2222	6	2.0556	5.3333	4.5	1.8889	2.7222	2.8889	5.5556	4.5	5.7778	8.7222	9.1667	2.6667	3.7222	8.5	4.4444	2.6667	3.6667	2.2222	4.6667	3.7222	4.3333	4.1667	6.11111		0.609754	4.48889
12.0333	6.6667	6.0556	9.6667	5.4444	7.8889	4.0556	3.1111	2.1111	4.0556	2.1111	5.4444	4.3889	6.1111	5.5	5.2222	6.2222	6.4444	1.8333	3.2778	4.9444	2.2778	5.3333	2.4444	5.5	4.88889		0.615854	4.84
12.1524	4.5556	3.8889	7.1667	2.2778	5	6.2222	2.7778	3.8333	4.3333	8.7778	5.3333	4.3333	6.6667	3.8889	6.5556	7.5	3.6111	2.6111	3.1667	3.1111	3	2.8333	4.1667	4.7222	3.05556		0.62195	4.53556
12.2716	4.2778	5.1667	4.0556	5.5	4.2778	4.2222	4.7778	7.1667	6.8889	5.7778	5.9444	7.5556	4.0556	6.2222	4.4444	3.5	6.5	2.1667	2.1111	2.0556	7.5556	4.7222	4.3889	6.0556	4.22222		0.62805	4.94446
12.3907	3.5556	4.2778	2.5	4.1111	5.3333	5.6111	3.5556	2.5556	4.9444	6.1667	4.8333	5.4444	10.8889	6.2778	3.4444	6.9444	3.4444	4	2	4.2778	3.2778	4.7222	3.2222	4.5556	2.77778		0.634146	4.50889
12.5098	3.4444	5.3333	4.7222	2.2778	5.0556	4.8333	4.5	2.6111	6.8889	5.6111	7.7222	3.4444	4	7.2778	1.9444	5.3889	5.2222	3.8889	2.8889	4.8333	4.7222	4.1111	4.6667	6.3333	3.83333		0.640241	4.62221
12.629	4.1667	6.0556	2.7222	4.5556	2	4	4.3333	5	5.7778	6.6111	4.3889	4.3333	5	7.2778	3.1111	5.0556	2.6667	5.7222	3.0556	2	4.6111	5.0556	4.3889	3.1667	5.27778		0.646342	4.41334
12.7481	3.0556	4.1111	4.9444	3.5556	4.2778	4.0556	2.1667	5.3889	6.5	4.6111	5.9444	7.3333	5.2222	5	3.3333	2.8889	4.8333	5.2778	3.7222	2.7222	4	3.6667	5.5	6.6667	6.61111		0.652437	4.61556
12.8673	7.4444	6	6.1111	3.8889	5.3889	4.5	2.2778	3.9444	3.9444	7.1111	5.8889	6.1667	4.6667	8.5556	4.4444	5.2222	5.6111	6.6667	2.6111	2.5556	6.7222	5.1111	2.2222	3.5556	5.66667		0.658538	5.05111
12.9864	3	3.3333	2.4444	3.5556	4.0556	4	3.0556	5.8333	8.4444	5.2778	5.2222	7.5556	2.6111	4.3889	4.7778	5.1111	4.5	2.9444	3.3333	2.8333	3.8889	4.9444	2.5556	4.6111	6		0.664633	4.33111
13.1055	5.1667	2.7778	3.6111	2.5556	8.5	2.8889	3.2222	3.3889	3.2778	5.0556	2.3333	5.2222	6.6111	6.2222	6.0556	5.8889	7.1667	2.7778	3.7778	2.5556	3.7222	3.9444	2.7778	3.2778	4.88889		0.670729	4.30668
13.2247	2.1111	4.5	4.0556	2.0556	4.6111	3.3889	4	5.4444	6.4444	8.2778	4.7222	5	5.2222	5.5	6.1111	5.7222	4.7222	4.2222	2.7222	4.9444	3.8333	6.1111	5.2222	3.6667	2.83333		0.676829	4.61777
13.3438	4.4444	3.1667	4.1667	4.7222	3.7222	4.1111	2.2778	2.9444	6.3333	6.3333	6.2222	3.2778	4.7778	5.2778	4.7778	4.6667	5.0556	2.8889	2.2222	5.4444	3.8333	5.4444	4.7778	5.5556	6.33333		0.682925	4.51111
13.463	5.7222	4.2222	3.7222	6.6111	6.4444	6.5556	4.8889	5.3333	4.0556	7.6667	4.8889	10.1111	6.8889	8.8889	9.2222	6.2222	9	4.6667	2.1111	2.6667	4.3889	2.3333	3.2222	4.5556	6.61111		0.689025	5.64
13.5821	3.3889	5.0556	7.4444	4.2222	7.3333	2.9444	5.3333	5.2222	5.5	7.0556	4.0556	4.3333	5.2222	9.1667	3	8.1667	9.7778	4.8889	1.8333	2.5556	4.3889	4.9444	3.7222	6.2778	4.77778		0.695121	5.22444
13.7012	4.3333	3.5556	2.6111	6.3333	2.5	3.7778	2.7778	4.5556	6.2222	3.8333	5.2778	6.1111	3.1111	12.2778	4	2.5556	6.6667	2.2778	4.3333	3.8889	3.1111	3.2778	3.8333	4.4444	4.61111		0.701216	4.41111
13.8204	2.6111	5.2222	4.1111	4.5556	4.8889	3.8333	7.1667	3.3889	4	5.7222	6.0556	4.3333	3.5556	5.7778	6	4.2778	3.3333	3.9444	3.5556	3.2778	7.0556	5.9444	3.6667	4.3889	4.61111		0.707317	4.61112
13.9395	6.2222	6.7778	3.1667	5.4444	3.8333	3.7778	4.7778	2.2778	5.1111	3.8333	6.6111	9.7778	3.2778	9.6667	9.5556	7.2222	3.6111	7.5556	2.5	3.2778	4.7222	5.3889	4.2222	3.8333	3.61111		0.713412	5.20222
14.0587	4.7222	2.5556	6.7778	3.8333	2.0556	2.5	2.8889	4	5.8889	4.9444	9.6111	4.0556	6.2778	8.1111	6.9444	4.6667	4.1111	3.2778	3.1667	1.8889	4.7778	5.4444	3.3889	2.8889	3.55556		0.719513	4.49334
14.1778	3.2778	6.6111	3.2222	4.6667	6.7222	3.3333	5.8333	2.6111	7.7222	8.8889	7.4444	6.2778	5.1111	7.3333	8.3889	6.6111	6.5556	3.1667	4	2.3333	5.5	7.2778	3.7778	2.5	3.66667		0.725608	5.31333
14.297	3.3889	3.4444	6.7778	5.8889	5.8333	2.8889	3.2778	4.7778	3.1111	4.9444	4.0556	7.3333	8.1667	8.5	7.7778	2.8889	9.2222	2.3889	3.5556	2.0556	4.2222	7.5	4.5556	3.3333	4		0.731709	4.95556
14.4161	2.6111	3.3333	2.6667	3.1667	4.4444	3.2778	5.7778	2.3889	5.0556	4.3333	5.5	7.8889	7.7222	7.2778	6	5.7222	7.5556	2.7778	4.7778	4.2778	5.8333	5.3333	2.2778	3.1111	3.16667		0.737804	4.65111
14.5352	5.1111	5.5	2.6667	3.5556	4.2778	4.8889	2.1667	4.5556	3.6667	5.6111	3.1667	8.8333	10.4444	8.7222	13.8333	4.8333	3.5556	4.2778	2.1111	2.2222	2.9444	2.8333	4.9444	3.9444	3.94444		0.743899	4.90444
14.6544	2.7778	3.8333	3.2778	5.2778	3.2778	3.6111	5.8889	4.2778	4.4444	3.6111	3.6667	10.9444	3.8889	6.3889	7.4444	4.2778	5.3333	2.6667	3.2222	2.8333	4.6111	4.9444	2.6667	3.2222	3.11111		0.75	4.38
14.7735	4	5.7222	4.1667	4.5	3.2222	4.1111	5.3889	3.0556	2.6111	3.7222	3.5556	7	6.2222	4.3333	5.4444	5.3333	6.6667	4.3333	2.8889	3	3.7778	6.9444	3.1111	4.8889	2.33333		0.756095	4.41333
14.8927	4	6.2222	3.5556	2.8889	5.2222	4.5556	4	2.3889	3.3333	6.5556	3.5	8.6111	7.7222	7	7.2222	4.7778	3.7778	6	4.3889	4.2778	7	6.4444	2.2778	3.0556	3.11111		0.762196	4.87556
15.0118	3.6111	6	4.6111	3.3333	3	5.8889	4.9444	3.0556	5.2222	6.2222	5.2222	7.9444	6.4444	6.2222	10.1111	2.7222	3.6667	4.2778	4.3889	5.8889	3.8333	3.2222	3.9444	6.6667	5.27778		0.768291	5.02888
15.1309	2.7222	4.2778	5.6111	3.3333	5.2778	4	3.1111	5.5556	2.6667	6.7222	5.7222	7.9444	7.5	6.1111	6.3333	4.5556	3.8889	2.3333	2.9444	5.8333	5.3333	3.8333	3.6667	2.8333	5.05556		0.774387	4.68666
15.2501	6.1111	3.3889	4	3.8333	5.5556	4.8889	3.7778	5.1667	6.8333	5.7778	4.2778	3.6111	4.3333	6.1667	6.8889	5.6667	2.9444	4.5	2.3333	2.5556	3	5.0556	2.7222	2.5556	3.05556		0.780487	4.36001
15.3692	4.1667	4.2222	3	3.8333	5.3333	3.8333	3.3333	7.1667	4.4444	4.7778	5	4.6111	6.0556	4.2778	8.2222	4.7778	2.3333	6.0556	4.5556	3.7778	3.1667	3.6111	2	2.6111	2.77778		0.786583	4.31778
15.4884	6.7222	5.3889	3.1111	4.1667	3.2778	3.7222	5.3889	5.7778	3.2222	4.7222	6.0556	3.1667	4.2778	3.4444	9	2.6667	3.5556	1.9444	3	4.1667	6.7778	2.0556	2.7222	2.0556	2.11111		0.792683	4.10001
15.6075	5.2222	5.1667	6.9444	3.6111	5.1667	3.7222	6.7778	5.1667	5.4444	8.1667	5.7778	4.8889	2.7778	4.4444	3.5556	3.7222	7.3333	3.9444	4.9444	2.6667	1.9444	2.8333	1.7778	2.0556	2.83333		0.798779	4.43555
15.7266	3.6111	5.2778	3.6111	5.8889	6.8333	9.3333	2.2222	7.6111	5.0556	4.9444	3.4444	6.0556	7.8333	4.3889	4.6667	6.7778	3.3889	2.6111	4.4444	6	4.1667	4.2778	2.6111	2.7222	3.61111		0.804874	4.85555
15.8458	6.5556	8.2222	5.0556	6.3889	3.5	7.1667	2.9444	6.7778	2.1667	4.6111	6.3333	4.5	6.2778	5.2778	3.9444	5.3333	4.8333	7.0556	2.7778	3.8333	3.2222	2.6111	2.5556	4.6111	2.88889		0.810975	4.77778
15.9649	2	5.5556	7.6667	3.7778	3.7222	4.9444	3.6111	7	4.8333	8.2222	7	8.8889	6.8889	6.8889	5.5	6	7.8333	3	4	3.9444	5.2778	2.9444	2.3333	1.9444	3.66667		0.81707	5.09777
16.0841	4.1111	7.7222	3.8889	6.4444	3.1667	5.3333	3.5	3.4444	3.8889	3.5	9.0556	7.8889	4	5.7222	7.2778	4	4.7778	2.6111	2.1667	5.9444	5.2778	4.8889	2.2778	2.1111	2		0.823171	4.6
16.2032	3.7778	6.5556	2.7778	4.2222	4.5556	6.3889	4.2222	2.6667	3.1111	5.3333	7.2778	6.1111	6.1111	12.2778	2.7778	4	4.0556	4.3889	3.8889	3.7778	4.8333	1.9444	2.1667	2.1111	3.94444		0.829266	4.53112
16.3224	6.4444	7.2778	6.1111	6.1111	3.2778	5.0556	3.1111	4.7222	2.2222	8.5556	3.5556	3.7222	5.5556	6	7.3333	3.0556	7.2778	5.9444	2.7778	5.1111	4.6667	2.7778	2.0556	2.9444	3.55556		0.835367	4.76889
16.4415	5.5556	3.1111	5.5556	5.1667	4.3889	3.8889	5.5556	4.1111	5.4444	7.4444	6.3889	3.2778	3.4444	5.3333	7.6667	2.1111	2.1667	5.2778	5.0556	4.2778	2.4444	4.3889	3	1.9444	2.27778		0.841462	4.37112
16.5606	4.7778	4.1667	6.7778	2.0556	6.8889	2.7222	5.8889	3.8333	4.6111	3.7222	3.7222	2.1667	4.6667	4.3333	4.1667	3.4444	4.8333	4.2778	5.2778	4.2222	4	2.8889	1.8889	1.9444	4.55556		0.847558	4.07333
16.6798	4.3889	6.2778	5.8333	5.2222	3.7778	3.3333	4.0556	4.7778	3.9444	10.5556	3.8889	5.2222	6.6667	2.3889	2.5	1.9444	5.2222	2.3333	5.6111	4.3889	2.1111	2.0556	3.7222	3.0556	2		0.853658	4.21111
16.7989	6.0556	5	10.6111	2.7222	3.6111	9	4.6111	5.2222	2.2778	3.5	4.2778	4	6.2778	4.4444	2.6667	1.8889	3.1111	4.7778	4.2222	2.1667	3	1.9444	3.8333	2.4444	2.22222		0.859754	4.15555
16.9181	9.3889	4.5	7.1667	3.6667	5.2222	5.4444	3.4444	3.0556	2.7778	3.9444	3.6111	3.1111	7.2778	4.9444	4.3333	2	4.5	5.7778	6.7222	2.3333	2.5	2.1111	2.4444	2.1111	3.61111		0.865854	4.23999
17.0372	11.5	2.9444	6.3889	5.2222	5.1111	4	2	5.8333	2.6667	6.8333	5.0556	2.3333	4.9444	2.0556	1.9444	5.3333	2.7222	5.7778	3.2222	4.5556	3.1111	1.9444	2.8333	2.5556	3.83333		0.87195	4.18888
17.1563	4.2778	6.2222	7.2778	2.3889	5.8333	4.1111	3.8889	6.7222	5.8333	4.2222	5.9444	7.5556	6.9444	3.3889	3.1111	5.3333	5.2222	5.0556	4.7778	3.9444	2.4444	1.8889	3.6667	1.7222	2.88889		0.878045	4.58666
17.2755	3.8889	3.0556	6.9444	4.0556	4.9444	2.5556	1.8333	4	5.8333	8.5556	4.9444	6.0556	5.5	1.8333	2.2778	2.1667	3.2222	3.7778	5.1111	2.5	2.8333	2.3889	2.8333	2.7778	2.55556		0.884146	3.85778
17.3946	6.1667	4.6111	5.0556	3.8333	4.3889	4.0556	4.6667	2.8333	3.7222	8.3333	5.4444	8.3889	2.2222	3.5	2.2222	2.5	3.8333	3	6.6111	2.4444	4.1111	2.6111	1.9444	2	4.27778		0.890241	4.1111
17.5138	3.4444	6.9444	8.5556	4.9444	3.4444	5.9444	6.8333	5.8889	3.3889	4.2222	4.8889	5.0556	7.1667	5	2.3333	1.8333	2.1667	1.9444	4.8333	4.5556	3.1111	1.9444	1.9444	2	4.5		0.896342	4.27554
17.6329	6.8889	4.7778	2.7222	4.5556	3.7222	6.1111	2.8889	4.5556	5	7.8333	5.5556	2.4444	2.8333	2.0556	2.1667	2.7222	4.7222	2.4444	3.2778	1.9444	4.6111	3.2778	2.5556	2.8889	2.05556		0.902437	3.78445
17.7521	4	6.6111	4.6667	1.9444	4.9444	2.8889	4	4.9444	3.8333	4	3.1667	7.2222	4.6667	2.5	2.0556	2	4.1111	2.5	5.6111	2.3333	3.2222	2.6111	3	1.8333	2.88889		0.908538	3.66222
17.8712	4.3333	2.7222	5.1111	4.1667	3.0556	3.9444	3.9444	4.5556	4.0556	4	4.1667	7.1667	4.4444	3.0556	2	3.0556	2.1667	2.5	3.7778	3.9444	5.2222	2.1111	2	1.9444	1.83333		0.914633	3.57111
17.9903	4.6667	4.3889	8.2222	2.0556	3.3889	4.2778	5.4444	8.1667	3.0556	3.6111	3.5556	7.1667	2.8333	4.3333	2.6111	1.8889	4.6111	2.5	2.7778	4.1667	3.6111	1.9444	2.5556	3.1111	2.44444		0.920729	3.89556
18.1095	2.6667	5.1667	4.1667	4.3333	3.5	3.4444	3.6111	8.7778	4.0556	4.5	5.2222	3.8333	4.8889	1.8333	1.9444	1.8889	1.9444	1.8889	2.4444	2.5556	2.6111	2.8333	2.9444	2.7778	1.83333		0.926829	3.42666
18.2286	3.9444	5.6111	5.6667	4.7778	4	4.9444	4.3333	5.0556	3.7222	3.0556	3.7222	3.7778	5.2222	2.1111	1.8889	2.0556	3.3333	2.1667	3.1667	1.6667	2.0556	2.0556	2.1111	1.8333	2.77778		0.932925	3.40223
18.3478	5.8333	6.1111	7.3333	3.7778	2.8333	4.1111	6.3333	4.7222	4.7222	6.3333	2.2778	5.2778	3	2	2.0556	2	2.4444	5.0556	3.3333	2.1111	4	1.8889	2.0556	2	2.61111		0.939025	3.76888
18.4669	2.7222	2.6111	2.7222	2	4.6111	4.7778	3.7222	7.0556	4.7222	3.0556	5.6111	2.5556	2.8333	3.5	3.0556	3.5556	3.0556	3.7222	2.3333	2.9444	2.3333	2.3333	1.8889	2.9444	5.33333		0.945121	3.44
18.586	3.8333	5	2.2222	4.1667	3	4.4444	4.0556	4.4444	3.6111	6.4444	3.8333	7.2778	1.6667	2.0556	4.5556	3.0556	3.5556	2.6111	1.7778	2.4444	3.0556	2.1111	1.8889	2.0556	2.05556		0.951216	3.40889
18.7052	4.8889	6.3889	2.5	4.7222	6.4444	4.3889	2.9444	3.2222	4.5	4.1111	4.0556	2.7778	3.1667	2	2.1667	2.1111	3.2778	1.8333	1.8889	2.7222	2.1111	2.0556	2.7222	3	1.94444		0.957317	3.27778
18.8243	3.3889	5.8333	4.4444	3.3889	3	6.6111	3.1667	2	5.1111	2.1667	3.5556	3.3889	2.6667	2.9444	1.9444	2.5556	2.1111	2	2.5556	2.7222	2.5556	2.0556	1.9444	1.9444	4.66667		0.963412	3.14889
18.9435	3.6111	5.6667	3.7778	2.7778	2.7778	2.7222	2.7778	4.8889	3.4444	2.9444	3.2222	2.1667	2.6111	3.8333	2.0556	2.6667	2.5	3.5	3.0556	2.7222	2.5	2.0556	2.2778	2.0556	2.33333		0.969513	2.99779
19.0626	4.6111	3.7778	3.5556	2.0556	3.5556	2.2778	5.5556	3.1667	2.3333	2.3333	2.2222	2.3889	2	1.9444	2.4444	2.5556	2.5556	2.1667	2.6667	1.9444	2.3889	1.8333	2.7222	2	3.05556		0.975608	2.72445
19.1817	4.2222	2.1111	4.3333	4.0556	1.9444	4.3889	6.6667	3.2222	6.1111	2.5556	3	2.0556	3.4444	1.9444	3.0556	3.8889	1.8889	2	1.9444	2.7222	2.1667	2.8889	4.4444	2.2778	3.11111		0.981703	3.21778
19.3009	3.1667	3.5	4.1667	5.8889	3.3333	3.1667	5.0556	3.1667	2.7778	3.1667	2	2.0556	2.1111	2.4444	3	3	2.1111	2.1111	2.1667	2.0556	2.5	2.1667	2.0556	2.1111	2.38889		0.987804	2.86668
19.42	3.2222	3.1111	3.7222	5.4444	2.1111	2.2222	6.8889	2.0556	2.8889	3.1111	2.8889	4.2222	2.9444	1.8889	4.6667	2.0556	2.3889	2.8889	2.1111	1.8889	2	2.1111	1.9444	2.1111	2.61111		0.993899	2.94
19.5392	2.0556	4.7222	4.6667	4.2222	4.7222	3.6111	5.4444	2	2.0556	3.2222	2.0556	2.6111	2.0556	2.2222	2	2	2.5556	2.6667	2.1667	3.6111	2	3.3889	2.2778	3.1111	2.05556		1	2.94001

## Sheet: Image11
X0	Y0	Y1	Y2	Y3	Y4	Y5	Y6	Y7	Y8	Y9	Y10	Y11	Y12	Y13	Y14	Y15	Y16	Y17	Y18	Y19	Y20	Y21	Y22	Y23	Y24	Y25	Y26	Y27	Y28	Y29		Ap-Basal	Avg intensity
0	7.8889	11.0556	9.2778	5.1667	6.6667	17.7778	15.5	12.0556	20.7778	20.2222	13.3333	11.8889	15.7778	8.1667	3.5	7.7778	16.8333	11.2778	16.5556	13.4444	10.2778	3.3333	7.3333	8.1111	6.5	12.5556	13.6667	1.9444	8.2778	10.0556		0	10.9
0.1191	2.5	6.6667	8.8889	7.8889	13.0556	14.0556	16.2778	14.7778	10.9444	25.9444	15.6111	14.8889	12.5	5.0556	8.2222	8.5	16.3889	11.6111	19.5556	10.8889	15	6.2778	10.7778	11.4444	5.6111	10.1667	5.8889	5.8333	7.8889	7.7222		0.00502339	11.0278
0.2383	6.7778	10.8333	9.3889	12.4444	14.9444	13.8333	14.3333	15.7222	22.8889	29.2778	17.7222	17.3333	17	5.5	7.0556	10.5	7.5	13.2222	16.5	9.7222	12.5	7.4444	9.5556	12.7222	8.3889	7.6111	8.8889	7.7778	7.7778	7.0556		0.010051	12.0741
0.3574	6.8889	9.2222	7.3333	8.7222	12.2778	12.6667	13.2778	17.5556	15.4444	13	21.7778	13.2778	10.9444	6.3333	5.5	10.6667	6.8333	7.1667	8.0556	10.7778	11.9444	12.7222	6.4444	7.6667	9.3333	10.4444	11.6667	6.6111	2.1111	9.8889		0.0150744	10.2185
0.4766	8.7778	7.4444	7.9444	8.6667	12.5556	11.9444	6.3333	20.8889	25	14.7778	23.9444	9.3889	13.4444	6.8333	11	11.6667	11.2222	4.9444	6.5556	8.3333	11.8333	8.3333	6.2778	9.6667	5.5556	6.1111	13.4444	4.5	3.4444	7.8889		0.020102	10.2907
0.5957	13.7778	12.2222	9.0556	7.3333	13.2778	13.7778	9.8333	12.1667	15.8333	18.3889	26.3889	8.5556	12.9444	8.3333	10.3333	13	15.5	9.6667	9.5	7.7778	11.9444	8.5	5.4444	11.7222	8.2222	7.8889	7	6.3333	6.5556	5.1111		0.0251254	10.8796
0.7148	9.2222	11.8333	4.8889	4.2222	10.5556	20.5	13.8889	15.0556	13.1667	23.8889	31.1667	12.4444	15.1111	7.8333	5.7222	10.1111	19.6111	10.5	13.5	13.2222	12.8333	12.7778	8.7778	12.6111	8.9444	7.8333	11.3333	8.2222	7.7778	4.6111		0.0301488	12.0722
0.834	10.3889	9.1667	10.1667	5.7778	7.9444	14.1111	13	12.0556	19.6111	15.2778	27.2222	15.4444	11.3333	4.5	6.6667	11.1111	15.8889	12.9444	10.0556	11.7778	5.2778	10.3333	6.2778	10.6111	10.1667	14.5556	10.1667	7.0556	6.4444	8.1667		0.0351764	11.1167
0.9531	9.3889	13.7778	8.1111	9.7222	6.8889	18.3333	15.3889	10.2222	24.5556	18.9444	28.5	13	15.2222	6.9444	7.6111	12.8889	14.2222	12.8889	11.3333	10.1111	10.7222	5.7778	14.7222	4.7778	7.9444	8.9444	9	5	8.6667	12.8889		0.0401998	11.8833
1.0723	6.6111	8.8889	11.7778	5.1667	14.3333	14.1111	16.3889	10.3889	21.9444	15.3889	29.8333	16.7778	22.1667	8.9444	5.9444	14.2778	13.8889	12.3333	12.8333	7.3889	8.4444	8.0556	4.5556	9.2778	5.2778	5.8333	7	9.7222	6.6667	13.8333		0.0452274	11.6019
1.1914	8.7778	8	13	9.8889	13.2222	16.6111	14.8333	13.4444	28.8333	14.6111	30.2778	15.6667	18.7778	4.6111	9.1111	12.2222	12.9444	8.1667	7.2222	11.2778	14.2778	6.0556	11.0556	5.1111	6.9444	5.3889	9.8889	17.9444	7.7222	4.3333		0.0502507	12.0074
1.3106	9.8889	11.1667	13.3889	9.1667	8.5	19.1111	17.6111	18.5556	24.7778	16.6111	23.2222	15.7222	14.9444	10.1667	6.3333	6.3889	11.7222	9.6111	7.5556	13.7778	16.5556	6.3889	8.0556	6.3889	5.6111	8	6.0556	12.4444	13.1111	8.2778		0.0552784	11.9704
1.4297	8.8333	15.7778	11.6111	8.9444	11.6667	17.7778	12.1667	20.8889	27.2778	14.2222	29	14.2222	16.2222	7.7222	8.1111	12.3889	9.8889	10.3889	8.8889	10.5556	10.0556	6	5.5	7.5	6.3889	9.8333	6.0556	8.7778	6.7778	7.3889		0.0603017	11.6944
1.5488	9.9444	12.6111	15.6111	10.8889	10.2778	15.6667	15.2222	13.7222	15.6111	18.2778	30.8333	15.5556	11.3889	3.6111	11.1667	8.9444	13.4444	8.7778	6.5556	12.8333	9.3889	6.7778	7.7222	11.8889	6.5	7.7778	8.2222	14.3333	4.3889	6.7778		0.0653251	11.4907
1.668	8.7778	11.8889	12.9444	13.8889	14	13.6667	9.3333	11.7778	17	15.7222	21.1667	9.2778	18.1667	5.7778	10.8333	8.2778	13.5556	7.3333	8.6111	13	10.6111	5.7222	5.5556	13.3333	4	8.3333	7.6111	15.3889	3.9444	10.1667		0.0703527	10.9889
1.7871	12.7222	14	9.5	13.0556	9.5556	15.7222	11.8333	11	18.6111	16.6667	27.8333	16.0556	18.1111	9.2222	11.9444	10.3333	20.1667	5.4444	13	15.8889	10.7222	8.8889	6.7778	10.9444	9.4444	9.9444	9.4444	11.5556	6.1667	10.8889		0.0753761	12.5148
1.9063	8.7222	16.2778	9.3889	12.9444	9.5	16.2778	18.8889	14.7222	28	24.6111	32.5556	12.8889	14.1667	9.5	11.3889	17.1667	11.8333	11.7222	11.4444	10.3333	9.2222	9.6111	5.2778	8.9444	6.1667	11.4444	8.0556	13.4444	9.5	10.8333		0.0804037	13.1611
2.0254	11.2222	19	12.3889	10.3333	10.9444	11.8333	11.0556	13.0556	21.8333	15.5556	17.8889	23.5556	24.6667	6.1111	10.1111	30.8333	11.2778	13.4444	9.8333	9.3889	19.4444	5.0556	6.0556	11.3333	9.8333	10.7222	11.3889	9.4444	4.1111	7.2222		0.0854271	12.9648
2.1445	10.1667	16.5	11.8889	12.7222	7.8333	11.1111	13	18.7222	19.2778	20.1667	22	21.2222	20.4444	5.7222	11.2778	17.6111	12.8889	16.6667	12.5	8.8333	12.3333	13.2778	6.2222	7.1667	10.2222	7.5556	10	16.5	7.2222	6.2222		0.0904505	12.9093
2.2637	14.3333	12.0556	15.9444	7.8333	11.5556	11.1667	12.9444	18.3889	20.2778	15.7222	21.5	18.8333	21.3333	6.2778	16.7222	19.3889	15.7222	14.2222	8.9444	8.0556	13.1111	8	9.5556	6.6111	5.6111	10.9444	14.2778	12.1667	7.3889	11.2778		0.0954781	13.0056
2.3828	14.3889	12.8333	15.8889	7.8333	14.2778	14.7222	13.1667	12.5	39.7222	19.9444	19.1667	13.5	18.8889	11	9.4444	19.7222	16	16.7778	15.6111	13.4444	16.6667	11	3.6111	8.1667	9.3333	10.8333	13.3889	9.2778	7.5	10.3333		0.100501	13.9648
2.502	14.1667	17.8889	12.3333	12.3333	9.1111	11.8889	16.1667	17.0556	35.3333	10.4444	25.7222	17.8333	21.4444	6.3889	5.9444	17.7778	12.4444	22.1111	11.2222	9.8333	15.0556	12.1667	7.7222	8.5	7.3333	11.6111	8.8333	11.9444	5.6111	11.7222		0.105529	13.5981
2.6211	26.4444	16.0556	11.0556	11.3333	10.6111	9.1667	21.0556	16.6667	29.8889	15.3889	18.1667	18.7222	24.9444	11.2222	9.6667	16.2222	6.8333	22.8333	15.0556	12.1111	15	5.2222	13.8889	13	15.9444	9.1111	5	15.8889	6.7222	5.4444		0.110552	14.2889
2.7402	13.8333	14.2778	8.1667	11.5	11	16.7222	24.2222	16.5556	23.4444	13.5556	22	14.8889	17.7222	7	11.3889	15.0556	11.0556	17.2778	10.1111	16.5556	15.6111	9.0556	7.5556	5.3889	8.5556	7	11.3333	6.2778	5.6111	6.2778		0.115576	12.6333
2.8594	11.6111	11.9444	14	10.1111	15.8889	15.6667	30.1111	13.3333	30.2222	16.5	26.1111	11.4444	20.5556	6	12.9444	19.3333	20.9444	16.7222	15.1111	14	17.1667	6.1111	6.1111	3.1667	6.1667	8.6111	7.6111	8.9444	5.7778	9.2222		0.120603	13.7148
2.9785	13.3333	18.1111	9.5	5.8333	21.1667	15.5	36.1111	21.8889	21.4444	15.4444	26.6111	12.7778	21.7222	8.8333	9.3333	10.2222	14	14.9444	21.2778	15.1111	20.9444	11.4444	6.6667	7.0556	6.9444	5.6667	12.2222	9.6111	5.3889	11.5		0.125627	14.3537
3.0977	7.7778	14.6667	14.5556	7.2778	10.6667	15.0556	47.8333	12.4444	27.8333	12.2222	27.9444	19.1111	25.2222	9.3889	11.3333	15.5	24.6667	12.5556	11.5	13.7778	17.3333	10.8889	10.1667	9.5	7.0556	8.1667	15.3889	9.8889	3.8333	7.0556		0.130654	14.687
3.2168	13.1667	18.1667	7.6111	10.0556	13.9444	19.7778	47.1667	15.8333	26.9444	19.2222	25.7778	20.4444	24.1667	7.8889	6.9444	9.6111	14.0556	9.7778	12.7222	10.3889	20.5	7.5	10	6.3889	2.4444	12.6111	15.4444	12.6667	5.9444	9.7222		0.135678	14.563
3.336	15.2778	12	10.6111	5.7222	8.6667	14.5	44.7222	15.2222	33.2778	17.9444	24.2222	24	11.8333	7.3333	9.5	16.8333	11.5	19.3333	16.1111	13.9444	15.1111	10.8333	11.1111	2.5556	6	12.1667	8.2222	7	5.7222	7.1111		0.140705	13.9463
3.4551	16.6111	16.0556	14.6667	6.8889	11.5	14.7778	50	7	35	17.3889	22.2222	20.3889	26.6667	10.1667	15.4444	19.4444	24.4444	10.7778	16.4444	16.9444	16.3889	3.8889	8.6111	7.7778	2.6111	12.1667	12.7778	4.1111	5.4444	9.1667		0.145729	15.1926
3.5742	16.9444	14.7222	17.5	7.3889	10.7778	18.9444	31.5556	17.5	31.8333	14.8889	11.1111	20.4444	21.1667	10.8889	14.7778	13.7778	17.7222	18.3333	19.6111	18.5556	16.5556	8.2222	8.1667	8.7778	7.8333	13.5	14.3889	6.8333	4.1667	7.3333		0.150752	14.8074
3.6934	12.6667	17.9444	13.5	14.8889	10.8889	32.2778	45.4444	24.4444	24.4444	17.6111	12.9444	22.7778	18	6.8889	9.5	14.9444	15.1111	20.7222	21.5	19.2778	15.8333	5.3889	8.3333	7.5	6.8889	12.7778	9.5	8.0556	6.8333	6.4444		0.15578	15.4444
3.8125	19.2778	10.5	9.6111	12.5	9.3889	25	42.5556	22.5556	30.9444	15.7222	19.6667	25.5	14.1667	6.0556	8.7222	13.3333	13.8889	25.4444	21.0556	21.9444	14.7222	11.2222	13.1667	14.3333	10.8333	9.5	11.1111	9.6111	5.2778	8.6111		0.160803	15.8741
3.9317	17.4444	16.8889	13.6667	8.0556	9.6111	27.3333	33.7222	18.1667	24.0556	22.3333	17.5556	15.1667	17.6667	10.1667	10.8889	14.1111	12.6111	22.2222	14.9444	13.8889	8.4444	4.3333	8.3333	11.6667	9.1667	16.5	13.1667	5.3333	6.5556	6.5		0.165831	14.35
4.0508	25.7778	12.1667	16.3333	10.3333	10.5556	26.1111	28.1111	25	34.8889	26.5556	14.1111	14.0556	19.3889	12.2778	7.2222	14.6111	21.2778	24.8333	18.1667	22.1111	13.5	5	12.5	5.8889	9.9444	12.5	9.1111	4.7222	6.1667	4.5		0.170854	15.5907
4.1699	14.3889	22.1111	14.4444	9.1667	13.5	27.2778	36.4444	13.7778	28.1667	21.2222	25.6667	21.1111	20.1667	10.5556	10.7222	17.5556	22.4444	21.2222	17.9444	13.3889	13.2222	9.3333	5.9444	11.2222	4.9444	17.3333	13.7222	4.3889	3.8333	8.2222		0.175878	15.7815
4.2891	28.0556	17.8333	9.7778	8.8889	11.7778	38.0556	32.7222	12	22.7778	18.2778	12.2222	20	17.6667	12.6111	11.1111	13.1111	18.8333	18.1111	18.4444	16.1111	13.3889	9.6111	11.2222	12.8889	4.1667	16.2778	11.4444	5.2222	2.8889	7.7778		0.180905	15.1093
4.4082	15.3889	17.8889	16.4444	8	14.6667	28.3889	23.2778	14.2222	32.0556	20.9444	20.4444	14.3333	18.8333	12.0556	4.5556	13.1111	25.8333	16.6111	12.1667	17.5556	11.4444	4.5556	9.5556	9.3889	7.2222	17.7778	6	6.1111	8.6667	4.4444		0.185929	14.3982
4.5274	22.0556	22.4444	19.7222	12.5556	12.9444	19.1667	15.7222	13.7222	30.5556	22.5556	14.8889	19.2222	13.7222	6.1111	10.7222	8.1667	18.9444	16.4444	11.6111	13.1111	14.8889	6.5556	6.8333	7.7778	6.8333	10.3889	6.7778	3.4444	4.2222	6.8333		0.190956	13.2981
4.6465	8.7778	15.5	12.3889	9.6111	16.4444	27.3889	18.1111	12.2778	29.3889	16	12.3889	16.2222	23.6111	13	5.6111	11.1667	15.3333	17.2778	13.8889	15.6111	15.6111	12	8.9444	10.3889	5.5556	11.7778	13	6.5	1.5	5.8889		0.19598	13.3722
4.7657	13.1111	21.5556	10.3889	9.8889	8.7222	20.1667	13.7778	13.4444	27.6111	20.8333	13.8333	18.4444	16.2222	12.7222	8.3889	15.7778	19.7778	21.3333	9.7222	16.5	8.8889	6.1111	10.3889	7.2222	7.7778	11.7778	8.1111	9.6111	3.6667	7.5		0.201007	13.1093
4.8848	15.2222	18.2222	16.5556	13.9444	10.3333	23.0556	11.3889	16.1111	17.4444	20.6667	16.5556	17.1111	16.5	11.8889	10.7222	8.7222	13.7222	20.7778	15.2222	11.9444	14.6111	8.1667	12.6667	9.6111	5.6667	13.1111	8.6111	4.1111	4.1111	6.2778		0.206031	13.1019
5.0039	14	19.5	22.2778	5.7222	7	16.3889	19.3333	16.9444	27.2778	22.1111	17	22.6111	17.3333	12.8889	7.7778	10.3333	13.7222	27.6667	8.5556	18.4444	20.5	8.6667	13.8889	8.7778	10.4444	9.4444	7.6667	4.2222	3.4444	5.9444		0.211054	13.9963
5.1231	12.2222	20.8333	21.8889	16.5556	12.5556	17.7222	18.8333	18.8889	18.6667	13.6667	17.5556	16.6667	17.1667	11.7778	6.0556	10.6111	14.4444	25.2222	16.0556	16.7222	13.4444	12.7778	11.8333	13.1667	12.6111	7.7222	2.9444	7.0556	4.7778	5.6111		0.216082	13.8685
5.2422	11.3333	21.3333	19.7222	15.7778	7.3889	21.6667	21.7222	14	13.6111	18.1111	19.4444	14.0556	22.0556	10.2222	11.2222	7.8889	18	16.4444	18.4444	11.3889	12.1667	11.3889	10.2222	8.1667	14	9.9444	5.9444	5.6667	5.8889	3.5		0.221105	13.3574
5.3614	14.5556	20.5	18.7778	12.3333	7.5556	23.6111	14.8889	12.7222	15.1667	25.5556	17.3333	14.4444	17.7778	16.5556	5.1111	7.7778	16.0556	18.1111	17.1667	15.1667	15.4444	16.7222	8.8333	10.3333	11.1111	11.8889	7.8889	4.1667	8.6667	10		0.226133	13.8741
5.4805	17.6111	12.7222	25.1111	13.2222	15.9444	20.1667	12.7778	9.6111	14.7778	13.8889	23.7778	11.6667	19.8333	7.7222	7.5556	9.6667	20.2778	21.1111	17.7222	20.3889	11.8889	16.2222	11	9.2222	13.6667	11.6111	5.8333	11.8889	3.3333	4.8333		0.231156	13.8352
5.5996	18.8889	10.3333	6.8889	10.8333	11.5	21.1111	23	14.2222	14.7222	14.0556	21.2778	14	16.0556	14	7.5556	9.8333	9.8333	16.5	20.3889	17.7778	19	16.1667	9.7222	10.2222	7.7222	10.5556	3.3889	7.5	2.6111	5.6111		0.236179	12.8426
5.7188	14.3889	11.7222	15.8333	17.1667	11.6667	16.1111	14.0556	14.4444	18.5	21.9444	16	15.5	11.2778	8.1111	7.3333	15.8333	15.0556	16.3889	13.8333	20.4444	20.6111	18.2222	12.6667	10.3889	7.6667	13.1667	5.5	6.6667	7.0556	4.0556		0.241207	13.387
5.8379	11.8333	12.6111	15.5	12.6667	12	13.3889	18.0556	12.4444	15.3889	16.7778	14.2222	9.1111	15.2222	12.5	7.4444	16	13.1667	18.3333	16.0556	13	20.3889	11.8333	11.6111	9.3889	16.9444	15.1667	9.5	5.5	8.3889	1.2222		0.24623	12.8556
5.9571	11.8333	9.0556	9.5	10.8333	14.4444	20.8889	12.6667	14.6667	14.4444	23.0556	23.2222	4.9444	9.5556	17.1111	4.4444	14.6111	16.4444	15.8889	16	13.3889	19.1111	9.2778	17	8.5	24.1667	6.6667	7.4444	6.3333	3.6111	5.8333		0.251258	12.8315
6.0762	19.7222	9.1667	10.7778	13.9444	12.9444	20.8333	13.1111	13.6111	15.0556	20.6111	19.2778	11.5556	16.2778	5.8889	11.3333	11.6111	8.2222	15.6667	16.9444	27.3889	16.1667	7.2778	13.5	6.3333	13.6667	7.1111	5.8333	5.8333	7.8889	4.6667		0.256281	12.7407
6.1953	12.8889	9	14.2778	14.6111	4.3889	21.3889	15.6111	16.2222	15.8889	19.3333	11.8333	13.3333	14.7778	9.1667	7.0556	12.3333	12.2222	15.9444	18.9444	23.3333	21.5	7.4444	6.6667	9.3889	16.5	10.1667	4.2778	7.8333	6.2222	6.2222		0.261305	12.6259
6.3145	13.5556	9.5556	12	9.2778	14.6667	12	12	14.2778	21.7778	17.0556	16.1667	6.4444	8.8889	6.7222	4.7778	14.7222	9.5556	10.8333	16.4444	22	9.7778	11.3889	5.6667	9.9444	24.1667	7.7778	5.7778	4	1.3333	5		0.266332	11.2519
6.4336	13.8333	7	8.9444	7.6667	8.1667	16.5556	19.7778	12.5556	13.5	20.5	23.7222	12.3889	11.7222	8.6667	4.2778	14.4444	9.3889	15	16.4444	18.6111	18.6111	13.8333	12.1667	8.7222	14	6.9444	6.3889	4.7222	5.6111	6.0556		0.271356	12.0074
6.5528	13.7778	9	5.8889	7.1111	8.8889	10.5556	18.0556	17.8889	17.4444	27.8333	20.1667	8.0556	9.7778	9.7222	5.6111	10.9444	7	16.3889	20.7778	29.0556	24.1111	6.7222	12.7778	7.6111	14.4444	16.3889	6.8889	5.5	3.3333	6.4444		0.276383	12.6056
6.6719	13.9444	8.8889	10.5556	6	5.0556	21.1111	16.3889	13.7778	16.0556	23.7778	23.0556	10.1111	10.0556	3.3889	5.3889	7.3333	12.9444	15.8333	14.2778	31.2778	20.5	17.1667	10.2778	7.3333	14.0556	10.2778	3.4444	3.9444	3.3333	3.2778		0.281407	12.0945
6.7911	13	12.7222	5.7778	6.9444	6.6667	14.5	12.7222	9.6667	6.6111	17.2778	21	8.6667	13.7778	5.5	4.5	7.1667	13.1667	13.9444	11.0556	21.0556	26.7222	9.2778	12.7778	12.3889	16.6111	14.5	12.1111	3.1667	4.7778	3.8889		0.286434	11.3982
6.9102	13.5556	12.3889	7.2222	10	8.9444	14.0556	14.1111	14.5	8.1667	16.8889	21.4444	8.7778	10.9444	9.0556	3.3333	8.8333	13.2222	18.1667	18.5	25.8889	12.8889	10.7778	12.6667	8.7778	14.1667	14.2778	8.0556	3.7222	4.7222	4.8333		0.291458	11.763
7.0293	19.2222	4.9444	8	4.3889	6.8333	13.3889	4.9444	15.7222	12	17.5556	14.3333	12.6667	10.5	7.6111	2.7778	7.9444	9.9444	17.6667	10.8333	19.3889	19.2222	7.9444	7.6667	8.5	9.7778	12.8333	7.1667	4.7778	2.2222	4.3333		0.296481	10.1704
7.1485	13.7222	8.3889	8.5	7.8333	5.8889	11	13.1667	12.8889	17.2222	17.3333	15.0556	9.4444	9.8333	15.5556	3.8333	6.8333	6.1667	17.1667	11.2222	19.6111	15	5.9444	8	14.2778	12.7222	11.1667	8.6111	4.2222	4.1111	6.0556		0.301509	10.6926
7.2676	12.2778	8.0556	8.8333	8.2778	9.6667	14.3889	9.6111	9.1667	17.3333	20.7222	17.7778	5.6111	6.8333	6.5	9	10.3889	9	19.1667	16.6111	11.9444	11.8333	9.1667	6.2222	9	19.2778	17.6667	5.6667	3	6.3889	6.4444		0.306532	10.8611
7.3868	9.1667	6.2778	8.4444	3.3333	9.6111	16.1111	12.6111	11.5	6.7222	14.8333	10.5556	8.9444	10	5.1667	5.9444	7.8333	10.8889	15.5556	12.3889	8.9444	13.3889	10.5	9.3333	12.8333	14.1667	8.0556	9.5556	4.5	5.1667	4.5556		0.31156	9.56296
7.5059	6.9444	13.3889	3.4444	6.8889	9.2778	9.5556	12.4444	9.0556	9.2778	13.2778	14.9444	5.3889	10.1111	4.8333	5.5	6.8333	14.5556	16.2778	15.8333	10.2778	13	8.2778	15.9444	12.1667	15.8889	8.1667	3.7778	3.9444	7.3333	4.4444		0.316583	9.70185
7.625	8.6667	6.2222	7.2778	3.7778	6.2222	12.2222	12.2778	9.5	16	9.5556	17.5	9.1667	12.7222	5.4444	8.3889	10.6111	9.1667	18.2778	11.2222	20	14.8333	16.1667	5	16.3889	11.4444	15	6.7222	4.3333	2.0556	4.5		0.321606	10.3556
7.7442	10.7778	10.6667	9.7222	5.3889	5.5556	9.8889	14.3333	6.7222	8.1667	12.5556	16.6111	7.2778	10.2778	9.7222	3.3889	16.0556	10.1667	17.7222	14.0556	19.9444	11.9444	6.5556	6.0556	15.8333	10.5556	17.3889	4.8889	5.1111	2.6667	2		0.326634	10.0667
7.8633	7.3333	6.6667	6.8889	6.0556	6.0556	10	8.6111	6.5556	12.5556	10.9444	10.5	7.3333	6	6.4444	5.1111	5.7778	11.2222	16.8889	18.3889	14.3889	13.1667	10.3889	11.4444	8.9444	11.8333	15.3889	6.0556	4.4444	5.1111	2.7222		0.331657	9.10741
7.9825	9.4444	13.1667	11.9444	6.8333	10.1667	9.7222	8.6667	7.5	12.7778	15.3889	15.7778	9.6111	6.5	10.2778	2.7222	7.3333	7.6667	17.6111	17.3333	21.4444	12	7.2222	11	8.3333	6.6111	10.9444	12.2222	4.4444	4.7778	5.2222		0.336685	10.1555
8.1016	12.1667	6.3889	7.3889	5.1111	3	9.2222	8.7778	5.4444	10.5	11.8889	10.6667	7	6.8889	9.1667	3.2222	3.7778	9.4444	13.9444	10.2778	12.5556	15.6111	11.7778	11.5	10.0556	6.7222	9.2222	3.4444	4.3333	4.8889	6.3333		0.341708	8.35741
8.2207	5.5	12.3889	4.3333	7.6667	6.1667	6.7778	7.3333	13.2778	7.9444	13.5556	15.2222	8.7222	5.6111	7.0556	5.6667	7.4444	8.8333	12.4444	7.2222	9	14.5	10.1667	12.3333	8.4444	8.8889	12	4.8333	4.5	1.9444	2.2222		0.346732	8.39999
8.3399	11.3333	11.3333	9.2778	5.5	6.3889	5.8333	4.7778	11.5	11.5556	13.8333	17.1667	7.7222	10.6667	6	4.1667	5.1667	8.2222	14.8889	9.8889	18.8333	11.5556	10	8.2222	9.7222	10.3889	8.2778	5.1667	5.6111	4.9444	3.5		0.351759	9.04815
8.459	5.2222	6.1111	9.7222	3.5556	3.3889	9.3333	15.5	9.3333	10.1667	9.3889	18.3333	9.7778	11.0556	7.7222	4.6667	5.7778	11.1667	8.8333	8.5	18	12.1667	9.5556	14.3889	6.4444	10.6111	6.9444	6.3889	3.0556	3.6667	6.7222		0.356783	8.85
8.5782	13.1667	5.7778	7.8889	8.1111	7.6111	4.2778	5.3333	12.5556	9.6667	12.1667	14.8889	11.2222	7.8889	7.0556	3.3333	2.6111	7.5	12.2778	9.1111	11.5556	13.4444	7.2222	15.1667	6.7778	9.7222	6.9444	4.7222	6.3889	2.8333	6.3889		0.36181	8.45371
8.6973	10.0556	3.6111	8.8333	5.5556	4.5556	10.2778	5.4444	8.6667	5.7778	9.9444	13.5	4.2778	5.2222	6	4.3889	4.1111	5.8889	6.7222	8.7222	13.2778	11.7222	10.6667	10.5556	8.7778	10.9444	11.0556	7	1.8333	4.9444	3.8889		0.366834	7.54074
8.8165	6.1667	8.0556	7.8889	6.5	5.4444	6.5556	8.8333	3.5556	4.9444	9.2778	15.1111	9.2222	7.8333	4.2222	2.6111	3.2778	3.2222	6.2778	8.1111	12.3889	20.1111	7	13	9.5556	10.9444	7.4444	3.4444	2.2778	4.1667	2.6111		0.371861	7.33518
8.9356	7.8333	9.3333	5.1111	3.2222	3.2778	6.6667	10.5556	6.0556	5.4444	15.1111	11.2778	8.2778	3.3333	5	3.1111	2.9444	12.2778	7.1111	8.6667	15.8889	8.8333	14.7778	6.5556	9.5556	5.8889	8.8333	3.3889	3.6111	2.2778	4.2778		0.376885	7.28334
9.0547	2.8333	5.8889	9.8889	6.2222	5.7222	4.7222	7.2222	11.8333	8.7778	13.9444	11.2778	10	7.1667	4.7222	1.4444	2.2778	9.5	6.8333	5.0556	11.5556	6	8.3889	7.3333	9.5556	10	5.5556	3.8889	2.4444	4.3889	2.6667		0.381908	6.9037
9.1739	6.7778	5.5556	5.6667	3.3889	5.2778	7.6667	11.4444	4.3333	5.7222	14	9.5	6.0556	7.4444	2.2778	3.8333	3.9444	9.8889	8.4444	11.6111	9.7778	13.7778	6.8889	9.6667	9.3889	7.3889	4.4444	3.3333	2.1111	2.8333	4.3333		0.386936	6.89259
9.293	4.0556	4.4444	4.7222	6.2778	6.8889	5.5556	10.5556	8.6111	6.2778	15.3889	9.9444	9.0556	6.2778	5.2778	2.4444	4	6.2222	3.1111	13.5	12.1111	6.7222	7.3889	9.8333	5.8889	3.8333	6.3889	4.0556	3.7222	4.1667	3.3333		0.391959	6.66852
9.4122	8.8333	6.6111	12.5	3.4444	7.7778	5.1667	8.1667	8.9444	5.6667	13.1111	13.9444	7	6.0556	4.2222	4.1111	3.6667	6.1667	9.8333	6	12.7222	7.1111	5.8333	11.1667	4.1667	11.1111	6.1667	3.6667	2.5	4.1111	2.6111		0.396987	7.07963
9.5313	7.5	6.2222	4.1111	1.7778	4.4444	7.4444	9.4444	10.7778	5	12.5	16.5556	8.2222	6.0556	2.6111	2.2778	3.5	4.6111	8.3889	13.3889	5.8333	9.8889	4.7778	9.3333	7.1111	6.0556	3.2222	8.0556	3.7778	4.7222	3.6667		0.40201	6.70926
9.6504	7.1111	4	7	4.9444	5	5.2778	11.8889	6.6667	3.6111	12.3333	10.7778	8.4444	3	2.1667	1.7778	6	3.0556	7.6111	9.5	13.9444	13	6.5556	5.0556	4.7222	13.5	3.3333	3.5	5.5556	4.3889	5.1667		0.407034	6.62963
9.7696	3.6667	5.5556	7.8889	6.2778	8	5.8889	8.7222	4.8889	3.2778	10.2778	11.3889	6.7222	5.3889	2.4444	2.5556	3.3889	3.2222	9.4444	9.7778	9.0556	14	3.3333	3.8333	4.1111	8.6667	2	3.6111	2.9444	5.1111	4.3333		0.412061	5.99259
9.8887	4.2222	5.7778	11.2222	4.6667	4.7222	7.5556	14.6111	8.2222	3.3333	8.8889	12.1667	6.1111	6.7778	3.6111	2.8333	4.0556	6.2778	8.5556	9.7222	6.6667	7.3889	6.2222	8.6667	4.3333	12.5	4.2222	3.5556	2.1111	2.2222	5.2222		0.417085	6.54815
10.0079	4.3333	4.3889	12.2222	5.5556	6.5556	5	9.7778	9.8333	3.6667	10.2778	7.1111	5.9444	3.9444	2.0556	3.7222	6.2222	5.1667	6.7222	7.8889	14.1667	4.2778	3.1111	3.1667	3.8333	7.9444	7.9444	5.8889	3.7778	2.1111	2.6111		0.422112	5.97407
10.127	7.2222	4.7222	6.3333	3.5556	1.8889	4.7222	7.2222	4.1111	8.8333	13.7222	6.7222	6.1111	2.5	1.7778	1.3333	4.9444	5.1111	8.2778	15.3333	14.6111	11.9444	6.2778	3.6111	6.1667	9.0556	6.3889	4.2778	5.1667	1.3889	3		0.427136	6.21111
10.2462	6.7222	8.5556	5.1111	5	9.8333	4.9444	10.7778	7.7222	2.5556	13.3333	6.0556	6.1667	3.9444	2.1111	2.5	7.0556	4.5	2.4444	6.2222	14.9444	5.1111	5.0556	4.2222	4.6667	6.0556	2.8333	4.7778	2.5556	3.9444	2.8333		0.432163	5.75185
10.3653	5.3333	6.8333	6.3333	7.0556	8.2778	7.3889	11.7222	2.4444	3.9444	12.6667	7.2778	5.8333	5.8889	3.9444	1.7778	6.6667	2.2778	7.9444	13.2222	11.8889	11.6111	3.9444	6.8333	4.8889	4.5	4.5	4.5	2.6111	4.3333	4.5		0.437187	6.36481
10.4844	7.1667	3.5556	5.9444	4.4444	1.8889	8.4444	13.3333	8.0556	1.3333	13.1111	6.5556	4.5556	6.1111	2.9444	2.8333	2.7222	3.7222	4.3333	9	7.3333	8	5.3889	4.2778	5.2222	5.9444	6	5.2222	2.5556	3.8333	3.6667		0.44221	5.58333
10.6036	6.0556	6.5	8.5	3	2.8333	6	12.2778	3.5	2.5	10.1111	11	5.7222	7.1111	3.1111	1.4444	3.8333	7.6667	3.8889	21.4444	9.6111	5.2778	5.5556	2.9444	10.8333	5.1667	8.7222	3.5	1.3889	4.3889	2.5556		0.447238	6.21481
10.7227	9.6111	4.3333	6.8333	6.3889	3.9444	9.0556	5.8889	9.2222	3.5	12.2778	8.5556	4.1111	6.7778	1.4444	1.3333	3	3.6667	3.2222	11.2222	5	6.7778	4.9444	5	6.5	6.5	3.9444	6.5	2.6111	3.1111	2.5		0.452261	5.59259
10.8419	3.5	2.9444	2.6667	4.5	4.2778	5.6667	12.7222	3.3333	2.0556	11.0556	11.0556	7	5.1111	1.3333	1.3333	2.3333	9.7778	5.3333	9.5	8.3889	6.5556	5	3.7222	3.1111	2.6111	2.4444	3.4444	4.1111	1.3333	3.8333		0.457289	5.00185
10.961	3.8333	4.8333	3.9444	8.6667	5.1667	4.5	12.7778	4.5556	3.3889	11.1111	7.1111	4	4.9444	1.2778	2.0556	1.8889	5.0556	7.0556	3.2778	9.1111	6.8333	4.2222	2.8333	3.5	4.5556	4.7778	5.3889	3.0556	2	5.2778		0.462312	5.03334
11.0801	6.0556	5.9444	3.9444	9.6111	5.5556	5.0556	14	4.6111	2.8889	11.2778	6.6111	3.3889	7.5556	2.8333	2.0556	4.7222	6.5	6.2222	6.1111	7.1667	7.1111	2.5	2.1667	7.3333	3.7222	3.6667	4.0556	4.0556	1.4444	2.2778		0.467335	5.34815
11.1993	4.2222	7.4444	3.9444	9.5	3.9444	6.3889	9.2222	3.4444	5.2222	11.9444	6.7222	4.9444	8.3889	3.1667	1.5556	4.8889	3.3889	5.7778	4.5	6.5556	3.2778	3.5556	1.7778	5.7778	4.7778	3.1111	2.2778	3.1111	2.3333	3.8889		0.472363	4.96852
11.3184	3.6111	5.1111	7.7778	8.1111	5.1111	4.2222	10	5.8889	4.2778	5.5	8.6667	3.1667	11.5	4.1111	1.2778	2.6111	6.2778	4.7222	7.1111	7.6111	6.5556	5.7778	4.3333	6.8889	4.1667	4.2778	1.4444	3.5	2.6111	2.9444		0.477386	5.30556
11.4376	5.0556	4.8889	9.1111	8.3333	3.0556	2.9444	9.4444	2.2778	1.5	9.3889	6.2778	6.3889	6.1111	1.1111	1.3889	6.2778	5.8889	5.1111	10.9444	5.8333	5.1667	2.1667	2.4444	5.5556	4	1.6667	4.6667	4.0556	1.9444	5.9444		0.482414	4.96482
11.5567	4.1111	3.9444	4.8333	5	7.8333	2.6111	11.7778	3.8333	2.5	6.7778	8.5556	3.5	7.2778	2.7222	2.3889	1.7222	5.1667	6.6667	6.5	6.5556	4.6111	2.6111	2.6111	5.3889	5.0556	3.8333	2.8333	2.8333	2.6667	1.7222		0.487437	4.61481
11.6758	7.5556	2.2222	5.4444	10.6111	3.2222	3.1667	5.1111	2.9444	4.3333	5.7778	9.1111	4.8333	6.2222	1.7222	2.7778	3.2222	5.2778	6.5556	10.3889	5	4.5556	3.4444	3	8.3333	4.2778	4.9444	3.3889	3.7778	1.5	2.7778		0.492461	4.85
11.795	6.8889	4.8333	5.8889	4.7222	2.8889	2.8333	5.1111	4.7778	1.7222	8.5556	3.5556	6.1111	3.6111	1.3889	2.4444	4.6111	7	12.1111	3.2778	6.0556	6.3889	3.6667	1.2778	4.5556	3.7222	4	8.7222	3.5556	1.3889	4.8889		0.497488	4.68519
11.9141	9.6667	2.2778	4.1111	10.2778	3.0556	3.8333	7.8333	2.6667	2.7222	8.4444	6.7222	6.2778	11.5556	1.2778	2.5	1.7778	5.1667	7.2222	5.7222	3.3333	6.5	2.0556	1.3889	6.3889	3.3333	6.1111	3	3.3889	5.6667	5.6111		0.502512	4.9963
12.0333	3.8333	5.9444	4.5	5.3333	5.7778	4.5556	5.3889	2.3889	3.3889	5	3.8333	5.9444	6.8889	2.6111	2.2222	1.9444	6.2778	9.8889	6.6111	2.3333	8.7778	1.4444	2.2778	3.9444	8	2.3333	3.2222	2.7778	3.5	2.3333		0.507539	4.44258
12.1524	5.2778	1.3889	4.5	9.1111	5.1111	5.4444	9.8889	4.2222	2.7222	5.5	7.6667	6.6667	6.7778	1.8333	3.1667	1.5556	5	9.8889	8.3333	3.6667	6.4444	3	4.8333	4.5556	3.4444	2.6667	6.2778	3.1667	1.8333	2.5556		0.512563	4.88334
12.2716	5.6111	3.5556	3.9444	7.9444	7.3889	6.3333	9.3333	1.8889	3.3333	8.5556	8.4444	3.5	6.1111	1.3333	1.4444	1.5	2.1667	7.3889	5.5	2.8889	4.6111	1.9444	1.7778	3.0556	5.2778	2.3333	4.6111	2.2778	2.5556	3.5556		0.51759	4.33889
12.3907	5.9444	1.4444	5.3333	5.3889	5.2222	4.3333	6.6667	4.2778	3.1111	7.3333	10.7222	5.5	4.8333	3.2778	1.2222	4.9444	5.5556	4	7.8333	6.9444	4.4444	1.6111	4.5	3.7778	8.9444	4.8889	2.9444	1.5556	4.1667	2.7778		0.522614	4.78332
12.5098	3.1111	2.5	5.5	4.7778	5.6667	7.4444	6	3.7778	2.3333	8.0556	4.2222	5.6667	3.7778	2.1667	2.3889	4.1667	7.6667	7.5556	7.4444	6.6667	3.0556	5.6111	2.8333	3.3889	3.6667	3.7222	2.4444	3.1111	3.5556	2.2222		0.527637	4.48334
12.629	8.2778	9.6111	2.5	6.1111	3.7222	4.7778	5.9444	1.2222	2.3889	10.5	10.9444	4	5.6667	3.2778	2.6667	1.7778	2.7778	4.8889	5.2778	7.1111	5.2222	2.7222	1.7778	2.8889	2.0556	2.8889	2.5	2.1667	1.8889	1.7222		0.532665	4.30926
12.7481	6.9444	2.4444	8.8333	4.0556	2.7778	3	8.7222	2.8889	3	11.1667	4.8889	9.6667	6.7778	2.3333	3.6667	2.6111	5.3333	4.1667	7.2222	11.3889	2.7222	2.1667	2.6111	1.6667	3.5556	4.5556	5	1.8889	1.3889	1.9444		0.537688	4.6463
12.8673	3.5	2.2778	4.6111	6.2222	2.8333	5.8333	8.2778	1.4444	2.5556	7.1667	7.5556	4.5	5.2778	2.6667	2.0556	4.1111	5.8333	5.4444	2.8889	8.1111	3.0556	3	2.4444	1.7222	4.1111	2.5556	1.4444	3.3889	2.8333	1.6667		0.542716	3.97963
12.9864	9.0556	3.7222	4.4444	4.6111	2.1111	2	4.2222	1.3333	2	4.9444	7.9444	5	4.6667	1.8333	2.3333	4.4444	4.3333	8.3333	4.6667	6.6111	3.3889	4.0556	2.3333	2.0556	1.5556	3.9444	2.5556	1.9444	2.3333	2.2778		0.547739	3.83518
13.1055	11.2778	8.0556	3.1111	3.3333	4.6111	3.8889	10.7222	3.6111	1.4444	8.1667	8.0556	1.8889	5.3889	2.6667	1.2222	4.2222	7.5556	6.7778	2.9444	3.3889	2.7778	1.5	1.5556	3.1111	6	3.2222	7	3.2778	1.5556	2.7778		0.552762	4.50371
13.2247	3.3889	6.8333	2.5	5.4444	1.7222	3.1667	7.8333	2.5556	2.6667	6.3889	4.1111	8.2222	5.6111	2.5556	1.3889	1.9444	8.3333	4.0556	3.6667	8.6667	1.9444	2.8889	1.8889	2.7222	6.1111	2.6111	2.1667	2.2778	1.9444	3.5		0.55779	3.97037
13.3438	4	9.9444	4.6111	1.6667	4.9444	4.3333	5.2222	1.6667	1.6667	4.6667	8.6667	5.7778	8.5556	3.3889	1.3333	6.3889	9.7222	6	6.5	2.7222	3.4444	3	3.2222	2.2222	7.3889	2.3333	4.1667	1.2778	1.2222	1.8333		0.562813	4.39629
13.463	4.1667	9.1667	6.8889	2.4444	5.4444	2.6667	11.2222	3.0556	2.3333	5.6111	2.3889	4.2222	6.5556	1.4444	1.2222	5.8333	10.8889	11.2778	5.3333	6.0556	4	4.5556	1.3889	1.7778	5.0556	1.7222	1.6111	2.8889	2.2778	3		0.567841	4.55
13.5821	2.8889	4.4444	9.2222	4.4444	3.6111	4.7778	7	2.7222	1.7778	7.5556	5.7222	8.5556	4.3333	3.3333	1.3333	2.4444	5.7222	7.6111	3.2222	5.8889	2.2222	1.7222	2	2.2222	6.3889	5.8889	2.4444	3.6111	2.3333	2.3889		0.572864	4.2611
13.7012	3.8333	4.5556	7.6111	6.2222	1.6667	3.8889	5.3333	2.2778	4.0556	1.3333	7.8333	4.8333	6.3333	3.2222	2.2778	2.6111	2.7778	11.1111	3.7222	7	2.8333	2.7222	2.2778	2.4444	4.9444	4.8333	5.3333	6.2222	3.9444	3.2222		0.577888	4.37591
13.8204	3.2222	9.1667	8.5	4.2222	4.5	4.8333	7.1111	3	1.7778	3.3333	2.7222	4.6667	6.1667	3.6111	1.8889	3.2222	6.1667	4.4444	5.2222	3.2222	3.5556	2.3889	3.0556	1.3889	3.0556	2.9444	1.5	3.3333	1.9444	1.5		0.582915	3.85555
13.9395	2.1667	7.7222	5.5556	8	2.3333	2.6111	4.7778	3.1111	3.2778	4.0556	7.8333	6.2778	6.5	4.2778	1.5	3.0556	4	5.8333	3.8333	7.8889	4.6667	2.2222	1.6111	1.5	3	2.8889	2.3889	2.5556	2.0556	6.5		0.587939	4.13334
14.0587	5.7778	4	5.5	7.4444	6.0556	3.8889	7.0556	3.8889	1.7778	5.1667	5.5556	6.4444	7.4444	1.5	2.5	5.1667	4.7222	5.5556	9.3333	6.9444	2.3333	4.6667	4.4444	3.2222	6.3333	3.0556	4.4444	1.4444	4.2778	4.1667		0.592966	4.8037
14.1778	7.2222	3.3333	4.8333	3.8333	3.9444	4.5	7.1111	3.8889	3.4444	6.3889	5.9444	3.6667	3.4444	2.3889	2.3333	2.2222	6.8333	3.3333	2.8333	9.2778	2.7778	3.9444	1.8889	1.5556	3.5	1.9444	1.9444	2.1667	1.8889	2.1667		0.59799	3.81851
14.297	3.5556	6.7222	3.8333	5.0556	2.7222	3.9444	3.6667	2.2778	1.2778	3.3889	4.9444	5.6667	4.1111	1.5556	1.4444	1.8889	3.5	3.8333	3.6111	4.7778	5.3889	2.6667	1.1667	3.2222	3.3889	1.3333	2.5556	3.2778	3.5556	2		0.603017	3.34445
14.4161	4.0556	6.5	6.2222	3.3333	7.1111	2.8889	4.4444	2	2.0556	4.7778	7.7222	3.6667	3.7778	2.2222	1.2778	1.3889	5.7222	5.9444	2.1111	9.6111	5.4444	3.5556	2	2.1667	4.1111	2.2222	2	3.5556	2.7222	2.3889		0.608041	3.9
14.5352	5.3333	6.4444	8.5556	3.9444	3.1111	3.3889	5.1111	2.9444	4.0556	5.4444	3	4.3889	6.5	3.3333	1.4444	3.3889	3.1667	5.0556	5.5556	6	4.1111	3.1111	2.8333	3	4.9444	1.3889	5.6667	4.0556	2.7222	2.6667		0.613064	4.15555
14.6544	5.0556	6.2778	5.6667	2.7222	2.4444	5.8333	6.2222	1.8889	1.4444	4	6.4444	2.7778	3.2222	1.4444	2	1.3333	5.2222	4.1667	4.5	4.1111	3	2.8333	3	2.3889	2.3889	1.7778	3.4444	2.6111	2.6667	1.7222		0.618092	3.42036
14.7735	3.7222	2.7222	12.3333	4.1111	6.1667	3.8333	6.1111	2.3333	2.3889	3.9444	5.3333	6.2778	5.9444	1.3333	1.9444	3.7778	7.3333	6.2222	6.5556	5.6111	6	1.4444	2.1667	3.0556	3.1667	1.3333	1.8333	4	2.8889	2.1111		0.623115	4.19999
14.8927	9.1667	4.4444	5.2778	2.6667	5	5.4444	7.5	1.5	1.6111	4.7778	5.1111	5.5	4.1667	3.6111	2.6111	1.9444	2.6111	4.7778	5.1111	4.7222	2.2778	1.3333	1.3889	2.6111	3.1667	4.2222	4.4444	1.6667	1.9444	2.2222		0.628143	3.76111
15.0118	6.6111	5.8889	7.4444	6.6111	4.8889	5.1667	6.4444	3.2778	2	5.1111	4.8889	5	5	1.5556	3.3333	2.4444	2.3889	3.6667	4.7222	5.6667	3.6111	3.2222	3	1.7222	1.8333	3.8333	4.1667	1.3333	1.7222	2.5		0.633166	3.96851
15.1309	4.2778	6.8333	5.1111	4	5.3889	5.4444	5.4444	2.2222	2.6667	3.7778	4.1111	5.9444	3.0556	4.5	2.5556	5.1111	4.2778	9.3889	6.3333	4	5.3333	2.1111	2	1.3889	2.3889	3.2778	3.2778	2.5	1.4444	2.5556		0.63819	4.02407
15.2501	2.1111	4.1667	4.6667	3.9444	4.9444	4.9444	9.1111	2.1111	1.8333	3.6667	8.8889	6.7222	2	1.2778	3.6667	2.1667	3.3333	5.1111	2.5556	4.8333	3.6667	1.3333	2.8889	3.1111	1.7222	1.8333	2.2222	1.8333	1.7222	4.7222		0.643217	3.57036
15.3692	2	5.6111	7.3333	5.5	1.7778	4.6111	6.5	5.1667	2.6111	5.2778	7.8889	4.5	4.3333	1.5	3.0556	4.2222	4.1111	7.0556	4.5556	6.5556	5.7778	3	2	2.7778	4.6111	3.1667	2.5556	1.3889	2.0556	1.8333		0.648241	4.11112
15.4884	4.2222	4.4444	5.3333	5	5.8889	3	14.2222	1.8889	1.7778	3.6111	8.7222	5.5	6.7222	2.1111	1.3889	6.3333	3.2778	5.1111	4.2778	7.2222	3	1.4444	4.8889	1.5	1.8333	1.2778	4	3.1111	1.5556	2.2222		0.653268	4.16296
15.6075	7	2.4444	2.5	4.5556	4.8889	5.7222	6.3333	1.7778	2.2778	6.5	2.8889	5.3333	4.8333	1.5	1.2222	1.5	2	5.2222	3.1667	3	4.2778	2.8333	1.8889	1.8333	3.5	3.8333	2.6667	1.2222	4.1111	3.4444		0.658292	3.47592
15.7266	2.8333	3.1111	2.1111	2.7778	3.1111	3.6111	10.2778	3.4444	1.3333	1.3333	3.9444	5.2778	4.2778	1.8333	1.2222	1.5556	5.3889	4.3333	6.5	8.1111	2.9444	2.3889	1.6111	2.7778	2.3889	2.5556	2.1111	2.7778	1.7778	2.1667		0.663315	3.32963
15.8458	5.7222	3.2778	5	5.6111	3.3889	3.6667	5.5556	3.1667	2.4444	3.2778	6.0556	4.7222	4.1111	1.4444	2.1667	4.6667	3.5556	6.1667	6.3889	4.6667	4.1667	1.7222	1.5	3.8333	2.9444	2.2222	2.1667	2	3.1111	1.8333		0.668343	3.68519
15.9649	5.9444	6.1667	2.8889	7.6667	6.1111	5.6667	7	2.7778	5.2222	3.5556	7.2778	4.8889	3.7778	1.3333	2.7778	4.6667	10.3333	2.7222	2.7222	6.0556	1.8889	1.5556	3.2778	3.1111	7.8889	1.4444	3.5	1.4444	2.5	2		0.673366	4.27223
16.0841	3.5	3.7778	5.3889	3.7222	4.3889	5.8333	11.5	3.5	1.7778	4.0556	2.6111	2.8333	5.8333	2.8889	1.4444	3.0556	8.4444	8.5556	3.7222	5.7222	2.8889	3.5556	2.7222	2.4444	4.7778	2.3889	2.5556	1.8889	2.3889	2.8889		0.678394	4.03519
16.2032	4.6111	5.5	1.5556	6.2778	5.6667	6.7778	3.2222	1.5	4.0556	4.8889	3.9444	5.6667	1.7778	1.6667	1.5	3.4444	5.3333	4.2222	4.8889	8.6667	2.8889	1.2778	1.2778	1.8333	2	2.3889	4.1111	3.2222	1.3889	2.2778		0.683417	3.59445
16.3224	5.5556	6	6.8333	4.3889	2.0556	8.2222	7.5	2.6111	2.8889	5.1111	4.4444	3.2222	7.1111	1.8889	1.6111	4.0556	4.1667	7.0556	4.7778	7.2778	4.5	2.6111	1.6111	1.5	4.7778	4.1667	3.2222	1.2778	1.6667	2.6667		0.688445	4.15927
16.4415	4.6667	3.7778	5.0556	5.3333	3.7778	1.8889	4.7222	2.1111	2.5	8.0556	6.5556	5.5556	3.5	2.3333	4.4444	2.5556	2.4444	5.1667	7.2222	10.3333	4.8889	2.1667	3	3.3889	5.8333	3.8333	2.8889	1.3333	2.0556	2.5556		0.693468	4.13149
16.5606	7.5	3.7778	6	4.4444	5.3889	3.1111	4.9444	4.4444	3.1111	5	4.0556	4.3333	2.3333	1.5	1.3889	2.4444	7.3889	3.0556	5.8889	7.8889	8.1667	1.3889	1.6667	2.4444	1.5556	2.8889	3.5	3.1667	1.8889	3.1111		0.698491	3.92593
16.6798	2.9444	4	2.7778	5.8889	5.5	5.2222	6.7778	3	1.3333	2	4.4444	7.8889	2.0556	2.1111	2.5556	4.2222	2.4444	3.6111	9.4444	3.8889	3.6111	1.5	1.5556	2.7778	1.7778	2	1.4444	1.1667	2.5556	4		0.703519	3.48333
16.7989	7.1667	5.8333	3.0556	4.9444	2.5	3.2222	4.5556	1.4444	1.9444	2.6111	3.7222	5.6667	2.5556	1.9444	2.5	7.2222	6.5556	2.1667	4.7778	4.6111	3	1.5556	3.1111	3.8333	1.9444	4.2778	1.8889	2.5	3.7778	3.0556		0.708542	3.59815
16.9181	4.8889	3.5	6.5	4.8333	6.7222	3.6111	9.1111	1.9444	1.9444	3.3889	5.2778	5.8889	5.6111	1.5556	3.2222	5.6667	4.6111	4.2222	14.8889	7.5	3.6667	1.2778	1.9444	5.9444	3.1111	1.2778	5.0556	1.4444	4.0556	2.6667		0.71357	4.51111
17.0372	5.1667	5.2222	8.1111	4.8889	3.5556	5.7222	5.3333	3.6111	4.4444	2.2778	3.5556	4.7778	3.9444	1.4444	3.5556	8.4444	3.2778	5	6.7222	1.6111	3.3333	1.3889	3.3889	1.5556	1.5	1.3889	1.3333	1.5	2.8333	3		0.718593	3.72963
17.1563	4.5	4.4444	5.6667	4.3333	4.5	7.3889	9.3889	2.3889	2.9444	7.5	5.6667	4.5	2.5556	3.1111	2.9444	3.6667	3.2222	4.3889	9.2778	4.5	7.6111	3.3333	1.2778	2.6667	2.1667	1.6667	3.1667	3.1667	2	2		0.723617	4.19815
17.2755	7.6667	3.2778	5.3889	3.6667	4.9444	2.4444	11.6111	1.8889	2.9444	2.4444	6.4444	4.2778	1.9444	5.3889	2.6111	5.6667	4.3333	1.2778	7.8333	4.2778	2.3889	1.3889	2.3889	2.6667	2.5	1.9444	2.8889	1.3889	1.3333	2.5		0.728644	3.72407
17.3946	7.3333	4.1667	10	2	2.5	3.6667	12.3333	2.2222	3.9444	4.0556	6.5	5.2222	3.6667	3.6111	2.8333	4.1667	4.5	2.6667	7.5	4.7222	3.7222	1.5556	2.3333	1.5556	3.2778	2.5	1.1111	2.2222	2.1111	4.5556		0.733668	4.08519
17.5138	7	4.7778	4.6667	4.0556	2.3333	2.5556	7.1111	2.9444	2.7222	6.8333	5.0556	4	4.7222	2.1667	1.5556	4.5556	7.6111	4.5	7.6667	4.8889	3.8333	1.5	3.1111	1.8889	2.1111	2.0556	1.7778	3.8333	1.6667	1.4444		0.738695	3.83149
17.6329	6.9444	3.6111	2.6111	3.6111	1.8889	3	7.3889	3.3333	2.8889	5.8889	6.4444	6.3333	5.7778	2	1.5556	2.7778	8.2222	1.8889	11.9444	5	5.1111	2.9444	1.7778	2.5	3.8889	3.2222	1.3333	2.1111	1.8889	2.3333		0.743719	4.0074
17.7521	4.8889	4.5556	5.3333	5.7222	3.3889	5.2778	2.6111	3.7222	1.6667	4.6667	6	5.8333	2.8333	1.6667	2.4444	3.8333	7.6667	7.5556	6.2778	1.9444	3.9444	2.9444	1.3889	2.3333	2.6111	2.4444	2.7222	1.4444	2.8889	1.3889		0.748746	3.73333
17.8712	3.1111	5.6111	9.0556	5.3333	2.5556	3.4444	5.2222	4.8333	2.1111	3.4444	6.1667	3.5556	5.7778	1.5	2.6111	4.5556	8.7222	2.7222	10.4444	3.7778	7.2778	2.6111	1.6667	2.6667	1.6667	3.2778	1.5	2.6111	1.3333	1.7222		0.75377	4.02963
17.9903	5.7778	8.8333	4.3333	2.6667	3.5556	4.7778	7.9444	3.7778	2.2778	8.0556	7.2222	4.5	3.7222	1.7778	3.7778	2.0556	4.6111	2.0556	10.5	3.2222	4.8889	3.0556	2.4444	1.8333	2.7778	2.1667	2.7222	2.5556	2.8889	1.6111		0.758793	4.07964
18.1095	3.3889	3.5556	8.8889	3.3889	3.5	4.8889	6.3333	2.9444	3.8889	4.9444	2.7222	4.6111	4.4444	1.8889	1.7778	4.5556	6.9444	4.1111	4.0556	8.9444	3.6667	3.3889	2.1667	1.4444	1.3889	2.1111	1.8889	1.1111	1.5	1.7222		0.763821	3.67222
18.2286	4.8889	4.7222	6	2.5	4.7222	4.5556	4.7222	3.2778	2.4444	3.1667	3.4444	3.1111	4.3889	1.3333	1.5556	2.1667	5.7778	3.0556	4.1667	6.3333	5	1.7222	3.3333	1.5556	2.9444	1.3333	2.9444	2.0556	2.6667	4.1667		0.768844	3.46852
18.3478	6.0556	5.1667	7.6667	4.8889	3.1667	4.2222	5.4444	5.5556	2.1111	5.8333	6.8333	2.5556	2.7778	3.5556	3.5556	3.1667	3.8889	2.1667	8.9444	2.3333	3.1667	1.8889	1.7222	1.8333	2.0556	3.5	1.7778	1.5556	2.6111	2.8889		0.773872	3.76297
18.4669	5	3.7778	5.5556	4.6111	7.3333	3.0556	3.7778	4.6111	4.3889	4.0556	4.6111	6.2222	2.1667	1.6667	3.2778	5	2.6667	4.1111	7	3.2222	2.2222	5.2778	1.3333	1.8333	2.0556	2.2778	1.2778	2.2222	2.4444	3.1111		0.778895	3.67223
18.586	5.5556	4.6667	4.7222	3.0556	4.6667	6.7222	5.0556	2.5	2.3333	3.1667	2.8333	6.6667	3.2778	2.5	2.8889	4.2222	2.6111	4.1111	11	1.8333	1.9444	1.6111	1.3889	2.5	1.8333	1.3889	1.7778	6.0556	4.3333	2.7222		0.783918	3.66482
18.7052	3.5	3.5556	3.8333	5.6111	5.2778	4.1111	8.5	4.3333	3	4.4444	5.2778	7.4444	5.7778	2.5	3.6111	5.1667	4.3889	2.6667	9.1111	3.8889	4.4444	2.3889	2.6111	2.8333	4.7222	1.8333	2.7222	1.3333	2.4444	2.7778		0.788946	4.13703
18.8243	3.1111	3.7778	3.3889	4.8889	3.5	5.5	3.3889	2.6667	1.4444	4.1667	3.1667	5.3333	4.6667	2.0556	2.2778	2.2222	4.3889	3.2778	3.9444	5.7778	4.6111	2	1.9444	1.5556	1.9444	1.3333	2.6111	1.4444	2.3889	1.1667		0.793969	3.13148
18.9435	4.2222	5.9444	3.5556	5.2222	3	3.9444	3.8889	3.7778	4.4444	8.5	5	9.5556	8.3889	5.2778	1.2778	6.1667	6.3333	5.0556	5.4444	5.7778	3.1111	1.3333	3.8889	2.6667	2.2222	2.3333	2.1111	2	1.4444	1.6111		0.798997	4.25
19.0626	3.5	10.3889	7.2778	6.3333	6.8889	3.1667	7.2778	3.7778	5.7778	5.0556	4.3333	9.5	5.1111	3.5556	2.9444	5.2222	2.7778	3.3333	9.3333	3.4444	2.1667	1.3889	2.0556	2.3333	2.1111	1.2222	1.3333	1.0556	1.6667	2.5556		0.80402	4.22963
19.1817	7.2222	7.8333	3.8333	6.8333	4.7222	4.8333	6.7778	4.7222	2.5	3.6667	4.0556	4.6667	9.6667	1.3889	1.2778	6.7222	5.8333	2.8333	4.8333	3.3333	3.5556	1.3333	1.5556	1.6111	1.7222	1.3333	1.6111	2.4444	2.8889	1.5556		0.809044	3.90555
19.3009	6.7222	3.9444	4.2222	3.0556	4.3889	6.3333	4.2778	1.2778	4.1667	7.2222	4	3.4444	4.4444	5.3889	2.7778	11.3333	4.8333	3.2222	6.7778	4.5556	4.7222	1.3333	1.8889	3.7222	2.7778	1.8333	2.8333	1.2778	1.7222	2.0556		0.814071	4.01851
19.42	2.8889	4.8333	4.2222	7.7222	4.1667	3.9444	4	6.5	4.3889	5.2778	2.7778	4.0556	4.4444	2.8889	3.1667	6.3889	2.3333	3.7778	3.6667	4.8333	5.2222	3.5	2.2222	4.4444	1.7222	1.2222	1.5556	2.2778	2.4444	2.5		0.819095	3.77963
19.5392	3.5556	4.5556	4.4444	6.6667	7.1667	4.8333	3.3333	5.2222	6.4444	6.1111	4.7222	5.3889	4.3889	2.1667	2.6111	2.6111	4.1111	4.3889	2.5556	5.4444	3.4444	2.6667	1.4444	2.3889	1.6667	1.2778	1.1667	2.8333	1.5556	2.0556		0.824122	3.70741
19.6583	2.3333	6.5556	8.8889	7.5556	5.9444	5.1667	3.8333	5.2222	8.4444	3.1667	3.3889	4.0556	2.8333	2	2.9444	2.3889	2.7778	7.7778	6.0556	3.4444	7.3333	2.1111	1.4444	4.0556	3.2778	1.3333	4.2778	2	2.6667	2.6111		0.829146	4.1963
19.7775	3.6111	2.5556	2.6111	6.1111	8.2222	1.4444	4.7222	5.7222	5	3.8333	5.5556	5.1111	1.7222	2.7778	3.5556	2.5	4.8889	5.2778	7.1111	2.8889	1.3889	4.5	1.2222	4.2222	3.6667	1.2778	1.5	1.9444	2.5	2.4444		0.834173	3.66296
19.8966	3.4444	2.3333	6.7778	7.6667	5	2.5	3.7222	4.7778	4.4444	2.2778	1.8889	4.0556	2.5556	3.5556	2.0556	5.6111	2.5556	5.8889	4	3.8889	5.7778	2.8889	1.8333	1.9444	3.4444	3.9444	1.6111	2.6667	2.6111	2.7778		0.839197	3.61667
20.0157	1.4444	4.8889	5.8889	4.9444	2.2222	5.7222	3.0556	3.7778	5.3333	2.7222	4.1667	8.7222	5.1667	1.3333	5.4444	7.4444	4.2222	4.4444	6.8333	3.2222	4.6111	3.6111	1.9444	4.2778	3.5556	1.3333	1.2222	1.5556	1.3333	2.5556		0.84422	3.89999
20.1349	4	6.6111	4.2222	5.4444	4.6667	5.2778	2.2778	6.2222	3.6111	5.5556	7.3333	9.2222	4.8333	2.6111	5.4444	6.7222	4.1111	5.5	2.7222	6.3889	6.2222	2.4444	1.7222	3.0556	2.5	2	1.3333	1.2222	2.6667	2.9444		0.849248	4.29629
20.254	2.4444	5.1111	3.8333	7.8333	2.5556	4.5556	2.6111	5.5	6.4444	5.9444	6.1667	3.6667	3.7778	1.5556	3.3333	7.7778	3.7778	6.9444	4.3333	3.2222	4.5	3.0556	2.7778	5.6667	2.6111	1.2778	1.5556	2.1667	3.0556	4.4444		0.854271	4.08334
20.3732	2.3889	3.1667	6.6667	5.7222	3.3889	6.2222	5.4444	11.4444	4	4.2778	3.1667	4.2222	8.7778	2.5	3.3333	5.3889	3.8889	7.1111	5.6111	5.6111	1.5	2.7222	2.5556	5.1111	1.3333	2	1.2778	1.2778	1.2778	1.6667		0.859299	4.10185
20.4923	3.9444	2.9444	3.6111	10	4.5	3.3889	1.8889	11.1111	5.3889	7.3889	8.1667	2.9444	4.5	1.6111	4.8333	5.7778	2.3889	9.3889	8.3333	6.2778	7.6667	3.2778	1.6111	1.2778	3.1667	3.5556	2.6111	3	1.5	2.4444		0.864322	4.61667
20.6114	8.3889	3.5	5.7778	5	3.3889	2.6667	2.1111	2.5556	4.0556	3.8333	3.9444	4.7222	6.8333	4.9444	5.7778	7.6111	2.5	6.1111	6.2778	4	6.4444	3.1111	2.8889	4.3333	2.6111	1.2778	1.3889	1.3889	4.9444	1.7222		0.869346	4.13703
20.7306	5.0556	4.4444	3	7.3333	3.7778	6.3333	4.8333	8.3889	1.9444	3.9444	7.7222	4.7778	8.2778	5.5556	3	2.2778	2.6667	6.3889	4.6111	2.7222	4.6667	1.7778	5.1111	2.5	3.3889	1.3333	2.3889	1.4444	1.2778	1.7778		0.874373	4.09074
20.8497	5.8333	3.6667	2.7222	4	6.7222	5.4444	4.1111	5	4.4444	7.5556	3.3889	4.9444	6.1667	5.2222	3.7222	2.2778	4.5	4	4.2778	6.5556	5.3889	2.6111	4.5	1.4444	2.0556	1.5	1.4444	1.7222	2.4444	1.3889		0.879397	3.96851
20.9689	6.6667	3.1111	2.1667	4.1111	4.7222	4	3.4444	4.5	7.3333	7	6	1.6667	6.3333	2.2222	2.7778	3.5556	3.2778	8.9444	7.3333	2.7778	4.1667	2.7222	1.2222	3.7222	1.4444	1.9444	1.4444	1.5	2.8889	2.7222		0.884424	3.8574
21.088	9.2778	1.6667	4.6111	3.4444	4.4444	2.8889	4.2222	6.8889	4.7222	5.3333	7.6111	4.3333	10.6111	7.9444	2.9444	3.1667	3.6111	6.9444	4.7778	7.2222	5.0556	2.7778	3.5556	1.6111	2	1.5556	2.0556	1.6111	1.6667	2.3889		0.889448	4.36481
21.2071	5.1667	1.8889	4.2222	2.5	5.7222	3.7222	5.0556	8	4.5556	9.7222	7.0556	3.9444	8.6667	6.3333	3.0556	5.3333	2.8889	2.1111	3.0556	3.1111	3.3333	2.5	5.0556	3.6667	1.3333	1.2778	1.7778	2.5	3.0556	1.3333		0.894471	4.06482
21.3263	6.4444	3.3889	5.6667	3.9444	4.7778	1.7778	4.2222	1.6111	2.2778	8.3333	5.6667	4.5	6.2222	5.1111	3.7778	2.7222	3.0556	5	5.9444	5.6667	4.2778	5.1667	1.2778	2.8889	1.1667	1.2222	1.3889	1.9444	1.6667	1.4444		0.899499	3.75185
21.4454	5.1667	2.7222	3.3889	5.7778	4.7222	3.6667	4.7222	3.2222	3.9444	7.2222	5.2222	4.1111	8.7778	4.3889	4.9444	3.6667	3.0556	2.9444	4.2222	5.1111	5.1111	1.2778	3.6111	3.6111	2.0556	2	1.2778	1.2778	2.3889	2		0.904522	3.8537
21.5646	2.7778	6.1111	4.2778	5.9444	2.2778	6.0556	3.2778	5.1111	6	10.8889	6	3.4444	5.9444	7.5	4.7222	1.6667	2	3.7222	3.2778	3.0556	5	3.0556	2.4444	1.7778	2.1667	1.2778	1.5	1.5556	2.8333	1.2222		0.909549	3.8963
21.6837	5.3889	2.8333	3.1111	4.2778	5.2222	1.7778	1.1111	3.9444	3.3889	8.0556	5.3889	3.1111	2.8333	3.6111	2.8889	3.3889	2.3889	4.5	2.3333	4.2222	3.6667	1.8333	3.7222	2.6111	2.6111	1.4444	1.4444	2.3333	3.6667	1.5		0.914573	3.28703
21.8029	3.5	3.2222	6.2222	3.1111	5.1667	2.2778	2.0556	1.5	4.6667	5.7222	8.1111	3.1111	10.2222	4.3333	3.3333	2.3889	4.5556	3.2222	2.8333	8.0556	2.3333	2.7222	4.5	3.7778	1.7778	1.3333	1.5556	1.4444	2.0556	1.8333		0.9196	3.69815
21.922	3.8889	1.6111	4.2222	2.8889	3.4444	1.7222	2.0556	2.6667	3.4444	4.2778	6.2222	4.3333	3.6667	4.8333	4.3889	1.7222	3.2778	7.2222	4.8333	7.7778	4.8333	3	2.8889	3.4444	1.2778	1.4444	1.7778	1.2778	3	2.1667		0.924624	3.4537
22.0411	3.2778	2.2222	2.8889	4.6667	5.5	2	1.3333	3.5	2.6667	9.1667	10.6111	3	2.5	6.2778	4.2778	2.2222	3.8889	4.4444	2.8889	9.0556	3.1111	2.8889	3.8889	4.8333	3.7222	1.4444	1.4444	1.4444	1.4444	1.7222		0.929647	3.74444
22.1603	4.1667	2.1111	4.3889	2.5	4.5	1.4444	2.1667	2.6667	4.1667	10.4444	9	2.5556	2.6667	3.4444	3.7222	2.5556	2.9444	4.3889	5.8889	6.2778	3.5556	4.0556	2.9444	2.7778	1.8333	1.2778	1.3333	1.8889	1.2778	1.2778		0.934675	3.47408
22.2794	1.7778	2.0556	1.4444	1.1111	3.5	1.1667	1.3889	3.9444	7.1111	7.5	4.7778	3.8889	7.4444	4.1111	5.1111	1.3333	3.7778	2.8333	5.3333	2.2222	5.5	2.8889	3.6667	2.8889	1.5	1.3333	1.3333	1.5	1.8889	1.7778		0.939698	3.2037
22.3986	1.3889	2.1111	3.2222	1.6667	1.7778	2.0556	1.1667	1.7222	5.1111	7.6111	9.2222	5.1667	6.8889	3.6111	5.0556	2.5	2.0556	3.0556	2.1667	5.3889	3.8889	1.6667	3.5	1.3889	1.4444	1.6111	1.3889	2.8889	4.0556	1.6667		0.944726	3.21483
22.5177	5.5556	1.9444	1.8889	1.7778	2.1111	3.7778	2.6667	4.3889	3.8889	11.8333	6.5	4.7222	7.5556	5.7222	1.4444	3.0556	1.9444	3	3.6667	7.0556	5.6111	3.3333	4.2222	1.2222	2.1111	1.7778	1.1667	1.6667	1.3333	2.6667		0.949749	3.65371
22.6368	4.7778	2.1111	1.1667	2.6667	2.8333	2.3889	2.7778	1.5556	2.7778	9.1111	7.6667	4.7222	4.3333	2.8333	5.1667	3.4444	2.0556	2.8333	3.2778	1.6667	3.4444	4.1667	3.5556	1.3889	2	1.6111	1.5556	2.2778	1.3333	1.2778		0.954773	3.0926
22.756	2.5	1.9444	2	1.2778	2.4444	1.5	3.6667	2.2222	3.1111	11.1111	5.6667	4.1111	8.3333	2.5	4.8889	1.8333	2.1667	4	4.1667	2.6111	4.5556	3.7222	2.4444	1.3333	1.3889	1.5	1.4444	1.7222	1.7778	1.3889		0.9598	3.11111
22.8751	3.1111	1.3333	2.6667	1.4444	1.3333	2.5	1.4444	1.7222	3.3333	8.1111	6	2.5556	7.7222	2.1111	2.3333	2.7778	2.6667	2.5	3.9444	2.4444	3.2222	4.7222	3.5	1.3333	1.2778	1.7778	3.3889	1.3889	1.1667	1.2778		0.964824	2.83703
22.9943	1.3333	1.4444	2	3.5556	3.5556	1.4444	1.3889	3.0556	2.2222	7.2222	4.3333	5.1667	6.2222	5.3889	2.6111	1.7222	1.3889	4.7778	1.9444	4.9444	2.3889	1.7222	2.3889	3.0556	1.2778	1.5	1.3333	2.3333	1.5556	1.4444		0.969851	2.82407
23.1134	4.3333	2.6667	1.5556	3.4444	1.3333	1.3889	1.6111	2.3889	1.8333	6.5	4.5	6.6667	2	1.6667	2.3333	1.4444	2.5556	3.1111	3.1111	3.1667	2.2778	5.8333	2.5556	1.2778	1.1667	1.4444	1.4444	1.4444	1.2222	1.8333		0.974875	2.6037
23.2325	4.5556	2.2222	1.5556	1.7778	2.3889	1.8333	2.1111	2.1667	1.6667	9.5556	8.6111	4.9444	4.5556	3.7222	1.5556	1.9444	2.1111	1.7778	1.5556	2.1667	5.6667	3.5	3.6667	1.5	1.2778	1.2778	2.5556	1.3889	1.5	1.3889		0.979898	2.88335
23.3517	2.1667	1.1667	2.6111	1.8889	1.3333	2.2778	2.5	2.5556	2.6667	3.7222	7.7222	5	5.0556	3.3333	1.4444	1.5	1.2778	1.7222	3.1111	3.2778	1.9444	4.3889	3.2222	1.5	1.2778	1.6111	1.8333	1.3333	1.3333	1.3889		0.984926	2.53889
23.4708	1.6667	1.5	1.2222	1.3889	1.6111	1.6667	1.5	2	1.3333	9.2778	3.6111	6	5.0556	4.1667	1.3889	1.8333	1.3333	4.7778	1.8889	3.3333	2.5	3.0556	2.2778	1.5556	1.1111	1.2778	1.4444	1.3333	2	1.3333		0.989949	2.48148
23.59	1.2778	1.5	2.1667	1.4444	1.6111	1.4444	1.6111	4	2.2222	7.0556	5.3889	3.8333	4.9444	4.8889	2.5556	1.6667	1.3333	1.4444	1.3333	2.1111	4	3	2.7222	1.8333	2.2778	1.3889	2.1111	1.3333	3.2778	1.5556		0.994977	2.57777
23.7091	1.8333	2.7222	1.7222	1.5556	1.2778	1.2778	1.7778	2	1.2222	2.6667	7.7778	5.7222	4.8333	2.2222	2	1.3889	1.6111	2	1.6111	2.3333	2	1.6111	3.3889	1.3333	2.0556	2.3889	1.5	1.3333	2	1.2778		1	2.28148

## Sheet: Image10
X0	Y0	Y1	Y2	Y3	Y4	Y5	Y6	Y7	Y8	Y9	Y10	Y11	Y12	Y13	Y14	Y15	Y16	Y17	Y18	Y19	Y20	Y21	Y22	Y23	Y24	Y25	Y26	Y27	Y28	Y29	Y30	Y31		Ap-Basal	Avg intensity
0	8.2041	11.2975	12.6258	9.5865	6.5032	5.6883	11.5337	8.3023	7.2971	7.3629	8.3279	4.91015	5.013	9.0653	11.4117	14.5741	8.5766	9.75905	6.8703	7.91065	8.1741	9.1108	9.7702	14.3412	9.6455	9.1833	8.7552	6.7949	5.0317	8.4706	11.4086	6.3498		0	8.808
0.1191	11.4856	12.3476	10.3005	10.0097	11.7842	10.6575	9.6432	11.0977	11.8269	9.0514	10.7647	7.63182	6.2877	12.9145	8.1869	10.9383	7.27973	7.08925	6.9901	11.2893	9.4422	13.1092	5.3594	4.3686	4.9187	8.2496	5.4654	2.904	4.7593	8.8091	8.893	6.8495		0.0044429	8.77202
0.2383	10.911	9.2217	8.4637	13.276	8.8332	6.6025	5.5222	8.4108	9.9058	8.0466	4.4516	8.59726	4.5273	9.1218	8.4187	9.7174	10.6005	5.54628	6.2666	10.618	4.9251	6.5821	8.7246	8.4778	6.0316	3.7123	9.0075	10.6186	4.6523	8.5564	5.1489	4.7042		0.00888954	7.75626
0.3574	7.6256	12.6302	13.1138	12.1603	6.1103	7.5862	4.6843	5.8694	10.7686	9.8428	8.6071	7.58968	4.6687	8.5577	10.1507	9.9393	9.09042	4.69569	7.717	4.06515	7.2554	12.8031	4.7674	7.2261	8.43	6.0636	7.5759	9.0133	6.4645	8.807	5.1033	8.3205		0.0133324	8.04072
0.4766	10.2591	12.9283	11.8059	13.1806	10.01	6.9133	8.4704	7.2127	11.6183	11.2484	8.1359	6.83879	3.4643	5.2771	10.2067	11.1476	9.05523	9.36103	7.5332	5.23786	7.5355	11.6239	8.3624	9.3241	6.4365	12.098	7.6561	6.5001	4.2765	6.936	13.2617	7.2333		0.0177791	8.7859
0.5957	13.5533	12.4117	10.0459	13.6002	10.2745	7.9344	7.2318	12.0587	10.0127	9.292	7.8793	5.04802	6.5672	5.1543	9.829	9.0216	5.08576	5.74902	7.3464	8.42565	3.5236	9.172	7.4698	12.0778	8.4288	11.553	6.5418	9.7924	6.4665	10.3607	11.5585	4.6539		0.022222	8.69126
0.7148	11.5626	11.4333	14.1318	11.5253	9.7089	10.5219	5.9224	11.8214	7.7208	8.5555	5.4322	6.67243	6.3844	6.7277	6.7777	13.8069	8.52418	3.8265	10.0453	9.66332	6.5895	6.927	7.0007	8.444	7.5463	9.6153	7.3588	9.2771	6.2651	11.8885	10.034	5.9319		0.0266649	8.67634
0.834	11.3828	8.9614	11.9064	9.3532	8.5079	10.2081	5.4997	8.4445	4.572	12.649	6.7671	10.5504	6.3897	11.4894	7.7674	9.1671	6.76342	4.24929	9.1966	5.69697	3.8323	9.3998	6.7798	5.7054	5.7303	9.9535	6.9822	5.8281	4.61	10.3659	5.4123	5.0056		0.0311115	7.78524
0.9531	8.0839	4.7462	6.0806	7.5062	12.271	8.5893	7.363	11.5049	8.7978	8.7356	9.4885	10.664	5.0287	12.9189	11.57	5.1365	10.0824	6.49061	9.5049	8.29016	3.9641	9.6038	5.9907	7.8838	7.2252	8.2299	7.5944	7.7183	6.8979	10.1267	7.2822	5.5909		0.0355544	8.15503
1.0723	12.6427	8.6163	11.5767	11.9757	7.9384	6.4202	10.8487	10.4119	9.3611	9.9036	6.7476	10.0174	5.3043	4.8557	12.4595	8.0691	7.38153	4.45735	12.7364	10.0937	6.8907	8.2935	7.194	7.8228	4.2809	8.9245	12.5036	6.696	6.8978	12.135	8.2412	2.8884		0.040001	8.58082
1.1914	12.6524	8.2095	13.0894	8.0559	7.1514	10.0185	12.7223	11.4089	10.9579	8.8377	6.0644	3.08332	3.6181	7.4183	10.877	6.4067	7.92364	3.47588	10.2466	5.28273	7.4496	6.5365	8.1749	7.3051	7.4666	4.8145	8.0931	6.5764	5.6249	9.1831	9.7023	4.4244		0.0444439	7.90162
1.3106	8.1307	5.8537	11.971	10.6226	9.2973	9.2351	10.1398	9.4651	11.5552	12.5441	4.9294	3.67476	5.8465	3.0722	5.5153	6.6984	7.46121	5.82716	7.2406	4.7767	6.6444	9.9302	11.5012	6.5849	8.6434	8.0241	8.4043	10.638	7.1315	10.8627	6.3587	7.1287		0.0488906	7.9909
1.4297	10.2597	11.265	7.0404	6.9786	10.2259	12.3327	6.2474	8.5586	6.3846	13.7827	5.6317	7.00729	4.2187	7.0071	9.4831	7.8617	4.42335	4.85634	5.4591	5.26196	4.6785	10.8196	9.1448	4.9663	7.2103	5.6593	11.0383	10.6708	8.7079	12.7677	7.2955	7.5063		0.0533335	7.96098
1.5488	11.0605	9.9541	10.3033	10.203	10.5162	9.7028	15.9991	9.3996	9.1752	7.6305	8.3699	4.38851	4.1822	2.2231	6.4694	11.562	4.08944	8.30095	8.3274	7.37369	5.24	8.4627	7.8482	6.5805	8.1123	6.1965	7.4747	10.444	5.3219	15.2471	9.6762	6.4044		0.0577764	8.31998
1.668	9.1629	10.6318	11.604	10.3176	9.2706	13.0375	11.1332	8.2131	9.4197	9.4422	6.3407	3.49486	4.2111	4.0448	9.0516	4.5257	7.12991	10.1931	7.8175	6.4821	4.5914	5.9522	6.4412	6.5938	6.9437	8.9577	10.4518	5.0739	5.0733	17.5385	12.7309	8.5584		0.062223	8.26346
1.7871	9.3255	11.2779	9.4292	11.7408	12.9813	13.5224	8.402	12.7961	13.0565	4.7167	8.9952	7.5507	5.0526	6.6241	6.4592	8.8529	4.17035	9.05049	9.6104	5.79482	11.2958	6.169	5.8204	6.3839	6.9084	7.2542	9.2608	9.449	4.8466	12.9123	7.4268	7.8986		0.0666659	8.59484
1.9063	14.0529	12.8879	8.7683	8.9544	10.2925	11.2715	10.7074	11.4008	10.5733	5.392	7.5614	9.33101	6.1515	4.2667	9.357	11.336	6.92702	3.37274	5.6205	10.1995	6.0862	9.2323	6.6329	5.1188	6.4186	5.6879	11.4025	9.3738	9.5894	10.1463	5.5476	7.8509		0.0711126	8.48474
2.0254	11.7939	12.2365	10.1397	12.6172	9.4953	9.8651	13.6445	10.638	7.053	9.3946	7.4623	5.62287	4.1992	7.7238	5.832	6.1098	6.77956	6.70639	5.8266	7.6798	5.5337	6.2146	13.8793	4.4572	7.3631	5.8497	8.8689	9.0661	8.5512	9.9145	7.5029	4.4007		0.0755555	8.20069
2.1445	9.3408	9.9229	9.5512	9.3918	7.9254	10.1044	14.8131	8.8938	10.1223	11.3641	4.2154	6.34627	6.5479	7.1286	5.9597	8.6676	9.05368	7.4622	4.4675	8.41043	5.352	10.1517	10.4169	5.5518	7.3158	7.2302	11.7881	12.6723	11.0059	15.6445	11.9953	7.3804		0.0799984	8.94356
2.2637	8.3703	10.788	8.9643	7.664	11.745	11.5421	7.2186	7.114	13.3716	9.7448	4.4319	5.73038	3.1408	5.7992	3.571	8.3978	4.78447	4.53697	5.4618	5.0869	5.9694	5.8931	8.4841	8.6414	6.1581	5.1163	9.561	9.4625	9.2636	9.6238	10.289	11.2727		0.084445	7.72497
2.3828	10.2893	9.6675	12.4407	7.1917	13.3314	6.6898	12.4217	8.5322	8.403	7.9841	3.9414	5.15637	6.5675	4.6926	6.5893	13.6446	5.92944	7.97985	5.6902	4.77252	6.8499	8.492	10.9056	8.2998	6.8969	7.9334	6.4442	13.2401	8.4486	9.534	5.6938	7.4031		0.0888879	8.18927
2.502	9.2741	11.8631	9.4872	10.4374	13.4344	11.5848	11.0239	15.5146	9.8915	11.5838	10.2749	6.20807	4.7651	4.5868	10.9247	13.21	5.8117	6.27169	3.3467	4.05035	5.3995	11.5169	4.9323	7.9734	9.8726	10.1865	6.2253	8.9394	8.8985	7.7208	3.5441	7.2729		0.0933345	8.62584
2.6211	8.6469	6.7484	10.2472	12.8168	13.1312	12.5077	14.6595	14.7297	9.9858	10.6409	5.9792	8.97695	4.6298	5.634	5.9919	11.0971	8.47997	5.35007	5.4654	2.68148	3.7949	8.0729	4.2556	6.9964	7.6911	5.5915	14.0901	9.9413	6.1452	9.1508	7.6886	3.6168		0.0977774	8.29485
2.7402	8.9916	8.9093	11.515	11.7673	12.1397	11.557	10.459	17.682	8.7649	9.9384	6.9484	1.76329	4.5209	5.2964	4.7124	8.0409	8.24965	2.7252	1.758	4.36491	4.157	6.6442	7.5739	6.4186	6.1327	7.2725	6.1295	12.587	9.3164	10.7575	9.5048	7.3563		0.10222	7.93608
2.8594	10.0005	10.6865	11.6208	13.9905	15.6775	11.6104	11.252	13.9003	12.0077	7.63	10.778	2.44536	4.6594	4.1725	5.0455	4.3063	7.33596	3.99654	5.0576	5.21313	3.6676	8.8812	5.8463	4.0623	6.4955	7.4558	7.9238	11.3429	11.5039	8.7328	9.9352	6.7639		0.106667	8.24993
2.9785	7.6559	14.2252	10.6693	15.2761	10.0148	10.2279	8.2267	19.1535	13.0758	7.8036	9.3994	3.232	7.7009	6.3163	6.0612	6.2519	3.10376	6.74429	6.9112	6.10677	8.2361	7.7243	3.2989	5.8164	4.7687	5.5959	8.1696	9.031	10.2461	13.7122	7.2329	6.7686		0.11111	8.39866
3.0977	13.3082	13.896	16.4663	16.7684	15.1107	13.0351	6.6851	17.3073	14.4521	8.4107	5.3899	3.28688	2.8372	7.127	4.0687	3.3328	5.68037	4.78145	2.3536	2.31903	4.7005	7.7617	6.7384	4.6467	4.9472	3.9857	6.5776	15.8683	10.5801	8.6987	5.9959	7.8304		0.115557	8.27963
3.2168	13.9422	8.4139	18.8378	12.5275	12.3475	9.8364	4.9765	19.308	9.7073	7.9409	6.761	3.33311	5.4785	3.0505	7.3779	8.1615	4.45931	3.73637	5.8425	3.3847	4.29	7.2753	4.9239	5.1576	2.7927	5.8151	5.0233	15.9374	14.7198	11.3508	7.8598	7.4035		0.119999	8.18664
3.336	12.3143	10.9949	5.9212	8.2063	13.6449	5.4239	8.874	11.6805	14.7144	11.2029	6.978	3.41731	3.9739	4.8259	8.1007	8.6275	8.60636	3.78823	4.5867	5.20545	5.2333	7.9941	6.4969	8.0636	5.4734	6.1229	6.7999	10.8115	12.4137	10.1452	10.4636	5.8945		0.124446	8.03125
3.4551	11.475	15.705	7.1551	8.1586	10.9644	7.2439	7.0418	20.333	15.708	7.0267	8.6708	1.95578	2.6213	3.4553	9.0382	5.39	8.50199	4.11304	5.0224	6.13038	6.3055	7.7587	7.3116	5.096	8.78	4.512	4.7023	17.1471	9.1594	11.3791	6.0118	7.0447		0.128889	8.15372
3.5742	10.8096	6.9398	9.5592	10.5077	8.8112	8.2588	8.5739	4.9783	23.0579	9.6458	6.4119	6.63807	3.7302	4.1387	9.7559	4.5086	4.71936	6.11469	3.7896	3.83941	7.2029	6.6574	6.2781	6.7636	8.6868	2.8252	4.3874	14.3028	11.6229	10.6083	8.7845	12.0894		0.133332	7.96869
3.6934	13.6157	6.697	12.7347	6.5257	4.8	8.9093	4.2123	12.5276	18.6149	14.7409	5.4165	8.81198	4.3579	5.915	7.5556	5.7239	6.81297	4.72301	4.6347	4.86818	6.6682	5.8183	3.4492	6.8361	4.9552	3.473	9.6355	6.9665	11.0374	9.548	10.9416	9.4081		0.137778	7.84172
3.8125	9.1845	6.0442	9.1787	7.8941	10.9276	5.1753	4.699	7.3119	13.3782	14.7398	7.3998	5.04528	2.8029	2.473	8.1218	9.1148	6.9626	3.9401	4.1734	3.21563	3.4984	6.7767	5.6139	7.7038	5.9347	9.2603	5.9888	8.3398	9.6224	6.4673	10.8588	5.6821		0.142221	7.1103
3.9317	7.8856	10.6584	9.8428	11.8916	9.1453	10.8204	5.5301	6.0996	18.4003	16.8923	6.1064	3.50008	2.3563	3.0554	6.1933	5.4801	5.92032	5.19253	5.1908	3.54387	4.1381	4.4659	2.9236	5.3082	6.0766	8.2286	6.3349	8.6498	12.0903	9.3018	11.0556	6.7141		0.146668	7.46853
4.0508	11.323	12.174	8.8892	9.893	7.6168	5.9744	7.5707	10.303	14.0102	14.7346	12.0484	4.30707	7.4917	3.2356	3.3601	6.1805	4.50728	4.25804	4.0557	3.16937	7.6132	4.9585	5.1826	5.5431	11.7798	5.9558	7.5327	10.0639	7.4876	9.0918	7.5929	10.9386		0.151111	7.77635
4.1699	10.029	10.2481	9.7447	4.2855	8.5545	5.8842	6.3548	12.3048	7.9259	15.1242	9.771	2.38978	3.9836	4.4849	4.9861	4.7479	6.57393	2.7327	4.0008	3.53106	3.482	9.4533	5.9825	8.3237	5.56	10.0839	7.8532	7.7511	15.3674	11.4453	7.4867	7.318		0.155554	7.43014
4.2891	9.51	5.5418	10.0766	6.4206	6.2934	8.0532	5.6401	10.384	9.8632	12.9502	9.5446	3.17129	6.2662	5.2968	6.7287	4.1421	6.03282	3.10969	3.3334	5.74422	6.0464	6.4534	6.0715	7.0613	4.739	6.3663	11.365	7.607	10.8401	9.1752	6.4832	4.2078		0.16	7.01622
4.4082	8.6867	6.356	13.9917	7.2285	4.0544	11.8088	6.1087	6.4632	10.3912	13.741	9.5502	5.05496	4.0046	5.9457	5.8009	4.6777	7.07742	3.4246	6.073	4.07287	5.3034	7.7455	5.4892	4.5878	5.6428	3.0339	6.9788	5.9691	10.0631	11.6661	15.8568	7.1968		0.164443	7.31392
4.5274	7.887	13.0407	8.3119	6.239	3.4282	4.1172	5.192	8.2537	7.1069	12.6053	10.3852	7.68724	2.3587	4.1273	3.6887	5.5612	10.2118	4.40258	3.2567	5.29869	5.226	4.5406	4.2772	6.2137	4.3941	5.4468	9.0352	12.0648	8.9509	8.1248	13.9543	6.4586		0.16889	6.93272
4.6465	6.4888	9.6636	8.8681	7.5522	7.4282	8.4108	7.9642	9.916	7.3375	12.4722	6.8293	6.71881	2.4881	5.5029	4.6356	11.9275	10.4542	3.94783	3.7999	2.91713	4.5203	8.7279	8.0448	4.8919	7.1806	5.5672	8.8406	13.8627	5.4375	6.9684	9.9884	6.0566		0.173333	7.35656
4.7657	14.0588	9.2541	11.8535	6.0122	5.4003	4.6475	5.448	10.0664	5.7193	9.9061	15.203	3.22792	7.6202	3.1277	3.7117	6.4841	7.8418	3.34478	5.0821	6.11	3.5304	11.7132	7.6488	5.5638	8.7326	6.1481	9.4633	5.5221	10.0676	7.8242	13.4613	1.6765		0.17778	7.35848
4.8848	9.5719	9.7378	10.7834	7.1191	6.0977	4.4275	6.6974	9.006	5.6057	7.3538	9.7466	8.83528	8.6117	4.3921	8.4793	7.4599	3.17733	2.36516	6.4221	5.16194	5.0448	7.6991	7.5262	6.8317	6.998	3.7446	8.1161	6.2705	8.9982	3.8403	8.118	6.7379		0.182222	6.90553
5.0039	6.1478	7.0675	12.6231	7.4694	7.0469	6.0812	6.5351	10.6591	5.6495	8.2719	8.8003	6.38525	3.4684	3.3186	4.9037	6.0612	5.63452	5.10937	8.7071	2.32377	3.8011	7.5969	8.1143	5.9707	11.2717	5.7547	8.408	11.0776	5.4802	7.717	6.5785	4.1232		0.186665	6.81743
5.1231	7.7743	9.9843	8.2609	6.2665	6.9377	4.8946	5.0215	9.5998	3.772	4.5754	11.3928	8.96817	3.9794	5.3681	2.3177	5.8489	5.89761	3.87955	7.9538	5.93789	3.467	12.8946	6.7492	7.7149	6.2789	5.0518	8.6065	8.517	10.7218	6.6579	11.0921	4.0243		0.191112	6.88772
5.2422	6.8918	11.2444	11.8126	5.0236	5.8039	9.1746	8.8736	8.9505	9.337	7.1278	13.3156	8.20898	3.3887	3.9956	5.9888	8.143	4.53359	4.72614	5.5469	5.14983	5.9184	10.152	7.8742	4.7047	8.7671	9.2638	5.4167	9.533	9.0106	7.393	11.6578	5.7561		0.195555	7.58389
5.3614	8.9395	7.9723	8.5615	8.9772	5.7738	7.5113	6.651	6.4744	12.6884	6.8046	8.3626	3.1884	3.3561	4.2497	7.0521	7.7408	3.83218	7.1684	6.2141	6.97697	5.9845	8.0253	5.8961	6.3408	5.9278	6.9892	6.686	9.8888	7.6249	3.9814	10.656	8.1977		0.200001	7.02168
5.4805	7.8946	7.8344	11.7247	6.324	9.8743	6.3478	2.5629	4.5302	9.0032	11.345	8.2828	4.86442	4.3524	6.0379	5.2034	8.5691	3.00153	3.90128	7.2286	2.99017	3.9352	8.5633	9.1316	7.3175	4.6899	4.3489	10.6607	12.0371	12.6582	6.8292	7.4693	6.2047		0.204444	7.0537
5.5996	7.2338	7.9506	11.82	8.509	6.6131	4.7963	5.7732	3.962	8.8809	6.955	4.396	5.52694	2.9062	5.1592	4.8049	9.3631	6.85381	2.65182	4.6877	6.63841	4.896	8.5049	8.3058	5.0936	5.3574	6.0021	7.3201	11.1339	11.342	8.2982	8.4859	5.2468		0.208887	6.7334
5.7188	5.3875	8.9891	13.97	8.7896	6.3858	3.0952	3.1172	7.1226	4.013	8.3558	7.7234	5.01197	7.1633	6.0533	5.4943	12.0117	10.5786	6.06057	3.3672	3.22685	4.5664	5.0974	4.9182	11.1465	8.2001	7.7979	6.7728	6.5136	6.4047	7.3419	9.2094	5.2876		0.213334	6.84917
5.8379	10.5012	6.0173	13.3274	8.6096	5.301	6.4958	5.3235	4.1354	6.427	5.8839	6.5358	8.62844	6.437	3.049	5.1188	9.6533	5.97363	2.82385	5.2023	3.49156	7.0989	7.3894	5.8815	3.8733	5.5976	7.6341	7.6912	11.0575	5.3011	10.2977	6.434	5.6174		0.217777	6.6503
5.9571	5.6166	4.7849	10.9174	7.9447	4.3513	3.876	4.2009	8.6067	2.9803	4.9382	5.3893	4.26962	3.1351	4.962	4.1967	8.4695	3.73986	6.55541	4.6981	3.19219	5.5946	11.1235	9.621	8.1122	5.4637	12.0122	5.725	11.5351	7.7332	7.6106	13.0423	6.6141		0.222223	6.59413
6.0762	9.0184	8.446	15.7699	6.3878	3.5319	2.1034	2.6307	6.1202	4.329	7.3039	4.9259	7.63351	7.0592	3.92	4.9357	5.1089	5.08297	3.22375	5.062	3.36555	4.3011	8.6765	6.4493	6.1553	5.4574	10.1609	8.9052	7.8014	7.0943	5.9286	11.228	8.6538		0.226666	6.46158
6.1953	9.0436	9.4239	15.0487	7.4751	5.8656	4.1367	5.0074	3.51	10.7903	5.0918	5.1902	7.21503	6.1386	9.8558	6.3588	5.6043	9.1621	2.79331	6.9649	3.84027	4.9392	6.8246	3.8889	6.5058	8.1768	7.5605	11.8195	9.2287	11.9704	4.3398	7.1005	8.2593		0.231109	7.16033
6.3145	9.5305	7.6183	13.1856	8.6384	5.6958	4.8449	7.5961	2.7852	4.9239	7.82	7.2137	7.66806	4.6076	4.4028	4.8383	9.1477	6.87199	4.42976	3.2802	2.95194	6.5225	3.93	5.4177	5.7548	6.014	4.4444	11.5069	7.0366	8.534	5.1481	6.7602	7.3954		0.235556	6.4536
6.4336	5.7868	7.4715	13.7081	5.6099	11.0537	3.6744	6.5895	2.9088	5.0808	12.0167	4.0158	5.66988	5.7794	2.7755	5.9167	6.3627	5.64139	3.59374	7.6822	9.52152	5.6218	6.3721	11.318	9.5984	4.8469	7.0565	9.972	11.1321	7.4893	5.915	5.0131	8.8935		0.239999	7.00274
6.5528	6.008	6.3437	11.861	7.2648	3.8536	7.5426	4.9491	6.9395	6.7474	13.765	8.1728	5.52237	7.6239	4.1195	4.8844	6.3051	4.82213	5.21671	4.2634	6.2671	5.7483	17.7064	8.0315	6.4873	3.4196	7.777	7.3393	11.4198	8.9881	3.8548	6.409	10.0694		0.244445	7.17883
6.6719	4.2006	5.4978	18.9026	3.6857	7.0355	4.5103	2.215	3.8482	9.8623	14.3772	7.0383	7.57775	12.5505	6.1966	6.0513	9.5096	5.1527	4.028	7.6008	6.49468	6.41	11.9117	5.7109	5.7912	8.9295	6.5846	8.8197	7.6776	4.7118	5.9512	6.8593	7.2818		0.248888	7.28046
6.7911	5.4334	6.053	21.2324	4.2596	5.404	4.9719	1.9658	5.2302	7.6022	9.564	5.7346	5.31048	9.2565	2.16	5.8308	6.5225	6.08134	3.24616	6.5866	6.67003	4.4181	8.7933	4.8816	4.9435	7.2089	5.2147	8.0047	7.7574	7.6225	6.1835	5.0254	7.5026		0.253335	6.45849
6.9102	6.2793	8.6352	17.6303	6.0876	2.8457	2.2974	6.4482	4.1143	4.4424	6.1375	6.4458	4.91344	6.5743	5.0916	6.3125	6.2795	9.25523	3.87054	4.7669	6.38775	5.3006	9.3099	9.0679	8.7099	4.9427	9.2759	8.0401	7.5513	4.0435	11.2312	6.5566	6.1317		0.257778	6.71802
7.0293	8.4304	4.8391	15.3461	5.1412	6.8891	6.4168	3.8209	5.0574	4.261	5.8134	7.5493	3.35272	5.1761	5.0132	7.387	10.4134	6.38229	3.75855	2.2546	4.66951	5.6252	7.945	8.0622	4.4399	6.3424	7.6332	6.6477	5.2356	7.3383	5.8674	4.3276	4.9045		0.262221	6.13566
7.1485	9.4248	7.0093	15.567	5.8005	6.6422	4.819	3.4744	8.067	8.9624	9.8192	7.8216	5.1296	5.2288	4.5676	4.2502	6.8394	6.04326	5.98218	3.0093	4.63216	10.2972	9.7785	6.9578	8.3193	7.7975	3.4443	5.2767	6.7618	6.7317	6.9835	5.9846	4.6578		0.266667	6.75252
7.2676	6.0703	7.4347	10.7594	6.5317	9.1322	4.8957	3.7706	3.2195	5.9774	12.1787	4.3646	7.67323	3.7233	3.9272	4.1459	9.8304	9.08705	5.1831	2.8516	3.3904	4.0666	5.3483	7.5488	6.2177	7.1529	5.6249	9.1502	4.9226	6.5809	6.5145	5.9486	7.6487		0.27111	6.27724
7.3868	7.8144	6.0962	12.8735	7.1614	5.9476	5.4971	4.7938	6.1634	3.2802	8.1058	5.7481	7.80025	6.0893	4.8841	4.2041	9.3596	7.09716	5.25762	4.9046	7.7427	5.6305	8.7585	5.8444	7.7905	5.2181	9.5943	7.2946	6.1653	9.405	5.3906	8.6713	5.1469		0.275557	6.74159
7.5059	7.4466	4.5001	12.7887	4.388	4.2794	6.4471	4.8366	5.3427	7.5067	9.4601	5.2462	7.43721	6.3781	5.1927	6.2912	8.6841	7.60302	3.14406	6.0228	8.85345	5.0654	7.5782	4.8144	8.6781	3.5088	6.2634	4.4556	7.6455	7.6491	7.4844	5.7635	7.3495		0.28	6.50327
7.625	5.1348	8.5706	13.1196	3.2094	4.5117	6.659	4.0223	3.4022	7.8542	5.4634	4.518	7.79729	8.7257	5.2386	7.756	5.8335	3.17586	3.75625	5.5174	4.33387	8.1752	7.8613	5.6094	4.2558	6.5513	4.8607	5.801	4.7452	8.5731	9.2099	5.0558	5.5888		0.284443	6.09022
7.7442	4.4485	4.1281	13.4725	7.2498	5.0463	4.6914	2.5534	2.5081	5.4279	5.6913	6.062	3.32598	7.7047	3.9037	10.827	3.6785	4.57784	5.94712	4.3503	6.14927	7.6021	4.9293	10.4576	5.4827	4.9294	8.2368	4.7907	4.8803	9.8852	6.5898	5.2257	9.0416		0.288889	6.05609
7.8633	6.085	3.8628	9.9891	6.5093	6.4904	2.9562	3.8619	2.7708	4.5956	9.9957	5.0009	5.80801	6.5717	4.9811	9.0007	7.0334	8.5305	2.61933	8.4207	5.52579	5.2077	8.1083	12.3103	3.6003	3.9013	6.2529	3.3475	6.05	9.0755	3.3015	7.9734	5.333		0.293332	6.09596
7.9825	6.1994	5.9309	8.1475	5.2081	4.0406	5.1184	2.6196	2.24	7.1924	5.8267	6.7226	9.53089	5.9103	3.7859	5.4713	9.7576	5.08567	9.71053	5.9498	6.10779	4.7965	9.8986	6.7484	8.9149	8.6977	7.1156	4.5119	7.8265	9.2276	6.9853	8.7244	6.2038		0.297779	6.56897
8.1016	4.6778	6.3024	8.1416	4.7747	2.5866	2.7004	2.9424	5.3282	4.7474	7.1887	6.3543	3.97547	6.9993	5.2865	5.7945	8.3353	5.5214	6.35256	6.7027	3.73328	5.277	13.8653	10.0158	11.9294	7.4296	5.5406	3.7629	9.3092	5.7242	8.2383	6.4461	11.6125		0.302222	6.48739
8.2207	8.5049	4.3272	3.7552	6.641	5.3048	4.4639	3.2232	4.5499	4.0509	3.8184	3.766	4.25855	8.9376	7.9197	8.7491	9.9348	10.4166	6.26889	4.6934	5.07136	5.7387	7.3765	8.4226	6.405	4.8856	5.5539	7.4352	6.5149	5.9037	10.0546	4.5949	4.6697		0.306665	6.13158
8.3399	3.5644	6.8498	3.8421	4.9864	6.0865	4.0188	4.5368	3.2424	2.5593	3.8409	6.3717	7.23857	5.7431	7.3712	6.2407	7.5788	9.87882	8.77484	1.577	4.45458	10.0623	10.239	6.1658	3.6518	9.6974	5.1038	5.1505	7.2247	7.8103	5.5577	8.1203	4.9967		0.311111	6.01678
8.459	3.3491	3.6835	6.4656	11.9935	3.3188	6.2805	1.6965	3.6294	9.4561	2.6157	6.7491	4.25302	4.7892	7.6769	7.5731	6.4337	8.04494	7.13748	2.5682	8.73308	7.8796	12.7272	8.1887	6.5848	2.5659	5.3293	6.1232	5.2302	4.6317	5.4504	6.9823	7.6639		0.315554	6.11889
8.5782	8.9643	5.7114	9.3209	8.0394	5.3607	3.1141	4.0654	1.8426	4.5901	2.8485	5.1173	4.01184	4.0489	5.8546	6.6431	10.1724	6.50025	4.63613	3.4947	4.7845	5.1495	9.7644	7.0971	7.2467	4.0771	7.2549	7.9131	3.9833	4.7204	5.6081	5.5908	10.1506		0.320001	5.86491
8.6973	4.7236	5.1077	6.7929	5.3717	4.6945	3.3821	3.6461	3.3133	10.0587	6.2834	7.3465	7.40923	6.4251	6.8321	6.1128	6.8983	6.24875	9.08483	3.7731	4.02269	3.4327	9.9964	4.8512	6.8173	3.0548	6.787	9.2687	4.9363	5.8568	5.1206	8.7262	10.7069		0.324444	6.15882
8.8165	6.0496	6.4468	5.1557	4.2639	3.1644	4.1305	2.7527	4.7937	4.675	5.5531	6.7818	6.00176	5.7227	9.1076	6.6819	5.3269	6.18531	7.90314	9.7553	3.71411	7.0274	7.2736	5.9306	5.2118	7.0958	5.0705	4.1701	5.344	3.2983	4.3027	8.9199	12.8161		0.32889	5.95709
8.9356	5.5247	3.1316	4.8986	6.6503	4.6704	5.6	4.1855	4.7068	5.5899	10.9713	5.052	3.97669	5.6418	4.2257	6.1653	6.4387	7.65161	4.64637	9.3329	4.12109	4.6256	6.1443	7.7981	3.3135	2.8977	5.2843	5.7432	5.2249	8.429	5.2242	3.9433	10.5434		0.333333	5.69852
9.0547	5.3988	5.6109	7.9686	6.1604	1.9474	3.3544	1.8316	4.0531	2.7626	6.8005	4.4067	5.90002	3.2206	4.2	3.748	4.7973	7.15836	6.99587	5.435	6.81799	11.4131	5.2511	6.1601	3.7573	5.5612	5.9964	6.1063	5.2826	6.1179	6.1659	1.9012	6.1945		0.337776	5.26487
9.1739	7.4689	9.9981	8.3834	6.657	7.4336	2.7317	1.3459	2.372	2.3689	5.5404	5.1097	4.64666	3.2089	3.2285	3.357	7.0061	9.56731	3.07416	7.0625	6.63087	4.4755	9.6277	10.3793	6.2671	4.8113	4.4755	7.4304	10.3132	5.5619	9.1708	9.1648	9.0525		0.342223	6.18505
9.293	5.8228	7.1035	7.2646	6.2999	2.3447	2.9792	2.0234	2.5754	3.722	6.4239	6.1191	5.40905	6.1952	6.6349	4.2762	6.4741	6.69993	7.43283	6.8538	5.03337	4.7497	6.8006	8.2067	4.4353	8.0124	5.6031	6.928	6.0458	4.6319	10.2698	6.8666	8.0725		0.346666	5.8847
9.4122	2.5855	5.8096	5.6919	8.2995	2.1019	2.8297	1.2125	1.3722	4.1852	6.9261	3.1762	6.09268	2.7676	4.1166	5.2122	3.8982	5.5967	3.44016	6.1195	7.18774	3.3361	5.3031	5.9256	6.4153	3.8445	6.0855	12.3459	4.8917	4.8427	10.623	10.8011	3.6203		0.351112	5.20801
9.5313	2.7882	6.0844	11.4391	7.0296	4.0087	1.8516	1.2577	2.0292	2.1106	10.9546	6.88	5.21275	3.8832	6.3708	7.5452	7.5092	7.43935	8.19582	4.2232	6.02384	5.3545	5.5311	3.7525	4.3846	2.4425	5.6757	8.9524	4.0052	3.0454	6.9495	7.7556	8.4097		0.355555	5.59674
9.6504	4.201	7.6445	8.0794	3.9221	3.488	3.3926	2.5187	2.922	2.5263	4.9566	2.7409	7.84854	4.1503	7.2595	3.3646	4.2744	5.20866	4.29404	9.1369	4.85095	4.9552	5.5001	6.1184	2.0263	5.2334	8.5669	5.4633	4.9392	7.3981	7.6875	5.767	11.2512		0.359998	5.36521
9.7696	4.6068	7.1776	4.1831	5.8621	3.4721	2.0463	1.6664	2.1645	2.112	3.9276	4.9161	5.16362	5.1274	3.0787	3.4086	5.1006	6.80098	3.65585	6.2032	4.99363	4.1645	4.2571	8.0648	6.1141	6.2404	9.6757	4.204	4.5635	8.5823	6.7347	4.391	6.8604		0.364445	4.98499
9.8887	4.9989	3.3434	11.966	6.2835	3.0999	3.2015	2.7168	2.58	2.268	3.4928	7.6197	5.6389	7.9536	5.8863	1.9625	7.669	3.74106	2.44772	8.2116	4.40074	9.1455	6.2702	9.1515	3.3421	6.2853	6.1124	2.3311	4.572	7.0833	9.2407	6.8087	4.233		0.368888	5.4393
10.0079	9.3577	4.7283	6.7011	4.6783	4.137	3.0251	3.2209	2.4586	2.3795	6.894	7.4468	4.85417	5.1835	8.0815	4.0599	2.4723	5.00244	2.02675	5.0109	7.37359	7.4892	6.7548	9.9721	1.9987	5.1603	4.0975	7.5481	2.6745	10.3121	6.3731	8.9088	3.7968		0.373334	5.44307
10.127	9.2731	7.4372	7.0903	6.0925	1.5878	3.5438	3.0908	3.3543	2.6548	10.4676	3.935	4.96801	6.3281	6.1077	5.3769	3.0452	8.79471	3.62396	6.6403	6.16845	6.419	3.3105	5.8335	4.4186	5.0623	3.295	3.6893	5.9868	5.5159	4.122	7.2795	5.338		0.377777	5.30784
10.2462	4.6259	6.2906	10.031	6.0275	3.5874	2.3899	3.0681	3.4751	2.5472	4.64	6.2291	5.6826	5.2474	3.3842	5.893	3.6547	7.25541	6.81845	5.7551	4.89702	7.4079	2.7583	4.5359	4.4965	3.7598	7.0327	4.8057	9.6426	6.4418	3.0996	6.9933	5.2934		0.382224	5.24272
10.3653	6.9908	4.4846	9.6409	5.5995	1.6212	3.3091	2.0014	2.0415	3.2862	5.0132	4.9494	4.21842	4.3589	8.1164	6.809	3.5336	7.02534	5.00758	4.1322	4.32437	10.0819	6.1043	4.3198	2.2192	4.9293	6.525	4.6208	5.4195	7.9304	4.7312	5.4719	3.965		0.386667	5.08693
10.4844	6.8041	6.769	6.1321	6.9364	2.6047	1.7573	2.2723	2.0623	3.5507	4.1256	2.2713	3.78667	6.0274	5.4239	5.1781	4.1659	3.94289	6.25697	6.5781	4.67062	5.3923	3.2578	4.9551	2.6168	7.3901	2.9961	3.6921	4.9692	9.2003	3.9636	6.0532	6.5394		0.39111	4.7607
10.6036	8.7103	4.435	11.5142	6.5946	2.2039	3.567	2.6235	1.4022	3.1814	4.2916	6.3368	3.45128	2.5905	4.8105	6.3587	6.5974	3.67268	7.58761	4.0841	3.59843	4.1138	4.8347	4.7396	6.1682	4.3545	4.3574	3.9053	3.2664	6.394	5.8595	6.2136	4.8133		0.395556	4.89475
10.7227	7.2205	4.4094	9.291	5.6962	2.5905	2.4063	2.706	2.9311	4.0541	4.4957	6.6375	2.76345	6.5341	9.2045	7.9184	2.9569	5.35781	5.83061	5.2057	4.31455	4.7625	4.0776	4.0281	2.9919	3.2791	3.0632	4.9623	3.1687	7.5259	5.9668	7.5496	5.4625		0.399999	4.98008
10.8419	5.8179	5.2294	8.0636	7.1445	2.2715	2.4413	2.2079	2.1947	3.216	4.5785	5.3718	4.4514	4.4577	4.0066	5.6184	2.7362	4.07079	6.81823	4.8336	3.63378	6.4823	3.2507	6.2632	2.6757	1.8965	5.1955	5.2952	3.9395	5.5589	7.1759	7.3317	4.0864		0.404446	4.63485
10.961	5.0148	5.5249	5.0515	6.4856	4.7329	2.1152	2.8916	2.3413	3.0349	5.3207	1.6357	3.63939	9.3975	5.6739	2.8111	2.6625	3.5609	3.89866	3.8182	7.57995	6.0678	7.0903	4.9042	2.5229	6.5948	5.4727	4.6043	5.8172	4.6315	7.0688	5.2198	2.3921		0.408889	4.6743
11.0801	4.9356	6.9481	6.7175	4.0622	2.1633	1.5625	2.0865	2.3099	3.6893	5.59	2.466	5.438	7.8757	2.7937	2.4173	3.2411	3.77134	2.8531	3.9259	4.15812	5.148	9.6259	4.1353	1.6527	3.8969	5.725	6.5403	6.4046	6.9547	5.9948	5.587	4.9802		0.413332	4.55158
11.1993	7.6093	5.0393	7.4197	7.9201	4.4239	1.3061	1.5026	1.6449	1.4416	3.6011	5.6963	5.22285	4.0588	6.9707	2.5188	5.682	6.6729	6.32215	4.0343	6.55361	3.2324	8.7079	6.4346	4.8346	5.3686	6.2947	7.047	5.4412	5.7505	7.8175	6.5386	4.0599		0.417778	5.22402
11.3184	9.1592	3.3773	4.0537	4.7529	2.7163	1.2035	2.5807	1.926	1.2585	4.9167	4.5691	6.318	3.2085	7.2681	6.7194	1.9481	6.98671	4.77306	2.1792	4.17741	5.0085	4.907	4.426	4.9388	5.3876	6.4525	6.235	4.6189	6.5996	3.8486	8.6449	4.646		0.422221	4.68143
11.4376	5.4611	7.4399	7.775	6.2444	3.4322	1.8823	3.0283	2.8128	2.6088	3.1026	2.6083	6.37738	5.3342	4.0193	4.7862	5.0922	7.49931	4.15446	4.9164	5.11401	3.1556	6.6333	2.6573	2.8338	1.8265	5.3016	3.1519	3.6346	4.9364	4.0607	5.3473	5.7619		0.426668	4.46844
11.5567	5.0887	3.3927	8.5656	8.0951	2.4263	1.6449	5.2252	1.6329	1.4342	3.9324	3.556	3.16055	5.6188	6.6708	3.0433	3.7116	8.66498	4.95453	3.323	3.17857	5.6166	9.0105	3.9887	6.1037	1.7406	3.8871	3.9725	10.8405	6.6119	6.8299	5.4029	3.8979		0.431111	4.85072
11.6758	5.6875	4.34	11.0374	6.6258	2.0244	3.1782	1.3517	1.3837	1.5094	4.4556	5.1502	3.59537	5.2461	4.6634	2.7354	4.1952	7.07007	5.63551	3.6187	3.54849	2.0632	4.655	2.7185	6.7155	5.1722	3.5169	8.2293	4.194	6.3595	4.3991	2.7881	3.9645		0.435554	4.43212
11.795	7.5655	4.0511	6.5452	10.3351	3.9197	3.6196	2.2544	1.4821	2.2292	2.9299	4.0286	5.58982	9.4534	3.54	6.1932	3.4599	5.99189	6.07438	4.668	6.55394	8.1776	5.513	6.6851	7.0964	1.7508	3.6193	3.4163	5.5215	5.4494	3.7381	4.8506	3.3046		0.44	4.98774
11.9141	8.0411	4.6859	7.1549	5.2633	3.4371	1.5352	1.849	2.8942	2.6432	2.4672	5.6073	4.57524	9.6938	2.1414	3.9895	6.4278	3.26727	4.28468	3.9542	5.59029	3.6138	4.803	7.1213	5.1813	4.7185	5.6695	6.8699	3.3817	9.2404	5.7245	6.9837	2.0784		0.444443	4.84027
12.0333	7.2878	4.8808	5.8558	4.6012	1.5978	1.539	2.1288	3.2497	2.3298	2.8761	7.3686	5.73584	5.4823	1.6322	3.9753	4.3552	3.84553	8.05129	3.2013	2.58929	7.569	5.4285	4.1808	3.8094	3.0421	5.2817	2.9444	4.3255	12.4059	5.3583	6.2341	3.8866		0.44889	4.59531
12.1524	9.1289	8.2395	7.1778	4.9736	2.0916	1.4529	2.1476	4.0137	2.0434	1.9867	6.8376	7.18171	5.3943	5.5534	2.9308	4.8737	9.2208	5.88921	5.3159	8.43584	7.4655	5.022	3.6376	5.0367	4.5617	6.3379	6.8976	7.152	8.1818	5.7906	7.9908	2.7876		0.453333	5.49221
12.2716	4.5965	7.2462	10.0184	3.4984	2.6037	2.6952	3.1962	2.0712	2.3918	2.8822	5.375	5.38332	3.1644	4.1823	5.124	4.1584	4.994	2.75859	5.0915	8.0263	5.1726	5.3713	8.944	9.1477	2.8568	3.1629	6.6186	7.7008	8.7366	5.5467	4.4639	2.2846		0.457779	4.98325
12.3907	7.4811	4.5431	8.703	7.2026	2.4296	1.65	2.9409	2.2043	4.7964	3.0012	5.7166	5.31979	5.7901	6.8709	4.0154	5.2175	6.67924	4.48901	3.8938	2.27102	9.5953	3.6414	6.0855	4.0184	4.7574	3.6499	8.2273	5.2881	5.0397	4.9009	3.669	2.6801		0.462222	4.89902
12.5098	5.308	4.9255	4.8902	6.0652	2.6113	1.5332	2.1021	2.0006	3.2734	3.3548	8.7705	3.75208	3.4262	5.2427	7.1599	3.5214	6.68067	2.49434	3.5262	5.08048	4.9602	6.1032	4.7644	3.0566	4.7149	4.5027	6.3496	8.006	7.9676	4.0213	4.0797	2.2837		0.466665	4.57902
12.629	4.9724	6.0876	5.6039	6.0713	6.1558	1.967	1.5052	2.364	1.5556	2.5188	7.0817	2.06395	10.4109	3.7094	2.41	4.6275	4.1291	3.6624	3.1314	4.4007	7.2914	3.8424	10.3125	4.3558	6.6629	4.3767	7.3021	6.8711	9.0929	3.361	3.3451	2.0456		0.471112	4.79025
12.7481	5.0921	7.5327	7.1118	5.0966	2.5252	2.5605	2.7399	3.0444	2.9056	2.5684	4.177	5.33646	3.7406	4.0429	6.0142	1.831	2.85846	5.91487	2.2743	2.87408	8.4445	4.8075	8.172	5.9166	6.0814	5.4343	5.3958	7.0821	10.8351	6.7638	5.4087	3.8593		0.475555	4.95132
12.8673	6.9928	6.2262	6.2464	4.684	1.8366	3.6263	1.397	1.7821	1.6433	2.0609	2.2287	5.02346	7.6562	3.1035	5.3558	2.2997	3.07649	3.89391	2.8625	6.05765	5.846	7.5989	9.147	4.7821	3.6812	5.085	5.1113	4.7119	6.0407	5.8608	2.9642	3.5677		0.480001	4.45157
12.9864	7.9583	3.3124	5.7593	3.3556	1.9342	2.5484	1.3146	1.3816	1.2821	4.7147	7.6025	5.56001	4.8906	6.3877	6.3289	4.3935	7.11205	4.66734	4.7015	5.88039	5.1129	6.6084	5.5198	5.3898	3.06	5.5021	4.4822	4.9579	5.8977	6.8253	3.2034	4.4175		0.484444	4.75196
13.1055	5.6262	7.5063	8.8302	5.9047	3.632	1.2583	3.5478	2.6358	1.5301	2.6382	6.8712	2.37547	2.8083	5.5798	5.001	3.6859	5.40318	4.01777	3.316	5.31262	4.8885	3.1441	12.7901	4.7956	4.1428	6.2546	6.4314	5.939	5.5269	5.4538	4.8944	1.7173		0.488887	4.7956
13.2247	3.8145	5.5928	7.7941	4.8303	1.6296	1.6249	3.6127	1.8735	2.2078	4.3709	4.9324	6.02497	3.7599	2.4557	5.2014	4.2422	3.41189	7.66947	7.4797	2.7187	4.3008	6.4225	5.6395	2.4316	1.6516	3.7925	5.8956	6.4568	4.0229	5.2008	4.3622	2.7111		0.493334	4.31673
13.3438	3.8676	6.5791	7.3279	4.4107	2.8289	3.9889	3.8625	2.6489	3.1077	4.1102	3.2184	6.09122	2.4777	6.4787	8.1112	5.0207	6.25912	5.92005	6.4289	3.09899	4.7752	6.3774	4.4143	7.9729	2.8486	4.1856	3.4405	3.3214	1.902	2.4165	3.77	2.6854		0.497777	4.49835
13.463	5.3088	5.5043	5.6716	4.4056	4.2895	2.4957	1.6737	2.2165	1.6265	4.2533	3.3688	2.73925	3.336	8.6448	6.0949	3.1092	3.63532	2.4199	3.8854	6.56348	3.2658	5.5221	3.574	4.796	7.4555	4.0087	5.2871	5.0631	5.4692	4.0594	4.2752	1.7459		0.502223	4.24264
13.5821	5.6296	4.5966	8.9258	5.6489	2.2367	3.3031	3.7474	2.79	2.4814	2.9818	4.801	5.21737	3.2266	4.5528	5.0518	3.3932	5.19	5.23471	5.5535	2.49158	6.068	4.4322	4.119	3.4933	5.2744	4.1143	4.9884	3.809	8.0479	3.4022	3.214	1.7328		0.506666	4.36717
13.7012	3.6626	5.0511	6.0054	4.3979	4.219	3.1656	1.8697	2.9144	2.4529	3.2887	3.4162	5.77284	2.9727	4.258	4.6289	4.8451	5.53285	5.27159	2.9472	4.14086	2.4608	5.7324	4.2458	3.8115	2.98	4.5201	9.8845	4.8685	4.3101	5.4416	2.5608	2.8422		0.511109	4.20225
13.8204	6.3937	5.5329	7.6444	6.6773	2.0917	1.9139	1.5263	2.949	3.3854	1.6379	3.3669	3.25175	7.4077	6.1343	3.1736	6.2106	3.76923	4.98886	2.3877	2.61358	3.5454	5.2918	2.2806	4.87	3.095	3.7724	7.1804	4.781	5.0705	5.6943	3.1223	2.4689		0.515556	4.19467
13.9395	5.8262	4.8025	5.6761	3.6469	2.4236	2.1102	1.5847	1.8442	1.7891	2.5266	4.7521	3.12278	6.2386	4.9834	5.4857	4.8964	4.22231	3.3227	2.5545	4.98495	4.7929	6.0348	3.3174	2.8436	2.7108	3.4047	5.5721	8.3902	4.3366	5.1211	2.0755	3.031		0.519999	4.01326
14.0587	2.7236	3.9318	8.0062	4.6217	3.3697	2.2542	2.5468	1.6375	1.9329	1.5952	4.0951	6.20942	6.2353	3.2262	5.1198	4.034	2.23853	6.19279	1.8973	6.70046	3.3582	5.6878	6.3499	5.812	3.2887	3.3865	6.0027	6.0699	4.2852	7.6212	1.4963	2.6423		0.524445	4.20529
14.1778	1.6788	3.9096	4.8018	7.3943	3.3233	2.873	2.9603	3.0044	1.7917	3.4562	2.9434	7.98989	2.7741	6.7743	3.6432	3.1958	4.81823	4.02994	4.0319	4.69338	5.115	2.8902	4.0552	3.8593	3.0387	2.3538	6.1425	10.2826	4.6226	3.6894	2.4561	2.4202		0.528888	4.09416
14.297	4.8538	4.1815	4.0428	2.0192	4.9665	3.2189	1.7512	3.5265	2.8504	2.1479	8.029	6.54475	5.9864	8.1388	3.0095	2.0639	3.14135	9.38152	2.0592	4.64523	3.0867	2.7295	4.2967	3.3867	4.5496	2.2054	3.2006	7.6773	3.3203	5.0735	2.2776	2.5797		0.533335	4.09194
14.4161	4.4971	5.7966	9.8779	5.4607	6.5091	2.8063	1.8493	2.3494	1.6562	2.2432	3.5638	8.07787	5.179	5.381	2.4757	2.4332	6.2485	4.74945	1.4145	6.97225	4.6552	2.7309	5.6302	2.4082	3.2098	4.8993	5.1261	3.5217	4.9386	3.2316	2.6932	2.0505		0.537778	4.20739
14.5352	4.5122	7.0342	5.6079	10.0563	2.6704	1.6281	1.491	1.6035	4.4257	2.7559	4.9923	3.06922	6.6292	3.6761	2.7051	3.2864	5.42738	2.88795	5.005	5.78571	5.4289	9.3172	7.5509	4.264	4.9673	7.4787	5.3763	3.9875	7.9333	4.9152	2.7585	2.0003		0.542221	4.72586
14.6544	6.1382	6.4243	6.4932	7.6546	1.7007	3.2377	1.2846	1.3392	3.6362	1.4288	4.9802	4.28136	5.9986	4.6138	2.1792	5.8178	3.34688	5.63826	5.5237	3.84095	3.5942	5.117	4.3568	5.5782	3.72	3.3239	6.1837	4.9358	7.5977	5.1897	1.7136	3.616		0.546667	4.39015
14.7735	2.855	6.1006	8.6663	3.8302	2.3494	1.6929	1.4172	2.5677	2.2908	3.3635	5.9854	3.45173	9.0662	4.4678	2.8079	1.8129	2.82884	2.72553	2.636	4.06558	3.4851	6.711	5.3185	5.2064	2.5972	2.5461	4.2083	3.1581	4.2012	5.0828	4.0881	1.4043		0.55111	3.84339
14.8927	2.6577	5.0937	8.5308	3.327	2.3065	2.2887	2.1776	3.2404	2.4694	1.7068	3.8577	7.39999	3.9103	6.5772	3.0587	4.9383	3.30876	2.84523	5.2931	5.27589	6.6093	5.7416	6.5438	2.8644	3.3102	5.7541	7.4723	2.8669	6.3975	5.6155	3.0249	2.9851		0.555557	4.35779
15.0118	5.7006	4.8136	8.3683	4.6856	2.367	1.7097	3.9582	2.3568	3.962	2.2067	4.3	5.38366	4.0063	6.7758	4.2589	5.9912	2.29372	7.725	5.9512	5.67032	6.6731	5.4623	4.8899	2.058	2.5394	2.3141	4.4137	4.8713	8.2475	3.5247	1.6468	1.6475		0.56	4.39915
15.1309	4.9522	3.1923	8.8928	4.4384	3.4767	2.5941	2.3192	2.8912	3.4358	2.5081	1.6086	5.20597	6.6781	2.8427	3.1611	2.3681	3.01573	5.57613	3.8757	4.43734	2.4188	10.1505	5.8855	3.5968	3.7578	5.1481	4.4444	3.8625	4.898	2.7078	4.6986	2.0132		0.564443	4.09538
15.2501	6.0581	5.8721	10.805	2.7537	1.5837	1.8243	1.7329	2.1205	4.1465	2.0108	6.2243	3.03204	5.2051	2.2238	2.8884	6.9415	3.52821	4.52488	4.1324	3.11307	4.235	6.7466	5.5675	4.0533	5.8209	2.7622	5.3294	3.7706	7.2822	4.5269	1.4694	2.9594		0.568889	4.2264
15.3692	3.984	5.1636	9.8649	5.0174	2.4383	1.7418	2.8203	1.9219	2.8707	1.8316	2.2374	2.82466	3.6387	4.2196	3.0011	5.3869	3.11063	3.7856	2.8727	2.67972	2.1432	6.6926	3.6153	2.2396	2.3471	3.6195	2.4089	5.3278	6.6449	3.2535	1.9559	2.4049		0.573332	3.56452
15.4884	5.7517	8.1775	6.8346	5.7238	1.6154	3.7258	1.3553	1.4901	1.8061	2.1848	4.0068	3.62502	4.1232	8.8708	1.9595	7.649	5.64169	4.4192	5.3929	5.72264	5.9637	6.6536	5.6942	2.9333	2.6617	2.3796	3.2354	5.0838	5.5305	8.7956	2.4855	3.5217		0.577779	4.5317
15.6075	4.7291	5.401	8.039	6.2564	2.8341	1.3231	1.4514	1.4585	1.4035	1.8523	7.431	4.87232	4.6948	4.6821	2.3135	2.9381	5.21473	2.56571	6.895	3.58577	4.0203	6.3132	3.513	2.8482	4.0031	4.2235	5.7912	7.8313	5.047	3.9759	3.6282	3.4694		0.582222	4.20643
15.7266	3.3435	4.8215	8.0434	4.4475	2.3924	1.941	1.2293	2.7331	1.7038	1.4868	3.5664	2.38325	3.4746	6.656	4.5015	2.4639	3.41491	4.17933	4.6644	3.67711	2.7547	4.9538	6.8718	2.7216	3.3787	3.3174	2.6299	6.4582	7.4682	6.7244	3.4723	2.5792		0.586665	3.88918
15.8458	3.2667	4.067	3.6789	7.9829	3.4909	2.0963	1.5009	2.2077	4.1129	2.5056	3.5025	2.49053	6.6026	4.9299	1.64	3.0083	3.31862	4.3668	3.7185	7.72591	3.445	6.1197	5.9945	3.4738	2.3042	3.5802	4.4541	1.7408	8.451	5.7575	3.2337	3.3156		0.591111	4.00261
15.9649	9.0977	6.0617	7.1808	7.9498	2.95	2.5736	3.1448	1.615	3.2724	2.5415	3.6704	3.24773	5.3457	3.7295	2.9193	6.1122	3.94144	3.23057	4.0921	6.27842	4.9773	3.4915	6.3873	4.2273	2.9054	5.4936	3.9662	3.2502	4.0201	4.165	2.9283	3.3874		0.595554	4.31732
16.0841	7.8448	4.1987	5.3512	2.5645	1.9459	1.7778	1.8029	2.391	3.5844	2.2207	3.9129	4.01127	7.4742	3.6395	6.7109	3.2276	4.2523	4.46905	2.6864	3.29917	5.3584	5.4648	3.432	1.9547	4.5751	3.9678	2.1674	4.1848	3.0118	5.6992	5.6895	2.7852		0.600001	3.92675
16.2032	10.2782	4.5014	5.438	3.8504	2.8366	1.8261	1.6062	1.5424	2.4762	3.4867	4.2237	1.94159	3.9505	5.4048	3.2035	4.0525	3.55867	2.65858	4.3225	4.28858	4.9278	7.9867	2.5624	4.515	5.5179	2.9596	4.9759	6.1103	5.4965	8.8289	1.9538	2.9598		0.604444	4.19505
16.3224	5.7574	3.6228	8.7519	4.0039	4.7392	2.6551	2.1383	2.0681	3.1492	2.623	5.8797	4.0049	2.9575	4.4546	2.8614	3.7079	5.86437	3.28623	2.9537	5.70067	2.6851	4.0274	5.0482	4.4022	1.7595	3.888	3.1401	3.9861	6.6652	6.3373	2.5738	2.2296		0.60889	3.99757
16.4415	7.6318	2.0438	5.1769	5.5914	1.7782	1.9614	2.1516	1.3914	1.9418	2.5494	4.845	3.93309	4.0527	3.2059	3.4378	6.7191	4.2784	9.98471	3.5328	4.69967	5.0504	4.5221	7.2591	3.3908	2.6522	3.3414	2.9844	7.6751	10.1316	6.2353	1.5348	5.0679		0.613333	4.3985
16.5606	5.4484	1.9705	5.117	5.3788	1.5086	2.1353	1.4982	1.5142	3.0268	2.7885	4.8039	4.88696	6.7043	1.7978	2.8008	4.356	4.26953	5.29606	3.3924	4.81158	4.9442	11.0468	3.82	8.6662	2.9253	5.4127	5.0332	4.3558	4.1005	5.0797	2.7793	3.973		0.617776	4.23882
16.6798	5.5688	3.5034	6.3311	11.504	2.4423	2.9297	2.6152	1.8361	2.9895	2.2719	6.7575	4.3736	2.6202	5.5647	3.3419	5.0525	2.93522	6.39586	2.6214	7.6693	6.5842	6.7292	4.4152	3.3849	4.4477	2.6592	5.0963	3.5411	4.7202	6.8652	2.4849	2.2373		0.622223	4.4528
16.7989	5.5896	4.1627	5.9805	10.2839	2.4055	2.6353	1.6823	2.0908	2.1612	2.9834	5.072	7.37552	4.183	5.0282	1.6274	3.6641	5.49934	6.72958	2.3788	3.9074	5.0549	9.003	3.4374	4.142	3.2798	2.6019	3.853	4.9382	6.9598	5.8217	2.4591	1.4603		0.626666	4.32661
16.9181	3.5508	6.2183	4.6617	8.7267	3.1442	1.8334	3.0465	3.741	2.6474	3.9411	6.7097	4.66655	5.1848	2.8035	4.5689	5.3522	3.36802	3.18412	2.9123	4.86548	4.8457	5.4063	3.0383	4.0811	2.0126	4.782	3.4128	6.5637	7.4095	5.6419	2.1497	1.7497		0.631112	4.25687
17.0372	2.8232	3.5567	3.4743	4.8406	2.7022	3.2052	1.5221	1.558	2.2725	1.4511	3.8379	3.55808	5.5423	4.3597	4.4233	2.4941	3.17496	4.20409	2.8574	6.08788	4.7669	4.911	4.2966	3.6084	2.1013	2.8933	5.5729	6.8709	7.034	3.5229	2.3531	3.3436		0.635555	3.72564
17.1563	5.9422	3.7414	3.5786	10.372	2.5415	2.0916	2.509	3.0844	2.2131	4.9287	6.4233	2.07309	6.7371	3.0296	3.6735	5.6277	3.09334	3.71317	2.1921	5.12958	3.903	6.0695	4.8769	3.6107	4.4625	5.6575	3.4983	4.693	6.4687	3.3081	2.2776	3.5298		0.639998	4.22033
17.2755	5.1178	5.5296	3.3193	6.2344	3.3436	2.4004	2.7358	1.7265	1.6956	2.9977	5.088	4.2677	7.0548	5.3017	3.9944	6.5354	3.83054	3.78154	1.7508	5.83034	2.0327	3.7406	7.4682	4.3813	3.9596	3.2973	4.5071	4.8856	4.4261	8.3758	4.1101	1.8334		0.644445	4.23605
17.3946	2.1135	5.4838	7.1002	4.2019	3.582	2.6575	2.0547	2.5596	1.3369	3.5981	6.4156	5.67632	6.9696	5.5379	2.9731	4.4253	3.64358	3.89075	5.3414	3.52098	2.2262	2.9365	6.8589	2.6794	4.2018	6.658	2.6978	5.2348	7.6804	6.0638	2.0676	2.53		0.648888	4.21619
17.5138	2.8799	4.4091	4.0897	7.9661	2.9172	2.5568	1.6169	4.3432	1.6251	2.2784	4.9423	2.31551	4.8963	7.1669	1.9699	8.5525	5.10133	4.9606	5.4743	2.49958	4.9024	3.3512	6.9584	4.6563	4.2354	4.0073	6.1174	3.9336	7.8266	7.6388	1.6295	2.5104		0.653334	4.38528
17.6329	3.5385	6.606	5.1128	6.6231	2.6201	3.6422	1.4592	2.4595	2.8732	1.4711	4.9078	5.56338	5.5246	4.7955	6.6103	5.2387	3.85516	5.15279	4.6191	3.39124	4.1477	5.2587	7.7939	5.5139	7.0077	4.3159	3.1006	2.2541	11.5295	6.0375	2.4498	1.9085		0.657777	4.60569
17.7521	3.4811	6.2522	6.1107	5.4281	2.4792	3.5346	1.5554	2.8442	3.0121	1.9885	3.1967	6.57305	5.8222	3.4312	4.284	3.2996	3.28496	4.44767	2.5789	1.53695	5.6404	4.7601	8.7974	6.5736	5.8168	2.7378	3.0933	1.9441	8.2453	5.6302	2.8568	2.3023		0.662224	4.17311
17.8712	4.7313	3.7908	3.5941	4.7738	4.4365	2.0514	1.2139	1.6449	2.0794	4.3555	5.6985	2.73906	7.3973	2.7127	2.7192	6.3574	5.76813	4.80241	2.1747	4.96866	5.8865	4.9642	8.0322	5.227	4.8745	5.9647	5.2936	3.0128	7.6516	6.4682	1.9105	1.9564		0.666667	4.35162
17.9903	4.6659	2.2669	4.0863	6.7334	2.0869	1.4792	1.3967	1.8751	3.5082	4.7731	2.9039	4.61212	6.236	5.4094	3.9728	4.6	8.62336	2.75213	3.3154	4.42585	6.275	4.6298	8.2096	8.6965	5.5692	6.0823	4.4768	5.9836	5.039	3.6193	1.7199	3.3191		0.67111	4.47946
18.1095	6.6664	2.7821	4.6297	4.3884	1.45	1.3808	2.1819	2.6359	2.6009	3.173	3.4959	3.15929	5.3669	5.0431	3.4305	3.8606	6.59916	3.33421	3.3891	1.68567	5.3461	3.367	4.254	4.5209	5.3084	2.2777	4.6202	3.1905	7.446	5.4741	1.7463	2.4376		0.675556	3.78882
18.2286	4.4396	3.4699	3.7175	3.4355	2.7125	1.7364	2.5699	2.2276	1.9408	2.3882	3.2174	3.47117	7.9895	4.2101	3.5606	3.9504	4.43111	3.63635	5.5578	6.95472	2.7919	4.5716	6.7782	5.81	3.8769	6.7756	3.3853	2.5082	5.8591	4.5935	2.763	1.7178		0.679999	3.97025
18.3478	4.73	3.6807	6.2653	5.4557	4.1689	1.929	2.5139	1.3819	1.513	3.3269	5.2514	5.50594	2.0153	5.8538	4.365	3.508	4.9401	3.90497	6.8413	3.98772	3.7213	3.4659	10.6262	7.4019	2.1523	5.3994	7.0674	3.8838	3.6907	5.0209	2.4309	2.3663		0.684446	4.32393
18.4669	6.7546	2.3928	8.4958	4.1074	5.0054	2.1459	1.5896	2.4017	1.7677	2.4826	5.7476	3.04848	4.5277	3.3156	4.3848	3.9657	4.58606	6.41641	5.0275	1.84642	4.1264	3.9835	6.776	7.9473	2.0757	3.5372	2.7573	4.9959	7.3461	5.1018	1.8363	3.6041		0.688889	4.19054
18.586	3.2452	3.0253	3.3688	1.9776	1.5018	1.4228	1.3062	1.5071	2.1285	3.5638	4.2378	5.58305	5.3022	1.8074	4.1215	3.2198	4.42657	3.86727	4.2694	4.78478	4.8112	8.4495	2.524	5.0388	2.0923	5.4329	2.312	2.4327	6.9759	3.9163	2.9591	3.4429		0.693332	3.59545
18.7052	3.0334	3.5801	2.6643	3.82	6.0366	1.5549	2.1382	3.3176	2.1046	3.1019	3.4327	4.44696	3.8732	4.7456	3.7961	3.5074	2.11564	4.08561	6.1196	3.19561	6.3797	3.9586	4.4601	4.3721	3.5417	8.8986	2.5946	2.0454	5.2001	7.8835	2.9919	2.8112		0.697778	3.93149
18.8243	6.3588	5.1512	4.3694	5.3384	2.2221	1.396	1.6748	1.6125	1.6574	1.7899	1.6768	3.1041	2.2145	6.3265	5.459	2.7241	5.18086	5.78424	2.7633	4.11813	4.3114	4.6707	5.6754	4.3034	3.9231	4.2883	2.4816	5.3127	9.1759	7.4891	2.8952	2.2901		0.702221	3.99184
18.9435	5.134	6.183	2.7471	4.2602	2.8343	1.9887	2.4342	2.7036	2.633	2.7382	4.2083	6.4031	5.6001	3.2225	6.4633	3.1276	4.25827	3.63528	3.2042	1.74626	3.1835	5.0619	4.9484	1.739	2.0471	5.247	3.8285	4.6662	5.4057	7.8322	4.7878	2.6348		0.706668	3.96585
19.0626	5.9995	4.0668	3.3223	3.0116	2.2011	2.1012	2.2815	2.6103	1.2498	2.5179	4.3846	3.01808	3.8004	1.9797	3.0956	4.1549	6.01083	7.04826	6.4128	4.63699	3.1873	3.2889	3.5836	3.0157	3.0148	4.1656	4.6973	5.4579	4.1482	8.0405	4.3185	2.4415		0.711111	3.852
19.1817	3.1713	2.4597	3.948	4.0168	3.9	2.7384	2.0323	3.1934	1.2839	2.927	3.4799	5.65638	2.7505	4.1344	3.694	2.6754	6.14612	4.87684	3.7003	5.41772	1.5692	4.0849	3.0122	1.8211	3.0924	4.1224	4.6713	3.8391	4.3793	4.4889	3.1465	2.9351		0.715554	3.54265
19.3009	5.2929	2.4994	3.5109	5.2718	1.7478	4.4005	1.9505	3.2033	1.7489	2.7497	3.8391	5.56792	1.7738	3.261	5.5706	6.6564	1.97412	2.62712	3.0728	5.0956	3.9838	5.2033	2.8241	3.4557	3.5705	9.9175	7.0799	4.895	5.5968	12.0617	3.6866	2.3533		0.72	4.26382
19.42	2.5212	3.3878	5.3231	5.3457	5.3112	2.8185	3.2166	2.453	3.834	5.715	4.2372	6.90616	3.3417	5.8382	4.1112	4.6568	3.34767	5.13602	5.6003	3.73076	4.4921	7.38	3.4472	4.6927	7.3805	6.6686	3.1214	3.2969	2.9068	7.1932	3.4914	1.4781		0.724443	4.44941
19.5392	3.0735	5.1599	5.1072	5.979	3.6371	2.0095	1.8962	2.1466	2.0559	7.1656	2.2677	5.24045	3.8156	4.2231	1.5384	3.9132	3.52086	5.43847	5.7628	5.04681	3.6304	3.9223	5.3479	3.7121	5.3845	6.4823	3.633	3.092	6.4009	4.7585	1.941	2.2904		0.72889	4.04979
19.6583	2.9196	3.3041	4.1697	6.0356	4.6008	2.311	2.8932	3.377	2.4621	3.6459	2.2232	3.3254	4.9155	3.3426	4.9353	3.6907	4.55437	4.28237	5.5065	3.32432	5.7955	4.6799	4.9133	6.796	4.5226	3.4816	5.2178	3.8698	5.8219	8.82	2.8657	5.0055		0.733333	4.30028
19.7775	5.8917	3.8542	2.539	4.0905	1.6918	2.4134	2.1267	1.4678	2.8078	3.9414	3.1876	3.02861	3.0413	5.1284	3.7449	2.6003	2.64024	4.23393	6.9354	3.92596	3.7949	4.6575	4.1391	3.5423	3.7934	4.7662	3.4319	3.2178	9.4368	6.5793	2.814	1.6183		0.737779	3.78383
19.8966	6.1589	4.4257	4.0259	6.5248	3.2449	1.7227	2.1321	3.0236	1.9638	3.4866	3.3254	5.65847	3.1904	2.7776	4.4479	4.4139	2.79478	4.43219	4.6412	4.56306	5.7179	3.9284	5.6942	3.6379	4.2227	3.4119	4.5181	3.7462	5.0136	5.2781	2.1508	1.9801		0.742222	3.94543
20.0157	4.9256	3.3808	4.369	5.8319	3.9879	2.9042	2.5995	2.4216	1.8261	5.6178	3.2379	4.47366	5.1488	1.9738	2.8057	3.5915	6.34716	3.35436	6.6873	3.04232	6.1184	5.0203	3.8379	3.1949	3.6791	3.8096	4.1158	1.7039	4.8173	11.5794	3.0658	1.8539		0.746665	4.10385
20.1349	3.3572	2.4379	8.1955	2.999	4.6781	1.641	2.4614	1.2471	2.1717	3.1772	3.2704	5.78384	3.0561	4.2475	3.3691	2.9735	1.97228	4.17461	3.9802	4.13737	4.5785	3.5636	2.5696	4.7681	1.7518	6.0009	3.0886	3.0443	6.9701	3.459	4.7776	3.4682		0.751112	3.66785
20.254	4.7617	2.6334	4.3035	6.265	2.441	4.0035	1.7731	1.4874	1.8803	3.8303	4.0955	6.11701	3.8137	4.4004	3.7354	3.0756	3.79637	3.386	2.3634	4.57092	6.9632	4.8272	2.4673	2.8941	2.6503	4.0443	2.4873	4.5162	6.9869	5.9468	3.4523	3.8154		0.755555	3.86827
20.3732	4.2451	4.442	6.984	4.521	2.7969	3.1874	1.5992	3.1674	3.3503	4.0919	3.7371	2.64165	3.6414	3.3624	1.7382	3.6224	4.66478	4.89399	4.5547	2.94144	6.9945	5.4888	5.2724	4.0492	5.413	3.3396	5.7913	3.3071	10.4983	8.2073	2.0199	2.7623		0.760001	4.29147
20.4923	8.5112	8.3457	4.0003	6.3791	3.668	1.8095	2.7509	3.3462	1.4411	4.7875	4.9815	3.31786	3.287	3.68	1.4029	3.1055	2.38278	4.77273	2.0334	3.11463	4.3161	6.4891	2.7283	4.6734	3.6376	3.8488	6.6233	4.1543	7.5959	4.2402	2.4678	6.4696		0.764444	4.19882
20.6114	5.8043	4.3816	3.5518	5.2339	3.5854	3.0936	2.1582	2.1488	2.9842	3.3698	5.7937	4.98029	6.599	4.9293	2.3504	5.1803	3.90297	3.22762	3.4167	6.01794	5.0131	6.0632	3.97	2.4979	7.5094	4.6535	4.6075	3.5257	8.8707	5.2033	4.9781	2.6717		0.768887	4.44606
20.7306	6.4794	5.5293	2.5596	5.4928	3.9998	3.5684	3.0073	2.2021	3.1848	3.4053	4.948	3.37224	4.116	3.793	3.1408	6.5012	2.54502	4.75813	3.0185	6.64281	7.2033	6.2205	2.5401	3.8168	9.0536	4.2192	7.3258	5.1424	8.4613	5.3409	4.7603	1.3869		0.773334	4.61674
20.8497	4.1653	6.2893	4.2426	5.2	4.8968	2.9357	2.5247	1.7171	1.8962	2.8181	4.1461	3.61835	4.3452	4.5358	2.3854	2.6115	5.39212	3.71127	3.7351	6.34893	6.2775	4.2705	4.8973	5.371	2.8524	4.6532	6.449	4.1321	5.3989	10.4893	6.6338	2.7403		0.777777	4.42753
20.9689	3.8933	6.0717	2.0891	7.6996	4.9149	2.7488	1.8197	3.271	3.5101	2.4003	2.2688	4.68943	5.5669	5.7308	3.1537	5.0617	5.36561	6.00745	4.4647	4.45072	4.0739	7.0318	6.5455	3.3279	6.4727	4.5358	5.4886	2.8764	4.7744	7.9131	5.8821	2.6368		0.782223	4.58554
21.088	3.295	4.9829	5.6034	4.2139	4.835	4.8094	3.1529	1.7975	1.2032	6.0564	3.7649	2.58018	2.5244	4.8038	2.6525	4.6162	5.72154	4.00469	2.952	4.84861	2.0091	4.0125	5.7811	2.1553	3.5	2.0722	3.5419	2.4893	6.9794	6.2745	6.6851	2.8641		0.786666	3.96197
21.2071	3.5171	2.9673	5.187	7.4219	3.6386	3.3466	2.0809	2.8869	1.984	3.6999	3.6651	3.81138	3.2701	3.9761	2.8428	5.8329	1.84927	4.10938	4.1149	3.69348	3.5869	6.574	6.3245	3.7245	3.3969	2.0257	4.8328	2.248	8.0664	4.6863	4.4703	3.7355		0.791109	3.98648
21.3263	6.9238	2.0728	5.0349	4.0446	4.8105	3.4624	1.7463	2.5325	2.7329	3.1484	5.5306	6.1452	4.4477	2.4343	5.5391	4.6814	2.77538	2.73008	2.7253	6.59349	4.6142	3.9172	5.5687	5.1122	4.8396	4.4064	2.6594	2.0254	6.0439	4.8722	4.3298	1.8811		0.795556	4.07443
21.4454	5.7343	3.3893	4.3704	3.5244	6.6481	2.8069	1.7593	2.2039	4.0624	2.1161	5.4797	4.8775	4.9445	2.8849	2.9596	2.3445	5.9124	7.89516	4.1801	2.87325	8.0711	5.0045	4.2321	6.215	4.6591	3.4158	4.1351	1.3826	6.825	6.1159	5.2849	2.3571		0.799999	4.33328
21.5646	2.6979	5.9016	4.677	4.0352	4.231	3.6739	1.9297	3.5893	2.4217	2.9038	4.0364	4.78904	4.7416	6.0646	2.4153	6.8566	1.92894	3.82498	2.9756	5.34745	6.2984	4.405	5.4039	5.7589	3.7253	4.7999	4.0724	3.9867	5.3281	6.0654	5.1164	2.218		0.804445	4.25688
21.6837	4.4625	3.5716	5.6318	5.7149	5.7357	1.9021	1.5288	3.2354	3.8784	4.16	4.3194	3.53383	4.8861	3.5734	2.4127	5.9075	3.08485	7.67871	4.4614	3.5469	2.5275	3.4291	6.8792	5.2213	4.3621	2.3443	3.1766	4.591	4.9858	3.0109	5.4723	3.8525		0.808888	4.15871
21.8029	4.7191	4.0865	4.639	4.1562	3.653	2.9681	2.5659	1.8072	2.5131	1.7469	5.0253	4.291	4.7207	2.8481	3.7583	2.3438	4.57046	3.66119	3.2951	3.05024	2.0843	4.1181	5.578	4.124	4.0547	1.4869	4.2214	4.0639	3.5636	6.9661	5.9735	3.6502		0.813335	3.7595
21.922	4.8874	6.8503	10.2109	5.6267	4.0764	3.4792	1.8783	2.2324	2.6743	3.3669	3.6584	7.66172	2.6058	2.7601	4.3112	2.7355	2.81479	7.87457	5.3595	4.33769	2.9661	3.0866	5.1187	3.8681	1.7473	2.7183	5.6341	2.496	4.4927	6.6507	3.9263	2.321		0.817778	4.20087
22.0411	4.0417	3.4305	3.5193	3.8472	4.6586	1.574	1.802	3.1012	4.2079	8.3384	3.2163	4.98356	3.6571	4.1703	2.6512	2.2741	2.2305	4.09625	5.0795	3.61258	2.1232	5.145	3.9524	1.6015	4.1094	6.5955	6.3859	3.9345	5.6816	7.5539	7.3041	1.5432		0.82222	4.0757
22.1603	4.3162	2.7961	6.1863	6.4985	4.4754	2.2624	1.9506	3.7102	6.187	4.0605	3.7309	3.18196	3.4876	3.6711	1.5966	4.8966	1.65879	7.06023	5.3589	4.01587	3.2985	3.116	3.4816	6.4855	4.4872	4.3041	2.8194	3.2896	9.9133	6.6631	5.8171	2.707		0.826667	4.29638
22.2794	2.0726	3.9138	3.1811	6.9575	6.0998	2.3399	5.116	2.5654	5.6752	5.228	2.9807	4.78207	3.3299	2.4506	2.2033	1.7985	1.79879	4.86236	3.528	3.2882	4.7805	3.1013	3.4345	1.8736	3.9068	4.1559	5.1447	7.114	8.9139	6.6382	4.9782	4.0179		0.83111	4.13223
22.3986	3.5065	1.4117	4.4604	3.6229	6.2164	2.7125	2.4627	3.3768	5.1066	5.646	3.7813	4.87749	5.349	1.4678	2.0345	2.9236	2.07604	4.93655	4.9143	3.64292	3.4359	2.9813	3.9709	4.3479	3.0363	2.9999	4.622	4.2748	3.003	5.3109	5.501	3.693		0.835557	3.80322
22.5177	4.9826	5.5245	6.5186	2.7483	6.7437	5.0524	3.9964	1.7316	3.0426	4.1748	5.6698	4.2109	4.9577	6.1182	2.1021	1.7651	3.10223	2.00987	5.5811	3.03005	7.1556	4.4659	3.6005	3.6022	4.5548	2.5364	5.1831	5.4213	2.9965	7.1732	8.5182	4.2635		0.84	4.45418
22.6368	3.7263	5.0302	4.5278	6.2044	3.2803	3.6797	6.7978	1.2334	2.3037	9.3147	2.8631	3.75594	1.6977	4.5383	2.8218	1.2749	4.24542	1.52957	3.8727	4.67364	5.4559	3.1228	3.3467	4.9772	3.1865	4.168	1.7682	3.121	3.1708	6.6237	5.5284	6.9328		0.844442	4.02417
22.756	3.8803	5.9702	4.0105	4.0869	3.7017	4.1566	2.88	2.8017	1.6401	4.5935	4.7648	3.82722	4.5423	2.3865	2.445	1.4361	2.30572	3.87997	6.7259	4.13151	3.9667	5.0403	2.4758	4.0492	4.1864	2.0258	5.6385	6.0755	2.0712	5.5296	6.3443	7.8286		0.848889	4.0437
22.8751	3.7354	6.2522	5.9088	2.7656	4.39	3.0855	4.3727	3.1288	4.4272	3.459	2.1884	3.44159	4.1129	2.7799	2.5757	3.5097	1.83445	4.24083	6.8273	2.82204	2.0758	3.1547	2.7565	2.9735	5.567	3.6983	4.5325	2.9394	6.0895	9.1802	5.2946	3.8776		0.853332	3.99993
22.9943	3.7431	2.8576	6.5163	3.4714	3.9593	4.6925	3.4909	5.585	5.607	6.0833	5.8363	3.8164	4.0141	2.3259	1.6627	1.9148	2.40373	2.77603	4.5658	4.04488	3.8552	1.3919	5.5456	6.5153	3.8954	5.0228	4.106	5.3861	5.344	3.9583	6.9494	3.8147		0.857779	4.22349
23.1134	6.1526	7.5571	3.432	5.9925	6.7751	2.1765	2.3701	5.3989	4.3213	5.6999	4.5466	2.98295	4.4399	5.1192	2.0852	2.4936	2.42778	1.84175	3.7685	5.35033	3.5294	2.4034	4.9309	2.2497	8.423	3.6706	5.5269	3.3172	2.1126	6.6123	6.9123	6.196		0.862222	4.4005
23.2325	4.8655	6.0396	4.2407	4.375	2.4329	5.0517	3.9836	2.1895	4.5084	5.5594	2.8856	2.53762	5.1337	3.9775	1.2638	1.2098	2.66081	4.38328	6.0381	6.67492	3.0016	2.7647	2.7955	5.1511	4.5045	8.4681	3.1093	4.3125	4.2624	7.5699	7.7564	2.7192		0.866664	4.26333
23.3517	5.2891	3.1878	4.5578	4.6817	4.4432	2.988	3.0038	2.7063	4.2798	6.1666	4.8542	2.10458	2.9183	1.4846	1.9777	1.4031	2.02898	4.69153	3.5572	2.52315	4.2933	2.9084	3.4241	3.1822	3.3558	4.7797	4.1938	3.1155	4.368	5.8285	9.8096	4.3151		0.871111	3.82567
23.4708	3.4813	2.2374	4.7873	2.6577	4.0368	2.316	3.6398	4.8588	3.7828	6.4533	4.5678	5.49393	2.0241	3.8942	1.504	2.365	1.93	4.37877	5.6688	5.63626	4.152	3.0438	2.79	5.862	2.8947	5.2007	4.1709	2.9722	4.7294	3.4381	4.6942	2.5941		0.875554	3.8205
23.59	4.6865	2.6054	7.3993	5.3781	3.8664	2.5767	5.0659	4.6284	2.8943	5.8036	2.9864	4.71935	3.7701	1.8152	1.6135	1.9337	2.13653	5.31853	4.7097	4.47392	2.7616	2.7727	1.7895	3.9179	3.5185	6.1169	2.4823	1.3417	3.1301	2.9761	7.1332	3.649		0.880001	3.74909
23.7091	8.5719	8.1391	6.747	4.0962	3.7297	5.3693	3.4881	3.9724	1.9822	6.2413	2.5814	4.17434	3.3542	1.6046	1.1874	1.1618	1.55023	2.90658	7.3491	6.5347	4.1566	2.9772	4.0043	4.6545	4.4564	3.1149	2.8491	1.9345	2.846	3.7375	5.1894	5.4209		0.884443	4.06509
23.8283	3.1712	3.4272	7.6285	4.7701	5.8945	2.7443	3.5041	3.28	5.1659	6.6295	3.6948	2.40479	1.6145	3.5796	1.332	1.3886	1.58085	4.96735	4.7599	2.87947	2.8674	2.7283	3.036	5.2715	4.0507	4.2553	6.346	1.9261	2.8411	4.3108	4.547	4.0797		0.88889	3.77116
23.9474	9.1325	4.0233	7.6299	3.8439	5.9858	3.2984	3.8367	5.3365	9.0952	6.6036	3.5766	5.56091	3.3602	1.8322	2.2194	1.2851	2.58508	2.09868	6.0325	5.39201	5.0501	3.3027	5.4769	8.375	8.1577	5.8191	5.4665	4.2611	2.2377	4.1657	4.2274	4.8865		0.893333	4.81734
24.0665	5.174	4.1367	3.6019	6.2758	4.6784	4.6969	4.6565	3.6217	4.5377	5.6044	1.7184	5.9476	3.1759	1.6262	2.3782	1.3645	1.57319	2.37975	4.1731	5.4726	6.2302	1.6843	3.3545	6.8419	7.0924	6.9369	4.0329	2.4196	4.3085	1.9239	5.0492	5.7768		0.897776	4.13889
24.1857	3.7687	4.1184	2.0062	4.443	5.0602	4.8135	7.5265	5.756	5.0756	4.9268	4.4867	5.39302	6.1793	2.5956	1.8852	1.2963	1.55393	2.71514	4.1629	4.77351	4.0305	2.9866	3.2604	5.0309	4.4664	6.2612	3.0668	1.9509	1.6652	5.1596	3.824	6.7581		0.902223	4.09366
24.3048	3.1431	4.4136	4.1149	4.2404	3.6189	4.6899	2.7414	6.1905	3.8499	3.1415	4.7382	4.79491	2.3218	2.3713	1.4813	3.5126	2.09905	3.0602	3.1917	3.67196	1.8312	2.7571	3.33	4.5012	8.3109	6.2868	2.5807	2.5942	2.7067	4.1124	4.2026	4.2542		0.906665	3.71422
24.424	6.4855	3.9256	6.6261	2.5379	5.136	2.7901	4.869	3.9551	5.8033	4.42	6.0989	5.84293	2.8254	1.2215	1.6392	3.2586	1.79036	1.60985	5.0241	4.92413	2.6928	1.6503	2.7799	5.9277	6.0382	5.3638	2.8936	1.5056	1.7997	2.3188	5.4127	9.7199		0.911112	4.02771
24.5431	6.0443	5.5759	3.5139	1.5111	4.2953	5.5022	4.9288	4.0188	6.7706	5.6053	6.7931	5.38068	1.5757	1.2218	1.2716	2.4732	2.36472	1.96089	5.9372	3.40713	2.1256	1.9961	4.9891	4.2781	7.129	5.9313	3.3146	3.6065	3.2491	3.985	3.465	6.1612		0.915555	4.07446
24.6622	3.4471	2.0465	4.5859	3.4345	4.6911	3.9427	4.0847	5.4364	6.9821	6.0944	7.816	5.76087	3.616	2.9242	1.3517	3.4187	1.35069	1.87563	2.9496	2.57895	1.4541	2.7676	3.6951	2.1363	2.888	2.7985	4.4598	3.4088	3.4269	1.54	3.7777	9.0817		0.919998	3.74445
24.7814	5.0366	3.5733	6.87	3.1073	2.8032	5.5436	4.1974	3.6381	2.5719	3.1128	2.5763	4.96634	2.1826	1.5249	1.9502	2.051	1.2428	1.37365	4.2434	5.4957	2.2776	2.4884	3.5364	5.1604	5.0746	4.0551	3.1362	3.643	3.3067	8.2213	5.1894	6.3958		0.924445	3.76706
24.9005	2.0443	2.5562	3.017	3.5554	4.2225	4.7664	3.7434	2.7926	4.3286	4.6849	4.5688	2.35768	2.661	2.1913	1.4933	2.2365	1.3475	1.40014	2.6456	3.46326	2.7885	1.3781	4.1078	3.5236	5.6099	2.3312	3.9617	4.3192	4.9008	5.1961	4.4161	12.1184		0.928887	3.58524
25.0197	2.0244	5.2022	3.2588	2.3473	5.8442	5.2423	3.6172	3.6184	4.7393	3.1219	2.4056	2.03751	2.1443	1.284	1.4209	1.9198	1.38523	2.57681	3.8392	3.65843	3.0774	1.3408	2.9242	3.628	6.1103	2.4783	2.9168	3.4831	12.2336	5.8055	3.3916	9.6005		0.933334	3.70868
25.1388	3.5735	6.9561	5.2603	3.1025	3.7621	7.8449	6.2513	6.5888	6.2377	4.8344	2.8894	1.19132	2.8569	1.7791	3.315	1.3808	1.51142	1.58159	2.225	4.87537	1.6855	1.1955	4.5294	2.8417	4.9199	5.0504	3.4204	1.6297	4.6354	6.232	8.5633	4.8793		0.937777	3.9875
25.258	4.188	4.9047	3.448	2.4162	4.351	5.6013	2.9685	10.358	2.1365	3.3931	3.2601	3.6746	1.4212	1.7727	1.4761	1.586	2.59815	1.41834	1.3742	4.16065	3.2561	2.8656	3.9741	3.4904	3.7233	3.9242	3.9021	3.4595	7.2758	4.6059	2.8287	5.9212		0.942224	3.61669
25.3771	4.306	4.5152	3.1762	2.4886	2.8855	5.083	4.4082	4.3858	4.8126	2.6356	3.2787	2.12644	2.5233	1.2925	1.3128	1.2968	1.57154	1.51028	1.2895	2.33782	2.193	2.3503	1.8292	5.5214	5.1172	5.7058	1.6967	2.6066	8.3692	3.6967	3.7472	4.9072		0.946667	3.28053
25.4962	6.138	5.0234	2.914	2.176	2.3045	5.4172	2.839	2.8411	3.9055	4.419	1.8412	2.68782	2.1282	1.4972	1.3761	1.2069	2.94775	2.21743	1.6815	1.55179	3.0765	2.2943	2.9604	8.8692	4.9521	5.9982	2.6981	1.2621	3.1672	6.2112	5.0229	3.9603		0.951109	3.36207
25.6154	5.2491	4.3978	3.7725	1.4755	5.432	6.746	2.0512	2.7239	2.4452	4.6529	2.4716	1.32644	2.7484	1.704	1.1903	1.5598	1.70434	1.54118	2.4665	2.48896	2.016	2.8082	1.7794	3.2814	4.381	2.6307	2.7589	3.5258	3.1844	6.0366	4.4287	5.9228		0.955556	3.15317
25.7345	4.5932	2.8615	3.7234	3.5558	4.3237	3.2435	3.0038	5.0377	5.3452	6.7136	1.4164	2.90076	1.6857	1.4028	1.527	1.4756	2.20805	1.34175	1.8667	2.01137	1.4142	2.0882	1.8543	4.3559	3.2671	6.4715	3.0467	3.9929	6.3538	4.4521	3.8032	7.8715		0.959999	3.41278
25.8537	2.6229	6.1319	3.6518	2.2512	2.3003	4.7172	1.9454	4.1838	3.5908	3.4622	2.4421	1.70931	2.3661	1.8653	1.9312	3.2696	1.69343	1.38671	1.3262	1.47761	2.7234	2.2189	3.2487	8.5986	3.1368	4.2248	5.1507	2.3123	5.309	7.5949	3.9111	6.2756		0.964446	3.40718
25.9728	2.229	3.6296	3.6096	2.6317	2.9726	3.2682	3.3833	3.5551	5.3137	2.6249	2.3293	2.23154	2.4664	1.6947	1.6218	1.6387	3.30644	2.77084	1.3832	2.90692	1.7679	2.3105	2.115	3.1631	1.9061	1.7364	2.8592	2.5783	3.542	3.7481	2.6583	4.4952		0.968888	2.76399
26.0919	5.4009	3.638	2.7322	2.3262	2.9127	2.4625	3.458	3.3424	3.3891	5.4985	1.9718	2.92289	1.8848	1.46	1.2992	1.3719	2.45504	1.9347	1.5382	1.35024	2.0459	2.1586	1.4442	5.4096	2.605	3.0126	2.4603	1.9495	6.4402	3.5416	2.1255	8.5741		0.973331	2.97239
26.2111	2.6276	1.6073	1.5691	1.4675	4.5902	2.1383	2.465	4.6814	2.9364	3.9373	1.6136	2.37052	1.5009	1.4375	1.1939	2.1271	2.08642	1.40261	1.3612	1.72259	1.3022	1.3538	2.5687	2.7183	3.6288	2.3531	1.8169	2.8624	3.796	7.3122	2.5547	6.49		0.977778	2.6123
26.3302	3.6565	1.7051	2.8772	2.1749	6.2041	2.2403	4.0761	2.6608	4.0342	4.1318	1.5185	3.29725	1.5462	4.775	1.6184	2.2877	1.34812	1.89264	1.2891	1.387	1.3992	2.0098	2.3822	2.9189	6.4572	3.8728	1.9897	2.1577	3.7596	5.3453	3.6207	3.1623		0.982221	2.93113
26.4494	4.9187	1.4095	2.1182	3.1342	3.727	3.0919	1.995	4.6987	3.0624	2.2022	1.8017	1.71778	1.2197	3.5778	1.325	1.3893	1.86531	1.46716	1.3242	1.37092	2.1508	1.7159	1.685	3.3877	2.8918	2.4742	1.574	1.8774	3.3239	2.3368	3.1479	2.6712		0.986668	2.39541
26.5685	2.7786	4.2766	1.7675	1.8315	2.7756	2.5185	3.6881	5.8411	3.2562	4.6778	1.648	1.4675	2.5884	1.3975	1.2946	1.348	3.47467	1.31027	1.8028	2.23733	1.3263	1.9085	1.6482	1.9248	3.1026	5.7437	2.2891	4.7957	2.2525	3.3709	5.5603	3.5887		0.99111	2.79662
26.6876	2.1669	4.0799	1.7553	1.4232	3.5888	1.7943	3.0021	6.091	1.4386	1.5158	2.4994	1.95142	2.0087	3.7346	1.8286	3.4393	1.71617	1.25508	1.3597	1.3915	2.3061	1.4148	1.4423	2.2168	2.3466	4.0819	1.5873	2.5887	3.2782	3.9314	5.2335	5.0425		0.995553	2.6097
26.8068	3.0145	3.5569	1.5586	2.0187	2.4489	2.121	2.8116	2.271	2.3666	1.5525	1.416	1.54707	1.3722	1.8044	1.4038	1.3778	2.13664	1.78406	1.8858	1.55507	1.3653	2.0327	1.8397	2.6973	2.4391	2.044	1.3939	3.2727	4.8373	2.693	6.5308	4.7545		1	2.37198

## Sheet: Image9
X0	Y0	Y1	Y2	Y3	Y4	Y5	Y6	Y7	Y8	Y9	Y10	Y11	Y12	Y13	Y14	Y15	Y16	Y17	Y18	Y19	Y20	Y21	Y22	Y23		Ap-Basal	Avg intensity
0	1.7606	1.86385	3.00302	1.61	3.75382	2.76476	1.90458	2.56759	3.5507	1.33586	3.12897	2.50153	2.57563	2.16458	1.30516	1.73248	1.68776	1.96	1.30816	1.97563	1.94642	2.36806	4.60949	8.0645		0	2.56013
0.1191	2.3363	1.1649	1.90849	2.21361	4.823	4.46224	2.95479	2.9881	3.36594	2.7348	1.43398	2.6929	2.17959	1.61901	1.27752	2.92683	1.97815	1.9127	2.25105	3.5959	2.87086	3.01324	4.74949	5.17051		0.00555364	2.776
0.2383	1.5872	1.67513	1.44535	1.76744	2.66988	3.03181	3.14335	2.2795	3.074	2.32024	2.0762	1.89519	2.89655	2.10178	1.33048	2.62705	3.73439	4.1221	3.38452	3.8016	2.70004	2.52006	3.83205	7.08535		0.0111119	2.79589
0.3574	1.8745	2.66987	2.07135	2.41904	2.66076	3.0638	2.22001	1.89925	4.6722	1.36452	3.8716	2.24646	4.23145	2.04144	1.5317	3.5816	2.38953	1.806	1.86811	1.66872	2.77247	2.53343	1.88824	5.61883		0.0166656	2.62354
0.4766	2.0014	1.30312	1.98505	2.25486	3.66631	2.10439	1.38466	2.4669	2.01309	2.12791	2.52916	3.71723	2.51726	2.25399	2.0697	4.41315	1.3619	3.3298	3.35858	2.48126	5.01808	2.37761	1.93232	3.8533		0.0222239	2.60504
0.5957	2.5662	1.61582	1.98015	2.58358	3.50089	2.80101	1.69105	3.09296	2.36833	2.12415	2.88908	5.14654	2.65328	1.80474	2.30117	2.48225	1.4804	2.4216	2.42047	2.92889	3.22976	2.29762	2.60313	5.12193		0.0277775	2.67104
0.7148	1.4435	1.40905	2.36465	5.11944	2.76	2.11777	2.54477	2.123	2.03212	3.50376	4.20128	3.52822	2.31225	2.97414	2.18512	1.92235	2.37499	3.0728	2.7348	1.33197	4.97726	2.37399	2.02221	4.38698		0.0333312	2.74235
0.834	1.384	1.67271	1.69739	2.30468	4.15017	3.08127	3.58965	2.61767	1.8714	3.71361	3.35009	4.72439	2.71868	1.74236	2.47117	1.43148	2.2256	2.1333	1.92332	1.23494	2.954	3.11504	3.90256	3.34512		0.0388895	2.63977
0.9531	2.3245	1.26575	2.0658	2.80828	3.28793	2.5962	3.03782	1.79434	1.8334	2.56351	3.3998	4.901	2.4176	1.39514	3.09527	2.29949	1.57549	3.457	3.26215	2.41454	2.92154	3.70092	1.82827	3.88558		0.0444431	2.67214
1.0723	2.0053	1.37425	1.99962	3.22505	4.48024	2.18389	3.6957	2.22449	4.53314	5.20577	4.30618	3.81295	3.54284	4.00273	1.90955	2.45145	2.36203	2.1973	2.70478	1.72425	2.45314	4.57931	1.75649	2.29021		0.0500014	2.95919
1.1914	2.2011	2.00069	1.85103	3.65434	5.39388	2.1327	4.32737	3.0814	5.56746	2.41694	4.10913	2.90387	4.2957	1.90142	2.31668	1.42809	1.31143	3.145	1.96936	1.36782	1.9097	3.9849	1.55148	5.12718		0.055555	2.91453
1.3106	3.1106	3.18027	3.62182	3.17485	4.54634	2.544	2.18451	1.80766	4.10526	3.56021	6.84116	2.12617	1.90318	1.71422	3.03702	2.06457	1.3827	2.7577	2.89692	1.65622	2.83075	5.32775	2.65345	4.97982		0.0611133	3.08363
1.4297	1.9967	4.06951	3.60537	1.43972	3.04241	2.16677	2.74814	1.2513	2.67357	2.78268	3.50072	3.7554	2.52358	1.75604	1.7604	2.00401	2.00028	2.4469	2.55624	1.75495	3.12097	3.65583	2.44058	6.31465		0.066667	2.72361
1.5488	1.8933	2.89927	1.55504	3.55461	1.80917	2.2737	2.61	1.56483	2.61911	3.50486	4.05951	4.28721	3.10486	1.67977	2.49593	3.20952	1.512	4.1868	2.41548	1.62612	2.87398	3.95789	4.3403	7.83213		0.0722206	2.99439
1.668	2.3178	2.48334	3.29423	2.79194	2.98097	1.75704	5.07241	2.32713	2.22134	3.14882	4.46895	2.71203	5.20719	2.59779	4.2056	3.80911	1.54034	2.9146	1.9693	2.02452	3.63871	5.47117	4.9049	3.51877		0.0777789	3.22408
1.7871	1.6684	4.8376	1.87812	2.13999	2.59835	2.55393	2.80817	2.61186	2.58914	5.15512	4.85739	5.81514	2.4055	2.62697	4.33788	4.5379	1.34938	1.3263	4.43844	2.74507	5.14603	3.1389	4.494	5.5793		0.0833326	3.40162
1.9063	1.7372	4.32923	3.51077	1.66275	3.06678	4.80219	2.216	3.8963	3.77003	3.13724	6.60286	7.97658	1.80386	2.32144	3.62149	2.88816	2.87832	3.7195	4.30811	3.12472	4.63717	6.5661	2.5395	4.65453		0.0888909	3.74045
2.0254	3.6995	3.08231	3.58632	1.68533	2.58491	4.31222	1.28593	3.92232	6.04342	3.79866	5.22052	4.57956	3.67795	1.84819	2.83981	4.12084	1.44241	2.2144	3.23933	2.91482	3.88741	4.48089	2.46406	4.5436		0.0944445	3.39478
2.1445	2.404	2.1526	2.97745	1.48834	4.64868	2.00177	2.793	3.59853	4.28405	2.38804	5.11025	4.17348	4.97876	2.09087	2.81102	3.88975	1.70357	4.6324	3.55493	3.08138	1.90824	4.1924	3.00041	4.80389		0.0999981	3.27783
2.2637	2.0952	2.75712	1.979	2.4753	2.22815	1.84653	2.33514	4.64051	1.86894	2.91258	3.58383	4.16587	4.71252	1.73552	3.74509	5.99554	1.68547	4.6585	2.68482	4.40755	2.0469	3.88213	2.32548	5.10948		0.105556	3.16155
2.3828	2.7715	2.96164	3.02032	2.16889	1.96358	2.19977	2.75128	2.58786	3.32146	4.03011	4.34583	5.46764	5.06042	2.34907	4.13463	5.02993	2.54537	3.3186	2.53109	2.79492	5.62094	4.14725	3.45934	4.58289		0.11111	3.46518
2.502	3.3502	3.22968	2.64509	1.62536	1.97329	1.87208	2.47815	2.85236	3.47715	5.3112	4.95607	4.17807	5.94132	1.90025	3.76802	4.72524	1.56869	3.4371	3.31798	4.36907	2.43723	4.17225	2.92473	3.80034		0.116668	3.34629
2.6211	2.3484	3.86637	3.26355	1.98855	3.03601	3.1729	3.18127	2.05286	4.10004	4.5412	3.48144	3.67202	5.4706	1.94162	4.99769	2.80672	1.47178	2.4506	1.53994	4.79084	3.51993	3.42566	3.1523	4.55959		0.122222	3.28466
2.7402	4.5809	3.19444	2.4396	1.82375	2.58964	3.22488	3.51429	2.54745	4.46745	3.26773	3.14	3.32842	6.73569	5.38318	4.0029	3.18906	3.82582	2.9275	2.27393	3.28343	6.09617	3.30214	4.10681	3.17441		0.127776	3.60082
2.8594	3.0168	2.73201	2.78216	2.09545	3.07681	1.42366	3.22399	2.29677	4.36934	3.01291	2.77034	2.67061	6.98799	3.90116	3.06697	3.16845	2.88198	4.556	3.37912	2.25407	4.76959	4.27247	3.49364	2.18503		0.133334	3.26614
2.9785	2.8955	3.39067	2.81001	2.07938	4.05865	1.3808	5.17314	1.96626	3.26017	4.2738	3.57141	4.16755	3.72747	4.2665	3.39575	5.17406	3.70833	2.9273	3.37978	4.29596	6.64392	5.11002	6.0967	2.87556		0.138888	3.7762
3.0977	2.7966	4.2074	2.03295	1.57698	3.19864	2.51435	2.64733	1.76361	2.6034	3.4927	6.11458	3.32662	4.09298	4.36754	3.74062	3.55109	4.55942	3.8793	2.21877	2.81176	6.14908	3.99633	4.28407	2.92604		0.144446	3.45217
3.2168	2.9982	3.50129	1.88205	2.33973	3.10698	2.48747	3.44709	1.79577	3.02748	3.71907	1.99742	3.28408	3.4477	2.14396	4.34118	3.60527	3.78836	2.7758	1.99925	1.45687	3.81082	6.74677	3.60188	1.61751		0.15	3.03842
3.336	1.9458	3.47992	3.30958	3.6022	4.09072	3.06691	4.43663	3.99901	5.15205	4.14948	2.88518	4.59342	4.71963	3.31063	2.81045	4.32214	3.48657	1.7863	2.17394	2.94682	2.92426	4.44336	3.96151	2.48858		0.155558	3.50355
3.4551	3.0345	1.91948	3.5903	3.67987	4.24552	1.96021	3.90743	5.16346	2.7969	3.43043	4.1957	7.57036	3.03748	3.38846	3.10047	4.67758	4.6404	1.7629	2.54413	3.75062	4.2595	4.92029	5.04363	1.8665		0.161111	3.68692
3.5742	3.6515	2.09975	3.74527	3.48467	3.33003	2.63137	2.3209	3.59089	4.71961	3.69336	2.05815	2.88442	6.23028	5.63324	2.10298	4.58356	2.33837	2.4979	3.25617	1.39002	3.98478	5.13425	5.08285	4.20033		0.166665	3.52686
3.6934	3.1886	4.49153	3.81538	3.14299	3.82973	1.92417	3.04732	3.59946	3.44532	3.50077	2.84728	4.5965	3.45832	4.45977	2.20593	4.04719	2.41873	3.3697	3.70572	2.8925	5.10153	4.37607	4.88883	4.49872		0.172223	3.61884
3.8125	4.3395	3.31815	4.2972	2.04145	2.65636	1.92263	3.92575	2.97528	4.55332	5.01089	3.99317	4.83022	2.49711	3.35361	3.83071	5.88147	1.99632	5.0043	3.36996	4.48148	4.65001	4.81944	4.53802	2.66027		0.177777	3.78944
3.9317	4.6317	3.16244	3.26449	3.24543	2.74169	2.19976	2.66879	2.67348	4.73643	2.34688	1.9948	4.45742	4.80718	2.98767	2.73308	3.55163	2.98449	3.1375	3.46476	3.75234	3.74246	7.03481	2.67629	2.6517		0.183335	3.40197
4.0508	2.5157	3.49621	2.92038	4.06311	2.1745	2.60922	2.80512	5.02371	2.99776	3.25618	3.3206	6.45426	5.55207	2.93032	5.48939	5.16695	3.78557	5.3345	2.06652	1.9695	2.09661	6.33147	4.0944	4.36392		0.188889	3.78408
4.1699	3.1806	2.72281	4.88676	2.44597	2.63206	1.50012	3.32734	4.20466	3.26579	2.8338	4.32361	7.34506	6.32326	3.08308	5.67111	2.67711	1.8702	2.9074	1.85677	3.42616	3.62684	4.98305	3.15604	4.97651		0.194443	3.63442
4.2891	2.4861	3.58951	2.47193	1.25622	3.51659	1.88691	1.77371	5.05637	4.34713	3.5928	4.15486	4.02832	4.95461	5.2328	4.41541	5.29154	3.08894	2.0345	1.42271	2.6371	2.9366	5.52626	1.85455	2.19586		0.200001	3.32297
4.4082	2.7601	3.11458	2.50641	2.10129	2.16758	1.76179	3.09896	3.88268	4.49866	2.85235	4.12866	2.56048	5.15422	3.04817	3.36087	3.47873	2.77049	2.9756	3.16414	2.37923	3.90079	3.77371	2.1007	2.40728		0.205555	3.08114
4.5274	3.4677	5.43529	4.15827	1.87991	6.18811	1.39735	1.85443	1.45693	3.51099	2.92001	3.72029	4.52683	3.95266	2.56265	3.72992	3.51958	3.24292	5.6254	3.96509	3.16504	6.8909	6.45894	2.94595	3.34411		0.211113	3.74664
4.6465	3.8881	4.48579	2.38097	3.19784	2.7265	2.22356	3.64846	3.66852	2.97875	2.33577	2.64776	5.31634	4.17754	3.84134	4.60974	5.16338	6.75556	4.3281	3.47233	5.47277	3.12495	7.54272	5.54215	3.59689		0.216667	4.04691
4.7657	2.682	3.2687	2.56335	4.25878	3.07465	3.19193	3.64088	4.32591	4.20151	1.99613	3.54579	4.61027	2.42405	4.45502	3.08316	4.32524	6.03782	1.8543	4.72076	2.99124	3.55172	2.78616	6.3684	4.79174		0.222225	3.6979
4.8848	2.7534	2.11282	3.5047	2.14128	3.78737	5.36985	4.07788	4.99877	4.82021	2.53214	6.46924	5.20768	1.57369	4.30666	3.48065	2.85383	4.23297	1.7308	3.80935	2.91694	4.50653	4.14292	2.25003	2.88326		0.227778	3.60262
5.0039	3.0381	2.31633	1.46295	4.14462	2.21073	3.72463	3.68042	5.01759	2.13967	2.65211	5.01405	3.59717	2.63419	3.56352	1.43752	2.29231	2.79953	3.0151	4.41679	1.95567	3.00263	3.76657	2.4076	3.34167		0.233332	3.06798
5.1231	3.2932	3.68963	1.43978	3.2482	3.04301	1.92217	1.55803	4.14001	2.5486	5.00053	6.68133	3.27896	3.74228	3.09204	3.65853	2.75433	4.78334	3.7424	1.9496	3.97458	4.13356	5.09214	6.19246	3.94479		0.23889	3.62098
5.2422	2.193	4.11472	2.15295	2.79632	2.49597	2.32046	1.76946	3.79	2.38579	2.77196	2.72284	3.90215	4.64173	3.99534	3.59903	4.31658	3.62324	2.7468	4.83694	4.33537	2.96913	5.45394	5.74848	2.91522		0.244444	3.44156
5.3614	2.7721	2.43266	2.12618	2.32255	1.97835	1.47519	3.67941	3.16376	3.89996	3.35792	4.02372	3.80721	5.92086	3.38908	3.25099	3.59806	2.22169	4.886	3.88618	2.99639	2.77661	5.41387	5.45383	2.58207		0.250002	3.39228
5.4805	2.4716	3.83751	3.57543	2.41964	1.29367	1.9046	3.05192	3.0873	5.90719	2.60542	3.98025	4.81814	3.18069	2.98809	2.28858	5.62198	2.44627	4.943	3.21968	3.48886	1.72127	3.42917	4.62473	3.30667		0.255556	3.34215
5.5996	2.8324	2.08101	3.15998	2.01687	1.60657	2.72141	2.32563	2.83098	4.59444	2.20802	2.60586	3.03676	5.4695	3.883	2.90141	6.2295	3.29438	2.2234	2.58398	4.45909	4.45679	4.10008	5.94955	6.32067		0.26111	3.49547
5.7188	2.2602	2.79398	3.35654	2.64389	3.28851	3.31761	2.18317	4.41742	3.0729	4.44672	2.28428	2.78955	5.16197	2.56706	6.77134	6.28526	3.07212	4.0991	4.1213	4.50169	3.4352	3.16474	5.75235	6.50027		0.266668	3.8453
5.8379	2.6811	2.89158	4.36035	2.07843	2.30734	3.09716	2.10991	2.17941	2.68399	3.73707	4.72341	4.57175	6.3273	2.3884	5.16361	5.81047	1.98869	6.0135	3.04985	3.63931	2.22007	3.49179	5.53455	3.97603		0.272222	3.62604
5.9571	2.528	3.42715	1.63244	2.814	3.80031	2.44801	2.51284	2.74539	3.73271	5.5069	5.16029	4.87958	3.75887	3.50624	5.2984	4.73322	3.76981	3.3881	2.96232	3.14539	2.71796	3.62818	8.52384	4.09989		0.27778	3.77999
6.0762	2.7221	3.54672	1.47374	2.97157	4.83344	1.692	1.17869	3.04185	3.35094	3.33665	2.88702	5.11436	4.34018	2.80757	4.07735	3.48507	4.18092	4.8818	2.53626	3.42098	3.91619	4.06365	8.15498	7.35706		0.283333	3.7238
6.1953	3.0415	1.90883	1.64452	2.34783	3.59619	2.22725	2.13616	2.6273	3.09154	2.78576	3.59227	3.55685	5.11904	2.39348	2.1844	1.87541	3.29825	5.2057	2.57039	3.56608	3.07469	3.55635	9.37109	5.75154		0.288887	3.3551
6.3145	2.7223	3.64017	1.83632	2.59811	2.86431	2.80158	3.92811	4.45427	4.08975	3.04984	4.0113	4.27109	5.13	2.59728	2.10029	2.09614	1.24453	3.9301	4.25733	4.45579	3.48073	6.46772	5.16407	4.94104		0.294445	3.58884
6.4336	3.0858	2.74496	1.50226	3.22369	2.97408	3.7322	4.44458	3.82387	4.35367	4.7287	3.76395	3.80055	6.24913	2.89398	1.87628	2.96359	1.70026	3.2516	4.79237	5.24016	2.10334	4.67418	5.26799	3.34723		0.299999	3.60577
6.5528	2.6241	2.52774	1.59805	3.65966	5.32164	1.96622	2.12747	5.88417	3.38246	3.92464	3.92739	2.71194	5.56046	1.72347	6.23346	5.11589	4.0459	5.7816	2.57847	2.61957	1.52615	4.56261	3.20745	4.06691		0.305557	3.61156
6.6719	2.2027	2.71889	2.5542	1.9461	2.71619	2.04379	2.76739	5.11777	4.45528	5.47592	4.49152	3.02564	2.39506	3.35594	4.31027	3.27594	2.88626	4.794	4.71472	4.35726	4.07644	4.42809	4.72246	3.0104		0.311111	3.57676
6.7911	4.0207	2.18972	3.33407	1.65429	2.29421	2.53443	1.60983	2.37456	3.14562	3.69425	4.73722	4.43565	2.93576	2.5069	4.30948	2.09057	1.9283	5.5849	4.14476	4.42344	2.12956	2.62389	6.0095	4.49341		0.316669	3.30021
6.9102	3.8329	2.63963	3.17579	1.85324	3.06501	2.69543	3.40269	6.22087	3.71526	4.22815	3.84997	4.36999	4.56333	3.35538	2.4958	1.87162	4.11652	4.2155	3.27401	3.1211	2.50795	3.79294	5.03818	3.81598		0.322223	3.55072
7.0293	2.4925	3.21115	2.05483	3.42103	2.34079	1.97177	2.28754	6.30482	4.43656	4.89849	3.74478	2.83127	3.56254	4.04495	2.20502	1.28549	2.20572	3.2267	3.34616	2.58025	3.34448	3.22221	6.45001	3.61109		0.327777	3.29501
7.1485	2.4877	4.99315	2.27448	2.00366	2.55129	4.36567	2.66034	3.3909	4.04171	6.28737	3.1182	2.7607	3.95214	2.77885	2.9864	1.74149	4.91036	3.6782	3.87894	4.98572	2.33046	3.05019	3.58621	2.59346		0.333335	3.39198
7.2676	2.2469	3.27864	3.00114	1.60379	4.80624	5.21351	3.55105	4.01029	6.33699	3.5134	4.26986	2.44938	3.72234	4.56919	4.76111	3.89649	4.52358	5.7939	5.79613	5.83567	2.88746	2.79525	4.01864	5.9632		0.338889	4.11851
7.3868	3.4204	4.17612	2.1246	2.13718	2.42479	3.37579	3.44986	4.93289	5.82126	4.19333	2.03385	3.32567	2.99455	4.81487	3.82184	1.84686	6.79494	7.1485	4.87063	3.30224	3.25423	3.28	3.4818	6.53125		0.344447	3.89823
7.5059	4.1348	4.63766	3.05917	1.88953	4.31297	2.71901	1.95291	3.1702	3.08884	3.42075	2.45994	3.50886	4.38567	4.2049	4.28196	2.07755	3.01138	4.6936	2.83961	3.30695	3.68795	2.19004	3.71648	6.6188		0.35	3.47373
7.625	3.9875	2.80009	2.91978	3.10134	3.57168	2.40692	2.55294	6.57934	3.37263	4.11289	3.17291	2.2701	3.97923	4.33221	2.25587	2.12821	4.98733	13.1979	1.63395	4.01138	3.96271	1.85406	3.65565	6.53608		0.355554	3.89095
7.7442	5.2915	2.33528	2.73077	1.52154	5.42931	2.64086	2.85111	5.04651	3.75106	2.53403	4.11689	2.58759	2.28565	4.05001	2.63864	3.99408	2.53034	13.1817	4.04666	3.35671	4.55125	2.47449	6.16899	5.54421		0.361112	3.9858
7.8633	6.257	4.1517	2.32978	2.41096	4.55047	3.19264	4.19563	4.33718	4.4008	2.80136	3.86424	4.72446	4.10489	5.25191	1.98353	2.28167	3.10329	8.0108	2.26222	3.23797	4.01836	5.60071	2.63892	6.81208		0.366666	4.02177
7.9825	2.9972	1.90633	1.70386	2.79711	5.03058	3.8171	4.51148	4.33649	3.90669	2.71581	4.22358	5.77285	6.99712	3.5593	2.85067	1.8378	3.26584	9.9506	2.64453	6.29919	3.83241	4.67958	2.60593	5.91951		0.372224	4.09007
8.1016	4.1164	2.28072	2.77464	1.63352	3.22297	3.07808	3.70046	3.60276	4.98662	3.08351	2.85643	1.4666	5.01183	6.24738	3.78017	2.11095	3.19802	7.7311	2.37676	7.68048	3.67805	4.01155	2.99183	6.25607		0.377778	3.8282
8.2207	2.1521	3.45663	1.63956	2.11355	3.67424	3.46017	6.61558	3.21206	3.29877	2.98477	3.39121	2.34415	3.65469	4.99011	2.46675	1.63011	4.64865	7.6237	3.22295	6.33442	3.76698	4.20014	2.77913	5.34332		0.383332	3.70849
8.3399	1.8243	3.50828	1.48485	2.25646	5.63385	2.74118	7.05466	2.83479	5.16349	4.34519	1.86684	3.33081	2.65623	3.58173	1.89926	1.65105	3.23389	5.1489	4.12484	4.55899	4.88535	4.17278	3.35919	4.45135		0.38889	3.57368
8.459	2.441	2.59549	1.7945	1.93466	3.00635	2.95747	4.64863	4.97772	4.16731	2.42113	1.44487	2.97541	3.87728	4.11933	4.68085	2.267	3.68796	2.7595	4.37838	4.41129	3.80398	5.02589	4.08787	6.8716		0.394444	3.55564
8.5782	3.1671	2.98005	1.5418	4.01826	1.67863	2.45244	4.68265	4.47247	3.14426	1.81347	1.64893	1.86823	5.42044	3.92251	3.74979	2.67545	2.04884	2.2597	4.77256	5.58056	2.4289	4.04488	3.71371	6.8666		0.400002	3.37301
8.6973	3.2964	5.17857	1.48769	1.83219	3.02527	1.66426	5.1227	3.12666	4.71171	2.27381	2.30217	1.88664	3.14005	4.66048	2.75489	3.72481	2.46388	2.4549	3.64719	5.63732	4.4507	3.2725	2.25658	4.93306		0.405556	3.30435
8.8165	4.8851	4.6161	1.34159	2.16713	3.17353	5.25959	5.54335	3.48838	5.31996	2.00216	2.66023	3.77967	2.23898	3.90237	2.19545	5.60503	2.23629	2.3326	2.87992	2.92482	1.96732	2.91913	3.43561	5.10692		0.411114	3.41588
8.9356	2.5841	2.82041	2.12455	2.17375	2.87189	2.47806	3.76559	2.48023	5.80097	3.18087	1.65199	2.60132	4.51	3.44113	2.76821	2.74097	3.35057	2.3219	3.19416	3.62921	3.48843	4.19626	3.80344	4.26983		0.416667	3.17699
9.0547	2.6322	1.45023	1.68472	3.2764	4.46937	3.73852	3.41541	1.58895	4.7291	2.94425	2.57832	4.18154	3.93868	4.0012	2.26159	1.50792	6.57935	2.9461	4.31907	3.53447	3.98108	5.97677	2.939	2.82565		0.422221	3.39583
9.1739	1.9572	1.84476	1.96237	2.34015	4.20124	5.04648	1.88187	2.93517	4.27638	2.01005	3.83707	2.11164	4.29146	4.10897	1.58661	1.5492	5.23527	3.1726	5.34276	4.25129	3.02259	6.61635	3.88051	6.41791		0.427779	3.495
9.293	3.525	2.14716	2.48504	2.47226	2.18443	3.77287	1.52518	2.35742	6.55315	2.33456	2.95574	3.31145	2.17966	3.23747	2.33047	1.90838	5.10763	1.5447	6.62969	4.70613	2.85829	3.36822	5.17478	6.92784		0.433333	3.3999
9.4122	5.8167	3.53474	2.31787	1.21224	4.48931	2.63492	2.73048	1.5868	4.41398	2.28864	2.91798	3.98573	3.96995	2.17862	2.88786	2.99673	3.24475	2.5578	4.19791	3.05598	3.23112	2.01366	5.05796	3.0843		0.438891	3.18358
9.5313	4.8584	2.16729	2.53621	1.94004	3.61227	3.50668	1.97727	4.09376	6.50139	2.50148	3.73771	1.29203	1.92589	3.72971	1.58767	2.66599	1.908	2.092	5.50655	1.86331	4.87123	1.72188	4.27107	3.08329		0.444445	3.0813
9.6504	7.2354	1.62623	2.3209	1.55357	3.66262	2.58086	2.16434	4.51913	6.30047	3.31788	3.04107	1.88947	1.98569	1.84695	2.13828	1.95198	2.91814	2.9956	4.05194	3.82559	3.69737	1.64064	5.53234	2.31544		0.449999	3.12966
9.7696	8.4994	1.4305	1.40334	1.63462	4.03687	1.37132	2.71571	2.702	3.68535	2.64983	5.17411	3.90727	2.81145	3.38938	2.13105	1.29913	3.93178	3.4586	4.80059	5.60398	3.61362	2.11351	4.6362	3.70079		0.455557	3.36252
9.8887	5.1029	1.44669	1.72591	1.28388	3.53761	2.38965	2.20358	2.92146	5.85763	3.62427	5.7551	2.76945	2.7397	2.30573	2.04205	1.5107	4.78766	2.6159	3.22416	4.4362	2.12223	2.86593	6.00319	2.71453		0.461111	3.16609
10.0079	5.71	1.70409	3.11005	4.00115	3.07247	2.92029	1.83193	3.71448	3.7934	3.14428	4.09422	2.68605	3.08079	1.87977	2.02249	4.44765	3.75292	4.1317	2.5471	3.13588	1.91291	1.98116	5.79995	2.87651		0.466669	3.22297
10.127	6.6252	1.72771	1.7264	1.40213	1.80977	3.4724	1.7704	3.95612	2.64584	4.583	4.18868	2.59608	2.82657	2.60791	1.10455	3.16545	4.33548	2.2287	2.87557	3.00221	1.87647	4.43237	5.5988	4.62469		0.472222	3.1326
10.2462	4.6993	1.43635	1.90939	1.6471	1.66943	2.3389	1.87234	3.31061	5.67092	3.58443	3.20897	1.98351	3.21076	5.61981	1.50949	1.49136	3.22879	2.0249	2.37763	2.63022	2.59556	3.78232	7.70829	3.40263		0.477781	3.03804
10.3653	5.621	1.60104	2.36583	2.22669	1.4743	3.64369	3.36428	2.42907	3.67086	4.11728	2.52763	2.34658	2.80385	8.55517	1.82616	1.67752	6.07082	2.2794	2.93601	3.10891	3.28146	5.13432	4.23507	2.03434		0.483334	3.30547
10.4844	7.724	1.35014	1.83921	2.84352	1.15381	2.83802	2.92344	2.86967	4.87259	3.81241	3.23375	3.2023	4.56323	4.81568	1.35924	1.37884	4.43803	3.1306	2.41682	3.75669	4.57511	3.38272	3.65061	4.3623		0.488888	3.35386
10.6036	7.9834	2.33941	2.46233	1.58014	2.04251	2.03806	3.83423	1.7648	4.54594	6.92837	3.86532	3.01208	2.50379	2.61344	2.4144	2.71069	6.75849	2.6859	3.75234	3.44495	5.12372	4.46603	3.98094	3.54857		0.494446	3.59999
10.7227	11.8635	2.4297	1.50834	1.34071	2.81588	2.20132	3.68705	2.70815	5.7389	3.33476	1.95795	2.99823	2.31239	1.94589	2.24751	2.97376	6.43814	3.5278	2.28169	2.18921	3.16055	4.54803	2.56431	3.27096		0.5	3.3352
10.8419	5.0525	3.07277	1.88753	1.48236	2.40887	4.32594	4.66432	2.75415	2.63313	2.23259	2.33326	3.82108	3.20299	3.22612	1.40538	3.39141	6.46818	4.1752	1.6369	5.64699	3.39243	3.43526	4.07918	4.95493		0.505558	3.40348
10.961	4.412	3.16519	1.71757	1.60315	1.73537	5.67561	2.92545	3.0544	2.92593	4.1346	2.94349	7.14462	1.34936	3.59	1.78547	2.36025	5.52827	1.8058	1.43969	3.25577	3.72801	4.22119	5.71371	5.10879		0.511112	3.38849
11.0801	2.1289	1.82056	2.55559	2.44298	2.82673	4.03455	4.51428	2.13657	2.87255	4.38716	3.51322	5.50944	2.42313	3.43797	1.76439	1.92612	3.82709	1.2652	2.46596	3.88593	3.30285	2.89835	2.84903	3.61915		0.516666	3.01699
11.1993	3.2339	1.64662	1.58011	2.24917	2.83047	4.06792	4.95566	2.39119	3.63524	5.5895	1.74571	3.18659	2.28654	4.98486	3.24578	1.94216	3.34591	3.9119	2.93553	6.7362	2.02263	3.7094	2.97792	3.67563		0.522224	3.28694
11.3184	4.011	1.44391	1.60026	1.17874	2.14156	5.21881	3.63393	2.61872	2.84539	4.4395	1.78239	4.052	1.7937	4.43201	2.6472	3.17693	3.4498	2.7193	2.34823	5.55057	3.24096	2.72543	4.62478	3.03204		0.527778	3.1128
11.4376	4.1498	2.82665	1.37206	1.50379	2.30247	4.36568	2.24595	1.80082	2.73997	4.851	2.5869	2.30616	2.34187	2.12343	2.10488	2.71087	4.37539	2.7916	1.44568	4.10577	1.28164	3.33177	4.18142	2.38857		0.533336	2.75976
11.5567	2.941	2.75376	1.35289	1.6656	2.18502	2.24914	2.49625	3.20907	2.8693	7.45788	2.46216	4.50747	2.88511	1.99233	1.83229	1.86142	3.54388	2.6125	2.30546	5.64877	3.3289	3.62182	4.31641	1.63117		0.538889	2.98873
11.6758	3.8525	1.74672	1.44396	2.27606	2.56227	2.78226	3.50146	1.95414	5.71182	4.99663	3.77587	2.95668	2.13937	3.69359	1.95696	2.85753	3.22846	2.2622	2.79869	5.27502	3.67644	3.22422	5.27239	3.09713		0.544443	3.2101
11.795	4.8092	1.98716	1.72902	1.33749	1.92985	1.89084	4.51563	2.24381	2.72704	5.67238	3.79263	2.84122	1.2956	3.21275	3.9231	3.04223	3.05125	3.2247	3.23778	4.09687	1.99301	2.04626	5.47038	4.14056		0.550001	3.09212
11.9141	5.2005	1.61713	1.24309	1.81729	2.20633	2.13905	2.40652	4.14469	2.27871	2.15996	2.49171	4.84163	1.51226	2.7618	2.24394	1.48366	4.97057	2.1931	4.22343	3.77903	1.40097	4.98952	4.41211	4.775		0.555555	2.9705
12.0333	3.3111	2.05798	1.8425	3.39344	3.58683	2.97772	2.33504	2.81029	2.42993	4.58411	2.48054	2.45761	2.72546	2.55421	1.82321	1.33779	5.04463	4.0466	1.53177	3.94033	2.23808	4.67281	5.64058	2.3611		0.561113	3.00765
12.1524	3.2856	1.98218	2.30909	3.09594	2.59928	4.53841	2.64624	3.57466	2.92093	4.01837	3.32748	3.38614	2.79805	3.63007	2.01912	1.419	3.72381	1.5092	3.43583	4.51085	2.72188	3.43639	5.39509	1.88844		0.566667	3.0905
12.2716	2.3397	1.37199	1.34372	3.17598	4.03207	2.93483	2.94802	2.50405	3.74909	3.28465	3.99775	4.47957	3.93296	1.99515	1.73346	1.65726	5.1499	2.1139	3.04019	4.83186	4.37722	4.25049	3.84471	2.09453		0.572225	3.13263
12.3907	3.9778	3.01586	1.72482	1.95537	1.94491	4.18213	3.89108	3.02479	3.00743	2.59027	3.55382	2.60671	4.36547	2.41258	1.92076	1.50971	4.06774	2.5804	2.27015	6.01276	2.11783	4.58939	2.58484	3.01256		0.577779	3.0383
12.5098	2.441	3.58513	2.0764	1.81289	2.57729	2.63076	2.75506	3.06141	2.87136	1.41989	2.79301	1.54134	2.89698	2.28985	2.70019	2.21495	7.30216	1.6133	2.95434	3.68137	5.2149	3.75601	3.50804	2.92246		0.583333	2.9425
12.629	2.4056	1.71741	1.34259	2.18152	1.71274	2.95997	2.37642	2.55237	2.24082	1.79699	4.10288	3.30598	2.92244	1.838	2.23002	1.75742	5.63212	2.3798	2.31569	4.66389	5.31149	4.19357	3.45262	2.15602		0.588891	2.81452
12.7481	1.9868	3.03736	1.5477	1.57589	2.21986	3.16309	2.09591	4.21785	2.79734	2.27902	3.60988	3.73955	1.84911	2.04599	1.30985	2.30508	4.60488	2.0144	3.9801	6.10378	5.69008	3.80589	3.13826	3.46071		0.594444	3.0241
12.8673	2.515	2.74556	1.86307	2.03992	2.60494	2.98001	3.69809	3.35	4.78203	2.92397	3.45146	2.77847	2.4813	2.01325	1.1968	2.95075	2.94421	2.6708	2.20123	3.36719	3.7256	2.66063	2.65391	4.24658		0.600003	2.86853
12.9864	2.3725	2.10837	1.25519	1.86157	1.93516	4.25888	1.76302	2.15212	1.92942	2.58758	3.32819	3.82011	5.31083	3.29971	1.31813	1.63211	5.01397	3.0529	2.8712	4.13571	7.43669	2.14518	1.9588	4.90311		0.605556	3.01877
13.1055	3.0427	2.20216	1.5638	2.44083	4.71815	3.52431	1.88749	3.13594	1.57725	3.8073	4.72615	3.93652	2.99592	2.32645	1.58826	3.16688	2.53472	2.9971	2.55308	3.86383	4.64128	3.83382	2.91944	2.07073		0.61111	3.00225
13.2247	4.6075	1.94501	1.32173	2.13263	2.19444	2.96817	2.12219	3.32551	2.91257	4.64026	4.92179	4.08814	2.70892	2.64439	2.25721	1.77712	2.63591	1.3304	2.21822	4.72709	3.31226	4.96623	4.99812	2.93291		0.616668	3.07036
13.3438	5.7345	1.91237	1.34715	2.27641	2.25715	3.07264	2.18619	2.60008	3.70235	3.39362	4.54201	4.58677	3.28609	3.73618	1.6526	1.78751	2.90044	3.1322	2.94314	4.32594	5.26695	4.86321	4.40254	2.03407		0.622222	3.24759
13.463	2.606	1.37052	1.1886	1.61405	3.01642	4.14522	2.07691	3.00562	4.71299	3.9126	5.28557	3.15854	3.44766	3.71669	2.31788	1.42289	2.75276	4.1872	4.38823	6.48165	3.38986	3.94121	7.15282	1.93003		0.62778	3.38425
13.5821	2.7564	1.4151	1.21273	3.3632	2.08992	2.32162	2.15113	2.90091	2.82669	3.57159	3.51716	2.43417	2.42437	3.56779	3.23346	2.14877	3.0048	3.8216	2.94068	4.0423	4.81232	3.88269	3.89195	3.28676		0.633334	2.98409
13.7012	1.2964	2.99069	1.7493	2.09372	2.37999	2.13601	2.47961	3.01707	1.36042	5.39431	3.34284	4.30446	1.98049	4.3408	2.86427	1.73074	3.14315	2.0589	3.57655	4.7916	4.43913	2.64359	4.19101	2.92842		0.638888	2.96806
13.8204	2.3895	2.70636	1.93799	1.46812	3.29677	3.91644	1.6042	3.70155	3.445	5.31824	4.16416	3.43063	2.4045	1.84245	2.47069	1.81855	4.1717	1.7103	3.88785	4.21189	3.73232	3.40275	5.56801	3.94575		0.644446	3.18941
13.9395	3.1065	1.3409	1.79667	1.30979	1.30523	4.04511	1.83335	2.06248	4.07885	3.36106	2.45209	2.89695	2.61336	3.37395	3.21585	2.6345	2.1705	1.3796	2.76509	3.46974	3.69522	4.04419	5.96055	2.91345		0.65	2.82604
14.0587	2.6911	1.72099	1.6519	1.60491	1.42476	2.69257	2.72647	3.36863	2.15849	1.43569	2.72222	2.93434	3.10809	6.2549	1.39029	2.14145	3.96524	2.0594	1.82081	3.40849	5.97204	1.59135	4.52075	2.28052		0.655558	2.73522
14.1778	1.9337	2.60598	1.48684	1.62795	2.35398	2.39964	2.95926	3.08953	2.14345	2.57464	3.9811	2.703	4.01306	4.27641	1.38328	1.35929	3.59891	4.1229	3.00241	5.72011	4.54312	2.48724	4.95378	3.49448		0.661111	3.03392
14.297	2.5527	1.80791	1.17776	1.38278	2.58807	1.85919	3.44778	2.99275	3.58018	3.78529	3.67532	2.99303	5.25268	4.27534	2.896	2.86287	4.57629	1.9038	3.90325	3.75444	4.69517	4.34074	5.00122	1.25554		0.66667	3.19
14.4161	3.2459	2.542	1.27726	4.05624	2.2628	1.58668	1.5729	2.08619	1.76319	2.49931	2.50378	2.15732	3.65536	2.85186	2.79467	2.27683	3.31698	2.6544	4.2456	3.59452	4.72095	2.95652	5.04747	1.83306		0.672223	2.81257
14.5352	3.1956	2.88685	2.07049	3.29719	3.29125	1.88722	1.94325	1.78391	4.36053	2.59498	4.62188	3.5256	7.20264	1.97704	1.43764	2.3198	4.43046	1.7391	3.06836	3.69567	4.24034	3.09489	5.32002	2.51188		0.677777	3.18736
14.6544	3.6968	3.06219	4.09762	2.62364	2.19666	2.61515	3.44925	2.28892	3.09648	4.12363	4.03215	4.70005	4.52848	1.66197	2.11967	3.30005	4.15059	1.9162	1.97349	4.17308	4.94588	2.09002	3.72207	1.69029		0.683335	3.17726
14.7735	2.1311	2.77324	1.49648	2.08835	2.77497	1.54167	1.6692	2.73908	2.70623	3.84742	3.3616	3.68752	2.72398	2.57833	1.56	4.109	3.46781	1.9364	2.01618	3.63995	3.79053	2.02879	4.64303	4.06067		0.688889	2.80715
14.8927	3.3216	2.93807	1.44573	1.31614	2.66823	2.15956	1.47059	2.25573	3.86494	1.98131	4.98224	6.57244	2.87145	4.2819	1.79983	1.75324	3.22758	1.9711	1.35325	2.92093	4.65521	2.67209	5.47409	3.77155		0.694447	2.9887
15.0118	2.4487	1.63548	1.33466	1.28344	4.55675	2.96858	2.33016	1.26893	2.45539	1.98406	4.8529	3.27855	4.21217	3.61936	2.41611	2.52664	3.89906	2.3311	1.69967	1.99197	8.36885	3.19277	4.90706	3.21956		0.700001	3.03258
15.1309	1.5591	3.61187	2.02911	1.17878	3.98652	5.42798	2.96097	1.58641	3.61984	2.88815	5.9134	2.12077	3.02915	1.70531	3.48488	1.66372	2.58289	1.8222	2.16375	3.3355	2.85908	3.48491	4.59348	4.22788		0.705555	2.99315
15.2501	3.8673	2.87043	1.63238	1.35725	3.40467	4.0905	5.27803	1.77815	3.70931	2.3758	3.70542	1.97331	3.32649	1.32298	1.68141	3.76855	1.20312	2.1348	2.18879	2.98962	3.97413	3.48433	4.53229	2.80507		0.711113	2.89392
15.3692	3.3704	3.00644	1.59412	2.79498	2.29113	2.18972	4.79077	1.81067	3.30585	2.21907	2.14854	3.0787	5.11387	1.51135	2.63686	3.99443	2.19228	2.6515	2.04751	3.50717	4.63517	4.59067	3.32143	2.60328		0.716667	2.97525
15.4884	2.0804	3.57632	2.82325	1.87084	2.02062	2.13408	3.87244	2.66072	2.62808	2.08476	1.83128	3.03057	2.88224	3.87635	2.20305	1.98739	3.27572	2.818	1.64755	2.0565	5.6168	5.30424	4.51386	2.31282		0.722225	2.87949
15.6075	3.7014	1.97799	1.97001	2.34263	2.74698	2.22998	4.10343	1.69199	2.87024	2.55801	2.89988	3.5157	3.78699	5.09475	1.3832	2.30858	2.9743	2.9197	2.18835	3.49255	2.18381	3.2904	5.13453	3.64403		0.727778	2.95873
15.7266	2.4522	1.29198	1.53741	1.68214	2.75626	2.60579	2.80981	2.24228	2.48575	5.25495	3.2441	3.19085	2.54306	2.54638	3.51928	3.38173	2.60066	5.4327	2.88644	2.58314	3.33526	3.67805	3.90016	4.25296		0.733332	3.00889
15.8458	2.068	1.8522	1.29957	1.54301	3.35926	2.49743	2.09516	1.64173	1.98113	4.07243	3.58246	3.82324	1.87531	2.5307	3.45296	3.6223	2.64659	2.7002	2.02132	2.74658	2.38402	2.31125	2.99493	2.85016		0.73889	2.58133
15.9649	1.9768	2.25457	1.2228	2.17444	3.21173	2.28561	2.67441	2.15219	1.5185	2.31464	3.3468	4.32959	2.64022	2.14932	3.65955	4.61163	3.38966	2.6245	1.4856	3.29648	2.74449	2.73597	3.32368	2.51642		0.744444	2.69332
16.0841	3.8683	3.03344	2.72056	1.59131	1.32052	4.62791	1.31719	2.28347	2.05526	2.76112	3.05598	2.44476	3.43007	2.1617	3.02812	3.98707	5.31199	5.053	2.55338	3.03989	2.96041	3.09138	5.65823	2.2196		0.750002	3.06561
16.2032	2.148	1.80431	2.16158	2.21459	1.58731	4.21538	1.40657	1.93714	2.19307	1.75628	2.49279	3.11266	1.75449	2.90541	3.18568	2.32863	4.58276	4.8824	1.90818	2.73431	3.37795	2.10787	3.9199	3.07457		0.755556	2.65799
16.3224	2.5258	3.80449	2.72631	2.11594	1.81142	2.1328	1.45409	2.31775	1.36203	1.94548	2.07284	2.70205	1.34745	2.72201	2.74998	2.03434	4.73008	4.2099	2.5266	2.86636	2.92751	4.44124	3.10946	3.76477		0.761114	2.68336
16.4415	2.6278	2.81562	2.03232	1.63727	3.12389	2.63458	2.85943	2.92904	2.27817	1.2039	3.65824	3.70032	1.82413	4.5541	2.7201	2.11725	3.48483	3.4815	4.36099	1.90807	2.35206	2.6113	2.4066	4.48082		0.766668	2.8251
16.5606	3.5376	2.49225	1.75565	1.98636	2.57733	3.22246	2.48579	2.20798	2.85569	2.11033	3.11542	2.61265	3.89245	3.48305	2.26424	3.55985	2.8415	4.3615	3.97997	3.36384	3.14869	2.6254	5.72504	5.85641		0.772222	3.16923
16.6798	5.0209	3.04468	1.50639	1.48961	3.16821	3.17647	2.98927	2.70578	3.23319	1.30324	2.20595	3.23214	4.04452	4.37303	3.21228	3.13531	2.36967	8.492	4.47964	4.46397	4.87403	2.91459	4.49289	4.11458		0.77778	3.50176
16.7989	3.5946	4.38676	1.32528	1.33864	1.77209	4.15267	3.20003	3.79272	3.22095	1.59615	2.331	2.43862	4.32356	4.30148	4.04526	4.43785	2.36456	4.7333	2.07221	2.17683	3.33901	3.03005	4.06435	4.80382		0.783333	3.20174
16.9181	2.6468	1.89873	1.51053	1.99383	1.75409	4.19294	3.00463	3.03623	2.2052	1.35696	2.18615	2.28669	3.12073	3.25563	5.13791	3.85096	3.39667	3.4196	3.15193	2.46645	3.49772	3.10465	4.69314	4.46047		0.788892	2.98453
17.0372	2.5796	2.52782	2.27894	1.75582	3.04334	4.23276	2.33134	1.85296	1.78512	1.35904	1.31007	1.33292	3.85379	3.0633	4.63685	3.32857	5.87867	3.1928	2.68423	3.83204	3.85215	4.11793	5.37293	6.35009		0.794445	3.18971
17.1563	2.9199	2.16249	1.53415	2.73969	2.10293	2.80618	5.08518	3.72463	1.60306	1.32893	2.15644	1.29053	2.32803	6.51827	3.26239	1.96644	1.59019	5.077	6.01456	2.86621	3.8767	6.43312	2.68253	2.50675		0.799999	3.10735
17.2755	1.7725	2.44751	1.57128	1.49773	2.74918	2.27954	1.39254	3.79334	2.12154	1.97072	1.67003	1.39534	2.46788	3.27559	3.40507	3.90092	3.42202	4.323	5.25338	3.65471	5.71619	3.18733	3.73817	4.10886		0.805557	2.9631
17.3946	1.674	3.02164	2.41348	1.41268	2.80327	2.39484	1.24427	1.92224	1.60869	1.35323	1.56469	1.3288	1.27216	1.54484	4.15809	6.0495	3.58873	1.7762	2.76604	2.22641	5.29336	2.11125	3.37305	7.27249		0.811111	2.67391
17.5138	3.03	3.82195	1.93028	2.66235	1.89562	3.14298	1.22354	1.73618	1.61164	1.2932	1.52364	1.32146	2.35252	3.5838	4.42967	4.47475	2.10122	2.2319	2.39867	2.89673	3.56337	4.05287	4.10922	3.17138		0.816669	2.68996
17.6329	5.0487	5.0988	1.93238	3.46626	2.57143	2.40308	1.78502	3.01395	2.50043	1.4142	1.73142	2.23456	1.21822	1.95991	7.19965	3.85922	5.88315	1.8374	1.35075	4.08027	5.20092	2.80866	3.2981	1.68093		0.822223	3.06573
17.7521	2.6714	3.54764	3.30252	2.57256	3.57066	3.74679	1.62938	1.64972	1.66309	2.16565	1.34348	2.00579	1.57614	2.20286	7.61846	5.91022	2.98307	3.9006	2.2633	3.07198	6.85521	5.24412	3.49492	1.32056		0.827781	3.17959
17.8712	1.7313	2.94908	2.50085	4.88553	2.53078	3.19194	1.96701	1.34969	2.18701	1.33216	1.61846	1.91215	2.36918	1.52276	3.30994	7.02118	1.94402	2.2607	2.74852	2.87118	7.174	6.12411	4.15165	3.51132		0.833335	3.04852
17.9903	2.9845	3.18422	2.54383	3.34253	1.60571	4.14062	2.09157	2.13522	2.43482	1.23261	1.52261	1.33262	2.64547	1.55659	4.34909	2.47422	1.2475	2.644	2.61867	2.83935	5.45624	4.51241	4.83966	5.30185		0.838889	2.8765
18.1095	2.1669	3.44036	1.64021	2.02983	1.49994	2.89998	2.21158	1.90662	1.77921	1.25557	2.29194	1.34066	1.67077	1.21311	2.28551	2.52469	1.26428	2.2249	2.53196	2.00007	5.2908	3.8472	3.27289	3.40025		0.844447	2.33288
18.2286	2.3498	3.61923	3.2322	2.57776	1.642	4.61113	1.39626	1.28973	2.77675	1.53143	1.5731	1.43227	1.35618	1.27656	2.5335	3.17966	1.25552	1.5625	1.20628	2.45989	5.80837	2.64959	3.15386	1.82715		0.85	2.34586
18.3478	1.8925	2.77601	2.31839	2.1681	1.80074	1.97721	1.38376	1.64909	2.11172	1.54834	1.78629	1.58951	1.29787	1.55193	2.16434	3.05657	1.34768	1.4471	2.53583	3.55485	6.15577	2.91094	3.90764	2.36981		0.855559	2.30425
18.4669	4.2828	2.69361	2.31801	1.99988	1.43917	2.69686	1.37957	1.39262	1.76239	2.64823	2.01561	2.03685	1.69648	1.79624	1.65363	1.71142	1.33779	1.7797	2.14233	3.01347	4.07588	1.9396	3.05762	2.38332		0.861112	2.21888
18.586	1.941	2.08722	1.48705	2.08433	3.5283	4.60366	1.61155	1.55479	1.42376	2.36556	1.83917	2.16302	1.86575	1.16765	1.13687	1.68025	1.36263	1.9077	2.33545	3.94223	3.77285	4.48675	3.78115	5.46595		0.866666	2.48311
18.7052	2.4839	2.00982	2.24635	1.77533	1.5852	5.83282	1.55877	2.38538	1.30932	1.76516	1.23706	1.78155	2.29521	1.34159	1.27675	1.71852	2.63831	1.4911	1.51114	3.14838	2.7596	3.56289	1.58044	4.41567		0.872224	2.23793
18.8243	2.1507	2.97006	2.39577	2.89489	1.40491	2.57107	1.19515	1.55887	1.19724	1.48698	1.31177	1.24077	1.97008	2.7923	1.24006	1.59506	2.83544	1.209	2.135	2.13141	1.6457	2.45375	1.73081	2.11402		0.877778	1.92628
18.9435	3.2147	2.01964	1.52251	4.22267	2.15617	1.89504	2.10875	2.01658	1.2316	2.2095	1.27565	1.14235	1.69534	4.94533	1.20932	2.34756	2.1865	1.1887	3.45682	3.03796	3.22101	3.37763	1.97314	3.03574		0.883336	2.36209
19.0626	2.8635	1.29603	2.09001	5.43084	1.49171	1.63468	1.2348	1.63912	1.47817	1.45071	2.60843	1.1871	3.01847	2.7667	1.22913	1.88748	1.7444	2.1002	1.38032	2.89212	2.47637	2.73141	1.70703	4.68475		0.88889	2.20931
19.1817	2.9277	3.28949	3.68036	3.41543	1.34935	1.58713	1.88098	1.53776	1.43305	1.64902	2.84617	1.37963	2.29629	1.48965	1.5624	2.33745	1.60534	2.134	1.33949	1.85321	2.0708	4.36925	1.48572	2.20039		0.894444	2.155
19.3009	2.8699	3.67978	2.56646	2.325	1.23427	2.16354	1.83707	1.17156	1.21426	1.94767	1.68272	1.74622	1.39468	1.22059	1.89848	1.5971	1.42537	1.9308	1.29676	3.02376	2.31888	3.85406	1.33301	3.6578		0.900002	2.05791
19.42	4.102	2.97028	2.26294	3.66133	1.77249	2.78695	1.39697	1.76002	1.39911	1.96717	1.41683	2.18095	2.74319	1.86974	3.11783	1.97714	2.53899	1.4176	1.37303	2.93724	1.91889	3.10364	2.51006	4.20658		0.905556	2.39129
19.5392	3.4905	1.82111	1.79779	4.1315	2.28301	1.86069	1.33011	1.28738	1.27842	2.84058	1.52967	2.41367	1.40266	1.31913	2.88933	2.55839	1.75346	1.3448	2.63915	2.35354	3.82585	1.69572	1.82209	4.33657		0.911114	2.25021
19.6583	3.306	3.01975	2.24798	3.15698	1.79514	1.4214	1.36727	1.30249	1.27769	1.36877	1.81264	2.4317	1.85376	1.20003	2.60136	2.09385	1.63518	1.5422	2.59498	2.50071	2.62126	2.71289	1.36042	3.61428		0.916667	2.11828
19.7775	3.2202	3.74153	1.6727	3.10623	1.50374	2.63113	1.95677	1.2796	1.75331	2.08871	2.09751	2.23972	1.80866	1.21725	2.90526	1.32057	2.37792	1.3649	2.53841	3.73838	2.14768	1.56175	1.25901	4.56461		0.922226	2.25398
19.8966	3.0977	1.87458	2.95979	3.64863	2.06453	2.73367	2.42965	1.83614	1.4964	2.24422	2.25744	1.63806	1.61661	1.27795	1.53374	2.28524	1.69206	1.6818	1.31668	2.12105	4.93401	1.38506	2.16556	4.14791		0.927779	2.26827
20.0157	3.1835	2.95807	3.2496	3.22334	2.49115	2.06007	1.32284	1.97464	1.19637	1.73863	1.84858	1.75551	1.60459	1.73545	1.09781	2.13156	2.31028	1.6468	1.32447	2.06536	3.25714	1.70786	2.11059	4.19392		0.933333	2.17451
20.1349	2.8937	2.95209	2.67531	1.79927	1.77992	2.08992	1.26309	2.65328	1.37483	2.22304	1.29729	2.53022	1.59236	1.30996	1.24862	1.4657	3.22861	1.9413	1.37425	2.14511	1.3483	1.56551	1.88286	2.83776		0.938891	1.97801
20.254	2.7938	3.23637	3.77059	2.82995	1.45479	1.26353	2.03988	2.12861	1.51552	1.24256	1.28761	1.40798	3.73944	1.79095	1.36122	1.55237	2.72124	1.3207	1.29312	1.3535	1.64153	1.24499	2.42072	2.03378		0.944445	1.97686
20.3732	1.6005	1.42953	4.3777	2.54726	2.55323	1.22046	1.24026	1.26053	1.70375	1.39037	1.69414	1.44775	2.20928	2.74968	2.47262	2.03403	2.43313	1.3903	1.3787	1.3525	1.62277	1.30837	2.22357	1.58004		0.950003	1.88419
20.4923	2.3133	2.2293	2.71356	3.08103	2.1364	1.81182	1.38914	1.37131	1.75595	1.748	1.73804	1.46113	1.52446	2.70707	1.7701	1.70987	3.20244	3.1607	1.50989	1.1677	1.78965	3.02107	1.67798	2.10701		0.955557	2.04571
20.6114	2.1226	4.76379	3.95854	2.80561	2.19058	1.49494	1.68622	1.69492	1.70189	1.51954	1.3765	1.44358	1.54204	3.48998	1.47499	1.86379	2.27396	1.5054	1.40687	1.32723	2.86284	1.43721	2.07426	2.37737		0.961111	2.09978
20.7306	2.3213	4.10748	1.78982	1.50068	1.50154	2.26825	1.79201	1.81532	1.2186	1.73993	1.35287	1.63086	1.49545	4.17158	2.387	1.69617	3.24378	2.0001	1.47493	1.31278	2.47662	2.57063	1.24646	1.55501		0.966669	2.02788
20.8497	2.3389	3.34834	2.7379	2.63459	2.24136	1.33421	1.36792	1.29884	1.4145	2.25992	1.37995	3.12666	1.63737	1.93901	2.2666	2.75375	3.06629	2.417	1.6336	2.73498	1.48065	1.48851	1.24423	2.26085		0.972222	2.10025
20.9689	1.4517	2.47246	2.34801	1.85515	2.18768	1.32662	2.86831	1.34867	1.26082	1.4314	2.0078	2.51306	1.83747	2.18613	2.0091	1.7462	3.89824	2.172	3.01319	3.1624	1.57006	2.1421	2.2927	2.58618		0.977781	2.15364
21.088	1.3366	2.43827	2.34456	2.62589	1.3168	1.55168	2.17856	1.38451	1.39093	1.20675	1.82712	1.51212	1.34652	2.0924	1.57079	2.9055	5.66928	1.7244	2.9947	2.49425	1.89555	2.3578	2.94968	2.15498		0.983334	2.13624
21.2071	1.2924	2.539	3.96155	2.09114	1.57333	1.29601	1.32946	1.37967	1.54432	1.25901	1.63605	3.13877	1.29978	1.68952	3.81872	3.7504	3.75292	1.6957	2.3629	2.27858	2.74793	1.77771	2.01758	1.35692		0.988888	2.14956
21.3263	1.9239	1.69796	1.45264	1.48061	1.28766	1.31043	1.29427	1.53703	2.61362	1.59323	1.75774	1.53521	1.42472	2.45914	3.41932	4.65489	5.19834	1.2962	2.07499	1.91717	1.77849	1.23449	1.40674	1.31085		0.994446	1.98582
21.4454	2.7186	1.76633	1.757	1.58148	1.46662	1.33707	1.35485	1.51611	2.81119	1.39694	2.16888	2.59215	2.0281	2.77701	2.55599	3.83572	3.37031	1.6648	1.24172	1.83952	1.27109	1.67589	1.56491	1.13974		1	1.97633

## Sheet: Image8
X0	Y0	Y1	Y2	Y3	Y4	Y5	Y6	Y7	Y8	Y9	Y10	Y11	Y12	Y13	Y14	Y15	Y16	Y17	Y18	Y19	Y20		Ap-Basal	Avg intensity
0	2.48365	1.6256	2.76725	1.846	1.77156	2.63719	2.37447	3.68996	1.55859	2.18711	2.22225	1.22541	3.50409	1.69774	1.85958	1.19511	2.15375	2.88396	2.92649	4.00671	3.28489		0	2.37626
0.1191	2.36188	1.72959	2.70027	2.10119	2.35643	1.58057	2.32487	2.13806	2.97938	2.12882	1.81527	1.58742	1.59303	1.41558	2.91321	3.19771	1.67488	2.16335	2.29408	2.2209	2.50927		0.00540354	2.18027
0.2383	3.05935	3.9063	2.1136	1.8278	2.17744	1.28125	1.93594	2.10931	3.05837	2.01655	3.36665	2.09886	1.29474	1.21618	3.16836	3.13198	2.70158	1.7441	1.74662	3.4096	2.15094		0.0108116	2.35788
0.3574	4.46743	4.08679	1.70919	2.22195	1.70735	2.57672	1.60134	1.3211	1.53931	2.82219	1.45938	1.56877	2.19105	2.00506	3.31451	1.33184	3.34495	3.31977	3.6074	5.29181	2.02076		0.0162152	2.54803
0.4766	1.84904	2.45747	3.06915	3.11344	1.99591	3.18009	2.55261	1.90802	1.58572	1.87952	1.1608	1.91019	2.20903	1.61959	2.89272	1.70642	1.71998	3.16003	3.02973	5.34837	1.36617		0.0216232	2.36733
0.5957	2.35401	3.23183	3.65504	1.88109	2.17045	3.16046	3.32785	1.93293	1.26904	2.08724	1.24715	2.59243	2.58637	1.91152	1.91249	2.53132	1.65653	1.95635	3.51802	3.80963	2.34014		0.0270268	2.43485
0.7148	1.65644	4.56689	3.23252	2.54334	1.64445	2.69411	5.08964	2.39466	2.57159	2.48606	1.81223	2.00352	2.09404	2.55533	2.99945	3.66435	2.52105	1.94288	3.51969	4.19318	3.55334		0.0324303	2.8447
0.834	1.25124	4.79723	2.63526	2.82911	1.61546	3.69745	2.82202	4.02383	1.5874	2.22571	2.19268	2.85419	2.91334	2.87029	2.86414	4.17962	2.30767	2.34041	3.03784	2.22819	2.88748		0.0378384	2.76955
0.9531	1.93589	1.8232	2.76797	3.83792	3.19107	2.23168	3.48588	2.47648	1.88396	3.31485	1.63197	5.73075	2.14608	2.14175	2.13836	2.53587	2.58979	3.03372	4.42537	2.34875	4.56298		0.0432419	2.8683
1.0723	3.32436	2.54437	2.82108	3.81713	2.61463	3.42279	5.39979	4.38072	2.65005	2.16457	2.07462	3.04123	1.4458	1.93971	3.58361	1.90496	4.44357	2.78631	4.88376	4.19686	3.58436		0.04865	3.19163
1.1914	2.22414	2.61602	2.76775	4.17934	2.33984	1.9543	2.79444	2.64073	2.34862	1.77733	3.01273	3.08202	2.20731	2.02915	1.57082	1.99028	3.04649	2.76647	3.71713	3.79827	2.83109		0.0540536	2.65211
1.3106	3.35981	2.26204	3.70483	4.75506	2.51049	1.56889	2.59379	3.23953	2.25118	3.46989	1.96963	2.61818	2.25211	2.05864	1.35731	2.08337	1.44057	2.34349	3.25927	2.06586	4.21439		0.0594616	2.63706
1.4297	3.76579	1.83621	2.23099	2.14933	4.79598	1.54483	2.44419	2.94989	3.31708	2.48459	4.6757	1.52807	2.11013	1.74956	3.12338	2.29868	1.29752	2.07227	2.60017	3.32794	4.81776		0.0648652	2.72
1.5488	1.55948	2.91575	2.88555	1.72075	3.34232	1.75854	2.26501	2.74529	1.88885	2.18327	2.68891	2.80754	1.97545	1.8656	2.03229	2.85368	2.35411	2.81098	3.07839	3.97404	7.29445		0.0702687	2.7143
1.668	2.51913	2.18067	2.89951	1.53771	2.83124	2.64044	3.06109	3.20341	1.5398	2.3549	3.99147	3.99579	2.09442	1.58406	1.79345	3.56358	2.45638	1.87683	3.36576	2.81335	5.59449		0.0756768	2.75702
1.7871	2.52087	1.20816	4.64452	2.53708	3.44083	3.38412	2.13969	3.34372	2.65217	4.70006	1.60164	4.53124	2.03328	1.53001	1.93398	1.81263	2.09631	3.89993	1.98214	3.97637	5.39336		0.0810803	2.92201
1.9063	1.86017	2.10879	2.90703	4.05543	2.22895	2.41247	2.58273	1.39141	1.7236	1.81767	2.82368	2.07581	2.88958	2.5033	2.75923	3.08457	2.3763	3.69942	1.61048	2.93946	2.53366		0.0864884	2.49446
2.0254	3.24887	3.16824	2.87013	3.42543	1.82117	2.57594	3.5375	1.2414	1.98966	3.13676	2.96245	3.63605	2.76673	2.37634	3.39484	3.9954	3.16519	2.41709	3.30717	1.75442	2.29671		0.091892	2.81369
2.1445	3.60637	2.2847	4.47843	3.6209	2.24444	2.98102	3.90789	2.67543	2.19984	4.38326	3.49737	3.83051	2.29315	1.35021	2.18767	4.53889	2.97605	2.84818	5.52047	2.91937	2.91369		0.0972955	3.20275
2.2637	4.22622	3.00001	1.96038	4.14231	1.99951	5.90315	1.44273	3.53699	1.24147	2.99905	2.52664	4.31443	3.13147	2.19129	1.71302	3.3675	3.72205	1.70404	2.81196	4.31178	1.69629		0.102704	2.94963
2.3828	3.40401	4.66021	4.07898	3.3745	1.94115	3.69944	1.31111	3.22879	2.17379	2.77449	4.68758	5.14529	3.79066	2.37432	1.66232	2.32105	2.27115	2.50747	3.5489	3.75678	1.68853		0.108107	3.06669
2.502	4.97049	3.57183	3.89754	2.8785	3.31339	1.72311	4.21273	3.22044	2.63822	2.41581	2.33149	3.02701	3.18837	1.64384	2.89612	4.1841	1.89526	2.55107	2.58593	5.55798	2.51346		0.113515	3.10556
2.6211	2.748	2.31416	3.18106	5.00844	3.19664	2.86098	3.59211	1.99027	4.59099	1.71241	3.65454	3.06789	3.6747	1.67119	2.50005	3.48597	3.97039	1.28232	2.98121	3.73294	3.8573		0.118919	3.09874
2.7402	5.04268	2.95574	3.41049	3.89984	4.09531	1.69272	2.88702	3.55451	2.99473	3.40646	3.86875	4.8555	4.50751	2.77507	2.44704	3.15004	3.18894	3.66323	5.68905	2.00243	2.55357		0.124322	3.45908
2.8594	3.8475	2.62729	2.9935	2.69869	4.8799	1.40959	2.49997	4.32442	3.3279	6.145	3.85438	4.05947	3.92503	2.79569	3.15487	4.16641	2.17193	2.06124	4.9119	2.21822	3.69799		0.12973	3.41766
2.9785	2.7821	3.29005	2.51654	4.15453	4.14569	2.45465	2.53209	3.89018	2.3252	3.91873	3.48264	4.13969	3.09906	2.66532	2.41849	4.78438	3.10802	2.02667	3.51785	2.63142	2.86547		0.135134	3.17851
3.0977	2.82478	1.955	2.81317	2.80224	5.41304	2.98759	3.37593	4.59815	3.7732	3.43516	3.13667	4.39792	3.9139	3.39782	2.7065	2.22956	1.91498	1.93376	2.23282	3.70984	3.24947		0.140542	3.18102
3.2168	2.3235	2.03421	4.60032	6.67843	3.47103	3.05101	2.69427	2.55396	2.81513	2.51297	4.09599	5.34775	4.45694	3.84352	2.26797	3.93847	1.7344	2.22028	5.09754	3.28959	3.36962		0.145946	3.44747
3.336	2.82911	2.63332	4.25922	5.54217	4.61122	2.53221	2.69643	1.39034	2.48764	3.06009	3.88978	3.16982	2.67944	2.64199	2.01102	2.89224	1.78913	2.23825	2.9106	3.48391	2.00244		0.151354	2.94049
3.4551	2.59374	2.15048	4.0368	3.82174	4.74512	2.22342	1.40018	3.25392	1.69478	2.45723	3.20977	2.00528	4.07948	5.20272	3.36424	2.87937	2.91347	1.78388	2.8363	3.55692	4.08615		0.156757	3.06167
3.5742	2.89035	2.07002	4.00719	6.43181	5.22572	3.12425	2.09049	4.44042	4.38988	2.9895	3.8159	2.70507	3.14946	2.16087	3.38095	2.60475	3.1829	2.34185	3.60735	4.90173	2.93778		0.162161	3.44992
3.6934	3.1097	1.58707	4.35691	6.04458	3.22179	3.43702	3.54377	4.12835	4.97222	2.86527	1.7239	3.50547	6.31914	2.01294	2.26128	2.79046	2.69759	3.60176	3.88427	4.19829	3.65774		0.167569	3.51998
3.8125	2.18413	3.08912	3.51057	3.93071	4.09176	3.55253	4.05768	3.88603	4.00908	4.18687	3.72228	2.91063	3.86539	2.83904	2.72419	2.97242	1.65366	2.50836	6.15716	2.11209	2.88455		0.172972	3.37373
3.9317	1.40755	3.17264	3.32433	2.55496	5.37456	2.21277	3.23798	4.33122	5.0806	5.01375	5.65977	4.21829	6.03215	3.24461	4.36343	1.91651	3.32207	1.37492	2.82731	5.94595	3.97642		0.17838	3.74247
4.0508	2.17442	1.99129	3.20634	3.27809	7.81633	2.87729	3.12472	4.64769	4.48275	4.54744	3.99926	4.42452	5.00718	4.30843	2.81735	1.73739	3.54409	1.68689	2.074	6.39598	2.65434		0.183784	3.65694
4.1699	2.24295	2.73396	3.3955	3.7996	6.40167	3.15427	1.56609	4.9713	4.93875	3.40774	6.78246	5.76855	4.72602	4.13515	3.15865	2.41765	2.76487	2.72559	3.27088	5.24648	4.6052		0.189187	3.91492
4.2891	2.68731	1.64181	2.68235	2.60507	3.18336	3.25007	2.71718	5.4655	3.27954	3.44761	5.89289	3.76592	5.27535	3.42399	2.52113	2.0305	2.45523	2.67001	3.66994	5.5521	3.85097		0.194596	3.4318
4.4082	2.38839	2.88842	4.01671	4.99607	4.98749	4.90183	2.57343	2.99995	3.35954	3.81264	4.24725	6.27283	3.80066	3.5491	3.407	2.57183	4.21585	4.72708	3.51602	2.78652	5.03668		0.199999	3.85978
4.5274	1.814	3.87785	4.7444	5.07759	3.69497	3.22778	3.06273	2.48114	2.21698	3.93737	4.15427	4.67795	5.28209	3.71569	2.75448	1.30915	3.01361	3.42625	2.37151	2.60744	3.99379		0.205407	3.40195
4.6465	2.66786	4.50445	3.94905	7.24956	3.50134	3.18884	2.89553	4.29916	2.34753	5.23781	4.81606	2.51731	4.88232	2.67913	3.98425	1.3616	2.15591	2.33908	2.62712	2.76879	4.22789		0.210811	3.53336
4.7657	1.54333	2.37849	5.31802	5.82343	3.60243	5.03617	3.85315	3.37062	3.46038	4.47148	2.40379	3.23384	2.81019	3.97925	4.14993	2.79723	3.23205	2.87807	2.27892	5.20534	3.70373		0.216219	3.59666
4.8848	2.25725	4.08224	4.83907	3.70554	3.94614	2.97835	3.24928	2.16615	3.19534	3.93737	5.6016	4.04026	4.55485	4.05103	2.65048	2.29558	2.05536	3.96774	3.04486	2.13569	4.20333		0.221622	3.47417
5.0039	2.4644	4.28179	4.54248	4.49731	2.89395	4.00642	4.06012	2.225	3.71565	4.57956	4.89061	4.43848	4.02891	4.31823	2.18318	2.78443	1.77583	2.51248	4.14305	3.58383	5.4024		0.227026	3.68229
5.1231	2.03943	3.68545	2.94428	4.00889	4.10454	4.67055	3.93607	3.04552	7.2879	2.20756	3.53542	1.72642	5.84977	5.72938	1.52647	3.85822	3.92606	1.77739	2.57708	3.74256	5.05127		0.232434	3.67763
5.2422	2.09736	4.3192	2.35991	4.02414	5.20741	6.39499	4.57436	3.90162	6.03253	2.7909	3.09171	3.1275	3.72485	2.93623	2.9539	6.1062	2.2878	2.20535	2.62092	2.51857	3.40322		0.237837	3.65137
5.3614	2.43487	1.80716	4.56804	4.89516	5.76293	5.45923	3.73139	2.38864	2.6935	3.12284	4.48821	2.47462	2.82225	3.53392	2.7585	3.49779	1.77992	1.54059	5.3994	3.08414	2.70157		0.243246	3.37832
5.4805	3.51862	2.02456	4.12232	5.35614	5.59375	2.76644	2.11071	2.54003	3.90921	2.34229	3.45091	2.9357	2.91123	2.27816	2.88213	2.43179	3.18859	2.88251	4.44488	2.734	3.97366		0.248649	3.25703
5.5996	2.15302	4.06723	5.2896	6.05874	3.90855	5.88768	2.93014	3.47309	4.98624	4.0042	2.68607	5.37472	3.03455	3.53046	2.33958	2.34849	1.91415	4.02512	2.74419	2.42665	5.60169		0.254053	3.75163
5.7188	2.48684	5.00504	3.69505	4.71466	3.60877	4.87287	3.80683	2.56526	5.31338	3.68153	2.06841	4.37542	6.37765	2.91701	3.34253	4.1111	3.67591	4.11996	2.84299	4.80009	2.93782		0.259461	3.87234
5.8379	3.54064	1.93088	3.12044	5.80355	7.36574	4.38713	3.10363	3.16407	5.12123	3.79814	2.37646	3.9349	4.53258	4.42499	2.35943	3.19123	4.02558	4.18063	2.19641	3.17272	5.42619		0.264864	3.8646
5.9571	1.53668	1.54559	3.0268	5.27162	8.61964	4.95884	2.91248	3.24886	4.46895	3.78635	4.14183	4.09758	5.06188	4.58701	2.50328	6.98941	3.849	4.12249	2.90716	3.90085	4.46569		0.270272	4.09533
6.0762	3.58114	2.96723	2.09244	4.75697	4.97762	6.1189	6.48076	2.90964	3.28613	2.93641	4.07842	3.7638	4.41268	2.50881	1.48563	4.22376	2.73146	4.99173	2.64358	3.04817	3.07186		0.275676	3.66986
6.1953	1.99227	1.58039	3.14452	5.2455	4.94541	4.35428	4.59829	2.60883	4.50176	3.54766	3.94531	2.87993	5.24615	2.89296	1.63159	5.85178	3.37811	3.01153	2.42182	3.00259	3.42647		0.281079	3.53367
6.3145	2.36064	1.76387	4.4799	4.00999	4.06657	3.95651	3.70286	4.28401	3.48853	3.5793	1.87557	3.97783	5.83599	4.48932	1.72507	6.18194	2.98581	2.04115	4.9218	1.51207	3.33532		0.286488	3.55115
6.4336	1.91353	1.76517	2.59522	4.85384	4.2417	2.40357	6.55492	3.14044	2.66834	3.92971	2.28785	2.58671	7.16567	4.94546	3.07468	5.81368	2.55639	1.99954	3.72492	2.25667	2.79301		0.291891	3.4891
6.5528	2.70779	4.94707	2.97547	6.92322	5.59725	3.78644	4.94328	3.01334	4.8149	4.82778	2.30178	2.22606	6.03027	6.69396	2.65271	4.78396	1.40721	2.72989	4.09144	3.1309	2.85692		0.297299	3.97341
6.6719	3.86174	3.66396	4.47222	3.96839	5.07157	3.7658	5.77539	4.33494	4.035	4.11152	3.34775	3.13648	5.83854	4.78037	3.38871	5.52124	3.33799	2.13101	3.48971	5.12382	1.78293		0.302703	4.04472
6.7911	4.14986	4.2965	3.08066	3.25719	5.3429	2.67015	4.56518	4.37739	4.94156	7.89324	1.82511	2.89227	7.16386	5.09265	4.12258	4.36612	3.31589	1.96758	4.11909	4.82207	2.53126		0.308111	4.13301
6.9102	2.56173	3.51179	2.61125	2.5748	5.50923	2.0903	5.80553	3.67547	2.70429	5.33577	4.05037	2.49713	6.60637	1.83551	2.40912	4.51619	3.30281	3.4295	3.36254	5.38885	3.16157		0.313514	3.66382
7.0293	3.34221	3.25968	3.19964	2.81775	6.78341	2.38024	3.72751	2.63836	2.01284	3.36016	2.62461	4.04327	4.31192	2.04328	2.15946	4.19651	2.67863	3.32627	3.51539	4.52552	3.11294		0.318918	3.33617
7.1485	1.15431	2.28944	4.14523	4.17338	5.53667	7.45764	4.79961	3.23218	3.01801	2.99625	1.64595	3.46658	4.99617	1.98737	2.18664	4.59348	3.672	3.29041	3.11258	3.26952	3.46183		0.324326	3.54692
7.2676	1.47077	3.18069	6.1612	3.71606	4.19464	3.61182	3.84742	3.7258	3.37424	3.60672	1.83532	2.03357	4.19408	3.01975	3.04568	4.2362	3.94928	1.92626	2.94949	3.4311	3.31661		0.329729	3.3727
7.3868	1.75142	3.06257	5.20483	1.55578	6.25118	3.72646	4.08934	3.04316	3.95349	2.74241	2.39185	4.38703	3.99045	3.0136	3.9995	2.99387	3.05125	1.80302	3.66341	3.28281	3.92693		0.335138	3.42306
7.5059	2.11118	3.09962	3.02674	2.40383	3.67115	2.94563	3.9157	2.88938	4.46569	2.31418	2.05036	4.72212	3.26166	3.18727	2.54562	5.4229	2.20683	1.93016	2.84608	2.13899	2.86124		0.340541	3.0484
7.625	1.62947	3.97522	3.7513	4.88866	4.3165	3.17296	3.23073	3.00097	5.05151	2.49538	3.45175	4.84035	4.49899	4.44094	3.39891	4.29746	2.15718	1.62789	2.83628	4.01841	3.22561		0.345945	3.5384
7.7442	3.22183	4.01302	3.17414	2.03736	5.27954	5.63774	2.01956	1.99144	3.3703	4.28163	2.18874	2.14221	2.7305	4.82142	4.48778	1.76294	3.1717	1.4843	4.20559	4.14014	2.29195		0.351353	3.25971
7.8633	1.41239	4.17626	4.42688	2.89847	3.88304	3.49606	1.72938	3.03282	3.01251	2.77766	1.91623	1.62122	3.02792	3.29304	4.38737	4.80492	2.85811	2.53659	4.6215	3.90037	2.56369		0.356756	3.16078
7.9825	1.45547	2.82462	3.78908	2.20888	4.29357	2.32511	4.06614	3.54992	3.42466	2.73036	2.31545	4.55537	3.08797	3.27224	3.07739	4.93741	2.68812	1.9921	3.48377	2.46509	2.7633		0.362164	3.10981
8.1016	2.62594	5.13569	2.71567	4.33736	3.83875	2.10147	3.08802	1.9739	2.73577	2.96627	3.18554	3.19812	3.28042	4.16693	4.22245	3.71665	3.92944	2.62627	3.60448	2.38264	3.22		0.367568	3.28818
8.2207	3.99076	6.05761	2.28118	4.5061	5.18241	2.91819	2.72308	2.0936	1.53998	2.67045	2.11157	4.21407	3.55497	3.11319	4.25465	4.08694	4.86218	2.35192	6.10941	3.69003	2.07811		0.372971	3.5424
8.3399	3.3101	2.87918	3.10275	2.09856	4.23181	3.7707	1.88814	3.07947	3.22433	3.98627	2.36765	2.19391	3.10354	2.63122	3.60443	3.10774	2.90648	2.69342	6.32776	3.46514	3.02291		0.378379	3.19026
8.459	2.0178	3.95452	3.93531	2.29313	5.16998	3.21762	3.19513	2.77498	2.33793	3.46578	3.2651	3.48936	2.09425	7.01173	2.14644	2.90266	2.24785	1.87504	6.5171	4.71336	4.08007		0.383783	3.46215
8.5782	1.39582	5.08333	2.10092	3.16431	4.85786	2.59453	2.68	1.96091	2.40553	1.70984	2.40067	3.47499	3.61798	5.75536	3.93614	3.14824	2.33288	1.5585	4.99837	2.18418	3.13956		0.389191	3.07142
8.6973	1.83014	6.5147	1.99849	2.04137	4.33404	3.86183	3.37014	2.55101	3.41013	2.84188	3.04898	2.02966	3.24099	5.04018	5.3189	4.34079	2.20346	2.11799	4.76685	4.43596	1.82142		0.394595	3.38661
8.8165	3.27331	3.64782	1.82922	3.08151	2.38415	3.05996	2.9594	2.01582	5.11929	2.65993	2.96001	1.75319	2.82983	3.77871	4.11133	4.91531	1.94554	1.43548	3.173	3.62888	2.17866		0.400003	2.98764
8.9356	2.78941	3.32311	1.88278	4.13265	5.35203	4.55945	1.65636	1.84109	3.44515	3.09821	2.17927	2.79746	2.72845	4.35521	3.27427	3.23076	2.80332	1.48779	5.09056	1.57325	3.10935		0.405406	3.08143
9.0547	1.82642	3.98269	1.94502	2.88163	3.6059	8.59033	1.97349	2.33601	3.31911	1.99229	1.57855	4.38361	3.13276	2.63902	2.38167	4.3859	2.65571	2.36787	3.87997	3.73013	4.75312		0.41081	3.25434
9.1739	1.91864	5.64278	1.90866	3.17349	2.64582	7.1926	2.90615	3.25091	3.38432	1.76085	1.86153	4.01524	3.22957	1.46993	2.36264	4.2353	1.70449	1.56247	4.89281	4.28769	5.41769		0.416218	3.27731
9.293	1.47188	3.98448	3.02495	1.76915	3.23156	6.84557	2.95113	3.65033	2.45101	2.43478	1.51292	2.84934	2.07985	2.04211	5.65797	3.97755	1.55297	2.05495	6.76579	2.90335	4.93148		0.421621	3.24491
9.4122	2.76381	3.86735	2.98021	2.52745	5.13839	4.39275	3.93672	2.95051	2.52764	3.0248	1.82136	2.12964	3.43976	1.32328	4.32604	3.31958	1.45023	1.95322	6.62385	2.9842	3.31801		0.42703	3.1809
9.5313	3.57546	3.40408	2.66917	3.26424	6.14979	4.34854	4.39077	1.23027	2.92608	3.05714	3.36396	1.73603	2.45167	2.16057	4.43239	1.38095	1.407	1.85131	6.65519	3.25028	4.46711		0.432433	3.24629
9.6504	3.71237	3.99525	2.28233	3.35248	5.20818	4.61843	3.32571	1.20577	3.46943	2.41844	2.12193	1.90913	2.97021	3.11494	5.86542	1.88107	2.21162	1.7551	5.03253	3.51183	3.61186		0.437837	3.21781
9.7696	1.96883	4.57016	3.67302	3.08725	2.46396	6.9135	3.74536	1.89431	3.71342	2.46066	2.42535	2.20374	2.20997	3.81088	5.33371	2.80478	1.70406	1.3361	4.63917	3.80564	2.42583		0.443245	3.19951
9.8887	2.44989	5.45529	2.79939	1.38861	4.1207	5.77798	6.58306	2.1916	7.31748	2.01262	2.63905	2.72203	3.43195	5.49963	4.25521	2.4011	2.34287	2.27651	4.69887	2.39754	3.44344		0.448648	3.6288
10.0079	3.94505	3.36096	2.72944	2.86083	3.15538	5.08273	3.56817	3.00492	4.8897	2.42653	2.58738	4.06944	5.1295	4.47602	3.1683	3.51623	2.2692	2.39664	1.41772	3.03601	2.68202		0.454056	3.32248
10.127	2.51636	4.87772	2.28778	4.36663	3.87851	8.12419	3.28195	1.95398	2.97296	2.47222	2.09571	2.65233	6.12074	2.71179	2.2961	2.88399	2.51507	2.48756	1.39121	1.84838	4.418		0.45946	3.24539
10.2462	2.82622	6.54949	3.93519	2.91367	3.29156	4.8638	3.5226	3.4397	4.52228	2.95662	2.19109	1.90535	3.73304	1.63124	2.01876	3.71085	2.03243	2.26569	1.76792	4.37351	2.79746		0.464868	3.20231
10.3653	4.95269	4.09906	4.73823	2.59948	3.98392	2.51968	1.68763	4.21417	2.80151	3.42461	1.80587	1.86708	4.5093	1.44277	2.45599	4.02785	2.11753	1.76569	2.08022	3.444	3.16438		0.470271	3.03341
10.4844	4.50468	2.56524	4.20124	2.59928	3.41385	3.21695	3.32175	3.10879	1.86614	1.98809	2.57422	2.03457	3.52089	2.53874	3.73075	2.70812	1.64003	2.11232	3.04098	1.71071	3.71141		0.475675	2.86232
10.6036	5.28852	3.51338	1.30725	2.221	5.03436	3.60544	5.79373	2.66978	2.62397	2.00859	1.48554	1.32854	2.86563	2.67902	5.04803	3.5409	1.1961	2.10683	3.02632	1.57761	4.0886		0.481083	3.00044
10.7227	4.30349	3.25503	1.69266	1.81605	4.78045	4.77903	3.91304	3.17736	2.0822	1.85863	1.40792	1.7162	3.53079	3.61691	3.59238	3.71047	1.31789	1.32595	2.41418	3.06674	5.29305		0.486487	2.98335
10.8419	3.24855	2.87896	3.33454	1.92301	5.28444	5.04986	4.3461	3.98614	1.58633	2.00142	1.27568	2.06521	3.23589	5.00594	5.83376	3.66408	1.3199	1.33874	1.87284	1.6646	4.18749		0.491895	3.10017
10.961	3.98192	2.40992	2.90153	1.74586	3.73473	1.98376	4.25431	1.47055	2.59194	4.63531	1.36665	3.11578	2.6199	3.50641	4.43965	3.77794	1.65847	1.54842	1.8972	2.42131	6.52587		0.497298	2.98035
11.0801	3.4552	1.43095	3.51232	1.47643	3.84684	2.81761	3.46297	2.44764	3.55924	3.89507	1.66763	3.78788	2.86881	3.38118	4.75982	5.18236	1.44497	1.38201	1.73169	2.1336	7.65891		0.502702	3.13824
11.1993	2.67848	1.22855	3.54559	1.54391	3.74909	3.29493	4.51781	4.74429	2.80812	3.4242	2.79546	2.75203	3.55947	3.35144	3.65186	7.5409	2.56445	2.18951	2.24774	2.30261	2.14946		0.50811	3.17333
11.3184	3.26141	2.55738	2.16583	1.60448	3.57882	3.43628	4.55961	3.48219	4.15623	5.38456	2.06044	3.27406	1.95896	3.3582	3.89276	5.09767	2.35741	1.68428	2.11784	5.43722	3.51019		0.513513	3.28266
11.4376	3.25958	2.73119	1.90241	1.90329	5.77598	3.36063	2.3896	2.12763	3.8645	2.14103	2.58446	1.87876	2.18439	2.39006	2.12113	6.18189	1.41986	1.98353	3.80728	6.56113	3.41845		0.518921	3.04699
11.5567	3.00886	1.45438	2.64642	2.57938	3.15691	6.19835	4.08511	2.00111	3.47866	2.29816	1.81177	2.5289	2.97528	2.43562	2.99872	5.19496	1.43486	2.0115	3.08482	3.85386	6.31278		0.524325	3.12145
11.6758	4.6828	1.30811	3.72572	3.17999	4.19004	4.59878	4.74102	1.50279	2.5673	4.1111	2.2834	3.15132	3.60101	1.48489	6.36352	3.97063	1.63912	3.01939	2.24228	4.26485	4.66572		0.529729	3.39494
11.795	2.90394	1.6139	3.15112	1.63105	3.94964	2.60228	2.79321	3.24226	2.2361	3.72927	1.60087	1.31808	2.91795	2.04667	4.30789	5.93555	1.47243	3.12348	1.52622	4.23427	4.51708		0.535137	2.89777
11.9141	4.27259	3.94254	3.65564	1.53492	3.8787	2.77597	4.48356	3.98072	2.05164	2.56951	1.34161	1.67228	3.60377	2.33781	4.20572	5.62736	1.88417	2.59235	1.98894	4.53162	3.21404		0.54054	3.14978
12.0333	5.70279	3.62615	2.90199	1.89586	4.59477	3.25351	2.5908	3.09046	1.69505	3.68238	2.32405	1.51486	3.02528	5.24594	2.15172	3.76667	2.28372	2.70979	1.97775	7.4544	3.77904		0.545948	3.29843
12.1524	3.27088	4.37274	2.26626	2.38545	2.82569	1.84988	2.8469	2.9314	1.96582	2.89828	2.67021	1.96951	3.88822	1.94021	3.58372	4.80487	2.0925	1.86472	2.06512	8.5725	2.63845		0.551352	3.03349
12.2716	2.01398	3.72592	2.11652	1.72952	3.36772	3.32709	2.39648	5.18032	2.73261	1.2296	1.30988	1.59066	2.10523	2.65821	3.93603	4.47799	2.3768	2.10759	1.86849	4.98223	2.63537		0.55676	2.75563
12.3907	2.50055	1.85654	2.19716	1.2787	1.65696	1.77143	3.92993	3.06621	2.29462	1.50649	1.83785	3.8508	2.97204	2.34589	2.49451	4.08432	2.31117	1.6771	1.84631	4.69235	4.3953		0.562163	2.59839
12.5098	5.66487	2.06544	1.67469	2.91211	1.25912	1.66964	6.31901	2.74571	2.40179	1.57773	2.75965	2.44831	3.77329	2.9733	3.902	1.8366	1.76316	1.43287	2.23579	5.55364	3.66266		0.567567	2.88721
12.629	5.18251	4.82794	3.1391	2.06021	2.66179	2.54607	4.01108	3.3343	2.46313	2.70035	2.97127	1.60203	2.78743	4.14265	4.96993	1.6103	1.36443	1.2513	1.49067	4.41131	2.52305		0.572975	2.9548
12.7481	3.04542	3.63467	2.3743	1.74894	2.31869	3.5232	7.28444	2.90808	3.64003	3.11874	1.73745	3.0767	2.80794	2.79435	3.48287	1.26081	1.47071	1.40729	2.46518	5.19341	5.85165		0.578379	3.10214
12.8673	4.62497	2.96206	2.05993	2.17837	3.35916	2.92914	2.91454	2.07165	2.65529	3.04192	3.43957	2.35175	4.48462	4.41082	1.66454	1.91409	2.14099	2.40395	1.84982	4.0524	4.63819		0.583787	2.95942
12.9864	2.16419	2.29833	1.6893	2.40846	4.24776	2.73446	6.61876	3.17917	1.14306	2.84132	1.74984	1.52432	4.09231	3.78901	2.4572	3.63613	2.16624	2.23641	2.32069	1.46575	4.59875		0.58919	2.82674
13.1055	1.84526	3.63925	1.38227	2.08968	3.52026	1.95567	4.75489	4.53925	1.77009	3.37112	1.75425	2.04712	3.05287	2.56072	4.3357	2.71195	1.55554	1.74271	2.15751	3.27151	6.59401		0.594594	2.88817
13.2247	1.59548	3.4784	2.30083	2.30381	3.36203	1.57667	6.54215	3.30005	3.25622	3.54175	3.93493	1.921	2.48977	2.06302	3.26468	2.87771	2.48043	1.48182	2.22291	2.56774	4.56618		0.600002	2.91084
13.3438	2.09181	3.79407	3.55202	1.61504	4.88699	1.84797	6.42847	2.96922	2.78535	4.39171	1.97561	1.72178	3.34761	2.41057	3.47243	2.33221	2.00365	2.21794	3.9479	2.93036	6.97534		0.605405	3.22372
13.463	3.24276	2.6498	3.73676	1.5947	3.50757	2.06065	2.70476	2.64407	2.2246	3.73287	2.21743	1.43497	4.7852	2.99091	3.90176	3.04738	2.35833	2.27309	2.35875	1.6342	3.61728		0.610813	2.79609
13.5821	2.98656	4.04265	3.33389	2.8813	1.13801	4.61422	2.16472	3.28818	1.70426	3.13442	2.43921	1.40606	3.45658	4.03875	4.7409	2.32591	1.22466	2.46475	1.4409	2.89887	5.21637		0.616217	2.90196
13.7012	2.75658	4.23497	2.11723	2.10043	1.53843	3.33603	3.70876	3.5235	1.92537	1.37655	3.0579	1.66681	1.46774	2.1131	3.25431	1.33617	1.30133	2.24212	2.04893	4.54708	2.4665		0.621621	2.4819
13.8204	2.96247	3.18146	2.68559	3.57962	2.76429	2.03494	4.32708	4.38977	1.42692	1.35829	2.22081	1.72011	2.21965	2.89155	3.62182	1.61386	1.29563	1.906	2.36519	3.16196	4.24873		0.627029	2.66551
13.9395	3.31255	5.36197	3.04148	2.25311	1.53481	1.81899	2.32845	3.7805	2.47114	1.95524	1.3848	1.74937	1.66187	2.13071	4.27891	1.85685	1.29303	1.56328	3.33428	3.45751	5.59195		0.632432	2.67432
14.0587	3.61693	4.1912	3.69901	2.22127	1.9629	2.04592	2.98074	3.0525	3.36777	4.55437	1.45345	2.28556	1.43527	3.38729	1.96812	3.81012	1.97377	1.96268	3.03069	4.27928	2.42411		0.63784	2.843
14.1778	2.20995	4.63497	2.75573	2.23278	2.60746	1.89012	2.9292	2.76913	2.92223	1.91849	1.96881	3.54979	1.74847	3.42896	3.14741	4.25005	1.27278	1.64485	2.07148	4.02818	3.34787		0.643244	2.72994
14.297	2.40344	1.8701	3.05498	1.25701	2.85362	1.6217	2.17177	2.30196	2.43432	2.06554	3.41346	2.35	1.8869	2.677	2.97931	1.53609	1.38864	1.60271	1.99385	3.26519	2.65255		0.648652	2.27524
14.4161	2.43008	3.33125	2.77964	1.2763	3.47393	1.99863	4.14318	3.60185	2.0802	2.50651	2.00455	1.39964	1.38869	3.73686	1.48602	3.94484	1.43224	1.71506	1.36877	4.21624	2.76224		0.654055	2.52746
14.5352	2.81699	3.71094	2.70825	3.79396	2.67335	2.87514	3.66437	3.29593	2.59582	1.71534	1.32834	1.92133	1.22563	2.13717	1.58869	4.62536	2.58936	2.03869	2.68616	2.57592	2.21145		0.659459	2.60849
14.6544	4.05511	4.32168	2.53583	2.06725	2.77908	3.4245	3.91462	2.96875	4.54644	2.63499	1.47459	2.04021	1.2505	2.90863	3.57949	1.83652	2.87946	1.48859	1.98652	2.46794	3.0666		0.664867	2.77273
14.7735	3.10489	4.0843	2.22699	1.59786	2.18678	3.04619	3.32941	1.9531	3.25646	2.27514	1.99255	1.5051	1.47289	2.71385	2.35637	2.44321	1.95548	2.18478	3.2012	3.98849	4.40152		0.670271	2.63222
14.8927	5.49614	4.81735	1.98206	1.69238	2.50868	3.02904	1.72956	1.33574	5.56322	2.13955	1.71305	1.20987	2.57052	2.2191	1.42714	3.1832	2.04912	1.4465	1.33687	3.36577	4.04807		0.675679	2.61252
15.0118	2.68339	3.39736	2.56497	1.83792	2.91307	3.85548	3.33849	3.20139	4.75942	1.67614	3.41435	1.37388	3.25105	2.72549	2.242	4.43339	1.24052	1.92885	1.77036	2.61184	3.3707		0.681082	2.79
15.1309	2.66109	1.73998	2.29178	2.92559	3.03744	2.75846	2.03037	2.76404	2.12352	2.80389	2.17999	1.92523	1.90707	4.36058	2.67388	2.69637	1.08516	1.26494	1.29886	2.86931	3.99393		0.686486	2.44721
15.2501	3.6309	2.93072	2.13623	2.79629	3.06146	2.95503	2.15754	4.40666	4.43797	2.32526	2.46878	1.33896	2.79789	4.88341	1.47145	2.6058	1.38089	1.62445	3.13897	3.25811	3.59108		0.691894	2.82847
15.3692	2.75218	5.30029	2.08615	1.49788	2.43101	2.83098	4.34355	2.62822	3.6058	2.86009	2.81179	1.83927	3.849	3.17314	2.29245	2.49266	1.90984	2.19656	2.57346	3.52215	4.03438		0.697297	2.90623
15.4884	2.76468	4.33655	3.35224	1.86587	4.91387	2.3635	3.21093	4.79594	2.88874	1.801	4.79742	1.7297	2.18169	3.07965	2.11595	3.68959	1.36359	2.06762	1.83192	1.62394	6.39145		0.702705	3.0079
15.6075	2.6495	4.79207	2.62069	1.40727	4.62645	2.91661	4.85336	4.0238	4.47144	3.17826	3.37949	1.44576	2.96263	1.70873	1.77731	1.28407	1.62497	1.38215	2.74705	4.20784	3.00986		0.708109	2.90806
15.7266	1.49382	2.93298	2.11956	1.81102	2.67464	4.06442	3.00671	3.10586	5.16071	1.50394	2.42242	2.50818	2.5384	2.93444	2.83233	1.74861	1.40164	1.28436	2.93818	4.73513	3.61698		0.713512	2.7064
15.8458	2.32806	3.32199	1.88573	2.0579	2.81968	3.37167	4.87558	4.11262	4.14252	3.93464	3.86424	2.03315	2.40652	2.51104	2.49064	2.27246	1.98577	2.33321	1.4904	4.21541	2.09629		0.718921	2.88331
15.9649	4.24805	4.12536	3.00734	2.42218	2.24457	2.18963	5.39331	1.5343	3.43838	2.59422	4.2803	2.42732	2.47635	3.94245	1.98926	2.38811	2.07282	2.02823	1.55654	4.95245	2.74611		0.724324	2.95511
16.0841	3.56888	4.95905	1.55012	1.16597	4.05972	2.42051	3.37437	3.23879	2.65498	3.42321	3.55019	1.59701	4.37016	1.95401	4.75764	2.31209	2.19157	1.5786	1.23401	4.36438	3.86549		0.729732	2.96146
16.2032	1.86651	5.30127	1.66656	1.56088	1.67189	1.17001	5.70139	1.49067	3.14085	3.63625	2.64411	1.87823	5.43005	2.10748	3.162	2.89595	1.72245	1.60287	1.48762	3.02348	4.35137		0.735136	2.73866
16.3224	3.19883	4.5493	1.4828	3.50857	1.30427	1.80045	1.88417	1.24752	3.36392	2.10526	2.48168	1.61414	2.5795	2.15506	2.18801	3.5345	2.30708	1.72216	2.06988	4.02273	5.62552		0.740544	2.60692
16.4415	3.76011	1.70898	1.56518	1.37385	2.44972	1.99951	3.28394	1.34053	3.90246	2.10421	3.7906	1.31264	4.61481	3.29008	4.20421	3.57017	2.5526	3.36281	2.25066	2.65722	2.84476		0.745947	2.759
16.5606	2.64317	3.71083	2.1757	2.16755	5.10589	2.62671	2.71349	1.9101	3.44335	1.56602	3.89413	1.36901	4.69057	4.3818	4.38969	1.94682	1.67534	1.45131	2.04146	1.93957	2.18553		0.751351	2.76324
16.6798	2.82589	2.35282	1.41651	1.87193	2.84387	4.44363	3.7435	1.62067	3.42315	1.56341	3.95167	2.84807	3.67783	1.789	4.31198	3.11022	2.18599	1.39026	2.47455	2.80563	3.03574		0.756759	2.74697
16.7989	4.12149	3.14322	3.30011	1.72773	3.69308	3.26611	2.3761	2.04236	2.64507	1.56657	3.01811	4.47842	2.87989	4.19991	4.46306	2.10287	1.5895	2.74158	2.72714	2.88424	4.52118		0.762163	3.02323
16.9181	2.67278	6.41203	2.58911	3.44961	3.61022	4.373	2.38168	4.38679	1.35306	2.90631	3.9434	2.20903	2.73118	4.13294	6.36029	1.9264	3.31594	2.77045	2.70989	2.66627	3.15827		0.767571	3.33613
17.0372	3.2721	5.40708	1.69663	2.7906	3.398	3.7379	4.17839	1.88342	2.06836	3.3753	2.2513	2.78846	1.79602	2.48882	2.8547	1.82868	3.98682	2.85476	1.97983	2.75359	4.12628		0.772974	2.92938
17.1563	3.23237	5.33828	4.21822	2.73973	1.81956	2.25736	4.04344	3.15541	1.68574	3.24861	3.74551	2.07264	3.50749	2.0556	4.33923	2.97031	2.58822	3.95145	2.19244	2.81578	3.77434		0.778378	3.13103
17.2755	2.66871	1.47745	3.4671	3.58981	2.09163	3.42856	3.17073	1.3551	2.83536	3.49803	6.00704	1.6789	2.51057	5.14478	2.27951	3.05688	3.62307	1.58139	2.31639	1.34276	5.7014		0.783786	2.99167
17.3946	3.57104	1.75727	2.74227	2.88749	4.6291	3.2491	3.72432	2.8861	2.73046	7.05789	1.64994	2.92722	3.25202	4.31267	3.07435	2.44179	2.79573	1.64351	2.11589	3.00525	8.23156		0.789189	3.36595
17.5138	3.41176	2.41012	2.75927	1.98499	4.37544	2.26292	3.58792	4.43725	1.43872	2.37141	1.36229	2.51075	5.81094	2.77384	2.19409	4.50946	2.74035	1.71055	2.38025	3.8801	4.51325		0.794597	3.02027
17.6329	2.41102	3.06489	2.67106	1.36235	3.00502	2.95347	3.18012	3.39623	1.49778	2.88085	2.00196	2.54416	3.19425	3.30176	2.81713	4.12767	2.91878	2.06409	1.33333	2.80459	5.2517		0.800001	2.79915
17.7521	2.76498	2.68625	2.12492	1.45543	2.10498	4.84012	3.98432	1.97091	2.30838	2.38071	3.52586	1.67825	4.06862	2.52731	4.37915	4.21384	2.99008	1.69234	1.79299	2.66945	4.12074		0.805409	2.87046
17.8712	2.09095	3.84787	1.57518	1.36704	2.20559	2.59602	5.33238	2.74071	2.11033	2.74256	2.83438	1.81281	3.09744	2.7817	2.29309	2.494	1.97462	1.48063	1.68771	4.38535	6.76333		0.810813	2.77208
17.9903	2.91462	4.41318	1.8526	2.33298	2.76207	1.91526	3.22709	3.13252	1.84334	1.37257	2.66802	1.30081	3.68303	3.03101	2.60696	2.36298	3.02341	1.53581	1.23897	3.95403	5.7702		0.816216	2.7115
18.1095	2.17115	2.93964	1.66661	3.17436	2.6464	4.74272	3.33318	2.2844	3.50952	2.06758	3.2656	3.8087	2.02298	1.45032	4.37547	2.236	4.44716	1.53027	1.31315	5.58723	6.21738		0.821624	3.08523
18.2286	2.20079	1.58844	2.18335	2.13013	3.05839	3.70865	1.99945	2.81929	2.15288	3.46922	1.71327	3.04223	2.52586	1.83854	4.28158	4.3952	3.61105	2.65984	1.90699	4.48905	4.25695		0.827028	2.85863
18.3478	2.55522	2.35561	3.19684	2.2778	4.75469	2.00457	1.42499	2.3231	1.32161	1.57453	2.18309	2.87205	3.10162	3.14105	3.2014	2.13798	2.97349	3.4553	2.02692	2.32905	2.89562		0.832436	2.5765
18.4669	3.20859	2.627	2.88865	3.441	2.8426	2.61859	2.10344	2.3517	3.14253	2.44747	2.32704	1.81669	3.85122	2.1105	3.86096	3.12847	2.63777	2.69752	2.48423	2.40897	3.04358		0.837839	2.76374
18.586	3.72741	2.96688	2.10186	2.03258	2.9685	3.41279	1.51666	2.76293	3.18252	3.66866	1.65343	1.21354	3.46858	1.77099	3.22858	2.02816	4.82234	2.88233	2.73011	2.7497	3.20871		0.843243	2.76654
18.7052	2.98812	2.46068	3.58634	1.92436	1.34295	1.8467	1.46399	1.61779	2.49487	1.76677	1.77908	2.05751	2.25442	2.18858	2.75821	2.93332	2.17702	2.16651	1.92654	4.07403	2.80624		0.848651	2.31495
18.8243	1.48093	2.17247	3.17226	2.69836	2.08542	1.51032	1.93856	1.33421	5.76267	1.73821	1.25767	1.72427	2.87252	3.09228	1.51123	2.99324	4.25827	3.11638	1.94646	5.67574	3.43689		0.854054	2.65611
18.9435	2.23387	1.51446	2.92874	4.66274	5.37725	1.64105	2.43622	2.60435	1.18604	3.11335	2.2152	1.73598	2.88254	2.36758	2.64664	1.68311	2.62131	3.40901	1.55567	2.88646	5.33113		0.859463	2.71584
19.0626	2.03969	1.85098	4.57275	5.00376	7.62139	1.59134	2.37691	2.91817	1.28747	1.33624	2.64594	2.28664	1.64196	1.70942	3.85771	2.2657	4.16651	4.53985	2.3639	2.2965	5.00565		0.864866	3.01802
19.1817	3.04412	4.09447	1.62043	3.84199	3.42254	2.54251	1.67155	1.73182	2.18728	1.78187	1.3532	1.39951	1.29385	2.16808	4.05455	1.73433	2.44254	2.62505	2.28233	4.87727	3.34271		0.87027	2.54819
19.3009	2.9096	2.27073	3.93602	4.56531	4.03867	2.0284	2.16836	2.00255	1.85591	1.27109	1.29539	1.57174	1.78085	1.4948	1.71743	1.44937	1.46316	1.72193	3.00194	3.4581	5.95152		0.875678	2.47395
19.42	2.96853	3.22682	2.17916	1.92531	5.52252	2.09945	2.4365	1.89822	1.39476	1.25334	1.89048	2.7114	2.23226	1.26464	2.05469	1.2923	1.39903	2.46169	1.5411	2.13778	1.90176		0.881081	2.18056
19.5392	2.25007	2.80186	1.9507	3.45769	2.55399	2.16911	1.96375	1.48082	1.40664	1.81795	1.63794	3.06185	1.82354	1.44015	1.49939	1.93859	1.76328	1.59681	1.69731	2.79752	2.73596		0.886489	2.08785
19.6583	3.14056	1.9312	2.62292	2.28219	1.73235	2.58012	2.15072	2.35628	1.76185	2.42799	1.28816	2.18384	2.2489	1.64582	2.12347	1.37987	1.2863	1.92197	1.24604	3.32949	1.73127		0.891893	2.0653
19.7775	5.9017	1.20539	3.94317	4.46065	1.35932	3.22091	1.62269	3.31857	1.42484	2.96813	1.14487	1.43798	2.06452	2.26044	4.12118	1.19683	1.28392	1.93849	2.9656	3.61724	2.63143		0.897301	2.57561
19.8966	4.31068	1.30373	3.19179	6.07353	1.5406	2.99056	1.91269	2.08824	1.29332	2.11872	1.53045	1.71097	2.0873	2.00137	3.48713	1.53093	1.58706	2.76242	3.64194	2.86879	1.43498		0.902704	2.45082
20.0157	2.86878	1.25528	3.4066	2.1479	2.58939	1.83599	1.53181	1.63471	1.1892	2.06063	2.58105	1.90505	1.83717	1.53779	1.9718	2.62182	1.2432	1.96469	3.04298	2.04995	2.10029		0.908108	2.06553
20.1349	3.74771	1.61684	2.1694	2.87005	2.12858	1.36	1.24244	1.34573	1.29682	1.17932	3.80659	1.42204	1.49039	2.5412	1.51859	1.45588	1.27375	1.49255	1.38315	2.42626	3.111		0.913516	1.94659
20.254	2.9868	4.46467	2.79382	2.59212	1.8169	3.1032	1.12939	1.50345	1.38559	1.71331	2.17638	1.76989	1.41895	1.40467	1.74048	2.39644	1.31927	1.62921	1.34419	1.95926	3.19915		0.91892	2.08796
20.3732	2.05328	2.35024	2.94614	2.94616	1.52279	1.42529	1.20619	1.80519	1.60098	1.38085	1.22371	1.93044	1.19149	2.01179	2.46025	3.42856	1.26958	2.35048	1.66832	4.21541	1.65707		0.924328	2.03068
20.4923	2.38384	2.40607	1.9005	1.47863	3.15774	1.22393	1.22436	1.43336	1.73275	1.40817	0.96631	1.64366	1.17476	1.91033	2.00234	1.30096	1.29896	3.04574	1.69492	4.1511	1.82671		0.929731	1.87453
20.6114	3.54205	4.15906	3.15633	3.04932	2.97172	1.12933	1.32764	1.39596	1.77893	1.27419	2.14845	1.58304	1.1611	2.32264	1.26708	1.26947	1.28105	1.14096	2.92097	2.96064	2.34718		0.935135	2.10415
20.7306	1.89451	3.62307	2.32703	3.09086	2.62137	1.82249	1.71226	1.30513	2.47172	2.0233	2.55944	2.84404	1.32568	2.19667	1.37216	1.86337	1.16279	2.95665	4.56817	4.61434	3.5342		0.940543	2.47092
20.8497	3.15708	3.01829	1.82945	1.74567	2.15757	2.09487	1.57943	2.20719	1.36441	1.42999	1.9973	1.85515	1.25214	1.96159	1.65349	1.13675	2.17142	3.44997	2.2885	4.3917	2.03389		0.945946	2.13218
20.9689	4.39082	3.35797	3.07011	1.6359	1.90508	2.17974	1.30037	1.99221	1.67371	1.6956	3.04254	2.73372	1.92568	2.17057	2.58318	1.84724	1.71264	1.92256	1.8559	2.40051	1.72049		0.951355	2.24364
21.088	4.62191	3.16282	2.6475	2.37619	1.31259	1.43643	1.42578	1.38184	1.28943	1.43809	1.41349	1.5978	2.46178	2.25401	1.51289	2.10975	1.48299	1.15982	1.85371	2.32863	3.95195		0.956758	2.05807
21.2071	2.31798	3.87983	4.70154	1.89725	1.65705	1.82843	1.47172	1.50871	1.08863	2.3334	1.53899	1.52609	1.48765	1.7586	2.39448	2.17993	1.81064	1.18687	1.57524	1.70657	3.83881		0.962162	2.0804
21.3263	2.31675	3.56042	4.10897	2.84332	1.34087	1.46046	1.68943	1.22812	1.30096	2.79707	1.78508	1.2981	2.52209	3.28616	2.15662	1.32363	2.2663	2.34125	1.47969	1.62548	2.01034		0.96757	2.13053
21.4454	1.90286	2.9387	2.52737	2.08951	1.46323	1.27565	1.27055	1.95262	1.27655	3.32921	2.02452	2.67954	1.80256	3.3916	2.32834	1.26689	1.48745	1.86259	2.25596	2.96011	3.46675		0.972973	2.16917
21.5646	2.6752	1.18104	2.06153	2.44282	1.58798	2.1368	1.26389	1.13836	2.1741	1.20138	1.77566	2.23645	1.4947	1.99496	3.14771	1.47658	1.24161	2.65199	1.48409	1.98002	1.835		0.978381	1.8658
21.6837	2.6913	1.8882	3.57656	2.13823	1.92668	1.38597	1.28341	1.36208	1.24981	1.09394	1.17372	1.59701	1.47635	1.90874	3.15339	1.35658	1.37736	2.29167	2.11652	1.69331	2.41974		0.983785	1.86479
21.8029	2.86944	1.2185	3.77798	2.30828	1.70287	1.54123	1.27793	1.63823	1.19571	1.83157	1.14842	1.94613	1.44972	2.52357	1.81754	1.23891	1.33756	1.51909	1.48831	2.02884	1.21883		0.989193	1.76565
21.922	2.6423	1.79314	3.74691	2.34033	1.2021	1.36023	1.39936	2.02042	1.38771	4.07462	1.21007	2.07951	1.37271	2.25825	1.44201	1.2148	1.83657	1.61177	1.87685	1.92039	2.86786		0.994596	1.98371
22.0411	3.41038	2.62366	3.63351	1.94563	1.28819	1.29766	1.30856	1.50518	1.21678	1.91111	2.48104	1.31373	1.31473	2.14761	1.44297	1.54134	1.52117	1.40189	1.55779	2.68301	2.07662		1	1.88679

## Sheet: Image7
X0	Y0	Y1	Y2	Y3	Y4	Y5	Y6	Y7	Y8	Y9	Y10	Y11	Y12	Y13	Y14	Y15	Y16	Y17	Y18	Y19	Y20	Y21		Ap-Basal	Avg intensity
0	7.7736	12.0135	7.2914	8.1409	17.2001	9.5569	7.0962	7.4927	4.9141	8.6556	5.855	7.0403	7.334	5.9654	13.2585	8.5979	12.8331	10.026	7.1257	4.8782	8.4117	7.1735		0	8.57429
0.1191	7.5989	19.8656	7.7451	7.1502	10.499	6.047	9.7355	7.3739	3.7855	7.8161	5.4966	8.3269	4.8596	5.2445	7.7218	11.9812	8.3121	11.926	11.8917	9.4379	7.2697	9.0626		0.00540354	8.59761
0.2383	5.5067	17.4776	7.9224	4.6331	12.9793	4.8738	10.2507	3.9987	5.7096	7.717	11.0726	7.3561	10.0462	8.3651	14.3576	9.7342	11.0569	8.8646	7.5525	8.3019	4.3365	11.5062		0.0108116	8.80088
0.3574	5.4847	13.5778	8.3734	6.9341	12.6264	6.5236	8.014	10.3689	7.2912	10.4493	7.8266	6.5533	9.4043	5.9712	12.0519	8.7801	7.7731	9.3315	7.0067	7.0065	5.502	9.1868		0.0162152	8.45625
0.4766	4.6457	17.9708	5.478	4.8938	8.4743	6.3704	8.1602	9.7096	3.6695	6.7918	4.89	5.2418	7.9445	10.5939	13.1789	8.6246	6.164	6.8706	8.0529	3.7013	9.7094	4.5387		0.0216232	7.53067
0.5957	4.6155	20.0861	6.4233	6.6812	8.8836	6.7011	8.0175	11.7469	4.0766	7.9516	5.5693	4.4766	8.8051	8.935	12.1292	7.5604	6.2204	8.6165	8.2487	8.1845	2.7743	8.781		0.0270268	7.97656
0.7148	8.9488	17.337	11.0617	11.2506	11.5994	7.4767	9.006	19.9963	6.5354	7.6775	6.6532	6.5873	7.6066	13.4417	8.5268	15.4385	9.3466	10.1989	8.1545	7.2466	8.0012	5.8778		0.0324303	9.90769
0.834	6.756	25.7965	10.8576	9.1086	10.9956	7.3645	10.9455	12.2629	7.8478	11.5704	9.2668	6.0319	7.4482	14.0817	16.0772	12.2334	9.2952	10.6901	8.2563	12.9337	10.9123	7.3655		0.0378384	10.8226
0.9531	7.198	27.6963	9.7893	11.4655	9.4203	10.1877	6.3781	19.0465	6.0042	9.8843	6.8155	5.0615	9.0331	12.6779	14.8735	10.9126	11.4363	6.46	10.6921	9.1927	9.81	18.4781		0.0432419	11.0233
1.0723	13.161	28.4432	13.295	9.651	9.4562	8.1615	9.5034	17.4136	9.1162	12.1548	6.7828	4.479	6.9139	16.348	16.3687	11.0455	9.6964	7.2451	7.3995	16.2623	7.7354	11.7316		0.04865	11.4711
1.1914	12.2535	16.5139	17.1741	13.1625	18.3323	8.974	7.2319	20.2477	10.6797	15.2453	6.9684	12.041	8.8804	12.8527	9.9511	16.3216	9.716	7.7393	10.5079	10.7305	13.7689	10.2509		0.0540536	12.252
1.3106	8.8443	16.1508	12.709	17.6228	12.4865	7.8879	5.4415	18.0886	7.2993	9.9163	10.9132	10.9418	15.3817	15.9264	7.2327	12.5798	11.171	8.4314	10.8226	13.4074	12.1007	9.6707		0.0594616	11.5921
1.4297	10.5215	22.2627	14.9163	14.2546	11.8729	9.1413	11.3147	18.0749	10.4037	5.2856	8.9036	10.7568	12.5991	14.3584	14.531	15.3272	11.787	5.8316	13.0859	16.9218	12.4501	18.9159		0.0648652	12.8871
1.5488	10.4104	15.275	10.571	16.0008	11.5905	8.1117	8.4322	14.0592	6.3966	9.522	6.8916	11.8757	10.2199	8.9704	10.8507	15.1771	12.6127	12.0553	13.3889	16.6926	22.6872	13.8225		0.0702687	12.0734
1.668	10.6556	17.7946	8.8927	16.5632	11.3821	6.6968	8.18	17.0609	6.4371	7.5572	6.9709	12.9481	10.2232	11.8304	15.5238	11.681	10.7984	11.3225	14.7039	18.9714	20.0288	11.4184		0.0756768	12.1655
1.7871	13.1721	14.8017	8.4842	13.6282	14.6738	10.0092	10.3436	19.3495	14.0836	7.4895	4.9405	8.9673	11.6053	19.676	14.0072	15.3366	9.6738	11.8511	15.1414	11.8203	19.9569	8.1511		0.0810803	12.5983
1.9063	12.9801	14.9676	16.0005	13.6226	12.9666	15.7857	10.2759	17.6024	9.6715	11.2784	10.0481	11.5282	16.2357	14.1637	13.9435	14.2492	12.5021	8.8732	17.5199	19.2249	19.1797	16.0474		0.0864884	14.0303
2.0254	16.903	24.7775	9.5279	24.9228	8.7963	8.7423	15.4214	14.7118	12.5155	12.2194	11.721	10.7221	13.5033	13.1901	12.5519	20.2119	9.6721	10.89	20.4913	16.911	23.3325	13.8125		0.091892	14.7976
2.1445	16.4668	16.1781	12.4023	21.5315	15.3913	9.8105	14.3781	15.7953	8.7209	11.9427	11.4802	17.4218	16.4049	15.4094	11.5306	13.7005	8.3553	19.4545	14.4572	14.413	18.1692	15.1708		0.0972955	14.4811
2.2637	17.1707	17.1246	8.2465	16.3772	16.0489	14.0796	15.9985	18.1898	13.8475	10.6752	10.2222	14.8075	21.1359	21.9717	13.3614	11.9588	6.4723	17.7488	16.6864	14.0647	13.5029	14.2201		0.102704	14.7232
2.3828	6.2597	17.7253	10.7167	13.3889	10.0847	14.7793	9.4062	14.8657	9.8484	8.8071	11.5317	13.0841	10.5632	10.953	12.0612	9.4585	8.214	23.2426	17.3209	11.4944	16.7633	20.5865		0.108107	12.7798
2.502	11.3798	15.2705	13.0922	13.7136	11.9225	19.8072	10.774	13.1031	6.5317	13.9233	14.6112	18.9179	10.3867	18.8327	16.3627	10.3723	10.3939	21.1047	25.2668	13.713	16.7713	17.0711		0.113515	14.6965
2.6211	12.7522	9.9236	16.381	13.2184	11.7956	21.1058	13.6848	18.4428	7.9011	9.7399	10.7655	20.7024	10.4332	18.6355	14.1877	10.6331	8.0736	18.645	21.7005	15.9728	15.2649	11.6709		0.118919	14.165
2.7402	11.486	15.8405	16.9874	16.0888	9.2439	15.9966	14.3546	20.9915	10.0932	11.6413	13.6007	14.1689	13.4607	18.156	14.0392	15.5077	8.4912	18.2423	19.0544	11.0927	14.8193	13.1605		0.124322	14.3872
2.8594	13.4236	14.666	11.3582	18.2379	8.7132	16.8972	21.2949	19.2447	11.9818	11.9517	17.3731	16.8367	11.7085	9.1879	11.0006	9.413	8.3294	13.5201	18.087	14.3466	22.0639	11.9357		0.12973	14.1624
2.9785	12.6488	14.9584	10.5363	21.0226	11.5876	16.1016	17.6616	21.5829	8.1773	7.8628	15.0855	18.3258	11.5738	16.3489	16.1506	13.0061	8.6018	11.5523	9.1251	11.2646	18.8422	15.766		0.135134	13.9901
3.0977	9.4729	10.2026	13.3475	13.471	9.5323	18.799	14.5445	21.5601	10.5816	10.6703	12.0661	13.5564	9.0537	12.6498	12.4397	11.9773	6.0937	11.1194	12.54	11.0547	19.9613	15.9736		0.140542	12.7576
3.2168	14.9876	7.2262	12.6994	20.3901	7.4119	11.6089	12.823	12.2728	8.0596	9.0658	10.9518	15.4603	9.4139	11.9315	11.0397	8.4482	7.0077	11.6076	12.8303	10.9203	17.0227	10.4757		0.145946	11.5298
3.336	11.0986	10.6443	8.9733	13.6915	7.4336	13.894	12.1459	15.7819	13.7436	8.6725	11.8912	12.2781	9.073	10.2237	9.8227	12.243	14.7575	7.268	12.3571	17.3072	19.2294	6.5701		0.151354	11.7773
3.4551	15.4087	5.4716	9.7409	11.7849	11.7261	12.0551	9.0637	14.91	14.1729	7.4877	16.1127	14.5131	12.7761	19.718	10.6088	6.6378	8.1978	10.4403	10.6945	15.8548	20.1013	10.7964		0.156757	12.1942
3.5742	8.9423	6.9704	13.123	13.6855	8.3748	10.7835	10.2121	10.9491	9.4792	10.4461	13.3843	16.4317	10.1192	10.3035	12.9613	11.0911	7.3547	12.6724	12.7683	13.7377	18.8808	17.2297		0.162161	11.8137
3.6934	7.3013	9.3576	7.4499	10.7799	7.4895	10.376	10.3231	14.0232	14.9391	9.6003	10.3923	12.4052	12.3815	9.4815	9.6924	6.7089	7.5315	7.5787	17.3708	7.0963	20.8643	13.544		0.167569	10.7585
3.8125	6.8906	6.88	9.313	9.712	5.6013	5.3773	8.12	12.287	12.8093	9.84	6.4134	14.7499	10.3823	9.7746	6.1882	11.1672	7.4718	10.7846	14.1595	10.2532	9.5202	8.598		0.172972	9.37697
3.9317	8.8076	4.3378	8.6773	13.0564	8.5398	10.1348	8.9032	10.0807	17.3521	10.0925	10.3955	10.1774	13.5452	10.4159	8.334	7.4851	12.432	9.3144	14.0896	12.2498	12.2371	5.3614		0.17838	10.2736
4.0508	11.7506	9.1831	6.4307	6.1001	6.49	11.74	8.6301	10.6594	15.0888	8.5507	9.9992	12.0606	9.3631	8.6914	8.3992	5.3769	9.0625	5.7503	13.8229	13.2992	6.7231	7.0974		0.183784	9.28497
4.1699	8.0121	13.196	8.7075	12.8862	9.5407	10.3177	9.617	13.4633	12.2079	8.5602	16.8544	10.4402	13.7648	6.8381	7.696	5.7161	9.6306	8.1539	7.6656	7.7655	8.3103	7.232		0.189187	9.84437
4.2891	12.5694	6.6078	7.1753	8.8662	8.1931	16.6841	10.5503	12.3142	6.0538	7.3609	13.168	11.8747	10.8528	9.6736	7.9431	6.3659	10.2535	9.4349	6.1474	12.1451	7.3103	9.4181		0.194596	9.5892
4.4082	11.2695	7.0712	7.7194	6.9742	9.9382	7.7462	11.0668	10.2511	9.8765	11.5088	7.7934	9.6426	12.3971	4.6574	6.7771	7.3937	9.7433	9.349	13.6536	10.872	6.0185	11.1156		0.199999	9.21978
4.5274	11.578	6.5062	5.8182	9.5542	7.6163	8.6883	7.4928	5.4674	11.0452	8.1563	11.4002	11.7431	9.4016	4.7627	5.5466	6.6089	6.4429	7.5604	12.4657	8.4683	5.3665	8.424		0.205407	8.18699
4.6465	7.9658	5.1759	8.6566	11.346	11.6894	6.5865	7.8792	8.7536	11.433	5.255	6.6368	9.0827	12.5713	7.4092	6.7543	5.1586	8.3526	9.0784	9.5762	7.2493	8.6783	10.2917		0.210811	8.43547
4.7657	5.9287	4.8566	6.3744	6.843	6.3603	8.7767	7.298	9.6666	5.3667	7.6542	10.8806	8.4203	10.9291	9.8418	6.516	4.9663	13.522	6.2099	11.632	12.9293	5.5599	11.8827		0.216219	8.2916
4.8848	5.653	7.4939	4.0894	10.2487	7.366	5.9953	10.5766	5.7573	6.2667	6.5432	12.9793	15.0582	12.1208	3.2908	8.3431	9.4663	10.8104	6.5037	11.1855	10.0734	7.5016	13.4114		0.221622	8.66975
5.0039	6.3808	5.7809	6.3286	6.9299	5.2085	6.7468	9.9482	9.0515	6.7446	12.3625	7.8246	9.8881	12.1266	6.8276	8.2849	8.2194	9.2813	6.2659	9.9293	7.3996	6.6957	7.4157		0.227026	7.98368
5.1231	9.2739	5.349	5.9647	6.6619	7.9764	10.4137	8.5737	8.7575	8.0055	11.9428	8.8075	7.6633	11.4368	5.3047	5.0375	7.4521	7.3904	8.1761	14.0587	9.6068	6.4934	6.885		0.232434	8.23779
5.2422	8.6818	6.1133	5.3937	5.7115	8.278	7.1699	7.028	8.6113	8.4726	9.2627	8.7463	9.8558	6.9504	6.6182	5.937	5.3056	8.8331	7.7847	10.4698	7.1346	6.6696	9.2539		0.237837	7.64917
5.3614	10.3609	4.6373	7.5116	5.6457	5.7036	8.9214	11.0512	5.5031	5.8264	5.324	6.2726	6.4116	6.8642	6.3804	7.5656	6.7129	10.1402	7.3859	6.3063	10.9817	6.373	11.1304		0.243246	7.40955
5.4805	8.3169	7.933	7.0037	5.2924	6.1206	7.0913	7.9421	8.5228	4.1335	5.3903	9.6844	6.1804	6.3074	6.1607	6.6526	10.5576	10.3855	7.6819	9.3458	7.0797	10.6402	9.7514		0.248649	7.64428
5.5996	10.7764	7.0238	5.3376	7.2505	8.5226	6.8844	5.0385	9.0039	6.7328	6.7048	6.6118	7.3075	7.1986	6.5422	5.1246	6.0144	8.1481	5.8039	8.7046	11.4811	12.4241	8.5974		0.254053	7.60153
5.7188	6.4575	3.2316	3.4861	5.9275	5.7879	5.737	4.0061	4.1627	6.8093	9.3751	8.7982	6.9255	6.8902	7.1541	5.2337	4.1736	5.6148	7.023	6.4066	9.0775	13.1146	5.9098		0.259461	6.42284
5.8379	4.42	3.8647	5.7889	2.8764	8.0855	7.6053	5.0979	5.7654	6.8077	7.1042	10.5157	4.4178	6.6167	8.167	4.4379	5.9272	4.794	5.0236	8.1382	8.9576	10.6323	9.1513		0.264864	6.55433
5.9571	4.9496	3.9656	4.5332	8.0718	4.5276	5.4459	3.3562	5.9602	6.5165	9.9331	6.8382	6.8244	4.4502	7.6234	3.4177	4.7239	6.3333	7.6412	7.9315	3.2934	6.9409	10.8634		0.270272	6.09733
6.0762	5.2643	4.2774	3.4562	4.5758	4.6054	6.3775	7.3159	8.5536	9.7397	5.9705	8.7835	7.0269	5.1821	4.8198	4.7414	5.8521	5.4815	8.824	7.2853	3.5191	9.9528	4.3812		0.275676	6.18118
6.1953	4.518	6.7396	5.6594	2.8258	8.8803	6.1812	6.2519	10.8466	8.7883	5.6825	7.0387	7.3902	7.0468	5.5796	4.8233	4.6305	7.8837	7.0516	6.2669	4.3237	9.8042	6.4591		0.281079	6.576
6.3145	8.7224	4.2151	2.2515	3.4493	3.9141	4.7095	5.3179	7.0335	7.6701	7.6868	7.3803	6.5417	7.7984	7.1549	4.0078	3.0351	6.1448	7.5963	8.2085	7.917	8.8055	8.7741		0.286488	6.28794
6.4336	7.6186	1.9364	2.3921	3.074	4.8924	7.1562	5.0905	8.9812	7.8409	4.1379	3.8217	7.7473	4.41	9.9517	3.0082	2.9261	4.126	7.2386	7.4001	6.3018	10.592	3.2757		0.291891	5.6327
6.5528	8.0575	2.777	5.8998	4.7286	6.4367	6.5819	4.6401	6.9897	7.6811	5.2124	5.5206	9.1786	3.8835	8.844	7.0345	5.3349	2.3143	6.5537	6.0036	7.0041	11.8025	8.1293		0.297299	6.39129
6.6719	5.2245	3.5071	2.8243	4.2207	4.0089	4.7722	3.9815	9.9326	4.078	10.2674	4.5118	11.6356	7.5171	11.1424	4.1412	3.8221	3.5135	6.4838	4.5126	7.1858	10.0496	5.8578		0.302703	6.05411
6.7911	5.347	3.7493	3.5328	4.8049	4.165	4.5252	3.4544	10.246	4.4561	6.7219	5.9366	8.975	12.0368	11.546	3.6965	3.1376	3.197	7.5893	5.3917	12.2839	8.2383	6.3933		0.308111	6.33748
6.9102	5.6396	6.2646	3.0398	2.8407	4.1156	6.2855	5.0418	8.1555	6.367	4.7479	3.4526	5.4851	7.7093	8.0208	2.3127	4.9994	2.1743	7.7645	6.4046	7.3446	9.9749	5.4593		0.313514	5.61819
7.0293	7.0334	4.7649	3.6964	5.0338	6.2643	4.2731	8.2171	5.9317	5.6585	8.3327	4.2685	9.4938	5.1034	5.2828	5.793	4.0157	4.3301	6.8463	9.0406	9.5256	7.2611	4.0081		0.318918	6.09886
7.1485	7.7692	3.1455	2.8163	2.6508	5.1423	3.3666	3.8603	4.2363	5.2387	7.862	4.6644	7.7377	8.2622	6.3294	5.3779	4.0648	4.7032	5.9215	11.862	7.3499	5.3207	6.3769		0.324326	5.63903
7.2676	6.7863	3.4443	1.8194	5.522	5.7545	3.0887	3.4789	6.6258	6.1755	9.7656	5.2101	10.2045	7.6864	5.3206	2.871	4.5847	4.3814	5.2258	8.9916	7.3794	4.7413	5.4852		0.329729	5.66105
7.3868	5.2958	2.4728	2.4232	4.9815	4.4124	3.9614	3.2939	7.7586	3.9365	6.2047	3.6976	5.1156	6.7622	7.2936	2.4332	5.4278	3.3117	4.3207	11.6617	7.0742	4.8787	8.268		0.335138	5.22663
7.5059	8.6511	2.8518	2.5141	4.2718	6.4284	8.3761	5.2061	9.6788	5.6558	8.9089	4.814	7.5825	8.4204	7.4339	2.2383	4.4596	3.6374	8.678	7.2488	6.5976	5.4954	11.6985		0.340541	6.40215
7.625	4.3331	1.7755	1.6442	4.6368	3.738	6.3761	4.7516	6.7368	5.2262	7.075	5.9977	3.916	5.3911	3.7597	2.2678	2.4587	4.1827	10.2337	6.2257	7.0456	4.8744	10.813		0.345945	5.15725
7.7442	5.0509	2.8772	2.4377	3.0629	4.0768	4.8517	1.9799	5.1013	5.6449	6.0348	5.8395	7.9231	4.4271	4.6608	2.2557	1.6314	3.264	5.006	3.9825	4.1124	4.5881	12.6409		0.351353	4.61135
7.8633	7.6224	5.8825	2.3613	1.9711	4.4606	4.3003	4.8789	4.0636	5.56	5.6735	7.2686	8.4082	7.8005	3.6938	1.349	3.9033	3.2452	7.5728	3.4993	2.7754	4.8224	11.0792		0.356756	5.09963
7.9825	3.6313	2.1261	2.3892	4.9254	4.7409	6.2417	6.262	4.7046	4.5504	6.9566	7.1558	3.5823	8.2998	5.8237	2.017	2.3541	3.079	5.9121	5.2015	5.7377	2.616	7.0726		0.362164	4.78999
8.1016	4.4818	3.0548	2.0609	2.9261	4.3572	9.27	7.1557	7.1925	2.9532	6.6922	5.9375	7.3858	12.7931	4.7931	3.4894	3.7863	2.5484	5.0694	7.016	6.6613	1.3555	4.6706		0.367568	5.25685
8.2207	6.7173	3.8279	1.6431	3.9052	7.4562	8.5951	4.4119	3.2355	7.912	4.8893	5.5421	5.2352	10.3892	7.4799	4.5517	2.5874	3.5872	3.1732	6.5044	6.3034	4.3196	5.4506		0.372971	5.35079
8.3399	7.7414	4.5881	2.3963	4.7266	7.3449	10.4544	5.8467	5.2013	5.6741	3.0467	2.3893	7.8583	8.3773	4.7791	1.8853	3.6791	4.4843	5.2596	4.2473	7.7654	4.4225	7.5635		0.378379	5.44234
8.459	4.351	2.3002	2.7137	6.3038	5.6327	6.1731	5.1202	3.9312	6.32	3.0136	3.1076	5.5781	6.096	5.2724	1.8944	4.6056	6.1175	11.5558	6.0713	6.8452	2.4526	5.183		0.383783	5.02905
8.5782	3.1074	3.5899	2.805	4.0666	7.6886	7.0836	4.1348	4.7188	6.1628	4.8332	5.7578	4.3405	4.666	4.3277	3.0468	3.9528	2.5115	7.485	5.5706	5.0568	2.4189	4.557		0.389191	4.631
8.6973	5.263	3.2842	2.2172	3.2729	8.8704	6.1966	4.5161	3.4202	7.4	3.2847	5.9037	5.8776	4.5562	3.7444	3.1784	2.3555	2.2965	6.9696	9.0738	3.3762	3.3573	3.2358		0.394595	4.62047
8.8165	5.338	1.4438	1.3613	3.419	6.7452	9.2177	5.2058	3.5377	8.5901	4.0132	4.7556	5.5026	5.6466	4.5123	2.038	1.41	4.0618	3.9761	8.8394	6.248	1.6513	2.237		0.400003	4.53411
8.9356	6.5785	1.4054	2.0695	2.5973	5.9766	5.7897	2.6907	4.4013	4.6515	4.7817	4.6509	5.1992	6.7685	4.2408	2.4794	3.2517	4.4089	7.7029	6.9132	7.4002	2.0954	2.0669		0.405406	4.46001
9.0547	8.6727	2.1785	1.8966	3.2912	4.6204	9.256	3.9917	5.6946	5.5691	4.9913	2.4569	6.4954	7.4795	4.4319	2.4479	4.7035	3.7706	2.9245	6.5446	4.9402	1.3313	3.3433		0.41081	4.59235
9.1739	8.1886	2.8137	2.7416	2.6639	3.3667	8.2793	3.2335	4.3807	4.5184	2.2377	3.0602	12.5575	8.9057	7.3514	2.2542	1.9292	3.2568	5.1712	6.8162	5.2694	1.9315	2.6369		0.416218	4.70747
9.293	7.1742	2.3761	1.559	2.308	4.4075	6.5003	3.4307	5.7873	5.8561	3.6544	5.7562	11.0161	8.1704	4.9272	1.9971	2.4683	2.8392	3.0648	9.4841	4.0998	1.2555	2.3119		0.421621	4.56565
9.4122	7.9635	2.753	1.4128	4.5297	3.9454	4.7344	6.4278	4.576	3.9276	5.0368	3.7994	6.2226	5.6093	5.5373	4.5248	2.1207	2.4208	4.2165	8.0206	5.3588	1.6566	2.2935		0.42703	4.41309
9.5313	7.0306	3.623	2.4636	2.5337	4.5137	6.1688	4.0123	3.4756	3.3026	4.0606	7.0401	5.9965	8.0249	2.1563	2.4381	1.2717	1.9385	4.836	6.6665	3.8679	1.5478	1.7873		0.432433	4.03437
9.6504	3.4184	3.8866	2.0493	1.167	10.9049	3.1443	4.6565	4.9978	4.2416	4.9585	4.1196	8.3067	5.8164	3.3346	3.7713	1.3415	1.6967	5.9014	6.1521	3.1268	3.0337	1.5752		0.437837	4.16368
9.7696	3.2591	3.2093	3.7149	1.8323	5.0366	4.0062	3.4317	3.58	4.717	4.7282	4.9327	6.3129	13.8144	3.7447	3.839	1.5755	4.7168	6.0643	7.3406	4.2301	1.5856	1.8634		0.443245	4.43342
9.8887	4.4326	1.6744	2.7166	3.0712	3.14	5.8111	4.6829	1.9434	7.0226	3.7575	4.21	5.8392	8.355	4.6977	1.7748	4.022	3.018	4.5783	2.9995	4.1372	1.6085	2.6827		0.448648	3.91705
10.0079	4.1233	2.4085	4.9124	3.6275	3.5917	3.6648	3.6739	1.8196	2.6996	2.6049	4.5461	2.9846	7.7031	3.4427	2.2234	4.5256	3.6222	6.5271	9.3406	3.6526	1.8468	1.7624		0.454056	3.87743
10.127	2.2453	2.3937	5.0791	3.9111	2.5965	2.4988	3.8001	4.2643	2.4022	4.5051	4.7338	6.9027	7.2512	3.5269	3.4309	1.8985	3.5982	6.0387	10.0095	3.3657	2.8397	2.8943		0.45946	4.09938
10.2462	1.9894	1.2654	3.2348	1.947	3.6959	2.9236	2.6869	2.9958	3.536	3.8819	5.5252	7.7712	4.4465	2.9886	3.6943	1.7443	4.1161	7.4067	3.8746	2.0405	4.1792	1.9613		0.464868	3.54115
10.3653	5.363	1.8128	3.7911	1.9064	3.24	4.8191	2.296	1.794	2.9499	2.8601	8.9937	5.6507	6.4109	3.9169	3.6413	1.9199	2.9506	5.381	4.0782	2.4941	1.2699	2.0994		0.470271	3.61995
10.4844	2.6984	1.89	3.7436	3.3758	4.9019	3.5977	4.6275	4.8603	2.2905	3.7403	4.3791	4.8587	4.8881	4.3678	4.6042	2.0289	2.8295	7.9843	7.849	1.3282	2.9427	2.4472		0.475675	3.91971
10.6036	2.1915	3.6857	2.1543	1.6885	6.1157	2.7492	4.1527	5.5245	1.2198	3.2048	4.7422	5.0055	6.6543	5.6377	2.4924	1.622	2.707	6.4545	10.327	4.7088	3.3918	2.0538		0.481083	4.02199
10.7227	5.3928	2.0625	1.6232	3.2717	4.4326	4.2586	5.5895	3.7009	3.9607	3.521	2.9068	3.2432	6.4927	3.6093	3.7829	2.3926	2.6917	6.9903	5.0901	2.1461	2.9126	2.9845		0.486487	3.77529
10.8419	3.5347	2.8604	2.1508	3.0392	2.6046	9.5516	6.715	7.1436	4.4552	4.12	1.9428	5.2084	4.4958	3.4022	2.1521	2.2877	2.0825	3.7144	4.6726	2.706	1.5447	2.9827		0.491895	3.78941
10.961	2.6385	1.7501	2.0919	1.6033	3.3887	7.0527	2.4552	2.7565	1.3253	2.9825	4.3471	3.7335	4.8818	4.8437	4.3732	3.4666	2.1261	4.5737	5.406	1.4216	1.8897	2.6614		0.497298	3.26223
11.0801	5.3353	3.0766	2.1489	2.9719	3.3628	5.2366	2.9371	3.7834	1.6979	3.0614	4.0942	4.2043	4.2816	5.3423	2.1414	1.7753	2.5884	8.5977	4.9303	2.3588	2.2895	1.4422		0.502702	3.5299
11.1993	3.8785	2.8918	2.4194	2.6954	3.5854	5.6147	3.493	2.2348	1.4211	3.3286	4.2912	3.1221	5.2903	3.5529	1.9166	1.7755	3.8123	8.9844	7.2802	5.2792	1.3912	1.9164		0.50811	3.64432
11.3184	2.0039	2.5261	2.3027	1.5396	3.1509	5.1898	2.7515	2.3147	2.1776	4.0407	3.3552	2.7348	7.9731	1.8638	3.5779	2.3924	3.8429	7.63	5.486	3.0543	2.9767	1.6271		0.513513	3.3869
11.4376	3.8424	2.7392	1.9542	1.3524	4.9822	3.9387	3.6009	1.7757	3.1931	1.8959	5.1741	2.3727	4.4714	1.5604	4.7348	3.641	2.7062	4.991	5.2949	2.2856	2.6689	2.4642		0.518921	3.25636
11.5567	2.7582	1.8926	1.7457	3.2943	5.0514	4.2388	6.5763	1.3549	4.1187	1.9597	3.8144	2.2297	7.1184	2.7463	1.4623	4.1712	1.1772	5.9148	7.9749	3.6061	1.5492	2.0353		0.524325	3.49047
11.6758	8.4041	1.8473	1.8271	2.5491	1.8663	5.0142	2.964	3.6217	3.461	2.0165	3.913	4.3199	5.2198	2.6823	1.7932	1.6334	2.6744	4.2782	6.8476	3.3984	2.5945	2.139		0.529729	3.41205
11.795	3.3423	1.5377	2.2075	3.1785	4.7812	4.0843	3.4586	3.1395	1.7124	2.1845	3.5086	3.3774	4.2324	3.7566	2.5979	2.0558	2.7982	6.9751	4.339	1.8711	1.814	1.5701		0.535137	3.11467
11.9141	2.1853	2.5711	1.5299	1.8405	3.4902	5.3009	4.485	4.1023	2.0657	5.1653	4.5227	6.608	5.2554	2.1969	3.5485	4.2241	3.0002	5.9864	5.8705	3.0056	2.0601	3.6858		0.54054	3.75911
12.0333	2.2872	2.3873	1.9001	2.6656	2.4411	5.9877	4.8586	1.4993	2.3989	6.6681	2.4728	4.8942	5.9689	2.6431	2.5345	2.9366	3.3169	6.7586	6.8428	4.7363	1.9385	2.3467		0.545948	3.65835
12.1524	1.9862	1.5875	1.5758	2.6368	4.5702	3.5687	3.84	3.5996	3.2894	3.4349	4.5643	7.4913	3.0146	3.481	2.8639	1.4529	3.252	7.9791	6.1309	5.2231	2.8899	2.4321		0.551352	3.67565
12.2716	3.8364	1.3063	2.1176	1.6904	1.9729	4.865	3.1373	3.2979	1.5342	1.6448	3.5862	5.0704	2.97	2.8099	4.109	2.4053	1.9738	6.9094	7.216	3.8792	2.59	2.2703		0.55676	3.23601
12.3907	2.283	1.2035	2.5079	2.9014	3.7285	3.7563	2.9011	3.7883	2.5971	2.0511	3.0284	4.6427	4.4139	5.2696	2.6137	2.0657	2.0536	5.1115	4.4151	4.1616	2.7018	1.4493		0.562163	3.16569
12.5098	2.2816	1.217	1.4964	1.3952	3.9943	5.7805	3.7688	2.175	1.6676	4.7168	2.0363	7.4071	5.0753	1.9822	2.1806	2.8712	1.9721	9.0476	7.1983	3.264	2.5429	1.635		0.567567	3.44117
12.629	1.6602	1.0278	2.2834	2.8472	2.4082	3.7347	4.6215	1.846	2.1424	1.9626	3.375	7.2518	6.3931	2.0416	3.4088	2.0033	3.0542	6.1006	4.2435	1.5879	1.5658	1.242		0.572975	3.03644
12.7481	2.4032	1.2624	1.2119	3.302	2.3209	7.571	3.9291	3.5161	1.2184	1.2439	3.6637	3.8182	4.0681	2.3214	2.5602	2.2004	2.2138	4.951	6.6001	3.1146	1.348	2.8072		0.578379	3.0748
12.8673	2.1242	1.628	1.2054	1.8143	5.1094	3.7377	2.1932	4.0187	1.7288	3.4604	3.6172	7.2234	3.0442	1.7454	2.7075	2.9016	5.0347	4.825	6.572	3.9595	2.4722	2.5191		0.583787	3.34736
12.9864	3.1901	2.6727	2.4153	1.7874	2.6462	4.8029	5.2019	2.7946	3.8086	2.494	6.972	9.0298	3.4286	2.4592	1.6273	4.1279	5.3643	5.3846	10.8943	2.7618	1.8442	1.5796		0.58919	3.9676
13.1055	3.3367	1.134	1.545	1.9911	3.949	6.2729	1.8913	2.5384	3.0492	3.5719	2.7819	9.5981	2.2963	2.712	2.766	1.5046	3.8987	4.8403	8.0573	1.4093	1.7796	2.4542		0.594594	3.33535
13.2247	3.6607	1.8285	1.7156	3.5427	3.7766	3.6784	3.3637	4.1059	3.2257	3.753	5.3155	8.7633	1.9802	1.4873	2.5629	3.1643	4.3747	4.9342	6.6025	2.9729	2.5961	1.5208		0.600002	3.58752
13.3438	4.2482	2.6051	2.1858	2.4173	4.0992	4.8068	4.3173	1.4484	2.0463	2.7917	3.223	6.8394	4.7388	1.2939	1.7013	2.6854	3.1182	8.568	6.3458	1.7355	2.3421	3.4386		0.605405	3.49982
13.463	2.2015	1.2672	2.0239	2.5785	3.4726	5.9879	4.4188	2.3531	1.764	3.7702	3.0474	6.7139	4.9798	3.8614	1.9401	2.6264	2.4035	4.3008	5.2117	3.2433	2.1751	2.6952		0.610813	3.31983
13.5821	1.3273	1.1049	1.201	1.5292	2.7511	3.3079	4.5259	2.5932	1.5372	2.6907	5.4856	7.505	2.4037	5.3109	2.2305	1.9049	3.4121	4.4037	8.4514	3.8465	1.0127	2.4463		0.616217	3.22644
13.7012	2.0415	1.9511	2.1877	1.8705	4.8156	3.2417	3.5665	3.8821	3.0112	3.2245	4.7575	7.8793	4.0097	2.2008	2.6892	3.3665	2.4289	3.6387	4.2565	2.7149	1.2917	2.3303		0.621621	3.24347
13.8204	1.71	2.6788	2.6971	1.5643	4.2248	5.8853	4.1487	3.7676	2.0074	2.3888	4.0465	4.5952	2.0247	3.5007	1.709	2.278	2.0153	4.7445	7.1047	1.7873	1.198	2.497		0.627029	3.11699
13.9395	2.5817	3.1014	1.5248	1.46	3.0865	5.7474	5.4292	3.8612	2.4386	2.1907	6.2476	4.364	3.1164	3.3384	3.0765	1.8518	4.0456	5.216	8.8437	2.3342	1.7814	1.29		0.632432	3.49669
14.0587	3.8982	2.8913	2.2943	2.4944	4.3883	4.5751	4.5292	2.4794	1.796	2.5399	6.5118	5.0168	6.1367	2.8915	4.4057	1.4093	3.9604	5.796	6.9882	4.1386	1.3395	2.0635		0.63784	3.752
14.1778	2.2394	3.0399	2.4168	2.2182	4.0692	4.4613	6.1416	2.6831	5.2214	3.4596	6.2884	8.6593	6.7201	2.9254	3.043	3.5326	3.6126	10.6405	2.8648	1.6383	2.2633	2.0209		0.643244	4.09817
14.297	2.2175	2.7425	1.7661	1.7175	4.8781	5.3596	6.8602	5.6359	3.2374	3.17	4.766	5.5922	8.8314	3.9042	2.1857	5.0575	3.0224	5.4251	4.2269	2.3865	2.3715	2.0452		0.648652	3.9727
14.4161	1.808	2.9012	1.1672	4.2279	5.5296	5.2461	3.7629	3.0727	4.7223	1.4164	4.6991	10.5927	5.896	2.7244	1.3384	3.971	1.6559	5.9011	4.4697	2.1403	1.6706	2.1094		0.654055	3.68286
14.5352	3.0676	2.2481	1.2906	1.546	5.2104	4.2908	6.8055	2.3942	1.4432	2.8255	5.7115	6.6632	7.416	3.2041	3.8434	2.9039	1.3951	4.7764	5.0769	2.8317	1.1107	3.8727		0.659459	3.63307
14.6544	2.6704	1.6979	1.3309	1.147	6.0126	4.532	4.1536	2.409	2.4363	2.0461	5.4472	7.1023	4.8077	2.5067	2.3188	2.1522	1.4191	3.3231	6.6792	1.8581	1.1534	2.599		0.664867	3.17285
14.7735	2.2504	2.4482	1.5524	2.7075	5.4366	5.0128	5.6196	1.6126	2.8544	2.7923	4.6472	6.9376	5.1331	4.3043	2.6668	2.9169	3.0075	3.5051	4.0562	1.3734	2.2203	3.4807		0.670271	3.4789
14.8927	2.021	2.7215	2.6708	1.9595	3.2258	4.3207	4.4975	2.167	2.5393	2.4574	2.5866	4.7718	7.4508	4.505	2.0937	2.3831	2.447	2.4161	7.451	1.5145	2.7314	3.2688		0.675679	3.28183
15.0118	1.7196	2.2381	3.0595	2.6378	3.8008	4.4876	2.888	1.7448	3.2043	4.4944	1.828	3.4374	3.7806	3.0297	2.3057	3.5137	1.7752	5.0686	5.2026	2.1541	2.2442	1.642		0.681082	3.01167
15.1309	1.3255	4.7369	1.9705	1.9964	3.1192	4.2252	2.5614	1.2663	2.496	2.0521	3.5629	3.6287	3.6	2.6056	2.004	4.8413	1.8361	3.4883	7.0156	1.7084	2.1281	2.1649		0.686486	2.92425
15.2501	2.7029	2.302	1.6617	3.7521	4.4396	3.2263	1.5127	1.4591	2.7178	3.0944	1.7064	5.7103	4.8228	4.1733	4.3764	4.0652	5.6797	3.9823	3.522	2.4016	2.0651	1.3482		0.691894	3.21463
15.3692	2.8007	3.5162	2.3084	2.1444	4.5978	5.6389	4.2918	1.388	4.7675	2.3434	3.8584	4.6609	3.3682	4.474	3.8668	2.7906	3.0814	8.6296	5.2356	1.9047	2.3732	1.3437		0.697297	3.60837
15.4884	3.2427	1.2807	1.7223	2.8459	5.5763	4.4101	3.0762	3.0278	2.9107	3.1704	2.0044	4.2886	6.1002	4.3003	2.1892	2.8658	2.2098	5.2067	4.0899	1.8608	3.1736	2.0386		0.702705	3.25414
15.6075	1.7863	2.6779	2.2218	1.2806	3.5779	4.3521	6.5954	3.0217	3.3186	2.8599	1.3482	4.3815	2.508	5.524	1.2654	4.1801	1.7412	3.5982	7.7578	4.2799	2.8411	2.1347		0.708109	3.32965
15.7266	3.5481	1.6254	1.4296	1.6873	4.2552	2.2381	5.0973	2.5633	2.7363	4.5386	1.5295	3.5726	4.7125	2.9477	2.2835	2.178	1.7527	6.0123	7.9637	2.6945	2.5187	2.0149		0.713512	3.17726
15.8458	2.8013	2.2248	2.6484	2.3363	1.8921	2.7767	3.7299	1.6932	3.5523	3.311	5.0567	6.5011	5.3132	2.9424	1.5915	4.9916	4.6528	7.528	4.2203	1.7921	1.7089	2.1592		0.718921	3.42835
15.9649	3.5547	1.9422	3.45	2.3169	4.5447	7.3637	3.3962	1.7841	3.2012	3.8424	2.9864	7.2512	4.2091	2.1004	1.7353	2.6673	2.4596	5.1426	3.944	4.6723	1.9339	2.1572		0.724324	3.48434
16.0841	3.9023	2.0247	1.5204	3.098	4.3382	5.5631	2.1957	1.7322	1.4466	3.1254	5.6182	4.6322	4.7215	5.5963	2.4449	1.6365	2.984	5.8727	4.2199	4.1932	2.0004	4.203		0.729732	3.50315
16.2032	5.3776	2.0601	2.6328	2.2205	3.8016	5.6799	5.7342	2.2461	4.0192	3.3587	5.3791	8.1285	2.6184	4.1039	2.4187	3.8907	3.7563	5.2481	3.721	4.0543	1.9448	2.1581		0.735136	3.8433
16.3224	6.238	2.3393	2.629	1.9861	3.2291	3.1287	1.7174	1.606	2.4469	3.1303	3.0286	7.3252	2.4923	4.8052	1.3514	4.3734	3.2103	2.2745	6.9272	2.4283	2.4108	1.9412		0.740544	3.22815
16.4415	4.8237	1.5495	1.9813	2.2254	3.3153	4.0868	5.0921	2.5883	1.5308	3.6634	4.5766	4.8706	5.179	3.3083	1.7072	3.194	2.6947	4.354	6.2343	3.0986	2.1533	1.6759		0.745947	3.35923
16.5606	3.8416	1.2743	3.2391	3.1712	2.3822	4.7757	2.8691	2.8184	2.4234	4.4675	5.9134	5.9964	5.6129	3.0314	2.9297	2.7736	2.8584	4.9948	8.0134	3.4932	1.5966	1.2984		0.751351	3.62612
16.6798	2.4218	1.3354	3.9205	1.9186	4.3249	4.0429	4.9373	2.6467	2.7908	3.4139	4.6889	4.713	4.2867	3.009	2.1035	3.3905	3.1363	2.1892	10.7303	4.5263	2.5106	1.5159		0.756759	3.57059
16.7989	2.9899	1.4845	1.2684	1.1872	5.3206	2.8243	5.9944	2.1588	1.5847	2.7672	2.4501	6.562	4.1968	3.2301	1.9996	3.188	3.8404	4.1606	7.2734	4.6849	2.1382	1.2232		0.762163	3.2967
16.9181	1.9099	1.8412	2.9577	4.4085	2.5454	4.0258	5.7747	2.2429	2.738	2.9547	3.4383	7.6242	2.1038	3.1774	2.531	3.4566	1.9942	5.9137	7.0415	4.7487	2.1813	2.066		0.767571	3.5307
17.0372	2.3717	3.0863	3.3412	2.8587	9.0574	2.2995	8.359	2.5059	1.9582	4.0112	5.9437	4.4553	2.0866	4.2752	2.3603	4.6374	4.4425	3.8486	7.4205	6.7722	2.761	3.0568		0.772974	4.17769
17.1563	2.8598	3.3232	1.3837	7.2114	4.0419	7.5577	6.3632	4.0904	2.7737	3.9594	7.4917	5.3283	3.6613	4.3485	4.0365	4.0786	5.4582	4.5222	8.6373	2.8032	2.87	2.5286		0.778378	4.51495
17.2755	3.9868	2.9469	2.1107	4.6651	3.4546	4.238	4.0206	2.5179	3.2875	4.5439	2.9731	5.1504	3.9971	3.8817	5.0592	4.1087	4.8381	5.5364	5.6829	3.0711	2.5302	2.0057		0.783786	3.84575
17.3946	3.1355	1.6839	3.3347	4.2988	5.1159	5.5768	5.5266	3.746	4.4709	4.4086	1.5237	4.5246	4.5623	4.7813	3.0871	5.3964	2.9811	4.4747	8.7052	2.1031	2.0814	2.8912		0.789189	4.01863
17.5138	5.8322	3.3764	1.3581	2.6833	3.9606	3.6156	4.7519	3.5289	2.3674	4.9459	2.4431	7.0148	3.8116	5.1947	4.8656	1.6233	6.7613	5.3313	9.407	2.5524	4.7063	3.3542		0.794597	4.24936
17.6329	5.4629	2.4683	3.1863	1.9098	3.1403	3.54	4.7971	2.2309	2.5224	5.4226	3.386	7.2442	5.5256	4.6353	3.6658	2.9705	6.365	3.5108	5.7198	1.4736	2.4628	1.8916		0.800001	3.79689
17.7521	5.1245	2.1823	1.8773	3.7861	4.404	5.9307	6.0662	3.0387	4.4845	4.6281	4.9435	2.5048	3.5759	6.1831	1.9904	4.7979	5.8798	3.1449	3.7698	4.3533	1.3168	2.5915		0.805409	3.93519
17.8712	3.8942	3.2971	1.2885	3.284	2.9654	4.9447	6.1987	3.8012	3.6435	4.7645	7.082	2.4529	1.6834	2.3481	3.5641	3.9738	3.9241	3.2534	2.6546	3.2684	2.5401	3.1077		0.810813	3.54247
17.9903	5.6243	3.3899	2.4579	2.3885	8.4011	4.2994	5.5746	3.0055	4.976	6.1699	4.4442	3.0511	2.3481	3.6521	4.5288	2.7628	7.4668	5.2392	5.579	5.3819	1.774	2.4104		0.816216	4.3148
18.1095	5.0861	2.112	3.1674	1.6805	5.7	1.7941	3.6436	2.6845	3.8142	4.1029	2.2026	3.3706	2.9938	4.0957	2.5433	4.1671	6.9796	4.8532	8.2356	2.904	4.2736	2.534		0.821624	3.76993
18.2286	3.8627	3.6397	3.3733	2.0918	6.6983	4.2319	4.6456	4.3346	2.4654	4.0994	2.6291	5.3296	3.1472	3.3844	3.3732	4.656	5.64	4.1569	3.1544	3.5991	4.2343	2.3416		0.827028	3.86766
18.3478	3.8329	2.4324	3.2553	3.0813	6.1147	4.0019	4.6409	2.2855	4.5555	3.7207	2.825	2.3572	5.1149	3.6685	6.3797	3.9574	4.6989	5.4998	3.5464	5.2569	5.7171	1.4409		0.832436	4.01745
18.4669	5.4508	2.7762	2.7223	1.9959	7.0083	2.1251	3.3691	3.7956	3.668	2.7538	4.1492	3.8064	5.7942	4.4064	2.1729	4.1006	2.5347	4.3548	6.2096	5.2486	5.892	2.3511		0.837839	3.94025
18.586	4.8014	2.3559	3.7544	4.5697	5.42	2.8634	2.2402	3.1776	3.4217	2.5917	3.6161	7.9832	3.9498	6.0779	4.3463	2.5157	5.0228	3.4911	5.9752	4.0087	5.9573	1.936		0.843243	4.09437
18.7052	4.7077	3.1414	7.3407	3.9329	7.6383	1.8798	2.1084	2.0095	3.6444	3.7978	2.861	9.4041	4.0054	5.4647	5.4299	6.275	2.2959	4.5487	6.0053	4.2936	3.2604	1.7972		0.848651	4.35646
18.8243	4.6799	2.1786	5.969	5.3386	5.5201	3.4804	3.3474	3.2764	6.0061	4.1677	2.8882	7.7337	8.8583	3.9028	6.9387	1.9829	2.3197	5.6296	7.8197	4.7051	2.5958	3.0666		0.854054	4.65479
18.9435	7.7773	3.7237	3.9233	7.777	4.5882	3.1574	4.8058	5.6814	5.5802	3.1728	2.4431	5.9991	5.6874	7.3153	4.5839	4.7818	3.2749	6.5749	5.4094	5.9846	3.8858	3.7719		0.859463	4.99542
19.0626	6.7352	3.5362	3.1791	6.2158	2.0132	2.4316	2.7891	3.3069	2.4523	2.8496	1.9762	6.0785	4.5857	4.0143	5.0109	3.8338	3.6528	6.4399	6.0945	4.0387	3.5628	2.8448		0.864866	3.98372
19.1817	5.9178	2.7402	5.4264	6.0863	3.7317	5.798	2.201	5.2548	2.041	2.5332	2.6276	4.0058	4.5057	2.1272	6.5158	5.4913	2.6969	3.9781	5.6073	5.7553	2.7511	5.6807		0.87027	4.24878
19.3009	4.4837	4.8402	4.9988	4.8993	6.1736	2.2355	1.9372	4.5603	2.825	4.3756	2.456	6.1248	2.1541	3.6384	7.0162	6.0014	2.8792	5.1131	2.9246	7.7338	3.2818	7.47		0.875678	4.46012
19.42	5.6441	4.3643	6.201	7.9653	6.0193	3.1066	1.3981	4.1675	1.8542	2.4263	4.4655	6.4058	3.5689	4.6047	7.208	8.1028	2.0981	6.2158	4.2775	6.9874	3.184	3.4837		0.881081	4.71586
19.5392	5.7402	5.5732	4.3557	5.4303	3.6277	4.7432	3.9246	2.4692	2.0294	2.0251	5.1205	7.0158	5.625	5.5023	3.963	4.065	3.3098	4.178	4.3847	6.4145	2.1468	1.6353		0.886489	4.23997
19.6583	5.5644	4.1594	4.4636	7.0206	3.2915	2.39	3.9008	2.9755	4.418	1.954	3.6495	7.9452	4.0605	5.8574	2.5888	2.1761	2.4993	6.036	3.1231	7.716	5.9338	1.332		0.891893	4.2298
19.7775	2.3553	3.0789	4.9128	7.4968	3.9191	3.1019	6.08	2.2964	3.9962	2.0033	2.5897	6.0112	3.7945	5.429	8.4477	7.8382	3.9674	2.362	3.9767	10.6671	6.8221	2.8589		0.897301	4.72751
19.8966	5.0613	4.7095	3.643	6.8424	1.9306	2.9829	3.6266	1.9514	1.7536	2.2089	3.3135	6.8886	4.7314	4.7637	4.2812	3.5282	2.9919	2.0746	4.451	6.5294	7.77	3.9826		0.902704	4.09165
20.0157	4.5042	7.5382	5.7609	7.1711	4.1358	8.9285	3.2811	1.4636	1.2612	1.7804	3.4567	6.2742	3.8173	3.7093	2.7891	4.3615	3.2478	1.7597	5.6561	3.1509	5.352	2.6109		0.908108	4.1823
20.1349	3.3097	5.5448	3.8587	5.9748	5.1078	5.0717	5.5614	1.2261	4.8671	1.5757	6.692	7.9141	4.4752	4.4078	3.6227	9.8457	5.1528	4.1792	5.2899	4.9731	4.2183	4.5376		0.913516	4.8821
20.254	3.0352	3.4322	5.4752	5.867	1.4353	5.3789	2.9824	1.9967	2.7955	2.9757	3.3092	8.3749	5.7441	4.021	3.6882	5.0092	6.5081	3.3977	3.1398	3.1771	4.8742	6.3235		0.91892	4.2246
20.3732	2.5684	2.2583	2.8154	7.6405	3.8832	5.605	4.5643	1.2902	2.2813	2.7656	4.9909	6.0426	5.5763	4.9374	6.0705	5.249	3.3138	3.1662	3.6161	2.2069	3.1665	11.5148		0.924328	4.34196
20.4923	4.2999	4.6518	2.9697	4.9523	3.528	5.6965	4.2561	4.1375	2.9891	1.3232	3.4064	3.4471	4.6002	3.7991	4.7988	5.0851	2.721	6.7328	5.7806	3.53	6.1957	10.3409		0.929731	4.51099
20.6114	3.7169	3.6391	6.7456	3.9014	4.5013	5.7045	2.1627	2.4964	1.9296	1.3364	1.9784	1.8833	4.8901	3.646	1.7111	4.8636	4.4254	2.8891	5.3617	9.7256	3.1196	11.181		0.935135	4.17313
20.7306	3.8991	2.841	6.3087	5.7281	6.9402	2.9266	2.7375	1.3762	2.1743	3.2163	2.9765	3.1679	3.6063	2.0608	3.9448	9.0913	4.2751	4.9266	7.5587	7.8268	4.3404	7.2084		0.940543	4.50598
20.8497	4.6002	3.5432	6.0624	6.4598	5.4761	3.0989	8.1055	2.4152	2.0779	1.491	2.9825	4.7738	3.6976	3.0751	7.4286	5.4049	8.1461	6.4003	9.5415	8.4675	4.1904	5.0723		0.945946	5.11413
20.9689	3.7144	3.4195	5.5357	5.2751	3.7473	1.8023	2.8452	2.312	1.5024	2.7351	3.0529	3.0813	4.0353	3.7978	5.2876	6.2419	6.2799	4.0904	6.2845	5.9912	6.9331	4.3819		0.951355	4.19758
21.088	3.2294	3.9594	5.7445	6.5089	6.3651	2.4586	2.5081	3.7092	2.0417	2.9283	1.2232	2.5015	4.5726	4.223	3.4759	5.3783	6.9799	4.2571	7.4734	6.5113	3.3148	6.9843		0.956758	4.37948
21.2071	2.72	4.4562	3.8327	4.3448	6.0577	2.2213	2.154	3.3827	2.3623	1.3406	1.4974	1.957	3.0797	5.3265	2.5479	3.9101	4.4073	2.6831	8.959	4.1524	6.6409	6.6201		0.962162	3.8479
21.3263	3.4531	4.4455	8.8286	3.0753	7.7758	1.584	1.1447	1.6069	1.1368	1.1655	1.9628	1.5524	2.6305	3.0151	2.3574	4.3895	3.0594	2.6925	4.474	3.3256	7.0036	7.7275		0.96757	3.56393
21.4454	3.4193	5.145	3.4301	4.1025	4.3621	2.5917	3.5361	1.1671	1.9227	2.3503	1.3486	3.1948	2.9229	1.3823	2.3644	3.3245	2.5191	3.1671	7.6168	2.1248	7.8299	10.6205		0.972973	3.65648
21.5646	1.9039	1.986	3.0542	3.9426	4.6172	1.9086	3.0672	1	1.7627	1.4074	1.3957	2.2969	2.135	2.8389	1.834	1.1949	2.9499	2.7317	5.5228	3.3029	7.9505	7.3607		0.978381	3.00744
21.6837	2.4044	3.1287	4.8951	5.3783	4.4971	1.831	2.7522	1.1072	1.1718	2.7771	1.1745	1.3004	2.2661	4.0112	2.4789	1.3284	1.766	1.766	3.2866	4.0653	6.2726	8.9312		0.983785	3.11773
21.8029	1.2427	2.3309	4.2258	1.7791	6.3717	1.4088	1.4422	1.3066	1.3168	2.2543	1.4152	1.1134	2.7505	2.1378	2.1985	2.3528	2.0305	3.5278	2.9897	3.585	4.4228	6.1255		0.989193	2.65129
21.922	1.6754	1.7522	2.0806	1.1291	3.5178	1.2196	2.445	2.5002	2.1191	1.5364	1.2336	1.1936	1.7727	3.846	1.8535	3.3154	1.5762	3.114	9.8427	5.0675	7.0603	3.1194		0.994596	2.86229
22.0411	1.2041	1.8412	5.0989	1.215	2.905	1.7509	1.5316	2.5789	1.14	1.1866	1.1235	1.1521	2.9418	3.1056	2.2721	2.5001	1.2905	2.7304	4.3772	1.6739	6.094	8.3201		1	2.63789

## Sheet: Sheet1
Image7				Image8				Image9				Image10				Image11				Image28				Image30				Image31				Image32				Distance	Image7	Image8	Image9	Image10	Image11	Image28	Image30	Image31	Image32
Ap-Basal	Avg intensity			Ap-Basal	Avg intensity			Ap-Basal	Avg intensity			Ap-Basal	Avg intensity			Ap-Basal	Avg intensity			Ap-basal	Avg intensity			Ap-basal	Avg intensity			Ap-basal	Avg intensity			Ap-basal	Avg intensity			0	8.57429	2.37626	2.56013	8.808	10.9	15.2133	6.26029	20.3315	13.1502
0	8.57429			0	2.37626			0	2.56013			0	8.808			0	10.9			0	15.2133			0	6.26029			0	20.3315			0	13.1502			0.05	9.583	2.59917	2.70451	8.30039	11.2793	12.8813	6.2624	16.3457	11.8119
0.00540354	8.59761			0.00540354	2.18027			0.00555364	2.776			0.0044429	8.77202			0.00502339	11.0278			0.00609544	14.5133			0.00613285	6.39874			0.00517954	18.724			0.00510027	12.7028			0.1	13.261	2.80121	3.19165	8.3253	12.4665	11.1597	7.04523	12.7256	9.43685
0.0108116	8.80088			0.0108116	2.35788			0.0111119	2.79589			0.00888954	7.75626			0.010051	12.0741			0.012196	12.7089			0.0122709	6.25129			0.0103634	18.8154			0.0102048	12.6342			0.15	11.7773	2.94049	3.41482	7.9514	14.1785	10.0114	7.48333	12.5882	9.7953
0.0162152	8.45625			0.0162152	2.54803			0.0166656	2.62354			0.0133324	8.04072			0.0150744	10.2185			0.0182914	14.8756			0.0184037	5.96528			0.015543	17.8817			0.0153051	11.9494			0.2	10.2617	3.5568	3.53852	7.14766	14.6328	8.67417	7.85472	12.8832	10.2857
0.0216232	7.53067			0.0216232	2.36733			0.0222239	2.60504			0.0177791	8.7859			0.020102	10.2907			0.024392	12.4022			0.0245417	6.17094			0.0207269	15.5699			0.0204096	11.5806			0.25	8.01098	3.54044	3.57711	6.82306	13.395	7.51583	7.27866	12.4991	10.0103
0.0270268	7.97656			0.0270268	2.43485			0.0277775	2.67104			0.022222	8.69126			0.0251254	10.8796			0.0304874	12.7044			0.0306746	6.05765			0.0259064	15.9355			0.0255099	11.6636			0.3	6.24419	3.78824	3.5974	6.40245	11.735	6.70247	6.80919	12.0394	9.47049
0.0324303	9.90769			0.0324303	2.8447			0.0333312	2.74235			0.0266649	8.67634			0.0301488	12.0722			0.0365829	12.3978			0.0368074	6.25113			0.031086	15.5556			0.0306102	10.7482			0.35	5.63911	3.48024	3.57564	5.86266	9.56167	6.14194	6.63019	10.1953	8.38957
0.0378384	10.8226			0.0378384	2.76955			0.0388895	2.63977			0.0311115	7.78524			0.0351764	11.1167			0.0426834	12.18			0.0429454	6.24032			0.0362699	16.1595			0.0357147	11.6174			0.4	4.92143	3.22807	3.78085	5.14477	7.37167	5.77972	6.24795	9.20699	7.02155
0.0432419	11.0233			0.0432419	2.8683			0.0444431	2.67214			0.0355544	8.15503			0.0401998	11.8833			0.0487789	11.2067			0.0490783	6.83944			0.0414494	15.9677			0.040815	11.5164			0.45	4.3005	3.28582	3.2945	4.79983	6.08629	5.29805	6.01546	7.32099	6.1279
0.04865	11.4711			0.04865	3.19163			0.0500014	2.95919	2.70451		0.040001	8.58082			0.0452274	11.6019			0.0548794	10.6111	12.8813		0.0552163	6.18895	6.2624		0.0466333	15.6792			0.0459196	11.2141			0.5	3.72878	3.06066	3.26928	4.65997	4.97685	4.98139	5.72844	6.5414	5.92024
0.0540536	12.252	9.583		0.0540536	2.65211	2.59917		0.055555	2.91453			0.0444439	7.90162			0.0502507	12.0074	11.2793		0.0609749	11.6089			0.0613491	6.8433			0.0518128	15.2634	16.3457		0.0510198	11.1539	11.8119		0.55	3.48865	3.15543	3.13993	4.21232	4.42056	4.79161	5.58169	5.98907	5.47602
0.0594616	11.5921			0.0594616	2.63706			0.0611133	3.08363			0.0488906	7.9909			0.0552784	11.9704			0.0670754	12.3378			0.0674871	7.1234			0.0569967	14.2509			0.0561244	10.0061			0.6	3.35466	2.87593	2.98769	4.13793	4.15092	4.24806	5.23186	5.62585	5.15387
0.0648652	12.8871			0.0648652	2.72			0.066667	2.72361			0.0533335	7.96098	8.30039		0.0603017	11.6944			0.0731709	11.2378			0.07362	7.03993			0.0621763	13.4462			0.0612247	10.5385			0.65	3.5409	2.71191	3.0426	4.22081	3.9274	4.62111	5.33361	5.58172	5.27667
0.0702687	12.0734			0.0702687	2.7143			0.0722206	2.99439			0.0577764	8.31998			0.0653251	11.4907			0.0792663	10.2956			0.0797528	6.83663			0.0673558	12.6649			0.0663249	9.24155			0.7	3.28663	2.73397	3.02869	4.12747	3.80926	4.76167	5.05532	5.39283	5.07674
0.0756768	12.1655			0.0756768	2.75702			0.0777789	3.22408			0.062223	8.26346			0.0703527	10.9889			0.0853669	11.0667			0.0858908	7.10768			0.0725397	13.1936			0.0714295	9.68566			0.75	3.44217	2.80913	2.89441	3.99316	3.94481	4.81389	4.67983	5.11529	5.38397
0.0810803	12.5983			0.0810803	2.92201			0.0833326	3.40162			0.0666659	8.59484			0.0753761	12.5148			0.0914623	10.24			0.0920237	7.45224			0.0777193	13.0842			0.0765298	9.404			0.8	3.89364	3.02142	3.02839	4.25395	3.80685	4.5637	4.75364	5.03351	5.01324
0.0864884	14.0303			0.0864884	2.49446			0.0888909	3.74045			0.0711126	8.48474			0.0804037	13.1611			0.0975628	11.0645			0.0981617	7.01146			0.0829032	13.3531			0.0816343	9.27066			0.85	4.06202	2.72281	2.77662	4.08623	3.91666	4.55389	5.04427	4.80555	5.22246
0.091892	14.7976			0.091892	2.81369			0.0944445	3.39478			0.0755555	8.20069			0.0854271	12.9648			0.103658	11.4267	11.1597		0.104295	6.94716	7.04523		0.0880827	12.0108			0.0867346	8.80751			0.9	4.41031	2.45735	2.2172	4.10625	4.08074	4.14999	4.83097	4.32875	5.22033
0.0972955	14.4811			0.0972955	3.20275			0.0999981	3.27783			0.0799984	8.94356			0.0904505	12.9093			0.109754	11.8756			0.110427	7.31223			0.0932622	12.7778			0.0918349	9.23663			0.95	4.4592	2.10624	2.14396	3.71533	3.47185	3.57194	4.06143	3.58011	4.85168
0.102704	14.7232	13.261		0.102704	2.94963	2.80121		0.105556	3.16155	3.19165		0.084445	7.72497			0.0954781	13.0056			0.115854	10.1844			0.116565	7.2996			0.0984461	12.1613			0.0969394	9.17985			1	3.30271	1.97832	2.07502	2.85697	2.6821	3.01417	3.09775	3.04592	4.05276
0.108107	12.7798			0.108107	3.06669			0.11111	3.46518			0.0888879	8.18927			0.100501	13.9648	12.4665		0.12195	10.9756			0.122698	7.41222			0.103626	12.4462	12.7256		0.10204	8.99805	9.43685
0.113515	14.6965			0.113515	3.10556			0.116668	3.34629			0.0933345	8.62584			0.105529	13.5981			0.12805	9.82			0.128836	7.05494			0.10881	12.1183			0.107144	9.16601
0.118919	14.165			0.118919	3.09874			0.122222	3.28466			0.0977774	8.29485			0.110552	14.2889			0.134146	10.0156			0.134969	7.40823			0.113989	12.8065			0.112245	9.27245
0.124322	14.3872			0.124322	3.45908			0.127776	3.60082			0.10222	7.93608	8.3253		0.115576	12.6333			0.140241	9.92444			0.141102	7.50898			0.119169	13.3835			0.117345	9.80921
0.12973	14.1624			0.12973	3.41766			0.133334	3.26614			0.106667	8.24993			0.120603	13.7148			0.146342	8.60223			0.14724	7.65092			0.124353	12.5735			0.122449	9.90386
0.135134	13.9901			0.135134	3.17851			0.138888	3.7762			0.11111	8.39866			0.125627	14.3537			0.152437	8.69333	10.0114		0.153373	8.21955	7.48333		0.129532	12.095			0.12755	9.85475
0.140542	12.7576			0.140542	3.18102			0.144446	3.45217			0.115557	8.27963			0.130654	14.687			0.158538	8.99332			0.159511	7.93836			0.134716	11.5645			0.132654	9.85149
0.145946	11.5298			0.145946	3.44747			0.15	3.03842			0.119999	8.18664			0.135678	14.563			0.164633	9.11334			0.165644	7.6345			0.139896	12.6935			0.137754	10.3036
0.151354	11.7773	11.7773		0.151354	2.94049	2.94049		0.155558	3.50355	3.41482		0.124446	8.03125			0.140705	13.9463			0.170734	8.70001			0.171782	7.99971			0.145079	12.31			0.142859	10.348
0.156757	12.1942			0.156757	3.06167			0.161111	3.68692			0.128889	8.15372			0.145729	15.1926			0.176829	8.14222			0.177915	7.46031			0.150259	12.8853	12.5882		0.147959	9.76621
0.162161	11.8137			0.162161	3.44992			0.166665	3.52686			0.133332	7.96869			0.150752	14.8074	14.1785		0.182925	8.53111			0.184047	8.08033			0.155439	12.9821			0.15306	9.6774	9.7953
0.167569	10.7585			0.167569	3.51998			0.172223	3.61884			0.137778	7.84172			0.15578	15.4444			0.189025	9.28667			0.190185	8.21047			0.160622	13.0824			0.158164	10.6936
0.172972	9.37697			0.172972	3.37373			0.177777	3.78944			0.142221	7.1103			0.160803	15.8741			0.195121	8.08444			0.196318	7.54211			0.165802	13.7563			0.163264	9.50713
0.17838	10.2736			0.17838	3.74247			0.183335	3.40197			0.146668	7.46853			0.165831	14.35			0.201221	8.54222	8.67417		0.202456	7.97199	7.85472		0.170986	12.371			0.168369	9.96989
0.183784	9.28497			0.183784	3.65694			0.188889	3.78408			0.151111	7.77635	7.9514		0.170854	15.5907			0.207317	7.79778			0.208589	7.79399			0.176165	12.4731			0.173469	10.0068
0.189187	9.84437			0.189187	3.91492			0.194443	3.63442			0.155554	7.43014			0.175878	15.7815			0.213412	7.67778			0.214722	7.85879			0.181345	13.0305			0.178569	11.3562
0.194596	9.5892			0.194596	3.4318			0.200001	3.32297			0.16	7.01622			0.180905	15.1093			0.219513	7.60444			0.22086	7.65584			0.186529	12.8029			0.183674	10.1191
0.199999	9.21978	10.2617		0.199999	3.85978	3.5568		0.205555	3.08114	3.53852		0.164443	7.31392			0.185929	14.3982			0.225608	8.03555			0.226993	7.07811			0.191708	12.9391			0.188774	9.89971
0.205407	8.18699			0.205407	3.40195			0.211113	3.74664			0.16889	6.93272			0.190956	13.2981			0.231709	7.55555			0.233131	7.01694			0.196892	12.6631			0.193879	10.6004
0.210811	8.43547			0.210811	3.53336			0.216667	4.04691			0.173333	7.35656			0.19598	13.3722			0.237804	7.33556			0.239264	7.35386			0.202072	13.1344	12.8832		0.198979	10.442
0.216219	8.2916			0.216219	3.59666			0.222225	3.6979			0.17778	7.35848			0.201007	13.1093	14.6328		0.243905	7.34666			0.245402	6.93236			0.207256	12.5789			0.204084	10.2625	10.2857
0.221622	8.66975			0.221622	3.47417			0.227778	3.60262			0.182222	6.90553			0.206031	13.1019			0.25	6.77333	7.51583		0.251535	6.53936	7.27866		0.212435	12.3674			0.209184	11.1071
0.227026	7.98368			0.227026	3.68229			0.233332	3.06798			0.186665	6.81743			0.211054	13.9963			0.256095	7.26222			0.257667	6.7703			0.217615	12.1487			0.214284	10.194
0.232434	8.23779			0.232434	3.67763			0.23889	3.62098			0.191112	6.88772			0.216082	13.8685			0.262196	6.18223			0.263805	6.96842			0.222799	11.1022			0.219389	10.6431
0.237837	7.64917			0.237837	3.65137			0.244444	3.44156			0.195555	7.58389			0.221105	13.3574			0.268291	6.72223			0.269938	7.04261			0.227978	13.4014			0.224489	9.22874
0.243246	7.40955			0.243246	3.37832			0.250002	3.39228	3.57711		0.200001	7.02168	7.14766		0.226133	13.8741			0.274392	6.92888			0.276076	6.87272			0.233162	12.7939			0.229594	9.50083
0.248649	7.64428			0.248649	3.25703			0.255556	3.34215			0.204444	7.0537			0.231156	13.8352			0.280487	6.65112			0.282209	6.42476			0.238342	12.1595			0.234694	9.80438
0.254053	7.60153	8.01098		0.254053	3.75163	3.54044		0.26111	3.49547			0.208887	6.7334			0.236179	12.8426			0.286583	5.94			0.288342	6.80393			0.243521	12.4821			0.239794	10.3603
0.259461	6.42284			0.259461	3.87234			0.266668	3.8453			0.213334	6.84917			0.241207	13.387			0.292683	7.22001			0.29448	6.6084			0.248705	12.4713			0.244899	9.87143
0.264864	6.55433			0.264864	3.8646			0.272222	3.62604			0.217777	6.6503			0.24623	12.8556			0.298779	6.26002			0.300613	6.98242	6.80919		0.253885	13.052	12.4991		0.249999	9.38294	10.0103
0.270272	6.09733			0.270272	4.09533			0.27778	3.77999			0.222223	6.59413			0.251258	12.8315	13.395		0.304879	7.15555	6.70247		0.306751	6.69014			0.259069	13.0125			0.255103	10.5252
0.275676	6.18118			0.275676	3.66986			0.283333	3.7238			0.226666	6.46158			0.256281	12.7407			0.310975	6.59778			0.312884	6.89702			0.264248	12.276			0.260204	9.72723
0.281079	6.576			0.281079	3.53367			0.288887	3.3551			0.231109	7.16033			0.261305	12.6259			0.31707	6.66			0.319016	6.45347			0.269428	11.0699			0.265304	10.0026
0.286488	6.28794			0.286488	3.55115			0.294445	3.58884			0.235556	6.4536			0.266332	11.2519			0.323171	6.09112			0.325154	6.84774			0.274612	11.4749			0.270409	9.95849
0.291891	5.6327			0.291891	3.4891			0.299999	3.60577			0.239999	7.00274			0.271356	12.0074			0.329266	6.19333			0.331287	6.34837			0.279791	12.8065			0.275509	8.66299
0.297299	6.39129			0.297299	3.97341			0.305557	3.61156	3.5974		0.244445	7.17883			0.276383	12.6056			0.335367	6.17555			0.337425	6.81862			0.284975	12.3118			0.280613	8.84948
0.302703	6.05411	6.24419		0.302703	4.04472	3.78824		0.311111	3.57676			0.248888	7.28046			0.281407	12.0945			0.341462	5.70666			0.343558	6.5744			0.290155	12.3978			0.285714	9.46962
0.308111	6.33748			0.308111	4.13301			0.316669	3.30021			0.253335	6.45849	6.82306		0.286434	11.3982			0.347563	5.73111			0.349696	6.48073			0.295338	12.0143			0.290818	10.1599
0.313514	5.61819			0.313514	3.66382			0.322223	3.55072			0.257778	6.71802			0.291458	11.763			0.353658	5.98	6.14194		0.355829	6.56122	6.63019		0.300518	12.2903	12.0394		0.295918	8.74983
0.318918	6.09886			0.318918	3.33617			0.327777	3.29501			0.262221	6.13566			0.296481	10.1704			0.359754	6.64222			0.361962	6.48498			0.305697	11.7133			0.301019	8.5996	9.47049
0.324326	5.63903			0.324326	3.54692			0.333335	3.39198			0.266667	6.75252			0.301509	10.6926	11.735		0.365854	5.40889			0.3681	5.85131			0.310881	11.1577			0.306123	8.29703
0.329729	5.66105			0.329729	3.3727			0.338889	4.11851			0.27111	6.27724			0.306532	10.8611			0.37195	5.47556			0.374233	5.9016			0.316061	10.4301			0.311224	8.91612
0.335138	5.22663			0.335138	3.42306			0.344447	3.89823			0.275557	6.74159			0.31156	9.56296			0.37805	5.44666			0.380371	5.90663			0.321245	10.6577			0.316328	8.45525
0.340541	6.40215			0.340541	3.0484			0.35	3.47373	3.57564		0.28	6.50327			0.316583	9.70185			0.384146	6.7089			0.386504	6.06328			0.326424	10.3656			0.321428	8.67828
0.345945	5.15725			0.345945	3.5384			0.355554	3.89095			0.284443	6.09022			0.321606	10.3556			0.390241	5.50666			0.392636	6.37412			0.331604	10.9247			0.326529	8.704
0.351353	4.61135	5.63911		0.351353	3.25971	3.48024		0.361112	3.9858			0.288889	6.05609			0.326634	10.0667			0.396342	5.63778			0.398774	6.70713			0.336788	9.34588			0.331633	8.19764
0.356756	5.09963			0.356756	3.16078			0.366666	4.02177			0.293332	6.09596			0.331657	9.10741			0.402437	5.41112	5.77972		0.404907	6.69454	6.24795		0.341967	9.56452			0.336734	8.54146
0.362164	4.78999			0.362164	3.10981			0.372224	4.09007			0.297779	6.56897			0.336685	10.1555			0.408538	5.62667			0.411045	5.96141			0.347151	9.86917			0.341838	8.22483
0.367568	5.25685			0.367568	3.28818			0.377778	3.8282			0.302222	6.48739	6.40245		0.341708	8.35741			0.414633	5.22444			0.417178	5.97962			0.352331	9.83872	10.1953		0.346938	7.84279
0.372971	5.35079			0.372971	3.5424			0.383332	3.70849			0.306665	6.13158			0.346732	8.39999			0.420729	4.97556			0.423311	6.34145			0.35751	9.79929			0.352039	8.03835	8.38957
0.378379	5.44234			0.378379	3.19026			0.38889	3.57368			0.311111	6.01678			0.351759	9.04815	9.56167		0.426829	5.23334			0.429449	5.98394			0.362694	10.8889			0.357143	7.33067
0.383783	5.02905			0.383783	3.46215			0.394444	3.55564			0.315554	6.11889			0.356783	8.85			0.432925	5.25332			0.435582	6.13946			0.367874	10.6326			0.362243	8.00786
0.389191	4.631			0.389191	3.07142			0.400002	3.37301	3.78085		0.320001	5.86491			0.36181	8.45371			0.439025	4.96667			0.44172	5.8081			0.373058	9.58602			0.367348	6.74688
0.394595	4.62047			0.394595	3.38661			0.405556	3.30435			0.324444	6.15882			0.366834	7.54074			0.445121	5.59333			0.447853	5.98834			0.378237	9.55735			0.372448	7.34991
0.400003	4.53411			0.400003	2.98764			0.411114	3.41588			0.32889	5.95709			0.371861	7.33518			0.451221	5.51111	5.29805		0.453991	5.92138	6.01546		0.383421	9.01075			0.377553	7.18217
0.405406	4.46001	4.92142		0.405406	3.08143	3.22807		0.416667	3.17699			0.333333	5.69852			0.376885	7.28334			0.457317	4.93778			0.460124	5.48461			0.388601	8.21685			0.382653	6.7093
0.41081	4.59235			0.41081	3.25434			0.422221	3.39583			0.337776	5.26487			0.381908	6.9037			0.463412	4.50222			0.466256	5.70182			0.39378	8.82437			0.387753	6.83124
0.416218	4.70747			0.416218	3.27731			0.427779	3.495			0.342223	6.18505			0.386936	6.89259			0.469513	4.78889			0.472394	5.70048			0.398964	9.01971			0.392858	6.61946
0.421621	4.56565			0.421621	3.24491			0.433333	3.3999			0.346666	5.8847			0.391959	6.66852			0.475608	4.92001			0.478527	6.00684			0.404144	8.11828	9.20699		0.397958	6.33207
0.42703	4.41309			0.42703	3.1809			0.438891	3.18358			0.351112	5.20801	5.86266		0.396987	7.07963			0.481709	5.46223			0.484665	5.6205			0.409328	8.21505			0.403063	7.10595	7.02155
0.432433	4.03437			0.432433	3.24629			0.444445	3.0813			0.355555	5.59674			0.40201	6.70926	7.37167		0.487804	4.8			0.490798	5.60523			0.414507	8.2276			0.408163	6.33262
0.437837	4.16368			0.437837	3.21781			0.449999	3.12966			0.359998	5.36521			0.407034	6.62963			0.493899	5.06889			0.496931	5.93005			0.419687	7.03583			0.413263	6.62047
0.443245	4.43342			0.443245	3.19951			0.455557	3.36252	3.2945		0.364445	4.98499			0.412061	5.99259			0.5	5.37111	4.98139		0.503069	5.77802	5.72844		0.424871	8.16667			0.418368	6.60561
0.448648	3.91705			0.448648	3.6288			0.461111	3.16609			0.368888	5.4393			0.417085	6.54815			0.506095	4.52889			0.509202	5.35702			0.43005	7.53585			0.423468	5.77568
0.454056	3.87743	4.3005		0.454056	3.32248	3.28582		0.466669	3.22297			0.373334	5.44307			0.422112	5.97407			0.512196	5.47112			0.51534	5.63089			0.435234	7.23298			0.428573	5.668
0.45946	4.09938			0.45946	3.24539			0.472222	3.1326			0.377777	5.30784			0.427136	6.21111			0.518291	5.03555			0.521473	5.79954			0.440413	7.0681			0.433673	6.22786
0.464868	3.54115			0.464868	3.20231			0.477781	3.03804			0.382224	5.24272			0.432163	5.75185			0.524392	5.05556			0.527611	5.47349			0.445597	7.40501			0.438777	6.22526
0.470271	3.61995			0.470271	3.03341			0.483334	3.30547			0.386667	5.08693			0.437187	6.36481			0.530487	5.25334			0.533744	5.93005			0.450777	6.82975	7.32099		0.443878	5.63428
0.475675	3.91971			0.475675	2.86232			0.488888	3.35386			0.39111	4.7607			0.44221	5.58333			0.536583	4.83333			0.539876	5.83573			0.455956	6.38709			0.448978	5.95144
0.481083	4.02199			0.481083	3.00044			0.494446	3.59999			0.395556	4.89475			0.447238	6.21481			0.542683	4.70889			0.546014	5.31902			0.46114	6.58602			0.454083	6.23775	6.1279
0.486487	3.77529			0.486487	2.98335			0.5	3.3352	3.26928		0.399999	4.98008			0.452261	5.59259	6.08629		0.548779	4.34			0.552147	5.30774	5.58169		0.46632	7.29571			0.459183	6.87431
0.491895	3.78941			0.491895	3.10017			0.505558	3.40348			0.404446	4.63485	5.14477		0.457289	5.00185			0.554879	3.89777	4.79161		0.558285	5.33848			0.471504	6.46596			0.464287	6.23219
0.497298	3.26223			0.497298	2.98035			0.511112	3.38849			0.408889	4.6743			0.462312	5.03334			0.560975	4.14222			0.564418	5.37098			0.476683	6.66488			0.469388	5.56801
0.502702	3.5299	3.72878		0.502702	3.13824	3.06066		0.516666	3.01699			0.413332	4.55158			0.467335	5.34815			0.56707	3.95556			0.570551	5.25478			0.481863	7.02867			0.474488	5.77493
0.50811	3.64432			0.50811	3.17333			0.522224	3.28694			0.417778	5.22402			0.472363	4.96852			0.573171	3.72223			0.576689	5.07865			0.487047	6.22223			0.479592	5.63521
0.513513	3.3869			0.513513	3.28266			0.527778	3.1128			0.422221	4.68143			0.477386	5.30556			0.579266	4.52668			0.582822	4.9628			0.492226	5.96953			0.484693	5.90745
0.518921	3.25636			0.518921	3.04699			0.533336	2.75976			0.426668	4.46844			0.482414	4.96482			0.585367	4.53111			0.58896	5.39181			0.49741	6.08244			0.489797	5.9127
0.524325	3.49047			0.524325	3.12145			0.538889	2.98873			0.431111	4.85072			0.487437	4.61481			0.591462	4.43555			0.595093	5.45583			0.50259	6.67563	6.5414		0.494898	5.79372
0.529729	3.41205			0.529729	3.39494			0.544443	3.2101			0.435554	4.43212			0.492461	4.85			0.597558	4.26			0.601226	5.00152	5.23186		0.507769	6.42294			0.499998	5.58366	5.92024
0.535137	3.11467			0.535137	2.89777			0.550001	3.09212	3.13993		0.44	4.98774			0.497488	4.68519			0.603658	4.41111	4.24806		0.607364	5.17351			0.512953	6.00538			0.505102	5.69913
0.54054	3.75911			0.54054	3.14978			0.555555	2.9705			0.444443	4.84027			0.502512	4.9963	4.97685		0.609754	4.48889			0.613496	5.24608			0.518133	5.90323			0.510203	5.80308
0.545948	3.65835			0.545948	3.29843			0.561113	3.00765			0.44889	4.59531			0.507539	4.44258			0.615854	4.84			0.619634	5.50041			0.523317	6.27062			0.515307	5.24786
0.551352	3.67565	3.48865		0.551352	3.03349	3.15543		0.566667	3.0905			0.453333	5.49221	4.79983		0.512563	4.88334			0.62195	4.53556			0.625767	5.58126			0.528496	6.25089			0.520408	5.37386
0.55676	3.23601			0.55676	2.75563			0.572225	3.13263			0.457779	4.98325			0.51759	4.33889			0.62805	4.94446			0.631905	5.58606			0.53368	5.6111			0.525512	5.48665
0.562163	3.16569			0.562163	2.59839			0.577779	3.0383			0.462222	4.89902			0.522614	4.78332			0.634146	4.50889			0.638038	5.12629			0.53886	6.03405			0.530612	5.70908
0.567567	3.44117			0.567567	2.88721			0.583333	2.9425			0.466665	4.57902			0.527637	4.48334			0.640241	4.62221			0.644171	4.86351			0.544039	6.10215			0.535713	5.28604
0.572975	3.03644			0.572975	2.9548			0.588891	2.81452			0.471112	4.79025			0.532665	4.30926			0.646342	4.41334			0.650309	5.59179	5.33361		0.549223	5.6828			0.540817	5.61885
0.578379	3.0748			0.578379	3.10214			0.594444	3.0241			0.475555	4.95132			0.537688	4.6463			0.652437	4.61556	4.62111		0.656442	5.13946			0.554403	6.29211	5.98907		0.545917	5.27829
0.583787	3.34736			0.583787	2.95942			0.600003	2.86853	2.98769		0.480001	4.45157			0.542716	3.97963			0.658538	5.05111			0.66258	5.29133			0.559587	5.73835			0.551022	5.25736	5.47602
0.58919	3.9676			0.58919	2.82674			0.605556	3.01877			0.484444	4.75196			0.547739	3.83518			0.664633	4.33111			0.668713	5.23088			0.564766	5.31362			0.556122	5.4358
0.594594	3.33535			0.594594	2.88817			0.61111	3.00225			0.488887	4.7956			0.552762	4.50371	4.42056		0.670729	4.30668			0.674846	5.35595			0.569946	5.84588			0.561223	5.82654
0.600002	3.58752	3.35466		0.600002	2.91084	2.87593		0.616668	3.07036			0.493334	4.31673			0.55779	3.97037			0.676829	4.61777			0.680984	5.07614			0.575129	5.87276			0.566327	5.2161
0.605405	3.49982			0.605405	3.22372			0.622222	3.24759			0.497777	4.49835			0.562813	4.39629			0.682925	4.51111			0.687116	4.90698			0.580309	5.55376			0.571427	4.9756
0.610813	3.31983			0.610813	2.79609			0.62778	3.38425			0.502223	4.24264	4.65997		0.567841	4.55			0.689025	5.64			0.693254	5.12953			0.585493	5.39606			0.576532	5.00185
0.616217	3.22644			0.616217	2.90196			0.633334	2.98409			0.506666	4.36717			0.572864	4.2611			0.695121	5.22444			0.699387	4.97899			0.590672	5.75089			0.581632	5.14315
0.621621	3.24347			0.621621	2.4819			0.638888	2.96806			0.511109	4.20225			0.577888	4.37591			0.701216	4.41111	4.76167		0.70552	4.38868	5.05532		0.595852	5.48925			0.586732	4.93918
0.627029	3.11699			0.627029	2.66551			0.644446	3.18941			0.515556	4.19467			0.582915	3.85555			0.707317	4.61112			0.711658	4.54676			0.601036	5.54122	5.62585		0.591837	5.41396
0.632432	3.49669			0.632432	2.67432			0.65	2.82604			0.519999	4.01326			0.587939	4.13334			0.713412	5.20222			0.717791	4.54137			0.606215	5.86918			0.596937	4.7587
0.63784	3.752			0.63784	2.843			0.655558	2.73522	3.0426		0.524445	4.20529			0.592966	4.8037			0.719513	4.49334			0.723929	4.56978			0.611399	5.67025			0.602042	4.8278	5.15387
0.643244	4.09817			0.643244	2.72994			0.661111	3.03392			0.528888	4.09416			0.59799	3.81851			0.725608	5.31333			0.730062	4.52126			0.616579	5.638			0.607142	5.25526
0.648652	3.9727			0.648652	2.27524			0.66667	3.19			0.533335	4.09194			0.603017	3.34445	4.15092		0.731709	4.95556			0.7362	5.0514			0.621763	5.57886			0.612247	5.23953
0.654055	3.68286	3.5409		0.654055	2.52746	2.71191		0.672223	2.81257			0.537778	4.20739			0.608041	3.9			0.737804	4.65111			0.742333	5.14866			0.626942	5.62006			0.617347	5.69683
0.659459	3.63307			0.659459	2.60849			0.677777	3.18736			0.542221	4.72586			0.613064	4.15555			0.743899	4.90444			0.748465	4.55536			0.632122	5.62725			0.622447	5.07089
0.664867	3.17285			0.664867	2.77273			0.683335	3.17726			0.546667	4.39015			0.618092	3.42036			0.75	4.38	4.81389		0.754604	4.50406	4.67983		0.637306	5.90681			0.627552	5.22725
0.670271	3.4789			0.670271	2.63222			0.688889	2.80715			0.55111	3.84339	4.21232		0.623115	4.19999			0.756095	4.41333			0.760736	4.6396			0.642485	5.48746			0.632652	5.11525
0.675679	3.28183			0.675679	2.61252			0.694447	2.9887			0.555557	4.35779			0.628143	3.76111			0.762196	4.87556			0.766874	4.6981			0.647669	5.45162			0.637757	5.37526
0.681082	3.01167			0.681082	2.79			0.700001	3.03258	3.02869		0.56	4.39915			0.633166	3.96851			0.768291	5.02888			0.773007	4.69075			0.652849	5.60932	5.58172		0.642857	5.34976
0.686486	2.92425			0.686486	2.44721			0.705555	2.99315			0.564443	4.09538			0.63819	4.02407			0.774387	4.68666			0.77914	4.9406			0.658028	5.22759			0.647957	5.09089
0.691894	3.21463			0.691894	2.82847			0.711113	2.89392			0.568889	4.2264			0.643217	3.57036			0.780487	4.36001			0.785278	4.9656			0.663212	5.00179			0.653062	5.34583	5.27667
0.697297	3.60837			0.697297	2.90623			0.716667	2.97525			0.573332	3.56452			0.648241	4.11112			0.786583	4.31778			0.791411	4.50626			0.668392	5.34587			0.658162	5.23362
0.702705	3.25414	3.28663		0.702705	3.0079	2.73397		0.722225	2.87949			0.577779	4.5317			0.653268	4.16296	3.9274		0.792683	4.10001			0.797549	4.70778			0.673576	5.89605			0.663266	5.04419
0.708109	3.32965			0.708109	2.90806			0.727778	2.95873			0.582222	4.20643			0.658292	3.47592			0.798779	4.43555			0.803682	4.88041	4.75364		0.678755	5.22222			0.668367	5.1572
0.713512	3.17726			0.713512	2.7064			0.733332	3.00889			0.586665	3.88918			0.663315	3.32963			0.804874	4.85555	4.5637		0.809815	4.58745			0.683935	5.51792			0.673467	4.89063
0.718921	3.42835			0.718921	2.88331			0.73889	2.58133			0.591111	4.00261			0.668343	3.68519			0.810975	4.77778			0.815953	4.99236			0.689119	5.55198			0.678572	4.91948
0.724324	3.48434			0.724324	2.95511			0.744444	2.69332			0.595554	4.31732			0.673366	4.27223			0.81707	5.09777			0.822085	4.98254			0.694298	5.40323			0.683672	5.11896
0.729732	3.50315			0.729732	2.96146			0.750002	3.06561	2.89441		0.600001	3.92675	4.13793		0.678394	4.03519			0.823171	4.6			0.828223	5.25783			0.699482	5.6362			0.688776	4.966
0.735136	3.8433			0.735136	2.73866			0.755556	2.65799			0.604444	4.19505			0.683417	3.59445			0.829266	4.53112			0.834356	5.0512			0.704662	5.20968	5.39283		0.693877	5.04478
0.740544	3.22815			0.740544	2.60692			0.761114	2.68336			0.60889	3.99757			0.688445	4.15927			0.835367	4.76889			0.840494	4.79204			0.709845	5.14336			0.698981	5.27492
0.745947	3.35923			0.745947	2.759			0.766668	2.8251			0.613333	4.3985			0.693468	4.13149			0.841462	4.37112			0.846627	5.26635			0.715025	4.79571			0.704082	5.11764	5.07674
[truncated: 87 more rows]
