# Supplementary material for: Crumbs organizes the transport machinery by regulating apical levels of PI(4,5)P2 in Drosophila
Source: eLife. 2019 Nov 7;8:e50900. doi: 10.7554/eLife.50900 (PMC6881148; doi:10.7554/eLife.50900)
Supplement: Figure 6—source data 2. [file elife-50900-fig6-data2.xlsx]

## Sheet: Image36
X0	Y0	Y1	Y2	Y3	Y4	Y5	Y6	Y7	Y8	Y9	Y10	Y11	Y12	Y13	Y14	Y15	Y16	Y17	Y18	Y19	Y20	Y21	Y22	Y23	Y24	Y25	Y26		Ap-Basal	Avg intensity
0	9.6006	11.0513	9.0009	9.1167	9.1404	10.1789	6.3475	8.1057	11.3833	13.6286	10.4702	9.5027	11.4643	12.8208	8.4682	8.1316	11.015	16.4472	7.9478	9.2322	12.8526	15.0495	12.4421	8.1011	15.7548	8.403	9.7292		0	10.5699
0.1191	8.788	8.6635	9.0665	9.1367	8.8224	10.1784	11.3407	12.2806	9.1504	9.4942	9.715	8.6464	10.674	14.4344	11.2548	10.3796	10.7025	9.1548	4.2454	15.278	12.1884	13.792	9.6458	13.2766	11.7358	9.1881	12.4411		0.00684695	10.5064
0.2383	10.4433	12.073	11.4071	10.198	6.251	13.1105	12.1675	8.3443	12.608	12.5901	9.0664	9.6078	13.7445	10.2226	6.7955	10.9401	11.8273	16.6157	11.6989	7.5298	11.7197	12.2972	8.5608	8.9644	13.1599	11.8234	15.39		0.0136997	11.0799
0.3574	6.7569	11.1542	9.0829	11.2035	11.0761	16.3067	9.7688	11.0106	21.8664	10.0234	13.892	8.7923	7.7349	7.6618	9.9534	5.2468	14.9965	17.2442	10.4795	8.0506	14.5518	14.5244	11.3661	11.7981	18.6992	12.2007	14.4911		0.0205466	11.8494
0.4766	8.4531	9.4633	15.6012	11.2725	14.8145	16.8049	12.4829	10.6766	10.0108	9.7087	17.4311	9.7679	8.5325	7.8298	8.0368	8.7503	13.8037	14.4604	14.8195	8.2716	10.0885	16.5834	13.3741	17.4078	16.0204	12.6254	18.4635		0.0273993	12.428
0.5957	9.3661	6.3018	10.8499	9.6819	13.1066	17.9833	14.0898	7.3488	19.494	14.9491	12.7086	12.3145	8.6393	8.4221	6.9217	5.5858	17.6998	26.4535	11.6051	6.3335	17.3843	18.9054	13.2042	14.3657	15.7466	19.0079	10.0128		0.0342463	12.9067
0.7148	9.7108	9.5012	21.2831	12.9228	14.6224	16.438	14.7057	8.3841	15.7477	13.1674	12.6183	12.6327	8.1297	5.9286	6.359	9.6492	17.8047	26.0606	10.8074	8.8545	13.9155	20.6176	13.6665	15.6632	18.4517	18.5623	9.5851		0.0410932	13.5478
0.834	10.2081	12.5479	27.9743	13.7496	15.3855	20.6879	13.774	11.1166	12.455	14.9718	12.6128	13.7151	7.1706	10.0403	7.0701	8.6322	16.9951	30.9054	12.6369	10.8664	18.9668	24.3002	17.2231	21.7366	20.4224	13.5469	11.1225		0.0479459	15.2161
0.9531	12.1144	11.7731	24.4799	14.3482	12.7085	35.081	12.6663	10.3224	18.6885	15.3608	13.4137	10.2705	7.9139	11.0056	10.8887	17.0306	23.3893	38.1862	7.9589	13.1082	16.7627	21.8273	21.3482	16.4792	19.8872	10.2094	9.8869		0.0547929	16.1892
1.0723	10.1601	14.8594	43.6404	21.6365	15.0101	33.1278	27.131	16.3904	17.335	16.9944	14.8397	10.6611	10.606	6.7413	6.2717	16.4237	29.4265	40.1978	12.4275	13.6836	13.0893	23.1631	20.0603	20.2575	23.0404	13.6851	8.5591		0.0616456	18.497
1.1914	12.6543	16.4195	43.7672	29.9896	24.7294	36.5163	20.5881	16.556	23.9872	17.9919	17.1115	7.5049	10.0105	8.4133	4.3006	25.2484	24.508	52.1424	14.2727	9.5684	20.5762	31.7815	22.5988	27.5209	20.6279	9.913	16.7294		0.0684925	20.964
1.3106	13.1384	18.9206	45.7445	31.4697	43.9864	42.7271	27.0122	21.5959	31.2691	16.0005	15.0885	6.3472	13.8884	9.0815	9.0378	30.5311	23.3183	36.2641	11.0264	10.2093	25.1515	22.335	23.776	22.974	23.964	19.4113	11.0836		0.0753452	22.4205
1.4297	7.4114	19.4207	68.0613	42.9651	49.3225	36.8969	29.1296	28.0336	33.4683	28.844	12.994	6.8519	8.2148	7.0784	8.784	25.7895	33.5052	35.1437	13.3014	14.4387	25.944	27.9648	28.2433	25.4338	15.8972	25.6907	12.0099		0.0821922	24.8459
1.5488	9.7061	22.2015	62.6487	65.7578	53.3126	35.591	32.8272	22.5669	29.4086	27.166	20.0702	7.2444	7.4465	8.705	5.8195	25.6452	32.7729	28.4965	15.976	17.9049	28.0653	34.5349	36.3886	17.5859	19.0569	20.4575	13.8201		0.0890391	25.9695
1.668	14.8442	20.821	67.8352	68.5673	49.0018	34.9058	29.8348	31.5826	39.2726	29.7719	15.5057	6.2755	10.9007	7.1757	6.8436	36.7569	27.3703	34.0277	10.4429	13.8486	25.0416	30.1968	35.9839	28.1894	12.0816	30.5045	15.1094		0.0958918	27.1367
1.7871	17.8812	21.7457	78.3258	70.8921	41.6793	29.7485	31.4466	22.3104	31.8611	30.3317	15.4284	10.9107	7.2991	8.1561	11.995	19.2841	27.8545	37.5631	18.0141	12.1642	25.0703	20.7303	34.8307	27.4629	14.6656	31.2563	8.6102		0.102739	26.2044
1.9063	10.774	24.972	76.7045	58.1319	43.1148	34.316	27.6109	25.2309	32.2157	27.4478	16.5167	8.922	9.1522	6.9225	6.9361	19.6219	27.2808	32.7289	16.5953	10.8848	21.4219	30.1088	29.1353	26.5099	16.3326	31.5382	8.4545		0.109591	25.1697
2.0254	15.6247	22.1705	66.5916	73.6003	46.1926	35.0492	15.9955	17.6441	35.5172	28.6346	20.9696	8.1022	8.2337	7.5467	5.3145	22.5074	19.1927	31.5888	15.1734	13.413	18.854	35.3237	24.3659	26.9291	19.1449	20.8126	10.8969		0.116438	24.6441
2.1445	14.6294	15.39	63.6306	62.4922	50.9784	33.2844	13.727	16.5229	31.0782	29.1265	19.0953	11.1876	6.425	7.1449	4.8863	29.0857	25.0656	31.9968	13.295	10.8345	23.4395	31.4484	19.037	20.3909	22.5006	28.0965	8.7028		0.123285	23.833
2.2637	16.1847	25.1866	80.677	61.7735	46.5874	25.1003	9.8706	13.6214	32.6433	24.5942	15.9636	5.4713	6.8349	9.2632	7.8018	27.8552	38.796	35.6888	11.4327	12.5104	24.7938	24.5233	20.3546	20.4666	18.6964	27.3197	14.6		0.130138	24.393
2.3828	12.7667	27.6924	72.257	46.8797	31.6518	23.8212	22.4878	15.8743	35.6483	20.1616	17.8013	5.2293	7.1104	6.4319	11.4197	19.2199	30.4956	29.4776	13.6566	6.8646	23.0997	23.24	25.9517	13.4756	21.809	24.4044	11.6624		0.136985	22.2441
2.502	9.8	19.1147	61.9097	37.5017	32.868	23.7035	24.4639	20.7157	34.5449	18.3321	15.1489	7.5994	7.1221	5.168	9.4422	21.0093	23.0157	32.1101	18.5858	10.1936	19.9026	15.7925	25.2966	23.2305	18.3712	35.4406	10.5251		0.143838	21.5151
2.6211	14.0564	18.2887	65.2318	30.7743	36.4778	20.8113	15.2144	18.923	24.937	18.2032	19.3174	5.951	3.0698	5.2863	6.723	24.6242	29.302	39.8147	11.1589	8.5932	14.3169	17.6556	25.6725	22.4862	29.858	21.9019	12.1054		0.150685	20.7687
2.7402	14.3984	29.9608	55.8848	26.8539	33.5018	21.0368	17.2634	21.5277	34.0547	17.337	16.4646	6.3625	6.6829	8.5555	8.5021	24.945	29.236	28.2342	8.544	9.3407	13.0782	15.5185	28.6646	18.762	29.9993	22.4022	16.9754		0.157532	20.8921
2.8594	14.8036	22.6844	55.0825	26.8222	31.8914	30.5834	12.852	17.376	20.497	13.582	19.2096	5.2424	7.5734	6.7299	5.7113	25.3258	29.848	22.5788	12.1698	9.2357	13.981	14.2991	24.4028	19.4968	24.6784	17.5525	11.8978		0.164384	19.1151
2.9785	13.063	20.2871	63.9357	26.0875	26.4634	37.3773	12.666	13.7818	21.149	14.6802	11.0027	5.1242	4.066	5.4178	5.5566	21.7047	22.8007	25.582	7.514	13.474	20.231	16.291	22.686	16.5241	25.0662	17.6387	11.747		0.171231	18.5895
3.0977	12.3589	20.8341	64.3957	22.7595	29.008	20.1801	11.9584	14.635	24.8624	17.7635	11.9902	10.2896	10.9838	6.7805	6.5867	18.4044	17.1041	16.6719	8.9651	7.8592	11.3052	22.3182	20.8491	20.5406	26.712	16.7963	13.9388		0.178084	18.0315
3.2168	9.1339	18.3807	74.8675	21.8783	26.1668	16.2522	7.9565	13.9172	18.4303	17.8624	14.7292	10.5714	5.8847	11.5636	5.1602	14.8045	21.1548	15.512	12.2968	11.1216	7.4332	14.0128	18.2468	20.2433	18.8139	14.8336	15.4926		0.184931	16.9156
3.336	14.2855	18.1506	59.8471	24.8539	19.9397	17.8726	10.6672	10.8799	20.3291	14.3614	11.4986	7.1858	7.211	9.1608	5.7168	18.276	24.7697	20.0352	9.3161	10.8401	8.9472	12.5537	18.9309	18.7047	26.3121	23.811	15.0275		0.191784	17.0179
3.4551	14.7641	16.1328	57.0424	28.3322	17.7143	11.7961	10.1597	11.0048	17.2105	17.7227	18.4203	5.1507	7.5754	7.5532	6.5682	17.1571	17.5441	14.8913	9.3705	7.9333	6.9735	17.6531	17.7787	20.7093	33.1186	23.7639	15.0774		0.198631	16.634
3.5742	13.5468	16.3058	61.4199	28.1885	19.3783	16.0157	8.7687	11.6544	14.5501	11.3274	9.8717	8.6493	3.9938	7.4474	10.0112	18.842	14.1819	12.2714	8.7803	12.3786	7.8123	21.5935	13.4936	26.2328	25.0569	16.241	11.3382		0.205478	15.9019
3.6934	13.4932	14.5793	65.8347	22.7813	21.8817	10.3966	14.0807	12.781	13.4955	18.8837	9.0928	5.8297	7.1023	4.2397	6.6683	16.4823	19.1589	13.9594	9.5627	12.5582	7.8079	21.8739	12.2432	26.3281	22.7317	20.6646	15.8447		0.21233	16.3095
3.8125	14.4085	11.3638	55.6767	28.2048	22.0561	10.4027	9.6602	12.345	16.2827	14.1393	8.7595	11.4277	6.5194	4.1893	3.6347	11.5269	20.8923	12.7751	7.1734	10.2932	5.9599	22.4064	14.0181	15.4232	24.6665	16.0503	13.5579		0.219177	14.9561
3.9317	12.2526	12.0133	44.9981	20.9223	22.5916	10.5571	8.2715	8.0818	13.6986	13.0752	6.6796	8.2996	7.2414	7.3288	5.1356	15.0825	20.8708	15.5867	10.744	9.0447	9.3946	14.1423	15.3438	20.8953	35.7421	17.2809	11.0784		0.22603	14.6797
4.0508	16.3598	14.4091	44.2524	27.9608	18.0709	12.1122	10.8241	8.8167	20.4471	13.2201	8.5645	5.7671	5.9791	8.7527	4.5143	9.1641	18.342	10.181	9.3374	9.7982	6.3688	19.0323	16.0099	19.1941	21.1494	12.3382	20.5878		0.232877	14.502
4.1699	18.2249	21.5433	53.5408	27.3713	14.99	14.2273	9.4013	7.4754	14.379	14.0876	9.8886	4.2116	6.2539	6.5172	5.7986	11.4769	25.2818	9.8291	13.0425	7.177	5.8567	14.2814	12.2934	20.7087	24.2646	10.8876	12.2449		0.239724	14.6391
4.2891	22.8879	16.8352	48.6926	29.6063	14.3031	12.561	19.8938	11.6611	12.7892	12.6818	11.858	8.4939	4.2896	7.2895	8.8541	7.727	19.9085	12.7991	8.9715	9.0921	8.7704	18.7619	9.9141	15.5363	19.3346	12.9851	15.5852		0.246577	14.892
4.4082	14.1868	19.1824	52.2432	30.7073	12.6021	16.5146	11.4067	14.2572	16.2278	11.7848	14.2017	10.6925	5.1641	4.6367	7.2664	13.7373	15.5947	12.6707	9.2389	8.3562	5.1842	8.9038	13.7365	14.0277	25.0236	14.2761	17.1676		0.253423	14.7775
4.5274	13.8744	17.9344	57.1872	37.1159	14.2578	12.5447	12.4055	12.7585	12.0587	11.5074	15.2323	6.9024	6.2486	3.4721	6.8287	11.8196	13.6402	17.4583	7.9667	7.0491	7.5244	11.7719	10.5862	13.79	19.0249	13.096	18.6779		0.260276	14.5457
4.6465	24.6889	19.3828	45.3512	30.724	7.685	12.5655	11.5228	13.4469	9.7965	10.0123	14.4244	4.8662	5.7561	4.1431	7.5195	9.33	20.3295	14.392	6.9863	10.9742	7.9192	10.7726	11.195	10.1999	16.1715	16.001	21.2667		0.267123	13.9786
4.7657	17.0831	28.6904	45.0609	32.0536	9.5175	17.6144	12.3689	7.5807	9.0111	15.931	12.2381	7.7845	7.1804	5.4883	5.7217	10.3324	15.4981	15.4986	11.8707	10.5333	6.0611	12.699	16.9519	7.968	14.8156	12.7498	16.3869		0.273976	14.2478
4.8848	11.2494	24.8792	31.7254	23.1071	6.1348	13.5195	10.9717	10.7625	15.2109	8.473	11.7374	5.9993	9.7508	7.5144	7.2691	9.4223	24.7122	12.1707	9.6728	10.6146	9.4262	12.974	8.8052	12.9602	23.6967	14.4434	11.5651		0.280823	13.2877
5.0039	16.0262	25.1625	40.6633	20.7106	8.0025	13.9411	9.3763	9.9416	13.1431	16.6954	13.1373	5.3683	5.9304	7.2883	5.567	13.6068	17.0154	15.506	7.8915	12.0999	7.0568	16.8002	10.1647	12.5137	14.0949	9.4695	15.5173		0.28767	13.433
5.1231	8.8415	28.536	29.5003	19.2052	6.283	10.1224	9.2341	8.7044	7.4161	10.4381	15.5106	5.1005	2.9796	3.2812	7.6734	14.0965	18.7587	13.9167	11.6874	11.8186	10.2444	15.4595	7.073	14.0115	12.5109	12.5927	14.7392		0.294522	12.2124
5.2422	10.0691	21.0509	24.6271	20.4188	6.8897	13.9455	9.5198	5.9274	9.3787	10.0815	19.4346	4.4043	4.7433	4.4684	6.0364	10.7726	16.7645	11.2436	7.1336	11.1463	11.7068	13.5516	8.7306	11.245	14.3568	10.1135	11.4943		0.301369	11.4539
5.3614	11.1001	25.2931	19.1281	24.1445	8.5959	15.0675	11.2735	6.3187	13.6832	10.7395	14.7509	4.3544	8.9363	5.6623	10.1034	10.5553	18.0714	13.5982	13.8262	15.779	8.5556	14.1738	11.4082	16.4067	14.3351	14.5909	10.623		0.308222	13.0028
5.4805	14.4858	24.1619	19.3764	23.2816	7.2259	9.5544	8.6466	6.4009	8.5778	15.1428	14.7786	6.3542	3.8856	4.669	9.5163	11.4535	13.1645	13.8485	6.951	11.2838	8.5715	13.6421	11.0903	10.3338	13.3432	11.988	12.2968		0.315069	11.6305
5.5996	9.5082	24.339	15.1159	23.8476	8.3692	7.4493	6.0727	5.984	9.8338	11.8855	11.1093	6.2538	6.5145	6.6298	8.0169	11.1039	14.0798	17.7322	10.5781	12.3416	11.4882	8.4816	14.7388	12.3277	12.6799	7.4621	8.8515		0.321916	11.2146
5.7188	13.626	20.4725	10.5555	23.7152	8.3254	9.5675	7.9818	6.7125	12.2896	13.2459	12.6605	4.4632	4.8689	2.8292	4.3559	12.5207	12.5853	16.5602	7.4811	11.5518	10.7553	12.7959	11.1063	10.7167	11.4557	10.5136	12.5924		0.328769	10.9742
5.8379	14.233	15.2549	12.5014	25.8967	6.5983	8.97	10.1757	12.1474	9.9332	6.8692	14.7708	5.4766	3.2484	5.2148	5.3658	8.6414	17.0115	13.5059	13.0503	11.6455	10.7719	15.4513	11.8589	6.0593	12.0915	10.0862	6.4266		0.335616	10.8614
5.9571	9.7477	14.8863	11.1259	23.4395	5.5913	6.3351	6.2161	9.1957	9.5812	9.6937	13.549	4.9687	8.1828	3.8362	8.3357	9.7621	12.4982	11.6227	8.9409	9.1433	8.9087	12.3024	16.1641	8.2166	13.145	11.1499	6.2999		0.342468	10.1051
6.0762	10.1803	9.8773	13.5228	24.4998	6.0276	5.6387	5.818	5.5418	15.6266	13.1803	12.3505	7.2064	2.8377	5.3341	6.7762	12.3156	12.7459	14.5214	8.5469	12.5073	13.6128	7.7573	10.2457	7.801	10.4462	10.3136	5.1149		0.349315	10.0128
6.1953	11.2313	7.8864	16.6825	30.045	9.6962	9.3421	7.112	6.2292	11.1456	8.2185	11.0786	4.3011	4.1915	5.2825	4.6775	12.0161	10.738	11.1024	10.8633	7.8937	13.7796	11.9994	8.5608	5.2396	12.8119	9.8283	4.3746		0.356162	9.86399
6.3145	12.3303	10.8753	12.0084	25.7456	6.1238	6.3628	5.269	8.3396	9.097	8.4583	7.2938	3.2117	3.5614	2.2707	5.8929	10.7409	12.9087	13.5455	12.8541	10.0985	9.6521	10.5098	9.2472	10.0472	15.3638	7.7388	3.7559		0.363015	9.3816
6.4336	10.3547	10.6873	17.0446	31.4489	8.4564	6.1687	2.9508	6.9419	14.805	6.9221	7.6501	4.9583	5.5282	5.4362	7.3996	14.3204	11.8396	11.7027	12.9581	9.7189	10.8936	11.2971	14.6904	4.828	17.1062	8.693	2.774		0.369862	10.2805
6.5528	12.5958	11.408	18.247	24.0166	5.9708	5.2839	5.9635	6.2128	8.7953	3.6556	7.992	6.2842	2.1647	3.757	4.9722	12.1766	12.1666	15.4461	10.4065	10.2705	7.7817	9.6843	8.9854	3.5816	11.871	8.9885	4.3431		0.376715	9.00079
6.6719	10.5944	8.2549	15.0596	21.6955	6.947	3.4796	6.4322	6.6518	5.001	7.0942	12.2394	5.1034	6.549	3.7834	5.058	12.0716	14.8164	11.978	10.5933	5.395	10.8171	7.2226	12.9421	8.323	10.6428	6.0092	3.887		0.383562	8.83857
6.7911	5.9189	10.3719	17.212	20.1555	7.8989	4.2199	6.7623	6.2145	6.9116	3.8513	10.8565	6.962	4.0817	3.4183	8.1606	15.9432	10.8546	8.0191	7.8004	5.8199	6.5041	9.2049	8.3953	5.7427	19.9566	3.2866	4.0677		0.390414	8.46633
6.9102	14.6393	12.2043	16.1265	26.785	9.347	4.1892	6.0516	6.4783	7.5705	4.7501	8.9388	5.6957	4.4859	3.4679	6.6201	18.9451	8.412	12.7531	13.3278	2.8648	9.3651	8.7957	9.1294	6.1858	11.3279	4.9966	3.5321		0.397261	9.14761
7.0293	14.4267	5.7934	17.9707	23.5676	8.1894	3.3891	4.9156	4.1873	4.4223	6.3175	6.0897	3.0617	3.5053	2.4084	7.4789	14.795	10.2965	15.1254	9.0709	5.3252	4.284	8.5231	5.4052	6.8936	14.3122	6.1385	3.8746		0.404108	8.13955
7.1485	11.5387	5.4047	16.1405	25.5203	5.7783	4.0994	4.1012	7.2342	4.3507	6.9298	7.537	6.4274	5.1412	3.3371	5.7648	13.2551	10.1395	11.8871	8.1846	3.5233	8.3497	7.2737	9.573	4.7344	11.2263	3.4562	3.3776		0.410961	7.93651
7.2676	10.9105	7.0879	18.8177	21.5303	8.4575	3.376	2.7989	7.5589	3.9641	4.2327	10.0655	4.4406	3.7593	3.3133	9.2441	9.4119	17.051	13.8495	5.2022	2.4918	5.4902	7.4923	9.5098	5.6053	10.0915	3.7182	2.5558		0.417808	7.85284
7.3868	7.1067	10.1937	19.1311	24.3689	9.9779	2.8658	2.8924	6.6177	6.5176	3.7845	9.5971	7.2045	4.9172	5.3889	6.1726	9.9727	11.9449	11.3125	8.9027	4.7422	8.7926	11.5982	14.6953	8.6023	10.592	3.8801	2.7195		0.424661	8.68487
7.5059	7.6304	11.134	21.7923	21.4758	7.0484	2.7076	4.6227	4.384	5.1947	6.2868	10.7278	4.6693	3.9723	3.319	7.4697	7.7662	10.7326	15.1959	7.4358	7.7623	9.1547	13.179	11.7874	8.0484	6.6157	4.9721	3.1082		0.431507	8.4516
7.625	11.0234	11.7641	15.2842	15.8784	9.6522	2.3193	4.2139	7.6223	6.0728	3.9839	7.5404	7.1896	3.1689	4.8801	5.3779	8.4503	12.3429	15.7962	7.0708	6.5222	5.9137	9.142	5.2787	6.7419	8.6385	4.4785	6.4986		0.438354	7.88317
7.7442	9.9179	7.6683	13.4061	19.4127	8.5416	2.7899	2.1283	6.7681	6.1181	3.1535	8.8802	4.596	4.1749	4.1836	11.0478	5.0318	11.3575	12.7397	7.7796	5.1145	6.466	11.2379	9.3168	5.5901	12.4882	3.3364	2.7509		0.445207	7.6295
7.8633	5.8372	9.1501	10.6293	20.384	8.4977	3.0955	4.1113	4.8834	4.4667	3.0839	8.0833	5.0401	5.0167	4.7201	6.4895	10.1255	11.3641	17.69	3.3318	4.607	6.3814	10.5524	10.6342	4.9824	14.1534	3.8139	4.0745		0.452054	7.59998
7.9825	9.8214	10.0294	11.4176	18.4537	12.2199	4.1529	3.8678	6.7207	8.0346	3.5696	8.8162	3.5415	2.3066	4.8352	5.9483	10.0484	12.9728	15.4723	5.3369	4.6167	4.9501	8.3261	12.3729	4.8194	14.2882	4.5675	3.7839		0.458907	7.97373
8.1016	6.5217	8.1486	6.5943	23.8754	9.6202	2.8289	3.3241	7.5922	6.4833	4.5561	8.6915	3.7845	3.8725	4.3254	7.3161	9.9841	9.5436	11.8401	6.0187	2.5201	6.0445	6.9716	12.6727	6.2248	8.0076	6.5062	2.3446		0.465754	7.26716
8.2207	4.514	7.7583	11.8271	27.7	7.4535	4.3572	3.336	7.6376	6.3646	4.7114	6.9342	4.3696	3.8407	2.6493	9.0668	12.5342	15.4749	19.563	4.3021	2.9242	6.3074	6.3475	8.8456	6.9525	13.4176	4.664	2.4294		0.472601	8.01047
8.3399	3.4066	7.1993	7.2892	21.9215	5.5062	3.6603	4.161	4.9519	3.6495	4.5944	4.7127	2.7923	2.1845	6.2063	8.443	5.9929	16.1383	8.7073	4.4619	4.1577	8.1529	8.6277	9.1669	5.4913	10.3287	4.5021	2.1736		0.479453	6.61407
8.459	7.1481	6.9209	6.6208	24.9656	6.6594	4.7344	4.7851	5.6396	4.9022	2.849	10.168	3.3512	3.3747	2.4878	7.7054	6.0687	12.8714	14.2531	3.2789	3.4895	9.1716	10.752	3.9376	7.543	11.642	2.8853	2.3081		0.4863	7.05605
8.5782	5.4907	6.5727	6.0993	25.0392	7.4715	3.2382	3.8393	6.9071	7.3058	5.8164	7.7397	4.5732	6.7189	2.6273	10.1212	8.1324	14.8428	8.43	6.1572	3.9338	7.9846	6.8218	6.7993	5.1418	14.0563	4.8795	2.1149		0.493153	7.365
8.6973	2.6037	9.6178	10.1225	16.1286	6.7913	3.7928	4.0161	6.212	5.282	4.7083	3.7775	3.516	4.7595	3.5329	9.1004	8.4815	11.6836	10.7673	3.994	4.8082	5.0909	13.9759	9.4592	6.5926	16.1776	2.5528	4.0992		0.5	7.09793
8.8165	5.0816	7.5218	8.4665	15.5644	6.3527	4.8599	4.1916	6.638	6.4204	6.1722	6.728	3.4218	2.3918	2.2211	8.1289	4.9373	14.3407	12.6032	4.3661	2.8779	9.322	9.5035	9.5757	6.0432	12.2868	3.2396	2.1786		0.506853	6.86797
8.9356	5.4176	7.9579	13.9455	14.6222	6.5323	5.0255	3.4361	3.5751	3.6199	3.9231	7.9089	4.9044	2.658	2.4736	6.7829	10.2745	16.7	12.7334	3.3351	4.1101	10.593	5.0317	7.3516	12.7525	9.9152	5.0365	2.909		0.5137	7.16761
9.0547	5.156	6.8127	9.638	16.6096	5.4593	2.6381	2.3594	5.0783	5.6257	6.5933	7.4871	3.3778	3.1478	2.9969	7.725	11.3078	10.8957	15.6832	5.549	3.889	5.9745	5.9224	8.6049	8.4435	13.6884	4.5658	4.4622		0.520547	7.02561
9.1739	3.0083	8.7321	10.0947	17.2419	4.4232	2.1732	2.3329	5.9112	4.5778	4.1107	4.2109	4.5596	4.3801	3.0969	6.764	12.599	14.1619	7.4726	6.3215	7.0915	5.8208	6.7177	5.8322	7.6754	9.8826	2.6622	4.7352		0.527399	6.54037
9.293	2.4309	6.7698	12.0315	12.3415	4.1701	2.8697	3.4667	5.6679	5.2624	4.3248	6.1247	4.292	6.3686	2.6425	7.7864	12.8909	8.8422	8.0516	6.5819	6.0137	6.7768	5.6516	6.6704	9.2663	11.5037	3.4407	3.763		0.534246	6.5186
9.4122	3.3421	3.0926	8.2121	12.302	3.9539	3.5822	2.671	5.8417	4.5226	3.0157	5.5015	5.2455	3.2845	2.2159	6.4225	7.9046	15.3749	7.7944	3.1096	6.8383	8.5367	5.1182	8.3852	8.6636	8.6089	5.5498	3.2532		0.541099	6.01271
9.5313	3.2314	5.4703	5.3507	16.3015	6.8969	3.2565	4.8457	8.3357	5.6122	3.7488	5.0867	3.5053	3.7149	3.4067	8.4875	10.2413	10.7009	10.6124	4.1462	5.1831	6.4914	4.5706	5.6778	8.6152	8.4393	4.4153	3.632		0.547946	6.29542
9.6504	2.7249	3.8955	8.0009	10.5117	8.2701	2.5344	3.1922	3.6875	5.6987	5.0011	6.4285	5.7319	4.0416	5.0747	3.8723	8.3948	10.8928	7.5073	4.0207	3.2129	6.5338	4.0933	4.6046	11.144	8.3667	3.3722	2.6133		0.554793	5.68231
9.7696	4.912	4.5725	6.1567	12.354	3.681	3.0297	2.1234	6.113	4.8562	2.7736	4.3426	4.8582	6.3898	6.2525	3.3983	6.9578	8.6327	8.1228	6.1493	2.7772	5.8112	6.8586	6.7463	10.871	7.1664	4.4569	2.6803		0.561646	5.6683
9.8887	2.6253	4.9431	4.7512	6.8131	5.9065	2.2788	2.5316	5.4471	3.5637	3.8036	6.488	6.1452	5.3247	2.6457	7.4179	10.6779	12.6722	6.1345	3.1465	6.4722	9.0552	4.6287	5.2514	9.7954	5.9359	3.0824	4.0126		0.568493	5.61298
10.0079	6.5625	9.7123	6.5813	8.2065	5.1753	3.0671	4.8227	7.8509	4.0284	3.6094	5.3138	2.8655	5.9268	2.724	6.9578	9.5234	4.453	6.9979	3.6543	4.406	9.3204	3.8613	3.2701	8.8746	8.3294	2.9543	3.4168		0.575345	5.64688
10.127	5.5427	4.0752	7.7952	10.1762	4.4783	2.0198	4.9067	6.1942	4.9834	3.5137	4.0425	3.2781	3.3283	3.2386	8.0556	12.6189	5.0045	5.7405	3.1619	3.3768	6.8171	4.4894	5.1786	8.6942	9.0656	3.089	2.61		0.582192	5.38796
10.2462	4.859	5.3852	4.81	8.0332	6.7143	1.9983	2.1627	3.578	4.6256	3.1299	6.3253	3.6782	3.675	2.9219	4.2659	17.9197	7.4336	6.244	3.2291	2.8298	6.7335	3.6638	7.618	8.4988	4.7947	4.2281	3.0661		0.589045	5.27488
10.3653	3.5059	4.1575	11.7383	7.9718	7.0548	3.131	2.7075	5.8707	3.294	2.5771	5.6214	5.0533	7.3874	2.7778	5.8059	11.1105	8.9814	7.9586	3.432	3.4367	7.7083	2.9894	5.3317	7.0112	7.8886	3.6973	3.0143		0.595892	5.60053
10.4844	2.2363	3.1118	11.5395	6.4718	4.4038	2.7937	4.142	7.1526	4.6982	3.8833	5.1217	8.8747	7.6817	4.9746	4.9717	12.3283	13.0193	6.8505	5.1735	4.6098	8.9431	5.301	7.8299	10.7037	7.4197	3.1075	3.1507		0.602739	6.31461
10.6036	3.7612	3.3673	9.5294	11.5667	3.8406	2.3213	2.6327	4.8586	4.9455	4.7767	7.092	5.4687	5.299	2.984	4.3547	12.5044	10.6264	5.3543	5.2354	5.7328	6.5137	3.1221	4.7718	8.5219	5.9811	2.773	3.5967		0.609591	5.6123
10.7227	3.9673	3.7168	4.7061	6.8606	4.4812	3.2068	2.7565	3.4532	6.9809	2.3912	4.8739	6.3867	6.4916	5.0339	5.2438	9.1854	11.2114	6.1845	2.7319	4.6779	7.3936	5.01	7.8654	8.0046	2.2944	3.515	5.185		0.616438	5.32628
10.8419	3.109	4.9171	10.5329	11.9577	7.0325	4.0708	2.1366	6.885	3.8962	2.1959	3.7411	5.1408	5.4793	5.8229	3.7976	13.2076	8.7989	4.9745	4.0322	3.7335	3.9519	4.8204	6.0915	12.9445	7.2224	4.8604	2.5428		0.623291	5.848
10.961	2.6325	4.0328	9.4677	9.7251	5.7783	4.9965	2.2351	5.9212	5.0377	3.055	4.4349	3.4125	3.8736	3.2536	5.7301	11.4756	7.8554	5.6208	6.9868	3.9262	4.1335	4.6488	8.7693	7.0082	8.4348	2.425	3.7344		0.630138	5.5039
11.0801	2.774	4.1415	7.677	11.801	3.5893	3.9907	6.0511	6.4964	4.3115	4.2906	3.5768	4.1982	4.2123	2.1104	8.0208	13.2647	7.7597	6.2376	6.7136	8.1729	5.3386	2.7254	5.9811	6.8598	4.7435	3.9615	2.4598		0.636985	5.60962
11.1993	2.9959	7.9251	8.192	11.7936	4.0582	4.1463	4.5833	7.2639	4.7036	2.5577	3.3513	7.7548	4.6617	2.2555	7.6272	13.7861	7.5144	11.522	4.9544	5.8114	6.5996	5.9523	5.6144	9.3574	4.834	3.3946	2.3934		0.643838	6.13349
11.3184	4.6646	9.0959	12.5675	10.3128	5.5647	3.4343	2.9229	5.3909	4.7208	2.385	3.5086	8.1448	5.4773	3.9297	4.2019	10.694	7.5718	6.6931	5.9415	4.2115	4.9103	4.0122	7.525	6.8686	3.8803	3.7511	2.5955		0.650685	5.73987
11.4376	2.003	9.8107	13.1558	10.2802	4.2655	3.4637	2.3345	4.8646	6.3828	3.3909	3.9594	9.2775	3.7848	5.1032	5.5152	10.2387	8.5206	5.2816	3.7039	9.1222	3.5074	7.4087	5.465	12.3625	6.0403	2.6634	2.928		0.657537	6.10497
11.5567	2.6789	4.3943	13.9377	7.7086	6.3886	2.9681	2.3531	6.8418	4.5812	2.6691	4.1276	8.2742	4.1149	4.5568	3.9988	8.2514	8.2266	9.2377	4.6609	6.3828	6.4563	7.1213	3.8562	8.604	8.0174	4.444	3.2468		0.664384	5.85552
11.6758	4.1096	7.9796	10.5138	9.1088	5.9471	4.3156	4.1581	6.1259	5.6075	3.2234	7.2028	5.4704	5.5841	4.8773	4.9213	14.5962	9.8534	8.9047	3.7671	10.9319	4.7358	4.8131	4.7242	8.053	4.7449	3.7258	3.461		0.671231	6.35024
11.795	3.224	5.5641	14.2669	12.7257	4.852	2.0042	4.544	6.5863	4.889	2.8763	3.9736	6.417	4.4905	4.0464	5.5083	9.2143	10.104	11.177	3.7728	4.7681	4.8652	5.7742	5.6355	6.6001	4.8852	3.3466	2.893		0.678084	5.88905
11.9141	5.0918	5.7378	13.3833	13.3017	5.2468	3.6567	4.7615	6.1603	7.4907	6.3822	4.9567	8.1277	4.946	3.3537	8.5783	8.4631	10.9728	9.3969	2.9457	5.1826	5.0599	3.9186	3.2182	8.4906	5.3127	4.2923	2.1446		0.684931	6.31753
12.0333	3.0673	5.5296	8.2103	8.3055	5.0596	3.3478	2.8333	6.5093	6.081	3.6897	3.8774	5.7815	3.6987	5.2919	8.1236	12.1971	7.7687	10.1163	4.9107	7.2218	5.2707	5.3865	4.8987	9.2494	3.6261	3.5642	3.0038		0.691784	5.80076
12.1524	3.2701	6.6305	10.0752	12.7105	3.095	3.506	4.8324	7.9514	4.9066	7.0808	3.4305	6.6753	2.0329	2.1895	5.5906	9.5243	10.0969	9.8983	4.2128	7.7493	5.053	5.5105	9.1852	6.6081	3.4963	2.4647	3.1414		0.698631	5.95993
12.2716	5.2883	9.1641	11.2888	8.3614	8.7842	3.2934	4.0093	8.6575	4.951	6.0598	5.2993	6.5136	3.2644	3.4575	4.6058	14.2415	7.1849	6.4186	3.6214	5.8355	5.0405	7.9961	5.9697	8.6425	5.8974	2.4574	2.8377		0.705483	6.2645
12.3907	3.869	5.45	12.9515	15.0666	7.2844	2.8224	4.9645	7.4974	7.6441	3.64	6.7203	7.6574	4.2578	5.4758	4.3209	12.4563	7.9281	9.3505	3.0805	8.0564	3.1455	5.6294	3.8711	8.134	3.6248	2.86	1.9261		0.71233	6.28462
12.5098	6.4907	6.3825	7.1451	8.8715	4.813	2.7875	3.2659	7.5655	9.4777	3.5168	4.1085	13.4046	4.5812	3.5775	5.5312	13.1018	7.0862	6.3953	4.3542	7.742	2.67	6.2187	5.6724	9.5407	5.0123	3.0775	2.2699		0.719177	6.09853
12.629	6.2737	9.7997	12.4546	6.085	9.555	4.961	5.0784	9.7175	8.4371	3.6292	4.1016	8.0412	2.8148	3.2464	3.2916	9.2502	4.9995	4.4947	2.8998	9.423	2.4112	3.611	7.6093	10.7409	6.5576	2.4155	3.3354		0.72603	6.11981
12.7481	4.399	9.7494	10.2933	5.588	7.5433	3.4859	5.0591	5.6238	6.7717	4.0129	7.3689	7.0565	3.8412	6.5918	2.9196	5.8139	6.5012	8.6972	3.7191	7.115	3.2616	3.1582	5.9955	8.5675	4.5193	4.5151	3.1013		0.732877	5.75071
12.8673	6.1741	11.8634	11.7907	7.9477	5.499	4.318	2.7994	12.1879	8.9119	4.589	3.8011	6.1632	4.3381	4.6536	3.6163	8.2651	6.008	7.8254	3.4831	6.7832	3.6289	5.285	6.6694	8.0903	5.6163	3.6626	2.9086		0.73973	6.18071
12.9864	5.3089	16.8256	9.1235	9.3401	6.1833	5.8444	4.9484	9.9589	6.7525	4.1101	7.9133	8.3901	5.442	6.3056	4.5304	8.4201	8.5844	7.101	4.2332	6.6808	3.6149	2.7906	5.0192	10.7695	9.0769	4.9256	4.229		0.746577	6.90453
13.1055	7.4863	13.0289	10.6377	7.1816	6.1112	4.2086	5.2351	8.4948	5.5475	4.0788	5.7793	8.1069	5.2743	4.6888	3.0047	6.964	5.8178	6.0271	3.6148	7.3203	4.4047	2.1957	6.3013	6.2853	5.6772	3.388	3.1616		0.753423	5.92675
13.2247	6.8978	16.9218	8.8318	8.4112	7.9316	5.5653	3.631	5.6013	6.0597	5.4519	4.6163	6.8459	3.0561	3.1994	4.1998	6.5592	6.3991	3.4648	3.6695	4.5304	4.6133	4.3763	6.5246	11.5412	4.0171	3.7292	3.0904		0.760276	5.91615
13.3438	8.1752	8.1853	5.6764	8.5222	12.0049	6.0606	5.8756	7.0951	7.3638	5.6641	6.5791	4.7404	4.8772	3.3865	2.8334	6.0804	4.5296	5.6125	5.9532	10.0446	4.3906	3.3032	4.0787	6.461	7.0077	3.2057	6.3972		0.767123	6.07793
13.463	8.0325	8.8026	7.3097	7.2324	7.6664	6.5927	7.3583	6.5168	8.8636	4.7126	12.1945	7.8416	5.4864	4.8046	2.662	5.0759	3.468	4.243	4.7834	8.8065	4.4617	3.708	4.1818	8.9052	5.5223	7.3078	5.8852		0.773976	6.38613
13.5821	7.0876	10.9317	8.3958	4.6975	9.5093	6.5423	4.6793	8.5852	4.8565	7.5997	7.4469	6.1556	3.493	4.4494	4.3534	7.4354	5.5961	4.4356	7.9262	6.2449	4.6389	5.0043	5.0484	7.006	6.6893	4.4381	5.1583		0.780823	6.23721
13.7012	5.4589	9.761	6.8404	3.0387	7.9767	8.5254	4.9193	8.5711	6.9981	8.4858	5.9838	4.4414	3.9302	3.4363	4.1942	7.603	3.3444	3.7445	3.3707	9.3163	4.8005	4.5238	4.2303	7.799	9.0028	4.6657	5.5519		0.78767	5.94497
13.8204	7.2278	10.9726	8.9355	8.5141	5.7374	8.6901	12.7181	8.7143	5.4852	8.0068	7.6898	5.0246	2.7487	4.0744	4.5862	3.0638	2.1494	4.6101	2.6914	6.8552	6.1951	2.9514	2.0736	7.1299	9.3142	4.6324	8.7015		0.794522	6.27754
13.9395	7.1403	11.0934	7.7289	5.6455	9.3049	5.1924	7.4259	6.0328	4.5007	5.754	6.4053	4.4859	5.7584	4.5028	2.9853	3.2924	2.5494	3.7458	4.5795	7.1013	5.156	5.2959	3.876	4.3096	7.9678	5.3929	5.9058		0.801369	5.67144
14.0587	8.5395	12.7481	10.8669	5.3375	8.3657	2.7554	6.5306	3.2668	5.9578	7.6996	4.6204	3.825	2.7539	3.2182	3.2597	4.8015	2.1951	1.932	2.8267	6.43	3.7512	4.2504	2.8934	3.5877	9.901	4.8851	8.2671		0.808222	5.38764
14.1778	5.6265	10.8605	8.2824	5.2396	6.8076	5.5256	5.356	5.0071	6.3821	9.9674	7.5755	5.2551	3.4261	2.749	2.9894	3.4193	2.2217	2.2445	5.614	6.4936	4.0012	2.4645	4.2415	4.511	7.2205	4.6015	3.1238		0.815069	5.22989
14.297	5.6201	13.3067	11.3483	7.2205	5.7135	2.5912	5.4744	3.4684	5.6483	7.2094	5.6414	6.8646	3.6565	3.5231	2.7334	3.419	3.4064	2.284	3.9783	6.9264	2.6123	3.7849	3.2695	5.864	6.3611	4.1276	4.8544		0.821922	5.2188
14.4161	10.0781	7.4628	10.318	4.8787	5.7216	3.1761	5.5886	4.88	5.7266	6.4542	5.8064	4.1034	5.5189	2.9706	3.1765	1.9087	2.9732	2.699	4.102	4.4422	2.9283	3.2704	4.7538	3.961	5.1721	3.9393	6.4804		0.828769	4.90707
14.5352	6.2447	8.8334	9.6219	6.6706	4.9039	2.9953	3.7755	5.3358	5.0445	8.0538	5.3583	2.6175	3.8164	2.2695	2.3421	2.4331	2.2281	2.3471	4.5154	3.3957	6.1499	2.5081	2.6965	6.8785	5.2474	5.3115	9.4715		0.835616	4.8543
14.6544	5.3135	10.0452	7.8749	6.6932	4.1921	2.9738	3.0082	4.6911	2.9078	4.7343	4.1453	8.9447	3.1267	2.695	2.7338	2.48	2.431	2.0681	4.8873	2.3516	3.155	2.4812	2.8127	5.7965	5.1416	4.8036	5.0071		0.842468	4.35168
14.7735	6.7777	4.4197	4.2223	3.7868	3.5464	8.2087	4.6159	3.9192	5.2856	4.7344	4.0522	3.3659	3.8697	2.9964	2.4122	2.707	2.7533	2.2045	3.2459	3.4781	2.0959	4.5857	2.6016	8.5688	8.0604	5.3847	4.7375		0.849315	4.31987
14.8927	7.2641	4.8312	9.3823	3.5912	3.3944	3.8118	2.8925	4.132	5.4292	2.3329	3.7988	2.9239	4.3079	2.2926	1.9977	2.1907	2.0843	2.1267	2.0581	2.3276	3.3102	3.2274	3.678	7.2791	7.0209	5.1452	4.2158		0.856168	3.96469
15.0118	5.979	6.4892	5.2136	3.642	4.7262	2.6508	2.21	5.1303	2.8309	3.1699	4.2811	4.895	4.8579	3.6119	2.694	2.0432	1.9427	3.3067	3.5258	4.4048	2.9505	3.3492	3.725	4.9665	4.7397	3.8723	5.5069		0.863015	3.95241
15.1309	5.5356	7.531	2.9912	4.2069	3.0556	5.5339	3.2292	4.2887	2.3184	3.5415	4.0801	5.1733	2.613	2.0599	1.855	2.0406	3.2794	2.4637	2.8713	2.9637	2.7456	2.2776	2.1537	4.1802	3.7995	3.2311	4.5076		0.869862	3.50101
15.2501	7.8747	5.8114	2.6326	3.5762	3.909	5.6977	3.0919	3.414	2.2266	1.9519	3.5462	2.9826	2.8315	2.058	2.2254	2.7315	3.0794	2.308	2.8347	2.863	2.8915	1.9651	2.6548	8.5591	4.3596	4.5616	4.807		0.876715	3.60907
15.3692	8.7448	5.0565	3.6022	2.7516	3.5877	3.0831	5.0344	3.965	3.6172	2.1511	3.4862	2.9178	3.0995	1.9456	3.007	2.2952	1.9917	1.9992	2.176	2.0069	2.4826	2.0922	3.3794	7.2502	3.6979	3.0982	5.9503		0.883562	3.49887
15.4884	6.7785	4.61	3.639	2.1168	4.1727	5.2304	3.7206	3.7057	4.3031	5.8239	2.2139	3.1987	3.6803	1.964	3.4736	2.4531	2.6676	2.099	2.9988	2.9378	2.4409	1.984	2.2498	7.7576	3.8877	3.2537	3.7877		0.890414	3.59811
15.6075	9.803	3.703	2.7044	2.1622	2.8416	6.131	3.8585	3.8485	3.1191	3.4587	2.2535	3.64	2.6608	2.3211	2.2283	2.4823	2.1295	3.1447	2.253	3.3548	2.4633	1.9142	1.9644	2.4919	3.6741	4.4201	2.3812		0.897261	3.2373
15.7266	11.8735	5.2095	2.1135	6.3331	3.9694	5.1609	3.0429	2.2718	2.2802	2.0353	4.2506	4.2378	2.0359	1.9175	2.0817	2.7612	2.1071	3.3634	2.0275	2.0092	2.1046	2.1676	3.1958	5.0807	4.0626	4.4543	2.5068		0.904108	3.50572
15.8458	6.3815	4.205	1.995	3.4536	2.32	5.8306	6.278	2.6378	2.424	3.4471	1.9855	3.8994	2.0962	2.3345	3.1379	2.1733	2.0467	2.2324	2.9109	2.0698	2.0812	2.4026	2.3827	3.1174	7.1983	5.056	4.2962		0.910961	3.34791
15.9649	4.8554	3.1119	3.0102	2.3054	5.2908	8.2446	2.4961	3.1885	2.2926	2.6716	2.7539	2.0117	2.711	3.1027	2.2754	2.7857	1.9211	2.1041	2.271	2.1385	1.9928	2.5613	2.2891	4.4024	4.9343	5.6079	4.6922		0.917808	3.26008
16.0841	4.1609	2.8552	2.7545	3.0723	6.0698	13.1888	2.9226	3.9574	2.3852	2.6788	2.9309	3.2001	2.0391	3.5102	2.0605	2.6065	2.0063	2.2494	1.9304	2.6375	2.1567	2.1728	2.0895	3.9344	4.951	4.9775	3.2738		0.924661	3.436
16.2032	5.2858	3.4417	3.3053	2.6029	4.4844	8.9807	4.5649	3.6056	3.148	3.8706	2.9425	2.803	2.5373	2.0444	2.0757	2.5856	1.9918	2.1342	2.0907	2.6087	2.1201	2.0843	3.7043	3.187	3.7595	4.2341	3.2591		0.931507	3.31304
16.3224	4.0593	3.072	3.2565	4.4092	3.679	9.5344	4.3911	3.2721	2.8458	2.7141	2.2588	1.9971	3.7129	2.1217	1.965	2.6285	2.0568	2.5191	2.0316	2.1366	2.0624	2.5305	3.8597	4.0758	2.5891	3.6804	2.1296		0.93836	3.16997
16.4415	3.052	2.4837	2.6648	2.9968	5.3788	7.1728	4.0476	4.865	3.6046	1.8883	2.6185	2.0669	2.8863	1.9967	2.0894	2.1656	1.9333	2.1792	2.0679	3.2631	1.9571	3.8625	2.1475	2.0365	5.3866	3.8684	2.7994		0.945207	3.09183
16.5606	4.6077	1.9385	2.6474	4.6561	4.3014	7.38	10.1541	5.0393	2.3487	1.981	2.9637	2.2079	3.7204	2.105	2.0274	3.1401	2.048	2.2457	1.9224	3.2461	2.2153	3.2133	2.8105	2.2913	2.9151	3.0795	2.3086		0.952054	3.31535
16.6798	3.0446	1.8799	2.3321	2.4397	4.8395	7.0589	4.2538	3.3424	3.7514	4.068	2.1169	1.9046	2.0516	2.0171	2.0967	2.7352	2.0575	2.197	2.7131	3.0185	2.1925	2.5488	3.3208	3.9513	2.3682	2.2444	2.7716		0.958907	2.93763
16.7989	6.9054	2.1522	5.5837	2.5878	3.9006	10.8224	3.2628	3.4611	3.1789	2.2685	2.0595	1.8569	1.9498	2.586	1.9425	1.8382	4.175	1.9858	2.3573	2.0549	3.5095	2.0847	2.148	3.4843	4.6584	2.3513	2.4868		0.965754	3.24638
16.9181	3.4712	3.4359	5.4617	3.5311	3.2384	11.1079	2.6119	2.4835	2.9235	2.6722	2.2971	2.025	2.0125	1.9811	2.0705	2.7622	2.0964	2.3486	2.091	1.9354	1.8843	2.3928	2.1451	2.7111	2.3254	2.2865	1.9844		0.972606	2.89951
17.0372	2.2557	2.7099	2.6153	2.7931	8.5256	12.3106	4.4822	4.4953	3.1366	2.0759	2.3855	2.9262	1.91	1.9927	2.6804	2.4224	2.0021	1.807	2.188	1.9678	2.0286	2.2506	2.3951	2.1672	3.4078	2.9474	2.9606		0.979453	3.17924
17.1563	2.8423	2.1694	4.2356	2.9866	5.3628	11.8062	5.6404	3.9337	3.5514	1.885	2.8631	2.9682	2.1301	3.0887	1.8871	2.3347	2.0085	1.8525	2.036	2.0555	2.0601	2.2654	2.244	2.8173	3.0494	2.0729	2.7128		0.9863	3.14295
17.2755	3.4018	4.0304	2.3902	2.4873	5.6264	13.1902	6.4441	4.0249	2.5845	4.417	2.2447	2.2031	2.9161	2.1834	1.9896	3.3393	2.1335	3.1434	2.1461	1.9997	2.2085	1.9804	2.9813	2.3459	2.1849	3.7474	1.9023		0.993153	3.34246
17.3946	5.1091	2.6778	3.119	3.6946	7.7075	11.6944	5.3245	4.9706	4.4442	2.4131	2.0166	2.0677	2.1819	2.6441	1.9672	2.0975	2.1872	3.0048	2.2039	2.0091	2.1124	1.9369	2.3507	3.1941	3.1464	2.4026	2.0946		1	3.36194

## Sheet: Image35
X0	Y0	Y1	Y2	Y3	Y4	Y5	Y6	Y7	Y8	Y9	Y10	Y11	Y12	Y13	Y14	Y15	Y16	Y17	Y18	Y19	Y20	Y21	Y22	Y23	Y24	Y25	Y26	Y27	Y28	Y29	Y30	Y31	Y32	Y33	Y34	Y35	Y36		Ap-Basal	Avg intensity
0	16.6205	18.3908	20.0459	18.8107	15.2464	21.3308	24.5267	17.3451	12.0427	17.5085	26.8022	18.7759	25.6777	19.7218	19.4664	19.9467	37.0438	14.1285	23.4778	31.696	23.116	29.768	30.056	27.246	27.5937	22.289	12.465	12.7376	15.9027	13.9524	16.2821	25.3941	18.0302	18.2223	20.1131	15.364	17.0048		0	20.6525
0.1191	20.8859	19.4663	15.0443	18.8404	28.7432	22.8042	23.1709	23.1081	12.7616	19.4039	20.6979	24.9503	33.6186	16.9833	18.1997	24.9973	47.0755	20.203	26.6558	33.777	23.943	28.752	33.87	37.845	23.2814	29.654	18.688	13.5136	16.8446	17.9287	12.5716	26.7054	18.5981	22.5093	23.3479	19.7716	19.1277		0.00768963	23.1984
0.2383	11.6392	12.7365	16.576	17.3621	29.0253	27.3279	24.2462	19.9223	15.1618	23.6695	22.9773	26.2027	31.2792	22.2659	21.5361	25.2083	45.7079	19.1413	31.6801	34.5485	23.91	40.223	45.878	42.342	28.0992	34.178	15.005	14.1758	16.1804	21.8312	21.1155	32.0807	20.0906	21.2008	28.3455	15.9889	20.6353		0.0153857	24.8512
0.3574	14.3357	13.0432	17.3545	12.7533	25.8089	26.9898	22.5735	17.8188	12.3797	24.8405	25.6741	31.5055	28.4144	18.1691	17.4817	32.2199	50.6402	25.0934	28.2934	32.2954	31.563	56.489	44.77	37.648	29.4021	34.394	14.492	22.091	20.14	21.4336	25.8087	25.0393	24.2888	26.7828	29.6386	15.6456	21.5323		0.0230753	25.9147
0.4766	16.6741	16.3248	17.111	11.9995	27.7607	28.4265	27.8633	17.281	19.8628	22.2093	26.4847	40.3584	40.7349	24.4957	18.3193	42.1519	53.3801	30.2304	36.4477	33.4851	30.103	59.869	55.178	42.623	26.7037	42.243	12.813	24.4927	27.2564	18.5896	27.1248	26.6693	21.1429	27.1204	34.0573	19.8983	21.8873		0.0307714	28.902
0.5957	16.2013	16.4363	15.3155	14.3074	28.2847	26.1607	20.1213	18.8907	23.8154	31.9034	18.313	40.4428	43.5405	26.7815	27.9476	48.0026	60.817	43.5917	45.0207	35.8617	42.948	52.381	46.375	39.53	31.1277	50.059	15.034	19.1104	28.2358	23.4295	44.5663	29.4397	23.9996	28.3677	33.3013	20.3553	20.9674		0.038461	31.1077
0.7148	14.7004	16.5367	16.5123	16.6033	22.2951	27.0778	24.2432	17.2206	16.2358	32.7785	21.3906	47.9198	32.4358	30.5943	28.1841	44.2934	55.3717	48.9105	48.7566	26.151	52.523	68.255	52	56.314	41.4784	47.23	18.957	19.7075	23.7741	25.7084	50.8403	29.1089	23.2036	30.961	27.7997	22.1961	19.7268		0.0461507	32.3783
0.834	19.6243	16.282	17.7056	19.3236	28.9466	27.5788	32.8239	19.5455	26.505	32.0948	30.9588	58.4519	34.0365	43.9319	34.1784	47.5045	54.2681	49.0637	42.673	30.6406	55.357	73.005	65.839	68.618	40.1593	51.045	20.068	26.1991	24.0592	37.9707	44.9395	28.7698	24.1146	34.7027	39.2377	30.6868	21.1284		0.0538467	36.5415
0.9531	18.7795	12.1863	23.1621	14.2959	28.5231	27.9172	24.9678	25.7277	25.1967	35.9143	31.9942	59.5197	51.3022	46.1484	40.8916	56.1682	62.6794	55.2109	39.0642	31.9558	65.458	69.404	75.937	73.001	47.5219	74.466	32.759	25.6292	26.6451	29.1412	43.8799	29.0562	26.1994	33.0794	39.7235	28.8221	25.0765		0.0615364	39.3893
1.0723	14.856	19.8037	21.8314	19.9047	23.6926	22.4972	28.9965	21.6517	27.8619	44.2788	43.1578	57.4721	45.6872	55.5224	55.387	62.1966	54.752	58.2716	38.0189	30.2357	69.461	88.982	90.509	78.437	47.23	83.461	49.661	28.6701	26.8984	26.2813	50.8825	28.3495	30.3541	28.8369	37.5701	29.6583	27.9209		0.0692325	42.4119
1.1914	18.4137	19.5847	22.3793	22.2872	31.449	23.0336	30.2702	19.6939	24.5335	47.1819	36.6976	75.7239	50.939	66.5919	68.8956	54.2444	52.9397	54.6484	37.0947	35.8526	85.932	89.614	86.781	90.872	52.4921	91.483	58.824	30.0173	26.472	22.3731	46.0128	31.672	27.6547	32.4496	41.1685	32.3383	26.8729		0.0769221	45.0131
1.3106	13.2385	18.7265	20.8801	27.7345	32.915	24.3092	39.7358	20.0658	20.589	43.2117	39.9477	68.1064	57.97	62.0646	60.7356	56.2461	54.693	51.1473	53.3041	33.7781	95.164	96.02	87.627	105.877	67.623	97.32	62.413	20.5288	30.5899	25.923	38.2762	34.4748	26.5707	35.8127	40.0025	30.9192	24.5574		0.0846182	46.4621
1.4297	11.9148	16.7414	22.4493	21.5422	22.8067	31.3936	38.0071	25.038	23.5556	42.3775	36.6726	61.5174	71.9994	70.4961	67.0435	63.8526	54.0052	62.7141	42.9743	33.6709	87.893	100.28	82.006	108.834	85.5732	96.625	81.973	25.0121	26.8985	30.0264	42.3419	29.7207	32.2885	34.877	41.402	36.1648	27.999		0.0923078	48.397
1.5488	14.8814	13.4801	30.0527	22.5515	30.8603	31.4638	46.0572	26.9819	28.7869	41.5377	33.6864	69.5882	73.795	78.6512	64.6216	56.5737	54.3597	60.4713	41.3665	34.7831	106.846	117.678	87.2	103.917	96.0627	102.854	85.288	27.797	28.5398	29.416	43.3618	25.4528	37.1477	39.9826	48.54	41.4144	27.4714		0.0999974	51.4465
1.668	13.9277	19.695	34.7243	22.379	35.9587	23.5444	51.1536	23.7298	20.0228	39.6193	35.6483	77.5702	82.1933	80.2622	62.6777	53.311	51.7543	53.4068	35.7182	37.8873	101.521	107.27	103.95	114.431	95.3423	98.102	98.878	26.9828	26.1255	31.6462	44.3693	25.1387	33.633	38.4434	37.8253	47.7558	30.7577		0.107693	51.8204
1.7871	12.2231	17.6905	26.3378	27.2237	30.5574	35.4048	42.7877	19.2872	24.0524	47.5832	45.2748	81.4028	77.9724	69.1561	66.7208	63.8064	60.4385	55.8398	44.5705	34.441	94.508	90.404	93.171	97.802	88.5311	97.016	93.102	26.4885	18.7073	38.0022	48.8758	34.0366	44.5415	35.2834	38.1403	44.3789	34.5549		0.115383	51.3598
1.9063	10.2597	17.4608	26.7651	26.7962	35.4195	34.0274	49.8178	26.9501	29.0645	48.1614	50.2486	84.4187	74.68	70.7813	68.7986	58.5181	47.132	61.7833	60.5113	36.6376	114.509	98.276	84.055	112.599	100.4	112.493	91.748	26.8431	26.6204	34.6162	43.9129	29.6451	43.9607	28.5177	42.9472	33.2672	28.8931		0.123079	53.2848
2.0254	13.438	23.992	23.0333	17.3854	30.7395	32.4517	58.6542	24.9445	22.0632	56.7844	49.8175	70.5898	78.4145	70.5105	66.7201	61.8819	46.1427	59.3324	49.7817	40.8742	124.922	102.64	83.652	111.473	95.1419	118.22	107.607	27.5961	34.3883	30.4261	36.4017	27.0353	36.9441	29.3726	50.7038	45.7771	26.186		0.130769	53.6767
2.1445	9.9458	15.5445	21.5242	25.6351	37.4069	34.1875	51.9308	28.3621	17.3012	35.9246	52.2409	80.2493	80.5821	64.5024	78.2965	63.9708	47.2863	53.4984	42.1997	40.5566	115.099	100.802	85.812	103.935	84.0734	104.939	103.51	27.2594	29.252	33.2295	47.8691	31.6235	36.0601	38.8451	53.1489	53.634	27.9476		0.138458	52.9239
2.2637	14.2567	18.4583	19.5933	25.6321	34.1321	38.4446	63.0074	27.7599	15.7386	44.7371	53.6347	76.8017	82.3269	68.6353	78.7904	49.4221	53.9399	56.6039	46.8336	50.5409	111.83	105.893	81.375	100.187	93.5821	102.118	92.338	20.6892	26.1155	23.9687	50.9381	24.372	35.9126	28.0375	53.116	53.6762	27.1854		0.146155	52.7196
2.3828	17.2696	18.3324	19.1051	27.8393	29.303	30.7378	51.8003	30.1825	16.8343	52.5099	49.5191	78.5494	72.3721	68.004	72.0797	52.7217	55.4776	54.9626	47.0176	40.2236	114.859	99.731	73.273	104.008	82.6103	101.232	107.037	12.8247	24.2857	24.4665	36.7912	21.2593	33.0036	24.7506	43.1384	35.5398	21.7086		0.153844	49.8746
2.502	15.2997	19.4771	22.9575	22.709	35.8808	29.919	70.785	29.3856	24.0898	41.2704	44.6379	68.6155	76.8902	64.2434	69.9229	58.6091	55.623	59.3637	43.8629	38.8516	105.456	104.22	85.602	98.274	83.2847	85.58	96.395	17.2601	15.7809	22.7429	53.6639	26.6225	35.2398	33.0421	50.2475	34.0976	36.0652		0.16154	50.7018
2.6211	13.5012	18.5788	30.4363	15.3848	40.5596	30.4689	70.702	30.8942	21.1307	32.9299	40.6114	76.9877	78.4339	62.0144	74.003	61.9195	53.8332	55.1249	44.3084	42.2882	108.686	107.183	83.281	106.458	83.0626	100.694	82.266	16.8443	19.4339	25.9843	53.2243	21.6328	33.001	40.1223	43.4898	51.4313	39.0305		0.16923	51.6199
2.7402	15.4385	19.0146	29.6569	26.5692	36.7907	26.0535	58.9419	32.7576	28.303	39.1678	45.7221	73.2566	65.5333	56.9557	66.5064	44.472	39.0402	56.5418	50.261	45.6214	111.31	98.583	77.955	112.656	92.913	101.609	74.933	13.0033	25.4143	21.5913	47.6715	25.369	33.1834	31.23	39.263	43.6396	44.66		0.17692	50.0429
2.8594	21.7913	20.8858	26.7753	24.1406	31.5314	38.6504	59.8215	31.8434	20.6139	44.9765	38.0771	79.5152	69.7219	51.9614	76.7812	51.3855	42.7674	65.1296	53.4742	46.1099	104.532	93.377	86.598	105.694	81.0563	96.841	68.038	13.2326	14.6533	24.6015	45.0082	20.9982	41.8212	37.8987	45.9562	34.5452	42.2351		0.184616	50.0822
2.9785	20.3993	18.7207	25.9645	26.6767	30.012	46.2037	51.3167	29.0629	22.4792	45.9796	42.0631	84.429	64.3745	44.6875	78.4786	50.1293	43.9112	63.4862	54.9968	46.2103	121.01	107.178	80.612	88.079	76.2584	86.999	64.269	12.5927	14.1384	25.9436	38.3895	17.2321	33.1318	28.7241	38.7613	37.002	37.4467		0.192305	48.577
3.0977	15.6137	18.1024	26.425	34.2209	32.6034	30.0332	58.2413	25.6383	25.4697	46.93	47.1525	96.8681	66.3271	41.0282	59.5574	57.0815	52.0732	58.4792	67.7024	48.3021	118.235	93.25	82.274	74.382	69.6045	100.131	59.127	11.5152	14.0891	28.026	47.9466	24.631	38.0945	27.145	42.3084	34.2669	29.7202		0.200001	48.7188
3.2168	14.7627	15.566	28.4119	32.3053	29.1601	35.9874	49.7755	28.3467	31.2338	32.631	47.0681	79.6454	65.1589	36.1703	58.9351	52.8356	42.5069	49.055	68.7679	58.5402	103.236	95.705	71.762	77.796	68.6399	78.516	61.944	13.4264	15.6558	27.8384	37.0393	21.1945	31.64	29.6473	43.243	38.4074	31.9914		0.207691	46.0688
3.336	18.7344	18.737	30.3495	26.1007	30.6684	33.033	42.2358	22.1999	37.6427	31.9741	41.9447	80.5756	66.4762	38.0524	65.3491	59.5523	39.4106	57.9016	63.321	60.9602	94.142	79.091	70.722	61.816	76.3004	94.838	54.993	12.401	13.2773	19.6116	43.8299	21.0074	29.702	34.2567	44.5446	36.0957	34.2966		0.215387	45.5715
3.4551	18.3901	18.0165	25.845	22.507	30.0152	31.4914	53.2613	27.8514	43.4709	43.2419	50.5757	81.2818	60.1796	39.351	59.9834	53.1059	37.4723	66.1409	64.827	48.341	103.005	77.432	69.299	70.507	79.0418	91.782	46.478	9.8841	13.8881	20.7707	38.0228	17.0296	32.2247	28.5961	39.7714	36.0108	30.089		0.223077	45.3833
3.5742	20.2487	28.8803	19.7035	30.2049	34.61	29.8366	50.7809	26.1419	39.5389	43.3887	45.6538	86.3989	54.2531	37.2425	46.7115	54.0586	40.6569	61.3024	68.4337	53.4676	102.022	81.788	58.522	63.279	73.7251	92.921	52.743	11.3881	13.9715	22.435	49.3028	17.1694	36.4471	25.1058	46.589	41.8151	22.6401		0.230766	45.4967
3.6934	21.991	22.2857	24.4677	28.6879	28.8026	32.5758	43.8103	29.5944	38.5777	39.6052	53.3613	79.0836	50.8057	30.1413	49.0022	50.45	41.4515	59.767	57.1952	56.3787	85.345	78.048	54.683	61.962	62.6518	96.041	39.322	8.0537	7.8163	20.2658	44.4526	16.612	30.6956	22.9877	40.3156	37.8013	28.5964		0.238462	42.532
3.8125	25.3595	17.2555	33.3904	29.5968	25.9023	37.7355	34.0108	32.0553	36.5741	35.7373	43.7876	72.018	53.6314	24.0945	43.5218	43.4266	37.0278	61.7986	56.2928	60.0294	98.406	58.938	57.085	55.279	70.3641	73.549	30.507	9.4572	5.7156	19.7766	42.9136	15.0841	30.3836	24.7725	50.3875	31.7967	25.7936		0.246152	40.6339
3.9317	25.7734	18.0599	37.5388	35.3589	29.2572	25.5804	31.3883	32.8907	42.2115	28.3629	41.888	77.333	39.1941	26.5476	39.4437	52.5681	35.3263	60.0151	60.0694	60.6291	116.262	55.509	46.83	53.28	75.1251	71.777	25.265	6.9789	7.9062	18.2853	33.1761	16.4779	23.95	28.0771	53.2634	29.1302	25.0385		0.253848	40.1559
4.0508	28.3765	17.7421	23.7873	38.5785	32.0856	24.3563	30.7937	36.4636	37.7678	30.2108	50.0802	84.7221	30.8615	24.6348	39.4857	45.8417	31.1787	50.0919	64.0089	53.4496	106.347	55.329	35.421	42.174	65.3162	70.494	20.145	7.6329	10.8839	16.2294	34.9424	13.0433	16.6831	20.623	49.2774	24.855	23.6531		0.261538	37.5018
4.1699	21.2551	17.0798	24.7589	33.7885	35.8772	28.4918	27.6707	28.5493	36.0328	35.1172	41.6324	83.7477	38.7168	16.5279	27.6711	55.8753	35.4687	54.4823	72.8029	60.5883	109.035	59.461	23.668	40.412	57.345	73.593	14.256	10.6049	10.8532	24.8229	40.0565	10.3491	20.7257	24.2864	54.8556	26.1494	22.42		0.269227	37.8116
4.2891	27.965	17.589	32.4087	30.3092	32.9374	22.5312	28.9274	29.2765	40.8158	37.1871	35.5071	63.7049	31.757	21.7247	44.5804	51.7096	44.4157	58.3649	69.1686	56.775	115.437	52.12	19.023	42.604	60.3873	76.23	11.874	8.7832	9.8322	17.5855	37.8178	15.3274	23.948	15.3967	44.1749	29.7542	20.9161		0.276923	37.2667
4.4082	26.0094	15.2987	37.2779	24.8841	27.0818	24.483	26.3446	34.5393	26.2184	31.2412	33.2305	71.929	29.0641	14.9564	40.464	43.2385	31.5832	47.9325	58.7698	55.8397	98.407	50.907	22.055	46.925	60.5332	72.662	16.641	12.0388	6.0506	19.0988	40.1144	17.7736	22.4407	12.2787	42.3876	26.449	19.4793		0.284613	34.7737
4.5274	22.1592	21.5223	38.157	27.5465	24.0924	25.3183	31.8304	27.8007	25.6536	30.6297	26.6114	77.7197	37.0761	15.1754	25.8512	36.0692	29.6947	50.7826	63.7635	55.6398	88.022	47.937	25.975	42.147	56.8572	67.017	13.228	10.2271	6.3825	15.3313	35.5037	14.696	20.3331	15.0548	39.4991	19.6635	19.5095		0.292309	33.2561
4.6465	18.7767	20.9529	35.027	28.6785	31.011	22.3461	26.2213	32.1936	23.42	25.5168	24.5759	76.1518	31.9482	14.7856	22.2912	43.5032	22.042	38.8684	63.6069	52.5317	87.305	42.869	21.052	45.072	47.2896	76.432	13.966	10.4366	5.8724	19.4993	40.7811	15.8874	13.985	12.5352	42.1096	15.0204	13.7245		0.299999	31.8456
4.7657	28.5164	18.8568	39.4512	23.9988	31.1074	19.5433	21.9414	24.919	28.6833	32.1766	23.5959	77.699	38.8049	17.3089	21.3985	34.5807	28.4495	47.643	63.18	64.9727	87.836	40.882	21.365	38.78	55.3246	84.986	11.446	9.3373	7.7929	17	36.3685	12.5952	22.0072	13.4121	31.2037	12.609	13.3144		0.307695	32.5159
4.8848	28.6833	15.2727	35.3435	25.2484	23.0506	19.2833	26.2548	32.0182	27.3597	21.4076	30.2753	69.2683	35.5782	18.5621	22.777	29.946	23.8521	56.5777	69.034	52.4042	75.637	32.926	24.396	31.04	52.5131	87.15	17.742	9.9982	7.6462	15.3526	33.0051	11.0391	25.467	13.3726	29.2117	9.6873	12.9255		0.315384	31.1164
5.0039	19.9206	16.126	27.2837	24.6091	26.6547	25.4257	23.5554	34.6537	25.0806	28.7988	28.3039	63.1144	32.6684	15.0205	21.9972	29.4392	17.8261	54.4893	56.2214	54.8098	57.759	35.796	24.667	35.679	61.4966	83.123	24.046	9.4459	6.6755	12.323	36.3404	10.0171	17.965	13.9258	27.9225	11.0135	10.5479		0.323074	29.8579
5.1231	25.0653	15.2161	24.1951	29.0419	28.9217	23.0225	22.4765	24.1195	22.8384	30.2543	31.5518	59.0418	36.4569	14.3561	20.7335	25.4085	36.398	44.9468	55.1586	44.4181	57.285	34.609	28.179	40.182	53.7312	88.827	17.772	9.242	7.5887	16.2144	29.4774	12.7093	16.481	14.894	23.7321	8.6817	6.6244		0.33077	29.1852
5.2422	20.999	20.7615	31.4892	23.4293	30.8296	21.2546	21.6405	28.958	22.9619	29.2087	18.3148	65.8162	23.8204	23.6202	24.5326	29.7456	31.6334	41.6235	69.0141	46.0024	42.945	39.939	27.463	47.828	55.4382	76.82	24.465	8.9653	7.7332	11.0178	26.5957	13.9084	20.2292	14.6744	20.8991	11.545	8.2759		0.33846	29.308
5.3614	21.1712	17.7846	29.0971	23.8779	27.5945	22.2646	26.55	23.8758	25.3505	21.2499	18.1008	68.9123	25.0579	20.4457	23.5501	20.8498	24.2609	35.2623	72.5777	40.9748	35.6	41.531	21.955	49.564	48.6252	90.369	26.759	6.7522	7.1896	10.4789	26.3472	11.5638	14.8411	13.2326	17.6734	12.2965	9.9769		0.346156	27.9342
5.4805	24.1763	9.254	28.6028	19.9145	22.5961	19.0033	34.7174	26.3834	21.5878	20.2807	23.7012	47.2197	21.9414	22.7305	24.8731	19.0679	21.0718	41.7335	71.848	43.6443	38.299	30.544	20.019	30.204	39.8625	82.974	26.471	8.7812	8.3071	11.4552	19.4705	8.2149	19.316	13.3738	18.4858	7.4447	6.6486		0.353845	25.7897
5.5996	25.27	10.0279	32.5711	18.8047	27.0298	23.4497	22.7583	21.4965	17.4444	19.7823	17.1277	48.4554	25.301	21.6976	21.1497	13.6388	20.3574	37.4839	66.9025	44.2765	38.851	38.958	21.777	37.334	37.1713	75.817	23.079	9.6906	9.4122	11.968	19.6114	10.1807	16.7612	15.1072	11.8054	8.7437	9.4894		0.361535	25.1563
5.7188	20.553	10.2535	31.6827	19.5271	25.4805	15.7636	23.1865	12.5746	15.866	17.6615	22.9768	51.2748	17.3984	26.6076	21.1812	19.5202	25.2843	41.8244	71.5968	44.0337	41.617	35.112	24.243	35.812	36.2546	66.593	22.593	13.2139	10.1645	9.5809	15.6164	8.5749	16.2739	11.1209	13.204	8.9087	7.5546		0.369231	24.6131
5.8379	25.6574	15.3811	33.7963	18.5355	19.6558	13.5968	24.5655	14.4101	14.4142	7.3799	18.3654	49.9923	24.2347	29.9843	19.1703	16.4441	28.4196	41.7132	73.7987	41.0033	32.288	28.683	23.696	35.826	29.678	57.355	22.673	11.4048	10.2888	8.7189	14.837	13.9997	11.9647	11.6661	12.6387	9.2349	8.964		0.376921	23.6334
5.9571	25.7687	15.9166	31.4527	14.9973	16.4792	14.0346	20.5667	18.9159	14.7971	15.3278	16.2995	40.5659	20.3233	27.4124	25.2939	16.3362	24.411	43.0279	76.7445	32.2517	28.74	32.793	15.467	36.291	26.1325	37.367	29.061	14.3521	10.0151	13.3363	17.2257	11.9784	13.5067	16.0753	13.4361	10.0731	11.615		0.384617	22.9294
6.0762	15.7934	17.002	19.5062	17.8499	17.5133	21.8212	14.9252	20.1014	12.4029	10.1829	16.7147	45.588	20.2759	28.3066	20.8982	15.4984	20.3523	33.4916	61.2868	35.747	34.577	35.059	20.056	30.33	26.6485	41.033	30.223	9.4994	8.0749	16.0789	16.2741	10.5818	9.1709	16.453	12.6931	8.2956	10.2535		0.392307	21.6367
6.1953	24.3394	11.6915	19.7929	14.7143	18.6876	12.0501	15.8798	15.9735	11.7654	8.5066	15.0985	37.5736	19.0632	31.6495	15.9013	12.5494	23.7837	32.0886	59.7435	34.072	35.403	35.539	17.685	33.909	26.8482	38.094	29.753	7.029	5.6455	9.1525	10.2068	14.3	10.9113	12.6184	16.4573	8.2636	10.3594		0.399996	20.4621
6.3145	18.2007	13.1951	14.0558	16.6368	15.1244	17.3793	21.4743	15.4225	12.2047	7.8331	16.7505	27.9945	14.3859	25.8347	26.4031	11.4401	22.8023	36.033	62.2702	26.8988	30.177	26.053	15.709	34.168	25.5859	38.322	23.319	6.9923	7.1802	7.1798	6.9165	12.6728	9.551	9.3069	17.8828	13.27	9.7529		0.407692	19.3616
6.4336	17.8133	5.4681	14.5939	18.6926	16.9477	14.2385	17.6755	9.6094	10.5401	9.3982	13.3506	29.6818	17.6102	19.356	15.8517	10.7064	20.2267	35.0775	57.8106	22.681	37.116	18.842	20.287	37.963	21.5384	23.158	24.317	10.4709	7.0329	8.0157	9.218	14.306	14.9792	15.9337	15.8067	14.2182	11.7165		0.415382	18.4392
6.5528	13.9214	7.015	14.5868	12.8439	14.8391	13.3552	22.4813	12.8478	10.8516	6.7092	15.124	21.5552	11.5303	14.3865	13.7157	14.7932	22.1892	28.2351	46.0313	32.0467	35.553	23.616	14.961	41.354	22.6441	24.812	23.127	7.4832	4.6942	9.2364	8.2565	10.6388	11.354	8.9528	18.6181	8.7054	12.7303		0.423078	17.1837
6.6719	10.5081	11.6165	9.6082	15.5922	16.9031	14.1663	24.414	14.4558	9.3071	10.1805	15.0291	21.7742	15.8129	19.5954	13.9431	12.4644	17.2798	32.6385	54.3365	22.1281	31.608	22.952	10.135	41.674	22.1038	24.329	24.405	7.5646	9.197	6.7133	13.558	12.7223	12.928	11.2143	9.9796	8.7683	14.8864		0.430768	17.4728
6.7911	13.2664	11.4766	8.8463	15.4233	11.3406	9.1242	23.0761	12.9567	8.0262	4.7608	12.5263	26.5766	14.3487	14.3416	13.9525	9.463	20.6854	33.5147	48.0546	26.0476	26.134	13.345	10.229	42.546	20.9969	22.215	20.7	8.7754	7.9928	10.4618	12.7418	10.9259	16.539	12.1999	10.5312	8.1206	12.4588		0.438464	16.3438
6.9102	10.7984	10.1258	12.3709	16.1487	12.2402	9.3647	22.7056	9.0147	5.9151	5.4487	10.2153	22.7451	13.4515	8.8622	8.6789	10.9568	19.2259	38.9029	48.8761	29.4773	23.935	15.382	12.023	47.25	15.9398	19.542	24.755	6.8171	9.0718	13.5089	8.2385	11.6415	12.4938	9.7278	9.7492	10.8159	10.5977		0.446153	15.8652
7.0293	12.9365	8.1385	17.9181	14.4262	18.5439	14.1464	13.1508	13.1343	3.8213	3.1077	9.1039	15.2407	14.5017	12.1022	11.7247	9.3042	14.6369	34.8042	47.2271	28.5876	32.075	15.652	10.801	52.828	22.251	16.056	17	8.5056	7.196	8.2355	10.7064	12.6764	12.6427	8.533	11.7835	9.0532	11.0559		0.453843	15.7732
7.1485	12.4949	9.9211	11.8382	19.2403	18.0052	12.7922	13.7146	15.0891	4.8009	2.7932	13.0558	11.9193	14.968	10.2824	12.931	9.3324	21.3322	35.8131	35.1978	31.5068	26.997	8.022	11.751	53.254	16.3812	13.115	19.238	9.9683	7.0885	11.8461	12.3179	7.0872	10.8098	10.8899	12.3844	9.2688	9.1174		0.461539	15.3126
7.2676	14.0388	7.1415	16.4401	14.3413	17.2029	9.5926	16.1237	12.8021	4.5597	4.5693	16.4723	14.5974	17.1342	8.7879	11.8117	8.5632	16.0376	28.5749	37.0143	24.7449	14.899	10.607	11.428	52.408	18.3274	12.673	26.28	7.931	7.682	11.5023	11.6153	7.9208	7.3097	8.0484	7.4787	7.5985	9.6568		0.469229	14.4302
7.3868	14.7618	14.3853	14.9262	16.0354	13.8738	10.9166	17.5711	12.9201	6.8214	6.6003	12.1341	21.6426	15.2852	7.4158	8.6691	10.7086	9.9942	41.6331	38.8292	25.0668	16.429	9.077	12.758	49.245	17.0071	10.965	25.363	8.7105	5.0863	11.3274	12.9134	10.7643	8.6208	7.239	6.2483	11.8617	10.3426		0.476925	14.977
7.5059	9.0793	8.453	14.9018	14.392	12.2615	10.6071	13.5631	12.5277	8.8127	3.8517	9.9898	23.255	11.9851	6.5223	12.6808	6.9382	15.94	38.3228	27.0801	23.6725	20.686	7.197	15.83	55.013	11.2393	8.538	18.249	9.0367	7.2645	15.0048	8.1718	12.6619	11.2845	8.1022	8.7974	9.6822	8.8603		0.484614	14.0664
7.625	13.09	9.7643	12.5805	18.5752	9.5711	14.6472	11.6035	10.5252	8.8584	2.6809	8.8875	23.5811	18.4534	5.7157	10.8835	8.547	11.0687	39.3126	24.8395	23.486	17.256	8.479	17.263	55.681	14.26	6.115	18.12	10.0408	9.8402	10.2459	10.9682	9.2279	4.5403	11.4099	7.9082	6.6192	10.4085		0.492304	13.9204
7.7442	11.1729	7.7996	10.2031	17.9581	13.4382	9.3013	11.3869	11.0061	8.5707	5.3552	11.2772	20.5595	19.4528	6.9509	12.9109	8.9126	12.1227	38.4366	23.3357	26.7889	8.663	6.848	18.92	56.204	12.0015	4.427	18.706	4.9212	11.9221	12.014	15.3756	10.6239	3.2701	11.3893	4.1552	6.8145	12.4065		0.5	13.6649
7.8633	10.2886	8.3096	12.3722	12.4485	13.1133	20.1129	10.0384	10.8619	4.6996	4.0872	10.0381	19.8949	12.9908	8.6784	10.4145	7.3553	12.4522	34.634	25.8858	20.12	7.248	8.236	20.627	50.937	14.7341	5.556	15.262	7.1779	8.7993	16.3176	10.9939	11.828	2.9223	11.1794	3.6973	4.8638	14.054		0.50769	13.0603
7.9825	8.7262	8.2461	11.1282	14.775	12.0758	11.9762	6.8402	7.718	4.6146	4.5872	11.0711	19.565	15.5337	6.9605	6.6183	5.5824	15.5403	36.1344	23.6778	22.2919	8.179	10.794	17.321	47.907	11.5147	6.72	7.567	5.67	7.0147	13.7336	12.1935	10.9497	3.9008	8.435	5.5787	3.7998	8.6051		0.515386	11.9877
8.1016	17.4046	8.4002	11.3931	11.0426	8.8154	14.0927	7.4516	11.5326	7.1616	2.4925	11.118	31.4005	16.2027	7.0976	6.7274	6.9832	8.5286	27.8366	25.7651	24.5154	11.256	7.081	13.182	44.934	7.3132	5.112	7.93	6.4196	8.9291	11.2155	10.7647	13.4526	3.9119	12.4536	3.5147	4.3552	7.2784		0.523075	12.0288
8.2207	18.3458	9.0206	9.5436	12.6976	14.3077	10.6792	10.4188	10.8533	6.0084	2.1551	11.3316	29.8725	15.293	5.3914	6.2038	5.4808	6.5637	32.1479	22.0546	26.57	11.499	3.109	14.187	53.888	8.0322	3.924	11.978	3.1707	6.1744	19.5537	8.5875	10.316	3.9334	13.7073	6.627	4.5734	11.4691		0.530765	12.4235
8.3399	12.6081	9.5881	13.0306	12.5404	12.6967	10.548	13.1664	11.394	4.7155	4.4967	11.7148	25.2169	16.697	4.7178	8.2335	6.3551	10.0625	29.3187	18.7894	23.545	5.775	6.698	15.686	66.306	10.6527	3.731	8.065	4.5773	7.0912	12.7203	8.5058	6.0164	2.9728	9.6374	5.0114	6.9133	8.6837		0.538461	12.121
8.459	16.303	11.7033	9.6665	13.7102	12.2488	6.9966	4.6431	10.2288	5.5731	5.8037	6.9935	24.8864	15.4233	3.0699	7.2463	6.1257	7.9415	30.8176	20.4137	18.7009	7.697	4.883	11.865	61.351	8.7	4.588	7.603	5.0993	4.6267	10.4642	9.2448	11.6174	3.0909	13.782	4.6827	6.1948	7.4006		0.546151	11.3888
8.5782	19.7346	6.6308	7.1785	16.975	10.3483	9.4692	3.5749	11.1195	6.4369	5.5528	9.6995	20.837	12.1431	4.6654	5.7502	8.6346	8.4052	30.3416	17.3794	15.5141	8.137	5.372	13.572	61.058	9.3981	7.239	12.218	7.5005	6.629	11.7745	11.6454	6.4713	3.7228	12.632	3.035	4.1071	11.3886		0.553847	11.5214
8.6973	17.3431	7.4951	6.7995	16.7336	8.7472	6.8315	8.4206	14.2731	4.5267	3.9854	8.4376	19.0662	14.7814	6.4421	7.5991	6.6311	11.8612	27.7216	13.5358	21.9059	8.469	4.349	10.367	55.532	7.9914	6.704	6.744	7.433	10.3324	8.259	4.6609	5.7446	3.2668	13.2693	2.7202	5.413	9.2708		0.561536	10.9098
8.8165	7.9685	5.7458	8.8501	15.9211	8.7403	6.2244	4.0476	8.2022	4.1228	5.427	11.6763	20.1551	16.7689	3.4002	5.9167	5.2544	12.1825	25.0469	15.5715	14.9558	7.062	5.178	9.432	40.983	11.5879	4.65	8.86	5.8768	6.078	12.4919	6.9547	6.7743	3.7973	7.7584	2.5364	5.108	6.7499		0.569232	9.67721
8.9356	11.2418	9.1003	5.5833	11.6949	10.6049	9.408	5.5931	9.4651	5.4068	4.3444	5.2362	21.6339	15.0041	2.7496	4.5346	5.5063	15.4096	20.12	25.787	17.1346	4.604	4.217	11.732	32.669	6.4789	4.284	10.314	5.505	4.0085	10.9431	5.18	13.1187	6.058	9.3346	3.5159	6.7307	6.0168		0.576922	9.73699
9.0547	7.5234	6.4085	7.8319	10.6978	9.7887	8.6037	4.827	10.5421	4.2313	5.3564	7.2593	17.7176	13.4113	3.476	5.2568	5.0318	12.2962	21.8173	19.4772	17.878	6.724	7.769	10.977	33.035	13.1175	3.221	5.402	3.5743	4.3761	12.1922	7.0688	4.4616	5.0018	9.9356	2.5134	5.2059	8.6207		0.584612	9.26022
9.1739	9.9183	7.4724	6.8621	14.5745	6.3193	6.027	8.8751	6.3534	3.502	4.2329	5.0562	18.2659	12.3302	3.5904	8.2685	5.3713	6.8913	17.0255	18.2031	19.826	6.08	6.505	7.856	24.874	7.7568	3.36	4.941	2.9151	5.2665	6.5319	4.8039	7.0045	4.4344	7.9616	2.638	6.8842	4.0505		0.592308	8.18456
9.293	13.7315	6.7404	4.5021	13.0032	7.8597	6.7737	8.2991	5.3979	3.6001	5.1393	6.947	15.2638	13.4456	4.7076	6.7535	3.9365	9.1856	15.2504	18.0785	18.1518	6.649	4.737	6.908	22.54	6.9169	3.539	6.383	6.3303	5.2389	7.3439	4.4416	7.3636	4.5411	9.6538	3.8056	4.8553	7.3133		0.599997	8.2521
9.4122	15.0305	7.8123	10.9844	15.284	9.6382	8.3503	7.9435	7.3988	3.1208	3.2379	5.7795	14.079	17.7822	3.7694	5.543	8.7875	8.4738	20.6535	18.0442	19.1756	5.484	4.232	7.416	21.558	8.008	3.699	6.737	5.795	5.6835	7.711	5.0039	7.6808	4.9209	11.0627	4.8879	5.0723	4.7345		0.607693	8.93446
9.5313	9.9746	7.2639	8.1645	10.0094	10.5437	7.1317	8.0684	6.3705	3.6296	2.4492	10.4344	12.8296	14.6699	5.2289	5.7645	7.0787	12.0438	11.888	22.4679	16.5948	5.26	5.609	6.675	18.845	6.496	5.014	8.192	5.5187	6.1664	10.498	3.7832	7.0908	3.9179	11.9622	3.1637	3.3317	5.9414		0.615383	8.3803
9.6504	10.3697	8.8563	6.7294	11.6455	5.6736	4.3199	5.1495	5.1146	2.2379	3.7327	6.8232	9.3904	18.4118	2.5115	3.8064	4.8849	11.8527	15.5814	20.7904	17.1101	5.695	5.151	5.503	16.753	6.2741	4.728	7.566	9.0645	6.9235	11.5289	6.0271	4.1491	3.0023	9.7444	3.2206	4.584	4.2085		0.623073	7.81392
9.7696	13.3363	6.351	6.9175	14.5554	6.7535	4.4573	4.1986	10.571	3.7472	3.7288	4.6935	7.3243	15.256	2.6278	4.9645	4.879	9.8522	10.1152	24.3412	16.6868	4.505	3.905	7.859	13.702	4.1632	4.48	11.652	7.5254	4.0408	7.8049	4.6068	5.7614	3.2214	8.4447	3.8174	4.1923	2.4298		0.630769	7.49914
9.8887	6.6116	6.8524	11.6874	14.0841	6.4616	6.4443	6.7588	8.2766	5.121	3.9651	4.8934	9.2571	10.5585	4.0558	6.1045	4.9449	7.7581	9.2642	17.8503	19.1965	6.727	3.488	6.369	17.149	4.3571	2.593	9.674	4.4854	4.5498	12.5899	4.4972	6.7993	3.0808	6.3334	2.8758	5.1837	4.1103		0.638458	7.43267
10.0079	6.2314	6.7491	9.05	14.1423	9.2742	5.84	9.0929	7.2142	3.1145	4.2976	8.3158	9.2003	13.3834	4.4649	5.8961	4.677	5.5873	7.7445	18.0648	19.6942	5.211	3.054	4.354	13.601	4.5441	3.075	5.526	3.9617	4.8131	14.8287	5.1234	5.2879	4.7212	8.0683	3.5173	2.5784	4.3228		0.646155	7.26006
10.127	4.7809	7.5117	8.4637	14.1756	6.4065	7.4039	6.3756	10.1337	7.9685	3.941	8.5304	11.0564	14.4577	2.8497	6.0483	8.2396	9.5101	8.9746	16.4125	20.7193	3.397	3.919	4.635	19.348	5.9965	2.309	7.17	4.7844	5.5288	15.0443	5.5896	5.8023	4.6259	4.9042	3.1775	4.1486	4.6241		0.653844	7.80984
10.2462	8.8839	7.2427	10.1456	16.2703	4.9584	11.0349	6.1069	8.7227	5.8455	2.6947	7.9567	8.1801	12.6945	3.1204	4.8729	5.1126	9.7865	8.1331	14.4339	19.0459	5.625	2.845	8.437	14.689	5.5313	3.663	5.255	5.4	4.8453	10.6105	5.2803	6.5088	4.4362	3.7649	2.5736	6.0956	4.3676		0.66154	7.43704
10.3653	7.7338	10.4316	6.1315	13.486	3.2194	8.3252	6.1333	6.2223	2.3582	3.0113	6.8829	6.3045	11.9942	3.1389	6.245	7.2521	9.8486	6.672	13.4376	25.9256	8.525	6.198	7.592	20.291	7.088	5.669	4.354	4.868	6.1629	7.5595	5.5174	9.1469	2.9629	3.9192	3.2872	5.7853	4.1406		0.66923	7.50867
10.4844	4.7986	8.2474	10.0782	7.2183	4.1321	8.3842	5.8963	7.8933	2.4719	5.1504	5.3199	8.4741	9.1956	3.8827	7.4235	4.3625	13.5991	3.5895	12.3256	19.0822	4.299	4.2	5.293	20.456	4.6798	5.094	4.893	7.0818	8.8929	15.739	3.9207	8.4871	2.3809	3.5942	3.4657	6.3669	2.8685		0.67692	7.11454
10.6036	4.7821	6.7766	7.3192	9.7727	4.3776	6.4001	3.9388	6.6659	3.6588	5.0734	9.8532	9.7468	8.6065	4.6162	7.3818	4.5113	17.8891	6.5506	10.809	18.2646	4.085	4.232	8.344	22.709	4.4724	2.51	9	6.6805	6.5024	12.3297	4.7793	5.8906	2.1915	4.3647	2.8794	4.0169	3.6339		0.684616	7.1788
10.7227	3.4673	7.5583	4.2441	10.0355	3.0945	13.5899	5.7843	9.823	2.6202	3.3685	7.2894	6.9099	7.184	5.0697	6.4956	5.6617	19.7655	5.7212	10.9461	19.3735	3.595	4.379	7.828	24.186	2.7312	4.266	8.395	4.5487	5.2239	9.9611	4.8141	6.3948	4.4188	7.356	3.6686	6.2807	4.2657		0.692305	7.30581
10.8419	7.9455	5.8568	5.9427	7.8138	2.5478	10.1987	3.7139	6.0204	2.489	2.2764	9.5033	8.3606	5.6773	4.048	6.0213	3.2927	13.6628	9.2274	12.2535	21.3844	4.358	3.546	8.354	17.273	5.4664	5.458	3.847	5.1547	4.471	13.0101	3.4148	5.4312	3.4307	6.4509	3.0788	2.8006	5.2615		0.700001	6.73089
10.961	4.1558	7.6992	4.4397	11.4876	4.9142	12.0963	6.1648	6.6813	3.0177	3.9733	9.0832	7.3153	5.8821	2.9801	7.518	4.8077	13.9072	3.97	6.5957	16.926	6.407	3.51	7.915	16.057	4.0143	6.622	6.265	6.3131	2.9084	13.6708	6.8144	6.9501	3.0771	5.9678	3.3762	4.2626	4.5998		0.707691	6.82016
11.0801	4.4939	8.9848	4.3917	7.9842	4.3758	10.8631	4.2591	3.9237	3.8182	4.5967	11.1201	8.5376	7.09	3.8389	7.1139	4.4793	15.812	5.5461	4.7642	21.7444	6.521	5.535	7.273	15.819	3.6769	6.55	4.324	6.8848	2.5619	9.5274	4.7632	5.8141	3.9701	8.2032	2.8534	4.6519	3.4839		0.715381	6.76082
11.1993	5.1143	8.4817	6.5839	9.5824	3.0976	5.0727	4.1132	5.2652	3.8038	4.7611	7.1019	8.1247	9.2371	4.3188	6.8262	4.5897	15.8386	5.3957	6.0968	11.3383	4.608	4.609	5.451	14.114	4.7377	6.146	3.798	10.1528	2.9331	14.1681	4.0701	7.098	3.3294	6.2173	2.8412	3.7426	3.1467		0.723077	6.37586
11.3184	6.3992	6.6127	6.5461	10.1779	2.7632	5.437	4.3359	5.8863	4.3269	3.592	9.0304	6.9281	7.8428	3.0342	10.1376	5.6535	13.886	5.9634	7.8513	9.1378	5.068	3.646	5.04	16.685	6.8766	4.985	6.222	8.0612	4.6238	10.5877	5.2367	8.6126	4.2213	6.6966	4.7006	5.3161	3.3363		0.730766	6.63399
11.4376	9.1575	8.5102	7.2237	9.9056	5.0895	6.3046	3.7186	6.3971	4.6333	2.7246	9.9985	9.2722	6.5931	3.7609	4.1152	4.9927	15.1372	6.4949	5.8438	16.8252	4.929	3.503	5.713	15.859	6.0543	3.288	6.223	10.2752	4.9664	11.7285	3.8618	9.7095	2.3378	5.7554	4.476	3.928	2.8001		0.738462	6.81369
11.5567	3.6811	8.4823	6.9598	6.6919	4.0223	6.3465	5.0374	3.9831	2.8875	3.8016	8.4843	5.9504	6.2213	5.4758	4.6266	4.2891	16.8538	5.0071	4.4949	13.4829	4.771	5.064	5.651	23.067	7.0389	5.419	7.127	7.257	6.6129	11.162	5.5329	7.0836	4.5002	7.1525	2.2551	2.6239	4.909		0.746152	6.59478
11.6758	2.6176	5.9732	8.8875	8.7354	3.4367	5.7568	5.9797	4.4089	2.4844	3.1069	7.3099	5.8692	6.3791	3.8099	8.3272	4.9919	10.9913	4.2015	4.0229	12.1315	4.418	2.658	8.014	23.949	6.8264	6.119	6.214	3.5918	6.8743	8.7338	4.8958	3.1775	2.9362	7.4642	2.2316	3.7029	3.8592		0.753842	6.08344
11.795	3.1584	10.7926	9.1241	5.9257	2.9627	4.4343	4.3286	5.1719	3.2454	4.8616	8.6443	8.6426	5.0712	2.734	4.7374	6.0752	10.744	4.2842	5.1286	13.6402	5.564	2.342	6.037	23.147	7.6897	4.053	10.032	3.0131	5.3611	12.0252	3.1724	6.087	2.6885	6.222	4.1208	3.5529	4.4843		0.761538	6.30538
11.9141	2.9289	9.6427	8.8251	7.2719	4.6689	4.5394	4.6997	7.0691	3.8807	3.2966	10.9611	6.6317	3.7712	2.658	5.2579	7.4835	13.4254	5.1398	6.0383	10.4456	4.743	3.057	7.559	18.945	5.9476	6.624	7.584	5.7958	4.2548	7.9617	3.3192	5.5115	2.155	3.7546	5.8739	3.0048	3.3232		0.769227	6.1635
12.0333	3.9366	5.2007	5.3269	6.964	4.4879	5.2928	6.405	5.8796	2.6558	4.5242	9.3613	10.072	4.3983	3.2232	3.3537	5.5534	9.5035	4.7468	4.0289	8.9988	4.758	2.261	4.499	30.376	7.3589	4.161	6.975	8.4345	7.1542	7.7888	3.9353	4.0392	2.883	2.4961	3.8358	4.505	2.5898		0.776923	5.99903
12.1524	2.397	5.1924	6.7512	8.2618	5.2636	3.2494	3.9234	7.2043	5.1104	4.6115	8.0235	6.0098	5.7111	3.2827	4.2894	6.4912	9.6442	4.5426	6.6755	7.6745	4.521	4.818	4.173	33.517	6.1094	3.615	6.056	4.3863	6.5902	6.5746	4.65	5.7295	3.851	5.4958	3.0009	2.9491	4.2588		0.784613	6.07041
12.2716	2.2565	9.1547	11.6489	6.7487	4.3072	6.2116	4.9532	6.2178	4.3684	3.9227	11.0807	6.7045	5.8894	4.0818	5.8184	6.7722	10.8491	3.743	5.9564	5.1969	5.275	4.196	5.957	36.616	6.6201	3.652	7.269	3.0835	4.561	12.2222	3.4112	3.9387	3.6335	5.9594	4.2144	2.7849	3.7936		0.792309	6.56945
12.3907	2.6639	10.2029	8.9724	8.4828	2.7677	5.4769	4.5599	4.3429	4.3608	3.3276	8.59	6.2467	5.043	3.1691	5.6757	5.7627	10.1963	2.6137	4.8034	7.6936	5.747	3.475	4.599	25.916	7.5687	6.369	7.694	4.3726	6.033	10.3024	4.3821	3.493	3.643	5.7959	3.4548	4.5965	7.6905		0.799999	6.2185
12.5098	4.4703	8.0883	7.5976	10.0303	3.211	5.0424	8.3897	4.2392	3.6224	3.8374	9.2439	8.4713	5.6559	4.6168	4.717	6.4707	9.8692	3.7609	5.8331	8.3502	7.173	2.656	5.297	21.494	4.4624	5.896	6.254	6.8568	3.1807	9.7294	6.2612	4.616	3.5764	6.4015	4.0332	3.9685	2.8109		0.807688	6.22121
12.629	4.3025	7.5382	10.3877	7.6257	2.8854	6.7026	4.6573	4.326	3.0188	3.0832	10.7951	6.505	5.6594	5.0568	5.7585	8.1205	7.3713	3.3258	8.3353	8.2096	4.718	3.12	10.304	22.639	5.0509	5.738	9.565	6.7702	2.9128	9.4827	5.3086	4.5675	2.8286	4.6422	2.6306	5.3934	4.6547		0.815384	6.32408
12.7481	2.8947	7.0473	6.7861	9.1197	3.0891	4.7725	7.0181	5.8739	2.6626	2.3608	4.4879	5.8615	3.5622	4.3997	5.2616	7.4101	4.6344	4.2226	5.3777	8.7524	6.651	3.739	5.476	18.133	7.8986	6.046	10.477	3.8815	3.4307	8.0045	2.897	4.4064	4.4394	4.0803	4.5339	3.4766	5.6438		0.823074	5.6435
12.8673	3.6737	8.1247	8.735	5.5805	2.9226	9.2264	7.1576	4.2201	3.7147	4.1516	4.0231	5.1504	3.7554	4.1182	5.2671	9.1151	4.7549	3.5224	5.0116	10.7437	4.783	4.067	7.232	16.339	5.8765	7.232	10.583	3.9485	4.4126	7.9267	5.134	3.7842	2.5018	5.3083	3.9814	2.7181	6.3436		0.83077	5.81461
12.9864	3.8543	4.6357	9.6699	7.065	2.7836	6.2326	3.7669	3.915	2.7947	2.6786	10.4693	9.1862	4.363	4.0316	6.4918	5.4357	6.5753	3.5565	7.3493	9.2634	6.057	3.489	9.246	14.616	4.6735	8.017	9.761	6.1858	4.3646	7.57	4.9137	4.9411	2.314	4.0109	2.7331	3.6488	6.7345		0.83846	5.87552
13.1055	3.9141	6.3158	10.4257	7.431	5.2997	6.5603	6.633	4.6569	3.2081	2.4861	7.5297	8.5129	3.8475	3.5651	8.5081	9.1236	9.0786	3.8999	5.9547	8.9424	5.068	3.349	8.292	14.701	3.2041	5.078	10.811	6.209	5.3775	10.7209	6.6511	4.9824	2.8791	4.8932	3.9514	8.2726	5.7919		0.846149	6.38177
13.2247	4.5082	6.3037	9.1714	5.7783	3.5119	5.454	7.4474	6.3079	3.0845	3.4626	3.8823	8.174	4.6171	4.4087	6.6304	4.3774	4.9875	4.6899	5.8521	9.8029	5.78	4.833	7.831	14.398	3.8564	7.17	10.963	6.1628	4.0651	11.3727	6.3712	8.4852	2.2926	4.61	3.4478	5.9652	6.437		0.853845	6.12144
13.3438	5.4166	6.6942	5.5616	5.8558	4.5413	5.0155	6.0299	5.8317	4.7627	4.6469	9.8086	7.0504	6.0887	3.3501	7.3263	4.6189	3.852	3.6877	4.4533	7.0925	7.69	4.148	8.222	15.964	4.07	7.26	9.706	9.9793	4.7813	8.49	8.4951	4.6653	2.3684	6.7856	2.3016	3.3378	6.0824		0.861535	6.10896
13.463	3.5475	6.0528	6.3841	7.9873	5.6086	5.8139	6.6029	4.5872	2.7274	7.1327	8.7498	9.7212	4.2722	3.9035	8.6024	3.5803	8.3454	3.9366	4.5256	6.4606	8.047	4.884	7.444	14.755	6.6186	7.778	8.614	7.7562	3.3847	8.8402	8.3017	4.2787	3.1933	6.3018	2.3615	4.0551	4.8081		0.869231	6.21524
13.5821	2.9025	4.8241	4.2581	7.5172	5.3465	4.6136	4.5312	5.3251	3.6036	5.513	6.6359	7.9301	3.1695	3.9219	6.3425	6.5757	9.9448	4.0055	4.1995	9.366	5.607	4.792	5.725	11.444	8.9359	12.751	9.794	5.8087	8.0768	9.1785	7.2482	3.8597	4.4317	6.2477	4.0439	6.6346	4.4584		0.876921	6.20442
13.7012	2.8718	5.4702	4.7876	7.6644	2.047	4.187	4.5763	4.0914	3.1537	7.5172	7.9759	6.9868	4.0607	3.9236	8.6956	5.3715	4.4477	3.5213	3.496	9.4601	4.299	3.913	7.47	12.466	10.2963	11.848	8.871	7.51	8.0379	11.3081	6.3791	6.8717	2.4581	5.9585	2.8417	6.8612	3.4854		0.88461	6.08597
13.8204	4.3652	5.1842	5.1419	11.0054	2.5876	5.5893	6.0943	5.405	4.1915	5.4139	6.4618	10.2729	6.0431	2.1256	4.5122	4.7366	5.9239	4.3099	4.2625	5.9123	4.57	5.841	6.853	15.174	6.9634	12.524	10.546	9.0833	4.8739	10.431	6.2171	4.6529	2.08	6.1686	3.8381	4.488	8.0171		0.892307	6.2665
13.9395	3.7563	8.1001	5.6882	9.1739	2.2318	6.2024	5.9767	6.389	5.2082	8.1964	10.8575	10.148	7.1505	3.4332	4.6258	6.958	6.4354	5.4695	4.6904	7.6645	6.684	6.221	6.691	12.141	4.7322	14.777	10.404	12.0816	3.7377	7.7121	6.8042	6.5739	4.1333	5.7847	6.2567	4.9652	4.7282		0.899996	6.83199
14.0587	2.7779	7.2774	7.6794	13.3657	3.4523	6.8885	6.5313	4.0207	4.2254	5.2563	8.7635	10.5677	5.6551	3.8184	5.5575	4.9787	7.9052	2.6384	5.995	6.1761	8.059	5.214	4.388	7.333	4.8082	15.051	5.493	5.4925	4.1864	5.9428	6.759	6.3319	5.0551	9.9264	4.3279	5.7169	4.8754		0.907692	6.28354
14.1778	3.7866	6.8592	5.344	9.9252	4.4952	5.6091	6.1254	5.8844	4.3651	4.3825	9.7577	8.1801	6.5347	3.6212	7.1791	5.0284	5.9397	4.1002	4.8808	6.0129	4.718	5.025	4.628	7.661	4.8796	18.569	8.645	3.8624	5.8828	6.6224	6.6653	5.801	6.159	7.5209	3.1074	4.0936	5.817		0.915382	6.15321
14.297	5.8619	11.3306	7.3983	13.0655	2.5173	6.7769	5.6889	5.6777	4.4229	8.2504	9.0275	6.3249	5.069	4.2599	11.466	10.2491	5.189	4.0597	4.36	4.9259	3.609	5.227	5.06	8.989	3.9787	22	9.063	5.2113	4.6601	6.4583	6.1068	9.3809	5.3137	5.4168	3.6279	4.2448	8.0749		0.923078	6.8201
14.4161	3.4552	9.1923	5.5119	13.9583	2.788	6.5055	5.4484	5.3558	4.5609	6.4007	11.3615	9.3144	4.8877	3.8986	9.2855	7.8951	4.488	2.924	4.1821	9.3631	4.91	3.056	6.587	7.731	3.8476	15.697	6.503	6.217	4.1989	4.6403	8.6475	7.2095	4.4912	7.9377	5.6562	4.9187	10.4226		0.930768	6.57968
14.5352	3.5352	6.1702	7.9735	9.5906	4.5589	6.2736	7.299	5.8644	5.3371	5.1514	10.96	9.5571	6.4314	6.7994	11.1512	6.2305	5.4297	2.9908	6.6144	11.2173	8.261	6.482	3.308	7.985	6.8717	18.063	3.467	3.9368	5.3382	4.7743	6.9393	4.1283	5.669	7.1017	4.4753	6.2375	9.9406		0.938457	6.8139
14.6544	4.28	4.5026	6.5761	10.6457	3.0876	7.399	6.79	7.7455	5.6083	8.7877	10.2547	9.0362	4.9148	6.4039	16.1951	4.4243	4.31	3.9869	6.6916	6.7531	7.007	5.244	5.349	8.056	10.2289	13.79	6.049	3.227	3.4779	5.989	11.9783	4.5977	4.8221	8.8647	4.7435	5.5445	11.5907		0.946153	6.99871
14.7735	3.1057	2.9543	6.5785	7.1031	5.0398	4.7733	10.0032	6.0779	7.0478	10.2571	8.9853	8.3577	3.1465	5.3557	10.3854	7.1419	4.9519	2.6188	5.3084	6.6686	3.12	2.491	3.242	5.976	10.9062	18.695	7.331	4.4265	3.1607	6.3597	6.2963	6.5251	6.5292	9.7011	6.4229	5.4205	7.5007		0.953843	6.48554
14.8927	2.5901	4.6766	9.5444	12.4938	3.3543	6.6543	13.6046	6.7195	8.9886	9.2195	6.3634	9.97	2.7475	6.6301	9.701	6.1867	4.8041	3.1738	6.2079	6.1827	3.934	2.869	3.166	2.706	11.1474	17.972	5.666	5.282	2.242	4.5719	6.5618	10.5775	3.8807	7.5546	6.4453	5.8537	5.8492		0.961539	6.65114
15.0118	3.2944	5.0971	8.0901	11.9739	3.8096	6.8387	11.2411	6.5358	7.4207	10.9701	7.9154	12.7735	4.2997	5.7983	13.3441	5.9732	4.5892	2.64	6.8779	4.915	3.122	2.416	3.341	5.607	12.5286	15.211	7.373	4.4711	2.9931	4.4497	5.6543	6.7694	5.369	4.616	6.164	8.7284	8.5757		0.969229	6.80506
15.1309	3.6624	6.3856	3.5678	11.2731	4.1829	6.1086	8.872	11.3491	5.5705	10.1351	5.0494	6.2955	8.8664	5.654	12.1724	12.3575	4.2197	3.155	5.4969	5.7394	2.874	2.919	2.569	6.245	9.7826	19.545	3.624	4.3707	3.0274	3.3732	7.7897	7.8192	4.9838	4.251	6.292	7.193	9.9222		0.976918	6.66741
15.2501	4.0022	13.0849	7.7565	12.4471	3.497	6.3825	7.5802	10.1842	7.6789	15.5442	3.9501	8.7212	4.9933	3.9919	11.3743	13.5618	3.0943	2.3707	6.9281	9.3894	2.807	2.458	2.357	8.653	6.1742	12.951	3.632	2.0862	2.3105	2.5027	6.078	8.1119	3.8821	4.2919	5.8526	8.431	6.0168		0.984614	6.6251
15.3692	4.8318	11.9858	11.6117	10.8473	2.1814	5.8856	10.8252	7.015	5.0186	16.8222	6.5892	4.8827	4.38	6.9373	7.8758	7.3183	2.4381	3.5675	5.6833	13.4776	2.196	3.247	2.744	5.023	6.3927	9.479	3.491	2.0602	2.9883	2.145	6.4272	8.0733	4.289	7.9836	5.066	7.4478	4.7372		0.992304	6.32337
15.4884	5.8113	10.8317	5.0824	9.6583	5.4049	5.2372	11.812	6.4962	6.3794	14.6615	5.5362	15.0494	6.5765	6.2264	11.0007	8.6981	4.2934	2.9783	3.6767	8.8565	4.482	2.681	2.256	2.029	3.9586	7.325	3.517	2.1804	2.5415	1.9923	6.996	5.1481	5.6259	5.1596	4.3276	7.6383	4.8287		1	6.13389

## Sheet: Image33
X0	Y0	Y1	Y2	Y3	Y4	Y5	Y6	Y7	Y8	Y9	Y10	Y11	Y12	Y13	Y14	Y15	Y16	Y17	Y18	Y19	Y20	Y21	Y22	Y23	Y24	Y25	Y26	Y27	Y28	Y29	Y30	Y31	Y32	Y33	Y34		Ap-Basal	Avg intensity
0	15.7952	6.5907	4.9915	10.166	12.7611	9.5962	14.4515	13.14	5.8619	9.6636	11.3056	13.3254	18.0286	13.952	11.4899	17.3366	24.3836	31.6176	15.9459	19.383	20.4583	12.9974	18.6184	13.4053	16.5363	11.5115	16.3178	13.7055	15.316	11.9147	10.8178	6.7425	5.0161	5.5672	17.8699		0	13.6166
0.1191	16.1921	5.4719	7.9519	9.5961	10.6759	10.8507	15.6355	19.1631	10.6549	11.3764	11.6185	20.643	28.6197	12.3215	8.325	16.5675	21.9061	38.619	18.2895	18.2681	14.3524	7.1318	19.1462	19.0787	11.5579	12.0934	11.7736	9.2918	26.4437	13.2014	11.1382	6.1495	6.9228	12.0599	12.206		0.00644938	14.437
0.2383	21.9226	6.2903	7.4992	12.1078	14.9216	7.0047	16.9868	23.565	13.56	14.1526	12.6657	24.0864	36.5889	16.6628	14.6393	19.6764	18.692	34.0333	23.7036	19.1373	22.0536	14.6164	23.8811	22.7924	12.7191	10.1034	6.745	17.9767	18.3724	22.8288	12.9091	6.9784	6.6476	11.5014	12.9576		0.0129042	16.5994
0.3574	18.2258	5.0182	5.4489	9.4852	16.7004	11.8397	13.7742	24.353	9.1302	12.4454	8.9501	22.8003	37.2452	14.3898	11.7007	16.3964	22.1616	31.8858	21.2485	15.2736	22.3925	10.4485	18.0619	15.3611	11.5461	11.7578	9.3843	12.6866	19.4473	21.8824	15.4001	8.4708	9.4624	12.6574	11.7829		0.0193535	15.4061
0.4766	20.3498	4.0425	4.1046	18.8638	18.8393	9.4528	15.4696	29.4972	11.8592	13.8732	12.8786	19.9512	35.9622	15.1287	12.0335	18.1459	21.7634	37.7631	16.7861	17.7813	24.3895	9.7829	21.3668	18.5566	14.5549	12.3797	14.6289	17.1214	14.6109	27.2137	12.1959	10.7701	11.4089	16.6583	6.9786		0.0258083	16.7761
0.5957	16.8363	9.4583	3.6888	16.1374	20.1846	8.6071	26.1769	28.1567	16.968	15.1661	10.7139	33.1175	30.63	20.2615	10.6428	18.7082	24.3168	42.0974	18.5195	17.01	24.2548	14.5032	20.863	12.2769	12.7354	8.4437	11.0526	13.2518	15.4199	26.6126	9.7147	11.5511	11.2508	21.2073	8.2783		0.0322577	17.3947
0.7148	20.1084	9.1796	6.8197	14.0354	20.3817	10.1797	25.8129	19.4381	18.3719	10.1107	12.9254	31.3035	35.5683	28.4492	13.7755	15.8706	23.5158	37.3554	17.3432	22.2589	23.4463	8.7564	19.2222	17.4087	9.2084	10.9035	10.8115	11.1858	24.5809	32.8442	22.1864	13.2238	15.2454	15.2768	9.0812		0.0387071	18.1767
0.834	26.69	9.9237	5.4876	9.3671	19.582	11.4332	31.5904	24.1344	9.9272	11.2892	16.0703	34.2988	36.4402	33.9818	14.0093	18.9904	26.5507	42.8489	17.4174	16.4608	22.9915	8.4402	24.5327	17.8745	15.6593	11.6653	13.0737	7.1881	13.7675	27.6823	13.6683	12.9676	12.3573	20.5405	7.358		0.0451619	18.4646
0.9531	30.0354	5.9945	4.4234	17.2833	24.0096	10.7725	27.3608	22.7814	15.0514	12.4449	9.2709	29.6916	35.5743	32.8204	16.11	14.3754	26.3816	38.9063	10.6567	23.438	17.1929	15.6023	28.3315	15.0434	11.391	8.8315	13.8734	18.7619	22.5088	34.093	16.2166	9.6878	20.509	16.935	12.9181		0.0516113	19.1222
1.0723	26.738	4.4355	7.9226	23.385	16.7324	12.2099	21.3217	16.7015	11.9283	18.2042	13.2409	27.4554	34.2115	31.454	15.2486	15.7016	29.9828	33.5856	14.1393	26.2312	19.9827	10.3503	27.9033	18.6663	18.3715	14.7481	13.3519	22.9044	19.6474	28.4985	22.1199	11.7516	12.3598	11.3234	9.9929		0.0580661	18.9372
1.1914	22.9802	8.2095	7.7357	17.9137	17.7468	15.865	31.6224	31.9496	11.3011	12.2649	14.6627	29.7549	33.9683	23.0764	16.9431	20.6964	26.6351	33.4064	15.8815	19.1105	21.3125	17.5614	17.5421	20.5934	12.2895	14.8462	12.7511	11.7778	26.2018	18.1357	21.2407	14.3973	16.6282	16.742	13.2255		0.0645154	19.0563
1.3106	23.0415	8.1475	5.8161	20.9117	19.5159	16.9837	27.515	28.6986	16.6897	14.695	14.1181	22.1803	35.132	30.6963	14.4485	10.239	27.6462	35.8956	15.8946	30.4261	22.566	13.8803	24.4254	16.6862	14.4126	12.0337	13.2632	16.7892	20.5851	25.4516	14.8699	14.6039	16.359	16.7275	9.7119		0.0709702	19.1731
1.4297	19.1021	8.4384	5.1163	18.8747	22.3588	19.1159	28.4802	24.0877	12.2382	11.2458	10.1166	27.5324	36.1684	35.8286	13.6723	14.8603	38.2069	42.0782	17.1201	21.0587	21.9315	17.5291	20.8451	16.333	18.7868	12.1469	13.7789	18.7468	18.6646	20.3219	26.25	12.3975	16.8896	14.6191	11.6019		0.0774196	19.6155
1.5488	20.5116	7.0486	8.1154	18.6294	23.0644	11.9282	30.1197	31.9301	11.5732	16.019	20.3836	18.222	19.4333	31.1427	17.0874	12.6337	29.5562	45.4245	12.3083	25.2297	27.4143	15.3902	20.3462	13.6124	15.2996	15.7937	8.6951	10.7834	19.0928	21.067	16.5639	14.0891	15.6707	18.7479	12.2412		0.083869	18.7191
1.668	17.2451	7.2823	4.7468	17.8962	16.2154	10.3335	31.6829	28.53	14.6416	9.6544	10.8719	19.9839	18.2301	43.4425	12.3376	15.7265	39.742	39.1141	18.122	16.7356	19.9607	14.548	19.3516	13.2076	18.0364	12.4644	8.8766	9.2309	22.1115	18.0883	25.2717	15.2704	22.5916	16.0307	13.9788		0.0903238	18.3301
1.7871	12.0141	4.6001	8.2641	22.5858	13.7436	8.8138	24.5556	25.3036	11.2294	11.0105	14.7737	12.7362	14.5087	46.7827	16.925	14.7616	32.3223	40.5851	20.5984	22.4713	21.7254	16.5982	18.2835	15.5161	22.2195	12.1316	8.0806	7.8149	20.7489	14.9928	20.0363	17.243	18.901	13.9576	11.4742		0.0967731	17.666
1.9063	16.0679	7.4019	6.4486	11.3299	29.4355	12.4797	26.2627	19.0267	14.2559	14.7303	18.443	19.519	11.0579	46.5237	12.1143	18.3573	34.5504	36.3498	16.8374	23.0724	24.5095	13.929	18.6372	21.6459	18.4906	16.704	9.6919	16.3675	22.3657	16.4522	22.7416	8.0231	16.428	11.9908	13.0693		0.103228	18.4374
2.0254	23.5351	4.2157	11.0137	15.0336	23.1249	17.5226	30.267	30.8597	17.5445	15.587	18.1598	17.1798	12.9914	35.049	21.2014	15.3619	34.865	38.1358	13.7816	26.6524	27.0439	21.1531	17.7125	21.7663	16.7707	13.4316	19.1782	19.2118	19.1864	15.5043	16.269	14.3458	9.6477	12.3558	12.9563		0.109677	19.389
2.1445	21.7145	8.6483	11.061	18.8618	19.0623	10.839	25.4677	42.2769	10.8064	20.0499	23.204	17.086	10.7603	29.9838	13.9977	16.6153	43.8007	28.2493	17.6408	18.566	25.4229	23.0557	17.3834	22.2904	16.9339	16.0384	12.7234	22.4262	15.1994	20.9093	23.8913	15.319	11.2842	10.488	12.8071		0.116127	19.2818
2.2637	19.6693	4.9957	13.0681	20.3038	22.6077	13.107	27.9031	29.0001	10.7967	16.8539	22.0393	15.5411	15.1783	26.3148	14.8315	15.9889	39.5582	49.8984	13.5767	20.1868	28.8584	22.4645	23.0205	24.3125	18.2987	13.2938	12.8786	13.4175	11.2132	16.9429	18.2652	10.3313	14.6143	14.2228	10.9826		0.122581	18.9867
2.3828	22.2092	3.9088	7.8282	17.6497	23.8729	13.3572	23.4763	25.4915	18.422	12.7547	21.9711	15.0646	18.3279	34.4334	12.09	12.7019	40.7494	35.9294	13.9097	27.3141	24.058	17.5956	15.9492	18.6152	15.883	10.5891	14.4807	17.4004	17.0616	15.3413	21.1232	11.4196	11.2009	16.1086	15.1332		0.129031	18.3835
2.502	15.4871	6.5838	8.0804	21.5782	18.6594	14.4869	25.786	38.1888	14.837	11.7899	20.3474	12.147	14.6986	36.9188	17.8475	15.8944	43.2483	34.3717	15.9161	21.6673	35.1302	13.549	20.5443	23.0217	11.8983	15.0818	14.2008	15.1485	13.8792	15.2531	17.037	13.5076	10.0146	14.1814	10.2873		0.135486	18.6077
2.6211	14.8373	6.1477	11.6385	13.3991	20.4837	12.4673	23.8927	21.7201	13.776	17.3435	17.4684	17.0573	16.2097	34.6246	17.837	13.2574	46.3428	29.6542	19.2568	15.8455	24.7932	21.1129	10.9478	17.4441	14.0286	19.1361	8.7981	18.7928	17.4317	23.9015	15.7519	11.0172	7.6266	12.3431	14.0844		0.141935	17.7277
2.7402	22.3183	4.4203	7.4332	17.1673	16.4611	16.8253	23.532	22.5667	15.1149	18.2444	17.5832	11.8073	11.0448	41.6939	15.1514	16.9606	44.1267	41.7014	20.8167	23.3415	31.1124	26.3262	12.2511	21.6483	10.3669	16.3988	10.765	19.2937	17.5966	24.2517	13.6452	17.3564	12.0599	16.8893	16.9437		0.148384	19.2919
2.8594	20.3386	4.8081	11.3324	20.4943	19.0114	9.7108	23.2099	21.1075	13.2591	20.6377	25.5667	14.9727	9.3943	39.8167	15.9201	10.8512	41.4276	40.5307	17.7348	16.7819	35.6579	14.9276	15.3938	19.7193	16.355	16.1417	12.8752	21.8584	15.107	18.2449	15.9824	16.7676	9.1943	10.1168	9.4114		0.154839	18.4189
2.9785	16.6477	6.9338	13.9141	17.3768	21.0617	14.3536	16.3342	27.1775	14.4288	14.4998	20.476	19.1586	10.3746	42.6672	15.6053	15.5475	46.6482	37.2901	21.7278	24.9749	26.1147	21.7995	16.3905	27.1206	14.9424	18.681	14.0512	20.1945	18.9646	21.4742	12.552	20.3062	9.8337	16.5632	11.713		0.161289	19.6543
3.0977	15.3341	7.9763	11.2982	13.6021	17.5778	17.2215	24.1139	25.4879	12.1967	18.2467	31.1324	14.4013	9.6475	26.0764	21.9441	19.3596	53.378	45.4944	20.0991	26.2102	26.9614	24.4594	13.5562	23.5506	15.2681	15.4612	8.2093	16.2945	19.6418	25.9829	19.6398	13.4435	13.8028	18.1968	13.3311		0.167743	19.9599
3.2168	16.6221	4.4184	11.3646	14.9438	24.829	9.1725	20.2633	24.5721	15.8931	17.967	25.619	18.0451	11.294	28.8327	20.8573	20.2745	53.452	49.9278	28.2475	17.054	29.1893	28.3262	12.1878	18.6601	16.698	14.8947	11.0733	19.6982	28.6242	25.105	26.5549	9.0584	13.2505	8.996	11.8113		0.174193	20.2222
3.336	10.911	5.0144	8.1869	9.9118	17.1401	15.2067	23.1794	30.553	23.2366	15.4497	18.1014	12.8191	18.0953	38.9263	13.1827	29.6404	46.0473	43.5019	26.2944	22.9964	35.8769	23.143	12.0493	25.2994	15.9964	19.2045	14.3916	13.1244	12.4557	24.9267	17.4277	7.4216	8.7814	20.7466	16.7686		0.180648	19.886
3.4551	12.6989	4.533	10.512	17.8053	19.4082	15.0909	17.8275	24.9672	18.3518	13.6067	24.8805	16.6586	19.9489	30.4871	8.6269	35.4782	31.0047	41.1505	21.6426	22.4251	24.1901	20.567	11.5041	21.5614	16.2177	18.551	9.5162	19.1069	19.8305	26.113	32.9932	15.1278	4.9599	17.2991	16.3502		0.187097	19.4569
3.5742	13.1788	6.4176	9.0976	15.4795	14.819	13.7128	21.1735	32.4192	14.3361	20.1196	16.3495	17.5569	21.0637	44.6291	11.463	35.36	46.3813	48.497	22.8967	17.828	29.3967	30.1533	10.8126	30.9639	15.0469	17.6906	10.4829	20.7041	25.4538	19.7592	21.7087	14.8342	7.6228	12.6987	12.5524		0.193546	20.6474
3.6934	7.6104	6.2012	11.7485	13.8112	20.1069	12.1099	31.1103	32.1009	22.0616	16.109	21.8655	14.3905	22.4715	44.6138	14.9759	33.6026	52.7805	40.5917	23.5668	16.0324	27.5513	22.4667	9.4278	25.4342	17.0046	13.2915	12.4662	13.9112	23.3933	25.3217	23.0125	14.1405	13.7642	16.1847	16.3185		0.200001	20.9014
3.8125	11.7873	10.1164	13.1616	14.9987	18.9907	8.6446	21.8587	25.9378	22.2896	16.5866	16.1506	21.9121	25.2067	42.9599	14.9125	24.7581	49.1159	46.0099	25.1985	30.0414	22.6007	15.142	15.1407	18.8049	18.96	14.5884	9.7481	14.0277	17.7881	22.1461	15.9228	19.9375	12.9743	13.9789	12.1505		0.20645	20.13
3.9317	6.7084	7.3687	7.1106	12.8482	12.9714	8.3599	21.6722	31.5053	16.5101	20.1713	18.4403	16.4278	24.314	40.864	15.0426	18.0452	55.4336	49.3721	19.8316	17.5665	19.9148	29.7969	19.2893	15.3484	16.235	11.5828	7.6873	14.6382	11.9566	18.835	13.773	14.8785	15.6082	9.4977	14.8708		0.212905	18.6993
4.0508	8.5758	10.7135	10.2419	15.9367	13.0384	12.412	22.8436	23.9934	23.2579	13.6415	18.1048	20.077	28.3254	51.4527	16.8861	21.6019	46.6782	39.1858	28.0342	16.6886	21.9048	16.7469	20.4727	12.038	15.3438	10.4472	8.311	16.8361	16.0651	15.1738	13.0524	17.8511	14.8703	11.1975	17.3299		0.219355	19.1237
4.1699	10.3099	12.2218	10.7395	14.721	17.5191	8.7267	11.9601	29.8955	18.1802	14.0559	26.4103	16.3966	37.285	50.7358	19.423	22.1025	49.5304	44.4806	22.1392	15.8772	24.2095	18.2455	13.1473	8.6675	14.2394	11.8857	8.4309	16.555	12.3118	20.7098	12.1971	15.1678	14.2289	11.734	15.1407		0.225804	19.1309
4.2891	7.5251	8.7963	11.2829	14.8626	15.5142	13.5161	20.9565	25.4331	28.1853	14.4767	23.4464	20.1102	23.7205	41.1734	13.333	15.4601	47.4987	40.9884	27.9819	20.822	29.0004	13.634	12.415	8.91	13.1295	17.3894	11.0204	18.2985	11.616	13.1961	9.8527	14.9859	10.2742	16.1678	15.4902		0.232259	18.5847
4.4082	8.9735	10.8155	12.1889	14.2555	11.7086	9.133	14.6799	18.6533	18.7586	11.9596	23.564	11.4069	29.9994	28.0623	17.3207	16.2989	41.4932	53.5078	29.0008	28.126	26.8224	14.904	17.1571	11.5523	16.7326	18.0972	10.2866	21.105	19.1895	17.2575	14.2245	18.826	7.8447	14.2337	11.9201		0.238708	18.5731
4.5274	6.1254	10.686	6.6906	17.1024	18.4518	8.0595	21.7194	24.1966	22.8075	20.6698	20.6896	20.1303	24.8573	26.0875	27.5641	18.3162	46.5164	47.7022	27.1501	22.0704	31.9607	26.0971	10.3169	14.8503	16.9294	25.687	12.492	18.7491	21.3587	21.3652	17.6651	10.2993	12.0894	13.7683	9.7877		0.245163	20.0288
4.6465	10.7605	8.6258	8.884	10.834	10.897	12.9476	19.9066	22.778	21.8829	24.2196	13.5019	14.4399	33.319	29.153	27.216	26.9743	34.8411	44.2055	24.4458	28.5861	27.311	19.8839	12.6421	12.1343	22.7154	17.1198	9.4384	11.6753	14.6079	13.1896	12.8301	13.6366	9.0777	10.0187	7.8243		0.251612	18.3578
4.7657	10.596	11.7777	11.369	14.3267	14.0148	12.6474	15.6438	24.7674	24.2671	15.4901	16.6188	22.5568	31.0349	33.3824	25.2535	24.1615	39.3206	41.2594	31.29	19.6354	33.0893	16.8501	10.8936	13.1322	14.8343	16.87	9.2939	15.6109	15.7801	17.9328	12.1389	13.2737	7.2239	14.936	11.1388		0.258067	18.9261
4.8848	7.3954	8.9662	5.4903	11.0462	19.9331	11.2774	18.9341	33.0005	23.0055	16.1104	13.4654	22.1403	34.4963	36.8717	22.7221	18.4564	29.3227	35.7195	36.6334	21.3567	30.1332	12.2298	8.6529	11.8652	14.5487	13.7234	7.2521	10.9809	11.6599	14.696	11.3633	17.66	7.1106	11.1675	9.9802		0.264517	17.6962
5.0039	8.4922	9.6516	10.641	10.107	10.9488	10.2722	11.9496	32.0989	19.8424	19.0786	21.3877	20.818	28.3229	28.4499	23.9561	20.333	26.8139	31.2243	38.4763	21.107	32.5156	19.4129	15.2629	12.1921	17.0467	17.1169	7.9704	15.8087	19.3652	14.399	10.7467	13.6042	8.9143	16.6413	15.5059		0.270966	18.2993
5.1231	4.5051	8.6708	5.0651	12.949	14.771	9.3263	12.774	23.2241	19.7767	13.3389	14.8575	17.7953	32.1363	34.8482	19.0353	17.8726	21.656	29.0152	33.3125	18.7748	20.0168	15.8504	10.3384	12.661	16.3036	18.3453	7.532	11.9174	17.6053	14.4994	14.1544	11.7348	9.0308	10.8361	14.0236		0.277421	16.2444
5.2422	6.7141	6.9314	7.847	17.3952	13.1577	14.1121	8.0475	30.1532	15.2496	13.3529	15.1007	22.3756	25.46	29.7317	16.4699	13.8696	24.6076	39.5242	39.6119	23.0102	23.6922	16.1169	5.8239	10.1069	12.3491	17.2181	11.2744	13.5184	20.0155	16.9327	9.6964	15.7234	8.2424	16.256	9.6956		0.28387	16.8395
5.3614	4.6475	5.6717	9.0069	6.7763	12.0588	11.4667	19.7429	31.0257	17.219	14.5432	17.0045	19.8681	25.0346	22.7651	14.6753	22.1506	19.4741	36.9366	37.9032	18.6901	26.4827	15.4289	8.8658	7.4594	8.413	21.6016	6.4965	18.4059	18.1156	12.3233	9.8835	14.6612	10.7981	15.8649	8.7886		0.290325	16.2929
5.4805	4.2813	7.1167	5.7915	7.237	16.9223	12.8652	22.5642	18.869	10.6838	20.3048	14.426	20.6015	22.9652	28.5284	14.8777	15.0473	18.2121	38.5815	33.9153	22.9296	26.0563	12.4118	9.7017	9.4692	12.6476	18.4371	11.6731	17.3757	13.3778	13.6904	13.322	15.1372	10.063	12.8786	7.0015		0.296774	15.999
5.5996	1.9386	6.7711	10.1187	9.877	8.5612	16.4016	12.5705	15.5173	16.6538	14.6013	15.9509	23.8105	19.322	36.2818	11.7506	15.0198	18.9283	31.5772	42.0659	23.3299	26.6717	18.3319	9.2655	6.913	12.0308	18.0864	11.3306	13.6912	12.5055	11.3783	10.3778	14.2061	10.9049	16.0313	6.9543		0.303224	15.7065
5.7188	4.7187	9.3525	4.9512	5.5127	14.4552	15.2671	18.6012	15.8989	15.5673	14.9797	13.5228	23.3712	16.4149	38.5893	9.8685	16.5312	24.3442	26.8384	37.6294	20.8245	28.2347	16.5824	8.6607	6.8434	12.748	22.4413	9.1381	11.8927	12.7481	10.6822	14.0935	13.6419	10.637	14.3624	11.0529		0.309678	15.7428
5.8379	3.2607	7.5375	7.2802	11.7507	4.9598	11.8886	15.664	16.8091	16.581	14.7001	13.8017	21.1873	14.9839	33.5646	8.852	10.8672	20.7029	18.8288	44.7203	22.0653	17.3881	15.544	8.3267	9.1935	18.2035	17.855	6.6753	16.2915	18.3013	19.1252	13.6189	14.0609	8.6505	16.2596	8.1516		0.316128	15.0758
5.9571	5.0878	7.7293	6.949	9.9377	8.6499	18.0977	18.622	13.6572	11.6904	9.7535	15.3825	17.6533	21.4804	36.7179	8.364	10.6948	18.3878	19.4756	38.0417	27.5031	25.134	24.6999	12.4857	7.5231	19.5322	16.7137	8.9695	11.7118	13.5464	16.2469	11.7725	10.7249	10.3558	15.6095	8.4168		0.322583	15.352
6.0762	4.3982	7.7086	5.8146	13.3077	14.776	15.2161	19.3861	13.4781	20.4639	14.7123	11.9623	16.5319	12.514	35.7157	7.7504	8.7364	17.5529	21.5491	43.2266	24.5794	24.4187	11.4774	11.3122	10.5124	22.7773	9.8062	8.4908	10.5744	16.5477	15.7672	14.142	9.9802	7.2816	17.5319	10.2113		0.329032	15.1489
6.1953	3.2063	3.993	11.133	13.6048	9.2183	18.1982	14.1381	22.752	16.7552	11.917	15.7608	15.2893	11.3487	32.5865	6.1925	5.8159	18.3678	12.509	37.0824	20.6493	23.3884	16.1149	10.1094	9.316	25.3692	12.5795	5.3321	12.8793	10.0774	16.6936	10.6789	7.0978	5.2148	12.088	9.7137		0.335481	13.9192
6.3145	3.7705	6.9502	7.7875	12.73	14.8899	15.3879	23.0722	10.7904	16.828	18.4679	10.4068	19.9756	10.6186	18.0419	8.4023	10.6801	9.9527	14.56	40.8026	27.6691	21.1941	10.9968	17.7802	8.3657	23.5438	21.5579	10.4105	9.1304	12.2137	16.1567	10.2214	11.1956	4.5094	15.1294	11.7287		0.341936	14.4548
6.4336	3.1923	6.7786	5.399	10.2882	11.8934	19.347	15.1742	14.4356	15.0167	8.7913	8.1587	14.8699	13.1133	34.1521	11.5002	8.1069	11.9112	13.7544	36.6992	22.4046	13.216	10.4257	13.2878	6.6331	17.3781	9.2507	8.352	6.4029	5.4043	14.932	12.4789	12.016	8.9748	13.3814	12.0201		0.348385	12.8326
6.5528	3.8443	6.8055	5.9292	9.3467	16.7194	13.1431	10.718	10.2061	13.1371	10.2664	11.718	10.6314	15.5881	36.7099	5.3987	11.3458	14.5432	12.2745	29.5633	23.7335	16.5706	9.7352	9.7695	7.5401	17.9254	10.9845	6.3237	8.1134	14.4207	15.4371	11.6734	9.3192	8.3013	15.0669	11.596		0.35484	12.6971
6.6719	2.7527	6.098	5.1169	8.5449	9.5575	10.7781	16.8858	17.3008	16.5917	8.8261	8.0664	14.7923	13.7185	26.1656	9.1583	11.458	10.9756	9.0222	24.3945	21.5277	17.8661	10.8132	13.2492	3.9659	26.0754	10.2981	10.0566	8.4321	15.3796	14.4595	12.3416	7.9877	7.0618	12.2915	8.8716		0.36129	12.3109
6.7911	1.8442	4.3641	2.5686	7.1325	9.218	11.8661	20.7688	18.3309	11.1371	8.2403	13.4602	18.5363	10.2233	34.0218	6.8147	10.4148	11.856	10.6371	26.4033	19.6319	26.817	11.0222	8.4039	3.6604	20.0182	5.8123	13.7827	8.6288	11.7613	17.907	12.7165	10.5689	11.3091	10.461	13.5032		0.367744	12.6812
6.9102	2.8429	3.2427	4.3416	7.7192	7.3799	12.63	13.8439	14.5306	14.828	8.1944	7.8124	13.2637	11.2261	32.1846	11.2386	8.9142	9.6319	11.8754	28.8692	29.0452	22.4077	12.5041	7.3122	4.6797	15.7751	10.2955	3.95	6.2113	8.0831	17.4036	9.6007	9.7934	12.138	7.7407	15.2584		0.374194	11.9077
7.0293	3.0904	5.8727	4.7293	10.13	6.0101	11.9873	16.918	18.3602	12.3777	8.7899	6.0098	15.5016	13.427	35.4246	12.3418	6.5837	7.3157	10.5119	23.3826	20.382	17.5306	7.5946	5.3604	4.9469	12.6725	11.9987	4.387	9.9586	8.5337	14.872	14.7658	9.8247	6.2579	5.6293	17.5184		0.380643	11.4571
7.1485	2.3542	6.7158	4.0391	4.9519	11.3497	4.8524	15.2199	17.4046	9.0274	9.8648	6.8091	9.4211	16.4717	36.446	14.3793	5.1623	8.2252	16.3736	21.3924	13.4754	21.7684	8.8397	5.9558	4.5354	11.4223	7.3149	6.2482	4.8524	6.6088	14.0102	15.4252	9.9213	6.9762	8.2741	14.6196		0.387098	10.8774
7.2676	3.8896	3.942	4.8518	4.8441	9.1597	4.8567	23.8146	12.8718	10.0995	6.0144	8.9572	11.1122	11.0686	20.6561	9.3427	6.1007	8.3682	7.2378	15.7522	14.1015	25.8344	12.082	5.5984	2.7582	14.9502	6.4025	5.4781	4.2602	11.7183	12.0419	20.1478	6.7599	6.4782	10.1218	15.4375		0.393547	10.2032
7.3868	3.866	4.6623	2.9053	5.6252	6.4241	6.1048	14.0763	11.307	9.0921	4.7847	7.8169	11.7407	21.775	25.0562	7.8073	4.2483	12.613	7.2451	17.0242	12.0496	23.64	8.39	5.1816	3.3472	14.5454	10.6481	4.395	9.004	15.7196	11.3221	16.5087	4.9067	5.4737	11.6426	14.4366		0.400002	10.1539
7.5059	2.2572	4.0978	3.1367	6.0164	4.8311	8.0184	13.9938	9.8609	9.3354	5.6714	3.2599	8.7234	13.2244	16.9966	6.7593	8.0104	7.7532	6.5673	21.2478	11.1176	11.6065	8.0742	5.7276	6.8818	10	6.4675	3.9833	5.2126	11.0779	8.9037	17.132	7.0114	5.9464	17.6906	15.9427		0.406452	8.92963
7.625	2.7808	4.4404	3.9052	6.5991	8.185	4.5717	14.8338	16.5823	13.7953	8.2754	7.0061	12.967	13.1729	19.8744	7.1139	8.1692	7.2163	7.6787	17.5427	11.3375	13.4826	6.6674	4.8871	7.1109	8.6408	10.0265	4.0922	8.3018	8.633	17.215	12.572	7.7273	5.5692	8.8903	11.6893		0.412901	9.47295
7.7442	2.7871	4.1491	3.5292	7.787	6.0248	5.7325	19.1029	12.3195	9.7852	5.6598	8.8092	8.3903	13.1393	21.4907	6.6652	6.8429	8.7243	8.3534	10.8107	15.1368	9.9654	8.8215	4.6842	8.5055	9.7259	9.4382	6.2902	5.7372	8.4552	9.8234	15.0562	11.5708	9.0483	12.2461	11.4357		0.419356	9.31553
7.8633	2.6997	4.0632	3.3964	4.735	4.3357	2.6674	11.0736	10.8399	6.5321	4.8817	4.0507	9.6493	12.5727	12.5077	4.7644	9.8764	5.4317	4.1767	14.0666	11.8024	9.0136	9.5677	6.6703	3.4839	6.1379	12.3494	5.2306	5.5414	5.3739	5.3465	12.6763	6.7258	5.1281	12.6894	12.0721		0.425805	7.48943
7.9825	2.996	4.3242	4.6883	4.412	6.7081	4.1453	7.7454	14.5237	5.8858	5.5932	7.0798	17.0267	9.0208	10.0092	9.9145	5.2407	6.19	5.5132	12.8754	11.3071	8.0684	8.3017	3.1167	4.0339	10.1629	7.644	8.1007	4.9298	8.5971	12.7638	11.5882	6.9744	5.7084	8.3545	7.6801		0.43226	7.74926
8.1016	2.7277	4.0703	3.3879	2.6767	3.7319	4.4912	12.4883	16.4234	8.2732	4.3071	4.853	10.9769	15.0187	16.2894	9.6067	4.1447	4.5475	5.6112	16.8677	9.5127	7.1344	7.8506	4.3755	2.6455	13.1544	8.3761	4.308	4.8642	9.5423	10.3863	12.5841	8.4675	7.1283	7.9327	13.7145		0.438709	8.07059
8.2207	3.5258	3.005	5.3778	4.6916	5.1251	3.7453	7.7107	13.931	6.9525	5.6819	5.1941	6.6288	7.7042	11.3529	17.977	6.8255	8.9887	3.7882	15.578	10.1843	10.2746	14.4014	5.4472	2.9057	7.052	7.1158	3.2845	8.7366	5.8932	8.6888	11.5724	7.4629	3.9276	11.3615	12.2556		0.445159	7.83852
8.3399	2.6963	2.211	2.1096	4.4345	4.4713	4.749	4.5176	14.0272	7.1786	3.9061	8.1673	7.2486	11.1687	7.065	12.0913	5.0134	9.4726	3.7281	16.6762	15.1766	8.3372	12.4935	7.5079	4.1172	10.323	10.4456	5.7744	5.7148	8.7641	11.5042	8.7015	6.3409	6.8991	11.375	7.8405		0.451613	7.77851
8.459	3.206	4.1346	2.7267	2.8884	4.9756	5.0502	8.0087	13.8115	6.093	6.9861	4.0793	8.431	7.8531	4.4771	5.3112	5.0466	6.9297	3.0171	17.6287	9.3779	8.3946	10.0487	5.9135	3.4978	9.7074	10.7887	4.4766	4.7784	9.8811	12.6645	8.6709	3.8449	6.0625	6.7626	10.0997		0.458063	7.01784
8.5782	3.6569	3.5864	3.1761	6.0262	5.6167	3.7423	3.4643	7.8404	3.3465	9.3992	4.56	6.3678	8.3353	7.4743	5.3919	8.9997	5.1153	4.5383	11.5781	10.784	7.7089	10.4125	4.5789	5.1192	2.9897	9.312	3.7803	2.2904	7.2984	11.2942	8.8191	5.3051	5.2925	7.2092	11.6172		0.464518	6.45792
8.6973	4.4254	3.8921	6.1964	4.8163	4.2287	5.8543	7.475	8.673	7.4267	4.651	5.4941	5.5231	7.2954	8.061	6.1961	7.9975	7.0601	5.9462	8.5558	8.7378	6.1168	9.7147	6.6298	3.5644	6.8489	11.492	4.8618	7.2668	7.3067	11.0764	4.4899	6.0453	4.2668	9.1256	11.7173		0.470967	6.82941
8.8165	3.0295	2.9541	3.3268	4.0545	5.7041	4.0282	9.0474	8.8539	6.4187	8.2325	10.8485	8.1581	9.8556	8.1786	10.4541	5.886	4.6825	4.0996	13.1141	11.9481	4.6345	12.125	7.007	3.0744	10.0994	8.0249	4.8718	5.6169	5.8598	7.2142	7.9752	10.0977	6.5826	12.63	13.7266		0.477422	7.49757
8.9356	2.7548	4.2392	2.3577	3.1134	4.1366	4.0783	3.3014	9.5368	4.3536	4.6167	7.0595	6.808	9.4525	10.3995	8.8437	9.2816	5.7904	3.9814	6.4027	9.9928	5.6012	8.0961	4.7714	2.9154	8.6283	9.9169	5.209	5.8301	7.3362	9.3144	4.3854	5.276	2.1696	7.2346	11.6234		0.483871	6.25167
9.0547	2.6925	2.501	2.6293	2.7701	4.5982	4.2509	3.0447	6.3698	4.9525	6.2004	6.7166	8.9226	6.0971	6.6188	6.2373	12.9576	5.2973	7.1075	7.8916	10.4614	6.593	10.4013	3.0722	3.4476	9.4095	12.7061	3.7199	5.0211	7.5229	13.8844	7.6411	9.0933	5.2823	9.5561	10.6535		0.490321	6.75204
9.1739	2.7079	3.8673	2.9209	3.6974	2.2513	3.2376	5.889	4.1969	5.1402	5.049	5.6319	5.4387	9.4685	4.7024	11.4426	16.3442	8.1098	3.1868	6.814	9.4219	7.484	8.4042	6.0151	4.756	8.8454	6.4342	4.8535	2.3644	6.3599	10.6425	12.2981	4.5695	3.716	5.7496	9.176		0.496775	6.31962
9.293	4.5744	3.2313	3.3464	3.4882	3.2714	4.8059	6.5816	6.4077	3.4681	4.8976	6.2201	4.7843	11.8351	6.4049	7.0751	7.5835	8.1352	3.9427	8.7738	9.3738	8.6035	9.0246	9.2974	8.8669	8.2963	5.6133	4.7079	3.8903	2.8031	11.2978	5.8068	6.4217	4.5387	8.4689	12.8723		0.503225	6.53459
9.4122	2.7321	4.6732	4.6998	5.4163	3.0165	5.4665	5.4285	5.2014	5.9014	6.9023	8.8541	4.0491	10.6124	5.2287	6.2833	9.2462	3.6173	5.524	7.5905	7.839	11.2732	6.7425	6.4293	6.7418	3.2119	5.7931	3.4712	3.7199	5.1451	9.0472	12.126	5.3958	3.6742	3.0663	6.4089		0.509679	6.01511
9.5313	4.468	2.0037	4.1328	4.5399	3.9609	3.9519	3.7106	2.9056	7.2217	4.6809	7.3017	5.5745	6.6334	5.9157	3.9097	4.6609	5.3502	3.4534	4.6803	10.9734	12.137	9.3523	7.5286	4.3339	7.4221	6.5527	5.0827	4.3254	4.5247	7.2185	6.6949	5.7548	3.8942	4.256	7.9908		0.516129	5.63137
9.6504	3.2508	3.2873	3.005	4.8672	3.1805	3.328	6.7153	4.1863	2.1262	6.7226	7.1182	10.0604	5.4665	4.8945	5.8607	6.1202	5.0762	3.9252	4.2433	4.8343	10.0862	10.3306	3.2236	2.2654	6.616	6.5896	3.8832	5.3053	4.1196	9.2099	7.841	6.0825	2.6798	4.4807	7.8414		0.522578	5.39496
9.7696	4.6643	2.0028	4.0005	5.6143	3.0262	2.9018	7.4189	5.3459	3.4827	4.0273	8.8725	3.2388	7.79	4.8997	6.5429	6.7035	6.163	4.9469	6.1694	7.882	11.2187	9.1351	4.698	3.9299	6.901	5.3581	7.4614	3.4296	3.5795	9.9612	10.1859	3.566	3.462	4.905	11.4005		0.529033	5.85387
9.8887	2.0577	3.1653	2.4524	4.4631	3.27	2.6905	6.3236	4.4908	4.905	5.8846	6.5632	3.7991	4.9985	9.1372	5.0872	9.0469	3.7211	4.6345	5.9148	12.8607	9.3536	7.7617	7.7671	3.1686	6.7752	7.4658	3.0847	5.819	3.2196	11.6103	7.3922	4.4225	1.8816	4.5815	7.7786		0.535482	5.64423
10.0079	5.0331	4.041	4.075	4.0047	7.944	2.3226	4.3504	3.1302	5.4884	3.2389	5.9698	5.8791	5.6957	6.1894	7.268	10.3817	3.4728	4.713	4.8344	11.3555	9.7753	8.9313	4.7036	3.7709	8.5163	6.4514	3.8464	3.9624	3.9628	9.2292	8.3765	4.8938	3.3705	3.893	9.4195		0.541937	5.78545
10.127	4.6571	4.8506	4.0968	3.945	4.588	3.0569	5.7672	3.5757	6.7764	3.5025	8.048	8.1924	7.8141	5.7867	5.7552	9.078	2.9836	3.5662	5.5637	7.2262	7.9597	5.343	3.8149	3.0961	6.1745	7.7705	4.5953	3.5531	3.9168	6.9154	6.299	4.2394	5.8243	6.9939	6.9431		0.548387	5.49341
10.2462	3.7896	4.2992	2.6706	3.2273	4.4624	6.5451	5.5384	7.1317	6.2099	4.7457	4.7065	6.819	4.9281	9.0142	4.9391	9.5537	6.3389	4.1381	5.7645	9.8952	6.0774	6.5125	3.3632	5.336	7.238	8.6035	6.1213	3.0366	5.1555	7.9389	5.1016	5.4436	3.7229	3.7647	5.5268		0.554841	5.64742
10.3653	2.1158	2.2648	5.6254	5.1204	2.7786	3.2077	5.0544	4.4849	6.0775	5.7227	5.4564	6.7203	5.0756	6.4212	5.7074	7.8725	5.8037	4.5536	4.831	8.3424	7.9056	4.526	3.1164	3.5821	4.3993	9.7855	2.9663	3.45	3.9624	5.3588	7.7756	3.8291	7.8488	6.1812	9.1401		0.561291	5.34467
10.4844	2.5569	2.1586	3.1942	3.304	2.3056	2.965	2.797	2.6959	3.8169	2.9164	5.2211	2.8098	7.2189	5.233	7.8311	9.1437	9.3745	5.4058	3.9189	9.4798	6.2427	3.9755	2.7862	2.9917	5.0614	6.8957	2.8831	2.5932	4.7917	6.2939	5.7201	5.2702	4.1172	2.6692	9.6674		0.56774	4.75161
10.6036	3.241	3.659	2.4284	2.2953	3.8565	4.3158	2.9112	3.651	6.4916	2.8618	4.8624	4.6626	9.3213	4.3681	5.095	13.0803	3.2835	4.0651	6.1996	9.3656	8.9133	5.3721	4.9339	2.3297	4.8187	6.4925	2.5273	3.1177	6.468	8.9907	5.4487	3.9106	4.7745	5.102	6.9546		0.574195	5.1477
10.7227	3.0951	4.3957	3.456	2.981	3.3997	4.1606	5.6246	4.4607	2.4613	5.0044	6.4707	5.5738	12.8324	5.3331	5.86	7.8052	5.7792	3.5231	4.6264	13.909	7.3204	5.0742	3.4638	4.1257	6.6261	7.7867	4.7349	2.661	3.219	4.552	7.7822	3.1611	4.7116	4.252	7.4982		0.580644	5.36345
10.8419	3.4094	2.9263	2.9383	3.3387	2.0631	3.6895	4.6881	2.9299	2.4758	3.4779	2.0332	9.7961	16.1157	4.7077	6.5553	7.8891	5.8197	3.7628	2.8939	9.7078	5.9954	7.4869	3.1838	2.9244	8.6404	7.5177	3.9615	3.7395	4.9909	4.8158	5.4659	4.0944	4.0873	4.6671	9.6459		0.587099	5.21243
10.961	3.5818	2.7208	2.9499	2.1214	3.5456	4.1664	4.4202	8.1522	4.701	3.2587	4.4133	7.9897	13.2154	6.3834	4.6163	8.154	4.7065	3.0754	3.7417	9.7594	7.4162	7.893	2.8572	2.8642	5.0733	4.0693	5.7602	2.6404	4.8515	6.2886	4.7018	3.0083	2.8292	6.6937	6.9861		0.593548	5.1316
11.0801	3.7833	2.6616	2.6645	1.9426	2.1442	2.2843	3.0834	5.0575	4.3742	2.0934	5.8914	5.4445	7.5278	6.7392	8.7134	6.2386	3.9976	4.0287	5.8329	5.6985	5.2682	6.5424	3.5098	2.9802	6.9463	9.7164	7.3965	6.2073	4.7471	6.3299	3.6516	4.0808	2.7735	3.7854	9.2678		0.599998	4.95442
11.1993	2.2834	3.6319	3.7289	5.6165	3.6136	3.0271	4.37	3.5713	3.9618	3.2029	4.9606	8.3375	5.2236	6.2309	6.2772	5.557	7.2736	3.6676	4.4685	8.48	4.2306	9.1284	5.6393	2.0618	3.6558	5.7964	4.6438	5.3159	5.0268	11.0222	4.3058	4.2721	2.4271	7.5735	3.1061		0.606453	5.0197
11.3184	5.1084	2.6869	4.578	3.0187	2.1644	2.5712	3.9671	3.9552	4.0557	6.0193	5.2916	4.037	6.139	3.2586	6.196	7.8712	2.4814	3.3866	2.5185	9.2268	2.3959	4.64	4.0413	3.3711	6.3265	7.6664	4.7841	3.9418	2.3344	3.5299	6.0743	2.3727	3.6294	4.3109	8.2062		0.612902	4.46161
11.4376	4.3865	2.0804	4.2769	3.959	2.0361	2.7092	4.5298	3.6297	2.7596	4.8791	4.042	9.0676	8.5892	8.8408	5.9693	9.0186	3.6881	3.4672	5.7528	11.3524	7.0237	7.3318	3.0423	3.726	6.0527	4.6407	3.1937	4.0576	5.4266	5.8842	7.5965	3.7441	5.6314	5.0617	8.5373		0.619357	5.31385
11.5567	3.426	3.7452	2.7068	4.6569	3.0555	3.6141	5.2793	5.8153	3.8854	2.1349	2.0267	5.558	10.2353	5.3607	4.7414	7.9908	3.423	2.8905	4.1321	7.9243	3.6927	5.44	4.3402	4.0333	4.1445	5.267	2.4862	4.1034	5.0563	5.7776	3.1609	3.6157	3.0997	7.7453	8.1762		0.625806	4.64975
11.6758	4.6739	4.0351	5.7724	3.4169	2.3093	3.8667	4.5057	2.1265	3.9677	4.2158	3.1909	9.8747	4.3457	5.2355	9.2505	4.8972	3.4068	3.4846	3.3403	6.4084	7.3136	6.8273	3.6841	4.5841	6.9631	5.3044	3.491	5.6945	4.5308	5.3772	5.1684	5.0649	2.0886	5.0604	10.0499		0.632256	4.95791
11.795	2.5723	3.5749	2.1871	5.6472	5.8436	3.8162	3.8936	2.855	3.462	3.203	5.2857	4.8771	5.1963	4.3072	3.3292	4.7593	5.8695	3.4226	3.5384	11.3973	4.7709	4.3298	4.0863	2.9907	5.5136	9.9988	4.6703	6.6273	6.8345	5.0892	5.4875	2.8817	3.8829	4.9943	9.306		0.63871	4.87147
11.9141	2.2932	1.8683	2.6323	3.054	5.0713	4.6496	4.7584	2.5141	2.6575	3.4864	4.3546	6.4747	7.8102	6.595	5.5821	7.1642	3.437	2.1275	4.7167	7.402	4.7159	9.5353	2.7625	4.5663	5.5703	9.6087	3.8574	2.5165	4.6085	3.6905	5.2826	3.9325	1.8727	4.4669	4.8896		0.64516	4.58644
12.0333	1.9979	4.0189	2.1892	2.4365	4.9621	4.1321	3.1518	2.7698	2.6169	5.6823	3.6925	5.8353	5.517	6.6266	5.1723	4.9943	6.0827	3.2307	5.9845	9.0479	8.7342	6.2375	4.0887	3.2787	4.8476	4.0064	4.8623	4.7761	2.7507	4.7422	5.0807	3.2471	2.2686	4.5671	5.3867		0.651615	4.54331
12.1524	4.0723	2.8244	3.4384	2.156	3.3489	3.2945	3.5431	3.3918	3.7054	6.1104	3.9502	8.736	9.5671	6.5424	4.5254	4.3238	5.6017	2.0526	4.2849	12.1977	8.7267	9.4782	3.8576	4.0218	8.2869	4.1333	5.5108	4.353	3.6902	5.5946	4.5556	6.2673	4.052	4.7224	6.4757		0.658064	5.18266
12.2716	2.5978	3.1306	2.3161	5.7328	2.7977	2.9415	3.1351	3.2449	2.4789	3.0628	3.843	3.8012	4.2046	6.0036	5.1204	6.0126	5.6567	4.4212	2.2752	8.7818	3.7195	5.9478	2.9745	2.6537	5.166	5.527	5.0665	3.8051	6.4492	5.2152	4.7979	2.6314	4.1513	5.0727	4.3869		0.664519	4.26066
12.3907	2.7402	2.2913	2.225	3.3146	4.3035	3.4456	4.9299	4.1087	3.0008	4.6492	4.0259	8.5436	8.5817	8.8461	8.6432	4.9225	3.1	3.6281	3.6386	8.8267	12.3066	6.4716	4.7268	3.6496	3.1226	6.9504	4.4465	3.7863	3.6524	4.5292	2.9093	4.1093	3.0627	5.7062	7.9409		0.670968	5.00387
12.5098	2.8828	2.2196	3.6335	2.4658	3.9673	2.4139	3.5236	4.4232	3.7863	3.4312	5.5509	2.5257	6.064	7.0162	4.532	4.5437	6.5504	3.5688	3.4927	7.0434	10.655	4.5629	4.5113	4.6067	8.2912	7.6283	4.5301	4.3938	6.5835	5.1322	3.7299	3.16	5.3239	5.1154	8.7344		0.677417	4.8741
12.629	2.9644	3.3204	2.6804	1.9058	3.6695	2.124	3.5287	4.1331	2.0383	2.2275	3.3536	4.4588	5.7869	3.6173	4.8431	7.2874	4.5223	3.4013	3.8379	6.1252	6.9051	9.2741	3.4352	3.6334	4.9571	4.4382	3.1471	4.1099	4.468	4.5102	2.9352	3.5287	2.0705	7.8331	8.793		0.683872	4.28185
12.7481	2.0747	1.9986	3.5095	2.0876	3.2636	3.9298	4.4942	3.9648	2.7902	5.4974	4.0875	3.7403	6.547	6.6114	6.094	4.6194	3.0374	2.8566	3.8693	7.7417	7.0899	8.3421	4.7023	3.0031	7.0672	2.6714	4.834	3.5223	6.2167	6.5134	4.2047	3.0213	4.1945	7.0309	8.1945		0.690322	4.66924
12.8673	1.9495	2.8076	2.2622	5.4552	3.405	3.1715	3.3893	4.9292	3.791	2.2455	2.2894	4.8949	6.3568	7.214	6.5151	4.1775	4.8305	2.9762	4.2548	5.6904	7.2741	5.8501	3.1514	3.5642	7.3947	3.2147	3.0858	3.5192	4.5387	3.1858	3.2245	2.2806	2.6754	3.3893	7.4258		0.696776	4.18228
12.9864	1.9872	3.0013	2.3773	2.6821	2.3486	4.7963	2.8178	3.4914	3.9627	1.9477	3.6398	6.358	6.3668	8.2876	3.4609	2.9203	3.2178	3.0742	4.2763	8.0725	4.3525	7.0837	5.73	3.1163	8.5735	3.8277	1.967	5.6284	5.6589	5.4343	3.7772	5.3208	3.371	3.9994	6.0405		0.703226	4.37051
13.1055	2.0667	2.5725	2.7238	2.0523	2.5817	3.5221	5.6951	4.629	3.3237	2.6491	5.4271	2.9777	4.6933	7.4759	6.4237	7.2966	4.4628	2.5209	4.2778	6.241	6.2263	7.3312	2.9643	4.3541	5.9865	4.8908	3.324	3.977	3.7765	3.2073	7.0051	3.0856	3.1994	7.3917	7.7861		0.709675	4.51768
13.2247	2.2333	2.0198	5.535	2.0559	2.849	3.4392	4.6949	3.0225	4.4221	3.6463	2.1476	3.272	5.6117	4.1744	7.0264	4.9025	5.0346	2.4203	2.3649	4.9044	7.4873	9.7095	3.4441	3.4577	6.3375	5.4534	5.3359	3.8361	3.8871	4.546	4.6147	3.9486	4.4643	6.4638	8.1197		0.71613	4.48236
13.3438	6.1226	1.8837	4.555	2.2988	2.8106	4.8244	2.4966	5.4492	3.2408	2.252	1.9713	3.6522	4.4193	7.2521	4.7445	4.6667	3.1531	3.5055	2.9393	7.5093	3.318	5.9387	3.2275	2.5657	6.5028	5.7993	2.7599	4.3332	3.6623	5.2257	4.2093	2.8289	2.2825	4.9092	5.3913		0.722579	4.07718
13.463	2.3955	3.3851	2.436	2.7488	2.7793	3.4194	5.5305	5.133	4.4915	3.791	2.65	3.3709	6.2677	9.6204	2.7708	6.2826	5.8944	3.3838	3.7468	4.6891	5.9697	8.4814	4.1055	3.9978	5.6588	6.7591	4.1091	3.6535	2.528	7.7898	5.6382	5.8048	3.1954	5.5367	11.1777		0.729034	4.83406
13.5821	2.0937	3.7799	2.0597	2.5493	4.8464	4.7657	4.1881	3.0868	3.7225	2.8236	3.1573	7.079	6.111	8.2116	3.7957	9.098	5.8418	3.0167	3.725	5.639	5.7863	8.2652	5.161	3.7574	4.3378	4.4384	2.8642	3.1814	3.1074	7.7319	2.6518	3.1063	3.523	3.5893	8.1671		0.735483	4.55027
13.7012	4.1731	3.9909	2.4504	3.6892	2.8702	3.4644	2.7012	2.8601	2.8434	4.1919	5.131	5.6456	6.5253	8.152	6.7211	10.3557	5.4353	2.4032	4.6931	6.1538	6.695	16.6205	2.2826	3.0625	4.7563	6.5955	4.0664	2.4032	3.285	4.2341	2.1069	2.4816	3.7065	5.4166	6.4556		0.741933	4.81769
13.8204	3.103	2.2826	2.8982	4.0272	1.9622	2.6781	2.1569	3.5811	2.3726	2.5617	2.1958	3.0315	5.5942	9.7266	3.476	6.3165	4.1848	2.7851	4.0968	4.5724	4.1892	11.9702	2.5746	2.7003	6.3774	3.3688	2.0351	2.8159	4.4122	6.5358	3.7005	5.0264	2.775	6.7057	7.2601		0.748388	4.17287
13.9395	3.8535	3.2786	2.281	2.7513	2.4993	3.4258	3.7681	4.1585	2.7537	3.2798	2.183	4.4863	4.9257	6.6326	3.3522	8.0954	4.1947	2.351	2.842	3.6621	4.6277	11.9641	3.9188	2.6652	6.3137	4.321	4.033	4.8715	4.32	5.3322	4.9855	4.3266	3.0894	7.6341	6.5584		0.754837	4.39245
14.0587	2.9033	3.0583	2.5548	2.6637	3.9975	2.731	6.8708	5.6285	2.757	3.1543	3.1344	3.0248	6.5879	7.6175	6.0769	5.6627	4.8637	2.5337	4.7155	3.0434	6.4028	8.985	2.9221	2.5255	5.198	6.8136	4.1011	2.1133	5.4858	5.1276	2.086	2.1589	2.2011	4.0047	7.5485		0.761292	4.32153
14.1778	2.4631	2.4696	4.9896	2.9432	2.0849	5.0098	2.8777	2.6117	4.1614	2.0677	2.3181	3.2614	4.398	5.7077	7.199	5.0547	6.5081	2.9881	3.7524	3.4145	7.2835	5.132	2.6097	4.4148	6.2765	7.8054	3.6545	4.6865	7.8286	5.0314	2.593	2.1844	3.7536	3.65	9.4815		0.767741	4.36189
14.297	4.652	2.887	3.4165	2.3239	3.4762	2.4111	3.8402	1.9296	3.8416	2.6369	2.2145	5.8432	7.4375	3.2494	8.4876	5.1324	3.3028	2.2934	2.5818	2.958	5.6529	5.7852	3.0292	2.1039	5.5851	5.2491	3.7198	3.7107	4.8756	4.5987	3.5944	3.2865	3.151	5.0178	11.4151		0.774196	4.16259
14.4161	4.7943	2.212	3.2516	2.5242	4.5852	1.952	2.8223	1.9902	3.352	3.7961	3.9632	4.6336	8.1123	3.784	4.6907	10.8038	4.4585	4.7747	2.901	2.5154	8.3501	10.806	4.9793	2.9246	3.497	5.8873	4.1953	3.7296	4.4622	8.3405	4.3169	2.524	3.7316	6.2647	8.6553		0.780645	4.70233
14.5352	4.2423	2.7281	2.1138	2.1189	2.2879	3.4773	3.284	2.694	4.3785	2.5666	3.0137	3.358	6.8201	6.4398	5.1604	6.1399	4.8949	5.5886	3.1625	3.5398	5.9718	3.6554	6.7634	2.987	7.3968	8.5954	7.3319	3.4535	5.4407	4.9428	5.2769	4.3635	3.4881	8.0402	9.5311		0.787095	4.72136
14.6544	2.2786	2.7083	4.247	2.815	1.8499	4.5234	3.2972	3.271	1.8156	2.2049	2.5982	2.8158	5.6522	4.4506	5.4356	5.7133	3.8501	3.4117	2.6359	5.5156	9.0292	6.6201	4.9319	3.7333	10.291	4.7078	4.9012	3.3366	3.598	5.2486	2.1962	5.2393	3.438	5.9293	7.315		0.79355	4.33158
14.7735	2.9989	3.4415	2.3141	5.2619	2.5208	3.4279	3.0524	3.3256	2.458	3.6598	4.2533	3.6692	6.8471	3.6747	7.2641	8.4305	5.0968	4.5194	3.6281	5.3255	10.1388	6.7976	3.2418	3.9525	5.675	3.3125	4.6855	2.9254	5.7355	4.5113	6.2056	3.8141	3.306	4.0113	4.3306		0.799999	4.50895
14.8927	2.7823	2.1782	3.7597	2.6001	2.3586	2.4008	1.9453	4.2744	2.2107	2.967	3.2778	6.8843	6.2338	5.4581	4.0382	8.6385	6.0641	3.7104	4.0272	3.4139	8.0853	7.0406	4.1305	2.9659	8.6151	5.6629	2.5579	5.3286	7.554	6.9631	4.9861	2.9413	2.9815	6.4246	8.0335		0.806454	4.67127
15.0118	5.3377	2.4885	3.2535	2.8896	2.6859	4.033	3.0533	4.8731	2.4011	3.1369	2.716	2.3501	5.6021	4.9261	10.5242	5.0696	7.57	2.7332	2.2239	5.2444	5.8138	9.4931	3.4836	4.2999	13.2377	4.869	6.8715	4.1656	2.6551	5.8922	4.943	4.0889	4.8626	7.4524	7.6287		0.812903	4.93912
15.1309	2.2878	2.8593	2.9856	3.9223	2.2587	4.4711	5.0061	4.0895	3.1299	2.3098	4.0871	5.5135	4.0475	6.5108	5.2831	7.907	5.1463	2.8477	1.9322	4.8736	4.7288	10.5249	3.0012	4.8584	9.2147	8.0069	3.0203	3.5321	3.1745	4.157	3.6677	2.4708	4.6282	5.953	7.3445		0.819352	4.56434
15.2501	2.3729	2.2168	3.6942	3.2568	2.3686	3.0724	5.3967	5.1141	2.0007	2.0523	2.6475	2.868	6.1745	6.9524	4.4293	8.5888	8.5644	3.5723	2.5861	7.4937	4.4926	9.5179	4.1982	3.552	5.5411	9.3957	7.6489	5.0239	5.6822	4.452	2.0846	2.8437	2.6311	5.0108	6.1908		0.825807	4.6768
15.3692	2.633	3.6166	3.2828	2.6726	2.1641	2.5021	2.1014	3.2373	3.2824	2.5119	3.2036	3.5123	8.7546	7.2213	4.5931	9.778	10.8304	5.2525	5.3802	8.7107	5.084	7.3543	4.957	4.1572	8.2613	6.0132	6.5543	4.632	3.6341	2.5915	4.1712	3.739	2.1092	4.5746	5.7531		0.832257	4.82363
15.4884	2.7004	3.4936	3.2569	1.8371	3.7499	2.4581	5.5124	3.0983	4.5347	3.7648	1.8009	3.6615	3.7235	6.6967	5.5796	5.5441	10.0511	2.4463	2.4126	7.8781	5.9664	8.6922	4.9603	5.5793	9.1656	6.2902	5.8977	3.5665	4.7933	3.9155	5.3085	3.2475	4.6202	5.1382	6.9799		0.838711	4.8092
15.6075	2.939	3.0517	2.0215	2.05	2.1313	2.0223	3.4734	4.4933	2.1004	2.8154	3.5109	6.0269	6.4423	6.0787	3.7207	4.4021	8.9162	3.2196	4.8796	7.0568	6.1068	9.976	5.9756	4.6364	9.7378	5.8401	2.9818	3.3928	5.8633	3.474	4.4458	2.2216	3.2966	2.8566	4.8386		0.845161	4.4856
15.7266	3.6999	3.269	3.2087	2.1904	3.8796	3.3663	2.9729	3.9961	3.3449	3.52	4.124	3.887	7.2341	5.7779	7.1036	5.9531	10.4154	3.8812	3.125	6.2212	8.9826	6.9375	6.0927	4.308	6.7641	6.5827	8.3073	6.2598	5.3589	3.8664	5.1896	2.6459	2.2216	4.1391	7.6322		0.85161	5.04168
15.8458	2.9434	2.0287	2.7286	2.7517	5.0779	3.4135	2.9285	3.4928	2.489	5.9054	2.782	5.8559	7.0311	8.3138	5.1317	7.4669	12.9783	2.1898	2.513	8.5336	5.1272	7.0912	4.8964	2.3747	4.9801	3.6221	4.1039	4.2904	4.6885	3.9288	4.158	3.8639	2.1159	4.5981	7.6521		0.858065	4.68705
15.9649	4.4766	3.5984	2.4611	1.931	3.2783	2.9823	2.8705	2.828	4.0392	2.8783	4.3997	3.694	11.1882	6.1165	4.2957	3.0374	22.9555	2.9455	4.5752	8.1076	6.3524	5.6649	4.8413	6.2084	4.1889	5.0978	6.9621	7.0906	3.067	4.9259	4.4798	2.9829	3.5747	5.4226	9.3383		0.864514	5.22447
16.0841	5.045	2.7714	2.554	2.8988	4.1142	2.0392	3.3109	2.0873	3.0043	2.061	2.0778	4.0867	7.8722	4.427	5.5422	4.8544	25.8277	4.7448	4.0916	9.3838	8.1049	7.0643	4.9446	3.3159	4.67	8.9051	9.73	4.3186	7.0585	5.7488	3.7764	4.2709	4.623	8.9101	8.5009		0.870969	5.62104
16.2032	2.6861	3.8309	2.7441	3.6499	3.282	2.7124	2.3151	2.9193	3.8596	2.8186	3.1204	6.7296	8.34	6.9212	6.1552	6.1613	27.1623	2.6208	5.3481	15.2135	7.1412	7.0047	10.9857	4.042	4.6765	5.8057	5.9462	3.5032	2.8388	11.3259	6.1748	3.0361	2.0214	3.5773	6.1459		0.877419	5.79474
16.3224	2.1139	1.9261	2.0109	2.0267	3.4727	2.6437	2.6825	4.0642	2.61	2.8168	2.206	6.4566	8.0492	4.2554	4.7371	5.8664	16.6634	4.1397	4.4595	6.6668	8.3148	8.1147	8.4561	3.5664	6.3676	4.2828	5.5652	4.0588	3.5077	3.6115	6.9164	2.2309	3.8622	6.2494	4.4124		0.883873	4.83956
16.4415	4.247	2.5062	2.5021	2.1685	4.252	2.1719	2.8942	3.2085	2.5813	3.3923	2.0893	8.0526	3.7806	3.8474	5.339	3.6475	17.6678	5.5143	4.4012	5.0692	6.6798	6.8478	9.6476	4.562	3.3325	4.8182	6.5005	5.2649	5.6966	5.0917	7.5539	5.569	5.7208	3.8986	6.557		0.890323	5.05925
16.5606	2.1347	3.0499	3.5057	3.0887	4.5655	2.7455	3.1598	3.2094	3.3901	1.9785	3.3061	8.5642	6.1994	4.1486	4.924	7.3986	15.1955	6.9224	3.3601	7.1598	7.6647	6.3019	14.0631	5.7583	3.772	2.9783	4.6006	2.4831	5.4356	4.5078	5.887	4.9055	3.9682	6.9133	5.5183		0.896772	5.22183
16.6798	4.8038	3.0366	3.2532	3.9409	3.8734	2.1238	3.3994	2.6958	2.2112	2.8273	2.5869	4.6915	7.3983	6.9429	6.5453	11.1928	9.745	6.1035	5.0401	6.8699	6.7123	8.7231	15.4249	2.7849	4.4268	4.2178	5.3302	4.2234	3.1815	4.5577	3.9343	6.7233	3.1253	4.1831	3.974		0.903227	5.16583
16.7989	4.9977	2.3354	4.2222	4.5761	2.1752	2.095	2.7905	3.7092	3.6959	3.3841	2.8291	3.6834	6.2002	5.9248	7.0318	7.268	11.1081	4.74	4.2429	5.9103	6.7701	6.3886	11.222	4.7774	4.886	7.7684	8.0634	5.1369	2.583	5.2068	5.2105	2.7601	5.3251	5.9451	3.5508		0.909676	5.1004
16.9181	4.6408	3.0051	4.9161	2.8027	3.3438	4.4036	4.6063	2.0801	4.0784	2.1834	3.9088	3.2905	6.6954	6.9183	6.8414	5.0762	12.6249	5.6648	2.0551	5.732	9.2291	7.756	10.6694	5.6155	7.7259	4.7555	7.1795	5.0345	6.2559	7.2345	4.1935	3.4958	3.5498	3.9593	5.6388		0.916131	5.34745
17.0372	2.7562	3.8079	3.6115	2.0625	2.5943	3.1785	3.4837	2.2736	4.0158	1.8537	3.7237	3.8533	9.1014	8.7493	4.7795	5.0741	6.2887	5.6918	4.039	7.8762	5.9703	6.0344	10.4955	4.8418	4.644	4.9805	5.1976	8.5845	7.329	7.4316	3.7327	5.7664	3.025	6.8078	7.7772		0.92258	5.1838
17.1563	2.1073	2.2212	2.2553	3.3878	3.1206	2.2129	3.2919	2.7119	3.658	3.1609	3.0229	7.1369	6.3406	6.5792	6.53	7.3435	8.7927	7.3278	4.0824	11.2342	6.0372	7.4474	8.7535	4.1329	5.1997	4.2489	5.1668	3.2254	4.5228	3.6484	3.3636	3.0715	4.4423	8.1741	8.6169		0.92903	5.04484
17.2755	3.2142	4.0596	2.0185	3.7115	3.0441	2.3486	3.8259	2.4411	2.1107	3.1502	5.3517	2.6105	7.5892	8.2029	6.9283	4.0158	9.8867	12.8286	3.2257	8.3166	5.6954	3.7827	9.0307	13.5784	4.9927	8.0622	4.6208	3.1902	4.3887	6.0704	3.2293	4.6291	3.0466	6.1386	8.3417		0.935485	5.36223
17.3946	3.5564	2.0156	4.4359	2.5321	2.5612	2.3927	2.3691	3.0709	3.0697	2.4943	4.7685	4.893	4.7485	5.7431	7.2077	4.3938	11.0064	8.0645	3.6432	12.156	4.8651	8.5388	8.3882	8.5154	3.5893	6.7967	7.183	3.501	3.0499	3.9775	3.3478	3.7114	3.8729	6.4415	9.1497		0.941934	5.14431
17.5138	3.3863	2.2989	2.8124	3.5387	2.056	3.5111	3.5265	2.7079	3.2212	3.7515	4.3629	3.9926	5.5255	5.5783	4.9178	5.1303	11.1619	7.7366	4.3671	10.3075	5.3489	8.1829	6.4867	8.2763	4.8677	8.485	5.7889	5.7852	5.2857	5.1326	4.7277	4.1301	4.7592	7.2291	6.3404		0.948389	5.27764
17.6329	2.1352	2.7437	1.8971	3.2793	3.5239	2.4787	3.0267	3.3621	1.9438	4.018	5.4129	4.4255	4.6342	3.6995	2.2203	3.4595	7.1345	11.0216	3.8114	9.1822	7.5444	13.0794	7.2895	8.508	6.1927	4.8163	3.9318	4.8879	4.7492	3.0009	6.6173	3.0874	3.2613	7.8593	12.929		0.954838	5.17613
17.7521	3.7605	3.8361	3.3606	3.0027	2.1536	3.1224	2.8116	2.7345	1.9039	2.4067	3.2154	3.26	6.9942	4.141	3.981	5.7291	7.664	15.2259	7.6827	14.0498	5.1978	6.5915	5.3144	5.1947	8.6835	3.6058	8.4319	5.0018	3.913	3.4221	3.7092	3.6365	5.465	8.7257	5.4376		0.961293	5.23903
17.8712	3.0617	3.5856	2.3224	2.0938	4.4971	2.0939	2.9791	2.511	3.1393	3.2248	2.1044	9.5662	5.9759	2.3085	6.9136	2.8041	11.409	17.6674	6.7934	8.1865	6.5071	4.7073	6.1928	7.9701	6.4576	5.4131	3.7798	5.6709	6.2901	3.7325	4.0941	3.0883	4.7153	5.5425	6.0987		0.967742	5.2428
17.9903	3.5043	3.2467	3.7904	3.9928	2.6016	4.5533	2.5782	2.8012	4.4447	2.7812	4.473	2.9739	5.6106	6.1054	3.0664	3.8989	5.3091	18.3652	6.6552	10.0931	5.5548	4.8024	5.5864	10.2812	6.7002	3.1557	4.9415	4.627	6.7687	4.8561	5.709	4.3399	3.6369	4.9462	7.8419		0.974192	5.27409
18.1095	2.6203	2.0046	2.2332	3.1158	2.836	2.5456	3.6982	2.6349	5.503	4.5154	2.0064	3.9435	5.9742	7.6873	3.8645	3.9667	8.1983	12.0699	5.0253	13.3755	6.4826	6.0371	9.2559	9.0865	13.5735	5.9148	8.6078	3.9452	4.8212	4.0943	7.793	5.582	3.4042	8.3896	6.3099		0.980646	5.74618
18.2286	3.0244	2.626	3.6805	2.4134	2.1591	3.7819	2.8247	2.0294	2.0566	3.0092	3.7664	3.0179	5.3276	4.8983	4.3117	2.0378	7.4404	7.9874	4.8255	12.5344	6.9737	4.5395	5.5903	6.1432	9.0165	3.8559	4.4342	6.5693	2.8152	4.3332	3.9935	2.4021	4.8323	5.1198	5.0251		0.987096	4.55418
18.3478	3.0874	3.051	2.9079	2.9253	2.2179	2.391	1.942	2.4746	3.1969	3.7278	3.0306	5.4235	5.344	5.6946	2.2945	2.402	5.7993	12.7492	5.5108	13.3654	2.6964	6.1526	5.0179	8.6368	9.444	7.5732	4.3089	6.4491	4.4856	7.7469	2.2621	3.0746	3.2061	3.3762	6.4904		0.993551	4.87019
18.4669	1.9899	3.4228	2.07	2.8205	3.1086	1.7308	2.5947	4.3471	2.1639	2.0659	4.2457	2.5463	5.9081	3.805	4.4632	4.2626	6.1642	6.8008	6.5518	12.9834	6.4164	3.6109	5.5304	5.9015	7.0461	6.0375	4.2769	3.9849	4.5435	5.1364	3.0811	5.9534	5.6445	3.7132	6.3778		1	4.60857

## Sheet: Image5
X0	Y0	Y1	Y2	Y3	Y4	Y5	Y6	Y7	Y8	Y9	Y10	Y11	Y12	Y13	Y14	Y15	Y16	Y17	Y18	Y19	Y20	Y21	Y22	Y23	Y24	Y25	Y26	Y27	Y28	Y29	Y30	Y31	Y32	Y33	Y34	Y35		Ap-Basal	Avg intensity
0	13.5	13.9444	9.7778	14.8889	14.4444	8.5556	15.5	23.2778	9.3333	16.8889	8.9444	21.6111	19.6667	13.5556	22.1667	19.5	16.3333	14.2778	10.5	13.1111	13.8333	14.5	14.5	8.7778	16.6111	18	17.4444	15.4444	7.2222	10.6667	8.1667	8.7222	13.3333	24.9444	21.4444	19.5556		0	14.804
0.1191	15.2222	12.6111	19.7222	17.2222	10.6667	14.8333	15.6111	19.1111	18.8333	15.8333	13.1667	15.7222	19.6667	17.0556	33.8333	17.5556	17.1667	11.0556	13.0556	10.1111	19.7778	14.2778	14.0556	10.6667	22.5556	10.6667	11.5556	12.0556	7.4444	4.1667	5.2778	20.6667	15.9444	20.3333	18.0556	25.2778		0.00523378	15.5787
0.2383	14.4444	12.1111	19.2778	21.8333	10.5	9.3889	16.7222	18.7778	17.4444	15.7222	9.2222	25.8333	26.3333	14.3889	33.3333	16.8889	12.1667	15.1111	10.1667	12.5556	18.3889	14.5556	6.9444	12.6111	19.7222	14.5	17.1667	8.2778	6.9444	5.9444	11.9444	11.5	23.3333	11.3333	20.3889	31		0.010472	15.7438
0.3574	20	17.7778	16.0556	15.0556	12.3333	10.1667	14.1667	15.7778	18.2778	28	11.3889	24.0556	28.0556	19.6667	34.6111	11.5	19.1111	18.7778	16.1667	17.2222	18.4444	18.7778	9.3889	17.3333	28.0556	13.3333	15.7778	7.9444	11.1667	10.6111	7.6667	15.4444	17.1667	30	22	34.0556		0.0157057	17.9259
0.4766	16.1667	17.5	18.7778	11.1111	10	14.8333	10.6111	16.6111	25.2222	27.8889	6.2222	31.5	27.2222	21.2222	47	17.7222	23.2778	27.5556	7.5556	17.8889	30.1667	20.6667	14.2222	14.0556	25.6667	16.0556	13.4444	13.9444	3.5556	7.3889	11.0556	12	19.3889	28.0556	26.4444	27.1667		0.0209439	18.8657
0.5957	19.3333	11.5	18.3889	17.8333	7.6667	19.6111	16.3333	15.6111	18.8889	22.0556	13.6667	29.6667	33.2778	21.5556	34.4444	13.2222	20.7222	18.4444	12.8889	21.1111	31.7222	20.7778	12	13.3333	35.4444	13.7222	18.5556	10.8889	6.6111	7.6111	10.5	14.8333	24	32.5556	32	31.7222		0.0261777	19.5139
0.7148	22.1667	20.2778	22.4444	19.7778	17.5556	23.8889	17.7778	15.6667	28.7778	28.5556	17.3333	37.7778	31.4444	27.7778	36.1667	14.6667	14.8333	18.3333	8.4444	21.2222	34.8889	20.7778	8.8333	16	43.7222	20.7222	15.2778	8.8333	11.1667	7.7222	7.8333	17.8889	17.8889	38.5556	27.7778	38.2222		0.0314115	21.6944
0.834	25	18.7222	27.3889	13.5556	12.2778	11.2222	16.6111	20.0556	27	24.0556	13.4444	44.7222	32.3333	24.2222	26.5	18	22.6111	15.6667	19.5556	32.3333	40.9444	24.5556	14.8333	14.6667	34.5556	17.4444	17.5556	7.6111	11.2778	8.5556	7.9444	22.3333	24.8333	36.8333	32.1667	40.7222		0.0366497	22.2809
0.9531	31.1111	23.0556	21.7222	17.6667	18	12.1111	19.7778	16.2222	18.4444	25.0556	10.8333	30.2222	17.5	25.6667	24.6667	29.6111	20.1111	18.2222	27	37.6111	44.6667	35.4444	29.8333	23.4444	45.3333	20.7778	21.2778	13.9444	11.8333	11.2222	8.0556	19.1667	18	39.7778	36.8889	27.5		0.0418835	23.6605
1.0723	31.1111	21	19.6111	18.6111	13.6111	21.6111	11.2778	14.1111	16.2222	24.5	18.2222	41.0556	27.5556	31.5	23.5	34.4444	31.2778	20	18.7778	42.5556	45.6111	41.3889	21.1111	19.0556	41.2778	26.4444	15.9444	8.9444	8.8889	6.2778	14.9444	19.2778	25.0556	38.3889	36.3889	42.2778		0.0471216	24.7731
1.1914	28.1111	14.9444	26.1667	14.8333	17.9444	27.7222	14.5	15.6667	23	27.7222	23.6667	45.8889	21.6111	34.5	36.5556	25.1667	26.4444	19.5556	18.2222	40.2778	46	37.7778	21.8889	20.6111	43.8333	29.4444	7.7222	13.0556	8.5	9.6111	10.2222	25.0556	25.1667	39.6667	44.4444	39.6667		0.0523554	25.6991
1.3106	20.8889	15.7222	17	17.5556	14.3333	38.5	19.6667	13.9444	23.3889	25.6111	15.4444	42.6667	33.6667	29.8333	41.5	32.7778	29.5556	15.7222	15	37.5	43.5	45.8889	16.8333	19.1667	49	34.0556	14.8333	4.6667	11.5556	6.3889	8.3333	18.5	33.3333	30.8889	41.9444	43.1667		0.0575936	25.6204
1.4297	21.1667	30.6667	20.6667	17.4444	15.9444	33.6111	13.0556	19.2222	23.3333	21.7222	22.6111	34.8889	30.8333	24.8889	37.7778	44.2222	22.3889	20.5556	20.3889	32.7778	46.5	42.8889	25.3333	23.5556	51.3889	38.6111	21.3889	8.0556	9.5	8.8889	8.6111	33.9444	29.2222	27.7778	47.1667	48.8333		0.0628274	27.2176
1.5488	26.5	21.0556	31.3333	17.6111	23.3889	40.1667	18.7222	13.3333	23.7222	21.3889	26.3889	44.5556	29.2778	32	33.5556	26.8889	29.8333	17.5	29.1667	41.7222	45.4444	52.5556	20.0556	23.5	43.8889	50.1111	19.8333	9.5	2.7778	12.3333	5.9444	28.1667	34.4444	30.5556	47.5	50.7778		0.0680612	28.4861
1.668	28	18.9444	26.0556	11.5556	25.9444	30.2778	24.1667	22.1667	36.6667	18.7778	25.2778	34.3889	43.6667	21.3333	46.8889	35.1667	33.8333	23.7778	30.2222	40.6667	42.3889	36.1667	15.4444	27.2222	38.5	44	25.7222	10.5	3.2778	13.6111	9.5556	27.1667	43.2778	17.8889	46.2778	51.8333		0.0732993	28.6281
1.7871	29.7778	27	26.3889	15.5556	30.6111	31.5	18	15.5556	28.3333	30.1111	31	41.4444	39.1667	28	37.7222	28.6111	33.1111	28.6667	30.7222	46.6111	43.0556	38.3333	21.3889	28.3889	44.2778	45.7222	22.8333	7.1667	11.6667	9.0556	15.1111	23.6111	33.7222	23.7222	45	63.4444		0.0785331	29.8441
1.9063	27.6111	23.1111	34.9444	20.8333	23.1111	26.5	26.6111	17.0556	24.7222	31.3333	21.5	43.3333	43.5	34	46.3333	45.4444	29.6111	17.3889	26.2778	56.2222	47.7222	44.4444	13.5556	30.4444	44.6667	47.2222	24.5	5.9444	12.7778	11	14.6667	23.1111	35.3889	16.3333	41.2778	60.0556		0.0837713	30.3488
2.0254	33.5	21.7778	37.2222	22.5556	23.3889	26.7222	35.9444	28.1111	34.6667	40.9444	34.2222	39.2778	34.2778	19.9444	40.0556	51.6667	35.9444	28.6667	32.2778	41.7222	47.8889	42.7222	21.8333	23.4444	47.3889	46.1111	26.4444	8.0556	7.5556	15	18.6667	20.1667	43.8889	21.8889	40.7222	52.9444		0.0890051	31.8781
2.1445	35.5556	16.5556	36.1111	15.9444	27.5556	36.1667	17.6111	28.6111	41	29.2778	31.7778	43.3889	40.0556	27.8333	44.3333	35.6667	41.3889	24.0556	27.0556	46.7222	42.2778	48.2222	16.1667	26.5	35.1667	43.7222	23.7222	6.4444	8.1111	6.2778	13.2222	26.7222	35.9444	22.6667	33.9444	53.9444		0.0942389	30.2701
2.2637	32.7222	20.2778	26.8889	21.3333	24.7222	37.7222	26.2778	15.7778	31	35.1667	30.2778	46.5556	36.6111	31.4444	35.7778	35.4444	35.7778	23.3889	31.0556	37.6667	60.1111	57.3333	20.7778	30.8889	30.8889	47	19.2778	7	5.7778	10.9444	6.5	19.8889	32.2222	19.1667	45.6111	51.4444		0.0994771	30.0201
2.3828	32.2222	15.6667	29.1667	18.2222	26.7778	32.2222	24.3889	32.7222	37.3333	47.9444	31.8889	48.5556	37.2222	43.0556	31.4444	39.5556	35.2778	30.5	32.2222	43.2778	43.8889	50.4444	19.2222	25.6667	51.5556	46.4444	21.1667	9	5.8889	11.5	9.7778	23.0556	25.8333	21.2778	41.3333	49.2778		0.104711	31.25
2.502	24.0556	24.5	24	23.8889	20.5556	44.0556	19.3889	30.8333	39.8889	30.6667	38.6111	54.6111	42.0556	33	32.8333	38.5	51.4444	29.8333	41.3333	37.8889	32.7778	45.9444	9.8333	26.7222	40.9444	44.6111	12.9444	6.6111	5.3333	11.0556	18.5556	27.1111	25.5556	22.6111	36.4444	33.5		0.109949	30.0694
2.6211	27.7778	24.6667	21.2778	17.0556	23	45.7222	33.4444	24.6111	44.2222	43.8333	29.3889	46.9444	31.6111	27.0556	25.3333	36.0556	39.6111	22.1667	28.8333	28.9444	37.0556	59.6667	23.0556	23.1667	37.5556	47.2222	16.0556	9	6	12.3889	12	26.2778	25.2222	13.3889	31.5556	41.8889		0.115183	28.9738
2.7402	33.7222	28.4444	32.8333	20.7778	21.5556	26.5	24.7778	25.5556	39.8333	40.1667	40.1667	49.8889	38.1111	34.1667	39.6667	44.9444	42.0556	38.7778	17.7778	33.1667	36.2222	46.4444	13.8333	24.5556	31.9444	50.3333	23.7222	10.3889	9.7778	10	18.3333	25.7222	36.6111	13.7222	22.6111	31.9444		0.120417	29.9738
2.8594	21.7778	20.4444	27	17.7778	23.8333	37.5	36.5	31.1667	39.8333	32.8333	33.8889	44.7778	30	37	45.6111	40.1667	38.3333	26.2222	24.0556	21.6667	43.2222	38.0556	16.5556	16.5	31.6111	46.8333	13.6667	6.7778	9.5556	11.6667	22.9444	25	28.2222	11.5	35.8333	23.1111		0.125655	28.0957
2.9785	23.2222	19.1111	23.1667	15.8889	16.6111	22.2222	22.6111	29.1111	38.5556	34.1667	32.7222	46.8333	38.3333	47.3333	31.8333	43.1111	34.2778	29.8333	34.7778	21.6667	37.1111	47.3889	18.1111	10.8889	28.7222	46.7778	11.5556	9.3333	10.5	10.9444	19.6111	26.1111	38.2222	7.3333	26.2778	25.5556		0.130889	27.2176
3.0977	27.5	15.3333	32.1111	19.2778	23.1667	25	28.2778	28.1111	43.6667	39.3333	32.6667	41.2222	48.5	33.8889	42.4444	40.2778	53.3333	31.1667	21.7778	29.1111	34.1667	60.5	10.4444	14.3333	40.1111	39.1667	15	12.1111	11.3889	12.3889	15.5556	24.5556	31.2778	14.5556	22.8333	34.1667		0.136127	29.1312
3.2168	30.1111	19.2222	23.3889	15.7222	34.2778	25.2778	29.7778	30.2222	43.5	37.6111	34.2222	43.5556	29.5556	38.5556	29.3333	38.2222	39.1667	28.8333	23.2778	25.1667	33.3889	50	13.3889	12.6111	30.3333	43.7778	10.8333	5.9444	7.4444	5.6667	12.3889	27.6111	30.8333	14.7222	14.4444	38.7778		0.141361	26.9768
3.336	23.3333	25.1111	23.5556	29.8333	17.0556	20.8889	31.1667	15.8889	41.7222	40.2778	30.5556	41.2222	40.0556	33.2222	29.8333	41.0556	44.7778	27.6667	18.7778	16.4444	29.7778	49.2778	9.6111	10.2222	25.1667	33.3333	11.6667	8.2778	8.6667	6.1667	17.2222	26	31.1111	8.1667	19.2778	35.1111		0.146599	25.5972
3.4551	37.7222	14	29.1111	18.6111	22	22.5	22.5556	25.1111	32	26.1111	33.7778	36.1667	33.1667	36.1111	23.7222	40.1111	45	30	16.0556	24.8889	25.2778	43.2778	10	10.5	22.7222	28.0556	7.8333	7	5.5556	9.5	14.3333	21.5	40.6111	8.3333	21.1667	25.0556		0.151832	24.1512
3.5742	32.1111	25.4444	23	21.2222	22.6667	17.5	27.3333	34.5	33.2778	49.2778	27.7222	47	30	38.5	33.6667	32.9444	46.5556	32.7222	15.5	19.8333	20.3889	32.7778	10.7222	8.8333	22.3889	35.5	6.3333	12.3333	9.1111	11.4444	26.2222	19.3333	25.1667	7.2222	13.5556	25.6111		0.157066	24.9367
3.6934	24.9444	25.8889	26.1667	16.7778	18.3333	20.8889	26	28.8333	46	40	22	36.5556	47.1667	41.7778	39.7222	46	37.9444	24	14.7222	36.7778	16	31.6667	14.7222	7.2222	14.2778	28.6111	6.1667	13.5	8.2778	9.2778	16.2778	22.7778	20.8333	9.2222	14.6667	33.3333		0.162304	24.6481
3.8125	27.5556	23.3889	28.3889	25.3889	22.6111	21.3333	15.5556	27.3889	38.8889	37.6667	32.0556	38.5556	30.5556	45.1667	33.1667	42.4444	38.3889	23.3889	15.3333	24	20.0556	20.5	10.5556	9.5556	17.7222	31.6667	10.7222	11.6111	10.2778	7.2222	12.4444	24.6667	33.3333	9.8889	12.3889	35		0.167538	24.1343
3.9317	30.8889	27.3889	22.6111	20.7778	8.8333	23.3889	17.2222	26.9444	33.5	41.1667	23.6111	38.9444	41.9444	51.0556	22.6111	53.6667	40	14.5556	9.7222	18.9444	17	18.1667	8.9444	11.6111	15.3889	31	7.1667	11.7222	17.2222	5.7222	12.1667	23.0556	16.2778	6.2778	11.6667	24.2222		0.172776	22.3719
4.0508	27.0556	25.4444	20.5556	18.5556	14.2778	12.7222	14.0556	22.3889	43.2778	31.0556	26.6667	48.5556	36.4444	50.2222	33.1667	38.0556	44.7778	24.5	9.5	20.3889	16.9444	28.7222	12.3889	6.4444	15.8333	31.4444	7.9444	13.1667	8.8889	10.1667	10.1111	13.0556	19.4444	4.6667	7.5556	16.5		0.17801	21.804
4.1699	26.3889	23.3889	29.2778	17.8889	14	10.2222	17.4444	28.1111	30.3889	40.6667	28.6667	36.1111	40.5556	51.7222	21.6111	48.0556	45.2222	19.0556	7.6667	17.8889	13.1111	32.7778	6.1111	8.9444	17.8333	28.3889	6.1111	12.2222	10.5556	7.3889	10.8333	23.5	18.0556	11.3889	8	18.1111		0.183244	21.8796
4.2891	36.5	28.1667	25.6667	25.1667	12.1667	11	16.8333	23.2778	35.2778	29.2222	21.6667	33.6667	33.5556	39.5556	14.2778	45.0556	45.2222	18.2222	10.6111	13.4444	14.2778	22.6111	10.3333	7.5556	11.8889	37.3889	7.6667	8.3889	12.2222	8.5556	10	14.4444	17.6111	5.8889	16.0556	19.5556		0.188482	20.6389
4.4082	36.0556	25.7222	28.6111	15.1111	8.6111	14.9444	15.5	25.3333	34.6111	32.5556	27.7222	40.3333	29.5556	50.1111	16.3333	41	42.3333	19	12.0556	15.8333	15.6667	26.0556	7.2222	7.2222	12.3333	31.1111	8.4444	12.6111	9.6111	12.4444	10.6667	10.6667	8.8889	15.6111	13.2778	22.1667		0.193716	20.9815
4.5274	35.7778	27.6667	25.8333	23	11.9444	12.3333	14.3333	25.3889	46.8889	43.1111	22.3333	44.1667	26.8333	42.3889	26.1667	52.5556	46.5	17	11.8333	10.1111	11.8889	18.1667	7.2778	6.5	12.6111	35.5	6.5556	12.1111	9.9444	12.1667	7.7222	16.2778	9.3889	6.1667	10.7222	17.2222		0.198954	21.2886
4.6465	28.2222	30.7778	23.6667	17.1111	7.6667	9.2778	14.2778	24.2222	22.7222	28.3889	23.1111	26.1667	39.2778	47.7778	20.4444	36.7778	52.3333	24.2222	9.8333	11	13.6667	18.8333	4.5556	6.7778	15.5556	28.6667	5.7778	8.4444	6.4444	13.7222	10.8333	15.3889	15.4444	7.9444	13.6111	16.7222		0.204188	19.4352
4.7657	41.6111	22.6111	27.2778	18.9444	6.5	14.6667	19.3333	23.7222	37.5556	29.0556	21.1111	31.5	30.1111	39.6111	23.2222	47.7778	52.9444	12.4444	6.7778	11	12.4444	12.9444	6.1667	3.6667	12.2222	23.8333	4.6111	9.2778	7.7222	12.3333	8.6111	8.5556	11.3333	11.2222	16.5	20.5		0.209426	19.4367
4.8848	41.9444	33.2222	31.7222	21.9444	7.4444	9.6667	20.3333	14.3333	38.8889	27.1111	16.5	34.5	39.7222	53.6111	21.2778	39.7222	53.2778	16.1111	7.6111	11.9444	12.3333	13.7222	5.5556	6.6667	14.9444	25.0556	5.1667	7.6667	9.3333	9	11.6667	14.3889	15.5	8.8333	10.8889	10.2222		0.21466	20.0509
5.0039	34.2222	25.3889	27.6111	15.2778	5.1667	11.1111	20.9444	14.9444	39.1667	20.0556	17.2778	37.9444	28.2778	59.8889	31.3889	38.9444	42.6667	14.4444	8.4444	7.7222	11.4444	15.1111	5.8333	8.3889	5	22.9444	9	7.3889	6.6667	6.7778	10.1667	8.1667	9.6667	6.3333	9.9444	13.0556		0.219894	18.2438
5.1231	34.1111	33	30.6667	26.1667	8.5	12.5556	11.6667	14.2222	49.7222	35.2778	11.6667	39.3333	42	44.8333	24.1111	53.6667	45.5	12.5556	10	5.4444	9.1667	13.8889	6.8889	6.2222	4.5	19.2222	8.5556	10.2778	6.4444	8.3333	11.4444	8.9444	10.1111	7.2778	12.9444	13.2222		0.225132	19.5123
5.2422	36.8889	23.4444	24.9444	23.2778	8.5	12.8889	10.0556	17.3333	24.2778	31.6667	20.1667	40.5	41.3889	48.8333	27	44.8333	36.8333	11.7778	6.7222	10.3333	8.7778	17.4444	6.9444	8.6667	8.5556	24.4444	7.4444	9	5.7778	10.6667	6.0556	12.9444	11.3889	10.3333	11.5	24.3889		0.230366	19.0556
5.3614	34.6111	26.1667	33.1667	30.7778	7	10.8889	11.6667	12	39.2222	28.6667	17.9444	32.6111	32.9444	49.2778	44.8333	44.0556	41.8889	12.2222	4.5556	7.2778	7.8333	11.7222	5.3333	6.7778	5.2778	16.2778	11.1667	8.0556	11.1111	2.4444	4.2222	9.7778	8	8.7222	13.6667	19.2222		0.235604	18.6497
5.4805	38.8333	26.0556	32.2222	20.6111	9.5556	11.6111	15.7222	14.7222	31.7778	24	17.3333	33.4444	38.9444	39.8889	24.9444	34.6667	36	16.1111	6.2222	7.5	10.4444	8.3889	5.8333	4.9444	6.5556	20.2222	7.3333	7.6667	8.5556	7.8889	5.0556	6.1111	9.2778	6.6667	7.3889	13.6111		0.240838	17.1142
5.5996	30.2778	27.4444	28	17.6667	4.8333	21.7222	13.1111	10.1111	26.0556	29.2222	13.5	28.3889	41.7222	55.1111	27.8333	48.8889	27.1111	9.0556	6.7778	9.8889	12.1111	8.7778	5.7778	8	4.7222	19.8333	7.8333	3.0556	4.4444	9	3.7778	8.3333	15.3333	9.3889	10	16.7222		0.246071	17.3287
5.7188	20.6111	25.5	22.6667	25.4444	5.8333	17.3889	12.3889	12.6111	31.8333	17.1111	20.9444	31.2778	34.8333	47.3889	38.2778	28.2778	32.2222	10.2222	6.0556	5.4444	17.8333	9.4444	7.0556	3.8333	5.3333	18.0556	4.5	4.2778	7.5556	6.8889	5.1667	15.3333	14.6111	10.6111	12.1111	14.8889		0.25131	16.7731
5.8379	29.1111	33.1111	23.0556	19.2222	10.8889	13.8889	9.3333	14.5	27.9444	19.7778	11.7778	29	37.7778	46.4444	34.3333	24.8333	27.3889	9.3333	5.5556	10	7.3333	8.5556	3.7778	10.0556	7.1111	13.0556	10.4444	4.9444	7.9444	9.2778	2.8889	7.1667	9.5556	14.7222	12.9444	11.5556		0.256543	16.0725
5.9571	26.3889	21	24.8889	15.2222	12.6111	8.9444	12.5	15.7222	29.2222	25.9444	12.1111	25.8333	36.5	40.8889	22.2778	23	33	10	3.2778	5.1111	8.5	7.5556	11.7222	4.2222	10.2778	15.3333	5.8889	4.0556	3.1111	3.1111	3.9444	6.4444	12.1111	11	16.3333	14.6111		0.261782	15.0741
6.0762	33	19.8889	23.3333	16.2778	8.5	6.8333	12.9444	13.7778	25.4444	16.6667	13.1111	22.8333	39.8889	46.8889	26.3889	16.8889	26.2778	8.7222	4.0556	4.7778	8.3889	7.8889	2.0556	6.5556	5.2778	10.1111	5.3333	4.2778	7.5	5.6667	3.5556	5.2778	14.1111	11.0556	18.5556	13.2778		0.267015	14.3164
6.1953	39.2222	15.8333	23.8889	21.2222	8.8333	13.7222	13.2222	10.4444	29.7778	16	12.9444	21.6667	39.1111	54.5	18.6667	22.2778	28.6111	13.8889	6.6111	4.5556	9.4444	5.5556	8.0556	5.2222	7.1111	12.1111	2.4444	10.3889	7.6667	5.9444	1.7222	5.8889	12.3333	9.3889	18.5556	11.1667		0.272249	15.2222
6.3145	39.3333	13.9444	14.2222	16.9444	6.8333	13.1667	15.7222	11.5	26.7778	14.5556	9.6667	19.8333	39.3889	39.2222	26.3889	9.5	33.3889	12.6667	4.8889	3.5	7.2778	8	4.4444	4.4444	8.6111	6.6667	4.2778	10.4444	3.9444	3.7222	5	3.7222	9.9444	11.6111	17.7778	10.9444		0.277487	13.6744
6.4336	32.8889	19.9444	20.7778	18.4444	5.5556	12.6111	8.2778	10.6667	20.2778	12.7222	13.2222	22.2778	43.1667	48	21.7778	12.7778	32.1111	10.4444	2.8889	7.0556	6.5556	5.0556	5.2778	5.1111	10.3333	16.9444	2.8889	2.3889	4.5	2.9444	2.6111	3.3333	14.3889	9.7222	11.4444	7.9444		0.282721	13.537
6.5528	33.0556	23.7222	20.2778	12.0556	11	17.5556	4.7778	7.3889	28.7222	6.5556	11.2222	23.2222	27.6111	48.1111	15	11.9444	25.1111	12.3333	3.2222	3.9444	8.3333	6.7778	6.3889	3.2778	5.5	9.5556	3.1111	7.0556	5.7778	3.8889	2.8889	5.8333	10.6111	6.4444	11.4444	9.1667		0.287959	12.5802
6.6719	30.5556	17.7222	23.6111	15.3889	6.8889	12.6111	12.0556	7.4444	24.8889	10.8333	14.9444	17.6667	25.7222	40.6111	26.3333	12.2222	18.7222	5.9444	2.6667	5.4444	9.6111	8.5556	1.8889	7.8333	5.7778	16.4444	7.0556	3	7.9444	5.0556	6.7778	4	12	10.8889	10.7778	10.2778		0.293193	12.7824
6.7911	31.5	23.2778	20.0556	12.3889	4	14.9444	12.0556	8.8889	23.2778	4.7222	10.1111	27.6111	28.7778	56.0556	35.3333	8.7778	24	5.1111	3.4444	3.2778	12.3333	7.0556	3.2778	1.7778	4.5	11.8889	5	3.4444	6.6667	4.6667	1.5	3.8333	8.9444	13.2778	6.4444	6.2222		0.298431	12.7346
6.9102	21	17.2222	23.4444	13.5	6.6667	14.7222	20.1667	16.9444	21.5	9.7222	10.8889	15.8889	31	38.6111	22.3889	12.5556	22.4444	4.6667	1.3333	3.3333	8.7778	3.6111	5.3889	4.3333	3.8333	13.1667	5.1667	2.2778	6.2778	6.5556	3.5	5.5556	11.2222	5.2778	5.6667	7		0.303665	11.8225
7.0293	21.4444	22.2222	26.5	8	7.6667	9.9444	12.5	14.8889	27.5556	6	8.6111	35.9444	27.9444	49.3889	37	8.7222	28.1111	5.7778	3.8333	2.2778	8.7778	8.1667	2.9444	5.1667	6.5556	9.7778	4.8333	5.1667	7.6111	7.5	6.6667	3.6111	10.7222	8.4444	8.5	3.8333		0.308899	13.1281
7.1485	34.8333	22.9444	18.2778	8.7778	3.0556	7.7778	11.1667	25.5	16.5	4.8889	9.2222	20.4444	23.7778	53.6667	34.2222	9.9444	14.8889	5.7778	1.6111	3.0556	13.2222	7.5	3.2222	3.3333	4.9444	11.9444	6.0556	4.3333	4.7222	5.2778	1.3889	4.5556	13.0556	6.6111	7.4444	4.7222		0.314137	12.0185
7.2676	19.0556	18.5556	22.2778	10.8333	8.6667	15.1667	14.8333	19.7778	16.8333	11.3889	9.9444	21.9444	26.5	51.5556	29.5	9.4444	11.7222	6.0556	5.3333	2	12.5556	7.8333	3	10.3333	7.3889	10.4444	5.1667	3.0556	7.3889	4.2778	3.6111	4	10.1111	4.4444	7.3889	2.8889		0.319371	12.091
7.3868	31.9444	13.2222	20.6111	5	9.0556	13.3889	9.5556	17.4444	9	10.5	12.5556	23.2222	24.3889	45.8889	30.1111	4.5556	19.1111	5.8333	3.2778	1.7222	11.2222	7.8889	2.6111	3.4444	4.5556	7.7778	4.6111	7.8333	5.4444	4.5556	4.1111	2.9444	8.3333	14.1667	4.8333	3.8333		0.324609	11.3488
7.5059	21.3333	17.0556	17.2222	13.4444	10.0556	9.7778	13.4444	17.6111	15.4444	7.6667	9.5556	15.3889	25.6667	53.3889	32.1111	7.7778	16.2222	5	3.1111	4.7778	9.7778	2.5	4.3889	2.0556	5.8889	9.1111	7.7222	3.7778	5.6111	4.6111	4.2222	4.3333	7.6667	5.3333	11.8333	4.1111		0.329843	11.3611
7.625	28.8333	13.9444	15.7222	4.8333	5	10.7778	13.1111	18.1667	11.2222	7.9444	13.3889	14.6667	34.6111	32.7222	24.7778	9.1111	16	4.6111	2.7778	2.6667	7.2222	7.0556	2.9444	1.3333	4.6111	8.2222	7.7778	5.2778	7.8333	5.1667	1.2222	2.5	13.3333	4.3333	8.2222	4.0556		0.335076	10.4444
7.7442	17.7222	16.5	16.8889	9.1111	4.5	9.2778	15.7222	9	17.1667	5.7222	13.8889	17.2222	22.4444	37	28.8333	9.4444	14.8889	2.8333	3.1111	3.3889	9.3889	5.2222	6.3889	2.6667	4.5	9.1111	2.8889	5.5	4	4.5556	2.3333	2.6667	10.5	9.1667	7.2222	1.7222		0.340315	10.0694
7.8633	14.1111	12.2778	21.1111	4.6667	6.6111	10.4444	12.7222	12.5	6.3889	10.6667	15.3889	12.6111	31.2778	41.9444	27.6111	12	15.9444	3.8889	4.5556	2.1667	11.1111	5.4444	3.4444	3.0556	2.6111	5.3333	8.3333	7.2222	8.1667	2.5	1.6667	2.8889	11.5556	4.5	5.8333	8.9444		0.345548	10.3194
7.9825	20.7222	11	22.3333	6.2222	6.4444	7.1667	13.6111	13.8889	9.1667	4.8889	11.5556	12.3333	27.0556	33.4444	23.0556	6.8333	14.4444	12.2222	3.0556	2.2222	3.9444	5.2222	2.2222	1.8889	2.8333	5	4.1111	6.6111	6.3333	4.8889	2.4444	5.3333	11	5.7778	6.5	5.5556		0.350787	9.48147
8.1016	16.2778	9.6667	18.2222	8.7778	9.1667	4.6667	7.5556	8.6111	2.8889	11.6111	15.5	14	25.4444	26.7222	24.5556	7.8889	9.8333	6	3.4444	1.7222	5.8333	6.2222	1.3333	1.7778	5.3333	3.9444	4.3889	5.0556	9.4444	4.5	2.3333	4.4444	6.1667	3.8333	4.0556	5.8333		0.35602	8.52932
8.2207	24.9444	9.3889	19.5556	6.6667	9.7222	6.3333	8.9444	6.3889	8.6667	9.7778	17.5556	10.1111	21.8333	29.6111	21.2222	8.2778	9.3333	3.9444	2.5556	4.1667	6.5	3	1.7222	2.0556	2	3.8333	5.7778	5.2778	7.2778	4.1111	1.6667	2.8889	5.6111	5.2778	8.1111	5.8889		0.361254	8.61111
8.3399	22.6111	16.0556	19.6111	7.8889	13.8889	11.8889	11.7778	11.7778	3.6667	18.6667	10.2222	17.6667	17.2222	19.3889	28.8889	8.8333	9.0556	9.3333	2.7222	1.4444	5.8889	6.8333	2.8889	4.6667	2.6111	2.9444	3.7222	2.7222	6.2778	5	4.3889	3.0556	8.5	3.7778	5.8889	6.7222		0.366492	9.40278
8.459	23.8889	14.5556	12.9444	2.1667	10.9444	6.8333	13.0556	9.3333	11.4444	17.6111	7.2778	15.0556	16.1667	20.3889	36.3333	9.8333	8.1667	6.6111	2.9444	1.3889	5.2778	6.4444	3.6111	4.1667	1.7222	1.5556	1.3889	6.6111	3.8333	3.1111	2.4444	1.0556	5.4444	6.9444	5.5	8.6111		0.371726	8.74074
8.5782	20.5	9.2778	18.2778	3.6111	9.7222	11.3889	10.5556	9.1667	5.6667	9.2778	13.3333	14.0556	19.4444	26.1667	20.4444	7.1667	8.3333	2.8333	4.7222	3.7222	2.2778	5.7222	2.6111	3.0556	4.8333	4.0556	8.7222	4.7778	4.7222	2.8333	3.2222	1.5556	6.5	6.7778	5.6667	7.3889		0.376964	8.39969
8.6973	17.3889	5.2222	11.6667	5.1111	4.6667	12.7222	5.7778	6	5.8333	14.8889	7.3333	10.8889	20.9444	29.0556	30.5556	2.5	10.4444	5	2.6111	2.9444	4.8889	3.6667	3.4444	3.3333	3.5	5.5	4.0556	3.7778	4.1111	4.7778	7.5556	3.2778	6.7778	5.8889	3.4444	8.2778		0.382198	7.99537
8.8165	14.4444	5.0556	13.7222	2.2778	11.6667	5.7222	6.1111	9.3333	4.8333	12.5	5.7778	9.8333	14.7778	21.5	29.0556	3.9444	8.1111	6.5556	1.1667	4.3333	4.1667	5.1111	4.4444	2.2222	3.7778	2.3889	7	4.0556	3.2778	5.3889	1.9444	1.8333	6.3333	8.0556	2.2222	4.1667		0.387436	7.14198
8.9356	21.0556	6.7778	9	3.6667	10.4444	7.8889	3.3333	9.5556	12	12.2222	3.4444	10.1111	23.4444	21.8333	19.9444	4.7778	6.0556	5.8889	1.8333	3.8889	4.7222	3.1111	2.8889	0.9444	2.8889	6.1111	4.5556	5.8889	5.2222	7.7222	1.9444	1.3889	6.2222	5.1667	4.5556	4.1111		0.39267	7.35031
9.0547	13.8333	6.2222	8.1667	7	7.6111	10.0556	4.8889	6.3333	7.6667	16.8333	6	8.3889	20.6667	14.2778	15.7222	5.5556	9.3333	7.5	2.9444	1.8333	2.7778	6.3889	4.6111	4.2222	4.5	8.1111	6.5556	4.5556	5.5	3.5	2.2222	2.5	3.0556	3	7.3333	4.8889		0.397904	7.07099
9.1739	8.1667	5	10.3333	2.5556	10.8889	5.4444	10.5	8.2222	10.8889	13	9.6111	7.7778	12.3889	14.7222	22.3889	5.8333	5.2778	2.5556	2.4444	1.6111	4.3889	5.0556	3.2222	2.6111	8.1667	3.8333	4.0556	3.1111	3.8333	2.3889	3.5	3.3889	3.8333	10.8333	3.1667	5.0556		0.403142	6.66821
9.293	11.2778	5.5	6.8333	3.4444	9.3333	10.7778	8.5	6.4444	9.9444	13.9444	6.7778	13.5556	16.8889	22.9444	13.5556	6.6667	5.1111	5.4444	2.6667	6.2222	6.6111	4	5.0556	1.5	1.5556	4	4.6111	6.5	8.1111	5.2222	4.3333	1.0556	7.5	4.8889	4	6.2778		0.408376	7.25154
9.4122	15.8333	8.0556	12.9444	4	9.5	7.0556	6.4444	10.1111	10.0556	16.2222	13.1111	8.1111	11.6111	22.3889	13.3889	6.2778	5.5556	3.8889	2.6667	3.2222	3.2778	2.7222	4.2778	1.7222	6.3333	4.8889	4.6111	2.6111	8.5	5.8889	3.2778	2.0556	3.2778	6.7778	2.2222	4.0556		0.413614	7.13735
9.5313	9.1667	8.3889	13.8889	6.1111	9.2778	7.5	4.6111	3.7778	11.8889	10.4444	9.1111	7.5	8.0556	25.6667	12	5.7778	5.6667	6.4444	2.5	1.5	5.1111	2.5	1.3333	2.5	1.8889	1.2222	8.1667	3.2778	6.1667	4	2.3889	2.5	2.3333	6.7778	2.3889	4.7222		0.418848	6.29321
9.6504	11.6667	3.8889	7.7222	8.6667	9.1667	7.3333	6.2778	4.0556	8.3889	13.0556	10.7778	7.0556	18	17.3889	7.5556	5.6111	4.8333	7.6111	1.8889	2.1667	3.8889	4.6111	3.6111	1.8333	4.0556	2.2222	4.8889	3.6111	7.5556	6.7222	1.0556	2.2222	4.5556	7.8333	3.3333	6.1667		0.424082	6.42439
9.7696	5.6667	7.8333	10	7.6111	10.3333	4.5556	5.5	11.3333	13.0556	15.2222	6.8889	5.6111	8.2222	23.2222	10.6667	11.0556	3.5	6.5	1.8333	3.3889	4.5	3.7778	2.9444	1.2222	3.1667	3.8333	3.1111	4.2222	8.5556	4.4444	3.5556	2.5	2.3889	9.0556	3.4444	2.5556		0.42932	6.53549
9.8887	8.5556	4.9444	6.2778	4.0556	5.3889	8.3889	2.4444	9.6667	8.6111	14.6111	10.3333	7.3889	11.6111	18.2222	9.1667	11.1667	6.2778	7.5556	3.8333	2.0556	3.2778	7.1667	5	4.5	3.3889	3.2778	8.5556	5.1667	3.5556	5.3333	1.3889	4.9444	2.6111	9.6667	6.8333	6.9444		0.434554	6.72686
10.0079	6.6667	6.5	13.3333	2.7222	7.1111	7.3889	5.7778	6.9444	7.4444	14.8889	11.5556	4.3333	14.4444	25.8889	13.6111	5.9444	3.2778	9.0556	1.3889	2.9444	4.1111	5	1.4444	2.1111	4.7778	3.4444	6.1111	1.1111	8	4.7222	1.1667	2.6667	2.1111	7.0556	4.6111	6		0.439792	6.54629
10.127	8.0556	6.6111	12.6667	5.9444	3.1111	6.8333	4.3889	10.6667	12	10.4444	9.8889	7.0556	11.6111	26.6111	8.5	6.1111	8.1667	4.9444	3.4444	1.9444	6.8889	4	2.1111	5.1111	6.0556	2.7222	6.7222	4.0556	4.3333	3.0556	2.6667	5	1.8333	5.5556	2.1111	4.6667		0.445025	6.55247
10.2462	7.3889	9.3889	9.9444	11.2778	9.1667	9	4.7222	7.8889	11.0556	13.5556	9.0556	11.1111	6.5556	26.5556	11.6111	3.8889	3.7222	8.7222	1.1667	1.4444	4.7778	7	1.7778	2.5556	1.6667	3.6667	2.8333	3	9.3889	5.5556	1.8333	2.3333	3.0556	2.8333	3.6111	1.8889		0.450264	6.52779
10.3653	8.5	6.2222	8.6667	6.8889	4.5556	9.0556	6.2222	5.8333	10.5556	16.3333	7.8889	8.5556	14.2778	21.5	19.7778	2.8333	9.7222	5.2222	3.6667	3	4.6667	3.1667	1.8333	1.8333	4.3889	4	3.1111	3.4444	5.1667	2.2222	1.2778	1.3889	5.5556	4.0556	6.4444	3.5		0.455497	6.53704
10.4844	4.8333	6.7222	9.2778	6.5	2	4.5	5.7778	3.1111	12.5	13.5	10.7222	6.9444	14.8333	11.0556	8.5556	2.8889	7.5	5.1667	2.2222	2.1111	3.7778	3.2222	2.3889	1	5.3889	2.2778	1.1667	1.5	6.1667	5.8333	1.4444	1.6667	2.8889	5.2778	7.6111	3.7222		0.460731	5.44599
10.6036	5.2222	6.5	6.7778	5.1111	7.1111	11.4444	4.2222	7.7222	14.1111	10.0556	4.6111	7.1111	9.2778	8.2222	8.7778	4.9444	7.8889	4.6667	1.5	2.5	3.9444	6.2222	1.1111	1.8889	4.6111	8.6111	5	4.3333	2.8889	6.1111	2	2.0556	2	5.1667	2.1111	5.7222		0.465969	5.59876
10.7227	6.4444	6.9444	4.0556	7.3889	4.2222	8.7778	4.8889	6.5	9.5556	6.2778	7	9.5556	16.5556	11.3889	8.6111	3.8333	9.9444	1.1111	1.6667	1.6111	7.1667	2.8889	2.3333	2.2778	3.2222	4.5	2.2778	3.5556	1.9444	4.8889	3.1111	1.2222	2.6667	5.1111	5.8889	4.9444		0.471203	5.39815
10.8419	3.1111	7	5.2222	7.7222	4.3333	9.2778	8.3333	3.6667	6.7222	5.1111	5.7778	6.0556	14.8333	11.8333	8.6667	6.5	13.3333	1.1111	2.3333	2	2.6111	3.7222	2.6111	1.1111	5.1111	6.7222	2.6111	2	4.0556	4	2.1111	3	3.9444	1.8889	4	4.8889		0.476441	5.2037
10.961	3.6667	5.8333	5.3889	7.2222	5.2222	4.1111	8.4444	7.2222	14.8889	4.6667	7.7778	8.5	13.2222	7.5556	10.5556	7.0556	6.7222	1.6111	1.7778	2.5556	3.3333	3.1111	2.8889	4.4444	6.3333	4.7222	4.7222	1.9444	1.1111	5.6667	2.2222	3.2222	3.7222	4.6111	5.6667	3.6111		0.481675	5.42592
11.0801	2.5556	6.9444	6.0556	9.8889	3.1111	8.7222	2.4444	4.5556	8.7222	5.5556	7.0556	11.4444	4.8333	13.3889	8.1667	4.8889	10.5556	1.1111	3.1111	1.6111	4.1111	4.2778	4.8333	2.5556	1.2222	3.6111	3.2778	2.3889	2.6667	4.4444	1.7778	1.1667	3.5	10.7778	2.5	4		0.486909	5.05093
11.1993	5.9444	4.6667	5.5556	7.6667	2.0556	2.0556	3.4444	6.3889	12.6111	5.1111	8.3333	9.1111	12.8333	5.3889	5.8333	7.7778	6.7222	2.3889	2.8333	2.3889	5.8889	5.1111	1.6667	2.1111	5.7222	6.3333	3.0556	5.0556	5.3333	2.5556	2.5	3.2778	3.5556	6.4444	2.1667	2.6667		0.492147	5.07099
11.3184	8.1111	4.2222	4.6111	5.8333	5.1111	9.3889	1.7222	4.8333	9.0556	5.8333	8.0556	9.3333	7.5	10.6111	7.3333	5.6111	8.6111	1.4444	1.8333	2.1667	2.3889	7.2222	2.5	4.9444	3.6111	4.1667	1.7778	4.3889	4	4.5	4	2.5556	2.5	8.7222	1.9444	2.7222		0.497381	5.08796
11.4376	4.8333	12.0556	5.6111	4	2.7778	6.4444	5.4444	4.1667	8.5	7.8333	8.3889	12.0556	6.4444	3.1111	7.2778	3.2778	7.1111	3.1111	2.5	2.1667	4.1667	3.8889	1.9444	2.8333	3.7778	6.5	3.4444	4.1111	3.2778	4.6111	4.2778	1.6111	2	5.7222	3.9444	5.3333		0.502619	4.95987
11.5567	8.3889	5.8333	3	5.7222	11.6111	5.5	4.2778	3.6667	8.5556	5.0556	5.9444	15.6111	6.9444	8.8333	8.3333	7.3889	1.8889	2.1111	1.1111	3.5	3.1111	6.7778	2.6667	2.7222	4.6667	4.9444	4.9444	3.2778	4.1667	2.1111	2	1.4444	7.3889	4.8889	6.2778	4.2778		0.507853	5.24846
11.6758	4.6111	7.7222	6.6111	7.2778	4.1111	6.0556	5.3333	7.8333	4.3889	6.7222	5.8889	9	13.8889	11.6111	11.8889	3.7222	8.3889	1.9444	1.1667	1.5556	3.3333	4.3333	4	1.2222	2.4444	3.2222	4.1667	3.1111	2.1111	3.6111	1.5556	2.3889	3.5	5.9444	2.7222	4.6667		0.513087	5.05709
11.795	10.0556	3.8333	4.6111	5.1111	4.8333	5.0556	4.5	6.2778	7.1111	6.8889	2.6667	12.8333	10.0556	6.8333	6.3889	2.8333	2.3333	2.2778	2	2.6667	3.7222	4.3889	1.7778	1.8333	3.0556	5.7778	2.0556	4.0556	4.2222	4.8333	2.9444	3.3333	5.2778	3.2778	4.1667	2.2778		0.518325	4.61574
11.9141	6.4444	3.2222	2.9444	4.5	4.5	5.6111	3.7778	3.7222	7.2778	4.8889	10.1667	11.6667	8.4444	9.9444	10.9444	5.7222	2	2.1667	3.1667	1.7778	5.1111	3.3889	2.5	3.6667	3.6667	9.0556	3.6667	2.1667	3.8889	7.1111	4.4444	2.9444	5.3889	4.7778	2.6667	3.2222		0.523559	5.01543
12.0333	9	5.1111	1.5556	5.5556	3.6667	10.7222	5.5556	4.1111	3.4444	11.8333	7.3889	7.6667	7.3333	8	16.6111	5.6667	4.0556	3.1667	1.1667	2.4444	3.6667	3.4444	2.8889	2.2778	3.4444	8.7778	2.6667	4.3333	4.3333	2.5556	1.8889	3.5	4.8333	3.6111	1.8333	7.8333		0.528797	5.16513
12.1524	11.4444	4.3889	4.1111	3.8889	5.7778	3.7222	5.2222	1.8889	6.1111	9.8889	4.7778	11.3889	8.1111	10.7222	11.1111	2.3889	2.6111	2.8889	2.1667	4.9444	3.7778	5.5556	4.3333	2.3889	3.7222	4.3333	5.5556	3.7778	7.7778	9.6111	5.9444	3.9444	7.0556	3.1111	2.0556	3.8333		0.534031	5.39815
12.2716	7.6667	4.4444	4.2778	2.1111	4.9444	4.6667	3.5	2.3889	3.4444	5.6667	7.1667	4.6667	8.3889	3.7222	6.0556	4.8889	2.3333	1.8333	1.5556	1.5	5.8889	4.7778	3.3333	2.1667	4.4444	2.6667	1.7778	3.9444	7.5	6.5556	2	3.1667	12.1667	4.5556	4.7778	5.1111		0.539269	4.44599
12.3907	5.8889	5.0556	6.5	3.2222	5.2778	5.4444	6.7222	1.5556	2.2778	9.1667	5	10.3889	13.6667	4.6111	12.8889	4.0556	4	2.1111	2.5556	2.8333	3.2222	4.2778	3.5556	1.7778	2	3.0556	3.1111	3.3889	5.1111	10.9444	4.5556	1.8889	3.5556	3.8333	3.8889	3.3333		0.544503	4.8534
12.5098	11.3889	4.5556	3.6111	1.8333	5.8889	6.7778	4.7778	3.9444	2.5556	8	5.2778	7	9.2778	8.9444	8.5	4.1111	2.9444	2.6111	1.3889	2.5	8.2778	4.5	3.6667	2.3333	4.3889	4	6.5	3.6667	8.7222	6.8333	4.8889	3.7222	5	3.5	4.2222	5.4444		0.549736	5.15432
12.629	11.7778	3.7222	4.0556	3.3889	2.1111	2.8889	4.8333	4.3333	4.9444	6.7778	5.6111	9.0556	7.6111	5.8333	6.7222	2.2222	3.1667	3.4444	2.6667	2.3889	6.7222	2.3889	3.9444	3.2778	9.6667	3.5556	3.0556	3.2778	7.0556	7.1111	2.8889	2.4444	6.2778	5.8889	1.2222	1.9444		0.554975	4.67438
12.7481	6.8333	7.5	1.8889	3	3.1111	3.6667	2.8889	1.5556	5.6667	5.2222	3.6111	5.3889	6.8889	3.8333	11.3889	5.7778	2.2222	3.3333	1.6667	3.2778	6.2222	4.2778	3.7778	3.4444	7.5556	1.2222	4.6667	5.0556	6.0556	5.1667	3.6667	2.3333	3.2778	4.5	4.3889	1.7222		0.560208	4.33488
12.8673	9.9444	2.8333	2.1111	2.2778	6.8889	5.7778	6.5556	4.2222	5.2778	7.0556	5	6.6111	14.1667	7	6.7778	2.1111	3.2778	2.7222	3.8889	2.7778	5.3889	5.6667	2.9444	2.8333	5.6111	4.6667	2.8333	3.6111	4.2222	6.5556	5.2222	4.2222	10.5556	4.9444	4.6111	3.3889		0.565446	5.12654
12.9864	7.7778	2.5	2	2.2778	6.0556	3.2778	5.0556	3.5	4.5556	4.1111	5.6111	7.3333	9.1111	8.8333	9.1111	3.6667	8.5	1.7778	2.1111	1.6111	3.9444	5.8889	6.3889	1.7778	3.2778	3.2778	3.1667	3.0556	10.3333	6.2778	7.3333	5.2778	6.7222	3.5	3.1667	2.6111		0.57068	4.85494
13.1055	5.7778	3.1111	3.1667	3.2222	3.3333	5.6667	5	2.4444	5.4444	3.8889	7.8333	7.8889	11.4444	6.6667	11.1667	1.2778	5.7222	4.3889	2.5556	2.5	5.9444	4.0556	9.3333	3.2222	2.6111	4.6667	5.0556	6.6111	8.7778	8.3889	3.0556	4.5556	7.6111	5.7222	3.4444	7.8333		0.575914	5.37191
13.2247	5.1667	3.1667	3.1111	2.5	4.5556	5.8889	4.7222	2.2222	2.5556	3.2222	6.2778	11.5	15.5	8	5	1.7778	3.7778	2.2778	1.8333	2.4444	2	4	1.8889	2.3889	4.8889	3.2222	5.1667	4.5556	7.9444	5.2778	6.3889	2.2778	8.0556	3.8889	3.8889	6.0556		0.581152	4.6497
13.3438	6.5556	3.5	2.8889	2.2778	6.2778	2.2778	1.7222	5.2778	3.6111	8.6667	5.9444	3.6111	9.9444	8.7778	4.2778	1.3333	5.9444	4.3333	4.8889	2.6111	2.1667	4.8333	2.6667	4	1.8889	2.9444	9.0556	2	7.2778	5	5.5	4.2222	4	2.7222	1.7222	6.8889		0.586386	4.4892
13.463	4.4444	1.9444	2.8333	2.2222	6	6.5	3.3333	2.5	3.5556	4.5	4.5556	4.8333	9	9	11.0556	2.6111	5.4444	1	1.2778	3	3.2778	9.7222	2.5556	3.6111	3.8333	2.1667	7.7222	3.0556	3.2222	2.6667	6.3889	8.2222	5.7222	4.1111	2.4444	7.0556		0.591624	4.59413
13.5821	4.2222	3.7222	4.1667	3.5556	3.9444	1.7778	2.5556	1.5556	4.7778	2.5556	2.1111	6.4444	5.7222	10.5	3.8889	4.1667	1.4444	1.2778	2.8889	3.4444	4.5556	7.0556	7.8889	1.3333	8	3.8333	4.3333	5.0556	4.5	5.7778	5.2778	5.0556	2.5	1.3333	3.2222	2.7778		0.596858	4.08951
13.7012	5.7222	1.1111	1.5556	1.8333	3.1667	5.8333	3.8333	2.3889	7.5556	7.2778	3.8333	2.8889	7.7222	15.2222	5.3333	1.2222	6.6111	4.9444	2.1667	3.2778	6.8333	6.8333	5.1667	3.2778	4.2222	3.4444	2.0556	3.3333	5.1667	4.2778	8.8333	1.7778	4.8889	1.6667	1.0556	4.2778		0.602092	4.46142
13.8204	4.1667	3.5	3.5	1.9444	3.8333	4.8333	1.6111	2.1111	3.6667	4.3889	7.2778	5.0556	15.2222	4.6111	9.3889	3.6111	6	1.8333	2.2222	3.8333	3.3889	4.7222	4.9444	5.2222	3.5556	3.3333	3.4444	4.3889	2.0556	2.6111	4.3333	2.3333	2.6667	2.5556	1.5556	5.8889		0.60733	4.15586
13.9395	4.6111	1.1667	4.2778	1.8333	4.4444	4.0556	5.7778	3.8889	5.6111	5.5	2.1667	10.5	14.8333	9.6111	3.2222	3.0556	7.7222	1.2222	1.3333	2.0556	3.0556	7.2778	6.2778	3.8889	3.7222	3.2222	4.5	5.2778	3	5.8333	3.7222	2.7222	1.6111	1.8889	2.5	4.7778		0.612564	4.44907
14.0587	3.3333	1.7778	2.9444	3.1111	9.5556	2.9444	1.1667	1.5	6.4444	5.7778	3.1667	6.7778	6.8889	8.8889	3.2778	7	6.2778	1.5556	2.8333	2.3333	3.0556	5.6667	9.4444	4.5556	5.2778	6.8333	1.7222	5.4444	5.0556	4.1667	3.8333	2.4444	1.6111	1.6111	2.6111	3.1667		0.617802	4.27932
14.1778	3.3333	2.6667	3.0556	5.0556	7.6111	4.3333	3	2.3889	1.3889	4.1111	4.4444	4.5	14.5556	6.7778	3.1111	3.9444	6	3.6111	2.5	3.6111	3.3889	5.0556	9.8889	1.1111	3.2222	9.8333	4.4444	6.3889	2.8333	1.7778	2.8333	2.3333	2.8333	1.1111	1.7222	2.3333		0.623036	4.19753
14.297	4.4444	3.7222	3.7222	2.1111	9.2778	4.5	1.6667	2.3333	4.6667	7.3333	2.6667	6.2778	8.8889	8.3889	4.8889	1.1111	4.1667	3.3889	2.5	3.7222	5.1667	3.1111	4.6667	5.6111	2.8333	6.5556	2	5.6111	3.0556	4.6667	2.2778	3.9444	3.2222	2.1667	3.3333	1.4444		0.628274	4.15124
14.4161	7.4444	4.5556	1.2222	2.1667	3.7222	6	1.5	1.6667	4.0556	7.6111	2.6667	7.1667	8.9444	10.8333	4.5556	4.3889	8.1667	1.4444	2.7778	1.9444	10.7778	4.3889	5.5556	1.2222	4.7222	4.3333	2.6111	3.3889	2.8889	8	3.4444	2.9444	2.3889	1.4444	3.3889	2.5		0.633508	4.35648
14.5352	4.7222	4.0556	3.6111	1.6111	5.5556	2.8333	3.5556	3.1667	5.6667	7.8333	3.9444	9.2222	9.4444	4.4444	4.2222	3.3889	8.3333	3.2778	4.2778	2.5	2.3889	5	6.2778	5.3889	3.1111	5.4444	4.0556	5.5	1.2778	5.2778	4.3333	2.5556	1.8333	3	2.5	2.6667		0.638741	4.34105
14.6544	5.3889	4.6111	2.1667	1.8889	3.1667	2.4444	1.1111	2.6667	2.8333	7.0556	4.3333	4.7778	5.5556	6	6.2222	3.6667	6.0556	3.3333	2.2778	1.1667	7.0556	6.0556	4.3889	3.8333	2.1667	4.7778	4.3333	3.7222	1.1111	1.1667	4.1667	3.8333	3.8333	1.3889	1.2778	2.8333		0.64398	3.68519
14.7735	5.2222	3.5	1.2222	3.1111	5.6667	4.4444	1.8889	2.2778	1.8889	6.5556	6.5556	4.3333	8.6111	8.5556	2.6667	1.8889	5.5556	3	2.3889	2.8889	1.7222	4.7222	5.1111	4.5556	1	6	1.4444	5.8889	2.0556	4.1667	4.8333	2.3889	1.1667	1	2.4444	1.2222		0.649213	3.66513
14.8927	2.4444	4.3889	1	2.5	6.0556	4.5556	1.5556	2.7222	3.4444	4.7222	2.5	3.8333	13.7222	6.6111	2.1667	3.9444	6.6111	3.7222	1.3889	2.9444	2.8889	3.6667	5.7222	7.4444	3.2222	6.2778	1.9444	8.7222	3	2.2778	2.7222	1.8889	1.8889	2.2778	2.8889	1.0556		0.654452	3.85339
15.0118	4.9444	1	3.5556	2.7222	7.2222	5.1111	2.6667	1.8333	3.7778	16.8333	4.1667	2.1667	14.0556	9.4444	4.6111	1.9444	3.8889	4.3889	2.2222	6.7222	3.3333	7.0556	4.1111	1.2778	1.7778	3.0556	1.1667	4.1111	3.8889	3.9444	3.4444	1.1667	2.7778	2.7778	3.3889	2.6111		0.659685	4.25463
15.1309	2.7222	3.3889	1.8889	2.1667	7.6111	5	3.0556	2.2778	5.1667	9.8889	2.0556	4.7778	9.8889	7.5	6.5556	3.6667	5.7778	3.3333	5.2778	5.4444	5	4.1667	4.3333	2.8333	3.3333	2.0556	1.8333	3.5	2.0556	1.1111	1.0556	2.2778	2.1111	2	1.0556	1.5556		0.664919	3.82563
15.2501	4.5	1.2778	2.2222	3.3333	4.0556	4.2778	3.2222	1.0556	2.8889	3.7778	2.5556	4.1667	15.6111	3.9444	5.6111	2.3333	6.2222	4.6667	5	8.2778	11.8333	2.7778	5.8889	4.7778	1.6111	6.3889	2.3889	4.3889	2.4444	2	2	2.6667	1.2222	1.2222	3.2222	2.0556		0.670157	4.05247
15.3692	2.9444	2.2778	4.5556	1.4444	4.7222	5.3333	3.4444	1.8889	3.3333	6.5	2.0556	4.7222	16.6667	6.1667	2.5	2.3889	4.7222	1.8333	3.3889	4.7222	7.6667	2.2222	3.2778	2.7222	1.2778	3.6111	1.5	3.3889	2.3889	2.7222	3.6667	1.2778	1.0556	1.6111	1.5556	1.8889		0.675391	3.54013
15.4884	6.5	3.0556	1.8889	2.1111	3.6111	3.8333	1.8333	1.9444	2.1667	8.5556	4.2778	3.7222	13	3.4444	1.3889	6.2222	5.1111	3.6667	5.8889	2.7778	6.4444	3.7222	2.1667	1.3333	2.3333	2.5556	3.0556	1.1111	3.1667	1	2	2.1111	2.5556	1.1111	1.1111	2.4444		0.680629	3.42284
15.6075	1.7778	2.8889	4.2222	2.6667	8	5	1.1111	6.1111	3.0556	3.3889	6.1111	5.5	13.6111	5.0556	2.7222	4.1667	4.7778	4.8889	2.3333	4.2222	2.0556	3.3333	1.6111	2.4444	1.1111	2.0556	1.0556	3.4444	1.1667	1.3333	2.8889	1	1.0556	1.1111	1.5	2.1111		0.685863	3.35803
15.7266	4.8889	3.1667	1	2.1111	3	7.1111	2.5	1.1667	3.7778	3.8889	3.7222	2.7778	24.5	7.2222	3.5	2.8889	8	3.6667	3.0556	2.6111	2.9444	3.6111	1.1111	3.6667	1.8333	3.1667	1.1111	1.6667	0.8889	1.0556	3.4444	1.6111	1.4444	1	1.3333	0.8889		0.691097	3.48148
15.8458	5.6111	2.2222	3.1667	2.7778	5.6667	3.7778	3.2222	3.1111	3.3889	5.6111	4.8333	3.7222	24	3.8333	1.8333	4.0556	2.7222	4.1667	2.1111	4.5	3.2778	2.7222	2.5	2.6111	1.1667	2.5556	1.3889	1.8333	1.4444	1.8889	2.8333	1.7222	3.5	1.8333	2.7778	3		0.696335	3.64969
15.9649	1.5	2.6667	1.0556	2.3889	4.6111	8.6667	1.8333	2.5556	3.7222	4.5	4.5556	3.9444	22.9444	3.7222	3.1111	8.7778	6.3889	3.1111	4.9444	9.5	2.3889	1.2222	1.6111	3.5556	1.2222	2.6667	2.5	2.3889	2.4444	1.7222	1.1667	1.0556	1.1667	1.1667	1.1111	1.1111		0.701569	3.69445
16.0841	3.8333	1.2222	2.3333	2.1667	3.5556	5.3333	1.7778	2.1111	2.8333	6.6667	4.5556	5.5556	16.6667	5.0556	3.7222	6.3889	8.5556	2.9444	1.8333	5.5	3.8889	3.9444	1.5556	3.8889	1.1111	3.7222	2.2222	1.1111	0.9444	1.0556	1.4444	1.0556	1.1667	1.1111	1.7778	1.0556		0.706807	3.43519
16.2032	1.6111	3.1667	4.2222	3.3889	5.3333	6.2222	3.1667	1.2222	1.1111	4.7778	5.5	6.1111	22.3333	6.0556	5.6667	2.5	4.2222	2.1111	1.7778	2.3889	1.8889	2.6667	3	4.1111	1.7222	4.5	1	1.6111	1.5	1.2222	1.2222	1.6667	2.6111	0.9444	1.2222	1.7222		0.712041	3.48611
16.3224	4.1111	1.2778	2.1667	3.4444	6	3.8333	4.6111	1.7222	2.0556	4.6667	3.1667	4	21.5556	2.6667	1.8889	5.3333	4.2778	4.1667	1.2222	4.8333	2.2222	1.8889	1.6667	1.5556	3.3333	2.7778	1.1111	0.9444	1.1667	1.1111	2	1.8333	1.8333	1.4444	2	0.8889		0.717279	3.18827
16.4415	2.7222	2.2222	1.9444	4	3.7222	3.8333	2.5556	3	2.6667	5.2222	5	5.1667	17	5.5	3.5556	3.7778	6.1667	8	2.8333	2.4444	1.8889	1.2778	1	1.9444	1.1111	1.8333	1.0556	1	2.1111	2.1111	1.5556	1.4444	1.1667	1.6111	1.9444	1		0.722513	3.20524
16.5606	3.6667	3.5556	2.5556	2.2222	5	5.3333	3.5556	1.8889	3.3333	6.1111	3.1111	3.8333	23.3889	7.6111	4.6667	4.1111	6	3.8333	1.6111	2.9444	1.6667	1.6111	1.8889	1.5556	1.6667	3.6111	1.1111	2.0556	1.6111	1	1.1667	1.8333	1.6111	1.7222	1.2222	1.2778		0.727747	3.47068
16.6798	3.4444	1.6111	2.6667	1.7222	6.0556	3.1667	5.9444	6.0556	3.2222	6.3333	3.6667	2.5	17.5556	4.4444	2.1667	2.8333	4.5556	5.8333	1.1111	3.4444	1.5556	3.3333	2.6667	2.3333	1.1111	1.7222	3.2222	1.5556	2.3333	1.0556	1.1111	1.1667	1.1111	1.0556	1.7778	1.6111		0.732985	3.25154
16.7989	3.2222	1.4444	2.0556	3.3889	5.6667	5.2222	3.4444	1.0556	2.7778	3.1111	3.6111	5.6667	14.5	4.0556	1.8889	3.6667	3.3333	4.3889	1.2222	2.1667	3.6111	1.6111	1.4444	1.6111	3.1667	2.5	2.2778	1.3333	1	2.1667	1.1111	1.3889	1.5	1.3889	1.1667	1		0.738218	2.89352
16.9181	4.1111	3.8889	4	2.1111	5.7778	1.9444	3.3889	7.5	6.5	4.4444	4.9444	8.1667	17.5556	4.5	5.6111	5.6667	2.2222	4.8889	2.3333	2.0556	1.1111	1.6667	2.3333	1.1667	1.2222	1.2778	3	2	1.5	1.8889	2.7222	1.6111	2.1667	1	1.7222	1.3333		0.743457	3.59259
17.0372	2.2222	2	2.8889	5.7222	5.3333	8.7778	4.7778	1.4444	3.2222	2.5556	3.5556	8.6111	9.8889	7.1667	1.8889	4.2222	4.2778	2.6667	1.1111	1.2222	1.7222	2.2222	1.1667	2.2222	2.8333	2.2778	1.1111	1.1111	1.6111	1.1111	2.7778	1.0556	1.8333	2.5	0.9444	1.7778		0.74869	3.10648
17.1563	4.5556	1.2222	1.3889	4.8333	3.7778	3.5556	4.8333	1.8333	5.1111	8.8333	2.8889	5.5556	10	7.4444	4.4444	3.3333	5.2778	3	1	1.7222	1.1667	1.0556	1	2.5	4.9444	1.1111	1.1667	1.0556	1.7222	1.1667	1.5556	1.1667	1.1111	1.5556	1.8889	1.8889		0.753924	3.07408
17.2755	2.0556	1.8889	3.0556	5.6667	4.3889	1.8889	6.6667	1.8889	5.0556	3.7222	2.8889	4.6111	14	5.5	3.1667	4.3889	2.2778	1.1111	2.4444	1.2222	2.6111	3.6111	1.3333	1.1111	3.2778	1.1667	1.1111	2.1111	2.5	2	1.3889	3.3333	2.2222	1.2778	2.3333	1.3889		0.759162	3.07408
17.3946	7.8333	1.9444	2.9444	5.6111	6.0556	6.3889	6.5556	2.3333	3	4.0556	1.7222	5.1667	6.1667	4.5556	4.3333	5.7778	2.7778	2.2222	1	1.9444	1.0556	1.1111	1.0556	1.7222	3.1111	2.2222	1	1.8333	1.8889	2	1.2222	2.1111	2.1111	2.2222	2.1667	1		0.764396	3.06173
17.5138	1.6667	4.0556	1.5	1.8333	2.6667	7.1111	5.1111	4.2778	2.0556	6.0556	6.1111	6.0556	14	1.8333	3.1667	6.4444	4.0556	3.5556	2.6111	1.2222	2.1111	1.1667	1.3333	2.4444	7.8333	3.1667	1.2222	2.4444	1.5	1	1.7778	2.1111	1.2778	2.1111	1.1667	1.1111		0.769634	3.31019
17.6329	2.3889	3.5	1.1111	3.0556	4.4444	2.7222	2.7778	2.8889	2.5556	7.6667	2.5	6.2778	11.5556	6.1111	2.5	1.3889	6.2778	1.6667	1.1667	0.9444	1.3889	1.3889	1.9444	1.3333	3.7222	1.5556	2.1667	3.8889	1	1.1111	0.9444	1.1667	1.1667	1.1111	1.0556	1.0556		0.774868	2.7639
17.7521	3	2	1.6667	3.6111	6.8333	5.9444	6.2778	4.1667	2.1111	1.1111	5.1667	2.7222	9.3889	3.7222	4.4444	7.2222	3.9444	2.8333	2.3333	1.0556	1.1111	1.9444	1.1111	2	3.7222	2.0556	1.1667	2.8333	2.0556	1.5	1.2222	1.7222	1.8333	2	1.1667	3		0.780106	3.05555
17.8712	2.8889	2.8889	1.2778	2.7222	6.6667	2.9444	3.6111	3.2222	1.8889	2.1667	4.4444	4.9444	15.6667	9.2778	3.1667	2.8333	6.8333	2.9444	1.2222	0.9444	1.8333	2.5556	2.9444	1.6111	5.5	1.1111	1.3333	1.0556	1.7778	1.3889	1.1667	1.7778	1	1.1667	2.7778	1.1111		0.78534	3.12963
17.9903	3.6667	1.1667	1.9444	5	5.4444	5.6111	7.0556	2.7778	3.3333	4.5	5.8333	8.0556	10.3333	5.9444	3.1111	6.2778	7.7222	2.6111	1.0556	1.4444	1.1111	1.1111	1.0556	1.7778	3.6111	1.0556	1.1111	1.6667	1	1	2.0556	1.2222	1.0556	1.1667	1.5	1.1111		0.790574	3.20834
18.1095	4.1111	0.9444	2.5556	2.8889	1.1111	2.5	9.6111	4	4.7778	2.5	2.5	9	8.1667	3.1667	3.7778	4.8333	4.2778	2.4444	1.1667	1.8333	2.6667	1	1.1111	1.7778	2.8889	1.1667	1.8333	1.5556	3.0556	1.1667	1.2222	0.9444	1.3333	1.6667	3.1111	1		0.795812	2.87963
18.2286	5.4444	4.8333	1.7222	2.8333	4.5556	3.4444	12.5	1.7222	1.1667	2	6.7778	3.7778	7.6667	6.7778	3.3333	6.6111	4.7222	1.1111	3.5556	1.6111	1.1667	2.8333	1.1111	1	1.2778	1.6111	2.3333	1.1111	2	1.6111	1.1667	1.5556	0.9444	1.0556	3.1667	1.1111		0.801046	3.08951
18.3478	5.0556	6.2778	4.3333	4	3.2778	4.8889	13.4444	1.6111	1.9444	4.3333	4.4444	8.6667	9.5	3.6667	2.2222	9.3333	2.5556	1.0556	1.2222	2.2222	2.3333	1.2778	1	1.1667	3.2778	1.3333	1.1111	1.2222	1.1111	1.0556	1.7222	1.1667	1.2222	3.0556	1.1667	2.1111		0.806284	3.31636
18.4669	3.3889	1.8333	2.6667	2.8333	4.3333	8.6111	3.2778	2	7.8333	4	3.7222	12	8.2778	4.3333	3.1111	9.5	3.7778	2.2222	1	0.8333	1.0556	1.6111	1.7778	1.3333	4.8889	1.6667	2.2222	1.4444	3.7222	1.1111	3.3333	1.1111	1.3889	1.1111	1.1111	1.6111		0.811518	3.33487
18.586	6.0556	1.4444	3.2778	5.4444	4.6667	3.2778	4.7222	6.7778	8.2222	2.9444	3	8.6111	10.0556	8.5556	3.7778	1.2222	2.7778	1.7778	1.8333	1.0556	1.5	1.2222	1.5556	1.0556	2.8889	2.5	1.1667	4.2778	1.7222	1	1.1667	1.1667	1.6667	1.1111	1.1667	1.1111		0.816752	3.21606
18.7052	3.6667	3.1111	5.3333	2.5556	4.1667	9.7778	4.4444	5.5556	6.7778	7.2778	4.6667	9.7778	5.6111	3.2778	3.9444	2.4444	4.6111	1.2778	1.9444	1.2778	1.2222	1	1.0556	1.6111	2.6111	1.1111	1.2778	1.0556	1.1111	2.5	1.8333	2.2222	0.8889	1.0556	1.5	1.1667		0.82199	3.18673
18.8243	3.8889	1.3889	4.8889	1.8889	5.5556	12.1667	6.7778	3.1111	4.3889	4.2778	4.5	3.3333	4.8333	6.7222	3.5556	4.5	3.1667	1.2778	1.7778	2	2.5	1.1111	3.6667	1.1667	1.7222	1.5	1.5	1	1.1667	1.3333	1.3889	1.5	1.1667	1.2778	1.1667	1.5556		0.827224	3.02007
18.9435	4.3889	2	1.5556	4.5	3.8333	9.2222	2.3889	5.5	5.4444	6.5	3.2778	5.0556	5.7222	5.8333	4.8333	5.8889	2.9444	0.9444	2.1111	1.8889	1.2222	1.1667	1.1667	2.2222	4.6667	1	1.8889	1.3889	1.0556	2.1667	1.1667	1.3889	1	1.0556	3.1111	1.5556		0.832462	3.08488
19.0626	4.2222	1.6667	4.7778	2.8333	3.3889	6.5556	4.7778	6.1667	5.5556	5.9444	6.1667	9	3.6111	4.1111	3.2778	2	2.1667	1.6667	1	1.1111	0.9444	1	3.5556	1.2778	2.0556	2.8333	1.1667	1.6111	1.3889	0.9444	1.1667	1.3889	1	1.7778	1.1667	1		0.837696	2.89661
19.1817	2.5556	4.9444	3.5	2.7222	2.6667	2.7778	4.1667	4.2778	3.2778	2.6111	10.0556	7.3333	11	4	3.5	3.2778	2.2222	2.5	1.7778	1.2778	4.8333	1.6111	1.7222	0.9444	4.9444	1.3889	1.8333	2	2.2222	1.5556	1.1667	1.3889	1.8333	1.9444	1.5	1.2222		0.842929	3.12654
19.3009	4.3889	3	3.4444	4.1111	3.3333	6.8889	1.7222	3.2778	2.3333	4.4444	8.6667	3.8889	8.5556	4.2222	3.7778	1.6667	4.2222	3	1.3333	1.1111	1.3333	2.2222	1.3333	2.6667	2.2778	1.1111	2.3889	1.2778	2.8889	1.0556	1.5556	1	1.6111	2.2222	2.1111	1.2778		0.848168	2.93673
19.42	5.5556	2.2778	1.8889	4.7778	2.8333	3.3889	4.4444	6.5556	6.6667	3.1667	6.7222	3.7222	11.0556	5.3889	3.3333	4.7222	2	2.7222	1.0556	1.0556	2.7222	3.2778	1.6667	3.2222	2	1.2222	1.4444	2.3333	1.1111	1.1111	1.0556	1.1667	1.1667	1.7778	2.1111	3.8333		0.853401	3.1821
19.5392	2.5556	5.2778	1.7778	3.7778	1.8333	6.5	3.5	8.0556	2.6667	4.6111	5.1667	9.9444	13.4444	5.5556	3.1111	3.4444	1.0556	1.3889	1	1.0556	1.0556	1.4444	1.7222	1.4444	1.1667	2.2222	1.2778	1.2222	2.3333	2.0556	1.7778	1.6111	1	1.1667	1.3333	0.9444		0.858639	3.04167
19.6583	3.1111	2.4444	2.3333	4.5556	1.5556	1.8333	3.7222	6.4444	7.4444	9.7778	3.7778	16.3889	18	3.6111	3.9444	4.5	2.7778	1.2222	1	2.1111	2.1111	1.1111	1.4444	1.2778	2.5556	3.2222	2.5556	1.0556	1.3333	1.0556	1.9444	1.4444	1.3333	1	1.6667	1		0.863873	3.51851
19.7775	6.4444	1.4444	4.5556	10.5	1.8333	2.5556	5.9444	8.1111	3.3333	4.1667	5.7222	14.0556	17.7222	3.6667	4.5	1.9444	1.3333	1.1667	1.4444	1.1667	3.7778	3.3889	1.1667	1.2222	2	2.8333	1.4444	2.0556	2.2778	1.1111	1	1	2.5556	3.5556	1.3889	1		0.869111	3.70525
19.8966	2.4444	3.8889	2.3889	8.5	1.8333	1.9444	8.8889	7.3333	3.8889	2	13.2778	15.4444	9.9444	6.2778	5.5	3.7778	1.4444	1.3333	1.1667	1.0556	2.0556	1.4444	1.1111	1.3333	1	1.6111	2.2222	0.8889	2	1.6667	1.2778	3.7778	1.0556	1.0556	1.7222	1.1667		0.874345	3.54784
20.0157	8.1111	3.0556	1.0556	3.8889	1	3.9444	6.6667	3.9444	5.5	4.8333	6.6111	11.6667	10.8889	7.6111	5.1111	1.7222	2.3333	1.6667	1.0556	1.5556	2.6111	1	2.6667	1.7778	1.2778	2	1.2778	1.1111	1	1.7222	1.0556	1.6111	1.8889	2.9444	2.1111	1.9444		0.879579	3.33951
20.1349	3.9444	3.5556	5.5556	6.5556	2.4444	1.8889	5.7778	4.9444	8.2222	2.3333	7.5556	13.7778	11.2222	3.5	4.2222	1.6111	1.1111	1.1111	1.1667	1.7222	1.0556	1.7778	1.1111	1.8333	2.2778	2.0556	1.0556	1.6111	1.0556	1.1111	1	2.8333	1.0556	2.1667	1.0556	1.3889		0.884817	3.24075
20.254	6.8333	1.2778	3.5556	7.4444	3.3889	2	5.3333	5.6111	3.8333	6.1667	9.8333	9.8333	8.2778	9.0556	5.7222	1.2778	2.0556	1.5	1.5556	2	1	1.4444	2.1111	1	2.2222	3.6111	1.1111	1.2222	2.6111	1.2778	1.6667	2	2.1111	1.7222	1.7778	1.0556		0.890051	3.45833
20.3732	4.3333	3	2.5556	5.2222	2.0556	1.1111	7	5.5556	7.5556	3.5556	8.7778	8.1111	8.1111	4	5.6667	1	3.1667	1.1667	1.8333	1.7222	1.1111	1.0556	1.5	4.6667	1.0556	2.5	1.1111	1.7222	0.9444	1.7222	1.5	1.5	1.7222	1.1111	1.1111	1.2778		0.895289	3.08642
20.4923	3.6667	2.3889	2.0556	5.4444	2.6111	1.9444	2.6111	4.8333	9.8333	3.8889	6.5556	6.4444	7.7222	7.7778	4.9444	2.0556	2.1667	1.5556	2.3889	1.1111	1.1111	2.0556	1	2.4444	2.5	1.5	1.1667	1.2778	1.0556	2.3889	2.2778	1.1667	1	1.2222	0.9444	2.4444		0.900523	2.98766
20.6114	7	2.8333	2.2222	5.1111	1.1667	1.1111	3.1111	5.2222	4	3.5556	9.1667	8.5	8.5556	7.3889	5.2778	3.3889	2.6667	2.1111	1.1111	2.4444	1.7222	1.3889	1.8889	1.0556	2.0556	2.5556	1.8333	2.1667	1	1.2222	1	2.1111	1.9444	2.2778	2.1667	1.1667		0.905757	3.15278
20.7306	3.1111	1.8333	3.4444	5.3889	2.4444	2.0556	5.8333	8.1111	6.5	2.6667	10.1667	11.5	8.5556	5.4444	5.2222	1.2222	1.4444	1.1667	1.0556	1.8889	1.5556	1.1667	1	2.7778	1.8333	1.9444	3.8333	2.5	1.1667	2.7222	1.2778	1.1111	1.5	1.1111	1.2778	1.6667		0.910995	3.26389
20.8497	3.5556	1.8889	2.5556	5	1.6667	3.7222	1.7222	5.1111	4.2778	5.4444	3.3333	9.5	9.3333	3.3333	4.8333	1.2222	1.7778	1.3889	1.0556	1.5	1.1667	1.5556	2.6667	3	1.5	4.4444	5.1111	1.7778	1.0556	0.8333	1.1111	3.1667	1.8889	1.6667	3.3889	1.8889		0.916229	3.01235
20.9689	9.1667	5	3.6111	5.2778	1.8333	1.1667	3.5	5.2222	5.7222	4.2222	11.3333	9.7778	6.4444	4.6667	4.1111	1	1.8889	2.4444	1.8333	1.5	1.3333	1.3889	1	1.7778	1.1667	2.8333	2.3889	1.1667	1.1667	1	1.8333	1.3333	1.9444	1.4444	1.1111	0.9444		0.921467	3.15431
21.088	7.3889	2.3333	3.8889	3.7778	2.3889	2.3333	2.3889	4.8333	4.4444	7	6.8889	9.5	4.5	2.3333	6.0556	2.3333	1.5556	1.1667	2.6667	1.1667	2.1111	1.2778	1	1.2222	1.2222	1.9444	3.1111	0.9444	4.1111	1.1111	1.8333	1.3333	1.2778	1.2222	1.1111	1.1667		0.926701	2.91512
21.2071	8.2778	6.1111	1.1667	2.6111	1.1667	1.2222	3.1111	3.9444	6.5556	4.6111	7.9444	6.8889	7.2222	2.7778	4.9444	1.9444	1	0.8889	1.3333	1.0556	0.9444	2.1111	1.8333	1.0556	3.8333	1.3333	2.8889	1.1111	1.2778	1.2778	2.1667	1.5	1.0556	1.5556	1.0556	1.1667		0.931934	2.80401
21.3263	10.1111	4.5	6.7778	5.0556	2.1111	1.2778	1.6111	5.5556	6.2222	7.5	7.6667	8.5	8.9444	3.7222	3.2778	1.1111	1	1.1111	1.2222	0.9444	1.9444	1.5	2.2778	1.3333	1.7222	3.3889	3.5556	1.2222	3	2.0556	1.0556	1.0556	1.8333	1.1667	1.2222	1.1111		0.937173	3.26852
21.4454	6.7778	4.1111	3.5	1.7222	3.6111	1.7778	3.5556	9.0556	5.8333	2.8889	5.8889	13	8.1667	1.7222	5.6111	1.5556	2.1111	1.1111	1.2222	2.1111	1.1667	2.6111	2.5556	1.0556	2	1.4444	2.5	1.1667	1.5	1	2.2778	1.8889	1.1667	1.1667	1.1111	1.2778		0.942406	3.08951
21.5646	4.3333	3.7778	6.6667	4.4444	2.5556	1.4444	5.3889	2.2222	5.2222	8.4444	6	2.5	12.1667	7.3889	6.7778	1	2.0556	1.3889	1.2222	1.1667	1.1111	2.3333	1.2778	1.7222	1.2222	1.2222	2.0556	1.2222	1.1111	1.0556	1.0556	1.0556	3.4444	1.1111	1.2222	1.1667		0.947645	3.04321
21.6837	8.2222	2.5556	6.8333	2.8333	3.5	1.9444	4.4444	3.8333	2.6111	8.5556	8.6667	5	6.3889	2.7778	4	1.3889	1.3333	1.8889	1.6667	1.7778	1.2222	1.8889	1	2.8889	1.1667	2.5	1.9444	2.1111	1.2222	1.9444	2.3333	1.2778	1.1111	1	1.2222	2		0.952878	2.97376
21.8029	9.7778	3.6111	2.3333	2	1.6111	1.5	2.5	8.3333	3.5	4.3889	10.5	5.2222	6.1111	6.5	2.7222	1.4444	1.1667	1.1667	1.0556	1.0556	2.2222	1.0556	1.1111	1.0556	2.4444	2.8889	1.6667	1.6111	1.1111	1.0556	1.3889	1.6111	1.5	1	1.0556	2.9444		0.958117	2.83951
21.922	5	4.1111	5.3889	1.7778	3.3889	1.7222	1.8889	7.7222	2.2778	8.2778	4	7.2778	10.3333	4.1667	3.9444	2.2778	2.6111	1	1.2222	1.2222	1.1667	2.8889	2.2222	2	2.0556	2.5556	1.3889	1.1667	1.2222	1.6667	2.6667	1.2778	2.5556	1.5556	1.2222	2.4444		0.96335	3.0463
22.0411	8.8889	3.6111	5.3889	1.0556	1	3.0556	4.0556	6.8889	3.9444	5.3889	8.2222	4.4444	6.1111	5.3889	4.3333	1.2222	1	1.7778	1.0556	1.1667	1.7778	1	2	1.7778	1.1667	1.7222	1.8889	2.0556	1.4444	1.1111	1.4444	1.5	1.1667	1.1667	0.9444	0.9444		0.968584	2.80864
22.1603	5.8333	4.3333	5.8889	3.0556	1.6111	2.3333	1.0556	5.1111	3.8889	8.9444	5.2222	7.2778	5.2778	2.6667	3.9444	2.1667	1.1667	2.1111	1.9444	1.7222	1.4444	1.1667	1	1.3889	2.4444	2	1.0556	2.4444	2.5556	1.8889	1	1.1111	1.3889	1.3889	1.6111	1.3333		0.973822	2.79938
22.2794	2.5	5.6667	2.4444	1.1667	1.7222	1.2778	2.7222	3.5556	1.5556	4	6	6.1667	6.8333	3.3333	3.8333	1.2222	1.3889	1.4444	1.2222	1.8333	1.1667	1.1667	1.0556	2.0556	1.6667	1.1111	1.2222	1.5	3.0556	1.0556	1.1111	2.6111	2.3889	1	1.2222	2.5556		0.979056	2.38426
22.3986	2.2222	3.7778	4.7778	1.6111	1.9444	2.2222	2	2.1667	7.5	4.9444	5.8333	3.1111	7.7778	7.0556	1.3333	2.1111	1.0556	1.5	1	1.5556	1.4444	1.7778	1.7222	0.9444	1.3889	1.2778	1.2778	2.1667	1.1111	1.2222	0.9444	1.1111	1.1667	1.0556	1.1111	1.1111		0.984294	2.39815
22.5177	1.9444	4.7222	5	1.1667	1.9444	1.1667	1.6111	2.5	5.2778	4.6667	3.1111	7.2222	4.8889	2.8333	4.5	1.7778	2.1667	1.3333	1.2222	1.1111	2.3333	1	1.1111	4.0556	1.1111	1.5556	1.1667	6.1667	1.0556	1.6111	0.9444	1.1111	2	1.1111	1.1667	1.1111		0.989528	2.46605
22.6368	3.2778	4.9444	7.4444	4.7778	1.5	2.0556	1.2778	2.5556	4.5	3.5	4.3333	7.7222	9.0556	4.4444	4.3333	1.9444	1.2778	1.1667	1.3889	1	1.0556	1.1111	1.0556	2.2222	1.8889	3.3333	1.3889	1.9444	1.0556	1	1.2222	1.5556	1	1.2222	2	1.3333		0.994762	2.69136
22.756	2.5	5.0556	5.3333	3.2222	1.1111	1.9444	2.5556	2.8889	1.8333	4.6111	3.3889	4.6111	4.0556	6.3333	5.5	1.1111	1.5556	1.0556	1.0556	1.2778	1.7222	1.1111	1.0556	1.4444	1.8333	3.1667	1.2778	1.5	1.8889	1	1.2778	1.9444	1.1111	1.3333	1.1667	2		1	2.38426

## Sheet: Image4
X0	Y0	Y1	Y2	Y3	Y4	Y5	Y6	Y7	Y8	Y9	Y10	Y11	Y12	Y13	Y14	Y15	Y16	Y17	Y18	Y19	Y20	Y21	Y22	Y23	Y24	Y25		Ap-Basal	Avg intensity
0	9.4816	8.0299	8.5127	13.1509	11.16	11.0326	8.3671	17.4677	16.7501	8.2028	10.5117	6.6055	8.1376	9.3046	7.659	6.3044	7.7406	5.278	5.8364	6.7293	5.2844	3.7675	5.9499	3.1212	2.468	6.5845		0	8.20915
0.1191	9.4206	8.0356	7.2213	13.7758	9.3993	9.2783	10.803	19.4182	19.3452	15.4574	12.6739	10.0935	7.796	14.6694	6.6723	12.0149	4.5434	5.8428	5.4549	3.6631	7.071	4.2635	3.7351	2.9997	8.7318	10.3385		0.00526134	9.33533
0.2383	13.2948	9.0647	11.0739	8.4076	10.8157	12.7898	11.1849	15.6496	10.981	13.9501	14.4374	12.3717	9.4657	6.9832	7.543	9.4011	8.2228	9.7626	4.4014	3.1014	5.7046	3.0623	5.2722	2.3255	7.2907	10.3632		0.0105271	9.11234
0.3574	10.9512	7.324	8.2199	9.3771	11.5855	9.4328	14.3855	18.1955	13.6953	12.2642	9.8152	12.6792	9.5693	9.457	9.4712	5.9396	10.0119	12.1474	3.7933	3.5842	6.8738	8.1101	5.7356	4.6645	9.0714	9.2184		0.0157885	9.44512
0.4766	5.6574	12.4173	13.7521	15.6718	10.0889	8.2274	13.821	17.7148	12.8081	15.6049	8.4921	9.1658	5.4711	9.0418	6.7388	7.8148	13.6716	10.7027	5.5692	4.4523	7.2769	8.1335	4.4425	3.4387	4.5009	9.4794		0.0210542	9.39061
0.5957	9.2583	9.3404	9.7931	12.4452	10.889	12.037	11.1624	22.0952	11.9488	14.5211	13.633	8.1119	7.5285	10.7107	5.3183	10.0035	14.6683	13.4852	8.964	2.8179	5.2766	6.4545	3.7534	2.7475	5.6402	8.7837		0.0263156	9.66876
0.7148	9.6038	8.6902	11.7561	10.9885	12.7575	12.1048	13.0707	21.1976	10.1096	16.8569	12.5678	10.9567	7.815	12.2306	10.5189	7.3008	13.5223	17.6224	11.4084	4.7914	5.4616	7.9168	6.9111	2.9558	6.7038	9.0847		0.0315769	10.5732
0.834	12.9721	9.1176	10.3626	14.3758	10.4523	8.747	19.0192	22.6786	10.0633	12.6353	16.9138	10.792	5.9634	11.8263	9.9254	13.1289	12.5128	22.9305	10.2581	8.2261	8.3665	7.6699	5.5899	4.0353	7.4129	11.7763		0.0368427	11.452
0.9531	10.8064	7.1297	9.1888	18.2565	12.3877	10.1236	15.567	26.0373	20.9603	12.9969	13.1089	8.407	10.288	13.1668	9.3455	8.5922	12.8248	20.4465	9.0604	9.6267	15.926	9.3781	6.2387	8.9384	5.2996	14.1233		0.042104	12.2394
1.0723	13.17	7.4081	8.4979	10.891	14.2223	15.9458	15.6154	20.1413	22.6161	9.9266	13.9344	11.0413	6.7312	8.3465	13.2529	5.9855	14.8766	20.4915	13.4228	6.7304	12.6694	13.7497	9.1674	7.7089	8.2209	13.2532		0.0473698	12.2314
1.1914	9.2862	8.9012	8.6352	12.3728	14.7272	12.2894	11.4149	23.2528	13.5198	10.3136	14.8828	11.5458	9.0892	11.5445	6.7741	10.2701	14.3274	19.7652	12.1779	5.6913	12.6954	17.0798	9.1745	8.6294	4.3729	10.8355		0.0526311	11.6757
1.3106	8.8495	5.4546	9.3449	11.0384	12.0976	10.8984	14.1634	25.2525	16.7117	15.8255	19.4027	10.9704	5.7166	9.0855	9.6544	7.267	20.4375	19.6376	15.1061	5.9497	17.1199	17.8904	12.7413	6.6469	6.0995	7.5946		0.0578969	12.3445
1.4297	9.5603	9.2371	7.8826	17.4581	18.976	11.9248	18.7247	21.9399	19.7425	15.9348	13.2651	7.8318	9.307	9.0269	8.2603	10.888	19.6889	27.2931	9.7324	6.9746	10.9708	15.2935	9.2365	5.6941	7.2199	8.3245		0.0631582	12.7072
1.5488	8.6071	16.6978	7.6074	17.1014	19.5508	12.398	15.8153	24.051	15.9391	12.8121	15.2042	11.0391	10.2712	9.9495	14.4525	13.2862	18.507	22.2299	15.1456	12.2973	16.1959	17.6414	15.5947	6.3128	4.1026	10.2486		0.0684196	13.9638
1.668	9.4211	9.887	10.5236	13.0742	19.8664	12.3527	18.5832	25.8977	22.431	14.9557	18.1551	10.3972	7.6769	9.9908	12.8741	7.912	26.4892	34.0608	16.7514	5.4864	10.3894	17.234	17.7718	8.6746	5.6402	14.5398		0.0736853	14.6552
1.7871	10.9531	7.002	15.4626	20.4077	18.7752	14.7468	14.8923	17.782	16.4642	13.0014	24.4967	5.6384	8.6995	14.4114	13.1098	9.223	23.8316	29.6956	24.6129	10.9188	8.9864	15.1732	14.8403	12.0631	6.9011	10.6627		0.0789467	14.7212
1.9063	16.1378	5.9494	8.7634	20.2325	17.5746	14.17	12.4361	22.3289	20.7977	15.3852	19.1762	5.0994	4.6855	14.5767	8.8512	11.8814	23.8534	28.022	24.5367	13.4065	14.6011	17.728	12.4926	10.0831	13.9727	8.2906		0.0842124	14.8089
2.0254	14.2062	8.4159	8.9311	18.1122	15.8347	14.4585	15.7337	24.6003	14.6562	16.4679	14.8398	7.7756	7.8085	13.6795	10.3814	7.5144	19.2379	27.0539	17.694	16.8233	15.4409	25.395	14.8004	8.8513	11.7402	5.4976		0.0894738	14.4596
2.1445	11.7102	8.1189	7.1199	19.2145	18.5788	14.7198	22.2014	27.0436	16.602	17.6783	12.318	6.7888	8.2153	16.1656	13.7984	8.2401	13.5819	21.5078	14.8988	13.3901	10.8758	21.8154	20.913	10.6947	7.4943	8.7035		0.0947351	14.3227
2.2637	9.0902	7.318	5.1933	17.2854	19.1291	15.5881	17.8835	18.998	21.0281	16.3658	13.9094	9.6534	8.9447	12.9016	12.8545	13.3091	20.6945	27.5958	21.2972	17.6264	10.0932	21.855	14.5572	12.6727	14.6161	7.665		0.100001	14.9279
2.3828	8.3964	9.3896	7.9929	14.302	19.1762	14.5701	17.9877	22.2743	23.3075	11.6985	10.9351	9.1771	8.6756	12.0626	12.6735	16.4884	19.2245	19.5648	21.4057	11.5437	16.0096	20.0338	13.9223	11.0209	15.0649	6.5104		0.105262	14.3619
2.502	9.0658	8.3297	12.2396	9.9745	14.4211	11.5263	27.9203	15.9833	16.4241	14.3833	13.8346	8.9444	6.8273	10.672	10.8362	15.3275	23.4974	25.7975	20.0163	15.5682	14.3467	16.6047	20.5684	13.2161	7.1906	6.4262		0.110528	14.2285
2.6211	7.4087	7.545	7.4241	18.7495	20.7532	16.8173	27.5283	27.7368	14.6788	15.8653	15.1101	7.4616	8.1347	16.0767	9.4145	12.7004	28.5746	27.605	19.3249	12.5552	17.5856	18.2818	13.8268	9.3992	13.1679	9.8446		0.115789	15.5219
2.7402	11.7427	9.8441	8.8809	14.9717	21.1456	16.0493	26.462	26.9608	22.4012	15.0531	10.3853	5.7867	5.7484	12.1103	19.1977	9.7559	28.5625	26.9243	23.7229	16.6579	18.5542	17.1652	16.2993	10.81	15.1748	9.1417		0.121051	16.1349
2.8594	11.9982	9.8582	13.8157	19.6197	17.0675	17.5109	24.7397	27.3877	21.9961	15.7785	14.36	7.6109	8.4309	11.5282	11.6365	13.6636	24.2227	22.9916	25.0809	20.779	16.8629	20.4977	14.3305	10.6847	11.8023	7.5844		0.126316	16.2246
2.9785	11.3148	10.1826	13.0029	23.3006	19.0803	13.3993	22.8072	21.2135	25.6079	8.873	15.1033	10.169	5.8394	12.4329	10.9237	19.5331	25.8997	22.5925	24.2905	21.3372	13.7648	15.3277	17.0641	8.8702	12.2489	6.2396		0.131578	15.7853
3.0977	8.0553	8.8809	10.9014	18.1249	16.189	17.1581	29.0711	22.2892	18.0766	10.3957	8.0082	7.5318	8.0982	11.3975	12.2336	9.2639	28.2278	24.5834	25.7511	18.9851	21.2383	23.3411	10.9848	6.7526	13.1007	12.4999		0.136844	15.4285
3.2168	6.9476	14.8479	10.2831	16.1772	15.6345	13.6666	24.4734	24.9635	25.0889	10.7775	11.8761	5.681	6.6817	12.6521	14.5862	7.0244	30.9238	24.4506	21.9545	20.0076	16.8697	23.1618	14.0501	5.6971	13.7539	6.606		0.142105	15.3399
3.336	4.5099	11.4691	10.9883	20.3323	14.6156	10.8631	22.6751	28.1872	17.2971	9.8943	15.0485	11.2773	7.4772	8.2338	16.1133	11.4208	19.8237	26.2663	25.6886	13.0133	14.9586	23.0862	10.1332	6.1883	11.6638	11.6672		0.147371	14.7266
3.4551	9.8009	11.479	9.6028	12.2211	12.8884	13.1087	27.8422	31.9217	26.6058	8.9374	7.7756	8.9392	11.7913	13.8874	17.7472	9.73	13.8296	22.9418	23.6517	23.3582	16.2655	21.2984	11.0676	7.3888	13.1127	11.8333		0.152632	15.3472
3.5742	10.4465	6.1401	8.604	18.8381	16.3355	15.3492	29.2468	28.218	23.2814	7.1625	7.4796	9.5819	8.4097	18.6128	11.0016	15.0174	16.0065	23.3741	25.3313	25.6369	13.1759	17.1972	13.7677	8.3933	9.2974	10.3787		0.157893	15.2417
3.6934	5.8766	9.5038	7.4739	16.9383	18.9856	19.3101	29.65	24.0012	31.1589	5.1593	13.4079	8.5869	5.2004	15.6131	14.5246	12.5608	28.768	30.1372	20.3896	20.2898	12.4402	17.0995	12.1275	9.2814	11.7542	8.9067		0.163159	15.7364
3.8125	6.6187	13.1986	8.7059	17.9838	18.6564	12.1661	32.1803	28.5948	28.9008	7.1374	10.0634	11.2362	5.9666	8.9359	16.8053	8.9671	19.7388	27.6204	18.0321	15.7768	14.8352	19.0945	13.617	9.945	8.6727	12.6196		0.16842	15.2334
3.9317	8.8765	8.8279	10.5646	16.4993	13.8051	12.2765	27.6987	30.929	22.3152	8.352	9.7339	11.8381	6.8158	11.7568	16.2884	10.2404	22.8856	24.4728	27.7654	15.2926	14.6938	12.3598	11.9794	5.9888	8.5812	6.4993		0.173686	14.513
4.0508	5.9884	8.0475	6.608	26.1409	23.8054	15.3773	23.2097	36.6477	21.7403	4.7351	8.7022	11.1886	8.685	8.5025	11.5382	10.1746	18.4642	27.7286	19.9311	18.0034	10.5165	13.8581	11.4026	5.4831	12.4057	5.1946		0.178948	14.3877
4.1699	11.3655	7.1406	8.2235	19.2228	22.2091	17.5583	27.1541	36.7159	33.868	5.8173	8.5403	5.465	6.4304	12.2343	15.7218	6.6739	15.4752	23.0786	23.7211	15.7587	14.352	14.7494	13.5744	8.3233	8.4202	8.6683		0.184209	15.0178
4.2891	10.7829	7.1999	8.0952	16.2997	14.5862	19.0339	25.3483	24.9031	23.3515	5.173	9.9667	6.8292	5.7883	11.5434	15.8611	6.9431	15.3715	27.7863	17.0318	17.9704	13.8251	15.0709	13.6005	4.9248	8.157	8.0668		0.189475	13.5966
4.4082	4.8556	7.172	9.455	24.6964	24.9955	16.782	31.2492	34.6173	25.9306	7.8906	9.0093	9.0133	8.4546	13.2683	10.1742	9.0598	11.0566	19.3886	20.0246	20.0545	11.4618	12.4666	12.0713	6.8934	10.9779	10.3185		0.194736	14.6668
4.5274	6.1353	8.0777	6.3162	19.9801	26.394	16.9856	23.3288	32.5163	20.5648	11.5691	10.5944	13.792	8.8782	14.6039	11.0957	4.2319	15.0915	13.397	25.6813	15.6373	14.9339	19.1539	15.338	5.4042	10.7559	8.8806		0.200002	14.5899
4.6465	6.7725	8.1092	8.9501	18.1075	21.7774	18.2451	25.7861	23.5373	20.8031	8.839	10.7085	9.1791	8.5841	15.5303	8.3405	7.5552	20.7229	19.1576	20.445	15.6055	12.2277	19.1796	14.1421	4.6295	14.1127	11.8		0.205263	14.3403
4.7657	8.0283	7.9332	13.4328	20.0072	22.3224	17.6711	23.2401	20.7065	22.83	10.4402	4.7744	8.978	6.4975	10.1111	11.042	4.7979	15.9869	22.7026	23.1997	18.6583	10.6431	19.5384	17.4953	5.4209	10.9979	8.5613		0.210529	14.0776
4.8848	7.6733	8.6751	5.5431	20.8012	24.1298	18.4254	31.6436	21.1156	20.8546	4.6084	10.6674	7.0975	7.0267	11.1737	5.2724	8.0531	14.0266	17.9428	18.0022	20.5707	8.5542	12.6194	11.3591	4.4713	11.1317	9.1493		0.21579	13.0995
5.0039	5.9743	7.309	9.6352	21.0916	16.9049	14.601	20.1495	19.8325	19.146	4.7206	5.8526	5.0276	8.1797	8.8797	7.8958	6.6646	7.6047	20.8278	19.5858	13.3678	7.0678	12.3611	10.598	11.9626	10.3348	8.464		0.221052	11.6938
5.1231	5.9613	5.6318	11.2594	15.897	17.036	16.0876	18.2591	20.0234	19.6587	6.6703	4.8293	7.4667	6.1263	7.5258	8.0452	8.4343	8.1393	21.8792	18.4202	16.5507	10.785	12.5499	10.9302	3.8163	14.2193	5.1105		0.226317	11.589
5.2422	7.44	5.7255	4.9921	19.0025	18.2434	10.5021	26.3344	24.0054	15.3416	3.9851	3.1168	6.8575	6.5505	6.6029	8.6441	8.7403	10.9677	18.9913	21.9815	7.9838	7.118	9.1414	8.5214	6.5816	11.2536	5.017		0.231579	10.9093
5.3614	7.1431	6.073	7.3418	20.2625	22.0961	10.2963	28.7574	20.4998	16.8579	3.4951	5.2054	6.8087	6.1955	5.5431	8.3262	10.7179	8.6507	19.5679	23.0926	14.1373	9.3681	14.1552	8.4333	5.3776	6.4653	5.5451		0.236844	11.5543
5.4805	4.5571	6.3177	6.4459	17.1064	20.665	13.9401	21.4573	18.0084	11.8989	4.6416	3.9639	3.137	4.6398	6.2699	4.5417	9.3115	4.6822	11.8302	13.8803	12.6377	4.8317	12.5189	10.1438	10.3517	5.3651	4.8416		0.242106	9.5379
5.5996	6.9375	5.7925	6.8077	12.4333	13.5906	13.3502	19.094	19.0313	10.5528	6.4573	4.8218	7.5597	4.071	5.9852	6.2636	4.8553	5.9775	14.7599	26.3737	14.3112	6.5106	11.2084	12.1153	5.8735	8.9435	7.0281		0.247367	10.0271
5.7188	6.2787	4.886	6.6079	20.202	13.9441	14.7027	13.1849	18.1471	11.3514	7.222	4.6774	6.772	6.4728	4.7362	5.6011	5.658	9.8247	19.0811	16.8282	14.4001	5.692	13.9631	9.7538	4.3339	5.9367	6.828		0.252633	9.88792
5.8379	7.1119	5.3754	5.5678	16.6876	18.3282	10.1632	14.0532	19.1772	10.0331	5.4383	5.8316	6.8916	2.6595	6.7685	5.2158	4.761	8.272	11.9142	14.5589	8.0065	6.845	14.2523	6.5828	3.3493	7.7359	3.6006		0.257894	8.81467
5.9571	6.5033	3.0245	4.3236	12.3311	14.2045	9.2425	18.4284	16.6834	7.1239	4.079	8.3347	4.4876	7.0378	6.9796	6.3562	5.3345	4.7347	6.8018	21.574	12.3146	6.3402	15.5974	8.7151	2.8986	6.581	4.2297		0.26316	8.62545
6.0762	7.398	4.1234	7.3662	12.3247	17.0944	9.1265	17.7637	13.7863	8.4565	3.7797	3.9437	7.5298	8.9969	6.1375	7.4022	5.4818	4.5782	8.8022	16.3439	12.1517	5.1824	16.8288	4.8994	1.7847	7.2261	4.868		0.268421	8.59141
6.1953	6.7439	3.3279	8.722	15.7581	10.4897	8.7111	21.7436	16.9713	11.6245	6.812	6.1807	6.1426	5.725	4.735	7.065	5.915	5.6835	8.9882	18.7011	6.0139	9.2691	9.2661	4.9135	5.8121	4.7613	2.1687		0.273683	8.54788
6.3145	4.041	7.818	4.9151	14.1746	14.673	9.8571	10.0845	9.1588	9.613	5.3966	5.3247	7.2307	5.1381	5.6175	7.426	6.7353	5.2871	6.2456	19.1986	6.444	6.8504	8.0238	5.9619	3.0535	5.6994	5.0334		0.278948	7.65391
6.4336	5.9319	4.7093	4.6042	8.9092	14.9202	9.4149	11.2392	14.1706	12.3528	6.3658	4.5626	6.6479	4.6771	8.5574	8.7522	3.4586	3.1453	8.3763	15.611	9.7503	6.9186	10.2119	5.9092	2.9044	10.3852	3.2915		0.28421	7.91452
6.5528	6.4467	5.4132	5.2828	10.851	12.5624	5.5176	11.7476	9.9899	9.4505	7.3477	5.5071	3.7649	5.0247	5.0666	9.8097	2.0722	5.3892	3.6791	9.9583	8.6565	10.3053	12.4784	4.1063	3.3077	8.8	3.2897		0.289476	7.14712
6.6719	4.8514	3.626	7.6123	11.695	15.2231	7.3736	17.7211	12.4231	10.2477	9.3509	3.8891	3.8134	7.5397	7.6551	7.1076	3.3544	3.7489	4.0354	14.3745	10.8979	12.0484	13.8196	8.0049	2.6557	7.4638	4.4137		0.294737	8.26717
6.7911	6.7878	4.6113	5.802	9.9774	15.0705	5.7669	15.742	11.1201	8.3492	6.1978	5.6305	4.845	4.0155	4.8966	4.4122	2.2076	4.0054	4.4279	12.1013	10.5545	6.2168	8.9687	5.0958	2.846	4.7141	4.0871		0.300003	6.86346
6.9102	2.6426	7.371	6.7367	9.7934	11.466	8.9746	14.2192	10.1832	4.7634	6.5837	2.1792	3.0096	4.924	4.2857	4.0881	6.0924	5.5332	8.0079	11.1765	9.8854	9.0322	5.9624	5.2605	2.0274	4.9751	6.0751		0.305264	6.74033
7.0293	3.7654	3.8973	5.7752	9.5291	10.3132	6.2167	10.4163	12.6291	9.0037	4.9573	3.2714	3.5535	7.0621	8.9138	9.883	2.3286	4.1817	4.1933	8.1302	5.615	5.5681	6.8158	5.3735	2.5066	5.5161	2.5737		0.310525	6.23037
7.1485	3.3504	7.4259	6.6433	9.2442	7.7318	7.522	8.643	10.0218	10.3832	3.3698	6.0454	3.7786	4.5356	6.1134	6.1181	3.5468	4.9209	5.9871	8.426	6.0675	5.7648	4.3051	3.6015	4.0315	3.248	5.4107		0.315791	6.00909
7.2676	5.1215	3.7856	3.6107	11.6335	7.2167	6.9921	6.2089	9.5373	9.9778	7.5019	7.0805	4.5439	3.2137	6.3999	7.5521	2.105	3.8596	8.0114	9.2183	7.5591	10.1617	5.8489	5.2703	2.8314	3.2324	4.4456		0.321052	6.26615
7.3868	4.9498	3.7992	4.4865	12.9168	6.8932	7.4152	8.9574	10.9932	5.9002	5.1134	7.5717	4.7289	3.8752	2.919	12.7606	1.6881	6.3368	7.0362	9.4152	7.8958	7.04	9.3961	4.0297	2.4919	4.9576	5.1217		0.326318	6.48805
7.5059	10.6807	3.7772	4.2295	8.5821	7.3347	6.0898	6.1852	9.3974	11.4967	3.3178	3.7405	4.285	3.801	4.1741	9.0495	2.5445	1.6399	6.5331	4.8249	8.1734	8.7302	6.7657	5.2947	2.8533	4.0828	7.4454		0.33158	5.96266
7.625	5.4033	5.3636	2.8226	7.1647	5.734	9.3488	9.1003	9.4312	10.262	3.0417	5.3589	3.753	4.3577	4.1329	9.7825	4.5008	1.6345	11.6667	9.0006	3.4018	5.0789	4.7442	5.1943	2.9206	5.632	4.0744		0.336841	5.881
7.7442	5.1318	2.7091	7.2115	4.93	8.153	11.5104	11.2407	13.5913	13.7214	5.1587	4.4499	2.8696	4.367	4.8192	7.5341	5.8136	4.3597	10.28	8.8922	8.288	8.4736	4.6512	2.3096	2.5744	2.6067	6.4509		0.342107	6.61914
7.8633	4.4093	3.1746	3.3813	7.8193	7.7663	6.161	7.7264	13.2053	12.6009	3.3807	2.8404	2.7693	5.0497	7.461	9.8103	4.3125	2.4016	12.4312	10.2394	8.3502	7.0187	4.6139	2.6262	4.4439	2.946	3.919		0.347368	6.18686
7.9825	3.081	2.8876	6.4775	4.2357	8.4349	5.6036	10.9663	8.3108	11.1501	1.4942	5.8789	5.5522	4.0702	4.0168	8.7111	1.7223	4.1546	12.7471	10.1724	4.0767	9.6057	5.337	1.86	1.8112	1.6707	5.3343		0.352634	5.74473
8.1016	4.2328	3.8951	2.8926	5.3247	6.7384	6.5735	6.4294	13.3016	9.929	2.6042	5.8466	4.238	2.2615	1.6156	7.7608	4.8843	3.3926	19.095	8.2268	7.1785	7.3799	3.7323	2.096	2.0143	3.2009	4.7443		0.357895	5.75341
8.2207	2.9414	2.605	2.7886	6.1121	9.1835	6.6766	6.117	16.4068	9.0514	5.2562	3.6359	4.1397	7.0106	2.4161	8.8898	3.1554	2.7416	12.6971	5.4062	7.8505	4.1773	4.338	2.2942	2.5413	1.1449	4.7081		0.363156	5.54943
8.3399	3.5548	1.9233	3.2178	8.0744	5.3905	3.9251	5.2091	14.2408	7.3806	4.0083	3.6475	3.6242	4.6668	3.8556	7.8309	3.9033	3.0055	13.2104	5.7292	9.8526	7.1323	5.3529	4.8104	1.5712	2.5438	4.7518		0.368422	5.47743
8.459	3.4387	2.5401	2.4776	4.6793	7.7616	3.0753	5.4955	14.1538	7.5515	4.757	5.3366	2.443	2.3223	1.867	5.2072	2.1521	1.8969	11.6322	6.4824	6.2991	6.6505	2.2254	1.6924	2.9215	1.7039	4.1087		0.373684	4.64891
8.5782	3.2654	3.8725	2.1371	5.1812	6.2985	2.6482	4.4518	10.4499	8.7216	6.4321	2.2872	2.4621	3.7809	5.9308	5.511	3.1741	2.2841	10.5491	7.9143	3.2223	4.5021	4.1713	3.6476	1.1484	2.1677	3.6084		0.378949	4.60845
8.6973	2.9514	2.3874	3.8717	3.7453	4.3619	3.8479	8.9409	14.9523	11.8983	6.3937	2.8679	1.2829	3.997	3.4378	9.0423	2.1894	2.7224	14.73	6.21	4.35	8.0982	4.105	4.2574	2.5469	3.0752	2.2628		0.384211	5.32792
8.8165	2.0895	3.7507	2.3411	4.3644	6.567	4.6499	5.6784	18.2326	9.9919	6	2.5135	4.3002	2.3881	2.7534	6.561	2.6457	4.3888	11.9133	11.0591	4.6092	3.6922	3.8422	2.4231	1.6051	2.6571	1.7037		0.389476	5.10466
8.9356	5.2369	3.1383	2.8938	3.5035	7.4641	2.2201	6.6085	9.6583	11.6775	4.3336	4.1018	2.1685	3.2729	2.422	4.5081	3.7774	3.4375	14.5429	4.4586	6.1106	2.5379	3.1504	1.6991	1.3711	1.5106	2.1084		0.394738	4.53509
9.0547	3.648	2.8536	2.8655	5.3398	8.8456	4.3676	4.2024	9.0934	8.6376	1.7951	4.6592	1.7312	3.6549	6.8112	5.0767	5.6476	2.7572	13.8269	6.6439	4.4138	4.2115	3.9815	2.8641	1.7303	1.6495	1.9567		0.399999	4.74095
9.1739	2.7163	3.6518	3.3209	3.8702	5.9977	3.3585	6.0285	10.4907	10.851	4.0066	2.6448	2.5692	3.7764	5.0846	5.6585	3.7053	3.0549	15.1496	9.6924	7.1401	4.17	2.0406	3.0286	2.1485	1.4198	3.2205		0.405265	4.95369
9.293	4.8808	2.5229	3.1868	2.9971	5.6643	3.9764	5.5148	11.9575	7.0189	5.1853	5.7799	2.883	3.7143	4.0324	7.5898	4.9812	2.9939	14.5687	6.3306	5.4864	3.5608	1.782	2.7103	2.8794	1.4332	1.7649		0.410526	4.82291
9.4122	2.6719	2.0982	5.0716	5.6154	4.5929	3.4223	2.4727	4.973	8.0806	2.6772	4.7469	2.9551	2.631	5.7078	4.2008	2.6706	3.7455	13.894	6.2874	7.871	4.7391	2.1314	2.353	1.7374	1.4898	2.8257		0.415792	4.2947
9.5313	2.3022	2.9241	3.5442	5.0403	1.8229	3.1473	5.3929	8.7236	11.5636	3.6287	2.6143	1.5942	3.1024	2.5768	3.2323	4.4894	2.8591	14.1532	9.3307	6.4987	8.4445	2.7634	3.7308	1.7024	1.5482	2.959		0.421053	4.60343
9.6504	2.7848	3.9349	4.3244	5.0199	2.0228	5.9808	5.5887	7.8623	14.3385	3.4347	5.0724	2.0274	4.3371	4.3968	1.7658	3.2	3.4808	16.9379	12.328	4.3413	5.3188	4.9261	4.183	1.2109	3.4515	1.6156		0.426315	5.14943
9.7696	3.3778	2.9953	5.3679	7.7287	3.664	4.1416	3.0032	7.0616	12.188	3.0238	3.8645	4.2124	1.93	5.2809	4.9875	3.833	6.8376	9.6303	6.6799	3.0104	4.411	3.5987	1.4188	2.5054	1.3802	2.9594		0.43158	4.58046
9.8887	3.623	3.4486	6.0498	3.8207	5.8512	3.8723	6.8969	3.0307	10.4634	5.4911	2.4596	1.4393	4.9399	4.2118	4.705	3.5451	3.064	9.4952	5.1575	2.2324	4.7916	2.9794	4.659	2.7171	2.5169	1.2761		0.436842	4.33606
10.0079	2.018	1.7444	3.8341	7.3254	5.4664	5.1296	2.3376	4.6215	9.4244	3.1541	5.8056	1.6579	2.7544	3.9075	3.504	2.7258	2.1805	9.7778	5.2402	2.3364	4.2733	1.6574	1.6657	4.172	2.1058	3.7587		0.442108	3.94533
10.127	3.0154	1.8615	5.1381	5.7883	8.0187	3.0634	6.2209	4.8264	16.126	5.3632	5.431	3.8089	2.2297	2.5837	1.5698	2.5655	4.4214	9.1485	5.3479	2.9719	3.8731	2.3605	2.0447	3.3292	1.2528	1.9843		0.447369	4.39788
10.2462	3.3213	2.7142	9.9708	6.467	2.9475	2.7315	6.509	6.2844	11.0032	2.2337	4.9777	3.4568	2.4948	4.8721	3.4262	1.9759	3.5156	10.0774	3.4063	3.4583	2.7476	4.7253	3.3115	1.4717	1.7339	4.6839		0.452635	4.40452
10.3653	2.7674	3.0785	9.1787	2.2867	4.8973	2.9935	3.148	4.9124	11.7885	2.3934	3.6862	3.9184	2.6117	2.6164	4.7295	1.5018	3.7954	10.1624	6.1637	3.2961	2.9493	4.3769	2.7372	1.2573	1.2405	2.4529		0.457896	4.03616
10.4844	2.3147	4.5074	8.9206	2.9376	3.6305	2.3862	3.3299	8.3765	15.0911	2.4919	3.0577	2.3462	2.6326	1.7138	5.6169	2.431	6.1348	10.3659	5.409	1.4261	3.9894	4.8303	3.2938	1.745	2.0473	1.9918		0.463157	4.34685
10.6036	4.014	2.5564	5.8106	5.6537	5.4143	2.2942	2.2664	4.3142	14.6391	4.0024	2.074	5.1581	3.6648	3.6544	3.3827	2.4103	4.1003	8.0586	3.9816	1.7536	3.5093	3.3338	1.7166	1.4317	1.2788	3.2098		0.468423	3.98783
10.7227	4.1692	3.0572	4.9711	3.0522	4.269	4.2669	3.2137	5.5647	10.2365	2.1489	2.6538	3.5991	3.5263	2.8915	5.7318	1.85	2.8297	6.3728	3.2938	2.1094	4.6092	6.3671	3.5034	2.2227	1.3782	1.26		0.473684	3.81339
10.8419	2.5791	3.5757	4.3421	5.1251	5.6071	4.4834	2.3986	8.9516	11.5372	6.1085	5.1703	2.683	3.5815	3.1396	3.1216	1.4328	2.8526	12.3813	2.8687	4.3238	2.7893	4.3717	2.3331	2.7321	2.8535	2.7361		0.47895	4.38767
10.961	2.7472	2.7549	5.2386	4.9924	7.6806	3.3303	1.7805	4.6495	12.7244	2.7057	4.5377	3.1155	2.7853	2.6764	3.0574	2.214	3.8527	7.1049	4.2314	2.4535	3.267	5.6951	2.6932	2.3131	1.3141	1.8583		0.484212	3.91437
11.0801	2.4796	1.6103	5.7112	2.5394	4.279	4.1744	2.2034	7.1442	13.1336	3.4535	1.6967	4.2268	2.1699	5.6201	1.5009	2.7343	3.9612	7.5405	4.3987	2.8359	2.8938	2.8622	1.751	2.8058	2.2877	1.5029		0.489473	3.75065
11.1993	4.4762	1.1421	4.3732	4.4697	3.81	4.911	4.8615	3.7649	8.0554	1.2378	2.7347	1.7256	5.3773	2.6139	2.4891	3.6732	2.7482	6.7656	3.7755	2.3174	3.0119	1.7677	1.4767	1.0557	1.5973	1.1387		0.494739	3.28347
11.3184	3.9279	3.3783	5.2108	6.9375	2.0119	3.063	3.3747	4.4517	7.3335	2.9515	3.6418	4.163	5.2724	1.8525	3.0927	2.2038	2.9104	9.5424	4.8376	4.3343	1.8427	3.3908	1.806	1.0455	1.6366	1.6201		0.5	3.6859
11.4376	5.4034	3.2543	3.3586	2.7413	2.1349	2.1509	2.3266	2.5967	9.2383	4.2885	3.1298	3.614	3.1343	3.3203	2.6566	3.4634	2.7191	2.7734	4.3217	4.4281	2.152	4.9644	1.7166	1.5335	1.5862	2.0888		0.505266	3.27291
11.5567	2.7075	5.2595	3.1343	4.4858	3.7107	4.7118	1.955	3.4364	5.1814	1.7772	3.0986	5.1451	5.0829	1.8448	2.4043	2.7873	4.7427	2.8649	5.8667	3.3745	1.9635	3.7484	2.4989	1.0964	1.0712	2.2002		0.510527	3.31346
11.6758	3.786	3.1725	3.1761	2.5669	5.6585	3.606	4.2983	4.3368	3.7071	5.4432	2.0381	6.7588	1.2905	2.2485	2.5678	1.3024	1.114	5.1178	8.4017	1.4017	3.4764	1.95	1.7928	1.2109	1.9683	2.4568		0.515788	3.26338
11.795	2.9633	3.9704	2.6861	5.3707	2.6421	4.9942	2.5613	5.936	4.7593	4.398	3.5538	5.4688	1.4275	1.8197	1.9207	3.1396	2.6445	4.2018	4.967	1.3609	3.3898	3.5228	1.4343	1.4351	3.0287	1.2148		0.521054	3.26197
11.9141	4.7379	4.1259	6.1784	4.7248	2.6955	5.1804	1.5725	4.0492	5.632	1.4526	3.168	2.864	1.7737	3.6573	3.2655	2.8276	3.0096	4.9807	5.2487	2.001	2.185	2.2469	1.8577	1.2136	1.627	2.4354		0.526316	3.25811
12.0333	4.6815	2.5157	3.079	2.8471	6.6027	4.0482	1.4271	5.5566	2.3654	3.951	2.6013	2.0749	1.7262	2.8392	3.6931	2.0229	3.417	7.5224	6.3498	1.4786	1.9454	3.7543	1.1678	2.0009	2.976	1.8752		0.531581	3.25074
12.1524	4.9271	4.9923	2.7106	3.3703	2.8882	1.6397	3.8392	2.6267	5.0479	6.7732	3.8279	1.8112	1.6801	1.2706	4.2576	1.1299	2.2585	3.8454	4.2978	1.3054	1.2291	2.2287	2.2765	1.8666	1.1816	1.2377		0.536843	2.86615
12.2716	4.2677	1.4163	3.8714	2.4937	3.2011	1.2382	3.4518	3.8524	7.3638	2.3684	2.9062	4.2989	1.5451	1.2944	6.7776	1.3517	3.3351	2.6807	3.2474	2.0475	1.3225	1.1942	1.1673	1.193	1.1734	1.2734		0.542108	2.70512
12.3907	2.3603	1.63	2.4179	3.72	3.9361	1.774	4.3644	1.9252	7.3119	1.7434	2.6564	1.7225	1.2053	2.6514	5.9697	3.649	2.3267	6.2532	2.5669	1.3178	1.7521	1.5189	3.688	1.3844	1.3762	1.3548		0.54737	2.7914
12.5098	4.1032	1.668	4.2951	2.8851	3.7018	2.076	2.024	3.5433	4.7801	2.4729	7.2182	1.3984	1.1814	3.5553	5.7586	1.4845	4.9843	8.874	1.8224	1.2736	2.0345	1.5947	2.1042	2.3449	1.1821	1.1922		0.552631	3.05972
12.629	2.9463	4.7106	2.6052	2.8951	4.0937	2.4454	2.6563	5.0993	4.4145	1.9997	4.2453	3.8077	1.7511	2.7064	2.4483	1.3817	3.3088	11.2787	4.7367	1.3847	1.4451	5.7386	1.7311	1.0625	1.1479	1.2299		0.557897	3.20272
12.7481	1.7159	5.5476	2.2351	5.2646	3.1159	2.2123	2.6321	2.19	5.9683	1.3988	2.1567	2.9926	1.9874	1.386	2.0417	2.1404	1.9557	4.8988	2.7459	1.9567	1.6108	1.74	3.4212	0.9231	1.0705	1.0655		0.563158	2.55283
12.8673	4.9627	3.2589	1.8891	3.6922	4.922	2.0701	2.5657	1.9878	5.1322	1.5175	3.5449	3.2006	3.9261	1.2985	3.9958	1.3043	2.468	3.9778	2.5977	1.6216	1.4086	1.7112	2.3923	1.7674	1.0873	1.1853		0.568424	2.67252
12.9864	2.7852	4.2124	1.4804	3.1325	5.613	5.9025	3.3744	2.5269	3.985	2.6453	2.4075	1.8654	1.5091	3.2195	2.2799	1.9149	1.1179	2.5366	1.4832	2.0783	1.982	2.0186	2.1489	2.3001	1.1228	2.0293		0.573685	2.60275
13.1055	4.3027	3.1355	2.958	3.7237	2.3779	2.5274	1.8134	2.527	1.6212	2.1929	2.5611	3.4174	1.3836	2.6553	3.1336	1.6699	1.2324	6.1085	3.4514	1.7482	2.1328	3.7323	2.5242	2.0691	1.4967	1.8683		0.578947	2.6294
13.2247	4.7688	2.2307	2.7059	4.0474	4.456	2.691	3.9201	1.9008	2.4791	3.5293	2.5185	1.7643	1.4122	2.2944	3.5215	2.0417	1.2858	3.3126	2.7224	1.702	1.1807	1.8758	2.0008	1.3561	1.3669	2.6973		0.584212	2.53008
13.3438	2.9729	1.3592	4.9225	6.2533	4.1799	3.6794	5.0255	4.1995	4.311	4.2204	4.5108	1.2365	1.9911	2.4099	3.6028	2.7136	2.5289	6.3741	3.2127	2.289	1.0721	2.6211	1.4225	1.1456	1.2165	1.5435		0.589474	3.11593
13.463	2.5965	1.8368	2.7834	3.7245	3.7139	2.2557	1.4479	2.5703	4.7337	2.91	3.1428	2.8835	1.771	2.3058	3.39	1.9563	1.3684	5.4747	3.7412	1.2517	1.7384	1.2168	3.541	1.5776	1.0559	2.3567		0.59474	2.59017
13.5821	2.7582	3.0011	1.3915	3.6942	6.4273	1.0688	2.7516	4.8941	5.0118	4.5655	3.9973	1.5789	1.4537	1.6552	2.712	1.6479	2.5899	4.7901	4.2468	2.1636	1.8044	3.7872	2.8324	1.1447	1.188	1.283		0.600001	2.86305
13.7012	1.8368	2.3145	3.9923	3.7171	3.5261	1.9557	3.3075	5.2578	6.7347	6.5477	3.7939	1.7189	1.0992	1.3158	1.4675	1.4058	2.9602	5.0598	2.0454	2.2732	1.0703	1.9295	1.164	1.1231	1.4672	1.1171		0.605262	2.70004
13.8204	2.5912	1.7869	2.1921	3.5479	2.4137	2.0155	2.5314	4.5942	5.7398	2.5808	2.5151	2.1668	1.6288	2.1056	4.4117	1.4871	1.7695	8.3709	3.3314	3.0492	1.7792	2.5039	2.4764	1.055	2.1686	1.823		0.610528	2.79368
13.9395	3.3413	2.3405	2.6622	2.9068	3.2713	1.748	4.2864	5.3254	3.9234	4.8724	1.3659	1.4675	1.8599	2.6187	2.32	2.7091	2.078	5.1164	3.3952	3.5814	1.1987	3.2382	1.5167	1.2082	1.3828	2.8554		0.615789	2.79192
14.0587	3.2117	2.9291	1.5467	2.2151	3.7577	2.5756	2.5594	2.7063	4.4717	4.6407	3.863	1.1748	1.467	1.9636	1.4261	1.1614	2.4612	5.2522	2.2443	3.1991	2.0758	2.3521	1.9403	1.9158	2.1842	1.2904		0.621055	2.56097
14.1778	3.6882	2.1058	2.5489	3.3029	2.9646	4.2717	4.4363	3.8653	2.3074	5.4543	2.2335	1.7508	1.6759	2.3589	1.3377	2.1184	2.7716	4.786	3.636	2.1553	2.0113	3.3263	2.1532	1.7954	2.4292	1.693		0.626316	2.81453
14.297	2.168	3.0054	1.4659	3.1852	3.3386	2.7657	4.161	5.3371	2.5734	2.9859	2.3037	2.0164	2.7198	2.1594	2.6514	1.4313	1.6281	5.1413	3.0486	2.3318	1.7606	1.6013	3.2043	1.4742	1.3854	1.849		0.631582	2.60357
14.4161	1.6408	2.799	2.2826	2.052	2.4062	4.5027	1.6493	6.2355	4.6293	2.8409	3.4084	1.5301	1.5505	4.4354	1.487	1.2641	1.8068	8.3155	4.1101	1.3538	1.4476	2.9719	1.306	1.0015	2.0292	2.8042		0.636844	2.76386
14.5352	3.1196	3.0858	3.0167	3.2182	1.0031	2.3258	4.2585	4.1028	1.8524	3.152	2.1524	1.2798	1.4973	2.9141	2.0166	1.5178	1.2764	3.971	3.9296	1.8629	2.7777	2.0592	2.1199	1.2885	1.5766	1.5662		0.642105	2.4208
14.6544	2.3264	1.4706	1.8914	3.1697	2.4883	2.6728	1.4985	3.3372	3.3469	2.5713	1.6266	2.2976	3.1485	2.306	2.5397	2.0715	1.5581	5.7997	5.184	2.9252	4.1491	1.5834	3.7619	1.1286	1.179	1.8535		0.647371	2.61098
14.7735	1.9381	2.6821	1.6065	4.6844	2.3412	2.9675	1.4788	5.2096	3.2098	4.8845	2.5827	3.0165	2.8402	2.3988	1.6984	1.2035	1.5333	4.4374	7.3695	1.2394	2.5407	1.6796	3.4116	1.907	0.9904	1.2571		0.652632	2.73495
14.8927	1.4537	3.571	2.2694	2.6783	1.5879	3.3984	2.2469	3.9415	5.1918	2.2549	2.1728	2.1715	1.397	2.4242	1.7629	2.6194	1.9041	6.2984	4.8246	1.5857	2.6002	1.8305	1.8679	1.2546	1.7933	1.6911		0.657898	2.56892
15.0118	1.7058	2.9491	3.3473	1.7579	2.2903	3.98	2.1832	5.8037	6.6608	4.5719	2.929	1.2728	2.089	1.7211	1.75	3.4309	1.5238	3.1186	1.6333	1.5582	1.4627	3.1457	1.6132	0.9382	1.6777	1.5628		0.663159	2.5645
15.1309	2.6116	1.5685	2.1998	2.6405	3.8103	5.1509	3.7814	5.3205	4.9642	3.5483	3.0354	1.3494	2.1981	2.2742	2.0087	1.837	1.5124	5.18	2.6652	2.0262	1.5742	2.1605	3.0934	3.4181	1.8119	2.6257		0.66842	2.86025
15.2501	4.3494	1.4857	2.5575	2.3853	3.0931	1.5644	2.6321	4.1129	5.949	4.7614	3.2506	2.6128	2.889	2.6187	1.808	2.7865	1.3796	4.5084	4.1911	1.699	1.2084	1.9162	1.1635	1.5071	1.2216	2.0543		0.673686	2.68098
15.3692	3.9027	2.12	1.8455	4.936	2.8253	1.1869	1.9314	5.4609	3.63	5.0774	3.0606	1.0235	2.7888	1.4739	2.1044	1.8645	1.1379	5.2746	2.7722	2.7506	2.9651	1.9115	2.2656	1.0952	2.1044	1.963		0.678948	2.672
15.4884	1.515	2.8523	2.3736	6.7482	2.4278	1.9665	2.4551	3.7822	4.537	5.5367	2.6499	1.1756	2.7116	3.4177	1.7263	1.8328	2.0492	3.767	1.4067	2.8285	1.4421	1.9581	2.6651	2.5476	1.8272	2.1276		0.684213	2.7049
15.6075	2.0733	2.6972	1.2613	4.5308	4.3949	3.4604	3.3509	1.9662	4.124	4.4849	2.0593	1.8156	1.9841	2.7468	1.7314	2.6721	1.3648	3.3804	3.9356	1.1226	2.3206	2.5693	3.1449	1.9968	1.0724	3.0632		0.689475	2.6663
15.7266	2.4348	2.4284	1.1521	5.2447	2.7725	2.5216	2.4386	4.5664	3.323	7.2965	3.2437	2.6362	1.3015	3.8598	2.499	1.0291	2.1483	4.4674	4.9226	2.3433	2.0149	3.4194	1.2171	1.468	1.021	2.3824		0.694736	2.85201
15.8458	1.8259	3.1893	2.2797	5.2461	3.2339	1.3415	1.6701	1.6348	3.479	2.7909	1.8783	1.5793	1.6539	4.4752	2.147	1.2739	2.3451	4.6627	5.2826	2.4189	1.257	2.0654	1.1397	2.8543	1.5182	1.2368		0.700002	2.47998
15.9649	1.7788	2.7687	2.4028	2.2476	2.4876	2.9933	2.1748	2.2739	4.0721	2.463	3.5925	1.5464	1.3299	2.5161	2.4882	1.7241	2.6159	3.9724	4.4074	1.9828	1.2241	2.8459	1.4834	1.1336	1.2673	1.3235		0.705263	2.35062
16.0841	1.2786	1.8235	2.4283	3.609	3.7263	1.2925	2.0722	2.2953	3.9425	3.0917	1.7325	1.9742	1.54	3.7599	2.0137	1.3779	2.5813	4.8273	1.9377	1.1356	1.2645	3.1266	2.8559	1.7611	1.636	1.0845		0.710529	2.31418
16.2032	2.2086	2.1753	2.0143	5.6401	2.4854	2.0069	1.6704	2.041	1.7344	4.7476	5.2967	1.4859	1.8375	3.104	2.5743	1.8106	1.266	2.8773	3.2319	2.0075	1.6667	2.7255	1.7787	1.6168	2.101	1.1185		0.71579	2.43165
16.3224	2.0013	2.2551	3.7371	4.0825	3.1028	1.6521	1.2546	2.9438	3.4015	7.07	3.8789	3.4649	3.6434	2.0608	4.7949	2.3917	2.3953	4.048	2.7952	1.9781	1.6477	3.0939	1.4732	2.9944	1.326	1.3773		0.721056	2.8794
16.4415	2.9408	1.8081	2.3943	3.8641	2.0658	1.8287	3.6068	4.1956	4.0063	9.1603	2.0026	2.5016	1.7736	3.0576	2.0676	1.8373	1.9791	2.5423	2.938	1.353	1.4963	1.4355	1.4622	1.5253	2.1723	1.4228		0.726317	2.59377
16.5606	1.3761	2.3175	3.3076	4.1288	2.5261	1.6673	2.1816	3.1823	4.0392	10.1025	1.8346	2.5777	4.1891	2.6305	4.0193	1.2838	1.5677	2.5934	3.8752	1.3002	2.2714	2.2196	4.1197	1.11	1.1106	2.392		0.731579	2.84322
16.6798	2.6092	1.4047	1.2512	2.5133	4.5368	1.8433	1.7062	2.5479	3.513	6.0725	2.8214	2.0408	1.5687	4.3744	3.1145	1.4646	2.4832	3.3615	3.2065	1.2473	1.0816	5.6386	2.9202	1.1405	1.1031	1.4162		0.736844	2.5762
16.7989	1.3713	2.4315	3.5486	2.5518	5.7593	3.5519	4.2088	1.2899	4.1705	5.697	3.2399	2.3513	1.5886	2.1023	4.6758	1.2699	1.0762	3.1191	1.5804	1.3108	1.7394	2.836	1.6443	1.2223	2.2237	1.7964		0.742106	2.62912
16.9181	1.1419	2.2878	2.9471	3.0032	2.1835	2.4612	1.9388	1.762	3.5988	5.3671	2.0256	1.4137	3.2501	3.0232	2.4367	2.4819	1.3876	3.8505	1.4413	3.4153	1.5939	2.1777	1.6297	2.017	2.0994	4.4073		0.747372	2.51317
17.0372	1.4126	1.9502	2.0667	3.7104	1.8798	2.6045	2.5202	2.3573	3.0614	4.1042	3	1.3954	1.3765	3.0835	2.7919	2.5062	2.8144	2.2793	2.3262	1.7894	1.6909	2.1006	4.1125	1.532	1.3092	1.0442		0.752633	2.33921
17.1563	4.5952	3.3556	2.4101	3.6524	4.7737	2.0309	3.6529	1.4363	4.1716	5.2606	3.0545	1.3053	1.6934	2.238	4.0011	2.4965	1.1457	1.9407	1.9477	2.4507	1.9145	2.6087	3.2091	2.3384	1.3031	1.0557		0.757894	2.69394
17.2755	3.2612	1.5417	1.1729	2.7734	2.8203	3.219	3.2441	2.9662	3.0922	4.3726	3.304	2.4529	1.4812	1.7765	5.5841	1.1114	2.0067	2.9883	2.3823	1.2069	4.0947	1.8028	2.1756	1.4988	1.4769	1.3927		0.76316	2.50767
17.3946	2.5668	1.1876	1.4194	2.0998	2.0466	1.5734	1.5997	1.5831	3.5606	6.5782	2.556	2.5709	3.7638	1.7808	4.997	2.366	2.4148	3.5184	3.1746	1.2082	2.6745	1.273	2.0192	2.3194	2.1121	1.5441		0.768421	2.48108
17.5138	1.271	1.1341	1.2296	1.4594	2.4523	3.4669	2.638	3.8949	2.9206	6.4747	1.9206	1.3264	1.502	4.4715	4.6075	1.8437	1.108	1.375	1.6616	1.0882	3.0965	1.2154	1.7219	1.6665	1.677	1.7908		0.773687	2.26977
17.6329	1.0932	1.139	1.8398	3.2354	5.1365	5.1131	3.509	2.1627	2.5504	4.249	1.9595	1.3285	2.581	2.342	4.2925	1.9838	1.7	2.3162	2.7543	1.1574	2.182	3.4193	2.2875	2.1725	2.4568	1.3504		0.778948	2.55045
17.7521	1.3142	2.1733	1.8884	4.1115	5.5457	3.6655	4.7628	3.5348	5.3456	2.7147	3.9747	1.155	3.7411	2.9779	5.5053	2.2919	2.061	2.655	6.6967	2.538	1.4909	1.294	2.9619	1.0687	2.6504	1.3061		0.784214	3.05481
17.8712	1.7875	1.3964	2.4333	4.2265	2.2345	4.7346	2.8779	2.5793	5.1298	5.2755	2.1661	1.3173	3.36	3.5556	4.8796	2.1586	1.5217	1.7695	4.9637	2.0125	1.5692	1.2099	3.8793	2.0055	1.4613	1.1758		0.789476	2.75696
17.9903	2.1165	1.3099	1.1542	3.7851	6.6637	2.3211	1.5356	3.6355	3.2995	6.7075	1.9904	1.5143	3.7422	1.9867	5.3773	3.6303	1.7596	2.8937	3.2361	1.5053	1.4025	2.4167	3.1124	1.9833	1.0689	1.4697		0.794737	2.75454
18.1095	1.9226	2.4566	1.1373	4.2246	3.5208	4.7697	1.9385	3.6731	2.7776	5.289	4.3511	3.1343	2.2142	3.0273	2.6984	2.1784	1.5576	2.38	6.1103	1.9997	1.5357	1.6	2.8938	2.4882	1.2179	1.4979		0.800003	2.7921
18.2286	1.5255	3.1612	1.0638	3.5643	4.3336	2.5006	2.4718	2.6082	2.8613	8.3023	3.8323	1.9618	1.7121	2.1152	5.8267	2.7005	1.134	4.0453	5.2673	2.2524	1.2751	3.8494	2.9	1.4895	1.508	1.1436		0.805264	2.90022
18.3478	4.0269	2.9744	1.1829	2.6497	3.9886	1.9251	2.3501	4.5449	2.1828	4.2167	2.6393	1.3375	2.4646	1.4516	6.3657	4.103	1.5836	2.8902	3.7802	4.0356	1.3472	1.3692	3.1248	1.8318	1.5731	1.1362		0.81053	2.73368
18.4669	2.2583	1.9765	2.2047	4.9355	1.9416	2.0479	2.7977	4.3618	4.674	4.0622	2.7652	3.3057	2.8123	2.1469	3.5314	1.5655	3.2087	2.4585	4.7284	3.4019	1.892	3.9858	2.8884	1.995	1.9326	1.2559		0.815791	2.88978
18.586	1.1601	3.9647	2.1521	1.6621	2.0715	2.6463	2.8246	4.1944	3.6836	7.5288	2.9017	1.5306	3.8957	4.0762	4.9819	4.7844	1.3503	3.6069	2.9989	2.3533	2.5221	2.1181	2.243	1.8569	2.3316	2.365		0.821052	2.99249
18.7052	1.4359	1.1835	1.5389	1.4891	2.7871	3.0839	2.1154	3.0201	3.175	5.4579	7.369	2.3746	2.1567	1.9385	2.4405	5.1244	3.6923	4.0392	3.9881	2.5767	2.2075	4.6767	2.6287	2.8654	1.6933	1.9928		0.826318	2.96351
18.8243	3.0996	1.5483	2.6063	3.8823	3.6149	1.4809	1.8104	4.7979	4.7353	6.2912	4.391	1.337	2.9451	3.2551	2.3588	3.2649	3.1251	2.5805	8.0986	3.0421	1.5046	3.9918	3.979	3.1738	3.1048	1.3323		0.83158	3.28275
18.9435	2.559	2.7056	1.822	3.0097	2.1379	3.7696	1.5414	6.9424	2.8007	9.4036	2.27	1.9773	2.8816	2.0272	5.4375	2.5724	2.648	4.5023	9.167	2.7916	3.3429	4.3282	2.6133	3.1596	2.5901	2.2348		0.836845	3.50907
19.0626	1.2727	3.2799	1.3691	2.696	2.8912	2.9519	2.0899	5.0019	3.4372	6.3049	3.9111	2.6588	2.0232	5.4869	3.973	2.5789	3.3337	4.9643	5.4439	1.6958	5.1616	2.2151	3.0552	1.7647	2.2908	1.1438		0.842107	3.19213
19.1817	1.7042	2.4448	2.4446	3.1133	4.178	3.3089	3.1016	4.024	3.3389	8.5626	2.7087	1.9072	3.9585	4.1897	4.493	2.9532	1.8412	7.8887	8.4305	1.3302	3.7416	3.6591	4.3859	1.1571	1.4236	1.4616		0.847368	3.52887
19.3009	1.3538	5.1422	3.5214	2.862	3.7946	2.8874	2.7404	4.7539	5.1451	6.8792	2.2982	2.0807	2.5944	3.1315	6.0172	2.4962	1.5747	6.4558	6.3582	2.5804	4.0162	3.2519	2.6957	1.632	1.6457	1.2666		0.852634	3.42982
19.42	1.2496	4.8648	2.041	2.9873	2.3079	1.7281	3.8918	5.7805	2.3005	5.5247	2.5508	3.0288	1.9967	1.5169	4.3941	3.7671	5.507	4.3159	7.9685	2.4974	3.4217	1.9024	4.3028	1.8059	1.5907	1.8951		0.857895	3.27454
19.5392	1.5702	2.6814	2.2406	2.8692	1.8312	3.703	2.7848	3.5276	5.847	8.349	3.395	1.1514	2.7967	1.959	4.7939	2.1785	1.6352	2.9461	11.9267	4.0966	4.2925	3.7911	2.9984	1.2781	1.3588	1.156		0.863161	3.35223
19.6583	2.2239	1.4624	1.3677	3.3133	1.8716	1.9099	2.2856	4.7541	5.6337	3.9502	2.8803	1.4011	3.7354	1.5362	5.3711	2.7691	4.2272	1.4604	4.6793	3.489	4.9028	3.0902	2.1778	1.4419	3.6875	1.2591		0.868422	2.95695
19.7775	2.343	2.5976	3.9881	2.7092	3.9815	4.7947	3.4548	5.165	4.8681	5.7021	4.1285	2.0284	1.6458	2.5912	2.7846	1.4931	4.5275	2.4303	4.8592	2.2662	4.5777	2.8003	2.1546	1.2641	1.6364	1.3661		0.873688	3.15993
19.8966	3.1866	2.3301	3.9212	1.9289	4.5169	4.7239	2.0132	2.6903	2.2908	7.5326	4.0717	2.1642	2.0038	1.9006	2.6184	1.4939	2.4724	3.6402	7.3346	2.7954	4.5319	2.4997	1.683	1.0806	1.3801	2.0443		0.878949	3.03267
20.0157	1.6225	2.5998	4.8	2.2152	2.3768	3.0063	2.6896	1.1774	3.0273	3.4464	1.7414	2.5723	2.2858	2.7791	4.4428	1.467	2.6671	3.2583	6.2202	3.8541	3.5728	3.3437	1.7563	2.5986	1.093	4.18		0.884211	2.87668
20.1349	3.1539	3.7556	5.174	2.2242	2.3919	3.7335	3.4218	1.767	2.3279	4.4019	3.842	1.5411	1.3143	2.4656	3.0507	2.2978	2.0019	4.7364	3.4529	2.3274	2.8656	1.6594	2.6798	1.7007	1.1109	1.2639		0.889476	2.71777
20.254	1.2267	1.547	3.0861	3.3149	3.2165	3.0818	3.3828	2.8576	2.856	4.0239	3.9558	2.5461	3.1388	4.1144	4.6992	2.2353	4.3939	2.2462	4.6709	3.4283	3.0571	3.3448	2.1696	1.7788	1.2662	1.2903		0.894738	2.95881
20.3732	1.0652	2.6546	3.3486	4.1007	1.4798	3.1178	2.4644	3.5915	4.8795	2.6141	7.8013	2.1529	3.3466	3.2335	2.4062	1.9674	8.6631	4.6071	4.9567	1.9037	1.1824	2.9075	1.6607	1.6789	1.4815	1.5026		0.900004	3.10647
20.4923	1.8849	1.2546	3.7757	1.7771	2.6098	4.5712	2.1685	3.4613	2.1069	4.5656	5.1542	3.1893	3.8872	4.1551	4.4993	1.4495	7.6792	3.4109	1.8843	4.0701	2.4535	3.3183	1.3836	1.9576	1.1593	2.0677		0.905265	3.07287
20.6114	1.2612	2.3088	4.9429	4.3862	3.2452	3.6678	4.0586	3.4004	2.7409	4.3594	3.3977	2.5152	2.9512	3.1593	5.8663	1.655	2.1732	2.7897	3.8672	2.4063	2.0089	5.396	1.7847	1.7077	1.0562	1.2515		0.910526	3.01375
20.7306	0.9806	3.1399	3.8552	6.5295	2.1428	7.5145	4.1239	2.3143	3.7774	3.1828	2.6564	1.5237	3.7338	3.1929	4.4543	2.2626	3.4418	2.3565	3.8055	2.2777	2.0611	3.461	2.2784	1.2032	1.4896	1.1612		0.915792	3.03541
20.8497	1.1151	2.3496	5.1685	4.9378	1.8997	5.0721	4.7022	2.0745	3.5139	3.4238	2.8741	1.9635	4.0774	3.85	1.4615	2.4585	3.7429	1.4144	2.5945	1.665	2.4406	2.1012	1.7207	1.0873	2.521	1.0723		0.921053	2.74239
20.9689	2.5466	1.1542	2.6552	6.723	3.1721	5.5001	5.3105	3.1134	4.532	1.8827	2.5797	5.3717	2.4583	3.6777	1.7827	1.2476	2.6367	1.2491	2.2298	1.7847	1.034	1.3703	1.4393	1.0836	2.155	1.055		0.926319	2.6825
21.088	1.6165	1.8175	2.4728	1.8313	1.4131	4.5932	2.5962	2.9241	3.4448	1.9767	1.5453	3.521	4.661	1.291	3.2822	1.2729	1.3633	1.1836	2.5791	1.8921	1.3022	1.1112	2.073	1.0578	1.4131	1.1427		0.93158	2.12991
21.2071	1.9214	1.1756	2.4852	1.4888	1.3213	3.9449	2.5371	4.8241	4.0873	1.5593	3.1044	2.663	4.9113	1.7569	2.1061	1.9787	1.8078	1.2118	1.6971	1.2367	1.1053	1.18	1.2274	1.0774	1.1759	1.1236		0.936842	2.10417
21.3263	2.0133	1.2136	5.1423	2.9155	1.7084	2.7022	2.8676	1.4609	3.372	1.8289	2.6779	2.5225	3.2301	1.4762	2.3823	1.4779	2.2443	2.9347	1.1852	2.6786	1.3789	1.1015	1.0399	0.9875	1.1295	1.0716		0.942108	2.10551
21.4454	1.9963	1.3151	2.7378	3.0108	1.569	1.9955	1.4307	2.2453	2.3427	1.4528	3.6597	2.0698	4.42	2.7678	3.7313	1.1844	1.6517	1.8561	1.6884	2.149	1.1535	1.476	0.9362	1.0035	1.136	2.4911		0.947369	2.05656
21.5646	1.4464	1.2196	1.3664	2.8215	1.3569	1.2588	2.0455	1.7518	1.9797	2.2367	2.9969	2.4848	1.915	2.7576	2.3864	1.3572	1.4318	2.4941	2.4532	1.2767	1.4211	1.792	1.9329	1.1273	1.2851	1.1539		0.952635	1.83651
21.6837	2.9995	2.5672	1.5268	2.9095	1.2144	1.8931	2.0798	1.3947	2.5667	2.2164	5.4567	1.4259	2.1511	1.3127	1.8909	1.0315	1.1847	1.211	1.4238	1.1602	1.1632	2.0857	1.5097	1.2468	1.358	1.2112		0.957896	1.85351
21.8029	2.7713	2.2574	2.2048	2.2119	1.9957	1.2736	2.3052	3.1053	2.0677	3.0834	3.3867	2.9998	1.5873	1.5948	2.0778	1.0843	1.5698	1.1543	1.2515	1.2528	1.1848	1.557	1.422	1.1913	1.4186	1.1051		0.963162	1.88901
21.922	2.335	2.2003	1.0431	1.1071	1.2338	1.2099	2.0569	5.1707	2.014	1.3242	6.422	2.6382	1.1457	1.4256	1.4672	1.0259	1.2909	1.0857	1.8689	1.5951	1.4703	1.2764	1.1938	1.1753	1.0467	1.1988		0.968423	1.80852
22.0411	3.202	2.1605	1.1917	1.1612	1.8991	1.2363	1.8693	2.1979	1.7351	2.0554	4.9908	2.6564	2.7359	2.4818	1.1936	1.2775	1.4865	1.2191	1.4311	2.1629	1.2057	1.72	1.0862	1.0491	1.1638	1.2905		0.973684	1.84075
22.1603	2.3839	1.4774	1.6863	1.1461	1.2104	1.0819	2.5761	3.3626	1.6569	1.8187	6.1162	1.9803	1.2814	1.8001	1.4644	1.2413	1.6035	1.7218	1.091	1.2992	1.1404	1.331	1.531	1.5924	1.5604	1.2533		0.97895	1.78492
22.2794	1.4588	4.347	1.9273	1.1311	0.8562	1.0486	1.5232	5.5785	1.8547	2.0882	4.9525	1.4966	1.0265	1.2977	3.0551	1.3053	2.0379	1.0474	1.4881	1.9157	1.3256	1.7955	1.327	1.6824	1.3402	1.4304		0.984212	1.93606
22.3986	1.3419	2.001	1.3138	1.1729	1.014	1.2209	1.0964	2.668	1.5058	1.4598	4.3807	2.7034	1.6962	1.029	1.4198	1.0504	1.3892	1.1215	1.1525	1.1913	1.8017	1.3058	1.5613	1.2655	3.6988	1.5189		0.989477	1.65694
22.5177	1.8515	1.2597	1.4842	1.0905	1.1334	1.0507	1.5082	4.8064	1.6177	1.0984	1.692	2.3184	2.4172	1.0512	1.2676	1.253	2.2329	2.3215	1.1094	1.2559	1.0675	2.3238	1.3573	1.2344	1.1932	1.1227		0.994739	1.61995
22.6368	1.5427	1.1633	1.4515	1.1667	2.2535	2.3421	1.7597	1.9584	1.0807	1.3787	3.0053	1.6641	4.4691	1.0118	1.2345	3.1267	1.5327	1.3329	1.141	2.1723	0.9861	1.4011	1.2171	1.1519	1.8847	1.2086		1	1.71682

## Sheet: Image3
X0	Y0	Y1	Y2	Y3	Y4	Y5	Y6	Y7	Y8	Y9	Y10	Y11	Y12	Y13	Y14	Y15	Y16	Y17	Y18	Y19	Y20	Y21	Y22	Y23	Y24	Y25	Y26		Ap-Basal	Avg intensity
0	8.67067	4.1102	6.2438	9.7697	6.1837	7.9717	7.32698	4.97311	5.37	4.1932	10.6953	10.7758	12.2897	5.7866	8.3009	11.3722	13.0567	10.0825	9.494	8.2676	6.6995	7.7237	6.761	8.8464	8.1095	10.8936	8.3396		0	8.23362
0.1191	9.16062	10.4135	15.4576	8.2384	4.0185	9.4534	7.97173	6.20847	6.1035	10.3598	10.9846	13.0555	8.6398	7.9893	11.1889	8.4146	10.242	14.1914	7.2777	7.4303	8.8061	6.0377	11.9296	11.1339	6.307	7.3	8.4995		0.00581194	9.14124
0.2383	9.04531	5.2769	12.9519	10.8732	5.492	5.6837	6.8436	7.01045	6.1046	15.6856	12.8099	15.6756	9.1879	9.2051	9.3351	6.727	9.4329	10.1828	9.7801	10.3362	7.4063	6.9369	9.9907	9.1361	8.3458	10.6667	9.1252		0.0116288	9.23139
0.3574	10.3434	6.2938	9.8697	8.2862	6.5687	11.0374	7.21778	10.6367	4.1006	9.4288	16.2166	19.4291	9.9192	8.5236	7.4155	6.6978	11.9209	17.9432	9.5145	10.2776	9.5181	5.6505	5.3376	9.0102	7.2823	5.619	7.3869		0.0174407	9.3128
0.4766	10.6311	10.1801	9.2506	7.1806	6.0961	5.4399	8.98853	5.64634	5.1118	14.1466	11.1772	10.1612	11.1557	5.5167	7.826	10.2891	9.4121	13.0122	17.1712	11.2382	7.5656	5.5313	8.3405	7.6969	7.8924	5.9355	9.5752		0.0232575	8.96921
0.5957	7.37602	9.1668	12.5738	9.5187	6.3765	6.1338	8.09359	5.18712	6.0314	13.6579	15.7	12.94	17.3383	9.8216	7.4401	7.3787	8.7749	11.8401	10.9746	5.3767	7.1051	8.6537	9.8827	7.0099	8.8523	8.8575	10.0902		0.0290695	9.33896
0.7148	6.81121	7.7138	12.1425	8.0411	8.1367	7.6147	6.01563	5.09441	10.0935	18.6592	13.4907	12.8103	16.2097	7.4326	7.8781	6.0495	6.2659	12.2606	9.8549	8.1246	10.2092	5.0092	9.0068	9.1678	6.6859	8.677	6.9678		0.0348814	9.12679
0.834	6.08699	13.4463	9.3818	8.9288	9.0946	8.4836	3.88665	7.09586	11.8087	23.7969	25.9997	16.4747	19.4008	7.7216	8.1863	4.8798	14.0049	13.5628	11.1806	5.9879	7.8281	9.9215	8.2845	7.5457	9.0725	11.4349	7.6877		0.0406982	10.7846
0.9531	7.06032	5.5403	10.9725	8.5884	7.0853	11.2316	8.32458	6.47013	8.541	22.1969	26.623	24.9019	18.5604	7.3605	10.7732	4.7171	10.21	8.4063	8.9748	6.5193	9.9321	9.8632	6.4916	15.315	8.9498	6.2457	11.7183		0.0465102	10.799
1.0723	9.40763	5.6507	12.6102	6.2459	7.9994	4.4348	8.42929	8.21974	14.2804	13.4278	30.4477	28.5902	24.3838	8.2181	7.9684	6.0349	8.6915	11.0762	7.03	6.3363	9.9473	7.4016	5.6599	7.5481	12.3033	10.8344	8.6636		0.052327	10.8089
1.1914	7.9563	5.6903	14.425	9.2254	9.2375	2.7812	4.01836	3.24884	12.5482	27.948	40.2403	28.4305	21.6348	9.9693	5.0411	4.0513	6.6802	8.6743	10.9966	8.4473	5.7719	6.2062	9.375	10.6721	13.9865	7.2276	8.3308		0.0581389	11.2154
1.3106	8.88555	5.0677	12.5786	10.2124	7.2738	3.666	5.08524	2.81352	25.263	22.8503	36.7233	29.0847	21.7697	10.7877	4.5244	5.3963	7.1288	9.0421	8.4128	9.3347	11.8623	7.7217	7.6987	8.9839	18.7857	9.0376	7.667		0.0639557	11.7651
1.4297	5.1045	4.8233	13.5726	9.7899	9.8515	6.0942	5.99191	3.02791	38.1139	36.2853	41.4463	42.77	33.8741	14.1112	6.1811	9.016	7.9754	10.8427	10.1683	8.6255	8.0058	7.0011	5.587	11.0373	15.4157	5.2103	12.0627		0.0697677	14.1476
1.5488	5.09533	8.1496	16.3777	12.7925	12.7999	8.6943	3.64156	3.30874	26.9927	42.3323	40.1407	29.5723	31.0263	13.0502	7.0222	5.7401	8.6396	9.7769	11.0052	9.8061	6.3562	9.4465	6.8061	4.7322	14.1639	8.7523	8.7875		0.0755796	13.5188
1.668	4.40804	5.2941	7.4688	17.2444	15.1552	6.522	5.58669	4.81241	34.3482	41.8029	50.6342	27.3852	25.378	9.0749	7.999	5.418	6.2896	9.6927	11.4853	9.8861	13.0084	9.4088	9.9713	7.4957	9.3549	7.4749	11.5473		0.0813964	13.8573
1.7871	5.79352	6.6147	18.3239	13.1976	18.3666	6.6161	3.06244	2.32934	36.6518	38.8682	51.2144	31.3939	35.9901	16.5984	8.5172	4.0358	8.5499	7.909	14.61	7.254	12.2394	5.7618	8.5718	10.2841	12.1585	13.5036	6.4		0.0872084	14.9932
1.9063	6.43502	6.7494	16.2261	14.4332	21.881	9.133	3.95952	3.48797	34.5351	38.3009	47.7378	26.0883	36.933	8.6152	8.3983	4.7835	6.3546	10.168	15.2875	13.889	7.477	8.8357	8.5916	11.9131	18.6685	11.2085	5.0982		0.0930252	15.007
2.0254	7.85362	4.6645	16.7006	32.3287	27.5385	11.2314	4.06821	2.29123	45.0267	37.44	43.2785	24.0857	30.9488	9.2493	8.6308	4.7204	4.852	10.1832	12.4324	12.4508	9.7018	6.6398	10.9461	11.1271	14.0926	14.8028	7.3116		0.0988371	15.7258
2.1445	6.53726	4.1331	14.0949	27.6523	31.4947	6.9302	4.03144	6.41775	48.4862	43.4368	44.4342	19.2523	38.4531	5.7305	8.1134	4.3026	5.0939	10.822	18.8154	12.2288	5.9171	8.4425	11.3789	8.8732	12.8087	12.3158	5.2262		0.104649	15.7564
2.2637	6.81628	7.8783	14.1775	40.3375	39.4549	5.9577	4.3749	2.29267	35.4172	43.281	54.0287	16.1005	37.8913	8.4017	5.5866	6.778	7.1225	5.8465	13.8079	17.4401	6.5408	4.7774	9.2726	13.2255	6.3869	11.7462	8.0125		0.110466	16.0353
2.3828	6.43562	6.3462	12.2226	35.8841	41.6752	10.7181	4.7653	2.59282	31.765	58.2754	34.4519	18.5442	27.8806	4.4282	8.8147	5.6813	6.137	10.5211	17.7596	17.0293	8.2414	7.2246	3.9819	17.3035	9.2158	13.6909	11.5793		0.116278	16.0432
2.502	3.96664	9.1532	10.9251	41.6577	56.331	7.3073	3.58475	4.82541	32.2303	58.2288	21.9091	24.1247	22.8531	4.6861	6.8805	8.9921	4.5026	12.7393	17.2511	25.9166	5.9524	8.453	8.54	7.9259	4.9449	16.6049	6.0443		0.122095	16.1678
2.6211	4.95974	5.8149	13.6941	42.41	39.7127	10.2502	5.87322	3.16814	31.2242	48.6028	22.8301	15.7627	29.0204	6.056	8.3836	5.3529	5.1659	13.8352	23.3917	17.2213	7.5219	8.3679	3.7102	11.045	4.057	13.1625	11.5833		0.127907	15.2658
2.7402	6.31036	6.8906	15.0149	33.2275	40.9279	10.3153	4.24714	4.10824	30.2666	48.6609	22.3831	13.0027	30.2752	6.2069	5.6813	3.683	3.7237	19.3911	21.9379	18.5527	13.7456	5.917	5.2309	10.6996	3.8201	15.4045	8.2478		0.133719	15.1064
2.8594	4.78556	6.429	17.9981	36.0094	39.8425	11.3619	3.39387	3.3858	29.3412	46.1048	27.5494	20.3311	37.7076	6.1505	7.8713	7.2825	2.4412	14.8124	20.5977	13.3428	6.806	13.0146	3.9427	15.2114	6.1563	15.8584	9.3446		0.139535	15.8175
2.9785	3.8378	6.9734	9.5382	33.3025	45.066	13.5633	1.91313	4.04927	29.2336	36.3815	21.7887	12.627	27.7815	4.7782	6.2627	5.7809	3.7088	18.7732	24.9827	14.4788	7.4264	8.1315	6.5186	6.802	5.9244	14.1618	7.1457		0.145347	14.1086
3.0977	5.51628	4.926	16.0616	45.5274	48.5478	10.2197	4.39141	3.15011	27.7992	33.4784	15.8865	12.4844	33.2096	1.8417	7.9861	4.38	7.0797	16.3377	26.6159	18.5466	7.489	6.9364	8.3062	8.7155	3.1732	14.1643	5.9895		0.151164	14.7689
3.2168	5.69088	5.9638	19.8227	41.6337	39.2155	9.5247	4.67486	5.09195	29.7319	27.5578	14.7534	10.9707	28.0181	4.4584	11.3203	6.6802	8.3874	11.8383	17.3996	21.0224	9.9066	7.2153	7.1622	19.8482	4.0323	10.0617	11.362		0.156976	14.5683
3.336	6.76332	8.7373	20.2515	34.5383	29.2968	15.0881	3.01903	6.97274	26.1519	28.5232	11.3693	10.6005	32.6657	4.289	8.0904	9.0004	4.3061	13.1649	16.3787	19.7812	8.3923	6.8524	4.7047	12.2224	2.049	7.7731	7.745		0.162793	13.2862
3.4551	5.70371	7.0868	21.1153	36.41	33.3884	12.1244	3.23129	3.3814	24.4288	20.2346	16.0695	10.1749	28.372	6.2107	4.4384	4.292	5.5494	12.0552	20.7338	12.4082	9.1371	7.9266	7.5371	12.781	1.788	11.55	6.5393		0.168605	12.7655
3.5742	4.4287	3.9845	16.457	25.8846	34.0866	10.0381	3.19596	4.79694	14.1574	18.8903	20.1537	7.9595	25.0841	4.0868	5.8856	8.6703	2.9139	12.0741	28.372	15.1888	12.0219	9.5999	5.4533	15.0143	4.7781	4.9573	9.4844		0.174417	12.134
3.6934	4.71842	5.0894	24.7465	22.8713	29.3487	6.0101	2.79831	5.28665	13.6181	14.6658	21.9046	11.8084	25.0394	4.9201	4.5818	5.6091	3.9672	12.9227	19.6027	13.0406	10.3017	6.1658	5.8519	13.2158	5.4907	8.037	10.3201		0.180234	11.5531
3.8125	3.69741	4.2727	21.0107	28.2911	28.2598	5.8089	4.65092	7.45556	18.1874	12.1022	12.876	16.0355	17.7147	6.8805	6.7586	4.2444	2.9995	8.757	18.8177	13.1045	11.773	3.737	5.9638	11.171	4.9727	3.9193	11.1254		0.186045	10.9106
3.9317	4.9922	6.3535	27.7084	27.0783	29.4673	6.6368	3.32777	5.42274	17.5293	11.8019	11.0302	15.6372	15.2412	6.4403	6.6528	6.2492	5.8975	12.0783	12.2728	12.1013	10.4023	5.5317	3.9978	11.5519	5.1062	6.2905	9.8145		0.191862	10.9857
4.0508	6.42888	8.4742	20.5198	25.1856	21.0466	5.5305	3.71213	4.82585	14.8209	10.2745	11.2485	12.1526	17.3804	4.5661	5.6414	3.3324	6.9956	9.0085	14.6286	12.0568	12.6711	6.5917	2.9439	7.2707	3.5305	4.6879	11.0743		0.197674	9.87407
4.1699	3.12193	3.3891	23.3897	25.6593	19.7726	6.5675	3.43895	4.02108	14.7253	13.6934	14.127	12.02	13.7025	2.5585	3.777	3.7383	2.0746	4.4474	14.6776	7.6662	13.7299	9.1361	2.6015	7.8472	4.5134	6.0831	8.6153		0.203486	9.22572
4.2891	3.79155	5.7325	17.4394	19.6998	15.9623	5.2978	4.91891	6.57667	12.2236	7.5379	11.8723	11.7038	10.2446	2.7923	4.1291	4.9539	1.8218	7.6048	11.8826	10.2699	6.4845	4.8798	4.5325	9.9	2.8369	7.3661	8.5315		0.209303	8.1847
4.4082	4.58276	3.5124	21.2714	21.1406	16.2786	9.9328	6.34016	3.31062	8.3569	9.7404	10.7608	10.1699	11.4072	3.1574	2.3058	3.9303	2.7598	4.8248	12.8452	10.2584	10.0758	7.0982	4.535	9.3081	6.1366	8.2119	16.4242		0.215115	8.83985
4.5274	6.06493	2.691	20.3935	10.4019	14.679	8.8888	3.55574	2.40573	13.6054	6.1349	11.5989	10.7126	10.1244	5.4485	3.6765	2.3004	4.6944	6.9677	9.2441	10.3032	8.541	4.0613	2.587	4.8985	6.8012	11.4029	15.7305		0.220932	8.07089
4.6465	4.49088	5.1615	21.1416	11.4495	16.7025	10.193	6.40151	2.55402	11.3986	8.4782	13.8973	10.3726	10.6531	4.4903	5.9304	3.5701	9.6977	3.227	8.3962	9.1638	5.3538	3.6204	4.953	8.2655	6.772	10.0615	19.5703		0.226744	8.73949
4.7657	2.90856	7.113	13.4121	16.0455	15.2042	8.22	5.05412	3.00741	7.8148	6.6662	14.4884	13.3847	8.6516	2.2602	4.4782	6.6175	7.5827	8.9083	4.6851	6.469	7.1912	3.7828	4.3782	8.6489	5.2218	8.2008	15.1906		0.232561	7.98466
4.8848	2.06791	6.5647	16.4788	14.7879	16.8213	10.2779	2.91133	3.36863	13.142	4.5273	9.4828	16.2319	10.9289	2.4011	3.0124	2.5884	6.6552	6.4027	6.6025	5.262	4.467	3.7821	4.952	6.785	6.3137	6.8752	8.2862		0.238372	7.48062
5.0039	3.58104	7.3426	20.2548	13.5295	15.3865	6.2653	5.61603	5.85395	9.3721	3.2234	11.2276	12.8469	14.2034	3.2285	4.1037	3.6657	7.115	3.0086	6.0406	5.3006	5.4824	5.8111	4.1918	4.7111	7.7795	7.2168	14.3379		0.244184	7.80357
5.1231	5.18691	12.4007	14.1975	14.2168	18.3337	6.2664	6.51869	6.00522	8.9411	6.4124	9.987	15.0127	9.6791	3.9981	3.4143	4.0098	5.0669	3.8805	6.4554	3.1605	5.5366	5.6441	1.6643	3.587	3.4888	10.2414	13.5878		0.250001	7.66273
5.2422	3.35447	5.3447	14.2537	8.8218	16.0898	2.2518	4.26334	8.20208	9.5492	5.8944	8.7418	15.1465	11.7722	3.8229	6.1326	5.3423	4.7002	2.895	5.3023	6.8592	4.4566	4.2838	3.5359	5.9754	3.1201	9.5208	17.1748		0.255813	7.28917
5.3614	3.32058	5.5787	19.7626	13.0721	18.3643	3.0624	6.80598	4.40806	9.5363	4.6091	14.4799	6.9734	11.2513	2.5617	3.9283	9.1492	3.8805	2.6661	4.0016	5.4915	6.3595	3.9516	3.6013	6.3618	3.7776	7.1019	13.1794		0.26163	7.30506
5.4805	3.03714	8.2105	17.9719	16.0882	21.2075	7.543	3.2802	3.07295	5.8084	9.8133	8.4655	10.2073	13.4076	2.6752	5.0603	3.4394	4.6117	4.9362	5.7425	6.2613	7.0012	4.5128	2.9462	7.0423	3.5478	6.3979	12.8431		0.267442	7.59746
5.5996	5.4689	8.9871	10.87	8.7674	20.8621	4.6048	4.2942	6.69377	5.2891	10.6766	4.5402	11.4825	16.2855	2.2462	4.1512	4.2597	3.5118	3.9742	6.7512	7.8109	7.4949	4.7332	2.8643	3.1851	3.8987	6.5307	17.8216		0.273254	7.3354
5.7188	4.90474	8.2539	13.2245	15.1746	12.484	3.4331	5.86948	8.02728	8.7195	9.5231	7.4644	6.3168	5.808	4.1155	3.5015	5.1269	2.495	3.8911	3.6865	7.4347	4.1118	2.8299	3.9965	5.8171	3.3663	9.5037	14.5887		0.279071	6.80254
5.8379	5.38201	11.2093	11.4987	5.6087	14.7533	4.4676	3.72696	7.00676	4.9766	9.6681	10.1754	8.8134	6.6729	3.7191	5.709	5.6444	3.7428	2.385	3.9792	8.5583	4.9531	4.877	6.1507	11.2906	3.3813	11.9603	16.7745		0.284883	7.29945
5.9571	5.60203	10.5918	12.7918	8.2838	16.6721	5.0588	5.20576	6.63117	5.1839	14.1492	12.249	6.3712	4.0937	2.9534	8.2625	5	3.08	3.1181	4.1743	7.5968	2.2863	3.7363	5.304	3.2362	4.4612	8.8058	10.312		0.290699	6.85967
6.0762	3.63985	13.0632	7.7176	8.645	19.2857	2.1086	3.45793	8.07279	9.4648	4.2001	12.067	9.2801	4.1501	2.1289	5.5892	4.9522	4.496	7.2479	3.9311	8.0151	2.9153	6.2444	3.7832	3.5633	3.415	4.7739	10.3545		0.296511	6.53936
6.1953	3.80573	13.8675	9.5629	7.3957	12.6661	3.9307	4.02056	5.58224	7.4818	6.3865	9.1514	8.0769	3.1799	2.2106	4.5266	5.2637	5.6155	4.7517	2.8623	8.5045	4.4927	5.7787	3.3838	5.6132	6.4974	8.8274	14.0397		0.302323	6.57318
6.3145	3.27761	7.4329	7.2315	8.2654	16.3568	5.867	4.7055	5.41502	7.2419	9.2811	18.1578	7.3299	2.6014	1.7943	6.3422	4.0979	2.5561	3.9496	2.6676	6.0481	2.932	3.3678	10.8756	5.3743	7.2581	8.2678	7.8542		0.30814	6.53887
6.4336	6.59347	6.0748	8.9899	11.2403	13.1359	3.4631	4.38881	7.24995	8.678	5.3421	12.7852	9.4395	5.5863	1.524	5.8548	3.8508	1.1847	5.082	2.1241	6.3864	4.4636	6.4095	6.6399	8.1115	5.6034	5.3221	10.3054		0.313952	6.5122
6.5528	6.59009	10.2297	7.9962	10.824	13.2788	4.4541	4.65008	7.93254	7.7115	4.3832	14.4756	7.1719	5.6253	3.7642	6.5966	3.6616	2.4213	3.2025	3.4456	9.3798	7.0192	7.0971	4.29	3.7093	6.8209	4.0637	9.561		0.319769	6.67984
6.6719	4.03314	13.7051	9.3826	14.896	12.2913	3.1619	4.00684	7.65001	6.4206	9.4535	15.1496	5.7535	5.3248	4.7726	3.5601	5.1685	6.0953	4.9588	3.5387	8.6074	6.9981	8.5114	5.345	6.2409	5.9329	6.4658	10.7107		0.325581	7.33834
6.7911	5.90525	7.393	6.0667	8.9906	12.0755	3.8007	4.06129	7.84527	6.4025	4.1893	7.8888	6.9876	4.2847	4.5264	5.741	2.1404	3.6861	4.0008	2.9473	6.3163	4.0611	6.5885	7.0601	4.8193	4.1939	10.9575	10.3033		0.331398	6.04567
6.9102	4.36969	4.7635	6.4436	12.2624	11.6553	4.4342	5.69341	4.17173	3.6557	5.2078	8.7426	5.7962	3.7772	2.7523	4.662	6.2386	3.1033	6.8066	3.3134	7.3978	1.5797	7.5211	6.8566	9.3273	5.3726	5.9983	7.3391		0.33721	5.89785
7.0293	4.64977	8.6923	8.7182	10.5236	9.2041	3.3002	3.22307	5.72706	4.4982	6.5651	8.3823	8.0607	3.494	3.4969	4.2257	4.3783	3.3913	6.4008	2.0053	7.4169	4.6566	7.6526	5.097	6.4956	5.3951	7.5961	12.5565		0.343022	6.14086
7.1485	2.01628	12.7068	7.2628	14.1347	13.6979	5.7779	4.23909	7.91428	6.3235	7.7161	7.1062	7.3955	4.0055	3.4849	5.8925	3.8139	2.3983	7.3878	4.3073	5.4686	2.5112	5.399	4.9048	2.6128	6.8713	9.3116	13.8781		0.348838	6.61254
7.2676	1.92533	7.2206	4.4548	6.5409	16.4046	5.4808	4.975	6.86578	8.1962	6.6452	5.8828	8.1782	5.4193	4.4223	4.1873	7.9518	2.9945	6.9033	3.5639	10.0105	4.216	4.2501	6.6183	3.6653	6.1343	5.5673	14.5729		0.35465	6.41657
7.3868	2.84224	8.5085	5.6609	6.8967	13.1542	3.9339	3.46955	5.86844	7.2966	5.5954	8.9492	3.7868	4.51	2.6692	4.6516	7.2235	3.7095	6.1039	3.7943	8.1175	5.1106	3.2103	3.6679	6.2912	6.4328	9.2819	10.3065		0.360467	5.96456
7.5059	5.29303	9.6575	4.2281	5.5839	13.9219	4.8965	5.43046	7.48397	7.495	6.7924	8.3695	7.3055	4.7829	2.475	5.1874	3.8145	2.6167	4.4099	5.4427	7.5033	5.6888	5.5302	3.7009	8.6992	5.0949	7.0638	6.9119		0.366279	6.12518
7.625	5.22141	6.5897	6.2611	8.8923	12.1571	3.6874	3.81334	6.30384	8.8263	7.8157	9.0469	7.0786	5.9569	3.4845	3.427	3.0953	2.2566	4.2292	4.746	3.2664	8.0288	7.4299	5.3346	5.4507	3.9837	6.7011	8.1046		0.372091	5.96996
7.7442	7.72241	6.8324	3.3429	10.6355	11.2582	4.1069	3.68951	7.08437	5.5921	6.6505	5.8769	7.0882	5.774	3.3002	4.4891	5.5324	3.1358	4.5436	4.243	5.6053	6.7992	2.9329	5.9614	4.9415	5.4869	9.2965	10.4393		0.377908	6.01337
7.8633	4.96922	7.2998	2.881	10.1895	12.6862	4.1145	2.7635	8.80326	5.5435	5.6776	9.4293	6.2659	5.9218	5.1576	5.6774	4.4667	6.2088	5.5323	7.0372	6.9525	4.1835	4.085	3.5997	9.1203	6.0777	10.1973	8.621		0.38372	6.42452
7.9825	8.10604	7.4167	1.4682	5.7618	11.1176	4.6639	3.36602	5.08822	3.5474	4.0804	7.166	7.9671	4.704	7.0509	5.6222	3.5686	6.289	5.121	6.4472	6.6171	4.2876	8.4774	5.6941	9.2787	5.5443	5.7046	7.1406		0.389537	5.97395
8.1016	3.48978	10.5309	3.3881	7.4923	11.2933	5.9329	2.6529	3.96186	5.1326	4.8103	8.3323	6.6815	4.2016	3.0811	3.191	1.9591	5.0974	2.7378	4.3742	5.6921	4.626	5.059	4.7506	5.9929	6.1405	5.7772	8.2858		0.395348	5.35796
8.2207	5.34288	5.5471	3.9011	6.312	9.6104	5.19	2.73758	4.68619	3.8748	8.198	7.1909	7.0496	9.1963	4.068	2.396	2.4693	1.624	3.645	2.4106	7.5359	5.3227	6.8016	3.312	6.045	3.46	4.7849	5.1163		0.40116	5.10475
8.3399	5.9039	7.2471	3.6518	5.9512	12.768	2.6282	2.90489	8.2326	4.0036	9.2902	7.8474	7.0639	5.1277	3.8791	2.7042	1.6	3.4202	4.9281	3.6587	5.1895	3.5984	5.9411	5.6753	2.7239	2.9432	6.9811	6.0425		0.406977	5.25577
8.459	3.42495	6.8389	3.046	3.5132	11.1839	2.6005	2.60083	5.24344	6.9815	5.0375	5.7258	7.2876	3.2973	3.5167	2.3303	3.3339	4.8113	5.9329	3.9077	3.2376	7.7482	5.4327	5.7012	4.2109	5.6597	3.3094	8.8405		0.412789	4.9909
8.5782	5.93324	7.3512	5.6301	6.2007	10.4464	2.1369	4.59425	5.17759	6.3116	9.2229	6.5275	5.3823	5.5555	2.9435	2.5675	2.7365	3.6025	6.2419	6.8022	4.5073	5.6071	2.008	4.7938	2.9551	6.0189	5.2191	4.5128		0.418606	5.22172
8.6973	4.33048	7.5515	2.2973	4.6026	15.2046	2.3639	3.71309	4.42899	5.0676	4.448	7.2864	5.6231	3.7231	1.1577	2.9599	2.1406	4.9919	4.3603	4.9996	4.5838	5.5458	4.6515	5.0058	5.1885	5.586	8.1913	5.604		0.424418	5.02249
8.8165	4.71175	7.5933	1.8165	3.65	10.4551	5.1753	3.93521	3.41998	5.1392	3.4042	9.4799	5.4872	6.38	1.052	2.0292	1.825	6.4922	4.8244	2.1841	5.5883	2.5268	5.3582	6.915	5.1762	5.2792	4.9365	7.9832		0.430235	4.91918
8.9356	5.54267	3.4949	1.5537	5.8532	11.0577	4.3271	5.7703	4.68428	5.3602	4.1281	4.3345	3.1309	6.2671	1.2645	5.9543	1.5003	7.3025	3.5131	3.6184	3.2855	6.9369	2.6453	4.8695	5.118	4.9855	2.9919	10.2381		0.436047	4.80476
9.0547	5.34744	5.6006	2.949	5.9875	13.0294	2.0849	2.18223	6.09761	10.4237	3.0173	9.0754	4.948	4.6917	3.8046	5.1216	2.9907	10.7165	2.9311	3.3405	4.0582	7.0277	5.5385	8.6287	4.4736	7.5881	4.9262	9.5751		0.441859	5.78355
9.1739	4.40112	6.0588	3.3515	5.4216	8.212	2.7604	3.77541	2.5709	6.4931	2.4092	5.6988	2.1975	3.9354	3.7526	3.9266	3.7962	8.2514	2.5288	5.9374	4.4963	6.0345	3.6289	5.4905	6.4176	4.8872	5.2356	8.8349		0.447675	4.83349
9.293	2.75393	8.9089	2.499	2.05	9.4568	2.1462	7.27222	3.3738	4.9893	3.813	5.7008	8.7343	2.4092	2.9711	1.9252	2.7867	6.6916	7.0976	4.7855	6.607	2.7459	2.3764	6.6357	6.2699	10.2945	7.421	7.3314		0.453487	5.18692
9.4122	3.51055	5.22	3.5044	2.8993	12.8243	5.9115	5.15725	2.9563	8.1532	4.1154	4.543	9.5837	2.5886	3.8976	5.1404	3.3981	6.1275	6.7851	2.7305	2.5338	5.4584	4.3221	7.5814	5.522	4.4805	7.0713	6.8764		0.459304	5.29232
9.5313	2.90969	4.0855	2.5155	3.1774	10.4205	4.8377	4.35264	4.13253	6.7878	3.1943	6.8297	4.752	3.3664	2.389	5.2517	6.2007	7.7251	4.5051	3.7767	1.6793	4.1377	4.75	5.4797	6.5481	7.6097	6.6819	9.1018		0.465116	5.08141
9.6504	3.26288	4.1759	2.0383	4.1481	13.3656	2.8306	2.72853	5.35007	9.5411	5.5271	5.948	7.0959	3.2948	1.4181	4.8704	3.9664	5.6231	4.7343	1.7787	3.7016	5.7207	6.257	7.8897	7.9875	4.2295	10.1366	9.1943		0.470928	5.43758
9.7696	4.56822	7.3334	2.4036	2.7067	7.7888	6.1309	3.50603	6.05253	8.8671	3.6495	6.804	8.5581	2.455	2.9746	4.698	1.984	2.8487	5.0211	1.4737	5.6913	4.3643	8.0728	9.2768	4.6858	4.7398	7.8265	12.4345		0.476745	5.44133
9.8887	5.12122	4.1323	1.9351	2.442	6.2101	5.0424	5.04602	3.59699	11.9723	4.5972	6.6391	7.3103	3.3163	3.9497	4.8321	3.9925	3.7397	5.2253	1.62	3.854	3.7489	8.2717	10.1235	5.5043	3.7205	6.0202	9.4835		0.482557	5.23879
10.0079	5.37283	3.9667	3.4393	2.3296	9.2893	4.6023	5.2981	5.4507	12.9099	1.9233	10.3515	4.8905	4.3912	2.0208	5.824	3.9193	2.4018	3.8392	2.3045	5.3236	3.8219	7.9985	7.5413	3.7742	5.1085	5.2396	7.1		0.488374	5.2012
10.127	3.59804	3.7825	2.2238	3.6727	8.6366	2.6725	5.31388	3.16173	8.3602	5.5443	10.4444	7.0603	5.817	2.6751	7.9492	5.3833	2.8152	3.7354	2.6929	4.4234	3.9613	6.2603	5.741	2.2778	3.239	9.9687	7.719		0.494186	5.15295
10.2462	5.5902	4.8783	3.3138	2.8798	15.7678	2.9865	6.96623	2.82489	9.6935	3.752	9.744	6.3099	4.0354	1.1963	3.0927	3.3536	3.6975	4.6325	2.2368	6.8607	2.217	6.0214	2.8117	6.2529	4.8716	4.908	5.8656		0.500002	5.06521
10.3653	5.77091	5.6745	2.991	2.086	8.6037	5.1271	5.558	5.12611	12.9441	2.3166	6.0405	5.8309	1.9374	2.5643	2.2654	1.9795	3.9146	3.9809	2.377	2.8893	2.4161	2.837	9.698	3.0608	3.169	4.9704	13.8332		0.505814	4.81342
10.4844	3.94142	3.7102	3.5649	3.7284	6.6227	5.6125	3.84296	2.10177	5.3383	3.852	7.0189	7.1459	4.9177	4.594	3.0727	4.4602	2.6605	4.2154	4.9319	3.341	2.3491	6.4987	4.9385	5.0367	5.0592	5.2951	12.1804		0.511626	4.81596
10.6036	5.44539	4.2536	2.9149	4.8108	5.9374	4.4045	8.49571	3.41139	6.8593	5.9527	6.1633	3.7175	4.8766	2.079	4.2675	2.2473	6.1559	2.8976	2.485	5.4605	1.8836	8.8473	7.4682	4.8644	6.9782	6.8153	22.2426		0.517443	5.62724
10.7227	2.63564	5.3072	1.1536	3.1884	7.7031	3.513	5.64018	3.35279	9.3412	3.2269	3.6684	4.4142	2.8722	3.0347	4.3956	2.7038	6.342	3.607	3.2731	4.7269	2.7629	3.6742	6.0742	5.2342	3.3034	4.7761	12.797		0.523255	4.54526
10.8419	4.67176	4.5391	2.8477	1.8835	8.1433	4.9236	3.60041	4.41395	5.6176	2.667	4.14	4.4272	3.7565	3.87	7.7953	3.8805	5.222	2.1669	3.1207	4.1848	2.1753	5.7939	3.1241	4.7124	4.046	7.2068	11.33		0.529072	4.60223
10.961	6.72992	5.0622	1.9562	3.8031	7.7388	5.45	3.42673	5.30029	4.1714	3.7068	4.3992	6.4373	1.7223	3.6789	5.146	3.0047	3.1756	1.3421	4.9493	2.8437	1.6385	10.7298	2.682	6.9584	5.8804	7.968	13.9267		0.534884	4.95661
11.0801	3.79033	4.0703	3.9225	2.7406	7.3988	3.6677	6.39667	6.17568	4.9174	5.0963	8.7177	2.9102	4.5533	1.5771	4.5849	2.2834	1.4797	1.0368	3.3586	3.4464	2.7203	8.6158	3.0825	3.8386	5.964	4.4727	10.9061		0.540696	4.50831
11.1993	2.8883	3.3795	3.3777	4.0278	8.0905	3.2331	2.90018	3.13707	5.5524	2.8737	9.3522	3.7082	4.0075	3.4476	3.5067	3.7229	3.447	1.8066	2.3859	1.8222	4.535	7.4153	4.4441	4.4919	6.9399	4.5166	13.8313		0.546513	4.54967
11.3184	6.872	1.7613	1.5402	1.5596	6.8758	2.4436	3.07651	3.18896	3.8212	3.771	7.3597	3.5445	3.4576	2.6251	3.0817	3.3594	5.4845	1.6403	4.3126	2.4698	5.8141	6.49	5.1226	5.6858	3.138	4.2587	18.6587		0.552325	4.49679
11.4376	3.73647	3.5089	3.1888	4.1203	3.2861	4.4538	3.59442	4.50891	6.3062	3.3154	13.9506	2.8256	3.1203	2.2563	5.8294	3.6215	2.7139	2.0648	4.05	6.1416	4.1451	5.1984	4.0242	4.4694	2.8957	6.823	14.3258		0.558141	4.75833
11.5567	1.58141	4.7136	2.9619	3.5805	2.6398	2.4546	2.90635	3.30387	6.3852	1.719	8.8406	4.1886	3.0526	3.2848	4.748	2.1368	2.7965	5.4602	2.1736	3.5908	8.2304	10.7085	4.0302	4.4826	2.4705	3.9716	14.634		0.563953	4.4832
11.6758	4.37197	4.4592	1.8853	4.4285	6.3312	2.3962	4.17787	1.18335	7.2436	3.0592	9.1942	3.2531	1.9218	3.635	1.8765	4.4074	4.3129	4.8223	1.2286	3.9724	4.991	6.3945	1.7096	2.1086	1.8777	4.1628	17.7643		0.569765	4.3396
11.795	3.75931	3.1515	2.3475	4.7272	1.9745	3.0748	6.28576	4.26503	6.7355	5.5349	7.3348	2.3666	2.2424	4.3111	2.9546	1.6227	3.1688	3.1888	1.1734	3.0127	3.5339	2.6624	3.8665	5.9687	1.7336	3.8502	15.4174		0.575582	4.08387
11.9141	3.84198	1.6251	2.2966	2.9189	3.6609	2.451	3.80225	4.51531	4.7604	6.4683	5.6877	5.9827	6.1944	3.9572	1.8994	1.3895	4.5455	1.9442	1.4879	4.5724	6.5182	6.1863	3.0519	6.3141	1.5535	6.2432	12.6559		0.581394	4.31573
12.0333	3.56258	1.2948	2.2618	2.6637	2.484	1.7582	2.97501	6.97324	2.8779	2.9051	4.5811	11.1741	2.8927	3.6571	2.3481	5.2362	2.2022	2.2329	1.586	5.7211	3.6086	4.3799	1.6668	3.369	4.3659	6.9385	15.516		0.587211	4.11972
12.1524	5.90007	4.5295	1.5945	1.0853	4.2903	1.2971	4.7287	4.10511	6.163	2.597	7.3369	8.4054	3.5068	3.9069	4.2145	5.6404	3.1833	1.7932	1.7359	4.5969	4.1588	2.5709	3.836	3.378	4.382	5.7174	16.1587		0.593023	4.47454
12.2716	4.16282	2.5639	1.2987	2.348	5.4651	1.9293	5.45749	2.99734	3.0754	7.5488	6.049	6.0641	4.4357	4.8692	3.1774	5.8122	2.8706	1.6194	2.382	5.0132	5.1276	2.5115	3.0751	4.5992	3.2798	6.9136	10.975		0.59884	4.28228
12.3907	1.92289	1.2021	1.887	4.6353	6.202	1.5012	5.23624	2.64401	5.8097	6.658	4.0239	4.3122	1.7877	1.9059	1.8246	3.0678	3.2849	1.6923	1.6968	4.6855	4.5573	6.2376	1.7767	3.2079	3.9027	5.2898	12.3142		0.604652	3.82468
12.5098	3.34473	1.0977	1.633	3.8682	5.555	4.025	2.62497	4.21196	5.2204	6.069	4.9096	2.98	2.7682	3.2424	2.6238	3.669	3.7087	1.8098	2.0592	2.8269	6.296	6.1776	3.6275	2.7237	2.295	7.4983	16.1496		0.610463	4.18575
12.629	5.79106	2.2605	3.1284	2.9772	3.8867	5.7641	4.1407	6.27588	6.2422	6.4981	3.935	2.6449	1.5662	1.5039	1.6645	3.3758	3.9498	2.5968	2.011	4.4985	3.047	5.8049	2.4483	1.468	3.1124	6.4053	13.3805		0.61628	4.08806
12.7481	4.04108	2.2912	3.2799	1.4772	2.8273	3.8621	5.5003	4.09132	5.4188	3.5638	7.0086	4.0816	2.3024	3.6548	2.8558	2.6618	4.4371	1.3919	1.8903	4.1528	2.4162	5.5656	5.6845	4.5207	2.5631	5.1848	9.6981		0.622092	3.9416
12.8673	4.40582	3.7927	1.8412	1.0487	3.7714	4.7233	4.00212	9.20969	4.3278	3.4577	5.1357	6.5798	1.6946	3.3396	2.6022	2.5613	4.7433	3.1467	1.7187	2.4828	5.2026	3.0391	4.4192	3.8459	3.02	6.9518	12.1837		0.627909	4.19435
12.9864	4.49796	3.7643	4.5833	2.382	7.6369	3.9337	2.99588	5.44055	3.4742	4.3045	4.3383	5.1568	4.0801	5.6816	2.9302	2.4158	2.568	1.1779	3.5324	2.8373	4.7886	4.1328	3.8261	3.0561	2.8264	6.7169	10.7449		0.633721	4.21568
13.1055	3.94988	3.3684	1.1047	1.1696	6.4247	5.9736	2.59205	2.68818	4.784	4.7269	5.0114	4.4713	4.6336	3.5418	4.256	4.0655	2.2557	1.7416	4.0511	2.401	5.355	2.5423	3.4078	4.6086	1.2125	3.3199	16.6697		0.639533	4.08618
13.2247	6.28442	1.6446	1.8341	1.9301	3.6976	4.4898	5.63938	3.81264	5.0575	4.6749	5.4158	4.3349	7.1441	3.9645	3.6983	2.4365	2.8338	1.7313	1.4209	3.1928	4.1454	5.321	3.8308	3.1161	1.8062	5.8901	11.1466		0.64535	4.09238
13.3438	7.30802	5.0302	2.5481	1.7128	3.1897	2.8142	2.95483	5.61495	6.5842	3.1053	5.7068	5.6961	3.4451	2.4294	4.9222	0.992	2.9806	1.7134	3.8685	2.7031	4.1608	5.006	6.3759	2.9655	2.7002	5.0791	11.9915		0.651162	4.20735
13.463	4.5281	2.4409	2.9099	1.5998	3.2386	1.4034	2.16755	5.7752	4.3961	3.7187	3.5064	4.7791	3.4315	1.3684	5.5338	3.0867	6.768	4.7996	2.7687	3.5023	3.8262	3.5699	6.185	2.583	3.8033	4.7287	9.5734		0.656978	3.92564
13.5821	3.23902	2.8524	2.1487	2.0577	3.1135	3.2805	4.33021	6.50518	6.3217	4.2837	2.8045	4.6574	5.0208	1.642	4.3494	2.056	4.295	1.5515	2.0315	4.1142	2.628	2.0458	4.6781	4.6427	1.9327	8.2345	8.114		0.66279	3.81225
13.7012	4.25411	3.2725	2.2061	2.9663	1.9995	4.4141	3.89658	2.10047	7.0471	7.0157	5.1841	3.6594	5.5053	3.803	2.5381	3.1405	5.9018	1.0621	2.1521	1.9512	3.7247	2.9577	7.0744	4.2343	5.0901	6.4419	11.8763		0.668602	4.27665
13.8204	3.23228	1.8973	2.0469	2.1956	4.522	5.0965	1.90773	1.26383	7.4624	4.8315	2.0149	5.0912	3.8191	3.0624	2.132	2.3338	5.9864	1.0899	1.6607	6.1206	2.949	3.9037	3.7289	2.6299	5.0816	4.7953	12.6356		0.674419	3.833
13.9395	3.74581	1.6931	3.1296	3.3585	2.265	3.1629	3.27758	4.77418	3.8863	4.4383	4.2946	6.2923	5.3797	3.0478	2.6203	1.759	7.9592	1.195	2.0234	10.0646	4.1211	5.315	3.7721	4.2075	3.8458	4.787	13.49		0.680231	4.36688
14.0587	4.2677	2.5768	2.8586	3.7781	5.5328	4.8823	1.38601	3.75014	3.6255	4.8858	7.1953	3.8315	2.9521	2.1962	3.9359	1.4748	3.7986	1.9535	3.5887	5.5381	3.4227	5.3475	4.4371	3.6258	4.0833	4.4877	12.2094		0.686048	4.13415
14.1778	4.85999	2.1252	1.2321	2.3362	3.9244	4.7107	4.10869	3.80363	6.0485	5.4607	8.0608	3.4669	2.7381	1.8563	2.898	1.7628	6.1297	2.2957	2.1396	3.3335	2.7629	3.7123	9.4526	4.7941	2.0665	7.8226	12.3502		0.69186	4.30566
14.297	4.24364	1.1255	1.3935	1.5796	6.8571	5.2884	1.72963	3.51114	4.8788	6.5372	6.0798	1.5912	1.3819	5.3168	3.2595	2.0969	2.8042	3.1354	3.2618	1.6787	2.9433	2.507	6.4056	3.9616	4.2561	3.9807	3.6566		0.697677	3.53562
14.4161	6.94703	2.2175	1.1375	3.719	4.0638	5.5939	4.06265	5.06195	7.2906	4.9579	2.8682	2.6665	2.7903	5.3103	3.0031	3.4398	5.1776	1.6169	1.3444	3.0039	4.3375	2.8646	6.2307	2.5395	6.9069	8.1793	3.5534		0.703489	4.10684
14.5352	6.86496	5.2334	2.0295	3.7019	4.2276	7.7601	3.06263	2.6909	6.5763	4.1963	3.0047	2.2827	4.3498	2.4438	1.9668	1.5585	2.5145	1.8253	1.0117	2.7653	7.3224	3.8432	4.0541	2.1737	4.782	5.99	8.1586		0.709301	3.9404
14.6544	6.26186	2.9117	3.5638	2.2753	5.4757	7.1667	4.09223	2.24296	2.7756	3.6586	6.0959	2.6769	2.0718	6.0164	3.8119	2.914	1.6405	2.4224	1.5988	2.0825	7.3478	5.4619	2.188	4.5654	3.6928	8.1622	9.3174		0.715117	4.16634
14.7735	6.83256	4.728	3.6004	3.594	5.6054	5.4086	2.4872	2.10116	2.7542	4.4665	4.1354	3.0504	2.4883	4.1568	1.6333	1.9704	2.6496	1.8768	2.9073	2.3124	6.5761	4.7744	1.8004	2.952	2.4905	8.5959	7.1249		0.720929	3.81752
14.8927	2.78916	2.9246	1.5357	3.9368	7.089	6.6782	1.5228	3.0794	4.9147	2.4341	1.4613	2.5684	1.6642	3.0724	1.2657	3.3785	1.8104	1.4598	2.8809	3.2994	6.175	2.9779	1.8632	2.9693	2.4805	3.7911	8.439		0.726746	3.27635
15.0118	4.37616	2.6451	1.7264	3.4398	5.6437	3.552	4.42653	2.58542	3.9774	2.1133	2.8748	4.4171	4.1083	2.079	1.8114	2.651	3.5229	3.6163	1.4946	1.5971	4.9101	3.2294	2.7005	7.0651	5.318	5.4527	7.5314		0.732558	3.66169
15.1309	4.6683	7.3455	2.1764	3.3726	4.6825	3.2994	1.92473	3.88242	2.9917	2.1902	2.5835	2.5868	5.5312	4.1419	4.7405	5.3927	2.2396	2.9435	1.2861	6.8921	3.8557	5.1002	3.9407	2.634	2.7076	4.7431	12.3584		0.73837	4.0819
15.2501	1.83946	5.2941	2.1027	4.6434	6.5341	2.7815	3.42379	4.21659	3.4249	2.3397	3.0789	3.1558	3.8662	5.4391	7.1028	3.8053	2.2763	4.1216	1.1421	2.4581	2.5254	4.1053	4.356	4.4587	2.2366	3.3198	18.0659		0.744187	4.15238
15.3692	2.26507	4.8902	2.414	1.7576	3.0015	2.0776	3.84923	3.74732	4.7029	3.3576	2.9084	2.3574	3.0849	4.1747	6.2971	2.4849	1.2927	4.2641	1.5323	2.6897	4.9743	2.7999	2.3898	2.3802	6.2081	4.422	8.3158		0.749999	3.50516
15.4884	4.52458	6.2758	1.6335	3.7103	5.6621	2.1915	4.79413	2.63509	3.533	5.081	2.9908	1.6246	2.081	3.1804	4.7563	3.9555	1.3003	2.7926	2.8214	1.644	3.2314	4.1582	1.5759	2.7358	4.0563	3.2303	5.3151		0.755816	3.38855
15.6075	5.27646	3.9069	1.3772	2.5856	6.2315	1.7142	4.73602	4.60301	4.8241	3.3672	3.0508	1.2927	3.0929	2.7899	3.7515	4.8932	2.2338	1.5598	2.0832	1.4756	3.3699	3.3266	1.853	2.9817	4.0186	3.3215	5.457		0.761628	3.30274
15.7266	6.20478	2.6995	1.3313	3.2708	4.2277	1.3464	2.85537	3.38605	5.0471	5.8165	2.683	3.1142	3.0578	5.1371	3.726	3.187	1.8158	3.2507	1.662	2.2684	4.8086	2.5156	2.639	4.6053	4.7766	3.2463	4.1581		0.767439	3.43841
15.8458	4.889	5.0201	3.5469	4.9521	6.3049	2.7459	2.47789	5.0859	10.0538	6.4529	2.6548	2.2069	3.092	4.0768	2.8539	2.6975	1.6818	3.8153	2.8149	3.021	4.4809	6.6429	4.5037	6.3916	5.3481	4.5784	3.1671		0.773256	4.27989
15.9649	3.28112	4.0681	2.4419	5.1335	4.3979	1.7599	4.6046	2.36879	7.6524	4.152	1.5122	1.8468	3.1332	2.3508	2.6135	2.3724	1.4439	1.9821	1.6214	1.8999	3.223	3.601	1.8617	4.1192	4.9857	4.7106	2.9886		0.779068	3.18986
16.0841	5.0052	3.6947	3.099	4.2126	4.7508	2.9262	2.98541	1.9868	4.0118	2.525	1.3072	3.026	1.9589	2.4508	1.2108	3.7204	1.7526	2.5248	3.1503	2.2759	4.6156	1.8938	3.1068	4.109	5.2574	3.7508	3.7027		0.784885	3.14857
16.2032	8.90943	4.4026	3.4373	4.4809	4.0017	2.9228	4.36679	2.25933	5.5845	3.4178	1.4231	2.7936	2.6482	3.0126	1.8747	4.0126	3.1192	2.9308	4.3952	5.2053	3.5824	2.2784	2.7363	2.4656	3.1994	3.8616	4.4384		0.790697	3.62076
16.3224	5.76639	5.2559	1.0846	6.6515	3.7087	3.1099	4.10685	3.67019	5.8298	4.3443	2.0835	3.0825	1.5666	4.0282	4.1808	3.8629	2.1589	1.6919	2.8712	1.3195	5.6623	3.0214	3.1178	2.0778	8.1635	3.4302	3.6019		0.796514	3.6833
16.4415	6.18611	6.1413	2.1643	6.6497	6.4871	2.0022	2.65438	2.57367	7.9809	3.2083	4.5309	2.7528	1.8368	3.2101	2.7578	2.7782	2.7772	2.7165	3.28	1.5404	3.542	3.776	3.0454	4.018	10.4764	4.7627	3.6553		0.802326	3.98165
16.5606	5.35064	4.5217	4.2669	9.3258	11.9043	1.7166	2.79134	5.49268	7.322	5.3066	1.4141	1.0323	3.5607	2.6488	3.0962	2.8885	1.4193	2.5882	1.301	2.0254	4.3106	4.8693	1.188	4.5698	14.7116	4.1419	4.0471		0.808138	4.36338
16.6798	6.0049	4.8053	2.0712	5.1168	6.5554	4.9733	2.07222	4.78547	9.8272	2.8092	2.4512	2.0015	2.1733	5.0397	2.4423	3.2876	1.5972	1.5383	1.2974	3.2844	7.9022	3.0379	2.3932	2.1568	11.8839	3.9133	4.7841		0.813955	4.08168
16.7989	5.52608	2.2389	4.7739	6.2097	4.2545	2.5221	2.62336	1.77887	2.5081	1.9075	2.3734	1.6446	6.3739	2.9269	2.5331	2.1493	3.742	3.1365	1.9094	3.4883	4.0621	2.2968	3.3449	7.2285	9.0273	4.3583	3.5615		0.819766	3.64814
16.9181	3.50055	3.1529	2.5844	4.8111	4.5431	1.3212	1.9083	3.58515	3.6882	2.1514	1.192	1.4098	5.1883	4.9574	1.613	5.8547	2.0538	4.2288	3.8365	2.5274	4.3902	4.2366	4.368	4.3791	4.7663	5.484	2.1149		0.825583	3.47582
17.0372	2.9628	3.3461	2.9784	2.7276	2.2985	1.3276	2.75938	2.02849	2.377	2.0962	2.5778	1.8838	1.7419	2.9333	2.7374	2.2225	2.4613	2.3351	2.4506	3.0102	4.0815	3.6569	5.4373	4.217	7.6368	5.7588	1.7198		0.831395	3.0283
17.1563	5.68623	6.1779	1.5252	2.2395	2.4949	1.4761	1.18072	3.16961	4.1642	3.444	3.2471	1.8717	1.8624	2.2667	4.4745	2.1895	3.8397	3.0278	4.5416	2.2514	5.5646	4.9511	3.4665	3.4278	6.4643	6.6206	4.2652		0.837207	3.55151
17.2755	4.22886	4.405	2.1631	2.9775	1.4349	1.8046	1.1027	1.61406	2.8759	1.9821	3.1513	2.752	3.6586	3.3967	2.5644	1.563	4.0553	4.4287	1.7583	1.9213	5.6496	3.5826	3.8589	5.2043	3.1917	2.331	4.5684		0.843024	3.04536
17.3946	5.27487	4.3072	1.3521	2.6557	1.9974	2.3326	1.97903	1.13188	2.6873	1.9573	1.5873	1.5485	3.8191	1.6368	3.0483	1.3536	3.6934	3.5246	2.8453	2.3049	4.6513	4.968	3.6791	4.5203	4.4522	2.6674	3.7368		0.848836	2.95231
17.5138	4.99154	4.1255	1.5887	1.868	1.4418	1.0361	2.90147	2.29606	1.0872	1.134	1.031	1.2229	1.5934	1.047	2.7275	1.6835	2.2022	2.7986	4.7183	4.2399	2.9721	2.4493	3.1528	2.8402	3.651	4.0027	3.612		0.854653	2.53388
17.6329	4.55573	3.2902	3.7079	2.4345	2.4921	1.2469	1.39783	1.89148	1.7856	1.4247	1.9107	1.0685	1.3231	2.9193	4.4486	4.1101	1.9685	3.4172	4.0075	3.654	3.8639	2.5702	5.8778	3.3049	5.7588	3.9011	3.2139		0.860465	3.02019
17.7521	6.75473	7.7642	3.1515	2.6355	3.8321	2.338	1.06071	2.90913	1.1062	1.5378	1.0565	1.4794	2.1523	1.9984	5.3873	2.8528	2.0802	4.068	5.7689	3.0297	4.2156	4.9582	7.5469	4.1739	3.1099	2.9754	3.4175		0.866281	3.45781
17.8712	4.44137	5.0776	2.2341	2.3687	2.1944	1.2126	1.05087	2.36249	2.0235	1.4055	1.3361	1.7892	1.7751	1.1753	1.7947	1.9454	3.3232	1.6711	2.6112	3.6351	3.5989	4.0083	5.105	4.2073	1.3554	3.3217	4.1617		0.872093	2.63651
17.9903	4.90696	1.7615	1.8148	1.1951	2.0399	0.951	2.58883	1.57309	1.0295	1.051	2.508	1.3395	2.5236	1.6102	1.8507	4.598	1.8343	3.0037	1.4713	2.4557	1.8627	4.0693	3.1642	2.9541	3.8753	4.6618	2.8342		0.877905	2.42697
18.1095	4.50993	3.429	2.3482	2.6494	1.9838	1.0259	1.22019	1.3577	1.3178	1.5021	1.412	1.4518	1.4265	1.0392	1.7649	1.8432	2.872	2.5528	4.452	4.3019	2.8724	4.4032	3.3941	4.6461	4.7933	3.4239	3.3807		0.883722	2.64348
18.2286	5.17612	4.5186	3.4566	2.1347	1.5024	1.3931	0.93934	1.95609	1.2118	1.4454	2.4781	1.9566	0.9438	1.6652	3.4404	1.6355	3.1205	6.436	4.9931	4.9511	3.0744	2.5115	5.4782	3.261	2.6703	3.3495	5.6088		0.889534	3.01141
18.3478	4.55616	4.4813	2.4886	2.648	2.3374	1.2253	1.89385	1.74984	1.1755	1.2182	1.7451	2.1715	1.1844	1.4835	1.2117	1.9462	2.7502	4.5268	3.1416	5.8005	3.3281	4.0586	4.3957	1.9027	3.6387	1.4258	4.5476		0.895351	2.70492
18.4669	4.12688	5.0597	1.896	1.2882	1.2156	2.2684	1.26569	0.92358	3.3994	2.3565	1.2002	1.1471	2.0603	2.2877	1.2529	1.2131	2.617	3.9924	2.7559	5.9717	2.6327	4.4327	4.754	1.3034	1.8471	2.4986	4.3167		0.901163	2.59568
18.586	4.47481	3.6836	2.3828	1.2425	1.2089	1.1841	1.74044	1.07671	3.3855	1.2405	1.5491	2.2446	0.9171	1.3654	1.8019	1.5064	3.932	7.9429	4.1541	3.6262	2.8353	2.2549	3.6923	4.1205	6.8721	2.88	1.7223		0.906975	2.77915
18.7052	4.15243	5.53	1.336	1.3639	1.0906	0.873	1.65576	1.32526	1.4983	1.6164	1.146	1.3481	2.5443	1.0476	1.6756	2.4329	2.0584	4.0618	6.6486	2.6946	3.3311	2.8079	3.6905	3.5569	5.7369	4.155	2.5258		0.912792	2.6631
18.8243	5.05202	1.6994	1.7391	1.5607	1.3617	1.7348	1.21532	2.54323	1.2237	1.3617	1.6634	1.1343	2.7493	2.5025	2.26	1.6364	3.9948	3.3964	4.1651	2.9517	2.7578	2.3964	6.5641	2.4503	4.9553	4.1143	4.6289		0.918604	2.7338
18.9435	4.48979	1.1663	1.0208	1.4349	1.147	1.0715	1.72867	1.49494	1.7928	3.8134	1.1339	2.3147	1.2068	2.2275	2.0593	1.0626	2.218	4.0405	2.9523	4.338	5.8362	3.1789	4.4213	1.8013	5.2127	2.2321	5.5582		0.92442	2.62794
19.0626	4.92894	1.6022	0.9703	1.664	1.3036	1.6943	1.06613	1.65609	1.8117	2.0759	1.1973	2.0466	1.843	1.1753	2.4939	0.9406	1.7519	4.9566	2.6458	4.2129	2.9533	3.7264	3.9744	2.4109	3.4472	2.9448	3.3608		0.930232	2.40203
19.1817	2.88314	1.31	1.5491	1.566	2.7508	1.5035	1.68467	2.20939	1.0421	1.5783	1.6349	1.8258	2.6793	1.8248	1.0352	1.7565	3.3654	3.8822	1.8617	4.9415	1.2919	1.5332	3.5492	3.3104	6.1641	3.4748	1.9082		0.936044	2.37467
19.3009	1.74119	1.46	3.3352	1.1689	2.2745	1.4852	1.79562	2.3891	2.8395	1.0909	1.0732	1.8576	2.0409	2.5185	1.0833	2.1313	1.3916	4.08	2.0853	2.92	3.9882	1.4478	4.0845	2.9522	3.7835	2.2073	1.8179		0.941861	2.26086
19.42	1.99515	1.8434	2.7815	1.852	1.739	1.3784	0.97798	1.93577	3.3458	1.0806	1.1323	1.6415	2.014	1.2949	1.9026	1.0958	1.8528	3.1668	1.802	2.4029	3.4169	2.492	2.6643	6.4712	3.0009	3.3918	2.9559		0.947673	2.28253
19.5392	2.43278	2.3422	4.5674	2.0835	1.3674	1.4042	1.04607	2.45442	2.7574	1.3295	1.8485	2.7517	1.0527	1.7588	3.6599	1.4073	2.4224	2.6905	1.5907	1.8195	3.3416	3.1359	3.4406	3.5316	2.6168	2.9608	2.1505		0.95349	2.36906
19.6583	2.20994	0.9743	1.2824	2.5426	1.5125	1.1208	2.68269	3.75815	1.43	2.1617	1.2336	1.5506	1.0397	2.6837	2.302	1.0271	1.1106	1.9616	2.6844	1.4604	3.6131	2.454	4.3836	3.0751	3.2049	1.4349	4.405		0.959302	2.19627
19.7775	2.78694	1.0869	2.229	1.5328	1.4496	2.3673	2.29221	1.57753	1.2523	2.0143	1.6625	1.1691	1.62	1.8826	1.5076	1.2973	1.0174	2.5034	2.8895	1.0355	2.9931	2.3873	3.9168	2.167	4.4134	1.5203	4.2125		0.965119	2.10312
19.8966	2.00192	1.5999	4.7936	3.4954	1.6902	1.7272	1.62665	1.08441	1.3529	1.2339	1.8131	2.0172	1.1125	1.284	0.9939	1.1211	1.3433	2.5074	3.8004	1.3714	2.9083	1.5566	2.7546	1.9399	2.3501	1.9046	1.7693		0.970931	1.96866
20.0157	1.34441	2.4561	2.0134	1.6513	1.3918	1.3011	2.05743	2.02828	1.8321	0.9603	1.8711	1.6114	1.4418	1.1083	2.809	1.467	1.1757	2.7301	2.3368	1.6233	2.1871	1.1776	2.8988	2.1123	1.1291	1.8361	2.5654		0.976742	1.81915
20.1349	1.19874	1.4041	1.1327	2.8601	1.0541	2.0054	1.65339	2.36629	3.179	1.9775	1.6001	0.8962	1.473	1.6673	2.411	3.2617	1.6499	1.0151	3.6915	2.0001	1.2472	3.5901	1.4119	2.0344	2.8723	2.0049	3.5599		0.982559	2.04511
20.254	1.01487	1.076	1.8452	1.4652	1.548	1.556	1.77841	3.34969	1.4866	1.1225	1.5725	1.0941	1.8338	1.6773	2.2295	1.2697	1.0452	1.7147	2.5167	1.7574	1.7554	2.4367	2.3781	1.652	1.7658	4.7486	1.9466		0.988371	1.83839
20.3732	1.43207	2.388	2.0756	1.6287	1.2089	2.1398	2.12092	1.77347	2.9992	1.0014	1.1689	1.4814	1.345	1.065	1.0734	2.0032	2.2227	1.1526	2.1067	2.8731	1.7755	1.5345	2.5637	1.4193	2.5008	1.8456	1.2467		0.994188	1.78319
20.4923	1.33866	1.843	1.7104	1.2728	1.0995	2.7406	2.33428	1.2877	1.2593	2.7791	1.1726	1.231	0.9599	1.084	1.0984	1.5596	1.2024	0.9677	1.7719	1.5059	2.1291	1.4054	2.006	1.7922	2.2132	2.0307	2.1357		1	1.62708

## Sheet: Image2
X0	Y0	Y1	Y2	Y3	Y4	Y5	Y6	Y7	Y8	Y9	Y10	Y11	Y12	Y13	Y14	Y15	Y16	Y17	Y18	Y19	Y20	Y21	Y22	Y23	Y24	Y25	Y26	Y27	Y28		Ap-Basal	Avg intensity
0	7.8556	8.5869	7.5194	2.9392	3.9237	7.7495	6.7932	11.3628	9.4638	13.2743	5.832	2.989	3.5621	4.3898	5.46682	10.306	13.5089	11.277	8.833	4.55698	5.7995	9.62	9.1254	6.6808	7.4547	12.9647	11.6546	14.2305	10.8561		0	8.22677
0.1191	11.2869	7.8611	6.787	4.5954	3.3845	6.2226	6.9897	6.8083	11.4389	8.1514	9.0768	2.988	11.9753	5.4436	6.69083	10.5581	13.8725	14.1405	7.6103	4.0992	8.0477	11.4882	9.9	4.3971	5.7221	11.3729	16.0325	10.2805	13.858		0.00523378	8.65793
0.2383	5.7198	7.7489	8.2574	3.4794	5.1589	5.3919	11.4917	5.9807	9.7579	10.9034	8.5868	5.3643	11.0766	10.3724	8.16819	9.7188	15.4072	12.0847	6.7379	6.0402	5.7904	8.0737	6.7232	4.4193	7.9708	15.2638	15.7273	11.1042	11.0616		0.010472	8.74419
0.3574	7.616	9.2227	6.0283	2.8173	4.9824	5.6624	5.4488	8.7377	6.8344	10.6887	8.8341	6.0412	9.0427	7.0975	7.69565	8.1129	9.8399	9.3703	6.2408	5.87945	3.2567	7.57	11.2718	4.4367	8.1338	16.7802	12.977	12.0867	7.983		0.0157057	7.9548
0.4766	6.9988	7.1651	4.9783	5.2352	7.8217	6.4144	6.1546	7.7613	8.1137	7.1733	11.3576	4.4179	5.8008	6.0443	5.0128	6.8163	12.7323	17.2617	7.9249	4.3493	8.8328	6.4698	9.7002	7.0019	8.4772	17.824	20.2766	10.5273	8.5257		0.0209439	8.5231
0.5957	6.261	6.4557	6.1902	6.0947	7.3626	7.2585	8.9771	9.9411	8.7019	12.4513	5.0242	6.4952	4.4818	5.1827	10.2484	9.3326	17.9176	17.5865	9.635	7.72964	7.419	7.7466	8.5687	7.5373	4.257	20.6929	18.0841	18.6366	12.6915		0.0261777	9.61936
0.7148	5.8927	7.3912	6.8355	5.876	7.0569	4.1079	11.5476	12.7686	8.9062	8.4174	8.344	5.0865	6.5104	9.4552	6.18582	6.2124	17.3027	13.9306	9.8405	5.45765	6.1412	5.1328	7.8353	4.8144	3.3563	16.4261	18.4142	21.7506	12.058		0.0314115	9.07085
0.834	10.6434	8.7429	8.0323	7.1128	8.8565	4.4748	8.8827	11.3226	8.2458	6.7654	6.709	5.4641	6.9396	14.9612	6.87507	12.5093	12.3639	11.2914	9.8536	4.73936	4.8077	9.2881	11.2062	8.0138	5.6575	14.899	18.0134	16.5249	11.771		0.0366497	9.48163
0.9531	9.5871	10.9332	12.7617	9.4216	7.0273	9.9965	6.5196	12.3112	7.8906	7.7825	7.3099	9.0073	5.8431	12.4417	5.55441	14.1436	13.1517	14.3508	8.6589	4.90767	3.9166	10.7304	11.5576	8.4167	7.1787	18.199	23.1313	18.2984	9.9159		0.0418835	10.3774
1.0723	8.6682	14.5036	16.5812	12.0326	6.7799	4.3602	5.1933	7.3773	9.745	7.7437	7.1847	6.8836	5.2012	7.1593	5.59965	12.1171	11.3462	16.4656	8.656	7.6104	3.7545	15.5169	19.5399	7.191	9.7242	12.9604	24.4909	20.7825	13.479		0.0471216	10.643
1.1914	8.4154	15.422	21.7331	15.9773	8.0866	6.9493	8.6176	10.3875	9.8917	7.2838	9.0573	5.5858	5.2517	7.7121	4.7591	11.4411	14.8267	15.0659	6.7536	4.65111	7.1802	20.7416	14.8722	7.2517	10.7334	16.3876	22.51	18.8382	12.0904		0.0523554	11.3267
1.3106	5.8699	23.2181	28.3314	12.5824	7.8439	8.7375	6.0211	10.1149	7.7053	8.9351	6.9699	5.4351	6.2319	6.8705	4.15263	9.6206	15.9385	17.7429	10.7783	3.97062	6.8415	14.7253	9.8306	7.1694	7.0766	16.2739	26.6754	16.6821	12.9667		0.0575936	11.2177
1.4297	6.3174	27.9081	35.686	14.2414	5.9846	4.5452	8.6116	8.7028	11.2835	6.5593	5.8108	6.5002	6.046	6.8905	4.54126	13.4317	15.3823	14.4388	7.8282	4.57646	3.6583	13.8832	13.4462	8.7832	5.1748	15.8211	25.7676	19.4539	10.5724		0.0628274	11.443
1.5488	9.016	27.4542	36.9203	17.7934	8.1447	6.0672	5.3192	6.5265	12.8934	5.3292	6.6108	4.7457	3.6204	6.5878	6.06011	10.5609	18.3307	17.6996	7.6578	10.1285	6.1063	13.4432	14.9111	6.9679	9.3045	17.6592	24.7025	21.378	11.611		0.0680612	12.1914
1.668	9.1669	30.3759	50.1113	21.1381	6.8003	6.8364	6.0956	7.8806	11.1256	9.8411	6.4328	5.1198	4.0506	6.1865	5.34012	12.0199	22.0083	10.3674	6.0828	4.6372	4.687	15.0925	20.7679	6.345	7.8731	17.2047	21.1678	21.8308	12.3418		0.0732993	12.7216
1.7871	9.0441	38.6146	49.395	21.5209	6.4093	9.3051	6.1285	6.6999	9.8141	8.8039	6.2009	5.7463	5.9091	4.8132	6.67295	12.3824	28.9394	14.6116	13.1678	4.20394	3.9972	17.4512	15.0177	6.6017	5.0568	12.5304	16.6075	24.6448	16.9656		0.0785331	13.3537
1.9063	12.595	39.5199	45.7945	21.783	6.9807	7.0552	5.3054	8.2173	14.2071	6.5551	8.5497	8.7869	5.096	6.2495	5.18556	16.8859	28.6735	17.9556	11.2605	4.25381	4.102	14.098	22.4181	5.956	6.5715	13.9704	22.6384	23.0375	21.0513		0.0837713	14.3018
2.0254	15.8553	37.7388	57.5645	25.4747	6.7676	9.92	9.2651	6.1545	17.611	8.8508	10.0832	6.7137	6.5631	10.2102	4.17258	15.7716	22.6594	17.2065	12.0397	3.9465	4.3721	23.7118	23.0823	6.4421	8.8659	16.8078	26.1835	20.7465	15.7234		0.0890051	15.5346
2.1445	15.0879	48.5778	44.0647	26.0754	6.203	9.6949	10.0605	7.7406	15.8532	7.4571	7.8859	5.7847	3.1572	6.0031	6.03211	15.77	23.7458	20.8016	8.9206	4.66693	4.965	19.4179	23.2659	6.2509	7.6257	16.2008	21.1112	24.3966	20.7711		0.0942389	15.0892
2.2637	15.5095	42.9876	38.8878	25.9832	4.3737	6.1563	5.7274	10.9488	8.4988	12.2892	10.037	6.4141	3.8406	8.3686	6.3955	17.5435	25.346	20.4074	12.0784	3.26806	6.0072	25.2379	22.5064	7.0047	9.8966	14.8491	22.3086	19.4512	15.0098		0.0994771	14.7356
2.3828	17.2596	39.4485	38.1457	22.3891	6.5819	4.7473	6.8204	9.09	10.6911	8.12	7.904	9.8836	6.6291	4.1552	7.60653	13.1998	23.6095	19.0287	14.1125	3.7323	6.2736	27.6552	20.9325	6.4003	6.8193	15.164	22.8091	19.2085	16.0771		0.104711	14.2929
2.502	20.3198	40.6885	38.4262	19.5501	6.5176	2.3561	7.315	10.1592	14.2983	9.1518	9.8787	7.9561	5.5446	5.5765	4.87458	16.0433	21.8654	17.7701	12.4087	4.94063	3.4281	26.6405	26.3701	8.3794	6.3909	14.5322	23.5839	18.7781	15.7391		0.109949	14.4649
2.6211	25.2775	42.6377	38.6008	16.5238	4.0648	2.938	5.3615	11.9558	12.5777	9.64	8.2779	6.239	6.0506	3.2242	6.41351	17.57	18.9832	20.7106	12.766	4.13503	5.2549	15.4577	18.1243	9.1948	7.0471	13.6722	23.1028	23.9424	17.9985		0.115183	14.0601
2.7402	25.686	49.0597	36.5073	18.9687	7.9603	4.1928	6.058	7.1442	14.5732	13.8777	7.5176	7.36	4.7581	4.8133	3.68257	14.2852	18.7899	20.3323	11.5343	3.24846	5.0677	18.5967	17.5759	5.7826	6.7515	15.7546	23.0606	23.0263	16.798		0.120417	14.2332
2.8594	29.1968	45.8666	37.4562	22.9474	7.701	7.7635	4.8934	11.6745	10.2492	10.3338	7.1879	9.2206	4.155	7.9024	7.86247	13.6511	21.1397	22.3859	12.545	5.46114	9.3578	16.859	13.7119	7.8314	5.5956	17.0942	25.2425	21.5196	15.748		0.125655	14.9156
2.9785	29.9021	45.2354	31.6183	20.5312	3.5262	7.5305	2.2355	11.9592	6.5855	14.9104	6.8362	4.8151	4.9678	7.8047	7.20107	15.4334	27.2056	23.4419	10.8966	2.34911	6.0036	18.764	14.358	6.2533	4.0189	15.8404	26.6358	21.3226	19.9515		0.130889	14.4184
3.0977	27.8811	43.3103	28.5093	15.8457	3.7408	5.0319	8.703	8.658	11.8369	13.9793	4.7237	5.1543	6.6674	7.2157	4.2471	14.8488	23.5322	20.4871	9.0726	3.42061	5.693	24.5476	13.7961	4.9276	6.2393	12.9997	25.5337	14.5659	16.8313		0.136127	13.5172
3.2168	26.6715	36.0469	30.0072	22.2587	5.8062	4.4774	7.4818	9.1678	14.6728	13.6608	8.8342	13.0025	9.3529	6.4641	3.63356	15.9118	22.058	20.8691	14.6975	5.75834	9.267	22.1896	16.4417	4.8771	8.3648	16.8913	22.755	22.7303	13.8032		0.141361	14.7639
3.336	27.4875	33.0154	34.0846	20.8173	4.9698	7.5112	6.8195	9.3379	9.8858	12.7641	10.1135	11.535	6.4877	4.9808	2.63689	20.1844	20.5867	16.3637	18.8475	5.61831	8.7302	16.7593	13.0734	9.8106	8.4771	14.5825	22.6836	25.9312	19.3001		0.146599	14.5998
3.4551	24.5397	40.2094	30.4853	13.6793	8.3255	6.5261	9.2765	10.3497	10.3027	10.4869	12.4095	6.1695	3.7035	5.3862	4.94802	21.0331	17.9444	17.9371	19.0515	2.86193	10.6727	24.3384	11.9923	9.7344	5.45	16.2029	18.5851	24.6108	21.6729		0.151832	14.4443
3.5742	28.415	41.9507	25.0089	13.742	4.5938	8.459	9.5462	11.1216	9.9331	10.6271	5.0021	7.7963	4.4087	5.7491	4.76106	14.6642	25.1162	19.095	17.142	3.74675	8.1069	16.7803	13.2342	8.9608	5.0634	11.4289	28.7641	22.3503	19.44		0.157066	13.9658
3.6934	35.8029	37.3393	29.4894	14.7802	5.0887	5.7756	11.5815	13.7951	9.3261	8.7652	4.7903	10.8428	5.3515	6.988	3.82147	11.9397	26.441	21.5574	14.5049	7.89557	10.138	19.8997	12.0648	5.8193	5.214	12.0778	23.9889	26.8116	14.458		0.162304	14.3569
3.8125	32.1325	32.3899	25.1821	12.9595	3.3492	9.2052	11.591	12.9355	9.147	7.78	8.9095	7.1457	4.452	7.1304	4.5208	18.2894	25.8346	13.0304	17.912	4.69334	8.0845	19.7366	13.95	4.487	5.0641	12.8864	20.9151	23.6518	18.6394		0.167538	13.6553
3.9317	35.2948	29.8838	24.2149	11.0105	3.1349	11.0318	10.7305	11.137	5.8177	9.2081	8.7437	8.3609	3.8461	6.0392	4.98051	16.4548	20.6602	15.4084	15.6439	3.1865	7.7554	15.4926	11.4991	9.5425	6.2682	11.3654	19.9842	22.0571	14.7209		0.172776	12.8784
4.0508	33.3825	31.1334	25.3414	19.8462	5.1938	13.8294	11.3725	12.8295	10.0069	11.794	8.8176	5.7592	4.8757	4.8812	4.62285	13.3627	27.1056	18.8198	20.727	6.77722	9.0669	15.4693	11.898	10.8642	7.7375	15.4202	14.4402	22.0522	14.5146		0.17801	14.2049
4.1699	32.2563	27.1003	25.3973	12.7253	5.2541	10.6939	11.8408	8.1111	13.5994	7.6098	6.5308	6.1868	3.5508	5.7353	8.48115	12.8226	25.387	17.7817	20.6576	6.05537	7.404	11.67	8.7331	11.2649	6.1832	14.4897	15.1699	26.7368	16.0872		0.183244	13.2937
4.2891	36.1866	23.5415	26.8006	12.2031	5.1033	9.7375	13.1825	9.3104	9.6429	12.9543	6.4596	8.0891	3.897	3.4331	6.2117	14.368	17.3352	19.0324	15.2897	4.74899	6.5484	9.9507	12.2113	4.8291	5.2008	11.6575	20.9326	22.6922	20.8676		0.188482	12.842
4.4082	37.1336	28.1912	21.666	11.8834	7.4053	7.8941	9.9596	10.8037	9.6729	10.0852	10.4713	7.0822	5.6957	4.3737	3.61503	14.3735	17.1831	13.1925	14.9761	4.23049	9.7885	10.9366	8.4368	3.8871	4.56	8.3308	25.8735	21.9003	17.2919		0.193716	12.4446
4.5274	44.9994	27.3056	16.6236	13.0474	7.6165	12.5064	9.9761	9.7827	11.1978	7.2609	6.1377	9.0745	4.3299	8.9796	4.35711	9.8453	13.5044	13.5647	9.8668	3.81606	9.1298	12.248	5.6475	4.5489	3.1269	7.6736	21.5267	25.2894	22.4453		0.198954	12.2562
4.6465	44.9322	24.4776	17.8099	14.7006	6.9267	14.9818	12.6533	9.2605	15.5401	8.7718	6.0432	5.9203	4.8217	7.3725	5.42175	11.2961	18.1401	16.1077	9.2252	6.96523	12.1051	15.572	7.0966	5.8611	5.8068	7.3285	16.371	27.4566	16.2249		0.204188	12.9376
4.7657	29.4636	23.8471	22.798	10.2056	7.5977	13.6578	15.2583	10.4244	11.2523	7.4384	8.452	7.5324	7.5885	6.4364	5.08449	12.8126	19.049	13.0809	10.5514	4.61691	6.686	16.4289	10.6764	4.3249	5.3961	9.0189	17.8258	27.0195	18.881		0.209426	12.5312
4.8848	37.9457	21.0095	21.9675	10.4826	7.6291	11.1225	13.8804	10.4918	16.4118	5.5223	9.6656	8.2273	5.1443	6.099	7.18737	9.2313	18.823	13.423	5.5052	4.22859	6.9283	16.633	11.9666	5.967	3.5744	6.5753	14.0299	24.5921	11.2568		0.21466	11.9145
5.0039	24.0814	22.2582	24.8337	8.7449	6.1085	15.0827	18.12	14.6918	11.3298	7.1779	10.371	8.1925	7.321	4.9648	5.84566	9.0154	20.1628	7.9407	7.1041	2.84548	11.5116	14.8679	10.9976	3.6521	3.2989	8.4777	14.0841	21.2817	13.7386		0.219894	11.6587
5.1231	26.6442	31.4972	23.6146	10.0234	11.5086	13.5916	14.3084	11.9918	16.0076	9.6191	8.7752	8.5231	6.5818	4.1153	6.76919	8.2373	12.8699	12.5857	8.2975	2.67713	9.4801	16.5057	10.7366	7.0375	5.6764	7.8887	15.8817	20.4525	11.8004		0.225132	12.1965
5.2422	32.3789	29.9144	19.4404	8.1026	6.5602	10.7494	14.5492	17.0857	14.0169	14.2844	7.6609	7.7036	5.8598	5.0956	2.89719	6.9194	11.8459	11.7886	11.115	3.35286	10.5333	16.7706	12.2009	4.8451	5.8668	6.9713	17.9392	19.3998	8.5101		0.230366	11.8744
5.3614	32.0766	27.6229	19.377	5.4803	9.0936	9.5288	14.5712	10.5881	15.5936	8.4992	6.1636	5.5685	4.6249	5.9838	4.98446	7.4163	11.9941	7.5031	7.5512	5.12232	7.3443	11.948	12.5668	2.1078	5.2194	7.3777	14.7132	22.5001	11.3606		0.235604	10.8442
5.4805	34.9952	19.3505	22.0717	8.8703	10.3323	7.0968	14.9235	9.2832	11.3569	9.984	7.7352	5.1465	5.6975	5.9046	4.58736	7.9055	13.2947	10.4317	12.4693	5.82572	4.8594	11.0349	10.7714	5.2451	3.8946	5.6888	11.8248	28.5867	10.9491		0.240838	11.0385
5.5996	29.9177	17.8456	21.702	8.7625	6.7159	12.6332	15.369	13.7037	8.245	10.8571	8.1472	5.4931	5.0226	2.9497	6.39411	7.5016	12.6573	7.1492	6.7799	6.11449	5.8074	11.0867	8.4983	7.4473	3.1388	6.1837	13.8644	27.5962	5.9955		0.246071	10.4682
5.7188	19.8382	24.2375	19.0269	7.1045	9.2649	13.8016	12.2945	12.4043	8.2693	8.8736	6.5695	7.371	5.3362	5.083	6.9243	10.0587	12.7392	8.3139	9.9857	5.17197	4.8607	13.7205	9.0915	7.6152	3.4935	4.9589	14.2568	28.8512	7.0626		0.25131	10.5717
5.8379	20.4817	26.9087	21.8359	9.8578	10.483	11.5403	17.9782	10.2682	11.1712	6.0796	2.9159	6.3976	6.738	6.3582	5.82075	6.4235	11.8746	7.5283	12.2084	4.62393	7.0059	13.3345	11.4703	10.7307	5.3399	5.654	19.7702	21.7404	6.6112		0.256543	11.0052
5.9571	19.6418	23.2202	13.3444	6.8173	9.3939	10.2794	13.9406	13.592	10.029	3.3315	4.429	8.1485	2.9426	5.872	9.91238	6.376	9.6746	10.0147	8.5225	5.80563	8.4838	13.6338	11.556	8.8138	6.3136	4.3793	13.8459	18.1895	7.3871		0.261782	9.92727
6.0762	16.2849	21.056	14.7817	10.3024	7.8183	10.0212	17.7104	14.8928	10.6889	5.1228	5.3572	8.3242	2.2622	5.8557	8.08764	7.5691	9.2478	11.833	8.2305	3.25342	8.5772	11.5474	8.7944	5.2721	4.339	5.2604	13.257	18.8403	9.106		0.267015	9.78255
6.1953	22.0668	24.6069	15.5145	12.4007	8.8274	13.8381	20.9694	8.9956	7.2302	5.2288	6.1163	3.8759	2.5271	6.9714	5.4507	6.876	11.9977	9.0941	8.3517	3.77254	8.2504	11.2263	10.3266	8.778	7.9289	6.3802	8.4671	16.3112	5.8323		0.272249	9.93837
6.3145	17.2027	25.9123	17.3658	10.8744	7.5691	14.9943	22.8222	8.1614	8.5649	4.2856	6.4509	3.1298	3.679	5.7729	3.66725	6.6975	11.6397	6.9465	5.4665	5.75303	7.6541	16.3078	8.747	10.8622	4.0881	5.9761	7.794	10.8442	6.9675		0.277487	9.52403
6.4336	12.9669	17.1503	18.0686	16.1125	11.6581	9.2833	19.1234	9.169	9.9371	7.0982	5.5809	2.827	5.7688	5.2948	7.28249	6.232	7.8174	9.3561	7.2316	6.73696	7.1556	13.2532	12.4731	6.8054	4.0305	4.0622	13.9081	16.2671	2.773		0.282721	9.49737
6.5528	15.1475	21.3548	13.5249	12.5755	14.5655	11.6127	21.9607	7.7977	6.6097	8.0227	3.5108	2.8778	2.9448	3.2245	7.74845	5.4542	9.7604	7.1324	5.7152	3.71071	6.3461	10.1027	10.4933	5.0676	3.4283	6.0502	13.3045	14.2123	3.4121		0.287959	8.88511
6.6719	11.9718	20.7774	14.6918	11.3262	9.1351	12.0974	19.2898	7.2703	7.7607	5.728	1.8227	6.1123	2.9975	3.8609	6.28388	5.1829	11.439	8.9715	13.5775	4.75757	6.4516	10.7969	10.8278	5.8627	5.5125	4.8863	13.9944	14.1229	8.0707		0.293193	9.15793
6.7911	11.7617	21.4727	16.3082	11.1844	7.3477	11.1759	16.8453	9.5004	7.8036	10.1627	2.8335	4.0032	4.8996	3.1476	9.66378	6.9038	5.6308	5.9586	8.8553	5.58836	6.7276	15.6602	8.583	6.3313	8.7362	4.9442	18.0831	14.2363	6.5922		0.298431	9.3428
6.9102	17.6569	26.4093	15.5663	12.2072	10.715	7.8907	14.9855	16.5407	9.6782	7.6076	6.2704	5.1191	4.3596	5.0158	4.67328	7.2184	10.835	6.9267	7.1879	5.19185	9.2862	13.3997	12.666	7.2292	5.9339	3.7814	15.0159	10.293	4.5242		0.303665	9.79948
7.0293	14.2316	14.7481	17.6287	9.8699	10.2685	11.4924	14.7697	8.0904	6.9868	3.9827	5.7956	6.0138	3.3976	6.3257	4.18697	9.051	9.2827	8.0284	4.6938	5.95279	13.5381	13.376	8.7264	5.9128	4.0609	8.7633	13.369	8.1168	3.0417		0.308899	8.74835
7.1485	12.8554	14.6838	18.1706	10.9987	6.0223	10.6685	17.2748	7.3084	8.0908	5.2317	4.2761	8.9265	2.7597	6.162	7.24516	4.9373	8.2523	9.5184	7.1406	5.25895	7.2809	11.7435	10.5553	6.5317	7.6044	6.3119	9.2852	8.6372	5.1583		0.314137	8.58243
7.2676	16.8627	15.4906	15.3973	10.4374	14.2029	8.795	13.8234	8.3251	6.3272	4.8593	6.1273	6.7808	3.4114	5.0656	3.72073	5.1045	9.1434	6.0173	7.7348	3.13678	9.4412	8.494	9.1291	6.9125	5.7105	6.9455	9.7251	7.5342	3.2117		0.319371	8.20232
7.3868	15.1769	12.6879	12.747	7.923	10.2823	10.1916	11.7411	7.287	7.4456	3.729	7.4353	6.4952	4.1427	3.4045	3.94164	6.1671	13.8585	6.1519	4.8471	4.34364	12.0538	13.7823	8.8812	4.9668	5.3756	8.0625	13.1016	7.7294	6.2326		0.324609	8.28223
7.5059	10.2083	15.4083	14.8079	8.6909	9.4415	11.3712	10.3079	6.4703	8.5811	3.0706	6.2325	5.2017	4.1397	4.0824	4.24447	7.9349	12.4286	7.0382	4.9831	4.23857	6.4637	9.7334	5.8341	6.9066	8.9906	6.8868	11.5665	5.5558	6.0608		0.329843	7.82346
7.625	10.557	15.8249	19.6083	11.4651	7.1716	9.697	10.9891	4.9737	7.4744	4.5584	5.6242	4.1133	1.909	3.7233	2.31016	7.1974	7.541	12.0026	3.4216	5.69071	6.1112	8.5571	7.451	8.9057	11.3106	7.8761	9.3789	4.2994	6.6694		0.335076	7.80732
7.7442	8.7199	17.4028	14.0335	7.4304	10.9798	10.5207	8.3817	3.4994	4.9889	7.6819	5.3235	7.3	3.6322	6.3006	2.99123	5.6328	8.5025	11.006	5.6435	4.18194	5.5705	10.7438	7.4437	7.6951	8.0855	8.6812	7.3858	7.3358	8.2147		0.340315	7.76929
7.8633	8.9298	16.5191	16.2352	6.9411	4.8586	9.1784	11.6379	5.8888	6.1422	6.2168	5.9441	7.1476	5.4267	5.3313	4.00293	4.5965	7.6048	10.3526	5.5462	5.42623	8.354	8.5424	6.346	10.9331	4.8985	8.7496	10.7409	6.6783	7.7412		0.345548	7.82451
7.9825	9.7126	14.3199	13.2697	6.1635	10.7729	16.4752	10.7088	6.8992	8.7981	4.9798	6.2153	6.9789	2.8354	3.6952	6.29874	4.4325	4.7536	7.7695	4.2899	7.45911	5.0811	7.2238	9.057	7.3785	5.1449	7.8864	10.4874	9.717	6.8733		0.350787	7.78197
8.1016	5.9132	8.703	13.2435	9.6519	13.1233	11.4808	13.9637	5.2839	7.4751	5.5328	2.7925	5.0089	4.9095	4.136	3.96917	5.9911	5.3784	7.213	6.6383	5.06333	3.2663	6.4643	4.9978	6.1513	4.5328	3.8989	7.4381	9.5011	3.9684		0.35602	6.74794
8.2207	7.5148	12.7639	11.3023	7.1146	8.2877	11.6518	10.4004	4.9097	7.1735	4.4797	5.1636	3.2413	4.5801	4.0821	5.83491	10.5416	4.0997	7.1484	5.737	3.42688	8.006	7.6697	7.7486	5.9763	4.5855	5.3045	6.3104	9.4464	2.4037		0.361254	6.78983
8.3399	8.366	15.5236	14.1275	5.6148	9.1256	6.8056	11.4289	3.9013	6.2126	6.1985	4.3887	5.4789	3.3269	4.2884	3.2529	5.3422	4.4109	6.7093	3.3585	4.09752	7.2843	8.2729	8.0534	4.9738	4.2348	6.3947	6.4394	6.071	2.8089		0.366492	6.43075
8.459	9.8255	15.0449	14.9008	10.5112	9.0995	7.8893	10.9863	6.3962	5.7766	6.5741	5.3291	3.525	1.5481	3.9835	2.7098	4.1358	6.8762	6.4886	4.6185	3.7897	5.9391	7.4696	4.1804	6.0996	6.4846	5.2934	6.6506	10.7577	3.9435		0.371726	6.78714
8.5782	9.1004	13.9451	13.9076	9.7631	9.6451	7.786	14.7318	8.0804	9.3025	8.0496	4.207	7.639	2.8185	6.1809	2.77685	6.113	9.1528	6.5417	6.2223	4.24662	9.9447	4.1816	4.6502	5.7856	5.6577	5.5347	9.004	8.1244	4.299		0.376964	7.49628
8.6973	6.5015	13.8672	11.8022	10.7465	11.7017	9.9079	18.1959	3.8112	7.5377	6.984	5.2123	5.4368	3.0183	2.9206	2.19505	6.0727	6.6436	5.7748	6.748	4.44906	6.2444	5.3382	7.1512	2.0179	5.7357	4.867	8.9967	7.2938	6.4462		0.382198	7.02131
8.8165	7.2585	12.3415	16.4827	5.0797	12.5452	10.6559	11.1022	7.0583	6.6466	5.6069	5.5297	8.9894	4.627	5.6954	1.77239	5.5106	6.3654	6.8123	6.7639	5.73403	6.8817	6.6673	4.5935	3.0299	6.7193	3.9041	8.4839	7.3304	7.0005		0.387436	7.14442
8.9356	7.3679	12.9859	12.6417	8.0911	11.2594	8.5125	9.9725	6.4209	5.1821	7.2384	5.8123	9.4806	4.4167	4.2847	4.44447	8.7656	9.927	5.8538	6.4962	5.8009	8.3702	6.3497	6.7127	7.6233	7.9073	6.6579	6.6713	6.747	6.867		0.39267	7.54693
9.0547	6.1614	13.5232	10.7562	8.2707	8.3924	7.8236	8.4009	3.4305	5.8488	7.1434	5.649	8.5067	3.4115	4.1266	3.75525	5.8537	4.5275	3.7481	5.7059	2.69308	6.3183	6.8057	5.443	8.2358	4.4622	6.8006	4.9815	4.312	7.1475		0.397904	6.28397
9.1739	5.1617	9.925	10.1003	6.1419	10.2912	9.2575	6.208	4.1244	9.7844	6.9433	4.7233	5.2476	6.0049	5.2885	3.01352	4.1403	3.3901	6.363	3.6177	4.09908	7.736	4.6168	4.6416	7.4944	4.818	7.9758	5.2427	4.77	4.2808		0.403142	6.04834
9.293	8.4376	9.0904	10.3281	6.4062	11.1192	7.9845	6.8288	4.2291	9.0541	5.9382	2.911	3.6547	4.2608	4.1559	2.90395	5.5837	11.8055	4.6627	4.7405	4.44973	9.849	7.7991	4.59	4.9267	6.3726	6.3797	4.494	9.4968	5.2317		0.408376	6.47187
9.4122	6.7384	11.6115	12.0726	5.8641	9.3292	11.627	7.4788	4.848	5.5302	4.0138	2.2178	4.7788	3.4218	3.059	2.3598	6.7719	12.1931	2.7059	6.9651	3.89842	6.9471	9.3485	3.1964	3.9514	4.9931	3.066	6.8434	6.7443	6.082		0.413614	6.1606
9.5313	7.1607	7.521	7.6191	6.3379	9.869	9.183	6.9566	7.6929	4.7398	5.0062	3.7379	4.3936	4.6256	3.2182	2.07857	8.4357	9.9168	2.7065	4.6835	4.5087	8.0381	7.1951	2.1669	7.0872	7.8609	4.7219	6.685	7.3584	5.5047		0.418848	6.10377
9.6504	7.5243	8.2247	11.0044	6.1367	10.5111	8.5687	8.5634	4.278	5.5262	7.2611	3.6233	4.3006	2.9398	2.1704	1.1898	6.7837	7.5156	6.1479	5.8203	3.82427	7.0986	5.0345	1.363	5.0028	4.2257	4.6195	8.7672	5.4038	5.5127		0.424082	5.82559
9.7696	10.0323	7.8895	5.4349	8.4267	7.327	6.6329	4.5496	5.2845	4.3219	7.3499	3.198	5.5883	3.0046	1.6779	2.06688	4.9164	8.7326	8.1334	5.5776	3.36209	6.5762	3.8303	2.0518	7.8353	3.0176	9.2597	4.6982	7.197	5.6691		0.42932	5.64283
9.8887	9.2456	7.7483	7.2307	8.2866	6.9801	5.5759	4.5543	6.6901	5.0849	4.7403	2.4766	8.25	2.9938	3.558	2.78121	6.2473	5.5403	5.6394	3.3214	4.20402	9.8835	4.5658	0.9255	6.4836	5.0421	4.4534	3.8824	8.1393	4.572		0.434554	5.48608
10.0079	9.0293	8.9338	6.3788	8.045	9.6165	4.3236	5.8899	4.5674	5.3224	5.6125	3.1184	5.1834	2.7275	3.7578	2.32618	4.3999	6.2868	4.2517	3.3324	2.45228	4.3453	6.0288	1.1628	7.0912	5.0529	5.932	6.7524	3.8138	3.3019		0.439792	5.1392
10.127	10.0376	9.3479	8.6516	5.3902	7.413	4.6469	5.0417	4.5594	4.5304	4.935	2.8655	4.6825	4.9485	2.2762	3.14487	3.3339	6.5721	4.6418	2.5992	3.00386	4.3293	8.7924	1.9784	6.0791	3.0037	6.7484	7.4978	4.8475	6.2816		0.445025	5.2476
10.2462	5.1508	10.3965	12.7813	5.4487	6.1757	7.0709	7.6437	7.5381	5.5885	3.7896	3.4804	4.0454	4.7687	3.6146	3.63889	3.7899	7.2098	2.678	2.8263	6.35649	9.228	6.1755	3.3151	3.4278	4.4762	4.6325	3.7093	4.606	3.8631		0.450264	5.42848
10.3653	6.3696	11.1357	13.5544	2.5337	11.0234	9.2253	5.1871	7.8359	4.0812	3.985	4.4653	3.3533	3.7668	3.4635	2.68195	3.5095	8.7232	5.9669	3.4883	4.03194	6.2761	3.4861	3.996	3.417	6.5574	6.315	6.9365	5.3402	4.4452		0.455497	5.69488
10.4844	7.535	8.4652	12.7847	3.095	9.4952	11.8797	2.9568	8.4002	5.94	4.6762	2.7516	4.122	2.7474	2.5498	1.36088	3.9716	4.8242	5.5288	2.1389	2.89389	6.5827	5.3565	1.7319	2.7367	4.7386	6.1566	6.6784	4.3064	3.4428		0.460731	5.16716
10.6036	8.1935	9.2617	8.0566	5.6324	7.4002	5.1248	3.6051	6.3145	6.8417	3.2243	3.0294	2.4577	2.5529	4.5183	3.0836	3.9571	5.9497	3.8357	4.0268	2.95188	6.0895	2.4421	1.1425	4.5711	5.0031	6.894	4.5885	4.2369	4.2665		0.465969	4.8018
10.7227	6.7735	5.3595	7.8404	6.5545	10.7104	7.8017	4.6911	6.6801	3.6441	1.3725	5.6308	3.8668	4.801	2.7879	3.51025	6.5002	3.4467	3.9658	4.8471	3.84901	6.9773	3.7448	2.5796	5.6249	3.2725	2.7186	9.4654	4.793	8.2357		0.471203	5.24294
10.8419	8.0405	9.5704	8.2317	4.2685	8.3351	8.2537	6.7508	3.3908	5.4797	2.6245	3.3497	2.5079	3.827	3.9607	1.14965	4.2337	4.1738	4.6697	5.7416	3.2055	6.7674	3.7069	2.3672	3.6323	3.3588	5.9854	4.3638	4.3396	6.6029		0.476441	4.92722
10.961	6.1889	9.614	10.5159	5.6518	9.3999	7.8694	7.7193	5.5789	5.6413	4.2113	4.2634	3.9882	2.764	1.7331	1.12381	4.4001	7.8771	4.8824	4.0952	5.51483	3.4742	4.4668	2.1511	5.2265	4.0536	5.8213	4.0229	4.2949	3.998		0.481675	5.19111
11.0801	10.8153	8.4086	9.4895	5.4171	10.9828	6.4731	5.3373	7.9702	4.1869	2.6136	4.7157	4.15	3.466	1.3323	2.88628	2.8892	3.909	5.9428	3.9144	3.81523	3.822	2.9959	2.7415	5.2288	4.6323	5.2806	7.8793	8.1108	7.0818		0.486909	5.39615
11.1993	8.4436	6.9273	15.3698	4.251	11.3688	5.974	3.5468	6.5849	2.6149	4.476	5.4017	3.8563	5.0154	1.6212	3.19888	5.231	5.3402	5.7517	2.3427	5.08787	5.8728	3.4275	2.3325	5.8778	3.978	5.6586	4.1343	6.3833	6.4169		0.492147	5.39606
11.3184	5.4167	8.2594	10.0533	6.444	13.4228	9.2648	4.3939	4.2659	4.3522	3.313	4.0102	4.1196	4.2228	2.3835	2.11615	4.6911	2.8242	3.5232	5.4187	4.30106	9.2048	3.7266	3.985	3.1148	4.3337	4.7801	3.7747	8.9236	4.1642		0.497381	5.2691
11.4376	7.1671	7.4401	10.9457	7.3609	8.8428	5.9948	4.6368	3.4475	3.9751	1.5565	4.318	2.4202	5.5151	2.8258	2.7537	3.6163	2.3844	6.0468	6.2705	4.43312	10.7352	2.5774	2.4083	4.3111	5.8002	4.1728	5.7414	11.1512	4.9035		0.502619	5.3018
11.5567	5.6364	6.8937	10.21	6.5174	9.8551	5.1927	4.7482	6.6831	3.9329	1.7777	5.1418	3.9432	7.6877	2.185	3.51285	2.274	2.2189	3.7202	4.0912	3.35866	9.007	2.8356	2.8207	3.2687	3.5721	4.6094	5.9099	4.7303	6.9836		0.507853	4.942
11.6758	4.9408	7.0454	12.068	5.9437	11.7494	5.4829	4.578	4.6697	5.0858	2.0953	3.9866	7.5602	7.5306	0.9836	2.26627	1.4195	2.595	5.6026	4.6817	5.9269	9.007	4.4906	2.1005	3.0027	4.3	4.7799	8.6486	6.7974	8.3418		0.513087	5.43726
11.795	5.8468	9.3051	10.0009	4.494	8.7874	5.287	7.1013	3.9235	2.5772	3.544	6.2629	4.3227	5.7065	1.0636	4.44699	3.3601	2.9387	4.9864	3.2553	3.11576	12.2674	3.7469	1.9377	4.9441	6.4288	4.8188	8.0844	6.6353	5.6248		0.518325	5.33843
11.9141	7.8809	5.9688	6.5113	3.4414	9.3238	3.0265	7.1972	7.2302	5.0897	3.568	4.0555	5.5659	5.3175	1.0821	2.88123	3.2761	5.4787	6.2607	3.1901	3.26666	14.0505	3.1788	2.7243	3.3492	3.3997	3.0761	7.0533	6.0589	5.4506		0.523559	5.10185
12.0333	4.952	9.5529	6.4979	2.8682	7.7539	2.3846	4.8416	5.6778	2.7331	2.3886	3.6257	6.3599	5.354	1.4497	2.79291	4.7023	5.423	6.7699	7.8268	3.38488	12.6675	3.7119	3.4549	5.6862	3.1947	3.1655	6.0735	4.4643	3.84		0.528797	4.95166
12.1524	2.6035	12.2123	9.6636	3.0761	9.6734	2.0453	4.7611	4.706	3.1847	3.3275	3.1377	4.4492	3.4658	2.5807	2.33463	2.5513	4.2698	3.2985	3.7504	4.16788	10.76	2.9337	4.57	6.9559	3.8162	5.3697	5.7983	4.485	5.8263		0.534031	4.81981
12.2716	6.6799	8.57	9.4766	4.8608	8.1032	3.861	6.9777	6.5575	2.4425	1.6077	3.985	6.2795	6.3094	1.8075	1.2686	2.2159	3.6828	5.2569	2.9597	3.10944	10.6695	2.3758	3.2781	6.2251	5.0698	5.5482	4.5149	5.5724	5.0082		0.539269	4.97495
12.3907	3.4987	10.3602	7.4244	4.6406	5.3133	5.5799	2.4671	6.3921	3.4123	1.6824	4.6722	8.2551	4.3808	1.4251	1.16641	2.8993	1.9298	4.4782	4.9559	4.22765	8.5777	2.1195	3.0101	6.1476	2.714	4.3587	2.9313	4.6643	6.0818		0.544503	4.47471
12.5098	2.5785	8.1297	5.79	4.3435	7.2523	4.8036	1.839	5.3182	3.2919	3.1516	3.4163	6.0725	4.9088	1.5485	1.9289	3.5527	2.3644	5.4441	5.241	3.59014	7.5583	2.7615	2.8789	3.2601	4.3865	7.3356	4.3172	2.2244	5.8339		0.549736	4.31455
12.629	2.3488	10.8958	6.9139	5.2263	7.2559	4.1677	2.6798	4.9657	2.9195	4.1527	3.2741	2.7773	3.7127	3.6393	2.11228	3.8034	3.256	5.3586	6.9254	3.55327	8.5402	2.4679	2.9651	1.6627	2.5504	3.4965	5.9775	3.5458	6.1205		0.554975	4.38845
12.7481	3.2374	6.9388	6.4363	4.2701	9.3109	4.4463	2.5126	7.4863	4.8365	4.7502	4.2473	6.1355	2.6851	2.8325	1.04227	7.5128	3.1979	3.6792	5.1822	3.10177	8.4267	1.9533	1.3023	2.805	6.0729	6.1968	8.2768	7.2029	7.7203		0.560208	4.95858
12.8673	4.487	5.3265	4.0469	3.1051	7.0295	4.3305	3.4534	8.5443	2.8957	3.341	4.2296	6.1797	4.4825	1.2066	2.41127	9.497	5.1597	2.61	6.3506	4.6882	7.7763	3.1201	1.2349	2.397	7.1353	5.0336	5.204	5.5723	6.3279		0.565446	4.73022
12.9864	4.2739	6.9552	3.7641	3.1067	6.2066	6.0512	4.9331	7.4646	2.0217	1.5461	2.6875	5.9099	3.9631	1.8302	2.86707	8.4727	3.0971	3.1666	4.8162	5.30297	6.2826	1.4774	1.4548	4.5393	5.8938	5.1986	4.9684	4.1648	6.8901		0.57068	4.45884
13.1055	4.2606	13.9444	4.7897	1.4774	5.6096	4.651	7.7499	6.0915	2.8453	3.9024	4.0923	5.1719	4.1562	2.7388	3.69216	6.3495	6.4761	5.9673	5.2281	3.03638	11.3496	1.5638	1.2476	3.2876	3.909	2.9501	5.6491	3.9052	6.1927		0.575914	4.90639
13.2247	3.6041	12.1722	3.3873	1.4183	2.1672	4.0826	3.7805	7.0055	2.5197	4.6907	5.0756	5.8452	3.0702	2.1233	3.88652	4.7935	4.9776	6.3961	4.1879	5.07758	6.264	1.7849	2.3191	1.4305	4.0212	5.2628	9.4304	3.5071	3.8233		0.581152	4.41741
13.3438	4.8586	6.5865	3.7012	2.1833	3.9841	5.5383	3.3273	5.8048	5.187	2.9059	5.6119	5.7866	5.508	1.2781	3.13343	5.9705	3.4674	4.5172	7.9927	6.49239	5.2485	1.0067	1.4506	1.3224	4.3701	4.6171	5.2818	2.453	3.8641		0.586386	4.25688
13.463	1.9444	6.2708	2.5957	1.5633	6.4416	4.8788	3.3643	3.2691	6.4637	1.6424	3.897	4.3474	4.3729	1.7063	2.26032	5.5281	5.6094	3.0354	8.9708	5.92359	4.1052	3.0252	2.3288	3.2713	3.2969	4.7639	3.4084	5.28	3.8978		0.591624	4.05044
13.5821	2.8788	8.9563	4.38	1.3868	8.6162	5.8227	2.5544	3.8476	4.8039	1.906	2.669	9.409	4.1587	1.8819	1.73127	4.0114	6.4328	4.341	5.7344	4.71348	7.4722	3.3952	1.115	3.2476	4.3203	2.8881	3.6313	2.8511	3.0109		0.596858	4.21267
13.7012	3.2445	10.2545	3.0551	1.4948	7.8995	4.4604	2.4853	4.9382	3.4173	2.5275	4.3877	6.665	4.699	1.6383	2.07887	3.4005	6.3028	3.6251	5.9543	5.68369	4.4329	2.5368	0.9719	2.2326	5.8433	5.8284	4.9694	6.4231	4.2012		0.602092	4.33283
13.8204	3.428	8.7232	1.6274	3.1008	9.2527	4.8309	4.4082	3.6421	1.7941	1.903	2.547	8.056	3.6038	1.7913	1.85216	3.4274	5.2588	6.3738	5.9448	6.02148	7.6485	2.2274	1.3816	3.9985	4.7437	3.3766	3.9207	4.5169	3.5534		0.60733	4.2398
13.9395	4.6636	9.7253	2.8426	2.1751	6.1711	7.7093	4.8292	7.9195	2.3562	3.4116	2.4212	5.4692	3.908	3.3477	2.8587	2.2468	5.5069	5.2236	7.4004	4.44696	7.0184	5.1675	1.9437	4.4119	5.4323	2.1426	3.6749	3.6402	4.5741		0.612564	4.57374
14.0587	2.3054	5.8032	2.5008	2.4289	8.3047	3.4964	4.0362	8.4006	2.9172	4.0368	4.7573	5.1484	5.4298	2.5341	1.48335	4.261	3.7987	5.0829	6.9902	3.22511	8.398	2.6796	2.3248	3.1381	3.6443	1.4001	5.3221	4.6672	5.8657		0.617802	4.289
14.1778	4.5161	3.331	3.9499	1.5643	8.141	4.3614	5.5464	4.638	1.9571	4.9417	6.1548	3.8586	4.9743	4.3863	1.99739	3.7068	6.6084	9.6855	4.6512	3.58899	6.0669	2.3401	3.077	2.2991	5.1182	2.5288	5.7359	4.7432	4.083		0.623036	4.43281
14.297	5.694	4.6725	3.1152	1.5749	4.9717	6.043	3.3745	3.009	2.318	5.0029	6.9404	3.7344	3.8398	2.7483	1.03432	4.3883	4.898	8.3386	5.5072	5.38256	6.4891	1.9616	2.8419	3.381	4.405	2.9398	5.1318	6.558	6.3964		0.628274	4.3687
14.4161	4.341	6.2565	2.3631	1.8215	7.886	5.6435	4.9132	2.6163	3.7094	4.1457	6.2067	4.1819	3.1953	1.472	1.0805	5.7077	4.8377	9.9089	8.7248	8.63129	8.2503	1.0822	1.7146	1.9197	4.4586	3.0489	5.3062	5.3986	4.7063		0.633508	4.60443
14.5352	4.5266	3.3093	2.1882	2.8975	7.0396	3.0526	3.2457	3.2195	3.4384	6.1618	4.5473	4.1894	5.225	1.4498	1.54924	4.4886	4.2632	6.3796	10.5417	5.58883	8.2803	2.2626	1.5925	2.7545	4.7732	4.0809	5.6338	3.1766	5.42		0.638741	4.31987
14.6544	2.1119	1.8349	4.2764	3.699	8.69	3.001	4.7493	6.7916	3.2914	4.1999	2.9571	4.0848	3.708	1.5027	4.08928	2.9989	3.1739	2.5899	8.7207	2.37333	5.602	1.4	2.174	4.1263	5.5932	3.0086	3.4405	6.1798	5.7718		0.64398	4.00483
14.7735	2.619	3.661	3.284	2.0421	7.2868	2.5027	5.1206	7.9296	3.4743	1.853	3.7372	4.7408	2.4595	1.974	2.30361	2.7478	3.3325	6.9518	8.3873	3.39435	12.1356	2.5008	2.8398	3.0033	4.8055	3.7099	6.2653	4.2833	3.8306		0.649213	4.24745
14.8927	4.5175	8.0419	3.0399	1.6698	5.8928	3.7281	4.7385	5.1828	3.3282	4.3987	6.6515	5.9976	5.7588	1.4427	2.49359	3.4151	5.0677	8.4275	6.7556	4.48112	7.3379	4.7325	2.5746	2.1707	3.441	6.7866	5.4673	2.4569	4.5599		0.654452	4.63989
15.0118	4.4325	4.0171	3.0614	2.5028	4.9121	4.8735	4.057	5.8219	3.8126	3.9044	6.1742	4.6085	2.4935	1.2818	3.03515	4.297	5.5443	8.4254	5.5856	2.92768	5.2955	5.4729	2.8632	2.546	3.9548	4.3676	7.5819	3.1363	5.8877		0.659685	4.37498
15.1309	4.7044	4.7523	3.9973	2.256	3.6458	2.4157	3.4951	7.3956	2.7467	3.2858	5.4363	2.9106	3.3492	2.021	1.74565	3.3815	5.8145	8.1113	3.8134	4.21464	4.3817	6.8877	3.0602	2.9685	3.1115	4.0916	5.5948	10.6724	4.3011		0.664919	4.29525
15.2501	6.8538	3.6159	3.69	1.5348	3.4879	3.2923	4.8337	8.2881	4.9545	2.044	3.8005	2.834	3.5733	3.8401	2.25709	3.3132	4.5172	5.0903	3.81	5.63813	4.3235	5.199	2.4183	1.753	5.1911	5.7209	4.6638	5.6077	6.6321		0.670157	4.23373
15.3692	8.8795	3.2466	4.4619	1.7452	5.1403	3.7217	3.0837	7.2829	2.6121	3.5474	5.7027	2.5642	4.9476	1.4332	2.90033	3.9419	3.6992	4.0908	4.4832	5.37987	4.983	2.3782	2.5702	1.6474	3.9317	3.3996	4.2646	5.7527	3.8011		0.675391	3.98596
15.4884	6.5369	3.4148	4.0897	2.4551	4.0333	2.6836	6.057	8.2802	6.5973	4.4797	6.4074	3.894	2.6791	3.7674	3.99985	2.9721	8.7548	3.2068	6.0888	6.10293	6.0517	3.632	1.615	3.4087	3.1112	3.4958	5.5541	5.7079	3.8767		0.680629	4.58462
15.6075	5.1009	2.813	2.4913	1.6393	4.0818	3.3189	3.0652	4.8731	5.4457	3.6087	6.9647	1.964	3.297	2.9834	3.66719	6.0359	7.6034	3.2474	9.3327	5.43898	4.7596	2.9339	5.8882	3.3989	3.0904	4.4169	4.9468	5.0585	2.6161		0.685863	4.27869
15.7266	4.0895	2.5679	1.3297	1.3315	3.8277	3.162	2.9624	4.2981	2.9051	1.8573	2.9205	4.0661	2.0426	3.3305	2.703	6.3579	6.3915	2.8114	5.4122	7.02165	4.4328	4.0495	2.5986	2.0268	5.171	2.9587	3.6021	6.1465	1.3847		0.691097	3.57791
15.8458	4.1276	4.9495	3.5052	2.062	4.1414	4.4439	4.6355	8.5543	5.8348	2.5231	3.0663	5.6611	4.8251	2.0013	2.08377	4.7736	6.3966	4.4246	7.5094	6.44267	4.0895	6.5048	3.6713	3.0547	4.5118	2.8049	3.5971	3.7827	6.175		0.696335	4.48805
15.9649	4.3806	6.3381	3.7085	3.0451	3.653	3.007	4.6041	7.578	3.3209	1.5927	5.6658	3.387	3.447	4.0652	5.45323	6.1245	5.2264	5.834	7.6292	7.56598	6.3429	5.9551	2.5936	2.4497	3.5909	4.714	4.2196	2.6441	3.8022		0.701569	4.5496
16.0841	7.3879	3.8462	1.4447	1.6548	3.5787	1.81	1.8985	10.2751	4.1953	2.1473	5.0961	2.436	5.6322	3.6134	5.21972	4.5491	5.9107	4.6696	8.1976	4.82544	8.2258	6.888	1.2771	2.9114	3.8992	5.4809	3.348	3.9852	1.5494		0.706807	4.34322
16.2032	6.7635	4.1585	1.7169	1.6564	3.4818	1.9039	3.2331	7.0876	4.0679	5.1124	6.4177	2.6746	2.6847	2.4796	3.39032	3.4463	6.6249	4.8246	7.0354	6.29886	11.6162	5.0098	3.1817	2.7295	5.182	7.1142	3.1629	2.4718	3.2624		0.712041	4.44102
16.3224	7.6099	3.0204	1.8004	2.3253	3.9551	2.2475	4.0147	5.8351	2.8131	5.7188	3.3356	3.288	3.8464	3.8826	3.24907	7.1044	5.8687	2.5534	5.3773	10.1575	3.6036	4.4483	3.1169	2.6905	7.4447	5.0194	6.562	3.765	1.5977		0.717279	4.3535
16.4415	5.359	3.833	3.0255	4.1325	5.8403	3.0276	4.2415	4.5013	3.1393	3.1834	2.5653	2.7767	2.1941	3.2988	1.92167	5.9664	2.4104	6.4933	6.2467	7.18722	7.0206	4.5754	2.7	4.5209	3.977	4.0749	4.5359	3.3289	4.1823		0.722513	4.14689
16.5606	3.4737	3.9053	1.6799	2.2157	3.2533	2.8112	4.112	5.0857	4.3042	2.74	4.8534	2.3254	2.2999	3.8923	3.70865	4.6093	6.2546	6.8136	9.4187	4.32375	4.2622	6.2469	1.9357	6.3295	5.4861	4.968	6.1453	3.9372	7.2192		0.727747	4.43485
16.6798	5.7462	1.899	2.191	2.0838	1.9505	2.2861	3.2953	4.9478	5.1668	3.9839	8.0651	5.4595	3.3682	7.4559	6.7559	6.8681	4.1729	5.8147	2.7097	6.17269	8.5011	6.0535	3.1566	4.5027	3.9354	8.7334	8.0415	6.407	4.4708		0.732985	4.97224
16.7989	5.0537	2.6579	2.2504	1.1855	4.1615	3.2085	5.5067	4.9829	2.3415	3.6998	8.6128	2.9299	5.022	6.9125	6.59639	3.7689	3.4348	7.0564	4.5533	5.26807	7.4153	7.9407	3.7467	7.226	5.1264	7.3824	4.3544	12.6625	5.373		0.738218	5.18727
16.9181	3.8022	3.1928	1.1651	3.3863	6.1858	3.5169	4.3215	6.1	2.4257	1.9095	6.1608	3.3569	6.3085	9.4	10.2856	5.1194	5.9923	5.8713	5.391	5.26527	5.4683	4.364	2.4509	6.5508	3.6858	4.2453	7.8081	6.2862	3.7746		0.743457	4.95831
17.0372	3.6071	3.3281	1.995	1.991	4.5743	3.9485	5.3277	9.4887	3.0476	4.0369	3.2992	3.8994	8.3792	6.853	8.4465	5.2284	6.199	7.0372	5.175	5.418	4.1307	5.01	3.1392	8.0131	3.5805	5.1685	2.0551	4.5244	3.7163		0.74869	4.84888
17.1563	3.7762	2.4951	1.6546	1.4059	3.5155	2.9693	2.9986	8.098	2.645	6.7875	1.8503	4.7538	5.975	7.6263	5.71455	6.5228	4.355	3.4417	3.4365	3.79316	4.5248	3.5657	2.5503	5.4005	5.9885	7.0558	3.7318	7.347	3.1354		0.753924	4.38326
17.2755	4.3362	4.8897	2.4858	1.173	3.1213	2.2436	1.3441	8.4527	2.7754	5.2715	3.1006	4.2009	5.1906	7.2326	7.11342	4.9298	4.2524	3.7589	3.3611	5.60177	4.8126	2.4759	3.8748	2.6791	9.637	5.1152	5.2336	3.8064	3.596		0.759162	4.3471
17.3946	4.2077	6.0082	2.5498	1.9262	2.9368	2.0441	3.3065	11.0121	4.3232	4.4629	5.0431	2.0551	5.7898	9.0604	7.62476	8.4219	3.799	4.3463	3.9553	5.44016	6.6997	4.1547	2.8345	7.5566	4.3618	3.8478	9.3815	4.6333	3.5241		0.764396	5.0106
17.5138	4.2307	3.7062	2.3523	3.571	3.1392	3.0254	2.4162	8.4397	2.0344	7.1047	4.7581	2.4238	5.9578	8.1432	6.80013	6.6205	3.4782	3.6935	6.3036	5.89828	4.4027	4.0518	2.4144	4.7225	5.3819	2.5048	7.4039	8.0997	2.5785		0.769634	4.67783
17.6329	5.9319	1.934	1.2272	4.8705	3.7432	3.5047	2.6192	11.8139	2.0168	3.5048	3.7365	2.6956	6.5676	5.1474	4.86461	10.6234	3.643	4.0149	5.3939	6.76265	5.2148	5.8951	2.9865	9.161	4.3798	3.9468	9.4653	9.7238	5.087		0.774868	5.18882
17.7521	4.1019	2.5781	1.318	1.7374	2.7905	1.8815	2.1143	12.5017	3.1412	6.0245	4.2227	3.6219	4.5118	5.7324	4.91734	8.0966	4.5104	3.52	4.992	5.80211	9.868	5.0188	3.399	4.8315	5.6608	2.7417	7.2638	7.2621	2.5334		0.780106	4.71364
17.8712	4.2383	1.661	2.0642	2.4547	2.8863	1.627	2.8679	10.5209	5.5537	4.8458	4.1821	2.8846	5.6618	3.7667	9.22651	7.292	3.3895	4.6497	3.3666	5.49063	5.1938	10.7042	1.9972	6.5473	3.7565	5.6439	5.7403	5.8742	5.1897		0.78534	4.80266
17.9903	4.6237	1.6247	1.8977	3.2442	2.5473	1.6588	3.1258	6.2373	3.7036	3.3823	4.8437	2.3604	6.3585	4.3861	3.5764	7.564	4.9156	4.4699	4.5353	3.53447	3.8631	13.0281	2.1647	4.0969	4.6274	5.7693	5.867	6.7392	5.0437		0.790574	4.47549
18.1095	6.4082	3.1845	2.4521	3.717	1.2437	2.078	5.114	7.2527	3.9436	2.7619	4.7477	3.5415	4.382	2.8855	4.46792	7.2408	3.0405	5.3149	7.238	5.90687	4.9073	7.7562	3.0768	3.9855	5.3065	3.7954	5.2713	9.0043	3.2115		0.795812	4.59435
18.2286	6.017	2.9779	3.0952	3.9543	2.955	2.6195	5.4932	5.1611	2.8913	2.4573	4.5826	4.0992	3.8536	3.3124	8.32334	11.4994	6.3367	5.1535	6.5388	6.07128	6.9794	10.0743	1.6494	5.4635	6.7172	5.839	6.9335	5.9341	4.9727		0.801046	5.23985
18.3478	3.7663	1.9784	1.8687	2.3887	4.0728	4.8998	3.8663	4.3921	3.3616	3.1651	4.2899	3.6145	3.6349	2.4802	4.89552	13.495	4.8189	4.2357	4.6847	4.15992	3.9474	4.4081	4.731	6.8852	5.0787	4.6258	4.8611	6.2356	4.2516		0.806284	4.4515
18.4669	3.9179	1.4262	2.3965	2.987	2.6216	2.823	4.1542	3.1635	1.6246	6.3308	6.5673	3.6359	4.8331	4.7239	5.91614	7.9267	6.8411	5.463	4.4548	5.27653	7.0917	3.7976	3.9278	4.4666	2.798	3.6024	6.5601	4.8586	2.4567		0.811518	4.36701
18.586	3.5575	3.0573	3.2446	3.0905	2.3129	3.4275	5.8153	3.1756	2.3693	5.1362	5.8002	3.0967	5.8564	3.0285	5.59904	6.8458	5.329	3.691	5.9355	5.68984	5.1056	2.7297	6.5615	3.9306	4.8873	3.2514	7.9696	5.8861	2.6452		0.816752	4.44916
18.7052	3.3159	3.5197	2.4744	3.0911	3.2269	3.9904	3.8311	1.922	3.949	7.0374	6.5148	4.4414	4.9771	1.3901	4.58563	9.2245	5.7315	2.7511	5.6161	4.16558	4.038	5.5842	6.3598	3.87	6.6923	1.9984	7.7024	6.7519	3.8982		0.82199	4.57417
18.8243	3.6553	1.6301	3.0371	1.0516	1.7392	2.3707	3.7595	3.3524	3.5161	5.8156	7.3255	4.8033	4.1204	3.3067	3.32077	4.4834	5.3677	4.298	3.7293	5.40604	4.3236	6.1434	3.9964	4.985	7.8325	2.9179	6.8317	4.307	6.0277		0.827224	4.25703
18.9435	4.6196	2.3195	1.4289	2.5849	2.3324	1.5983	3.9907	5.1355	3.7637	4.1267	2.3748	3.748	5.3298	2.7028	5.81775	2.345	4.7287	4.6026	5.2377	3.51235	6.476	6.0526	3.9094	6.171	8.956	2.3305	5.8916	6.2615	3.9757		0.832462	4.21807
19.0626	4.7457	1.8312	1.7224	3.4349	1.6917	3.2785	5.0281	5.3459	3.5956	6.3437	3.0516	2.8489	5.03	3.5555	3.69172	3.8876	6.1494	3.2224	4.8691	3.88117	6.6514	4.3643	5.4315	10.866	6.4294	2.5246	5.1128	6.0911	4.0608		0.837696	4.43921
19.1817	6.0887	2.2282	2.2683	2.3646	3.6309	2.2152	2.979	3.8409	3.6681	4.4629	3.2767	4.4415	4.7709	5.191	2.86591	1.7779	5.7436	5.8252	4.7055	4.43766	4.6421	4.7582	4.9792	7.2172	5.9482	3.0317	8.4512	7.6104	2.7088		0.842929	4.3493
19.3009	9.2382	2.9637	2.7995	3.6692	2.0799	2.4462	5.9318	5.1987	4.7368	5.4178	4.3898	3.1048	6.3471	4.8149	4.85168	3.5808	4.1229	6.0914	5.0568	3.94638	3.8175	3.9257	3.3692	10.022	7.7411	4.9553	7.2109	6.8264	1.474		0.848168	4.83208
19.42	5.187	3.9119	2.6471	3.1854	2.2597	4.3896	5.9341	5.6883	5.8356	6.6518	5.7848	3.3406	4.543	5.1338	5.7325	2.6402	6.3833	3.3981	6.0929	3.95198	4.8826	3.2829	4.2615	9.1103	8.1672	2.5093	4.6115	7.1582	2.9362		0.853401	4.81419
19.5392	4.4363	2.1125	1.99	1.9809	5.0408	5.2927	3.5243	5.9532	1.6976	7.0716	3.8442	2.9941	5.2824	4.4453	7.79353	5.1628	3.4325	1.6074	6.1013	4.65619	3.6536	5.0211	6.7994	9.8617	3.0629	3.7533	5.104	8.6865	3.2398		0.858639	4.60696
19.6583	4.3222	1.8318	1.8309	1.9225	3.7486	2.1124	3.5263	5.6957	4.3189	3.5962	3.3442	6.6612	2.8253	3.6806	2.03776	5.2444	3.3911	2.801	5.5668	5.47261	4.8921	3.4588	6.2155	8.9653	5.3566	5.1534	4.4931	7.2441	4.7589		0.863873	4.29201
19.7775	5.158	1.6398	1.754	1.8987	5.8877	1.8998	3.2639	5.7386	3.7118	3.5362	6.5266	4.5823	4.3299	4.3401	4.50099	3.7959	4.2123	4.6554	4.7661	3.4236	5.3824	3.1468	7.2237	8.9992	2.8154	5.3436	4.7942	6.1755	3.3717		0.869111	4.37497
19.8966	3.3493	2.346	1.3892	3.1429	4.5879	1.7017	5.6448	8.216	4.9479	3.1379	3.8925	3.1822	4.4373	4.1679	3.92329	4.1478	5.205	3.5454	7.5072	7.75562	5.2491	4.9188	12.3256	12.4505	5.0434	3.4557	4.9342	8.4186	3.0859		0.874345	5.03826
20.0157	8.2339	2.1822	3.3102	3.0931	3.2381	2.5879	4.8499	3.9223	4.8934	4.8388	4.9709	6.1026	6.6607	5.8077	3.06999	4.0424	4.4681	2.8913	6.609	5.43551	3.2156	4.6744	15.9842	10.3013	6.6131	2.8906	5.0617	4.8293	2.04		0.879579	5.0627
20.1349	5.1254	2.7978	3.5433	2.904	2.468	2.5752	2.8119	4.6379	2.7406	3.5144	3.8032	2.47	4.5412	4.6821	4.88423	5.7836	7.1219	6.1005	8.7064	2.99644	3.1379	4.353	12.4419	10.673	4.2856	2.2792	3.9137	6.0764	2.6155		0.884817	4.62015
20.254	3.6632	4.8097	2.622	2.7651	4.7338	2.2104	3.4258	2.1593	3.0586	6.9448	3.5333	6.0558	3.982	4.4084	5.03324	4.4737	4.9676	4.2004	7.7664	4.90512	4.6144	1.4011	8.0439	12.8496	5.5397	1.8458	5.5412	5.3979	2.7982		0.890051	4.61208
20.3732	3.3414	3.5467	3.4728	2.1575	3.6105	3.9337	2.6731	4.3899	2.5907	4.5449	7.6656	5.2147	4.276	5.8418	4.32378	3.3462	2.0054	2.2289	8.083	3.3286	3.3953	3.3588	3.3092	5.4804	3.3998	1.1545	6.5239	9.4432	1.7608		0.895289	4.0828
20.4923	3.5417	1.4526	1.9305	2.3143	3.2428	6.1605	1.4219	5.3275	4.1221	2.6734	7.5265	3.5352	3.021	5.3599	3.3354	4.5633	4.4322	4.0342	6.2445	2.39434	4.3914	6.249	6.0151	5.8825	2.7919	1.156	3.8495	5.7172	1.6373		0.900523	3.9422
20.6114	4.9606	3.211	1.7138	2.3624	2.8895	5.2027	2.8447	3.767	1.8691	4.512	6.2158	3.7297	2.1923	4.2572	4.74564	3.5936	3.1649	5.6917	7.1055	6.89134	5.4227	4.958	4.7472	8.5674	3.5187	2.3043	2.9847	7.7373	1.2212		0.905757	4.22007
20.7306	4.4835	3.0965	1.958	3.4931	3.5419	2.9219	3.4277	1.8561	4.5919	2.1964	5.6662	4.7266	2.5361	4.879	2.94902	6.0903	4.3276	6.0974	3.9501	2.64551	3.9572	2.6375	5.9842	4.9447	1.7079	1.3352	2.9809	6.77	3.1882		0.910995	3.75657
20.8497	5.2186	3.1615	2.2563	2.9891	3.5813	4.2216	3.9688	2.2778	3.1344	5.1485	6.4927	3.1547	2.2356	3.2818	3.80541	6.5924	5.706	5.3198	5.669	3.63369	4.4382	4.7547	4.0433	4.8969	1.4066	1.5488	3.0525	8.4793	2.0425		0.916229	4.01765
20.9689	4.8383	3.9811	2.3411	4.7426	2.5775	4.7687	3.248	4.2154	4.9431	3.9569	3.9697	4.521	2.1683	2.8064	5.26165	6.4915	3.6238	2.7803	3.4176	4.3534	2.8735	8.195	2.0913	4.7043	1.324	1.0464	4.1911	6.4017	1.1754		0.921467	3.8279
21.088	5.3401	5.6854	1.9207	2.9226	3.8312	4.3961	1.6807	2.2085	4.1669	3.145	1.4024	3.7154	2.9972	4.1623	6.16088	3.7944	2.4951	3.4841	1.7265	3.01021	1.626	5.8122	2.6018	4.9836	1.015	1.2694	4.2765	6.269	2.436		0.926701	3.39777
21.2071	7.0559	5.385	4.0035	2.6457	2.8114	4.9067	2.2101	1.6095	3.3695	3.25	2.2304	3.353	1.4098	2.1081	5.86565	4.894	2.7282	2.5958	2.6895	2.38113	3.5421	4.651	4.2528	3.34	1.1609	1.9591	3.8294	5.5611	0.9966		0.931934	3.33779
21.3263	7.4691	2.0314	4.4415	4.6442	3.8411	2.4176	1.3701	3.4306	3.9706	1.4279	4.0544	3.4367	1.0535	3.1523	4.97336	5.4394	2.7524	1.7491	1.5889	2.25192	3.9022	4.9532	2.2839	3.1804	1.3532	1.1131	3.0551	6.2083	1.2415		0.937173	3.19955
21.4454	6.1229	2.4319	3.8065	2.3731	4.8506	3.862	1.0338	2.8279	2.8427	1.713	2.8818	3.2518	1.3074	1.917	3.05851	3.0401	3.7942	1.5121	1.115	2.75958	2.4042	4.2244	2.1448	3.4901	1.8283	2.4663	2.6633	5.7681	1.4411		0.942406	2.85974
21.5646	6.7574	3.8457	1.7681	4.2915	5.155	5.4318	1.1898	1.9336	4.0225	3.1786	1.8867	2.6382	2.9116	2.371	2.7065	3.2251	5.2819	4.0153	0.9525	2.7902	2.4838	2.4205	2.245	4.6059	2.3885	2.0757	2.215	4.5848	1.8812		0.947645	3.14667
21.6837	5.019	4.7506	1.6396	4.0256	4.551	3.4959	1.6788	2.2568	2.0814	1.5595	2.0256	1.0709	2.511	2.359	1.68018	3.2104	3.4202	3.2768	2.4373	2.16909	2.4508	2.2148	2.4897	2.3422	1.5609	1.2618	1.8119	3.5094	1.0796		0.952878	2.54965
21.8029	5.6448	6.0263	2.9775	5.0958	5.558	1.7875	3.2382	3.4563	2.6647	1.7424	2.1755	1.7883	1.2594	1.2198	4.61471	3.0259	2.7898	1.7192	3.9645	1.84318	1.9196	2.4874	1.2514	1.042	1.0328	0.9825	2.3155	2.2192	3.1025		0.958117	2.72223
21.922	6.5593	6.6354	3.4786	3.9091	4.3661	2.4059	2.3704	3.9639	2.4489	1.6601	1.421	1.4299	2.6756	0.9562	4.65063	1.1316	3.3643	1.6409	4.1149	1.63542	1.8686	1.0501	1.502	1.0832	2.0063	0.9693	3.7309	1.1349	1.366		0.96335	2.60446
22.0411	5.5482	4.8379	4.9253	2.2911	2.8508	2.9745	3.2173	1.011	3.4532	0.9753	1.726	1.1785	1.9505	2.0161	2.53958	2.3083	1.5502	2.2227	2.4322	1.72087	1.3321	1.0693	3.71	1.1044	1.8505	1.6669	2.1539	1.5996	1.3068		0.968584	2.32838
22.1603	3.5441	4.6975	4.9777	3.7475	5.0153	4.031	2.9855	1.1167	3.4908	1.7903	2.1012	0.924	1.7409	1.3292	3.1731	1.9269	1.1761	1.8095	2.4294	2.62562	2.1064	1.4156	1.7032	1.4569	1.1982	1.2687	1.0176	2.7051	1.1148		0.973822	2.36617
22.2794	6.4387	4.3383	5.037	3.5517	2.1586	2.5214	2.3341	2.728	1.7576	1.3641	2.0581	1.0399	1.6546	1.3483	1.50697	2.1263	1.0286	3.7959	2.0933	2.49083	1.6041	1.714	2.7368	0.9928	1.7259	1.3983	1.6327	3.0731	2.0712		0.979056	2.3559
22.3986	2.5606	5.1692	5.7642	3.6643	2.2517	1.4462	2.5258	2.5852	2.6231	1.7927	1.0923	1.9563	1.1408	1.5758	1.1317	2.6599	3.3752	1.3759	1.6058	2.97144	1.9991	1.9064	1.8189	1.0581	3.5893	1.782	1.1585	1.9018	1.5164		0.984294	2.27582
22.5177	2.8767	5.3698	3.0032	4.073	1.3016	3.191	3.2769	1.2843	1.9538	2.4235	2.1599	2.0694	1.2743	1.7798	0.87192	2.6522	3.2916	1.989	1.8028	2.13245	0.9933	1.5067	2.6212	1.3277	2.1505	1.4653	2.3419	2.3984	1.043		0.989528	2.22845
22.6368	6.3409	4.8895	6.6819	4.2121	2.6507	3.2684	1.7899	0.9985	1.8922	1.0392	1.3144	1.4136	2.7636	2.0334	0.93193	1.7551	1.0927	1.346	1.5617	2.78302	1.2018	1.1852	2.0505	1.3805	1.7347	1.7328	1.2186	1.3883	0.9656		0.994762	2.19368
22.756	6.0975	5.8606	3.3161	2.1961	2.2183	2.7806	1.7462	3.0214	2.2642	2.0569	0.9845	1.6855	1.6263	1.7508	1.48151	1.1558	2.0149	1.6828	4.0346	1.98651	1.9718	2.4217	1.5091	3.5476	1.2703	2.193	1.5283	2.2695	1.8292		1	2.36212

## Sheet: Image1
X0	Y0	Y1	Y2	Y3	Y4	Y5	Y6	Y7	Y8	Y9	Y10	Y11	Y12	Y13	Y14	Y15	Y16	Y17	Y18	Y19	Y20	Y21	Y22	Y23	Y24	Y25	Y26		Ap-Basal	Avg intensity
0	3.2339	10.6242	8.2653	13.5456	11.3701	20.9955	8.1117	13.0676	9.5221	12.7919	9.4247	11.1908	8.9188	13.8018	12.5365	12.1764	18.9142	11.3544	13.2199	6.7447	9.1424	7.5851	6.89	8.9039	11.2114	4.9755	10.6514		0	10.71
0.1191	5.5138	8.1247	11.7392	13.4908	14.712	20.4693	10.2536	8.9405	9.6602	16.502	11.7415	14.0138	8.3441	16.333	8.8672	10.9955	13.1262	16.5264	12.0119	10.4865	9.281	8.7132	7.9207	7.7479	7.8637	5.2793	7.0541		0.00510027	10.9523
0.2383	6.9822	11.2858	12.7862	12.4801	13.1833	19.0824	12.0298	8.4711	8.4202	14.3472	16.0632	9.7432	9.0153	13.2471	15.437	16.4755	11.6234	13.4115	15.0643	9.423	8.7593	5.5014	11.2472	7.7439	6.8097	10.7178	6.8088		0.0102048	11.3393
0.3574	6.1717	12.6334	8.6027	10.4872	12.6569	26.9172	13.6061	10.5596	7.1181	18.015	15.7399	13.8249	10.2902	11.7197	12.0022	11.8698	13.6223	14.3477	6.5212	9.3296	6.7809	8.2362	7.512	8.7654	6.5597	10.1873	8.6774		0.0153051	11.2131
0.4766	11.8978	11.9402	18.3071	9.4479	12.744	21.1922	15.264	10.2146	10.3261	21.7087	10.4832	20.634	8.9402	13.2662	9.1516	10.6981	11.5256	10.8305	8.5425	9.7901	9.1621	9.1769	5.0688	11.0508	9.443	10.9445	6.176		0.0204096	11.7751
0.5957	12.0178	11.8414	17.3839	10.8196	11.6696	21.0812	22.0423	11.1326	9.6112	18.514	13.9716	16.4083	8.4793	12.1399	9.1072	10.3091	14.0414	16.1395	6.6953	7.406	8.0424	9.945	6.6674	11.729	10.8675	9.7452	9.5642		0.0255099	12.1249
0.7148	8.2529	10.0274	12.3059	13.4717	9.8007	22.4215	15.3015	10.9159	11.7127	24.2495	14.6258	17.9683	11.7158	10.4672	14.33	13.0714	15.33	14.7198	5.3885	9.3046	11.0427	9.4224	9.9145	6.1239	10.301	7.7105	11.06		0.0306102	12.2576
0.834	6.7664	11.382	19.0525	12.229	15.2773	17.6283	16.1182	10.5957	8.9289	23.1375	12.7056	23.2416	10.8071	11.9826	12.2936	18.548	18.6247	14.141	8.6349	9.5205	15.4683	7.5592	8.8301	6.2158	12.1073	17.5326	13.7532		0.0357147	13.4475
0.9531	10.0671	11.2291	20.3533	14.701	18.3049	27.486	19.9262	12.4975	11.881	27.1591	15.3991	25.0947	11.5497	12.809	13.056	17.9792	19.5136	13.1035	9.476	16.0887	20.278	9.2151	8.7727	12.5828	12.3251	18.5628	14.1567		0.040815	15.6877
1.0723	10.1592	10.8793	24.0894	10.6585	19.8741	28.5819	17.7314	21.1341	13.9457	31.3419	13.1459	33.3778	14.2906	13.6807	10.9652	15.3978	22.8717	14.5019	11.0237	15.3198	18.6681	14.2385	7.1329	10.1794	12.7434	14.2407	11.3701		0.0459196	16.3535
1.1914	8.1864	15.6171	27.2148	12.6629	23.3527	31.1178	21.4294	26.5625	16.7846	25.5808	22.0422	35.1047	14.5571	12.4537	15.8628	25.8898	32.8152	9.6452	9.3522	7.6873	16.3557	16.9433	7.9141	10.054	11.788	14.5947	8.4039		0.0510198	17.7768
1.3106	9.9432	19.4667	33.4904	17.3085	22.2052	30.4073	23.1075	36.9417	19.2096	31.2285	18.2366	36.6667	13.8818	11.0059	12.6038	20.7397	35.9258	15.6472	9.4505	9.0978	18.665	14.3189	11.6432	8.5327	10.1156	14.814	13.265		0.0561244	19.1822
1.4297	9.8276	22.8118	29.9888	13.3136	28.9983	35.4275	25.8495	40.8554	21.1222	34.2001	17.3709	32.9993	23.7722	15.7979	13.6265	26.7485	33.0569	14.5105	9.2403	7.0434	17.7483	14.0318	10.4549	9.8811	10.5469	16.6595	10.8982		0.0612247	20.2512
1.5488	12.2989	22.4202	41.2236	19.537	36.8817	40.2257	28.1428	36.2723	28.5335	41.297	29.6981	41.3642	26.5744	17.3891	9.9779	34.7879	29.0687	15.8386	7.0373	12.4144	16.2844	21.0255	7.4293	7.5355	9.7505	15.4656	21.1523		0.0663249	23.3195
1.668	13.2431	27.1087	48.6201	18.8083	37.1303	35.0457	36.8425	33.1961	29.5142	45.3855	28.9568	41.5912	26.0611	26.5358	15.1581	30.316	27.408	15.6706	7.5226	11.2888	11.6119	14.4083	4.8134	8.2109	11.0466	16.6336	27.824		0.0714295	24.0723
1.7871	12.0794	31.1506	50.7924	17.0483	36.1844	35.5906	47.1448	47.3527	32.4898	51.23	28.59	42.7733	32.9148	23.839	17.572	49.2367	34.5252	17.4978	10.3911	13.7614	15.497	12.3408	6.5822	9.941	7.0566	19.0043	24.7153		0.0765298	26.9371
1.9063	14.1049	36.3741	40.9523	19.3989	38.8644	34.3082	43.9512	48.8742	40.0295	43.2863	36.2233	43.7141	38.7781	34.3944	15.7486	65.1031	50.8199	14.9729	15.1268	12.8626	23.9005	17.2043	11.5345	9.8586	7.6931	23.9365	21.0885		0.0816343	29.7446
2.0254	15.5172	40.1137	46.3032	32.045	36.433	42.6294	43.4812	54.1806	45.47	35.5246	28.7643	39.4229	43.7854	40.4845	25.5615	48.9973	69.4533	27.9849	8.8485	13.8774	23.6029	24.6985	14.2769	11.2131	6.8252	19.7557	17.9674		0.0867346	31.7488
2.1445	23.6883	38.6793	43.9863	38.7465	41.6124	39.5103	49.6263	45.5986	47.2095	46.4554	33.3848	54.0724	47.2228	43.6736	19.1329	58.4305	68.6937	25.4336	15.277	14.5896	23.7719	25.0759	10.1939	6.245	6.3054	15.9839	15.216		0.0918349	33.2524
2.2637	19.113	44.4709	51.0523	32.3935	44.9705	34.4211	46.786	57.892	61.078	50.8698	36.2365	45.4945	59.4599	41.5242	26.132	68.5785	62.2607	25.0494	13.5726	8.9861	23.3375	26.6392	9.4236	5.745	6.8145	24.1034	23.0556		0.0969394	35.1652
2.3828	26.6593	46.5322	57.2	43.373	37.7675	33.2411	50.6894	57.5453	64.9322	44.0511	30.8582	42.479	56.6571	37.6542	33.0294	67.0597	83.9748	18.4447	10.9017	14.2383	19.2656	25.2962	6.5791	12.1098	6.0437	22.1708	19.0876		0.10204	35.846
2.502	26.764	47.4847	46.6738	41.0901	47.2801	38.4202	44.1766	57.3599	66.2118	47.1279	34.6204	47.2981	51.232	33.0018	40.5952	65.128	89.387	27.9645	15.6407	14.7103	22.6597	23.5226	7.2943	5.7328	5.952	20.6108	19.2209		0.107144	36.5615
2.6211	28.7575	55.4177	49.5797	41.1654	40.0877	36.0913	51.8539	57.6008	56.9259	47.6281	39.8179	45.5752	68.2926	42.2949	56.1815	61.5611	91.3265	31.7227	17.3679	19.4645	22.7795	25.6603	7.0747	6.2727	7.7788	17.8674	23.384		0.112245	38.8715
2.7402	20.4814	50.0837	47.1051	48.7856	42.5061	38.4487	48.2062	60.7588	60.5357	49.687	30.128	36.842	57.6837	34.7644	54.3878	85.8248	95.8148	24.6349	20.1349	26.4407	23.4675	26.5662	8.1341	3.7187	10.3407	22.62	25.4566		0.117345	39.0207
2.8594	30.6492	48.4914	59.8099	44.0719	27.4383	28.4052	50.6708	60.4693	58.51	50.9916	34.2011	32.5355	53.9348	42.1134	54.9998	72.0396	98.4371	28.8971	25.7845	24.6126	25.7377	23.2662	7.3913	4.2831	9.5085	16.7126	27.2999		0.122449	38.5653
2.9785	24.0765	51.8561	49.8574	39.9713	27.8403	33.1096	43.6644	65.5159	59.0102	55.4204	36.5047	34.6984	56.4379	44.4723	62.1204	75.6659	94.1542	31.396	24.616	19.3424	23.9143	25.1464	9.9462	3.5411	8.322	18.1232	20.7698		0.12755	38.4998
3.0977	23.0838	54.9946	53.1818	32.9568	27.471	33.5378	50.3373	56.2552	73.6684	44.7962	37.6812	42.2963	54.591	38.8702	66.0386	82.8443	85.1293	38.6935	22.9471	20.0502	24.4178	20.3124	9.2617	5.258	7.2057	20.5256	37.1545		0.132654	39.3911
3.2168	24.9835	54.0277	45.8201	33.5861	32.4221	26.9697	39.3595	54.1082	65.3181	53.6693	40.41	52.9231	53.1368	42.3046	60.1547	90.3424	98.0847	44.0081	22.9056	21.8123	22.038	16.0118	10.3758	5.984	7.046	17.6204	27.1731		0.137754	39.3554
3.336	26.0001	55.0821	47.9047	30.0033	26.2185	25.0232	44.8229	67.8372	63.9939	56.0094	32.3526	45.9853	53.8601	41.6913	75.9447	83.6332	91.6103	46.6831	23.5041	23.3151	24.7216	21.4591	9.0061	4.3764	9.5796	17.3244	21.1213		0.142859	39.5949
3.4551	29.2215	48.7103	56.6953	31.5018	18.0919	27.8889	43.0694	63.3025	66.7578	56.0998	33.0574	33.7595	58.8746	41.2488	71.7025	83.0408	74.5389	43.6871	23.4315	30.15	26.3469	27.7751	8.6733	4.3585	7.7002	17.79	20.2996		0.147959	38.8064
3.5742	29.5169	59.7978	46.0928	22.4921	22.8217	24.3167	51.5034	64.7867	57.0203	55.3468	28.769	43.9525	56.1353	34.5688	73.9064	92.1221	71.7731	50.8741	24.6593	21.1882	23.5522	30.7165	7.9091	4.5327	7.6292	14.8115	26.0872		0.15306	38.7734
3.6934	33.3095	46.0965	50.2048	25.627	11.8763	22.3881	53.8747	72.3294	60.9972	58.1221	27.6076	45.8041	61.3582	39.5923	63.2025	83.6031	78.0278	48.1445	22.5858	17.8992	23.2974	30.8169	9.5088	5.7132	3.8327	13.8212	18.48		0.158164	38.0786
3.8125	29.8068	39.7337	47.7959	28.3433	13.4558	17.4048	47.1409	76.5576	63.7455	47.3089	24.3493	36.5277	55.5074	37.8042	63.0993	81.878	89.8544	45.0303	25.0709	19.7031	23.8538	24.0325	11.5698	6.4367	6.4736	11.8961	12.7502		0.163264	36.5604
3.9317	27.5215	43.3508	43.7288	22.7004	12.5584	17.3677	40.5734	57.6984	57.9403	58.5004	28.4967	38.5613	52.1064	33.1812	55.781	78.4752	80.495	54.9266	28.8453	17.3251	21.8002	20.5355	6.0209	4.0143	4.3344	15.0561	16.3466		0.168369	34.7497
4.0508	22.2457	51.2389	50.7373	17.5056	13.5194	16.5541	52.1233	63.9654	52.1677	39.0664	21.5558	47.1684	59.2985	30.5542	57.4444	82.0577	79.5776	47.6608	22.4439	14.964	25.8902	16.523	6.3821	4.9491	6.4956	12.8911	17.4934		0.173469	34.5361
4.1699	23.4532	49.4629	40.5883	14.6245	13.3181	17.3847	49.2069	61.2096	54.8849	37.8951	18.4945	33.5945	50.3233	28.2149	79.0636	74.5096	80.5788	58.8077	15.2929	15.0695	24.3342	20.8403	9.3351	4.0477	4.917	12.6615	16.5287		0.178569	33.6534
4.2891	24.7885	39.7505	33.5889	12.5394	11.1923	12.2537	30.5091	64.0506	51.178	29.0538	14.8519	36.5035	51.1295	28.5314	73.5116	94.4465	97.5737	50.6624	18.0129	11.1073	27.2651	23.8481	10.3446	3.1695	4.9309	12.8743	16.4902		0.183674	32.7466
4.4082	20.992	38.7618	31.249	13.8029	12.2302	14.5572	25.6315	67.8232	57.9383	27.0853	10.8823	38.9087	44.1371	23.0406	65.1323	85.4417	74.9659	56.1496	16.5203	10.943	23.0012	21.4635	8.669	3.1087	4.5007	12.0673	15.584		0.188774	30.5403
4.5274	14.3507	40.1039	26.1675	17.6719	12.3652	11.1557	27.2834	71.8255	55.0767	25.2606	13.8969	35.003	45.9602	22.6518	67.4074	84.4405	81.8962	48.7471	13.9571	15.2233	21.1056	25.911	9.4049	3.9161	4.6197	8.897	13.1587		0.193879	30.2762
4.6465	13.5198	35.3123	16.2668	17.2699	6.8908	9.2152	32.8444	63.744	60.6097	22.1026	14.5485	29.5835	43.7734	22.6107	70.0051	81.5725	77.271	64.1281	15.1809	10.4462	16.3707	17.9089	8.522	3.3143	5.4714	13.0036	12.8483		0.198979	29.0494
4.7657	12.2908	37.4196	16.38	14.8669	7.3754	9.9613	29.5523	68.5672	55.7051	15.0555	16.3674	30.3249	42.05	20.6957	71.0546	72.799	66.7114	46.6836	13.5061	11.9259	16.4027	22.4856	7.9646	1.4799	3.9799	10.4914	10.1887		0.204084	27.1217
4.8848	12.9058	31.8648	16.8056	13.3203	8.9419	9.6083	33.3474	61.8283	54.362	19.8309	11.9382	30.495	45.0772	20.1231	49.294	80.0018	60.0824	54.5736	12.0725	18.6099	15.4328	20.1229	5.8573	4.2821	3.7025	7.7283	12.7112		0.209184	26.4785
5.0039	11.513	33.9057	13.6184	13.8597	9.2811	10.1339	34.9242	60.7547	51.1978	19.7419	13.8683	29.1973	34.7159	14.7228	45.5324	77.6488	49.1141	47.7496	14.5664	13.2975	14.6033	21.8551	5.0302	3.8783	1.8569	9.3752	13.1078		0.214284	24.7796
5.1231	14.0308	33.9315	11.1651	12.0662	8.3571	9.4983	35.6079	50.1499	55.5016	23.61	10.6809	24.3704	33.4747	13.4294	44.1021	84.3955	51.5422	48.6048	9.7573	16.0907	16.975	17.827	6.9489	3.215	3.7951	11.8291	9.5107		0.219389	24.4617
5.2422	11.9124	39.8582	11.0002	9.6397	7.2274	8.1631	37.5885	46.0859	43.7924	24.8621	11.0631	24.1188	40.3875	14.5455	46.569	74.3701	51.1833	51.3986	7.0669	18.7835	13.9092	16.9109	7.5519	3.1462	4.8876	8.8933	9.9696		0.224489	23.8846
5.3614	7.0924	27.3313	8.5666	11.2973	9.9268	6.6397	26.6002	55.5408	43.5143	28.5111	12.6117	21.9973	30.6566	15.0547	44.9233	71.5268	53.4081	46.9381	7.9224	16.4138	12.7418	16.4749	6.6881	5.3584	4.2836	6.5806	10.2829		0.229594	22.5512
5.4805	12.9781	26.0773	4.816	7.3464	10.8262	7.3975	29.6862	48.5294	48.4486	26.0882	15.2896	17.0108	32.1821	12.0327	41.2629	63.1841	49.1107	46.47	7.2664	15.3135	14.2089	15.0504	6.6484	3.4573	5.2116	6.4463	12.5651		0.234694	21.6631
5.5996	9.7452	22.2172	5.371	6.4841	4.7306	8.4517	32.0908	44.388	34.783	22.3887	12.3951	21.6044	30.57	15.2179	37.9611	59.4977	48.5523	51.4215	5.6326	11.6208	15.1635	16.3558	5.97	3.3786	4.9271	7.8906	9.8126		0.239794	20.3193
5.7188	8.3167	18.816	5.0916	8.3877	7.6591	6.8859	24.1366	40.6407	25.775	27.8701	15.0281	18.364	26.8428	13.6063	30.1978	57.1559	56.0223	36.3037	7.9887	9.4647	14.3213	15.4863	4.4832	2.6081	3.7589	8.2293	6.5819		0.244899	18.5194
5.8379	9.7776	15.7602	5.7677	5.752	7.0852	10.9763	24.2545	32.1502	23.7748	18.2621	16.3556	12.3899	26.8179	11.766	26.186	49.7828	56.1269	39.9188	6.0775	9.2232	14.8694	11.1672	6.1266	3.091	2.9992	8.6833	7.6514		0.249999	17.1405
5.9571	9.8087	12.8637	4.6592	8.753	3.6628	5.3331	23.3963	30.1768	28.1732	25.4601	14.1655	14.186	29.2486	12.2822	27.8506	51.1645	52.1973	35.9079	6.4799	9.6853	13.5995	14.9261	5.481	3.7887	4.0883	7.7828	9.702		0.255103	17.2157
6.0762	6.0171	10.3287	4.5265	10.6634	8.4906	9.1044	25.9231	20.2185	19.4565	22.624	11.8014	12.5223	26.8265	10.5208	29.0798	47.9561	51.088	33.3166	6.8895	9.8902	10.2094	12.6952	5.3971	2.8013	3.2376	6.2559	16.5728		0.260204	16.0894
6.1953	3.1413	9.9919	2.7701	11.9074	6.4491	8.9948	22.2223	18.7076	18.1093	20.0538	9.1184	14.4871	23.6827	6.6082	21.5151	46.2347	46.4789	41.8426	5.4452	9.7228	12.1768	7.7346	6.2953	2.9863	4.1196	4.4764	12.443		0.265304	14.7302
6.3145	3.6283	9.9011	3.0779	6.2593	6.0784	10.643	23.6171	20.1549	23.7212	20.3999	12.158	7.8347	22.5806	5.6527	25.1002	41.6007	51.4393	30.9932	5.7952	9.6213	13.4681	9.9327	5.4897	3.1296	3.5833	6.1489	7.2403		0.270409	14.4167
6.4336	5.7292	9.6018	4.7833	7.6434	5.7651	8.6724	19.75	13.0777	15.9187	15.4084	11.092	7.4717	21.8274	9.9411	19.1084	38.9973	53.3322	30.8457	4.986	6.9574	16.0993	10.8901	6.9755	5.9759	2.5434	3.9551	11.8611		0.275509	13.6744
6.5528	4.5872	9.2611	2.5779	5.6037	6.282	9.5934	16.7267	12.9365	13.363	6.6792	14.177	9.5924	20.0417	11.0809	15.0195	35.0976	44.5546	31.5242	7.1991	8.6918	7.7272	10.8004	3.1864	5.7391	2.2702	5.6991	10.1451		0.280613	12.228
6.6719	4.8875	6.7169	3.7495	5.2333	8.7219	12.0581	15.4856	11.2501	14.0756	9.7988	11.6158	7.1674	14.399	7.6329	15.143	32.8395	41.4047	27.5153	7.378	5.7249	7.4251	10.6309	7.0838	3.7449	3.9374	5.425	14.574		0.285714	11.6896
6.7911	5.0594	4.9873	4.1692	5.4714	8.6613	8.6258	14.2402	7.4762	17.8622	13.1185	9.7539	7.6193	12.1896	6.7949	18.5563	34.7835	52.3431	21.9484	5.3531	8.6488	7.0545	7.9291	3.8382	3.4946	1.9612	4.088	12.3413		0.290818	11.4211
6.9102	5.8984	5.8465	3.8037	11.9294	10.4319	9.9904	14.1649	5.3193	12.518	13.3119	10.093	6.8559	13.8069	9.5401	18.2165	30.1828	41.22	20.1117	6.1113	9.1049	8.871	8.0161	4.2776	3.9039	2.3018	3.7677	11.9993		0.295918	11.1702
7.0293	5.3751	5.7388	3.5634	6.2294	9.6038	5.256	15.6026	5.1412	10.6925	15.2365	9.2153	6.7566	10.7048	13.8311	17.7736	19.5733	50.9119	17.9421	4.661	5.2409	4.9259	7.7774	4.4657	7.5857	1.6465	3.0465	12.78		0.301019	10.4177
7.1485	4.6065	8.3543	2.9265	5.651	6.2715	4.2473	17.8827	8.3944	13.3719	20.3126	8.7768	10.1624	9.8688	10.3038	19.1428	28.8128	46.3712	22.9303	4.1796	4.0189	7.7124	9.042	4.0195	5.2048	1.4662	1.8352	10.9058		0.306123	10.9916
7.2676	3.4213	5.9124	2.7879	5.179	7.8073	4.2471	18.3777	5.822	18.8586	20.4415	7.347	6.5613	8.6124	14.6801	14.773	30.7096	47.6971	21.8006	3.3874	5.9521	5.9903	7.0954	4.7868	2.2179	2.7187	2.7094	9.3039		0.311224	10.711
7.3868	5.0352	5.562	2.0538	5.0101	6.3581	5.166	13.7247	6.5278	11.6812	18.0527	6.3866	7.0438	12.5816	15.5306	18.2397	31.2648	42.5427	20.6081	3.7898	6.5929	6.0676	3.5786	4.4529	3.6241	6.1691	2.293	10.2637		0.316328	10.3778
7.5059	6.0695	3.933	1.8661	4.2633	7.1161	8.1552	13.5176	7.8515	15.9682	15.7076	7.2545	6.8054	15.6742	14.2408	20.8679	34.3476	37.9364	32.1002	3.5703	8.5571	4.8817	5.4419	5.4083	4.6048	4.7052	2.8051	12.6951		0.321428	11.3461
7.625	6.7587	5.5348	2.7807	5.7075	7.8951	9.5169	10.2417	7.4781	15.4958	18.8129	4.9821	9.1637	13.9269	17.6313	19.7162	32.1446	36.4078	16.1138	3.584	4.7319	3.8358	7.5545	5.3689	3.2987	4.7688	2.2974	14.6319		0.326529	10.7548
7.7442	6.453	4.5053	2.2655	4.6486	7.8427	9.8682	11.9538	5.7819	16.0044	19.8788	10.9864	8.4187	12.5284	13.2685	19.6129	28.5378	32.7466	25.8263	3.2789	7.0325	2.248	5.331	3.1288	2.2523	2.9838	2.3952	12.5534		0.331633	10.4567
7.8633	4.7212	3.8248	2.6595	1.9655	6.4075	7.378	10.907	8.5942	18.8584	17.5749	12.4584	7.4379	15.1506	9.0502	25.2186	29.415	28.0633	23.2741	3.8089	7.2701	4.7834	6.0746	3.7892	3.4848	3.435	2.7308	8.9438		0.336734	10.2696
7.9825	4.5603	7.101	2.9465	5.3301	4.0774	8.5597	9.146	4.8788	18.6934	13.6407	8.8306	11.3203	16.3744	7.1959	24.1056	25.2794	21.6312	13.0812	4.8363	7.9384	5.8266	6.3549	5.6157	3.7115	2.6238	3.58	8.7122		0.341838	9.4797
8.1016	3.3397	4.4644	2.8608	3.7913	2.8134	8.2712	8.8904	8.3754	17.2361	18.551	11.5188	9.7414	16.3611	8.9993	13.3056	19.0041	27.7315	16.8988	3.2706	6.1511	6.0231	3.6383	5.0016	3.0051	4.1231	3.0246	11.1184		0.346938	9.16704
8.2207	1.9924	3.7645	1.9641	1.9422	3.8023	5.6681	15.8012	10.5288	14.1857	17.4188	10.2063	10.5843	16.9286	11.4709	18.6384	14.6355	26.8945	17.3547	2.9953	4.6603	6.1193	4.8276	4.0373	4.4588	5.6543	3.9715	8.3597		0.352039	9.21724
8.3399	3.1752	2.4028	2.385	3.7689	4.5012	8.5573	15.5776	13.4507	15.2433	21.1646	10.7668	9.1813	16.8534	11.4178	14.6965	15.5572	22.8798	15.3424	3.2339	4.9315	4.9989	4.7911	3.3375	4.7396	7.3102	1.3623	11.7962		0.357143	9.38604
8.459	5.0554	2.962	2.7421	4.0462	2.6582	11.1203	12.2845	8.2408	11.0896	25.5269	9.6763	7.6104	12.4175	14.2139	11.9909	8.7807	19.253	13.2091	2.3532	4.718	4.2401	5.0174	4.467	7.6553	2.9341	3.9611	10.6091		0.362243	8.4753
8.5782	2.6967	3.0936	2.0888	2.55	3.3764	7.3063	13.8709	11.3754	6.8948	32.7968	6.8358	5.6604	11.5362	10.9133	9.7968	9.5852	21.4954	15.92	1.8384	4.9642	5.6701	7.7523	6.0393	7.1726	6.0749	6.4102	7.446		0.367348	8.56151
8.6973	3.51	6.8868	1.5885	4.1015	5.385	7.4706	15.5245	17.026	5.0572	25.3554	8.2259	3.5406	12.3043	13.2403	8.1858	11.5703	29.1396	13.743	1.8579	3.2047	4.1497	8.2939	3.754	5.7783	3.6752	7.0774	7.5868		0.372448	8.78641
8.8165	5.483	6.665	1.5919	4.0236	2.0587	10.1038	15.0661	8.9361	3.0823	18.6458	12.3141	6.3069	6.8312	12.0585	4.7746	11.9046	19.6409	14.2158	4.5916	2.3823	4.1845	7.3927	3.6488	6.7064	3.5293	5.0479	9.4013		0.377553	7.79954
8.9356	3.8352	3.7884	3.2116	2.6836	3.0298	8.1326	15.6596	7.3001	5.5364	19.0494	8.3506	5.45	6.4332	10.3984	6.5698	7.0569	24.018	15.9327	3.9503	2.5568	4.587	5.9945	3.0069	5.115	5.5092	3.1738	8.0412		0.382653	7.34707
9.0547	1.4769	7.2854	1.967	2.8435	2.3611	8.766	16.3541	9.0341	4.9006	13.3589	3.6208	6.413	6.0575	12.7843	9.2531	8.1364	28.6732	16.2531	3.964	2.0706	1.8923	5.8844	4.8562	4.4664	5.1624	5.288	11.0264		0.387753	7.5611
9.1739	3.4525	4.5886	2.2193	1.9319	3.1909	6.5669	12.728	7.4194	3.2958	11.393	5.9969	2.4517	10.1546	15.6045	7.0992	3.5845	20.8705	18.1121	4.1086	2.5716	1.7858	5.6779	7.0292	4.7891	2.3916	5.5768	10.2892		0.392858	6.84741
9.293	6.0582	5.3557	1.6782	3.4271	5.2022	4.4222	12.3284	4.4723	3.6725	11.1622	5.3456	3.8122	11.546	10.945	6.9812	4.2203	18.5728	18.1548	4.6888	5.1704	2.5312	8.0559	6.213	9.7645	5.1249	5.8373	7.3318		0.397958	7.11388
9.4122	4.5971	4.1766	1.5214	1.3818	12.3312	5.8093	8.6904	5.9748	2.9058	7.7973	3.4755	5.6601	7.4809	7.8237	10.2873	4.9191	11.4789	12.0105	7.0428	2.23	3.6412	5.1506	5.6242	3.6636	4.0003	5.8942	6.9575		0.403063	6.01949
9.5313	6.9548	4.0789	1.3046	0.9144	6.832	4.9266	10.282	4.7813	2.2921	4.8695	7.4221	5.3949	7.2694	14.1697	4.9112	6.5997	12.01	15.6908	6.1149	1.1838	4.2323	5.8592	7.0372	3.4065	1.7831	6.6833	10.6893		0.408163	6.21087
9.6504	7.1049	1.9706	1.9166	2.8335	5.0796	5.3597	7.5911	4.2815	4.4659	6.1262	9.0393	5.6489	6.3438	17.3548	6.308	6.6824	11.7406	13.2691	3.4529	1.3303	2.957	5.9942	7.044	4.1577	3.0299	7.6779	9.8954		0.413263	6.24651
9.7696	5.5667	3.161	1.592	1.8488	5.5027	8.3825	8.8505	4.181	3.4978	3.6032	7.4194	1.8521	9.7458	8.5549	9.4945	5.7361	13.2557	14.4774	4.5276	2.3431	3.2082	7.3115	7.3606	3.7098	2.3271	5.697	7.4861		0.418368	5.9516
9.8887	5.4603	5.2202	2.2183	2.8115	4.7082	8.7908	8.4592	4.1514	3.5523	3.872	8.0021	2.3161	9.4497	8.1753	6.7259	6.0776	17.5311	13.0514	3.0576	3.1947	2.5012	8.3673	6.0643	4.3752	3.5373	4.9509	8.9627		0.423468	6.13276
10.0079	2.5148	2.4247	1.6124	1.801	5.0448	6.8864	6.7902	3.2672	4.8267	3.4129	8.3827	3.7666	9.1974	5.417	3.7485	6.6943	14.6423	12.8535	2.6193	2.2888	3.0914	8.1468	2.8892	4.583	1.7909	6.5909	6.6613		0.428573	5.25722
10.127	2.789	2.4852	1.6792	2.1875	2.7111	3.8553	6.3055	6.9077	2.6065	5.3931	6.0438	3.827	7.2844	5.1797	3.2181	3.595	19.8931	13.4089	4.8542	2.1771	2.8655	4.1027	3.4355	6.0657	3.1975	5.1345	12.6353		0.433673	5.32734
10.2462	3.9893	2.7441	3.1647	2.508	2.9834	3.9659	5.8487	6.1134	3.0577	3.4616	8.9994	8.9306	8.2329	10.5736	2.8108	3.8115	14.9973	10.6613	6.0212	1.9422	3.1719	4.8886	3.5273	4.7428	2.6842	8.7168	7.0928		0.438777	5.5423
10.3653	7.2625	3.3831	2.1516	4.2987	4.7643	3.9574	7.8535	3.5726	0.9415	4.3992	9.9572	11.0478	11.2873	9.191	3.219	3.4924	12.2427	12.6112	6.9151	3.5441	2.4783	5.3917	3.2772	5.1199	3.084	8.7488	4.6189		0.443878	5.88189
10.4844	7.6885	2.9752	0.9077	1.6922	2.4676	5.0076	7.2555	3.4303	2.1392	3.9032	7.6811	6.6517	12.8698	10.236	2.081	6.8266	14.6024	13.9636	8.5902	3.1213	3.3673	3.464	1.7836	3.6757	2.8601	8.723	9.8532		0.448978	5.8451
10.6036	2.0724	2.0698	1.6194	2.2597	2.1074	4.9528	5.5912	2.537	3.4385	3.4696	9.6718	5.6575	7.4815	8.2597	3.2352	3.7986	10.6445	16.9705	3.3595	1.5199	1.9347	3.1462	2.7083	3.5208	2.3592	7.8086	9.0979		0.454083	4.86267
10.7227	2.2424	1.1043	1.5188	1.4883	1.2566	3.7151	6.8016	1.8481	3.0446	5.1478	4.7965	6.8069	7.7713	9.4123	4.7291	3.3085	11.4804	17.6045	6.2137	2.8804	1.4015	4.5858	2.5777	2.4289	3.4963	7.763	9.8019		0.459183	5.00838
10.8419	2.8231	3.4921	2.3441	2.7564	2.2114	5.6645	8.3947	3.7072	4.1859	5.031	10.3835	7.4154	10.0905	7.6185	1.985	2.9613	10.0275	16.8682	6.3409	1.9814	1.5096	4.8637	3.5466	3.9263	2.5941	8.8402	9.3026		0.464287	5.58762
10.961	6.4043	1.464	2.8344	2.5906	4.1286	4.9171	7.0839	1.2738	2.9362	2.7418	14.1548	6.1208	7.9674	4.8912	2.4753	3.2626	10.2679	7.3775	5.0454	2.5934	1.9969	6.4303	2.5464	3.8296	2.8668	4.6365	9.2007		0.469388	4.8903
11.0801	5.1128	1.7019	1.9256	2.8926	4.4877	4.2607	6.8653	3.9327	6.0572	3.7201	16.6756	3.4245	6.5107	7.2441	5.011	6.8091	12.0734	8.7857	5.436	2.3263	1.9542	4.9084	2.5115	4.8265	2.9423	4.7676	5.8465		0.474488	5.29667
11.1993	3.2365	1.1811	1.5689	3.1926	2.3965	5.3308	5.8638	4.9174	3.8416	3.5253	10.1165	1.8997	4.6139	8.2983	4.5579	2.898	10.002	11.5184	7.1962	2.7728	2.2626	4.6054	2.9368	3.54	1.1091	4.143	7.3073		0.479592	4.62342
11.3184	5.5784	2.8096	1.5182	1.5911	3.4838	4.5868	5.3643	6.1165	4.1309	3.5452	11.2951	3.9867	6.6791	5.2227	1.3824	3.8293	8.9052	8.8187	6.1442	2.3878	1.4124	3.0883	5.5847	3.3614	1.7334	2.5305	8.2035		0.484693	4.5663
11.4376	5.2688	4.5189	0.913	3.0403	4.0275	5.0304	5.2062	5.5748	2.8974	4.289	10.3341	5.8821	6.7605	6.3573	1.3712	1.9965	11.8229	10.3011	4.1619	2.0739	2.8309	2.9696	6.0186	4.1879	4.0139	5.6272	6.9753		0.489797	4.97967
11.5567	6.8756	1.6532	1.4395	3.3332	2.9657	3.8485	4.9731	4.4083	1.9598	4.1792	8.3118	3.3608	6.7701	7.5316	3.26	2.3247	16.3111	5.8198	1.5397	2.2968	4.4676	4.7974	2.9052	6.4926	2.9401	4.8936	2.8979		0.494898	4.53914
11.6758	5.312	1.9179	2.4544	2.6429	1.722	2.7313	3.9412	6.657	3.8594	4.7291	5.5928	4.6649	4.1036	3.3614	1.7164	2.6611	10.8691	2.8393	1.7505	2.4869	2.3179	3.9051	4.8132	3.4474	2.3576	4.5424	4.02		0.499998	3.75618
11.795	4.7396	1.315	1.974	2.535	1.0679	2.5971	4.988	4.3333	1.9356	2.8527	11.3769	4.8129	4.3574	4.2268	1.5548	3.9509	9.8077	4.0312	3.2539	2.0803	1.3505	2.201	7.3392	2.9021	1.3553	6.1483	6.4696		0.505102	3.90952
11.9141	2.4503	0.9899	1.7373	1.4099	1.1555	3.2193	3.3252	5.1352	3.2362	1.7474	5.5087	7.0217	4.876	4.337	2.8557	2.2748	12.6516	6.9364	3.9889	2.1642	1.6134	3.7038	4.8631	3.3772	1.7856	7.4463	8.0443		0.510203	3.99463
12.0333	2.3548	2.0443	1.0947	2.4531	1.8055	4.6284	4.2382	5.9292	2.9095	3.5436	4.447	6.7818	11.5598	2.7401	2.0668	2.8949	13.7668	7.3525	5.2688	1.4363	1.314	3.2942	3.0565	2.5893	1.1279	3.9143	5.4959		0.515307	4.07808
12.1524	2.0418	0.8674	0.9993	1.4301	3.6334	4.7056	3.9392	3.671	2.2581	1.3775	5.0629	5.7424	4.3715	7.7586	3.6214	2.5923	9.6022	7.1522	3.8158	0.944	1.3638	3.6452	4.4431	1.3472	1.7997	1.7581	2.3429		0.520408	3.41803
12.2716	3.9527	1.0761	3.1322	2.4941	2.5347	6.3035	3.157	2.7188	2.3103	1.4208	5.8043	5.1502	2.3648	12.5134	2.6741	1.3288	11.9613	4.2484	3.464	1.0691	1.4732	4.0524	6.4071	1.5719	0.9312	5.1947	5.045		0.525512	3.86497
12.3907	3.1329	2.3809	1.8762	1.6209	2.8331	2.7147	2.4697	4.3124	3.1774	4.9287	5.6465	8.9282	7.1081	14.7089	2.5832	1.9976	11.0047	6.2943	3.9092	1.7218	1.326	2.1989	6.5125	1.7019	1.2311	1.8873	4.3801		0.530612	4.1699
12.5098	3.0249	1.6674	2.8906	1.1923	3.0753	3.3316	2.7769	2.3871	1.7963	2.7374	6.3976	8.3502	7.5034	8.9291	3.0809	3.5405	7.974	6.4553	1.968	1.0324	1.7203	1.8687	6.7699	2.0758	3.7764	5.5242	2.0998		0.535713	3.84986
12.629	2.1965	2.7285	2.6094	1.0547	2.6401	1.6947	2.0358	4.4251	5.8509	4.2627	6.1149	8.6144	5.4068	5.4761	2.4544	3.1444	8.4851	6.3335	3.0663	2.0825	1.8042	1.9312	8.7938	2.229	3.4344	4.1262	2.9954		0.540817	3.92559
12.7481	4.417	2.7756	2.3544	1.604	3.1349	3.3166	4.4558	4.6485	5.2283	3.6605	6.604	6.3587	7.3164	5.1061	1.5819	2.5647	6.9155	5.916	4.362	1.8089	1.8884	4.3283	4.5513	1.6034	1.2331	1.8189	4.0188		0.545917	3.836
12.8673	4.4562	3.0498	1.6632	1.4232	4.9384	3.1804	4.0313	2.7842	4.489	7.956	7.2066	3.3144	6.3551	6.3681	3.4905	1.6902	5.6376	6.8322	2.6604	1.2218	1.9417	2.2487	4.0649	2.8829	0.9902	1.3768	5.7408		0.551022	3.77758
12.9864	2.7111	1.4085	1.4235	0.9452	3.1373	1.7148	3.2015	4.3718	4.4712	8.7355	6.2485	2.794	4.923	7.7153	3.7112	2.7119	6.6718	7.0189	2.422	5.2165	2.0955	2.3533	3.7033	2.5026	1.118	2.1316	4.4469		0.556122	3.70017
13.1055	3.2448	1.2524	3.1982	1.5877	2.0849	1.9101	4.4434	5.2785	4.7973	2.9799	5.3836	4.2286	3.745	5.3362	3.5921	1.5107	11.8658	8.084	2.5062	3.4965	1.5986	3.0897	4.6907	2.2767	1.4509	4.041	3.9233		0.561223	3.76284
13.2247	3.3341	2.2544	2.3488	0.9757	2.1311	1.7549	3.312	2.4142	2.9291	2.4311	2.9389	2.875	5.0698	5.261	3.5715	1.2351	8.4841	4.3751	3.843	2.1654	2.2116	2.4546	2.659	1.7885	2.1455	2.9916	3.2478		0.566327	3.00751
13.3438	4.5112	2.2468	1.9277	2.1695	5.2854	4.5156	1.5894	5.0431	2.8638	2.5069	1.343	5.4329	4.6501	3.1797	2.5608	2.0707	7.8252	5.4505	2.988	1.6034	1.373	2.5255	2.954	2.3638	2.422	3.3041	3.5112		0.571427	3.26731
13.463	1.7998	1.486	1.561	2.433	7.7546	2.571	2.6164	3.2936	3.7148	5.0933	1.5724	4.5626	6.6053	1.7385	2.3061	3.1356	11.2343	7.4164	5.0517	2.3973	2.1427	1.073	6.5634	2.2626	3.7728	2.8425	4.4462		0.576532	3.75729
13.5821	5.6318	2.6455	1.1694	2.5562	2.6162	1.9546	7.942	2.5474	1.2464	3.493	2.1249	3.4179	5.4548	2.9981	3.4138	3.463	14.0556	7.4224	3.7333	3.2009	2.1214	2.1228	5.6193	3.2014	2.0259	4.5745	3.1325		0.581632	3.84759
13.7012	3.8566	3.0789	1.678	2.517	1.9207	3.7403	4.3214	2.7758	1.6566	6.1841	2.7069	2.3477	5.6834	2.668	1.5129	2.5403	14.8379	7.6978	5.4191	1.0932	2.6047	2.2133	6.8999	2.6568	1.0985	3.2621	5.3493		0.586732	3.78967
13.8204	1.7096	4.1589	1.6486	3.6218	3.9084	2.6192	2.838	2.6076	2.6528	4.9439	6.088	1.9025	6.2456	1.5966	1.0296	2.0691	14.7121	8.2024	3.4873	1.0281	1.7619	2.4501	6.0245	1.9096	1.1817	4.1359	5.7676		0.591837	3.71487
13.9395	5.7508	1.9255	2.4937	3.6334	3.9964	4.9067	2.3212	1.6555	1.4289	2.19	5.5881	2.2604	6.2122	3.6998	2.2291	2.9833	7.8674	7.0893	5.3815	1.2104	1.4137	2.0146	1.8109	1.7404	0.7358	3.6458	2.9304		0.596937	3.30056
14.0587	3.8792	1.366	4.0218	1.2415	2.3283	3.0562	3.7109	2.7487	3.1907	2.3045	4.0491	3.1234	6.4085	6.9054	2.944	3.2698	10.4054	4.7198	6.3782	2.4935	2.2632	1.2651	3.9153	3.1903	1.1981	3.4571	5.2748		0.602042	3.6707
14.1778	2.8314	1.6138	1.4425	1.0475	3.9213	2.6593	3.4969	4.2444	2.3997	1.0546	5.074	6.0641	6.0706	5.3387	3.1267	3.5576	11.4354	4.5723	7.4617	3.1436	2.1542	1.3429	5.8877	1.599	2.7448	3.9938	7.6681		0.607142	3.92395
14.297	4.0579	1.8472	1.9245	3.167	2.8005	2.0794	3.7824	3.2076	5.1905	2.0055	3.5267	2.5047	4.7678	7.2779	2.8902	2.6221	10.1314	6.3945	3.9214	2.1656	2.2842	1.2785	2.8244	1.4038	2.684	4.7974	5.7797		0.612247	3.60433
14.4161	4.7134	1.9588	2.8119	3.6645	4.5442	3.2254	2.0854	2.2377	3.944	3.581	5.6775	2.9739	3.5673	9.0387	2.3947	1.6297	6.2585	8.9593	4.9663	2.0784	1.6827	2.0756	1.1646	2.3871	1.2425	3.344	3.8559		0.617347	3.55789
14.5352	2.8816	3.1108	1.5656	1.5003	2.6823	1.9798	1.0285	2.3718	2.396	3.0232	4.9994	3.4571	4.1475	8.0304	2.267	2.609	7.8885	8.5396	6.3313	1.3184	2.1375	1.7569	1.794	2.6464	3.5144	2.4714	4.3753		0.622447	3.36385
14.6544	5.382	3.47	3.0905	2.2331	2.7683	3.5954	1.6684	3.3091	1.4296	1.9928	5.0045	1.3777	5.2355	2.873	3.6636	1.0954	7.2996	8.361	6.6567	2.9506	1.2192	1.8915	2.9637	2.3631	2.5435	3.672	4.3551		0.627552	3.42463
14.7735	4.1264	2.9383	4.4794	1.5815	1.0236	4.2296	3.1244	3.0101	2.9138	3.4211	5.1547	4.2853	7.0384	2.3278	2.495	2.904	9.9525	7.5225	3.6843	4.3722	1.6365	4.6329	5.4927	3.3521	2.9011	3.0832	3.496		0.632652	3.89553
14.8927	2.8911	2.9931	7.2461	1.0131	3.0364	4.5124	3.4564	1.7776	3.1288	2.8733	3.7472	2.4396	8.4278	4.0927	2.8353	2.9063	8.1172	6.2918	5.3353	1.5052	1.4166	4.4307	2.2279	2.2457	1.1801	3.894	2.1432		0.637757	3.56166
15.0118	3.5157	2.5479	4.1111	2.302	3.6683	1.6579	1.6653	1.5841	1.6307	3.0619	4.3351	4.5872	3.8673	7.3784	3.4265	3.6188	10.2203	5.1028	5.2802	1.8613	0.9194	6.2361	4.7469	2.1332	1.3751	2.6974	3.9753		0.642857	3.61134
15.1309	4.4443	4.2756	2.3409	3.4447	2.4673	1.1946	1.4573	1.2815	1.6288	2.7901	1.2149	2.4614	3.8778	6.5608	3.6232	2.0113	10.0258	4.3267	5.8482	3.3784	1.5668	4.7549	2.9631	2.6323	1.4856	3.4826	2.2867		0.647957	3.2528
15.2501	4.7779	5.5959	3.5152	4.9644	2.3729	1.7114	2.4975	3.5724	2.3917	2.1249	2.6104	2.5397	2.7796	6.7212	2.9125	1.5769	13.0221	3.6442	5.3227	2.1203	2.5241	4.2814	1.846	1.9629	1.3486	3.4025	2.1223		0.653062	3.49117
15.3692	3.4873	2.8252	3.3507	1.6167	3.3621	1.516	3.1866	2.7891	1.4679	1.9047	3.8738	5.5454	3.0539	5.557	3.1826	1.8418	11.3794	6.0653	12.6576	1.5225	1.4347	4.5407	1.5153	3.1425	1.2167	2.9107	5.693		0.658162	3.72738
15.4884	2.5248	3.2102	1.9627	3.5954	2.5371	3.709	3.6016	3.9485	2.4724	3.5966	4.4805	4.6718	4.2435	6.9059	2.6247	3.0331	11.9836	6.1265	8.7896	1.5175	1.2459	5.0779	0.9011	4.8838	1.0364	4.3109	3.89		0.663266	3.95856
15.6075	4.1827	3.0729	1.5462	2.2851	1.575	1.44	0.8958	2.6436	2.3687	3.2768	4.2392	3.9709	5.1614	8.1346	4.1466	2.5723	9.5297	4.2585	6.4094	1.429	1.232	5.3103	1.621	2.9296	1.1833	5.6542	4.1839		0.668367	3.52788
15.7266	2.0142	4.2452	1.7318	2.0185	2.3547	1.46	1.0883	2.2487	1.1666	1.9031	2.8639	3.5305	1.9504	5.9843	4.334	2.0982	6.6089	4.4992	5.8952	1.7134	2.105	4.5367	2.4153	2.1466	1.8067	4.6564	6.8499		0.673467	3.11947
15.8458	1.8073	2.6316	3.8168	4.9585	2.0857	2.5112	0.9739	2.9634	2.3781	3.2162	3.2725	2.487	3.6543	5.7208	3.0118	2.2644	9.7755	6.9294	3.2803	0.9289	1.0852	4.071	3.7975	2.986	2.4149	3.7281	3.8529		0.678572	3.35567
15.9649	1.9338	2.1943	3.4482	2.3022	2.2614	4.0199	0.9276	3.7229	2.1894	4.2973	3.083	2.329	5.419	4.302	4.4227	2.3469	6.6272	4.6321	6.3524	1.7786	1.2531	4.4959	2.7924	2.1303	2.1063	5.6127	4.669		0.683672	3.39443
16.0841	2.7217	2.8582	4.2775	2.9564	1.5823	2.0594	1.5774	3.2639	1.7975	2.9234	4.6734	4.999	2.118	8.3909	6.0346	3.6813	5.7455	4.7357	6.5857	1.8812	1.3273	2.7715	1.5583	2.4239	2.8338	4.0814	3.6046		0.688776	3.46162
16.2032	2.3125	2.5709	1.4483	2.9705	2.3026	1.6247	1.5713	1.5093	1.6964	2.9566	7.5967	4.1428	1.2647	7.9939	4.8823	2.7191	5.6664	3.6392	5.2576	2.0526	1.9069	3.7639	1.6505	3.8938	2.3113	4.0544	1.4032		0.693877	3.15416
16.3224	2.2993	1.9512	1.6432	1.9499	2.3491	2.1649	3.1774	1.9882	1.8163	1.1366	5.2323	3.0017	3.3621	4.9022	3.3487	1.9478	10.0103	7.6823	4.2773	1.1448	2.3512	3.1747	3.1287	3.4366	1.74	3.234	3.5694		0.698981	3.18593
16.4415	2.3255	1.4273	1.3872	2.4866	3.6851	2.106	3.9669	2.316	1.3597	3.603	4.9165	2.0168	4.457	5.5111	4.8054	3.5157	11.8805	5.3297	5.4646	2.3806	1.1299	3.117	4.8909	3.3179	2.7247	3.4484	5.4897		0.704082	3.66888
16.5606	1.8412	2.6881	1.7991	2.0942	3.9004	2.8829	1.8754	2.7477	1.1681	2.2386	3.2136	1.2359	4.686	5.2961	10.0929	3.9485	8.9459	3.9445	2.3239	1.0797	1.0653	4.6565	7.5106	2.9173	1.7213	4.1513	5.081		0.709182	3.52244
16.6798	1.636	2.8653	1.9748	1.3001	4.2588	3.8128	1.3096	1.0827	1.4305	0.9835	4.6161	2.7055	3.0368	7.975	8.5223	5.6646	6.0692	4.9196	3.6386	2.3165	0.9661	4.1499	2.9295	1.3309	1.5172	6.0444	3.4209		0.714286	3.35101
16.7989	3.7379	2.033	2.1677	1.6837	4.1191	2.3531	1.5465	2.5992	1.8533	2.6882	5.7339	5.5152	3.5893	2.5231	9.3481	3.0715	6.7331	4.6354	2.385	3.9941	1.406	4.1024	4.4636	2.1292	1.5921	5.8562	5.3338		0.719387	3.59977
16.9181	3.0879	2.7077	1.508	2.2508	2.9818	2.1818	2.1221	2.4622	2.4968	2.5604	3.7838	1.5931	3.2425	2.6299	7.0397	4.7355	6.5714	3.4931	2.862	2.167	1.6355	3.4731	4.5845	2.0928	2.5977	4.6506	4.1093		0.724491	3.17115
17.0372	2.0303	2.5432	1.6611	2.7454	2.7733	3.0397	1.9825	2.4434	2.7736	2.9402	6.0557	2.1665	2.0262	3.5869	6.6391	7.3535	9.7464	3.3719	5.1317	1.8617	1.1613	4.8353	3.1946	1.4159	2.5737	4.0069	2.7921		0.729591	3.43897
17.1563	1.9914	1.1017	4.167	3.1009	2.4819	1.9264	2.6379	3.3008	3.554	3.2954	3.8469	2.4225	2.2002	2.5446	6.0821	6.6567	9.6347	2.5143	8.8916	2.649	1.787	4.4054	3.8052	0.99	1.6002	3.34	1.82		0.734692	3.4351
17.2755	2.4991	2.1736	2.4704	1.907	1.6355	2.1178	3.2152	3.5403	2.2885	2.0828	4.8367	1.9576	4.6564	2.3687	4.9555	8.7132	6.1187	1.5763	4.2654	2.399	3.1464	3.8029	4.8844	3.8794	3.0495	2.3862	2.831		0.739796	3.32435
17.3946	2.3873	2.1156	2.5303	1.6061	2.3077	2.5338	3.4895	4.1403	2.2053	2.1399	3.6738	4.3838	4.0216	4.0362	6.4218	6.7745	5.4209	4.5146	3.2391	4.2784	4.0745	4.0761	6.6313	4.6701	1.3119	3.0471	4.9961		0.744897	3.74176
17.5138	4.0662	2.2172	2.0049	1.702	3.3582	3.6803	1.6102	3.9897	1.7503	4.2503	3.9884	3.1123	2.5146	3.02	3.6113	6.8047	5.3427	2.9242	3.0259	4.7994	2.6167	4.5924	4.8107	1.6074	0.9632	3.3571	2.2613		0.750001	3.25858
17.6329	4.2904	2.4545	2.9813	3.4858	2.8209	2.9919	2.9108	3.8664	1.3749	1.5686	2.4776	4.4912	1.1447	1.4403	4.1246	7.7531	5.6747	1.448	0.899	1.7362	2.7172	5.7925	3.5996	1.9091	1.5406	3.3506	2.9693		0.755101	3.03014
17.7521	1.9807	2.5338	3.0896	1.9155	2.7755	1.2431	2.6778	2.5947	1.1403	3.0832	4.1065	1.7034	1.6764	1.6519	4.3087	10.0429	7.7992	2.7413	1.7324	3.344	2.7228	4.3741	3.0082	3.0854	3.6581	2.4477	3.6312		0.760206	3.15068
17.8712	1.2415	2.097	2.2177	2.0703	4.1973	2.1459	1.7856	1.0021	1.7536	2.0279	2.9255	2.7376	1.8091	3.0943	3.4556	7.6276	7.3962	1.6208	2.3582	1.3351	2.914	3.3059	4.5444	2.4495	2.1203	2.1859	4.1209		0.765306	2.83481
17.9903	1.4701	1.706	2.3624	1.6549	2.7133	3.4898	0.9104	2.5284	2.0016	1.9927	3.5571	1.8162	1.9226	2.5909	2.6828	9.5979	5.8221	1.9254	4.3212	2.8737	3.9508	4.4559	3.1364	4.5873	2.7139	4.5999	7.9925		0.770406	3.31023
18.1095	1.8573	2.5242	1.5064	3.5693	2.4541	4.8325	1.7693	4.6577	2.6181	1.5778	4.034	1.9499	3.0069	2.4203	2.7816	5.5421	3.9602	3.198	2.6823	2.6486	2.7994	4.7866	4.5925	6.6365	1.7647	1.7648	5.2079		0.775511	3.22752
18.2286	3.5727	2.7016	1.409	3.6785	5.6668	4.8828	2.7143	3.4176	3.5782	2.6559	3.6602	1.0472	2.3473	3.2343	1.0432	3.6621	3.306	3.8606	1.7451	2.2506	2.6786	3.6003	3.9206	6.7208	1.8417	2.8762	4.0872		0.780611	3.19109
18.3478	2.8266	1.7551	4.6002	2.3464	4.2462	4.5717	2.4651	2.9822	3.325	3.8083	2.4943	1.5792	1.9414	3.6309	1.3307	3.2776	3.4529	4.4518	2.3517	2.5609	3.3862	2.593	1.9842	5.8236	1.1461	5.0139	3.904		0.785716	3.10553
18.4669	4.1139	1.1141	3.7095	2.3822	2.0578	4.5	2.7146	2.0521	2.1196	3.077	3.4417	1.5179	3.5819	2.0287	2.371	5.1225	2.1154	4.0655	1.7282	2.3342	2.4682	4.2903	3.1192	4.3756	1.6495	4.3195	2.7803		0.790816	2.9315
18.586	1.5227	2.3565	3.0752	1.4048	1.4659	3.2854	2.2715	3.8696	1.9428	2.627	3.1488	1.9534	1.5494	2.3284	2.1463	4.3035	2.1617	2.9715	1.2313	3.1099	3.0365	2.0771	3.2218	3.8785	3.5646	4.5869	1.8566		0.795916	2.62769
18.7052	0.9418	2.8534	3.2833	2.6238	3.8998	2.6607	1.4041	3.2229	1.8708	2.5173	3.244	1.1097	1.3196	2.3347	1.2136	1.5907	3.3534	1.9947	0.9635	3.4085	2.1484	6.4064	2.8448	3.9712	3.4263	6.8066	4.1791		0.801021	2.79974
18.8243	1.5161	3.2677	2.3397	2.2521	2.71	1.3867	3.3273	2.2328	1.0845	4.1154	4.3351	3.8324	3.0522	2.218	2.1034	2.0844	3.1782	1.7978	1.6866	5.0708	1.4903	4.8217	2.6612	4.0812	2.0565	5.8067	2.9419		0.806121	2.86854
18.9435	1.72	2.5483	1.5261	0.9493	1.7464	3.3918	1.6534	1.8464	3.346	4.1855	4.3347	3.7602	2.3731	1.3258	1.0511	2.9736	1.2845	1.7842	1.889	2.7954	2.1162	3.8124	1.2157	2.7613	2.1475	2.074	1.7514		0.811226	2.30975
19.0626	2.1776	2.0875	1.0988	1.015	1.6343	4.0166	3.9484	1.7177	2.2005	4.5687	2.9639	3.1314	2.336	1.306	1.918	3.082	2.8382	0.9512	1.231	1.6914	2.7591	3.7431	2.2433	2.8333	3.2892	3.4242	3.6343		0.816326	2.51262
19.1817	1.429	3.6117	2.4491	1.1214	2.4522	2.806	2.3659	3.3845	2.2645	1.6868	2.4944	3.5403	2.3026	1.7895	1.7506	1.7197	1.4675	1.4576	1.0957	2.9497	2.1935	4.1181	3.3942	2.5953	4.4523	4.2864	3.7873		0.821426	2.55429
19.3009	2.6191	2.0048	2.866	2.1633	3.4115	3.0302	3.7635	1.7398	1.8776	2.4379	1.8506	3.7519	4.0338	2.1232	2.8171	1.2408	1.6932	1.3229	1.1791	2.3291	1.9748	3.0854	2.1903	3.7236	5.028	4.4876	2.8316		0.826531	2.65099
19.42	3.4088	2.365	2.3316	1.3779	4.117	4.0573	2.8197	2.1654	1.1777	2.8759	1.3119	5.0624	8.0086	4.2323	1.8727	1.8762	1.5122	1.0042	1.6589	1.7747	3.3933	3.3465	2.6606	2.9001	7.1201	3.024	1.6111		0.831631	2.92837
19.5392	3.9062	2.8501	2.6457	1.4841	5.1097	4.1164	3.7337	2.6782	2.0428	5.2046	1.0222	2.266	6.5161	4.184	2.308	1.9421	1.082	1.7514	2.3234	2.1988	2.5703	3.2972	3.4692	6.7802	1.5783	3.8128	2.3501		0.836736	3.08236
19.6583	1.3659	2.6717	1.5079	1.9422	5.0014	3.4169	4.7983	3.4012	2.4226	3.3665	2.5464	2.146	1.9783	3.5292	1.9135	2.6349	1.3535	2.933	1.1315	1.5779	2.4814	3.6636	2.355	5.399	1.0895	3.5033	2.2842		0.841836	2.68203
19.7775	1.6472	2.669	1.965	3.626	2.6378	2.5576	3.6988	1.9987	1.1185	1.4531	3.1576	2.8631	3.504	2.681	1.3145	1.0342	2.2792	1.99	2.2097	1.6191	2.062	1.6087	4.5047	2.4219	2.8282	4.1587	2.294		0.84694	2.44083
19.8966	2.7299	1.9354	1.2663	1.639	2.7158	5.2018	6.6462	2.8111	1.1959	2.4959	3.0561	1.2255	3.301	3.3332	3.2437	1.0921	1.9723	1.4934	1.8282	1.5272	1.1907	2.7153	2.4798	4.0205	2.4309	4.8149	2.7224		0.852041	2.63276
20.0157	1.6848	2.024	1.2955	1.7281	2.8154	3.1714	3.9214	3.0872	1.2836	3.0963	1.9052	1.1731	2.6555	3.3568	2.2144	1.1824	1.7857	1.7125	2.1032	1.2697	1.428	3.0799	3.7815	4.0697	3.5408	4.6021	1.8984		0.857141	2.4395
20.1349	0.9768	1.2658	1.0264	1.1892	2.0907	2.2986	4.8628	1.8369	1.7069	2.7358	1.4597	1.4813	3.2902	6.4614	1.9552	1.1083	0.99	1.4066	1.3982	1.3311	0.8733	2.3957	2.8339	2.3015	3.3307	3.2536	2.8118		0.862246	2.17305
20.254	1.7463	1.378	2.0466	1.1292	1.9714	2.0465	3.9196	2.0449	1.799	3.6623	2.0878	1.5405	3.0627	4.8054	2.6304	1.7236	1.5432	0.9822	0.9856	1.9053	0.8827	1.6615	3.7358	4.2634	3.6251	2.0628	4.2257		0.867346	2.35065
20.3732	2.4593	2.0697	2.2988	2.3252	2.8197	3.2206	3.7543	2.6887	3.1628	4.0186	2.2588	4.1117	1.2633	4.7905	1.9159	1.9053	0.8738	0.9715	1.1617	1.6651	1.0208	3.3704	2.777	3.6035	4.1211	4.0727	3.5396		0.87245	2.67557
20.4923	1.7615	3.2401	2.2585	3.526	1.7943	3.6888	1.7941	3.2323	2.1512	3.9841	1.3546	3.2772	0.9918	4.9193	1.3702	2.4903	2.1702	1.0382	1.4163	1.2285	1.5724	2.0981	5.5522	2.672	4.2114	2.6569	5.0857		0.877551	2.64949
20.6114	1.4818	3.1763	1.5055	1.405	1.2133	3.2995	2.5636	1.1549	3.4613	4.9894	2.1174	2.3723	3.2562	4.6813	1.462	1.0192	1.1236	1.186	1.9226	1.3624	1.3123	1.6498	4.1354	1.8164	4.2421	2.2024	3.4721		0.882651	2.35497
20.7306	2.7979	3.8385	3.9649	1.4679	2.3902	3.6656	1.5091	3.1219	5.6751	3.4917	2.4523	2.1004	3.1514	6.4417	1.661	1.028	0.8499	2.5218	0.9118	1.5269	0.8549	1.3244	4.2644	3.4457	2.8481	1.9898	5.3833		0.887755	2.76587
20.8497	2.7633	2.9186	5.7153	3.1397	2.2714	3.5249	2.9825	2.923	3.2027	2.7146	3.9805	2.0001	2.0864	7.7229	2.42	1.0479	1.918	2.752	1.3186	0.9995	1.2268	1.9916	2.9935	1.761	1.4452	2.5195	4.2016		0.892856	2.76078
20.9689	2.1732	2.5577	2.2248	2.8205	2.4953	3.4541	4.3719	3.487	3.3933	4.3351	1.8265	2.7783	3.8987	6.5775	1.5393	2.2121	1.3651	1.4238	1.7759	0.9682	1.7771	2.5516	1.8747	3.2268	3.5082	1.7002	4.1045		0.89796	2.75635
21.088	2.7312	2.5915	2.6781	1.5288	3.5071	3.3612	3.1033	2.7534	1.5383	3.1033	1.3848	2.0105	2.6264	5.6904	2.9871	0.917	0.9997	1.6878	2.3668	0.9399	1.555	1.939	1.8434	4.6225	5.0465	1.8127	4.4525		0.903061	2.58438
21.2071	2.7037	1.7837	1.5685	2.8068	2.1126	4.8315	6.0217	3.2183	1.6709	8.5293	1.795	1.7898	4.3185	6.1759	3.795	1.9273	0.9924	0.8813	0.8451	0.7971	1.0338	1.5279	1.8576	7.0006	3.0484	1.4067	5.5854		0.908161	2.96388
21.3263	2.9979	0.8713	1.8712	1.0478	1.8339	5.3501	6.2134	3.3524	1.7011	3.6433	1.6068	3.044	2.4154	3.9987	2.2564	1.1864	1.3631	1.2483	1.3826	1.5482	0.8785	0.9996	1.7271	3.2885	3.4824	1.4481	4.5465		0.913265	2.41863
21.4454	1.543	2.6911	1.1227	1.374	2.114	5.3194	2.6378	0.9705	1.7678	2.6928	1.103	4.5473	3.8971	2.4414	2.7717	1.0747	1.6921	1.0707	1.9979	1.3871	0.9507	0.9175	1.1311	3.9775	4.1178	3.4246	3.6433		0.918366	2.31032
21.5646	3.122	3.2114	1.5462	1.8379	2.734	2.3691	4.6023	1.5285	2.5734	5.6847	3.0369	2.977	2.6983	5.4759	4.8792	1.6631	0.9448	1.4268	2.1091	1.5669	1.7124	0.8454	1.4458	6.3565	2.4118	4.0433	3.4348		0.92347	2.82361
21.6837	3.6183	2.5775	1.9738	1.2133	1.9154	2.4086	5.8948	2.7165	2.0249	2.4762	1.5004	1.8888	3.0622	3.5699	4.6817	2.7418	1.9449	1.5808	1.4149	1.4414	2.2675	1.3573	1.3129	3.6493	3.5379	4.1663	3.6992		0.928571	2.61617
21.8029	2.9082	2.6503	2.2675	2.1995	1.246	4.5956	3.9261	3.2158	2.2828	4.8546	1.5055	2.517	2.645	3.9164	5.579	2.9355	1.5112	1.0109	1.4287	1.7348	1.5761	1.2741	0.8503	2.4376	2.3898	2.598	4.7927		0.933675	2.62404
21.922	4.3444	2.9583	3.2361	1.9114	1.5038	5.2871	2.7751	1.6054	1.7568	6.0084	2.2099	3.2417	4.1175	4.2678	4.5871	2.1224	0.8952	0.9921	1.833	1.6638	1.6614	0.7672	2.2972	3.9654	3.004	1.2521	5.9561		0.938775	2.82299
22.0411	2.8416	2.2449	2.991	1.6986	3.1229	2.0866	2.4594	2.5996	2.8228	4.2272	3.2319	4.937	3.5846	4.5105	3.5128	1.8116	1.5837	1.5429	0.8183	1.885	1.7566	1.4091	1.4225	2.7446	2.2338	1.1589	6.1029		0.943876	2.64227
22.1603	1.0451	2.9412	2.7468	2.2722	1.3037	3.3387	1.9754	2.3145	3.6766	6.7789	1.9041	7.2431	4.0273	2.5639	4.113	3.2225	1.7167	1.7585	1.6803	1.3099	1.1174	1.4374	2.9531	1.3018	3.1257	2.2889	3.3947		0.94898	2.72413
22.2794	3.6023	1.6112	2.3237	1.7253	2.0882	4.9697	2.4979	3.0404	3.6031	4.7377	3.052	4.2165	4.2911	4.5781	5.0728	3.3042	1.505	1.4801	2.5889	0.9944	1.2686	1.036	2.2891	2.2996	3.0258	1.9883	2.7715		0.95408	2.81339
22.3986	2.669	1.5749	3.6456	1.1028	2.7466	3.7795	3.5845	2.589	4.9878	2.8462	1.1497	3.0401	2.6358	3.0014	3.1863	2.592	1.8085	1.0711	1.9241	1.4755	0.9583	2.1045	1.7022	1.3639	4.7039	2.0251	7.1285		0.959185	2.64433
22.5177	2.4425	1.3241	3.1134	1.3641	2.387	4.6638	3.3093	2.5498	2.5919	2.4535	1.2995	3.2288	2.4376	4.8512	2.9076	2.8884	1.5289	0.9945	0.9644	1.0061	0.9606	2.5437	1.3224	1.0802	2.2843	5.8533	5.9478		0.964285	2.52958
22.6368	1.4505	1.9905	4.4489	2.4008	2.5272	3.4943	4.0167	2.0662	1.2975	4.4365	3.0986	4.7255	3.3059	7.3219	3.9401	2.9285	1.9213	0.8436	1.2187	1.3261	0.9161	1.0579	1.0157	0.9195	0.8906	5.0699	4.3526		0.969386	2.70302
22.756	2.324	1.9538	2.6767	4.371	2.1263	2.4674	2.7505	4.5186	2.5303	4.5818	1.4152	3.5469	5.4508	7.688	3.4641	3.3518	1.7452	0.8706	0.7681	1.4729	0.9325	1.0448	1.1149	1.2743	3.0723	3.9936	4.953		0.97449	2.83183
22.8751	2.3743	2.0802	2.8133	2.4467	1.3453	2.0915	3.0805	2.0949	1.6315	5.3128	2.4616	4.7135	3.0471	5.8613	2.7362	4.9369	3.5715	0.9372	0.9075	1.6072	0.8837	1.6736	1.3101	0.9314	2.1762	2.5719	2.5864		0.97959	2.52534
22.9943	0.9971	1.5466	3.4131	2.8011	3.8508	3.341	4.1582	3.5595	2.1445	3.3589	2.9455	3.8156	1.826	7.6669	2.553	5.0499	1.0495	0.9769	1.2517	1.0769	0.8626	1.6975	1.8588	1.5466	1.3361	2.3811	4.2664		0.984695	2.64192
23.1134	4.1139	1.5878	3.2976	2.2955	2.8738	1.9222	3.4639	5.36	2.6015	2.4495	2.5337	4.0655	2.8721	6.9459	3.536	5.2044	0.7707	0.9789	1.4507	1.2985	0.776	0.9162	1.0082	0.917	2.4398	4.5115	2.3825		0.989795	2.6879
23.2325	2.3531	1.6874	1.4762	1.97	2.7058	4.4111	1.6898	5.7938	2.9268	3.2339	2.5881	4.2091	3.7443	9.254	4.8381	2.4936	1.1482	0.9513	1.9125	1.287	0.8443	1.9716	0.9082	1.5874	1.2181	4.0404	3.028		0.994895	2.75082
23.3517	2.4215	2.9061	1.8158	1.9771	3.6719	3.7702	2.2482	2.3135	2.3088	2.0017	2.5601	7.3664	2.5636	6.1622	5.148	1.9531	2.017	0.9672	1.8255	1.4005	1.1894	1.8754	0.8904	0.8432	2.3319	2.3393	3.2827		1	2.59817

## Sheet: Sheet1
Image1				Image2				Image3				Image4				Image5				Image33				Image35				Image36				Distance	Image1	Image2	Image3	Image4	Image5	Image33	Image35	Image36
Ap-Basal	Avg intensity			Ap-Basal	Avg intensity			Ap-Basal	Avg intensity			Ap-Basal	Avg intensity			Ap-Basal	Avg intensity			Ap-Basal	Avg intensity			Ap-Basal	Avg intensity			Ap-Basal	Avg intensity			0	10.71	8.22677	8.23362	8.20915	14.804	13.6166	20.6525	10.5699
0	10.71			0	8.22677			0	8.23362			0	8.20915			0	14.804			0	13.6166			0	20.6525			0	10.5699			0.05	13.058	9.32961	9.57466	10.303	20.0491	16.6659	27.9433	12.6993
0.00510027	10.9523			0.00523378	8.65793			0.00581194	9.14124			0.00526134	9.33533			0.00523378	15.5787			0.00644938	14.437			0.00768963	23.1984			0.00684695	10.5064			0.1	27.9519	13.4882	13.9985	14.1012	29.3563	18.7418	46.42	23.7197
0.0102048	11.3393			0.010472	8.74419			0.0116288	9.23139			0.0105271	9.11234			0.010472	15.7438			0.0129042	16.5994			0.0153857	24.8512			0.0136997	11.0799			0.15	38.744	14.3797	15.4142	15.3099	27.7985	18.7609	52.3066	23.224
0.0153051	11.2131			0.0157057	7.9548			0.0174407	9.3128			0.0157885	9.44512			0.0157057	17.9259			0.0193535	15.4061			0.0230753	25.9147			0.0205466	11.8494			0.2	32.7312	13.2835	11.7004	14.7759	22.2119	20.104	49.9571	17.8872
0.0204096	11.7751			0.0209439	8.5231			0.0232575	8.96921			0.0210542	9.39061			0.0209439	18.8657			0.0258083	16.7761			0.0307714	28.902			0.0273993	12.428			0.25	22.1998	11.4553	8.09582	11.6717	18.4628	19.0785	43.6917	14.9651
0.0255099	12.1249			0.0261777	9.61936			0.0290695	9.33896			0.0263156	9.66876			0.0261777	19.5139			0.0322577	17.3947			0.038461	31.1077			0.0342463	12.9067			0.3	13.3053	9.68601	7.06681	8.04729	13.7816	17.0005	34.9959	13.3084
0.0306102	12.2576			0.0314115	9.07085			0.0348814	9.12679			0.0315769	10.5732			0.0314115	21.6944			0.0387071	18.1767			0.0461507	32.3783			0.0410932	13.5478			0.35	10.2772	8.09132	6.46475	6.21284	11.1403	14.4029	28.8652	10.9582
0.0357147	13.4475			0.0366497	9.48163			0.0406982	10.7846			0.0368427	11.452			0.0366497	22.2809			0.0451619	18.4646			0.0538467	36.5415	27.9433		0.0479459	15.2161			0.4	7.78978	6.82969	5.86678	5.07	7.99105	11.3702	22.5418	9.03643
0.040815	15.6877			0.0418835	10.3774			0.0465102	10.799			0.042104	12.2394			0.0418835	23.6605			0.0516113	19.1222	16.6659		0.0615364	39.3893			0.0547929	16.1892	12.6993		0.45	5.72583	5.72289	5.1132	4.50386	6.66616	8.33055	16.8463	8.0055
0.0459196	16.3535			0.0471216	10.643			0.052327	10.8089	9.57466		0.0473698	12.2314			0.0471216	24.7731			0.0580661	18.9372			0.0692325	42.4119			0.0616456	18.497			0.5	4.8053	5.23882	5.23885	3.91181	5.37793	6.70758	14.3952	7.34063
0.0510198	17.7768	13.058		0.0523554	11.3267	9.32961		0.0581389	11.2154			0.0526311	11.6757	10.303		0.0523554	25.6991	20.0491		0.0645154	19.0563			0.0769221	45.0131			0.0684925	20.964			0.55	3.88241	4.92836	4.76839	3.1043	4.99486	5.68323	12.0759	6.51383
0.0561244	19.1822			0.0575936	11.2177			0.0639557	11.7651			0.0578969	12.3445			0.0575936	25.6204			0.0709702	19.1731			0.0846182	46.4621			0.0753452	22.4205			0.6	3.58185	4.47127	4.29799	2.75105	4.66466	5.1157	9.27934	5.64373
0.0612247	20.2512			0.0628274	11.443			0.0697677	14.1476			0.0631582	12.7072			0.0628274	27.2176			0.0774196	19.6155			0.0923078	48.397			0.0821922	24.8459			0.65	3.56871	4.37205	4.12642	2.67953	4.11343	4.76919	7.87577	5.68192
0.0663249	23.3195			0.0680612	12.1914			0.0755796	13.5188			0.0684196	13.9638			0.0680612	28.4861			0.083869	18.7191			0.0999974	51.4465			0.0890391	25.9695			0.7	3.4554	4.2632	4.03296	2.6722	3.6977	4.60315	7.21262	6.06781
0.0714295	24.0723			0.0732993	12.7216			0.0813964	13.8573			0.0736853	14.6552			0.0732993	28.6281			0.0903238	18.3301			0.107693	51.8204	46.42		0.0958918	27.1367			0.75	3.42701	4.60694	3.7767	2.54705	3.27037	4.48057	6.58325	6.18081
0.0765298	26.9371			0.0785331	13.3537			0.0872084	14.9932			0.0789467	14.7212			0.0785331	29.8441			0.0967731	17.666			0.115383	51.3598			0.102739	26.2044	23.7197		0.8	3.02089	4.78337	3.58065	2.65126	3.06362	4.47269	6.22107	6.07305
0.0816343	29.7446			0.0837713	14.3018			0.0930252	15.007			0.0842124	14.8089			0.0837713	30.3488			0.103228	18.4374	18.7418		0.123079	53.2848			0.109591	25.1697			0.85	2.66625	4.47517	3.40893	3.14223	3.1301	4.76291	6.02682	4.77924
0.0867346	31.7488			0.0890051	15.5346			0.0988371	15.7258			0.0894738	14.4596			0.0890051	31.8781			0.109677	19.389			0.130769	53.6767			0.116438	24.6441			0.9	2.55106	4.51468	2.81212	3.04845	3.3251	5.20172	6.28523	3.5575
0.0918349	33.2524			0.0942389	15.0892			0.104649	15.7564	13.9985		0.0947351	14.3227			0.0942389	30.2701			0.116127	19.2818			0.138458	52.9239			0.123285	23.833			0.95	2.67594	3.43134	2.49924	2.47796	3.06775	5.2046	6.64186	3.27631
0.0969394	35.1652			0.0994771	14.7356			0.110466	16.0353			0.100001	14.9279	14.1012		0.0994771	30.0201			0.122581	18.9867			0.146155	52.7196			0.130138	24.393			1	2.65699	2.38191	1.92262	1.78961	2.64644	5.07643	6.53433	3.15859
0.10204	35.846	27.9519		0.104711	14.2929	13.4882		0.116278	16.0432			0.105262	14.3619			0.104711	31.25	29.3563		0.129031	18.3835			0.153844	49.8746	52.3066		0.136985	22.2441
0.107144	36.5615			0.109949	14.4649			0.122095	16.1678			0.110528	14.2285			0.109949	30.0694			0.135486	18.6077			0.16154	50.7018			0.143838	21.5151
0.112245	38.8715			0.115183	14.0601			0.127907	15.2658			0.115789	15.5219			0.115183	28.9738			0.141935	17.7277			0.16923	51.6199			0.150685	20.7687	23.224
0.117345	39.0207			0.120417	14.2332			0.133719	15.1064			0.121051	16.1349			0.120417	29.9738			0.148384	19.2919			0.17692	50.0429			0.157532	20.8921
0.122449	38.5653			0.125655	14.9156			0.139535	15.8175			0.126316	16.2246			0.125655	28.0957			0.154839	18.4189	18.7609		0.184616	50.0822			0.164384	19.1151
0.12755	38.4998			0.130889	14.4184			0.145347	14.1086			0.131578	15.7853			0.130889	27.2176			0.161289	19.6543			0.192305	48.577			0.171231	18.5895
0.132654	39.3911			0.136127	13.5172			0.151164	14.7689	15.4142		0.136844	15.4285			0.136127	29.1312			0.167743	19.9599			0.200001	48.7188	49.9571		0.178084	18.0315
0.137754	39.3554			0.141361	14.7639			0.156976	14.5683			0.142105	15.3399			0.141361	26.9768			0.174193	20.2222			0.207691	46.0688			0.184931	16.9156
0.142859	39.5949			0.146599	14.5998			0.162793	13.2862			0.147371	14.7266			0.146599	25.5972			0.180648	19.886			0.215387	45.5715			0.191784	17.0179
0.147959	38.8064			0.151832	14.4443	14.3797		0.168605	12.7655			0.152632	15.3472	15.3099		0.151832	24.1512	27.7985		0.187097	19.4569			0.223077	45.3833			0.198631	16.634
0.15306	38.7734	38.744		0.157066	13.9658			0.174417	12.134			0.157893	15.2417			0.157066	24.9367			0.193546	20.6474			0.230766	45.4967			0.205478	15.9019	17.8872
0.158164	38.0786			0.162304	14.3569			0.180234	11.5531			0.163159	15.7364			0.162304	24.6481			0.200001	20.9014	20.104		0.238462	42.532			0.21233	16.3095
0.163264	36.5604			0.167538	13.6553			0.186045	10.9106			0.16842	15.2334			0.167538	24.1343			0.20645	20.13			0.246152	40.6339			0.219177	14.9561
0.168369	34.7497			0.172776	12.8784			0.191862	10.9857			0.173686	14.513			0.172776	22.3719			0.212905	18.6993			0.253848	40.1559	43.6917		0.22603	14.6797
0.173469	34.5361			0.17801	14.2049			0.197674	9.87407			0.178948	14.3877			0.17801	21.804			0.219355	19.1237			0.261538	37.5018			0.232877	14.502
0.178569	33.6534			0.183244	13.2937			0.203486	9.22572	11.7004		0.184209	15.0178			0.183244	21.8796			0.225804	19.1309			0.269227	37.8116			0.239724	14.6391
0.183674	32.7466			0.188482	12.842			0.209303	8.1847			0.189475	13.5966			0.188482	20.6389			0.232259	18.5847			0.276923	37.2667			0.246577	14.892
0.188774	30.5403			0.193716	12.4446			0.215115	8.83985			0.194736	14.6668			0.193716	20.9815			0.238708	18.5731			0.284613	34.7737			0.253423	14.7775	14.9651
0.193879	30.2762			0.198954	12.2562			0.220932	8.07089			0.200002	14.5899	14.7759		0.198954	21.2886			0.245163	20.0288			0.292309	33.2561			0.260276	14.5457
0.198979	29.0494			0.204188	12.9376	13.2835		0.226744	8.73949			0.205263	14.3403			0.204188	19.4352	22.2119		0.251612	18.3578	19.0785		0.299999	31.8456			0.267123	13.9786
0.204084	27.1217	32.7312		0.209426	12.5312			0.232561	7.98466			0.210529	14.0776			0.209426	19.4367			0.258067	18.9261			0.307695	32.5159	34.9959		0.273976	14.2478
0.209184	26.4785			0.21466	11.9145			0.238372	7.48062			0.21579	13.0995			0.21466	20.0509			0.264517	17.6962			0.315384	31.1164			0.280823	13.2877
0.214284	24.7796			0.219894	11.6587			0.244184	7.80357			0.221052	11.6938			0.219894	18.2438			0.270966	18.2993			0.323074	29.8579			0.28767	13.433
0.219389	24.4617			0.225132	12.1965			0.250001	7.66273	8.09582		0.226317	11.589			0.225132	19.5123			0.277421	16.2444			0.33077	29.1852			0.294522	12.2124
0.224489	23.8846			0.230366	11.8744			0.255813	7.28917			0.231579	10.9093			0.230366	19.0556			0.28387	16.8395			0.33846	29.308			0.301369	11.4539	13.3084
0.229594	22.5512			0.235604	10.8442			0.26163	7.30506			0.236844	11.5543			0.235604	18.6497			0.290325	16.2929			0.346156	27.9342			0.308222	13.0028
0.234694	21.6631			0.240838	11.0385			0.267442	7.59746			0.242106	9.5379			0.240838	17.1142			0.296774	15.999			0.353845	25.7897	28.8652		0.315069	11.6305
0.239794	20.3193			0.246071	10.4682			0.273254	7.3354			0.247367	10.0271			0.246071	17.3287			0.303224	15.7065	17.0005		0.361535	25.1563			0.321916	11.2146
0.244899	18.5194			0.25131	10.5717	11.4553		0.279071	6.80254			0.252633	9.88792	11.6717		0.25131	16.7731	18.4628		0.309678	15.7428			0.369231	24.6131			0.328769	10.9742
0.249999	17.1405	22.1998		0.256543	11.0052			0.284883	7.29945			0.257894	8.81467			0.256543	16.0725			0.316128	15.0758			0.376921	23.6334			0.335616	10.8614
0.255103	17.2157			0.261782	9.92727			0.290699	6.85967			0.26316	8.62545			0.261782	15.0741			0.322583	15.352			0.384617	22.9294			0.342468	10.1051
0.260204	16.0894			0.267015	9.78255			0.296511	6.53936			0.268421	8.59141			0.267015	14.3164			0.329032	15.1489			0.392307	21.6367			0.349315	10.0128
0.265304	14.7302			0.272249	9.93837			0.302323	6.57318	7.06681		0.273683	8.54788			0.272249	15.2222			0.335481	13.9192			0.399996	20.4621			0.356162	9.86399	10.9582
0.270409	14.4167			0.277487	9.52403			0.30814	6.53887			0.278948	7.65391			0.277487	13.6744			0.341936	14.4548			0.407692	19.3616	22.5418		0.363015	9.3816
0.275509	13.6744			0.282721	9.49737			0.313952	6.5122			0.28421	7.91452			0.282721	13.537			0.348385	12.8326			0.415382	18.4392			0.369862	10.2805
0.280613	12.228			0.287959	8.88511			0.319769	6.67984			0.289476	7.14712			0.287959	12.5802			0.35484	12.6971	14.4029		0.423078	17.1837			0.376715	9.00079
0.285714	11.6896			0.293193	9.15793			0.325581	7.33834			0.294737	8.26717			0.293193	12.7824			0.36129	12.3109			0.430768	17.4728			0.383562	8.83857
0.290818	11.4211			0.298431	9.3428			0.331398	6.04567			0.300003	6.86346	8.04729		0.298431	12.7346			0.367744	12.6812			0.438464	16.3438			0.390414	8.46633
0.295918	11.1702			0.303665	9.79948	9.68601		0.33721	5.89785			0.305264	6.74033			0.303665	11.8225	13.7816		0.374194	11.9077			0.446153	15.8652			0.397261	9.14761
0.301019	10.4177	13.3053		0.308899	8.74835			0.343022	6.14086			0.310525	6.23037			0.308899	13.1281			0.380643	11.4571			0.453843	15.7732	16.8463		0.404108	8.13955	9.03643
0.306123	10.9916			0.314137	8.58243			0.348838	6.61254			0.315791	6.00909			0.314137	12.0185			0.387098	10.8774			0.461539	15.3126			0.410961	7.93651
0.311224	10.711			0.319371	8.20232			0.35465	6.41657	6.46475		0.321052	6.26615			0.319371	12.091			0.393547	10.2032			0.469229	14.4302			0.417808	7.85284
0.316328	10.3778			0.324609	8.28223			0.360467	5.96456			0.326318	6.48805			0.324609	11.3488			0.400002	10.1539	11.3702		0.476925	14.977			0.424661	8.68487
0.321428	11.3461			0.329843	7.82346			0.366279	6.12518			0.33158	5.96266			0.329843	11.3611			0.406452	8.92963			0.484614	14.0664			0.431507	8.4516
0.326529	10.7548			0.335076	7.80732			0.372091	5.96996			0.336841	5.881			0.335076	10.4444			0.412901	9.47295			0.492304	13.9204			0.438354	7.88317
0.331633	10.4567			0.340315	7.76929			0.377908	6.01337			0.342107	6.61914			0.340315	10.0694			0.419356	9.31553			0.5	13.6649	14.3952		0.445207	7.6295
0.336734	10.2696			0.345548	7.82451			0.38372	6.42452			0.347368	6.18686			0.345548	10.3194			0.425805	7.48943			0.50769	13.0603			0.452054	7.59998	8.0055
0.341838	9.4797			0.350787	7.78197	8.09132		0.389537	5.97395			0.352634	5.74473	6.21284		0.350787	9.48147	11.1403		0.43226	7.74926			0.515386	11.9877			0.458907	7.97373
0.346938	9.16704			0.35602	6.74794			0.395348	5.35796			0.357895	5.75341			0.35602	8.52932			0.438709	8.07059			0.523075	12.0288			0.465754	7.26716
0.352039	9.21724	10.2772		0.361254	6.78983			0.40116	5.10475	5.86678		0.363156	5.54943			0.361254	8.61111			0.445159	7.83852			0.530765	12.4235			0.472601	8.01047
0.357143	9.38604			0.366492	6.43075			0.406977	5.25577			0.368422	5.47743			0.366492	9.40278			0.451613	7.77851	8.33055		0.538461	12.121			0.479453	6.61407
0.362243	8.4753			0.371726	6.78714			0.412789	4.9909			0.373684	4.64891			0.371726	8.74074			0.458063	7.01784			0.546151	11.3888			0.4863	7.05605
0.367348	8.56151			0.376964	7.49628			0.418606	5.22172			0.378949	4.60845			0.376964	8.39969			0.464518	6.45792			0.553847	11.5214	12.0759		0.493153	7.365
0.372448	8.78641			0.382198	7.02131			0.424418	5.02249			0.384211	5.32792			0.382198	7.99537			0.470967	6.82941			0.561536	10.9098			0.5	7.09793	7.34063
0.377553	7.79954			0.387436	7.14442			0.430235	4.91918			0.389476	5.10466			0.387436	7.14198			0.477422	7.49757			0.569232	9.67721			0.506853	6.86797
0.382653	7.34707			0.39267	7.54693			0.436047	4.80476			0.394738	4.53509			0.39267	7.35031			0.483871	6.25167			0.576922	9.73699			0.5137	7.16761
0.387753	7.5611			0.397904	6.28397			0.441859	5.78355			0.399999	4.74095			0.397904	7.07099			0.490321	6.75204			0.584612	9.26022			0.520547	7.02561
0.392858	6.84741			0.403142	6.04834	6.82969		0.447675	4.83349			0.405265	4.95369	5.07		0.403142	6.66821	7.99105		0.496775	6.31962			0.592308	8.18456			0.527399	6.54037
0.397958	7.11388			0.408376	6.47187			0.453487	5.18692	5.1132		0.410526	4.82291			0.408376	7.25154			0.503225	6.53459	6.70758		0.599997	8.2521			0.534246	6.5186
0.403063	6.01949	7.78978		0.413614	6.1606			0.459304	5.29232			0.415792	4.2947			0.413614	7.13735			0.509679	6.01511			0.607693	8.93446	9.27934		0.541099	6.01271
0.408163	6.21087			0.418848	6.10377			0.465116	5.08141			0.421053	4.60343			0.418848	6.29321			0.516129	5.63137			0.615383	8.3803			0.547946	6.29542
0.413263	6.24651			0.424082	5.82559			0.470928	5.43758			0.426315	5.14943			0.424082	6.42439			0.522578	5.39496			0.623073	7.81392			0.554793	5.68231	6.51383
0.418368	5.9516			0.42932	5.64283			0.476745	5.44133			0.43158	4.58046			0.42932	6.53549			0.529033	5.85387			0.630769	7.49914			0.561646	5.6683
0.423468	6.13276			0.434554	5.48608			0.482557	5.23879			0.436842	4.33606			0.434554	6.72686			0.535482	5.64423			0.638458	7.43267			0.568493	5.61298
0.428573	5.25722			0.439792	5.1392			0.488374	5.2012			0.442108	3.94533			0.439792	6.54629			0.541937	5.78545			0.646155	7.26006			0.575345	5.64688
0.433673	5.32734			0.445025	5.2476			0.494186	5.15295			0.447369	4.39788			0.445025	6.55247			0.548387	5.49341			0.653844	7.80984	7.87577		0.582192	5.38796
0.438777	5.5423			0.450264	5.42848	5.72289		0.500002	5.06521	5.23885		0.452635	4.40452	4.50386		0.450264	6.52779	6.66616		0.554841	5.64742	5.68323		0.66154	7.43704			0.589045	5.27488
0.443878	5.88189			0.455497	5.69488			0.505814	4.81342			0.457896	4.03616			0.455497	6.53704			0.561291	5.34467			0.66923	7.50867			0.595892	5.60053
0.448978	5.8451			0.460731	5.16716			0.511626	4.81596			0.463157	4.34685			0.460731	5.44599			0.56774	4.75161			0.67692	7.11454			0.602739	6.31461	5.64373
0.454083	4.86267	5.72583		0.465969	4.8018			0.517443	5.62724			0.468423	3.98783			0.465969	5.59876			0.574195	5.1477			0.684616	7.1788			0.609591	5.6123
0.459183	5.00838			0.471203	5.24294			0.523255	4.54526			0.473684	3.81339			0.471203	5.39815			0.580644	5.36345			0.692305	7.30581			0.616438	5.32628
0.464287	5.58762			0.476441	4.92722			0.529072	4.60223			0.47895	4.38767			0.476441	5.2037			0.587099	5.21243			0.700001	6.73089	7.21262		0.623291	5.848
0.469388	4.8903			0.481675	5.19111			0.534884	4.95661			0.484212	3.91437			0.481675	5.42592			0.593548	5.1316			0.707691	6.82016			0.630138	5.5039
0.474488	5.29667			0.486909	5.39615			0.540696	4.50831			0.489473	3.75065			0.486909	5.05093			0.599998	4.95442			0.715381	6.76082			0.636985	5.60962
0.479592	4.62342			0.492147	5.39606			0.546513	4.54967			0.494739	3.28347			0.492147	5.07099			0.606453	5.0197	5.1157		0.723077	6.37586			0.643838	6.13349
0.484693	4.5663			0.497381	5.2691			0.552325	4.49679	4.76839		0.5	3.6859	3.91181		0.497381	5.08796			0.612902	4.46161			0.730766	6.63399			0.650685	5.73987	5.68192
0.489797	4.97967			0.502619	5.3018	5.23882		0.558141	4.75833			0.505266	3.27291			0.502619	4.95987	5.37793		0.619357	5.31385			0.738462	6.81369			0.657537	6.10497
0.494898	4.53914			0.507853	4.942			0.563953	4.4832			0.510527	3.31346			0.507853	5.24846			0.625806	4.64975			0.746152	6.59478			0.664384	5.85552
0.499998	3.75618	4.8053		0.513087	5.43726			0.569765	4.3396			0.515788	3.26338			0.513087	5.05709			0.632256	4.95791			0.753842	6.08344	6.58325		0.671231	6.35024
0.505102	3.90952			0.518325	5.33843			0.575582	4.08387			0.521054	3.26197			0.518325	4.61574			0.63871	4.87147			0.761538	6.30538			0.678084	5.88905
0.510203	3.99463			0.523559	5.10185			0.581394	4.31573			0.526316	3.25811			0.523559	5.01543			0.64516	4.58644			0.769227	6.1635			0.684931	6.31753
0.515307	4.07808			0.528797	4.95166			0.587211	4.11972			0.531581	3.25074			0.528797	5.16513			0.651615	4.54331	4.76919		0.776923	5.99903			0.691784	5.80076
0.520408	3.41803			0.534031	4.81981			0.593023	4.47454			0.536843	2.86615			0.534031	5.39815			0.658064	5.18266			0.784613	6.07041			0.698631	5.95993
0.525512	3.86497			0.539269	4.97495			0.59884	4.28228			0.542108	2.70512			0.539269	4.44599			0.664519	4.26066			0.792309	6.56945			0.705483	6.2645	6.06781
0.530612	4.1699			0.544503	4.47471			0.604652	3.82468	4.29799		0.54737	2.7914			0.544503	4.8534			0.670968	5.00387			0.799999	6.2185			0.71233	6.28462
0.535713	3.84986			0.549736	4.31455	4.92836		0.610463	4.18575			0.552631	3.05972	3.1043		0.549736	5.15432	4.99486		0.677417	4.8741			0.807688	6.22121	6.22107		0.719177	6.09853
0.540817	3.92559			0.554975	4.38845			0.61628	4.08806			0.557897	3.20272			0.554975	4.67438			0.683872	4.28185			0.815384	6.32408			0.72603	6.11981
0.545917	3.836			0.560208	4.95858			0.622092	3.9416			0.563158	2.55283			0.560208	4.33488			0.690322	4.66924			0.823074	5.6435			0.732877	5.75071
0.551022	3.77758	3.88241		0.565446	4.73022			0.627909	4.19435			0.568424	2.67252			0.565446	5.12654			0.696776	4.18228			0.83077	5.81461			0.73973	6.18071
0.556122	3.70017			0.57068	4.45884			0.633721	4.21568			0.573685	2.60275			0.57068	4.85494			0.703226	4.37051	4.60315		0.83846	5.87552			0.746577	6.90453
0.561223	3.76284			0.575914	4.90639			0.639533	4.08618			0.578947	2.6294			0.575914	5.37191			0.709675	4.51768			0.846149	6.38177			0.753423	5.92675	6.18081
0.566327	3.00751			0.581152	4.41741			0.64535	4.09238			0.584212	2.53008			0.581152	4.6497			0.71613	4.48236			0.853845	6.12144	6.02682		0.760276	5.91615
0.571427	3.26731			0.586386	4.25688			0.651162	4.20735	4.12642		0.589474	3.11593			0.586386	4.4892			0.722579	4.07718			0.861535	6.10896			0.767123	6.07793
0.576532	3.75729			0.591624	4.05044			0.656978	3.92564			0.59474	2.59017			0.591624	4.59413			0.729034	4.83406			0.869231	6.21524			0.773976	6.38613
0.581632	3.84759			0.596858	4.21267			0.66279	3.81225			0.600001	2.86305	2.75105		0.596858	4.08951			0.735483	4.55027			0.876921	6.20442			0.780823	6.23721
0.586732	3.78967			0.602092	4.33283	4.47127		0.668602	4.27665			0.605262	2.70004			0.602092	4.46142	4.66466		0.741933	4.81769			0.88461	6.08597			0.78767	5.94497
0.591837	3.71487			0.60733	4.2398			0.674419	3.833			0.610528	2.79368			0.60733	4.15586			0.748388	4.17287			0.892307	6.2665			0.794522	6.27754
0.596937	3.30056			0.612564	4.57374			0.680231	4.36688			0.615789	2.79192			0.612564	4.44907			0.754837	4.39245	4.48057		0.899996	6.83199			0.801369	5.67144	6.07305
0.602042	3.6707	3.58185		0.617802	4.289			0.686048	4.13415			0.621055	2.56097			0.617802	4.27932			0.761292	4.32153			0.907692	6.28354	6.28523		0.808222	5.38764
0.607142	3.92395			0.623036	4.43281			0.69186	4.30566			0.626316	2.81453			0.623036	4.19753			0.767741	4.36189			0.915382	6.15321			0.815069	5.22989
0.612247	3.60433			0.628274	4.3687			0.697677	3.53562			0.631582	2.60357			0.628274	4.15124			0.774196	4.16259			0.923078	6.8201			0.821922	5.2188
0.617347	3.55789			0.633508	4.60443			0.703489	4.10684	4.03296		0.636844	2.76386			0.633508	4.35648			0.780645	4.70233			0.930768	6.57968			0.828769	4.90707
0.622447	3.36385			0.638741	4.31987			0.709301	3.9404			0.642105	2.4208			0.638741	4.34105			0.787095	4.72136			0.938457	6.8139			0.835616	4.8543
0.627552	3.42463			0.64398	4.00483			0.715117	4.16634			0.647371	2.61098			0.64398	3.68519			0.79355	4.33158			0.946153	6.99871			0.842468	4.35168
0.632652	3.89553			0.649213	4.24745			0.720929	3.81752			0.652632	2.73495	2.67953		0.649213	3.66513			0.799999	4.50895			0.953843	6.48554	6.64186		0.849315	4.31987
0.637757	3.56166			0.654452	4.63989	4.37205		0.726746	3.27635			0.657898	2.56892			0.654452	3.85339	4.11343		0.806454	4.67127	4.47269		0.961539	6.65114			0.856168	3.96469	4.77924
0.642857	3.61134			0.659685	4.37498			0.732558	3.66169			0.663159	2.5645			0.659685	4.25463			0.812903	4.93912			0.969229	6.80506			0.863015	3.95241
0.647957	3.2528			0.664919	4.29525			0.73837	4.0819			0.66842	2.86025			0.664919	3.82563			0.819352	4.56434			0.976918	6.66741			0.869862	3.50101
0.653062	3.49117	3.56871		0.670157	4.23373			0.744187	4.15238			0.673686	2.68098			0.670157	4.05247			0.825807	4.6768			0.984614	6.6251			0.876715	3.60907
0.658162	3.72738			0.675391	3.98596			0.749999	3.50516			0.678948	2.672			0.675391	3.54013			0.832257	4.82363			0.992304	6.32337			0.883562	3.49887
0.663266	3.95856			0.680629	4.58462			0.755816	3.38855	3.7767		0.684213	2.7049			0.680629	3.42284			0.838711	4.8092			1	6.13389	6.53433		0.890414	3.59811
0.668367	3.52788			0.685863	4.27869			0.761628	3.30274			0.689475	2.6663			0.685863	3.35803			0.845161	4.4856							0.897261	3.2373
0.673467	3.11947			0.691097	3.57791			0.767439	3.43841			0.694736	2.85201			0.691097	3.48148			0.85161	5.04168	4.76291						0.904108	3.50572	3.5575
0.678572	3.35567			0.696335	4.48805			0.773256	4.27989			0.700002	2.47998	2.6722		0.696335	3.64969			0.858065	4.68705							0.910961	3.34791
0.683672	3.39443			0.701569	4.5496	4.2632		0.779068	3.18986			0.705263	2.35062			0.701569	3.69445	3.6977		0.864514	5.22447							0.917808	3.26008
0.688776	3.46162			0.706807	4.34322			0.784885	3.14857			0.710529	2.31418			0.706807	3.43519			0.870969	5.62104							0.924661	3.436
0.693877	3.15416			0.712041	4.44102			0.790697	3.62076			0.71579	2.43165			0.712041	3.48611			0.877419	5.79474							0.931507	3.31304
0.698981	3.18593			0.717279	4.3535			0.796514	3.6833			0.721056	2.8794			0.717279	3.18827			0.883873	4.83956							0.93836	3.16997
0.704082	3.66888	3.4554		0.722513	4.14689			0.802326	3.98165	3.58065		0.726317	2.59377			0.722513	3.20524			0.890323	5.05925							0.945207	3.09183
0.709182	3.52244			0.727747	4.43485			0.808138	4.36338			0.731579	2.84322			0.727747	3.47068			0.896772	5.22183							0.952054	3.31535	3.27631
0.714286	3.35101			0.732985	4.97224			0.813955	4.08168			0.736844	2.5762			0.732985	3.25154			0.903227	5.16583	5.20172						0.958907	2.93763
0.719387	3.59977			0.738218	5.18727			0.819766	3.64814			0.742106	2.62912			0.738218	2.89352			0.909676	5.1004							0.965754	3.24638
0.724491	3.17115			0.743457	4.95831			0.825583	3.47582			0.747372	2.51317			0.743457	3.59259			0.916131	5.34745							0.972606	2.89951
0.729591	3.43897			0.74869	4.84888			0.831395	3.0283			0.752633	2.33921	2.54705		0.74869	3.10648			0.92258	5.1838							0.979453	3.17924
0.734692	3.4351			0.753924	4.38326	4.60694		0.837207	3.55151			0.757894	2.69394			0.753924	3.07408	3.27037		0.92903	5.04484							0.9863	3.14295
0.739796	3.32435			0.759162	4.3471			0.843024	3.04536			0.76316	2.50767			0.759162	3.07408			0.935485	5.36223							0.993153	3.34246
0.744897	3.74176			0.764396	5.0106			0.848836	2.95231			0.768421	2.48108			0.764396	3.06173			0.941934	5.14431							1	3.36194	3.15859
0.750001	3.25858	3.42701		0.769634	4.67783			0.854653	2.53388	3.40893		0.773687	2.26977			0.769634	3.31019			0.948389	5.27764
0.755101	3.03014			0.774868	5.18882			0.860465	3.02019			0.778948	2.55045			0.774868	2.7639			0.954838	5.17613	5.2046
0.760206	3.15068			0.780106	4.71364			0.866281	3.45781			0.784214	3.05481			0.780106	3.05555			0.961293	5.23903
0.765306	2.83481			0.78534	4.80266			0.872093	2.63651			0.789476	2.75696			0.78534	3.12963			0.967742	5.2428
0.770406	3.31023			0.790574	4.47549			0.877905	2.42697			0.794737	2.75454			0.790574	3.20834			0.974192	5.27409
0.775511	3.22752			0.795812	4.59435			0.883722	2.64348			0.800003	2.7921	2.65126		0.795812	2.87963			0.980646	5.74618
0.780611	3.19109			0.801046	5.23985	4.78337		0.889534	3.01141			0.805264	2.90022			0.801046	3.08951	3.06362		0.987096	4.55418
0.785716	3.10553			0.806284	4.4515			0.895351	2.70492			0.81053	2.73368			0.806284	3.31636			0.993551	4.87019
0.790816	2.9315			0.811518	4.36701			0.901163	2.59568	2.81212		0.815791	2.88978			0.811518	3.33487			1	4.60857	5.07643
0.795916	2.62769			0.816752	4.44916			0.906975	2.77915			0.821052	2.99249			0.816752	3.21606
0.801021	2.79974	3.02089		0.82199	4.57417			0.912792	2.6631			0.826318	2.96351			0.82199	3.18673
0.806121	2.86854			0.827224	4.25703			0.918604	2.7338			0.83158	3.28275			0.827224	3.02007
0.811226	2.30975			0.832462	4.21807			0.92442	2.62794			0.836845	3.50907			0.832462	3.08488
0.816326	2.51262			0.837696	4.43921			0.930232	2.40203			0.842107	3.19213			0.837696	2.89661
0.821426	2.55429			0.842929	4.3493			0.936044	2.37467			0.847368	3.52887			0.842929	3.12654
0.826531	2.65099			0.848168	4.83208			0.941861	2.26086			0.852634	3.42982	3.14223		0.848168	2.93673
0.831631	2.92837			0.853401	4.81419	4.47517		0.947673	2.28253			0.857895	3.27454			0.853401	3.1821	3.1301
0.836736	3.08236			0.858639	4.60696			0.95349	2.36906	2.49924		0.863161	3.35223			0.858639	3.04167
0.841836	2.68203			0.863873	4.29201			0.959302	2.19627			0.868422	2.95695			0.863873	3.51851
0.84694	2.44083			0.869111	4.37497			0.965119	2.10312			0.873688	3.15993			0.869111	3.70525
0.852041	2.63276	2.66625		0.874345	5.03826			0.970931	1.96866			0.878949	3.03267			0.874345	3.54784
0.857141	2.4395			0.879579	5.0627			0.976742	1.81915			0.884211	2.87668			0.879579	3.33951
0.862246	2.17305			0.884817	4.62015			0.982559	2.04511			0.889476	2.71777			0.884817	3.24075
0.867346	2.35065			0.890051	4.61208			0.988371	1.83839			0.894738	2.95881			0.890051	3.45833
0.87245	2.67557			0.895289	4.0828			0.994188	1.78319			0.900004	3.10647	3.04845		0.895289	3.08642
0.877551	2.64949			0.900523	3.9422	4.51468		1	1.62708	1.92262		0.905265	3.07287			0.900523	2.98766	3.3251
0.882651	2.35497			0.905757	4.22007							0.910526	3.01375			0.905757	3.15278
0.887755	2.76587			0.910995	3.75657							0.915792	3.03541			0.910995	3.26389
0.892856	2.76078			0.916229	4.01765							0.921053	2.74239			0.916229	3.01235
0.89796	2.75635			0.921467	3.8279							0.926319	2.6825			0.921467	3.15431
0.903061	2.58438	2.55106		0.926701	3.39777							0.93158	2.12991			0.926701	2.91512
0.908161	2.96388			0.931934	3.33779							0.936842	2.10417			0.931934	2.80401
0.913265	2.41863			0.937173	3.19955							0.942108	2.10551			0.937173	3.26852
0.918366	2.31032			0.942406	2.85974							0.947369	2.05656			0.942406	3.08951
0.92347	2.82361			0.947645	3.14667							0.952635	1.83651	2.47796		0.947645	3.04321
0.928571	2.61617			0.952878	2.54965	3.43134						0.957896	1.85351			0.952878	2.97376	3.06775
0.933675	2.62404			0.958117	2.72223							0.963162	1.88901			0.958117	2.83951
0.938775	2.82299			0.96335	2.60446							0.968423	1.80852			0.96335	3.0463
0.943876	2.64227			0.968584	2.32838							0.973684	1.84075			0.968584	2.80864
0.94898	2.72413			0.973822	2.36617							0.97895	1.78492			0.973822	2.79938
0.95408	2.81339	2.67594		0.979056	2.3559							0.984212	1.93606			0.979056	2.38426
0.959185	2.64433			0.984294	2.27582							0.989477	1.65694			0.984294	2.39815
0.964285	2.52958			0.989528	2.22845							0.994739	1.61995			0.989528	2.46605
0.969386	2.70302			0.994762	2.19368							1	1.71682	1.78961		0.994762	2.69136
0.97449	2.83183			1	2.36212	2.38191										1	2.38426	2.64644
0.97959	2.52534
0.984695	2.64192
0.989795	2.6879
0.994895	2.75082
1	2.59817	2.65699
