# Supplementary material for: Crumbs organizes the transport machinery by regulating apical levels of PI(4,5)P2 in Drosophila
Source: eLife. 2019 Nov 7;8:e50900. doi: 10.7554/eLife.50900 (PMC6881148; doi:10.7554/eLife.50900)
Supplement: Figure 6—source data 3. [file elife-50900-fig6-data3.xlsx]

## Sheet: Image39
X0	Y0	Y1	Y2	Y3	Y4	Y5	Y6	Y7	Y8	Y9	Y10	Y11	Y12	Y13	Y14	Y15	Y16	Y17	Y18	Y19	Y20		Ap-Basal	Avg intensity
0	3.3191	4.6652	4.99181	3.1662	5.8291	5.6984	5.2941	2.48204	7.2639	4.0042	8.9747	6.9119	5.3893	9.0759	7.4397	6.3349	5.4887	5.3283	5.696	7.64797	3.89285		0	5.66163
0.1191	5.4915	6.3358	4.46238	4.7743	5.6796	7.0178	6.0443	6.33553	3.98251	6.3154	7.1972	3.0212	7.7931	6.1216	5.4236	7.0455	4.8085	7.455	4.0576	6.4408	7.43433		0.00666435	5.86845
0.2383	2.1607	5.2144	3.83215	6.5828	7.2923	5.9766	6.0507	2.82005	6.38761	4.1607	6.2637	6.2564	3.3801	14.8307	6.1068	4.052	5.7694	2.4221	8.518	5.67021	5.88867		0.0133343	5.69696
0.3574	2.0793	4.7877	5.21045	4.7512	4.5568	4.6574	4.8692	4.72165	6.27238	4.6724	4.712	10.0009	7.267	7.4481	3.4382	5.8442	3.5454	5.5116	5.659	3.01152	2.78495		0.0199987	5.03816
0.4766	2.5707	4.1137	3.88227	4.2154	4.9534	7.0307	5.1227	3.23555	5.3992	6.5067	8.1579	6.8269	4.5699	9.3779	2.7796	4.0417	4.5302	6.2255	4.9378	5.02163	1.89155		0.0266686	5.01861
0.5957	4.3358	5.9836	4.3017	5.1257	8.7173	5.3265	4.9865	4.70707	6.20818	8.3423	8.1561	7.9787	5.8363	6.3037	5.5102	4.6436	7.6974	3.5246	5.3805	7.18578	5.55779		0.033333	5.99092
0.7148	2.7811	3.9044	5.73266	2.8797	7.2471	4.7827	2.6044	5.86771	8.24446	5.9869	9.3561	8.9722	6.1934	5.2306	5.6031	5.8223	6.5054	3.0937	6.7065	3.73384	4.38534		0.0399973	5.50636
0.834	2.1079	4.3104	3.88501	5.2079	4.3461	3.3707	3.4603	4.92958	8.19286	3.8014	13.2363	6.3486	4.6309	8.8753	5.7656	5.1389	5.085	3.81	5.8179	5.11651	4.44407		0.0466673	5.32768
0.9531	4.7995	5.1101	4.62581	4.5447	5.1024	7.2879	4.0041	3.12224	7.78543	4.1284	15.9814	6.7076	8.0524	7.2999	3.4327	5.318	3.3614	4.8324	6.5903	5.52577	5.48965		0.0533316	5.862
1.0723	5.4001	10.2274	5.98912	5.1073	6.1414	5.4012	2.2803	3.64239	8.80915	5.6488	14.4459	5.7796	7.9628	8.8722	4.0294	4.4167	3.79	7.8622	9.9346	5.94896	2.63454		0.0600016	6.39638
1.1914	3.6782	6.9581	6.9537	4.7071	5.2558	4.0896	3.6812	4.03379	4.73731	5.0241	12.2759	6.329	11.326	10.8449	7.3485	5.1447	9.0975	4.9426	7.9542	6.32734	2.13652		0.0666659	6.326
1.3106	5.6638	4.9784	4.5565	6.9943	6.9717	2.6165	5.5541	3.93271	5.89745	4.0078	12.4607	6.9536	5.0231	8.0642	7.1908	10.4076	8.8084	4.7415	7.3144	5.42509	3.84404		0.0733359	6.25746
1.4297	4.8867	6.7503	5.65793	6.64	5.282	4.3739	3.2547	3.75857	2.51281	5.5494	6.8983	7.2979	5.7709	8.4234	9.8228	4.7401	10.7883	4.0682	4.3185	5.42536	6.72035		0.0800002	5.85431
1.5488	4.8839	10.4753	8.1042	3.4678	6.6665	6.0107	5.5025	3.90811	5.39139	8.7518	6.8554	14.5776	10.9723	12.5266	4.1436	9.2414	7.8304	4.2355	4.2567	3.72607	7.11288		0.0866646	7.07813
1.668	4.3518	7.2947	7.70757	4.6408	4.8087	2.8938	8.248	3.93253	10.0598	3.2005	3.4672	7.0731	6.722	9.8728	6.6729	6.8167	6.9436	6.2176	7.9115	4.97565	6.02259		0.0933345	6.18257
1.7871	3.9985	3.772	3.21925	5.1429	4.152	5.1288	5.8759	3.87457	8.01449	6.6883	4.6533	10.4066	7.5998	7.1923	12.7906	7.6252	4.8701	4.6009	4.6527	6.72372	2.42605		0.0999989	5.87657
1.9063	5.1122	3.8938	11.6629	7.7342	8.1309	3.3048	2.8681	7.29707	8.95123	6.8529	5.9435	13.0306	8.6051	8.572	9.0541	5.5869	6.9745	5.6233	6.0245	5.95572	3.72231		0.106669	6.90003
2.0254	5.6564	8.6213	4.73351	4.7464	3.1386	3.436	6.88	3.69975	6.21058	11.9284	5.8351	13.3478	9.5	5.7275	3.9233	5.2554	8.2546	6.8585	8.2	4.96123	6.71429		0.113333	6.55375
2.1445	5.2443	5.4734	5.68012	4.6298	3.8693	5.1905	6.7641	3.89031	6.97673	6.3666	7.644	12.731	12.355	8.0546	7.3346	7.5474	7.9411	6.2505	8.2065	5.77244	8.66155		0.119998	6.98018
2.2637	4.4993	6.7212	6.22699	5.3321	3.7192	3.9022	3.9451	6.72072	11.2822	2.8573	5.5224	10.467	6.5031	5.9878	16.7093	5.4866	7.4468	3.7807	5.9279	3.89731	6.66351		0.126667	6.36185
2.3828	4.6803	6.1318	5.9286	5.7335	7.1637	3.4749	7.0319	4.87389	5.46671	6.7756	9.9846	11.89	11.198	11.2173	7.3484	11.6533	6.201	7.8427	5.236	4.03503	6.69893		0.133332	7.16982
2.502	2.9813	6.3341	8.94214	4.5746	8.4734	7.2523	5.924	3.13372	10.1506	7.2605	4.2609	7.5051	8.865	9.5098	8.9189	11.0845	9.9401	4.8552	8.0365	3.48304	3.73889		0.140002	6.91545
2.6211	6.1228	4.7612	9.36051	4.6794	10.3107	3.973	9.0586	4.31274	4.63768	5.8907	7.7823	10.4528	6.6854	10.8607	4.8054	8.2757	5.1114	4.8408	6.5454	2.59503	5.48667		0.146666	6.50233
2.7402	8.2118	4.0171	8.07082	5.625	5.5157	3.6129	5.0137	5.98728	6.63483	7.6422	9.5842	11.4136	9.5531	2.9194	9.3227	11.9073	7.3873	8.7852	6.4373	5.62383	3.70988		0.15333	6.99882
2.8594	5.2259	5.4107	9.63127	4.4761	5.0663	8.8246	3.8454	6.79686	4.67397	5.9491	7.3106	17.3136	8.9474	5.8577	8.4826	9.3614	12.8533	6.7515	6.0974	3.7422	4.21952		0.16	7.18273
2.9785	5.8392	4.5395	7.90456	7.2738	5.0311	5.1773	11.3809	6.7225	3.22029	5.9172	10.0408	12.0052	10.7564	9.9436	9.0389	7.4245	6.0226	5.5887	9.5843	3.79094	3.54685		0.166665	7.17853
3.0977	4.1432	5.928	6.40488	4.2501	4.7577	5.5521	9.5622	4.82426	5.69504	8.3729	8.2145	14.2937	9.3928	6.9846	7.7377	8.7003	8.5229	5.8612	5.3285	4.41785	2.25329		0.173335	6.7237
3.2168	5.3819	3.7179	6.69832	3.2511	5.3106	5.4164	3.281	4.39227	10.0036	7.3209	5.8156	15.9898	6.3309	5.5525	10.2448	13.8183	6.9037	6.2466	7.5357	5.46488	6.73059		0.179999	6.92416
3.336	7.3149	7.7109	8.88801	7.3778	5.6067	3.7757	8.0842	4.63458	8.26144	5.3275	7.6928	8.2664	5.0211	6.1415	12.3415	8.848	7.7679	6.555	8.581	6.33493	3.63848		0.186669	7.05573
3.4551	5.2194	6.4592	7.31497	4.7605	8.4609	6.1429	2.4506	8.34837	8.68746	8.9899	7.9	9.6662	6.3101	8.252	10.7719	7.2268	7.0481	8.1285	8.1781	4.0875	5.24286		0.193333	7.12601
3.5742	2.961	6.4619	5.01177	3.6679	8.4032	5.9494	5.7727	5.66033	7.3103	7.7175	10.5811	7.9391	4.7243	6.5937	9.425	5.4907	10.6796	6.3668	7.2376	2.74372	4.72501		0.199998	6.4487
3.6934	5.8573	9.5065	7.70421	7.5111	7.3206	7.2359	6.0614	3.97204	2.98057	6.7013	8.4134	11.4165	7.5785	7.8051	9.3273	11.9267	9.1534	9.8786	12.7534	5.34731	4.9718		0.206668	7.78204
3.8125	3.8144	12.3091	4.16821	6.5921	3.8109	7.2117	2.6372	3.19752	5.34825	5.8882	7.8555	10.2613	5.4814	7.1785	6.3199	10.2442	6.079	8.4365	9.0756	6.20843	3.88112		0.213332	6.47614
3.9317	4.9309	4.9902	7.17425	3.4674	4.1922	6.3373	5.3614	6.91003	9.65249	11.617	9.0552	9.3603	4.5846	9.0051	6.3136	5.7864	5.3631	6.2578	5.5251	4.59517	6.1926		0.220002	6.5082
4.0508	5.7969	6.4737	6.42878	2.753	6.0964	4.2582	5.485	5.35315	7.01033	9.329	8.0488	13.6502	9.9645	3.6804	5.0468	8.2978	4.9952	5.6559	8.3008	2.60119	2.91147		0.226666	6.29226
4.1699	8.325	10.1915	5.20869	4.0379	3.6304	2.6595	9.8205	4.8158	7.36217	11.2323	8.0131	8.0079	3.6942	6.7043	5.7889	8.7732	5.1046	11.3985	8.5106	3.94238	6.3568		0.233331	6.83706
4.2891	5.4922	9.8577	7.19516	5.4417	6.1347	2.7957	2.436	5.57934	6.08247	15.0772	6.9209	10.958	9.048	4.9239	5.6199	5.0275	7.9332	8.2681	7.4069	4.7486	4.19951		0.240001	6.72127
4.4082	7.4862	4.0311	5.81202	3.0306	7.2163	3.8907	3.7549	4.48019	5.34631	6.2555	5.6563	6.1638	5.4786	5.7778	5.6982	3.7239	6.7017	5.44	7.014	6.55641	4.18786		0.246665	5.4144
4.5274	7.525	6.5354	4.56337	5.2782	6.5065	4.6141	5.0472	3.00939	5.2707	5.6323	10.5633	8.8112	10.7091	7.8197	6.0109	5.2098	6.6864	7.0684	7.7338	3.71934	3.35004		0.253335	6.26972
4.6465	6.2481	6.349	6.81061	3.7057	10.9495	4.1025	5.8451	6.77594	6.82227	7.7123	6.8485	8.935	8.5971	7.5485	6.2697	5.2826	7.0374	7.0987	8.8622	3.18883	3.92455		0.259999	6.61496
4.7657	4.4866	6.212	8.46502	7.2805	8.6515	4.1734	7.5238	5.84084	6.47905	5.5663	9.4027	8.4343	4.4293	9.1895	8.1334	5.6008	6.9936	9.4149	7.5565	7.86749	2.12664		0.266669	6.84896
4.8848	6.2294	7.4981	8.45057	5.3828	6.8262	4.2972	7.7243	3.78967	5.77616	4.5492	13.0493	11.4655	7.9227	13.9247	8.3935	6.1486	6.2846	6.0892	5.6179	5.00449	3.9813		0.273334	7.06692
5.0039	5.8222	10.3189	6.56919	8.4338	5.1262	6.0883	6.2485	5.37909	5.9708	4.9743	9.7426	9.3963	6.378	6.9535	6.1519	4.7812	6.6265	7.3208	9.2089	4.38114	5.15706		0.279998	6.71568
5.1231	3.6452	4.9733	4.55633	3.4697	4.6023	6.8633	4.8006	6.43772	5.14787	12.0939	7.6592	5.4844	3.8361	12.5041	7.8073	9.7136	6.1726	6.1291	8.0164	3.9452	3.4658		0.286668	6.25352
5.2422	4.0182	8.6104	4.94366	8.7414	6.1905	6.4578	3.7016	2.823	7.11802	8.1591	5.595	13.0703	8.0617	3.9991	5.9797	5.3704	7.8051	6.7938	8.4262	3.77775	4.89231		0.293332	6.40643
5.3614	6.0877	6.8819	10.26	5.2749	5.9439	4.36	6.5368	7.52843	5.66785	5.4683	8.5031	9.8482	3.4159	10.8363	2.7791	5.0608	10.1918	7.9293	8.9497	2.76991	5.52512		0.300002	6.65805
5.4805	3.7748	6.7853	5.25372	4.5857	9.9414	5.2996	6.1627	7.53962	7.90041	9.6607	9.4785	11.5481	5.0094	8.3765	3.206	3.7871	7.7316	6.0728	8.8795	5.36586	3.2212		0.306667	6.64669
5.5996	6.2943	6.1582	5.98586	11.2117	8.8149	7.1905	4.2208	7.01034	3.28558	9.3841	4.6985	8.8487	5.1883	5.5341	6.5325	8.5028	7.5175	5.7939	10.9148	10.1009	5.1614		0.313331	7.06427
5.7188	7.2452	4.7317	4.53356	5.7253	8.8331	3.6033	5.9111	7.63889	5.9174	6.9227	9.9752	9.8358	2.0193	6.6426	6.1433	11.0865	4.2487	9.4944	9.6385	5.08897	4.32173		0.320001	6.64558
5.8379	3.8176	8.3309	6.04473	6.0587	5.0736	4.5465	13.9531	5.1052	7.57357	10.5014	6.1591	3.6747	5.5159	5.4861	12.0703	5.1449	9.4168	5.0652	7.6993	6.70712	4.75822		0.326665	6.79538
5.9571	2.7395	6.5019	3.78829	10.4175	6.13	7.3464	8.284	6.64177	5.18326	10.6737	5.065	2.6105	4.8674	5.1082	4.2213	6.7077	8.7649	15.3783	9.8747	4.71073	3.4306		0.333335	6.59265
6.0762	10.3416	4.7325	5.85204	4.8759	5.0403	8.803	6.2683	3.21834	6.32535	8.3593	7.765	7.5774	4.1875	3.7005	7.1346	4.7866	7.3883	7.1825	10.4225	2.3746	4.21163		0.34	6.21656
6.1953	7.1391	7.8139	5.73971	7.7836	9.2438	4.371	7.5216	5.70636	5.7312	9.1172	13.0833	4.8923	2.1559	4.1666	5.5053	5.6334	5.6896	6.7231	5.0168	5.94828	6.40274		0.346664	6.44689
6.3145	7.028	8.1266	6.60564	5.5778	7.3276	5.9253	8.6241	7.9701	7.72606	4.263	10.2758	5.5414	4.6924	6.4164	3.6665	4.2706	6.3037	6.9316	10.7405	5.45664	3.14382		0.353334	6.50541
6.4336	3.1886	8.4084	5.06061	6.8961	5.6333	5.2906	5.9882	3.40453	5.21837	4.775	10.1936	4.1374	3.3458	4.3016	3.0673	6.0496	3.1328	6.9637	10.6909	5.23507	2.56465		0.359998	5.40696
6.5528	5.1394	4.5994	7.21522	5.5927	3.136	5.5247	11.3018	3.46152	8.45904	7.4026	9.9823	4.6671	5.6025	3.89	8.7849	6.6959	7.4351	4.6091	10.7295	6.95114	2.5342		0.366668	6.36734
6.6719	5.3507	6.1095	4.65129	7.143	3.9544	2.3174	9.1688	3.74821	7.57716	3.5617	8.3527	4.442	4.0282	4.4266	7.4946	7.084	6.1478	6.2664	8.1491	6.34859	4.77245		0.373333	5.76641
6.7911	7.29	5.1873	3.97974	7.669	7.3994	7.6362	6.5504	4.44933	4.15788	5.0018	6.9032	4.9476	4.3173	2.6524	4.6629	5.507	3.7485	6.2958	3.4115	4.86367	3.28598		0.380002	5.23414
6.9102	3.6497	8.4176	5.90669	6.0152	4.1323	9.4715	4.3825	3.60553	3.00719	6.4687	3.8269	3.0306	4.6175	4.1204	5.4374	5.1072	5.7076	5.6325	6.939	8.47701	4.03626		0.386667	5.33282
7.0293	6.0963	4.0459	5.06116	13.1664	4.4548	6.6896	6.0007	3.00548	3.75843	7.8119	7.0787	4.0335	2.8175	4.4287	6.3427	5.7606	7.3026	6.4691	5.3871	6.48714	4.59223		0.393331	5.75193
7.1485	5.2676	3.999	4.20396	7.1572	6.4718	7.667	5.6256	4.01552	4.17314	5.1898	6.4744	3.6629	5.9669	6.3677	8.5788	8.3307	4.6649	6.7868	5.9643	9.17758	6.91828		0.400001	6.03161
7.2676	6.5335	10.634	5.64034	5.5901	5.3646	5.5389	7.3986	4.09835	3.94038	6.1638	7.5389	6.1977	4.4429	6.3491	8.4041	8.124	6.4225	3.7931	7.9727	3.45875	2.96109		0.406665	6.02702
7.3868	10.2752	5.5947	5.24752	3.2234	5.6269	5.3083	6.0133	3.69153	2.71045	7.1005	9.3754	3.7316	2.6182	4.3863	5.8613	5.8543	9.4319	3.58	6.9058	5.33511	4.93364		0.413335	5.56216
7.5059	7.065	8.21	6.75417	11.0168	8.2006	3.9201	7.3355	5.46217	3.68133	4.5023	11.7914	3.7283	4.9382	4.2704	7.1107	7.4551	5.0553	8.6627	10.2705	3.35892	2.82159		0.42	6.45767
7.625	10.7003	6.184	8.71487	4.9556	3.8836	5.022	4.7194	2.5032	4.38209	5.2293	6.2388	7.067	3.0749	2.8819	9.0814	9.7357	3.9575	7.812	10.2929	5.04127	3.8384		0.426664	5.96743
7.7442	9.0506	6.0498	4.57978	9.0194	6.2983	7.7696	3.0587	3.30732	5.51851	9.8259	5.9758	5.2021	3.347	2.3795	6.1678	6.9467	5.0438	9.3737	5.4213	5.25059	4.32423		0.433334	5.9005
7.8633	12.4724	3.8766	6.08352	7.2431	3.9996	4.9286	4.1672	5.83711	3.41993	8.1002	6.2513	8.3316	3.2965	3.9854	6.7606	5.1496	7.5143	4.7059	7.6288	4.8324	2.13289		0.439998	5.74845
7.9825	7.7431	3.5909	3.27888	3.9058	4.8589	4.0652	2.8287	2.42918	3.8081	8.7606	4.651	3.0501	4.7604	3.6581	4.9012	5.072	4.759	4.3053	5.987	5.79592	5.61246		0.446668	4.65818
8.1016	8.3804	4.944	4.80256	6.7375	4.835	4.6774	2.4471	4.02442	3.46093	6.1488	4.8618	4.5095	3.1241	2.7855	6.6649	5.242	9.5562	3.2201	6.0201	5.87228	3.05863		0.453333	5.01777
8.2207	7.4158	7.7893	3.56079	7.4754	9.9242	4.7162	3.4357	4.66812	2.58384	9.4684	10.3681	5.2854	3.5018	3.9397	5.7276	8.4749	8.9198	5.2334	3.7389	4.46398	2.4308		0.459997	5.86296
8.3399	7.0263	5.487	4.7984	5.7387	8.2221	4.5542	4.5381	4.10467	3.03639	6.0569	4.4088	5.5936	2.643	4.9331	4.6997	5.4471	7.7073	5.2747	3.1108	5.71356	4.65071		0.466667	5.13072
8.459	6.084	4.6394	5.21243	7.6908	5.3991	4.6694	3.4681	3.04448	3.28694	4.5747	9.2462	5.1296	3.8762	6.1483	7.7543	8.923	6.9435	5.6354	7.1001	5.02438	4.23103		0.473331	5.62292
8.5782	8.2082	5.1501	7.18541	6.3128	3.4755	3.6217	2.9725	3.67643	2.72769	11.0522	9.0582	2.9368	4.1117	2.4355	4.2342	5.4273	5.5426	6.3324	6.1835	4.90683	2.57072		0.480001	5.14868
8.6973	6.2175	3.5496	3.60492	8.6589	5.3506	5.5156	6.5139	2.20126	3.33799	7.4838	6.4924	2.6863	2.8787	4.7575	6.1356	6.0827	5.0108	5.3631	7.5205	5.85413	3.40965		0.486666	5.17264
8.8165	7.4448	4.4713	6.63851	6.9433	4.2056	6.4617	3.7557	3.34915	5.06193	10.0259	5.9586	2.166	3.2831	4.5827	5.7057	5.1007	4.1639	6.9578	9.7095	4.48761	2.16843		0.493336	5.3639
8.9356	5.6386	5.191	4.29755	10.4776	2.3769	8.2178	3.6407	4.3225	4.09384	4.4529	10.347	2.0999	3.9117	2.6015	4.3008	9.0266	6.1047	5.2509	6.2038	4.14878	4.2221		0.5	5.28225
9.0547	3.6177	6.611	6.94802	15.5227	4.7667	7.1342	3.9151	2.96714	3.29848	5.8198	7.9787	3.5937	4.1787	3.7968	5.2515	3.7956	5.5865	7.7045	3.4313	4.07768	3.24024		0.506664	5.39219
9.1739	6.528	5.3171	3.11412	7.0824	5.4567	6.3296	3.9905	3.47258	4.26813	4.2907	5.5112	5.9699	4.3648	2.2928	7.0699	4.0347	7.479	6.6809	7.3691	3.34738	3.62119		0.513334	5.12337
9.293	2.439	7.4609	6.07984	6.3316	4.0197	11.9462	4.3826	5.05191	1.92366	7.0333	7.415	4.148	3.4918	4.5296	8.4796	7.1592	6.0284	6.7132	3.3438	5.2233	3.39663		0.519999	5.55225
9.4122	4.4394	10.7549	5.35794	3.2048	5.168	10.3379	2.2002	2.69095	6.07863	4.201	4.4141	2.3424	3.7126	5.96	8.5976	3.1231	6.3462	6.4364	3.7844	3.11428	3.39306		0.526669	5.03133
9.5313	8.6087	9.8549	5.60862	2.281	5.4257	7.2552	4.4485	4.46576	5.23887	8.72	3.7176	3.8821	4.715	3.6041	5.3131	5.3288	5.5495	5.3607	8.0479	3.27182	2.45901		0.533333	5.38842
9.6504	7.3862	7.6811	10.6896	6.587	5.8242	5.4398	2.551	3.33906	3.11216	5.5258	4.4122	2.7609	2.5837	2.3369	6.4425	5.652	9.3064	9.9462	5.8322	3.50604	4.54619		0.539997	5.49815
9.7696	6.3456	7.9199	8.07192	6.1973	6.0484	5.1466	2.8646	4.63218	1.98754	8.2154	4.3924	4.4589	2.731	4.0715	7.6072	7.4396	6.1063	6.8787	3.7148	3.46323	6.37398		0.546667	5.46034
9.8887	3.4293	6.1119	7.58196	3.9679	6.4344	8.2659	5.503	5.0898	4.07585	9.5769	4.9532	2.571	2.9406	1.9987	7.1391	7.1241	9.2846	5.8206	2.906	3.59381	3.59823		0.553332	5.33175
10.0079	10.7552	9.5185	5.74026	4.8522	3.4131	5.571	3.7236	2.52159	3.60256	6.778	6.0206	3.5333	2.4289	4.3108	7.4407	6.44	9.3762	14.9915	6.9328	3.26962	8.27172		0.560002	6.16629
10.127	6.8404	6.5858	8.18536	6.5509	6.7962	5.5682	3.8044	3.41688	2.69271	3.9988	3.3863	3.1899	2.449	2.6929	4.5408	9.5519	6.833	8.1365	7.2715	4.02656	7.08043		0.566666	5.40945
10.2462	4.3295	9.9273	5.53645	6.9765	3.3499	7.6663	3.5734	2.9886	2.11509	7.7745	10.8101	5.5417	2.2598	3.1792	4.2069	8.4098	4.6381	5.2344	4.7391	4.97171	4.10007		0.573336	5.34897
10.3653	5.3431	4.105	5.65623	5.3107	7.068	4.5483	2.0544	2.86007	2.54519	4.8895	5.6849	4.9516	2.5476	5.5728	4.3507	6.4124	3.8003	9.8913	5.3459	5.64861	2.43177		0.58	4.8104
10.4844	5.5623	6.7743	3.86426	5.6766	5.2957	6.5873	3.3566	1.94458	2.97683	8.7399	3.1454	3.559	2.7026	3.5415	5.1008	5.1181	5.9296	8.4005	5.3217	4.6596	5.34866		0.586665	4.93361
10.6036	5.0433	5.6482	4.51262	5.0543	6.9975	6.4353	4.8218	4.69748	2.81339	5.9655	7.8936	3.8934	2.0796	3.4142	3.3499	3.8184	9.9074	10.2155	6.3734	4.55954	2.75313		0.593335	5.24988
10.7227	12.3515	6.2793	6.62927	4.6016	8.9115	8.0506	2.2665	4.85825	4.3848	6.5277	6.1565	5.8402	2.708	1.9925	4.1503	6.852	4.0662	9.5264	5.0881	8.52172	2.69163		0.599999	5.83117
10.8419	4.0469	5.6485	5.96273	6.51	7.2018	6.8503	4.9253	3.0215	3.45111	4.9609	6.3732	6.0324	3.1944	4.9992	5.5951	3.9921	3.7487	8.1515	7.1515	5.28771	2.41323		0.606669	5.21515
10.961	8.6753	8.2681	9.29922	6.9186	7.0739	4.899	3.8281	3.8874	4.16623	7.6361	8.4958	4.5682	3.0429	4.2892	5.6259	3.7106	5.5678	7.3275	6.6124	6.82917	5.10227		0.613333	5.9916
11.0801	5.1267	4.5282	2.68935	4.9484	6.9451	2.1774	2.894	3.61389	4.02139	6.2603	4.6934	7.7007	2.9436	2.6725	4.2597	5.5551	10.3577	10.7734	2.0092	3.76036	3.51558		0.619998	4.83076
11.1993	6.4984	5.8222	6.40226	8.0835	5.4748	5.4652	3.0173	4.5446	3.05788	7.5379	3.5475	3.1808	2.8968	2.5442	5.3083	3.13	7.8131	4.0908	3.7684	7.54501	4.26172		0.626667	4.95194
11.3184	4.3299	4.7297	8.5687	9.135	8.6595	4.8528	4.0023	2.02671	4.59292	8.1531	5.5205	5.7356	3.2573	5.3438	6.4834	8.0463	6.0455	10.092	4.7347	4.79743	2.99941		0.633332	5.8146
11.4376	6.9081	4.6922	6.50797	7.7176	4.7594	7.8043	2.3819	3.00656	2.09489	3.7014	6.9767	5.4333	4.4002	3.3228	5.7784	6.415	11.2021	6.882	4.1126	3.95644	4.69221		0.640002	5.36886
11.5567	3.0789	5.2453	6.16973	9.3064	6.3235	3.3673	4.6284	2.0299	2.97586	4.1605	3.9096	4.602	2.9011	4.2785	5.6641	5.1343	6.4146	2.8671	6.6703	3.29344	3.17495		0.646666	4.58075
11.6758	6.7814	9.7992	5.53929	9.7446	4.9989	3.8386	3.8519	2.96105	4.08361	7.0378	3.3638	5.2016	4.5552	1.881	6.7639	6.5383	6.8688	8.8313	4.1508	4.57384	5.2566		0.65333	5.5534
11.795	8.8292	5.0292	5.39792	9.5279	9.5169	5.6207	3.0926	2.45126	2.51309	5.6033	4.6011	5.7436	3.1361	3.1278	8.526	6.875	11.763	4.4897	3.1651	4.92007	3.50441		0.66	5.59209
11.9141	7.6031	4.9072	6.07353	8.3752	8.4381	3.5383	3.0711	4.06769	5.88156	4.919	5.0476	7.1772	2.0439	5.1176	8.8821	4.7968	7.677	6.2684	7.7113	5.23333	2.48074		0.666665	5.68146
12.0333	9.5888	3.1191	5.44048	8.2937	3.0864	6.1037	1.8352	3.59586	2.95281	5.8888	6.0069	4.404	4.9742	3.508	7.2645	5.173	8.5908	7.7287	5.4583	3.8561	3.42067		0.673335	5.25191
12.1524	4.6825	3.5976	5.70731	9.8686	7.1333	4.8086	3.1179	2.24658	2.39819	6.7263	3.8837	6.4596	3.7652	3.3286	6.6235	6.1111	6.3847	4.1338	3.9759	3.09227	3.15154		0.679999	4.81889
12.2716	3.5015	6.9359	3.82524	9.0879	5.9229	6.9104	2.9277	2.78925	3.52781	9.6493	4.4269	6.8164	2.4575	3.2952	4.081	8.0804	11.7212	4.8913	3.7267	3.08581	5.15447		0.686669	5.37213
12.3907	6.0564	4.9283	5.54179	9.315	8.6315	5.0294	3.9173	3.51527	5.08671	3.7992	3.5988	9.3667	1.996	4.5235	2.6991	3.4558	5.9231	5.251	3.5797	2.99727	5.8008		0.693333	5.0006
12.5098	7.9576	5.8166	2.99402	9.9785	11.6951	4.9875	2.9167	3.37459	3.26396	8.0588	5.2072	4.3838	4.4262	4.915	6.6218	9.6823	8.4564	5.8152	2.0183	4.19192	2.32276		0.699998	5.67068
12.629	5.88	6.9063	6.25663	9.2596	12.1502	5.2071	3.7429	3.47247	2.69908	6.4068	7.8827	6.5545	2.5328	5.418	7.8905	7.9659	9.4951	3.3094	5.5407	3.82369	4.15491		0.706668	6.02616
12.7481	4.8958	7.285	6.02266	5.6397	8.2379	5.6846	2.7497	1.89005	2.27961	6.9701	2.9348	6.3963	3.0056	4.1381	4.7053	4.3119	6.6207	6.7765	4.1319	8.18973	3.06651		0.713332	5.0444
12.8673	9.675	4.6513	3.68579	6.6924	7.2715	5.2031	3.4237	2.80529	3.26367	4.8569	4.1763	4.4857	3.8415	2.4196	6.3651	12.5119	4.435	4.254	4.9531	4.70073	5.20034		0.720002	5.18438
12.9864	5.7889	5.9414	6.18616	9.551	7.7184	2.8653	4.6792	4.9673	3.56631	4.4491	5.8811	5.1363	5.3968	3.8502	6.7772	6.3154	7.6798	4.1705	3.3856	5.63644	5.09153		0.726666	5.47781
13.1055	4.8333	4.633	7.39655	7.5073	5.6187	5.2567	4.2032	3.99138	6.82505	3.195	8.0619	2.9978	2.8518	4.1531	4.9404	5.5396	4.9419	6.3615	4.067	7.36915	2.5837		0.733331	5.11086
13.2247	9.0598	8.0279	3.48487	5.1541	5.1797	3.3951	3.8609	3.04	2.11908	7.7396	5.1743	4.6206	3.2465	3.5393	4.2252	4.8125	4.0579	5.0791	3.8472	6.68294	2.94483		0.740001	4.72816
13.3438	8.082	9.0243	5.04627	5.3163	6.0939	6.9742	3.9191	2.10011	3.52847	4.1562	4.0066	5.9603	2.9304	2.6706	4.4032	7.3723	5.3724	4.7704	3.6562	4.16119	2.68779		0.746665	4.8682
13.463	9.3782	4.9733	6.37174	3.5623	8.177	8.4157	3.1422	4.32945	4.04397	4.0992	6.4749	8.6414	4.0383	2.5688	4.3411	5.0649	6.5201	6.0648	4.4033	7.93668	7.38093		0.753335	5.71087
13.5821	5.2551	4.9791	6.38382	5.2149	5.6347	7.9453	2.6139	2.64987	4.92808	4.2936	4.8018	10.3628	2.7186	4.0171	2.9044	5.6053	4.616	6.199	7.129	3.39583	4.97148		0.759999	5.07713
13.7012	5.6503	8.1447	5.63236	6.2055	3.7725	5.2573	4.0634	3.16827	3.99891	9.4507	4.7821	5.6498	4.6396	3.2363	6.7935	5.6298	4.375	7.1715	6.3445	6.22463	3.59793		0.766664	5.4185
13.8204	6.4102	7.7677	6.23201	6.3062	9.5028	5.9757	3.1536	2.93642	4.71012	9.1806	6.7954	4.6631	3.1223	3.6309	4.4131	8.8811	4.2099	9.7741	4.4959	5.03854	8.28297		0.773334	5.97536
13.9395	5.6413	5.3244	8.22251	8.507	8.161	9.3473	5.0388	3.44432	3.21385	4.8051	8.4944	6.7456	4.8777	1.9432	5.3281	5.9997	6.8537	8.3154	9.3565	4.82298	4.21555		0.779998	6.12659
14.0587	3.9426	4.0007	4.6292	5.1167	10.1272	6.5296	2.7348	3.69287	3.85951	7.5643	6.832	4.5998	4.6285	3.3359	6.2487	4.0714	5.4955	6.3935	6.5414	10.8895	4.54873		0.786668	5.51345
14.1778	4.9664	3.1641	6.03893	4.7561	9.1745	8.1483	5.4463	4.48965	3.09534	6.3182	4.6946	2.6218	4.1723	5.5675	5.1815	6.7991	5.8105	7.0057	4.3585	5.27777	3.70705		0.793332	5.27591
14.297	8.143	4.1019	8.28431	6.9079	4.8826	6.6582	5.5862	2.28238	4.45256	2.9496	5.2246	4.2123	4.5625	4.3186	4.9526	5.1211	3.8889	6.1157	7.0952	7.21998	5.22946		0.800002	5.34236
14.4161	5.4512	3.8462	5.64813	4.6285	7.2979	5.4699	4.9195	5.03978	3.39395	5.7185	6.7176	4.487	5.0901	5.5291	9.1232	4.5579	3.4463	5.3704	8.6525	6.58819	4.77656		0.806667	5.51202
14.5352	4.9865	5.2615	6.70507	4.9705	7.5312	6.4683	4.024	3.56027	4.10032	5.9364	3.3748	4.5333	5.5324	6.3176	2.9232	6.7415	4.3917	7.5409	7.1763	3.88905	4.04871		0.813331	5.23874
14.6544	3.2553	6.4922	4.40926	7.5867	5.1564	7.2965	8.0454	4.54855	2.88063	4.9663	4.0015	4.6545	7.0643	5.099	4.5576	7.1347	6.5073	4.2451	5.8456	6.17206	4.54445		0.820001	5.45064
14.7735	6.6056	4.3514	6.57444	4.1784	5.9188	5.8583	6.3475	3.12721	3.27088	3.6302	7.1862	4.6607	5.701	5.0583	6.03	4.4062	2.5378	2.6107	6.7841	3.87468	3.48048		0.826665	4.86633
14.8927	3.2179	4.7103	4.8289	2.806	5.7306	3.9786	6.705	4.94211	4.43752	3.0311	7.6156	8.2747	2.9233	6.6393	7.1047	7.4329	8.3582	7.7186	4.1242	4.28742	9.27342		0.833335	5.62573
15.0118	3.5376	4.2357	4.4945	8.005	5.2466	6.0062	5.8643	3.52432	4.94336	4.7169	7.2371	3.5472	4.3679	5.1836	9.9395	2.6903	5.3691	6.2355	2.898	4.45501	6.35949		0.84	5.18368
15.1309	3.1404	3.9252	4.40495	5.541	5.4656	7.3316	8.9765	4.74849	6.11547	2.9874	6.4198	3.553	6.5905	5.0161	9.8903	9.129	7.3892	5.1395	6.919	3.46998	5.20323		0.846664	5.77887
15.2501	3.1705	4.8118	3.71929	5.6294	5.0317	4.312	6.232	5.43626	6.81383	3.0701	6.7314	6.6832	5.7798	5.7099	10.105	4.4431	3.7964	6.3998	5.0327	4.79514	2.94754		0.853334	5.26909
15.3692	4.0604	5.7633	7.17564	5.9967	6.233	2.635	3.3579	4.02044	7.31062	3.4898	5.3565	11.0229	7.0807	4.0077	3.8099	3.9338	7.5636	3.8929	7.8742	5.86907	4.82517		0.859998	5.48949
15.4884	6.6355	4.874	5.80166	4.9246	6.0776	5.2705	5.037	2.98483	2.80043	3.2303	6.1375	10.2846	3.0963	3.5614	4.7915	10.1914	8.0023	5.3858	3.8709	8.27235	3.93816		0.866668	5.48422
15.6075	5.0834	5.1369	4.66796	4.8031	9.0269	4.5789	4.066	2.66053	7.07285	8.5533	5.9466	6.9286	5.0196	5.8043	8.1559	5.1835	7.4901	6.7623	4.3019	3.92774	6.92961		0.873333	5.81429
15.7266	4.7715	4.6146	5.11023	3.8059	10.2204	3.9222	5.8424	5.26095	3.50622	5.036	7.2268	8.4102	6.0928	4.1832	8.7379	3.8075	6.8341	3.7168	3.4559	7.0114	5.59099		0.879997	5.57895
15.8458	5.3612	6.4383	4.86922	5.2439	4.4519	4.3748	5.9764	5.11572	6.55227	6.0288	6.8169	8.3374	4.9165	8.7171	6.4721	5.8083	4.5746	3.5426	4.4668	2.26074	4.22937		0.886667	5.455
15.9649	3.75	5.9913	6.76287	5.9578	5.6389	3.8751	3.502	3.75639	4.39845	5.3449	9.9926	5.9601	6.6424	7.8824	4.7993	5.218	4.0391	8.9932	4.9462	1.97309	3.86714		0.893331	5.39482
16.0841	4.5528	4.9759	5.23222	6.0234	5.9091	4.3666	4.5125	6.27026	3.92725	7.5515	5.4797	4.9434	5.7963	7.3738	7.2027	4.9991	3.7017	3.5981	3.3632	5.61391	2.76989		0.900001	5.15063
16.2032	6.1516	6.2047	6.44588	9.0801	4.7572	3.8714	4.1478	4.26026	6.24522	5.1867	2.65	5.4975	3.5903	8.7208	3.1705	4.2763	6.6291	4.2558	4.0654	3.72673	6.42648		0.906665	5.20761
16.3224	4.7475	3.7968	7.94866	6.8416	5.0312	5.0648	2.4954	6.36702	5.57954	6.9117	5.1992	8.416	5.2854	7.7017	4.9634	3.7647	6.0289	4.6502	2.785	6.88546	4.48813		0.913335	5.47392
16.4415	7.9352	3.6447	6.26206	4.8751	4.0651	2.5528	4.4876	5.23166	3.0044	10.481	6.2084	8.7358	3.4057	5.9571	4.1911	3.4462	3.9758	5.2749	6.4022	4.48664	7.46407		0.92	5.3375
16.5606	3.0468	4.6052	4.10303	7.8349	3.4733	4.9147	4.5586	4.53077	5.551	7.5119	10.9311	3.6041	5.7661	5.8319	6.0444	3.7652	5.5575	4.9832	5.4789	5.24989	5.7244		0.926664	5.38414
16.6798	5.0975	3.0349	4.98746	8.2323	3.2049	3.0217	3.1986	4.40291	3.12681	4.5217	5.9569	6.0759	3.6112	7.7099	4.3757	5.3129	4.536	7.5192	5.1583	8.05599	5.46363		0.933334	5.0764
16.7989	5.5644	5.7755	4.19932	4.0408	1.9369	3.1034	3.8951	3.22883	4.21314	7.0913	3.8626	3.7581	2.6115	3.7165	5.0127	6.5213	4.4118	3.0856	4.8183	6.80595	5.12308		0.939998	4.41791
16.9181	5.7526	3.4122	3.63557	6.8728	3.0964	3.1431	2.2714	8.25644	2.48363	3.7862	3.7488	3.9413	3.8914	5.4477	2.9957	3.4156	3.7179	3.9989	4.4834	5.57115	5.62508		0.946668	4.26416
17.0372	3.5736	6.1384	3.48853	6.2865	2.0136	2.3798	5.0874	2.61825	2.99481	3.2493	4.5778	4.6491	5.8174	3.796	3.9425	3.5867	2.6058	3.3619	5.0525	2.76174	4.44324		0.953333	3.92499
17.1563	3.7519	2.412	2.78083	6.531	2.6953	2.3106	2.7538	4.28831	5.17975	3.2157	4.313	5.0832	3.922	5.9317	3.2486	4.0634	3.9534	5.541	5.0667	5.8207	4.0414		0.959997	4.1383
17.2755	3.5309	2.0961	2.02352	4.6608	2.0912	4.0525	3.1501	7.30213	4.26999	4.1653	2.7947	6.7153	4.7418	5.3609	2.8272	2.1383	2.7272	4.0347	5.6743	5.0737	4.56491		0.966667	3.99979
17.3946	1.9943	5.0956	2.98854	3.8157	2.8343	2.8621	3.8155	4.89158	4.15511	2.8438	3.1319	4.736	2.3558	2.9506	4.993	3.7297	4.6329	3.5155	6.2207	3.93397	6.26496		0.973331	3.89341
17.5138	3.0088	5.1925	2.02523	4.2307	3.3086	2.9258	3.089	5.12957	5.57292	3.5514	2.4466	3.791	2.3251	3.4385	2.5293	3.6456	2.0981	5.8698	3.5569	3.85356	4.06424		0.980001	3.60253
17.6329	2.445	3.0111	2.92755	4.5463	2.1847	3.0607	4.7148	2.52169	4.9486	4.6088	3.5028	3.1914	2.0653	3.5097	2.8512	2.0513	2.276	3.7392	2.7316	6.78522	3.92132		0.986666	3.40925
17.7521	1.8444	2.4347	3.22276	4.2561	2.0085	1.9281	4.1505	5.79746	2.59814	2.9867	3.8498	3.8932	2.8348	2.9916	4.5	1.7363	3.4678	4.6155	2.2096	3.1422	2.89643		0.993336	3.20784
17.8712	3.9807	2.3758	2.78693	5.8848	1.993	3.8468	2.4893	3.24523	2.17579	3.4873	2.7668	2.371	2.1636	2.5681	3.2371	2.8079	4.1118	3.1953	4.4434	8.04107	3.25771		1	3.39188

## Sheet: Image38
X0	Y0	Y1	Y2	Y3	Y4	Y5	Y6	Y7	Y8	Y9	Y10	Y11	Y12	Y13	Y14	Y15	Y16	Y17	Y18	Y19	Y20	Y21	Y22	Y23	Y24	Y25	Y26	Y27	Y28	Y29	Y30		Ap-Basal	Avg intensity
0	8.8997	16.4475	19.9902	13.9125	14.749	13.0362	21.0964	14.3477	14.9597	21.349	15.3827	13.6912	16.923	14.6239	15.116	14.3175	14.532	15.0592	13.4932	11.6092	16.763	15.7422	19.9649	18.3885	19.3127	19.8064	21.9692	18.4687	11.9442	9.9272	7.9489		0	15.6055
0.1191	12.7567	18.2083	15.0924	16.6883	14.0411	13.2068	15.5679	16.6165	16.1617	23.006	15.8773	15.9285	12.7309	11.1789	16.4248	14.4389	17.885	17.1092	13.2171	10.2618	16.5714	18.1775	19.0047	11.898	15.0701	21.0603	17.2807	14.5279	8.2082	13.0689	8.1482		0.00467128	15.1424
0.2383	19.1474	19.2556	23.4222	17.2605	15.0262	14.2579	17.1221	19.5674	13.592	16.9947	16.416	17.5329	15.0781	9.6059	15.0782	20.4663	16.0644	16.11	10.3777	12.9512	14.0961	18.1086	13.967	13.1836	15.0518	11.3976	18.0708	11.7856	8.7937	14.951	11.4053		0.00934649	15.3593
0.3574	18.3231	22.9786	23.2614	13.087	17.0361	11.7845	17.7485	13.4523	16.0622	17.0072	13.1005	17.1606	13.865	10.5233	13.7659	13.7947	21.66	13.2341	10.6306	13.8288	15.9637	11.5052	17.1183	15.4166	14.203	16.1514	18.7155	11.1694	9.4714	13.359	12.926		0.0140178	15.1066
0.4766	18.6379	21.4015	19.0613	16.0389	12.7872	12.4523	21.4087	17.7361	15.0789	15.3161	18.8163	16.4623	17.9722	13.7386	14.3273	12.1739	13.6142	16.22	16.3956	12.9521	15.5869	11.5994	13.4568	11.57	14.0652	16.0676	15.1898	10.4521	11.0483	10.4602	13.916		0.018693	15.0324
0.5957	16.2568	21.8533	21.7307	20.3057	12.3642	12.4849	16.8283	19.0766	17.8673	15.3786	16.7209	15.0374	15.8803	12.6547	15.2557	13.8001	9.8759	17.7444	12.542	11.6265	14.6697	15.8735	8.5338	14.7794	11.3829	18.3337	11.8328	12.025	14.9205	15.2693	12.4204		0.0233643	15.0105
0.7148	15.1081	19.324	16.2761	21.1769	18.4024	14.9846	15.3842	16.5184	20.4523	11.7118	18.658	9.5308	16.4756	11.3611	9.9839	11.8775	12.5977	12.3726	11.7057	15.92	15.1361	10.9025	14.3321	12.238	15.0746	14.276	17.5471	9.1479	16.4261	15.1852	10.8616		0.0280356	14.5467
0.834	14.2797	21.7629	18.2372	20.4703	14.3646	13.5179	18.8516	18.0924	12.588	13.7034	21.3028	10.6689	13.7559	9.8758	11.1341	12.9882	11.6735	14.5802	8.0868	14.3197	9.1666	12.8745	13.7157	9.6866	15.3656	13.6811	16.7003	8.5232	7.9328	13.1709	13.1856		0.0327108	13.8147
0.9531	13.0992	24.0851	18.9735	21.2304	11.9441	19.0582	14.4166	15.948	11.139	12.5512	20.6761	12.1439	15.5301	16.3469	16.0337	15.8039	9.9807	16.1013	12.815	9.1004	11.6266	10.4123	14.3254	14.1813	14.6096	11.9858	15.8528	7.7711	8.0838	17.446	17.327		0.037382	14.5355
1.0723	12.8605	23.0239	20.5761	16.6317	16.713	16.7728	14.6318	9.8236	10.9677	12.6174	16.357	14.4799	18.4627	14.2775	14.4164	15.4374	10.9775	18.1847	15.7282	12.7499	12.2817	10.7669	16.6702	9.6716	19.1424	13.4527	14.7446	8.9679	11.236	14.4647	10.1371		0.0420572	14.4266
1.1914	13.0504	17.9178	17.1602	16.4531	19.6237	15.0487	16.152	12.2422	18.0956	11.4214	16.1999	15.7547	11.7894	10.5788	12.1443	13.4359	13.2695	18.7855	14.2107	12.1599	12.2856	13.1134	10.4244	7.6504	9.81	12.4715	10.9391	9.5141	10.1429	15.1906	7.9031		0.0467285	13.3851
1.3106	10.5674	13.1575	15.6787	16.6961	19.2992	15.0929	13.8646	16.7414	15.4719	14.2273	13.4423	13.0379	13.575	10.4871	10.9742	12.9075	17.1981	17.474	9.2903	14.811	15.0631	11.882	11.3818	8.6757	11.168	9.3125	10.69	12.2753	13.2942	16.4998	11.4595		0.0514037	13.4096
1.4297	13.8164	18.4281	15.7075	15.3248	17.0534	18.2521	18.1217	16.0683	12.7461	17.1242	15.2878	16.3743	16.698	10.5502	8.5734	9.6216	15.9685	19.3827	13.2649	11.0961	12.7117	13.7302	13.537	10.6914	11.9069	14.2808	14.2624	8.9366	15.2662	9.621	10.7019		0.056075	14.0357
1.5488	15.4183	18.7394	23.4972	13.9442	22.4159	18.9331	14.5963	15.5851	18.7724	11.7031	13.2265	16.1692	19.4531	8.6685	8.2618	8.719	15.5313	13.8523	15.1794	7.1897	9.5938	12.4321	11.431	10.3804	13.5985	13.432	9.8079	7.0143	11.2084	11.5868	12.5254		0.0607463	13.6409
1.668	13.8908	13.4684	22.2292	10.7188	22.6765	20.7124	20.924	23.0167	18.248	12.8072	15.0003	8.5443	18.2415	8.3816	12.9974	7.8894	15.0333	14.4503	11.3084	12.4323	10.1583	13.7625	9.9383	9.8053	14.0678	13.4046	10.8919	10.6571	15.7886	17.6115	16.6314		0.0654215	14.377
1.7871	13.0372	17.5032	20.732	17.1753	20.4274	24.4821	26.0952	18.0587	16.4386	14.7605	13.8106	12.2254	23.8868	8.5649	16.4774	11.3454	11.8984	15.7776	11.4625	11.9349	7.9283	9.3396	9.9695	9.535	12.2963	14.7635	13.1373	5.3142	10.9033	13.071	12.1002		0.0700928	14.3372
1.9063	10.1972	15.3466	18.5287	15.6856	20.9218	21.0379	28.4177	16.7274	14.6064	13.0501	15.8061	13.5576	25.6298	10.9595	9.4154	11.0319	11.6281	14.9842	9.1002	11.2668	9.9525	11.3001	12.3764	8.6708	14.6059	17.4381	13.1429	9.1828	5.1415	17.5243	13.0148		0.074768	14.2016
2.0254	9.058	15.0345	19.8434	16.4316	19.4317	25.4462	24.9454	15.9863	12.9783	8.4498	11.8342	12.5126	25.3533	11.1807	8.0557	14.3266	10.4153	19.4872	11.0367	8.3896	11.3897	10.9295	9.4085	11.6634	12.6394	15.9171	10.9335	9.7343	3.3088	11.5492	11.4768		0.0794393	13.5209
2.1445	9.1565	17.5922	20.8672	17.6269	15.3492	20.5472	23.1655	24.742	16.2997	12.2768	10.7737	9.793	18.605	7.193	10.75	11.0811	11.8041	15.9235	8.2226	9.996	8.5285	8.9092	11.1469	6.0588	11.7966	17.8657	7.2889	11.3376	5.3715	11.9385	18.1192		0.0841106	13.2299
2.2637	11.4565	11.7448	20.2204	16.8754	13.0199	20.1334	19.8611	24.1092	22.2845	10.6602	12.4511	9.7724	20.8713	7.2811	5.377	11.9623	12.7483	13.445	12.3375	7.0521	11.0852	9.6954	8.7853	6.5496	13.3052	24.2965	7.4029	9.8095	7.9695	13.3848	21.5842		0.0887858	13.4688
2.3828	10.5809	10.6578	20.5556	18.3091	13.4593	19.4145	22.8	23.5356	18.1607	9.144	10.0692	8.363	21.2985	12.0497	9.1202	13.2816	12.4365	9.9253	9.6217	6.4508	12.7848	6.9053	9.5495	8.3264	8.7702	21.3794	10.073	10.2065	11.9115	11.1594	22.4219		0.0934571	13.3136
2.502	9.154	13.9397	16.104	22.9677	14.5525	23.5434	13.5724	24.9784	20.9742	18.8487	9.5852	9.5302	21.6904	8.6145	8.5137	6.3056	10.0669	8.398	11.3769	12.1989	11.6754	7.2518	7.0611	10.3822	8.167	19.491	8.2252	7.6785	6.1436	13.1623	21.8571		0.0981323	13.0971
2.6211	14.258	15.7422	15.7829	20.1943	14.9712	20.0191	16.218	20.5293	23.4483	20.2206	10.6458	11.5463	18.3831	7.6246	10.5367	5.8095	11.9397	10.468	13.6121	10.9432	5.4574	8.2085	11.4208	7.04	9.8198	14.7441	7.8952	6.4965	7.0081	14.4876	20.1533		0.102804	13.0847
2.7402	12.1983	17.1564	18.0927	17.3729	14.159	12.0049	12.9563	17.2228	27.2972	19.6925	9.1113	11.0261	16.1735	6.408	9.226	8.9582	10.4497	15.7521	8.8812	8.2496	8.2243	7.172	7.5941	8.6326	8.7181	15.7665	10.3429	9.3824	6.7262	8.3194	22.4504		0.107475	12.4425
2.8594	12.3836	15.6604	17.7887	25.1279	15.0048	11.4267	12.7201	15.7574	28.6689	16.4995	9.1297	7.8926	15.8557	6.208	9.1533	6.2253	10.8166	15.6161	6.746	11.8103	8.3204	8.4623	8.2783	5.1986	14.8697	18.1671	8.3701	10.2357	5.65	6.7325	20.279		0.11215	12.4211
2.9785	8.1883	11.8757	17.5724	34.2586	8.736	11.7109	13.3177	14.7017	28.2648	16.3039	9.2347	8.5308	13.8516	9.5873	10.8431	6.4813	9.2681	15.6837	9.9342	11.0531	9.32	10.3912	10.2631	6.3235	14.0751	13.0722	7.9742	8.2154	6.246	11.2336	15.9902		0.116821	12.3388
3.0977	8.1191	11.8094	19.3963	30.8684	12.1938	11.8321	11.3972	13.5167	24.3138	22.497	9.1895	6.1503	15.6953	9.4413	8.3016	11.5581	8.1826	10.2221	12.2612	8.8035	7.3463	7.0805	10.6569	6.4991	12.4079	13.98	6.4808	9.1099	6.6836	10.3199	12.0477		0.121497	11.8826
3.2168	9.519	7.9116	14.6418	28.8504	9.5134	9.8804	7.3803	15.6272	27.1385	16.5916	7.325	7.0435	18.0369	6.107	7.2066	8.6537	13.1312	11.9998	10.102	8.5414	11.4938	6.0905	8.5903	6.5394	13.4436	11.263	7.4733	8.8675	6.5835	8.6709	20.5837		0.126168	11.4452
3.336	11.4695	13.3796	19.7849	25.877	10.1652	10.4376	7.4944	11.4012	21.5628	17.9345	7.6225	6.0319	14.6558	9.6097	7.2073	8.9743	11.626	14.332	16.6727	9.3151	11.8845	7.8819	7.4828	5.8125	7.8573	10.8727	9.1215	8.0097	7.6063	10.4794	16.6583		0.130843	11.5878
3.4551	10.5369	13.8099	21.7304	26.0494	7.8506	12.7339	11.8128	14.0855	19.1409	19.1855	7.6439	10.2793	14.0557	9.115	5.4713	11.3507	11.9705	13.2655	11.7767	12.6871	9.2112	8.2753	9.1365	7.0926	14.212	14.1045	8.1604	8.7178	9.8818	9.5875	18.392		0.135514	12.3007
3.5742	11.0539	11.1381	14.1726	17.1251	11.5108	9.7731	8.3602	11.3261	21.3526	25.2241	7.6969	11.5652	24.2519	9.605	8.094	11.6765	8.9355	9.4274	9.8355	13.3883	7.201	10.5899	6.1358	4.5213	8.5448	9.3374	6.8128	6.7698	7.7021	8.908	16.9858		0.140186	11.2588
3.6934	9.241	9.3237	11.6122	24.7296	7.7406	10.294	8.1349	13.8313	19.3682	15.8671	7.1873	5.9114	17.1202	8.0789	7.7573	7.1627	9.0459	13.5052	9.6862	14.7367	9.5535	7.8127	7.437	4.3845	10.7818	11.3828	8.2866	8.6653	6.5294	10.4405	15.6628		0.144861	10.6862
3.8125	9.071	10.8359	11.1469	21.5517	13.9528	7.952	7.5971	9.2203	20.6307	12.8116	8.9496	8.3781	14.6364	7.6226	5.3459	6.3196	8.4263	13.7015	11.3081	12.232	7.7328	6.0122	6.5236	4.3623	10.2241	14.9913	7.6874	10.2583	7.0133	6.5945	19.5647		0.149532	10.4082
3.9317	10.2056	12.404	9.8671	18.6465	9.3264	8.2772	8.1613	9.1505	17.3477	12.8477	9.5956	10.138	16.6548	7.8771	6.5712	8.8411	10.1371	16.4206	9.0791	8.4616	9.7276	7.8063	6.0049	4.8215	9.2015	12.1853	7.2139	11.5142	9.3492	5.7582	16.5902		0.154207	10.3285
4.0508	6.4149	14.8448	14.2278	14.8257	12.4932	9.0187	9.9339	10.6723	19.2638	16.3401	6.1465	11.5691	15.9082	8.913	5.305	8.8536	7.3688	13.6302	8.5113	8.4024	11.7133	5.2656	5.6865	5.2209	4.7096	9.186	6.4419	9.9647	8.1442	11.2583	12.1642		0.158879	10.0774
4.1699	6.4951	12.1797	11.3374	18.2565	9.4207	8.6202	13.6286	11.9433	18.6574	11.0071	8.3507	5.8643	16.7216	8.6818	6.1582	9.053	5.0998	14.8287	6.6359	8.5014	9.6504	4.4186	6.3098	4.6211	6.5562	11.4369	7.6306	7.8445	8.5485	10.54	17.5701		0.16355	9.88929
4.2891	6.7172	7.1144	12.8448	13.2134	6.7466	8.2481	12.1358	9.1032	18.6592	7.5732	6.6387	7.3888	15.3274	5.6322	4.523	8.9918	6.1767	16.5075	6.494	9.9117	5.7837	4.2956	8.0779	5.6838	8.9613	9.7275	6.4332	8.6697	8.4174	11.7359	18.7386		0.168225	9.24104
4.4082	9.4866	9.5514	11.6189	16.0684	9.127	10.2289	10.0614	15.9468	15.1087	10.3018	6.7252	6.1469	16.8082	5.6029	4.99	5.5661	8.1878	18.6501	8.9895	7.8862	7.4548	5.5757	5.1236	4.7443	8.7772	13.625	6.9221	10.1889	9.7458	9.5578	16.6851		0.172896	9.85333
4.5274	9.382	9.5054	14.3725	17.8901	7.0998	11.5894	8.0205	10.502	18.3039	10.2074	7.1687	8.9616	16.8154	6.2254	10.1627	5.5145	12.6036	16.8046	13.3225	9.2755	6.1921	5.8364	5.5662	3.7051	7.553	14.2348	5.5811	9.0256	7.8051	10.1383	10.5287		0.177572	9.99658
4.6465	8.6745	13.3739	13.2218	13.7212	11.6692	10.8401	9.6213	11.472	17.6539	10.07	6.5032	6.8456	17.4501	11.184	8.3349	7.59	15.4125	20.3014	11.7535	12.9036	7.2842	6.3523	7.8389	3.725	8.0391	14.3023	7.1306	8.9044	9.0129	8.5641	13.0378		0.182243	10.7351
4.7657	5.314	10.7328	10.2859	13.6883	11.6431	10.8404	12.8957	14.3168	19.2163	7.5673	12.5955	6.5513	15.1497	11.8504	7.1172	6.1565	12.0124	17.6937	8.6114	9.5625	6.4982	4.6687	5.8053	4.0515	7.2851	16.9318	7.8118	12.7965	9.0148	13.4684	16.2591		0.186918	10.5933
4.8848	4.088	7.0058	11.8084	19.8629	11.9377	8.4627	12.1143	13.2101	16.3551	8.3317	10.4636	6.0067	14.9246	14.9782	5.6093	7.377	11.3483	13.9069	6.7279	12.9502	5.3131	4.6046	6.7068	4.5538	7.2708	13.2281	6.8631	10.6362	11.1594	12.1334	12.2628		0.191589	10.071
5.0039	6.8449	7.6089	10.8671	18.8114	8.1025	8.637	16.81	14.7657	15.3231	8.7428	10.4349	5.2542	12.8816	15.5714	5.7422	6.2527	10.9003	18.3083	10.6512	7.4842	7.5492	7.9408	3.2016	6.1924	6.2986	14.9207	10.9054	10.3877	8.4575	10.8438	13.4306		0.196261	10.3265
5.1231	7.0223	8.4785	11.8219	22.7977	7.3994	10.0615	12.7199	9.1857	20.7959	8.6897	10.1141	8.0005	20.8044	11.2284	5.54	7.236	11.6298	19.6723	9.9156	12.8869	7.4022	7.7409	4.5859	9.3339	6.136	19.2575	10.6465	11.8788	9.0113	9.2128	15.2478		0.200936	11.1759
5.2422	6.7883	9.9007	13.6893	23.7078	8.143	10.1866	9.6502	10.1871	20.0143	9.241	11.8641	8.6896	14.2557	14.4901	4.4339	8.0704	14.907	16.6856	14.4101	10.2116	8.72	6.5605	5.4744	7.4333	6.9445	18.4115	11.3428	10.9639	7.1311	11.148	13.3132		0.205607	11.1926
5.3614	6.4197	11.7048	12.2666	20.0475	7.4538	11.2481	9.0731	9.7538	19.8682	11.3022	10.8671	10.6136	18.1093	11.2057	5.7279	6.0705	12.1903	12.7435	9.2722	11.5521	11.2785	7.174	5.3319	10.3254	8.1558	11.8679	7.7865	11.6244	10.7751	10.261	10.0162		0.210282	10.7125
5.4805	6.3445	10.9705	13.859	18.4818	8.1125	10.0399	10.2958	13.5674	14.2771	10.477	11.8487	14.0688	18.9719	9.8956	4.3019	5.5407	10.2095	17.955	12.0754	12.2038	6.7732	6.8658	4.41	6.7745	7.8115	9.8347	5.4843	10.113	8.7352	14.2685	12.198		0.214954	10.5408
5.5996	6.8294	9.9538	10.1079	16.7241	7.2073	9.353	10.4585	11.7279	18.6828	11.0265	10.578	6.6875	14.4012	8.4851	4.5148	5.7621	11.1885	16.0825	14.7557	10.4011	8.7783	6.4183	3.9993	4.7854	6.363	12.55	8.2616	8.8094	9.2798	9.7508	8.5106		0.219625	9.75594
5.7188	8.5961	10.5335	10.8741	21.6255	9.1816	10.9141	7.2684	9.3045	17.572	8.3367	7.7602	7.6174	14.1182	8.668	4.8484	6.1246	11.9004	10.5688	15.5281	8.4651	8.6563	4.3165	5.1701	6.3664	7.6883	12.5352	11.038	8.8189	11.1901	14.8981	12.465		0.2243	10.0951
5.8379	7.8126	13.8184	13.2275	14.1245	11.8728	9.3888	7.842	7.6344	16.4703	8.2512	11.0657	12.5926	16.549	6.2851	3.2177	5.7455	15.6	20.5652	11.2694	9.3049	8.0789	4.1554	6.5824	7.5475	7.5348	12.7245	10.9083	9.9824	9.8449	12.739	16.1161		0.228971	10.6081
5.9571	7.5796	13.1215	16.4595	12.2157	10.5288	10.4515	7.5096	6.0045	17.8932	11.7144	15.1753	10.8539	18.4527	8.3412	3.3225	5.2183	9.3705	25.0222	14.6868	9.7115	5.7002	7.0107	7.41	6.7607	9.2287	9.5321	11.0958	10.3271	8.7226	10.0031	13.6969		0.233647	10.7458
6.0762	8.4747	11.2191	11.0032	18.1614	9.734	10.6293	10.6221	12.2302	20.2964	12.0748	14.642	11.5505	12.2901	9.781	6.4145	8.527	8.0773	16.1236	16.6953	7.8989	7.5153	7.8021	4.264	7.6238	5.5519	7.7248	7.8867	14.4559	10.9196	9.5235	10.077		0.238318	10.6384
6.1953	10.2701	10.1144	9.4219	13.3682	10.403	10.4286	9.626	12.2647	13.3791	11.7489	16.277	8.527	12.7441	9.0114	7.6976	5.7251	11.2396	14.9797	7.6855	12.4302	9.5659	5.8196	6.761	4.1943	6.3415	12.5573	8.5075	15.3163	7.774	11.011	13.4767		0.242989	10.2796
6.3145	9.3953	8.2297	13.2945	17.5391	14.4752	10.6594	5.5238	9.0899	15.4245	11.8189	11.8415	10.4099	12.4516	10.9269	5.1186	5.9852	9.1437	17.7653	10.1417	12.2457	7.7199	5.9413	6.8181	5.5123	7.9346	10.8993	6.3357	16.8658	7.9072	15.114	12.8912		0.247664	10.4974
6.4336	9.5085	7.5625	14.5587	14.1979	12.0895	15.8414	10.9784	10.2606	12.0815	12.5087	11.7067	11.646	11.633	11.2221	5.7116	6.8614	11.5812	18.0808	13.1155	12.9164	7.9197	4.1076	5.4867	6.1912	11.5735	10.3372	9.9713	10.686	7.7247	14.9866	15.1294		0.252336	10.9089
6.5528	9.541	8.2567	12.9131	18.0763	12.9065	15.1279	13.5241	9.5321	16.5677	16.2685	12.5317	9.8305	9.324	14.7542	5.8585	8.4033	15.3882	21.4895	10.1898	16.442	7.2281	6.8105	5.1945	4.1261	9.7404	9.0273	7.2552	8.9841	8.6803	11.9256	12.7231		0.257011	11.2458
6.6719	9.9994	6.616	12.3212	16.6694	12.9179	13.1587	7.1034	11.5428	7.866	15.8091	11.034	9.9673	10.8506	17.9001	6.435	7.8045	15.0095	18.1759	10.8846	12.7826	10.1452	5.3402	9.4112	7.5841	9.0616	9.0683	9.7935	10.1736	7.0103	11.482	13.1281		0.261682	10.8725
6.7911	7.9743	10.716	16.7928	16.4955	10.5047	15.6375	8.0491	11.8808	9.4412	15.4166	15.8115	10.2423	8.4409	16.8495	6.756	7.7053	13.7686	17.5622	13.4904	10.1354	9.5512	6.6694	6.8641	6.7986	8.8894	11.2829	9.299	11.3673	10.5595	12.3152	12.7429		0.266357	11.2906
6.9102	7.5986	11.3007	14.2674	16.4114	9.6429	18.7767	6.4372	10.9079	12.0146	12.7802	9.7947	10.5553	10.3088	17.3163	7.5288	10.204	10.2635	14.5178	13.1433	15.9676	10.3634	7.0902	7.8655	8.5226	10.3893	10.8743	12.91	10.4549	6.9999	14.3832	15.5169		0.271029	11.4551
7.0293	10.4737	9.173	10.9285	16.7693	10.26	14.7625	9.2366	8.8161	13.4352	8.3972	11.8845	9.0933	11.1959	15.3034	6.0883	9.0505	14.0722	14.781	12.0285	15.0756	9.8997	7.9454	8.0215	7.9949	10.6186	9.0889	11.5915	12.9936	6.0413	12.5261	15.8011		0.2757	11.0757
7.1485	7.4996	11.5478	9.5541	22.332	10.6256	14.3593	14.5392	13.8826	13.8108	12.5462	12.5126	14.0943	7.9588	14.2598	7.6963	7.4522	12.3453	14.2508	12.4507	16.0971	6.4826	4.394	7.2445	6.5009	9.4603	7.9995	9.3503	9.1045	8.9518	9.165	19.8069		0.280375	11.2347
7.2676	11.2132	12.678	13.6717	15.5467	11.0744	16.0278	13.1335	15.7337	13.5793	14.2217	11.4461	12.8159	7.8544	15.2147	9.556	8.4773	7.1154	11.1166	10.1115	10.8955	6.0199	5.7897	7.9486	8.0684	9.1339	8.0058	11.368	10.4152	4.3714	12.1746	18.3113		0.285046	11.0674
7.3868	11.6929	14.897	18.6533	20.5932	9.4775	12.2126	11.2418	7.9271	16.2395	13.9896	12.3154	9.4072	12.6943	9.9868	6.9239	10.0512	7.4649	15.8892	8.0775	11.0621	5.506	6.2151	5.7077	6.8501	12.2724	7.4967	9.4587	7.3007	3.8553	15.3915	15.1583		0.289722	10.839
7.5059	17.57	14.7921	12.7254	19.6439	10.8638	9.9373	14.5625	13.7254	17.4326	11.7719	12.3073	13.8515	10.5045	12.6338	6.3694	10.9857	8.5125	18.5668	7.6077	10.1776	6.8067	10.5652	9.5657	8.3921	7.1073	7.1711	12.4948	6.0443	7.6418	12.1926	17.724		0.294393	11.6209
7.625	19.2764	12.7558	14.0283	15.8443	10.7667	11.5016	9.6625	18.0136	21.8172	8.4586	9.8484	12.029	11.3141	16.8124	6.4402	10.0038	14.0058	18.2018	13.0459	8.0267	7.6181	7.485	7.6866	6.3762	6.7087	7.5554	14.4987	7.333	5.9749	6.5897	20.8349		0.299064	11.6295
7.7442	14.6959	10.5485	9.923	22.2857	10.5269	10.5928	7.791	10.7	17.2171	13.3525	9.9835	16.3009	10.3366	17.4668	8.3474	10.3342	10.7853	17.4657	10.7207	7.9888	7.7196	10.8591	7.7686	6.3692	5.1881	7.7571	9.7378	5.4005	5.285	10.4238	14.3056		0.303739	10.909
7.8633	10.7112	15.748	8.665	19.0008	8.9415	10.3489	9.1889	13.1644	16.9195	15.4741	9.0047	14.9818	8.3617	16.3156	9.5235	7.4609	9.7899	13.5998	10.1083	10.7043	9.932	9.1135	6.9976	10.8653	8.8365	8.0459	6.7822	7.1888	5.7277	14.2847	11.1249		0.308411	10.8681
7.9825	15.9067	15.5957	10.2032	19.4925	9.5072	12.2166	5.9209	13.358	17.6698	9.0999	9.1882	11.1711	8.3537	11.0468	10.9799	9.8485	10.6134	19.2125	7.9255	11.5147	6.3847	6.9291	6.3436	9.5434	9.6694	8.4798	12.4126	6.5342	4.3334	13.3159	15.1276		0.313086	10.9
8.1016	14.7079	15.4416	12.3813	14.7898	11.2884	8.8393	5.8076	9.6108	16.2944	9.8127	8.3748	15.1431	8.3359	13.5447	10.7065	7.4582	9.9625	13.5353	7.4561	9.3042	8.2746	5.9055	7.1371	8.3088	8.4744	11.4452	8.8378	5.0122	3.5582	10.3629	13.8518		0.317757	10.1279
8.2207	15.4456	15.967	12.6369	18.181	13.4701	11.0157	4.4581	13.8698	13.502	8.4956	9.7962	12.433	8.5313	13.3591	11.0088	9.5233	7.3206	14.4677	8.0362	9.8328	7.9708	9.7496	8.7366	6.7425	6.4743	10.5326	11.1808	3.988	4.3127	8.9529	13.6289		0.322428	10.4394
8.3399	12.3573	15.4226	10.4998	20.7028	11.6591	8.5095	9.3842	13.4527	11.7895	11.6011	8.9616	9.3151	10.3152	18.6958	13.4048	10.72	9.6845	10.3277	10.5387	10.6016	5.2755	7.8097	7.7282	9.2035	13.5501	11.3645	12.1112	5.3765	5.4092	8.5974	10.6392		0.327104	10.8067
8.459	13.0428	16.8509	12.4026	15.2489	10.9116	6.6655	8.4511	11.475	15.097	6.655	10.4991	11.3041	12.6514	17.887	11.1253	13.6235	10.9938	11.9648	7.8463	6.4403	5.0275	6.7731	7.2379	9.456	11.2707	9.0262	13.2363	8.9118	4.418	10.443	10.8781		0.331775	10.5747
8.5782	16.8129	17.8891	19.885	12.9831	13.1499	8.1986	8.2361	13.3223	19.2884	11.0388	11.6317	10.8576	13.5461	15.127	12.8431	15.4326	13.5235	13.1218	6.2842	7.0459	8.6348	7.0374	5.862	13.4091	12.2842	7.2038	10.5513	6.5393	6.6792	13.0009	8.8651		0.33645	11.6221
8.6973	17.4361	15.7271	14.0962	12.1439	15.9153	8.1836	9.21	13.1342	14.4813	8.8091	8.7019	11.2558	12.2814	10.702	13.8867	13.3112	9.4151	17.5379	10.3389	8.6857	7.4583	9.5658	6.7716	8.4711	9.6609	6.7495	10.4317	3.1485	5.3526	8.4199	11.2461		0.341121	10.7268
8.8165	12.9389	11.2202	15.8658	15.6809	13.7009	9.2051	7.4984	15.8616	12.4211	8.1619	7.3972	10.797	12.988	10.15	13.3188	9.4485	8.1912	13.7856	9.0729	7.625	6.0223	9.2495	7.9603	4.8102	12.7334	6.2415	13.8879	2.9014	3.9289	7.4526	11.246		0.345797	10.0569
8.9356	14.1563	19.4841	12.673	16.2168	17.7065	6.5279	8.2341	13.2021	15.7106	10.2484	7.2153	12.5498	13.9312	9.8701	11.1258	9.1477	9.6623	10.5201	9.76	5.9302	6.9642	8.3896	8.8685	9.5145	10.3785	6.0904	9.0854	5.0491	7.2912	7.0354	10.8005		0.350468	10.4303
9.0547	12.6327	12.0969	9.9044	15.4296	20.8184	4.5699	9.2344	12.5017	19.924	10.1725	11.6048	8.6884	12.3096	8.5051	10.984	11.2211	9.2069	11.2082	10.2007	7.8637	6.2673	8.0169	8.7271	11.8479	10.3767	8.4241	7.4115	2.9389	5.5383	7.2645	12.4419		0.355139	10.2688
9.1739	10.4595	15.6554	9.4998	13.4498	15.8219	4.9008	11.0519	9.2928	17.2578	10.0763	11.3158	7.811	15.0527	13.5172	11.2396	9.3244	13.302	12.2817	8.1883	9.5819	6.4514	9.941	8.6954	6.3681	7.8431	11.6145	6.2541	3.3813	5.1678	7.2464	9.1961		0.359814	10.04
9.293	9.3274	15.3218	10.2892	17.4099	15.1803	4.4026	7.3689	12.7192	11.6821	9.876	10.0914	9.0714	13.702	8.967	14.8982	10.7129	13.3561	10.6131	11.9654	7.4323	9.8549	10.0668	9.1738	7.4098	6.4894	5.0623	8.4332	3.5872	6.7751	7.2366	13.0448		0.364486	10.0491
9.4122	12.6954	15.7825	6.9861	14.1734	14.0631	9.2523	5.8366	12.1425	14.5617	9.6448	11.3777	7.6772	9.9172	5.2841	13.7759	10.8675	10.1471	11.0807	9.8626	9.1397	6.5664	9.5849	8.7569	9.4778	7.462	6.5003	8.8827	4.9658	4.1655	6.0838	14.9985		0.369161	9.73267
9.5313	14.1857	11.9632	10.1561	15.0936	11.0413	6.6324	4.167	11.0785	16.7906	9.6267	16.3842	9.4774	11.0512	7.1296	16.294	13.105	12.2378	14.4447	5.8108	9.9517	9.6889	8.0283	9.1602	8.599	9.9239	8.622	7.7564	4.5555	4.0079	6.1397	15.3108		0.373832	10.2714
9.6504	15.1923	13.0067	13.6254	13.6703	13.2172	4.4654	4.4716	8.7364	15.1268	8.5649	10.9897	11.1669	13.4467	9.8694	9.5879	15.739	11.916	9.9237	7.2348	7.7197	9.476	8.7702	6.6654	12.0468	8.9939	4.8852	7.6208	4.1708	3.128	6.3478	7.5041		0.378503	9.58967
9.7696	12.157	16.3629	13.8697	13.4359	13.4929	5.6158	4.0191	11.7159	17.0815	12.0441	9.7362	7.0107	8.233	9.8605	13.2134	12.8389	12.3629	11.4871	8.0617	6.8357	10.9296	9.2387	7.459	8.0116	7.3479	5.3433	6.2758	3.8807	2.9081	5.7672	11.9355		0.383179	9.63007
9.8887	12.1138	11.0149	9.0538	17.0628	14.0278	5.153	5.9583	17.5998	11.2273	11.8097	5.3652	4.2361	8.7256	9.3555	16.6891	10.835	11.4514	12.2661	5.5126	6.0654	11.5759	8.597	12.0746	11.5468	8.6303	8.1399	6.7941	5.8346	3.285	4.7185	13.7017		0.38785	9.69102
10.0079	12.909	9.2942	13.2667	10.8327	10.9002	3.9507	5.7755	13.3432	17.4616	8.4574	6.5228	8.7186	10.0562	13.1968	13.7253	12.7532	11.9038	8.0755	6.3435	8.3627	6.6273	7.7347	11.4061	11.7047	7.0405	7.7241	7.765	5.7285	3.73	4.3668	10.8639		0.392525	9.3723
10.127	13.005	15.7199	7.7414	12.8601	9.9898	7.8536	5.3135	10.3407	11.1392	8.5095	5.0222	7.0321	5.3992	8.5818	19.799	16.0805	10.1556	7.6856	13.4742	10.2668	5.6688	9.3879	7.1106	5.2631	7.8835	8.8046	4.9906	5.3714	3.9212	5.3271	12.6614		0.397196	9.10838
10.2462	14.8563	10.8561	11.9906	18.1989	8.616	6.8327	3.9692	10.9736	13.0668	12.0488	8.6429	8.5072	9.0648	12.7854	14.5784	13.3186	9.1727	4.6248	6.8111	9.2643	9.2763	10.0661	7.8671	7.4523	6.8594	5.8694	6.0008	5.5871	3.5043	4.5774	10.166		0.401872	9.20663
10.3653	12.468	10.6451	8.1728	11.2075	10.3759	6.1102	3.9503	10.8283	13.6129	8.8899	8.9463	6.9769	9.6184	12.7341	10.0813	13.3312	14.6649	9.7631	14.2917	9.5016	5.4731	5.312	6.7268	6.3041	7.311	5.3899	6.7719	2.9943	3.874	4.2601	11.8464		0.406543	8.78819
10.4844	10.2532	8.3318	10.05	16.9402	9.3314	6.7512	5.2255	10.0239	20.5797	7.4877	12.1961	10.4095	8.8839	9.9963	11.0823	11.9207	9.0257	7.653	8.0462	6.6955	3.6588	5.302	5.2439	9.0754	9.5304	9.0981	7.6147	4.5974	2.8284	2.2037	11.3608		0.411214	8.75475
10.6036	9.9663	14.3345	9.2652	13.7541	10.2388	5.2937	7.8831	8.0336	15.3285	11.7485	10.6308	7.7073	4.9314	11.4715	9.8632	11.8303	10.1502	7.1869	10.449	7.6635	6.5507	4.9477	5.5761	6.8137	8.943	7.318	6.4561	5.3802	4.4495	3.8672	10.8105		0.415889	8.67236
10.7227	8.8007	10.3038	7.8262	18.7951	11.7348	6.683	8.6574	10.8802	12.621	7.0493	5.1404	6.3117	9.1558	14.3159	11.3055	15.0851	10.9785	7.3603	10.2033	8.834	6.5914	8.9734	5.3498	5.8339	9.1665	6.3573	6.0377	2.5414	4.1518	6.228	10.7668		0.420561	8.84
10.8419	15.6035	8.5861	8.8614	23.7287	12.8104	3.7057	7.001	12.1653	17.3261	8.0259	6.4946	9.5952	11.6446	12.0803	11.4347	17.6399	13.5747	11.9729	7.2327	9.0736	9.2714	7.7588	6.5045	7.5171	8.6747	7.2093	7.1528	3.4107	3.3163	5.4384	12.5441		0.425236	9.91469
10.961	11.0511	12.4179	7.4058	19.7791	8.1452	3.6834	4.9572	6.0216	14.3049	6.8571	5.418	12.0701	8.2845	8.872	7.1124	13.6956	12.9734	9.312	9.5853	8.8163	7.767	7.6459	6.4847	6.9728	9.6421	7.8866	7.1896	4.6168	3.9217	5.2149	9.0173		0.429907	8.61685
11.0801	10.3894	9.8362	9.7137	17.0413	12.5512	3.5306	6.7564	6.3858	16.3077	9.6716	7.7935	8.0461	6.7797	8.52	11.1522	11.7859	13.5057	10.7872	6.0921	6.7875	9.7209	4.1753	3.5598	7.8673	11.8876	8.9303	7.7411	4.4591	4.4021	3.4105	8.9354		0.434578	8.66204
11.1993	12.9898	10.0938	8.5843	14.9018	13.7135	3.5657	7.2167	7.0694	12.8943	7.023	9.1881	5.7577	8.6124	7.3438	9.6845	12.4484	12.696	10.8596	8.9814	9.0704	10.0204	4.6123	4.1106	7.9733	9.0954	7.1859	9.4837	4.2974	4.3581	4.5281	8.4946		0.439254	8.60821
11.3184	14.6015	10.1359	9.9522	16.1541	8.7036	4.1019	5.3859	7.5022	19.9889	5.226	10.9653	5.7911	6.8139	8.8015	9.9615	8.9821	8.1411	10.701	10.8485	10.1993	7.7413	4.2494	6.6968	4.1137	7.7636	7.0773	7.7589	4.5858	5.8757	4.8201	8.0987		0.443925	8.44319
11.4376	15.2924	14.3724	11.7022	16.87	12.0369	4.5504	5.7096	7.1894	17.3759	10.678	7.6383	8.8925	13.9847	10.0482	7.627	13.1835	7.6509	7.2441	10.6879	9.0933	8.058	5.463	6.2078	6.6267	13.0847	8.3627	6.8985	4.4101	3.3345	4.7411	9.592		0.4486	9.30989
11.5567	10.8241	9.4513	9.8192	17.5625	13.0707	5.2886	4.7695	5.1695	14.0011	6.0698	7.711	7.4061	10.0393	7.4549	8.7183	9.46	16.9253	5.9796	11.2955	8.3266	7.1384	4.3838	4.6548	5.443	10.595	8.5506	5.9711	2.6508	2.6092	4.5704	9.5671		0.453271	8.2412
11.6758	9.939	9.5016	5.8438	19.6299	14.3601	4.2683	5.2851	8.2757	14.0697	6.0355	10.0859	7.667	8.0396	8.4492	10.5074	8.3689	13.1716	7.6485	12.0011	6.8574	5.8903	3.7809	4.5201	4.7275	9.1041	4.916	7.4437	2.9436	2.8166	5.5558	8.3904		0.457943	8.06756
11.795	6.3684	6.8948	12.5125	17.759	8.5375	2.8905	4.2004	8.1352	14.6435	8.2936	4.8323	11.0034	9.9451	8.5438	10.4449	14.1928	10.1036	8.0481	8.6244	8.9014	4.251	3.7107	3.5452	4.6246	8.3529	7.1781	5.4861	3.5588	5.2089	3.819	6.6657		0.462618	7.7831
11.9141	5.0964	8.201	9.7644	15.182	11.235	2.8616	7.241	12.3963	13.4481	7.2747	4.3557	11.2307	6.4222	6.7537	9.809	11.1288	10.4429	8.6509	8.9356	7.8393	5.2654	3.3472	2.7335	5.4172	5.6156	7.8723	5.1974	4.543	4.3533	4.5435	6.6382		0.467289	7.5418
12.0333	6.1212	11.5856	10.0295	17.7489	8.2505	8.2967	4.0504	9.5983	14.1445	9.7755	5.5813	8.4073	8.5882	11.065	13.3134	14.1347	8.4638	5.4856	7.7955	8.1027	6.3325	2.5079	2.8699	5.5939	6.9602	9.2025	5.6184	3.8374	2.3721	4.6598	7.4895		0.471964	7.99944
12.1524	8.1073	12.95	13.4198	19.3922	10.6415	5.5331	4.0975	11.0256	12.3812	4.604	7.6264	6.9353	6.7428	9.1383	13.8825	13.5437	11.4731	8.7185	6.3184	6.0974	7.3593	3.0128	3.1274	6.7715	6.8953	8.7561	5.9819	3.2671	4.5951	4.3869	6.1867		0.476636	8.16028
12.2716	6.3079	15.0717	9.9005	16.4476	12.2536	5.5741	6.1068	12.5926	11.3031	5.0409	7.3397	7.2423	8.08	8.4687	9.9591	15.4635	13.9383	6.5742	6.6203	10.3	7.2614	3.2823	3.1813	5.2422	10.0753	6.928	10.2728	4.4347	5.2958	4.5321	7.3899		0.481311	8.46712
12.3907	7.42	12.2984	7.8889	15.7654	7.266	4.6172	5.8838	8.358	10.1643	6.6707	4.7411	7.1979	5.7179	9.6244	9.5291	16.2415	11.1489	5.6258	6.0496	7.3016	6.897	5.3118	2.9834	6.6525	5.0843	4.4034	10.7306	3.9339	3.9359	3.975	6.0166		0.485982	7.40113
12.5098	4.8712	9.2458	10.8956	13.7815	9.4241	7.7884	4.6928	11.2078	12.1592	8.7304	3.7815	5.0853	5.9747	10.0475	7.9297	14.35	10.6143	5.8579	12.4344	5.0251	6.4279	5.1871	5.0091	7.9085	5.9862	5.5536	10.0656	4.3134	3.4552	5.3043	6.1862		0.490654	7.71917
12.629	9.1741	11.7934	6.5291	17.3514	10.4858	4.842	4.9553	11.7538	11.1263	6.6877	5.3187	7.5211	4.3436	9.3249	6.8408	17.2985	8.8679	5.8606	8.1474	8.8148	6.9978	4.6452	4.2552	4.2299	7.717	4.5022	4.4786	2.7372	3.1589	4.5794	8.1703		0.495329	7.50029
12.7481	14.2904	10.7227	5.6039	17.1082	8.929	2.6393	3.8946	8.8525	6.4271	7.8501	5.1144	4.6454	8.5775	10.5701	8.3471	15.0562	8.014	9.1827	13.9071	7.6294	4.4131	4.1237	4.9905	5.7094	8.9443	7.4057	8.4648	3.1505	3.4209	4.3958	10.3028		0.5	7.82849
12.8673	4.7557	8.1897	8.4069	17.4955	7.9444	3.0319	3.5595	10.0913	6.9384	7.0781	5.8619	11.6126	9.2281	13.3373	13.9333	17.0757	15.2334	5.1734	13.8224	5.612	5.8738	3.5735	5.1637	4.5805	7.7644	9.6888	9.7055	2.7587	3.8146	2.3828	9.1102		0.504675	8.15477
12.9864	9.3452	10.6843	6.9729	14.6219	6.7868	4.0937	3.3211	9.1637	8.1504	6.5724	5.3952	9.1797	9.8042	8.7629	10.7073	17.1044	9.7217	7.2088	9.155	6.8282	4.5363	3.3703	3.8314	2.7501	9.2643	9.965	6.8479	3.1217	4.3014	2.3113	8.5845		0.509346	7.49884
13.1055	10.919	15.2672	6.2503	16.2309	11.2213	5.7334	5.9807	9.3406	8.7645	7.9225	7.3329	5.1083	4.6359	7.8846	8.9799	10.1122	9.6179	7.2467	9.1942	5.073	3.1315	2.5971	2.8429	4.2901	5.9261	10.173	7.6424	2.6906	2.5153	2.2427	10.0134		0.514018	7.31875
13.2247	4.9639	12.9324	10.095	22.2256	10.4403	4.9339	6.2775	6.8618	9.8234	7.5765	4.0622	4.654	5.0693	7.9119	11.3293	11.7446	8.4333	4.4778	10.429	5.14	5.2741	4.4911	3.1056	6.551	5.6642	6.5084	5.6396	2.3471	2.1871	4.1805	8.9001		0.518693	7.23324
13.3438	5.6219	12.0183	6.439	19.7129	7.6687	5.4481	4.1969	12.3725	10.6656	8.2463	5.0816	4.4196	4.6171	10.0501	7.904	9.9601	7.6133	9.368	6.8469	5.4814	3.4787	3.1724	3.6676	3.3362	8.3234	8.4173	6.8265	2.4068	3.4336	3.879	8.2555		0.523364	7.06224
13.463	10.3458	9.2621	9.4228	19.9477	9.387	5.5242	3.068	9.9107	12.6064	7.0814	6.1599	6.9184	3.305	6.4046	10.4869	11.6181	7.4715	7.6748	5.7844	4.3857	5.5134	5.6294	2.0557	5.049	6.31	5.2053	6.1885	3.2392	2.9164	4.235	5.5316		0.528039	7.05287
13.5821	10.7731	5.2805	9.63	21.8345	8.0884	5.5022	3.955	7.3908	14.3588	5.7956	6.0585	4.3054	5.5187	8.8593	14.1786	9.1659	7.9915	6.0512	5.2643	10.9724	6.3736	4.4733	2.5269	4.2045	7.5288	6.2959	6.3951	3.744	4.0674	3.9686	8.5309		0.532711	7.3898
13.7012	7.7332	9.0161	12.2202	22.4624	6.8606	4.8155	4.0145	10.1416	12.8292	7.1353	5.5659	4.0439	5.3253	7.6304	10.7857	8.1734	5.6011	8.1493	4.8541	10.9725	3.0868	2.3786	2.3467	5.1989	8.3891	7.4303	5.7739	2.3025	4.7042	4.2345	6.8932		0.537382	7.13125
13.8204	7.6861	7.2808	12.8436	21.0806	7.7094	3.1404	7.6569	10.4055	8.8537	8.8016	4.3624	5.7772	3.7041	6.1743	9.1579	11.0695	6.2412	4.3616	8.8666	8.2098	3.1897	2.9974	2.4447	3.3571	6.4281	9.0271	5.4649	2.3018	2.2583	3.3593	11.0435		0.542057	6.94371
13.9395	12.4796	6.2426	8.5946	15.0167	4.9659	3.893	7.4319	9.5048	10.0934	6.6889	5.218	5.4821	3.2689	7.0757	6.9162	9.5028	10.4553	4.318	6.8152	5.1487	4.4802	4.0988	3.7855	3.2762	8.4892	4.9648	10.6831	3.3506	3.9597	4.4674	8.5682		0.546729	6.74955
14.0587	11.9114	13.4396	8.5163	11.6383	4.5101	4.4706	4.5502	5.488	6.5163	3.6696	4.5187	4.3608	6.5721	7.2874	11.3442	11.0955	6.6681	5.9262	7.7508	5.7105	2.9518	2.8814	4.5449	5.094	6.9282	5.7789	7.1674	4.0452	3.0531	4.6746	9.0166		0.551404	6.51874
14.1778	10.4773	8.4636	10.8173	12.0911	6.4478	5.8093	3.4057	6.6807	6.0096	5.7051	4.029	5.5327	8.6249	9.8999	7.4513	12.1644	5.1062	7.7814	6.6692	8.7704	6.1437	3.2215	2.4871	3.2721	5.6847	3.9734	5.3326	2.4825	4.3069	5.1321	7.2326		0.556075	6.49052
14.297	10.6411	14.8294	8.4675	14.2805	5.0385	4.1417	5.7375	7.2444	8.265	3.9917	5.1627	6.2415	4.6949	12.5205	6.4708	11.8808	3.7342	8.2323	10.0215	4.4468	6.6479	2.0902	4.1603	4.183	6.5593	3.6671	3.7294	5.7526	2.5063	4.2545	6.9518		0.56075	6.66276
14.4161	11.5355	9.1051	7.6514	15.0604	4.3718	6.0742	4.9928	6.3885	10.1601	4.3045	3.8367	9.1675	5.49	7.9178	7.8159	9.5141	5.6929	6.0903	7.3681	4.6909	4.1189	2.0702	3.0925	2.8326	7.8137	6.4793	2.4205	4.7574	3.5534	3.0256	7.684		0.565422	6.29279
14.5352	8.7625	6.4718	4.8325	11.2872	8.4655	3.3413	5.1532	4.7452	11.9266	6.4656	6.4888	8.3522	5.1043	11.0417	10.5006	8.3883	6.4826	8.2826	9.228	8.3729	4.924	2.2788	3.2852	2.2304	8.463	6.2575	4.7645	2.2575	3.8476	3.7033	8.8495		0.570093	6.59854
14.6544	12.0192	9.5694	9.0916	13.0353	4.0862	3.5911	5.2169	7.6463	9.1285	6.8302	5.2085	5.2887	4.9865	7.6678	8.0729	3.22	4.7933	8.3313	10.7959	7.692	5.6448	3.8611	3.8197	3.7382	7.7815	6.4644	5.4273	2.4768	3.1562	3.7946	14.5354		0.574768	6.6765
14.7735	8.6708	6.8723	7.079	11.4095	5.1082	2.6732	3.0919	4.7292	10.9008	7.3732	6.1424	4.1396	4.2866	7.4704	8.2804	4.3995	5.0483	6.7738	6.9774	8.078	4.2856	2.0402	3.4411	2.904	10.1284	7.2146	4.1433	2.6985	3.6586	2.6921	12.6801		0.579439	5.98035
14.8927	10.8429	8.0607	9.9791	8.4006	6.9751	2.7734	2.618	8.0304	13.6367	6.0581	3.909	5.0427	5.153	6.9016	10.9597	5.5367	7.3847	5.331	5.4353	8.4123	3.0105	3.234	2.96	3.4015	6.7599	6.2023	5.8466	3.5127	2.3639	2.5777	11.8746		0.584114	6.23176
15.0118	12.1849	7.5705	7.0479	9.6941	7.4025	2.6967	3.8004	7.2125	11.1715	7.6304	6.4392	5.7265	3.2578	9.8584	16.9152	5.6257	5.1396	8.5344	5.1497	9.2107	2.7316	3.8128	4.6214	3.2181	7.3222	4.5982	5.4096	3.4689	3.9298	2.6092	9.8462		0.588786	6.57537
15.1309	9.4358	12.266	4.4726	9.3594	5.3128	3.6555	4.6929	5.362	15.7655	8.8665	7.6617	5.6086	5.1208	5.5013	10.0294	4.3086	4.4021	6.6891	6.4792	6.5063	3.3654	2.986	2.7412	3.5096	8.8106	3.6593	6.4887	2.1386	4.5856	3.2568	6.803		0.593457	6.1239
15.2501	8.1458	11.3106	5.2217	13.7794	5.7767	2.8485	4.1984	5.3427	12.6134	6.9698	4.7996	3.7106	7.2212	6.1819	10.2172	7.4713	6.0303	6.2512	6.3894	8.3967	6.2744	4.4106	2.2933	2.1336	9.1477	3.8977	8.1267	2.4897	2.9409	5.7685	6.6792		0.598132	6.35609
15.3692	8.0623	15.654	5.2988	10.7697	7.5329	3.1782	4.554	7.8131	10.8542	5.7423	3.5878	4.8636	4.7119	8.7785	11.8589	4.6883	5.7449	7.686	6.4417	5.6466	4.5892	4.9552	1.8956	1.8185	9.7608	5.6375	7	3.7037	2.4811	3.6858	6.54		0.602804	6.30758
15.4884	8.772	11.4658	6.7695	9.7001	6.6017	5.0796	6.7006	9.7469	9.3495	8.3415	4.1098	5.7161	4.4195	9.0872	10.117	6.5535	4.9193	7.2609	6.2302	6.027	6.1756	3.5565	2.4699	3.5619	9.5739	6.6755	6.2045	4.8582	3.6714	4.7382	7.8154		0.607479	6.65383
15.6075	8.9466	11.0939	4.1681	11.1478	5.5692	4.1108	4.4307	6.1986	9.7899	5.9798	5.4733	5.3337	4.017	4.4057	6.3899	5.7193	4.4927	6.1681	6.7747	5.7052	3.3743	2.5075	3.4509	4.4354	9.3945	6.9259	6.5394	4.9951	4.9205	4.1139	9.1901		0.61215	5.99234
15.7266	7.8559	8.5382	5.5423	12.4331	3.4529	4.0899	3.4923	6.2025	12.6048	5.5367	6.0836	3.8485	6.3741	7.0511	7.0502	5.7023	3.7532	5.915	5.2846	5.2449	2.2193	3.8553	2.916	6.4223	13.1291	7.5451	8.8016	3.6504	3.1944	3.8943	8.3553		0.616821	6.1303
15.8458	6.9309	6.0442	7.6184	10.3826	5.6392	5.1808	3.896	7.2749	11.1434	4.2874	5.6312	3.6846	6.0635	7.3169	6.4877	7.4684	5.9468	8.2407	5.2316	7.4531	3.0509	4.1575	2.7429	7.0683	14.5787	8.108	7.1223	3.8317	2.9389	3.1074	7.4179		0.621497	6.32409
15.9649	13.4965	7.9999	9.1279	9.3472	10.269	4.3089	3.0855	8.2808	7.6926	6.4011	4.4668	3.4099	5.7568	5.8889	7.1043	7.2651	5.9071	6.4782	6.8598	6.9406	3.0052	2.4369	2.8497	4.191	6.8565	4.782	7.7119	2.256	3.2265	2.8122	6.14		0.626168	6.01145
16.0841	6.2844	12.0943	6.4492	8.9868	11.766	4.2293	4.3067	8.7389	13.7162	5.8221	5.0208	5.9198	5.2013	7.4686	8.2995	6.2163	6.0227	4.6652	9.599	5.3873	2.7447	3.2871	3.5695	5.3974	7.3019	5.2237	6.2174	2.9084	3.5046	2.3875	7.967		0.630843	6.34528
16.2032	7.0107	11.0675	5.4095	10.1632	7.5961	3.8248	2.726	6.1755	10.6385	6.3002	6.2227	4.5222	4.5796	7.9126	4.9114	6.5423	4.7218	7.6803	6.7261	7.2517	3.2302	2.4946	4.0064	3.965	5.7711	7.7379	7.8755	4.1368	4.1792	2.4069	8.4653		0.635514	6.00812
16.3224	6.8265	11.5989	6.6781	8.3062	8.5992	3.1147	3.2072	8.3493	8.2242	4.8157	4.8965	6.826	6.4405	8.2748	5.614	6.9163	5.2225	6.4981	6.4405	5.4517	2.1492	2.9637	2.7803	2.7404	6.9764	4.5773	5.7199	3.1658	3.7429	2.2479	7.935		0.64019	5.71935
16.4415	8.3353	10.1105	6.591	7.8485	9.8321	4.5219	4.8917	7.2513	8.4453	5.5717	4.6209	5.3354	6.6043	5.5113	6.9286	6.4691	5.9864	5.5804	8.7189	6.3324	3.9288	4.8002	2.0261	4.8982	6.0957	5.4358	8.2884	5.1111	3.2818	2.7561	8.2894		0.644861	6.14189
16.5606	10.2005	9.931	11.1151	14.805	9.54	3.3786	6.9508	7.1645	7.2909	6.8322	5.8422	2.9527	3.8477	7.6605	6.751	5.2752	6.6244	5.7326	6.2042	6.6211	3.6737	2.8572	4.2578	4.1322	10.4451	7.6159	5.5081	4.1267	2.637	2.895	7.3072		0.649532	6.45729
16.6798	10.3369	11.6885	5.5786	15.8896	13.0029	4.3236	4.8028	7.6228	7.6747	4.1483	4.2386	3.8292	5.6931	7.7005	6.8938	5.4705	5.4733	5.9239	5.0938	6.1054	5.7166	2.0313	4.0227	3.0981	8.6956	6.4954	8.7677	3.3042	2.5337	2.5916	7.0341		0.654207	6.31554
16.7989	9.0357	9.547	8.2964	12.2959	13.09	6.5622	5.1908	7.0436	11.2239	4.2576	4.3278	5.5175	6.1497	6.3782	7.869	7.5851	4.4555	6.7125	5.5394	5.9308	5.1122	2.1751	2.623	2.4912	5.7939	7.8607	10.9995	2.8387	3.428	4.2165	7.7266		0.658879	6.52497
16.9181	12.3278	7.323	5.3512	12.9737	8.7459	4.6183	5.7277	10.913	9.1846	3.2026	5.4234	4.0277	6.2914	6.2488	4.4142	4.7189	6.9373	10.3851	4.5027	5.0776	4.1753	3.1282	3.5613	3.4534	6.7491	9.3648	11.065	2.5912	3.8279	5.237	7.1705		0.663554	6.41028
17.0372	9.3864	7.1377	5.0539	11.0046	9.9672	3.2744	4.0864	8.9846	9.9383	5.6402	2.857	3.0382	6.2894	6.3153	6.0408	4.8059	6.7192	5.7688	5.9901	6.0433	4.2379	2.021	2.7349	3.5882	7.2963	7.1378	10.1942	4.3771	2.3483	3.9791	8.3213		0.668225	5.95412
17.1563	9.3491	8.3439	9.3332	14.4757	8.6381	4.3428	3.0351	8.6139	10.0168	6.8226	3.9122	4.1004	5.3398	5.0969	5.9886	5.7286	7.5648	5.2037	5.4487	5.9977	2.8469	1.9738	3.8742	4.3277	12.9557	6.1366	7.0557	3.1457	3.3089	4.0137	9.727		0.672896	6.34576
17.2755	10.3909	7.3944	8.9748	8.1149	9.8959	5.1226	4.5248	13.0475	9.5642	9.9555	5.0249	5.8432	3.4566	4.3929	6.8841	7.7379	7.4674	4.8644	3.7638	5.0137	3.5299	2.5351	3.1204	3.0076	12.3208	5.8516	7.9938	4.8035	3.8858	4.2425	7.321		0.677572	6.45311
17.3946	8.942	8.5614	9.385	7.8817	11.5068	4.0507	6.0286	9.0467	5.8632	6.6477	3.6278	4.6711	3.9334	6.2598	8.3402	3.8885	7.9495	7.943	4.0705	7.6375	4.3595	2.7128	2.7383	3.4356	8.305	7.3321	9.2937	5.5962	4.1567	2.9451	5.3859		0.682243	6.20955
17.5138	10.9239	8.4696	6.1704	7.0086	10.1029	4.1809	4.8677	8.5713	11.9956	6.6767	5.0919	4.336	4.6486	5.2499	9.0764	6.218	6.1464	7.839	3.7192	8.3475	5.3675	2.0065	2.042	3.4941	9.0713	7.146	9.7736	5.4389	4.0183	2.4076	5.9379		0.686918	6.33368
17.6329	7.9749	5.3246	6.1552	8.994	9.1273	5.3298	6.7556	10.4777	12.4666	4.9918	5.1723	3.2765	5.3794	7.7928	6.5205	6.8875	4.4043	9.865	2.8263	7.35	3.4843	2.9454	2.4153	3.7185	9.0447	7.9728	8.7959	6.8173	3.4411	5.2073	6.3443		0.691589	6.36319
17.7521	10.7908	7.4821	8.3848	7.9873	11.5423	5.0608	6.2615	7.6094	11.1579	5.8752	3.9582	4.1339	3.7737	8.3326	5.1414	6.9728	7.3733	7.3626	4.5005	7.8551	2.5996	4.3765	2.7534	4.7914	8.0155	6.1263	5.8766	6.1684	3.1129	3.6005	9.2269		0.696265	6.39368
17.8712	10.198	8.1902	7.5232	8.3124	9.9158	3.6985	11.3424	8.5546	11.8537	7.5732	3.3421	5.0866	4.6556	6.415	8.4545	4.6296	6.4096	6.2885	4.78	5.894	3.5814	2.8088	3.2171	3.5419	6.8232	6.5687	9.4927	4.7682	3.1973	2.9207	5.5302		0.700936	6.30864
17.9903	9.273	5.6488	5.6661	7.7427	12.781	3.2238	6.7595	8.6107	7.3102	8.183	3.685	3.8302	5.0488	5.5985	5.9971	4.0832	4.6834	7.9083	6.8141	9.1978	2.5112	2.9794	2.4827	5.7092	6.4425	5.7106	8.0703	5.7858	2.7793	3.3823	8.7668		0.705607	6.02146
18.1095	10.6978	6.6292	7.8537	9.7737	8.9114	5.3851	6.7263	6.3468	8.2039	9.0675	4.2811	4.4911	6.0911	4.1637	6.8498	7.4102	5.8694	5.8992	9.2286	7.9142	2.9568	2.0469	3.3393	4.6759	6.8473	5.2781	5.4961	5.5836	3.3453	2.4846	8.5968		0.710282	6.20789
18.2286	9.1037	6.7488	6.1505	8.3424	7.7394	5.7547	5.8389	11.1759	5.9128	7.014	3.731	5.4794	5.6733	5.2506	7.2693	8.2727	4.4756	5.7321	6.4915	7.7843	2.5438	2.5991	2.7789	2.9079	9.5118	6.4674	8.2856	4.1805	4.7255	2.8828	6.2254		0.714954	6.03386
18.3478	13.0374	8.6236	4.6721	8.3818	10.5683	5.1133	4.2002	9.9982	7.5418	6.2392	5.2221	3.2182	6.1045	5.1415	6.7044	5.2161	7.1058	6.187	4.1857	9.8934	2.4454	3.0624	4.4837	2.7314	5.6307	6.1981	8.9247	5.944	4.5093	3.2156	8.2336		0.719629	6.21721
18.4669	11.5131	9.0277	7.6763	12.5278	10.8516	3.1397	4.9987	9.7608	7.3232	6.1364	4.1649	3.7601	3.7499	4.4841	6.8497	5.6083	7.3499	6.7757	3.6021	7.9459	3.2382	3.0575	2.256	2.7324	5.0101	4.7264	10.9018	7.5733	4.9481	5.1141	7.1657		0.7243	6.25708
18.586	8.1865	7.3604	5.3699	8.5914	8.5986	4.1545	7.0411	8.1782	5.7843	5.6094	5.3812	2.6964	3.4927	5.2811	5.0046	4.3519	5.7691	8.4649	5.8268	5.5053	3.2822	2.7312	2.7394	3.5371	7.6019	4.427	8.2457	5.3801	2.5945	3.3687	7.4879		0.728971	5.54981
18.7052	8.5552	5.6529	6.5546	11.216	7.5085	6.2558	6.5383	10.1579	6.7549	6.9162	7.2639	3.1125	5.313	3.8265	8.9388	6.095	5.4039	8.3405	8.4494	6.9335	3.6457	3.7817	2.9128	3.8465	6.3442	6.5764	6.5274	7.5374	3.232	3.5011	11.9858		0.733647	6.44124
18.8243	7.5304	4.6711	9.0087	11.1607	12.6803	4.8504	4.7798	11.7331	7.1861	6.6968	5.45	3.2163	5.0309	4.0929	7.3701	4.6933	6.0381	6.6704	6.6269	11.7319	3.315	3.4855	2.1945	3.9595	5.754	6.9253	10.0484	8.5954	3.5688	4.2329	10.4677		0.738318	6.57307
18.9435	7.8465	6.2426	5.7993	12.6697	8.6697	6.3784	4.7103	12.1032	7.3047	8.7945	3.3007	4.1775	5.7161	5.0292	5.0172	3.8098	5.0644	6.9189	6.5818	8.5783	3.2114	2.5568	2.5296	3.817	5.475	5.1358	11.3162	7.1886	3.9007	3.9158	7.5343		0.742993	6.17077
19.0626	9.6545	9.5302	6.8244	11.0172	10.2473	6.4762	4.4357	11.1581	5.6121	4.9617	5.0523	4.9135	4.2126	4.9179	5.1875	5.3487	5.0264	7.6199	7.624	5.1371	2.8044	3.079	2.708	3.2312	3.5054	5.4701	9.8885	7.3642	2.7571	3.4084	7.6618		0.747664	6.02695
19.1817	11.4678	8.1117	6.9081	9.7578	12.822	3.5297	5.1938	10.5264	6.3381	7.1571	5.6051	4.8653	4.7642	6.2824	2.7673	4.9602	4.6365	6.8968	6.4121	4.7325	2.7724	3.3653	2.3613	3.214	6.6102	7.0882	11.3322	8.5708	2.8853	3.3425	8.2385		0.752336	6.24244
19.3009	12.7192	6.9367	5.9909	11.5571	9.8107	4.7346	6.0846	7.0043	6.9855	8.5157	3.8874	3.631	5.5126	7.0579	3.8189	3.7895	4.713	7.0036	4.6349	5.6987	3.2973	3.7177	2.8776	2.3445	4.3224	4.0951	11.2535	9.0689	3.5681	5.2246	10.5616		0.757011	6.14252
19.42	9.6888	4.5228	4.5242	7.4251	11.3107	4.5618	7.1785	9.0099	5.0485	8.7811	3.3532	5.6273	6.7178	5.4828	5.6196	5.2972	7.5967	6.2274	4.1295	5.9133	4.3535	4.0505	2.5207	2.2214	6.1828	7.361	7.8265	5.9244	4.5791	5.8947	4.882		0.761682	5.92945
19.5392	9.4461	6.1892	5.5134	7.7801	9.3705	3.8247	6.6301	10.1387	5.9756	6.7543	3.5845	5.0594	3.6598	5.2245	3.6634	6.0479	7.0572	7.9309	4.3241	5.6148	3.4801	4.0283	4.5667	3.3863	7.998	6.2095	8.9364	5.6034	6.6532	5.8919	5.1867		0.766357	5.99128
19.6583	8.4391	4.3194	6.5762	9.4486	10.5479	7.1924	4.991	10.7354	7.4888	6.3062	7.3	3.741	3.6235	5.1104	2.6077	4.5424	6.5258	7.6172	6.4925	3.9894	4.0456	2.9493	4.3192	2.9167	6.6471	3.8281	7.6674	6.2146	8.4108	7.9513	6.9417		0.771029	6.11247
19.7775	8.9827	5.3867	8.0591	8.1965	11.557	8.4546	8.2913	12.3429	6.3828	5.2032	4.9431	3.4627	4.086	4.8747	3.3262	6.6934	7.5212	6.465	5.4327	4.1407	4.7408	3.0697	2.8497	3.48	6.7163	2.8302	8.707	6.2813	10.4476	7.3007	8.436		0.775704	6.40845
19.8966	6.764	7.4878	5.9162	10.7824	7.5385	8.8192	8.9832	14.9529	7.3105	4.3252	4.6072	3.4397	5.3193	6.7235	4.9138	8.1657	4.4917	6.2948	8.7236	4.8846	2.8077	4.9398	2.7412	2.503	7.9202	4.5611	8.5143	5.801	9.2028	6.1567	9.8072		0.780375	6.62577
20.0157	7.1022	5.0006	6.9834	8.7237	6.0871	9.7834	5.6884	15.041	10.4667	6.0735	6.9096	2.2495	5.1489	5.1962	4.6241	8.0825	7.6855	7.9947	5.0906	5.1662	4.3283	3.0926	2.5036	2.0791	9.9434	6.4465	9.1536	5.494	6.8364	7.9403	8.551		0.785046	6.62795
20.1349	7.2169	4.4979	5.3539	6.873	7.7555	14.3061	7.0988	16.7295	10.7177	5.6607	4.5189	3.5711	3.722	5.1601	2.6021	7.2723	6.5924	7.4031	5.6939	4.9598	4.514	2.278	2.5283	3.8075	7.5357	5.099	8.7603	7.3381	9.1504	7.5786	5.9825		0.789722	6.5251
20.254	8.1673	6.4773	5.6921	6.0592	6.458	10.9264	7.6066	11.2415	7.4792	3.0737	2.6542	3.3572	4.4913	6.4511	2.886	4.301	5.0777	7.4638	4.7512	4.4809	5.078	1.8065	2.5872	2.8328	6.732	4.6381	8.1845	9.6181	9.3038	6.7166	6.5858		0.794393	5.909
20.3732	8.4693	9.9126	5.6701	5.5744	7.344	11.6134	10.3919	14.1176	4.8447	8.0446	4.6409	4.1139	4.4611	7.4737	4.4271	6.2542	5.4589	6.8243	4.426	6.2514	5.9425	3.0983	2.9128	3.4573	8.7696	6.2196	7.8563	8.2066	7.9146	8.5662	7.6504		0.799068	6.80349
20.4923	7.6982	7.0828	3.7441	6.0954	6.3114	11.4725	7.2045	13.5335	5.2103	7.2743	5.7786	4.4073	5.8673	5.1227	4.0379	6.1063	4.9294	5.0352	4.348	6.3653	3.2601	4.0563	1.8934	2.2329	7.3085	8.7885	6.2182	9.5403	7.8489	7.2285	7.9461		0.803739	6.25635
20.6114	9.384	7.4327	9.6113	7.4419	7.0308	12.4432	9.0212	15.2971	7.4501	4.3154	5.5641	4.6993	5.0677	7.2347	3.9125	4.3011	8.5868	5.8906	6.2457	5.6269	4.9163	2.1677	2.7286	2.5926	7.1646	7.1537	5.4457	9.1287	9.0914	8.5176	6.6707		0.808411	6.84305
20.7306	7.7385	10.635	4.851	7.8185	8.1859	12.2778	9.4358	11.726	6.3686	5.0469	5.8302	3.1529	3.7622	7.6311	3.423	6.6383	5.6083	7.7148	4.0161	5.0694	5.7459	2.1099	2.5749	4.3372	5.9669	7.6546	6.3829	6.8567	7.7316	7.2531	7.2582		0.813086	6.47749
20.8497	5.9553	7.3	4.4912	10.5109	8.7431	11.5737	13.1763	10.055	6.8086	6.7732	4.4255	7.2065	5.1328	5.6381	4.5341	4.7525	8.6043	7.2572	4.1818	6.41	5.7082	2.601	3.3167	3.8884	7.2102	5.6621	9.0771	7.4308	7.5837	6.8799	9.473		0.817757	6.85036
20.9689	6.5201	6.8462	3.0469	9.7614	10.7382	11.2535	11.9526	13.1652	3.1897	7.1261	3.5686	4.416	3.7051	4.5425	4.1234	5.3008	9.9664	5.6845	4.7113	5.493	7.963	3.2313	4.0501	3.0524	7.5421	7.7599	9.6686	8.052	10.8418	7.0367	8.4335		0.822432	6.86267
21.088	7.0758	5.077	4.5949	9.3479	9.5897	8.8204	13.1531	8.6635	5.4283	6.365	6.5152	3.3791	5.9612	5.297	3.8331	8.131	8.1059	8.9133	5.4205	7.5631	4.5248	3.2042	2.3396	2.566	15.8182	7.9956	8.825	11.4049	10.8478	4.1597	8.8422		0.827104	7.15365
21.2071	8.5509	7.5422	5.6112	10.1851	9.1372	10.1285	14.0867	9.7448	6.8573	4.9908	4.6353	3.6104	5.2826	4.3902	3.8452	6.6073	7.5487	7.6026	3.8297	7.5152	4.1369	2.968	3.0317	2.5871	10.288	6.4808	13.9092	10.4575	9.5598	6.2328	8.9547		0.831775	7.10672
21.3263	9.6215	6.2976	8.5398	6.5569	10.8693	7.1452	14.417	8.6513	6.1139	5.4691	4.5125	3.6395	6.1603	7.1448	3.7666	4.3764	7.2156	7.5047	5.5432	6.1331	5.2832	4.8241	2.8872	2.8504	8.6049	3.8847	10.5141	8.9119	10.3021	6.467	10.9832		0.83645	6.94165
21.4454	6.0713	6.9295	5.6152	8.567	8.4427	7.2973	12.9211	7.3089	9.0568	5.401	6.1633	3.6732	10.9496	5.3282	4.8775	4.5778	6.9082	7.3064	5.0579	6.8533	10.1401	3.4443	4.7178	2.6588	11.2085	4.6028	12.3352	7.5695	10.7279	5.2003	10.7163		0.841121	7.18154
21.5646	8.4042	5.8084	5.8334	7.3289	12.2409	8.3025	9.945	10.5263	7.0275	5.5218	5.7278	6.9023	8.3104	5.1625	4.462	6.0302	5.6459	4.4411	2.3302	5.2093	7.1567	2.5397	3.2518	2.388	8.8129	5.4751	14.9654	8.1387	14.2654	7.5817	12.9402		0.845797	7.1831
21.6837	9.1613	7.4814	6.1702	8.303	9.7854	8.6208	14.2851	12.0292	3.5692	5.3273	6.5885	4.0447	8.6928	3.8644	5.0041	3.9725	7.4824	5.1091	3.9038	4.522	5.5775	4.5098	2.5981	3.2456	9.1729	3.4807	11.081	7.9073	10.7166	9.9657	5.846		0.850468	6.8393
21.8029	5.1846	5.547	6.5698	10.5455	7.7488	10.0488	10.8786	10.1019	5.0248	6.7794	4.9075	4.47	7.2457	4.5732	4.23	2.9248	8.5654	7.1213	5.3354	5.3072	5.5156	2.6208	2.5642	4.0278	11.3995	3.8173	8.8444	10.4948	6.6664	9.417	7.6325		0.855143	6.64871
21.922	6.3721	5.3802	9.8067	7.8959	8.8685	5.8388	10.6282	5.3136	5.9982	6.7766	3.8984	6.0802	3.686	3.6603	4.2564	5.0333	6.6514	5.8935	4.9076	5.311	6.4502	2.8795	2.185	3.7631	8.4687	7.197	8.5862	7.2461	6.5925	9.7501	9.0909		0.859814	6.2731
22.0411	7.2136	9.5394	8.0893	6.629	7.3691	10.3493	10.0151	4.6643	7.025	5.872	7.4833	3.8861	5.0897	5.0408	4.6809	4.0137	4.2234	3.9291	4.213	6.7351	8.6576	4.1943	4.1497	4.7332	8.0807	5.3586	11.9071	10.211	8.519	11.8474	10.8776		0.864486	6.9225
22.1603	8.9698	8.4628	4.9466	5.0984	7.5084	6.3775	13.1335	7.2986	9.0051	5.3451	7.9151	8.1219	6.8189	5.9934	6.6849	5.8618	2.721	2.3187	4.8978	6.5681	6.6034	2.2405	3.8048	5.2105	8.766	4.6673	11.3235	10.819	6.5064	9.7233	7.806		0.869161	6.82316
22.2794	8.6734	9.7995	4.7382	8.1381	12.2724	8.014	11.2771	8.9406	5.8466	6.6265	4.2132	6.8791	5.37	4.0073	5.2817	5.3246	6.5526	4.6104	4.1901	6.952	8.8432	4.5095	2.7791	6.99	8.1086	4.177	9.8644	8.1743	7.0607	11.5983	7.7532		0.873832	7.01825
22.3986	8.0476	10.0753	6.3888	6.1807	6.2999	5.467	11.4649	3.2627	5.6596	7.1251	6.4863	7.0004	7.1024	3.2468	5.8956	4.8728	7.8986	4.6909	3.2339	4.7157	9.2681	4.8185	3.4348	4.1762	9.6479	4.6767	9.2527	9.4913	8.9858	8.1404	10.8348		0.878507	6.70459
22.5177	10.108	5.9385	3.722	5.0234	7.1276	14.9762	10.6772	5.9409	4.882	8.1414	3.0354	7.8591	6.4027	5.7769	5.7766	3.851	6.3006	6.2265	5.2622	7.9411	6.6146	4.6225	3.975	5.3145	6.3701	5.3622	10.7363	9.0001	8.1769	9.7974	10.5962		0.883179	6.95275
22.6368	11.0371	8.953	2.9918	7.3656	8.4464	14.9607	11.6537	8.1124	5.4506	8.7844	3.0469	7.6083	4.9776	4.2041	3.7041	2.53	4.0805	8.8789	8.7768	5.465	7.0848	3.8103	2.8323	5.4833	5.3283	5.4149	9.4285	10.2487	8.1534	10.0349	8.2294		0.88785	7.00247
22.756	11.5049	7.8903	4.2008	7.0747	10.399	13.7859	10.0291	8.2195	3.322	8.3695	5.7314	10.2299	4.1673	5.8466	5.1772	3.8017	5.4535	4.0121	6.6407	4.6546	10.0341	4.2081	3.2266	7.3143	5.5439	3.305	7.0357	8.4394	5.7346	5.4744	6.2832		0.892525	6.68097
22.8751	5.6307	7.5706	3.6733	3.9882	8.2377	8.6882	10.1476	8.1938	5.5768	10.5608	6.1258	9.4723	4.0356	3.5594	4.768	4.8502	5.748	3.1662	2.7324	6.3332	5.9084	6.4571	3.1436	7.5803	6.4421	3.8245	5.4926	5.1319	7.3484	6.8921	5.0437		0.897196	6.01044
22.9943	7.5538	7.3805	4.4356	6.0443	7.4652	14.6933	7.9135	5.3776	7.5728	5.4237	7.0929	13.118	7.481	2.7895	3.0459	5.3211	3.311	4.3547	3.9197	4.8753	7.2437	6.0464	3.6083	6.5997	6.3366	2.3799	4.4254	4.7509	8.071	5.2819	3.6478		0.901872	6.05035
23.1134	5.2799	5.8286	4.8409	5.6695	8.1452	15.4625	6.5483	7.1598	5.4394	6.5181	3.8999	8.4196	7.2712	4.1877	5.3429	4.3403	3.1986	7.9318	7.236	5.6439	6.7815	5.4736	3.5009	8.7469	7.31	3.6189	3.4817	7.3603	7.2422	6.2946	5.8139		0.906543	6.2577
23.2325	3.5982	7.2865	6.7873	7.7234	8.5404	16.3621	8.316	10.9132	6.8599	6.6415	7.2187	6.0954	9.8237	5.5399	5.2116	4.9912	4.4507	5.6696	10.1581	5.4411	6.5162	6.544	2.9282	12.1265	6.0077	3.4458	4.0467	4.9821	7.5531	4.7806	2.4446		0.911214	6.74206
23.3517	3.9462	10.8564	9.4808	4.1027	7.6135	11.0779	8.0259	10.5269	7.3039	5.77	5.5419	6.9074	7.5412	6.4383	5.6362	4.5703	4.8399	3.0856	5.0449	3.2636	7.4078	5.8143	7.0172	9.7181	4.1754	3.1019	3.134	4.5116	4.9477	6.2875	2.6459		0.915889	6.13984
23.4708	7.0042	8.4932	6.2563	4.1893	7.0734	13.0223	7.219	8.65	8.2173	9.0863	6.1134	4.5586	5.2875	6.2963	4.6996	4.0265	4.2021	2.9289	3.8312	4.3691	8.5276	5.1895	6.9294	8.7135	4.3981	3.7285	7.3472	6.3754	4.0018	6.8964	2.183		0.920561	6.12306
23.59	7.3739	9.0203	5.5248	3.9578	9.7104	13.7751	5.8183	9.1583	10.2207	6.0136	7.1753	5.634	9.1524	6.0014	3.6839	4.8918	6.7845	4.4355	3.8521	6.4727	7.7489	7.8362	9.4383	11.6491	6.0065	3.5604	5.8327	6.0672	5.3344	3.3365	3.7271		0.925236	6.7482
23.7091	8.9404	6.3203	2.4952	5.1476	7.2813	10.7883	10.0222	7.7506	10.3682	5.8481	7.9419	6.9941	7.0839	4.2502	3.931	3.4469	4.116	3.359	4.6606	4.8961	6.8204	4.7769	7.1001	10.3976	6.4895	5.857	6.2399	5.7076	9.3614	3.8236	4.4198		0.929907	6.34309
23.8283	12.8444	6.9054	3.9958	2.8722	7.0083	11.5744	11.9745	7.6947	5.802	6.5974	7.5723	10.1187	4.918	3.7395	4.4765	2.0802	3.1345	3.638	4.417	4.786	7.2454	6.1483	6.845	5.479	5.3816	3.1641	4.8532	5.2135	6.0511	5.0356	2.9241		0.934582	5.95131
23.9474	8.6211	6.8163	6.8879	4.1452	7.6793	8.0553	17.4904	9.868	4.8675	9.245	5.2601	7.1473	4.9212	6.3512	3.2034	3.1086	3.1416	4.0357	3.5911	4.8186	6.7191	6.0559	7.4454	6.3942	3.1192	3.4711	4.8713	5.4488	4.6926	4.4869	2.62		0.939254	5.95417
24.0665	9.5969	5.7248	4.4338	4.2177	6.6931	12.3934	12.8583	6.9072	4.9429	9.9398	6.9091	8.4777	6.3752	3.7684	3.9832	5.4598	4.1998	5.5429	3.9527	5.6933	4.9793	4.2423	7.339	9.2646	2.575	2.4996	6.4867	5.335	5.1539	3.6811	3.1996		0.943925	6.02665
24.1857	9.6035	6.6504	3.5187	3.2718	6.2449	19.2489	14.5972	5.9491	5.3822	7.3308	5.0362	5.8767	7.3712	4.3144	4.9124	7.7034	2.7516	4.2794	6.6081	5.6961	4.0456	2.8675	8.8751	7.6072	4.0506	2.0766	5.9724	3.4114	3.188	2.461	2.6664		0.9486	5.92157
24.3048	10.2609	5.9049	8.1125	2.5202	6.226	14.716	17.1499	7.4914	5.0359	7.048	8.8419	5.4149	6.8981	2.0035	2.8254	3.8951	3.391	5.8657	4.9956	6.9257	4.2874	2.7365	9.1723	7.2779	2.1084	2.3161	2.838	3.621	2.8987	2.6527	3.02		0.953271	5.7565
24.424	8.2463	3.2254	5.7327	3.8256	4.7262	9.7043	15.9075	8.7914	5.6469	7.2832	5.0559	5.7124	8.3346	2.8747	2.2087	5.1547	3.0387	4.337	4.4262	5.8825	7.8692	3.7548	7.7781	4.0246	2.1291	2.0433	5.1238	5.1272	2.789	2.7879	2.6416		0.957947	5.36076
24.5431	6.9314	3.1414	4.5014	2.3206	5.8597	9.4776	12.0048	6.4606	7.658	4.629	6.6886	4.7075	6.7034	4.1578	2.6217	4.4161	2.477	3.5256	3.5533	2.7288	6.7155	4.6845	9.8366	3.1832	2.9022	2.2944	6.5165	4.5239	3.7812	2.1876	2.6075		0.962618	4.96121
24.6622	8.265	5.55	3.7276	3.0004	6.0482	10.3429	12.3441	7.1457	5.3588	3.5054	8.8134	4.5724	4.6895	3.2163	2.492	2.8936	2.7859	4.8047	3.2809	3.9055	3.8993	4.5732	10.7872	2.4162	3.9501	4.4145	4.4712	3.4886	3.5854	3.2218	2.436		0.967289	4.96728
24.7814	11.2789	8.4322	2.7394	2.4742	4.5959	8.9604	10.2409	11.8728	5.5483	4.3504	4.5253	5.7887	3.4912	2.9745	3.065	2.4522	3.2888	5.7712	3.4069	3.301	3.9156	6.556	7.267	2.4803	1.9559	2.3411	3.3562	2.5817	2.9861	3.161	3.027		0.971964	4.7802
24.9005	9.0774	8.4149	2.4771	3.6831	2.5351	6.1163	10.7238	8.7891	5.4589	6.3691	3.4616	5.1498	3.1731	2.4162	3.5676	1.9576	6.0534	2.8131	4.7253	3.8679	2.0285	3.5393	7.0162	5.0265	2.0631	2.1756	4.041	2.7698	1.967	2.1161	2.3938		0.976636	4.38604
25.0197	7.1282	5.3374	2.7779	2.2131	2.6523	6.7299	16.1263	12.0524	3.8611	8.2269	4.2472	5.3141	4.0352	5.0244	2.6936	1.9583	3.6819	3.6471	3.126	4.2838	4.0954	2.7169	4.4172	3.5889	1.8911	2.0445	2.8262	3.935	2.2492	2.406	3.279		0.981311	4.46989
25.1388	7.1204	4.8863	4.2525	3.1379	2.6124	4.4658	9.3437	10.4458	4.5528	7.6297	3.3098	5.4954	4.2531	3.8732	1.9546	2.108	2.8492	2.2628	3.236	5.9553	6.024	5.047	5.4987	3.7279	2.0529	2.0447	2.9331	3.3533	2.5061	2.6545	2.0782		0.985982	4.24726
25.258	5.5829	6.6772	3.3748	3.2908	4.2478	4.6631	8.8238	7.4799	4.9568	5.6765	6.9726	5.5006	2.7102	2.5323	2.4156	2.3753	2.9369	2.4266	2.2918	2.8132	6.0993	4.8788	7.777	4.849	2.4021	2.0212	2.0613	3.2194	2.6308	2.464	2.5308		0.990657	4.15105
25.3771	5.4322	3.0052	3.1419	2.2122	2.4502	3.9363	8.7139	9.809	3.4872	5.1072	5.2963	5.7038	2.3902	2.8066	3.2559	3.0234	2.7323	2.45	2.2225	3.6221	4.7538	4.0235	6.7325	2.8174	3.5276	2.1065	1.9326	3.6828	2.2939	1.9052	3.6607		0.995329	3.81403
25.4962	5.2895	3.9286	3.1617	2.1418	3.0065	5.1159	8.5927	5.7506	5.0885	2.474	3.7064	2.775	2.3322	2.8129	5.5681	2.668	2.5644	2.1006	2.5095	5.0999	3.6292	5.8672	4.3489	2.7668	1.9991	3.1029	3.2992	2.4877	2.8208	2.7618	2.5238		1	3.62239

## Sheet: Image37
X0	Y0	Y1	Y2	Y3	Y4	Y5	Y6	Y7	Y8	Y9	Y10	Y11	Y12	Y13	Y14	Y15	Y16	Y17	Y18	Y19	Y20	Y21	Y22	Y23	Y24	Y25	Y26	Y27	Y28	Y29	Y30	Y31	Y32	Y33	Y34	Y35		Ap-Basal	Avg intensity
0	8.5089	6.3571	10.92	6.7686	8.1372	9.1538	13.0804	11.3465	15.1085	25.6692	6.8674	6.6422	10.804	9.8909	9.5947	5.2101	5.2033	10.992	7.7122	5.3358	8.0593	8.932	6.8287	7.2506	9.6429	9.0648	7.8528	7.7057	11.9074	4.3116	12.6079	7.4429	7.8184	11.6161	10.7604	6.7767		0	9.21892
0.1191	7.1751	5.7752	9.4004	8.0052	7.7984	12.2815	13.0027	12.138	14.2258	19.6794	7.5101	4.6058	7.7608	6.4448	7.5461	5.66	9.3316	10.4913	8.7237	4.4587	8.4258	13.034	5.4988	3.7125	8.4668	10.9274	6.7226	8.1272	8.4793	8.1312	9.3275	6.9402	10.8928	9.095	6.7372	7.5244		0.00574513	8.72381
0.2383	7.8025	7.0343	9.0359	9.0754	7.3431	5.7963	13.4658	16.9583	15.0979	18.1483	11.3293	8.0939	7.6248	6.2983	10.1459	8.2987	9.1361	8.3754	6.9753	5.179	8.3019	6.9199	6.8918	7.8037	10.6192	17.7641	9.945	9.0678	16.4806	12.4089	11.1724	8.6116	10.3237	8.4578	4.6619	7.7359		0.0114951	9.67724
0.3574	5.9363	7.9698	12.0232	6.3629	10.9233	6.4859	8.8823	15.562	18.4369	23.0717	10.078	9.0116	11.2817	12.8408	8.7509	9.3083	6.5284	8.6362	10.7466	7.5252	9.2558	9.3095	5.9494	7.7854	9.4782	11.9537	8.8437	9.9939	10.9586	11.4498	11.9873	9.9457	10.8119	5.6049	5.6315	7.9846		0.0172402	9.92516
0.4766	9.0089	8.9365	8.8459	8.2884	8.285	6.1729	11.6718	15.6794	16.5556	16.1853	12.956	8.4976	13.138	10.3683	7.9589	10.2264	7.6159	12.3514	13.3979	10.6242	9.3057	11.1894	11.931	7.3396	4.7777	14.0845	6.3083	6.3108	10.2156	9.2301	10.565	11.0102	11.0096	7.7064	7.0902	6.1749		0.0229902	10.0281
0.5957	12.0428	6.0049	11.1352	5.6219	6.8423	7.0928	9.4315	20.641	20.4906	20.5663	11.9022	7.85	9.4493	7.8253	13.1238	5.6885	6.8997	8.6603	11.5725	8.2943	12.9579	9.3477	10.667	7.9201	11.7078	11.4244	5.8862	9.8153	14.8387	14.828	13.269	13.639	8.6951	7.7812	7.6313	8.4438		0.0287353	10.5552
0.7148	13.5567	6.4303	6.3652	9.8314	8.9431	6.6494	15.7661	18.8128	25.8209	20.5791	17.0871	7.8952	9.4013	8.5632	7.3027	8.4146	8.2952	9.1796	6.2238	6.5058	18.2346	10.1607	4.569	4.3474	7.6472	10.5622	12.1434	12.2864	10.9413	11.8055	14.7085	16.1622	13.5647	5.1541	5.7192	10.6959		0.0344804	10.8424
0.834	9.7118	10.0515	8.7322	10.9729	7.6671	7.6878	17.1334	17.8891	18.793	19.502	17.4403	6.5806	9.4154	8.6922	6.9742	7.2415	7.3042	12.8609	6.63	11.413	12.3882	17.8175	7.3806	7.042	10.4889	9.6687	12.056	7.2111	9.5628	10.1666	5.8108	11.6241	11.5896	7.5736	6.0423	8.2474		0.0402304	10.4823
0.9531	14.5932	10.6299	6.8242	8.2951	6.9194	5.119	12.1272	18.3597	17.4094	22.4506	17.6024	8.0023	7.3753	11.7836	9.2679	7.6382	8.3713	9.6979	8.3722	9.9852	15.2158	18.4043	10.5182	8.7105	12.6951	11.7587	10.843	9.1702	10.7302	12.8788	11.6952	14.2228	10.0147	5.9072	9.7535	6.112		0.0459755	11.096
1.0723	9.8575	13.0337	10.3761	7.5996	7.3915	9.4075	12.1276	13.0194	18.6617	25.0423	15.3208	9.7491	6.4413	9.0758	11.0721	8.9732	5.7446	12.7767	11.9875	13.0371	22.9705	18.359	11.4241	10.9759	11.2543	7.9766	11.6667	9.91	15.1435	16.5476	14.0145	10.8409	9.4476	7.5726	6.7211	7.284		0.0517255	11.7446
1.1914	12.0744	15.0879	9.554	8.8862	6.8208	6.0685	14.8791	15.6179	18.3667	27.6155	11.4643	9.2927	8.2223	9.6757	6.939	10.0637	8.1699	14.6999	14.3014	17.6288	20.9941	18.1776	18.1295	8.8097	12.2136	7.5754	5.4787	12.0691	14.658	16.052	8.8888	13.6633	18.8519	12.7658	8.6918	7.3864		0.0574706	12.4954
1.3106	13.2368	14.0209	10.9991	8.464	7.4165	9.5668	12.0457	16.6635	19.2067	25.8246	11.5019	5.9897	11.2961	9.0796	10.0635	14.7388	6.27	15.9588	18.9178	19.5237	22.9035	17.5171	15.1068	10.9953	9.1045	6.2312	10.1012	10.2926	11.6129	15.9412	10.5482	16.3061	18.5297	11.5988	9.9691	8.2489		0.0632206	12.9387
1.4297	17.523	11.4183	9.5699	8.0835	9.4514	9.5261	14.9555	16.5117	23.1962	21.7069	9.6988	13.2318	12.3301	10.8481	6.9834	14.9522	11.3821	11.2442	22.3752	16.5876	39.4452	16.2414	12.424	9.7668	9.9623	10.6715	7.1822	12.4378	7.0392	7.8072	12.9454	12.2721	15.6982	8.2521	7.0712	8.7967		0.0689657	13.0441
1.5488	18.5542	11.6889	7.2546	7.9605	14.4808	8.1809	14.6386	21.4388	23.3754	20.5299	14.9331	17.8462	9.0544	12.5572	8.3696	15.9859	18.8014	13.5361	19.6775	21.047	30.1179	15.9484	18.44	8.5741	15.153	8.3082	5.4448	8.8546	14.1772	13.0991	9.6293	11.982	10.3501	6.35	7.3592	7.106		0.0747108	13.6335
1.668	13.4381	10.4634	8.1288	6.3273	13.1881	13.4194	15.2507	20.2617	23.1282	15.562	17.5823	9.8881	7.4033	13.8869	11.0723	9.4727	19.6999	14.7644	22.3998	24.4259	30.878	15.6157	17.6508	10.1411	10.5999	8.8208	9.7553	12.1207	16.7139	8.7626	11.0323	10.3977	13.2582	13.0088	6.6343	5.9984		0.0804608	13.6431
1.7871	11.1437	10.6629	7.7929	5.4388	9.2863	13.1726	16.5569	19.0092	22.998	18.5288	16.7415	11.3004	9.023	11.3929	12.7439	14.2359	15.5503	16.2595	23.537	22.7659	35.0031	17.0536	18.2429	10.3805	9.5224	7.4619	13.6901	12.7447	15.8466	8.8473	16.5597	17.4605	10.5425	16.9006	7.7734	7.1164		0.0862059	14.258
1.9063	13.2342	12.7735	9.7103	7.8518	8.2407	16.5266	15.8949	16.9223	21.0044	15.8833	27.784	16.164	11.1695	15.9373	15.1206	13.8407	15.336	22.7316	28.3176	22.0974	33.0901	20.6823	17.1817	6.503	8.866	11.466	12.2523	18.9612	13.6891	9.4765	12.4108	24.7935	7.7254	12.5317	7.9149	6.5395		0.0919559	15.2951
2.0254	11.8917	17.749	7.9216	10.5141	18.047	12.3444	14.5919	19.1105	16.2756	17.459	22.1648	9.488	12.6584	9.8281	11.3332	13.3348	21.4842	22.5371	34.0042	24.2934	25.8256	19.9391	16.1469	11.1117	10.1149	6.0334	21.1391	15.133	18.8611	12.1848	11.9799	23.1296	12.5651	15.0083	5.9736	10.3172		0.097701	15.6248
2.1445	14.3495	10.8147	11.1109	7.7911	15.6867	17.6813	16.292	21.5375	16.1061	14.3984	22.049	12.555	20.8874	9.7482	10.2213	14.5586	26.6124	22.7602	28.9885	26.4491	26.3528	15.5264	13.8889	11.1438	15.6045	9.1937	19.7498	22.5322	20.3351	8.0137	14.3655	22.8276	12.7941	11.6039	8.8184	9.0701		0.103446	16.1783
2.2637	11.7624	14.169	8.8392	9.8596	15.0584	13.1556	16.8767	25.7431	19.1605	22.8358	21.475	28.9695	13.62	15.778	9.2921	16.5242	21.5751	24.1955	23.5052	22.408	25.1673	14.0261	13.7812	7.877	9.5082	7.5038	18.4184	20.3981	18.3432	9.5203	14.7065	20.7966	15.18	11.6707	8.4643	10.1228		0.109196	16.1191
2.3828	14.106	14.5218	7.4135	10.1147	15.2771	14.2724	18.3215	25.7773	23.2397	29.3871	19.9722	20.8032	15.8488	17.0048	12.2436	14.357	15.2591	23.6837	26.5821	23.3888	27.8825	19.3522	11.0811	7.1746	5.842	7.8941	10.2114	14.6079	21.1419	8.0163	14.2874	18.6468	17.5118	14.3475	10.5637	5.9951		0.114941	16.0036
2.502	13.0119	14.6612	11.2956	11.5015	16.9003	16.5373	14.9593	33.7812	22.4047	20.4896	20.9515	32.4365	18.9869	12.536	13.6119	15.5221	14.1395	21.3654	29.7839	22.3139	18.7997	18.5369	15.3918	16.9864	9.8187	13.5404	8.6784	13.682	19.3189	9.0445	14.688	24.2765	15.187	11.7325	6.4133	10.615		0.120691	16.775
2.6211	12.1387	10.75	12.3272	15.8033	17.0942	19.7101	15.5778	37.308	20.2064	17.5096	18.3118	35.9614	25.8458	14.4808	14.3207	20.404	22.1943	23.0738	30.0326	23.4139	18.2129	18.9322	15.2835	18.5611	9.2341	8.4123	7.7881	13.7248	17.739	10.1102	13.2312	25.901	14.8651	9.7264	10.1656	9.343		0.126436	17.436
2.7402	10.4619	15.3646	11.1667	15.6465	17.642	14.1529	13.8026	34.6693	19.6045	13.6004	17.7743	31.7165	14.1958	15.1637	12.8681	18.9337	18.7693	23.048	29.8291	20.8302	16.0553	14.8506	11.1262	13.7289	7.9882	12.1041	13.0357	12.0572	13.9827	11.181	16.1109	13.2033	11.5376	14.1176	10.3571	7.608		0.132181	15.7857
2.8594	12.3118	15.0035	9.8625	14.6845	13.1774	13.1772	14.2667	35.4005	21.7941	20.4626	10.8701	24.3782	16.5444	19.1511	13.4869	16.5581	14.0183	15.4358	23.8664	17.5973	18.9723	13.5384	19.5089	11.021	5.6799	15.5929	13.3541	15.1503	16.2925	12.2585	11.4269	14.6992	13.7714	11.6651	17.2874	15.659		0.137931	15.7757
2.9785	10.4153	11.5155	11.0728	12.8878	19.7479	14.0432	12.6777	35.2577	20.4246	11.6885	15.6386	24.6243	20.989	21.3348	13.2783	12.2767	16.3914	15.3332	33.3731	17.2246	18.5009	19.5206	11.9543	10.1552	4.4019	12.2585	14.6135	13.3535	19.7933	15.4949	13.7681	17.018	10.4606	11.0319	12.5957	9.441		0.143676	15.6821
3.0977	12.8649	8.8409	15.1405	11.9275	15.9364	15.5302	12.3493	31.1559	26.5242	18.1321	13.7174	24.5486	12.549	18.4552	15.2049	11.6881	15.4999	13.2956	28.4444	20.7431	13.8799	12.6509	19.7223	10.992	9.3771	11.1196	13.2384	14.1747	19.6735	15.7387	10.8045	16.6256	13.4501	10.6234	9.6237	14.0818		0.149426	15.509
3.2168	11.9909	16.2712	9.733	9.9749	12.1618	10.3199	10.792	29.1525	29.6249	20.5045	19.0686	17.3552	13.7247	15.5891	13.1762	13.8469	10.3932	10.6103	26.7451	16.7944	14.73	10.6173	13.9584	9.8918	8.8108	7.8684	13.308	14.2635	14.7907	15.147	14.4616	16.8481	13.7134	11.8179	10.7038	14.9562		0.155172	14.5477
3.336	10.8879	16.9498	7.8178	13.3259	15.5856	7.3172	15.988	29.908	20.3171	13.7801	14.3393	21.1374	14.2701	17.5799	9.461	11.5962	8.7162	12.3574	27.7157	12.8666	10.0292	11.6682	14.9872	9.0127	9.5836	11.3143	15.2362	14.1629	13.7235	14.2469	18.5379	18.7217	11.6392	13.5506	9.5914	13.3852		0.160922	14.203
3.4551	10.5401	16.2676	10.2811	8.574	16.9288	9.0108	12.5185	33.0306	22.6737	11.286	20.1051	19.4027	10.9277	22.5734	13.033	9.9646	12.4708	13.8384	19.412	15.367	14.885	16.2136	15.5881	13.6943	7.4874	11.6547	11.6204	19.0633	16.1833	13.2968	14.2859	18.8478	8.4874	14.4751	14.5066	16.4156		0.166667	14.8586
3.5742	10.6685	20.497	7.448	10.6337	11.6524	9.5576	14.4583	28.6948	14.9459	12.9839	22.1002	17.219	14.3731	18.0145	12.2834	14.3168	11.5105	10.9596	21.0941	11.0813	11.2384	9.8663	15.4736	12.8126	8.0315	7.956	7.3557	15.1054	13.3138	17.7609	17.4839	16.2507	8.6205	11.1295	12.542	19.751		0.172412	13.8662
3.6934	14.3499	16.1189	6.3331	8.129	10.9548	10.9736	11.2734	24.1708	16.0678	16.5747	22.2636	15.9023	11.1526	14.0176	9.1536	13.4979	12.846	12.7004	24.391	12.6536	9.326	10.6764	10.6057	12.5338	7.6621	9.3282	17.2723	13.2383	15.3796	13.5669	9.9545	17.7949	7.4319	11.8496	13.1285	9.7221		0.178162	13.1388
3.8125	10.1737	16.5035	4.8853	10.1654	11.0769	7.4394	12.0232	15.7917	17.6201	15.8122	28.0618	12.8638	12.4514	11.1487	15.0574	11.0319	17.0719	11.7378	23.8685	11.0813	12.4451	11.9558	12.8473	11.4325	6.8045	9.5776	9.0732	13.1354	15.2155	13.9251	12.4822	14.0885	11.3968	7.8008	9.765	17.9394		0.183907	12.9375
3.9317	6.8262	13.2862	6.762	8.5155	9.5407	5.9105	13.7764	12.3572	24.845	14.2844	25.6438	17.1258	11.495	15.819	15.5148	6.749	9.6594	10.8968	17.2165	10.463	12.0316	12.3325	9.6842	14.0495	11.2023	8.3573	10.3506	13.9172	9.1615	11.7562	18.4808	13.2305	7.8513	11.6446	11.624	15.5784		0.189657	12.4428
4.0508	9.5613	10.5589	9.8995	12.4677	11.7619	4.0976	7.1963	18.0833	26.1847	14.7283	28.5245	20.8275	12.342	17.0214	16.5561	6.5846	11.1071	11.2302	20.1377	11.52	20.3114	8.8354	6.6838	8.6997	9.5004	8.4663	14.0896	12.7215	12.7803	10.7841	14.6995	12.1014	8.3539	10.6323	14.3646	8.1735		0.195402	12.8219
4.1699	11.0462	8.7146	8.5421	10.8701	10.4393	8.6689	9.0161	17.5784	20.9632	14.3151	32.2248	17.5815	17.2228	12.6054	13.6648	8.9245	10.0751	13.475	26.4388	9.0636	19.6545	11.0649	7.7305	8.3697	8.2516	10.4396	8.2314	13.174	13.9401	12.1983	19.5523	15.3424	6.8182	10.5949	14.2933	12.6795		0.201147	13.1602
4.2891	9.247	9.2328	6.5833	11.771	9.2946	9.2743	11.6485	12.6179	13.9942	15.6697	33.2675	20.6406	16.5255	9.1951	15.2267	10.0278	14.4496	11.3408	22.0212	9.6972	15.9105	11.3268	13.1621	9.4554	8.8429	12.2871	6.2313	10.163	12.2588	11.795	14.5087	13.0039	10.9331	10.0682	18.0551	14.0441		0.206897	12.8825
4.4082	11.4122	7.6247	8.0034	9.1798	8.5303	7.5129	9.6155	16.7469	15.5479	9.7895	32.3507	15.4196	18.8806	10.73	14.3389	8.7186	8.4801	11.5492	20.9635	10.446	8.8592	14.0178	12.7065	13.8259	7.1603	10.5696	6.8177	14.5599	18.7774	7.6523	9.6624	9.4266	14.2557	7.7861	13.6787	12.2359		0.212642	12.162
4.5274	9.0248	5.9319	7.1543	15.3568	11.3707	6.3771	8.429	14.8561	17.7541	15.9777	34.2913	17.761	14.422	14.7706	10.7591	10.4714	7.1482	11.3649	28.3913	11.4043	12.9066	16.4446	13.7687	10.908	8.1793	9.2295	10.7289	14.018	12.8353	5.4635	8.4916	9.0136	12.6492	8.23	13.8248	8.9364		0.218392	12.4624
4.6465	5.5115	3.5635	6.8979	10.0839	12.295	6.0393	15.2072	16.6986	15.8736	19.268	32.561	20.4585	13.3534	11.637	13.2831	6.7871	7.2919	9.6038	23.7405	13.7995	9.9586	19.1301	14.7431	13.6574	8.7437	9.5531	8.7534	12.2145	8.4415	7.1354	6.7021	11.7219	10.5066	9.6318	11.7226	11.6765		0.224137	12.1735
4.7657	6.6535	8.118	5.3301	10.3757	8.6428	9.2449	17.0625	11.3887	22.5044	20.1399	28.1416	24.2986	16.2865	9.2816	9.9224	11.1767	10.4494	13.5333	23.7881	11.1763	9.2965	15.0675	16.6377	9.1703	9.8721	9.545	7.2495	9.2787	14.8601	10.8006	9.0442	12.2463	10.1033	8.944	15.4524	7.0652		0.229887	12.5597
4.8848	6.111	6.226	6.7944	8.9251	6.8893	6.8576	9.8737	9.9642	14.8849	18.0065	21.4464	23.8587	10.1383	19.1176	15.3763	9.3431	10.2801	18.0139	26.4617	9.1185	13.2256	20.5537	12.0555	10.796	7.9549	13.1088	7.5486	8.7556	12.4467	11.4073	5.6657	10.0761	9.8197	7.4991	12.9341	9.6185		0.235632	11.9765
5.0039	5.1174	9.3087	6.8733	9.2054	7.168	8.9351	7.2461	8.9144	16.5284	19.1082	15.9581	19.3125	12.9117	12.3601	19.3476	8.0197	10.9828	12.3598	26.539	11.6874	22.2824	16.0481	17.8521	10.9259	8.7155	10.6333	8.8063	16.3824	13.1454	11.0529	7.5305	15.686	9.0331	9.1412	13.7444	10.2373		0.241377	12.475
5.1231	11.4942	11.9206	6.1497	8.9593	9.1641	9.2924	11.2998	10.706	17.6684	18.5615	23.9399	22.1605	16.5665	15.0824	15.356	6.2092	10.0709	17.1545	24.1721	14.8833	11.3524	17.8276	17.6439	14.1192	6.4707	7.3769	9.4901	8.9627	13.2867	15.7536	10.9478	9.8714	11.9851	11.3466	16.6995	11.3199		0.247127	13.2018
5.2422	7.3982	12.908	6.1857	7.6155	7.7416	11.2727	6.4636	10.8572	16.759	13.6434	25.6707	22.1698	11.4742	12.1858	11.4936	6.832	10.2868	11.0332	13.2293	13.2676	15.7662	13.8339	20.5867	10.6185	9.322	10.0897	7.1331	11.2264	11.1533	15.829	12.3412	12.9758	15.785	8.2596	15.4029	8.4537		0.252873	12.1462
5.3614	5.3707	9.7135	7.4818	7.1113	11.4538	6.1318	9.4282	12.9121	24.1496	13.9378	17.1014	23.4988	11.5455	15.2625	13.5563	8.6415	9.6941	8.2616	11.3685	13.1285	14.478	9.1381	11.669	9.2242	6.3689	12.2993	7.2922	12.7145	12.0166	16.1252	9.5965	9.8081	8.8759	9.0256	15.6285	8.4327		0.258623	11.4567
5.4805	5.5256	13.9391	11.7184	6.5939	10.6724	5.1421	7.9816	10.9915	17.0387	18.4913	27.4863	22.1907	12.454	15.572	11.6841	7.0599	10.5636	9.7292	12.8587	12.0835	12.2718	13.9294	14.5082	10.9237	6.7172	13.6652	12.5628	11.8695	12.9974	10.6897	9.4325	10.1454	11.8477	8.9492	14.8446	8.2755		0.264368	12.0391
5.5996	6.3229	11.7288	12.1332	11.2987	6.9662	8.8705	9.5771	9.2567	25.0203	21.7683	21.6421	18.4299	15.4238	10.1448	19.3313	6.818	7.2686	12.7581	14.9734	11.3087	17.6256	14.3626	13.4163	10.2075	10.6204	12.2165	11.7946	11.3276	10.5232	8.6825	10.7722	8.3371	11.8382	8.9665	14.6158	9.5143		0.270113	12.3851
5.7188	6.2065	7.4045	9.4536	13.3416	7.6141	12.1058	9.8714	10.3413	20.0181	23.6081	19.5381	21.0055	9.3514	10.5069	16.5188	9.8076	6.5617	11.581	12.4707	15.2373	17.3101	13.3419	17.1091	10.7619	10.1189	10.281	6.011	9.4309	11.4336	7.3502	11.7191	10.4185	9.7084	8.372	11.0326	15.4377		0.275863	12.0106
5.8379	5.6227	6.2276	11.6118	9.6771	10.4767	11.3862	12.4761	9.443	16.3707	14.5461	18.8442	18.7942	15.3499	14.193	12.5854	12.5002	9.599	12.0303	18.3883	11.3464	16.169	13.0181	18.3071	12.5425	9.0158	10.6701	7.502	17.4679	8.5883	10.2242	12.983	8.5228	8.1921	10.5138	15.2238	13.4496		0.281608	12.3294
5.9571	6.2845	7.778	9.8059	10.335	12.4253	11.9001	9.6814	8.1905	14.6516	14.8653	12.4799	16.9101	13.603	23.2727	9.1545	10.3248	8.5155	11.1326	20.8931	17.1423	13.1057	11.8887	13.6251	7.9326	9.3154	10.5198	6.7362	13.9871	11.724	10.5612	6.4504	6.6212	11.1297	10.9255	19.4946	11.6856		0.287358	11.8069
6.0762	4.5677	9.1823	9.31	7.447	8.3828	12.4184	9.4054	12.3153	12.7911	16.7833	21.2067	14.5991	14.4812	12.0086	11.9701	8.9631	7.1727	8.7187	24.2462	17.7305	22.3051	15.7136	10.8136	9.238	5.9536	11.2803	8.4268	14.2707	10.4899	11.2247	10.5636	11.3901	8.7459	8.1972	10.5453	13.4362		0.293103	11.8415
6.1953	5.9	10.3074	9.9153	12.7401	10.817	11.2773	14.1432	10.2706	10.1633	16.6804	16.8347	24.6896	15.4476	15.8741	12.5776	11.1555	8.7427	10.7918	21.9598	14.045	16.261	11.93	9.7537	9.3769	9.565	8.2256	9.6256	13.4785	12.2825	9.4683	10.9272	10.0511	7.5135	15.8196	9.2842	14.6089		0.298848	12.2918
6.3145	3.6192	8.8931	5.7835	8.9637	10.6683	12.3843	11.2487	14.7588	20.0491	18.8316	17.6555	24.6748	17.7503	9.7011	9.2928	8.2895	6.5853	9.683	14.1032	15.1634	18.6916	9.4835	13.3787	9.7101	10.8032	5.806	7.4458	10.4963	12.2181	8.8001	9.0915	9.8765	9.1297	13.3389	12.257	11.489		0.304598	11.6699
6.4336	7.2109	13.1932	9.0866	9.5182	9.8028	7.4294	10.7364	12.4605	22.7605	13.7135	14.5515	16.4981	13.8122	9.3257	5.879	8.8677	9.5753	9.7961	12.5435	12.6371	21.2654	10.7573	12.0303	11.851	8.163	6.7711	8.1703	8.8429	9.0917	11.5505	13.5465	12.54	7.1157	12.4854	13.088	13.461		0.310343	11.3925
6.5528	6.2252	12.6266	10.3407	10.8326	13.6496	8.4577	9.4389	9.4385	18.8007	23.1185	20.1374	17.5419	9.9595	13.2759	11.3745	9.4013	5.5071	7.299	13.3117	11.204	16.8764	10.4918	11.0136	9.7816	6.6214	5.8769	11.978	10.5985	8.5122	9.3609	10.6591	8.1941	8.7993	14.3645	17.1463	11.2102		0.316093	11.4841
6.6719	8.0912	12.326	6.449	7.7356	11.4286	10.3569	7.7791	8.8175	10.4929	14.8691	15.1429	19.0434	11.7052	14.2773	12.3234	16.9449	6.9823	11.5052	12.6499	14.5439	18.9662	9.4918	11.9238	11.5674	4.9199	6.0276	9.9551	11.3351	9.4236	9.719	8.1207	10.6303	6.0525	9.1535	9.0901	11.9903		0.321838	10.8842
6.7911	6.4955	11.1122	7.5876	7.9359	7.0229	9.6069	10.3174	7.9742	12.406	15.051	17.8519	19.8617	19.7142	12.2018	11.0645	8.4142	7.2749	13.9481	11.6746	12.7226	12.4096	13.4057	13.6717	13.9458	5.3401	5.7645	10.4436	12.0633	11.3755	7.8463	12.4914	8.8972	4.7569	8.2529	10.5505	12.0161		0.327588	10.9297
6.9102	8.0505	12.6399	5.7339	8.6972	10.6215	11.2826	11.3575	11.0594	11.4741	13.0924	15.6321	17.4286	10.1874	9.3511	11.1624	5.9962	9.8136	11.7259	12.9483	14.0559	14.6756	9.0772	10.0296	10.602	4.9633	7.5065	11.135	14.638	12.6554	12.6623	7.7039	9.3176	7.8116	9.211	10.0839	16.3775		0.333333	10.8545
7.0293	8.0481	8.7649	5.8016	5.3576	12.9946	10.6433	10.0706	14.8819	11.2465	18.2118	10.7924	17.089	11.9903	15.8054	11.6211	3.4402	5.6511	13.1119	10.766	13.7426	17.3638	6.4253	13.3455	6.948	5.8383	5.9422	7.468	10.3489	10.644	8.1045	6.9352	8.4484	8.567	11.1158	12.1499	10.55		0.339078	10.284
7.1485	5.7372	12.5331	7.5553	9.4229	10.7028	8.2639	10.1357	14.5804	12.4513	16.1302	17.2583	17.7963	12.4508	12.3083	8.3867	9.8555	6.6233	14.9607	8.0462	15.7695	19.4517	6.6339	7.9199	7.4128	5.4458	5.6525	13.2526	9.2194	12.014	8.4034	9.8031	7.7776	5.9911	10.5839	9.2162	7.1827		0.344828	10.4703
7.2676	6.8635	13.7405	6.4322	6.2028	11.7949	14.4745	9.6151	13.0389	11.866	16.4626	18.2546	14.1239	12.7544	12.1056	12.9146	9.6477	5.2354	17.5844	6.5764	13.3825	21.0324	6.5094	9.5096	7.3054	4.0044	4.1772	10.294	8.6149	12.5676	6.8748	10.4428	6.883	7.6024	11.1835	11.6192	8.8138		0.350574	10.5696
7.3868	8.0168	10.9882	11.9253	8.4598	9.2002	11.6886	11.3825	10.5449	8.19	15.7575	16.5358	18.0202	12.1432	15.3292	5.4709	7.6891	6.2565	14.4741	8.7467	7.1021	18.1922	10.8762	11.313	6.9056	4.2551	4.2155	8.8809	6.5355	11.5427	8.5808	11.6271	6.6191	4.9767	10.6312	13.899	11.5295		0.356324	10.2362
7.5059	6.1908	9.8902	11.4771	10.0476	5.4808	8.7054	7.765	13.0774	8.7988	16.5247	11.2071	22.3615	11.9695	16.0763	6.8173	7.6873	7.2276	12.4931	11.0627	8.0986	19.1563	7.4269	11.7165	8.404	3.7372	7.0155	10.2677	8.5988	4.8251	8.0842	11.7853	10.328	3.6276	6.3855	10.4679	9.5787		0.362069	9.84344
7.625	6.8641	6.6212	13.4426	6.9304	5.2669	6.1117	8.5688	13.1112	7.0289	16.5163	11.0273	10.359	9.9994	15.5909	5.527	6.5454	9.5956	8.0991	11.4831	10.9013	20.1813	8.1959	6.8082	7.6148	2.6607	4.3327	8.3632	8.3877	7.9006	10.4058	7.8448	15.8329	5.3951	10.9022	13.3226	7.6388		0.367814	9.31604
7.7442	3.7878	7.7161	6.8632	6.9103	10.242	6.1217	4.4872	13.5469	18.0958	12.4711	16.2968	10.4768	15.4241	9.7197	5.6751	4.5721	7.1321	9.5273	12.4242	10.019	21.3498	10.1979	7.0738	7.2597	5.0163	6.0884	10.5346	6.7141	16.5118	9.4988	6.9907	15.822	6.9671	9.0029	10.6631	7.4599		0.373564	9.68501
7.8633	6.665	7.8702	8.143	7.6151	6.2347	3.6827	5.4122	18.8895	11.2501	17.128	9.1603	23.28	12.3978	11.3281	3.8593	6.2492	7.3879	8.911	7.1058	12.1029	18.8938	10.3856	5.296	7.4816	4.6672	5.905	7.8496	5.1304	10.4339	7.2434	10.0527	7.4669	6.3003	9.2683	8.9152	7.5773		0.379309	9.09833
7.9825	4.9514	7.6317	8.8887	9.0974	7.5853	5.9088	5.2176	14.3055	11.5476	22.0594	9.3589	14.9936	12.4594	13.3109	6.3949	4.9942	3.5908	7.972	7.7654	8.9341	17.8236	10.6792	8.0239	7.7145	6.5016	4.1302	7.043	7.7855	6.6802	9.72	10.3299	10.0566	7.7104	13.5789	6.9912	7.0429		0.385059	9.13276
8.1016	6.3423	6.3084	5.8042	7.0048	9.7516	4.5517	3.4433	11.6736	11.8033	15.2142	12.3729	8.2444	10.1044	10.1471	9.8056	5.2991	4.4761	5.1064	12.5292	11.6725	22.4857	9.9534	8.5677	10.3301	6.8874	3.8707	9.3326	10.8321	11.2892	8.7674	10.6572	7.2659	7.2041	14.5421	9.7211	9.7645		0.390804	9.25351
8.2207	6.8348	9.0173	7.5398	5.7799	9.8482	3.9063	3.6961	8.8303	8.9164	16.2228	13.8305	10.4504	10.8247	10.3534	9.0291	5.6633	5.3628	8.8981	10.0726	12.0984	24.4209	13.9945	8.8168	7.5345	2.6628	3.3191	8.5163	10.1256	8.6128	10.1726	9.3889	11.0257	8.8072	10.5991	5.9374	8.5385		0.396549	9.15689
8.3399	5.1951	5.9943	11.4358	6.5023	7.6734	6.0355	6.6817	15.7346	8.5161	11.6555	13.2683	12.9536	13.4142	8.801	9.5656	4.0594	5.9237	4.9224	11.6514	9.3477	21.657	13.7397	9.4429	8.3841	3.9352	2.4344	5.9416	5.7409	9.7924	11.2669	12.5399	6.3481	8.0631	6.8528	9.2973	5.4463		0.402299	8.89484
8.459	6.3624	6.2376	6.4094	10.4445	7.6448	5.2496	7.2478	11.7184	6.8255	19.3211	9.5784	14.1791	10.383	12.9715	12.4684	5.3401	5.2665	8.5505	9.2935	7.1557	26.9974	8.3949	8.6245	7.7587	3.9831	3.3787	3.9793	8.4425	9.9408	9.979	9.972	10.3612	7.1536	6.8305	10.2756	7.7938		0.408044	9.06982
8.5782	4.8313	7.7642	8.5676	7.3743	6.5198	4.4866	5.4937	8.2293	8.6432	17.3416	21.3915	12.6684	8.4795	6.3998	8.2387	4.6886	4.8768	9.8608	11.3818	7.6888	23.9762	9.9423	8.0079	8.1844	4.8573	5.1148	4.3966	8.7168	14.4049	8.8054	10.8567	12.5403	11.6324	7.8728	14.8371	9.2542		0.413794	9.39796
8.6973	3.4661	5.7893	7.4639	6.2929	6.9497	2.6326	4.054	5.4551	9.7178	18.2348	14.0876	11.4206	6.855	5.7911	7.9149	4.8624	4.9726	6.8108	13.8054	8.5209	16.9316	12.2243	7.6312	5.505	4.2682	4.9217	6.6048	12.5029	8.4438	8.7885	10.8776	10.6112	11.9789	9.3021	10.7563	6.4307		0.419539	8.41323
8.8165	8.557	6.7726	9.2143	9.3366	11.0319	2.9006	5.5639	7.7691	7.611	14.5671	14.0201	7.8189	9.2875	14.3349	9.8877	2.8865	3.9865	5.5205	15.3866	7.9348	18.4328	11.6106	10.4332	7.3565	4.5948	4.965	4.9172	13.2797	9.8044	7.1446	4.886	5.7033	10.9057	8.2719	21.0013	7.8377		0.425289	9.04258
8.9356	5.0975	6.0762	6.9104	11.3435	13.3285	2.2892	6.8338	8.9171	7.7106	18.6143	16.62	5.5327	9.8029	10.9829	7.2095	3.3886	4.9222	7.2802	11.9776	9.6372	16.5271	13.4701	9.7348	6.8837	4.1704	3.0874	2.5923	9.514	9.1535	8.3669	5.3527	4.9814	8.8069	6.0709	13.2175	8.9525		0.431034	8.48214
9.0547	4.7611	5.1267	9.6824	7.9349	6.8479	2.7494	6.2045	9.5784	10.6234	18.0284	10.1119	7.4687	7.5476	10.9724	8.1584	5.4325	5.1654	5.5014	14.8288	9.9532	9.8346	10.8843	7.1565	9.5259	3.6252	3.6029	4.7367	9.7044	13.1827	9.6349	9.8083	6.5217	5.9878	5.063	7.9831	8.5679		0.436779	8.12492
9.1739	3.3049	7.0985	5.9409	10.0965	7.4174	4.0268	3.124	6.0636	6.3991	26.2445	14.1303	11.6986	8.6012	10.7967	7.1269	4.9369	5.0621	5.7187	10.7793	13.7904	13.2578	11.7915	8.0116	10.2725	4.3024	2.3721	6.333	8.6941	10.8078	10.3544	7.1867	8.2765	7.338	4.1653	9.0765	10.1727		0.442529	8.46584
9.293	4.1708	4.0733	6.5013	8.7386	7.1714	6.847	4.4426	8.1294	7.2914	20.8368	12.6588	9.5193	7.4479	8.8364	10.6141	4.2445	6.0303	5.9406	12.1614	20.5637	17.5405	14.4313	10.3864	7.7714	5.2451	2.1532	6.4084	11.0699	9.8358	12.9184	9.8784	8.1534	8.4717	6.0386	10.7093	8.4458		0.448275	9.04659
9.4122	4.5843	4.7166	6.1975	8.562	7.9806	3.9712	5.5133	6.9029	8.5135	20.0863	14.5763	7.5529	6.1585	10.9928	8.9555	4.5894	5.7121	5.5609	12.3324	14.1113	13.1574	10.3738	9.5987	6.826	5.3076	3.4683	10.0441	9.5437	10.9714	11.2937	10.7079	6.5676	8.0951	5.7149	12.0213	10.7567		0.454024	8.66718
9.5313	4.6328	4.8919	6.4608	9.839	8.4422	3.9334	5.6959	5.0628	10.5731	19.2909	11.6471	11.8298	6.528	12.1133	9.4205	4.6944	4.8718	6.6178	9.3537	15.7119	12.0061	14.9754	10.8707	6.8622	4.32	3.1123	14.1505	8.0461	10.0529	11.8502	10.0462	3.1391	11.8355	6.2992	8.9013	10.7706		0.45977	8.85693
9.6504	2.9043	4.5965	9.4153	6.2573	7.946	5.1413	8.0914	4.6712	10.1725	21	14.6365	9.1131	9.7288	13.1115	5.4734	3.1941	4.9545	8.4883	11.7363	21.3271	11.1821	9.8432	10.2455	8.3492	4.7224	5.3388	9.3277	7.9403	15.7989	8.9282	6.8841	4.6199	5.6178	5.2474	12.3334	6.6565		0.465515	8.74986
9.7696	2.8895	3.5155	7.1909	8.4229	6.374	5.5261	5.1457	7.9526	5.59	16.9942	12.1141	10.3052	10.0343	10.2315	9.5704	4.2869	3.0893	4.1538	13.6132	15.7018	11.4367	11.3829	11.8882	8.6941	2.7182	2.3689	8.657	9.7774	9.3048	12.8359	8.7655	4.149	8.0434	8.237	9.5041	10.9379		0.471265	8.3723
9.8887	3.0306	3.1179	7.3042	7.1075	5.8815	5.8289	5.3312	5.5646	12.5247	14.9862	13.8023	9.8058	7.6093	10.3761	5.2012	5.2736	2.9779	4.9311	9.0329	15.9353	11.5885	10.3893	13.8734	9.2079	4.7443	3.9456	7.3536	6.7185	10.1833	12.0785	7.0839	6.2161	13.1723	6.6749	13.4966	11.0747		0.47701	8.42845
10.0079	6.0838	5.4151	12.331	5.6388	5.2045	4.5109	4.962	5.5254	8.8382	11.5139	15.3291	7.9625	4.7823	9.505	7.9858	5.1042	3.953	4.6816	8.9224	20.2434	10.0086	11.444	10.5306	13.5909	4.7501	3.919	11.5704	7.0197	11.1521	7.5787	10.7395	7.7414	6.2491	4.4859	10.6116	10.8271		0.48276	8.3531
10.127	3.7882	4.3738	12.2029	8.8922	3.7982	4.1106	2.8145	5.1357	9.4681	20.4988	10.3884	12.4893	7.3894	10.3218	6.6304	3.7786	4.1149	6.3894	9.9756	12.5474	10.7659	8.5692	8.9957	5.5047	3.3381	5.2633	9.0509	7.0344	14.1506	5.5937	10.7395	13.8305	4.6366	7.113	10.8411	9.3115		0.488505	8.16241
10.2462	4.3275	4.2852	7.968	9.1638	6.4795	3.8065	3.6663	6.5166	9.6359	12.4219	13.0271	12.7409	9.9716	10.7299	8.9468	5.6066	5.4444	4.0199	9.1545	13.4216	12.6667	7.4328	13.3615	6.3122	2.7722	3.8497	5.3438	5.7608	14.9084	7.1961	9.798	9.6882	4.9494	7.7289	7.9384	8.4176		0.494255	8.04053
10.3653	2.6263	3.6568	10.4091	7.7189	5.2589	3.8954	3.079	7.5676	7.3971	13.2894	16.5197	11.1501	12.3642	9.0803	5.2443	3.7743	4.7689	4.864	9.1483	12.6528	10.9624	11.0509	9.8976	5.3631	3.7315	4.1129	9.6443	7.0648	12.1735	6.5507	7.742	9.2272	5.7041	11.2023	6.0981	12.4311		0.5	7.98394
10.4844	4.7504	4.6271	6.6687	6.5149	4.8161	3.6891	3.6433	8.4945	8.1905	19.6187	22.4023	10.3147	10.8148	11.7486	6.699	3.1908	4.18	4.9342	13.5181	10.635	15.3294	10.6135	12.232	3.9013	3.528	2.6499	7.4151	10.1436	9.4747	8.0469	9.5191	12.9498	7.8667	6.8986	6.2287	7.9231		0.505745	8.4492
10.6036	3.099	5.1876	6.4737	11.6503	3.3146	2.6763	2.7057	7.2897	7.4923	23.5388	26.7699	10.6446	13.3121	10.715	5.5901	2.885	3.2517	3.97	11.2952	12.9169	13.9959	8.014	9.6574	6.4505	3.0329	2.8765	5.69	6.8387	15.3678	7.3466	5.5776	11.0663	9.9312	4.7395	8.9498	10.0353		0.511495	8.45412
10.7227	3.5847	5.8683	8.2772	9.2553	4.2655	3.442	3.7425	5.7652	4.0487	23.115	16.3325	10.5616	10.5026	9.5949	4.8416	4.3036	4.1565	6.2655	14.51	8.1425	13.8754	9.3542	8.136	5.9035	2.8007	7.7257	3.9501	7.5179	8.1109	6.3318	5.2572	9.8978	8.2224	7.0573	8.6479	8.5649		0.51724	7.83137
10.8419	2.93	3.8098	6.7381	6.8095	3.9785	2.6104	4.2847	5.2976	7.5928	19.9901	23.9868	11.1597	13.6624	6.2422	3.8301	4.5328	3.7348	5.0557	10.5645	9.2783	13.4908	8.3927	7.5459	5.5909	3.099	2.9193	5.0506	5.3181	8.2481	5.5658	5.5298	9.7023	7.6309	8.4584	10.625	7.7276		0.52299	7.52733
10.961	2.6234	3.7607	6.5374	9.9298	4.7076	2.3623	4.4461	8.4461	11.6298	19.8706	25.3206	6.2481	10.3414	9.5748	9.72	4.4715	4.2577	3.5614	12.3176	7.695	10.1587	8.8591	11.2556	4.8277	3.0207	2.5916	7.4558	4.2119	11.0618	7.1982	7.2987	10.1245	6.2732	8.0363	7.6315	5.5045		0.528735	7.87032
11.0801	3.6402	3.5828	11.3282	7.7651	5.9744	3.5791	4.5696	10.142	10.3042	16.1456	15.0929	7.9533	12.4806	8.1436	5.8816	4.9291	3.7551	3.1821	7.4198	9.3657	12.0199	11.8359	9.3795	5.1383	3.0363	4.4899	5.0312	6.5156	8.7319	4.5848	7.6748	7.8527	9.1057	9.3172	8.6756	6.6753		0.53448	7.64721
11.1993	4.8163	2.7661	11.2108	8.3206	8.0076	2.8471	4.7389	8.5103	10.3919	18.7542	12.1839	12.4076	10.6715	11.4419	4.7251	2.486	2.4603	4.8698	12.6714	6.039	14.5649	9.9661	10.3101	4.4936	4.593	3.1326	4.6946	6.1275	12.5124	6.7791	5.9291	9.0846	6.5267	7.6205	7.6222	9.4478		0.54023	7.88125
11.3184	3.6269	3.049	8.5862	9.9052	7.5412	2.7845	2.3478	6.5138	8.426	21.9174	17.2792	11.7651	8.9729	10.1139	8.0948	4.7108	3.7888	3.1002	9.3551	9.0882	13.7835	11.4734	10.1242	3.7822	4.6787	3.7781	5.7574	8.6303	9.348	5.523	4.6641	10.9625	9.5749	6.2785	8.0291	10.3178		0.545976	7.99091
11.4376	3.8053	4.5897	5.3787	6.5562	4.2973	3.8911	3.0452	9.6748	7.4994	17.7216	12.6306	10.6673	8.886	9.9311	4.9502	3.7582	3.6523	4.7064	11.5804	11.5298	8.8469	12.0782	11.8808	5.2889	3.9434	2.867	4.5507	9.4442	8.8476	4.6542	5.6701	7.9588	8.4665	7.7783	10.9787	6.2859		0.551725	7.45255
11.5567	3.4199	2.7473	9.288	6.0568	3.7071	2.6349	3.234	7.3362	7.8662	19.0859	11.4186	10.9808	9.3988	12.2375	5.0058	3.2795	2.451	3.3405	8.5556	12.5529	7.1224	12.4384	10.7205	4.486	4.516	3.2725	4.8422	5.4892	11.7203	3.9858	6.8793	9.4448	6.4719	11.83	15.2105	7.8919		0.557471	7.52553
11.6758	3.3186	4.6663	9.9608	10.9471	4.5966	2.2092	4.0232	9.7117	5.9965	12.0731	12.8048	12.2683	7.062	7.1925	2.1902	3.9752	4.7227	4.7213	8.8321	10.2258	10.5928	13.5402	11.7831	7.7698	3.6241	6.1835	6.6196	7.5353	7.5911	6.5679	6.7202	13.6452	5.4019	5.9371	9.2581	5.1418		0.563216	7.4836
11.795	4.2922	3.7565	10.3204	11.4077	5.7752	3.2491	2.8154	8.3164	5.7032	9.5891	11.9561	9.9017	10.1188	5.6449	4.2495	3.8133	5.458	4.6875	6.4521	11.4594	11.4243	11.3619	6.7911	8.5136	2.7031	2.6686	9.4094	6.8618	16.1176	3.1946	7.223	11.4273	4.2609	8.1742	10.2029	6.7644		0.568966	7.3907
11.9141	3.5304	4.3742	9.1303	9.0001	4.5615	2.783	3.9417	6.65	9.0762	10.48	12.9661	12.7536	8.6422	7.6726	5.5671	4.8867	3.5768	4.6346	11.7409	7.1572	14.9201	10.0002	7.3604	4.0756	4.0778	2.3903	6.3547	7.0897	15.8648	6.4286	7.2306	9.3084	8.0568	7.1007	9.2313	11.5423		0.574711	7.61549
12.0333	2.7222	5.5151	9.9463	14.9757	3.1646	3.1238	4.8176	9.4631	11.497	5.9472	11.589	11.7423	9.1615	7.7231	3.9518	3.7317	3.0005	4.0648	4.6918	10.4101	11.7212	9.2999	8.0427	4.3111	2.6097	3.6891	6.234	8.3162	11.0961	6.262	5.6761	6.4017	10.758	7.9606	6.2535	9.4639		0.580461	7.20375
12.1524	3.0444	5.4729	13.208	11.3486	5.2995	3.267	5.2129	8.2597	8.331	7.7902	12.2149	10.719	7.6515	9.6968	4.2994	2.9461	5.8702	3.7718	5.411	11.8378	8.7861	10.8593	6.2197	7.7886	2.9826	3.3477	9.6625	8.9763	11.2203	6.2692	7.9637	3.977	6.9003	5.9321	8.0654	8.4547		0.586206	7.30717
12.2716	4.6332	5.3003	9.6161	8.1305	4.6834	3.398	3.9788	5.2699	11.4733	6.5694	9.695	11.9584	6.9729	7.5366	2.3745	3.9314	5.093	3.0347	7.4486	7.8714	6.5165	8.8947	11.7753	5.4972	5.6741	3.4084	5.523	8.5881	10.1939	7.4671	6.4432	8.2597	4.8369	5.7987	10.0284	10.1842		0.591956	6.89052
12.3907	2.7318	4.1112	8.6796	11.0226	3.7006	2.9211	3.9584	6.3946	10.175	10.4741	9.8505	10.5338	5.1806	8.5496	4.0569	2.9265	5.3383	4.0355	6.4034	12.1617	8.5332	8.1951	10.0879	8.4744	2.9236	3.4007	4.5554	9.6094	9.45	4.5414	6.8307	7.3334	7.6383	8.6694	11.6528	8.7966		0.597701	7.05272
12.5098	4.9333	5.9396	8.1682	18.7087	4.1012	3.4933	7.1957	5.7596	6.7287	10.7955	7.1697	7.1488	7.2489	9.8253	6.5487	4.7807	4.0143	4.7121	6.099	12.8722	6.5611	9.0505	7.2025	7.2102	3.1345	4.1628	4.3447	10.0732	6.817	5.3297	5.556	5.9138	6.0897	7.1962	9.8163	7.5332		0.603446	7.00653
12.629	3.5329	3.1062	9.394	12.7715	6.1446	2.9919	5.4806	4.2034	10.3503	11.0112	9.7154	8.7762	8.2181	7.3226	4.307	3.9562	3.486	4.0072	6.7859	13.8378	9.4644	7.8039	11.5112	4.5208	3.4307	3.7124	3.8225	10.0625	10.3147	5.9429	4.9977	7.9941	6.4641	5.7369	11.8533	5.5844		0.609196	7.0171
12.7481	3.3058	3.9754	6.396	10.4909	4.3196	2.9904	5.5599	6.1324	7.4467	13.8306	14.3561	5.0241	9.9182	10.9174	7.7185	2.944	2.7017	6.8747	6.2371	11.6765	10.4583	16.0066	6.3077	4.1014	2.2297	3.3816	4.6638	6.0249	11.2514	4.3753	6.283	8.2151	6.7105	5.7654	7.0485	7.8302		0.614941	7.04082
12.8673	2.9292	2.4919	8.3926	11.9002	2.9894	2.4613	5.0865	8.4124	8.6298	9.7449	7.1516	7.8489	6.8962	11.687	5.932	5.0883	2.3787	4.2885	6.7152	8.0859	8.5136	11.9802	4.486	5.9397	3.1309	3.8959	4.3398	7.5074	9.0105	6.045	8.6034	7.4349	5.3259	6.7617	5.828	8.7073		0.620691	6.5728
12.9864	2.4274	2.1342	9.7518	8.2279	3.0464	2.642	4.6643	6.2124	9.1839	6.834	10.9652	7.3401	6.2885	13.0021	4.6803	4.4802	3.7981	2.7301	6.7718	6.2817	7.6201	14.4339	9.8252	6.0182	3.7547	3.0132	7.9487	6.0191	9.0733	5.8719	8.7159	11.1688	4.7776	8.0315	6.7295	5.333		0.626436	6.66103
13.1055	2.4971	4.1134	9.0701	13.7843	3.6717	3.8137	5.4675	7.1427	8.3639	8.7877	15.7519	8.0681	7.0493	14.9028	6.2989	2.8598	4.9802	2.6872	8.955	11.2974	9.9498	10.8828	5.6825	7.3044	4.0247	2.9117	6.3437	3.7644	9.2739	6.2695	6.2637	6.665	4.8864	6.9019	6.6578	10.6141		0.632181	7.16553
13.2247	2.4001	3.5469	10.3471	11.0992	4.7145	3.5347	3.5939	8.9483	10.6073	11.3045	15.7928	10.1365	5.9389	14.031	7.7101	3.9271	3.3698	3.5097	11.399	9.5565	6.8163	13.3039	7.8884	10.1728	3.3542	4.2066	5.9915	7.1637	6.7958	5.1037	6.3504	6.4546	5.6977	9.6798	8.1623	8.3192		0.637931	7.5258
13.3438	4.352	3.1482	14.3083	10.3328	4.902	3.7976	3.7098	8.3837	12.4362	11.9628	12.0253	8.4275	7.862	11.845	8.1576	3.898	4.4966	2.6971	5.2126	10.018	8.3929	10.4327	8.9113	7.6236	2.1431	5.4003	5.8157	11.3801	9.7012	4.8506	5.9513	6.9296	9.0025	8.86	9.0486	6.8687		0.643676	7.59126
13.463	3.5803	3.7921	12.168	7.8397	5.0955	6.4539	5.5625	8.8963	6.1729	10.9768	10.3285	7.9231	7.6927	12.4471	7.7874	3.4855	2.2258	3.0975	7.2384	10.0413	11.3718	11.5151	6.3584	7.9162	4.2528	4.3702	5.9026	10.5429	11.3046	9.139	4.8415	5.4291	7.9825	12.135	10.8892	7.817		0.649426	7.62703
13.5821	2.0995	2.9629	7.1354	11.83	7.4901	3.4421	4.5541	6.0595	10.1107	13.5257	11.8883	7.2086	7.1342	13.366	5.6954	2.0561	3.6201	2.9642	6.6889	6.5665	9.1451	10.4061	4.8935	5.5165	3.0018	6.2591	7.6594	6.2347	10.1389	6.8378	7.2248	8.405	10.0726	5.6175	9.5881	6.2348		0.655172	7.04539
13.7012	3.1073	3.49	15.4907	10.9654	3.9611	3.4878	3.2377	8.7398	8.0924	8.1569	7.535	9.622	8.3081	17.8361	8.5404	3.5235	3.2791	3.6133	9.9985	7.7614	6.9076	12.8878	8.0635	9.3739	6.4073	4.3408	6.8271	7.3815	10.8159	10.7675	6.8992	12.9459	8.3239	9.5826	7.1336	7.1858		0.660917	7.90529
13.8204	2.6759	4.8186	14.2759	10.4364	6.2606	5.2022	2.7766	5.2237	8.9806	12.2709	13.0401	13.3773	10.2222	9.0101	7.5746	5.1913	5.9113	3.3211	7.0255	8.9737	11.4847	14.5975	9.3746	9.7141	5.851	4.7198	7.988	6.9752	7.7262	8.7618	11.4677	11.2284	8.4346	5.6953	5.2109	7.5766		0.666667	8.14931
13.9395	2.7993	5.0087	9.405	9.4081	5.7615	3.3192	3.0424	4.3739	9.3965	15.5782	10.455	9.6012	8.7387	13.727	7.6583	3.6524	5.0332	3.3385	8.8883	11.2893	7.8075	6.3249	6.8362	10.3269	3.75	2.9913	8.2307	8.5459	7.0932	9.8899	7.5773	9.9406	10.4885	5.4891	7.8886	3.2097		0.672412	7.41292
14.0587	3.8761	3.3853	11.943	10.8041	4.1393	5.9787	3.9039	5.001	7.6026	9.6454	6.8542	8.9716	9.4222	16.7471	7.8319	2.6178	4.378	4.2523	8.7887	10.091	9.4341	7.3512	4.2496	6.0527	5.1447	2.8581	10.0528	4.6621	10.4176	14.4158	6.5421	13.3689	11.1475	6.534	4.3397	5.2941		0.678162	7.4472
14.1778	2.6096	4.9954	10.0052	10.3949	5.5484	3.5609	2.7107	6.305	7.2348	13.9321	9.582	12.1838	8.3752	15.3928	6.8984	3.227	4.2914	4.2878	6.7329	11.6795	17.7248	9.3464	8.5963	6.0185	3.777	4.0612	7.0848	6.4389	5.982	10.3311	5.1042	11.8313	6.444	6.3432	4.3704	8.8969		0.683907	7.56386
14.297	2.3774	4.1963	9.9182	11.9794	3.5908	3.7157	5.4194	4.3343	10.022	12.414	6.7975	15.0006	11.057	17.5852	7.9918	4.1946	2.3804	3.774	9.7076	8.1487	13.4976	11.6828	8.8414	5.3253	2.9334	2.4376	14.5854	5.1767	5.5428	8.8547	2.8968	8.2718	5.9813	7.5589	7.0565	5.7633		0.689657	7.52809
14.4161	3.898	4.8035	11.113	14.7829	2.8061	4.7736	4.9223	8.6651	10.6384	10.8897	9.014	14.8964	5.7415	11.1525	10.0909	2.897	3.1287	4.748	6.4033	9.8833	14.0012	9.3614	9.0512	9.2637	3.5289	2.502	10.6084	5.4577	5.7816	8.487	4.3453	14.0215	7.4852	8.3664	4.1632	4.7576		0.695402	7.67863
14.5352	2.3673	3.535	12.3856	9.0654	6.6818	4.3409	3.0888	5.1602	6.8401	12.9334	8.8879	11.1797	4.6112	11.6588	9.9822	5.304	3.166	3.227	4.9904	12.7801	16.5315	12.6706	11.0142	5.0583	2.9734	4.086	12.0299	7.0257	12.0138	7.7283	3.4382	7.7077	6.6879	5.1593	4.1852	7.9052		0.701147	7.45558
14.6544	1.9995	3.0987	11.8847	9.4168	4.5618	4.0369	3.6281	7.204	9.6569	11.9488	5.7859	13.1612	6.9509	11.4582	6.5196	3.808	2.5641	2.9456	8.7847	8.6663	16.1141	8.8274	6.1616	11.4261	3.6793	4.4055	7.7605	7.577	13.3274	6.4435	6.3621	7.9178	7.5967	2.8856	6.2797	7.9996		0.706897	7.30124
14.7735	2.0116	2.8772	12.3767	5.9675	5.4639	4.4775	6.1642	9.8478	12.5231	13.2853	8.6895	10.113	10.7147	11.3614	6.4743	3.0122	4.1883	4.7243	6.7639	7.6581	19.2466	12.0527	5.338	4.8423	5.1857	3.6318	7.7125	5.137	13.2127	5.6611	5.7422	8.4487	8.2966	4.5128	6.9298	10.236		0.712642	7.63558
14.8927	3.5403	2.9003	11.6301	6.189	4.1866	4.4705	3.1975	5.0916	7.9334	15.0292	11.5798	12.3701	8.962	15.5522	8.418	4.8282	3.139	3.6867	8.2635	7.0319	13.1738	16.6504	7.3623	5.922	4.0764	6.4638	8.7065	7.1132	9.3739	5.6528	7.7038	12.6457	8.9846	7.2251	4.6659	11.2068		0.718392	7.91464
15.0118	2.6789	1.9557	8.6086	8.7082	4.4313	2.1261	5.8765	5.2682	8.1009	11.3652	11.8644	10.9538	9.0172	13.1902	5.5891	2.7232	2.8104	7.1551	9.3121	8.1587	11.3169	15.154	6.245	5.4702	3.3055	7.1797	5.2842	8.037	7.9035	7.8892	9.239	12.8912	7.8159	5.2015	5.8544	13.0156		0.724137	7.54713
15.1309	3.1837	3.5536	12.6382	8.0243	4.3704	3.7454	5.1756	6.3712	8.7846	9.1665	10.7088	8.5711	7.1669	6.2439	8.2721	3.4682	2.4792	4.1212	7.7691	9.9544	9.8533	15.4995	5.2216	6.6263	3.3002	4.3168	5.2577	7.0232	8.9785	3.5618	9.8986	11.2425	9.4606	8.1566	5.6302	9.5408		0.729882	7.14824
15.2501	5.0222	4.3027	13.1245	12.7551	4.2149	3.4724	3.1578	5.4687	9.3524	9.7359	11.1365	8.3722	8.2634	7.241	6.142	4.5628	5.031	4.8236	6.9273	13.414	13.4524	8.4991	5.3308	7.1561	2.1627	2.9774	6.7981	3.8085	7.9177	4.7214	6.2121	9.0549	7.0429	5.9468	6.9158	7.8674		0.735632	7.01068
15.3692	4.2227	4.0271	11.7447	10.1773	4.2736	3.586	3.1413	4.3091	8.1486	10.2283	11.9053	9.5782	7.9359	10.5011	7.8802	3.5756	4.1872	6.9509	10.0576	8.0034	14.7291	11.1711	7.141	7.423	3.1057	4.5418	6.2294	4.8195	5.9412	6.619	9.2027	9.6963	7.9992	5.8829	6.5963	15.2842		0.741377	7.52268
15.4884	2.1929	3.4986	11.8726	7.2261	5.0204	4.4501	5.8472	6.5018	7.6556	8.018	10.9547	6.5026	9.774	11.4566	11.0276	3.4257	2.9428	7.2993	10.3561	8.1474	17.6262	8.8367	8.4163	8.0634	7.2332	6.5168	5.7369	6.7078	8.455	5.6356	10.0552	9.0687	6.6865	8.7624	6.1374	14.01		0.747127	7.83662
15.6075	2.3597	2.0033	8.5671	10.6356	3.9872	3.7113	5.4474	5.9999	10.5712	8.8844	8.2465	9.7744	6.9086	11.8746	9.1268	4.2123	4.2552	4.9578	5.6475	9.8655	20.1052	8.975	4.1052	6.4159	3.8061	4.5994	4.1068	4.2892	6.1751	4.9332	11.5223	7.0799	8.9167	9.807	7.0753	13.7527		0.752873	7.29726
15.7266	3.5239	3.4297	10.7655	10.6893	3.6329	5.3396	5.8273	7.5166	11.7161	7.546	13.2646	9.7046	5.4098	11.0105	5.7515	5.6665	3.3031	3.4505	5.6783	5.8292	9.4119	10.7739	7.0148	4.9766	2.5792	4.5222	6.5034	4.8094	8.3516	8.4619	10.9362	5.9053	10.4019	4.8271	5.2396	10.8276		0.758618	7.07217
15.8458	2.4628	3.4669	12.3899	7.2961	2.1493	3.5326	2.5504	5.2589	10.3923	5.216	12.1687	5.7167	5.564	7.8416	9.4853	6.0841	2.8541	4.2879	2.9729	4.3062	15.5112	7.8202	10.5044	3.9239	3.3118	4.4341	6.7474	4.2722	11.1304	4.5118	10.4154	9.5342	7.7649	8.1893	6.3294	9.4362		0.764368	6.66204
15.9649	3.4417	4.9326	12.6746	8.6218	5.2482	4.1416	2.907	4.9095	11.9145	5.8913	9.6416	9.9034	5.8294	12.4104	5.1013	5.1202	3.1296	5.2253	4.1476	6.8982	11.4219	8.257	11.3431	4.9308	4.3371	4.6605	6.5022	5.1314	9.4468	5.9001	7.867	6.9625	6.3053	6.6009	7.9306	7.9492		0.770113	6.87878
16.0841	3.6594	3.2431	15.7999	7.5378	5.6553	3.0548	4.2208	6.6399	12.085	6.4013	18.7445	8.6695	5.9981	14.3524	7.5994	5.1654	7.3095	4.4339	6.6355	10.059	9.0456	8.7216	6.1326	3.2737	3.8751	7.1716	10.2575	6.0455	6.3055	6.9016	8.8936	6.0436	6.9215	4.5296	5.6802	9.8449		0.775863	7.41412
16.2032	1.9256	3.7806	11.0937	6.1459	8.3009	2.864	3.9736	5.6847	6.8559	8.2407	15.1613	10.0384	9.065	10.7794	6.533	7.0357	4.499	5.2713	5.5443	9.8223	7.7181	12.2988	7.707	6.3731	4.952	5.5915	7.1718	3.6044	8.9234	9.8492	8.1218	11.8656	5.425	6.5962	7.1311	8.8466		0.781608	7.3553
16.3224	2.5449	3.4933	9.7723	10.787	4.8489	2.4406	5.5301	5.6323	5.4587	5.8287	12.9034	10.5351	8.9529	14.6981	6.6309	6.1434	3.784	5.2699	7.599	7.7214	8.9333	10.1029	8.9358	8.3823	5.5256	5.238	10.0952	4.2228	10.2341	10.2244	8.5555	10.3719	7.7527	5.9615	6.0649	10.7735		0.787358	7.55415
16.4415	3.2164	3.438	8.0453	9.2502	5.2102	2.8726	4.1733	7.162	7.7554	5.2864	14.3883	11.9611	9.5201	12.5303	7.683	6.8939	4.2167	4.4432	6.603	4.0353	8.5015	7.7293	7.3676	5.7709	3.6058	8.8474	7.3939	6.2333	12.7013	10.1035	5.0822	7.9501	5.7222	7.1349	6.1942	7.0141		0.793103	7.11214
16.5606	4.3058	3.6814	6.8563	11.6644	5.8707	2.6251	5.3503	7.1153	6.7661	7.8157	11.9384	9.2158	11.7242	9.589	9.0754	5.3593	6.3355	3.1966	7.2017	8.5358	7.8132	11.8849	8.402	7.1726	5.2374	7.9683	5.2982	6.8011	10.7677	9.3062	5.4459	7.7042	9.1223	6.1554	9.6699	7.6877		0.798848	7.51833
16.6798	3.653	4.926	9.1879	6.4936	8.4214	3.2976	4.1908	8.4716	5.7677	7.3298	8.3538	6.5355	11.6259	9.5664	9.2961	4.2703	4.503	3.8042	5.5485	9.0219	8.1803	5.4583	10.4978	8.2488	3.6536	6.6734	7.2691	4.4818	8.0747	7.7191	8.1088	4.8621	4.5706	4.5628	5.1672	6.2424		0.804598	6.61211
16.7989	3.1405	3.7512	8.1719	7.145	8.0896	6.3984	4.5675	6.6246	6.3669	6.708	13.9923	5.7431	11.2284	12.2921	7.3924	4.3342	3.8617	5.5239	7.6592	8.6816	8.5302	4.8654	8.3059	7.325	5.4539	10.4097	7.532	7.5057	5.2961	3.6976	6.7464	5.248	4.607	5.4101	9.7333	4.8422		0.810343	6.86614
16.9181	4.165	3.1306	9.4913	6.4392	9.0369	6.4535	3.4839	8.7946	7.0065	7.9269	8.4587	7.532	10.1292	11.0281	5.6409	3.8611	5.1296	5.3703	6.9661	8.2722	9.7469	7.9822	12.7424	11.5421	6.6277	10.48	8.2555	5.1808	7.0698	3.1977	7.0096	5.6767	4.7969	4.7891	9.1235	8.705		0.816093	7.25674
17.0372	3.2503	4.7839	7.5395	7.1696	7.1886	2.7138	4.5733	5.3106	7.573	7.7314	10.4958	7.3921	8.8157	11.8775	10.0699	6.1521	2.5335	5.4145	10.3938	7.5771	9.2716	6.3361	7.5087	10.715	5.6428	8.5872	5.8951	7.3096	5.883	7.6842	4.5648	5.1392	3.6648	4.7916	5.0964	7.7915		0.821838	6.78993
17.1563	2.7474	8.9166	5.6972	9.3178	6.3095	2.7448	5.8648	5.5346	5.5621	9.5687	8.3169	8.6773	6.9128	17.6658	6.7607	6.9655	4.0136	6.4615	11.7425	9.9553	7.5287	9.5621	6.9294	9.9464	8.8298	7.8585	4.5768	5.7923	4.7317	6.8141	4.4529	6.5844	3.6076	3.959	5.4125	5.257		0.827583	6.98829
17.2755	2.6462	7.1524	8.2627	6.7382	4.3719	3.0276	3.0979	6.5448	6.1795	8.0258	9.3136	7.7437	9.2746	9.0875	9.8318	4.4878	5.3758	3.9619	12.511	9.2227	6.0347	9.1053	3.7045	10.6524	7.2782	7.6148	7.1791	5.4563	3.5643	7.1731	5.8244	6.395	3.1563	4.31	4.9363	6.4872		0.833333	6.54804
17.3946	3.9673	6.6832	6.4531	8.4511	6.7425	3.1306	5.0575	5.7052	8.2165	7.7207	9.0963	5.4189	9.4634	12.2756	5.9462	5.8464	5.1612	3.8823	16.43	11.7151	6.1189	4.8422	7.2868	7.4008	8.0373	8.429	8.1808	8.613	4.7915	4.3779	3.6676	6.0026	3.0814	3.3382	4.1491	12.6507		0.839078	6.89808
17.5138	2.4686	9.3224	7.3361	8.9181	6.4272	7.0998	5.4207	5.0136	6.7985	8.0432	8.3609	8.1757	4.46	14.0998	6.2469	3.6408	4.8197	5.6703	11.8797	13.1772	6.1882	6.3293	5.5838	8.305	8.0425	6.7519	6.7692	5.6893	2.6844	5.7983	3.09	7.6109	3.2496	2.1627	4.8944	10.6558		0.844828	6.69957
17.6329	4.3559	6.8432	8.1562	8.4297	6.8469	9.3557	3.6281	4.622	6.1194	5.9196	9.541	8.1355	5.1685	4.4667	4.0663	5.1283	4.4714	4.8334	11.1602	7.4612	9.5733	5.6663	9.04	5.2934	6.7144	6.4891	5.251	9.2317	3.7856	3.35	4.6242	12.6289	2.5245	2.1635	5.5684	9.6792		0.850574	6.39702
17.7521	2.7039	6.2501	7.5224	7.8436	6.8903	5.5972	4.7442	4.9948	7.8541	7.4252	7.1473	9.7075	4.4462	5.0896	7.1389	8.6456	5.8736	6.8159	11.0952	6.6389	11.9239	6.0671	6.9113	5.6571	9.2388	7.6812	7.1645	6.8566	2.7576	6.3932	2.363	6.7189	2.4067	3.9664	4.5019	4.91		0.856324	6.3873
17.8712	2.8167	7.3455	7.0643	8.2706	8.9179	6.2278	5.6284	7.6224	10.2917	6.7846	10.3172	8.0531	7.2883	7.5674	5.1981	7.9642	6.6231	6.4562	9.568	9.3381	10.924	5.2327	9.0646	7.3357	9.5439	6.8379	6.6684	3.4992	2.4723	6.6007	3.2232	6.8859	2.2039	2.7443	5.9998	4.6372		0.862069	6.75604
17.9903	2.9859	11.8655	9.2901	7.4884	7.7298	5.3249	7.1724	10.1878	9.1181	9.1858	7.7882	8.1099	5.5813	7.6069	6.3537	5.7646	4.7723	5.6495	15.0201	6.0157	13.525	5.3842	5.8307	4.9983	3.2263	6.4257	5.1689	5.2463	3.089	5.8825	3.5101	7.7872	3.4195	3.0753	3.9914	6.3125		0.867814	6.66344
18.1095	2.9669	6.9143	10.4352	9.3265	9.5506	6.1055	6.2877	8.6593	6.4759	6.3028	10.5366	7.1602	6.3225	6.719	7.8485	8.3245	7.3994	8.2834	14.3376	9.0575	6.5293	5.9821	9.514	3.5077	5.9236	3.3248	4.4426	3.9836	2.0663	6.4835	2.2058	4.6174	2.5961	2.0192	4.8803	5.2452		0.873564	6.45376
18.2286	2.4715	4.0903	7.627	7.4486	6.8932	5.1492	5.2299	6.7307	5.3094	5.5838	8.625	5.9754	3.1794	6.4913	5.9121	7.4112	5.4173	7.1433	9.219	10.0516	6.5442	5.988	4.2895	4.8646	5.9533	3.5751	4.3801	3.8175	1.9221	4.4597	2.0671	2.7314	3.0908	3.0085	4.0632	6.0241		0.879309	5.35384
18.3478	2.3976	7.0245	6.2074	9.7385	3.986	6.2387	7.9033	9.3837	7.1319	4.4614	11.0031	8.0281	3.9956	5.5934	8.6445	7.0424	8.8707	9.0495	10.2753	10.1782	5.7806	4.5017	3.6384	4.5354	4.1607	3.3999	5.0604	4.3231	2.4757	3.6039	2.4741	3.4652	3.4547	3.2197	3.5753	6.9976		0.885059	5.88389
18.4669	2.5395	10.7231	7.012	5.8669	3.8283	4.2249	7.7378	11.7561	8.3487	6.1525	9.8599	8.7483	4.8204	6.8493	2.9346	4.4442	11.986	7.5859	15.189	7.7915	4.6714	4.3329	4.4089	6.0621	3.3656	4.5385	5.4916	4.0795	3.5102	2.3398	3.1822	4.1461	2.4271	2.7	3.9664	7.9717		0.890804	5.98869
18.586	3.4845	6.3517	6.2826	6.3436	4.0859	3.2888	5.4573	8.8481	5.8739	4.2745	9.07	8.2093	3.9008	6.5399	5.0736	6.5099	4.9483	7.0449	13.9299	5.1862	4.4952	5.6417	4.8635	3.715	2.784	3.0202	4.2198	2.3563	2.5952	2.5885	2.8749	2.1867	1.9733	2.6921	4.2848	8.822		0.896549	5.10602
18.7052	3.5666	7.3417	4.031	4.8267	2.2668	4.4922	5.7756	4.392	4.6039	4.799	7.8196	6.1427	4.7964	5.1342	6.1328	5.2267	4.8679	9.6393	9.0715	5.699	2.6657	3.7714	3.0855	4.3508	2.8876	2.1459	2.7637	1.9805	2.1371	3.9013	2.2997	2.4932	2.1456	2.2745	4.5258	7.7764		0.902299	4.49529
18.8243	4.3441	8.8396	6.5654	4.7839	3.7342	4.6592	5.7563	7.0163	4.4124	5.3441	8.5306	7.9259	4.7763	5.2749	7.5737	4.3385	5.3473	9.5688	5.906	6.6993	3.7396	3.9814	2.3518	5.3132	2.4788	2.3944	2.2475	1.9389	3.207	2.7105	2.099	2.5564	2.9997	3.0403	3.6374	7.4381		0.908044	4.8203
18.9435	3.8555	8.4402	3.8857	8.0216	4.1787	4.4495	2.555	4.9695	5.4875	6.0137	8.068	5.5545	4.1494	2.6945	5.3256	3.5848	6.3104	7.2184	9.946	5.5062	3.0534	2.1605	3.7426	2.7878	2.9739	3.3433	2.7534	2.9425	2.1154	2.4742	1.9729	3.0038	2.2442	2.8654	3.8838	9.1113		0.913794	4.49009
19.0626	4.6123	6.0804	5.7888	4.1599	3.9894	3.6608	3.2298	5.0013	5.1074	5.5036	8.8895	5.1143	4.2675	3.8843	2.7214	4.4048	9.6909	8.082	9.1092	4.1617	2.76	4.5596	3.2448	2.455	2.0999	3.4904	2.6096	2.1668	2.4054	2.2998	1.9849	3.1208	2.1081	2.7098	5.8317	7.1502		0.919539	4.40156
19.1817	6.0427	4.1437	7.0045	3.409	4.6905	4.9386	3.7166	4.2936	4.1325	4.002	7.1866	4.7032	4.2965	3.2247	5.2651	3.5377	8.6586	9.3637	7.6523	4.2558	3.5593	2.8935	2.1799	2.4218	2.6891	2.6614	2.8109	2.0675	1.8989	2.9038	2.5218	3.2173	1.9791	2.2351	5.5193	7.7487		0.925284	4.27292
19.3009	7.2213	6.6162	2.9148	3.2358	3.2991	5.6859	4.7065	3.3785	3.8654	2.5356	9.5232	6.0067	2.6619	3.8773	3.356	4.2736	8.8659	9.3949	3.5985	3.0227	2.136	1.9112	2.423	3.3985	2.9366	2.8496	2.6287	2.5408	1.9878	2.8863	2.0387	2.3738	2.0433	3.7808	2.9707	6.6066		0.931034	3.98756
19.42	7.3134	5.4599	3.3311	2.5909	2.0704	3.9805	3.9514	4.0549	3.9434	3.8944	6.0104	5.943	2.5114	2.5717	2.2759	5.0066	5.575	8.2727	5.3805	3.0994	2.4242	2.5407	4.3931	2.9706	2.5357	2.4986	2.2527	3.4315	1.896	2.4411	1.9617	1.9891	1.9307	2.8041	2.4896	4.6454		0.936779	3.62338
19.5392	5.2417	6.1472	5.4805	2.1327	2.6066	3.5829	3.0003	4.3991	5.0399	5.4382	4.9193	2.9438	2.0368	2.4194	2.7547	4.4132	8.5916	4.5777	4.3479	4.8171	2.4755	1.9671	2.5259	3.1127	2.0181	2.3398	2.4373	2.3777	2.2706	2.0719	2.0071	2.138	3.0701	2.0687	3.2188	4.1231		0.942529	3.47536
19.6583	5.4529	2.8334	3.9551	2.9371	4.5584	3.5877	4.6498	3.5091	2.81	5.359	3.2789	4.7744	3.3553	2.918	3.6437	5.7223	4.441	3.4406	3.5821	2.9819	1.8311	2.1362	2.1271	3.8144	2.2053	2.04	2.3869	2.7445	2.3864	3.5347	2.205	2.0875	2.2423	3.1626	4.1622	5.6867		0.948275	3.40399
19.7775	4.3033	2.3267	3.347	3.526	2.373	2.2227	3.5745	2.2318	3.1201	3.3469	4.3105	6.3363	2.4039	2.5654	4.0923	4.5888	4.4679	3.442	5.4123	4.5597	2.3196	2.2612	2.8089	2.7528	2.0031	1.9659	1.8968	2.4508	2.0038	2.163	2.9916	2.4482	2.6266	2.4851	2.4182	7.273		0.954024	3.2061
19.8966	4.2747	3.3868	3.4887	2.6228	2.9826	2.0689	2.2689	2.1057	3.1874	2.2319	6.7661	5.0139	2.2159	2.7115	3.321	2.5089	5.3883	3.4866	3.5118	3.7932	2.6881	2.8847	3.3625	2.863	1.9236	2.199	2.0947	1.9046	2.6673	2.9446	2.1861	2.3187	2.2141	2.6558	2.6677	6.7372		0.95977	3.10131
20.0157	3.7862	3.5924	3.8939	2.7822	3.5222	2.5834	2.0741	2.5877	2.8245	2.8358	3.323	4.0306	3.4595	3.0174	2.015	2.5841	4.6759	2.8831	3.7141	2.4146	2.3897	2.1295	2.4832	2.7	2.6194	1.8827	2.5724	1.9601	2.4447	2.4048	2.8688	3.4486	2.2562	1.8128	3.7132	4.792		0.965515	2.91883
20.1349	3.9668	3.6558	2.8992	2.927	3.4348	1.9818	3.0388	2.6683	3.3492	2.5411	3.9485	2.2769	2.7336	2.1611	2.2389	2.4898	3.2606	3.9841	3.4671	2.5312	2.6546	1.9314	2.0443	2.9804	2.8242	2.2758	2.3334	2.1428	1.8673	3.184	2.2894	2.0726	2.0789	2.0666	2.5852	5.2562		0.971265	2.78171
20.254	3.3105	2.6985	1.8866	1.8922	2.7802	1.9446	2.5697	3.0288	2.8691	2.365	3.4446	2.2624	2.5009	3.7115	2.0765	2.4158	3.678	5.2029	2.829	3.1227	2.4424	2.0552	1.979	1.9999	2.641	2.1049	3.0021	2.1256	2.603	2.7263	1.8507	2.158	3.001	1.8242	2.0749	3.7579		0.97701	2.6371
20.3732	2.3056	2.7946	2.9144	3.0406	2.892	2.7057	3.1254	2.631	2.8075	2.7515	6.2072	2.5739	2.2538	2.115	2.5898	3.3777	3.7053	3.4443	3.0507	2.8266	2.0622	2.0904	2.0777	2.1943	3.3229	1.8872	1.9442	2.8421	2.2841	1.8399	2.3885	2.3499	2.7253	2.0829	4.4602	4.1052		0.98276	2.79916
20.4923	2.9004	2.9771	3.3795	2.2216	3.1782	2.7601	2.6045	2.299	3.2425	3.4045	3.6289	3.138	2.9055	2.3123	1.9046	2.5562	3.0573	2.6941	2.1284	2.4722	2.8804	2.8888	1.9208	3.3539	2.1191	2.1212	1.8909	2.1039	1.9809	1.9217	2.6219	2.0951	2.5486	2.0417	5.0833	5.188		0.988505	2.73681
20.6114	3.343	2.4572	2.5841	2.2935	3.2767	4.0274	3.8707	2.3278	2.5291	2.4598	3.2993	2.9078	2.509	2.5797	2.8034	3.073	2.298	2.1566	2.7225	3.1112	2.2696	3.0119	2.0045	2.2896	2.2134	2.5168	3.0801	1.8365	2.4285	2.2983	2.1233	2.093	2.9736	1.935	3.2907	5.9675		0.99425	2.74895
20.7306	2.5928	2.4838	2.4288	2.6253	2.1312	4.0568	3.0078	1.9382	3.9888	2.9093	2.4141	3.7831	1.9978	2.2305	2.4635	2.9525	3.0145	2.1264	3.0898	4.4596	2.8807	2.4104	2.4286	2.26	1.8825	2.6014	3.4197	2.6796	1.9026	2.0026	1.7676	1.9367	2.3716	2.013	2.5856	4.3842		1	2.67282

## Sheet: Image16
X0	Y0	Y1	Y2	Y3	Y4	Y5	Y6	Y7	Y8	Y9	Y10	Y11	Y12	Y13	Y14	Y15	Y16	Y17	Y18	Y19		Ap-Basal	Avg intensity
0	10.1968	9.6685	10.5445	9.7097	7.4226	6.6354	7.49265	12.429	7.49809	11.1443	10.9908	7.1972	9.10928	10.4352	12.1881	7.16775	5.17758	9.3742	8.73878	9.6706		0	9.13955
0.1191	10.5116	12.268	8.28753	8.9959	6.144	4.2087	6.41994	10.3484	9.51056	7.23017	9.62847	9.22357	8.41796	6.67099	7.9559	11.3553	5.1432	8.387	11.6967	9.7995		0.0053173	8.61017
0.2383	12.3025	13.554	8.69946	6.3241	5.8951	7.5894	6.90032	7.8839	6.22961	6.56628	6.55069	6.72877	6.68197	6.97759	7.9	10.2364	6.73553	8.5387	9.37333	10.0944		0.0106391	8.0881
0.3574	12.6138	7.3276	8.4809	10.0563	6.265	13.4653	9.32701	6.2669	7.9147	9.39346	6.13892	6.99019	5.30548	6.63501	6.1862	8.10543	7.15033	10.9021	8.91538	8.0565		0.0159564	8.27483
0.4766	10.2417	7.9296	10.9829	7.8745	8.4959	12.6606	8.65891	7.6015	8.36412	7.31086	8.19074	5.49238	6.71444	7.66518	6.7974	6.42664	7.1692	8.7768	6.90343	10.9648		0.0212781	8.26108
0.5957	8.2393	7.8919	9.00101	7.0391	7.6706	7.1066	9.42335	6.8219	7.86863	8.38677	7.98277	7.71671	7.04302	8.12783	8.4432	7.13047	5.68199	11.3029	10.4592	11.3698		0.0265954	8.23535
0.7148	6.0855	7.5181	10.7145	5.321	9.101	7.9116	7.20825	10.2	7.74467	7.38871	6.69522	5.56119	7.70162	3.79283	12.6185	8.89446	7.41512	12.4046	7.26474	7.5875		0.0319127	7.95646
0.834	7.4085	9.077	6.98833	4.0025	7.6005	6.7273	9.42946	7.8579	8.55239	5.64368	5.83367	7.23621	9.0782	5.87579	9.1027	8.84442	7.677	12.2332	9.07014	7.119		0.0372345	7.76789
0.9531	5.6973	9.9448	4.28315	8.5299	6.0062	9.2529	7.94924	6.0244	7.07299	7.88911	6.50439	6.52956	10.4177	5.21602	7.2955	7.1002	5.91123	9.9218	7.7844	12.1044		0.0425518	7.57176
1.0723	6.5742	7.6454	9.75005	7.0047	9.8883	9.2348	6.16862	8.5625	7.72396	5.44253	7.41068	5.60318	9.13992	4.74199	8.6109	6.79394	5.93989	10.8457	5.86565	11.3115		0.0478735	7.71292
1.1914	8.8364	9.6483	9.39569	5.4879	8.4308	7.8274	5.16892	7.9623	6.42932	6.46734	7.74935	9.58406	7.85471	6.39172	5.528	6.29147	5.09596	10.8516	7.63727	7.4759		0.0531908	7.50572
1.3106	8.0858	7.0968	8.80366	6.2212	5.7865	9.2764	5.84164	6.2432	5.23382	7.81734	6.47238	7.21109	4.95399	4.76805	6.3165	5.61158	5.64064	10.7562	8.04648	8.4172		0.0585126	6.93002
1.4297	4.9278	6.2913	8.31252	7.0553	3.4696	6.9259	7.94218	4.2698	6.51104	4.63022	5.56931	6.89609	7.00919	3.79322	6.1421	4.20354	7.05331	7.4185	7.69274	7.79		0.0638299	6.19518
1.5488	5.0448	8.6899	7.89114	4.1387	7.677	8.9375	10.9481	7.3417	6.2806	6.91496	5.0916	8.37987	7.7003	5.3905	3.9601	3.46505	7.20195	11.0485	8.86572	8.4469		0.0691472	7.17074
1.668	6.7052	13.7168	6.21853	4.7793	8.4654	6.9971	6.19278	5.3251	5.7489	10.66	8.20777	6.39738	5.71822	4.16865	5.2042	4.99448	6.35402	8.1667	6.10692	9.5025		0.0744689	6.9815
1.7871	7.6685	7.4779	6.89288	7.9394	10.366	7.5782	5.44341	2.405	4.31979	5.22372	7.20565	6.55495	5.98592	2.58936	5.1075	5.38611	5.63643	6.5229	6.14723	6.7561		0.0797862	6.16035
1.9063	8.8477	6.8177	8.75045	9.2082	7.7933	8.8618	9.06255	3.3486	5.04941	6.45219	3.91425	4.09581	5.44787	3.51084	3.6478	7.5396	8.12958	6.2461	6.02571	6.3383		0.085108	6.45439
2.0254	7.1028	10.6658	6.89426	12.5876	10.4789	6.2448	8.89094	3.697	4.67538	3.91421	2.9107	3.62375	5.18158	5.40964	3.1999	4.23438	6.1451	6.7266	8.62721	5.5547		0.0904253	6.33826
2.1445	6.293	7.1747	6.39703	10.7538	11.9096	6.5176	7.1155	6.23	5.21047	6.21956	3.72836	4.75738	6.20115	3.21577	4.9624	4.18972	5.76895	6.2218	5.08723	9.4398		0.0957426	6.36969
2.2637	5.6028	10.0458	5.76592	11.5559	8.6602	8.9971	7.62641	4.7514	8.75598	3.32641	3.55426	5.87176	3.75545	6.21958	4.343	5.45589	4.73338	4.8325	2.65097	6.1386		0.101064	6.13217
2.3828	5.858	7.3174	7.61567	6.6436	10.018	10.0466	4.50023	4.0266	5.23531	6.85174	2.62953	7.8177	4.64861	5.18781	2.3496	7.11988	7.29326	9.4654	6.74583	6.4382		0.106382	6.39045
2.502	5.0924	8.0729	8.8682	9.9008	12.9917	8.0472	4.69779	4.1562	4.89839	3.68497	6.26801	3.71262	4.91146	3.37591	2.6518	6.53395	5.49645	6.7242	8.12851	6.1078		0.111703	6.21606
2.6211	4.8603	6.385	7.10674	7.5247	8.7194	5.7913	3.15146	2.7261	3.50687	6.00465	3.10664	4.26026	4.97726	4.23181	2.4629	5.52736	3.76397	6.8095	5.91221	8.9476		0.117021	5.2888
2.7402	4.0597	8.4388	5.99165	6.6128	8.5035	7.2891	3.10527	4.3117	3.21358	3.9371	3.38565	6.24344	4.85951	3.42732	2.6744	7.01883	4.08223	8.492	6.65035	10.9538		0.122338	5.66254
2.8594	3.6046	9.1652	7.89154	8.7853	9.1528	8.473	3.79659	4.9209	4.44251	3.85624	3.29794	4.56271	3.09611	4.58818	1.9683	9.78464	5.534	3.4506	9.4192	10.9049		0.12766	6.03476
2.9785	3.7497	4.3472	7.22241	7.885	9.4538	6.8761	3.51744	2.7588	4.25461	5.24583	2.88459	4.27774	1.78853	2.48631	3.3182	9.16302	7.49266	3.6294	5.85004	7.6491		0.132977	5.19252
3.0977	3.5194	3.5017	6.00902	6.5341	8.171	7.9806	2.74561	4.6552	2.42141	2.32635	3.75095	3.87876	3.35212	4.41528	4.7039	6.65275	4.98111	6.0814	5.16185	7.3271		0.138299	4.90848
3.2168	3.8184	3.4038	6.01143	5.5204	6.4538	9.499	2.47086	3.185	3.31612	2.96528	2.31417	2.32206	2.89399	3.98492	2.7345	6.88754	2.61482	5.2043	4.90802	6.5448		0.143616	4.35266
3.336	2.1771	7.1902	5.17188	4.5321	7.5194	6.6267	3.85906	4.271	2.91049	3.45931	3.79091	2.98985	3.73516	3.36653	3.9802	5.04828	5.05472	5.9996	4.92156	8.3279		0.148938	4.7466
3.4551	2.8251	10.8786	3.71033	5.1539	4.1596	5.318	2.54145	4.1837	2.80241	2.63711	3.36447	3.28415	4.77738	5.29391	3.9208	4.30749	5.61833	3.2267	3.65416	6.8822		0.154255	4.42699
3.5742	2.9784	9.7906	6.65592	6.1974	6.5502	4.481	4.98069	3.6036	3.53477	2.67791	5.337	2.06915	2.23151	3.52163	4.0491	4.64664	4.42387	5.1226	4.81327	6.7013		0.159572	4.71833
3.6934	4.0569	4.9078	9.24765	4.9597	5.6444	5.9416	2.51831	4.0423	2.04569	4.96714	4.66686	2.45763	4.28115	3.32746	2.9704	4.52717	6.35599	3.8541	3.45054	5.8203		0.164894	4.50215
3.8125	3.6863	4.7226	8.16691	6.1986	4.1267	6.5727	4.80065	3.5939	4.40812	5.53398	3.76777	2.83874	2.97426	3.20786	6.0996	2.48499	5.27861	6.1866	6.1425	10.1833		0.170212	5.04873
3.9317	4.6228	4.6052	7.37974	8.8904	4.0527	5.7593	3.16941	3.6012	4.20404	6.51953	2.99857	3.73938	2.52491	3.7278	4.5383	6.54188	5.72213	4.7592	4.78307	6.5886		0.175533	4.93641
4.0508	5.8136	5.286	8.55955	4.7399	5.1354	5.4531	2.83871	4.2743	7.04293	3.29896	3.3045	1.92775	1.99867	5.01175	6.2196	5.32563	3.81023	5.9881	3.86521	8.3443		0.180851	4.91191
4.1699	3.9938	4.771	7.57828	3.0919	6.162	3.6509	3.11423	3.4706	4.69659	4.90882	2.75203	3.2728	3.4618	2.77698	3.838	4.07919	2.90044	6.8527	3.39439	3.9446		0.186168	4.13555
4.2891	3.8242	10.3625	10.5951	2.6714	3.7956	4.0661	3.41158	4.2725	5.18096	4.92035	2.53137	2.82858	2.48361	4.00396	3.8111	3.76826	4.86372	3.3449	3.84212	4.7026		0.19149	4.46403
4.4082	5.4252	9.2131	9.92753	2.7637	3.4108	4.0911	3.3625	5.9002	2.2597	3.30266	3.58752	1.78859	2.94054	2.84384	2.8178	2.70997	5.30224	2.8866	4.62779	6.8019		0.196807	4.29816
4.5274	4.6231	6.4246	8.15441	3.74	3.3662	4.0564	4.94261	3.9922	2.80308	3.96982	3.58799	2.739	3.14737	3.54838	4.5317	2.57826	8.41633	3.2116	3.53771	7.143		0.202129	4.42569
4.6465	4.5654	7.2152	7.00586	4.571	2.3122	3.4016	3.68744	5.0132	3.65566	3.07704	3.63121	3.72814	3.73158	3.00344	4.8145	4.8015	4.2174	4.2661	4.45169	5.4841		0.207446	4.33171
4.7657	5.7288	4.3317	4.62931	3.131	2.3728	2.4126	3.11539	3.5632	2.63531	2.43573	3.45589	3.70823	4.73025	2.77178	1.9161	4.31539	3.4498	4.7772	4.15671	4.9565		0.212768	3.62968
4.8848	3.4654	4.4349	5.74168	2.3952	2.4263	2.7715	3.6228	2.5506	2.9415	5.15805	1.91956	2.50658	3.09765	4.88419	4.7106	3.597	4.46897	5.7049	4.29563	3.7484		0.218085	3.72207
5.0039	6.0019	8.9099	5.82791	2.8448	2.4937	3.678	3.51462	2.5056	3.39264	3.12488	1.8627	2.70679	1.67364	3.6426	3.8295	2.95855	3.33708	2.4919	4.45444	4.2417		0.223402	3.67464
5.1231	5.9628	4.9853	5.06074	4.4913	2.5243	4.9986	3.54252	5.1154	2.70721	1.91202	4.32732	2.22956	2.34253	2.9039	3.9265	2.06649	5.5726	2.9454	2.09598	7.91		0.228724	3.88102
5.2422	4.4556	5.442	3.31991	3.286	2.7301	3.9983	2.93611	4.455	2.98646	1.75756	2.37347	2.60403	2.76596	2.47326	4.2095	4.34619	3.76982	3.8904	4.00438	5.4071		0.234041	3.56056
5.3614	6.6923	6.8454	5.36587	3.4893	4.955	4.15	3.07747	3.6067	4.69233	3.35805	2.85592	4.38981	2.86097	3.14019	2.9807	3.40321	3.5676	2.5358	3.7725	5.7414		0.239363	4.07403
5.4805	2.9888	5.9703	5.07306	4.9997	4.2458	5.2706	2.97543	2.8933	6.30798	3.36478	2.40443	5.0445	2.94674	3.57057	2.4675	5.81969	4.84893	2.5854	3.40786	5.1301		0.24468	4.11577
5.5996	3.0392	2.475	4.82855	4.9636	2.6681	3.8243	3.49399	5.6331	4.29995	2.50315	1.71457	3.65134	1.68945	3.46277	2.8036	2.58009	6.3469	4.9414	1.77591	5.7931		0.249998	3.6244
5.7188	3.5729	2.567	4.6829	3.6566	3.6813	4.215	4.0446	4.8654	4.02727	3.23102	2.81604	2.2293	2.44496	3.49866	2.5064	4.40726	2.68303	3.6631	3.8501	7.3375		0.25532	3.69902
5.8379	2.598	2.9013	3.50695	4.5607	5.2506	4.3757	4.10912	6.6742	5.54679	1.95256	3.80538	4.54961	2.953	3.66933	3.1455	5.44352	2.73875	4.5572	4.93123	7.2616		0.260637	4.22655
5.9571	3.378	4.1625	6.45166	2.7294	2.6529	3.0895	6.96552	6.5507	5.3988	3.2174	3.29826	2.60262	2.99	2.5265	2.9865	5.56441	4.4155	3.9661	8.18228	5.3793		0.265959	4.32539
6.0762	3.511	3.2009	8.45477	4.2184	2.2943	2.278	6.15023	5.227	2.51269	3.69005	2.57583	2.97054	1.89849	2.76824	3.811	2.14755	5.67582	5.178	6.70993	6.5329		0.271276	4.09028
6.1953	4.2375	3.5463	5.12198	4.759	3.0023	2.3812	2.81119	5.5281	2.4227	4.4779	2.6143	2.88843	2.90449	3.30464	3.1313	4.26926	4.48689	6.3613	3.85327	4.9073		0.276593	3.85047
6.3145	2.894	3.5274	5.08227	3.5104	3.5264	3.5256	3.74234	4.4511	2.90349	3.18048	2.83793	3.47759	3.08392	4.05728	3.2716	4.89864	3.6899	4.1818	4.17029	2.5673		0.281915	3.62899
6.4336	2.9803	2.8399	4.391	6.9509	4.0761	4.717	2.29646	6.0154	2.85252	2.9154	2.30862	2.0176	2.54468	3.56272	3.9183	3.09984	4.39101	5.902	4.61705	2.1327		0.287232	3.72647
6.5528	4.435	4.3286	5.61419	3.7036	2.7367	4.8415	2.53635	4.3337	2.86595	2.81914	1.9397	2.96812	1.81526	1.95914	2.0054	3.9332	4.45869	2.4948	3.34917	3.501		0.292554	3.33196
6.6719	6.3065	3.2169	6.55412	4.9982	2.4052	4.4056	4.77892	4.8369	3.29269	1.74285	2.37684	2.61468	2.41696	1.98202	2.0147	3.08152	4.90756	3.4173	2.61595	4.7138		0.297871	3.63396
6.7911	5.5909	2.8911	4.12143	4.3417	3.496	3.7124	4.20586	5.3819	3.34025	2.49016	3.90272	2.78384	2.49755	2.42562	2.1614	4.37722	2.95545	3.3516	4.93227	5.132		0.303193	3.70457
6.9102	6.8557	3.4233	5.21057	3.0689	4.1397	2.8263	3.30156	3.1944	3.78216	2.05975	3.90909	2.54899	3.98187	2.73492	3.3954	3.56243	1.7923	2.1553	6.66691	3.1794		0.30851	3.58945
7.0293	2.9222	2.312	5.71651	3.325	3.9242	2.8223	2.19834	2.428	4.05152	2.09636	2.77685	1.98296	3.46739	4.30958	4.0957	3.83358	3.34176	1.9374	6.0648	3.1825		0.313828	3.33945
7.1485	5.0997	2.4353	3.50759	3.2623	6.4764	2.114	5.38911	4.6518	2.07437	2.7038	2.68439	3.85408	2.92563	1.79134	3.5301	3.45072	4.22369	2.4442	3.34755	4.581		0.319149	3.52735
7.2676	2.7207	2.5441	7.75507	4.7654	5.785	2.01	4.56121	5.4764	3.81571	2.60808	4.47156	3.44883	2.35025	2.09572	3.064	2.35341	3.44604	2.5595	3.66704	5.4603		0.324467	3.74792
7.3868	3.0287	4.0495	7.28453	7.8271	5.014	3.62	2.81718	4.8752	3.37856	2.18175	2.84961	4.5491	2.59444	3.06637	2.4226	3.10572	2.85922	3.1341	5.97336	3.6972		0.329788	3.91641
7.5059	3.7258	4.9566	8.23053	4.8874	4.5688	6.5482	3.79737	4.2018	4.80902	3.26362	2.9201	3.62918	1.84226	3.4157	3.459	1.70719	3.35356	4.0853	3.38565	4.5864		0.335106	4.06867
7.625	4.3406	3.2537	4.96043	6.1953	4.098	3.6549	3.03309	2.4082	3.73432	2.81073	2.81377	3.09375	1.66311	4.39285	2.6841	1.66991	4.69546	5.2916	4.67503	6.5477		0.340423	3.80083
7.7442	5.7954	2.7763	5.88585	5.025	3.679	3.065	3.51968	2.769	3.64776	1.72339	2.18614	3.32969	2.31892	2.64146	3.3012	2.91893	3.92401	2.5872	2.8549	5.2676		0.345745	3.46082
7.8633	4.5985	2.6487	5.43364	5.0177	2.8557	6.274	3.60061	3.0667	2.63865	1.84797	2.38876	2.62867	2.50733	1.93011	3.0861	4.99075	3.3141	2.1075	4.32928	4.5193		0.351062	3.4892
7.9825	3.2773	3.4156	4.69018	7.6136	3.6509	2.5156	2.87213	5.4974	3.18556	2.15456	1.93144	1.97248	4.87112	2.22736	4.0775	4.45441	2.78572	2.8207	3.84845	4.651		0.356384	3.62565
8.1016	4.6268	4.0383	2.96518	3.2278	5.5256	3.4096	2.46433	3.8168	3.59726	5.44553	2.27512	2.93406	2.00011	1.75205	2.8184	3.41343	3.99906	3.0262	4.52717	6.6403		0.361701	3.62515
8.2207	3.1845	3.5171	2.23492	3.4765	3.9517	2.8538	3.35013	4.0111	3.14087	3.60744	2.36056	2.08502	2.85718	2.86466	2.5333	4.82004	2.87378	4.2383	4.80328	5.7956		0.367018	3.42799
8.3399	2.5567	3.5365	3.81668	3.4444	4.9346	3.4476	3.11488	3.5948	2.93087	4.502	2.65671	4.01522	3.77737	4.11026	3.2678	3.04995	4.53481	2.3528	3.9022	4.2782		0.37234	3.59122
8.459	5.1806	4.7805	4.28516	2.6942	4.2558	4.0582	3.05723	3.0924	3.81703	3.96417	2.95459	4.89938	1.95389	3.01875	2.8457	4.60596	4.04636	2.9057	2.13595	4.5416		0.377658	3.65466
8.5782	3.5166	4.0841	3.7462	3.4581	3.1022	3.5612	3.94283	2.9484	3.14206	2.39154	4.40487	3.59764	3.16025	2.8731	3.3719	6.4875	2.83473	2.3316	2.20394	2.7119		0.382979	3.39353
8.6973	4.1802	7.5263	3.19633	2.2955	3.1655	2.694	3.56538	4.8686	4.96292	2.88173	4.00667	3.78184	2.50751	2.89394	3.1016	2.78928	8.24086	2.8858	5.35029	4.9173		0.388297	3.99058
8.8165	3.855	4.9912	3.8093	3.25	4.0823	2.169	3.53622	5.9831	4.01545	2.7046	3.76864	2.36389	4.31707	2.68697	2.4665	4.21286	4.37662	2.2814	2.62914	6.6621		0.393618	3.70807
8.9356	2.9997	2.9215	3.43262	4.8019	3.3491	2.7281	3.33857	3.2885	2.42463	3.14978	2.9941	3.3578	3.41056	2.85153	1.9877	3.05715	3.08914	3.5185	2.57802	4.6043		0.398936	3.19416
9.0547	4.6175	4.3091	3.71998	3.5823	3.5688	2.7402	3.53018	3.5855	3.10269	3.65217	2.85983	3.54436	2.63175	3.01517	2.3675	4.25647	1.98657	2.7721	2.69628	3.2574		0.404253	3.28979
9.1739	5.6388	4.6793	1.87127	2.4769	4.7967	4.674	2.96269	3.2709	2.29847	4.15782	2.0721	2.27823	3.20555	1.9093	2.5612	5.2341	2.71156	2.6049	4.4632	3.5156		0.409575	3.36913
9.293	3.1612	4.513	2.90367	2.5583	4.574	3.695	4.03577	5.368	2.12652	2.7658	2.49828	2.84834	2.62504	3.04947	2.7314	2.74127	4.35402	6.1316	3.16209	2.755		0.414892	3.42989
9.4122	3.0368	3.0697	2.2676	3.0065	3.7201	2.8516	4.26612	3.2308	2.61192	1.88847	3.2681	3.97805	2.85351	3.38074	2.8575	3.20078	5.80812	3.7946	2.96974	4.6771		0.420214	3.33689
9.5313	5.2926	3.6354	1.63355	3.4251	5.481	2.898	4.19933	4.5649	2.83921	2.57451	4.20331	3.0305	4.17864	2.77945	3.356	3.1983	5.91104	3.6652	2.35994	4.4053		0.425531	3.68156
9.6504	3.3978	3.8782	2.07686	2.016	6.6581	3.8926	5.92753	2.9076	2.25973	2.03499	4.03673	2.54557	3.90076	3.04271	3.5242	5.24408	3.31636	3.2031	2.35524	4.1911		0.430848	3.52046
9.7696	2.8833	3.3519	3.89113	1.6393	6.6181	4.6503	3.3138	2.6346	2.35492	2.00345	2.81122	2.52481	2.72654	2.48228	2.0103	4.24922	5.19071	2.6562	2.22305	3.8413		0.43617	3.20282
9.8887	2.3513	3.221	2.87472	2.0149	3.9301	3.2244	2.74275	3.0159	2.53991	3.30951	2.27808	3.33737	3.21903	2.59362	1.9281	4.24485	4.68285	5.227	3.44953	3.7443		0.441487	3.19646
10.0079	3.9691	4.116	2.72857	2.9659	6.0234	3.2348	2.55018	3.5216	2.65962	1.99246	2.48008	4.14917	2.7815	2.4749	4.1612	4.12881	3.20557	5.6243	5.5496	2.4986		0.446809	3.54077
10.127	4.4716	3.3811	2.52272	2.4784	5.5775	3.9021	3.13816	2.8032	2.78172	2.25468	1.88912	4.09481	3.3914	2.26431	3.022	3.48862	3.23385	4.1885	5.624	3.2897		0.452126	3.38987
10.2462	3.6245	4.705	2.3782	1.8306	5.6701	2.4098	4.04381	2.4552	2.54628	2.08591	3.20283	4.34369	3.82635	2.5984	2.8365	4.65575	2.45402	3.9412	7.62398	4.3654		0.457448	3.57988
10.3653	2.4112	3.3341	1.83855	2.2724	5.6637	2.3382	3.86464	4.7739	3.45752	2.2212	6.36584	4.10045	2.98185	1.78804	2.4973	5.68294	3.06016	3.6126	5.31079	4.2109		0.462766	3.58931
10.4844	1.8711	3.4417	2.27051	2.9226	4.7357	2.622	2.53984	2.9246	3.3493	3.01029	4.96209	2.43272	1.79302	2.00453	2.6022	4.2368	6.8825	2.1122	4.86342	4.0334		0.468083	3.28053
10.6036	2.0671	4.3055	3.74749	2.7627	2.6398	2.8948	2.7824	3.8962	3.13353	1.77101	5.38996	2.04136	1.77897	4.64689	3.7304	2.96493	6.71215	3.657	4.43497	5.4298		0.473405	3.53935
10.7227	2.2899	3.365	2.17256	1.7769	3.2884	3.2143	2.84993	3.0202	3.24154	2.0206	2.81283	2.72753	2.78644	3.71822	2.2489	3.09565	3.99986	3.6141	2.88784	3.0503		0.478722	2.90905
10.8419	3.6452	4.317	4.22966	1.8935	2.1554	3.8595	3.29198	2.0426	2.19094	2.72562	3.13926	2.60925	2.44778	2.03927	4.1171	3.89311	5.26518	3.4434	4.64897	3.7008		0.484044	3.28278
10.961	2.9947	2.5486	2.59478	2.6655	3.5366	2.4064	3.45626	2.9733	3.23636	4.21772	3.14375	1.73011	3.71856	1.72187	3.7495	3.15904	3.05963	2.7173	4.90252	3.3953		0.489361	3.09639
11.0801	3.462	4.5946	1.7498	2.416	4.1799	2.295	2.73824	2.709	2.425	1.77137	2.36657	2.08516	3.10846	3.75141	1.6062	4.66784	3.36489	2.7589	5.03575	6.0117		0.494678	3.15489
11.1993	2.987	3.2472	1.76184	2.8145	5.1876	4.1114	3.29334	4.3126	3.22335	2.09011	3.17827	4.02648	4.06787	2.72502	2.5707	3.89545	4.86136	3.812	5.47755	5.3516		0.5	3.64976
11.3184	4.1266	4.0058	2.3363	1.7498	5.22	4.0659	2.70772	3.7317	3.09296	3.63269	2.55365	4.46585	3.22885	4.13679	3.652	3.01251	4.38656	4.0053	3.4953	5.8243		0.505317	3.67153
11.4376	3.5757	2.6502	3.58661	1.7822	5.4479	4.7498	1.94143	4.5885	2.54317	4.39433	3.42627	5.72492	3.13386	4.01244	4.563	3.74794	4.52029	4.5084	4.06886	4.8376		0.510639	3.89017
11.5567	2.4586	2.9364	2.02404	2.6525	3.8773	3.6309	3.4013	3.6166	2.20525	3.78916	2.39194	2.96145	2.15178	2.74369	2.8219	2.90932	4.90024	3.4927	4.87608	3.7078		0.515956	3.17745
11.6758	2.6805	3.8643	2.11987	4.7567	5.4109	4.164	2.71172	2.5487	2.64256	4.57954	2.77953	3.76715	3.0209	3.30592	1.9559	2.80742	5.85718	5.1294	2.836	4.1753		0.521274	3.55567
11.795	3.4206	3.6351	3.31049	2.5914	4.5273	5.332	4.22706	2.6635	2.3132	2.21954	3.77923	4.43964	2.86433	2.18689	4.0419	3.05726	5.07279	4.8502	2.71806	6.1862		0.526595	3.67183
11.9141	2.9668	3.053	2.02986	2.3232	4.8721	4.3097	3.67492	3.5277	2.59707	2.01602	3.56331	4.17527	3.26074	2.20333	3.6511	1.51903	5.67131	3.3827	5.02018	5.0679		0.531913	3.44426
12.0333	3.3437	3.3629	2.21539	3.262	3.6696	3.6111	3.14403	5.0618	2.60942	3.25342	2.43656	2.72075	2.83329	2.84689	2.2955	3.07458	8.03759	4.3833	5.39596	5.9387		0.537234	3.67482
12.1524	2.3176	4.4889	2.76305	2.5032	3.9098	2.4284	2.20596	4.6071	2.73825	2.71529	3.76642	2.14871	3.51418	2.68674	2.1746	4.28701	3.73827	5.7457	4.29041	4.1194		0.542552	3.35745
12.2716	4.8685	1.7719	3.62573	1.5824	4.5415	1.6594	2.63647	3.8652	5.25162	3.31395	3.21706	3.03715	3.26278	2.54814	2.3303	4.06735	4.04533	3.6788	3.72622	5.4954		0.547874	3.42626
12.3907	2.6207	4.1586	1.85278	2.119	2.6078	2.0389	3.54206	3.4871	3.85632	3.06999	3.45439	1.99295	4.54575	1.86256	2.733	2.80059	4.06351	2.6484	3.57344	4.6951		0.553191	3.08615
12.5098	1.5922	3.4225	2.49187	2.9253	2.792	2.9633	3.72716	3.6415	2.57763	2.19088	5.93614	1.98843	4.50973	2.53748	2.0136	6.36421	3.83233	3.3745	5.35225	3.108		0.558508	3.36705
12.629	3.0228	3.0001	2.79843	1.967	3.7313	3.1817	1.82448	3.9835	2.01316	1.78582	3.97773	2.19806	3.99878	2.13268	1.9704	2.99969	6.22641	4.4388	2.84653	5.5472		0.56383	3.18223
12.7481	2.051	2.3758	3.44734	1.6977	4.9108	3.8748	3.36653	1.949	1.96921	1.90432	2.0359	2.95549	3.11267	1.69127	2.8477	3.09404	2.7195	2.6895	3.37856	4.828		0.569147	2.84496
12.8673	1.7076	1.6143	2.81718	1.5493	4.6568	3.9261	3.09777	1.5207	2.69925	2.65067	2.59047	2.37049	2.88537	2.57408	2.8563	2.62871	2.13265	3.6536	3.029	4.84		0.574469	2.79002
12.9864	2.0365	2.8669	2.25611	1.7147	3.8111	3.0692	2.33028	3.0351	2.11955	3.26912	1.73946	2.13564	2.63767	2.40492	3.06	3.76481	2.67227	3.4997	2.15022	5.1303		0.579786	2.78518
13.1055	2.601	4.8445	2.01884	1.8961	3.1093	2.4125	3.024	2.8143	4.58749	2.29263	1.56895	2.9839	2.24498	1.83529	2.7082	2.95557	3.89098	2.5811	2.51493	6.9361		0.585104	2.99103
13.2247	3.8727	2.5682	2.44447	2.0332	2.8743	4.2081	2.06738	3.5393	3.6053	2.32171	1.59824	3.68871	2.50581	1.66186	2.3828	2.58884	2.96644	3.0821	4.03263	7.2603		0.590425	3.06512
13.3438	2.3257	1.9403	2.59023	3.0439	2.7945	3.6771	1.56111	3.6309	2.09206	2.18813	2.74397	3.44878	2.66836	2.12446	1.9404	3.13472	2.77052	2.1513	3.03069	5.7067		0.595743	2.77819
13.463	2.7366	2.09	1.98785	2.8857	3.0997	3.2841	1.85594	2.2811	3.06382	2.05512	2.62837	2.17832	2.46741	2.09588	1.8406	2.31336	2.27251	2.1962	3.21523	5.6592		0.601064	2.61035
13.5821	3.8471	1.6153	2.90861	3.1803	3.3016	4.0356	1.80681	2.307	4.5407	2.26031	3.4828	3.0818	1.93355	1.89705	1.8909	2.24095	2.46648	2.4731	2.44051	10.1431		0.606382	3.09268
13.7012	4.2716	1.6544	2.17721	2.4869	1.8167	3.5729	1.97199	2.4732	3.01663	1.73901	3.93545	2.8889	2.6866	2.17151	1.9907	1.81512	2.18602	3.5706	2.37805	9.8349		0.611699	2.93192
13.8204	2.4358	1.728	4.19249	2.9128	2.8949	2.664	2.22873	2.8175	2.29529	2.78634	2.47789	2.99072	2.53095	2.08292	2.2252	2.40449	3.61414	4.9929	3.47234	7.7012		0.617021	3.07243
13.9395	4.28	2.3318	1.66371	2.7479	3.5531	3.2653	1.83921	2.0419	2.81273	2.87651	2.25913	3.50272	5.68755	1.61623	2.6864	3.87841	5.23746	2.8959	2.55567	5.977		0.622338	3.18543
14.0587	3.0033	2.9741	1.74552	1.7198	2.9131	2.2216	2.18824	3.2777	2.12509	1.96604	2.13167	4.99124	3.80167	2.35934	1.7477	3.08606	3.42295	4.2037	4.39239	4.3514		0.62766	2.93113
14.1778	2.099	2.3562	2.38873	2.0863	4.2909	2.3592	2.41917	2.38	2.45743	2.20707	4.17702	2.35689	2.93678	2.23277	4.0488	2.65597	3.53882	5.101	3.3551	5.3703		0.632977	3.04087
14.297	2.2586	3.731	2.79355	3.0437	4.2504	2.0108	3.41563	2.641	2.13561	2.28231	2.10764	2.01274	2.63958	3.00319	3.3773	2.85495	3.23063	3.1948	3.65751	4.7534		0.638299	2.96972
14.4161	3.0281	2.0379	2.67841	2.8768	3.1241	3.2801	2.88458	4.982	3.7691	2.51384	2.14439	3.07848	2.00757	1.80097	4.143	4.88382	3.54571	2.977	3.42581	5.724		0.643616	3.24528
14.5352	3.4293	2.0376	2.19955	2.1191	2.1549	6.94	2.02244	2.305	3.98106	1.71204	1.74025	4.06071	3.05264	2.23041	2.5197	3.65275	2.34792	4.1511	2.95459	4.2614		0.648933	2.99362
14.6544	3.8997	1.6557	2.05135	2.01	2.5598	4.8824	3.13386	1.881	3.38339	2.5006	1.86173	3.64218	1.98973	3.84693	2.293	3.04017	3.92823	3.5059	3.2824	4.25		0.654255	2.9799
14.7735	5.5898	1.9625	5.40808	1.8098	6.1404	6.0838	2.44086	1.7474	2.53208	3.03379	1.98031	3.60285	2.23122	2.72706	4.8334	3.29215	5.93682	2.9456	2.88803	3.2843		0.659572	3.52351
14.8927	3.8448	2.4955	2.03064	1.6375	5.7385	4.2208	3.5177	1.7855	2.79001	2.31603	2.04149	3.27609	2.06713	2.2405	3.9158	5.34049	3.04764	3.6406	5.43251	1.9828		0.664894	3.1681
15.0118	3.382	2.066	2.34238	2.5166	4.7188	4.2427	2.33053	2.3029	2.69059	2.47282	2.52087	2.6352	1.86724	1.76383	4.032	3.19095	2.56145	3.1248	4.40082	3.1668		0.670212	2.91646
15.1309	2.5433	3.3677	2.48264	3.4236	3.2415	3.74	3.46864	3.3137	2.31629	3.36377	1.72494	3.64942	2.48259	2.17083	5.0265	2.79422	2.98367	2.6602	3.56067	3.9315		0.675529	3.11228
15.2501	3.523	1.9395	3.25025	2.8614	2.6277	3.5377	4.61984	3.4043	2.22889	1.59298	3.97686	3.59982	3.0504	2.99304	1.8448	2.93298	2.98392	2.8055	3.85335	3.9759		0.680851	3.08011
15.3692	2.9227	2.4837	3.56336	1.6898	1.7993	2.6646	2.25111	1.639	1.93181	2.09087	3.15673	2.11964	2.95552	2.08329	2.1911	3.21315	2.44974	4.8123	4.722	5.26		0.686168	2.79999
15.4884	2.7611	2.5248	2.3384	2.3866	2.1461	3.6709	3.58897	2.8235	2.5987	1.90899	2.08825	4.47387	2.3148	1.83729	4.2284	2.38887	3.57471	4.2772	3.00514	5.3879		0.69149	3.01622
15.6075	3.4319	3.6651	1.85739	2.862	3.1684	2.065	2.67991	5.2681	4.07243	2.78356	2.4198	3.12048	1.85525	1.74239	3.2851	2.84139	4.35942	4.6383	2.94244	4.1185		0.696807	3.15884
15.7266	3.2572	2.4312	1.83288	2.6032	3.1295	2.7708	4.04928	3.715	3.246	1.85855	2.47118	2.56955	2.01669	1.7017	4.3913	3.81397	3.32347	5.079	3.31724	4.3293		0.702124	3.09535
15.8458	3.1306	2.6315	3.20954	1.9259	3.3609	7.2521	2.44613	2.3464	5.2661	2.58699	1.94521	2.62641	2.39546	2.00163	2.658	4.60748	3.56011	3.2139	3.82911	2.9176		0.707446	3.19555
15.9649	2.6606	2.1867	2.67076	3.8519	2.1813	3.7971	2.01035	2.5739	2.94589	2.10982	3.28912	3.44916	2.02602	2.51607	2.7997	3.85169	3.86518	3.2849	4.66332	4.6736		0.712763	3.07035
16.0841	3.0922	1.7722	2.90624	2.6786	2.735	1.9034	2.90778	5.1877	3.91173	2.67191	2.32624	1.88003	2.18763	1.9078	5.4086	3.56922	2.31432	2.6774	3.46208	3.8318		0.718085	2.96659
16.2032	2.2102	2.046	2.06816	2.4128	4.9999	2.4485	1.78743	2.4754	2.9789	2.44537	3.29053	2.26037	1.87913	1.64094	6.1079	1.99435	3.36134	3.4452	3.53161	4.0082		0.723402	2.86961
16.3224	2.9087	2.0628	1.7747	1.7532	3.7413	4.4083	3.30254	2.3752	3.55778	2.32339	1.95763	1.85701	1.66815	1.8179	3.5889	2.66773	3.04586	3.1724	3.77568	3.0807		0.728724	2.74199
16.4415	2.2977	1.9152	1.71123	2.9284	2.6237	3.2501	2.05182	2.7612	3.76571	2.54236	1.85664	2.68864	2.10084	1.86156	2.2394	2.65516	4.52294	3.6229	3.07147	3.2164		0.734041	2.68417
16.5606	1.9167	3.8395	2.19888	3.1531	2.6386	1.8797	2.51727	2.8092	1.9878	2.91216	3.12818	3.12984	2.91176	1.77304	3.1297	2.14088	3.10977	3.649	3.36862	1.8728		0.739359	2.70332
16.6798	2.0984	2.6249	2.57531	2.1627	2.2166	2.9354	2.2543	2.0853	1.91504	2.16911	2.53677	3.43716	2.30728	1.89649	2.4758	2.63013	2.38465	3.4523	4.67188	2.1199		0.74468	2.54747
16.7989	2.7775	1.8992	1.88494	3.0521	2.4529	2.0519	1.82039	2.91	2.24091	3.57071	3.83788	3.67659	2.0204	2.03368	2.2285	5.07027	4.14409	4.3888	4.43656	2.1021		0.749998	2.92997
16.9181	2.0207	2.3855	1.91598	2.526	4.7377	3.6277	2.31118	2.0106	2.30924	2.91172	2.96426	2.02492	3.0229	2.03468	3.7392	3.84921	3.61668	3.2645	3.36543	3.6195		0.75532	2.91288
17.0372	3.0584	1.5405	2.2701	1.8656	3.9209	3.356	2.29839	2.0704	2.83118	2.06114	3.34174	2.81219	1.75805	1.96899	3.1969	4.02466	3.20711	3.033	5.3942	3.156		0.760637	2.85827
17.1563	2.9304	1.7652	3.53727	2.0181	2.7929	3.3525	4.4176	2.7319	2.51446	3.44408	3.07542	3.21948	2.31409	2.66678	4.74	2.76136	2.59085	3.0364	5.41922	3.7495		0.765954	3.15388
17.2755	3.538	2.4837	2.34918	2.5617	2.5234	2.1752	3.01009	2.3675	2.73961	4.09808	3.58693	1.78252	1.94259	2.21932	4.2618	2.63553	3.5107	4.065	4.84821	3.9888		0.771276	3.03439
17.3946	2.7768	3.1884	1.77529	3.5235	2.0517	2.0757	1.87481	2	2.26446	2.25181	3.35251	1.65814	1.78472	2.3971	3.1926	2.32944	3.35089	3.3149	5.24213	3.6803		0.776593	2.70426
17.5138	1.9275	1.8256	1.94449	2.9626	2.413	3.4546	1.7194	3.0993	2.28119	1.67773	2.09394	1.67786	2.49404	2.23975	2.6003	2.08419	2.08638	3.4714	3.91105	1.8069		0.781915	2.38856
17.6329	2.8326	3.2628	1.99358	3.0482	4.4043	2.9313	1.99692	1.9955	1.91188	1.78907	3.87994	1.81912	2.1503	1.8253	4.3627	4.52642	3.05507	3.9594	2.40269	1.7495		0.787232	2.79483
17.7521	2.6651	2.8393	1.58326	4.2826	3.948	1.742	2.29329	2.3818	2.17845	1.69937	2.3234	3.61489	2.07168	2.59864	3.5531	4.79284	2.73108	2.7614	5.03306	1.9333		0.792554	2.85133
17.8712	2.6686	1.9929	1.76769	3.1312	2.0199	2.7769	3.05915	2.7042	2.25199	2.62534	3.2783	3.53917	1.87566	2.61407	2.2062	3.64523	3.40227	2.7325	6.1214	2.6342		0.797871	2.85234
17.9903	3.0139	1.9674	2.00063	2.8527	3.2293	1.8803	2.65951	2.2243	3.98081	3.0947	2.8068	2.47381	1.5849	2.47737	2.1126	2.63651	3.27746	3.2301	7.02632	3.3147		0.803189	2.89221
18.1095	4.2772	2.077	2.86045	3.5552	1.8054	1.8468	2.04364	5.781	4.05491	1.92205	2.40669	3.76261	2.10218	2.64175	2.1392	2.04072	2.75433	2.6256	4.6117	2.5873		0.80851	2.89479
18.2286	1.9262	2.56	3.38342	1.916	3.767	2.8625	2.38921	3.2115	3.5446	1.68598	2.0676	2.6538	2.3831	1.91521	1.9798	3.92379	2.69965	2.0613	3.1366	4.186		0.813828	2.71266
18.3478	1.6802	3.3033	3.23081	2.2597	5.1446	4.6864	3.88958	4.0415	3.22152	2.16441	3.55226	2.50597	2.66689	2.74596	3.3571	4.47954	3.94193	3.1116	4.82048	2.2012		0.819149	3.35025
18.4669	2.8274	2.766	3.14955	2.4718	3.2377	3.0918	5.337	4.1023	3.00176	1.99391	2.87528	2.30672	2.11288	1.79005	4.6052	5.49974	3.03652	3.0004	6.58304	4.09		0.824467	3.39395
18.586	3.8061	1.6964	2.14848	2.8708	4.652	2.8293	4.05525	3.1243	1.75857	3.10012	2.10122	2.07298	1.64328	1.70477	4.4081	5.34844	3.91345	3.6391	4.36627	3.3864		0.829784	3.13127
18.7052	4.2714	1.4811	2.28637	2.0445	4.7492	4.1058	2.48363	1.7481	2.32225	3.08486	3.08304	2.66511	1.74676	2.18118	3.5107	4.3943	4.78361	2.1747	3.63109	2.3657		0.835106	2.95567
18.8243	6.4255	1.5059	2.24328	3.0749	3.1113	4.196	4.64678	2.9135	2.48831	2.98338	2.55114	3.51594	2.5298	3.29527	3.6667	4.57642	3.34035	1.9504	3.56093	3.3459		0.840423	3.29609
18.9435	5.6074	2.1051	1.68856	1.9863	5.3171	1.9479	6.08634	2.7176	2.06085	3.13852	2.68908	3.01289	2.1925	2.35154	3.3914	4.51038	3.3692	2.8568	4.28039	3.4188		0.845745	3.23643
19.0626	3.8787	2.1588	1.80889	3.3711	4.5869	2.7977	4.24202	2.7773	2.00957	3.57484	1.84061	4.97982	2.62838	2.12128	4.6129	5.05866	3.83376	4.8315	3.95952	2.5531		0.851062	3.38127
19.1817	5.2569	2.9988	3.29781	3.6263	3.7824	1.9175	3.7967	2.8219	1.94629	2.79191	3.43554	4.32579	1.97967	1.67157	4.0508	4.22001	2.96206	3.3828	4.5912	2.1785		0.856379	3.25172
19.3009	5.267	4.1526	2.09972	3.2142	1.8845	1.9636	3.66048	3.0385	2.63886	2.50865	1.97875	3.69843	2.68167	1.81222	5.0546	3.81978	2.40765	2.982	6.29145	2.2891		0.861701	3.17219
19.42	3.2659	3.428	2.84649	2.4736	3.4789	2.0762	2.53628	2.8374	2.75814	2.24561	2.53448	2.19151	2.53431	2.44807	3.7607	4.0135	3.38283	4.7052	3.37121	1.9463		0.867018	2.94173
19.5392	4.2259	3.9139	4.48513	3.557	3.0586	2.5392	2.34424	4.5854	1.94727	2.71916	3.11965	1.85778	2.99842	1.71322	2.8263	4.12133	4.09945	4.0814	4.57105	2.2031		0.87234	3.24838
19.6583	4.8764	2.9549	3.53086	3.1811	2.8427	1.7325	2.18009	3.2779	2.16321	1.82381	2.58591	2.33838	1.90784	2.39283	2.623	4.68982	2.8669	2.5504	3.75227	1.6177		0.877658	2.79443
19.7775	3.766	3.7566	2.99312	3.2565	2.7183	2.702	2.43986	3.4437	2.55017	2.80614	2.50038	4.21424	2.12765	2.21012	3.5889	4.95511	1.97674	4.0547	3.66688	4.6636		0.882979	3.21954
19.8966	3.3263	3.7523	3.25707	2.626	4.3033	2.1585	3.75652	3.6219	2.71824	3.11793	2.76816	2.44785	2.78333	1.74238	3.8342	6.32255	3.23667	1.8482	3.56224	4.9862		0.888297	3.30849
20.0157	3.6394	5.603	3.83848	2.6528	2.6158	2.3555	3.08499	1.9048	2.23034	2.10101	2.32969	2.41292	2.44032	1.91758	3.8975	5.72817	2.0973	2.2137	3.43118	3.0478		0.893614	2.97711
20.1349	4.2759	2.8335	7.37626	4.2425	2.8429	2.4072	2.65027	2.2362	3.66678	2.20085	3.73692	3.96775	2.41681	2.97229	4.13	3.11501	2.69338	3.2784	3.12722	5.0728		0.898936	3.46215
20.254	4.5643	3.4805	3.53607	3.3745	3.5382	1.8201	2.26262	2.7244	2.05017	2.35674	3.80912	2.9659	3.81515	2.34023	6.8489	3.35878	2.8892	3.1749	3.48408	4.1472		0.904253	3.32705
20.3732	2.8817	3.1595	4.59696	3.2344	1.5762	2.504	2.33176	2.1738	2.56229	1.5809	2.62871	3.8827	2.405	2.05423	3.0146	5.44545	2.78997	3.3428	6.87723	3.5931		0.909575	3.13176
20.4923	2.8025	4.6694	4.66918	3.9057	1.747	3.0094	2.67352	1.9136	3.29844	2.20932	1.9043	4.3778	1.98357	2.24879	2.6968	6.83557	3.76864	2.8287	6.25471	5.2004		0.914892	3.44987
20.6114	1.8063	4.4222	2.48868	2.7837	1.9353	2.4902	2.15414	1.7903	3.50265	3.10064	2.53315	2.29042	1.80464	2.81571	4.4201	6.18732	4.08669	2.0963	5.34747	4.414		0.920209	3.1235
20.7306	1.5711	2.9735	4.16426	3.0643	1.977	2.7538	2.69568	1.7657	2.26973	2.05623	3.45724	3.66125	1.96476	3.38095	6.1253	4.45833	2.75097	1.8478	3.48847	2.0848		0.925531	2.92556
20.8497	1.8587	2.5024	4.09312	2.9853	1.987	1.7755	2.7088	2.3385	1.74047	2.71495	3.83	3.02601	1.67989	2.22268	3.8913	4.88192	3.08805	2.3473	3.74798	1.6929		0.930848	2.75564
20.9689	2.255	2.1702	2.07586	1.6419	3.2505	1.7898	1.8757	1.9805	2.40053	4.28976	2.18	4.10943	1.84594	2.43856	3.7406	5.6472	2.2166	4.128	5.53928	2.3911		0.93617	2.89832
21.088	2.3747	1.9753	1.99152	1.7364	3.2909	1.9328	1.8562	1.7825	2.40347	2.33944	2.97342	5.2224	2.23704	4.05773	1.8224	5.17467	2.32569	2.5595	3.66257	4.4506		0.941487	2.80846
21.2071	3.7816	2.3898	3.04597	1.6071	2.4539	1.999	1.83777	1.7765	2.40309	2.6613	4.27854	4.77091	2.20309	2.41293	1.7596	3.44182	2.62367	1.8586	4.0035	3.4887		0.946805	2.73987
21.3263	2.2051	1.881	2.15106	2.2832	1.6257	1.6387	1.77151	1.6725	1.71263	2.06589	2.60803	2.46253	2.068	3.27627	3.1721	3.05779	2.20923	3.0788	5.21304	4.0044		0.952126	2.50787
21.4454	2.4404	1.7973	2.43703	1.9028	1.6057	1.9446	1.74164	1.8167	3.34105	2.20979	2.45024	2.30251	1.81347	4.34521	2.7378	3.77795	3.3697	3.048	4.33823	4.1571		0.957444	2.67886
21.5646	2.0895	3.135	2.88578	1.7127	1.7397	2.0264	1.68355	2.2551	2.01045	2.8713	3.37006	3.53477	1.82396	3.40231	2.9009	4.27384	2.77226	3.2801	2.104	5.7542		0.962766	2.78129
21.6837	1.6613	1.8099	1.86756	1.6265	1.6852	1.8129	1.6505	1.7179	3.95209	2.01558	2.93338	2.19146	2.37829	1.94886	1.9777	3.31745	2.98102	3.8099	3.59443	5.1022		0.968083	2.50171
21.8029	2.9089	2.3253	2.13689	1.6387	1.8128	1.8274	1.91201	1.5566	3.51411	2.9271	1.98091	3.15102	1.79793	3.03993	1.8378	2.8355	2.83305	2.8276	4.01222	3.994		0.973405	2.54349
21.922	1.7144	3.1207	1.87532	1.8918	3.5626	2.0688	1.86507	1.5026	2.00297	2.44022	2.36077	4.33579	3.20187	3.69451	3.2417	3.33359	3.52141	2.1931	4.70298	5.0813		0.978722	2.88558
22.0411	2.5567	2.4619	1.74107	1.7879	2.1274	2.2225	2.23692	1.5351	2.82841	2.39965	1.86794	2.85546	2.90569	3.74909	2.8532	2.19732	4.53226	2.5391	4.90483	5.2579		0.984039	2.77802
22.1603	2.877	1.7684	2.46255	1.7316	2.339	2.0722	2.0342	1.6801	3.14377	4.29599	3.58494	2.72917	2.13716	3.04164	3.3071	2.21778	2.19301	4.2401	2.93277	5.0665		0.989361	2.79275
22.2794	2.3463	2.7727	2.1536	2.4405	2.8404	1.796	1.63459	1.6543	2.0986	3.68422	2.2012	2.14591	2.15994	2.97779	3.7905	2.2498	3.19561	4.0638	3.42972	6.2687		0.994678	2.79521
22.3986	1.6808	2.197	2.05096	2.1243	1.9521	1.7188	1.58792	1.7044	1.59111	2.60118	3.23369	1.69024	2.24282	2.30528	3.2677	2.8543	2.19166	2.7609	3.03934	4.02		1	2.34072

## Sheet: Image15
X0	Y0	Y1	Y2	Y3	Y4	Y5	Y6	Y7	Y8	Y9	Y10	Y11	Y12	Y13	Y14	Y15	Y16	Y17	Y18	Y19	Y20	Y21	Y22	Y23	Y24		Ap-Basal	Avg intensity
0	2.10392	1.72014	1.54962	3.45612	1.76633	2.74367	1.57665	3.76415	2.70655	2.11152	1.70093	1.89131	4.81793	2.32409	2.63465	3.11034	2.64248	1.59191	1.96932	1.97897	2.3874	1.99848	1.86015	2.68051	3.06241		0	2.40598
0.1191	2.43002	1.85116	2.0382	3.84025	2.66885	2.20529	2.01206	2.84341	1.99838	1.5579	2.04461	4.09124	2.72618	1.89643	1.81512	1.86989	1.94716	1.52126	1.53097	2.56479	2.60576	2.1738	1.65891	3.91104	1.84952		0.0049244	2.30609
0.2383	2.26276	2.61322	1.88468	2.545	2.31016	1.95297	2.05677	2.08713	1.73969	2.63519	1.75708	2.83417	1.91188	1.64038	1.95884	2.18008	1.67619	1.80169	1.47906	3.42937	2.52436	3.77467	2.18519	1.67396	3.12611		0.00985293	2.24162
0.3574	2.18506	1.62464	2.40883	2.16566	1.94159	2.16139	2.03931	1.96737	2.55495	2.38696	2.08697	3.19779	2.29641	3.43693	1.61044	1.86618	2.30971	2.62705	2.13967	2.9134	2.5201	1.78923	3.53434	2.09621	2.07865		0.0147773	2.31755
0.4766	2.38638	1.83034	3.0283	2.86626	3.67433	3.32481	3.21052	3.27047	4.07985	3.08423	1.76362	1.65453	1.79258	2.15466	1.52813	1.60827	2.24313	2.75444	1.88177	1.54037	2.17455	1.86537	1.97789	1.49304	2.75225		0.0197059	2.3976
0.5957	1.7058	2.35956	1.8774	2.73083	3.37293	2.32704	2.22739	2.947	3.19953	2.54089	2.38203	4.4838	2.33742	2.7092	1.63748	2.35872	4.7208	3.17623	1.60621	1.67548	2.45016	2.1582	2.88496	1.9755	2.79044		0.0246303	2.5854
0.7148	1.94688	1.54337	2.42632	1.73576	2.23369	1.66671	2.7147	2.23656	2.69822	1.80683	3.2858	4.48065	1.88237	1.80139	2.43335	4.82676	2.39172	4.25896	1.68104	2.6412	3.22747	3.30339	3.47346	1.90346	2.84933		0.0295547	2.61798
0.834	2.38773	2.40715	2.51591	2.789	3.15841	1.81978	2.27284	3.1528	3.8583	2.54929	1.96313	3.092	2.3113	2.42864	3.87435	2.48436	3.07889	1.41993	1.82601	2.93665	1.92683	2.35789	2.0905	2.48454	4.276		0.0344832	2.61849
0.9531	1.94856	3.27196	1.85662	3.03388	4.10693	2.79243	1.54818	2.13749	3.28449	1.86262	2.23573	3.165	3.98864	2.35057	2.15902	2.01235	3.25724	1.54538	2.03564	2.01135	1.62821	2.6148	2.79427	1.78943	3.27518		0.0394076	2.50824
1.0723	3.61991	2.15035	2.49251	4.53565	3.02336	2.1821	2.58617	1.89934	2.46034	1.57791	2.57663	1.49076	2.03155	2.15985	2.6078	1.74912	2.53701	1.42543	2.29252	2.86061	1.66146	1.77691	4.0493	3.48619	2.73514		0.0443361	2.47872
1.1914	3.17698	1.90966	3.33057	2.529	2.26532	1.67392	1.95677	3.35097	1.90804	2.11989	3.13404	1.52506	3.41417	1.5914	1.68434	2.90175	2.92023	1.62258	1.77054	2.16415	1.82844	2.40033	2.79472	4.29131	2.87122		0.0492605	2.44542
1.3106	4.11015	3.15405	1.87677	3.56417	3.96598	2.71669	2.85416	3.28124	2.28763	2.21488	2.14168	3.29263	1.88131	2.56541	4.9232	2.46346	2.46711	3.14021	3.3355	1.78528	2.78745	1.71509	4.12325	3.35391	3.12051		0.054189	2.92487
1.4297	4.04343	2.4816	2.6501	2.15079	1.62595	2.81012	1.80531	2.55099	2.28998	2.43257	2.89261	6.13792	2.00307	2.15167	2.03897	1.71475	1.68637	1.60517	3.51606	1.88623	1.62983	1.56342	3.2853	5.3114	2.24954		0.0591134	2.58053
1.5488	1.79803	3.37556	3.21329	2.12437	2.19827	2.29699	2.40966	1.94604	1.45736	2.44414	2.03736	3.51199	2.70961	2.24	1.77375	2.38086	2.7968	2.98709	2.82163	1.74588	3.19132	2.15569	3.82359	2.3526	3.37066		0.0640378	2.5265
1.668	1.67107	2.95158	1.99325	2.19755	2.42036	2.46908	2.0299	3.07102	1.80411	1.6665	4.12565	2.18218	2.6121	1.571	2.74153	1.65106	1.7918	3.87588	1.96672	2.64386	4.01329	1.73098	2.20404	2.80631	1.9342		0.0689664	2.405
1.7871	1.67922	1.98718	2.98488	1.71296	1.68329	2.92933	3.58731	3.03295	2.39168	1.88724	2.55422	2.88665	2.94521	1.88246	2.71883	1.84103	1.92828	1.64259	1.67852	1.74091	3.51857	1.93636	3.35525	1.56674	1.8285		0.0738908	2.31601
1.9063	1.55633	2.69908	1.77653	1.77089	2.865	2.13343	3.3536	2.14061	1.68401	2.21491	1.68296	2.63539	4.74459	3.68222	1.57369	2.74156	3.14019	2.01706	2.30423	2.41215	3.64205	1.79786	3.83363	3.08042	3.09819		0.0788193	2.58322
2.0254	1.65118	3.18781	3.16528	2.07857	3.78577	1.72481	1.69501	2.29355	1.65032	2.29316	1.78203	2.5364	2.93357	2.35571	1.83795	2.81096	2.78855	2.96835	2.83406	3.39391	2.2118	2.50214	2.79929	1.87557	2.29442		0.0837437	2.45801
2.1445	1.91429	1.64851	2.03397	2.98286	3.95469	3.23571	1.6675	3.20384	2.05722	2.15866	2.84428	3.12922	2.39863	1.97198	2.44932	1.71781	4.53024	3.18904	1.82077	4.11261	3.79192	3.48969	2.20075	1.67425	2.76904		0.0886681	2.67787
2.2637	3.02798	2.08827	2.49492	2.00744	2.8594	2.14602	1.76125	3.12456	1.80984	2.24465	2.09453	2.73313	3.55963	3.77173	3.84508	3.51317	2.11847	3.94973	2.00184	3.84788	3.63177	5.10369	2.18904	2.03043	5.67333		0.0935966	2.94511
2.3828	1.82311	1.64914	2.62769	2.38759	1.72329	2.70212	2.45816	3.01769	1.49127	2.93355	2.80429	1.78216	2.10784	4.73244	3.35924	3.09281	2.90681	2.13816	1.73163	4.59819	2.33789	2.02545	3.48963	2.91241	4.12165		0.098521	2.67817
2.502	3.98998	5.48296	2.00946	3.84225	1.8744	3.01752	1.97212	2.16828	3.63584	4.26623	1.84397	2.96445	3.90749	2.84047	2.96092	2.64594	4.02579	3.61268	1.72049	3.0683	1.48675	3.2628	3.95752	2.32704	3.45711		0.10345	3.05363
2.6211	2.19228	2.20755	3.03429	2.21098	1.76265	2.24153	2.14564	2.83345	2.09914	3.13747	2.56426	3.12562	2.23234	3.18695	1.94279	3.82665	2.75885	3.98764	1.62119	3.76664	3.5859	2.85946	3.05205	3.29501	3.99163		0.108374	2.78648
2.7402	2.22143	1.76164	2.8074	5.22075	1.49638	2.18925	2.82641	3.16897	1.69882	1.85071	1.73054	2.45778	2.92695	2.72163	1.93097	3.22622	4.34905	2.48321	3.31563	3.88749	3.60879	4.28361	4.44985	3.84293	3.45242		0.113298	2.95635
2.8594	1.51892	1.68997	3.69308	3.39556	2.6334	1.903	2.06879	2.80197	1.92872	2.58025	1.88422	4.43637	2.11574	3.40792	2.35347	3.35916	3.49617	2.76278	2.93936	1.93293	1.94279	2.39278	3.95811	2.61136	4.21237		0.118227	2.72077
2.9785	1.77235	3.19785	2.00223	3.09932	2.20531	2.22079	1.81354	2.26944	2.71854	2.15956	2.82541	2.87014	4.90425	6.35745	3.07613	2.5694	5.30479	2.83123	2.8594	2.66731	4.11381	2.7473	2.74427	2.55365	3.38702		0.123151	3.01082
3.0977	2.56869	3.03656	2.89302	2.66189	1.69672	2.94964	2.40174	1.6714	2.25915	1.67708	3.07003	4.58936	4.09932	3.84256	3.83112	1.90822	4.44828	3.54697	4.04951	2.16144	2.29831	2.13855	3.08793	5.60596	3.52126		0.12808	3.04059
3.2168	2.94902	2.48517	1.50517	4.22358	3.11855	2.27601	2.21344	2.12632	1.7439	2.70124	3.44335	3.04264	4.32982	5.16237	1.92487	2.82853	3.62015	4.55063	3.71082	2.02748	2.80898	4.03336	2.93136	3.83413	5.86529		0.133004	3.17825
3.336	3.26629	2.12631	1.80158	2.33206	2.37256	2.44208	1.76187	3.39391	2.09981	2.89394	2.03847	3.78094	2.91599	5.83853	4.464	5.44633	3.78773	2.29514	1.55683	2.4851	2.28139	2.75793	2.21993	2.27741	4.54496		0.137933	2.92724
3.4551	1.85437	3.08381	1.79298	3.92035	2.8538	2.74563	2.47284	2.53574	1.80609	3.84947	3.70121	4.50132	3.4545	5.12038	2.51613	3.12511	3.1254	4.70981	3.23475	1.82275	1.78485	2.66728	2.48735	1.93006	3.11611		0.142857	2.96848
3.5742	2.06969	3.70486	2.21082	5.21981	3.09032	1.89778	1.83466	2.57151	4.4482	4.31258	3.90649	2.41695	3.56076	3.83653	2.50008	3.08369	2.21053	3.1742	3.95332	2.49488	1.90291	2.20081	2.74537	2.74369	4.1905		0.147782	3.05124
3.6934	2.23492	2.791	2.03533	2.67393	2.3639	2.28443	1.84264	2.03747	3.53255	2.56064	2.85001	5.53012	3.34768	2.83885	3.9874	2.37693	2.99673	1.86109	3.16434	4.46758	3.42304	3.0014	1.92998	2.09673	4.07548		0.15271	2.89217
3.8125	2.04985	2.93812	3.9783	2.59414	2.77238	1.80006	2.2222	2.7668	2.60261	1.81088	1.98008	4.88116	5.03259	6.22236	3.46442	2.80544	2.01962	5.1167	3.52415	2.59669	4.18669	3.51227	2.25711	1.93982	4.19204		0.157634	3.17066
3.9317	4.19108	2.73491	2.20448	3.51699	3.13257	2.15157	2.84477	2.59026	2.08867	1.83359	3.24425	3.29024	3.23537	4.15502	3.5234	2.78518	4.77201	3.01764	2.86643	2.15396	3.46458	3.11492	4.17425	3.48701	3.25388		0.162563	3.11308
4.0508	3.52473	2.20924	1.65119	4.17467	3.28927	3.48955	3.01719	4.11459	2.92041	5.10933	2.376	2.90307	4.69204	4.3641	4.58816	3.01691	8.13359	2.41901	4.59869	4.6588	5.61687	2.70634	2.80053	4.25014	5.32902		0.167487	3.83814
4.1699	1.61111	3.60737	2.4179	4.50909	3.68976	2.65991	1.89884	2.09884	2.80287	1.90318	2.93718	1.78763	4.77382	5.79673	2.69184	2.68511	5.57821	3.70593	4.31177	2.53124	2.86662	2.81526	3.13009	2.37407	5.82704		0.172412	3.24046
4.2891	2.92557	3.35332	1.61745	3.94071	2.1199	2.77853	2.59419	1.86599	4.00236	2.91187	3.48337	3.36343	2.64265	8.48815	3.4026	3.86308	4.76925	6.54521	3.90296	2.61762	2.27608	2.93672	2.49795	2.84699	2.64215		0.17734	3.37552
4.4082	1.90626	1.93601	2.47087	1.91799	1.98529	2.11488	1.74793	1.57375	3.18185	2.71518	4.07768	2.77801	2.33935	4.25697	3.05957	1.75377	5.42481	4.63185	2.81128	2.12912	2.71849	3.65273	2.33931	3.70519	2.81309		0.182265	2.80165
4.5274	1.86464	1.83572	3.31237	3.57487	2.80866	2.52309	2.64707	2.3727	3.92362	3.467	1.65933	2.35395	4.61825	4.68843	3.27233	1.48757	5.43105	2.80332	3.19162	2.36814	3.12227	2.8563	2.75715	3.24663	1.64449		0.187193	2.95322
4.6465	1.48271	3.11913	3.82598	3.23542	2.48214	3.29649	4.33051	1.88231	3.55127	3.8522	1.67272	2.33186	3.71202	4.97248	2.14716	1.46003	1.73937	4.6505	3.00859	2.66269	3.06672	4.08985	2.87225	3.54144	2.49847		0.192118	3.01937
4.7657	2.65223	2.96332	3.38831	3.00313	1.75373	2.90073	2.5009	2.5347	3.80147	2.33089	1.64183	2.76999	4.5327	3.81182	2.44837	2.77115	4.53627	4.58623	4.74241	4.92265	2.75704	5.68999	2.84141	3.38816	3.87145		0.197046	3.32564
4.8848	2.19008	1.88999	4.30222	2.25691	3.19884	3.24708	4.50638	2.77037	2.15951	1.96532	3.64922	2.07648	3.54481	4.22331	1.63464	1.66527	5.15341	2.69857	5.38071	4.62449	1.68293	2.85763	2.72042	4.38423	1.54706		0.201971	3.0532
5.0039	2.11248	4.28198	2.0603	2.64103	3.42588	2.45946	5.5779	1.86797	2.29778	5.15463	4.65573	3.65178	3.62929	4.67319	2.61222	3.23743	3.96223	2.89441	4.31878	2.72676	1.62421	5.12308	1.89681	4.22328	3.20805		0.206895	3.37267
5.1231	1.68969	2.3152	1.99588	3.19165	1.694	3.87561	3.03185	2.08138	2.65204	2.72591	3.41709	3.69693	3.06597	1.99441	2.6669	1.92071	4.64372	3.61141	3.11206	3.98154	3.07153	5.48643	2.33982	3.55648	3.85417		0.211824	3.0269
5.2422	1.48733	2.90044	1.62608	4.22169	3.61386	2.00335	4.12561	4.57955	2.46458	4.47297	2.68868	3.08733	3.44004	3.71493	1.70289	1.93115	3.53864	2.94616	3.09403	2.1593	2.11719	5.01849	2.54577	3.35615	4.73934		0.216748	3.10302
5.3614	1.50848	1.64445	2.709	3.1585	2.28975	1.66071	2.66901	4.1873	1.89681	5.18215	4.39051	2.31259	3.97785	5.09279	2.63661	3.09159	5.14672	4.72323	3.43863	2.70853	4.71402	3.47615	2.47041	5.59682	2.42939		0.221676	3.32448
5.4805	2.6299	2.51785	1.98537	3.47168	1.9851	1.89716	2.06162	3.01743	2.11651	3.94502	2.10745	3.51436	3.14029	4.32183	2.87866	2.72649	5.72078	2.53863	2.27206	3.44036	3.55228	3.95847	4.22266	2.56504	2.49693		0.226601	3.00336
5.5996	1.73888	2.65893	2.0571	2.96103	1.90948	2.21484	4.15114	2.25548	2.49499	1.9469	5.53839	3.13042	2.69366	3.2929	1.60941	2.60864	3.62868	3.17916	2.95062	2.78761	4.54264	4.7677	4.81443	4.47784	2.04962		0.231525	3.05842
5.7188	2.15894	2.3687	2.93744	4.31318	2.66289	2.99007	2.72038	2.9913	5.28489	1.92755	6.09674	3.8271	2.56494	2.48248	3.34343	1.70258	3.60729	3.21064	3.27279	3.77946	2.89503	3.13468	2.42163	3.06637	3.96795		0.236454	3.18914
5.8379	1.47077	2.95702	2.49469	2.79871	2.46769	1.54141	4.24489	3.16334	4.60157	1.9446	6.89556	3.64607	2.11934	3.24181	2.15891	2.04402	6.6112	4.85853	2.8927	4.90361	2.20864	2.56198	3.70888	2.63622	1.92475		0.241378	3.20388
5.9571	2.16197	2.11285	1.5361	3.42884	2.04646	1.88049	3.69081	3.53699	2.37738	2.4265	4.511	3.69854	2.43505	4.67199	3.44238	2.03878	3.64867	2.98858	2.77646	5.17621	2.80981	2.10279	4.116	3.7965	3.53508		0.246307	3.07785
6.0762	1.77959	2.44501	2.19836	3.33589	1.95381	2.05673	6.00287	1.89243	1.88099	5.40836	3.31729	2.06771	2.49504	5.16614	3.14726	2.1767	2.87136	2.98801	4.02825	3.75546	1.69252	2.29734	4.82876	4.70995	3.48367		0.251231	3.11918
6.1953	1.64766	1.76493	2.89615	2.31959	1.77179	2.99554	3.22114	1.71128	1.92278	4.11699	4.91351	4.86283	8.54941	4.86356	4.61231	2.87934	2.836	4.90441	3.81262	6.66768	2.01349	3.34061	3.86499	3.2887	5.26107		0.256155	3.64154
6.3145	1.60028	2.11661	3.46167	1.57665	2.38303	1.60799	2.44196	1.77966	3.64476	3.02645	4.449	2.13701	3.76835	3.75995	2.7533	4.20639	3.22351	2.3167	2.31737	4.21869	6.50112	4.40049	3.86278	3.56067	3.59229		0.261084	3.14827
6.4336	1.76862	2.55877	2.67515	1.83767	3.1815	2.49606	6.58014	2.93422	2.86915	2.11999	2.55958	2.27231	3.82957	2.22853	2.93232	5.67404	3.25971	3.52865	2.2353	3.89602	4.42683	2.66636	3.9907	3.10476	3.15605		0.266008	3.15128
6.5528	1.83199	3.95534	3.01028	3.39496	2.66028	3.04127	3.56966	4.20735	2.39486	2.52621	3.0027	2.79845	4.33196	4.07616	2.82057	3.10444	2.95446	4.00518	2.02966	3.93066	3.37595	3.22475	3.86768	4.66311	3.06299		0.270937	3.27364
6.6719	1.6121	4.00942	2.01643	2.54557	2.24802	3.11247	4.78934	4.04017	2.37411	4.10996	2.77411	4.02164	3.18889	4.33289	1.65016	3.00679	5.64622	3.14001	3.37412	3.91961	2.19817	5.36494	5.08562	3.86023	3.23174		0.275861	3.42611
6.7911	2.03858	2.22949	2.99953	6.42997	2.24378	2.75983	3.88594	2.84623	2.76276	2.09634	2.3952	2.97942	2.62827	3.22296	2.5036	1.82573	3.20296	2.63856	2.77092	3.24195	3.85483	2.03294	5.92642	4.04899	3.36671		0.28079	3.07728
6.9102	1.57114	3.28809	4.51897	2.43779	1.67226	1.99959	3.96949	2.85076	2.19398	3.89767	1.54959	3.894	4.17992	3.76745	2.45261	6.08885	3.40301	2.99181	2.27341	2.00595	5.06531	3.50489	3.41283	2.38538	2.46423		0.285714	3.11356
7.0293	2.47396	2.4128	2.29455	1.79541	1.75336	3.60165	3.90966	3.34292	1.65201	5.34797	2.39224	7.17976	8.07539	4.25024	3.54995	3.6097	4.70523	2.04533	1.94219	1.67192	2.85682	3.53958	2.1348	3.03473	1.95955		0.290639	3.26127
7.1485	1.57198	2.11586	3.50919	3.32929	1.67704	2.23781	3.16437	3.63466	3.53363	4.66647	3.25088	3.31095	4.67898	6.56633	3.38775	2.92805	1.94447	3.15293	2.21828	2.20846	2.54237	3.29978	2.84657	4.20388	2.2169		0.295567	3.12788
7.2676	2.20342	1.624	2.37239	3.4126	1.95399	4.45176	2.46007	2.227	2.26037	5.12638	3.54313	2.15278	4.67184	3.3796	2.83839	3.48422	3.08844	2.79325	2.33388	2.30324	3.80569	3.80544	5.64322	2.69597	1.915		0.300492	3.06184
7.3868	3.49164	1.82151	2.27711	2.08119	1.87181	2.94153	4.45078	2.05599	2.3601	3.12587	5.82257	3.28276	7.28643	3.89397	3.96407	3.59182	3.96525	3.33478	2.07964	2.91584	1.93873	2.93505	4.30731	2.58026	1.67029		0.30542	3.20185
7.5059	2.32772	2.89435	1.60319	3.23014	1.65025	3.21783	3.11074	2.02602	2.13817	2.2849	1.94655	2.86277	7.39591	4.44655	4.42001	1.87309	2.6602	2.74713	1.70762	1.94039	2.41976	3.76325	6.9469	2.50482	2.08151		0.310345	2.96799
7.625	3.26784	4.57746	2.39521	1.56688	1.81679	3.58093	3.02555	2.41635	2.32468	4.05388	2.20383	3.41711	2.98654	5.44082	4.53242	3.48544	4.02643	2.17815	1.62672	2.13802	2.51824	2.61107	6.4236	4.06439	2.35796		0.315269	3.16145
7.7442	2.7143	1.55041	3.47644	1.69272	2.41337	3.18074	3.37763	1.79371	2.01922	4.50453	2.75736	2.15991	5.86438	3.21853	5.66882	3.06546	4.35845	2.06221	3.65265	3.62855	2.74428	2.5803	4.3879	4.15137	2.55995		0.320197	3.18333
7.8633	2.08949	1.47189	3.35052	1.96473	2.6031	1.65152	2.907	2.15142	4.78412	2.08459	3.41907	2.87183	3.96959	3.16227	3.40507	2.30782	3.40938	2.27522	2.01578	1.78926	3.22646	4.15975	6.57473	4.49154	2.55364		0.325122	2.98759
7.9825	3.01016	3.68473	3.34117	1.73244	2.33348	2.57076	2.16736	3.20908	4.16477	2.78028	3.37953	2.89685	3.406	3.29994	3.38855	5.52402	3.15062	1.99803	2.16045	1.96573	3.42866	3.40744	4.61216	5.02997	2.41139		0.33005	3.16214
8.1016	1.75256	2.68167	1.7784	1.67898	2.84096	4.8088	3.36297	3.76147	2.68059	3.3218	3.40442	2.59777	4.08447	5.06205	4.6613	2.83674	4.86699	2.19461	2.15415	1.99644	3.50571	3.34987	4.2381	2.12304	2.68061		0.334975	3.13698
8.2207	1.6878	1.75358	2.94616	2.25095	2.91709	3.69832	2.17556	2.45625	2.14029	2.86456	3.43692	1.6327	3.06527	2.97647	2.52499	2.38516	4.47495	1.88495	2.29222	2.73509	2.42564	2.06616	5.75346	2.79642	2.35845		0.339899	2.70798
8.3399	2.18904	2.51956	2.32654	2.3039	1.9582	3.12932	2.0065	2.7001	1.6295	3.61776	1.86025	1.63948	1.92695	2.11291	2.97683	3.04696	2.66745	3.25463	2.50997	1.71555	2.34171	2.86095	6.09669	4.9867	3.11489		0.344828	2.69969
8.459	2.4274	4.18699	2.41788	1.81366	2.59221	3.85717	1.43614	6.20441	3.00916	3.97489	2.06509	2.65661	5.22387	4.02381	2.90564	4.06972	3.28815	2.95954	5.03606	1.67264	1.99398	2.21305	2.87889	4.88094	2.1532		0.349752	3.19764
8.5782	1.58956	3.52401	1.97322	2.89533	2.20836	2.55317	2.70882	2.53711	2.32541	2.78745	3.32413	3.23313	4.02854	5.95567	2.75559	3.39954	4.40425	2.03191	2.21901	2.05032	2.41465	2.53919	6.41737	4.77945	1.95517		0.354681	3.06441
8.6973	1.8517	2.62904	5.43932	2.95647	3.05267	2.87118	1.92897	2.91299	3.17695	4.00731	1.84156	1.79692	3.28044	2.85656	2.97786	4.78218	2.35746	2.35302	1.92676	2.71307	3.93979	3.16069	5.22198	5.93888	3.95774		0.359605	3.19726
8.8165	1.72248	1.91478	2.82014	1.89382	1.8382	3.44023	4.51083	2.19996	2.84673	2.64101	3.16222	4.46443	3.40879	4.65422	3.41466	3.53042	3.66917	2.61741	1.93167	2.26865	5.17084	2.69587	5.09378	2.976	2.9328		0.364534	3.11276
8.9356	3.10236	2.36252	4.94889	2.25623	1.81108	2.20436	2.83683	1.95644	2.8719	1.83512	2.62568	3.85353	4.9258	3.22458	3.82306	5.41146	3.40663	1.56369	2.3411	1.87702	2.05817	2.8804	4.4745	3.47378	2.11227		0.369458	2.9695
9.0547	2.1827	3.116	4.92338	3.00001	2.2702	3.19365	1.93493	2.90412	5.39645	3.47141	2.51113	4.99839	7.49378	3.17315	3.39088	4.40973	3.61604	1.63434	1.63196	3.52067	2.12826	2.64236	2.53099	3.73288	3.71384		0.374382	3.34085
9.1739	3.00532	1.65593	4.84259	3.16734	4.06615	2.48258	2.09624	4.75242	1.99413	3.62898	2.0221	3.10206	2.99876	6.91477	2.43133	6.86053	3.32024	1.87823	2.78792	3.91869	2.76217	4.4902	3.96205	4.19915	5.76833		0.379311	3.56433
9.293	1.99308	1.89817	2.56876	2.54227	2.38738	1.68059	3.40124	3.38938	3.28229	2.83696	3.08936	3.91375	3.9699	2.38282	2.28719	4.02848	2.09202	2.42572	1.62896	3.26798	3.44819	5.15062	2.85397	5.0357	5.52896		0.384235	3.08335
9.4122	2.77454	2.81015	3.06512	2.57634	1.76856	3.29291	2.62551	1.99455	3.2455	2.20162	3.30156	2.66802	1.8364	3.30071	1.71835	4.85094	2.60171	2.19114	2.52631	2.77646	4.78092	3.86694	2.45554	4.51048	2.84102		0.389164	2.90325
9.5313	2.50064	1.9381	3.6972	1.70567	2.11438	2.46517	2.66071	2.02699	4.07989	1.73482	3.58963	4.30692	2.53061	3.72001	3.29598	5.95992	3.4444	3.9539	2.10656	1.69129	4.49822	3.01152	5.4814	5.02355	4.15146		0.394088	3.26756
9.6504	1.87999	1.98275	2.80587	2.78331	3.05469	2.65442	3.26678	2.21134	2.14623	1.94175	2.97455	3.60921	2.36114	2.883	2.29306	5.24053	4.68446	1.7814	3.36911	4.05534	1.64676	2.95207	4.05724	5.06218	4.03624		0.399013	3.02934
9.7696	2.17308	1.70871	1.96889	1.79933	3.07376	3.8678	2.58745	2.82983	1.76799	2.31427	1.94928	3.56894	1.83478	2.54615	2.33806	3.6317	3.24433	1.80669	3.53096	3.59253	3.11004	6.6437	5.08452	6.66178	2.40257		0.403941	3.04149
9.8887	2.02127	4.18887	3.77995	2.66915	2.27331	2.05988	2.16077	1.7039	2.80629	2.33031	2.37238	4.48908	4.08999	2.98293	2.87319	2.59476	3.81207	4.09537	2.43294	1.68749	5.953	3.34176	4.62061	4.6927	2.06565		0.408866	3.1239
10.0079	3.78849	3.40609	2.3558	2.65502	3.94854	2.26258	5.37583	1.95763	2.60216	5.89257	4.36096	2.85142	2.76332	2.05798	2.32339	3.44408	3.37138	2.36825	1.89705	2.63143	4.41037	2.21752	5.6833	5.00309	5.15992		0.413794	3.39153
10.127	2.87745	3.13174	2.61974	2.77448	3.30168	1.96837	3.4106	3.30609	2.24092	3.27775	2.16244	1.64325	1.78428	3.33549	1.68205	2.15228	3.93351	2.78891	1.74687	2.57888	5.48956	4.15639	2.78231	4.27785	3.02652		0.418718	2.89798
10.2462	2.08181	2.00551	1.78822	3.55416	2.43363	1.8588	1.62974	1.74605	1.99534	2.90945	3.16388	2.35898	3.64696	2.55594	2.24133	3.10578	3.03814	1.81323	1.72569	1.54851	2.5043	3.07099	6.00871	4.64047	3.69544		0.423647	2.68484
10.3653	2.29629	1.89972	3.0918	3.93507	3.11362	1.72187	1.77112	2.38166	2.52282	2.84597	3.06025	2.70561	2.64486	3.94307	4.55508	5.40964	3.13607	2.30792	2.74684	2.04994	3.11663	3.6653	3.18297	3.29012	3.5241		0.428571	2.99673
10.4844	2.31469	3.42661	4.52781	3.45385	1.71884	2.01077	2.1081	1.92942	3.97321	3.24605	3.22024	3.86625	2.58808	6.15715	3.63126	3.83694	3.75222	2.88765	3.76212	2.92761	5.07	2.22166	6.98932	5.7922	4.23877		0.433496	3.58603
10.6036	2.85829	4.67581	2.3609	2.91773	3.18672	1.78964	1.79473	2.1753	2.36408	4.21217	2.95762	3.31275	3.73424	4.19514	2.38859	3.16617	3.48671	3.30881	3.18485	1.59224	3.50683	6.12134	4.9282	2.04242	5.61286		0.438424	3.27497
10.7227	3.63332	4.10121	2.30005	2.56648	2.76744	3.27708	1.65381	2.425	2.52327	3.44231	2.49016	3.9681	2.10559	2.68133	1.90675	5.14873	4.67626	2.5833	2.01889	2.75015	5.73093	4.27931	4.98602	3.95221	6.47114		0.443349	3.37755
10.8419	2.3978	2.78639	2.57857	2.94963	4.7233	3.23525	3.38937	2.40488	1.7525	3.98866	4.77179	3.87662	3.00829	1.87111	2.57867	5.03308	5.26734	1.94246	2.19927	3.50154	3.25816	4.75715	3.72455	2.1151	4.7623		0.448277	3.31495
10.961	2.08526	3.01829	2.10741	4.15915	3.39921	2.54563	1.81236	1.78147	4.33887	2.74547	3.90466	2.96472	4.78831	5.22505	3.22494	3.25585	4.61085	2.7613	3.21895	2.9828	2.19251	5.62703	3.89383	2.66911	3.79662		0.453202	3.32439
11.0801	2.36204	3.02127	2.75456	3.85863	4.03665	2.83043	1.78467	1.5142	3.66365	3.44598	2.10867	3.23616	3.20453	3.91967	2.88575	4.86182	2.50126	1.64419	2.12616	1.99023	2.51106	2.37092	4.95247	3.39554	4.25383		0.458126	3.00937
11.1993	2.88544	2.78233	2.26506	2.47766	2.89894	4.63152	2.35001	1.7415	4.31797	3.22801	2.08441	3.7316	3.15628	3.23838	1.94776	3.2172	3.95539	1.85866	1.84033	1.78434	2.82752	3.88353	4.39636	3.72726	7.45066		0.463055	3.14712
11.3184	1.80767	2.35691	2.42061	3.72223	3.90743	3.62981	1.93494	3.48895	2.63267	2.24712	2.31675	3.08557	2.97489	3.40714	1.9421	4.37609	3.5097	1.69891	2.68197	1.59481	3.35643	5.6506	3.55717	2.5421	5.30007		0.467979	3.04571
11.4376	1.90875	2.60095	4.32359	4.79578	2.99671	3.15928	2.89661	3.10256	4.18434	2.79341	2.02676	5.21331	4.46801	2.48969	1.61146	4.10747	7.44351	3.3439	3.27818	2.16218	2.31388	5.41268	3.88908	2.11327	4.77067		0.472908	3.49624
11.5567	3.55829	4.30259	3.12329	3.11537	1.91053	2.98114	3.2021	2.30512	2.91542	3.76158	5.07074	4.36972	7.07685	4.31658	2.19105	2.91825	3.54063	2.84788	3.04071	2.09457	4.07977	4.12943	7.00928	2.09038	3.07246		0.477832	3.56095
11.6758	2.93135	2.15582	3.01162	2.35348	3.85694	3.83511	2.9816	1.66099	1.8842	3.83349	2.24031	5.84951	2.26047	2.73611	2.7619	2.27633	2.94143	1.71706	4.06665	1.76374	3.33902	4.18531	2.71509	2.34777	5.58575		0.482756	3.01164
11.795	2.1323	2.58839	3.15017	4.21089	3.42397	1.86524	2.59298	1.93162	3.0732	5.89529	1.50605	4.77819	3.11854	2.73321	2.01261	3.69413	3.63055	2.47934	2.36825	3.09992	4.26757	4.45831	3.63857	3.62922	2.39755		0.487685	3.14704
11.9141	2.39069	4.70391	2.53945	3.78638	5.02305	5.01271	2.58567	2.9644	1.69503	3.44556	1.55969	3.85562	3.17754	4.06126	2.09189	5.72769	3.50105	3.4566	3.18572	3.2027	3.11555	3.17941	2.94409	3.04166	2.3233		0.492609	3.30282
12.0333	2.95886	5.07817	2.3879	3.29446	2.9228	4.52215	3.8817	3.94759	2.60162	3.44216	2.7794	3.08917	3.92979	4.03155	1.99352	4.46089	6.35422	2.55392	3.56304	2.3843	3.77121	5.67629	4.35362	3.61664	2.0823		0.497538	3.58709
12.1524	3.30621	2.38881	2.70094	3.87567	2.4947	1.63638	2.1582	2.45629	2.27763	2.78856	2.2843	2.78242	6.09975	1.71145	2.51195	2.75295	5.47101	2.8016	1.69191	1.5618	2.68671	2.67948	4.77422	2.30925	2.1714		0.502462	2.81494
12.2716	2.48254	4.9798	2.30463	3.25247	2.71797	2.96804	3.0674	2.33692	2.33062	2.59326	3.74695	3.44485	4.90188	2.91492	3.04684	1.78051	3.29155	2.24761	2.2047	1.6224	1.98805	2.68378	5.64245	3.25474	2.41811		0.507391	2.96892
12.3907	2.49367	4.31013	4.79852	3.59879	4.53124	1.60305	1.77172	2.28954	2.21824	5.12982	2.03958	2.91297	5.46208	3.95586	2.19063	1.49579	3.72384	3.58688	2.57511	1.68811	3.84873	2.1933	3.97369	3.34345	3.44499		0.512315	3.16719
12.5098	4.34912	1.52968	2.43364	4.33069	2.17126	2.41519	2.48926	1.56557	1.81542	2.08131	2.00524	3.77431	2.1027	5.36622	3.54344	2.46866	3.88301	1.8494	2.70835	2.42196	2.43618	3.92713	3.95266	2.48415	2.05556		0.51724	2.8064
12.629	3.45304	1.82104	1.55413	3.28245	2.62118	4.28021	3.60657	2.18565	3.49794	2.71681	3.36763	3.54732	3.1504	4.37802	3.79893	2.19943	2.68281	1.74459	2.67691	1.92451	1.76033	2.26135	3.03036	3.95977	2.17339		0.522168	2.86699
12.7481	2.32469	2.90363	1.6857	2.59369	3.08289	2.28662	3.98289	1.86326	1.95739	3.0207	4.5789	6.29722	2.49849	4.71369	2.10358	1.7251	3.56538	1.72653	2.08245	1.71548	1.82984	4.00331	2.81649	3.3371	3.0087		0.527092	2.86815
12.8673	1.73727	2.31693	1.99311	3.0945	1.96889	2.50462	4.23184	3.10622	1.67633	5.62043	2.75646	2.59585	3.42982	1.70269	1.66565	4.25412	2.99679	1.69642	2.00064	2.59932	1.98491	2.05011	3.23956	3.23727	1.9216		0.532021	2.65525
12.9864	2.03636	2.74274	1.97396	2.5466	2.41716	1.77832	3.37891	2.35994	1.86014	3.92571	3.25997	3.10129	2.50909	3.25929	1.63088	4.13079	3.60101	2.40771	1.70879	5.05042	3.65395	3.00255	3.29491	2.6443	2.17707		0.536945	2.81807
13.1055	1.8886	3.13006	5.14591	2.10906	2.29909	3.37896	5.59209	1.94288	1.62266	2.88107	1.80567	4.01347	2.70125	1.95008	1.98416	2.9715	5.47407	3.15831	2.26548	2.22596	2.74657	6.75123	2.41782	2.72233	2.93677		0.54187	3.0446
13.2247	1.56529	3.76521	2.64732	2.45954	3.09544	4.37863	2.85299	3.48019	1.76043	3.99943	3.25487	4.08539	3.96598	3.00101	2.22428	2.35807	2.40813	3.09927	1.65471	2.00126	2.29056	4.73522	1.54337	1.90007	2.76606		0.546798	2.85171
13.3438	3.29429	2.45128	2.11125	5.64235	2.31234	2.7729	1.8705	3.00904	3.39182	3.49915	2.37259	3.55907	2.72605	3.26523	2.80031	2.52564	2.78627	3.14872	1.69872	2.21439	2.22229	3.18031	2.65407	1.71557	2.619		0.551723	2.79373
13.463	2.03336	1.88999	2.77384	3.34259	2.11473	3.65598	1.48687	4.83934	2.59135	3.0562	2.81485	3.20784	2.37156	4.00245	2.16042	3.87847	2.63606	2.38768	1.63398	2.55622	1.8629	3.69637	3.70786	2.89423	1.96334		0.556651	2.78234
13.5821	3.52097	3.42669	2.1318	1.42557	2.72432	2.57643	2.00143	2.32678	4.65673	2.74666	4.18858	2.37088	2.47882	2.94775	2.03601	4.44412	1.84174	1.96581	2.00833	1.56597	2.19571	5.99323	2.03953	2.6313	2.91702		0.561576	2.76649
13.7012	2.15609	2.05818	2.37158	2.55287	1.87975	2.23306	1.86101	3.18731	2.69772	2.68315	2.45452	3.99006	3.17472	4.29173	1.74222	8.64918	3.25647	2.58035	2.03568	1.52471	3.9762	4.24459	5.10733	4.21219	3.37347		0.5665	3.13177
13.8204	3.39013	2.06808	3.10454	2.69608	2.76313	5.64256	2.77378	3.42629	2.39166	3.96526	2.07709	4.18956	3.03235	2.33688	2.62466	4.83572	3.84855	3.82459	1.83352	1.91035	2.04823	6.42168	3.22649	2.8275	2.31959		0.571429	3.18313
13.9395	3.35069	2.87967	3.00519	3.9406	3.41293	4.03157	1.89057	3.06897	3.18763	2.91492	3.22624	3.74065	2.46077	4.60703	2.40628	3.56635	2.49243	3.25759	2.27821	2.13589	2.36229	5.24441	2.47644	1.97972	3.04622		0.576353	3.07853
14.0587	2.61968	2.42107	2.16911	3.51756	2.63997	1.9677	2.66472	3.30144	2.65356	8.33281	2.80581	3.81942	2.60873	3.66898	2.80737	2.10849	4.99935	1.7574	2.78024	1.93512	1.66928	2.25033	2.15684	2.10465	2.55169		0.581282	2.89245
14.1778	5.18395	1.94928	3.21758	3.50991	5.00815	2.43218	2.13855	3.6365	4.35162	3.50917	3.17214	3.61109	3.55268	3.91111	2.28215	2.21388	3.65015	2.36916	2.15042	3.34823	4.44081	4.89991	3.12006	3.27351	2.24363		0.586206	3.32703
14.297	2.24208	4.46884	2.46006	1.81205	4.54258	2.43168	1.60575	3.05108	2.67249	4.97267	2.25394	1.68089	3.0865	4.62493	1.8278	2.51203	2.57018	2.71824	4.27708	2.58763	2.57252	5.43395	2.11118	2.91023	2.03422		0.591134	2.93842
14.4161	3.19268	1.98343	2.11823	2.15656	4.36765	2.09478	1.63072	2.43787	3.77545	7.384	1.70237	2.30189	4.58105	6.37051	2.14019	2.24054	2.64999	3.01683	2.15378	3.52594	2.85864	2.44568	2.24055	2.45305	1.53473		0.596059	2.93428
14.5352	2.04632	2.04853	3.7867	1.87025	4.09587	3.08402	1.92361	1.85994	5.0338	5.41407	2.84663	3.5205	3.22827	5.20386	1.5028	2.12977	1.59257	1.72451	4.37982	1.687	4.15049	3.34318	4.77088	2.48841	2.03498		0.600983	3.03067
14.6544	1.54199	3.83882	2.79714	1.70574	2.58576	3.21309	2.10421	4.65575	2.44389	3.56895	3.98798	3.04207	3.9985	6.30657	1.84616	4.19305	2.38913	2.21166	2.35068	1.62944	2.91083	4.94976	4.24723	2.91451	2.2306		0.605912	3.10654
14.7735	1.4351	5.0137	3.20834	2.09633	3.2753	3.28076	2.75855	1.88332	2.35601	2.67552	2.29161	2.63096	4.31138	3.92326	1.97473	1.76774	3.92919	3.00859	1.62104	3.10998	2.68484	3.89154	5.77731	3.29886	2.36761		0.610836	2.98286
14.8927	1.76112	4.31543	2.80253	2.37519	2.0492	2.81339	2.63588	2.81394	2.17623	2.81732	2.68096	2.82671	3.85333	5.18191	1.98104	3.61445	2.90042	2.35955	2.56206	2.1671	2.64818	3.90444	3.95028	1.84821	1.80494		0.615765	2.83375
15.0118	2.07784	3.68688	2.64779	3.77052	2.38398	2.25942	3.30897	2.47189	2.39445	2.00826	2.27101	3.01259	3.59218	3.1447	5.4166	3.32624	3.41479	1.80042	2.52065	4.34186	3.13424	3.99223	2.09565	2.84509	2.55772		0.620689	2.97904
15.1309	2.72242	2.55667	1.79528	3.39577	3.0999	1.83342	2.61057	2.43166	2.6286	3.82778	2.83438	1.89377	3.7725	4.51113	2.41555	3.24399	2.42899	2.30965	2.14409	2.57903	1.81187	3.35373	4.36572	1.88915	2.64328		0.625613	2.76396
15.2501	3.33107	1.84262	3.65849	1.72479	4.20847	3.30777	3.22757	2.01356	3.80752	2.62332	2.0753	2.22314	3.12633	7.28614	3.07604	2.40601	2.92355	3.73418	2.72041	3.04013	3.07583	5.02493	2.73226	3.3268	1.76054		0.630542	3.13107
15.3692	2.09851	2.09426	4.40357	3.80075	2.57192	3.83069	1.79325	2.1627	3.32217	2.92543	3.55058	2.81433	2.03665	6.7037	3.88574	2.53882	2.49546	3.64387	3.83001	2.54938	1.97955	4.57761	1.81411	1.94666	3.15291		0.635466	3.06091
15.4884	1.84594	2.15411	3.58732	2.95005	2.37145	2.12723	1.98054	2.06962	2.27448	4.62283	2.76437	4.12599	2.43307	6.32877	2.61268	1.84195	4.27117	4.29783	2.63907	2.6819	2.51898	3.94933	2.25863	1.62415	1.7725		0.640395	2.88416
15.6075	3.03844	2.98061	2.9072	4.32352	3.21318	2.32011	3.50945	2.63701	3.03782	4.5692	6.38734	1.9659	3.85833	3.67238	2.03906	1.81214	5.50904	3.83641	2.78756	2.11179	3.07212	2.81937	1.97506	2.89355	1.60822		0.645319	3.15539
15.7266	2.28831	3.05119	1.87362	2.38654	3.76663	2.34203	1.87718	2.90212	3.12476	5.58102	3.41435	2.37526	2.96821	3.35756	4.91724	2.12221	2.39339	2.8323	2.32598	1.40454	3.07227	2.75643	3.93473	1.99993	3.87204		0.650244	2.91759
15.8458	2.69424	1.52331	2.283	2.48713	4.96626	2.91163	2.04007	1.85792	3.17313	3.03767	4.51177	2.89068	1.8236	3.49593	2.42559	2.01975	3.12312	4.7472	2.97293	1.55829	2.65146	2.97123	4.90608	3.22008	5.04843		0.655172	3.01362
15.9649	1.82019	3.55166	2.49995	3.70252	3.39959	3.21548	3.28042	2.68948	2.50892	4.24172	2.54132	1.88575	1.70534	2.67286	4.59059	1.85401	5.91991	3.48422	1.93953	1.56474	2.6685	6.92433	4.09392	2.34681	2.27319		0.660097	3.095
16.0841	1.82056	2.6272	2.33833	3.86905	2.32744	3.09757	3.45226	2.55119	1.99924	4.76127	3.88431	1.78272	2.55763	5.96483	2.59526	3.89799	3.50701	2.61789	2.65939	1.85629	1.80537	3.96408	3.52973	2.18956	1.54404		0.665025	2.92801
16.2032	2.38753	1.83365	1.92483	3.86289	3.23583	2.43482	3.2295	2.92268	1.81257	3.98307	3.61209	3.80054	2.78284	5.46858	2.60388	4.29485	3.41922	5.70617	1.75427	2.40943	2.51716	4.11588	2.50769	2.65836	2.40964		0.66995	3.10752
16.3224	2.27761	2.86082	3.15646	3.18629	2.17214	3.89519	2.55932	3.84384	2.96232	4.16223	3.43661	5.9017	4.11587	2.24911	2.32972	2.72868	4.65102	2.62731	1.43793	1.6694	2.04828	4.33664	2.85388	2.89186	2.25503		0.674878	3.06437
16.4415	2.72152	3.12459	2.14628	2.80285	1.66682	3.23562	4.52572	5.18745	2.20006	4.14324	2.76129	4.95536	3.3638	2.4678	3.04087	2.57873	5.02612	4.7946	2.78069	2.42275	2.68255	2.2631	3.92843	2.05218	2.62541		0.679803	3.17991
16.5606	3.9224	2.84977	3.15499	3.57037	3.5941	2.31384	3.07777	3.68039	2.23642	5.13701	2.14398	2.29747	3.15796	1.59476	5.74616	3.16324	3.79856	3.66604	4.21133	2.66898	2.96167	2.80652	2.49502	2.62687	2.24365		0.684727	3.16477
16.6798	3.22553	2.75918	3.16936	4.87657	2.94338	3.71456	5.3298	2.39354	2.01918	6.47554	4.00013	3.38252	2.93307	2.32445	4.02381	3.13206	2.03268	3.20612	4.07402	2.25536	2.84008	4.55026	1.85856	1.77698	2.62291		0.689655	3.27679
16.7989	2.96721	2.77728	3.17688	3.44029	2.40883	3.84906	2.37554	2.34228	4.0464	4.783	4.11945	3.32757	3.42638	3.91951	2.27519	4.5988	3.44137	3.05465	2.68059	3.92782	1.88193	2.90366	2.04662	1.82726	3.79453		0.69458	3.17568
16.9181	2.53818	2.09761	2.10882	3.13748	2.06372	4.24384	2.77034	2.68362	2.44575	4.61901	1.88646	1.88317	2.80117	2.84501	3.06218	3.86656	5.87125	2.44094	2.2062	1.90297	1.57989	2.64846	3.03423	2.48949	2.05656		0.699508	2.77132
17.0372	1.62813	3.38949	3.34143	2.34514	1.74543	2.87809	3.49038	2.75582	1.62217	3.86974	2.08329	2.52706	3.2953	2.46431	4.03709	4.46606	2.59369	3.06999	2.50641	2.11648	2.5274	3.95195	3.37777	2.83187	1.57529		0.704433	2.81959
17.1563	1.62565	2.76595	3.37357	3.04974	3.49465	3.75259	1.84881	2.02242	1.8509	4.76246	3.27724	5.45147	1.81811	2.03975	5.93713	3.48464	2.48505	4.06294	2.72881	4.30831	2.0698	3.67631	5.11817	2.71987	1.73216		0.709357	3.17826
17.2755	2.99126	2.97419	5.49896	5.22497	3.16845	2.91944	2.48679	3.06865	2.91103	2.01019	3.18035	2.52642	1.84193	2.60797	5.03971	5.11715	2.76834	3.85017	2.76335	2.95737	2.52838	2.84837	3.09337	4.47195	1.62759		0.714286	3.21905
17.3946	2.75748	2.40052	4.71626	3.87277	2.69714	4.36411	4.629	2.05935	5.43519	4.03691	3.23041	3.28407	3.18105	4.28893	3.54871	3.03662	2.48059	4.60989	2.2705	2.04079	2.5433	3.50295	3.79281	2.43984	1.9366		0.71921	3.32623
17.5138	4.4135	2.22915	2.63003	3.38264	2.55512	5.73951	2.82483	3.18032	4.26312	2.12509	2.80321	5.03347	2.8046	5.97899	3.80313	2.84629	3.69225	2.57947	3.14439	3.64484	3.66938	4.95731	3.69942	3.59486	2.11458		0.724139	3.50838
17.6329	1.86761	1.66264	1.66768	4.3241	3.65154	4.13735	4.28695	3.82834	4.64458	3.02179	5.30178	2.40266	2.60132	4.94778	7.0969	3.16638	2.89679	5.2956	2.2637	2.08847	2.24022	4.85339	3.60161	2.86621	1.81995		0.729063	3.46141
17.7521	1.86574	1.57838	2.55909	5.13319	3.91824	3.17703	2.2456	2.84532	3.05423	3.10697	5.05276	2.81973	3.59629	4.0622	2.31512	3.42413	2.47941	5.53841	1.92614	2.20984	1.56446	2.91553	3.78786	1.47163	1.57545		0.733992	2.96891
17.8712	3.87119	2.53748	3.33439	6.45195	1.91476	5.18248	2.77365	3.07392	1.77538	4.30107	3.61971	3.36177	2.39673	4.31685	3.72481	2.49888	2.10942	4.47045	2.28939	2.80419	2.17593	2.59713	3.19042	2.44788	1.60275		0.738916	3.1529
17.9903	3.51729	3.28547	2.10147	3.30604	3.32943	3.25053	1.96424	3.59588	1.76956	5.02826	4.2975	2.98927	3.27757	4.6626	3.78912	3.05443	2.1701	4.81965	3.7574	4.31636	2.69708	3.94457	3.02862	1.62905	1.73344		0.74384	3.2526
18.1095	4.76341	3.46653	2.61246	4.68061	2.05892	3.8285	4.74339	4.06482	3.93456	3.58661	3.70177	2.00356	2.10203	4.77155	3.12214	2.95084	3.12896	4.503	2.4371	2.49012	3.04709	3.24022	3.49271	2.70512	2.29373		0.748769	3.34919
18.2286	2.56557	2.87856	3.25796	4.54115	3.45235	3.457	3.25286	5.7651	2.80481	5.31345	3.65616	3.65637	4.21583	3.73978	4.18629	3.647	2.62891	4.44238	1.87533	2.68866	1.82083	3.01976	3.39332	2.9311	2.50369		0.753693	3.42777
18.3478	1.70888	2.47525	2.14024	4.96177	2.51477	2.76873	2.83363	3.05215	2.68694	4.17736	3.37408	4.09586	4.44711	4.02262	4.63884	1.87578	2.02229	4.85612	2.96321	3.35784	4.19333	3.29672	3.8493	2.12412	2.74758		0.758622	3.24738
18.4669	2.66759	3.25428	2.65355	4.09431	3.00678	3.34664	4.12954	4.76693	3.83504	3.64897	2.40387	4.56989	2.07874	4.7617	8.72061	2.55206	3.8062	1.75076	2.62478	1.65527	2.161	2.70692	3.069	3.88543	1.61227		0.763546	3.35049
18.586	2.39838	2.77139	2.03775	4.14262	2.08012	2.10195	3.75035	4.03946	2.68812	4.58292	2.38966	4.02406	2.37927	4.86295	4.6758	1.91943	4.35983	3.51737	3.55001	1.74932	2.08841	2.75043	3.30702	2.00348	2.29157		0.768471	3.05847
18.7052	2.51005	3.44454	2.07976	4.76341	3.03548	3.00043	2.245	3.09699	2.00765	4.45661	3.50577	4.33051	4.31555	4.37324	6.09728	2.74681	4.31313	2.58424	3.55521	3.47066	3.041	2.02665	2.14717	2.26611	3.70284		0.773399	3.32464
18.8243	4.52854	2.06321	2.10344	2.99628	2.44654	2.89641	2.25143	3.86736	2.92432	1.99862	2.55861	2.21869	4.81482	4.56357	7.23954	2.55606	3.63188	2.3868	3.05459	3.7235	3.14335	3.15037	1.6186	3.96458	1.8276		0.778324	3.14115
18.9435	3.91124	3.52056	3.92879	2.0962	3.63307	3.5976	6.82748	3.55275	2.85818	1.75548	3.50107	2.31152	6.48609	4.42044	7.0915	2.97956	4.82935	1.97185	4.57242	3.06502	4.03827	3.62971	2.02673	2.88326	1.74185		0.783252	3.6492
19.0626	3.92004	4.37444	2.59151	2.7612	1.65117	2.08982	3.78705	2.66197	3.33019	3.56184	3.5244	2.86983	4.6245	2.81075	5.01985	1.74253	3.73095	2.14811	3.94666	5.00418	2.8171	5.40888	2.75852	5.08966	2.29011		0.788176	3.38061
19.1817	3.29795	2.59897	2.12054	4.13672	1.9639	1.83986	5.4608	2.99714	4.23209	3.22045	4.10985	3.64349	4.85302	2.83918	2.44911	2.63319	3.65296	3.16906	4.11766	5.78997	2.74377	3.05627	2.4876	4.32663	2.70412		0.793101	3.37777
19.3009	2.49373	1.7329	2.66187	5.65255	2.14357	2.34092	2.28483	2.62405	3.32026	3.09729	3.88061	4.60353	5.53546	2.40264	3.70038	3.20115	5.48822	5.12107	4.33927	3.49571	2.79857	5.50424	3.28754	3.01711	2.04939		0.798029	3.47107
19.42	2.14363	3.2792	2.46884	3.65005	1.87403	3.70336	2.60343	3.01425	3.29914	2.85812	3.79796	3.33214	3.58151	3.91242	4.64008	3.62545	2.8276	2.99879	6.93499	3.17498	2.4546	5.65716	3.45833	5.04735	2.42783		0.802954	3.47061
19.5392	1.70997	3.70791	2.05285	2.87557	2.63303	3.50862	4.16834	2.65688	3.47815	2.10339	4.22158	3.21968	5.85475	4.17111	3.46718	1.71228	1.96562	1.75624	5.13407	2.21445	3.22921	4.30979	2.54487	3.27458	3.08854		0.807882	3.16235
19.6583	2.78678	2.67586	1.66681	3.15711	1.99774	3.88252	2.81307	2.98373	4.97857	4.33469	2.39586	2.69481	3.49009	2.08329	4.37091	1.99723	3.01352	2.7828	3.66305	2.55569	2.72188	6.19484	3.16602	5.09034	2.08715		0.812807	3.18337
19.7775	3.47107	3.26427	1.88185	2.555	2.62915	1.49509	3.24966	5.00932	4.08229	3.45259	4.73567	2.9891	4.25881	2.68738	4.40474	4.27524	1.97564	3.03792	3.40393	2.96898	2.1172	3.90266	3.20854	1.91014	3.16647		0.817735	3.20531
19.8966	4.12003	4.11658	2.75268	1.75175	2.40529	2.13055	2.20681	4.16813	4.43366	2.30804	4.55252	1.98415	3.67898	2.98974	1.56221	2.59495	4.47269	2.84549	2.48752	3.48051	2.48047	2.55986	2.47049	2.30265	2.69038		0.82266	2.94185
20.0157	2.05763	3.84829	2.80194	3.22773	1.7098	2.22752	3.73209	4.29719	5.63904	1.95362	3.10739	2.01848	3.89193	5.01663	2.2308	3.61853	3.19096	3.89983	3.00617	2.0078	2.91424	3.19876	4.39945	2.32417	3.8608		0.827584	3.20723
20.1349	2.22721	3.1244	3.74697	2.99577	2.90546	3.1296	3.43011	3.1191	2.52288	3.29945	2.1367	3.24994	1.9232	3.23789	4.09266	3.45313	4.8232	3.75254	4.71119	3.10846	3.29058	4.22301	5.15443	1.874	4.11896		0.832513	3.34603
20.254	2.64206	3.05982	3.80168	1.84881	3.67337	3.49424	4.30958	2.5701	2.10512	2.15931	2.61151	3.23148	3.08593	2.27496	4.51611	2.58293	4.58557	3.69821	4.84377	2.89017	3.82711	3.17599	4.95001	2.78241	2.5803		0.837437	3.25202
20.3732	1.80508	5.34746	2.79534	2.86344	3.33695	2.63345	3.57284	7.26736	2.96245	2.21996	2.53559	3.09744	3.09722	2.47969	2.84589	3.62878	6.6695	2.82668	7.38798	2.48346	2.11822	3.79791	5.90066	2.55733	2.23517		0.842366	3.53863
20.4923	1.72752	2.87163	2.29438	3.11556	2.71262	2.69236	5.78131	5.48945	2.60023	1.97166	2.70894	4.14536	5.02471	4.06312	4.18304	3.99111	1.94023	3.3063	7.17974	2.62753	4.11575	3.75311	5.1939	4.06174	2.16977		0.84729	3.58884
20.6114	1.69107	3.35401	1.67012	2.80492	1.84315	2.24465	4.25319	3.02099	2.57464	2.09416	4.91228	4.77968	5.20709	2.11345	5.13269	3.10569	3.85403	4.36857	5.7959	2.40416	2.27445	4.06506	4.74252	3.46797	6.73238		0.852214	3.54027
20.7306	3.52167	2.47174	1.6919	2.41836	2.07883	3.04297	3.32353	2.1604	2.45649	3.37093	4.6705	2.30703	6.45541	2.7363	2.52366	4.15778	4.62042	4.94801	4.47881	2.2166	1.60542	1.81247	3.07277	3.58114	3.15454		0.857143	3.15511
20.8497	4.62461	2.61788	1.60494	2.05513	3.28871	2.21025	3.36904	3.24143	2.49265	2.90716	2.58044	2.0679	6.64494	4.295	2.11847	5.80888	2.77712	2.5237	5.07245	2.47581	1.63675	1.47065	2.02797	1.69999	4.3444		0.862067	3.03825
20.9689	1.90314	2.0138	2.24733	2.01804	1.7116	2.23563	1.88618	6.01144	2.24348	3.55924	1.60352	3.00387	6.05938	6.85644	1.97484	6.64961	4.9486	4.39508	3.19929	3.32183	2.63541	1.52119	2.15003	2.69259	2.7555		0.866996	3.18388
21.088	2.36712	1.72552	2.15664	3.23896	2.07528	2.6298	2.7189	5.11594	2.80189	1.89107	1.6826	4.45915	3.21675	2.2183	3.05943	3.53333	5.01182	4.32565	2.70133	4.72306	1.78593	1.7616	2.88228	1.90704	3.0252		0.87192	2.92058
21.2071	4.03037	2.20352	2.03495	6.12637	2.83556	4.85015	2.58361	5.87955	2.05507	3.00952	4.13001	5.48308	5.24068	3.09807	2.65663	2.06529	3.75513	2.24561	4.61096	2.04594	1.5852	1.97325	2.52424	1.77679	3.8872		0.876845	3.30747
21.3263	1.82509	3.1156	3.04591	3.7595	2.78663	2.59046	2.50246	3.85862	2.20333	1.64938	2.24474	4.79422	4.05086	6.31081	2.08505	3.36729	4.54723	5.23833	3.61087	1.85885	2.17163	1.82668	2.83092	5.62433	2.7733		0.881773	3.22688
21.4454	2.28621	3.92582	3.50213	2.90824	2.77793	2.66428	4.57988	3.79661	2.28117	2.27248	4.54684	4.21671	5.57755	3.31946	1.71943	2.85054	2.52663	4.7462	4.17486	1.54336	2.32643	1.77361	2.00048	3.67273	2.91364		0.886698	3.15613
21.5646	3.3149	1.79554	4.47847	1.72128	2.47837	3.26806	2.69257	2.94317	1.86981	4.83113	4.35888	9.09641	7.55443	2.35365	2.31482	3.37983	3.16928	3.60212	2.70721	1.61643	1.90238	1.62481	2.53458	4.44208	3.40477		0.891626	3.3382
21.6837	1.92958	4.73653	4.19038	1.65499	5.72441	5.11237	3.81974	4.71774	1.57845	2.94116	2.90353	5.8287	3.18909	2.07116	1.93609	2.43408	3.5789	4.12907	3.00519	1.69405	2.62799	2.2974	2.35856	5.191	2.33142		0.89655	3.27926
21.8029	4.10032	2.84953	3.40251	1.9741	4.19845	2.89989	1.87258	2.78994	1.85116	4.85911	2.54167	3.23618	5.83795	2.2609	1.61899	2.33358	3.36422	5.13543	4.5715	1.70624	2.55149	2.04434	2.4607	4.36373	4.8352		0.901479	3.18639
21.922	2.69781	3.03749	2.75726	3.88895	2.78642	3.05744	2.30151	4.53692	2.42099	2.43968	4.91117	3.95201	3.45037	2.75016	1.69912	5.87947	2.47089	2.70198	1.89233	1.64397	2.07745	2.4293	1.80654	4.09552	4.09023		0.906403	3.031
22.0411	1.9338	2.67456	3.51386	3.60128	3.23709	2.76607	2.05925	4.2638	2.68374	1.95246	3.59347	4.10695	3.17876	1.80516	2.74588	4.58592	2.1616	2.91548	2.1833	2.45324	1.84168	1.94558	1.99061	1.96315	2.12697		0.911328	2.73135
22.1603	1.99407	2.61439	3.45081	2.65392	1.80196	2.9272	2.28692	3.15753	2.33637	2.64724	3.57657	3.93896	5.49484	2.21627	1.80403	3.33071	4.70307	2.81942	2.81207	2.32613	1.71764	1.57101	1.68707	2.93393	3.64091		0.916256	2.81772
22.2794	2.17501	2.44323	2.69694	2.16121	1.59342	3.22687	1.70248	4.17905	1.91824	2.18562	2.26948	2.52947	3.30099	1.78209	1.73188	2.74131	2.6254	5.70171	2.50344	2.24799	1.75042	1.47183	2.44145	2.59211	3.19744		0.921181	2.52676
22.3986	2.24345	1.6665	3.17048	2.49303	1.61325	1.83393	2.18972	2.59299	2.34338	4.54334	2.63662	2.5953	1.98417	1.85807	2.32867	1.61313	2.54502	2.53715	1.54578	1.61144	1.65763	1.65145	1.60136	1.94677	3.18096		0.926109	2.23934
22.5177	2.21472	1.74065	4.50171	2.98076	2.4485	2.38394	4.28299	2.74686	3.89038	5.09059	2.81012	2.65127	2.59891	3.21046	2.62502	1.51659	1.75548	1.74407	1.60751	2.29694	1.77916	1.74354	1.48113	2.83542	3.00667		0.931034	2.63774
22.6368	1.78636	1.81738	4.01698	2.87747	2.28589	2.59723	2.2383	3.52076	3.46243	4.79364	3.24656	2.06794	1.88741	2.3725	2.08091	2.16295	1.62832	1.74736	1.95601	2.05065	1.58555	2.68663	1.69394	1.96529	2.21196		0.935958	2.42962
22.756	2.68604	3.28514	4.60112	3.98903	2.26978	3.90103	3.66751	3.88006	2.76423	2.22852	2.4108	1.99059	1.66715	2.08002	2.05204	1.86694	2.08854	1.47624	1.56595	1.83828	1.67007	1.96825	1.57979	1.66394	3.32222		0.940887	2.50053
22.8751	3.17034	2.51933	3.95458	3.96459	3.15919	2.03832	2.11707	2.07419	3.7015	5.7185	2.30243	1.78963	2.03425	1.64439	1.83652	2.0876	1.82856	1.6599	2.15572	2.18211	2.14427	2.45194	1.58252	1.6532	3.44584		0.945811	2.52866
22.9943	3.84332	2.65373	4.40806	5.82212	4.81784	2.81801	3.07056	2.26805	6.66898	4.00249	1.85601	1.5548	2.48972	1.61666	1.78674	1.76119	2.00259	1.67613	2.31101	1.66201	1.70145	2.00966	1.576	2.30876	1.64517		0.950739	2.73324
23.1134	2.22468	2.79543	2.14585	7.35011	2.10716	2.47419	5.158	4.64868	2.56501	4.64895	1.85903	1.51466	2.26932	1.50544	1.63413	1.76355	1.8123	1.73256	1.71923	1.55584	1.60663	1.60932	1.65206	2.33176	1.77449		0.955664	2.49834
23.2325	2.99294	1.93035	4.19892	3.61928	4.72256	2.72485	3.12309	2.22291	4.98165	5.49043	2.07776	2.20849	1.6024	1.62755	1.67443	1.66265	2.45519	3.17133	1.70266	1.78443	1.50848	1.60673	1.67849	1.69791	1.54052		0.960588	2.56024
23.3517	2.79344	1.58803	2.11661	5.69948	3.89408	5.05035	5.44605	2.63232	2.47656	6.0867	2.93735	2.48078	1.77693	2.7869	1.5108	2.30663	3.93108	2.57728	2.51321	1.60046	1.6864	2.50104	1.56519	1.74159	2.133		0.965517	2.87329
23.4708	1.81236	1.63063	2.12539	3.57016	3.44951	2.77175	4.04947	3.24792	3.77209	4.67453	1.58998	1.73667	1.74918	1.77201	1.65771	1.73375	2.92745	2.08319	1.71341	1.72121	1.64206	2.46494	1.44441	1.73659	1.97934		0.970441	2.36223
23.59	1.59148	1.50346	1.64808	4.32475	1.97199	1.66126	6.05573	4.41478	5.11966	3.2731	1.9335	2.74771	1.6701	1.85376	1.71558	1.48847	1.83409	1.99385	1.70893	2.51251	2.06379	3.55488	1.50863	2.26443	1.60934		0.97537	2.48095
23.7091	2.47843	1.59521	1.77643	1.95084	1.69651	1.50097	7.72941	3.05184	4.04307	7.37742	1.97961	2.46169	2.85798	1.9273	1.42875	1.88068	1.92628	1.7472	2.48948	2.73935	3.21365	1.68137	2.11972	1.67	1.4295		0.980294	2.59011
23.8283	4.3476	2.74841	2.97481	2.76349	3.17864	3.26779	4.02169	4.7205	3.69211	5.96034	3.10008	1.65319	2.59904	2.94209	1.69672	1.85542	1.93085	1.65698	1.95423	2.23959	1.60705	1.55601	1.80901	1.60938	1.79791		0.985223	2.70732
23.9474	3.02409	1.90443	2.00781	3.05528	2.63081	2.85715	2.82088	3.26483	5.03454	5.04327	2.63529	1.53843	2.01846	2.67137	1.59482	2.00541	1.61244	1.59955	2.27516	1.59005	2.05549	1.66724	1.66698	1.8463	1.52282		0.990147	2.39772
24.0665	1.98304	1.67723	1.7693	3.11878	5.4998	1.87339	2.62415	3.28425	3.52452	6.45989	1.82841	1.48848	1.93187	1.78398	2.0953	1.45208	2.5849	1.4433	2.21881	2.58316	1.6194	1.52949	1.78589	1.53741	1.51843		0.995071	2.36861
24.1857	2.51367	4.44906	2.23931	3.41183	4.02081	2.03496	3.71671	3.93585	5.52488	4.49013	1.53353	1.61136	1.64462	1.7788	1.78648	1.84287	1.59395	1.59111	1.85199	1.58537	1.90347	1.97969	1.59947	1.646	1.56207		1	2.47392

## Sheet: Image14
X0	Y0	Y1	Y2	Y3	Y4	Y5	Y6	Y7	Y8	Y9	Y10	Y11	Y12	Y13	Y14	Y15	Y16	Y17	Y18	Y19	Y20	Y21	Y22	Y23	Y24		Ap-Basal	Avg intensity
0	12.6235	14.4689	9.5499	10.6742	13.5171	12.4546	13.6006	10.4615	8.2082	6.7866	9.3759	11.3717	6.3686	10.9814	10.525	4.5653	3.1171	6.63815	3.631	7.0682	4.705	3.78444	4.4144	3.70913	7.03942		0	8.38559
0.1191	22.1	12.3159	13.8363	14.0527	10.069	9.598	12.4045	10.2623	11.8965	9.2948	10.3999	7.6469	8.6887	19.4281	7.5289	7.9805	5.4743	8.18952	2.8282	7.8817	6.1545	3.9779	7.4018	3.89176	8.18101		0.00462803	9.65935
0.2383	13.4448	17.4964	11.9713	9.5198	9.1518	11.9314	8.2263	12.7906	9.2531	8.3863	10.5296	9.3255	5.5624	19.9665	8.565	6.6079	4.5396	9.88295	3.9255	6.0864	5.7203	7.41772	8.6494	9.36236	3.94512		0.00925994	9.29032
0.3574	12.3492	17.333	13.3277	9.7709	12.8875	12.7495	8.9146	11.5696	8.5449	8.408	5.5507	10.012	9.3729	19.655	10.7682	11.9437	6.8402	9.45579	2.9307	6.3063	4.9495	4.07749	7.6761	9.06726	1.91106		0.013888	9.45487
0.4766	9.0964	10.793	12.813	9.0222	11.1946	10.4257	9.5004	10.3571	8.3224	10.4696	5.7069	11.6349	9.8392	18.3492	15.5544	5.7625	8.731	7.28648	3.6483	7.1491	4.2469	3.04712	7.2592	7.57212	4.45477		0.0185199	8.88946
0.5957	15.5264	9.7858	17.1829	9.7305	9.849	11.1799	11.3338	12.1238	5.0077	6.864	12.2083	9.2395	5.0989	16.0313	13.5957	8.8707	5.6605	6.28541	13.9859	8.3904	5.8299	2.31986	7.6549	7.68559	6.10583		0.0231479	9.50186
0.7148	17.8057	10.3833	14.2524	4.4948	12.7359	10.6182	11.3725	11.4342	6.9756	6.1507	4.9175	11.3142	7.7347	20.5738	8.7324	11.9966	13.5269	7.34787	7.4652	8.567	8.4473	2.96981	7.3944	10.1395	4.82682		0.0277759	9.68709
0.834	14.4888	9.5351	12.0989	9.5546	12.6085	12.323	8.5077	10.5031	7.6065	8.5191	7.1565	11.8154	10.7275	19.4118	7.4142	7.9923	9.5511	4.50717	9.0343	5.3115	5.6254	3.78467	3.851	7.95645	6.60884		0.0324079	9.05974
0.9531	11.4011	8.5086	10.3866	11.9496	8.7271	10.0603	7.074	10.0511	12.519	8.6689	8.5876	5.1484	7.6256	16.3577	12.1054	9.3983	9.2569	6.06416	7.6401	6.3624	7.3929	7.27727	5.3474	5.92392	6.86186		0.0370359	8.82785
1.0723	11.0539	12.7097	11.9773	8.6486	10.5148	18.8345	5.2294	8.9457	8.9778	8.6321	7.2543	6.1637	5.321	29.9405	15.3778	10.3627	8.3566	4.98347	8.9716	9.0544	6.1432	5.52067	10.3687	5.2746	6.4817		0.0416678	9.80395
1.1914	7.5269	11.0612	12.4503	13.4733	8.031	12.0466	7.4141	10.6781	8.2261	5.7025	11.588	5.493	6.5012	27.5864	12.3711	10.4805	5.2665	4.25314	7.5484	3.5617	4.4555	5.13421	14.8642	4.50677	6.37267		0.0462958	9.06374
1.3106	17.0239	9.8801	15.1467	9.8873	10.8334	11.8105	6.6856	8.7434	5.4064	11.0547	6.9195	8.7579	8.8207	25.0654	19.2083	13.4945	6.2621	4.42175	7.2846	5.375	6.0668	3.57059	9.6153	3.61501	5.46642		0.0509277	9.61663
1.4297	13.7026	9.3302	10.2625	9.1506	11.4422	7.1592	2.4417	9.0086	12.6356	11.533	5.7521	6.4027	3.5461	20.2638	12.2171	5.475	6.1291	5.88997	7.4969	6.9918	3.7619	4.35963	8.5791	6.09519	6.26099		0.0555558	8.2355
1.5488	14.8361	4.7764	15.2049	7.7845	6.4224	9.5645	3.8601	9.1813	10.8423	8.2293	12.5789	6.7665	5.8525	16.5185	9.9097	13.3883	4.2751	5.38836	10.2022	9.6906	6.7771	6.1071	8.6982	6.20334	5.10383		0.0601838	8.72648
1.668	6.3922	12.7901	10.5391	7.1244	7.0906	11.362	4.9124	10.7341	7.006	9.0094	8.7918	5.4273	6.5211	30.8567	11.6609	14.9351	4.9322	4.18579	12.6756	3.9195	4.3074	5.0669	8.7932	5.53277	3.81737		0.0648157	8.73536
1.7871	14.3178	6.7884	10.9489	5.0956	8.4913	9.6407	3.6217	10.8293	11.0551	11.9405	10.1339	4.5777	5.8318	25.658	14.5735	8.9755	8.7616	4.51841	7.2845	6.1436	5.1604	3.12514	11.0911	5.6442	5.47238		0.0694437	8.78724
1.9063	11.7797	11.3766	12.726	5.7438	6.3587	10.8781	7.5138	11.3969	9.5336	13.8525	8.1479	4.7682	4.3781	26.1536	9.4769	11.9928	11.7095	5.94871	12.4461	5.9106	4.223	5.1151	6.7551	9.00364	4.18312		0.0740757	9.25488
2.0254	6.5996	9.8978	10.1613	6.8624	14.2069	7.0116	10.1035	11.2309	8.4579	16.102	10.4579	10.7968	4.9063	28.994	11.0976	10.3848	3.7553	5.94413	13.6468	7.692	7.1234	3.84333	8.1578	6.08064	6.6657		0.0787037	9.60722
2.1445	7.8907	8.353	7.8618	6.0179	8.3149	9.4452	6.4211	7.4046	10.1151	8.8874	12.0816	7.7996	6.0833	28.8252	9.1626	13.0725	10.0788	7.42701	10.6747	9.1693	4.1488	2.13058	6.5495	7.64631	3.43981		0.0833317	8.76005
2.2637	8.3868	9.2315	11.2821	5.8783	9.1275	11.0215	4.1261	7.1062	9.1281	10.986	12.4252	5.9447	3.8228	22.0433	9.5687	9.8208	5.1503	4.38251	13.9373	9.4144	3.4561	6.93553	4.5799	6.97098	4.1739		0.0879636	8.35602
2.3828	13.6374	14.1966	9.7818	8.2902	8.5965	6.0138	3.523	5.1934	10.206	10.063	9.7809	9.2825	8.472	27.678	17.2397	9.2029	8.0736	6.82134	18.7866	5.5778	4.9585	7.97551	4.8335	5.06864	5.25706		0.0925917	9.54041
2.502	9.092	9.68	8.9203	3.7306	6.1806	5.5335	5.3613	8.0311	6.8737	12.3155	12.4306	8.6504	6.1838	23.4519	9.7078	16.1193	9.6377	4.16002	9.3954	8.9016	4.4506	5.71731	7.0316	3.26443	6.32842		0.0972236	8.44598
2.6211	7.4695	12.8618	5.4964	2.8589	8.3898	9.467	4.4396	3.6165	9.3298	14.0868	6.3451	12.603	4.1706	28.4648	13.6766	13.4503	6.8208	6.67461	12.6929	8.6223	8.38	5.06397	7.4176	4.62966	5.90867		0.101852	8.91748
2.7402	8.2223	8.1779	11.4388	5.4318	7.8272	6.2625	4.4248	4.2237	7.1528	9.7509	7.2939	9.6091	7.0919	23.6747	19.6505	12.7012	8.6862	10.8272	9.6846	9.7401	5.3142	2.9493	4.2901	8.16519	7.5284		0.10648	8.80477
2.8594	11.4491	4.8121	12.5194	4.5222	8.0713	6.1633	6.6705	3.8847	12.1971	12.7524	5.047	15.1372	3.841	25.2634	11.0591	11.0677	9.776	7.42412	12.8355	8.9633	3.5232	3.9733	5.4111	7.82622	8.67301		0.111112	8.91453
2.9785	8.9154	9.8039	2.2994	4.4369	6.0922	8.1219	8.0616	4.4525	13.4714	12.1809	8.8675	12.4042	9.2794	25.7345	18.7877	9.5491	9.2116	6.62987	11.5818	4.7186	3.8694	2.77011	4.9995	5.79323	6.46974		0.11574	8.74009
3.0977	11.5054	11.076	2.6717	4.2867	6.6659	5.0858	7.4672	6.4385	9.1191	13.3419	4.2299	11.9403	7.9556	21.3167	13.5086	7.1746	9.6981	7.42784	7.5968	7.7554	5.7109	2.51947	6.1483	5.49357	6.01735		0.120371	8.08607
3.2168	10.9342	7.2439	6.0445	5.5086	3.6161	2.5407	4.8537	8.5706	8.3406	14.0581	6.3381	9.4191	5.1455	26.7816	17.3537	4.9613	6.3488	3.96744	12.9535	6.4029	3.8204	2.00872	5.0067	4.29603	5.25926		0.125	7.67096
3.336	9.1851	10.4433	5.0458	6.7275	3.2978	6.4239	4.3678	10.1185	10.5658	11.1845	5.2576	13.295	5.3066	19.9089	17.3607	12.3324	5.2235	6.70614	6.2716	11.5673	7.8274	3.6989	3.7534	9.10601	8.42168		0.129631	8.53589
3.4551	10.2703	17.5654	4.1282	4.8091	6.2854	6.6257	7.0327	4.3686	7.7073	11.4611	5.4353	17.2128	5.297	23.8889	12.5877	13.533	9.4348	3.93314	6.6225	7.3754	5.0982	3.28142	4.053	9.503	7.3856		0.134259	8.59582
3.5742	8.6228	10.0247	8.171	3.5173	9.0764	5.4266	5.0125	7.0356	12.0267	11.3027	10.3733	11.3316	10.3474	23.9269	13.8864	5.5828	11.3702	7.58019	6.3045	10.1213	10.0518	4.2314	4.4989	5.64784	4.08204		0.138887	8.78211
3.6934	6.5969	14.2771	5.6929	3.7769	4.5242	7.3835	5.4806	6.9592	7.9878	6.7127	5.8808	8.1132	6.8398	22.6374	12.7019	8.0859	7.4221	4.65426	5.66	7.9232	7.1395	4.58982	4.9219	9.05798	6.74906		0.143519	7.67074
3.8125	3.9257	14.5332	5.9137	4.6937	7.8921	4.5233	4.8609	4.2036	8.798	6.8709	7.6814	9.6431	5.1077	26.8697	14.3839	12.0755	5.3717	7.85796	10.5858	10.1732	12.4497	3.52631	2.1109	4.48865	5.82298		0.148147	8.17454
3.9317	4.932	8.9543	6.8129	2.7435	3.9319	4.3275	6.0125	6.7829	12.3388	10.7049	8.3408	9.281	8.1326	17.9905	12.9991	10.6922	8.1347	11.0218	8.5175	8.6199	4.1279	4.20342	4.0927	5.16649	6.24772		0.152779	7.80438
4.0508	5.3408	12.932	4.2634	5.7267	2.474	5.8036	4.1186	7.0761	6.2302	12.0565	10.276	7.5286	10.039	20.8741	18.6516	11.1402	8.7824	6.79517	10.5438	11.4152	2.5862	4.2619	2.8765	5.13056	8.12892		0.157407	8.20208
4.1699	7.353	6.1311	3.6584	5.6252	4.8274	6.4738	8.626	6.3683	8.8714	14.1627	6.9494	5.1373	7.0939	25.3967	10.7571	13.0281	5.1137	7.90241	9.188	10.6628	3.5181	4.38494	8.443	4.06298	3.85471		0.162035	7.90362
4.2891	6.0718	7.5917	4.5011	3.2221	5.8788	5.5278	5.9015	9.5676	8.3386	12.7521	6.05	5.9295	6.0255	22.3335	12.1891	8.6441	5.9028	7.4366	7.1716	10.3303	5.4001	3.01304	5.2275	4.58948	6.08355		0.166667	7.42719
4.4082	3.7571	8.9785	6.1789	3.2464	4.9453	3.5408	3.4851	5.2395	9.2384	15.5461	8.9111	6.5507	4.8293	26.3313	9.3212	10.866	7.0858	4.35739	7.3851	8.1455	4.6425	5.36532	6.8602	4.72016	4.38252		0.171295	7.35641
4.5274	10.3312	5.9815	5.7041	2.7701	6.2305	6.5584	3.6314	5.4276	8.5538	9.4723	4.4985	9.2543	4.8837	23.0774	18.6903	11.4394	9.014	10.6477	7.7484	4.1734	4.6323	4.81794	4.2875	2.91361	8.10274		0.175927	7.71368
4.6465	9.2338	4.4409	4.4292	6.2492	2.5746	6.3742	3.9882	5.048	13.9166	12.4955	8.2968	4.0608	3.0546	26.0545	18.5824	11.341	8.5501	6.80996	5.8602	9.7289	5.4054	4.06311	5.3756	7.1599	6.39164		0.180555	7.9794
4.7657	5.7912	9.0366	6.1831	3.3211	4.5576	9.6983	2.6665	3.2823	13.8869	12.1795	8.8507	6.7439	4.2889	33.4314	13.3822	12.0733	9.4709	7.66256	6.482	7.4455	4.4293	2.05467	3.3642	5.54739	5.48583		0.185187	8.05263
4.8848	8.2568	4.2675	6.1913	2.42	5.2306	5.2475	2.7192	3.8519	7.4962	9.3362	10.9169	6.5427	6.2594	23.7281	18.8081	11.0152	8.1431	4.01501	5.4374	5.8953	6.7327	2.68354	5.9509	3.12155	4.98139		0.189815	7.16994
5.0039	10.9029	5.0914	4.6867	4.6019	4.1557	9.5622	4.1146	5.7514	10.4052	10.7275	7.1462	9.229	5.7221	24.2013	11.7931	10.9378	14.4298	7.01095	7.663	6.1332	6.5598	3.68584	5.7612	7.02253	4.18816		0.194443	8.05934
5.1231	14.8119	3.2092	3.8016	1.8989	3.2266	6.0266	5.036	3.2264	15.0948	9.199	9.3012	5.1931	5.8209	19.6985	15.4065	7.4739	7.1506	7.66207	10.0139	9.1863	7.444	2.52427	4.413	4.12909	3.47477		0.199075	7.37692
5.2422	8.2207	3.5712	1.9077	3.8085	5.1032	5.7734	3.4051	6.5467	11.3662	11.5872	12.2888	4.3449	6.4449	24.7511	18.5441	10.0722	10.6902	6.59169	14.8874	5.1029	4.5142	1.94088	3.9138	3.39098	5.40298		0.203703	7.76684
5.3614	8.3938	7.2781	5.2794	3.7647	4.0059	2.9051	6.0854	3.7943	10.1853	12.8274	12.4563	5.6776	8.35	18.6117	11.3296	10.2733	7.6158	5.38798	6.3688	3.5143	4.1415	2.08473	4.7311	7.00174	4.03155		0.208335	7.04382
5.4805	6.8058	3.4482	2.8571	3.4135	3.0524	3.7791	2.0321	5.4119	10.7595	14.5207	11.9001	3.3917	5.8544	20.4559	16.0266	5.5245	4.3776	5.3233	7.6098	4.6842	5.8129	2.03623	6.4751	2.6465	5.24971		0.212963	6.53795
5.5996	4.6852	7.6879	6.1248	2.8567	4.7193	6.8508	3.6052	3.1238	14.1843	17.5168	9.8859	7.1719	6.7605	21.6861	19.6681	8.853	7.1891	8.97589	6.7624	4.6467	6.4916	3.09836	3.03	7.50851	6.20036		0.217591	7.97133
5.7188	6.3704	3.8891	5.7169	2.3147	7.1736	8.5373	4.0647	7.6472	9.7761	11.979	9.1062	7.6015	4.4452	25.9888	19.5174	9.5788	9.0744	8.03153	8.0475	3.0109	4.3683	4.79872	5.5708	7.83956	5.64668		0.222223	8.00381
5.8379	5.0924	5.635	3.3218	5.2486	9.0632	5.9842	3.1133	5.3937	13.0151	14.0997	12.5897	5.3971	8.1538	27.0785	16.1792	8.6437	16.743	8.00508	5.7353	8.7057	4.0978	2.99304	4.3069	4.32192	4.9986		0.226851	8.31665
5.9571	5.9416	5.4401	1.8123	4.6589	4.1846	4.5411	4.0772	5.0089	10.397	14.7483	10.9932	9.3415	6.3757	32.2278	22.5998	9.1408	9.4264	7.31199	7.0069	4.6376	3.9202	4.81936	3.2961	3.16192	4.87666		0.231483	7.99784
6.0762	5.6579	6.8601	4.8305	3.7526	2.8511	5.4452	2.6642	4.4423	12.1316	11.7914	4.8423	6.3877	6.7887	27.5659	29.8097	7.8398	10.4307	10.4951	11.4861	7.1612	5.2213	4.24416	3.352	4.22493	3.70759		0.236111	8.15936
6.1953	4.2336	6.078	1.8125	3.3353	4.6999	5.8936	4.8137	3.9359	14.1467	12.6695	8.7094	5.8922	4.2242	23.7734	20.7093	10.4723	7.5443	9.04409	7.9129	6.8427	5.2721	6.00921	6.3795	6.30897	3.27897		0.240739	7.75969
6.3145	3.4134	7.3402	1.8058	3.3275	4.0568	6.2857	4.6019	3.8968	14.5097	12.7987	12.0799	8.4297	8.043	30.9979	16.5069	9.4712	5.6232	4.88203	9.6248	5.064	3.7282	2.97589	4.9227	4.16884	5.26516		0.245371	7.7528
6.4336	6.6008	3.608	3.2913	4.371	6.6549	8.6204	5.8666	3.5994	12.1402	8.6739	10.1718	6.1249	5.026	23.7676	22.6309	6.6724	7.8452	10.0412	6.6738	2.3964	5.7512	4.60138	5.5579	5.2205	2.39386		0.249999	7.53206
6.5528	7.1358	2.1423	4.6761	4.7004	6.7457	4.4615	3.2491	2.4563	11.0932	5.1949	8.4862	6.5745	6.424	26.1909	18.357	9.8373	10.5833	9.99605	3.6433	4.7795	4.7488	2.86804	3.1928	7.3458	7.06779		0.254631	7.27802
6.6719	5.7529	7.1525	4.191	5.3635	5.0594	4.8148	3.2038	4.852	15.3047	16.5406	8.1807	7.6807	2.982	25.7396	19.4671	9.0918	8.3263	7.60129	4.7921	2.4114	4.6237	6.33476	4.7861	3.61299	4.87609		0.259259	7.70967
6.7911	3.6624	3.7646	4.4744	3.6344	2.9299	2.2776	3.8725	4.1997	15.8805	15.4374	9.4231	8.4605	4.2788	23.799	21.7295	8.0358	10.8859	8.08055	7.4965	6.9018	7.0573	2.41801	8.1095	3.94171	7.10346		0.263891	7.91419
6.9102	4.8433	5.7287	5.2169	4.417	6.4772	6.7289	4.1439	3.6407	14.9187	15.1178	11.7766	4.388	8.4815	14.5891	22.4231	10.4863	13.0953	5.52601	5.2009	5.0119	4.2593	4.80987	9.9346	3.49412	4.2658		0.268519	7.95902
7.0293	1.9438	8.0577	2.4562	4.4885	5.2999	6.3082	3.4684	5.3721	8.5292	8.6857	8.2234	4.7818	6.5997	26.7683	27.2901	12.0137	14.3389	6.81027	3.8411	6.8055	4.7026	5.17791	7.2874	3.75899	3.48573		0.273147	7.8598
7.1485	6.6631	6.6067	3.848	4.8515	3.8079	6.8474	2.688	5.4736	7.4205	12.388	9.9889	6.8074	3.5592	28.1209	21.2617	12.2505	9.5719	7.29938	5.3469	5.0631	3.5141	5.04737	6.3901	7.49128	6.60461		0.277779	7.95648
7.2676	5.1554	3.5397	4.0478	6.065	2.7699	6.5153	3.7649	3.0073	12.237	8.4057	7.3076	9.865	6.3681	32.3205	25.6146	6.4553	11.448	5.75446	6.6921	3.4413	5.1901	5.11158	4.8284	6.03068	5.15897		0.282407	7.88379
7.3868	5.1596	2.9329	4.7215	2.6752	4.781	6.0574	3.0902	5.743	14.4458	10.9465	8.7145	6.4176	8.2064	28.7212	24.0426	7.352	7.4881	8.04986	6.3118	5.3342	7.1203	5.75871	4.0701	2.20869	3.15649		0.287039	7.74023
7.5059	5.6515	5.5439	4.4076	7.8501	5.5952	4.3055	5.2989	4.4173	13.7047	11.8598	4.2343	4.7566	7.8066	21.4284	30.1855	14.9674	5.7324	5.46748	7.6103	7.4075	7.209	3.66469	4.1694	5.0644	3.93599		0.291667	8.09098
7.625	5.219	3.1058	3.4319	3.5332	2.6767	4.183	3.7785	5.8609	7.551	16.5935	5.3026	3.1662	4.7867	23.7121	34.3829	11.0358	8.0387	7.50763	4.9914	4.731	4.7514	6.54795	5.212	5.45234	6.32942		0.296295	7.67527
7.7442	5.8497	4.29	4.3339	4.6731	3.5123	2.778	3.5485	3.5647	13.4298	16.8443	7.1871	2.9443	9.4771	20.4305	29.0412	12.1971	8.7299	6.20468	6.4178	5.2525	4.8382	10.5046	4.1652	4.90163	5.37151		0.300927	8.01951
7.8633	2.453	3.6161	3.9092	5.3948	3.1465	2.5059	3.4968	3.1486	8.2225	13.7749	12.0026	3.4204	12.3748	19.5914	36.6459	9.7226	8.6308	6.56952	5.911	5.8604	6.5404	5.29812	2.9842	5.21107	7.07378		0.305555	7.90021
7.9825	3.3492	2.7075	2.8746	3.1791	3.806	4.1794	5.1307	3.4446	12.5363	16.5623	7.5106	8.9629	7.4075	20.098	28.2093	11.122	9.9748	7.23853	5.4477	6.1327	6.0354	8.12997	3.5935	5.31564	4.82808		0.310187	7.91105
8.1016	5.5786	4.862	5.1215	1.6384	1.8476	5.2685	4.4162	5.411	14.2855	10.4206	8.1601	9.6302	4.7884	26.407	24.456	7.2904	6.7899	8.27247	5.8792	6.0611	9.0932	8.10541	7.581	2.91406	4.01849		0.314815	7.93187
8.2207	6.2261	2.978	2.5057	3.5829	3.6221	3.4293	3.825	5.5745	9.5468	9.8161	8.8254	6.1778	6.3942	15.5063	26.3821	11.5413	7.3469	9.87655	3.7164	9.7598	5.4793	10.4289	4.5159	3.44948	2.83638		0.319443	7.33373
8.3399	4.7908	2.6442	2.0928	2.2441	3.1891	5.2988	3.9228	2.3196	5.9501	15.9508	5.0696	7.1054	7.0218	11.3435	24.6113	10.4077	10.1606	10.5388	4.9449	5.1647	4.1802	5.41014	5.0714	6.22194	4.58395		0.324075	6.80956
8.459	4.9368	3.6171	2.4152	5.1507	3.7144	5.7745	5.0148	3.8973	9.9219	16.6222	6.8263	6.5553	4.7795	14.0695	32.961	11.3183	7.6275	6.43601	6.2754	6.3399	4.0385	4.8397	3.4971	5.23754	6.87759		0.328703	7.54976
8.5782	3.1256	3.705	3.1688	2.6308	1.8466	3.4799	3.7905	2.5464	10.6501	13.2148	9.0806	4.7839	5.8985	13.3244	40.8314	7.6551	6.6533	4.77039	4.4286	3.6548	2.5723	3.47351	4.5467	2.39077	4.40617		0.333335	6.66516
8.6973	4.0474	5.242	3.6072	3.1206	2.5545	5.2658	3.3977	4.057	5.2767	13.3376	10.2391	5.2209	13.7317	12.6535	32.5004	10.7525	6.5533	5.27422	6.1439	3.0001	3.9478	5.18344	3.4292	4.44566	6.74964		0.337963	7.18927
8.8165	6.0294	4.1679	2.9409	3.4817	5.4203	6.601	2.1687	3.4272	6.714	11.1098	8.2183	7.8678	6.7007	12.4683	28.8098	13.9167	6.4455	4.55412	4.2408	3.2753	1.5746	5.49941	4.323	3.48474	7.20863		0.342595	6.82594
8.9356	4.4976	4.6218	3.1703	2.9487	1.8648	4.046	2.8787	2.7581	5.2642	7.4152	6.9563	7.074	8.6305	16.0436	31.6677	7.7655	7.6759	2.18446	3.6152	5.1412	3.8267	7.83423	7.4928	4.81527	9.59442		0.347223	6.79133
9.0547	3.8573	4.7283	3.1021	4.057	2.9438	4.5819	3.5875	3.3976	10.6872	11.195	7.0174	5.4764	9.3075	16.4338	30.0048	10.3127	5.0603	2.84891	5.0179	5.7771	3.0527	8.69757	2.9698	3.94973	9.06753		0.351851	7.08527
9.1739	3.9324	3.4922	4.6884	2.3931	4.2651	6.4455	2.4482	4.1223	10.3775	12.5686	6.7914	4.9565	6.5913	10.0745	32.1087	10.8529	7.7673	4.63796	4.5294	2.6945	3.6981	5.11532	5.386	6.07143	4.84846		0.356483	6.83428
9.293	4.53	3.1675	2.6128	2.4932	5.3647	6.1176	2.3453	2.6617	9.606	5.8997	13.3883	5.6385	4.2597	9.1624	33.2162	23.1507	7.8178	2.26701	5.0494	5.311	4.7316	8.17714	2.7749	4.14954	7.30035		0.361111	7.24772
9.4122	1.7368	6.581	2.4505	3.7503	4.4044	3.9715	3.1109	3.7805	13.065	7.4907	10.0241	6.0803	5.2487	8.1503	28.1585	20.3066	4.6442	1.5757	2.4862	5.3038	3.1114	4.84858	6.1698	3.20142	3.81997		0.365742	6.53885
9.5313	5.1882	2.9456	3.2263	2.5009	2.8133	2.8575	1.7844	4.1197	8.1476	7.6624	9.3262	7.1167	5.7208	7.5642	32.4573	19.1956	7.2795	2.85406	5.2269	2.9352	2.5854	7.95019	5.6448	2.82796	5.73241		0.370371	6.62652
9.6504	5.5323	3.4065	4.5804	2.7459	3.9221	2.1536	4.8703	3.3807	7.9853	4.4607	6.0966	3.5093	6.6098	5.951	35.4924	20.2183	4.0876	2.32757	4.6146	5.4512	2.4143	6.27921	6.0618	1.98911	8.02439		0.374999	6.4866
9.7696	3.6091	2.4452	1.6173	1.7398	3.415	3.0204	1.9874	3.7609	5.1871	4.3647	8.5984	4.8059	6.9197	10.6752	35.1762	17.862	3.3355	3.20916	5.4815	9.386	5.7538	7.61744	4.288	4.37141	4.76146		0.37963	6.53554
9.8887	7.1662	3.2701	2.5618	3.5998	3.5013	4.5745	2.8708	4.6888	4.3294	4.835	6.2291	5.6626	3.6128	8.1387	31.5607	16.7945	5.8504	5.40805	3.8429	6.2415	3.873	8.48235	4.1052	4.64352	4.93621		0.384258	6.43117
10.0079	5.1479	4.5259	3.5657	2.5239	2.736	4.4847	2.3907	5.1559	5.4333	5.7243	5.4664	2.3592	7.3497	8.7452	34.8069	21.6389	6.1088	3.65843	8.7188	5.7848	4.7396	4.66061	4.5226	6.60066	5.85937		0.38889	6.90833
10.127	5.8438	3.6817	4.4128	2.2881	3.498	10.8406	4.457	2.9062	8.6809	3.2642	7.8947	8.6086	5.5706	14.1751	29.1804	15.8057	4.9945	5.33002	5.3521	4.3933	6.4994	4.61961	9.8638	2.63913	10.1695		0.393518	7.39879
10.2462	4.3711	3.4457	3.5161	3.9689	4.1947	5.3194	5.6048	2.6148	5.5545	3.3729	6.8156	7.3626	6.8639	6.7568	22.8737	11.614	2.6078	2.73787	7.8125	5.006	2.7884	4.50054	9.2942	6.94409	7.39579		0.39815	6.13347
10.3653	2.5593	2.9631	2.0035	4.467	2.374	3.0975	5.172	3.1561	4.8725	6.9205	4.4094	7.3115	5.4839	10.8607	18.1801	21.6629	4.9394	5.1191	6.25	5.4597	4.4251	3.76587	5.8262	5.8397	6.6085		0.402778	6.1491
10.4844	2.2327	1.5543	2.4487	2.6297	6.8364	2.9783	3.3041	3.3983	5.7076	3.7176	4.8379	6.1462	7.2146	7.2367	16.8497	12.0912	5.2709	3.76439	7.185	3.8086	3.2393	6.28253	5.7746	4.82982	3.73135		0.407406	5.32282
10.6036	2.8349	3.8676	1.7836	3.6885	4.2188	7.1186	4.8182	2.7894	5.2688	7.385	4.0192	7.3357	8.9621	11.2078	10.9882	11.4806	7.1732	4.44666	5.8086	3.9685	4.8686	5.10885	4.4846	6.05009	4.0004		0.412038	5.74706
10.7227	3.6525	2.5307	3.4053	2.3874	2.7982	5.8807	5.6857	1.6748	7.112	7.6955	2.8703	4.415	7.6851	6.9559	13.8289	9.8655	4.2461	4.65061	6.3505	4.2348	3.8408	4.68399	2.1578	5.70639	5.33338		0.416666	5.18591
10.8419	7.1396	1.6844	2.4008	5.8526	1.5755	4.3766	3.6652	2.1846	2.3391	4.5777	2.5491	3.8876	8.5864	5.463	12.8987	9.9723	8.6465	5.23072	8.8294	5.5503	3.0248	2.8239	2.3997	6.69207	5.12868		0.421298	5.09917
10.961	4.4864	4.2275	2.01	1.5117	3.1118	4.962	4.4613	6.2503	5.5656	5.0262	2.8875	4.3669	9.1223	6.6695	11.0993	9.4297	4.9263	5.11106	11.8846	5.232	5.1617	4.80662	3.1781	4.36262	7.01606		0.425926	5.47468
11.0801	3.7196	4.324	3.0835	3.0409	3.0666	2.4101	5.3436	4.2834	8.6556	5.7867	4.2781	4.6716	6.2388	7.3579	11.4139	7.7428	5.1447	7.29603	9.9018	2.8267	5.8087	3.44261	1.9521	4.61616	7.29201		0.430554	5.34792
11.1993	2.8532	6.5374	4.1171	4.2587	4.4361	4.533	5.4114	3.3539	7.5015	5.7112	4.42	6.5292	6.9177	6.4263	9.6609	8.4555	4.001	5.77388	8.5567	6.5963	7.0035	5.4285	4.3023	4.45467	4.14374		0.435186	5.65535
11.3184	2.8449	2.7705	2.4589	2.453	2.798	3.7754	3.6724	3.7237	4.359	3.8428	2.605	3.8964	9.6266	6.7161	11.8886	8.7436	5.4476	7.46619	7.2712	6.1073	1.6957	6.838	4.8787	3.80665	5.43298		0.439814	5.00477
11.4376	4.6864	2.6159	3.3862	5.3456	3.7947	2.9206	3.6892	4.0545	2.7651	5.3747	3.4976	4.9623	9.2827	6.0305	13.8613	10.2261	3.8116	3.66312	7.0512	6.1115	3.0737	4.56568	1.9039	4.17165	4.15141		0.444446	4.99989
11.5567	3.6272	2.7277	2.8063	3.8941	3.6371	3.9077	2.0158	4.7316	3.9887	8.4162	2.674	4.7753	6.5447	6.885	13.2982	7.925	5.2976	4.2543	9.042	6.1773	3.2256	3.34125	2.2246	5.3498	2.52866		0.449074	4.93183
11.6758	2.6053	3.0885	4.2702	2.9353	3.861	2.8892	4.0019	4.0931	3.2611	5.9321	5.7458	4.5569	7.971	7.3988	9.2648	5.6907	2.8987	6.68297	10.6433	4.8788	4.5252	3.63019	2.0339	8.16774	4.19943		0.453702	5.00904
11.795	3.1816	3.853	4.0012	3.9371	1.9482	2.4806	2.7758	2.7284	3.8612	3.3778	3.7564	3.1484	7.2485	7.8929	5.0524	7.0995	4.2703	5.7787	9.6916	1.9877	3.787	1.95011	2.8067	3.78276	5.71584		0.458334	4.24455
11.9141	2.9509	3.8992	4.2564	2.4124	1.696	5.2631	6.493	5.85	4.7204	4.6091	5.2134	3.5444	9.7116	5.5728	9.8878	8.5046	3.6224	4.29803	6.5995	5.0897	4.2147	2.58976	1.8949	3.40508	2.61735		0.462962	4.75666
12.0333	4.572	3.698	4.4244	2.0956	1.6419	2.77	5.5019	2.5882	1.8345	7.1733	3.1059	5.2292	10.6055	6.4355	7.6392	5.4949	4.6386	6.13752	5.8033	9.1729	3.1832	4.33534	2.0011	1.7046	6.0287		0.467594	4.71261
12.1524	4.6001	2.6125	2.1037	3.9592	2.8158	3.2597	7.1199	3.8052	2.9398	8.4755	2.6734	6.4267	4.958	8.6046	3.8208	9.5491	4.532	6.50219	5.3722	3.7068	4.8219	6.25911	3.2154	2.81472	3.75773		0.472222	4.74824
12.2716	6.8	3.9163	1.9522	3.807	4.0317	4.0348	3.0383	4.9964	3.5996	5.9491	3.4856	3.4192	4.5267	8.884	4.0902	9.5671	4.825	2.77741	6.0317	4.5093	3.4891	5.11457	2.1916	3.40834	4.55157		0.476854	4.51987
12.3907	7.2455	2.2669	3.0348	2.4855	3.4774	1.8513	3.6308	2.8663	3.639	7.1942	2.9165	2.7329	6.3161	6.5092	3.2082	5.4497	7.303	5.2108	1.9469	7.2082	10.1934	2.42386	2.4667	3.78085	3.93876		0.481482	4.37187
12.5098	5.5271	3.2771	2.5102	1.8553	2.0902	1.651	3.5765	2.5304	1.8503	4.8905	3.7591	5.1483	7.0561	5.7241	2.7699	5.2996	4.8131	4.46686	2.4153	5.3361	5.8567	5.48391	1.6783	2.67206	4.86703		0.48611	3.8842
12.629	4.8777	1.7743	6.1192	2.1779	5.4548	4.0908	3.0319	3.2023	4.6637	5.1841	3.3032	3.3551	5.4225	6.8153	4.99	9.0646	4.691	3.22123	3.2349	2.6366	8.3398	5.07998	1.8827	4.20915	7.17449		0.490742	4.55989
12.7481	5.3341	2.7094	2.5021	3.702	2.6214	4.0705	4.3669	2.992	1.9713	5.2758	5.1568	4.7424	5.0018	12.409	4.8127	6.2708	5.7876	3.13617	2.1672	3.8342	6.9292	3.40986	2.8842	2.75132	5.58731		0.49537	4.41704
12.8673	3.1442	2.9333	3.9112	1.7942	2.1556	3.166	4.8492	4.4093	3.4305	4.492	5.6376	4.377	5.1619	4.9697	5.5815	7.5309	2.2452	9.11917	3.2319	4.2672	4.5549	4.99633	3.3213	2.21911	3.55725		0.500002	4.20226
12.9864	4.7472	3.243	2.5947	1.6644	3.6206	4.5051	1.8024	4.7487	3.1927	4.8948	4.3506	2.5835	4.822	3.077	3.6956	4.422	3.1652	6.11253	3.9921	4.5081	6.7082	4.33351	3.0161	3.32605	6.89857		0.50463	4.00099
13.1055	3.9579	5.6025	3.0204	2.8854	4.929	4.2053	1.9386	3.0486	5.1498	3.9759	4.472	3.2736	5.4673	8.1943	5.3274	6.4832	2.8866	3.30443	2.6286	6.3824	3.3417	5.76783	2.104	3.23402	5.34554		0.509258	4.27705
13.2247	5.464	2.3925	3.4363	2.0467	3.7279	2.8244	5.094	2.34	2.8808	3.9897	3.5677	6.5211	4.1862	3.9508	6.6922	7.2625	2.8195	2.50075	3.4236	3.4824	4.1108	4.84218	2.3987	3.22028	5.28612		0.51389	3.93845
13.3438	3.7582	3.9236	2.8582	1.7608	3.2403	4.3779	2.2341	4.7172	3.5811	5.0243	2.8193	5.1238	6.149	4.5165	2.6704	3.2072	4.1363	4.10427	3.3408	2.9904	6.8465	3.30224	3.0588	5.03879	4.12592		0.518518	3.87624
13.463	5.7619	3.9191	3.3198	1.522	3.0635	5.7596	3.1597	3.854	4.2345	6.2505	3.6998	3.4187	5.75	5.9497	5.2336	5.4019	6.2603	3.17751	1.7498	2.8274	5.589	2.3433	4.8898	5.26057	5.26588		0.52315	4.30647
13.5821	3.6419	2.3247	2.8665	2.9395	1.6128	5.101	2.4154	5.2728	5.114	2.7853	6.2213	2.7124	5.3434	3.4701	5.0554	6.8146	5.1387	2.87337	1.7519	3.4556	3.6266	3.1893	1.9949	3.76051	8.26724		0.527778	3.90997
13.7012	6.6256	4.1449	3.0671	2.405	4.4729	2.944	4.4089	2.1176	5.4619	3.6862	3.8488	2.1993	6.2797	4.3391	4.3892	6.9026	3.8245	3.06985	2.5762	4.1594	4.3793	1.38289	1.939	3.01909	5.84754		0.532406	3.89962
13.8204	6.5411	3.1091	2.3916	2.974	3.7633	3.1456	1.7	5.0621	2.3302	2.7418	1.9327	2.6822	7.1375	2.4547	5.0578	4.911	3.0736	3.65538	2.2646	2.9901	2.5249	3.22311	2.4117	3.17244	5.23981		0.537038	3.45961
13.9395	3.2163	3.4159	2.6398	2.2526	1.7134	4.604	4.3465	2.6258	3.2767	2.3237	1.761	5.0017	4.2454	3.9153	3.2716	5.1907	4.7908	1.92617	3.6835	5.5513	7.2148	3.36223	2.2325	3.91995	5.57377		0.541666	3.68222
14.0587	2.3328	4.2479	1.9058	2.4001	3.3808	3.5953	4.5522	3.148	2.8393	3.7549	1.7754	5.2547	2.7048	2.0589	3.8577	7.0113	1.7609	2.07231	3.6003	3.5266	3.9322	1.50291	2.5427	2.83269	7.93857		0.546298	3.38116
14.1778	3.2217	3.603	2.8419	3.3714	2.3367	2.2698	4.2709	4.6052	4.784	3.0292	2.035	4.6353	3.4743	3.5327	2.09	7.1457	4.8109	1.76592	1.8012	2.6898	2.5569	4.55627	2.13	2.29749	4.84314		0.550926	3.38794
14.297	5.7331	3.2959	3.2951	1.7166	1.8436	2.4851	5.3352	2.9554	3.9809	5.0886	4.0929	2.7477	2.6807	5.0992	5.8133	6.3582	3.379	2.66417	4.088	3.0682	4.6795	2.97019	3.272	3.10428	5.81198		0.555558	3.82235
14.4161	2.3603	1.8056	2.3103	3.1553	1.5797	6.284	3.313	3.3724	3.5388	3.1582	2.3724	4.672	3.68	5.0627	5.6767	3.8454	5.4278	2.11549	2.9603	2.9169	2.7326	6.3927	2.8909	1.94621	5.8898		0.560186	3.57838
14.5352	2.7671	3.4569	3.8391	1.3868	1.5282	5.2562	2.3936	5.3076	2.0935	7.4337	2.4697	4.825	3.0202	3.6724	2.5384	7.0228	2.1014	2.34677	2.5892	2.9015	4.415	8.16238	2.4111	1.94663	3.96379		0.564814	3.59396
14.6544	2.0236	4.3757	2.4204	1.963	2.5719	3.6915	4.7135	1.943	3.5623	5.6122	1.7833	4.5745	2.3297	5.5043	4.9409	4.4485	6.7333	1.63736	3.141	2.1244	6.4307	2.77358	3.2964	2.18005	4.76474		0.569446	3.58159
14.7735	5.5155	3.7798	2.8591	2.7213	5.3489	2.2577	2.2984	4.7633	5.7383	2.699	3.0066	7.9699	3.26	3.2973	5.4645	9.6896	3.2123	5.43206	4.3539	5.4642	5.7286	3.3201	2.4937	3.10996	6.71215		0.574074	4.41985
14.8927	4.0616	3.4704	4.9745	2.2902	4.7875	2.299	3.3256	6.3068	5.7057	2.7987	3.5607	2.6311	4.5843	3.8694	4.9317	5.6975	4.1296	3.07106	3.3205	3.9501	3.6465	2.69885	3.4728	2.25865	3.61728		0.578706	3.8184
15.0118	3.6757	2.5355	3.2174	1.8607	3.8554	3.0561	4.1426	6.7018	4.4229	6.0168	3.0304	4.9309	2.2015	3.1095	8.5569	4.8661	6.3334	1.86026	1.894	4.2146	5.139	4.05764	2.5887	3.11692	5.89193		0.583334	4.05107
15.1309	1.8875	3.7253	2.8584	2.1853	1.9178	1.9651	2.6956	10.1102	4.524	2.1762	6.2007	6.142	4.3094	3.1993	5.5406	3.8394	2.4933	2.37307	2.6899	2.2669	6.9916	4.13701	2.0768	1.59256	6.31403		0.587962	3.76848
15.2501	4.4116	3.5329	4.1089	2.3786	3.2695	2.0279	1.4353	6.9062	3.8805	2.671	3.13	6.5287	3.7488	3.3696	2.8472	6.3787	3.9686	2.29292	2.0579	3.6163	4.9607	4.84019	3.6618	2.13763	7.05989		0.592594	3.80885
15.3692	4.2649	8.2111	1.5361	3.423	4.1346	2.2462	1.4578	7.7921	3.5877	4.2897	3.5504	3.3589	6.5798	2.6769	2.9618	6.7301	4.8218	2.25903	3.7351	4.8284	3.4877	4.09392	3.7814	4.79188	3.1993		0.597222	4.07199
15.4884	5.9854	5.5935	5.3482	2.401	2.6928	3.8283	4.2642	11.8824	2.5203	4.0741	4.1396	6.9345	2.941	3.1601	3.0035	3.598	5.7221	1.79705	2.1224	3.4146	3.8341	3.48859	2.7037	2.45291	3.44718		0.601854	4.05398
15.6075	4.1573	4.5517	1.716	2.3098	2.4463	1.55	4.6083	8.3856	4.3274	4.2737	6.9901	6.86	4.687	2.4642	4.799	2.4718	4.5518	2.40137	1.8712	5.2616	5.659	5.67145	1.4507	2.83557	7.91814		0.606482	4.16876
15.7266	3.6911	2.5275	1.7785	3.368	1.9536	3.1099	3.7817	5.2324	3.2707	2.9551	3.297	5.425	2.0313	2.8461	3.9512	5.4321	3.4166	4.3671	3.0817	4.524	4.1911	2.46858	2.3671	2.42671	6.10827		0.61111	3.50409
15.8458	6.7408	3.091	3.3255	3.3775	3.7167	4.413	2.6556	13.8661	2.5005	2.8982	4.2081	5.2835	8.2035	2.3048	3.2949	2.4743	3.2723	2.90906	3.6521	3.534	3.0725	2.12802	3.094	3.84397	6.02567		0.615742	4.15542
15.9649	1.9564	5.7267	4.1037	1.6749	4.7826	2.9501	3.2475	10.205	1.5636	3.0264	6.1662	3.546	5.4065	2.2496	3.0469	2.9652	2.4094	2.37471	1.8302	3.4761	4.1481	2.67509	1.6557	3.34039	3.84297		0.62037	3.5348
16.0841	3.1869	3.3167	2.8563	1.8051	2.1582	3.1439	6.2415	5.5164	2.194	2.2644	2.9722	4.8795	7.9487	1.7117	3.2233	5.5047	6.0121	1.40366	4.6772	3.0462	6.2297	4.129	3.031	1.76969	4.5235		0.625001	3.74982
16.2032	2.8136	3.5489	1.8771	1.8723	1.8143	1.6271	2.5422	6.786	3.685	1.6917	5.376	4.1123	4.1793	4.3712	3.8353	2.8192	3.8361	1.90042	3.1584	4.9411	5.1181	3.39986	2.2577	4.18249	2.16414		0.629629	3.35639
16.3224	3.0393	4.7503	3.4496	1.7872	2.2182	3.6405	2.1087	8.3158	5.1226	1.6663	3.1743	4.8997	4.1462	2.2828	1.9715	5.5194	6.221	1.70166	2.0665	2.6853	3.2245	4.30441	3.2342	3.24464	4.01222		0.634261	3.55147
16.4415	2.4941	1.8145	3.4672	1.5394	1.946	3.2685	4.7907	7.4654	2.4577	2.8953	5.3037	3.1788	7.3868	2.4695	2.7643	3.5968	5.1694	2.14382	1.8651	2.4841	6.7807	4.13054	2.9661	2.09356	5.95304		0.638889	3.617
16.5606	4.5368	2.6526	2.4091	1.4691	4.063	4.2549	4.5129	8.191	2.2591	4.6994	4.7451	3.4301	4.7392	2.7998	2.9644	2.7187	5.4903	4.20736	1.9558	3.8421	4.4987	2.55377	3.5913	2.10981	1.9107		0.643517	3.6242
16.6798	1.8183	2.1996	1.8124	1.6293	2.3539	3.4064	2.8554	6.0253	2.5935	5.182	4.4233	3.5844	3.6932	3.564	2.4049	7.2835	6.3741	7.34047	2.3971	5.3886	4.2489	5.16222	3.0762	2.68032	4.85491		0.648149	3.85409
16.7989	1.8834	3.9475	3.5664	2.4294	1.7735	2.8086	4.0007	4.5503	3.3531	2.3574	3.9477	3.7678	4.5058	2.5646	2.8049	4.7758	5.2883	2.15174	1.6854	5.0398	2.502	3.71308	3.2256	1.84235	5.92286		0.652777	3.37632
16.9181	1.5751	2.7088	2.4262	1.5456	1.941	3.1132	4.3141	5.113	3.6162	2.2329	1.9793	2.4035	4.2705	1.6957	3.6699	5.1046	2.4546	1.92843	1.5928	5.3643	3.4435	3.18962	2.9185	2.03219	6.17596		0.657409	3.07238
17.0372	2.4518	4.6283	1.5232	1.8083	2.0228	3.8662	5.4358	2.5969	2.006	3.2797	4.8865	3.5704	2.323	1.5639	3.5786	3.3495	2.2626	1.50665	2.0221	7.0789	4.9159	5.17619	2.5979	2.07674	5.53192		0.662037	3.28239
17.1563	3.8969	2.7339	2.3612	2.1553	2.8352	4.0659	3.3985	3.6212	4.4607	2.3391	4.0646	4.3479	5.2105	1.5715	2.4131	4.777	5.1223	2.26492	1.4771	4.9233	4.8533	4.72956	1.6872	3.65111	3.37639		0.666665	3.45351
17.2755	3.1732	2.4315	2.0779	2.2419	2.8372	2.4779	3.6524	2.8486	2.5588	2.1544	3.7343	3.9156	5.0097	1.5979	1.8648	10.7704	3.5812	3.00512	3.6142	2.6722	3.8558	4.71372	2.6779	3.1437	2.1561		0.671297	3.31066
17.3946	3.7214	3.7263	3.7895	2.2253	3.5242	4.1106	5.0478	1.8702	3.6697	2.2592	4.5506	4.0663	4.1209	3.2099	2.3648	4.5401	2.5084	1.69027	4.1804	2.9237	4.3935	4.29342	3.0671	2.24097	2.62126		0.675925	3.38863
17.5138	4.354	2.4587	2.2123	1.7918	3.921	3.9175	2.4793	2.2467	3.8444	1.8096	3.0325	4.556	4.1468	4.1294	2.0982	5.4963	3.1474	2.24692	1.6553	4.4826	3.5101	4.30208	1.8355	2.88897	4.60561		0.680557	3.24676
17.6329	1.8677	1.7165	4.4129	2.484	3.3858	5.0971	3.1116	3.3735	3.136	1.7436	2.7599	3.2539	6.386	2.863	3.2688	5.114	3.0496	1.57014	2.4339	3.2105	4.1374	2.7368	2.6309	1.93771	2.99326		0.685185	3.14698
17.7521	3.5785	4.9687	1.9081	1.5052	1.7948	2.262	2.4078	3.1163	2.395	2.2335	5.4798	4.7623	4.0288	1.5874	2.3056	4.3069	5.4661	3.32158	2.9386	5.6158	7.0481	1.80355	2.5995	1.92004	3.06148		0.689817	3.29662
17.8712	3.0128	4.6367	2.0067	2.5853	1.9805	3.7829	7.4864	1.7984	2.7477	3.3004	4.4791	2.8208	1.8897	2.0446	4.3221	3.2951	3.9172	2.42877	2.9598	5.4489	3.4678	3.26078	2.1871	3.08203	2.18902		0.694445	3.24522
17.9903	2.3757	2.804	1.5728	2.3039	1.5534	2.8197	3.118	2.1063	2.3675	2.6906	4.7785	3.5286	2.3628	1.6782	1.8272	3.8772	2.5537	3.95846	2.2144	4.9277	3.3206	3.62845	3.3267	4.05087	3.37542		0.699073	2.92483
18.1095	4.208	5.4051	2.2308	2.2051	1.7138	3.1111	4.0042	1.7867	3.0509	2.8527	2.3631	4.0069	3.7295	2.6007	2.6657	5.918	8.7237	2.22023	3.1736	4.6292	2.93	6.73689	1.6088	2.17389	2.83705		0.703705	3.47543
18.2286	3.5741	3.0852	6.3045	4.1952	2.4849	3.9364	3.4288	2.6005	1.6076	3.7396	3.1917	4.2334	3.1933	2.1325	1.8186	4.8306	5.4275	1.95261	2.2311	5.1462	4.2566	3.57692	1.8765	3.22959	1.84887		0.708333	3.35611
18.3478	3.11	3.7189	2.011	1.5001	1.7422	4.6648	4.0392	2.2621	1.4986	2.1241	2.8681	2.5766	3.3579	1.4409	5.1659	4.385	4.4483	2.68935	2.4507	8.3761	6.8493	5.77505	2.2826	3.34808	3.9511		0.712965	3.46544
18.4669	3.4934	2.4649	4.5153	1.7701	2.0471	3.3994	5.9845	4.0645	1.7993	3.9957	5.6387	5.2291	2.289	6.363	2.7973	4.0226	7.3138	2.76172	2.7008	2.7105	6.1949	5.62357	3.5373	1.88842	2.94095		0.717593	3.82183
18.586	3.0973	2.5329	2.6588	2.3689	1.6519	3.451	2.5972	4.1415	2.6849	2.4206	6.0495	2.4152	2.2488	2.6372	2.2987	6.9936	3.9086	3.95415	1.4217	3.3623	3.9623	8.47891	3.0019	3.08639	5.33095		0.722221	3.47021
18.7052	2.3956	4.3685	2.1358	2.7563	2.6135	2.5069	1.661	2.1391	4.7121	3.2988	5.5806	7.8982	3.0167	1.6135	2.8919	3.6414	3.4103	2.24087	1.4716	4.862	3.9006	4.59287	3.2545	2.50893	2.78576		0.726853	3.29029
18.8243	2.6631	4.3032	2.7294	2.5263	3.1156	2.5569	5.3149	1.765	1.769	7.5759	5.2546	6.5653	4.2814	1.5517	1.8988	3.0488	3.6919	2.35268	2.1803	4.0429	3.4517	4.14213	4.6105	2.90835	4.75777		0.731481	3.56233
18.9435	3.3608	1.7637	2.2977	2.4003	2.0948	2.0612	3.877	3.2815	2.3821	2.8542	3.5609	1.6895	2.9691	2.1033	2.6989	2.4833	4.3349	4.11529	2.511	7.1527	4.6663	5.12819	3.5831	2.23259	4.4646		0.736113	3.20268
19.0626	1.5831	1.5165	3.0337	2.9895	1.6343	3.2946	6.5113	2.8718	2.2047	4.8137	2.7354	2.769	3.9306	2.3972	2.7299	3.4453	5.0445	3.6337	1.4477	4.2468	4.7276	6.45093	5.5613	4.13392	4.38308		0.740741	3.52361
19.1817	2.0232	1.4645	2.2708	2.1006	1.6561	1.991	3.8338	1.5542	3.1845	4.4124	4.3439	4.3995	2.6343	1.8628	2.6689	3.1786	2.409	3.46971	4.5382	3.9527	4.5823	5.81629	3.1629	2.67234	2.54305		0.745369	3.06902
19.3009	2.7015	2.7975	2.6827	1.5963	1.7001	1.4218	4.643	1.8313	2.8473	4.1325	2.7762	4.2445	6.7836	3.3955	2.6571	3.301	2.6719	2.27378	3.9654	3.2109	2.0906	3.95314	2.9593	2.10809	5.16914		0.750001	3.11657
19.42	2.5403	3.1769	1.6836	2.0532	3.2149	1.6393	5.1017	3.5453	2.3536	2.3078	2.0262	2.8564	3.4232	1.6314	2.3875	3.932	2.5451	2.14873	1.584	2.7916	5.6224	3.29704	3.3871	1.89044	3.58066		0.754629	2.82881
19.5392	2.955	1.6859	2.8353	1.618	1.7046	3.6525	5.4891	1.6981	2.2939	6.027	3.1524	2.1476	3.7549	1.7949	4.9128	2.7944	6.0913	4.73402	2.5803	6.3662	6.0652	5.4287	2.7459	3.6971	4.57209		0.759261	3.63189
19.6583	2.9945	3.8731	1.6904	4.0201	2.6205	2.608	3.299	3.7828	2.973	2.1817	1.5474	2.3059	3.8014	2.241	3.071	2.9001	4.9325	4.52242	3.4024	3.1988	4.3362	4.45444	3.0736	3.786	5.83615		0.763889	3.3381
19.7775	2.2171	1.6506	2.7587	2.9666	2.0483	2.8712	4.3245	5.6019	2.8815	4.863	2.5044	1.5273	4.6476	1.7755	2.0364	5.3314	3.1744	6.9333	3.55	3.3922	2.4496	3.34632	6.2208	2.87381	4.99158		0.768521	3.47752
19.8966	2.7437	1.7757	1.5421	2.1445	3.0002	4.7498	5.0968	4.4796	4.242	3.1411	3.2191	3.8894	2.0317	1.5551	3.5947	2.7664	6.4594	3.1426	4.707	2.0592	4.6027	4.18329	4.1901	2.04305	4.02944		0.773149	3.41555
20.0157	3.789	2.5878	1.8432	2.2025	2.7795	4.1592	6.8743	2.4486	2.1466	2.5121	5.5045	1.6764	2.0144	2.1451	3.7166	2.9518	4.6754	4.32132	3.187	1.341	7.7989	3.14293	5.408	4.4284	3.01614		0.777777	3.46683
20.1349	1.979	1.6734	2.6644	2.8101	1.9175	1.9432	3.4359	2.8844	2.5798	4.8079	3.998	3.3089	3.2316	1.7575	3.8004	5.8894	3.9496	3.66613	2.7737	3.3713	4.8044	5.3977	6.5789	5.73683	6.25285		0.782409	3.64851
20.254	4.6144	2.2989	2.1316	1.6203	1.6239	3.0778	2.6898	1.7091	3.8409	3.4945	2.6028	4.4518	1.8287	2.3957	1.9573	2.548	4.6276	2.35195	1.6259	2.9306	3.7844	5.15573	2.6364	2.7192	3.06909		0.787037	2.87145
20.3732	3.0351	4.2695	2.0033	2.0735	2.7066	1.6481	1.7895	1.5885	4.4099	2.1791	2.1964	3.0653	2.3322	3.7858	3.0869	2.029	3.769	3.3077	3.3109	5.1676	4.7773	3.92817	7.5007	5.27756	4.27813		0.791669	3.34063
20.4923	1.957	2.9711	3.0503	1.5574	1.8493	3.9227	3.799	3.223	2.4847	4.6628	2.625	4.3403	2.3462	2.23	3.3548	2.2373	4.8811	3.04982	3.1129	6.2662	3.1551	3.9433	5.4652	3.58792	4.94182		0.796297	3.40057
20.6114	3.3794	1.7625	2.002	1.6446	4.1126	3.6814	3.1363	3.1657	1.4942	4.4473	3.0306	4.3372	1.8595	2.4737	2.9723	2.2366	6.1961	3.92208	1.8016	2.3384	3.4118	6.01083	3.4458	2.93033	9.0322		0.800925	3.393
20.7306	3.192	2.3405	1.9642	3.052	2.7682	2.9276	2.3786	3.7861	3.4058	4.5406	2.6241	5.4256	3.0033	4.4713	2.0747	2.1906	2.7683	5.05529	3.3424	3.1295	4.6256	4.89461	3.8134	8.60045	4.61393		0.805557	3.63955
20.8497	3.0267	2.3186	2.384	1.83	2.5162	3.6981	2.1483	3.2931	2.5041	2.9748	2.2383	4.6756	2.7338	1.7671	2.4341	3.8551	2.5863	7.11782	3.8313	4.5771	2.6723	1.69376	5.2837	3.32025	4.16888		0.810185	3.18597
20.9689	2.035	2.3594	1.5856	2.2949	1.8311	1.8465	1.995	4.6599	1.6823	3.0044	2.3757	5.6422	3.3452	2.592	2.2711	5.2253	4.4981	3.58666	2.9986	4.7592	2.067	5.09317	6.0894	5.34463	4.16648		0.814817	3.33395
21.088	2.6947	3.2255	2.5284	1.4844	2.9766	2.4089	2.1613	3.1575	3.0968	4.7941	2.2158	9.1407	2.5398	3.689	4.3141	3.5631	3.9066	3.34431	5.0213	3.4908	4.185	4.6698	3.8205	7.81771	4.25537		0.819445	3.78008
21.2071	3.2749	5.0684	2.7928	1.8149	2.0271	3.7186	3.4556	2.3182	2.3882	4.6964	5.5942	10.1097	4.0911	3.8954	2.7995	2.2581	3.8794	2.49536	3.5547	2.9526	2.1325	5.55472	4.0037	5.86272	2.4834		0.824073	3.72889
21.3263	2.0477	2.404	1.7629	3.1226	2.627	3.8427	3.3651	3.3715	2.1903	3.5221	3.1502	8.0963	3.2841	1.6928	3.2599	5.6874	6.387	4.30062	5.0082	2.4007	5.758	4.48817	5	3.47474	3.32414		0.828705	3.74273
21.4454	1.7921	2.4444	3.0855	4.0873	4.4513	2.5341	2.3201	4.245	2.6873	4.0594	4.6464	7.0863	2.6511	2.7603	1.9119	5.1231	4.8306	6.41123	6.454	1.978	4.1492	3.33891	3.8884	2.98281	2.76858		0.833333	3.70749
21.5646	2.2358	2.7414	2.4096	3.3311	1.8801	3.8406	3.0685	3.4342	3.3684	4.892	2.6381	7.028	2.4898	3.4048	2.9495	5.7267	7.5964	4.75853	4.7903	4.1335	2.3523	2.79168	3.6802	3.48739	3.5703		0.837965	3.70397
21.6837	3.4213	2.7765	1.8457	2.4687	3.4304	5.6092	2.4613	4.3741	4.2189	2.2132	2.9384	7.0329	3.0138	4.1918	2.5545	2.9878	2.4506	6.56138	4.7375	3.8717	2.228	5.49414	6.7174	1.78179	2.1624		0.842593	3.66174
21.8029	2.9887	3.7466	1.8263	2.4819	2.6997	2.9568	3.6322	1.8224	3.1755	3.4067	3.5924	6.1888	3.3802	4.3691	2.882	3.0092	7.828	2.98251	2.3601	2.0803	4.1645	6.11184	2.7489	3.43379	2.6597		0.847225	3.46113
21.922	5.0696	2.9872	3.0016	3.6169	1.7339	3.0227	1.7425	4.3467	1.6806	3.5842	3.6861	7.9301	3.3982	3.9335	1.9093	3.3842	3.8875	4.61001	4.2646	5.2824	6.1119	4.72866	3.0058	4.44062	2.50125		0.851853	3.7544
22.0411	1.8526	3.666	4.7437	1.6343	1.9631	3.7438	2.952	2.2993	2.8185	3.3383	1.8711	6.6369	5.5642	1.6885	1.634	5.4906	4.6698	3.5804	5.3897	4.3909	3.1319	2.99965	3.2265	2.15227	1.84868		0.856481	3.33147
22.1603	3.2042	4.394	2.2264	1.6496	4.7564	2.7169	2.2081	3.1908	2.9437	3.5897	4.1988	4.3145	2.8629	1.9656	1.6047	4.8263	4.1993	3.91891	5.0857	4.5405	2.9881	4.29645	2.3101	2.63685	3.19741		0.861113	3.35304
22.2794	1.7407	3.3535	2.3567	2.9842	4.005	2.6081	1.8103	2.3632	4.9674	1.7001	6.2539	3.0176	3.7025	1.5718	5.3187	2.6248	4.3065	4.19627	3.7643	6.411	2.5198	5.52641	3.0009	1.86025	2.02018		0.865741	3.35936
22.3986	4.4121	2.5188	2.1297	3.8961	2.5407	3.3571	3.495	3.3577	2.0146	2.9209	6.8172	6.4003	4.366	1.7893	1.9002	5.0141	2.2537	4.04664	4.5284	8.6687	3.1751	2.83045	2.9768	1.60133	3.4514		0.870372	3.61849
22.5177	6.2579	2.2402	3.1352	1.7161	3.3257	1.9187	5.7115	3.2193	2.6517	2.8613	3.1186	3.4514	4.0246	3.1788	1.9502	4.2686	2.8613	4.97458	7.034	7.3698	4.7112	2.0823	3.9511	3.28048	2.14639		0.875	3.65764
22.6368	4.2135	3.0631	1.6771	1.6029	3.4593	4.3918	3.3102	2.3879	2.731	6.116	4.5334	5.5451	4.7249	1.9886	2.7048	3.5301	1.9169	3.89848	4.5765	4.622	5.7188	4.96886	3.5954	3.29893	1.65518		0.879629	3.60923
22.756	1.904	2.2504	2.8288	1.8403	1.7568	4.5339	3.1488	3.2929	2.4233	4.8357	3.8343	6.9587	2.9369	3.4149	3.1448	3.0948	4.7332	4.899	2.7028	6.8545	2.6472	4.52596	1.829	2.17894	1.56636		0.88426	3.36545
22.8751	4.821	3.9711	3.1799	4.6731	3.221	4.6531	4.0262	2.3919	3.9314	1.7665	1.8384	6.7606	3.1616	2.1703	4.2665	2.2902	6.9337	4.44454	4.481	5.3809	3.5504	4.45161	1.7201	1.60866	1.7458		0.888888	3.65758
22.9943	4.1084	4.8829	4.1213	2.4102	3.6524	2.2777	2.7352	4.1033	2.9792	2.6125	2.6751	3.3948	4.871	2.5669	3.9997	3.5924	3.9482	3.89469	4.1722	4.133	2.1407	2.86911	1.6129	1.6707	1.81872		0.89352	3.24973
23.1134	3.6927	3.2075	2.2465	3.5557	3.2139	1.8687	6.5908	2.2343	2.5533	2.1374	3.3294	5.7447	3.6877	2.1713	3.215	3.0699	3.0707	3.46074	6.3388	2.5973	2.1287	3.08117	2.2888	1.58949	1.53186		0.898148	3.14425
23.2325	2.8809	2.8477	3.4236	3.3374	2.8442	2.2388	4.7327	3.024	1.5752	3.1572	2.9888	5.8004	4.0227	2.7399	3.4076	5.2677	3.0903	5.01705	4.037	1.9536	2.2187	1.86732	2.6587	2.31971	2.24566		0.902776	3.18787
23.3517	4.9699	2.1392	1.9067	4.4469	2.5076	1.4407	3.3912	2.2604	2.7747	2.5727	2.9152	7.3344	2.6495	2.7031	2.1764	7.6717	3.5387	4.00237	2.2829	2.8234	2.9825	2.41881	2.2526	2.54019	1.54012		0.907408	3.12968
23.4708	2.6921	1.6657	2.7246	3.1311	3.5143	1.9537	2.9065	4.5486	4.4366	2.7561	2.4229	2.9032	4.7222	3.5478	2.9055	3.3079	2.8272	6.88886	4.3415	4.8237	2.4624	3.2977	2.8486	2.04934	1.36052		0.912036	3.24154
23.59	2.1044	2.5198	2.3142	2.8735	2.8535	5.9497	2.7506	2.4243	2.599	3.3419	3.1955	5.2105	3.0805	1.9217	3.9505	3.2266	6.052	6.00285	3.2546	2.4097	1.6704	2.6337	1.4257	2.37237	2.2631		0.916668	3.13602
23.7091	3.5689	2.6243	3.2138	2.8074	1.8318	2.5952	3.3822	2.7388	2.8515	2.6988	3.5655	4.4176	3.7632	2.9551	2.9489	4.587	3.2117	3.58737	4.4531	1.9349	1.7168	3.86224	1.7251	2.55443	2.4824		0.921296	3.04312
23.8283	3.1313	2.648	4.5557	3.8686	2.4238	3.9442	1.7656	3.354	2.588	4.5553	3.7167	4.3306	2.4545	3.0973	2.9517	5.5895	2.3775	2.92879	4.7117	1.971	1.3116	4.43001	4.1518	2.97377	1.92368		0.925928	3.27019
23.9474	4.4846	3.7503	3.146	2.4533	3.4308	2.482	3.0576	2.7176	1.7233	1.9512	3.8053	2.8184	5.1014	3.9739	4.7673	3.2265	6.7048	6.86776	3.3168	1.5844	1.5058	3.83299	1.5821	1.54046	1.67601		0.930556	3.26002
24.0665	4.8857	4.5572	2.4469	2.5237	2.1348	4.9199	1.7846	1.8978	2.33	4.1525	3.2389	9.5931	5.2927	2.866	3.6861	1.8715	4.6289	4.06195	3.9515	1.7657	2.602	1.87332	1.773	1.50963	2.43279		0.935184	3.31121
24.1857	2.6187	3.5408	2.7194	2.4455	1.8997	3.7465	3.2416	2.9745	2.5314	2.0838	3.6157	6.8592	4.086	3.0514	4.2682	7.6908	2.3444	4.56803	2.5288	3.7788	2.5199	5.30657	3.3249	2.6147	3.49378		0.939816	3.51412
24.3048	5.2009	1.8274	2.9245	2.6401	2.6495	3.8165	3.9651	3.6178	2.648	1.7016	2.4992	2.7153	4.8409	3.5081	2.9527	4.643	6.0252	3.10324	2.06	2.0662	1.5489	2.92527	2.9595	2.52638	1.83456		0.944444	3.08799
24.424	6.2502	3.4412	4.6324	3.2663	3.2731	3.6511	4.3566	2.6011	3.0563	3.1334	1.8741	5.7433	4.0443	2.6906	3.1111	13.5932	6.609	5.44724	2.0701	2.71	1.5662	1.70288	1.6444	1.58686	1.71019		0.949076	3.75061
24.5431	2.4605	2.511	3.8779	2.4965	2.6393	2.7614	3.3085	3.4104	2.711	2.4409	3.6693	5.8298	3.1564	4.8329	4.214	16.8982	7.9271	3.17744	2.6469	1.5276	1.536	1.67235	2.1873	2.32934	2.65163		0.953704	3.71495
24.6622	2.742	2.2024	2.7771	4.9584	1.7392	2.3372	1.7705	3.9513	4.4421	1.6111	3.1319	8.7122	3.3407	5.5729	5.9376	26.4071	3.9375	2.37389	1.8324	1.6912	1.5327	1.65217	1.5874	2.15246	2.79848		0.958332	4.04768
24.7814	2.0302	2.7979	4.4437	4.0108	2.3115	4.2342	3.1204	2.7798	2.918	2.1438	4.271	7.9801	5.8433	5.7658	3.6461	16.6289	5.674	3.98329	1.4499	2.0298	1.3098	1.63702	1.8664	2.90793	2.21621		0.962964	3.91999
24.9005	2.2887	3.4947	5.2384	3.5459	2.8084	3.0879	3.4506	1.8626	3.4911	2.2664	7.8471	6.6044	3.8005	4.3723	3.6451	20.7743	3.9374	4.08564	3.1422	1.674	1.4701	2.67275	1.7199	2.6757	1.85897		0.967592	4.0726
25.0197	2.1581	2.3905	2.2306	4.7123	5.5876	4.5633	2.7615	4.6046	3.3056	3.5902	4.3075	6.1106	3.6701	6.2386	3.546	14.6742	4.7961	2.58577	4.0054	2.6689	1.9855	1.44825	1.5154	1.65468	2.98173		0.972224	3.92372
25.1388	1.685	4.5843	3.5033	4.3046	6.7164	1.7808	3.0313	4.4787	2.1313	5.5699	3.9909	4.4416	4.1393	4.1816	3.2678	10.8212	6.8423	2.61244	2.3338	1.8643	1.6382	1.52948	1.5418	1.61678	1.82323		0.976852	3.61721
25.258	2.5691	2.9736	2.7176	2.3461	3.7853	2.474	2.1087	2.6934	1.8095	5.4168	5.6552	5.1728	3.3094	5.2827	3.2683	10.0521	3.599	1.70356	1.6909	1.6111	2.8111	2.44844	3.1268	2.79927	2.51536		0.981484	3.35761
25.3771	3.7558	2.7308	3.2292	1.8414	4.1022	2.2055	2.8034	3.1338	2.2185	2.7462	3.5431	4.0385	2.3335	4.7672	3.6865	6.8086	3.744	2.01241	1.5437	1.5863	2.2856	1.50677	1.5742	1.82495	1.57084		0.986112	2.86372
25.4962	2.2626	1.9785	3.4234	2.0962	8.1994	3.4418	1.8243	4.35	4.5855	3.0392	4.6331	4.7047	2.7893	4.0138	2.7045	3.7764	4.0539	3.4334	1.5633	2.0441	1.6771	1.60099	1.6019	1.65821	2.00553		0.99074	3.09845
25.6154	1.6682	2.7086	4.6041	2.3082	4.5402	3.2576	1.8841	4.0587	2.037	4.6099	4.9963	5.6458	4.2305	3.2211	3.1015	2.357	4.403	1.64436	2.6483	1.6647	1.5091	1.45764	3.1861	1.86926	2.41337		0.995372	3.04099
25.7345	1.5164	3.3532	2.1554	1.7828	4.4267	3.306	4.7436	3.5947	2.4818	5.9198	3.9186	4.0438	6.1527	3.2001	2.4229	3.2018	2.5506	2.41981	2.7718	1.8416	1.8982	2.12871	1.6542	1.68091	2.1483		1	3.01258

## Sheet: Image13
X0	Y0	Y1	Y2	Y3	Y4	Y5	Y6	Y7	Y8	Y9	Y10	Y11	Y12	Y13	Y14	Y15	Y16	Y17	Y18	Y19	Y20	Y21	Y22	Y23	Y24		Ap-Basal	Avg intensity
0	1.97773	1.4887	2.03736	2.32281	3.19287	2.37392	2.84838	1.93559	2.02503	1.53175	1.49673	2.15698	3.19198	1.58952	2.68929	2.70422	1.834	1.46617	1.95325	1.51295	1.64755	3.00094	1.69452	1.69978	2.40322		0	2.11101
0.1191	1.72889	1.38989	3.09573	2.06531	3.45129	3.0409	3.06307	1.45584	1.36468	1.41639	1.89641	1.74589	1.5998	1.80064	4.50782	1.70865	2.02534	1.84914	2.18028	2.11903	1.59722	3.21781	3.0641	1.91046	2.19862		0.00517954	2.21973
0.2383	3.1755	1.32972	2.36541	2.38516	1.41194	1.92871	2.06173	1.63442	1.41617	1.55388	1.77862	2.33855	2.27261	1.8829	3.26494	1.59036	1.47513	3.00408	2.44524	2.70527	2.52457	3.03699	2.66498	2.63893	4.98901		0.0103634	2.31499
0.3574	1.93015	2.0028	2.28871	2.13952	1.98563	3.63021	1.88154	2.16827	1.50558	1.35334	1.84895	1.69076	2.05899	2.16482	4.05664	2.19205	1.6999	1.62113	1.9685	2.74959	2.80339	2.59089	1.71424	2.8954	3.61884		0.015543	2.26239
0.4766	2.4182	1.89347	2.785	2.86082	1.61546	2.78006	2.02165	2.3581	1.50696	1.39728	2.3878	3.00389	4.02141	2.46238	2.44068	1.61673	1.61253	1.50086	1.67878	2.48213	2.52734	4.03489	2.7316	3.98496	1.64091		0.0207269	2.39056
0.5957	1.46018	1.69546	1.66478	2.27059	1.99917	2.30985	1.48434	1.40271	2.77503	1.54034	2.31893	2.68353	3.96647	1.98669	1.64044	2.77398	1.54617	1.52952	1.75554	2.03343	2.73211	2.10678	4.58799	2.95286	2.70574		0.0259064	2.23691
0.7148	2.05668	3.35823	2.40015	1.80812	3.0131	2.96725	1.95302	2.13672	3.10022	1.61687	1.97227	1.92742	2.34254	2.52692	2.64236	3.85732	2.09002	2.70585	2.05919	2.95686	2.32671	2.4878	2.51872	2.01578	3.00633		0.031086	2.47386
0.834	1.76281	2.00144	4.11917	2.26636	3.30877	3.84107	2.06001	2.79436	2.18713	2.05101	1.63548	1.77337	1.93488	4.73734	4.575	4.07832	1.8649	2.96606	2.2212	2.93034	1.80288	2.09429	2.90018	1.98792	3.83168		0.0362699	2.70904
0.9531	2.98356	3.02694	2.50523	2.46101	2.74343	1.78763	3.58778	2.9264	1.76968	1.54323	1.72359	2.03315	1.49878	3.27225	2.5632	2.54208	1.54553	3.87268	2.93121	2.10459	2.42774	3.60414	3.18471	2.05735	1.82639		0.0414494	2.50089
1.0723	2.12174	3.22824	3.59686	3.80361	2.89416	2.23894	2.36633	2.52012	2.01141	1.86883	1.52821	1.94759	1.47165	4.04264	3.21991	1.87052	1.40512	2.75712	3.03569	1.55449	2.03173	2.47797	2.71493	2.27456	1.65879		0.0466333	2.42565
1.1914	2.65644	2.67718	3.94536	4.00924	4.06804	2.26448	3.2696	2.65226	2.11196	2.50135	1.57868	1.83961	3.89008	5.37337	4.46728	3.77365	1.51381	2.58559	1.87091	3.35063	2.25561	2.57157	3.36843	2.6036	2.01241		0.0518128	2.92845
1.3106	1.54282	3.21347	5.59666	2.47463	2.37891	3.71549	3.30997	1.5744	3.14619	2.15527	1.92499	1.91021	2.2309	3.6546	2.52612	5.88871	1.77947	2.99421	2.83111	2.06266	2.11364	1.84614	3.42167	1.88581	3.20472		0.0569967	2.77531
1.4297	1.95135	3.41366	4.23428	3.6043	1.61453	3.4118	3.10832	1.74706	1.78564	2.36944	2.07323	2.1288	1.86977	1.8298	3.60323	5.79036	2.54412	2.43412	2.36858	1.50967	3.01831	2.50508	2.88041	3.31303	3.02703		0.0621763	2.72544
1.5488	2.07747	3.63375	2.90546	4.48241	2.56851	2.1912	2.86299	1.65401	2.48436	2.07664	1.97844	1.52696	2.49133	4.29661	3.41493	4.01106	2.18156	2.07725	1.94906	2.01321	2.52676	3.09565	3.45773	2.87173	2.68553		0.0673558	2.70058
1.668	2.47577	2.49842	4.76434	3.90516	3.75163	2.72168	3.03703	2.41935	2.33099	1.79452	1.70037	2.51506	3.79921	3.50301	1.91575	5.77426	2.35793	3.27094	2.21207	3.09514	2.84606	3.28243	2.53866	5.89374	3.58443		0.0725397	3.11952
1.7871	2.61462	3.43545	4.07805	3.68927	3.58755	2.22014	2.70801	2.50041	2.70708	1.59804	1.36208	2.9053	2.91641	4.46931	4.09426	3.52878	3.31553	2.13347	2.59679	2.03892	2.46035	2.35942	4.55538	3.31664	2.70947		0.0777193	2.95603
1.9063	4.08905	2.91078	4.15502	3.55267	2.24446	2.4791	3.84461	3.35966	2.63779	1.61646	1.41668	3.58829	2.64824	5.83679	5.52312	3.63674	1.89118	1.95461	2.95117	2.82001	3.10604	2.31397	4.5034	2.28531	1.74874		0.0829032	3.08456
2.0254	4.33485	2.7728	2.93932	3.6196	2.55274	5.28334	6.23541	2.51124	2.95245	1.53769	1.72563	2.4786	3.24512	5.84643	4.02191	3.98406	1.84195	3.71413	2.29239	1.94807	1.68347	2.78618	2.806	2.3965	2.68894		0.0880827	3.12795
2.1445	2.88672	4.01749	2.34496	2.33284	3.01256	3.67309	7.97921	3.59257	2.11584	1.59894	1.52113	1.6956	5.1932	4.90122	3.68524	2.72365	2.12457	3.67286	1.8246	2.01143	2.11802	3.59655	3.8795	3.04813	4.68348		0.0932622	3.20934
2.2637	4.36142	4.40119	2.93421	2.60886	3.85357	3.7433	6.23097	2.4027	1.68805	2.15451	1.6823	2.30642	2.57844	4.56462	3.02434	2.19204	3.1171	2.96213	1.65279	2.20375	2.33723	5.66921	3.85705	3.95933	3.98729		0.0984461	3.21891
2.3828	5.16171	6.1869	4.60381	3.976	1.6912	4.19379	4.6313	1.87231	2.10003	2.0509	1.79731	1.88624	2.97702	6.21251	5.42344	2.59207	1.5903	4.04284	2.2653	1.66458	1.4633	2.04355	3.13905	3.65657	3.10552		0.103626	3.2131
2.502	2.94747	4.04128	3.47446	2.60449	1.717	3.39838	5.20468	3.74277	1.965	1.73711	2.19824	1.59511	3.13966	3.76875	6.42544	3.28025	1.72371	3.93973	2.14511	2.46076	1.48989	3.7466	5.42827	3.56	3.55871		0.10881	3.17171
2.6211	3.61938	3.01816	2.86921	2.92156	3.6768	2.70944	5.24539	4.80668	2.54028	4.52514	1.62058	3.06433	3.36502	5.97675	5.02717	2.43919	3.99796	2.5696	1.68976	1.86291	1.92852	3.03021	2.73854	2.87182	4.96942		0.113989	3.32335
2.7402	4.86434	3.98471	3.82275	2.57519	2.58618	4.32782	2.57003	3.46704	3.58422	2.1605	2.25424	2.83326	3.79378	4.80023	5.41313	1.94253	3.04461	1.95438	2.31952	1.64504	1.75763	1.96924	2.19779	3.04998	4.33611		0.119169	3.09017
2.8594	2.76119	3.80188	5.53489	2.89035	3.13982	4.50452	1.82515	3.34941	2.47849	2.62843	2.72261	4.43035	2.40921	3.53535	3.29666	2.29616	2.82399	2.71237	3.0205	3.18118	2.06647	4.20284	3.11931	2.1807	4.43203		0.124353	3.17375
2.9785	3.67576	7.67234	4.01651	4.28518	3.8468	3.16688	1.96617	3.09944	4.61143	2.2658	2.72607	2.7826	2.31842	4.04483	2.72416	4.20915	2.88667	1.54704	2.56963	2.10731	2.50941	6.19496	5.20372	2.56711	4.02092		0.129532	3.48073
3.0977	3.75797	4.46446	2.49557	3.90579	1.99204	3.41238	3.7837	2.16329	3.65253	3.07137	2.7699	3.33247	3.5462	4.83636	3.65002	3.87808	3.17082	4.32529	2.19166	2.30348	2.22326	5.16475	3.99687	4.00522	4.28939		0.134716	3.45531
3.2168	4.79638	3.9528	2.53816	2.62369	2.42587	4.87663	2.47274	3.00548	4.15773	2.18055	3.67328	3.11309	3.01762	2.46948	5.08066	3.79829	3.10667	3.59682	2.24825	1.52734	2.39139	3.82565	3.47179	4.86182	4.16268		0.139896	3.33499
3.336	4.60995	4.77556	5.00603	2.91325	3.76643	3.29473	1.77631	2.54749	2.37507	3.88467	2.83045	1.88444	4.32141	2.28138	5.20631	2.88576	1.99578	3.9461	4.00147	1.58175	4.28224	2.98763	2.50176	2.49888	3.52367		0.145079	3.26714
3.4551	2.06504	2.78621	3.60211	1.85122	3.3324	2.49995	4.53172	5.04736	2.13242	2.38175	2.25733	2.88824	2.86842	1.87555	6.07772	1.97917	3.07053	2.53453	3.71942	1.49472	2.05896	3.57309	3.32063	3.19632	2.68365		0.150259	2.95314
3.5742	3.26501	2.72589	2.57117	3.13945	2.73446	1.68231	2.0914	2.61067	2.91823	4.10029	2.62365	3.92402	2.27935	2.83048	5.67641	2.98131	1.72818	3.18829	3.86475	1.75625	1.98142	1.66643	4.48852	2.11223	2.45562		0.155439	2.85583
3.6934	2.90593	2.57188	4.66912	1.3959	3.02328	1.93206	3.86677	2.35278	3.8543	3.33566	3.41379	2.53381	4.65038	3.00257	2.05418	3.04189	2.70493	3.57704	3.39784	1.78137	3.5602	1.54171	3.3879	1.55185	3.69026		0.160622	2.9519
3.8125	2.70379	3.20584	5.41937	1.94836	2.04957	3.31196	4.17977	2.76547	2.3355	2.24136	4.60377	2.66625	3.33604	2.9741	3.94548	2.15175	3.13776	2.92777	3.54137	2.22669	2.33426	2.56621	4.64887	2.36161	2.12281		0.165802	3.02823
3.9317	2.48092	4.55998	2.52617	1.92501	1.52924	3.13386	2.54118	2.76083	2.58559	2.12339	3.56959	1.91395	3.47354	3.48325	6.73769	3.22727	2.35621	2.93657	4.77775	3.05048	3.0689	3.75492	3.92893	3.07847	2.69638		0.170986	3.1288
4.0508	2.56335	2.678	2.11699	2.61045	2.64048	5.88038	2.71093	2.17629	5.30536	2.48957	3.72204	3.22412	3.54653	4.75155	4.55204	3.27555	2.70935	2.33301	5.99098	2.26262	3.01684	4.32954	3.65332	5.19984	2.03062		0.176165	3.43079
4.1699	2.86816	4.51125	1.98197	1.69719	1.76948	2.873	3.50617	2.97487	4.24064	2.41312	2.91518	3.01513	2.84124	3.87802	3.69156	3.50741	3.74953	2.30153	3.65116	1.46605	3.43028	5.98198	4.35102	2.83901	3.55481		0.181345	3.20039
4.2891	3.06598	3.99402	2.22037	2.13409	1.85909	2.14023	2.91461	2.99191	3.68021	3.60446	1.56213	2.11629	3.49675	2.57124	5.3504	3.90299	2.68646	1.54749	3.70413	1.73561	3.94422	3.59802	4.34407	3.12607	3.09829		0.186529	3.01557
4.4082	2.69545	3.45146	1.67533	2.63707	1.80967	2.82197	2.87437	3.69063	2.82591	3.20852	3.3452	2.49165	4.80063	2.96691	7.86766	3.58935	3.12769	2.40348	5.3614	1.43298	4.08455	2.44689	3.40003	2.65339	1.83257		0.191708	3.17979
4.5274	2.56488	3.08316	2.61248	2.41876	2.1287	3.14148	2.86209	1.77186	3.39519	2.42834	3.61622	1.8965	2.4968	3.16708	4.13973	4.81265	2.40801	2.69711	5.06907	1.60275	2.79102	4.46337	5.89362	2.30852	3.16418		0.196892	3.07734
4.6465	2.79172	2.59418	5.71279	2.34515	2.16222	4.33925	2.31568	1.69058	4.18051	3.40986	2.99662	2.20069	2.4014	2.85105	4.90933	3.73586	2.4983	2.75718	3.63432	1.80353	3.54898	5.97384	3.48198	3.91653	3.44951		0.202072	3.26804
4.7657	2.34442	3.869	4.30817	1.64765	2.12725	5.20547	2.11316	2.85001	3.20588	2.34198	2.49136	3.93635	2.15709	1.98371	5.15401	4.89736	4.3755	1.60615	3.19966	2.17013	2.24073	3.8952	2.5498	5.35709	3.51787		0.207256	3.1818
4.8848	2.9106	3.33408	3.11105	2.30872	2.40719	5.3013	3.98714	3.60108	3.00198	2.61511	3.66607	3.62946	3.27953	3.00252	4.85077	7.14185	2.48742	2.88271	4.07615	2.63871	2.78027	5.68148	2.1536	5.18413	3.33997		0.212435	3.57492
5.0039	3.31144	3.40953	4.04137	2.70885	2.10103	3.92236	2.26986	2.54294	3.027	2.6574	6.16054	3.48579	3.74736	4.32655	5.36247	7.82443	3.34835	3.30917	5.3576	4.36843	1.61918	5.69565	1.80635	3.89665	2.4324		0.217615	3.70931
5.1231	4.00307	3.40757	3.19132	1.50236	2.49525	4.04879	1.79066	2.49926	2.835	1.93937	5.056	4.23493	2.89416	3.77768	5.18934	4.37208	2.35677	5.87378	2.9657	4.91625	1.96002	4.68433	2.34622	2.25143	3.23751		0.222799	3.35315
5.2422	2.1816	3.54752	3.33872	2.37921	1.41983	3.17722	3.40461	2.81919	3.63934	2.23117	2.04318	4.54539	3.45905	3.01771	3.9296	3.90078	2.0536	5.11952	2.32004	5.64578	1.60449	4.34885	2.92876	2.13674	2.86068		0.227978	3.1221
5.3614	1.70245	3.41015	2.30447	2.54908	1.78735	2.09573	2.79269	3.17568	3.35693	3.67482	2.63304	6.11936	2.48951	4.63261	1.79197	2.56555	2.20965	3.88544	4.96521	2.77358	1.74839	1.94732	3.40556	1.94376	5.06037		0.233162	3.00083
5.4805	1.75421	4.19904	2.2204	1.87586	2.31453	1.88385	1.66231	4.97706	2.20457	2.89263	2.94394	3.44606	3.40595	4.01237	3.51815	3.28521	3.06095	3.88573	5.01859	3.85208	2.47772	2.64001	1.77878	1.71365	4.64789		0.238342	3.02686
5.5996	3.00556	3.5022	3.50246	2.36256	1.6703	2.26478	3.99103	3.34319	2.20103	2.71414	2.33671	4.37792	3.30951	2.25438	2.31215	1.68858	2.98909	3.52882	4.5191	3.84626	2.9535	3.27583	2.02201	2.4919	5.30984		0.243521	3.03091
5.7188	4.54559	2.33804	2.72889	1.8259	2.79016	5.37242	4.14788	2.0956	2.52692	3.57024	2.9525	4.27439	2.58412	2.42319	2.80225	2.49259	5.23059	2.43378	2.97074	4.07818	4.09179	2.01268	2.29349	4.91694	6.3365		0.248705	3.35341
5.8379	2.80644	4.51571	2.37539	2.14866	3.17823	4.83615	3.28343	2.39554	1.97276	2.23614	3.75756	2.83799	2.55129	2.64188	2.68199	2.54401	4.50655	2.37597	2.28511	3.05279	2.14196	1.48944	2.47017	5.91202	3.27877		0.253885	2.97104
5.9571	3.12742	4.49851	3.86441	2.20939	4.65036	2.53818	2.81727	1.66215	2.91142	2.32888	2.80929	2.68144	1.90106	2.58381	3.82191	2.8765	2.87334	4.05709	3.08562	3.99138	1.97944	2.14717	2.47992	2.52082	2.39964		0.259069	2.91266
6.0762	2.49653	3.63149	3.50458	2.28969	2.08235	4.02399	6.20114	1.8772	1.77054	2.54464	2.13355	3.37556	2.1144	5.78583	4.07601	2.77732	1.87588	2.8306	3.19175	2.46197	2.27385	3.80006	3.22205	1.99996	2.42015		0.264248	2.99044
6.1953	2.7181	2.06798	5.71967	2.42906	2.60089	3.7538	3.55303	2.17472	3.23088	3.82437	2.78239	2.11054	2.30975	3.51002	2.6013	4.92117	2.94788	4.03062	2.2344	3.64709	3.21132	3.97378	4.3342	1.80628	1.82171		0.269428	3.1326
6.3145	3.01577	3.53641	5.94303	1.70708	2.64632	2.38152	3.16886	2.07983	3.9158	2.11596	1.866	1.6824	2.11083	2.7806	3.93524	2.12423	4.2377	4.50681	2.33636	1.85137	5.01453	2.17857	3.47014	2.51189	2.01725		0.274612	2.92538
6.4336	4.28183	4.27216	4.44766	2.47777	1.92198	1.62629	2.50276	1.92313	2.44578	3.9725	2.80465	2.31545	2.42908	1.79063	4.16192	2.71966	4.39455	4.74941	2.5611	3.83162	3.38816	2.98469	3.81055	3.36869	2.50721		0.279791	3.10757
6.5528	2.45815	5.4961	3.92956	1.53044	3.3679	3.37502	2.95068	3.34188	2.83693	3.41556	2.39263	4.08121	3.12894	2.36932	5.34896	5.28169	3.9711	3.99046	2.49537	2.73412	2.27227	2.1792	2.34847	3.63593	1.72378		0.284975	3.22623
6.6719	2.72764	4.47287	6.15107	2.34011	2.90668	2.28738	3.41469	3.69124	3.69447	3.27898	1.76539	3.27236	2.5719	3.0347	5.08433	3.46396	3.73816	2.32861	1.7332	4.25789	2.87839	1.64157	1.51811	3.96743	2.45151		0.290155	3.14691
6.7911	5.03704	3.21535	3.29683	1.7275	3.23629	2.38126	5.09357	3.36929	3.66372	3.20246	2.53162	3.51666	3.53396	2.73594	3.82074	3.10367	3.35214	2.16564	2.43777	5.25706	3.20139	2.09468	1.82723	2.71554	5.0282		0.295338	3.26182
6.9102	3.63727	1.67841	3.62968	2.07298	3.39417	1.93367	3.74753	3.03668	4.00252	2.03112	3.75	2.35623	4.17016	1.7465	2.77968	3.21945	4.39721	1.92598	2.18713	7.19318	2.47307	2.64667	2.46943	2.63026	4.56761		0.300518	3.10706
7.0293	3.22245	2.22799	3.84514	2.72969	2.6078	2.88415	4.93111	3.72552	3.27891	3.94647	2.28547	2.94043	2.60802	1.8728	5.24946	2.35551	2.67953	2.33479	3.46976	6.72188	2.50049	1.65797	3.98694	3.93027	2.44853		0.305697	3.21764
7.1485	5.17953	2.37392	2.72511	1.99268	2.87601	2.95407	3.87662	3.92901	4.61363	2.05927	2.69716	3.52807	2.33614	1.87914	2.70206	2.28862	2.34135	2.97875	3.79665	4.26465	2.43394	1.5058	3.65899	4.57234	3.63785		0.310881	3.08805
7.2676	4.25391	5.361	2.62679	1.9238	1.85465	2.6131	3.15875	2.50872	4.15524	2.45682	4.38308	3.81977	2.13881	1.99947	2.8043	4.02299	2.33948	2.11282	1.9263	4.43261	6.13144	2.06764	5.87465	3.76951	4.5756		0.316061	3.33245
7.3868	2.7807	5.47779	1.82129	1.8367	1.62639	5.19253	2.15183	1.7846	3.48174	3.28161	2.80501	3.28543	2.54053	3.36835	4.98813	2.46254	2.6805	3.82054	2.49778	4.94421	1.81504	1.64051	3.2622	2.04762	2.93758		0.321245	2.98125
7.5059	3.94288	3.85023	1.72913	1.93274	1.87205	4.27403	3.29853	1.66122	4.4302	3.72793	2.38918	2.6949	2.66264	5.5871	4.05376	1.82271	2.92081	3.12703	3.0676	4.88628	3.50884	2.22674	2.88593	2.54338	1.52408		0.326424	3.0648
7.625	3.91071	2.45618	2.20553	2.74837	2.90476	2.06066	2.50524	1.7285	2.28022	3.74035	2.81672	2.74121	2.28655	4.56838	3.39694	2.55274	2.70797	2.61195	3.5044	2.82459	3.58601	2.45789	4.09422	4.41283	2.05336		0.331604	2.92625
7.7442	3.10864	3.15596	3.50717	2.56304	3.88604	2.02874	1.70636	3.22782	2.59468	1.9064	3.46072	2.35444	2.82478	2.56979	2.66802	3.31017	4.00544	2.31909	2.56751	3.0708	2.39891	3.74758	2.13328	3.32257	4.17014		0.336788	2.90432
7.8633	4.07706	4.14098	3.89727	3.41885	3.19107	4.50826	2.48761	2.61916	3.49655	3.10189	1.79382	1.62946	2.49078	3.22917	2.86967	2.39403	2.028	3.2477	2.43571	2.12961	2.23361	2.85249	2.64778	1.45062	4.90981		0.341967	2.93124
7.9825	5.8563	4.59148	3.24868	4.09087	3.97224	4.3159	2.51402	2.91282	4.65078	1.79513	2.42048	2.42093	3.65182	2.96935	2.03726	3.21878	4.50091	3.12794	2.92971	3.07978	2.1249	3.99231	2.4113	2.34807	2.74881		0.347151	3.27722
8.1016	4.77497	4.87472	3.76662	3.67678	2.79113	2.08509	2.44437	5.17307	2.34929	1.543	2.06283	1.6631	3.58956	3.04476	2.02482	4.60047	7.16106	2.03711	1.68983	4.34065	2.10347	3.07453	2.83793	2.50131	2.1426		0.352331	3.13412
8.2207	4.05646	4.31604	2.79425	2.02097	2.78056	4.33574	2.19131	3.55158	2.71999	2.59366	2.50776	3.6245	3.69103	2.72256	2.40683	2.43419	2.88797	1.77179	2.56168	2.05069	2.93171	3.58945	2.57937	2.4612	2.18496		0.35751	2.87065
8.3399	2.05777	4.72926	3.81056	1.81623	3.20773	3.34822	2.57474	2.47656	3.10833	2.34309	1.61064	3.5238	3.46949	7.30312	2.46416	2.17894	3.62761	2.38302	2.34531	3.56398	3.30355	3.82975	2.22497	2.15519	3.20991		0.362694	3.06664
8.459	4.39486	6.93719	3.28929	2.17367	3.31817	2.19532	3.87977	2.68138	3.16064	2.20214	1.71043	1.78744	3.30805	2.37837	2.01946	2.06939	3.60365	2.12747	2.75616	4.15472	2.45149	2.71767	3.45587	3.1744	1.83177		0.367874	2.95115
8.5782	5.77644	5.46048	2.04696	1.92338	3.15971	3.27007	3.7988	1.95827	3.94812	1.86116	2.53925	2.10086	2.78843	2.80347	2.32054	3.05787	4.6408	2.75993	2.18336	5.84647	2.13139	3.73921	4.68888	3.43688	1.90794		0.373058	3.20595
8.6973	4.14826	3.77621	4.23726	2.34495	3.62288	2.69764	2.12377	2.82314	3.74782	2.2797	1.55641	3.22322	3.05447	2.93854	1.87327	2.03943	3.21355	4.63532	1.89202	5.65076	1.85607	3.79797	3.53677	2.91909	2.03346		0.378237	3.04088
8.8165	2.75134	3.55938	3.5716	3.22732	5.77391	3.19635	2.59459	2.70905	3.53427	2.00684	2.13765	5.27117	2.74333	2.58904	2.06323	2.81622	1.9933	2.76114	2.40419	4.34866	2.8351	4.11775	4.15585	3.74841	3.11294		0.383421	3.20091
8.9356	2.49925	2.10237	2.316	3.90394	4.09516	4.43631	3.6902	4.80111	3.98883	1.59021	1.9995	3.4157	1.72594	2.57985	1.93213	2.39105	2.263	3.13218	2.32913	9.0981	4.59371	3.26362	3.24229	4.83442	4.41394		0.388601	3.38552
9.0547	2.07186	3.39884	3.17686	3.52691	2.78157	3.27868	2.41108	3.0982	4.04966	1.5995	4.03923	5.11583	1.97079	5.71041	2.13332	1.90722	2.08311	3.03757	2.45388	8.47343	2.40006	3.43509	3.02552	3.54	3.11516		0.39378	3.27335
9.1739	1.9731	3.93508	3.22285	2.58378	4.87061	2.99532	3.83611	3.38887	2.26963	1.54255	3.68335	3.88181	3.10953	4.02936	2.03248	2.30413	2.17436	3.97614	2.09417	6.33808	3.51194	2.66614	2.14852	3.68137	2.75637		0.398964	3.16023
9.293	3.5011	3.45897	4.36616	2.93815	3.77981	2.70128	2.00507	3.11734	3.21439	1.97734	4.21547	4.16993	4.14183	3.13276	1.4983	2.54566	2.85509	2.142	1.81528	3.08813	7.81658	3.42966	3.08796	4.49905	2.52304		0.404144	3.28081
9.4122	4.94091	3.91629	5.81998	2.76119	3.86298	4.13543	1.8593	4.21321	3.91402	2.95387	2.82079	3.66856	2.31552	2.61878	1.76693	2.60642	2.76372	3.77746	2.75172	2.92658	8.89898	2.87825	2.62393	3.0551	3.16951		0.409328	3.48078
9.5313	3.68295	4.79087	2.51068	2.02496	5.217	3.1724	1.86782	2.27987	1.6682	3.45865	3.09176	4.12474	2.18193	2.27283	2.27315	2.21073	5.25363	3.77963	3.67324	3.23085	4.69761	3.63262	1.92007	2.31928	2.69298		0.414507	3.12114
9.6504	5.09554	4.32595	3.4366	2.70159	5.9557	4.45885	1.95909	3.8954	2.47338	2.56716	2.5258	4.79665	2.54066	1.90864	1.66815	3.14151	4.28392	2.47854	3.09395	1.55957	5.48744	3.94135	3.4245	3.55793	3.77272		0.419687	3.40202
9.7696	5.53654	6.01445	3.06446	2.80019	2.57423	3.44148	3.02774	2.93683	2.55456	2.88832	2.54246	5.63303	1.7909	2.52234	2.47102	2.66112	2.28312	1.52899	2.71337	3.61886	4.74622	4.40533	4.18342	2.39631	2.84748		0.424871	3.24731
9.8887	6.33507	4.14543	2.59361	1.57375	3.34976	2.87814	3.15354	3.54166	2.81465	3.01401	1.62078	4.19707	2.22712	2.24882	1.67652	4.41445	3.03856	3.53081	4.6475	3.9995	3.95991	4.20896	1.89069	2.0959	2.42182		0.43005	3.18312
10.0079	4.38132	5.94656	2.06666	1.80374	2.72972	2.77109	3.96719	3.20168	2.43425	2.31784	1.81275	2.9164	1.84182	2.54873	1.51826	2.77263	2.75176	3.94202	7.4461	2.72714	3.90472	3.4926	2.06654	2.49051	4.16991		0.435234	3.12088
10.127	5.83863	4.72223	3.36795	6.80099	2.63551	2.89786	2.51672	2.67975	1.92913	1.78849	2.4391	1.74438	2.7588	2.03148	2.7579	3.11099	2.20718	3.7502	8.03885	2.25104	4.41244	1.48075	3.64044	4.03233	3.36064		0.440413	3.32775
10.2462	8.19023	5.39336	2.30616	5.85296	3.80957	4.65594	1.81262	3.57434	2.61761	2.4942	2.72147	1.6299	1.69181	2.33264	2.56931	1.56618	2.75242	3.35087	6.05767	3.44246	5.60049	2.47367	3.64409	2.88119	3.32395		0.445597	3.4698
10.3653	4.85692	5.91628	2.31104	3.05015	3.71369	3.07871	1.77829	2.06424	2.45464	1.62478	3.20459	1.76779	1.64145	2.4592	3.86455	2.00868	2.27773	2.6059	4.71059	2.78443	3.31901	2.3297	4.61879	4.2502	2.90674		0.450777	3.02392
10.4844	6.60778	3.11941	2.40553	3.31681	3.10283	2.44375	2.51589	2.23456	2.18649	3.33335	2.52918	1.88045	1.82754	3.02707	5.12463	2.70726	2.48661	1.60402	4.33472	1.96974	3.76638	5.77906	2.67282	4.10667	4.66669		0.455956	3.18997
10.6036	5.51883	5.4828	4.37899	2.76649	2.3429	3.07635	3.69134	2.72688	3.52656	2.88621	1.75888	2.69225	2.5672	2.27776	4.09999	2.61736	2.57076	2.88958	4.02415	2.44278	5.76348	4.82113	2.91921	3.52035	2.92873		0.46114	3.37164
10.7227	5.56404	3.77342	2.35508	3.47501	3.51228	3.16113	1.81419	2.04811	2.88114	2.5881	1.95562	2.02988	2.03526	1.88929	3.62215	3.06533	2.71018	3.04988	5.06307	2.15839	3.98549	5.31596	3.27492	3.35066	2.40745		0.46632	3.08344
10.8419	3.98271	3.35606	2.23397	3.525	4.36844	3.91659	1.917	1.89049	2.30108	3.32764	2.36097	2.1341	1.82661	2.74084	3.29828	2.31626	2.35805	2.52792	4.29251	2.62435	2.72755	4.5711	3.55657	3.23927	3.74969		0.471504	3.00572
10.961	3.55915	3.50764	2.20797	3.58603	3.37661	2.86525	3.04289	2.51371	1.87523	2.28058	2.43128	2.99018	2.39308	2.74697	3.73072	3.78221	2.68551	2.1481	4.94492	3.80736	1.68747	2.98322	3.17509	3.55627	5.60643		0.476683	3.09935
11.0801	4.73128	2.28049	1.97009	1.96976	3.50236	3.97539	3.16235	1.79315	2.7679	1.88222	1.9818	4.52324	1.82468	2.35483	2.15009	2.85437	2.47382	3.50451	3.32975	3.9973	2.78817	2.83864	1.99274	5.3923	5.63579		0.481863	3.02708
11.1993	3.80612	2.03852	3.34477	1.70371	1.84664	5.16959	2.40977	2.79358	3.71221	2.9737	2.27414	3.10339	1.75729	4.06238	2.93246	2.3604	2.90043	4.39921	4.42754	3.71336	2.9958	3.44005	3.49837	6.45398	4.53016		0.487047	3.3059
11.3184	5.29723	3.38619	3.73498	4.60907	2.05021	4.95734	2.15269	1.72442	2.15108	2.22667	3.28782	2.79967	1.73683	3.56895	3.24474	1.95515	2.1453	3.56537	3.55304	3.08458	1.78008	5.04698	3.79978	5.75753	4.15525		0.492226	3.27084
11.4376	5.03309	2.01921	3.04592	2.7279	2.49343	2.60326	1.73659	2.88103	2.28167	2.39334	1.91448	3.20223	2.05006	3.15344	3.89781	1.56697	3.01739	3.09126	2.57053	4.24446	3.09168	4.42008	3.12564	5.39524	7.28975		0.49741	3.16986
11.5567	4.39052	1.7753	2.09247	2.79217	4.96734	3.37348	1.65638	2.605	2.24502	2.50213	2.55247	3.93895	2.49172	2.79619	2.95032	1.43618	3.22905	3.8462	2.81646	3.19887	6.18882	2.42941	3.76836	7.19946	3.45497		0.50259	3.22789
11.6758	5.34608	2.13242	4.31776	3.89769	4.96825	1.77496	3.20823	4.24661	3.58053	2.64851	3.15432	3.23222	1.81197	3.67973	3.00017	1.70991	2.3188	3.3374	4.39339	1.58114	3.49329	2.41523	4.08229	3.63403	3.30385		0.507769	3.25075
11.795	4.96825	2.06391	2.64652	2.92957	4.34943	1.53642	2.33235	5.57843	2.38235	1.7507	2.76271	2.0035	1.66999	2.63269	3.46893	1.96809	3.48007	3.47793	3.11359	2.23399	2.89553	2.93302	3.62514	2.70309	2.74913		0.512953	2.89021
11.9141	4.0726	3.80028	2.42052	3.30104	2.80054	2.47576	1.4745	3.12694	4.4703	1.76905	1.90281	2.59162	2.32197	3.36569	3.9689	2.02584	2.87356	4.33013	3.08285	3.79821	2.99679	2.51888	2.1114	3.90281	4.78082		0.518133	3.05135
12.0333	3.11166	3.42822	2.49485	2.58379	2.2642	2.46928	1.55319	4.43017	2.49279	2.24764	2.61886	2.11029	2.11525	3.39972	2.09033	1.65202	4.54417	3.36564	2.72604	3.41668	3.78596	2.03216	1.76232	2.74997	3.09192		0.523317	2.74148
12.1524	2.44409	1.96272	1.52901	3.53837	2.42203	1.72092	1.85829	2.08097	1.66065	1.816	2.11703	3.07545	3.16107	3.40014	1.69454	1.90153	4.38061	2.88583	3.66348	2.37213	1.88195	1.97221	1.81626	3.18089	4.21197		0.528496	2.50993
12.2716	3.79864	1.69013	1.43452	4.48937	2.22327	1.7835	1.91447	2.57443	2.79362	1.50294	2.73599	2.45798	2.51728	3.09849	2.71245	2.65934	2.5801	2.59861	7.23193	3.13984	3.26798	3.57004	3.27293	3.53173	7.87417		0.53368	3.09815
12.3907	4.26844	1.85225	2.08381	4.11816	1.84957	3.06135	2.58705	3.34115	2.63111	1.59904	3.80474	2.76244	2.15156	3.07485	2.78154	2.17848	2.75845	2.24447	4.12367	2.6552	1.96436	4.11757	3.6472	4.05852	9.83945		0.53886	3.18218
12.5098	3.22848	2.04871	3.21572	2.67792	2.26395	3.90499	2.70976	1.69705	3.66566	2.1141	2.49556	2.26063	1.98657	2.64563	2.66788	1.54958	2.99434	3.37324	2.07816	2.13675	3.5412	6.26708	2.71917	2.1519	6.25503		0.544039	2.90596
12.629	5.44581	1.6375	2.21758	4.14523	2.53394	2.59123	2.13668	2.40269	2.80646	1.48685	1.51085	2.74494	2.22251	3.03617	2.82716	1.5749	3.73802	3.53827	4.43701	3.79235	5.04735	2.90246	2.68558	4.32595	4.26829		0.549223	3.04223
12.7481	3.48158	1.77296	1.7256	2.09055	2.2921	2.25383	2.67497	4.46342	2.56086	1.48851	1.81758	2.94875	1.78323	1.96073	3.10567	1.47956	1.90283	2.38788	3.88671	3.09571	3.12191	4.23226	3.63664	2.47873	6.07794		0.554403	2.74882
12.8673	3.79181	2.44264	2.24864	3.57296	2.88448	1.53132	2.41147	3.82613	2.49749	1.64806	2.01927	2.71842	2.71315	4.65497	2.80104	1.4153	2.14443	3.96202	4.81404	3.54222	3.88095	3.26918	4.11985	3.06748	5.85529		0.559587	3.1133
12.9864	3.37043	1.62579	1.8112	3.99604	3.90313	2.05525	1.87282	1.49665	1.55343	1.61769	2.27039	2.86119	2.84152	3.35374	2.37694	2.22272	3.072	3.3861	5.75374	5.05403	3.03676	4.78314	2.70368	4.41994	4.26304		0.564766	3.02805
13.1055	3.86195	2.1703	1.68253	2.63716	3.32817	2.5065	1.46822	1.67085	1.38058	1.60163	1.79479	2.48122	1.65216	3.81991	3.27989	1.90665	3.03679	3.04796	5.06045	2.11013	2.51329	3.48687	6.41083	2.84412	3.48704		0.569946	2.7696
13.2247	2.8328	2.95039	2.59582	3.03162	2.94795	2.50342	1.95387	2.49041	1.54726	2.06177	1.76614	2.67109	1.6797	5.12471	3.45849	1.79782	3.1099	2.11682	6.06878	2.80912	4.46832	2.84722	5.2977	1.7183	3.21387		0.575129	2.92253
13.3438	3.18612	1.74144	2.50647	3.37971	2.69832	1.64023	2.64029	2.45947	3.01576	1.66903	3.82689	3.77719	2.54848	3.16279	4.26658	1.96131	2.36603	1.46225	6.5749	3.49828	4.09907	3.95102	5.26473	3.94533	3.798		0.580309	3.17759
13.463	3.91672	2.56239	2.67918	3.52643	2.83863	1.88291	1.83861	2.38546	2.50921	2.17961	1.72193	3.48845	3.69917	2.37896	3.02154	1.59642	2.45463	1.88131	2.62829	2.89735	1.88747	4.27957	3.68934	5.02488	3.78516		0.585493	2.83014
13.5821	2.21808	1.99087	3.23674	3.72898	4.03708	2.09011	1.53169	2.81449	1.51524	3.01542	2.6034	3.28348	1.55569	4.29349	3.09213	2.31803	4.68536	4.06326	4.01802	3.22648	3.622	4.19862	2.26963	2.98393	4.14846		0.590672	3.06163
13.7012	3.44627	2.50965	1.78839	2.36608	3.41544	1.74542	1.54669	2.20641	1.46625	1.80152	2.17798	3.10367	2.79337	2.94035	2.19799	4.04619	2.41434	4.53848	5.32648	2.78189	2.26041	3.83231	3.03092	3.24904	4.36057		0.595852	2.85384
13.8204	4.19142	2.44362	2.6976	2.9234	2.20212	1.71169	1.42411	3.5417	1.6752	2.01367	2.2899	2.26018	1.75301	4.00558	3.06064	3.60579	2.45898	4.59164	3.62447	2.23658	2.85346	2.99813	2.6289	4.80931	3.13202		0.601036	2.84532
13.9395	3.2319	2.57052	3.63377	2.55814	2.82165	1.67201	1.68954	1.94321	1.87578	1.51439	1.92977	1.49459	4.19339	5.02105	2.68883	2.55132	3.55801	3.91383	2.16288	3.13618	2.78549	3.93641	3.73738	3.04885	1.7045		0.606215	2.77494
14.0587	4.29383	2.46548	3.28161	2.36179	4.36991	3.24877	1.59072	1.82698	3.66068	1.67392	3.52159	1.5664	4.50189	3.16338	2.31012	2.89161	1.80242	2.58463	3.1666	3.19687	3.80902	2.87722	3.14131	7.70969	4.22933		0.611399	3.16983
14.1778	3.92286	2.45497	3.26417	2.66067	2.03106	2.91638	1.49264	2.05279	1.79242	2.17941	1.68833	1.707	1.83683	3.07978	2.93275	2.33718	2.20454	5.505	3.03381	4.66056	2.77944	4.71147	2.28997	5.19197	2.29184		0.616579	2.84071
14.297	2.22982	1.81415	2.13681	2.2829	5.10708	1.66716	1.96391	3.29911	1.82914	1.9315	2.69132	3.09032	2.66979	5.94167	2.04189	2.68964	2.38994	5.30702	4.64661	4.55396	2.42738	2.91988	4.77892	4.73365	2.67555		0.621763	3.11276
14.4161	1.913	1.74649	1.54518	2.2635	3.8884	1.9101	2.54064	4.09468	1.58434	1.95863	3.49555	2.71283	2.95145	5.5537	3.00307	2.14285	2.53348	4.02702	3.56404	6.52255	4.86813	4.95712	4.45442	6.15141	3.27534		0.626942	3.34632
14.5352	3.03175	2.57613	1.94339	1.94052	4.54337	2.23549	1.68262	2.74882	1.70023	2.46937	3.49004	3.41079	2.94167	4.63591	4.74602	3.67666	2.25897	2.46144	4.12459	6.51579	2.01987	2.73905	4.30076	10.0074	5.45769		0.632122	3.50633
14.6544	2.66946	2.6263	4.18844	2.57357	5.19057	2.97804	1.56321	2.79798	2.16673	1.742	2.4537	4.77652	3.55199	3.59927	2.58536	2.30895	4.23372	2.24992	1.9727	4.31752	2.59762	4.19697	3.01312	8.58076	2.81485		0.637306	3.26997
14.7735	4.25417	3.91715	4.01936	1.96226	3.95771	1.79769	2.13182	7.56361	3.24708	1.62974	2.65166	2.02627	2.54623	6.9916	2.56545	3.03271	5.31178	3.93159	6.12981	6.33198	3.50423	6.63507	4.94322	6.15239	3.10836		0.642485	4.01372
14.8927	4.04659	3.24828	2.08886	3.14971	2.57661	2.13342	4.26895	2.60435	3.7011	1.72274	3.23136	3.6354	2.69782	5.70807	2.15448	4.08638	2.39325	3.87017	4.19314	6.21615	3.68084	8.20152	3.46748	6.91216	3.67692		0.647669	3.74663
15.0118	2.8485	2.64938	2.89631	3.91793	1.66133	2.08662	1.92021	1.75612	1.56925	3.44334	1.67556	2.27944	1.76596	4.3595	2.1197	2.61582	2.2883	3.66132	4.40199	3.55205	3.94529	6.77704	4.06594	5.63124	5.27231		0.652849	3.16642
15.1309	2.50273	2.22455	2.15749	3.2097	2.34747	1.7577	2.18403	1.54204	1.72155	2.1383	3.8426	3.45637	2.91259	2.69458	2.41327	2.02192	3.9585	4.4453	3.71069	4.11761	4.88254	6.71379	3.73767	6.08473	5.56292		0.658028	3.29363
15.2501	2.68916	2.56141	1.94746	2.52143	3.07202	1.93157	2.66088	1.39557	1.50071	1.60496	2.86676	3.5079	1.97923	3.82392	2.75043	3.46944	2.71204	3.61501	2.81805	3.66422	2.89186	4.76085	3.84404	6.63167	4.26993		0.663212	3.01962
15.3692	2.38484	1.61199	1.69986	2.69687	2.32483	1.93777	1.66119	1.58735	2.31468	1.55449	4.49983	1.90856	4.08041	3.21458	2.75255	1.7301	3.14205	3.14282	2.44604	5.14493	2.96426	6.87553	3.35325	4.35024	2.61361		0.668392	2.87971
15.4884	2.29123	2.91814	1.56036	3.37531	2.32284	1.56485	2.84173	2.85331	2.90532	1.61157	4.93631	1.55016	4.16975	2.92953	4.11682	2.43205	2.90368	3.6658	2.52395	5.34102	4.02699	5.44061	4.27231	4.52548	3.82207		0.673576	3.23605
15.6075	3.93587	1.48959	3.02121	1.72633	1.54278	1.56536	1.66963	2.79005	1.76392	1.78889	2.60676	1.84602	2.46466	3.64927	2.57544	3.85911	3.5805	3.52703	2.90653	5.46232	3.83065	7.43754	4.87683	3.0184	4.18401		0.678755	3.08475
15.7266	3.72983	1.71873	1.94765	2.1199	1.84436	2.17834	1.49258	2.17768	2.41248	2.24191	2.00109	1.53623	1.83603	3.51782	3.40843	2.29508	3.47491	4.12958	2.30975	2.3732	4.16909	4.8996	5.22233	2.49167	2.28445		0.683935	2.71251
15.8458	2.96566	2.4741	1.94002	2.65867	4.99689	1.81104	1.53514	2.49266	1.95513	2.43009	2.3207	1.55209	3.02276	1.60498	3.30448	3.5088	2.44253	2.83218	1.77787	4.90183	4.48876	5.49276	3.96238	4.54609	3.24673		0.689119	2.97057
15.9649	2.35422	3.38698	3.69822	2.55607	2.81558	2.00806	1.9565	2.2575	3.38821	3.07168	1.75175	1.60296	1.8204	2.81818	2.81738	2.93136	1.63475	2.59926	3.59301	2.6636	4.79411	3.87604	4.22619	2.31141	3.49071		0.694298	2.81697
16.0841	1.66023	3.33207	2.18138	2.61795	3.32148	1.80448	2.3051	2.14649	2.79529	2.49708	1.7232	1.63663	2.11053	4.33008	3.26116	2.8036	2.2169	3.06272	2.82874	1.94082	2.46486	5.09203	6.13947	2.43109	3.74934		0.699482	2.81811
16.2032	1.98345	2.83528	1.75866	3.7665	2.76284	2.12412	1.50206	2.63256	1.80403	1.50117	3.86	1.51487	1.72668	3.68375	2.79555	1.69425	1.94811	3.57613	5.13253	4.35191	3.90006	3.41644	5.31258	3.18688	3.13024		0.704662	2.87603
16.3224	2.97694	2.54246	2.89747	3.90566	3.22736	2.10569	2.22007	2.93903	2.8694	1.79055	2.51886	1.54815	2.38415	2.72343	4.09923	2.34074	2.15644	2.84041	2.64843	4.36104	3.02216	2.83741	2.97212	4.12307	3.23304		0.709845	2.85133
16.4415	2.27333	2.58356	3.57351	1.73892	2.96974	2.25418	1.88756	1.67179	2.06228	2.55659	1.53194	1.65943	3.0268	2.71762	5.66556	3.06413	2.50865	3.12702	4.857	2.88825	3.95102	2.99505	4.87789	4.98849	2.25216		0.715025	2.9473
16.5606	1.70696	3.67691	2.37707	1.74034	2.63741	2.307	1.57567	1.64412	2.20009	3.47104	1.33574	2.48313	3.48255	5.05443	2.86266	2.85563	4.95632	2.66243	4.60391	2.34372	5.93863	3.03681	5.29338	2.51652	3.52003		0.720205	3.0513
16.6798	2.0471	2.31114	2.89134	2.12263	1.7029	2.22386	1.82952	1.7437	1.40635	1.78718	1.39575	1.5942	4.71195	2.44224	2.52828	2.63099	4.20054	2.07456	3.04402	2.70865	6.35295	3.89208	5.08944	2.86188	3.2627		0.725388	2.75424
16.7989	3.42061	2.31374	1.88215	3.72227	1.64327	2.05406	1.53019	2.28106	1.52857	1.48563	2.43078	2.40289	2.95532	3.24159	3.22737	2.70166	3.09041	5.09385	2.95453	2.93962	3.8908	5.01172	4.34143	3.11941	2.58816		0.730568	2.87404
16.9181	3.0453	2.34307	2.37337	2.6681	1.88838	1.93578	1.59886	2.55071	2.25334	2.35153	2.00238	3.21654	5.35261	3.25499	3.10418	2.76553	2.48007	4.57369	3.32415	2.51529	5.90497	3.88678	8.39957	2.3257	8.39578		0.735752	3.38043
17.0372	2.38776	3.84856	3.632	2.37668	3.85974	3.37001	2.57119	3.04822	3.0059	1.85564	1.88681	2.70071	4.10813	3.82376	3.14165	3.53284	3.74033	3.13335	2.17104	3.87185	3.78202	5.12613	4.83304	2.41615	4.14287		0.740931	3.29466
17.1563	1.96691	2.03829	2.34262	2.60207	2.94348	2.66693	1.90712	2.70192	4.05933	1.57288	2.61112	1.87537	2.01761	2.96572	2.86628	2.60198	4.00306	3.11382	2.52634	2.83076	2.96238	4.40588	4.59112	2.10141	3.8141		0.746111	2.80354
17.2755	5.19866	3.00222	2.35439	2.18271	1.86542	2.05886	2.44288	1.79502	1.94321	1.47433	1.90636	1.73644	2.74755	3.00455	3.65538	2.83867	4.06112	3.43282	4.02567	3.32399	2.72249	5.0382	3.58584	2.34435	4.61845		0.751295	2.93438
17.3946	3.59542	3.95768	3.83122	2.74675	2.47688	2.81856	2.68407	2.14534	1.61066	1.51653	5.73531	2.6415	2.74306	2.13755	3.21761	2.62385	2.49353	4.21163	3.0456	2.70297	2.30092	4.43502	3.82864	4.46274	5.06752		0.756474	3.16122
17.5138	3.21768	2.07233	3.62605	2.69233	2.02087	2.26373	1.66692	2.30609	1.62646	2.06025	4.03854	1.84255	4.67167	1.89308	2.04353	4.74604	4.15253	3.6138	2.73031	2.80375	2.70977	4.43578	3.74486	2.5445	2.63357		0.761658	2.88628
17.6329	1.8402	2.4251	3.03489	2.43587	2.64662	2.28413	1.40639	2.64993	1.32834	1.73696	2.29838	3.1702	2.12278	1.75443	1.62265	3.05407	3.28342	3.7893	3.28637	2.99572	3.78398	2.76624	1.86988	2.26894	4.59947		0.766838	2.57817
17.7521	2.30749	2.73123	1.37261	2.74479	4.10529	2.45581	1.50669	3.05556	2.09199	1.64256	1.71233	2.14522	2.28685	2.01369	1.40941	2.37768	2.51352	3.44702	3.89407	1.86205	4.86385	3.90323	2.53577	3.86273	6.39741		0.772022	2.76955
17.8712	3.5909	3.1451	2.06355	2.19514	2.52516	2.1732	1.70344	2.82494	2.08969	1.6072	1.96146	1.65677	1.60084	2.29497	1.57365	2.64459	3.32513	2.38894	4.12696	2.15456	4.51748	5.64488	2.23599	2.3516	4.44186		0.777201	2.67352
17.9903	2.98569	2.22687	2.69412	3.37803	1.79543	2.39628	1.84592	2.21555	1.78136	1.55239	3.12373	2.07928	1.73641	2.32633	2.19234	2.4879	3.16484	2.60344	3.46249	1.75265	2.47227	7.03501	2.46125	1.90028	3.29185		0.782381	2.59847
18.1095	1.78432	2.03442	1.75654	2.29529	2.80004	2.0459	1.87358	2.01301	2.55514	1.28603	1.92705	2.37586	2.07896	1.77938	2.54745	2.11353	6.08603	1.91061	2.16944	4.21925	3.00497	3.87878	1.73032	3.91518	5.00584		0.787565	2.60748
18.2286	1.74634	3.24648	1.7258	2.57782	2.6542	1.74393	1.71785	1.93329	1.71469	2.1203	1.75234	1.88203	2.57311	2.15649	2.93133	3.79498	4.2148	3.75216	2.32557	2.3794	2.81531	4.06995	1.90986	3.8355	2.05588		0.792744	2.54518
18.3478	3.17262	2.42461	2.58075	1.86754	4.16038	3.04063	1.52529	1.68632	1.81596	2.47365	2.06791	2.11382	3.1904	2.28516	4.14395	2.77518	3.78007	3.59812	3.86417	1.469	2.35843	3.92478	2.03674	3.84955	3.75048		0.797928	2.79822
18.4669	2.60327	4.25895	2.25489	3.47833	2.64201	2.82419	1.52415	1.54391	1.66572	1.47752	2.59289	2.42941	2.60916	2.88868	2.42377	2.6778	3.8023	5.31634	3.79653	2.21758	2.18024	2.92535	2.70925	4.42123	6.32453		0.803108	2.94352
18.586	2.2408	4.51914	2.75682	4.75717	2.55156	2.36232	1.72709	1.44358	1.60426	2.68695	1.6904	1.8686	3.10749	3.09885	4.85289	2.66388	4.78802	2.33718	3.2271	3.50175	2.66669	3.07032	3.35829	3.59446	5.31053		0.808287	3.03145
18.7052	2.1118	3.61431	3.95351	3.53204	2.28949	2.95027	2.82524	1.53515	1.72291	3.20494	1.71649	2.04773	2.35716	2.37453	2.85359	2.97455	1.71155	3.37381	2.3924	3.10431	3.09369	5.9962	2.25998	3.97506	4.98407		0.813471	2.91819
18.8243	4.05937	2.91549	3.14504	3.4014	2.40854	1.71788	3.05161	1.9465	2.23888	2.30749	2.38762	1.71689	2.21667	2.71656	3.46006	2.63479	3.61007	3.05592	2.1833	4.10454	1.81501	7.23225	1.94177	4.85548	3.11404		0.818651	2.96949
18.9435	1.9978	3.28399	3.83651	2.29689	1.8114	1.5184	3.14819	1.90294	1.75786	1.70273	3.23118	2.27398	1.50814	2.00492	2.62201	4.39025	2.73791	3.91102	2.77988	3.37665	2.8635	5.31982	2.51352	4.4651	5.7775		0.823835	2.92128
19.0626	1.78466	1.96351	2.45836	1.87048	2.22198	2.0261	2.53807	2.57004	1.36531	1.55202	1.81097	1.68232	2.53746	3.17183	4.3347	3.47123	4.04036	2.53104	3.42492	2.4243	3.98882	6.59358	3.52232	3.70499	4.246		0.829014	2.87341
19.1817	3.47027	2.18118	2.44724	1.63135	2.56598	4.25302	2.11681	2.86194	1.9821	1.61105	1.64763	1.62128	2.16594	1.67743	5.47329	3.46416	3.53919	2.08893	2.64723	3.77569	2.13539	3.66317	2.29192	5.06371	2.86968		0.834194	2.76982
19.3009	1.75671	2.7283	2.93732	3.41663	2.09111	4.22605	1.66449	2.30144	2.40473	2.92144	1.92451	1.67982	1.46861	2.12819	3.94123	3.5698	2.94522	3.5235	2.59751	4.0188	2.19458	4.19225	3.09103	5.5887	3.37948		0.839378	2.90766
19.42	1.77821	2.71339	3.99607	2.13894	3.23198	2.03077	2.86453	2.39265	2.3937	1.68883	1.68771	1.50728	1.86954	1.79739	3.17654	3.58418	3.13061	3.97374	5.89532	4.84929	2.03141	4.88258	4.06763	3.06257	4.00888		0.844557	2.99015
19.5392	3.94981	4.578	4.4972	5.34492	3.23981	2.81766	3.60368	2.63699	3.89733	1.70835	1.37857	1.74363	2.04897	1.93451	2.89648	5.24603	3.30594	3.91067	2.79174	3.04158	2.18938	3.08582	4.80927	5.13311	3.83066		0.849741	3.3448
19.6583	3.2444	3.07224	4.44515	3.24063	2.30103	3.37198	1.68371	2.55038	3.30019	3.7957	2.49156	1.82988	2.60185	3.29885	2.94723	5.02109	3.2298	2.91654	3.51011	4.14422	2.76067	4.37815	7.75875	3.77094	4.77229		0.854921	3.45749
19.7775	1.85696	3.46669	3.36115	2.8009	2.40507	4.39529	1.75353	3.29562	1.99184	2.45214	2.21368	1.92441	1.82659	3.59568	2.24764	3.79213	3.00038	3.68686	2.01649	3.2306	1.49933	3.41363	5.41034	3.61601	3.61017		0.860104	2.91453
19.8966	2.36377	1.92545	4.68702	2.73227	4.02776	2.62007	2.92883	2.82495	3.20741	2.25081	2.05383	1.57293	1.56722	3.01539	1.95598	2.48387	4.00453	3.43952	1.92603	2.59521	2.39173	4.78547	3.05827	4.19657	3.81034		0.865284	2.89701
20.0157	2.47061	2.94282	2.82625	4.09003	2.54865	3.62059	3.3246	2.13216	5.12865	1.70636	2.5975	1.90501	1.90847	2.53812	2.14436	2.98342	2.99493	2.59006	2.00456	1.83115	1.94088	4.19448	2.89068	8.63764	3.81883		0.870464	3.03083
20.1349	2.59838	4.05548	2.90206	5.8133	1.64275	4.65966	3.24232	3.77878	1.79356	1.92062	1.55353	1.6363	1.54969	3.98906	2.67026	2.68147	5.13294	3.94386	1.55721	2.07667	1.74977	3.67715	4.28295	5.22121	5.23028		0.875647	3.17437
20.254	2.56541	2.81006	4.21248	3.39328	2.10932	3.56985	2.42435	5.27814	2.07686	1.64105	1.58922	1.74267	1.88903	3.55574	4.04461	2.4581	3.76532	2.86349	2.26984	2.92106	1.78621	4.95928	4.43829	6.87724	5.69189		0.880827	3.23731
20.3732	1.7913	2.21079	1.92601	2.00148	1.9694	2.92911	2.25233	4.31403	1.57453	1.68072	1.75213	1.86667	1.62833	2.33601	3.08125	3.59819	3.53841	2.93332	2.15722	2.13857	1.46468	2.67823	3.41637	3.74851	4.20453		0.886011	2.52768
20.4923	3.11622	2.07415	1.65547	3.73808	2.35773	2.42488	2.06348	3.05809	2.01974	1.93905	1.46431	2.04134	1.69721	2.90128	4.29578	2.98164	3.14896	1.99879	1.96739	1.62152	2.40475	1.58084	3.18745	7.55722	5.53349		0.89119	2.75315
20.6114	4.42373	3.60568	1.59162	2.2622	2.34955	3.50585	1.46774	3.79311	2.76079	2.79145	2.22394	2.38175	1.57928	3.46943	2.97568	2.26236	2.84258	1.60917	2.35373	2.16973	4.33921	2.30408	2.70099	4.01572	4.15705		0.89637	2.79746
20.7306	2.43462	3.04165	1.66226	3.44764	3.41272	2.95625	1.53565	3.99981	2.89108	2.78713	1.82275	2.71293	2.48657	2.49167	2.57903	1.68128	4.27471	2.25093	2.17225	2.67907	4.88873	3.87794	4.62003	4.46624	3.73935		0.901554	2.99649
20.8497	3.45583	2.82576	2.85799	4.54571	2.52745	2.5103	2.44173	3.4469	3.2091	2.89432	2.74723	2.16743	1.80312	2.84588	2.2818	1.78256	3.02306	1.8713	2.52521	2.413	1.57724	3.7146	2.87927	3.77679	3.8896		0.906733	2.80053
20.9689	2.71282	2.79236	2.42156	4.25505	2.33143	2.34574	3.02381	2.31464	3.90452	1.77367	1.94972	1.7212	2.08787	2.75276	2.38858	2.72764	2.82177	3.95083	1.86567	2.26314	1.61215	3.19956	2.27282	4.97054	5.04416		0.911917	2.78016
21.088	1.58436	1.9371	2.31878	3.57439	2.48751	3.01636	4.62823	3.64839	2.70963	4.31891	1.63433	1.94577	3.30467	1.60324	1.70737	1.53747	5.64985	2.35038	2.41135	1.57892	1.71497	3.67071	2.56378	4.7712	3.57549		0.917097	2.80973
21.2071	2.06175	2.17782	2.95699	2.85758	3.95702	1.99393	2.64689	5.8598	2.34837	2.72689	2.32509	2.25956	4.12167	2.09729	2.1579	1.59031	5.10472	3.14052	1.92553	2.40218	2.12573	4.8402	2.26933	2.21814	7.21		0.922276	3.01501
21.3263	3.06476	1.88694	3.44102	1.66075	3.12769	1.61553	4.97004	2.48278	2.52841	2.35405	2.87982	1.82617	3.53938	3.80552	2.52082	1.92463	3.2919	5.19715	2.48895	2.80704	3.36739	3.49922	3.07784	3.25244	5.59526		0.92746	3.04822
21.4454	3.48278	2.82911	2.48699	2.1717	3.41299	2.10129	4.13238	1.98696	1.63671	2.11074	1.78933	1.50156	3.10374	2.55032	2.07768	1.82576	1.87712	3.72315	2.71455	2.33008	2.51113	2.1301	2.33156	4.75498	7.19522		0.93264	2.75072
21.5646	3.56833	2.14682	3.35736	3.90566	2.66921	3.99553	2.23145	2.80995	1.50304	2.54296	3.12281	2.6139	1.68761	1.57905	2.18932	1.63082	3.17107	2.68273	4.38784	2.21967	1.8837	1.62072	4.08697	2.75698	6.90813		0.937824	2.85087
21.6837	2.97691	1.53509	3.19621	2.29585	2.78945	3.6305	3.23583	2.96359	1.59609	2.23239	2.25212	2.23977	1.7407	2.1695	3.17715	3.09181	4.70962	3.66444	2.11733	1.8112	2.10991	1.57343	2.18203	2.57854	6.50877		0.943003	2.73513
21.8029	2.25896	2.66505	4.30458	3.29177	4.09152	4.04623	1.82238	1.91897	2.24929	3.28644	2.32611	2.24257	2.02426	2.9174	2.24423	1.51876	4.48841	2.28853	1.98593	2.2356	2.24687	2.09629	1.59944	3.75716	5.99918		0.948187	2.79624
21.922	2.3798	3.09646	2.23139	2.66062	2.4984	2.43393	1.73107	1.62585	4.37095	4.73869	1.60772	2.84433	1.73639	1.55795	2.55771	1.47945	4.01692	2.60796	1.54268	2.56337	3.14977	2.30095	2.2671	3.11257	5.36226		0.953367	2.65897
22.0411	2.96117	3.0571	1.58346	2.869	4.21181	3.83996	1.73176	1.90533	2.14673	2.82985	1.60674	2.3841	1.63496	2.23694	3.05502	2.0333	5.39096	3.47033	1.56993	1.62509	1.79007	3.28804	4.00224	2.36198	5.88022		0.958546	2.77864
22.1603	2.16783	1.67444	3.37418	1.86116	4.97851	3.25339	1.66939	2.08491	2.72236	2.26875	2.05626	2.15536	1.88164	3.75721	2.20816	2.31375	6.18739	3.99082	1.63181	1.6745	2.54562	3.42306	4.99574	2.78217	8.47186		0.96373	3.04521
22.2794	2.07001	1.51944	2.36897	2.57611	4.48896	3.41408	1.73788	2.54706	3.16209	2.99639	3.02472	2.60246	2.24204	3.38025	1.70533	1.93891	5.06614	3.38791	2.00848	1.79811	3.53081	2.42457	5.64198	3.36452	9.97013		0.96891	3.15869
22.3986	1.63242	2.02814	1.80748	2.23079	4.18362	2.19573	3.33175	1.95855	2.17137	3.81733	3.63117	2.182	2.29481	2.82154	1.66154	2.02681	3.01905	2.78394	1.86099	1.39826	3.08184	2.37524	3.60406	3.58407	5.87948		0.974094	2.70248
22.5177	2.13951	1.8294	2.97633	2.46859	2.85916	3.13504	2.09132	3.97451	2.7163	2.87151	2.60295	1.49422	1.93274	1.90792	2.82675	2.19663	2.60839	3.73453	2.81163	1.83974	3.99387	2.65789	5.54333	3.34728	7.28547		0.979273	2.9538
22.6368	1.60594	2.52959	1.99667	2.46705	3.92999	1.55871	2.60982	3.03998	2.39394	1.59056	1.45069	2.07972	1.60663	2.03538	2.01081	2.50072	3.48449	3.83794	3.83986	1.70626	3.01659	2.09483	6.27333	5.65475	7.66616		0.984453	2.91922
22.756	1.68428	2.88816	1.71116	1.60811	3.09917	1.54854	2.90649	3.79211	3.1427	2.16564	2.0056	3.04908	1.46556	1.59137	1.52417	3.69613	5.78481	3.40341	5.11167	1.98216	3.64989	2.23775	5.89	5.79395	7.23597		0.989637	3.15872
22.8751	3.50148	2.72013	1.64259	1.92216	2.39769	1.55182	2.82893	2.65216	2.48735	3.24832	2.69359	2.78057	2.61743	2.0349	1.55483	2.91705	3.249	3.65331	5.91906	4.78908	2.418	2.78257	6.58808	4.41896	5.52325		0.994816	3.15569
22.9943	1.61224	2.31586	1.74533	2.95113	2.55573	1.85256	3.18122	4.32513	2.29286	2.71665	2.29005	1.64362	2.0856	2.19151	1.50776	2.66811	3.87138	4.15622	2.70618	2.95283	1.65322	2.98758	2.47601	7.96384	5.12023		1	2.87291

## Sheet: Image12
X0	Y0	Y1	Y2	Y3	Y4	Y5	Y6	Y7	Y8	Y9	Y10	Y11	Y12	Y13	Y14	Y15	Y16	Y17	Y18	Y19	Y20	Y21	Y22	Y23	Y24	Y25	Y26	Y27	Y28		Ap-Basal	Avg intensity
0	7.5245	5.4757	11.1889	10.7754	6.7562	13.7773	18.5496	8.8604	13.329	6.2144	6.0224	11.5921	6.3358	5.9082	8.81117	7.59463	4.6081	4.53568	3.1999	4.1697	6.00035	9.5065	7.3822	5.6547	5.9236	8.332	9.3664	3.06568	3.42455		0	7.72017
0.1191	3.7549	8.9679	9.741	10.0807	9.8413	15.3596	14.2332	11.6502	13.063	3.97839	5.2092	10.1337	4.5961	8.5474	2.04136	3.75996	6.63837	6.45901	3.15997	7.348	5.60368	6.8103	9.9799	8.3154	15.3432	14.2462	3.9186	3.36548	3.87465		0.00467128	7.93175
0.2383	2.4998	8.0511	12.7872	5.1698	6.5514	16.0638	16.01	13.0648	6.9871	6.91486	9.1166	8.0916	6.5244	4.8563	3.47272	2.85768	2.14177	7.28371	4.11984	8.0204	3.92247	8.8887	10.7853	3.2161	11.8603	15.7178	6.1926	4.34676	2.35318		0.00934649	7.51269
0.3574	5.6125	7.9583	12.2006	8.3507	7.9576	17.5608	15.3336	16.7793	7.9244	8.00551	6.9434	6.7138	5.0461	4.5869	5.88355	4.40749	2.65187	6.48984	3.84761	6.2289	4.0165	8.0085	5.2427	3.771	17.6919	8.7249	6.2185	2.06088	3.95492		0.0140178	7.59216
0.4766	8.0592	11.6734	7.4268	11.7915	6.2184	19.6582	16.2644	11.8242	10.7474	9.74979	7.6769	9.158	4.2999	5.5883	1.56202	1.75529	1.99855	7.94535	6.72701	7.0279	2.44504	6.357	3.8607	6.0251	11.0836	15.4455	5.7758	3.10094	3.35444		0.018693	7.74485
0.5957	5.2968	14.1116	10.8696	11.4307	6.8415	18.2148	15.9526	15.6541	9.6853	8.61803	10.522	9.7757	5.6862	3.8647	3.59315	3.25071	2.75704	5.6768	2.84937	4.3451	7.37985	5.2908	11.7155	3.6085	13.559	14.9396	8.7061	3.58657	2.33807		0.0233643	8.27999
0.7148	7.0377	19.1604	9.6572	12.2934	4.9618	24.8516	29.0105	15.0431	8.0972	9.00709	3.3666	9.6919	7.4114	4.7114	2.65369	4.09559	4.15014	8.14899	5.283	3.9442	4.54369	7.6195	8.9034	7.0075	14.7765	15.3922	3.8218	4.99579	5.19212		0.0280356	9.13205
0.834	7.5834	11.2495	8.8014	12.4037	7.766	15.0098	21.5863	14.4297	13.318	5.31144	7.3342	7.4723	5.059	5.6233	2.60912	4.19382	3.58958	2.82651	3.14346	8.0133	4.599	7.3174	7.9385	7.4904	11.0521	14.3627	3.7285	3.09032	2.7649		0.0327108	7.91957
0.9531	14.0256	15.6779	10.0181	9.5987	8.2225	21.1828	20.8901	13.0273	12.0254	10.727	7.1231	6.4347	7.3567	5.4069	3.53229	5.2138	2.36895	4.26054	2.63066	5.7489	2.8178	6.6087	9.6062	7.5058	13.2067	15.3631	6.3768	2.94852	8.32701		0.037382	8.90457
1.0723	11.1343	16.5495	15.0541	8.3272	6.44	17.212	21.0472	12.9157	7.0045	7.82884	8.1124	6.0566	3.7536	5.6987	3.64314	3.86443	5.74682	3.61635	2.32331	11.7567	4.88914	8.3298	6.3571	10.0791	11.345	8.2122	7.8448	1.40695	4.74795		0.0420572	8.3206
1.1914	16.0924	15.6741	7.6247	7.5112	9.9421	17.0176	24.6375	14.66	5.7238	10.3266	4.0687	6.6234	4.5126	2.8931	3.72169	3.83233	3.64106	4.46924	2.29099	8.0194	7.60743	7.6222	6.3214	6.4632	13.2004	12.4655	5.8882	2.77434	2.44445		0.0467285	8.2093
1.3106	17.4149	18.6793	11.2007	7.9137	7.6064	19.889	22.1337	14.218	7.9963	7.5656	7.2403	14.557	7.1511	3.4326	3.71262	2.47404	2.31342	2.98854	2.37951	8.4136	6.25701	11.0924	5.3434	12.2595	10.6826	19.3572	4.6299	3.62839	5.042		0.0514037	9.22665
1.4297	17.0255	20.1933	11.1377	9.5534	8.1137	15.3816	19.0981	16.8703	6.0124	7.17572	5.9771	8.3864	4.925	4.0362	2.19577	4.25243	2.99294	3.60545	3.87732	6.9957	1.63037	8.422	4.7834	7.4024	9.8467	14.6561	2.7453	4.32917	3.39417		0.056075	8.10399
1.5488	12.1088	22.8376	15.7461	8.3102	7.5842	17.0761	22.5139	13.0013	5.7689	7.7496	4.6002	5.6165	4.4514	5.8605	3.69283	2.14947	3.418	3.46222	4.4851	12.6999	3.37471	12.5931	11.0348	9.1492	7.3924	12.3017	5.7182	3.60171	6.13851		0.0607463	8.77369
1.668	12.6755	16.855	18.4315	12.8258	8.0918	13.4925	13.1844	11.8518	11.3037	4.60314	5.6929	3.9256	6.6916	6.9172	5.19751	2.51686	1.74156	3.05144	1.88085	11.1461	5.43297	8.6898	11.5784	9.3937	6.4811	13.6157	8.5515	4.86671	5.93849		0.0654215	8.50431
1.7871	11.3467	21.2315	18.464	13.4073	10.6727	18.7536	13.7941	12.6888	7.5622	5.20245	6.39	3.1953	6.6059	10.4829	3.11612	2.7698	2.83716	6.39837	3.47551	11.5313	2.005	5.2748	8.9152	9.4264	10.2381	18.2392	7.534	3.1844	2.31939		0.0700928	8.86421
1.9063	13.5801	31.4205	21.9782	9.6714	14.5852	16.5359	7.6423	12.4334	8.9316	3.76307	3.8327	5.2831	4.7078	10.7138	2.94561	2.4954	3.78493	1.77169	2.07639	7.2357	4.32258	8.5475	5.6138	6.0943	10.7192	28.3741	10.0531	2.22451	3.31864		0.074768	9.12609
2.0254	12.3205	18.007	19.9571	10.4627	13.4424	12.7392	10.9586	20.4703	4.4459	6.16533	3.7991	4.6954	5.1793	12.1785	2.73828	2.87223	2.9791	5.6504	3.87728	3.6985	2.16187	5.8871	5.4087	9.8593	10.5905	25.6859	5.8676	2.22718	2.74729		0.0794393	8.51974
2.1445	8.487	14.5511	22.1368	7.5561	9.4891	14.1171	11.3115	17.3761	6.5453	10.2691	6.3343	7.4303	2.1346	10.7753	3.15579	3.6896	2.28493	1.49785	6.3353	11.6416	4.86978	4.1496	9.2552	13.3814	7.7769	20.9307	6.4607	4.04355	2.26365		0.0841106	8.62932
2.2637	12.4438	11.9917	20.3196	11.6308	14.311	16.769	12.1573	16.8721	9.3285	6.30523	10.9316	5.459	6.5122	7.078	2.973	2.93235	3.9683	3.73189	3.49982	3.0262	2.37138	6.0551	12.8873	6.1574	13.8148	23.8223	6.7284	3.59648	6.74112		0.0887858	9.11778
2.3828	11.7484	11.0554	30.6786	10.1301	13.2273	17.505	10.3484	10.9303	10.3743	5.32227	4.5842	5.4709	4.6186	6.1923	3.72378	2.60522	2.40839	5.61323	5.1658	4.6042	3.74325	7.1194	8.87	9.4029	12.9302	29.6074	6.3512	2.69953	2.3315		0.0934571	8.94352
2.502	9.189	13.3167	23.6985	11.9468	12.3403	16.0079	10.5635	16.6563	8.2634	5.26451	4.6861	3.4112	7.5686	12.9244	3.76659	2.91731	7.41208	5.48442	4.62853	5.1484	3.00649	6.1843	9.8883	12.5772	9.5312	38.211	7.3421	5.53222	4.91256		0.0981323	9.73724
2.6211	6.0809	16.375	24.3808	8.2203	14.8255	27.067	7.4797	13.1681	7.6914	5.7761	5.3192	4.1158	8.8845	4.9088	3.5639	3.33553	1.90856	2.20087	5.08914	8.5082	3.266	4.945	9.5815	8.4839	5.1675	38.4359	8.1464	3.79182	3.79853		0.102804	9.12124
2.7402	11.4265	9.2221	18.0341	5.9956	11.0181	23.5955	14.0088	28.0204	4.3547	7.4346	3.3263	4.8249	8.0906	5.0855	2.53782	3.48116	3.41614	2.42071	1.61519	3.9719	4.53311	4.8013	9.2328	13.4276	12.355	28.4998	8.5093	2.62845	3.55459		0.107475	8.94561
2.8594	14.2008	11.9078	28.1847	6.7944	12.5536	24.9491	11.4374	15.3616	6.6795	6.65239	4.9154	3.5036	8.8402	5.4085	3.38688	3.00844	2.17922	1.42189	2.50069	4.6696	2.55022	4.541	7.5077	7.7737	15.5304	33.6988	6.4981	2.0736	2.95172		0.11215	9.02348
2.9785	6.6082	13.8912	25.0106	8.7289	18.8156	20.9099	9.8282	15.5557	8.7615	3.98569	5.6876	5.3032	10.0319	4.6303	4.0547	2.417	3.18164	2.25549	2.49046	4.6226	3.809	2.7173	8.7625	12.3591	10.7753	29.023	11.2762	5.2199	5.10645		0.116821	9.16618
3.0977	7.5323	13.3306	15.8072	9.5983	16.0601	28.178	10.9679	16.3717	6.9505	3.76487	4.4794	5.2292	13.1395	4.9039	4.43074	4.48021	2.83775	3.37213	3.96314	3.7015	1.64564	3.2678	11.1554	13.7636	18.5518	23.576	6.4843	3.03237	3.17914		0.121497	9.095
3.2168	9.1267	8.4454	12.1609	7.9	18.1296	16.1858	17.0476	10.4509	9.9875	4.99561	4.9538	4.2495	12.2963	7.2167	4.53998	3.9453	2.46225	3.95694	2.75536	5.4194	3.25211	5.497	13.826	8.1645	17.5858	19.4535	5.7529	2.9773	1.51528		0.126168	8.42241
3.336	13.8338	14.4203	15.0431	9.074	12.5049	19.7601	11.4762	8.8892	9.4879	9.27745	4.6011	5.9071	7.7841	4.1863	3.42083	5.30958	3.18287	3.95319	2.63281	3.5521	3.40334	2.5902	9.9204	9.1301	19.7789	18.3499	7.2468	5.30977	2.40196		0.130843	8.49753
3.4551	6.9776	10.4355	15.1545	15.7823	18.1652	20.2263	10.3833	7.5341	6.7886	9.64524	1.6866	6.1651	9.0289	5.4846	3.69801	3.08634	3.96387	4.57064	1.94079	3.7058	2.90835	2.9106	12.7995	14.3684	16.4715	25.4215	9.9174	3.61262	3.58812		0.135514	8.84211
3.5742	9.75	14.0945	10.4619	7.2955	18.0315	17.4521	13.6066	8.9191	7.1084	8.27806	2.5014	8.9299	9.2718	4.1027	3.5822	1.50941	3.39014	6.31843	3.9773	4.2539	2.10973	2.83	6.5644	7.0263	22.5998	23.5486	7.8289	2.78622	5.59696		0.140186	8.40434
3.6934	12.8067	15.1764	11.2213	12.8551	13.3562	14.9424	13.0504	16.8949	3.5167	4.73006	4.7359	7.0253	7.9001	7.1833	2.26981	3.26807	1.4844	5.05068	3.00641	3.3568	2.84977	4.6649	8.2905	10.9219	19.8899	31.4331	8.7642	3.34207	2.86826		0.144861	8.85709
3.8125	9.2817	16.2289	7.534	17.1209	10.9201	15.9244	9.7543	16.1694	3.4639	7.78326	3.3067	4.1169	5.2916	4.3981	4.78659	3.62022	1.66591	2.34819	1.99142	3.7467	1.73131	2.1769	6.8549	15.7266	13.6178	23.5104	6.0258	4.08733	2.21824		0.149532	7.7725
3.9317	12.706	13.2547	7.3421	11.8375	17.2112	19.5126	14.7701	14.7996	3.1545	6.33672	4.6997	3.8238	7.6888	10.3768	6.168	2.49914	2.35327	3.56895	2.5242	3.2925	4.24793	3.1368	7.726	11.9281	22.2161	30.7254	5.0744	2.43536	3.2844		0.154207	8.92051
4.0508	13.3877	17.7775	11.0035	16.3515	10.1987	20.9235	8.9747	11.6511	1.7362	5.88188	4.6334	4.3098	6.5269	15.9735	4.44536	3.8338	2.06101	4.9376	2.59908	5.3357	2.21736	3.1238	8.1437	13.8924	20.6829	25.731	8.8489	3.98393	4.63649		0.158879	9.09665
4.1699	11.1233	15.4682	8.4703	8.6978	15.2524	14.5305	9.0617	10.76	4.1958	7.69873	3.029	5.4346	5.715	9.3315	3.48387	4.82422	3.92713	2.0435	2.07776	9.9672	2.85301	3.5091	7.3189	15.6848	18.1809	30.0674	11.8707	2.83424	5.22171		0.16355	8.71149
4.2891	9.578	12.5369	9.5411	8.0833	8.8233	19.4626	16.303	5.6572	6.662	9.31055	4.0247	2.1283	4.5743	6.8741	4.47592	2.81848	3.24421	5.98102	4.07242	6.3484	2.46112	4.9753	6.3156	15.6597	14.7724	28.6977	8.5807	3.95387	2.97024		0.168225	8.23746
4.4082	10.7296	19.0883	10.4171	8.7946	10.5434	15.4087	10.8455	7.3375	5.1836	6.82216	3.1143	4.5769	3.3495	15.0539	7.82746	2.88396	1.6539	3.00369	5.44072	4.9003	3.82411	4.431	5.1391	17.8651	17.7185	24.569	14.1953	3.39818	2.67153		0.172896	8.64782
4.5274	14.23	10.7319	10.1095	9.2592	12.603	19.3379	7.2694	4.3209	5.0579	5.97064	2.875	4.8005	5.7114	8.2875	6.67352	3.30559	2.86072	1.97954	2.98701	7.3614	1.74532	3.0372	7.8202	16.2175	21.474	25.5015	10.338	3.44904	3.18709		0.177572	8.22422
4.6465	15.5051	10.3215	18.5228	7.9201	10.8726	9.8877	16.1158	8.1298	9.1365	8.02567	3.9799	5.5011	5.6172	13.7308	6.7724	4.43825	1.60654	3.3522	3.60434	6.3853	5.1582	5.3413	7.0197	17.5396	18.5356	21.7256	11.3705	2.02825	3.58677		0.182243	9.02521
4.7657	12.4899	7.7878	10.2174	10.0734	8.8173	15.4287	9.1176	7.2844	6.5995	5.84513	4.7012	4.8705	4.4752	12.8586	2.08322	4.70717	2.05707	4.24549	3.97422	7.0245	2.99023	5.282	4.8331	18.807	13.4908	14.5023	7.3108	4.10013	3.78673		0.186918	7.57798
4.8848	11.3855	6.9361	11.7011	6.358	7.6254	8.8499	15.6309	12.8641	4.0944	6.87644	4.201	6.529	4.7976	9.3487	6.23006	2.9272	1.98444	6.04688	3.96719	6.7945	1.88142	2.0479	3.8891	16.6487	12.6343	15.6086	5.051	1.70457	3.89898		0.191589	7.1901
5.0039	11.8007	8.5575	5.2102	6.9277	9.1668	11.7254	19.0773	7.5778	4.2114	6.86476	3.9316	9.7477	5.4789	5.0907	6.78295	3.7057	2.4047	3.45794	3.65963	9.4237	3.35468	5.4237	8.9711	19.557	12.7191	15.6289	7.1503	4.22012	2.8779		0.196261	7.74848
5.1231	12.3409	4.3167	12.1754	7.185	9.3632	12.1979	18.627	10.6772	5.0207	10.1405	3.1102	8.6393	6.4622	9.161	4.91036	3.02967	3.94044	5.69205	2.16307	5.117	3.46354	5.6967	5.0239	15.8187	13.7719	11.3976	6.073	3.45273	2.31327		0.200936	7.63038
5.2422	8.6362	7.9739	7.3425	6.9731	9.2018	12.4471	19.9356	9.3271	4.8527	5.86028	3.3014	9.8432	6.3874	7.5711	2.52647	2.37874	5.56427	4.06027	2.16074	6.7297	4.24555	2.7306	4.6827	12.2173	15.203	9.9677	9.761	4.34917	2.80483		0.205607	7.20812
5.3614	14.0451	9.0329	6.5379	6.4085	7.8967	13.8795	25.3386	10.4644	6.6791	7.3595	5.3397	7.0042	6.9769	13.4159	7.20629	2.69114	3.50262	2.64487	3.11701	3.402	5.36829	7.1649	6.7505	11.4657	7.0163	5.5909	12.0886	4.27565	2.79073		0.210282	7.77429
5.4805	16.5843	7.1467	7.5941	4.9743	10.2664	12.6594	20.8002	9.0865	5.3597	9.20025	5.8428	3.2183	5.602	13.1736	2.66499	1.5653	3.10992	6.05289	2.37525	3.2161	2.38585	3.969	4.7388	8.7627	14.4378	10.212	7.5382	2.58988	4.35753		0.214954	7.22361
5.5996	9.928	8.9954	8.6863	10.595	9.2515	16.8888	16.4859	7.3293	5.1523	6.04037	5.8547	5.2941	3.2701	8.5953	3.5295	2.33185	4.28798	5.37311	4.35163	6.5662	2.57363	3.2723	7.3916	14.6438	14.3926	3.9393	6.4548	4.27356	3.42479		0.219625	7.21289
5.7188	7.3358	6.9198	7.9251	6.9218	8.0046	13.0853	18.6058	4.7205	4.1054	10.8145	4.4634	9.1679	5.6401	12.2987	1.95638	4.2048	3.97592	2.8389	1.60959	3.2057	4.24027	3.1267	9.796	14.0859	9.4579	7.4419	5.1393	4.72673	3.31444		0.2243	6.86652
5.8379	12.9282	6.5189	8.771	6.8061	13.0906	11.7434	14.8336	9.8092	4.1955	8.90679	6.6987	10.3935	5.0416	12.0563	5.44482	2.0609	3.4488	3.75433	2.41659	4.8726	3.31558	2.1346	8.0607	9.2666	7.7219	8.5186	9.0474	3.40592	4.76135		0.228971	7.24221
5.9571	5.2725	10.9962	7.3689	6.3789	10.198	9.7774	20.9744	5.7686	9.7259	5.04405	2.986	14.8707	5.6934	11.9597	4.95894	1.55331	1.89335	4.30851	3.26891	3.1876	3.94688	4.1507	8.5912	8.793	7.6843	7.9818	9.1148	2.17053	4.10891		0.233647	6.9906
6.0762	7.354	10.9566	6.2244	6.0177	9.0937	12.0259	21.5433	8.2983	7.6636	8.80779	3.9802	11.773	10.2262	7.9605	4.95757	2.6466	3.69351	2.72578	2.5719	1.6259	3.78794	3.9207	6.6609	8.7218	6.6562	5.2131	6.8019	5.20694	2.55838		0.238318	6.88532
6.1953	5.8206	8.3538	10.9126	7.3512	18.9935	16.6099	17.4078	10.355	6.1711	5.34864	3.9511	6.7513	7.5991	11.0915	4.02776	4.30906	1.87301	5.10319	5.13946	3.8606	2.88151	3.7755	11.0981	8.062	8.9891	7.0228	8.0715	5.52775	2.7181		0.242989	7.55781
6.3145	6.3397	10.2927	5.5074	6.2923	16.7764	19.2685	21.9074	17.9816	6.5522	7.83728	7.4975	8.2549	5.5766	14.4727	7.0624	3.64226	2.50722	6.15368	4.04731	2.4136	2.29677	5.2513	9.3114	8.6024	10.3958	7.1529	6.093	3.85686	3.04463		0.247664	8.15133
6.4336	8.5585	13.7764	7.5556	4.9931	16.6193	13.6879	18.467	14.3467	7.6729	6.21125	7.1571	10.2256	3.8713	9.9824	6.13867	3.88746	2.81252	7.72587	5.88191	3.0551	3.59714	3.2101	4.0267	11.74	10.1113	9.2079	5.834	1.82782	1.57318		0.252336	7.71568
6.5528	7.4467	7.5696	6.7671	10.663	16.7074	9.035	15.3518	15.4379	5.7914	6.22759	3.7995	6.5807	5.8525	9.8124	4.14638	4.30739	2.69114	4.00199	7.61515	3.5567	2.79939	3.5642	12.9608	7.1969	12.6463	12.0527	5.7632	4.82945	2.45155		0.257011	7.50434
6.6719	6.1918	9.8637	8.8583	9.895	12.1858	9.1406	13.6458	12.5516	3.0142	9.08796	6.3626	5.8181	8.4734	8.1158	1.47492	2.61123	4.00709	6.81341	2.31861	2.8571	4.66613	6.6977	10.578	7.2077	10.4681	6.7319	7.7278	4.44852	3.40902		0.261682	7.07662
6.7911	11.0182	8.9505	6.2643	5.8829	11.4623	12.6572	13.0375	16.1406	4.3609	5.96704	7.7433	10.4541	6.1906	10.4544	4.66448	2.58936	3.64153	1.83889	5.87391	1.9415	5.33382	6.6414	10.6601	10.6741	13.8862	3.3324	6.2725	3.35778	2.73099		0.266357	7.3801
6.9102	6.6406	6.579	7.6314	7.8863	13.3791	15.5592	21.7716	11.4476	2.7127	5.92347	6.9856	13.9023	8.1793	6.3206	5.61768	5.96942	5.12156	5.00218	3.04854	2.5021	5.26301	5.7999	11.4721	8.5639	13.9175	8.3181	10.4435	3.64695	2.82502		0.271029	8.01484
7.0293	6.6437	5.8828	4.8902	6.0746	13.4328	13.9454	13.3345	14.2252	2.3132	7.9086	3.6672	10.8132	5.9603	3.3161	5.84221	2.68072	2.47851	5.00082	5.13585	3.628	4.08268	6.8601	5.2963	4.776	11.0058	4.2988	7.2588	2.54703	1.61451		0.2757	6.37634
7.1485	6.2104	10.6839	4.0458	6.9467	15.5138	13.1853	9.765	6.1634	4.089	9.48498	6.5908	9.3188	5.6801	4.7217	3.06576	2.61867	2.93716	4.61486	5.23217	5.9332	2.40779	4.3262	7.4224	8.0743	8.3327	5.7413	7.6584	1.53023	2.75529		0.280375	6.38104
7.2676	9.9598	3.7025	7.528	8.032	7.5775	11.5372	10.6251	11.3153	4.7727	6.71598	15.3618	11.9435	7.9772	6.5436	6.1539	2.40059	4.08985	4.66051	1.95352	2.931	5.74536	5.5209	7.801	8.5446	6.3738	6.7483	6.3133	2.37134	2.70213		0.285046	6.82422
7.3868	11.9569	8.9833	5.8989	7.1225	6.0132	12.3349	6.3911	11.2099	4.9926	4.84426	11.2611	7.0775	6.5554	3.2767	3.06397	3.21047	2.54916	3.55182	6.57898	2.7268	4.57998	4.6137	9.2128	7.4232	7.645	9.8554	7.9168	4.11306	6.22878		0.289722	6.5927
7.5059	7.7543	6.2366	4.7347	5.1843	13.4966	10.9345	6.5055	8.8065	3.7566	7.92513	5.9937	9.0879	10.045	6.4004	2.00138	3.03943	2.98473	7.82375	2.68619	5.4633	4.24946	6.962	9.0492	4.4467	9.0437	9.555	8.4912	2.49493	3.77696		0.294393	6.51482
7.625	11.3735	8.5714	7.4205	7.2283	14.8694	9.269	4.3436	9.0954	4.2713	4.2289	4.7651	10.5816	8.4759	5.2446	3.25946	2.62963	2.50117	3.52857	4.39975	3.099	3.41932	4.8742	5.1642	6.555	8.6934	8.1221	4.5063	3.47569	3.26154		0.299064	6.1113
7.7442	11.2612	6.1862	9.6505	5.3516	11.1059	12.1142	9.0292	8.2769	9.2349	2.99196	7.2444	8.5049	5.5089	6.8069	5.10633	1.55038	4.06563	5.08736	3.46925	3.9028	4.84718	5.3195	9.9746	5.3998	5.0376	14.2331	7.4184	2.55562	2.28222		0.303739	6.67301
7.8633	13.8019	5.4316	5.5676	2.7074	16.2031	10.0961	5.9745	11.4091	5.6401	5.55105	12.0875	6.6801	6.5926	4.6172	4.93201	2.18234	5.79818	3.85272	2.73173	7.5665	4.53996	2.6172	8.1308	4.9842	8.768	7.0266	4.6903	1.52642	2.5696		0.308411	6.35436
7.9825	13.1373	3.5063	9.0159	4.4719	10.8386	7.418	6.4666	8.4488	2.1828	6.13974	14.3522	7.743	8.0356	3.735	4.91397	3.76862	3.35475	3.74063	3.99472	6.3015	6.9321	5.4975	5.4609	7.9232	8.0467	5.7176	3.8317	1.94492	2.79388		0.313086	6.19705
8.1016	10.9492	10.216	5.9927	8.1945	10.8278	8.1747	6.407	13.9419	4.9224	4.46185	10.3196	6.2065	7.1054	3.3961	3.42832	4.95344	2.21787	4.92002	5.02748	5.9977	5.65209	4.6515	5.6985	4.3724	8.3846	6.4783	11.0445	2.54359	2.14701		0.317757	6.50459
8.2207	8.5744	4.4021	4.2103	7.0304	7.3251	11.0395	2.5963	8.195	5.0364	5.03427	5.2543	6.1702	3.7895	3.8097	6.93797	3.92133	1.84354	5.1935	3.23483	2.7068	4.75373	7.8624	6.716	8.8377	6.6731	5.681	5.8734	2.32082	4.00544		0.322428	5.48376
8.3399	8.0271	5.9982	4.1361	4.0852	8.1902	10.9954	4.5205	8.7684	2.7796	2.79903	3.7575	7.0681	2.6888	7.0046	5.01145	5.71221	2.53183	5.10335	7.47143	8.0089	5.68888	4.7076	5.8692	9.9023	4.9966	9.7945	5.8871	1.88134	5.85948		0.327104	5.83603
8.459	10.8092	4.7207	3.0784	7.3652	5.1101	9.9553	8.0736	6.6981	2.7485	4.05883	4.8912	3.6316	4.2209	5.0042	3.44724	2.9694	3.27633	4.12933	2.67921	6.5236	3.77613	2.8754	5.6871	8.9451	6.6359	8.3121	4.0184	4.71199	4.12014		0.331775	5.2577
8.5782	10.2918	5.9325	6.4982	6.2075	7.8805	13.9456	4.4282	9.541	1.7907	3.36443	8.3314	3.7864	4.3136	6.6398	3.53558	4.42267	2.13337	2.44828	4.51495	6.4888	5.23927	6.9951	4.7315	7.4528	5.4791	9.0811	6.2328	4.15918	4.09881		0.33645	5.86086
8.6973	8.6208	9.8206	2.4131	3.8289	5.0237	12.4162	3.934	11.3203	2.7504	5.56174	8.4174	4.8842	6.9862	7.4343	2.86754	4.21619	2.03602	2.07327	2.8456	5.6341	7.14788	4.3444	3.4312	5.2617	6.2785	4.1396	6.6003	3.2471	3.15971		0.341121	5.40327
8.8165	7.0732	7.9961	4.1328	8.4087	2.967	6.9161	2.5291	4.2369	4.8856	3.89406	6.927	2.5059	4.1738	3.4833	3.42032	2.38727	2.35971	3.82546	5.76083	5.4877	4.52271	4.4269	4.3008	8.8799	7.2023	6.5848	5.9311	3.97096	4.26715		0.345797	4.94681
8.9356	5.3882	8.6273	4.6651	5.7482	4.2223	10.4682	6.0627	5.7904	2.826	5.41259	5.432	3.8129	4.5281	3.5307	4.42332	3.23828	3.33708	3.5035	3.00179	6.7295	3.95986	7.362	2.6037	8.1334	5.7751	4.7686	5.7604	1.5244	2.13779		0.350468	4.92322
9.0547	11.664	12.408	4.97	8.5381	6.5066	13.686	7.9981	5.1661	7.3828	4.12728	4.93	2.4853	6.2173	4.7711	2.15044	3.75028	3.2405	4.3422	2.77404	5.8383	4.10223	2.3544	3.7527	12.9977	8.6759	8.2186	5.2734	3.91824	3.81472		0.355139	6.07084
9.1739	10.5539	9.6699	4.2097	4.5929	7.9719	9.8045	4.7325	8.6195	4.4949	5.45527	5.2524	2.2399	3.3777	3.0661	3.54308	4.57666	4.96341	4.00555	1.56417	5.9433	3.62862	2.5293	6.1454	8.3195	3.4025	7.1213	4.6946	2.26961	3.9472		0.359814	5.19639
9.293	12.4133	11.5289	6.157	5.5389	8.0546	9.5671	5.1694	5.2066	2.27	3.87244	5.5475	2.4009	4.9708	3.9097	2.96372	3.89606	3.8495	4.96776	4.36608	4.2782	2.09788	2.5987	6.7952	5.5006	8.0494	3.892	6.2199	2.08629	3.21447		0.364486	5.2201
9.4122	6.2684	10.0081	3.8419	6.8688	7.3058	9.5112	4.4895	5.313	3.3682	4.37538	7.5043	1.6474	7.4589	1.5785	2.8691	3.62612	4.85412	2.78233	3.6771	5.153	8.88343	3.3359	5.143	6.8394	3.6067	5.6406	3.2413	3.44333	1.79584		0.369161	4.98037
9.5313	9.1705	5.745	2.0002	3.8214	7.7435	12.3776	4.9239	4.127	3.5735	4.86967	6.9814	2.4489	3.2231	2.2625	3.113	5.71238	3.98606	3.97846	2.82951	4.9894	6.14534	2.0539	2.6431	4.4484	6.581	5.7825	5.9323	2.42543	3.87181		0.373832	4.75037
9.6504	5.0637	5.6513	1.6496	3.8388	5.6192	9.1831	4.8723	5.744	4.4465	3.9865	6.146	2.251	4.8157	5.1021	1.68284	4.65562	2.93296	7.05386	3.02848	5.4056	4.69891	3.4419	3.7745	5.038	5.3798	6.1026	7.5234	3.38815	4.69488		0.378503	4.73004
9.7696	7.5412	4.9019	3.0009	2.8345	4.944	8.2686	8.3041	8.9583	4.2064	3.70324	5.9419	3.0404	3.9362	2.4794	2.13316	7.89018	3.67217	5.96861	2.70814	6.4141	3.78454	3.5088	5.4664	5.3391	4.6389	2.3659	4.6703	2.99148	3.2861		0.383179	4.72065
9.8887	6.9813	3.2408	3.5663	2.6131	5.9199	7.5101	5.3818	4.2894	4.7975	5.86705	7.0057	2.237	2.0326	2.2692	4.1122	2.28726	3.46707	4.03989	2.8946	6.0355	4.1516	6.7455	6.0021	4.1497	5.1199	7.3221	2.8179	3.24124	2.39499		0.38785	4.4308
10.0079	11.2528	6.6217	2.2414	2.4958	7.1289	10.6053	4.9585	4.4468	4.2713	5.44551	5.1483	2.5742	3.7904	2.2002	3.59227	5.24867	3.09939	3.76781	2.77552	3.3542	5.65135	4.1386	5.6605	5.8331	5.1377	4.0391	5.8409	4.77545	2.26681		0.392525	4.77112
10.127	7.81	6.1414	3.1272	2.6459	4.4849	10.1949	7.2042	3.9763	4.6929	3.13655	2.1258	3.4322	6.112	2.6785	2.8136	3.75346	6.65918	4.69903	4.86897	2.9737	1.66246	2.8082	3.2911	7.4874	3.645	6.6164	6.9074	3.75866	3.29391		0.397196	4.58625
10.2462	6.8566	4.2761	2.2371	5.6326	4.507	10.5714	7.1692	3.9745	4.462	3.17302	4.2052	5.4185	2.8125	2.8105	4.45374	5.571	3.33975	3.95984	2.27888	4.5732	4.44494	4.0857	3.8092	7.6958	4.4904	7.4773	4.0037	4.97612	5.46196		0.401872	4.78372
10.3653	7.751	1.7596	1.645	3.3586	3.3465	7.5269	6.9005	2.852	3.386	1.60515	3.1145	3.7696	2.975	3.2515	3.918	3.96437	1.86042	3.4401	4.94478	6.9133	4.74266	2.8892	6.3406	5.5899	5.0305	2.5708	5.6102	3.1171	2.60627		0.406543	4.0269
10.4844	7.9586	2.5179	3.1015	2.8018	4.0905	6.5601	3.4662	3.5102	3.0045	2.92061	2.3562	3.4458	2.0843	3.4662	4.16802	2.43458	5.39981	6.2532	4.24842	3.3707	2.35967	2.9428	4.2091	6.3616	4.9921	2.3804	2.2862	6.06923	2.63295		0.411214	3.84114
10.6036	13.5413	4.9676	2.0173	2.2674	2.8118	7.5044	5.4965	4.6557	2.9521	3.29979	2.6669	5.198	2.448	3.953	4.15763	6.10332	3.95818	3.51595	2.03332	5.2531	5.34401	3.1209	5.9782	2.9822	2.7955	3.4393	2.9493	4.48094	2.26995		0.415889	4.21247
10.7227	3.8397	3.8472	2.2028	2.218	6.6812	9.5268	4.279	6.944	4.205	3.4217	5.5319	2.8752	2.7359	3.8754	3.53584	3.02304	3.19499	5.02863	2.93339	3.2775	2.7041	1.9746	5.6682	4.6727	4.4198	3.9097	3.6354	3.03064	2.91848		0.420561	4.00382
10.8419	3.7479	3.5113	2.9276	4.265	6.9927	5.813	3.68	4.2234	1.9976	4.56369	2.725	3.6013	3.8066	2.3294	3.92972	4.52498	3.42162	3.74369	4.26191	4.0992	3.00991	5.587	3.8911	6.652	4.6358	3.9495	5.2876	4.39215	2.75401		0.425236	4.08016
10.961	4.9344	4.5686	2.6043	3.5492	3.4158	6.5306	2.6939	4.6657	1.8021	1.65458	5.9977	2.5257	2.4855	5.177	3.31433	3.64802	4.40069	3.57628	3.15812	4.6853	2.59836	3.6792	5.9041	8.5858	4.5928	4.847	3.2722	2.98146	3.66724		0.429907	3.98331
11.0801	7.7092	5.0058	3.0968	5.5313	2.6814	7.1795	5.1619	5.5118	3.5714	3.38952	3.8281	2.6717	4.0168	4.5758	2.63777	2.97163	3.6476	3.37661	1.76238	4.6097	3.89477	4.1262	2.9875	6.4254	5.1055	5.5178	6.6879	5.85212	3.08473		0.434578	4.36616
11.1993	4.0845	2.5004	1.74	5.0396	6.2474	6.1869	2.6148	4.7566	4.7682	6.44743	1.6875	2.7629	3.6266	2.6405	3.50838	4.88338	3.03765	5.19643	1.85697	4.4735	2.41856	5.2834	5.1444	5.5865	4.5209	4.227	3.5869	4.14461	2.23677		0.439254	3.97271
11.3184	5.0576	4.0949	3.6726	3.0695	3.8274	4.4782	4.8015	4.479	2.8092	2.96004	4.5119	3.0715	1.5629	3.4125	2.28074	2.33591	1.70646	3.9135	2.26997	6.0239	3.5805	1.8502	3.7261	2.8335	2.9897	4.2456	6.8943	3.01912	2.78456		0.443925	3.5263
11.4376	4.4234	3.0064	1.7587	3.4992	1.7509	4.9	2.8231	2.7642	2.8626	4.3309	3.1937	2.9396	3.7272	1.7408	3.02046	2.87985	2.03757	5.02704	4.23562	3.287	4.63459	2.2375	7.5149	1.7133	2.5396	2.034	6.1025	2.58358	1.73745		0.4486	3.2864
11.5567	4.9765	3.3257	2.8189	2.8856	3.6943	4.7187	3.4183	3.6502	3.0154	2.31494	2.6072	1.8246	2.1679	1.4989	3.42856	3.40875	2.58829	4.28848	3.20032	4.8496	1.92751	2.6015	7.2328	4.0441	2.2017	2.7702	4.5586	2.85943	2.5888		0.453271	3.29192
11.6758	2.4035	3.4412	1.8899	3.873	2.6181	7.3864	4.7685	4.2453	3.6577	2.80487	2.4453	2.0856	2.7378	3.594	2.7953	4.26784	1.53271	2.64678	1.71428	2.5839	2.81388	2.4876	6.4281	4.2226	2.1875	2.4831	3.776	2.51286	2.27637		0.457943	3.19586
11.795	2.7488	3.4627	2.1193	2.5628	3.7761	6.5884	2.3477	3.2742	1.8435	2.22375	3.3784	3.5571	1.8025	2.93	4.24657	2.72585	3.33136	3.849	2.37921	3.2091	4.346	2.3882	6.5782	6.707	2.407	4.6679	4.3838	2.07102	1.95522		0.462618	3.37451
11.9141	1.5211	3.3609	1.413	2.7808	2.96	7.5119	3.9045	3.7631	2.7699	5.6038	2.0853	4.745	2.3079	2.5202	4.66588	1.28338	2.47486	4.39998	1.63223	5.3333	2.21724	1.9493	7.5808	3.5195	2.0656	4.8774	6.625	3.29287	2.26559		0.467289	3.4976
12.0333	3.9325	2.232	1.4905	2.4379	2.4104	3.4115	4.297	4.6822	1.5139	3.01445	3.0064	2.0365	4.1397	5.6635	3.11482	1.95359	3.16188	5.23198	2.59327	5.1584	2.35598	3.2711	6.5743	2.3421	2.9466	4.2695	4.8674	5.00619	2.38826		0.471964	3.43117
12.1524	4.3685	2.1354	1.5225	3.4382	2.9614	3.4114	4.2096	2.8244	1.9932	4.33278	4.067	5.2168	4.0249	4.3308	5.78066	4.84983	1.59615	5.34042	2.48814	3.7887	3.01854	2.1055	8.2155	3.2137	2.6339	5.7083	4.8489	3.00905	1.45288		0.476636	3.68576
12.2716	8.3402	3.2163	1.6564	3.918	2.0598	5.9498	5.6091	2.162	1.426	3.6094	2.2786	2.6313	3.0248	1.4566	3.5801	2.05997	3.64674	2.28709	2.42289	3.9658	1.57223	4.3901	6.1481	3.3351	2.291	5.1848	3.4164	5.44388	3.9775		0.481311	3.48483
12.3907	11.8167	2.2214	1.6002	2.5148	2.3608	9.1517	6.0871	4.5871	1.9816	3.06032	4.828	2.9068	3.265	2.5398	8.97163	5.65993	2.73218	1.87236	2.72972	3.5197	2.48489	2.4455	5.1102	1.5245	1.4761	6.5121	4.044	3.61611	1.9873		0.485982	3.9175
12.5098	8.35	3.3759	2.0159	3.7602	3.4902	5.3516	7.0296	5.2712	1.9329	2.11744	4.3362	1.7175	2.6735	2.1431	4.8871	3.06393	2.31793	3.99844	4.48369	1.6622	3.50759	2.3444	4.1767	2.5194	2.1631	3.3802	3.6376	1.683	4.29639		0.490654	3.50645
12.629	8.9255	2.1332	2.6869	4.3339	3.3551	10.7105	3.6075	2.2979	2.3548	3.95434	3.8243	2.0921	3.2971	4.0399	6.09885	2.1673	1.58515	3.95484	1.94586	6.3641	3.72213	1.5754	5.7677	1.3173	1.5485	3.7403	2.7766	3.48559	3.3109		0.495329	3.68874
12.7481	6.9769	2.2847	2.4026	5.2526	2.3359	6.7386	3.0438	2.6846	1.2544	2.57482	3.7817	2.4296	2.2235	3.155	3.29321	2.75525	1.40132	3.33567	3.36424	6.488	2.28216	3.1334	4.4536	1.4717	2.093	4.6282	2.9928	1.53275	3.43345		0.5	3.2344
12.8673	10.1391	2.3868	2.5692	1.4988	3.5684	3.8503	3.8395	4.1316	2.6161	4.63307	4.2643	3.1412	3.1734	5.6874	3.62306	4.3995	2.14892	3.3377	4.27711	3.5962	2.84514	2.8332	3.6904	1.4741	1.4153	2.251	1.4426	2.06344	2.55543		0.504675	3.36042
12.9864	5.5312	2.4513	2.5162	3.0877	2.6507	3.9996	2.782	1.9473	2.5906	2.15465	2.5698	3.7248	4.514	3.1896	3.01682	3.59862	3.42584	2.62151	2.88904	2.0635	4.27624	4.9205	4.5923	1.6183	2.815	2.3334	5.1932	2.1505	2.98951		0.509346	3.17978
13.1055	13.0249	3.0128	4.3747	2.0272	2.1697	4.1879	2.7321	2.1809	2.7311	2.81041	2.2476	1.9024	4.3649	5.3195	4.68589	3.04669	4.37872	4.62757	3.38069	2.4113	7.24419	2.2985	3.9231	2.4541	2.0168	4.1992	4.6159	2.45916	2.87037		0.514018	3.71373
13.2247	6.953	2.4715	1.3451	3.4278	3.0699	6.4846	5.07	4.1867	2.5531	2.1838	2.8017	2.699	1.9687	4.5322	2.44921	1.7495	2.13104	6.08668	4.82203	3.1693	5.50289	2.2737	2.1832	1.7934	3.2104	2.1911	5.4226	2.91946	3.37792		0.518693	3.41481
13.3438	8.6411	1.7109	2.7735	2.6277	3.2791	5.1824	5.7106	2.0324	1.6871	4.1714	1.8953	1.4133	2.374	5.0805	3.76689	1.63953	3.66993	4.15305	1.8726	8.2917	2.62198	2.0481	3.9796	2.2512	2.1778	3.7041	4.9951	1.99383	2.69694		0.523364	3.39454
13.463	5.6035	2.4006	2.0788	1.6731	2.23	5.0904	4.7577	3.9156	1.4587	2.06231	3.6331	2.9386	3.516	3.7859	3.88357	3.70237	1.62911	4.73506	2.20146	5.2164	2.56756	1.853	4.4517	2.1997	2.9494	2.9693	2.0333	1.9452	3.89087		0.528039	3.15077
13.5821	5.7743	1.8478	2.9057	2.1278	3.6864	6.4599	3.8495	3.082	1.7159	3.71136	4.5187	1.8407	2.3604	3.1503	4.06418	2.57317	4.42869	4.85628	2.51753	3.8427	4.03638	4.0671	2.9064	3.5316	1.6071	2.6001	4.3113	2.2116	1.90423		0.532711	3.32721
13.7012	7.5588	2.5252	2.4574	2.0481	3.4565	5.7768	5.0977	3.0385	3.0162	2.70274	2.4984	1.4339	3.0128	2.7663	4.21799	2.58187	3.94019	2.9115	3.45635	3.3581	2.80674	4.7055	3.8906	2.8734	2.1429	2.1262	4.3204	3.32417	2.25556		0.537382	3.32072
13.8204	4.8309	2.9763	2.4175	3.0135	2.4599	7.0009	4.2012	1.6363	1.8061	2.49069	1.76	1.5997	4.3784	2.2354	3.06372	2.41631	1.97066	4.60513	2.81855	1.5238	2.4413	5.6694	5.0391	1.536	2.003	3.3987	4.3254	2.56279	2.50806		0.542057	3.05823
13.9395	8.176	1.7246	1.5169	2.7078	3.1815	5.087	4.1111	4.6685	1.5199	2.2984	2.7832	1.7769	1.9037	2.0905	3.16595	1.44356	1.96172	2.88151	2.56866	4.1173	5.26646	3.0458	4.0591	2.9619	2.1968	2.6108	3.9766	2.27651	1.73052		0.546729	3.0279
14.0587	5.4623	2.0881	1.6083	3.7225	4.1947	2.8182	3.2839	5.1512	3.4781	3.5072	3.231	2.4817	1.9366	1.4853	2.19574	1.93876	1.77366	8.31153	2.2593	2.7734	2.26343	3.4394	5.7536	2.1929	2.0092	2.9945	2.6486	4.30052	2.28457		0.551404	3.15821
14.1778	3.2994	5.0755	1.7099	1.7535	3.0345	5.9298	3.9242	3.3487	2.4008	2.1904	1.5673	1.8747	2.8518	1.5643	2.63149	3.09019	2.71094	4.23081	2.418	1.8014	4.31216	1.7148	2.6373	2.135	2.489	3.1312	6.1561	2.62048	5.86417		0.556075	3.05062
14.297	3.6989	4.3286	2.9101	2.2577	5.4436	5.6709	4.3485	4.3264	1.9229	3.90998	4.6043	4.0678	3.1987	1.6383	1.98054	4.21967	2.9015	2.62637	3.09183	9.2505	6.12077	2.8438	4.3813	1.8954	2.6487	2.6181	4.0492	3.20018	2.69289		0.56075	3.68439
14.4161	5.2367	1.7676	1.6799	1.5495	3.169	3.4598	4.3024	4.4798	1.8113	4.29205	2.1876	7.1123	2.7164	1.3694	4.29845	1.63098	3.0084	2.42396	2.09265	8.5108	2.23053	3.1455	4.5842	2.2784	3.0964	2.8362	5.9848	2.83098	3.27449		0.565422	3.35726
14.5352	9.523	2.2851	2.1191	1.4741	2.6758	3.4885	4.2838	2.7052	1.4116	2.60278	1.6997	2.3627	1.9418	1.4281	3.03959	1.36443	4.02925	1.50345	2.04503	5.8485	5.24533	3.7742	2.1817	2.8327	2.8924	2.3169	4.1571	1.62022	3.29297		0.570093	2.97052
14.6544	5.6791	2.8329	2.8985	3.7354	4.8287	2.9745	3.7269	2.4756	2.2094	2.04463	2.6399	2.392	1.6605	2.498	1.36126	1.81573	1.72721	3.62154	2.84773	5.2807	4.54227	5.7449	2.1956	2.8739	1.516	1.5962	3.6923	3.29264	2.71571		0.574768	3.01447
14.7735	6.0451	4.3809	1.7887	1.7398	2.1206	5.0976	4.991	3.1002	2.1829	1.94686	3.7442	1.7787	6.4039	1.5939	2.8783	1.49884	3.13209	2.02297	5.04351	5.9232	5.03542	3.9535	4.5329	1.514	3.0569	2.4791	4.0545	2.44931	1.7646		0.579439	3.31909
14.8927	6.7134	2.6759	1.4995	2.6268	2.2409	6.1734	6.7599	2.5549	1.3851	2.58253	2.1134	1.9397	2.5865	2.3109	2.39584	1.45675	2.75616	2.11679	2.06799	4.6025	2.26759	4.1638	6.0719	4.1586	1.7079	1.5892	3.7289	3.34519	1.33414		0.584114	3.03193
15.0118	3.925	3.8743	1.4369	1.8791	2.2469	2.3657	5.7732	1.7105	2.4319	1.8225	1.8068	1.4564	2.9861	1.6406	3.59699	2.27126	5.75608	1.9682	2.52057	4.6263	6.081	3.0655	3.4742	1.3682	1.5085	2.418	2.4969	4.15919	1.84643		0.588786	2.84528
15.1309	3.7426	2.4301	2.9464	1.5803	2.2247	2.6144	3.1032	5.6652	2.6332	1.49791	2.1241	1.4674	2.17	2.3201	1.84214	1.58107	4.32674	3.62531	1.51409	3.1794	4.75535	3.0352	3.4853	1.6235	1.7403	2.1728	3.2551	3.3659	1.18986		0.593457	2.66247
15.2501	5.8914	1.9417	1.7546	1.3283	3.4197	4.1775	5.2291	3.8332	2.6318	1.80927	2.3266	1.3989	1.5919	2.4734	2.38977	2.89218	2.00579	2.88604	3.30264	5.7111	4.67512	4.0873	2.173	2.4748	1.3723	2.5749	2.023	4.45093	1.37308		0.598132	2.90342
15.3692	5.9051	2.6148	2.7639	1.3433	1.889	5.8392	6.9264	3.1792	2.0634	2.13914	2.4954	1.5626	2.5166	1.753	2.77144	2.96225	3.33212	4.69154	3.33088	3.7643	3.1723	3.9608	2.75	2.8286	2.7644	1.9704	4.7133	2.39476	1.8341		0.602804	3.11146
15.4884	2.6646	2.9304	3.7803	3.1953	1.4273	1.646	5.6665	3.7214	2.2625	1.48776	5.1924	2.3444	1.8292	2.3243	3.40338	1.43419	2.04049	2.26055	4.80017	6.1201	2.46418	3.2501	3.6859	2.6967	3.6408	2.8426	2.826	2.51631	2.05302		0.607479	2.98299
15.6075	4.6497	4.2313	2.7078	1.7405	1.5114	3.0567	4.0307	3.0745	2.2617	2.18139	1.9979	2.8416	4.4586	5.1023	1.68322	1.61854	2.92655	3.00774	1.8482	4.0107	5.39978	3.9584	2.6608	2.5263	2.8885	1.8744	5.322	3.80398	1.5695		0.61215	3.06706
15.7266	6.403	3.068	2.2397	2.5864	2.4161	1.9454	4.4779	5.599	1.5544	1.64672	2.7394	1.4108	4.9205	3.1882	1.6651	2.59571	3.07325	1.96862	1.59412	3.8311	3.29691	2.4537	2.756	1.3666	1.6723	1.659	4.3597	2.79241	1.4722		0.616821	2.78456
15.8458	3.4718	4.3186	1.7412	3.6753	2.2762	2.5396	3.1101	7.2753	1.8225	2.39116	5.0247	3.6862	2.6796	2.0683	2.98173	2.54707	4.37625	2.33907	3.08974	4.0723	2.17692	2.7489	4.3411	1.8183	1.4376	1.6953	4.0189	2.40742	1.73481		0.621497	3.02986
15.9649	11.938	3.9043	1.5677	2.484	3.0815	5.4995	6.2671	2.9201	1.5684	2.48563	2.988	3.7969	4.572	6.3974	1.9436	1.4529	3.35583	4.02044	1.57635	5.0113	2.71319	2.7298	3.1518	1.7234	1.9368	1.7481	2.5169	2.02752	2.13908		0.626168	3.36267
16.0841	9.5694	3.0124	3.3279	2.0737	7.1892	4.1683	2.4691	1.5558	1.4609	1.95447	3.4359	3.8026	2.3236	3.0969	2.02314	2.28279	3.00486	3.44017	2.23095	4.99	3.79095	3.817	3.4347	1.9112	2.0899	2.112	4.5628	2.53338	2.97887		0.630843	3.26355
16.2032	8.3988	3.9197	1.6848	3.6121	2.7738	7.7781	5.2904	2.8395	1.9887	2.12518	3.9413	3.0552	4.5325	1.817	3.78317	1.55726	1.74098	3.73707	2.9841	4.2378	3.66881	3.1149	3.0913	1.5775	3.5729	2.5725	3.2353	1.27512	1.48577		0.635514	3.28936
16.3224	6.4358	2.1727	1.3542	4.537	4.375	6.7602	2.1327	8.7767	1.5873	1.99365	2.515	2.4069	2.5623	2.1611	2.85232	2.38888	3.75222	4.40379	1.46348	3.8193	3.11821	2.4419	4.8577	2.2408	2.7298	2.1324	4.3711	3.37353	1.40723		0.64019	3.28011
16.4415	3.8775	3.1526	3.3164	2.0325	4.5242	3.1172	1.7137	3.88	3.084	1.78841	3.6682	1.7868	2.294	2.7877	1.73596	1.88201	6.20394	3.28434	3.93028	3.3092	3.37158	1.5993	2.1274	4.3179	2.0677	3.0467	3.9827	1.63567	1.78611		0.644861	2.94152
16.5606	3.0956	4.1074	1.5376	2.9678	5.5307	5.0666	4.7168	2.4865	1.6547	2.8581	1.5268	1.5684	4.2528	1.5357	2.81493	2.83354	3.73705	3.45164	2.86328	2.2682	4.13884	3.5497	1.7978	2.5993	1.813	1.9007	2.9063	2.3994	1.8407		0.649532	2.89034
16.6798	4.6264	7.869	2.2188	2.355	4.3936	4.6866	4.4763	3.37	2.2619	2.87799	2.7551	2.6209	2.6124	1.8384	1.41736	1.46945	4.05002	4.21628	2.87259	2.1821	3.15373	3.0578	2.853	1.4081	2.0914	1.4937	5.1747	4.42298	2.379		0.654207	3.14499
16.7989	2.1612	3.6998	2.688	2.5252	4.4183	6.8454	5.8813	4.2791	2.0181	1.35314	3.7568	2.5839	1.7807	1.4234	1.43537	2.26478	6.93142	2.5062	2.81999	3.2584	2.32096	3.8876	3.5062	3.0033	2.4279	1.4057	4.4727	2.06085	3.27807		0.658879	3.13772
16.9181	3.9827	4.9272	3.9941	2.5657	3.1271	6.096	5.6103	3.4264	1.5281	2.15653	3.0355	2.4715	3.3231	1.5641	1.52765	2.13702	2.28254	1.54381	2.25671	2.0389	2.76222	2.5657	4.5692	4.5765	3.8012	1.9286	3.7173	2.48426	1.5133		0.663554	3.0177
17.0372	5.447	3.9834	3.5756	4.1825	2.5402	4.119	2.651	2.0804	2.7246	2.42328	3.1227	3.2573	2.3792	1.49	2.01068	2.01996	2.31947	3.97303	2.85011	2.9284	5.17613	1.8506	2.8859	1.8073	4.8123	3.5953	1.8046	2.29928	1.83049		0.668225	2.97034
17.1563	1.7961	2.4142	1.5309	5.2951	2.5911	3.6368	3.4011	2.5082	2.478	1.61044	3.0013	3.6235	2.1903	1.5716	1.40158	1.53546	2.89862	3.31721	2.10723	3.2641	3.84613	4.4083	4.3775	1.5382	3.0391	2.3335	2.9594	2.30402	1.3667		0.672896	2.70158
17.2755	3.4977	4.5449	1.3868	4.364	2.9353	4.4581	1.7322	2.5827	1.3155	2.1777	3.9001	3.0759	1.4269	1.4728	1.74597	4.18933	3.48539	4.57661	3.41736	3.4453	2.26414	4.0117	3.8488	1.2458	3.5733	2.6439	2.258	1.85779	1.7074		0.677572	2.86694
17.3946	3.9888	5.9323	1.8422	5.0331	2.4115	4.2167	3.896	1.992	1.377	2.20585	1.6926	4.415	3.2718	2.0638	1.37179	2.53102	2.76174	2.89445	3.171	4.1546	2.26697	2.546	2.0035	1.4356	1.3553	2.2719	3.1638	2.78117	2.60177		0.682243	2.81549
17.5138	3.2803	1.8663	4.2921	3.4267	2.8761	4.2434	4.2091	1.5155	1.5393	1.72054	3.6123	1.767	2.5551	4.2946	1.51209	1.54438	2.07442	2.43628	3.83863	5.7633	2.39379	5.7604	2.3574	1.4701	1.6212	1.3809	2.108	1.57081	1.54538		0.686918	2.7095
17.6329	3.547	5.2431	2.6319	1.6162	4.2253	8.4495	4.5685	3.9387	1.7496	1.59369	4.2176	3.9625	1.9261	1.8022	1.94032	3.52657	4.4966	4.59913	3.44799	6.1812	4.23999	3.0484	3.9388	1.7456	1.3258	1.4969	2.0994	3.03425	1.30652		0.691589	3.30687
17.7521	2.5105	7.0217	2.5523	1.8846	3.0469	5.248	5.1603	2.1791	2.4887	2.58387	3.7805	1.3501	3.2651	1.5153	1.45644	1.91532	2.62146	1.81561	4.94818	6.5745	2.41522	2.9696	2.1077	2.3852	3.2979	1.6571	1.6401	1.77968	1.46773		0.696265	2.88409
17.8712	2.1572	9.2572	1.9185	1.5675	3.2605	5.9342	2.8213	2.2117	3.3142	1.63829	3.0366	1.7112	1.8255	2.6637	1.38774	1.54554	1.9573	2.69933	4.15215	7.0032	4.30782	3.9163	3.2511	1.7715	2.068	2.6895	2.0235	3.05712	2.01196		0.700936	3.00551
17.9903	4.9593	7.9808	1.4334	2.2571	4.0503	8.0028	2.0545	1.7009	1.7414	1.84429	1.5181	3.5753	2.071	2.9607	2.2485	1.6303	2.95587	2.47149	3.96652	5.7752	2.96025	3.1725	3.4251	1.3015	1.4615	1.8982	2.2119	2.40463	2.42478		0.705607	2.98131
18.1095	1.6588	3.0175	4.9955	2.7185	4.4124	4.2061	5.1031	3.2272	1.4175	1.24054	2.9888	2.6877	2.4248	1.9525	2.63608	2.61845	4.05241	2.25043	1.58817	2.6188	1.99793	2.2099	1.8643	2.1222	2.0924	1.4246	2.4249	2.00623	2.41003		0.710282	2.63337
18.2286	2.6951	3.3221	3.9992	2.6059	6.0929	3.3439	2.1065	2.2187	3.0974	1.32513	2.1223	1.5476	4.9132	3.0698	1.34864	3.07971	3.95354	3.46541	3.08555	2.3705	4.11426	4.324	2.2789	1.5546	2.279	3.6911	2.1107	1.86652	1.93032		0.714954	2.89353
18.3478	3.2427	6.5733	3.0719	2.2867	6.399	3.4036	1.6913	3.1599	2.4276	1.68902	1.5365	2.0398	3.1639	2.2682	1.51262	3.19472	4.18331	2.36315	3.44064	2.1858	5.34566	4.5486	2.1749	1.4875	1.6565	1.5917	2.2621	1.43991	1.62986		0.719629	2.82657
18.4669	5.4818	3.3267	3.5642	1.4167	4.8895	3.1872	6.4345	1.9143	2.2056	2.22055	2.8405	1.3566	2.0284	1.9696	2.62037	1.67648	1.99891	5.81951	1.597	2.9085	6.07962	4.2343	3.8805	2.5345	1.6553	1.4546	3.9563	2.46508	3.02667		0.7243	3.06013
18.586	4.2162	3.8535	2.4948	2.8944	3.7072	4.0637	2.8979	1.5115	1.4368	1.38424	2.5327	2.1136	2.9282	1.5491	1.68478	2.2702	3.27105	2.29426	2.59401	3.6035	3.72787	3.1836	4.2884	2.3355	2.8975	3.006	2.5902	3.05259	2.31875		0.728971	2.78283
18.7052	5.2632	6.0527	3.9485	3.7499	3.2778	6.3282	3.2983	2.5975	1.5139	1.39642	1.3376	4.1915	2.6477	2.5422	1.98222	1.38955	2.70864	4.33362	1.85369	2.8949	5.75238	3.216	4.0494	3.2179	1.7314	2.0807	3.0958	1.73595	1.57069		0.733647	3.09511
18.8243	3.2362	3.3091	2.6243	1.4446	5.7974	5.2241	2.7455	2.2678	1.5874	1.45703	1.3001	1.9828	3.1315	2.3348	1.54416	1.37719	4.33196	1.88875	2.27361	2.906	2.84573	4.7735	1.9169	1.7306	1.4987	1.9415	3.3375	2.21768	1.64665		0.738318	2.57493
18.9435	3.4268	2.2563	4.7515	2.5665	2.7322	8.1296	3.4326	2.4131	1.3998	2.20486	1.4765	1.7737	1.777	1.3432	1.5659	4.70099	5.53308	2.2952	4.56355	5.1281	2.641	2.3629	2.7632	2.7236	2.1006	2.7081	2.4221	1.38567	1.86521		0.742993	2.91182
19.0626	7.6534	4.9685	2.5382	1.5623	4.0124	3.4136	2.1998	2.788	1.4959	1.30624	1.4939	1.6528	1.629	1.9082	2.36298	2.32489	4.52094	4.1369	5.77704	5.2868	4.507	1.6096	5.5985	2.6946	1.4958	2.694	2.958	2.53642	1.76033		0.747664	3.06504
19.1817	3.86	3.7314	2.5391	2.4446	3.8731	5.6024	2.5743	1.6824	1.5069	1.99431	3.0563	2.6143	1.5084	1.2996	1.36344	1.92639	3.44179	2.03106	3.14518	2.2754	3.40851	4.3398	3.7088	1.4468	2.6702	3.9	2.6903	1.93785	2.60884		0.752336	2.7304
19.3009	4.2592	4.7448	4.218	3.0304	4.2969	5.2453	1.5249	4.9737	1.766	1.98606	3.4893	5.3268	2.8188	1.3335	2.20976	2.05434	3.90829	3.36628	2.91261	4.992	3.46774	2.8539	3.6335	1.4199	1.6831	2.1366	1.4176	4.08771	3.02171		0.757011	3.17858
19.42	2.8815	2.7754	4.0135	4.2295	4.207	3.7112	1.9485	2.2874	2.1612	1.63711	2.0242	1.7443	4.9073	2.7654	1.52598	2.1382	2.55305	4.19183	3.83366	3.5051	3.05825	3.2013	2.1336	2.6577	2.8439	2.3007	1.8963	3.00971	1.74819		0.761682	2.82383
19.5392	4.7279	3.2801	4.1321	2.5336	6.4327	5.2745	1.9286	1.4483	1.4118	3.19942	3.5516	1.6159	2.055	2.0239	1.44314	1.46139	1.96171	2.41548	2.84825	4.6996	3.3486	2.9389	3.2527	1.6715	1.4166	1.4803	5.2302	2.39505	2.01738		0.766357	2.83435
19.6583	2.2044	2.5227	2.2285	2.4287	2.8376	6.3305	2.4648	1.9129	1.4886	2.83474	2.2886	2.341	3.5226	1.3001	1.7546	1.4104	2.6245	4.69526	2.32003	3.3751	2.3177	1.7885	4.4422	1.7327	2.6515	1.5472	3.8878	1.4287	1.79845		0.771029	2.56829
19.7775	2.5187	3.1863	1.5093	6.1554	4.7414	7.2997	3.3636	1.7389	1.4558	1.60275	2.1224	3.1669	2.9791	1.454	2.33257	1.41936	2.52016	5.08531	4.40409	3.1688	2.82986	2.9402	6.0584	4.0545	1.9231	1.9029	4.0487	1.25524	1.26649		0.775704	3.05186
19.8966	5.146	4.5782	2.4	3.9162	4.5719	3.9141	2.6795	2.0247	1.5922	3.40395	2.5547	1.4995	2.5542	1.9907	1.37886	3.4004	1.50143	3.05678	4.49903	3.3829	3.35644	1.525	4.0551	2.3343	1.5242	4.5788	5.9522	1.94878	1.60455		0.780375	2.9974
20.0157	3.5741	2.1518	2.9804	4.6471	3.4691	5.222	2.291	1.6318	1.6032	2.17364	2.3055	3.6875	2.4136	1.4692	1.49475	2.32076	1.79572	4.40743	2.12132	4.5705	2.03996	1.5477	2.3567	1.7937	2.5844	3.0391	5.1283	1.47549	1.60672		0.785046	2.68629
20.1349	4.2269	2.6229	4.9406	3.719	3.7007	5.7463	3.6916	2.556	1.4906	3.29508	2.7452	2.2733	2.2445	1.3203	2.59785	2.81697	1.8729	4.84802	2.14124	4.3127	2.28496	2.3543	6.3547	3.2833	2.0587	1.9537	3.7719	2.07969	1.94672		0.789722	3.07761
20.254	3.5356	2.2253	2.8217	3.8327	4.9638	3.9174	1.9197	3.4846	1.4039	1.80067	3.6386	1.9038	1.8025	1.6746	3.57006	1.60843	1.50038	3.43423	2.33347	5.896	2.77364	1.6682	2.9316	2.5468	2.4532	2.7914	3.3975	1.41109	1.53642		0.794393	2.71646
20.3732	3.5269	3.0275	5.1845	3.5909	3.4023	4.6502	1.4882	1.4956	1.7015	1.88617	1.9895	1.6672	1.379	1.5603	2.43153	2.2141	2.88042	3.98684	2.78794	3.4017	3.89514	1.2738	3.5735	2.8481	3.9827	1.5838	2.5894	1.46709	2.52808		0.799068	2.68945
20.4923	3.8953	4.5314	5.4542	2.6529	3.0971	3.2036	1.4118	1.4582	1.5399	1.43869	2.3576	4.4991	1.5539	1.5284	1.73951	1.66349	1.61928	2.37334	4.55954	3.9885	4.07314	1.949	4.7568	2.6341	2.9986	3.302	2.1578	1.99061	1.77393		0.803739	2.76558
20.6114	3.9755	4.6872	6.7508	3.9174	1.8628	4.181	2.5015	1.8361	3.2419	2.33141	2.4412	1.5898	4.531	2.4307	2.20301	1.8779	3.03585	2.05633	2.53657	2.4128	2.71554	1.687	4.3753	1.7916	1.445	2.1313	2.1019	2.3103	3.56219		0.808411	2.84555
20.7306	3.2904	3.7481	4.4678	3.3837	5.0998	3.7582	3.7104	1.4025	1.4113	1.31092	3.5888	1.8209	1.7306	1.8409	2.04203	1.77197	3.06332	2.03426	6.28326	6.3318	5.15675	2.1776	4.8192	2.6381	2.4782	1.7927	1.3858	1.79949	2.96075		0.813086	3.01033
20.8497	2.4466	1.8945	4.5773	2.1698	5.3937	2.7536	4.6966	1.8627	1.5946	2.11162	2.5369	1.9741	2.815	1.3897	2.15511	2.60463	2.03025	3.61862	4.20627	4.4859	2.05611	4.3374	5.2207	2.317	2.071	5.4101	4.739	3.93512	1.92034		0.817757	3.08015
20.9689	1.6388	2.6434	5.5597	2.1986	2.4636	1.5539	2.5641	3.5585	1.5642	2.29831	3.7849	5.537	1.9718	2.8761	1.6347	2.76161	2.49321	2.32539	2.93163	2.7761	3.29252	5.4125	2.086	3.0815	1.3801	3.0503	7.3716	3.5864	1.78939		0.822432	2.97193
21.088	4.1191	2.2557	4.0713	2.6699	4.3744	6.2086	3.5759	1.4664	2.5322	1.41483	3.1123	2.1974	4.4691	2.1626	3.36925	2.89151	2.47444	3.32137	3.38453	3.7092	3.09211	1.8434	4.6035	1.4638	2.2885	2.0768	2.4482	3.23091	2.88318		0.827104	3.0245
21.2071	4.7592	1.5887	5.7673	2.665	5.5368	3.7031	5.7258	1.9687	1.3247	1.93845	2.5073	1.7445	2.6966	1.3466	1.46551	1.37732	2.53255	1.54975	5.67565	8.839	1.72306	1.5416	3.7834	1.6031	2.7429	2.768	2.5299	2.30088	1.59504		0.831775	2.94139
21.3263	1.8667	5.0909	5.5763	1.8421	1.9295	1.4892	2.7054	1.4322	1.3541	1.58475	4.009	1.7021	2.6228	1.5595	2.15489	1.63111	1.53555	3.09295	4.4985	5.6236	3.26058	2.1786	3.1417	2.7997	2.8992	1.4641	2.0821	2.89493	2.49479		0.83645	2.63851
21.4454	3.6126	4.6142	3.6028	2.9216	4.8417	3.1814	2.838	1.9169	1.4134	2.65	1.8463	2.2883	1.6788	1.3607	3.32575	1.94061	1.97861	1.69079	1.88415	4.1348	2.479	3.1186	2.2088	1.6527	2.7494	2.6592	1.7926	3.66812	2.68103		0.841121	2.64589
21.5646	4.1409	4.8307	5.4571	2.6858	3.6966	4.3358	3.412	2.2756	1.5326	1.76601	1.7172	1.4965	1.7872	1.6333	1.41335	1.46441	2.48968	2.54547	2.218	7.4469	3.16976	3.3152	3.6893	2.4889	2.6612	3.0165	4.0349	2.2331	2.96167		0.845797	2.96261
21.6837	5.5868	2.971	3.2779	3.2558	4.0066	6.6982	3.4046	1.828	3.5778	1.91905	2.4168	1.8748	3.2548	1.559	1.67438	1.48642	1.71729	3.25708	2.00625	4.63	3.47133	3.1262	4.3865	2.5087	2.916	2.9915	3.5184	4.42965	2.08487		0.850468	3.09778
21.8029	4.112	3.5645	5.051	2.9335	3.4554	3.8404	3.0493	1.4868	1.5133	2.45006	3.2214	4.2146	4.7188	1.3921	2.37488	1.39111	3.42861	1.5374	5.34631	4.0141	2.49009	3.8567	2.2573	2.3619	2.9009	4.1879	2.3271	1.80358	2.8789		0.855143	3.04
21.922	4.7058	5.7894	5.5393	3.0307	2.9935	3.286	5.4311	1.787	1.5136	1.46674	1.8877	2.3672	3.0057	1.7909	3.29815	1.47092	4.19334	2.73281	1.77227	1.9052	4.60581	4.0621	2.2705	1.8448	3.2085	2.0412	5.5159	4.89099	3.41523		0.859814	3.16629
22.0411	3.8106	5.6397	3.4866	2.7712	3.5421	5.2257	4.1723	2.3346	1.4237	1.46647	2.333	1.7363	3.0634	1.8287	2.37881	2.08755	1.73332	2.54702	3.84877	3.0052	4.46428	3.4103	5.0662	2.1849	3.4453	1.9431	4.271	4.06673	1.41107		0.864486	3.05855
22.1603	4.0135	3.0576	4.4132	2.8031	4.3757	2.2798	1.5536	1.6097	2.2499	2.27492	2.5308	1.4756	1.7998	1.5769	2.06644	1.52524	1.44691	2.51465	3.05744	4.0137	1.9804	1.8847	3.0842	2.5797	1.9476	2.5698	3.5628	2.43652	1.33548		0.869161	2.48344
22.2794	4.0725	2.9525	3.7731	3.0782	6.9811	2.1332	2.1902	1.5428	1.7077	1.60228	2.4516	3.6824	1.4552	1.5454	1.54357	1.46348	4.11507	2.87792	5.48729	1.8839	3.25812	3.4895	4.943	1.8803	3.5995	1.5502	2.4939	2.25996	1.52721		0.873832	2.81176
22.3986	4.5207	3.7714	5.4234	3.6007	6.3376	4.7143	3.1557	1.5273	1.9347	2.64678	3.6022	3.2221	2.077	3.3298	1.80821	1.67801	1.80882	3.44642	3.38399	2.319	4.25512	3.4919	3.5812	3.9423	2.5923	2.8135	2.6552	2.30997	1.87987		0.878507	3.16653
22.5177	1.836	4.3744	4.3974	2.1713	7.4677	5.9081	3.2845	2.1806	2.1798	2.60342	4.6448	2.472	1.9811	1.7487	1.81173	2.15121	3.01132	2.39003	2.68811	3.8603	2.94792	3.8058	4.0395	2.6968	3.2917	3.7097	2.5472	1.7748	1.46382		0.883179	3.08413
22.6368	1.7352	4.7515	6.1707	4.0691	5.8646	5.5942	2.7579	2.8575	2.0338	1.54887	2.534	1.9721	1.4515	2.6174	2.35683	1.77464	5.02193	2.76175	3.44807	3.1514	5.59883	3.5496	5.1058	2.185	1.9681	2.3896	4.9593	2.64359	2.76754		0.88785	3.29794
22.756	3.5093	4.4091	6.4489	2.4164	5.6063	3.1675	2.7963	4.6708	3.4999	2.02102	3.4769	1.6671	1.9409	1.5946	1.73498	1.54731	3.0167	2.21367	3.51341	3.3476	3.12713	4.4529	6.3694	2.072	1.7971	2.698	1.8993	2.06037	3.33239		0.892525	3.11749
22.8751	5.2066	3.7714	3.5447	2.9833	5.2038	2.2228	1.5451	4.4833	2.3269	1.5963	3.8971	2.24	1.3733	1.5424	2.33639	1.49437	4.25965	1.97186	2.6809	3.5038	3.81269	5.9111	4.3603	2.6894	1.4032	1.6429	2.5729	2.26815	1.80384		0.897196	2.91891
22.9943	2.677	3.4254	3.3224	2.3227	5.7853	4.1799	2.2826	2.6969	1.4788	4.05108	2.7682	3.3345	2.5072	1.4735	2.21806	2.0116	1.42362	2.91977	4.4907	3.9114	2.83677	2.1825	4.4366	2.0528	1.3824	3.4411	6.7966	1.57773	2.88397		0.901872	2.99556
23.1134	3.7269	1.5594	2.0549	2.929	5.1773	6.3239	2.3929	1.385	1.3352	2.73746	2.2874	2.6729	2.5589	2.0265	1.61727	1.50852	1.46719	4.12898	2.33335	1.6713	4.56742	3.8533	5.5364	1.8101	2.0375	5.0967	2.1771	3.1813	2.15639		0.906543	2.83829
23.2325	5.269	3.6754	6.2832	3.6615	5.8917	5.5971	2.5635	2.3678	1.4534	1.62629	5.4637	2.2331	2.156	2.6089	1.60979	1.35895	4.05327	1.57986	4.97256	2.3748	4.63283	6.2273	4.455	1.7483	3.5429	3.2728	3.5353	2.00128	2.53061		0.911214	3.40504
23.3517	3.3365	3.0191	2.6818	3.8509	5.2395	5.3702	3.9306	3.3059	1.4527	1.68211	3.0822	1.5715	1.5756	2.1766	1.57089	2.05206	2.11197	1.89453	2.28829	4.0389	3.11349	2.8695	5.077	2.5378	2.3621	6.2315	2.8488	3.48039	4.75148		0.915889	3.08634
23.4708	4.3608	4.0812	4.4287	3.3472	4.044	5.0232	2.1932	9.9566	1.7433	3.71957	2.7523	2.6103	2.4624	1.5334	1.28468	2.52013	1.77577	1.46158	3.21383	2.4893	3.08324	2.569	5.5272	3.2425	2.2553	3.8201	1.7227	2.72887	3.13048		0.920561	3.20968
23.59	4.6278	2.6217	4.1081	4.0178	4.9158	2.5317	4.7573	4.5234	1.6342	1.96558	3.3039	1.8811	2.7551	1.7069	1.62862	2.29603	2.60201	2.23878	3.61912	3.3425	5.19487	3.3695	1.9884	3.1729	3.3071	4.955	2.5533	3.11878	2.48494		0.925236	3.14559
23.7091	7.5858	3.3175	4.6446	3.6266	3.4995	2.9555	4.4954	2.9308	2.5908	2.24048	3.0254	3.4673	2.7174	1.8883	2.38775	2.01719	1.72088	3.06543	2.46028	3.9528	3.36595	3.7693	6.7245	1.9063	3.4802	2.4529	5.6815	1.49804	1.82214		0.929907	3.28588
23.8283	4.7869	2.4393	7.2764	5.5324	4.559	5.44	4.0463	5.063	1.5613	1.75708	3.265	1.9399	2.056	1.533	1.40981	2.30323	4.19456	1.5732	2.95572	1.6819	3.15629	3.7097	3.9789	2.0152	1.4376	2.9402	3.3787	2.24529	2.07715		0.934582	3.11424
23.9474	4.7787	1.9976	1.8384	4.0072	2.4172	3.0811	3.0044	4.044	2.0093	2.06552	5.0913	2.5097	2.0463	2.6794	1.58624	1.53899	3.73592	3.30248	3.18455	2.84	4.41458	1.7698	5.1357	2.1552	2.4997	4.2574	3.6308	1.62255	2.09693		0.939254	2.94279
24.0665	4.4878	3.193	2.5629	2.4366	7.5151	1.8239	2.1588	1.4842	2.8607	3.37824	5.4925	3.2762	2.7475	1.9848	1.47975	1.7714	3.65984	1.72548	2.23533	3.9745	3.21026	2.45	3.3678	3.8425	2.3833	3.3043	3.8144	2.15695	2.95078		0.943925	3.02513
24.1857	2.3002	6.4659	2.6977	1.887	4.2183	4.2808	4.794	2.8325	1.937	5.69602	2.4004	1.8301	2.7334	2.5913	1.77301	3.36802	2.73366	2.94309	1.62469	2.943	3.10694	1.5612	3.9902	4.0085	2.3635	3.1293	3.6577	1.5616	2.55208		0.9486	3.03383
24.3048	3.1991	3.2236	2.6876	3.3502	3.7446	3.5196	3.3591	5.0457	2.0842	2.49842	3.329	2.9002	4.7086	1.4167	1.54024	1.916	1.78021	3.78385	1.67042	2.6604	1.98135	3.4103	2.4844	2.5387	1.7372	1.8556	1.7244	2.3788	2.62327		0.953271	2.72937
24.424	3.1979	3.7951	2.5652	3.4813	4.6459	1.9742	1.6167	4.0676	2.7496	2.79117	1.7637	1.9101	1.8368	1.4799	1.30579	1.53464	2.48753	2.52871	2.27704	4.5705	4.35575	2.9226	4.1806	3.5452	2.2759	2.3295	1.6087	2.99454	3.71777		0.957947	2.7762
24.5431	2.7362	2.788	1.6879	1.4704	4.1636	3.6486	1.4452	3.7191	2.6221	2.55094	2.7569	1.9479	1.4832	1.8538	1.53489	1.6012	4.93462	3.03052	2.32287	2.6524	3.80894	1.7346	3.6701	2.7875	3.3063	3.1148	4.182	2.50165	3.43997		0.962618	2.74125
24.6622	2.3528	3.5478	4.518	4.414	3.3881	2.8468	1.8342	5.1985	3.1371	2.26713	4.6981	1.3682	1.2801	2.5329	1.2687	2.78708	2.63009	4.42074	3.70162	2.3232	2.21202	2.4707	3.3183	2.9353	2.9506	4.7694	2.9599	2.70138	1.71262		0.967289	2.98432
24.7814	3.3603	3.9634	2.4319	6.3372	3.9331	3.0241	3.7309	3.092	1.783	2.56465	1.7808	1.4667	1.8696	2.4671	2.68484	2.06996	2.208	2.16292	3.04268	1.4394	5.56599	2.4507	3.3188	4.469	3.7061	5.5979	1.7169	2.89538	2.0253		0.971964	3.00547
24.9005	5.7415	2.6302	2.8945	5.0068	6.1379	3.32	5.0944	2.2979	2.4176	1.53502	3.5924	1.9642	1.661	1.9713	1.76679	2.01446	4.40196	1.60261	5.61601	2.7877	3.98451	3.0322	2.7451	2.8213	2.2488	4.7249	2.2869	2.35696	2.30727		0.976636	3.13663
25.0197	3.4771	3.0823	1.478	2.6971	3.4763	3.0507	5.8724	1.9886	1.7599	1.78529	2.4225	1.4221	3.2237	3.836	2.87761	1.39776	3.23392	3.22008	2.47281	2.9308	4.92699	1.4506	3.6656	4.4825	4.3876	4.825	2.5569	2.50583	3.44756		0.981311	3.03288
25.1388	2.8062	2.1172	1.9704	5.0407	2.7665	6.9231	4.9165	4.2488	2.8629	1.78982	1.5878	2.7031	2.9315	2.6881	1.64432	2.75491	3.09588	2.54236	3.92699	2.5012	3.00187	1.9538	3.7718	5.333	3.1476	3.5763	1.9788	1.69179	1.81824		0.985982	3.03764
25.258	2.7834	2.9479	2.7997	1.7212	4.5404	3.3331	3.2587	5.2988	3.4123	3.80279	2.3223	1.1326	2.4563	2.554	2.08568	3.68513	3.60178	2.65977	4.52898	3.6949	5.35474	3.2889	2.5165	2.9	2.7423	4.6843	2.0323	1.43191	2.79445		0.990657	3.11604
25.3771	3.1419	1.5878	1.5087	1.325	3.4608	3.0643	3.9466	3.6827	3.575	1.85083	2.5309	2.2734	1.9657	2.0957	1.51724	3.20244	3.48763	4.47872	2.53118	4.0567	1.7771	1.5673	3.1757	2.429	2.1162	2.9837	3.2486	1.42679	2.77373		0.995329	2.64763
25.4962	3.9457	1.7819	3.6463	1.5432	1.2617	2.2514	5.2598	3.8671	2.4627	1.54107	3.3409	1.9741	1.5915	2.9115	2.98736	2.12272	2.47283	4.27576	2.1532	2.7864	2.77001	2.3071	3.9787	2.1575	4.5556	2.5276	2.6305	1.99962	3.49863		1	2.77939

## Sheet: Sheet1
Image12				Image13				Image14				Image15				Image16				Image37				Image38				Image39						Distance	Image12	Image13	Image14	Image15	Image16	Image37	Image38	Image39
Ap-Basal	Avg intensity			Ap-Basal	Avg intensity			Ap-Basal	Avg intensity			Ap-Basal	Avg intensity			Ap-Basal	Avg intensity			Ap-Basal	Avg intensity			Ap-Basal	Avg intensity			Ap-Basal	Avg intensity					0	7.72017	2.11101	8.38559	2.40598	9.13955	9.21892	15.6055	5.66163
0	7.72017			0	2.11101			0	8.38559			0	2.40598			0	9.13955			0	9.21892			0	15.6055			0	5.66163					0.05	8.20786	2.47616	9.27004	2.48733	8.10217	10.2294	14.6146	5.55231
0.00467128	7.93175			0.00517954	2.21973			0.00462803	9.65935			0.0049244	2.30609			0.0053173	8.61017			0.00574513	8.72381			0.00467128	15.1424			0.00666435	5.86845					0.1	8.85829	3.05271	8.85151	2.6224	6.6238	14.1234	13.6643	6.35893
0.00934649	7.51269			0.0103634	2.31499			0.00925994	9.29032			0.00985293	2.24162			0.0106391	8.0881			0.0114951	9.67724			0.00934649	15.3593			0.0133343	5.69696					0.15	8.72243	3.21494	8.34363	2.95324	5.32199	15.9593	11.5546	6.78317
0.0140178	7.59216			0.015543	2.26239			0.013888	9.45487			0.0147773	2.31755			0.0159564	8.27483			0.0172402	9.92516			0.0140178	15.1066			0.0199987	5.03816					0.2	8.20898	3.14626	7.72801	3.18909	4.60455	13.4286	10.196	7.0527
0.018693	7.74485			0.0207269	2.39056			0.0185199	8.88946			0.0197059	2.3976			0.0212781	8.26108			0.0229902	10.0281			0.018693	15.0324			0.0266686	5.01861					0.25	7.34804	3.20552	7.70753	3.14789	3.84599	12.4488	10.5432	6.35986
0.0233643	8.27999			0.0259064	2.23691			0.0231479	9.50186			0.0246303	2.5854			0.0265954	8.23535			0.0287353	10.5552			0.0233643	15.0105			0.033333	5.99092					0.3	6.85903	3.12396	7.82609	3.22827	3.82177	11.9812	11.2037	6.65207
0.0280356	9.13205			0.031086	2.47386			0.0277759	9.68709			0.0295547	2.61798			0.0319127	7.95646			0.0344804	10.8424			0.0280356	14.5467			0.0399973	5.50636					0.35	5.67676	3.05104	7.27211	3.04282	3.68136	10.8586	10.6553	6.61418
0.0327108	7.91957			0.0362699	2.70904			0.0324079	9.05974			0.0344832	2.61849			0.0372345	7.76789			0.0402304	10.4823			0.0327108	13.8147			0.0466673	5.32768					0.4	4.93097	3.20462	6.66276	3.15097	3.54455	9.40189	9.72364	5.69874
0.037382	8.90457			0.0414494	2.50089			0.0370359	8.82785			0.0394076	2.50824			0.0425518	7.57176			0.0459755	11.096			0.037382	14.5355			0.0533316	5.862	5.55231				0.45	3.87194	3.23177	5.25258	3.19729	3.40754	8.74558	8.80467	5.6674
0.0420572	8.3206			0.0466333	2.42565			0.0416678	9.80395			0.0443361	2.47872			0.0478735	7.71292			0.0517255	11.7446	10.2294		0.0420572	14.4266			0.0600016	6.39638					0.5	3.50168	3.18125	4.40165	3.21229	3.34244	8.36844	7.84684	5.36915
0.0467285	8.2093			0.0518128	2.92845	2.47616		0.0462958	9.06374			0.0492605	2.44542			0.0531908	7.50572	8.10217		0.0574706	12.4954			0.0467285	13.3851			0.0666659	6.326					0.55	3.28239	2.92836	3.81187	2.8841	3.49556	7.90048	7.1867	5.34723
0.0514037	9.22665	8.20786		0.0569967	2.77531			0.0509277	9.61663	9.27004		0.054189	2.92487	2.48733		0.0585126	6.93002			0.0632206	12.9387			0.0514037	13.4096	14.6146		0.0733359	6.25746					0.6	3.08645	2.91818	3.8699	3.00651	2.9349	7.29286	6.39056	5.37061
0.056075	8.10399			0.0621763	2.72544			0.0555558	8.2355			0.0591134	2.58053			0.0638299	6.19518			0.0689657	13.0441			0.056075	14.0357			0.0800002	5.85431					0.65	3.09427	3.34663	3.68113	2.98153	3.0443	7.13853	6.19086	5.29885
0.0607463	8.77369			0.0673558	2.70058			0.0601838	8.72648			0.0640378	2.5265			0.0691472	7.17074			0.0747108	13.6335			0.0607463	13.6409			0.0866646	7.07813					0.7	2.94157	2.92656	3.25849	3.05423	3.09535	7.64261	6.3297	5.42674
0.0654215	8.50431			0.0725397	3.11952			0.0648157	8.73536			0.0689664	2.405			0.0744689	6.9815			0.0804608	13.6431			0.0654215	14.377			0.0933345	6.18257					0.75	2.86864	3.02235	3.33699	3.28447	2.85656	7.46823	6.15834	5.16067
0.0700928	8.86421			0.0777193	2.95603			0.0694437	8.78724			0.0738908	2.31601			0.0797862	6.16035			0.0862059	14.258			0.0700928	14.3372			0.0999989	5.87657					0.8	2.85361	2.74318	3.3984	3.34714	2.84429	7.13101	6.30289	5.53017
0.074768	9.12609			0.0829032	3.08456			0.0740757	9.25488			0.0788193	2.58322			0.085108	6.45439			0.0919559	15.2951			0.074768	14.2016			0.106669	6.90003	6.35893				0.85	2.92186	3.00668	3.60908	3.29659	3.15026	6.80548	6.94395	5.34472
0.0794393	8.51974			0.0880827	3.12795			0.0787037	9.60722			0.0837437	2.45801			0.0904253	6.33826			0.097701	15.6248			0.0794393	13.5209			0.113333	6.55375					0.9	3.01278	2.91276	3.41219	3.17922	3.17028	5.8987	6.6443	5.44688
0.0841106	8.62932			0.0932622	3.20934			0.0833317	8.76005			0.0886681	2.67787			0.0957426	6.36969			0.103446	16.1783	14.1234		0.0841106	13.2299			0.119998	6.98018					0.95	3.0742	2.82237	3.3145	2.6176	2.92676	3.96458	6.17856	4.83986
0.0887858	9.11778			0.0984461	3.21891			0.0879636	8.35602			0.0935966	2.94511			0.101064	6.13217	6.6238		0.109196	16.1191			0.0887858	13.4688			0.126667	6.36185					1	2.92575	2.99584	3.49545	2.53127	2.67751	2.79959	4.47601	3.66329
0.0934571	8.94352			0.103626	3.2131	3.05271		0.0925917	9.54041			0.098521	2.67817			0.106382	6.39045			0.114941	16.0036			0.0934571	13.3136			0.133332	7.16982
0.0981323	9.73724			0.10881	3.17171			0.0972236	8.44598			0.10345	3.05363	2.6224		0.111703	6.21606			0.120691	16.775			0.0981323	13.0971			0.140002	6.91545
0.102804	9.12124	8.85829		0.113989	3.32335			0.101852	8.91748	8.85151		0.108374	2.78648			0.117021	5.2888			0.126436	17.436			0.102804	13.0847	13.6643		0.146666	6.50233
0.107475	8.94561			0.119169	3.09017			0.10648	8.80477			0.113298	2.95635			0.122338	5.66254			0.132181	15.7857			0.107475	12.4425			0.15333	6.99882	6.78317
0.11215	9.02348			0.124353	3.17375			0.111112	8.91453			0.118227	2.72077			0.12766	6.03476			0.137931	15.7757			0.11215	12.4211			0.16	7.18273
0.116821	9.16618			0.129532	3.48073			0.11574	8.74009			0.123151	3.01082			0.132977	5.19252			0.143676	15.6821			0.116821	12.3388			0.166665	7.17853
0.121497	9.095			0.134716	3.45531			0.120371	8.08607			0.12808	3.04059			0.138299	4.90848			0.149426	15.509			0.121497	11.8826			0.173335	6.7237
0.126168	8.42241			0.139896	3.33499			0.125	7.67096			0.133004	3.17825			0.143616	4.35266			0.155172	14.5477	15.9593		0.126168	11.4452			0.179999	6.92416
0.130843	8.49753			0.145079	3.26714			0.129631	8.53589			0.137933	2.92724			0.148938	4.7466			0.160922	14.203			0.130843	11.5878			0.186669	7.05573
0.135514	8.84211			0.150259	2.95314	3.21494		0.134259	8.59582			0.142857	2.96848			0.154255	4.42699	5.32199		0.166667	14.8586			0.135514	12.3007			0.193333	7.12601
0.140186	8.40434			0.155439	2.85583			0.138887	8.78211			0.147782	3.05124			0.159572	4.71833			0.172412	13.8662			0.140186	11.2588			0.199998	6.4487
0.144861	8.85709			0.160622	2.9519			0.143519	7.67074			0.15271	2.89217	2.95324		0.164894	4.50215			0.178162	13.1388			0.144861	10.6862			0.206668	7.78204	7.0527
0.149532	7.7725			0.165802	3.02823			0.148147	8.17454			0.157634	3.17066			0.170212	5.04873			0.183907	12.9375			0.149532	10.4082			0.213332	6.47614
0.154207	8.92051	8.72243		0.170986	3.1288			0.152779	7.80438	8.34363		0.162563	3.11308			0.175533	4.93641			0.189657	12.4428			0.154207	10.3285	11.5546		0.220002	6.5082
0.158879	9.09665			0.176165	3.43079			0.157407	8.20208			0.167487	3.83814			0.180851	4.91191			0.195402	12.8219			0.158879	10.0774			0.226666	6.29226
0.16355	8.71149			0.181345	3.20039			0.162035	7.90362			0.172412	3.24046			0.186168	4.13555			0.201147	13.1602	13.4286		0.16355	9.88929			0.233331	6.83706
0.168225	8.23746			0.186529	3.01557			0.166667	7.42719			0.17734	3.37552			0.19149	4.46403			0.206897	12.8825			0.168225	9.24104			0.240001	6.72127
0.172896	8.64782			0.191708	3.17979			0.171295	7.35641			0.182265	2.80165			0.196807	4.29816			0.212642	12.162			0.172896	9.85333			0.246665	5.4144
0.177572	8.22422			0.196892	3.07734			0.175927	7.71368			0.187193	2.95322			0.202129	4.42569	4.60455		0.218392	12.4624			0.177572	9.99658			0.253335	6.26972	6.35986
0.182243	9.02521			0.202072	3.26804	3.14626		0.180555	7.9794			0.192118	3.01937			0.207446	4.33171			0.224137	12.1735			0.182243	10.7351			0.259999	6.61496
0.186918	7.57798			0.207256	3.1818			0.185187	8.05263			0.197046	3.32564			0.212768	3.62968			0.229887	12.5597			0.186918	10.5933			0.266669	6.84896
0.191589	7.1901			0.212435	3.57492			0.189815	7.16994			0.201971	3.0532	3.18909		0.218085	3.72207			0.235632	11.9765			0.191589	10.071			0.273334	7.06692
0.196261	7.74848			0.217615	3.70931			0.194443	8.05934			0.206895	3.37267			0.223402	3.67464			0.241377	12.475			0.196261	10.3265			0.279998	6.71568
0.200936	7.63038	8.20898		0.222799	3.35315			0.199075	7.37692			0.211824	3.0269			0.228724	3.88102			0.247127	13.2018			0.200936	11.1759	10.196		0.286668	6.25352
0.205607	7.20812			0.227978	3.1221			0.203703	7.76684	7.72801		0.216748	3.10302			0.234041	3.56056			0.252873	12.1462	12.4488		0.205607	11.1926			0.293332	6.40643
0.210282	7.77429			0.233162	3.00083			0.208335	7.04382			0.221676	3.32448			0.239363	4.07403			0.258623	11.4567			0.210282	10.7125			0.300002	6.65805	6.65207
0.214954	7.22361			0.238342	3.02686			0.212963	6.53795			0.226601	3.00336			0.24468	4.11577			0.264368	12.0391			0.214954	10.5408			0.306667	6.64669
0.219625	7.21289			0.243521	3.03091			0.217591	7.97133			0.231525	3.05842			0.249998	3.6244	3.84599		0.270113	12.3851			0.219625	9.75594			0.313331	7.06427
0.2243	6.86652			0.248705	3.35341			0.222223	8.00381			0.236454	3.18914			0.25532	3.69902			0.275863	12.0106			0.2243	10.0951			0.320001	6.64558
0.228971	7.24221			0.253885	2.97104	3.20552		0.226851	8.31665			0.241378	3.20388			0.260637	4.22655			0.281608	12.3294			0.228971	10.6081			0.326665	6.79538
0.233647	6.9906			0.259069	2.91266			0.231483	7.99784			0.246307	3.07785			0.265959	4.32539			0.287358	11.8069			0.233647	10.7458			0.333335	6.59265
0.238318	6.88532			0.264248	2.99044			0.236111	8.15936			0.251231	3.11918	3.14789		0.271276	4.09028			0.293103	11.8415			0.238318	10.6384			0.34	6.21656
0.242989	7.55781			0.269428	3.1326			0.240739	7.75969			0.256155	3.64154			0.276593	3.85047			0.298848	12.2918			0.242989	10.2796			0.346664	6.44689
0.247664	8.15133			0.274612	2.92538			0.245371	7.7528			0.261084	3.14827			0.281915	3.62899			0.304598	11.6699	11.9812		0.247664	10.4974			0.353334	6.50541	6.61418
0.252336	7.71568	7.34804		0.279791	3.10757			0.249999	7.53206	7.70753		0.266008	3.15128			0.287232	3.72647			0.310343	11.3925			0.252336	10.9089	10.5432		0.359998	5.40696
0.257011	7.50434			0.284975	3.22623			0.254631	7.27802			0.270937	3.27364			0.292554	3.33196			0.316093	11.4841			0.257011	11.2458			0.366668	6.36734
0.261682	7.07662			0.290155	3.14691			0.259259	7.70967			0.275861	3.42611			0.297871	3.63396			0.321838	10.8842			0.261682	10.8725			0.373333	5.76641
0.266357	7.3801			0.295338	3.26182			0.263891	7.91419			0.28079	3.07728			0.303193	3.70457	3.82177		0.327588	10.9297			0.266357	11.2906			0.380002	5.23414
0.271029	8.01484			0.300518	3.10706	3.12396		0.268519	7.95902			0.285714	3.11356			0.30851	3.58945			0.333333	10.8545			0.271029	11.4551			0.386667	5.33282
0.2757	6.37634			0.305697	3.21764			0.273147	7.8598			0.290639	3.26127			0.313828	3.33945			0.339078	10.284			0.2757	11.0757			0.393331	5.75193
0.280375	6.38104			0.310881	3.08805			0.277779	7.95648			0.295567	3.12788			0.319149	3.52735			0.344828	10.4703			0.280375	11.2347			0.400001	6.03161	5.69874
0.285046	6.82422			0.316061	3.33245			0.282407	7.88379			0.300492	3.06184	3.22827		0.324467	3.74792			0.350574	10.5696	10.8586		0.285046	11.0674			0.406665	6.02702
0.289722	6.5927			0.321245	2.98125			0.287039	7.74023			0.30542	3.20185			0.329788	3.91641			0.356324	10.2362			0.289722	10.839			0.413335	5.56216
0.294393	6.51482			0.326424	3.0648			0.291667	8.09098			0.310345	2.96799			0.335106	4.06867			0.362069	9.84344			0.294393	11.6209			0.42	6.45767
0.299064	6.1113			0.331604	2.92625			0.296295	7.67527			0.315269	3.16145			0.340423	3.80083			0.367814	9.31604			0.299064	11.6295			0.426664	5.96743
0.303739	6.67301	6.85903		0.336788	2.90432			0.300927	8.01951	7.82609		0.320197	3.18333			0.345745	3.46082	3.68136		0.373564	9.68501			0.303739	10.909	11.2037		0.433334	5.9005
0.308411	6.35436			0.341967	2.93124			0.305555	7.90021			0.325122	2.98759			0.351062	3.4892			0.379309	9.09833			0.308411	10.8681			0.439998	5.74845
0.313086	6.19705			0.347151	3.27722			0.310187	7.91105			0.33005	3.16214			0.356384	3.62565			0.385059	9.13276			0.313086	10.9			0.446668	4.65818
0.317757	6.50459			0.352331	3.13412	3.05104		0.314815	7.93187			0.334975	3.13698			0.361701	3.62515			0.390804	9.25351			0.317757	10.1279			0.453333	5.01777	5.6674
0.322428	5.48376			0.35751	2.87065			0.319443	7.33373			0.339899	2.70798			0.367018	3.42799			0.396549	9.15689			0.322428	10.4394			0.459997	5.86296
0.327104	5.83603			0.362694	3.06664			0.324075	6.80956			0.344828	2.69969			0.37234	3.59122			0.402299	8.89484	9.40189		0.327104	10.8067			0.466667	5.13072
0.331775	5.2577			0.367874	2.95115			0.328703	7.54976			0.349752	3.19764			0.377658	3.65466			0.408044	9.06982			0.331775	10.5747			0.473331	5.62292
0.33645	5.86086			0.373058	3.20595			0.333335	6.66516			0.354681	3.06441	3.04282		0.382979	3.39353			0.413794	9.39796			0.33645	11.6221			0.480001	5.14868
0.341121	5.40327			0.378237	3.04088			0.337963	7.18927			0.359605	3.19726			0.388297	3.99058			0.419539	8.41323			0.341121	10.7268			0.486666	5.17264
0.345797	4.94681			0.383421	3.20091			0.342595	6.82594			0.364534	3.11276			0.393618	3.70807			0.425289	9.04258			0.345797	10.0569			0.493336	5.3639
0.350468	4.92322	5.67676		0.388601	3.38552			0.347223	6.79133			0.369458	2.9695			0.398936	3.19416			0.431034	8.48214			0.350468	10.4303	10.6553		0.5	5.28225	5.36915
0.355139	6.07084			0.39378	3.27335			0.351851	7.08527	7.27211		0.374382	3.34085			0.404253	3.28979	3.54455		0.436779	8.12492			0.355139	10.2688			0.506664	5.39219
0.359814	5.19639			0.398964	3.16023			0.356483	6.83428			0.379311	3.56433			0.409575	3.36913			0.442529	8.46584			0.359814	10.04			0.513334	5.12337
0.364486	5.2201			0.404144	3.28081	3.20462		0.361111	7.24772			0.384235	3.08335			0.414892	3.42989			0.448275	9.04659			0.364486	10.0491			0.519999	5.55225
0.369161	4.98037			0.409328	3.48078			0.365742	6.53885			0.389164	2.90325			0.420214	3.33689			0.454024	8.66718	8.74558		0.369161	9.73267			0.526669	5.03133
0.373832	4.75037			0.414507	3.12114			0.370371	6.62652			0.394088	3.26756			0.425531	3.68156			0.45977	8.85693			0.373832	10.2714			0.533333	5.38842
0.378503	4.73004			0.419687	3.40202			0.374999	6.4866			0.399013	3.02934			0.430848	3.52046			0.465515	8.74986			0.378503	9.58967			0.539997	5.49815
0.383179	4.72065			0.424871	3.24731			0.37963	6.53554			0.403941	3.04149	3.15097		0.43617	3.20282			0.471265	8.3723			0.383179	9.63007			0.546667	5.46034
0.38785	4.4308			0.43005	3.18312			0.384258	6.43117			0.408866	3.1239			0.441487	3.19646			0.47701	8.42845			0.38785	9.69102			0.553332	5.33175	5.34723
0.392525	4.77112			0.435234	3.12088			0.38889	6.90833			0.413794	3.39153			0.446809	3.54077			0.48276	8.3531			0.392525	9.3723			0.560002	6.16629
0.397196	4.58625			0.440413	3.32775			0.393518	7.39879			0.418718	2.89798			0.452126	3.38987	3.40754		0.488505	8.16241			0.397196	9.10838			0.566666	5.40945
0.401872	4.78372	4.93097		0.445597	3.4698			0.39815	6.13347			0.423647	2.68484			0.457448	3.57988			0.494255	8.04053			0.401872	9.20663	9.72364		0.573336	5.34897
0.406543	4.0269			0.450777	3.02392	3.23177		0.402778	6.1491	6.66276		0.428571	2.99673			0.462766	3.58931			0.5	7.98394	8.36844		0.406543	8.78819			0.58	4.8104
0.411214	3.84114			0.455956	3.18997			0.407406	5.32282			0.433496	3.58603			0.468083	3.28053			0.505745	8.4492			0.411214	8.75475			0.586665	4.93361
0.415889	4.21247			0.46114	3.37164			0.412038	5.74706			0.438424	3.27497			0.473405	3.53935			0.511495	8.45412			0.415889	8.67236			0.593335	5.24988
0.420561	4.00382			0.46632	3.08344			0.416666	5.18591			0.443349	3.37755			0.478722	2.90905			0.51724	7.83137			0.420561	8.84			0.599999	5.83117
0.425236	4.08016			0.471504	3.00572			0.421298	5.09917			0.448277	3.31495			0.484044	3.28278			0.52299	7.52733			0.425236	9.91469			0.606669	5.21515	5.37061
0.429907	3.98331			0.476683	3.09935			0.425926	5.47468			0.453202	3.32439	3.19729		0.489361	3.09639			0.528735	7.87032			0.429907	8.61685			0.613333	5.9916
0.434578	4.36616			0.481863	3.02708			0.430554	5.34792			0.458126	3.00937			0.494678	3.15489			0.53448	7.64721			0.434578	8.66204			0.619998	4.83076
0.439254	3.97271			0.487047	3.3059			0.435186	5.65535			0.463055	3.14712			0.5	3.64976	3.34244		0.54023	7.88125			0.439254	8.60821			0.626667	4.95194
0.443925	3.5263			0.492226	3.27084			0.439814	5.00477			0.467979	3.04571			0.505317	3.67153			0.545976	7.99091			0.443925	8.44319			0.633332	5.8146
0.4486	3.2864			0.49741	3.16986			0.444446	4.99989			0.472908	3.49624			0.510639	3.89017			0.551725	7.45255	7.90048		0.4486	9.30989			0.640002	5.36886
0.453271	3.29192	3.87194		0.50259	3.22789	3.18125		0.449074	4.93183			0.477832	3.56095			0.515956	3.17745			0.557471	7.52553			0.453271	8.2412	8.80467		0.646666	4.58075
0.457943	3.19586			0.507769	3.25075			0.453702	5.00904	5.25258		0.482756	3.01164			0.521274	3.55567			0.563216	7.4836			0.457943	8.06756			0.65333	5.5534	5.29885
0.462618	3.37451			0.512953	2.89021			0.458334	4.24455			0.487685	3.14704			0.526595	3.67183			0.568966	7.3907			0.462618	7.7831			0.66	5.59209
0.467289	3.4976			0.518133	3.05135			0.462962	4.75666			0.492609	3.30282			0.531913	3.44426			0.574711	7.61549			0.467289	7.5418			0.666665	5.68146
0.471964	3.43117			0.523317	2.74148			0.467594	4.71261			0.497538	3.58709			0.537234	3.67482			0.580461	7.20375			0.471964	7.99944			0.673335	5.25191
0.476636	3.68576			0.528496	2.50993			0.472222	4.74824			0.502462	2.81494	3.21229		0.542552	3.35745			0.586206	7.30717			0.476636	8.16028			0.679999	4.81889
0.481311	3.48483			0.53368	3.09815			0.476854	4.51987			0.507391	2.96892			0.547874	3.42626			0.591956	6.89052			0.481311	8.46712			0.686669	5.37213
0.485982	3.9175			0.53886	3.18218			0.481482	4.37187			0.512315	3.16719			0.553191	3.08615	3.49556		0.597701	7.05272			0.485982	7.40113			0.693333	5.0006
0.490654	3.50645			0.544039	2.90596			0.48611	3.8842			0.51724	2.8064			0.558508	3.36705			0.603446	7.00653	7.29286		0.490654	7.71917			0.699998	5.67068
0.495329	3.68874			0.549223	3.04223			0.490742	4.55989			0.522168	2.86699			0.56383	3.18223			0.609196	7.0171			0.495329	7.50029			0.706668	6.02616	5.42674
0.5	3.2344	3.50168		0.554403	2.74882	2.92836		0.49537	4.41704			0.527092	2.86815			0.569147	2.84496			0.614941	7.04082			0.5	7.82849	7.84684		0.713332	5.0444
0.504675	3.36042			0.559587	3.1133			0.500002	4.20226			0.532021	2.65525			0.574469	2.79002			0.620691	6.5728			0.504675	8.15477			0.720002	5.18438
0.509346	3.17978			0.564766	3.02805			0.50463	4.00099	4.40165		0.536945	2.81807			0.579786	2.78518			0.626436	6.66103			0.509346	7.49884			0.726666	5.47781
0.514018	3.71373			0.569946	2.7696			0.509258	4.27705			0.54187	3.0446			0.585104	2.99103			0.632181	7.16553			0.514018	7.31875			0.733331	5.11086
0.518693	3.41481			0.575129	2.92253			0.51389	3.93845			0.546798	2.85171			0.590425	3.06512			0.637931	7.5258			0.518693	7.23324			0.740001	4.72816
0.523364	3.39454			0.580309	3.17759			0.518518	3.87624			0.551723	2.79373	2.8841		0.595743	2.77819			0.643676	7.59126			0.523364	7.06224			0.746665	4.8682
0.528039	3.15077			0.585493	2.83014			0.52315	4.30647			0.556651	2.78234			0.601064	2.61035	2.9349		0.649426	7.62703			0.528039	7.05287			0.753335	5.71087	5.16067
0.532711	3.32721			0.590672	3.06163			0.527778	3.90997			0.561576	2.76649			0.606382	3.09268			0.655172	7.04539	7.13853		0.532711	7.3898			0.759999	5.07713
0.537382	3.32072			0.595852	2.85384			0.532406	3.89962			0.5665	3.13177			0.611699	2.93192			0.660917	7.90529			0.537382	7.13125			0.766664	5.4185
0.542057	3.05823			0.601036	2.84532	2.91818		0.537038	3.45961			0.571429	3.18313			0.617021	3.07243			0.666667	8.14931			0.542057	6.94371			0.773334	5.97536
0.546729	3.0279			0.606215	2.77494			0.541666	3.68222			0.576353	3.07853			0.622338	3.18543			0.672412	7.41292			0.546729	6.74955			0.779998	6.12659
0.551404	3.15821	3.28239		0.611399	3.16983			0.546298	3.38116			0.581282	2.89245			0.62766	2.93113			0.678162	7.4472			0.551404	6.51874	7.1867		0.786668	5.51345
0.556075	3.05062			0.616579	2.84071			0.550926	3.38794	3.81187		0.586206	3.32703			0.632977	3.04087			0.683907	7.56386			0.556075	6.49052			0.793332	5.27591
0.56075	3.68439			0.621763	3.11276			0.555558	3.82235			0.591134	2.93842			0.638299	2.96972			0.689657	7.52809			0.56075	6.66276			0.800002	5.34236
0.565422	3.35726			0.626942	3.34632			0.560186	3.57838			0.596059	2.93428			0.643616	3.24528			0.695402	7.67863			0.565422	6.29279			0.806667	5.51202	5.53017
0.570093	2.97052			0.632122	3.50633			0.564814	3.59396			0.600983	3.03067	3.00651		0.648933	2.99362			0.701147	7.45558	7.64261		0.570093	6.59854			0.813331	5.23874
0.574768	3.01447			0.637306	3.26997			0.569446	3.58159			0.605912	3.10654			0.654255	2.9799	3.0443		0.706897	7.30124			0.574768	6.6765			0.820001	5.45064
0.579439	3.31909			0.642485	4.01372			0.574074	4.41985			0.610836	2.98286			0.659572	3.52351			0.712642	7.63558			0.579439	5.98035			0.826665	4.86633
0.584114	3.03193			0.647669	3.74663			0.578706	3.8184			0.615765	2.83375			0.664894	3.1681			0.718392	7.91464			0.584114	6.23176			0.833335	5.62573
0.588786	2.84528			0.652849	3.16642	3.34663		0.583334	4.05107			0.620689	2.97904			0.670212	2.91646			0.724137	7.54713			0.588786	6.57537			0.84	5.18368
0.593457	2.66247			0.658028	3.29363			0.587962	3.76848			0.625613	2.76396			0.675529	3.11228			0.729882	7.14824			0.593457	6.1239			0.846664	5.77887
0.598132	2.90342			0.663212	3.01962			0.592594	3.80885			0.630542	3.13107			0.680851	3.08011			0.735632	7.01068			0.598132	6.35609			0.853334	5.26909	5.34472
0.602804	3.11146	3.08645		0.668392	2.87971			0.597222	4.07199			0.635466	3.06091			0.686168	2.79999			0.741377	7.52268			0.602804	6.30758	6.39056		0.859998	5.48949
0.607479	2.98299			0.673576	3.23605			0.601854	4.05398	3.8699		0.640395	2.88416			0.69149	3.01622			0.747127	7.83662			0.607479	6.65383			0.866668	5.48422
0.61215	3.06706			0.678755	3.08475			0.606482	4.16876			0.645319	3.15539			0.696807	3.15884			0.752873	7.29726	7.46823		0.61215	5.99234			0.873333	5.81429
0.616821	2.78456			0.683935	2.71251			0.61111	3.50409			0.650244	2.91759	2.98153		0.702124	3.09535	3.09535		0.758618	7.07217			0.616821	6.1303			0.879997	5.57895
0.621497	3.02986			0.689119	2.97057			0.615742	4.15542			0.655172	3.01362			0.707446	3.19555			0.764368	6.66204			0.621497	6.32409			0.886667	5.455
0.626168	3.36267			0.694298	2.81697			0.62037	3.5348			0.660097	3.095			0.712763	3.07035			0.770113	6.87878			0.626168	6.01145			0.893331	5.39482
0.630843	3.26355			0.699482	2.81811			0.625001	3.74982			0.665025	2.92801			0.718085	2.96659			0.775863	7.41412			0.630843	6.34528			0.900001	5.15063
0.635514	3.28936			0.704662	2.87603	2.92656		0.629629	3.35639			0.66995	3.10752			0.723402	2.86961			0.781608	7.3553			0.635514	6.00812			0.906665	5.20761	5.44688
0.64019	3.28011			0.709845	2.85133			0.634261	3.55147			0.674878	3.06437			0.728724	2.74199			0.787358	7.55415			0.64019	5.71935			0.913335	5.47392
0.644861	2.94152			0.715025	2.9473			0.638889	3.617			0.679803	3.17991			0.734041	2.68417			0.793103	7.11214			0.644861	6.14189			0.92	5.3375
0.649532	2.89034			0.720205	3.0513			0.643517	3.6242			0.684727	3.16477			0.739359	2.70332			0.798848	7.51833			0.649532	6.45729			0.926664	5.38414
0.654207	3.14499	3.09427		0.725388	2.75424			0.648149	3.85409			0.689655	3.27679			0.74468	2.54747			0.804598	6.61211	7.13101		0.654207	6.31554	6.19086		0.933334	5.0764
0.658879	3.13772			0.730568	2.87404			0.652777	3.37632	3.68113		0.69458	3.17568			0.749998	2.92997	2.85656		0.810343	6.86614			0.658879	6.52497			0.939998	4.41791
0.663554	3.0177			0.735752	3.38043			0.657409	3.07238			0.699508	2.77132			0.75532	2.91288			0.816093	7.25674			0.663554	6.41028			0.946668	4.26416
0.668225	2.97034			0.740931	3.29466			0.662037	3.28239			0.704433	2.81959	3.05423		0.760637	2.85827			0.821838	6.78993			0.668225	5.95412			0.953333	3.92499	4.83986
0.672896	2.70158			0.746111	2.80354			0.666665	3.45351			0.709357	3.17826			0.765954	3.15388			0.827583	6.98829			0.672896	6.34576			0.959997	4.1383
0.677572	2.86694			0.751295	2.93438	3.02235		0.671297	3.31066			0.714286	3.21905			0.771276	3.03439			0.833333	6.54804			0.677572	6.45311			0.966667	3.99979
0.682243	2.81549			0.756474	3.16122			0.675925	3.38863			0.71921	3.32623			0.776593	2.70426			0.839078	6.89808			0.682243	6.20955			0.973331	3.89341
0.686918	2.7095			0.761658	2.88628			0.680557	3.24676			0.724139	3.50838			0.781915	2.38856			0.844828	6.69957			0.686918	6.33368			0.980001	3.60253
0.691589	3.30687			0.766838	2.57817			0.685185	3.14698			0.729063	3.46141			0.787232	2.79483			0.850574	6.39702	6.80548		0.691589	6.36319			0.986666	3.40925
0.696265	2.88409			0.772022	2.76955			0.689817	3.29662			0.733992	2.96891			0.792554	2.85133			0.856324	6.3873			0.696265	6.39368			0.993336	3.20784
0.700936	3.00551	2.94157		0.777201	2.67352			0.694445	3.24522			0.738916	3.1529			0.797871	2.85234			0.862069	6.75604			0.700936	6.30864	6.3297		1	3.39188	3.66329
0.705607	2.98131			0.782381	2.59847			0.699073	2.92483			0.74384	3.2526			0.803189	2.89221	2.84429		0.867814	6.66344			0.705607	6.02146
0.710282	2.63337			0.787565	2.60748			0.703705	3.47543	3.25849		0.748769	3.34919			0.80851	2.89479			0.873564	6.45376			0.710282	6.20789
0.714954	2.89353			0.792744	2.54518			0.708333	3.35611			0.753693	3.42777	3.28447		0.813828	2.71266			0.879309	5.35384			0.714954	6.03386
0.719629	2.82657			0.797928	2.79822			0.712965	3.46544			0.758622	3.24738			0.819149	3.35025			0.885059	5.88389			0.719629	6.21721
0.7243	3.06013			0.803108	2.94352	2.74318		0.717593	3.82183			0.763546	3.35049			0.824467	3.39395			0.890804	5.98869			0.7243	6.25708
0.728971	2.78283			0.808287	3.03145			0.722221	3.47021			0.768471	3.05847			0.829784	3.13127			0.896549	5.10602			0.728971	5.54981
0.733647	3.09511			0.813471	2.91819			0.726853	3.29029			0.773399	3.32464			0.835106	2.95567			0.902299	4.49529	5.8987		0.733647	6.44124
0.738318	2.57493			0.818651	2.96949			0.731481	3.56233			0.778324	3.14115			0.840423	3.29609			0.908044	4.8203			0.738318	6.57307
0.742993	2.91182			0.823835	2.92128			0.736113	3.20268			0.783252	3.6492			0.845745	3.23643			0.913794	4.49009			0.742993	6.17077
0.747664	3.06504			0.829014	2.87341			0.740741	3.52361			0.788176	3.38061			0.851062	3.38127	3.15026		0.919539	4.40156			0.747664	6.02695
0.752336	2.7304	2.86864		0.834194	2.76982			0.745369	3.06902			0.793101	3.37777			0.856379	3.25172			0.925284	4.27292			0.752336	6.24244	6.15834
0.757011	3.17858			0.839378	2.90766			0.750001	3.11657			0.798029	3.47107			0.861701	3.17219			0.931034	3.98756			0.757011	6.14252
0.761682	2.82383			0.844557	2.99015			0.754629	2.82881	3.33699		0.802954	3.47061	3.34714		0.867018	2.94173			0.936779	3.62338			0.761682	5.92945
0.766357	2.83435			0.849741	3.3448			0.759261	3.63189			0.807882	3.16235			0.87234	3.24838			0.942529	3.47536			0.766357	5.99128
0.771029	2.56829			0.854921	3.45749	3.00668		0.763889	3.3381			0.812807	3.18337			0.877658	2.79443			0.948275	3.40399			0.771029	6.11247
0.775704	3.05186			0.860104	2.91453			0.768521	3.47752			0.817735	3.20531			0.882979	3.21954			0.954024	3.2061	3.96458		0.775704	6.40845
0.780375	2.9974			0.865284	2.89701			0.773149	3.41555			0.82266	2.94185			0.888297	3.30849			0.95977	3.10131			0.780375	6.62577
0.785046	2.68629			0.870464	3.03083			0.777777	3.46683			0.827584	3.20723			0.893614	2.97711			0.965515	2.91883			0.785046	6.62795
0.789722	3.07761			0.875647	3.17437			0.782409	3.64851			0.832513	3.34603			0.898936	3.46215			0.971265	2.78171			0.789722	6.5251
0.794393	2.71646			0.880827	3.23731			0.787037	2.87145			0.837437	3.25202			0.904253	3.32705	3.17028		0.97701	2.6371			0.794393	5.909
0.799068	2.68945			0.886011	2.52768			0.791669	3.34063			0.842366	3.53863			0.909575	3.13176			0.98276	2.79916			0.799068	6.80349
0.803739	2.76558	2.85361		0.89119	2.75315			0.796297	3.40057			0.84729	3.58884			0.914892	3.44987			0.988505	2.73681			0.803739	6.25635	6.30289
0.808411	2.84555			0.89637	2.79746			0.800925	3.393	3.3984		0.852214	3.54027	3.29659		0.920209	3.1235			0.99425	2.74895			0.808411	6.84305
0.813086	3.01033			0.901554	2.99649	2.91276		0.805557	3.63955			0.857143	3.15511			0.925531	2.92556			1	2.67282	2.79959		0.813086	6.47749
0.817757	3.08015			0.906733	2.80053			0.810185	3.18597			0.862067	3.03825			0.930848	2.75564							0.817757	6.85036
0.822432	2.97193			0.911917	2.78016			0.814817	3.33395			0.866996	3.18388			0.93617	2.89832							0.822432	6.86267
0.827104	3.0245			0.917097	2.80973			0.819445	3.78008			0.87192	2.92058			0.941487	2.80846							0.827104	7.15365
0.831775	2.94139			0.922276	3.01501			0.824073	3.72889			0.876845	3.30747			0.946805	2.73987							0.831775	7.10672
0.83645	2.63851			0.92746	3.04822			0.828705	3.74273			0.881773	3.22688			0.952126	2.50787	2.92676						0.83645	6.94165
0.841121	2.64589			0.93264	2.75072			0.833333	3.70749			0.886698	3.15613			0.957444	2.67886							0.841121	7.18154
0.845797	2.96261			0.937824	2.85087			0.837965	3.70397			0.891626	3.3382			0.962766	2.78129							0.845797	7.1831
0.850468	3.09778	2.92186		0.943003	2.73513			0.842593	3.66174			0.89655	3.27926			0.968083	2.50171							0.850468	6.8393	6.94395
0.855143	3.04			0.948187	2.79624			0.847225	3.46113			0.901479	3.18639	3.17922		0.973405	2.54349							0.855143	6.64871
0.859814	3.16629			0.953367	2.65897	2.82237		0.851853	3.7544	3.60908		0.906403	3.031			0.978722	2.88558							0.859814	6.2731
0.864486	3.05855			0.958546	2.77864			0.856481	3.33147			0.911328	2.73135			0.984039	2.77802							0.864486	6.9225
0.869161	2.48344			0.96373	3.04521			0.861113	3.35304			0.916256	2.81772			0.989361	2.79275							0.869161	6.82316
0.873832	2.81176			0.96891	3.15869			0.865741	3.35936			0.921181	2.52676			0.994678	2.79521							0.873832	7.01825
0.878507	3.16653			0.974094	2.70248			0.870372	3.61849			0.926109	2.23934			1	2.34072	2.67751						0.878507	6.70459
0.883179	3.08413			0.979273	2.9538			0.875	3.65764			0.931034	2.63774											0.883179	6.95275
0.88785	3.29794			0.984453	2.91922			0.879629	3.60923			0.935958	2.42962											0.88785	7.00247
0.892525	3.11749			0.989637	3.15872			0.88426	3.36545			0.940887	2.50053											0.892525	6.68097
0.897196	2.91891			0.994816	3.15569			0.888888	3.65758			0.945811	2.52866											0.897196	6.01044
0.901872	2.99556	3.01278		1	2.87291	2.99584		0.89352	3.24973			0.950739	2.73324	2.6176										0.901872	6.05035	6.6443
0.906543	2.83829							0.898148	3.14425			0.955664	2.49834											0.906543	6.2577
0.911214	3.40504							0.902776	3.18787	3.41219		0.960588	2.56024											0.911214	6.74206
0.915889	3.08634							0.907408	3.12968			0.965517	2.87329											0.915889	6.13984
0.920561	3.20968							0.912036	3.24154			0.970441	2.36223											0.920561	6.12306
0.925236	3.14559							0.916668	3.13602			0.97537	2.48095											0.925236	6.7482
0.929907	3.28588							0.921296	3.04312			0.980294	2.59011											0.929907	6.34309
0.934582	3.11424							0.925928	3.27019			0.985223	2.70732											0.934582	5.95131
0.939254	2.94279							0.930556	3.26002			0.990147	2.39772											0.939254	5.95417
0.943925	3.02513							0.935184	3.31121			0.995071	2.36861											0.943925	6.02665
0.9486	3.03383							0.939816	3.51412			1	2.47392	2.53127										0.9486	5.92157
0.953271	2.72937	3.0742						0.944444	3.08799															0.953271	5.7565	6.17856
0.957947	2.7762							0.949076	3.75061															0.957947	5.36076
0.962618	2.74125							0.953704	3.71495	3.3145														0.962618	4.96121
0.967289	2.98432							0.958332	4.04768															0.967289	4.96728
0.971964	3.00547							0.962964	3.91999															0.971964	4.7802
0.976636	3.13663							0.967592	4.0726															0.976636	4.38604
0.981311	3.03288							0.972224	3.92372															0.981311	4.46989
0.985982	3.03764							0.976852	3.61721															0.985982	4.24726
0.990657	3.11604							0.981484	3.35761															0.990657	4.15105
0.995329	2.64763							0.986112	2.86372															0.995329	3.81403
1	2.77939	2.92575						0.99074	3.09845															1	3.62239	4.47601
								0.995372	3.04099
								1	3.01258	3.49545
