# Supplementary material for: Crumbs organizes the transport machinery by regulating apical levels of PI(4,5)P2 in Drosophila
Source: eLife. 2019 Nov 7;8:e50900. doi: 10.7554/eLife.50900 (PMC6881148; doi:10.7554/eLife.50900)
Supplement: Figure 6—source data 4. [file elife-50900-fig6-data4.xlsx]

## Sheet: Image46
X0	Y0	Y1	Y2	Y3	Y4	Y5	Y6	Y7	Y8	Y9	Y10	Y11	Y12	Y13	Y14	Y15	Y16	Y17	Y18	Y19	Y20	Y21	Y22	Y23	Y24	Y25	Y26	Y27	Y28	Y29	Y30	Y31	Y32	Y33	Y34		Ap-Basal	Avg intensity
0	55.9086	29.2853	18.353	25.9758	14.7219	14.3509	15.16	19.2968	15.0694	21.2916	17.155	15.7115	14.3809	13.9151	20.3983	28.2978	19.1753	11.9798	15.4308	10.9221	11.4719	18.0488	14.8905	13.6322	10.9614	17.7071	14.1958	8.2379	13.0226	11.5522	11.8147	9.8591	10.7879	16.9569	9.2247		0	16.8327
0.1191	48.4577	32.7449	19.2448	24.1772	13.0342	10.3625	15.4771	18.3502	20.2304	14.1075	15.0215	19.9963	15.8172	14.7053	18.1658	19.7028	15.7491	16.0175	17.1776	15.2116	10.5803	14.2347	13.2651	13.596	10.5114	14.5058	11.0455	9.6153	16.688	13.299	13.015	12.048	9.5612	12.3784	13.4079		0.00605851	16.3287
0.2383	47.5881	25.6019	20.6838	17.3823	11.428	18.4555	16.7825	15.9724	18.3283	13.2807	17.28	21.437	14.4084	21.284	19.1036	19.0253	14.0059	17.1945	15.2296	16.5384	13.5698	18.0892	10.9614	10.6513	11.3014	7.4698	10.177	8.8386	11.5563	12.5789	9.3471	8.5289	13.4966	10.661	15.3668		0.0121221	15.8173
0.3574	48.728	22.8152	19.4598	19.9368	12.8695	20.8919	13.7011	17.4853	15.2788	15.2575	19.1283	13.4448	16.2813	18.3931	22.1173	20.4978	16.6703	14.68	15.167	15.903	16.8134	15.6633	9.0843	16.2306	15.7752	10.199	10.7813	9.2493	13.003	13.3063	11.7358	8.3279	13.8693	13.895	11.3371		0.0181806	16.2279
0.4766	47.3646	27.3736	16.8586	20.2845	17.6198	15.5897	13.7103	26.7625	21.1768	17.4737	19.3403	17.4325	20.5774	19.0498	23.4106	19.462	24.5354	21.8451	11.7778	16.9377	13.4831	16.4885	9.3813	10.4328	19.6162	11.5797	7.8291	9.1281	10.3748	14.5096	8.3578	13.0962	10.1936	10.8241	12.1969		0.0242442	17.0307
0.5957	56.4189	22.4701	15.1397	18.9415	21.0247	12.9477	14.9511	32.5653	29.6855	22.9056	18.4933	16.3224	20.2685	24.0289	23.0601	22.4237	12.9174	13.2188	12.0765	16.3099	12.579	16.9831	13.207	9.2879	13.8023	8.6306	7.7418	8.7708	12.6807	17.629	8.7507	11.9877	12.4117	16.2381	13.0993		0.0303027	17.4277
0.7148	51.8502	23.928	14.7508	22.3312	19.7053	16.6782	12.0264	39.3063	28.927	17.2701	19.8424	9.5368	17.3466	18.5537	22.4216	23.7071	18.9628	14.2295	17.4801	13.7471	9.1906	11.6653	14.7239	9.1253	13.8196	8.197	11.4382	10.1538	10.1838	15.6599	10.0776	8.5325	14.1103	12.1873	12.9392		0.0363612	16.9887
0.834	53.6769	25.0313	16.7893	18.0534	16.6024	12.6869	13.4797	30.8765	20.3173	15.1137	23.1417	15.1331	15.8284	23.8221	33.7302	20.2297	21.6477	23.9779	12.4375	18.0144	15.6754	15.1886	12.2795	15.7415	11.3532	6.5591	10.0194	10.2908	12.2274	14.3704	12.4088	7.9281	10.2662	12.7833	14.5467		0.0424248	17.4922
0.9531	52.4029	22.9003	20.5274	20.3374	20.9864	16.5411	12.3227	37.1764	24.351	11.6865	13.6093	19.2243	12.0109	16.163	25.3049	24.2165	19.1088	17.7038	13.1299	14.6343	13.2434	15.4511	11.7322	13.318	12.2443	7.67	9.3971	8.4405	14.437	9.93	11.6444	8.9269	9.6431	12.9916	11.9453		0.0484833	16.7244
1.0723	51.9614	23.886	17.3363	19.0078	16.2006	11.4171	14.5956	35.594	27.9747	18.7575	22.847	13.1584	12.8853	20.3883	28.8429	23.1376	16.2999	15.8827	14.8189	13.4754	12.2427	14.8996	19.5232	14.3863	19.7222	9.1236	14.334	10.9261	10.7928	12.1478	11.1996	7.6067	12.0024	10.7682	15.1037		0.0545469	17.5213
1.1914	59.1234	29.3739	27.6271	22.6262	15.9679	7.3959	17.5418	45.4776	29.2695	16.2476	17.6246	16.4276	16.4299	15.896	27.2679	21.2827	23.3571	14.3204	19.1214	19.1371	11.3786	10.1804	12.8149	18.374	12.5021	7.8761	9.706	12.0624	8.8824	13.0791	11.6454	10.7083	11.016	13.1235	12.4123		0.0606054	18.2079
1.3106	48.5043	19.3455	22.2111	19.6935	21.1315	18.1301	19.4925	40.3257	33.1475	20.7989	16.5861	19.8029	19.1176	23.2447	29.9278	25.6984	28.1976	13.739	16.8165	13.0871	11.923	15.1074	12.6973	17.9835	17.3493	11.9793	9.7538	12.8991	11.4665	10.4808	7.2593	10.0374	12.3155	14.637	10.625		0.066669	18.7289
1.4297	53.3051	18.9168	25.3892	21.9964	19.9676	17.0679	20.135	49.5588	42.0178	17.2426	18.5767	12.863	18.8311	24.9512	33.6831	28.9334	23.3188	20.996	18.1486	14.8581	13.9479	14.3555	13.8793	13.2913	16.4642	8.9457	9.5308	9.0976	12.1136	13.1175	9.165	7.3174	12.1472	16.8808	10.2149		0.0727276	19.4636
1.5488	51.5598	20.9076	31.6516	20.6468	14.1002	12.681	19.9124	56.7767	33.4324	16.381	15.2466	18.5566	13.1827	17.2781	28.6665	26.5439	26.3958	25.9328	21.9242	13.5657	10.3683	24.8661	17.3589	15.36	18.5999	10.5215	10.1295	11.3633	11.884	11.1986	6.5141	7.8615	11.4318	14.0493	9.2415		0.0787861	19.3169
1.668	44.7644	21.4042	26.7702	15.2398	14.058	13.9419	20.5261	59.7794	40.6023	21.8457	17.4631	19.9703	12.8478	18.4712	23.992	26.8266	29.1353	20.4813	20.0737	16.1835	10.9918	17.8939	12.579	16.7359	18.2052	8.775	10.168	11.7751	11.8311	13.1448	10.2549	8.6576	15.4467	11.5834	14.9472		0.0848497	19.3533
1.7871	45.6818	24.6966	27.4861	17.1413	13.7694	13.576	19.1882	52.1887	37.4831	16.7531	17.3795	16.3599	16.8892	21.814	20.8438	27.0356	26.6482	27.211	19.4967	19.7553	12.5157	15.553	12.4199	12.5138	19.0865	10.3576	10.3984	9.9938	14.1005	16.8942	14.2157	8.2315	11.852	13.7	13.1085		0.0909082	19.324
1.9063	51.1068	20.0695	22.6539	24.14	16.9916	9.552	23.6089	58.3845	37.6716	12.8604	13.1738	18.2894	17.5345	18.9155	24.2521	25.0887	34.5129	31.6613	20.619	16.6452	11.2507	13.3381	8.5909	13.1048	12.7423	10.0024	10.9168	11.1709	13.9302	16.2764	7.4262	6.591	11.1183	12.1629	9.0236		0.0969718	19.0108
2.0254	39.1966	22.7819	27.6432	25.3526	17.3783	10.7963	31.2254	53.1729	36.1621	14.0495	19.9666	13.5668	24.8931	22.2316	28.1965	25.7474	46.9194	37.5639	21.975	22.5909	14.8797	10.2509	8.511	14.6066	15.9018	10.1693	10.3341	11.8263	12.4807	9.6014	8.8578	5.9231	10.8033	10.9529	10.9619		0.10303	20.2135
2.1445	33.6406	25.9505	36.2511	18.0732	15.0638	11.6386	31.809	46.9861	33.7376	20.3428	22.5407	17.6062	24.5138	22.6176	32.7609	20.0745	48.3074	36.444	23.8159	18.5032	14.3273	14.0275	12.0171	10.4334	14.4825	11.8027	12.4725	11.1903	10.1099	9.7275	8.4783	7.8069	6.7332	10.929	16.0707		0.109089	20.3225
2.2637	44.0194	33.7688	33.5041	16.2149	14.3101	15.0754	25.281	41.6914	31.7158	21.1137	26.1168	17.619	16.1129	17.7585	24.2293	28.6017	47.5684	45.1954	32.768	19.0733	13.0093	13.9051	14.2041	12.9313	14.4091	15.3241	9.3956	9.43	12.3634	4.4378	9.8968	6.4834	10.2889	9.918	8.9568		0.115152	20.4769
2.3828	38.7798	27.2386	29.955	23.3259	13.796	13.6898	22.4515	42.6864	32.6414	17.943	23.2259	12.8841	15.0335	20.0474	22.839	33.0245	55.0716	62.0363	44.9604	26.0951	11.7878	15.7995	11.7749	12.0059	17.8516	12.2344	12.5085	12.7382	10.1494	5.916	8.2394	9.6685	9.6985	12.6653	11.8022		0.121211	21.5019
2.502	46.0974	21.7298	38.1613	17.8046	14.361	12.9985	21.3346	49.2401	34.8267	18.0381	23.0426	14.3376	17.3079	23.2919	23.8826	39.365	59.6672	63.6081	53.2197	34.5211	12.5005	16.393	13.5592	18.6068	19.2224	9.9323	12.8079	11.2793	14.7267	5.3361	8.5469	6.1966	9.4469	12.2443	12.8984		0.127274	23.1581
2.6211	43.2243	23.9993	26.6764	20.1283	21.6203	13.7094	22.7629	45.0898	42.0464	21.2753	23.8692	12.0231	14.9326	20.479	22.4768	40.4434	65.23	61.8198	59.782	39.9464	16.6257	22.4586	8.5957	12.2999	16.3822	11.5376	10.4241	17.4013	17.8964	5.978	5.9391	5.157	8.9389	12.7168	12.6878		0.133333	23.6164
2.7402	41.8882	24.0747	31.0716	20.1743	22.55	16.272	24.7317	34.338	44.6305	22.5097	16.4396	15.6114	16.4645	17.9442	14.3768	41.6591	57.963	64.7882	65.8126	36.333	17.0939	14.2622	10.7071	9.5295	13.2295	14.9735	10.833	13.2634	12.8294	7.8609	7.8462	7.3551	6.2572	12.4639	14.6024		0.139392	22.9354
2.8594	39.0827	21.9903	29.9558	20.3064	14.4805	10.2032	27.8823	35.4159	48.145	21.0624	19.2369	15.8575	14.8758	17.1158	22.3426	43.8288	52.1349	60.858	71.4653	37.9073	14.7212	13.2558	16.3184	8.5436	14.7125	16.4505	15.8898	8.1474	7.8277	4.3211	7.5279	5.1921	10.1537	9.938	11.9411		0.145455	22.5454
2.9785	41.3775	18.34	26.0962	17.0952	11.4638	15.4792	32.4122	27.848	43.3891	26.7021	17.4877	22.7968	20.2791	22.463	19.0379	44.7643	43.9854	69.82	70.4274	38.4917	12.5762	14.6867	15.5898	9.3617	7.6456	19.5441	13.2898	9.6231	11.7365	7.2542	6.9328	9.9784	11.1389	14.1697	13.4587		0.151514	23.0498
3.0977	46.3422	21.4328	28.3416	19.1373	21.6057	9.4369	22.161	23.6089	45.1571	21.1519	17.9269	24.2249	19.7284	22.5775	17.6892	44.6139	38.1518	61.4488	68.0679	43.5859	15.7773	17.4284	11.2118	9.2744	6.7687	22.2816	14.8703	8.3119	10.8094	4.7543	7.653	10.0334	7.6598	12.2518	8.1896		0.157577	22.3905
3.2168	38.3428	22.6822	25.4341	20.2904	14.606	13.1826	22.6745	24.2982	45.5802	20.5125	18.733	15.8531	10.6819	20.93	23.2479	41.9056	31.3324	61.2713	79.9336	47.7076	16.5051	16.4116	15.6127	14.276	11.2217	21.9094	16.8153	10.5011	8.247	4.6419	4.616	8.5605	7.7895	7.6066	11.7928		0.163636	22.1631
3.336	39.1065	16.919	27.1407	20.4556	18.8588	15.3466	31.3449	15.9137	47.3807	27.4084	18.5461	21.0651	13.1175	15.9722	13.6946	41.714	32.5538	49.1806	96.2504	46.3849	14.3889	12.8361	14.5141	10.6269	12.3833	19.3034	12.5929	11.9657	11.691	4.9659	6.1561	7.1086	9.4632	8.1572	10.7963		0.169699	22.1515
3.4551	45.8007	16.4394	29.3703	21.0405	13.1158	16.4192	31.6265	18.879	41.7937	26.798	11.5245	14.6645	15.8699	17.7593	17.285	55.5177	31.4656	51.0009	76.3936	51.1838	19.357	15.5073	11.594	8.8994	13.376	17.3771	11.0884	10.1119	9.821	8.298	5.4603	6.7022	7.1027	12.3915	6.9734		0.175758	21.9431
3.5742	41.6644	33.5245	25.7378	17.4552	15.3176	11.4712	32.577	18.269	32.6791	31.1846	18.1619	14.8549	17.3657	19.1117	14.7125	46.5284	24.7348	45.1139	78.5835	51.2236	17.4587	13.4374	13.6469	7.5857	10.8587	13.8012	7.4973	9.0329	8.8546	5.3699	7.7596	5.5891	5.627	10.7036	11.442		0.181816	21.1125
3.6934	38.0477	27.6231	25.4928	28.9915	17.5735	12.7932	37.0385	11.1021	42.0879	26.0545	19.9555	13.4325	18.2627	17.9312	12.1498	42.4337	39.6024	38.13	87.6059	45.7727	16.393	14.214	9.6912	14.6656	11.0031	8.3587	11.895	6.4989	8.243	7.9121	7.5825	5.2851	6.8179	5.7565	9.9648		0.18788	21.3246
3.8125	48.7062	20.3793	24.5222	26.4701	20.1848	13.6638	27.7349	15.1304	34.5429	29.0176	16.9338	10.8276	18.4097	19.4548	14.8864	42.6738	28.8766	45.5435	73.6219	40.9445	13.3114	11.1876	10.1215	10.1249	6.8949	11.8049	11.3324	8.4993	10.5385	8.8247	4.0706	5.1213	7.6112	9.3705	7.9281		0.193938	20.2648
3.9317	40.9939	27.4731	22.8794	22.3609	14.0747	11.3274	28.4393	19.2188	33.513	28.8331	18.0636	13.8336	19.1021	27.0551	10.2552	40.7209	28.7635	45.9468	72.3747	41.7263	17.0378	13.5652	12.597	12.2614	8.0902	16.6646	11.1568	10.3317	8.0075	3.568	2.476	4.1241	5.6075	14.5364	10.0593		0.200002	20.4868
4.0508	41.408	25.4554	20.1865	19.6884	15.1589	10.8156	25.8394	15.7942	37.276	29.9773	16.4386	14.2892	19.1714	27.1715	19.9647	40.7886	31.9786	43.4255	66.515	45.1535	14.0449	7.9315	13.0053	9.3925	7.6421	17.1719	12.1089	6.4294	11.019	4.8095	6.2615	8.3015	6.9193	9.9697	9.1302		0.206061	20.3038
4.1699	38.7034	24.8907	21.9292	17.4758	14.4148	14.7184	28.3162	15.1894	31.7694	23.7264	16.9143	9.4782	19.1316	25.8686	18.275	46.9306	29.5931	41.017	57.8865	37.6519	17.7526	12.186	7.6365	7.7382	12.1982	9.6202	10.3607	7.4874	8.9536	6.4577	6.2257	4.2159	9.422	8.3128	6.3529		0.212119	19.1086
4.2891	32.1866	23.4976	22.992	20.2478	19.5275	16.385	22.922	13.3922	28.7517	31.4226	13.3539	9.1396	20.2704	27.1981	17.6822	42	25.1398	39.9577	53.2532	35.3378	13.6945	11.2797	10.9453	10.4614	11.8126	12.361	15.6196	12.523	10.1413	3.9199	3.5194	5.2061	9.9579	9.5259	8.3375		0.218183	18.9704
4.4082	35.7781	25.8546	23.0456	19.8572	17.7378	12.9318	24.8021	16.9248	40.0459	28.7856	15.1294	12.6108	19.1109	17.1631	20.1204	46.4174	22.5747	30.3014	49.7533	32.9739	13.4585	8.4143	10.2462	8.2414	15.7408	16.7965	10.751	7.1653	8.8577	4.4538	4.2553	6.4227	7.7398	9.2225	7.4488		0.224241	18.6038
4.5274	30.1373	25.0173	20.5835	19.6504	12.077	14.2588	25.0954	15.2802	34.413	28.756	15.5274	14.2785	24.4134	16.3605	21.5963	39.0526	23.9618	22.5609	42.0101	33.4758	12.8484	6.4679	13.1194	10.1013	8.9652	17.9931	10.7455	9.6667	11.8791	3.7096	4.827	4.4847	7.5704	9.2264	6.4834		0.230305	17.617
4.6465	32.7683	24.9219	18.5442	19.3766	12.1968	15.7123	25.0549	18.3835	33.0587	22.877	18.8275	12.0672	22.1974	18.0439	17.7513	46.7401	24.4215	24.2752	30.1065	27.6809	8.1241	6.7813	14.5284	8.4123	8.6796	14.9056	7.5507	8.3828	8.4742	3.8612	3.8406	4.6241	4.3541	9.3579	7.229		0.236363	16.6889
4.7657	36.1301	33.2299	18.9622	20.0509	18.5624	14.6158	24.0546	14.8804	30.5709	26.7772	15.7719	10.2679	19.8147	17.7951	17.2797	40.5309	28.6642	26.0251	20.7429	19.5323	10.7961	8.5937	12.0727	6.7839	12.2963	16.2537	10.0898	10.485	6.746	4.2933	7.2805	6.4806	10.3203	9.6854	5.752		0.242427	16.9197
4.8848	37.7438	23.7972	14.1401	20.8806	13.8895	10.3128	24.5822	14.4548	23.404	28.4727	17.8851	12.7117	19.4717	21.0297	15.7482	36.3048	15.921	29.3004	24.2404	17.1236	5.8249	6.8829	14.4822	7.8567	9.6029	12.5388	9.09	8.7321	9.1099	3.3306	4.4394	4.3384	7.6941	7.1718	5.566		0.248485	15.3736
5.0039	31.5229	22.4522	12.2681	13.6686	13.2947	12.9138	22.1954	14.7298	26.8077	26.7061	21.4662	11.3158	22.0806	18.1157	24.5227	30.5076	19.3111	26.3312	27.4648	13.1058	8.5946	9.0932	14.3658	11.0136	16.4573	9.8491	9.0075	8.1275	8.674	3.6364	3.701	5.4642	7.1415	6.2871	6.5577		0.254544	15.3929
5.1231	30.3834	22.4144	15.6633	14.6565	7.6474	11.7651	20.4501	9.656	27.3956	19.0367	11.7752	21.8279	20.9399	10.6762	20.9031	34.7424	13.0573	20.3465	25.8684	16.4454	7.3924	8.331	7.6344	11.4764	14.1706	13.9323	7.1212	8.4779	9.8871	7.2871	5.7239	4.5024	6.414	5.492	6.3168		0.260607	14.2803
5.2422	25.8898	25.2443	16.2508	18.0282	12.4937	13.3269	15.8103	8.6692	21.7436	17.461	17.1598	23.6961	12.5114	12.0127	26.0273	27.7871	17.6408	23.4703	24.7155	17.7574	4.4924	10.7785	8.319	11.2884	8.5242	10.9996	6.4995	7.9389	8.884	6.0593	7.3775	8.7135	8.3252	9.0118	6.1713		0.266666	14.3166
5.3614	30.292	26.8359	18.2852	16.3192	16.6223	9.8466	13.4994	12.3174	18.1769	16.84	17.2786	23.7806	14.8019	18.1649	24.2011	20.6106	16.0021	22.8239	25.3039	14.2483	6.1711	8.4928	9.9798	13.7768	11.9374	12.777	8.4087	10.6428	4.9713	5.3012	6.7477	6.535	6.8365	8.0084	6.9335		0.27273	14.3935
5.4805	31.736	22.8003	14.325	17.3784	17.4271	13.566	11.5301	11.5094	18.8594	16.6635	13.9662	27.0486	18.7711	19.5576	26.6962	26.5151	20.2385	20.6827	26.7465	11.4931	7.3153	7.3329	9.0867	13.3342	14.2875	16.1907	10.8452	10.3511	6.6068	6.9109	4.9482	4.1556	8.665	8.0334	6.53		0.278788	14.9173
5.5996	32.6152	19.7541	13.8357	26.0551	12.0643	16.9803	11.279	8.1448	12.6689	21.4825	17.8059	20.2011	14.3154	16.8049	28.8257	32.25	17.7466	18.3744	22.5308	14.4674	4.2789	5.2879	11.9873	10.5574	14.64	14.4655	11.0992	8.5417	6.3886	5.4667	5.0944	4.3053	6.2749	8.5862	6.2593		0.284847	14.3267
5.7188	37.6086	24.1891	22.76	19.0701	11.452	15.1601	12.9637	8.1823	12.9685	17.9095	14.0251	15.7008	14.0001	12.1835	28.3587	34.2091	21.2908	21.6328	25.5361	13.3659	3.6205	6.7685	11.8052	11.1534	9.3208	11.4572	8.5251	9.2647	9.2722	6.7524	6.555	5.2893	6.4207	8.4494	6.2765		0.29091	14.3856
5.8379	40.4997	23.8731	21.497	13.0916	12.2883	11.1431	8.4056	9.965	15.5822	20.0255	12.2657	15.5808	15.6603	15.4607	31.81	37.595	19.7535	18.4792	27.6204	12.1741	6.0853	10.2502	8.8655	9.299	10.2616	15.8892	9.8441	8.4565	7.9797	7.0645	4.2927	3.119	6.7866	6.9029	6.6658		0.296969	14.4152
5.9571	29.9606	30.3646	24.0305	19.8881	10.8384	8.8575	6.9288	6.7025	13.6954	16.0107	14.446	12.9524	16.0725	14.054	27.4275	38.4645	30.6992	20.0614	19.3901	10.9213	4.6917	8.7149	5.9119	5.3426	11.0985	14.2999	10.1603	6.6995	8.9787	6.4183	5.3743	3.5797	9.5935	8.2658	5.6664		0.303032	13.9018
6.0762	32.5121	28.0343	14.4901	21.5102	12.7629	7.8754	8.0458	9.7325	15.6704	17.0899	19.0624	9.6189	18.5781	14.4827	26.0815	45.806	34.9689	25.0604	13.4095	13.2205	5.2001	9.4357	7.4265	9.9699	8.3612	18.0418	5.6475	4.8669	8.4309	6.3467	5.0806	3.8196	7.722	9.3563	9.0578		0.309091	14.4793
6.1953	32.6187	24.7947	15.8263	14.0186	13.0909	8.3474	8.088	9.3084	13.0203	20.972	15.0548	9.4489	17.4646	13.481	27.8886	45.7577	30.8827	25.6768	15.2907	13.611	4.7896	8.7982	6.5492	10.6689	10.1721	18.9814	8.1999	5.8431	7.9856	7.7043	4.3743	6.3574	5.4967	6.0095	5.3138		0.315149	14.0539
6.3145	29.3272	24.7526	18.0123	16.4328	10.276	10.8815	8.3909	7.5009	12.9225	17.6293	10.7655	11.9686	15.6807	16.7078	29.9706	45.8695	30.7861	27.2853	9.7622	12.615	4.987	6.6618	5.5407	11.1487	11.3388	15.6989	6.0159	6.3066	6.917	9.6462	5.8438	4.7406	4.6003	5.7583	5.7879		0.321213	13.6723
6.4336	18.0483	24.9777	11.4165	15.6254	12.3973	9.5405	9.6257	11.2064	12.8793	23.8029	9.9334	13.7802	12.244	15.5756	29.5415	49.3462	34.3301	31.4314	9.8059	9.7921	8.437	6.9221	8.8762	10.2516	7.5596	12.6474	9.6209	7.2959	5.7928	6.366	4.5272	3.4704	6.4453	6.0596	5.5591		0.327271	13.5752
6.5528	25.9438	30.3255	11.8328	14.7599	11.942	6.2718	6.3366	9.0131	15.552	16.3093	15.4624	12.0615	13.3844	8.5321	30.0805	56.5387	32.6725	23.9599	9.8702	11.4465	5.8355	11.4952	6.9945	6.2314	7.9398	8.933	7.3283	4.0256	3.8489	3.6621	5.6615	5.8246	4.0021	7.3618	8.2677		0.333335	13.1345
6.6719	22.2942	30.8792	7.7683	19.6992	14.1318	5.8234	8.7778	8.915	11.2008	15.95	17.434	10.3766	14.657	13.2792	29.7159	57.7333	30.4672	26.5203	14.1545	10.0258	5.8801	10.6131	8.2006	7.9728	6.991	9.7211	3.9878	5.8953	6.0909	7.1807	5.1053	7.2488	3.1627	7.2001	8.5843		0.339394	13.5325
6.7911	14.2638	23.3062	11.3963	14.9371	10.3372	8.7223	8.4754	8.3059	14.0642	16.9805	16.6981	11.8701	17.0236	11.5132	28.7285	47.4474	31.188	31.4645	10.1946	5.8596	5.1422	9.0622	7.265	7.8229	6.4604	12.9656	6.3787	3.9716	6.7622	5.4673	5.5395	3.8283	2.9476	6.5177	8.6339		0.345457	12.6155
6.9102	16.456	22.3108	12.6479	14.0396	13.7291	4.1495	6.552	8.29	13.9577	15.3001	13.3757	9.4316	12.128	10.86	23.0502	37.5568	33.4863	30.7413	10.1613	6.3369	8.3912	10.4113	7.1316	7.4895	7.989	13.3646	7.8461	5.3115	4.6834	3.9681	4.6978	4.4697	4.1901	5.5863	6.1898		0.351516	11.8937
7.0293	22.5926	27.6004	12.5817	11.0766	9.3606	4.7064	8.0037	8.1601	16.9701	12.0521	11.4371	8.5612	9.9806	11.3162	22.3017	39.1829	30.7597	26.2742	12.7251	7.1963	7.2334	9.0224	6.6015	9.7622	8.5181	9.7449	5.356	6.4207	4.5699	4.9212	5.9625	3.8778	5.1074	4.9295	4.2729		0.357574	11.6897
7.1485	17.0146	23.4394	14.1254	11.5961	8.9329	5.1095	9.5547	8.4426	15.4647	13.7787	13.9634	9.6239	9.9137	9.6238	25.1537	34.5595	24.4281	31.5687	9.3256	8.8404	5.2784	7.7701	5.2131	9.0743	10.27	7.873	6.9169	4.9894	5.343	6.166	4.1096	4.5111	4.2476	6.2549	7.0574		0.363638	11.4153
7.2676	15.4906	26.2042	13.4565	10.6822	11.6071	4.511	9.2807	12.0281	19.394	8.5308	12.4988	9.275	12.7662	10.5877	21.9147	29.7855	28.0385	36.0912	12.2288	12.1905	3.9852	7.905	7.6405	7.7429	7.4668	10.1054	8.0363	5.8897	6.8542	4.6324	4.3936	3.5758	4.2451	6.8174	8.1047		0.369696	11.8273
7.3868	18.4821	20.4096	13.6648	14.3558	13.9702	7.9949	11.8571	15.5639	13.6642	10.0127	11.3454	8.739	11.8414	9.52	23.0392	29.4993	27.7556	39.0753	11.5702	7.4942	4.4907	6.6756	5.8482	5.1885	8.5005	8.0656	8.5368	5.0755	6.7165	4.823	4.074	3.3388	6.3823	7.645	7.6773		0.37576	11.7969
7.5059	14.2539	17.0076	9.9801	12.3615	10.243	4.7403	9.7102	15.0957	11.2369	13.9215	11.4946	10.2295	8.5979	8.7127	34.6098	36.767	25.4019	33.4643	8.8758	8.0312	7.5117	7.457	6.9819	5.9894	7.5766	10.5728	7.5247	5.057	6.6222	6.0475	3.9333	4.4152	6.5746	5.6	8.2885		0.381818	11.5682
7.625	13.33	15.5946	12.8692	9.0162	9.1943	5.5026	7.32	15.2961	12.766	8.1095	14.3993	6.0021	16.0212	11.0479	30.3908	33.3971	18.8741	33.817	13.7211	6.9455	4.6627	8.1046	6.5212	4.053	4.2619	11.0872	8.5374	6.6161	5.522	6.0862	4.1096	3.9708	7.2956	6.3894	12.4545		0.387877	11.2368
7.7442	16.1778	14.4101	14.3059	8.0044	5.5299	4.7138	8.3809	19.2002	13.594	12.6666	15.1649	9.1621	10.4395	9.225	18.9855	23.7302	14.6178	37.4262	19.5002	8.2759	6.549	7.1835	5.6298	5.845	5.6093	9.9284	8.8202	7.4523	7.7752	5.9648	5.4874	3.4237	6.8635	7.8909	7.0535		0.39394	10.9996
7.8633	20.3219	14.5956	11.9814	7.9756	6.2246	6.6192	8.6796	16.8544	12.0167	11.0272	19.8741	9.5629	11.1663	8.5137	15.9241	21.1307	17.3923	37.8163	19.7532	8.0285	3.8024	6.4281	7.9212	6.3582	6.1603	10.1493	9.8216	6.8322	4.622	7.5044	3.0749	4.4686	5.6737	3.8214	7.988		0.399999	10.8596
7.9825	15.7052	15.8898	9.93	10.8734	6.1208	5.6318	8.8794	11.8317	11.9016	10.7454	20.4597	10.1646	13.6848	12.5393	17.7835	18.5575	13.6787	24.2349	10.5679	11.1869	3.4998	7.9161	9.3329	5.3968	10.5082	11.5706	5.3874	7.621	5.6536	7.4651	4.6681	5.7214	6.0616	3.6041	7.6509		0.406063	10.355
8.1016	11.9042	17.8251	11.9481	7.4365	7.8104	8.4244	6.734	12.9028	9.131	7.1468	12.7023	12.4301	11.911	15.0299	20.0934	19.7036	16.1212	21.496	11.2232	7.619	6.3462	7.4451	9.34	9.7573	9.6177	9.6341	10.8507	12.038	6.3654	6.6609	5.9154	3.9298	8.087	5.3554	9.7646		0.412121	10.5914
8.2207	14.4497	17.3941	9.6443	8.6105	6.3361	7.3161	6.8774	11.8411	7.5745	13.9967	13.9108	11.3572	12.2528	13.6267	24.291	24.6666	17.7722	17.3652	9.6667	7.6849	7.4201	7.1204	7.1271	6.8077	9.6257	11.1055	7.4418	11.4072	8.8978	4.9595	5.5954	4.6534	3.9478	5.0052	7.5063		0.41818	10.4359
8.3399	13.0699	12.3095	13.0031	8.3094	5.1189	4.7987	6.9774	13.2972	12.9636	15.8324	15.102	11.2636	12.3491	11.4055	20.6329	17.0657	16.169	16.9328	8.7221	8.1978	8.4354	6.8722	6.4682	4.5271	4.3064	12.0469	5.6646	6.4037	8.9178	3.0369	3.8646	4.9245	4.2793	5.6602	8.2485		0.424243	9.63363
8.459	15.54	19.0778	11.5901	10.4752	6.2792	3.9544	6.3481	7.3134	13.891	10.8291	17.9995	13.7841	14.7698	11.3313	14.9837	16.7937	13.0128	20.0161	10.9601	9.1086	7.9533	8.6272	4.6244	5.919	6.5481	11.5099	7.6716	4.8662	5.1125	4.6848	4.3806	4.4468	4.2624	4.8875	5.864		0.430302	9.69761
8.5782	16.5411	14.9198	9.3485	7.1953	6.9567	5.3462	6.6324	11.7802	10.321	6.542	14.2795	14.3156	15.993	14.6623	15.4358	16.0784	12.4551	14.1058	9.2387	3.5239	5.8824	6.2879	5.086	5.4874	6.5896	10.4022	7.3808	3.9414	5.601	2.7931	4.1021	5.5927	7.2098	6.648	9.7964		0.436365	9.0992
8.6973	11.9242	12.1289	9.3987	5.9002	7.6621	6.1746	6.501	10.7046	13.3749	10.3008	10.6866	12.9703	15.3455	15.5143	15.3224	13.8721	11.0607	12.5767	6.726	5.8526	6.9103	4.9759	5.7697	5.6624	4.2355	9.4413	3.916	4.0965	6.6266	6.5523	3.484	6.8823	5.4883	6.6205	8.3838		0.442424	8.65836
8.8165	13.0271	9.2841	7.5367	5.6477	6.2422	4.1952	4.2488	6.7365	13.2495	12.2621	13.4421	14.1529	8.0286	13.6259	11.9593	15.6842	11.393	15.4039	6.2547	7.6785	5.9595	8.1978	5.7842	6.4868	5.365	8.3133	4.1254	7.9123	6.1111	5.7059	4.2768	3.49	5.7676	6.3514	10.8279		0.448487	8.4208
8.9356	10.9579	11.8241	6.9784	6.1013	7.0724	4.404	3.6022	7.4723	9.5744	7.4409	6.8822	10.9666	10.1424	11.9237	11.6991	12.0724	11.4222	17.8907	6.7398	6.2857	8.9802	6.1229	4.637	7.9761	10.1833	6.2512	3.5046	7.4506	4.8142	6.1128	3.0639	5.0129	6.248	3.2885	8.615		0.454546	7.8204
9.0547	16.2004	10.5402	6.404	7.3351	5.4621	5.0962	4.0424	8.3955	10.7129	8.9329	10.644	11.2595	8.3239	12.6582	11.8703	10.3536	11.8777	8.1641	4.6696	11.1072	3.8013	7.2303	6.3856	5.1958	10.0347	3.9518	5.0905	3.8137	5.1307	4.5467	2.8352	3.3517	5.294	6.1029	7.4394		0.460604	7.55012
9.1739	18.7219	8.0013	9.5861	6.0164	4.235	5.1074	3.3156	8.9783	8.8495	7.5191	10.1314	13.0935	6.4592	13.3757	11.2575	10.755	8.9179	9.7593	8.8677	8.2246	5.4206	4.4321	3.4934	6.2255	6.6116	6.577	6.209	3.9009	7.776	6.3736	4.3204	3.4747	4.4316	6.3815	7.8309		0.466668	7.56089
9.293	11.4775	9.2452	10.2205	6.5133	4.0076	5.752	3.0872	5.2701	10.5356	9.1794	12.1257	14.3497	6.5691	15.1031	11.3022	15.4623	6.6221	11.8513	10.3563	8.7715	4.7317	6.1275	3.9705	6.9916	7.996	8.9504	7.4108	5.2267	5.4097	5.4756	3.1577	3.6842	6.5785	5.0886	6.8902		0.472727	7.87118
9.4122	13.1112	8.6217	9.7622	6.9171	8.3704	4.776	5.9052	6.7481	12.1279	6.5706	7.1166	12.6971	6.9355	13.0302	10.4284	11.9172	9.2647	9.6624	7.9879	8.3546	5.7938	7.9	4.7168	4.3671	7.2866	7.6409	6.5438	4.7194	6.9748	5.9794	5.3326	6.0151	6.4582	5.5528	9.7748		0.47879	7.86746
9.5313	8.0353	5.1607	5.8519	9.8214	8.3374	7.0061	2.2785	7.9375	14.7812	8.0882	5.6629	9.3593	9.4433	19.9863	9.2378	7.8406	6.9079	7.417	4.5047	9.5358	5.8944	7.1775	4.6145	4.1531	4.5097	6.1318	4.8141	6.5616	4.9451	7.2004	4.9428	7.0375	4.8368	4.3047	6.8134		0.484849	7.17518
9.6504	7.9246	8.4677	4.0532	8.945	9.1932	5.3479	2.2703	4.7033	11.6439	8.0791	9.0565	9.5382	8.3573	14.2625	9.1376	7.7709	9.2259	9.1385	8.0434	6.8922	9.5528	7.9018	6.3999	5.0826	5.5204	9.6627	5.1065	6.241	5.9191	3.1188	6.1039	4.6347	2.8969	6.512	9.5738		0.490907	7.32223
9.7696	8.6571	5.8849	5.6656	3.2152	7.7317	5.0876	3.6034	4.146	9.8032	6.6625	8.7418	6.9437	8.214	12.8335	12.204	6.9726	6.136	6.1777	4.6807	7.1239	8.1605	7.7979	7.3742	5.0508	6.6809	7.5863	4.7518	5.4894	2.7074	6.8111	6.3525	7.2474	2.9623	6.5997	8.1067		0.496971	6.6904
9.8887	9.6542	3.9235	5.0157	4.7859	6.2031	5.5397	3.5233	3.3573	11.627	6.7019	7.4887	7.2589	7.018	7.2002	10.0698	5.8331	6.5678	7.5718	3.7715	7.8987	4.4526	4.4928	5.8569	3.4559	6.5818	6.1282	4.0236	5.5974	4.6541	7.1464	5.7222	4.5309	4.9072	6.2433	7.4129		0.503029	6.06332
10.0079	6.27	5.4669	8.6005	3.8769	7.2071	5.5021	3.1547	5.6637	13.0669	4.4278	10.7668	11.398	7.2595	8.3976	10.2727	8.428	7.9775	5.9225	5.9251	3.9518	6.6297	6.3966	3.462	2.7111	8.0088	7.3669	3.2702	5.2101	4.061	5.2819	5.4012	4.0864	3.8722	5.1761	9.6697		0.509093	6.404
10.127	11.2312	4.8767	12.6265	4.9422	8.8804	5.3517	3.7278	5.9397	8.9152	5.0375	7.1641	12.3654	7.368	5.3058	7.289	8.201	5.9411	6.6849	7.4521	2.5873	5.5472	4.5175	4.054	3.8031	11.2618	8.5453	3.4162	5.4699	4.9816	6.1617	4.8353	3.7997	4.0345	5.1348	6.7262		0.515151	6.40504
10.2462	7.5602	4.5594	12.4174	7.7714	7.384	5.3556	4.4257	3.9983	6.3361	6.0021	3.4499	8.9793	7.5408	7.9305	5.729	8.0013	5.3932	6.0452	8.2224	6.7264	5.0866	6.0813	4.7698	5.6321	6.7817	10.0023	5.2238	2.1196	3.9484	5.4067	3.7476	4.8436	2.8453	5.3738	5.2417		0.521215	6.02664
10.3653	5.7991	5.1348	8.3561	8.1943	5.9108	5.7712	3.0642	4.3894	8.5767	7.5349	7.7019	8.9472	4.1205	8.3601	7.5941	6.8551	6.7503	4.4002	7.0954	5.2732	4.7867	8.3124	3.3402	4.279	9.0259	8.9027	2.5754	3.9228	2.8516	4.8281	4.2437	4.8319	3.6642	8.0849	6.9628		0.527273	6.01262
10.4844	9.5818	6.1792	5.0562	6.7734	7.7842	7.3244	2.3456	3.3071	10.6328	5.8897	8.5041	12.0032	3.8306	7.4109	5.5594	8.1305	4.7517	6.5856	11.9501	4.6973	7.2019	5.2036	3.6978	4.9693	5.2034	8.6392	6.9216	3.7485	2.873	4.7626	4.7707	3.0066	3.755	7.8168	6.1268		0.533332	6.19985
10.6036	8.8107	4.9247	9.4305	4.8239	6.9303	4.125	4.0938	6.6421	7.5871	6.3646	8.1161	10.4317	5.2365	7.4952	6.5725	7.3792	5.9099	7.4759	10.3033	7.6297	7.3158	3.6788	4.2809	6.4653	5.0362	8.6797	4.1984	3.2605	3.5061	5.9949	6.4331	2.729	3.6972	6.731	6.504		0.539396	6.25125
10.7227	5.5672	5.0021	7.6415	3.9489	10.5783	3.8278	2.5959	5.2824	5.4588	10.3051	14.4188	13.2936	4.0316	8.3742	7.5846	2.7087	5.3654	9.2264	6.7491	7.9412	8.8672	3.2502	3.5117	6.0973	3.0852	11.1442	4.4925	5.8969	5.0387	5.0702	5.0851	2.6435	3.496	6.5269	5.0035		0.545454	6.26031
10.8419	5.936	5.9427	8.8273	4.7539	6.4086	4.9735	4.0362	6.4714	5.3176	6.8466	9.4667	13.3805	5.4828	4.0934	10.246	5.17	4.0404	7.429	7.6869	7.3154	4.9635	3.425	3.4001	5.0702	6.1934	7.6214	5.1913	4.0625	5.678	4.9935	6.7969	4.0901	2.2492	4.5781	5.8389		0.551518	5.9422
10.961	7.1184	5.1297	9.3493	4.3978	2.9614	6.5826	3.4464	4.1749	6.8315	7.554	5.9612	6.7191	5.2337	5.2973	7.2859	8.6949	3.6355	6.546	11.7523	7.1069	5.0669	3.2802	3.1015	4.3666	8.6282	8.9645	7.6832	4.2815	6.4206	6.8771	4.5997	2.6472	2.3234	5.3137	5.2561		0.557576	5.84541
11.0801	6.9951	4.2296	10.439	6.5391	2.7442	6.3214	2.756	2.7797	5.2325	6.3912	5.3297	9.1969	5.8928	4.512	6.7606	7.2126	4.3731	7.5755	9.3895	6.4186	5.5622	3.4869	6.2475	4.4884	5.999	10.1565	6.5259	3.4342	4.8904	4.402	4.4849	3.4027	3.9908	7.4376	6.8161		0.563635	5.78326
11.1993	6.0205	6.5859	11.1287	6.0194	7.6357	5.5882	3.3766	5.6867	5.0125	7.6433	4.8915	7.3359	7.554	3.1422	9.5966	3.7098	4.5871	10.7098	9.2718	5.2988	5.2078	2.835	5.0483	5.9243	5.3888	8.8686	4.4421	2.9755	4.6646	4.9563	3.9858	3.497	4.1997	8.287	7.8232		0.569698	5.96854
11.3184	7.5029	7.4864	9.3031	4.2434	5.6157	4.04	3.2588	3.4	8.8773	6.8928	5.5574	5.9359	6.0804	5.2697	8.8778	5.3778	3.2263	4.8213	7.0489	5.3662	4.1035	4.7522	2.901	5.6361	6.2598	7.0701	4.4725	3.8214	6.2832	5.8999	3.8114	4.1321	4.4536	5.8787	4.7739		0.575757	5.49804
11.4376	5.9844	7.8619	9.7742	4.4668	5.7893	5.2791	2.9072	4.4625	7.3338	7.1869	7.7335	2.6236	9.6383	7.2591	7.5354	7.5133	3.7843	3.9678	6.4164	7.1762	5.9453	6.1195	2.7088	6.6186	4.3853	5.0405	3.4678	4.197	5.8291	7.0783	4.1353	2.7848	3.7832	9.4355	5.8679		0.58182	5.77403
11.5567	6.7651	5.3404	7.5366	3.7272	5.1798	5.3734	3.2157	5.8626	7.9005	5.3703	9.6757	4.4506	8.7534	5.9506	7.147	11.0358	7.0587	7.0695	12.2132	5.6675	4.1228	5.2833	2.4179	4.0736	9.2149	7.9009	3.7295	4.1095	3.9218	4.7067	5.4594	3.6622	8.3919	4.7148	9.0628		0.587879	6.1733
11.6758	4.7124	5.5135	10.4606	4.7399	5.2516	7.1589	5.0238	3.2187	8.7802	6.4415	7.9902	4.0976	9.2572	3.0272	11.0544	6.4842	5.2096	7.3425	11.7338	5.1725	3.5995	3.724	3.8825	3.7429	6.9987	9.5658	3.5469	4.0944	4.8542	5.511	4.9039	3.0012	5.9575	5.8657	7.2762		0.593937	5.97699
11.795	3.5157	4.9313	9.5581	4.873	5.006	7.3597	4.4974	3.9799	10.6947	6.6959	5.7258	3.8165	6.6699	3.2291	6.991	6.3951	5.5856	4.4832	9.5217	6.899	3.8526	5.2148	2.4691	4.0895	6.7085	10.0205	3.7022	4.4009	5.2544	4.4377	3.6084	2.8734	3.7706	5.1916	6.4211		0.600001	5.4984
11.9141	6.7618	4.5032	5.6674	3.965	5.9619	6.6205	3.8226	2.835	6.5274	5.6672	5.2298	5.2269	6.4209	4.4734	8.7575	3.8337	4.1693	9.0572	7.5309	5.7636	4.1391	6.6416	2.4084	3.9898	5.0026	8.853	2.8552	3.0526	6.5811	6.1719	3.6365	4.5974	5.2091	5.0632	4.5491		0.60606	5.30131
12.0333	5.3948	2.5982	6.9728	5.1907	4.5895	7.0591	2.3144	2.8463	6.6384	9.5655	4.1472	6.0197	7.3682	4.7498	8.5762	7.7681	5.2297	7.0569	7.4346	3.7959	3.2344	3.8416	3.262	3.8381	3.9368	8.2805	3.9611	2.5118	6.6672	5.6972	2.1702	3.6425	4.562	6.264	4.9633		0.612123	5.20425
12.1524	6.3448	2.7502	6.179	5.1673	4.1547	7.5017	3.5057	4.0851	8.5348	6.0664	4.9867	6.0926	5.3044	3.6166	5.0487	6.0781	6.8724	4.721	4.8741	4.5597	2.2593	3.797	4.8548	4.1208	7.7043	9.9258	3.7852	4.0779	4.6005	5.5128	2.8915	3.165	4.5256	4.8993	5.3878		0.618182	5.08433
12.2716	8.2873	2.8921	3.2421	3.3917	5.5321	5.3371	3.6829	3.0309	6.2065	5.1911	6.2583	5.1349	6.9365	3.969	4.5212	6.6485	4.5227	3.7048	8.5801	3.9293	3.7444	4.5667	4.8793	4.2978	6.1664	8.8335	6.2473	4.8164	5.3726	7.4216	2.2325	3.4352	6.3237	6.4547	4.6355		0.624245	5.15505
12.3907	5.6192	3.1185	5.2515	3.4354	6.365	3.2498	3.2692	3.3185	8.3234	6.1753	5.1298	5.0359	5.8969	4.0692	7.6114	5.7163	2.8547	4.2021	9.7381	4.3516	3.8901	6.9406	3.2536	4.1648	5.1971	9.2304	4.5799	2.6141	4.2947	5.6703	3.6689	3.9714	5.2319	4.463	5.963		0.630304	5.02473
12.5098	3.67	2.2152	5.1876	4.8007	5.1612	7.0292	2.1604	3.9382	10.6102	6.3336	4.8324	4.9223	3.8014	4.1062	6.1569	4.8552	2.8941	4.1975	9.2219	4.2443	4.5191	5.7966	2.5687	2.1473	5.819	7.5858	5.0321	5.8371	3.3665	6.4734	3.0733	3.6074	3.054	5.1486	5.2809		0.636362	4.84709
12.629	5.7519	3.4339	4.6007	5.1123	4.4292	5.6813	3.2645	4.1326	6.972	4.8516	8.4308	7.2153	5.1778	3.4039	4.1717	8.0376	2.7598	4.3165	6.1107	5.1203	5.7653	5.9897	2.8185	4.0762	3.5494	7.429	2.832	3.7722	4.9913	4.8442	2.274	2.8233	4.3141	5.8632	4.8491		0.642426	4.83331
12.7481	4.3207	4.0302	6.4485	3.9936	6.7414	5.5332	3.4742	2.6205	11.2327	6.5528	5.2632	4.7301	3.4392	4.2944	3.9887	4.706	2.274	3.4374	5.0041	2.7225	5.5046	6.7775	3.899	3.4658	6.0445	8.0693	3.7418	3.1284	5.0954	3.7153	5.2682	3.7512	2.8734	5.1493	4.3075		0.648484	4.73139
12.8673	3.2457	4.3311	8.4328	7.5653	4.8933	6.5371	3.793	3.4521	11.0112	6.3648	4.1182	5.2709	5.8038	2.8611	6.4747	7.2786	3.8719	4.2958	5.5153	3.2055	6.1882	5.4262	2.5518	2.6665	5.1012	7.4784	4.1589	3.8557	4.0465	6.9203	3.6491	4.3015	3.2342	4.8526	3.9311		0.654548	5.04813
12.9864	3.8314	4.4083	5.868	5.2638	3.2278	3.7183	4.0612	2.2346	9.3153	5.8004	5.3822	5.4773	6.1776	4.0955	3.5111	5.5653	5.1416	4.2955	5.9648	3.428	5.0122	5.2012	3.6228	2.2258	5.4662	6.4479	2.0373	3.1083	5.9383	6.1162	5.5796	4.4532	4.7798	5.2192	8.0982		0.660606	4.85926
13.1055	6.4441	3.1555	5.9447	4.8472	6.1714	5.1137	3.5025	3.5461	8.8336	10.0665	7.8183	4.983	4.3963	3.2194	5.0419	5.8623	5.0323	4.0637	4.2775	4.0318	4.9531	4.9046	2.7135	5.4826	10.3055	7.3428	2.1913	2.7155	4.71	6.3755	4.4747	5.4989	3.5635	7.0248	5.9164		0.666665	5.27213
13.2247	4.5402	3.7228	4.955	6.4389	5.1286	4.6807	3.3413	4.6196	7.1289	7.9903	6.968	6.8966	3.8198	3.3361	4.2961	7.2479	3.609	4.4971	3.8861	2.3214	5.2795	4.6581	2.5452	3.4454	8.3324	7.3686	2.9322	3.8143	5.3482	3.8601	3.9952	3.7198	3.4918	3.8547	3.5579		0.672729	4.73222
13.3438	5.6299	3.5894	4.8153	5.1183	5.2882	6.9754	2.1975	3.3715	3.8064	5.6925	6.548	3.8555	2.9594	3.4521	3.9989	7.2223	3.9213	3.5677	4.5226	5.2623	4.5186	7.2602	3.632	3.0722	7.0925	6.1973	4.5167	4.6294	5.099	4.3024	2.9172	3.5342	2.4173	4.367	3.6225		0.678787	4.54209
13.463	3.7203	5.4443	4.7338	4.1736	5.3612	6.3734	4.2873	3.0906	7.7627	8.0779	6.8104	5.0812	6.5683	3.1192	6.0583	3.6284	5.125	3.4423	5.6988	3.7279	5.3211	4.2635	2.7199	3.9374	5.7757	6.6344	2.4447	3.85	3.3188	4.3562	3.7935	4.0796	3.4348	5.5662	4.8893		0.684851	4.762
13.5821	2.2079	3.7112	6.1293	5.9287	6.5231	6.7478	2.4712	3.1665	6.5177	6.9013	6.0045	8.1827	5.5257	3.8147	5.2574	2.21	4.5715	4.3625	4.1647	3.887	6.5145	3.6191	3.9304	3.7285	5.4304	5.6076	4.5773	3.1376	4.3365	6.72	3.4812	4.4716	2.4216	4.2644	4.2662		0.690909	4.70835
13.7012	2.6229	4.9953	4.061	3.7966	7.34	5.3552	2.0171	3.2362	4.6638	8.0362	5.0894	5.7852	7.3364	3.1601	4.1276	4.854	2.5482	2.4928	6.4522	3.3165	5.3127	7.0948	4.8387	5.4583	7.4918	7.5982	6.5535	3.8233	5.4417	2.8782	4.2415	3.2802	2.6122	4.3186	2.8725		0.696968	4.71723
13.8204	3.1625	2.8013	4.7417	6.4344	4.4049	5.7192	2.5207	4.8729	7.1942	7.3839	5.5916	5.4726	7.5934	3.2446	3.842	4.7365	2.9506	5.2619	4.841	3.677	5.1498	7.8798	7.0762	4.6416	5.2224	5.9288	6.9024	2.8494	4.4335	4.8705	5.5925	2.8789	3.5747	6.2107	7.4989		0.703031	5.06163
13.9395	4.8288	2.0946	5.1612	4.0643	5.509	6.0237	3.4807	5.12	6.0315	7.09	4.3313	6.9763	7.612	2.5643	5.6296	4.0421	2.3933	4.5993	5.0489	4.8367	4.758	2.0166	2.8061	3.6094	5.0995	4.7576	3.3699	3.457	4.7741	5.1531	4.1745	4.6923	2.2338	5.084	5.783		0.70909	4.54876
14.0587	3.9058	2.519	6.4852	8.5698	4.3308	6.9208	2.7651	3.6736	5.7755	5.757	5.1195	8.3686	6.8177	6.3601	5.3202	3.982	3.3374	3.4494	4.9229	3.2949	5.1955	3.0607	3.2464	2.9821	5.9931	5.146	4.2382	1.9394	4.7172	7.2178	4.9105	3.2687	2.4447	3.4041	6.1182		0.715153	4.73023
14.1778	4.3917	5.1462	8.31	5.0091	6.7883	6.0004	5.7963	3.417	6.35	3.6372	3.9647	7.5392	5.6587	5.0014	4.7563	5.7667	4.5529	3.6508	6.4143	4.4641	6.6043	5.0315	3.4893	5.0927	4.3002	7.4911	3.5898	1.8953	4.6284	6.0642	4.852	5.0828	3.5025	3.8269	8.2178		0.721212	5.15097
14.297	5.3846	3.945	5.9946	5.3904	5.6244	6.2895	3.6569	3.4585	8.8144	4.9903	4.006	4.6943	2.5424	4.4704	4.0438	3.8495	4.8518	3.2913	3.4921	5.1515	3.302	4.3417	2.9923	4.4302	6.3217	5.7364	5.0285	3.043	4.5064	3.6933	5.8694	2.7629	3.1962	3.2669	4.7833		0.727276	4.49188
14.4161	7.4365	2.4281	5.633	4.4247	5.2754	4.7235	2.5327	6.1971	5.019	6.0517	4.8938	6.845	4.1286	4.6241	6.4987	5.4039	3.8703	3.4186	4.4612	5.2111	4.6393	7.0498	5.5091	5.3558	6.0285	3.9946	4.3411	3.0034	6.728	5.6796	4.816	3.6024	4.4465	3.3374	6.7974		0.733334	4.98303
14.5352	6.3021	3.3067	6.3757	7.1452	2.6511	6.3204	2.5518	2.9072	8.8463	4.6263	7.3351	8.1526	3.8661	4.3531	5.3154	6.2326	4.4055	4.7776	4.6384	5.9684	5.5673	5.4032	5.0186	3.5183	4.9029	5.3092	3.2621	3.0504	5.3985	6.417	4.2098	3.2734	5.8924	2.767	6.7538		0.739393	5.05204
14.6544	5.6282	6.1515	4.7087	6.0887	3.3023	6.7974	2.8162	4.2202	4.4474	5.3951	6.3056	7.763	7.6699	2.9803	7.3652	4.7422	3.5939	3.7626	3.4979	4.2693	8.1509	4.0572	3.0534	4.0354	5.346	6.83	3.3705	3.1461	4.7605	3.8347	4.1335	2.9363	5.8786	2.904	7.3084		0.745456	4.89289
14.7735	5.6158	2.4489	6.0554	5.093	4.7339	7.8578	2.7881	3.9538	5.7658	4.2378	6.6794	5.9219	6.522	4.5766	5.5803	6.126	3.5407	4.5872	4.8651	3.4038	5.1827	4.3901	4.468	4.5471	5.6973	6.6768	3.917	2.8965	4.4459	2.9922	4.1706	3.303	4.1894	2.3248	7.2809		0.751515	4.76673
14.8927	5.6864	3.4398	6.5989	5.0221	5.6602	5.1513	5.5403	2.5786	3.2819	4.3421	5.6276	7.5304	6.7708	5.6069	6.1452	6.8451	3.6161	3.1415	5.8429	4.279	6.0249	3.8939	3.6226	4.3943	3.7461	5.7385	4.3879	2.528	2.4978	4.192	4.322	2.9733	4.5927	3.5578	6.6033		0.757578	4.73663
15.0118	3.5604	4.3706	7.6696	6.1505	3.0009	5.3595	3.4724	4.2348	10.1779	2.518	3.2959	6.144	5.815	2.9753	4.5911	6.5891	5.2263	3.1207	4.0379	5.8044	5.2679	3.8402	2.3303	2.741	6.0104	5.6825	4.5276	3.2388	3.1458	4.1627	3.9436	3.2941	3.8717	4.6415	5.7689		0.763637	4.58804
15.1309	5.0375	3.5742	8.5442	4.0846	5.1656	5.5447	2.7937	3.3808	8.8608	4.1386	3.9821	7.1799	7.2949	2.4963	6.0895	7.3293	4.3527	4.0061	4.0786	4.8203	5.8746	4.5482	3.0139	4.5297	3.4932	3.0784	4.1229	4.192	3.3542	7.3928	3.4771	2.6146	3.1069	3.9451	6.8938		0.769695	4.75405
15.2501	4.8453	2.4513	6.4412	5.7407	6.6405	5.217	2.4128	3.6861	4.7549	5.1589	7.3045	4.3968	4.7876	2.9648	7.5292	3.9669	4.1998	5.1918	2.9466	5.9433	3.9197	3.8077	5.5283	4.5883	4.972	4.3945	5.8085	3.5028	4.512	7.5012	3.503	3.0181	4.3451	3.6878	4.5728		0.775759	4.69262
15.3692	6.8699	2.421	5.7573	7.6669	5.6986	4.6965	2.7107	5.2974	6.9301	4.1497	8.9963	6.7382	5.0801	3.2343	5.4188	7.3292	2.2449	5.4251	5.6531	5.1733	5.643	3.4909	5.4696	3.7603	5.1892	5.2789	4.4081	3.0815	4.6238	7.4284	2.8368	3.4507	3.465	3.7119	6.9278		0.781817	5.03592
15.4884	4.422	3.3645	9.2079	5.2997	3.4375	8.1581	3.7448	6.5696	7.0005	3.4324	11.4576	7.0104	6.3111	5.7688	7.1151	8.3929	4.9096	4.3164	4.2727	3.4616	4.9594	3.0461	4.7546	3.6055	6.0917	4.8296	3.0718	2.9357	2.6769	6.8209	4.2888	2.4778	4.173	3.1525	5.2395		0.787881	5.13649
15.6075	3.334	3.0212	6.7657	3.9517	3.9137	5.331	3.9349	4.7719	4.9915	4.963	6.0122	6.4798	4.2099	4.7623	5.0607	5.9708	4.6398	6.0119	4.087	4.9993	7.0938	2.9027	4.9066	3.1347	4.5299	3.8464	6.0339	3.3519	4.2331	5.4042	5.1472	4.5471	3.3402	3.9656	7.9838		0.793939	4.78953
15.7266	7.4735	4.4302	5.3934	5.2453	3.1895	5.1019	3.5753	2.7853	7.4976	4.9239	3.8967	8.5867	8.4535	8.2501	6.8514	4.1487	4.0302	4.5293	5.1064	3.7612	5.6544	5.6585	4.7886	4.071	5.0649	7.3154	6.0868	4.3175	4.8843	5.5041	7.3727	5.0776	3.718	5.8033	6.6683		0.799998	5.40616
15.8458	7.1517	6.0363	8.3739	5.5086	4.5949	4.898	6.0382	5.1467	6.563	4.2673	7.1972	6.1316	6.7304	7.6291	5.2128	5.8001	3.0287	4.1477	5.5892	3.8283	4.2261	4.4004	4.0234	4.6795	6.4178	7.7528	7.5414	2.8426	4.902	4.8367	5.9646	3.9765	2.5949	5.0433	4.6609		0.806062	5.3639
15.9649	2.9734	2.9368	7.3992	4.6508	2.7123	9.3616	3.9812	6.1572	4.7822	3.8392	9.0621	4.7184	7.5484	4.0697	5.5421	4.1176	5.0118	4.9773	8.3044	6.5257	5.3673	5.8037	4.4581	6.0176	3.8445	6.2157	7.0448	2.5535	4.5343	4.3649	5.7397	5.2616	3.3081	2.8275	4.7638		0.81212	5.16504
16.0841	5.4392	3.9767	6.0564	2.7485	4.5103	9.3263	2.5972	5.6239	4.4826	2.6933	7.7712	7.8383	8.7998	7.2892	7.0052	5.6909	4.1552	7.5358	3.8969	4.7515	5.7833	6.0412	3.5104	6.6374	2.9945	6.0392	4.5968	3.5378	4.9444	7.0739	6.105	5.2583	3.7119	4.0983	3.5068		0.818184	5.31507
16.2032	6.0976	3.7255	8.0568	3.8124	4.6278	6.0738	4.3662	5.4745	6.868	7.1913	6.0655	6.0664	4.8324	7.9152	6.4164	5.6347	3.8004	10.602	2.7792	4.7901	5.8928	4.1277	3.6032	5.4252	5.2581	5.1175	5.4861	3.0237	5.4662	5.9833	4.9111	3.8287	5.334	6.6991	4.5865		0.824242	5.42684
16.3224	5.0222	3.8304	8.571	4.7698	5.839	7.4545	3.2857	6.1238	5.5599	4.7528	6.8663	5.7554	6.8374	8.2203	5.1528	4.5669	5.0183	4.0764	4.6229	4.4828	6.8038	6.0065	4.3701	4.6562	3.7386	5.3601	5.1794	4.0842	5.9324	4.2075	8.2514	4.2552	4.9095	3.5107	3.5761		0.830306	5.30429
16.4415	4.7818	3.7467	7.3377	6.0939	5.2848	3.8041	3.6748	6.3254	4.4552	4.2136	6.8004	6.1424	6.9161	5.8065	5.1689	6.8588	4.581	4.7856	4.8388	4.0575	6.201	6.6113	5.6732	5.0252	5.685	4.1009	5.6133	3.3815	6.4735	5.5505	7.6234	3.4116	3.1655	3.0367	5.141		0.836364	5.2105
16.5606	7.229	4.621	9.2436	5.7942	5.8225	5.7246	2.3283	6.9127	4.6433	4.0264	4.2573	5.1488	5.8947	7.6529	4.8743	6.9919	5.2643	4.443	4.9837	4.1165	5.7368	5.1572	5.3103	6.6516	4.2235	3.7903	6.1679	2.6701	7.0952	7.0977	6.409	3.1361	3.0026	3.9603	5.0606		0.842423	5.29835
16.6798	5.1453	3.1926	6.4296	4.2149	3.061	5.4766	2.7198	7.2799	4.9669	3.6604	6.616	5.6052	6.3384	6.3826	3.0588	6.0597	12.1394	5.6985	4.5317	2.9297	5.9182	6.3674	3.7138	5.2065	3.05	4.1921	4.04	2.249	4.9468	8.585	4.253	5.1164	2.7212	3.335	3.7463		0.848486	4.94136
16.7989	6.017	3.744	7.7298	7.5005	3.2883	6.3086	2.9181	4.7868	8.1677	3.2024	7.1607	6.0296	7.949	4.7209	4.9362	5.568	9.1384	6.6055	4.8041	3.9305	6.2753	5.4556	3.5344	6.1486	5.2114	5.3178	6.5806	4.6769	6.358	5.1792	4.5207	4.0226	3.9312	3.4176	2.8578		0.854545	5.37125
16.9181	4.6947	4.2905	7.1062	7.3505	4.3882	6.0289	4.3476	11.8815	7.0505	4.4962	5.8943	8.6589	6.807	6.8748	3.0797	8.5387	8.6623	4.2316	4.6699	4.1343	7.4066	5.3299	3.7556	5.0111	7.5171	6.0535	5.0157	4.2144	5.7565	5.6487	5.0792	4.6793	3.534	4.8917	4.0001		0.860608	5.74513
17.0372	4.6942	3.8134	4.3829	5.1016	5.1222	6.4432	3.7114	11.9353	8.1583	7.1124	4.2423	5.0408	7.6956	6.8701	4.0628	6.0985	9.6083	4.6721	2.3249	4.3273	5.1953	4.6987	4.2564	2.4154	5.0983	5.3412	5.0859	3.4393	5.8875	6.2114	7.1579	2.8989	3.4024	4.2219	3.9004		0.866667	5.2751
17.1563	3.5311	3.6471	3.7307	7.6969	4.701	9.2024	4.7729	7.125	5.517	9.7778	8.207	5.8127	5.8084	6.1795	3.4857	6.162	5.793	5.905	3.9342	3.5245	3.2824	5.3663	5.3957	3.8867	6.294	5.4077	5.5603	3.5395	6.407	6.9469	2.8274	3.1495	2.8971	4.6068	3.9634		0.872726	5.25842
17.2755	5.392	3.1016	5.6939	6.5484	3.8063	7.0633	6.1414	6.0228	4.7421	11.2817	8.2553	2.9834	6.4866	5.432	4.3312	5.1111	5.0694	7.1961	3.9071	3.0931	5.4664	3.8689	3.5352	7.6024	2.8851	5.3164	7.376	3.9078	6.127	4.2238	4.5228	5.3986	5.5893	2.926	5.6849		0.878789	5.31684
17.3946	4.9145	4.3641	8.9413	9.1597	3.9164	8.1395	6.7682	3.9026	4.734	8.3988	7.9149	4.754	6.7215	7.4553	7.1229	5.9592	5.0085	3.4067	2.8831	2.143	5.8972	3.3786	4.1168	6.2381	3.024	4.0855	4.4207	5.5944	5.6528	2.7331	4.2794	3.4215	4.7889	4.1514	5.5644		0.884848	5.25586
17.5138	6.6655	4.7088	5.5774	7.2575	3.2008	8.375	5.5663	7.9374	4.6976	5.5187	6.8022	6.686	4.0125	8.2945	4.7272	6.1383	6.013	5.8801	2.7484	3.2092	5.4869	3.7103	3.6667	5.5978	3.4371	4.0919	3.8331	4.1615	9.2415	8.2553	4.4915	3.0909	4.1355	5.8361	4.6317		0.890911	5.36241
17.6329	4.4868	5.9738	4.694	4.5097	3.06	7.1872	5.6283	6.1935	7.6867	6.7896	5.3373	8.6317	5.1886	8.3737	5.8075	4.5192	5.4958	4.6571	4.3016	2.7253	4.3813	4.0942	4.1454	4.1124	5.8213	2.7083	3.7896	4.1975	6.649	4.9764	3.5545	3.2263	3.1067	5.987	3.4962		0.89697	5.0141
17.7521	5.0004	4.4247	6.0526	5.1577	5.6282	7.0677	7.8705	4.7741	6.4871	8.3176	5.0816	7.08	5.836	7.684	6.4808	4.4948	3.6616	4.3622	2.7968	3.0346	3.5298	3.5388	2.5479	5.1896	3.1525	2.086	3.2548	4.3058	7.3886	5.8864	6.0729	2.5582	4.5594	4.5938	3.8659		0.903033	4.96638
17.8712	3.3641	6.8112	6.3345	5.563	8.128	8.955	8.6419	5.6435	5.5362	8.3319	4.4815	5.3513	4.0085	7.5035	4.2533	6.7936	3.1924	4.4944	3.7116	3.7272	4.9771	2.9916	4.2218	3.9239	3.0742	2.9565	1.7465	6.7296	5.7455	7.6331	4.6115	2.8306	5.8346	2.5566	3.6851		0.909092	5.09557
17.9903	4.5397	6.6643	7.1894	6.2932	4.2169	7.2043	4.0667	5.6514	4.2063	7.2172	2.411	5.115	5.8474	6.7773	4.0247	6.0587	5.0515	5.7724	2.6753	2.935	3.5283	2.3347	4.4523	2.3091	2.7212	3.0739	2.4866	5.7448	5.7731	4.9198	5.7131	3.6214	4.9864	3.3934	6.0599		0.91515	4.71531
18.1095	5.5517	7.5394	9.3178	5.0613	5.2757	6.2703	5.3581	5.7119	4.6539	4.0569	4.102	6.7664	7.4232	6.9323	6.3967	3.7781	4.4214	3.8966	2.8029	3.2507	3.5718	2.3509	3.9448	2.2976	2.2825	3.5784	3.4341	3.1218	5.6707	5.9864	3.2312	3.9814	3.5989	3.7598	6.2269		0.921214	4.73156
18.2286	4.4	6.3956	7.3364	4.2853	6.398	5.7874	5.676	5.8992	6.2626	5.9704	4.7667	6.8017	8.4854	7.336	5.9431	2.6715	5.5684	3.536	2.538	2.6805	2.6962	4.6408	3.8967	2.9362	4.6758	3.5922	3.3319	3.9509	4.9988	3.747	5.7388	4.5418	3.7239	2.7462	6.2301		0.927272	4.86244
18.3478	2.6235	7.1134	4.773	3.9407	5.1429	5.0457	4.8056	5.1589	8.6188	4.7919	4.3937	5.7201	5.6675	6.887	4.1539	6.5123	4.279	3.4469	2.2893	3.6426	2.4324	3.0156	2.8516	4.0551	4.2394	2.3622	2.879	4.2955	3.9172	4.3085	3.1713	7.0327	3.1683	3.7083	5.1842		0.933336	4.44651
18.4669	4.0014	9.5601	4.8121	4.3865	7.0313	6.0135	4.2356	6.0964	7.9173	5.2277	4.6065	6.8724	5.828	7.8733	3.5282	2.8456	4.5935	3.0097	2.8037	4.3145	2.7277	2.9885	3.6456	2.9816	4.3665	2.7791	3.1839	3.2906	3.3167	4.3074	4.2917	4.3609	4.7833	4.003	3.761		0.939395	4.58128
18.586	3.7541	6.1944	5.1157	5.1563	3.283	5.4229	3.5991	6.3793	7.3915	5.1075	6.7218	6.4488	5.5415	4.234	4.5578	2.7062	4.479	3.2672	2.2254	4.4029	3.8794	2.7097	3.7238	2.632	6.1457	3.9166	2.4584	2.2965	2.8304	5.2513	4.6461	3.5991	4.355	4.8396	3.8887		0.945453	4.37602
18.7052	3.9505	7.3002	3.6766	4.2428	3.4582	5.6937	4.2301	8.485	5.327	5.5203	3.3457	5.0798	6.4288	4.6227	2.704	4.1745	3.6799	3.5169	2.8697	5.0896	3.1031	2.9451	3.9566	2.3231	3.5361	3.0909	3.0835	2.3156	3.283	4.1474	4.1654	3.0131	5.8136	3.5693	4.8196		0.951517	4.18747
18.8243	3.8987	9.4176	3.9172	4.288	4.0988	9.4375	5.0301	9.6572	3.8975	5.5131	4.5613	6.9158	5.4245	6.0999	4.4389	4.1304	4.3811	3.9718	2.7064	3.8146	3.6131	3.3703	3.5559	4.2007	4.3632	2.2584	3.1904	2.8343	2.126	3.2347	3.6905	2.5388	5.8807	3.5083	5.8		0.957575	4.56473
18.9435	6.6602	4.8957	7.0598	4.4062	3.9348	8.1085	3.8686	4.4466	4.0169	4.5658	4.9881	5.4592	5.1065	4.4872	2.743	4.1194	3.5207	2.5491	2.8046	2.0067	2.6614	3.0693	2.4068	2.1853	3.2412	2.9365	3.008	4.5316	3.4303	2.4048	3.2561	3.5434	5.9789	3.3128	6.074		0.963639	4.05109
19.0626	6.2851	6.4206	5.5173	4.9363	5.7969	7.1009	2.7151	3.8846	2.6184	4.7346	4.4883	6.0485	4.3115	6.2135	2.9559	2.6081	4.2087	2.94	2.6355	2.0319	2.2499	3.0885	2.5889	2.3257	3.4431	2.1172	2.8991	3.8688	2.845	3.2269	2.1834	6.6846	6.5071	5.5586	6.2982		0.969697	4.12391
19.1817	4.3773	7.0038	3.8472	5.7805	5.1056	7.5058	4.36	4.9933	3.3615	5.7426	3.4145	5.5443	3.0454	7.5412	3.6359	3.1363	3.4927	3.891	3.1905	3.6273	2.3669	1.9509	3.0185	3.0832	3.4243	3.3611	4.1546	2.1763	2.8926	2.9358	2.255	6.3072	4.0495	4.484	3.6353		0.975756	4.07691
19.3009	3.9972	7.5643	8.2922	4.2164	2.7237	7.7947	6.1666	3.0903	3.6081	3.0142	5.7199	4.6	5.2053	6.7663	2.8573	3.1319	6.634	3.8966	3.9571	2.9902	3.1276	2.033	2.8066	2.144	3.7608	2.6822	3.1017	3.1086	2.4535	2.6392	2.5221	4.9289	5.013	4.1158	2.313		0.981819	4.08504
19.42	5.0971	7.8123	9.9884	3.6437	4.173	4.4352	5.7333	3.8638	5.0529	2.83	6.3018	2.8026	3.9196	6.4634	3.9073	5.1656	3.9957	2.805	2.7317	2.0787	2.3435	2.6442	3.4228	1.9826	2.2326	2.0654	3.3679	3.0916	4.0413	2.3005	2.5278	5.2328	3.5861	3.331	4.2756		0.987878	3.97848
19.5392	6.0322	7.7796	5.6666	3.7002	5.2688	4.7004	5.4103	2.6315	5.2972	2.7869	4.156	2.8356	3.9115	8.3697	5.1916	3.5969	2.8202	3.3164	2.2435	3.8723	2.779	2.9965	3.8978	2.9032	4.0915	2.1016	3.6438	2.7569	3.4856	3.0703	2.1181	2.692	2.524	3.0269	3.3945		0.993941	3.85912
19.6583	4.3808	5.1651	5.5225	3.5863	3.5544	4.3833	3.4604	4.0706	3.0965	2.7108	2.9541	4.7992	4.7899	4.2738	5.183	2.1755	3.0883	3.2255	2.2935	3.501	3.6523	3.1116	2.3452	3.4235	2.7421	3.3855	3.8766	4.055	3.911	3.3378	2.0425	2.1439	2.0128	2.9084	3.2706		1	3.49809

## Sheet: Image45
X0	Y0	Y1	Y2	Y3	Y4	Y5	Y6	Y7	Y8	Y9	Y10	Y11	Y12	Y13	Y14	Y15	Y16	Y17	Y18	Y19	Y20	Y21	Y22	Y23	Y24	Y25	Y26	Y27	Y28	Y29	Y30	Y31		Ap-Basal	Avg intensity
0	10.8571	9.0136	15.2405	9.8281	10.5846	4.9979	7.4699	15.3832	9.9627	21.0083	13.0537	12.2836	17.4816	26.9589	20.1137	11.5877	18.6421	19.0974	21.8399	29.5295	23.6852	20.6641	12.0012	15.7778	19.4976	20.4478	18.578	46.1054	15.212	24.3174	36.8914	20.356		0	18.0771
0.1191	9.1448	11.2382	14.3111	7.0209	9.054	5.2481	8.7289	7.4971	11.3955	18.8713	11.2975	10.8678	15.7124	25.8649	17.1736	14.2596	18.9973	21.406	18.4693	21.4911	24.5175	21.2906	16.3839	16.0437	19.8656	24.9824	23.4463	60.9217	15.6114	23.9725	43.6501	22.1013		0.00567984	18.4636
0.2383	7.8989	8.9771	12.2921	5.7743	10.1631	4.1741	7.229	7.5842	10.5324	19.3794	19.2941	12.3551	17.7475	24.4895	16.1472	12.7525	20.6754	17.6761	18.0633	29.1088	23.4261	30.4307	24.0679	15.4247	15.4213	24.1141	23.7639	61.9373	24.0181	25.653	55.896	25.3084		0.0113644	19.743
0.3574	8.516	8.268	15.3731	7.9669	13.8196	7.5776	10.381	11.5189	13.7891	23.0798	21.2786	13.7861	17.6747	26.5578	16.9043	15.9005	24.5102	23.4006	19.2576	23.9417	26.0424	33.9324	31.5473	19.3897	18.3655	17.8756	22.7442	60.7165	23.0819	22.3316	57.8286	25.0764		0.0170443	21.3261
0.4766	10.7658	7.3914	16.0382	8.3172	12.6648	6.8396	16.205	9.4399	10.5021	25.0132	18.3998	16.3508	17.2732	26.8418	17.6097	15.6305	22.999	24.9209	20.754	19.732	23.4446	41.217	37.2812	16.3469	12.8483	17.3527	18.5238	66.6208	28.1117	21.6574	50.57	25.6578		0.0227289	21.3538
0.5957	20.1043	8.5691	24.742	9.6097	12.7263	6.249	23.7751	9.693	15.8511	23.7775	12.4903	16.372	15.5971	30.3141	20.3093	17.7055	24.1672	28.6038	18.3836	20.1742	25.1722	33.7228	41.1586	15.7654	8.1477	16.3862	24.536	62.535	34.7697	21.0676	48.9419	28.6112		0.0284087	22.5009
0.7148	15.584	10.4402	20.5624	7.3326	14.3437	6.1875	24.8973	11.4289	17.2944	25.563	19.1556	14.3374	15.4704	33.4501	15.7859	19.1446	27.5612	29.8721	19.3392	21.186	27.2373	35.5973	34.5166	14.1795	15.1983	23.8125	25.4266	57.0515	30.8577	21.9742	53.6408	38.7536		0.0340886	23.3495
0.834	20.2885	15.1664	14.5547	12.4204	14.2785	11.6683	28.5277	15.4436	16.0635	23.6047	21.7393	17.0471	25.21	35.8959	20.575	18.6012	33.036	35.8216	20.288	19.8211	31.3642	27.3949	33.9776	12.9803	14.0852	19.5342	29.5981	74.66	33.6329	26.4753	54.4657	40.4732		0.0397732	25.5842
0.9531	22.1079	19.6952	16.2655	14.8978	23.2279	13.0997	23.8024	13.597	18.4463	28.3801	21.1725	19.8492	19.3233	25.5304	22.3454	17.5971	34.3858	37.5828	27.8657	17.0363	37.6435	31.5478	34.5853	16.1449	16.9446	16.1926	30.3669	81.5778	46.2285	26.2272	55.5146	40.8796		0.045453	27.1894
1.0723	23.1625	26.3975	20.7976	21.2385	22.0769	15.9297	25.8538	16.8591	25.515	26.8794	28.2219	17.7063	23.6141	27.4099	19.7678	18.5925	34.4853	34.3965	37.1191	21.6621	28.6094	25.2193	45.8128	22.0794	15.5346	16.5028	28.9057	70.7019	48.4815	31.5493	55.6577	35.3133		0.0511376	28.5017
1.1914	20.5231	25.5463	21.0253	25.559	22.3017	20.1626	28.7173	19.7047	25.0099	23.175	28.5742	11.3561	19.2496	33.0483	16.0514	24.2005	44.1857	43.3109	35.0435	25.7323	30.359	26.6329	36.2599	26.1513	15.2012	24.436	28.772	82.0148	50.4492	28.9444	58.0191	30.7388		0.0568175	29.7018
1.3106	18.1034	26.9999	23.6616	36.8213	21.4906	16.7903	23.6484	15.1767	21.4074	31.7565	26.3137	20.0283	19.4265	27.6642	18.4246	23.5222	47.3165	48.4885	28.7256	25.7204	32.2237	28.3313	35.7381	27.3019	16.9423	23.1415	28.2667	74.1472	48.7536	27.4262	63.4043	32.956		0.0625021	30.0037
1.4297	24.5482	33.1659	21.6965	35.7179	24.848	22.9713	29.6789	17.251	25.6856	37.1652	37.9994	17.0696	22.4383	34.2692	16.3075	26.5429	46.8578	35.7961	26.5863	24.9615	25.8952	29.0245	40.4145	18.3104	18.5976	17.0252	27.084	85.7557	50.4214	28.3749	54.1223	28.1675		0.0681819	30.7734
1.5488	24.7941	32.5034	23.8068	30.5117	29.1742	30.4313	33.5128	23.8348	25.7624	33.6745	37.1393	17.9412	27.553	31.8903	13.6623	21.1138	46.978	39.0686	34.1876	28.6839	29.3109	29.6389	29.5336	28.0718	12.4887	15.8466	37.1489	70.9531	48.8879	29.6227	52.4372	31.077		0.0738618	31.2888
1.668	27.6925	33.0727	21.4727	34.0923	38.4579	23.2301	29.9791	30.0222	31.2877	32.2775	32.5188	19.9174	24.7097	28.0881	18.8501	29.3388	50.3594	41.9267	32.1604	24.6655	26.7361	28.477	24.1367	31.7167	14.892	20.4103	31.8472	77.9336	45.5079	35.2617	63.4353	36.6491		0.0795464	32.5351
1.7871	28.9737	34.1475	22.7563	35.8478	36.9595	24.2959	26.3913	24.3066	18.7954	33.5263	37.7781	17.9199	24.4729	28.626	16.8975	28.2892	44.2735	43.3925	40.802	22.4289	22.292	32.3396	28.1216	30.9358	14.2137	18.7333	28.9793	72.9696	47.8544	27.6405	54.0526	47.6559		0.0852262	31.7709
1.9063	30.9866	37.0461	21.666	35.484	27.8123	20.0488	30.5236	23.2568	28.5782	36.2709	41.562	22.7194	25.956	29.8048	12.4664	27.4919	42.8594	40.2251	35.7287	19.3488	26.4095	24.9424	36.6371	38.1998	14.8775	14.9086	24.1679	82.7663	56.5945	38.7299	54.1429	41.2216		0.0909108	32.6073
2.0254	32.22	34.3484	24.5241	37.9805	30.9512	22.8202	35.9176	24.1243	28.7722	37.6625	56.2604	21.6534	20.6252	28.6632	15.7005	29.1579	49.5124	49.669	36.5316	21.8375	32.8642	29.0031	30.1764	36.8676	17.1506	14.4157	26.0271	76.5924	57.091	32.5904	59.9676	39.4533		0.0965907	34.0979
2.1445	34.9714	33.5941	21.7997	35.4912	28.3751	32.3134	27.6177	26.5489	27.5498	30.3873	53.6278	19.4213	26.3417	31.7151	19.8596	28.8469	45.4685	36.1718	36.8604	20.3807	28.7891	28.4352	31.8397	38.5262	10.3815	19.0099	26.9161	76.814	53.9715	33.7374	72.5068	37.2594		0.102271	33.6103
2.2637	33.0697	38.5502	19.5126	28.6612	32.0325	26.0931	24.3571	19.8262	23.366	27.2337	50.8602	17.7844	26.6289	30.7868	16.8255	34.7325	51.9077	43.1095	44.0399	20.5734	30.5931	27.9099	30.8948	30.19	14.23	22.1482	28.3078	80.977	63.457	32.1042	66.0128	48.2093		0.107955	33.9058
2.3828	31.6746	36.7191	19.6657	38.479	27.5543	32.6357	21.9054	21.3472	25.0867	32.3331	63.8881	24.4695	27.6622	29.4164	18.8802	38.8282	48.0655	45.4893	38.9959	22.6703	28.7066	24.5673	28.0154	37.1246	13.1482	20.5515	23.1082	61.2312	65.9409	40.9471	60.9517	50.7937		0.113635	34.4016
2.502	38.1778	30.0848	16.3553	40.4983	27.0354	28.195	26.8056	27.1921	24.643	35.5181	56.6597	20.9988	30.0981	29.649	20.5302	38.0768	47.1103	53.285	32.9244	24.0686	32.1535	28.4046	26.1075	28.8633	16.9654	22.8974	20.8072	57.0879	69.2374	45.7002	63.8974	50.4882		0.11932	34.7036
2.6211	36.0639	32.6866	22.7845	37.5389	31.7909	25.624	28.3833	25.0507	30.3886	39.4836	56.6768	23.1811	23.6583	26.6617	20.5037	40.4546	38.4112	45.1053	38.1926	23.7537	38.9813	35.2989	21.4575	30.5606	13.9054	26.7898	27.6279	54.4484	60.242	54.1581	58.6177	38.5773		0.124999	34.5956
2.7402	36.7806	34.0184	19.6691	35.8433	35.9075	29.8398	28.4852	26.1753	26.7097	37.7662	53.7104	31.3407	20.2382	23.522	15.4238	42.9005	39.1573	42.67	40.2934	28.0061	33.6549	31.6554	19.6831	34.0844	12.2754	23.0872	26.4242	63.6058	58.4401	63.9299	55.4659	42.2093		0.130679	34.7804
2.8594	36.8838	38.3493	21.6358	42.9556	23.455	34.3535	26.7131	28.9602	23.4811	41.2781	60.5289	24.6375	20.8625	20.7233	15.2725	43.5959	46.7443	51.6835	43.2532	30.2522	25.0308	34.0361	21.4745	29.9576	14.5329	26.0392	25.4882	56.342	61.6639	56.6595	59.6677	54.0941		0.136364	35.6439
2.9785	35.9844	32.9702	16.9629	42.6132	24.5078	33.6631	32.2631	24.9752	21.5055	40.41	65.2165	26.8106	20.9077	24.9534	17.0065	48.9259	46.4078	60.1565	42.8701	33.0427	26.5451	28.0228	19.8708	31.8664	20.2944	20.184	26.0872	57.1025	67.7926	55.5302	72.1571	54.5801		0.142044	36.6308
3.0977	42.3044	33.9171	20.6756	37.9764	32.1235	31.7885	30.8146	22.1148	20.6579	45.4077	59.4242	30.5259	24.7426	18.8729	26.8501	57.5118	51.2491	47.682	45.8193	26.6851	26.7442	29.4756	21.3412	37.1994	14.1791	19.5486	31.8049	62.5576	56.9045	55.6291	61.5961	53.6224		0.147728	36.8046
3.2168	41.795	41.1894	19.3457	29.5729	31.7599	41.1347	27.7014	22.9628	21.7167	44.8592	55.3375	25.9164	25.2331	22.1918	28.5034	57.066	44.7192	40.4223	47.271	36.9644	20.4618	23.2993	29.7493	30.2742	12.4313	17.0037	27.3405	63.6773	62.981	58.7299	56.4522	52.7982		0.153408	36.2769
3.336	39.0472	38.6245	20.2156	34.4314	32.6818	36.0141	33.8591	23.9204	26.7213	37.8911	61.5393	22.2438	21.7535	25.6084	23.6207	56.4168	39.8554	46.8237	48.8271	35.8185	20.0821	23.5147	22.3739	33.4587	12.8157	18.6581	34.2545	61.8492	48.6382	65.7733	45.9931	51.4573		0.159093	35.7745
3.4551	28.08	34.8141	21.1808	34.9884	30.4473	32.6365	24.5615	25.0771	20.7356	40.391	58.2373	28.2125	24.5897	21.6375	27.3057	50.3993	39.7876	37.7726	44.9431	29.3512	28.9241	26.607	27.9455	28.479	13.6213	17.4376	22.6658	58.6177	43.9581	72.0614	45.4356	46.7805		0.164773	33.9901
3.5742	15.9625	42.2634	17.7483	25.8359	20.9248	42.4729	27.6681	26.6119	21.993	43.1093	48.9386	31.1453	28.5199	23.3559	24.4478	49.5385	44.2178	43.5057	52.6771	36.466	28.345	26.2513	26.404	32.7115	13.3644	20.583	24.1626	55.7398	48.7318	62.0136	48.0331	52.5649		0.170452	34.5721
3.6934	19.3617	35.9638	18.9312	23.6411	21.268	29.6081	31.3953	24.9517	26.3293	34.9375	51.5748	35.2489	26.4436	23.9778	27.1041	46.0078	50.7403	39.8375	50.1227	32.171	24.1999	21.1941	23.4152	30.0596	13.9772	21.4251	23.2498	57.6026	49.9259	52.1975	47.8446	50.3748		0.176137	33.2838
3.8125	21.2495	36.0483	23.6561	22.6734	24.1292	34.9507	28.9796	26.5287	25.1606	36.5924	53.488	32.7908	28.3915	28.2011	24.4289	59.7463	44.6303	44.284	46.8964	29.2001	25.7186	21.9741	24.7707	33.7006	17.1645	18.738	23.158	53.8087	48.0227	63.3268	43.916	33.9895		0.181817	33.7598
3.9317	21.3434	37.6846	22.4932	23.4736	18.0715	27.5465	25.2167	35.1074	18.2698	36.2024	55.8154	32.3207	27.0194	19.6575	26.1503	48.5145	40.4744	45.6903	50.4705	37.3248	26.4713	22.4444	18.3971	38.4328	19.9838	18.5471	24.5065	60.3508	40.7991	51.5899	47.5952	40.1204		0.187501	33.0652
4.0508	15.4776	42.4495	16.175	17.4741	15.975	26.2373	22.2593	30.9236	22.2836	38.0648	57.5376	34.3117	21.6	27.6226	32.2394	45.4332	44.3924	40.9514	51.8176	45.1013	26.3327	17.9754	26.018	38.4954	14.8311	19.1179	24.0123	57.6399	55.6184	61.1259	47.941	52.8818		0.193181	34.0724
4.1699	13.624	38.6274	19.8545	18.7984	11.4864	32.2098	24.4024	31.3252	18.3221	46.9723	70.8633	39.1349	20.1051	24.7625	36.3242	40.6263	40.442	43.8715	55.0893	42.5287	33.3315	21.2866	24.0974	32.1163	15.6632	18.4651	21.0354	61.0106	50.7118	71.0241	44.9854	44.3714		0.198861	34.6084
4.2891	18.5369	40.563	22.8748	18.9202	11.3442	32.1421	20.6869	35.3269	23.0831	40.0336	58.2649	46.1391	18.9112	18.0621	32.084	50.786	47.307	37.2053	47.8897	38.8276	31.3582	22.1134	19.7486	30.2135	15.3997	23.6093	28.3431	68.6649	48.2394	64.542	42.7233	45.8735		0.204546	34.3693
4.4082	15.4086	38.1807	25.9493	29.3226	15.572	27.9495	16.8809	30.7343	26.9556	45.9411	50.3412	40.8946	21.3418	21.9417	32.1753	51.8091	59.4361	47.4294	48.3328	42.0627	31.6795	23.1585	18.5147	33.7173	15.8203	23.9183	24.6835	61.3771	41.106	54.6684	40.8725	50.2007		0.210226	34.6368
4.5274	9.942	39.9656	25.9283	24.4826	16.1574	30.783	16.7417	33.0857	24.947	47.9275	51.4454	29.9998	23.7923	22.8798	28.4769	54.1625	56.443	56.3505	43.5508	33.4197	40.6863	26.2608	27.8518	26.827	16.8511	21.5326	20.4579	51.1002	43.1131	49.5168	41.5774	39.2966		0.21591	33.611
4.6465	13.1506	39.5871	21.601	21.106	18.7485	27.1469	18.5726	38.2663	25.4015	43.3987	44.1945	33.4495	27.2063	21.5126	29.987	60.9923	57.8588	52.8505	51.6335	31.4637	30.0216	24.4477	20.9252	35.5685	14.2981	17.3121	28.1144	49.8072	42.6264	45.1565	36.2515	39.4717		0.22159	33.1915
4.7657	12.7976	29.4329	20.6264	17.9791	23.4065	29.507	14.2156	36.069	28.7921	38.7702	42.9208	29.3425	24.1639	23.2359	37.4414	61.6464	53.5571	46.7621	42.4315	33.9247	38.1467	23.922	28.5748	30.7808	12.8078	18.6472	29.2614	57.1761	43.4256	45.5663	35.2956	33.5348		0.227275	32.6301
4.8848	14.7807	33.2913	18.8005	14.8952	16.1472	23.7591	14.5498	29.2474	32.2588	38.927	39.1613	30.333	24.6776	28.647	31.7265	52.9756	53.4898	46.9694	39.4734	40.795	37.9037	24.7256	24.2513	19.9437	18.7539	20.8365	25.8458	52.5922	38.613	45.5433	40.3858	31.2154		0.232955	31.4224
5.0039	14.042	27.2046	17.8167	15.7486	16.477	23.7929	14.1114	25.514	33.3185	41.8765	39.9935	31.7015	34.62	28.3983	35.5285	50.1416	54.0687	50.2886	40.2079	39.71	23.7512	24.3453	19.5799	20.9216	21.5919	20.4951	25.8276	60.6345	39.8637	41.6846	37.4861	34.3646		0.238634	31.4096
5.1231	12.3756	27.7542	22.4991	16.8683	20.8955	24.7262	15.6607	33.8341	27.7148	44.1093	37.8076	24.2803	38.5653	27.4398	35.6573	50.3612	58.6199	44.9775	34.6058	37.3903	26.0432	28.3702	24.9284	31.1703	13.7106	19.1511	30.7025	54.8179	42.0405	47.2384	34.0148	30.785		0.244319	31.8474
5.2422	17.1005	19.2642	21.8878	15.3155	16.6948	24.8634	17.6352	33.863	25.3757	49.3299	34.8803	31.662	42.5929	23.235	32.4054	46.2964	50.5977	51.2664	30.5047	29.3726	26.8545	24.7733	20.1924	25.3137	17.1062	17.5462	31.1528	41.4256	44.0645	47.4017	23.6407	29.0484		0.249999	30.0832
5.3614	15.3785	22.0436	19.1844	14.3778	16.7569	21.2096	14.2038	31.718	29.5209	43.2214	31.4251	34.6271	39.303	29.0953	28.486	50.0274	52.9579	43.9276	34.6223	34.2369	19.5795	30.2308	15.7619	22.1339	22.7082	14.7595	28.1189	48.4995	44.596	46.7398	24.6651	34.827		0.255683	29.967
5.4805	10.6089	18.5122	16.2796	10.5187	22.1985	17.5866	15.1161	25.752	32.3464	40.3106	27.5022	30.3217	32.1372	27.6721	31.5438	49.8192	50.6119	41.0802	40.6337	31.8478	22.2786	19.8981	13.972	19.5197	20.2654	17.1687	33.1255	54.7841	39.4292	47.6409	28	22.1827		0.261363	28.4583
5.5996	11.2323	26.8943	18.911	10.9349	18.8175	15.573	12.5144	22.5778	34.5372	29.4801	32.145	29.4949	24.4792	41.2301	26.6882	41.9226	46.703	46.832	36.1672	40.7588	26.2784	20.8178	10.5103	20.9018	15.189	17.508	39.5479	58.8108	45.032	45.0191	25.3247	23.7184		0.267043	28.6422
5.7188	10.7667	27.7911	19.6267	14.0248	15.3612	14.3779	10.3126	22.6699	31.0202	30.6148	27.0063	35.8381	29.3123	35.7596	32.0518	33.4662	46.5486	40.4378	43.3324	33.0431	18.7763	21.6134	18.2003	23.4081	15.3681	15.2153	28.811	55.0331	43.0583	49.2385	26.053	22.809		0.272728	27.8421
5.8379	13.1311	42.059	18.3001	15.6083	15.2863	13.8359	15.2094	22.5687	25.726	40.8728	26.8797	30.4896	29.3111	29.6534	31.7936	36.6646	46.9535	28.1609	32.496	25.4809	22.1194	32.1642	14.3544	30.4401	15.4869	18.8623	28.4267	42.4205	39.2973	36.3367	22.7972	21.1173		0.278408	27.0095
5.9571	14.6474	43.6312	19.3165	11.019	12.2114	10.6125	11.2163	23.497	29.3297	30.4481	22.4395	30.6381	29.6761	20.0645	35.4457	43.9559	39.7851	28.8015	34.6424	24.5709	23.2456	27.2217	19.9365	21.7002	19.2207	17.1721	33.3664	44.6274	41.9677	30.7891	23.8428	17.853		0.284092	26.1529
6.0762	12.6253	41.7977	13.4633	11.6775	15.7368	9.3379	13.7842	19.3047	32.4143	24.2582	22.3079	28.9308	28.1282	20.2236	26.9393	49.2854	42.4832	33.0478	36.564	15.707	21.3708	30.3738	18.9404	23.3427	13.2634	14.2889	26.7345	46.5469	40.535	31.5317	23.6537	19.9159		0.289772	25.2661
6.1953	26.6995	42.6368	16.5472	11.8706	15.0222	9.2116	17.1894	17.0702	34.732	45.7208	22.4227	23.9416	26.307	20.2895	27.579	43.9585	33.9634	21.2243	41.4295	15.409	18.8858	22.6114	22.0438	19.4899	15.1584	14.1278	21.7686	43.2187	40.3381	33.6891	26.1189	12.6393		0.295452	25.1036
6.3145	26.3167	54.856	18.8683	14.9773	11.2064	14.4126	12.6352	15.5259	27.4842	36.3739	25.0186	30.1812	27.4709	24.7499	36.3714	44.0747	24.7192	24.3689	32.9867	16.8042	20.047	20.5607	23.0533	14.4408	17.4298	9.9978	24.7045	47.0499	42.7579	25.567	34.2705	14.449		0.301136	25.4291
6.4336	29.351	44.4387	17.4166	12.5481	10.4518	12.7088	12.6559	18.88	24.2987	38.54	29.0642	28.2232	28.7767	23.81	36.6208	38.3696	25.2527	21.1654	35.185	19.5833	22.0488	20.7055	21.6751	17.1953	17.2519	9.6326	24.0343	48.4682	45.0788	30.2482	34.9277	11.6186		0.306816	25.3195
6.5528	24.1661	41.5442	16.3846	17.0284	12.1291	13.3437	12.145	18.2518	26.547	36.8569	25.0599	26.4224	34.9469	25.8307	29.4976	36.0371	20.4904	21.3447	35.054	16.638	22.9156	19.5732	16.8228	15.3233	18.8152	10.1518	17.6741	54.5977	40.7478	28.803	28.3798	9.1114		0.312501	24.1448
6.6719	30.4007	39.58	12.7529	15.344	8.0502	13.5098	17.0312	23.2247	30.7581	39.7086	24.6999	32.3784	34.0727	25.2954	27.2545	32.3345	18.8625	16.3835	28.9412	15.677	19.7319	22.9667	12.7756	15.5723	12.0245	8.6889	15.3273	42.6509	42.4092	35.333	23.151	14.0557		0.318181	23.4671
6.7911	25.1691	31.6121	18.3188	17.6616	6.6849	14.5791	20.0056	15.3987	23.0817	37.0014	22.566	29.4197	42.8817	25.034	24.2734	36.3118	16.4886	13.8139	22.3278	15.399	16.9079	12.5685	15.7291	13.0169	12.1285	7.1676	20.2027	40.7348	44.1922	31.5202	18.8546	13.0147		0.323865	22.0021
6.9102	27.3824	32.2823	17.5256	17.8793	7.0431	13.3259	13.4008	13.2795	23.2818	34.7405	24.9977	24.3882	38.1987	30.819	21.8492	30.7354	13.6857	11.6417	17.3925	14.7147	17.666	18.0643	16.6907	18.4147	11.9513	8.2062	15.1205	38.2953	46.9841	22.4682	21.4403	10.3899		0.329545	21.0705
7.0293	25.364	33.442	17.5644	11.3578	9.9278	17.079	13.2113	12.6502	24.2212	30.3846	28.0222	29.335	37.6357	24.668	17.4348	32.8316	13.1434	12.0008	17.6805	13.4347	12.8388	16.6461	17.3532	12.9589	11.2971	9.742	12.2015	38.3849	54.2886	19.1551	18.7543	8.2043		0.335225	20.4129
7.1485	19.4654	26.1756	12.3093	9.9005	11.0412	18.3662	13.223	13.9518	16.4225	25.978	24.7465	25.0997	29.3647	26.4777	24.2273	29.2698	15.8729	12.0647	15.8867	18.2052	13.999	17.6359	17.2913	11.7514	9.1564	6.9696	9.4696	36.0331	42.2164	18.386	16.2418	9.1099		0.34091	18.6347
7.2676	19.1931	21.9808	13.0683	9.9569	14.1762	16.2131	16.2396	13.0447	20.1595	23.6347	26.3756	26.9016	33.8919	20.046	18.8559	24.9866	14.6014	10.5915	17.1109	15.1242	14.498	18.1296	13.9799	9.0536	10.3646	8.9132	8.4742	31.5394	49.6025	15.7807	12.4362	13.1395		0.346589	18.1895
7.3868	20.0911	22.8767	18.5539	15.1052	10.7536	20.6142	17.536	14.5077	18.6704	15.6744	24.8723	20.3746	33.3897	17.8701	14.5449	17.4282	14.8617	8.7523	18.0892	11.7854	13.5927	23.8726	12.2976	9.004	8.828	7.1442	8.3756	28.0153	42.3747	19.8587	17.3171	13.2215		0.352274	17.5079
7.5059	19.8869	19.0078	18.4607	14.0431	11.3931	21.9699	17.0514	12.7904	22.452	19.9057	20.8272	19.2894	28.5286	18.598	11.7486	20.9228	13.6686	10.7097	11.6848	14.8834	15.5171	18.0512	13.0932	7.8323	7.3638	8.689	8.5106	26.3688	34.6224	15.8501	13.546	15.1626		0.357954	16.6384
7.625	23.2957	23.6701	17.8303	13.2618	10.2737	23.3861	17.8859	6.3722	23.3033	24.8468	21.2478	22.3555	20.6545	16.6244	15.6449	18.6032	14.0114	11.4586	13.24	15.5714	11.7348	14.1242	15.9375	10.1425	10.2578	8.3666	8.8056	25.4923	34.1974	12.7099	11.5153	13.5797		0.363634	16.575
7.7442	20.0978	22.2071	14.4415	14.9335	10.6245	20.7554	14.0907	10.8904	19.4567	21.0037	20.7815	23.8112	20.441	14.6554	17.9634	13.303	11.3374	15.0242	10.8156	11.8092	14.2802	17.3394	13.4651	7.7857	11.2539	8.4417	7.176	22.3862	38.1277	16.3368	15.4141	13.9495		0.369318	16.075
7.8633	16.0183	14.6673	15.1655	14.4845	8.9248	18.965	15.4967	12.7046	21.3991	16.8871	18.4917	21.4585	22.1809	19.1963	14.1696	13.6796	11.5874	11.1988	10.0487	16.3433	12.6757	11.0455	16.5143	7.6994	12.1169	8.4506	5.8187	19.1779	29.8895	12.2775	16.869	14.1115		0.374998	14.9911
7.9825	20.6412	15.2381	16.2443	12.7627	9.3142	9.7429	9.8322	7.6728	20.1633	20.687	24.5605	12.5947	25.6398	14.9553	13.4432	14.4878	11.3307	11.7888	9.0594	11.8238	12.1813	11.9579	17.7393	10.4634	10.2101	7.889	7.8034	15.7128	28.5856	14.443	14.1064	13.3747		0.380683	14.264
8.1016	25.4867	12.6549	14.5475	9.8069	6.4504	11.4544	12.8862	6.0682	22.5117	15.959	21.6825	16.1597	28.2095	13.4962	12.7118	9.128	12.1582	12.3686	7.5806	9.1347	10.353	9.8756	12.7534	11.0419	14.4302	9.5984	5.4557	18.7655	28.793	16.403	14.5192	13.9665		0.386363	13.9503
8.2207	22.609	15.1927	16.1065	13.8343	6.2064	8.3729	8.6496	7.3881	18.4629	17.0993	16.8576	11.3063	26.1009	16.5073	11.3908	10.133	10.7512	12.647	7.5416	11.7186	12.7189	13.9975	11.2227	11.9478	11.577	6.0876	6.2159	19.5395	27.6342	16.122	18.9986	15.2021		0.392043	13.7544
8.3399	22.5721	14.2705	17.9539	16.9641	11.4423	11.8857	10.6205	9.2712	20.5582	21.5819	13.2036	11.3609	20.0388	17.9689	8.0253	14.4403	10.2488	7.5429	9.3502	10.0821	14.5744	14.2388	12.7472	9.4196	10.3586	5.9887	7.5537	18.5495	37.0012	23.7348	20.6948	16.6942		0.397727	14.7168
8.459	18.0757	15.4215	19.4673	13.9981	10.494	11.9954	11.5939	7.1488	20.8016	15.7514	13.1213	10.5074	27.3785	14.7677	12.1714	13.6926	8.5315	10.8999	7.4	7.7209	12.9232	15.0275	14.9231	8.0385	9.4273	6.9692	3.6556	18.3823	35.166	20.9245	20.5947	18.6833		0.403407	14.2392
8.5782	17.4446	10.9674	14.6649	9.1429	6.6851	11.2102	9.6396	7.9052	19.3679	12.6522	11.5507	17.7876	21.831	12.3284	13.2917	11.0088	12.431	12.1677	7.1169	12.2888	12.1969	11.7134	17.5663	7.7669	14.5291	5.4045	5.4607	16.4856	36.7343	16.9758	20.7108	19.5314		0.409092	13.6424
8.6973	12.8961	10.4616	21.3945	11.3525	9.1203	14.0334	8.8542	10.4189	15.2751	14.0845	10.3195	16.1234	17.2593	12.4358	12.2185	9.4915	9.318	9.9983	9.0325	10.577	13.9002	11.5741	21.2253	8.5687	11.537	10.1973	6.7791	17.5875	36.8298	14.7016	24.256	22.6487		0.414771	13.8897
8.8165	13.8952	17.1169	17.8709	8.8767	8.1685	13.7326	8.3089	10.8963	14.0787	13.0656	9.3559	11.4588	17.2198	15.3874	12.9966	8.2976	7.5178	9.6514	5.6599	6.7126	11.6213	14.2672	17.2011	9.7661	13.8505	9.8111	4.8754	17.9537	32.2745	19.111	20.7168	17.9546		0.420456	13.1147
8.9356	15.7888	20.6879	17.5418	12.5805	9.0662	12.182	7.7553	13.2584	16.4211	13.6927	6.2672	16.1676	14.8862	15.2597	14.9201	8.8214	8.9638	11.1165	7.2863	6.307	11.8188	12.8536	20.3409	6.0042	8.9437	6.7121	5.1835	15.5919	34.3022	21.2289	24.8937	16.7674		0.426136	13.5504
9.0547	14.157	17.7702	20.4454	8.8996	7.8993	15.9633	9.7959	14.9012	10.0148	13.7259	10.356	20.8254	20.0707	15.2841	14.5154	10.8963	13.6431	11.0537	7.1485	7.694	10.4921	11.7697	15.5881	4.0947	9.8435	8.7166	5.6446	19.9499	34.5251	9.7262	17.4432	13.3885		0.431816	13.3201
9.1739	17.6918	14.1262	19.3952	8.089	4.7785	9.1317	6.0252	16.4358	11.1492	12.6586	10.6855	22.9366	19.7439	16.5104	15.4215	10.3578	10.7377	11.5827	5.2311	7.7785	10.8922	13.9249	16.1513	6.5598	5.6459	5.5106	6.5817	16.7882	31.0264	11.9685	19.0492	13.5448		0.4375	12.7534
9.293	15.834	13.1624	18.7582	6.6242	5.7503	8.9053	5.6112	9.701	8.0792	8.691	5.8332	24.9703	23.3823	14.1719	7.6643	10.8381	10.425	13.2518	3.9339	9.9417	13.471	13.3403	16.5932	4.8357	5.4102	6.9464	6.8638	10.8181	30.4514	12.4095	14.7853	14.1649		0.44318	11.7381
9.4122	8.9862	18.7403	13.6288	6.4787	8.0897	6.7142	4.9738	11.7496	7.7123	9.5714	8.9897	22.0034	20.053	12.3123	7.6494	8.1787	10.6185	11.6659	5.5239	6.252	9.9825	18.7379	14.1619	4.0944	7.6295	6.344	6.9699	13.5097	27.4079	15.0869	12.9308	14.35		0.448865	11.2843
9.5313	10.5784	14.8687	13.0114	6.7796	5.843	10.7416	8.1502	13.4944	8.7157	8.0478	8.5189	19.7696	16.9859	13.1484	7.1971	7.4193	14.0621	12.9395	6.5418	5.9424	10.626	16.5384	11.5366	4.8536	7.5956	8.1545	5.6159	8.1212	24.2255	14.8965	15.478	9.7766		0.454545	10.9429
9.6504	12.419	17.292	11.4799	5.6272	7.9245	6.0812	7.7966	15.3664	9.5744	9.6053	11.4345	19.1772	17.8418	10.2118	7.9922	7.6345	13.1166	12.5485	3.3611	6.3153	12.8654	11.117	7.1114	9.4341	4.8145	5.8583	5.8634	11.0915	22.4236	15.0336	18.0319	5.4382		0.460224	10.6838
9.7696	13.2678	15.9404	7.0911	3.7824	8.8479	7.8302	5.1723	15.6133	8.0407	5.9258	8.6606	25.5889	17.3051	8.3273	7.8488	10.2473	12.1646	13.8812	4.4533	5.051	13.3331	13.003	8.2655	5.0196	7.011	7.5563	6.226	10.3555	26.2133	13.7826	11.389	7.1897		0.465909	10.4495
9.8887	13.516	18.0561	7.0805	6.3637	6.4126	6.3239	4.3307	14.0704	7.8704	7.2724	11.749	25.7348	14.4375	10.9265	5.0039	7.8058	10.9111	11.8988	4.0591	2.7364	8.2256	17.0717	9.383	4.4743	3.7689	4.1613	8.2363	15.9556	32.0583	11.0678	11.1818	7.1517		0.471589	10.2905
10.0079	13.9728	16.5134	6.5808	6.7234	9.8012	10.6032	5.8441	9.0026	6.6405	5.1937	9.8382	19.9922	9.3088	8.7477	5.2424	5.364	8.3888	7.7043	3.8135	3.413	8.1762	15.4298	9.7228	4.3947	4.3004	5.8109	9.8008	13.1964	25.3298	11.1217	15.1898	8.0425		0.477273	9.47514
10.127	14.3693	16.4408	6.239	8.0997	11.0894	5.2289	3.8717	7.8323	5.0598	8.8306	5.6356	21.2463	7.9545	5.5241	5.6849	8.1605	11.6522	7.9059	2.9576	5.9303	6.0153	14.6833	5.5963	4.056	5.8879	8.7003	8.4174	9.6588	32.6061	14.8661	11.7469	6.0445		0.482953	9.31226
10.2462	13.1922	16.6287	8.3299	6.957	6.9859	4.7908	4.5999	6.4098	6.7324	8.0846	5.9507	29.9482	9.0904	3.0016	9.8524	5.6683	12.4525	11.1585	3.703	5.4504	9.2076	18.6452	6.2631	4.3393	4.7508	5.5548	5.6841	8.4135	25.5186	11.7413	11.0588	9.3278		0.488638	9.35913
10.3653	16.3535	15.5967	6.3533	6.0175	6.1405	6.127	5.7909	9.4276	10.4423	5.6289	8.0892	23.2861	6.4399	3.6137	8.393	5.3584	11.4897	11.6114	3.3637	6.37	10.7106	12.2281	7.7724	2.8909	5.6286	6.4199	5.0688	14.0701	17.7737	12.9669	10.8068	8.0507		0.494318	9.07128
10.4844	12.9412	21.3227	6.3061	7.444	6.2805	3.4327	4.3749	7.8137	5.8538	6.3958	8.4714	20.384	4.6506	6.0956	9.1132	5.0186	13.3967	8.4672	4.1006	3.744	9.855	12.18	8.5724	2.2986	6.6233	9.1991	7.0285	11.1006	24.6146	12.8729	11.7729	6.2468		0.499998	8.99912
10.6036	14.4028	15.3597	7.1062	5.4569	5.5743	3.2909	3.6034	9.5896	5.5288	6.3955	7.1436	18.4233	5.6394	6.9082	7.6165	7.614	12.5381	10.7056	4.9425	4.3796	7.2847	13.5241	5.7352	3.7253	4.0897	7.449	5.7621	7.6109	26.5224	14.4341	16.2877	6.4114		0.505682	8.78298
10.7227	14.9848	19.2254	6.0958	8.6303	7.5007	4.8735	2.4353	8.6136	7.0878	5.7719	5.3564	17.9983	6.28	8.5	4.3934	6.4433	14.8984	7.2485	5.1359	3.0546	11.7096	14.3007	5.6503	5.3752	4.2401	8.7024	3.9974	9.5785	27.9788	10.6623	12.135	6.103		0.511362	8.90504
10.8419	13.0107	16.694	7.5986	6.9079	7.8552	3.6829	3.7	9.5114	7.6091	7.8322	4.7732	19.9552	5.8415	6.5531	4.9362	5.7663	16.3914	8.9825	5.2361	2.6269	7.6	11.7946	7.1052	3.7248	6.4911	6.3615	3.4371	13.5556	21.3879	9.4216	12.2618	6.9483		0.517047	8.61106
10.961	10.9656	16.4192	6.1539	7.4484	11.1963	4.6429	3.9044	10.6612	9.9076	9.6787	6.8529	18.1027	8.8048	6.4013	5.0697	6.5549	13.9682	6.0463	2.812	2.8962	7.0527	12.2213	3.5923	2.3955	8.267	5.7822	3.9169	11.1227	27.5987	10.2077	6.9225	3.7406		0.522727	8.47835
11.0801	7.6147	15.5919	7.2823	9.7671	5.3114	5.3145	3.0982	9.6878	8.2962	6.8734	7.6889	15.5494	6.9944	6.9156	5.3063	7.1293	9.0703	2.8412	2.8317	4.3327	8.7371	11.9285	6.1723	2.8504	6.4814	8.8803	4.1489	6.3472	24.5148	9.4309	9.699	3.5234		0.528406	7.81911
11.1993	9.1669	13.3174	9.1044	5.2951	6.5876	2.5009	2.9635	6.5948	8.3581	6.0599	8.3847	16.5934	6.3908	5.423	9.9024	5.6454	8.3161	4.528	4.7067	4.2703	10.0108	12.4671	7.4053	5.366	6.0552	5.4628	3.4786	7.892	26.3703	7.9669	11.7179	3.5233		0.534091	7.86955
11.3184	9.3705	10.1299	9.4077	5.5304	7.6806	3.0843	2.4033	7.077	8.0182	4.0376	6.7506	18.928	7.1278	7.0359	9.666	5.1853	12.2535	4.2112	4.0708	2.9605	5.772	9.2237	10.18	4.5586	2.7742	4.4749	2.4919	8.6832	20.1176	6.405	11.4879	5.5571		0.539771	7.39547
11.4376	12.4536	10.2718	8.1392	3.2907	6.1716	2.866	2.793	9.4269	8.8905	5.7745	5.4832	20.9925	6.2453	8.8694	10.2517	5.8525	7.2085	3.6526	2.8658	2.3515	5.6521	10.4875	6.8403	2.5821	3.54	6.9325	3.5275	9.5976	12.9737	9.2404	16.2296	3.8208		0.545455	7.35234
11.5567	8.7177	9.2928	6.6853	6.2841	5.4675	1.9047	3.7163	7.6824	7.1166	3.7718	6.0163	17.9135	6.9295	3.6473	14.1884	6.0884	9.4048	4.1678	2.8604	2.3319	5.2397	9.1726	9.3875	3.5935	3.4627	4.7336	3.2765	6.5555	10.7735	9.8562	13.4088	4.3857		0.551135	6.81354
11.6758	7.4965	12.6431	7.7938	7.1179	9.1297	3.1287	3.3598	5.5261	6.6309	2.752	6.4702	18.7582	4.3783	4.7913	12.3648	4.9276	11.0316	4.4349	3.3438	3.3276	8.065	8.1947	7.2852	3.5984	3.8488	5.6993	5.5598	8.922	12.1741	8.3852	11.6014	4.9812		0.556815	7.11631
11.795	7.1538	10.5198	10.0036	4.7798	6.5117	3.5787	3.3855	5.2391	4.7433	5.1464	5.1525	19.5025	4.1843	3.1467	16.2451	6.3379	11.8348	6.4637	3.9317	2.4207	5.1569	5.7428	7.5536	3.1459	4.6529	10.0149	5.5413	7.1879	8.4074	10.6065	7.4817	3.8493		0.5625	6.86321
11.9141	4.2303	9.1238	9.502	4.4984	6.21	3.6436	3.7364	9.856	6.5148	3.924	8.8519	10.2596	4.3335	3.284	13.6259	3.6214	11.1456	3.3836	2.712	3.3359	10.2184	5.691	7.1653	3.9255	4.1753	7.135	2.1618	7.5622	9.1123	7.8667	7.6168	2.8746		0.56818	6.29055
12.0333	4.6093	10.5828	8.4192	4.2837	5.5278	3.3272	4.154	10.304	5.6093	5.1876	6.6207	12.7664	5.8175	5.5347	13.1973	6.7614	11.3856	4.7291	3.7118	3.2826	4.5084	7.9078	5.9706	4.0204	4.5797	3.8637	5.4555	6.313	8.5759	10.5419	6.8964	4.6573		0.573864	6.53446
12.1524	6.0122	8.6312	9.6019	4.5821	6.6767	3.1604	2.8486	6.7774	4.9299	4.393	7.0948	11.7967	3.6593	4.1673	13.0212	5.9659	11.2961	5.0778	5.1698	3.9169	7.3265	4.6939	4.654	4.2624	4.2548	6.2906	3.9712	6.2009	8.1117	8.3713	13.2997	3.8959		0.579544	6.3785
12.2716	8.8635	10.3199	9.5468	4.4059	7.2147	4.2414	3.3583	5.848	6.8104	6.3248	6.6129	7.2087	3.3958	3.8548	9.1416	5.0311	10.2077	4.2533	2.8319	2.4933	7.8639	6.0133	4.9477	4.071	4.7706	8.5733	4.1405	7.0229	6.1687	7.4144	11.8068	4.5727		0.585229	6.22908
12.3907	6.4946	8.7145	7.6698	3.7208	4.3267	4.2473	3.124	6.5384	6.5231	5.3357	5.0338	6.5686	4.0319	3.6046	7.2885	4.6576	7.6678	5.614	4.034	2.9814	6.6267	3.8888	4.2896	3.0743	2.6392	6.0758	4.9574	6.9779	7.7637	10.0952	12.4273	4.42		0.590908	5.66916
12.5098	4.0397	8.3812	7.017	4.2311	3.4708	3.0108	4.5785	6.4199	3.596	3.4858	5.2931	6.0017	3.8374	4.0391	13.1162	4.6919	10.0891	5.954	5.1046	3.7727	7.8271	4.1076	4.0483	3.2498	4.0371	6.7828	7.3366	5.0949	4.5742	10.4755	10.6158	3.6363		0.596588	5.68489
12.629	2.9829	10.4376	7.5349	4.7784	2.6612	3.44	3.2706	4.557	4.122	4.7252	5.7061	4.9052	4.2805	4.2045	10.3544	6.6478	8.4237	4.6114	2.6667	5.2972	4.8311	4.7327	2.6975	2.8274	4.8801	6.5824	4.7472	5.7457	7.405	9.8776	10.5911	4.6344		0.602273	5.47373
12.7481	5.0409	11.3631	4.9011	10.5591	2.3332	4.7497	2.5109	2.9614	4.4831	5.5867	6.4401	3.9896	4.2443	2.4898	11.216	4.9495	10.0122	4.9449	2.5122	4.2322	6.1558	5.6955	4.0619	2.3998	4.9118	6.4593	2.8942	6.5375	7.2522	7.6143	8.6421	4.7253		0.607953	5.52718
12.8673	5.4821	10.2908	4.581	13.023	3.5567	3.8015	3.0298	3.3282	4.5405	4.4865	7.2819	4.9867	3.7435	2.2807	7.2317	4.7199	7.519	3.3879	2.963	4.0919	5.3246	6.3349	4.056	2.6377	4.3246	6.3922	4.4039	8.38	7.0879	6.2439	8.7315	3.9447		0.613637	5.38088
12.9864	2.8514	7.6859	5.4352	11.5946	3.6302	3.3313	3.1798	4.4426	4.0106	4.4369	5.1181	6.3054	4.2763	2.6136	3.7835	5.1778	9.6699	3.2417	4.5057	2.6735	6.6256	4.0976	3.0338	5.2636	2.6883	4.3867	4.2043	7.6608	5.5629	4.9323	8.7395	2.4557		0.619317	4.92547
13.1055	4.6628	7.9167	4.0572	12.6995	5.2991	3.2268	4.0943	5.8139	4.8748	4.2303	7.86	8.8659	5.6032	2.8377	4.2391	4.6893	11.2552	4.6147	2.9215	2.5581	4.2276	6.1329	4.5808	5.3888	4.5459	7.803	3.7011	4.7261	6.2423	4.404	8.0847	3.6605		0.624997	5.49431
13.2247	3.6498	8.5871	5.6346	5.9494	5.6321	3.7585	2.6908	2.7698	5.7877	5.6951	6.805	5.8934	3.4387	3.3141	7.5308	3.6471	12.9641	4.3661	3.613	2.5937	5.923	6.5404	2.6057	4.8572	4.8916	8.428	4.0354	4.2749	9.9092	5.2383	9.463	3.5066		0.630682	5.43732
13.3438	2.9622	10.1735	5.5318	7.8746	6.0569	3.7831	2.9183	2.3755	2.9518	3.7802	7.5939	3.629	4.9386	4.3223	7.9621	3.706	10.6854	4.093	3.7388	3.2641	4.2702	5.0607	2.2585	2.2445	2.8246	10.3088	4.2302	4.0604	11.4428	5.2789	7.642	3.6416		0.636361	5.17513
13.463	4.0639	14.033	5.1909	6.0711	3.5969	3.3119	3.0488	4.899	2.8152	3.2487	6.7499	7.4702	3.9311	4.7181	4.1697	6.7169	10.8638	3.3591	2.5808	4.1654	5.3542	4.0411	3.5256	2.6174	4.6749	12.2167	4.5562	4.3098	12.2009	3.7554	11.0422	4.7938		0.642046	5.56539
13.5821	4.8912	9.3939	7.0969	8.4924	5.9993	2.9561	2.4428	5.3011	3.5409	3.9465	6.7885	6.7624	2.4661	4.3011	4.5433	4.939	10.0067	4.2115	2.3366	4.1377	5.1284	4.0689	3.6033	2.4454	3.8733	8.3617	3.7334	3.7482	11.5631	6.3294	9.4819	3.3697		0.647726	5.32065
13.7012	7.8895	14.4478	4.4923	8.3352	5.743	2.7242	2.92	4.0634	2.4316	4.1303	7.4017	8.0109	4.7123	5.1535	4.8869	4.6913	12.7713	4.9853	2.4936	5.7981	4.0498	6.6926	3.7743	2.6178	2.6279	8.461	5.0752	2.5046	9.5223	5.1283	8.9946	3.6052		0.653406	5.66049
13.8204	6.2049	10.1767	4.4942	3.3558	5.2518	5.0276	3.4759	4.0274	3.3784	2.9757	4.7125	6.6937	5.3359	3.8811	5.3702	3.482	13.3451	3.2805	2.5647	5.111	6.2411	4.9274	2.9349	2.7154	4.1363	9.2864	6.7267	3.9329	10.7998	4.8372	8.7898	4.0661		0.65909	5.3606
13.9395	3.9061	7.3201	3.7089	5.415	5.5506	2.5059	3.2749	4.7092	3.6081	6.7073	6.0565	5.9438	2.6553	3.6185	6.743	4.6723	9.6496	4.1231	4.0037	2.8664	6.2377	7.744	4.1013	3.647	4.5495	11.5172	4.507	3.7499	9.9929	5.7125	6.0198	3.0922		0.66477	5.24717
14.0587	5.1698	8.9321	3.1835	6.0558	6.7459	3.2935	4.2791	7.3998	4.7849	3.4663	7.6676	4.3612	2.5779	3.0028	8.1994	4.9772	9.1448	6.0526	4.2533	2.5918	3.7389	8.3479	5.8077	3.653	2.985	8.4532	3.7068	4.6757	10.1428	5.8886	7.5452	4.515		0.670455	5.48747
14.1778	6.0113	10.1362	5.1874	9.1374	4.417	2.2519	4.0387	6.1237	5.1913	3.9423	8.604	5.187	3.0551	2.6855	7.3358	4.1315	9.025	4.2703	3.1852	4.7499	4.2559	5.6789	3.697	3.2557	4.0399	13.4754	4.7152	2.88	11.927	5.6041	6.3044	5.3614		0.676135	5.62067
14.297	5.4261	9.7739	4.6178	7.6177	6.9405	3.9669	3.6596	7.0524	3.3467	5.0562	8.6046	4.2704	2.5252	3.8702	11.4029	5.3887	6.819	3.7902	2.9255	5.1283	3.0089	3.5096	2.5392	2.1564	6.4081	12.3038	4.133	5.3463	13.4928	6.3313	12.0937	5.5863		0.681819	5.90913
14.4161	3.2478	6.5137	8.7845	11.447	9.0889	4.3442	2.83	5.5199	3.122	3.761	8.3845	2.9947	3.1334	3.2753	7.3011	4.6816	8.0317	3.4122	2.8183	3.0736	2.6739	6.7089	2.6005	2.5119	5.3345	15.1408	3.8534	5.7988	8.0844	6.1664	12.011	5.0775		0.687499	5.67898
14.5352	3.0365	6.998	6.6264	14.3706	6.7726	3.7011	3.2724	6.9824	2.9638	2.4713	6.4074	3.7784	3.6198	2.4299	7.5034	5.9858	7.5486	3.7731	4.7109	3.6097	3.512	4.9767	2.8512	3.3591	5.8126	16.1328	6.0438	7.1875	7.5665	5.0463	8.8011	5.9319		0.693179	5.74324
14.6544	3.8369	5.2799	6.4532	9.728	8.2322	3.7412	2.2221	4.0442	3.5688	2.2356	14.133	7.3942	3.1388	3.2366	9.7426	5.3987	5.5175	3.6074	3.547	3.6112	3.5137	4.4361	3.5191	2.999	3.9465	15.1132	3.2405	4.7068	8.6258	6.3528	12.2516	5.2605		0.698864	5.70733
14.7735	4.2776	6.9584	4.674	8.2227	8.2493	3.0053	2.996	5.708	2.6829	3.6103	7.7818	4.7808	2.2785	2.6506	5.5087	8.7284	6.3068	3.1443	5.7781	3.3726	4.3564	6.2185	3.828	3.2134	3.5224	12.8462	5.005	3.516	6.038	5.4664	8.2551	7.2929		0.704543	5.32104
14.8927	5.4773	6.285	2.8952	7.1641	5.6777	2.8589	3.6382	4.222	2.4066	4.6695	8.857	4.7447	3.1933	2.9922	6.5556	5.6272	9.4689	3.0234	5.4846	3.3105	4.4005	8.8702	4.0471	2.7167	3.8075	21.7886	2.5496	3.6399	4.8105	9.6176	7.0503	9.9086		0.710228	5.67997
15.0118	5.453	5.3182	2.8444	6.8512	4.4242	2.8141	3.1353	2.7092	3.7851	5.5313	8.7136	3.4735	2.7019	3.2515	6.2669	5.7522	8.8605	2.8465	2.7154	2.7086	4.6688	10.5712	3.9285	3.9781	3.595	13.6678	2.7721	5.489	6.3	6.9197	11.5477	7.4363		0.715908	5.34471
15.1309	4.7053	4.7471	3.8009	7.0126	9.2032	3.3141	3.9863	4.0693	3.1793	5.2734	6.4732	4.6098	4.2977	3.3985	5.7154	4.3826	9.7817	3.9927	4.4162	4.0177	4.4549	6.832	5.5178	3.7759	2.9231	14.7009	5.4006	5.6346	5.1153	4.245	11.884	6.6053		0.721588	5.54582
15.2501	3.9755	5.1729	2.3942	10.8365	5.0964	4.1157	2.5326	4.1289	2.9356	2.7441	7.4962	3.1805	3.1752	5.0036	6.2057	4.5757	10.1713	2.762	4.1509	4.0579	4.1397	5.3021	5.6093	3.2251	3.7054	8.295	6.7563	4.4731	7.1245	3.8837	6.9626	5.753		0.727272	4.99816
15.3692	2.7574	5.8886	2.9221	9.4025	5.517	4.006	3.7733	3.0877	3.1362	4.6745	8.4923	5.928	3.9964	3.5422	6.8459	6.5092	5.2994	3.3484	2.9542	3.6435	4.5472	4.2801	4.4937	4.8205	6.4141	11.8548	6.4552	3.5312	5.9462	3.4825	8.9638	5.9396		0.732952	5.20168
15.4884	2.315	4.4247	4.3227	14.3345	5.1999	2.1677	4.1878	2.5635	2.4541	6.6902	5.0966	4.1731	3.2915	3.4401	8.2328	5.4978	4.3499	3.216	2.5766	2.5338	4.1011	6.3967	5.1719	3.358	4.3941	6.7617	5.3073	4.6996	6.1132	4.7598	7.6728	5.0622		0.738637	4.83958
15.6075	3.2344	3.1835	5.1639	11.1014	6.1708	4.2007	5.6975	4.2536	4.1751	3.254	6.3961	2.9534	3.9021	3.079	8.3797	4.0014	4.5988	7.5687	3.5953	3.8821	4.7531	4.3776	6.6964	2.7817	3.9838	8.7698	7.0544	4.7334	7.0475	3.7458	5.8332	12.1893		0.744317	5.33617
15.7266	6.1922	2.9387	3.4665	13.3182	5.4933	3.5612	4.0942	2.8846	3.766	4.5156	5.643	3.5174	2.4996	4.8917	6.5183	5.2835	4.083	5.3348	2.6635	4.6976	4.097	6.6839	5.7591	2.8291	4.3884	5.326	6.4143	4.3732	9.2827	4.6979	6.6507	11.5207		0.749996	5.23081
15.8458	6.0871	3.6909	4.7745	10.3595	6.1926	2.0861	4.9012	2.8132	1.962	6.5793	8.2306	5.174	2.441	3.2832	7.2756	5.0211	4.7653	3.1173	2.3417	7.2911	3.4781	6.7231	2.7824	2.7573	3.2054	11.1734	5.1213	6.2603	4.402	6.6646	10.136	9.8317		0.755681	5.34134
15.9649	4.6801	6.8748	2.6711	7.4943	2.8063	4.7041	4.4258	4.8519	2.4079	5.603	3.2873	3.5481	2.8642	5.3442	4.9893	4.1013	4.4872	3.4509	2.7845	5.6706	4.6643	6.8488	3.8071	2.5926	3.4759	6.7889	2.9199	5.7417	3.9103	4.3486	7.5716	10.5428		0.761361	4.69561
16.0841	3.7555	5.2746	3.3678	7.2877	5.3419	3.0677	3.4933	4.0697	2.7261	4.0552	3.473	2.5863	3.9002	3.5437	4.4281	7.0503	7.3234	3.1903	4.6493	4.3128	4.3456	7.5238	4.8254	3.8329	3.3287	5.6957	3.2486	4.2636	4.6027	5.3737	6.6681	12.6093		0.767045	4.78797
16.2032	3.5923	5.1938	3.5884	5.3011	4.0495	6.4715	3.5886	5.3562	2.9974	8.0424	3.9595	4.331	3.6707	4.3572	5.6682	6.6358	6.2353	3.07	3.4051	4.568	7.6053	4.3324	6.7306	4.7379	4.6409	3.5462	4.071	4.7386	5.5767	5.9441	4.7188	12.772		0.772725	5.10927
16.3224	2.822	4.2986	2.5612	6.3226	4.123	3.5922	6.4693	3.2636	2.4726	7.3236	3.2454	7.2742	4.5771	2.9162	6.2054	5.186	6.3032	3.6636	3.6135	4.4007	4.1716	4.295	2.6641	4.2034	3.9052	5.5627	3.3287	5.5341	5.2974	3.4442	5.2945	8.6941		0.77841	4.59466
16.4415	4.0688	4.4917	3.9014	5.5315	3.5708	4.1564	3.3813	4.8024	2.7431	6.0967	4.8101	3.1788	5.3753	3.0009	7.0653	3.9968	4.4656	4.0099	3.7154	6.3665	3.3513	6.0561	4.9592	4.127	5.9349	4.2892	5.3407	8.0988	4.0105	5.7011	6.0231	8.3333		0.78409	4.84231
16.5606	5.1501	4.5131	4.8685	4.8484	2.9788	3.2607	3.7322	2.9603	2.2284	6.0901	4.0722	4.6188	4.8775	3.6281	6.1039	5.936	5.9806	3.2713	4.7023	5.3307	6.8448	6.8265	6.2057	3.9638	4.4378	7.4496	4.678	9.2478	4.6569	7.4686	5.426	8.1624		0.78977	5.14125
16.6798	6.3453	3.7862	3.7049	4.9346	2.7077	3.1641	4.7264	2.6764	2.9468	5.6391	5.1211	6.4176	2.504	2.8313	5.5764	5.0876	6.1485	4.0836	8.7606	4.906	4.1615	6.7001	5.1156	5.0648	4.9979	5.3283	3.9231	8.6486	6.1261	3.5261	5.2174	5.1686		0.795454	4.87645
16.7989	3.4986	3.3949	6.0855	5.6707	3.6244	2.6518	3.4216	2.6482	3.082	5.3814	6.1938	4.6339	3.3175	5.6247	6.3613	4.2449	3.4207	4.7729	5.7041	3.5841	3.3945	5.5942	7.6014	5.5401	7.3605	3.898	4.8612	8.4637	5.877	5.0491	7.3822	8.0235		0.801134	5.01133
16.9181	5.7056	4.343	5.5964	6.4433	3.8901	4.5939	3.7185	4.9822	3.1921	5.3831	4.5506	6.2499	3.4207	3.9069	4.7516	3.6196	3.6369	4.0885	7.1332	3.2339	4.061	9.2715	4.6304	6.2432	7.227	3.9106	4.1073	10.1923	4.6848	3.6715	7.598	7.1335		0.806819	5.1616
17.0372	5.7898	5.4893	4.507	4.8317	5.0245	3.1719	4.1494	4.6993	2.6599	6.6851	4.3958	5.5458	3.0094	3.4375	4.4448	4.0157	4.8103	3.481	6.6668	3.2991	6.2764	8.8692	5.8786	3.4123	6.3795	3.5454	3.9942	6.7883	4.3259	4.3718	4.2479	4.2587		0.812499	4.76445
17.1563	3.5508	5.7418	5.4057	3.1868	4.8168	4.6379	3.2459	5.4138	2.9096	5.386	6.1343	6.6704	3.4032	5.6322	3.2315	3.2473	8.5764	5.0681	8.7546	2.476	5.2141	6.831	9.2331	5.3311	5.0114	5.2609	3.293	6.4071	4.5335	4.3627	5.1462	5.2968		0.818178	5.10656
17.2755	4.121	5.4314	5.2869	5.0923	7.0227	3.325	4.7557	5.4846	3.2672	7.1211	4.5783	8.3741	2.4369	4.3311	4.3752	4.9114	6.7989	6.5575	3.2196	3.2317	3.1817	9.1636	8.1808	5.4355	9.6136	4.4411	3.8507	8.0026	7.0186	4.0088	7.9336	6.7761		0.823863	5.54154
17.3946	7.2155	3.136	4.2385	3.825	5.2766	3.2162	4.7521	4.1825	2.5571	4.2871	3.9895	8.6734	5.0056	4.2134	5.0595	5.5054	4.4059	7.1754	3.97	2.7495	6.0071	6.0497	4.671	5.8626	12.5952	3.7666	3.491	5.0734	6.8691	5.8738	7.3596	5.7362		0.829543	5.21217
17.5138	6.7727	2.3783	4.7567	4.9901	4.8979	2.1323	3.9717	4.5139	2.0379	5.9107	6.1974	6.0242	3.2296	3.9778	4.4341	3.5638	7.9322	4.0988	4.4813	4.2853	4.2309	4.5821	5.3364	3.133	13.853	5.0138	5.7096	5.9786	2.7765	4.8348	7.46	7.9717		0.835227	5.04585
17.6329	8.0854	2.9375	4.0564	5.6026	6.5166	3.4755	3.4102	2.7873	3.727	4.1263	5.6573	6.1863	2.0129	4.2947	7.5167	5.4154	4.8779	4.5299	5.069	4.776	6.6799	5.352	5.0812	3.271	7.8164	5.4737	6.4627	5.8549	3.1789	4.4422	8.1184	9.5454		0.840907	5.19805
17.7521	5.6066	3.9488	6.9019	4.4037	4.4711	3.395	5.6556	4.7574	3.2371	3.4981	5.235	5.7237	3.4969	5.1802	8.863	4.3803	3.7216	6.1125	6.7982	2.9936	4.3295	2.9454	4.08	4.6239	6.5262	5.0175	5.0149	5.7646	4.3278	3.853	5.7892	10.4533		0.846592	5.03455
17.8712	3.7613	5.0245	5.0034	4.6527	3.2303	3.3433	3.3569	5.2923	4.7904	4.8284	3.1567	5.2381	4.1566	4.3511	5.6028	6.135	5.4321	5.6495	3.6021	2.847	5.8909	5.9017	4.4067	3.6459	7.5688	5.0629	4.2667	4.7843	4.242	5.378	3.634	13.2476		0.852272	4.92137
17.9903	6.0436	7.2856	5.952	4.4568	4.4007	4.4493	3.0013	5.0759	3.0439	4.7363	3.157	7.9551	3.9466	4.8004	4.51	6.6984	3.8561	5.4309	3.3391	4.0059	5.91	5.8002	5.5588	5.2845	5.0584	6.9322	3.9594	4.8836	3.7849	4.2662	7.5053	9.0585		0.857952	5.12959
18.1095	3.1476	5.2262	6.1416	5.0795	5.1078	7.8184	3.7901	5.3769	2.2855	3.3729	2.5513	7.1624	3.2135	5.1166	5.7012	6.6921	4.8052	3.9057	4.7653	4.8339	5.3931	3.8106	4.7722	4.9125	4.3873	5.5124	3.679	5.6851	4.7901	4.4188	5.5098	10.8145		0.863636	4.9931
18.2286	3.6092	8.9299	4.3856	5.5236	4.5721	3.6877	3.8506	4.5016	3.1553	4.4864	4.8324	10.0561	3.3401	5.1787	4.5997	8.1838	3.8098	3.4616	3.8603	3.464	6.1265	3.6577	7.1191	4.114	3.1844	4.0886	4.5219	4.2087	6.1143	3.7081	4.4156	5.9185		0.869316	4.83331
18.3478	5.0938	10.2679	3.9188	4.3811	3.961	3.5299	3.7167	5.937	2.1558	5.6985	5.2439	6.904	3.6079	4.5771	4.2762	8.0272	3.9673	3.0261	5.3479	4.7501	6.0723	3.6185	9.4096	5.2325	3.6378	5.903	6.1546	4.7504	3.506	4.9819	5.8749	5.3861		0.875001	5.09112
18.4669	5.4261	9.2595	5.3539	4.3025	6.0284	5.1358	3.6648	3.6283	2.5232	5.1923	3.6224	5.7079	3.7135	5.8619	4.0219	5.8753	4.1283	4.1552	4.5608	3.8646	3.5485	5.1855	5.6885	4.3313	4.5156	5.2352	7.1717	3.7299	3.3377	4.075	4.1288	8.2318		0.88068	4.85019
18.586	5.1529	6.3616	6.7914	3.0444	6.3572	6.1447	3.7306	3.8813	2.3217	3.497	4.6697	4.3816	2.269	6.0252	5.1569	7.5471	3.4752	3.6094	4.2907	3.8138	4.4729	7.7913	9.284	5.5662	3.4931	4.3921	4.3108	4.3359	4.8821	5.4961	5.172	4.7837		0.88636	4.89068
18.7052	6.255	7.3088	5.8642	2.8665	5.8575	4.7954	3.1909	5.2068	2.5667	4.6798	3.4922	3.9762	2.7698	6.2721	3.8563	5.4892	3.6304	3.5357	3.946	4.7674	5.5102	5.4825	7.9063	5.7774	3.4042	4.6879	6.1832	3.5707	5.6758	5.392	4.9916	6.2622		0.892045	4.84909
18.8243	5.8262	7.1584	5.7555	3.7629	3.0879	3.7456	3.7988	5.1432	2.6255	3.0511	3.951	8.3973	2.914	5.8886	4.2057	4.1105	4.0604	3.5563	3.8238	3.1416	5.5152	3.8917	5.3944	5.7914	2.6003	4.6605	6.9894	3.9492	3.3206	4.57	6.01	4.8746		0.897725	4.54911
18.9435	5.0981	5.9397	3.5317	4.2974	6.4957	4.8923	4.5745	4.2244	2.9932	6.3254	4.0027	7.8215	5.7824	5.7449	3.2467	5.2984	5.8105	4.3586	4.4111	5.4049	4.9409	4.5362	4.7216	3.9926	3.1981	4.8184	4.5152	3.4896	4.6448	5.7017	7.511	5.4682		0.903409	4.93101
19.0626	3.4848	4.9113	5.61	5.2915	6.3163	3.291	3.7126	4.7138	3.6017	5.2504	3.2581	4.5325	2.5127	7.4374	3.7587	6.0911	3.282	4.1708	3.9621	5.8304	4.3226	5.5093	5.337	3.3017	4.3421	3.5285	4.159	3.8675	6.1027	4.7869	5.4112	7.7236		0.909089	4.6691
19.1817	3.0449	4.956	5.2899	3.1185	4.4019	6.3021	5.9484	3.646	3.2304	3.6258	3.3981	3.6487	2.5503	7.0525	2.9617	3.6043	2.61	2.2771	4.7292	4.7517	4.0408	4.7505	5.6879	2.3533	2.9545	2.3172	5.4521	5.4661	4.7943	6.4832	4.6702	6.0747		0.914769	4.25601
19.3009	3.131	5.7555	3.4502	3.7269	4.2987	3.2779	3.4445	3.5975	2.7163	3.2888	4.5059	3.1188	3.5531	3.7455	4.095	2.9254	3.6944	3.5712	5.1333	4.4973	4.4434	5.7417	6.9279	2.5494	2.1956	2.9246	7.0433	7.1205	4.1075	6.2727	7.4995	6.1647		0.920454	4.32869
19.42	3.0976	3.2718	3.7546	3.342	5.398	3.0347	3.1577	4.7257	3.9395	3.5243	4.2204	2.2897	4.0638	5.8932	3.87	2.863	3.233	5.7219	3.9119	4.8744	3.3624	3.8332	4.643	3.0649	2.3226	5.2988	4.0819	4.4876	4.1732	5.8746	4.6133	3.7569		0.926133	3.99061
19.5392	3.9926	2.6903	3.2988	5.4744	3.9452	3.6352	2.2206	3.5824	2.2864	2.8887	3.4108	3.602	4.7663	4.4463	4.2703	3.1349	6.3772	4.8914	6.147	2.6105	3.4671	3.0987	5.166	2.5056	3.2169	7.4302	4.0526	4.7731	6.7875	3.6319	5.1089	6.4126		0.931818	4.16633
19.6583	3.5699	5.3336	2.9834	2.6182	5.0754	2.9832	3.6361	2.8195	2.6998	4.0456	3.873	3.5129	3.88	2.3107	4.3385	4.1046	3.8553	4.1999	3.0567	5.1398	4.0946	2.7043	6.0276	1.9472	2.2813	5.3907	4.572	3.0363	4.8174	4.4399	6.2612	4.9917		0.937498	3.89376
19.7775	4.536	3.464	3.3403	2.1357	5.8671	2.9765	4.4919	3.9425	2.6259	2.8063	6.2372	3.6996	3.2368	2.9291	3.8851	2.6949	4.3466	4.774	4.4273	5.6148	4.763	3.5404	4.5029	1.758	1.7928	6.4402	4.5458	5.8817	4.4469	3.6335	4.1612	4.9188		0.943183	4.01302
19.8966	4.1809	5.0736	3.5278	2.818	3.7621	3.0371	4.3854	3.163	2.9536	2.9392	6.067	4.7412	4.8416	2.4393	2.509	3.596	4.7288	3.1736	2.7457	5.0174	6.8586	3.3652	2.7703	1.8115	2.113	4.9214	5.78	4.964	3.1007	8.4275	4.6326	6.7011		0.948862	4.09832
20.0157	7.2337	5.0466	4.0145	5.0701	2.9705	3.5151	3.348	3.3839	3.9543	4.1661	5.885	2.8818	3.649	3.2819	3.4029	4.3042	4.4823	3.4861	2.5226	5.05	5.6842	2.8737	2.4071	2.0722	2.4229	2.7021	3.2078	3.563	4.7882	3.9714	4.7084	5.0816		0.954542	3.91035
20.1349	4.5181	4.1401	2.9525	3.9784	3.976	3.6779	4.7852	5.3075	5.4062	3.1399	6.6598	2.5275	4.0377	2.2582	2.7131	2.5671	3.6776	5.3891	3.1166	3.9821	3.337	1.9324	3.7581	1.9631	2.0461	5.8501	4.8129	3.6032	4.8404	2.2188	5.8289	6.7506		0.960227	3.92976
20.254	4.2996	3.4075	2.5189	2.8407	4.4917	3.396	2.517	5.2806	3.0975	3.2564	5.2112	4.46	2.4737	3.4736	2.6696	1.9378	4.028	2.6478	2.363	4.6577	2.4943	1.9001	5.1728	2.4855	1.8215	4.982	3.4108	5.2333	4.44	3.9465	4.221	5.3822		0.965907	3.5787
20.3732	3.9215	3.5639	3.1183	2.0923	7.2154	2.7573	4.0843	3.9752	2.5685	3.448	2.4728	3.1706	3.386	3.59	3.5884	1.9187	4.436	3.9224	2.5983	3.8676	1.7274	2.3181	4.1821	1.9332	2.3359	5.8537	2.8721	3.1107	4.2957	3.7393	3.838	3.7388		0.971591	3.42627
20.4923	4.384	5.326	4.8229	3.3231	6.7879	2.3167	2.3974	4.4332	4.1785	4.0676	3.9769	2.6771	2.6966	3.0155	2.2763	2.0829	2.3431	3.2165	3.856	2.5682	2.1966	2.1104	2.3816	2.7975	2.2038	5.7068	2.6388	3.8713	3.1909	4.038	3.6814	6.9958		0.977271	3.51748
20.6114	4.7239	4.4578	5.0569	3.5292	6.0345	3.3741	2.6132	2.8455	3.8818	5.1346	2.7571	2.2256	2.2147	3.1354	2.1231	2.8848	2.3387	2.3539	2.4208	3.0448	3.5632	2.0633	3.2306	2.7774	2.061	7.43	3.7262	4.5694	3.781	2.9071	3.3528	3.9134		0.982951	3.45393
20.7306	4.4199	3.5189	5.3742	5.7888	6.6115	3.3361	3.3121	3.0057	2.1332	3.6105	3.9922	2.7351	1.9567	2.0394	2.0278	2.3447	2.6829	2.6063	2.2362	3.3871	3.5377	2.0194	3.8168	2.4398	2.0681	3.957	3.6592	4.4512	4.7897	4.0528	3.319	3.8775		0.988636	3.40961
20.8497	3.3677	3.7389	4.0814	4.6864	4.7713	3.7294	5.1544	2.9576	2.8162	3.6803	2.2756	3.2271	2.0752	2.0358	1.9742	2.4134	2.5656	2.076	1.9153	2.3217	3.2612	1.975	3.4033	2.8035	2.1252	2.605	3.2867	4.3172	3.8703	3.3031	4.7287	3.0608		0.994315	3.14386
20.9689	4.5134	2.3921	2.2995	3.7153	5.0392	3.9345	5.4663	2.7547	3.636	5.3787	2.1233	2.1502	2.4588	2.9697	2.3398	3.2748	3.6024	2.7819	2.3899	2.2837	2.4451	2.0937	2.2753	2.4252	1.9653	5.1282	4.6011	3.3904	4.8899	1.9168	5.046	3.0198		1	3.27191

## Sheet: Image44
X0	Y0	Y1	Y2	Y3	Y4	Y5	Y6	Y7	Y8	Y9	Y10	Y11	Y12	Y13	Y14	Y15	Y16	Y17	Y18	Y19	Y20	Y21	Y22	Y23	Y24	Y25	Y26	Y27	Y28	Y29	Y30	Y31	Y32		Ap-Basal	Avg intensity
0	9.2578	6.725	7.71115	7.9295	8.6428	14.5378	12.7678	8.7783	10.696	13.4334	9.2776	12.9363	12.3215	6.2739	8.7263	6.8415	9.7466	10.033	10.8244	7.2331	10.5407	11.8608	7.8335	4.6585	7.3926	5.2609	8.2032	13.6774	22.2732	11.9974	7.7	5.7293	10.9286		0	9.7803
0.1191	2.9379	5.2615	7.06363	10.2711	7.6056	10.5978	13.2616	5.4234	9.3371	14.3562	12.8012	16.612	11.2393	10.4157	12.3854	6.9472	6.8835	8.2083	11.3563	6.2464	5.8067	9.6573	9.0861	6.4993	8.952	4.4364	14.9597	20.9623	20.3871	12.1182	9.5937	9.1094	7.4692		0.0073504	9.94693
0.2383	9.4414	6.0306	9.19083	7.451	9.6568	7.2146	14.4268	10.8981	11.7531	12.1432	14.6699	12.7719	8.7596	9.3354	9.1245	9.4227	8.4705	6.4349	5.9663	9.1077	8.6405	7.1346	10.8781	6.5088	6.5154	7.0456	16.6357	17.8344	17.907	8.5002	11.384	12.5969	10.7573		0.014707	10.1396
0.3574	10.7161	7.192	7.83127	7.5128	10.2075	10.4129	9.9791	9.3619	9.1034	12.4622	17.9555	20.6827	8.1198	9.9349	9.9854	5.6438	5.5403	7.8552	10.9656	9.1439	8.0071	8.6529	9.0106	6.7151	9.3519	9.9224	15.8752	20.5497	19.8262	10.8146	13.5341	12.4869	8.7449		0.0220574	10.7302
0.4766	5.7404	3.8333	4.62695	9.1055	10.2331	9.9595	12.0124	10.4411	6.3274	15.626	8.318	17.3837	11.7324	12.4503	11.797	7.3901	9.0927	8.5546	11.4843	11.4725	7.4934	9.7369	8.1154	7.1208	7.1868	7.0985	13.9974	20.4102	27.0649	13.4475	11.0582	9.0036	7.6245		0.0294139	10.5133
0.5957	8.5441	6.7315	8.2367	11.0123	12.6457	7.5964	10.6075	11.2005	9.0718	14.2755	8.8417	12.8554	16.0771	7.3095	11.5856	8.5375	7.0461	7.6041	11.6688	11.8088	5.3985	7.2066	6.3414	6.0566	5.5036	7.545	14.1036	23.3293	29.5386	18.3923	9.9663	11.2844	10.9476		0.0367643	10.8749
0.7148	9.74	7.8489	7.6417	10.3173	11.8442	10.5772	16.8188	8.7412	11.4544	12.0604	10.4781	22.8187	9.9945	10.8771	12.9367	12.1195	5.0425	8.7799	15.6065	9.6636	7.2672	10.764	7.5753	8.1679	6.4652	8.8695	17.8374	24.1786	22.8712	21.2064	12.5244	11.4198	8.6484		0.0441147	11.9138
0.834	7.3288	7.8372	6.39758	13.1915	11.6922	9.4547	15.4193	13.1852	12.8003	10.8127	13.1792	18.2039	9.3186	12.4848	12.4221	14.0361	5.1781	7.5819	9.0451	8.1436	8.7524	8.8177	11.6598	11.7921	8.3162	10.9312	15.0815	29.8667	21.804	18.4416	15.7851	8.6844	6.6887		0.0514713	11.9495
0.9531	7.102	10.0001	7.87902	12.3269	17.5115	11.1265	14.366	14.1673	14.6133	11.4831	16.7564	21.2347	7.2555	11.9444	13.8059	10.2948	10.8036	9.3592	15.1537	10.2032	13.3956	11.8131	9.8571	8.3465	9.5451	6.6253	18.1998	32.4229	27.633	13.4002	12.316	9.9175	10.728		0.0588217	13.0784
1.0723	11.0283	14.3609	12.6668	17.0434	18.172	11.1707	18.26	18.4389	15.5466	12.9927	16.0537	19.7643	14.6822	12.189	16.6233	11.586	10.0171	15.3261	15.0417	13.5429	10.1793	13.4037	10.8779	12.0805	12.1616	8.3132	13.3001	36.253	33.2516	23.7451	14.5886	9.0279	11.2179		0.0661783	15.2396
1.1914	10.0379	9.1454	10.4039	12.9139	18.6023	12.7621	13.1206	16.0261	20.0819	15.706	10.1095	24.175	9.0804	16.4167	15.4027	13.6249	9.2619	8.1374	13.9323	16.5565	11.8675	14.9849	13.3508	10.4958	9.015	11.6922	8.8363	37.3389	38.441	23.3193	11.6816	10.8393	9.666		0.0735287	14.7584
1.3106	11.8274	8.0616	8.92787	10.2491	12.6422	16.9845	16.687	14.0961	21.0852	11.1964	16.4319	20.7739	7.7501	15.0693	12.7587	8.5216	7.9422	10.1838	16.5853	17.8807	14.3135	14.8958	10.4181	11.1813	6.1854	9.9695	13.1622	39.4499	37.4555	24.5574	12.4701	11.3215	9.2948		0.0808853	14.5555
1.4297	8.5292	12.8852	8.70085	14.8451	15.7864	18.0768	19.7251	11.6817	15.5391	11.1305	16.7474	17.7986	14.6401	10.7822	9.6137	14.2852	7.4049	8.75	20.9731	25.7411	12.1503	13.6634	11.8032	7.0246	9.698	5.8894	11.6264	43.6427	36.8174	34.1436	12.7018	8.4808	8.6955		0.0882357	15.1507
1.5488	12.563	10.4389	6.05945	13.7337	19.6418	22.5298	19.5474	14.3213	18.3976	10.7771	13.4891	13.9931	12.3101	6.7865	20.5383	12.3573	8.8059	8.4631	17.3073	19.2859	14.0351	13.8343	17.0081	11.8466	8.9902	9.871	14.5688	37.5172	29.7139	26.3782	16.1462	15.1578	9.3683		0.0955861	15.3267
1.668	6.7348	5.4729	6.65872	11.5892	12.3351	17.4304	15.738	12.8538	16.3946	14.6134	11.4302	22.295	11.2163	8.8435	17.2212	10.7389	14.276	10.03	20.6736	12.0775	9.9261	9.666	15.9242	17.2002	6.8237	8.3032	11.7077	40.0114	32.3714	26.8221	13.4615	9.5259	11.6948		0.102943	14.3049
1.7871	8.4184	5.1872	11.6662	14.652	13.0535	20.9014	10.5634	11.6276	19.1914	13.7224	17.2212	22.39	13.4022	9.2733	13.3677	9.5606	6.0909	6.7644	19.3717	11.5644	5.4359	11.0377	16.8365	12.0457	10.8876	8.8208	15.8131	32.5537	35.0361	38.1413	13.6732	6.0357	10.0777		0.110293	14.3753
1.9063	9.3815	5.8847	11.344	10.3593	13.417	21.4904	12.9499	11.7563	16.5487	17.8123	12.1632	15.3944	13.7146	11.3554	14.7626	7.7067	6.2833	7.1202	21.2678	17.1401	7.8631	14.9397	12.1447	12.9629	10.3881	9.1671	11.1463	31.4611	26.8426	32.797	10.3625	9.5658	13.2371		0.11765	13.9615
2.0254	7.7642	8.7111	8.8346	10.8544	12.2717	12.9501	11.2506	9.7186	14.7583	17.0961	14.57	15.3543	11.041	9.5388	9.3833	9.6434	7.926	8.7378	20.4338	19.9671	6.9989	11.3773	17.4186	11.6546	6.1551	8.1466	8.9412	31.4853	20.6516	31.6826	10.5236	11.9058	9.4795		0.125	12.9462
2.1445	7.3802	8.7156	9.51592	9.7063	10.0802	21.0732	11.5124	12.6121	18.7884	13.1051	15.0038	16.0298	8.8399	9.3425	9.8258	8.6351	8.793	7.9749	19.9399	16.7976	8.462	11.0669	16.6424	15.6851	9.2898	7.2782	9.9511	38.6058	18.2523	26.9643	11.1566	14.8258	11.0286		0.13235	13.4206
2.2637	5.7647	5.3941	4.04089	16.5373	8.4605	19.0191	12.8418	7.4946	11.7856	9.5379	13.1455	18.6274	6.6362	6.2015	6.9996	9.978	6.7974	10.0602	17.8454	21.8349	9.4493	7.2464	11.4044	11.5387	8.777	9.1631	13.3577	34.3032	17.0373	38.3071	13.088	17.4576	13.2528		0.139707	12.8299
2.3828	5.4656	6.7715	4.91522	10.8437	8.7198	15.0031	11.5991	13.1244	11.0742	8.5231	14.8862	21.6007	9.0812	8.2362	9.4655	7.2711	8.6846	7.6644	16.7528	11.5221	7.4183	14.068	10.1683	6.9432	9.418	12.4414	14.8962	38.7404	15.2744	28.55	13.1926	8.1933	8.3026		0.147057	12.0852
2.502	3.6683	8.5569	6.67551	14.694	8.2491	15.0216	10.316	7.2253	10.0854	7.3764	10.716	18.1213	9.0131	7.4368	9.487	8.751	9.6285	6.8946	17.0759	15.4781	9.5257	11.2824	10.8711	11.4695	8.932	14.583	9.493	35.5026	20.1196	26.2151	9.6946	11.2067	11.2232		0.154414	11.9573
2.6211	4.8304	7.4609	4.9298	9.1371	9.7029	11.7858	11.7644	9.2952	15.0268	7.7081	9.6158	18.8592	8.9767	8.0216	10.2501	5.2805	8.5088	8.4569	13.8259	20.41	8.285	9.0646	11.5965	8.6165	7.7046	9.6382	11.8097	43.0417	21.3383	34.7401	15.9376	10.2609	10.2133		0.161764	12.3059
2.7402	6.0569	4.7544	6.6926	10.3303	10.1743	12.2466	16.1954	6.0566	10.5181	10.5599	6.8094	24.7188	10.8148	8.0209	7.2988	7.2672	4.4981	6.6633	14.4715	16.0133	11.5736	5.875	11.2315	9.7733	7.9697	10.0339	8.2813	48.3922	22.3899	31.6605	12.9358	12.0991	18.1473		0.169115	12.4401
2.8594	4.6033	7.4184	4.25291	10.1422	15.1497	10.5657	14.494	5.1589	10.5862	8.4888	10.4389	23.2712	9.0676	10.8475	10.2065	8.1424	5.0646	4.6126	15.0473	10.6391	10.0473	9.2566	14.0152	6.0263	7.0676	14.3726	10.6145	40.8936	28.3873	35.4226	10.5903	15.2389	16.1444		0.176471	12.6144
2.9785	5.8275	8.3387	6.41271	9.0104	11.2935	9.3286	7.7455	7.7169	8.5678	8.8319	13.7698	16.5205	6.9296	9.0662	10.8413	7.7569	9.5894	6.5049	16.6109	12.9618	10.2498	12.2005	11.7287	8.5801	7.3543	13.021	7.8121	39.6468	22.4484	39.411	13.919	13.9104	14.5908		0.183822	12.3787
3.0977	8.9514	11.2381	6.87722	11.3509	7.2579	6.8498	7.1079	7.4005	10.0377	8.5307	8.8258	14.3921	9.0132	4.9886	10.2339	11.9858	10.1085	7.1307	13.8904	18.9946	12.1075	13.5522	10.1825	6.2916	7.0059	10.4901	8.5819	45.3384	26.7528	44.2228	15.7175	12.7255	12.7983		0.191178	12.7555
3.2168	10.1578	7.3245	6.95182	11.3098	7.3972	7.4307	7.8573	10.8349	8.6145	8.9899	8.9535	15.1721	7.1376	5.7221	8.4943	6.7537	6.5928	6.0636	17.4317	18.965	16.0856	11.5794	11.8024	8.7878	5.8833	10.714	7.2516	38.8587	29.0721	31.5002	10.5156	12.7608	16.2672		0.198529	12.098
3.336	5.8502	9.0172	8.09783	9.745	9.8625	7.1296	9.1813	10.4085	12.3008	6.9378	10.8591	16.9719	6.1548	7.2475	7.4522	6.8548	5.7784	4.3179	13.9641	14.7874	12.1859	10.6745	14.6084	10.342	8.3115	12.2697	7.4043	34.7331	29.1224	38.631	11.6082	13.7214	15.5788		0.205885	12.1852
3.4551	8.6394	6.3007	10.2161	10.8207	11.8238	8.3672	9.2421	11.2814	13.9502	7.0124	8.3459	17.1237	8.2461	8.3717	6.1784	5.3912	5.594	5.0656	18.1951	14.3077	9.6231	10.4458	17.6934	8.1135	8.0161	13.0579	10.9101	42.3113	26.085	34.7548	10.2202	14.8361	15.006		0.213236	12.5923
3.5742	5.0151	8.2267	7.04341	8.3726	9.3298	10.095	9.3561	8.2312	8.7376	6.1965	10.3689	15.0265	5.0996	11.8191	5.0836	5.6962	10.5024	3.258	11.7306	13.0642	13.3488	9.8629	16.2379	5.4086	7.5899	11.0447	8.3676	43.4385	40.5413	44.7732	12.3915	9.7359	18.1934		0.220586	12.5208
3.6934	4.9163	5.7186	6.03805	8.7525	7.9106	7.4461	10.4807	11.0821	16.6121	7.5625	10.2005	12.2742	6.3022	10.2038	6.0881	6.529	9.6385	4.0381	19.429	18.286	19.3901	8.2557	18.593	8.6189	11.2529	9.6643	7.7128	38.4058	41.8047	43.0644	11.2157	14.9677	15.2238		0.227943	13.263
3.8125	8.7095	8.839	5.18098	11.8031	6.9409	12.3156	14.1276	9.9232	16.3416	5.9489	11.1004	10.9334	8.5086	7.0429	6.0463	5.7686	9.1104	6.3296	10.1935	12.9225	16.3168	10.1787	16.4588	11.3458	10.3467	8.9676	10.3351	30.9046	32.188	33.9882	15.7416	13.6996	14.8878		0.235293	12.5287
3.9317	6.0944	5.2401	8.93458	11.3154	8.3147	11.9354	9.9251	6.6601	14.522	5.5818	14.2361	8.8648	8.2014	6.0652	7.1614	8.2157	4.7793	4.7163	7.6377	12.9058	12.1049	9.2912	12.9061	10.3582	11.0475	11.9493	10.958	51.5445	38.3778	41.1854	12.2607	12.9573	13.6604		0.24265	12.7245
4.0508	4.7224	8.5488	10.1826	12.1128	7.7241	7.7017	7.5652	7.8716	15.3073	5.1397	9.8954	12.9404	9.1744	7.7199	9.2436	4.8738	5.1659	7.7931	12.1051	10.8831	11.5704	9.7843	11.5366	9.4095	13.9033	13.2762	8.3401	48.2598	49.0119	39.3393	15.0767	12.954	11.6635		0.25	13.0544
4.1699	6.5916	6.9401	6.92965	12.7796	5.8315	10.7897	9.5696	11.5651	13.9994	3.7041	8.7934	12.4683	8.0946	9.3021	7.4983	8.4928	7.1158	6.2844	7.1065	6.6341	12.0383	12.2555	21.2178	7.0696	12.105	13.375	12.5051	38.8836	45.662	40.1275	11.5279	10.8737	11.8068		0.25735	12.7254
4.2891	9.6414	5.5378	4.44177	14.6826	8.3403	6.3452	12.0788	7.0857	10.4586	4.5921	7.1787	12.3793	10.7393	9.1672	5.5806	9.6929	6.9291	6.5596	7.8585	10.2896	8.6266	13.0145	16.1321	8.8675	8.7934	15.7027	8.319	37.6863	36.4383	29.2195	6.5821	12.2403	24.7252		0.264707	11.9978
4.4082	4.5239	6.0674	8.79389	10.9273	6.7234	10.7886	9.5443	6.7389	11.0682	6.5003	9.5536	8.0107	7.0001	12.2204	5.5778	11.3697	4.7899	6.5809	10.2928	13.0703	7.6792	12.085	12.866	8.7199	12.9523	15.8535	9.7201	45.3297	35.3632	21.0894	9.5675	10.2402	16.0949		0.272057	11.7486
4.5274	6.3895	3.661	9.55948	10.4918	7.1174	9.9788	10.6385	8.2091	12.1174	6.4715	11.3964	11.9696	9.0019	9.4271	8.5445	7.2376	7.3893	6.9185	10.0993	11.626	8.3879	13.9648	17.5659	9.1568	15.6437	16.0741	9.9609	45.5722	39.6124	24.9247	9.3367	12.9939	14.2503		0.279414	12.5966
4.6465	6.9928	4.3841	9.12804	7.3569	5.6532	10.7941	10.688	9.8597	9.0913	4.7116	6.319	12.0958	8.1012	10.5484	12.0826	8.7663	5.0675	5.6316	14.6356	14.0191	6.7084	14.884	14.9081	9.7674	15.6457	11.4197	11.2998	43.4693	41.3051	19.9301	11.2693	12.3544	9.6981		0.286764	12.0784
4.7657	6.085	6.7518	7.1967	8.368	5.6184	11.3456	10.8431	9.6754	11.4017	5.4614	10.6895	12.6426	7.5804	10.0574	7.1092	7.0482	6.4562	8.6099	9.6346	9.1041	6.8451	12.7417	17.256	11.5823	10.8337	10.1032	11.9111	44.4771	44.4451	15.1136	15.3064	10.4081	13.778		0.294121	12.0146
4.8848	8.1934	6.074	7.70524	10.992	4.5999	8.6898	10.5846	11.3448	12.8801	4.0871	10.1814	15.1381	6.4334	7.8052	6.7271	5.0326	8.657	6.4166	11.0335	9.1545	3.6744	12.0803	14.5969	10.1707	9.2075	11.1491	11.7697	47.1472	38.5262	17.8017	15.9777	9.1416	10.827		0.301471	11.6303
5.0039	8.6834	5.131	7.24025	10.1135	6.7638	5.4728	8.9014	6.5451	11.5193	7.4434	7.383	9.9819	6.8234	8.2375	6.0815	7.3942	8.1589	9.0438	15.8316	8.983	3.2233	10.1854	16.6404	9.6844	9.2116	7.815	10.4118	35.165	40.6101	14.5856	15.0504	10.1879	8.9793		0.308822	10.8328
5.1231	7.1504	6.3134	5.52577	10.0354	4.6621	7.1293	9.623	7.009	11.0542	6.2918	5.332	13.267	6.4873	10.1689	6.991	7.5618	6.0342	12.0116	9.9817	7.2074	2.8575	11.0614	17.006	8.5794	8.8338	9.0056	7.0214	46.1792	39.8591	21.4046	14.2301	20.5	12.0053		0.316178	11.4661
5.2422	9.9512	8.2998	7.47823	5.0806	4.8968	14.3106	13.4137	12.8947	13.1264	5.1631	5.6786	15.7121	8.7291	9.9761	5.1113	5.8203	7.4914	6.3908	11.3682	5.7662	4.5182	13.5066	11.7095	13.0055	7.1709	6.7633	8.3731	38.4953	37.1751	23.3086	15.2148	13.2167	11.161		0.323529	11.5236
5.3614	6.4142	4.7651	9.39986	5.9883	5.5293	7.6974	12.6757	11.2922	15.9933	3.7229	5.6774	11.8379	10.3159	9.3762	5.8548	4.7491	7.4867	5.183	15.6233	6.6071	4.9177	8.4494	14.7339	9.8965	9.2752	5.6203	8.8262	32.3593	36.0436	24.7333	16.0673	17.1989	12.9494		0.330885	11.1291
5.4805	5.9888	6.3716	6.84942	8.3989	4.2188	8.7438	7.9163	12.9391	16.1312	4.8558	3.988	12.8397	10.7503	9.4202	4.8233	5.002	4.4681	7.2949	14.9649	6.6069	3.9209	5.1013	14.534	11.3467	4.606	8.2136	11.12	39.4349	33.3249	22.8749	17.4953	10.6854	12.2476		0.338236	10.8327
5.5996	5.7589	5.2779	4.3063	10.6432	3.4174	7.7653	12.3119	13.5825	12.5308	3.3891	6.8959	8.5583	8.5408	7.0152	8.8256	6.4492	7.6103	8.3155	20.5626	6.2652	5.1209	4.3085	18.6713	9.6336	6.8533	4.6423	8.3386	36.7522	27.0697	20.0522	17.6507	11.877	13.2225		0.345586	10.6732
5.7188	7.1451	6.6731	8.22318	11.5186	4.6677	5.2565	9.0758	8.5096	9.0624	4.975	8.0277	10.712	8.282	11.7844	7.2022	4.0989	6.655	9.9474	20.951	9.0102	2.7029	5.0974	19.1543	12.9948	7.4045	7.5536	5.8743	51.3538	32.3789	19.8421	19.7405	12.8885	9.6827		0.352943	11.4681
5.8379	7.7681	9.2359	6.34429	6.353	2.928	6.8745	8.865	7.9623	9.5401	2.9841	7.6291	13.3624	10.4654	10.4236	4.2558	4.8555	7.512	8.2281	23.6672	5.7015	3.5419	3.5165	21.0117	10.1762	10.3578	9.293	7.9703	45.9997	25.9361	18.6644	13.9802	13.5048	17.688		0.360293	11.109
5.9571	5.6662	8.2255	5.88164	7.292	2.2575	3.4647	12.146	7.9442	5.6189	4.3419	5.3735	12.8935	8.6538	7.6898	3.3369	6.4794	11.3602	7.5561	20.213	7.2217	2.2204	3.9278	16.5393	6.8053	6.4084	10.8053	7.4285	52.9633	27.149	18.8668	17.1575	18.0561	11.4017		0.36765	10.7074
6.0762	5.9712	4.9228	7.01573	6.2767	2.6634	4.3605	9.6604	11.5418	9.7183	5.3914	4.0704	11.1959	6.2139	5.5735	5.0671	6.9602	6.1529	7.3485	20.4865	7.2085	2.8961	7.5674	25.8874	6.7625	9.9672	9.8576	7.7412	42.4682	24.5801	16.6646	16.9407	13.6629	9.929		0.375	10.3856
6.1953	5.6363	8.2792	6.29912	5.1609	3.4988	2.7406	11.4101	11.5952	11.8755	3.9618	6.7007	10.945	5.2157	5.1703	3.6752	6.035	3.6495	7.3921	17.5718	9.9449	3.8564	4.0349	19.8615	9.3033	11.0317	7.7556	10.255	33.4576	25.0769	16.5027	15.8894	13.0633	8.0458		0.38235	9.84521
6.3145	5.2512	6.3587	6.98106	7.6501	4.2917	4.8638	11.7018	8.509	9.4679	3.9094	4.7816	13.6472	4.3285	5.057	5.7283	5.2991	5.3328	9.2359	20.8266	5.038	3.2664	4.8763	15.7521	9.2956	7.8206	10.0497	8.5857	28.5004	23.154	13.9711	19.4508	16.5371	3.9994		0.389707	9.50057
6.4336	5.0123	6.3825	7.06839	10.9788	3.5441	4.4535	14.1604	5.6533	4.5831	3.4536	4.8794	14.3257	6.8471	4.1416	10.1946	5.7921	6.0449	9.456	12.363	7.7284	2.5223	5.5713	13.3782	9.5819	6.3847	9.6744	9.736	24.965	22.0875	12.3257	23.5761	13.4666	4.6875		0.397057	9.24303
6.5528	5.2454	8.136	5.82091	6.4701	2.3561	3.0717	10.2778	9.6124	6.2121	3.0805	7.7373	12.095	5.5957	7.6377	5.545	7.2424	5.7997	11.5461	17.075	7.5633	2.649	4.4645	16.8552	9.5309	10.1794	7.6416	6.9464	21.9123	29.3597	12.5798	30.7309	18.1309	7.2359		0.404414	9.88899
6.6719	5.3675	6.7871	5.69208	7.5077	2.5282	2.3612	9.4105	10.8896	9.4983	3.5057	5.7296	5.9201	5.7867	7.6428	5.4687	5.8342	3.6003	10.6254	14.6539	5.6566	2.9865	5.525	16.0859	12.048	6.9577	10.0312	6.5521	22.0345	27.8931	9.435	25.6259	17.306	7.6523		0.411764	9.23028
6.7911	4.6859	6.9096	7.79504	6.9121	3.9743	4.0508	12.8213	11.3139	7.1636	4.0573	5.9485	9.9564	9.5372	4.6192	8.6683	7.8496	3.4764	7.1139	14.4542	3.5978	2.8118	4.0574	13.6482	10.9419	5.4693	12.6476	10.0341	24.6335	28.0766	8.4996	22.5633	13.1156	8.7795		0.419121	9.39951
6.9102	4.9424	8.2157	8.1225	6.1937	3.5089	5.4194	11.3804	7.7779	7.9046	3.0522	6.6235	8.5601	6.9806	5.1028	7.3818	4.9743	4.6839	8.7309	20.2756	2.9153	6.6894	4.9264	10.1022	10.2261	8.9369	10.5118	5.4809	28.1923	35.6598	7.8795	23.6616	10.7585	7.1404		0.426471	9.48219
7.0293	8.3754	6.7982	9.02371	6.7183	4.017	3.1142	11.7011	9.3939	10.7048	4.3597	3.8313	7.8546	9.3176	4.0476	3.8828	6.5908	5.8534	9.7477	13.6307	5.4206	5.2445	4.7981	11.3897	8.0461	7.3975	10.3173	5.8723	25.8396	42.6521	12.2812	22.5039	15.126	6.803		0.433822	9.77742
7.1485	6.1444	6.496	6.49299	5.1928	3.8121	4.7314	10.9407	9.0359	14.1243	4.5085	5.2656	8.1135	8.8266	8.0524	4.9755	3.8961	6.8295	5.6955	14.7069	3.9159	3.4619	8.9241	11.8451	8.9074	4.1258	11.1505	8.7697	25.8157	39.4091	11.52	22.8309	18.5455	4.0693		0.441178	9.73126
7.2676	9.8449	6.0308	8.0473	6.2981	4.582	3.2716	13.0195	8.7307	14.9292	3.5572	5.0146	6.1858	6.7787	8.8026	4.7594	3.9929	4.5101	4.6388	17.0079	4.4479	2.6704	10.0161	12.0077	9.2968	5.3871	6.5351	8.1206	26.8984	33.9523	11.3553	20.3392	14.9333	5.1898		0.448529	9.42885
7.3868	9.0635	7.3401	6.58617	5.7804	3.4514	2.9653	9.1525	13.2307	9.1726	7.2186	5.6464	4.911	4.8878	8.6225	3.614	4.0434	5.6935	5.648	10.7113	6.1723	3.6884	5.0618	15.1346	13.1311	9.6504	8.1554	9.5412	29.3514	40.5982	13.4612	17.5073	10.0179	4.8266		0.455885	9.51627
7.5059	11.535	4.7713	6.82376	6.343	3.1675	3.9781	13.1981	12.6633	8.3823	5.0346	4.3207	6.7279	5.1254	5.6713	5.2006	7.5609	3.7503	7.5404	7.4825	4.1062	4.8035	3.9753	13.7728	10.8542	9.4399	7.663	10.5482	30.1995	46.0052	17.7021	18.2881	9.9016	5.755		0.463236	9.76641
7.625	5.4089	7.5335	8.67886	5.5466	3.6683	2.6527	12.644	8.5567	12.1852	3.1556	4.744	6.9423	6.3492	3.1179	4.597	3.1748	6.1708	6.1594	10.9415	3.7191	4.4277	6.5866	12.3772	7.5483	6.2495	6.9575	5.6859	29.6179	47.4843	16.9563	21.763	9.5947	5.2874		0.470586	9.28735
7.7442	3.1816	7.2475	9.34975	5.5405	2.6752	3.5398	12.1207	10.7148	8.0709	2.6036	4.0818	7.1148	3.8956	4.435	6.0707	6.145	4.7703	6.9211	13.3198	3.7227	4.7273	5.91	14.2043	7.2519	8.9904	8.303	6.9437	26.8074	37.3345	10.921	10.3048	10.1259	4.6814		0.477943	8.54627
7.8633	4.5016	7.3633	8.32253	5.5937	2.3084	3.6106	9.7349	11.5026	7.8431	5.2036	4.6769	5.7789	5.3173	5.1759	5.0815	5.989	4.6623	6.8799	14.1597	4.9144	3.3407	5.375	11.1118	9.1031	8.9446	8.3664	9.8082	18.7829	45.1121	12.3493	12.7297	9.4053	3.8501		0.485293	8.69392
7.9825	4.6646	4.3914	7.17356	6.2106	2.2438	2.4142	7.1447	14.4232	10.0482	2.8437	4.2737	9.6924	4.0153	4.1126	2.0456	3.969	5.4769	12.14	11.9842	6.561	3.363	4.3004	11.158	9.5604	5.8534	11.9462	7.1675	18.5251	36.7951	9.2514	8.6837	10.9853	3.6025		0.49265	8.09154
8.1016	4.406	7.9918	10.6432	4.9215	3.1968	4.0184	9.3492	9.3218	11.8398	6.2016	6.2936	9.5555	6.0771	5.7183	2.1968	3.4992	8.91	9.2128	10.8382	5.2369	2.4673	5.9211	9.0153	7.4959	4.472	8.3428	8.958	16.8395	30.108	9.925	16.448	12.0563	4.9335		0.5	8.3761
8.2207	3.9132	6.2674	10.609	4.0348	3.2862	4.3081	8.9736	9.5976	10.1038	4.3813	5.2523	7.8082	3.4316	8.3571	2.6642	7.3805	6.6163	6.6843	13.7984	4.9619	3.9575	4.049	12.0528	6.6105	7.0069	7.3006	7.0378	14.1887	22.8548	9.1551	19.6061	8.0323	6.0913		0.50735	7.8901
8.3399	3.621	4.8565	6.12894	4.6744	2.5929	3.0321	5.7128	11.0394	9.003	6.2437	5.3988	9.9528	5.2393	5.7474	4.5655	3.2316	4.8734	6.156	20.1567	4.5906	4.1527	3.3567	8.8889	11.8597	7.05	8.507	5.9639	12.0834	28.5687	8.4912	14.9715	5.5257	4.8369		0.514707	7.60828
8.459	3.1503	6.8258	8.58933	2.7935	2.4013	4.7477	6.0235	10.0463	8.9434	4.2355	5.0527	9.6294	7.562	7.4977	6.6576	2.9864	6.664	5.837	12.2384	7.4249	2.7867	2.2164	11.4752	14.65	7.7135	8.4034	6.6352	10.3514	23.1446	9.3803	21.3335	8.8367	6.6357		0.522057	7.96574
8.5782	3.3254	5.8836	8.06771	3.2909	2.822	4.6142	7.9205	8.5724	13.1367	3.6089	3.1827	7.8162	6.0686	5.6603	5.5102	5.2269	5.1064	6.9211	17.135	2.4658	4.1009	4.8131	11.636	12.7267	6.4141	9.7969	8.3937	10.4585	20.5123	7.4514	15.0967	10.6093	5.4348		0.529414	7.6903
8.6973	5.2615	4.444	7.75537	5.6248	2.1496	4.341	9.8425	8.3675	10.3715	6.4182	6.1755	11.4443	7.4015	4.7965	3.4154	5.8305	3.8204	10.0791	16.6614	4.0555	2.7802	4.7898	14.2061	13.4684	4.5804	8.3447	9.4733	7.7041	18.478	14.0229	14.4537	7.1649	4.4639		0.536764	7.94504
8.8165	6.1866	3.987	7.35553	3.774	3.4641	2.0331	10.6053	10.3663	6.6311	4.0165	7.0212	11.7766	5.8403	4.9424	4.6673	4.5556	4.9735	8.731	17.5441	3.5188	4.4343	3.938	12.2336	11.8598	6.1228	5.6661	9.6081	9.4602	26.7355	11.9814	11.9745	11.3352	5.9435		0.544121	7.97828
8.9356	3.7035	2.8617	6.43056	3.5167	2.493	2.1376	8.8799	9.3562	8.5124	5.053	4.6493	9.1827	8.1353	4.0554	6.0913	4.4737	4.6849	10.1596	15.2434	4.1763	3.5708	7.5709	8.4074	10.545	8.548	6.5876	8.9849	5.888	17.5808	10.8942	11.2593	11.5033	5.7135		0.551471	7.29849
9.0547	2.3498	3.9628	6.89138	3.6809	2.5545	2.649	8.8815	10.968	13.4828	4.5584	7.4142	11.9404	6.4855	4.9114	4.822	4.1397	4.4561	8.216	14.2507	5.4165	3.6571	4.1608	10.123	6.9968	5.0991	8.2326	9.1651	5.9275	22.2508	11.8176	10.2918	9.4183	5.6506		0.558822	7.41887
9.1739	5.5495	6.1704	8.21905	5.0792	4.1598	3.9135	7.6312	10.7996	11.9787	3.2633	4.759	11.4943	4.1782	4.7909	4.6819	3.5284	4.5012	8.8978	17.3706	6.6678	3.7154	2.2482	12.9999	12.9307	8.0109	6.1636	7.7231	4.903	19.8442	9.9519	10.8024	8.5586	3.4918		0.566178	7.54479
9.293	4.9779	8.3016	9.1817	2.7902	3.7734	2.4078	6.1966	8.3292	7.3162	8.6033	6.2144	13.079	4.9022	4.8997	7.1644	4.1752	6.9137	8.7575	14.4055	3.6469	4.3928	2.663	10.0895	12.3886	5.1185	6.4027	12.374	6.0098	16.2907	11.3856	12.3476	5.1747	3.7146		0.573529	7.40571
9.4122	5.0219	4.7931	7.33998	5.6211	3.5414	2.5844	5.7709	14.7632	8.5571	3.6885	2.8665	7.9765	4.1548	3.3042	5.7599	5.3127	5.5272	8.0393	16.6705	6.0831	5.2657	5.3925	8.9595	14.5936	5.2106	5.3663	8.0635	7.1364	17.4306	9.5014	13.0023	3.4973	4.9623		0.580885	7.14419
9.5313	6.0796	6.4687	7.19645	3.3729	2.4593	2.7289	4.8676	13.2508	9.3728	4.3068	3.4247	13.7881	5.0977	4.716	3.3282	5.7774	5.3441	6.5566	16.8191	4.6804	3.1863	4.8221	11.3548	14.722	8.4903	4.805	7.1882	6.9485	14.7319	12.1714	11.9388	6.0899	4.504		0.588236	7.29059
9.6504	4.308	9.859	7.13942	3.816	2.9952	2.3937	5.315	11.6483	9.7522	5.9006	3.4363	10.0588	6.6601	3.362	3.6034	5.0463	6.3574	7.223	17.6131	4.5804	4.4248	4.2145	10.1209	10.021	6.9136	4.6969	6.5783	7.874	13.9311	11.6595	8.0297	6.6762	6.9224		0.595586	7.06458
9.7696	3.9374	6.2017	6.47114	2.5493	3.1351	2.4384	5.3831	6.904	8.0169	4.05	3.3996	7.5157	5.4724	5.9457	4.7515	3.2069	5.9311	5.8189	9.9924	5.8928	3.0614	2.67	7.0981	19.4549	11.993	6.6177	6.2465	6.8095	15.9161	12.1929	7.2918	6.0261	5.3475		0.602943	6.59817
9.8887	3.4586	6.9531	6.37393	3.4888	2.9287	2.4759	7.0091	6.9119	9.8858	3.4714	6.5186	8.8652	4.6904	5.1398	4.9998	3.1349	4.1536	5.4181	11.5129	6.6331	2.826	3.3192	11.5126	14.9274	9.1668	9.9399	10.985	5.544	10.0593	10.6027	10.0799	6.0923	4.8619		0.610293	6.78608
10.0079	7.8067	6.6353	11.1785	3.6794	3.9157	3.3501	7.3781	7.8139	7.4624	4.3474	4.557	9.7304	6.1742	3.829	4.5541	4.064	8.3918	7.3656	16.705	3.4271	4.2339	3.8115	12.6352	12.8245	7.8572	10.702	9.8384	7.4502	12.5762	11.4941	13.6377	8.1305	3.9429		0.61765	7.62121
10.127	7.6825	7.6453	7.30647	3.6345	4.0193	3.5466	7.9082	9.7228	11.1975	5.5261	5.6058	10.038	6.3999	3.5505	6.3407	6.8648	5.6778	7.3036	17.4188	5.8136	4.492	3.3715	6.683	14.2791	6.878	8.101	8.0529	6.8682	18.8263	8.9474	14.1706	5.3844	4.0889		0.625	7.67715
10.2462	4.7248	6.3528	5.58557	4.247	2.3805	2.862	6.2647	14.1555	9.3994	3.9445	3.9549	9.0073	7.3112	3.6875	5.6562	7.3228	7.1636	5.7661	13.8252	5.3496	2.9984	4.4772	9.1361	12.5735	7.3647	9.1362	8.979	7.1484	17.6038	6.2292	12.5842	4.6916	5.1289		0.632357	7.18219
10.3653	6.3965	5.5774	9.37892	4.7152	2.7085	3.9614	9.162	8.4102	11.414	6.1994	3.4753	10.7939	5.3819	5.8579	2.2078	4.8474	3.3822	5.0493	15.8677	3.6426	2.8091	3.6582	7.7251	8.4193	7.2377	6.2266	7.5632	7.6181	12.6631	7.1771	10.9969	4.8878	6.5314		0.639707	6.72555
10.4844	4.4262	5.4492	6.62741	2.4076	4.3366	4.7337	7.9834	7.3609	6.7532	6.1066	4.8041	9.3239	4.3942	4.8752	4.0603	5.9729	5.1085	7.2215	15.9641	5.7144	2.6572	3.1782	9.1905	9.9207	3.9556	3.3328	7.1556	8.0249	17.4362	7.4142	8.229	3.3241	4.1952		0.647057	6.41328
10.6036	5.3721	8.0887	7.16342	2.7384	2.4968	3.7699	10.2757	11.2511	6.1905	6.6898	3.991	9.1488	5.6627	4.1437	3.0087	4.5962	6.6224	4.1967	18.752	3.7997	3.2829	4.8944	8.006	10.6954	6.3897	3.0966	3.1429	5.8541	20.2502	9.6685	10.8229	7.4425	5.6487		0.654414	6.88343
10.7227	6.8128	6.6663	5.87781	2.7058	2.1059	2.3844	3.9152	13.8861	8.2702	6.0981	4.8448	7.2028	6.0861	5.7148	5.1134	2.4942	7.0915	3.8676	19.8283	3.9904	2.241	5.6408	6.9253	13.3577	6.2073	6.4869	5.6173	4.9939	16.6789	9.2979	10.8562	6.4136	3.102		0.661764	6.75077
10.8419	4.638	4.9588	9.21157	3.4486	2.0141	2.9814	6.057	18.3268	5.8214	6.4164	5.4882	6.9905	3.7586	8.4932	3.9602	3.6856	4.2728	5.6727	20.1481	4.11	3.7586	6.5962	6.2497	12.8524	4.6766	6.4451	8.1368	5.9165	14.5083	9.7741	10.2837	5.5407	3.574		0.669121	6.93232
10.961	5.3533	6.8204	8.1093	3.5658	2.8218	4.0358	7.0558	10.904	9.3863	6.8737	7.3045	6.2571	2.9966	4.1937	5.864	4.808	5.0069	7.5475	10.9252	3.1884	5.4589	5.6552	5.05	7.7223	7.0309	5.3348	3.9144	5.4736	20.5074	5.5683	11.8874	6.7939	5.6749		0.676471	6.63909
11.0801	4.4861	5.3191	10.7328	3.7522	2.1619	3.2348	6.7163	10.893	8.5178	7.8496	7.3427	10.7883	4.135	3.3915	6.6031	4.6623	3.6912	9.7076	12.041	3.505	3.8927	4.9888	6.8147	9.6561	10.6472	5.0744	7.1066	7.4655	21.9438	5.099	11.9898	6.1294	4.0721		0.683822	7.10338
11.1993	5.9632	8.2579	9.90825	3.7249	2.661	2.2755	4.8265	7.6677	9.6211	6.4146	6.9674	6.2954	6.0022	2.7373	4.1844	4.9385	4.3868	6.3154	12.8234	6.3798	5.0463	4.1889	6.4107	9.5347	7.3708	9.211	6.214	5.9481	15.9996	6.6227	9.6567	5.7407	5.6979		0.691178	6.66647
11.3184	4.0618	5.7707	4.1559	3.1946	3.8433	3.1443	4.9233	6.8779	12.7605	6.4796	5.1337	5.1818	4.9754	3.8098	4.4633	5.7866	5.4551	7.8043	8.0405	5.5506	3.9648	7.0181	5.8919	6.584	8.0443	5.2664	5.9343	4.8684	16.974	6.0135	10.9029	4.6166	5.3441		0.698529	6.14655
11.4376	4.3879	9.0975	6.22859	5.4002	3.1878	2.4827	7.4704	10.7192	8.7647	5.7766	3.8275	4.2213	5.6309	4.232	3.5894	2.618	5.606	9.2896	8.119	3.659	3.7794	7.293	10.35	5.7294	8.9259	8.0723	4.0199	8.2423	17.3067	6.1224	9.8714	6.7787	3.9984		0.705885	6.50903
11.5567	5.4622	5.3183	5.79813	3.8525	2.2466	2.7415	8.1274	16.3772	7.6243	6.2811	4.4866	6.0214	5.5728	5.4302	3.2166	3.7924	7.8226	7.5007	12.4211	3.388	4.8649	7.0649	7.6715	4.89	7.7281	10.4814	2.8139	6.4183	19.7697	7.0252	11.3398	7.1189	3.1241		0.713236	6.78159
11.6758	6.5166	6.7661	7.56023	3.0921	2.086	4.1071	5.0233	11.5369	10.9619	4.488	5.1557	9.903	4.9724	5.2856	3.1737	4.5445	5.6492	5.7198	7.7107	6.2657	3.2313	5.7341	8.5239	7.6741	7.5595	9.9121	3.8303	7.6223	15.2669	6.1156	10.3518	6.6408	3.4532		0.720586	6.55862
11.795	4.4607	5.5688	7.49175	4.9958	1.9779	4.3116	4.6712	9.4266	11.8218	7.7084	4.7994	7.8313	5.5683	2.475	4.1664	5.1689	5.9748	6.9127	9.5315	3.8807	2.8842	4.7788	9.8305	10.3758	8.6287	8.251	4.7375	6.7181	23.4371	4.834	8.9788	8.1087	4.2796		0.727943	6.80565
11.9141	3.7342	5.3694	5.57449	3.6894	3.0035	4.1556	6.2071	15.5695	13.9916	10.9037	6.149	10.1165	3.8039	2.2533	6.1829	5.3018	4.448	13.0243	7.8932	7.9147	3.7599	6.0888	10.1833	5.6457	5.6517	6.7501	3.9738	5.3637	16.3559	4.6935	8.5886	5.2597	3.4824		0.735293	6.8207
12.0333	4.8185	7.8842	7.24113	2.3805	4.4146	3.5861	4.8177	10.3568	10.8425	9.0294	5.2007	7.3641	5.6132	5.0831	4.2196	5.6102	4.9371	9.4513	7.3086	5.1764	4.9078	5.8931	5.6492	9.5154	7.8817	8.1429	3.4097	7.9724	20.0493	5.826	5.5796	7.0067	4.8084		0.74265	6.7266
12.1524	5.1001	7.9534	4.78305	2.3683	3.2846	4.2186	5.517	8.5005	8.3269	10.2709	3.2064	6.8287	4.748	6.1767	7.7761	9.3321	4.2194	9.1694	8.1555	7.8043	6.5458	7.7299	7.9118	10.9013	8.9359	6.3268	5.5315	4.9917	24.1643	4.1516	7.9492	7.6545	2.8552		0.75	7.07241
12.2716	5.8212	5.5109	5.98118	4.1221	3.7914	3.1403	4.9069	8.9696	8.6298	7.6838	7.2049	5.6148	6.19	8.3594	4.3656	7.059	6.1895	11.4645	8.637	3.6996	6.9004	6.0404	10.4545	10.0892	6.0599	10.6847	3.8435	6.1856	23.3765	4.696	7.4173	7.1828	2.5347		0.757357	7.05476
12.3907	6.719	7.3891	9.12978	4.8534	2.5877	2.8794	7.1072	12.3079	8.1439	10.9916	9.2118	6.8761	2.7074	7.0028	3.9576	8.045	6.2679	11.0741	10.3158	4.0336	4.5385	5.969	8.7474	8.2757	10.1806	4.9156	4.4068	7.6136	25.1503	3.7781	4.5068	7.7899	4.5363		0.764707	7.33363
12.5098	3.9779	5.2852	7.05656	3.7648	3.4441	4.8717	6.1204	6.2348	9.2668	15.3654	7.1815	8.8011	6.9249	5.9077	4.9125	6.0299	4.7654	8.0182	12.8569	6.101	5.1826	7.2187	7.6258	8.5647	4.6665	6.3681	7.4422	7.6102	30.8353	5.4933	7.6041	11.9705	4.854		0.772057	7.64614
12.629	4.4775	4.0133	3.9123	3.3602	3.0168	3.4189	5.2929	9.095	11.2455	7.6719	11.7512	10.7507	4.7271	4.933	6.8685	4.8347	5.6431	10.0924	14.993	5.8712	5.8584	9.3458	7.9655	6.3004	4.2507	5.4745	4.4408	6.7311	26.3821	4.5944	8.6628	11.3416	6.6924		0.779414	7.39423
12.7481	2.7673	5.6406	4.40068	3.5805	2.6795	2.8801	6.0046	15.5659	9.095	10.7367	9.5887	8.3686	5.7061	4.3758	4.8738	5.1752	4.8883	10.2067	13.3462	5.1265	4.1584	8.5269	10.2458	11.0944	4.2305	5.6729	4.2394	10.5638	24.5311	3.4556	5.0549	17.5276	6.672		0.786764	7.60546
12.8673	5.4364	4.7832	5.46605	2.289	3.7394	3.7382	7.1581	12.9154	9.396	6.9957	10.9709	8.0903	5.2714	5.7806	3.829	3.8689	4.7165	6.9197	8.6208	6.7697	4.168	6.0321	14.2496	9.2709	8.3252	6.3235	3.386	8.4924	25.7452	4.7698	5.6482	17.697	7.2001		0.794121	7.51707
12.9864	5.2255	5.424	6.72762	3.9784	3.7881	4.7809	4.7657	9.2065	6.0787	7.3037	13.04	6.5767	8.853	7.052	3.4988	4.426	6.6908	7.8197	10.2275	7.3303	4.8031	7.5063	8.0971	11.1322	7.7156	10.9781	4.1251	6.6961	30.8578	5.4449	4.8893	17.3081	5.4667		0.801471	7.81256
13.1055	4.202	8.1038	6.73564	4.3144	2.9972	3.4434	6.6231	7.5828	6.0257	10.4169	9.3155	8.5077	3.4559	3.9466	4.1223	5.762	3.6519	7.8326	13.78	7.6575	3.6337	9.9893	5.0476	11.2215	6.3135	5.0357	3.5894	8.5276	26.753	2.6681	2.3924	22.5105	8.0531		0.808822	7.40037
13.2247	5.5536	4.6777	6.51397	5.6215	3.1784	2.9848	7.6868	7.0096	7.7891	7.3233	8.9362	7.6041	3.1913	6.5954	7.4571	6.3714	2.4961	8.6864	14.5814	7.4679	4.7507	7.0673	5.0628	15.28	3.9452	3.8979	6.2566	9.6525	28.5333	4.6017	4.0217	20.3056	5.6664		0.816178	7.59902
13.3438	5.6064	9.1528	2.7606	7.5857	3.0338	3.5172	3.8264	9.9289	7.7383	6.332	8.6278	7.7615	5.4089	4.3331	5.1831	4.2295	3.3629	7.4624	10.4888	10.0252	5.7913	9.1517	7.0065	9.0191	4.4882	2.8175	5.0577	11.4114	28.8477	5.1813	4.6862	26.5435	5.0202		0.823529	7.61781
13.463	4.3338	5.0106	4.70444	6.4282	4.547	3.296	3.9529	11.642	6.6808	7.6342	8.8585	6.2449	4.7183	7.3577	4.2282	2.7809	7.2688	8.1607	13.9498	8.4252	3.8011	6.0859	4.575	11.6146	6.9208	4.1982	4.5487	11.8756	23.1068	5.8057	3.9389	24.7415	3.9598		0.830885	7.43623
13.5821	7.6093	4.1498	4.74647	5.7997	3.6636	2.3592	3.5947	12.1636	8.4424	5.2057	9.4308	5.8238	8.7675	5.6834	7.2486	4.8974	3.9717	13.017	13.1966	9.385	4.0185	8.066	5.0764	13.1496	4.9977	7.8511	3.2966	6.2066	25.6924	4.4688	3.8723	23.6329	4.2805		0.838236	7.68987
13.7012	9.7886	4.6068	3.554	4.0485	3.5604	3.467	3.3713	7.9699	9.2789	4.1499	11.6323	5.702	5.0876	4.6334	6.0213	4.8428	4.2387	8.7032	12.2625	10.7662	4.0939	8.3274	5.4267	12.3514	4.3108	5.5664	4.9796	5.6709	27.6556	4.6093	4.0704	23.2798	3.6534		0.845586	7.32366
13.8204	5.2254	5.9512	4.26837	4.7918	1.9962	3.8615	6.7252	7.4985	7.9165	3.7567	11.6627	7.4973	4.3559	8.1466	5.1911	5.0147	3.9293	6.4102	10.1705	6.912	6.8138	7.9548	7.3572	8.9968	3.3518	4.5823	3.5666	7.3313	21.7405	7.4033	3.6379	23.9425	3.8721		0.852943	7.02523
13.9395	7.1204	7.5249	3.95372	5.298	2.5574	5.5532	5.6428	11.4443	8.2717	4.6247	9.0837	8.4126	6.0231	6.095	4.3698	3.8233	3.4976	5.5775	11.5359	11.4302	6.6173	5.8257	3.1653	7.2498	4.9963	8.1214	5.9432	6.0324	22.3586	8.1975	3.6082	18.5676	3.5363		0.860293	7.15332
14.0587	7.4512	6.3844	5.97959	4.22	4.2557	5.6061	8.8595	7.1846	11.9695	6.7506	7.6568	6.9819	5.3508	6.7274	3.9836	6.0294	5.5007	8.3342	14.8148	10.4057	5.8198	7.0777	6.4849	5.7034	4.0336	8.1339	5.1058	7.7507	24.9662	6.7575	4.1305	21.6771	4.7595		0.86765	7.78325
14.1778	5.6791	6.6905	3.70197	6.2008	4.0531	6.1154	11.9889	6.4514	10.3333	6.7633	8.9433	8.1951	7.3798	5.7392	2.621	4.7277	4.1143	7.6556	12.5444	11.2626	7.3331	5.7779	3.4217	6.6446	3.4795	5.4132	3.8179	4.6244	24.2222	6.6504	5.0631	13.7156	6.6155		0.875	7.2103
14.297	5.2966	5.9048	4.60615	4.1148	2.4504	6.4571	8.0168	8.5866	12.3796	6.7848	10.0096	12.5789	4.8803	8.4129	5.168	4.2202	5.8381	5.7167	9.7153	9.4789	7.7351	4.3742	4.6824	6.5247	2.6896	4.8785	4.2269	4.6852	24.6403	5.073	10.9214	17.6705	6.8203		0.882357	7.44057
14.4161	4.2927	6.0333	5.1526	5.7669	2.4391	6.6907	5.6323	5.3871	11.144	9.0328	11.6166	8.6696	6.7717	8.0641	6.5716	3.2082	3.1125	7.9526	8.7605	9.0348	9.1817	4.022	4.8472	6.8347	3.7015	3.3674	5.0866	5.3374	20.8062	4.4945	7.5972	10.8043	6.3816		0.889707	6.90291
14.5352	5.2524	3.964	2.90712	9.811	3.3611	5.0276	8.7236	5.6165	11.7448	5.5375	10.5365	6.4162	4.8815	4.5707	4.2556	3.6419	4.5713	5.7091	7.3759	8.2306	6.3059	5.4285	5.398	5.0677	3.1339	2.1759	6.0783	5.2442	17.4419	4.3606	3.6702	9.2418	9.5194		0.897057	6.21822
14.6544	4.0198	3.3488	6.38466	6.2808	7.1979	4.1746	7.4948	5.1493	9.2455	7.5495	9.6645	9.5971	3.3858	3.9234	4.4427	3.5524	5.4995	5.4975	3.8316	4.5498	5.22	3.5568	3.882	4.8529	3.1103	3.3323	3.4088	6.2706	17.8617	6.395	5.5282	11.6915	6.0924		0.904414	5.93917
14.7735	4.6291	5.2571	8.8041	11.9962	5.8012	4.6975	5.7774	6.4854	11.2367	11.7073	6.0122	7.7626	3.6059	5.6198	3.228	2.4085	3.8445	3.8003	3.9755	5.1425	9.2773	5.1515	3.7585	5.6081	3.6307	3.8357	4.1974	5.6515	11.9107	6.7637	4.5859	8.1542	7.4667		0.911764	6.11466
14.8927	4.9788	4.2603	10.7324	10.8399	3.3887	7.8567	3.9481	6.3366	7.0928	10.7107	7.9838	4.6946	4.3022	2.8424	4.6175	2.1677	2.4644	4.5047	5.2396	5.8803	5.0513	3.3008	3.7495	3.7036	3.6693	4.6457	3.3657	6.1868	11.9442	8.434	3.3441	7.0003	6.5224		0.919121	5.62909
15.0118	3.2019	2.9544	7.96886	9.0247	3.1977	8.7418	5.3536	6.6119	6.1404	7.9162	6.3396	8.8677	3.1342	3.0628	4.7138	2.231	2.9188	5.438	2.4908	5.6973	4.4866	4.8707	3.9566	2.3102	3.182	3.3151	5.6956	3.0996	8.3471	6.6814	3.7045	7.9387	13.2251		0.926471	5.35814
15.1309	5.9745	4.5701	7.48059	5.4703	4.3736	5.2673	4.739	4.9101	6.3305	9.0702	4.2737	7.7454	4.7608	2.6327	3.0605	2.3529	1.9664	3.1826	4.1127	3.3787	5.687	5.7208	4.2632	3.0284	2.5126	1.9838	5.8868	5.3178	6.2403	10.5415	3.3979	11.0049	7.0166		0.933822	5.09861
15.2501	5.4215	6.9906	7.99684	6.2065	6.1647	6.5914	8.7137	6.5077	5.4909	9.8582	5.2882	3.6262	5.37	3.913	2.8505	2.6472	2.0816	4.2162	3.2331	2.7469	3.5637	5.1581	4.5636	2.9392	2.4103	2.6846	3.571	6.8726	6.3362	9.1114	4.046	7.1534	7.2443		0.941178	5.19907
15.3692	5.2042	3.8044	6.23437	6.3732	6.7152	10.2114	4.4559	6.3347	6.5499	10.4846	7.8129	8.1836	5.1653	2.8747	2.2198	2.9472	2.8346	3.8862	3.6194	2.311	2.3574	4.0124	3.4699	2.7068	4.112	2.7304	4.6705	5.0349	7.7465	8.3558	2.9336	7.5184	10.1457		0.948529	5.27324
15.4884	4.6154	3.7809	8.07362	4.4706	6.3331	6.1368	3.3472	5.4419	6.0912	11.309	7.2718	7.395	3.5967	2.9162	2.1682	2.9244	4.8049	3.2065	1.8642	2.8434	3.5514	3.642	4.3481	1.8899	2.7709	4.0655	5.9363	3.227	6.3299	8.1927	3.7147	7.4473	10.806		0.955885	4.98523
15.6075	3.5191	2.6834	5.3388	5.877	4.2917	7.5139	3.9967	6.2281	4.5584	12.0192	8.0346	5.3587	3.4028	2.5248	4.1946	6.3284	2.3217	3.3168	1.9647	3.4552	2.3791	2.3191	5.8486	1.8822	3.8889	2.835	4.2544	3.4494	6.466	9.1995	5.2998	8.2128	12.0381		0.963236	5.00005
15.7266	3.8334	3.3048	5.24768	4.4988	4.1442	5.8347	4.2674	4.8176	2.4486	12.0358	3.9052	4.3805	4.1038	2.7008	3.0498	4.5364	4.0343	4.3847	3.883	3.5812	2.9898	2.5643	2.8293	2.9026	2.3847	3.3415	3.2782	3.5622	9.3665	12.0804	3.3173	10.8354	13.4866		0.970586	4.90701
15.8458	3.9013	4.1206	5.24122	5.5755	3.5683	6.0133	4.5438	8.5113	4.8229	9.0175	9.3689	5.0466	4.5213	2.1095	4.7341	3.9253	4.7591	3.9861	3.1086	4.9431	2.9995	2.9623	1.987	3.7747	2.0752	2.9033	3.9122	3.9805	8.8238	15.4191	3.1815	12.2103	9.5663		0.977943	5.32164
15.9649	4.9	5.1223	7.20078	3.6382	4.2773	4.6115	3.5908	7.4144	3.0372	9.1035	9.5758	4.155	4.0957	2.3193	3.2398	3.0377	3.5261	3.5383	2.858	5.8626	2.7936	2.8793	2.2714	3.7363	2.0249	3.0119	2.9532	4.2189	7.7051	13.4228	3.9696	9.2475	12.1001		0.985293	5.0133
16.0841	4.6266	4.6551	5.60591	6.0601	2.9434	5.5061	4.0357	5.8181	3.027	7.1864	10.4425	4.17	3.818	3.0862	3.8044	4.1164	3.1161	3.7302	3.8183	6.6455	4.1961	3.5708	3.2349	2.8797	2.5778	3.2187	2.6493	3.0364	10.0203	13.4726	4.6734	6.5733	13.4765		0.99265	5.14521
16.2032	4.9503	5.0007	4.49079	3.5945	3.2864	6.262	2.3887	5.3689	4.5743	7.2536	7.8965	2.3598	2.7455	2.831	2.8009	5.2726	3.5712	3.9906	3.6019	3.1138	2.6883	2.2747	3.0866	2.4222	2.6531	3.9948	2.2898	4.9315	8.3552	17.9583	4.1964	6.7735	12.2448		1	4.82495

## Sheet: Image43
X0	Y0	Y1	Y2	Y3	Y4	Y5	Y6	Y7	Y8	Y9	Y10	Y11	Y12	Y13	Y14	Y15	Y16	Y17	Y18	Y19	Y20	Y21	Y22	Y23	Y24	Y25	Y26		Ap-Basal	Avg intensity
0	5.75491	5.0408	4.59668	4.46264	2.75737	4.9942	3.85549	3.30891	3.90549	6.19351	4.73618	5.06122	5.97058	7.29843	7.74005	4.47836	7.24162	5.71835	4.02306	6.4939	6.42972	5.16123	5.75572	3.48752	7.43145	5.82682	6.47881		0	5.34085
0.1191	3.83899	2.6551	4.38461	3.26976	3.47405	4.2881	4.01057	3.44517	3.63075	7.66575	4.99768	6.18063	4.05722	7.328	8.18354	5.59764	6.28044	4.82101	5.08227	9.76415	7.21586	5.88184	3.58282	4.32349	8.80688	7.1789	2.63992		0.00487635	5.28093
0.2383	7.69743	3.4459	4.26408	3.89517	2.65965	2.95835	4.46866	2.71812	2.55295	7.99251	5.89787	4.24771	6.17107	8.49454	6.9838	4.61857	7.80977	6.80878	5.19742	7.18442	7.68941	6.97939	4.99918	3.93975	6.92888	4.98576	3.34232		0.0097568	5.36783
0.3574	5.99409	3.5493	3.13269	4.12053	2.38519	4.79702	3.25356	4.01058	3.29638	4.34472	7.18411	8.74626	5.89978	7.09862	9.3399	9.46845	9.07862	7.61073	3.9817	4.98548	4.6036	7.08157	6.31085	2.72853	5.7733	5.08105	4.05312		0.0146331	5.47814
0.4766	7.92042	4.8393	3.55622	3.75852	2.72145	5.13846	3.14781	2.63357	3.3447	4.45522	8.43333	7.43168	6.56448	5.1976	9.00348	9.95198	4.66081	4.6934	3.9815	3.25338	5.6224	8.17286	6.41751	6.10246	4.51875	5.95122	3.32213		0.0195136	5.36276
0.5957	6.24479	3.6513	4.9597	3.30602	2.59698	5.43885	3.65688	3.14937	4.88389	4.53912	8.96329	7.91155	7.72759	6.86612	6.39393	8.89986	8.65523	5.3186	3.42943	4.49487	6.8725	8.92063	5.29051	3.63408	5.84001	5.21116	4.51334		0.0243899	5.60628
0.7148	6.88423	3.518	4.58422	4.18542	3.50301	3.51779	4.9157	3.12199	3.95821	4.1982	7.68059	4.01211	5.77811	10.9588	5.24322	3.81042	5.73886	5.48869	2.65703	7.73634	7.43923	6.84551	3.30367	3.73064	4.93914	7.06415	5.32648		0.0292663	5.19036
0.834	6.26302	2.2989	4.04175	4.24559	2.76391	7.60258	2.91282	3.45777	3.58409	2.66715	8.55304	6.60047	3.64377	7.83941	7.56352	6.67108	3.96449	6.95423	2.98124	8.87742	6.01326	4.44661	3.71009	4.65514	2.63663	6.32263	4.87231		0.0341467	5.04233
0.9531	5.89778	4.0095	4.1333	2.97183	3.6296	3.83289	2.34942	3.09309	4.18641	5.22312	6.73658	6.12818	5.73863	4.80959	4.61098	8.69105	6.98142	6.59467	3.63317	6.02733	5.5251	5.89951	4.26323	4.86918	2.81386	10.7955	4.25483		0.0390231	5.09999
1.0723	5.44331	5.3186	3.65937	2.83056	2.99182	3.37775	2.74329	4.2927	4.66086	4.10228	6.11524	6.39741	5.69874	7.37109	4.76043	7.48538	6.44205	4.34439	5.65275	5.811	6.69759	7.68723	4.49956	5.03062	4.13747	7.40512	4.78177		0.0439035	5.1755
1.1914	5.07647	3.6435	3.7923	4.25122	3.26924	7.36936	2.82265	4.88692	4.89424	3.38192	5.45997	7.72197	3.80295	7.2626	8.91183	5.97692	3.6493	5.27617	6.8615	8.60834	6.99042	6.40983	6.2446	3.8933	5.74765	5.45416	4.58525		0.0487799	5.41647
1.3106	6.78959	4.4164	3.85796	4.23319	3.09142	7.44111	3.54137	4.96528	3.05747	2.76312	5.8566	6.02842	3.41682	5.83337	7.25622	7.07275	3.2116	5.52448	5.7407	6.43666	5.89164	6.60347	3.79495	3.64634	7.01211	3.46723	4.25609		0.0536603	5.00764
1.4297	6.47753	3.1391	5.53208	2.85908	4.05918	4.92087	4.82186	3.92791	3.99082	5.21299	4.54398	6.60312	5.89469	8.15321	7.28328	9.31134	5.54205	2.95993	6.87926	3.56788	3.96776	5.63116	2.273	6.33176	5.09636	4.51609	3.554		0.0585367	5.07594
1.5488	5.88946	3.5549	3.72577	3.06676	2.84746	4.36523	5.49548	5.14382	3.42222	5.73957	4.71919	5.26579	5.90235	7.20042	5.90972	7.92287	6.36355	5.01508	9.2427	5.32039	3.51888	6.58931	2.89906	3.2152	3.25207	6.51034	2.74772		0.063413	4.99427
1.668	5.24656	4.0655	4.1085	3.5228	3.17987	3.07155	5.13774	3.93664	2.4956	4.38249	3.22572	7.49968	5.84658	5.91644	3.84737	4.82634	4.32867	5.24354	6.30023	6.012	4.64502	6.07863	3.3745	2.17801	4.02547	6.52854	3.99552		0.0682935	4.55628
1.7871	5.48065	4.2138	4.22447	3.11587	3.20486	3.30841	3.88061	4.24617	3.01535	5.78836	3.17707	4.97703	4.09245	11.9048	7.71743	6.93923	4.722	8.23517	5.82701	4.95448	5.23535	4.49311	3.99695	2.59537	3.44733	5.65476	3.09478		0.0731698	4.87196
1.9063	5.55266	4.7178	2.90158	2.29978	3.37445	4.25607	5.22426	2.76279	3.52503	4.46587	2.64911	7.6476	3.63932	5.76182	9.30141	2.57668	4.09951	7.56057	6.8058	4.80832	3.41071	5.14382	4.2074	3.20621	3.01379	5.93366	5.80342		0.0780503	4.61665
2.0254	5.25316	5.0188	3.09251	3.04272	2.87902	4.0181	5.52854	3.48791	3.09724	3.40097	2.30125	5.13169	5.8601	4.99822	7.99849	4.33157	6.36495	5.73625	6.88226	5.49996	4.41879	7.3755	3.39211	3.01786	3.59071	6.01877	4.96795		0.0829266	4.69279
2.1445	4.74895	4.2461	2.81345	3.03361	5.40793	4.08383	7.19355	4.16457	3.2222	3.57504	3.11233	5.54863	4.75731	5.15185	7.6785	8.71108	7.31629	6.00064	5.1606	3.30947	6.05563	8.50924	2.67597	1.90616	4.04965	5.46467	4.74169		0.087803	4.91255
2.2637	5.66821	3.9915	2.39066	4.36236	3.65251	5.20273	5.67841	3.5845	2.23001	3.78327	3.59971	4.43311	6.45776	4.91699	8.29687	4.11976	6.37238	6.33519	5.01662	3.71252	5.54184	7.46686	4.38344	2.35919	3.20252	5.07727	4.93165		0.0926834	4.69511
2.3828	4.56303	4.9694	2.64598	5.57791	4.68539	3.93884	6.40389	3.62403	3.20436	6.0051	2.41157	6.458	5.37004	7.03427	8.49947	6.10064	4.59117	6.62636	5.48618	5.91338	4.21187	3.80708	3.28236	3.18785	2.07379	5.58787	5.6029		0.0975598	4.8838
2.502	3.43598	2.9004	4.20954	5.99226	2.79816	3.7265	6.37767	4.51092	2.57686	4.66568	2.48363	3.47581	3.12171	6.76412	4.24178	2.99404	4.06728	6.10004	4.48477	4.53792	4.62742	5.01177	4.89331	4.63124	2.72753	5.65857	4.25635		0.10244	4.26931
2.6211	4.00174	4.0753	3.47762	6.33556	3.82474	2.96812	4.81932	5.87457	6.57281	5.7422	3.2081	3.21466	5.43125	6.00933	6.95079	5.43251	4.43866	5.7206	4.07304	3.53944	4.3263	5.34122	3.8427	3.30483	3.68607	2.97781	6.10272		0.107317	4.64044
2.7402	4.63792	3.169	3.14056	2.36158	3.83017	2.25931	6.58398	3.89965	6.59375	5.35881	3.97873	4.70549	2.51655	4.62826	6.16693	4.15606	2.92064	5.19337	3.53837	2.56981	4.69179	4.64151	5.21034	2.90529	4.55177	6.20735	6.53942		0.112193	4.33172
2.8594	6.15313	2.6598	2.94134	2.06974	2.82606	3.3881	6.26256	3.58465	6.40543	4.04113	4.7771	5.91049	5.15024	4.59069	7.04695	5.51911	4.13227	7.61028	3.13019	2.61681	3.84076	6.08311	5.22591	3.10664	4.27271	5.37644	5.90698		0.117073	4.61587
2.9785	5.36377	3.3154	5.6088	4.27284	2.93518	3.21764	5.64089	3.21199	4.47255	3.7991	4.09844	5.0539	4.18863	7.50765	7.36625	3.22407	3.69384	4.76744	5.49187	3.40502	4.07732	5.14753	5.12054	3.39409	6.31707	4.72335	5.91296		0.12195	4.64178
3.0977	4.11792	4.1643	4.01811	3.0238	3.58754	2.13024	3.83775	5.91621	4.20419	5.68851	3.5511	2.60035	3.1642	4.71283	5.37038	3.09703	3.49892	4.39785	5.57041	4.62151	5.31694	3.5453	2.92797	2.48272	5.86942	3.85071	4.4262		0.12683	4.06268
3.2168	4.20487	4.5816	2.57315	4.1729	2.2108	2.73231	3.33759	5.17482	6.36307	7.22773	2.41816	5.45805	5.51172	3.51443	10.1778	3.45781	2.43898	4.73091	5.05364	3.60047	3.64796	3.94512	3.44861	2.92725	3.29012	3.86601	2.82339		0.131707	4.18108
3.336	2.7326	3.9913	3.71505	2.47613	3.37812	2.54804	3.43277	4.75194	3.18103	5.25653	1.95195	4.7977	6.81046	7.13181	4.48159	2.65972	3.3882	4.92887	3.83025	3.71703	2.60873	4.88425	3.97666	4.58383	4.41851	3.5517	5.1928		0.136587	4.01398
3.4551	3.99553	4.1404	5.32706	3.95488	4.70356	3.49486	4.09377	3.98567	3.83629	4.39987	2.66698	5.51819	3.80013	6.15829	6.01152	3.28829	4.19236	4.41303	7.05435	4.95222	2.31984	5.10999	3.69846	4.26108	3.49664	2.32808	4.97879		0.141463	4.30297
3.5742	5.52368	5.4959	5.24649	4.93324	4.87444	4.60224	3.05415	4.10905	6.93072	6.56193	3.69978	6.88669	2.13492	3.25254	11.8315	3.52618	6.44123	4.52492	4.3085	7.19749	2.90748	4.64857	5.53174	5.90807	2.992	6.08439	4.51209		0.14634	5.10074
3.6934	5.90245	4.9075	4.47938	2.97001	5.16124	2.95097	5.54601	4.65585	4.99832	3.97555	4.00803	6.84085	3.14338	3.63949	8.55671	4.04682	4.31531	3.04794	3.3932	4.7238	3.74338	3.5138	5.37521	4.43363	2.90146	5.13561	3.6773		0.15122	4.44604
3.8125	3.82911	3.7489	4.41048	2.89779	3.08823	5.69672	4.16151	4.39875	3.48154	3.00779	3.77896	5.06041	3.84921	5.87831	7.32138	4.02818	4.31401	4.131	3.38929	4.19667	3.79719	6.18181	4.03854	5.50336	3.00909	6.60941	5.32238		0.156096	4.41222
3.9317	6.32559	3.3323	3.87901	3.52976	2.26885	5.59968	2.78625	2.94864	2.75245	3.10821	4.83049	3.11504	2.84499	8.80191	6.57133	6.62532	3.27016	3.50775	3.96844	3.29596	3.61758	6.13328	2.69578	3.77579	4.58999	5.16629	6.03347		0.160977	4.27312
4.0508	4.96265	4.9462	2.81165	3.33081	2.49229	5.09615	3.41627	3.98519	3.65818	3.933	2.80692	3.35752	3.25293	8.30809	8.42391	6.50963	3.88927	4.30762	5.56307	3.09896	2.40158	3.31949	2.91669	4.0951	3.53806	7.04777	3.74666		0.165853	4.26725
4.1699	5.71644	4.1481	2.52109	2.59343	2.88476	5.8229	2.36003	3.91692	5.0004	4.7637	2.39589	4.71953	3.51775	3.33511	9.89262	3.13095	3.34686	2.42126	6.32901	3.16821	4.47301	2.9689	4.28051	3.84557	5.32159	6.45934	6.00849		0.17073	4.27194
4.2891	4.97681	4.2441	3.44163	3.44747	3.7488	4.92897	2.71134	3.59219	4.63697	5.28988	4.29243	6.17255	3.5346	5.03336	5.61347	7.46106	3.14735	6.00374	4.34326	4.0732	3.38379	4.99154	4.68828	3.07276	5.22296	4.0464	4.38638		0.17561	4.46242
4.4082	5.38681	3.7638	2.98545	2.43544	2.41004	5.71061	2.87888	3.4978	2.78427	6.48312	3.59931	5.41662	5.33948	3.01262	6.5955	3.5204	2.10636	6.9795	4.42402	3.59067	5.11833	4.66592	3.26156	3.65518	7.5107	4.66057	4.30646		0.180486	4.29998
4.5274	4.67187	2.9079	3.7988	3.0411	3.52416	5.17716	3.75817	2.10477	3.12308	3.27829	5.65322	3.13175	4.70957	3.36748	6.80849	4.29687	5.2523	3.96056	4.3369	6.10277	5.41945	5.328	4.69957	3.76162	7.69606	3.40684	5.09348		0.185367	4.38556
4.6465	4.83511	2.3544	3.61912	3.51946	3.68396	5.14227	3.51729	2.77695	4.74105	3.49307	4.12125	4.66594	4.72635	3.94081	4.61422	3.45654	5.19893	3.54553	3.46173	6.54665	5.38568	4.15122	3.71562	4.61315	4.84923	5.09541	5.44131		0.190243	4.26712
4.7657	6.08566	2.689	2.78564	3.5137	3.5176	5.17414	5.47245	4.27149	3.04371	3.66032	4.17522	5.04921	5.50264	3.38601	9.27365	5.75814	4.60498	5.0938	3.86712	4.06231	4.70267	2.74648	5.51927	3.03261	4.07644	7.02998	4.20312		0.195124	4.52953
4.8848	3.64249	2.774	2.87053	5.61592	3.10184	2.93273	4.27384	3.95883	2.94398	4.03043	5.99205	2.61812	3.62883	2.87923	7.03508	5.22741	4.67842	6.32267	3.39866	4.27974	4.86415	4.93356	4.24546	3.95458	4.50854	6.54671	4.83196		0.2	4.29962
5.0039	2.92047	3.2504	4.55376	4.08367	5.09155	3.71135	3.27306	5.08504	2.50527	4.94492	4.75365	2.51013	4.0102	3.87361	4.5209	5.59646	3.39777	4.72484	3.29457	6.78375	4.97376	4.01836	4.05004	4.28113	3.68313	5.2211	4.87289		0.204876	4.2217
5.1231	4.99677	5.2858	3.78865	4.68522	4.18393	4.43493	4.16347	4.36778	3.88415	3.29468	3.24832	4.95844	3.07099	4.22261	6.18825	5.48613	4.72205	3.91275	2.94223	5.0533	2.69261	3.20276	5.4514	2.84574	3.98795	5.301	6.4631		0.209757	4.32722
5.2422	4.55323	3.8917	3.86292	2.28026	4.90716	3.41581	2.65089	4.75082	3.90989	2.86056	3.16568	7.28083	4.89496	5.53307	8.72609	3.38878	3.43128	5.11802	3.27551	6.79649	3.22146	3.7898	7.62319	2.91069	3.00241	5.04487	5.58092		0.214633	4.43953
5.3614	3.96354	3.211	3.47519	3.83922	7.10685	2.0047	3.04154	3.25605	3.38494	3.24561	2.99429	6.65894	4.90937	4.33572	6.57505	2.8882	3.76403	5.08826	4.75749	4.92852	4.521	3.71473	4.93448	4.53015	5.16182	3.89528	3.18002		0.219514	4.19874
5.4805	3.75028	3.103	3.98916	3.94802	5.00051	1.86577	2.7313	4.24525	5.58282	3.26001	4.12536	4.21796	5.69482	4.71822	7.65121	4.01154	6.31275	3.96226	2.07953	4.08305	5.02208	2.84628	4.79049	4.62948	7.89366	4.13405	3.03051		0.22439	4.32146
5.5996	4.01215	5.5698	3.68229	3.41963	5.15003	2.9585	2.1623	3.16114	4.90259	3.79224	3.36876	4.09645	6.01868	5.50241	6.51568	5.00768	5.1266	3.89776	2.77947	5.62374	4.7094	5.14622	3.97741	4.77473	7.0459	4.77384	3.32117		0.229266	4.46284
5.7188	3.94064	5.8357	3.18672	2.67357	3.13198	2.81222	2.24748	5.25853	4.39399	3.46044	3.32946	3.36299	4.32256	5.31971	6.76826	4.32642	4.35281	3.16202	2.79965	5.94784	4.56985	3.19037	2.45212	7.10654	5.25727	4.31164	3.12636		0.234147	4.09804
5.8379	5.92799	3.8768	4.29502	2.32164	5.18192	3.9942	4.35827	3.14265	4.09681	4.8299	4.21733	3.61499	4.15859	4.16002	5.05607	5.58636	4.21417	6.40927	3.64533	6.62484	4.6756	2.89181	2.44548	4.16648	5.38361	4.79945	2.34705		0.239023	4.31191
5.9571	8.0362	4.9358	3.34614	5.30279	4.18388	2.94996	4.06233	5.57476	3.76046	3.36818	4.05207	4.1315	4.952	4.72454	4.62303	5.63851	3.87616	3.69069	4.67992	3.85895	4.45373	3.91493	3.02677	3.96892	4.21463	4.18105	3.55929		0.243904	4.33582
6.0762	6.07002	5.3063	5.12299	2.95059	4.22361	3.31133	2.80863	2.81738	4.9741	3.043	2.80109	4.71482	6.34871	4.40956	5.19165	5.59368	3.5938	5.92079	2.86984	5.82182	5.76958	2.7993	3.51227	6.24913	6.95219	6.95502	4.58023		0.24878	4.61894
6.1953	7.18249	3.5102	3.30317	3.22124	4.41387	2.8583	3.15485	3.39485	2.86467	4.8627	2.16175	3.21727	4.09688	5.1283	6.17407	5.49394	6.47761	4.44982	6.84957	3.84699	5.96729	3.46772	4.08505	3.06682	6.29377	6.77864	3.20015		0.253656	4.42674
6.3145	6.01175	3.4008	3.7765	3.92202	5.20031	3.98546	2.80127	3.20961	4.52555	4.06832	2.2195	2.61839	6.88885	4.53405	4.80698	6.19164	4.50345	4.31474	7.97599	4.48345	6.56714	3.20674	4.37673	2.99624	4.23802	6.27154	3.53286		0.258537	4.4677
6.4336	4.3044	4.3748	5.96119	3.44615	3.11489	4.56778	3.02231	2.65745	4.76225	3.3694	3.85865	4.36151	4.40519	5.55088	7.73089	5.33568	5.38544	3.67714	3.94424	6.00473	6.23737	3.41332	2.94056	4.77647	6.19649	7.66092	4.12174		0.263413	4.63636
6.5528	5.41133	8.2412	6.03304	4.05097	2.80044	2.81631	3.45432	3.50922	3.35359	3.42611	5.22314	4.96175	3.69643	4.70603	7.31039	4.7771	3.85871	4.49932	3.7609	6.76645	5.74778	2.91917	3.59045	4.17851	4.29744	5.97635	3.8895		0.268293	4.56504
6.6719	5.31584	8.6871	4.39915	3.57369	3.65156	2.05973	3.50302	6.68078	4.0139	3.89682	2.98582	4.6414	5.37977	4.62068	6.06339	6.3469	5.02738	3.78218	5.69405	4.29284	3.86321	3.33756	3.04168	2.39114	5.72162	5.7928	4.04053		0.27317	4.54832
6.7911	5.75337	12.0337	4.30369	2.63388	2.73474	2.83305	2.77025	3.62478	7.12184	4.91059	3.5841	3.15963	6.722	6.75077	7.72441	5.39886	3.9507	5.80616	4.30427	3.20588	5.40593	4.85669	3.32661	3.92794	6.82367	7.42033	3.74383		0.27805	4.99377
6.9102	3.90447	12.3848	5.44395	2.69609	4.46781	2.95921	3.21014	2.67683	4.12991	4.33315	3.52995	3.90086	8.86781	5.68878	5.48987	6.24197	5.79445	5.06281	5.04547	2.89352	5.16814	4.19788	2.90842	4.6316	6.16148	5.96879	6.64906		0.282927	4.97805
7.0293	2.65016	9.863	5.74644	3.463	4.49807	3.63086	4.50681	2.79243	2.88515	3.02547	3.45971	4.15653	5.97583	4.62546	3.10781	6.04928	6.14609	4.57403	4.02743	4.96737	3.27733	2.92019	3.80718	4.10141	4.20805	5.0918	6.28328		0.287803	4.43852
7.1485	4.99029	8.3595	6.25949	3.91463	2.95103	4.0829	3.98404	2.62891	3.39292	2.73834	4.8685	3.61616	3.93079	3.05554	4.87468	4.6628	4.80608	4.97235	5.92267	3.9212	6.07814	2.84012	3.85594	2.34115	5.26852	7.08366	6.57228		0.292683	4.5175
7.2676	6.82033	6.1251	3.40001	5.01931	4.06424	3.4487	3.78531	3.49466	5.56317	5.26708	3.38326	3.44552	2.4212	2.84953	3.60396	5.21174	3.94412	4.61634	7.75108	3.57328	5.68771	2.19856	2.94197	3.71888	3.10919	6.09433	5.13093		0.29756	4.32109
7.3868	6.69538	6.4032	4.37681	6.24916	2.91152	3.32258	2.89841	4.61579	3.58929	5.28408	2.63865	4.80891	6.08068	4.04148	5.2822	5.44078	6.16708	4.65094	7.6653	3.94561	4.79017	3.79316	3.22164	3.77847	5.02663	6.10932	5.68278		0.30244	4.79519
7.5059	6.56146	3.4797	3.91473	4.62183	3.1798	4.18413	4.19115	4.99039	2.73616	5.21029	3.12178	2.97408	7.34823	4.63155	6.91216	6.68635	5.16353	4.2262	4.67308	4.21842	2.02559	3.07375	3.27647	4.61666	4.61403	5.5766	4.39928		0.307317	4.46694
7.625	6.60632	5.1148	5.11667	3.82412	2.92533	3.6605	3.16229	3.64986	2.4908	6.10346	3.59125	4.82679	4.16965	3.55651	7.6811	6.18685	4.82774	4.83453	7.07464	3.43965	2.47795	4.27801	3.76794	4.41391	3.84408	4.23965	7.76702		0.312193	4.57894
7.7442	5.61614	4.1046	4.91052	4.67515	4.57754	3.22271	2.68703	3.54333	5.31071	5.31987	3.8573	4.08878	2.33509	3.29289	6.91359	3.55661	5.07058	3.07888	6.63675	4.81912	3.28334	4.39925	4.55984	4.72303	4.44349	5.99301	7.49344		0.317073	4.5375
7.8633	4.44293	6.1609	3.48528	7.38699	6.15803	3.53353	3.01711	2.81283	4.31053	4.33302	3.62387	3.96552	4.08476	6.07198	5.77965	4.59644	3.72366	3.30235	4.19983	6.56671	3.64418	4.82654	2.10356	5.77371	4.25857	6.72528	7.78976		0.32195	4.69176
7.9825	5.78668	5.5559	2.36377	4.34672	5.75923	3.59245	2.71595	3.58911	4.74471	3.49308	5.35865	3.52424	7.88536	6.1203	6.13431	5.95905	4.1704	4.55264	6.00965	3.78508	4.59932	8.01071	4.04182	3.24173	4.84668	4.73411	6.69428		0.32683	4.87466
8.1016	5.35143	3.7907	3.61842	6.53084	4.90788	3.23824	2.2388	6.18514	5.28386	4.69958	2.97943	3.73492	4.85427	5.24347	5.63669	4.03781	4.93756	3.6182	4.56203	3.52679	4.50378	5.8771	3.10158	4.23877	4.25141	8.64495	5.73422		0.331707	4.64177
8.2207	4.08677	5.9574	5.71965	5.89701	3.34088	3.25598	3.01013	4.97171	3.04315	5.48397	4.60847	3.38833	4.18765	5.14761	4.7734	4.41537	4.30915	3.61519	5.26326	6.56848	6.13195	5.34193	3.53953	3.4226	5.34255	6.5261	5.48473		0.336583	4.69752
8.3399	6.03315	3.9917	4.76092	3.57741	2.91193	2.41687	4.27115	2.77748	3.15521	6.01254	4.02566	3.82418	5.56522	4.89151	4.50464	5.58834	5.04249	4.84991	3.18822	5.86203	4.25272	6.03931	3.18902	4.95764	4.52139	5.96433	5.8871		0.341463	4.52082
8.459	6.2748	4.2847	4.61327	4.84837	4.43504	2.12023	2.58772	2.56295	4.45543	5.66738	3.70353	4.61739	4.60549	3.38087	8.43793	5.41878	5.56862	3.9085	2.21047	7.01571	4.34979	3.47645	4.15477	4.778	5.77844	4.76663	4.54076		0.34634	4.53933
8.5782	4.55266	6.6933	4.96439	4.0864	3.64745	3.01529	2.45313	2.29964	4.27416	2.9703	4.30459	4.22758	5.07684	2.75052	6.9899	6.38998	5.02592	5.94734	2.5889	6.45908	5.03443	4.15743	3.42572	4.49003	5.32272	6.74567	3.58132		0.35122	4.49906
8.6973	6.27712	4.8174	5.49596	4.51794	4.22447	4.53181	2.46121	3.38284	2.81743	4.48052	4.08191	3.32529	4.7937	4.3704	7.41927	4.22416	4.52099	5.3593	2.20249	7.5644	6.03546	6.15581	5.07976	3.94221	6.01244	6.15539	6.78041		0.356096	4.85297
8.8165	3.35775	7.1723	7.10698	9.38244	3.15755	3.76231	2.02021	2.81589	4.11163	3.67761	4.77641	4.32856	8.45863	5.1594	6.315	3.7545	5.74196	4.46964	2.31578	4.7086	6.93882	3.67529	3.70754	3.49488	4.57421	5.7676	4.70338		0.360977	4.79462
8.9356	5.43119	4.7451	3.90902	6.27756	4.37504	3.13948	2.22782	3.48063	3.3444	3.3837	4.66217	2.40212	5.35629	3.32228	5.85595	5.75336	3.71764	3.43653	1.91098	4.78012	4.72138	5.618	5.89448	4.61169	6.60208	5.65417	4.92282		0.365853	4.42726
9.0547	4.21712	3.5771	2.61371	7.49363	4.52892	3.05503	2.27092	3.49021	5.23125	3.02069	5.80894	3.89807	3.40209	3.55202	5.77573	3.77662	2.58047	2.58012	2.69421	5.62807	4.33267	3.9164	6.2364	3.81083	6.8172	5.37436	7.67763		0.37073	4.34668
9.1739	4.81815	4.3396	4.04022	4.66597	4.43057	3.19828	2.55865	3.51313	7.1588	2.84878	5.71795	6.55274	3.17688	3.56819	5.70632	3.26467	2.19335	3.46433	5.46731	4.62349	4.33472	4.53237	5.45332	4.43155	9.09739	6.17296	6.75571		0.37561	4.66983
9.293	4.58645	4.4167	2.60903	5.48619	8.68727	4.98185	2.63597	3.84562	3.94839	5.19697	4.85767	3.51952	4.22453	3.89576	8.40946	5.47442	4.88064	4.06512	6.11122	2.59161	5.96572	2.40182	3.30375	2.26044	5.78228	4.62241	5.74481		0.380486	4.61132
9.4122	3.045	6.326	3.3189	4.94287	6.96876	2.70493	3.04149	3.50512	4.21958	3.32224	5.17402	4.07361	3.54204	6.16363	7.55844	3.37616	6.02392	3.9841	4.12332	4.27287	7.00173	2.41508	7.21459	2.27582	4.57388	3.77055	9.32705		0.385367	4.67651
9.5313	4.88426	5.7517	2.82324	3.21002	3.16454	4.31518	3.16269	3.55863	4.69609	3.47973	5.46807	4.36437	6.42707	3.20041	5.95677	6.31694	2.85782	3.3593	4.18026	5.2274	5.65052	3.44357	6.121	2.74629	7.99871	3.79677	5.93855		0.390243	4.52222
9.6504	3.9138	4.3828	3.32838	2.70547	3.39477	3.66527	2.77701	2.94761	4.00032	3.89639	5.8437	3.62665	7.76367	5.4344	5.45531	3.23159	3.2331	2.8947	4.14438	5.46082	5.0397	3.24089	5.13347	4.73594	5.82165	4.93814	4.76518		0.39512	4.28797
9.7696	6.39677	4.1252	3.10937	4.41378	4.0367	3.58835	2.72052	2.65072	2.75965	2.825	3.14473	2.75275	5.77562	3.23597	3.0064	3.59596	3.26378	2.52117	3.0995	4.91473	4.14461	3.51124	3.84122	5.72511	5.08996	4.37152	3.39761		0.4	3.77844
9.8887	6.38023	4.7232	2.7183	4.63292	4.09112	4.5909	2.5159	2.28261	2.62177	3.25402	2.59696	3.02335	5.18705	3.95004	5.38431	6.23727	3.0169	3.46415	4.06833	3.76639	4.90422	5.54368	4.15399	4.66667	7.48405	6.74837	4.43318		0.404876	4.31259
10.0079	3.31407	6.1789	3.35254	3.68804	3.35322	4.60136	3.12339	4.10304	4.53105	2.22497	2.96717	2.92657	4.3551	4.80585	2.91221	4.14631	6.51292	2.55112	2.90888	3.12238	4.24204	4.15884	3.57241	3.79907	6.35648	7.42393	4.04346		0.409757	4.04723
10.127	3.00645	4.3456	3.32688	4.16936	2.67829	2.67471	2.44154	4.96299	3.46211	3.84861	4.45369	4.94528	5.22984	4.92737	3.71905	3.95341	3.87195	3.00158	3.13839	3.56541	3.10449	4.95649	2.34286	2.9832	7.11493	6.10024	4.41676		0.414633	3.95339
10.2462	2.44036	6.2994	4.65137	2.31038	3.61289	4.57188	2.00059	4.63816	6.03815	3.70555	2.93911	3.97965	4.2927	4.48093	7.27839	5.08411	4.34186	3.7411	3.42778	2.98594	3.55781	2.85752	4.15264	3.72891	4.72627	5.37191	2.46176		0.419514	4.06212
10.3653	3.66779	4.8485	4.09736	3.34703	5.63796	4.04119	1.85444	4.29371	3.48107	4.43052	2.56227	2.90108	4.29849	3.39321	5.76265	4.74538	5.30534	4.26167	3.89554	2.84681	5.0508	4.26375	3.86463	4.67997	4.61007	4.74208	3.02907		0.42439	4.07083
10.4844	4.92167	4.2934	5.50397	4.69673	4.29768	3.38068	3.09621	2.95112	2.27109	5.93476	2.44175	2.65972	2.42481	4.52203	4.79936	4.76276	6.3125	5.86812	3.11306	2.53384	4.29066	4.42795	4.1482	4.90077	4.80748	5.38872	3.79943		0.429266	4.16846
10.6036	4.66068	4.5301	4.01126	3.58916	4.00243	2.73997	4.20865	3.25991	2.73336	3.82041	2.48088	3.32071	3.30978	4.52245	5.17031	6.28454	6.75665	5.801	3.12675	2.90496	4.64225	2.79393	5.32509	4.40077	4.77974	5.41089	5.00194		0.434147	4.20698
10.7227	4.72184	2.93	2.53044	3.29867	2.85829	2.59333	2.88747	3.58921	5.92685	3.7055	3.9689	3.41767	3.71524	4.81995	5.03459	5.07241	5.76376	4.36761	5.81729	2.89613	3.47075	3.1564	4.58745	5.61522	5.23196	4.14462	3.86161		0.439023	4.07345
10.8419	3.18429	5.0035	4.84171	3.08675	5.30538	2.69961	2.44274	2.13756	7.1902	3.75935	4.45468	4.25893	2.33569	4.5078	6.21331	5.92396	6.30232	3.21878	4.08286	4.10783	4.34097	2.36363	5.8216	2.60897	3.43976	4.03787	3.00392		0.443904	4.09904
10.961	2.77298	3.0706	4.86056	3.16641	4.18906	4.7363	2.58298	3.73769	2.75816	4.33928	4.28165	5.12415	2.057	5.81676	5.47129	3.86775	3.67979	3.77569	3.75154	3.40692	4.80238	3.86338	6.182	3.019	2.5489	4.72497	6.48261		0.44878	4.03962
11.0801	5.17322	4.8265	4.55848	2.99567	3.92212	3.94707	2.61939	2.85998	3.72291	6.52345	3.44093	2.78561	2.49698	5.20755	3.97118	4.50292	2.92904	5.37649	2.90011	4.45541	3.17937	3.67019	4.59533	3.57369	2.60129	4.87443	5.56751		0.453656	3.97322
11.1993	4.58873	3.3902	3.4784	2.80644	5.22311	5.45104	1.96932	2.78796	6.04291	3.24296	3.03328	3.29878	3.09551	6.51005	4.3773	6.23003	5.03689	4.7757	3.82771	7.02449	3.35285	2.96907	2.69655	3.96417	4.1959	3.97645	2.62965		0.458537	4.07316
11.3184	3.56643	5.6236	3.16986	3.68292	3.62561	5.57166	2.36113	2.30412	5.37956	3.2264	2.71404	4.79693	3.77205	3.5467	4.59909	7.06256	3.98204	4.60942	3.78543	5.82951	3.91757	4.1947	3.41461	3.42602	6.65986	3.76064	3.26994		0.463413	4.14268
11.4376	4.15586	5.8173	2.51044	2.43817	5.02891	4.19577	2.31329	3.84789	4.78622	3.71527	2.30202	2.75942	3.02872	5.27959	4.40834	4.49374	4.43108	5.48203	3.28771	5.58937	5.78662	6.0667	2.98504	4.67923	5.70025	3.01482	6.22417		0.468293	4.23437
11.5567	5.34324	4.4195	3.01996	3.03059	3.50003	5.47868	2.78718	2.12056	6.12936	4.36246	3.89026	3.5629	3.28869	6.64106	5.00335	4.80977	3.60651	6.08908	5.72449	3.43931	5.11788	4.75423	3.99618	6.26658	5.04338	4.71698	5.54818		0.47317	4.50705
11.6758	5.73559	4.9594	3.30755	2.15958	3.2418	3.71236	2.80046	2.3006	3.85434	2.68102	5.72247	4.83546	3.34099	5.16306	5.95339	3.85236	2.96931	6.35889	5.81629	2.74581	3.60583	2.36996	3.56067	5.30139	3.04913	4.35349	3.91962		0.478046	3.98781
11.795	5.52771	5.4647	5.12788	2.78379	2.61451	6.18794	2.72333	2.0607	4.56908	4.49956	3.68436	2.6777	3.64951	4.82999	4.55494	3.85472	3.86211	6.80811	3.36268	4.57938	4.11055	2.40598	2.79209	4.44372	2.53223	2.47545	2.71031		0.482927	3.88493
11.9141	3.79911	2.5339	4.5784	2.54171	3.47763	2.67024	2.88864	2.85032	5.50143	3.71303	3.91806	3.55791	4.61692	4.37463	4.8358	3.88808	2.9283	4.80795	3.91388	4.04712	4.33894	3.44062	3.25006	2.56775	6.1988	4.66383	4.27338		0.487803	3.85839
12.0333	3.59308	3.7683	4.21541	2.92071	4.25951	3.38697	2.81445	2.1375	5.89341	2.58197	2.76094	2.55093	3.57883	5.75703	6.48106	3.42352	2.73856	4.85427	4.0413	2.82254	2.83437	2.97685	2.71038	3.91119	4.78577	8.10883	5.94996		0.492683	3.92065
12.1524	5.57943	4.2739	5.92168	2.05163	2.5935	5.28991	2.65485	2.23662	4.54418	2.82599	2.22724	3.55205	4.07798	3.98922	4.72145	4.89895	3.08491	3.90817	4.67066	2.11425	4.98563	3.17824	2.69731	4.23048	4.17425	5.67471	4.58867		0.49756	3.87948
12.2716	4.80737	4.3792	2.57361	3.08327	2.91698	3.72932	5.51385	3.39724	3.63874	3.52426	4.67119	4.17883	3.57063	4.69882	5.83329	4.95773	3.00585	4.83757	3.01538	3.28509	3.29637	2.77461	5.57273	4.12247	5.07857	3.77777	4.25805		0.50244	4.01847
12.3907	2.41923	4.641	2.83898	2.89626	3.83404	5.47523	2.97492	2.58723	2.85626	3.03624	2.85189	3.7656	3.01087	5.88131	3.42608	5.12133	3.02655	5.7267	4.67663	3.50982	3.42017	3.67702	4.16637	4.06889	4.74398	3.01984	4.38022		0.507317	3.77899
12.5098	2.05843	5.0331	3.79037	2.36019	3.17223	2.71493	2.43357	2.51817	4.82413	3.34436	4.24279	3.75137	3.48	5.24157	6.50642	4.02511	2.578	4.79433	4.62859	3.53683	3.83433	3.3588	3.91269	3.68585	3.35808	3.81706	3.7212		0.512193	3.73046
12.629	4.26639	6.6281	3.24202	2.05802	3.29354	4.46495	2.58111	2.83888	4.039	2.12083	4.26994	4.30617	3.47997	4.17402	5.18593	7.76876	2.38278	5.42085	3.57337	3.50545	3.71339	3.45654	3.88014	4.46138	3.6547	2.51784	3.95709		0.517073	3.89782
12.7481	3.85276	3.329	3.5412	3.0871	2.94784	3.68676	2.44984	2.45317	2.71332	3.316	2.91401	2.21358	4.67518	4.46628	3.99875	4.19404	2.59332	3.48771	2.4148	2.22792	2.49899	4.68679	4.28338	4.52421	3.79905	5.22213	5.30894		0.52195	3.5143
12.8673	3.96422	3.1943	2.4484	2.47029	3.37129	4.93964	3.16507	2.08709	2.18768	3.43543	3.81249	3.60561	4.1574	4.00273	6.47338	4.64099	3.89816	3.51431	2.57552	3.81825	3.15517	5.07059	2.94318	4.69342	4.19327	4.63954	5.75881		0.52683	3.78579
12.9864	3.42486	3.4126	3.73289	2.84965	2.78722	4.15276	2.36723	2.62589	3.74145	3.89659	3.22165	3.1678	2.9334	3.46597	7.4066	5.03391	3.319	3.42679	3.85643	4.46129	3.46241	4.29872	3.51947	3.47805	4.92704	5.3501	4.84166		0.531707	3.82079
13.1055	3.34859	3.8712	2.73008	3.19686	1.85077	3.65002	2.68221	2.82531	4.91912	3.81622	5.15196	2.6229	5.08525	3.58802	5.4897	5.0237	2.62529	3.20173	4.5746	3.5475	5.16121	4.32885	2.21729	5.69067	6.35447	3.29707	5.85577		0.536583	3.95209
13.2247	5.65139	3.2549	4.09025	4.0398	2.70077	4.01536	2.55933	2.55813	4.16986	4.0304	4.20636	2.57698	4.20548	3.14262	5.11297	4.21107	3.35572	3.91803	4.03251	3.71504	4.56325	3.9824	3.70288	5.60099	3.48929	2.82743	5.00456		0.541463	3.87844
13.3438	7.3438	3.0063	3.73383	2.98355	2.64258	3.74699	3.32524	2.63035	4.44647	2.77038	3.67494	3.72106	4.70508	4.66537	3.81272	3.70214	3.98805	3.6662	4.11137	4.59764	4.06574	3.16554	4.19531	3.94218	4.05078	4.67656	7.34773		0.54634	4.02659
13.463	3.65957	4.1808	4.54897	2.04204	3.71439	5.83581	5.42936	4.23912	5.78617	3.94244	3.87478	5.08694	4.63312	5.4214	3.39653	6.59387	3.25854	3.46278	4.54357	2.18484	4.94359	4.28462	5.01338	3.80788	4.70154	3.72259	2.88622		0.55122	4.26648
13.5821	5.27684	5.7505	6.31462	2.60799	2.96795	4.048	3.14524	2.65888	3.99604	3.03186	4.34343	2.83342	4.92589	6.80328	4.83454	3.61801	3.04063	4.21753	3.38921	2.10888	5.21177	3.59025	5.64757	4.25435	5.97907	2.1849	2.81746		0.556096	4.05919
13.7012	3.4456	6.0303	4.08906	2.41118	2.47069	5.3818	2.58822	2.03289	3.96225	5.80569	3.91224	5.12984	4.26842	9.54761	3.95749	3.39136	3.02559	4.90992	5.29416	2.08127	4.69467	3.23816	4.53008	4.19984	5.4744	3.46205	2.63137		0.560973	4.14689
13.8204	3.37338	4.8877	3.85944	3.8249	3.19421	5.54899	2.9161	2.6649	5.00844	3.38264	3.34642	3.45777	2.61403	7.05241	5.61389	4.01963	3.32128	3.71874	4.62252	3.56019	4.39101	3.36309	2.5587	5.68022	5.17184	3.38745	4.58214		0.565853	4.04156
13.9395	2.93345	3.5826	3.05272	3.45537	3.36015	3.94002	2.58334	3.26222	5.87601	2.61734	4.12099	2.54325	3.30765	4.01435	5.92088	5.25013	5.91717	3.3359	3.43558	2.28482	5.14474	4.3272	3.07114	7.5378	6.24979	2.42159	4.75482		0.57073	4.01115
14.0587	3.70467	4.0372	3.25205	4.09535	3.29804	3.42508	4.9846	3.57948	4.36888	4.43749	3.79579	2.70224	3.45314	6.85631	3.37553	5.53343	5.03813	4.23045	2.9783	2.01854	2.41278	2.20339	2.7815	7.06591	3.70975	2.15429	2.38264		0.57561	3.77315
14.1778	2.23536	4.8856	4.22338	3.08509	4.16382	4.28929	4.2157	3.50154	2.85437	4.64907	4.07517	4.28942	2.71989	6.35813	4.49255	5.41153	4.25531	2.38477	4.5503	2.94777	2.15984	2.99498	4.31056	5.22871	2.67409	4.36216	3.48517		0.580486	3.88161
14.297	3.48291	6.433	3.15981	3.11606	4.19848	2.96693	3.91201	2.8128	4.00579	3.28427	3.53147	3.13525	2.6558	5.63575	3.97256	7.57056	2.95122	3.39838	5.14664	3.54185	2.64093	2.72062	3.46489	3.64541	3.60783	4.13455	2.55007		0.585367	3.76577
14.4161	3.37917	5.055	4.04262	2.98333	3.66765	3.23216	4.76932	3.47923	6.60093	3.50186	4.82963	3.65655	2.20152	6.54169	3.43167	6.20678	2.59659	3.17879	4.26499	3.07873	2.83641	5.92719	2.51298	4.95022	3.47972	4.05913	3.08446		0.590243	3.98327
14.5352	3.74609	5.2058	4.79733	2.0688	2.25574	4.59341	2.72722	2.1852	6.22878	3.99577	4.51614	3.55834	3.96249	4.30892	5.02463	3.86274	2.178	2.5455	5.35262	4.2482	2.57698	3.05628	2.50589	4.49445	3.38012	2.91612	4.70788		0.59512	3.74072
14.6544	3.67744	2.9443	4.14385	4.22383	2.85877	6.05433	2.61254	2.01012	6.11506	2.56951	4.30926	2.61396	3.72322	3.7655	5.35526	5.51282	4.35984	3.82994	4.63198	4.79676	3.96504	4.41189	5.01128	5.23	2.97147	2.63187	2.79411		0.6	3.96755
14.7735	4.333	4.0786	3.57683	3.75762	3.01508	3.83531	3.35945	3.41393	2.38909	2.74181	3.58697	4.04573	3.6493	5.23186	3.44337	3.75475	3.84217	5.39616	3.25424	2.95619	2.8743	4.55577	5.16823	4.32087	3.56165	4.76263	3.25755		0.604876	3.78379
14.8927	3.91674	3.474	3.5856	4.116	2.44955	2.81224	5.01503	4.47601	2.41886	4.4322	3.22798	3.97205	3.98262	3.18493	3.88511	3.95135	6.00161	4.99579	4.07007	2.41594	2.79947	4.07078	5.55265	4.30468	2.55946	4.42244	4.37614		0.609757	3.86923
15.0118	3.79336	3.177	2.52244	2.94666	2.3202	4.08527	3.39752	3.43003	2.4225	5.26781	4.35354	3.80419	3.83414	3.67809	2.62664	4.65254	7.05148	5.18459	3.12366	1.8113	3.29811	2.4692	5.06931	3.46565	2.54295	3.99645	4.47912		0.614633	3.6594
15.1309	2.57687	4.4778	4.17572	2.30972	2.56174	2.98016	3.95427	4.16479	2.13656	4.64877	3.93682	5.71495	3.85192	4.38503	4.9043	2.86895	3.8081	5.98939	2.60856	2.29	4.08924	3.074	2.80561	5.37464	5.12994	3.48836	2.52485		0.619509	3.73448
15.2501	3.05423	3.1518	5.7937	1.92041	2.78503	2.25261	4.19424	3.19313	4.19153	5.78687	7.23847	3.80351	2.26997	2.38239	3.87375	4.82371	4.49785	5.07806	2.46526	3.3962	5.45389	2.36654	2.9325	4.62434	3.20992	4.25511	3.61512		0.62439	3.80038
15.3692	3.99887	2.6593	3.96391	2.54686	3.71537	3.87617	2.89035	3.10505	4.90664	5.12976	4.63928	3.77473	3.74593	2.64571	3.08103	4.18992	4.1175	4.65022	4.40577	3.07678	3.64933	1.94916	3.07142	3.26867	2.74996	2.40096	3.30224		0.629266	3.53744
15.4884	2.35109	4.0669	5.11066	3.83052	3.84919	3.11126	2.59947	4.68017	4.12447	4.82055	4.39298	3.89475	2.72889	3.45426	3.93273	4.22764	5.03575	3.32205	2.9614	4.71862	3.85493	3.42051	2.35244	7.25662	3.25613	2.72892	3.99749		0.634147	3.85483
15.6075	2.60465	2.3229	4.91069	2.62338	2.97635	4.23107	3.41918	3.8246	3.23741	3.92438	2.70837	2.29928	4.0864	4.60142	3.34372	3.60388	6.08215	2.73508	2.82355	3.29604	2.89626	2.80943	5.04923	7.04666	2.92384	3.5195	4.71697		0.639023	3.65246
15.7266	3.21182	2.3406	3.48548	2.25372	3.25112	3.61862	2.80284	2.16563	3.99794	3.46015	2.88317	2.44285	6.38702	2.80339	3.00632	3.39068	6.07911	2.29208	2.79528	3.80545	2.01608	2.37024	3.44954	4.04859	2.84209	6.82699	3.41775		0.643899	3.38684
15.8458	3.58687	3.3192	2.13224	2.37711	4.24391	3.19509	4.92873	2.38413	3.47658	4.68682	3.74501	4.10125	3.54509	3.45472	4.00463	4.90128	4.20601	3.03676	4.06153	3.25867	3.11551	3.81357	3.32889	3.94616	3.16181	4.90228	4.56939		0.64878	3.68456
15.9649	3.71632	3.0206	4.24845	4.02924	2.28559	4.47355	3.90082	3.74711	5.16896	4.66524	6.32708	5.93177	5.76622	3.78391	3.7742	3.6885	3.97982	3.30198	4.53571	2.4959	3.71632	3.15323	3.50555	2.66285	3.46914	2.53767	4.1054		0.653656	3.9256
16.0841	2.1881	4.5052	4.37712	3.4158	3.09251	2.97588	4.28325	2.50985	4.80821	4.28034	4.47682	4.11915	6.04845	3.134	4.42436	3.18961	2.92102	3.76335	2.96433	4.50625	3.95208	3.59751	3.93423	3.22089	3.6414	3.77473	3.63843		0.658537	3.76825
16.2032	2.31464	4.9368	2.8814	2.71155	3.05935	3.93329	4.51247	3.02803	4.92649	4.78605	3.13628	2.9993	3.05778	3.94695	3.65873	2.87276	3.33101	3.48647	3.06735	3.21015	4.0112	3.41397	3.94901	2.60243	4.14193	4.1189	4.18873		0.663413	3.56604
16.3224	2.44596	4.4161	5.07759	3.00574	3.16239	2.34244	4.07571	2.65099	5.76162	6.20852	5.16744	1.92195	3.28708	5.54152	3.78306	4.59322	2.32539	3.0938	5.70114	3.34216	2.79754	4.94079	3.41608	4.60629	4.06041	3.56157	3.45121		0.668293	3.87917
16.4415	2.05164	2.5805	3.82938	3.52715	2.59959	1.83936	3.73523	2.41239	4.52934	2.62625	3.7874	4.57238	4.04035	4.07415	4.48909	4.81199	2.66828	4.06577	3.10587	3.76122	2.59438	5.8558	4.08503	3.48365	3.00248	3.2402	4.68226		0.67317	3.55745
16.5606	3.02082	2.3284	5.43006	2.40606	2.79456	2.54002	3.3459	3.01173	2.8414	3.40551	3.64482	3.10456	3.13081	3.27777	4.04723	4.64507	3.82811	3.34247	3.73114	4.67504	2.35233	2.39615	3.66372	3.55628	6.48561	3.41329	4.26147		0.678046	3.50668
16.6798	3.76503	4.1763	4.85678	1.9848	4.14992	3.10769	3.92995	4.05421	3.58633	4.97094	2.95361	3.03272	3.34687	4.27301	5.02128	3.83955	5.60432	2.09532	9.28188	2.59509	3.08948	3.15376	4.97689	2.43654	3.30737	3.09599	3.43681		0.682927	3.85639
16.7989	2.49665	2.6863	4.88298	2.82018	3.33628	4.07498	3.39913	3.50565	4.2962	3.45849	5.22713	5.60499	2.87401	5.27395	3.35135	4.7072	4.4267	2.68086	4.38494	2.39279	4.23966	3.39219	3.78944	2.89965	3.46183	4.86736	3.0631		0.687803	3.76274
16.9181	2.49246	3.1184	4.61597	2.57051	2.68071	2.63843	3.69198	3.62576	2.74044	3.79089	5.9049	2.79689	2.16584	7.25492	4.59813	2.55599	2.65382	4.22273	4.5223	3.1113	2.97828	3.28388	4.00467	3.76976	3.17028	4.53982	2.79944		0.692683	3.56661
17.0372	3.13888	4.0329	4.93696	2.63103	2.99628	2.92149	4.67585	3.21967	2.64429	2.90973	6.05377	2.69706	2.61083	3.34742	3.35962	2.37687	2.26025	3.34394	6.9659	2.44298	3.38944	3.66808	2.59712	3.63422	5.32647	3.12626	3.17893		0.69756	3.49949
17.1563	2.80167	3.256	7.74975	2.13552	3.79692	2.30713	3.63772	3.79395	2.78644	3.72968	3.19069	4.06348	2.49427	3.99549	4.70504	2.20839	3.17097	2.1124	4.34825	2.9082	4.57274	5.25756	3.28982	3.54514	5.0212	4.90949	2.09536		0.702436	3.62531
17.2755	2.16969	3.1725	4.61463	2.54174	2.91155	3.06288	3.41402	4.17712	3.2315	3.9883	3.56901	2.83	2.13307	4.12491	2.64614	3.46011	2.83433	3.04288	3.14338	3.03003	3.36759	4.31832	2.72267	3.30081	3.98342	4.46783	2.23333		0.707317	3.27747
17.3946	2.62661	2.4034	4.10724	3.70879	2.33632	2.91589	4.4695	5.0703	3.649	4.78163	5.14733	2.94466	3.62284	4.67551	3.3816	4.5384	2.82095	4.04426	3.86189	2.17098	3.76263	3.26868	2.51052	4.79514	2.26518	4.54673	1.8274		0.712193	3.56494
17.5138	2.51278	2.0563	3.7765	4.17166	2.02948	2.30493	4.59702	3.77767	2.77076	4.59626	4.40388	3.18724	2.86007	3.85534	3.58355	3.31472	2.87694	3.45295	2.66296	4.40739	3.77267	2.14524	2.5022	5.16863	2.42773	8.38168	2.10809		0.717073	3.47054
17.6329	4.05526	3.1144	5.6874	3.53577	2.35714	2.80209	5.38048	3.35779	4.83013	3.72126	6.48545	3.20417	4.15646	6.93686	3.79236	2.67927	2.77286	5.7076	2.52015	4.16254	4.51766	1.94645	3.18575	4.60884	3.94256	5.27258	3.76024		0.72195	4.01828
17.7521	4.15698	3.4253	4.1516	3.05875	3.29953	2.74602	3.47009	4.47459	6.47724	2.89299	3.30631	4.55809	3.17346	3.21329	3.44167	2.68734	5.06035	5.20615	3.21682	3.92878	5.6739	2.54893	3.69166	3.48738	3.13358	4.01856	4.352		0.72683	3.80931
17.8712	2.27138	3.3405	3.93559	3.65195	2.56981	2.58457	3.22288	3.49624	3.83817	4.21995	4.16831	4.4947	3.06076	4.41016	2.94531	3.27515	5.32367	5.08476	3.80872	3.09706	2.98386	3.17911	4.86141	3.79139	2.72356	3.81861	3.59891		0.731707	3.62061
17.9903	2.11145	3.8007	3.63783	4.32368	2.18831	2.23905	4.80175	5.00318	4.79404	3.99469	4.3917	4.73233	2.48028	3.6821	3.76751	2.43193	5.01376	4.79399	2.75865	2.75816	2.70328	2.51875	5.45514	3.66276	2.38199	6.54114	2.92302		0.736583	3.69967
18.1095	3.13569	3.0309	3.67963	3.91967	2.02051	2.96996	3.34292	3.79071	5.38134	2.70478	4.38426	3.67924	2.74928	3.93111	2.31649	5.07293	3.69546	4.40853	3.2755	2.94716	3.28664	2.98901	2.96235	3.77705	4.57049	6.08134	2.20161		0.741463	3.56684
18.2286	2.94589	1.9077	4.51545	3.21074	2.58347	3.69145	4.77552	4.44632	4.06089	3.33305	5.33155	2.80001	3.15465	3.43308	3.03521	4.90249	2.86121	3.45394	2.5688	4.37786	4.66279	2.65665	2.25124	3.30117	3.32538	7.49291	2.81217		0.74634	3.62561
18.3478	4.00713	2.1543	5.10735	2.65432	2.64402	2.35288	3.94104	3.33051	4.62563	4.57263	3.64842	4.75295	5.07961	4.05802	4.68368	4.56057	3.65759	3.25384	2.84183	2.72757	4.40223	2.32562	2.52942	2.30957	2.53296	4.37804	2.66831		0.75122	3.54815
18.4669	4.10475	3.3329	5.00894	2.3804	2.3419	2.9781	5.49104	2.26758	5.0926	5.03896	6.03856	3.92617	3.14262	3.63886	5.19206	6.82541	4.36281	2.90317	2.05651	2.61888	3.74714	3.12779	3.30552	3.83077	2.88974	2.48928	3.01392		0.756096	3.74616
18.586	2.55972	2.3661	3.95383	3.82665	2.30382	3.1125	4.82464	3.58932	4.73103	3.96461	5.73906	3.9884	2.22811	3.282	2.59931	4.56503	6.08911	3.90679	2.85648	4.37138	2.87979	2.83422	2.83074	3.84956	2.84042	2.84611	3.75307		0.760973	3.58118
18.7052	2.10629	2.6042	3.62084	4.53289	2.98485	4.70885	5.67339	4.78015	4.31622	3.60841	3.75169	2.30253	2.97516	5.12327	3.64711	3.49408	4.74273	3.93853	2.48259	2.89762	2.60179	2.93571	2.80212	2.17177	4.78701	3.80187	3.03275		0.765853	3.57127
18.8243	2.87594	2.8234	2.5024	2.94744	2.06934	2.46224	5.16112	5.53614	5.58821	2.88116	4.28791	3.61802	3.14383	4.90007	3.21528	2.48367	3.34979	6.37085	3.43088	2.71023	2.16553	4.39279	4.56068	3.3522	3.16884	3.90999	3.2075		0.77073	3.59687
18.9435	4.79005	3.0075	3.1467	2.79119	2.05016	3.61927	3.83593	4.42595	5.90784	4.55472	3.55252	3.87076	5.20303	5.48607	4.14624	2.74804	3.11186	2.70913	3.26703	3.9692	3.10709	4.30243	3.22547	2.42458	2.93983	4.21479	5.41247		0.77561	3.77111
19.0626	3.78092	4.687	5.69204	4.36714	3.20928	2.43359	2.36819	5.00754	6.099	4.07239	3.24631	4.23971	5.30624	4.67673	4.09512	3.69813	3.10481	3.48902	2.54452	3.95073	3.51277	4.45105	3.07445	4.07079	2.25964	3.21751	4.08931		0.780486	3.8794
19.1817	3.11486	3.9762	5.17238	2.82319	2.45732	2.61835	4.30431	3.39585	7.57271	4.42203	4.64591	2.81134	4.2061	3.67694	4.0946	3.69457	4.64511	4.47334	2.97679	3.21469	2.74663	3.4212	3.48517	4.35639	2.45373	2.39672	3.3457		0.785363	3.7223
19.3009	3.51552	2.6411	3.02152	2.97367	3.39727	4.26169	3.45972	3.77209	6.0524	3.42051	3.70765	2.88075	2.311	3.11139	3.15557	3.9787	4.2583	3.98018	2.54081	3.37584	3.74967	2.27086	3.40703	4.33705	2.29303	2.45454	5.28389		0.790243	3.4671
19.42	2.81861	3.8209	3.67592	2.79414	2.3717	4.17479	2.22223	5.43674	5.08059	3.73629	4.48461	3.17795	2.75258	3.16347	3.01351	4.39493	4.21474	4.40217	3.13938	3.53388	3.02288	2.96905	2.97895	3.35247	3.71134	2.47816	2.65244		0.79512	3.46572
19.5392	2.36663	4.2673	3.73857	4.84034	2.33694	4.40769	3.01056	5.17585	8.62176	4.11169	5.0669	2.54932	2.97975	3.52068	4.85028	4.82003	3.17818	3.1536	3.14625	3.76637	2.20898	2.91151	3.1509	2.53368	2.45715	4.45567	3.56052		0.8	3.74767
19.6583	2.10531	1.9407	2.40995	4.65466	2.31443	3.79159	4.4187	5.02231	6.24273	5.65393	3.27874	3.36624	3.53125	4.14685	4.19729	4.00044	3.79974	3.39752	3.09036	4.75084	3.76664	2.90881	3.05534	4.86497	2.644	4.94311	3.65818		0.804876	3.7761
19.7775	1.94496	1.8645	2.92849	6.71975	4.06036	4.23178	4.02922	5.83224	4.82822	4.78698	2.73483	4.78983	3.42434	3.90513	4.5561	4.02681	4.86478	3.5281	4.06862	2.88241	4.06269	2.88373	5.1833	5.1203	3.10942	4.86883	3.56105		0.809757	4.02951
19.8966	1.92277	1.9001	3.81798	7.05086	2.94227	3.8066	2.50582	5.01445	5.73908	3.12741	2.54621	4.96752	5.29135	2.83651	3.65967	3.39177	6.42056	5.00788	3.5805	3.61281	2.88139	3.11198	3.26137	3.80329	2.61943	4.18138	3.28162		0.814633	3.78824
20.0157	2.12466	2.0245	3.41552	3.77483	2.29077	4.15923	3.36062	5.76347	6.2394	3.01825	2.29729	4.99615	4.09555	5.3028	5.88273	3.35256	4.4765	5.199	4.43699	3.41544	3.72506	3.50052	3.72612	7.75933	3.3854	6.87781	4.1555		0.819509	4.17615
20.1349	2.04015	4.992	3.92279	6.75035	3.04816	5.48659	6.25292	5.36354	3.93049	5.57156	2.459	5.20507	5.75775	4.8567	3.41476	4.43221	3.35638	3.69391	2.29421	2.54908	3.57335	2.49394	3.66939	4.35111	3.9498	6.01757	4.69564		0.82439	4.22698
20.254	2.0285	2.8411	8.21395	5.98811	2.83504	3.11312	5.77628	6.17551	3.95806	5.81523	2.61938	4.8936	3.64066	4.6662	3.62194	5.81765	2.76137	4.09911	1.9681	3.18272	4.03249	2.70346	4.03396	2.6986	3.14774	4.08522	4.33866		0.829266	4.0391
20.3732	2.27674	2.2019	6.50094	5.6204	3.02287	4.40197	5.07248	4.28462	5.24647	4.70644	2.39385	4.19117	3.46257	5.02108	3.91438	4.87093	3.2836	2.955	2.14047	3.76692	5.23947	3.00019	2.7994	2.69789	2.55131	3.99753	8.0369		0.834147	3.98731
20.4923	2.23336	3.6991	4.78251	4.72381	2.70425	4.29718	6.77319	2.92487	3.36275	5.5422	3.17586	3.97723	3.9744	2.71859	4.49146	2.37415	3.60613	4.01017	4.70367	3.76997	5.23207	2.70349	3.70007	3.43257	3.30107	4.076	6.08659		0.839023	3.93988
20.6114	2.0931	5.0756	6.98815	3.84524	3.18465	3.7197	4.03648	3.51004	4.18499	4.95862	2.68834	2.70882	3.04291	3.59473	4.00028	3.09488	3.1535	4.22325	4.29316	3.64083	4.17058	3.03616	3.64111	4.94226	3.03762	3.6203	3.34752		0.843899	3.77159
20.7306	2.34918	2.536	6.20797	4.33283	3.28451	3.2369	3.54683	4.82317	2.77597	3.67204	2.93806	3.19043	4.44968	6.46597	5.31272	3.5023	5.67434	3.04924	5.26556	3.0449	4.35567	2.94207	3.64153	3.20508	4.58334	4.4923	2.23892		0.84878	3.89324
20.8497	2.23093	2.6078	5.56977	4.22672	3.86479	3.35639	2.55168	4.64032	2.33258	3.72039	2.67494	3.41527	3.84632	3.91207	5.21959	5.77025	3.54609	2.25245	4.42214	2.64636	4.44155	3.47738	4.41837	3.36347	2.742	4.78177	2.89124		0.853656	3.6638
20.9689	2.02716	2.532	2.68491	4.53359	2.0892	3.66767	5.8638	3.98396	2.59115	3.98413	4.20705	4.81217	3.05156	4.3438	7.02164	4.50296	2.88187	3.27785	3.79785	2.68022	2.81507	2.39562	4.57531	2.95483	2.85564	3.28681	3.22822		0.858537	3.57948
21.088	2.41988	4.8043	3.35965	4.22152	3.06541	2.23689	6.01047	5.28994	3.64029	4.21061	4.434	3.38479	5.00866	5.96871	5.74296	3.95187	4.21751	3.11383	4.29417	2.71198	3.18514	1.98529	4.19813	2.65082	2.55642	3.36074	3.94642		0.863413	3.85076
21.2071	3.10652	2.3944	7.96227	5.42333	5.53887	3.67021	4.49907	3.03682	6.22025	3.89475	6.8378	3.09169	4.76965	5.46154	2.60506	7.27245	3.54989	4.39717	5.18669	2.73021	4.99739	2.33217	3.31192	2.62162	2.81212	3.40126	2.86122		0.868289	4.22172
21.3263	5.63691	3.7362	4.36543	2.79434	4.61185	3.61327	4.23381	3.05531	6.7732	2.98476	7.8577	4.44777	4.73204	5.23423	2.42894	6.10701	5.07794	3.20845	5.44045	3.61284	3.95904	2.29125	5.14647	4.84453	4.21258	3.16272	2.96047		0.87317	4.31591
21.4454	4.36101	3.6165	4.8918	4.51282	5.50703	4.46354	3.40808	3.03712	5.65655	3.413	4.6036	3.01018	3.44688	4.45114	5.24918	5.57673	3.99868	3.76346	3.95686	2.8704	3.1745	2.76123	4.17992	2.93082	3.89254	3.53239	4.06944		0.878046	4.01242
21.5646	5.52313	3.894	4.75498	4.3013	6.1741	4.60115	2.42598	3.01997	4.00774	4.90695	5.53116	3.64751	4.24608	4.59249	2.7714	3.73167	3.13275	2.8725	3.16675	2.18307	4.3932	3.43343	3.48586	3.10264	5.13036	5.09779	2.9607		0.882927	3.96625
21.6837	4.65746	3.5005	4.39298	3.30675	4.37391	3.06797	4.3074	3.55981	3.22523	3.24979	6.73775	2.62226	3.80432	5.41443	3.88897	3.35993	2.57204	4.42965	2.93292	3.08517	2.65701	3.86886	4.01027	2.36945	5.16526	6.3455	2.43926		0.887803	3.82759
21.8029	4.8346	3.1887	4.65221	4.72211	6.18097	2.98911	8.15882	5.57525	4.59408	3.10249	5.41232	1.98125	5.2474	2.80352	3.69341	2.93033	3.48806	4.23893	4.19392	3.59792	3.16509	2.73973	2.6026	2.99849	4.761	5.53524	3.98312		0.892683	4.12484
21.922	5.01653	3.4381	3.98321	6.67606	3.29092	3.15087	5.69307	5.53557	4.27862	5.80503	5.73165	2.50989	3.29141	3.79847	3.2751	3.98692	2.30167	5.88844	5.64837	2.17548	3.10999	3.11499	3.22562	3.05553	5.12853	4.32757	4.61483		0.89756	4.15009
22.0411	3.98095	3.452	4.17277	5.61337	4.52929	2.77495	5.13774	5.04536	2.77631	4.88785	7.75506	2.45533	3.74205	3.07445	3.71919	2.97648	3.83719	3.80032	3.67708	3.66217	3.42697	2.62005	2.06293	3.57874	4.45817	4.03993	4.11319		0.902436	3.90259
22.1603	3.83236	3.2026	5.40774	4.52274	2.46764	3.39169	7.13915	2.33915	3.6667	5.40922	5.67517	2.09595	2.97192	5.86601	2.94557	4.12965	5.08427	2.58858	2.97015	2.38643	2.80975	4.56032	4.69991	3.5564	2.90423	2.0039	3.47116		0.907317	3.78142
22.2794	1.92222	2.9333	4.74106	6.94407	4.66063	3.53874	7.1595	3.83629	5.31522	5.84915	3.37978	2.73505	2.66643	3.09852	2.52032	5.84279	5.33604	2.41613	3.52076	3.23867	2.3145	3.80261	4.33621	4.12728	3.37488	3.84476	2.92974		0.912193	3.94017
22.3986	2.68104	3.2281	3.52726	3.77579	3.55105	6.03825	4.1205	3.50386	3.12459	4.9164	4.56297	2.16941	4.10671	5.58724	2.66073	5.06478	6.03638	4.23225	6.6342	2.41198	2.55595	2.69214	2.93935	3.78863	3.34708	3.49853	3.0081		0.917073	3.84308
22.5177	3.84253	3.3581	6.57109	4.10149	2.54987	3.82119	4.52261	5.07462	4.54569	6.16975	5.82599	2.48082	3.15446	5.52711	2.9812	3.54564	4.93739	6.38897	5.86256	3.0328	5.4875	2.49102	3.49294	4.54446	2.55874	2.16271	4.86022		0.92195	4.2182
22.6368	4.27748	2.5324	4.71862	4.583	3.758	3.33993	6.39325	6.54384	5.0137	6.0612	3.77683	2.37928	2.91627	4.52224	2.92585	2.97628	5.00116	5.93508	4.46621	2.7962	3.13657	3.23466	5.85704	3.81015	3.34051	2.66179	5.10027		0.926826	4.15029
22.756	4.64258	3.4787	6.16905	3.0728	4.72358	5.30917	4.39982	6.20572	4.96066	7.91929	3.03695	3.1938	4.33963	4.50487	2.24197	3.92218	3.2887	4.73646	3.82694	2.24599	3.89281	4.13532	4.04117	3.82643	2.05426	3.04842	2.70045		0.931707	4.07103
22.8751	2.91102	3.9811	6.28811	3.01004	3.81753	6.77179	2.93662	3.74564	3.50795	7.33193	3.64775	3.36737	2.41718	4.75174	3.41195	4.39126	3.88798	4.1423	3.34994	2.02318	4.94185	4.0752	3.09112	4.62986	4.2621	4.09165	2.41969		0.936583	3.97051
22.9943	3.99584	4.6957	5.80282	3.74731	3.70841	6.35429	2.73015	2.85546	5.8622	7.69377	2.506	5.26113	2.16639	2.87332	3.75742	2.62027	5.33223	3.54342	2.6854	2.6364	3.99591	4.62719	3.35426	5.26803	4.29492	2.55495	3.66726		0.941463	4.02187
23.1134	4.6171	5.1477	8.54984	2.20701	4.35785	6.10831	4.18491	4.11874	7.04895	7.64665	2.11573	3.67097	2.24567	4.73499	3.03963	2.68253	3.03262	2.75723	3.35162	1.95973	3.05488	2.62443	3.55369	5.12826	4.38576	6.02774	3.0983		0.94634	4.12781
23.2325	5.84147	5.2091	4.884	3.94032	5.81779	4.93754	3.38146	5.90081	4.30094	6.78644	2.98665	4.63666	3.25526	5.72136	2.84311	2.40302	3.51315	4.06633	2.40925	2.79533	5.84035	3.39218	4.58454	3.16056	4.19225	6.06604	1.90474		0.951216	4.25076
23.3517	3.02284	4.8838	4.24385	4.96543	4.80727	4.30062	4.20475	6.16541	2.31875	4.62922	2.64424	4.30387	2.86388	3.3935	3.92784	2.40145	5.03148	3.1403	3.66049	2.8805	5.58226	2.21678	4.86992	3.25458	2.65904	6.50576	3.46845		0.956096	3.93875
23.4708	6.24115	4.3968	3.81636	2.94907	4.73198	8.34295	5.2945	3.94606	3.11541	5.71216	2.64063	2.54904	2.75134	2.57453	3.75289	3.83902	3.26532	2.5497	3.09444	4.96559	2.93097	2.43807	2.68932	4.7309	2.31078	6.58159	2.90119		0.960973	3.89303
23.59	3.50093	5.3294	3.51559	2.44017	5.14166	4.77316	4.9227	3.83097	2.92245	7.57502	3.86594	2.4044	3.27126	2.62447	3.01681	4.70232	2.88732	2.90171	2.8781	2.11569	3.36652	2.34881	3.09196	5.52399	2.61991	3.52915	3.05467		0.965853	3.63537
23.7091	5.51615	2.5856	3.5655	3.24181	3.36176	5.47348	4.79462	3.02738	2.39801	6.93838	2.86772	2.60421	3.02087	2.05826	3.72731	3.74712	2.34068	2.66349	2.48955	2.7183	2.12494	2.58266	6.45466	5.47088	3.23342	4.06324	3.10087		0.97073	3.56188
23.8283	3.93907	3.553	3.31818	3.93155	3.62712	5.54856	2.8446	4.37018	2.9942	4.06879	2.87652	2.71175	2.2115	2.41384	3.32139	2.55969	3.16934	2.51736	2.71401	2.39145	2.2374	2.45338	3.16977	3.44483	3.13756	5.34839	4.25654		0.97561	3.30111
23.9474	4.6735	2.9533	2.00823	3.42168	5.65391	7.13346	3.26256	4.60565	4.57303	4.58737	4.33708	2.62712	1.91805	1.99618	2.35384	2.80981	2.52484	2.25347	1.96329	2.46765	2.55687	2.03704	3.81125	2.43547	2.62904	4.33537	4.65985		0.980486	3.35514
24.0665	2.84364	3.4456	2.36098	4.061	6.00721	4.331	3.28819	4.21076	4.61114	2.72983	3.59925	3.50802	2.08301	2.59723	2.69062	2.93317	2.95928	2.90436	1.82979	2.28976	3.17702	1.96303	3.83719	2.59634	2.56573	4.87837	2.96741		0.985363	3.23218
24.1857	2.4025	3.0999	3.65691	2.30329	4.29304	5.12459	5.0676	4.73622	8.6537	3.42856	2.26679	4.12049	2.27856	3.27485	3.02342	2.30994	2.55298	3.12729	2.34609	2.19473	2.73823	2.80045	2.65096	2.6194	3.27594	4.64582	3.00929		0.990243	3.40746
24.3048	3.09106	2.1545	5.27285	2.39948	2.99362	4.70713	7.46206	5.72011	6.74926	2.5729	2.46813	2.65399	2.25764	4.12484	2.04226	3.12574	2.04497	2.2505	2.64633	1.8818	3.55401	2.65964	4.3057	3.83284	4.09983	3.02486	2.11178		0.99512	3.4151
24.424	4.13075	1.9207	3.34148	2.13813	2.87722	6.84925	4.65928	5.38987	4.58333	2.39391	2.69978	3.68062	2.74701	3.82236	2.05104	2.44275	1.96978	1.71521	1.92746	1.92577	2.38917	2.57586	2.52909	2.71513	3.09344	3.14523	2.78166		1	3.05538

## Sheet: Image23
X0	Y0	Y1	Y2	Y3	Y4	Y5	Y6	Y7	Y8	Y9	Y10	Y11	Y12	Y13	Y14	Y15	Y16	Y17	Y18	Y19	Y20	Y21	Y22	Y23		Ap-Basal	Avg intensity
0	8.8633	9.9983	10.5991	8.85342	7.0814	4.79017	6.65471	6.68191	4.84979	4.8494	8.59629	6.82173	9.68535	7.3446	10.1571	6.5788	9.5784	17.7329	14.9458	10.8619	13.6532	16.333	13.3953	16.2034		0	9.79622
0.1191	10.4311	7.6418	8.728	7.67811	8.38583	6.00381	4.75575	9.10575	4.21674	5.15794	6.29675	10.3453	8.75378	9.4731	9.2319	8.2972	11.3935	12.4306	12.276	11.3148	14.18	19.291	15.9834	15.6163		0.00485269	9.87452
0.2383	14.4646	9.083	12.2592	5.47105	7.55481	8.15335	5.41878	6.76391	4.01916	7.96015	7.19249	6.67066	7.19608	12.2878	5.1564	8.0989	11.6914	8.2764	12.09	14.7667	12.0899	18.9971	13.6515	10.5217		0.00970945	9.57646
0.3574	9.8789	9.3355	10.635	6.88805	5.10822	6.28005	7.06947	6.63629	4.92595	8.11845	8.4075	8.32773	10.9011	11.6024	8.8842	9.9612	11.4008	11.3337	9.0825	13.8561	12.1406	16.5245	14.0037	11.3024		0.0145621	9.69184
0.4766	9.03	6.5888	8.5063	7.13411	9.288	7.07083	5.21125	5.943	7.07167	2.66856	8.53759	10.2837	10.3798	10.4285	7.0209	13.7311	10.2694	12.686	13.3726	13.4132	11.5293	19.7334	14.7174	15.2951		0.0194189	9.99627
0.5957	10.2942	8.0414	11.2032	8.26687	8.15503	6.43638	5.5205	6.72204	6.0304	5.89128	5.02175	7.14146	9.1767	10.2865	7.8919	7.1776	12.782	16.396	11.1801	9.4234	12.717	15.728	16.7941	11.2487		0.0242716	9.5636
0.7148	8.7021	12.0783	9.5622	7.16547	7.51735	8.724	6.59449	4.40893	6.77257	10.3905	6.63499	6.30936	9.97865	8.9857	6.6576	8.0282	9.7703	12.0592	12.4746	9.2834	15.8015	9.6177	21.0476	15.719		0.0291243	9.76182
0.834	10.9088	9.5831	5.754	7.89193	4.89564	8.11837	6.44531	4.62976	3.95488	7.67061	10.4831	8.86405	9.12118	8.7011	6.597	8.0615	11.4244	11.6249	16.7859	13.2834	15.5089	15.114	13.2427	13.2522		0.033981	9.6632
0.9531	7.3634	9.7772	9.0984	5.89502	8.40492	5.66045	6.81186	6.50826	4.20494	6.39269	9.9501	6.88864	6.65231	7.3637	10.9659	8.763	13.2423	13.4735	13.1319	13.7201	18.0146	11.493	12.4756	13.5812		0.0388337	9.57637
1.0723	7.943	9.3704	10.6883	4.02786	5.47575	4.51681	6.36685	4.76918	5.70831	6.37893	4.66545	11.7419	6.20264	12.9844	13.6293	7.6229	10.7693	14.6177	12.5482	8.8478	16.3604	14.3219	12.98	14.1354		0.0436905	9.4447
1.1914	8.0341	7.242	6.6704	5.57293	4.42536	7.75073	6.85368	5.88457	7.56739	6.0526	7.26694	6.61698	7.85526	6.6042	13.665	9.7101	9.1821	12.0176	9.0804	6.3923	11.1216	12.7508	12.6595	11.2788		0.0485432	8.42731
1.3106	9.2649	9.7217	8.2374	6.82382	8.59583	5.81169	5.98003	5.17562	5.46059	8.2206	9.51703	9.62169	9.99156	9.9438	12.1036	9.1407	12.4933	11.9076	10.4602	9.2935	15.1779	12.1331	11.9316	11.4182		0.0533999	9.51775
1.4297	8.3763	5.7643	9.6802	11.6997	7.64973	5.67686	5.42513	5.68641	5.21478	5.1613	10.3468	10.4121	8.16813	10.6325	12.4769	10.8116	11.0785	9.0949	10.9696	13.1696	12.8289	16.3386	11.317	9.2689		0.0582526	9.4687
1.5488	5.5174	4.4647	10.5724	8.29373	3.62283	7.90414	5.93901	6.74449	5.29255	7.68916	9.53258	9.79707	10.2935	11.3869	15.7294	11.88	13.2747	13.5254	11.7087	5.7812	13.309	11.643	16.1363	11.682		0.0631053	9.65501
1.668	9.388	6.7615	9.8177	6.31806	4.01226	6.40554	6.87426	7.91221	7.31835	4.2129	8.01723	10.8059	8.84577	15.173	9.8069	11.4559	12.8623	13.5005	12.8286	9.8756	16.6615	10.2932	7.0806	13.4618		0.0679621	9.5704
1.7871	5.3932	6.7295	9.0406	7.46532	6.37497	4.4372	5.71355	6.46212	4.67298	7.46198	8.61207	8.09178	7.77147	12.4733	10.0575	11.2516	12.3014	10.8739	8.4346	12.3446	15.4946	8.991	6.9502	9.5101		0.0728148	8.62123
1.9063	6.6468	8.8969	8.5168	9.12095	4.15326	2.12783	3.7864	4.69564	4.27579	8.7659	7.54501	8.77459	10.3968	9.7899	9.8103	10.6974	9.5291	8.7362	5.8441	8.8532	14.8105	12.8061	9.6461	11.5687		0.0776715	8.32476
2.0254	8.743	8.1915	6.626	5.17213	8.34381	2.71288	3.98186	5.62026	5.60235	4.52629	5.68816	9.39564	7.27839	8.3062	7.8495	9.9744	10.2658	13.8206	6.3171	7.3759	9.4621	10.7938	10.3968	10.9906		0.0825242	7.80979
2.1445	6.4152	7.8226	5.9053	7.7291	7.01216	7.20658	7.4217	5.49659	8.60327	6.03437	6.46877	8.80466	8.85045	8.2573	9.5106	11.5326	12.5695	9.0879	5.8531	11.3768	9.138	8.9162	9.4146	12.2758		0.0873769	8.4043
2.2637	9.1494	7.6232	6.6337	9.30196	5.37582	7.33383	6.41378	4.2602	5.42105	10.4885	4.6705	5.98398	9.21996	9.4904	9.8936	12.4916	7.4514	9.2741	8.3956	10.2444	13.3875	9.1545	10.2383	5.6176		0.0922337	8.22979
2.3828	6.3054	7.992	8.0594	7.03273	4.98444	4.51121	5.03897	5.45328	3.83709	8.65712	5.12475	8.88497	7.09785	8.266	9.2606	10.0592	6.3652	11.5334	12.1704	12.2873	13.8442	9.9201	6.5432	11.0265		0.0970864	8.09397
2.502	5.9959	5.1975	5.6871	4.82664	5.29319	3.6948	4.38961	4.38226	4.56286	5.6172	5.80432	8.86374	5.27419	6.8939	11	9.5848	8.341	14.0931	11.6081	9.8709	9.952	11.4198	10.0393	13.4038		0.101943	7.7415
2.6211	6.6324	6.3107	6.5332	5.58474	5.74368	4.97221	5.72276	4.83393	6.06954	3.80419	9.37318	9.9075	5.17205	9.2322	12.2543	9.4082	6.5799	8.6912	13.2398	7.4464	9.2532	8.1244	8.8077	9.0002		0.106796	7.6124
2.7402	8.2556	6.6539	5.983	4.28422	5.47776	4.78341	4.24519	3.75713	3.73994	3.54018	11.1719	9.66137	5.65491	10.6992	8.095	11.4231	9.2853	12.2337	7.1678	7.0385	7.0659	6.7336	5.3773	6.5719		0.111648	7.03749
2.8594	6.9681	5.2397	5.87	6.16179	3.29196	3.90398	5.18057	4.85599	6.25009	5.54215	5.9706	9.38101	6.80101	6.727	7.6425	7.1386	8.7514	12.2633	4.3615	8.3301	9.563	6.4752	6.5651	5.8438		0.116505	6.62827
2.9785	8.3583	3.3221	6.9839	5.00581	4.98208	5.42487	5.84653	8.39684	5.09278	5.97848	4.99389	7.71972	6.81889	5.9377	9.3173	8.4052	11.4921	14.5584	6.5334	9.2047	9.6393	8.8312	5.0447	5.058		0.121358	7.20609
3.0977	6.4303	3.1251	5.2979	6.48634	5.01328	4.11585	6.42953	4.64895	3.90373	5.76456	7.08308	7.65199	4.58176	5.3736	9.8122	9.6364	9.62	12.0056	7.6043	10.9186	13.9003	6.0435	5.491	8.1554		0.126215	7.04555
3.2168	5.9821	5.256	4.7095	5.45327	5.63629	8.18265	3.72813	3.23994	6.6162	8.64694	8.5197	7.39128	5.33362	7.7232	4.7476	11.2334	10.7587	10.4361	7.5632	10.4965	8.1791	6.3874	9.8234	8.2771		0.131067	7.26339
3.336	3.8611	4.8299	6.3876	3.23093	6.21763	4.15363	3.62114	2.52112	4.98493	7.85937	9.41556	6.85867	8.51586	9.6521	7.9811	8.7394	7.7444	12.791	4.3077	7.787	9.5594	7.5714	8.9132	4.7008		0.135924	6.75854
3.4551	4.4396	4.3312	3.8633	5.2879	5.08034	3.67088	4.7297	5.53173	6.88031	5.19346	7.25965	3.28794	7.82942	7.5151	6.8906	11.1523	7.9153	11.3089	3.734	5.0701	12.248	6.6268	5.5101	5.0454		0.140777	6.26675
3.5742	7.1134	5.2877	4.9537	4.01953	3.57684	4.08752	5.69798	4.51759	3.93967	7.88827	6.62743	5.54145	8.72246	9.9962	7.4007	9.9684	12.1435	6.222	9.6323	5.2728	10.4396	6.0766	5.6135	5.1875		0.14563	6.66361
3.6934	4.3744	5.0801	8.5676	6.06989	4.99061	4.01284	4.53701	3.17402	4.57915	6.97289	5.09224	6.49	5.80641	7.248	8.0649	9.1678	13.2792	7.7054	6.9994	5.9804	10.4463	6.8837	4.1939	7.3904		0.150486	6.54611
3.8125	6.3269	2.5498	5.6139	5.40458	2.67524	3.79457	2.72643	2.50874	6.20086	7.05715	4.80649	7.01695	7.8225	9.9287	7.6612	8.7322	12.0557	5.8888	7.3605	4.509	5.2121	7.1614	3.5018	5.0354		0.155339	5.89795
3.9317	3.4029	7.0083	4.5233	3.78015	3.88114	3.06561	3.38196	2.66001	5.06383	7.82267	9.2603	3.86796	4.6433	9.5828	11.1159	8.1677	8.8338	6.888	7.6242	5.0742	6.9813	7.5105	4.9076	3.5357		0.160196	5.94096
4.0508	5.4329	7.9552	4.8847	2.60463	4.22853	4.03424	2.80075	2.4498	5.19921	4.45069	6.85865	6.5496	4.35098	7.1959	11.3409	9.0796	11.2552	8.9009	6.5155	6.0882	8.5277	5.7739	6.1406	5.1556		0.165048	6.15725
4.1699	6.4011	5.8804	3.5077	5.86612	5.10032	3.02455	3.16787	3.93731	4.40874	4.59546	5.91054	5.19378	7.00545	5.7333	8.0194	8.2914	14.0767	6.1128	6.3771	3.8967	7.2142	6.8016	4.0153	3.6628		0.169901	5.75836
4.2891	5.7588	3.1062	4.5891	4.45522	5.16543	3.1168	2.26667	1.94261	4.17502	4.61394	9.68393	6.05652	7.48917	8.3101	6.8606	8.5314	12.4856	5.9922	7.1396	3.7898	9.923	5.4953	3.4798	4.8776		0.174758	5.80435
4.4082	5.423	3.2902	3.3307	4.53354	4.62512	3.73956	3.87128	3.75793	4.6467	5.8859	6.39598	4.29638	5.07039	6.9196	6.7372	8.5417	13.9721	9.8574	5.2316	6.778	4.2662	6.5823	3.6585	5.1868		0.179611	5.69159
4.5274	4.3421	4.6006	5.1039	5.35904	3.88182	4.56615	4.7998	3.61358	5.03433	6.36826	4.82777	5.68399	3.81947	7.2411	5.0383	5.3907	11.2543	8.629	3.1818	8.5043	6.5306	6.9001	4.4641	7.6966		0.184467	5.70132
4.6465	5.211	3.9074	6.2448	3.65615	4.649	4.89986	4.39831	2.78962	3.61049	7.94501	9.03188	4.65507	5.87665	6.498	7.4008	6.5089	5.0784	6.2412	6.5837	5.4153	4.7619	5.3701	5.5776	5.5875		0.18932	5.49578
4.7657	5.2576	5.6111	4.9076	2.80092	6.4441	3.63464	3.75568	3.90353	5.89213	5.76138	9.32065	6.93836	5.18236	7.4553	8.7266	7.6748	7.3279	7.1309	6.527	4.5646	5.483	6.1654	4.3918	6.391		0.194177	5.88535
4.8848	5.9289	5.5491	5.8162	5.65031	4.57792	6.22467	3.06667	3.0528	5.501	5.73985	10.3128	5.63525	7.00742	4.9456	6.5474	7.8212	8.0238	4.3971	8.0181	5.4322	7.0324	7.0922	6.5211	5.7828		0.199029	6.06987
5.0039	5.5534	3.128	4.1026	3.53271	3.39688	4.05817	2.25635	2.49996	3.05995	4.57191	8.5493	7.059	5.67269	7.7037	8.1264	4.8078	7.9395	3.7474	7.9848	4.8146	5.4962	5.1877	4.4384	5.7712		0.203882	5.14411
5.1231	5.5076	4.1417	6.2849	3.74676	4.69808	5.06715	2.8262	2.73901	6.20144	5.03216	6.69593	6.07931	5.63323	6.5463	7.7954	10.8059	9.9769	3.341	3.3286	4.7133	7.1442	5.7182	3.9596	3.6153		0.208739	5.48326
5.2422	4.328	3.7087	5.2131	4.0747	4.25034	4.89167	5.87661	3.49671	4.82533	7.40361	7.2123	3.93887	6.88162	10.0162	5.8897	9.2556	11.5254	3.5925	4.0796	5.9174	5.6658	5.029	6.9557	3.8504		0.213592	5.74495
5.3614	3.4322	4.6768	3.8679	5.62374	3.28868	3.70202	2.19618	2.49983	4.93148	4.97471	6.67209	4.18477	5.73356	5.0194	4.0277	5.4157	11.2349	3.3856	7.2092	6.2266	7.6732	4.9027	4.5054	5.4997		0.218448	5.03684
5.4805	2.9118	5.022	4.6956	5.72048	5.79312	3.66715	3.42114	5.11658	4.80369	7.72223	8.07302	5.53485	4.31003	4.4596	6.1835	5.3584	11.7675	7.5384	7.3574	5.1597	6.478	5.5553	2.9785	5.6432		0.223301	5.6363
5.5996	4.6099	3.7413	5.9724	6.48131	3.04617	2.84155	3.07861	5.49229	3.43013	10.0241	5.66204	7.50843	4.48545	6.7714	5.471	4.7908	13.909	7.8898	5.4882	3.1624	8.5199	7.9742	3.8944	4.5125		0.228154	5.78155
5.7188	6.0432	2.8564	4.7377	5.09557	4.43534	3.1792	2.09295	4.40053	2.2289	5.70161	8.01117	5.50443	4.72395	4.6766	7.0908	8.638	11.7757	6.5431	5.3912	4.1872	7.4295	5.7906	4.5052	3.2299		0.23301	5.34453
5.8379	3.892	2.956	6.1514	6.72059	2.98755	2.69943	4.6305	3.5214	3.77511	4.27081	6.89799	7.62595	4.23664	6.0406	8.6721	7.6166	7.5202	5.7139	6.431	4.8646	4.9305	6.2504	3.6569	3.4851		0.237863	5.23114
5.9571	5.8438	3.153	3.6379	4.60894	2.51408	2.80955	2.61082	2.36841	3.90904	4.20719	9.29581	9.94846	3.63374	9.6007	6.3226	4.2078	7.6173	4.4138	7.5182	4.466	6.2005	6.231	3.0528	3.7389		0.24272	5.0796
6.0762	5.0857	3.1293	3.7303	5.58139	4.09102	2.82929	4.62727	2.2875	3.12528	3.48276	5.53407	5.27191	5.097	6.077	6.2407	6.0314	9.4529	5.6009	2.593	3.9782	5.7221	7.2558	5.7432	5.0305		0.247573	4.89994
6.1953	5.832	4.1722	2.7035	7.00264	5.47367	2.70888	4.19774	2.10101	3.12125	3.32864	4.14258	4.89701	7.98244	5.8544	4.7532	4.3061	8.7302	5.1808	2.1996	3.271	4.5913	5.8914	3.4724	3.8094		0.252425	4.57181
6.3145	5.4232	3.3324	3.9879	6.53871	2.98586	3.39844	3.60407	2.37792	3.50844	5.91765	5.46791	6.85624	5.43883	2.45	5.6277	4.7019	10.5487	5.9619	4.063	4.0699	6.4618	6.5222	2.9815	4.2143		0.257282	4.85169
6.4336	3.7171	3.4164	4.6031	5.58006	2.0925	2.52432	1.9652	4.23993	5.21208	5.23276	7.48684	7.85922	4.22304	4.0036	7.9276	6.0069	7.5631	3.9308	5.9973	4.9712	4.4005	5.8256	4.253	2.696		0.262135	4.82201
6.5528	5.0487	2.5972	3.8257	5.85725	4.40349	2.61142	3.82699	3.77307	5.28662	4.4221	4.62403	5.81164	4.73948	6.0889	7.186	4.4822	7.5102	4.3751	6.3624	3.5666	6.4514	5.7903	4.5814	3.7384		0.266992	4.87336
6.6719	4.9248	3.7856	4.8334	6.31455	4.8334	2.00837	2.47881	2.76544	4.19587	4.23236	4.88246	5.67716	4.70097	7.6488	6.9919	5.6755	6.6233	3.0482	5.8097	5.7881	5.5101	5.9678	3.7299	6.7538		0.271844	4.96585
6.7911	4.1203	4.2268	4.3205	3.72529	3.35393	3.20126	2.45996	2.46908	4.33582	3.25596	5.7112	6.80935	5.42537	7.8698	4.6242	7.5601	8.9954	4.3725	6.5228	7.3103	6.7505	7.5651	4.481	5.7917		0.276701	5.21909
6.9102	2.4971	4.9952	3.3432	2.95758	4.00168	4.63991	3.8845	4.10558	2.88581	6.82805	5.16222	5.73648	5.03667	5.7604	6.3517	6.5914	5.5919	4.3325	5.2399	4.6176	6.0909	6.7681	6.0182	4.5715		0.281554	4.917
7.0293	3.2783	4.8627	3.3542	3.35906	4.36606	3.14179	2.70108	2.45089	5.55918	6.87299	5.81775	7.43035	10.4253	5.0573	4.8044	6.6246	6.215	5.4858	6.262	4.5979	4.775	6.097	3.7339	5.5359		0.286406	5.11702
7.1485	7.1212	4.2558	4.9957	5.4883	4.9582	2.00935	2.86761	2.60587	3.34405	4.97336	8.61735	6.90224	8.43396	6.7019	7.1773	4.4312	8.1083	6.0769	4.6427	5.6101	8.9894	5.0362	3.5166	6.2836		0.291263	5.5478
7.2676	5.0833	3.9239	4.4591	3.78	2.4961	3.19485	2.0982	2.10785	3.94963	4.97531	7.54385	5.82974	6.55149	7.1135	9.1559	7.9391	9.4907	6.534	4.4392	4.5319	4.6799	6.4548	4.014	4.7483		0.296116	5.21228
7.3868	2.6911	6.4738	3.7502	3.57078	4.17242	5.95562	2.1631	2.8958	5.70894	3.99862	6.21207	2.73738	5.4873	7.4015	6.3027	4.9515	7.384	7.9601	7.3053	3.719	6.0701	9.6198	5.3421	3.6195		0.300973	5.22886
7.5059	4.9461	4.7335	3.2142	3.12764	4.28452	5.47772	1.90836	3.89792	4.07867	2.83148	5.99813	5.53041	5.94301	7.0587	6.2657	9.1365	8.1487	5.7357	7.5479	5.0837	8.3352	10.1043	4.1564	3.3941		0.305825	5.45577
7.625	3.5535	3.894	3.4931	3.50791	4.10295	4.34668	3.16842	5.10862	4.29296	4.26808	5.68765	4.73795	8.47068	7.7134	5.5273	8.5991	6.2352	6.1307	6.3339	4.7905	6.5002	3.4469	1.898	6.0524		0.310678	5.0775
7.7442	3.001	4.1972	4.0987	2.82192	4.9121	3.75178	3.08171	2.19814	2.14103	4.70566	5.97744	7.36469	8.15607	4.3572	5.7142	6.442	8.4044	6.0693	6.2293	6.9583	6.887	4.2752	4.0427	6.3935		0.315535	5.09086
7.8633	7.1081	2.8385	3.829	2.22473	4.49213	3.06719	2.04959	2.47764	3	4.53743	7.7677	5.44074	4.58237	8.4021	4.1614	6.194	6.782	7.8821	7.6538	4.2804	5.5391	5.1863	3.0134	6.8789		0.320387	4.97453
7.9825	4.361	3.337	3.4003	4.33473	3.48422	4.04145	3.09251	3.25299	2.25277	5.57314	5.75347	5.84055	5.19094	10.5253	3.8499	2.9923	6.815	5.811	6.7667	4.4154	4.5441	4.9155	2.7921	3.7091		0.325244	4.62714
8.1016	5.4968	5.6447	3.5393	3.1242	3.05749	6.23572	3.67329	4.48407	3.67817	4.35493	6.74979	4.09543	4.79986	9.1139	5.4269	5.3477	5.9406	6.3803	8.2753	3.9702	5.9463	4.6647	3.7404	3.0424		0.330097	5.0326
8.2207	4.4514	3.4635	4.7276	5.02739	3.8622	3.96163	1.99654	3.48723	3.82873	2.53975	6.61118	7.01032	4.83555	6.2551	6.2301	8.2018	7.2057	8.5842	8.9743	5.2431	8.6775	3.3329	5.4141	3.6057		0.33495	5.31365
8.3399	6.2607	3.8793	4.4792	2.83184	3.52485	2.63787	2.40642	5.95975	2.42799	4.08003	4.79994	10.3691	4.60767	5.0802	6.7625	4.7691	4.2762	9.0775	9.8268	6.3751	8.5969	3.6572	3.5754	3.8224		0.339806	5.17016
8.459	5.0483	5.1297	4.1538	4.17094	5.85506	2.6178	2.36373	3.59097	2.97967	5.31061	5.47912	6.39951	6.11402	6.0017	7.5716	3.6258	3.4873	9.019	7.3179	3.4548	9.8959	4.2332	3.1724	3.6004		0.344659	5.02472
8.5782	4.7229	3.5833	3.832	2.26997	4.18095	2.91609	1.8987	2.57399	3.08064	3.75399	4.26098	9.03178	3.15262	6.8635	6.7071	3.9689	4.4188	8.5006	11.2562	5.9948	7.3202	4.7813	5.295	3.8344		0.349516	4.92495
8.6973	3.6576	2.6604	3.3284	2.94513	3.18088	4.00578	3.94616	3.02438	3.76905	5.10379	4.8208	7.58867	6.44315	5.6284	9.4167	3.7019	9.2299	8.6171	13.7199	4.2994	9.8299	4.2575	6.8369	4.1763		0.354368	5.59117
8.8165	4.2731	4.0493	2.5536	3.14956	3.8367	3.61112	4.23766	2.95882	3.12296	5.90779	3.93229	6.98793	5.98137	5.442	5.2062	3.1652	8.3627	8.0126	8.3571	5.3601	8.5594	6.3218	3.4474	4.3585		0.359225	5.0498
8.9356	3.7079	4.9804	2.5832	2.77574	3.45313	3.39745	3.36484	3.07414	4.0374	5.10089	5.77394	9.61177	7.83399	4.2743	5.814	4.0913	5.2859	6.9229	6.3319	7.0734	8.0251	5.8759	4.375	6.882		0.364078	5.1936
9.0547	3.7616	4.4726	2.7915	1.91478	3.06994	4.37516	5.2991	4.30739	3.66006	8.36041	7.05353	6.17497	6.49778	6.0407	5.5325	5.3984	3.8202	8.7911	9.2929	5.6388	7.1269	6.1823	3.5334	3.4899		0.368931	5.27441
9.1739	3.4609	3.4941	3.1778	2.18309	4.15507	3.31341	4.60738	5.00699	3.79828	3.61837	5.94311	6.83454	9.79463	7.0712	4.9289	4.3857	4.2138	6.3188	11.1243	4.6545	9.2193	5.5304	3.398	3.6393		0.373787	5.16133
9.293	4.3746	2.6187	2.4464	3.58365	5.79823	2.91946	2.54601	3.78793	3.30178	4.09539	4.61185	6.23427	6.71263	6.1846	6.402	5.103	5.0696	9.8173	7.1171	5.1312	8.9292	5.994	3.4758	7.3489		0.37864	5.15015
9.4122	3.3347	3.5028	2.1741	4.13251	2.60173	2.61736	3.60765	1.83442	3.07849	5.74203	4.18289	8.29891	5.3132	5.3184	4.0181	3.28	6.0366	8.2613	9.4332	3.6493	7.8598	7.4489	3.1461	5.2559		0.383497	4.75535
9.5313	4.0726	3.9266	2.5108	3.85859	1.76057	2.45359	5.26721	3.07832	4.22287	4.20311	6.14338	8.27954	5.3266	4.436	6.5255	4.3657	4.6865	7.4081	7.7806	5.8667	6.0154	3.3103	3.552	6.3908		0.388349	4.81006
9.6504	4.9854	3.2277	3.3111	3.83583	2.86416	4.22391	3.35494	3.61046	5.71508	3.67685	5.56706	3.84505	7.76353	5.2772	9.333	6.851	7.0983	7.0365	9.5143	6.7886	4.5153	6.1483	4.7794	5.4564		0.393202	5.36581
9.7696	6.2196	5.7097	2.377	2.6787	3.35858	3.89892	2.97358	4.15207	4.42305	5.78777	5.44796	5.04514	6.09896	6.137	5.9918	9.8636	4.5807	9.0898	8.9906	5.8481	4.507	6.3967	2.9029	6.355		0.398059	5.36809
9.8887	5.9419	5.1506	2.4785	3.18436	2.17029	3.2094	3.5722	4.37862	3.44058	5.83527	5.69748	3.53244	4.22599	7.0874	5.4957	6.8032	4.091	9.0659	5.6673	5.5451	6.3019	3.8247	4.5166	4.0882		0.402912	4.80436
10.0079	5.1957	4.3585	2.4753	3.58135	3.8173	3.75877	4.59246	3.31796	3.3697	3.46837	7.73115	4.32407	5.10903	2.9823	6.4617	4.8736	5.7652	6.8555	7.3854	4.9884	3.4193	2.5706	3.6495	6.217		0.407768	4.59451
10.127	4.1007	2.9015	1.9356	3.82147	2.96691	4.1047	5.16735	3.83299	4.35126	2.88982	5.02648	3.93284	7.52391	4.1001	5.709	2.577	5.4989	9.4874	6.3517	5.2469	5.657	1.857	5.0963	7.0857		0.412621	4.63427
10.2462	3.3702	4.553	1.9349	1.97041	2.92214	4.22467	3.88566	3.35534	6.24355	7.0646	4.19813	4.04707	4.8185	4.2171	6.0678	4.5985	3.1305	8.1035	4.8444	5.2861	5.0227	4.5712	3.0044	3.9699		0.417478	4.39184
10.3653	4.202	3.047	3.0462	3.42437	2.05313	6.01543	4.74035	4.6418	3.44488	4.47689	3.29005	5.78029	7.04946	8.807	7.6151	4.6735	3.774	9.0591	7.1583	8.3683	3.6104	5.6326	4.8067	4.8159		0.422331	5.1472
10.4844	7.5693	3.4721	4.4461	3.08237	3.05299	2.75001	4.28633	3.33642	3.40106	6.351	1.90527	6.16747	4.16966	8.4586	6.6276	3.4856	5.2877	10.4846	9.2475	7.4717	5.6538	4.3205	4.7205	5.8786		0.427183	5.23445
10.6036	4.4903	2.3132	3.4523	2.55985	2.77031	2.67894	3.99324	5.91394	4.70489	3.54098	4.10236	8.11859	5.87138	5.2213	4.6987	3.1569	6.3651	8.1254	7.8348	7.5395	8.0965	5.805	5.4034	6.9079		0.43204	5.1527
10.7227	4.7075	3.1528	2.8729	2.28914	3.46214	3.19613	3.741	4.12248	3.89004	4.3974	6.98368	8.76531	4.70058	5.9938	3.9277	5.1586	4.3657	7.9649	9.7275	8.0402	8.4211	3.5567	7.3783	6.2356		0.436893	5.2938
10.8419	4.311	2.5107	2.3511	4.01186	3.78801	5.64798	3.63293	2.39506	5.47115	4.29093	5.09048	5.65684	6.89847	4.8462	6.5577	5.6277	3.797	4.9807	6.5921	5.8275	6.2385	6.9688	5.52	4.6203		0.441749	4.90138
10.961	6.433	2.6639	2.5599	3.94302	3.4632	5.60298	2.24435	2.66386	7.06802	2.92235	2.77034	5.79807	5.04171	8.1871	5.834	4.5858	5.0953	4.9457	7.2313	6.1239	5.0266	9.226	5.9917	5.5202		0.446602	5.03926
11.0801	5.3467	4.2974	4.672	2.94778	5.0468	2.13678	2.83696	2.24527	3.58499	2.23489	2.98342	4.74667	3.2497	7.2108	5.812	3.5314	5.7117	5.5347	8.2153	5.3454	3.6224	8.031	4.648	4.7802		0.451455	4.53218
11.1993	8.374	4.6242	4.4958	2.7206	2.33443	3.0069	3.50991	4.56747	3.6862	3.84344	4.67961	4.20309	3.58649	9.9832	4.6019	4.0038	4.2165	6.4803	6.9521	3.4908	5.8961	7.1516	5.1161	4.2374		0.456312	4.82341
11.3184	3.1007	4.7261	2.9869	2.53527	2.2003	4.33709	4.00992	3.58887	4.32397	3.61917	5.46744	4.27876	4.70922	4.0304	3.3127	4.9343	5.4315	5.191	5.912	3.934	5.1357	5.3941	5.7647	4.1464		0.461164	4.2946
11.4376	3.5503	3.5	3.5454	1.86022	3.90272	3.82306	4.29551	3.30259	5.44053	4.29576	4.61645	4.47997	5.38299	8.1961	4.9387	3.9033	4.1714	5.419	10.1252	5.098	8.5345	5.6506	5.0035	4.5921		0.466021	4.90116
11.5567	3.4734	4.5571	2.8218	2.39545	3.28113	3.56529	2.44537	1.93454	4.56944	5.66293	3.6598	2.76111	3.04758	4.8494	5.9612	7.1206	4.1832	4.7925	7.5558	4.2837	7.2831	4.1435	4.8962	4.2801		0.470874	4.31351
11.6758	4.3151	2.8608	4.0099	2.26252	4.51271	2.46423	3.47162	1.81788	5.14352	6.31066	2.92661	3.47934	3.05791	7.4028	7.6949	5.7913	4.8651	5.6071	6.2657	2.974	8.5218	5.0829	6.1952	4.2296		0.475726	4.63597
11.795	6.9132	5.0546	5.905	2.73208	3.76356	3.45595	2.17747	1.97428	2.88258	5.82611	4.85235	3.83011	5.42425	5.5561	7.5653	5.656	3.3081	5.3463	4.3735	5.046	4.1827	2.7972	6.2893	3.1825		0.480583	4.50394
11.9141	4.7357	3.1521	3.166	1.80523	4.10978	2.34757	2.15675	2.73125	3.32702	5.25757	3.84776	5.28132	4.53113	2.983	5.6041	5.9006	4.3073	8.1113	6.171	5.6131	3.4983	2.2311	5.1507	5.7241		0.485436	4.23932
12.0333	3.6708	3.1929	2.8501	1.74492	3.73519	2.84786	2.98085	5.68069	6.53446	4.10612	6.18877	9.2479	4.11297	7.3962	4.299	6.8153	3.467	6.7341	7.081	4.1749	3.3413	2.9256	4.5696	4.9838		0.490293	4.69506
12.1524	3.2237	2.8005	3.2867	2.71822	2.54734	5.04726	4.33786	3.87607	5.66605	4.17423	6.45249	4.65708	5.45904	5.853	3.9432	7.2732	5.6512	5.3279	5.6008	2.5147	4.8528	4.0994	6.598	6.8118		0.495145	4.69886
12.2716	3.6084	4.8497	4.8486	2.33149	2.82292	3.22359	2.93212	3.19288	4.13483	4.92084	4.97653	5.60133	5.13081	8.3255	3.5842	3.8758	4.2004	6.8738	3.0542	2.9474	4.0488	5.554	7.71	4.7652		0.500002	4.47972
12.3907	3.0029	3.7074	4.9724	2.03458	2.97062	1.82612	3.60262	2.05967	3.42681	4.34863	9.35672	3.47986	4.66799	6.8002	4.6732	5.686	4.884	4.2624	3.3804	4.5623	2.949	6.084	5.2984	5.5648		0.504855	4.31671
12.5098	4.7566	2.9046	3.7758	5.42382	4.14941	3.41217	2.73097	1.97696	4.68455	5.84732	6.92292	7.86836	4.67617	7.2024	3.1553	7.1032	3.934	8.2155	3.4005	2.5989	3.5145	4.8945	5.8931	6.4521		0.509707	4.81224
12.629	4.6005	3.2853	3.2269	2.8761	3.42987	2.81704	2.1623	2.07165	5.38596	3.7487	4.09117	6.7265	3.97062	5.4144	5.4623	6.2135	4.8284	6.4219	4.5291	3.485	3.6292	4.0532	6.0358	4.2855		0.514564	4.28129
12.7481	4.8045	4.6236	2.7111	3.76311	3.76647	2.60342	2.96147	1.70421	4.18808	7.51122	5.99326	4.91404	3.97152	6.5507	5.4829	7.7913	5.6003	6.9005	7.5644	2.9597	3.893	3.4304	6.571	3.489		0.519417	4.73955
12.8673	4.5735	4.3359	2.3289	3.04636	3.84739	3.72886	2.30249	1.97033	4.96394	6.47374	3.59014	5.24715	6.83639	5.6969	4.9727	4.1125	4.3098	6.6561	4.4641	3.3422	2.7139	3.4971	6.2026	3.2184		0.524274	4.26797
12.9864	6.7445	5.7234	3.4945	2.13865	2.176	3.51263	2.48061	2.44171	4.65217	4.65761	5.89716	5.24934	7.48124	5.2991	4.2858	5.4894	4.0791	8.2455	4.5972	3.5663	2.0526	3.4052	5.2466	2.749		0.529126	4.40272
13.1055	2.0316	5.3336	2.9843	2.06872	4.85086	4.2067	2.14668	2.5174	2.43138	6.19547	3.71039	7.09696	4.05099	5.2438	4.0772	5.7214	4.7418	8.7863	4.4801	3.1698	2.5265	3.7239	4.4468	3.0843		0.533979	4.15112
13.2247	2.7142	5.0206	2.1574	3.10331	3.7801	3.47587	3.61705	1.78651	3.14121	4.31963	3.96287	8.79365	4.55902	4.8671	7.7771	4.6529	3.4621	7.3394	4.3095	4.2175	3.2135	5.0482	4.6883	4.647		0.538836	4.36058
13.3438	3.2807	4.8025	2.3243	2.36949	3.0393	2.48823	3.04107	2.45296	3.73158	5.37986	5.07988	6.22221	4.18584	5.3917	5.9783	6.665	4.4433	3.2506	3.7262	3.3552	3.2539	8.1316	4.3633	3.7676		0.543688	4.19686
13.463	5.039	2.8162	2.9097	1.80764	2.64748	1.93364	2.65091	2.21338	3.61347	4.0769	6.26703	4.66979	4.6774	3.9567	5.7038	6.8901	5.0429	6.6034	3.0462	3.7919	5.0539	4.7182	5.0204	4.022		0.548545	4.13217
13.5821	4.927	3.6272	2.8079	1.89174	2.53475	2.6349	2.57008	3.42649	5.55555	3.99004	7.30405	3.79985	5.89607	5.4438	3.6494	4.7675	4.1008	8.4346	5.4243	3.3856	3.7418	2.8332	6.2956	2.5256		0.553398	4.23199
13.7012	3.4667	5.022	3.6214	2.05162	1.89684	2.85754	2.80573	4.81533	4.49712	4.84639	5.65495	3.64619	7.952	4.7609	4.6067	4.4051	5.1332	4.4929	5.8992	2.3169	3.3684	3.0586	7.4232	3.0394		0.558251	4.23493
13.8204	2.1287	3.6604	3.4114	1.94894	3.26818	2.26766	2.8538	2.30681	3.21597	4.18959	4.95297	3.58224	8.61269	6.0266	6.2725	3.0476	3.7321	4.361	4.2054	2.9148	3.4666	2.6043	5.3479	2.6047		0.563107	3.79095
13.9395	3.5627	1.8947	3.4342	1.84345	2.85185	5.60857	1.88302	2.30658	3.32177	3.62363	4.70372	4.64629	6.0134	8.4624	4.2937	5.5701	3.4201	6.6528	3.8875	2.9818	3.5788	5.1969	6.3462	3.187		0.56796	4.1363
14.0587	4.9355	2.1317	3.2498	1.96541	3.58043	3.49407	2.45451	2.12158	4.17271	4.72814	4.0267	7.05035	6.86768	6.1292	6.9069	3.3793	2.3215	6.7506	2.6817	2.3852	3.9487	8.9362	5.4957	3.9029		0.572817	4.31735
14.1778	3.7233	2.8288	2.9976	2.58193	3.7026	2.81255	2.09942	2.22616	3.01259	5.06473	4.8985	4.14478	7.74347	6.4279	4.7758	4.863	3.024	10.9436	2.4646	2.9292	4.0953	7.6653	7.6334	4.2492		0.577669	4.45449
14.297	4.6977	3.893	2.3036	2.62008	3.32019	2.83398	2.67251	1.9067	2.74531	8.80724	5.71647	4.45601	4.53701	11.8916	6.374	3.7287	4.8641	10.3048	4.2343	3.0763	3.3125	9.1367	7.2775	3.6963		0.582526	4.93361
14.4161	4.7096	2.9678	2.6452	2.48521	3.20966	2.31161	4.75889	2.16428	4.47371	5.14037	4.70579	5.44363	5.62794	5.9332	8.8777	3.1812	4.5791	6.187	3.8407	1.9084	2.6495	6.5404	8.1976	3.4146		0.587379	4.41471
14.5352	3.1042	2.6291	2.538	3.45884	2.42178	2.40458	2.68872	3.07716	4.38166	3.88868	5.33843	5.03815	5.03429	6.1579	6.5985	7.081	5.0295	7.2524	2.7603	4.3479	3.8252	4.9242	6.4815	4.3627		0.592232	4.3677
14.6544	4.6563	1.9893	1.6057	1.91772	3.22676	2.65561	1.96755	2.82462	3.26449	4.58197	6.98075	4.4714	7.04017	3.9922	6.6674	4.1859	3.6051	9.8283	4.7299	6.2895	3.712	9.5493	4.7944	4.5459		0.597088	4.54509
14.7735	2.6563	2.9587	1.6756	2.01804	4.93719	3.75991	2.19785	1.74542	2.62435	4.56413	7.4944	5.3514	6.31464	5.9962	3.7335	3.7611	4.2163	7.5527	4.2799	2.0526	6.0565	6.4087	6.7855	4.1962		0.601941	4.30571
14.8927	3.3716	3.0628	2.4057	3.01723	3.23878	2.40148	2.75956	2.22539	4.33478	5.48629	3.02011	4.47242	7.25241	7.4335	6.7485	2.3335	4.7099	8.348	5.7869	3.2102	4.9125	4.8682	7.5269	2.6265		0.606798	4.39805
15.0118	2.4677	3.9414	2.5247	2.85227	4.54853	2.41403	1.97656	2.47706	3.46971	4.71934	4.19107	5.71124	5.56549	9.5089	6.5853	4.0784	3.6284	5.7952	3.6699	5.8898	5.1967	9.1739	6.985	2.7573		0.611651	4.58866
15.1309	2.9106	3.9131	2.897	2.64684	4.40772	2.06201	1.83187	2.24978	2.48605	6.19893	4.98651	7.02024	4.89085	6.7348	5.5213	5.5041	3.6476	6.1791	3.0949	4.0599	2.5598	7.5726	10.0135	2.7719		0.616503	4.42337
15.2501	3.6297	3.0909	5.1346	3.87577	3.49918	2.97334	3.08179	2.11653	3.46413	6.03689	4.76847	8.73128	5.40219	4.7737	5.6286	4.9217	3.5189	6.3475	4.2745	2.8676	3.1668	6.109	10.2864	3.3243		0.62136	4.62599
15.3692	3.7866	3.9617	4.7986	3.88343	4.06739	2.85138	2.71932	2.2628	4.3922	5.30082	6.06319	5.53348	4.4027	7.1359	7.3438	6.3734	3.9096	6.4965	2.7585	4.3766	3.855	7.8367	11.9299	2.9441		0.626213	4.95765
15.4884	3.7398	2.951	3.0481	3.71508	2.6009	1.91213	3.01965	2.26666	5.73598	5.25911	4.84861	4.09335	5.17571	4.0324	3.1139	6.1218	6.301	9.3738	3.1766	4.1354	3.3526	8.0393	6.6654	2.19		0.631069	4.36951
15.6075	2.3158	1.9094	2.1123	2.81177	3.62271	1.77385	2.2158	2.91118	3.68329	5.74911	4.25142	5.07533	4.04792	5.9527	3.5134	7.0654	4.5135	7.1113	3.5923	2.2028	3.0817	4.8091	6.4331	2.1917		0.635922	3.87279
15.7266	2.5198	3.7634	2.2896	3.30445	4.25955	3.03121	2.10985	2.24843	2.80773	5.52961	4.05505	4.16436	4.85841	4.7146	3.3697	5.8883	4.1567	8.032	3.3758	3.5579	2.8042	6.6956	6.8961	2.4852		0.640775	4.03823
15.8458	2.8352	3.4868	2.6417	2.02047	6.05875	2.32698	1.71556	2.2161	2.63883	6.59041	3.16066	4.06112	4.98899	4.9704	5.7456	5.0163	7.212	5.7294	4.7276	2.2246	1.9299	5.9852	9.1384	2.2981		0.645632	4.15496
15.9649	1.9374	3.8775	3.9168	2.35268	3.79815	3.94075	3.34757	2.57756	2.59518	5.51225	7.19601	5.36974	4.04147	4.6527	6.2211	6.5609	7.2444	7.9433	3.9237	3.6811	1.7718	6.2941	7.597	2.8982		0.650484	4.55214
16.0841	2.7779	3.5592	4.1547	2.884	3.82462	2.81434	3.18269	2.89109	2.29858	7.45045	5.7333	3.86107	6.5138	5.4147	4.9763	5.6098	4.906	7.7485	3.662	2.4476	2.0081	7.3341	2.9231	2.3823		0.655341	4.22326
16.2032	2.9688	1.9893	2.6215	2.55624	4.21259	2.88765	2.62608	2.36643	2.17442	6.08148	5.59304	5.13463	4.65921	4.119	4.6021	3.9961	3.1295	7.3154	3.4586	1.8374	2.2791	7.2478	4.8249	2.6031		0.660194	3.80352
16.3224	2.124	3.1489	3.0793	3.24516	4.29434	1.79406	2.96211	1.93813	3.03017	6.24818	5.72295	3.85539	3.96809	7.525	6.4554	3.8548	6.1547	4.1304	3.8982	3.2507	3.2611	4.4118	2.201	2.0973		0.66505	3.86047
16.4415	2.7848	2.2443	3.9141	3.33661	6.0971	2.0395	2.24285	2.47324	2.55557	7.58083	8.19375	4.17396	4.69668	5.4641	8.1428	3.6176	6.3663	4.8885	5.0987	3.6299	2.4843	4.9802	2.6138	3.1047		0.669903	4.28017
16.5606	2.6063	2.3328	2.705	2.12893	5.40748	1.81741	2.3305	2.25835	2.55642	7.12048	6.2546	4.43766	4.08347	5.398	7.3434	4.9028	6.2617	7.9367	4.4113	3.0906	2.228	6.4699	5.5342	2.6543		0.674756	4.26126
16.6798	2.2879	3.1043	4.767	2.12652	3.32268	2.36784	3.27885	3.10834	2.78984	5.40689	6.25031	4.09504	3.55667	6.7596	5.2912	7.2951	3.4048	7.5279	2.7055	2.5179	3.5445	8.8674	3.8326	4.6061		0.679613	4.28395
16.7989	3.3301	2.7814	2.7111	2.90237	4.33625	2.30327	3.22621	2.51375	2.99764	5.84523	5.21241	4.15097	5.50363	5.462	3.001	6.3282	4.6905	4.3665	4.0706	3.9423	3.511	7.3164	3.9953	2.7567		0.684465	4.05228
16.9181	1.9045	1.9779	2.5132	3.38586	3.74029	2.62766	2.14355	2.29505	3.27981	7.05544	6.58564	4.1961	7.51327	5.376	2.5725	4.7778	5.5221	5.1392	4.0025	2.924	1.8615	7.5575	3.9721	4.0696		0.689322	4.04138
17.0372	2.2604	1.7106	2.6516	2.81273	3.74923	2.17031	2.13115	2.15579	2.82408	8.86358	4.10475	6.70947	4.76936	5.7812	5.0133	4.9037	5.7809	8.8021	3.4592	2.4906	2.4254	4.6195	4.6152	4.493		0.694175	4.13738
17.1563	2.8659	2.2045	2.5198	3.79409	4.10011	1.91305	2.39279	2.10288	2.15538	5.06627	6.11192	6.92987	5.27315	6.2724	6.6823	3.2808	6.1285	9.6591	4.9888	3.2015	3.1247	6.0455	5.4846	4.7331		0.699027	4.45963
17.2755	3.6016	2.3857	2.3445	2.74903	4.48237	2.30098	2.78605	1.97795	2.01081	4.80903	6.31651	6.60527	5.15738	6.9887	4.575	3.6695	7.9117	6.4919	3.2089	2.0433	3.1347	9.2833	6.1273	6.4457		0.703884	4.4753
17.3946	3.1622	3.0616	3.9683	3.26902	5.51944	2.03229	2.25067	2.53473	1.93002	3.80239	5.50376	4.34667	5.93362	6.5672	3.9779	3.6558	4.0531	6.586	1.7873	2.0542	3.8954	7.0603	6.9718	3.8162		0.708737	4.0725
17.5138	4.2636	1.9324	3.992	2.60817	4.14362	2.70473	1.79595	3.63967	2.71174	3.90628	6.02959	5.00405	5.02876	6.0622	6.1748	3.6955	3.9947	9.4779	4.1131	3.2098	2.8539	9.698	4.6419	4.4204		0.713594	4.42095
17.6329	4.4187	2.7917	3.2781	2.38389	3.5656	1.82758	1.94012	3.35132	2.80274	4.06105	4.56898	4.13837	6.24203	4.9699	7.7341	3.8455	4.753	9.7866	5.9852	2.5625	2.7493	7.0501	3.5254	4.1408		0.718446	4.26969
17.7521	3.117	2.6206	3.377	2.88434	4.48178	2.6687	1.77832	3.02306	2.61585	5.88175	6.80156	4.48916	5.07226	4.3748	6.9892	3.6225	4.7433	5.9679	3.7497	3.8878	3.3557	7.578	3.4911	4.2721		0.723303	4.20181
17.8712	2.1026	2.428	2.5789	2.65845	3.70022	2.29407	2.65009	3.12563	5.10571	5.03673	7.80475	4.46549	6.80429	6.5102	4.7119	4.4245	5.9696	5.797	5.4371	4.8136	3.5783	6.7635	3.4532	4.7501		0.728156	4.45683
17.9903	3.5977	2.127	5.0667	3.95112	2.20006	1.87367	3.64009	3.7657	3.82676	4.23815	5.92144	7.82437	8.12151	4.7022	6.5518	6.3328	5.5081	6.0371	4.1362	3.2916	2.2656	4.8695	3.7282	2.8493		0.733008	4.43444
18.1095	2.2708	3.3711	4.7897	3.08112	3.458	1.95319	2.18973	1.9689	4.20252	4.59795	6.86891	6.52498	7.35534	5.1143	9.8653	4.3656	4.7499	7.1171	4.4949	2.0822	2.813	7.6327	4.4247	3.7925		0.737865	4.54519
18.2286	2.2513	2.2928	2.6161	2.28164	4.61074	1.83553	2.05232	2.01743	2.75608	6.27513	4.56328	4.84346	5.74548	4.1768	9.6193	5.6113	4.3442	5.1848	3.4252	2.4011	3.3463	7.6609	5.9935	3.7131		0.742718	4.15074
18.3478	3.3881	3.5629	1.8916	3.98179	3.83421	1.56051	2.46165	2.3469	2.50122	4.38574	4.46814	3.67939	5.71789	7.69	5.0654	5.4273	3.2945	6.5278	1.9326	2.6562	4.8068	5.4052	3.699	4.0295		0.747575	3.92976
18.4669	2.7122	3.9731	1.8102	3.12613	3.16104	1.80212	3.45216	1.91605	2.54043	6.36363	3.15745	6.82035	7.24686	7.399	7.6257	5.9424	6.0411	4.259	1.7391	4.3833	3.55	8.9384	5.2835	4.6299		0.752427	4.49471
18.586	3.7392	3.2718	2.0092	2.59723	4.19403	2.78584	2.15024	2.8454	2.98778	5.67968	3.00174	6.81078	7.56612	6.5277	5.4744	5.2447	4.0028	4.9652	1.7851	5.407	3.2876	10.5826	5.0397	3.5684		0.75728	4.39684
18.7052	3.0763	2.1837	2.6476	2.07749	4.25978	2.67398	1.86094	3.18246	2.00891	6.62513	3.41372	5.01687	7.28852	6.2968	6.0076	6.1358	6.1443	6.2941	2.4609	3.6058	3.7671	9.0536	4.3635	3.8556		0.762137	4.34585
18.8243	2.8167	3.6674	2.2224	2.78143	3.32287	2.11422	1.99975	1.9753	2.35577	5.32514	4.28608	6.05981	6.48064	6.3463	6.3119	4.6544	4.2614	7.117	3.6618	5.6427	3.617	6.9003	3.9548	6.1739		0.76699	4.33538
18.9435	2.331	3.0418	1.949	2.62918	3.62402	1.96535	2.28069	1.99645	2.9443	4.05859	5.48061	6.44649	9.3224	5.7966	7.1971	5.537	6.1281	8.1573	2.4862	3.0896	2.0509	6.5566	2.5013	3.0896		0.771846	4.19417
19.0626	4.5167	3.8705	2.1402	4.15956	3.81365	2.94168	2.16186	2.14056	5.89775	3.96798	5.48632	6.69619	10.087	6.6584	4.746	5.8801	4.4765	7.5306	2.4805	3.9146	4.0063	6.8984	4.3763	5.029		0.776699	4.74486
19.1817	4.0301	2.1984	3.0293	4.31596	3.71817	2.4495	4.03752	2.1468	4.79247	3.96252	4.11192	4.08969	5.49711	7.785	3.78	5.1917	4.4236	6.64	2.9163	2.7479	4.079	5.8802	4.9588	2.8879		0.781552	4.15291
19.3009	2.4778	4.1963	2.2078	2.49106	6.02329	2.49059	2.20329	2.43282	6.60357	3.72811	6.01174	3.84243	8.67562	8.3379	5.1701	6.0255	4.9939	8.4679	5.2603	3.2052	3.6259	6.7944	4.1808	1.8504		0.786408	4.63736
19.42	2.7879	2.7502	2.2864	3.20544	4.85558	2.36481	3.16273	2.61183	3.06231	3.71588	6.76101	4.8991	7.66474	8.6733	7.8406	7.6535	4.7999	5.1425	3.0724	3.6843	3.7046	5.7858	5.9123	3.5315		0.791261	4.58036
19.5392	1.8945	2.6474	2.0725	2.99489	2.98963	4.09666	2.99848	2.34739	3.43806	4.61879	4.452	2.92614	6.25936	6.8636	5.6162	9.4562	5.3736	6.0122	5.1441	2.8522	2.803	6.7152	5.3638	4.3167		0.796118	4.34386
19.6583	2.8816	2.4658	1.8157	3.45506	2.79166	5.03078	2.33126	3.00104	4.87711	6.20664	7.31655	2.63663	8.39134	9.1122	4.6348	6.9495	6.9821	5.8206	4.6454	2.5579	3.7765	4.3995	5.0121	6.5353		0.800971	4.73446
19.7775	2.3068	4.7362	3.231	4.04008	3.50023	3.61206	2.391	2.65043	5.3134	3.58824	6.87524	5.53134	5.47465	5.6882	5.1746	5.2124	4.0597	5.4313	3.0412	3.072	2.5255	4.2231	4.6256	3.0442		0.805827	4.13952
19.8966	3.216	2.8142	3.5293	4.78465	4.47287	2.47442	1.62453	2.37408	2.97371	2.4397	3.52103	6.77186	9.30394	4.2761	7.0057	4.8746	3.5753	7.7767	4.6075	3.1461	1.9525	4.9406	5.2533	2.2628		0.81068	4.16548
20.0157	3.5143	2.1255	1.9942	3.94961	5.11542	2.52468	2.19242	2.37417	2.60911	2.3191	5.9777	4.56251	6.02986	5.2595	5.3403	7.7419	6.4402	6.0009	3.7894	2.2349	2.2857	5.5855	5.9291	3.7407		0.815533	4.15153
20.1349	3.107	4.0792	2.8598	4.09919	3.92215	1.96276	2.98936	3.00584	5.21048	2.7455	5.47747	4.07052	7.34708	5.5926	11.1171	9.9608	6.6268	8.1805	3.7857	2.3632	2.6149	5.2289	3.4239	2.976		0.820389	4.69778
20.254	3.2266	4.9605	3.6763	2.71077	3.86511	2.22448	2.82683	2.02479	5.40854	6.973	3.80916	4.16233	8.65133	6.3078	8.7302	9.2884	5.2282	7.7381	4.376	3.4236	3.5215	4.7626	5.3197	4.5504		0.825242	4.90693
20.3732	1.7251	3.386	2.4902	2.06405	3.50507	3.13842	2.27586	2.06696	4.098	6.70721	6.20987	5.2904	10.0953	9.7778	8.0231	13.7653	3.7641	5.9482	3.8287	2.4624	2.5361	4.0084	5.2281	4.4579		0.830099	4.86886
20.4923	2.1889	4.0973	4.5253	2.80093	2.97313	2.91191	2.09886	2.49456	4.1557	5.56917	3.64879	9.23393	6.00986	4.8383	8.5386	6.7184	4.4228	5.7909	2.997	4.5759	3.5027	7.4832	4.1521	5.359		0.834952	4.62864
20.6114	2.525	4.0879	4.7805	2.76824	2.95975	2.32113	2.19816	2.00067	4.50871	5.56059	4.41203	5.04261	10.344	5.6157	5.8056	10.3746	6.0381	6.4571	3.8176	4.431	3.328	8.0849	4.5209	3.3948		0.839804	4.8074
20.7306	4.1324	4.5321	3.9902	2.83209	4.98624	2.61921	3.53147	3.0931	5.39422	3.64639	7.04539	3.45393	7.75821	4.3048	6.9133	10.1013	5.6037	4.3437	3.7608	4.3575	3.4771	11.0371	5.5032	3.3028		0.844661	4.98834
20.8497	3.3689	2.6981	2.1713	2.95635	2.75876	2.17473	2.14532	2.06772	5.30445	3.09162	4.28468	4.16684	4.40447	8.0615	6.6741	10.3772	7.5135	5.6529	4.3024	3.5477	3.2913	5.001	5.7729	4.3774		0.849514	4.42355
20.9689	4.0397	2.4541	2.6646	3.23787	3.29505	2.14987	2.05179	2.70085	7.0858	3.73196	6.30058	5.38666	5.30633	14.0529	6.7204	12.6303	6.3053	5.7067	4.2387	3.1812	3.0805	7.1872	3.4692	3.6639		0.85437	5.02673
21.088	4.0383	3.483	2.2328	3.24763	2.83233	2.02145	3.51178	3.05627	3.29221	4.00649	6.24594	4.52715	5.0938	13.5277	6.3242	14.6847	4.0663	3.1223	3.0506	3.0592	5.3273	6.0568	4.2081	4.3298		0.859223	4.80609
21.2071	2.8247	1.9792	3.4782	3.21138	1.84801	5.77787	3.31814	2.43626	4.30057	2.31456	6.73632	2.31071	4.41965	8.146	6.8082	11.6361	3.9901	3.1038	2.0745	2.5377	4.8211	5.6635	3.4324	4.303		0.864076	4.228
21.3263	2.8006	2.872	2.641	2.54543	3.02641	4.0405	3.41197	3.25899	5.5805	4.41921	6.9607	4.08759	4.22903	9.0491	6.5142	6.8971	3.7618	3.1578	3.1925	3.828	5.3112	5.732	3.5314	4.484		0.868933	4.38888
21.4454	4.4638	1.8991	3.071	3.60375	2.38517	2.16762	2.09303	4.01798	4.91241	5.04649	4.75155	5.24486	5.30602	11.8056	3.8255	6.6207	4.9821	5.1638	8.1332	2.5914	3.7011	5.7635	3.9471	2.9511		0.873785	4.51866
21.5646	2.6408	3.2688	4.0886	4.87266	4.2099	1.78036	1.83549	2.55901	5.03084	4.08955	4.17758	4.22322	7.4759	8.6149	5.227	5.9175	6.4315	3.9361	8.0096	3.0129	4.0841	4.4075	5.0486	3.4268		0.878642	4.51538
21.6837	4.9818	3.2166	2.7498	4.32939	2.51283	2.01039	2.54392	3.06256	4.92731	5.1548	6.16423	4.52898	5.23741	8.4724	5.7441	4.9458	7.169	5.6361	5.8248	4.1026	4.1383	6.2367	5.0417	2.3332		0.883495	4.6277
21.8029	3.7219	5.3706	3.8744	3.79343	2.60723	2.18061	2.58996	2.74756	5.57321	3.80296	3.60536	5.56715	6.04864	9.5946	9.0296	7.797	3.661	4.3096	5.6152	3.7306	5.3286	6.1439	7.3049	3.9624		0.888352	4.91502
21.922	2.8644	2.4623	2.2449	2.91247	3.82861	2.88163	2.16224	4.64805	5.64341	6.13952	5.61539	4.08411	5.22229	11.017	8.2903	5.6129	4.4883	3.0569	8.2469	3.3511	8.7908	5.3302	5.6808	2.9971		0.893204	4.89882
22.0411	3.4492	3.0951	1.9865	2.53606	3.31434	2.53708	2.34283	3.12718	4.70641	5.28194	4.20395	5.79673	4.91784	6.9951	6.6107	4.0525	4.7393	5.1441	6.5821	2.3001	6.0884	5.9829	5.5183	4.5928		0.898057	4.41256
22.1603	4.144	3.5361	2.461	3.14944	2.74649	3.61986	2.8735	5.02848	4.01211	2.77627	3.26407	4.27703	7.27141	6.1165	6.2345	9.449	5.9594	5.5909	8.5725	3.6837	7.4969	5.0186	4.9528	3.6373		0.902914	4.82799
22.2794	2.4458	3.9366	2.7124	4.65591	4.64459	3.95276	3.31402	6.34609	5.43436	3.75931	3.72079	4.06993	8.32339	11.1244	9.2886	7.032	5.4914	6.5243	8.0546	3.9533	5.841	5.2722	4.6109	4.1825		0.907766	5.36213
22.3986	1.9117	3.4044	4.0989	3.93682	5.71286	4.08681	3.17628	6.57957	4.50188	6.11841	2.363	6.10064	5.85447	7.938	6.3673	5.0164	8.2929	7.6004	3.8523	7.802	4.009	5.2476	4.2392	5.0638		0.912623	5.13644
22.5177	3.2269	5.14	4.0049	5.31153	5.32902	3.76823	1.93254	5.37956	4.91638	3.63194	2.96151	4.94737	7.25498	11.0971	4.7589	7.3411	7.5024	7.0216	5.3511	9.7128	4.2386	6.2306	4.7119	3.2073		0.917476	5.37409
22.6368	3.7948	4.0796	3.9354	3.17275	4.03898	6.60637	1.84429	4.27923	6.96558	5.11343	3.4184	2.65015	7.90168	9.3892	4.3792	3.1692	8.5009	5.58	6.3682	3.6312	3.9575	7.1082	6.8068	3.5696		0.922328	5.01086
22.756	2.9066	2.1828	2.6282	3.11139	5.21828	6.45781	3.93323	3.10661	7.4613	9.48738	5.33294	4.4556	6.50038	6.0519	5.7317	4.1456	5.0517	7.7451	4.4396	6.11	4.8604	6.9125	4.7452	2.5647		0.927185	5.04754
22.8751	4.0722	3.7906	3.525	3.16461	6.05873	6.4906	2.79795	4.72416	4.61091	6.65902	5.42861	4.8892	6.78255	7.1764	4.617	3.7766	4.8652	8.6397	7.9966	4.8591	4.5214	8.2329	5.5764	3.9997		0.932038	5.3023
22.9943	3.3265	6.1574	3.5978	4.55593	5.22906	4.17923	3.50445	4.31706	6.33884	4.00704	4.38676	4.61043	6.13861	8.9304	8.2368	2.3891	4.563	4.924	11.3738	4.807	5.9311	8.6743	7.8602	3.613		0.936895	5.48549
23.1134	3.4515	5.9583	2.0535	4.57845	4.72672	7.53503	3.28371	5.29995	4.38034	4.3807	5.05629	4.72689	5.96972	7.4309	5.196	2.3467	5.2287	5.5663	5.5146	7.651	4.598	7.3344	5.2769	4.658		0.941747	5.09177
23.2325	3.7179	5.3258	2.8089	3.74032	3.54112	6.40626	3.27205	2.85517	3.0148	3.73896	5.21437	6.03123	7.41656	8.1493	8.5985	3.9306	6.0469	6.8094	6.9032	10.7985	8.3833	3.7632	5.7567	4.1122		0.9466	5.43063
23.3517	2.7091	2.9077	3.0254	5.05303	4.67241	8.57818	3.42624	4.31002	7.04614	2.64504	4.54347	4.98688	5.78906	8.211	8.2254	3.464	4.8733	9.1633	5.7649	8.317	4.7552	6.4345	9.6841	4.066		0.951457	5.52714
23.4708	3.3944	4.9956	3.4507	4.8459	5.60781	3.99692	3.39351	5.52474	8.09097	3.27927	4.86731	3.92224	6.36772	6.5803	4.5312	4.282	6.8358	8.6682	7.6112	8.5161	5.1089	4.5725	8.5523	5.2718		0.95631	5.51114
23.59	3.7682	4.0461	3.0896	2.97507	5.20611	5.8634	5.74424	4.52724	4.62754	3.45965	4.07735	8.39192	7.40302	4.0505	6.8662	3.5176	4.9521	4.66	6.0996	7.2918	2.5221	2.8044	9.3354	4.6082		0.961166	4.99531
23.7091	2.2159	2.9566	1.8543	4.60359	4.16034	4.75158	4.45773	3.99053	4.6097	4.42322	5.17752	5.87569	6.22649	5.7586	7.3282	3.0101	4.0266	4.4441	5.0547	3.4668	3.535	3.8846	7.883	3.1339		0.966019	4.4512
23.8283	2.8962	4.0349	3.7641	3.76133	7.19164	5.46255	4.86672	3.54315	3.99506	2.74855	3.74419	4.0465	7.89403	4.5612	5.2683	3.2629	4.7118	4.2333	2.6261	5.2478	3.806	4.0978	6.9134	3.417		0.970876	4.42061
23.9474	3.4312	3.2367	3.9419	3.1318	6.04917	6.24427	5.42224	4.53706	4.60865	2.9044	5.52575	5.15548	4.18568	3.8386	6.6033	2.1188	5.3673	3.9059	4.8492	8.0462	4.1763	5.2783	7.9556	5.5324		0.975728	4.83526
24.0665	2.6052	3.8312	5.2096	3.35645	4.93229	4.24279	3.29913	3.83032	3.79971	3.93513	5.18086	4.70606	3.11217	3.5679	7.246	3.6357	4.9869	6.4277	5.688	6.3753	3.2738	7.9331	7.0152	3.7326		0.980581	4.66346
24.1857	3.3199	3.4732	3.2163	3.29706	4.44575	2.98595	3.38585	1.79218	2.64898	5.45696	5.10239	5.90088	3.34813	3.0697	7.2985	4.2563	3.4579	3.5994	4.9191	10.6506	4.8532	9.4915	7.2452	2.7693		0.985438	4.58268
24.3048	2.9243	3.0658	3.6232	3.37408	5.98117	2.6395	4.55394	1.95314	3.70808	3.49802	5.83162	4.16519	5.98977	2.7377	4.8912	3.3717	2.6791	3.2128	3.5657	6.0505	3.2922	5.8931	4.5339	2.5499		0.990291	3.92023
24.424	2.7303	1.8737	3.9303	2.8881	3.79139	2.76949	2.9482	1.73956	4.11416	3.42203	4.26244	5.6225	6.20334	2.6715	4.031	2.6965	3.9146	3.9955	4.1696	4.9763	3.0751	5.5226	4.2111	4.4842		0.995147	3.75181
24.5431	2.2849	1.9602	2.8994	3.99855	5.94511	1.86993	2.60279	1.88699	3.26307	2.1624	6.37114	6.03776	5.51031	3.2778	7.4638	3.8085	3.0889	2.3558	6.5336	4.3855	2.9775	3.5931	7.3779	2.8863		1	3.93922

## Sheet: Image22
X0	Y0	Y1	Y2	Y3	Y4	Y5	Y6	Y7	Y8	Y9	Y10	Y11	Y12	Y13	Y14	Y15	Y16	Y17	Y18		Ap-Basal	Avg intensity
0	40.9548	55.3046	24.5805	50.6794	19.6126	28.0625	32.8638	25.6208	37.2019	28.2943	30.4402	28.6985	31.3587	26.2272	15.2201	16.2892	17.6082	17.8915	21.8411		0	28.8816
0.1191	33.3524	52.548	25.2341	43.1163	23.8108	24.1182	24.7922	29.9765	34.0967	28.3215	28.2778	28.8648	35.8301	20.278	16.5331	17.5062	18.1181	9.4583	15.5169		0.00708975	26.8289
0.2383	39.3724	59.7437	30.0207	41.4436	25.113	25.6316	25.1672	32.1524	24.1845	23.7674	30.9777	28.9854	30.6462	17.7095	19.4422	18.6989	17.6924	11.544	13.0803		0.0141855	27.1249
0.3574	33.7712	52.2163	25.9793	39.9654	27.073	23.7845	30.2797	25.7827	22.6634	23.1238	28.8292	25.3788	16.1604	20.698	16.8194	9.6868	16.3043	9.1397	10.8031		0.0212752	24.1294
0.4766	31.5899	41.8965	30.7912	34.2679	19.3262	25.6255	24.1541	27.8614	21.699	17.2799	25.9012	21.5909	22.8286	15.9564	15.1656	8.4091	14.5179	12.7992	13.8099		0.0283709	22.3932
0.5957	36.6176	34.6382	27.1878	36.0595	19.7356	18.4487	24.553	31.5241	24.5633	18.5293	21.7102	27.3984	17.3591	16.2706	12.7444	11.4281	9.8794	9.2031	13.8052		0.0354607	21.6661
0.7148	29.4044	36.631	24.7102	43.1469	33.2841	18.4094	30.9529	22.2106	23.2039	27.3218	28.1649	21.0601	21.1029	11.6472	10.4174	11.3133	7.0765	7.074	9.851		0.0425504	21.9464
0.834	34.8028	38.3503	27.1855	36.1452	24.2667	17.3157	27.5977	18.4217	18.0361	23.0681	24.7908	18.6553	14.0102	10.875	5.8823	12.1071	4.2962	7.5716	6.5345		0.0496461	19.4691
0.9531	31.6715	34.798	29.7556	33.9841	28.1132	19.0609	25.1224	18.1714	23.9664	18.8693	19.9994	18.4066	12.8065	8.2502	5.6014	12.384	4.5826	6.0218	7.0854		0.0567359	18.8764
1.0723	21.8352	27.7458	23.1368	33.4169	25.8103	19.8655	20.6216	23.2292	25.0149	22.8567	15.2507	15.8007	13.0583	10.0938	6.4326	8.1515	7.038	5.1109	5.9943		0.0638316	17.3928
1.1914	23.9637	26.7927	33.8007	34.221	25.1571	17.1481	24.1686	13.1101	30.7519	16.8941	22.2161	12.8138	16.4654	9.1287	7.5944	6.5348	10.3467	5.2932	5.9051		0.0709213	18.0161
1.3106	29.5167	29.7298	30.9934	29.0367	23.1143	14.0155	23.672	16.4409	30.5679	18.0457	19.2494	13.6877	10.6537	14.2399	6.2097	8.4875	8.3345	3.9142	5.9127		0.078017	17.6749
1.4297	30.4849	27.5109	28.3058	27.0015	17.6167	10.9581	21.7839	16.7141	26.5272	15.9717	18.2107	11.5943	7.4594	8.1157	4.8867	8.5366	7.9785	3.0232	6.0993		0.0851068	15.7252
1.5488	24.0787	30.2571	27.0534	34.3418	16.1763	17.2625	17.0837	15.7016	21.5477	7.7538	17.2607	13.936	8.4278	10.7164	5.7571	9.2889	6.6389	4.0455	6.1717		0.0921965	15.4473
1.668	28.6667	25.4788	33.9802	33.379	11.1148	16.7035	10.4716	13.2998	20.0838	11.3337	14.1775	8.2341	9.0007	10.0393	4.8059	8.0916	5.9708	3.5839	4.9674		0.0992922	14.3886
1.7871	24.835	26.0812	28.1423	25.1669	19.0551	13.7876	14.5052	9.6919	14.4666	13.8728	16.3923	9.5244	6.6546	9.0585	3.1555	7.3857	3.7776	2.232	6.6771		0.106382	13.3928
1.9063	18.2959	27.3363	31.3074	33.6218	17.8057	11.5734	14.949	6.5796	16.5939	15.4565	15.1403	11.5493	6.9912	4.6883	5.2027	5.673	5.0743	4.1761	5.1264		0.113478	13.5337
2.0254	19.7817	28.756	33.1174	40.3792	12.1827	10.8681	12.5695	8.4574	15.3443	12.9904	14.1501	6.5843	6.1188	8.7616	6.8825	4.4975	3.9362	3.5907	4.0082		0.120567	13.3146
2.1445	18.4782	20.6547	30.0254	37.0292	18.1208	11.5539	10.6686	10.8674	14.6234	16.661	15.8292	6.1598	7.2571	5.2102	6.0894	4.8795	7.0331	4.6847	4.4137		0.127657	13.1705
2.2637	19.0295	24.1603	28.4696	38.2872	18.2758	8.7838	11.724	9.9865	17.0544	18.3333	20.5206	6.8968	5.8501	5.8971	3.2581	4.6393	6.8359	7.4141	4.1062		0.134753	13.6591
2.3828	21.3022	27.4284	23.8894	36.4054	14.4698	11.9145	8.0995	8.0328	11.9456	12.358	13.5543	7.7758	4.2366	7.7274	4.926	4.361	5.927	5.3667	4.7189		0.141843	12.3389
2.502	14.1021	21.1692	27.4953	29.1528	13.633	10.6325	15.7576	12.5158	9.2469	13.3	16.6061	6.8924	4.3043	7.0406	5.3699	2.5808	4.901	2.454	4.8325		0.148938	11.6835
2.6211	13.1288	20.3886	23.236	29.2994	13.8698	10.51	14.8626	9.186	13.7272	13.3162	13.9635	6.6435	3.8932	6.629	6.6587	3.6559	4.8088	4.0754	4.0907		0.156028	11.3654
2.7402	15.6099	20.7569	24.2153	32.0341	19.9211	9.2617	13.0508	9.1443	11.6371	9.2148	9.7437	6.0194	5.2454	6.598	5.4777	4.4947	5.3448	4.0224	4.7947		0.163118	11.3993
2.8594	16.799	24.9493	22.3293	28.4748	16.8302	9.4567	13.0325	8.774	12.7618	9.7644	11.6502	8.1765	5.4329	6.4431	6.0461	4.2667	6.428	2.938	4.5872		0.170214	11.5337
2.9785	12.7438	21.3737	20.3769	35.0754	15.4122	10.0094	17.5196	6.848	12.5671	11.9358	11.8421	7.868	8.768	6.7832	8.4342	3.9396	8.898	3.1549	4.9944		0.177303	12.0286
3.0977	13.3265	26.2992	24.6287	31.1337	13.7156	8.0837	11.8857	9.557	16.3676	13.7642	12.6519	7.331	6.141	6.3832	6.4915	5.9868	7.5716	3.7853	6.1617		0.184399	12.1719
3.2168	17.2616	24.39	27.1333	32.4608	16.0319	9.4164	13.829	6.7847	10.9227	9.3708	13.3586	5.4587	6.0427	6.6085	5.4233	7.9282	6.1986	2.8898	6.6415		0.191489	12.008
3.336	16.3218	27.3018	20.2307	33.4833	11.2042	9.6172	12.2084	8.2117	14.6452	13.2747	15.4411	7.84	6.5422	4.0506	4.459	4.6523	7.2896	3.3446	3.2793		0.198584	11.7578
3.4551	15.7512	18.1705	18.5046	33.1824	14.1515	9.2325	12.862	10.5398	14.828	13.0566	17.2014	9.1425	7.2798	3.7237	4.9612	5.3771	3.6303	3.9364	3.5387		0.205674	11.53
3.5742	20.7833	17.3444	22.7348	30.0997	12.3199	14.5033	9.7556	10.2069	18.6746	7.7208	15.3722	5.9348	5.8437	3.209	4.1429	3.3809	3.7536	4.0019	4.9676		0.212764	11.3026
3.6934	17.3361	20.0255	29.0863	27.0622	9.3699	20.8844	9.9783	9.1036	11.5991	7.3623	21.5475	5.6464	5.5697	5.1182	6.1702	5.8269	6.8432	4.3674	3.7381		0.21986	11.9282
3.8125	21.7658	19.0175	22.5575	26.3618	11.4211	17.5385	6.7256	11.1572	12.0335	8.0899	14.4855	9.4077	3.8742	3.7141	5.2296	5.8928	5.6391	3.3169	3.0213		0.226949	11.1184
3.9317	24.2623	16.0265	25.5228	19.7346	14.6685	12.4126	8.7667	16.2204	9.9029	14.2382	13.619	6.3013	5.6366	4.8219	6.1064	3.5322	5.2868	4.4586	3.728		0.234045	11.3288
4.0508	27.3495	18.1123	25.3276	22.8608	8.8989	16.0452	7.8495	15.8583	11.1737	17.0318	10.4446	4.7056	7.1743	6.5277	8.2524	5.207	5.7807	4.2709	4.9373		0.241135	11.9899
4.1699	27.6371	19.916	25.0924	28.7755	11.6968	17.8731	7.8913	16.2366	10.1208	11.812	9.2042	8.0655	6.9133	5.8395	7.1446	4.9049	5.8102	2.9502	7.0565		0.248225	12.3653
4.2891	21.1293	17.3824	31.4216	27.771	16.1593	18.5478	8.5023	12.5131	10.0559	16.805	10.3962	9.4899	5.9879	5.336	4.2269	5.4841	5.5174	2.553	4.6539		0.25532	12.3123
4.4082	24.9348	19.0866	23.2152	23.6053	13.4101	14.1145	7.6662	8.633	8.6524	9.2745	10.6051	11.0963	7.4113	5.3245	5.2335	4.1506	4.2098	3.7239	4.6542		0.26241	11.0001
4.5274	16.8995	25.2421	31.3814	14.8522	13.3206	15.2385	7.1556	7.8795	9.3218	8.0959	9.0761	10.3319	7.5428	7.1405	6.7929	4.8245	2.3597	2.0803	6.2475		0.269506	10.8307
4.6465	13.2656	22.1775	30.907	19.2962	10.793	9.5174	7.3609	7.3733	8.9933	10.9061	7.4468	8.1714	5.9201	5.4412	6.2188	6.1831	3.249	3.2713	5.2983		0.276595	10.0942
4.7657	13.6505	17.3938	38.4324	23.5307	8.5963	14.6587	8.5957	4.6888	4.6382	10.2868	8.9603	8.7892	5.2249	5.5643	10.6238	4.6626	2.2779	3.5927	4.8798		0.283691	10.4762
4.8848	12.6659	15.4124	32.3974	22.8482	10.6642	9.1037	10.1965	4.0141	8.3758	12.4576	14.1154	8.7241	3.9661	5.893	6.2222	4.3474	2.2143	2.9586	4.1628		0.290781	10.0389
5.0039	10.4749	19.7462	34.8188	16.218	13.1628	11.0016	6.0407	6.2719	5.999	12.1821	16.9916	7.4873	3.0776	5.085	4.6782	3.9227	3.906	1.927	3.9537		0.297871	9.83922
5.1231	13.239	23.9278	47.5648	12.072	9.2601	13.0231	7.9049	4.1525	10.5722	6.1555	11.3653	4.9365	5.1716	9.0362	3.7906	4.8305	4.3095	3.2529	3.6947		0.304966	10.4347
5.2422	12.1832	22.6523	40.3751	19.1138	9.2592	12.9716	5.768	4.1099	7.4052	9.519	15.1225	6.3719	6.3692	10.6069	4.773	5.0238	4.015	3.4638	3.5415		0.312056	10.6655
5.3614	13.5607	15.5748	36.9105	26.7294	12.886	12.0821	5.782	4.5559	6.2082	9.176	11.0944	5.5714	5.1109	8.2293	6.1265	5.0289	3.9216	3.332	4.4134		0.319152	10.3313
5.4805	14.4272	18.0753	32.1438	21.3218	13.703	10.9547	8.1639	3.6264	5.4237	7.5519	13.956	6.4243	7.6261	8.6712	4.0237	4.3861	3.5992	2.9469	2.4045		0.326242	9.96998
5.5996	14.7591	14.4563	33.9091	20.8954	10.7819	10.3184	7.454	3.9138	5.5651	6.649	10.7899	7.6682	7.5678	9.1396	4.5367	4.385	4.8255	3.1012	4.1096		0.333331	9.72766
5.7188	17.3486	11.9469	22.0567	20.0502	11.5723	9.1672	7.8021	2.7524	5.7649	8.3315	14.0743	8.4603	4.4185	5.0662	2.9567	3.4939	2.2313	4.2277	4.7729		0.340427	8.76287
5.8379	15.3778	11.0058	25.1643	22.4956	11.3185	10.6139	7.6321	3.7508	4.471	9.1072	12.7083	6.9914	4.8646	7.8722	5.3533	6.8533	2.5198	3.3205	2.8064		0.347517	9.16983
5.9571	19.7815	11.0461	17.8054	18.9161	8.5788	10.4702	6.2288	3.0269	3.7327	9.5743	12.2275	6.5498	6.1778	6.0875	6.2959	5.5086	4.1828	1.834	6.1361		0.354613	8.64004
6.0762	18.4428	17.4323	19.9026	23.6309	9.0843	13.3632	9.9347	2.8156	5.1304	8.6054	10.6326	7.3806	7.4707	4.7479	5.5261	5.1777	4.3574	3.2885	4.4696		0.361702	9.54702
6.1953	17.7338	15.2697	17.9029	18.6072	10.7908	9.1793	7.6781	2.9798	4.7712	7.5836	9.9928	8.2167	5.8735	6.3275	3.1998	5.0517	4.9756	2.4515	5.6365		0.368792	8.64326
6.3145	14.6117	12.1079	10.7628	15.6707	7.8456	8.6989	9.2018	3.0889	4.5444	4.3298	7.091	10.3139	3.9907	6.1989	3.8548	3.9772	4.8073	3.0759	5.5388		0.375888	7.35321
6.4336	14.6996	13.3665	13.2163	15.9645	10.1497	8.7723	8.1278	2.515	4.7704	4.3704	12.0115	9.0337	5.6027	5.5883	3.658	6.2934	3.1138	2.4692	3.8052		0.382977	7.76465
6.5528	11.8077	13.5225	16.5013	14.3753	8.477	7.7907	4.6301	1.8767	2.8334	6.2448	7.505	4.7098	3.1023	2.9887	3.7401	6.7047	3.5456	3.7781	3.7052		0.390073	6.72837
6.6719	13.1757	15.231	13.7521	16.2645	14.6827	9.9627	6.3192	2.0767	1.9738	7.3353	4.411	4.7195	3.4742	3.0884	5.2462	4.8719	4.3039	4.811	2.4309		0.397163	7.27004
6.7911	15.4149	13.0863	12.1699	20.2594	13.8519	9.5224	5.7937	2.3278	2.8645	6.5509	12.9509	4.4618	4.4553	3.8002	5.2458	5.662	3.3537	3.1153	1.7837		0.404259	7.71949
6.9102	21.9663	11.5453	6.5342	19.4792	11.3329	6.8878	6.9886	2.7481	2.4418	4.0032	16.3306	6.1677	5.1335	3.025	2.9368	5.4289	3.7655	3.481	3.1447		0.411348	7.54427
7.0293	25.4263	8.6834	5.3641	16.5176	10.9908	9.678	7.0213	2.8119	3.0402	3.4784	13.8085	5.5611	5.4495	3.3216	2.0422	7.0997	3.9364	4.5622	3.0738		0.418438	7.46668
7.1485	27.9854	10.0948	6.8048	20.4763	9.6603	8.4752	8.2255	2.922	3.3232	3.2053	11.8047	6.8897	2.9176	4.3308	4.1202	5.301	4.2838	3.0235	2.2113		0.425534	7.68713
7.2676	25.7963	8.9326	4.372	16.5096	10.2277	10.2489	8.0507	3.9137	2.7198	3.8605	9.1994	7.7115	5.402	5.011	3.2784	4.7449	6.3864	2.6175	2.1443		0.432624	7.42775
7.3868	21.8847	7.5064	6.5626	14.8846	8.2483	12.3423	7.9366	2.6584	2.719	3.6302	11.3912	6.2672	5.0185	3.5121	3.16	4.0291	4.8882	2.8003	2.621		0.439719	6.95056
7.5059	11.8798	5.6611	5.4604	16.0065	10.3388	10.52	5.8419	2.244	4.2909	3.76	9.8665	8.4078	3.6613	3.8201	5.0679	8.0707	5.4624	2.1317	2.9265		0.446809	6.60096
7.625	10.6661	9.1238	7.7479	18.4361	11.3241	8.2033	5.9775	5.2586	3.3647	2.6098	13.0286	7.2464	2.1463	2.4701	3.3169	4.2265	6.5332	2.3639	3.1918		0.453899	6.69661
7.7442	14.1449	9.4621	5.469	15.2225	14.8269	10.2765	10.9301	3.3024	3.5797	2.928	11.0828	4.724	3.0107	6.7598	4.41	4.5333	6.0538	1.9981	3.5904		0.460994	7.17395
7.8633	16.8188	6.3365	5.3124	13.4369	12.8085	9.1753	5.6275	3.6799	2.3997	3.0568	9.1136	5.96	5.3393	4.521	2.8842	6.0735	4.6159	3.3567	2.2245		0.468084	6.46005
7.9825	12.9926	7.1001	7.1022	20.9317	8.8619	9.1139	4.278	3.8112	2.5646	2.8901	10.9278	3.8737	5.7983	2.2024	6.1796	2.6947	2.827	2.0422	3.2223		0.47518	6.28496
8.1016	8.5387	7.9596	8.4965	13.8911	8.9289	11.2812	6.8241	2.4729	2.9887	2.5161	11.8906	5.0144	6.9904	2.4799	3.727	3.6994	4.962	2.0549	2.7473		0.48227	6.1823
8.2207	9.9277	4.0531	5.773	13.5784	9.0732	7.5011	3.7487	2.2296	3.378	3.6592	10.7376	5.2637	5.9837	7.7113	2.8752	2.7019	4.3383	2.6744	2.5647		0.489359	5.67225
8.3399	9.7887	6.3334	3.9241	18.113	7.2035	7.5983	7.3693	2.6985	1.9253	3.8111	10.1567	5.2011	3.3343	5.8891	3.701	5.6266	4.0986	1.755	2.746		0.496455	5.85651
8.459	11.5855	5.9217	4.8687	26.5378	7.1058	9.8057	7.9086	2.6488	1.9157	3.0859	8.8605	5.8219	5.1258	6.8076	3.6043	3.0973	3.7382	1.8575	4.355		0.503545	6.56065
8.5782	11.4315	5.4654	5.61	22.0012	11.2799	10.4068	7.1247	4.4594	2.613	2.8193	10.0194	7.144	5.172	6.3405	4.98	3.0034	5.8904	3.2751	5.3549		0.510641	7.07321
8.6973	6.5427	6.7626	5.4852	16.9157	7.6877	8.1334	7.287	4.0257	2.5326	3.2394	5.9056	6.1234	6.2937	3.286	4.5574	4.4289	4.1363	3.9488	2.7077		0.51773	5.78946
8.8165	8.9036	4.606	4.1804	19.6204	11.8477	6.6241	8.3566	3.5097	2.2468	3.0274	6.6384	6.729	3.728	7.5605	4.3517	2.8219	2.6807	3.0664	2.0316		0.524826	5.92268
8.9356	8.6732	3.4722	6.2176	23.2817	9.2468	8.2529	8.8331	3.901	4.8686	3.7341	8.5681	5.5387	4.7876	5.2299	4.4618	2.5346	3.9405	2.5671	3.4325		0.531916	6.39695
9.0547	9.5557	3.4975	6.1177	26.8025	13.5861	10.0912	7.9141	3.3726	3.1813	2.4029	11.365	4.5791	7.5528	4.678	4.1979	3.0992	3.4086	3.6439	3.3177		0.539006	6.96652
9.1739	10.7282	4.0737	5.1451	25.5408	10.6517	8.9692	8.2931	4.1168	2.7509	3.3672	12.3968	5.2214	6.7844	6.5238	4.3975	3.4076	3.5679	5.1791	4.6484		0.546101	7.14545
9.293	8.2489	5.9393	6.7978	19.9647	9.2676	9.3817	8.5735	4.5254	4.1614	2.3571	15.4062	4.4811	4.5501	4.9434	3.5854	2.1564	4.877	4.6597	3.918		0.553191	6.72604
9.4122	12.2842	4.6873	4.3595	15.7464	8.7814	11.6442	6.2389	2.7105	3.1882	2.971	10.9286	6.0818	3.4565	2.4494	3.584	4.2361	3.1702	3.4726	3.393		0.560287	5.96757
9.5313	17.4443	4.335	3.4134	13.0395	7.3499	6.9258	6.8986	4.1198	3.1895	4.2059	10.4933	7.4483	3.785	5.6224	3.1795	4.2817	3.2526	4.8968	4.655		0.567376	6.23875
9.6504	13.6565	5.4481	5.128	8.1958	8.7873	7.7986	4.4365	3.0163	4.3579	3.6001	9.6239	5.0575	4.7971	6.8295	3.129	3.9459	6.3865	5.3244	5.353		0.574466	6.04589
9.7696	17.1258	5.6118	2.6661	8.1012	10.8513	9.8366	3.443	2.8964	2.7114	2.818	9.5091	6.9272	7.8644	4.5181	5.5811	3.8756	3.9078	4.3834	5.0345		0.581562	6.19278
9.8887	11.1288	5.807	3.6621	8.1924	15.9578	8.3186	8.4154	3.5773	2.5971	3.0725	8.6693	6.6808	8.1043	5.4913	3.6213	2.6418	3.7197	4.0424	5.7084		0.588652	6.28465
10.0079	12.6984	7.2476	4.4974	5.267	20.1981	5.2699	4.5677	3.5029	2.5371	4.1284	9.1981	9.3856	5.3275	5.3412	3.338	4.1953	5.6045	3.4868	8.9344		0.595747	6.56452
10.127	12.47	6.16	4.9414	7.1497	19.4089	3.5003	7.2886	4.6229	2.8345	2.6312	6.8515	3.3705	4.544	3.2553	6.2595	4.7423	4.4375	4.8721	3.8532		0.602837	5.95755
10.2462	9.3189	5.4012	2.6926	5.121	15.5551	5.8486	7.7583	4.6214	2.7343	2.8503	6.2925	6.0298	3.5082	4.2614	3.8106	3.2057	5.3475	5.7383	5.3096		0.609933	5.54765
10.3653	8.5967	2.9781	2.9819	3.9845	13.0103	7.0722	4.6851	5.0535	2.9563	3.7952	8.8095	6.8432	5.3087	2.9145	3.2404	3.919	6.1438	2.9268	5.1629		0.617023	5.28329
10.4844	10.9084	2.6191	5.0253	5.0064	13.6837	8.7498	4.5358	4.8889	2.9486	2.923	7.9466	7.5344	4.7737	3.2366	2.7732	3.7107	4.6662	1.8454	3.7734		0.624112	5.34469
10.6036	9.0086	3.0843	2.4564	4.6046	16.9331	8.5827	6.0866	4.818	3.2063	3.473	5.7165	9.3299	4.3001	4.4027	2.7256	4.7142	3.6643	2.0493	3.6493		0.631208	5.41082
10.7227	7.2095	2.9398	2.2734	7.414	15.9731	7.8117	5.7878	3.7251	3.8493	3.5386	8.6037	6.1888	4.1011	5.7149	4.0453	6.7194	2.8027	3.1465	5.5607		0.638298	5.65292
10.8419	11.4259	5.3331	2.3438	6.4949	11.6697	12.9971	7.7651	4.0944	4.496	2.8919	5.2351	6.7281	3.4377	3.6742	4.1488	7.8762	2.936	2.5675	6.4847		0.645393	5.92633
10.961	15.0638	4.9749	3.3307	5.4606	10.6896	14.3739	6.1147	3.3127	3.9324	2.9024	6.9326	6.0787	5.0855	3.0806	4.6599	4.7445	3.4858	2.7165	7.9228		0.652483	6.0454
11.0801	13.0307	3.2307	3.5511	4.0131	16.3083	8.6749	5.2051	5.9031	4.518	4.3721	5.3783	5.2782	3.5134	4.1213	3.9353	4.1412	2.21	3.734	5.2561		0.659573	5.59868
11.1993	13.1658	2.6036	2.1577	3.1133	10.5465	9.1343	3.6121	3.0638	2.383	2.3839	6.1234	8.52	5.0701	2.3772	3.5056	6.0592	4.0529	3.5231	4.1667		0.666669	5.02959
11.3184	10.4176	2.7476	3.9597	8.3107	10.8808	10.9552	4.2755	4.1934	4.3751	2.3603	4.3101	6.5713	3.3581	2.6667	2.2216	4.6437	3.0244	3.4364	4.3916		0.673758	5.11052
11.4376	10.3472	2.3315	4.6577	4.6693	8.8701	14.4951	2.933	3.4079	3.3509	2.999	4.1484	5.8984	2.734	5.1592	4.2487	4.0546	2.9432	3.2833	5.2172		0.680854	5.03941
11.5567	6.2265	3.499	1.9319	4.547	15.2457	13.1046	3.2968	4.798	3.932	2.7686	8.629	4.4787	4.3605	3.3115	4.5472	5.1077	4.514	2.7243	2.8406		0.687944	5.25598
11.6758	8.7746	5.041	1.9935	6.8623	15.554	14.4954	3.8288	5.546	2.1813	5.5233	6.7933	5.6632	6.0755	4.4036	5.5423	5.4052	3.2321	4.0443	4.5237		0.695034	6.07807
11.795	8.5648	5.2957	2.2357	8.0614	15.2018	12.9387	2.6107	6.9404	2.367	3.5535	5.6227	5.9947	5.6435	4.8401	4.2757	4.2606	5.7252	3.7588	5.9641		0.702129	5.99237
11.9141	8.3229	6.443	1.9362	3.237	12.395	12.8767	3.4703	4.367	3.7099	4.6064	7.0325	6.3183	5.9586	4.6992	6.44	6.4744	5.3167	3.8523	4.8066		0.709219	5.90858
12.0333	11.2361	3.8664	2.6702	3.5862	10.2227	10.301	3.6657	7.8669	3.5198	3.2148	5.9231	5.0776	5.9533	3.9678	3.9562	7.0388	4.0621	4.7589	2.4908		0.716315	5.44097
12.1524	7.8647	5.37	3.0329	5.7257	12.1833	6.9579	6.8628	6.388	3.9978	4.8158	9.4256	6.0884	6.3099	2.2798	3.3471	3.7837	2.6589	4.6271	2.3661		0.723405	5.47818
12.2716	6.7133	3.2311	4.811	4.8682	24.3363	9.2495	5.2635	6.3837	5.9624	5.5063	6.9736	4.9948	5.2051	2.2563	2.3278	4.0051	4.4268	3.5025	4.7141		0.7305	6.03849
12.3907	6.5344	4.9733	5.0766	4.9929	16.1437	9.9119	5.6305	6.8949	4.5007	7.0466	6.0634	3.9623	4.7617	3.5011	2.831	4.0381	5.8033	4.1611	5.0759		0.73759	5.88965
12.5098	10.3589	4.2339	5.2558	6.5727	14.4987	7.4312	4.7509	9.7972	4.1879	7.3599	7.1429	7.3439	5.4565	5.5106	5.3047	3.9246	3.9214	5.0439	5.0255		0.74468	6.48006
12.629	12.238	3.6089	4.3539	6.8422	14.7999	6.289	6.394	9.4105	3.7479	7.5057	9.078	7.5279	3.6504	4.004	3.0493	2.899	4.1263	5.2668	5.8393		0.751775	6.349
12.7481	12.828	4.514	5.8723	4.8604	14.882	6.9364	8.6946	8.4483	3.0026	9.505	7.4103	5.319	5.8334	4.7802	3.2599	5.0989	5.4337	3.2997	5.4469		0.758865	6.60135
12.8673	8.5016	4.5399	6.4768	4.7602	22.3281	8.4233	9.3086	7.9098	5.3951	6.5911	8.0049	5.6095	3.7606	6.1725	2.8087	4.0605	4.1269	4.2274	3.0807		0.765961	6.63612
12.9864	12.5623	3.152	6.0186	6.9597	24.1178	6.8185	8.8059	6.7679	6.3898	7.4729	6.6479	7.3405	4.56	4.2735	3.1185	3.6009	3.2316	3.2287	3.5596		0.773051	6.76982
13.1055	8.1752	5.7557	5.5733	6.4484	17.3534	5.3289	7.1904	8.5968	7.3771	8.5093	6.9228	6.3173	6.6034	3.3315	2.6523	4.9636	2.8046	5.2672	2.3644		0.78014	6.39661
13.2247	8.6126	5.5073	3.5134	6.8854	16.194	4.3896	6.4511	5.5924	6.7689	8.2667	12.3322	6.0572	4.4103	3.2778	2.0599	3.3148	2.9546	3.2627	3.9599		0.787236	5.99004
13.3438	8.7081	7.8875	3.9221	5.3169	14.4286	5.1893	10.9793	8.5879	10.2172	7.4642	8.3381	5.907	5.6866	3.8038	3.0752	2.5996	3.4383	3.0473	3.0912		0.794326	6.40464
13.463	5.7126	7.658	5.4448	3.8416	17.6124	5.5484	9.7512	8.1335	11.3308	9.4474	6.6099	7.8077	4.4255	3.0329	4.2038	3.0518	4.1296	2.663	3.6415		0.801422	6.52876
13.5821	8.4445	7.7971	4.3995	3.4439	12.5876	6.3702	7.132	8.1995	7.0772	10.8542	5.5541	5.5668	4.6496	4.1414	3.4318	3.7901	3.4386	2.937	3.1077		0.808511	5.94331
13.7012	11.7158	5.4182	3.3911	6.5185	14.7806	5.9396	6.2011	4.756	5.8001	13.3177	8.9124	6.8887	4.4869	3.1918	1.9705	2.4256	3.5312	1.9109	6.042		0.815601	6.16835
13.8204	7.1532	5.1252	4.7683	6.786	8.1857	5.4416	4.6267	5.4745	6.1022	10.6334	7.2999	7.8273	4.7299	3.9768	1.7083	2.5495	3.8426	2.6451	3.5214		0.822697	5.38935
13.9395	4.7907	4.7749	3.5233	5.9329	6.7508	8.3841	5.0763	5.3335	5.0608	8.878	9.0606	7.6631	8.5636	2.7187	2.3207	2.9519	3.7877	1.9994	2.3175		0.829786	5.25729
14.0587	4.0242	7.1318	6.333	4.3874	9.6077	8.0347	8.4983	5.7733	5.5063	10.5992	8.7277	4.8364	3.4281	2.1452	2.3748	3.2504	3.327	2.2865	2.137		0.836882	5.38995
14.1778	5.7874	10.3655	5.0756	5.3242	10.6411	8.6511	4.2329	8.2559	5.1404	5.2648	6.0008	2.9149	2.6734	2.1047	2.795	2.0996	4.41	2.6926	3.6178		0.843972	5.16041
14.297	8.0196	8.8373	4.8849	5.4422	7.5765	9.3646	4.7802	4.8297	3.0777	5.3784	3.3891	2.7305	3.6991	2.5566	2.3004	2.179	3.0715	2.4756	3.0359		0.851068	4.61204
14.4161	6.2079	8.0913	6.1434	9.3816	8.4701	7.3747	4.8883	2.7908	7.589	6.8491	7.7623	2.3663	2.6652	2.7753	2.0623	3.9269	2.1286	2.356	1.987		0.858157	5.04295
14.5352	3.9874	8.1404	6.484	11.8757	8.4289	13.6841	5.0465	3.8965	6.2935	6.5432	4.179	2.3808	2.4213	2.7206	2.8098	1.918	1.7824	2.8544	1.9978		0.865247	5.12865
14.6544	5.7105	12.7204	5.0456	12.1275	9.0734	10.8738	3.7936	4.9444	7.7301	7.0818	4.0921	2.0338	1.9848	2.1381	2.5685	1.7773	2.1237	2.155	1.69		0.872343	5.24549
14.7735	4.9248	6.962	6.4656	11.3217	9.5233	14.5468	6.3518	3.4163	9.489	5.8266	3.0254	2.5309	1.8107	2.7647	1.8016	1.7618	2.4639	1.7382	1.6214		0.879433	5.17613
14.8927	5.2308	9.3338	10.2174	10.6772	9.46	9.9495	9.9979	4.704	5.3829	5.8939	3.2662	2.6397	2.1073	1.7697	2.5409	1.7855	2.4571	1.9871	1.8278		0.886528	5.32783
15.0118	7.8656	6.4725	4.9956	9.9484	10.1872	9.0774	8.1117	4.5012	5.2372	6.811	3.7053	1.7251	2.3481	1.6821	1.8702	2.8773	2.8455	2.8175	3.0103		0.893618	5.05733
15.1309	7.2425	6.4736	6.3665	9.1753	8.5196	10.8982	5.818	5.6471	5.2763	6.0401	4.281	1.7537	3.0672	2.2773	3.1097	1.9704	4.2585	2.1716	3.0093		0.900708	5.12399
15.2501	4.0819	3.6159	8.0205	7.7918	7.5913	9.6112	9.5375	4.525	5.2149	4.1047	2.1156	2.46	2.343	1.7816	2.5199	1.7817	2.9366	2.7508	3.6107		0.907803	4.54708
15.3692	4.2327	4.4857	5.1749	8.2135	11.885	7.0431	7.0913	2.1997	5.0028	4.8261	1.7385	2.2786	2.7719	1.6305	2.1554	2.1792	2.2021	2.5849	1.9648		0.914893	4.19267
15.4884	2.7403	3.7516	4.7564	7.3736	11.5325	6.26	4.2942	1.9261	3.6665	2.8945	2.2171	1.8806	2.1053	1.6823	2.3793	2.0952	1.9396	1.6299	1.8627		0.921989	3.52567
15.6075	2.5326	2.8915	3.3813	6.8104	7.2144	6.0281	4.144	2.5641	4.5118	3.5454	2.1239	2.605	2.2734	2.0819	2.7428	2.6882	2.0262	1.7228	2.5971		0.929079	3.39394
15.7266	2.5256	1.9902	4.3469	5.5247	7.0244	5.2562	5.9009	3.9753	2.5015	2.7256	1.7655	2.8001	1.7426	2.1191	1.6786	2.5802	1.7685	1.8934	3.2631		0.936168	3.23065
15.8458	2.2219	3.9177	2.3409	4.854	4.2096	6.6217	7.0738	3.7687	3.3091	2.0359	1.8961	1.8484	2.0573	1.7692	2.0727	1.5941	3.1539	2.6096	2.8701		0.943264	3.16972
15.9649	2.3274	4.4097	2.1294	6.7255	2.8661	5.3733	3.6721	2.3294	1.9117	3.5505	1.9693	1.7238	2.4648	1.825	3.4452	2.7593	3.8866	2.3703	1.8485		0.950354	3.03094
16.0841	1.872	1.728	1.9632	5.3315	3.1212	6.9101	2.838	1.9069	1.8196	4.9701	1.9016	2.3499	2.3829	3.2616	1.8207	1.9914	2.6054	2.5558	1.9213		0.95745	2.80269
16.2032	2.7741	2.0673	2.4116	4.0454	2.7343	6.4656	1.8992	3.372	3.3277	3.4492	2.5985	3.2605	2.4902	2.1299	3.2888	1.7837	2.1532	3.0013	1.5707		0.964539	2.88543
16.3224	2.3834	2.9416	2.1715	3.0917	2.8267	6.5266	2.8702	2.5772	2.9124	3.0808	2.2774	2.1805	2.0063	2.4159	2.554	2.1471	2.2648	1.8728	2.0009		0.971635	2.68957
16.4415	3.088	2.4129	4.4514	3.56	2.5511	3.3524	3.2178	1.8434	2.3957	2.3483	2.2497	1.9247	2.2024	1.9294	1.7585	1.8356	1.9358	1.7686	2.4581		0.978725	2.48862
16.5606	1.9558	2.4603	2.7426	4.193	1.9567	2.3913	2.5387	2.0671	1.6946	1.8726	1.7849	2.7715	2.2215	3.0282	2.5594	2.0992	2.0304	2.0985	1.8882		0.985815	2.33445
16.6798	1.8747	2.6875	3.0048	3.1708	2.136	2.9939	3.5397	3.434	2.3902	1.8509	2.1181	2.0479	2.1303	2.7098	2.2983	1.6312	1.8374	3.8119	1.883		0.99291	2.50265
16.7989	1.9477	1.9362	3.297	2.6324	2.1234	2.7575	2.9648	1.8342	3.0528	2.0998	2.5065	2.9679	2.5273	4.0753	1.6147	1.8708	1.7723	2.1521	1.9446		1	2.42512

## Sheet: Image21
X0	Y0	Y1	Y2	Y3	Y4	Y5	Y6	Y7	Y8	Y9	Y10	Y11	Y12	Y13	Y14	Y15	Y16	Y17	Y18	Y19	Y20	Y21	Y22	Y23	Y24	Y25	Y26	Y27	Y28	Y29		Ap-Basal	Avg intensity
0	17.8333	13.8333	11.0556	12	14.1111	16.0556	12.6111	8.1667	8.22222	8.72222	10.2778	11.2222	16.2222	14.4444	16.2778	11.9444	17.9444	10.2222	8.1111	11.2778	12.7222	12.9444	19.2778	10.9444	15.3889	12.6111	11.5556	13.8333	10.3333	10.7778		0	12.6981
0.1191	9	11.2222	8.3333	11.3889	13.7778	12.9444	11.5556	8.6667	10.1111	7.66667	9.8333	19.4444	17.9444	19.7222	9.2222	15.2222	17.8333	13.1667	11.3333	7.2222	13.5	14.1111	15.9444	14	14.2222	15.1667	12.9444	12.9444	14.7778	9.5		0.0053173	12.7574
0.2383	10.1111	14.8889	13.0556	11.6667	10.4444	11	9.5556	13.9444	11.0556	5.66667	9.6667	11.2222	14.5	13.4444	13.9444	11.1111	20.1667	11.2778	7.1667	5.3889	11.7222	15.6667	12	18.6111	9.7222	14.2778	10.2222	13.3333	16.7778	10.7222		0.0106391	12.0778
0.3574	10.8889	11.1111	7.7778	15.6667	7.1667	11.7222	11.9444	9.6111	6.94444	9	12.4444	15.9444	12.3333	7.3889	15.1667	15	14.5	14.3333	11.9444	15.9444	12.6667	14.1667	11.0556	18.2222	15.1667	13.1667	7.5556	10	17	14.3889		0.0159564	12.3407
0.4766	7.7222	18.2222	15	12.8333	13.7778	11.1111	7.8333	10.8889	7.5	5.11111	13	8.5	10.3889	13.2778	13.2778	17.6667	14.0556	13.4444	10	12.1111	9.1667	12.9444	15.3333	16.9444	14.0556	8.0556	9.1667	9.6667	11.8333	6.5		0.0212781	11.6463
0.5957	11.2222	15.2778	12.6111	10.3889	12.2778	8.5556	6.1667	10.5556	6.55556	5.38889	5.8333	8.3333	10.7222	16.6667	8.3889	7.6667	8.8333	14.6667	9.8889	10.0556	10.7778	14.7778	10.8889	10.3889	9.8889	10	9.5556	12.8333	10.5556	7.1111		0.0265954	10.2278
0.7148	14.2778	13.0556	10.9444	10.5556	10.5556	10.8333	17.3333	8.8889	9.83333	7.44444	8.7222	9.7778	12.5556	8.7222	9.4444	12.3889	14.3333	16.3889	7.6667	9.2222	6.3889	14.9444	16.1667	9.8333	13.6111	5.6667	7.0556	8.7778	16.4444	8.3333		0.0319127	11.0056
0.834	6.1667	12.3333	10	7.8333	11.7778	9	14.8333	11.9444	5.11111	7.44444	11.6111	11.8889	11.1111	11.0556	8	12.0556	11.2222	9.7222	6.5556	14.2778	14.3333	16.1111	14.2778	13.8333	10.3333	9	9.6667	10.3889	11.2222	14.2222		0.0372345	10.9111
0.9531	7.7778	10.7778	8.9444	7.5556	7.6111	7.4444	7.8889	7	7.33333	7.38889	10.2222	6.1111	8.7222	7.2778	13.6111	15.3333	15.1667	12.0556	8.8333	8.2222	6.5	12.5556	14.2222	6.1111	12.9444	10.6111	6.6667	12.7778	8.8333	12.2778		0.0425518	9.62592
1.0723	4.6667	11.8333	12.0556	10.2778	5.4444	8.8889	8.5	10.7222	3.94444	10.6667	5.5556	10.2222	12.1667	6.6667	8.9444	8.6667	20.3333	7	8.6667	7.3889	8.5	12.4444	9.2222	12.7778	7.1111	7.1667	6.5	8.6111	10.3889	8.1111		0.0478735	9.11482
1.1914	8.8333	11.8889	13.3333	10.5556	11.3333	9.6667	8.8333	13.5	8.05556	5.61111	10.3333	11	7.7778	6.0556	8.6111	6.4444	11.0556	8	5.7778	2.7778	7.3333	11.8889	10.2222	8.6667	10.7222	7.1667	5.7778	7.6667	5.2778	8.0556		0.0531908	8.74075
1.3106	7.1111	8.5556	11.2222	8.6667	6.4444	8.1111	6.6111	9.1111	4.72222	5.61111	7.4444	8.9444	13.0556	5.7778	11.1111	8.7778	15.6667	11.5	7.6667	10.1111	7.1667	11.1667	12.5556	19.6111	11.3889	9.3333	5.6111	6.7778	14.1667	6.5556		0.0585126	9.35186
1.4297	7.5556	7	11.6111	5.0556	10.4444	7.3333	6.6111	8.4444	7.38889	2.94444	5.6667	8.4444	10.8889	10.2222	13.8333	5.7222	7.1667	6.6667	3.8889	7.8333	10.7222	11.4444	12.8333	12.4444	6.5556	5.1667	7.3889	10.3333	9.1111	9.3889		0.0638299	8.33703
1.5488	5.8889	9.5556	9.5556	8.4444	9.4444	11	8.7778	4.1111	5.5	4.38889	8.8889	9.2778	11.6111	8.9444	11.1111	9.5	10.1111	6.2778	3.0556	6.8333	10.3333	5.9444	8.5556	12.6667	10.8889	12.2778	7.1667	12.0556	8.1111	10.5556		0.0691472	8.69445
1.668	4.6111	9.5	10.8889	8.9444	8.2222	8.5	5.7778	2.9444	2.44444	4.88889	8.0556	9	8.0556	9.1667	11.4444	9	12.3333	5.2222	4.6111	5	8.3889	9.2222	4.1667	10.5	7.2778	8.7778	4.4444	10.8889	8.2778	5.5556		0.0744689	7.53704
1.7871	4.5	9.7222	14.5	7	5.6111	9.1667	5.0556	3.8889	5.83333	6.44444	6.2222	7.2222	8	8.5	6.6111	7.8889	6.7778	9.1667	7.0556	4.8333	7.3333	8.3333	13.6111	8.8333	7.9444	4.8889	6.5556	12.1111	12.1667	6.6111		0.0797862	7.7463
1.9063	4.8889	9.3889	10.7778	7.9444	6.7222	11.2222	3.3889	5.7222	6.11111	2.88889	5.8889	6.6667	7.8889	6.6111	7.5556	11.7778	7.7778	4.1667	3.5	7.9444	7.5	11.8333	12.5556	9.2222	10.1667	7.6111	3.0556	10.5556	11.3333	5		0.085108	7.58889
2.0254	6.7222	6.5	7.6667	3.0556	8.7778	3.7778	6.7222	2.1111	8.83333	6.72222	6.6667	14.4444	7.6667	5.3889	7	8.1111	11.3333	7.8333	7.3333	8.4444	7.3889	13.9444	10.1111	5.6667	5.4444	6.0556	5	6.2778	10.1111	6.8889		0.0904253	7.4
2.1445	4.4444	10	4.8333	8.7222	6.9444	6.1111	5.1667	7.7778	7.22222	5.22222	5.6111	4.2778	9.7778	8.3889	7	10.3333	10.2778	6.5556	6.1667	4.1111	6	7.6111	5.5	7.6111	3.8333	6.8889	4.1111	5.3333	9.1111	5.0556		0.0957426	6.66666
2.2637	7.2222	4.7778	7	6.2778	8.6111	7.1111	5.4444	6.8333	8.94444	3.33333	4	7.2222	9.2222	5.7778	9.3889	8.5556	6.3889	9.5556	5.7778	5.5556	6	6.3333	7.2778	6.2778	7.9444	5.0556	5.2778	3.7222	6.7222	10.2222		0.101064	6.72778
2.3828	3	8.8889	9.3333	4.4444	7.3889	7.5	5.6667	4.9444	4	2.77778	5.8889	6.8333	5.8333	6.8333	5.7778	8.1667	10.7222	8.3333	3.2222	8.5	5.2222	5.5	6.6667	11.5	6.1667	9.1111	5.3333	9.5556	5.1111	9.3889		0.106382	6.72037
2.502	4.2222	5.2222	9.3333	7.0556	6.1667	6.9444	5	3.6667	5.27778	4.11111	7.3889	4.7778	7.6111	12.1111	14.7778	6.9444	7.7778	4.8333	4.2222	5.7222	4.1111	7.5	7.9444	10	3.5	3.5556	4.1667	5.3333	5.7222	8.9444		0.111703	6.46481
2.6211	4	5.5	5.8889	8.4444	6.7778	6.5556	4.8333	3.1111	4.77778	3.72222	7.3333	5.4444	9.7222	10.3333	10.7222	9.6667	5.1667	6.9444	9.1667	2.5556	4.6667	8.7778	3.0556	7	3.8889	8.3333	5.9444	4.2222	7.6111	7.5		0.117021	6.38889
2.7402	4.3333	5.7778	3.6667	7.5556	12.8333	10.7778	7.5556	4.7778	5.16667	3.66667	5.3333	6.6667	4.4444	8.4444	4.7778	4.7222	12.3889	7.6111	4.2778	5.2778	4.6111	5.0556	3.5	5.6111	7.1667	4	6.2222	7.9444	7	10.6111		0.122338	6.39259
2.8594	4.5556	6.2222	9.2778	5.5556	3.7222	8.7222	6.0556	5.6111	5.38889	4.05556	5.5556	3.8889	7.3889	9.9444	3.7222	5.2222	6.4444	5.1111	5.1667	4.2778	4.6667	8.7222	7.3333	8.5	8.1667	3.6667	4.8889	6.1111	4.7778	5.1111		0.12766	5.92778
2.9785	4.1667	5.8889	5.3333	4.1667	5.1111	9.1111	4.8889	3.7222	7.27778	2.5	3.7222	6.2222	11.5	8.5	5.5	6.8333	5.6667	4.7222	3.0556	5.7778	4.6111	4.2778	6.1667	7.3889	2.0556	5.3333	2.2778	5.7222	11.6111	6.6111		0.132977	5.65741
3.0977	4.8333	7.5556	8.8889	10.2222	4.9444	7.5	3.3889	4.8889	3.66667	4.44444	6.5556	9.1667	7.9444	7.1667	7.2778	3.2222	9.2778	4.7778	8	3.6111	3.1111	3.0556	8.8333	8.7222	4.1111	4.3333	4.2222	3.8889	8.3333	10.3333		0.138299	6.20926
3.2168	4.2778	4.9444	6.8333	7.7778	6.5556	5.2222	4.7222	4	5.16667	6	6.6111	8.1111	11.1111	2.8889	7.7778	7	5.4444	4.5556	5.3333	2.3889	5.0556	4.3889	2.8333	6.1667	1.8889	4.8889	3.2778	5.7778	8.5556	11.9444		0.143616	5.71667
3.336	6.2778	4.9444	3.8333	8.5	6.4444	4.5	6.1667	2.8333	4.61111	2.16667	5.7222	2.4444	8.8889	6.8889	9.5	6.1667	5.3889	2.7778	4.8889	6.4444	3.4444	3.1111	5	5.7778	6.5556	5.5	9.5556	9.7778	7.7222	7.8333		0.148938	5.78889
3.4551	5.2778	7.6111	8.7778	6.2778	5.6111	7.7778	4.3889	6.3333	3.44444	3.77778	5	4.2778	5.6667	3.2778	2.8333	4.1111	2.3333	6.8889	3.8333	2.4444	3.0556	2.8889	6.1111	5.3889	3.3333	2.8889	7.8333	5.2222	7.7222	7.2222		0.154255	5.0537
3.5742	2.8889	4.3333	3.5556	4.1667	6	2.9444	6.0556	2.7222	5.77778	3.5	2.9444	5.6667	7.3333	2.5556	5.0556	6.6111	5	1.8889	6.3333	4.0556	4.7778	5.5	7.1667	10.6111	5.9444	3.0556	6.5556	9.8889	6.2778	7.5		0.159572	5.22223
3.6934	2.3333	6.2222	3.6667	8.5556	7.3889	7.6667	6.6667	3.0556	3.16667	7.61111	6.5	4.9444	3.6667	7	4.9444	4.1667	4.0556	4.6111	4.2778	6.1111	9.7222	5.5	4.6111	8.1667	4.4444	3.0556	5.1111	7.1111	4.8889	5.4444		0.164894	5.48889
3.8125	3.6111	4.3889	9.5556	9	12	7.4444	5.5556	6	5.61111	2.16667	2.7778	4.1111	3.6111	4.5556	8.5556	5.3889	7.5	5.2778	4.6111	2.9444	6.3889	5.1111	4.7778	6.7222	7.7222	4.8889	4	4.0556	9.9444	7.8889		0.170212	5.87223
3.9317	4.1667	5.4444	5.8333	6.8889	3.8333	3.6111	6.1111	4.7778	5.16667	4.27778	7.6667	7.5556	5.8333	5.6667	7.1667	6	7.5556	7	3.3889	4.0556	3.1667	4.2222	5.7222	2.6667	3.4444	6.2222	8.8333	7.2222	7.6111	8.1111		0.175533	5.64074
4.0508	5.5556	6.2778	3.5	7.5	7.6111	7.8333	4.1667	6.7222	6.11111	7.77778	3.9444	4.3889	4.5556	5.2222	4.9444	5.6667	5	3.1667	4.0556	4.1111	3.6667	4.6667	5.7778	5.1111	5.2222	4.0556	6.2778	6.4444	7.1111	8		0.180851	5.48149
4.1699	3.2778	8.7222	4.2222	6.0556	4.4444	5.7778	4.7222	6.0556	6.94444	3.38889	5.8333	4.1667	7.7222	4.8333	5	8.3889	3.6667	2.0556	4.7222	3.5	7.3889	6.5556	6.9444	3.5	5.8889	2.6111	4.5	7.3333	6.3333	6.0556		0.186168	5.3537
4.2891	3.1111	6.3889	8.1111	5.8889	5.2222	7.9444	6.9444	3.8889	4.05556	5.11111	6.6111	8.3889	9.8889	4.5	3.5	6.6111	7.2222	3.6111	5	7.9444	4.7222	5.2222	5.3889	5.1111	3.7222	4.9444	4.5556	1.8333	5.8333	8.5		0.19149	5.65925
4.4082	9.8333	5.3889	6.5	4.1667	6.0556	6.0556	6.3889	4.7222	6.83333	6.55556	6.2222	4.5556	5.3333	5.1667	4.3333	6	5.3333	3.8333	6.2778	6	5.9444	4.1111	4.2778	9.7222	5.2778	7.3889	3.8889	2.1667	7.8333	4.3889		0.196807	5.68519
4.5274	5.1111	5.6667	3.6667	4.2222	3.5556	4.9444	5.5556	6.7222	6.66667	4.5	6.1667	2.6667	4.3333	9.5556	3	6.8889	6.2222	3.6667	7.5556	6.4444	5.2778	6.1111	5.0556	6.8333	7.8333	4.5	4.1111	5.3889	7.1111	4		0.202129	5.44445
4.6465	5.6111	4.6111	6.7778	3.2778	5.1667	2.9444	5.7778	3.9444	4.61111	4.11111	6.1667	3.1111	7.8333	10.2222	5.0556	4.3333	3.6667	3.1111	2.6667	4.0556	3.1667	5.5556	2.6667	4.1667	6.8889	4.2222	4.9444	7.5	5	5.8333		0.207446	4.9
4.7657	6.2222	4.6667	4.6667	5.7778	4.1111	3.7778	5.3889	4.8333	5.38889	6.83333	8.0556	3.4444	4.1667	4.3889	7	3	4.4444	5.1111	4.6111	4.8333	3.8333	3.5556	5.5556	7.8889	5.0556	8.7778	6.5	9.1667	6.3889	9		0.212768	5.54815
4.8848	3.6111	7.2222	7.1667	2.8333	7.8333	5.0556	7.5	6.3333	2.72222	5.88889	9.3333	4.8889	6.7222	6.3333	6.3333	9.1667	6.6111	2.1111	3.7778	2.9444	2.5556	6.8889	2.1667	4.2778	1.8889	3.8889	6.3333	4.3333	5.8889	7.5		0.218085	5.33703
5.0039	9.5556	3.9444	4.8333	4.5556	8.0556	6.6111	6.3889	4.0556	4.05556	3.05556	4.5	4.3333	5.8889	3.3889	4.5556	7.1111	5.5556	6.7778	3.8333	2.1111	3	3.8333	1.6667	7.0556	3	5.5	4.5556	4.8889	5.7778	6.8889		0.223402	4.97779
5.1231	9.2222	4.2222	5.3333	4.6667	7.4444	5.4444	7.5556	5.2222	6.94444	6.55556	3.6111	3.2778	3.6667	8.3333	4.8333	4.5	4.4444	3.0556	4.7778	5.5556	8.3333	6.2222	5.6667	3.7222	4.5	3.6111	5.9444	6.3889	3.3889	7.2222		0.228724	5.45555
5.2422	6.4444	7.2222	4.2778	2.6667	3.9444	2.5556	6.1667	7.4444	3.55556	3.16667	3.9444	4.6667	7.9444	4.5	6.9444	4.2778	4	4.2222	4.7222	5.7222	5.7778	4.1667	3.7778	4.1667	2.2222	5.4444	6.8333	4.2222	6.6111	6.5		0.234041	4.93703
5.3614	5.7222	3.0556	1.9444	6.8333	3.0556	2.6111	2.6667	9.9444	5.5	4	6.9444	8.3889	4.9444	7.5556	9.4444	5.1111	4.7222	3.2778	4.5	4.3889	5.1111	7.2222	4.2778	6.5556	3.7222	3	6.2222	9.2778	2.5	4.3889		0.239363	5.22963
5.4805	6.8889	5	4.9444	4.9444	4.1667	3.3333	4.3333	7.5556	6.55556	8.77778	4	7.1667	7.6667	5.1111	8.3333	5.8333	4.5	2.2222	6.3333	2.3889	1.7222	5.8889	4.6667	3	5	4.5	7.6111	4.5556	7	6.7778		0.24468	5.35926
5.5996	3.7778	8.4444	3.2778	3.6111	3.2778	3.5556	8.5	7.1111	4.38889	9.94444	4.2222	5.0556	4.3889	3.8333	5.2222	9.8333	6.6111	3.5556	5.9444	3.5	4.2222	6.1111	6.7222	3.0556	5.1111	3.7222	3.4444	6.8889	3.3333	4.2778		0.249998	5.16481
5.7188	4.3889	5.2778	2.7778	4.4444	5.3889	3.1111	3.9444	5.4444	8.55556	5.66667	6.6667	6	7.6111	5	9.9444	6.2222	5.8889	7.5	3.7222	4.7778	4.8333	5.4444	8.5556	3.5556	6.6111	6.2222	5.4444	9.9444	6.3333	4.5		0.25532	5.79258
5.8379	6.4444	7.6111	3.9444	3.2222	7.6667	6.0556	6.1111	6.4444	6.05556	3.44444	6.3889	7.2778	4.8333	8.9444	6.7778	10.3889	2.8333	5.7222	4.5556	2.7778	6	1.6667	7.1111	3.6111	5.3889	7.8889	4	7.7222	5.0556	7.8333		0.260637	5.79259
5.9571	4.6111	5	3.8889	7	2.3889	5.1667	6.5556	6.1667	7.22222	6.22222	3.5556	5.9444	6.0556	9.9444	5.1667	3.6667	6.9444	4.1667	3.0556	3.2778	5.8333	2.9444	6.2222	2.7778	5.2778	5.5	7.6667	5.0556	4.1111	5.0556		0.265959	5.21482
6.0762	8	11.4444	5.6667	3.0556	3.8333	4.7778	6.1667	4.2778	3.05556	2.94444	4.2222	3.5	5.2222	6.0556	7.1111	3.2778	5.3889	5.6667	4.3333	3.3889	5.0556	4.5556	4.7222	6.3333	4	7.0556	5.3333	10	5.2222	6.6667		0.271276	5.34445
6.1953	4.6667	4.7222	6.1667	4.9444	4.5	7.5	4.5556	10.0556	8.77778	4.55556	6.1667	5	3.6667	4.8333	3.1667	4	6.0556	4.3889	2.9444	3.9444	3	3.9444	5.9444	5.7222	2.4444	8.6667	6.3889	7.0556	4	2.7778		0.276593	5.15185
6.3145	10.0556	7.5	3.7222	5.2222	6.2778	3.4444	2.6667	5.1667	11.2222	7.72222	3.8889	4.2778	6.0556	6	6.2222	5.7778	3.4444	5.4444	4.3333	5.9444	4.5	2	4.1667	3	3	3.1667	4.7222	4.9444	2	6.0556		0.281915	5.06481
6.4336	6.3333	4.7222	4.3889	3.3333	11.9444	4.6111	6.6111	5	2.72222	2.38889	4.1667	4.5	8.2222	4.1667	6	8.3889	6.5	5.0556	4.1667	4.1111	2.7222	3.8889	7.6111	1.6667	4.8889	5.6111	5.2222	4.7778	6.3889	3.7222		0.287232	5.12778
6.5528	5.0556	7.3889	4.3333	4.5	5.7222	4.3889	4.0556	6.6111	6.61111	6.27778	5.7778	5.2778	7.3889	6.3333	8.1667	7.7222	7.8889	7.3889	6.8333	5.6111	5.4444	5.9444	5.6111	5.3889	4.1667	4.6667	3.4444	4.5	4.7222	3.9444		0.292554	5.70555
6.6719	4.8889	3.0556	6	3.5	7.3333	5.3333	2.0556	2.8889	9.38889	7.22222	3.6111	7	8.5556	3.9444	7.6667	7.0556	5.1111	4.1667	7.1111	7.7778	4.6111	7.6667	3.7778	3.6667	5	5.3333	2.1667	7.1667	5.8889	4.0556		0.297871	5.43334
6.7911	5.8889	7.5556	4.2778	3.8333	4.3333	5.2778	4.7778	5.7222	6.55556	4.83333	3.4444	4.1667	8.1667	7.5	4.8333	11.6667	4.8889	5.6667	3.9444	6.1667	3.6667	4.4444	5	2.3333	5.6111	5.3333	4.2222	5	5.6667	5.6111		0.303193	5.3463
6.9102	6.3333	4.1111	4.9444	3.3889	2.1111	5	3.2222	4.2222	5	8	7.6667	6	9.1111	4.1111	4.9444	14.3333	6.7222	5.8333	3.0556	7.7222	4.9444	4	4.1667	4.5	1.9444	5.5	5.6667	7.4444	5.6111	2.7778		0.30851	5.41295
7.0293	6.9444	4.7778	6.6667	4.6111	3.1667	3.5	6.6111	5.7778	5.66667	6.05556	8	4.5	4.3889	10.9444	5.8333	5.0556	6.1667	4.5	3.7222	4.7778	5.6667	2.7222	5	6.7222	2.4444	3.1667	6.5	4.8889	7.7222	6.1667		0.313828	5.42222
7.1485	3.7778	5.0556	4.5556	3.9444	3.0556	6.1111	7	3.6667	8.44444	5.38889	6.1667	9.2778	7.2778	8.8333	4.1667	5.2222	9.6667	5.5	3.6667	4.8333	4.7778	3.8889	3.8333	5.2222	2.7778	6.7778	5.2222	4.2778	5	6.0556		0.319149	5.44816
7.2676	7.2222	6.8333	8.9444	5.1111	5.0556	4.2222	3.8889	6.3333	4.61111	4.16667	5.8333	6.9444	4.4444	3.8333	3.5556	4.1111	3.6667	6.0556	1.6667	5.1667	2.9444	4.6667	6.8333	5.4444	4.5556	5.1111	4.5	3.3889	4.5556	2.3889		0.324467	4.86852
7.3868	9.0556	4.8333	3.0556	5.2778	3.2778	3.9444	7.3333	6.0556	5.44444	4.27778	3.4444	4.2222	4.5556	6.2778	5.4444	5.8889	4.3889	6	2.2778	5.7778	7.3333	5.8889	2.6667	3.9444	5.4444	4.9444	3.5556	7.0556	6.9444	6.2222		0.329788	5.16111
7.5059	5.7222	3.2222	4.0556	4.5	5.3889	5.5	7.5556	3.6111	6.61111	4.44444	7.7222	4.8333	2.5556	3.9444	5.7778	4.1111	3.3889	5.5	3.4444	4.0556	3.9444	2.2778	4.6667	4.3333	5.6667	4.2778	6.3333	7.1111	7.0556	5.2778		0.335106	4.8963
7.625	6.7778	4.6667	5.2778	4.5556	5.6667	3.0556	3.8333	2.9444	5.66667	5.11111	6.5	6.3889	3.2778	3.5	4.1667	3.0556	5.6667	6.5	6.2222	3.8889	4	4.7222	3.2778	4.5	3.8889	3.4444	10.9444	6.3889	10.5556	4.8889		0.340423	5.11112
7.7442	2.1111	3.7778	6.1667	8.4444	2.7778	1.8889	5.2222	4.9444	4.66667	5.11111	7.3333	5.4444	5.8889	4.1111	6.5556	3.2778	3.6111	4.7778	8.0556	4.1111	3.9444	6.5556	3.6111	4.6111	3.6667	2.7778	4.3333	6.5	7.0556	3		0.345745	4.81111
7.8633	5.3333	5.7222	7.2222	5.2222	5.1667	1.8333	2.3333	3.3333	5.16667	8.61111	5.7778	3	3.1111	4.8333	8.5	8.1111	8.5	4.2778	5.2778	2.8889	2.7222	3.6667	3.6111	7.0556	5.5	5.6111	4.8889	5.1667	2	4.3889		0.351062	4.96111
7.9825	7.2222	3.3889	5.5556	2.4444	2.8889	1.9444	6.9444	4.6111	9.88889	4.44444	4.0556	6.5556	2.2778	2.2222	8.2778	12	4.2778	5.6667	7	5.6111	4.2778	3.7222	3.6667	2.6667	4.0556	5.7778	4.8889	9	4.3889	7.7222		0.356384	5.24815
8.1016	6.5	4.3889	7.7778	4.5556	6.1111	3.8333	3.9444	4.1111	7.38889	5	3.6111	3.6667	2.8889	5.8889	5.9444	7.0556	5.8889	5.3333	5.3889	3.3889	5.9444	3.4444	6.5556	3.0556	3.1111	2.0556	5.5	5.6111	2.6667	3.9444		0.361701	4.81852
8.2207	5.3333	7.5	3.5556	5.6111	4.8889	3.8889	4.8889	3.7778	6.38889	4.72222	4.5	8.0556	5.6667	7.2778	8.8333	5.3889	5.9444	8.8333	3.0556	5.9444	4.1667	4.8889	5.6667	3.7778	4.1667	3.7222	5.2222	3	6.3889	4.5556		0.367018	5.32038
8.3399	3.6111	3.9444	6.5556	3.8333	5.6667	3.8333	4.7778	3.7778	5.38889	4.16667	4.6667	3.6667	5.8889	2.3889	6.7778	7.0556	4.1111	9.3889	3.7778	6.2222	3.3333	5.8333	3.8889	2.5	4.9444	3.1667	7.3333	6.6111	11.7222	7		0.37234	5.19445
8.459	6.3333	4.6667	6.7778	5.7222	3.6111	5.3333	3.7778	5.6667	6.05556	9.38889	4.7222	7	6.6667	3.5556	7.2222	3.2222	2.5556	6.7778	5.5	5.8889	3	5.1667	4.5	4.0556	4.8333	2.3889	5.0556	3.0556	4.1111	6.3333		0.377658	5.09816
8.5782	4.6111	2.9444	6	5.6667	4.4444	3.8333	3.2778	4.5556	3.83333	4.61111	4	7.5556	6.4444	4.8333	8.0556	5.0556	3.6111	5.6667	5.9444	9.1667	5.3889	7.7778	3.1111	2.4444	2.3889	4	3.2222	4.9444	5.8333	5.8333		0.382979	4.96851
8.6973	5.3889	4.4444	4.5	5.6111	2.2778	1.7222	5.7778	6.3889	5.77778	6.22222	4.0556	3.9444	3.5556	3.0556	6.7778	7.1667	7.5	6.7222	4	5.3333	4.7778	5.6667	2.8333	4.7778	4.8333	4.2778	4.4444	4.0556	6.6667	11		0.388297	5.11852
8.8165	6.5	6	9.5	3.2778	4	5.0556	2.1667	6.7778	6.05556	6.5	4.8333	4.9444	2.9444	8.3333	5.7222	4.8889	3.6667	7.2778	4.7778	6.1111	5.4444	5.6667	5	5.3333	5.6667	4.0556	11.8333	6.5556	6.2778	6		0.393618	5.70556
8.9356	5.9444	3.6111	4.7222	2.1667	3.6111	6.9444	2.1111	5.0556	6	4.77778	2.8889	6.5	5.1111	7	6.6111	3.6667	4.6667	6.2778	2.3333	5.1111	3.3333	8.8333	2.2222	3.5	4.5556	4	5	5.0556	4.7778	4.6111		0.398936	4.7
9.0547	3.8333	3.1111	7.9444	4.6111	5.1111	2.9444	3.8333	7.6111	6.72222	3.83333	5.0556	4.5556	7.6111	7.3889	6.6111	9.3889	3.4444	3.1667	3.4444	6	3.9444	4.3889	4.1667	3	6.2222	2.5556	5.2778	5	4.1667	7.5		0.404253	5.08148
9.1739	2.3333	2.1667	7.0556	3.1667	2.9444	4.5	6.7778	5.1111	5.5	3.33333	8.1111	5.7778	8.6111	7.1667	9.1667	8.5	2.0556	5.6667	5.2778	5.8333	2.4444	8.4444	6.2778	2.2778	3.6111	6.8333	3.0556	3.5	8.1667	8		0.409575	5.38889
9.293	4.7222	7.2222	4.2222	3.2222	3.0556	2.5	6.1667	6.3333	4.38889	3.11111	4.8889	7.2222	5.0556	6.9444	4.7222	3.2778	9.1667	6.5556	3.7222	6.6667	4.5	5.6667	3.7778	5.5556	1.6667	3.8889	3.7778	9	7.1111	6.5		0.414892	5.15371
9.4122	6.9444	4.6111	6.3889	2.2222	4.4444	3.7222	5.6667	4.9444	3.66667	5.38889	6.6111	9.8889	6.5	4.4444	10.5556	4.3333	4.6111	5.7222	4.7778	3.0556	4.7778	5.5	3.3333	3	7.1111	2.7778	4.6667	7.5556	3.2778	3.4444		0.420214	5.13148
9.5313	4.4444	5.7222	5.9444	3.6667	5.3333	2.7222	4.6667	5.5	5.22222	2.44444	4.1667	4.8333	8.1667	7.6111	3.6667	6.0556	3.1667	4.5556	3.1667	3.7222	3.8889	4.3333	5.8333	6.5556	4.5556	3.5556	4.1667	3.2222	5	4.3333		0.425531	4.67408
9.6504	4.5556	3.8333	5.5556	4.3333	3.0556	3.9444	4.3333	5.8889	6	3.88889	3.8889	2.6667	6.2222	5.1667	10.6111	7.1111	2.1111	9.2778	3.5556	2.5	6.9444	4.2222	7.6667	6.5556	5.5	4.5556	2.3889	5.0556	4.6667	5.7222		0.430848	5.05927
9.7696	3.0556	5.5	4.9444	3.1667	4.1667	3.3889	3.9444	6.4444	3.55556	8.88889	5.1667	7	3.3333	7.6111	6.5556	7.2778	2.5556	4.1667	4.4444	2.3889	3.6667	6.6111	8.1111	5.1111	6.2222	3.9444	4.1111	3.7778	4.7778	5.1111		0.43617	4.96667
9.8887	3.6111	3.1667	9.7778	5.9444	4	3.5	5.2778	8.7222	7.5	5.16667	5.8889	4.5	4.5556	9.1111	5.8889	3.4444	2.2778	6.6667	3.4444	7.8333	3	4	5.4444	2.2778	5.9444	2	4.5	3.8333	1.9444	8.8333		0.441487	5.06851
10.0079	3.6111	3.7222	7.2778	5.6111	2	3.8333	4.5	4.6111	3.5	4.5	4.5556	8.2778	3.7778	5	5.7778	4.9444	3.8333	6.4444	4.7222	3.1111	6.6111	4.4444	4.8333	5.2778	5.1667	1.8333	2.2778	5.2222	5.1111	4.2778		0.446809	4.62222
10.127	4.3333	6.5556	4.8889	2.2222	4.5556	3.2778	3.0556	7.3333	6.55556	3.72222	4.0556	2.6667	4.5556	4.6667	7.7778	4.6667	5.6667	3.8333	5.7778	4.3889	3.2222	4.9444	5.0556	3.2222	3.8333	3.5556	2.4444	2.5556	4.8333	2.8333		0.452126	4.36853
10.2462	2.5	3.9444	4.8333	5.2222	3.3889	3.6667	4.0556	5.2778	3.66667	2.77778	5.5	3.6667	6.0556	3.2778	9.0556	3.2778	4.4444	7.4444	3.3333	4.7778	6	3.8889	5.8889	3.3333	7.2778	4.3889	2.2778	2	3.5556	5.7778		0.457448	4.48519
10.3653	2.7778	2.3333	4.8889	7.8333	6.5	3.7222	4.6667	7.4444	6	4.27778	4	3.5	5.5	8.7778	8.1111	3.2778	4.1667	3.3889	5.4444	8.2778	4.8889	6.7778	3.8889	4.6667	4.8333	6.3889	3.2778	2.9444	5.0556	6.0556		0.462766	5.12223
10.4844	3.7778	3.9444	5.0556	4.8889	5.3333	3.5	6.0556	8.4444	3.66667	2.16667	3.6667	4.4444	4.2778	7.6667	4.5556	9.3889	6.7222	5.2222	3.4444	4.7222	3.8889	7.5	5.3333	2.8889	3.2778	4.7778	3.1667	2.5556	3.8889	4.7222		0.468083	4.76482
10.6036	1.7222	4.9444	6.8333	8.1111	3.8333	4.5556	6.6111	3.8889	4.66667	6.44444	2.8889	5.8333	8.1111	9.8889	5.5556	4.2778	6.5	3.7222	3.8889	5	4.2222	5.2778	7.4444	2.2222	4.6667	4.2778	3.6667	2.3333	6.9444	5.2778		0.473405	5.12037
10.7227	3.5	2.8889	8.4444	3.6111	4.2778	3.1111	2.1667	2.2778	8.72222	4.11111	5.8333	6.1667	6.2222	8.2222	4.2778	7.1111	5.7222	3.2778	5	4.1667	4.3333	2.9444	7.1111	4.2778	4.1111	3	4	2.6111	4.5	4.2222		0.478722	4.67407
10.8419	3.6111	5.3333	5.1111	3.6667	6.1667	1.9444	5	4.7222	3.44444	2.61111	5.5	4.7778	7.7778	7.4444	3.8889	5.6111	5.5	7.7222	6.8889	2.5556	4.7778	5.1111	4.6111	3.5556	6.3333	4.5556	3.7778	2.9444	5.3889	7.3889		0.484044	4.92408
10.961	3.7778	3.5	5.3889	4.7222	5.1667	4.1667	3.9444	6.3333	6.33333	3	4.8889	5.8333	5.1667	6.8889	4	3.1111	4.2778	4.2222	4.6667	3.9444	3.4444	4.2222	7.5556	7.5556	6.3889	4.1667	2.1111	2.8333	4.3333	3.2778		0.489361	4.64074
11.0801	2	5.3889	4.7222	6.1111	3.3889	2.7222	5.0556	8.7222	3.88889	3.72222	5.3333	4.3333	7.4444	7.2222	4.9444	7.6111	7.5556	4.4444	4.8333	2.7778	2.2778	2.4444	8.0556	3.4444	2.8333	5.3333	7.6667	2.8333	2.5556	4.7778		0.494678	4.81481
11.1993	2.7778	3.8333	4	4.6111	4.9444	3.8889	5.0556	4	2.83333	1.66667	5.6111	10.2222	2.5556	4.7778	9.5	5.1667	3.3889	7.5	3.1667	1.8889	2.5	5.3889	7.7778	4	4.1111	5.6667	1.6667	2	2.3889	7.5556		0.5	4.48149
11.3184	2.7222	3.6111	4.3889	4.9444	5.4444	4.7778	3.5	3.9444	3.83333	2.94444	4.7222	9.8333	4.7778	4.4444	5.7222	4.1667	5.7778	4.2222	5.2222	2.4444	5	6.2778	7.2778	4.1667	6.1111	4.0556	2.3333	1.7222	2.1667	7.1667		0.505317	4.59074
11.4376	2.6111	1.8333	4.9444	5.0556	2.5556	4.3333	6.6667	4.1667	3	5.5	4.2778	4.7778	3.8889	2.7778	7.1111	4.9444	3.5	4.8333	6.1111	4.2222	4.9444	5.3889	7.1111	4.3889	4.1667	3.5556	4.7222	7.5	3.5	5.3333		0.510639	4.59074
11.5567	2.5556	2.8889	3.0556	4.7778	2	5.7222	3.1667	3.7778	2	3.55556	3.7778	3.5556	4.9444	3.9444	8.6111	7.8333	2.2778	3.7778	4.4444	7.6667	4.8333	7.8333	4.8889	4.4444	4.8333	2.2778	2.1667	2.7222	5	6		0.515956	4.31111
11.6758	2.4444	3.9444	6.2778	4.8889	4.6111	5.3333	3.5556	4.5556	3.88889	3.55556	3.5	3	4.3889	6.6111	1.8889	4.8889	9.6667	1.8333	6.1667	5.5	2.3333	6.3333	5.3889	5.7778	5.4444	3.0556	3.4444	1.8333	3.8333	5.2778		0.521274	4.44074
11.795	4.6667	3.0556	4	3.5	4.1667	6.8333	6.3889	6.7778	3.94444	4.61111	7.8333	5.2222	2.8333	2.7778	4.2222	2.7222	3.7778	5.2222	3.2778	3.7222	4.4444	3.8333	6.1111	8.2778	3.1667	4.6111	7.7222	2.8889	4.1111	5.2778		0.526595	4.66666
11.9141	4.0556	2.8889	7.4444	5.5	3.7222	3.1667	4.0556	2.8889	6.66667	4.44444	3.1667	7.2778	5.8333	4.7222	4.9444	6.2778	3.1667	3.8889	10.1111	4.9444	2.7222	4.2222	6.7778	4	2.8333	4.3333	2.2778	2.3889	2.8333	3.3333		0.531913	4.49629
12.0333	5.0556	3.9444	5.3889	2.7222	3.8889	3.8889	3.8889	5.8889	2.72222	4.38889	5.5556	7.6667	9	6.9444	3.8889	4.0556	4.7778	4.0556	6.6111	4.1111	2.1111	6.7778	5.9444	2.1111	4	2.7222	2.6111	1.8333	4.8889	2.4444		0.537234	4.46296
12.1524	1.8889	2.5	6	4.0556	4.7778	3.6667	3.8333	5.6111	7	4.44444	4.3889	5.0556	4.1667	8.0556	2.5	2.7222	3.5	3.2778	6.3889	1.8889	3.9444	3.8333	6	3.7778	4.2222	2.9444	2.0556	3.1111	5.6667	2.0556		0.542552	4.11112
12.2716	3.6111	5.3889	8.5	4.3333	5.5	3.0556	4.7778	3.3889	5.44444	6.16667	5.8333	7.2222	6.1111	6.8333	4.5	5.3333	6.6111	6.1667	4.8333	4.9444	5.5556	5.5556	3.1111	4.2222	5.8889	1.6111	3.3889	2.5556	7.7222	4		0.547874	5.07222
12.3907	3.1111	4.1111	5.6111	3.6667	3.2778	5.3333	4.5556	4.2778	5.5	6.5	4.7222	6.3333	5.3889	6	3.5556	4.1667	6.7222	2.5	6.1667	4.6667	3.1111	4.3889	7.3333	5.8889	5.1667	3.5	2.5	2.3889	4.8333	6.4444		0.553191	4.72408
12.5098	2.4444	1.6111	8.8889	4.3889	1.8333	5.2778	5.8889	5.1111	8.83333	4.16667	2	4.6111	7.4444	9.2222	3.5556	3.5556	4.2778	4.7222	7.6111	4.6111	2.6111	1.7778	7.2778	3	3.1111	3.1111	3.1111	3.4444	4.1667	3.2778		0.558508	4.49815
12.629	2	5.1111	4.7222	4.4444	5.6667	2.7222	4.8333	10.1667	7.27778	4.77778	4.3889	7.1111	3.9444	7.9444	2.6111	3.7222	7.9444	3.2222	4.6111	3.2778	2.8889	5.6111	5.8333	4.3333	4.4444	3.3889	3.9444	3.6111	2.7222	5.6111		0.56383	4.76295
12.7481	6.1111	5	3.8333	5.2778	4.2222	4.2778	3.8889	6.3333	5.83333	3.05556	3	8.8889	6.8333	7.1111	3.1111	2	5	5.1111	3.6667	5.0556	7.6111	5.1111	9.8889	4.5556	4.7778	3.2222	3.2778	1.8889	2.6667	5.2778		0.569147	4.86297
12.8673	2.0556	3.4444	4.6667	4.8889	3.6667	3.0556	4.7778	6.1111	4.94444	3.44444	3	6.0556	6.8889	3.2222	3.7222	5	5.1667	3.7778	3.3889	2.6111	4.1111	6.4444	6.1111	5.3889	2.1111	2.6667	3.8333	2.1111	2.6667	3.9444		0.574469	4.10926
12.9864	2.2222	2	6.1111	2.8889	4.1667	4.1111	2.4444	7.7222	7.05556	3.88889	3	5.3333	8.1667	6.7778	4.7222	5.0556	3.5	5	5.2778	2.5	2.8889	4.3333	4.1667	4.3889	1.7778	5.6111	2.6667	2.4444	3.7778	6.4444		0.579786	4.34815
13.1055	4.7778	2.9444	3.8333	6.1667	4.2222	3.6667	6.5556	4.1111	5.44444	5.55556	7	4.3333	3.0556	4.4444	4.3889	2.8889	2	3.9444	3.3333	3.1667	3.5556	4.7778	5	3.6111	3.0556	3.2222	2.3333	5.5	2.6111	9.3333		0.585104	4.29444
13.2247	2.3333	2.3889	9	2.4444	3.0556	3.2778	4.7222	3.6111	5.94444	4.44444	1.6111	4.2222	5.4444	6.6111	4.6111	3.0556	4.0556	5.7778	6.0556	6.8333	2.6667	3.3333	8.3889	5.3889	3.2222	5.7778	2.0556	1.5	2.8333	4.3333		0.590425	4.3
13.3438	3.1667	4.2222	5.0556	5.4444	5.9444	3.6111	7.2778	3.5	3.88889	2.38889	5.5	7.7778	5.8889	3.1111	3.8333	1.8889	3.7222	3.3333	6.8333	1.7222	3.4444	5.2222	5.0556	5.8889	4.4444	4.5556	1.5556	2.8889	5.8333	9.5		0.595743	4.55
13.463	4.2778	6	7.5	4.9444	7.2778	8.2222	4.1111	7.8333	4.44444	3.27778	4.7778	6.9444	3.2778	1.7222	3.3333	4.2778	4.0556	6.0556	5.7222	2.6111	2.5556	4.2778	5.7222	6.5	3.5	6.6667	2.3889	2.2778	4.1111	10		0.601064	4.95556
13.5821	1.6111	3	5.7778	8.8333	7.5556	7.0556	6.3333	7.3333	3.38889	2.55556	4.0556	7.4444	4	3.7778	5.5	3.1111	2.8889	6.0556	5.1667	4.0556	3.5	2.8889	3.6111	5.6111	2.3333	3.2778	3.6111	1.5	2.1667	6.2778		0.606382	4.47593
13.7012	2.7222	3.2778	2.7222	4.1111	3.6667	4.4444	4.8333	4.9444	4.33333	3	6.8889	9.5556	8.2778	2.0556	2.8889	3.5	2.9444	2.7778	9.8889	2	4	5.3889	8	4.6667	5.5	2.4444	4.8333	2.2222	2.3333	5.9444		0.611699	4.47222
13.8204	3.7778	4.5	5.2778	4	4.8889	3.2222	2.2778	5.2222	2.77778	2.5	4.1667	8.2778	5.8889	3.5556	3.1111	7.7778	2.9444	7.2778	4.6667	3.4444	9.9444	3.7778	3.7778	4.2222	3.1111	3.0556	2.5556	2.8889	3.4444	4.0556		0.617021	4.3463
13.9395	3.3333	5.0556	6.0556	4.4444	5.7778	3.5	5.2222	4.8889	3.88889	2.77778	4.0556	5.7778	7.2222	7.3889	3.7222	3	5.2222	5.2778	4.8333	4.2222	6.2778	5.1667	4.8333	4	2.3889	8.4444	2.9444	4.6667	2.6111	5.0556		0.622338	4.73519
14.0587	2.2778	6.6667	5.6111	2.9444	3.3889	3.7222	5.7778	5.4444	4.83333	6.22222	2.7222	2.8333	4.3889	3.8333	5	4.2778	3.7778	6.9444	6.5556	2.9444	4.5556	6.1111	3.1667	3.0556	4.5	2.2222	2.9444	3.7222	2.3333	3.4444		0.62766	4.2074
14.1778	1.8889	1.7778	9.9444	3.9444	2.4444	2.9444	2.7222	4.5	4.72222	3.55556	4.5556	6.3889	7.0556	3.0556	3.7222	4.8333	5.5556	4.6667	7.8333	6.1667	3	4.2778	3.2778	4.1667	4.4444	4.3889	1.6111	4.2778	4.6111	4.8333		0.632977	4.37222
14.297	1.6111	3	5	2.8889	4.1667	3.2222	1.8889	6.1667	5.22222	2.72222	4.6667	4.7222	6.6667	3.4444	7.3333	4.3333	4	5.3333	4.7778	3.3889	4.8889	4	3.1111	6.2778	6.4444	2.5	3	3.3333	4.7222	4.1111		0.638299	4.23148
14.4161	2.2778	4.3333	3.8889	4.9444	4.4444	5.3333	4.9444	1.8889	1.83333	4.72222	3	4.7222	4.5556	4.8889	6.8889	4.9444	2.6111	8	9	4.5	5.6111	5.2778	3.6111	6.3333	3.3889	4.0556	3.9444	2.4444	2.1667	5.0556		0.643616	4.4537
14.5352	3.4444	2.7778	5.2778	4.6667	3.6111	3.5	5.9444	4.1667	6.94444	5.72222	3.1111	4.8333	4.3333	3.4444	7	3.7778	4.6111	3.3333	3	4.2778	5.3333	3.7222	2.5	6.2778	3.8333	3.3333	4.5	2.7222	3	7.3889		0.648933	4.34629
14.6544	5.5556	3.8333	6.0556	3.5	3.2222	6.1667	3.3333	6.1111	5.88889	3.05556	2.2778	7.6667	3.5	4.7778	4.5556	4.8889	4.4444	5	6.9444	4.7222	2.0556	3.3333	4.7222	7.0556	8.2778	1.7778	4.4444	1.6667	1.7222	3.2222		0.654255	4.45926
14.7735	4.5	2.6667	5.8889	7.6667	4.5	1.9444	3.8333	5.6667	6.33333	4.61111	3.1111	5.1111	1.8889	4.1667	7.2222	3.8333	3.3889	4.5556	1.8333	4.2222	5	4.8333	4.6111	4.7222	5.5556	5.7778	6.6667	2.0556	3.0556	2.2778		0.659572	4.38334
14.8927	4.2778	4.6667	6	3.2222	6.6111	5.2778	4.7778	4.6667	4.05556	2.44444	2.3333	6.5556	5	3.1111	4.5556	3.8333	3.8889	3.8333	5.8333	6.1667	2.5	5.1111	6.3889	2.7778	7.3889	4	4.5556	1.6667	3.3333	4.1111		0.664894	4.43149
15.0118	5	1.9444	4.1111	6.3889	7.2222	5.1667	4.1111	8.5	5.38889	2.77778	3.6111	5.1111	4.6667	3.6111	5.7778	4.7222	3.1667	4.9444	5.9444	4.5556	3.7222	8.5	4.3889	4.8333	3.8889	5.6111	4.4444	5.0556	3.2222	4		0.670212	4.81296
15.1309	2.3333	4.8889	7.0556	3.5556	6	6.7222	3.4444	2.7778	6.72222	2.77778	2.5	5.3333	2.6667	2.7222	6.7778	3.2222	3.6111	7.1667	2.8333	2.6111	4.1667	5.2778	8.1667	4.9444	3.4444	5.2222	4.5556	3.5556	2.1667	3.8889		0.675529	4.37037
15.2501	3.5	4.1667	3.3333	9.1111	3.7778	5.1111	3.8889	9.5	7.77778	6.72222	3.8333	4.1667	6.8889	3.7222	5.0556	3.6667	3.8333	5.8889	6.3889	2.6111	3.3333	5.3333	2.5556	3.9444	2.5	7.1667	3.4444	2.8889	1.9444	8.7222		0.680851	4.82592
15.3692	2.2778	5.6111	5.2222	3.7222	6.6667	7.3333	5.1667	6.5	8.83333	3.16667	2.5556	3.5	7.0556	2.8889	2.7778	5.7778	3.5	3.6111	5.1111	4.1111	4.2778	6.3889	4.2778	4.8333	3.9444	6.0556	3.8333	5	5.1111	3.5556		0.686168	4.75556
15.4884	4.7778	5.5	3.6111	4	5.5556	3.5	5.1667	9.3889	3.77778	4.38889	4.2222	4.8889	7.9444	4.1667	7.4444	4.2222	4.8889	4.1111	5.0556	5.3889	5.1667	10.1111	3.1111	3.1667	6.3333	2.6111	3.7222	3.4444	4.4444	3.5556		0.69149	4.92222
15.6075	3.3333	2.5556	6.1111	4.3889	4.1111	3.5556	4.5	6.7778	11.3889	4.5	2.5556	3	5.2222	4.8333	7.7222	5.5	3.0556	4.1111	4.0556	2.9444	4.8889	3.0556	3.2778	2.9444	5.1667	5.9444	2.1111	2.7778	2.2222	7.2222		0.696807	4.46111
15.7266	2.6667	4.8889	2.9444	7.7778	4.8889	2.7222	2.2778	4.7222	7.05556	6.5	3.2222	5.1667	7.6111	5.0556	5.5556	4.8889	2.9444	2	5.4444	6.4444	3.5556	4.0556	6.0556	5.2778	5.0556	3.4444	3.4444	2.3333	3.6667	5.7222		0.702124	4.57963
15.8458	2.6667	4.2222	6.9444	4.3333	3.6667	5.5556	4.0556	4.9444	6.38889	4.55556	7.6667	5.5556	6.1111	3.5556	4.8889	3.2222	3.8889	6.5556	5.3333	6.5	3.7222	6.2778	5.3333	4.6667	2.3333	5.5	2.4444	2.6667	2.5	8.7222		0.707446	4.82593
15.9649	2.6111	4.0556	6.2778	4.9444	8.2778	6.5	4.6111	6.7222	10.9444	7	3	10	5.7778	5	2.0556	5.5556	4.7778	4.1667	2.5556	3.6667	3.5556	3.7778	7.8333	5.3889	6.8889	5.5556	3.6111	2.5556	5.3333	4.6111		0.712763	5.25371
16.0841	3.5556	3.8889	2.6111	4	4.0556	5.7222	2.9444	5.3333	9.33333	4.72222	2.2222	4.9444	5.4444	7.0556	5.6111	3.9444	3.6111	4.7778	3.8889	2.5	8.4444	5.3333	3.6667	3.5	7.5556	4.4444	9	3.1111	4.3333	5.1111		0.718085	4.82221
16.2032	2.7778	3.5	5.1111	3.1667	2.5556	4.8333	6.0556	4.2222	3.77778	5.94444	4.2222	9.1111	7.7222	6.1111	6.7222	3.7778	4.3889	5.8889	4.1111	4.1111	4	2.1667	7.7222	5.2222	1.9444	5.8889	2.7222	1.9444	4.0556	5.3889		0.723402	4.63889
16.3224	5.3333	4.8889	3.4444	3.2778	2.7778	3.3889	2.5556	4.7222	2.77778	2.55556	5.1111	8.2778	4.0556	7.6111	4.8889	2.2778	3.0556	7.2778	5.3889	4.1111	4.8889	4.6111	3.5556	3.8333	4.3333	4.7222	5.0556	2	4.3333	5.1111		0.728724	4.34074
16.4415	2.9444	3.1667	7.6111	3.1111	6	3.8333	2.3333	5.5556	6.33333	2.66667	5	6.5556	5.6667	6.1111	7.1667	3.6111	7.8333	5.7778	5.6111	6	3.8333	8.2222	6.3333	6.9444	2.2222	3.7778	5.7778	3.4444	2.3889	3.9444		0.734041	4.99259
16.5606	4.6111	4.8333	3.2778	5.5	2	2.2222	4.8333	4.5	4.16667	2.72222	5.5556	4	2.2778	4.7778	5.3333	3.8889	5.1667	2.7222	4.7778	3.9444	4.0556	5.0556	6.8889	5.6111	3.6111	5.6667	2.4444	3.0556	2.4444	3.8889		0.739359	4.12778
16.6798	1.8333	4.4444	5.4444	3.3333	3.4444	3.4444	6.6667	5.5556	5.66667	2.55556	4.1667	9.1667	7	5.8333	6.1111	4.5556	5.7222	2.7778	4.6111	4.8889	4.6667	6.3333	6.7778	6.7778	5.2778	4.7222	2.9444	3.6667	4.5556	8.7222		0.74468	5.05555
16.7989	3.7222	2.2778	4	4.4444	3.3333	3.1667	4.1111	3.8333	4.5	3.61111	5.6111	7.7222	7.0556	4.3333	2.7778	3.5556	6.1667	5.7778	7.2222	6.5	8.1667	4.6111	5.4444	3.5556	4.8889	5.5	4.5556	2.3889	2.0556	6.2778		0.749998	4.70556
16.9181	2.8889	3.1667	3.3889	3.2778	3.5556	4.1111	3.1667	3.1111	5.27778	3.22222	7	6.3889	6.5	4.2222	8.2222	6.7778	3.1667	6.3889	6.9444	7.2778	5.6111	6.2222	5.6111	3.2778	6.2778	2.5556	5.2222	2.2778	4.9444	4		0.75532	4.80186
17.0372	2.8889	5.2222	5.7222	4.7778	2.8889	2.8889	7.1667	7.6667	4.55556	4.27778	5.7778	5.3333	5.9444	3.5556	8.8333	5.7222	3.8889	4.5556	2.6111	3.6667	7.1667	4.4444	3.5	4.7222	2.8889	5.2778	4.6667	2.1667	4.2778	2.4444		0.760637	4.65
17.1563	3.9444	3.5	4.7778	1.6667	3.1111	3.1111	3.1667	8.2222	2.88889	2.72222	10.6667	6.5	7.6667	3.2222	7	3.9444	6.6111	3.2778	3.5556	5.7222	5.1667	4.8333	7.5556	7.6667	5.3333	6.1667	3.2778	3.3333	1.6667	5.5556		0.765954	4.86112
17.2755	2.9444	3.8333	4.7778	4.0556	2.9444	4.1111	4	5.1111	9.11111	6.55556	3.2778	3.5556	5.4444	6.1667	5.8333	2.3333	5.5	10.8889	5.2778	4.8889	6	8.2222	6.5	3.5556	3.2778	2.7778	3.9444	4.3889	3.4444	5.6667		0.771276	4.9463
17.3946	6	5.8889	4.8889	7.8333	2.7222	3.6111	3.5	9.1667	4.16667	3.22222	5.3889	11	2.9444	5.8333	3.8333	3.8889	4.2778	5.1111	5.8889	3.9444	6.7778	8	3.9444	4.2222	5.9444	5.7778	4.2222	3.1111	5.2778	3.3333		0.776593	5.12407
17.5138	2.5556	6.3333	6.1667	3.1111	7.3889	2.6111	2.7222	11.1111	8.44444	4.66667	4.7778	4.8333	6.3889	5.2222	4.4444	3.1111	5.7222	3.7222	8.3889	6.3333	5.3889	5.3889	5.4444	2.5	6.1667	3.6667	4.2778	3.1667	5.7222	3.1111		0.781915	5.09629
17.6329	4.5	5.0556	8.6111	4.0556	8.5	2.5556	3.2778	9	5.27778	6.27778	5.2222	6.6111	6.8333	4.1667	5.1667	5	6.3333	5.4444	6.6111	3.5	3.1667	4.7222	3.0556	5.9444	4.8889	4.1111	6.2778	2.2222	3.6667	5		0.787232	5.16852
17.7521	3.5	2.3333	1.9444	7.5556	3.5556	4.0556	2.7778	7.3889	6.72222	2.11111	3	8.3333	2.7778	7.8889	3.4444	7.2222	7.2222	2.5	6.3889	4.2778	3.2222	9.1667	4.1667	7.3889	6.3889	5.2222	3.5	2.8889	4.6667	4.1667		0.792554	4.85926
17.8712	2.6111	3.9444	2.9444	6.8889	2.5	2.8889	5.7778	4.1667	4.33333	5.94444	4	7.6111	5.5556	4.3333	4.4444	6.0556	3.1667	7.6111	6.0556	7.7778	6.9444	3.7222	6	4.2778	3.2222	6.2778	5.7778	4.1111	4.8889	3.8333		0.797871	4.92222
17.9903	4.6667	3.1667	7.3333	8.6667	2	3.5556	7.8333	3.5556	2.5	5	5.8889	3.6667	4.5	6.1667	4.5556	6.5	3.6111	2.0556	11.3889	3.4444	5.6667	3.3333	5.3889	3.8333	4.2222	6.8889	1.7778	2.0556	5.5	5.1667		0.803189	4.79631
18.1095	2.8333	2.8333	4.2222	5.9444	7.6111	5	3	4.9444	7.83333	4.83333	3.2222	8.8333	3.8889	3.5	3.5	5	4.8333	3.7778	4.8333	2.9444	3.8889	4.1111	5.2222	5.8333	4	7	3.2778	1.7222	4.2778	6.7222		0.80851	4.64814
18.2286	3.5	2.1667	4.4444	2.5556	2.8889	4.2778	2.8333	4.8333	5.83333	7.38889	3.1111	4.7778	4.0556	11.1111	2.7778	4.8889	6	4.3889	4.3333	4.1111	3.3889	5.7222	8.9444	6.0556	3.6111	3.3333	4.4444	1.8333	4.6111	5.0556		0.813828	4.57592
18.3478	3	3.8889	3.5556	4.3333	4.3333	2.8889	4.8333	3.6667	7.61111	2.22222	4.9444	4.1111	2.3889	7.8889	5.0556	1.7778	3.2778	2.8333	6.5556	3.2778	5.1111	3.5	5.8333	3.8333	2.7222	4.7778	2.4444	2.7778	3.2778	4.0556		0.819149	4.02593
18.4669	3.3333	3.5	2.3889	6.2778	5.2222	4.9444	4.1667	4.6111	5.16667	5.88889	4.6667	3.7778	2.9444	4.3333	2.8333	1.6667	5.2222	3.8889	4.2778	3.1667	5.9444	3.1667	6.5	2.6111	3.8889	6.0556	4	2.3333	2.2222	4.6667		0.824467	4.12222
18.586	8.8333	2.1667	5.2778	5	5.0556	5.8333	3.7222	6.7778	2.61111	4.5	6.4444	6.9444	5.1111	6.1667	4.0556	1.8333	4.1667	4.2778	7.8889	5.5	6.6667	4.9444	5.7222	2.9444	4.1111	2.6667	4.6111	4.0556	5.2778	4.5556		0.829784	4.92408
18.7052	5.5556	4.5	5.3333	5.3333	5.2778	4.8889	8.3889	1.8889	2.72222	6.27778	4.7778	8.6111	3.3889	3.5556	2.1667	3.6111	6.1667	5.4444	5.0556	4	3.7778	2.8333	3.2778	5.6111	4.8889	3.4444	2.7222	6.3889	4.5	8.4444		0.835106	4.76111
18.8243	3.4444	2.7222	4.7222	3.8333	4.5	5.6111	2.6111	5.7778	3.22222	4.44444	4.6667	8.1111	3.1667	6.6111	4.7778	3.3333	4.6667	4.4444	11.1111	3	2.1111	2.5	7.1667	3.3889	3.3333	4.0556	2.1111	3.5	4.5	5.2778		0.840423	4.42407
18.9435	3.1667	2.8889	4.3889	3	4.5556	3.9444	5.5	4.3889	6.66667	6.11111	7.6667	4.3889	4.8333	7.3889	3.8889	3.1667	6.1667	4.7778	5.7778	5.6667	6.8333	8.5556	2.9444	3.8889	3.1667	4.3333	3.2222	5.4444	2.5556	7.0556		0.845745	4.87779
19.0626	7.1667	2.9444	4.8889	6.1111	2.4444	6.0556	5.3333	4.7222	6.77778	3.55556	5.3889	2.7222	8.3889	6.8889	1.8333	2.2222	2.3333	4.1111	5.2778	2.8889	3.2222	3.5	6.2222	2.5	5.1667	1.7222	3.7222	3.3889	3	5.1111		0.851062	4.32036
19.1817	6.5	6.7778	3.7222	6.6667	6.1667	3.1111	1.8889	5.6667	6.77778	11.5556	1.7222	5.0556	3.1667	5.1111	1.7222	3.7222	3.4444	2.6667	4.3333	4.2222	3.8333	4.2778	4.6667	6.4444	4.6667	3.8889	3.2222	2.7222	4	5.3333		0.856379	4.56852
19.3009	4.8333	6.3333	5.3333	4.3333	4.7778	3.6667	3.7222	6.3889	7.05556	5.38889	2.5	4.6667	5.1667	3.6111	2.5	5.1667	4.1667	4	3.9444	5.1111	6.1111	2.6667	5.9444	5.5556	8.5556	3.7778	5.6667	2.7222	5.9444	3.8333		0.861701	4.78148
19.42	2.6111	4.1667	3.7222	9.2778	2.1667	1.8889	4.0556	10.5556	6.94444	3.27778	5	3.6667	5.1667	8.9444	1.6111	5.7778	4.0556	4.2778	4.2778	2.1111	5.5556	4.5556	6.1667	7.3333	5.0556	3.1667	2.7222	2.7778	5	8.3889		0.867018	4.80927
19.5392	3.5556	4.6667	4.3333	5.6111	3.1111	2.1667	3.3333	4.9444	5.44444	4.72222	2.4444	3.4444	8.5556	3.6667	4.1111	8.0556	2.6667	3.5	6.2778	3.0556	2.9444	4.1667	5.8889	2.5556	4.0556	3.2778	3.0556	4.1111	4.2222	4.5		0.87234	4.21482
19.6583	3.7222	4.9444	4.2778	4.9444	2.1111	4	2.9444	5.6111	4.44444	3.33333	7.2222	4.4444	5.9444	3.0556	4	3.7778	3.3889	5	5.5556	4.7778	7.0556	3.7778	3.7222	6.0556	3.7778	3.7778	4.2222	2.6111	3.7778	3.5556		0.877658	4.32778
19.7775	3.0556	4.8889	4.2222	8.1111	2.6667	3.3333	3.4444	4.6667	2.83333	6.88889	2.8889	6.5	5.3889	6.6111	2.8889	4.2778	2.8333	4.2222	7.2222	4.9444	4.3889	5	5.9444	5.1667	10.1111	5.8333	6.3889	4.0556	4.8889	4.3333		0.882979	4.93333
19.8966	4.0556	4.2222	5.3889	7.2222	3.6667	3	2.1111	4.2222	6.5	2.83333	2.6111	5.9444	7.9444	4.5556	4.4444	2.3889	6.1111	3.3889	5.7222	4.0556	3.8889	4.9444	4.7222	3.4444	5.5	3.8889	3.2222	1.7778	4.4444	8.5		0.888297	4.49073
20.0157	2.3333	6.6111	4.3889	5.6111	3.4444	2.6111	4	2.3889	5.88889	4.05556	5.7222	5.1667	3.5556	6.1667	4.7778	3.6111	6.3333	6	3.5	3.1667	7.2778	2.6111	4	2.1667	6.3889	4.8333	4.3333	4.2222	3.1111	5		0.893614	4.44259
20.1349	5.8333	4.5556	5.2778	2.7222	2.5556	1.6667	2.2778	3.4444	5	8.72222	3.7222	2.8889	6.2778	4.5556	2.1667	4.2222	2.7778	6.1667	3.8333	7.3333	8.6111	2.8889	3.1667	8.5556	8.1667	3.5	3.5556	2	3.4444	6		0.898936	4.52964
20.254	5.1667	3.3889	3.9444	4.7778	3.4444	1.8889	3	5.8889	7	6.44444	4.0556	5.1667	4.2222	2.7222	3.9444	4.5	4.8889	7.0556	5.3333	7.2778	7.3889	3.5556	5.1111	3.3333	6.8333	5.1111	3.6667	4.7778	2.5	4.6111		0.904253	4.7
20.3732	1.7778	4.0556	2.7222	4.5556	3	2.2778	2.5	3.6667	5.88889	3.72222	10	7.7778	7	5.5	4.0556	6.6667	5	7.0556	6.5	5.3889	3.9444	3.5556	5.3333	5.6111	7.0556	5.8889	4.6667	5	2.1111	3.4444		0.909575	4.85742
20.4923	3.8889	4.6111	6.5	2.8333	2.6667	4.8889	2.6111	3.6667	7.16667	7.66667	4.2222	8.1667	5.4444	2.5	3.7778	3.8889	3.4444	6.5	3.5	8.5556	4.6111	6.9444	4.5556	3.4444	7.5556	7.3889	3.6667	3.1111	5.2222	5.2778		0.914892	4.94259
20.6114	3.5556	2.5556	4.7778	2.7222	5.6111	2.8889	4.2778	6.6667	6.44444	5	5.9444	2.7778	5.3889	3.7222	4.7222	7	6.3889	6.0556	2.6667	6.7222	5.8889	7.3889	4	3.5	4.3889	3.0556	2.5556	6.9444	4.8333	2.7778		0.920209	4.70741
20.7306	5.2222	4.1111	4.8889	6	2.7778	3.8889	2.8333	5.8889	7.05556	6.88889	4.1667	3.8889	2.7778	7.1667	3.2778	5.1667	3.5	6.5	8.7222	5.3333	3.0556	2.8889	2.6111	4.2778	5.1667	5.5556	1.8333	6.0556	4.8889	8.2778		0.925531	4.82223
20.8497	2.4444	7.3889	2.3889	3.3333	3.7222	2.8889	3.3889	6.5556	4.66667	8.77778	4.2222	6.2778	5.9444	4.3333	6.9444	7.1111	6.3333	7.2222	6.2778	6.7222	5.5556	7.5	2	5.3333	4.6111	3.6667	3.6111	2.9444	6.3889	5.7778		0.930848	5.14444
20.9689	4.2778	2.6111	2.6111	4.1667	2.7222	2.2222	4.8333	5.3889	10.3889	4.38889	6.6667	4.6111	7.6667	8.8333	4.2778	11.3333	8.8333	2.3889	5.5	5.8889	6.5556	7.4444	4.0556	4.8333	5.3333	5.3889	2	4.2778	8.5556	4.1667		0.93617	5.40741
21.088	5.0556	3.2222	5.0556	1.8333	3.2222	3.2778	2.3333	3.8333	4.83333	5	7.6667	5.8889	3.3333	5.4444	4	10.0556	4.1667	3.7222	6.4444	6.3889	9.8333	8.7778	6.2222	5.3333	3.8333	6.1111	3	3.2778	4.6667	7.6667		0.941487	5.11666
21.2071	5.2778	5.6111	4.7778	3.3333	2.5	3.8333	2.0556	4.5	4.66667	3.94444	5.9444	4.7778	5.3333	7.8889	6.0556	7.5556	6.1111	6.9444	4.6667	4.3333	5.1667	5.8889	5.7778	2.6111	5.9444	7.5556	2.7222	2.5556	2.8889	3.1111		0.946805	4.81111
21.3263	4.2778	3.1111	3.5556	2.6111	1.7778	3.6111	2.7222	3	7	6.61111	3.7778	4.8333	4.6111	4.6111	4.4444	5.8889	3.4444	9.7222	3.8889	5.1111	3.0556	3.4444	7.6667	3.8333	4	3.2778	6.4444	3.0556	2.8333	5.5556		0.952126	4.39259
21.4454	2.7778	5.1667	3.1111	3.1667	3.0556	1.8333	2.9444	4.3333	4.72222	4.83333	5.3333	7.6111	4.4444	5.5556	4	5.5556	4.0556	8.6111	8.6111	6.8889	6.6111	5.5	4.2778	4.2778	2.0556	3.7778	5.1667	6.3333	4.9444	3.8333		0.957444	4.77963
21.5646	4.3889	2.2778	3.8889	5	2.2778	3	3.5556	1.7778	7.88889	7.22222	6.0556	5.1111	10.3333	4.7778	3.5556	6.9444	3.7778	6.3333	4	5	6.2222	3.6111	4.0556	3.1667	4.2222	6.5	3.2778	2.5	4.5	3.8333		0.962766	4.63519
21.6837	5.1111	4.5	2.2222	1.8889	2.3889	3	2.6667	5.6111	8.83333	6.66667	3.2222	5.5	3.1667	7.5	5.3889	6.2778	5.6667	6.1111	9.7778	3.2778	6.3333	8.8333	2.9444	5.5	3.3333	6.7222	4.2778	5.0556	3.9444	5.8889		0.968083	5.0537
21.8029	2.0556	2.8333	2.1667	1.7778	2.1667	3.0556	2.3333	4.3333	6.11111	9.05556	4.2222	4.6667	4.6667	2.3889	3.3333	3.5556	3.6111	3	3.5	6.8889	5.8333	3.8333	5.1667	2.7222	4.3333	3.1111	4.1111	2.5	5.6667	5.3889		0.973405	3.9463
21.922	3.7222	4.0556	2.6111	5.1111	1.8333	2	2	3	6.38889	3.72222	13.7778	3.6111	4	6.3333	3.2222	5.2778	4.4444	6.6111	2.8333	3.8333	2.2778	3.7778	5.7778	3.2222	2.7222	5.6667	2.5	4.5	4.5556	5.3333		0.978722	4.29074
22.0411	2.8889	1.7778	2.8889	2.6111	2.8889	1.7222	1.7778	5.6667	4.5	5.38889	4.1111	6.3889	3.3333	6.2222	5.6667	3.9444	3.1667	2.9444	2.8889	4.6111	8.2778	3.2778	4	6.7222	3.9444	3.7778	9.2778	2.3889	4	9.4444		0.984039	4.35
22.1603	1.7778	3.2222	2.6667	3.0556	1.8889	1.8333	2	4.8333	3.77778	5.72222	4.7222	2.7222	3.2778	4.3889	6.1111	8.3333	4.4444	6	2.7778	2.6111	3.8333	3.7222	3.4444	3.2222	4.4444	4.1111	9.1111	5.2778	6.7778	7.3889		0.989361	4.24999
22.2794	1.8333	3.1111	1.9444	2.7222	4.1667	3.7778	2.2778	3.0556	3.22222	4.05556	5.3889	5.4444	4.1667	3.3333	3.0556	3.6111	3.9444	3.8333	5.5	5.1667	3.6667	3.3889	3.7222	5.0556	3.1111	3	3.9444	4.8333	6.9444	4.1111		0.994678	3.84629
22.3986	3.2778	2.5	1.8333	2	1.7778	2.5556	2.5556	5.9444	4.11111	9.61111	5.9444	5.5	2.2222	4	2.6667	6.0556	6.7222	4.7222	1.7778	3.1111	2.5	1.9444	2.9444	5.5	2.8333	3.3333	5.7222	3.6111	2.6667	3.8333		1	3.79259

## Sheet: Image20
X0	Y0	Y1	Y2	Y3	Y4	Y5	Y6	Y7	Y8	Y9	Y10	Y11	Y12	Y13	Y14	Y15	Y16	Y17	Y18	Y19	Y20	Y21	Y22	Y23	Y24	Y25	Y26	Y27		Ap-Basal	Avg intensity
0	10.8278	12.7186	10.7241	25.8991	17.8484	22.9172	9.0213	19.3111	13.3908	18.2545	9.4185	8.6776	15.9697	15.3628	18.8475	8.9235	14.0698	11.6071	8.6737	13.7063	7.6033	13.242	11.9302	13.3703	12.9277	11.6801	5.1311	2.7743		0	13.0296
0.1191	15.9743	9.45	12.5676	19.0188	17.3457	15.5117	12.1517	16.3342	12.5713	19.8786	9.3446	11.3155	11.1611	19.2986	13.8006	13.1849	9.6493	12.047	12.4945	14.7749	8.6446	15.8514	17.1876	9.5136	9.717	7.4592	6.9164	2.5287		0.00471534	12.7033
0.2383	17.5424	8.4664	11.4659	21.8472	15.362	12.0941	17.1485	20.3485	16.7136	16.5895	10.2463	10.2715	12.6746	14.1387	15.7744	15.7885	8.9493	13.4291	11.2068	10.0129	11.7056	20.0469	17.5208	7.7354	7.2619	8.9472	4.4611	2.2413		0.00943463	12.8568
0.3574	12.9975	12.7656	9.9911	19.8101	15.7505	16.6022	16.8824	19.2161	15.2892	27.1522	12.4727	11.3525	14.3079	12.1799	17.128	10.8824	13.4631	10.6403	11.4138	10.9552	8.5076	17.9051	20.4488	8.1521	8.8782	7.773	2.8815	2.5097		0.01415	13.1539
0.4766	14.059	8.2387	10.1503	21.939	16.0174	14.9243	16.5186	17.3146	16.1611	16.9804	9.4435	9.0197	13.54	13.7653	12.4779	12.3005	9.1165	10.2833	9.3073	10.5675	9.7501	16.5141	22.0555	10.1373	8.4327	8.2901	5.3922	3.2509		0.0188693	12.3553
0.5957	16.3259	8.7606	11.2417	22.6129	18.3082	14.3893	19.8988	22.2945	13.8347	11.7993	11.3902	7.8411	10.7746	12.3209	12.2972	12.0921	8.9269	10.7272	9.0633	12.8318	7.2127	16.8928	26.1372	7.6498	8.2109	5.8568	6.6326	2.4399		0.0235846	12.4559
0.7148	11.4796	9.317	12.1055	21.5218	16.23	16.6789	18.7897	17.558	17.7671	15.0647	10.6516	8.2368	12.1445	12.0028	8.3727	10.413	12.2124	10.999	8.5664	14.7054	11.7249	16.6169	28.3683	6.8036	6.5527	6.8408	8.505	3.9098		0.0282999	12.6478
0.834	10.2531	11.5775	14.3874	23.4688	23.7319	11.9922	15.0343	16.9597	15.9827	14.3671	13.0704	11.1205	11.0412	10.9962	6.3103	14.1683	14.3498	11.6453	15.5985	13.835	8.3908	23.6859	26.8416	10.1477	11.6754	5.6812	8.5019	5.0801		0.0330192	13.5677
0.9531	11.0484	8.2044	18.2156	18.6711	22.9633	14.4162	14.9139	15.2531	13.7789	18.2629	15.8883	6.8772	14.8147	8.1698	8.4903	14.7011	12.996	9.7752	11.071	10.3664	11.6106	24.9551	23.8962	11.2536	8.5496	7.4685	7.9681	3.4133		0.0377346	13.1426
1.0723	9.4563	10.4471	19.457	23.0266	21.3673	13.936	21.992	18.8862	17.3099	18.7313	15.5541	6.471	19.6903	11.4702	5.6432	15.4703	11.3464	9.9377	9.528	13.2575	10.3408	27.7872	20.2184	11.9015	7.8391	8.097	6.3015	4.2172		0.0424539	13.9172
1.1914	8.0058	11.0793	17.3578	17.6763	25.6223	10.2886	24.6073	22.43	12.5648	18.8259	10.119	7.946	18.0007	7.4934	7.8486	6.4097	9.2275	14.6461	11.8601	10.3312	9.2765	24.0919	25.6691	13.8292	5.2822	7.4837	7.8434	3.3234		0.0471692	13.1836
1.3106	10.8814	9.248	20.8351	20.4782	26.4385	11.1752	17.5137	20.9842	12.4426	17.2941	9.6607	6.2013	14.9938	5.0869	6.4173	13.4189	9.709	16.8245	9.8803	8.9543	10.0204	25.6458	23.0417	10.1058	8.4977	8.4726	6.5406	3.7456		0.0518885	13.0182
1.4297	6.7774	13.9835	17.155	21.9736	23.5085	15.1475	17.5819	19.8764	14.384	19.2865	10.4126	10.047	19.0432	8.4832	5.977	12.4244	12.4944	12.0612	9.5565	11.8325	9.9167	29.2045	19.9235	9.7685	7.4402	9.3167	6.7683	5.7595		0.0566038	13.5752
1.5488	7.6874	13.3899	19.8967	29.1149	23.3944	14.4208	24.445	19.8919	14.6493	18.5971	12.3389	9.464	13.927	7.2725	7.1128	8.8753	14.5991	16.5364	12.1426	11.0522	12.4978	24.9231	17.2559	7.6959	8.6788	10.41	4.52	5.4445		0.0613192	13.9369
1.668	12.0823	12.3825	19.821	28.9375	19.4626	12.217	17.691	21.3768	11.9148	15.8387	13.4257	9.1875	14.0339	6.1455	5.4572	13.4487	12.0382	11.364	7.1598	9.7769	10.2334	25.265	19.994	9.9462	9.2186	7.0135	5.797	3.906		0.0660385	13.0405
1.7871	12.5644	11.6515	14.7281	22.7491	22.8189	13.5828	13.5827	16.2283	17.3687	18.5616	15.017	11.6227	20.4139	5.8073	8.3095	12.8833	10.713	12.9661	5.7116	8.1572	9.5926	19.9081	19.4403	11.2879	7.098	8.1643	6.5611	3.9853		0.0707538	12.9098
1.9063	9.4265	11.6566	10.8494	20.3897	24.1061	12.2593	17.7499	18.1775	11.5238	20.5142	18.4851	14.0847	21.3994	6.9214	6.6561	5.6835	14.9579	13.8356	6.2147	8.884	6.7173	20.2473	18.9632	11.9659	9.3985	12.0728	5.4792	4.0241		0.0754731	12.9516
2.0254	7.3174	6.6711	17.7536	17.8107	28.8596	13.859	16.1504	19.9644	17.057	20.973	11.9096	15.8588	19.476	7.0787	8.0766	7.8963	16.7967	15.113	7.3052	8.4977	10.8113	22.5277	22.3798	17.4687	9.8287	7.7201	4.6813	8.3325		0.0801885	13.8634
2.1445	5.8267	12.7613	15.987	18.0159	29.3824	14.3463	19.2819	19.4902	14.5783	19.7931	15.6558	14.2153	18.8471	4.2748	4.3143	11.9194	11.8963	15.6953	8.1991	8.0674	7.6853	28.5347	26.6047	14.9751	7.2995	7.1704	4.1785	5.8083		0.0849038	13.743
2.2637	5.5237	9.9347	16.1811	22.6657	22.6095	17.408	22.0702	19.0802	16.3847	14.1356	16.6093	16.6693	13.4044	7.1435	5.0281	12.3163	10.4315	13.1014	11.4428	9.4732	8.229	26.3175	25.0198	14.7442	12.0771	10.9275	5.939	3.475		0.0896231	13.8694
2.3828	7.3051	8.9045	12.6211	21.6196	21.5578	14.7053	20.8689	16.555	11.4144	14.3264	13.8562	15.9358	14.2136	5.1986	7.2132	9.8066	15.5768	13.6896	9.0259	7.8446	11.5669	28.4776	24.8675	22.3633	9.1042	7.9297	5.0915	2.7103		0.0943384	13.3696
2.502	7.3745	6.7699	6.7806	23.29	26.6743	9.748	30.8167	18.6304	13.4241	14.9963	13.4572	14.1783	17.6589	5.6876	7.7484	9.452	15.0183	14.0246	10.6299	7.4353	9.5005	26.0537	24.3567	14.8787	7.605	8.8196	4.7936	2.377		0.0990577	13.2921
2.6211	8.3961	6.4584	8.6298	16.3676	24.8577	10.6416	25.2242	13.928	12.1615	11.8047	12.2712	17.3751	15.3473	7.0312	7.437	5.396	9.5732	12.3087	11.9187	7.8543	10.0494	22.7539	19.661	10.7668	10.4115	10.3995	5.5623	3.77		0.103773	12.0842
2.7402	8.4381	6.4439	7.0254	13.1535	26.3002	17.2108	22.4552	14.4412	10.8726	13.5766	13.1477	14.3379	21.3477	8.3111	5.9754	10.9892	13.1132	15.844	9.0066	6.4742	5.2606	27.155	22.5303	18.5853	9.0074	9.0768	4.6569	3.837		0.108488	12.8062
2.8594	8.1761	8.8073	6.2043	11.8462	23.8237	17.4001	24.509	13.4434	14.3111	14.4621	15.1495	13.0448	18.342	9.3819	7.226	10.3283	10.6014	13.9436	7.1704	8.0904	4.9388	31.912	24.6108	16.3309	9.1088	8.864	8.6431	4.0225		0.113208	13.0247
2.9785	7.133	8.1113	6.8401	11.3733	21.78	20.7496	18.3888	19.9277	11.0613	20.2407	13.5434	10.8064	16.1602	10.3022	4.8598	10.7464	11.0421	12.0669	9.2405	7.8568	8.609	23.5073	25.3556	16.1313	12.8006	8.0737	6.7539	5.2347		0.117923	12.8106
3.0977	4.1332	5.1597	6.0004	11.2464	14.6458	17.3074	22.7824	19.5675	9.6309	14.1944	12.9023	15.8958	14.648	6.0755	3.4744	9.3639	10.8462	13.317	12.8567	8.1449	10.0096	20.4698	25.3881	17.5656	11.8084	9.3869	5.766	6.2001		0.122642	12.0995
3.2168	6.8745	4.7115	9.096	10.274	15.9238	17.3184	24.7534	20.9571	15.614	15.2996	17.592	17.2591	20.8272	9.5609	3.8281	8.8501	9.6947	13.5926	9.4017	8.686	6.5556	24.9772	22.7034	17.3449	9.8108	9.5666	4.5224	4.8239		0.127358	12.8721
3.336	5.3186	7.18	6.6181	11.1264	11.7306	19.516	23.3609	21.009	16.4242	11.9271	9.4771	15.3101	19.4444	6.7138	4.3751	7.3779	13.5963	15.2624	5.9482	8.7775	5.594	28.6619	24.8287	21.4021	18.5644	9.0554	6.4222	4.2522		0.132077	12.8312
3.4551	6.0971	4.3951	5.4143	14.3097	11.7225	18.197	28.7196	22.3969	14.2545	12.1237	15.8698	15.9021	13.843	7.4084	3.371	7.0795	9.246	15.0791	11.871	8.3687	8.1405	20.7562	26.9504	17.0265	15.4861	6.7899	8.1147	3.828		0.136792	12.5986
3.5742	8.6897	4.096	7.9732	11.7086	10.208	15.9412	22.3311	23.6341	11.0319	14.2056	16.1614	16.5516	12.2767	7.5767	4.078	6.1651	11.6424	12.2802	14.5387	8.125	9.3604	21.6313	27.8233	19.4187	14.2586	11.3947	7.9447	4.1798		0.141508	12.6867
3.6934	9.6388	5.5661	8.7132	10.3479	9.9705	16.8619	21.1689	19.8903	9.9914	11.0108	11.4427	15.0161	11.4144	7.6511	5.3196	8.0574	16.7916	15.0263	13.1306	8.2741	11.2305	19.5576	33.684	19.853	12.8171	11.4884	6.0907	9.0844		0.146227	12.8246
3.8125	8.6349	6.1925	6.8337	6.1719	10.7633	15.8794	10.4777	18.257	9.6692	11.1523	15.3326	16.3647	11.7251	4.6871	5.4336	10.0363	12.8228	14.7383	9.1715	7.4252	6.4382	23.3884	23.7777	22.5004	15.8957	10.532	5.5487	7.6675		0.150942	11.6971
3.9317	7.3246	6.5111	4.3	9.2734	12.1119	17.3014	21.6772	18.1884	7.3285	9.3708	16.3578	20.3968	10.2722	12.4172	7.0114	6.6102	10.9168	16.6794	11.6514	5.5573	6.9444	23.2147	26.796	21.2821	16.903	8.6424	3.2027	4.2687		0.155662	12.2326
4.0508	9.7292	5.6871	10.0004	6.1854	12.0824	14.4651	20.9478	15.499	10.4522	14.5532	16.2847	16.0743	11.9914	8.0383	9.6368	6.7881	13.9704	20.7607	11.3428	10.4729	5.1944	30.826	33.6489	18.5156	17.5903	7.9217	5.1765	3.3143		0.160377	13.1125
4.1699	10.4905	4.7794	9.7587	7.2049	8.5203	16.2041	15.8055	16.0338	13.314	14.9509	13.7821	21.8995	11.1531	7.6755	9.5298	3.9887	11.1278	18.9035	10.2765	6.5672	8.1909	26.8078	25.1174	21.2065	18.6465	8.3782	7.5149	5.2402		0.165092	12.6096
4.2891	6.3691	4.9876	8.1818	6.8535	6.306	23.8293	15.5078	14.9948	14.0187	11.0864	13.0636	24.0995	11.0999	9.7589	5.0463	7.4877	13.2047	13.7988	6.9863	7.2339	4.4529	24.7611	17.8035	23.7504	14.6126	10.4677	8.3792	7.5557		0.169812	11.9892
4.4082	7.5564	3.413	7.9286	10.5397	10.0941	12.7687	13.3601	15.178	14.5814	11.449	22.1774	19.5778	14.6485	7.7658	4.9121	9.6434	13.0879	10.1623	12.2245	6.198	4.9993	22.8409	25.3163	17.6903	10.4445	12.9453	6.9922	7.2769		0.174527	11.9919
4.5274	5.7782	6.3995	4.604	10.1077	10.1651	8.7679	16.1864	15.1896	10.9037	8.6656	17.5609	17.6427	13.2123	6.8421	6.3467	9.7274	9.2718	9.5195	10.1144	6.6066	7.9107	18.5627	28.862	21.7681	15.8612	15.1411	11.3693	6.3437		0.179246	11.7654
4.6465	8.2951	3.6416	6.9606	9.3999	8.6718	13.0673	19.4309	11.5283	11.4163	10.6675	15.927	15.9919	9.8681	12.0264	6.6092	6.4442	11.8247	7.3613	12.0873	10.3859	7.5282	20.2023	26.7295	25.13	16.8826	12.0013	8.7932	3.819		0.183962	11.8818
4.7657	8.3376	5.5048	8.4567	6.0736	7.0243	12.9805	20.7771	9.7304	11.7912	12.2514	13.6754	14.3133	9.9263	11.4059	6.4333	10.2614	11.242	9.8405	16.0499	11.1515	6.0659	20.6754	18.8882	20.1254	18.7778	11.9097	8.2064	4.8083		0.188681	11.6673
4.8848	8.4962	4.5804	4.8757	5.5371	6.7333	8.3375	20.3756	14.8059	13.4271	15.5552	11.5536	13.68	8.1096	11.2604	5.3902	6.9251	11.0042	14.0887	11.5737	10.0463	6.8505	20.3134	25.2451	19.8591	17.3133	9.9445	8.0711	5.8493		0.193396	11.4215
5.0039	9.6908	4.7126	6.505	8.1921	6.5496	10.4672	13.8248	10.417	9.7625	17.432	14.3106	14.2622	8.7011	12.325	4.4939	9.1368	13.7656	10.1249	13.823	6.7003	9.3547	21.0013	26.5255	24.9523	17.2437	10.1974	4.8229	8.2353		0.198111	11.6975
5.1231	11.9544	5.4006	7.1719	5.39	7.7098	7.6799	14.3527	11.3288	12.3174	12.7873	13.1242	17.6722	10.3922	10.8249	7.2614	9.5256	14.8815	10.0442	20.4829	8.6309	9.1844	27.0704	27.7782	16.167	17.541	6.545	4.7667	7.0708		0.202831	11.9663
5.2422	8.0763	3.5675	8.5045	6.0711	6.7042	9.6354	10.9315	15.028	6.747	7.7454	12.6254	15.6354	8.0436	8.5049	6.7175	7.2746	14.0033	10.8954	21.4465	9.1565	6.0107	27.2644	33.458	28.3087	19.9088	8.8435	4.485	5.1281		0.207546	11.8115
5.3614	7.9031	4.9746	6.7957	6.1777	7.1154	7.6086	6.5051	15.1481	8.1489	9.8425	10.1145	15.9785	7.6639	10.61	9.6325	11.1121	14.8317	10.4166	16.2967	10.9265	9.3853	21.0038	29.1087	31.7606	18.1905	7.784	4.3015	7.4243		0.212265	11.67
5.4805	10.2802	6.6274	8.7171	7.9086	9.7191	7.5671	8.8494	16.1435	8.3064	11.2913	12.1035	16.5837	9.9096	12.7637	12.1911	11.9725	17.2198	9.4408	13.2515	9.0195	9.2216	20.4481	25.361	28.1932	20.8914	9.5068	6.2516	5.0145		0.216981	12.3126
5.5996	8.2668	4.4371	9.0621	8.2566	11.9537	10.3631	11.8181	15.581	10.9166	13.4648	9.4	22.0007	9.2609	13.8694	10.1831	9.3952	13.2318	8.9558	13.0858	6.3095	14.2978	16.7482	25.1829	30.8749	19.2263	11.0477	4.1321	5.7062		0.221696	12.3939
5.7188	5.6035	3.1727	8.9504	5.2131	10.144	9.6964	8.4429	18.3906	14.9114	15.3534	8.3309	19.1744	10.3121	14.0127	7.0079	6.6289	15.2448	10.5856	14.2588	4.9035	8.7046	15.7388	31.8994	28.8453	17.4085	9.8925	5.6103	4.8687		0.226415	11.9038
5.8379	4.5552	3.7275	5.2342	5.2663	14.212	6.9504	6.6118	15.9986	10.7637	12.2923	12.2744	15.0076	9.9946	17.3514	7.4518	7.1469	13.4552	9.5012	15.9305	6.4444	7.705	13.076	25.7121	26.7941	16.6429	13.5945	9.1075	6.0003		0.231131	11.3858
5.9571	7.6719	5.2478	7.2563	8.4967	12.3	7.9055	6.7398	17.7074	11.4699	11.802	11.7426	18.0132	10.5715	15.626	9.5851	6.5614	15.1114	10.7261	16.7811	6.1286	5.5635	16.4462	26.5876	25.408	20.5511	9.8844	7.5293	6.8181		0.23585	12.0083
6.0762	4.9195	6.62	9.2289	6.2866	11.5032	5.2268	9.0465	11.0366	9.907	10.7994	8.0983	17.5582	11.8564	14.1107	10.6186	5.3318	12.8679	10.3518	19.8163	6.9895	7.951	14.7565	24.4023	26.442	18.7455	5.4594	8.5878	4.7562		0.240565	11.1884
6.1953	6.1336	5.9663	8.2636	5.8931	9.6863	4.3001	10.3328	12.4309	11.5355	9.4821	7.7439	15.0114	10.3714	11.05	9.9597	6.2349	15.5286	10.537	18.439	6.9748	11.1693	15.9241	24.0561	27.3939	21.2403	7.092	8.191	4.8662		0.245281	11.2789
6.3145	5.7072	6.7824	7.7546	6.6373	6.1251	5.8858	12.585	11.1605	14.0504	10.0084	7.4616	16.3757	13.3486	7.4373	9.8333	9.7838	8.9392	12.4772	18.1184	8.0369	8.8457	15.3783	24.6145	37.1087	22.0472	15.0246	7.3295	5.1153		0.25	11.9276
6.4336	9.0807	5.4905	5.6909	10.0613	7.1112	10.9462	5.4005	10.7411	12.9488	9.3531	9.7157	14.9516	9.6416	10.6901	14.5853	9.6387	7.0167	10.8026	15.7299	8.0133	6.0064	19.0276	26.833	26.1748	19.3848	12.6264	5.9803	5.5774		0.254715	11.4007
6.5528	11.0405	4.5331	6.8455	7.9029	5.8833	7.9784	8.3566	12.7356	13.8464	12.7775	7.4635	12.7056	9.9551	13.5409	15.3799	11.1287	10.3554	10.4886	13.4121	10.2493	7.7269	12.2595	19.3284	20.2795	21.8576	11.0026	6.4338	7.2302		0.259435	11.1678
6.6719	9.5232	4.6309	3.7563	10.3525	7.6218	7.1753	11.6731	14.2332	18.5387	15.4693	9.5265	10.4952	7.7128	12.0995	12.7194	5.8779	11.6262	11.8213	15.8461	10.3208	12.1403	11.414	23.434	28.576	18.5785	11.0545	6.4281	5.1336		0.26415	11.7064
6.7911	8.228	3.4337	3.4507	9.1548	7.4153	6.4461	9.604	11.0993	15.4373	12.4862	8.979	11.3674	7.4547	11.8177	16.0696	12.6457	13.156	8.1742	10.1305	8.1602	7.2777	13.2101	24.8864	29.9598	26.1677	12.2022	8.993	8.4657		0.268869	11.6383
6.9102	6.5518	4.5507	3.2812	7.511	10.8083	9.9444	9.9082	8.7838	12.9917	6.8885	9.1381	7.7643	10.0408	8.5271	13.605	12.7979	9.2198	7.2843	12.4617	8.7809	6.8778	13.1529	28.5303	21.9178	25.2449	16.1754	6.2815	7.3219		0.273585	10.9408
7.0293	6.0411	4.1542	3.2667	7.3903	8.5501	8.9699	9.358	10.1383	10.0236	8.1773	10.9618	5.0934	10.8921	7.9503	8.6584	10.1576	13.6633	8.558	14.9269	7.766	7.1566	12.3273	24.6929	27.9351	29.2555	13.815	6.3821	10.8473		0.2783	10.9682
7.1485	6.8765	3.4814	4.2067	9.3339	10.1556	8.9735	8.4782	9.8443	9.8871	10.5835	11.527	9.3566	12.3067	9.71	8.71	11.8625	13.3651	9.5983	12.4703	9.9245	5.4114	11.5321	18.0772	31.3878	23.1853	15.859	6.801	9.8501		0.283019	11.1698
7.2676	6.4051	5.4272	4.4317	10.2274	9.1586	6.9332	9.7086	10.4304	8.4331	9.7265	14.9655	9.7039	7.7944	11.1724	8.3999	13.7552	12.8365	13.0962	14.3254	7.3571	6.236	14.2217	16.7386	24.8322	24.9468	12.579	3.8515	9.2975		0.287735	10.964
7.3868	7.1827	6.7018	5.5633	6.5197	5.4135	6.0149	8.3952	12.2939	9.9519	11.6395	7.1429	9.6705	14.3986	14.0582	13.6303	12.7452	16.1266	11.5295	13.6213	6.6516	6.6023	14.8648	14.5006	25.1031	32.7182	14.2342	9.6661	7.3865		0.292454	11.5831
7.5059	8.0129	5.1478	5.151	4.6587	7.1881	5.4494	10.2915	11.3637	10.0938	14.734	9.7763	6.7753	12.3077	12.4277	13.6621	11.6569	15.7942	10.848	13.8586	5.1239	8.2415	17.6668	20.4235	22.1179	29.8146	14.388	9.5859	8.5002		0.297169	11.6093
7.625	5.8352	3.8289	4.139	3.4575	5.0528	9.394	11.4691	13.1058	6.3529	13.0888	8.6723	7.6486	9.0597	14.2153	11.7719	8.9782	9.2906	12.9762	11.3096	5.6954	7.7207	20.9721	21.3753	23.7092	30.7421	13.6027	7.303	6.5367		0.301885	10.9751
7.7442	8.407	7.1008	3.2317	4.6684	8.1401	7.5648	8.2733	11.5063	9.0153	16.0329	12.7189	7.5896	11.7887	13.0573	13.9103	10.078	9.109	9.5734	8.6065	7.7464	7.5431	19.1751	16.2805	28.7078	26.1473	16.2685	6.7054	6.4117		0.306604	11.2628
7.8633	9.9921	4.6513	6.6113	4.4831	11.1511	6.1547	12.4707	9.7503	10.2517	13.7906	11.9291	10.8094	10.6771	15.4626	7.7825	10.1022	9.1394	13.8501	6.9069	6.7744	8.6905	15.7363	21.0196	26.9886	22.3021	13.9375	6.3884	6.6941		0.311319	11.2321
7.9825	10.7653	9.9737	6.9364	7.0257	10.4663	5.0526	9.7864	10.6194	10.9203	17.3972	7.8175	9.7965	10.8701	20.0465	14.692	11.0142	9.0277	13.9697	10.2445	7.4406	8.4213	11.1375	20.595	17.8321	21.2948	14.4471	8.8493	5.7007		0.316038	11.505
8.1016	6.5158	10.3085	11.6307	10.3349	7.0779	11.4175	9.2035	9.2464	11.2431	11.278	7.6562	8.4698	7.2106	20.2357	15.307	10.7168	14.1071	14.8153	9.9299	5.8345	5.116	11.5837	17.3961	13.1403	21.4983	13.4645	5.2196	7.2189		0.320754	10.9706
8.2207	5.8596	6.7536	7.2021	7.8365	10.1406	9.9425	6.9473	8.3545	13.6424	12.3205	9.208	7.7803	10.6785	18.4251	12.5383	8.8943	13.3415	11.5247	10.9957	8.869	9.0811	15.3388	13.1785	17.8352	22.9125	14.5392	5.5605	4.2323		0.325469	10.8548
8.3399	6.3693	5.352	7.4855	6.8773	5.2791	12.7904	10.9579	7.4932	10.4936	11.2994	10.4392	7.7469	10.2381	22.0086	9.7579	9.8401	14.6868	14.1489	12.2645	9.793	10.0927	14.5181	17.861	16.8068	25.7545	15.7136	5.2041	5.5266		0.330188	11.3143
8.459	7.1415	7.608	7.7861	5.4129	6.4681	7.9719	6.7723	6.2942	10.237	10.8276	10.8971	6.6003	8.1671	24.0227	12.2037	13.5489	10.9919	9.6788	10.0291	8.7279	11.1234	12.8458	13.8228	10.0593	25.0072	16.3673	5.8828	5.7907		0.334904	10.4388
8.5782	9.6682	7.8718	8.6473	9.0186	8.2025	5.9451	6.3419	9.5029	10.6193	11.9265	12.0024	10.914	7.5029	19.8237	11.3249	16.0827	13.2203	10.7028	7.8356	8.1888	8.5495	13.2254	20.7172	7.7571	21.0995	16.1612	6.6637	6.4024		0.339623	10.9257
8.6973	8.1562	6.8173	6.2315	6.0195	8.2444	6.0759	9.3981	4.635	10.4508	8.7856	10.1721	8.1986	15.2629	18.8871	11.3231	14.3356	11.7487	11.5444	8.3095	9.117	7.2174	13.777	19.1314	9.3756	18.6254	12.2454	5.9355	6.6899		0.344338	10.2397
8.8165	7.8722	6.5918	11.7238	6.9091	8.6586	5.7527	10.4049	6.7826	12.307	8.4101	8.5372	8.5438	13.6682	20.0448	12.0453	18.4183	6.7478	9.2969	7.5485	7.5051	5.5085	11.8231	18.7682	9.8679	25.3827	17.7534	10.3545	6.4458		0.349058	10.8455
8.9356	7.0789	13.5598	11.0994	4.1667	9.6309	8.2346	6.2669	7.3121	10.8752	6.3924	10.1885	8.8274	17.38	19.7628	14.9334	16.7596	6.9733	8.1496	8.1118	6.644	6.5884	15.5589	15.7867	8.8139	23.6746	16.1898	6.6127	6.2685		0.353773	10.78
9.0547	5.36	7.3486	6.4548	5.3085	10.8745	10.7653	6.4201	10.0134	10.5258	9.7286	5.5165	7.598	18.245	24.6274	19.4588	17.1564	6.7453	8.6262	10.309	8.8576	8.8925	10.9731	15.926	9.8161	24.4168	19.0946	5.7996	6.4711		0.358488	11.1189
9.1739	6.1329	4.4647	5.9918	7.3156	10.8534	10.5183	7.9762	9.7451	6.5861	9.5006	6.9779	7.971	18.7327	17.6461	15.0733	17.6983	11.5523	11.4228	12.0031	9.0452	7.4791	10.8676	14.0535	8.981	21.1157	21.5474	3.5053	8.288		0.363208	10.823
9.293	6.4	8.9951	6.181	6.9384	4.7811	9.2671	7.5041	8.9889	6.6794	8.7987	5.9563	8.0238	19.2845	12.7462	12.8493	11.54	11.3663	6.5398	13.7062	10.8854	8.9692	9.2629	13.6916	14.552	10.9904	23.6641	7.0371	8.5659		0.367923	10.1487
9.4122	5.9699	8.0248	9.9798	5.1447	7.1729	9.7057	7.1633	8.9822	9.5289	6.8936	2.9448	8.8492	15.2705	15.4935	17.3486	13.6531	10.7949	6.9117	12.5865	11.0807	8.5917	10.725	16.1597	10.4018	11.7755	20.3369	8.0368	9.8131		0.372642	10.3336
9.5313	4.8431	4.1727	6.4985	5.0731	8.8944	8.041	6.3344	7.6632	10.6236	6.7228	6.5354	12.1409	11.6041	11.881	13.3008	10.4099	9.9969	7.0742	10.8726	12.8063	7.4122	9.6302	8.4944	11.0517	11.6759	13.5646	9.5084	12.8379		0.377358	9.27372
9.6504	7.8013	6.9785	4.5066	6.4037	13.3179	9.6006	4.9585	6.3521	10.906	8.175	9.7695	6.2145	15.0316	10.3958	16.0504	9.6069	8.4894	7.1023	12.653	7.5232	3.4968	15.8183	13.0705	11.8276	14.222	14.8203	8.0255	7.8531		0.382073	9.67753
9.7696	7.7756	5.2759	8.324	4.2861	10.8597	12.1417	3.9067	9.953	5.6593	5.8793	5.9661	8.2273	12.1851	13.9666	14.7406	11.7919	11.1298	8.0453	8.4076	10.2166	6.6564	13.0362	11.663	9.7459	10.1178	17.8218	6.9026	9.107		0.386792	9.42103
9.8887	7.4897	6.5098	8.4418	7.827	7.7036	11.1256	6.6208	7.0833	8.3768	6.5228	6.3124	9.5899	9.5856	17.6884	11.5479	12.768	6.991	8.5512	7.0225	12.178	3.8628	12.1896	10.5289	14.1764	8.0084	21.4616	6.5863	8.705		0.391508	9.48054
10.0079	7.1163	8.3943	11.7615	7.7774	11.7923	10.4015	6.9782	6.4698	11.4935	5.4234	4.124	11.2274	12.3578	10.667	11.6981	9.905	11.0377	6.4931	5.9083	9.9083	6.1426	9.9734	12.3687	11.4702	10.3959	14.9642	3.865	9.5013		0.396227	9.27201
10.127	5.5545	7.0322	6.2023	5.2463	9.9985	14.7076	9.1936	5.5253	7.751	5.5255	7.4545	10.687	13.4123	12.1113	12.7832	9.4979	15.5435	6.0676	8.8395	7.5304	8.0599	11.5206	11.7487	11.4407	8.7591	11.2515	5.5644	7.1076		0.400942	9.14702
10.2462	5.6216	5.2151	6.4525	5.6137	6.5069	13.6219	7.895	4.5153	7.8447	3.5383	5.481	8.6302	14.7299	11.0318	11.843	7.6927	15.3009	5.6965	5.5812	7.6596	7.8573	7.7544	8.7255	11.5608	5.4487	14.3694	4.7446	7.8632		0.405662	8.17128
10.3653	9.4372	6.3254	7.3304	8.1615	6.1556	10.3019	8.1153	6.3362	10.2314	6.0457	3.0917	10.2905	11.2065	11.7909	10.63	7.5069	11.5871	6.7511	7.3973	5.7737	8.4009	10.6194	10.534	9.9287	5.4525	16.1454	4.0325	4.9022		0.410377	8.37435
10.4844	6.5084	4.9939	7.8198	6.4803	6.6987	8.6675	7.5155	5.4722	8.3514	5.8705	4.3567	5.3913	13.45	9.8499	12.2534	7.7176	12.0069	8.9833	12.647	9.3954	8.2641	8.5979	13.0959	10.3033	9.3013	14.9831	5.1978	4.8616		0.415092	8.53695
10.6036	7.0137	8.1106	6.87	9.1701	7.4157	8.0178	5.9643	6.7092	8.0962	3.1307	4.7178	10.2718	13.6536	13.7386	12.9195	12.388	9.3389	9.6991	8.6026	8.9276	9.4822	8.4043	10.5301	8.6765	7.3858	13.0808	5.1377	5.426		0.419812	8.67426
10.7227	9.3085	7.1328	6.7855	7.5487	8.8072	6.8137	6.854	6.7485	12.0951	3.9428	3.5931	9.4279	14.4	12.3087	12.8196	12.9137	7.338	6.89	10.6973	7.4483	10.2096	7.3317	9.8271	8.3985	8.4001	14.9498	7.4083	7.2493		0.424527	8.84456
10.8419	9.0315	6.5134	5.8182	5.6116	7.6081	8.896	8.0034	2.1033	5.3937	2.7196	4.4073	8.3385	16.0543	13.6008	7.5991	14.3685	9.1445	8.2543	10.0704	6.1825	5.1609	10.4004	11.5939	10.8562	10.5512	10.5121	8.3479	6.1234		0.429246	8.33089
10.961	8.4389	7.177	3.875	7.5181	7.98	6.7325	6.2763	3.3054	8.8827	2.1743	4.3694	8.4113	13.2788	13.1077	9.1466	12.065	7.3248	8.7614	10.1334	10.062	5.4558	8.6864	10.4352	15.9216	9.3493	16.9908	5.6946	4.5784		0.433962	8.43331
11.0801	8.7551	5.1091	2.4591	7.5267	7.5986	5.0796	8.9932	4.061	7.4605	2.507	3.4472	8.4289	12.0476	12.9387	9.3407	11.4939	8.5336	5.2543	9.69	8.3563	6.006	8.7303	6.6042	11.0476	11.2588	17.004	7.9381	4.4691		0.438677	7.93354
11.1993	8.8575	5.7568	5.5188	7.2369	8.9147	4.7705	6.6587	4.8202	5.0254	3.1654	3.301	8.6813	11.5007	8.4782	7.1426	8.677	9.2551	4.3483	10.3369	10.626	5.0333	9.1635	11.4175	14.0973	8.8408	13.4294	10.6379	5.0779		0.443396	7.88463
11.3184	7.7793	5.6001	6.4998	5.7358	9.935	4.3525	6.2061	3.7054	5.3693	2.4576	2.2663	10.2914	16.5192	8.4767	9.9078	9.8545	5.9793	5.8903	8.2875	7.719	4.4262	6.8029	11.6228	11.981	10.5272	13.8133	9.5056	5.3353		0.448111	7.74454
11.4376	10.3914	6.384	7.6118	5.6594	8.9112	4.6816	4.383	6.2742	5.8069	2.0939	2.7175	9.8166	17.9133	12.2003	10.5718	7.1535	9.4179	7.4919	7.7382	6.2431	4.4247	5.8005	11.2411	10.7948	10.6548	12.2826	5.9833	5.0889		0.452831	7.84758
11.5567	10.2133	10.6126	5.7746	3.7623	7.4605	5.0757	2.618	5.9035	7.9375	2.0253	5.2935	8.2351	17.4354	11.4418	10.2405	7.2424	9.9743	6.3361	7.1588	4.9538	5.6624	6.1869	9.9762	8.4793	9.8381	13.7523	11.5714	5.3939		0.457546	7.87698
11.6758	8.3174	5.8387	6.1945	5.3301	13.0505	5.1671	4.029	6.4643	7.7718	4.7226	4.2915	7.2842	17.1643	15.6881	6.1667	12.9164	9.444	5.6923	7.6965	8.1485	6.3726	5.287	11.7546	7.0866	7.3959	11.5577	14.797	4.4717		0.462261	8.21791
11.795	7.3393	8.421	7.5114	4.8266	11.257	4.6001	3.3679	6.9743	4.1224	5.2478	2.5509	8.7898	17.425	15.5908	8.929	8.1426	13.262	11.1465	10.5816	7.2744	6.9674	4.6	11.7142	10.4249	7.7015	16.6059	10.1304	9.1007		0.466981	8.73591
11.9141	6.8501	10.8885	6.0825	4.1577	12.9825	3.6104	2.2761	6.2753	9.1341	4.6184	2.6107	6.0769	19.4134	10.7917	6.5193	8.8053	7.3512	7.7128	11.3813	6.5602	6.4551	11.2823	12.0849	9.3845	6.1112	16.3315	9.333	11.2611		0.471696	8.44079
12.0333	6.7837	8.0788	5.7227	7.2158	8.6131	2.2543	3.6667	5.6131	9.0518	4.6512	3.7636	7.1336	18.2847	13.0499	10.528	8.7372	5.3226	7.2138	11.8463	6.5838	6.3026	7.5379	16.4949	11.369	9.0138	15.6618	11.6644	9.2742		0.476415	8.62262
12.1524	6.9242	4.4375	4.0813	11.0037	9.5441	3.0912	2.4093	7.6563	7.628	4.3859	3.4709	8.2412	19.8644	10.2077	12.4479	12.4154	5.5601	6.6582	8.0055	8.7661	7.119	7.1166	12.4689	10.8054	4.9777	12.3492	10.7723	6.6521		0.481131	8.18072
12.2716	4.5728	4.6866	4.2417	6.6063	12.3511	4.1061	2.7087	8.0233	7.9413	3.5582	3.2366	9.7213	20.0527	7.8247	11.4466	15.5177	6.9167	7.9706	5.3754	7.6123	8.9013	6.7054	12.5104	12.2226	6.0765	12.312	8.9542	6.2236		0.48585	8.15631
12.3907	9.0715	5.4158	7.1747	6.5947	12.4915	4.5528	2.9003	6.7656	5.5826	2.252	2.3772	12.2685	17.9724	16.2372	10.3183	15.7946	9.4943	15.8665	8.4935	9.9896	5.6418	6.9344	11.055	7.7253	6.5783	13.7771	10.1995	8.061		0.490565	8.98521
12.5098	5.7114	6.2037	7.033	10.7467	13.0841	7.1062	3.1019	8.755	10.406	4.3342	2.637	11.3139	17.8597	15.8067	11.4659	10.0791	6.8726	9.0379	9.6887	8.8535	5.9829	7.4055	11.7063	7.1902	6.6412	13.5186	11.9388	5.0454		0.495281	8.91165
12.629	7.8597	9.8274	6.3444	6.3594	9.6199	5.4097	2.5054	5.6074	7.3618	4.3441	1.9563	12.5585	17.7737	21.0351	11.042	11.9254	8.4935	6.375	10.6856	10.9516	5.2029	7.4581	9.6395	6.6	6.4041	11.4362	8.743	4.1965		0.5	8.48986
12.7481	8.207	4.5485	8.04	6.2377	10.522	4.1943	4.0597	5.3301	6.569	2.3679	3.6909	14.5363	18.2419	9.7367	11.4604	12.3385	7.2435	5.0555	7.9583	7.592	3.9738	8.8969	10.7357	6.615	7.8764	14.1235	12.9645	5.7732		0.504715	8.17461
12.8673	9.8597	5.9064	5.7486	6.0247	10.4082	3.6823	3.3456	3.6017	5.3015	1.7004	3.6372	13.31	12.1454	13.1341	14.5713	13.1498	8.0988	7.5136	10.3878	8.9321	4.8117	8.7887	19.3577	5.3481	7.9419	10.8609	10.9678	6.085		0.509435	8.37932
12.9864	9.8393	6.4862	8.253	7.2822	10.4025	4.5568	3.3978	6.3345	5.0877	3.4702	2.6335	9.4596	11.0271	8.9871	9.1091	9.7731	9.6727	6.647	12.3397	12.997	2.9668	7.8313	18.5713	5.0767	5.522	10.7162	8.8522	6.7118		0.51415	8.00016
13.1055	8.4975	3.0557	6.4848	9.3069	4.6519	2.9444	3.2791	6.3013	6.7139	2.934	2.3069	6.6978	7.8065	9.0193	10.5628	11.3571	8.4637	7.2004	7.6558	9.4595	3.999	5.3532	14.7173	5.9209	8.4571	10.1109	14.4696	6.5902		0.518865	7.29705
13.2247	7.7583	8.151	4.7078	7.4706	7.3673	2.4927	4.4191	7.8439	6.9547	3.6751	2.6948	4.8207	11.8071	12.0232	7.5098	13.0766	7.873	9.3268	9.1518	7.2117	7.2346	7.7594	13.0988	7.0598	6.7124	6.2207	9.5195	5.7583		0.523585	7.48927
13.3438	9.9771	7.0801	8.2736	4.8738	5.2395	2.2217	2.8241	4.6257	5.8294	3.7364	3.0005	7.6067	12.7848	10.2971	6.225	12.3553	10.5466	9.42	6.4062	7.1081	6.0562	6.2201	11.5081	8.0756	5.9622	9.7494	13.6615	6.4983		0.5283	7.4344
13.463	5.3911	8.2721	8.6536	7.7365	3.7716	1.9933	2.0976	3.8682	4.6101	3.2626	3.0502	12.4803	13.3372	12.4179	11.4389	5.8093	9.1432	11.1469	6.2271	6.0544	3.877	4.3821	14.6113	5.7442	7.0571	14.2006	15.5223	7.1832		0.533019	7.61928
13.5821	7.4355	7.3541	8.1011	6.1222	5.8297	2.6749	3.261	5.3632	4.3559	2.4382	3.2702	14.7883	13.2117	13.3823	8.5904	11.4306	14.2082	14.3879	7.449	8.4351	5.1912	5.5712	16.1745	4.3478	9.3184	6.2057	13.7117	5.7224		0.537735	8.15473
13.7012	7.3948	5.0438	4.852	7.717	4.2942	4.7783	3.4921	4.4873	4.3957	4.4375	4.3399	10.9519	11.7947	10.6561	6.1134	11.2637	9.4015	10.0179	5.9761	6.835	7.8142	5.8403	12.7518	6.4536	8.3973	7.6196	14.3026	5.9023		0.54245	7.40445
13.8204	8.6689	7.9354	8.8488	6.9791	5.7741	2.5859	1.9778	5.0896	5.442	2.4634	3.7564	8.5359	12.9727	9.533	8.5665	10.7349	9.7038	6.4736	2.8538	6.7762	9.7017	8.4619	19.1821	5.8707	8.3326	8.9193	16.404	8.9787		0.547169	7.91153
13.9395	8.1493	6.9322	4.6073	7.4224	4.2129	2.1548	2.6582	5.824	3.8802	2.7676	3.3092	7.8188	15.8681	10.9949	8.7346	8.9994	14.5092	8.1411	6.2073	9.6499	6.4719	8.2144	20.3205	4.3787	8.4516	10.0112	17.2893	5.8636		0.551885	7.99438
14.0587	8.567	7.1679	3.975	6.9002	3.7346	5.2975	2.0534	4.0206	5.3778	3.0785	2.6078	7.6221	15.2636	9.585	15.0724	5.5837	15.6075	7.1907	5.5034	7.6464	7.5078	8.4643	16.1056	3.8868	5.0246	8.5822	26.2909	6.1252		0.556604	7.99438
14.1778	8.2053	6.1234	5.4089	5.7656	3.7149	3.8893	2.8975	3.8421	3.6984	2.5254	2.4469	9.4023	12.8971	10.7849	8.5822	6.8279	12.8907	4.7995	3.3147	5.9365	7.3964	7.894	16.7169	7.5165	7.1055	10.2735	21.7984	4.5018		0.561319	7.39845
14.297	4.9091	8.047	7.3629	6.3409	6.193	3.6675	3.5939	8.2662	2.3957	3.1875	3.0245	10.244	15.2616	10.7098	6.4258	7.0197	10.5533	7.897	5.8538	5.0661	5.9918	9.6849	12.0558	5.5342	7.567	9.9268	19.2571	4.4579		0.566038	7.51767
14.4161	5.2916	9.021	4.7069	8.0714	5.8365	4.3695	2.931	7.1279	4.0973	3.296	2.3353	8.8294	15.5169	10.1706	8.3894	11.4161	12.8806	6.1043	5.8588	7.1131	5.6928	10.5043	6.6108	4.5265	6.0187	5.7194	23.1639	6.6351		0.570754	7.57983
14.5352	4.9548	6.7621	5.4432	3.1309	7.354	3.0133	3.8476	4.0259	5.1043	3.0294	2.9186	9.6347	10.6719	9.3226	10.05	8.4947	13.1955	4.7927	3.4038	8.9015	6.8441	12.2025	9.0591	8.5845	4.908	7.296	19.7916	9.5922		0.575469	7.36891
14.6544	10.1722	5.5673	4.4987	5.3421	8.6293	2.0087	4.7951	4.6161	3.1825	2.751	1.8826	8.1951	10.0821	10.8945	7.5713	4.2888	13.2981	5.8981	3.7733	7.8533	4.3591	8.3312	10.5098	4.0349	5.3131	11.8095	20.0338	7.1664		0.580188	7.03064
14.7735	7.0215	8.0292	5.8618	6.2849	8.6326	2.896	3.1953	4.9206	4.6512	2.9587	2.7636	6.9336	12.355	8.1049	7.4114	6.0395	15.1226	2.6513	3.9122	5.6614	7.2277	7.426	8.1738	4.9007	5.3577	18.0702	20.4788	8.0389		0.584904	7.32433
14.8927	4.4189	5.8155	9.0692	5.7228	7.9063	3.5388	3.5784	4.5692	3.7428	4.7714	4.1455	6.3185	12.499	10.3874	7.3312	8.1034	13.8844	4.8589	3.8133	13.0449	6.0617	6.8565	10.3193	5.3305	2.9686	12.052	21.4902	9.3632		0.589623	7.57006
15.0118	9.8548	12.715	10.2669	8.5668	7.1728	2.8218	3.4568	8.0294	3.3074	2.5249	1.9445	10.1726	15.5829	12.4429	7.5835	8.9597	14.971	5.0907	2.816	12.8316	6.2637	6.9362	11.1813	6.0044	4.5447	8.7839	18.3493	7.551		0.594338	8.24023
15.1309	8.2124	7.3167	6.3093	7.8815	7.2198	4.2642	3.5688	5.1259	3.038	2.3674	4.8706	9.0724	9.8548	13.7214	6.0368	8.2116	10.8799	3.2877	5.4143	10.5368	6.2391	9.4328	9.8608	5.5106	5.5863	11.3016	17.3183	6.8002		0.599054	7.47286
15.2501	9.3258	4.1911	6.1944	4.5929	6.3661	3.718	2.6014	3.6908	2.3875	4.6697	5.717	6.7341	15.286	12.3585	5.1339	10.075	7.3085	3.2973	4.7693	15.3872	2.3594	7.9121	8.4304	4.273	6.084	11.1274	14.151	6.6154		0.603773	6.95561
15.3692	7.4768	6.0431	6.3427	4.4895	4.4362	3.3888	2.2051	5.9099	2.1599	2.6899	2.0341	4.9879	10.0466	11.2158	6.7773	12.4451	12.1027	5.3888	4.1148	7.3255	4.3201	5.7054	9.7949	7.7033	6.6203	13.7925	20.195	2.9963		0.608488	6.88244
15.4884	5.191	4.977	7.4492	8.1945	4.8975	5.6821	3.1863	4.7573	2.6036	2.1697	2.0515	5.292	10.6294	11.5247	7.8169	8.7952	10.3698	4.6012	3.2749	9.985	4.1532	6.6611	12.656	6.3709	3.6688	12.4589	15.4027	5.1626		0.613208	6.78511
15.6075	7.1321	6.4007	7.2546	6.0992	6.3559	2.4694	2.3839	5.9554	5.2098	2.9546	2.3451	8.8732	10.0434	7.1668	3.9871	9.3992	7.3102	5.2321	2.5903	16.475	3.3864	4.4283	10.596	3.6083	2.2869	8.4638	10.7838	8.7661		0.617923	6.35563
15.7266	7.0616	4.757	8.5908	7.5628	5.0336	3.8361	2.139	6.8745	3.0934	3.3146	3.4176	8.6945	11.6464	5.7267	5.9234	8.5047	12.8761	4.1813	4.9346	13.4054	4.4525	9.1984	5.7902	5.8335	3.6302	8.154	15.7692	6.3419		0.622638	6.81229
15.8458	9.345	7.1263	8.0654	8.7856	5.7493	3.7897	3.1096	7.9123	2.3407	3.0469	2.3368	8.6267	16.8397	9.861	8.8294	8.7072	10.7797	5.4768	4.5254	11.1265	4.3731	11.3167	10.3582	8.9267	4.6588	8.2603	16.0111	2.5909		0.627358	7.60271
15.9649	10.9937	8.4879	5.6802	7.6731	4.753	3.1285	2.8257	12.0498	2.5925	1.8859	2.4543	7.4798	20.5609	9.589	12.7438	8.3599	9.2334	4.4718	4.2825	10.3794	3.4825	7.9929	7.0107	7.7626	6.3484	5.8589	15.2675	4.6466		0.632073	7.4284
16.0841	9.092	8.2928	7.3977	3.7193	4.5072	3.4823	1.9258	10.5629	2.4858	1.9737	3.5015	7.5284	21.635	11.1631	11.7981	10.0146	7.1949	5.4139	4.1062	12.9509	3.9742	5.8151	8.6945	4.4755	3.826	6.3006	16.3793	4.9863		0.636792	7.25706
16.2032	9.3442	5.464	8.7152	8.842	5.145	2.3928	2.1807	8.8064	4.1853	1.8373	4.197	5.7907	16.1786	9.4822	11.1698	8.1693	6.1729	7.9032	4.3844	9.5945	5.4206	6.5142	9.8505	5.0259	3.3753	7.3743	20.5978	5.1794		0.641508	7.26048
16.3224	8.5554	6.1123	5.6282	7.6653	4.5022	3.564	1.889	11.8216	3.8662	2.661	2.7532	8.893	21.7856	11.5601	15.6233	8.1504	5.4928	7.3226	3.1817	9.4646	5.5047	9.2785	11.4604	3.3862	5.1514	7.4122	20.6672	5.091		0.646227	7.80158
16.4415	8.0657	6.4639	7.41	9.483	5.5622	3.0217	2.0358	9.8893	3.2822	3.4499	3.5413	13.751	23.9013	9.3554	10.3412	6.7691	6.1156	7.8915	2.2966	10.9999	6.8683	7.136	12.0194	5.0998	2.1876	4.5753	16.4975	5.2812		0.650942	7.61756
16.5606	5.7651	9.6629	12.7051	6.0478	4.7437	2.9023	2.6806	7.2951	3.2343	5.1251	3.4358	15.8568	28.1814	15.7697	10.9796	11.222	9.5311	5.9942	2.0203	10.8947	6.5724	8.8541	14.5453	4.7905	3.1801	5.8826	13.1155	9.9219		0.655658	8.60393
16.6798	7.6322	8.057	5.7105	8.3414	4.3149	2.5489	3.5642	6.0335	2.7297	6.2876	2.0207	11.3181	29.9367	15.3564	15.0787	9.2304	8.0175	6.1074	2.7987	15.6701	8.439	9.1182	15.9663	6.6743	5.9131	6.5297	17.5109	9.4481		0.660377	8.94122
16.7989	6.6321	7.2111	6.4905	6.2033	4.8045	2.8706	3.8412	4.3461	2.1006	2.4927	3.1883	11.8943	25.488	9.9066	11.6589	7.6081	6.1887	4.342	4.2762	11.3353	8.0651	7.7381	17.3383	7.3067	5.3592	5.7956	18.4798	9.3035		0.665092	7.93805
16.9181	7.8444	8.7804	7.7202	3.2602	6.5746	2.0473	3.5751	3.2295	3.4958	3.5942	5.1969	9.1553	16.7545	8.9366	10.1921	11.589	8.7089	5.7225	4.096	13.8562	9.2939	8.6251	11.8989	5.5854	4.5869	5.5637	10.0374	9.0372		0.669812	7.46279
17.0372	12.5538	8.8846	10.5886	4.3207	4.9597	1.8307	2.9867	4.3853	4.5381	3.5222	4.1409	11.8986	19.3782	10.092	15.1403	10.995	4.7067	5.1871	2.6367	10.4746	7.743	10.6749	12.3645	6.2161	3.9044	6.8831	10.3245	12.1641		0.674527	7.98197
17.1563	9.1239	10.4513	11.0882	5.0754	4.796	2.6346	2.5661	5.0093	2.6404	3.777	3.1687	12.2211	21.4438	9.2377	7.2387	10.4329	8.109	7.3522	5.5958	11.6324	6.5576	13.0283	18.9205	3.7142	3.922	5.2818	12.6389	8.9737		0.679242	8.09398
17.2755	7.1757	10.4047	10.0544	4.7285	4.5283	3.5689	1.8271	7.1711	3.3024	4.7451	2.1394	10.3076	20.59	7.1224	11.6613	13.7611	7.7412	4.9648	3.9589	9.2906	10.5679	11.1596	17.1405	7.1291	4.1611	7.6189	9.1894	11.0062		0.683962	8.10772
17.3946	10.1209	11.4084	8.1751	6.1695	5.4236	1.9705	3.4822	7.4592	4.4143	2.4718	2.77	10.5917	19.9793	13.5822	11.1736	8.917	10.1028	4.3734	4.2178	5.3664	9.7104	7.1413	15.2298	3.5077	8.7122	4.4169	9.2791	6.1749		0.688677	7.7265
17.5138	8.4684	8.4832	9.8911	4.8154	5.9015	2.3443	5.3289	7.0438	3.4635	2.2833	2.221	10.725	19.5821	9.2279	10.5401	10.8348	10.7646	3.1565	5.8784	7.0704	9.4282	4.3731	16.1893	11.2978	5.66	3.7725	10.4128	5.9017		0.693396	7.6807
17.6329	8.9222	9.7651	11.6476	4.3712	3.3602	3.8188	3.3261	6.3078	2.6569	1.9269	2.5083	12.5077	18.0362	13.7684	9.2181	10.6354	10.1132	3.5088	3.9918	12.0569	10.283	8.9155	14.5007	4.6043	6.0495	4.1568	11.9138	8.4163		0.698111	7.90313
17.7521	7.3457	6.0818	8.1835	4.2387	4.8569	3.9629	1.9919	10.3883	2.6808	2.9544	2.7184	12.4765	16.1075	5.809	12.289	8.2531	6.0459	3.1737	5.9647	7.4969	9.2095	11.6133	13.0897	6.821	5.5577	5.8954	12.3394	7.3801		0.702831	7.31878
17.8712	8.0844	7.4132	4.9236	4.221	4.1498	3.2132	2.8201	5.2964	3.2516	1.8698	3.1667	9.4056	9.396	5.595	7.8413	5.7834	5.4314	3.7224	5.2939	11.5557	7.3327	11.6991	12.2941	4.5978	6.0956	6.7995	7.3747	7.7264		0.707546	6.29837
17.9903	7.9619	16.5997	8.2137	5.2422	4.0625	2.7824	4.547	4.7994	4.1996	3.0127	2.7414	10.5149	9.2784	8.0053	7.9784	9.2053	9.2571	5.2648	3.5608	10.6657	8.9121	12.0105	10.4962	5.0144	4.5881	5.8846	12.1732	13.4181		0.712261	7.51394
18.1095	9.2097	5.8984	5.5209	4.9577	3.649	2.2707	2.1755	8.0739	2.2468	2.937	3.2384	11.0234	12.2955	12.7724	7.371	9.2527	8.4752	4.7388	5.0411	9.7991	8.418	8.8118	12.8139	7.2512	3.7998	5.4175	12.2509	7.5698		0.716981	7.04572
18.2286	11.5635	7.5857	4.2436	4.7376	4.3596	1.9998	4.5878	6.0248	4.2625	2.1498	2.7464	12.9658	8.8323	11.2838	18.1036	8.2467	6.6975	4.7767	4.124	13.0344	7.7471	9.9687	12.3931	7.9009	3.2956	4.2834	13.1168	8.2337		0.721696	7.47376
18.3478	8.954	7.2867	6.0981	4.1169	5.206	5.061	3.1677	8.3358	5.3984	2.3021	2.3666	7.0332	9.5901	9.5706	9.8757	8.1987	8.2425	3.5953	3.5648	11.5128	8.9474	10.0233	12.9607	6.8913	4.807	5.9657	9.3099	7.8996		0.726415	7.01007
18.4669	7.6051	8.7069	5.7754	5.0651	2.9791	3.0062	3.4361	7.3182	3.7594	3.596	3.54	5.5583	12.5804	8.0676	10.1123	7.4958	7.7307	5.0126	4.9919	9.0026	7.5671	5.4158	16.1783	5.6713	7.4549	6.7113	9.2393	9.9414		0.731131	6.9114
18.586	9.2915	8.1738	8.9887	6.5076	3.9657	3.6885	4.1145	7.8957	4.4052	3.3441	2.1939	8.6416	11.7651	6.0889	12.9578	6.9346	8.3166	4.6759	4.7082	9.2357	7.6405	6.9324	8.8663	3.8125	3.5887	6.2437	7.135	10.0677		0.735846	6.79216
18.7052	10.0485	13.992	6.7796	6.3223	7.7163	3.5411	4.2257	9.012	5.2939	2.9367	2.3888	6.4161	13.4333	6.6805	12.3321	7.4621	8.7754	5.3299	5.0734	14.6497	7.3289	6.8899	9.9364	3.8018	6.3472	5.0094	5.6457	11.2609		0.740565	7.45106
18.8243	6.5471	10.6317	7.0676	6.8132	4.6716	4.8306	3.5819	9.6953	3.8548	3.8015	2.5691	7.3146	13.6538	8.4871	9.2489	7.5939	10.1614	3.1297	4.2165	11.7809	10.2252	4.994	11.0828	4.2389	6.1908	8.0971	6.9445	12.1817		0.745281	7.27165
18.9435	9.3043	10.6301	6.9922	6.1787	5.2661	3.6283	3.0432	6.3012	5.1661	3.9902	2.03	7.3955	14.6896	14.3911	14.1805	11.2273	8.4227	2.96	4.6162	13.9046	9.6446	5.9983	8.5428	3.5175	3.8541	7.0919	7.4464	12.2937		0.75	7.59669
19.0626	9.2815	6.6599	5.9303	8.619	4.0256	3.8568	4.7702	7.9255	3.1102	1.8895	3.1378	4.5598	15.6636	12.1949	15.2476	10.3463	9.4566	3.1688	4.5524	16.2829	9.8749	7.2508	13.1711	3.3446	6.128	7.6476	6.4761	11.2531		0.754715	7.70805
19.1817	8.225	7.2608	6.6032	6.3629	4.0673	2.2571	4.2086	10.508	3.0938	1.9531	3.9457	9.0696	14.0861	12.7385	12.9967	7.4972	9.7905	4.246	5.2203	19.7383	9.5203	6.2849	13.1299	5.2243	5.3849	2.9042	5.8115	14.9782		0.759431	7.75382
19.3009	6.9806	9.7981	8.8566	6.4813	4.2747	3.6894	4.1504	4.8114	3.6768	1.9804	2.2116	10.4529	16.8523	10.7967	12.238	7.8559	7.4694	5.5331	4.1206	12.14	12.1534	6.4772	14.9397	9.9591	3.8899	6.149	6.684	17.2338		0.76415	7.92344
19.42	5.3604	13.5397	4.92	7.9841	4.6859	1.9909	4.6478	5.6465	3.3067	3.2176	3.8297	4.8652	19.1441	12.9176	12.9944	7.6392	8.1722	4.1887	4.5619	15.0599	10.2497	10.3717	13.6242	8.5862	4.8416	4.5735	6.1576	17.912		0.768865	8.03532
19.5392	8.3731	13.2571	4.3419	10.034	4.5699	2.4613	5.8124	6.2751	5.1999	6.0747	4.7035	6.9163	14.8134	17.1694	12.1659	10.9641	7.9605	2.9612	4.7694	10.9709	10.6825	7.211	15.6213	9.2802	5.4459	4.7158	5.4579	14.8171		0.773585	8.32235
19.6583	8.9413	8.4148	4.2276	4.7414	4.6343	2.3184	6.515	5.0345	4.1169	2.6679	5.8865	9.2386	17.9969	11.8717	15.2083	10.4131	6.8463	2.9702	7.5257	7.0982	8.5108	7.8634	14.7444	8.5792	6.5212	5.993	5.4972	13.577		0.7783	7.78406
19.7775	9.6998	6.2168	6.8697	6.275	7.8759	4.8923	7.081	4.4838	4.0179	2.404	4.0534	9.5734	20.9915	10.5224	12.8753	8.1283	7.6442	4.8948	10.5382	7.8231	11.997	7.7161	9.5269	11.4773	4.4281	5.3744	6.7852	15.9516		0.783019	8.21848
19.8966	5.7832	7.7064	6.9534	7.4103	9.5247	6.0764	4.6861	4.2595	7.9091	3.0369	5.4093	8.8837	18.3688	10.4644	13.914	12.6322	7.0627	4.2302	5.1343	11.3334	9.2796	8.3671	8.4559	7.3326	4.8572	5.367	5.3085	17.962		0.787735	8.13246
20.0157	9.3748	7.4177	6.4435	8.2076	4.6008	2.4949	5.8247	3.5335	4.9731	4.6873	4.9959	12.0223	16.5973	10.8085	19.6213	11.3057	8.0189	4.3805	4.6264	11.1425	12.826	5.8599	9.1159	8.7934	5.1416	5.5378	5.7514	16.6548		0.79245	8.24136
20.1349	9.476	8.8279	7.1558	6.4701	4.4678	2.9792	6.8775	3.5133	5.8661	3.5345	7.6092	6.5519	19.1061	9.8139	15.404	15.2456	11.937	2.363	7.8137	10.16	11.4073	9.3189	7.2579	9.3527	5.5325	5.9357	7.2295	16.1713		0.797169	8.4778
20.254	13.1051	14.5157	4.2986	6.6372	6.0752	3.531	8.4059	7.872	7.6907	2.6385	5.8726	7.4016	16.4931	10.0349	16.7454	16.4573	10.0446	4.8273	6.7216	7.9191	9.6373	7.6708	9.28	15.7241	5.1833	4.673	5.4032	17.1994		0.801885	9.00209
20.3732	7.394	13.797	6.3734	7.6764	9.5496	3.4326	7.2042	7.1819	6.596	4.3787	7.703	7.5928	17.6288	13.7649	22.7057	12.943	14.1481	7.6678	4.6695	14.9931	12.3188	8.5637	10.3418	13.5838	4.5476	5.8812	4.4119	16.4702		0.806604	9.76855
20.4923	8.45	9.4957	4.5981	8.4546	4.6037	2.5435	12.7201	3.2397	4.912	2.9802	8.6754	13.7875	21.0681	14.7494	25.0947	10.2105	13.7753	4.9013	6.7314	12.0566	13.6159	7.5534	10.9589	14.9541	8.2014	3.9858	6.236	13.7481		0.811319	9.72505
20.6114	6.2109	9.3942	5.6159	5.9841	4.7566	2.6813	10.6104	6.4926	8.1309	4.9447	11.2809	11.9351	24.1067	14.0132	24.6039	10.7424	14.8503	5.5364	4.6964	11.9985	15.2874	7.6728	8.7501	11.249	5.6834	5.8003	7.7201	18.0585		0.816035	9.95739
20.7306	11.5266	8.9038	6.0025	6.5376	10.1311	3.3285	11.2589	3.3232	9.5976	4.0536	9.5703	6.4464	22.8261	12.1168	20.9481	10.1754	11.3332	4.2644	6.5228	10.6878	11.6511	6.9183	11.751	11.8664	6.7783	4.4528	4.8862	16.4766		0.820754	9.44055
20.8497	5.4807	10.2901	6.9241	6.284	14.1411	3.2544	11.1325	3.9563	13.9805	5.776	8.5897	10.8291	20.782	13.8359	32.4634	12.9969	12.8111	6.3045	6.2303	10.518	18.3116	8.7554	7.5991	16.0428	11.7724	3.3859	5.2006	20.0015		0.825469	10.9875
20.9689	9.7453	11.8232	7.2652	5.4444	12.616	3.8244	11.3421	4.6445	10.6528	5.8757	9.2029	7.7823	22.0058	12.3992	17.648	12.8972	9.2515	5.665	4.7965	11.3778	11.3493	10.4376	6.3961	16.084	9.0609	7.8372	8.4972	26.9168		0.830188	10.4585
21.088	14.0765	12.3838	7.4297	9.9891	13.7218	4.1938	15.6401	4.7622	11.0113	8.6998	10.1177	7.7892	18.1965	11.0878	25.1627	17.6385	7.9497	3.9485	5.6077	8.8958	15.2881	5.2353	7.0509	10.6181	7.6132	6.3285	7.932	18.338		0.834904	10.5967
21.2071	9.0865	11.2416	10.024	6.3593	10.6802	6.1846	14.7898	3.0512	11.8962	6.0016	10.6901	7.9616	21.1249	9.7255	21.6196	13.1585	8.8537	6.2803	3.7931	7.3369	11.9615	8.0951	9.3769	9.5594	11.7156	5.5393	6.4013	16.7645		0.839619	9.97403
21.3263	9.6639	7.7897	5.8766	6.4388	8.1312	4.5284	19.2662	6.3672	9.1495	6.4653	11.8412	10.247	22.1885	10.8495	23.7658	13.8833	14.7946	7.8207	5.487	7.9918	11.7971	6.9664	16.4097	10.2467	12.3292	7.0589	5.5719	13.4356		0.844338	10.5843
21.4454	11.8435	9.6526	7.7372	8.4072	8.5215	5.6424	12.7043	6.4241	13.6243	7.4272	10.5794	7.7699	23.7353	8.9896	24.7014	13.747	17.4899	6.0587	3.4065	8.139	14.46	7.1823	11.8491	10.7614	10.9286	8.5992	6.3493	10.4132		0.849054	10.6123
21.5646	16.7835	10.6895	9.1995	9.5979	10.8744	8.6349	12.2617	3.124	12.6213	5.4987	8.707	6.2747	19.9106	10.7159	26.6998	12.4957	16.6709	7.9414	4.3665	10.8632	11.384	8.623	11.9387	6.1513	8.7735	7.9513	3.416	14.4183		0.853773	10.5924
21.6837	14.0555	11.9457	8.1058	4.9919	11.2601	7.2597	16.871	5.4031	6.6974	4.6693	10.2513	7.1978	11.9306	9.2637	25.4536	15.1178	19.4913	4.8656	4.9365	11.4438	11.0222	9.5905	8.5743	6.7972	9.4591	9.3169	3.1252	13.7241		0.858488	10.1007
21.8029	10.8758	7.8213	6.0043	4.5846	9.3275	7.1401	9.6198	2.2456	10.825	5.0794	10.972	7.5879	16.4232	11.8713	21.4736	7.5759	20.9567	4.9392	5.6304	15.6045	13.9567	7.5137	9.613	10.7176	8.8354	15.4936	5.1921	12.4577		0.863208	10.0121
21.922	12.4152	12.8511	9.0297	5.0877	12.2056	8.3088	9.6139	2.1356	10.5012	2.9293	11.8458	6.0882	9.2556	13.697	20.366	6.9965	16.8831	7.6463	3.2606	17.6	11.849	7.5243	10.9209	10.2999	12.6355	15.313	5.7608	11.7132		0.867923	10.1691
22.0411	8.4692	4.5669	5.4155	8.1312	14.2229	6.9534	12.985	6.8172	9.8253	3.8199	10.6309	3.9208	11.813	12.4305	21.709	8.4347	18.3305	8.3415	3.6555	13.039	8.8379	6.2168	10.9437	16.8991	17.9019	11.933	5.4291	11.4362		0.872638	10.1111
22.1603	9.7745	5.979	8.5059	6.7875	10.361	6.8104	10.4754	4.0354	8.9745	6.9524	10.1236	5.162	11.2095	13.3755	14.5221	8.1894	17.6116	10.6593	6.9007	12.4439	9.4383	6.3447	11.6682	17.874	14.1026	17.4883	4.4605	9.4792		0.877358	9.98962
22.2794	11.4722	7.6718	9.3112	4.9539	9.6501	9.5637	9.5346	3.5535	4.5688	7.3522	13.9654	3.4338	13.3411	9.5431	12.0341	11.5035	16.6294	6.8661	8.8046	8.984	11.2129	8.5946	11.401	16.913	18.0599	11.6779	9.4693	10.2183		0.882073	10.0101
22.3986	14.7807	8.0462	6.0684	5.3859	10.8964	7.7995	10.7652	6.8045	8.3482	5.3932	4.6017	2.8978	9.8318	9.1506	18.7577	6.343	14.6264	7.92	5.4107	12.1541	9.7393	7.6119	8.0766	21.8222	16.0068	9.393	10.0961	9.9525		0.886792	9.59573
22.5177	10.8279	10.4878	5.5904	7.1918	11.8722	8.8786	9.8741	6.6198	10.9788	6.1142	5.4222	3.1532	10.8201	13.7614	16.1376	5.4204	15.3798	11.178	6.5395	14.2204	7.661	4.6909	8.1881	20.4614	17.8518	10.4947	4.4201	8.0513		0.891508	9.72455
22.6368	10.9372	8.3629	5.7262	6.1332	8.0128	9.8256	10.397	5.8364	9.92	6.5412	5.9073	3.9738	10.2338	13.0185	15.9394	6.9698	16.1971	13.8475	7.9553	9.2902	11.2346	5.2099	10.2811	21.0032	18.4074	10.2101	8.4263	6.6544		0.896223	9.87329
22.756	9.9517	7.3978	7.2463	6.9401	7.0534	9.0246	7.8506	3.1571	8.8742	7.0654	9.2171	4.4499	7.6112	11.9356	15.9908	9.9398	15.937	8.861	7.1633	10.0868	9.0346	6.0673	12.7089	22.1894	21.9709	9.1776	11.6958	5.4841		0.900942	9.78865
22.8751	10.9503	8.6507	7.7257	8.236	7.527	9.4994	6.4909	5.2104	9.7289	5.9827	7.2885	2.6853	7.6591	10.3485	12.8464	7.5315	11.4158	11.0198	11.8059	7.8235	5.1131	6.6815	9.163	17.8249	14.5449	10.5743	12.7586	6.4121		0.905658	9.05353
22.9943	12.7289	7.7558	6.6761	5.5977	6.9813	7.1379	6.9999	3.6203	6.0948	6.5258	8.8069	5.3541	9.3172	11.4342	15.3857	6.7207	12.9888	12.8573	10.5253	9.0654	9.0172	8.2698	8.3262	22.0342	18.3251	10.5487	9.4975	7.9703		0.910377	9.52011
23.1134	11.4241	7.4679	9.4499	5.6824	9.7005	8.7476	4.0856	3.0415	6.0512	6.5087	6.3536	5.2357	8.6523	9.5783	14.7388	7.5261	11.9494	16.7894	8.1783	7.4481	8.0731	6.9811	5.5183	15.4159	14.3475	9.6059	11.8162	4.1987		0.915092	8.7345
23.2325	9.0807	10.6323	11.3914	6.2357	9.7557	7.1225	6.9183	3.7986	8.3866	3.9163	6.4027	3.6242	7.0018	7.9007	10.8395	8.1248	13.1357	10.6685	11.1876	4.2306	9.2929	4.0334	5.6264	17.2952	19.6841	8.1906	10.1366	4.7661		0.919808	8.54927
23.3517	11.4954	8.4697	13.7529	7.6954	7.8783	7.8803	5.6044	4.2907	7.516	6.0095	4.7835	5.6426	7.4244	9.7045	11.2509	9.1136	10.0674	10.4965	7.8154	5.9336	9.4953	4.8563	6.5561	10.8785	16.1792	9.7355	7.2525	5.7637		0.924527	8.34079
23.4708	12.0944	9.2304	13.4458	6.8624	5.0839	6.0829	4.0184	3.6118	6.9467	3.811	8.3857	3.6356	6.2191	2.8245	12.5034	8.6488	8.7516	4.9978	12.4437	6.3575	8.6092	4.4112	5.1716	15.5617	17.4368	10.3618	6.2337	5.1368		0.929242	7.81708
23.59	11.5208	8.0738	11.6248	7.3825	5.5273	7.3685	3.4509	4.3705	10.8487	3.4862	7.8716	4.2381	5.0297	3.2938	8.7601	8.856	11.854	5.0604	8.5794	7.1781	7.3849	4.3849	8.2455	23.9006	15.6949	15.4815	9.5183	6.8987		0.933962	8.42445
23.7091	10.5628	8.6262	16.7692	8.384	6.3613	5.697	5.0688	3.173	6.4052	4.0859	5.4976	3.5749	6.441	6.0311	6.7275	2.7679	9.1301	5.5663	9.2467	8.6023	10.7191	3.634	5.3032	17.1168	12.6303	12.7244	10.1915	5.424		0.938677	7.73079
23.8283	13.3885	6.7977	13.1986	6.3941	5.292	7.3547	4.28	3.5398	4.1858	3.3479	5.5145	3.8925	2.6237	6.3633	7.3022	8.0536	9.6829	9.4094	10.7373	6.6477	9.7313	5.0731	5.3556	9.0422	13.8327	13.368	9.3323	5.6436		0.943396	7.47804
23.9474	10.89	5.2988	9.8145	6.2958	5.4912	7.5143	5.3838	4.1419	3.5815	5.5728	5.4001	2.1881	2.8814	3.9325	5.0716	8.8939	9.5778	8.7443	13.2479	5.2011	5.9761	5.8014	8.1815	13.3714	13.0983	14.075	7.5915	5.6275		0.948111	7.2445
24.0665	8.4464	6.4076	11.1601	6.125	3.145	6.8048	6.7804	4.1522	3.1826	3.5825	5.0942	3.008	3.2507	3.9349	8.313	6.5095	9.604	9.5541	15.933	5.8801	6.7633	3.5064	8.4772	13.6983	10.5367	8.8481	5.8841	3.9216		0.952827	6.87514
24.1857	7.224	11.3988	9.1978	4.2615	6.562	6.5877	3.7243	3.0443	2.0295	4.3058	4.614	1.7564	2.2864	3.5311	6.5322	4.9322	7.743	11.0778	10.6266	5.5941	7.0604	4.076	7.2566	10.5675	8.5356	7.5088	3.7631	4.8233		0.957546	6.0936
24.3048	10.052	7.9873	8.0083	5.44	5.6952	5.3012	2.1223	2.6118	3.0481	5.4214	3.3298	1.7292	1.8452	5.2802	6.6842	4.856	8.1612	9.0033	9.5489	7.3076	6.5829	5.4603	10.1992	8.5915	7.2471	7.0057	3.2379	4.9426		0.962261	5.95359
24.424	9.8555	4.7611	7.3748	5.4626	2.5	5.5697	3.1281	4.4118	3.3225	2.3216	3	2.03	1.7862	4.9482	6.4565	5.9953	5.8886	6.1976	8.8394	5.2669	8.3119	5.9569	6.5286	13.1609	4.8349	5.4939	2.1443	4.3978		0.966981	5.3552
24.5431	11.4512	6.5971	7.7353	3.8492	2.3535	5.4218	4.605	2.9111	2.6	3.6987	3.6376	1.788	1.6995	2.0692	4.415	3.2478	7.0059	6.9055	15.383	5.0245	8.7381	2.4569	5.2417	7.7817	8.0455	5.5171	4.8527	3.9857		0.971696	5.32208
24.6622	11.4186	10.0002	3.3715	3.2973	3.7153	4.6538	3.3505	2.2171	3.2416	2.9972	2.4409	2.0558	2.1543	3.5551	4.6288	5.0641	5.9745	6.2547	13.3413	5.8779	7.2544	5.7863	4.1017	13.3225	4.4205	4.542	3.0387	3.6235		0.976411	5.20358
24.7814	6.2726	6.4867	5.7306	3.5569	2.3111	3.7463	2.2737	2.2416	2.4869	2.8761	2.4381	1.8359	2.2687	2.5673	3.9739	4.9914	6.6512	7.3145	16.9717	3.7389	5.2172	4.9065	3.4475	6.8711	5.2529	4.332	1.6851	2.391		0.981131	4.45848
24.9005	7.0762	8.2161	5.1344	3.1568	3.6361	3.8433	2.0338	2.5324	2.9569	2.0986	3.5969	2.3279	2.3204	1.7583	3.1027	4.0115	5.3826	9.3122	14.76	5.2532	6.3002	3.7386	6.9355	8.0805	3.4442	3.9996	1.7551	4.818		0.985846	4.69936
25.0197	6.5048	6.7367	7.3897	2.1962	3.4833	2.1994	3.0081	2.5636	1.8654	1.7872	3.3637	2.5827	1.9589	2.9554	1.9751	5.6426	4.4422	9.6584	12.4986	3.4478	6.1128	3.8522	2.753	4.7184	3.9204	2.4302	2.4783	2.6612		0.990565	4.1138
25.1388	9.6937	5.746	4.2063	1.8267	2.2197	2.2856	4.1402	2.4932	1.7778	3.2573	2.8097	2.6506	2.2736	3.5429	3.1064	4.7119	2.3009	7.1072	11.9311	4.1125	4.8906	2.5717	3.7807	5.8022	3.2446	1.7992	2.5191	3.2591		0.995281	3.93073
25.258	7.9895	4.828	2.7854	2.0737	2.4933	3.349	1.9813	2.3449	2.0619	2.6027	2.4198	1.9508	4.3286	2.1761	2.1101	3.7977	3.3717	6.3569	11.7134	3.8265	4.7299	3.1038	3.3144	4.7256	2.618	2.069	2.4207	2.6367		1	3.57784

## Sheet: Image19
X0	Y0	Y1	Y2	Y3	Y4	Y5	Y6	Y7	Y8	Y9	Y10	Y11	Y12	Y13	Y14	Y15	Y16	Y17	Y18	Y19	Y20	Y21	Y22	Y23	Y24	Y25	Y26	Y27	Y28	Y29	Y30	Y31	Y32	Y33	Y34		Ap-Basal	Avg intensity
0	14.7257	12.6722	13.6132	15.8578	10.2489	16.9912	14.8589	15.0009	20.0368	21.1683	29.5769	22.2515	13.87	14.4193	17.4274	20.3123	17.9766	20.319	24.4103	15.6364	27.3515	16.959	26.4218	20.8535	19.9084	11.9408	8.7598	11.9774	13.5441	11.7356	10.898	13.5274	12.3228	16.515	11.2819		0	16.7249
0.1191	12.7975	9.4428	12.9588	19.9716	15.8544	13.1805	18.6449	18.8097	18.9399	18.9876	26.8393	17.0391	24.7475	13.813	19.4619	18.9244	17.8968	23.1152	18.0168	17.1145	21.7865	13.1676	19.6524	16.4674	13.2403	11.4032	10.3785	8.6161	10.6087	20.2245	15.1231	12.2917	12.8363	12.853	15.8431		0.00517954	16.3157
0.2383	17.9043	9.2816	10.8626	10.7061	13.4431	16.6441	17.5813	16.7218	15.9428	18.0117	24.4619	23.7713	17.1456	14.512	14.8734	19.7653	22.8104	19.0936	18.7424	19.473	21.7319	19.5575	19.356	14.284	14.033	10.3734	10.9806	7.7514	18.321	20.2204	12.3746	10.6417	15.5924	10.7701	15.4514		0.0103634	16.0911
0.3574	10.2011	9.3318	15.1237	15.5204	12.111	22.7946	26.1049	13.699	21.1019	20.6946	21.5118	19.079	15.8759	13.3026	18.4432	20.3246	18.2697	20.2148	17.5904	15.4738	20.2515	16.976	20.657	16.0417	18.4152	12.1094	9.626	12.8448	21.863	11.5053	14.6708	6.646	16.1525	19.0228	12.5599		0.015543	16.4603
0.4766	10.9945	10.7199	14.9539	14.9939	9.4595	17.5835	14.1988	11.9585	18.1158	19.4006	16.403	17.157	13.3266	15.1924	14.7151	19.7338	16.8175	17.4197	20.8848	17.719	20.3761	17.1985	20.1542	13.2884	11.8843	13.9706	12.9956	12.5	13.578	16.4272	10.4827	11.8614	10.6935	18.6121	8.213		0.0207269	14.971
0.5957	11.7671	13.8193	10.3786	14.0885	8.307	16.4029	16.3997	10.9419	14.4839	16.8777	12.4394	13.4821	17.4783	14.0619	13.0232	18.8999	20.9801	26.3115	12.6662	19.6065	23.4869	17.645	20.1107	8.3116	15.8923	9.786	9.0932	13.8309	13.6136	18.2492	10.7267	10.5738	16.3514	15.3322	10.9959		0.0259064	14.7547
0.7148	9.0295	4.8348	10.0444	9.5157	6.9429	12.1261	14.002	13.2282	12.4234	22.9019	18.5729	13.7177	13.8505	12.1795	20.8161	22.15	19.7365	17.6415	21.824	17.4745	24.0396	12.3201	20.567	10.4276	13.124	14.0801	6.1714	13.8096	20.6812	18.5183	9.4261	9.9566	11.6378	15.0222	14.1532		0.031086	14.4842
0.834	6.7179	5.1389	7.0049	7.2099	8.3571	13.9007	13.6121	12.1243	15.4684	23.4046	16.3029	16.165	14.0418	14.1507	19.452	17.0251	19.5821	13.8401	20.3144	7.6833	24.9477	12.0557	16.2511	9.9924	17.2368	8.6799	6.2418	18.2573	30.4404	22.5557	9.796	10.2429	15.4254	11.2039	5.3094		0.0362699	14.0038
0.9531	6.6359	6.8404	7.9691	5.7843	6.2729	11.7691	12.5558	10.0813	15.8916	14.0565	12.4954	12.5984	13.0687	13.4351	16.7476	14.1386	20.2402	12.3873	17.6734	12.8378	24.7916	15.1965	11.4904	10.4259	17.7421	19.038	10.6853	17.522	44.1224	21.4777	14.9915	8.5113	18.3871	10.971	7.7461		0.0414494	14.188
1.0723	7.5239	4.7268	7.8037	5.7076	7.0723	10.1227	14.7706	11.0273	9.4345	9.4206	9.7204	15.2178	16.8658	11.5968	14.4543	15.6341	14.3341	14.9116	14.345	12.3635	17.4906	15.0792	12.5168	12.0559	23.9024	33.9538	12.4356	19.3067	42.5021	25.5833	14.7956	7.7362	11.3237	17.5944	9.0693		0.0466333	14.3543
1.1914	7.3542	5.6586	6.5078	5.3638	9.2054	7.973	9.23	8.92	6.528	10.6862	16.0361	17.8761	12.4496	18.8279	12.9132	14.2191	12.7307	13.9595	11.2418	16.8325	27.8313	12.4918	16.8526	11.3868	27.393	35.6825	11.5501	19.1798	53.4889	24.1684	10.7533	13.1838	13.393	13.2759	8.1655		0.0518128	14.9517
1.3106	3.6988	5.7294	4.8258	11.5013	9.369	9.928	9.2546	11.8584	7.4733	12.4624	16.8189	15.8866	14.0401	13.0062	15.1458	20.3894	15.5146	15.0537	13.1608	14.4846	29.3746	9.8261	14.5205	13.1152	20.7698	38.609	13.3581	28.9274	47.1984	32.854	10.1028	12.395	17.0704	13.1043	6.064		0.0569967	15.6255
1.4297	8.8233	3.4266	5.5955	7.0488	5.7992	6.1526	8.6614	8.4674	10.6955	9.0267	14.2896	8.5842	17.0618	6.6189	17.037	19.8479	22.0336	12.6179	12.1183	16.4128	25.5405	6.7211	17.1745	20.1387	30.9458	38.1997	15.7011	21.1707	49.1823	41.7643	9.7253	11.3061	12.2445	14.0092	9.1055		0.0621763	15.5214
1.5488	8.4357	8.0764	3.8749	7.2005	7.9264	10.7612	10.8767	11.8856	6.7179	7.7941	11.3618	10.5328	11.8909	8.2199	16.6513	16.6748	15.3866	14.7313	9.887	24.6343	26.8203	15.865	13.3903	23.2854	31.1276	46.2581	18.9303	20.4295	35.2724	37.1265	10.445	12.1513	10.8201	10.6681	8.372		0.0673558	15.5566
1.668	4.8401	7.092	3.8106	6.339	7.262	7.4258	12.3443	8.9849	5.4886	6.9546	14.7358	10.5828	10.5854	15.0589	14.2	13.863	13.6979	11.3189	9.0182	26.8932	16.8376	10.3731	12.1214	27.7254	33.5413	35.1024	20.1115	28.4797	33.8486	30.0739	13.0988	9.2285	9.8345	12.8064	8.4184		0.0725397	14.6314
1.7871	3.4994	5.112	5.931	6.1015	4.9471	6.0464	8.1758	8.6052	4.6896	8.4958	10.5727	11.3453	6.9125	12.762	7.9161	12.4211	13.2802	7.8751	7.3771	16.1627	18.802	15.7081	11.1193	23.4457	25.5891	24.6637	16.3975	27.0554	32.5031	26.3267	12.6903	9.356	8.2452	11.2185	8.3752		0.0777193	12.5636
1.9063	6.3857	4.021	4.1428	5.7742	5.357	7.7543	6.4248	6.4606	9.4225	8.3418	8.7985	19.0391	6.1536	10.5189	14.7071	20.7874	14.0114	13.4269	10.1198	20.1216	22.8213	10.2724	17.4083	20.5394	15.9741	20.3173	18.4543	19.1326	41.1376	39.9408	9.4173	5.1769	9.3795	11.5308	6.6914		0.0829032	13.4275
2.0254	7.592	3.7444	7.9107	5.1534	4.9129	6.9674	9.4367	7.9362	8.3705	8.1149	9.3839	16.6456	8.6991	8.4542	14.0605	17.1395	10.3048	10.6808	6.0466	25.7108	26.3578	12.0044	14.1079	21.3645	14.6874	21.6768	20.7226	17.319	34.8782	40.216	8.4266	7.2514	7.7999	13.0025	5.4798		0.0880827	13.216
2.1445	5.0881	4.8363	4.5915	4.9012	4.585	6.3368	9.8999	5.5194	9.4456	5.5488	11.5783	10.9182	7.8796	14.348	13.1231	13.7962	11.1123	11.9972	8.4667	24.1613	16.8423	10.753	13.2195	17.5081	25.1296	19.1999	16.7048	16.614	35.205	32.502	9.4226	7.9775	8.4224	11.2788	5.5534		0.0932622	12.4133
2.2637	7.7355	4.9263	3.2952	3.7838	3.253	10.2737	5.194	8.4242	8.5609	5.153	12.4513	11.9874	9.0022	11.7418	11.6584	10.9592	10.8024	11.424	10.3147	14.5285	28.6669	13.8694	12.2124	11.9936	19.6018	14.9851	15.8511	20.143	29.7381	36.7303	6.0883	7.2535	10.7358	11.2281	7.3898		0.0984461	12.0559
2.3828	3.4937	5.4888	3.9212	3.7318	4.0163	8.1517	5.1287	10.1113	4.6747	3.7722	8.5149	12.0683	11.4915	13.3386	7.2372	10.7519	8.0033	9.8561	7.7112	19.2187	25.9923	8.0885	13.3296	14.6636	13.6516	15.686	12.8754	15.3279	29.2778	28.0699	6.7875	5.0283	9.2573	6.9698	3.5711		0.103626	10.5502
2.502	4.8673	4.1238	4.7741	4.9571	3.0219	4.0098	5.5853	3.6111	10.7769	5.3317	8.6066	14.0866	9.5256	10.853	17.3726	14.6982	12.2957	8.7555	9.6823	12.115	25.5918	10.0332	12.9204	12.87	18.53	9.5604	15.3445	8.861	28.8662	30.1662	8.0354	4.947	7.3116	8.7027	3.7895		0.10881	10.7023
2.6211	5.2731	3.8054	3.0829	2.3632	3.7163	6.6381	6.7534	7.1485	9.6606	7.0943	7.4884	10.4668	10.6721	5.3504	10.152	14.9399	9.5688	6.7651	11.9016	15.7436	27.434	8.5424	15.1422	8.6338	20.4728	11.5153	11.6065	16.2224	20.4285	27.538	7.2382	5.2152	4.5777	9.1853	7.9309		0.113989	10.2934
2.7402	5.6348	3.7563	2.3583	5.4718	6.1018	6.438	8.1501	6.0838	5.2766	7.1798	8.8184	10.1682	7.4788	13.2602	6.5768	11.8648	10.8629	14.5715	14.605	14.6879	29.1648	9.1776	11.4793	12.2511	18.6137	10.4979	11.2471	10.4532	23.3051	25.2844	5.185	8.2607	4.4224	9.1368	9.4844		0.119169	10.4946
2.8594	3.4081	2.2477	3.3962	3.737	4.8992	5.4296	7.328	4.1186	4.7945	4.1293	8.2272	9.501	10.6246	11.6812	11.3458	10.1469	13.4012	15.834	12.8907	13.02	23.9939	12.3172	14.8168	12.0046	22.8047	10.7313	13.8076	8.4411	17.1985	18.6806	10.7374	5.4609	3.5022	9.2866	10.2039		0.124353	10.1185
2.9785	4.2556	2.8845	3.7218	5.9974	6.6895	3.9699	7.2107	6.116	3.6233	4.6186	9.7707	8.6601	11.3566	6.5487	10.9344	11.3554	13.2973	12.9416	10.6602	14.3109	36.9595	8.6887	9.8595	10.4669	19.4914	12.072	17.5549	8.1685	12.249	16.9713	6.3317	7.6324	5.5185	10.2212	6.6902		0.129532	9.93711
3.0977	5.6952	4.4131	3.7131	3.126	7.1772	5.9974	6.811	5.8701	3.317	3.7234	12.0518	9.0235	9.8941	6.3875	12.4277	11.1067	13.2214	14.0393	15.404	11.7438	24.8994	10.3503	10.6695	6.4717	17.1746	10.0408	18.5903	8.0302	14.8399	22.0374	7.023	5.2834	6.6385	9.0376	6.0002		0.134716	9.778
3.2168	5.0868	6.235	3.9655	3.0134	5.4321	10.9059	5.3576	5.3636	6.839	6.0466	10.599	8.5917	9.0836	6.254	11.7038	13.2353	10.7073	21.2719	13.8615	16.8949	17.4284	9.3826	8.5336	11.3506	13.785	15.7084	16.043	9.3081	10.3014	22.8483	4.7441	4.0092	5.8744	10.186	5.2286		0.139896	9.86229
3.336	4.0363	3.6599	4.2541	5.5578	7.1227	6.7763	4.781	8.2573	7.4903	4.5503	11.4915	8.0646	8.0895	6.1072	12.9159	7.8794	6.7657	20.5795	12.036	21.5559	24.0751	6.3148	9.2837	11.9943	16.0587	16.1416	22.9291	9.9378	11.8349	12.6396	6.6134	4.93	6.7593	14.5594	8.9423		0.145079	10.1424
3.4551	3.3719	2.1164	4.3322	3.3721	7.0242	5.8375	4.6392	8.3294	4.9577	4.4463	4.0045	9.477	9.9174	7.9157	11.3073	13.4947	7.6627	17.1774	15.2908	19.6102	28.2807	11.4296	9.8346	13.1966	12.8561	14.7754	20.3227	7.0754	14.391	18.2539	3.6337	6.8422	6.856	8.0831	7.6392		0.150259	9.93585
3.5742	3.6942	5.8589	4.7995	3.6788	6.0727	5.6364	6.922	5.679	3.3793	6.7152	6.8526	12.1321	9.0513	7.838	9.2271	14.2094	13.3135	21.1904	11.9144	16.1094	27.4437	9.9011	13.0302	17.6814	16.6229	13.1013	18.4916	7.8436	15.2615	18.0016	4.2992	5.9502	8.0687	6.9902	8.6742		0.155439	10.4467
3.6934	2.8024	4.4476	6.9863	3.6492	4.114	5.6867	9.6327	6.5028	4.147	7.4027	6.7963	8.0227	8.2388	7.7263	9.1829	10.5145	14.4226	24.3246	10.8411	22.8163	24.6392	12.3134	10.6989	17.6446	16.858	22.3785	17.5972	7.8737	13.3517	18.3362	4.0239	7.7937	3.987	7.9897	8.717		0.160622	10.6417
3.8125	4.6982	3.6331	2.4207	3.0694	3.3523	3.8374	6.3269	2.8149	4.0163	6.9146	8.3279	4.8694	5.7236	6.9954	10.5571	10.6778	15.3577	20.431	18.141	18.6596	20.7675	8.4256	11.6381	12.3301	16.17	20.9794	17.0941	9.1435	17.2706	13.9393	5.1892	8.8227	5.8521	7.3571	5.0494		0.165802	9.73866
3.9317	4.4336	3.9087	3.121	4.3157	5.3946	6.492	3.2018	6.2107	3.9505	2.4977	9.0077	14.2799	5.3092	4.3163	7.6926	13.9257	16.5375	20.455	12.0613	16.4459	23.3963	9.4872	12.8809	14.1531	10.3749	20.953	15.0478	8.586	10.7968	14.9286	7.6756	9.3831	4.3204	5.7521	7.5177		0.170986	9.68031
4.0508	5.0727	3.546	3.4979	5.0118	5.4938	5.4019	4.3692	7.6123	4.9664	3.6607	8.7668	5.1932	9.4014	6.4712	14.8118	13.0837	21.481	16.8732	9.9617	15.1335	28.2347	9.5642	8.3796	11.9247	14.9122	26.2833	17.1159	12.3736	16.3234	15.6772	5.5642	6.4727	4.8688	7.1719	4.3832		0.176165	10.2589
4.1699	4.7145	3.6741	5.9703	3.4752	3.9939	4.622	7.9565	6.8805	6.7227	3.6989	8.8532	10.7717	5.5339	12.1607	14.5906	14.4307	13.601	13.653	8.8302	11.1444	20.1199	9.9239	9.0156	12.971	15.8675	19.9627	18.7364	6.6869	17.3984	14.3593	2.9443	8.9317	3.6249	6.774	9.5439		0.181345	9.77538
4.2891	3.8839	4.0503	7.3111	3.4464	5.1534	5.1671	6.7946	6.8997	5.7329	7.9738	5.6492	8.6459	6.9296	11.2418	11.4058	13.0891	17.0247	17.9156	11.3648	12.0136	17.0316	9.3245	8.0773	16.5483	18.555	21.1173	17.3454	14.086	13.2253	10.1495	4.9077	5.5637	6.1314	8.1469	4.9848		0.186529	9.91109
4.4082	4.2886	3.1082	5.1054	3.9558	4.0851	4.4341	3.8993	9.8769	6.31	4.0812	7.9361	6.2705	6.0458	10.4152	11.3597	14.0074	12.777	15.439	8.1028	16.3873	19.9856	10.7847	12.2116	17.7587	25.6377	29.4254	14.5384	19.12	18.6928	14.8192	4.095	6.5311	5.9628	9.5154	4.7887		0.191708	10.6215
4.5274	3.6101	6.0093	3.6598	3.6224	5.7948	6.1319	4.7149	9.3578	4.8807	4.7829	7.791	7.3823	4.0974	4.4466	13.61	18.6649	13.6523	8.594	6.1302	8.7554	14.8531	8.9284	10.6931	12.435	25.9945	20.6493	12.2505	22.4075	21.7505	16.3648	5.2539	9.4296	5.5422	7.5496	9.3514		0.196892	9.97549
4.6465	5.5789	3.3274	6.1451	7.8277	4.0863	7.6452	6.492	4.8001	6.4636	6.1753	7.7598	7.9268	6.8065	9.2831	11.1834	14.2584	10.182	17.7896	7.0613	8.8028	16.6063	7.7723	9.2217	13.4516	19.4249	21.7904	14.2829	23.5902	19.7192	14.9411	4.0301	8.2665	6.1559	6.7999	9.7323		0.202072	10.1537
4.7657	3.6759	5.5568	3.3755	8.3919	3.2772	3.6048	5.5495	4.7867	5.8975	5.9679	7.0058	9.798	6.069	7.9594	8.2974	14.5602	15.5608	10.5992	6.4949	11.9796	11.7859	10.3579	9.5233	12.5312	18.6295	23.1382	15.062	11.6189	23.341	19.0666	8.8728	5.3581	5.5889	4.8572	8.4388		0.207256	9.61652
4.8848	2.8166	4.6725	3.7746	4.1306	4.3886	4.808	4.9886	4.8198	4.5447	5.2653	4.9937	5.9571	8.1164	9.4007	14.0387	18.3409	18.0107	11.1881	7.4778	7.3338	11.1121	7.5912	6.8379	11.0187	20.1303	18.3049	20.796	17.2639	18.2038	13.8579	4.9552	5.1319	4.5045	5.8937	6.4512		0.212435	9.17487
5.0039	3.5994	5.5932	4.1521	7.0466	3.1461	4.5592	4.7563	4.0866	5.315	6.3894	6.97	7.9282	7.2419	10.5712	13.3548	15.1329	17.2432	10.5913	8.4865	10.5186	11.8142	7.501	9.742	10.5341	20.416	11.6579	23.2465	17.9018	28.2961	12.7979	5.1572	5.7795	6.8057	4.3652	5.3612		0.217615	9.65882
5.1231	3.1354	3.8034	4.7604	6.0324	3.5842	2.9731	3.2736	4.2891	2.7101	6.0936	6.8428	10.4639	5.2519	9.5834	14.3269	12.8313	10.1545	10.3118	12.8305	11.0049	9.0177	9.7206	8.2194	15.3588	18.4382	15.7468	21.4915	20.7891	17.549	14.3692	4.1799	4.3387	7.1057	6.4003	6.1249		0.222799	9.23163
5.2422	5.8403	4.3854	5.2771	2.9531	4.0664	7.7305	3.6378	3.6943	5.5171	5.125	5.1406	8.4678	5.7264	5.9084	11.0922	10.7405	13.2925	11.1172	9.9645	9.159	10.1853	7.9553	11.016	22.8057	15.8535	19.0488	19.2024	16.8588	18.9227	14.5028	3.1588	4.0912	6.1883	5.9558	6.726		0.227978	9.18021
5.3614	7.0262	4.7972	5.8045	3.0667	6.9302	3.0464	4.7286	3.5418	7.0328	4.5878	7.5942	9.3048	5.5164	11.5216	14.5853	13.1337	14.4378	11.0782	13.5483	10.0408	10.6303	5.0558	6.6125	20.761	20.9507	15.4648	13.9878	26.5217	17.3455	14.3952	6.0519	5.0876	7.523	6.2265	15.2369		0.233162	10.0907
5.4805	7.2143	6.6564	6.8008	4.4576	5.5331	3.4767	5.6013	3.6629	7.3786	5.159	9.5545	9.9305	4.2576	7.9766	11.0929	8.7018	12.605	9.6163	15.0335	6.314	10.3246	10.5583	6.9023	18.4232	19.668	13.9325	13.2446	22.8372	12.9635	14.1237	5.5236	4.4861	3.863	7.4652	8.4545		0.238342	9.25125
5.5996	4.6379	8.3096	8.4601	3.0879	4.2326	5.4268	3.7675	4.1787	3.4862	4.3612	8.1204	5.5798	6.9971	7.9432	9.4658	11.2728	12.3226	10.3316	10.9333	9.9117	7.528	10.1617	9.6056	15.2149	17.8027	15.726	14.846	20.3464	13.9241	15.7254	3.4625	4.3085	4.3525	4.4419	5.9258		0.243521	8.74854
5.7188	4.8496	4.9799	7.9727	3.0887	5.2877	2.8071	4.6352	5.2555	3.3938	4.9522	8.9859	7.9198	9.508	13.8696	8.604	10.8426	9.7075	9.7286	10.8475	10.4673	8.7085	8.7262	9.5891	17.562	21.2096	16.3963	12.9105	20.6175	14.4317	17.8845	4.2085	5.4223	4.9491	6.0554	4.3085		0.248705	9.16237
5.8379	6.1416	2.8262	4.443	3.1307	4.341	3.6876	4.5666	7.2748	3.2399	4.9884	5.8122	6.1911	7.3352	8.3595	11.2288	8.1738	11.6408	8.4088	15.7129	7.9127	10.1899	9.2618	8.1144	21.0537	16.7792	16.0778	16.578	12.5872	18.4382	9.8045	4.871	5.6989	4.6628	7.2543	4.8359		0.253885	8.61781
5.9571	4.0804	2.6912	5.9208	2.5279	4.7821	3.4263	3.9442	3.7312	4.898	5.3396	6.1639	4.8405	6.9257	7.4317	13.2633	8.4842	9.3651	12.9948	17.6117	10.3406	5.8408	9.099	11.5624	11.4404	16.0077	10.2195	14.1269	20.2098	21.175	12.7381	6.549	4.0112	5.5941	3.7704	5.3651		0.259069	8.47065
6.0762	3.4069	3.8759	5.6641	5.0922	4.4598	3.9184	7.0704	5.5329	4.857	7.7775	4.9502	4.7836	4.3172	7.9949	10.856	10.5158	6.8817	12.431	13.8428	8.6684	7.0554	5.27	12.2293	9.493	13.4387	14.3781	16.7102	18.7076	23.2324	14.1935	4.2605	6.2592	5.4297	4.6481	4.8359		0.264248	8.48681
6.1953	3.0136	3.4144	5.2731	5.3237	3.7755	4.4945	6.1306	4.7135	6.9425	5.3166	10.5297	3.7697	4.583	6.3068	17.3841	5.5928	7.5274	14.4992	12.7133	11.7203	5.387	8.7048	8.2907	8.551	15.2869	10.6851	12.8337	16.1212	19.6483	18.6899	4.4759	5.5804	4.2807	5.5327	4.4863		0.269428	8.33083
6.3145	5.5237	5.4904	3.1909	4.1792	8.0376	3.7241	5.7718	4.531	7.2965	6.3883	5.7412	7.6451	4.1404	5.8325	10.9709	10.9565	7.8872	8.2119	9.3207	9.8727	7.6897	7.2182	8.3093	12.8117	10.0703	9.2846	9.7263	15.0266	16.5817	16.2907	7.1004	7.3579	6.6619	5.9944	5.6009		0.274612	8.01249
6.4336	3.5611	4.4935	4.2765	3.5397	4.9661	5.3283	4.1603	5.7221	6.3114	5.4428	6.148	6.3516	6.1782	9.2524	9.9668	9.2966	7.2656	8.3758	7.8884	8.6923	4.5655	5.8377	4.9716	9.5303	9.3851	8.8464	6.4357	16.6655	16.5069	11.9631	4.3935	6.0095	4.952	3.1505	4.3721		0.279791	6.99437
6.5528	2.5641	4.2429	7.471	5.1401	4.4504	4.0594	4.6737	3.693	4.8408	5.4766	5.9349	4.6481	4.5605	9.7066	11.3111	7.5383	8.2819	10.7062	10.0595	9.0316	5.0883	6.0537	9.5285	10.1873	12.8736	6.0316	6.1379	12.766	12.8622	13.6788	5.2969	4.811	5.5369	4.2608	3.7255		0.284975	7.06371
6.6719	4.9935	4.0193	5.9935	5.6448	5.3202	3.0409	4.9015	5.8768	3.0762	7.4007	6.2809	6.775	4.3672	6.9682	10.9119	8.3953	7.8313	7.6315	10.9875	10.0526	5.8306	9.5683	7.2461	6.7936	9.6497	4.8572	7.0485	16.6064	17.3813	15.1944	3.1101	6.6936	3.7548	5.7395	6.0026		0.290155	7.31273
6.7911	3.5972	4.3644	5.5378	5.6772	5.1	3.3481	5.439	6.1623	4.8172	5.3355	6.007	8.2051	6.2351	7.4568	8.2165	10.8196	11.7902	8.8356	12.6542	7.995	6.939	6.7474	7.2762	8.7703	7.8383	6.2793	6.3075	15.7901	14.795	10.9729	4.167	5.7522	5.1269	6.6718	3.8054		0.295338	7.28095
6.9102	4.1164	2.7847	4.237	5.8165	5.0227	3.1361	2.4582	3.7571	7.0888	4.5401	4.8093	3.6498	6.3856	8.1305	13.1823	7.7187	8.3954	8.346	10.1834	8.052	6.8736	6.5105	9.4717	8.7798	5.1556	4.6578	5.0773	14.0023	12.6231	7.6713	4.6532	4.7737	5.8188	9.2593	4.739		0.300518	6.62507
7.0293	3.3563	2.5482	4.8573	4.0919	6.126	3.8846	4.6563	4.9729	6.9677	3.3575	5.9287	5.5199	7.0541	9.2327	10.919	8.2619	8.9837	8.1172	9.1185	8.3034	5.3728	6.112	7.1945	10.0941	6.4128	4.3418	3.2203	15.6572	10.1813	8.5475	6.6414	5.1404	7.6917	4.4675	6.4259		0.305697	6.67883
7.1485	3.9832	5.576	6.0272	6.8668	5.8149	3.3804	6.5021	4.6368	5.4154	6.0175	4.7947	7.174	4.7128	6.8035	9.0196	5.8438	6.8508	7.7616	7.9558	8.9051	5.5131	4.9952	5.8529	12.2291	9.8493	4.0081	4.5138	11.8081	10.4602	7.6519	5.0639	5.2459	7.5166	5.9526	3.1168		0.310881	6.50913
7.2676	6.1902	4.5234	4.1747	6.4531	5.9818	3.4993	4.4706	6.2707	3.4854	6.203	5.9554	5.3615	3.2498	3.9061	8.158	4.5101	5.5226	7.6293	6.1409	11.756	6.2799	8.0828	5.1052	12.1474	9.69	5.6703	2.8818	11.7374	11.0916	9.8995	3.828	5.2294	5.7731	5.0708	2.8891		0.316061	6.25195
7.3868	2.969	5.0745	4.5717	7.4	3.3085	6.5049	7.0369	2.9019	3.2725	3.5409	9.7357	3.844	3.8336	6.2605	6.6547	7.6511	6.0722	8.8505	7.6685	6.0623	6.945	5.7511	7.6106	12.8062	9.6421	4.4474	2.6062	7.8293	14.1597	9.3002	4.1342	5.0961	5.5764	6.5735	2.471		0.321245	6.23323
7.5059	5.3689	5.2609	2.6662	4.4068	5.0422	4.2298	3.9457	2.7211	3.3825	4.7505	3.7889	4.9974	4.619	5.0685	6.6244	9.8315	8.0592	8.3877	6.9299	7.5349	6.1982	5.869	6.7859	6.6005	6.0868	3.7999	3.2743	8.5755	8.8722	8.0631	5.7638	4.7574	5.7718	5.2924	5.3332		0.326424	5.676
7.625	5.4638	5.7798	2.1493	5.1849	5.1041	7.1148	4.9946	2.9872	3.3157	4.7201	4.483	5.7561	5.5735	7.0847	11.2331	13.7454	6.6388	7.1837	11.0493	10.1883	7.1982	6.5384	7.9545	7.5815	8.1141	5.3962	4.2525	5.6248	10.5888	8.7805	7.0847	5.0163	4.2255	3.3851	5.0234		0.331604	6.47185
7.7442	5.0739	4.2969	5.6492	6.9453	3.249	3.5943	5.9827	4.1839	2.1919	6.4425	7.1655	3.1712	5.2623	6.8079	6.5509	11.2434	8.4075	8.8142	9.9809	9.6746	2.4784	4.0733	7.48	8.9909	6.4359	2.0854	4.7404	7.1002	14.5681	10.9892	7.1493	7.9297	4.0976	3.2124	4.8621		0.336788	6.31088
7.8633	5.8361	7.15	3.3543	6.7061	6.5274	3.1283	7.4543	3.7718	1.9886	9.322	4.9961	11.5119	4.596	8.7076	4.4874	9.4793	12.2493	5.8699	7.5246	8.8885	5.4533	5.8851	5.3021	5.2497	4.8358	1.6819	4.1713	6.5963	15.6605	9.7737	3.9405	6.06	6.2977	5.3849	3.3029		0.341967	6.37558
7.9825	3.1922	4.2173	3.5352	5.9372	6.3417	4.9039	3.7511	3.622	2.6839	5.9868	3.4129	6.1937	5.3368	5.4966	9.2533	5.7414	10.4457	5.1957	12.8366	5.9668	5.8937	4.6603	3.7011	7.8798	5.6427	4.0645	3.3157	5.9251	11.7169	6.1198	4.3307	5.2047	6.5123	3.7979	4.0442		0.347151	5.62458
8.1016	4.3087	3.4156	4.9191	5.5614	4.9254	5.1295	5.9585	3.8262	5.2538	4.614	3.3765	6.468	5.1411	3.8422	7.2044	8.6018	7.431	6.2165	10.1966	4.0041	5.8842	6.3762	3.1971	6.4226	4.7572	4.188	3.5591	5.1644	7.3404	9.4286	5.4904	4.3432	6.2917	5.3999	5.5994		0.352331	5.53819
8.2207	4.5594	4.8056	3.8307	6.1607	5.444	3.955	3.1336	5.4562	3.5485	4.8431	7.6754	10.5615	7.2949	5.7158	5.3408	6.6222	3.8961	5.85	7.571	6.5675	6.0145	4.8164	4.3917	5.1978	5.7498	3.7086	4.0834	5.9865	14.9881	10.1249	2.6844	5.9326	4.0198	4.3375	6.4062		0.35751	5.75069
8.3399	5.5355	4.9878	3.2716	5.6195	4.9199	6.6787	1.9803	4.3493	4.1952	6.3788	5.1662	7.3586	5.2935	7.0459	7.9606	8.4289	4.4953	5.3004	7.5649	7.977	4.8725	3.9499	4.4804	4.1599	5.7432	2.8956	2.2482	4.0343	15.6258	6.1835	4.6252	9.9494	4.3005	4.1258	3.5083		0.362694	5.57744
8.459	6.7215	4.0655	3.0213	4.2986	5.6538	3.1521	3.1537	4.4094	7.2449	4.3558	2.3769	8.3279	3.3484	8.4879	5.2562	6.1129	3.8516	10.8778	9.1714	6.9779	8.6801	4.5564	6.7917	7.7091	6.9648	3.2561	5.9409	4.9237	8.6787	10.4133	3.824	6.9866	2.7583	4.9352	3.8874		0.367874	5.74777
8.5782	5.4314	4.1648	2.8289	3.7069	7.9003	3.9616	4.3992	5.3354	3.8476	4.8644	2.6553	4.8148	2.963	10.0796	6.4737	7.2011	4.5433	15.8207	12.3291	9.7225	4.2901	3.938	4.9429	8.7253	5.7944	3.4508	3.554	6.3637	7.6763	11.5887	5.0544	5.959	1.9234	7.5164	5.1029		0.373058	5.96925
8.6973	2.4838	4.8603	2.9034	3.6143	4.4915	3.3219	2.5091	5.4349	4.1058	3.9736	4.9017	4.962	5.3985	11.7913	5.7304	7.335	3.2062	7.9965	11.4797	8.4306	3.8398	6.4691	8.2039	8.9035	5.4771	2.5425	2.7554	6.4457	10.6249	14.8193	5.4788	3.705	3.1849	4.5759	5.5132		0.378237	5.75627
8.8165	3.6945	3.2758	1.8954	3.9005	9.6105	3.4057	2.8498	4.4227	3.9345	3.8753	4.2022	6.8809	4.904	13.4068	7.7677	8.5818	3.8097	7.8119	8.2123	9.8415	5.5348	6.1198	5.4998	5.7932	4.4066	4.1179	3.5717	3.4882	10.4556	10.6471	5.0773	3.3184	3.4481	5.6325	5.9423		0.383421	5.69534
8.9356	4.4476	4.2943	4.6829	3.7728	6.7912	3.6313	5.0988	4.3377	2.7558	4.2662	5.7697	5.4115	4.4818	10.9522	6.303	10.8197	8.5129	6.6518	6.0265	6.6634	4.4677	3.7021	6.2304	4.677	3.2141	2.1215	5.2695	2.695	10.7107	7.4295	4.7435	4.1178	7.4449	7.1398	3.219		0.388601	5.5101
9.0547	5.0095	3.3102	4.1571	2.4008	4.5914	6.533	4.4198	3.9825	7.6604	5.0765	5.6175	5.7026	3.8975	11.6934	5.5358	4.6616	8.1126	7.3444	7.5433	6.291	4.3336	4.8313	9.2013	6.9963	4.5447	2.8904	5.6816	6.0393	7.4136	11.3598	4.2405	6.5909	3.8009	6.2854	5.1082		0.39378	5.79596
9.1739	3.9741	2.9965	2.2188	3.1137	6.704	4.2737	5.011	4.4124	3.801	3.4253	4.8284	5.0829	5.6133	11.2259	5.6475	5.4547	7.076	9.6359	11.087	8.9505	2.6111	7.008	6.5891	7.4971	5.9616	2.8136	4.319	5.1886	7.1412	12.1148	2.6408	4.7468	4.9743	4.3167	5.1407		0.398964	5.6456
9.293	5.0013	4.5447	3.1336	3.3149	5.0521	4.3621	3.3489	2.8724	2.6439	3.772	4.8917	6.512	7.6541	12.6048	8.7015	6.9004	7.1536	10.2667	8.7339	9.0219	2.5127	9.0168	5.6052	9.5037	5.7993	3.3083	3.8569	4.5069	7.258	7.8552	3.5306	5.6603	5.2278	7.061	4.4222		0.404144	5.87461
9.4122	3.4557	5.243	2.7084	5.6369	5.1886	3.6695	3.1448	3.4082	4.1555	5.5139	6.2841	4.8183	4.7917	10.25	5.0066	8.6028	5.877	7.5241	6.3402	8.8067	4.5413	6.0065	6.8223	8.8262	5.1598	3.3437	2.3934	2.728	6.3811	5.8277	5.0119	6.1306	2.7827	5.4907	4.0169		0.409328	5.31111
9.5313	3.1338	4.3959	3.4584	6.063	5.5137	2.8195	4.292	6.431	6.2785	2.9505	4.4583	3.9837	3.0929	10.1952	4.748	6.1721	4.8748	8.166	7.9924	9.8121	3.9691	5.3045	6.6827	7.1547	6.2536	2.4274	3.5473	3.5263	6.8617	7.0478	2.6174	8.8709	4.3516	4.7273	2.6678		0.414507	5.2812
9.6504	2.8246	2.1352	2.7446	3.7602	5.5841	4.9262	5.9434	6.6764	5.3661	3.6108	5.8428	5.3067	3.1212	6.0812	6.5183	3.1608	5.8879	6.635	7.7607	9.7796	2.8345	4.5754	5.3097	6.0182	3.4482	3.4398	4.3901	3.6146	7.4913	8.1421	3.6997	6.4611	4.0633	5.1317	2.2023		0.419687	4.98537
9.7696	3.5471	2.5534	4.8469	3.2327	5.0811	4.0991	5.2107	3.9745	4.3876	5.8064	6.4849	3.6047	6.7403	8.1862	2.2601	7.2947	4.6061	4.8658	6.8456	9.4968	2.6456	4.5808	7.6277	10.5228	4.7868	2.881	3.5615	4.6529	6.4661	6.7521	5.0085	7.8581	3.6392	3.9555	2.1514		0.424871	5.14899
9.8887	6.1386	3.2967	3.508	5.0782	3.5133	4.4735	3.3565	2.904	4.1232	5.7223	4.778	3.1754	3.8365	3.732	3.6765	5.0539	5.3105	6.8231	6.7299	9.5903	2.4868	3.8813	4.298	4.1483	4.2184	4.1462	3.5019	3.0363	9.004	7.6628	4.6096	3.2767	3.0305	3.7579	3.9048		0.43005	4.56525
10.0079	3.9798	4.7507	2.3434	2.6725	4.0107	3.7606	5.1083	2.2992	3.0264	3.8827	3.8431	4.5236	5.4876	4.7436	2.4572	9.8692	5.344	6.634	5.238	11.0558	3.9201	5.1271	6.7493	6.8919	5.0541	1.9184	3.8941	3.6967	8.306	8.4318	3.1038	3.4176	4.0207	4.1875	5.1817		0.435234	4.82661
10.127	5.7879	2.0616	2.3882	2.6546	3.6788	6.6702	5.809	3.1076	3.0525	4.2416	3.7014	3.3841	5.2293	5.9214	2.2737	5.2248	10.4356	8.7636	7.6177	8.9213	2.9242	7.3138	4.1821	6.7735	4.6094	3.7062	1.8401	4.3895	11.4738	5.7622	4.5182	4.9088	4.0413	3.8624	2.7605		0.440413	4.97117
10.2462	4.7226	5.3338	2.2365	2.8331	3.9062	4.1341	4.0847	2.7069	2.2318	5.243	2.8537	4.799	3.7782	7.4804	3.1726	7.1169	6.6438	7.7667	6.9314	7.402	5.7944	3.423	4.092	7.9958	7.8611	3.4076	1.8055	4.6722	8.0309	5.4689	4.2959	4.6105	2.4777	5.2564	4.3833		0.445597	4.82722
10.3653	3.73	2.4029	3.7395	1.8199	2.8227	4.1811	4.9765	4.5931	2.2883	3.0455	7.7954	3.9359	3.4586	4.8454	4.869	5.4019	6.1819	6.9881	6.6942	9.7409	3.2624	3.1237	8.8803	7.358	3.1041	1.9509	3.5234	3.1492	5.2753	5.7283	7.122	2.6441	1.7516	2.911	2.4435		0.450777	4.44967
10.4844	3.5473	2.683	4.6195	2.6015	4.3375	3.8691	5.2801	3.8276	2.0923	3.4392	4.6026	5.4328	6.0381	3.96	3.634	5.6548	3.8835	8.2595	9.1322	8.726	4.3951	6.8229	7.2961	6.4403	4.5663	2.9968	2.7952	3.5267	8.558	6.3678	6.1602	4.0005	2.2824	3.7137	4.1875		0.455956	4.84943
10.6036	4.4603	3.331	2.3648	2.0135	4.0394	4.2497	3.2385	3.7245	3.3222	2.6512	5.8856	5.4042	5.5744	3.3196	3.6671	5.303	3.4178	6.2324	6.3669	12.6369	3.1021	4.9912	10.9181	7.5684	3.0708	4.1872	2.6446	2.0328	5.3856	5.099	6.5026	5.9341	4.093	4.9783	5.2035		0.46114	4.76898
10.7227	5.4156	2.5721	2.7412	4.0469	4.7418	4.3993	4.0507	1.983	3.3681	4.8491	5.115	4.0913	4.8606	2.9269	2.4221	5.7023	6.1804	2.3848	5.5628	6.421	5.7969	7.2601	8.2627	5.4366	2.4317	3.7762	3.7419	2.8533	4.3006	8.5067	4.71	3.4676	4.3877	3.8123	3.1393		0.46632	4.4491
10.8419	4.461	2.7195	3.026	2.9716	6.9349	2.7692	3.7978	2.2566	2.9361	3.4796	4.7387	2.7481	5.5917	2.9855	4.3594	4.262	3.8419	5.0967	8.4577	8.9535	3.851	5.9802	9.1177	5.7727	4.0013	5.3753	4.3517	4.0674	5.7383	8.8538	4.7441	3.8079	4.2765	3.7146	2.7963		0.471504	4.65247
10.961	4.0775	4.0844	2.5136	2.3969	5.0728	3.1043	3.854	2.7826	4.0314	4.3888	3.7383	5.1342	7.3202	2.8229	2.7086	2.4966	3.9037	5.6193	9.5117	8.9904	4.2468	3.0729	7.4827	3.9926	3.212	3.1336	2.9537	2.4176	8.5351	5.4295	4.1827	5.4138	4.0166	3.2029	2.8866		0.476683	4.36375
11.0801	3.2981	3.298	1.7945	3.2467	4.0904	4.0183	2.7429	2.1788	2.4936	3.0845	3.5063	3.9743	5.2161	1.8782	2.8866	3.0937	5.4441	4.9713	9.5034	8.3942	6.8233	6.2502	7.3993	5.6124	3.6724	2.0164	6.5208	2.8272	7.5402	5.9733	5.2119	2.3935	3.9801	2.1311	3.5115		0.481863	4.31365
11.1993	5.3771	2.3992	3.2171	2.8161	4.8491	4.0284	5.1004	2.405	3.5104	2.4391	5.1352	2.4058	4.9612	2.3796	3.0888	6.0851	4.5875	3.6418	10.2589	9.3438	6.0361	4.7697	6.2382	4.2706	3.4577	1.6993	3.182	3.7146	6.8533	8.3644	4.0783	4.8884	2.2039	4.1953	1.8046		0.487047	4.39389
11.3184	5.5959	2.4447	1.9361	3.483	4.6191	4.9552	3.484	1.9578	3.8715	2.0846	4.0537	4.1771	5.4392	4.7937	3.6155	7.6269	3.3904	4.5493	12.8284	6.7523	4.2365	6.1639	4.6013	7.7051	2.0374	2.8347	2.4979	2.3861	9.3749	6.4589	3.167	3.5472	3.2972	2.7363	4.2265		0.492226	4.48369
11.4376	7.0179	2.93	1.9324	3.6995	4.98	3.3727	5.6264	3.2249	2.0936	2.4943	3.5117	4.373	4.2796	3.4727	3.5908	3.8195	4.9812	7.6332	10.3929	5.1412	3.5123	4.7011	5.3501	10.8329	4.9253	3.2003	1.9097	3.0835	8.8325	7.0087	3.3952	7.0524	2.3231	5.2769	5.3523		0.49741	4.72354
11.5567	9.1147	3.2095	1.8895	3.9017	8.0788	3.7739	2.7572	3.135	2.0177	3.3225	5.3246	4.1658	3.3517	2.9868	2.39	4.4318	6.1485	8.2793	7.6569	5.4105	5.83	2.934	5.5586	6.2696	5.3223	2.4303	2.3105	3.4891	6.946	7.4403	3.7051	7.4279	1.8706	2.1858	2.9093		0.50259	4.51359
11.6758	3.9729	4.6374	3.1372	1.8047	10.854	4.7379	3.5682	2.8403	3.9044	5.5862	7.2275	4.5016	5.6444	3.51	2.3259	5.3273	6.5753	6.9865	9.6575	7.1754	3.5501	4.0382	5.2603	5.7468	2.3194	2.0163	2.5487	3.5601	5.94	7.1405	4.7695	4.3936	1.8598	2.9241	1.8452		0.507769	4.62535
11.795	5.049	2.8329	5.0126	2.3595	8.4032	2.8028	3.7534	3.6026	4.7427	3.6784	5.1371	4.6166	3.2492	2.5962	2.4999	7.8765	3.4084	6.6792	6.2437	5.7814	6.6147	4.8209	5.739	5.8018	2.7677	2.3207	1.7734	3.7314	5.0288	9.9836	6.5299	4.8204	3.5591	5.2167	2.2085		0.512953	4.60691
11.9141	2.168	2.7884	2.3249	1.7731	6.071	4.4712	5.2217	3.1843	2.8394	4.1252	2.7476	4.8691	5.6253	2.101	3.2089	7.1987	4.5923	6.941	4.8784	7.3297	4.0115	6.7897	8.4591	4.7144	3.7934	2.2926	1.942	2.3298	8.3922	10.0917	4.8287	5.6751	2.5626	3.915	2.9625		0.518133	4.49199
12.0333	4.4872	5.4544	1.884	2.0088	4.3803	4.6856	4.4162	3.0488	2.999	3.6125	2.5952	3.8459	4.6074	2.0062	4.4088	4.6644	3.4844	6.1429	4.3485	3.8681	3.26	7.0649	5.6309	3.7649	4.7325	2.8463	4.6227	2.8024	9.6761	7.8149	5.8423	5.073	3.501	3.3655	3.1475		0.523317	4.28839
12.1524	5.1595	4.6203	3.0896	2.0875	4.4345	4.2562	3.2697	2.8685	2.0571	4.7157	3.5712	5.3799	4.6778	3.5388	4.4681	3.3602	5.1348	6.3121	4.4691	3.8014	4.4487	6.1216	8.8799	3.5701	4.0232	2.2079	2.9073	2.6932	9.2211	9.7056	3.2689	5.8353	4.8757	3.2088	2.2481		0.528496	4.41393
12.2716	2.6091	4.1768	2.4763	1.7973	4.8538	2.9723	1.9318	4.5014	3.1994	5.2469	7.8292	4.9018	4.9971	2.7821	3.3949	3.4726	4.0631	4.7642	5.4959	4.6735	5.3914	8.1909	6.6534	4.2988	3.1623	2.8939	3.2966	3.4693	8.3624	10.3003	5.3944	6.0015	6.2111	3.3364	2.7274		0.53368	4.56656
12.3907	3.8009	2.8595	1.6876	2.7673	2.518	2.1869	3.9909	3.3184	3.18	3.6606	4.8151	2.7115	4.0682	2.5086	4.9142	3.0872	4.7821	6.9411	5.3561	4.6583	4.0977	6.6954	4.4197	4.409	2.7594	2.8404	3.2676	3.1728	6.4894	9.6859	5.0532	4.546	4.3173	2.6156	3.6585		0.53886	4.05258
12.5098	9.9842	1.9579	1.739	2.6633	2.5552	2.5384	2.608	2.6547	4.7243	4.1391	5.1995	3.1485	6.6234	1.8249	3.1247	5.3286	2.7343	4.9747	5.3978	5.6747	2.9544	8.2673	6.5293	3.6232	2.9653	3.188	3.6622	2.4438	4.7645	11.8078	5.2683	4.4069	2.5237	1.8769	2.1667		0.544039	4.17267
12.629	7.2461	3.4558	2.0661	2.3146	6.1151	4.1054	3.8269	3.0618	3.2799	4.5805	4.735	4.5186	6.0756	2.5993	3.1487	4.1566	5.5309	3.4536	4.8141	3.8701	3.1784	5.1658	3.8344	5.1388	2.6185	2.1697	3.8532	2.8382	5.7161	14.8847	4.9144	4.6354	3.1184	2.6	2.9474		0.549223	4.30195
12.7481	5.3865	2.9094	2.5228	2.8428	3.6064	4.801	3.5879	2.6703	3.6794	2.1893	4.786	2.9093	5.5166	2.2218	2.9838	3.4638	5.966	4.3588	4.0522	5.9243	4.0613	8.5541	4.2514	6.8467	2.619	3.1405	2.3635	4.1534	3.8384	11.3057	5.9067	5.5678	5.3193	2.0753	3.0732		0.554403	4.27013
12.8673	2.6436	2.2792	2.5965	2.9501	2.1834	3.4973	3.5043	3.1068	4.846	3.3812	6.3556	3.92	5.864	2.1709	3.7273	6.0923	5.4505	6.2113	5.0331	5.5851	2.7551	4.5899	3.6451	5.9503	3.8421	2.787	3.1196	3.0742	7.6169	10.6219	3.2466	2.6711	3.2489	2.1568	3.4976		0.559587	4.12062
12.9864	3.6743	2.6558	2.0389	2.4443	4.2502	5.9901	4.369	3.4968	3.5265	4.3437	6.6595	4.7613	4.2808	2.5294	4.4985	3.7748	4.2404	5.3918	7.5656	6.7766	2.7726	5.5957	2.5886	3.179	4.0297	3.8183	2.3362	2.9508	5.2927	7.5348	4.1478	5.0407	2.8165	2.9484	3.9014		0.564766	4.17776
13.1055	3.5756	2.5407	2.7689	3.3646	7.8438	3.5892	5.939	1.6929	2.6807	3.4741	8.1869	2.4182	4.5809	3.5168	2.9066	2.278	4.4369	5.248	5.7119	3.9041	5.6438	4.8855	4.8109	7.1383	3.9916	2.1768	2.3092	4.9007	7.8646	6.192	4.471	3.9022	4.2707	3.2747	2.0202		0.569946	4.24314
13.2247	6.6445	1.9218	1.7827	3.1014	3.7325	3.7655	4.5948	2.161	2.909	4.8751	4.3568	4.2709	4.6988	4.0325	4.2274	2.3117	4.3528	3.53	7.0361	3.8418	3.317	3.7786	6.7364	4.8563	2.3702	3.1588	3.111	3.6738	6.1486	5.5938	3.4427	5.2413	2.5769	3.3032	3.2883		0.575129	3.96411
13.3438	3.3693	2.636	1.919	3.2604	4.0692	4.3656	2.4097	3.647	2.331	3.261	4.8351	5.1935	6.4443	2.19	2.5866	2.2437	5.7758	6.6444	2.3452	5.0149	3.2169	4.2882	4.4808	3.6174	3.6786	3.0711	2.5644	4.6018	4.0989	6.5067	3.4825	3.9583	3.1104	2.7777	3.0999		0.580309	3.74558
13.463	5.6803	2.2765	1.9628	3.6208	5.4684	4.717	2.485	4.292	2.426	4.8456	4.6141	5.0014	3.6406	2.5468	3.26	2.403	3.0938	4.7434	4.7272	4.2748	3.6922	4.064	5.3106	6.0278	3.4401	1.8219	1.7264	3.4027	3.4853	9.047	4.1979	4.7675	2.2147	3.4268	3.9657		0.585493	3.90486
13.5821	4.6604	2.2585	2.3181	4.0504	5.0593	5.4385	2.8315	3.0286	1.8519	7.1423	4.5458	4.9665	5.363	3.0723	2.695	3.405	4.94	6.5254	2.4469	5.9642	3.8311	5.2761	6.8032	7.86	4.1605	2.0521	1.9964	2.4738	5.1179	8.939	5.9094	5.5968	3.5087	3.0035	2.8376		0.590672	4.34085
13.7012	2.1582	2.2969	1.9878	2.1005	4.2749	6.6011	4.3133	2.343	1.6861	4.7319	3.3584	4.8666	2.6263	2.5647	5.3464	2.2781	4.1202	5.7481	5.9703	4.885	3.6802	4.8493	8.4536	9.1892	2.0067	2.8465	3.9857	1.7987	6.3497	7.7607	2.3569	5.4243	5.9458	1.9121	1.7798		0.595852	4.0742
13.8204	3.2864	2.7758	1.7898	2.4343	3.2576	6.596	7.7102	2.822	3.6511	3.3807	4.4053	2.3642	2.5397	1.746	3.3522	3.986	4.5502	5.1268	5.1687	3.034	2.1944	3.6492	6.8894	6.9715	3.0357	2.5299	2.089	5.2748	7.9756	5.5596	3.372	4.3314	4.7899	1.9518	3.3266		0.601036	3.94051
13.9395	2.778	1.9585	1.8002	3.5126	3.728	8.9954	4.2403	5.0242	2.3433	5.1667	5.8877	4.9247	3.9666	2.3691	3.9945	4.5478	7.6699	3.7685	5.4534	4.7204	2.7782	3.3253	5.7702	6.5653	2.859	2.3025	4.0928	3.8543	4.8917	6.5992	5.8934	4.8064	4.1862	1.9839	3.7881		0.606215	4.30132
14.0587	2.1536	3.6302	2.3215	3.352	3.0776	7.3296	4.619	2.4667	2.9494	3.146	4.2834	4.6857	3.4814	2.0238	4.0209	4.5447	7.0324	4.0154	5.4794	3.974	4.0018	3.5225	9.582	5.9655	3.0034	2.4385	2.5718	4.6659	9.4792	6.8504	5.2578	4.3114	2.8435	1.9441	2.4978		0.611399	4.21492
14.1778	3.4038	1.8899	2.0269	2.4015	4.6138	4.5334	3.577	2.4478	5.3461	1.9065	4.5121	5.548	4.5419	2.4083	4.2797	4.1936	5.3989	4.2702	4.4524	4.1897	5.0765	3.4107	3.2131	4.8042	4.3815	1.7378	2.0453	3.0596	7.4211	8.5643	2.5777	3.7381	3.5806	2.4913	2.4438		0.616579	3.84249
14.297	4.7402	2.322	2.9444	2.589	3.5391	4.1642	4.1648	2.4391	5.3384	3.1806	4.9814	2.4241	4.2258	2.518	2.4252	3.3493	4.7298	6.402	3.4394	2.52	3.0327	5.475	4.1173	10.2426	3.5928	3.0993	2.1288	6.2784	7.0277	9.427	3.9013	4.2284	3.5922	2.7663	4.009		0.621763	4.15302
14.4161	3.46	2.7691	2.9828	2.0664	4.1597	4.132	4.4062	3.0704	3.9502	3.1367	4.8833	3.755	3.3916	2.211	2.4891	3.8509	7.5318	3.2433	3.871	4.4797	6.2063	5.741	4.9642	4.9893	2.3065	2.2178	2.195	3.8715	7.7598	7.3757	3.4549	3.3497	2.7535	3.1809	2.4108		0.626942	3.90335
14.5352	4.0686	3.1526	3.1433	3.5089	3.1963	5.8438	3.3316	2.3831	2.2111	2.083	3.3223	5.7197	6.6267	2.1487	1.965	2.076	6.6466	4.327	2.7295	6.376	3.4133	6.5488	9.5582	4.6685	6.2141	3.4298	3.4619	3.6512	8.9952	4.1552	2.2433	4.1718	6.3131	4.5522	2.9691		0.632122	4.26301
14.6544	3.7107	2.5672	2.4003	2.4394	2.1748	5.3783	4.8353	3.1078	2.0926	2.1765	3.7421	4.9773	3.5741	3.5118	1.8236	2.103	5.1335	2.6534	3.0343	5.5064	3.6072	6.9464	4.5878	3.107	4.443	2.3006	2.5394	3.0798	8.4215	3.5449	5.9705	2.3872	4.4368	3.921	2.4435		0.637306	3.67654
14.7735	4.0111	4.2004	3.413	2.1414	6.8476	4.8445	4.0969	3.3926	2.9587	2.686	5.2256	2.3287	2.783	2.1203	1.7934	2.947	3.4121	3.4483	5.819	5.709	4.7333	6.6611	3.3477	4.2625	4.5137	2.3383	2.2628	3.7444	5.5349	4.0043	6.0632	6.0727	3.227	2.1371	2.7809		0.642485	3.88179
14.8927	1.8786	2.8512	1.9909	3.7613	6.9351	3.574	6.8781	3.7418	3.5848	2.1511	3.7232	2.8487	3.5653	2.0872	3.7036	2.6821	3.2608	4.3748	7.143	4.5609	2.964	4.6674	5.9618	3.8805	2.5705	3.6953	1.8302	3.2786	6.1967	4.5586	7.3043	4.3068	3.6461	2.486	2.1626		0.647669	3.8516
15.0118	5.2582	1.8929	2.6663	3.7237	6.6295	2.6601	3.7336	3.365	2.8414	2.5953	2.817	6.0829	3.1152	2.8468	3.4382	3.2628	5.352	4.3632	3.7386	3.8846	4.0995	5.9619	5.6582	5.797	3.4557	2.4316	2.2684	4.8259	4.6034	7.4962	4.0104	2.1637	5.1398	3.7017	1.8667		0.652849	3.93564
15.1309	4.9019	1.8679	2.5447	2.0135	5.1047	2.9524	3.458	3.5159	3.1119	3.3377	3.2057	5.5297	2.9112	2.5528	2.0805	2.6295	3.4128	3.5821	5.8801	3.0536	4.8153	4.2071	3.423	4.6608	6.0286	2.0236	4.4525	5.0963	4.4097	5.1794	6.265	3.3789	3.6789	1.7824	2.1696		0.658028	3.69193
15.2501	4.9782	4.2499	2.5339	1.762	5.3677	3.2582	5.3638	2.7257	2.1674	3.6641	1.9096	4.5924	3.9628	1.7803	2.2438	3.9054	6.1311	4.3691	4.3085	4.1758	4.35	5.438	4.0447	4.4122	5.547	2.743	2.4891	3.4374	7.5564	5.2196	3.5605	4.0917	4.1722	4.3872	2.317		0.663212	3.92045
15.3692	3.839	2.2656	2.3577	3.2386	7.2681	3.3566	2.6669	2.5762	3.6689	3.7837	4.3327	2.7039	5.5526	1.9501	3.1544	4.4258	5.2319	6.0235	5.8118	3.1314	3.2913	5.5422	6.315	3.8697	3.3742	3.5895	3.6407	3.1086	10.265	2.4285	4.082	4.6948	3.403	3.68	1.9754		0.668392	4.01712
15.4884	5.3164	3.5179	2.4195	3.2787	5.7477	3.8627	3.2037	2.0998	4.0395	2.6303	3.5682	3.4919	3.5469	2.5311	4.0954	2.867	3.8751	6.9038	2.9954	4.3254	3.433	3.3567	5.721	4.1965	4.5261	4.129	4.945	4.5774	6.9892	4.6301	4.6607	5.2193	2.9568	4.0429	2.0427		0.673576	3.99265
15.6075	4.7694	4.3891	2.2159	3.1822	2.0951	2.5033	2.9565	2.6186	4.7177	2.1794	3.0931	4.892	3.8597	3.4435	2.662	2.1183	3.2895	6.5938	2.8389	5.4116	5.0986	4.0572	6.6508	5.7217	4.8336	3.6852	4.6043	4.1563	4.7754	4.0571	4.2882	4.6394	2.781	1.8247	3.8417		0.678755	3.85271
15.7266	2.8583	2.6611	1.7491	3.2795	3.2809	2.3877	4.4988	3.9377	2.6509	3.905	2.8998	6.1705	5.3704	3.4592	2.8292	3.4395	5.1063	6.1833	7.3388	3.2818	3.7114	3.2138	4.2867	8.6472	2.4477	4.6502	3.6812	2.772	4.6681	6.6366	7.2139	2.705	3.5441	2.9726	1.7565		0.683935	4.00557
15.8458	3.1279	2.6229	2.916	3.2516	4.1935	4.4286	3.7896	4.3682	3.2362	4.6076	4.3839	3.9733	4.2611	2.22	2.7303	3.9642	8.2454	5.3408	3.9338	5.0857	5.6752	5.5262	5.914	9.5843	3.4301	4.2238	5.3121	2.9056	5.7229	5.9539	4.4035	2.1405	5.5745	4.1282	1.6238		0.689119	4.36569
15.9649	3.5564	1.6846	2.4026	3.6264	2.6338	3.2133	4.1107	2.5567	4.6823	2.8065	5.3322	5.6448	4.9826	1.9354	2.3736	5.0158	10.5124	2.1139	3.1744	4.3471	3.5915	3.3855	3.1522	6.9201	4.8758	4.0128	3.7231	3.7657	4.0932	7.9967	6.3186	4.2517	4.1861	3.392	2.2789		0.694298	4.0757
16.0841	2.8312	1.9132	2.4255	2.3536	3.5828	5.6892	2.1044	2.5214	2.9783	4.1236	6.1601	5.046	4.5793	2.0321	2.4476	3.5484	5.9565	2.609	2.5915	3.3086	4.1832	4.6555	2.6324	10.5432	5.4621	4.3902	2.3261	5.1926	4.7021	8.7017	3.4768	4.4671	2.2408	4.7752	2.9217		0.699482	3.98494
16.2032	2.8642	2.4695	1.9503	1.9507	4.5924	4.6094	2.1104	2.7891	2.4247	2.9825	6.4044	6.913	4.249	1.9025	1.8295	2.5647	3.9676	4.0323	3.1344	3.4972	3.2499	5.6823	4.3936	4.0665	5.5208	3.0603	3.6821	2.7201	4.5531	5.1298	3.1836	4.6147	3.1131	3.8575	4.4719		0.704662	3.67249
16.3224	3.7724	1.9049	2.4479	3.1985	7.2035	2.6084	2.1875	4.457	3.434	1.9995	2.784	5.0151	4.9657	2.1664	2.1209	4.9064	6.0481	4.6463	2.759	5.2255	2.2736	4.1903	5.9897	4.1746	7.4674	4.7544	2.5162	4.287	4.1721	8.301	2.313	3.3225	4.6103	1.7736	3.1174		0.709845	3.91755
16.4415	5.8869	1.9387	1.8726	5.153	5.413	1.9311	2.0393	2.6519	2.7576	3.1503	5.9291	6.9444	6.725	2.5869	2.7318	1.7979	4.4405	4.3376	3.3145	4.6239	4.31	5.2359	6.0018	7.0351	5.7492	5.1062	2.5949	4.3727	4.2995	10.0475	2.6323	3.7551	2.5244	2.5135	2.3389		0.715025	4.13551
16.5606	3.1993	3.1416	2.5991	2.3859	5.1284	2.0611	1.9859	2.2283	2.4315	3.207	4.8583	5.5618	2.3518	1.9992	2.2306	2.7181	3.131	3.8402	3.9444	2.9407	4.2418	6.2825	4.7032	5.2898	8.2602	2.4277	3.6527	2.6165	5.587	7.5308	3.6293	3.6816	5.1405	2.878	4.5453		0.720205	3.78317
16.6798	2.965	2.4533	2.3143	4.5004	3.4294	2.8744	2.0508	1.8182	2.7671	3.7854	2.8929	6.2547	2.9241	2.2506	3.0715	3.1232	3.8517	2.0577	3.803	6.3912	2.5325	6.4448	4.0149	6.1732	4.0561	4.7308	2.9487	3.4807	5.3978	7.5209	3.1736	4.1007	4.83	2.9215	3.6648		0.725388	3.75914
16.7989	6.4146	3.0597	1.6703	4.0828	5.8672	3.749	2.823	3.0403	4.1904	4.1776	5.8364	3.4435	2.6283	3.4669	3.0068	5.019	5.372	3.5387	7.9578	5.2125	3.1884	4.2772	4.3406	5.9693	11.2166	8.2097	4.0868	5.3109	9.0476	3.3789	3.5358	4.522	4.7186	5.9315	1.9357		0.730568	4.69218
16.9181	4.5805	5.7007	1.9006	2.3901	3.5208	3.6002	2.6072	2.3292	4.0409	2.6489	5.1503	5.0004	3.0214	3.2668	2.5559	3.7244	6.6087	4.295	3.2907	6.3071	3.6704	3.9167	5.2961	4.3933	5.7564	6.191	5.3594	5.3676	5.3996	5.6767	4.2329	3.4506	2.8649	2.7935	2.1367		0.735752	4.08702
17.0372	3.8211	3.5917	2.6088	1.6824	4.3215	2.0588	3.6456	2.6612	2.1826	2.4699	3.7045	5.3498	5.9683	3.7896	3.5037	4.6981	5.1491	3.4018	3.1054	3.2878	4.1384	3.4848	4.5097	6.7302	8.0325	6.4595	5.1854	6.547	5.8167	6.3128	4.144	5.0362	2.4277	2.4519	2.5279		0.740931	4.13733
17.1563	3.3138	2.0297	2.0413	2.4346	2.939	5.2111	6.0898	5.7678	2.3974	3.55	3.0217	5.4816	4.1407	2.7359	4.0621	3.5336	4.7104	6.9323	3.6299	2.0031	2.1232	3.6127	4.5364	5.6603	7.1209	6.5465	4.6706	6.6523	11.0194	4.6932	4.0685	4.7915	4.306	3.9951	2.5891		0.746111	4.35461
17.2755	5.0406	2.0187	2.2415	3.1596	3.7594	5.6965	4.1132	3.057	4.361	2.8883	5.0129	6.0367	4.848	2.9897	2.6001	4.3585	6.6964	2.229	5.3201	4.3378	4.0705	5.8274	4.7447	6.7168	5.1121	7.5933	3.8571	10.296	3.2382	3.8187	4.776	4.5161	3.5682	4.0886	2.3421		0.751295	4.43802
17.3946	4.4806	2.3737	1.808	4.54	4.2483	3.9046	4.7818	2.8963	3.061	2.1755	6.8959	6.4783	3.6924	5.3806	3.8851	4.0096	5.7321	3.7061	4.4529	2.9767	2.6315	2.4994	7.1524	5.1625	4.6975	6.7792	7.0472	8.8897	4.2651	3.4527	3.2538	2.7815	2.5226	4.1106	2.4606		0.756474	4.26245
17.5138	5.2887	2.4459	2.4132	2.7338	5.7085	5.3852	5.5424	3.8959	2.5575	2.2372	4.1245	4.9018	5.335	4.8811	2.4872	3.276	4.8557	3.3947	4.5759	3.2451	2.3365	3.1573	2.7247	4.4578	4.6659	7.0209	7.1844	6.7346	7.0573	7.0642	3.0024	4.0236	5.0526	3.3831	2.5177		0.761658	4.27624
17.6329	4.384	2.0877	2.0952	3.6697	3.1795	3.2106	6.2305	2.7048	1.7113	1.7733	3.436	5.6089	5.654	3.9608	2.9594	4.4092	3.8213	4.2436	5.848	4.1097	3.4893	3.3384	3.5369	8.4381	4.4766	6.5694	9.019	8.1719	4.895	4.7069	4.901	4.1755	3.1131	1.8992	2.9825		0.766838	4.25172
17.7521	3.6252	4.6419	2.2009	4.4705	3.3528	5.6137	5.4408	3.8847	2.8945	2.1474	4.5554	7.2223	5.154	6.4832	3.0746	3.7356	2.5149	5.1816	4.7568	3.7511	4.8701	3.0592	5.2737	6.2125	3.6983	9.0001	7.9715	8.8406	5.4599	5.6746	5.1424	2.1633	3.4211	2.0179	2.2554		0.772022	4.56464
17.8712	2.5916	3.0227	1.9423	2.3839	3.4896	4.1372	6.7612	2.3976	2.2814	3.6078	4.0057	4.4974	3.1546	4.8054	2.5104	5.6738	4.4282	9.2775	3.2847	4.3373	3.3544	4.0474	2.6181	6.2409	2.8641	6.287	7.3004	7.8735	5.7165	4.4264	2.5695	3.8108	3.3738	2.6802	3.4293		0.777201	4.14807
17.9903	3.9848	2.3294	2.761	3.9367	2.7525	3.6263	5.6543	3.7074	3.9245	6.3598	4.5187	4.9468	3.0337	2.4065	2.6532	4.513	4.2163	4.5953	4.0368	3.2961	3.0304	2.7779	1.8749	6.0025	6.0937	5.9001	7.6158	5.5763	5.8421	3.8597	4.0518	4.4191	3.8828	6.7366	2.6816		0.782381	4.2171
18.1095	4.1262	2.314	1.879	3.8723	4.5401	3.1704	3.8513	4.3518	3.1176	2.9613	3.5951	2.0803	2.9714	2.1992	2.3659	2.7295	5.1981	2.7054	5.6483	2.1052	2.1028	2.6333	2.7931	4.7922	8.7855	4.5958	9.6542	6.2011	3.1313	3.7177	3.4952	3.1149	5.704	5.4998	4.0649		0.787565	3.88766
18.2286	2.3785	3.305	2.7706	4.5865	4.0456	5.0111	3.076	2.7314	3.7908	2.0672	3.2991	2.0658	3.3786	4.2439	2.6766	3.269	4.0161	6.2396	3.0811	2.7632	1.7389	2.4731	2.465	3.9547	7.5455	5.954	3.8798	4.7911	4.1621	3.9819	4.0262	2.5188	7.4584	4.3443	3.3086		0.792744	3.75423
18.3478	2.7081	4.3791	2.3549	2.9328	4.9163	3.1062	5.8594	3.5279	2.5263	3.1479	3.5583	5.5423	2.8639	2.8522	2.3145	3.4064	6.6703	9.0627	4.6694	2.0832	2.8559	1.8612	1.9846	3.8495	4.0428	3.614	5.8631	6.486	3.2361	2.98	3.235	1.8868	3.7702	2.6467	3.063		0.797928	3.7102
18.4669	3.933	3.6435	2.5163	2.6673	2.7289	3.8186	3.8649	3.2726	2.3777	3.1224	3.5827	7.7633	4.061	2.3785	2.4707	8.6132	4.2939	2.738	3.8034	2.4626	2.7751	3.3186	2.8041	6.6556	3.029	6.4399	9.0799	4.416	2.657	4.6687	2.4264	4.7145	3.9712	3.6832	3.2416		0.803108	3.94267
18.586	3.6127	1.6941	2.2567	3.08	2.5568	4.8331	4.9382	4.1728	1.9427	2.469	5.0888	5.6348	2.8777	2.7887	2.0847	8.4659	4.8	5.3653	4.7818	2.2904	2.3601	2.6799	2.4527	4.8707	4.4797	4.6746	6.1201	2.2264	4.1717	4.5652	3.6001	5.7508	3.2858	4.0041	4.2268		0.808287	3.86294
18.7052	4.4218	2.7598	1.9048	3.5839	3.211	4.2767	4.76	3.8898	2.6967	2.2701	5.0516	6.0883	4.6405	2.8236	1.9495	4.2889	5.1295	4.7128	4.0038	2.6008	2.318	2.4806	4.0922	2.8828	2.6442	3.845	3.953	4.1388	5.6944	3.5188	2.6783	4.4508	4.8655	4.6344	2.8948		0.813471	3.71873
18.8243	2.989	2.6693	2.8321	2.7609	5.0547	3.2203	5.231	5.9394	4.3467	2.248	7.0615	4.9136	3.575	4.0125	3.4333	6.0905	5.1576	3.0924	5.346	2.5448	2.0698	1.7289	5.1683	2.4712	2.1146	5.3542	3.8891	4.3831	4.4117	6.4084	2.3405	3.2024	4.4175	5.2065	2.1093		0.818651	3.93697
18.9435	4.5715	2.997	1.9865	3.6122	3.0042	3.2698	4.5637	2.7908	2.4564	2.4156	4.2764	5.0938	4.1169	6.3983	5.2515	5.8163	3.1587	4.3834	2.5954	2.0381	3.02	1.9297	2.4766	2.3149	3.1563	4.0695	3.1879	5.2622	4.7478	6.3118	4.4027	3.4146	3.7354	3.8747	2.5684		0.823835	3.6934
19.0626	5.7788	2.515	3.2867	4.13	4.9611	4.9776	4.2172	4.7797	3.8634	2.7301	3.9535	5.7178	2.5938	4.2135	3.4574	6.4579	5.795	4.3321	3.7179	2.0507	4.1678	3.1887	3.38	3.0976	2.5221	3.8058	3.9903	2.4578	3.4661	5.7564	5.0044	3.8551	4.3004	7.5618	1.725		0.829014	4.05167
19.1817	4.3354	2.1969	2.4044	3.4837	5.2462	8.6839	3.7006	4.2029	2.3015	2.4172	7.4282	5.3126	2.4304	3.3164	6.0986	2.6517	3.5321	5.5221	4.2938	2.9597	2.0018	2.6279	2.6262	3.2769	2.4069	2.902	4.3892	2.2935	2.3767	6.8302	3.8409	4.029	4.3168	3.6317	2.6603		0.834194	3.79224
19.3009	6.1481	4.434	1.6308	2.4324	3.2147	4.4697	4.3917	2.6634	2.0339	2.7822	5.5023	2.9332	3.972	3.0475	4.7333	3.4205	5.3287	4.2494	3.859	2.1943	1.667	2.8918	1.8525	1.9745	3.4518	6.3104	7.063	3.0954	2.5752	5.4843	4.3081	3.3272	3.2753	3.1597	2.4637		0.839378	3.60974
19.42	2.7854	3.0899	2.646	1.8885	3.2286	4.6194	3.4609	2.781	2.5398	2.8306	3.4293	3.9042	2.7012	5.9762	3.0589	4.8471	3.3575	4.9666	3.6834	1.8024	2.4079	2.0187	2.0963	4.7642	3.2573	2.0871	5.997	3.2789	2.3886	5.923	4.1496	7.7178	2.8296	3.3971	3.6757		0.844557	3.53102
19.5392	3.7577	4.2102	3.3439	2.6571	2.9768	4.2792	5.0406	2.3366	3.2519	2.8592	3.4007	6.1344	2.7898	5.2106	3.1523	4.6232	5.4626	3.1649	3.3784	2.2748	2.2518	2.4303	1.7746	3.6342	4.3424	2.1591	4.5967	3.8536	2.8841	3.4322	3.8008	6.5303	3.2343	3.1105	2.7267		0.849741	3.57333
19.6583	2.2003	2.9484	1.9591	3.9932	3.865	2.4893	2.553	3.1443	6.1348	2.043	2.4589	4.5829	3.3641	4.4105	4.8985	4.0494	7.4123	3.8554	4.3178	1.9038	2.5485	2.0914	3.2917	3.4374	2.9205	2.286	2.5138	3.2992	2.3687	3.3064	3.643	3.6938	2.99	3.0513	4.8952		0.854921	3.39774
19.7775	6.0377	3.7974	3.2164	3.336	2.872	3.2656	2.6474	4.2859	3.5442	4.2233	1.7024	3.0443	4.8841	3.4358	6.9549	3.1672	5.4921	3.7668	4.0426	1.7692	3.3914	1.8473	3.999	2.1011	3.0721	2.0886	1.721	2.6936	5.868	3.3497	4.5156	2.6933	2.5598	2.7985	4.0114		0.860104	3.49131
19.8966	3.5273	5.6849	3.2581	7.0043	5.2372	3.8516	3.4235	2.9102	4.6249	5.2552	3.8651	3.8482	2.2424	4.7526	4.5916	4.083	4.3512	4.2406	6.432	1.8957	2.8238	2.0387	4.4763	2.9137	4.3567	2.4652	1.8498	4.0694	4.0036	3.5685	4.1955	2.1827	6.5906	3.3185	3.9547		0.865284	3.93964
20.0157	4.7329	4.4465	3.1892	3.0863	2.2774	4.4173	3.7712	3.458	2.8926	3.9335	6.9008	3.9977	2.5778	3.8032	4.2457	3.7226	6.5797	5.9195	3.6583	1.9402	2.883	2.837	4.3698	4.5741	3.2226	2.0428	1.6166	2.5606	1.9044	3.3199	3.7839	3.3866	4.5278	4.5547	2.6869		0.870464	3.65203
20.1349	5.0696	4.0611	3.9381	4.8464	2.3905	3.8484	2.6368	3.2539	3.8025	2.9765	3.3447	3.275	3.3917	6.8033	4.8264	3.578	3.2743	3.6039	3.0844	2.0223	2.3086	3.1046	3.1464	3.7739	3.5163	2.5915	2.7953	2.8225	3.6837	2.7896	3.3108	4.0671	4.2882	4.0675	3.2074		0.875647	3.52861
20.254	3.9884	2.5571	5.8825	5.4177	3.0267	6.0456	3.8423	2.6729	2.1207	3.0029	2.933	2.6445	4.4433	4.2158	3.0179	3.9796	5.0708	4.232	2.3823	1.8812	2.7238	2.4882	2.8748	5.4262	2.0536	4.2764	2.9543	2.6324	3.2425	2.103	3.8096	3.8362	2.864	5.0769	3.3322		0.880827	3.51575
20.3732	3.0992	5.0683	2.217	4.0228	2.7947	3.2435	4.9794	3.7975	2.7047	3.377	3.1662	4.794	7.7662	4.5536	4.3797	4.7666	5.9779	3.0082	1.8478	2.0778	2.5784	2.3881	3.9742	4.8672	5.1319	2.6419	3.0266	1.8717	2.3461	3.1175	4.3046	3.1013	2.9453	3.2159	3.5873		0.886011	3.62115
20.4923	4.4977	4.7264	3.0692	3.7041	2.9638	4.3137	4.7069	5.6275	3.36	4.009	3.7304	4.5727	7.6576	4.5125	3.2358	4.1755	3.72	3.8235	2.3646	1.723	2.3445	1.8078	2.9219	5.0876	6.8563	4.5687	4.4022	2.985	2.5208	3.5677	3.4029	3.1017	6.5197	3.621	2.1318		0.89119	3.89524
20.6114	2.3295	5.2424	3.236	3.7144	4.1232	3.9475	4.4554	3.6043	2.5814	10.0928	3.6865	4.0626	3.007	2.1181	3.6206	3.9281	5.0748	4.334	1.9473	1.876	2.3531	2.1079	3.1603	5.1877	7.1154	4.9082	2.4665	3.7709	4.1698	2.777	4.2591	3.3433	4.2908	3.962	3.3322		0.89637	3.83389
20.7306	2.0882	5.1103	2.3155	4.1237	4.5632	4.6572	2.8088	4.8174	4.1948	6.1966	3.93	4.6076	4.8602	3.1009	4.544	2.5964	5.5102	4.0802	3.6007	3.243	1.8875	2.0588	3.4759	6.4593	6.2485	4.5167	2.7397	4.8699	2.7874	3.0495	3.0814	4.4994	2.6014	3.0799	3.1012		0.901554	3.86873
20.8497	3.4392	4.1121	2.8754	2.879	5.0496	3.941	4.4702	3.9776	4.2094	3.8092	2.6902	6.1363	4.2695	3.8576	3.695	2.2014	4.7895	1.7943	2.618	2.7663	1.8788	2.5315	2.7725	5.7966	5.4087	4.8082	3.5092	3.4813	2.6275	2.8976	2.6677	3.4196	3.1541	3.5153	2.5077		0.906733	3.55877
20.9689	4.4663	3.7238	5.1067	3.8348	4.3005	4.2154	3.1083	5.3762	3.1106	3.2119	3.4335	6.3274	2.3012	3.3575	3.3756	3.1504	6.1586	2.6966	2.257	2.5173	2.6429	1.9555	2.1499	4.2845	7.5899	6.442	3.4797	1.7262	3.3481	3.1198	3.1143	2.9681	3.5529	4.905	2.4602		0.911917	3.70767
21.088	6.7506	4.5184	4.1456	4.4559	5.2771	3.3797	4.3086	4.2629	2.7763	2.9506	4.7374	4.0728	3.2429	3.1225	4.8301	3.0697	5.062	2.5855	2.7178	1.8346	2.1187	3.5494	2.409	2.8734	7.656	5.5849	3.4945	2.3771	3.5327	1.8953	2.5459	2.8005	5.7174	2.9386	2.2522		0.917097	3.7099
21.2071	5.5292	3.2149	4.0837	6.5601	4.0677	3.6009	4.8645	3.0836	2.9234	2.6975	5.3086	3.9109	4.5679	4.7352	4.1801	3.2557	6.3583	2.7702	2.7996	2.2722	2.1377	2.3145	3.0027	4.1491	3.5907	3.66	3.5551	3.818	2.8879	3.0327	1.7464	3.196	4.873	3.2747	3.8626		0.922276	3.71101
21.3263	6.5524	2.1357	3.0691	3.4763	4.5831	5.3856	4.8244	2.2922	3.6023	4.7994	2.8131	3.4817	3.7185	4.2709	5.4774	4.6679	3.4749	3.3684	1.9776	3.0574	1.7251	1.8966	3.6286	2.8845	7.1484	4.2996	2.6853	3.441	3.9894	4.1363	1.9941	2.8534	4.2007	3.6159	4.0223		0.92746	3.70141
21.4454	4.7046	1.8118	3.0353	4.3651	4.0682	6.8063	2.8296	1.9818	4.5931	4.1121	4.25	5.5259	3.4106	2.4135	2.8514	4.2762	3.506	2.3617	2.9578	2.3687	1.746	2.4226	4.3829	2.4585	6.7491	4.75	5.8661	4.2437	4.4674	3.3081	1.9781	4.8493	3.4436	4.7521	4.1564		0.93264	3.76582
21.5646	6.2852	3.7644	3.7922	2.9897	3.3913	5.9507	4.886	4.2904	4.5547	3.2741	4.784	3.1481	3.4308	3.1909	3.7886	4.3626	3.9534	2.1966	2.1411	2.0546	1.7471	1.7673	3.49	6.0529	5.0744	3.6785	5.1385	3.8488	5.4234	4.8352	1.8213	2.5177	2.1659	4.0071	4.2355		0.937824	3.77237
21.6837	4.944	2.8258	4.6453	5.2907	2.0653	5.8877	5.2959	3.3169	3.9525	2.2512	6.3059	4.1053	1.7183	3.4157	3.303	2.3767	2.8445	1.9253	2.5017	2.6516	1.9688	1.7766	3.7842	6.2712	6.5973	3.6821	3.6043	3.4681	7.3783	4.8078	1.692	2.1779	2.9973	4.6756	5.0181		0.943003	3.7578
21.8029	4.0562	5.3406	4.8443	3.4696	6.1986	4.4504	2.2242	3.4944	5.5023	2.3509	5.1445	2.8553	2.4437	5.3394	2.8415	4.4891	4.0663	2.6432	2.8092	1.7624	2.3847	1.88	2.7601	4.015	3.0332	4.9022	3.8667	3.4398	5.2981	4.4627	3.0255	3.1552	3.8818	3.5665	4.1965		0.948187	3.71983
21.922	4.8523	2.2839	3.6584	5.2471	5.7606	5.9121	2.3568	3.3773	4.892	3.8278	3.7864	2.3486	2.662	4.8081	3.1679	4.7216	1.9124	2.223	2.0035	1.611	2.6923	1.9613	2.7276	3.7715	5.0295	4.0624	4.2088	2.9392	3.2872	4.4748	3.1347	3.4796	4.5457	4.3044	3.548		0.953367	3.58799
22.0411	2.7862	1.737	3.6795	3.9193	4.1175	3.2652	2.5871	4.0404	3.6194	2.1182	4.9806	3.0758	3.6342	3.0145	2.6839	4.1595	2.0347	2.9393	1.8981	2.0208	1.8961	1.6403	5.4178	4.8159	5.2508	4.9016	2.1104	3.4943	2.9667	3.7231	2.5355	4.2898	3.2728	2.8268	3.6652		0.958546	3.28909
22.1603	2.7507	3.5836	3.3277	6.2303	3.919	1.8053	2.6324	2.5277	2.8068	4.5372	2.6074	2.7085	3.2384	2.6752	3.7685	3.359	4.9849	2.6694	2.3818	2.3827	1.7601	2.4506	3.8791	5.5245	8.8334	5.3664	4.6778	4.7056	2.8799	6.5171	3.3452	2.4251	3.9203	2.9416	5.5645		0.96373	3.70536
22.2794	3.339	4.9369	3.374	6.0352	2.4904	3.8347	2.9886	2.084	3.0549	2.843	2.8297	2.0521	2.8805	2.8867	2.611	2.5511	4.259	2.596	2.0233	2.3546	2.4887	3.1429	4.3701	5.0538	7.8235	3.5477	3.9916	4.8554	3.2946	3.4789	3.8217	2.767	2.473	5.3194	4.3391		0.96891	3.50835
22.3986	2.0892	3.597	3.0735	9.3309	3.5502	2.3493	3.3293	2.7905	4.3339	3.2121	2.7847	1.7488	1.9316	3.5079	3.848	3.7946	4.9832	1.9276	2.2758	4.1472	2.9066	2.8287	4.0446	3.4951	7.6956	3.7958	2.5425	7.4173	5.2593	6.7486	3.8811	2.7438	2.8234	5.9406	4.3721		0.974094	3.86001
22.5177	1.7699	3.8896	3.1533	4.8202	4.4651	3.4327	3.1773	3.8401	2.6596	3.598	4.7646	3.007	1.7879	2.224	2.1143	4.417	3.7689	1.6933	1.7776	3.8169	2.459	2.3633	4.4089	4.7355	4.3643	5.3182	6.4523	7.6856	8.3495	11.2887	7.0621	4.2776	3.5062	4.6649	6.8651		0.979273	4.22796
22.6368	2.8777	2.812	4.1632	4.6266	2.4729	4.0592	1.7456	2.4082	4.0384	3.8339	4.0799	1.7563	2.1758	2.7027	2.0222	4.0944	3.0622	2.0862	1.6282	1.8365	2.3025	2.3023	3.8706	4.9328	4.5257	5.7258	6.1887	5.0499	8.422	8.9474	4.9186	2.4417	4.4469	2.6831	4.5721		0.984453	3.70892
22.756	2.68	2.1986	4.5629	2.2894	1.9539	2.9502	2.0974	2.9426	5.9924	1.95	3.2435	2.532	2.6845	4.252	1.6591	3.3542	1.8012	2.0173	2.0373	2.3177	3.6599	2.1162	3.8599	3.5207	2.9224	6.8406	3.3108	6.6407	6.6417	9.9683	9.0764	1.8714	3.5875	2.6749	4.1542		0.989637	3.61034
22.8751	2.3016	2.7358	2.0597	3.3297	3.3574	2.7807	1.7918	2.5362	6.1771	1.7534	2.999	2.5458	2.1439	3.2177	2.3048	3.3935	2.639	1.9465	1.8276	2.9148	2.4575	1.8641	4.9211	4.243	8.29	4.4855	4.7569	5.6982	10.2439	5.5387	8.568	2.752	2.387	3.08	6.9944		0.994816	3.74389
22.9943	2.2752	1.9659	3.063	3.6826	2.421	1.856	1.717	3.0336	3.5082	4.1935	1.8239	2.2722	2.4159	1.691	2.5694	3.7649	3.0714	2.0279	2.3321	2.0099	4.0494	2.4528	4.5351	3.3698	7.5761	3.8373	10.9477	8.2376	7.4752	4.4031	6.3747	3.6519	2.0382	5.556	4.8852		1	3.74528

## Sheet: Image18
X0	Y0	Y1	Y2	Y3	Y4	Y5	Y6	Y7	Y8	Y9	Y10	Y11	Y12	Y13	Y14	Y15	Y16	Y17	Y18	Y19	Y20	Y21	Y22	Y23	Y24	Y25	Y26	Y27	Y28	Y29	Y30	Y31		Ap-Basal	Avg intensity
0	7.37645	13.0718	9.3873	6.8611	8.804	8.27305	6.7701	5.30341	11.1161	7.21833	8.19616	5.90063	7.01469	8.9366	7.55365	6.4881	5.77125	9.4899	12.1607	14.8752	7.9323	7.0805	7.0748	5.157	6.676	2.70678	3.7847	3.46533	6.30594	4.67775	5.11365	6.49979		0	7.4076
0.1191	8.43996	7.9353	8.7422	7.499	6.7881	8.38385	8.6827	10.0188	7.7971	7.73656	8.63477	9.28119	8.73959	6.24411	11.1011	4.579	9.42092	10.8439	9.4174	11.7166	10.4952	7.6167	5.6515	8.14635	7.4778	3.95636	4.31234	3.01967	6.15247	7.75458	4.19138	4.24168		0.00467128	7.65682
0.2383	6.99046	8.0245	7.7158	13.52	5.7163	4.77364	10.0005	7.33332	9.42924	7.16285	6.62794	8.38334	8.80443	6.05397	6.41896	5.0369	7.83023	4.7418	8.079	8.5213	8.3666	8.1059	6.0249	5.27314	6.8657	4.36485	3.1461	3.68884	4.37604	8.25368	5.66104	4.39071		0.00934649	6.86506
0.3574	6.93626	7.526	7.1079	8.0604	8.6462	5.27194	7.8809	5.06513	9.68971	5.14723	4.1461	8.59706	7.51421	9.76622	4.55932	6.0236	7.42406	5.0644	7.7439	7.7046	5.7953	6.7078	7.7637	5.65086	5.9259	5.8391	2.80109	4.85951	3.71162	3.40602	7.74089	5.96689		0.0140178	6.43887
0.4766	8.92998	10.4496	9.9697	7.4383	9.5358	4.71247	9.2679	4.11689	6.93795	5.77944	5.53417	7.72781	7.45171	6.86769	7.25683	6.266	5.80805	6.2477	8.5344	9.9676	6.8959	6.2657	8.6048	6.98611	8.5484	5.54313	5.78966	2.92485	7.17814	4.20256	6.93359	7.07944		0.018693	7.05476
0.5957	7.38907	7.4177	10.8903	11.7928	9.1575	7.2569	7.2806	6.68487	5.56786	6.01928	3.61202	5.45	9.90546	6.46047	6.50791	7.4383	6.49131	7.6524	8.053	9.12	8.5371	10.5592	5.5536	6.91375	5.2022	5.93366	4.73429	4.02311	4.34234	5.5202	6.3883	8.61503		0.0233643	7.0772
0.7148	5.72662	10.8139	7.7691	9.0352	6.0164	6.52432	6.2523	5.8651	5.43854	8.62811	7.83759	8.37735	9.90275	5.60523	9.0738	5.1063	9.27086	6.2232	10.3612	8.882	7.2351	9.4149	5.1848	5.71845	5.1376	6.66744	2.93278	3.48888	5.90297	5.7471	5.67533	7.8191		0.0280356	6.98857
0.834	6.09247	11.4121	7.5747	9.2454	5.0066	9.04964	8.5805	6.33553	9.52353	6.68561	6.78801	7.67162	6.77975	4.27379	7.32863	8.6087	5.16547	7.9794	10.1662	9.3599	6.7996	8.9093	14.0192	7.22567	8.1317	7.87078	3.372	5.85946	3.208	3.75235	5.86267	8.15364		0.0327108	7.39975
0.9531	6.50696	8.2251	9.1791	14.0746	8.2956	6.6514	7.6514	8.45905	8.67095	7.33887	7.08853	5.79399	7.18808	5.21638	8.31145	7.0404	6.0425	6.8227	7.6885	7.4554	8.8915	13.8777	9.0913	7.44143	9.3156	9.39358	2.26907	5.36477	4.96173	4.02873	8.79432	6.31005		0.037382	7.60752
1.0723	6.1814	11.6662	9.3946	8.3067	9.8758	5.36217	11.9706	8.56878	8.80623	6.17652	6.65029	8.36923	10.6124	6.84578	5.00154	6.288	11.0205	8.2927	9.954	8.8404	7.6762	10.9046	11.2427	8.12867	6.3745	6.62238	3.99983	3.75947	4.85265	4.51466	6.77737	3.61088		0.0420572	7.70774
1.1914	7.07086	10.5062	12.453	7.6945	6.3475	6.77101	8.1157	8.87056	8.70181	4.15572	7.92713	7.19338	8.24778	6.77183	8.87145	5.6278	8.06261	13.4806	6.3435	5.855	7.8467	6.2079	8.0453	8.06662	10.2133	7.1491	4.39344	8.23933	7.18526	4.65731	5.66429	5.88683		0.0467285	7.58198
1.3106	8.66779	8.6422	10.4541	8.4188	7.3158	7.92068	8.9512	8.13857	5.02046	5.16153	6.96978	6.41713	7.35452	7.09944	5.67945	7.6663	5.52734	9.7359	9.6014	6.2447	8.4641	7.3343	10.0693	6.911	12.1275	9.51021	2.99143	6.33184	8.19245	6.55933	3.93369	6.66038		0.0514037	7.50227
1.4297	10.6567	8.5614	9.8138	10.4165	7.7081	6.62197	7.3624	5.81069	5.1688	5.32366	7.77979	8.48006	9.12044	6.86169	8.16853	5.207	7.36754	6.3426	9.1589	14.5388	7.4606	8.6715	5.8349	9.56898	8.4682	5.00666	4.36976	5.49992	8.29439	5.04979	4.34191	5.72263		0.056075	7.46121
1.5488	8.51406	6.945	11.0749	10.9996	6.8596	6.3094	8.7672	6.87161	4.3156	9.38222	6.13367	9.13867	9.91472	7.25587	5.38471	7.4202	7.46924	7.2052	8.795	14.0238	5.6275	9.1308	8.8965	8.67307	4.4014	3.99236	5.66856	6.24506	8.68064	3.50012	7.06894	4.20558		0.0607463	7.46471
1.668	5.90452	6.5602	11.254	9.7058	7.875	9.45994	6.5036	7.52174	5.29	7.39357	3.48275	6.35721	6.74886	7.90718	6.05304	7.0485	6.65491	9.9634	6.7015	10.3396	8.8612	12.4701	10.7072	8.20836	7.2743	5.65296	3.73843	5.09485	5.69998	5.59696	5.1326	5.4167		0.0654215	7.26809
1.7871	6.7944	7.5864	6.6131	8.639	7.3735	6.99641	8.4344	11.2159	7.67199	5.2435	6.3174	8.78853	7.65735	5.7877	7.32925	6.7176	7.05799	8.0053	5.7436	10.7668	8.1121	12.1641	6.9156	7.81192	8.2516	5.99159	4.69125	2.50458	4.87224	8.69645	4.99691	4.02074		0.0700928	7.18029
1.9063	8.90057	7.8578	4.421	8.0732	7.0447	5.976	5.8563	11.0191	6.73279	6.05787	5.66362	6.3706	7.36259	7.66451	4.52888	3.8786	9.78397	12.4302	3.6749	14.1569	6.895	17.0104	10.9071	9.09743	7.2985	5.06307	4.13841	6.26708	5.08744	4.85881	6.01074	6.07675		0.074768	7.38015
2.0254	7.83064	10.7578	6.6549	9.5212	4.9762	6.39348	7.4029	6.77271	8.87507	5.13099	5.13292	4.3481	7.08768	9.14219	6.37841	6.7196	8.05076	12.0248	3.7341	8.9431	7.8531	16.4301	13.6228	6.31302	6.2713	8.42987	4.47635	4.33801	3.92845	5.17939	6.6397	8.42734		0.0794393	7.43084
2.1445	7.83827	11.3934	9.5884	7.7167	8.27	8.64725	9.13	6.06436	7.47956	4.97013	3.25531	5.25334	6.98303	8.95207	3.51186	5.9226	5.57394	8.4194	3.6061	8.5307	4.7295	19.0148	17.6334	5.22755	8.464	6.85031	7.55438	5.55397	4.04889	9.27693	8.30595	4.18289		0.0841106	7.56091
2.2637	5.39065	8.683	8.2735	8.6148	6.3774	6.11138	9.0854	9.27417	7.14262	7.48011	4.85349	7.10454	6.24634	8.38618	3.93748	5.4862	8.24563	9.0862	5.2546	10.8877	6.1612	18.6846	16.368	5.84903	6.6048	7.1034	4.6929	5.80546	3.51844	11.2216	9.72499	3.44172		0.0887858	7.6593
2.3828	7.96598	7.5949	7.7219	9.0589	11.2179	6.14474	7.7778	11.381	6.79851	7.74947	6.72371	6.34545	6.00009	6.25253	3.72694	2.9633	5.16179	7.5387	4.0686	7.4073	9.1137	12.3492	17.6205	6.0678	8.1864	5.50458	6.71419	5.36707	6.23392	7.11242	9.48852	9.73975		0.0934571	7.5968
2.502	8.65442	5.9891	14.1725	8.1593	7.6397	8.86391	6.0215	7.53005	8.58722	6.13363	6.34043	4.00804	4.21755	7.53127	6.31852	5.564	6.39115	6.6667	5.0725	7.8618	9.7505	15.7707	19.3529	6.74784	8.2897	5.3727	8.32686	7.87604	5.73959	3.73784	7.56729	7.00619		0.0981323	7.72692
2.6211	8.2105	4.06	11.6704	12.5517	10.0192	8.6485	3.575	7.61967	4.78666	3.27111	5.3663	5.77396	6.50043	7.03417	7.35196	6.5664	9.08463	7.3351	5.1078	9.9366	8.8296	18.0335	14.4369	9.01677	10.0699	5.36964	7.20974	5.7792	6.51162	6.04165	11.1702	5.04086		0.102804	7.87437
2.7402	5.92872	5.4367	10.3087	12.567	13.5176	7.55151	6.7457	11.1285	6.37994	4.42958	3.55422	6.7748	6.04293	7.30231	5.49414	8.9586	8.55801	5.2797	6.5419	12.1384	7.825	14.0434	16.2017	7.20709	5.1807	6.14153	6.99621	5.27982	5.91079	3.92743	6.76074	5.96776		0.107475	7.69004
2.8594	8.20022	7.9971	7.4228	10.6276	5.1073	7.07473	5.7305	8.67266	7.08803	3.45215	3.10893	4.77245	4.54173	4.57813	6.39382	6.1811	5.19406	5.1562	4.0262	7.6597	6.6747	14.1195	16.0909	3.8896	7.0563	7.01734	8.21226	4.29313	3.95292	4.93853	6.75721	2.71283		0.11215	6.52189
2.9785	3.95004	5.9526	13.0363	5.7166	7.1094	4.79123	5.7185	9.93563	7.05743	2.18811	4.99165	5.07619	7.17473	10.4062	6.24534	4.4672	6.87877	6.7513	5.532	8.9927	5.7145	16.1815	14.265	4.33794	6.8256	3.58216	5.44981	3.8703	4.81384	5.21184	2.75102	4.00589		0.116821	6.53067
3.0977	3.53959	4.1283	5.0978	7.7261	6.9521	4.06182	7.3533	7.14459	6.61674	4.18604	6.35764	5.04752	11.1342	6.12134	5.20884	5.3638	7.1429	6.4856	4.8898	8.0236	6.6101	15.3808	9.7602	10.033	8.1289	7.74547	7.1184	4.11101	6.90854	3.12382	2.20763	4.11542		0.121497	6.49453
3.2168	5.33317	5.6011	6.8443	11.2175	4.9072	5.56664	7.7019	9.06799	4.98773	4.58534	5.80203	4.88435	8.15613	6.019	4.99565	5.34	3.77528	7.1983	5.699	6.9605	11.43	14.7563	11.3585	8.6851	5.9866	5.75657	6.45606	3.09125	6.10119	4.90253	3.24519	6.96298		0.126168	6.66798
3.336	4.59644	5.9841	8.3291	7.8611	4.9928	4.40719	9.6285	8.95498	6.03167	3.57581	4.25198	4.741	7.11592	8.35954	5.33855	7.0202	4.44152	6.1128	6.7362	7.5977	10.5745	13.34	7.6928	9.72202	7.5518	8.05895	5.48947	3.43155	5.58362	7.84488	4.40439	4.57384		0.130843	6.69828
3.4551	5.04288	7.8984	9.0108	5.6637	2.9543	4.46561	11.4347	7.53182	3.68626	2.75956	5.44922	3.7145	6.21499	6.62629	8.34495	5.8919	6.31715	6.7119	6.5721	7.6744	9.1332	10.3837	6.0925	7.13785	3.7396	5.42599	7.05529	5.8553	3.98628	9.4985	4.95864	3.69296		0.135514	6.27891
3.5742	5.92103	6.9852	9.2513	4.6378	2.653	3.11145	6.6197	10.1602	4.07223	4.47457	4.18834	5.33418	7.25261	7.40156	5.0645	5.9137	8.73258	6.381	6.7698	5.3421	12.4286	8.7129	8.0755	4.86942	5.8508	3.78778	3.14981	5.84408	3.2279	5.64594	7.63578	3.4855		0.140186	6.03065
3.6934	6.02497	4.7645	6.8252	4.5555	8.4415	5.65742	6.7936	6.56979	4.80407	5.67603	3.92063	5.87371	8.94868	4.2044	4.31297	5.0336	9.80989	4.4761	7.1609	6.0419	6.8884	11.1434	7.7634	4.64134	6.6705	4.73019	6.07764	5.88404	4.78668	4.83569	5.65007	3.63111		0.144861	6.01868
3.8125	3.879	4.9091	7.3958	8.6603	5.6277	6.33207	5.3128	5.60303	4.36131	2.85776	3.44795	2.39675	5.73151	9.60378	3.35825	5.6198	8.14285	3.3682	6.4743	3.7317	11.1468	10.2942	8.9311	4.78744	7.1372	3.77658	8.81538	6.72023	5.63741	5.7478	3.68868	7.29944		0.149532	5.96238
[truncated: 182 more rows]

[truncated: 2 more sheets: Image17, Sheet1]
