# Supplementary material for: Crumbs organizes the transport machinery by regulating apical levels of PI(4,5)P2 in Drosophila
Source: eLife. 2019 Nov 7;8:e50900. doi: 10.7554/eLife.50900 (PMC6881148; doi:10.7554/eLife.50900)
Supplement: Figure 6—source data 5. [file elife-50900-fig6-data5.xlsx]

## Sheet: Image2
X0	Y0	Y1	Y2	Y3	Y4	Y5	Y6	Y7	Y8	Y9	Y10	Y11	Y12	Y13	Y14	Y15	Y16	Y17	Y18	Y19	Y20	Y21	Y22	Y23	Y24	Y25	Y26	Y27	Y28	Y29	Y30	Y31	Y32	Y33	Y34		Ap-Basal	Avg intensity
0	16.2009	62.66	26.0159	26.594	23.025	14.4807	14.0502	16.3461	20.6505	19.5397	24.7803	27.2619	21.759	18.5816	18.4146	18.9112	17.135	13.3532	17.3449	15.1758	20.0887	15.3915	15.6108	16.4062	23.7047	23.6704	18.594	20.8262	14.7629	18.7664	20.3636	19.6444	27.971	23.555	21.7623		0	20.9542
0.1191	28.4504	66.9132	27.2443	25.628	27.7702	15.3506	15.4162	19.2104	25.5299	18.1474	29.7258	26.0846	17.2173	19.6036	22.5877	16.4005	16.0214	12.7158	20.752	23.169	17.7141	19.7656	19.9301	17.5564	19.1636	22.6712	23.6329	22.9323	18.3669	16.513	13.2034	14.7655	31.4843	19.7442	20.0734		0.0082616	22.0416
0.2383	30.6121	78.5882	31.3607	27.031	29.1453	19.2179	15.2251	22.7177	17.7465	22.5428	33.116	19.9999	14.0006	16.1033	25.0277	19.2777	16.2297	18.4232	15.1543	17.9507	17.8066	21.9431	19.1729	20.237	28.3241	24.7566	26.9923	25.4988	21.1668	14.1015	12.5374	14.0206	30.9945	23.2134	18.106		0.0165301	23.0955
0.3574	29.4014	61.4249	36.7484	24.359	26.9596	17.9823	17.7318	18.599	14.3829	16.012	32.6513	29.4589	21.0804	17.5853	17.9635	15.9391	23.8522	16.0249	19.9381	17.846	26.4542	22.0822	22.4392	23.3403	28.7521	17.3353	18.6525	23.7484	11.8162	18.8043	11.492	16.7609	23.7779	25.5201	21.0415		0.0247917	22.5131
0.4766	35.5865	75.1435	39.5135	31.892	29.8728	21.1541	12.8707	16.4095	20.6283	17.6339	31.1976	28.0259	21.71	19.4784	19.9745	19.834	14.509	16.1397	17.7047	21.6214	21.9872	16.9912	21.2122	27.907	25.406	21.1597	18.3751	20.4193	19.3031	13.0779	14.9505	18.7642	28.6088	24.3546	23.2577		0.0330603	23.6193
0.5957	33.1873	79.0952	30.0963	32.451	36.4352	13.0611	16.0672	21.2124	15.5929	21.7373	35.8003	21.8321	19.3792	18.4626	19.7553	21.7171	16.3298	16.4651	14.0213	24.2174	19.5366	16.1034	20.8904	17.9747	31.5848	26.5382	18.5053	16.0524	17.6115	15.0699	16.6924	19.292	24.267	27.8961	18.7633		0.0413219	23.2484
0.7148	38.151	75.8475	46.4706	39.796	42.1684	16.3317	17.3352	19.4333	16.7287	22.9426	32.1289	26.8471	23.8886	18.196	18.6684	18.792	14.6327	11.9999	15.0404	22.4991	26.0494	15.4156	27.992	26.5166	27.7416	24.659	27.3693	18.6267	15.2274	17.9703	10.5605	13.4541	34.1925	18.4425	18.6839		0.0495835	24.5943
0.834	35.6722	72.7388	45.8679	43.635	43.3261	19.4827	14.5884	13.8115	15.1641	24.1667	31.397	30.0624	17.0014	16.5776	20.967	24.5899	15.749	11.4391	18.7505	26.7344	33.0677	25.9895	23.5248	28.6986	32.3074	24.8788	21.7359	20.555	17.0641	12.9011	15.8322	8.2909	37.8045	20.5008	22.6214		0.057852	25.357
0.9531	38.6438	66.999	43.646	43.445	63.4158	14.3338	17.6324	15.5842	10.8228	22.3376	44.7703	31.592	17.9195	20.0523	18.9107	21.3421	23.4449	16.3174	25.7512	27.9951	23.923	24.5571	31.9217	26.8691	25.6035	29.1671	27.8385	24.5299	21.463	12.7365	14.7466	9.4782	28.4531	31.3176	18.9903		0.0661136	26.7586
1.0723	37.6845	69.1638	42.1325	57.73	66.2586	18.385	16.7401	14.7224	13.5914	23.0741	40.7622	29.7823	19.9008	16.949	23.0872	26.047	20.3794	16.289	21.6554	32.3658	28.9581	17.6749	30.1541	23.3638	25.5066	20.3318	22.6205	17.1306	18.4539	22.7912	10.6615	12.547	40.0594	21.8969	19.0661		0.0743821	26.7976
1.1914	37.3428	61.0188	39.8492	74.304	78.6366	13.9364	15.9123	12.6872	13.4348	19.2099	40.474	29.7107	31.6816	17.7431	24.3894	28.5416	17.5775	9.7295	24.1521	31.1758	29.0908	22.3974	25.8063	20.2334	30.0098	22.6346	24.4012	20.0264	19.1849	15.7608	13.9644	11.0533	43.3075	29.0971	15.83		0.0826437	27.5516
1.3106	33.7305	65.4614	44.5066	69.097	71.6954	14.9727	10.7568	11.9608	13.047	19.4556	39.7883	34.2435	28.212	17.426	26.431	22.5119	19.0617	18.2159	33.9797	34.8495	30.8371	20.5103	28.211	29.8145	30.9964	30.848	24.7764	25.8466	15.6161	11.6559	11.0925	11.3193	40.2992	28.4381	16.4967		0.0909122	28.176
1.4297	44.4974	75.6023	50.1677	80.148	78.9235	15.3791	9.2349	12.2452	9.6949	18.1125	42.9037	39.1426	24.4456	15.1513	21.2382	22.6327	22.2731	16.7573	41.1735	45.1648	36.2622	29.1654	25.3547	28.4506	28.0763	41.8163	31.8671	19.6033	16.3292	9.3127	9.5362	13.3383	40.4707	35.9742	18.5406		0.0991738	30.5425
1.5488	45.1218	74.755	46.673	87.643	77.707	16.2058	11.1432	14.2217	10.8401	20.2907	33.6085	36.09	25.6689	16.5671	22.2351	26.8485	15.2557	17.7346	29.8421	52.3155	41.4787	29.0833	33.0687	32.465	35.0981	35.3158	25.566	24.826	12.3961	11.1146	10.8085	16.5993	52.2081	35.8837	22.1617		0.107435	31.3955
1.668	46.7978	78.6842	45.4683	81.03	77.0261	25.209	13.305	11.1193	11.6091	18.8183	43.7873	47.8168	22.2677	21.9692	29.1858	28.549	30.6671	23.9365	30.3079	51.6603	45.8021	28.4062	28.1607	34.8597	44.0776	27.1284	31.2343	29.7988	12.4086	13.3427	12.7289	11.2188	51.2548	38.1236	23.7364		0.115704	33.4713
1.7871	45.6697	89.2827	49.9702	79.051	76.1687	15.4596	13.7175	7.927	7.6514	16.7614	42.8143	57.9085	27.9188	22.5154	29.4114	34.2618	34.4593	21.6008	33.7447	51.393	44.8824	26.6627	33.4786	40.448	31.105	33.5231	26.6952	36.4591	14.1487	12.6524	10.6704	14.9707	46.463	36.0209	18.2716		0.123966	33.8325
1.9063	34.8749	77.4266	47.1457	90.327	74.8518	14.9691	17.9509	11.5221	6.5532	12.0917	40.1873	60.9402	19.709	25.329	31.6423	46.1677	33.4754	22.4949	30.4583	50.1123	51.5205	39.4965	31.8397	25.9773	37.7507	35.8598	31.54	38.337	18.8705	8.8284	10.947	10.362	46.2595	41.1193	15.9272		0.132234	34.0819
2.0254	40.4675	89.8432	50.4621	82.023	74.9794	15.6372	19.3225	9.3642	6.4169	19.0736	51.8892	63.5203	20.8581	23.7093	30.3833	45.6612	32.259	21.1791	36.4334	43.644	51.793	44.2593	34.7211	42.1161	43.3713	38.9718	35.8455	41.4023	17.6228	11.9897	9.2871	12.5263	38.9971	37.0615	24.6404		0.140496	36.0495
2.1445	44.7266	79.3449	50.7352	98.969	84.9763	15.7901	12.85	8.2089	7.5067	10.7912	48.0841	66.5302	21.8708	20.3552	37.1235	39.8384	35.5429	22.1561	45.4376	43.0747	49.2306	41.4892	35.4773	40.8774	47.1596	45.2123	43.0885	41.8184	17.013	10.1247	8.8348	11.4585	34.7992	37.9914	19.104		0.148757	36.5026
2.2637	50.0437	75.5409	46.2332	86.395	79.6182	17.7407	15.0714	10.5299	6.9709	14.1748	46.4492	72.2542	21.7408	24.4046	40.2219	52.7647	37.2606	28.8568	34.7508	45.5608	52.8216	49.1812	39.1066	45.7198	52.9753	46.7192	46.1288	46.3528	20.992	6.3922	10.2835	10.7667	32.6288	37.0882	16.4651		0.157026	37.7201
2.3828	43.2356	79.289	44.1005	109.179	84.6053	14.2208	8.4681	10.0285	7.7961	19.2171	53.8979	80.9141	19.9858	19.6707	31.7333	60.7003	36.3489	22.5662	33.6287	51.1513	51.3237	55.8973	52.8412	46.681	43.0711	52.9749	40.792	33.4699	22.6977	8.3661	6.6008	7.1658	31.5615	36.9642	16.9756		0.165287	38.232
2.502	37.4554	83.1361	35.4157	85.342	78.7025	12.7841	13.8172	8.1902	8.4666	14.9479	47.8483	69.5291	21.2716	19.8788	35.4793	61.4526	32.1757	26.8168	30.0983	52.8164	48.6851	51.53	51.8661	53.1069	40.4541	57.5658	56.0285	37.7756	28.6026	7.7245	10.2271	6.694	35.8969	37.1554	20.8804		0.173556	37.7091
2.6211	49.1103	82.1139	46.6018	88.226	75.8478	12.0802	15.5637	7.6361	7.6644	14.3991	50.3775	71.2684	20.1972	18.6308	29.3577	55.3236	41.3968	28.818	25.8202	51.6442	51.0921	50.0088	54.6972	51.7542	51.8649	48.3242	49.8549	49.1796	26.596	9.408	7.079	9.3037	30.4834	37.8641	26.1514		0.181818	38.4497
2.7402	46.6786	78.8442	55.6051	79.431	82.1493	15.8234	13.6755	4.1118	5.4756	21.9894	58.075	57.4999	17.4756	27.3232	31.496	60.2879	37.8186	26.4393	35.9135	56.4244	44.0547	44.9776	47.9049	44.0805	40.5471	41.6087	63.9006	55.0761	31.1736	16.0537	7.3366	11.031	27.2351	51.2439	19.7664		0.190079	38.8151
2.8594	53.167	79.2041	48	73.301	70.293	13.9034	9.8744	7.9862	9.6536	21.998	54.505	53.6843	20.497	26.4042	25.7922	62.7782	38.8453	29.1079	40.3165	56.0915	45.0707	42.5606	43.9147	41.3888	46.9848	30.8225	54.5759	43.6965	41.0472	12.2086	5.9238	8.0022	29.4694	55.5906	16.2591		0.198348	37.5119
2.9785	52.7507	78.7422	59.542	76.796	80.252	12.9957	12.5674	7.7307	9.0597	20.8196	53.2962	52.5057	17.7952	24.2333	29.0363	53.2427	35.8298	25.3649	36.7357	50.5206	44.4421	38.6715	56.3904	49.1018	45.0449	29.9367	53.7355	37.9267	29.2839	12.0559	7.3128	7.5657	23.598	45.1708	17.3957		0.206609	36.7843
3.0977	66.3749	72.7885	63.5497	63.032	61.9029	12.9887	7.7158	8.612	10.8268	25.3809	56.2586	62.9367	21.175	22.1649	24.7782	63.6186	34.2554	22.1296	36.8078	53.0715	40.8051	40.6082	41.6704	59.7939	47.2402	28.7672	51.1614	36.5628	22.5466	11.4291	9.6663	7.697	21.8171	49.8974	18.9008		0.214878	36.5409
3.2168	56.9264	73.1973	61.5252	69.1	62.0018	15.1988	9.2015	9.15	8.4265	20.2046	52.106	67.1705	19.5625	28.6732	29.217	52.9462	32.3974	26.0663	33.9951	44.2029	45.2026	50.3599	48.5794	45.5718	46.6828	27.1689	52.5293	57.1133	26.9048	11.3779	6.5946	6.7173	28.9184	49.8257	16.9375		0.223139	36.9072
3.336	64.9471	71.524	56.6556	58.02	53.6806	12.017	14.0057	5.8209	8.2828	17.0875	46.9705	72.6176	22.07	26.0753	29.8745	52.7035	33.6093	23.6403	28.1329	36.7785	36.2169	48.8023	46.3567	46.4905	36.3167	36.0185	61.9676	54.8072	34.743	8.1021	9.0745	8.9933	33.4132	45.2965	20.2938		0.231408	36.0402
3.4551	64.4566	65.9546	74.4739	54.47	53.6556	10.2569	7.6099	7.4313	9.6487	15.8634	49.4326	67.5934	18.2462	32.6088	28.8414	41.017	42.199	21.4925	31.4485	33.7379	38.4498	41.7145	45.7084	35.6885	38.5827	33.0447	44.7982	56.0472	31.0162	7.5285	8.7728	3.4912	22.3281	41.6233	21.437		0.23967	34.3048
3.5742	51.8409	66.7785	72.6794	44.432	52.349	11.903	10.6057	9.8182	10.1382	22.3645	38.0889	58.2537	14.6308	30.584	32.9654	36.306	41.6604	24.0068	36.7803	27.9824	30.8362	42.0453	37.4771	50.6353	37.2356	30.1346	55.8571	46.1681	31.1371	9.2828	9.0727	3.7948	17.6671	49.4763	25.9746		0.247931	33.4561
3.6934	53.0373	66.9979	68.2443	40.246	35.5439	16.9235	5.928	9.3626	9.2102	16.0599	45.6924	44.1038	14.3507	24.006	21.7499	34.9292	43.1554	16.9314	30.7828	27.6825	23.92	32.6954	34.2589	38.4286	43.4703	25.6858	55.5022	42.297	28.711	12.0236	6.5306	5.9738	15.6154	38.4198	19.4212		0.2562	29.9398
3.8125	74.512	67.681	73.6021	36.254	31.1926	11.0925	6.9941	7.2584	9.0568	19.46	30.186	44.5253	11.0843	25.8327	24.7218	28.7939	42.9074	12.7424	28.2799	21.6266	27.7375	28.152	33.235	40.7572	33.5836	25.2641	55.646	41.4334	24.3286	8.5598	5.3545	4.6014	8.6703	42.4057	22.6265		0.264461	28.8617
3.9317	69.0688	79.7708	78.3661	37.748	35.7065	12.2762	12.9097	10.4455	9.5684	17.2723	29.0833	49.1427	17.971	26.0616	23.8615	18.2935	31.0072	17.5611	28.8366	32.5967	24.5666	33.2608	31.3116	34.8513	39.131	22.3816	54.6436	41.495	23.1875	9.7018	6.5335	5.4484	13.8096	39.9057	24.0551		0.27273	29.7666
4.0508	58.409	68.2537	77.6251	37.256	32.7302	11.5986	7.8944	9.5222	9.8775	23.6254	33.0075	39.6109	13.5693	30.7001	20.9727	20.412	27.9866	18.6345	21.2839	34.8643	25.3858	33.9571	27.3758	29.263	29.4599	25.7329	38.8983	50.3086	20.3655	7.3869	8.3814	7.6341	16.7041	36.8676	16.172		0.280991	27.7636
4.1699	68.7325	66.6908	83.6056	36.347	29.4541	14.71	6.9534	8.1831	5.3376	16.7658	27.5672	41.4037	12.7157	24.8467	26.1008	19.4852	21.7993	29.5699	21.0374	19.7653	27.0717	31.8729	28.6504	18.6102	29.6391	26.8141	41.3839	40.7254	18.3394	7.0701	8.542	3.9038	8.4913	38.5454	21.7626		0.289253	26.6427
4.2891	66.5643	62.8612	89.2549	32.722	38.5323	11.8488	8.7243	9.8337	8.4015	21.7443	28.3867	43.812	13.2359	24.4087	18.4078	18.1642	12.7592	28.3858	19.4638	15.5981	34.2377	37.0327	26.8429	12.9508	25.2138	20.2876	40.5514	39.2188	22.758	6.0896	9.6431	2.7173	8.0808	36.6877	24.5224		0.297522	26.2841
4.4082	70.623	74.5956	94.9008	39.152	31.4403	11.1902	10.3569	8.4054	8.4307	17.3476	21.9352	34.0887	10.9339	20.4013	17.6615	15.3985	15.344	24.4078	15.886	15.9321	32.6744	40.1286	22.5665	16.1419	29.6908	30.7065	45.3086	32.1613	18.8461	4.8471	8.2746	5.1035	6.9569	42.3552	23.8207		0.305783	26.229
4.5274	65.8021	71.1834	75.7952	36.421	31.3514	12.8215	9.7042	8.4061	10.4619	14.8453	25.4295	29.9964	10.1993	29.2191	23.5262	17.6635	12.7519	30.6032	16.7542	13.838	31.7268	33.9273	17.1221	15.594	23.8343	28.0316	47.778	39.5108	22.2581	4.2292	5.158	3.5484	10.2353	35.6563	30.655		0.314052	25.6011
4.6465	65.8011	63.5949	77.9271	27.386	32.9331	12.5104	8.1037	6.6219	5.2804	16.3364	21.7455	37.021	11.9221	14.5529	21.6273	16.7597	13.5136	41.8306	20.9852	14.4511	24.8648	36.5763	18.2692	13.1657	32.0792	24.8485	43.7131	29.0761	17.985	5.2535	5.2349	4.1786	10.7338	39.2475	19.0096		0.322313	24.4326
4.7657	69.2204	61.8018	79.4964	30.301	27.9202	17.5465	8.0486	10.0432	7.3456	11.1643	26.1829	28.6661	13.5004	16.2086	24.5733	22.7851	18.4134	24.1578	15.7	12.6416	21.7806	23.3683	21.6336	21.1148	23.4461	28.643	36.6945	28.7095	19.8343	5.0679	7.5433	4.0028	11.9109	35.5075	22.9385		0.330582	23.9404
4.8848	77.6055	71.7733	72.6549	35.22	37.6199	12.1966	9.3899	8.5864	7.4978	17.1452	26.5668	21.4421	6.4454	17.0858	25.723	9.9725	19.5624	30.527	15.0761	8.0354	22.7661	27.0049	22.7637	16.6369	21.4372	19.3356	28.6346	40.8835	14.184	3.636	8.9604	2.3691	12.1869	37.4666	18.464		0.338843	23.6244
5.0039	71.4937	94.3138	61.3728	49.641	32.8794	11.1064	9.1631	8.2994	6.7766	15.9392	26.4735	29.6345	8.1682	12.6434	22.8813	12.7275	19.6824	24.0859	14.0145	8.6527	12.8576	27.4182	35.0212	17.2045	15.5992	15.1929	27.0935	28.9344	13.049	5.1059	4.1345	4.5682	12.7222	32.0672	16.2997		0.347105	23.0634
5.1231	74.663	79.7501	66.4101	43.951	29.3145	9.3157	12.0413	8.813	5.9772	18.0353	29.0424	23.0158	11.1164	15.5826	14.4059	14.6395	18.4521	22.7742	14.2338	8.0505	20.5239	24.661	25.3844	16.5367	12.793	16.4178	28.6008	30.8644	13.8235	5.7542	4.5646	4.6615	9.8281	37.1288	14.8279		0.355374	22.4559
5.2422	62.205	76.8062	59.6157	36.766	26.7493	9.7401	11.6937	8.6915	8.5736	14.1754	35.8411	12.3409	9.1078	19.9868	15.0938	13.1153	21.3358	17.0857	17.4825	5.841	17.7457	26.6571	23.6718	15.2347	13.2214	20.6197	28.2888	29.1265	14.8381	4.903	3.9046	5.6477	9.7651	31.4858	17.3807		0.363635	21.2782
5.3614	69.4246	84.5657	62.0151	43.721	29.1985	8.5228	7.9371	6.8424	4.6434	11.4975	26.6872	12.5414	12.9126	11.2081	15.6265	11.1462	19.9086	15.9896	20.2156	7.3971	16.1495	24.4563	29.6149	13.4492	8.4699	13.3268	30.74	24.7339	18.3284	6.4942	3.3355	4.8232	8.1058	26.0212	17.9351		0.371904	20.7996
5.4805	53.7273	100.318	53.8394	37.319	34.8482	10.2839	4.8173	3.289	6.7688	11.9146	20.6743	15.8195	13.2265	10.6973	19.3856	11.9315	22.461	11.1083	16.2002	5.1933	19.1992	20.6299	32.2771	12.8173	9.2457	17.658	27.3175	26.1171	13.4336	3.5377	3.3778	5.6524	6.8193	24.1856	10.525		0.380165	19.9033
5.5996	56.8902	84.9006	63.7187	41.414	37.6876	12.8596	7.7937	8.7254	9.5609	13.0557	17.5409	16.4385	12.3414	14.7286	20.115	8.182	27.865	11.3044	18.6554	4.5847	13.1047	17.5876	29.5186	12.5602	14.4916	15.6939	28.6598	23.9736	13.2449	7.453	3.0867	3.3779	11.3727	22.254	15.7712		0.388427	20.5861
5.7188	60.511	82.9202	54.7864	30.274	36.1054	9.5233	9.4722	8.1688	8.6064	9.4354	17.6816	16.7547	9.3531	16.6587	16.0091	15.0122	24.126	12.6745	19.5699	5.8818	14.8291	16.3825	29.6698	7.7321	14.1229	15.6453	20.2368	21.8534	10.9257	6.4697	4.5304	3.2017	10.8402	20.8395	15.6922		0.396695	19.3285
5.8379	60.2695	89.0497	62.0376	26.661	30.3291	7.7509	7.8977	9.7248	11.5588	8.723	12.8343	13.9206	11.1966	14.9085	18.6011	14.1071	18.0798	15.3434	21.1804	4.5384	18.8877	15.1603	26.6147	9.3646	14.0859	17.7134	20.9051	24.6678	10.7995	5.1222	5.1222	4.6838	4.3506	15.6431	13.6956		0.404957	19.0151
5.9571	62.1173	79.7912	52.4772	19.321	34.2025	8.4054	8.8307	8.9423	10.7855	7.389	14.5968	10.5526	10.1856	11.8485	15.7917	18.2857	16.4649	7.2722	15.2025	6.262	20.0987	23.5321	22.1139	6.9705	8.4845	16.7541	26.7006	21.0188	12.2947	4.2621	3.6299	10.0107	5.4537	18.0697	9.6769		0.413225	17.937
6.0762	58.5666	83.116	56.4119	14.66	31.309	5.6043	9.7323	7.0478	8.4177	8.0583	13.347	13.3004	12.8712	13.4137	12.4389	20.547	15.1036	12.9041	12.9862	8.7593	23.2536	20.0879	23.8889	7.4369	8.4612	18.9774	24.8014	25.8961	9.2612	5.4686	3.0926	4.7188	9.151	18.9315	9.0951		0.421487	18.0319
6.1953	73.7801	81.6247	52.7773	10.115	26.1379	6.0508	5.7397	7.7702	9.2762	12.7294	19.5101	13.9114	14.1197	10.4407	8.711	20.7868	14.2747	13.7958	16.0003	8.4558	20.8971	18.0521	17.4929	7.311	8.6735	18.6175	23.7948	20.3965	10.3345	6.7231	5.3596	3.8661	7.4216	13.3702	13.1295		0.429749	17.7556
6.3145	90.7468	80.033	36.4967	12.364	23.7809	4.7345	9.0101	7.4715	7.4799	11.7765	13.4752	10.222	10.425	11.7274	13.3962	15.4042	17.6825	13.7175	15.2153	6.8413	14.9305	23.4941	16.4014	6.5276	12.0676	17.4174	17.3347	24.5976	11.8519	5.4951	4.1231	4.3364	6.7969	12.9209	10.9597		0.438017	17.1787
6.4336	76.3997	67.264	29.922	12.871	22.0364	9.5069	10.4733	7.2986	7.8014	9.5847	13.8973	10.5007	8.836	7.739	14.0369	19.5576	20.3922	16.2244	13.4505	7.6531	11.0731	19.9667	15.6566	5.6433	12.4512	12.7113	16.9473	20.6656	9.6862	5.8389	3.2413	6.6617	11.4892	18.003	10.1625		0.446279	16.1612
6.5528	74.2678	68.1779	39.0581	11.366	23.7563	7.2225	7.3762	7.7044	13.1566	6.1065	20.3582	10.2704	6.9805	10.8939	15.3842	22.0465	18.8225	12.365	9.3467	7.1453	7.8824	24.2822	15.6382	3.3504	16.1373	19.8268	14.0218	17.3153	11.2839	2.9803	5.4005	6.3395	11.2701	10.5804	13.1945		0.454547	16.3231
6.6719	72.8852	74.8436	37.5811	8.646	18.2346	10.6963	5.9999	6.6226	10.0442	10.0368	27.4266	11.4509	8.0546	12.7964	13.7565	13.6203	16.1355	12.9564	8.0489	3.7792	7.0474	17.5168	12.8361	4.4682	8.3771	20.7601	13.8504	10.319	12.4661	2.7325	3.1293	3.332	13.7402	11.2565	7.7272		0.462809	15.2336
6.7911	54.3655	75.6488	36.8632	8.271	19.3305	13.6429	6.5418	6.137	8.2421	9.0373	16.6797	13.8446	8.1365	9.8571	10.7029	15.5858	12.1987	10.665	4.907	3.8362	7.3908	16.0089	11.1586	6.2754	8.2148	18.6049	14.9432	11.3303	11.4091	3.9373	2.4157	2.0607	5.7814	17.6027	9.8675		0.471077	14.0427
6.9102	53.4639	65.0273	39.0764	12.447	16.6379	7.6746	4.7407	7.7861	7.3131	5.5045	10.174	14.0776	11.9767	10.5681	16.6679	18.8933	17.7125	9.7322	5.8296	4.086	5.0343	10.668	14.2659	5.8152	10.5848	19.5646	19.861	10.0471	11.4771	9.4087	3.0209	3.988	3.7371	10.1457	8.3547		0.479339	13.8675
7.0293	38.0931	58.8327	47.2431	13.15	16.7424	7.5005	10.5958	6.6849	6.6938	7.5939	12.2069	9.2907	16.568	10.5181	15.6918	16.9819	16.5546	13.5145	5.8158	3.1376	5.8269	16.4329	13.2849	6.9116	7.7155	17.9294	19.3386	6.6113	8.9787	4.4134	4.0691	6.0468	6.391	11.1027	6.9309		0.487601	13.5827
7.1485	45.5003	50.1103	36.6704	7.125	19.4901	8.0801	8.0503	5.5704	9.7623	9.3317	11.5841	8.1119	14.746	8.4732	20.3056	10.731	11.5758	11.2034	4.691	3.0855	6.0791	12.1535	16.8827	3.8245	11.0796	17.1597	21.9023	9.0561	13.9508	4.8322	4.5177	5.7339	6.3315	10.7483	6.9661		0.495869	13.0119
7.2676	40.4441	50.4451	30.8586	10.587	18.1586	7.1235	5.1429	7.8173	8.0524	4.3712	17.0811	12.5403	12.2402	13.3667	18.5637	12.5702	7.1109	14.4499	6.9226	4.8041	5.7117	10.8824	13.3776	7.6364	10.4459	15.6805	19.9617	11.1891	7.4434	7.1432	3.1435	3.7205	6.4209	10.5037	7.1933		0.504131	12.6601
7.3868	35.4974	62.1771	29.8764	10.578	15.1062	10.1786	10.7959	10.159	8.5656	5.7738	19.4051	10.036	10.8973	15.4165	14.2068	9.2809	5.5376	12.818	9.0939	5.4037	4.4387	14.1913	14.3559	3.2388	12.0154	10.7385	22.5168	8.87	9.2184	7.4165	3.5837	4.2383	4.4381	11.2777	5.0222		0.512399	12.7533
7.5059	35.1067	70.3114	26.1077	5.539	15.3475	6.1784	6.7097	5.423	9.165	8.0575	26.7195	9.2004	10.8294	8.6507	15.0903	11.7736	7.023	14.9171	11.7445	2.9216	4.4141	20.4822	13.086	2.3739	12.0743	13.2431	15.272	12.2606	16.164	5.7865	3.5179	5.089	3.9274	9.3972	4.689		0.520661	12.8169
7.625	35.3793	54.1595	26.8614	8.33	17.5881	9.2777	7.7298	7.2547	5.1393	8.2756	26.9424	8.2274	7.924	11.5357	15.1087	9.7034	4.6379	14.0005	5.9146	5.483	4.2027	25.1546	15.0647	2.5457	7.825	16.3717	16.5849	13.1149	17.9473	7.2031	4.4955	3.4084	5.7839	7.1728	6.3992		0.528923	12.6499
7.7442	28.7737	46.5639	26.054	4.447	15.7434	10.5931	5.3082	5.2539	6.4868	6.4207	23.1792	8.7928	7.1124	8.8455	14.9979	10.7902	4.9096	13.0759	9.2936	2.9037	5.6675	22.2578	12.6002	7.3413	13.612	17.5019	12.1552	10.664	9.2702	5.9346	4.3326	3.1183	4.5044	4.5311	7.146		0.537191	11.4338
7.8633	32.5224	38.2068	30.2401	6.655	8.0934	7.7929	5.7742	5.5661	4.5642	5.9352	18.6229	12.3368	9.7527	11.9321	18.7601	10.571	3.6238	12.4205	4.8789	2.9618	2.1992	20.5876	9.4009	7.0426	8.8384	10.1015	11.3766	6.9108	17.3993	7.0318	2.4495	3.1495	2.6257	7.8206	6.6768		0.545453	10.7092
7.9825	28.611	41.3515	32.1126	5.655	10.1008	5.5317	5.0333	2.7696	6.0576	9.343	17.3504	9.1411	11.6501	13.0486	15.7179	5.8286	5.8102	10.597	8.4158	3.1459	4.4228	18.4026	8.1006	3.5648	7.1858	13.7165	12.2738	10.2585	11.1473	8.0494	1.6872	4.474	5.6031	8.4807	7.608		0.553721	10.6356
8.1016	31.2836	37.806	23.1865	6.934	11.025	6.361	4.2153	8.1802	5.5724	15.2675	12.7399	9.761	10.4708	11.069	14.7869	5.448	6.907	11.1405	5.5995	5.6689	6.6056	11.1854	5.9703	3.487	8.9076	11.7643	13.7569	7.4185	15.6457	6.6234	1.7984	3.5755	8.3159	8.5891	7.1067		0.561983	10.405
8.2207	25.9165	35.2167	18.5217	7.666	11.265	5.7052	4.7919	7.7278	6.0617	6.6978	12.8264	5.3735	7.6529	17.6596	11.7855	7.985	6.3171	9.3122	4.9015	3.6555	7.9791	13.66	5.0776	4.0141	10.9144	9.8405	11.822	7.1521	15.0998	3.2968	3.6274	4.0198	4.3737	10.3769	4.8165		0.570244	9.51743
8.3399	19.2899	37.5443	20.7839	6.035	15.9403	4.8066	4.3717	6.7527	7.7035	11.6192	11.6381	6.6218	10.085	14.8356	12.3744	7.4492	3.5263	7.91	6.8629	4.112	6.1283	23.9452	4.8131	4.1082	5.1986	14.3805	11.6698	8.7878	17.2848	3.0197	4.6506	6.4659	4.2012	7.682	7.2471		0.578513	9.99558
8.459	20.7599	44.7836	15.086	6.848	21.0149	4.0897	3.4333	3.3223	6.515	9.0064	14.7043	8.4754	8.4818	23.2933	11.3436	13.493	4.0126	7.5537	8.3117	2.4618	8.3001	30.3193	6.9697	7.9653	8.0403	14.4864	16.9337	9.1829	15.9936	4.0387	3.3312	3.7193	2.2575	4.5391	6.7242		0.586775	10.8512
8.5782	33.6616	39.9676	15.6619	5.162	16.5621	6.2601	3.1058	3.5146	7.5394	7.2432	14.8796	9.772	8.7017	13.9745	8.7837	8.9615	4.7549	6.6288	7.3504	3.9933	6.8597	18.0336	9.9349	6.7708	8.1108	14.5782	12.1495	11.7531	20.5367	4.035	4.1545	4.9558	2.8457	3.9203	5.5227		0.595043	10.304
8.6973	18.6544	46.8031	12.6076	4.723	13.7078	7.5726	1.8638	4.2823	5.274	10.4008	17.3605	6.32	8.5295	14.8346	12.6749	8.1636	6.351	4.5859	6.8796	4.3883	6.1229	14.6285	6.1641	6.6196	8.6795	13.8574	13.6956	13.1473	13.0349	7.191	5.401	2.2366	5.6333	4.8703	3.6623		0.603305	9.74062
8.8165	18.0449	42.7153	11.1013	6.933	17.1531	3.9224	4.0818	3.6499	6.7315	17.4939	15.8414	4.8449	4.9434	12.8061	9.6712	6.9082	5.6591	6.3508	12.0231	4.4049	6.5115	14.6461	9.7716	5.4909	4.6912	17.721	19.3805	9.0943	9.2526	5.4613	4.1082	5.3014	4.7572	3.4598	4.9531		0.611573	9.71088
8.9356	14.5628	37.8052	11.8041	6.768	12.9732	4.864	3.8986	3.0993	3.6368	12.7452	13.2101	5.6673	7.0737	9.0954	9.2362	5.9052	4.7151	8.6552	8.0839	4.5805	5.3495	16.6888	8.9859	6.7974	6.7034	15.7754	13.6546	13.2041	8.1119	4.6004	3.6581	3.9388	7.8514	5.7939	8.4323		0.619835	9.08359
9.0547	12.4596	29.1212	7.8989	7.014	8.9347	6.2528	2.2094	2.6873	6.5597	11.82	17.6791	9.3645	9.4024	4.8062	9.9439	4.9388	7.2022	10.1878	5.3736	4.719	5.9093	23.8487	13.9238	6.7996	14.294	14.8	15.8332	18.1984	7.2371	5.1559	2.1103	4.6758	2.9344	6.2803	5.2531		0.628096	9.3094
9.1739	16.7205	36.7935	11.2127	5.22	10.9486	4.2685	2.5013	3.5667	4.2315	8.0001	17.6553	5.0724	11.4008	4.5855	8.6425	8.5938	6.8542	12.0158	5.1939	5.4509	5.4061	17.7899	9.4091	5.2543	13.0706	15.9524	13.8076	13.5526	8.8775	5.8625	3.8892	4.9379	2.8977	4.8769	3.9331		0.636365	9.09845
9.293	13.4634	24.0669	6.5279	4.732	13.6931	4.2322	2.6554	2.3223	5.6311	9.1847	14.1431	7.4956	8.7478	7.9791	8.5981	6.4147	6.6533	11.3248	4.7332	4.5859	4.1165	17.1896	10.8283	4.9575	12.9809	16.3218	22.8092	13.3869	11.0356	6.9046	4.5642	1.9247	6.4681	1.669	6.1447		0.644626	8.81389
9.4122	13.6153	30.1547	11.602	4.867	12.286	4.1497	1.8059	1.9335	6.1283	5.5969	7.9278	6.6401	7.1528	9.2993	8.0381	9.1285	8.7128	9.708	4.4449	5.2388	3.979	12.6469	15.4242	5.079	13.3555	15.434	20.998	10.2935	12.4308	6.4998	4.1796	4.1588	6.3758	4.9077	8.1807		0.652895	8.92496
9.5313	17.4821	27.5216	7.5323	3.135	11.7234	4.3509	1.9027	3.1422	6.4733	6.5007	10.1564	6.1919	10.556	8.39	11.4911	8.6497	8.5762	8.6694	5.053	2.6696	3.8358	10.7862	19.6784	3.8037	14.5824	15.8543	18.188	6.8281	11.2003	6.2591	3.8647	5.8498	4.1984	5.5496	3.9232		0.661157	8.70199
9.6504	15.2428	31.0295	10.7639	4.568	13.2828	3.4371	2.1988	3.0558	3.8604	6.7884	7.1965	6.4163	6.7946	7.4612	7.3734	6.9015	12.3788	7.4637	6.625	3.5119	7.012	14.8639	25.7084	4.2043	13.1095	7.4938	15.7468	11.6765	8.6208	6.4037	3.8214	2.5671	4.3072	5.1772	5.1217		0.669418	8.63385
9.7696	9.0992	24.1611	10.8172	5.204	16.4901	2.6122	5.0357	2.997	2.9807	5.019	7.7637	5.8418	6.0554	8.8062	8.6199	7.5401	12.4283	3.3713	5.9458	3.8078	4.5909	14.4816	23.4785	2.9387	13.6879	11.7958	18.1988	12.0111	9.2833	7.0544	3.9022	2.5817	5.602	3.6683	5.2486		0.677687	8.37487
9.8887	14.7963	24.022	7.4656	5.463	22.658	2.3327	2.423	2.6158	2.9865	4.2105	9.1905	4.9995	3.9766	8.3319	8.8764	9.9271	11.6443	7.4525	8.1602	4.5832	6.2892	11.302	21.1154	3.9563	8.5256	8.3163	15.3155	12.2913	9.632	6.3164	2.8799	2.5333	5.4257	4.549	4.3156		0.685948	8.25369
10.0079	14.2396	16.9742	9.3636	3.705	17.7891	2.15	3.0439	1.8738	7.1154	5.7127	5.2694	3.5992	6.9306	8.4093	7.7035	7.3543	11.5422	7.6749	9.6955	4.8537	4.9364	9.3399	18.0699	3.3249	7.713	6.9129	16.7013	7.335	7.0621	3.9665	3.9088	4.529	5.3168	4.8671	5.2064		0.694217	7.54828
10.127	12.7551	19.9591	12.5587	4.083	20.824	2.184	3.1695	2.1331	5.2753	7.1096	8.3846	5.1026	8.2053	11.6003	7.6167	8.5095	14.7178	7.6287	4.3047	5.223	4.3983	6.1742	13.469	5.3835	5.5413	6.9477	13.214	8.5322	12.1786	2.8706	6.4995	3.9033	5.5682	4.2762	5.3548		0.702478	7.87589
10.2462	11.2798	17.3075	8.2286	8.085	22.7784	3.1663	2.5792	3.1206	4.7395	7.1884	6.741	2.8878	9.263	18.9974	13.4374	14.3299	19.1968	6.9947	7.4614	4.437	5.1691	6.7913	8.9066	4.9995	8.3571	9.9098	14.6446	13.5501	8.1974	2.8109	4.4605	3.191	4.4995	5.6942	4.7666		0.710747	8.51908
10.3653	13.3488	21.3119	4.7722	5.111	20.4798	3.4818	2.4613	2.1768	4.7712	6.9004	7.1819	5.4153	4.7887	11.2098	8.2584	10.5463	15.2329	7.2679	8.2931	3.693	7.5161	7.0876	9.8492	6.5102	11.2801	8.5302	17.0191	9.4975	4.7347	2.6476	3.6746	5.161	2.8447	4.0352	5.5496		0.719009	7.78971
10.4844	12.9438	31.3367	6.4118	8.243	28.4197	3.7017	3.8004	1.9796	3.7049	7.7673	8.0649	7.8036	5.4853	9.4653	5.9337	12.1682	14.2594	9.3834	9.3495	4.3039	9.0928	6.2463	9.039	6.3215	8.472	6.9655	12.7343	5.8772	4.2979	3.2302	4.4439	3.544	7.0637	2.7131	4.6787		0.72727	8.26418
10.6036	18.0463	30.1841	5.8335	5.128	27.3859	4.5135	4.2599	1.9183	3.9787	8.3578	6.3164	5.329	5.9949	13.3466	10.384	9.3273	15.5438	4.916	8.1207	11.9879	10.434	4.724	8.188	6.7497	6.6883	10.7722	8.5244	6.5305	4.6826	2.7355	4.0109	5.9332	4.1246	2.8198	5.446		0.735539	8.37818
10.7227	13.481	34.3827	4.2152	4.78	36.9472	3.5546	3.7482	3.1559	2.7679	5.7539	8.5578	7.4193	6.2789	8.0865	12.5606	12.0469	18.7272	6.2374	9.6471	10.1437	6.4323	3.9565	10.2493	5.9555	7.3974	6.7235	11.8506	6.2452	4.9586	2.2126	4.9805	5.5232	3.8519	4.0829	6.1039		0.7438	8.6576
10.8419	16.1675	35.6007	3.7528	6.88	31.6126	4.7923	3.1544	2.6243	3.2688	5.5445	8.3621	9.3811	5.9713	5.7419	8.0864	6.823	16.8854	4.3349	5.214	12.1435	4.4337	4.0224	7.2904	4.2315	9.6505	6.1362	17.0277	6.1273	4.4566	4.8752	4.2914	3.8584	2.582	3.2287	4.3701		0.752069	8.08353
10.961	14.0513	27.8463	6.7857	6.339	27.9857	4.4569	4.5048	3.3177	3.5092	5.6597	8.5721	7.783	3.9528	5.4136	6.1928	5.3742	13.795	2.3999	6.7585	13.7489	8.2826	4.7439	7.1042	6.1021	5.356	6.1056	10.8014	8.822	4.2638	2.6307	5.5	2.9125	4.0232	3.9671	5.7387		0.76033	7.56574
11.0801	13.31	19.5812	5.7391	5.112	27.4923	3.7565	3.906	3.5137	6.0988	7.759	8.841	6.1012	4.002	5.1809	5.6534	4.3563	9.9945	4.703	8.5482	13.7912	7.776	4.1346	4.0293	6.3908	7.0008	8.4751	10.0551	14.0068	4.3772	2.4738	3.0202	3.1603	4.7791	4.4689	3.3181		0.768592	7.28304
11.1993	11.6956	15.1695	6.9994	5.602	19.1121	5.5548	3.9331	3.2506	4.7257	4.7059	10.0248	6.4477	4.0888	10.3467	7.1969	4.0357	8.6068	5.0543	7.0788	10.6649	5.0001	2.9267	7.0795	7.2548	6.6941	6.0649	4.7127	11.3951	2.6022	2.7634	3.2725	4.2881	4.1696	5.1169	5.6681		0.776861	6.66579
11.3184	11.181	12.6557	6.2518	5.728	17.3974	6.5117	4.4394	1.9201	3.9871	4.0461	12.905	4.9613	4.2287	6.2373	3.802	6.2947	9.5789	4.1812	3.9952	6.9079	5.6826	6.028	3.5085	6.5693	4.9878	7.4695	3.6662	8.1562	4.0247	3.2106	6.5646	5.7245	2.2685	2.7316	3.6342		0.785122	6.04107
11.4376	12.2106	12.256	7.0605	11.392	7.8065	3.8954	4.3936	2.6915	5.2328	9.1317	13.5238	4.8054	4.4082	5.9509	3.1255	4.5725	4.3133	2.4752	3.4931	7.8665	6.5914	6.3363	2.9582	5.073	4.341	7.3532	5.7895	6.5357	6.2162	4.0124	3.8884	3.1829	5.0295	2.8268	6.4496		0.793391	5.91969
11.5567	14.2179	8.8986	7.7855	7.921	6.4511	4.7017	3.3897	3.7044	5.6703	7.9598	11.5073	3.7792	2.2941	5.9568	4.1318	4.6192	5.5182	4.4348	2.3908	4.6557	3.9504	6.8348	4.5158	2.615	4.5641	3.488	6.8913	11.4256	6.5823	2.4392	2.705	4.3679	5.6277	4.2776	4.2139		0.801652	5.55676
11.6758	13.7249	20.7501	8.6699	7.728	8.9759	8.0069	1.8509	2.7849	7.4695	5.5134	21.6398	5.8662	3.7	3.7713	4.87	2.6715	6.1551	3.3627	2.01	3.0261	5.1208	3.1539	5.6864	4.3676	5.2939	6.2553	6.0387	13.0671	5.2091	3.7806	2.6192	2.1637	2.4165	4.7794	5.5401		0.809914	6.2297
11.795	9.085	24.1183	5.5583	8.866	10.1622	3.8603	3.0121	6.3174	5.4278	6.8761	18.0343	6.6264	2.246	4.2197	5.0365	4.6173	8.3823	2.8759	3.5091	5.0646	4.5356	3.0709	6.2555	3.2135	3.8081	5.9623	4.338	10.488	4.4633	3.1849	3.3727	4.7028	2.5379	2.9179	3.8237		0.818182	6.01631
11.9141	12.2795	30.115	6.2842	15.804	13.7821	7.4183	1.9527	4.007	5.2497	6.793	16.3024	8.1558	1.7491	6.7105	3.6831	5.2998	5.7313	2.5541	3.6059	2.8339	2.2071	2.6988	5.8227	3.3858	4.635	2.7954	3.5654	5.9108	5.0406	7.696	4.8553	4.498	1.9869	3.3335	4.0099		0.826444	6.36436
12.0333	12.2379	22.3103	12.6008	16.701	12.5553	6.7515	3.1415	3.5651	5.9052	9.2581	21.0785	9.7426	2.2574	5.0663	5.6712	4.3651	7.657	3.2474	2.5004	2.4551	2.4666	2.1544	6.9809	4.5027	5.2407	5.0464	6.1735	4.3757	3.9566	3.254	4.6953	6.0503	3.1812	4.0271	3.5612		0.834713	6.70669
12.1524	10.0492	24.1017	8.3508	23.084	16.4748	7.8791	2.4592	2.7467	3.7762	7.2251	15.0203	6.2914	3.4382	2.6454	3.3541	4.8232	5.5929	3.0991	2.0544	2.2239	3.0997	2.1346	4.5605	2.8027	4.4758	4.9791	6.2963	2.995	6.3317	4.1453	5.6584	4.5258	2.5251	4.3291	4.6398		0.842974	6.23396
12.2716	11.4446	24.5848	10.0182	29.103	20.0659	5.8432	1.6768	3.9575	6.742	10.6283	21.0251	6.6687	3.518	5.2307	2.2998	3.6005	5.0266	3.1054	4.5159	1.6656	2.4022	3.0603	3.4685	3.1027	5.0615	5.1781	4.5868	4.1481	5.261	3.5215	6.4174	4.1733	3.0723	3.2293	5.5539		0.851243	6.94164
12.3907	11.0922	23.438	11.4342	27.482	25.6552	6.1744	3.631	2.5196	7.5714	5.6313	15.7317	5.6965	1.5607	3.2524	3.1753	2.6981	2.7931	2.899	2.1133	2.6956	5.2559	2.5781	5.2115	4.111	4.5336	4.6452	6.8608	4.4638	5.1883	2.987	5.6146	4.4152	3.3858	3.6898	3.0941		0.859504	6.66513
12.5098	7.8554	17.4535	12.9626	23.956	17.307	8.1942	3.5644	3.4939	7.7636	9.4405	17.4296	6.3681	2.9572	2.4661	2.6059	3.501	2.9428	2.8419	3.3506	2.2164	4.4846	2.2455	6.4932	5.406	3.3312	4.8522	5.1065	3.3611	4.63	4.1341	5.4571	4.3251	2.4319	3.5446	2.6663		0.867766	6.31829
12.629	11.3219	19.8813	14.7421	26.282	5.6743	4.9121	3.3991	1.7007	6.3496	6.868	22.6133	4.1065	3.0327	2.3911	4.0396	5.1808	3.1978	1.8268	2.857	1.9776	2.3029	2.0023	3.9341	3.6277	1.8168	4.3633	5.0652	2.8985	2.7005	4.295	4.2398	4.1206	3.2356	3.4781	2.0832		0.876034	5.78623
12.7481	8.557	25.2886	19.9283	26.726	9.425	8.453	1.8755	3.0074	5.5021	5.9393	21.2818	2.2503	1.7667	1.4068	3.2965	2.9111	4.5005	1.6116	1.3737	2.0792	3.2394	2.1556	2.6323	3.3491	2.9366	5.1513	6.0147	4.2276	2.5709	2.9336	4.6054	2.4898	3.1686	4.4078	3.0862		0.884296	6.00427
12.8673	9.6584	25.5974	24.8839	29.525	9.9943	7.6481	3.4635	2.6541	8.1953	7.7958	24.7778	2.8344	2.5507	2.0062	2.7807	1.9308	4.199	2.0962	1.4258	2.637	4.0952	3.6546	3.0076	3.3681	3.7576	3.8958	7.1705	4.6095	6.8742	5.2829	4.7797	3.5346	3.7855	3.7849	4.5079		0.892565	6.93609
12.9864	8.4191	22.4772	24.3468	44.102	8.4744	5.2548	3.2821	1.6405	4.8875	9.0232	17.317	2.4653	3.2997	2.5372	2.7312	2.2756	4.1438	2.6415	2.6429	2.1702	3.5944	2.3221	2.9164	5.2461	2.9538	5.4137	5.7823	2.4371	5.5707	6.8157	2.9348	4.4818	4.3643	3.0373	3.5979		0.900826	6.73144
13.1055	11.2914	26.2675	30.5433	40.282	8.8802	7.6722	2.8749	2.1305	6.5556	7.5051	11.5404	2.3429	3.1476	2.1894	2.2633	6.4762	2.3259	2.3308	1.912	2.4737	4.6173	3.5863	3.4686	3.7575	3.4335	3.5717	3.7067	2.8778	4.5318	4.2098	4.1615	4.0188	3.5036	2.8554	4.4738		0.909088	6.79369
13.2247	12.8336	19.8965	25.3832	47.301	5.8199	5.4109	2.8369	5.2065	6.6686	6.1657	7.9039	2.5415	2.6753	1.8232	2.5489	4.3224	2.2169	1.5917	1.6212	3.5177	3.226	3.18	3.8451	4.6847	3.3389	4.1543	2.6198	4.1308	6.361	5.0212	3.7284	2.8874	3.1125	2.3222	4.1547		0.917356	6.43007
13.3438	9.8711	19.6593	30.5169	42.395	8.0415	2.7218	4.6382	2.4308	7.8212	5.8444	7.5565	2.4374	1.8534	2.033	3.028	3.6495	3.2008	1.5181	1.669	2.0686	2.2482	3.2437	4.1076	5.072	4.8675	4.2731	2.7362	5.3574	2.655	4.3414	4.4189	3.0016	2.8057	4.0296	5.708		0.925618	6.33773
13.463	8.5473	26.4226	17.8375	29.657	6.4137	5.2379	5.4964	2.4877	9.5079	6.3487	7.5492	2.4188	1.5954	1.9393	2.3511	2.0783	2.5453	2.0169	1.5677	1.8726	1.4116	3.3708	3.2057	4.515	4.3403	4.4717	1.9164	5.0746	1.8773	5.9905	2.8498	3.1554	3.3626	3.5195	6.567		0.933886	5.70056
13.5821	8.3382	19.4415	20.5931	26.122	7.1937	5.865	2.8933	3.2685	8.7955	4.4843	5.9503	3.4279	1.6914	2.6215	1.918	3.5993	2.8288	2.6504	2.2761	2.6688	2.534	5.544	2.0707	3.4885	4.1463	6.7773	3.1053	5.2413	4.4814	8.2505	2.0064	1.7937	3.9195	3.9726	3.9251		0.942148	5.65383
13.7012	5.9074	14.1282	29.3814	17.91	3.613	6.0739	2.4585	3.0379	6.2626	3.1097	4.2072	2.0714	2.0417	3.064	1.6504	2.0862	2.7547	3.6371	2.4505	1.705	3.5797	4.7905	3.7491	3.7363	6.4607	5.0561	3.1789	6.0498	1.7328	8.1657	1.8833	2.3056	2.7661	3.268	2.2134		0.95041	5.04248
13.8204	6.7294	12.8536	24.9925	5.273	4.6499	3.1594	2.1313	2.4998	4.2465	3.4666	2.8912	2.7454	2.1996	3.7161	2.4251	1.4479	2.4488	3.6141	2.3208	2.6426	3.6958	3.1333	4.4425	2.9861	3.2466	4.6641	3.0276	3.522	2.2228	8.3116	3.7724	1.9144	3.304	2.2884	2.1068		0.958678	4.25977
13.9395	5.1122	10.1251	20.7216	4.729	3.8278	3.2951	4.7016	2.4463	4.31	5.604	4.3126	2.0948	1.6919	1.8822	2.0559	2.154	1.696	1.9993	2.0188	3.377	4.1867	2.1692	2.9106	3.6945	2.5893	4.9902	2.4504	2.717	5.7528	5.153	2.343	1.5429	3.292	2.7774	4.0834		0.96694	3.96593
14.0587	4.1109	13.469	23.5749	4.569	3.0076	4.0996	5.6587	3.0326	4.3165	5.3757	2.3987	2.3359	2.1869	1.991	1.4695	1.8795	1.7413	3.6321	2.5525	2.1595	2.9764	1.9353	1.622	3.3804	2.1637	4.9231	4.5547	5.8261	3.5569	4.8616	4.3061	1.9891	2.1446	1.5659	3.869		0.975208	4.09247
14.1778	5.1246	11.4877	22.7517	3.222	2.5671	4.3946	5.3436	3.5666	6.1841	4.3049	2.361	2.2307	2.9515	2.9654	1.6579	1.5474	1.5151	2.9233	2.4698	1.5868	3.203	3.195	1.8303	5.3941	2.6554	6.4921	3.4951	3.14	3.7606	7.2056	3.0039	3.3756	2.3675	2.7107	5.2337		0.98347	4.23481
14.297	3.4894	9.6966	14.9931	4.931	2.1614	2.5389	6.0432	2.3274	2.8276	3.9129	3.5573	2.0935	2.7496	3.6983	1.6113	1.9322	2.553	2.3432	1.8726	2.0812	2.6025	5.6526	1.8091	3.9244	3.0182	3.4375	2.0507	3.7994	3.1602	4.4238	4.584	1.6846	3.6072	2.2496	4.7327		0.991738	3.66143
14.4161	4.5639	9.3544	11.5086	5.192	2.7848	2.6332	4.4711	4.4638	3.3505	4.7786	2.6724	2.4681	1.9135	3.332	2.7614	1.7699	1.7844	1.5472	2.209	2.3355	5.6538	4.5578	1.9106	3.9767	3.2513	4.131	2.9528	2.9283	3.7656	5.5145	2.3481	1.6119	2.503	1.9334	3.6155		1	3.61567

## Sheet: Image1
X0	Y0	Y1	Y2	Y3	Y4	Y5	Y6	Y7	Y8	Y9	Y10	Y11	Y12	Y13	Y14	Y15	Y16	Y17	Y18	Y19	Y20	Y21	Y22	Y23	Y24	Y25	Y26	Y27	Y28	Y29	Y30		Ap-Basal	Avg intensity
0	46.2959	33.1723	35.7637	20.5748	34.2803	47.472	33.685	27.5806	39.6225	39.7767	31.7699	20.7613	26.7083	22.5302	30.3042	34.0465	37.457	22.546	24.8947	38.1053	35.6209	24.2829	31.5497	27.1134	21.896	23.7016	35.0677	31.5422	23.4775	19.9607	24.1067		0	30.5054
0.1191	43.8568	34.8265	33.8502	20.7758	32.975	46.9932	35.924	31.4439	43.4144	36.4795	28.7686	31.1462	27.3465	21.124	26.4256	40.9358	36.383	26.4899	28.8351	35.4452	31.8833	30.9988	19.3169	28.6361	21.2525	29.4026	34.6197	34.8934	28.7315	25.7227	18.1351		0.00934257	31.1946
0.2383	37.5441	31.5457	23.6168	35.519	32.7386	40.7919	47.084	33.703	42.3293	40.3795	27.3349	30.3558	23.6463	27.284	30.7587	39.2073	42.382	25.93	28.576	29.5305	26.3469	31.2467	22.6134	20.0767	19.7556	34.6692	34.5428	29.0155	24.4782	24.66	20.6337		0.018693	30.9128
0.3574	32.9368	27.5261	19.6272	32.3882	36.8657	37.6001	39.077	29.5101	42.7859	47.7978	29.0961	30.3081	31.6147	19.5081	32.1397	38.4544	42.647	37.1528	37.9868	37.6804	33.3703	33.4802	22.5648	19.5101	18.8166	34.893	31.648	24.6603	27.6853	18.3274	21.2649		0.0280356	31.2556
0.4766	39.2494	33.3571	24.6133	30.5863	33.6647	37.6012	41.909	35.3495	46.0699	45.9108	34.6592	26.8538	23.9645	25.5658	34.4223	34.2301	46.86	31.3199	40.5333	40.6072	31.2893	23.7844	28.7863	20.5867	19.5651	22.6299	37.3825	31.8546	19.4872	23.0864	32.4338		0.037386	32.2004
0.5957	49.1817	37.8033	35.2681	40.3533	42.8852	47.0194	44.501	30.8656	43.6067	47.7413	28.1348	26.8896	31.4421	25.2612	32.9623	38.4753	40.208	30.7684	39.5578	50.739	34.0629	28.1578	20.8435	24.4135	17.3458	29.5473	37.4188	31.4307	23.377	21.5082	35.281		0.0467285	34.421
0.7148	46.5959	38.5918	38.9638	33.8945	47.4336	50.8408	49.76	33.2828	36.1326	40.3541	42.5029	36.6833	43.6644	25.1673	33.825	46.5207	45.012	29.6457	42.9303	51.3171	42.3552	34.0005	35.178	23.875	21.5403	31.899	51.832	37.0921	26.1687	31.25	33.631		0.0560711	38.1271
0.834	56.9503	43.1404	35.3928	34.4346	41.2387	60.1043	57.534	25.9516	45.0954	48.6704	51.9044	54.0717	38.7575	30.3756	29.2148	45.4031	57.34	29.2058	54.8775	59.8259	47.5285	38.8994	30.7678	28.6763	24.9552	25.9886	44.676	56.3364	21.5674	47.3572	37.6151		0.0654215	42.0599
0.9531	54.5208	41.9229	43.6395	37.7701	42.9675	55.41	61.387	44.726	57.9051	55.1749	48.7679	55.7756	52.1949	25.8337	22.8506	49.3824	55.58	37.6298	55.0124	70.8733	63.4292	36.4181	34.558	27.9975	30.3735	34.3029	62.3971	68.7657	24.9561	49.9025	37.4684		0.0747641	46.4482
1.0723	52.2556	40.1266	44.6687	47.1303	60.4136	58.8719	67.845	46.5535	66.268	55.5715	58.8791	79.5359	58.9327	29.3605	26.8124	64.5909	57.204	45.5976	53.4756	80.4857	72.7465	51.864	29.1423	36.8332	30.2951	39.8614	67.6286	64.3026	34.6688	51.3412	39.0601		0.0841145	52.0104
1.1914	40.995	38.3821	38.6879	58.4458	52.1364	60.6586	63.918	41.4455	57.9461	57.8609	71.8229	73.0764	62.4937	43.5377	32.2758	77.6479	68.96	47.3184	58.8257	66.2195	55.2645	44.2319	40.3176	32.4424	42.4748	41.7111	53.2355	65.3632	45.2331	60.0727	42.0441		0.0934571	52.7434
1.3106	46.1765	42.8759	37.204	46.4632	60.5894	67.1569	74.374	49.0612	60.6021	63.1798	84.1396	79.1136	69.2833	52.2794	36.0092	65.5645	69.014	59.831	66.014	71.3445	66.6516	34.9163	46.9775	35.6971	51.1931	49.4985	56.9576	69.3872	58.2861	54.7992	39.255		0.102807	56.8998
1.4297	46.7164	53.409	48.6282	54.4724	59.1986	72.4186	67.538	54.1768	60.2659	82.1641	67.7813	75.1433	69.2382	68.4152	35.2428	64.7351	80.573	67.8454	57.1113	73.237	54.4278	58.1779	45.1879	39.9255	52.0531	49.091	59.7163	68.2623	65.4062	68.2051	51.732		0.11215	60.3386
1.5488	60.0023	44.5061	49.2063	63.3332	58.8887	84.5982	66.68	61.4909	75.3574	74.9083	73.75	84.659	82.4404	58.2139	34.7734	63.1059	86.696	66.1916	63.0823	74.9609	51.2443	45.5168	40.1319	33.3843	53.1184	59.0759	67.1623	63.4055	64.7187	67.1088	44.5731		0.121493	61.8156
1.668	52.7506	42.8234	45.1929	47.1352	56.5735	82.3459	70.524	60.497	65.4627	90.7493	88.701	88.2879	77.9141	69.2289	39.851	69.6326	101.852	84.6984	87.8447	75.3564	59.9211	50.5179	46.6256	34.25	54.5586	52.4069	68.4147	57.0743	72.0554	65.1766	46.4559		0.130843	64.6735
1.7871	51.5276	38.4044	41.2342	57.7018	59.18	91.564	84.087	73.8233	65.2124	85.8461	75.9721	82.1882	68.9188	66.1385	47.1975	54.7803	82.737	75.4104	69.6199	81.6371	56.6089	44.4005	45.1194	40.4036	52.3211	64.8564	52.862	50.1082	67.5526	70.101	38.8372		0.140186	62.463
1.9063	47.376	37.5304	49.5734	50.481	54.5455	83.0359	105.725	71.1736	67.7172	101.232	69.7868	82.3317	61.3957	62.2901	43.7962	54.8475	67.904	80.4905	75.5886	61.2326	57.8333	45.6939	46.4998	30.0486	54.714	49.291	49.4664	52.782	69.3796	55.3435	43.0935		0.149536	60.7161
2.0254	43.3116	44.2319	45.6753	53.7292	61.8581	93.1413	97.715	77.4215	62.2932	82.8554	78.1646	73.4613	73.8137	57.5998	42.6451	48.8078	68.91	83.2405	75.5229	67.9555	57.369	43.4828	38.3891	24.3954	45.3677	55.1304	46.946	48.5686	61.7063	64.5219	43.1339		0.158879	60.044
2.1445	45.717	42.5667	41.3796	66.023	54.833	86.9328	100.751	68.7158	60.6662	85.5643	85.2679	71.096	65.0182	65.2941	37.639	44.0096	69.99	81.0396	70.3928	65.8598	54.5926	39.4591	26.0013	27.8843	45.397	50.5502	43.1482	46.7594	65.0488	62.4667	39.9596		0.168221	58.3879
2.2637	41.1072	42.4746	35.8096	60.0586	50.4585	89.177	106.028	68.1005	62.031	81.4847	79.3954	59.3079	56.9565	59.7194	46.7381	42.5719	65.238	70.9348	59.2416	74.4582	42.8033	34.7051	26.6212	23.8856	45.4898	42.6099	33.6417	46.7465	53.3443	63.0782	35.2048		0.177572	54.8201
2.3828	50.5297	46.4629	30.6746	56.3174	56.3101	90.1835	96.372	64.8744	73.4356	82.4823	80.4222	48.9875	50.3468	62.5984	42.9303	50.7123	71.386	53.5282	60.575	68.8043	31.5708	30.446	22.848	20.1889	44.6239	35.861	33.3139	42.1251	46.9289	43.5727	36.1168		0.186914	52.4364
2.502	40.1439	42.1082	40.8639	50.664	58.313	79.5004	101.11	60.6571	78.3328	84.7234	92.4427	53.8416	58.7652	50.8854	31.4298	44.2965	60.461	47.3825	62.0546	69.3054	34.6469	24.3438	19.3618	18.0565	35.5425	37.5196	38.78	41.6033	40.8371	44.6265	27.622		0.196265	50.6523
2.6211	28.8807	35.8429	48.7006	56.4284	60.1684	87.5947	93.695	58.1441	77.8707	76.219	85.8091	58.3042	62.6303	37.0214	34.0275	57.3195	58.286	36.1179	68.1372	58.9539	26.7303	31.009	12.6356	21.8628	31.2081	47.8881	38.0484	35.1124	43.8761	44.3681	28.1074		0.205607	49.7096
2.7402	31.253	39.5486	42.4589	53.1831	62.3154	87.3587	92.627	65.1315	75.3491	72.7729	67.5124	52.638	53.9607	36.221	27.4654	34.053	52.647	30.3234	64.5125	66.6589	23.4495	29.6023	11.4532	18.6729	33.8293	46.2089	32.2581	38.2977	40.9021	47.3317	28.0642		0.21495	47.0342
2.8594	24.7272	35.9709	48.1153	49.7701	61.2255	94.209	75.804	59.8019	76.2099	72.051	72.1233	51.8918	34.0713	24.37	22.9518	36.3291	52.271	29.8315	67.0803	58.2201	20.9389	17.5424	10.4096	20.5336	28.8991	38.7841	40.9115	30.2065	41.0149	54.7059	17.4388		0.2243	44.1423
2.9785	23.8577	19.3336	41.9794	51.3245	53.0941	93.495	74.808	62.4592	64.6867	76.9986	73.3936	53.0947	34.7721	26.5766	24.6679	31.2532	41.292	22.5814	61.6929	45.3214	18.2534	13.8651	8.4535	22.5128	27.3334	38.4132	38.1875	30.2078	31.0515	45.6879	20.9067		0.233643	41.0179
3.0977	29.2343	27.0417	39.4874	47.355	59.5774	87.668	64.112	60.0823	53.2524	56.3605	75.5998	49.5105	30.959	28.3992	16.9699	36.3745	51.608	21.9828	61.5854	39.2529	14.6083	12.8687	9.5688	19.1747	21.264	32.8247	32.0929	32.6031	28.7223	35.0813	17.8479		0.242993	38.4861
3.2168	22.0801	34.2713	37.7395	49.5139	56.5727	94.431	57.12	54.1143	40.5879	44.7109	60.4022	50.9565	25.8616	17.7116	21.8603	33.4245	52.036	23.44	59.1153	37.8248	9.1366	17.944	12.6816	24.1228	17.1169	34.8244	23.8593	23.7863	32.4677	24.2326	18.7473		0.252336	35.8934
3.336	12.2746	32.1721	34.7719	50.6811	54.7864	101.391	45.846	47.3216	29.1476	67.1025	58.9571	49.878	22.5776	15.6057	19.534	28.2845	53.467	20.9855	50.4131	42.1814	12.6007	12.3198	12.0782	18.1878	19.6565	23.4636	20.1743	25.7576	27.7185	18.8451	13.3		0.261686	33.5961
3.4551	13.8604	18.309	33.4605	53.6056	53.0238	79.5118	45.321	32.3895	20.6838	66.9875	57.1132	47.5229	16.8936	10.9896	27.6651	23.0234	47.475	28.288	46.1452	43.0499	13.9676	13.7903	11.5229	21.9243	17.9831	20.9678	27.2966	26.0992	25.6387	20.7757	10.1756		0.271029	31.4665
3.5742	10.9328	18.5248	39.8249	47.0295	47.0444	66.9497	45.144	27.1098	17.2864	47.4825	70.0245	53.0625	19.0524	13.2895	26.1725	32.3092	43.126	33.2098	40.8095	37.2997	11.4774	9.4791	10.4032	19.1455	12.5885	13.436	22.8708	31.328	26.1408	17.5795	10.5082		0.280371	29.6981
3.6934	11.8192	20.3239	40.026	46.0535	56.5694	45.9612	29.453	31.8737	17.0447	47.1742	70.4573	45.1122	14.2356	10.6949	18.5336	32.6273	34.355	22.1752	41.923	42.0091	14.4534	12.7971	13.1782	16.9778	8.8168	15.7632	27.456	29.9832	22.0807	13.6749	11.5425		0.289722	27.9079
3.8125	10.345	21.3808	45.2371	41.3347	54.5224	49.3969	26.816	21.2371	18.535	39.8325	61.2823	43.5153	16.0946	10.1302	14.9461	25.8647	27.235	24.7629	32.647	37.5122	10.8337	14.0965	9.0829	23.5122	18.2162	16.8588	29.3107	29.5407	12.0689	12.0782	13.1885		0.299064	26.1747
3.9317	10.067	16.8505	34.414	39.9462	52.8505	48.7207	37.55	24.373	21.8402	38.6976	50.1634	41.4563	21.7604	16.5835	15.3703	21.8658	31.494	37.9335	31.7504	36.2784	10.6626	14.2018	10.593	19.6852	19.4587	14.4526	28.1855	18.9116	13.3152	11.114	13.0707		0.308415	25.9231
4.0508	12.6052	16.222	35.981	34.7301	62.522	46.5515	45.242	23.6961	16.7985	31.2375	48.707	46.5998	25.601	11.0257	12.2252	16.3665	21.997	24.7399	28.4387	28.2116	8.7832	10.3947	12.4927	20.6165	17.2342	14.2809	20.0414	19.9178	12.3839	16.708	9.434		0.317757	24.2511
4.1699	13.6184	17.8916	28.6797	34.8251	67.3121	49.711	39.058	20.3798	21.337	29.3228	41.6075	43.259	30.9288	8.307	9.6333	18.8978	18.714	21.9766	22.0976	32.9346	10.9407	13.0877	10.9519	19.7546	17.5814	8.1238	23.1538	29.8614	12.7463	12.8067	9.2077		0.3271	23.8293
4.2891	14.7312	14.2875	30.5321	27.9841	67.6836	46.061	33.287	20.1586	19.1201	28.6057	37.7748	43.0312	37.0357	12.51	14.9131	13.7126	25.795	19.5539	23.2015	35.2306	7.3204	7.0943	13.8413	18.6953	16.2707	6.3035	28.103	34.4714	14.258	10.6584	10.3884		0.33645	23.6327
4.4082	9.2286	15.077	35.952	22.5177	57.6076	44.0535	26.926	14.9213	18.5205	25.3506	38.8973	35.4764	43.3608	7.0627	11.4531	15.9837	34.239	24.6382	24.8542	22.8346	6.3408	8.044	6.5355	11.3023	10.5178	6.8378	26.6713	35.4227	10.6767	18.0357	15.6288		0.345793	22.0957
4.5274	8.9129	12.8396	26.4793	18.7835	57.3763	48.7358	22.889	16.262	27.7502	26.2527	30.0006	41.1168	45.4488	5.3786	9.4826	16.4837	31.927	24.246	14.9464	15.3851	8.6606	6.9243	8.1261	10.7985	11.4374	13.4095	28.2012	28.4497	10.9816	10.6945	17.9842		0.355143	21.173
4.6465	9.889	11.5994	27.9535	18.5266	47.7773	39.8944	23.984	25.6286	32.7132	30.118	33.1237	38.1842	36.661	6.4994	8.8774	15.5435	40.684	21.8384	19.8245	14.2641	7.4002	7.1657	8.9499	7.9721	11.2138	12.471	17.8186	32.2249	11.6127	14.3238	18.6193		0.364486	21.076
4.7657	10.618	10.7029	28.8662	16.3156	43.8863	29.0385	20.537	19.9672	28.7535	26.7672	27.3689	38.7106	38.302	6.8132	11.8065	19.9767	38.836	15.3707	24.6796	8.9952	7.6148	8.9412	11.3364	7.4627	11.1922	10.3759	15.6739	26.7197	10.677	16.6267	15.1355		0.373836	19.6151
4.8848	9.9633	7.1958	25.6436	21.9073	37.6205	29.4852	22.747	26.3018	26.9901	12.3768	24.2368	25.3223	32.853	4.5783	10.4118	17.301	37.777	17.2411	31.6923	9.0914	7.2984	13.8177	10.9582	8.0677	9.4455	9.1785	18.4807	20.6738	7.525	11.8412	20.43		0.383179	18.3372
5.0039	8.8466	9.7173	26.9285	16.8638	28.3387	20.1354	25.046	24.1589	35.3021	11.0259	24.8095	22.0417	32.4877	5.6464	7.1013	23.4673	25.666	18.6241	27.2436	6.9058	7.5083	18.0548	9.2358	9.6491	10.5297	10.4339	18.2324	23.3111	5.8297	12.5545	21.0025		0.392521	17.6354
5.1231	9.2984	7.8793	21.1646	11.8051	28.6898	18.1242	25.132	26.402	32.9314	11.5206	25.98	23.423	27.4454	3.3991	8.2903	17.5876	26.788	18.006	18.7329	6.6714	8.5146	19.0509	17.0923	12.2057	9.0209	12.1489	19.0268	14.5917	6.3377	10.8363	19.1307		0.401872	16.6848
5.2422	13.1878	9.1233	23.0789	10.905	24.8452	14.8793	33.995	16.5515	30.3369	8.7533	24.4225	26.6524	27.9228	3.5903	5.3309	13.4968	20.949	12.6045	21.9823	6.0969	8.947	20.3915	11.5986	20.0776	10.698	10.5954	13.1078	12.3423	5.3156	9.45	23.68		0.411214	15.9648
5.3614	10.8753	11.2187	20.2808	9.6483	33.1791	15.8609	43.138	15.9246	20.2714	13.5513	20.8236	23.6427	19.4144	3.6818	4.5102	12.1021	15.752	12.4529	22.4413	7.8226	7.392	24.6841	15.6563	18.8413	13.8193	11.1672	21.1713	12.5179	5.9248	7.0711	12.9755		0.420565	15.7359
5.4805	9.3963	11.2384	20.1586	14.6487	33.5558	14.2717	40.619	17.7398	16.0993	7.6333	16.0314	28.6761	10.7482	4.0841	3.3907	9.3328	18.052	12.3629	19.6094	8.6018	5.6021	11.5458	8.7695	16.1738	11.3893	8.8298	16.8732	9.9338	8.158	5.6233	9.0124		0.429907	13.8117
5.5996	8.1499	16.6624	14.8178	14.1759	32.3232	8.6208	34.127	12.4028	14.0363	8.9646	12.5454	21.0193	8.2791	4.2204	3.4171	15.4401	16.693	12.8064	14.9239	8.6879	5.3032	11.5751	5.4	14.8029	12.981	7.9106	18.6734	9.9334	6.5346	8.1737	13.9396		0.43925	12.8239
5.7188	7.8034	15.0099	19.418	18.9321	35.6678	10.3272	35.939	13.8186	15.498	8.2114	14.4677	21.0967	6.1186	3.371	5.4032	14.9706	20.146	10.7236	20.8841	6.2888	5.705	18.6246	6.6435	11.7456	14.6843	10.8896	16.3525	8.8956	5.2166	8.2647	10.2946		0.4486	13.5939
5.8379	11.0846	14.3285	16.6633	16.6351	30.0999	12.2352	33.562	14.9202	6.3613	7.4237	19.4193	22.6886	6.7552	2.2986	5.0864	10.86	25.24	8.2754	20.939	5.366	9.3512	16.5281	8.008	9.1696	11.3966	11.134	10.6728	7.9987	7.9318	7.8614	12.6375		0.457943	12.9978
5.9571	10.5128	12.2078	19.1795	16.1349	34.2254	13.1936	28.655	21.8449	9.1597	6.7332	12.7567	27.6241	8.765	3.7816	4.644	16.5732	29.473	9.1941	18.2419	5.5756	11.3333	11.6761	6.7128	11.1947	10.9067	10.9483	14.2804	11.0732	4.7599	4.4022	12.4737		0.467293	13.4915
6.0762	7.6886	8.772	17.4822	22.6177	33.1587	11.6892	31.802	16.4231	7.1667	9.4895	17.4828	24.4123	5.9868	3.7523	3.8468	11.7901	30.22	9.4162	16.9933	7.8975	9.9822	11.2402	7.9914	7.2001	12.4286	9.6512	15.7388	10.0512	9.0769	6.8475	10.6571		0.476636	13.192
6.1953	6.6066	9.3826	15.5456	17.1971	24.1078	16.1826	33.817	11.7597	7.2578	11.4115	13.7677	24.0706	9.4381	2.7684	4.0228	10.1004	22.413	10.1124	15.672	10.6632	8.9332	9.0909	5.9084	10.6093	13.8228	13.2861	13.2333	10.9161	6.1987	12.5882	9.2271		0.485978	12.5842
6.3145	3.0683	7.4025	10.7938	13.4952	18.794	12.5124	33.313	11.7135	6.7442	11.9326	15.3891	26.4534	8.4714	2.3222	3.0397	9.8796	18.385	10.0554	18.1386	12.4492	9.7185	10.0809	4.5399	11.282	11.4715	9.6543	15.9376	7.243	4.4987	14.4181	13.7929		0.495329	11.8384
6.4336	5.8886	8.5944	10.6564	12.1606	21.2757	13.8859	33.173	13.33	7.7081	16.2494	9.6774	29.943	9.2827	3.0875	3.6705	9.0139	11.652	11.2488	14.1528	12.9254	8.4105	11.4381	3.2509	10.3987	15.0951	8.3004	8.9634	6.4945	6.5178	12.7375	15.7456		0.504671	11.7719
6.5528	5.5718	7.165	9.2011	14.6904	21.2332	14.2618	42.431	14.4079	4.5044	14.2499	14.5994	18.6063	10.2038	3.0355	3.9997	6.1054	10.118	17.8826	14.223	14.1052	7.7162	11.547	5.5096	8.0218	14.7079	14.2005	7.5434	6.2794	6.5181	8.872	16.6177		0.514022	11.8751
6.6719	4.5662	7.686	12.1008	24.3701	14.26	11.963	35.687	15.6123	9.2453	11.8737	12.9433	18.9842	8.6428	2.7298	3.8735	4.3766	14.505	15.3568	10.3819	15.4936	6.6383	14.1856	7.7952	4.0978	12.5824	14.469	6.9027	3.7442	6.7928	11.3094	14.3908		0.523364	11.5342
6.7911	3.2069	5.3197	8.8621	17.2275	9.1056	9.1239	29.078	17.8066	9.8886	12.2062	12.7087	31.8808	4.6078	2.4777	3.5369	5.6098	12.389	12.8268	12.0162	16.3644	7.5386	9.1897	9.537	6.8056	10.3372	11.7783	5.0841	4.1535	5.2856	10.1257	15.7946		0.532715	10.7056
6.9102	4.3331	6.1829	6.9887	14.3751	20.3948	10.9656	24.017	17.4595	11.3409	5.2979	18.5031	32.419	4.9395	1.9808	3.9727	7.0469	11.209	14.2164	8.4654	20.9598	6.1816	9.8545	14.7755	8.0467	16.4487	9.9026	6.9101	5.2639	6.9732	11.0871	17.68		0.542057	11.5546
7.0293	3.9354	6.2118	6.8001	16.0856	18.9602	9.1017	24.908	16.2471	9.8168	7.7897	28.3174	32.2999	4.5234	3.7487	6.246	6.5589	14.73	7.7731	7.9644	18.3789	5.744	7.2653	6.9735	3.8665	10.62	11.3198	9.3551	4.8148	3.9743	9.8772	11.1862		0.5514	10.8192
7.1485	3.3021	4.2819	6.2209	11.2275	14.6073	10.7387	18.315	11.9088	12.0818	6.7262	23.5915	28.936	2.8158	4.1181	4.1851	6.828	15.167	6.7677	4.939	14.6801	7.7918	7.4559	7.6453	3.9881	9.7233	8.9386	6.4853	3.3682	2.4736	9.8171	13.57		0.56075	9.4418
7.2676	3.6048	2.8453	6.9424	13.6552	17.4402	9.879	19.763	10.5231	13.2477	11.5657	19.2601	24.8306	2.5451	4.7694	3.624	7.074	11.772	7.4444	6.3635	7.845	7.3405	6.8305	6.698	6.9753	14.7413	11.6966	1.8041	3.0176	5.0542	8.8129	7.8374		0.570093	9.21945
7.3868	3.4944	3.7985	7.4269	13.6215	19.9164	9.0546	12.369	12.157	9.0433	8.6027	14.8981	26.457	3.2871	3.0445	4.7742	8.2133	13.558	7.4417	7.7507	10.1453	7.8681	8.5119	6.3297	5.0148	10.3717	8.9495	5.0281	2.9779	7.8686	11.176	4.6523		0.579443	8.96138
7.5059	4.3649	3.7892	6.9891	14.1809	26.8153	11.8506	11.537	11.4007	11.4851	9.4404	15.561	18.7638	3.8347	1.8094	3.9683	4.1742	18.388	8.2793	8.6265	13.0872	7.8747	6.3637	7.7052	5.3509	6.8011	7.6136	6.2629	4.3224	10.6902	8.8489	7.7998		0.588786	9.28965
7.625	3.3008	4.0137	8.4215	12.1526	24.7478	13.5467	11.471	13.3274	14.2834	11.9536	13.2187	25.5903	4.0028	2.9642	3.1516	4.5857	17.84	9.5474	7.1251	13.8806	11.0253	4.1398	9.1259	4.4107	4.3665	8.2805	6.6351	3.1393	5.6679	8.573	10.1831		0.598128	9.50555
7.7442	4.6128	3.3077	5.7805	18.0558	19.6752	9.9824	8.728	14.1383	15.3336	13.8251	10.0433	14.7099	2.8387	3.9495	2.9476	6.2028	11.647	7.7338	5.844	8.0627	10.5873	5.0419	7.3123	3.5757	6.2749	7.0664	4.5195	4.8473	5.3508	9.086	12.4825		0.607479	8.50204
7.8633	1.9639	5.0069	9.2247	19.0566	15.2563	12.9962	8.765	13.5577	18.806	13.8245	10.0181	19.4409	4.4421	1.7901	3.3341	8.9078	15.369	13.0507	9.8653	8.1338	8.5205	5.2253	7.4374	6.3018	5.8315	8.512	5.5493	4.5783	3.64	6.4221	6.8468		0.616821	9.08628
7.9825	2.9157	4.8548	9.2165	10.6995	16.5715	10.2453	10.171	11.3886	16.399	13.5739	10.6549	14.7373	4.1144	1.7685	4.0815	8.1766	12.128	13.4442	8.53	6.2078	5.6469	4.2975	7.0329	6.0963	5.4256	11.1117	5.9094	3.1042	4.3308	5.8253	6.34		0.626172	8.22579
8.1016	3.2611	5.2814	9.6222	14.1476	17.4634	5.9467	4.895	11.7241	17.0524	9.4686	13.122	19.4793	4.5477	2.4378	3.4929	8.1981	9.26	6.3672	13.4587	6.7824	7.0723	9.8676	7.4373	8.9856	8.0587	6.5565	8.0715	3.6505	4.8579	4.5166	5.5258		0.635514	8.40674
8.2207	2.9149	7.2816	12.1863	13.2873	16.7083	8.1754	10.86	7.6136	24.106	6.347	11.6486	15.2415	6.7355	2.9297	6.061	9.3782	7.059	5.7886	10.6056	7.3085	8.3026	8.0927	7.7192	5.0876	7.6087	7.7036	3.9647	3.2904	5.6882	3.3659	5.9351		0.644857	8.35469
8.3399	1.8252	6.3852	12.6754	14.3717	12.575	10.4256	8.707	6.6712	23.3817	6.533	12.5335	16.7166	3.4475	2.3173	3.4487	5.5055	7.57	4.9758	10.3016	5.6695	10.7163	4.8278	6.1718	6.1317	6.1035	7.0395	6.1618	3.6375	3.8783	5.3766	5.0524		0.654207	7.77852
8.459	3.6717	5.2712	10.3802	14.749	8.1991	7.9556	6.297	9.8306	19.3398	8.272	13.2958	12.7504	5.5353	2.4741	2.7193	3.9008	9.437	5.7674	14.9066	2.7828	10.2938	6.6154	8.0577	6.5506	5.3668	7.3074	4.4203	3.3401	3.6266	2.8957	3.7754		0.66355	7.41244
8.5782	3.6421	6.2727	11.0982	10.5285	13.4834	4.8346	6.73	8.0589	14.7377	9.2911	11.9611	10.116	3.6811	2.6742	3.5644	5.2929	7.426	4.0963	17.7913	4.5983	10.4948	6.6728	7.8788	7.4957	5.5393	11.7446	4.5673	3.5531	6.2527	3.8127	4.2606		0.6729	7.48875
8.6973	5.9228	5.7859	9.813	16.4732	11.8345	6.162	7.674	8.7724	16.3689	5.239	18.7069	13.6861	3.3622	3.3104	3.8234	7.3117	11.015	4.5054	20.6392	9.1102	10.1123	5.165	11.1878	5.7907	5.4472	15.5184	4.674	4.7848	4.4388	4.8178	6.0807		0.682243	8.63012
8.8165	5.934	4.229	8.662	16.7482	17.3511	7.6322	7.768	8.49	16.7851	4.1536	14.4007	8.8245	3.7091	4.9345	3.4278	9.1341	15.002	6.368	22.2421	8.7075	7.9419	4.8989	9.4615	4.6419	6.5809	11.2556	6.1294	2.9303	3.8116	5.8586	6.0781		0.691593	8.5191
8.9356	3.8535	4.2201	10.7235	12.0056	12.789	9.9035	6.277	11.0758	12.6192	8.3517	7.0779	10.2215	2.8686	3.2776	4.1101	12.9466	13.267	8.8407	26.8829	8.5682	5.1203	5.4619	6.4191	5.0445	4.5146	10.5032	4.7725	3.5148	5.0422	5.4469	8.3933		0.700936	8.1972
9.0547	2.5645	4.2569	7.4508	8.1822	16.4132	8.0452	5.832	9.6779	8.9466	5.3541	5.9814	11.1993	5.2046	2.3828	6.33	13.0783	13.003	10.7522	34.7646	8.3329	5.2958	4.7895	6.9509	6.6351	5.0861	5.9175	4.9449	3.9089	4.2323	9.0943	5.6605		0.710278	8.07317
9.1739	2.0529	5.2209	7.1753	8.022	10.4727	6.6464	7.754	7.0757	11.8769	7.4426	6.3138	16.0743	5.9731	2.903	5.655	10.5176	12.168	6.6844	27.9944	14.1757	5.4841	6.9912	6.6812	7.2828	9.4777	4.971	5.4087	3.8561	5.7604	14.5464	10.3372		0.719629	8.48373
9.293	2.0674	6.3593	5.4046	6.9411	8.4643	5.7749	6.071	9.1157	7.2029	11.029	7.7817	16.7688	5.8775	3.5791	3.0351	7.8239	13.023	7.096	24.0364	14.071	3.6522	4.4587	6.0281	5.6622	9.1327	7.2866	3.8546	4.6001	3.7125	14.9497	16.1626		0.728971	8.09751
9.4122	2.3488	4.7165	5.5489	6.811	8.3115	1.7857	9.091	9.9725	7.142	12.7163	9.4612	20.7103	4.641	2.1003	3.5009	10.0171	8.998	5.275	23.409	9.696	2.987	5.2389	6.7394	7.9536	7.8285	4.6485	5.3304	4.8905	3.6817	12.1727	22.0951		0.738322	8.05869
9.5313	2.9209	3.4156	6.9789	12.682	4.6229	2.8361	6.39	9.8728	8.5463	18.4679	7.8629	17.0244	9.2065	2.2656	5.0169	9.6669	8.38	4.268	16.3617	8.4819	3.0002	4.3153	9.1398	9.4313	11.473	6.5678	6.5973	2.8526	3.5749	8.3848	26.9748		0.747664	8.30903
9.6504	2.441	2.1713	6.9563	10.2446	7.9041	4.0667	6.356	13.9219	10.6639	25.4692	11.4287	16.344	7.2025	2.9611	4.6147	13.2793	9.539	5.8267	13.4827	6.7733	2.55	4.09	5.8662	9.8309	5.5119	4.5437	5.4851	3.7022	4.0244	6.1892	23.3628		0.757007	8.28398
9.7696	2.4299	3.3761	7.9959	6.6033	5.9346	5.1868	8.184	9.0131	9.2631	22.0873	6.4347	16.6908	4.5363	2.9946	4.0834	8.6869	7.431	6.363	10.4634	8.55	4.1936	2.6753	4.6979	7.3789	7.5758	8.7595	5.5577	2.8005	4.4874	7.1819	26.2766		0.766357	7.67398
9.8887	3.5485	4.3887	8.6426	6.4356	4.4868	3.9252	6.125	14.0806	11.1632	17.7501	6.1414	15.9998	4.2771	2.8655	6.7737	7.6493	9.159	6.7598	14.277	9.4893	5.3209	5.5212	4.1994	5.3865	13.1152	10.371	5.2871	3.4842	4.4411	12.3225	25.6788		0.7757	8.35697
10.0079	1.7607	4.7004	5.8544	7.6583	3.8809	3.767	8.097	20.2764	8.6122	20.3292	9.2934	16.004	4.4278	1.4898	6.2633	10.3915	6.605	5.0914	15.016	7.9171	2.2139	3.6208	3.5612	5.3953	14.1573	13.993	5.065	2.8093	6.0741	11.0031	12.0672		0.78505	7.98052
10.127	2.8439	4.922	7.9112	8.3546	5.5685	6.5611	8.732	17.2942	9.4456	16.7391	5.2943	10.1685	4.0278	1.614	5.87	9.6074	8.694	6.3237	11.6181	8.9583	2.2303	4.0267	3.2028	7.2504	15.7885	9.2165	7.2916	3.5295	5.5644	8.3683	8.5935		0.794393	7.60035
10.2462	4.199	5.7502	10.4867	7.6514	4.958	4.3183	7.843	12.6735	7.6678	15.412	8.8388	13.4253	5.574	3.2137	3.8207	6.778	4.994	5.8279	6.9579	3.6933	1.7699	4.6181	1.7673	3.7835	16.3459	8.2525	9.9139	3.0644	8.1244	7.4714	14.1921		0.803743	7.20603
10.3653	3.0865	2.4193	7.8833	8.4175	7.4975	4.3348	8.129	11.7427	8.9951	14.9876	5.4497	9.6536	5.1382	3.2217	3.1419	7.1841	7.012	8.5932	4.5035	2.7689	2.1566	1.8622	2.3875	5.302	11.8936	8.4213	9.2953	5.0036	5.2982	7.198	12.4981		0.813086	6.62827
10.4844	2.5155	6.3681	6.6226	8.6254	9.116	3.6302	7.071	12.986	11.5159	11.8147	4.1798	8.4835	4.3822	2.7772	6.5432	8.6007	7.208	6.0097	6.3339	2.1396	2.1159	1.6063	3.4401	5.9695	10.9483	6.2975	8.7862	6.0293	5.2406	7.5197	16.4297		0.822428	6.81633
10.6036	2.8898	6.7591	5.5711	10.7904	8.3082	5.7634	10.719	12.5729	12.6284	9.1775	5.9508	4.7867	5.4627	4.0208	3.397	6.1302	6.258	6.6473	2.9316	2.1249	3.1338	1.5484	2.6551	3.5748	11.9759	5.0619	10.5587	8.6058	4.4204	7.3402	17.5737		0.831779	6.75285
10.7227	2.4516	6.0434	5.746	10.4947	14.997	7.3876	12.218	11.0936	11.3303	7.4525	5.5629	6.3325	4.4484	4.7483	4.407	10.1336	5.229	5.0093	3.3429	2.0445	2.3578	1.625	1.3755	2.6224	10.131	6.6536	8.374	8.8947	3.86	6.9744	19.5685		0.841121	6.86806
10.8419	3.078	4.5253	8.8386	15.6544	12.0258	5.41	10.864	8.1445	9.7646	7.653	6.254	5.4013	4.288	4.2187	5.84	8.2028	5.292	6.1853	2.1521	2.2594	2.1209	2.1408	1.2784	3.0527	12.5654	3.5853	10.291	6.2288	3.5615	7.7771	16.9466		0.850472	6.63227
10.961	4.3016	5.226	7.5117	15.8579	9.3916	7.3825	11.438	12.2993	11.3765	10.9515	4.1845	4.2112	7.2771	5.1634	8.289	5.5077	3.824	5.471	1.9943	2.9745	1.3798	2.9793	1.8078	1.8761	7.0973	5.2576	12.2882	5.4419	4.053	13.2268	12.8315		0.859814	6.86686
11.0801	4.7427	6.1168	5.4343	17.092	10.4043	8.5664	16.389	16.1966	7.75	7.6144	4.2789	3.8195	7.1145	2.5888	6.5199	4.9467	4.663	4.6082	2.302	1.5981	2.403	1.8177	2.3665	1.61	5.122	3.8458	12.3191	12.5459	5.0446	8.2863	10.4072		0.869157	6.72626
11.1993	4.647	5.7477	4.5883	18.8272	14.8411	8.9333	15.108	11.2517	5.9612	5.8528	2.4836	2.3532	8.2278	3.0728	6.9015	4.882	4.245	9.5562	1.8422	2.186	2.0251	1.6847	1.3664	1.6699	3.8835	4.7781	12.024	9.9325	4.7049	11.5268	11.491		0.878507	6.66437
11.3184	2.6944	7.4926	5.6951	18.8961	15.7604	8.6971	7.676	8.2969	10.3766	5.2242	3.2567	5.5753	6.7854	4.0507	9.0541	3.2378	6.187	4.8153	3.1675	2.349	2.077	1.3918	2.063	1.8754	3.7284	3.9666	8.1768	13.2194	6.333	13.2883	10.6286		0.88785	6.64634
11.4376	4.0644	5.2722	4.9429	18.1763	12.0812	8.5473	13.318	12.3638	11.1232	4.9432	3.5997	5.6138	6.8646	3.2633	6.8874	3.4493	4.873	1.6501	2.8196	2.0594	1.7564	1.7963	1.9935	2.2911	2.6274	2.9959	10.0556	11.243	5.3779	12.2707	13.9409		0.8972	6.52456
11.5567	2.3649	4.3815	4.4526	20.2939	7.5031	11.6881	11.414	11.2977	5.6788	4.6421	4.4377	2.9031	5.8644	3.2411	4.7403	3.3614	4.399	1.9792	2.4662	1.4025	1.6573	2.1615	1.7601	1.5683	2.2299	4.1459	7.614	9.0092	5.5989	10.4617	12.6243		0.906543	5.72073
11.6758	2.6163	5.6823	8.514	18.126	8.6317	7.0876	12.475	10.3914	5.4353	2.6519	3.2386	2.1667	3.9016	2.2589	4.8681	2.6585	2.972	2.5171	2.2288	2.1079	1.8153	1.7512	1.4765	2.2237	1.616	3.9532	6.4453	6.0188	3.6176	8.662	11.6585		0.915886	5.1538
11.795	3.8116	9.1785	8.2337	21.043	10.8707	7.2278	14.621	6.2773	7.2484	3.3409	3.5491	3.8356	3.3688	2.4221	2.7465	1.8737	2.191	1.4589	1.9251	1.3874	2.3831	2.3629	1.3092	1.475	2.0107	2.9192	3.2578	2.8638	4.2514	3.6555	10.8191		0.925236	4.96512
11.9141	2.83	9.284	6.8995	18.8005	7.5345	6.1018	14.57	9.1193	6.5275	3.1462	3.4216	3.0173	2.8131	1.9039	2.2347	2.2709	2.577	1.703	1.5361	1.4523	1.3546	3.2329	1.3704	1.3089	2.2835	1.5726	3.5047	3.325	5.7056	4.8831	8.2545		0.934578	4.66255
12.0333	2.3258	6.4642	5.9133	24.2061	6.9516	7.9527	20.235	8.5837	6.9249	4.4947	3.2381	1.52	1.7088	1.4059	2.1495	1.4929	3.466	1.6548	1.4591	1.3661	3.1447	1.4758	1.4098	1.6722	1.9227	1.3157	2.8526	4.4765	3.2228	6.3165	5.3061		0.943929	4.72995
12.1524	2.9806	4.7593	4.331	28.3569	7.2223	9.4095	21.576	7.1003	5.8064	6.3129	2.1694	1.9162	2.5989	1.4872	4.4073	1.5837	2.58	2.2079	1.4426	2.7212	1.5899	2.0979	1.4297	1.6578	1.8678	1.4162	2.213	4.219	5.2167	6.1387	7.0665		0.953271	5.02848
12.2716	2.2021	5.0224	4.8964	25.2893	7.9268	10.8059	20.474	14.6088	3.9882	7.7648	1.7834	1.9297	3.1881	1.625	2.6633	1.6333	2.408	1.8344	1.2857	2.1757	2.1359	2.1177	1.5297	1.3959	2.1158	2.0526	1.4103	2.3319	2.7761	4.9379	7.0296		0.962622	4.94641
12.3907	2.1058	6.166	5.2202	30.608	9.4598	4.0244	12.712	11.0252	2.7279	4.3617	3.0408	1.6757	1.6504	1.3365	3.0603	1.8775	1.693	1.9287	1.2347	2.1173	1.5008	1.6858	2.2675	1.2621	1.1547	1.3974	2.0688	1.5594	3.7966	3.5025	3.7514		0.971964	4.25719
12.5098	3.3723	7.1721	6.0794	25.1416	12.1878	5.676	18.683	10.0882	4.2482	3.2629	1.6783	2.0855	2.2427	1.3027	4.3573	1.4596	1.538	2.2321	1.2687	1.4856	1.2351	1.9692	1.6408	1.3443	1.5791	1.8847	1.6417	2.4868	2.9407	2.8552	5.6619		0.981307	4.54198
12.629	3.0982	4.6747	2.3774	24.9784	15.5384	7.1872	11.993	7.1782	3.239	1.7203	1.4409	2.1506	3.2277	1.2169	3.7033	1.8665	1.261	1.7849	1.525	1.7966	1.4009	2.1493	1.5208	1.3934	1.4967	1.5427	2.5299	1.5412	2.2763	2.4356	3.8202		0.990657	4.0021
12.7481	5.5959	5.4876	2.2987	18.6547	22.7383	7.3259	14.264	9.0079	3.9542	2.2916	1.2495	1.3528	3.0212	1.2691	1.4846	1.4102	1.719	1.2466	2.2882	1.2291	1.4626	2.8834	1.9726	1.4147	1.3851	1.4146	2.9688	1.647	2.2539	2.825	5.0437		1	4.2955

## Sheet: Image41
X0	Y0	Y1	Y2	Y3	Y4	Y5	Y6	Y7	Y8	Y9	Y10	Y11	Y12	Y13	Y14	Y15	Y16	Y17	Y18	Y19	Y20	Y21	Y22	Y23	Y24	Y25	Y26	Y27	Y28	Y29	Y30	Y31	Y32	Y33	Y34	Y35	Y36		Ap-Basal	Avg intensity
0	12.617	12.1003	18.914	7.6279	9.9984	7.8895	9.286	16.8027	11.3961	7.3773	13.1312	9.5867	13.2111	14.8178	19.7253	23.2568	15.7133	19.1891	19.1483	16.5189	13.2263	13.4498	10.1982	14.9571	15.3238	12.1994	11.6028	16.2095	14.6404	20.4381	34.7259	27.5372	11.2818	29.5175	28.5947	25.9828	17.3055		0	16.0946
0.1191	10.9343	14.8138	15.409	11.2891	13.9181	10.9022	11.8583	17.4529	14.3399	13.0488	11.3365	17.9701	14.1097	16.198	18.3623	20.0632	19.8455	27.6451	17.0163	18.4667	9.0528	13.4092	15.4087	11.3847	16.7014	9.4255	16.3459	13.1084	18.2471	17.6324	36.8639	33.6356	13.4383	35.4241	27.6489	29.0493	25.2814		0.00757316	17.7578
0.2383	8.2649	10.6145	13.4198	13.7915	15.7338	12.9233	15.0045	16.5261	13.2929	14.9962	15.7319	15.9224	17.9526	16.023	18.609	16.6149	21.5754	18.2873	13.823	19.5616	8.1698	17.5917	15.3204	12.3607	14.6322	9.4414	19.5759	17.1973	13.8347	18.649	37.516	41.2341	17.3265	37.1571	45.1809	26.4529	30.9779		0.0151527	18.6834
0.3574	8.715	12.1413	20.5852	14.7658	11.8585	14.5715	14.4543	17.2345	12.6968	13.7769	18.3225	19.0542	13.9849	18.0651	20.7984	23.1592	26.5115	18.4876	19.285	24.7472	8.7205	26.7581	11.3122	10.1737	9.4293	10.6409	17.6801	18.6615	13.4835	25.182	38.7983	45.8883	18.3612	48.808	47.083	27.4031	32.3593		0.0227258	20.3773
0.4766	13.5574	18.4547	24.7121	15.3952	12.1337	18.9142	15.6248	18.0949	10.7419	17.933	20.2612	23.528	12.7806	17.6995	22.7396	24.7003	20.6947	21.602	19.6608	18.6108	10.3779	28.6437	10.8098	12.0922	8.4296	12.4144	16.9356	22.3013	13.9733	28.2579	38.6861	50.0805	25.2862	59.5023	34.9078	33.5813	34.4611		0.0303053	21.8535
0.5957	13.8527	19.5362	21.7757	15.1502	10.6172	14.5714	17.3628	22.7038	14.4285	17.5503	24.5397	25.1582	17.675	18.3709	17.2807	28.5109	23.0615	23.2247	17.9332	18.7637	13.8987	26.6014	12.5026	9.6404	10.3718	10.6028	17.2925	20.175	16.5343	32.692	41.9593	47.5223	31.9454	46.5397	39.745	34.0657	31.4428		0.0378785	22.3135
0.7148	12.6084	16.959	30.1102	20.9457	18.1489	12.6496	19.4938	20.7414	17.6512	17.6123	25.7563	20.6223	20.2321	17.2195	20.8518	27.5297	19.6647	27.9955	18.8775	24.6473	13.4992	21.5512	14.8658	11.8244	12.8194	14.6362	17.9215	21.2322	18.6786	28.8792	46.7385	56.6214	35.4087	53.5313	33.0699	26.9466	43.8561		0.0454517	23.8486
0.834	12.7	22.0477	30.1413	15.0452	15.2072	15.6858	29.5604	15.0769	19.0272	17.792	17.3924	26.8849	14.4153	16.1815	19.6786	26.7569	18.6298	29.447	22.0787	21.5692	15.7304	29.8336	19.5963	13.1317	10.3171	12.7826	13.3248	27.6465	21.5592	26.0061	48.7433	60.4081	43.9629	51.1001	36.9874	22.479	47.0244		0.0530312	24.4852
0.9531	12.2625	33.9412	39.2267	13.8756	11.8474	15.7003	26.8912	15.284	23.8067	23.497	24.1422	17.9485	15.6576	17.1183	20.6485	23.3593	23.3095	22.1956	20.8417	18.1613	14.6895	32.2626	17.0362	13.4776	10.5195	17.0663	18.527	24.811	20.2548	36.4665	49.0881	54.4388	46.1429	53.2346	46.1678	28.6369	40.9286		0.0606043	25.499
1.0723	14.9342	30.576	39.0261	13.4028	13.1043	13.1451	19.976	18.4516	24.9776	20.693	19.4775	18.3463	18.7767	22.0811	25.7231	26.6136	19.9124	18.3397	14.9611	18.4359	12.1065	33.4962	16.6349	13.9222	14.4466	15.276	16.4029	21.8868	26.7013	34.0035	56.5292	52.4063	42.0952	57.6709	45.0022	31.2594	43.7161		0.0681838	25.5273
1.1914	18.3742	33.1943	33.2606	18.4652	8.472	14.4742	11.9722	13.1818	30.9812	23.9104	14.4795	17.1237	21.0711	18.5474	27.2572	25.2314	22.3795	18.3225	18.5841	23.3	12.8875	32.6993	19.3397	11.0753	25.1973	14.3964	17.2664	19.9511	28.7893	36.2612	52.4054	50.8186	41.9944	52.3066	45.7481	32.507	41.5383		0.075757	25.6153
1.3106	19.1145	36.6952	29.0326	16.6617	8.1507	9.1404	13.68	9.3021	29.5934	24.424	11.5583	15.8571	17.3404	19.3192	28.9937	22.6526	22.6223	19.1431	21.3625	19.6347	13.1707	29.2509	20.2198	12.6972	15.6472	15.7155	18.6755	17.6714	26.7252	37.088	43.4079	38.1737	35.7531	56.215	45.5894	42.0347	45.3732		0.0833365	24.5321
1.4297	21.7664	42.9194	34.8891	20.8086	4.4883	10.0336	10.4031	13.2366	26.1013	16.5739	10.1313	15.0296	21.4417	18.4861	27.5198	23.2786	19.1811	19.9022	14.8761	19.6223	16.3207	33.747	26.2134	8.1242	14.897	18.1354	17.8735	24.3757	34.597	33.1342	36.3585	31.478	39.0334	52.9729	41.8456	42.8558	42.0217		0.0909097	24.4506
1.5488	26.3345	32.6356	30.1081	16.0641	6.7162	12.0894	14.0898	12.0962	26.4029	14.4045	11.4576	16.0054	21.1347	23.9545	24.4622	23.2939	16.6468	18.4762	18.8553	18.7681	16.8463	30.1467	24.6367	7.1625	17.8949	18.7418	13.3763	29.6557	36.3222	31.3182	38.4243	33.3017	37.9346	45.5752	45.831	42.4645	47.6387		0.0984828	24.3586
1.668	21.1194	35.6978	31.6956	17.6801	10.4862	10.6058	19.3264	12.4464	21.4344	13.3596	16.765	24.4293	16.5263	13.1846	21.5556	25.9168	17.6457	20.6845	11.0163	14.0274	17.1369	30.1061	18.4516	11.7743	15.6742	15.2945	18.2728	24.4881	38.3475	28.7408	35.9182	26.7652	41.9755	52.5285	60.5737	37.2801	55.1054		0.106062	24.4334
1.7871	16.6004	43.559	25.0152	19.1579	12.7445	10.3799	16.7582	9.89	21.348	17.202	14.0561	23.5054	14.4283	19.9311	24.2081	23.7494	19.0758	14.4009	11.6504	14.6751	13.0154	23.9476	22.228	9.3501	12.4165	15.4397	20.3741	18.8603	38.0373	32.4831	34.3451	24.2494	31.7212	63.1227	46.7628	39.2474	61.1108		0.113635	23.758
1.9063	18.036	44.5498	25.3712	23.5828	10.8984	8.9863	16.8451	16.9903	19.5494	17.1722	15.8404	16.8585	11.3665	15.2152	26.4586	24.5048	16.7551	12.6039	11.899	13.3712	11.6476	26.5645	26.7137	12.3002	11.5124	15.8619	19.9585	23.1818	31.3747	30.8486	36.4068	29.4041	36.1751	54.1273	62.4392	48.6726	54.0252		0.121215	24.2721
2.0254	23.3755	37.8554	23.8247	15.9636	9.8549	16.5103	12.3183	20.9334	18.7944	17.9279	16.9674	14.694	11.3502	14.9375	19.0593	24.2535	14.3161	15.7083	12.8737	8.1088	10.596	24.4591	21.672	4.4776	13.2184	12.4585	21.3838	24.819	32.4688	25.3317	34.0454	24.8061	39.0211	49.3878	66.7266	52.2365	56.1087		0.128788	23.3201
2.1445	28.3706	35.0967	24.6653	20.7017	8.5863	16.0935	14.8183	17.3024	11.3119	16.6783	11.9913	16.4469	15.9403	15.8502	16.8666	25.5734	13.9287	13.0556	18.7415	10.7196	9.3984	25.015	17.1501	7.7464	13.7538	11.7293	20.0397	19.639	30.4605	28.7151	30.0073	21.173	39.9492	47.8158	70.6013	48.0129	63.7282		0.136361	23.1804
2.2637	31.5728	30.5423	21.5858	17.5273	6.3537	12.0049	11.197	16.7003	15.4752	13.5777	9.8043	14.8556	13.5792	17.4713	20.1252	26.0224	15.3786	11.1811	13.6081	13.3721	7.855	22.1907	14.0226	9.322	11.7401	10.7271	15.5257	13.0951	29.7133	26.3891	23.8407	19.5571	35.0733	55.8562	68.065	44.921	67.4218		0.143941	21.8176
2.3828	26.9841	33.6848	19.7442	17.7216	7.7232	11.1729	15.8612	21.7859	16.4888	15.5658	9.9298	12.2373	11.5285	11.63	12.9768	20.9347	12.9001	16.153	14.4791	10.1856	8.334	18.0857	14.0921	6.6863	11.5416	11.429	14.0431	19.3676	30.947	27.9421	32.4783	14.644	32.0471	44.0354	73.377	42.7813	63.3725		0.151514	21.2133
2.502	23.1575	42.2187	22.0045	17.6876	6.7343	14.2604	14.0709	18.0969	15.8939	11.7894	11.5203	11.1492	12.4773	13.7747	12.9337	19.6368	6.0149	15.2104	8.7629	10.0591	10.0857	17.6126	10.4152	9.2391	13.3791	12.4716	16.8591	16.5045	26.1514	20.4732	24.0168	18.654	29.7326	44.4949	74.3315	39.266	65.405		0.159094	20.4472
2.6211	22.4335	37.4236	14.8715	18.8409	10.0702	12.8221	13.0231	16.0155	14.4615	10.4988	9.2798	9.4394	9.895	6.9911	14.6395	25.9454	11.0507	12.1182	12.7267	9.9464	6.7338	13.8893	14.5525	9.9146	12.0806	8.7741	20.0592	18.5091	25.7335	17.7109	24.6187	16.3227	21.8443	38.811	62.9756	33.4911	63.2726		0.166667	18.9672
2.7402	25.1009	35.5311	20.8155	11.9427	10.1318	10.7309	15.3042	17.8294	13.125	6.8251	8.986	9.4777	10.9028	10.1665	15.2508	18.3935	16.9332	10.0513	12.5838	12.1374	6.7978	12.5659	13.7081	6.691	13.8056	8.4263	20.0924	20.2994	22.9708	13.9689	25.8644	15.3144	23.2798	40.3854	54.8429	42.467	57.3937		0.17424	18.6782
2.8594	26.7411	33.5322	22.0079	8.7433	10.2822	8.7594	11.9589	19.5137	11.4928	9.4403	10.5545	11.9551	14.6809	11.5023	19.0762	18.9028	12.7088	11.8854	16.2086	9.4207	9.9816	8.5558	10.9531	7.5558	14.5986	8.4139	20.9319	20.5782	21.8151	10.0922	17.8715	13.9548	27.8664	36.8616	48.9746	51.1797	63.7923		0.181819	18.739
2.9785	23.7312	30.4857	21.1284	13.5612	9.1065	11.4729	11.9162	21.8835	13.2873	13.4977	10.7478	8.998	14.8589	10.425	19.1436	19.471	9.69	12.5174	15.6485	9.7557	8.9221	8.8973	13.088	11.032	10.658	10.0882	16.0992	18.0849	12.7564	13.9968	14.8901	15.4554	20.7873	25.6635	51.2012	40.6476	60.0566		0.189392	17.6662
3.0977	23.6792	29.2524	15.912	10.3657	11.752	12.1246	13.619	18.4701	10.7354	10.0783	10.2819	9.5221	9.6648	12.4275	20.4756	21.0734	9.2809	11.3921	11.5776	9.8624	9.4453	12.3246	10.0277	6.36	9.8525	9.7578	15.0509	18.2642	12.6909	8.2316	10.3545	15.9505	22.5163	20.114	44.8498	43.2358	43.9445		0.196972	16.0681
3.2168	22.0795	26.2685	17.3783	11.2158	10.4568	10.6667	9.0319	12.6838	9.2411	11.231	8.562	9.6158	9.4032	10.4234	18.9271	23.5592	9.8378	12.3945	11.4601	7.2547	12.8287	10.8771	6.7619	4.1779	11.0592	12.5384	19.423	15.9181	8.811	8.1441	14.0741	15.1874	19.7512	23.6029	41.6737	45.8195	47.941		0.204545	15.6833
3.336	21.2507	25.2838	20.2094	9.2167	9.3082	17.5318	9.9914	15.012	8.7723	8.9327	8.0662	8.4293	7.3518	9.8613	14.6982	20.4188	11.1056	11.7572	13.4885	9.9191	10.873	12.7462	12.2499	4.9245	13.4425	12.5559	15.744	20.2475	12.1484	6.7045	18.5196	13.4172	21.2581	25.9144	38.1004	39.4592	51.7805		0.212125	15.9646
3.4551	21.4228	33.8818	15.4372	11.3955	9.2247	19.2725	16.63	16.0831	8.5152	8.8746	12.1044	8.392	6.2524	10.5716	10.6582	20.5986	9.0182	8.7062	13.8958	5.5858	6.0969	15.6649	10.1887	4.9207	10.7065	9.2776	15.6169	23.4079	11.559	8.4041	15.1139	15.5865	15.9519	19.8596	32.2566	46.7996	40.5466		0.219698	15.3643
3.5742	19.0653	24.4018	8.8126	7.1745	12.8853	15.9334	15.7614	17.9398	8.7051	9.4608	6.8564	9.3863	5.5521	12.2935	11.814	21.3356	15.6406	9.3313	12.2749	6.2692	7.911	13.8957	10.6222	9.1863	12.6918	10.7891	13.6735	17.8036	8.7337	6.309	15.9786	10.2553	24.3322	20.2336	43.8811	42.5208	40.0265		0.227271	15.1281
3.6934	24.7338	25.35	9.4395	8.8121	12.361	19.388	15.1034	15.0092	9.7298	9.9914	6.3493	10.5953	10.3562	8.4685	15.1862	20.3887	12.5935	8.5686	11.3014	6.258	9.5917	16.353	6.3854	8.0209	11.2012	10.2424	13.6759	14.7613	14.7687	4.4067	13.5075	13.401	20.1069	21.0102	40.6742	36.0214	33.4249		0.234851	14.7983
3.8125	17.5721	23.5832	9.4173	7.6386	10.4462	16.4714	13.2807	6.3874	8.3064	8.7439	9.6829	10.803	11.017	8.6944	15.115	18.1089	10.6898	8.3599	10.8513	12.2718	9.1855	14.4382	10.1356	7.2279	9.6169	9.6105	17.0844	15.9135	12.8747	3.1974	12.4081	17.3701	18.9442	20.6092	37.6949	29.9135	33.4821		0.242424	13.977
3.9317	19.7509	21.1872	7.9951	8.6083	17.7284	19.1026	13.2234	10.3572	6.9265	8.5629	10.2947	11.7192	11.5734	8.7774	11.2902	18.415	11.4887	7.979	9.4635	12.1764	10.6961	19.5484	7.4082	9.5152	9.2258	10.2581	15.7007	21.1977	8.3298	3.6212	13.4153	12.2193	14.6922	15.1935	43.7295	28.3874	29.551		0.250003	14.0354
4.0508	21.0338	19.4558	6.9078	5.491	15.9763	17.696	14.6731	18.3762	8.909	7.8893	10.4941	11.9808	8.9647	7.4638	11.4911	14.3872	10.5258	6.5297	8.525	7.005	10.3548	21.2343	6.8387	6.1639	9.874	11.7759	10.101	15.4522	10.6599	4.8157	17.9666	15.2114	22.3293	13.4293	38.8671	28.6543	28.6905		0.257576	13.6809
4.1699	18.847	17.6366	9.0429	9.0914	13.3237	12.7225	8.7659	12.4739	8.125	11.3959	11.44	13.9909	10.0733	9.6732	17.4864	18.4399	7.7062	7.7015	7.6672	5.5022	8.0825	17.2458	5.372	7.8214	7.8241	8.1257	10.4451	14.3894	9.2379	5.3139	17.2882	16.0351	19.7489	19.2381	36.6013	31.942	26.284		0.265149	13.3
4.2891	19.5417	20.6887	8.0197	6.5953	11.5372	8.2662	8.2836	11.9742	10.7574	15.1852	11.6927	13.9952	9.3328	10.1016	16.3996	15.8067	6.872	8.3555	5.9133	11.9645	10.0955	13.0365	3.8013	8.5573	8.0893	10.7867	12.898	15.1312	9.5486	4.0431	14.2139	13.5328	14.3229	23.6058	34.2824	30.0234	23.76		0.272729	13.0003
4.4082	22.2394	21.5164	6.6211	6.4095	11.0244	6.6546	7.1355	11.2919	8.4181	11.4711	10.4594	13.5763	7.6218	9.3686	10.3208	16.7546	7.0496	5.4909	7.4951	10.1314	12.4416	16.4758	5.7768	6.7576	5.6713	12.667	12.2681	11.7482	7.9031	6.5249	13.8899	13.2427	18.7811	27.0316	32.0546	23.785	21.7467		0.280302	12.4275
4.5274	18.1001	26.0588	6.0858	8.2121	5.6891	6.4999	8.249	15.0148	12.5229	10.3995	8.5135	13.9668	8.9371	8.2646	12.308	14.9243	9.4715	5.8506	6.7102	8.6307	8.3966	16.9208	7.3937	10.0257	5.1361	9.5498	11.8291	13.8501	7.5467	7.3779	15.917	11.4364	26.5194	21.8663	34.6138	21.9264	20.0858		0.287882	12.5622
4.6465	18.8738	19.268	9.4682	7.3218	9.8742	7.7524	7.7969	13.9347	13.4445	8.5159	6.4603	11.3579	12.4802	6.2577	14.151	10.7996	9.1681	8.1568	8.262	6.0655	12.6737	15.0941	9.6709	5.6035	7.2972	9.5657	12.7929	13.4303	8.9812	5.0582	14.9679	15.0969	15.7774	22.5666	38.7352	22.4128	19.0519		0.295455	12.3834
4.7657	18.249	16.3396	8.1027	6.2302	13.834	7.6775	12.1976	7.8587	9.1804	9.8446	4.3514	10.8923	12.9312	7.8446	8.6349	15.3668	11.3733	7.8392	8.9489	7.178	12.4921	13.0609	8.0889	5.5633	5.592	5.9488	13.1622	14.9511	5.012	5.2824	11.8159	19.2978	10.2251	22.3833	29.84	19.817	22.3937		0.303034	11.6163
4.8848	20.007	13.8693	8.4792	8.6906	9.7369	7.4786	10.5599	12.9148	10.7373	12.0085	6.6761	9.9312	12.7789	9.1313	10.1726	16.1494	6.6621	6.2593	11.6702	6.431	17.82	12.1372	8.8024	5.8872	4.5068	7.6528	12.3302	13.3263	3.9528	3.9308	15.5579	15.1272	13.1968	25.8719	26.4365	24.6683	17.1151		0.310608	11.8558
5.0039	16.5133	17.879	6.7105	6.7037	8.9838	6.8945	8.0128	12.0722	10.258	11.6204	8.1265	13.485	9.7829	9.3517	8.5935	14.3274	9.3984	6.9995	7.4195	8.5616	14.8135	14.0523	6.663	7.9911	4.4829	10.0387	5.9436	13.3397	2.7614	4.5111	14.5503	17.3921	10.4283	26.4074	22.9775	24.559	19.6874		0.318181	11.4133
5.1231	13.0617	17.761	5.8702	7.6657	6.9384	8.4917	8.8599	13.2043	11.4771	13.857	7.1467	10.2405	9.6308	10.0797	7.0348	9.5367	8.7336	9.0371	7.6858	11.5366	10.3373	12.4632	8.4234	4.9647	6.2415	10.2474	6.1658	14.1208	3.7387	5.0453	13.2922	14.5176	16.2093	23.3401	19.1973	27.1234	21.8872		0.32576	11.2207
5.2422	12.5952	14.8326	6.657	6.7834	9.2797	5.5883	5.2236	14.4192	5.3686	9.5414	7.2567	8.8546	9.2348	8.617	9.0223	9.8531	7.0899	8.0566	8.7488	9.2606	7.4363	8.8891	11.1729	7.0553	6.3315	8.0575	7.7484	13.7449	3.6353	3.8879	11.6862	8.8271	11.7401	19.0564	22.7569	32.1682	16.1801		0.333333	10.1799
5.3614	15.7274	15.5848	8.1515	6.365	6.0871	6.0596	3.5908	10.3427	7.939	9.1838	7.689	9.3115	8.873	8.0467	8.2073	15.6325	7.6946	7.0715	8.5761	9.2743	8.2515	4.6667	3.3495	6.214	5.961	8.1838	6.6405	17.1928	3.981	3.9613	18.9821	11.8	11.8962	30.0522	20.5109	24.7451	15.176		0.340913	10.2966
5.4805	17.0149	14.7033	11.2429	7.0327	4.3843	3.0153	5.5416	11.9394	8.5288	9.6783	7.4915	10.7147	7.496	6.5949	10.7864	11.8751	6.9869	6.8859	9.8735	7.152	10.5439	10.9173	4.0488	4.3888	6.1997	9.9952	7.1849	12.2132	5.0748	2.8408	13.0879	11.8581	14.0037	23.003	20.1866	18.6948	17.6154		0.348486	10.0215
5.5996	13.2561	12.3954	9.2298	7.4524	5.302	3.0451	4.5227	7.8349	10.4607	8.3636	5.8225	9.8143	9.6227	5.8149	8.441	13.8698	8.8345	6.3959	11.5995	9.369	14.5172	7.6145	6.2838	3.3263	4.235	7.299	7.3632	12.6754	3.2405	2.7904	9.4321	15.1897	10.5912	26.9251	17.1985	18.4658	18.4466		0.356059	9.64976
5.7188	9.7815	13.8935	7.9461	6.9847	4.5968	2.94	6.7361	8.0911	8.9361	8.0528	9.7126	7.0121	5.9132	6.8721	7.4474	14.9867	7.2907	7.813	4.8834	7.1634	13.5736	5.3199	6.736	7.4457	3.9176	3.7275	10.323	10.6606	3.0654	3.4542	7.3723	17.3862	7.687	15.5959	18.3274	17.0386	16.9695		0.363639	8.80145
5.8379	11.0845	16.3269	10.2017	5.3116	3.7735	2.2803	7.5474	10.945	8.9333	6.8035	9.9832	7.7405	11.0523	6.1733	5.3188	11.2586	9.2801	6.2257	9.8311	8.8169	13.9892	6.3445	5.955	6.2871	3.011	7.0834	9.0325	11.0272	4.6507	2.8207	7.326	15.3463	6.9423	18.6891	15.5243	16.7899	13.8985		0.371212	9.01638
5.9571	14.0276	15.0462	7.8144	6.7455	4.1552	2.7574	5.8163	15.075	7.7301	5.2808	5.9754	5.6619	10.2081	9.1923	5.5694	8.0252	4.9592	7.2402	7.3861	9.278	9.7148	6.2582	6.1972	6.0839	2.5474	6.2832	9.9509	9.8075	4.2272	3.3721	5.9148	17.6502	8.1187	21.3879	16.192	18.581	10.3507		0.378791	8.66438
6.0762	16.2038	14.7806	4.1155	5.773	4.6484	4.9273	4.2695	18.1931	7.9753	4.6644	9.0294	6.2494	10.1029	6.7069	9.1453	6.1098	9.1138	5.6927	4.9494	7.1669	9.0405	8.1737	4.7005	4.621	3.7049	7.0795	15.5083	10.362	4.9992	4.5895	7.4413	20.1403	10.1138	17.1556	14.3758	20.0742	10.8643		0.386365	8.99356
6.1953	10.2828	14.9329	5.8719	5.5565	5.0971	4.0971	4.5173	20.0484	5.1935	4.3528	7.7033	4.8624	8.2358	6.6302	9.8338	9.0916	10.1924	7.2673	6.2589	3.5712	10.2923	10.4722	8.8606	3.4915	5.6409	6.0085	11.6657	6.962	4.8098	2.0954	8.9318	15.4832	13.1039	19.1216	15.1497	12.5388	11.9799		0.393938	8.65419
6.3145	8.0956	13.7467	4.9302	5.8007	4.7688	3.833	4.3613	16.6294	9.1263	5.7211	7.4917	5.241	10.435	4.8411	8.4027	9.077	8.0878	6.6628	6.621	4.2285	10.4404	8.9792	6.6863	4.7884	4.1613	3.4989	11.2654	8.8477	3.1485	3.3822	6.5387	15.9419	13.0522	20.4838	15.7575	13.0684	7.9844		0.401517	8.2737
6.4336	8.3145	14.1564	7.1449	4.6438	5.4075	4.431	5.5627	16.4152	10.7923	5.5506	8.2456	7.8146	11.691	7.4168	8.1117	8.1839	4.4836	4.0119	7.9043	5.8194	8.5186	9.5746	6.3941	4.6351	3.4797	3.7937	10.8685	7.0609	2.5688	3.3615	6.8408	16.9728	12.1238	22.1944	11.5855	17.4519	6.92		0.40909	8.39044
6.5528	9.995	12.2411	8.9965	5.7028	3.2955	3.1973	5.5793	16.7925	9.9432	7.6549	7.2199	8.817	11.4183	5.0721	6.1934	7.3372	5.2605	5.5181	4.994	5.8437	8.6104	10.2596	4.9823	5.6875	2.7835	4.7983	10.6068	8.9488	3.3676	3.2015	3.8289	12.1909	12.5687	16.0989	17.3996	8.493	5.911		0.41667	7.85972
6.6719	12.944	12.0723	5.1283	7.8889	3.3644	4.2215	5.7611	12.4692	4.763	5.3275	5.4359	6.4367	9.0001	7.2194	10.8814	6.8246	6.5561	5.0661	3.9925	10.3489	11.9428	12.4882	5.749	5.8853	3.5664	4.3959	8.1897	6.7025	5.2151	3.1317	5.305	14.3257	12.5624	19.2841	17.2151	10.4044	9.667		0.424243	8.15492
6.7911	7.8439	10.5664	5.4343	11.9615	2.7831	2.8208	5.281	9.7147	5.9405	6.28	10.4185	6.7928	7.1105	6.1905	12.3397	7.1326	6.2553	7.3838	7.2779	10.4329	9.6252	7.2289	4.4174	5.286	3.7157	3.6504	8.2078	9.1794	5.7125	4.3352	4.5822	17.7026	8.1064	20.8097	15.2937	12.2983	10.0436		0.431823	8.11232
6.9102	8.6648	12.0109	7.14	10.6152	4.1209	2.7435	4.4111	8.9252	8.9477	7.5435	12.3896	8.0574	5.5001	6.5637	7.5472	7.4105	4.7378	7.0822	5.7687	7.8984	9.415	6.8802	4.3154	5.1819	2.4357	3.0144	10.2991	9.8129	4.0135	3.6464	4.0741	13.1282	9.374	15.729	13.4683	12.8045	9.9379		0.439396	7.71916
7.0293	5.8801	13.085	6.5861	7.8249	4.0981	4.3327	4.2409	11.2386	7.8481	8.5354	9.2343	2.8265	7.3605	6.258	7.3927	5.4542	5.6885	6.6151	5.2653	11.736	6.9696	13.4342	4.3724	3.5528	2.3115	4.6715	10.2659	8.6389	4.2947	3.4862	4.7586	13.0067	6.7859	12.6819	17.2058	12.5299	9.1694		0.446969	7.55775
7.1485	4.8249	11.4111	5.3978	13.6283	3.0891	5.3526	4.8359	10.8833	8.9709	7.2216	7.3469	4.829	7.4126	6.3982	6.9139	4.5715	4.5744	5.4928	5.2639	9.9424	11.7181	9.4004	6.0769	5.937	2.0091	4.3233	9.4379	8.4269	3.8562	5.5942	4.5345	12.4942	8.5605	14.2821	12.9791	13.7511	11.2098		0.454548	7.64736
7.2676	5.5977	10.678	4.5571	12.7079	2.4577	6.6403	3.4602	12.7712	11.7208	7.4632	4.1342	5.7513	7.5095	6.0056	5.9907	4.2528	7.478	6.2581	6.2711	6.8606	10.4209	8.3556	4.0673	5.0883	2.9728	2.8664	8.6471	6.3522	2.6582	4.9328	3.6004	12.2748	9.2678	13.7353	16.0445	10.4392	5.986		0.462122	7.19664
7.3868	5.9382	11.1751	7.554	10.5071	3.2168	5.0605	3.0262	11.5948	8.78	5.5403	5.0622	5.3777	5.9007	6.3119	6.9803	4.7261	6.8902	5.6717	8.8751	7.4971	7.4519	5.1488	4.7526	5.6127	3.5206	3.0568	6.7792	6.2974	2.8737	2.5389	4.3839	11.6475	11.0747	12.2298	17.6704	9.9698	6.4842		0.469701	6.95078
7.5059	4.9893	12.2658	5.0836	13.8219	3.1969	3.113	5.2986	16.3132	10.6103	6.5016	5.6975	3.5681	6.706	7.8461	7.5433	5.0799	4.1175	10.4453	7.0473	9.2839	8.4888	5.659	6.4765	4.1828	3.8162	2.7922	7.7977	7.949	2.3726	2.5729	3.4142	11.6481	10.7354	14.8403	19.3526	9.6026	7.315		0.477274	7.50122
7.625	4.9386	11.8951	3.9579	10.2083	3.7027	2.6316	5.5471	14.716	4.0646	9.387	6.0867	3.6326	11.3802	6.7729	7.5015	3.6023	5.7414	9.824	9.6573	4.1989	8.568	5.8762	6.0891	5.3443	4.0198	3.6678	9.5133	3.7765	3.2748	4.2787	4.3103	9.8461	13.8452	15.6382	16.2347	15.2346	5.695		0.484847	7.42322
7.7442	4.8534	12.3973	4.0467	11.2705	3.7285	4.8289	2.6138	16.5053	5.4493	7.9754	4.2811	5.4911	9.2154	5.225	6.761	3.6945	8.1907	9.1245	6.2714	3.5562	10.4181	5.9915	4.3729	3.6866	2.5157	4.9242	10.7874	5.3402	5.2241	4.5247	4.8072	14.2046	12.7194	12.9395	21.5735	9.2913	4.8688		0.492427	7.39648
7.8633	3.6171	11.901	4.6243	12.3412	3.0462	3.7706	4.2779	14.1373	7.2724	11.0272	6.028	8.0762	9.7117	5.2077	6.6228	4.6997	8.2523	6.4149	4.6148	4.354	7.4618	6.8437	3.528	4.679	2.2749	3.6687	8.0002	4.4512	3.0027	4.1232	3.2943	13.3914	17.4142	8.6839	16.876	8.9163	4.2387		0.5	7.04988
7.9825	2.5184	11.8307	4.7142	13.0215	3.0913	3.6371	4.3268	12.3578	8.387	5.4125	6.2144	8.8356	9.3789	7.8435	5.5571	4.9628	6.8354	5.4117	6.8658	4.9055	6.8117	7.7135	5.3717	5.0456	3.4292	3.1823	6.564	6.5712	4.2464	3.9745	5.1574	8.9283	15.8075	10.5464	22.8074	8.2123	6.2581		0.50758	7.20907
8.1016	3.4082	8.8713	5.646	10.2236	2.8436	3.9355	5.3739	8.6453	11.1259	6.406	5.4236	5.8077	6.8126	7.2072	5.3457	4.3915	6.5286	7.2105	5.2991	5.3221	5.6267	5.1407	3.8586	3.9344	4.0813	2.6033	5.5977	4.6218	4.3623	4.4345	4.2582	10.2614	12.4807	9.1085	29.8314	14.1158	7.3969		0.515153	6.9606
8.2207	2.9482	9.1923	4.567	9.5643	2.4512	3.4485	3.7984	7.8563	9.8523	9.975	5.5281	7.8006	12.6258	6.6082	4.3088	3.5646	5.535	7.4351	5.6686	9.9747	4.1299	5.1092	3.1584	4.9231	3.0035	2.9017	6.3897	5.1995	3.1989	3.6427	4.4315	16.0957	9.5385	9.2388	28.7733	10.5514	6.8212		0.522726	7.02189
8.3399	2.2932	6.6244	5.435	7.2945	2.2543	4.0684	4.7401	8.5349	10.3859	4.2808	3.4619	5.8149	9.8169	9.0182	6.7473	3.8818	6.2743	5.2949	10.0424	5.2756	6.0359	9.016	7.0199	4.1264	3.4784	2.2254	4.7645	5.0524	3.0952	2.9721	4.73	10.1891	9.8477	15.9105	27.2774	9.2904	7.9226		0.530305	6.87821
8.459	3.923	11.7084	4.2414	12.048	4.8205	3.7196	4.0853	10.9105	6.6898	4.735	2.7162	4.7167	5.55	6.3976	3.7702	4.4161	5.795	4.8505	9.9757	7.4738	5.7008	8.5621	5.6524	2.9948	3.9076	3.8803	3.1564	3.9601	2.6534	2.3256	4.4507	10.5944	11.1086	13.6342	19.5472	10.2596	6.1216		0.537878	6.51495
8.5782	3.6925	9.0633	4.3084	8.6516	2.3499	2.7404	4.6674	8.2672	8.82	8.6678	3.5415	6.8442	5.1006	5.5154	5.3117	7.6031	5.0954	5.7026	7.5328	8.7656	5.9779	12.0262	4.0628	3.509	3.3723	4.1131	6.2717	4.9829	4.2823	2.6922	4.573	10.2433	10.3802	10.0074	13.7792	10.4249	7.7456		0.545458	6.50501
8.6973	3.1798	10.3396	3.1322	6.9637	2.5591	5.0569	5.2716	9.533	8.4362	7.2925	4.26	8.9956	7.4327	4.4837	5.0875	7.6277	9.9792	6.4506	6.8296	10.1709	5.5573	10.2288	5.173	5.0637	4.2375	4.1333	7.1646	5.4759	2.6852	2.0522	2.4686	12.1365	9.6502	22.1531	16.5151	7.5826	7.6333		0.553031	7.10792
8.8165	2.3136	10.495	4.2485	10.1397	3.4086	2.9028	3.9319	7.4943	6.042	5.5087	4.6279	5.5925	6.8372	8.5657	6.3796	8.2447	11.0235	7.6071	10.0866	7.0828	6.5474	10.115	6.9388	4.9384	3.3001	3.0118	4.2915	7.4167	2.5184	3.3562	4.2554	13.1936	7.7676	17.0681	13.1773	11.3227	6.7533		0.560611	6.98662
8.9356	3.0857	13.8395	4.5479	8.1296	3.7588	3.3294	4.8774	9.2827	6.5768	5.0096	4.1915	6.6393	8.4258	6.438	8.7689	7.6343	7.1364	7.9886	7.9722	5.5139	7.6902	4.989	9.2983	3.6323	3.8849	2.1687	6.7832	10.0315	4.4614	3.3695	3.8795	11.7108	6.0143	19.6614	11.7267	9.3959	6.8406		0.568184	6.99147
9.0547	2.9297	7.8492	5.9582	7.6636	4.4181	3.0165	5.1123	11.0124	6.7316	4.8499	6.2609	8.341	11.1138	8.7048	10.241	5.5886	10.1884	7.5489	9.9694	8.0516	7.9379	5.72	9.6404	4.8656	4.0827	2.1574	7.9915	7.6587	4.5144	3.3197	3.7529	9.9461	8.6031	16.1632	9.1926	8.5896	5.1246		0.575757	7.15704
9.1739	3.3669	9.1	6.012	8.1897	4.3273	2.0426	4.1384	11.6526	4.7063	5.1364	6.7155	6.7908	10.6327	9.9978	6.1183	4.0875	10.0297	6.5138	7.1048	11.4028	7.6646	6.2843	6.5984	3.4213	2.9725	3.5826	5.0562	7.8945	4.6914	2.9148	4.2687	9.8204	6.7912	16.9137	9.9954	6.1216	6.6779		0.583337	6.74961
9.293	4.1411	11.9659	5.5224	8.3306	5.1326	2.0238	5.9084	8.4699	5.4168	5.4898	4.5794	6.3616	9.0227	8.4478	9.1084	3.6177	7.4961	6.8652	5.4286	7.0865	6.6802	8.0246	5.8862	5.1972	3.6522	3.0404	6.1853	6.9321	3.0632	2.878	3.1825	10.3169	6.6121	18.7427	12.6357	6.5826	6.8333		0.59091	6.67191
9.4122	3.1762	13.0257	8.9586	11.6158	2.6348	2.8971	3.4569	8.1598	3.9872	5.5921	5.1991	10.6978	7.7819	8.1833	11.683	3.8716	9.0492	7.3838	5.2271	5.0188	9.4577	8.2634	7.7764	4.0342	3.8688	2.0364	7.9938	10.0947	3.7838	3.048	2.5276	15.3558	6.4391	16.5524	13.6588	7.5183	7.0407		0.598489	7.21756
9.5313	2.1567	12.6677	6.3741	7.3212	2.9475	4.3247	3.3464	6.696	3.6835	5.7217	4.3229	13.0733	7.6038	6.8488	10.2845	5.6721	10.6915	6.8951	6.985	7.885	7.2192	6.1146	4.5463	5.1347	3.217	2.726	6.8209	7.5638	4.8538	4.2599	2.7978	11.1274	8.2756	18.5181	15.8326	9.6273	5.8236		0.606062	7.02595
9.6504	2.38	11.348	6.2795	7.6256	4.0284	2.6588	2.9588	7.4593	5.5837	4.5576	5.4623	5.6347	8.6676	5.1876	7.6273	3.8789	7.4167	6.5173	5.2326	9.8227	6.7508	5.0868	6.0423	7.4257	2.5234	2.8353	7.9386	9.0265	4.871	3.6968	3.3979	8.8027	7.4459	15.4177	15.8867	7.9822	5.137		0.613635	6.50256
9.7696	4.9631	10.9671	5.3554	7.0485	3.8775	4.3438	3.2711	8.6585	3.434	3.1852	7.4297	6.5746	8.4737	5.0787	9.6957	4.3518	6.9614	4.334	6.7965	7.004	6.3267	5.213	8.9856	6.566	2.7497	3.3015	9.5579	8.5719	3.5712	2.3578	2.6718	14.8977	5.8122	12.2938	11.3994	8.1573	8.0769		0.621215	6.54905
9.8887	4.774	7.4166	6.1639	8.9358	2.9466	4.6525	3.8789	7.675	6.7235	4.5519	5.4089	6.9491	9.1909	6.2321	9.2432	3.2926	6.8269	7.1952	11.0198	8.6209	3.9084	6.1901	5.3394	4.3019	3.6136	2.3212	6.4781	8.7172	3.4624	3.1525	3.7715	9.6871	8.6429	14.1636	17.6333	6.7192	5.8985		0.628788	6.64052
10.0079	2.7037	8.6572	8.8926	6.8869	4.3637	2.9177	3.2667	9.4655	5.2782	4.7744	5.1829	11.8874	10.1738	8.8942	8.463	4.4146	7.7806	7.2631	14.2018	9.0269	2.8012	7.0916	3.917	5.9167	2.4911	2.0944	7.126	7.8698	5.1583	4.0406	4.0722	9.2058	6.57	10.672	16.9375	4.7004	3.8774		0.636368	6.73073
10.127	2.0887	9.0533	3.2608	4.5464	3.0424	2.2321	4.628	9.6324	7.5168	6.3117	4.9247	9.805	8.3511	9.6706	8.2563	4.0215	8.4313	9.0239	12.1603	7.3306	4.1324	7.8343	4.3675	5.8084	3.6413	2.2214	6.4303	6.5898	4.7365	3.743	3.866	9.3729	3.6971	8.4772	13.472	8.1866	6.1564		0.643941	6.40597
10.2462	2.029	8.9429	6.5319	7.0851	3.1389	3.7665	4.6557	10.337	5.6374	6.6906	4.4744	11.2566	6.8561	6.915	5.6658	4.3302	5.7899	9.7007	6.4844	7.4438	5.9795	6.2769	3.5223	4.3121	4.3543	2.6423	6.0405	4.8477	2.9738	3.5188	4.665	12.0549	4.5277	11.2984	15.2856	10.252	6.7263		0.65152	6.40568
10.3653	2.1899	6.6097	9.18	6.9235	3.8337	3.7316	4.5504	8.3601	4.9943	5.2555	5.1276	7.4503	4.9628	5.7384	6.8137	6.7026	5.2164	6.4571	7.1143	6.1938	5.6796	5.6205	5.0161	5.8958	3.4071	3.4289	5.5068	6.909	3.7704	3.5061	4.9661	9.8916	6.2387	11.2717	20.5861	9.3053	6.8073		0.659094	6.3571
10.4844	2.3494	7.3052	5.006	6.8714	4.4641	3.1968	4.9116	7.05	5.435	5.184	8.4232	6.9425	9.499	3.9337	5.7631	8.9413	6.9706	7.5109	9.1721	7.6628	4.239	9.9054	6.3217	3.8598	2.7593	3.0568	6.1937	5.4786	5.0277	2.5216	3.4335	12.1554	4.6689	10.6352	21.527	6.2247	4.971		0.666667	6.47492
10.6036	2.3153	8.0904	8.9036	5.9008	2.8993	3.9519	4.1156	12.4875	7.613	6.8541	6.6752	7.2397	8.5564	3.0774	8.3857	6.6901	4.9278	8.2424	5.4258	5.1209	4.0821	6.6813	3.451	3.4652	2.2436	2.6745	6.8748	8.3229	4.9291	2.1317	3.0079	12.4041	4.29	8.15	20.0053	6.467	4.137		0.674246	6.23758
10.7227	4.0949	7.9196	9.8729	6.6116	3.2777	2.9236	4.6337	11.9984	5.1997	5.9104	4.6045	12.3993	6.4353	3.7836	6.2285	5.6104	7.0612	8.7479	8.7514	5.5224	4.8691	6.0126	4.6399	4.0254	3.5649	2.995	5.6836	11.5776	5.1444	2.6577	4.5846	8.3862	8.2234	4.773	16.8866	7.036	3.7205		0.681819	6.38831
10.8419	5.9182	5.3687	8.7069	6.121	3.6599	5.6966	3.9117	10.5202	6.559	2.9656	6.6814	10.1174	5.6681	6.1798	7.308	7.1804	6.0795	9.0884	7.0052	4.5685	5.3674	6.3369	4.1389	5.2733	3.4189	3.6213	9.59	9.8725	4.7253	2.0191	5.3263	7.3324	4.8752	7.499	17.821	7.3822	5.3696		0.689399	6.46686
10.961	3.4035	9.1544	3.9872	5.6173	2.9339	3.1678	2.334	10.8661	6.9871	4.0721	6.1127	9.0914	7.7941	6.7533	7.9054	4.2676	6.3647	6.7359	7.3864	5.2189	4.1172	5.0654	4.8779	5.9963	3.5204	3.3116	8.5037	7.0248	4.5443	3.3451	5.5818	7.9699	2.7811	6.4122	14.878	6.4068	4.3203		0.696972	5.9138
11.0801	3.3211	9.3305	5.0488	5.2029	4.2143	3.6303	3.4942	12.3194	6.6562	4.3983	10.2011	8.2387	6.8507	7.503	4.1342	3.7698	8.2751	9.9756	8.4545	5.34	6.1516	3.99	2.8718	4.4535	3.1344	4.175	9.9318	9.0059	6.1457	4.2013	3.2897	5.8901	4.1644	5.5117	11.9648	4.9074	6.275		0.704545	6.11954
11.1993	2.5987	5.5059	7.3121	6.1222	5.5247	6.3397	4.6795	9.9336	9.2882	3.5528	9.6213	6.7344	4.0953	5.3044	5.0254	5.7752	5.5638	9.4191	5.7636	4.7237	4.6591	2.7868	5.1477	2.8406	2.4713	3.6557	9.024	7.1319	4.9069	3.9344	3.2753	7.2347	4.0156	4.5969	18.3466	8.8666	5.1445		0.712125	5.97087
11.3184	3.4682	7.0841	6.4209	7.8606	4.0874	4.1608	5.5229	8.4198	12.6669	6.688	6.6427	6.6223	6.427	7.5193	8.0212	5.9113	5.3664	6.9671	4.1614	4.6289	4.9843	5.4585	4.425	4.3692	2.5261	3.2505	14.201	6.9082	4.6516	3.281	4.3266	6.0023	3.598	4.0798	11.6854	9.0637	5.9128		0.719698	6.14517
11.4376	5.544	7.1388	5.7575	8.1935	3.4788	3.914	4.7917	6.1018	5.8309	6.308	6.9125	3.6185	9.4147	6.72	8.0493	4.3412	5.2204	10.333	8.0771	3.0637	7.3005	6.0245	3.1721	3.3773	3.5119	2.3584	13.7266	6.0222	4.6477	2.9439	4.1853	4.1423	3.9714	5.9689	11.6609	9.9707	6.1134		0.727277	5.9975
11.5567	3.0142	7.1721	4.0754	6.8723	2.5432	4.1544	4.4334	7.3213	9.6821	6.5958	6.1834	5.0256	8.33	6.8891	5.4821	3.7684	6.4317	11.0493	8.2148	4.3096	4.6483	3.2341	5.2859	3.793	2.7262	2.8636	9.1185	6.9122	3.5038	3.4345	4.6298	4.4766	3.9265	5.0449	13.1451	10.8605	4.677		0.734851	5.77915
11.6758	3.7339	9.7737	6.2734	7.6673	4.3486	5.2601	2.6011	8.029	7.4489	4.5396	6.3611	6.875	8.9317	5.4863	5.3859	5.5233	7.9328	10.2561	5.7659	5.5209	4.0537	3.4643	3.4174	4.8993	3.2193	3.9237	9.8724	5.8631	5.2065	6.1768	4.6162	3.5689	4.1954	4.2556	13.8149	15.3005	5.0488		0.742424	6.17869
11.795	3.0799	6.2394	8.13	4.8462	5.9378	3.2916	4.3395	7.5001	6.0153	6.9972	6.679	7.3414	7.496	5.4701	5.4797	4.589	11.4859	11.9803	4.3967	8.3392	3.4125	3.4976	4.3743	3.556	3.797	2.7845	5.381	9.248	3.7998	3.3825	4.4228	3.7917	5.3717	3.4798	11.8262	10.1905	5.6653		0.750003	5.8815
11.9141	2.4379	6.0811	10.2874	9.3046	5.2101	4.7234	7.9209	6.3545	8.6073	10.7972	6.7087	6.0607	4.3186	5.6162	6.624	6.8464	9.7488	13.7462	4.2577	5.6858	2.8756	5.1595	6.2478	3.5695	3.4841	2.5742	5.3221	9.1899	5.4064	4.6571	5.1234	4.8128	4.567	2.7712	12.1826	10.6409	4.0738		0.757576	6.3242
12.0333	4.4457	5.7816	8.448	8.7658	7.811	4.059	4.9554	7.1642	10.2826	9.2875	6.2038	4.0502	5.1283	4.725	5.1627	7.5312	11.4143	11.8008	3.947	3.4475	2.9055	5.5194	6.28	4.3988	2.7706	3.1771	4.0525	7.0619	5.0564	4.4199	4.3129	3.7184	3.164	3.2489	11.7437	12.3067	6.8878		0.765156	6.09287
12.1524	3.3638	8.2598	6.4038	5.3862	6.4284	3.6147	3.9024	9.968	13.2124	8.4695	5.5604	6.4111	5.6735	6.1986	6.2597	5.6989	11.201	15.9429	4.1897	5.5332	3.1787	4.5311	5.1141	3.9319	3.2314	2.021	4.1465	4.0687	4.8515	3.2949	3.2159	3.6971	3.6173	4.1972	11.9418	11.7706	8.7839		0.772729	6.14248
12.2716	4.4119	5.785	6.0183	6.3416	7.9045	2.5777	5.3451	8.3533	10.7561	10.0155	5.5907	6.6518	6.6402	8.1084	3.1726	5.9706	9.6255	13.5257	5.0377	4.3095	2.2026	3.7915	6.8788	3.7727	2.7554	2.4594	3.5755	6.3427	5.781	3.7604	5.5122	2.6	4.0329	4.2005	9.1486	11.5862	6.4786		0.780309	5.97353
12.3907	2.4314	5.5056	9.2573	11.2233	6.1003	2.3122	8.2124	6.332	13.0779	9.6226	7.6497	6.4346	5.7213	7.8064	5.6831	8.5181	10.2503	16.8824	4.2337	5.6717	3.0538	3.1647	5.9829	4.7424	2.2231	2.9708	3.1539	6.0461	4.353	2.2371	7.4367	3.8513	3.2249	5.0635	6.069	14.1525	6.0616		0.787882	6.39766
12.5098	2.9093	5.8505	5.8898	12.6558	5.8973	2.935	6.3864	7.344	12.0394	7.6734	8.2862	6.08	4.8091	5.423	4.3647	4.8095	9.1674	8.795	3.0653	7.1327	3.7181	5.6974	4.1331	3.3028	3.4502	2.486	4.0349	4.8409	5.7702	3.9451	9.2497	5.3607	4.5088	3.6453	6.9997	7.5124	10.9593		0.795455	5.97644
12.629	4.2186	5.8136	5.3618	14.9482	5.7995	6.3949	9.394	8.6495	9.5935	10.6092	9.1743	4.9266	5.9247	5.6882	4.3144	3.2405	8.7025	8.8598	4.5403	6.1827	3.6874	3.0323	3.4116	3.2638	2.7454	3.2741	4.7964	5.037	4.6824	3.8179	6.9886	3.944	4.4599	2.0325	6.8577	10.5002	12.395		0.803034	6.14224
12.7481	4.0195	5.4191	6.8629	17.1535	5.3253	6.7907	6.0713	7.6365	10.4419	7.4486	6.242	4.5074	7.1911	4.8165	10.6424	8.0351	13.7669	10.9633	6.059	9.0125	4.1354	2.9161	3.8439	2.8523	3.2955	2.6172	4.844	5.4455	7.3744	4.5864	4.4185	4.0644	5.5921	2.9857	7.1311	9.3891	9.6424		0.810608	6.58215
12.8673	4.3849	7.0393	6.4704	18.5056	6.2768	6.5074	8.8118	6.9777	8.5049	6.4168	6.7185	3.9695	5.0727	6.481	7.5042	5.5444	12.3203	9.03	6.133	5.6698	2.7975	4.514	4.4916	3.794	3.2195	2.8453	4.7367	4.5346	6.8749	4.4727	5.5427	6.6291	7.8996	3.4821	8.1748	9.0048	10.6337		0.818187	6.54018
12.9864	4.244	4.5694	7.463	23.7736	5.6556	7.1755	8.6484	5.3947	6.4046	9.3567	8.7819	4.5659	3.6949	6.2372	4.8518	3.8541	14.2639	11.1453	5.9552	7.3421	7.03	2.537	3.1436	5.099	3.509	4.8252	3.3581	3.7368	5.3244	2.4191	6.0646	4.6552	6.6343	3.0554	7.5363	7.8533	9.8526		0.82576	6.4868
13.1055	4.2132	5.3513	8.5158	17.3149	5.8634	7.726	7.2476	6.3297	9.5442	5.6054	7.7459	4.306	5.0063	6.7813	3.5087	4.4906	9.2718	8.4188	6.6774	6.4059	4.6171	4.5402	3.1826	5.9704	4.1828	4.8322	4.782	8.0751	4.0936	1.8872	4.0407	5.4682	6.0673	4.0583	5.7333	8.5623	7.7182		0.833333	6.16583
13.2247	3.0847	7.015	10.1158	18.7556	7.375	7.8738	9.4993	7.0471	6.4483	4.0029	5.3028	3.7423	4.1934	7.9502	4.9396	4.2609	8.7163	11.2398	6.4062	7.0523	4.7295	3.6357	4.8687	6.305	4.3911	4.0428	5.5278	6.2319	4.7608	2.2402	4.329	5.6472	7.5957	5.5791	6.3775	11.9571	9.4413		0.840913	6.55896
13.3438	2.8239	6.574	8.8792	12.4616	5.7689	5.4445	8.7163	6.6091	4.5884	2.8057	4.7748	4.8551	3.2465	4.8982	5.2015	4.7753	6.7421	11.8799	4.5506	5.3547	4.1357	4.4259	2.7315	8.4622	2.8508	2.3669	4.8497	4.1451	5.4329	4.5395	4.2545	12.2702	7.3495	4.2041	7.7874	9.5038	7.5183		0.848486	5.8859
13.463	3.5241	8.462	10.3167	11.2761	9.7534	9.5971	5.7718	5.7718	4.1936	5.0023	4.9403	4.9369	4.421	6.5946	6.5379	6.2053	9.1129	6.9465	4.0978	9.5851	4.2409	6.6166	2.9231	7.3544	3.575	2.5475	4.6103	5.9355	4.5445	4.6021	5.9708	8.3495	5.8631	4.2407	9.2908	6.385	6.2074		0.856066	6.22444
13.5821	6.1618	8.1271	11.9729	14.3779	8.7969	9.9765	3.9614	6.6901	3.2957	4.9687	6.8578	6.4717	4.6544	5.2893	3.7022	7.0961	8.607	5.4462	4.7398	7.6204	2.5471	6.9575	4.2269	8.4218	3.727	4.3374	3.43	4.4946	5.3	7.975	2.8414	13.1462	7.0156	5.1742	5.0813	8.6285	7.0764		0.863639	6.46472
13.7012	6.2148	10.9475	9.1473	14.8596	6.0622	10.7657	4.099	5.0464	3.2691	4.7355	4.155	4.5739	3.554	5.7764	6.3826	7.3769	6.3348	8.1759	6.6365	8.5567	3.2376	5.067	4.2688	7.3735	3.4147	3.8239	4.9074	4.9566	4.437	5.523	4.4653	7.1644	5.324	2.8174	5.2141	9.0665	8.6427		0.871212	6.11821
13.8204	4.4311	17.5572	8.7383	11.1992	6.5411	6.5869	3.9012	5.252	2.4106	5.2088	6.7075	3.6416	4.705	6.0807	4.2668	4.8566	8.5324	5.9339	6.8025	9.777	3.8807	4.9343	3.315	7.9127	2.1501	3.1083	5.2019	2.458	3.8565	6.0086	3.8891	6.8896	5.0873	3.6518	4.0544	6.3795	7.8446		0.878791	5.7771
13.9395	5.1781	11.1654	6.8628	8.9669	7.9864	9.2273	4.3785	6.6931	4.9724	3.9102	5.2011	2.5495	4.2682	7.2941	9.3888	5.4715	9.2397	4.6936	6.8495	9.2251	4.2418	3.4395	2.1242	8.1746	3.3818	3.0994	5.2526	2.5486	6.3619	9.0865	3.2817	8.2641	5.9969	4.4718	5.3513	5.9338	6.2638		0.886365	5.96747
14.0587	5.0359	16.3088	7.7454	7.3988	7.0941	9.6648	3.3899	6.9261	4.9577	4.3998	2.4679	2.8048	4.019	5.5294	6.0277	5.1846	8.7466	4.4539	4.885	8.8857	7.542	5.8857	4.0837	6.2599	4.2108	3.9572	3.686	4.0552	9.073	6.2699	3.9926	8.0584	5.2294	5.6077	8.243	5.5609	7.6066		0.893944	6.08778
14.1778	4.4678	14.8191	7.1843	9.7438	8.0566	5.3007	2.7209	6.1781	3.4107	4.8652	3.7057	2.6944	4.1124	2.6426	5.2869	5.7742	9.833	5.6917	5.1671	6.8632	3.581	3.207	4.2802	6.022	3.8798	4.7155	3.2683	2.4862	7.9384	8.2358	5.1002	9.8949	4.9619	5.214	5.0478	4.9323	6.9939		0.901517	5.62912
14.297	4.6841	10.1951	8.2272	9.0217	7.5635	3.7331	4.3931	3.3045	3.4335	3.9786	2.9283	2.6279	2.2313	4.316	5.7198	5.3951	9.1169	6.6065	3.6557	8.4965	3.2677	2.8776	3.8949	9.2837	9.5396	4.9785	3.704	3.5387	7.5678	5.4318	2.6095	7.5374	3.8623	3.7856	7.4115	5.2515	5.2129		0.909097	5.38874
14.4161	4.7743	13.5933	6.125	6.8337	4.9477	4.3159	5.1553	3.9326	4.7955	2.7333	2.2176	2.312	2.7605	2.3556	4.4962	4.0305	7.8198	4.4617	6.095	8.4178	4.4812	3.7816	3.404	4.7017	4.0988	3.9842	4.1135	2.4236	7.2381	7.0016	3.3068	4.7435	3.9753	3.6823	6.4767	5.6996	3.155		0.91667	4.82272
14.5352	4.6939	10.5778	5.1548	7.8354	6.8227	3.4599	4.4651	3.7286	3.1908	3.0048	3.1707	2.962	2.8164	1.9443	6.4851	5.5682	5.2699	3.2916	6.152	7.1222	2.6961	4.432	3.2759	5.9309	4.7048	7.8767	2.6437	2.8043	9.7291	5.6548	3.2066	6.1727	6.9764	6.0101	5.6326	4.007	3.6406		0.924243	4.94893
14.6544	8.7636	6.616	4.6397	4.6297	2.1085	4.4977	4.1627	3.5402	4.412	2.209	3.1596	2.4877	2.9729	3.2152	5.7526	4.9343	3.447	5.0312	4.1346	5.5328	2.9018	4.4467	2.1395	6.3992	4.3129	2.7387	2.6568	2.3161	7.8155	5.1423	4.5263	5.8142	6.5289	4.456	5.6379	4.6517	4.214		0.931823	4.40393
14.7735	4.7307	8.1095	4.5716	4.9507	2.0025	5.2449	3.5812	2.3542	4.1347	2.9426	1.9754	2.345	2.2103	2.8612	3.6717	3.4666	5.295	6.9648	5.5469	7.2861	5.771	3.8374	3.1039	4.7795	5.039	2.3811	2.22	2.4919	6.2054	4.8811	4.9187	4.2808	6.2395	6.0228	4.8966	3.8522	5.5234		0.939396	4.34297
14.8927	3.9878	7.4612	5.2475	3.6757	3.0561	3.6028	3.8446	2.1346	3.3414	3.0514	2.3764	1.8962	2.9414	2.1115	2.7932	2.552	4.8395	3.9712	4.3365	3.074	6.823	3.3618	2.418	7.2728	3.9817	3.6972	2.7747	2.6185	9.8631	7.2145	6.7822	5.9103	5.6891	4.3027	4.1734	2.9681	4.1993		0.946975	4.1715
15.0118	4.8485	7.3396	4.6227	4.8855	2.8674	2.6662	5.0301	2.1397	2.2658	3.2202	2.3143	2.3482	2.4232	2.7036	4.0392	4.3376	7.9358	4.845	3.0579	2.4716	7.6331	3.996	3.6103	11.1999	3.7625	4.4255	2.1516	1.9329	8.6482	7.7285	8.2877	5.7711	9.7556	2.5699	5.2867	4.8133	5.3965		0.954548	4.68463
15.1309	6.4703	5.4268	3.2981	3.995	2.9704	3.6168	4.8452	1.8504	3.5041	2.8725	2.8685	2.1898	2.0059	3.0106	3.8007	8.6	5.8918	4.6943	3.7	2.2962	6.1262	4.1684	6.004	6.9805	3.5884	3.3957	3.092	1.9167	11.3067	7.8667	5.6881	5.5066	10.4383	2.8906	5.0571	4.7774	4.3243		0.962122	4.62257
15.2501	4.8671	5.5028	2.8357	2.0651	2.3917	2.6422	2.2598	2.1338	2.5531	2.3443	2.1668	2.2918	2.1092	2.6516	3.2216	8.0656	4.9466	2.7022	4.2569	4.2298	3.6463	5.8591	5.1388	7.8112	3.0605	1.9936	2.7407	2.2898	9.2023	7.3832	2.4726	5.5688	6.8112	4.647	5.0102	2.2537	2.9983		0.969701	3.9223
15.3692	6.2509	8.3406	2.135	3.1714	2.3838	2.19	2.4007	3.1328	2.2546	2.201	3.0113	2.2156	2.2143	2.7733	4.7233	4.6566	7.1884	2.2243	3.4378	3.5331	3.5465	3.8401	3.9844	4.8871	2.2408	2.1351	2.0863	3.8798	10.7681	5.833	3.1822	4.5029	6.2756	4.5025	5.0422	2.4161	4.2312		0.977274	3.88629
15.4884	3.7648	7.5633	2.1284	2.5536	1.9898	2.3891	4.0365	2.1955	1.9616	1.94	2.671	2.0912	3.8962	2.6626	3.9739	5.4897	6.8566	3.7588	1.9813	2.745	4.2641	2.6605	4.0477	5.992	3.5055	2.5372	2.5322	2.3543	8.2247	8.436	5.5566	3.4521	6.1237	3.4178	3.0447	6.2382	3.1259		0.984854	3.84222
15.6075	4.2263	3.6224	2.0617	2.2187	2.0378	2.2285	2.6321	2.1345	1.9709	2.289	2.2592	2.5738	2.7244	2.0188	4.125	4.847	3.4181	4.9649	2.173	2.1696	2.8363	4.6518	6.5438	3.4949	2.5867	2.7746	3.5142	4.2065	4.8729	7.0033	6.3292	2.7987	5.4013	4.9542	3.1154	3.0532	3.0011		0.992427	3.45497
15.7266	3.829	2.5364	1.9487	3.4286	1.8964	2.0799	2.7447	2.0853	2.1056	2.1897	2.1561	2.0655	2.1166	1.872	3.5094	6.8934	4.9684	5.7668	2.2087	2.0471	2.601	2.8031	5.6681	7.0249	2.6624	2.1224	3.2349	2.5344	6.9888	7.7553	7.1839	3.6211	4.984	3.9204	3.3437	2.9305	2.782		1	3.52998

## Sheet: Image40
X0	Y0	Y1	Y2	Y3	Y4	Y5	Y6	Y7	Y8	Y9	Y10	Y11	Y12	Y13	Y14	Y15	Y16	Y17	Y18	Y19	Y20	Y21	Y22	Y23	Y24	Y25	Y26	Y27	Y28	Y29	Y30	Y31	Y32		Ap-Basal	Avg intensity
0	50.6276	79.652	69.888	64.119	53.5228	59.1982	65.7048	61.6632	62.6203	53.1348	39.279	38.9617	41.3253	46.4522	68.2523	62.0647	45.9946	39.3512	47.3387	48.5678	48.7758	54.0817	51.0809	64.3483	65.363	53.4113	79.021	54.998	64.835	52.6099	55.134	55.214	37.2823		0	55.5719
0.1191	47.9537	81.516	80.125	70.569	49.3804	69.1259	60.561	58.2861	74.8999	47.7401	39.4467	40.1993	63.3992	56.6443	61.0581	47.466	43.4857	30.5989	47.7751	44.5561	48.595	66.1582	59.8812	78.083	72.121	65.9498	74.495	65.589	68.783	53.7172	56.934	50.568	35.3486		0.00900588	57.9094
0.2383	37.3964	79.254	92.672	74.084	55.1501	75.2982	60.6393	65.7525	82.7155	54.2135	39.4052	36.0441	60.3401	55.0223	75.1434	51.6523	42.6764	34.0536	44.1329	51.6186	43.1989	71.1662	68.4761	72.1422	88.005	70.4072	97.326	59.724	69.227	53.9176	71.799	55.932	32.3299		0.0180193	61.2399
0.3574	50.3342	108.488	85.398	84.355	59.1297	70.5181	60.7183	56.4875	84.1388	59.4162	41.3638	40.7222	49.5027	62.7988	77.1128	54.1694	40.2545	37.3176	44.9197	54.96	55.2748	66.0936	82.7432	77.1929	75.835	63.5682	104.046	68.308	61.326	55.7249	78.822	64.18	43.262		0.0270252	64.1964
0.4766	46.3753	103.935	91.866	78.075	64.1722	75.2036	74.3307	68.4076	93.7612	57.27	49.967	42.4796	56.4381	65.252	79.3053	47.2246	35.6743	28.9307	35.7306	56.943	55.1213	54.1243	83.3127	88.4944	86.169	71.1656	117.204	62.583	64.476	66.1645	90.889	66.648	48.8714		0.0360386	66.8656
0.5957	50.8714	101.847	106.683	90.983	63.181	77.4543	75.3949	67.6959	81.4552	48.174	57.145	42.799	55.3887	74.0297	78.3045	46.748	37.9725	28.0395	32.8217	64.9832	61.01	74.1462	87.242	98.4449	102.826	70.0908	119.42	72.518	68.625	59.6175	83.737	61.79	52.9153		0.0450445	69.5259
0.7148	46.6628	97.171	119.461	111.749	67.9827	77.4799	79.5342	71.7372	82.8978	49.9514	61.7229	50.8203	55.4036	59.7282	74.8095	51.1202	32.0945	26.1621	32.411	65.9504	60.941	61.5167	87.7465	80.2233	94.954	70.6482	121.749	74.989	78.747	59.5837	82.052	67.727	49.7045		0.0540504	69.8616
0.834	43.1997	88.244	122.818	103.885	63.5881	67.5221	75.6935	75.6109	85.9991	48.569	59.3311	48.8796	54.1043	70.8444	65.1049	46.3896	40.621	22.332	32.3617	58.6295	51.1908	64.3344	99.9629	90.5442	93.134	62.7389	133	87.669	83.197	68.7948	91.455	63.375	53.406		0.0630638	70.1979
0.9531	51.8476	88.078	103.394	90.532	69.4363	73.4817	61.7103	81.8359	78.0469	49.686	63.2506	56.5972	50.9757	57.6321	68.0069	43.3563	34.8845	26.5404	33.6517	59.6754	60.9647	71.3755	96.2093	101.374	100.994	78.2808	117.976	102.283	92.476	62.7018	85.916	68.374	52.3866		0.0720697	70.7252
1.0723	41.4519	86.717	119.348	78.568	71.4755	70.9166	66.3508	70.4459	88.8158	57.9132	71.8393	55.6538	55.4498	55.9557	61.2872	35.1403	37.7162	27.1142	30.3746	55.8748	74.471	57.2433	99.0256	96.2749	110.449	61.1037	114.149	114.038	105.827	66.4456	87.764	58.918	57.4826		0.0810831	70.9576
1.1914	50.3214	80.903	132.188	81.625	58.3286	70.3939	62.8704	61.3344	85.8053	64.9818	54.753	58.2347	57.1713	54.8327	66.723	32.1321	42.3182	25.513	27.3514	61.5991	66.9042	63.967	87.9162	96.7183	112.573	69.7591	111.668	117.965	115.076	82.4912	97.068	70.331	52.7947		0.090089	71.9579
1.3106	56.7899	79.942	118.38	63.276	64.5436	68.274	51.3886	66.4811	70.2466	61.838	56.2441	59.1854	48.4478	57.7597	60.9274	34.4725	43.4647	29.6439	31.4937	54.9616	75.3361	70.5843	74.0043	94.2155	108.082	66.2138	116.439	117.958	109.69	85.2746	85.89	71.071	39.2046		0.0991024	69.4462
1.4297	57.9203	68.997	126.611	69.763	63.0978	67.4758	42.7514	55.485	71.0822	50.6759	58.8742	51.4352	51.187	54.7922	59.3001	31.4501	38.674	22.0068	33.4793	66.1019	63.9836	73.0138	73.7668	89.4213	116.321	67.3059	105.124	117.302	114.354	90.4885	95.036	60.561	53.2442		0.108108	68.5176
1.5488	50.3967	66.334	109.111	71.861	58.7747	63.1653	51.4522	57.141	73.4638	49.9183	67.3605	59.5707	53.8479	55.368	55.8048	36.8151	38.1573	26.6234	34.7559	65.8074	54.5221	52.0077	81.3894	89.6001	104.271	75.879	104.972	116.155	124.48	93.043	116.597	75.267	51.1375		0.117114	69.2439
1.668	44.1794	67.622	114.528	75.057	53.8528	66.2834	54.2229	58.1074	61.455	48.6406	60.5399	54.1024	59.274	47.2673	47.5713	40.0388	40.3859	20.7179	36.6618	65.7884	61.6755	61.2557	71.7393	76.8222	95.944	80.638	116.053	121.167	109.685	97.633	120.983	71.413	55.6493		0.126128	68.3926
1.7871	32.7672	58.419	104.091	67.85	59.09	72.0533	56.4264	52.8601	68.8121	48.5407	53.1588	56.0074	49.3669	38.818	49.496	39.9081	35.4673	21.471	34.0907	56.8346	53.3599	67.0661	61.612	78.9339	93.097	84.8002	111.465	115.382	105.021	88.7393	119.419	71.924	67.346		0.135134	65.8695
1.9063	33.0074	47.217	104.538	71.143	64.9785	68.0679	60.7669	45.9201	61.121	44.7631	61.079	46.0786	49.9949	40.0086	38.3864	35.0168	27.0547	22.761	29.8772	66.6575	53.474	65.923	62.0426	59.8583	66.324	71.4065	94.661	108.847	106.219	86.6219	108.781	61.538	59.1278		0.144147	61.311
2.0254	33.9541	48.809	100.546	79.31	53.2287	76.4439	60.9287	42.7175	55.1304	42.0209	57.6985	51.2658	55.5525	36.6858	36.2052	26.5395	22.9817	17.9064	28.7334	47.4141	51.1243	63.4717	59.98	61.9523	70.441	78.5279	94.625	101.457	81.495	78.9332	115.577	65.145	63.9596		0.153153	59.417
2.1445	34.1729	44.126	87.829	78.054	45.3642	69.8222	58.9467	48.3391	40.0437	41.1163	48.1795	55.4116	48.3302	37.5343	35.9069	28.1598	23.0383	16.3283	24.9673	62.7761	45.2445	63.4357	58.1256	54.1853	51.44	75.5566	89.967	94.347	74.514	74.6596	117.614	74.206	62.9565		0.162159	56.506
2.2637	27.6447	44.744	62.539	71.361	56.6243	72.7801	58.7354	44.6676	31.7802	26.1354	33.3042	44.3079	47.8589	30.1282	37.6504	24.1789	17.1302	17.2825	22.7862	59.3775	46.8878	62.7097	59.4257	53.8958	38.711	70.7131	84.805	88.648	62.466	79.5941	109.502	79.075	61.2386		0.171172	52.3845
2.3828	25.9442	37.779	59.954	67.958	54.3497	57.4901	54.0006	45.9421	37.352	34.64	29.5089	37.1196	49.309	35.3954	28.4046	23.2241	21.4195	21.0777	26.3477	48.0016	45.6257	54.7093	62.0492	45.0104	37.963	66.8203	75.105	90.586	52.41	83.7912	117.385	85.62	90.1456		0.180178	51.589
2.502	25.5177	45.81	68.515	62.58	45.2876	51.6507	56.294	42.1333	34.0709	33.6783	35.3779	37.2062	42.4832	33.1976	31.5834	25.9204	18.9968	18.4554	28.0133	52.2643	46.5534	49.182	64.2206	36.3241	30.11	48.4335	56.698	85.792	47.816	90.3714	110.039	92.496	87.3356		0.189191	49.5275
2.6211	22.5669	35.345	64.587	54.644	41.2538	56.5229	58.469	37.7361	33.3968	30.7075	26.2088	37.7511	42.8806	40.1657	26.2293	31.3498	15.7591	17.1377	27.0735	55.7247	51.4079	55.1608	67.4896	41.1668	20.29	45.5354	60.001	78.894	34.937	79.4525	112.815	77.013	81.933		0.198197	47.3214
2.7402	24.4409	31.989	60.355	49.605	33.6612	58.7585	60.0973	39.2284	31.165	33.8771	22.4666	35.6827	42.2854	33.0884	35.9792	23.1964	13.0339	14.6874	25.2374	56.3949	52.3283	52.2644	62.5329	27.1202	14.724	43.0306	63.678	68.749	37.647	73.0502	113.179	83.577	78.2289		0.207203	45.3133
2.8594	25.8352	48.689	50.465	40.103	36.7936	67.2635	60.6661	46.6981	28.0631	30.7922	21.7314	37.5785	36.3251	23.6289	31.8655	25.6994	13.4799	17.7407	29.8059	51.1163	55.2128	46.0302	51.5244	27.3783	9.523	53.5798	64.528	64.356	26.542	60.0767	95.496	79.046	91.9415		0.216217	43.9265
2.9785	17.436	50.185	56.122	36.615	32.8215	64.7131	66.182	35.1903	20.351	32.5402	18.8604	30.7073	33.3719	24.6755	33.3981	26.1536	13.3332	18.0548	23.5485	51.1077	50.7669	43.8465	46.7143	18.9215	14.107	43.3804	71.284	57.474	25.032	40.7657	85.64	75.423	89.479		0.225223	40.8546
3.0977	21.3312	44.711	52.959	27.868	42.0416	60.4754	57.6399	41.6767	21.8952	28.1891	26.1388	24.0017	33.7235	27.337	30.8997	15.668	13.4144	13.2368	28.9213	49.0031	42.3047	46.0256	45.7624	24.525	9.477	35.2437	85.143	49.097	23.949	37.7798	92.78	85.435	78.0707		0.234236	39.9007
3.2168	26.5595	47.665	48.689	25.352	40.4868	49.056	50.6738	32.7765	19.6832	29.3881	23.7521	27.308	33.1775	28.158	26.4567	19.5766	15.177	14.0807	28.9208	53.4953	51.2936	55.3999	44.2233	26.9065	7.061	35.3597	80.316	44.015	29.438	29.3217	83.883	94.646	73.5664		0.243242	39.2686
3.336	18.076	49.644	38.509	23.686	32.2408	52.6502	51.3821	29.0202	19.567	30.8257	25.2403	23.0485	37.6913	40.08	26.5902	16.7316	16.9966	15.6931	23.4262	56.9157	46.7364	68.9293	42.1992	28.7671	8.478	39.7698	78.236	47.954	30.189	28.6794	74.105	104.653	69.3128		0.252255	39.2734
3.4551	24.633	49.575	37.162	22.626	26.441	51.2807	43.2727	24.6793	14.0407	23.2145	25.4089	22.7823	31.6428	46.3019	27.4029	15.9818	19.6625	15.8991	21.1503	60.4946	46.1528	59.8446	41.8219	30.2594	6.275	37.942	57.493	41.238	28.683	29.1896	75.301	101.691	74.6938		0.261261	37.4011
3.5742	23.602	48.818	38.835	18.445	28.966	47.3772	49.4495	32.1584	16.59	23.7507	29.8705	21.6915	28.6615	38.4553	37.7716	15.928	18.6572	10.9873	23.0166	45.7287	47.2274	46.9581	34.071	23.9601	6.092	28.2843	42.176	43.426	27.001	23.5258	52.567	94.84	81.3355		0.270267	34.8553
3.6934	20.9184	42.044	36.696	21.536	22.0746	51.2859	50.6987	28.7305	20.003	18.2439	34.9802	17.603	25.2196	26.3585	43.6146	16.7221	11.5904	10.0121	27.4747	40.0039	31.0218	52.4685	31.0816	16.2289	8.58	27.9197	41.477	32.338	28.231	28.8647	47.438	92.777	80.2804		0.27928	32.8641
3.8125	18.0722	32.496	39.634	16.121	20.9411	50.6125	48.1492	33.9318	14.7689	18.3241	32.6455	15.5524	24.1334	26.0027	42.9639	18.7747	12.5582	11.9368	24.5061	35.7274	25.876	52.9713	31.5181	12.8741	8.101	23.5498	36.703	27.775	30.003	27.8309	39.789	102.683	62.4416		0.288286	30.9081
3.9317	14.2	41.883	42.872	12.08	20.0073	44.4832	47.4273	31.8447	17.5875	12.5363	29.3131	16.6692	23.1324	28.5299	44.6652	12.8601	8.8551	9.6117	27.1043	33.0889	25.8984	36.9507	37.4807	14.3714	7.927	19.5526	33.586	25.758	26.543	30.4996	32.111	93.838	58.1192		0.2973	29.1329
4.0508	19.2587	44.878	34.316	13.401	20.3843	35.6031	48.7185	26.4209	14.7267	11.574	26.366	16.965	25.8626	25.6359	45.5411	16.3312	9.424	15.3741	18.4676	30.1829	31.5087	40.1803	34.8895	11.6918	4.67	16.4617	31.099	24.741	26.716	35.1972	33.106	93.439	46.4069		0.306306	28.1678
4.1699	13.1317	50.584	37.465	11.633	18.1743	34.3649	55.1362	30.7649	15.4939	12.8904	19.9736	14.2394	23.2722	24.8173	38.2701	16.9866	11.9608	16.55	25.8559	38.1057	27.4144	40.1266	42.84	12.3994	6.949	17.6967	23.304	31.392	22.998	30.3861	37.378	84.829	47.0693		0.315312	28.3167
4.2891	15.5063	46.577	35.104	9.937	14.7997	34.4907	58.1611	26.9773	8.9148	15.2671	18.308	13.7045	24.2202	19.4166	44.5738	15.3916	10.2037	12.4516	21.8237	31.6126	21.0658	44.5714	38.1782	14.6832	5.43	19.5304	17.056	33.909	19.569	35.481	29.998	74.221	42.3491		0.324325	26.4692
4.4082	15.7195	41.176	33.552	12.486	16.8948	29.2521	65.8233	25.6052	10.3264	15.3292	22.6983	19.2699	23.387	26.8083	39.9136	14.6547	6.8445	16.1898	21.3486	20.5166	18.2666	47.8449	31.9807	15.3142	2.985	16.8574	21.59	31.289	20.049	32.6353	31.014	79.431	33.1948		0.333331	26.0681
4.5274	17.5068	34.419	46.396	12.494	15.7845	18.7076	52.8549	23.571	6.8812	15.8374	23.3572	13.8012	19.8011	28.2756	33.6621	18.3059	5.9468	20.1246	19.6416	16.8132	18.6335	55.5783	43.8228	12.8359	7.044	24.8291	22.343	29.172	22.684	22.8782	34.186	78.915	31.5406		0.342344	25.7165
4.6465	10.9061	41.668	39.815	10.827	15.063	28.7519	63.8436	19.4731	10.0026	13.4357	14.6036	13.917	24.4056	31.6211	37.1906	10.9756	8.3065	14.467	24.7789	18.6628	23.4291	54.7645	53.4777	8.3494	6.814	18.2617	15.435	20.329	25.672	18.9549	28.576	60.91	29.5908		0.35135	24.766
4.7657	10.9894	44.517	37.108	11.8	15.3325	26.5695	43.7649	17.2705	9.4069	11.7809	13.38	14.9746	20.3157	24.755	35.8591	9.7203	7.7109	9.129	19.7564	16.31	23.694	40.9133	54.0023	8.2327	6.544	29.3737	16.512	31.068	24.226	11.1572	28.092	51.716	28.5535		0.360364	22.8647
4.8848	11.1308	34.975	42.019	12.184	11.6559	25.2789	38.796	12.5986	10.6497	12.423	11.4948	13.5136	13.9266	13.5437	27.3864	9.5676	6.0764	7.8348	20.6268	19.0618	21.7291	37.6552	58.6046	8.8176	7.623	30.0024	17.182	26.425	21.703	11.9349	26.667	50.598	28.4402		0.369369	21.2765
5.0039	6.5816	46.493	42.378	14.816	17.9696	25.8115	37.7311	13.0626	8.5148	13.9053	11.8014	14.5764	10.0117	13.1337	34.193	8.6598	8.8566	8.214	19.9482	19.5177	25.8589	31.2747	56.1072	6.295	6.77	29.6817	20.947	29.41	14.93	7.6035	22.851	40.269	26.5202		0.378375	21.0513
5.1231	5.9586	44.446	39.805	9.568	10.2099	20.8307	36.7538	14.8463	8.754	14.5595	13.6213	15.9258	14.51	18.0533	33.0954	8.6198	8.0147	9.5909	21.2161	21.5496	21.6036	38.8983	51.5642	9.6066	9.114	25.5986	17.3	29.148	17.652	11.6591	19.148	39.96	24.0507		0.387389	20.7646
5.2422	6.8438	34.586	41.821	12.199	11.3939	16.5944	42.773	15.183	9.0395	15.4141	8.5253	16.8619	15.3216	16.1649	37.2147	11.2203	12.0846	11.4191	18.8403	24.1189	26.1103	33.632	51.8109	13.4872	7.567	19.2383	22.652	33.576	24.596	8.3563	17.002	36.279	21.417		0.396395	21.0104
5.3614	8.2051	35.985	40.227	14.403	13.0371	18.9179	37.1086	13.0729	7.9619	14.3665	10.2678	16.5262	10.7036	14.6449	35.067	8.5776	12.3007	9.0128	23.8312	23.7816	40.1036	24.5534	58.1802	12.1717	6.812	14.6364	20.508	32.237	26.004	8.3094	18.593	34.825	19.1572		0.405408	20.73
5.4805	10.1447	36.223	42.337	12.577	10.7758	20.1028	44.2124	11.1097	9.9875	14.8377	12.3242	19.2194	9.6647	25.1015	38.6897	7.0966	7.3824	7.7679	23.5601	27.1938	44.4794	26.9215	41.6309	7.5255	5.291	14.2041	15.348	27.335	27.011	5.9218	21.333	41.181	19.4962		0.414414	20.8481
5.5996	5.6286	39.756	30.231	12.429	14.2143	26.0297	36.2045	11.8598	9.5397	12.1214	8.9652	22.0901	9.7876	25.2924	43.6251	8.8857	4.9857	5.6788	23.7112	24.3507	41.421	29.431	32.14	10.5803	8.313	12.2399	25.191	32.134	25.433	6.2684	20.791	36.875	14.3423		0.42342	20.3196
5.7188	9.061	33.198	24.44	15.112	23.3301	22.0522	35.9447	16.2033	7.3878	11.0297	9.3792	14.6969	11.5722	22.0315	42.9878	6.6174	4.0513	7.0389	26.7342	22.3216	41.4316	31.7004	22.6882	10.383	8.08	6.9208	26.233	28.706	26.85	6.679	22.049	42.149	14.2747		0.432433	19.798
5.8379	6.5303	26.661	22.364	15.389	16.3473	16.1964	30.8234	18.0877	4.024	12.1286	12.9396	14.4212	10.6149	31.1328	39.5837	5.7023	5.9128	7.8923	25.8616	25.937	46.9825	34.768	27.1035	9.3127	3.976	9.219	32.753	26.529	19.088	7.195	19.787	33.921	15.3404		0.441439	19.228
5.9571	11.0208	27.66	23.294	10.544	17.5985	18.0353	31.674	11.2068	6.8806	13.1354	7.0607	15.2642	11.2466	28.7902	37.8567	8.2608	7.0719	7.8361	28.749	21.8701	49.6393	41.2541	23.9769	10.7343	4.527	12.4196	30.714	26.561	14.688	7.9848	17.482	29.641	19.6939		0.450453	19.2234
6.0762	6.3898	29.074	18.465	11.459	18.8333	20.159	29.1986	10.9493	11.3044	7.0475	11.092	7.7612	17.5196	32.1244	40.1757	12.5031	7.6589	9.7495	17.1218	14.697	54.7842	37.2356	22.1484	12.9005	3.772	14.5312	17.337	25.263	17.981	5.871	17.36	24.202	12.5551		0.459458	18.1583
6.1953	4.5196	27.955	21.14	11.226	24.1101	17.4645	36.6029	10.8199	10.2766	6.5252	9.9705	8.8303	19.3467	39.8823	31.7731	9.6769	6.496	6.2956	15.0722	17.1348	53.4695	37.714	23.1044	14.4038	4.101	12.0275	33.438	28.765	20.78	8.579	13.575	43.032	10.7387		0.468464	19.359
6.3145	5.5802	23.669	18.277	11.416	21.6725	17.3297	37.0138	9.9394	4.9063	5.6935	9.2582	8.4342	16.8966	28.4362	18.6784	7.0943	3.443	8.2604	14.6798	15.916	53.8234	40.4601	26.5379	12.2376	8.017	18.4436	35.183	25.981	17.055	9.4932	10.833	45.762	10.5512		0.477478	18.2113
6.4336	6.1043	27.032	14.846	10.452	16.9966	15.4893	29.0796	12.7933	8.2531	7.3456	9.2887	8.9556	19.1393	26.8619	13.8308	4.3715	3.2772	9.4821	18.8676	15.9992	45.4801	34.5458	28.0997	15.1293	10.224	15.2297	34.965	21.039	13.149	9.0722	12.501	42.647	13.3004		0.486484	17.3893
6.5528	6.8344	30.55	16.709	10.937	17.6411	16.9785	32.0301	11.5137	8.6792	11.9906	15.0794	7.0888	16.2021	28.5962	13.013	9.593	2.949	7.7716	19.0717	14.834	34.759	34.6994	32.1324	9.8973	5.987	16.8454	30.212	14.881	13.435	7.855	14.844	35.447	17.4506		0.495497	17.1669
6.6719	6.0499	26.95	9.505	9.491	17.7946	15.0565	24.0021	8.7803	9.277	9.387	16.7363	6.8721	19.2591	29.8772	10.9192	9.2499	3.8088	5.7647	17.8775	19.6945	32.1309	30.0015	29.0754	8.0742	5.18	12.1409	31.526	15.04	12.869	11.008	10.943	32.119	12.2465		0.504503	15.7184
6.7911	5.2727	16.908	12.07	13.212	18.8512	17.441	23.3139	8.2536	4.9154	10.3726	16.579	6.3665	25.9604	29.5535	9.369	10.1585	4.9301	6.9659	21.0731	27.8255	31.0194	32.1548	28.2694	7.5506	4.303	11.0018	26.303	18.348	14.684	8.844	14.535	17.451	14.8284		0.513516	15.7177
6.9102	7.382	16.22	14.309	10.569	14.0694	12.2883	22.4674	8.3648	5.8183	8.5951	20.1858	6.8147	21.5591	33.5111	9.5139	5.5895	5.5361	9.6506	24.1329	24.0492	35.8293	33.195	25.9539	7.9896	4.853	10.3586	30.476	17.622	13.249	9.2071	12.086	19.105	11.6675		0.522522	15.5218
7.0293	10.6985	8.8	16.498	9.853	11.7468	18.3631	24.8702	8.1638	4.3799	9.834	20.7234	5.5798	20.4688	37.4934	10.8661	5.9492	6.2652	6.244	27.6962	27.6082	31.4872	25.383	32.7712	12.0362	4.288	12.9613	29.507	17.112	14.275	10.9593	8.228	12.788	14.7021		0.531528	15.7151
7.1485	7.5295	8.295	17.728	14.359	8.8009	12.0062	25.0006	4.952	5.2176	10.9895	20.0841	8.6832	24.185	37.2523	11.9449	6.2117	6.6202	6.7774	22.9024	28.21	33.701	30.9912	39.9241	10.3837	7.143	11.1161	33.085	23.943	19.203	7.5312	8.351	12.907	17.2414		0.540542	16.4627
7.2676	7.5274	6.106	19.178	9.142	11.0511	19.5067	26.0848	7.7314	5.7011	8.3077	25.0833	7.3211	22.6809	39.1973	10.4595	5.6642	9.3694	8.6	21.4681	20.5076	27.1278	36.5829	39.4848	12.8331	7.462	7.4551	27.521	20.071	23.829	8.8624	9.591	15.477	12.8966		0.549547	16.36
7.3868	3.1395	5.955	25.412	10.788	11.9831	21.4204	31.0492	8.1562	3.8836	8.5113	24.7469	14.5617	19.6581	38.6833	10.1891	7.25	5.1565	10.9245	20.5716	19.086	26.5589	25.6259	50.7928	14.0601	5.437	8.6589	25.855	27.795	17.336	9.0573	10.413	12.922	14.6975		0.558561	16.6768
7.5059	5.6942	6.837	26.526	11.997	11.1608	21.1715	18.0207	7.6668	6.3912	6.0175	22.4774	9.4621	17.7486	26.9914	11.533	11.5695	4.6638	11.8051	23.8307	22.8441	23.2739	24.2453	56.9978	16.2958	4.792	14.5213	25.801	19.619	23.205	12.3691	7.929	13.222	14.2763		0.567567	16.3926
7.625	4.5228	6.042	33.564	7.993	11.2493	25.2771	12.9012	6.2936	5.5158	10.8463	23.7012	6.1186	14.9761	35.5474	13.9786	10.4909	8.4925	6.0262	18.7604	24.1331	21.5128	24.9743	65.0086	15.3625	6.371	12.9588	18.489	21.233	21.85	15.4275	15.762	16.338	12.8167		0.576573	16.8041
7.7442	3.9229	5.215	38.06	6.326	8.6994	24.8825	10.9387	5.7822	6.3205	9.1822	27.8881	10.0874	9.1498	34.2742	14.1516	10.4303	10.7037	7.2429	16.0989	27.3688	19.3801	21.7682	60.5039	14.6697	6.404	12.9573	22.915	18.769	19.016	10.4365	12.622	19.414	13.7211		0.585586	16.3425
7.8633	4.6301	5.154	40.305	8.242	8.4309	20.4183	11.3149	6.6534	4.5064	8.7197	22.6343	5.9654	7.2446	40.0931	9.717	10.3799	7.0645	7.0327	20.5596	29.2955	18.8118	13.3942	69.7305	17.0667	3.495	13.4249	17.97	13.892	22.88	13.3962	13.367	19.044	8.8049		0.594592	15.8678
7.9825	6.1667	5.646	37.756	14.493	5.933	17.8048	17.883	6.3265	8.049	7.4557	16.9497	11.4255	15.1524	46.3299	9.4057	9.4356	5.863	7.7207	10.2884	26.5675	17.1857	22.8726	82.2398	11.7746	5.652	17.0047	18.336	25.573	24.508	9.6433	10.469	19.683	11.0872		0.603605	17.0509
8.1016	4.3217	6.616	44.327	15.188	7.569	29.4217	15.2304	7.9309	8.4785	8.0363	11.8581	12.3815	17.5977	43.4779	9.6806	10.1214	8.5045	5.7478	15.2995	30.7666	11.9733	20.4923	74.0011	13.6529	7.692	30.8396	24.01	23.584	23.475	7.3567	7.632	19.881	9.5063		0.612611	17.7773
8.2207	3.6049	8.101	49.468	9.857	10.052	29.6816	14.4312	8.6511	4.9098	7.3443	13.7596	13.6914	15.5967	51.4205	7.9769	10.8113	8.8082	8.5748	16.4828	31.2863	11.8954	16.6684	76.6539	12.7532	7.479	38.9109	24.057	14.027	18.308	4.7477	6.332	14.868	11.5238		0.621617	17.6586
8.3399	5.6754	10.397	55.343	7.525	10.3486	22.9218	18.2237	4.9424	4.4513	4.5587	12.1871	15.9546	20.4776	54.4539	13.9594	8.1797	10.9005	6.8066	10.8614	27.7994	18.1546	18.5877	63.4167	7.8079	7.948	40.9641	22.697	16.433	22.438	3.8358	10.632	11.713	12.0827		0.630631	17.6569
8.459	4.479	13.266	66.085	5.651	7.133	28.3468	20.5109	5.79	8.8163	7.81	12.4084	14.0725	21.9073	50.7341	22.5007	12.1326	8.1665	5.3719	9.5764	17.5378	17.499	12.1123	51.1702	11.75	5.573	47.1741	18.224	17.272	17.773	8.0349	14.009	17.376	9.5234		0.639636	17.8723
8.5782	7.1125	11.733	75.292	6.974	8.707	20.4237	14.6188	4.6297	5.4134	6.1986	9.5964	14.1281	19.802	58.9237	17.8181	10.3586	9.2153	6.2709	9.5354	17.6839	19.5069	10.3974	41.5617	11.5881	5.078	43.9161	14.172	8.551	18.365	6.9184	8.386	22.74	14.2811		0.64865	16.9666
8.6973	5.2931	13.951	66.768	5.549	8.4531	18.0926	20.3421	3.9661	5.1971	4.7502	10.1232	17.4725	20.51	62.0759	20.7569	4.0883	9.8022	9.5106	13.6543	25.6923	14.4161	11.4164	36.2425	9.8691	6.992	35.8937	8.209	10.272	12.77	6.6033	7.671	20.07	14.4409		0.657656	16.3913
8.8165	6.3202	14.398	51.987	7.432	8.482	17.8687	23.4244	3.549	6.5155	10.4049	10.9731	15.948	16.0325	60.7578	21.7283	6.8353	14.4438	10.5636	10.0708	26.0151	14.8842	10.025	27.4576	12.4917	5.457	39.4634	7.355	10.559	12.793	6.1396	9.248	15.081	11.919		0.666669	15.9583
8.9356	7.5589	16.4	49.406	6.202	10.4589	13.8771	14.1554	7.5427	5.9358	7.6093	12.6657	19.837	17.9504	60.3273	24.6554	7.7346	10.0654	8.5994	5.4058	32.829	12.41	10.84	27.1155	10.6632	3.274	47.0711	7.283	11.726	11.479	5.8214	7.908	13.884	17.4979		0.675675	15.9451
9.0547	4.0795	16.661	46.243	8.235	8.2554	14.1865	13.432	7.889	8.1246	7.2223	13.1282	18.4039	15.4831	73.5481	25.55	9.2767	10.4146	10.3956	6.3945	30.6201	10.1082	11.298	14.694	13.2855	4.787	39.1875	5.939	7.224	12.9	8.1409	8.268	12.217	16.3423		0.684681	15.5132
9.1739	4.341	15.36	45.409	12.133	11.194	13.5944	12.9145	8.8586	7.5316	6.2175	13.1893	22.599	20.2142	81.8048	25.2622	11.4075	9.4159	4.9669	9.4684	30.09	10.162	10.7538	8.8499	17.7379	8.461	39.0639	9.103	10.711	12.681	9.4912	11.784	11.458	12.3481		0.693694	16.3205
9.293	5.4415	17.65	45.877	11.324	8.1976	8.2248	15.891	7.6853	8.765	6.8965	12.7789	14.8098	21.9083	74.9065	19.8471	9.6268	11.7091	6.5422	6.2734	30.109	10.2462	9.111	10.0203	18.7488	6.186	32.7428	7.555	10.061	15.074	8.7952	12.628	11.082	10.8024		0.7027	15.3793
9.4122	5.0162	20.701	40.392	8.826	13.5863	4.2655	13.3882	7.1269	7.276	6.4989	12.0956	11.5295	16.1819	83.197	25.9106	11.7061	8.9471	12.7768	6.151	26.0544	10.5599	8.7507	7.8268	15.7671	7.007	34.9964	6.902	9.088	11.882	7.0553	17.358	12.139	14.2299		0.711714	15.3088
9.5313	5.974	23.907	44.67	14.386	17.9369	5.3149	17.1814	5.7739	7.6957	7.5647	11.8366	10.8631	21.1544	69.5937	30.0605	12.9275	9.8214	8.8599	4.9808	21.82	7.9416	6.0462	7.9526	25.1379	6.974	22.8798	4.386	7.379	10.941	8.4842	16.89	7.362	14.1342		0.72072	15.1161
9.6504	4.6767	17.283	37.444	13.95	27.5021	5.8552	11.4859	9.8775	8.0858	6.7969	10.5471	6.2642	23.2757	78.3158	29.6293	15.0867	6.5857	9.5418	4.4174	14.1765	6.8836	5.7557	5.9836	24.7758	8.538	12.9115	4.316	8.599	8.795	12.1034	11.265	10.523	10.8821		0.729725	14.3069
9.7696	4.4778	21.78	26.153	8.892	32.4545	6.1898	12.0844	14.0933	6.3841	5.987	12.5424	13.5651	28.6939	74.735	33.1379	9.9851	9.7483	10.0384	5.4454	13.7525	11.5896	4.0908	4.8443	16.9095	7.7	10.3112	6.833	6.858	9.423	13.7045	14.719	11.246	12.9902		0.738739	14.5866
9.8887	4.2015	15.61	18.38	8.468	40.3986	6.3361	11.8575	12.932	6.9732	5.7915	8.9544	15.3681	18.3012	77.8096	32.5775	12.4683	10.867	8.7481	5.5857	6.2206	11.9127	4.3015	5.7615	8.801	8.231	8.4694	9.248	7.059	6.94	15.1115	13.708	8.839	9.5103		0.747745	13.5073
10.0079	5.9288	15.403	12.328	9.642	38.6366	8.4891	8.3888	19.4535	6.6398	7.6604	10.322	15.8136	13.9291	67.3755	26.6082	11.6951	11.6757	7.5287	4.737	13.5257	8.2681	5.3956	10.6316	6.6663	7.435	5.5907	6.527	4.655	10.114	15.2319	14.658	9.919	9.8196		0.756758	13.0513
10.127	7.5147	16.956	10.58	10.748	33.6213	11.0985	10.1985	21.4588	6.2321	7.0859	11.0494	9.1163	16.509	55.5109	28.7072	10.3196	12.7433	8.6832	5.2394	10.1587	7.7981	6.7836	6.6947	3.9212	7.916	4.0682	5.225	5.904	8.186	9.3624	12.862	11.484	11.9375		0.765764	12.2931
10.2462	6.5106	15.636	10.65	11.178	32.0948	11.3838	9.2791	21.1496	9.8878	10.2829	10.6066	6.4345	12.4613	41.5628	27.3914	7.6301	11.0161	9.8558	5.2771	4.7117	8.1509	6.9996	3.2884	4.2809	5.435	2.0399	5.057	5.44	6.958	9.4209	7.407	10.246	10.2892		0.774777	10.9095
10.3653	4.9622	13.609	10.166	6.675	23.0585	11.3892	8.1673	17.1729	9.7343	17.551	9.165	15.4707	6.1488	30.8025	21.9798	10.315	10.5033	9.2014	4.4844	4.0204	3.3264	8.3632	4.0136	3.661	7.067	2.3441	4.206	4.152	10.51	15.0186	5.959	11.701	8.8564		0.783783	10.1138
10.4844	6.8842	11.994	6.514	8.885	20.6343	13.113	9.6789	16.5028	8.5	17.2959	10.2432	13.6778	8.3864	19.468	19.8061	8.0099	9.3291	6.7941	6.2788	5.3531	5.6714	5.0264	3.4692	5.2335	5.686	2.8916	2.601	6.751	8.6	12.7265	9.609	12.503	10.9049		0.792789	9.66734
10.6036	5.1959	14.807	8.682	8.664	17.6263	13.7996	9.3525	19.0358	8.787	20.4515	7.9985	8.5172	6.7758	23.0256	14.2489	7.1819	3.7721	4.4623	4.2924	4.256	4.1519	3.4723	3.0283	2.6553	5.635	3.0863	2.326	3.881	7.346	13.0506	15.406	10.427	14.2361		0.801803	9.07982
10.7227	5.456	21.147	10.164	8.885	11.3517	14.6528	7.7455	12.7118	13.782	17.0191	6.7264	8.8039	3.6088	19.7766	19.6685	6.9421	3.647	3.2298	5.0615	3.3195	2.99	2.3538	4.5307	4.1093	2.809	3.3862	2.582	2.708	5.914	8.3917	12.584	20.215	12.1779		0.810809	8.74093
10.8419	7.0649	15.056	7.249	8.45	9.7372	6.9402	6.838	13.0246	14.7715	21.2194	5.6887	12.1942	4.0276	11.4577	11.9835	5.708	4.4569	3.265	4.4153	3.3036	1.8761	1.8457	5.0445	2.9459	1.991	3.1808	2.875	2.379	7.116	10.1276	11.501	18.459	9.9153		0.819822	7.76085
10.961	7.5707	17.608	8.131	5.84	16.9822	7.7098	6.4483	19.4094	10.3874	13.4871	5.8787	9.1168	4.4702	5.8838	9.4057	6.0046	2.5503	4.1961	4.2364	3.5757	2.1286	3.1615	3.5762	2.6208	2.224	3.7139	2.989	2.678	5.576	6.0042	12.732	18.797	10.1805		0.828828	7.43254
11.0801	4.1117	12.192	8.01	7.951	18.3808	11.2879	8.4943	9.9411	14.846	13.1024	6.0793	7.7295	4.4033	2.7438	5.9629	5.438	2.6693	2.5607	3.8614	2.584	3.3494	2.8168	2.0077	2.3067	2.209	2.2399	2.908	3.713	3.003	5.0638	11.58	18.379	8.4546		0.837834	6.67819
11.1993	5.7699	16.696	7.984	7.22	16.7772	11.9973	9.1109	7.126	11.0848	15.1904	5.2327	9.497	5.3076	4.0779	5.281	5.9808	2.5327	3.1974	2.8485	2.283	2.6039	3.0808	2.5102	3.3992	2.192	3.1239	2.807	2.599	4.008	5.1566	17.471	21.99	5.6178		0.846847	7.02286
11.3184	6.8672	14.3	6.668	10.09	17.1776	8.5673	8.1786	10.5197	12.4526	13.4949	3.9952	4.7237	4.0605	3.4485	5.0838	4.0078	3.3986	2.1497	2.3618	2.2122	2.2729	2.4918	2.8154	4.3154	2.525	2.812	2.229	3.344	5.229	3.4447	17.358	21.177	7.5152		0.855853	6.70567
11.4376	5.8771	19.062	9.576	6.698	21.7097	11.2669	8.6236	17.5781	13.847	8.2044	3.8082	4.2932	3.0847	2.9378	3.2811	2.4658	3.3705	1.9677	2.6736	2.4755	3.0939	2.7349	1.7964	2.8222	2.182	2.2703	2.275	2.924	4.74	2.2122	14.123	19.099	10.3275		0.864866	6.76974
11.5567	5.2387	15.765	12.105	7.321	22.6635	16.0608	7.2875	15.9105	10.7841	8.2324	3.5476	5.7722	3.2349	2.3302	2.6455	2.3478	2.2491	3.2299	2.5886	2.3422	1.8989	2.2466	2.4692	2.4695	2.706	3.5499	2.925	2.464	3.193	3.6162	15.216	17.567	9.3504		0.873872	6.70692
11.6758	4.1408	14.043	11.585	5.994	16.3136	21.3659	7.87	17.4797	9.4347	6.9301	3.1527	2.6818	3.1993	1.9607	2.9553	2.724	1.9314	3.1605	2.0265	2.4185	2.2518	3.0271	2.0023	2.1169	2.032	4.2425	3.788	2.421	3.08	7.1845	15.514	13.259	7.6488		0.882878	6.36168
11.795	5.7674	14.139	8.654	5.512	13.1772	15.6651	10.9671	15.6828	7.9253	5.62	3.5062	2.178	3.4161	2.072	2.8237	2.3632	2.0816	3.0185	3.9201	2.1951	2.7255	3.6071	2.4401	1.9873	2.696	2.6647	3.45	2.022	4.613	3.5892	11.607	11.631	8.9505		0.891892	5.83842
11.9141	2.1568	10.644	11.939	7.865	12.7394	10.9518	9.8178	17.1483	4.7656	4.6399	3.3468	2.4696	3.1046	2.3915	3.63	2.2494	2.4564	2.383	2.7105	1.9349	2.573	2.1027	2.2934	2.5585	2.207	2.3608	3.46	1.996	3.566	4.5599	4.115	11.522	8.246		0.900898	5.17893
12.0333	3.1224	6.579	12.46	9.642	9.8606	8.2851	12.62	17.4402	6.8798	4.7599	3.0512	1.9117	2.8585	2.6037	2.7143	2.2324	2.4988	1.839	2.2896	2.0653	2.0642	2.3415	2.2946	2.1963	2.272	2.4066	2.586	2.33	4.283	3.7753	3.674	12.784	10.6224		0.909911	5.13162
12.1524	4.0755	5.73	6.833	9.105	16.179	7.1329	10.5812	21.9791	8.2196	2.655	2.8374	2.1337	2.823	2.367	2.113	2.3254	2.5017	2.6496	2.4476	2.8951	2.5003	2.8719	2.2677	2.5006	2.092	2.5784	3.732	2.735	3.161	3.3371	5.128	12.284	7.0492		0.918917	5.14609
12.2716	3.3334	6.589	8.99	5.864	16.4035	6.1925	9.1265	20.4908	5.5376	3.4383	2.6545	1.9475	2.4338	3.7553	2.4006	2.7452	2.9801	2.2745	2.1293	3.7589	2.4223	3.6323	2.1349	2.2674	2.037	2.7531	2.504	2.374	2.834	3.6691	6.424	12.596	5.1226		0.92793	4.96412
12.3907	3.4525	6.839	6.295	5.929	15.6048	7.0194	6.1213	14.6997	4.6028	2.8232	2.9905	2.0611	2.1035	3.048	2.2288	2.1051	2.092	1.9558	2.0027	2.8954	3.2869	2.4457	1.9317	2.0887	2.368	1.9918	3.746	1.988	3.149	3.6821	4.163	11.581	5.8171		0.936936	4.39723
12.5098	3.6492	5.236	4.128	4.77	10.8149	8.5745	4.4592	16.7609	6.3079	2.9974	3.0983	2.028	2.648	4.1105	2.3558	4.6692	2.059	2.0073	2.0895	2.1398	1.9123	3.7088	2.5089	2.732	2.53	1.8193	4.093	2.078	3.009	2.4751	2.66	12.138	5.4327		0.945942	4.30305
12.629	3.5733	4.281	3.605	4.279	7.1425	5.6425	3.4412	16.5122	8.7738	3.1452	4.1235	2.0435	4.0087	2.4814	2.1723	3.8315	2.2682	4.3884	2.146	2.6216	2.1448	3.0273	2.8921	2.8278	2.022	2.1657	2.652	1.904	2.057	3.4269	4.471	9.044	5.9223		0.954955	4.09205
12.7481	2.2749	3.022	4.169	4.928	4.7952	4.395	2.9826	10.8034	5.5704	2.9924	3.0437	3.2638	1.9999	2.7378	2.4209	2.7058	2.2289	2.9292	2.666	2.2737	2.9628	2.1642	2.0237	3.5258	3.018	2.7074	1.897	2.144	3.098	3.272	3.105	11.693	6.3972		0.963961	3.64275
12.8673	2.2351	5.384	2.37	5.222	3.3805	5.4694	3.6559	8.5372	8.2412	2.6983	3.0016	2.4178	2.0383	2.6449	3.0108	2.8415	2.4531	2.7233	2.2024	4.0532	3.0861	2.169	2.8439	3.7172	2.284	2.0169	2.648	2.257	3.708	2.1032	2.552	9.112	7.2666		0.972975	3.6468
12.9864	2.4921	4.53	2.245	4.469	3.7058	3.9841	5.1737	5.6795	5.1766	2.5188	3.9109	2.7408	2.5938	2.0979	1.8624	1.9467	1.8856	2.6461	2.9885	2.5764	3.9421	2.026	2.3679	2.6365	2.217	2.3862	2.213	1.878	2.026	2.5669	4.063	7.671	3.9779		0.981981	3.18773
13.1055	2.0558	4.031	4.095	2.655	3.388	2.9908	3.1737	5.9385	4.8435	2.122	3.537	2.3275	3.5867	2.2005	1.8674	1.9073	2.0184	2.669	2.1823	2.2676	3.5322	2.656	2.0106	2.6554	2.094	2.8529	2.502	1.936	1.894	3.118	2.697	6.227	5.7384		0.990987	3.02335
13.2247	2.3243	2.154	4.74	4.824	4.2889	3.7793	3.3261	5.0198	2.4618	2.1973	3.0015	2.8344	3.2933	2.1169	2.0831	1.7941	2.2343	3.607	3.6953	2.8606	2.1691	2.2108	2.9946	2.0764	3.455	2.1375	2.251	2.64	1.921	2.2669	2.003	4.273	4.1785		1	2.94584

## Sheet: Image39
X0	Y0	Y1	Y2	Y3	Y4	Y5	Y6	Y7	Y8	Y9	Y10	Y11	Y12	Y13	Y14	Y15	Y16	Y17	Y18	Y19	Y20	Y21	Y22	Y23	Y24	Y25	Y26	Y27	Y28	Y29		Ap-Basal	Avg intensity
0	37.8197	27.3944	22.9205	15.853	13.6816	11.4081	12.7858	14.1858	12.6129	11.4686	11.5675	18.759	18.2334	19.8189	15.4101	20.8144	22.7422	21.4439	7.7407	12.7084	12.4597	13.9717	21.5291	16.4598	18.4132	14.6902	24.3691	24.7771	14.0539	23.3248		0	17.7806
0.1191	41.0854	32.9928	21.8948	18.219	22.3918	8.8203	10.0651	12.046	13.7345	15.4177	9.6392	18.9585	13.7382	19.7098	21.2784	29.7618	27.1103	21.5088	7.9921	8.7468	11.6509	16.5603	18.511	18.2544	20.652	17.1648	25.5517	18.6643	19.4819	17.374		0.00787131	18.6326
0.2383	30.6804	33.9266	20.1151	13.4258	17.7354	11.2168	9.6667	10.0377	12.1769	12.8401	16.5933	19.4611	19.744	22.8428	17.1676	25.575	30.799	19.7044	10.8097	11.1024	9.4032	21.4951	33.5468	18.8219	22.435	12.8787	22.8588	24.977	20.2904	22.2306		0.0157492	19.1519
0.3574	25.0836	31.0828	24.3414	18.6435	23.0958	15.289	12.3401	13.7706	14.4116	12.6496	21.9236	23.9883	25.9303	31.0178	23.2515	33.6245	34.3264	25.8954	15.1817	12.5739	11.4574	19.1188	25.3726	24.2046	17.027	14.0645	26.0771	33.5276	21.9428	22.7785		0.0236205	21.7997
0.4766	23.5194	38.0943	27.5866	33.1806	24.7848	16.27	11.326	15.1918	11.495	17.7269	26.7108	22.5653	43.4884	28.1214	24.7465	34.6706	44.5719	34.2074	19.3189	10.0519	9.6642	23.6799	26.5011	22.7967	17.1011	16.5454	30.8898	36.6427	23.0161	23.3734		0.0314985	24.5946
0.5957	29.6742	39.7603	29.3282	35.1572	37.0597	18.9098	5.6641	15.4794	15.0208	11.5829	18.3914	37.8279	34.7861	35.932	26.4952	35.6405	55.3862	38.6736	15.1118	11.8222	9.6906	24.6708	28.7923	22.0478	21.0198	14.278	29.0708	39.6399	22.9273	25.81		0.0393698	26.1884
0.7148	31.3257	47.2234	33.4716	33.5886	42.0163	29.1514	12.0509	10.5197	11.6	14.9942	23.0488	29.668	28.1443	35.9521	26.5639	32.9562	54.4831	42.4354	15.7152	14.1952	14.483	21.8792	28.4086	24.0613	22.7731	17.1064	26.1318	50.3548	14.8544	24.635		0.0472411	27.1264
0.834	29.5005	48.6321	35.9112	40.9977	43.7402	26.9952	9.0868	11.2285	13.7226	10.9623	24.5673	29.5358	27.7409	39.8428	30.2155	32.1486	57.1719	40.2965	16.3811	16.6242	15.0909	30.5976	23.9614	27.7616	19.7621	18.1461	21.5837	43.1968	22.4346	21.2883		0.055119	27.6375
0.9531	29.521	38.9738	31.9451	30.7537	41.3492	27.6448	11.1231	13.7314	10.2068	14.2375	37.5991	27.2595	25.6229	46.0929	40.3131	29.6346	63.7632	39.2741	10.4343	16.316	8.9685	26.285	23.3697	24.5564	16.0989	18.8207	15.9725	37.5072	25.9012	22.4829		0.0629903	26.8586
1.0723	24.6822	33.751	35.5255	33.9004	40.6391	31.8023	8.5918	11.8679	13.6169	17.837	30.2303	25.7338	28.653	52.0835	37.3395	29.1208	68.5111	45.5881	13.3936	14.8457	10.6375	36.6215	23.0738	20.2033	14.8586	12.5897	17.8973	27.2184	20.7386	30.9854		0.0708682	27.0846
1.1914	25.6828	31.301	31.5286	41.2801	39.5946	32.7993	8.6874	13.8039	15.5681	14.6747	22.8848	22.9251	35.3973	49.4581	33.4421	31.1266	68.4629	43.2737	9.2736	15.4032	14.0101	30.9711	27.5004	16.5343	17.5912	13.7533	15.5476	23.9454	15.1942	25.9654		0.0787395	26.2527
1.3106	22.6304	43.1763	28.9024	30.757	38.4916	36.4773	7.2408	11.0508	10.4592	16.9277	27.0755	17.2086	29.7279	46.776	31.1963	29.786	71.8366	53.9781	9.4976	18.9161	12.4604	29.6222	19.7456	16.9625	11.1454	12.7131	14.7888	22.0289	15.5196	17.7925		0.0866175	25.163
1.4297	26.6194	51.8589	29.8697	34.3872	41.9276	26.5688	10.3203	9.5743	8.6072	13.4789	24.4599	14.2967	31.1939	45.1897	41.5138	19.6275	63.439	51.5317	12.1452	15.3787	14.256	26.8183	15.3866	16.8489	10.0028	10.1652	13.0595	13.6471	18.7361	15.7263		0.0944888	24.2212
1.5488	29.2005	49.3312	38.5855	42.2672	42.2296	19.2172	10.6325	10.2554	10.8086	15.6059	26.6032	15.5559	28.1282	46.6418	48.1674	19.8726	54.8396	42.6866	13.65	17.527	14.009	24.9913	16.3995	19.2446	11.8359	7.7469	9.9942	14.7141	18.1492	11.5265		0.10236	24.3472
1.668	26.1737	39.4249	37.0491	38.3883	46.3369	16.0235	7.8984	12.9312	11.8175	10.2939	27.1039	13.2358	22.3978	53.2157	40.9744	20.7644	48.9098	42.23	15.5798	15.3551	6.9526	20.843	19.9384	16.4512	9.8792	10.3828	10.9439	12.0636	23.1707	14.8827		0.110238	23.0537
1.7871	24.4855	41.9484	30.3599	36.1504	48.1399	18.6174	10.4513	10.714	10.1483	8.4055	30.1906	11.9784	17.3648	46.8562	37.6833	15.652	48.4029	45.4498	18.9585	13.3607	8.9222	22.8226	17.8198	12.9545	8.4426	8.057	11.2252	16.1239	20.3628	9.52		0.118109	22.0523
1.9063	28.2161	34.6436	31.223	35.1872	43.9111	15.0356	7.4999	11.3543	8.38	11.0783	21.6066	9.0205	15.5338	38.4374	29.7862	21.107	42.0614	46.775	18.3666	12.8524	9.643	20.8714	14.0837	15.6455	6.3749	10.3256	10.6436	12.9351	20.5675	10.9031		0.125987	20.469
2.0254	34.2147	46.4776	33.0757	43.6819	34.2312	16.9376	7.2947	7.3041	10.4732	12.0086	22.9892	10.4851	14.5985	37.4732	27.9385	23.8795	40.0943	46.6835	16.2807	15.5863	6.6513	13.6958	11.5917	11.9726	3.3783	7.6844	9.4921	10.0313	18.4124	10.563		0.133859	20.1727
2.1445	32.6893	44.3395	25.4333	44.542	39.1254	20.9384	8.584	8.784	11.4603	14.2563	22.4246	10.175	14.6817	30.377	28.7563	19.1527	23.686	49.4888	13.6774	15.1507	7.242	13.4882	11.7965	7.3333	5.239	5.6156	10.3012	12.8572	14.0734	14.9305		0.14173	19.3533
2.2637	36.3606	42.588	34.1789	36.4334	37.8946	18.3584	9.5136	11.858	9.723	13.2184	20.5521	8.5891	14.7579	32.0897	22.9294	23.394	25.7441	38.4093	14.104	12.1923	9.3135	10.1636	8.2063	6.8931	3.3149	5.6986	9.2323	11.8474	11.4689	7.8251		0.149608	18.2284
2.3828	36.1442	39.3525	32.8947	38.2938	41.7045	13.9952	7.8068	12.2694	8.9661	10.3533	15.9788	8.1914	15.1421	24.2303	22.1849	18.8394	32.3808	36.4866	15.3811	14.5233	7.6782	14.8854	7.1586	4.228	3.3063	4.3279	8.7647	10.935	10.5806	10.6957		0.157479	17.5893
2.502	45.9701	33.5715	23.2817	40.368	30.4574	16.7265	5.682	11.0838	9.1182	11.4026	14.5284	9.1566	17.5994	17.2613	18.4298	20.6189	30.1915	27.2798	6.9471	8.8269	6.6053	13.2904	4.1314	4.903	3.8114	6.7909	6.6541	20.5073	10.0173	9.8206		0.165357	16.1678
2.6211	35.3236	32.227	26.7923	29.6431	26.1195	22.4574	7.1618	13.774	15.276	15.7081	18.4975	5.0986	11.6654	18.0428	18.1136	15.4964	25.3199	29.6448	7.9665	12.2511	7.98	9.6003	10.6891	3.6671	5.1432	4.3595	7.9565	18.5118	5.7877	7.6608		0.173228	15.5978
2.7402	31.9834	30.3837	20.4182	25.7822	24.7163	15.6025	11.7302	14.4801	6.6979	10.1721	12.0929	5.9488	11.7126	14.5299	18.3933	22.6406	25.9394	32.0007	9.8875	9.5771	10.3565	8.1441	7.8362	5.9318	5.645	5.9129	5.2653	9.6382	9.1027	6.555		0.1811	14.3026
2.8594	28.7299	29.113	20.5316	28.0524	17.8463	14.8878	12.9608	13.1429	6.4296	13.1638	14.9088	6.3376	12.4836	9.1337	18.3883	27.6163	20.471	30.8379	12.2035	5.8361	12.2624	5.5841	4.9541	5.4466	3.3522	4.337	6.3764	8.7075	11.9332	6.54		0.188978	13.7523
2.9785	40.4343	27.9878	25.6502	21.9396	19.2792	14.6343	10.3484	14.4347	7.6788	11.9568	13.1989	8.5651	9.4093	7.7155	17.5032	14.0923	20.6057	21.7772	13.982	9.7766	10.4399	10.2264	6.4486	3.82	5.6621	3.3022	4.6664	13.9742	10.0094	6.5455		0.196849	13.5355
3.0977	37.6031	25.4854	25.2382	24.8125	11.2196	11.0482	10.0752	17.8545	8.4253	9.8241	9.2	5.5422	10.3041	6.9141	16.7356	11.6753	20.1693	22.2402	14.1947	11.1024	11.9284	7.199	6.5233	5.9944	3.7814	3.447	7.1955	13.725	9.3394	7.5587		0.204727	12.8785
3.2168	34.4818	24.1935	27.9034	19.0808	13.0288	15.5209	10.5241	16.2254	10.171	14.5419	9.9125	6.5737	6.9311	8.2502	20.6838	13.4929	18.5448	24.9069	13.167	11.0649	11.1058	7.7241	6.6896	2.9598	3.6246	2.8655	7.3428	8.971	9.6394	8.3817		0.212598	12.9501
3.336	35.17	20.649	24.1473	15.4832	12.1724	17.3053	8.0225	16.3498	9.7851	16.1141	7.928	8.6125	4.8895	5.2899	19.0992	14.8253	17.7454	27.1866	10.3256	9.7391	7.4698	9.4667	4.8647	3.5762	4.7532	2.1025	7.2182	12.2574	8.0069	8.8326		0.220476	12.3129
3.4551	38.6556	20.7716	24.2271	16.8197	15.4351	17.8155	10.0509	19.4242	8.0744	8.8842	12.4724	6.0856	7.0297	7.316	18.1402	14.2979	21.2892	28.7225	12.1878	7.094	6.1648	7.6128	5.3881	3.3282	3.6755	2.6467	3.381	14.9165	8.4256	6.4622		0.228347	12.5598
3.5742	44.467	20.6026	30.0188	13.2097	13	13.6203	9.4406	26.3249	8.0914	6.0786	11.7643	6.8158	8.2299	6.6278	19.1436	20.8858	15.1934	37.0858	12.2	5.4402	6.4966	4.4435	7.5611	4.8848	2.2046	2.0843	2.99	17.9904	7.5224	9.3789		0.236219	13.1266
3.6934	32.006	15.9876	30.0139	13.2869	16.8263	9.1177	8.5524	20.8807	8.6263	8.7313	15.6199	9.9124	9.6849	5.3454	17.8025	14.18	14.8645	30.0493	13.7694	4.7789	11.4581	5.3245	6.5991	6.5164	4.8456	3.0398	3.325	15.289	6.8077	10.6732		0.244097	12.4638
3.8125	27.9218	16.2166	19.002	11.72	18.3324	8.0386	9.867	19.9085	9.8362	10.0735	16.9188	7.6173	10.0545	10.0849	23.8463	15.4178	17.2385	39.3192	11.0339	7.6737	4.8231	7.3267	7.108	4.341	4.5947	2.4931	4.0586	15.3252	8.4216	8.2893		0.251968	12.5634
3.9317	33.5963	13.0584	18.982	13.5268	19.888	16.3773	9.9622	18.1937	13.3733	9.7561	10.0306	10.1941	9.031	7.5029	21.7356	17.4607	18.0021	39.3467	9.6084	9.2023	5.5502	5.207	3.4575	2.3433	3.5764	3.0213	4.1249	17.7486	7.7468	8.2649		0.259846	12.6623
4.0508	34.6911	15.4762	21.7659	12.8008	13.7006	16.8205	8.7266	17.4423	13.9618	7.6679	9.408	9.2721	14.2786	10.3151	24.1841	11.0746	25.0356	39.5477	9.4381	6.4446	9.2663	4.7514	3.3167	3.8915	2.2397	2.7417	7.2181	12.7178	8.977	8.075		0.267717	12.8416
4.1699	32.2466	12.3051	28.8247	12.929	13.2553	16.9098	10.5558	15.5755	11.5171	9.079	12.6162	9.1104	10.248	9.3109	19.508	12.0035	19.65	34.631	6.4866	5.9576	6.4187	3.2604	4.9055	2.8247	5.2031	2.6856	10.0475	11.5086	9.1506	6.6133		0.275588	12.1779
4.2891	31.059	19.0508	22.3055	11.7925	12.9342	17.2037	14.1183	12.3452	11.1844	9.759	10.4485	9.042	9.9615	10.7921	19.6275	9.3922	19.9935	26.5119	8.8811	5.9707	4.8713	4.4807	4.9148	4.9194	4.3479	1.8633	7.7795	10.5318	9.2778	9.8809		0.283466	11.8414
4.4082	34.1396	14.2556	28.961	5.0056	10.6213	19.2147	13.6798	10.7847	12.2755	14.8084	11.0201	8.5367	13.5167	15.3078	16.4856	12.0697	23.2329	23.733	11.0238	7.1408	6.9396	4.9043	3.886	3.8755	2.9195	2.3505	9.8678	8.7132	6.3768	10.4494		0.291338	12.2032
4.5274	41.0141	16.405	25.8232	5.2383	10.1862	18.2972	18.2785	8.9624	10.1374	13.5378	9.195	6.2678	9.094	12.4517	17.2881	9.0687	19.7469	23.425	14.187	5.0254	5.993	5.122	2.8006	4.8614	2.3071	3.707	8.4619	10.1055	5.9584	7.6476		0.299216	11.6865
4.6465	42.9333	17.2261	26.6462	7.0162	8.6494	18.3024	11.9302	12.7494	13.6928	9.0068	6.132	6.2966	4.8616	12.956	21.7808	13.1237	24.0367	22.5746	13.6551	5.7702	7.9927	3.1412	3.9292	4.0749	2.6792	3.5761	7.4105	7.1424	4.035	9.8984		0.307087	11.774
4.7657	49.0458	16.3158	23.3875	7.2123	12.7943	17.4012	11.2786	12.5021	10.8791	6.4275	5.8058	6.9245	6.9113	13.7693	22.3683	10.4006	19.8023	31.7832	10.9175	5.9577	5.7808	2.4377	5.0804	3.5864	2.5141	2.4194	6.4236	8.8926	6.0582	10.1544		0.314965	11.8411
4.8848	43.1165	16.2202	14.9158	5.0065	9.6957	16.6135	9.5126	13.3391	12.8767	9.0619	4.1019	5.045	7.7357	13.7025	30.5737	8.2909	22.8758	23.7323	11.5673	7.3241	5.069	4.4248	5.2307	3.0853	2.4856	2.9732	5.87	7.2392	6.1429	6.5121		0.322836	11.1447
5.0039	43.1123	18.6938	12.896	4.1406	8.2187	15.1313	8.6648	14.4552	9.8138	7.7168	6.8827	4.6247	5.4988	11.8792	27.9476	8.6212	17.7667	22.4883	14.7932	5.8493	6.1624	5.4429	6.2369	2.6929	2.7004	3.0052	5.6962	10.476	4.8932	5.6913		0.330707	10.7397
5.1231	44.8568	18.9719	15.1264	10.422	8.4793	18.0427	9.6323	10.6553	13.3707	7.1656	6.6687	6.3538	9.0749	10.1134	31.2358	14.1683	21.621	15.0054	19.3782	7.112	6.1687	4.5516	4.5741	2.3775	2.4405	3.9424	4.815	7.9325	4.0095	6.0799		0.338585	11.4782
5.2422	41.3923	16.1821	13.2238	9.1145	13.2242	13.818	13.5402	12.9659	14.2982	6.438	3.533	3.9075	8.7416	10.6104	24.5977	14.8058	17.0324	14.7123	15.569	8.3751	3.4984	4.7526	8.643	3.9461	3.1539	3.3667	4.9751	6.5783	4.4574	7.8235		0.346457	10.9092
5.3614	50.6297	16.616	11.8722	9.8632	12.5686	7.9033	8.5951	12.5164	10.1987	6.5021	3.8982	4.3349	4.8271	7.8756	22.5526	13.3947	15.7698	14.016	12.9428	10.3029	4.2588	8.2802	9.1412	6.0053	2.0049	3.6936	3.2282	9.7591	3.3154	7.9193		0.354335	10.4929
5.4805	45.4132	24.0121	16.5658	10.6826	9.9586	10.8757	6.4233	12.2531	15.5937	7.8985	5.5825	5.4224	4.3781	6.1093	19.849	10.5904	15.9972	11.5768	12.3146	5.6928	3.1245	8.1363	5.4971	5.5894	2.095	3.1956	3.5489	7.8688	3.5581	5.1156		0.362206	10.164
5.5996	52.9145	21.2149	14.5676	6.8525	11.4264	10.4683	8.9567	9.0946	16.187	6.3686	3.3646	5.4039	8.0347	8.2073	13.3877	10.8972	14.9129	11.9619	13.2199	6.577	4.529	7.1768	5.2264	3.321	2.5886	2.8327	3.6085	5.5387	3.337	6.8604		0.370077	9.96791
5.7188	42.3965	28.2818	17.0134	6.3155	12.6143	10.2951	10.5373	11.6979	13.8298	7.0236	6.0468	3.8487	6.5668	7.4592	17.6281	9.0291	7.8934	8.4259	12.9147	6.5259	4.743	7.0921	3.9631	2.6603	2.6282	3.0289	2.3657	5.404	2.9062	4.6134		0.377955	9.52496
5.8379	42.3316	31.0028	12.362	8.7967	10.1727	12.7901	6.2081	11.3752	8.8016	12.9447	3.7773	2.2086	6.3786	8.726	26.9649	10.9935	7.6657	12.9692	13.2432	6.3644	2.4656	3.767	5.3814	2.682	4.5961	1.9515	3.097	8.0688	3.5112	8.466		0.385826	10.0021
5.9571	51.0698	28.2138	15.8265	4.7271	9.2223	18.665	7.0145	7.0675	8.8815	11.1232	5.4301	2.2984	8.8613	8.8549	19.1291	10.6535	9.6615	16.2204	10.3079	7.0885	2.2957	4.6969	3.4604	2.4082	2.8688	2.5908	3.7614	6.895	5.2316	7.3225		0.393704	10.0616
6.0762	42.6151	29.8084	11.522	8.5064	8.707	15.7066	5.6715	5.2886	10.0815	7.8794	5.652	3.6194	5.421	14.8399	15.9688	7.7001	9.3421	13.8168	11.208	5.6554	3.9089	5.5731	2.3045	2.2021	2.0337	3.5453	3.2888	9.1173	7.71	8.3398		0.401576	9.56778
6.1953	53.0509	24.93	10.9589	7.3663	8.652	19.9661	6.8462	5.7247	9.9172	6.1279	3.4491	4.5589	3.0384	12.5677	17.6726	9.9848	8.0525	14.0431	6.7429	7.4623	3.0686	5.1719	3.0767	2.6067	1.9609	2.5108	3.6244	5.8813	7.1648	7.0944		0.409447	9.44243
6.3145	43.8611	34.4121	10.5055	8.1557	7.5446	15.9459	5.1295	12.2948	9.9629	5.4025	5.6386	4.3298	3.7527	10.8727	18.3014	10.465	4.8229	11.3848	7.3846	6.0265	3.7592	6.3403	4.3141	2.7963	1.9278	3.2494	2.5719	4.6407	5.273	5.2677		0.417325	9.21113
6.4336	42.1222	35.9943	7.7546	7.8573	8.7599	12.1147	5.2118	4.3903	15.432	7.909	6.1897	4.2894	6.5653	9.0406	19.2526	9.92	10.3355	13.4221	6.7337	5.1555	3.616	7.9741	4.1385	2.3159	2.5649	2.089	3.3184	6.5212	4.4652	4.5787		0.425196	9.33441
6.5528	44.2077	28.9477	13.0364	12.5185	8.5816	15.237	3.5144	6.3519	11.1912	8.9029	4.658	4.3326	3.4294	8.4508	17.8562	13.4919	13.5659	17.2087	10.4925	4.969	3.1042	8.6566	3.784	3.5629	2.8512	1.9749	3.934	8.2624	2.7084	5.3775		0.433074	9.83868
6.6719	52.1553	28.3318	7.5904	10.504	12.0975	11.7861	3.3279	6.0906	10.293	7.8591	4.2456	3.7068	3.3808	7.2634	19.7594	8.7412	6.9087	13.6134	10.3193	6.6686	2.8288	5.7438	4.6371	4.7866	3.7342	2.0653	4.6028	10.5065	5.4895	5.8124		0.440945	9.495
6.7911	37.4611	18.2244	9.1457	13.5431	10.0863	15.543	4.6399	9.1135	14.531	5.8673	5.8435	3.0296	3.5887	5.5884	20.279	9.4688	9.6928	13.9829	10.4672	3.4912	2.3792	4.918	6.1067	3.3096	3.0703	2.0298	3.1564	9.1743	4.0061	5.3326		0.448823	8.90235
6.9102	40.1465	15.3683	8.9901	14.9266	7.7929	17.9426	3.3022	6.1451	12.5591	5.1414	5.8101	2.4788	2.045	8.577	19.452	9.9682	5.2314	18.3526	20.0919	6.3001	2.409	4.7378	5.8687	3.0949	2.4532	2.2694	3.2965	14.6451	6.0008	5.8351		0.456695	9.37441
7.0293	44.2804	21.0288	6.7032	13.1102	10.2853	15.1457	4.7851	4.1987	11.8221	8.1694	3.1784	4.2445	2.3701	6.8068	19.0977	9.2392	5.2154	19.5223	16.8669	3.5902	4.1772	4.9389	7.9545	5.1394	3.6312	1.9622	3.4928	11.0231	6.1007	5.6978		0.464566	9.45927
7.1485	44.5332	23.0143	9.5234	11.5135	11.381	15.928	4.2488	3.9849	13.6065	7.8683	3.2693	2.4624	2.8895	7.0496	16.4658	5.4067	4.4352	14.6093	14.8423	5.1811	3.9463	6.5333	6.0062	5.033	2.7815	2.4005	3.075	9.9718	3.6409	9.148		0.472444	9.15832
7.2676	37.3455	16.6142	7.1466	6.6067	14.4362	16.2858	3.7651	3.2021	16.1762	10.439	4.1865	2.3582	4.1763	6.7548	22.3699	10.3835	7.1689	16.8456	14.5202	4.2699	2.4719	7.0483	6.9053	3.5052	2.2881	3.2848	3.1091	9.9147	4.4499	8.0812		0.480315	9.20366
7.3868	29.912	19.4911	5.9071	5.8389	14.1832	14.2162	2.8999	4.3625	13.4881	9.3052	5.8083	2.3643	3.1708	8.5869	17.8453	10.8273	11.4517	15.8975	15.5962	3.9133	2.8087	5.6821	6.5182	3.753	2.0275	2.9568	2.9519	7.9155	4.5146	7.0484		0.488193	8.70808
7.5059	22.9815	17.6293	4.4369	14.899	13.5956	13.9385	2.1991	5.0415	14.6979	10.1584	4.2966	2.0522	4.1896	7.1572	14.8171	8.6848	7.996	12.8823	16.9316	4.2593	2.8521	4.7274	6.0121	3.9082	3.684	3.094	3.4436	8.1432	5.3048	5.4558		0.496064	8.31565
7.625	25.1994	15.5867	6.9979	10.6907	12.3706	11.4797	2.6741	5.0302	11.8747	7.6795	3.0015	2.1016	2.5116	5.6087	11.3866	12.7131	11.2679	13.4308	19.9682	3.757	2.9628	4.6419	7.1569	3.9302	3.6406	1.9987	4.2054	7.7818	5.1779	6.9448		0.503936	8.12572
7.7442	22.2373	17.6607	9.0583	9.5712	13.9722	16.2904	3.5944	4.0879	11.7468	8.7086	3.1897	2.1827	3.6454	7.2939	15.858	13.1669	11.4974	15.9553	21.5414	3.4715	3.8998	5.3883	5.4718	3.0383	3.2748	4.3124	2.9377	5.2515	5.3198	8.9938		0.511814	8.75394
7.8633	17.8598	15.1053	5.5876	6.6138	9.2019	12.0445	3.3617	3.2453	10.6592	7.14	3.5807	2.8591	3.6396	5.4666	18.0305	11.1609	7.6676	17.7857	26.8396	3.4464	3.2219	4.2128	5.2962	2.9463	2.356	3.4479	2.9194	2.8046	4.8797	7.3551		0.519685	7.69119
7.9825	15.311	16.4398	6.3615	7.944	8.4147	11.5531	2.3551	3.8122	9.6719	10.5112	2.6273	2.6454	4.3986	9.5568	18.077	10.0626	6.764	16.9676	23.7177	2.5676	2.7995	2.9393	4.1377	2.856	2.1842	2.0636	2.8013	5.8147	4.7073	4.6884		0.527563	7.4917
8.1016	18.5929	22.4222	5.5434	9.4231	9.2412	10.6486	2.5229	5.3201	17.811	9.2142	2.5682	3.7029	3.4675	8.3995	14.3452	14.5324	7.5607	17.422	23.2583	2.8185	2.8887	4.9844	3.8451	4.5675	1.9148	2.1382	2.4687	6.4849	6.1538	6.0729		0.535434	8.34446
8.2207	16.5033	21.9754	8.4913	11.0607	6.1029	10.1115	2.8001	5.3309	11.9754	13.2777	2.7089	2.9019	2.4229	7.24	18.6542	10.279	12.4093	18.7356	22.5162	2.9533	2.809	3.4236	3.2631	5.0355	2.615	1.9462	2.6832	3.6861	6.4285	3.7772		0.543305	8.13726
8.3399	17.5467	24.5358	7.4972	13.5217	8.4734	6.965	3.2814	2.3872	13.0384	15.3734	3.408	2.6309	3.2207	10.7844	15.2022	8.4329	12.337	13.0059	17.4823	3.0167	2.5685	3.5631	4.568	5.2007	2.9921	1.9013	3.9206	2.7657	4.8313	5.4616		0.551183	7.99714
8.459	22.8556	19.7028	8.8271	13.3462	8.0836	7.3271	3.4076	2.8687	15.0886	10.3333	3.1101	1.8643	3.9493	7.9589	19.7835	10.3376	10.7371	11.9441	17.7936	1.9678	2.4851	5.5753	4.5332	3.3012	2.5017	2.2765	4.3501	3.4738	4.9796	6.3301		0.559055	8.03645
8.5782	22.507	20.4096	7.0334	13.0842	6.5242	7.3481	2.6123	3.2559	12.7266	8.5669	4.0561	2.6846	3.1344	5.6456	20.3707	13.4515	10.7691	13.7054	13.1566	2.1338	2.8147	5.927	2.464	5.4146	2.0829	3.5108	3.5808	5.2606	4.2822	6.1551		0.566933	7.82229
8.6973	19.4746	19.1177	7.8511	13.0952	9.1249	7.3051	4.1384	4.6393	11.8945	6.9527	4.811	2.7665	2.3469	5.6726	27.5512	12.7412	10.9739	15.7456	17.3643	2.4872	2.2714	3.0477	2.195	3.3168	2.2668	2.2226	3.999	3.0807	5.2049	8.0793		0.574804	8.05794
8.8165	22.133	18.018	9.227	15.8185	9.0252	9.1071	2.6712	2.5658	13.4692	10.7418	4.811	3.4625	2.6918	7.142	26.8448	9.4277	6.3527	15.4135	20.9027	2.8051	2.5434	5.887	3.5431	2.8515	2.2051	2.3024	4.0916	4.2101	5.2529	11.3995		0.582682	8.56391
8.9356	15.0581	17.2439	8.2825	11.3039	9.8924	4.0835	2.1096	3.7033	21.0351	7.4009	3.1386	3.8113	3.8026	6.985	25.4182	5.7933	10.904	14.9906	12.3879	2.6611	2.531	4.1566	2.4389	3.0854	2.1662	2.7381	4.6475	4.1881	5.055	10.0259		0.590553	7.70128
9.0547	18.7972	14.1752	6.6744	8.8274	7.4129	7.306	2.5915	4.0891	17.576	8.7687	4.6757	2.8212	2.3386	8.9887	29.5914	8.5595	14.2953	19.9021	12.4781	1.9994	2.8799	5.135	3.2805	3.4982	2.3828	3.8277	3.9917	4.4844	5.6708	6.0106		0.598424	8.101
9.1739	12.276	18.1972	8.0183	9.5535	9.8598	4.8489	3.2732	2.4038	22.2153	9.9424	2.6714	2.1135	4.7265	5.5158	37.9657	9.0358	18.1609	21.9604	11.8864	2.9818	3.6094	2.3572	3.5293	4.2414	2.6731	2.1073	3.5288	4.8077	4.3422	9.5789		0.606302	8.61273
9.293	12.4843	24.7188	6.0947	11.5468	8.2222	4.3507	3.1532	2.2615	18.7656	9.4384	3.4279	2.3711	3.57	6.2396	33.1427	5.923	20.9225	16.5993	12.0914	4.4466	3.013	2.3855	2.0874	5.4711	2.0199	2.2625	2.6359	3.509	4.5011	12.956		0.614174	8.35372
9.4122	14.475	32.6578	7.1562	7.9376	6.3809	4.9671	3.9129	2.7323	14.3241	7.1595	4.3025	3.8128	3.8604	7.4954	26.8609	6.879	24.7974	16.3594	13.5605	4.2726	2.4773	4.2083	3.0536	3.1674	2.2807	3.2965	3.3926	3.7903	6.1739	11.8808		0.622052	8.58752
9.5313	11.4899	26.7379	6.5785	9.5292	4.4351	4.6927	3.8536	2.9588	16.2857	8.424	4.6023	4.4968	4.8481	8.3669	21.5355	7.3067	22.815	13.0971	11.2343	3.3609	2.5833	2.8278	4.5485	5.4145	2.4086	3.0818	4.9986	4.4549	5.0547	10.2518		0.629923	8.07578
9.6504	16.4345	23.4988	7.6221	10.9472	5.0479	5.4888	3.3223	2.8283	11.5088	11.0571	4.5556	3.1574	2.7869	5.7592	23.7997	9.0988	22.3907	14.7945	11.2901	3.5654	2.137	4.8101	3.0276	3.4679	2	2.3547	4.1535	7.1051	7.0202	11.4911		0.637794	8.21738
9.7696	16.5451	21.0671	9.8877	10.8203	6.4318	4.2511	3.7137	2.8466	11.8068	13.1314	5.0245	3.4124	2.6319	8.3003	29.0736	10.0983	25.9974	17.7958	12.3308	3.6727	2.5343	5.0378	3.689	4.2665	3.0435	2.7022	3.4403	8.7023	5.461	12.8346		0.645672	9.01836
9.8887	20.6229	26.5446	9.8062	8.1011	7.6813	4.6865	3.3832	3.0894	11.1376	12.8265	3.8166	2.8699	2.3341	9.2493	26.0882	7.7987	22.5168	15.242	10.138	4.3359	2.9699	5.7404	3.5185	3.3945	3.1317	2.0918	5.1448	7.1552	5.8913	13.8442		0.653543	8.83837
10.0079	19.4913	22.7447	7.1931	9.848	7.1057	3.1854	2.7871	3.4364	9.952	13.6105	3.508	3.8688	2.887	6.4196	22.9829	7.3805	24.4326	14.3173	14.6816	2.5546	2.1184	5.9741	5.1898	2.8708	2.4173	2.3254	3.6643	5.2734	6.6156	8.8258		0.661421	8.2554
10.127	12.4967	19.2743	7.148	7.3241	6.3834	2.971	3.2083	3.2849	5.7827	9.2856	2.0852	2.6998	4.4929	5.9136	28.4747	12.6076	16.2639	16.3173	21.2676	3.0882	2.5953	8.3702	3.5495	4.8085	2.8819	2.5596	4.968	5.9233	5.1743	10.4004		0.669293	8.05336
10.2462	14.4602	20.5497	8.8068	7.1076	4.989	4.5464	3.6981	4.7392	7.1408	13.9863	3.3988	1.9181	3.7745	5.0764	25.9028	12.9236	19.8505	19.1677	19.3197	4.3984	3.8074	3.0834	3.3888	4.5837	3.0941	2.8769	7.909	6.2883	4.5641	4.6379		0.677171	8.33294
10.3653	13.9613	16.0781	7.7256	7.4982	7.84	5.9148	3.2163	3.6957	7.3486	8.7234	4.5917	2.3257	3.4678	3.5344	19.9613	15.2524	23.3611	19.0293	14.7747	4.0584	2.2113	3.6995	4.8698	5.2799	2.3892	2.0284	5.1495	5.3467	5.5495	7.0427		0.685042	7.86418
10.4844	12.6806	15.2729	5.7967	9.3146	5.9644	5.9812	2.3273	2.7042	5.906	6.736	4.9338	3.0446	2.8837	7.2508	16.5844	14.8338	28.2774	19.856	11.9769	5.2556	2.1105	5.2742	6.2401	5.363	2.8041	2.4611	3.0712	4.8978	5.5243	8.5049		0.692913	7.7944
10.6036	9.9084	13.0505	8.9118	10.2149	7.5363	5.6575	3.0101	3.0937	8.6114	7.8041	3.3932	2.2582	2.7916	7.9549	21.3714	17.7852	26.1517	24.0392	11.7667	4.3828	2.35	4.5497	5.0772	4.907	3.1731	2.4213	2.4685	3.276	6.1331	6.6203		0.700791	8.02233
10.7227	8.9948	9.1713	6.4043	8.9881	6.8833	6.1281	2.7677	3.6618	5.5831	9.3268	3.551	2.5533	3.131	5.6326	25.0134	17.7615	18.6678	18.7868	13.897	2.8608	2.2716	6.4629	3.7573	3.7854	2.651	3.2262	2.8489	3.6808	4.978	3.6445		0.708662	7.2357
10.8419	7.1517	6.1426	5.1958	10.6386	5.0401	5.3175	3.256	5.0959	7.0071	7.6088	2.4066	4.1318	4.1898	4.4931	18.8486	18.2216	19.8921	23.9106	12.195	4.5532	2.5285	5.4872	2.5925	3.6523	1.8118	4.1734	3.6283	5.0014	5.0645	4.4909		0.71654	7.12424
10.961	6.0725	5.6222	5.4322	6.7165	4.549	6.4361	3.7148	3.0937	6.9742	6.7961	4.1207	2.5651	3.1041	6.4049	15.2637	20.5872	16.4473	23.4981	10.9481	2.4557	2.8875	5.7932	6.1122	5.2281	2.3711	4.4632	3.5087	6.0327	6.7769	5.3701		0.724412	6.9782
11.0801	9.0522	5.6918	6.6749	7.4015	8.0439	6.7118	3.9045	2.6219	9.5868	6.3509	3.7046	4.0769	4.3075	7.2145	18.5527	13.8711	15.3623	22.4036	12.2644	2.3077	2.4279	6.2266	4.8275	4.688	2.3735	4.3782	4.2331	6.2762	6.896	6.0919		0.732283	7.28415
11.1993	11.6761	6.6412	5.2624	5.7098	8.3008	7.0526	3.7046	3.9058	6.9356	6.6916	4.9022	3.415	3.539	5.9096	14.2974	13.4095	13.6589	27.8134	15.6056	2.8477	2.2813	6.6618	6.8995	3.0125	3.5256	2.8041	3.2073	6.7566	5.8072	4.853		0.740161	7.23626
11.3184	12.3803	4.5781	3.8015	7.3579	6.4012	4.8671	4.245	4.3694	6.0893	6.2792	6.3937	2.574	4.3686	4.599	16.0082	16.6772	12.3236	28.3128	11.7233	1.9793	3.2615	6.6999	4.8022	2.6784	3.8465	3.2954	2.6344	7.2872	5.8377	3.8709		0.748032	6.98476
11.4376	10.8739	6.1521	5.5583	6.1054	8.5089	8.5267	4.0235	4.451	4.5669	6.9044	6.0587	3.7856	2.926	6.7536	20.9044	17.417	8.7903	25.1198	9.1981	2.1975	2.4486	11.2097	4.4132	2.3352	4.7213	3.3784	2.272	3.4498	6.0456	4.6917		0.75591	7.12625
11.5567	10.4052	7.5896	5.2622	7.6644	6.2792	8.8009	4.8078	2.7648	6.5569	9.2253	9.3341	3.9564	3.3083	8.7581	17.4462	11.4471	6.8942	25.5015	13.849	3.0712	2.4111	8.3231	4.9784	2.9696	2.6488	4.6986	2.3135	3.9501	6.5091	2.2461		0.763781	7.13236
11.6758	10.3051	5.1213	9.8329	8.641	9.6059	8.4318	3.6462	3.4245	7.9173	11.8441	6.6792	3.8209	2.5615	7.5336	11.9062	11.3729	8.8479	26.8444	12.9879	3.5027	2.2563	6.3692	4.4978	2.0406	2.061	4.1919	2.3125	6.4564	8.1385	4.0433		0.771653	7.23983
11.795	11.2767	5.6555	9.0395	4.3657	6.4467	7.0938	3.1126	4.4885	11.4834	12.7559	8.1054	2.6428	4.6256	7.5022	15.3592	12.3961	7.36	22.8916	13.3101	4.4515	2.7136	6.3844	4.8182	2.3246	5.0012	2.4897	2.0119	3.8135	6.56	3.9808		0.779531	7.14869
11.9141	10.8777	5.4612	11.2492	5.1848	7.157	5.7426	3.6887	3.5473	10.0517	10.1713	6.8103	5.2481	4.3724	6.4164	16.8192	11.416	9.0046	23.3787	9.6411	3.6411	3.6481	5.6751	4.7699	2.603	3.4602	2.6574	2.5677	4.0182	5.7898	3.3492		0.787402	6.94727
12.0333	11.7172	6.2905	11.4014	7.056	9.5326	6.7382	6.3415	3.3739	12.7022	7.2902	4.8068	3.4446	4.4094	7.1874	26.1894	14.8956	5.2005	22.5128	8.5429	2.7737	2.8549	5.8063	4.3595	3.3116	2.2042	2.3528	4.1231	3.4442	3.3796	3.8349		0.79528	7.26926
12.1524	9.7994	5.7082	8.2307	6.1329	5.78	10.7922	4.2543	3.1888	12.9057	8.8433	7.3372	3.3976	2.4705	12.6749	17.2399	16.5253	6.3163	22.0863	4.92	3.1135	1.8591	5.0864	3.7925	3.996	2.0299	2.4806	4.3434	3.1931	3.5224	2.8052		0.803151	6.82752
12.2716	6.9714	6.8833	9.2915	5.6054	10.7086	8.2942	4.6325	4.8331	15.2844	10.6726	10.2624	2.6211	1.9673	14.9465	14.198	14.6485	6.3484	24.5506	4.3018	2.4819	2.6234	5.7911	4.6598	2.4568	2.278	3.2706	3.0211	2.5085	3.4325	2.9298		0.811029	7.0825
12.3907	8.2923	7.5051	5.8735	4.6472	7.7323	8.1878	4.2141	5.9372	11.1348	6.9214	9.8712	3.9998	3.4813	12.4495	16.7572	9.7628	4.8673	16.7515	5.5894	3.1832	2.6061	8.2774	4.4385	2.8547	2.2086	1.9705	2.5473	2.1243	2.601	2.0439		0.8189	6.29437
12.5098	6.7548	7.3929	6.2581	5.1176	4.3354	9.1308	4.3365	6.9647	13.6274	15.1097	6.75	2.7325	3.836	8.5245	14.4069	15.2889	6.4359	18.3198	4.7907	3.4828	3.1292	9.4027	2.6194	2.0935	2.8404	2.0573	2.1594	2.0441	2.5912	2.3664		0.826772	6.49665
12.629	5.6714	7.6231	5.8934	5.1996	5.1296	7.6403	4.0722	7.6099	14.5917	14.0615	7.9658	2.1607	4.4468	9.0962	11.4231	15.3426	4.0187	16.132	6.8917	3.1893	3.1161	7.177	2.5439	2.9607	3.194	2.0694	2.1188	2.0829	2.6127	3.299		0.83465	6.31114
12.7481	7.2738	6.8923	5.7454	9.6046	6.0897	8.7671	7.5128	5.4892	14.5129	12.3302	5.7812	2.6399	3.8533	9.7288	17.2126	9.6018	4.6232	19.3426	6.0795	2.9667	3.1815	6.7645	2.6807	3.9032	1.861	2.2075	3.0904	1.9284	2.9265	2.0846		0.842521	6.55586
12.8673	10.5878	4.7418	4.7249	8.4399	3.9261	9.0434	4.1425	3.6658	13.6253	12.3142	5.557	2.9794	4.1712	10.4516	14.7378	12.381	4.9427	11.5852	2.9212	3.2976	3.2965	4.6249	3.0703	1.866	2.0741	2.8656	2.3911	1.8739	2.5709	2.3755		0.850399	5.84151
12.9864	7.1268	5.3082	8.8535	8.2965	3.6881	10.6304	4.0046	4.3527	17.2045	9.9625	6.2845	5.1315	9.2719	10.164	11.2189	11.2976	3.1517	8.5958	2.9094	4.9545	2.7369	4.6995	1.9747	2.5061	1.9181	2.2088	2.2643	2.2185	3.1825	2.6694		0.85827	5.95955
13.1055	7.106	6.9842	10.9189	10.2701	4.2919	14.0472	4.7949	4.0242	12.4776	8.2357	6.2768	5.4157	4.3628	9.9717	8.5687	10.4624	4.5475	4.4493	3.6376	3.1211	3.9478	4.2546	2.048	2.4188	2.0432	2.0602	2.028	3.1392	2.1239	2.5022		0.866141	5.68434
13.2247	8.8435	10.7002	8.0979	7.9996	4.6988	13.5059	3.8768	5.8875	10.2511	11.0985	7.179	5.6578	7.1496	5.9579	5.7631	8.812	2.8615	6.2177	3.9816	4.1343	3.2386	3.1695	1.925	2.0898	1.7593	1.9123	1.9791	2.6721	3.0397	1.8987		0.874019	5.54528
13.3438	9.5861	7.8904	8.287	7.6966	5.2854	13.6841	4.4076	4.6573	10.5779	7.2403	6.8841	3.383	6.476	8.4302	6.9948	12.3584	3.409	3.8751	4.5745	4.1809	4.0829	2.5918	1.9659	2.3768	1.8938	1.7881	1.892	2.1376	3.0486	1.9514		0.881891	5.45359
13.463	6.4988	10.6817	8.6938	11.2547	3.1734	12.9877	6.6125	3.6817	10.5947	7.9019	4.8908	3.9822	7.1699	8.2275	6.8715	13.2204	4.9206	3.694	3.6529	4.7575	2.5296	2.9878	1.9666	1.985	1.8549	1.9745	2.5384	2.0443	1.8804	2.0288		0.889769	5.50862
13.5821	6.1521	6.0475	8.0451	8.2632	3.0923	18.2671	5.932	7.0185	7.1188	9.6321	5.7269	4.5069	4.8758	5.3098	5.9274	8.3349	4.356	4.931	3.1223	4.9838	3.4107	4.8459	1.968	1.9504	2.0005	2.0849	2.5092	2.5288	2.5165	1.8595		0.89764	5.24393
13.7012	9.1858	9.431	7.8725	8.1889	5.3131	14.5929	10.5285	8.3468	9.4984	10.8772	5.0819	5.6391	8.0351	5.373	5.7618	6.0372	4.4898	6.3265	2.4372	3.4892	3.2826	3.6522	1.864	1.9005	2.1134	2.1923	2.15	3.0269	2.1455	1.9247		0.905511	5.69193
13.8204	12.0395	9.391	8.36	8.7535	4.6327	17.5976	10.2902	8.526	9.457	7.017	4.7933	5.3021	7.4484	3.2368	5.2327	8.7467	2.7262	3.56	2.8355	4.7288	2.8101	2.7493	2.3594	1.8827	2.0862	1.9168	2.3457	1.9659	2.0282	2.2584		0.913389	5.56926
13.9395	12.8918	13.763	7.0071	10.692	3.8731	16.981	9.7102	8.017	9.2497	5.1166	6.8757	5.4046	8.0936	5.1384	4.6918	8.73	3.0889	3.8853	4.6625	3.8152	2.1589	2.1517	2.3481	1.9479	2.4631	1.9848	2.2245	2.2244	3.9494	2.3632		0.92126	5.85012
14.0587	11.3479	13.3992	5.3087	11.9688	7.2792	16.074	11.5063	8.1524	6.0424	4.3137	5.5677	5.6113	12.7769	9.2654	4.5647	6.5173	2.2708	3.6845	3.4797	1.9232	3.7008	2.2308	2.4624	3.0491	2.3215	2.2808	1.9412	2.0375	1.9367	2.0312		0.929138	5.83487
14.1778	7.603	11.468	5.9736	14.6939	4.605	12.1432	14.7659	5.4372	13.9301	6.1328	4.5128	4.9389	11.4959	2.8917	5.6143	3.9577	2.2223	3.6752	2.541	2.3895	3.243	2.412	2.2857	2.116	2.1831	2.2112	2.0437	1.8959	1.9892	1.8571		0.93701	5.44096
14.297	6.7	8.1407	4.8172	10.3095	5.3273	13.6063	17.6796	7.6424	15.4888	7.6023	5.7497	6.0719	10.7401	2.7692	3.4775	5.2627	2.2507	1.9804	2.4405	3.1018	3.7494	2.4463	2.171	2.0443	1.8532	1.9373	1.9463	2.2689	1.8806	1.9662		0.944888	5.4474
14.4161	7.6588	9.4495	3.7716	9.083	7.3993	14.5405	17.7218	7.8926	14.917	6.7838	5.7972	5.1974	10.4124	3.9425	4.5543	3.4594	2.0394	2.0156	2.5205	2.7021	2.6896	2.7449	2.315	2.3441	1.8274	1.9906	1.9577	2.0213	1.9084	2.0776		0.952759	5.45784
14.5352	5.9302	11.2695	3.9062	6.9947	4.0756	11.7028	21.8016	9.0767	11.2952	6.9063	5.9258	7.2448	12.4231	5.6444	4.6841	3.9426	2.0632	2.0198	2.7519	2.5793	2.2532	2.69	2.1544	1.9723	1.9352	1.9921	2.0135	2.1175	2.0496	2.3877		0.96063	5.46011
14.6544	6.7059	13.646	6.4533	7.5837	3.2294	9.3637	21.2304	6.9715	12.3336	6.8409	5.8503	6.491	10.526	5.5615	5.6828	4.8984	3.1224	2.5855	2.1468	2.2106	2.0415	1.9776	2.02	1.957	1.984	2.1211	2.3784	2.4589	2.1785	2.1564		0.968508	5.49024
14.7735	9.6223	11.5646	4.7419	6.6541	4.9851	5.1261	17.1101	10.4279	11.0809	5.5446	3.733	5.9186	8.991	5.291	3.0915	5.6572	3.5913	2.5182	2.4892	2.0215	1.9717	1.9502	1.9902	1.9529	1.9683	2.077	2.1836	2.1153	1.9563	2.9214		0.976379	5.04157
14.8927	9.3476	9.1142	2.8888	8.0879	5.9737	8.0016	10.4733	9.1348	7.9224	6.7332	4.0806	5.42	8.0631	3.2925	2.275	3.7334	2.3586	2.0559	3.2279	1.9981	2.0151	1.9986	2.0983	2.0348	2.044	2.5011	2.12	2.7537	2.0286	1.9807		0.984257	4.52525
15.0118	6.0692	9.0958	5.3926	5.3967	5.3471	5.6599	8.6972	8.1105	5.8387	6.319	6.6522	5.4845	7.8473	3.4918	3.8775	3.0169	3.7646	2.451	2.147	1.9628	1.8761	2.2353	2.221	2.0383	1.8904	2.8136	2.1298	2.5066	1.9431	2.023		0.992129	4.27665
15.1309	7.5778	7.7605	6.1226	5.024	3.0264	5.7849	7.6646	9.3054	5.2618	4.279	3.5897	4.5513	7.3617	4.4278	3.2786	3.2718	2.7887	2.0983	1.8673	1.9275	1.7714	2.8521	2.1654	2.2325	3.9117	1.9694	1.9714	1.916	1.9253	1.8451		1	3.98433

## Sheet: Image38
X0	Y0	Y1	Y2	Y3	Y4	Y5	Y6	Y7	Y8	Y9	Y10	Y11	Y12	Y13	Y14	Y15	Y16	Y17	Y18	Y19	Y20	Y21	Y22	Y23	Y24	Y25	Y26	Y27	Y28	Y29	Y30		Ap-Basal	Avg intensity
0	17.2807	15.9005	12.7614	12.9707	18.9311	20.7537	12.1296	23.0137	34.0693	18.3856	26.9923	18.498	22.5189	14.029	22.2894	16.0169	22.9157	24.3154	22.7405	27.5905	33.357	20.4917	27.0335	23.6859	20.8868	26.4955	23.8792	26.8505	21.209	29.8955	19.4356		0	21.8491
0.1191	19.6187	17.84	13.3362	15.3989	16.2894	19.2651	12.7986	24.0754	36.9183	24.029	27.1981	18.6003	15.9799	18.9928	29.5784	24.2028	19.1809	28.116	23.9682	31.1595	23.6042	22.4488	23.4469	31.0673	26.9811	30.8237	21.0462	28.9065	20.6854	25.2	22.0788		0.0073504	22.9947
0.2383	27.7423	20.389	11.1272	13.8837	13.9921	18.2517	17.8179	12.7915	37.0331	26.1411	32.1361	20.1807	14.3595	31.0715	35.5506	23.976	29.0156	30.1312	38.1393	27.1536	18.1784	22.3792	29.5348	23.36	22.2912	31.1989	14.1532	31.9042	28.7127	35.8059	19.0793		0.014707	24.4349
0.3574	30.8004	28.4718	12.5299	11.7492	16.8811	16.8611	12.7314	19.9542	38.2327	22.6571	36.5732	23.1073	10.1934	44.6816	24.168	18.4918	27.5568	31.0043	49.1935	23.2568	23.6282	18.7519	29.0952	25.0756	23.819	37.5442	16.4113	37.4828	23.5209	47.3166	19.6876		0.0220574	25.8525
0.4766	20.235	30.1057	13.2848	11.9916	28.4706	26.7068	16.7879	17.0636	53.8334	26.7013	28.2963	22.9684	18.2268	48.017	40.4599	21.7104	23.2803	32.9243	51.793	25.3164	25.9646	17.5391	35.2573	27.3805	26.1433	43.5247	16.5954	36.8214	34.0769	37.2657	29.3667		0.0294139	28.6487
0.5957	29.4082	27.0113	12.2695	16.8617	18.5587	24.3719	19.2693	22.7701	50.1156	32.1161	49.7232	29.961	21.6657	46.2622	49.3284	18.7108	31.1278	35.7497	54.3151	30.4078	19.1439	25.7222	34.0179	24.4938	35.4052	42.6584	29.3384	33.8729	48.4848	60.1999	45.403		0.0367643	32.8627
0.7148	33.8029	31.0475	17.414	16.5693	18.5971	19.6954	29.6742	16.6026	45.7849	31.2352	44.5498	24.1245	31.7933	47.8006	46.559	15.9914	29.1763	26.9382	79.8512	20.568	15.353	16.7231	30.8534	27.676	26.1637	47.9119	26.1766	26.4077	57.956	65.2127	43.0688		0.0441147	32.6219
0.834	32.0063	28.1203	13.1458	7.1506	17.2488	30.9948	22.6057	19.4546	39.9615	40.622	58.3819	30.5921	31.0355	39.5334	42.447	22.9517	24.6674	26.0411	66.7032	25.372	16.1438	16.8094	42.4383	24.8221	25.4575	34.0329	28.9438	27.6516	67.5172	63.4573	68.1301		0.0514713	33.369
0.9531	35.2553	25.9398	18.3262	7.5044	28.4622	19.7297	35.6587	20.7567	45.5021	53.4551	70.0114	38.3265	34.7506	32.443	50.0026	21.1973	17.9405	39.513	65.1508	24.9699	19.3522	19.9775	38.7809	21.3786	17.1359	46.6202	27.5915	41.2248	56.7394	72.0146	65.5874		0.0588217	35.8483
1.0723	21.984	20.8483	23.9486	10.7487	26.8855	21.1642	37.3985	29.6747	49.9436	74.7474	61.9229	30.1959	43.7033	41.1318	52.3275	24.2469	18.5176	38.2213	58.7697	21.4428	19.4526	8.872	37.7206	30.2591	16.1928	46.8734	37.4568	47.2473	53.4113	87.8326	71.0621		0.0661783	37.555
1.1914	22.6157	27.9864	21.5132	9.9685	30.752	21.1078	55.5479	30.095	50.333	74.738	72.5883	22.9639	41.7084	37.6384	54.2406	25.4874	26.9578	43.3947	44.3036	22.2943	18.0252	13.8035	43.5317	28.775	11.8763	52.0153	34.6683	35.8307	55.3281	71.824	72.3681		0.0735287	37.88
1.3106	18.9017	22.5448	19.3086	14.5043	27.1023	18.6079	57.2934	26.0116	51.3289	78.338	70.8798	31.4484	54.6048	36.6845	57.4859	20.5926	28.3324	36.9002	47.8323	23.8005	17.6946	12.7312	29.207	22.9297	15.3782	52.997	38.592	39.1562	47.5471	62.1253	62.1424		0.0808853	36.8711
1.4297	26.112	21.4962	21.0731	11.4865	30.2802	19.7712	54.8683	25.9717	49.3484	82.9365	61.2157	31.0915	56.3209	29.7981	53.5312	27.7461	28.0537	28.4216	41.471	20.7876	22.2561	11.6282	18.6496	17.8104	15.5094	52.7411	45.2537	47.7656	43.4179	58.4453	48.471		0.0882357	35.6042
1.5488	27.2667	24.6654	22.9983	12.8624	25.1509	21.5703	35.3121	29.8034	51.059	79.1622	47.0305	27.4737	64.8009	34.1366	50.0891	24.4468	22.35	30.6752	50.1646	18.0202	19.6117	9.8349	15.0247	17.4655	13.0677	34.0156	49.2395	47.7387	38.0123	44.1802	49.0958		0.0955861	33.4298
1.668	22.5853	23.355	21.0641	16.3136	29.7285	20.0523	47.4496	24.9178	43.7057	74.6191	36.2015	17.6697	56.7853	35.7958	49.866	20.8227	23.7009	26.5958	30.8	13.9057	23.0164	8.4956	12.4279	18.3628	11.907	32.3843	41.1174	39.5663	43.3865	39.18	45.221		0.102943	30.6774
1.7871	25.9821	10.3132	19.306	12.7048	30.9484	19.4332	46.5859	31.8485	43.891	74.8928	28.6048	21.1468	46.5508	28.9884	53.9977	21.4975	25.0481	21.7683	28.0414	18.0305	21.4081	11.6956	14.3911	17.8177	8.4848	27.3515	38.029	37.8365	40.718	31.8253	36.8808		0.110293	28.9038
1.9063	23.1485	13.9896	31.0615	8.556	30.6947	16.5257	54.6075	27.2639	52.6144	79.1689	19.7063	15.2735	44.795	29.3367	51.6298	28.7268	25.4655	21.3019	25.4418	13.3116	14.5407	10.9689	10.7686	12.5564	8.6136	15.2512	32.832	37.8962	32.2351	22.6629	45.4084		0.11765	27.6243
2.0254	15.3885	15.1978	20.4481	11.2446	32.1747	15.6321	45.9321	23.9168	54.2669	55.0143	20.9949	12.2808	47.8219	22.778	50.5907	22.3235	21.2573	15.9523	23.9094	12.3063	22.8279	17.1891	8.2221	12.6162	5.0675	16.0183	28.0469	32.344	33.7343	19.2447	34.2205		0.125	24.8052
2.1445	14.6868	16.3587	24.7249	14.4901	24.2203	15.9181	39.4401	19.8464	52.5005	46.7143	22.8985	12.5277	45.405	18.4442	48.4567	21.0187	23.231	14.0427	13.6092	12.9818	15.8576	16.071	10.8482	9.7902	9.7652	14.7484	33.5736	22.5639	23.9255	23.0949	38.5201		0.13235	23.2347
2.2637	20.6262	13.4503	14.5701	15.9392	23.1109	14.7842	38.9018	28.349	54.7674	61.4826	17.0239	15.0113	43.2083	17.7589	49.7439	22.7634	15.2929	11.765	16.9916	11.6033	13.594	11.436	9.4476	12.8798	9.9639	18.8765	24.0163	18.3975	15.0245	24.0118	30.5652		0.139707	22.4309
2.3828	17.7512	15.0025	18.0319	20.3329	21.1744	10.7085	35.9908	26.7983	45.6962	65.4062	14.4574	12.9803	38.0916	22.3263	48.7424	21.3447	16.2428	13.7926	12.9775	11.608	16.6305	12.9861	8.6288	9.0737	8.0484	12.6837	21.6663	17.4432	15.1052	19.3545	26.2853		0.147057	21.2052
2.502	16.4656	14.9539	19.6398	16.6961	27.6993	12.0028	42.0737	25.1566	39.1618	53.642	13.6116	12.1297	41.6633	24.5652	42.3835	19.1844	20.0745	14.3382	18.0352	14.6688	10.5622	12.9088	9.5293	7.1944	5.5485	12.1054	14.6378	11.9235	11.2564	22.2398	26.018		0.154414	20.3894
2.6211	8.2584	16.7933	21.9654	18.6608	28.3216	12.5614	28.1124	35.7664	52.1656	56.8816	13.6013	8.8046	42.4779	21.7432	51.1393	17.9155	14.9309	14.5946	17.6398	9.7712	10.6494	11.9803	8.2464	6.9482	4.766	12.8522	10.9947	12.0509	11.2445	27.5464	19.6286		0.161764	20.2907
2.7402	12.8119	22.7511	13.0442	25.2946	28.5188	11.5772	32.3975	28.5612	35.4241	57.7285	16.3656	12.5556	39.4659	33.449	51.5622	19.3975	15.294	11.1875	11.5717	6.9676	5.1627	11.2726	10.1355	8.5343	5.9615	11.8824	15.5231	12.8878	9.7387	15.9801	13.2008		0.169115	19.555
2.8594	9.1067	12.5097	13.1406	14.2653	37.2499	16.213	30.3183	25.2314	24.5715	38.8485	14.2836	10.0207	40.2865	36.0203	39.479	20.1525	15.7363	11.2764	11.3787	8.802	6.8409	12.8206	13.7512	6.355	2.1756	13.0724	11.7122	13.4342	6.8969	12.1769	11.1529		0.176471	17.3961
2.9785	11.4239	18.8543	20.69	18.7042	26.8445	16.3369	31.1989	27.0189	19.9307	37.9554	17.3408	14.7043	40.1249	32.3992	39.7095	17.2803	15.8599	14.9135	16.1417	7.912	7.9911	13.0124	10.8477	5.8514	5.2518	7.4017	8.4618	10.7584	7.8667	12.2829	17.6709		0.183822	17.8303
3.0977	8.6028	20.9766	14.5721	15.0887	30.9967	17.0034	24.0241	33.516	24.0179	28.4934	14.6258	12.9556	23.3511	26.6904	41.9314	16.167	15.0639	12.017	17.7316	7.5521	10.3469	14.4713	10.5491	6.5339	2.3353	5.6466	5.1262	6.6038	5.8101	8.3165	12.82		0.191178	15.9335
3.2168	13.1886	18.7343	16.2174	18.9126	29.0231	20.2507	11.2189	29.1507	25.0737	38.4927	17.637	13.2266	27.2324	26.6719	34.0897	16.1854	15.2914	9.7411	12.812	6.8796	6.3978	13.2932	14.0362	5.2906	2.7763	8.2625	4.0819	6.8537	6.3147	7.1581	9.7843		0.198529	15.6219
3.336	11.185	12.8158	12.7651	16.2483	26.217	18.6956	16.3315	12.4669	19.5469	26.1088	20.1599	14.7533	22.3565	21.42	31.1464	22.6098	16.8967	12.5003	12.9909	10.2502	7.8245	8.4808	10.2246	5.4157	2.1532	7.771	4.3662	12.3968	6.695	7.1014	17.4655		0.205885	14.431
3.4551	13.9414	14.4703	15.4833	15.2323	19.3434	14.7354	14.6069	16.6177	23.2083	24.5638	18.5653	11.6527	26.5795	24.47	28.957	16.1225	13.0657	16.3914	13.5331	7.2986	9.2257	10.951	10.6323	3.7635	4.1664	6.8944	7.8134	10.0083	7.6857	3.4183	9.0161		0.213236	13.9488
3.5742	12.9576	19.7381	14.2994	13.9309	15.7372	11.0909	11.656	14.8195	21.482	17.0386	11.0485	11.9063	28.2657	22.6582	22.295	16.7521	10.1132	8.9689	14.5076	8.1894	5.3049	11.3029	7.3297	4.2665	3.4254	11.2775	8.9671	8.6826	3.2445	6.1363	10.3117		0.220586	12.5066
3.6934	7.4121	14.7882	17.3591	16.2736	16.1585	8.8219	10.9329	11.7764	25.1082	11.4068	13.8382	8.4494	24.8789	23.5484	19.5334	18.3819	11.2546	18.9258	19.854	8.3406	9.9509	13.6582	5.7694	2.5238	4.3169	11.0804	9.045	9.2048	4.5734	8.0982	8.0871		0.227943	12.6887
3.8125	7.8026	15.8373	14.6458	16.4153	11.4583	14.8346	9.2088	9.5497	22.8495	12.5532	12.7388	7.3043	22.8444	20.9515	23.7868	18.511	10.6751	15.0012	22.3533	6.6584	7.0575	11.4041	7.339	2.5429	3.6751	11.0753	10.8603	6.0238	7.7753	6.3111	9.4563		0.235293	12.242
3.9317	10.9465	14.9523	12.8545	21.8335	13.5348	12.5937	8.0607	7.9872	22.2857	14.1112	12.8592	9.4499	22.0632	22.4455	19.1818	14.3033	13.7321	11.1815	16.4456	10.3281	7.1458	7.9685	8.1371	3.2211	3.6884	14.139	8.5109	13.3274	4.9499	3.8247	7.4161		0.24265	12.0477
4.0508	8.3242	17.9106	18.0353	17.5179	10.9763	7.4199	9.1268	11.3616	12.5126	12.6738	11.6507	8.3264	22.6589	13.7581	19.8862	10.137	9.8897	10.5915	17.4766	5.783	7.7462	5.6518	14.0154	3.3699	6.7078	10.1171	10.2106	5.9548	3.3684	3.6709	9.0681		0.25	10.8354
4.1699	10.9651	17.6958	12.5875	23.4601	9.8288	9.6482	8.9923	19.1679	13.3623	7.5237	12.5999	6.877	28.4034	13.4755	16.9185	16.1702	7.7755	13.3402	13.9745	11.0283	8.7633	8.0168	8.6828	3.7601	2.4722	16.1037	6.329	7.1086	2.7887	5.3499	14.5607		0.25735	11.5397
4.2891	11.6124	9.9144	12.7569	25.9203	7.8037	12.085	7.105	9.3169	17.6571	12.7662	19.1653	5.2199	24.8789	12.1622	18.8751	13.0243	9.0325	9.228	11.315	7.4264	8.158	6.4442	9.9852	4.11	2.1613	12.8043	7.1223	11.8245	4.7942	6.0672	9.6171		0.264707	10.9792
4.4082	6.3334	11.5461	13.1087	24.3382	13.8065	12.1903	6.6997	11.7854	15.9906	11.6052	12.4486	4.6934	19.3006	14.1864	21.0713	10.1113	11.499	7.109	7.8622	9.4217	9.9574	7.5102	8.7888	3.9284	2.0965	13.6988	4.0492	12.117	5.9686	7.4107	8.1907		0.272057	10.6072
4.5274	7.4861	5.1645	8.706	23.4809	8.2476	8.7494	5.0117	8.5741	17.8245	11.0839	14.5535	5.3559	22.4616	11.4369	16.5689	8.2116	12.1576	9.861	4.5471	8.3535	9.554	9.8166	11.1039	3.6864	2.1828	10.9027	3.9823	10.4677	3.8429	4.5858	6.1202		0.279414	9.4865
4.6465	8.6031	10.7517	10.9117	18.0013	7.0917	8.507	4.7933	5.4563	16.2861	9.411	10.9742	6.8795	22.2116	15.5066	23.5204	13.7003	12.1923	8.382	4.2799	6.3226	5.0264	11.3507	9.6137	3.3805	2.1484	9.9159	4.8737	9.5882	4.0332	5.1105	5.5499		0.286764	9.49593
4.7657	9.8702	13.6478	15.8327	19.6394	11.6374	8.2069	5.5029	8.1778	10.1428	7.3072	7.9754	4.76	21.3096	13.0594	19.9725	17.3023	10.1043	4.9289	5.5579	9.2906	7.592	16.0457	8.5011	4.6453	2.8769	13.3308	5.4858	9.3965	8.4294	6.0304	3.0636		0.294121	9.98785
4.8848	6.1901	9.4541	12.6704	10.4157	10.2341	10.4739	7.2556	7.9338	9.2825	12.5025	8.1613	5.8057	22.5203	15.8231	15.7775	8.648	10.5591	4.6222	6.6302	10.0889	7.7437	9.0323	10.4033	5.0888	2.3082	11.5483	5.9716	7.9894	5.2099	6.3818	7.93		0.301471	9.18246
5.0039	7.4597	12.9488	10.5818	9.3604	5.803	9.5674	6.4779	9.4168	11.0399	9.3297	7.5443	5.3067	13.8914	17.4383	21.1412	11.9412	10.3137	4.2261	6.7164	11.0259	6.4262	11.1505	11.4415	3.1955	2.3529	10.5467	5.8395	9.6141	5.0455	7.4319	7.26		0.308822	9.09145
5.1231	6.3942	8.5114	7.8349	12.8182	6.3949	10.8768	5.9483	8.2685	11.555	12.497	8.9163	6.8511	17.0534	11.2921	21.076	8.4019	13.0813	6.2275	7.6463	5.9669	8.2644	8.6318	9.0154	4.0951	2.3559	5.3924	5.1813	6.194	6.3471	4.0425	7.3193		0.316178	8.53068
5.2422	10.2062	11.4895	11.8474	7.6305	5.0355	8.7697	5.0348	7.666	8.2886	11.9255	5.947	3.5989	12.3287	14.5778	20.9002	11.1851	16.229	4.8436	5.9183	10.4775	4.7273	6.6883	8.4884	4.1754	2.8071	6.5496	4.9911	5.1592	4.2932	7.6402	10.3074		0.323529	8.37829
5.3614	6.4766	7.722	13.5581	7.5603	9.0157	7.2675	6.6378	8.1508	12.5146	14.6951	9.8951	8.4187	11.1048	16.5044	13.3409	7.236	12.4468	4.276	4.7308	8.7885	5.9452	9.4689	6.4256	2.7704	3.1737	4.5632	6.1604	6.0741	5.6755	9.1685	13.2596		0.330885	8.4847
5.4805	5.7653	11.3976	6.9539	6.8421	9.8982	10.2129	6.9198	9.6181	14.6867	9.366	6.7462	5.1232	10.4545	9.2778	13.515	10.7222	7.7486	4.9227	8.4449	7.7781	4.2833	9.5265	6.8651	3.9966	5.1257	3.5639	6.0972	6.4054	4.9142	7.4652	8.5977		0.338236	7.84628
5.5996	7.7738	7.4946	5.377	9.9304	8.0876	4.2143	6.6498	7.3791	16.1782	10.2835	4.4404	4.5225	10.9099	9.4521	18.132	7.4717	5.4371	4.4676	3.9684	10.1535	3.0751	8.6679	8.6549	3.0625	2.6486	4.9211	7.1068	5.4274	5.4601	7.7726	8.3787		0.345586	7.33868
5.7188	4.9128	11.4336	3.4558	7.3017	5.0798	6.0139	5.5332	10.7818	17.221	10.1074	4.4024	6.1777	8.7143	9.2256	15.3423	7.3533	8.493	2.3942	5.3215	7.3629	5.906	7.1094	7.5902	4.1173	2.0579	6.9791	7.5625	6.1546	4.6273	6.6047	7.4437		0.352943	7.18648
5.8379	3.6249	10.1172	7.5301	6.1777	5.9449	4.8717	4.3407	9.3622	11.5513	5.3207	5.6018	3.6862	9.1305	6.1144	8.5771	11.924	12.2365	3.9075	5.6663	7.6516	11.651	4.4633	7.8065	4.3318	2.9716	5.4417	4.9884	4.7494	4.9903	10.3665	6.8721		0.360293	6.83774
5.9571	5.1276	6.3328	6.969	4.1243	5.5963	7.9893	6.2686	9.8327	12.3764	4.3172	6.6007	5.2323	11.961	8.4763	12.4833	7.4536	15.0727	3.1859	3.3573	4.9499	7.964	7.8714	5.0269	2.5647	4.555	4.7194	6.1819	6.6663	4.044	11.9608	5.5779		0.36765	6.93031
6.0762	3.6237	5.8075	4.9253	4.2828	7.1318	7.8926	5.0935	5.2046	10.7984	4.4305	7.1868	4.9385	14.4387	7.648	12.2682	4.8212	9.2494	5.9794	4.3077	3.3628	7.7579	7.9228	5.5515	2.5971	2.387	5.1369	4.6343	3.2813	4.2521	9.2805	4.7577		0.375	6.15969
6.1953	5.3958	6.554	5.0096	5.448	5.085	5.0876	7.6372	4.9439	11.7229	3.1977	4.8398	5.4974	12.6339	9.8368	8.386	7.5317	5.7234	5.3004	3.4426	7.4673	11.3588	6.3266	4.2549	2.5183	2.1783	3.7523	7.9516	3.2812	3.9341	9.7791	6.0471		0.38235	6.19753
6.3145	6.2047	4.1431	6.646	6.8427	7.454	4.1489	6.1671	5.9591	14.653	4.7793	5.3728	7.8107	13.5557	15.2744	10.2967	9.3011	10.8298	3.0647	3.9748	7.7562	11.3194	4.6619	8.7264	2.0558	2.6773	4.9389	7.8992	4.7983	3.9978	11.8636	6.1856		0.389707	7.20513
6.4336	3.2769	5.8731	5.9972	10.1535	4.8347	6.4849	8.6953	5.3674	11.6641	5.0002	5.3353	4.087	8.2798	9.407	13.909	7.2783	10.5035	5.6485	2.1998	6.1522	10.245	6.9089	4.347	2.6242	2.9442	8.3293	8.3079	5.7312	3.7177	10.5842	4.287		0.397057	6.7153
6.5528	4.9485	3.6455	5.8857	6.2089	6.3108	3.5775	9.1116	6.5888	14.9415	2.5034	4.241	3.7689	5.8809	13.2488	13.6512	7.9699	8.2909	4.0145	5.2639	5.8188	11.8581	5.9486	5.1119	5.224	3.3747	4.7355	6.8275	5.1135	4.8487	11.2961	6.2554		0.404414	6.66016
6.6719	5.1046	6.072	3.7957	6.8307	6.7255	4.3334	5.2467	7.468	15.9158	3.525	3.5599	5.0853	5.4251	8.3792	12.4439	5.2315	10.2538	4.1441	3.7786	9.4082	9.7431	9.1745	5.0349	3.7856	3.0537	4.7209	3.7935	4.2079	3.7998	9.5466	7.1456		0.411764	6.34623
6.7911	4.3962	5.419	4.0101	5.4295	6.0853	3.5034	6.2928	3.587	8.3155	5.7608	3.0718	4.5033	3.7591	9.4304	8.5146	7.6381	6.8229	4.8897	5.1105	3.5313	8.4481	6.9069	4.2264	4.0033	2.5785	3.9537	3.5884	2.6605	6.385	5.7992	4.6225		0.419121	5.26593
6.9102	6.2936	5.1829	8.2197	5.2966	4.4743	5.0212	5.0707	8.3817	12.4584	4.3169	4.7308	7.6876	4.6878	16.5305	12.8346	4.0928	4.6764	3.3266	4.7319	8.317	6.7922	5.654	10.5208	2.6787	2.2075	2.1424	3.7126	4.8963	6.0843	7.8725	4.1616		0.426471	6.22758
7.0293	6.0393	6.5719	4.6474	5.9927	6.1684	5.6164	6.97	8.7982	13.6201	3.7645	5.4118	8.3981	6.2131	12.1803	14.8257	4.1317	6.1929	2.1199	3.0031	6.5346	3.8393	7.6122	6.5533	2.2937	2.8833	4.702	4.4134	7.2261	4.52	4.1359	5.4917		0.433822	6.15713
7.1485	4.992	5.3217	5.3917	5.2605	5.4561	6.7667	8.6511	8.939	11.7056	3.2099	4.3175	9.1598	5.525	9.5798	14.3137	5.8626	4.683	2.9672	6.8755	6.4335	5.329	6.7374	5.6916	4.7535	2.9211	4.6862	2.6898	4.0538	4.5986	3.8297	3.6613		0.441178	5.94722
7.2676	4.54	4.5426	7.8839	4.5292	5.693	5.1516	8.3595	10.1353	15.7685	4.724	5.2138	6.6196	4.4456	8.5571	8.4284	6.192	7.9419	4.2428	5.5375	5.2079	4.4581	5.1509	4.2094	3.0472	3.4235	5.3628	3.9721	4.395	3.6278	9.6418	4.213		0.448529	5.9747
7.3868	5.0126	4.7245	4.1432	4.3136	7.3411	5.2974	5.9092	11.8281	14.6265	4.4779	4.9726	8.4114	6.2381	12.0825	10.6126	5.0062	4.7279	2.1144	4.7146	3.2344	4.3821	4.6773	5.17	2.0807	2.2644	3.1506	3.5815	3.0667	5.622	5.5828	5.7265		0.455885	5.64817
7.5059	4.2905	6.2609	5.2868	6.0252	2.8684	7.8292	4.1661	11.0665	17.6584	3.0136	1.7349	7.8144	7.3095	14.2001	13.0395	5.4123	6.3756	4.0116	5.3899	5.4699	2.5208	2.3137	4.2921	6.3719	3.0329	1.9916	3.524	3.2595	4.2466	5.5225	5.6481		0.463236	5.86926
7.625	3.6558	7.7325	4.7086	4.5046	3.8826	5.8997	5.078	8.4613	22.4334	2.5716	6.0041	3.9444	6.9556	9.4448	13.8574	4.6636	8.5462	4.7522	3.5852	4.1567	2.9756	4.1243	3.9832	4.2921	2.7793	3.0254	2.6368	3.263	5.08	2.7522	3.2028		0.470586	5.57913
7.7442	3.1575	7.6757	2.986	4.0416	4.1305	6.6091	4.31	9.1191	11.1692	2.0438	6.707	5.0114	6.3992	12.8347	17.3996	2.6991	5.3354	4.3658	4.6309	3.1533	4.4643	4.7132	5.0675	3.4545	3.3878	3.1826	3.4588	3.6308	4.6951	4.5081	3.2386		0.477943	5.40581
7.8633	3.6213	8.4575	3.3977	5.1291	2.6702	5.2032	2.7448	8.9083	17.406	3.1093	9.2307	7.2327	3.0897	8.6131	15.6422	2.8685	6.6537	3.7686	5.0432	4.7929	4.133	5.4692	5.389	6.7514	2.3603	3.3678	2.5751	3.2408	3.789	3.2833	3.4502		0.485293	5.52877
7.9825	7.2023	16.0728	5.8807	5.0997	5.6805	3.4194	3.3522	7.7203	10.2034	3.2262	3.3686	5.6204	5.3559	6.6502	20.0162	6.1683	10.0925	3.215	2.9184	3.526	2.8516	6.6128	2.7304	4.4834	2.0872	3.8606	6.1731	3.5953	2.1922	4.8993	4.2685		0.49265	5.75946
8.1016	5.5692	13.2645	4.6153	4.8622	5.6858	2.6891	4.0557	8.7781	10.6801	2.0934	4.5722	6.3702	5.1803	14.3264	12.562	7.769	8.8563	2.224	2.411	3.0964	3.6446	6.717	2.5356	3.8928	2.0752	4.6463	9.9239	2.448	4.4318	5.0684	4.8817		0.5	5.80408
8.2207	5.6488	10.7719	3.7229	4.7976	2.7198	4.3452	5.2121	9.5324	7.8269	2.7603	4.7747	7.3646	6.6133	10.9249	12.1099	6.2414	8.2028	2.8745	4.1866	4.4167	2.4147	5.3008	3.2381	3.9601	1.8038	9.77	8.0677	2.062	4.1233	4.5691	4.6061		0.50735	5.64397
8.3399	6.0953	13.171	5.4182	6.4782	2.7592	3.4924	4.8971	8.5226	6.6836	2.3542	4.0505	4.026	3.7633	9.8413	8.7579	3.5913	9.9255	2.8699	2.7133	6.0251	4.7075	2.4479	6.8492	3.1911	2.1321	9.5885	5.6642	2.4394	4.5443	3.7156	6.9853		0.514707	5.40971
8.459	3.647	11.2041	5.4168	4.6383	3.489	1.9101	4.4559	10.8406	7.3594	2.2891	2.6109	4.9966	3.5541	12.3504	16.9647	4.8315	7.6233	3.6704	2.8119	4.556	5.5435	4.9735	5.8504	5.939	3.475	10.0106	6.7489	2.1674	4.2876	3.4912	4.59		0.522057	5.68701
8.5782	4.7565	10.7044	5.117	4.2772	2.5857	3.4111	7.766	10.7786	8.0081	3.4241	3.9402	5.6231	6.6868	13.4581	17.4575	3.5397	5.307	6.166	2.6878	5.3885	3.5168	4.1234	4.2633	4.4421	2.6036	10.3901	6.3261	2.6786	2.4489	2.8098	6.6126		0.529414	5.84835
8.6973	4.1536	8.8386	6.7853	2.9468	2.479	5.3333	6.8327	9.2266	9.302	3.3975	2.9464	3.9666	5.0487	11.7603	12.5917	6.4064	6.0002	3.0252	2.651	5.0292	3.9956	4.7674	4.2111	3.5398	4.3991	7.1084	6.3782	5.2723	4.1365	4.4318	4.2039		0.536764	5.52146
8.8165	3.7182	13.0439	6.995	3.6939	2.2	4.2862	9.1752	7.9522	5.6481	3.5977	3.3922	3.8395	5.9229	11.0141	16.1653	8.9767	6.6559	4.5614	2.2775	3.1618	2.7039	3.0499	3.643	2.2532	3.5875	10.7191	15.0434	2.7726	2.5634	3.1311	3.8842		0.544121	5.79448
8.9356	3.0533	12.7966	6.5812	7.1719	4.5326	3.0897	7.5502	5.4734	4.4534	3.7813	3.409	7.534	4.9701	9.3699	13.7555	3.7135	9.0993	5.7493	4.0121	6.8206	3.7178	2.4394	4.3384	3.124	4.4271	8.9907	13.295	4.9304	3.0221	1.9762	3.0871		0.551471	5.815
9.0547	3.2273	8.6256	4.7329	5.1296	2.0665	3.0747	4.959	5.4125	9.0903	3.2257	3.4352	5.0209	3.0734	9.7179	11.632	6.7187	5.0761	2.9972	4.7682	9.0399	3.3398	3.6674	2.4175	6.3538	5.6108	6.7023	15.6293	2.8689	3.107	2.2886	2.1596		0.558822	5.32802
9.1739	4.0081	8.0831	6.0487	3.4782	5.6461	3.3707	5.8739	6.5952	3.754	3.0304	3.4367	8.8057	7.3746	11.4928	12.6073	3.7264	6.9595	2.696	6.0835	4.9688	5.2853	3.6225	3.9546	5.5586	3.4599	6.8353	13.1587	5.9912	5.363	4.8136	4.085		0.566178	5.81185
9.293	3.479	8.6526	6.763	4.8266	2.6601	2.5913	4.8941	5.0362	7.6995	2.4656	4.1301	4.1334	4.1208	14.9003	11.5835	8.0609	5.1135	3.9601	3.7421	4.5562	4.2034	3.7821	2.5816	2.3577	5.793	9.4671	12.311	5.1101	4.6889	5.0234	2.618		0.573529	5.52597
9.4122	4.5414	16.0159	3.739	6.1262	3.1221	2.9036	5.2455	5.0963	4.5108	4.8014	4.2223	4.9013	7.7495	13.7609	9.7539	3.6458	6.6059	4.0409	3.0376	5.5751	2.9463	6.8786	3.2072	2.9032	5.1735	6.1737	9.4974	4.0113	4.2209	4.3544	2.9031		0.580885	5.53758
9.5313	5.5459	20.2418	4.127	7.2436	2.0838	2.8094	4.9009	3.5181	4.3096	3.4437	3.2751	6.776	4.4177	9.4995	15.7994	4.0608	2.3904	2.5321	3.4821	5.5264	3.725	3.3074	2.7664	3.7951	3.7951	7.0865	10.0502	4.8885	3.7199	3.4984	5.0008		0.588236	5.40699
9.6504	3.6361	8.5927	8.6958	5.5201	4.2484	2.4227	8.6384	4.5904	5.1404	3.4787	2.613	4.5176	5.8461	6.3676	12.886	2.9436	6.9522	4.4067	7.9576	5.8805	4.3528	6.1147	3.6313	3.8187	3.8668	7.1692	12.2805	2.816	2.3158	4.2161	4.4347		0.595586	5.4952
9.7696	3.9137	11.7443	5.3943	7.671	2.2245	2.6128	3.8478	6.7995	3.7807	5.239	2.9115	6.5043	4.8688	9.5642	10.4522	4.2555	6.4402	3.4237	4.2412	4.8513	4.3748	3.752	5.2906	3.205	3.3283	7.7529	16.9603	3.3783	4.708	4.2961	3.6777		0.602943	5.53111
9.8887	2.7343	7.9825	3.0631	9.169	3.4068	2.7873	5.3195	5.043	6.1647	4.1153	2.9699	4.8048	3.9132	9.8546	17.8816	4.6167	7.1655	2.9857	3.2942	10.6663	3.449	5.9629	3.8625	6.5095	2.08	5.6037	14.7865	3.7877	3.8933	3.2622	2.6136		0.610293	5.6048
10.0079	4.0272	5.4052	3.5963	10.4132	3.5777	3.9332	7.4601	8.6077	9.7153	2.7521	2.317	3.4321	3.8726	10.1914	14.9416	3.5947	8.52	4.6858	2.9836	7.5639	3.5334	4.1869	2.9713	9.6943	3.1062	3.7817	10.631	1.9842	3.5122	3.232	3.5109		0.61765	5.53983
10.127	2.1146	3.7831	3.5663	12.2982	3.5408	4.1324	8.8218	5.9332	7.8197	3.9184	3.2889	5.6836	5.7143	12.5588	12.7526	6.5825	11.8094	2.8658	2.821	11.226	5.4309	6.085	2.2513	7.5422	3.1256	3.5345	9.2639	2.1249	3.0588	2.8374	2.6898		0.625	5.77986
10.2462	2.2345	3.0657	3.8936	7.5297	3.6675	4.6218	3.1274	4.1678	5.2804	3.8849	4.1119	3.9404	6.3986	8.8256	9.4322	5.2238	8.9058	3.6771	2.062	11.8598	3.7417	5.7777	2.701	12.8018	4.4333	2.4157	8.0762	2.3002	2.3441	2.842	1.9977		0.632357	5.01103
10.3653	3.644	3.2039	3.7816	12.5233	4.2807	3.9938	7.7857	8.8286	6.1678	4.1592	2.5142	4.6984	3.9114	5.6153	9.2973	2.8548	9.4282	3.998	2.4944	6.3654	3.3815	3.1644	3.6088	11.4446	3.685	3.6595	10.9786	2.0373	2.9256	4.0488	4.5553		0.639707	5.25921
10.4844	2.3241	4.155	3.5445	11.9362	4.1716	3.3187	4.3959	4.5178	7.5705	2.2299	2.8891	6.2103	4.5035	5.825	6.5391	6.1756	5.2722	5.0204	2.5368	11.8642	2.423	2.1196	3.0969	13.4735	3.5009	4.101	5.1099	2.2227	3.4823	3.4025	2.7317		0.647057	4.86014
10.6036	3.9675	2.8431	3.6266	13.6789	2.2106	3.2529	6.4584	3.1624	5.7054	2.0839	5.7099	5.8795	5.5818	5.5971	6.9345	5.7493	5.442	2.5298	3.7347	7.7554	3.7798	3.0504	4.004	15.4317	3.7347	2.8808	11.2261	2.7863	2.2876	2.3987	4.3824		0.654414	5.09246
10.7227	3.2838	4.6419	4.0793	8.0273	2.2837	3.4767	9.6216	5.0865	4.9271	2.7445	6.5671	6.4935	2.7073	9.5338	3.5475	6.467	7.3782	2.6996	3.6393	10.2942	6.1826	2.4685	4.4205	11.1825	2.1733	3.1391	8.9359	2.4216	2.2463	3.4452	4.0985		0.661764	5.10367
10.8419	2.7413	2.8845	4.8835	8.8628	2.806	3.5007	10.5015	4.5339	8.9689	5.1356	5.107	4.898	3.2523	6.5919	6.3648	4.9461	8.001	6.1772	3.9836	8.6341	3.8983	2.9191	2.4577	16.2506	2.2139	3.6006	8.8649	2.3468	2.8509	2.0366	2.3996		0.669121	5.2456
10.961	5.2813	4.3089	4.8417	9.1219	3.252	2.8331	8.4551	5.0504	10.2606	5.5285	6.4462	6.6386	6.2412	6.318	6.5801	3.4825	8.3182	5.6197	4.2524	6.9022	4.5299	2.2918	5.229	8.736	3.3582	3.1704	6.9563	2.1043	2.2147	2.9575	2.8462		0.676471	5.29442
11.0801	3.1463	4.5072	4.6211	8.1193	2.5233	2.6397	13.3148	7.4091	6.4868	2.6711	4.387	4.4292	5.654	6.6876	8.4327	3.5288	5.4181	4.0578	3.6862	6.4134	4.2217	2.186	6.6256	8.3401	2.2267	6.0103	6.8503	2.0058	2.0811	2.516	3.8277		0.683822	5.0008
11.1993	3.6931	2.5809	5.639	6.8271	2.8198	3.5563	12.5801	7.1002	6.4649	2.6055	4.8846	6.1046	4.9491	6.5519	5.2961	6.9819	4.1493	5.83	5.2111	3.8795	4.6789	3.2074	5.9867	5.2292	3.2332	4.5972	6.1197	1.8054	1.9765	3.6259	3.7142		0.691178	4.89933
11.3184	3.8609	3.9948	3.7633	8.551	3.206	2.8208	14.2414	3.8895	6.1636	2.7767	5.2675	3.5316	3.4411	10.2334	7.8579	5.7477	3.5799	3.6972	3.9083	4.574	2.2371	5.7874	4.2453	6.8414	2.1909	3.832	3.9961	2.2575	2.6675	3.0344	2.9336		0.698529	4.68161
11.4376	3.4086	2.4897	3.8305	8.6019	2.6591	2.2482	18.7287	8.0244	7.3132	2.9991	6.2191	2.5645	3.7217	12.626	12.5117	6.4977	5.1169	6.1399	3.3532	3.7579	2.2703	4.2083	3.3961	4.4945	2.4135	2.8815	4.6873	2.5762	4.1878	1.964	2.7173		0.705885	5.11641
11.5567	5.1161	4.7635	3.1275	11.9786	3.0651	3.5151	20.3202	7.3338	6.4702	4.9166	5.1408	3.4347	5.3659	13.686	5.9006	4.6937	4.3458	7.3273	2.4851	5.2924	4.7625	4.1838	3.0657	4.0105	2.3045	2.1741	2.8674	2.5068	2.9222	2.3495	1.9833		0.713236	5.20675
11.6758	2.2004	3.5818	4.4366	7.7632	2.3893	3.7577	19.1154	5.3427	6.4899	3.396	3.3099	3.9579	5.8294	9.2544	8.6464	12.5388	7.1682	6.0943	3.1686	5.6799	2.3158	6.0969	5.5497	3.3476	3.4659	2.3474	5.0352	3.557	2.6662	3.1942	3.0982		0.720586	5.31596
11.795	3.6812	5.9641	5.9595	7.7498	3.1179	2.1421	24.4939	7.5753	6.3947	2.6527	3.649	5.3149	4.0327	4.5081	7.6001	8.041	4.6733	3.1237	4.1169	6.0123	2.9247	6.2527	3.6462	2.0967	3.3811	3.6452	4.1917	2.0837	5.3249	2.437	2.1808		0.727943	5.128
11.9141	3.0653	5.2174	5.8946	5.8169	4.1251	4.6366	17.0751	7.4127	6.5068	2.1269	2.2966	2.6636	5.7418	6.9101	6.0168	8.5345	5.1752	5.3689	2.202	3.1634	3.0815	5.3886	2.2848	4.6429	2.8249	3.4279	4.6204	2.0268	3.6071	2.2545	2.8838		0.735293	4.74173
12.0333	3.4016	5.211	4.889	4.8555	5.1625	3.0172	13.5678	7.3283	4.4595	2.7239	2.29	5.0123	3.0377	5.8199	7.4552	5.6452	5.4856	7.3163	2.1006	4.7744	2.8032	3.2937	2.9635	2.9333	2.6181	3.0139	3.6395	2.3007	4.9289	4.6146	2.5304		0.74265	4.49011
12.1524	3.4548	2.9269	4.4853	5.3399	3.4529	2.0792	11.5338	6.5739	5.8978	2.2496	3.9844	2.2801	5.2555	7.729	6.1027	5.6511	2.7679	3.8399	3.4573	2.5966	4.7566	3.2055	3.1937	2.0473	3.2521	3.0356	4.4465	2.0229	3.7301	3.8519	2.0205		0.75	4.10391
12.2716	4.4566	6.3197	3.7989	6.6615	3.2904	1.8855	12.2575	9.1972	6.4085	3.6326	3.458	2.8892	2.8347	6.105	5.2983	9.1784	2.7985	3.8233	2.4682	3.8981	4.4597	4.2255	3.5623	2.5129	4.0826	3.3747	3.3565	2.8916	2.6669	3.7184	1.9432		0.757357	4.43401
12.3907	2.9672	3.009	5.3414	5.3282	3.0226	4.5392	9.1766	4.566	6.2293	2.1382	2.5257	2.0802	2.167	5.0855	5.5255	7.7998	3.135	3.4415	3.1022	3.4706	3.7621	3.3822	2.0752	3.3357	2.4174	2.9809	5.0888	2.4537	2.1697	2.7409	1.9509		0.764707	3.77446
12.5098	3.1904	3.6961	5.1761	7.4718	2.6989	2.5955	5.931	4.3295	6.107	2.7442	2.3517	2.0698	2.7038	4.7967	3.8263	6.2618	4.3899	5.0482	3.0733	4.7406	6.0714	4.2688	3.3844	2.6116	3.6361	2.2193	4.743	2.6296	1.8965	2.6271	2.1048		0.772057	3.85146
12.629	3.1772	2.4439	5.9224	4.985	2.0836	2.5752	9.8407	4.1957	6.4499	3.0411	3.2157	2.024	3.1833	3.4569	5.6113	4.5681	3.1024	2.9252	4.4476	4.6473	5.9777	2.2144	2.2991	3.2184	2.7587	4.0668	7.0372	2.8553	3.5387	4.8276	2.5054		0.779414	3.97406
12.7481	3.5674	4.1944	4.1861	6.2056	2.8871	4.301	6.1787	3.3386	3.3141	3.105	3.9867	2.1158	2.8235	2.9706	3.2359	2.9421	3.4474	2.9394	3.0372	4.5989	5.4359	3.2997	1.961	2.3069	4.6577	4.5938	10.0419	2.9541	2.4845	2.2318	2.4518		0.786764	3.73531
12.8673	3.0185	6.1734	4.5344	4.6931	2.7876	3.7591	4.9441	5.4256	5.0544	2.5058	2.951	1.801	3.528	3.2737	3.5114	3.0826	3.3626	3.3584	4.0492	5.1272	9.5379	2.1503	2.1913	2.4001	2.6519	3.2569	9.7001	3.4555	3.9631	3.0641	2.6491		0.794121	3.93424
12.9864	6.4031	5.8712	2.9092	8.0119	3.9007	2.6008	2.9536	7.7525	5.7314	2.0745	2.24	2.0739	1.9189	3.0492	2.6895	2.7146	3.4585	4.2502	4.0271	7.0711	5.0873	3.7772	2.3181	2.017	3.1122	2.5087	8.8257	2.649	2.1656	2.493	2.2097		0.801471	3.83437
13.1055	5.1639	5.9541	3.104	4.0439	2.9831	2.5726	3.6028	5.9457	2.367	1.9126	2.0912	2.0986	2.7567	2.1343	2.0346	3.6494	2.0693	6.0012	4.4209	6.9076	5.5788	5.0406	4.3093	2.1892	2.0776	2.6754	9.6674	3.2629	3.3474	2.0451	2.4821		0.808822	3.6932
13.2247	6.2015	3.2009	4.4861	3.1507	2.031	3.2922	2.3603	4.5247	6.3553	2.0099	2.0406	2.7304	2.1697	1.9866	3.719	2.7572	2.3154	5.0805	3.3348	3.5692	5.0946	2.4208	2.2959	3.7547	1.9058	2.6927	9.6959	3.8381	2.1492	2.0345	2.9999		0.816178	3.42575
13.3438	4.311	2.8226	3.4797	6.1933	3.3539	3.2015	2.9471	6.5231	5.6139	2.6378	1.9787	2.9272	4.2966	2.8534	2.3492	2.7274	4.45	5.4819	3.5029	3.4168	3.8968	5.0542	2.1421	2.5908	2.2256	3.076	5.4869	2.2913	3.3916	2.0665	2.1426		0.823529	3.53008
13.463	5.4613	2.3304	3.8682	4.4695	3.6081	5.9784	2.6953	6.8085	4.6165	2.7606	1.9667	2.1846	2.4432	2.593	2.6766	2.0457	5.3451	5.2116	4.6368	5.2597	3.8456	4.2375	2.0548	2.7343	4.0729	2.5942	4.4378	2.2173	2.1409	3.1612	3.4684		0.830885	3.61047
13.5821	8.1804	3.1816	4.9001	2.53	2.3107	5.5422	3.8657	5.4509	3.0658	2.5805	2.1781	2.7154	2.072	3.0099	2.0746	2.6449	3.3935	7.0229	4.6424	5.4091	1.986	3.06	2.3433	3.305	1.9461	4.3047	7.9284	2.4268	2.0058	2.6168	2.6993		0.838236	3.59332
13.7012	3.6769	5.7941	4.4164	3.9949	2.969	4.9134	3.1732	7.2425	3.1118	2.1532	3.0842	2.0103	2.8886	2.9301	3.0089	2.282	4.8982	4.8403	2.4928	3.9042	2.6696	2.6329	2.2088	4.0156	2.2312	3.2678	3.8359	2.0066	1.9955	3.4644	2.9377		0.845586	3.38874
13.8204	3.4149	3.4936	4.1144	4.1951	2.9831	6.5338	2.5814	6.2864	2.7704	3.4186	2.6583	2.3745	1.9234	3.7031	3.4631	3.1734	6.2094	3.8573	3.7387	2.8732	2.4743	2.595	2.081	4.2843	2.5017	3.2003	3.2175	3.3282	2.2715	2.7947	2.3799		0.852943	3.38369
13.9395	3.41	3.2691	4.6523	5.2489	4.2825	4.2126	3.1178	5.8497	2.0734	2.008	2.6498	2.4299	1.9194	2.4289	3.0691	2.7624	3.044	2.4789	3.3501	2.1874	2.7778	3.1506	3.8392	5.1932	2.284	2.9677	4.0941	2.5003	2.5749	3.5474	3.2535		0.860293	3.24603
14.0587	4.9349	2.9713	3.7451	3.6602	2.5013	2.5279	5.7035	3.1967	4.4291	2.2592	2.0906	1.9795	2.3067	3.4285	4.2341	2.6001	4.6301	2.8798	3.9533	2.0577	2.7486	3.0498	4.2556	4.1058	2.6169	1.8462	3.9501	2.5158	1.9816	3.7451	2.0607		0.86765	3.19245
14.1778	4.8202	2.7401	3.0113	3.0952	3.6527	4.6828	5.854	3.2161	5.0503	2.4663	2.1849	2.1463	4.1189	2.3434	2.2392	2.8722	4.2594	2.1437	2.9494	2.6125	3.983	2.1445	2.1819	5.4637	3.7616	2.7355	2.7323	2.2125	2.0182	2.8326	2.3194		0.875	3.18852
14.297	5.254	2.56	3.6136	5.2599	5.7717	5.4279	3.4139	2.5814	2.5824	2.7307	2.2251	2.0397	3.5722	2.0878	3.4251	3.4066	6.9584	5.9503	2.9906	4.2849	3.0404	2.0152	1.8772	4.1497	3.0021	5.7736	3.928	2.277	2.3605	2.7884	2.4237		0.882357	3.54103
14.4161	3.6704	3.9311	2.1686	2.6548	5.6351	6.5934	3.3683	3.4671	2.3534	1.9042	2.4241	2.0027	2.5178	2.0125	2.4826	4.7037	5.2655	5.5192	3.7253	2.1713	2.1446	3.081	1.9833	4.0204	5.9816	3.5459	3.3494	2.2498	3.3961	3.2295	2.8805		0.889707	3.36881
14.5352	3.5881	3.7902	3.2785	5.6038	4.7611	5.6888	2.2239	3.5645	3.2076	1.9435	2.4164	3.1492	2.2269	3.0158	2.4475	3.1589	3.6085	2.3193	4.1095	3.0996	1.7598	2.727	2.805	3.4092	4.4379	3.949	2.3496	3.0766	2.0341	3.1741	2.7246		0.897057	3.21447
14.6544	5.1827	2.8111	3.1346	4.5731	3.345	5.2554	3.2777	4.7147	1.9909	2.1852	2.3439	2.4166	2.0898	2.7989	3.0431	3.0675	3.3585	4.1943	2.56	3.6392	2.8497	2.2223	3.1179	4.4489	4.5674	5.3497	2.9792	2.1246	2.7597	2.9052	2.2315		0.904414	3.27543
14.7735	5.8722	2.1616	2.31	2.5888	3.3525	3.8321	3.3669	2.4996	2.3524	3.0059	3.7565	5.0042	2.5683	2.3875	3.2665	4.1658	3.6099	2.6171	3.1302	4.3372	5.746	2.2118	3.8001	4.0839	3.3546	5.6163	2.2041	2.4222	2.6492	4.3315	2.1874		0.911764	3.3804
14.8927	3.6992	4.5171	2.8327	2.7729	5.0661	4.463	4.1169	2.7159	2.5713	4.0066	2.2773	2.2419	2.1937	3.8182	2.3403	2.495	5.2301	2.6013	2.2716	5.7736	2.5835	2.6332	2.3053	4.9028	6.1719	3.8725	3.1675	2.7335	2.1606	3.868	2.0955		0.919121	3.37094
15.0118	5.9758	3.2641	2.6901	3.316	7.0003	3.2311	2.1416	4.3823	2.4003	2.585	3.4197	2.1845	4.1853	2.7358	2.7915	2.5864	4.4981	2.6893	3.0769	3.3114	2.0538	2.3747	6.4849	8.5532	3.5132	4.4161	3.7205	2.8964	1.8868	2.3406	1.9471		0.926471	3.50493
15.1309	4.1767	2.3821	3.1922	3.1166	3.0099	2.992	2.0333	3.5413	2.1386	2.3219	3.1144	2.9371	2.3284	3.87	2.7824	2.8588	3.9303	4.1336	3.1583	3.1775	1.9388	2.19	3.6995	6.1795	3.9341	4.924	2.4947	2.154	3.4122	3.1224	1.9771		0.933822	3.13618
15.2501	4.6877	5.136	3.2252	3.1482	2.4713	3.6609	2.8347	4.4506	4.0893	2.5292	3.636	2.5786	6.6143	2.4732	2.7203	5.1385	3.0107	3.2472	3.9431	4.0336	2.0386	2.0387	2.5978	7.2595	4.8877	6.4672	5.1678	2.5189	2.2291	2.4683	2.4854		0.941178	3.67057
15.3692	3.4614	4.3624	2.39	3.2922	6.3764	2.0416	3.4671	6.2589	3.675	1.9933	2.9597	3.1445	3.9174	2.7712	4.9602	6.8797	2.9683	3.4115	3.8975	5.4884	2.951	2.9541	3.3454	8.5451	5.5888	5.9095	4.6297	2.1138	2.3841	2.8119	2.944		0.948529	3.93207
15.4884	5.7437	3.1726	4.1596	3.2359	3.9867	2.3933	3.471	2.7514	2.1517	1.8567	2.2374	2.1887	3.4858	4.1377	4.6523	2.689	3.9376	2.4392	7.0715	5.1948	2.4531	2.7926	2.96	10.7319	4.362	3.8967	6.8645	2.2047	2.0929	2.4907	3.5064		0.955885	3.71975
15.6075	2.9661	3.8633	3.4119	4.204	4.4006	2.5434	4.585	2.2989	3.293	2.5523	3.0871	3.3758	4.0021	3.0304	2.5767	5.5061	2.8378	2.9444	7.9255	3.5224	2.0915	4.016	4.1217	10.2486	4.2261	3.8376	3.2538	2.7197	4.1367	4.8694	2.866		0.963236	3.84884
15.7266	3.7743	2.2017	1.99	2.0058	2.857	3.3407	3.8333	5.0822	4.0183	2.3134	2.895	3.2384	3.3176	3.1777	2.9886	5.0949	3.6644	3.0541	5.7138	4.6642	2.2108	2.2411	3.7071	7.3586	6.6716	5.6078	4.9252	2.1213	2.8087	2.4786	2.033		0.970586	3.5932
15.8458	2.4409	2.1278	2.8574	2.5239	2.7826	2.6648	2.1011	5.9652	4.8681	3.4894	1.9873	2.7435	4.5392	3.8424	3.1015	4.8598	2.9457	2.5523	6.4806	4.2639	3.6662	2.5285	2.9594	6.6397	4.7895	5.3978	3.4574	2.2007	2.2847	2.7332	2.7553		0.977943	3.50161
15.9649	2.4746	2.8256	2.2334	2.7723	3.7	2.9422	2.3341	3.2816	3.9829	4.1452	2.8314	2.3389	6.0971	5.3709	2.8557	5.3759	2.187	2.4509	4.4697	3.393	2.4769	3.2242	5.298	4.9163	8.4072	2.9916	4.2155	2.1294	4.3954	1.963	2.9657		0.985293	3.58212
16.0841	2.9917	4.6978	1.9222	3.2604	2.1614	3.047	2.589	3.8084	2.9036	4.2252	4.172	3.307	3.4558	5.1725	3.0136	3.9078	5.1255	2.3038	3.3789	3.0959	2.0146	2.6962	3.5171	5.4493	10.4542	4.6729	2.469	2.9824	2.104	2.8804	2.7005		0.99265	3.56387
16.2032	2.2158	2.8193	1.9707	4.0106	2.0472	3.0003	2.4936	2.2794	3.5658	2.3744	3.5157	2.4478	4.3175	3.1483	2.587	3.0031	3.0756	2.1243	6.8515	3.326	2.5213	2.8908	4.3069	5.2949	7.4924	4.2832	4.9673	2.6734	3.726	2.4776	2.1129		1	3.35228

## Sheet: Image27
X0	Y0	Y1	Y2	Y3	Y4	Y5	Y6	Y7	Y8	Y9	Y10	Y11	Y12	Y13	Y14	Y15	Y16	Y17	Y18	Y19	Y20	Y21	Y22	Y23	Y24	Y25	Y26	Y27	Y28	Y29	Y30	Y31	Y32	Y33	Y34		Ap-Basal	Avg intensity
0	17.0085	16.5881	26.6534	16.2402	17.9366	22.4527	20.7488	47.6539	43.2673	86.801	43.1487	71.9093	17.482	39.7513	30.5172	27.7134	23.2514	41.3796	28.8777	32.066	38.268	34.1943	17.5439	19.3138	18.5674	24.9345	13.4144	20.3515	31.4759	37.18	31.8936	25.2192	32.0258	33.1201	29.3947		0	30.8098
0.1191	24.6782	21.2681	22.3983	13.8707	13.362	29.096	25.2625	58.4111	50.0137	103.212	67.233	65.7003	21.7933	47.5331	30.45	30.6116	24.2958	29.8668	16.5663	41.6925	39.2776	32.6397	20.4917	19.1867	21.4492	23.763	21.8543	22.1358	26.2187	25.3129	33.0995	25.2132	31.3471	34.4864	27.5831		0.00746012	32.6107
0.2383	36.8696	19.6133	13.0877	12.2253	14.845	15.2921	17.6718	59.7782	49.6537	84.982	62.1771	70.193	22.4642	37.8981	38.4199	28.2756	27.9902	32.6312	31.6144	39.5777	43.0892	28.4075	17.3174	27.1233	26.119	22.2596	21.8652	20.3627	34.1846	18.0596	27.3892	18.9384	30.4381	40.2548	26.1808		0.0149265	31.9214
0.3574	45.8094	33.3237	19.9143	17.2558	15.2469	24.397	19.3501	49.6901	49.2393	90.85	58.3318	62.9424	25.2791	44.8186	38.2746	29.8945	28.2814	22.3249	24.1049	41.7728	50.1503	33.1936	27.8726	26.3999	27.9477	26.436	31.1341	17.9158	32.3543	22.3462	18.9634	25.0655	30.2482	32.4883	22.0413		0.0223866	33.3045
0.4766	70.854	31.1523	20.3804	14.4264	17.7879	17.2962	16.7602	40.5323	54.4231	93.955	63.8076	61.7545	39.5491	46.5884	31.6681	33.8352	39.2334	29.3291	25.5662	40.9207	80.317	33.0638	34.378	39.2576	33.1933	33.5202	34.272	18.6018	23.5913	17.9355	32.0305	20.964	40.1384	28.1872	19.9666		0.029853	36.5496
0.5957	71.8931	37.3115	20.6342	11.9777	25.3163	13.5353	14.023	35.8973	43.8603	91.497	72.4261	45.5064	30.0046	29.6912	30.9432	30.0754	40.9375	28.8303	26.1543	47.7518	64.7409	32.8418	38.9822	44.0953	32.5355	28.2377	33.373	20.1409	28.1677	19.1494	17.4161	16.6139	30.7445	25.8059	19.1058		0.0373131	34.2919
0.7148	72.3733	52.9375	20.371	14.2711	17.173	17.5015	15.3776	34.7557	44.7658	74.617	65.2232	37.7745	24.9729	32.9928	18.8355	32.8762	42.4139	29.4645	15.2673	38.8725	65.4439	26.1177	55.8701	53.7156	41.6864	28.6676	35.1274	17.434	31.2955	13.7385	14.4123	19.9221	33.3757	25.2354	24.9977		0.0447732	33.9965
0.834	61.7515	61.2444	20.2709	14.3819	18.6913	17.2705	11.7003	31.2976	48.7128	69.87	60.0524	47.0996	22.6742	33.9587	31.2935	42.5787	42.4748	25.8089	20.7511	36.9218	77.0427	29.0711	49.5102	52.4222	39.9562	26.7939	28.6374	23.5295	35.872	12.9449	18.0584	18.635	29.9879	22.6249	22.9481		0.0522396	34.4811
0.9531	56.4867	64.7971	25.8265	18.61	15.0673	8.8532	15.8965	31.1948	46.1518	67.144	61.4752	42.0811	27.4575	45.4703	27.0417	36.595	42.4714	36.8071	26.1959	33.6345	75.2453	28.1461	42.8543	46.5901	28.3497	27.2558	34.9727	21.0733	43.8729	17.714	19.5263	16.7924	25.4436	28.3399	26.9443		0.0596997	34.6394
1.0723	52.6248	78.5037	24.5502	13.5701	18.4032	11.1174	13.657	25.3018	49.6054	51.338	73.8064	41.0526	35.6542	37.2232	25.8161	30.3438	48.5791	31.0205	23.855	36.3284	69.8973	26.555	47.061	41.2618	27.5833	29.8693	41.5704	32.4007	48.8057	23.3614	15.5235	17.8916	23.6336	19.5736	22.1147		0.0671661	34.5558
1.1914	60.7987	77.5142	30.9831	17.752	17.0198	12.3886	10.3987	19.7619	51.2971	48.511	59.3822	43.0363	22.6104	39.6097	32.9177	29.6821	36.4442	45.9319	22.8386	37.0902	52.4483	23.5266	34.2566	43.1288	30.5775	24.6227	28.8391	17.2089	46.7364	24.8008	25.5805	13.2892	16.8827	24.6706	20.8142		0.0746262	32.6672
1.3106	55.1037	82.032	34.1394	21.176	15.1134	13.0534	13.8439	25.4485	50.5735	31.852	62.4925	32.7936	24.37	40.4443	26.8687	26.4263	25.8936	59.09	18.5847	33.3371	42.8111	20.3368	30.9245	34.4445	26.6986	23.0433	29.1263	24.1228	42.7028	36.5556	25.9026	14.8037	19.8095	23.4505	20.1441		0.0820926	31.6432
1.4297	56.5083	72.3138	33.8607	20.2857	15.8709	14.2318	11.7803	23.708	42.9441	33.985	57.3497	36.9078	18.9998	27.3482	29.1045	22.9417	35.9254	50.967	17.3801	39.6867	38.0762	27.4503	34.3671	28.3845	22.2277	33.0116	33.4914	27.8107	44.4226	27.6134	21.3855	17.0375	20.9942	22.789	19.1897		0.0895527	30.8672
1.5488	59.5221	75.5529	50.8761	18.6321	15.8496	12.6952	6.6506	22.1301	49.5159	31.846	52.8935	27.9155	20.2243	27.7051	23.7379	17.9918	34.9824	55.5551	17.5453	31.5768	36.5524	34.6411	29.3766	20.6501	25.0224	25.6963	28.5035	29.4563	43.3045	30.8509	26.0285	19.202	19.6486	24.1063	10.1487		0.0970128	30.1882
1.668	56.9864	64.3627	53.8821	30.6382	14.1676	9.08	13.4958	27.4794	62.9234	34.252	49.5367	40.6777	12.7594	32.2056	33.7135	16.7587	35.6994	49.3859	25.576	27.8719	26.9871	26.2176	23.3522	20.5432	26.3488	19.779	37.3839	31.6599	31.2813	25.1101	26.0009	20.1617	16.2746	23.571	16.2877		0.104479	30.3546
1.7871	58.8617	53.5367	54.1904	27.128	12.4945	9.5139	9.9589	24.7368	71.7153	34.064	55.068	28.2528	18.24	42.4774	31.6045	18.6123	42.7897	61.7444	24.578	25.999	28.5952	30.97	26.5622	17.0019	23.604	22.608	34.7874	26.5511	35.0993	22.78	27.8692	26.4929	23.9812	37.0942	11.2948		0.111939	31.4531
1.9063	55.0111	50.6128	51.5238	40.3622	12.4706	10.2304	11.5454	18.0331	67.6319	22.039	45.9171	33.1109	16.7685	41.1248	30.6663	20.9165	35.3719	55.8323	27.4164	30.5115	28.3036	29.0458	18.8248	12.3132	18.3241	23.1956	22.184	25.7986	38.6285	25.2339	20.6706	29.0164	23.4516	30.6711	11.9286		0.119406	29.5625
2.0254	38.4768	45.645	56.7282	40.2997	15.7761	14.6476	8.4753	21.5194	76.6656	22.627	38.4725	35.988	16.5265	29.2208	21.182	13.9802	32.161	54.8105	23.4228	33.1692	26.4474	30.7169	29.3011	13.8885	21.0002	12.075	24.3117	31.0469	41.5799	24.971	22.6888	20.3755	22.8594	31.1886	10.2313		0.126866	28.6422
2.1445	47.3546	42.105	65.6758	51.1194	16.2057	10.9011	9.4018	21.7745	74.1563	33.142	43.448	27.4078	13.1386	19.577	24.0876	11.3328	25.7311	39.1117	30.6777	29.21	27.5788	24.4607	20.4063	11.2979	18.938	15.0245	28.1293	26.2835	46.7185	26.897	18.8893	18.6938	11.5735	25.3734	6.7693		0.134326	27.5026
2.2637	41.2396	34.6918	46.2073	59.3735	15.0942	10.8025	5.4684	14.0469	72.945	35.957	33.4464	30.7821	12.5985	21.5118	17.452	9.4186	28.0348	32.4673	26.9511	35.936	26.5676	23.1053	26.3389	9.9613	19.9978	10.3929	15.267	18.4045	52.3951	27.0485	18.5967	28.6194	20.4683	30.6687	15.4179		0.141792	26.505
2.3828	34.8419	34.0675	49.096	38.9876	11.9606	10.8385	9.7168	9.2703	73.5994	32.301	33.9275	24.4519	17.5622	22.7088	13.679	15.3675	32.0024	37.6736	35.444	32.5989	13.8421	18.7812	20.0717	9.8999	28.36	12.4387	14.0685	16.6009	23.1225	27.0397	18.3045	30.7346	14.2727	41.3355	14.821		0.149252	24.9654
2.502	35.9033	28.7152	57.4187	47.6829	14.0354	10.6238	11.1121	14.7213	80.1549	32.846	19.9096	24.98	17.1372	19.9693	15.5137	12.024	17.7363	24.0699	29.3495	32.1073	16.6089	19.1718	17.2032	10.1613	24.2982	12.6916	14.089	13.6222	29.9678	18.9145	25.4609	18.3267	15.7388	38.1393	14.6387		0.156719	23.8584
2.6211	30.2138	43.0266	48.9736	46.2462	18.2498	9.8647	8.1309	12.9551	92.4446	35.769	29.0938	17.9114	19.7519	16.9008	16.8455	11.7496	30.7443	19.6408	30.5059	27.8663	25.4711	13.5946	28.1325	12.0996	17.7114	9.1692	15.6094	12.8798	22.8549	23.7311	22.5048	13.1298	22.1196	27.3029	15.4936		0.164179	24.2483
2.7402	26.2161	32.9681	65.7993	54.3933	17.3653	10.226	7.0226	15.5975	91.0869	39.941	28.4425	16.3496	18.7565	13.0599	20.6574	8.2326	30.1267	21.8617	27.1199	25.5631	14.324	19.5405	28.9013	15.4684	22.5153	9.5039	18.2304	13.4162	30.8765	21.5116	20.9864	14.9047	21.7669	24.2439	22.2681		0.171639	24.8355
2.8594	29.4693	43.0764	56.0339	44.1633	13.2023	7.8319	12.7427	8.4279	83.9945	25.915	29.4421	17.8195	17.2718	18.1366	16.1126	12.1001	25.5247	23.1285	22.942	24.6999	18.5126	17.3176	28.0531	11.2907	15.6439	9.5086	13.257	26.9893	26.479	26.0241	24.5347	14.9805	20.3436	27.4291	18.9692		0.179105	23.7534
2.9785	28.8498	35.4928	49.1356	53.8245	17.4252	7.908	14.6733	13.1476	88.8023	33.667	27.3312	12.999	10.1141	14.2358	11.822	6.9859	17.39	20.8307	30.4117	17.1163	17.301	9.2067	37.0591	13.3692	15.2987	11.1534	17.6381	15.2059	24.2718	20.3716	22.2806	14.3793	19.3355	22.2414	11.5559		0.186566	22.3666
3.0977	28.6456	30.9013	46.5356	49.9035	12.7765	12.8379	7.9931	11.9728	73.5329	35.544	24.7778	14.0745	12.94	15.4375	15.2634	10.1352	17.6792	22.349	25.6954	20.5618	12.3087	13.9655	39.2176	11.7773	17.7708	12.2843	20.9893	14.6948	18.9431	32.3512	23.9286	12.44	21.9493	20.5183	12.68		0.194032	22.1536
3.2168	27.525	27.3262	39.2035	55.3138	18.8837	10.0072	8.8802	10.3319	57.4899	25.761	28.7534	17.2185	16.4693	10.8196	16.2782	9.8619	16.6242	26.3896	24.8083	36.2798	14.014	12.3678	30.819	14.5444	19.6405	14.9254	18.4033	16.3468	23.375	20.492	16.5961	14.2585	20.4229	24.1153	17.4628		0.201492	21.7717
3.336	19.9808	27.038	50.8541	50.9357	20.0283	7.7213	11.0091	12.2081	52.2029	30.595	23.2584	16.0932	17.5972	10.3776	15.1412	11.4578	15.1308	14.5817	15.3638	33.2116	16.7492	12.5796	30.8817	14.9096	17.1489	8.6289	16.6951	22.769	22.1323	16.7824	19.71	10.0059	10.851	16.3654	8.6761		0.208958	19.9906
3.4551	16.3519	24.1214	41.9416	52.0729	21.45	8.5018	11.5703	8.077	41.0636	29.512	17.1359	20.0755	12.8563	10.2496	16.244	8.3504	13.719	12.9334	11.8092	27.4257	12.3507	12.997	28.5853	14.6018	13.2746	11.6986	17.7014	15.1658	19.7873	11.3319	27.6202	13.1565	16.8341	18.5282	12.9627		0.216419	18.6302
3.5742	11.9736	20.1369	36.3373	51.853	16.3697	11.426	6.0537	5.6118	43.9679	34.347	22.6148	20.6054	12.9833	10.1427	10.3459	10.5773	13.4316	19.6331	20.2031	29.8801	10.8831	16.1523	28.3804	15.4091	13.868	7.794	11.3087	14.4692	14.3091	14.346	15.6712	8.2884	13.2205	19.2809	12.6603		0.223879	17.8439
3.6934	11.521	18.4905	28.8797	38.3136	18.0666	10.5262	8.9163	5.4914	35.3863	35.569	22.767	24.547	8.6466	5.9968	10.0439	10.9301	13.0781	16.8604	16.2034	29.4438	14.1131	14.4968	25.5443	18.6077	15.2275	9.052	13.5376	16.8166	14.6753	20.9574	11.6229	10.1965	17.1428	23.0173	8.9063		0.231345	17.2455
3.8125	7.5067	15.2197	34.4963	37.9846	21.3338	16.3287	7.2021	6.2107	28.4061	38.143	23.1822	21.2117	11.2635	8.1164	8.955	7.7608	13.2679	9.7224	19.7498	23.8949	11.189	11.6199	19.8296	11.9822	16.4035	6.9499	15.8172	15.3058	12.7895	12.8431	14.2623	11.1588	14.5897	23.9854	13.9135		0.238805	16.3599
3.9317	9.1021	14.3633	28.2188	43.6587	20.6588	8.1807	5.752	9.7821	34.8841	40.984	24.3357	15.7325	13.2923	12.3834	12.8432	10.141	8.3592	11.7845	20.1515	28.7993	14.0381	14.6772	19.9999	22.6424	20.3531	8.9286	12.0333	10.7554	13.5857	15.6699	17.4658	8.0861	12.3776	23.376	11.445		0.246272	17.1098
4.0508	7.113	19.5445	25.6605	41.4935	14.6799	9.6005	8.9876	6.6092	40.7558	44.222	37.4145	16.4116	16.8608	9.088	13.7804	12.8811	10.538	18.9286	14.9795	23.2999	9.2043	13.9991	17.5922	17.1457	12.6851	5.6174	10.1864	16.3223	17.4225	9.9896	12.331	9.4741	14.5387	26.7128	13.2771		0.253732	17.1242
4.1699	5.7742	14.0233	22.922	32.0861	15.2458	9.9603	7.7753	4.9321	20.2642	50.331	23.9027	14.1459	14.461	9.8798	12.1021	8.5506	12.7396	17.5771	21.3124	25.5437	10.4858	11.1378	19.2492	14.0641	16.1448	5.7623	9.0089	11.1298	12.243	12.8047	16.3436	12.4706	13.2178	23.6477	18.7999		0.261192	15.7154
4.2891	5.439	10.2712	19.3616	21.1209	12.7895	10.0355	7.3691	5.9977	20.3273	64.241	24.133	18.2324	11.4769	8.1215	8.9408	8.652	17.1379	13.5308	33.3979	22.4114	13.1574	9.8398	16.5292	19.2383	9.6197	9.0722	10.2674	15.482	16.5107	12.0952	14.6976	11.5465	12.683	17.8193	15.9404		0.268658	15.6425
4.4082	8.3355	9.9117	16.5542	14.9537	10.7442	12.8094	5.531	4.3226	17.5051	49.825	21.6595	13.017	10.0007	6.8797	9.3767	11.253	9.7331	13.4092	31.9699	20.9633	10.1898	12.6161	10.793	19.0219	13.7136	6.4592	10.079	14.2359	21.1608	8.8439	15.3656	13.9136	17.9328	23.6379	8.0382		0.276118	14.4216
4.5274	3.9073	12.1148	15.905	17.1652	10.9421	8.9876	3.5846	3.9197	18.7458	58.779	20.9112	11.3996	14.3148	16.8602	8.0198	9.7248	8.7704	14.4261	19.1828	24.9975	14.4071	7.3622	23.1838	22.9047	13.1963	7.3596	12.167	7.8843	18.1442	9.768	16.8349	11.5561	17.1876	19.7111	11.9957		0.283585	14.752
4.6465	5.2847	6.86	17.5764	13.3998	10.3876	7.699	3.5678	6.2842	17.9973	26.039	21.8039	8.1091	9.1694	6.1506	8.7841	7.5334	4.08	13.8264	21.2426	23.6389	15.3302	14.5857	19.3571	17.8404	15.5371	4.9926	6.7689	10.5312	12.7672	12.5455	19.8875	8.7541	11.928	20.3484	18.1407		0.291045	12.8214
4.7657	4.2315	8.9402	19.5301	11.6646	10.8917	7.7931	4.5349	6.4847	21.3892	31.872	17.995	10.4666	6.6175	4.6284	11.9562	8.1218	5.5926	14.0633	18.8782	22.7822	9.928	11.5846	14.2295	9.159	9.8672	3.5994	8.3562	8.9986	10.6645	9.5994	18.1133	10.8009	14.6266	13.2918	17.3971		0.298511	11.9614
4.8848	4.7506	9.036	15.637	13.9939	10.8767	10.5941	3.5197	4.0177	23.4548	25.435	18.9774	12.888	8.8934	11.4572	14.2625	9.4323	12.214	14.9175	14.6414	22.2102	8.3243	12.8345	15.6834	17.3644	15.7072	4.3788	5.7743	12.4475	14.3486	7.1695	18.7477	5.624	7.8298	15.4098	13.2453		0.305971	12.46
5.0039	6.0098	9.5574	21.6647	14.0874	8.9867	10.4356	1.9226	4.8648	21.6623	32.867	15.1492	10.7125	7.4325	7.5629	9.3001	5.1973	8.6217	10.0748	19.3903	19.1263	8.1728	9.4916	19.5124	10.8721	8.6014	2.751	4.8787	9.3829	13.549	11.7102	13.8525	6.4001	9.2767	13.7077	13.8306		0.313431	11.4462
5.1231	5.5639	14.2043	12.9732	11.6965	8.6689	7.1378	2.0285	4.8433	19.8551	29.546	14.2716	9.9163	9.8202	9.0346	11.6161	6.1493	2.3975	9.9023	20.3213	10.1084	7.1154	7.1141	8.4332	7.4913	10.6654	5.1521	11.4671	16.0408	20.7637	7.0741	12.7257	6.0149	10.5864	5.8808	9.9349		0.320898	10.4719
5.2422	6.2297	11.785	15.2739	14.232	11.4832	11.4569	4.6883	3.3627	22.1629	27.083	13.6294	13.0054	8.9686	13.0352	7.749	11.9141	4.6973	6.4852	15.9103	19.0726	10.3065	6.1186	8.2848	9.8424	9.0266	3.7633	5.2057	9.5287	21.7291	11.4561	13.9084	5.8399	10.1997	8.5115	11.18		0.328358	11.0607
5.3614	3.6572	9.2132	10.4174	12.9907	13.8105	7.6151	4.6359	2.9017	15.217	31.988	9.0493	10.6403	8.421	10.9986	10.264	6.1471	6.9326	5.4717	15.299	14.2471	5.3716	6.1476	9.7314	6.7826	5.9338	4.1281	6.3699	11.7113	18.0593	7.0989	16.5603	5.74	7.1272	11.2778	11.5208		0.335824	9.81366
5.4805	3.6368	12.4885	14.6627	12.0777	13.589	8.7154	7.683	3.123	18.7247	25.168	9.5666	7.8305	9.687	7.3118	12.7339	7.167	4.3478	7.4572	16.0736	11.3657	3.9658	4.2647	8.8305	7.4984	3.5078	5.8286	7.0331	11.5295	15.9261	12.7928	9.2963	4.1645	14.2116	6.3986	7.868		0.343284	9.61503
5.5996	7.0767	6.1972	8.2906	10.6848	8.2266	9.6386	4.9899	2.6959	12.1551	29.332	10.5502	6.3365	8.376	6.2238	7.7888	5.7284	3.3628	11.5921	14.8028	12.4204	6.4164	7.3625	7.3507	4.4087	6.2612	2.7382	6.2056	11.4728	19.0411	9.7443	9.9781	6.3179	14.6018	7.7321	8.3608		0.350744	8.98461
5.7188	4.2081	17.4994	8.1436	7.1127	15.2464	9.37	3.6559	2.3997	10.3573	25.911	11.1056	5.6154	12.2047	6.8153	7.8742	5.5271	2.4407	8.8877	14.8992	6.6804	5.793	7.0233	6.6807	5.1946	7.7561	2.7903	4.5875	11.2424	15.2048	9.7093	9.125	9.4727	13.9803	3.8314	15.1851		0.358211	8.95803
5.8379	2.8276	6.5225	12.0701	10.039	13.0757	7.3003	5.3682	3.4194	7.6722	17.155	10.498	6.6755	17.8046	9.8258	8.2106	6.0342	3.1271	9.9701	13.4955	10.4208	6.3374	5.1006	3.6116	7.4576	3.1639	5.154	4.8502	11.2524	11.9915	4.758	7.0494	11.2366	9.1553	6.4024	8.7822		0.365671	8.22329
5.9571	4.4813	10.2882	13.1572	10.6695	10.0807	6.2586	4.3694	3.2761	7.3222	19.122	6.3387	3.5134	18.0032	7.8007	10.6883	4.4483	3.8395	11.9921	14.1085	10.2888	4.7648	5.3443	7.3184	8.3195	7.6381	5.0975	4.6571	10.7771	9.973	8.6422	4.2383	12.4009	13.5557	6.6996	12.4903		0.373137	8.62753
6.0762	4.2942	8.6454	11.5021	8.7576	7.8138	6.6513	6.2101	5.7977	6.6912	19.983	8.7434	4.5578	19.1137	10.5339	10.1559	6.763	5.1296	5.6949	16.6014	10.0043	3.7054	6.1273	10.8021	11.0472	4.2144	4.3314	5.0296	12.4032	7.7723	7.422	5.1684	15.6457	12.0372	8.4033	14.5141		0.380597	8.92194
6.1953	5.2133	4.886	11.0077	12.9663	9.1629	5.1876	8.8502	2.2555	8.5236	16.951	7.9714	4.2949	12.0237	6.1677	9.4915	5.6475	4.8413	9.5315	17.0203	9.0328	5.5868	6.7501	12.3799	6.4245	4.3219	4.4421	2.6515	7.9473	3.5599	8.1505	8.9523	13.3204	9.1217	6.0349	17.5361		0.388058	8.23447
6.3145	5.2584	6.7957	6.0848	15.8918	5.8933	4.9256	4.2829	3.4262	12.4134	18.892	4.9651	4.5762	12.4629	9.0476	10.6118	9.3904	9.6137	14.5464	16.2969	7.9826	4.9387	4.2474	13.7196	8.2389	4.88	4.1432	5.6722	5.2633	2.1401	6.4417	5.3097	10.9748	10.5603	4.4206	23.7166		0.395524	8.51499
6.4336	5.4044	5.6061	7.4941	10.9182	8.8766	3.7706	2.7841	2.5689	4.8717	18.734	5.5611	7.2944	7.9003	10.9152	7.6628	6.2351	4.6867	7.6726	13.3549	4.8814	2.8834	5.6378	18.6569	7.1094	8.3525	5.7282	6.0053	7.1751	6.4486	7.3451	7.6377	10.3948	8.9449	4.2142	16.5423		0.402984	7.72198
6.5528	5.7151	3.5704	5.1766	16.7568	6.4859	4.1882	3.2999	4.1258	7.0536	18.425	7.1875	5.2442	10.4412	7.0075	8.3559	3.8307	4.9095	6.9314	19.7507	3.6508	4.2995	5.0565	13.726	5.7158	4.8933	7.5284	4.7402	5.9127	4.6638	9.0612	4.439	10.9673	12.2481	7.3069	19.3291		0.41045	7.77127
6.6719	5.5675	4.0388	4.1606	4.5964	11.3606	4.5386	3.8645	3.6297	6.2591	15.133	6.5246	3.3494	9.3088	4.2918	7.0314	4.6503	5.5041	6.3303	12.9732	9.6418	4.5448	4.3197	16.1719	8.3712	5.4503	7.4458	5.6764	4.2694	6.8177	6.9397	8.1068	16.5881	12.4398	5.4752	18.4938		0.417911	7.539
6.7911	7.8513	5.131	6.2669	4.9919	9.8116	2.5864	5.0068	4.2434	5.8949	17.345	6.7353	6.8126	5.0044	7.0776	3.3898	5.2464	2.8766	6.5643	16.2122	7.2421	4.5122	3.7782	10.521	6.363	4.7332	4.1224	4.1282	6.2984	3.3685	6.3164	6.0571	14.5024	11.5571	4.6658	7.5835		0.425377	6.70851
6.9102	10.7767	3.2363	5.3084	9.3622	10.5857	6.2594	4.455	3.0814	5.9348	20.475	4.878	5.0272	6.1143	8.664	8.5402	7.8629	3.719	7.5009	13.4938	5.6935	4.281	3.2181	8.5027	9.7809	3.3142	4.3356	5.4392	4.884	3.6241	3.3285	9.8301	16.4892	11.6262	7.5055	8.7124		0.432837	7.30973
7.0293	3.3494	3.8505	6.4992	6.9778	10.0465	6.9098	4.2252	3.5991	7.068	15.347	7.9425	5.5412	7.9296	8.6891	7.0556	3.5483	3.0726	7.8364	13.5889	2.2957	3.4691	5.4554	9.3372	7.2151	3.4039	4.4229	6.2443	4.8826	5.8752	6.9761	5.0826	15.8129	7.6714	6.4897	10.5881		0.440297	6.80854
7.1485	6.8071	3.6753	4.2568	6.6747	6.2267	5.375	6.7173	3.75	10.1964	18.604	5.9261	5.22	5.3184	8.7202	6.1113	2.7209	2.0268	7.6317	11.6182	6.5646	5.7388	4.2911	8.5863	6.5282	5.386	4.0789	5.2161	7.1257	5.9522	9.9791	4.0985	15.2052	11.8079	9.4214	15.0844		0.447764	7.21832
7.2676	4.7868	4.2427	4.6135	3.4626	5.6062	4.3622	3.5515	2.8509	8.3707	14.58	2.7418	6.6304	7.3496	4.4391	8.2539	3.1507	2.9804	4.6998	10.6171	4.1793	5.0979	2.232	15.4206	6.8712	7.2885	4.1538	4.9773	6.8904	4.8936	4.7339	6.5283	9.3107	6.9787	7.7953	9.8786		0.455224	6.12914
7.3868	3.3872	3.881	4.0957	8.1058	9.4518	6.6058	4.6419	4.2184	10.4464	10.648	5.1321	3.2586	5.4501	11.9235	9.2513	5.3816	3.4143	3.1295	12.5073	5.26	4.3755	2.2717	8.5658	2.6087	3.2479	5.0593	5.1454	9.3151	3.7538	5.4959	9.4326	12.4569	6.7115	8.7807	12.822		0.46269	6.57809
7.5059	4.3473	3.518	4.886	9.3494	10.9594	3.3439	2.8877	4.7356	8.3988	12.231	8.3834	2.4669	8.2044	6.9445	5.5323	3.4278	5.6428	4.2863	9.0313	3.1002	3.5019	4.344	8.3211	2.1834	3.8227	5.4656	4.8125	10.4362	4.6089	2.6753	8.7611	11.4162	7.8178	8.1259	14.2849		0.47015	6.35013
7.625	5.541	4.6425	5.9791	8.6836	7.1073	2.5649	2.868	3.2126	12.1284	9.825	5.3221	4.9395	9.257	5.047	5.0171	2.9632	5.2779	4.9773	6.2035	5.7413	3.6739	4.3444	7.8026	4.6485	2.6208	4.5674	6.334	6.4923	3.9081	4.8111	15.9439	10.132	8.2741	7.6942	6.2419		0.47761	6.13679
7.7442	4.213	5.4513	6.4098	6.5355	13.8907	3.1311	3.9652	3.3936	12.4843	9.247	6.15	6.4382	9.086	5.9433	6.4783	4.1162	5.546	5.4856	3.9091	5.3701	3.505	3.5157	8.4901	3.9445	2.58	2.096	8.9653	10.0933	3.8884	6.2037	9.3335	11.8364	11.5099	5.9007	7.6062		0.485077	6.47751
7.8633	4.0569	4.5247	5.0232	7.5029	10.1812	3.9911	2.9007	2.6841	9.0647	12.53	5.9338	7.0152	8.5152	4.887	7.6365	5.4929	4.7009	6.048	8.939	3.6463	2.0993	5.1892	5.1331	4.5514	2.6903	2.7512	5.9136	10.0374	4.3886	3.0091	8.1716	7.9782	8.2836	5.4009	6.2909		0.492537	5.91893
7.9825	4.3917	4.3931	6.5485	8.5378	5.1944	4.1355	2.5349	3.2291	8.2453	9.166	5.1332	4.969	7.0968	6.1657	6.4076	4.5605	2.9478	4.3783	7.2621	5.1061	3.8164	5.5656	7.8958	6.334	3.0684	4.5146	5.893	8.3312	5.6193	3.9982	7.9877	8.8639	6.531	4.775	8.7417		0.500003	5.78112
8.1016	5.4934	5.9565	4.0106	11.76	4.0106	2.7069	2.9564	3.6157	7.6408	11.083	7.7704	6.7001	4.2321	5.058	6.2721	3.8722	5.8601	4.1339	10.8323	4.965	4.4438	6.26	8.1483	5.2357	4.2742	4.2206	6.983	7.9058	4.381	4.4787	4.805	10.3032	6.4889	6.7225	8.7282		0.507463	6.06597
8.2207	2.4833	4.0884	2.5883	5.8186	3.6354	3.7948	2.7908	2.7431	4.9376	5.732	4.9427	5.8133	4.965	6.9134	4.7013	3.7433	2.6606	4.7045	5.7832	4.0532	2.221	4.8579	6.9153	3.6818	3.5325	4.7135	4.9154	8.042	9.281	4.9792	3.8937	7.9349	10.0945	7.4729	6.7291		0.514923	5.03307
8.3399	4.2842	5.487	4.4253	7.6973	4.691	3.3511	2.1528	2.2796	5.3183	5.491	8.868	11.1819	5.7216	4.3013	5.744	5.9252	5.0902	3.7996	5.3558	2.873	4.3848	4.871	5.6607	5.2059	2.789	3.3124	8.3698	7.0726	11.4451	7.1447	5.5323	7.6009	7.7029	12.0734	9.0802		0.52239	5.89383
8.459	3.7836	6.1353	6.6146	7.7964	4.356	4.3717	3.9858	3.0067	7.441	4.248	7.2565	5.3658	8.1712	6.5869	5.2584	4.2535	3.543	3.393	9.7858	2.8171	3.209	7.0627	8.7767	4.0553	3.4488	4.0249	6.0491	6.2457	5.4105	5.1986	6.0402	3.5514	9.0197	5.4052	8.6555		0.52985	5.5521
8.5782	4.8616	4.6161	3.6607	7.0708	5.0841	2.3087	5.4647	4.1668	6.7561	8.729	11.25	4.2627	8.3332	6.7369	4.4699	3.372	3.7087	5.8452	7.5078	2.3656	3.7467	3.8801	6.3701	3.8888	2.7016	4.8239	6.1299	5.3995	8.6359	4.6574	7.4609	6.8504	5.2989	4.8232	4.6018		0.537316	5.42399
8.6973	2.391	4.7889	4.4142	8.7294	4.3063	5.3023	3.0452	3.7083	8.2665	6.519	5.7519	3.2947	11.1436	8.3691	3.5385	3.5576	4.6748	5.5688	7.4448	3.1575	2.5274	6.0725	8.0529	2.6183	3.85	3.8736	7.8302	6.5401	5.1704	8.4806	5.213	6.7198	8.0626	3.9899	5.4733		0.544776	5.49849
8.8165	3.2845	4.8892	3.5563	5.0957	5.0884	4.583	2.7188	2.0603	8.2892	8.026	4.7793	4.7505	19.0991	8.5127	3.8012	2.1532	5.4543	5.3234	4.6337	2.7764	3.0921	5.2537	5.3506	4.0646	2.5698	4.6684	6.6146	6.171	6.1762	9.1661	8.9736	5.3873	4.2561	5.6998	4.6792		0.552243	5.45709
8.9356	3.1155	5.0317	4.9391	5.6416	3.5875	3.0389	1.9724	2.6023	6.0475	9.08	3.0415	5.4871	12.5232	4.8504	4.0155	3.0382	3.7848	4.6532	6.4614	4.2938	4.4798	5.02	5.0838	2.5414	2.9205	2.3219	8.8805	4.3912	3.7665	6.6182	8.2298	4.3568	6.3473	5.7931	7.3397		0.559703	5.00846
9.0547	4.8229	3.4351	3.4567	6.5965	4.6734	5.327	3.9563	2.4497	4.2333	7.302	4.5127	6.2653	9.3369	4.0435	4.6764	3.339	2.7561	3.8196	5.6885	2.4948	4.2909	4.1033	6.8657	3.9208	3.3886	3.4272	5.5022	5.8159	5.452	5.4208	7.2003	8.2541	5.6301	3.6291	4.4979		0.567163	4.87385
9.1739	3.4876	4.4603	3.678	8.727	3.2803	6.4849	3.7288	3.8825	5.5199	6.677	7.7028	4.0608	10.9221	4.4473	5.558	6.1305	3.5898	4.2874	4.701	3.0977	3.3224	6.4473	9.084	5.1892	2.0972	3.3846	5.7518	5.1038	5.6833	6.1262	6.663	6.592	8.7641	3.3381	7.0838		0.574629	5.40156
9.293	2.4966	5.3793	1.9522	12.0866	5.6789	4.633	3.1392	4.3228	7.5709	7.376	6.089	5.973	9.4108	5.1606	7.516	4.1793	3.2405	4.2352	5.4909	2.0944	2.9473	6.0543	6.3373	4.5596	3.3579	3.1388	12.2723	5.3997	4.9718	8.7842	8.0768	6.2643	6.9313	4.3107	5.2182		0.582089	5.61856
9.4122	3.469	4.6263	3.4981	5.1529	9.056	4.8997	2.1043	5.1051	3.142	6.325	4.2514	5.7527	6.1472	4.9163	5.6076	3.6886	3.9358	6.1528	5.4907	2.47	2.6516	8.0379	6.5578	2.8559	3.7905	4.2694	7.004	4.9762	9.2838	6.0253	5.8824	8.3842	9.4566	2.9463	4.6319		0.589556	5.21558
9.5313	2.1511	2.773	3.9781	6.8901	5.9239	3.4551	4.7294	3.2231	4.0395	4.855	4.4282	9.7658	3.8344	7.5513	11.8017	3.8827	3.4187	6.7875	6.8715	4.5724	2.4105	4.0044	6.2628	3.9236	2.1988	4.2048	6.1562	5.4795	5.2898	9.3246	4.77	8.3036	10.0048	4.8186	5.3945		0.597016	5.35654
9.6504	3.3244	5.3556	4.8454	7.2167	2.649	2.5069	5.0283	2.2749	7.7451	5.708	3.7935	13.1593	5.6801	9.6623	8.9233	3.1479	3.739	7.4136	6.7777	2.9078	3.0055	4.1991	3.273	3.1542	3.514	2.7311	5.4713	5.6854	3.8422	10.9713	6.4421	9.3251	4.0078	5.2422	7.5883		0.604476	5.43747
9.7696	4.6167	4.7568	3.5102	6.8382	3.0383	5.899	4.0603	2.6805	3.8187	4.59	5.2808	11.1568	6.195	3.7878	5.2899	3.6774	4.8999	4.5161	5.7131	3.7509	3.4506	6.2662	6.87	4.2604	2.1139	4.515	6.5495	6.6702	4.4491	10.8092	5.9101	6.906	7.3107	4.1208	4.6246		0.611942	5.22579
9.8887	4.5149	3.3253	2.5209	6.8394	4.0027	3.5712	5.0522	4.5236	6.8527	5.81	6.1418	9.6594	3.4177	8.7251	7.2334	4.0657	3.8779	5.6409	8.6185	4.8334	3.5738	5.7232	7.8798	2.8593	6.1834	3.3197	6.1291	6.0645	5.4301	10.0619	5.4244	8.4847	12.5072	4.4137	4.7266		0.619403	5.77166
10.0079	4.0648	4.6593	2.7129	6.3083	3.3744	3.78	3.3068	3.7559	6.766	5.455	9.2355	11.3084	4.6595	8.3452	6.6717	3.9724	3.3847	6.5178	5.2492	2.6286	3.915	7.9674	7.9866	3.0052	5.6708	2.8636	8.0433	5.4301	5.6142	8.5296	8.5903	8.0761	7.4618	5.9094	9.0771		0.626869	5.83705
10.127	4.1528	2.3042	1.92	6.2001	6.1241	3.8802	3.2917	6.7213	3.4198	6.695	5.979	10.3289	4.0457	3.3862	4.3242	4.0444	3.9693	7.4728	4.2339	4.1346	7.7571	5.4332	5.8809	2.7647	2.604	2.3792	4.282	6.8226	4.8516	11.1557	11.9989	5.2684	8.9721	5.9673	5.8063		0.634329	5.38778
10.2462	5.7476	3.6106	2.8994	2.9847	4.2073	2.1076	3.3225	5.3639	5.7139	7.319	7.3646	12.7326	5.6016	6.686	7.7105	5.7131	3.9125	8.0084	4.3448	2.632	4.1262	9.2108	7.0696	4.2047	4.0916	2.1233	7.9822	7.5515	4.4545	8.1991	12.2126	8.3151	7.9489	8.9459	5.8566		0.641795	6.00786
10.3653	2.4503	2.3769	2.6574	4.2956	4.6096	3.7592	1.8993	5.0007	9.8359	7.097	6.2603	8.3794	7.4501	6.3486	5.3538	6.1441	4.3509	11.2632	4.4718	2.0979	4.5504	8.0896	5.6274	4.264	4.011	3.1384	6.9957	7.8577	5.6661	14.0665	8.0271	2.6828	6.5823	6.2088	3.823		0.649256	5.64837
10.4844	4.0624	2.4154	3.9394	7.013	5.606	2.8463	4.214	6.1639	7.908	6.22	10.2838	8.121	5.6693	3.0932	7.12	7.1562	3.6288	8.6669	5.2063	3.7277	3.1403	6.94	6.3782	4.1207	4.8378	3.5384	5.208	4.6836	7.6943	8.1509	8.5495	7.7674	6.2747	7.7994	5.1303		0.656716	5.80786
10.6036	3.4962	5.5239	4.3298	4.5596	3.536	3.2181	2.2741	6.6002	8.2476	7.469	4.2395	12.1138	4.3621	5.7761	6.5845	6.3044	3.5264	8.8709	4.509	2.4863	3.2655	7.6811	6.7438	4.3277	2.4102	3.803	7.7895	7.8188	7.2894	11.9211	7.4805	7.3138	4.935	4.4389	7.8975		0.664182	5.80409
10.7227	3.1602	2.8957	2.6464	6.0364	3.5099	2.9951	3.7404	8.4764	11.4807	8.533	6.4475	10.0432	8.3908	6.9602	5.182	5.379	6.2132	5.333	6.009	2.912	2.864	6.0881	8.1183	3.1112	4.9554	2.73	6.8747	6.32	7.2625	15.7666	8.0583	10.9875	5.3845	6.7611	8.1759		0.671642	6.28006
10.8419	4.6067	3.944	1.8051	4.9303	4.5254	3.1474	2.3537	7.5175	6.0679	7.089	6.102	14.1231	8.3744	4.3528	6.7099	4.6364	4.5667	9.3231	4.9772	2.651	4.3473	6.6794	9.732	3.3528	3.1782	2.387	8.0535	4.4123	7.851	6.5287	11.0879	7.3392	7.2494	3.6488	9.2473		0.679109	5.91138
10.961	3.2975	2.6951	3.0624	9.1683	4.5968	4.2031	3.6442	6.9659	6.141	11.639	6.3889	16.5827	8.4582	2.862	7.2902	5.6042	4.2724	7.1446	4.6954	2.8882	5.0767	8.8717	7.1504	3.5164	4.7121	4.6712	4.8715	5.9415	7.4993	6.577	5.4544	8.4518	5.9308	7.9262	10.1057		0.686569	6.23877
11.0801	7.0223	3.7565	3.5952	8.8324	8.3021	3.6069	3.0922	9.3321	5.9534	8.383	6.9281	13.4827	11.0594	5.1115	6.3394	3.5597	3.2792	4.7272	4.887	2.9367	4.5929	14.6565	8.0167	4.4201	2.8714	4.6143	7.6549	6.3986	4.9486	7.1748	6.6022	7.5864	5.1287	6.7981	6.4805		0.694029	6.34662
11.1993	5.1143	4.4072	4.0207	9.1297	3.3465	4.2436	4.0037	6.3719	4.5231	6.838	4.6438	11.8009	8.1704	2.7677	10.8585	7.1896	2.9787	3.6799	4.2321	4.3532	3.8476	14.1804	6.9382	5.0396	4.7665	8.5685	6.4741	10.3132	3.523	8.0544	10.2372	9.6082	6.921	3.8099	8.2812		0.701495	6.37819
11.3184	5.1806	4.3765	2.4413	7.1383	4.6313	3.8668	3.4406	7.2252	7.2299	8.369	3.035	20.7351	11.5642	4.0144	6.6577	7.2757	5.2396	4.0174	7.4483	3.7472	4.2056	16.6988	7.3752	3.7604	3.0063	4.6184	7.296	5.9163	5.5569	5.2112	9.6918	10.5412	5.896	3.6319	5.72		0.708955	6.47886
11.4376	3.4757	2.6561	2.1533	5.8289	3.606	2.7849	3.8215	9.6886	7.1749	8.896	5.6001	16.2809	12.4788	6.3203	7.4455	9.698	2.5494	4.2754	3.1673	4.6508	3.0431	16.2716	9.2087	3.5897	5.1035	8.2414	8.301	3.0171	4.4537	8.4786	6.4942	3.7075	7.0513	3.1352	6.303		0.716422	6.25577
11.5567	7.3328	2.6345	2.1477	5.4271	3.8963	3.031	4.0904	7.608	7.6173	8.726	10.3083	10.0096	6.8177	7.4501	10.7938	8.6181	3.7405	5.0554	3.2478	3.287	3.0291	11.3657	13.7346	6.0027	4.8219	3.9079	7.8894	4.9588	9.5651	6.2273	16.4243	6.8858	8.263	5.9284	5.4383		0.723882	6.75091
11.6758	5.5877	4.2192	2.7486	6.1744	5.1803	2.6514	2.3931	6.7883	4.6518	11.643	7.2627	11.7367	6.1618	5.8849	8.2329	4.1938	9.9009	4.1714	4.9559	5.2316	2.1189	15.1996	8.218	5.5513	2.4622	8.2082	4.6618	5.3181	5.8349	7.0973	7.1008	5.0113	6.2138	7.2173	8.8662		0.731342	6.25286
11.795	6.9006	4.6378	2.8793	4.2793	5.1975	4.1004	3.6523	3.8217	4.4867	14.56	5.2333	16.7857	9.4782	7.6284	6.5608	3.9108	5.708	6.5773	7.6549	4.1204	4.4971	12.4525	8.1021	3.5267	5.0725	2.547	9.7233	5.6191	4.6276	2.7432	5.0617	4.4213	4.8774	4.8486	7.3651		0.738808	6.10453
11.9141	6.582	4.9364	3.6245	5.1854	5.5787	3.967	4.664	3.0773	4.894	14.551	5.0353	12.8702	12.0775	5.8302	6.7861	4.3687	3.9221	3.7741	10.515	3.0536	5.7909	11.1165	10.3064	6.9365	2.9274	4.7362	6.6811	5.2141	5.2674	5.3115	4.3167	5.6791	4.6038	3.1277	6.1722		0.746268	6.09945
12.0333	4.8574	3.7487	2.7046	5.7142	7.6705	3.0173	4.433	3.6044	7.6017	9.922	7.6197	9.868	12.6812	6.0332	4.2515	6.7022	3.4112	5.5067	5.7938	5.1993	2.5348	6.903	9.8593	7.7034	4.0259	5.6893	4.465	5.5473	3.7319	2.0973	6.5828	4.9351	6.5346	3.9304	6.3344		0.753735	5.749
12.1524	3.2754	3.0926	4.4935	5.7385	6.7065	4.3916	4.0702	4.4573	6.364	6.442	14.9594	11.5635	6.9546	8.1279	6.9428	4.9735	4.5861	6.1053	5.4673	4.5942	3.9666	8.4698	6.4152	7.0156	2.8385	7.7539	6.3411	6.3532	3.0734	3.2236	5.109	5.854	4.6391	5.0835	9.6175		0.761195	5.97315
12.2716	5.432	2.142	3.6214	10.4352	5.3346	5.1943	3.2287	4.2812	5.3687	7.529	18.8104	10.5696	7.2703	5.086	3.985	6.5402	10.5475	3.8151	8.4684	3.9648	9.5224	6.6119	6.6375	3.1577	4.6975	6.0446	7.6519	3.6253	3.1679	1.9228	5.195	3.978	6.6132	3.5058	8.3192		0.768661	6.065
12.3907	4.1024	3.9425	7.0273	7.0966	7.5134	4.4645	4.2785	5.3008	5.6048	10.543	26.5927	7.8693	8.7862	8.0214	7.3877	5.5146	7.7544	3.1618	4.7327	5.9338	3.9291	10.0191	6.9292	6.4568	3.3299	3.8845	7.0475	2.0673	1.9712	1.9117	7.1651	2.3788	6.6393	2.8927	5.7258		0.776121	6.2279
12.5098	4.3956	2.9215	5.7809	4.8323	6.9319	5.2534	3.1136	5.3593	2.9795	6.356	30.5579	10.1632	13.239	5.5915	5.6196	3.6217	4.7462	3.6437	7.5177	6.5393	6.9872	4.4648	4.8651	9.031	4.7019	5.745	4.5625	2.8088	3.1787	3.6284	5.2157	3.7317	5.6983	4.4153	5.896		0.783581	6.11698
12.629	2.6357	4.0214	4.3423	6.0526	4.7849	5.9418	3.2512	2.9382	3.6485	10.829	20.6951	11.2155	8.6791	5.9518	4.2366	6.796	8.1716	4.7941	4.3839	7.9271	9.6142	2.2612	6.4146	4.0435	5.6933	5.1271	3.1453	2.5517	5.561	3.2021	4.2189	4.9574	4.9161	5.7877	4.9308		0.791048	5.82061
12.7481	2.7087	3.5905	3.9463	6.2978	8.6007	5.4933	2.6326	2.4546	3.725	11.307	20.0372	8.6408	8.8525	3.1044	6.3535	6.147	11.3381	2.2274	6.6884	4.575	6.8181	3.2384	5.7222	4.9339	5.7589	3.455	4.13	2.7248	3.9877	5.758	5.7279	4.8024	4.2859	5.3642	4.0383		0.798508	5.69904
12.8673	2.423	2.937	5.3826	5.5569	7.4883	4.0373	2.3102	2.4502	3.3604	12.737	20.5902	7.0657	8.0231	3.6805	6.7977	8.5206	6.6855	4.9859	8.553	3.2884	5.2519	2.9928	4.4302	6.6711	3.1222	2.9818	2.0967	3.0706	2.9489	2.7744	2.7772	3.4846	3.2712	3.3257	4.8896		0.805974	5.17035
12.9864	3.9512	2.7524	4.2341	6.6197	6.8272	4.8462	3.2556	2.7323	6.7712	10.601	18.4695	7.5754	6.3189	4.578	6.7931	4.7966	9.3047	4.6165	7.6438	5.3362	5.2944	2.4069	3.4031	3.5923	5.3618	3.0288	2.2632	4.3218	3.9723	2.7908	3.4979	4.2953	5.2387	6.0893	6.2298		0.813434	5.42314
13.1055	4.3832	4.514	3.4171	3.9423	3.7867	3.9278	2.2641	1.8657	2.5973	12.128	16.2091	9.6655	7.4877	3.9006	3.8721	5.8325	6.1698	4.1581	5.2367	5.9753	4.6041	2.4625	4.2308	5.2923	3.9148	2.7172	2.149	2.4821	2.7415	2.4383	4.0482	3.7658	3.5556	5.3097	2.5782		0.820895	4.67496
13.2247	3.6965	2.1779	2.407	6.8395	5.0441	3.0918	3.1926	2.4565	3.6383	11.111	11.4294	9.7545	11.0665	4.3345	5.5385	4.9697	4.1143	2.9387	3.5377	4.5718	3.5043	2.5874	5.7449	3.8752	2.1712	2.17	2.0142	1.9564	2.115	1.7975	2.318	6.6678	2.5181	3.5897	3.5819		0.828361	4.35778
13.3438	4.3207	4.5301	2.0045	6.8705	6.5406	1.9372	3.2987	2.1679	5.4126	10.82	10.0011	6.9913	5.8378	3.0142	6.752	6.373	4.0224	2.0351	2.3826	4.2175	2.0238	2.0056	2.4371	2.4778	2.8061	1.6758	2.0861	1.8	1.9879	3.1776	2.4086	3.6991	4.8275	4.1947	5.2925		0.835821	4.06943
13.463	3.0711	2.0709	2.6777	4.9179	3.3779	2.8487	3.6889	2.4102	2.496	16.691	6.3561	7.6175	4.6684	2.3208	4.4711	3.6061	4.4345	2.2508	2.6237	7.4611	3.5178	2.1601	2.5263	6.9792	2.2734	1.9914	1.9181	1.955	2.4056	4.0074	2.7486	9.1077	3.1651	4.6752	5.9237		0.843287	4.15471
13.5821	3.745	4.3969	2.3772	3.9184	4.2706	2.0912	2.2378	2.6876	2.8862	13.087	9.7825	8.7415	7.8159	3.0704	2.8663	3.3149	5.3119	1.8123	2.0939	5.3328	4.2129	2.2143	2.3135	2.7025	3.3195	2.1907	2.512	2.6864	2.7022	2.3507	2.5589	6.843	2.703	4.0693	4.3295		0.850748	3.98711
13.7012	2.1379	3.5128	4.3695	3.5297	2.0008	3.8401	2.3282	2.0251	3.517	11.768	13.8867	7.9008	3.7319	2.927	3.0182	4.2109	4.3061	1.9379	2.3147	3.5613	3.0436	3.9457	3.9561	2.7659	2.4756	2.3717	2.7681	2.7004	3.0072	2.4545	1.8534	6.1234	5.1485	5.6443	2.9411		0.858208	3.94355
13.8204	2.4423	2.749	4.8705	2.5951	1.9958	4.5546	2.7387	2.3925	2.1288	11.276	12.7642	7.1245	3.3848	3.9898	4.249	1.9651	2.8863	2.7278	4.1021	4.8231	1.9672	4.0371	3.2544	2.4296	2.2657	1.8466	2.1728	2.5446	2.7917	2.382	2.2278	6.3281	2.354	2.7481	6.6379		0.865674	3.76422
13.9395	3.6948	3.1849	3.2383	2.5383	2.4563	3.711	3.411	2.4673	3.2342	9.176	12.8554	7.4345	2.6822	2.8203	2.8242	2.288	1.7636	3.5807	2.3792	5.1856	2.0766	2.738	3.6754	2.5013	2.5629	2.1449	1.8944	3.5714	3.0253	2.3968	2.1436	6.5574	1.9421	5.6221	3.3853		0.873134	3.63324
14.0587	2.3388	2.4791	5.3675	2.181	1.9996	2.6375	2.8877	2.3362	2.3414	4.163	11.2301	5.1476	3.9684	2.9893	2.6533	2.3979	1.773	1.9961	3.3024	6.1554	2.164	2.848	1.8321	3.5271	2.0313	3.2952	2.2303	2.8172	1.8174	1.9196	2.7027	3.9492	3.3728	4.5746	2.5649		0.880601	3.19976
14.1778	1.7996	5.2472	3.1784	2.8509	2.807	2.9054	1.9133	3.4155	3.1344	6.052	8.339	6.4152	3.2515	2.1238	2.6797	3.8057	1.9302	2.3346	2.0039	2.8935	1.8918	3.0929	2.0886	2.0439	1.867	3.0364	1.928	3.4661	2.1711	1.9	2.6448	3.1784	2.5594	2.0131	1.9773		0.888061	2.99827
14.297	1.7987	2.1422	1.9156	1.947	3.3772	2.7599	2.0333	2.6602	2.0756	6.349	7.2572	3.893	3.7814	1.8777	2.8498	2.1241	2.0651	2.2074	2.7185	4.6087	2.2197	2.7633	1.9039	2.1231	2.0391	2.5701	2.5797	3.1829	1.9932	2.2364	1.9104	4.2792	2.5061	3.0797	2.5646		0.895527	2.81123
14.4161	3.188	2.9288	1.8716	2.5045	2.1379	2.0377	2.1141	1.8477	2.3885	5.949	7.808	2.1391	4.2876	3.0519	3.376	3.2161	2.0185	2.5493	2.9006	4.3844	2.2163	2.3991	2.0307	5.2632	2.6379	1.9199	2.0088	2.8857	2.8582	2.3401	2.172	3.7163	2.107	3.1742	2.3166		0.902987	2.93558
14.5352	2.7399	3.7258	1.9712	3.4443	2.66	2.5573	3.7988	1.8099	2.2162	5.446	7.2393	1.8511	2.4175	2.2113	2.2762	2.583	2.4984	3.1055	2.1673	3.5072	1.9072	2.4968	1.9419	2.7072	2.0425	2.0722	2.162	3.3341	2.3726	2.0341	2.4008	1.8667	1.8972	2.6231	4.2504		0.910447	2.75243
14.6544	2.3599	3.1806	2.8938	2.1108	1.9011	2.4273	2.6849	3.1238	1.9109	4.865	4.2377	2.5072	3.2908	2.9344	2.4761	1.9556	2.0251	3.3754	3.7586	2.2452	1.8321	2.7206	2.4505	1.7697	1.9322	2.0538	2.1045	2.0065	3.3251	2.7315	1.9535	3.0272	2.5653	2.2981	3.1681		0.917914	2.63437
14.7735	3.2103	3.177	3.0322	3.323	3.1264	1.9385	1.8678	2.1623	2.0015	3.559	2.4487	3.2315	2.045	2.8451	2.0527	1.9697	1.8982	2.4659	2.3937	2.2719	2.2384	2.8325	2.0328	2.0938	2.3892	2.1376	1.6868	2.0048	2.2843	2.105	1.8804	1.8186	3.9119	2.3028	2.6862		0.925374	2.44073
14.8927	3.1725	2.244	3.1645	2.5369	3.0717	2.4767	2.5616	3.1554	4.7331	1.886	2.9114	2.2105	1.9407	2.5187	3.0203	2.5713	1.8342	2.0687	2.7037	1.9884	1.7862	2.8789	2.7614	1.8277	1.9906	2.2711	1.8355	1.9525	2.2789	3.2767	1.9842	2.5083	2.0628	1.9604	4.1011		0.93284	2.52133
15.0118	3.1829	4.1747	1.8458	2.2546	2.0842	2.9624	2.1589	2.0654	2.6179	4.255	2.9234	2.6527	4.8654	2.3062	2.4526	2.7068	3.7527	2.003	3.0151	3.6709	3.5319	2.5616	1.9669	2.7675	2.4579	1.8482	2.7791	2.7874	2.0486	2.1328	1.6857	2.9832	2.8083	1.9862	2.3886		0.9403	2.70527
15.1309	2.9722	1.9208	2.0325	4.5462	2.7711	2.3789	1.8113	2.0404	1.8976	3.665	2.4452	4.8883	2.3611	3.547	2.1316	2.1444	2.5974	1.9635	1.9023	2.3286	3.0178	2.476	2.912	2.0879	2.9725	1.912	2.6026	3.9334	1.8431	2.8785	3.3013	1.9936	2.4712	1.9713	2.4655		0.94776	2.60526
15.2501	2.128	2.4249	2.7304	2.3653	2.5607	2.1299	1.9143	2.8598	2.394	2.902	2.7856	4.3892	2.6763	2.947	2.4482	2.1408	2.5135	3.136	2.0036	2.0253	2.244	3.2146	2.7155	2.2495	1.8527	2.469	2.1161	2.3447	2.6517	3.902	2.4034	1.9526	2.2843	3.2061	3.0289		0.955227	2.57457
15.3692	2.0015	2.4793	1.8861	2.8807	4.4889	1.8962	1.8786	2.0511	1.9723	2.052	3.0446	2.4681	2.5696	2.0769	3.0819	2.6758	2.5151	3.3928	3.3738	3.0827	2.938	2.2339	2.0588	2.3337	2.7624	3.3957	1.9698	2.0608	2.0119	2.0441	1.8563	2.8856	1.9717	2.1528	1.9972		0.962687	2.47259
15.4884	3.4936	1.8659	3.1821	2.2956	2.1142	1.9258	2.0168	1.9787	2.3618	2.189	1.9698	1.9213	1.8678	2.9837	1.8222	2.5915	2.878	2.1643	2.2853	2.0017	1.8244	2.4641	1.9584	2.9317	2.1231	3.4528	2.7678	2.6371	2.1776	1.9133	2.1176	2.8414	3.1641	2.7357	2.5654		0.970153	2.3881
15.6075	2.1152	2.0509	2.6875	1.897	1.7868	2.1062	2.8678	2.0045	2.4962	3.876	3.1869	1.9132	2.2619	1.8314	2.5378	1.8178	2.5113	2.5193	3.3091	2.4829	1.8626	2.0996	1.804	2.2258	2.0536	2.1011	2.9328	2.5514	2.8842	2.0768	3.2888	2.1551	2.7843	2.3345	2.4886		0.977613	2.39723
15.7266	2.9224	1.8533	3.1223	2.1874	1.9683	3.52	1.994	2.0103	1.7677	2.487	2.1781	1.9654	2.1876	2.4949	1.8948	2.4349	2.1484	3.3457	1.9987	2.8943	1.7476	3.0225	2.3759	1.9712	2.4221	1.9396	2.6327	1.7918	2.3026	1.9859	2.6825	5.7848	1.9147	2.1195	2.0154		0.985074	2.40241
15.8458	2.7661	2.0493	1.8141	1.7075	3.0011	2.2301	3.0051	3.5899	2.122	2.343	2.8071	2.3211	1.702	1.9869	1.9953	1.9124	1.8456	2.6318	1.8929	1.9679	2.8025	2.0222	2.4516	2.5141	3.7684	2.1762	3.6248	1.9393	2.3985	2.3364	2.1304	2.6589	2.591	1.8444	3.2542		0.99254	2.40583
15.9649	2.4038	2.0685	1.8997	1.8365	2.9716	3.0884	2.1915	3.4285	1.8681	3.423	2.0031	3.0844	2.0559	1.7802	3.7197	1.9265	2.9688	2.2333	2.6611	1.9345	3.5574	2.403	2.9443	2.5011	2.4526	1.9218	2.3447	2.0069	2.0212	2.0744	2.1423	3.2942	2.0004	2.09	2.0253		1	2.43791

## Sheet: Image26
X0	Y0	Y1	Y2	Y3	Y4	Y5	Y6	Y7	Y8	Y9	Y10	Y11	Y12	Y13	Y14	Y15	Y16	Y17	Y18	Y19	Y20	Y21	Y22	Y23	Y24	Y25	Y26	Y27	Y28	Y29		Ap-Basal	Avg intensity
0	15.3117	20.777	25.1305	20.8576	16.9569	12.198	12.576	14.1776	8.7697	26.6794	25.2513	25.9237	54.7857	45.4451	21.3437	23.1187	18.3518	21.3425	22.3667	21.8605	30.5521	48.9996	91.437	78.575	37.5523	45.744	60.4078	56.7535	31.2833	16.2476		0	31.6925
0.1191	20.5618	21.1715	22.8096	17.006	23.7202	16.6728	13.7907	7.9659	15.4641	26.8217	21.2426	22.6934	45.1152	43.8274	26.3794	23.4795	23.7144	19.1926	21.4144	18.6076	28.2862	48.4606	91.906	99.873	49.8358	50.867	58.1515	52.691	35.7659	16.296		0.00908779	32.7928
0.2383	22.0762	21.9339	18.0169	18.2733	24.6842	15.7635	15.9842	10.7346	17.1765	32.0931	21.1555	26.6942	60.9431	45.1298	29.1899	26.9797	22.4618	23.4597	24.68	27.661	38.7868	39.8891	110.443	104.909	42.9393	56.83	54.945	58.821	35.3339	15.2949		0.0181832	35.4428
0.3574	24.9042	21.487	17.3538	17.8399	34.0862	11.1575	12.197	8.3023	15.0747	29.9037	16.3437	32.3376	65.8098	48.7587	37.7358	27.6617	23.9755	24.8949	24.8496	31.2303	34.148	52.7921	103.746	118.78	44.8027	57.1755	46.5072	62.4672	52.8421	12.3202		0.027271	37.0495
0.4766	21.1153	18.6202	27.5535	17.7674	43.7561	12.4035	12.5926	10.4842	15.8477	20.5869	28.7283	27.8424	64.0246	48.5612	46.6164	33.3839	28.5351	32.1631	27.9023	26.7911	36.6059	40.8043	108.782	119.15	62.9566	71.7713	60.7481	60.9459	40.0069	13.209		0.0363664	39.3419
0.5957	26.2402	22.2705	32.6952	17.485	39.8999	20.735	11.7532	12.7522	11.5155	21.7182	27.5819	27.4712	62.9226	56.1711	55.2118	31.3698	31.6091	25.671	32.208	19.1865	44.8595	40.106	100.479	128.492	64.5206	90.3449	56.8136	51.4041	39.4285	15.2381		0.0454542	40.6051
0.7148	26.8344	25.3033	26.89	21.9535	43.3922	20.8703	9.4501	14.7384	20.9948	24.3071	19.0377	23.9461	58.062	47.6459	53.6115	33.0879	25.2554	24.3545	38.6575	25.1474	42.9201	31.0309	108.72	122.879	47.4936	78.7347	45.0233	56.823	45.4582	13.7526		0.054542	39.2125
0.834	35.6972	26.3304	25.7974	21.7814	55.3874	21.0862	12.5863	12.7447	19.5097	28.455	18.2264	24.928	51.7984	52.6241	58.963	44.9691	28.8969	24.3488	39.5159	34.4046	41.5103	29.29	107.226	125.817	52.4501	72.9866	52.0675	61.441	42.7054	11.3376		0.0636374	41.1627
0.9531	31.2927	21.9995	27.7203	30.6251	51.1152	21.6571	12.5646	11.4239	15.4868	22.516	17.5947	32.5541	63.2587	53.6793	62.31	41.6471	34.9513	27.2581	41.3268	20.0667	43.0392	27.5061	90.246	125.733	51.2113	73.4102	64.4703	61.5971	47.4928	13.0108		0.0727252	41.2922
1.0723	34.3431	25.0059	30.6829	35.8027	56.1985	23.7928	10.8716	16.7171	17.8436	22.3237	17.1633	33.7369	67.2293	50.2834	61.6031	44.5694	34.0283	26.0833	42.3604	21.7214	44.577	25.2648	98.714	112.794	56.6233	78.4281	62.5578	58.5839	41.6445	12.313		0.0818206	42.1287
1.1914	41.2436	19.5127	27.6154	27.5459	45.8144	18.7715	13.5	10.7414	17.0968	25.0332	19.2155	27.3584	57.1332	52.0151	61.5158	52.4156	31.9178	23.7869	30.0794	28.4755	39.5886	21.6589	91.084	118.114	58.3418	83.0716	56.0552	50.189	41.3413	10.7569		0.0909084	40.033
1.3106	44.5874	23.7808	30.9214	33.1518	51.5991	27.1902	7.799	8.9653	18.703	23.5522	23.1369	29.2353	55.5234	41.2307	51.425	44.1268	34.3485	17.9435	40.2011	25.0759	35.9174	18.3769	94.16	97.137	57.1309	84.2053	59.4294	44.8869	33.3102	12.0409		0.100004	38.9697
1.4297	44.5726	22.4188	26.8345	36.2561	50.6718	26.989	7.3749	8.0622	20.3894	17.1131	21.3607	29.5879	46.0111	46.9638	56.5354	49.2222	34.0474	18.3181	36.5433	20.0821	39.6721	20.9112	82.776	103.154	55.0045	71.3868	52.2151	48.244	28.6481	15.7902		0.109092	37.9052
1.5488	32.7303	27.3438	34.2967	34.326	47.9185	28.6856	7.4755	5.0909	17.1321	14.4305	16.0848	30.8749	43.1723	52.7061	54.7077	47.3477	28.8017	19.9425	40.6878	13.2479	34.5822	24.9288	89.027	101.134	48.3375	72.8681	42.2116	45.0696	32.639	17.6611		0.118179	36.8487
1.668	36.8365	21.9675	28.4732	34.2635	52.5777	24.5864	4.0797	6.291	17.3114	18.5922	16.5503	31.054	50.6855	48.006	54.5817	48.1514	25.4913	17.629	32.8281	20.6488	23.6237	22.2449	90.316	99.999	46.7152	63.9742	39.7356	52.0563	34.5443	13.6112		0.127275	35.9142
1.7871	38.1277	23.551	35.6301	37.6348	45.0252	34.9243	5.4942	10.8409	17.8296	15.0519	14.3664	30.2265	52.8478	46.3972	50.3098	50.9195	24.6114	15.835	29.604	17.1099	17.937	22.3311	91.558	85.721	55.8176	50.672	27.5588	39.066	35.265	15.3835		0.136363	34.5882
1.9063	33.5977	19.4986	31.2351	41.93	59.6807	33.7844	7.2598	15.5985	22.2494	16.2238	12.4739	25.2434	55.2636	42.8032	50.33	47.0795	17.4894	12.3725	33.7418	14.5522	22.3112	17.3377	87.969	93.939	54.147	73.5681	29.8451	47.1844	28.9456	12.4781		0.145458	35.3378
2.0254	36.9986	17.275	22.3309	39.4217	53.0257	33.9612	5.9668	12.3536	20.5527	12.5755	12.1969	33.8929	59.4176	44.3824	45.413	47.0273	18.6772	18.1287	30.0785	15.3178	19.1175	17.1873	76.901	99.766	59.6189	64.6766	34.4064	35.8868	30.6623	14.0524		0.154546	34.3756
2.1445	28.0157	21.3134	24.1828	42.7004	48.4013	34.683	8.4687	15.0378	19.4919	11.2523	11.1147	32.083	65.1354	35.8393	44.9408	58.2262	15.7795	17.4814	34.1336	14.4953	20.9968	13.8807	49.925	101.521	60.7258	65.6667	28.7367	31.8827	24.7679	17.298		0.163634	33.2726
2.2637	26.4355	14.4764	24.5804	47.05	49.207	30.3332	6.79	11.9211	22.022	11.4491	11.9358	28.8563	63.3694	34.64	46.2602	58.2083	16.4627	18.2633	26.5788	14.8935	16.717	12.9086	46.721	102.941	48.4683	63.9511	25.9542	33.7467	26.0922	18.1474		0.172729	31.9794
2.3828	22.1381	17.3295	21.7149	48.3369	52.7819	29.4725	7.4572	8.9898	17.6375	6.128	12.1977	21.7265	54.2152	39.9152	45.2639	51.5298	22.0282	10.6234	28.986	13.8323	19.1162	9.9023	49.785	98.26	45.1546	69.0344	26.2401	30.198	29.9161	15.207		0.181817	30.8373
2.502	24.2467	13.8722	21.2045	47.7783	48.1831	25.1079	5.3765	9.8262	14.1375	10.6509	13.5642	32.7311	56.4185	30.8963	47.7502	40.4207	16.2544	17.5819	26.7811	16.0081	16.544	10.6633	35.511	78.427	45.7749	58.173	25.937	28.9191	32.5503	11.9599		0.190912	28.775
2.6211	24.3113	9.1929	23.8339	50.2094	40.2201	23.8709	3.7694	11.9531	9.2741	9.8467	9.7221	30.4431	59.6283	20.059	43.1783	38.6237	11.2433	16.2961	28.8711	17.913	19.1588	12.8207	40.467	70.206	47.9399	47.7387	21.4852	23.0273	33.0873	12.8735		0.2	27.0421
2.7402	22.7176	9.4484	22.7342	43.1135	36.6045	18.5352	4.6747	11.1774	13.3455	8.3978	9.9405	33.3652	55.0734	23.632	39.0608	31.5309	14.9044	18.9449	28.4221	17.739	13.4265	12.2348	37.927	53.712	42.8988	34.2061	19.9702	23.5797	22.1342	14.2637		0.209088	24.5905
2.8594	21.9414	10.4153	22.3124	36.782	44.2684	21.0491	4.2373	11.2516	11.3856	9.0623	8.3535	34.9546	55.4684	13.8901	32.6511	24.1029	19.1151	15.6111	25.2029	15.1242	14.6055	12.9218	39.385	44.793	39.725	46.5795	21.0543	26.2996	35.1144	14.0133		0.218183	24.389
2.9785	20.7432	9.9574	29.3146	37.9075	32.1653	14.5707	5.428	12.1475	8.5445	9.5341	9.3729	28.8599	57.1812	16.1933	37.9706	22.8476	17.2922	14.4125	25.2591	11.8633	11.48	8.4987	28.694	52.916	37.3933	43.9474	21.6045	21.6153	28.5061	11.6543		0.227271	22.9292
3.0977	20.207	9.0188	21.3126	37.065	35.5399	9.4704	4.6335	12.5338	10.1897	5.4618	11.6507	22.5986	47.0419	13.0298	30.2623	23.3464	22.5772	14.6178	22.0468	19.3928	11.159	10.712	26.72	43.295	45.0386	42.6865	21.2566	22.0842	24.367	11.1105		0.236366	21.6809
3.2168	16.1599	8.4411	11.3997	34.2824	24.714	10.8129	6.8778	13.8487	9.5884	9.0798	11.3998	27.3092	49.8708	12.9818	26.7913	28.1147	19.6707	13.7889	18.3473	21.5027	9.9686	11.258	29.118	33.905	34.0192	38.1189	21.3701	17.8081	27.6715	13.4852		0.245454	20.3901
3.336	16.3071	8.4243	16.4398	30.716	19.0357	16.3325	5.2114	10.8899	7.1147	11.7554	6.6731	22.8333	51.9508	16.8706	27.9608	25.9358	17.4116	13.9651	18.4331	20.2577	9.7251	15.0087	27.161	36.257	34.7459	35.9368	25.1061	18.6841	31.9434	12.6041		0.25455	20.3897
3.4551	12.2696	3.8747	12.9445	27.1689	25.9823	11.933	4.8786	6.8212	7.7486	17.7085	5.62	19.0514	42.5614	16.9275	25.7117	28.2375	16.2834	13.4249	20.8392	21.2621	13.8222	9.0214	25.938	39.839	32.5694	40.1783	29.8149	17.9036	23.9196	13.0025		0.263637	19.5753
3.5742	13.0051	7.2608	9.4119	20.1755	21.2413	13.5415	3.5296	5.3625	6.5544	14.532	7.9468	19.3118	44.5433	12.7369	29.1424	19.6748	17.2645	13.877	17.973	24.2686	14.5247	7.4592	23.842	38.128	44.379	39.8662	37.6735	14.4331	24.996	11.3371		0.272725	19.2664
3.6934	18.9359	11.4135	6.2838	18.5598	22.9711	13.4545	3.581	8.2243	8.4196	8.6354	15.7098	18.0708	40.315	11.9307	29.6329	21.5648	16.9527	24.1623	20.0772	20.5313	14.7945	6.257	25.404	31.302	45.737	28.6275	35.3398	13.2741	24.246	10.438		0.281821	19.1615
3.8125	16.9931	7.665	8.8944	24.2903	24.2748	11.7364	3.3617	5.9495	10.0739	8.3189	12.7696	17.369	26.039	13.2334	23.8222	22.7237	18.1002	24.1172	12.9456	22.7754	18.8244	6.0564	24.571	30.634	39.8169	15.3783	38.1553	17.2696	22.4703	11.6694		0.290908	18.01
3.9317	15.5901	9.2817	10.1176	27.849	23.4682	12.4855	5.1117	5.2987	13.1599	6.29	6.9112	14.1136	25.6097	8.7997	29.1979	20.5307	19.8397	14.5033	12.9009	24.001	13.2649	10.7156	27.528	32.443	45.7837	18.5512	41.9288	17.5022	16.2187	12.3805		0.300004	18.0459
4.0508	16.1499	6.8525	15.5479	31.1893	20.8138	12.3715	4.6921	6.08	9.8782	9.8356	8.652	20.89	23.3875	10.2102	23.6361	18.749	14.0355	13.3591	13.6337	15.7925	12.1761	8.9773	34.117	28.904	43.5604	12.2789	46.6416	16.1671	17.2137	9.0334		0.309092	17.4942
4.1699	11.2874	8.5058	9.5195	28.5935	20.9116	13.3043	4.7795	4.4838	12.7681	7.8069	9.5917	30.2267	19.3607	10.858	24.4321	24.3058	15.5883	17.5505	9.4387	10.2601	12.4173	11.357	26.765	29.017	46.8587	8.4922	34.4078	14.5869	18.9153	16.5589		0.318179	17.0983
4.2891	11.4965	7.059	7.1071	22.1429	21.4623	12.4348	4.5622	6.9783	6.3149	5.7148	4.4172	32.9977	13.0093	16.0663	24.4312	22.1026	14.4477	17.3566	11.8775	6.8016	13.5189	12.7797	18.54	29.272	51.7923	7.9576	42.5697	19.6246	13.5426	19.5166		0.327275	16.5965
4.4082	11.0648	8.1543	9.8608	23.5382	24.5766	11.9658	3.8772	7.5219	6.0974	3.51	5.2681	29.5511	13.2006	8.7441	17.6228	19.7148	19.9247	11.8292	8.35	10.1065	9.6125	12.7154	13.758	21.709	42.7854	11.5653	36.8725	22.2494	17.365	13.6522		0.336363	15.2255
4.5274	10.0941	4.3775	4.6554	22.0979	19.7556	13.6279	4.2699	6.4452	6.9613	6.7865	5.09	27.218	13.8903	8.1118	16.4445	21.5706	12.7496	16.0826	7.4068	9.6468	10.2473	10.1577	16.41	18.645	50.5864	9.7283	27.4749	17.7632	18.7785	13.6561		0.345458	14.3577
4.6465	6.9796	6.0208	7.2192	19.1592	21.3248	19.3266	3.1333	6.7513	5.0166	6.5385	6.5988	34.3087	13.3271	8.599	26.568	18.8427	10.8072	17.158	7.1372	13.4263	7.8127	10.9097	17.421	21.012	41.2381	5.9093	22.9285	19.4629	10.435	18.0105		0.354546	14.4461
4.7657	5.6178	6.1435	6.9206	11.4515	18.6441	16.9151	6.4459	8.1182	5.3118	7.0038	6.7248	30.6658	8.7153	7.2917	31.5107	16.2655	8.1011	18.2042	11.9879	11.5003	8.5733	8.6742	15.304	23.019	40.6044	7.7441	18.6062	17.8284	12.6777	17.2495		0.363641	13.794
4.8848	4.9477	5.8538	9.5133	11.4114	18.2952	11.4347	4.9228	10.3434	9.5055	7.2036	7.6884	29.0981	6.5054	5.3632	31.3056	16.5304	12.8014	17.1769	7.7559	6.7945	6.2568	11.4324	8.701	21.269	33.783	8.2419	20.0764	12.6506	12.854	11.6031		0.372729	12.7106
5.0039	6.4465	4.7413	4.8814	12.8958	14.2225	12.7371	4.1692	6.86	6.6607	4.5252	5.3483	28.7036	7.3817	3.9508	27.1988	21.9481	6.3695	19.5882	5.2939	5.5171	8.732	12.3123	9.384	24.682	40.6516	9.3813	16.2232	17.464	15.2062	11.764		0.381817	12.508
5.1231	7.231	5.2252	4.4904	12.843	14.5553	8.8241	3.523	7.3607	5.9863	9.0243	4.6115	31.8582	7.3305	3.784	25.1477	14.001	6.7042	15.2317	7.7666	10.4206	10.563	7.3679	10.228	29.83	31.9118	11.0428	15.8757	16.6489	10.5667	14.2417		0.390912	12.1399
5.2422	6.6418	4.7438	5.5651	9.1195	18.1858	11.2261	5.1725	5.2004	6.543	7.9177	5.4462	32.3682	4.8798	6.2216	21.0733	12.1308	9.8496	15.1541	10.9161	8.9487	8.4884	7.9837	9.747	27.493	29.937	15.4632	13.153	14.0075	13.4257	9.8316		0.4	11.8945
5.3614	3.9329	5.0773	6.0092	8.7491	19.3347	7.6109	4.7206	4.4398	7.2335	5.9819	6.8099	21.9102	5.9796	3.3212	27.6522	16.9134	11.8417	16.6322	10.3226	6.3578	5.9796	7.577	8.913	26.211	33.3155	13.8603	10.0491	14.74	13.043	9.2369		0.409095	11.4585
5.4805	4.6024	3.8235	7.4105	12.3748	24.0197	9.9746	3.589	5.9851	6.7183	7.4437	5.6675	21.3142	4.7265	3.5877	20.7054	22.9153	9.7264	17.922	8.2217	6.7919	9.1106	11.15	9.189	31.376	24.8995	9.2933	11.7871	9.23	16.5555	6.9889		0.418183	11.57
5.5996	5.2818	4.1133	7.9959	10.4558	22.4624	13.2247	4.1532	5.9537	6.4169	9.6992	4.3034	26.8159	4.7129	5.2211	16.8654	16.6508	7.2124	17.9555	9.1448	7.5533	6.0399	9.6206	7.927	30.416	28.42	13.3738	12.441	13.6491	13.2688	7.2479		0.427271	11.6199
5.7188	7.2317	6.0695	5.8339	11.1465	15.4345	9.3793	5.5729	5.0876	5.7259	10.2207	4.4357	20.8726	6.6688	3.9516	16.7509	18.2872	4.9025	20.9079	8.649	7.2292	5.4877	11.1894	10.682	23.605	22.9716	11.2685	18.4973	9.9964	16.0623	4.7182		0.436366	10.9612
5.8379	10.7295	7.1087	6.9587	8.7595	16.3124	8.4347	2.5733	2.7555	8.9108	10.6345	3.3847	19.5306	6.2255	5.0207	20.8503	17.8277	3.9283	10.5984	7.1285	8.1921	5.6134	9.8563	10.522	21.612	18.0087	13.0741	16.8808	7.5134	13.8199	7.0529		0.445454	10.3273
5.9571	4.8632	4.3475	7.4378	11.0819	17.9917	6.9508	4.3328	3.5562	7.145	7.5044	3.0634	17.4842	5.7613	3.2196	27.5331	25.9078	6.0307	14.8648	6.3838	14.1685	7.0998	8.9958	8.365	24.717	14.952	16.4553	12.362	6.1352	16.039	10.0098		0.45455	10.8253
6.0762	4.4065	2.3315	4.752	8.2922	19.1127	5.3921	2.5399	5.6806	6.4491	7.6333	3.3116	19.3354	6.5322	2.6373	20.7738	24.6076	8.9828	13.4712	7.9971	10.1742	7.5368	9.5824	8.85	14.042	15.8957	17.0312	10.4946	6.4701	15.2378	11.0786		0.463637	10.0211
6.1953	3.8556	3.5329	3.6485	7.0661	15.5973	3.984	3.5505	5.2812	8.0387	6.7545	3.1	17.7567	5.6824	5.1097	21.0647	18.4293	8.5713	16.5855	6.6717	12.4825	5.6106	7.0434	8.696	18.094	15.3443	15.0954	15.7347	4.1513	8.6022	7.2851		0.472725	9.414
6.3145	4.6411	3.291	2.9896	7.4464	15.074	8.2329	4.5344	4.8482	10.1158	7.1988	5.3155	19.5859	6.0274	5.8615	20.9092	17.4938	6.4327	13.5865	10.0067	12.0166	5.2562	7.0046	7.259	10.467	15.5101	15.2679	8.5621	5.5446	7.0808	9.3908		0.481821	9.2317
6.4336	7.8737	3.2236	5.4612	7.4713	10.7078	6.8294	7.1593	7.0237	4.8422	9.6946	6.564	16.7352	4.8688	5.0762	14.5967	15.1189	5.7951	11.3624	8.6643	17.2384	7.3896	5.9933	6.506	9.648	16.0153	12.3842	11.2774	7.6834	8.4049	11.7806		0.490908	9.11298
6.5528	8.0906	3.4522	6.2497	6.0387	8.2143	5.7901	2.6676	7.3563	4.585	5.112	6.0399	11.7345	3.3062	2.4682	10.461	14.6221	4.3684	10.0744	9.9767	17.0619	7.4227	3.133	8.573	13.555	16.1962	14.0114	7.8813	8.6428	9.4168	11.6826		0.500004	8.27282
6.6719	5.0011	3.9131	6.06	8.6061	8.463	10.5708	3.2358	8.4214	5.8275	7.6611	8.0678	12.1402	2.2449	3.1027	9.5058	18.944	4.4224	10.9703	6.3981	14.2143	6.4943	5.4379	7.345	14.043	12.6631	12.569	4.9154	10.0328	6.591	13.9718		0.509092	8.39446
6.7911	4.185	5.5337	3.4192	5.127	8.5262	6.8241	3.285	8.1527	6.0706	5.4779	9.5529	18.4588	2.5873	2.7396	12.759	12.9421	7.8196	12.4487	7.6092	18.0671	6.8115	5.808	7.378	8.292	10.7721	11.7103	5.6414	8.552	7.8625	17.4064		0.518187	8.394
6.9102	6.3971	2.6888	5.253	4.0405	8.4555	4.9186	2.2607	6.3256	4.8033	3.9218	6.7928	21.2389	5.1067	3.3534	15.2765	12.3457	9.6866	12.8618	5.5964	12.7189	7.6991	7.4513	5.447	8.273	11.3681	9.0583	6.7288	12.2489	8.9737	15.3299		0.527275	8.22069
7.0293	3.2773	2.5603	6.0769	4.8241	7.8814	3.8195	3.3314	7.5184	3.5111	4.8918	6.4095	13.3202	5.7716	3.3736	10.5717	11.1088	6.8523	15.8971	6.0279	11.8399	3.7472	4.9539	8.125	11.488	10.721	11.5694	9.8798	14.5138	9.5408	11.9363		0.536363	7.84467
7.1485	2.4118	3.5604	3.4907	5.1103	11.3996	7.6003	4.6352	6.3477	4.8154	8.4974	5.2367	14.8609	4.9012	3.1742	12.2587	9.3901	7.7871	13.0111	6.2984	12.1937	4.9314	5.4112	7.263	6.448	11.9709	11.5852	9.8398	15.1107	11.2298	10.1012		0.545458	8.02907
7.2676	6.1383	4.2347	4.7428	2.9005	10.6658	5.3706	6.5041	6.9084	3.9506	6.0855	4.7147	11.9961	5.2589	3.0952	15.2274	10.1011	8.4054	10.9996	5.6028	12.3491	5.5367	4.6232	4.59	6.454	7.5602	9.1952	8.0706	11.3142	12.55	8.2492		0.554546	7.4465
7.3868	4.4108	4.9756	4.2211	4.732	16.4726	6.7528	3.7829	9.5148	2.7546	4.4962	4.9812	12.4846	5.5541	4.9545	14.2172	6.3306	6.7472	11.5249	5.6438	14.7767	3.4543	5.888	6.019	8.722	8.2657	6.2106	9.9309	15.6105	10.3072	8.8218		0.563641	7.75194
7.5059	6.1277	6.3091	3.8603	4.8718	14.8997	6.1093	3.8867	10.3942	3.4659	5.9682	6.2537	9.3883	3.5065	3.6265	10.7814	9.0988	6.1347	11.2796	4.9253	11.0698	7.0173	3.8932	5.137	7.589	6.9428	5.9705	10.9047	19.9585	10.6384	6.2721		0.572729	7.5427
7.625	7.8772	4.8933	4.5237	4.303	9.4151	5.8369	5.776	10.2061	5.4437	5.9348	6.8742	10.7812	3.3713	3.5444	12.1426	6.6688	7.0494	7.8624	2.71	9.7485	9.0596	4.9099	5.319	7.131	9.4241	7.7003	8.4029	22.336	5.3165	8.0767		0.581817	7.42129
7.7442	5.3644	2.5669	6.4189	4.0878	9.7805	4.8689	6.9175	7.8277	7.5805	4.9165	5.4707	11.6799	3.3231	3.0466	9.3979	9.4006	11.093	12.4914	4.2263	8.817	10.0613	6.4231	8.448	6.939	6.0129	6.1314	7.916	14.8351	8.1555	6.1576		0.590912	7.3452
7.8633	6.2334	3.7139	5.2803	5.4365	9.3816	3.9048	3.7304	8.9104	3.9399	5.3965	4.8084	9.1333	4.4542	3.919	5.6026	7.9563	13.2422	10.464	5.6858	10.354	9.8727	8.9534	9.35	6.356	6.3262	5.5879	5.6801	14.4849	8.3212	5.8538		0.6	7.07779
7.9825	6.0685	3.9403	4.229	5.3423	6.7866	3.3851	3.8614	9.0032	5.3164	4.1338	3.3152	5.9711	3.7208	5.7037	6.9647	5.3256	8.3553	7.9215	6.2768	7.7739	5.7135	4.9702	6.057	6.453	12.1454	6.4937	3.5502	6.4488	7.9642	4.9212		0.609095	5.93708
8.1016	2.6756	2.4329	4.7368	5.8568	6.0842	4.5606	4.9373	8.5177	5.2691	5.2124	5.1077	4.8531	2.9704	5.7006	8.383	8.4726	8.5534	10.4201	3.2555	10.7412	6.726	6.1214	5.839	6.576	9.1952	9.0739	4.7758	7.3269	9.2571	5.3677		0.618183	6.3
8.2207	5.2142	3.162	4.4998	5.5391	7.1512	4.9085	3.8675	8.6436	3.4785	6.0782	6.3566	3.8513	2.5534	5.369	6.2364	9.1133	5.1197	8.375	4.2385	11.3887	4.6767	3.9651	5.238	8.083	4.798	6.6538	11.9274	5.9222	5.4608	5.9552		0.627271	5.92749
8.3399	8.472	3.2239	3.9344	8.0749	4.407	4.0629	3.5985	11.3413	6.4242	4.6397	9.9225	5.3059	3.5798	3.5893	6.808	13.354	5.8414	5.6764	7.8615	8.2914	3.8653	2.9892	4.293	7.939	8.0513	6.128	9.3653	5.1845	4.8177	10.1404		0.636366	6.37276
8.459	10.9284	2.5238	4.4792	7.5498	5.2685	4.6318	5.0137	8.8678	7.5127	5.4112	5.6306	5.804	5.2862	3.9813	7.0907	10.4876	4.9223	8.2091	6.4467	9.5509	4.5952	5.0547	4.215	6.475	8.4684	9.0825	7.394	5.3177	7.3475	7.8594		0.645454	6.51352
8.5782	7.097	3.0147	4.0571	11.6376	5.9711	8.0106	5.2954	9.5074	8.2514	9.2461	4.6192	7.7534	5.7096	4.5482	10.2027	5.1443	2.9432	7.854	4.6994	9.4615	6.8921	4.4646	7.9	6.883	5.8883	6.1146	10.7569	6.554	6.2605	6.5126		0.65455	6.77502
8.6973	7.2658	3.4048	4.9255	7.4549	8.2351	10.1682	5.6808	8.5886	3.9543	5.6027	8.0324	5.7413	3.8796	4.1159	8.3118	8.1156	3.7561	6.9905	6.6875	11.3326	4.8184	4.6591	9.084	7.965	4.2672	4.9874	12.6625	8.4426	6.619	7.9527		0.663637	6.79006
8.8165	9.124	3.3676	3.4555	5.0889	9.7684	9.9838	3.8787	6.6189	4.4327	6.7411	8.2454	6.6737	4.3693	6.1078	6.6443	9.9024	6.3583	7.4572	6.6561	10.843	4.2363	3.5824	7.589	12.945	7.7756	4.1255	9.2523	6.2798	5.0709	5.7303		0.672733	6.74347
8.9356	6.5452	3.7204	5.1501	7.9577	9.8573	7.1393	5.405	7.4232	3.9278	5.2815	8.9324	9.0299	4.2014	5.9022	5.4031	11.424	5.6525	8.83	5.7272	5.7313	6.588	4.6088	9.76	11.552	8.7617	5.9615	8.3209	4.1298	6.5491	8.4103		0.681821	6.92945
9.0547	7.3309	2.8275	4.4601	8.6139	8.1533	6.4936	5.4737	5.7604	4.6024	5.1096	15.2427	10.4628	4.4445	7.9225	4.9595	9.827	4.4997	6.6688	4.2022	6.5498	5.4915	5.0395	7.694	5.666	7.3343	6.308	9.2203	6.1689	8.1292	8.3304		0.690908	6.76623
9.1739	6.8253	5.4329	5.1814	6.3309	8.4298	6.7072	2.9255	5.2796	4.8079	5.7837	14.3405	7.3136	3.8719	5.4451	4.389	7.0476	4.7731	6.232	4.8535	8.5423	3.8619	7.2273	7.392	9.606	11.5251	6.0364	9.6344	8.0912	7.6795	7.6087		0.700004	6.77251
9.293	4	3.7917	5.0821	7.3668	8.4305	5.7994	4.3784	7.3172	5.5124	4.6052	7.9268	5.2742	3.3224	5.631	4.8701	6.9859	6.1422	3.5079	4.9991	7.108	4.2114	6.9352	4.58	9.663	9.237	7.0494	6.933	6.2132	9.0575	5.8199		0.709092	6.05836
9.4122	3.1811	5.5153	5.1894	4.8914	7.4653	8.4646	5.0823	6.4709	5.1942	3.9423	10.3041	7.3003	7.6099	2.9499	5.5885	6.4865	5.4731	5.8344	5.9252	6.1451	8.9488	6.6376	5.599	10.774	13.2445	6.4712	11.1406	5.0464	12.965	5.4034		0.718187	6.84148
9.5313	3.3189	3.8316	8.5416	6.362	7.7217	11.4017	6.2877	6.2776	4.8522	4.4149	7.7597	7.8327	3.4662	2.5212	6.6645	8.3697	6.7609	8.7419	6.2594	6.4351	6.5684	7.3409	4.887	7.493	10.6543	5.2569	13.8636	5.1836	15.7759	7.7289		0.727275	7.08579
9.6504	6.815	3.4797	9.6421	5.6354	9.7792	10.5564	6.2328	5.2322	4.9197	6.455	7.1462	6.3999	3.9587	4.0797	5.9251	4.6863	6.6351	4.6392	4.2801	6.6186	8.6754	6.7849	3.492	10.959	14.3594	5.1668	12.8928	5.2205	12.9371	8.9387		0.736363	7.08477
9.7696	7.379	4.6747	9.4202	6.1909	8.2655	12.0788	8.1683	4.6817	4.261	7.3887	10.5593	7.1039	2.8651	4.2546	10.5645	5.0696	9.8477	7.738	6.609	7.2228	5.4324	6.8991	5.828	13.875	14.0629	7.2252	14.895	5.4732	20.7236	9.5574		0.745458	8.27717
9.8887	6.8683	6.0263	7.328	4.5181	4.7847	12.7948	6.6178	4.0195	3.3165	5.3776	7.6251	8.1008	4.0527	5.7157	10.6548	4.6799	8.2229	7.8084	6.5003	8.6505	4.1399	5.3034	6.934	10.251	7.4573	5.8091	11.736	4.7762	21.2767	15.3294		0.754546	7.55586
10.0079	5.441	5.4283	7.1449	3.985	5.9376	10.2606	6.9022	2.2081	3.2237	4.4335	7.8541	7.4616	5.0252	4.4984	12.7808	3.8649	5.7471	5.2622	6.091	7.7364	4.3123	4.9779	6.39	11.276	7.9289	8.0435	10.3696	6.4854	17.2518	15.8402		0.763641	7.13874
10.127	3.2324	4.4361	9.0357	7.9122	9.3988	8.0419	5.379	2.1182	3.2986	4.1895	7.2214	5.1701	7.0054	4.1364	14.7565	5.2407	6.6865	4.1565	4.5387	8.3628	5.0097	7.5135	7.578	6.721	11.5107	8.7811	7.8125	5.9748	21.2275	12.7634		0.772729	7.30699
10.2462	4.3396	2.736	6.4715	10.0952	6.0609	6.3302	4.5948	2.3051	3.6053	3.7164	6.9126	4.7681	5.0913	6.8501	12.7969	5.8171	6.745	4.5135	3.646	10.1696	3.8326	6.8084	5.3	4.856	11.3869	5.9849	7.0779	5.3451	19.1862	12.8912		0.781824	6.67448
10.3653	4.9547	3.5985	4.5276	7.3082	8.2001	4.0416	3.7648	3.2479	4.7482	4.5249	5.4366	6.7343	6.646	6.5324	10.1918	5.7989	6.7216	5.7534	5.2845	7.0133	7.9926	6.1364	4.519	5.524	12.7041	8.2721	7.5179	8.0969	25.1799	12.4301		0.790912	7.11341
10.4844	8.6683	7.1585	5.3372	8.4504	7.8841	5.1812	3.8757	3.9006	6.0223	4.8099	7.6462	9.6093	6.204	7.264	7.5054	6.3628	7.291	6.4791	4.2108	7.6714	7.1844	4.9013	4.119	5.471	16.3169	5.9228	4.7394	9.1396	21.7007	8.2379		0.8	7.30884
10.6036	5.1009	5.3647	6.6656	8.1652	4.8545	6.0331	3.2492	2.7205	5.3751	4.939	7.2415	11.9577	4.0498	7.2349	10.4025	6.3659	4.4119	5.8276	3.795	7.6297	3.6519	6.8206	3.187	7.66	18.1708	6.3552	4.5395	6.6738	20.6082	6.6934		0.809095	6.85816
10.7227	5.1837	8.2312	5.754	8.625	4.7252	5.6773	3.5716	2.863	4.2129	3.7765	4.3629	7.7561	5.3713	5.8853	12.2067	5.9399	6.5511	6.5775	4.7727	7.0555	2.8869	4.9553	3.425	9.188	17.589	9.609	6.3979	6.6785	14.3731	10.0263		0.818183	6.80761
10.8419	5.7128	7.783	5.9064	9.5661	6.7186	3.6616	4.7274	2.798	3.283	2.5963	4.5929	6.6592	5.6525	4.2754	8.7446	4.539	6.3611	6.4784	5.7293	4.4251	2.9362	3.2651	3.031	9.281	12.0686	5.4921	5.4909	4.2258	10.2704	10.9245		0.827279	5.90654
10.961	6.1061	5.3952	4.4591	7.6511	5.847	3.2548	3.6834	4.4915	7.6221	2.8999	4.0766	6.0384	3.7291	4.1071	7.5016	8.2121	5.865	6.9512	6.171	3.7472	5.2668	2.6855	7.213	7.372	10.517	6.1779	6.181	4.0955	9.0189	8.1928		0.836366	5.81766
11.0801	3.3622	6.6961	6.4921	4.5204	3.864	4.4967	5.3512	4.2082	7.1676	3.0044	4.0432	6.777	6.8916	3.573	4.4665	8.005	3.8682	6.0307	5.977	4.5855	3.753	2.6932	5.081	10.044	9.6879	7.2188	5.6551	3.6678	10.4912	8.7732		0.845454	5.68153
11.1993	5.8445	7.9313	4.2859	5.5122	3.7408	3.6171	4.8701	2.7641	4.5625	3.2439	3.4539	4.5287	7.1943	4.3728	5.1127	5.108	7.8583	3.2675	4.5863	4.7732	3.8516	2.2043	5.592	7.53	5.9343	4.7098	3.8785	4.674	7.109	8.1206		0.85455	5.00774
11.3184	3.8065	4.0898	2.6637	2.7564	3.851	6.1506	2.8447	2.4589	3.6261	2.9115	4.666	5.4566	5.7881	3.6658	5.1694	4.9026	3.6313	3.3909	4.5418	2.6581	3.1853	2.3385	5.668	10.662	7.9412	6.8468	4.5384	6.2553	6.4008	4.1788		0.863637	4.56816
11.4376	5.3702	3.7276	3.7879	4.7382	3.7991	4.3285	4.1591	3.892	3.2144	2.4978	3.8201	5.9389	3.915	3.4882	9.4255	4.6399	2.8825	3.4167	3.6314	3.7972	2.8025	3.9027	5.122	9.272	7.4567	7.5857	6.3667	5.2832	4.9845	6.7306		0.872733	4.79923
11.5567	3.9278	7.0596	4.0778	3.1916	4.0294	3.431	2.7521	2.7872	3.8264	2.6661	4.4753	6.1823	3.3062	4.5338	6.3639	5.2718	2.0538	2.7594	3.8866	5.813	3.3568	2.9644	6.067	12.747	9.642	6.3468	5.7333	5.222	7.3434	5.2862		0.881821	4.90347
11.6758	2.7132	3.6501	3.0435	3.3684	4.5574	5.7964	2.5239	2.3742	2.8907	2.9443	3.7117	3.8542	2.9657	4.0635	5.3028	3.8599	2.3429	3.5461	3.2419	4.7132	3.786	3.656	6.381	14.915	8.8612	6.5666	8.2198	5.7141	5.4151	6.55		0.890908	4.71763
11.795	2.0971	4.1469	2.0019	4.2642	5.2447	4.4132	2.5219	2.3551	2.9924	3.1609	3.2269	4.0443	3.8803	2.6718	6.4224	5.6977	3.1573	2.8933	2.2947	3.6406	6.453	4.7066	5.408	15.16	7.4442	4.6969	9.1956	6.5914	3.7464	4.6185		0.900004	4.63827
11.9141	2.1212	3.8589	2.9149	5.3042	4.8206	2.7748	1.7563	1.9745	2.7656	2.7588	4.3716	5.4064	3.4786	3.1535	5.0002	4.1677	3.4482	2.8056	2.6438	3.0758	3.5943	3.1668	3.677	13.077	7.5038	3.8963	9.0476	7.9419	4.6666	5.0853		0.909092	4.34193
12.0333	3.1714	3.1635	2.9462	3.3346	5.7716	2.5275	1.8271	2.0626	2.6148	2.8144	4.3629	3.3593	3.3492	3.6789	3.7637	3.3228	2.0832	1.8244	6.1988	2.5851	2.6532	5.4526	4.341	9.17	7.3887	4.4737	10.8371	4.2632	4.4655	6.1589		0.918187	4.1322
12.1524	3.4555	3.5826	3.7397	5.1217	4.752	2.6438	2.2494	2.4081	2.1398	2.1571	3.5978	5.9905	5.3499	3.4609	4.6	2.4662	1.832	1.8579	3.4128	4.6122	4.4919	5.6801	5.201	8.443	7.2312	7.5248	8.7012	6.6805	4.5787	4.3517		0.927275	4.41047
12.2716	2.0406	3.4642	2.1342	3.4542	5.2935	2.4859	2.049	2.0007	1.832	2.0663	4.4636	4.6526	6.7003	3.354	3.9314	3.5541	2.1648	2.3348	2.0083	4.4182	7.13	5.7129	5.393	8.225	5.4002	13.5032	12.2138	4.4098	3.2496	7.7113		0.93637	4.57838
12.3907	2.1764	2.3303	2.2806	3.7835	3.873	3.1588	1.9541	1.8367	2.0747	2.0347	4.8613	2.9376	5.6448	2.6965	3.3576	3.4789	2.3602	2.6349	1.992	3.26	5.0239	4.8366	5.241	9.966	5.9164	9.3868	11.2089	3.8385	5.1774	9.8178		0.945458	4.30466
12.5098	2.4081	2.0701	3.473	2.8259	3.2541	2.0549	1.9567	1.9635	1.8535	2.6646	3.3794	4.9678	5.2626	2.8082	3.2429	2.748	1.9105	2.7343	2.3801	2.4626	4.0024	5.9068	7.673	7.268	10.1512	11.2723	14.2519	5.5142	6.2759	5.8947		0.954546	4.48771
12.629	2.5756	1.9427	2.4108	3.0807	2.2809	2.2383	2.2809	1.8243	1.8564	2.1896	2.3104	2.5487	5.7694	2.4975	3.1464	3.3593	2.7256	2.7387	2.3026	2.8134	3.5423	3.1874	4.334	8.872	5.6664	7.6253	11.2539	7.3712	5.0846	4.1781		0.963641	3.80025
12.7481	3.0111	2.3793	1.9113	2.317	2.7589	2.028	2.167	1.9468	1.837	2.0235	1.8421	2.1936	3.4014	1.9887	2.1132	3.0667	2.9523	2.4655	2.1677	1.9613	3.5049	3.7304	4.584	4.983	4.2778	5.8017	6.9702	8.4187	2.17	6.4413		0.972729	3.24715
12.8673	2.0713	1.9944	2.036	2.6779	3.2154	2.4012	2.8643	2.0479	1.7519	2.1422	1.8666	2.2165	2.7959	2.3102	1.9405	2.5842	2.0684	3.9587	2.3667	2.6551	2.3903	2.933	7.835	4.244	10.3083	9.2417	4.1959	8.6454	3.5509	7.1473		0.981824	3.61524
12.9864	1.9519	2.81	1.8938	1.942	3.6696	2.3184	2.6053	2.489	2.0674	1.9303	1.7612	2.8483	3.0853	2.4281	2.1295	1.8973	2.165	2.3032	2.1244	3.4164	1.8838	4.3749	7.634	6.389	8.641	12.0864	6.389	7.7058	6.483	8.9824		0.990912	3.94686
13.1055	2.4583	2.432	2.0153	2.1569	3.5484	2.2598	2.5266	2.929	2.4375	1.8504	2.0821	2.916	3.9682	2.0028	2.171	1.8734	1.8882	2.0097	1.9568	2.0788	2.0209	4.8517	7.818	6.052	3.6799	9.3717	7.8002	7.72	4.6823	7.5631		1	3.63737

## Sheet: Image25
X0	Y0	Y1	Y2	Y3	Y4	Y5	Y6	Y7	Y8	Y9	Y10	Y11	Y12	Y13	Y14	Y15	Y16	Y17	Y18	Y19	Y20	Y21	Y22	Y23	Y24	Y25	Y26	Y27	Y28	Y29	Y30	Y31	Y32		Ap-Basal	Avg intensity
0	16.9986	22.9115	15.3461	14.0791	20.4662	19.4345	18.6856	20.1772	23.7814	30.5975	13.3129	28.1751	31.7486	59.6895	46.8846	47.7919	54.1069	42.3125	46.1398	50.657	40.4407	48.4919	25.957	26.4024	17.315	23.3436	24.3944	19.6945	61.6864	49.7978	60.6594	68.9331	11.7434		0	33.3987
0.1191	19.5238	24.2515	16.8187	14.4865	20.1164	14.1795	26.2562	22.5411	12.3366	19.368	18.9755	44.5538	37.3224	59.7636	56.3524	44.9886	54.2857	65.2155	51.1381	42.5399	49.4768	42.9548	26.0999	22.7694	27.4225	18.9633	14.2072	23.3493	65.4581	57.3596	73.4898	61.244	14.3785		0.0086177	35.2178
0.2383	28.6683	32.4608	17.0216	27.1862	10.5042	16.8159	27.7899	23.3254	17.6989	26.3201	25.1125	33.2266	42.0908	68.4381	61.5517	54.6218	61.9061	59.6844	47.1074	49.7838	37.217	47.884	39.9307	32.2071	31.6682	23.2875	18.5656	17.0555	55.9809	59.2992	68.5894	76.2982	11.2963		0.0172426	37.8968
0.3574	23.9539	32.9637	17.1669	20.3445	16.4927	21.9406	25.4443	20.3889	28.6799	16.7583	31.6184	44.4816	34.5242	63.4012	56.2407	71.5291	68.6478	54.9102	57.0227	48.8883	49.3102	54.4301	42.9728	35.5047	38.117	25.1137	22.3726	23.9202	62.3355	73.6501	68.2554	73.5834	8.2099		0.0258603	40.3992
0.4766	26.3402	27.2441	21.402	15.4011	20.5957	26.2526	29.2816	24.8905	24.6397	16.579	39.167	55.8009	39.0458	66.1253	58.7923	76.2422	74.4766	55.2403	65.3356	54.8315	51.961	47.2429	46.5511	34.9608	34.5002	23.8952	16.8536	18.3567	80.6496	70.2206	69.5457	64.1779	9.8546		0.0344853	42.0138
0.5957	31.1246	37.5339	18.9533	17.828	27.3326	24.5799	21.6626	19.8043	15.9759	16.0311	39.8885	49.2644	35.7625	60.1353	41.7148	78.168	82.502	70.7009	69.4926	58.6192	41.6962	50.4751	42.6594	51.5594	40.3803	26.6025	10.9969	19.7311	69.8644	65.7441	63.5956	83.3146	5.805		0.0431029	42.106
0.7148	32.2387	32.7144	23.1196	15.2791	24.855	25.8537	26.3758	22.2093	17.1695	15.0422	47.5436	58.4793	48.8602	54.3083	34.3238	74.2649	86.8154	78.5556	74.9583	54.2085	51.5871	40.6481	45.6583	44.0218	37.4011	24.1754	13.9043	18.3723	62.3928	81.1415	46.4505	86.9158	8.1239		0.0517206	42.6657
0.834	34.5648	26.3192	20.6151	15.0541	23.9871	29.1393	26.3808	19.2801	23.6914	16.8249	29.8879	52.388	52.3472	47.2582	40.1953	78.0661	84.4976	66.1781	80.8498	57.6165	38.845	44.0887	45.0395	48.5988	37.2488	22.9291	14.1082	21.5321	66.5283	65.5625	55.739	85.561	10.3313		0.0603456	41.8562
0.9531	25.9016	26.6976	20.4539	15.2372	22.6063	23.5017	25.6109	21.3727	14.9708	10.1723	33.9289	47.3821	35.5819	53.2955	37.0006	68.6592	65.7148	64.1708	80.4216	49.5996	53.1403	37.6436	42.5657	56.5909	34.7571	33.9977	14.8069	21.8263	88.4082	79.1186	46.1793	95.0079	12.3389		0.0689633	41.1716
1.0723	31.4151	30.5906	19.6124	14.9323	14.9342	24.8353	26.0435	24.5218	14.6667	12.5732	49.2657	45.1328	37.8388	48.9181	33.73	69.3438	54.2437	67.4132	76.5845	42.4395	45.3411	37.1375	38.4398	60.6073	27.5585	32.3234	11.4124	23.8655	90.8186	72.149	53.806	80.4065	10.3623		0.0775882	40.0989
1.1914	31.4364	23.4804	14.7567	21.064	11.8864	17.3101	18.0821	24.8971	8.3147	12.0909	28.6554	44.2749	44.5887	36.2065	29.7243	76.0726	54.1479	55.735	81.3274	48.8215	40.6518	40.8361	37.7017	54.9729	30.3268	27.6758	12.9168	21.071	85.7915	60.8407	59.4637	78.4034	12.9861		0.0862059	37.7731
1.3106	28.7606	20.0804	16.526	14.7087	19.4418	20.0322	24.2251	25.5055	8.3807	11.2569	30.3766	45.2355	30.0553	39.0827	30.2309	67.8644	55.3124	62.8796	77.3278	61.6328	33.8127	40.7637	31.4192	55.3461	30.2946	31.5625	13.7979	17.841	78.6625	71.5885	45.4525	75.3061	13.409		0.0948308	37.2173
1.4297	25.082	31.0482	20.9906	10.4943	13.1121	29.3645	28.5762	24.4788	12.1968	11.8559	36.721	36.2008	35.9575	30.3161	18.0466	64.1784	41.8945	53.3049	67.1783	49.2491	31.1395	37.7368	34.5891	59.4704	41.3594	29.1042	11.1486	12.7261	66.5378	69.3128	47.5881	81.1775	16.2246		0.103449	35.7079
1.5488	20.6778	29.2865	18.854	7.4245	10.9593	18.9547	13.3908	12.3204	11.2338	12.994	44.9723	41.5484	35.2773	39.5392	35.0461	66.062	48.2286	60.2912	66.7883	39.7076	24.0348	37.9631	32.5433	45.3417	36.2673	27.6291	10.2262	20.4924	61.8295	70.3666	56.65	67.879	10.0175		0.112066	34.3878
1.668	23.104	28.6855	16.5025	11.3499	11.3352	23.5473	23.1054	12.9076	8.9095	18.4552	40.9694	37.1221	28.4089	22.3185	22.1203	70.7883	48.1948	52.4975	75.3928	43.016	35.9	35.0898	44.288	36.0051	42.9355	25.1407	14.9491	20.9262	69.6779	67.8688	47.3482	71.9161	8.113		0.120691	34.5118
1.7871	26.1992	30.4965	15.5605	17.6758	19.5549	13.7643	24.4646	11.0386	6.8209	18.7878	33.8445	40.8555	38.4347	20.4061	21.0021	53.487	34.7337	46.2865	55.7492	39.3648	26.871	39.9334	42.7335	27.7042	41.6205	23.8932	11.6804	13.0936	59.8968	73.2069	50.9593	63.8633	9.4229		0.129309	31.9214
1.9063	12.8457	21.2842	16.0716	7.2919	13.6028	15.5245	18.7887	12.0136	6.2415	20.1097	30.8536	29.4344	41.9617	16.4769	22.6458	53.0913	37.9094	30.8629	51.8445	27.088	31.5824	43.4442	38.5852	29.9608	26.8815	20.053	10.7883	13.606	65.4892	56.04	52.4049	64.2559	9.8602		0.137934	28.7544
2.0254	22.6673	22.1193	7.4297	3.3805	6.2136	12.2377	20.1175	9.5497	6.5362	22.3451	27.0104	29.6803	33.2341	15.2474	20.5856	55.7476	38.9023	31.8179	51.0144	31.9325	24.5894	31.3428	38.2835	29.3668	23.6471	14.6427	12.792	13.316	80.6947	64.2299	46.6025	59.3062	9.2931		0.146551	27.7538
2.1445	16.9441	20.3389	9.0346	6.2548	11.0247	11.8084	13.9561	9.2709	5.0777	13.7644	25.7833	26.9645	34.6577	11.3596	28.5788	45.2802	36.1916	33.1775	48.6398	19.1152	36.9835	32.5807	30.6849	27.0502	30.1107	19.9653	12.6294	12.7201	63.1169	67.6027	44.9092	55.5407	10.3696		0.155169	26.4087
2.2637	20.1881	27.1103	7.8152	7.5686	10.9775	6.9528	14.4812	8.4131	6.2291	22.5678	19.61	19.4494	26.9441	10.9412	26.0192	36.7812	26.3713	31.9583	29.969	21.5347	29.5439	29.2203	34.8478	32.2138	21.9301	17.6836	11.0477	11.9098	60.8659	75.8124	42.4411	58.5592	15.756		0.163794	24.961
2.3828	19.163	27.5903	6.8466	7.0224	15.3527	10.4827	11.0317	7.2191	5.4888	17.5442	20.2134	21.2075	21.2748	7.131	28.7458	25.8543	26.1849	27.9494	26.9989	18.7085	34.2574	27.7036	21.1459	37.3262	19.2233	15.8952	8.7724	11.1836	52.7171	59.0848	38.0018	48.7479	19.9023		0.172412	22.6052
2.502	21.6237	20.0023	6.9275	11.2792	10.3785	10.6456	12.094	6.8089	6.6502	24.5339	22.2538	20.6339	21.4945	11.7723	36.4454	27.4975	26.926	31.8909	21.9918	14.8115	22.0766	28.4556	29.3767	31.9362	16.8833	9.1728	8.8198	8.375	50.8068	62.0248	34.2017	34.2675	16.7027		0.181037	21.8109
2.6211	17.3765	17.9501	5.9887	6.5442	12.5104	9.7791	12.2247	3.6955	3.9974	22.8696	25.66	18.6882	19.1315	8.0895	38.1211	22.062	24.6086	38.6205	24.2586	22.448	27.0252	24.9649	30.7719	29.0519	14.568	10.2116	10.0648	7.1307	57.4213	70.0509	36.9506	41.7418	14.8795		0.189654	22.1048
2.7402	19.4112	24.528	7.9135	5.1007	9.2685	9.0381	11.0732	5.3712	7.6834	17.3191	16.2842	14.7445	15.671	11.6672	33.2749	26.598	28.109	28.5706	25.3783	16.8456	38.3894	20.6017	21.9408	34.3862	16.5163	11.9229	14.4282	13.9857	43.0612	54.1639	45.8128	33.9579	13.3144		0.198272	21.101
2.8594	12.7149	15.2914	10.6789	6.5628	9.86	8.5599	8.5512	7.8966	4.9216	13.6529	11.3501	16.0255	23.8739	7.2784	33.7703	37.2679	24.274	24.9085	21.1883	21.9102	32.5564	29.1123	27.5516	27.7275	23.4453	11.7187	9.1923	9.5913	46.0253	43.4997	38.967	30.2851	6.3081		0.206897	19.8945
2.9785	9.8369	12.2722	6.366	6.1301	6.7916	10.2688	7.2714	8.5471	5.5945	11.9858	11.5475	18.2274	15.8282	5.1727	48.2059	34.7708	28.1573	26.6161	18.4846	19.6158	23.7075	25.5744	24.9097	23.7292	18.9536	9.9696	7.0309	11.8167	47.7345	46.8426	34.838	37.9305	13.8934		0.215515	19.3522
3.0977	12.643	17.3411	6.675	2.9404	11.802	10.6964	9.7262	5.6874	5.8516	9.8681	12.2011	18.1206	12.4613	6.4759	38.4012	33.7913	22.4133	22.6723	26.0715	15.4945	23.9365	32.703	32.476	25.2834	21.1469	11.4997	3.8547	5.0116	49.7303	36.594	32.5345	37.3087	14.7627		0.22414	19.0356
3.2168	13.3698	17.6022	5.0717	4.3252	8.769	10.2519	9.3849	8.6257	5.7348	7.703	16.9343	19.0685	9.703	3.6194	43.0587	31.4331	33.6298	24.5858	24.0678	21.9629	23.3462	34.8017	25.6533	23.3176	16.2489	12.9529	8.1136	8.2779	40.236	38.6165	45.5308	37.1402	14.4265		0.232757	19.6231
3.336	10.0744	12.7934	6.3211	6.1188	13.6027	14.2452	6.3586	9.9853	4.9887	7.7204	13.245	32.1917	7.8086	4.5178	36.4595	32.5473	35.5959	25.2718	19.4603	16.0912	16.6564	30.1727	16.6547	18.9211	22.6476	16.0757	11.0499	7.0683	54.4427	40.086	35.0858	35.7857	9.06		0.241382	19.0638
3.4551	10.8766	10.2668	10.4947	5.5262	7.7413	10.3767	7.9148	11.9341	5.5628	9.348	16.6596	32.6555	5.6563	4.2956	26.9457	34.437	25.8179	32.5268	18.0063	9.6486	22.9819	33.133	23.3242	23.6773	10.3184	20.0483	8.5697	6.7032	39.5314	29.9269	28.062	37.3048	9.429		0.25	17.8697
3.5742	11.2423	17.6778	5.4724	6.5437	12.3096	13.3123	8.5601	7.1546	5.404	7.9901	16.5696	38.8022	7.4457	3.5854	22.8239	38.3217	23.6265	26.5861	15.1558	10.0167	24.3579	25.5276	13.138	21.7419	17.3821	9.4862	7.9128	5.5812	31.3228	29.4264	32.1982	32.7384	16.5786		0.258618	17.1513
3.6934	13.9817	10.4941	6.3148	3.6331	10.4232	6.7478	12.9292	8.3904	4.8154	10.1777	19.0951	38.1224	8.1213	4.0684	23.618	27.1669	19.6774	35.7966	10.8906	13.5604	19.5278	18.3673	16.906	22.3547	14.3589	13.5157	6.458	6.142	27.1512	18.6284	15.0739	29.6037	16.3065		0.267243	15.5278
3.8125	7.5042	7.5831	4.4217	4.1911	6.5778	12.7196	8.7263	9.908	5.1507	6.464	17.8125	32.2283	7.2376	5.1201	15.9368	24.5931	23.7087	29.5387	10.5299	13.1537	22.7271	17.6493	14.8292	25.4117	22.0982	12.0996	6.6721	7.5597	28.1693	21.1112	24.5909	24.2367	13.2654		0.27586	14.9553
3.9317	8.6918	9.0936	4.9934	3.7661	5.3324	16.6165	9.6269	9.0413	5.1461	7.2911	17.4484	29.1949	5.2549	5.4689	13.7029	29.9937	26.3491	26.9973	11.0609	9.7264	17.5097	14.4843	13.9032	22.5324	21.364	9.662	8.5659	6.3707	24.0419	27.2873	26.8271	22.8797	13.0124		0.284485	14.6436
4.0508	5.4219	7.9992	6.3684	4.8376	9.558	17.3444	7.1333	7.7582	4.4472	7.2946	19.973	25.2293	2.3811	4.5908	14.1238	31.9508	26.9646	24.2945	12.2057	9.5151	14.434	13.4155	11.7377	14.3357	19.2202	17.0656	8.8336	6.6963	24.9472	18.7803	20.5424	15.4702	15.6657		0.293103	13.6526
4.1699	8.69	10.7408	5.594	2.7586	8.0584	10.7684	5.773	8.5099	3.0403	3.6017	24.7346	15.8214	4.6644	2.8464	7.8969	24.4561	17.2204	19.2826	16.2524	10.4621	15.7754	17.5908	10.6706	18.578	11.4955	10.5655	8.5481	8.8645	31.8159	23.3989	13.3646	18.0865	15.5815		0.301721	12.5912
4.2891	13.0335	10.0637	5.7866	4.0034	9.2067	7.5798	8.1592	6.3574	3.8711	3.8765	23.0792	22.6378	4.7581	2.6455	8.5341	20.0702	20.7843	29.2925	18.6105	6.1359	12.0684	12.853	13.5222	15.7268	11.8849	13.747	8.2234	8.4962	25.0037	21.1304	9.7034	22.7964	18.8924		0.310346	12.8041
4.4082	8.7905	6.8294	2.9339	4.5099	6.1245	8.1883	4.3111	4.0798	6.1476	4.515	15.8708	17.2782	6.5748	2.98	7.8577	16.7909	20.022	26.5839	12.1606	12.6106	17.3276	18.538	18.53	7.0476	8.6616	19.6333	13.5814	2.8068	10.3205	22.4716	13.9182	22.7476	18.7148		0.318963	11.8018
4.5274	9.1269	5.4182	5.4159	5.6134	6.5293	12.4606	3.3526	7.2057	7.233	9.6382	10.2028	15.6395	9.3876	2.2941	10.0707	21.1237	16.6248	28.9561	10.0323	12.2973	13.9749	13.7142	11.473	8.6019	8.4657	20.3675	8.563	5.0752	8.9189	31.3287	14.2395	31.3011	16.4935		0.327588	12.1558
4.6465	7.8396	6.2811	5.7705	5.105	6.667	8.0822	4.7378	4.7403	3.4712	5.1868	8.1711	15.9254	6.1559	4.3508	8.3338	21.147	16.8826	32.587	9.9554	13.4941	9.5606	17.6507	13.4318	9.8863	10.6065	20.6608	5.3241	8.9914	7.1353	23.7706	13.6819	28.0175	14.7588		0.336206	11.4655
4.7657	8.6584	5.6999	5.5975	4.3058	7.6048	10.3717	5.6688	5.3049	5.9496	4.359	6.919	17.8106	5.154	5.3593	7.5857	21.3802	13.0322	30.1243	10.8598	13.4258	10.3451	21.9409	11.0633	8.6507	10.3078	28.1426	8.2844	10.5552	7.6435	30.422	11.0333	26.0848	18.2519		0.344831	12.0575
4.8848	10.6795	3.9956	2.8635	5.3985	10.4244	8.6814	7.378	6.0432	4.2756	2.9853	12.3932	11.5627	4.1292	4.1478	9.1681	22.2181	11.0071	29.1897	12.0418	11.2179	10.911	29.6603	9.3498	6.2103	9.8208	25.8591	6.3423	6.9926	7.4419	18.3702	11.7864	22.1741	15.3616		0.353449	11.2146
5.0039	11.6272	4.1562	3.9019	2.5739	9.8687	6.0347	2.6514	4.3354	3.893	5.9753	13.6228	11.3513	6.3824	3.7682	12.3045	21.6513	11.8866	25.6199	12.8681	6.2114	16.9104	15.0183	12.5998	8.7543	12.0032	18.4817	9.4032	10.2481	9.2603	15.445	14.2047	14.6771	13.833		0.362066	10.6522
5.1231	14.8444	4.482	3.0324	4.8028	8.4671	7.532	5.5982	8.4453	9.7482	6.2088	18.4326	13.9488	4.3229	3.8583	11.8643	22.8109	11.2788	25.7407	12.4588	5.8584	14.5161	20.1573	7.3623	5.5511	13.3392	14.0593	4.9441	6.8324	8.152	10.6806	16.7093	12.0198	10.1633		0.370691	10.5522
5.2422	9.1117	5.0553	3.3738	2.1904	3.7603	4.6616	7.3929	4.0529	7.5753	3.3516	13.4753	9.3085	3.6411	2.3325	14.6894	21.3023	8.6017	27.7061	13.6176	6.0173	14.0563	19.0587	7.1471	5.0034	12.6046	16.9517	5.8914	7.4633	6.9804	5.8542	15.4677	11.1372	6.0003		0.379309	9.23739
5.3614	10.0407	4.1964	4.1724	3.1691	6.8076	3.6917	3.8009	4.6814	8.8502	3.9682	16.439	10.2756	3.4908	4.2581	13.26	30.5526	8.7327	22.0859	13.0994	7.107	13.5882	10.7768	5.3907	6.0685	8.6883	20.2545	2.384	4.3407	2.7102	8.8375	11.1272	9.1948	13.9552		0.387934	9.0908
5.4805	10.9751	4.3647	3.887	3.6827	8.59	5.7388	3.1375	2.6139	14.3682	5.2849	11.8785	8.4193	4.478	6.2393	8.993	18.9739	6.9701	19.6742	15.6366	6.2547	15.396	13.5421	6.4056	3.465	5.428	14.4178	6.6721	7.1281	3.6114	5.9609	10.5216	10.202	8.6662		0.396551	8.53264
5.5996	5.6651	5.0788	6.6879	3.2815	5.4764	4.597	3.5285	4.4635	11.3372	5.7758	11.0715	10.1016	4.587	6.119	15.1558	19.0024	12.1431	20.5629	10.3252	3.5672	18.8943	8.4339	6.158	3.5713	8.2979	15.3503	4.5239	5.0799	3.0293	4.3549	6.5747	9.1218	8.2627		0.405169	8.18728
5.7188	8.7912	5.8331	3.3991	2.8517	4.8408	5.0773	5.4225	4.0152	18.5815	5.4629	12.6513	10.2404	5.1354	3.9519	14.1761	18.7906	10.0921	22.6975	10.9235	4.2948	12.4962	7.6829	5.1479	5.0786	4.9989	15.9784	5.9488	3.9086	4.2851	3.413	6.4532	12.8105	9.6597		0.413794	8.33608
5.8379	9.7934	5.0206	3.4279	3.1266	6.1645	11.4577	5.6862	3.6584	11.7299	5.5814	17.7187	5.5397	3.5097	5.4839	11.8341	16.5886	6.4723	20.1697	6.4532	3.5476	11.4355	7.0495	5.5363	5.5057	6.3655	18.9794	6.0742	3.7432	4.0477	5.6997	7.6	17.8819	5.1967		0.422412	8.12362
5.9571	9.2106	3.685	4.7481	2.9601	7.1162	8.4643	2.423	4.4484	9.0439	7.6714	16.7814	5.8686	3.1894	4.9166	10.0959	11.4902	7.642	9.3081	3.854	6.8802	20.7065	8.5401	5.7742	6.9385	8.2566	22.5566	4.7987	4.0523	5.8558	4.5076	7.9595	15.8647	6.6756		0.431037	7.948
6.0762	12.0465	5.0222	4.6808	4.0135	6.2093	4.7561	4.115	4.2518	7.1051	5.6358	13.5347	5.511	5.218	3.8114	12.718	13.022	8.4634	17.3972	6.9233	4.337	20.5635	5.9336	5.3521	4.1413	3.7455	26.2808	3.9444	8.4962	4.6955	4.7052	9.6423	24.3513	7.0837		0.439654	8.41538
6.1953	5.4911	3.8048	4.2994	2.1256	6.2085	4.8054	3.4341	2.8372	6.0632	8.0013	12.1642	8.0007	5.3017	4.0108	12.7765	11.6581	10.4554	15.8874	6.2615	2.6666	18.4311	5.954	3.3539	3.6455	5.0224	22.663	5.9864	4.5313	7.0678	6.0342	9.1007	18.9926	8.2744		0.448272	7.73669
6.3145	8.6976	3.9487	4.5092	2.7914	5.8239	9.707	4.0327	2.7951	7.4913	9.1238	7.0533	4.775	2.8375	6.7168	14.9544	10.6623	5.6127	13.8024	2.9418	3.7335	15.8917	6.4179	4.3487	5.1614	3.6776	15.214	6.5973	6.6118	3.351	3.6937	5.2629	14.336	5.0228		0.456897	6.89688
6.4336	9.6433	5.667	3.7585	5.4759	6.6248	5.0331	3.1112	5.4231	9.1663	10.8825	7.8444	7.2179	2.929	7.2146	13.8268	11.601	5.2495	11.8689	5.6748	6.3395	11.854	4.5612	3.6732	6.0369	3.4963	20.4008	6.0811	8.8443	6.675	7.1348	5.5924	16.5372	6.1144		0.465515	7.62284
6.5528	5.2701	6.5373	2.1275	2.4545	4.921	6.1452	6.484	5.7908	8.0646	20.4038	5.4887	5.9465	5.474	6.2431	15.772	10.7255	8.7878	19.1327	3.5308	3.9209	9.5288	4.6342	7.2729	2.6256	2.6276	18.1578	4.2363	6.8421	6.7923	7.6982	4.503	8.4482	7.6227		0.47414	7.40032
6.6719	5.8615	8.1269	4.1643	4.9005	10.0442	6.0516	3.8244	4.6207	9.9114	16.8481	6.8307	3.3397	4.09	5.3072	9.1552	11.3243	9.1372	12.678	2.7648	4.537	12.8938	7.5735	4.7181	2.4993	6.4986	10.1616	3.9183	5.3197	4.1521	7.1878	3.0962	8.1715	9.7703		0.482757	6.95389
6.7911	12.4612	8.1107	3.9622	3.7159	3.0831	2.6427	4.6078	3.8896	8.1974	17.8697	5.8415	6.9606	4.0141	6.6664	9.6978	15.1984	6.5917	10.0467	4.2848	3.844	9.6124	6.112	3.8643	4.2845	3.5254	11.5055	6.8276	4.7305	4.5098	6.4568	8.8065	12.9107	7.4112		0.491382	7.03768
6.9102	8.479	6.4874	3.3527	2.6602	3.7046	4.4174	6.7245	6.392	7.2763	11.9048	5.2837	6.9554	3.3367	5.2213	4.7424	12.175	7.5642	10.4098	6.5223	3.4221	10.3737	6.1688	5.0516	2.8746	2.0378	12.4279	8.0421	5.6758	4.948	6.9267	6.9092	10.0662	7.7559		0.5	6.55425
7.0293	12.259	6.9006	3.5596	6.0011	5.4033	4.6064	3.3178	5.2493	8.6457	13.822	6.7921	5.7742	4.2591	5.6924	7.2871	10.8297	9.9481	15.5232	5.193	4.1105	3.3049	7.4502	7.1268	2.7746	4.4278	10.4771	7.6786	7.3106	5.1482	6.4978	3.8242	15.1913	6.7041		0.508618	7.06335
7.1485	11.3784	7.0346	5.595	3.4546	6.6785	5.6665	2.3756	3.3876	8.6842	17.0526	7.481	5.6537	4.2491	7.8008	9.579	13.8771	14.2984	10.5222	5.0776	3.5865	6.3963	12.9914	3.5349	2.135	4.0875	11.7421	10.2631	3.9401	6.1299	4.0305	4.4633	14.1183	5.8333		0.517243	7.36663
7.2676	14.3444	4.1191	4.7367	3.1656	6.5542	4.5303	3.6697	4.1816	11.1067	22.4296	5.8021	3.8401	2.3037	6.2139	7.3874	13.1648	12.2466	9.0389	9.0536	5.2468	3.4826	9.8984	5.333	3.2526	2.5531	16.0868	8.0056	6.2205	6.0379	3.4136	6.141	19.2571	8.8415		0.52586	7.62605
7.3868	8.3837	4.1543	3.9994	3.4183	3.496	2.9186	4.2029	2.8505	6.289	19.1347	5.4934	5.4884	3.2869	8.4226	4.6735	12.6944	6.5601	5.0162	13.417	6.7815	4.3792	10.4394	3.843	2.5623	3.2822	11.7353	6.5792	5.5534	4.1366	7.2855	5.5897	13.8798	9.1338		0.534485	6.63881
7.5059	7.8554	4.5552	2.2204	3.8061	7.6599	4.7037	6.4029	6.2076	11.5002	10.7843	5.3828	5.5377	2.7339	5.8129	7.9181	13.2008	9.2594	10.4756	9.2393	4.7416	4.9932	8.4456	4.3434	2.835	2.4855	8.2011	4.711	4.8444	5.5565	4.4654	4.8869	16.651	5.9256		0.543103	6.61644
7.625	4.9284	4.9773	2.7413	2.0828	9.5322	5.6747	4.8626	7.1411	8.2929	10.9882	9.2419	3.7686	2.8776	7.4144	7.44	10.1906	14.8837	12.6524	4.6153	5.9644	5.3553	11.8668	2.5657	3.1561	4.0154	6.7766	5.7854	8.7503	7.2239	4.1513	2.6677	8.0078	6.1993		0.551721	6.56945
7.7442	8.9553	4.9483	3.9697	4.1624	8.6847	2.9646	4.6489	2.9961	3.694	8.7884	7.3548	7.8979	5.3912	4.8564	11.0089	14.8291	8.4392	10.8529	6.7555	7.0518	7.3407	11.4474	2.8062	3.5414	3.8892	8.9235	6.0382	7.2402	4.5216	6.7357	5.2877	5.457	8.3458		0.560346	6.66135
7.8633	9.2918	7.6753	4.3122	2.1858	4.824	4.54	3.6412	3.5173	3.7607	5.1018	13.0965	9.1807	3.331	7.1015	14.5433	8.0532	8.3089	9.5257	5.0756	5.6921	5.6264	10.4974	4.5511	4.1834	2.1336	8.2715	3.8796	10.6875	7.0876	6.4526	4.5805	5.5045	8.5473		0.568963	6.50793
7.9825	8.7756	7.9025	4.0154	4.2559	5.2997	5.1849	3.3282	3.2386	3.9	6.5956	11.0181	7.1263	3.8525	7.774	11.3669	11.684	13.2488	6.2073	6.8985	7.0868	4.9295	11.8687	2.3592	2.8506	2.7339	8.9709	5.0271	5.9457	6.494	2.3653	9.9551	2.9446	10.9303		0.577588	6.54953
8.1016	5.3937	7.2077	3.3523	3.3893	2.9123	2.3516	3.8737	6.4634	7.3606	8.1135	12.0702	4.2829	6.1197	3.9341	6.4034	11	8.5036	6.8803	5.6795	4.5405	6.8552	8.4544	4.1262	3.0805	2.2444	8.3607	7.9278	6.5648	11.4741	4.7433	3.2667	3.3696	8.8923		0.586206	6.03613
8.2207	6.3086	5.384	2.3551	5.0495	2.8126	3.5893	2.8909	4.5376	5.6913	6.1492	13.9011	10.5545	2.8571	5.0376	8.8309	7.7151	9.9501	12.2531	4.3971	4.8669	6.6319	8.7777	6.3991	3.7963	3.3204	6.1232	10.5547	7.0565	10.8945	3.6913	3.0117	4.7761	6.9217		0.594824	6.27535
8.3399	4.8123	4.0739	3.9763	4.1266	3.4078	4.5664	3.8696	2.9624	4.4113	6.4356	11.5305	5.2668	3.075	5.3049	10.3453	7.8544	7.473	7.5016	4.2099	3.851	6.5444	9.7913	4.7602	4.5349	3.2146	12.2523	5.846	5.2445	6.9698	4.5223	5.4484	3.7607	8.3047		0.603449	5.76511
8.459	3.9127	4.3698	2.7317	2.5754	4.136	4.603	3.9458	3.7438	3.4963	3.8308	8.0798	7.5522	5.1841	5.1749	9.9466	12.2831	12.0533	9.9132	4.0752	3.65	6.6307	9.9924	2.9982	3.6788	2.8225	6.339	5.1652	6.5342	7.1791	3.6264	3.4751	3.4002	5.9832		0.612066	5.54796
8.5782	5.094	5.4152	3.7491	3.1245	3.6399	5.4844	4.0827	4.6385	4.6532	6.8332	11.1694	8.9743	4.1347	3.1506	4.7724	7.0991	8.0571	17.0104	7.6763	3.5021	8.8134	11.4572	3.7535	2.6277	2.6609	8.3076	4.9739	7.7313	3.7793	3.2597	4.47	5.5212	4.7276		0.620691	5.88922
8.6973	4.177	4.0143	3.5017	1.9401	4.4434	7.3277	2.3256	4.1526	3.1263	5.2258	10.4865	8.8288	4.8559	5.3736	10.2126	5.1373	12.4355	15.1766	12.8133	2.4482	10.4793	9.5963	5.6437	2.2977	2.8788	9.8727	6.529	8.7855	5.027	3.9889	3.8188	3.9328	4.146		0.629309	6.2121
8.8165	4.9682	4.5062	4.6358	4.4383	4.4746	3.8349	3.7148	2.9789	4.0254	7.3883	11.2751	7.1386	7.0331	4.4361	5.263	9.0104	12.4855	18.3487	14.5081	4.6089	11.734	8.7266	2.4539	2.3042	2.2279	8.7302	5.4298	3.3825	6.2181	6.1063	7.4698	3.7338	10.3096		0.637934	6.60302
8.9356	5.4455	4.6468	2.9273	5.5958	6.2166	4.8399	5.2479	2.4484	4.5004	4.2756	9.7584	12.479	4.4297	4.0381	12.5054	7.0292	19.2465	19.1889	10.935	4.2573	7.7208	8.528	4.8657	3.4759	2.257	11.6717	5.3645	5.3006	7.2633	3.7643	5.8395	2.813	8.1603		0.646551	6.87989
9.0547	5.3362	5.8888	4.4155	2.7568	3.2781	3.1156	2.1797	3.8113	4.2539	8.1243	16.0479	12.6137	3.6898	3.119	7.1406	7.1886	12.2392	24.3554	11.4901	6.8972	9.0092	8.1683	4.0785	3.0729	2.5705	5.9055	5.2779	5.9399	4.8902	4.0204	6.7505	2.7918	8.9989		0.655169	6.64898
9.1739	5.9216	11.0409	4.4224	2.4251	4.1454	3.0443	1.9252	3.4212	2.3741	4.5997	10.8043	16.0774	7.9152	5.1969	8.3253	6.5774	12.481	18.5379	9.6039	4.0118	14.3282	5.4974	3.3041	2.6122	2.0641	6.805	8.7997	5.319	8.3784	2.8889	5.6935	6.042	9.4961		0.663794	6.79029
9.293	3.0088	6.9464	3.2588	3.4565	6.7666	5.3272	2.0177	2.4268	2.4533	7.2018	5.6621	9.6483	4.7324	4.2688	4.6623	4.4045	9.3305	13.9134	11.7791	4.0391	8.5546	4.6942	5.5398	3.0505	3.0407	7.925	9.1328	3.5293	6.1249	3.1921	4.7965	5.0243	6.8881		0.672412	5.66052
9.4122	4.901	6.4301	4.4727	3.8018	3.0438	2.3282	3.9116	5.3949	1.8437	9.8168	10.0896	13.4545	5.9461	4.8932	8.2426	3.6749	9.1723	14.6798	10.1676	7.3978	15.2111	6.9844	4.2383	3.6266	2.4627	4.8212	3.9641	3.0154	8.6449	4.5824	6.0548	5.5828	7.2124		0.681037	6.36558
9.5313	4.5897	5.1069	2.8442	2.8499	3.2687	4.6816	2.5106	3.0124	2.1244	4.7387	7.2019	10.8172	3.4988	6.3085	8.1817	4.2162	7.7339	7.708	10.1162	5.2769	11.9961	7.7596	5.6895	2.5152	2.2062	8.1873	6.6354	5.2767	4.2445	3.7111	4.4095	5.6558	5.72		0.689654	5.47858
9.6504	2.4129	4.8027	1.9815	3.6251	5.0013	3.3705	3.9452	2.9245	3.3539	9.0849	6.5609	7.7319	6.5418	5.5933	7.2405	4.4793	8.2201	10.8683	15.7472	5.2378	15.166	9.1622	4.1168	2.0187	4.4826	9.1216	5.7027	4.2815	8.5039	4.1366	2.3349	5.3226	5.7015		0.698272	6.02349
9.7696	2.4393	2.4998	4.749	4.2735	2.3962	2.6403	4.8359	2.9143	4.4547	7.0424	5.2565	6.9175	3.5062	4.1661	7.415	4.2126	3.8208	5.3908	12.3952	4.3746	12.5576	6.2132	4.349	3.1093	4.0734	10.4182	5.8035	3.9916	11.1372	5.8071	4.2953	5.8578	3.2134		0.706897	5.34931
9.8887	6.9512	4.9648	3.6077	3.2884	2.7521	2.7673	2.2841	1.9157	2.9935	9.9976	4.0918	10.0454	3.7433	5.7511	6.7077	3.0391	6.8863	4.9451	10.6492	6.6232	8.0091	3.48	2.8955	3.0796	3.195	9.4962	6.3757	3.0089	8.795	7.2838	3.9789	3.4265	5.2492		0.715515	5.22055
10.0079	5.512	4.6689	3.2973	4.0343	4.6433	3.3755	3.1059	2.5061	2.5746	4.0058	6.2321	12.0258	3.6899	2.8855	4.0534	4.2237	5.0361	4.1526	5.9021	5.1276	5.7735	10.4856	2.6837	3.8358	3.7008	7.2035	6.2945	4.7772	9.0505	6.0515	6.3992	2.9142	4.3762		0.72414	4.98784
10.127	4.5479	3.406	2.3769	2.82	2.0552	2.1163	2.0833	2.0259	2.0202	3.2458	7.2221	10.8002	2.5515	5.9804	2.1885	2.6117	4.0336	3.5432	6.8611	9.525	6.1406	5.9666	4.0425	3.168	3.4271	3.5326	7.2179	3.8929	9.1781	6.4964	5.348	7.8614	3.666		0.732757	4.60463
10.2462	4.6459	3.1057	1.9256	1.9461	2.692	2.403	2.746	2.2754	2.73	2.1926	11.8353	9.8645	5.0633	4.0971	2.0044	2.0414	3.7117	3.5793	10.3482	12.5542	8.1431	4.4016	3.6405	2.5338	2.0757	9.6519	3.9307	2.3948	9.7254	5.9913	5.1167	5.476	3.8141		0.741382	4.8078
10.3653	6.1136	2.4762	2.7996	3.5461	2.2368	4.5219	3.1517	2.3178	2.5621	3.0403	6.4607	5.9938	6.5083	7.2013	1.9604	1.8365	3.1906	5.2329	5.0956	10.0881	6.7092	5.3117	5.2691	4.4702	4.0496	11.2887	6.5989	7.1899	5.9721	6.9587	7.494	3.8678	2.1404		0.75	4.95923
10.4844	4.2991	3.8453	4.3276	5.0764	2.2115	2.9437	2.0118	5.7714	1.9088	3.3567	6.7677	4.8869	3.4689	3.8	3.4323	1.993	2.9941	4.2088	9.9966	8.7678	3.6997	5.794	2.6824	3.4826	3.061	12.6844	6.4632	3.9707	4.7595	6.837	4.4363	5.5723	4.1208		0.758618	4.65552
10.6036	4.7479	3.765	3.4086	2.3167	3.2187	5.7617	3.8292	4.8471	2.7904	1.9431	6.0453	5.5816	3.7091	2.5436	2.1686	1.8959	4.6837	5.4176	5.434	17.9877	4.3572	8.4497	2.7858	4.2404	3.374	6.9436	6.0542	4.5327	4.9643	6.2817	5.3009	5.2626	6.8014		0.767243	4.89224
10.7227	4.827	2.5473	4.3453	6.5803	3.3068	3.7265	3.878	2.1362	2.1445	1.9729	3.6561	2.7855	4.4689	4.2233	4.6028	3.4413	1.9277	6.0739	3.8827	7.3169	3.6444	9.7184	3.0331	2.4738	3.0619	7.1856	6.9062	2.9793	6.5971	8.7313	8.3984	5.8929	6.4734		0.77586	4.63454
10.8419	3.4406	4.7077	3.2323	3.4721	4.545	2.7293	3.8454	2.5718	3.546	2.8992	4.7179	2.9736	4.6472	4.191	2.751	3.2824	2.473	3.5914	3.04	14.484	3.6122	6.3888	3.2322	3.1381	3.7022	5.282	3.4129	3.0303	3.9475	6.8455	5.0608	5.6554	6.4896		0.784485	4.27086
10.961	7.5403	2.5079	2.7828	2.7832	3.7119	2.1181	3.4989	1.8928	2.1134	2.4279	2.0099	6.1306	5.2425	4.6127	2.1995	2.679	3.2899	3.4964	4.3461	5.8024	4.7363	4.3856	3.2783	2.6301	2.1779	4.9235	4.7501	2.1862	7.0953	6.8577	5.6733	4.4888	5.8068		0.793103	3.94473
11.0801	5.9259	4.4978	3.1848	3.0783	2.5085	2.7948	4.5629	3.7136	3.4934	4.9091	5.8328	3.1221	4.6701	2.3419	3.4578	3.2474	4.1298	2.8485	3.1384	6.3622	4.8478	5.2537	6.717	2.6441	3.4686	5.9872	7.1682	2.5858	7.2278	8.6456	6.4221	5.8739	3.3884		0.801721	4.48637
11.1993	7.8086	5.9418	3.891	6.0405	2.1832	2.5705	2.2423	2.9862	3.3687	2.0277	2.752	4.7272	2.3511	2.756	2.9586	3.549	2.2813	2.8483	3.5482	4.0854	3.2297	5.9641	3.8307	3.2935	3.7118	6.6498	5.03	3.1074	4.7671	4.965	4.5735	4.9705	7.0919		0.810346	4.00311
11.3184	5.9983	3.3045	4.7267	4.06	5.6882	2.465	3.1219	2.4956	2.1292	2.6265	3.7633	2.2029	3.7011	3.2707	2.0208	3.0129	3.1231	4.6111	3.7042	5.7341	5.3223	4.2034	3.08	3.7343	3.106	5.1272	3.6188	3.7281	7.3466	6.0204	3.9835	5.4876	4.8457		0.818963	3.98073
11.4376	5.5778	3.5511	2.9757	3.1472	3.3843	2.6996	4.474	6.5139	4.1429	2.278	2.5729	2.4558	2.1459	4.124	3.2076	4.6919	1.9094	2.975	2.2603	4.4271	4.8572	8.5231	4.947	2.6984	2.4982	5.2004	6.3817	4.2865	4.2692	5.3149	3.7291	2.3481	5.0053		0.827588	3.92647
11.5567	5.1203	2.9161	3.7683	3.4459	3.8623	2.6185	2.945	2.6146	2.3732	2.8404	2.1289	2.1427	2.9887	4.0611	2.1447	3.0561	2.4498	2.5881	2.6968	2.6051	3.5052	9.4652	3.7828	2.3055	5.2718	5.2144	5.0195	5.6156	5.1732	3.5811	4.9423	4.0665	3.9652		0.836206	3.675
11.6758	5.2963	3.6323	3.0908	2.7181	2.5523	4.0891	6.4223	2.9977	3.3449	5.2526	1.7976	2.9368	5.1795	3.0038	4.6181	2.4118	2.9747	2.8733	2.6765	6.0495	4.3944	8.047	6.162	3.9903	2.5535	2.4466	4.8486	3.5116	2.4596	4.9812	3.6209	2.6701	3.5494		0.844824	3.85313
11.795	3.5936	4.7071	4.2662	2.5364	2.4483	2.9591	2.9325	3.0062	3.2527	3.689	2.4242	2.7788	2.6471	2.9224	2.793	3.3086	3.9347	2.6344	2.559	3.8629	6.1339	5.972	5.0793	3.8779	3.644	5.4876	3.6515	4.2809	4.4691	2.0598	4.9247	2.8131	2.2903		0.853449	3.57395
11.9141	2.4133	2.4585	5.2341	2.6056	3.1823	3.4634	1.8948	4.4633	2.6554	2.3885	3.1475	3.909	2.499	3.1658	2.4235	4.7064	1.8978	2.2516	4.0586	4.6639	2.1479	4.8635	5.4593	3.5552	6.0765	9.4977	3.7565	4.3594	2.809	3.2814	4.0768	2.9449	3.1154		0.862066	3.61896
12.0333	2.9506	4.3968	4.5498	2.2614	5.306	4.9054	2.7361	3.8292	2.9606	4.5205	2.9368	2.4518	2.4199	2.1604	2.3604	3.67	2.1094	2.9681	3.2239	3.6034	4.2164	9.4255	7.755	3.3964	3.8937	7.3565	4.0574	2.8612	2.4299	2.7991	2.9404	4.1951	2.9543		0.870691	3.7758
12.1524	2.407	2.6026	2.7552	3.2898	5.8409	2.2615	3.8902	2.168	3.2363	2.2037	2.4148	2.6128	3.4551	3.674	2.858	3.2264	3.1327	3.4299	4.1147	4.0097	3.6454	4.6034	4.7265	3.8442	3.8868	5.6816	2.6421	2.783	1.9317	2.5039	4.2467	4.584	2.8947		0.879309	3.38052
12.2716	3.3379	3.1562	3.7334	4.1261	3.9547	2.9012	3.3424	2.5975	4.3425	3.5138	3.1179	4.2793	3.4825	2.8051	2.5755	2.3711	3.1556	2.3084	3.1379	4.5874	3.0537	6.0192	3.932	3.7054	2.0936	4.6252	5.3105	2.4151	3.1313	2.7927	2.8385	2.517	1.9184		0.887934	3.36906
12.3907	2.9085	2.9492	4.1475	2.9062	4.269	3.0649	2.8421	6.3423	3.2513	4.7716	3.6432	4.0656	3.9235	4.4241	3.1047	1.9522	2.5074	5.1945	4.1886	2.5648	4.4035	6.9738	3.8624	2.7314	4.0082	4.6029	4.396	2.2011	3.576	3.6682	1.9619	2.6149	1.8891		0.896551	3.63365
12.5098	3.2602	3.3934	2.73	3.4532	3.7446	2.7965	5.0425	3.6572	3.658	2.2177	3.5591	3.3789	3.1011	2.2548	2.4755	2.0795	1.9816	1.9716	3.9097	2.6245	3.7934	2.9097	4.0205	1.9518	4.5464	2.9759	3.6241	3.4816	2.991	2.4421	3.1106	3.0424	1.9502		0.905169	3.09483
12.629	4.5279	4.0148	3.545	4.2056	2.0266	4.3927	2.3735	2.5525	2.081	3.15	2.5951	4.6317	3.125	5.1686	3.756	3.4755	4.5436	2.1448	4.6734	2.8585	3.9217	4.0066	3.9686	1.8842	4.0271	3.6281	3.3076	3.0548	4.1529	2.0775	2.8089	2.1218	1.9593		0.913794	3.35639
12.7481	3.4928	5.5101	3.7905	2.6261	3.5957	3.8475	4.9285	3.4821	2.4302	3.6604	2.6499	4.3294	4.3433	3.3274	2.5906	2.2546	5.1749	2.386	2.1563	4.2406	4.0706	3.082	7.172	4.1081	4.3497	2.1845	2.9632	4.11	2.5962	3.4349	4.132	1.9974	2.0258		0.922412	3.54677
12.8673	4.4774	5.1724	5.179	2.0455	2.8547	2.0853	5.3031	3.8468	2.1291	3.5552	2.8044	7.5198	4.0595	3.2502	5.9188	2.0637	4.0062	2.5012	1.8998	2.6491	3.6224	2.0884	4.8893	3.1496	3.9141	8.0276	5.0444	3.1554	2.5047	2.5517	2.9924	2.3463	3.1061		0.931037	3.65799
12.9864	3.6551	3.5208	3.3764	3.7305	4.3247	2.9907	4.664	3.1411	2.6086	2.1805	3.26	6.1531	4.151	2.1238	2.371	1.9435	2.5502	3.1951	2.9828	2.7576	1.7865	5.9236	8.5349	4.7232	4.0013	3.3216	2.9035	3.1191	4.5024	3.3586	2.8011	2.1859	3.1955		0.939654	3.51629
13.1055	4.3327	4.7079	3.0996	4.3253	2.4652	3.7642	3.913	2.9377	2.6938	2.9697	3.4396	5.3524	4.6785	3.4393	1.9667	3.4821	3.8015	2.4671	3.2009	2.3963	2.5979	2.6932	5.6579	4.9702	2.9584	3.9641	2.8472	7.0526	5.0304	1.9619	2.8261	2.5319	2.1019		0.948272	3.53416
13.2247	3.9122	2.8202	3.1236	3.8651	2.5669	2.9876	3.5655	3.5707	3.0779	2.6021	3.9359	3.4396	4.8987	4.2848	3.55	2.3876	2.7627	2.0115	1.9439	2.6216	2.2166	2.7859	3.3048	2.4273	4.8732	5.5828	4.099	3.911	2.9838	2.42	1.9727	2.2417	1.9417		0.956897	3.17238
13.3438	2.7831	4.9111	2.983	5.0142	2.5006	3.4566	4.5436	3.0197	2.6989	3.5924	5.5123	3.5082	5.6924	4.2534	4.657	3.956	2.4702	4.0993	2.4916	3.1552	2.1963	2.0091	3.3479	7.9945	4.9861	4.9099	7.046	5.3499	2.6154	3.7984	1.9877	1.9366	3.7482		0.965515	3.8553
13.463	3.8672	5.0441	2.7208	4.5981	4.3349	4.8081	4.9063	3.8943	4.5753	4.6569	4.8297	5.8025	3.9428	7.9091	3.4525	2.4087	2.6493	4.0985	2.5075	2.5955	2.6572	4.5264	2.8283	3.1108	6.6149	4.861	4.7815	3.2706	3.0863	4.2977	1.93	2.0499	2.083		0.97414	3.93029
13.5821	5.2584	3.2104	3.0275	3.4151	2.1653	2.3929	4.7751	4.1989	2.2512	4.0302	3.8205	10.8401	6.5992	2.9132	4.8574	2.2964	2.5271	1.9126	1.875	2.1637	2.1656	2.57	2.1646	3.9397	4.4958	3.5687	3.0325	3.7324	2.4176	3.5936	1.7876	4.0794	1.8832		0.982757	3.45336
13.7012	4.8604	4.2826	2.7645	2.6455	3.404	2.9627	4.4678	3.0655	3.546	3.0744	5.2185	5.2171	5.056	3.4817	4.4822	1.8467	3.1289	2.1675	4.0118	6.6855	3.4905	2.3679	3.9235	2.8256	5.0088	2.8493	4.8377	3.1894	5.4104	3.429	2.9359	2.0776	2.4876		0.991375	3.6728
13.8204	2.442	1.9943	4.8316	2.4493	4.7103	4.0571	2.3124	1.9147	4.913	2.8418	5.5684	4.8663	2.981	3.7674	3.3574	3.4082	2.6891	2.3699	3.7947	2.9876	2.8432	2.8373	5.8263	3.1199	3.255	4.7154	2.7345	4.0262	4.1214	5.7893	3.3757	1.9637	1.8065		1	3.47488

## Sheet: Image24
X0	Y0	Y1	Y2	Y3	Y4	Y5	Y6	Y7	Y8	Y9	Y10	Y11	Y12	Y13	Y14	Y15	Y16	Y17	Y18	Y19	Y20	Y21	Y22	Y23	Y24	Y25	Y26	Y27	Y28		Ap-Basal	Avg intensity
0	18.4	29.9787	27.4058	16.2461	18.8727	26.3744	17.8798	25.2459	24.2364	29.2796	32.9747	28.0402	18.2714	21.7273	24.2261	36.729	34.6696	19.7768	30.4022	29.0747	24.3074	27.1707	19.9871	38.8438	46.313	44.424	36.4633	43.6413	32.0465		0	28.3796
0.1191	17.6738	28.8522	26.2521	21.343	20.4201	24.9506	17.8285	26.1586	27.0865	24.4317	28.0727	26.161	18.9692	21.7621	27.8467	38.847	33.7536	26.2982	25.6098	33.2004	28.9696	29.1813	27.4621	46.4029	46.869	36.948	32.9266	45.057	39.7958		0.00649124	29.2803
0.2383	24.4752	28.3002	35.9085	20.5939	15.6689	25.6455	24.4464	22.3263	27.2663	33.2282	35.9598	26.4401	22.3895	26.4863	31.469	43.8257	33.683	24.5325	30.0315	26.4779	29.6559	33.5399	33.6108	46.3797	60.302	39.499	37.6187	56.8809	43.7415		0.0129879	32.427
0.3574	22.0047	31.9694	33.4872	14.8694	16.3437	27.3689	26.4671	19.2914	26.2515	32.9882	30.3262	24.2074	24.4579	23.9404	38.7639	44.4922	37.5275	22.7887	41.3093	29.9043	23.404	36.7655	34.6349	43.8986	52.368	45.292	32.2396	68.7624	39.3716		0.0194792	32.6033
0.4766	16.9069	36.5908	38.6577	10.8917	14.1395	31.1236	30.0915	21.1164	27.0746	21.2809	33.6326	29.6094	23.156	23.6972	32.0736	42.7917	37.8986	24.7089	38.0004	28.5284	20.6592	51.4199	36.9531	41.4578	41.125	44.086	37.8873	60.6421	42.7436		0.0259759	32.3774
0.5957	22.3641	36.7138	28.2857	12.472	13.5303	21.4409	27.9335	15.9861	21.9767	30.6199	30.0728	29.0685	18.6667	21.9095	28.4008	36.2132	35.4269	35.0537	37.2459	25.6988	21.6381	52.6496	44.627	38.4928	40.302	42.661	36.0146	53.9474	46.4303		0.0324671	31.236
0.7148	26.9005	36.6815	22.7856	17.515	17.035	17.2624	29.027	18.7527	27.0278	26.0632	22.7009	29.2726	17.2885	23.4691	30.2515	42.0623	29.4387	29.6372	40.658	29.1368	17.652	45.7056	50.4265	51.3064	45.999	53.632	26.2592	50.335	37.8368		0.0389583	31.4524
0.834	25.2846	38.4603	26.9004	10.4427	16.1761	19.0391	27.5318	15.7476	32.1665	34.2393	24.1763	31.9219	21.5559	24.7712	26.9473	42.5881	33.9579	37.3164	39.9666	31.5455	30.0571	62.8009	47.9454	58.8799	45.913	60.732	33.1344	50.1433	43.0078		0.045455	34.2534
0.9531	17.1729	33.0372	22.3788	9.797	10.6526	18.0134	28.3551	15.2805	30.4301	32.426	25.919	27.6247	25.9278	27.6516	31.3298	38.0442	27.393	39.5618	40.2385	38.3077	38.3184	67.7909	50.1357	63.435	51.083	54.619	30.8591	38.2924	44.6267		0.0519463	33.7483
1.0723	16.4298	36.0641	23.6777	10.4335	11.9604	16.622	22.1296	24.0969	30.3711	29.0959	31.7587	26.8799	19.4811	23.9806	27.859	34.2521	23.0049	33.1362	43.6098	52.202	41.6536	57.5373	43.614	67.7795	50.134	59.7	43.0496	32.7277	34.6099		0.058443	33.3742
1.1914	16.669	33.7995	18.3631	10.5344	10.2852	25.6769	20.9832	23.174	34.8503	28.0249	27.8271	29.6854	20.1399	22.3765	27.9761	43.0493	27.3751	32.6974	36.4357	46.7878	46.035	71.3703	38.5004	67.4078	58.73	63.115	46.093	40.6677	33.3563		0.0649342	34.5513
1.3106	16.4303	31.8465	19.4122	10.3322	10.2199	18.7902	27.4347	21.4673	32.8629	31.5037	24.2758	27.4526	15.3379	20.2404	26.4064	44.4524	29.4943	31.9302	37.1949	43.2027	45.8899	72.866	36.8065	56.0364	62.411	61.924	46.0315	45.2372	37.2361		0.0714309	33.9561
1.4297	17.6623	27.4068	16.2583	7.8933	9.6934	18.355	17.9627	18.128	34.1758	31.2134	30.3021	22.3912	15.9556	21.6942	30.6046	44.2171	26.1613	39.3797	37.6614	45.6955	35.9745	67.5882	30.7368	56.6353	53.403	66.814	49.9396	43.5442	34.7516		0.0779221	32.8344
1.5488	23.8062	33.2947	23.1467	9.3501	8.8905	19.9115	23.0036	18.6326	25.771	29.7402	34.7546	19.7103	12.8235	26.2373	27.5235	36.3566	30.8439	42.166	38.2331	47.6649	43.9795	73.0021	33.5155	49.8211	54.926	84.008	54.5429	45.6353	30.9589		0.0844134	34.5603
1.668	22.6026	36.2782	31.8572	10.3957	7.4693	20.3321	25.5708	19.1	25.6223	27.8286	31.9547	21.3398	12.7063	27.1419	29.1914	30.0622	26.4387	33.1516	25.7705	38.4891	44.8215	69.6968	31.9625	49.2331	62.354	86.637	46.917	46.4459	35.4609		0.0909101	33.6839
1.7871	18.108	33.5255	21.0208	11.0255	10.345	30.7278	27.4284	26.2985	24.8174	28.6464	29.1047	19.7891	13.7045	28.6362	31.5131	31.0728	27.7968	37.2967	29.217	44.8653	44.1154	58.5369	30.1103	49.1254	65.468	92.531	39.7837	50.1144	32.9456		0.0974013	34.0576
1.9063	14.1378	26.5758	14.833	7.3618	6.4752	17.2213	22.1586	24.5283	32.8992	28.0357	20.82	15.1654	14.3881	27.7199	28.7039	27.2741	39.0506	35.9411	24.2503	49.9339	32.0492	44.9997	28.5989	52.9078	65.471	92.868	34.0185	37.7937	40.3931		0.103898	31.2612
2.0254	14.4439	20.0005	19.9491	8.9489	9.3842	19.9068	23.7569	19.5183	30.8404	24.8417	21.7166	16.6838	12.8438	23.594	33.3907	21.7691	28.3917	35.932	22.6602	47.0714	25.9831	50.1183	26.9885	59.1565	80.994	104.101	38.0343	43.0712	46.7886		0.110389	32.0993
2.1445	19.5044	19.5386	21.6057	10.3167	7.8858	24.3974	21.4096	20.6376	31.2495	26.7207	26.5504	14.937	10.1699	21.8003	27.2047	20.9242	25.3333	26.7635	22.4205	36.7459	23.8121	48.4738	24.4506	61.2748	94.398	93.71	46.802	45.5564	45.448		0.11688	31.7256
2.2637	18.3794	18.2553	12.1859	9.9937	8.594	24.3556	25.1103	17.9207	32.3112	25.7544	24.0492	16.5367	16.4056	23.9903	33.2784	21.3262	27.8705	27.9721	20.4376	37.2863	18.7062	41.2461	22.9626	72.1523	93.308	73.568	54.4215	43.7127	52.0646		0.123377	31.5226
2.3828	20.8343	21.3926	14.5729	7.6876	7.5142	23.6617	27.3036	26.3953	35.7127	28.6196	21.2858	24.0336	16.5379	19.7729	36.5478	18.0706	30.1968	32.0403	28.426	39.1063	29.3289	38.9743	25.1894	78.8435	112.407	69.299	47.893	46.6207	58.1446		0.129868	34.0142
2.502	16.5183	15.6387	16.6745	6.1537	10.4948	22.8647	25.9463	25.3409	30.2242	26.1995	28.7171	17.4671	10.6998	16.3378	39.6452	28.5649	28.1495	21.4382	23.5997	33.363	27.0311	34.4836	25.8129	66.5641	111.817	87.994	51.1359	49.699	48.4776		0.136365	32.657
2.6211	17.6781	12.6155	14.5328	4.8938	4.3399	19.0898	25.0746	14.1388	36.9643	28.043	24.2051	19.8244	11.7632	16.7835	31.7491	29.3438	26.8958	21.9312	16.0865	39.9014	29.4474	32.4751	18.7311	62.1984	103.347	100.624	47.1253	36.4171	44.0631		0.142856	30.6994
2.7402	17.8302	13.548	15.831	6.5399	6.0673	17.6232	29.1782	13.5179	29.9714	28.4994	18.6944	16.244	8.1263	12.5875	25.7399	23.9858	27.3525	26.5627	10.8111	47.408	27.7264	25.0428	19.7603	57.3861	95.284	87.646	36.8771	37.8451	43.0984		0.149348	28.5098
2.8594	12.6053	17.3485	15.7592	8.1549	8.2219	20.9868	36.0619	18.1488	42.5435	26.9433	27.6376	16.3192	9.3524	15.0012	33.3069	30.1808	28.1004	25.8091	18.6794	45.349	35.1533	21.7876	17.8059	63.7329	95.161	77.106	43.3315	34.1086	45.2565		0.155844	30.688
2.9785	18.9487	18.6913	10.823	5.7393	8.6809	26.7403	25.7783	16.7831	38.0185	28.6632	25.9876	19.1043	16.5713	16.0384	27.7354	27.7881	38.7461	22.9039	13.6723	40.4648	39.219	22.2944	17.0394	69.2586	83.053	78.259	37.7898	35.5084	38.668		0.162336	29.9644
3.0977	13.3447	18.2215	13.1921	9.2546	6.485	26.0261	31.9894	10.31	44.437	36.3165	23.1722	14.1376	11.5683	10.0558	26.2352	26.223	33.0826	27.6159	20.8014	40.2018	35.1509	18.4011	21.1831	61.2482	74.375	80.387	34.7815	35.3041	38.8456		0.168832	29.0465
3.2168	14.1157	17.5203	9.4626	5.9338	8.3574	23.4629	30.8141	14.7378	53.3902	37.2151	23.7397	10.932	8.0652	12.3314	29.2496	25.4671	32.1572	30.5308	16.4478	36.1207	27.0772	19.9724	23.7526	55.7714	70.847	60.043	30.2464	39.7248	42.8179		0.175323	27.9415
3.336	14.5471	17.8002	11.0344	3.6804	9.6444	23.8087	32.139	19.3533	50.492	29.3615	17.8008	7.9659	12.2658	13.3314	27.6348	21.9181	29.6881	24.0201	13.6924	44.2581	19.2452	17.491	24.8546	45.3436	90.331	46.556	27.3002	38.7013	33.3822		0.18182	26.4704
3.4551	14.9361	16.6255	16.9199	4.5321	10.3848	19.3198	26.9173	8.3223	41.573	25.5182	17.987	8.0366	10.1052	15.3318	28.2776	24.636	26.2654	29.8564	17.2681	34.5847	13.9506	13.7196	16.0705	50.6016	80.622	48.139	30.7705	39.7799	34.5403		0.188311	25.0204
3.5742	15.5868	18.0964	14.8149	5.1093	8.3132	15.0021	30.0549	5.8663	40.1409	21.197	14.724	9.255	8.6548	11.1425	27.8264	30.2387	23.6096	26.827	16.7747	33.4032	14.3043	21.2224	26.0457	42.924	71.287	48.332	22.4822	27.391	29.7165		0.194803	23.4601
3.6934	12.64	14.8636	11.1762	4.6833	8.6819	14.89	29.237	7.0765	44.2375	25.4511	17.9961	11.9593	9.7948	9.3544	27.405	32.601	29.0918	15.735	18.6454	34.0211	17.967	21.459	28.9145	41.4582	67.637	36.009	19.2362	22.7698	38.6849		0.201299	23.2302
3.8125	9.6977	12.603	12.4457	5.6409	9.7347	18.6998	29.7492	9.0549	37.666	20.3713	19.8158	11.8247	8.6722	10.0885	27.5939	21.5386	32.7586	17.9657	18.7369	32.2589	16.0761	20.6316	23.8983	51.8673	51.009	35.315	20.6839	29.2339	33.8576		0.207791	22.3962
3.9317	10.9557	19.1216	11.982	4.839	5.9684	12.8711	27.5651	11.0326	31.8686	19.8577	21.7526	10.6984	10.4063	11.9094	27.1478	16.8863	33.6319	14.1463	19.7966	29.2889	18.1139	20.2709	28.1239	44.2371	53.525	25.096	18.7697	23.5992	35.218		0.214287	21.3338
4.0508	9.9325	22.7324	14.059	4.0919	6.6507	11.0264	23.8895	8.4535	25.9924	16.3483	19.3727	15.3204	9.9123	9.1908	15.7843	15.2959	24.6422	14.0457	17.3112	21.4322	22.3661	21.723	33.356	46.5938	46.383	23.053	16.4449	15.1045	33.5019		0.220779	19.4486
4.1699	13.7828	21.2054	14.4225	5.7381	6.3279	9.1451	23.8572	10.2425	28.9993	13.3588	14.3012	15.071	8.549	8.1906	20.7077	17.8985	24.7425	14.092	22.869	16.2163	28.114	20.9403	28.3943	49.6798	39.847	23.551	22.5259	13.6816	31.7608		0.22727	19.5935
4.2891	9.191	22.6681	9.0541	5.7907	5.3582	13.9216	32.2437	9.033	36.4765	11.1926	14.095	15.4575	8.3371	8.634	20.9503	22.953	29.6552	16.0406	22.5501	17.1803	19.0047	13.8249	23.3986	42.0887	34.055	27.097	29.5052	13.0115	41.4084		0.233766	19.7992
4.4082	10.5712	20.1579	9.6109	3.4553	5.8649	12.4078	30.1975	8.5022	38.0163	13.2342	19.7064	13.1522	10.1706	11.9405	18.1585	21.8846	21.6085	19.5856	18.3762	22.669	17.5239	14.8087	28.1165	45.1527	29.429	31.531	23.5637	11.5599	30.8154		0.240258	19.3714
4.5274	9.064	19.8659	10.4035	5.295	6.4845	12.9105	27.358	5.8697	27.5098	13.869	14.7485	16.4694	12.1708	10.4643	19.4109	24.653	13.845	20.1633	16.7459	21.2988	17.8099	16.0865	31.45	36.0952	24.485	30.171	19.2695	9.7256	25.56		0.246754	17.9053
4.6465	11.0303	19.7222	7.5567	6.0428	5.7396	14.8516	24.9557	5.9228	19.9459	12.8441	11.6355	17.8705	9.7095	6.5636	23.1328	25.8941	14.3744	18.5611	15.7943	19.0372	15.3171	9.3328	29.4084	31.0791	25.877	24.222	20.209	12.5004	24.4122		0.253246	16.6739
4.7657	10.4364	18.1793	11.3042	9.4906	6.2233	17.2268	23.4585	8.1247	19.4556	11.6744	8.8094	11.7912	6.7557	9.5896	14.1033	19.5669	17.6571	16.1338	19.144	17.8224	18.122	9.0511	27.9654	38.0268	26.886	22.935	19.3211	11.5761	23.8206		0.259742	16.3673
4.8848	10.4754	17.9104	6.4703	5.3204	7.3286	12.9019	23.4319	5.9954	22.5664	15.4079	8.741	10.0493	7.4128	10.8802	19.3608	18.3831	16.1139	12.1396	10.1048	16.3508	16.9988	9.9173	26.175	27.5542	24.894	21.165	15.9187	10.5259	22.3978		0.266234	14.9273
5.0039	13.634	21.3298	8.5426	3.4965	3.3858	10.0205	21.793	11.2788	22.0327	16.4027	12.8761	9.3731	7.0655	8.2537	21.7512	18.8959	16.9331	18.1759	12.1125	16.0881	20.1868	10.5767	33.4831	30.2104	16.151	27.09	13.6361	13.1792	21.777		0.272725	15.8528
5.1231	8.8573	16.0068	8.9026	3.9263	3.5323	9.9792	24.9898	7.4711	23.9911	13.1334	14.1089	10.5299	3.7784	13.8937	27.018	20.8715	20.0912	14.181	12.2861	18.9918	18.0254	8.155	27.7146	31.608	15.411	18.891	13.9897	9.9274	16.4607		0.279221	15.0594
5.2422	8.4946	17.6481	10.0886	5.532	5.1511	9.4431	27.5111	10.0658	20.607	14.2042	7.9667	11.7622	6.7661	11.2294	19.0367	20.5168	15.8198	11.778	11.0644	20.3772	14.5517	11.3603	23.1383	29.9178	13.473	25.196	19.0252	10.9286	15.2371		0.285713	14.7549
5.3614	9.2983	21.2063	10.8306	6.0745	3.7866	11.6252	22.1274	9.1177	18.2246	13.163	8.0531	11.5432	5.3821	10.2053	18.2632	19.7413	16.2147	13.4425	11.2784	13.324	14.419	19.5937	24.1048	23.0602	10.978	16.255	18.5785	14.8063	16.6936		0.292209	14.1859
5.4805	9.1422	12.2846	11.1452	3.9285	4.581	12.3799	19.4372	7.3851	7.764	17.8788	7.2421	9.9358	6.501	9.5435	18.5467	23.6056	18.7692	11.8885	7.4951	12.6453	10.739	12.5166	16.4838	14.2473	13.682	19.416	16.8788	9.894	16.2577		0.298701	12.4902
5.5996	14.2362	11.1225	17.0379	5.0132	3.3295	10.8862	19.3592	8.2	8.8714	17.5108	7.8076	8.0859	7.2576	8.5224	18.9892	18.1617	17.5359	10.3211	7.8618	13.0707	10.9493	7.8973	14.6834	12.9781	14.379	15.912	16.7925	4.7172	18.4547		0.305192	12.067
5.7188	11.3358	11.2225	12.2113	4.4546	5.1931	9.8221	17.7182	10.8095	13.3607	11.8451	9.7337	11.524	7.8004	9.564	16.8444	17.6172	14.6627	9.1538	9.0962	11.8126	12.6528	8.5624	14.9325	12.0192	15.763	13.185	20.0415	8.5817	14.6751		0.311689	11.9378
5.8379	11.117	11.988	15.7617	5.6428	3.4558	8.3385	16.5787	9.8086	13.1194	13.9799	6.9367	11.2706	6.6125	9.5795	16.0362	23.3536	21.4708	10.5228	7.1587	12.2583	13.6166	8.5496	14.9663	12.707	12.811	20.279	15.4906	4.6649	16.7954		0.31818	12.2369
5.9571	14.6052	10.2082	10.5724	5.4034	4.2413	9.4004	13.7523	13.6778	5.8109	14.9433	7.7008	6.2582	8.9055	13.8319	13.5512	24.0715	16.486	10.0724	5.4973	11.6231	11.8668	8.9269	14.9391	14.4512	13.541	15.508	14.8519	7.4509	13.0577		0.324677	11.5588
6.0762	15.8571	14.7291	12.6281	5.1326	5.4372	10.1557	18.8246	13.7744	7.1993	9.1091	9.4554	6.6207	6.5871	9.5965	15.2742	25.5865	14.5202	13.1096	5.493	14.879	9.7943	5.8272	18.2316	15.0619	17.702	9.058	16.5486	6.7534	10.7338		0.331168	11.851
6.1953	12.3678	10.3722	17.1735	3.7164	4.0303	4.6829	18.0944	7.5253	11.3605	6.3389	9.4362	7.8066	5.8755	8.3373	18.5913	17.0091	9.8142	12.4896	7.3079	11.7157	11.2925	6.3294	23.6963	9.4007	21.472	11.824	11.6445	6.106	10.3341		0.337659	10.9016
6.3145	8.4391	14.8216	19.9196	5.1791	4.6202	4.6961	15.6083	5.0769	9.7101	6.3077	11.1518	9.9332	6.339	8.3941	19.189	16.0915	7.3456	9.8958	4.2873	10.969	7.1416	3.0113	14.6193	10.1218	20.079	9.717	12.2299	5.5222	10.2359		0.344156	10.0225
6.4336	12.2983	8.549	12.2713	5.0903	4.8233	8.3512	13.8807	9.2576	9.8761	7.1306	13.8436	8.2788	7.3847	6.2679	17.5923	16.2335	7.3805	14.3655	8.8617	10.5341	7.3848	4.6047	17.1237	14.5763	16.349	11.695	6.9922	5.0659	8.653		0.350647	10.1626
6.5528	12.3667	12.505	15.5474	4.3716	5.353	7.0561	10.7588	9.2222	7.3725	8.4944	14.0601	8.2327	7.6606	3.4175	14.5141	16.4432	9.4508	11.5121	5.6443	10.5386	9.9194	4.2583	12.4889	15.583	13.86	10.399	6.9537	4.0164	8.4488		0.357144	9.67066
6.6719	9.9153	10.9304	17.2461	6.7714	6.2596	5.4314	10.496	7.3247	9.2695	8.9598	8.6909	9.2569	6.1968	4.1081	13.2277	17.3855	9.9302	12.415	5.5584	10.5114	7.6954	4.9547	11.3703	12.0469	9.575	5.384	9.48	3.4254	7.7701		0.363635	9.02024
6.7911	10.3413	11.0498	10.5616	3.0959	6.8956	5.4816	10.2812	7.1913	11.3509	7.892	8.9328	8.3749	7.9816	3.0161	11.6473	16.1147	8.9646	16.0714	9.7031	9.8115	12.6124	6.5233	9.6523	11.2964	12.773	9.162	9.8118	5.9253	9.3869		0.370132	9.37595
6.9102	10.8714	14.4798	10.359	4.5196	6.3907	5.0439	11.8779	7.5647	8.4777	8.7908	10.7619	8.622	6.0695	4.6441	12.1452	15.5041	10.8232	12.8729	6.7547	12.9906	8.7887	5.2017	7.7496	11.4958	11.2	10.085	11.3645	7.0651	4.7048		0.376623	9.21444
7.0293	14.3912	14.2666	12.8649	4.2814	5.972	4.1049	13.5888	8.0545	14.7866	5.3379	8.3974	11.1885	6.923	5.2338	12.4029	15.7045	12.7828	10.431	3.6471	8.702	5.8018	4.1352	13.8449	10.3881	18.644	9.498	17.1857	3.2713	6.2913		0.383114	9.72835
7.1485	10.7827	10.5798	9.4353	3.5774	8.2791	5.1603	10.8083	9.402	9.7352	10.3908	9.4615	8.7155	5.4224	6.3294	9.5668	9.0465	11.5034	8.5931	4.8833	5.2668	5.3236	5.4225	10.019	8.322	10.071	12.829	18.7133	2.8002	7.4472		0.389611	8.54784
7.2676	9.306	11.1944	8.5438	4.4042	6.2114	4.972	8.9141	7.2385	11.4779	8.444	10.3498	6.0678	7.2827	4.0202	10.2192	17.7199	9.8632	6.8479	6.036	10.0909	5.3146	7.3605	7.1203	11.8139	9.722	12.843	20.0332	4.7976	7.2925		0.396102	8.8104
7.3868	7.2409	12.4231	9.6462	3.3626	6.1241	4.2784	10.9293	8.8555	10.3998	10.4339	10.6276	5.6963	5.7972	5.0141	16.0914	12.7491	9.4564	7.3613	5.026	8.6556	4.9216	4.6289	6.1408	12.1121	12.238	13.245	17.9881	7.7773	5.7624		0.402599	8.79252
7.5059	9.7494	13.8288	10.4465	3.5476	4.5321	6.8397	15.3836	12.3421	6.2025	8.9164	12.2396	10.6924	7.206	3.4101	16.5221	12.1958	7.5181	7.1996	3.1425	7.906	6.5568	5.8508	9.2358	12.0497	9.981	12.772	20.8478	5.6343	8.0237		0.40909	9.33699
7.625	8.7643	7.2363	8.6972	7.3438	5.4154	4.4383	14.2169	8.2929	4.7547	6.986	12.6283	12.6501	4.3215	4.5167	16.6745	10.8662	9.5411	7.8744	5.337	9.0043	11.7011	5.171	9.5962	13.1046	7.977	9.357	25.5307	4.1707	3.6778		0.415581	8.96021
7.7442	8.5554	8.7699	8.0367	3.662	5.2821	4.125	10.7114	5.1221	9.6634	5.3745	11.2218	10.2899	5.2775	4.5164	11.8471	8.997	8.7675	6.3188	6.3494	12.6545	4.4076	4.0603	7.1833	11.8523	12.639	15.437	23.8917	3.7946	6.4537		0.422078	8.45731
7.8633	8.0213	8.2829	6.4834	3.0503	5.3456	6.1811	9.3496	6.4603	8.8902	8.6761	19.7372	6.5532	5.3141	5.5897	9.1752	11.3252	12.0271	6.1962	6.0664	8.1907	7.4882	6.2992	6.7554	16.3847	11.883	16.649	25.9858	5.0989	11.3945		0.428569	9.27084
7.9825	9.2493	8.5479	10.6775	2.7154	4.7775	6.1273	10.4577	8.5405	6.5861	6.9648	17.149	6.6046	5.9844	5.5485	9.6246	13.9105	14.6878	3.723	5.354	6.583	7.3882	4.4243	9.3911	22.4395	13.806	17.311	22.0939	7.7015	9.4215		0.435066	9.57898
8.1016	7.5578	8.2758	8.5205	2.6722	4.8856	5.0754	8.6099	5.8349	6.605	4.046	15.896	9.6997	8.5421	6.5726	12.2445	15.4877	12.2926	3.7743	4.5492	4.49	9.1515	5.1137	7.5541	15.2361	9.962	17.092	17.4044	4.8842	7.5876		0.441557	8.6075
8.2207	8.083	9.1832	13.0956	3.1733	3.7195	6.3716	4.4834	4.0209	7.6273	6.5632	16.03	9.7997	9.4432	4.4532	10.7686	15.1964	12.5001	4.9807	6.522	2.6305	8.3402	3.2901	6.7407	21.493	14.37	16.058	21.0242	4.4151	7.8552		0.448048	9.04248
8.3399	8.387	8.1449	10.5908	3.6383	4.3856	5.1567	6.492	5.5202	8.9716	8.6972	13.8629	9.1366	6.4834	4.9942	13.3639	19.9441	16.3864	4.6672	5.9554	3.9498	6.5821	3.9008	6.2668	21.5513	10.394	14.382	19.7953	4.0278	5.1956		0.454545	8.99393
8.459	9.8453	9.8679	7.6068	4.4032	6.2313	4.9632	5.6154	5.4031	9.7512	10.0896	7.6103	9.0701	5.0537	4.8971	15.9238	20.253	15.229	4.843	3.6552	7.7364	8.1819	3.8064	8.8866	21.1166	18.096	14.264	15.3327	3.9582	4.011		0.461036	9.16214
8.5782	9.899	7.9518	10.6737	5.2471	4.1492	5.0687	7.9564	6.2368	5.2281	10.5045	7.2521	7.1932	5.0517	4.5047	7.2949	16.7565	14.0933	4.2397	4.0884	13.4764	6.4908	6.9274	5.8434	23.2057	14.536	14.292	15.7648	5.0833	5.1066		0.467533	8.76263
8.6973	6.6538	4.5908	12.1101	4.4725	3.3864	6.5313	7.4243	8.9424	5.8572	7.128	10.0406	5.514	5.1512	8.8879	5.8559	17.1594	12.1085	3.1058	5.9256	10.9244	5.5395	5.8018	4.9542	23.8881	10.06	17.314	11.5822	5.4629	6.0169		0.474024	8.35827
8.8165	5.388	5.1478	7.6009	3.8941	3.6297	7.4369	7.998	5.2721	7.1762	6.6597	6.2714	5.8283	3.8036	7.1001	6.9329	20.6202	22.7012	4.966	5.5405	11.8323	4.2202	3.4275	7.7486	12.4038	6.635	15.488	10.0167	2.8751	6.696		0.480521	7.76934
8.9356	7.9618	9.5379	9.311	5.8069	5.3242	4.6965	9.9306	5.6668	5.39	5.7268	7.2358	3.9564	5.3815	5.6611	12.5723	17.6517	20.5501	3.9238	4.3499	9.8633	4.697	4.7353	6.4673	17.346	12.439	15.2	5.9393	3.8935	4.0305		0.487012	8.11194
9.0547	8.5052	7.0804	7.6877	3.7881	4.5228	4.7207	5.6043	4.7209	6.0588	6.6859	10.4787	3.7502	5.3835	4.6341	13.4916	16.3098	20.4043	3.3264	5.4948	14.7121	4.5223	4.5785	6.8782	21.4459	8.856	12.452	7.8142	3.7819	2.9538		0.493503	7.95321
9.1739	5.8507	7.2081	3.2242	4.353	2.9478	4.5047	3.9332	7.4006	8.489	5.9996	13.6675	9.5735	4.6061	4.2281	13.7553	16.627	15.6353	5.464	6.1675	10.2603	4.4308	5.9873	7.9023	22.3264	9.07	12.16	8.8394	6.5104	3.4533		0.5	8.08881
9.293	5.4122	7.5927	5.4498	2.9375	2.9069	4.6249	5.5896	6.4091	13.0535	6.4914	12.2317	5.4099	3.8331	3.4127	10.0523	15.267	14.5237	7.0522	3.3903	8.0538	4.706	6.141	9.7789	21.9422	11.241	12.488	6.2758	3.6395	4.2646		0.506491	7.73004
9.4122	5.9868	8.7085	5.6977	2.2061	2.6658	6.0683	9.4488	5.6788	9.1092	7.1883	11.5504	3.969	5.6266	5.6561	11.6072	15.6364	14.3469	4.7761	5.271	7.1157	3.2026	4.5497	8.4318	17.4736	10.467	13.971	7.9576	4.2985	3.3042		0.512988	7.65413
9.5313	5.8398	8.6709	7.4415	2.1275	3.7437	7.3233	6.2847	9.4498	13.3883	5.5227	12.9148	8.8321	4.7248	5.4231	4.544	17.0348	17.2988	5.2571	4.6752	8.3425	5.8895	5.0475	12.4781	24.5463	8.433	13.658	6.8268	4.3377	3.4254		0.519479	8.39592
9.6504	3.7462	8.9312	6.047	3.5828	3.6025	6.2341	6.6596	11.2643	19.1635	6.8871	10.5615	7.8187	5.0253	4.7545	6.8759	21.1335	8.552	3.6135	3.2498	7.1163	6.5806	8.1223	7.7089	19.9248	6.411	9.548	6.9426	4.4472	2.9309		0.52597	7.84261
9.7696	4.6061	6.9771	6.8551	3.2677	2.4342	3.3216	5.2403	8.9812	16.6619	2.9468	12.8538	4.3393	6.8773	5.28	7.1313	19.3287	13.7453	2.6013	3.8839	7.1184	3.8567	5.8815	5.2095	17.4836	8.027	11.345	7.1611	2.1683	3.411		0.532467	7.20672
9.8887	7.0863	6.652	7.7608	3.0408	5.0508	2.7348	4.6444	6.7794	13.9385	4.0568	8.6614	6.4447	5.8655	4.3272	5.8562	25.5868	13.1355	4.1446	5.9414	7.195	3.466	4.5829	7.1562	16.4915	6.581	9.475	6.072	3.1726	4.2049		0.538958	7.245
10.0079	5.5193	5.2183	6.469	4.4935	3.0219	4.096	5.8755	8.7639	12.3088	4.9781	6.5724	6.6051	6.4513	4.2349	6.6712	35.0432	10.9328	7.3611	5.1811	5.5073	4.554	6.5544	7.2296	16.7146	11.78	11.781	8.3275	2.4703	3.6771		0.545455	7.87563
10.127	6.9334	9.1394	8.9784	4.3599	2.3148	3.9378	8.8737	9.0039	10.0217	6.1567	5.4155	5.1694	8.2378	4.6814	11.8167	32.8944	17.7965	4.2822	5.3236	5.9378	5.2285	4.0275	3.7444	16.7306	11.248	11.821	9.8686	3.3104	2.4455		0.551946	8.2655
10.2462	10.1523	9.1561	10.7231	4.438	2.2966	5.1283	7.7517	7.3578	8.5353	4.4563	3.7964	4.7242	6.6171	4.576	7.0975	26.9207	18.5587	3.8446	3.5646	9.1888	5.4852	4.7636	7.3896	16.0041	9.844	17.751	6.0551	3.7656	4.5905		0.558443	8.08734
10.3653	5.8655	6.7078	7.3007	3.6459	4.5935	4.6262	10.4391	10.467	9.1338	5.406	5.9952	5.4067	4.2782	4.5255	5.1326	28.7812	14.5652	4.838	2.4951	5.2015	6.1157	6.8168	7.3684	16.3251	15.845	15.529	6.779	4.2505	3.1999		0.564934	7.98738
10.4844	8.7909	5.272	4.7548	3.9807	3.9892	3.1852	10.1665	6.4097	10.0143	7.1543	4.4212	6.8129	6.9782	7.3612	8.5424	33.5905	10.9184	7.5894	3.5361	3.5284	5.9058	4.7285	4.8132	13.1977	16.147	12.953	8.3043	4.3759	2.1681		0.571425	7.91689
10.6036	4.8717	6.2556	5.4882	3.7875	4.806	4.0137	7.6132	5.0984	7.7034	4.594	5.8881	5.9252	5.7889	6.2716	6.5441	36.1496	7.1527	4.2697	2.469	5.3613	7.0693	3.5239	10.5865	10.8997	14.312	15.711	8.1918	4.6515	4.557		0.577922	7.57085
10.7227	5.2097	7.6932	5.7251	4.5174	4.9564	2.7382	4.752	7.8797	7.7758	5.4151	9.4371	7.4709	5.3546	3.8728	5.686	33.7665	12.0753	4.717	3.3671	3.7421	3.6575	3.536	7.4612	10.9397	17.172	12.099	7.1374	6.7974	3.8248		0.584413	7.54403
10.8419	3.7984	6.769	6.9972	5.5256	3.2679	3.9197	6.8961	6.3402	17.5917	3.2982	9.8905	4.0883	4.5132	5.551	7.7711	30.7796	12.3067	4.3946	4.3817	4.3359	4.8489	3.146	8.6371	10.2253	16.944	11.982	8.1902	3.5785	3.1021		0.59091	7.69209
10.961	4.0833	5.417	10.6604	2.6944	3.1386	2.8547	8.082	7.0796	11.23	4.2042	7.0023	3.0072	4.1179	4.2678	6.1713	34.022	9.0305	4.154	3.9119	6.0405	3.5172	2.5757	9.4717	10.2092	14.934	8.766	6.7423	3.1075	3.7272		0.597401	7.04208
11.0801	4.7992	5.1701	5.3805	5.6842	3.7067	2.9688	7.3231	8.8722	11.6364	5.6654	8.5822	4.6376	3.4388	4.0742	6.4419	33.5563	14.3512	2.1855	4.0458	5.4635	4.6117	2.5234	10.2676	10.3647	13.674	4.732	7.3617	3.471	4.1021		0.603893	7.21006
11.1993	5.8409	5.5463	6.266	5.8142	3.183	3.0754	6.6272	9.2479	11.1922	3.7726	10.2816	4.2312	4.4435	4.9507	6.3408	20.8852	13.2542	3.4534	5.9638	5.8199	4.4531	2.171	11.4287	10.1358	13.851	7.277	6.3272	3.2634	3.2736		0.610389	6.9783
11.3184	2.866	6.8809	11.0478	6.8076	2.5469	2.7688	4.6846	6.4429	12.9477	5.9056	8.052	4.9304	4.9285	4.9999	4.2055	26.5449	14.1668	4.8657	4.7891	4.2705	5.575	2.5516	11.1746	8.0467	10.022	6.935	9.4461	3.9778	1.9819		0.61688	7.04699
11.4376	3.0286	5.8601	11.0875	7.2307	2.9608	2.4057	3.9334	8.9319	11.9612	9.2841	5.9923	5.7608	5.3971	4.6711	8.3461	21.3297	15.5978	4.1776	2.7399	5.5529	4.8493	3.2013	8.6189	6.6258	8.798	10.221	4.4463	3.8285	3.8615		0.623377	6.92069
11.5567	3.0785	6.0544	7.8549	5.3355	3.1761	2.1404	6.7406	7.0222	10.1547	5.2992	6.3524	5.6643	4.2507	4.1177	6.8927	23.4117	10.5769	3.7026	3.4884	8.0308	4.8014	5.2144	8.5995	6.8419	8.052	12.879	4.4671	2.9807	5.5893		0.629868	6.64724
11.6758	2.4637	6.8231	9.7331	5.2213	3.6929	2.8289	7.4793	9.2593	10.4998	7.8264	6.1391	6.8302	2.7609	4.3556	5.9075	22.3608	11.7214	3.3541	5.6405	6.7362	5.0842	3.4836	12.0698	9.2871	9.905	11.275	3.9728	4.1339	2.778		0.63636	7.0215
11.795	4.5174	8.682	7.321	5.9036	2.6621	2.5312	5.2756	12.5827	10.2855	4.9033	6.2611	8.4392	3.9859	5.2149	4.9096	25.0868	10.7393	4.9065	3.8123	5.0655	3.8878	3.3603	7.4833	8.4309	8.713	14.881	4.2356	2.4961	4.0415		0.642856	6.91776
11.9141	7.6069	7.708	8.4119	4.153	2.6659	3.3782	4.641	8.2849	10.4909	5.928	9.5776	7.9955	5.2295	5.1383	3.8977	28.2165	14.3636	5.0887	5.0862	8.9066	6.5562	4.179	8.8399	9.1745	11.175	20.868	4.1785	2.9579	4.8603		0.649348	7.9158
12.0333	5.5926	7.3296	11.58	5.7216	2.5185	4.4808	3.8797	4.7099	11.3494	6.4504	4.0341	5.7002	5.597	3.4398	5.7898	19.6349	11.3382	3.7121	4.0134	4.1047	6.9807	3.7214	8.0917	11.9468	12.949	19.172	6.5595	3.1007	2.7942		0.655844	7.11354
12.1524	4.88	11.5115	6.6186	3.5358	2.1122	3.2427	4.0358	5.632	12.3925	5.2089	3.65	3.8245	3.9745	2.2123	6.3676	22.0367	9.9952	3.6533	3.8179	4.6152	5.8024	3.2671	13.0328	10.2336	6.498	18.32	4.8987	3.1054	3.8892		0.662336	6.63326
12.2716	8.8891	9.6742	7.8533	3.6614	2.3642	2.2942	3.4277	7.4343	15.4736	4.614	4.5371	4.102	5.0888	2.8346	6.5435	16.6203	9.6676	3.027	4.3698	4.7073	10.2223	2.1526	13.2019	9.0175	10.006	16.64	3.9765	4.1132	4.1501		0.668832	6.91945
12.3907	9.5127	6.646	8.4877	4.4724	3.0945	3.5716	4.3319	4.4781	16.0338	3.0568	6.0838	5.958	3.442	5.0668	7.3491	14.0966	9.6314	6.5259	3.2098	6.1409	5.3093	2.6716	11.9093	10.8226	12.933	13.01	4.8177	4.551	6.1078		0.675323	7.01111
12.5098	7.6801	8.3963	8.8806	5.419	3.076	4.3163	5.039	4.741	13.3411	3.6335	7.2396	9.3694	5.9053	4.8236	6.6184	13.6089	9.7916	3.3327	2.9048	7.2542	4.793	5.1394	12.8481	12.5377	10.891	11.203	4.1109	4.0524	4.7119		0.681815	7.09168
12.629	7.9723	7.0272	10.5953	4.706	2.8962	4.3842	5.1876	5.3443	14.6959	6.6337	6.863	7.1287	7.5298	3.7121	6.39	13.5152	5.7823	4.9906	3.2522	6.5705	5.7192	4.693	10.1851	17.869	10.189	8.6	4.8767	3.4633	4.181		0.688311	7.06736
12.7481	7.2617	8.6658	6.1742	4.6811	2.6629	3.4403	7.7171	6.2708	9.283	7.3916	7.3457	5.7416	4.6039	2.3318	10.0978	9.6933	8.0293	5.4798	6.1303	8.0393	4.777	3.2419	9.8128	16.8009	11.982	8.432	5.0563	4.963	4.3569		0.694803	6.91256
12.8673	6.5404	7.3005	7.5099	4.1432	3.7569	4.42	3.3121	11.1311	7.3893	6.8574	5.3697	5.5297	5.7933	6.2195	8.0716	11.0436	6.6524	3.969	4.4468	10.6285	4.9003	4.9265	6.047	17.0191	9.456	7.014	5.1994	5.2747	3.7707		0.701299	6.67906
12.9864	5.7424	4.1211	6.8241	5.8429	3.5366	2.3556	3.2992	8.3057	8.6811	9.2162	8.9427	5.1957	5.7642	3.5548	6.2999	12.6697	7.7139	4.588	4.1487	7.2642	4.2041	6.3997	8.2535	13.9146	9.558	4.589	7.4018	4.3578	5.2944		0.707791	6.48412
13.1055	8.2059	5.8066	5.7599	4.9568	3.4597	2.8611	5.3246	7.891	9.7617	7.3734	8.0639	5.1667	4.4883	3.1606	7.0295	12.1025	7.6017	3.089	5.1355	6.8696	5.4278	4.8212	7.0439	12.8028	12.731	5.353	4.3628	5.3351	3.8428		0.714282	6.40788
13.2247	10.288	4.6549	7.0223	5.0752	3.6813	3.2834	4.0562	5.2979	9.6112	8.2022	7.4755	8.2363	6.417	3.3956	9.7043	13.5757	5.6171	4.3533	4.3197	7.0607	4.4514	3.0191	6.2044	10.1707	13.962	5.782	3.0281	2.6408	3.4887		0.720779	6.34741
13.3438	10.1171	5.4426	7.7127	4.6567	4.0176	3.9408	3.4286	5.7471	8.5105	11.955	6.4412	9.0234	7.6709	2.5717	11.5324	11.6073	6.2947	4.3242	3.8814	7.7892	2.8566	4.1074	7.1423	8.9614	10.485	4.847	6.372	4.0576	3.8265		0.72727	6.52831
13.463	13.3863	7.3295	11.2751	6.4782	5.8758	3.516	4.1961	5.8426	7.4967	7.2129	5.3146	4.3368	7.1747	4.1258	14.3176	7.9707	6.9681	4.8555	4.7661	9.0801	6.4055	4.5416	9.2945	9.1049	8.471	5.361	7.3672	2.489	2.5418		0.733766	6.7964
13.5821	12.0484	6.2234	11.5331	5.8572	4.582	3.7001	4.9781	5.7913	9.8505	7.0241	7.105	5.3475	6.8694	6.8776	13.7476	6.7166	8.4261	5.7902	5.7898	8.6977	5.9087	6.2238	8.0783	6.7771	13.63	4.709	5.0547	2.1237	1.9468		0.740258	6.9451
13.7012	13.7419	5.1201	9.8051	6.5478	3.4177	5.8717	3.8625	7.2109	8.0459	7.2132	9.5262	7.0255	6.9517	5.4262	8.1577	8.9815	7.8806	5.5382	5.9767	7.5532	4.219	4.6985	5.3335	5.5974	11.98	6.12	6.0171	4.3649	4.6711		0.746749	6.78813
13.8204	13.8532	7.1207	9.1718	4.1358	4.7885	2.413	4.4409	7.4811	7.9891	9.0145	6.3894	7.8804	6.0034	4.5463	5.4078	10.5344	7.6356	5.4268	4.6442	7.3823	3.4549	5.3774	5.1764	4.2724	11.224	6.122	4.9663	5.983	4.9654		0.753246	6.4759
13.9395	11.4204	6.2563	11.0391	4.6094	3.4055	4.0442	6.9168	5.1667	9.0345	9.8015	6.7437	6.8644	12.4771	4.2863	7.2248	10.1986	8.0005	4.244	3.5899	9.2145	5.9986	6.6006	7.1352	7.9709	9.025	4.469	9.0327	5.1545	3.9855		0.759737	7.03139
14.0587	11.1234	4.3581	7.2249	6.3984	3.2305	4.5805	7.4248	5.2868	6.9058	9.6387	5.2526	9.9488	8.592	3.2723	9.7254	9.9915	13.2507	7.3639	4.5462	10.3895	4.2616	3.9518	7.1932	5.3192	10.211	4.872	6.1693	3.372	6.0213		0.766234	6.89228
14.1778	9.2754	4.268	8.9106	8.1042	4.9819	2.7448	5.1188	5.7005	4.1499	10.3639	4.8203	6.171	11.398	3.6668	7.362	11.6856	8.7414	6.5914	5.6835	7.4202	5.0512	6.684	6.4797	7.2607	6.429	4.466	5.3929	3.6638	4.1684		0.772725	6.43979
14.297	12.6945	6.1909	9.228	6.2908	4.8771	1.9797	2.51	7.0413	6.7023	5.4957	4.8391	5.334	12.6319	4.7127	4.9925	10.8255	9.7235	4.3816	5.1806	8.1711	4.9657	7.1494	8.2989	7.0032	10.207	5.622	7.7262	4.5592	3.7532		0.779221	6.65819
14.4161	13.8352	3.9651	11.7423	6.2316	3.4327	3.8062	5.0756	8.9343	8.6542	5.8161	5.3213	6.1292	15.1968	5.5209	5.618	17.2904	10.9733	4.5267	5.5167	8.491	4.4499	5.5994	10.102	4.476	9.309	2.838	7.1084	2.4834	5.3959		0.785713	7.16688
14.5352	10.6875	3.4406	11.9869	6.5411	5.0116	4.6626	7.4304	6.6033	6.0281	6.223	9.5897	6.8884	15.9672	5.725	7.7118	17.3834	10.7385	5.5049	8.3753	4.5106	5.2972	4.4079	9.6165	3.2413	6.948	3.421	5.3889	4.1877	4.8704		0.792204	7.18582
14.6544	6.0132	5.8299	15.0874	7.3901	3.3146	4.0332	4.7908	8.5849	6.8821	9.9248	10.8308	5.5019	13.759	7.7677	8.3711	14.4857	8.6479	7.8952	8.8694	7.2921	3.161	3.4479	10.5052	4.9756	9.36	3.759	7.1261	3.6352	4.6907		0.798701	7.44595
14.7735	10.5338	3.911	12.3374	4.3015	3.7412	3.2685	4.5401	7.9906	5.9351	7.0254	5.9676	4.7325	13.6415	6.5817	7.5613	19.8696	7.444	6.8233	6.4518	8.0288	3.8837	5.662	8.9979	4.2898	10.729	2.914	7.6689	3.0118	5.6725		0.805192	7.0178
14.8927	7.3363	3.9128	8.0861	5.7702	3.4059	4.2264	3.2727	6.1856	10.494	9.7174	6.3258	4.8329	8.7592	4.4233	7.7033	23.867	8.9178	6.2272	11.8195	10.3642	5.2057	10.797	6.0561	6.8912	8.772	7.257	7.2078	3.4937	3.7974		0.811689	7.41812
15.0118	7.3807	6.3503	8.7105	8.1177	5.6622	2.6722	4.5223	6.5547	6.5775	12.1689	9.2682	6.2977	9.3223	7.2302	7.8953	34.4327	6.4178	4.5161	14.6152	10.7761	7.1365	6.2432	6.8864	5.8659	10.721	7.057	6.8358	6.283	3.7913		0.81818	8.28651
15.1309	13.099	5.8902	10.4222	4.3168	3.5528	3.2415	4.0286	4.6806	8.5606	13.4825	5.48	6.5547	9.2998	11.4727	7.6923	30.3829	8.1482	5.8233	12.2028	7.3092	6.82	7.1086	6.0324	5.8835	6.514	9.812	3.8339	5.452	4.2377		0.824671	7.97706
15.2501	8.9042	7.8367	11.2731	4.611	2.9581	2.9656	4.1158	8.3973	4.7993	12.573	8.2584	5.5567	10.225	11.1829	5.0672	24.6133	6.5904	5.3383	10.2703	8.2503	7.6853	9.8563	10.5475	5.3144	6.154	3.361	7.5692	3.5938	5.8402		0.831168	7.71409
15.3692	7.3248	11.8711	14.0532	6.4728	4.7118	3.9595	4.5804	5.971	5.4216	12.1602	7.7363	7.0797	8.4442	7.233	5.7099	15.2402	7.053	4.2061	12.2343	9.3461	10.7398	7.924	8.073	5.659	6.072	2.722	6.3115	4.9077	6.4174		0.837659	7.57364
15.4884	4.2663	11.6407	12.8904	8.6406	7.2846	4.5416	2.3156	3.6561	4.6481	14.0224	7.7777	5.8931	6.7899	5.2036	9.4343	14.95	6.9543	8.9947	14.8657	6.3136	8.0812	5.0143	4.3107	4.3676	8.086	4.594	4.6024	4.8214	5.7315		0.844156	7.26526
15.6075	4.1545	11.9246	15.7838	5.2571	4.0323	2.7179	3.1701	2.6122	5.588	9.9145	6.3961	4.5457	4.8311	7.2208	8.6716	11.5356	7.7884	6.3944	13.8649	7.3976	6.238	6.425	5.7586	4.0395	9.44	2.448	4.8831	11.2749	9.8193		0.850647	7.03888
15.7266	3.9037	14.1698	14.0445	6.6431	5.6909	2.7716	2.398	6.9968	5.3161	8.1407	6.7947	2.7571	6.0361	5.9176	6.524	8.1634	9.7561	9.0605	19.6365	5.9533	3.524	9.9168	6.6842	9.0201	6.228	6.28	2.6291	10.2531	5.5228		0.857138	7.26664
15.8458	4.3193	12.1199	10.9243	7.1355	4.7235	2.6837	3.5452	4.412	5.3364	10.1423	5.9137	3.8227	7.3468	6.062	4.7514	5.7042	9.4068	11.5505	18.6071	4.8025	6.4916	7.6283	5.0457	9.8072	4.832	6.037	3.6849	9.0339	6.7827		0.863635	6.98804
15.9649	6.5015	10.0503	6.1206	8.4982	4.6709	3.0957	4.2208	3.5032	6.0529	5.5673	4.9735	3.6217	7.9861	6.4416	4.3809	8.4635	9.6003	6.9621	17.5931	8.4652	13.0933	8.7097	4.5198	8.4999	4.641	5.318	3.5334	10.6557	5.2369		0.870126	6.93024
16.0841	3.1624	7.7164	7.897	10.3131	3.6724	4.0292	3.826	3.6507	6.6709	5.4476	4.5573	3.5861	8.4084	5.8287	5.2241	6.114	7.301	6.8289	21.3673	9.2967	7.1412	8.3661	6.0062	5.5626	3.631	2.681	3.8798	9.4892	4.1862		0.876623	6.40833
16.2032	3.1079	7.0738	5.3465	9.0823	3.2967	4.31	2.7102	4.6018	5.0573	5.2354	3.6356	4.1247	4.3778	6.0386	9.0815	8.4783	7.1295	12.4723	14.5279	9.963	4.9643	9.5776	5.8239	3.6064	5.315	2.733	2.2654	5.9705	5.354		0.883114	6.04349
16.3224	4.5426	7.2474	5.2059	6.2485	5.9093	5.1183	3.0264	3.4081	4.4446	4.0358	4.3799	3.4254	5.1461	3.2626	6.3662	9.0648	7.673	10.5608	8.4412	8.8324	3.5956	7.0242	4.9367	3.0514	6.436	2.352	4.133	6.8612	4.5215		0.889611	5.49141
16.4415	3.624	8.5001	5.0038	5.5357	8.074	3.3581	2.1154	4.2299	3.7512	4.8758	3.8331	6.792	4.501	2.6398	6.0748	6.2515	7.295	8.3609	7.8115	9.4697	5.4633	7.7691	9.0383	3.6749	4.095	2.472	2.8014	6.0469	5.5395		0.896102	5.48268
16.5606	2.835	5.2727	5.3226	8.6945	5.2231	3.6155	3.1623	3.8745	5.0709	4.0767	6.5409	2.6659	7.4244	5.7441	3.5104	4.8676	7.5277	7.5498	6.3277	8.1633	6.3238	7.2141	6.2723	3.539	3.611	2.51	3.5944	4.8472	7.3913		0.902593	5.26802
16.6798	2.7144	9.7526	5.2291	5.8685	7.1102	4.5374	3.4675	4.0764	4.109	3.7031	4.1282	3.2416	2.6427	4.245	3.5151	8.4259	7.9672	8.8758	5.9552	9.2466	5.0359	8.1835	3.9776	1.9037	3.683	3.033	5.5837	4.3363	4.3217		0.90909	5.13344
16.7989	3.4549	5.631	5.3425	5.0453	4.8912	3.5308	2.8348	3.8436	4.3872	2.4674	3.72	4.4973	3.9699	2.9671	5.0347	5.0306	9.0742	9.0336	6.124	5.9926	3.5376	5.6169	6.0978	2.2814	4.092	2.723	4.4112	3.1134	6.9955		0.915581	4.68074
16.9181	2.3244	7.1605	4.5311	7.4589	3.9737	2.6992	3.0234	2.2687	5.6525	3.9538	3.5606	5.8581	4.0696	4.9046	2.8829	4.6951	8.6716	12.1688	5.3093	6.5197	5.001	3.9933	3.9438	3.9241	3.9	3.177	2.9748	3.1251	4.1392		0.922078	4.68499
17.0372	3.273	5.072	5.6174	6.649	4.5986	2.7189	2.003	2.4043	4.4565	3.4864	6.9304	4.4883	3.6566	4.367	3.5437	5.2233	5.8652	7.0371	6.8759	6.2389	5.8585	5.2007	4.1829	3.1013	2.075	2.096	4.7572	4.0672	4.567		0.928569	4.49694
17.1563	3.1154	5.5227	8.4621	8.6076	4.0947	4.8259	2.0028	4.2538	4.3177	3.2284	7.4348	4.0801	4.1292	3.5848	2.3658	5.9581	5.1064	6.7882	6.7941	7.2834	5.467	10.5527	3.1048	2.6195	1.843	2.097	2.8551	4.16	3.4092		0.93506	4.76084
17.2755	4.3314	6.3838	7.0057	6.4698	4.792	4.7199	4.766	3.8003	3.3518	3.5605	4.5769	3.0434	3.2241	5.0105	3.0118	7.1478	7.338	7.3958	8.7683	4.5389	7.7187	8.1542	3.4157	2.2658	1.811	2.583	2.7624	3.8269	3.7064		0.941557	4.80968
17.3946	5.8869	5.2744	6.2505	3.634	4.7584	4.3913	6.3068	4.9547	2.8637	6.3379	4.2236	2.2798	3.2049	3.5866	5.5924	10.126	7.3695	4.6671	7.6683	9.394	6.7431	4.0649	3.289	2.9444	2.346	1.955	3.3215	3.238	3.0695		0.948048	4.8187
17.5138	4.8	4.09	7.496	4.3295	6.3959	3.0734	5.5034	3.3198	3.0141	4.2813	4.2309	3.5738	3.5699	2.4476	4.3309	6.7595	4.7014	4.318	10.3044	8.387	6.5287	5.7199	3.7409	2.4727	2.055	2.112	1.9302	2.6582	2.1749		0.954545	4.4248
17.6329	4.1192	4.6057	9.3601	4.1841	7.5254	4.0248	4.2933	1.9926	5.1815	4.0122	3.5748	3.9035	2.2441	2.9787	4.8742	5.8313	4.8835	4.7781	9.3554	9.8079	4.8924	4.9801	2.9016	3.5827	2.177	1.803	1.7944	2.0067	3.7981		0.961036	4.46436
17.7521	7.2507	5.1955	9.4753	5.888	4.6174	3.7943	2.3096	2.0527	4.8875	5.0159	2.9705	3.0045	2.3167	3.5717	2.1265	3.3927	4.009	3.0897	6.0083	7.0815	3.8992	2.9145	3.7349	3.1879	3.231	1.974	1.7753	3.2531	2.0979		0.967533	3.93537
17.8712	5.3516	4.9371	6.4015	6.9098	4.9239	2.7135	2.6115	3.6562	4.2909	4.3756	3.5001	3.4263	3.5263	3.5918	2.5743	4.5111	3.3127	2.9501	7.4531	8.0242	4.9281	4.1316	2.3009	2.155	2.397	2.024	1.8025	2.669	2.3554		0.974024	3.92431
17.9903	3.7396	2.922	8.9147	5.8108	6.1492	2.9424	4.0385	2.5533	3.4746	4.3096	4.3751	4.4997	2.6938	3.2643	3.3787	3.298	3.4309	2.6209	2.7666	5.5879	4.4698	4.5707	3.3066	2.106	3.167	2.102	1.7515	2.1929	2.9331		0.980515	3.70242
18.1095	6.4856	4.0394	6.7073	7.4542	6.5267	4.4866	5.0372	3.3345	2.9173	3.9787	6.8675	3.183	2.0317	4.7329	3.5503	4.2033	2.8394	4.2982	2.9362	8.3834	3.0125	2.7875	2.1699	2.7514	2.216	2.373	2.2409	1.8549	1.9361		0.987012	3.97709
18.2286	5.4652	4.193	6.963	8.2121	9.4815	3.3511	3.3996	5.0159	3.4266	1.8884	3.1177	2.1107	2.3386	1.8805	2.8501	5.8419	2.7153	2.5739	2.9212	7.0116	3.5322	3.7985	2.0236	2.9855	1.844	2.663	2.5164	2.0801	2.5713		0.993503	3.75078
18.3478	5.2443	4.4829	8.1243	7.616	6.0861	3.1887	3.4466	2.8709	2.4188	2.3223	3.4934	2.298	2.77	2.1456	2.9692	7.0262	3.0718	2.8292	2.331	4.4744	4.875	2.9807	1.8347	2.7403	1.958	3.564	2.6758	2.3436	1.8949		1	3.58885

[truncated: 1 more sheets: Sheet1]
