# Supplementary material for: Crumbs organizes the transport machinery by regulating apical levels of PI(4,5)P2 in Drosophila
Source: eLife. 2019 Nov 7;8:e50900. doi: 10.7554/eLife.50900 (PMC6881148; doi:10.7554/eLife.50900)
Supplement: Figure 6—source data 6. [file elife-50900-fig6-data6.xlsx]

## Sheet: Image9
X0	Y0	Y1	Y2	Y3	Y4	Y5	Y6	Y7	Y8	Y9	Y10	Y11	Y12	Y13	Y14	Y15	Y16	Y17	Y18	Y19	Y20	Y21	Y22	Y23	Y24	Y25	Y26	Y27	Y28	Y29	Y30		Ap-Basal	Avg intensity
0	19.8111	26.0504	28.6344	25.362	24.1952	24.496	18.7101	24.1421	14.0802	17.5338	11.2084	19.5402	17.3999	16.7409	13.1299	19.9817	20.1691	25.9904	18.8348	15.4734	20.8334	15.9274	26.833	17.7163	21.1682	26.356	16.1421	16.569	26.5619	22.3161	25.5255		0	20.5624
0.1191	21.5803	27.823	34.3827	31.6704	27.0406	18.3919	17.0997	19.8974	16.9382	21.1672	12.5136	13.5723	15.953	13.8435	11.1806	17.6731	23.4047	23.5676	26.8997	21.8327	19.1597	17.0132	32.682	28.3635	24.1219	33.1864	17.2476	17.6285	30.2348	17.153	35.4372		0.00780978	22.2148
0.2383	29.5702	24.1549	24.8091	32.838	26.8254	21.82	22.6995	17.7077	20.67	22.4239	12.721	14.2315	11.5404	14.1119	10.5103	13.8194	25.6295	28.5572	34.0691	26.6431	31.3392	19.013	45.101	25.4526	37.2254	35.869	14.9528	15.992	28.1751	27.2704	32.3444		0.0156261	24.1318
0.3574	26.9262	20.375	28.6024	36.6319	25.4693	23.0076	22.6351	21.6453	18.7475	26.0138	9.6065	11.594	15.8975	11.5095	14.4105	17.1031	29.5601	32.6354	56.207	36.5695	35.9551	22.067	55.472	42.358	46.8762	35.141	13.5449	16.6138	27.0973	31.2586	30.4956		0.0234359	27.1622
0.4766	25.8147	29.9781	28.915	39.9411	30.7494	21.6529	24.8264	32.0771	28.3043	27.6986	14.8004	10.8197	15.4181	12.3968	11.3739	15.8772	28.5624	30.5205	55.3559	47.3662	37.3769	25.4542	65.211	50.5024	54.2417	42.252	16.5481	11.6864	32.5226	31.1743	26.1971		0.0312523	29.8586
0.5957	42.3229	28.6339	31.5153	36.692	32.9982	22.2348	32.7167	32.9895	31.5859	29.1837	19.5964	11.2278	9.9637	12.7204	16.7212	18.7842	36.5865	47.302	50.361	45.6664	38.6766	34.6674	79.448	56.6274	59.1644	40.7822	19.3301	12.1189	38.1798	28.2873	26.9222		0.039062	33.0325
0.7148	43.0294	28.6363	39.0864	43.7868	32.5352	19.4524	30.0693	36.8664	40.7448	41.0425	21.5705	11.8706	7.1406	10.6109	10.3334	18.6599	42.6255	51.4514	62.8766	39.1184	39.0428	42.3898	84.177	78.8502	64.5627	45.1336	18.9206	10.7613	32.9438	34.5345	27.8073		0.0468718	35.8268
0.834	41.1658	28.407	35.5437	45.256	34.7323	25.1216	42.4234	45.7255	54.8895	48.7329	21.8163	11.3485	9.827	9.4171	11.7002	19.1061	35.1787	52.8357	55.8285	36.0672	35.8228	46.9144	81.775	90.0433	84.114	45.113	20.0433	13.9556	37.9116	35.235	23.0699		0.0546882	38.0362
0.9531	51.9256	29.3695	31.3059	41.2936	35.7568	28.5781	50.4661	49.4253	60.858	50.8903	23.6662	11.8755	10.517	12.3545	10.0881	18.2036	34.784	43.7355	57.8348	33.8194	29.9512	56.3937	96.092	83.3832	94.8984	31.0151	18.832	14.5571	42.4036	41.1763	27.5673		0.062498	39.4522
1.0723	49.0785	27.6099	34.2807	49.0646	38.255	21.0411	63.9012	55.5123	63.9188	45.0501	26.4006	12.0073	6.7087	8.8832	12.4357	16.1573	38.7381	36.3265	57.474	36.6398	38.4092	62.9551	105.411	79.8386	92.2795	31.6433	16.0708	14.8455	50.3299	38.5319	27.2811		0.0703143	40.5509
1.1914	35.548	29.8061	42.1825	54.2766	40.7801	27.4483	67.8937	66.4148	67.5887	41.729	21.608	10.5466	8.4214	8.1734	9.6589	11.6044	41.1098	40.3631	57.0897	39.0612	48.1166	51.8265	93.593	82.0692	93.1873	39.1105	18.5583	12.2198	48.2075	37.8228	24.3455		0.0781241	40.9794
1.3106	42.9298	29.1673	40.0017	51.5109	49.5972	34.1119	65.2873	79.0855	53.4533	41.7073	18.728	8.1324	8.325	5.683	13.0679	12.4607	39.7996	41.654	51.5113	36.5751	44.5872	48.8674	81.192	88.3524	83.6373	40.5283	21.4483	13.7954	51.5375	34.7466	29.7054		0.0859404	40.6835
1.4297	49.2954	18.3633	34.9689	53.8775	48.8829	28.5904	68.7174	61.6301	48.139	39.6739	17.2192	5.9842	8.6011	8.2641	12.6263	13.2048	25.4334	40.4166	56.2605	42.667	43.617	42.0296	84.336	87.2252	74.3494	47.2395	16.6641	14.2465	52.5694	39.4214	32.5638		0.0937502	39.2606
1.5488	48.4172	27.2592	41.137	55.0923	50.8022	34.685	70.4132	61.9766	47.0872	37.615	22.2918	8.1416	9.1951	8.1242	8.1454	15.1881	27.9482	51.0129	62.3084	41.419	41.2528	37.1834	70.502	92.6785	67.3467	39.2088	17.8586	15.5289	41.4063	40.7798	30.7987		0.10156	39.4453
1.668	47.0362	31.1103	42.2107	42.7372	44.7729	32.8711	75.2369	53.0778	35.5913	53.6583	20.7746	7.0225	8.1784	7.5177	10.7267	12.6887	24.8728	50.7215	51.7437	37.0611	35.644	38.863	76.557	86.1301	79.4736	31.824	15.563	12.6892	37.9401	39.9946	27.7426		0.109376	37.8075
1.7871	50.7563	28.8647	46.1704	38.2832	36.1902	36.0938	67.0879	52.1473	41.7475	48.7052	16.7388	6.3161	7.1841	6.147	13.6894	17.3737	24.6781	41.3721	50.5152	37.4979	39.2863	45.6511	77.357	85.7897	60.2024	28.6461	17.0646	13.6519	45.0041	41.2023	41.859		0.117186	37.5249
1.9063	50.6668	35.1268	49.0433	30.7375	38.1064	38.6659	69.6981	47.1056	42.8945	49.3725	17.0216	7.2186	4.8896	7.1974	13.5386	15.8015	23.4089	50.2882	54.9255	36.3803	36.9846	37.8941	68.961	91.1612	57.4596	34.9461	19.9446	10.0015	52.5409	53.837	33.9665		0.125002	38.0576
2.0254	42.8229	37.8958	47.9192	22.8884	40.0571	28.1242	73.8974	40.1736	32.7909	52.0316	18.7974	8.1571	10.3681	3.7956	12.0423	11.9911	21.5897	45.661	43.438	32.513	30.2577	45.9982	68.277	92.7607	44.3026	40.7606	14.9436	9.9711	41.2346	49.5385	28.014		0.132812	35.2585
2.1445	55.1715	44.0528	63.9628	21.9082	43.7601	32.8275	75.8786	42.7519	37.6807	35.4036	21.4492	6.1965	9.0631	5.7389	10.346	11.8571	15.7958	44.3115	58.9023	34.3113	20.2671	41.6871	72.529	95.5958	37.9016	25.206	12.1661	12.1817	48.6078	43.7829	31.2608		0.140622	35.8889
2.2637	60.8446	41.9251	59.3998	18.1779	39.4574	30.0351	89.9063	43.1982	38.8405	32.8066	17.283	9.2703	7.7102	9.029	14.522	17.2649	15.2373	41.9493	49.4828	35.2905	25.4273	33.6777	67.64	88.268	41.1897	29.2641	13.4152	15.3596	45.8202	48.5524	26.9163		0.148438	35.7149
2.3828	61.0248	39.4368	52.3304	15.2963	32.4628	29.8914	76.0323	36.1348	33.7938	30.4481	13.2859	8.3054	7.2957	7.5697	12.2047	11.7307	13.4041	48.76	44.2962	33.7137	24.1512	34.3031	65.709	88.2319	50.6192	29.327	15.0836	14.4371	37.5034	43.7119	34.1859		0.156248	33.6994
2.502	59.2977	36.1495	48.848	19.7229	26.2418	32.4532	77.9352	41.8883	43.5613	38.2583	11.4201	9.6653	6.4018	7.8555	10.1875	7.8447	14.0672	41.8106	45.9681	30.1129	24.171	34.6082	63.96	77.7295	53.8313	25.3012	15.2899	16.3254	29.4779	42.5403	25.2582		0.164064	32.8446
2.6211	48.9128	47.6781	53.7624	15.642	27.0625	24.3587	68.0502	39.9446	36.1889	38.682	11.956	5.4009	4.5034	7.0888	8.2682	9.0353	11.3362	38.0576	41.7873	36.2681	25.2458	22.5921	55.047	64.8091	53.5963	15.0143	16.8214	11.1309	31.502	36.1624	24.6062		0.171874	30.0165
2.7402	35.4045	50.6516	55.2015	15.1942	20.8363	20.8045	69.7774	38.3531	25.2501	22.8978	13.5938	3.9846	8.7424	5.0074	8.5143	9.5876	10.2087	37.7773	35.6466	41.0407	23.6557	31.5931	49.562	57.2289	58.4792	16.6517	16.1324	16.0323	25.6316	36.1629	24.9962		0.179684	28.5355
2.8594	29.723	43.5628	41.486	10.78	27.4867	20.409	74.5394	44.6209	23.7197	22.4855	15.5788	5.3544	7.1124	4.6171	10.5891	12.194	10.6393	34.6078	37.5849	23.9402	28.9951	37.0677	50.303	52.3883	66.7852	13.9423	16.4564	19.1036	25.6884	38.4117	24.38		0.1875	28.2114
2.9785	26.3357	38.3031	53.6509	13.29	24.045	19.2907	74.285	38.9956	22.6876	21.0509	13.7783	6.0805	7.0278	5.3776	7.5183	9.2142	13.2231	27.6046	27.6486	26.7139	20.0299	37.7246	46.53	42.9817	69.145	16.2082	11.1639	19.4845	22.9241	37.8173	22.8275		0.19531	26.547
3.0977	21.1115	38.211	42.512	16.2857	14.2742	14.0708	50.908	30.2332	18.1823	25.7878	12.1115	6.711	4.6375	5.1121	7.6399	6.0644	12.6488	33.079	23.3355	18.9672	20.3748	30.7512	37.511	46.431	60.6307	14.4174	11.8888	21.3421	23.2428	33.8162	20.5497		0.203127	23.3174
3.2168	18.8431	29.9699	44.9204	12.735	16.3686	13.3562	50.5803	28.4151	25.0431	24.131	8.6622	5.1493	3.4964	6.5002	6.6183	7.586	10.5576	25.2737	26.0021	16.2623	13.5239	28.1059	43.508	36.7845	63.9651	15.0153	17.7446	15.7773	19.2557	25.2434	20.9055		0.210936	21.9452
3.336	16.2153	29.8348	30.1125	11.8914	12.8936	12.8528	40.0249	25.5984	23.6502	31.3196	16.2946	7.4841	5.108	9.606	6.1691	11.549	9.9613	23.0467	22.1845	18.9467	10.8008	33.9643	45.582	42.198	57.325	11.1682	16.4126	15.5234	25.6285	15.0888	12.8499		0.218753	21.0092
3.4551	16.4647	22.124	31.7121	10.3506	11.526	13.2418	37.5059	25.0849	23.1911	25.2884	18.0045	7.0495	5.3669	8.644	6.7559	10.359	8.6164	17.6966	19.9075	19.6984	14.659	21.6128	37.842	42.9251	51.9197	13.0981	8.4305	12.4407	18.5744	17.4981	9.4308		0.226562	18.9361
3.5742	15.3744	20.5531	27.8677	13.2981	14.3452	7.8627	32.312	21.5581	17.6474	24.5534	17.3015	4.9774	3.6682	6.5994	4.7399	10.6053	12.3755	14.9397	21.3172	25.9573	17.1062	19.9309	35.52	44.9824	48.9558	14.9999	10.4817	12.4804	15.8407	16.1624	17.0321		0.234372	18.4305
3.6934	14.0134	21.1137	22.7805	13.8907	16.6916	9.5604	23.7503	25.3776	24.3229	20.9368	13.6281	5.3454	3.7014	5.9532	5.9238	8.9063	9.7823	13.1751	22.0714	18.4572	11.5667	13.7205	32.571	43.0396	52.7516	13.5116	11.5746	17.8001	14.9036	14.3972	18.4039		0.242189	17.5362
3.8125	12.8237	19.4358	23.5693	11.969	13.9806	10.0912	20.1882	22.6866	16.446	24.8007	14.0064	5.9628	6.9199	7.2227	6.3187	13.5634	9.8673	6.8824	17.7378	18.445	13.3975	14.0266	32.08	31.2244	58.4012	19.8366	8.1983	21.1954	14.761	12.251	16.9261		0.249998	16.9424
3.9317	16.1663	19.676	15.7898	8.8292	11.3505	11.6864	21.5574	20.7055	11.3633	23.9751	17.4089	4.7069	5.5297	6.4311	6.8604	10.957	10.0665	8.4071	17.6936	18.325	17.2546	15.8481	21.414	22.2433	60.5449	16.1116	9.8781	15.1018	12.0491	12.9313	19.7597		0.257815	15.8265
4.0508	17.8756	13.1158	11.5308	6.8603	13.301	7.5136	23.2107	22.9281	10.0894	16.8355	11.4123	7.6988	6.0568	4.7134	4.43	13.7891	8.7835	7.0512	12.626	14.9977	16.1225	14.7903	13.273	37.3128	55.2953	16.6235	7.2124	15.9111	7.7188	14.0955	14.4498		0.265624	14.4395
4.1699	15.0781	12.9482	13.4528	6.759	11.0957	11.2183	14.8114	16.2736	7.0312	12.5028	7.877	5.0579	6.5341	7.1801	7.5224	12.8917	7.7595	11.6044	13.6279	11.0668	18.0048	16.6938	13.46	44.0682	48.5677	20.207	10.7713	18.6691	6.1163	13.1942	9.3862		0.273434	13.9171
4.2891	12.9199	15.4337	16.3463	11.3175	9.657	9.5407	18.2025	22.7901	8.9634	12.2612	13.972	3.8466	8.2476	6.458	7.3767	11.7221	5.0737	13.2879	11.8279	10.4596	15.1658	16.9741	12.646	29.2976	43.6548	16.3045	11.275	19.5415	7.2669	13.5263	9.4438		0.281251	13.7032
4.4082	10.6062	11.4059	21.6938	8.1464	10.9536	10.091	16.989	15.7888	10.573	11.9174	12.081	4.5926	9.6516	3.9498	7.4719	14.2053	5.4987	12.3202	15.4346	7.6743	12.6151	15.9565	13.251	25.4065	40.3928	21.03	13.105	20.6598	5.3345	12.3297	11.9852		0.28906	13.3262
4.5274	14.8903	10.8609	13.7678	9.7129	7.0534	9.8954	10.6697	16.8718	12.7689	13.2469	14.0564	5.2935	8.0241	3.9674	5.8634	11.8831	6.1575	13.3404	14.1902	6.0841	8.0989	12.4785	8.125	27.212	35.3693	23.097	12.0558	18.5004	6.0246	11.1183	10.8422		0.296877	12.3071
4.6465	19.3395	15.6672	15.9838	9.8097	6.2825	9.7457	12.2107	16.6892	9.8545	17.307	7.7282	3.2987	7.2121	4.2923	4.4215	17.8506	7.2992	9.6096	17.7582	9.6879	8.6631	13.5662	9.124	27.3135	20.5787	10.5396	8.386	13.4342	6.1752	13.703	9.7594		0.304687	11.7191
4.7657	18.9746	15.4264	16.8846	5.8026	8.0116	14.2322	13.8917	15.2794	9.1703	13.6416	7.6876	4.9264	7.5259	2.9676	4.9286	10.2516	8.4699	5.5603	18.8097	7.0477	8.4505	11.9025	10.934	31.2274	15.5031	15.9665	8.2591	17.2433	9.0272	15.0218	10.2389		0.312503	11.7182
4.8848	15.3901	17.639	16.0188	9.7266	9.2227	14.5145	12.893	18.3092	10.0635	7.5259	6.5273	4.7818	7.8384	4.867	5.6693	11.979	5.8339	7.8306	13.7138	7.6361	10.4968	15.9732	10.167	21.7597	10.8282	14.5931	9.7988	13.7997	9.7438	10.4284	15.4608		0.320313	11.3235
5.0039	14.2981	13.7269	22.0069	9.3051	7.041	7.6153	19.0399	20.5894	9.8939	8.577	6.4978	4.7643	4.1564	3.1894	3.1809	7.8646	7.4544	7.8356	16.7673	7.1783	7.3082	11.1092	9.748	23.4986	15.0881	12.398	12.8559	9.7729	10.4591	9.3254	16.1453		0.328122	10.9255
5.1231	14.9478	11.1418	20.3012	11.8081	7.3977	9.7436	17.6798	19.3584	9.0472	10.1726	6.4319	3.2689	6.6044	4.1089	7.1614	7.5657	7.0458	8.0011	14.3232	7.1301	11.5795	14.9884	15.074	17.6273	16.3759	16.076	13.4518	9.8321	12.86	7.7834	13.5488		0.335939	11.3689
5.2422	11.1986	10.0941	15.0197	10.6521	7.308	9.3992	17.2615	18.7526	8.6208	11.4658	7.7825	5.5485	7.3464	3.6228	5.0769	7.4504	5.5587	6.7292	12.7144	6.1843	12.0688	20.9963	13.557	17.6495	10.2293	15.9596	11.2651	9.4935	12.6536	6.5937	14.6064		0.343749	10.7374
5.3614	11.2719	12.3506	12.9398	6.7199	11.3602	12.0606	19.9281	14.779	11.0156	12.1514	9.0162	3.5982	7.3877	3.3233	4.1432	10.9898	7.1778	6.3434	10.545	8.2298	7.5368	11.2623	9.293	14.5803	9.9355	9.909	9.4513	8.9537	14.8681	7.0313	16.6278		0.351565	10.1542
5.4805	11.2515	13.1634	11.4077	9.266	6.6457	12.1129	17.9691	12.464	9.4124	9.706	7.2665	4.0211	5.9532	3.2429	4.4589	10.3527	6.5684	5.3196	11.6948	9.6411	6.119	11.2566	8.654	13.8779	9.7734	6.8135	9.186	9.4056	17.4886	8.8686	8.3103		0.359375	9.40875
5.5996	11.6135	12.1919	11.9186	8.6389	9.5423	12.4592	16.8172	17.211	6.704	10.4827	4.8663	4.4171	3.732	4.5965	7.9429	5.4559	3.9376	4.1938	9.7602	5.7182	7.2258	11.2564	6.769	16.3539	14.5597	9.2355	6.8298	9.4811	11.6902	7.5707	12.7706		0.367184	9.22395
5.7188	7.0228	12.2843	6.7798	8.961	10.4311	11.5882	12.7615	13.6809	8.1959	9.3583	6.9728	3.4061	4.0488	4.3688	8.4245	5.7599	2.6694	4.5446	10.674	4.9398	10.8959	14.622	6.141	13.4711	17.7796	9.5296	6.0065	8.0524	11.1309	4.23	13.3566		0.375001	8.77704
5.8379	11.765	13.9098	10.9041	6.8003	11.875	15.5931	11.431	19.7275	6.8734	13.8553	5.3838	4.0569	2.9781	2.8326	6.8324	6.5072	3.3616	3.9259	10.2557	6.2753	6.455	11.3461	8.411	17.0435	11.0325	11.6129	7.9869	10.0177	17.3455	7.4781	11.1828		0.382811	9.51794
5.9571	10.0151	14.6257	14.1446	5.2676	8.6336	15.6308	7.9021	19.5064	7.7642	15.7152	7.0874	3.2348	3.4983	3.3364	9.9218	8.0232	3.3495	4.7578	4.7563	9.4971	7.9796	7.7381	12.807	15.0512	8.3445	11.1246	6.8394	8.1528	13.02	6.3452	13.4432		0.390627	9.27463
6.0762	6.6973	18.4825	14.861	6.9891	8.1483	8.6394	9.2504	19.9403	5.3268	14.9031	4.9939	3.3475	3.5739	6.4836	10.624	9.3121	3.4564	5.5441	8.9923	6.7973	4.8651	9.4422	9.263	12.2338	9.0345	7.7835	7.6565	3.0493	8.8637	8.4227	13.4647		0.398437	8.72395
6.1953	5.8624	17.1622	13.5883	3.4772	12.1558	8.7602	7.6112	19.5359	6.5619	16.0407	6.3591	4.682	3.5167	5.1935	10.3293	5.6142	2.3777	5.5719	8.4468	5.4439	3.5129	4.4728	10.896	15.8986	12.9062	9.7549	6.9375	5.6094	12.2997	10.3561	12.1723		0.406247	8.80991
6.3145	7.1542	13.9459	15.9873	5.0519	8.9398	8.6844	8.7069	18.7465	10.1651	12.3534	6.9439	3.5691	3.6177	2.3644	7.6024	7.4705	4.4881	2.0025	5.4565	6.5684	4.2972	8.1773	10.535	20.5447	11.5054	8.913	5.4306	6.6305	13.5694	10.3836	9.0076		0.414063	8.67139
6.4336	9.5882	14.7979	19.1921	8.2918	11.3531	8.2653	8.0709	14.5911	8.0942	11.4247	7.7847	6.1504	4.3234	2.8325	9.9152	7.2415	3.5586	2.7447	4.9118	6.2469	4.4657	8.1415	11.678	25.4677	10.2775	9.1248	5.4758	4.539	10.9277	5.7612	7.5863		0.421873	8.80078
6.5528	8.3888	15.2275	16.7032	5.8632	10.9364	10.1612	5.7192	14.3705	5.3622	7.2305	5.6938	6.3997	3.2825	3.7911	6.8441	6.2841	3.6225	2.774	6.0536	7.2738	4.3502	8.63	9.143	17.4355	11.438	7.8134	4.0491	4.1998	11.0938	7.2533	7.0797		0.429689	7.88605
6.6719	12.1743	13.8382	20.4384	5.722	6.5585	5.1168	5.6861	15.3085	6.6588	9.6197	5.0939	4.0632	3.9478	4.4441	6.2965	3.7276	2.3684	5.2137	7.0597	7.6871	4.4147	4.4168	8.585	26.9971	12.9676	8.2395	3.4252	5.1286	12.6008	7.8395	8.525		0.437499	8.19881
6.7911	8.7232	14.5161	17.9663	10.2067	10.2769	4.1746	6.3096	11.9781	7.4984	13.9	5.2674	3.2545	3.8675	3.5491	5.4565	8.4687	2.1602	5.8999	8.3729	6.3751	2.5167	5.2689	12.833	24.8363	6.3853	5.788	3.8301	4.8131	7.3468	10.4495	9.5728		0.445315	8.12459
6.9102	8.5788	11.4982	12.9702	11.2739	8.1064	6.1228	7.855	11.9106	7.5943	10.591	5.1531	2.0574	4.1002	2.859	6.4375	9.611	2.5679	6.0216	8.8122	3.7318	2.8357	6.9101	9.055	19.6913	7.1947	7.1449	3.9377	2.5659	10.1638	9.5114	8.8223		0.453125	7.60276
7.0293	8.6381	12.2606	9.6868	8.3177	8.7255	7.6045	9.4884	14.4919	7.0862	9.9689	8.7054	3.0989	2.5095	4.0438	6.0932	8.9718	3.3628	4.7792	5.9368	3.5787	3.2645	4.3547	6.545	24.3472	7.8919	7.761	4.6812	4.4738	8.9944	10.54	8.0758		0.460935	7.68639
7.1485	6.8296	10.6188	8.9047	8.0667	8.7455	10.3737	4.1241	16.5661	5.1876	8.9305	5.7981	2.8142	2.5377	4.4503	3.5002	6.6143	3.636	4.2327	6.3173	4.5327	2.8636	3.3252	6.435	21.3635	11.5366	9.4244	4.4279	5.9772	8.6126	10.4013	8.8025		0.468751	7.28873
7.2676	7.2113	8.625	8.2955	10.5854	12.4468	7.8902	7.9693	17.9366	7.2143	8.5837	5.6328	3.8547	4.1491	5.367	6.6354	3.8592	3.726	4.0208	5.2299	5.2756	2.1768	3.1434	4.786	19.3601	6.1529	12.9726	4.987	6.0455	9.0651	6.2266	10.1242		0.476561	7.4048
7.3868	6.6137	8.6425	10.0985	9.3429	9.68	7.5761	9.7458	13.5331	9.9912	9.5787	7.8392	4.2282	3.168	4.8541	3.8802	4.6894	4.1847	2.6983	6.4139	3.7359	2.7106	5.1295	4.52	14.0291	13.6602	14.0767	3.7669	3.4762	6.6305	5.9489	11.414		0.484377	7.28571
7.5059	5.5575	9.0327	12.7129	8.3784	9.3918	9.5404	6.3711	11.8867	7.3373	10.2711	9.6903	3.4499	4.1882	5.7954	4.8611	4.0134	6.2517	2.9728	3.5373	5.6736	2.4037	6.235	5.41	9.017	7.8156	11.8081	5.8819	4.3174	7.3843	9.7972	10.9294		0.492187	7.15849
7.625	4.5432	7.598	13.1571	4.9171	9.1572	5.8718	10.1992	8.9817	5.8483	11.0281	7.41	2.6085	2.8006	3.7899	7.6425	5.7022	3.3872	2.5811	7.8125	4.2522	2.689	5.5163	6.274	10.1042	8.3579	7.6069	8.7581	3.6282	8.1696	8.9008	9.9244		0.499997	6.74896
7.7442	4.0581	9.5193	11.81	5.6041	5.8497	6.9403	8.834	8.5319	8.7277	7.6979	6.4489	3.2383	4.0877	4.486	4.3123	7.5363	3.5292	3.4219	5.7709	2.9342	3.0869	5.0433	3.369	10.0123	8.6841	8.5864	6.382	3.0579	8.1914	7.2735	8.7396		0.507813	6.315
7.8633	4.2198	9.4735	7.97	6.1521	6.1553	8.9941	6.7087	6.4982	7.3139	7.5328	9.4164	4.3535	2.6444	4.2677	5.8263	7.8678	4.9153	4.4263	4.0143	3.7404	2.4539	5.3469	3.893	12.4971	8.0878	9.7279	6.6136	2.477	5.2757	4.8713	5.6391		0.515623	6.10884
7.9825	3.7739	9.7333	7.5776	7.5136	5.4018	8.3896	8.2816	7.2151	4.5741	5.9428	8.5741	3.5964	4.4166	4.8543	8.5878	2.9762	3.3183	3.09	3.4146	4.1273	3.4898	2.0077	5.941	10.0602	8.3949	5.3586	8.4855	3.9577	7.032	3.9427	8.2894		0.523439	5.88124
8.1016	3.5584	9.9631	7.1116	9.7076	8.6574	10.1088	6.8398	7.9832	3.7503	5.3658	7.8231	2.1964	2.2814	4.9425	6.9165	4.87	3.5724	2.9683	4.4874	3.0845	2.8867	2.3537	6.65	10.0105	8.2643	6.1078	9.4663	3.5373	8.0248	4.223	6.1621		0.531249	5.93145
8.2207	3.0193	9.3112	6.3696	4.5401	5.9672	7.6271	7.4362	8.6294	3.5043	7.4959	7.7749	2.9017	2.4219	6.0598	7.6073	5.6722	4.0961	3.2394	6.5765	4.0879	3.5741	4.1074	6.913	7.679	3.6806	5.1632	6.9253	3.0537	7.9284	7.3377	9.4475		0.539059	5.81122
8.3399	4.1442	8.9972	8.2768	6.0545	5.2687	6.35	5.7859	10.0488	5.0614	6.6378	9.7291	3.7229	3.4785	3.4332	3.8559	5.2151	2.5085	5.6711	4.5947	3.2065	3.1522	3.6341	5.022	8.5165	6.6523	7.0208	6.35	4.3225	4.8379	6.1366	6.2978		0.546875	5.61237
8.459	5.0258	8.4188	8.2788	8.8973	7.3317	8.0801	6.9133	9.2314	5.9762	6.146	11.2284	4.4912	5.1956	2.0131	5.958	3.3947	3.6602	4.5817	4.2609	3.9805	5.5792	5.5274	6.193	7.906	7.6972	8.6171	4.6215	2.7402	5.2923	4.5546	6.6158		0.554685	6.07768
8.5782	5.0518	11.4895	13.4699	8.2149	5.934	7.6647	5.9567	5.4801	4.399	8.1263	9.8718	2.8087	6.6393	2.798	4.4881	2.6814	3.0869	3.3287	5.8122	5.2916	3.7422	2.3253	6.294	6.7803	8.1646	5.0884	3.2815	3.9924	3.2967	5.6459	5.6108		0.562501	5.70373
8.6973	6.6984	7.4051	13.6468	5.13	4.5709	6.2962	12.1532	6.3442	5.5025	5.2347	7.2043	3.6619	2.885	3.1345	6.0578	3.9375	3.7237	3.1899	3.1165	6.0464	4.2574	3.483	4.84	5.4472	6.2468	4.9993	4.6815	2.8003	4.311	6.3486	4.9254		0.570311	5.42839
8.8165	5.4921	6.2809	8.0284	6.4961	5.7352	3.5796	6.9418	6.9118	6.2026	8.1449	6.4243	4.4719	3.8867	2.8312	4.923	5.0655	5.5013	5.3178	3.6846	8.0995	3.8247	3.2759	4.268	6.3082	6.9212	5.1312	2.685	2.3723	6.1232	5.9195	7.1957		0.578127	5.42078
8.9356	4.5016	4.8546	9.1209	6.4849	5.0373	4.4049	4.8904	6.6897	7.2062	7.7867	5.6452	1.7979	3.5571	2.9877	4.9757	4.1482	2.2755	5.4166	5.1615	4.3111	3.5903	2.6002	4.46	7.5698	6.631	4.7895	3.0279	4.2741	4.7423	4.2925	6.366		0.585937	4.95475
9.0547	5.4669	5.4071	8.7157	8.1535	6.2495	5.9971	4.2117	9.7047	6.4995	5.7733	5.1616	3.3065	2.3713	2.4797	3.1653	3.2093	2.3252	4.5726	6.1935	3.3596	2.8348	2.6258	4.331	8.6162	5.8521	5.4205	3.0925	3.2942	4.0172	5.9274	6.0057		0.593747	4.97874
9.1739	4.3246	5.1787	5.6817	5.6731	11.3855	3.5222	6.7913	10.8955	6.5634	4.4549	3.4103	4.5018	4.2844	2.3203	3.1321	4.8977	2.5117	3.8927	7.5751	3.6136	4.0941	4.0604	4.97	4.3888	5.1305	3.1945	5.6157	3.7658	3.0352	8.1541	6.4096		0.601563	5.07836
9.293	4.6017	3.5784	4.5368	5.4165	7.465	4.9622	6.5134	8.8705	5.3333	7.7156	5.2793	1.9602	3.714	3.6989	3.9327	4.5963	2.5953	2.1266	5.9515	3.8147	2.0485	3.5745	6.607	3.6226	3.3239	4.871	6.3203	2.4372	4.6574	6.6633	6.69		0.609373	4.75737
9.4122	3.555	3.4248	3.7452	3.7868	8.557	4.1715	5.6247	10.6192	7.0721	6.1049	7.4134	2.4872	2.4444	2.9419	5.4045	5.6764	3.3049	3.3311	4.7238	4.7293	3.4603	5.0485	5.973	4.6489	5.4842	3.3352	5.1177	3.5739	6.6468	8.5925	5.3199		0.617189	5.04255
9.5313	7.2544	4.8589	6.5816	3.4692	4.4017	4.1261	5.8108	7.9072	9.4843	8.8558	6.1909	2.2337	2.6079	4.2216	4.7585	7.092	2.3193	2.7175	4.5559	3.0015	3.3333	6.0345	5.992	7.4449	5.8921	4.5576	4.9656	2.5955	8.2517	9.3275	6.8748		0.624999	5.41027
9.6504	5.5437	4.0048	4.1599	5.5176	3.645	5.9076	10.4661	8.5664	4.2152	9.3539	7.2166	2.1519	3.0373	5.6555	6.6046	5.0986	2.9098	4.5201	6.7847	2.8347	2.2817	2.8824	5.056	6.1655	8.6967	5.5757	4.2294	2.5299	5.7658	7.8265	7.636		0.632809	5.38192
9.7696	6.2849	5.4846	8.1017	7.1197	4.5856	5.8338	9.8689	13.0938	6.1136	10.0512	7.4273	3.8183	2.7998	7.6713	7.5924	5.6647	3.8669	4.6713	6.6094	2.5692	2.6127	3.3959	5.281	5.105	4.2422	4.4904	2.2386	2.8818	5.7801	7.9705	5.0654		0.640625	5.75135
9.8887	8.5071	6.2225	6.886	7.8468	5.3557	6.4151	8.5166	9.8888	4.9451	7.2188	5.4468	2.4114	2.1276	4.8776	7.2315	5.6227	2.6685	5.4044	4.2335	3.2557	2.5289	3.501	5.276	5.8354	5.4608	4.1121	3.3576	2.5699	4.0867	8.0088	5.7038		0.648435	5.33946
10.0079	8.9123	5.4037	5.109	3.9502	4.6772	3.9495	4.9998	9.8753	3.5	10.26	3.9517	2.4669	2.6993	4.4547	4.6208	4.2861	2.3979	3.3985	5.8845	3.8918	3.0739	3.86	4.42	8.0559	6.8811	3.3162	3.7184	3.3224	4.4235	6.105	6.0781		0.656251	4.90141
10.127	11.6616	7.9029	4.1139	4.2347	3.877	5.0214	4.077	10.1706	4.4641	5.6805	5.6943	2.6551	3.5095	3.6455	4.5031	5.811	4.6299	3.439	5.2277	2.8495	3.3509	3.9049	4.943	9.9496	6.8625	3.2405	6.1642	2.5135	5.5496	5.4085	6.9393		0.664061	5.22564
10.2462	6.8807	6.9983	4.5759	6.9602	2.5195	2.8031	5.6304	9.4956	4.4196	4.8331	3.8978	2.663	4.0276	3.0695	4.38	4.4555	3.5982	3.6076	6.1783	4.5288	2.9813	3.4324	5.152	8.823	4.4224	4.8659	6.2868	4.2509	4.274	9.1229	3.3411		0.671878	4.91856
10.3653	3.7363	8.4224	4.5058	6.4052	2.5158	3.8147	6.1767	7.2415	5.6089	7.4132	4.9511	2.5489	2.3465	3.0179	7.4952	5.9655	4.4449	3.9762	4.9881	3.2003	2.0668	3.3908	4.914	7.6409	5.0036	4.8669	3.2322	2.8473	4.7497	6.2216	6.4667		0.679687	4.84437
10.4844	3.5901	6.0916	3.9749	7.8191	5.2384	5.1492	6.5883	6.4141	7.409	5.4741	2.5258	3.6273	4.0267	4.4607	7.0694	4.7924	4.5685	2.7531	3.2457	2.8667	2.6964	3.5987	4.513	8.0333	5.2649	5.3222	2.8988	3.436	5.864	7.7082	8.414		0.687497	5.01402
10.6036	4.8969	4.6795	3.3446	8.2229	6.7437	3.788	6.1137	7.249	6.677	5.5676	7.6385	5.4257	3.1658	6.2553	9.5876	6.3277	3.3563	3.8189	5.3766	2.4148	5.2384	3.5701	5.195	6.2663	5.8817	4.1715	4.1019	3.6103	4.918	6.9595	6.1007		0.695313	5.37624
10.7227	5.3504	7.134	4.8293	9.0023	4.4828	4.983	3.3281	6.3128	5.3102	6.1474	3.7508	3.4511	2.4388	4.5989	6.4944	6.2053	4.5778	2.3516	5.7387	2.9668	2.738	2.5185	5.839	5.3293	3.9313	3.0767	5.3002	3.9604	6.0623	6.1073	6.803		0.703123	4.87485
10.8419	8.3866	6.3452	4.961	4.8669	4.3344	4.248	4.6374	4.8223	6.112	7.3234	3.5668	2.6526	2.4712	2.9355	6.5827	5.8434	3.3247	5.7485	6.4807	3.4101	3.6086	3.2915	3.961	4.8045	4.5381	6.7747	4.9361	2.4499	5.5175	6.7768	5.335		0.71094	4.87249
10.961	5.7715	7.2137	6.194	6.1752	3.5449	5.2803	2.1816	5.4289	6.1595	8.4316	4.3531	2.9172	3.7718	2.9565	11.471	4.5654	3.2879	4.9263	4.836	3.1771	2.7594	4.1711	3.594	8.5143	5.2585	8.4321	6.0879	4.2124	4.5528	7.3157	7.1056		0.718749	5.3112
11.0801	10.0647	5.6609	5.277	7.5795	5.4835	4.098	2.7114	6.9178	3.3573	5.8342	4.6764	2.2325	3.935	2.2778	12.9136	4.4872	2.4181	2.6104	4.6542	4.984	2.7918	3.2028	4.934	8.6423	7.7792	5.4884	3.2658	3.5528	4.4399	6.0735	5.9312		0.726559	5.10565
11.1993	4.7234	6.6824	6.3803	5.5923	4.4567	4.6126	3.6491	3.3179	5.9994	8.4353	5.0058	2.6435	4.5908	4.4449	8.4686	4.2936	3.3664	3.2562	4.6406	6.0564	3.9586	3.4472	7.273	9.8275	6.44	5.5955	3.1885	2.4711	5.4334	5.559	9.3888		0.734376	5.26448
11.3184	9.1995	7.2727	5.3026	5.1536	3.3974	4.8346	2.9134	4.0813	5.5546	10.1418	4.0495	3.6587	2.5273	4.701	6.4349	5.1193	2.7392	2.5787	6.1403	4.713	4.9822	3.0318	9.143	7.3881	7.124	4.9085	3.1091	3.9657	5.9986	6.3812	8.3989		0.742185	5.32079
11.4376	5.3396	8.3395	5.6467	5.4295	6.09	6.7743	4.9202	6.6628	6.4064	6.5704	4.3783	4.547	2.4398	3.8266	6.071	7.0291	4.4355	3.5813	4.4997	3.5343	2.9385	2.2417	9.154	11.1133	6.9577	5.1149	3.5834	3.5477	5.1103	8.0474	3.8022		0.750002	5.42365
11.5567	4.87	5.2453	9.8016	5.3357	6.7518	3.3284	6.4814	4.7499	7.7211	7.175	8.527	5.7684	2.7783	3.0608	8.7905	5.1964	2.9994	6.9756	3.3236	3.2409	4.2294	3.0975	9.866	13.1181	7.234	4.8047	4.6699	3.8234	3.5718	5.0276	3.5174		0.757811	5.64777
11.6758	8.4114	6.291	5.8893	7.2024	7.5687	3.3557	4.1715	3.7573	11.3353	4.726	8.323	4.78	3.4654	4.7544	7.1656	4.9997	4.6197	6.1191	5.4271	4.0672	2.9163	5.0062	9.273	9.4188	5.2402	4.872	4.4735	3.5916	5.4106	4.5854	4.4912		0.765621	5.66802
11.795	6.5807	5.4148	3.9438	8.0143	3.8408	5.0601	3.2694	3.962	7.4446	5.7597	3.5854	3.9191	5.2705	2.6904	5.9476	5.1749	3.9257	3.945	3.4405	3.9813	2.9508	3.1758	6.899	10.4058	6.7581	10.4503	4.1393	3.8227	6.4395	5.4044	4.2937		0.773438	5.15839
11.9141	8.4903	6.9921	6.7152	4.8549	4.1407	4.0978	2.0256	3.3709	6.8626	8.4224	4.2242	5.3012	4.1162	4.597	4.5064	4.5761	4.4204	4.538	3.1525	3.4606	3.0438	3.1347	7.947	12.3277	12.4217	14.1624	4.5131	3.8689	4.0541	4.9241	4.2278		0.781247	5.59646
12.0333	4.7483	7.4303	3.126	4.5119	3.3435	6.8959	4.2339	5.5281	10.3935	4.4859	5.5125	4.8607	4.3537	6.5791	5.5339	8.8381	4.1292	4.5559	4.2538	3.1323	3.9388	2.4722	7.016	5.4226	9.1349	12.5558	4.6637	2.8883	4.4936	5.0341	5.8086		0.789064	5.47984
12.1524	5.2416	8.5089	4.4148	5.3495	8.3276	4.2488	2.6002	6.0398	6.7371	3.5752	5.5725	4.5692	7.1968	4.7454	9.883	13.1775	6.245	6.6911	5.0275	4.8936	2.8133	3.5502	7.522	8.3523	11.9111	15.4095	6.4312	3.9293	6.5267	4.0302	5.19		0.796873	6.41003
12.2716	3.9147	10.1568	4.2727	6.4155	7.159	3.6706	1.9966	7.2601	6.029	8.8993	5.0086	4.2412	4.4622	5.1039	7.0668	7.1564	3.5875	4.9446	7.708	5.4943	2.8414	2.5095	7.493	6.4798	13.7054	12.199	5.9011	3.5971	3.3744	4.5656	3.638		0.80469	5.83394
12.3907	6.0638	5.4906	5.2258	7.0425	4.0598	2.5174	4.0142	6.9802	10.2181	7.655	4.6924	3.06	4.7865	3.6124	8.9646	8.4156	4.3435	3.723	6.1825	4.337	3.9034	4.2567	8.508	7.415	13.2314	12.8789	5.1557	2.5464	7.2799	7.4316	4.8522		0.8125	6.09175
12.5098	4.2216	7.3002	5.0603	5.8877	4.1653	4.43	6.056	9.1073	8.2979	6.5864	7.5236	2.9939	3.8893	6.5159	5.1659	7.3766	3.3021	4.2056	8.0647	6.1683	3.9062	4.2149	5.881	3.6436	16.4945	12.13	5.5892	3.1969	5.5681	4.9524	10.76		0.820309	6.21469
12.629	4.9536	7.8366	2.772	7.5437	4.8703	3.5072	3.8212	7.8262	9.3007	6.9484	4.6951	5.5884	4.8151	5.5049	5.8447	5.7309	6.9019	4.2657	10.5397	6.5693	3.8023	4.4052	6.366	5.561	17.3537	8.3384	6.8468	4.6831	6.9485	4.1918	5.6151		0.828126	6.25637
12.7481	5.1137	6.3023	4.5026	6.009	4.0037	4.3174	5.8051	5.4016	7.6624	3.1206	5.6958	5.3558	5.7723	5.2572	7.6811	8.4652	6.3361	5.0877	9.9082	6.5427	2.8252	3.4913	7.274	9.7482	20.6976	8.1289	7.7405	3.5776	5.104	4.1079	6.6396		0.835936	6.37662
12.8673	4.2442	6.2699	5.2509	4.8662	3.6591	4.4079	7.909	8.3503	7.4086	4.8534	5.3556	4.1415	6.4855	5.7385	6.1966	4.0732	6.7586	6.9803	5.3096	4.558	4.3214	7.0839	6.399	6.9328	18.2709	5.5516	7.1524	2.9519	6.3755	6.5787	9.0817		0.843752	6.24247
12.9864	4.4165	10.3352	3.0302	5.3372	3.3134	3.1235	5.9438	5.2604	6.9595	5.1906	6.459	3.786	8.0456	4.3328	6.0244	4.7069	9.7245	6.9072	7.6278	5.656	5.2762	2.8093	5.977	4.9667	16.9525	6.1139	3.0915	2.3965	4.404	8.378	9.4996		0.851562	6.00147
13.1055	4.6664	6.3055	4.1737	7.2327	6.1609	2.7829	4.8017	2.838	5.9287	6.5105	3.815	5.9917	3.933	4.7746	7.0504	5.1119	6.2207	6.9696	8.0429	6.0777	6.6949	3.5776	7.842	4.5804	14.5829	6.1323	7.0872	3.7884	3.9763	7.3875	7.9391		0.859371	5.90249
13.2247	4.1778	3.9419	3.2387	7.6721	4.1858	2.2384	3.6519	4.2904	3.9655	4.1654	3.1263	8.0431	6.692	5.3108	7.3549	6.029	7.9272	7.1125	3.8138	5.8144	6.8131	4.138	5.861	7.0345	8.2962	6.7808	8.8164	4.0557	6.6451	3.9931	7.6323		0.867188	5.57478
13.3438	3.2323	4.283	3.1765	5.6614	6.5313	3.0427	8.1572	4.8352	4.4111	6.4148	4.4056	3.9034	3.943	4.4675	7.0223	2.2602	5.9999	5.7904	3.724	6.6002	4.2813	6.4275	6.789	9.1127	7.7546	10.019	7.2171	5.451	8.3795	6.3425	11.4652		0.874998	5.84198
13.463	5.3536	4.1048	7.4858	7.0093	10.1493	3.778	10.3823	4.4456	5.1266	6.8812	5.5268	3.7579	4.5829	5.784	5.7651	2.8582	8.5906	5.2868	8.1692	8.4993	4.2127	6.0715	4.756	6.3084	7.2033	8.0464	10.2499	7.4063	3.6948	6.0107	6.1681		0.882814	6.24727
13.5821	7.55	5.041	6.7761	4.1915	9.8108	5.9472	6.5683	5.8947	4.4855	7.197	4.4394	2.1131	7.9844	4.1198	4.4386	3.9569	10.5535	7.5925	4.1625	6.4662	8.0327	4.9271	4.574	6.781	7.4595	5.019	8.4036	5.7123	5.4601	5.8428	6.3054		0.890624	6.05827
13.7012	7.179	3.237	5.2675	6.4515	7.3905	3.5517	4.7556	7.673	3.6164	5.2252	3.0954	2.8969	5.6237	4.6949	3.6448	4.2886	7.818	8.8195	4.7128	5.8414	7.0766	5.3641	3.868	3.4933	3.9463	7.1507	7.9262	6.3496	4.882	7.1849	4.1088		0.898433	5.39142
13.8204	5.7587	2.5993	3.5188	5.3829	9.3131	4.885	6.0389	7.5718	3.3436	5.0203	3.0459	3.7292	3.7717	5.3278	5.789	2.8885	5.9058	8.4433	3.5299	4.8013	4.609	4.4774	4.253	4.0229	7.1197	6.8058	6.0298	3.7658	5.9136	5.2687	4.8815		0.90625	5.09071
13.9395	4.4693	4.5254	6.5554	4.3983	6.7489	5.0758	4.4711	5.6985	2.7317	1.9401	3.8119	3.4939	2.3372	3.872	4.088	2.0442	6.4081	4.0526	2.8768	3.7848	5.1261	4.0108	3.489	2.9095	5.263	4.2229	6.5132	4.1504	6.1338	7.1682	6.9297		0.91406	4.49357
14.0587	5.7927	2.3152	5.6946	3.6138	8.0556	5.6751	5.3355	5.0043	3.0598	2.775	5.2743	2.5865	3.3127	4.1207	2.8009	1.9721	4.8498	8.7634	4.6023	5.2978	5.8239	2.5007	2.854	4.2752	6.2842	4.9523	8.0708	5.0688	4.7662	6.8662	5.062		0.921876	4.75569
14.1778	7.7377	2.0198	6.1664	2.1721	7.7813	5.0743	6.3906	4.1164	3.0101	3.9521	3.1233	2.4813	1.8672	3.1169	3.9264	2.0602	4.1756	5.2464	4.2947	4.6076	6.1206	2.7874	3.697	4.8958	3.5208	10.7902	6.7024	7.4319	5.7089	5.1726	5.2234		0.929686	4.6894
14.297	6.0306	3.8728	5.641	4.7569	5.575	4.9849	5.8849	2.44	2.2728	2.9771	1.7808	2.1252	2.1042	2.5694	2.3886	3.2756	5.9592	6.5159	3.5599	4.0778	5.6482	5.6736	2.712	2.4781	3.8222	11.8668	5.7466	5.5417	6.7783	4.2151	5.6009		0.937502	4.47987
14.4161	3.343	7.9287	4.5991	2.8192	8.2976	5.3338	5.3607	3.1323	2.3765	2.7535	1.9925	2.7765	3.503	2.1611	3.3557	3.11	3.4149	5.4091	4.2025	2.883	2.7669	2.7459	5.799	1.7801	1.9159	11.1987	5.0186	6.3671	4.1566	6.7251	8.008		0.945312	4.36241
14.5352	3.999	5.3255	5.8002	3.4402	5.9705	3.9588	8.1717	3.249	1.725	2.1486	1.6784	2.2836	3.8809	3.0285	2.8676	2.2185	1.9658	3.7475	3.585	2.4468	2.3795	2.5034	3.043	1.765	2.3434	11.2929	6.0001	6.7272	4.1914	5.5704	4.8469		0.953122	3.94046
14.6544	6.5427	4.1089	3.5048	4.222	4.0663	5.5888	4.5721	1.9784	1.7627	1.9837	1.6537	1.8499	2.1889	3.2887	3.1108	1.9541	3.0248	3.9973	3.599	2.8637	2.1668	2.8835	5.216	3.3277	4.2809	8.1078	6.1184	7.2408	6.1014	7.0599	8.2022		0.960938	4.0828
14.7735	4.9261	5.3537	3.7023	4.1115	7.4887	3.723	4.0699	2.3778	1.8982	3.008	1.8273	2.529	1.6769	2.6856	4.1554	3.0599	2.6557	2.7445	4.1431	2.3647	1.8769	2.7311	3.8	3.8979	2.2451	7.8619	4.6284	8.993	5.876	6.4761	5.7642		0.968748	3.95651
14.8927	3.7588	8.5035	3.8349	3.5444	11.3521	4.0308	2.8629	2.994	2.5034	2.3898	1.9858	2.825	1.7758	1.9809	2.7245	3.2089	3.1818	2.21	3.5188	3.2438	2.1119	2.7541	2.905	4.3325	2.8606	4.1548	4.8029	4.5466	8.2266	8.484	3.855		0.976564	3.91819
15.0118	4.7836	3.252	5.6354	3.7403	5.1452	5.0599	2.771	2.327	3.0923	2.1694	3.3655	2.3877	1.7212	1.793	2.3695	3.8063	1.8146	2.4581	1.9643	2.5177	3.9041	2.8913	3.281	5.1166	3.6704	2.0863	4.8837	4.6927	5.4591	7.0138	6.2448		0.984374	3.59412
15.1309	6.5068	5.5111	4.9128	3.5006	3.2959	3.4988	2.0708	2.6494	1.7572	1.7323	3.1443	1.7541	2.2946	1.9424	2.2472	2.4994	1.8936	2.7751	2.0328	4.8674	3.304	5.8592	3.001	3.4008	1.8606	2.7279	2.6146	3.8496	5.6497	5.82	5.4712		0.992184	3.3692
15.2501	4.5483	6.2092	3.4405	4.3347	3.9508	5.7699	3.4134	4.4478	3.3201	1.8844	2.1243	2.333	1.8139	2.1813	2.001	1.5993	1.8326	2.3846	4.7862	2.235	3.1353	2.7593	2.989	2.464	2.8348	3.0427	2.3468	5.6059	6.3309	5.0049	5.307		1	3.43325

## Sheet: Image8
X0	Y0	Y1	Y2	Y3	Y4	Y5	Y6	Y7	Y8	Y9	Y10	Y11	Y12	Y13	Y14	Y15	Y16	Y17	Y18	Y19	Y20	Y21	Y22	Y23	Y24		Ap-Basal	Avg intensity
0	20.678	20.64	23.7074	49.559	45.4325	43.0294	31.1095	28.3488	21.6291	23.1967	38.6064	43.5482	23.4237	42.877	30.9783	68.5092	24.4992	24.2257	27.5038	27.1987	21.5738	18.9531	20.8038	12.3375	22.2782		0	30.1859
0.1191	21.286	25.892	25.8888	47.636	58.1985	46.9406	37.6735	38.6537	25.396	22.8747	43.6973	41.8098	28.7576	42.2344	31.3394	65.5079	21.5369	19.8959	23.5576	26.633	29.2042	27.0053	23.1542	20.5844	29.7753		0.00680035	33.0053
0.2383	21.317	22.208	35.0265	42.996	53.5045	55.5819	38.3766	43.8889	38.3232	18.6286	48.3093	44.4726	37.0404	40.334	30.1159	70.7299	17.3134	23.3827	17.8243	28.9239	33.6445	23.404	28.9471	30.6532	28.943		0.0136064	34.9556
0.3574	20.355	26.711	39.8693	41.839	61.7722	50.5905	40.4484	63.4392	44.8664	17.6795	49.8291	41.6724	40.0799	40.7964	31.8215	76.8768	27.9926	29.8564	21.9061	30.4494	30.9535	25.7361	32.6505	34.1808	27.5971		0.0204068	37.9988
0.4766	26.009	37.915	50.1367	42.774	60.888	52.8202	47.5208	52.02	46.697	23.0284	55.1763	42.0891	39.8517	41.1111	30.1979	76.3636	25.3814	27.4485	32.932	37.4024	26.5595	23.6063	31.9321	37.052	29.0584		0.0272128	39.8389
0.5957	39.319	45.299	50.5446	46.444	68.0805	60.8607	52.9126	58.4121	51.0575	26.9745	51.6567	43.7711	41.1278	42.7205	34.6343	73.5059	24.932	39.7042	46.0014	33.2161	30.723	22.4983	33.8973	48.7652	30.7947		0.0340132	43.9141
0.7148	41.549	59.576	56.8554	49.433	92.1264	75.2474	61.909	71.9925	57.3267	26.4483	58.644	48.3418	44.8477	42.7499	45.0162	68.7564	23.7204	42.3462	56.8936	38.9072	33.9809	29.0147	31.0856	59.2656	29.4333		0.0408135	49.8187
0.834	66.873	74.516	54.2046	48.584	99.2466	71.6445	74.4142	77.7726	76.0649	32.8208	54.3092	48.3299	45.73	44.2982	38.7821	75.904	27.8825	45.8431	56.106	40.7291	39.8712	27.9617	26.258	52.4418	43.0258		0.0476196	53.7446
0.9531	90.1	88.183	58.3791	56.102	92.8887	79.6493	72.7478	76.9659	81.5389	43.4701	68.7099	49.2635	50.2992	50.695	36.7252	74.0014	27.5411	57.453	61.2349	40.2867	40.5434	31.8033	30.6468	54.7942	41.3639		0.0544199	58.2155
1.0723	103.857	99.673	60.0836	55.117	98.3449	84.0568	72.6541	77.7526	89.3221	44.6492	67.4623	60.9824	45.0031	68.966	31.872	70.8037	34.3882	63.5533	54.6064	39.585	33.5387	40.8381	31.0357	60.243	42.4193		0.061226	61.2323
1.1914	103.056	99.132	69.3624	57.199	95.6536	89.5039	89.6626	70.7863	82.4206	57.067	64.7169	53.8721	54.1073	60.9582	41.2593	76.5867	32.7999	54.9434	54.8423	44.73	36.7886	41.3438	34.9743	61.3684	44.6842		0.0680264	62.8728
1.3106	107.291	105.401	62.9212	61.839	99.195	86.8876	87.6896	77.0601	84.4437	62.6807	69.8007	63.6846	64.074	51.5461	29.8669	84.7073	35.5402	49.8855	60.3065	55.3639	41.8411	37.3551	41.7912	57.9047	39.3469		0.0748324	64.7369
1.4297	111.706	108.267	67.5639	73.123	98.6263	98.6425	73.507	80.2161	78.2364	73.5569	67.6365	67.0601	60.1569	57.4621	43.4752	88.0442	27.2728	49.9205	60.6158	52.3286	46.6163	28.3362	47.475	58.8411	44.1067		0.0816328	66.5117
1.5488	115.914	108.463	71.4224	78.807	89.4899	93.9969	78.457	89.3912	94.4962	73.8061	69.7467	64.4993	62.4763	50.3913	52.5401	76.7305	29.968	43.7917	56.5111	55.9444	36.1632	26.7037	46.561	60.3611	49.1383		0.0884331	67.0308
1.668	118.131	111.976	77.8907	87.318	79.3082	90.1552	77.2104	93.5583	95.1078	71.6446	61.6846	79.7556	64.2152	42.7202	43.1887	77.9437	41.5376	37.7627	56.5331	63.3862	39.0491	31.5927	42.8683	58.5408	44.6899		0.0952392	67.5107
1.7871	118.604	119.357	70.7191	89.153	68.1864	86.8025	73.1977	87.1601	79.0736	67.4778	79.1763	90.7101	56.7325	45.4658	45.8049	82.2482	37.08	40.2276	64.25	49.733	52.0307	25.5151	50.6412	59.1001	44.6345		0.10204	67.3232
1.9063	123.855	107.268	70.1546	102.077	61.0178	82.2499	78.4052	80.5668	80.2702	67.4805	82.5107	77.3314	64.4561	45.2327	49.9759	73.0301	37.4051	39.5319	74.4394	58.2326	55.715	28.1333	50.929	54.6396	45.6961		0.108846	67.6242
2.0254	121.934	106.077	72.6148	105.988	52.2588	75.644	77.1923	74.6103	74.577	63.8748	70.7264	80.6237	69.9443	50.7528	40.6946	64.2818	38.4252	31.5912	75.7709	47.7189	54.6455	26.663	50.4394	52.4078	47.2932		0.115646	65.07
2.1445	111.518	100.505	76.998	102.027	57.4234	69.4212	97.3786	70.3132	76.5911	62.3882	61.8506	87.0019	80.5456	49.2084	38.6492	76.3606	42.0905	30.3407	70.1428	45.4886	54.0205	30.6371	45.7341	57.8343	51.706		0.122446	65.847
2.2637	112.114	93.793	74.6662	108.844	47.4677	67.1001	84.708	68.0871	73.3101	64.4577	77.6934	95.1052	69.5727	50.8027	40.3313	62.8588	44.4322	25.875	58.6944	54.6014	53.7277	29.0354	50.6115	55.6733	58.5537		0.129252	64.8847
2.3828	91.027	87.181	77.3683	121.502	48.077	65.6705	81.1016	76.1479	70.0837	66.6314	71.6325	81.4723	69.8325	53.8049	31.8441	59.394	41.6691	36.1604	59.5038	53.8992	53.7395	29.2164	51.2452	60.9458	41.4162		0.136053	63.2227
2.502	87.658	77.823	87.198	121.953	44.5634	62.2575	74.1902	64.886	69.348	65.3432	89.0702	75.8606	71.9245	53.0634	36.0994	67.298	30.3155	33.5184	52.3356	54.9844	45.9434	24.0645	47.805	61.3672	44.7758		0.142859	61.7458
2.6211	95.267	78.653	80.4047	125.514	51.3589	59.8002	74.331	60.8515	63.1062	64.9586	85.2009	81.5776	60.7055	55.8762	33.7596	72.9519	27.7739	27.2735	62.0862	56.2192	51.3821	16.5173	54.8671	54.5161	42.6379		0.149659	61.5036
2.7402	78.53	69.129	81.5993	128.36	48.6993	49.4593	63.5074	56.3865	60.3887	53.0274	68.5897	92.7115	68.488	52.9558	29.0899	69.3258	33.2623	23.8795	55.9751	49.4103	54.1061	22.0105	46.7965	50.945	43.4566		0.156459	58.0036
2.8594	72.702	53.546	80.2474	119.634	42.1388	49.5808	61.8523	60.9236	56.37	40.9107	72.3924	88.4567	74.4295	62.9052	30.0879	57.337	43.539	27.5948	47.5394	45.4782	32.9229	22.4657	39.6715	52.3355	53.9159		0.163266	55.5591
2.9785	75.49	50.938	91.2736	118.881	41.3154	46.9345	63.0421	42.8181	62.0022	52.6951	74.7018	83.657	80.7738	63.4093	32.3907	54.5718	46.5572	25.275	46.1843	39.6911	34.6022	18.8291	55.1007	60.3142	40.1188		0.170066	56.0627
3.0977	79.731	57.01	88.3296	100.471	48.853	49.2874	53.0516	41.3603	62.341	46.3561	64.9273	81.9634	79.7234	53.3669	36.1556	57.2614	46.5806	31.0077	53.4539	33.3849	32.7781	23.4704	43.1906	55.8566	49.3669		0.176872	54.7711
3.2168	61.949	41.54	86.111	106.576	37.4537	52.6673	53.6691	46.5207	56.7008	46.0397	73.9226	76.9615	80.0019	52.3179	26.931	52.1502	36.8643	34.8097	53.2047	29.0899	32.0995	23.9872	38.5289	58.6947	47.129		0.183672	52.2368
3.336	61.028	49.899	87.5349	91.89	36.262	47.984	51.919	46.7283	47.123	52.9853	73.9148	72.1813	70.2541	56.809	27.4506	42.9729	35.924	33.2368	54.1015	24.0751	36.3649	20.6397	49.7833	55.0192	47.7309		0.190478	50.9525
3.4551	56.523	39.923	87.6065	81.318	33.3287	39.4638	45.8665	42.1355	48.8702	47.1434	81.2455	69.5055	70.3591	47.9442	40.161	49.481	34.9796	32.1685	47.7548	24.9641	29.7703	12.8345	57.7709	45.2247	43.2139		0.197279	48.3822
3.5742	37.197	37.793	76.4788	79.038	33.7704	40.4493	38.7991	43.7703	48.0276	55.848	80.6758	61.0815	74.0194	56.7562	44.2153	59.9594	35.6992	34.4572	51.0102	22.0358	21.8693	16.205	48.6718	43.0679	42.8928		0.204079	47.3515
3.6934	30.049	48.188	75.2207	67.782	34.0075	41.7683	46.1047	37.6127	50.2397	41.2475	75.478	56.7072	83.6968	52.4975	43.0889	45.6659	33.9263	40.0214	45.411	28.0439	21.9875	14.1834	48.5061	59.7883	55.0417		0.210885	47.0506
3.8125	39.635	41.059	64.5947	63.452	37.743	35.2177	44.6447	40.0397	51.3689	40.0153	79.8079	55.4504	86.7017	61.6699	40.6702	54.5972	38.9932	45.488	48.5819	28.2061	23.9533	15.1297	46.164	60.7964	49.1678		0.217685	47.7259
3.9317	27.179	45.106	56.223	71.309	32.6035	34.7186	27.9832	38.3482	53.1249	36.663	70.8839	53.5531	103.207	54.1776	39.1785	53.3226	37.5955	43.6725	49.9656	21.4369	23.0457	12.9459	48.6084	54.8562	51.2193		0.224492	45.6371
4.0508	28.072	54.308	52.7173	54.845	34.6091	22.805	35.8944	39.0009	46.1137	45.3515	61.1973	43.2395	92.9504	58.9616	47.1499	52.5604	39.6031	42.2127	54.7845	21.0351	23.2749	16.183	54.2896	46.0783	49.8129		0.231292	44.682
4.1699	24.788	48.937	53.2851	36.069	40.2163	17.9664	37.5969	34.6303	42.0627	44.6223	62.6872	50.4156	91.8125	59.1554	38.4656	58.1392	38.4416	44.4612	48.1997	16.3439	22.0836	10.0129	41.1286	39.9127	51.5171		0.238092	42.118
4.2891	23.223	45.05	46.4301	31.099	36.9249	21.5299	36.7155	26.0453	40.019	36.7958	50.2434	53.3717	89.9214	48.1461	40.0686	56.0337	30.8224	45.911	49.0356	17.3506	22.0551	11.703	46.1296	43.0989	38.615		0.244898	39.4535
4.4082	32.461	41.308	33.585	24.925	44.581	15.2213	32.4417	24.5162	26.2197	31.1901	43.7751	46.6725	85.1109	45.1561	32.0874	57.787	29.4036	36.5703	42.47	16.5298	24.2147	14.3271	38.0235	35.7543	36.8588		0.251699	35.6476
4.5274	28.209	38.931	22.4807	29.259	40.6925	15.9836	33.5301	13.5529	23.7307	21.0952	42.1851	41.033	72.0458	40.9412	36.7054	50.5791	31.0283	39.6091	43.4762	18.7069	24.2906	13.2746	41.2556	30.5238	39.2023		0.258505	33.2929
4.6465	27.958	41.179	21.9731	24.548	38.8924	18.5232	22.0623	24.1185	20.9733	21.9492	45.6903	36.7303	69.9056	33.3922	39.9125	62.3291	28.9743	40.2449	46.9857	16.3939	19.6767	11.9791	34.2392	27.6011	43.0692		0.265305	32.772
4.7657	41.34	37.186	17.2899	24.233	42.2802	23.157	25.165	27.0359	23.1243	20.5671	43.8621	35.2668	65.2687	28.942	34.7959	55.6423	25.5962	42.4623	45.9631	15.252	13.2713	13.5242	43.1757	24.8074	42.0997		0.272111	32.4523
4.8848	44.171	29.811	19.3392	32.084	32.3639	19.5017	26.3996	24.9385	18.6611	20.3799	31.3435	33.6318	66.6937	23.185	28.8167	47.137	18.908	46.5158	38.9858	15.8917	12.8062	15.3852	41.4574	19.7023	37.2678		0.278911	29.8151
5.0039	38.346	35.716	25.5986	34.313	29.7215	21.3404	24.4888	25.3164	17.9903	21.7582	30.4103	32.321	62.4581	27.2288	23.2796	42.018	16.9213	39.3167	32.5334	13.0967	21.3944	17.2624	30.5067	19.5055	37.7868		0.285712	28.8252
5.1231	39.842	32.521	22.8962	30.119	24.6939	23.6375	19.2745	20.6292	8.1712	15.4797	30.3637	29.378	58.4338	26.7566	30.1619	52.2809	12.3723	28.2432	29.5625	12.3883	13.3135	21.3519	28.3521	20.7816	41.0077		0.292518	26.8805
5.2422	41.757	37.535	25.2869	23.81	19.9388	22.4283	23.8314	18.7902	9.9291	23.8001	22.263	25.1511	50.7535	29.4649	29.9918	48.3694	16.9364	40.3417	25.9796	12.0639	15.2054	14.9113	29.0559	16.4641	37.4104		0.299318	26.4588
5.3614	43.202	36.419	23.6254	17.787	14.1796	25.5373	23.2948	15.8038	10.1915	19.8126	22.1536	25.2894	45.7004	29.6943	24.2629	53.0965	16.4821	33.3577	25.421	10.7345	12.9164	9.52	37.9037	12.8231	35.3669		0.306124	24.983
5.4805	41.422	45.508	17.8417	18.252	16.5286	27.4427	20.6732	13.899	9.2159	15.779	21.8914	27.3074	43.1662	30.2322	32.4736	43.524	9.4862	23.9791	29.8454	8.5978	9.9666	11.3747	24.6585	11.7928	29.2669		0.312925	23.365
5.5996	50.898	47.951	20.9137	14.531	10.0341	23.8852	17.0004	13.9901	9.9618	16.6926	16.2948	18.6021	40.2972	28.5628	30.8047	39.0703	14.5921	30.43	27.4215	5.442	9.6808	17.8245	26.1535	13.2397	31.5375		0.319725	23.0325
5.7188	55.967	38.04	22.5	13.993	11.4991	20.021	19.0914	13.026	9.415	19.8726	20.1712	21.5843	44.2503	21.9161	22.2571	38.2365	14.6875	26.2229	26.0122	9.2451	10.8683	12.9761	24.2384	18.1491	24.9444		0.326531	22.3674
5.8379	44.758	35.268	19.1715	13.016	13.7105	21.0958	16.4412	16.1703	7.64	17.8625	14.2772	16.0165	42.4653	17.8472	26.3914	31.4323	12.4091	23.0807	20.0214	10.6788	8.0797	14.7206	23.4865	12.6204	24.844		0.333331	20.1402
5.9571	46.339	37.943	20.1766	14.533	17.0177	14.6306	14.3088	12.7952	9.0095	18.6695	9.8026	20.9733	27.3687	14.5936	22.6804	31.1689	10.1904	22.021	17.3343	8.5209	6.5643	14.2478	22.611	13.2518	17.4587		0.340137	18.5684
6.0762	61.38	36.72	16.1097	11.248	17.2331	9.8395	14.0685	13.8392	8.2511	15.9495	12.551	15.5814	33.516	11.4055	19.1857	27.2851	12.214	14.6524	18.0523	9.1608	4.3938	14.2251	19.0928	12.5014	19.5757		0.346938	17.9213
6.1953	54.216	34.724	15.498	12.721	13.0773	17.1594	12.0818	19.0433	10.4268	16.4	12.1436	17.1654	27.146	11.0541	16.4968	27.5565	10.0434	18.3258	16.9001	9.9184	5.216	16.8613	20.7405	12.0282	16.9047		0.353738	17.7539
6.3145	51.404	25.599	10.6144	13.079	8.5152	15.2991	9.8938	12.0121	12.3651	14.8539	9.4176	17.2899	28.7382	16.6068	16.2707	26.4101	10.2499	18.7011	11.0769	10.3032	8.3513	13.7041	19.3193	10.251	13.6839		0.360544	16.1604
6.4336	50.694	31.023	14.3923	10.488	12.2175	12.0164	10.888	10.8025	10.529	16.4654	9.351	13.4452	37.3837	15.9512	13.7423	22.7993	8.7929	12.6121	11.7914	8.5265	6.7729	9.1775	17.186	12.0613	17.9122		0.367345	15.8809
6.5528	47.278	30.635	14.313	14.399	7.976	8.8377	9.3446	5.647	12.9611	16.5888	10.7826	12.0777	29.7683	10.5393	9.5181	23.6597	8.9294	8.8644	14.5595	12.2675	6.4234	13.5549	14.5581	10.6571	14.6852		0.374151	14.753
6.6719	51.683	33.034	12.0018	20.099	7.3268	14.3368	8.1011	7.5721	9.1882	17.1091	11.4778	15.3812	28.4139	13.2151	11.5961	21.7612	9.2999	10.5591	10.8402	15.4827	7.9874	18.0529	11.9124	10.7421	19.1131		0.380951	15.8515
6.7911	47.869	22.319	11.1644	20.032	5.161	9.8984	7.8798	11.315	8.9376	15.556	6.205	17.3008	20.7271	10.9996	10.5543	17.711	10.0552	12.2827	20.4439	11.12	6.0399	16.4437	13.2889	11.9504	17.1984		0.387757	14.4981
6.9102	38.456	22.232	13.0132	24.895	5.1703	14.613	7.2948	7.9282	7.4546	15.2008	5.266	16.515	23.8171	13.0197	10.8013	14.7095	7.6829	13.7298	14.5296	11.3572	8.3545	13.0942	11.1618	8.0536	17.7484		0.394557	13.8439
7.0293	35.666	20.736	14.5486	19.058	4.6955	17.5247	12.8506	6.8778	10.6761	14.544	7.3917	19.0176	23.0803	16.3211	9.8277	18.8467	10.8072	10.6923	8.8977	12.1188	8.5028	9.5826	12.1056	10.1358	16.5446		0.401358	14.042
7.1485	35.366	23.721	11.7795	17.635	8.2413	22.045	8.3173	9.7046	11.5375	12.6233	6.401	16.1648	22.3142	9.8284	10.2395	19.7998	8.1012	7.5017	12.1632	8.695	8.3439	13.8897	16.0853	7.4243	19.1445		0.408164	13.8827
7.2676	35.205	26.404	13.3182	12.121	5.5322	22.6722	11.4623	16.9404	11.597	10.4933	6.3463	21.7812	17.6072	16.034	9.3101	16.3767	7.8561	7.7094	10.2438	8.1536	8.9892	14.1212	14.1041	7.5907	18.0654		0.414964	14.0014
7.3868	32.28	33.383	11.4457	8.59	5.7424	21.881	7.5088	17.8039	11.0281	12.1591	9.2515	23.727	15.0872	10.3502	8.9383	17.0442	4.8979	9.1562	7.9739	11.775	5.4824	6.897	16.4116	13.0045	12.4491		0.42177	13.3707
7.5059	23.132	28.539	8.7699	9.273	8.5383	20.4752	8.8793	18.1455	11.7687	7.7583	7.5068	23.9762	13.3704	10.1741	7.3587	14.8871	9.2534	11.4346	7.4915	11.6246	6.3608	9.5875	10.7024	10.603	11.7474		0.428571	12.4543
7.625	20.846	21.493	13.9002	7.93	4.9866	20.5925	8.4798	19.0526	13.2433	5.1113	6.6567	23.8568	17.1523	9.6424	6.2937	15.4815	8.3551	12.99	10.111	10.4121	9.8163	8.8105	11.2581	10.7834	10.6728		0.435371	12.3171
7.7442	17.979	25.76	15.9704	9.182	5.9124	16.0004	5.2863	19.6943	11.9526	7.9081	5.6787	16.9426	15.1863	7.4292	6.4989	14.7375	9.9318	11.6375	8.4621	8.8719	8.3986	6.9342	13.8879	13.1886	10.91		0.442177	11.7737
7.8633	18.672	27.164	11.8272	7.625	7.5821	9.9967	4.8226	18.7321	12.218	5.9182	7.6711	16.6634	17.2053	5.0919	3.84	13.0494	6.524	14.3721	9.1984	8.2094	6.7686	4.3235	6.779	7.7241	14.1803		0.448977	10.6463
7.9825	12.068	29.714	11.2194	6.97	6.049	9.9913	5.0578	14.4284	9.0055	4.3916	5.0658	17.8313	23.2931	5.2066	6.2679	11.2704	9.0886	13.9743	6.6211	5.6371	5.4521	3.5548	5.8757	10.8418	10.4638		0.455783	9.97358
8.1016	7.705	22.939	9.065	4.574	5.9966	11.2352	8.4059	9.4287	7.323	4.1164	8.0701	16.8957	25.7764	6.0785	6.2838	8.2411	9.7857	12.2576	8.282	8.8171	8.0467	9.712	3.2765	8.7163	9.3736		0.462584	9.61608
8.2207	9.947	26.379	6.0489	3.815	4.0107	8.3088	7.7391	7.9828	9.4156	4.9027	7.7056	23.2481	31.398	7.7469	5.7248	9.2977	4.8157	8.7508	6.3764	10.4964	7.2822	6.7628	3.5708	10.1198	7.8421		0.469384	9.58751
8.3399	11.857	20.015	8.2793	5.522	4.9119	9.2571	8.2122	4.5287	6.9147	6.2959	7.2272	21.3085	31.0264	9.7348	6.4467	8.5191	9.9806	11.164	8.0627	11.098	7.6343	4.8857	5.3466	8.2838	13.2364		0.47619	9.98994
8.459	15.108	23.166	7.2843	8.087	8.4631	9.084	6.9441	5.1181	5.8831	11.1489	6.9846	22.5664	30.7071	7.3059	7.41	10.7888	10.7488	11.0116	4.649	8.9246	8.1736	3.2264	2.7228	13.2477	10.4412		0.482991	10.3678
8.5782	13.737	24.234	9.0889	10.194	7.4301	11.0435	7.786	7.9932	8.8705	9.1288	7.7336	18.3497	30.4103	3.9862	9.175	10.2447	8.2812	8.5791	3.5568	8.3802	9.5486	3.0864	4.017	14.943	10.4689		0.489797	10.4107
8.6973	16.008	22.987	14.9551	12.334	3.8206	6.6032	8.9014	8.6703	5.6951	6.7018	4.7496	21.0019	33.2846	3.6868	7.192	8.3227	9.3914	9.0251	7.4964	7.3904	7.104	3.5096	3.239	18.281	13.1753		0.496597	10.5411
8.8165	16.321	16.586	9.4559	9.445	7.4196	7.1718	9.8334	11.6233	4.3111	3.3393	2.4359	22.5526	39.2559	8.9052	9.7571	6.801	8.0817	10.6968	6.8282	7.5211	8.4066	2.6974	2.3383	15.0507	12.374		0.503403	10.3684
8.9356	20.144	14.423	6.6855	6.109	3.4388	7.6186	8.4733	8.8357	4.2627	3.5353	3.482	19.142	30.8093	3.8079	6.5756	8.798	6.2655	7.154	3.2515	7.2559	7.0433	4.2751	3.0113	13.0922	10.5612		0.510203	8.72203
9.0547	22.141	12.302	8.7096	7.846	6.4715	8.3881	6.5352	8.5951	4.3883	2.6127	5.5859	19.923	29.7685	3.9105	5.0682	6.4406	6.4059	5.0979	6.6341	5.6045	7.98	3.6062	2.7759	14.4424	10.922		0.517004	8.8862
9.1739	24.22	12.683	8.4719	6.347	5.8092	9.5546	7.3564	7.0997	4.5028	4.66	6.5661	16.3965	28.6385	5.3217	4.9662	11.4392	4.7951	6.3764	5.646	9.3817	5.9992	5.2682	2.2683	11.1505	10.6147		0.52381	9.02132
9.293	20.3	16.537	10.6304	6.188	5.6137	12.7216	8.5215	6.4976	4.1557	7.1752	3.315	11.0356	23.3611	7.2141	3.8462	10.1917	4.6248	7.9166	7.5391	8.3402	5.9701	4.2271	2.6036	9.8369	14.2769		0.53061	8.90559
9.4122	10.374	15.846	8.8024	7.635	4.3811	15.9634	7.1178	8.1498	4.4974	7.5521	4.2114	7.468	17.6288	5.1821	8.4275	9.3599	3.015	7.3552	6.7527	7.5356	9.8169	4.2339	4.207	12.6656	14.2902		0.537416	8.49875
9.5313	11.458	14.28	5.4271	10.707	4.7222	12.974	7.1169	8.2336	5.6836	5.865	7.9549	9.4797	13.1345	6.773	5.6482	6.9857	3.5776	4.0569	4.8422	5.8329	7.9825	3.0033	2.7804	9.9934	16.8121		0.544217	7.81299
9.6504	7.352	13.024	3.27	6.632	4.6223	13.7107	4.4507	4.8396	5.1568	12.8319	4.8393	8.571	12.6882	5.078	6.1203	8.9997	3.7241	6.3146	6.8535	6.3902	9.8219	3.2414	3.4111	8.7436	11.2888		0.551017	7.27903
9.7696	8.235	8.095	5.8208	5.282	6.9997	17.8003	6.8297	3.0709	4.6915	9.7414	4.227	6.9727	14.6406	6.6255	4.4873	7.6499	5.1033	7.142	3.1174	4.9019	4.6012	3.2424	3.2141	10.8675	13.6948		0.557823	7.08216
9.8887	5.987	12.339	4.8575	7.753	5.0365	8.0832	6.6277	3.2716	3.1264	8.6158	4.3648	3.9761	11.2191	8.301	3.9871	7.2356	6.3687	5.6941	5.7683	4.277	5.4407	3.0715	2.3446	10.1727	10.6915		0.564623	6.34442
10.0079	7.951	10.016	4.8719	7.73	4.3662	7.949	4.3843	4.6313	4.4309	6.3568	7.4692	5.4347	11.618	9.6445	6.6919	6.4658	8.8939	3.8584	9.0577	4.4311	5.413	4.9067	4.2435	10.4331	9.0202		0.571429	6.81076
10.127	8.987	9.548	5.1732	4.489	7.1633	8.3263	5.5597	4.3653	4.6326	4.8842	7.7858	9.0356	10.0599	6.8624	6.2784	5.5299	5.9639	4.2301	7.1673	3.9924	8.5734	4.6447	1.9358	9.0014	7.9259		0.57823	6.48462
10.2462	8.375	12.688	5.2912	4.968	4.1304	11.9518	7.5397	4.9632	2.9866	6.3908	4.2632	7.6916	8.9403	5.4318	4.7348	6.6916	4.2036	4.3366	5.2167	7.19	9.924	3.4843	3.0861	6.442	9.4165		0.585036	6.41351
10.3653	6.192	7.728	6.4915	6.226	3.432	6.9157	6.1357	5.1228	5.6183	6.6467	6.0673	8.7671	7.2037	3.7585	4.3339	4.1603	2.6097	5.7713	5.5618	6.4765	4.582	2.6376	4.3153	6.8087	6.9213		0.591836	5.61935
10.4844	5.965	10.283	9.6212	5.655	3.8418	7.685	10.1078	3.3699	5.0458	6.961	7.7846	9.8861	7.4934	3.137	4.3455	3.7421	3.8896	5.3661	3.2396	7.8541	3.9914	2.98	4.1675	6.3071	8.3909		0.598637	6.04442
10.6036	3.882	11.356	8.6887	5.28	4.8479	6.0468	11.7336	3.2203	3.5802	7.4266	12.0378	10.4359	11.5263	3.8168	3.2853	5.4689	1.9241	4.4473	5.5412	5.9796	8.0419	4.4821	3.4393	5.0901	7.7504		0.605443	6.37316
10.7227	4.681	16.387	13.5215	3.623	5.7175	4.8168	14.5697	4.5166	5.0125	7.7591	12.2646	7.1297	5.163	5.1868	4.7418	5.9124	3.4899	4.8233	5.3263	6.5135	10.0306	3.0345	2.0487	4.8125	13.8732		0.612243	6.99822
10.8419	4.474	14.305	9.0049	4.799	3.1917	5.4827	13.8185	5.0812	6.1456	6.0024	11.3668	8.3622	6.2516	2.5158	2.9766	4.8522	3.8708	3.5811	4.8739	5.9634	10.8735	2.5992	2.6285	6.0901	12.943		0.619049	6.48215
10.961	3.8	13.042	8.2203	6.076	3.0435	7.0007	7.9002	4.4098	6.7906	5.7892	9.9439	9.2263	7.1473	3.3436	2.9373	5.0175	3.1336	4.348	4.3757	6.6321	8.4044	4.2782	3.5745	7.793	13.7407		0.625849	6.39874
11.0801	4.814	12.607	6.8168	5.403	3.0909	4.2379	7.9355	2.7772	4.4659	4.5907	11.391	6.7952	6.0413	3.9836	7.2866	4.402	4.1148	7.6225	4.7979	6.732	8.3577	4.4534	3.0412	3.4456	12.4247		0.63265	6.06514
11.1993	4.102	11.366	7.3741	5.816	2.3329	6.3044	5.857	3.7562	3.8422	4.7683	13.4971	8.2615	7.2773	5.8644	4.0233	5.133	4.3515	5.9132	5.0001	4.6131	8.4336	3.149	5.2466	6.5129	10.7791		0.639456	6.14299
11.3184	2.562	8.733	8.2922	6.172	3.4414	4.7142	6.7955	3.7035	3.257	5.0168	9.748	8.3815	6.9135	5.6737	4.7968	8.9042	4.0537	3.4246	6.0746	5.2312	7.9631	2.1618	3.6058	4.2799	11.2726		0.646256	5.8069
11.4376	3.731	7.624	8.4332	2.998	4.154	4.2864	8.9791	4.6289	4.5344	6.2323	10.1078	6.301	4.6864	4.4284	5.4797	7.4258	2.6624	3.4007	5.1342	4.2412	10.0236	1.9533	3.4142	4.6124	12.4908		0.653062	5.67853
11.5567	5.272	6.882	5.1549	5.007	2.8844	4.3628	8.3893	3.1458	1.9378	6.0917	13.9672	9.2407	7.5082	3.7117	4.8492	8.0338	2.872	3.7804	5.5337	8.4235	6.4953	2.048	3.2534	3.9166	10.0745		0.659863	5.71344
11.6758	5.16	6.75	6.321	5.168	5.4013	5.3888	9.7399	3.8931	3.5738	4.7786	11.2468	5.1917	9.4213	4.7262	5.1255	9.0088	2.9318	3.9235	3.3502	6.3319	6.854	2.2161	3.6311	4.1929	7.383		0.666663	5.66837
11.795	4.178	8.147	7.6988	4.524	3.8236	9.0959	8.7614	3.33	4.0403	3.9857	10.2965	12.0713	4.4321	6.3243	6.492	7.8513	3.8748	3.5905	4.0344	4.983	5.4917	3.9148	2.7001	4.6858	8.4834		0.673469	5.87243
11.9141	3.653	7.959	6.9719	2.558	1.8947	7.2513	13.4943	3.3924	2.1761	8.0142	8.5236	9.7747	12.1189	4.8879	6.6469	9.1334	4.8703	3.4444	4.3876	3.8229	5.3639	3.015	3.1296	4.1154	7.8299		0.680269	5.93717
12.0333	2.457	6.714	8.517	4.282	2.9559	8.3624	15.4794	2.4189	2.0472	7.3567	8.5499	10.8865	8.9912	8.6254	4.3199	5.6594	6.1352	2.6548	4.9628	4.3327	6.8801	3.2981	2.967	3.8489	6.839		0.687075	5.98166
12.1524	4.331	4.79	6.4677	4.194	3.2507	12.7915	8.8389	3.5369	2.3685	11.0765	6.7829	7.8376	9.9498	7.0771	4.6432	8.9853	3.7227	4.9643	3.4016	6.7996	6.6667	1.823	2.5698	3.6183	7.9788		0.693876	5.93866
12.2716	4.548	6.522	6.1905	3.705	3.2758	11.0717	8.1093	3.0927	2.7988	7.6011	8.0292	7.114	9.11	5.7369	6.4178	10.1378	4.9916	2.9027	3.3649	4.5724	6.986	3.0611	5.9544	2.3526	4.6822		0.700682	5.69314
12.3907	3.573	7.597	11.0604	4.577	4.4589	6.1565	12.3871	1.8027	1.8544	10.2296	5.3529	14.7077	8.6693	3.2516	8.4015	9.8814	6.152	4.9566	5.4488	2.7318	6.3165	4.7615	3.3056	3.1957	7.7779		0.707482	6.3443
12.5098	5.043	6.615	9.2737	3.506	4.2877	6.3618	13.264	2.7089	3.3909	10.0654	8.5455	16.1081	6.6335	5.016	7.0216	7.1134	4.2725	6.2081	5.2293	2.4205	6.1948	2.6759	4.9752	4.32	10.692		0.714282	6.47771
12.629	4.635	7.511	5.9871	3.771	2.2887	10.8265	13.1003	4.0354	2.7858	8.9064	8.4437	9.7512	8.5079	4.9729	5.5181	6.4429	5.8422	5.1659	4.1025	3.084	5.2458	2.8622	4.6592	4.9784	8.5033		0.721089	6.0771
12.7481	3.944	5.889	8.6139	2.976	2.8123	6.0331	12.2291	5.2633	3.896	7.3858	8.7369	8.4168	8.6597	5.7406	3.4994	7.2712	3.7046	5.5584	4.235	3.6257	4.1445	2.4239	3.3139	3.6013	8.6987		0.727889	5.62692
12.8673	4.815	5.624	9.0755	2.261	2.2164	8.1619	8.0912	3.9934	3.1361	8.5023	8.3424	5.8086	6.215	5.6186	6.2069	2.534	3.2483	5.7597	4.437	2.5827	6.2172	4.3767	2.5261	3.6048	10.6794		0.734695	5.36137
12.9864	8.933	5.028	8.8135	3.303	3.6448	7.4667	10.7104	3.9788	2.7925	9.1566	6.1016	8.6209	8.5347	4.5121	4.1219	3.442	4.0302	4.1783	5.6439	3.0912	7.4488	4.7676	2.7381	2.581	10.5954		0.741495	5.7694
13.1055	11.308	9.774	13.2044	3.28	3.3539	6.5719	9.6502	3.1456	3.8281	9.5966	5.5675	10.3768	8.023	2.4574	2.9466	5.9774	6.1528	5.4921	5.7157	7.2381	8.9345	2.6657	4.0752	2.0219	8.9411		0.748296	6.41194
13.2247	10.078	5.137	13.3468	5.968	5.104	8.1864	10.7005	4.4828	3.9982	11.0292	4.7733	5.6206	6.1526	4.0167	2.8115	7.1564	5.907	6.2511	9.0546	5.3302	6.7184	2.19	2.8515	3.5608	10.2396		0.755102	6.42661
13.3438	9.757	5.306	10.7526	6.802	2.3876	7.7123	10.013	5.0527	4.2521	7.0241	5.2216	6.5603	4.4295	4.2366	2.9439	4.5536	4.4335	5.9952	10.1498	3.7003	9.0747	1.9968	2.7904	3.1779	13.8087		0.761902	6.08529
13.463	8.542	6.691	11.7349	4.955	3.1095	6.2011	7.0994	3.8927	5.191	8.1467	5.0462	4.4798	3.3074	5.7961	4.1275	5.3136	7.0903	4.6518	5.731	6.7075	5.0511	3.3226	2.3065	5.3332	17.9662		0.768708	6.07176
13.5821	6.758	6.8	9.1666	3.094	3.6298	6.0481	8.3996	2.9794	4.1102	8.8313	4.5496	5.3277	4.2108	4.8925	3.1146	4.65	4.4721	5.1746	5.1836	7.0017	7.2213	2.8702	2.9751	3.4319	11.6954		0.775508	5.46352
13.7012	6.018	8.754	7.9989	3.295	3.4237	7.1351	8.1972	3.5703	5.6285	8.4695	4.1021	4.5073	4.846	6.1306	3.4255	3.5056	2.9275	6.0006	4.8625	3.6837	6.8837	2.9302	3.26	2.8768	9.7107		0.782309	5.28572
13.8204	6.057	6.043	11.1108	5.336	4.2075	4.0395	9.0717	5.2753	9.1265	12.7179	5.3647	7.0291	4.5198	4.5449	4.0515	5.2791	5.0435	5.7262	3.3654	5.2149	6.1658	3.7524	1.9411	2.3432	12.5746		0.789115	5.99606
13.9395	6.317	5.719	13.7439	3.519	2.7293	4.3136	8.4674	6.9348	8.6082	8.6688	7.2061	5.9639	5.3275	4.5487	4.4599	4.4308	5.8458	8.5153	3.1304	6.7791	7.3132	2.8208	3.7658	2.8704	7.973		0.795915	5.99887
14.0587	5.745	4.771	11.5109	3.127	4.8518	3.8156	3.8785	4.1798	8.5354	5.9029	6.1616	8.9391	5.7527	6.6183	6.3264	3.2724	4.3195	6.2918	3.5399	4.8906	11.0174	2.6666	3.3233	3.191	7.3053		0.802721	5.59735
14.1778	8.099	6.491	8.5845	5.68	3.2903	5.4201	7.9784	6.2869	10.3321	8.5641	4.8506	4.2415	3.4745	3.9167	3.9739	4.8134	6.3499	7.141	2.5243	4.6001	9.6135	3.0137	3.8333	2.9256	13.1498		0.809522	5.96593
14.297	11.886	7.417	6.138	5.963	4.9881	4.5634	11.8888	4.7006	6.7685	8.9499	4.4435	3.8642	6.2022	3.1351	8.0281	4.5712	6.0321	6.5225	2.5963	7.3427	8.1145	3.0472	2.4509	2.5203	12.7875		0.816328	6.19686
14.4161	10.739	5.741	7.363	5.069	5.5631	5.9457	5.9861	7.6419	6.1953	7.9595	5.2591	4.5746	5.4138	4.1857	3.6295	2.2553	3.514	6.4468	3.4382	6.4053	6.5595	3.7408	3.5495	4.1226	8.0071		0.823128	5.57222
14.5352	13.613	4.803	7.4837	8.448	5.8112	8.7435	8.2082	8.1398	8.7801	7.4291	4.5382	7.8109	6.2393	2.4473	3.5381	4.5323	3.4911	7.1941	4.9993	7.5746	9.1492	4.4378	4.6281	4.1912	11.7197		0.829928	6.71803
14.6544	12.372	3.811	9.2157	4.281	6.1372	8.4761	6.0581	8.5626	9.7352	5.8054	4.7931	7.2952	4.8855	2.8343	3.1713	3.0499	4.1211	9	4.8819	6.4262	10.8324	4.4339	4.6995	6.2238	6.5686		0.836734	6.30684
14.7735	10.219	5.022	11.5364	4.247	5.757	5.5532	10.1099	10.9425	9.3833	9.9209	3.8187	4.3138	3.4726	4.9178	5.402	3.0309	4.1375	8.6126	5.2105	3.3839	10.0232	5.2749	2.5016	2.6445	7.5267		0.843535	6.2785
14.8927	8.61	2.62	12.5238	2.814	4.8141	8.4673	6.8587	10.2219	7.3906	10.7205	4.4227	4.1926	5.5599	4.6085	6.9808	3.3424	4.709	11.6812	4.3285	4.7965	7.3557	2.4664	5.3895	3.3004	6.4398		0.850341	6.18459
15.0118	9.116	6.614	10.9238	4.624	4.9054	4.8606	8.6239	6.4119	11.8758	4.5145	5.5735	2.6737	6.252	4.2892	4.3272	4.503	7.0814	7.821	4.9673	3.6974	8.3002	3.8743	2.6448	4.8288	7.823		0.857141	6.04507
15.1309	10.217	4.594	14.7727	4.48	5.8376	7.6915	5.0344	6.8019	11.8876	4.5809	5.3661	3.5505	7.0107	2.3941	5.3732	4.9957	3.9328	6.5962	6.0508	4.9576	9.2865	4.2051	2.6553	5.1084	3.1278		0.863942	6.02034
15.2501	9.626	2.817	17.2536	6.262	4.2103	5.4962	8.4735	5.6149	9.3753	3.5439	4.4873	3.4751	4.9633	3.0529	4.7965	3.7492	4.0319	5.8792	6.1115	5.7168	7.3132	3.2632	3.1937	5.7561	6.2556		0.870748	5.78873
15.3692	7.145	4.113	12.4323	4.628	6.8159	4.0644	7.9342	7.9511	11.0439	6.2456	4.7918	3.4036	4.6036	3.7176	3.2658	4.004	6.7541	6.5922	5.6174	4.3886	6.9956	5.8042	3.2155	5.2822	6.6322		0.877548	5.89767
15.4884	7.652	5.944	8.8496	4.645	5.89	8.5386	5.8253	5.2213	12.7222	5.2436	7.6509	7.8612	6.1686	5.9312	4.3323	2.8744	7.8542	6.0287	7.3361	4.679	5.1093	4.2646	5.2024	4.8253	4.3451		0.884354	6.1998
15.6075	12.141	4.79	9.3942	3.035	3.7625	6.8336	5.3755	7.4265	8.8151	4.1452	5.0178	4.0273	6.5072	2.7262	6.5064	5.3848	9.607	5.6283	8.6925	6.9209	9.0493	4.986	4.4478	6.9453	4.2301		0.891154	6.25582
15.7266	12.173	8.49	7.7674	3.877	2.886	3.8285	3.693	8.4354	5.6633	2.6741	7.4249	6.794	5.2917	2.227	5.6497	4.1355	6.4241	6.2706	7.98	5.8737	7.5573	8.6122	5.3079	4.9632	3.2132		0.897955	5.88851
15.8458	13.694	5.431	7.6303	3.569	2.4564	3.4954	4.6885	6.0468	6.025	2.0861	6.1909	3.1068	7.5526	3.8294	4.6773	4.9526	6.5189	4.7478	3.7162	3.5019	7.4453	11.5628	7.6869	3.438	5.878		0.904761	5.59712
15.9649	9.602	5.879	5.3225	4.971	3.0274	2.7537	6.518	5.4631	3.1681	3.5997	5.1175	6.3942	5.2881	5.8682	4.6936	5.0351	8.5777	5.878	4.3611	2.6714	5.9189	8.7683	5.3224	7.8081	6.3076		0.911561	5.53259
16.0841	13.534	8.783	3.1846	3.675	4.4988	2.5516	4.6919	6.9735	4.8478	4.0362	4.6968	8.9521	8.0606	5.1809	3.6262	5.382	4.663	7.3145	5.2291	4.051	5.7987	5.739	12.1364	9.4594	6.7193		0.918367	6.15142
16.2032	17.621	8.762	6.8705	5.451	2.3414	4.2039	5.1276	7.411	5.1533	2.8228	4.2316	5.3643	4.5906	3.5112	5.6729	4.3618	3.3032	7.6719	4.249	3.7905	5.7029	8.4733	13.8579	13.0961	5.3213		0.925168	6.35852
16.3224	18.41	5.699	7.1382	4.469	1.8431	4.366	8.5324	5.6033	3.8535	2.3299	3.9416	4.1325	3.2628	3.709	5.4662	6.6505	4.8336	4.2547	2.6877	6.5133	8.4548	18.6372	12.3692	19.0872	4.5377		0.931974	6.8313
16.4415	20.589	4.596	4.4588	2.668	2.519	2.6997	3.9082	5.4592	3.9234	2.2626	4.4401	6.4674	5.7039	3.6013	7.1696	7.2374	5.2946	4.4448	3.1931	3.4259	9.1721	15.3337	15.2621	20.1519	7.0255		0.938774	6.84029
16.5606	17.941	7.403	3.6077	2.386	2.6484	3.8282	3.2348	5.8619	4.336	1.8174	3.7501	3.8083	4.409	4.4584	6.9784	6.0428	6.7513	5.9402	3.4705	3.6442	6.2337	13.2504	11.7949	17.362	8.3855		0.945574	6.37376
16.6798	21.185	4.815	3.9427	3.7	2.9363	3.1143	3.4258	4.4344	3.2993	1.717	3.1321	3.6302	3.8823	3.3671	7.229	7.0301	4.3201	3.7903	2.8214	2.8458	5.1625	9.6057	8.1737	22.0726	7.4416		0.95238	5.88297
16.7989	14.15	2.86	3.8353	1.997	2.7991	5.0157	3.3735	2.4576	2.6704	2.3069	3.896	3.074	3.6067	4.4314	4.372	6.8679	4.1157	3.8691	2.8487	2.8712	4.4686	7.7066	9.6557	17.2664	4.6		0.959181	5.00462
16.9181	9.105	5.742	3.0767	3.96	2.0974	3.2725	3.0685	2.52	3.8037	2.641	2.6307	2.2228	7.9355	3.6125	3.2097	8.2584	4.0939	5.2849	2.1282	3.7143	4.6237	7.8838	12.0714	15.1149	6.937		0.965987	5.16034
17.0372	7.866	6.296	2.8788	2.736	2.1909	2.5171	2.0826	3.1736	4.654	2.9804	1.8302	3.167	5.6213	3.5977	3.5489	4.855	4.6885	2.997	3.0372	2.5066	6.0528	4.2949	8.5696	9.8292	5.0399		0.972787	4.28045
17.1563	6.368	3.372	3.1076	2.786	2.1702	1.8865	2.5842	2.7216	3.113	2.0454	2.0602	3.606	6.1545	4.1032	3.8003	5.6148	6.734	2.0326	2.8518	2.3657	4.5689	3.9276	20.3163	7.2029	4.5581		0.979588	4.40206
17.2755	6.909	4.534	3.3841	2.353	2.4713	3.2552	2.4847	4.2482	2.5444	1.7717	2.0175	1.7915	5.7195	3.3604	5.3144	7.1529	3.5828	3.2537	2.2388	2.4873	4.6487	3.093	14.424	10.8429	5.6918		0.986394	4.38299
17.3946	5.22	3.421	1.7801	2.752	2.3511	2.6789	4.4288	2.6193	2.5759	1.7784	2.0546	1.8636	5.466	5.5592	3.6938	8.2578	7.6915	2.7723	2.5824	3.2883	3.5463	3.0035	10.6978	10.7019	3.97		0.993194	4.19018
17.5138	4.647	2.99	2.4637	1.997	2.245	1.8127	2.6821	3.3183	1.9993	1.696	2.8116	2.7202	5.0638	6.0253	9.1843	6.7952	3.1543	1.9084	2.4168	2.3911	2.9914	2.0508	9.2317	7.9536	4.3483		1	3.79592

## Sheet: Image37
X0	Y0	Y1	Y2	Y3	Y4	Y5	Y6	Y7	Y8	Y9	Y10	Y11	Y12	Y13	Y14	Y15	Y16	Y17	Y18	Y19		Ap-Basal	Avg intensity
0	35.4104	13.693	13.0358	25.0923	32.0425	36.8308	17.3185	27.9067	24.5434	24.9639	28.337	32.632	33.2643	41.3266	30.4628	17.41	22.7441	17.0223	24.2923	25.1934		0	26.1761
0.1191	39.5059	15.772	20.5806	25.7501	32.1055	27.8494	18.9153	28.8201	21.1059	24.2452	22.281	35.477	33.9445	38.8137	26.3065	25.75	24.7626	13.7711	18.5871	22.1827		0.00684695	25.8263
0.2383	46.2448	14.6954	22.5833	25.6107	34.7248	22.7841	17.0625	25.3768	20.5493	16.4266	31.693	34.833	31.1397	37.5255	26.3468	26.162	31.5347	21.2863	19.4599	15.0521		0.0136997	26.0546
0.3574	53.7141	14.2691	31.614	37.9894	37.4041	26.1302	23.8412	28.7368	15.0493	22.0186	31.89	40.939	31.3927	42.03	23.2076	23.932	24.8189	23.3138	16.5051	18.3052		0.0205466	28.3551
0.4766	47.8478	15.8137	30.4817	44.8749	36.6514	18.7326	21.8434	18.5977	11.6816	22.7923	30.695	51.626	33.2384	42.4994	31.2249	22.007	25.3631	25.3871	20.5266	15.9639		0.0273993	28.3924
0.5957	47.6428	19.6902	33.7255	47.7575	35.154	23.3277	18.0396	21.0313	16.8114	28.7215	42.759	54.933	35.3039	49.468	36.9798	30.393	33.2501	27.7278	19.2221	15.4436		0.0342463	31.8691
0.7148	50.875	23.0973	30.3001	46.3969	36.8755	22.9575	16.8548	28.3889	20.1528	35.7428	45.078	65.105	47.2341	52.7988	28.3681	37.424	35.6357	21.0173	19.282	16.3464		0.0410932	33.9966
0.834	49.9593	22.3159	30.4563	42.5262	33.8152	24.6906	20.6654	25.9753	15.7374	27.3803	65.62	79.026	66.385	47.9792	28.4967	31.022	36.4902	25.2753	26.2556	16.5775		0.0479459	35.8325
0.9531	40.3748	21.9367	32.765	43.3977	36.8776	19.1075	27.4445	23.1075	18.4009	26.1386	88.123	98.321	52.5302	45.6068	24.602	32.114	37.325	27.5975	33.8633	13.1359		0.0547929	37.1385
1.0723	30.542	25.944	35.75	41.1386	31.9229	19.7824	30.1359	19.5522	15.9426	19.7746	83.54	119.212	52.8837	46.7937	24.8477	41.136	40.4358	33.2753	35.5311	22.1813		0.0616456	38.5161
1.1914	32.7648	27.2077	31.5044	49.7788	34.1851	20.761	31.815	17.5434	20.4866	24.602	82.467	144.799	45.6928	42.2179	29.7891	35.544	64.59	38.4739	39.3378	24.1009		0.0684925	41.8831
1.3106	32.5404	25.6368	36.92	39.9739	39.7308	20.7628	38.8107	18.0066	22.7946	24.0124	87.869	129.235	57.4641	46.8899	30.652	30.478	58.4224	36.0929	51.6127	24.6584		0.0753452	42.6282
1.4297	33.2964	28.3557	36.1055	38.3453	27.4889	22.5733	46.4691	21.0389	23.8711	21.6908	88.47	119.555	57.3753	48.2561	29.2079	30.092	65.458	47.9113	50.4421	24.0521		0.0821922	43.0027
1.5488	35.7207	21.531	36.6719	37.2928	24.1128	34.8439	41.8518	21.7343	20.7835	26.7126	100.317	120.587	62.5813	48.0562	39.3328	42.661	69.5007	35.9114	48.7639	21.1385		0.0890391	44.5053
1.668	41.0482	20.2266	40.0879	37.7455	31.8759	55.1228	49.3562	22.3649	19.7517	23.7512	115.953	105.038	61.3422	51.74	46.5278	45.812	73.7592	41.9296	56.0797	23.9548		0.0958918	48.1734
1.7871	42.8658	29.2678	45.827	41.0556	28.7789	58.3891	41.0972	22.0677	27.1813	24.9924	110.762	106.149	61.2534	60.2328	42.4331	60.904	65.3109	43.5543	51.6333	19.4176		0.102739	49.1587
1.9063	47.9706	40.0046	49.6017	37.0381	35.5167	57.5668	50.9036	22.4521	32.1784	26.1359	100.052	105.671	57.6666	50.551	40.0262	68.604	67.7272	43.6058	52.0074	28.3555		0.109591	50.6818
2.0254	50.2675	32.3503	50.4916	47.1278	32.8226	63.4852	60.052	21.2202	29.5984	26.0033	96.573	90.707	61.2897	64.5362	53.1549	77.255	75.0273	32.1726	54.0323	24.4097		0.116438	52.1288
2.1445	44.6795	41.0533	45.0789	54.7738	33.9326	59.2094	60.8308	22.2485	32.132	29.553	87.64	87.464	54.6989	53.5301	56.1741	86.414	54.7595	22.9454	46.0476	27.0744		0.123285	50.012
2.2637	36.8628	44.3313	41.2077	54.9368	30.7559	63.1306	63.8059	31.391	31.2432	22.289	88.263	102.115	59.0708	63.4171	63.5561	89.818	62.944	25.0205	37.6503	23.7092		0.130138	51.7759
2.3828	45.6539	50.0161	42.1518	43.2633	28.876	56.9927	56.6642	36.2642	27.6454	19.1386	81.478	87.236	60.1395	60.6652	70.6327	98.517	71.9397	28.5604	26.9579	15.9899		0.136985	50.4391
2.502	44.5456	45.0553	41.0285	41.4242	35.4775	72.1995	53.1657	27.6928	23.9041	22.2135	85.219	109.554	67.2949	63.916	64.5625	105.079	54.0067	27.1879	23.9369	17.7322		0.143838	51.2598
2.6211	38.4118	31.2044	50.2458	38.6544	28.2201	84.0007	56.8283	28.1598	25.0248	18.829	72.451	109.705	68.5515	62.2745	59.8543	107.051	56.235	20.9179	27.4574	17.5372		0.150685	50.0807
2.7402	30.7081	40.1389	44.3695	45.5711	31.6987	86.0099	52.1371	31.5759	20.5889	18.728	63.182	92.668	67.6204	64.8017	52.7409	102.517	56.0415	19.8393	20.1585	14.6272		0.157532	47.7861
2.8594	28.5229	50.7948	30.9307	36.8763	29.7395	94.2499	53.7111	43.564	19.2327	19.9546	50.401	95.703	71.3261	60.3483	49.597	91.635	59.5692	22.5557	18.3695	19.9904		0.164384	47.3536
2.9785	32.2168	44.3044	28.0913	32.8863	29.9544	83.6765	49.5218	33.8076	17.5561	25.5319	49.862	81.282	58.8048	77.7845	49.4715	112.294	52.1818	23.3791	14.1342	21.5476		0.171231	45.9144
3.0977	26.4383	39.1351	33.2889	35.2325	34.4771	82.4315	42.7077	34.0485	20.2197	17.6311	58.607	60.922	53.8369	55.8818	36.4667	103.462	58.962	29.7222	11.1897	15.3661		0.178084	42.5013
3.2168	30.7288	29.9959	33.9933	37.4313	33.8144	70.1849	46.8941	38.5717	18.0124	19.1907	53.465	56.925	55.157	66.7342	36.8667	101.842	50.9281	22.1768	7.7385	15.2139		0.184931	41.2932
3.336	28.7252	31.7443	26.6639	33.2897	24.3934	80.2412	38.9446	36.5859	17.3919	17.1171	42.796	46.973	39.9284	56.0252	51.1221	105.205	52.7621	17.666	13.1366	18.7945		0.191784	38.9753
3.4551	19.5655	27.3648	28.4836	54.338	30.8142	85.3474	37.3178	31.7157	24.8826	14.6879	49.651	43.985	39.0091	48.8398	46.2412	87.475	73.6837	18.8627	15.7128	17.3678		0.198631	39.7673
3.5742	20.0595	25.2683	37.1798	45.4252	34.5015	94.447	41.2319	24.8949	20.3124	7.3273	60.063	48.445	44.68	44.895	47.8758	71.156	64.723	15.3881	13.8437	13.4844		0.205478	38.7601
3.6934	28.2469	19.9537	43.0593	42.5311	37.8345	96.9796	32.0676	20.6823	16.3613	9.1952	53.801	40.191	30.4369	37.969	40.1893	65.375	56.5751	15.1861	15.6923	9.1634		0.21233	35.5745
3.8125	21.2795	16.2067	42.2425	43.9249	31.7863	97.4694	28.3634	14.3497	14.4131	10.7259	44.001	42.589	21.3197	43.0827	35.2417	68.749	68.5037	10.2857	18.6777	7.9392		0.219177	34.0575
3.9317	18.0687	13.4667	36.9091	45.5244	34.217	99.0251	25.3274	15.2291	14.8573	7.1885	36.322	49.654	29.4205	43.721	29.9324	60.76	58.0323	12.911	13.9681	8.7763		0.22603	32.6655
4.0508	19.1749	12.2755	40.282	32.9449	35.4322	87.5813	24.5205	14.9105	19.4412	6.7478	36.082	43.614	32.1729	36.7812	25.5037	56.198	35.7661	15.0255	9.9961	6.4941		0.232877	29.5472
4.1699	22.2964	13.1272	40.7749	38.4428	34.4301	73.5641	27.6287	18.3101	12.461	14.9349	31.035	31.121	25.1905	38.8985	22.6841	57.918	31.2561	13.9976	9.1706	6.3022		0.239724	28.1772
4.2891	20.8827	14.3679	46.7886	32.7692	33.5937	59.9621	25.4827	15.6208	9.7492	12.6882	24.517	31.401	31.9331	50.8982	21.756	51.041	21.9698	12.5807	10.524	3.7905		0.246577	26.6158
4.4082	22.6997	18.0378	46.3678	30.4615	23.0371	74.9088	23.3736	18.0168	13.7343	8.9291	19.763	27.164	29.9207	48.3745	18.8553	50.027	16.8715	12.3575	5.7598	3.9196		0.253423	25.629
4.5274	17.1833	15.6214	49.1175	31.9423	19.313	86.8101	20.1841	17.2114	12.8481	10.9168	16.154	20.072	24.951	55.2172	17.7554	41.432	24.7432	15.3752	6.6886	2.7228		0.260276	25.313
4.6465	11.5277	17.666	34.6342	38.3712	15.9965	72.1587	29.178	16.6209	9.4439	8.4546	20.714	14.682	22.4453	50.5542	15.977	41.876	21.4945	21.6701	6.2345	3.8591		0.267123	23.6779
4.7657	16.6393	14.3712	33.3781	38.7787	19.1258	66.5898	19.4953	13.8896	11.1727	5.8807	24.777	11.898	30.4922	38.9754	15.0866	44.658	22.3867	22.9497	9.0754	5.0683		0.273976	23.2344
4.8848	24.3884	16.7291	38.2786	38.2319	18.8989	67.5556	19.1598	13.3278	12.0397	4.3937	20.429	11.991	29.0834	39.1034	9.5445	51.218	19.377	17.4842	6.8029	3.4037		0.280823	23.072
5.0039	19.7838	13.8977	33.3347	29.8749	17.8362	60.0431	17.7268	13.2152	12.3082	8.3889	18.437	7.426	31.0055	41.1669	10.3516	45.546	27.0937	15.6062	7.5912	5.3296		0.28767	21.7982
5.1231	16.311	13.4757	29.8655	28.1794	14.4133	56.6211	14.4254	14.4087	9.4578	5.6226	15.214	13.882	31.4019	35.622	12.8128	42.887	29.3494	15.3832	9.554	3.6319		0.294522	20.6259
5.2422	13.3333	11.1541	30.812	24.5501	17.1909	45.5335	15.369	13.7357	8.0377	4.788	21.022	15.402	31.8896	30.3576	14.8971	44.394	28.8267	22.1699	9.7561	3.1172		0.301369	20.3168
5.3614	10.0629	10.8851	24.982	27.4147	16.8387	40.859	18.6102	15.9668	8.7042	5.6348	16.29	15.41	37.569	23.7699	11.9926	32.536	19.3895	21.9451	7.2527	2.6241		0.308222	18.4369
5.4805	7.4716	14.3013	27.3887	24.6458	17.916	34.2015	17.8468	16.72	11.6355	5.286	12.537	13.457	25.9097	27.6973	9.8502	34.189	16.1588	20.9458	6.801	2.9331		0.315069	17.3946
5.5996	12.9957	14.9886	20.9648	25.9165	12.624	35.2947	18.4237	10.4936	10.3739	4.238	9.632	8.34	23.8304	23.5413	10.9596	31.378	17.0263	22.3748	7.1728	3.7665		0.321916	16.2168
5.7188	14.1315	13.1691	16.7154	19.7142	16.368	32.1162	16.0899	12.0381	14.4305	4.1017	11.323	6.968	20.0263	28.0269	11.1653	21.696	19.8018	14.274	9.9554	4.4751		0.328769	15.3293
5.8379	19.09	12.328	12.2815	20.1897	16.55	24.4189	14.0741	9.0665	8.1787	5.4092	16.116	4.831	13.4798	19.5329	13.6992	21.541	17.9732	19.5429	7.9461	4.4191		0.335616	14.0334
5.9571	13.8034	8.8414	17.708	16.1355	21.8427	25.3381	12.0524	6.5602	5.0687	3.5756	14.543	13.263	11.4879	18.0019	16.5702	17.795	13.4692	26.5005	10.5427	2.7138		0.342468	13.7907
6.0762	18.5063	10.1204	16.1744	17.7326	21.0034	24.0247	11.206	7.276	6.2141	2.3492	12.861	13.608	11.3131	20.755	10.4358	14.806	15.4378	29.8462	9.115	2.3869		0.349315	13.7586
6.1953	17.2009	10.1102	18.9713	17.202	23.9242	18.5143	7.676	6.7795	5.1341	4.579	11.876	6.25	10.8873	16.0426	13.9837	11.447	15.9894	31.4372	10.8518	2.3384		0.356162	13.0597
6.3145	14.2501	6.962	18.175	19.8861	23.8307	16.6565	8.3953	8.373	7.1456	5.0461	9.385	4.042	6.9642	18.5594	13.0706	8.916	13.9942	29.8681	10.6446	3.3319		0.363015	12.3748
6.4336	12.5311	5.4703	12.5346	18.3951	22.1522	19.8712	6.0745	8.1545	4.7368	3.6465	7.384	2.964	4.4517	15.9949	13.682	8.996	7.3105	32.5174	5.7064	3.6277		0.369862	10.8101
6.5528	9.2782	7.454	10.6972	18.7136	17.3759	13.2641	12.8147	6.2728	8.3206	4.3723	7.799	3.54	6.4026	15.62	13.1707	9.268	13.0759	28.7243	8.1413	4.0504		0.376715	10.9178
6.6719	7.3223	7.6231	14.3682	18.3451	13.8704	10.3341	16.0015	5.2425	9.4414	3.0309	9.926	5.75	6.7901	10.4884	14.0403	9.656	10.3828	26.2357	8.1121	4.1442		0.383562	10.5553
6.7911	11.4608	8.1501	9.5136	15.1667	12.5447	10.9245	17.1653	6.5434	5.7656	4.131	9.559	5.17	8.2135	10.5893	13.442	8.204	13.5407	22.7482	8.0583	3.0079		0.390414	10.1949
6.9102	11.2401	5.49	8.3327	13.9712	11.7891	9.7052	15.1361	4.7422	8.6082	5.3267	8.052	5.483	5.6052	11.4605	14.0645	9.491	8.5358	16.7996	5.7846	2.6687		0.397261	9.11432
7.0293	7.6545	4.2866	12.5097	8.1752	8.0782	15.8038	13.9119	6.3014	4.9404	4.0107	12.043	4.004	3.6397	13.7351	10.4486	10.583	9.0766	11.4062	7.4453	4.0154		0.404108	8.60347
7.1485	6.6303	6.8846	12.2054	10.7575	7.0685	9.8754	10.147	8.6249	3.3607	2.6916	16.787	2.928	3.982	16.919	11.941	8.712	8.2507	13.5766	10.7069	4.7404		0.410961	8.83947
7.2676	6.7395	9.2271	10.497	5.9311	4.954	6.5345	6.6725	6.809	3.7317	3.1291	12.921	4.849	3.8711	12.5835	11.5647	7.138	15.2232	8.5774	9.8609	5.1394		0.417808	7.79768
7.3868	8.0288	7.2624	9.9981	6.3709	4.5937	6.3017	14.6851	7.2388	3.7043	3.4477	9.854	4.071	4.1136	14.7593	9.2358	6.402	12.8974	10.95	6.046	3.5663		0.424661	7.67634
7.5059	7.3231	5.2122	11.2474	11.1851	4.5156	7.8185	6.2532	8.9168	4.1546	3.7208	6.137	5.179	5.158	9.2369	5.1533	10.946	12.2975	16.2209	8.5342	3.4425		0.431507	7.63263
7.625	6.074	5.4817	10.067	8.9706	4.5856	7.2564	3.3704	7.7569	3.9881	4.1099	6.004	3.743	3.5071	8.521	4.2492	7.415	8.1756	11.9925	5.4192	2.7394		0.438354	6.17133
7.7442	6.8536	10.6495	9.4535	5.6376	4.6662	7.8725	4.2122	7.1698	4.8795	2.8094	7.319	4.094	2.7924	8.797	5.5773	11.183	10.0043	12.8634	5.314	3.109		0.445207	6.76286
7.8633	5.1761	11.7915	10.7707	6.3613	4.8493	5.4399	4.1487	6.0522	3.8414	4.5229	5.818	3.605	3.3322	7.1245	4.5367	11.07	11.5222	7.4938	4.0599	4.3593		0.452054	6.29378
7.9825	9.078	9.9884	16.5889	4.9533	3.8562	3.5973	4.3837	6.7265	2.5614	3.2185	10.267	5.265	3.141	8.5588	4.319	15.372	10.1277	10.4256	3.098	2.1676		0.458907	6.8847
8.1016	7.4016	6.8816	10.4582	4.1346	3.138	5.4241	5.9162	5.749	2.9489	3.4116	11.03	3.236	3.0369	5.8731	5.2943	18.467	6.1967	10.9829	3.1837	2.2125		0.465754	6.24885
8.2207	6.3778	7.2742	13.004	3.6409	3.1245	6.5396	3.5887	5.1939	5.0571	4.3644	7.435	3.434	2.5848	5.9456	7.5721	17.727	6.1556	7.4422	5.8791	2.7864		0.472601	6.25635
8.3399	5.373	6.2905	11.6798	4.4643	3.5882	3.64	4.0942	5.7471	4.7622	4.327	6.086	2.984	3.0443	7.086	8.5582	14.513	4.1254	11.1271	3.6852	2.1371		0.479453	5.86563
8.459	7.1789	6.5748	10.2883	7.6783	3.2406	6.5906	4.6877	5.4939	2.6136	2.7586	4.54	3.246	2.0634	8.3226	7.0419	14.679	5.4133	8.5188	3.7531	2.362		0.4863	5.85227
8.5782	5.345	6.2338	9.9746	9.5907	5.0817	7.8829	4.9097	3.5929	3.539	2.4444	5.482	4.259	2.5851	8.7406	6.5453	15.374	2.8955	5.5905	4.9028	2.3337		0.493153	5.86516
8.6973	6.4647	7.0297	10.1347	6.2696	3.7119	6.9996	2.9607	6.5391	3.4748	2.1665	6.771	4.556	2.9443	10.8376	4.0269	11.095	4.4676	6.7625	3.2071	2.6426		0.5	5.6531
8.8165	7.9578	5.6971	9.5974	6.2241	3.0389	8.0183	3.9545	4.102	4.4017	2.6338	5.072	3.546	2.7766	8.4185	4.0127	11.637	6.5844	5.4865	4.5849	3.0532		0.506853	5.53987
8.9356	7.528	5.1288	7.7189	5.2909	2.0134	5.9197	3.4187	5.0749	4.1468	4.4921	2.512	3.601	3.3718	7.5766	3.3788	12.991	5.3567	5.2803	8.314	3.4659		0.5137	5.32902
9.0547	4.3153	3.6484	4.2912	5.1959	3.02	6.7192	4.6201	5.6074	4.0874	4.4986	4.491	1.91	5.3109	5.1286	5.8563	9.133	3.4117	4.7839	6.2964	4.023		0.520547	4.81741
9.1739	4.0996	6.7554	9.1756	5.7185	3.1127	4.8495	5.1251	3.3786	5.4065	4.0484	6.568	2.618	5.053	5.4389	7.6392	11.179	3.6167	4.4788	5.8383	2.6259		0.527399	5.33629
9.293	3.5152	8.1512	13.4762	6.9006	5.1268	7.9086	4.4355	3.5673	5.8506	3.0219	6.307	3.263	4.7897	4.7098	4.3038	9.226	2.9809	5.2835	5.2408	4.6577		0.534246	5.63581
9.4122	3.2669	5.9672	9.7349	3.772	3.2765	10.2232	8.1888	4.1486	5.8479	5.3995	4.792	3.96	4.3316	6.6244	6.5508	7.422	4.2149	9.9591	3.4825	3.324		0.541099	5.72434
9.5313	5.8033	7.8676	9.4157	4.4222	4.2621	11.0547	6.9736	3.8988	4.4715	4.438	3.877	2.991	4.4369	6.6663	6.6403	5.579	4.1261	7.5817	3.5136	3.0017		0.547946	5.55105
9.6504	5.5781	7.4749	8.0763	3.6161	3.4582	14.2493	5.4091	3.7832	4.2134	5.19	4.214	4.309	4.415	4.6414	6.6189	3.42	4.4445	7.7122	2.9147	5.4338		0.554793	5.45861
9.7696	5.1497	5.5106	8.3912	4.1257	3.4469	9.7421	4.6625	4.3813	3.4417	4.4263	4.185	4.481	3.867	6.0937	7.6557	4.253	3.8609	6.8141	3.3167	4.1179		0.561646	5.09615
9.8887	5.8636	6.4069	4.8561	2.9476	2.3745	10.9023	6.8891	5.4964	3.5909	2.7532	3.874	3.55	4.7079	4.4322	6.5408	2.797	2.6552	4.7498	4.1147	2.2413		0.568493	4.58717
10.0079	5.3	5.7842	7.9063	2.6524	2.781	11.5896	4.1406	4.2077	3.0462	3.5016	3.371	4.54	4.2372	3.8343	7.2662	7.999	2.6693	4.9664	7.3039	2.4719		0.575345	4.97844
10.127	4.1379	5.588	9.1057	2.2359	4.0965	13.7914	2.7759	6.0586	4.2352	2.8254	4.047	3.841	3.9706	5.4288	8.1366	6.631	4.8321	5.5955	4.2897	3.8061		0.582192	5.27144
10.2462	4.264	8.9636	6.2391	2.2457	4.2382	15.2774	3.1736	3.9295	5.2512	2.8762	3.436	4.517	4.0951	5.5841	5.5172	5.937	6.0332	4.7635	3.588	2.4974		0.589045	5.12135
10.3653	5.9153	5.5548	5.0541	2.1466	4.3214	7.18	4.9809	3.059	5.4565	3.293	3.317	4.198	5.833	4.7831	3.9065	6.862	3.1776	2.8241	2.7228	4.1169		0.595892	4.43513
10.4844	6.7444	8.502	8.2371	3.2623	3.2143	14.6107	5.3421	2.4598	4.2928	3.1179	3.031	3.858	2.7171	3.2596	5.4981	7.323	3.304	3.8294	2.3275	2.2699		0.602739	4.86005
10.6036	11.867	5.8932	4.4796	3.6242	2.1554	7.2142	2.6872	2.9152	5.4442	3.7364	4.91	5.236	4.4048	3.4155	3.2058	7.479	4.7528	3.8686	2.6125	2.1603		0.609591	4.60309
10.7227	6.0675	6.2952	6.7742	4.7723	2.7504	6.49	3.1207	4.3286	4.8054	6.059	6.389	5.101	5.5539	2.6663	4.6316	4.947	6.264	3.2063	3.6319	2.026		0.616438	4.79401
10.8419	5.2352	8.5139	3.8773	3.4592	4.0441	5.9295	3.7395	3.8687	3.3311	5.6613	5.917	4.193	3.9944	4.0198	3.7319	4.596	4.3054	4.6632	2.3153	2.5518		0.623291	4.39738
10.961	4.4583	6.7757	3.618	4.944	2.9915	6.0776	3.3197	4.4262	4.2216	7.0978	4.934	4.651	5.257	2.9954	3.7797	4.945	6.7887	2.8878	2.3449	2.8957		0.630138	4.47048
11.0801	4.0565	4.9633	4.4349	3.4013	3.7529	5.898	3.8567	4.4793	3.9886	4.4463	6.171	3.961	4.1116	5.3325	3.8505	3.582	3.9977	4.3611	2.2061	3.1817		0.636985	4.20165
11.1993	4.0368	8.2331	4.2873	4.4356	5.4007	6.2035	5.1076	4.1205	3.283	4.9849	3.424	4.001	3.4496	5.394	4.7483	3.809	5.5369	4.4903	2.9886	3.2462		0.643838	4.55905
11.3184	2.9487	9.3389	4.9641	3.1536	4.0444	7.2151	2.9888	3.267	4.0462	8.1817	4.49	2.988	5.898	6.5532	3.8376	5.368	8.1032	2.115	4.0835	3.2515		0.650685	4.84183
11.4376	4.0794	4.9753	5.3687	2.7437	3.2801	5.2485	2.243	4.2472	4.8922	4.8309	7.608	8.289	4.0179	4.3109	2.632	2.632	6.381	3.5974	2.5436	2.1998		0.657537	4.30603
11.5567	2.855	3.3312	3.7493	2.6381	2.5368	6.2286	1.9885	4.9182	5.7212	3.9919	8.184	6.53	4.5839	2.2888	4.0615	2.73	3.0575	3.0822	1.9718	2.3118		0.664384	3.83802
11.6758	2.6243	4.835	3.0907	4.1166	2.7919	9.4241	2.3412	4.274	2.4077	4.6623	2.748	6.325	6.2377	3.9009	4.4735	3.822	4.2647	4.6713	1.8922	3.3509		0.671231	4.1127
11.795	3.8558	4.2672	5.4392	3.9681	3.9263	6.5069	3.5143	3.2718	2.9252	4.9451	2.808	7.215	6.0603	3.5751	3.8336	3.797	2.9066	2.9858	3.2408	2.3836		0.678084	4.07128
11.9141	2.3186	3.5144	5.1355	4.8314	3.2742	3.8499	2.697	3.904	2.4201	3.3541	2.752	5.814	3.6692	3.4803	2.9349	3.858	3.0879	3.5228	4.147	2.1219		0.684931	3.53436
12.0333	4.134	4.2982	3.2838	3.1382	2.4443	3.7164	3.2964	4.6925	2.6935	2.826	3.476	6.551	4.8941	7.8871	4.3162	5.559	4.4955	2.3819	3.5762	2.4866		0.691784	4.00734
12.1524	3.441	5.6834	3.4232	2.5045	3.4503	5.2901	3.4585	4.2841	3.7126	2.8638	4.734	5.937	3.8839	4.6655	2.9734	5.783	3.5111	2.9872	2.4139	3.892		0.698631	3.94462
12.2716	2.3397	4.4134	7.2573	3.9358	5.0292	6.875	3.8704	5.5693	4.2317	3.4343	4.728	3.616	5.8285	3.7111	4.0392	3.862	4.9489	2.388	1.9237	2.2849		0.705483	4.21432
12.3907	2.183	5.7654	6.6732	3.347	3.1433	7.0569	2.179	3.8474	3.1951	2.5608	5.511	4.984	5.2892	3.3244	4.3889	4.273	3.4986	4.249	2.6468	3.3593		0.71233	4.07376
12.5098	3.1753	7.1096	6.1453	3.4411	4.7063	7.1886	3.9202	5.5264	3.6293	4.6221	4.978	3.098	5.4343	2.4738	3.3499	3.308	2.9024	2.7135	2.7704	2.9111		0.719177	4.17018
12.629	4.9665	4.0369	5.5355	4.0754	3.1257	7.0952	2.6497	4.1239	4.9804	4.3421	3.746	3.195	5.2703	4.2741	4.8906	2.82	2.144	2.0204	1.8267	2.4968		0.72603	3.88076
12.7481	3.1768	6.2938	5.9632	3.3844	2.6557	5.6894	3.1895	3.9616	4.6086	3.462	5.892	2.545	5.0424	2.3618	3.2757	2.963	3.7456	3.3555	1.9236	4.3124		0.732877	3.8901
12.8673	3.9316	5.4816	3.2958	4.4186	3.9004	6.2026	2.7605	3.6194	4.1573	3.1987	3.193	2.32	3.4249	1.9074	3.346	4.942	4.7851	2.0051	2.0128	2.2406		0.73973	3.55717
12.9864	5.6173	7.4083	4.6142	4.6091	3.2307	4.8402	3.1496	3.112	3.1095	3.5054	2.632	3.956	6.0816	2.8712	3.0209	4.684	4.0389	2.1309	2.3305	3.0423		0.746577	3.89923
13.1055	4.2138	3.2183	4.2314	2.8775	2.9539	2.6158	5.1147	4.6963	5.3336	3.8616	1.883	3.847	5.6455	3.5022	3.0218	3.48	4.5962	2.7507	2.001	4.0566		0.753423	3.69505
13.2247	5.0887	5.702	4.2764	2.6678	3.146	4.0355	3.1148	4.0899	4.8279	2.6238	2.522	2.601	3.8586	3.558	4.4207	2.759	4.3048	2.2578	2.6446	2.9596		0.760276	3.57294
13.3438	3.1707	5.9071	4.5907	5.4202	3.3624	3.9863	3.1861	6.631	3.0422	2.2285	4.9	3.569	3.1003	2.7122	3.1143	2.94	3.3411	3.9199	2.8056	3.2913		0.767123	3.76095
13.463	4.0753	5.855	5.587	5.7523	2.8836	4.6943	3.7525	5.7242	3.5743	2.1774	4.64	4.425	3.3009	2.1774	2.8047	2.52	3.6169	3.5012	3.6668	4.6372		0.773976	3.9683
13.5821	4.5381	4.5364	5.7303	6.2045	4.7226	4.899	3.5348	7.1651	4.5768	2.295	5.559	4.508	3.2921	2.7837	3.2199	4.287	2.6142	2.2605	2.838	2.493		0.780823	4.1029
13.7012	3.3417	4.556	7.4304	5.9502	3.5277	4.9957	3.6681	5.5409	2.4632	2.0846	4.41	3.788	2.8717	2.9849	3.3103	3.664	2.7808	3.5271	2.7424	3.231		0.78767	3.84344
13.8204	4.7311	5.9127	5.7782	4.3825	3.5601	4.9892	2.9227	3.3324	2.9774	2.039	6.836	3.09	3.1281	2.3986	2.1718	3.415	1.8966	1.9817	2.5844	3.4053		0.794522	3.57664
13.9395	3.3753	6.84	7.8359	6.7656	3.3365	2.8286	3.072	4.1307	2.8584	3.6406	6.139	5.071	4.7177	2.3381	2.6347	3.196	2.7404	2.1	2.0595	4.9983		0.801369	4.03391
14.0587	4.1767	3.6416	7.5291	4.029	3.6254	3.0233	4.1296	4.9056	3.1992	4.2492	3.127	5.481	4.2539	2.6035	2.8444	2.576	2.8895	1.9895	1.9918	4.0797		0.808222	3.71725
14.1778	2.3341	4.369	6.0452	4.8318	3.2501	5.7257	2.4357	4.0783	3.8672	4.2404	4.037	4.087	2.2114	2.7433	2.5685	2.384	2.0529	2.6274	2.6197	2.09		0.815069	3.42994
14.297	3.3676	2.7706	3.7084	4.9117	2.757	4.1531	3.6037	3.6491	3.6581	4.2495	3.886	3.106	2.3034	2.7761	3.3072	2.362	3.1734	3.1242	1.9781	2.0069		0.821922	3.24261
14.4161	3.1541	2.6176	4.8382	5.5049	2.3761	5.9357	4.0004	3.5746	2.5265	4.3126	3.757	2.371	2.4269	3.3389	2.7208	3.063	2.1328	4.3939	2.1042	1.951		0.828769	3.35501
14.5352	4.8116	4.2018	6.6262	2.8385	5.5211	3.9964	6.7554	4.399	2.8761	3.1602	3.338	4.311	2.1962	3.755	2.7137	2.872	2.2745	2.0122	2.694	2.1171		0.835616	3.6735
14.6544	5.8169	4.3202	6.2269	3.7841	5.5384	3.6499	4.74	4.2456	4.8718	2.9295	2.538	4.058	2.3376	2.5262	4.0662	2.975	2.9103	1.824	2.9273	2.004		0.842468	3.7145
14.7735	6.0675	4.1758	5.5073	6.4426	5.7689	3.1678	2.998	6.2929	4.2499	3.8139	3.607	3.212	2.1492	2.6341	2.6436	2.074	3.1935	2.5457	1.9786	2.0348		0.849315	3.72786
14.8927	7.4028	4.8632	3.1821	4.6145	4.6607	4.5126	6.4417	4.305	2.7485	5.4545	8.074	3.294	2.6254	2.3784	2.1644	1.992	3.2259	3.3377	3.5795	2.9351		0.856168	4.0896
15.0118	10.3039	7.1437	6.1344	3.7228	4.6938	3.3007	4.8493	4.2174	3.0751	3.491	8.2	4.539	2.4612	3.8963	2.2341	2.914	2.4567	2.5242	3.6057	3.3005		0.863015	4.35319
15.1309	9.9139	6.3719	3.6671	2.7264	4.5743	4.4462	4.3261	3.3321	3.4039	4.0452	9.523	3.482	3.4333	2.1058	2.545	2.78	2.4768	2.3609	3.0038	2.0884		0.869862	4.03031
15.2501	7.8703	4.6233	4.6187	3.244	3.3593	2.0191	5.798	3.1124	3.7918	3.4099	7.796	2.588	5.1404	3.2238	2.1935	4.158	3.8492	2.0234	2.3946	3.3144		0.876715	3.9264
15.3692	7.7349	5.2451	4.2115	3.071	4.0619	1.9269	4.431	3.2425	3.1709	2.9781	6.607	3.021	3.6463	2.8335	2.0202	5.623	2.4633	2.4223	2.4549	2.1689		0.883562	3.66671
15.4884	8.8066	4.1583	4.8371	3.5292	2.5115	1.9553	4.6558	2.272	3.5436	3.5516	9.414	3.215	3.8981	2.6079	2.6737	3.848	2.6884	2.1863	3.3028	2.5253		0.890414	3.80903
15.6075	8.2782	2.3695	6.976	3.8643	3.7733	1.9295	2.9432	3.2005	2.8721	2.1756	10.098	4.582	2.1505	2.2918	3.0446	2.964	2.3842	2.0935	2.8244	2.2502		0.897261	3.65327
15.7266	6.2065	3.567	4.5438	4.8811	4.4307	2.4641	2.7594	3.6772	4.71	4.6549	8.227	4.489	2.9159	2.3606	3.1337	3.625	3.1545	2.0572	3.4327	2.063		0.904108	3.86766
15.8458	4.291	5.3411	3.9479	4.8958	3.2523	2.8398	2.8542	3.2818	6.5591	3.9649	7.789	2.689	2.4704	2.7197	2.7507	4.621	2.2522	1.9935	2.6996	2.8608		0.910961	3.70369
15.9649	7.7846	3.9528	5.3518	4.4987	2.7631	2.3027	2.5348	4.4204	5.7429	2.5898	6.068	6.608	3.5479	2.532	2.6555	2.363	1.9112	2.8541	3.1657	2.034		0.917808	3.78405
16.0841	7.3605	3.6035	3.2048	5.4225	3.0525	3.1086	3.4557	4.8759	6.2215	2.839	4.822	3.949	3.1441	2.6811	4.36	2.26	3.5183	2.3717	3.0511	2.2501		0.924661	3.7776
16.2032	11.804	5.5791	4.3537	5.4537	4.877	2.2368	3.9943	3.7199	4.679	2.2851	3.996	3.539	3.7088	2.5753	2.5188	3.514	3.4694	1.9531	3.4588	2.9823		0.931507	4.03491
16.3224	9.7107	4.6233	4.7222	9.4222	4.8971	1.9538	2.7472	3.3342	5.4187	2.1957	3.785	3.501	2.8049	3.8805	2.8958	2.241	3.3258	2.1299	2.7633	2.1356		0.93836	3.92439
16.4415	11.7814	3.0081	6.8944	7.1457	3.8327	2.0758	2.5746	2.6903	3.3917	2.6211	4.682	3.37	3.2133	4.352	2.2624	2.293	3.2912	2.2116	2.4199	2.0052		0.945207	3.80582
16.5606	5.6301	2.2956	9.5316	8.6165	2.7019	2.0814	3.0878	3.2958	3.8503	3.061	5.763	3.286	2.9601	3.2163	2.8434	2.213	2.8627	2.0392	1.9319	2.0556		0.952054	3.66616
16.6798	7.708	2.991	10.8321	7.1418	3.1242	3.1969	3.114	2.9964	3.9987	2.2252	4.463	3.721	3.0179	3.9239	3.7022	4.376	3.1609	2.1102	1.9986	2.3084		0.958907	4.00552
16.7989	12.7055	4.1046	14.2603	6.436	4.0895	1.9267	2.8252	2.8171	4.4253	2.2326	5.705	5.889	2.1801	3.3005	2.2442	3.544	2.0508	2.0136	2.3465	2.1015		0.965754	4.3599
16.9181	10.0394	7.1899	8.2956	3.3217	4.3773	2.862	2.3568	2.4887	2.9012	2.0835	4.503	5.73	2.064	3.5135	3.7376	2.913	2.5624	1.9227	2.5527	2.2964		0.972606	3.88557
17.0372	8.8895	5.9819	8.462	3.2694	3.0988	3.6964	2.2254	3.1475	3.4926	2.6105	5.446	3.556	2.7996	3.0784	3.085	3.683	4.2646	1.9831	2.9685	2.0922		0.979453	3.89152
17.1563	8.0714	4.7327	5.4885	2.2595	2.83	2.8902	2.4235	3.0403	2.108	2.6915	5.115	3.953	3.3445	2.8221	4.2711	4.151	1.9703	2.4164	2.2558	2.0937		0.9863	3.44642
17.2755	9.2082	3.9463	4.0065	2.9891	3.008	2.0523	2.1611	2.6391	3.4326	2.7512	5.488	4.888	2.8912	3.5814	2.8843	3.321	2.3351	2.1352	2.099	1.8735		0.993153	3.38455
17.3946	12.7478	5.0617	3.273	2.8896	3.3234	2.2912	2.0682	2.2748	3.6883	2.0388	3.91	4.971	4.0358	4.9366	2.7653	2.544	3.9876	2.7233	2.8181	2.5855		1	3.7467

## Sheet: Image36
X0	Y0	Y1	Y2	Y3	Y4	Y5	Y6	Y7	Y8	Y9	Y10	Y11	Y12	Y13	Y14	Y15	Y16	Y17	Y18	Y19	Y20	Y21	Y22	Y23	Y24	Y25	Y26	Y27	Y28	Y29	Y30	Y31	Y32	Y33	Y34	Y35	Y36	Y37	Y38		Ap-Basal	Avg intensity
0	23.645	20.1893	24.0703	18.6335	21.3792	29.5015	22.3517	29.9053	26.9626	27.629	31.1881	24.4941	32.5352	30.4742	30.1756	15.8536	13.9769	21.7941	38.3124	32.4011	23.6009	31.3139	23.9693	21.4841	30.2049	30.4358	23.7826	35.4913	19.7279	28.3551	19.423	22.4247	21.6627	18.0768	27.9462	27.9387	32.3649	32.4097	65.6234		0	26.9669
0.1191	18.0418	15.4189	12.0558	16.1773	18.0908	30.3506	22.109	33.8787	18.6176	28.4473	26.2563	30.0306	28.0658	31.8852	26.1302	14.8222	18.5763	22.1925	29.5458	29.0805	28.5802	30.5742	20.8282	24.9732	32.7399	29.6416	26.6328	46.5329	33.0693	30.2499	22.9753	16.8394	15.3918	26.6894	35.8095	23.5279	28.8379	31.326	77.1716		0.00869267	26.9786
0.2383	19.9818	18.5588	23.7816	18.0865	19.816	27.3497	22.153	24.4305	13.7394	28.017	27.2521	24.5207	35.0502	29.4241	27.3742	15.2474	21.2424	26.4005	21.1731	28.0054	30.3305	22.3082	27.2432	15.0704	28.0666	26.3873	30.649	50.0844	21.9276	18.3852	19.5175	18.6246	16.6163	19.3365	33.379	28.0611	27.4546	24.5439	58.8325		0.0173926	25.3442
0.3574	21.0773	22.4119	16.7111	14.7852	24.2816	29.3145	31.5529	34.8947	20.5635	23.1734	22.8003	28.5659	33.1598	33.5674	21.9759	15.052	22.3316	29.3652	27.2498	29.4335	25.569	30.1275	19.1543	19.7268	18.0544	21.5716	23.2201	62.2158	28.4835	25.3977	22.5947	22.0361	10.4138	19.7119	40.0375	29.3721	27.0072	25.2312	49.6165		0.0260853	26.2002
0.4766	30.5288	22.6475	19.3757	13.8508	23.979	32.3504	34.9965	38.1426	17.4074	26.2431	23.3105	34.4578	24.7676	38.9094	21.925	16.4721	21.247	29.2191	32.3332	27.0007	26.9656	38.4529	25.1764	12.2978	15.1341	27.6161	33.7997	46.1046	45.3713	20.0359	16.4811	18.0878	10.553	20.0277	28.5167	28.1673	31.6311	28.3282	37.9846		0.0347853	26.664
0.5957	26.4539	25.6742	13.2556	10.8611	24.8791	44.5735	52.4492	44.2813	15.6919	34.4275	17.0334	27.7288	29.1389	44.3941	27.2421	17.4496	13.698	34.3053	38.3591	28.3855	36.0505	37.0698	27.4581	12.6788	21.2576	22.294	36.834	44.7326	61.5611	29.0912	14.2357	22.2717	16.3959	23.2851	28.0977	26.0088	28.6704	28.6402	37.512		0.0434779	28.8315
0.7148	36.4454	27.4614	12.9024	15.1573	27.6898	45.7916	55.5439	49.381	18.2086	27.9822	24.3549	35.6866	26.8167	43.9522	20.8153	20.6447	10.612	34.2454	34.172	33.1916	54.856	42.6752	26.0489	16.6507	21.7617	26.4164	40.821	53.4572	51.3985	26.6973	13.1831	19.223	8.1004	18.4435	28.078	16.1504	20.4853	27.5334	31.2275		0.0521706	29.3401
0.834	38.7735	27.076	8.1996	15.2069	43.5565	59.3734	42.506	42.1571	16.9138	23.1669	25.4054	26.241	35.5158	45.832	17.8527	24.1392	14.2371	29.1189	48.6235	29.8362	62.4659	47.4076	35.5013	9.9858	13.899	29.2909	41.1507	66.5907	78.1284	38.0355	12.7446	17.5622	17.3215	15.6386	16.5124	24.6459	24.5055	27.5021	33.8508		0.0608706	31.448
0.9531	39.4322	24.7779	13.6183	12.2729	39.7111	58.9134	34.1004	54.1612	10.1645	19.8386	15.3033	21.4605	38.9858	35.265	28.0644	23.3483	20.2559	31.3404	37.3663	36.8725	56.169	57.2048	35.1989	11.8035	21.5508	28.3467	40.9675	74.9913	64.669	35.6504	12.4697	16.439	13.7629	12.0424	20.5544	18.6749	26.0482	36.6096	38.9372		0.0695632	31.2139
1.0723	34.0859	20.5954	8.2368	13.8667	35.2355	56.5106	24.371	61.3655	17.9727	18.1392	18.3602	19.4709	40.1668	36.9703	24.1049	16.3063	18.2672	37.6932	42.7503	41.4063	41.5407	67.5642	48.3758	17.4444	16.9301	29.1433	49.4611	77.0456	57.3463	39.4196	13.5001	20.8744	15.1588	15.7449	18.0686	15.6923	24.3903	43.4431	38.4311		0.0782632	31.6782
1.1914	38.5018	21.0474	4.4496	15.2873	33.9865	65.9926	14.1638	56.6192	10.9543	22.2417	13.2446	16.9523	36.9834	43.7014	19.729	18.2918	20.0308	30.893	42.0485	46.2797	47.0492	66.4735	43.7325	12.0787	17.1566	19.3589	37.4548	72.0704	83.5232	42.6085	11.0559	20.6719	12.788	15.0309	16.8878	18.9766	18.9723	35.399	33.8166		0.0869559	30.6796
1.3106	41.755	23.1681	3.1733	10.969	32.529	80.7023	17.6037	47.5058	7.8425	21.6772	13.4246	17.4136	29.2654	40.9448	18.036	25.3368	20.6796	40.9174	44.5125	48.0433	50.1302	71.7941	44.0537	8.4242	14.865	26.4695	39.9005	59.9749	73.4511	48.2338	10.8522	15.9737	7.9485	16.4101	17.5081	13.6507	18.5329	47.0334	40.061		0.0956559	31.0453
1.4297	35.6542	29.9364	6.2281	16.7815	32.6785	71.6078	24.9421	36.1235	8.0695	16.6345	12.3096	14.4508	36.8889	38.3268	18.4923	18.0745	19.3374	48.0995	44.8354	52.8719	48.6714	94.0082	50.5631	19.3972	12.7118	24.5996	38.8452	69.6575	64.1857	37.0726	10.4428	16.5732	17.6366	11.6624	18.5815	16.876	24.8715	30.6342	26.4761		0.104349	31.1746
1.5488	47.8429	26.8964	7.2814	15.8873	28.0393	71.1732	22.4739	46.2619	5.7861	12.5889	10.268	14.4398	32.7233	31.0273	20.498	19.3657	15.8458	32.5817	35.6712	46.9087	57.8132	98.1409	46.2097	10.8795	21.9962	27.1605	37.7608	58.5566	83.9962	52.4668	7.8432	13.2463	10.6053	7.8902	16.3288	18.1759	24.3991	35.1159	24.7033		0.113041	30.6884
1.668	44.7672	25.6882	7.9253	13.3866	17.4308	77.4334	12.2657	28.1008	12.2643	15.273	11.3446	8.8794	28.4598	37.5166	14.4381	22.81	15.9499	30.2029	40.0471	38.3497	51.7091	93.3383	40.0506	13.8569	11.0229	16.0835	21.4529	54.6843	93.6872	55.9949	9.5964	9.8518	8.5905	16.2546	18.4714	9.9904	21.0282	35.6663	29.0395		0.121741	28.536
1.7871	41.5562	24.8657	10.2207	9.4103	27.3685	64.1421	17.0796	21.1472	9.7743	12.5106	7.756	9.5778	28.2036	27.9148	10.8981	25.3439	13.5573	30.0505	31.6712	52.109	45.1044	70.528	47.9619	15.3549	11.8154	21.0489	23.8045	44.0955	72.8668	47.3149	10.6903	15.2289	11.7313	10.2076	14.0975	12.2067	21.495	35.3762	39.157		0.130434	26.8011
1.9063	50.7112	30.065	8.0793	4.8067	22.8674	63.2189	9.0625	22.4357	7.3132	12.5122	8.8565	9.8169	30.9582	26.582	13.1542	14.0627	15.6798	30.3267	36.3542	37.195	43.2154	55.414	41.8593	13.4364	14.884	18.5454	28.2365	29.85	62.5731	45.2612	12.6002	13.7218	13.453	9.6521	11.1755	10.1684	19.1667	33.9738	30.9991		0.139134	24.6729
2.0254	54.0502	16.9633	7.1886	6.5687	23.9725	48.9469	8.1773	13.6088	11.9536	9.9677	7.0038	9.7439	39.3463	28.7264	10.8103	13.8355	7.5644	23.3374	43.1851	34.4181	29.288	47.9626	42.1734	15.2218	18.2281	15.9336	23.3265	27.7149	65.4053	40.4518	12.9506	9.0062	13.4962	12.5577	10.5158	8.8856	14.1897	43.2899	26.122		0.147826	22.9766
2.1445	49.4282	25.1968	7.0649	13.3669	19.8697	61.5424	12.0766	12.7918	5.3711	7.2095	9.2777	10.0758	24.0432	28.1747	13.8355	12.0427	10.1938	28.81	50.4755	43.1195	34.5513	45.2291	37.43	12.976	11.18	20.1594	27.1192	28.0079	55.4173	50.0635	10.3441	13.4554	9.3801	9.3944	15.7601	9.4169	12.3169	30.0179	27.9818		0.156519	23.1838
2.2637	60.0008	22.3074	6.5216	11.5092	17.664	45.0819	11.2888	13.9602	12.6904	4.7924	9.9382	10.6403	17.0525	19.854	11.2495	10.752	19.4271	21.8618	34.3576	35.5871	26.5086	30.6722	30.0931	9.9843	13.9051	22.5798	15.2342	25.7702	57.225	35.823	20.6678	12.6603	11.9423	8.566	8.5531	8.8033	13.4254	31.773	27.0661		0.165219	20.7126
2.3828	57.0361	33.0493	6.3754	15.969	18.04	48.9291	11.4906	11.3103	6.7544	5.0345	4.5992	10.7251	17.4641	20.1294	7.2615	6.8242	12.2324	14.6897	38.7557	42.6981	25.5803	33.8349	25.7072	9.3183	11.3596	11.5954	19.0385	21.6727	44.1626	35.6416	12.3781	12.1342	6.2242	12.2631	12.1672	7.1914	11.2772	24.4063	14.5181		0.173912	18.9702
2.502	52.0786	20.0407	5.1425	11.4489	10.3134	56.5528	12.5502	13.3663	9.6496	5.1664	5.5395	8.3595	20.2647	15.7877	5.1968	5.536	12.6982	19.7978	30.0158	35.497	18.7032	33.9996	29.734	13.4164	16.8011	11.8962	13.333	13.7375	36.1398	27.3457	12.4092	16.036	11.349	9.77	10.709	8.0482	13.1808	38.6383	12.6712		0.182612	18.0236
2.6211	59.035	28.3759	5.5246	18.3433	12.2063	49.5085	12.1593	11.7876	8.5038	8.9486	9.059	8.0002	20.9265	19.6465	2.0574	10.8873	12.3918	16.4967	25.6587	48.3077	24.4037	38.3525	17.8297	10.0938	15.4847	12.7582	15.7344	11.6968	35.1643	16.7969	15.2473	13.6625	9.7251	8.0577	14.8652	8.5574	9.7397	28.5523	15.7121		0.191304	18.2118
2.7402	53.7767	22.9562	8.342	17.0304	10.1886	37.9916	12.835	14.4567	11.2041	4.5075	6.9707	9.0484	23.8652	15.8898	8.3312	5.3118	10.9621	19.8853	27.0472	32.2081	29.9419	40.3256	22.3648	7.0614	13.4817	16.0771	10.0609	11.4171	11.1531	20.5693	10.3213	13.8455	11.3205	6.5585	20.1863	8.2842	8.6246	17.1358	12.6701		0.199997	16.5182
2.8594	57.4204	22.8913	4.8007	23.3224	8.8294	28.022	10.4326	8.9983	6.4698	5.7056	5.7803	9.812	14.8962	14.7284	9.3495	9.4556	7.986	11.2784	24.3198	37.1514	20.679	40.6087	21.0294	5.9676	16.5419	15.2686	11.591	8.0884	18.7753	7.1612	13.2827	10.8039	14.9999	10.0497	10.1311	6.389	9.0618	22.0977	19.1097		0.208697	15.4689
2.9785	51.6057	15.6852	7.3598	11.8826	9.5576	20.9216	13.3684	7.9658	6.5427	4.4207	2.7094	11.3495	17.7038	16.7484	10.5579	5.4119	9.3136	19.6571	24.7944	33.9104	17.2466	25.4001	12.8465	3.7106	12.1302	9.0093	8.7444	7.1438	7.6369	9.1146	15.9634	16.7056	10.5626	11.4696	10.4188	10.6544	4.9888	15.9712	10.7066		0.21739	13.3818
3.0977	52.1125	15.2966	6.0195	13.361	9.7395	18.2414	13.718	8.208	6.5551	3.4039	4.3763	8.6999	11.757	19.1698	5.5156	8.9828	7.9066	11.4563	16.1589	32.4235	20.499	27.9578	14.5706	8.9347	8.6092	12.1918	5.244	8.6877	8.8896	6.6238	12.0318	19.246	17.1246	11.5843	9.3977	5.4669	9.351	12.6742	14.7561		0.22609	12.9985
3.2168	54.0785	14.9928	6.4674	16.6589	8.7658	8.2786	19.6258	7.3895	8.6165	4.6054	8.0785	6.5086	11.6908	13.8219	10.9268	6.5225	9.6377	13.241	16.2117	28.8645	15.2528	20.1427	11.7068	7.2244	6.8823	11.5788	12.4005	6.5838	12.2238	9.0578	13.3978	23.1483	15.1381	7.7626	7.429	7.3125	9.3394	8.1922	18.6754		0.234782	12.7803
3.336	51.7018	13.0548	8.6742	14.6663	14.161	11.0267	10.2899	9.5264	7.2626	4.7191	2.827	6.2492	8.6358	14.7567	5.1955	6.9276	9.9245	13.4876	16.5958	27.9833	17.588	14.7149	9.2273	4.914	10.754	7.0201	8.5023	10.7564	8.8286	10.0119	7.3233	10.9894	14.3907	16.4748	8.0018	4.3827	8.5933	11.2879	14.9072		0.243482	11.7009
3.4551	44.3563	10.6468	9.5538	11.4191	8.7293	7.1148	13.8014	8.4607	5.3384	3.9362	6.5611	6.1727	18.9815	16.2998	6.0829	6.7059	4.7842	6.6562	19.1516	24.1066	11.9265	18.8885	4.9252	7.7346	11.0168	4.4343	7.6526	4.8921	10.8242	3.6999	8.4598	7.8807	16.8978	10.795	9.2902	6.9019	7.2727	4.3652	18.647		0.252175	10.6504
3.5742	44.2683	10.791	7.382	11.8355	7.5844	9.476	13.2108	6.2444	8.1968	4.5472	4.4677	10.3892	19.1679	9.2995	5.3741	6.9021	5.9562	11.2552	14.8018	23.2577	6.8566	18.5581	6.7681	5.6083	11.3083	5.5091	7.0194	5.6903	9.2932	9.2984	5.9175	6.7844	10.6655	9.8797	6.2883	6.1391	8.3063	9.3469	18.0974		0.260868	10.3011
3.6934	53.6588	8.2775	15.2268	9.8383	8.2337	8.2937	15.415	5.9885	7.3891	6.4748	4.4569	6.4708	16.18	16.3846	8.93	6.1666	6.5865	10.5276	10.2597	26.1628	7.4179	17.668	8.263	5.5293	9.2707	8.1166	6.9888	4.2897	8.7953	10.6398	5.9334	7.1982	13.07	9.6629	5.7776	6.8604	7.8381	17.1668	11.7516		0.269568	10.8503
3.8125	44.923	6.7377	7.0457	12.7556	6.9506	9.69	9.4362	2.5114	8.0606	3.209	4.1771	5.8999	10.2056	4.8096	7.6968	5.5025	3.0302	8.1206	10.189	21.3146	13.7295	17.1968	6.7335	3.7196	7.6205	7.3443	8.8408	4.6283	11.2305	7.0785	5.0501	6.5795	9.8055	9.4542	6.277	4.6742	8.7615	7.5618	11.9194		0.27826	8.98644
3.9317	38.1125	14.6939	5.4504	12.2791	3.5781	7.0558	6.0519	5.0534	5.3065	3.4344	3.8691	8.1456	11.413	12.9155	3.2614	6.009	4.6941	7.4296	13.7068	20.4647	9.5429	14.9216	6.7415	3.473	11.0709	11.4201	4.2166	6.0432	8.1766	5.8517	4.2989	5.1812	9.0339	9.1591	8.8095	4.7317	5.1901	8.2044	10.0447		0.28696	8.69324
4.0508	42.2192	5.6156	5.2694	8.2866	4.9841	5.3246	9.9601	4.4418	4.7979	2.7856	4.5073	7.2975	12.3323	8.8979	4.5603	7.4725	4.3153	8.87	4.938	19.4024	7.6476	15.6759	6.377	3.7792	7.215	9.6087	3.8066	3.53	13.7331	6.9138	5.7836	4.6321	6.6647	10.1166	5.3591	2.7656	6.8617	4.5171	8.0648		0.295653	7.93155
4.1699	50.5479	5.7514	8.4485	7.3253	3.0723	4.1048	8.187	4.7093	6.4632	2.5715	4.3475	4.1662	10.4803	10.1771	6.7231	4.013	5.4555	9.034	8.2019	14.5482	6.5337	13.7798	10.025	5.4423	6.401	5.6086	5.9397	6.1626	15.2084	4.5953	7.036	5.368	9.2487	11.5073	6.4874	3.5925	5.7183	5.6817	9.4319		0.304346	8.25888
4.2891	43.438	5.3455	6.6592	11.8919	2.7161	5.6649	11.3096	5.2247	4.7337	3.29	4.8449	4.5082	10.2659	5.688	4.698	6.1525	5.8273	6.9847	9.4742	16.1334	5.1022	16.6053	8.2377	3.0502	5.8328	8.5634	5.3424	3.0878	10.513	5.1027	3.8185	3.8927	10.3235	7.0112	6.2353	4.5448	7.5941	7.0429	5.6952		0.313046	7.75504
4.4082	43.8842	5.2975	6.497	12.134	6.099	2.7882	7.4269	5.3395	3.4158	2.6776	5.2476	5.4684	10.5028	4.7678	8.8298	5.3614	4.5009	5.5489	7.0751	16.2407	5.4251	16.3136	9.6879	2.7726	9.9819	8.9144	4.6019	3.3579	10.1604	6.3251	5.3293	4.0305	9.368	8.1683	8.9181	7.32	2.751	3.9026	7.6211		0.321738	7.79623
4.5274	39.3666	6.6686	4.3927	8.6187	5.5115	5.4939	12.2706	8.1554	4.4532	3.2919	4.8622	4.8884	6.8822	6.5167	7.9504	5.1195	4.3325	6.159	7.2546	7.3742	5.1485	15.6678	6.4286	4.212	5.2302	4.5633	6.8845	2.9664	14.2733	11.7283	4.1902	4.0603	6.3598	9.5041	3.8502	3.6181	3.9217	12.3441	6.6638		0.330438	7.4661
4.6465	37.4264	4.4107	5.0321	8.5238	3.7188	3.9944	8.0058	4.9394	3.1488	3.4976	5.1157	6.1478	7.522	9.3901	10.1268	4.9218	5.4961	6.5033	5.1522	5.1417	4.1375	11.5377	13.73	3.6715	5.1906	9.8221	4.0048	5.2525	11.7036	3.3699	6.4468	6.7486	6.1613	9.7554	3.4593	6.9245	2.926	4.0294	4.8229		0.339131	6.97204
4.7657	45.4516	5.8977	3.9921	10.7309	4.9309	3.3621	8.1734	4.1035	5.8596	3.0899	6.2218	6.0395	5.7707	10.1873	5.5255	5.6177	7.3581	5.958	8.7332	3.9152	2.5057	10.0598	10.8024	2.5868	5.8619	9.4467	4.5917	2.5937	8.3669	3.4311	3.2419	5.3089	6.2134	8.1223	7.3825	3.9824	5.0611	9.2054	7.8543		0.347831	7.11635
4.8848	38.0066	9.006	3.8443	10.8344	3.3521	3.7775	7.0567	10.2625	4.017	2.1601	4.1915	4.3411	6.3869	8.859	10.6643	3.3599	3.3938	9.9891	7.5209	10.5989	3.1965	8.5359	8.9958	2.8136	5.2527	6.5671	4.4505	3.2511	9.914	6.921	3.1789	3.4565	5.9129	8.9651	8.0639	3.483	3.4175	9.8616	5.1093		0.356524	6.99922
5.0039	42.5541	7.2168	3.9268	6.8752	7.2233	3.7026	4.1474	5.4117	4.159	1.9831	5.1651	4.5546	5.961	7.1081	6.5454	7.009	4.9332	6.6029	7.557	5.141	6.303	9.1772	11.7349	4.8048	3.6169	6.5114	5.8349	2.2956	9.0866	5.6044	2.8443	4.4591	7.9198	7.8853	7.108	4.9658	3.1436	11.7699	5.2263		0.365216	6.87357
5.1231	36.5007	5.5334	7.3376	6.828	7.2147	2.1454	5.8009	4.3775	4.18	2.973	4.4701	7.6603	4.9727	5.5844	8.2056	6.0509	4.3946	5.9943	7.846	3.2958	3.4043	9.6481	14.5901	4.8241	3.9692	8.5276	3.278	4.1288	11.8119	11.705	2.2612	2.6308	4.3931	6.322	5.9046	4.5091	4.9558	9.0432	4.0563		0.373916	6.70075
5.2422	35.6262	6.3591	5.0875	10.1817	5.8351	2.8826	3.6574	6.6219	3.6302	2.7516	4.1863	3.0174	8.9764	8.6207	9.2418	4.1913	2.5301	5.4268	6.6436	3.4687	1.9503	11.9854	7.9533	2.1912	4.796	8.2082	4.8626	4.5597	3.1616	9.3705	3.2013	6.1448	4.6839	6.4136	7.4635	4.6175	6.8118	5.0276	4.029		0.382609	6.31713
5.3614	35.3124	7.6419	6.168	6.0633	8.9276	3.3899	4.8217	3.5436	4.7677	3.206	6.8717	2.0501	7.9983	5.8474	10.6802	5.1986	7.6388	5.0829	6.3838	6.4125	3.0537	8.109	7.7575	2.3686	3.1095	3.7427	4.8433	3.6319	3.8911	5.888	3.7596	2.2926	5.3392	8.3988	3.9245	2.7563	5.0357	4.7122	3.9449		0.391309	6.0145
5.4805	33.0387	4.7598	6.8501	9.1886	7.4401	2.8456	4.0898	4.1698	3.6136	2.5081	4.9927	4.0518	10.4284	7.4009	8.2087	7.3245	3.4441	6.1466	4.4878	6.0969	2.9685	5.1486	4.5531	3.0588	2.646	6.0021	4.4446	2.4053	8.7488	7.6302	4.0438	3.2088	3.6904	8.2043	4.4369	2.2898	2.394	6.2255	6.0327		0.400001	5.87741
5.5996	35.2398	5.3854	3.5545	6.2412	5.8359	2.6339	4.882	4.6753	5.5834	3.313	4.6605	5.7205	4.6273	8.9684	10.8691	10.9672	4.8455	5.545	9.2842	5.046	3.3428	5.2641	4.3653	3.3483	4.0128	6.9505	2.1578	2.364	7.2312	4.3396	3.3565	2.9667	5.5841	3.5624	9.1203	3.4441	5.4025	5.3974	5.4526		0.408694	6.03952
5.7188	27.51	6.893	5.2145	6.3724	5.2941	4.3088	3.1234	4.4935	4.2737	1.8012	7.0506	4.5253	2.9515	6.8688	10.7943	12.9152	3.8094	5.6827	6.6979	3.7647	3.0231	6.1268	7.4883	2.3297	2.2459	6.6996	3.013	3.7089	4.9484	8.0672	4.4744	3.3981	3.0247	6.0054	5.3754	3.6792	3.3358	5.4669	4.6076		0.417394	5.67598
5.8379	14.8415	4.6406	3.5962	3.5928	3.1532	2.1595	3.9535	8.1893	4.8496	2.8303	5.9925	7.5625	5.6134	3.4036	11.5905	6.8883	2.6635	5.3759	6.8398	7.3618	4.2553	5.9551	3.0062	3.0178	4.1506	7.2324	3.0431	3.135	4.9571	8.5822	6.5183	2.7907	4.2569	2.798	6.0777	3.7928	3.9884	8.4592	3.8379		0.426087	5.25521
5.9571	11.6714	8.4079	4.2098	4.2024	4.9992	4.263	3.2945	2.5303	2.6386	2.6875	6.6792	4.4626	4.2237	6.4646	10.7677	7.4022	4.0574	3.3977	9.5532	6.3322	3.6234	5.359	4.4077	3.2858	3.3071	4.7501	2.5163	4.7012	8.1155	5.4221	2.9941	3.4562	3.2125	4.768	5.8568	2.6052	2.0857	9.7845	3.1372		0.434787	5.01624
6.0762	12.3484	9.7917	3.4853	5.1417	3.1464	3.0146	5.6048	3.1519	4.3666	3.0983	7.154	2.9197	4.2244	5.2114	9.0909	7.7896	3.944	5.4064	8.7019	8.1789	2.0665	6.2106	3.7282	2.8252	3.1166	4.7216	5.8353	3.8787	9.1403	3.8595	3.1066	3.0811	2.6649	3.7173	5.711	3.6801	5.9559	6.4942	4.1055		0.443479	5.11974
6.1953	13.2284	7.3179	3.2109	5.5432	2.0282	3.3939	5.6083	6.256	2.7569	2.4438	5.7237	4.5411	4.1331	5.8481	13.2515	5.886	7.1082	4.1592	9.2982	5.1377	2.7109	8.0949	4.2606	2.1734	3.7797	5.4734	5.5701	3.3763	5.4699	5.571	2.3156	2.2122	3.9717	4.1934	6.0345	2.114	3.7051	7.5954	5.3196		0.452172	5.14913
6.3145	10.7473	7.4345	2.4436	5.3237	4.5089	4.3294	3.522	4.5286	3.0732	1.9406	4.0182	3.1016	4.7405	7.6338	13.9704	4.5384	4.1837	6.4027	10.6338	4.1371	2.906	7.2382	5.2243	4.3648	3.5477	5.9036	3.5556	3.0639	4.3901	4.5026	2.475	2.7789	4.0788	4.9424	5.0756	3.0815	2.7248	9.7834	5.2601		0.460872	5.02844
6.4336	13.9972	8.7735	3.591	5.8179	3.5424	2.4148	5.743	2.687	4.7064	4.2932	3.5535	5.0876	7.6092	7.3741	10.2837	3.3484	5.368	6.5187	5.2798	3.0799	2.5127	3.8991	4.8633	4.1198	5.0358	3.3876	4.6463	2.4304	5.4361	5.7539	4.9966	1.9503	5.6658	4.618	4.0195	1.8741	2.6634	10.5033	4.1342		0.469565	5.01486
6.5528	9.6204	7.7451	4.4678	4.2807	3.9256	2.1533	3.7317	3.7494	2.9415	3.0126	4.4776	5.9576	7.5232	5.4794	9.2542	4.3281	4.1077	3.8564	7.07	4.1949	3.0664	5.2917	5.3167	4.6972	3.9005	6.7898	3.6173	2.682	4.7716	4.0818	7.044	2.7372	5.4212	5.8308	4.6531	2.0926	4.3542	10.566	2.6083		0.478265	4.90768
6.6719	8.5279	3.6493	4.0073	7.0613	3.633	4.0677	7.9904	3.2281	2.9294	4.1421	5.7541	5.6094	9.6151	6.9737	7.0235	4.6864	5.9341	4.6639	10.2798	7.2998	2.2095	7.2083	3.9254	2.14	3.0453	3.2921	4.479	5.141	6.6807	5.7579	4.4707	3.1318	7.381	7.9012	2.332	3.7442	4.8869	6.4454	2.4898		0.486957	5.22406
6.7911	7.2486	5.3769	4.0195	6.1508	3.5248	2.5438	6.3444	5.9682	2.9355	2.0893	4.9029	4.107	4.5091	4.9786	10.9871	7.0167	4.1781	4.7274	6.6077	3.7732	2.8066	5.0009	6.2184	4.6209	3.8328	2.8841	3.716	2.29	6.7247	6.3803	2.4531	4.5327	3.4647	3.0751	3.6479	2.0834	2.9401	4.8619	6.8479		0.495657	4.6249
6.9102	7.5183	6.4345	1.9453	3.431	4.7932	2.9273	5.3816	4.9879	3.3527	2.5074	6.5897	5.2974	5.3694	3.4426	9.8968	4.785	2.656	3.7299	7.929	4.9447	2.6958	4.8478	6.3927	2.5571	6.5724	4.8494	6.082	2.3609	5.449	6.5062	2.1549	2.2011	5.841	5.213	3.401	2.4599	4.1312	3.9943	3.1709		0.50435	4.58462
7.0293	6.8922	5.6154	4.2518	4.1621	3.7319	2.8536	4.2622	4.7821	2.8077	3.3203	4.4739	4.2053	5.857	5.3987	6.2647	9.079	4.9789	3.0522	10.3102	5.2661	2.3261	3.5499	5.4072	2.0303	1.9003	3.3017	3.9717	3.0656	6.4172	4.0315	5.2862	5.2947	3.5496	2.7893	3.7712	2.0821	1.9772	7.3523	4.3014		0.513043	4.46079
7.1485	5.8434	9.7372	3.5113	5.1075	3.6839	2.407	3.3186	6.0691	4.4846	2.1815	3.1796	3.9889	4.1882	7.0473	4.9688	6.0222	4.3266	6.385	9.3824	5.5541	5.0918	2.6736	3.6352	2.7341	2.2525	3.0032	5.6202	5.1143	4.621	3.2053	3.1075	4.0494	2.5101	6.1714	6.414	3.1885	1.7675	3.4535	2.9115		0.521743	4.43364
7.2676	3.8819	3.9985	2.3769	4.1532	2.6145	2.1698	3.7921	4.9525	2.9706	1.9763	3.7399	3.5404	5.5799	5.263	3.6053	7.3248	4.3282	3.6502	8.4095	7.4368	2.3154	6.3758	3.5678	2.9735	5.5908	3.8063	2.8496	2.7029	4.3991	3.7601	3.2589	2.4237	3.6202	4.3122	3.8481	3.0234	2.261	4.5844	4.3224		0.530435	3.99384
7.3868	6.7725	5.7662	2.638	4.4577	2.9203	2.5623	4.408	3.4495	2.6537	1.876	5.2058	6.1266	6.9382	2.8391	3.2475	5.7403	5.2562	5.7898	8.7691	3.1685	3.2692	5.9783	6.0837	3.4666	5.5063	5.063	6.2049	3.8494	3.2082	3.8572	3.2461	3.1728	1.9721	2.5874	7.4361	2.3082	2.6268	7.4145	3.454		0.539135	4.39205
7.5059	7.4817	4.8944	2.2138	3.3654	3.8775	2.3666	4.006	4.2726	3.7691	2.192	5.9046	5.4026	3.2273	3.4272	6.9703	8.8425	2.2265	8.1601	3.7598	2.9569	2.9554	3.1716	7.2282	2.0927	2.0297	3.6747	3.8901	3.3257	9.0078	6.1467	3.5546	2.2446	4.4227	3.0138	4.5784	2.9617	4.8543	9.6157	3.6056		0.547828	4.40233
7.625	4.7483	5.1323	3.4796	3.5065	2.8579	2.2519	2.3442	2.5159	2.6354	3.3927	4.5771	4.7795	3.227	4.3322	8.4166	8.6671	5.7839	6.67	5.6628	6.3086	2.543	6.9255	3.2796	3.256	2.633	2.4707	5.5577	1.9822	4.604	7.0516	3.9603	2.4807	5.8995	5.1682	6.7412	3.8521	3.433	3.1161	1.998		0.556521	4.31389
7.7442	4.2076	6.3168	2.1769	3.1954	3.4049	4.2856	3.1946	3.5419	2.9587	3.2366	3.9093	3.2288	6.4029	3.8819	5.9061	4.5531	4.0653	4.9305	7.5626	2.7508	2.334	4.2946	6.13	3.6654	5.4474	3.7201	6.9027	3.1344	3.2557	6.4596	2.6867	2.1506	6.4799	2.2844	10.2262	3.9716	2.2051	6.9593	6.709		0.565221	4.4289
7.8633	4.8627	7.4258	2.4324	2.8089	3.4505	4.419	3.273	2.2866	4.2793	2.6398	5.818	3.4141	5.4575	3.355	5.1797	2.9964	3.5924	4.5338	7.9408	6.8603	2.0697	5.0861	6.1921	2.947	4.3254	4.8709	4.4741	2.1599	4.109	5.2417	2.6104	2.3311	4.6963	3.5588	9.3752	2.886	3.3895	5.5132	5.4361		0.573913	4.31535
7.9825	5.2261	3.6199	1.9005	4.5884	3.0604	2.6429	2.4292	2.5223	3.1018	3.5606	3.1781	2.558	4.1508	6.9212	6.4105	4.091	4.031	7.2443	6.4856	7.8984	2.5692	3.6002	3.4534	2.2489	4.0263	2.8301	2.0205	3.3728	2.7826	4.8032	4.7109	3.7826	5.6729	5.7022	5.2634	3.496	2.8827	4.0437	2.7032		0.582613	3.98938
8.1016	4.5104	2.3246	2.2413	4.0953	3.4872	1.913	3.269	2.0947	2.0777	2.3016	2.9586	3.5085	4.7317	3.3256	7.311	3.6496	4.8728	7.0526	6.4333	4.7082	3.9756	4.1619	3.8966	2.0844	2.1147	3.7023	3.0315	2.8297	1.8796	4.0692	3.7145	2.9595	4.1578	3.3014	6.2738	1.8858	4.102	4.4557	5.059		0.591306	3.70568
8.2207	2.9412	3.6113	4.3634	2.2813	3.217	3.1913	3.7014	3.081	1.9373	3.5916	4.281	3.93	7.6829	5.8886	4.909	4.7687	4.43	5.8913	10.3975	5.3895	3.739	2.3333	4.3392	3.9063	2.3005	3.1628	4.2259	3.7921	5.2065	3.2625	3.2173	3.6852	2.5802	4.8876	4.5768	3.7035	3.5861	4.1535	5.3025		0.599999	4.13964
8.3399	4.8253	3.1098	4.9291	2.5767	2.8655	2.8217	3.5303	3.1095	2.0731	3.8847	6.3304	3.9871	3.3444	7.186	3.6885	3.2597	5.4544	3.3331	5.2112	6.0617	3.2131	3.6322	6.2201	2.3242	3.0258	2.7436	2.6892	3.8262	4.9073	3.2691	3.8316	2.3371	6.8535	6.3101	6.6524	1.9414	2.5862	3.8675	6.5306		0.608699	4.06009
8.459	4.2426	3.8058	2.2428	2.2491	3.0009	2.6887	2.7029	2.929	3.1595	2.3756	4.7171	4.0064	4.3852	4.3034	5.3079	3.6266	6.0061	4.9057	8.5505	4.3439	2.0934	3.3921	3.5863	2.5625	2.2935	1.8999	2.601	5.3609	4.2093	4.3921	4.0907	2.0554	4.4958	4.0818	5.5023	3.3981	1.932	7.1308	7.464		0.617391	3.89978
8.5782	3.585	3.71	3.2612	3.0862	5.1951	4.7294	3.5976	4.6093	2.0595	1.972	5.4955	4.2302	3.1079	3.8764	7.4448	5.0962	5.1338	5.6258	10.822	6.1505	4.5422	3.3831	2.5937	2.5024	2.6641	4.4426	3.465	2.83	2.0058	5.009	2.0895	5.028	4.1837	5.3393	2.5797	3.4592	1.924	6.4083	5.9583		0.626091	4.18452
8.6973	4.5919	3.1886	3.858	2.9522	3.3157	2.6221	3.0797	3.0808	2.2599	2.0193	4.7967	5.1174	3.9133	9.0333	6.0407	4.1715	3.0198	6.7307	10.1768	9.3888	5.7173	2.5866	4.9772	2.9903	3.0312	3.1118	6.4996	5.4417	2.9288	5.451	3.448	2.4383	7.4709	2.993	4.0428	2.4846	2.5267	4.904	2.9954		0.634784	4.3435
8.8165	2.8472	5.2431	2.6363	4.534	4.2875	1.9015	3.1872	2.6965	2.5494	2.3658	7.4963	3.7334	3.9792	7.732	5.6487	2.7078	5.7394	3.7261	11.7242	4.6947	3.8009	2.8487	2.8843	2.0245	3.4749	3.9976	5.3824	1.947	6.1151	4.427	5.5993	2.0616	3.774	5.9592	4.1859	2.9367	2.8133	2.9217	4.7553		0.643484	4.13692
8.9356	4.52	3.4377	2.1977	3.7777	7.6874	2.5168	4.2868	4.5201	4.5367	2.2136	8.6258	4.385	6.3302	5.7442	2.2259	4.0121	9.1619	6.513	10.2156	3.7707	2.7585	3.6481	5.1153	2.8715	2.1251	4.3547	2.1671	3.1658	4.0815	3.1237	4.1237	2.5916	3.8737	4.6407	6.1075	2.6265	2.3861	5.169	2.8899		0.652176	4.32048
9.0547	4.1932	2.7781	3.9924	2.0228	3.9195	2.6426	4.1492	2.6526	2.8975	2.8724	3.2182	3.3599	5.1501	2.4022	3.2727	2.5555	8.827	3.2558	9.9782	6.923	2.9667	3.1116	2.3733	4.8107	3.2282	3.9137	4.1702	4.023	2.1372	5.441	2.4503	4.4839	3.6527	2.8651	3.0618	1.9016	2.9121	6.7036	3.6142		0.660869	3.81753
9.1739	5.4329	3.137	3.6599	3.1464	3.3241	2.1401	4.3819	2.6172	2.0348	2.6831	3.4117	3.8417	5.0745	3.2636	6.1648	3.8563	11.6728	5.1938	5.4561	7.6813	3.877	2.5384	2.2732	3.6526	3.2581	5.1995	4.4754	3.0384	3.3983	6.8738	3.308	2.7222	3.1183	4.2687	4.992	2.4982	2.2851	3.7636	4.4711		0.669569	4.05605
9.293	3.0557	3.216	5.7291	2.0648	4.468	2.775	3.9134	3.1919	4.3903	2.7575	3.1663	5.6286	6.3371	3.2129	5.6362	4.0286	11.9851	3.9069	7.0635	6.711	2.8571	3.6123	6.2252	3.7802	1.9552	2.5893	2.7012	3.9578	3.7276	3.7307	2.6553	3.5314	7.485	4.7763	2.2355	2.5263	2.0131	4.6468	3.536		0.678262	4.14821
9.4122	2.9435	2.0187	4.6345	2.9062	3.234	3.1696	2.5043	3.7171	2.6709	3.196	2.5175	3.5648	5.3591	5.5471	3.3988	5.8504	15.246	9.1997	6.7471	10.5799	4.0645	4.0295	2.8001	3.4594	1.9268	2.9794	4.5223	6.2022	4.6719	8.3451	3.725	2.6573	4.0095	4.9349	5.6361	3.0545	4.3504	3.048	8.3459		0.686962	4.66072
9.5313	3.4911	4.0103	5.8593	5.0852	2.9127	1.8963	3.5617	5.1703	3.7693	2.1513	3.8863	3.5934	4.0007	5.0152	5.2667	1.936	7.9414	7.0074	5.7598	7.724	2.9841	3.3815	2.0426	2.9207	5.1466	3.4653	2.4812	4.7344	4.8877	5.5496	4.9954	1.799	5.1311	3.433	3.1294	2.6662	4.0877	4.4919	5.4791		0.695654	4.17551
9.6504	8.2834	2.907	6.0876	3.4915	3.3736	2.262	2.7596	4.8333	3.5921	4.0343	4.0186	4.7631	5.8151	1.9722	6.8135	3.8321	9.3175	5.7751	6.9988	6.2134	2.6947	2.1908	3.0046	3.7512	3.831	3.1757	2.0882	3.025	3.1004	3.9763	3.0499	3.9932	3.3941	4.9328	1.849	2.7516	2.3713	2.9399	4.8967		0.704347	4.05539
9.7696	3.1751	4.398	3.9461	3.2028	3.7021	2.0575	3.1589	3.8826	3.6878	2.0869	2.8975	5.9458	5.7628	3.8105	6.553	3.2494	8.2727	4.6175	8.8912	5.0723	2.5963	3.9282	3.2326	5.0579	3.7249	5.3834	4.5096	3.7798	4.3488	5.6105	4.9001	3.4666	5.3269	2.1765	2.2604	3.1539	3.157	5.6492	2.7938		0.713047	4.19043
9.8887	4.8294	2.6538	5.3797	1.9033	2.422	2.6274	1.954	3.4323	2.6556	3.0005	2.7706	2.386	6.4818	3.7897	5.5121	5.5964	8.5183	4.9104	5.4696	5.3226	2.4237	4.16	3.6869	3.2473	3.0006	1.9151	4.2519	2.6427	2.1672	7.2509	3.8495	3.2939	5.081	4.2575	3.7298	2.6711	2.2899	5.7936	4.9309		0.72174	3.90408
10.0079	5.312	5.6977	4.6661	2.3465	5.3237	2.1851	5.87	2.4148	2.1326	3.3482	1.8449	3.0094	5.638	2.2431	5.1964	3.3606	11.7464	8.1855	8.125	5.1613	4.154	5.1177	3.7266	4.1928	2.1352	5.1557	3.3818	2.5791	5.0697	2.735	2.3927	3.2623	4.744	2.7274	3.7807	1.9109	4.2982	3.7748	5.8845		0.73044	4.22642
10.127	4.6631	2.5197	3.135	2.1178	2.5601	1.9275	3.2071	4.4718	2.8499	4.6188	3.0506	3.598	4.1796	2.8917	7.119	3.7516	4.6139	5.2382	6.2142	7.7029	2.5958	6.0085	5.5534	4.1015	4.4399	3.5673	5.17	1.9499	3.4393	4.2362	2.7273	2.1162	6.1938	2.6242	2.4602	2.7453	2.5709	4.3102	5.0723		0.739132	3.90545
10.2462	4.406	3.3435	2.7406	4.3239	3.3241	2.1136	3.5646	2.788	2.3879	3.9992	4.1408	3.9067	4.5602	4.3636	6.7011	4.9667	5.2136	4.402	7.5256	4.8993	5.0728	4.3402	3.5625	2.8037	2.9431	5.0361	2.849	3.016	4.3536	6.0827	1.9275	1.9729	2.8424	2.0026	5.4063	3.2576	2.291	2.5452	4.7614		0.747832	3.86507
10.3653	5.3777	2.9113	4.412	2.1058	3.4091	2.4466	5.7709	3.0999	2.9219	4.3719	1.8971	3.0103	7.0913	2.7953	3.1777	8.4949	7.202	6.0137	3.3954	6.1094	2.1088	4.9433	4.5083	3.1241	2.0478	2.807	2.7057	3.4234	4.7251	2.2104	3.3025	3.2383	6.8508	3.0958	2.6951	3.8597	3.9939	4.5243	4.7729		0.756525	3.97311
10.4844	3.8411	2.4247	4.8403	3.0882	2.1398	3.4378	2.1498	3.3626	3.3378	3.7774	2.6161	2.6368	5.1072	2.5452	4.5023	6.1092	7.2601	7.712	8.3269	7.9759	3.873	8.1665	2.3778	3.5397	2.4392	4.471	4.3954	5.8942	2.7564	3.7818	3.2465	2.0934	3.1929	2.5149	2.0718	2.3136	2.955	4.8423	5.9549		0.765218	4.05312
10.6036	3.0895	2.1602	3.2286	1.8765	2.7687	3.7353	2.2503	2.2249	2.1975	3.5727	3.006	5.0489	5.5216	3.4859	3.748	5.5815	4.7617	4.7652	3.6446	5.7843	4.1047	2.8018	2.072	5.2851	2.0019	4.0725	3.8018	2.2968	3.0539	2.7722	3.493	3.3542	2.3737	3.666	3.1114	3.0186	2.9555	3.2308	3.7449		0.773918	3.42725
10.7227	3.8412	3.3206	4.572	2.1265	2.0037	3.9011	3.0037	1.8485	4.184	1.9338	2.3308	4.072	3.8215	5.7054	5.6775	8.7627	3.5155	4.7609	6.7884	8.4498	4.2394	4.3662	4.596	3.4277	3.0717	2.1942	3.6018	4.6013	2.2688	3.0094	5.425	3.8573	4.4201	2.5178	2.1257	2.5724	4.4187	5.0211	4.0753		0.78261	3.95973
10.8419	5.7492	2.7814	4.4391	2.5664	3.0919	2.2251	1.9585	3.3079	3.1133	2.6071	3.084	2.1864	5.1634	2.5651	4.4467	4.483	4.979	5.5364	4.6975	6.5921	2.462	4.502	2.7715	2.6788	2.9389	2.7103	4.0248	3.6114	1.9501	2.9834	4.2926	3.6988	3.2173	2.9178	3.485	2.9238	4.0729	2.9303	4.4959		0.79131	3.54464
10.961	3.9282	1.9912	2.0109	3.483	2.7233	2.7573	4.9703	3.9381	4.6061	3.8176	1.9153	3.6498	4.1904	3.3062	3.2148	3.7644	5.2076	6.1683	3.9361	6.5649	4.9835	2.97	2.2691	3.9737	2.114	2.4164	2.8589	4.3269	2.8454	1.8336	3.1517	3.2914	4.1991	3.6707	2.4856	3.9296	3.9649	4.725	2.6577		0.800003	3.55926
11.0801	7.9288	4.1587	2.0353	2.0007	2.511	4.7302	2.5369	2.9068	2.2876	4.8825	1.8744	3.2956	3.137	2.8921	3.7684	4.9124	6.3	4.2858	6.9913	5.58	2.6008	2.6574	1.8	4.1203	3.8558	4.0335	2.0789	3.3734	2.0332	4.2309	3.9115	2.0479	2.2963	2.4234	2.0426	2.4286	4.0535	5.357	3.3988		0.808696	3.53229
11.1993	2.5172	4.6558	2.9202	2.5444	4.221	2.7723	1.8959	1.8492	3.3008	4.2617	2.628	2.0046	4.5951	2.9783	3.3467	5.4946	4.9376	5.3027	5.2913	3.2223	3.683	1.9452	2.6892	2.961	2.6094	3.6656	2.3632	2.1064	3.1121	2.0305	3.8045	3.5255	3.2818	2.4171	3.0052	2.0653	3.6489	3.9738	2.6103		0.817396	3.23686
11.3184	2.5595	3.4613	3.4898	2.6983	3.697	2.9903	1.8382	2.0432	4.3914	2.2267	2.4035	3.0289	2.0694	4.3762	3.7234	3.0356	6.8228	6.2317	2.6481	3.9702	3.6144	6.183	3.4649	5.5854	2.592	4.0833	3.1724	2.8885	1.9542	1.8862	2.7113	2.7049	3.3679	2.3846	2.1565	3.2747	3.4638	2.0706	3.9589		0.826088	3.31341
11.4376	4.0185	4.3601	2.4787	2.477	4.8737	5.2605	2.4817	1.9036	3.5469	3.2357	2.5234	1.9959	3.1014	2.9529	3.9218	2.2476	9.403	2.6909	4.9069	3.4738	3.99	7.4947	2.0046	2.6106	3.1846	6.2734	2.4894	3.644	3.0056	2.5867	2.4297	1.8773	2.3884	2.8617	4.8876	1.965	3.1295	2.0451	3.9685		0.834788	3.4536
11.5567	2.9149	2.3771	2.0751	2.0051	2.2628	2.2118	2.0616	1.9992	4.8842	3.6274	1.8145	2.494	4.959	5.5618	3.8716	2.8385	6.5795	4.1219	3.7588	3.7831	5.1042	3.4886	5.4566	2.5885	3.8656	2.062	1.8984	1.8955	2.7221	1.8821	1.8454	2.9028	3.0567	2.0371	2.1312	1.8838	2.7469	2.9647	5.1813		0.843481	3.12604
11.6758	2.4702	3.6216	1.9795	1.9394	3.3217	2.5785	2.0042	2.2145	1.9766	2.8221	2.1255	2.0653	2.4783	4.2764	2.6625	4.2453	3.2323	3.3969	5.6965	4.1314	9.1882	3.4556	3.6629	2.9946	2.6595	2.697	1.9904	1.9419	2.1427	2.0986	2.4394	2.0565	2.5978	2.1039	2.5154	1.9181	3.8527	5.7648	5.6256		0.852174	3.10114
11.795	3.5295	3.089	2.1725	3.2384	1.9422	1.9872	3.005	4.2103	3.6541	2.2342	3.1769	2.3398	3.2983	3.3594	2.3065	2.9206	3.479	6.4661	3.8967	6.7383	4.7676	6.3672	2.8977	2.3936	2.7835	2.339	1.9616	3.0647	3.1856	3.0654	2.0523	2.3681	2.0082	2.6806	3.3292	3.0904	3.2977	2.2145	2.9732		0.860874	3.17652
11.9141	4.2654	1.8433	3.2007	2.075	1.8975	4.383	3.2856	1.9644	2.3838	3.1087	3.4338	2.2838	2.3925	3.1284	3.103	2.5748	5.9153	6.6572	5.3209	4.1116	5.084	4.2677	2.0742	1.8364	4.0854	4.1689	2.4136	2.3981	2.3694	2.0646	2.1142	3.0433	2.0441	3.4381	3.1968	2.1859	2.0664	2.0556	2.4331		0.869566	3.09406
12.0333	6.8739	5.2269	2.0393	2.0018	1.9862	3.3005	2.8872	2.0977	3.1907	1.9905	2.3514	3.1545	2.2152	2.5676	3.3658	4.2521	4.3235	5.0478	3.1211	3.1838	5.2169	6.5498	2.5795	2.1444	2.8165	2.3872	1.899	2.0225	1.8058	2.1649	2.4292	2.4245	2.6757	2.2165	1.8279	1.8083	2.2454	2.0805	2.749		0.878266	2.95438
12.1524	5.4261	2.0702	2.463	2.7833	1.9531	2.1955	2.8874	1.9576	1.9646	2.0479	2.2197	1.9908	3.1189	2.4563	2.0565	4.5833	5.3219	3.8715	2.265	6.3098	5.1919	7.663	1.8686	2.487	3.7134	2.025	2.0648	2.3891	1.83	1.9978	2.0202	2.0473	1.9809	2.3195	5.3208	2.2546	2.0679	2.5928	3.7242		0.886959	2.96157
12.2716	3.3243	1.9168	3.228	3.5694	2.0018	2.0421	2.7175	2.3175	2.0501	2.1581	2.382	2.5593	1.9902	1.9079	2.0084	3.2033	4.2357	2.4603	2.912	3.795	1.907	5.7009	2.9731	2.4568	2.6552	2.3113	2.7007	2.6829	2.0184	3.7151	1.9899	2.1106	2.7425	2.1318	2.7643	3.146	2.0657	1.9511	2.1168		0.895659	2.63897
12.3907	3.1313	2.4311	3.4027	1.9928	3.115	3.2477	1.8837	2.0944	1.8902	1.9552	1.971	2.1595	2.6589	2.0032	2.8697	3.3522	5.6462	3.9634	3.4946	3.9255	3.7873	10.1786	1.9789	3.0188	3.0492	1.8385	1.8346	2.3168	2.3046	2.0211	2.0055	2.621	2.6966	1.938	2.0985	1.8896	2.5434	1.9314	3.0877		0.904351	2.82893
12.5098	2.9457	2.1023	1.7332	2.2661	2.2162	2.162	2.2107	2.7307	1.9834	2.3221	2.0547	1.9377	2.3195	2.1106	2.8844	1.919	3.4479	2.6144	2.388	3.1632	4.946	4.1496	1.9408	2.418	3.6116	2.0002	1.842	2.1603	2.4469	2.2336	1.948	4.6354	2.3037	1.9621	1.9832	2.7251	1.89	2.005	2.4163		0.913044	2.4905
12.629	2.6562	2.0043	1.8886	2.4903	1.8376	2.0936	2.0579	2.7332	1.8629	2.0612	1.9885	2.8013	1.8946	3.1655	1.8677	2.0391	3.0911	5.0039	2.0632	2.9233	2.1327	2.9405	2.5439	2.8361	1.8984	2.0396	1.9351	1.8407	1.7417	2.9802	1.9411	2.5241	3.9303	2.7746	2.9323	2.1205	2.6027	1.9466	2.1406		0.921744	2.41861
12.7481	3.6556	1.8851	3.3417	3.0085	1.8297	2.5985	1.7859	2.1091	2.0395	1.9439	1.8977	2.1994	2.1602	2.0982	1.9627	3.0804	3.6166	2.8227	3.8594	1.9449	5.896	3.0283	2.8949	1.8223	2.1613	2.6445	2.0451	1.971	2.0761	1.9	3.1693	2.1273	1.9582	3.4151	2.0789	2.0471	2.0686	2.3425	1.8964		0.930437	2.49699
12.8673	3.7295	1.9901	2.0529	2.6572	3.0495	1.8562	2.6766	2.0573	2.3186	1.9504	2.8677	2.2663	3.6409	3.3291	2.6262	3.0992	3.7605	3.9075	2.2481	1.9938	2.9526	2.149	1.9044	1.9346	2.6021	2.0876	2.4757	2.5371	1.7949	3.194	1.9444	1.9515	1.8452	3.5113	2.4392	1.788	5.0152	2.0239	2.8411		0.939137	2.59152
12.9864	3.8463	2.0478	2.1681	2.1749	2.7313	2.9172	1.8241	1.9614	2.0218	2.6562	2.0659	1.9036	3.0724	2.7843	1.8416	2.1754	1.8519	2.2634	2.0663	2.011	1.9573	3.5224	1.8867	2.4494	2.5751	1.9009	2.9849	2.4364	2.1171	2.0174	2.4746	1.731	2.0493	2.7192	2.0532	2.0395	1.9825	1.9437	2.2898		0.947829	2.29526
13.1055	2.9437	4.5753	2.0034	2.0606	2.0561	2.087	1.8894	2.9534	1.9401	1.8407	2.0471	2.2186	1.902	2.0155	1.8915	1.9966	1.8924	2.0061	2.1021	3.1632	3.4576	2.2124	1.9413	1.8358	1.9009	2.0487	2.4328	1.9955	2.1036	2.057	2.0838	1.8832	1.9922	2.003	2.2948	2.9587	2.0934	1.9528	1.9347		0.956522	2.22479
13.2247	4.5484	2.5084	1.8889	1.9935	2.0069	2.1036	1.9396	2.854	3.3917	2.1419	1.997	2.3841	1.994	1.9999	2.5336	1.8915	2.1612	2.5126	4.0788	2.6606	3.3714	2.6718	2.0762	2.0497	2.8125	2.0451	2.008	2.1735	1.8404	2.103	2.1111	2.0494	1.8386	1.8336	2.0229	2.1933	1.9032	1.8398	3.2973		0.965222	2.35464
13.3438	3.8348	2.038	2.5371	2.1619	2.0505	2.1114	1.8384	1.9457	1.839	1.7998	2.7116	2.0939	1.9495	2.112	1.9165	1.9436	1.9493	3.3724	2.1945	2.0606	3.0813	2.6936	2.4994	2.0511	2.0512	3.1635	1.8389	2.7792	2.9671	1.8486	1.9698	2.0527	1.9962	2.3706	1.8886	2.9573	1.9355	2.0903	2.0552		0.973915	2.27566
13.463	3.0971	2.059	2.3219	2.1637	2.002	2.8036	3.5812	1.7887	1.7696	1.777	2.9954	3.0903	2.1022	3.3698	1.8909	2.2664	2.0227	2.4787	2.5081	2.0012	2.2583	2.2062	5.1632	2.0592	1.9964	1.9341	1.9428	2.4391	1.9989	2.0993	2.5321	2.0097	1.862	2.0805	2.3131	2.7816	1.8998	3.2086	2.6037		0.982615	2.39687
13.5821	5.2285	1.8074	1.9188	1.88	1.8757	1.8688	3.0896	2.0205	2.1053	2.0617	2.0239	2.2559	1.9983	2.0221	1.8896	2.4508	2.8034	2.1333	2.6657	2.2763	1.9721	2.7534	3.2201	2.0351	1.7846	2.3096	1.9408	2.0546	2.0979	1.9447	2.0019	1.8312	3.1311	2.1642	2.0204	2.1129	1.9367	2.5343	1.9986		0.991307	2.26205
13.7012	3.0299	2.409	1.9966	2.6887	2.0135	2.1063	2.1009	2.6899	2.0601	2.1372	1.9466	2.0647	1.886	3.2713	1.7386	1.8401	2.8682	1.8867	2.108	2.1488	1.8416	4.8129	2.2986	2.3605	1.9882	2.1607	2.0464	1.9995	2.1034	2.0056	2.0568	1.8891	2.8227	2.3377	2.2227	2.0108	1.9983	2.1753	3.5524		1	2.29934

## Sheet: Image35
X0	Y0	Y1	Y2	Y3	Y4	Y5	Y6	Y7	Y8	Y9	Y10	Y11	Y12	Y13	Y14	Y15	Y16	Y17	Y18	Y19	Y20	Y21	Y22	Y23	Y24	Y25	Y26	Y27	Y28	Y29	Y30	Y31	Y32		Ap-Basal	Avg intensity
0	15.1027	20.6252	21.567	19.116	16.7866	21.5251	12.0247	23.5213	31.0169	28.7036	22.3147	18.0828	23.4755	23.8962	17.7203	13.6854	18.283	18.1487	23.1616	15.7781	15.2315	24.5372	32.1249	19.9998	14.8691	20.1253	23.014	26.62	21.3431	19.7463	26.7662	21.9174	20.5257		0	20.9502
0.1191	15.9895	18.4086	21.244	12.19	28.3956	18.3081	17.8985	21.8291	15.9991	25.1146	23.3738	19.8924	28.8977	21.8873	15.8306	18.9071	21.2982	15.7668	16.658	15.1832	18.8848	24.202	28.7635	23.4618	14.546	16.3415	11.9827	31.9173	24.4576	18.1676	28.2319	25.3243	22.9534		0.00740483	20.676
0.2383	21.2072	13.8585	16.919	19.804	24.4448	18.2599	20.0203	25.1066	21.2898	33.4021	16.0583	23.095	21.3443	24.1808	20.4583	17.8595	19.4812	10.4221	15.2227	17.8903	27.0219	18.1336	28.5418	19.0549	21.6645	14.5089	14.0275	33.2488	22.8855	24.6873	33.4409	31.5833	25.5404		0.0148159	21.6565
0.3574	19.8504	16.0133	20.433	16.933	24.8007	27.954	18.648	17.2498	16.82	33.3628	16.7601	21.6331	32.053	24.9292	21.8478	16.8957	19.392	21.1611	17.302	21.9201	21.0456	23.4964	40.2397	28.1971	19.9371	16.7918	19.3618	31.9409	20.0185	30.281	31.6643	32.6205	21.5087		0.0222207	23.1231
0.4766	14.4061	17.1889	20.552	18.591	25.4277	14.5265	14.6578	17.0383	22.6482	31.2221	15.9429	16.6962	35.7271	29.4768	23.1241	21.8126	18.058	15.1477	18.3276	32.758	22.4774	18.3259	43.9742	26.9404	30.6438	19.9573	19.7093	29.0902	19.5123	19.5496	23.4953	34.7565	39.6139		0.0296317	23.375
0.5957	23.956	29.553	18.984	19.972	23.7947	17.3516	17.0162	14.8259	12.91	36.9121	15.7169	21.5112	34.5658	17.4921	17.3968	18.484	14.101	23.0004	17.8348	33.8233	26.9144	15.5326	33.632	33.8815	26.9758	19.2375	10.0093	29.1159	20.4018	26.5368	33.7527	37.0777	37.9629		0.0370366	23.6434
0.7148	24.3251	44.524	29.251	31.75	20.4446	18.4094	7.0003	19.9372	19.0578	34.3859	28.4315	20.7365	37.5428	28.055	22.656	18.114	18.3413	17.5611	18.9607	24.5968	27.8369	15.3383	39.6356	39.6642	34.7517	28.9362	17.6404	22.8349	25.9902	27.4069	32.2531	46.7254	36.8523		0.0444414	26.6651
0.834	21.8301	45.6601	29.262	37.421	26.8672	16.2824	18.6076	20.1811	12.9702	35.3097	27.3089	20.7573	39.3914	22.3291	18.3654	16.5099	16.2789	23.2008	14.6609	24.4183	26.7636	19.5838	50.5093	45.1686	37.597	46.2229	24.431	30.0643	27.4249	27.6266	34.6825	59.241	36.3958		0.0518525	28.8886
0.9531	21.3458	63.3618	33.887	44.013	31.1435	10.5529	15.0247	13.0831	16.5084	38.081	25.1425	15.6894	39.8855	28.192	21.4572	18.5005	17.619	12.8699	22.3103	24.8059	26.2091	14.825	50.4741	38.456	49.3127	30.7204	25.3167	31.6254	29.9876	23.536	24.7199	48.9289	52.1674		0.0592573	29.0834
1.0723	23.0958	53.5836	58.117	51.257	33.0326	11.5969	20.595	17.4056	14.3226	36.5472	30.5597	15.5094	45.6877	27.9065	27.1248	16.9667	21.0917	16.3627	15.8776	27.5787	25.3434	13.4361	50.5545	50.4322	44.6566	50.0758	21.4712	32.5501	28.8004	29.5193	36.8144	52.3414	37.5962		0.0666683	31.4488
1.1914	27.9685	76.1785	64.404	60.647	43.4324	19.2415	15.4006	12.6305	20.6313	40.6238	32.6192	21.2097	31.2147	39.6296	26.1122	16.2734	9.1323	14.5346	23.6423	28.8061	31.4072	11.4521	52.7627	54.7511	46.9581	50.1975	25.4574	39.6329	29.8136	32.3856	39.8643	50.293	40.6962		0.0740732	34.2425
1.3106	25.9233	78.4884	70.497	71.433	39.8857	16.7247	15.1891	16.0883	9.5539	50.7741	38.1115	18.2935	36.2275	25.9202	29.6426	11.1063	19.8719	21.423	28.094	35.0832	30.205	11.4519	48.2757	52.1058	61.4732	39.7197	38.6294	35.8399	26.5776	28.452	37.4411	57.1635	40.7381		0.0814842	35.3456
1.4297	27.3709	79.957	77.453	68.288	50.2832	20.7093	15.3757	17.7064	15.2464	53.7583	40.9622	20.9314	37.0106	29.6971	37.3255	20.4296	14.7589	26.0273	21.5828	31.2676	27.0509	15.8522	46.1032	61.1822	58.696	51.9003	30.5465	35.3085	28.2992	28.8495	35.5231	49.7905	43.7127		0.088889	36.9381
1.5488	13.6137	82.1976	80.853	69.731	60.1054	17.5402	12.7578	13.585	14.5495	53.6255	51.2641	25.4199	40.354	34.504	40.8196	11.6388	14.4152	21.9899	33.2537	29.8617	27.8808	20.7922	47.5833	68.6415	68.131	43.119	35.6825	34.8381	28.6353	41.9924	40.8504	40.7309	39.1647		0.0962939	38.1855
1.668	20.1013	77.4511	107.864	87.659	62.2384	22.4144	17.6723	25.1861	16.3995	54.2076	48.2427	28.3393	40.5568	41.7262	35.8861	8.7706	17.2176	22.2926	24.1361	31.7927	31.3172	16.1883	54.32	62.5885	74.035	49.9128	36.495	50.3768	40.2492	42.8397	42.2238	53.0614	49.4909		0.103705	42.2198
1.7871	17.9139	81.6314	110.63	90.721	75.7276	30.8258	11.524	18.2455	16.8742	53.482	48.515	28.4235	41.4164	37.4638	38.4592	15.2192	17.3531	21.3914	33.3778	34.2112	37.9024	23.8793	46.6511	57.065	56.5704	55.4549	38.5801	54.7079	40.3631	40.2368	39.6495	46.7374	48.9314		0.11111	42.7314
1.9063	20.7315	90.023	99.358	92.773	69.8963	31.2765	12.2834	14.3116	18.1744	58.2074	54.1255	17.1882	38.5151	35.6345	40.1538	19.08	18.4599	17.9777	26.188	31.765	35.0143	16.8855	52.3958	57.1492	72.9072	48.1947	45.2519	54.5288	40.3362	50.1226	43.7485	54.2835	42.4497		0.118521	43.0118
2.0254	28.2758	79.8407	108.352	105.885	77.0874	32.3571	14.4811	12.2025	16.3244	53.3481	59.9276	20.5195	29.4505	39.2437	41.9998	14.3367	17.1531	19.1905	36.4601	27.7294	31.1644	24.9726	45.805	71.6083	57.4663	42.8039	39.3485	53.832	42.759	40.5235	54.1896	57.9452	37.9274		0.125926	43.47
2.1445	22.5755	77.1806	99.354	97.848	82.989	40.7494	9.4609	16.4666	16.7742	57.1077	54.4969	25.7702	36.9445	47.5434	39.7634	18.5386	16.0079	19.1859	31.2983	26.4393	28.4956	20.5478	53.7003	67.6472	60.8655	47.5451	36.4133	54.9524	34.7252	37.258	48.5016	48.9269	44.9317		0.13333	43.0608
2.2637	23.5655	89.6437	105.005	91.93	78.1121	44.1339	15.8023	12.7148	18.5518	56.6322	58.8247	21.5331	34.5016	48.4698	51.8715	11.9599	15.4418	21.6671	29.8155	36.8788	36.9287	16.0128	44.5122	65.6124	69.9524	50.03	37.7385	60.8391	42.3038	37.0673	42.3551	51.2048	49.7213		0.140741	44.5859
2.3828	29.3871	86.8091	92.548	94.667	74.3903	42.4146	16.641	11.1101	15.4009	61.2231	67.5688	29.7828	31.8797	38.3192	45.1105	8.7745	15.7193	24.6861	21.4298	31.01	43.325	21.6984	44.3352	72.5729	61.6538	51.2958	39.7336	56.1871	48.2147	39.4128	36.6544	50.726	42.8635		0.148146	43.865
2.502	27.2517	72.4976	92.861	96.186	78.6551	55.2906	19.8116	10.6645	12.4103	60.1372	57.4494	29.4901	41.3887	48.9493	50.7821	18.0753	11.4343	21.1697	22.0977	29.7191	40.6407	27.7693	49.8282	72.1808	77.4544	40.5523	49.7389	47.0683	42.87	30.9024	33.8139	54.8401	40.459		0.155557	44.377
2.6211	22.6248	70.3861	105.973	106.741	76.7445	49.9284	24.0666	11.2388	19.0485	82.6726	49.1434	32.7472	36.7271	35.7182	46.8223	11.5432	16.4678	21.7563	29.2527	28.1995	34.9696	26.4315	49.255	78.6873	65.5782	30.8489	35.8904	50.569	42.3473	36.6479	41.0755	53.9592	32.5618		0.162962	44.1401
2.7402	21.9776	71.9929	105.713	108.076	72.9481	45.666	16.5622	15.7729	16.291	70.3611	56.3377	27.6549	43.1522	45.9369	47.4301	12.2456	19.9061	13.8903	29.9336	34.7094	34.977	28.8349	48.8704	85.3922	75.1863	38.3247	28.9387	47.5054	52.9436	39.8019	35.542	51.3827	46.5447		0.170367	45.1758
2.8594	26.1893	62.8901	84.674	94.08	88.8204	47.2781	15.0599	16.8481	16.3426	54.9006	74.0549	36.9641	41.218	47.0868	42.344	11.1288	19.2843	22.5907	28.3743	32.584	25.7686	26.4679	46.023	65.9239	54.961	37.8516	31.0846	42.4943	55.3567	20.7908	41.9903	47.9812	33.4863		0.177778	42.2089
2.9785	31.6156	63.5599	93.13	92.213	87.5672	52.5399	16.4785	15.3557	14.9993	71.9883	74.1451	47.3821	39.8075	51.1811	48.839	14.4931	18.183	20.4836	35.9186	41.4957	33.1054	25.0005	42.1141	78.2948	65.4093	38.4756	51.2142	33.2455	54.8757	23.7166	28.7652	54.2889	38.0859		0.185183	45.393
3.0977	29.1145	79.5069	95.107	87.802	85.4731	46.7243	11.7405	11.8042	22.7857	73.3051	71.6244	66.1274	40.8167	39.0811	41.9162	11.3522	17.2855	29.2251	29.6602	36.4819	33.8928	21.4802	46.6199	76.1451	50.8542	32.004	37.2314	40.2572	49.8134	25.7901	27.3146	43.9933	39.5866		0.192594	43.9975
3.2168	30.9389	79.4169	101.209	82.398	89.2354	48.9798	17.7844	13.9433	22.4102	66.4171	76.1786	55.6699	36.2737	47.3988	40.3821	13.6336	12.9095	27.3153	30.7603	38.1377	27.8908	23.1973	46.1343	63.2555	53.4396	42.6942	39.2707	22.8187	44.1189	15.1954	47.5857	35.8767	43.1026		0.199999	43.5143
3.336	27.375	79.3787	108.603	109.139	84.4642	57.5483	16.1782	5.9219	21.935	68.5415	74.5941	55.5948	40.3409	41.0022	33.3556	13.0624	19.1134	21.4994	30.1362	46.0996	18.9658	24.19	61.8283	76.2552	60.7009	40.7257	30.3946	32.9409	35.5324	20.0173	42.325	45.7062	43.3217		0.20741	45.0542
3.4551	22.4573	71.8368	97.027	95.014	81.1194	48.9902	13.8671	15.3093	22.9088	80.6502	68.578	59.3834	43.552	49.354	42.7341	13.3074	20.6309	30.862	32.1046	34.1578	33.1098	34.5201	56.706	64.8151	58.8385	42.3431	28.8031	29.8414	38.1355	19.3231	29.1178	45.7131	44.1976		0.214815	44.5245
3.5742	17.6724	83.6377	85.809	78.091	74.3723	55.3134	16.6057	13.4265	21.3245	91.5405	73.2498	67.8366	44.3267	47.8035	33.2927	10.892	19.3041	19.6507	39.7353	42.3605	30.9837	30.8963	51.9484	65.8781	48.8549	42.8455	19.6435	33.6685	34.1013	11.5409	28.3084	40.2379	46.2716		0.222219	43.0735
3.6934	21.5212	74.9507	87.416	91.285	75.0783	52.2205	13.9624	10.6857	21.1906	81.0937	83.7872	78.6023	49.5835	65.1449	34.1808	14.7361	21.7591	20.1926	45.8186	35.4086	18.2336	36.8237	57.9039	61.7444	61.2853	37.7481	27.8019	23.9519	27.3332	19.4676	24.4142	45.7813	38.9518		0.229631	44.2442
3.8125	12.3214	56.9658	89.466	93.155	67.8744	44.4197	10.8338	9.8861	19.1651	76.095	81.6861	73.5977	35.8729	53.8345	37.2671	17.1601	24.6943	28.0452	38.3856	35.2821	24.0382	30.1211	44.975	65.8442	52.2129	37.3374	31.7046	24.0254	27.1359	15.2654	23.5443	37.6564	52.3312		0.237035	41.5818
3.9317	16.9423	65.718	77.162	116.625	71.7189	51.4471	12.1843	7.856	18.631	74.6426	83.1016	89.2854	45.2055	57.1373	36.8163	13.7431	19.5229	20.1244	32.4281	43.2268	23.1139	33.147	40.1385	65.6012	57.1808	37.8597	36.3078	21.2842	32.5852	16.3165	18.461	29.5654	33.2406		0.244446	42.3733
4.0508	13.7287	72.7555	74.733	94.699	55.5666	45.3472	9.7338	9.7414	23.2568	68.9089	83.9251	78.6185	43.1916	56.6588	39.3321	11.9893	15.5087	21.6078	34.1539	32.2775	23.761	26.8442	51.6804	73.4715	42.761	37.7753	33.5557	18.6593	16.4992	13.3026	16.9103	29.3422	42.0352		0.251851	39.7676
4.1699	9.7849	54.0582	79.762	82.715	69.8642	38.3947	10.2186	8.255	14.4191	70.4148	76.9869	75.1743	45.8846	50.1069	31.5234	15.4922	17.3908	26.6758	32.9007	35.4818	25.697	22.6812	48.4035	69.4051	46.3549	34.9972	27.065	18.4904	20.6379	14.9338	22.2057	29.4217	38.1753		0.259256	38.3022
4.2891	9.043	43.2327	74.527	79.371	56.011	38.5715	5.4272	6.6414	17.8885	64.6265	72.6374	66.7006	38.3629	45.9195	29.2494	14.955	18.8559	25.3531	33.3108	29.6833	28.2841	30.2243	43.9708	60.6888	34.7734	37.0152	22.1788	21.5729	17.4772	17.3138	16.847	22.1411	39.5238		0.266667	35.2236
4.4082	10.4795	34.4391	68.061	67.402	66.2425	36.2394	10.2524	7.2152	17.9035	49.7153	70.3131	59.5605	39.2292	41.6524	21.8735	11.412	17.7	15.5291	34.8813	32.5874	20.7875	28.215	49.8858	63.2863	34.3951	31.728	22.5174	21.7867	18.0279	13.7659	22.2348	17.7216	36.3271		0.274072	33.1323
4.5274	10.7572	42.4008	65.397	59.799	46.1625	25.1146	7.0819	7.3339	31.0636	55.2783	58.4887	53.025	38.3968	49.4254	17.349	14.9507	19.644	20.722	32.3521	28.7589	25.1265	15.113	40.9588	64.4379	42.8601	31.8223	19.9104	22.9916	11.5292	11.6623	17.0976	12.0981	51.6692		0.281483	31.8418
4.6465	7.4268	33.0529	49.547	60.964	48.2235	24.811	6.6586	9.3469	19.4554	62.736	53.2997	52.1411	41.8837	39.6996	15.2168	11.6474	13.488	19.1844	25.1139	30.1172	28.8321	30.6952	48.9253	57.9803	25.7874	28.4624	22.1436	17.3727	13.0387	8.7888	19.3407	16.2094	39.2981		0.288888	29.7239
4.7657	10.0623	27.5003	54.895	41.733	47.0604	21.3228	5.8434	7.0265	22.4897	54.1424	44.4021	45.2244	38.9138	46.2153	14.6759	13.5296	9.79	23.5735	31.6981	24.0407	19.9663	27.3691	35.6607	49.9604	33.8832	31.1377	17.6288	19.5114	16.5193	12.0797	13.8923	16.6267	37.2499		0.296299	27.7462
4.8848	8.6237	33.9595	33.517	37.267	35.0632	26.0128	12.3099	8.5001	22.5726	62.8891	35.8705	51.3176	39.3841	35.6516	22.6219	17.6584	11.7666	14.88	34.7668	21.3609	16.7873	27.2582	41.5441	55.0358	31.2347	19.3434	16.8971	15.9872	17.2965	7.9846	11.2929	12.1146	37.5311		0.303704	26.5546
5.0039	8.2862	21.8582	30.154	30.299	22.9613	20.0318	5.9592	16.2969	24.2653	69.1668	25.7705	53.0613	31.1702	32.0812	18.9603	8.9199	10.4511	19.782	28.0665	20.1866	23.6625	20.5955	28.8208	51.5608	25.5513	24.7692	13.7846	16.2061	13.5915	11.8365	15.6043	8.381	30.9479		0.311108	23.7285
5.1231	8.961	22.4031	15.638	20.49	23.199	17.4317	10.1427	10.2485	23.454	70.991	29.1257	47.983	37.9737	43.8466	9.9244	8.0363	10.854	15.3213	26.2511	21.1011	20.1177	18.8146	22.2828	45.428	25.1392	15.0917	18.7911	13.918	10.0183	13.8277	9.2244	12.1461	22.609		0.31852	21.842
5.2422	9.7322	16.3872	11.345	12.017	20.2476	9.2822	5.6215	13.8043	13.4822	68.5505	25.831	41.0484	36.4237	39.7797	14.7933	11.7027	19.8711	19.3029	19.9504	25.0968	21.8646	16.4301	23.0212	36.5047	22.1731	14.5275	13.8989	23.2043	7.6536	9.5933	6.4718	12.8076	20.5904		0.325924	20.0912
5.3614	8.9542	19.1339	10.362	11.602	16.5235	9.5766	6.8905	6.9354	8.3553	67.105	29.438	39.2404	39.9236	38.5792	16.7396	12.7808	13.6356	13.6422	27.4434	31.0108	17.7921	15.615	17.4031	40.4005	15.7179	12.8789	13.6022	18.5608	17.8574	9.2761	14.3226	10.932	21.3957		0.333335	19.8069
5.4805	17.8694	15.6321	8.75	13.943	11.6276	10.4121	8.4939	9.0537	13.583	57.8341	30.5156	24.4263	37.0834	32.096	14.0802	13.5396	8.7627	15.2322	19.1429	23.5997	18.0176	14.6684	18.4281	37.6323	17.9389	8.5996	8.6229	15.8833	12.6693	9.3247	5.8959	7.8675	26.2167		0.34074	17.8013
5.5996	17.2917	14.6607	8.796	14.861	16.2364	14.0431	8.701	10.2559	10.1638	64.1079	25.5868	24.4261	38.9353	31.2503	9.6018	14.6754	5.0924	11.3165	22.8298	25.5377	17.3774	10.1491	13.0003	42.2921	14.0912	6.8097	8.7494	23.6627	22.4733	14.1556	11.6957	8.3858	21.7627		0.348145	18.272
5.7188	16.6084	18.167	6.371	6.519	14.9749	6.4667	5.9956	7.1344	14.3374	61.1633	19.94	21.7002	26.8978	24.6072	10.5038	5.8183	13.9398	10.9332	19.3954	26.2729	17.3698	13.2913	16.4085	33.3094	12.4164	4.0107	12.1701	27.2816	21.5091	13.1951	5.3716	9.1622	17.5467		0.355556	16.3875
5.8379	8.4782	15.5087	5.896	5.997	24.2674	5.7911	5.9864	7.7798	9.9464	38.4572	17.5946	21.6191	31.0306	15.0276	7.6443	14.2156	15.5497	11.3797	18.1203	23.6788	20.2858	10.8987	14.6206	20.582	9.8182	4.9534	9.5145	26.6738	21.9964	20.4913	5.0617	5.1311	23.8837		0.362961	15.0873
5.9571	16.8209	20.0944	7.088	7.473	27.8176	6.4175	7.9011	8.9031	9.3196	46.9167	20.6287	10.1631	23.2641	14.7965	10.7639	8.1352	11.9585	8.6722	15.8573	20.1486	9.8632	9.6206	13.0769	19.0826	9.9164	5.5551	10.5418	27.3	18.274	11.2428	8.5681	7.4701	14.8981		0.370372	14.1985
6.0762	10.8464	10.4587	8.788	5.652	30.0518	5.0938	6.4395	8.7475	7.2374	44.4322	16.731	13.3611	22.652	13.6196	9.5934	8.8397	6.7366	10.4819	11.885	24.2763	7.3223	11.1165	13.529	14.9823	12.3439	5.174	12.8886	27.1743	18.532	7.3995	6.8586	4.0338	15.4417		0.377777	13.1127
6.1953	11.3427	9.2333	8.259	4.88	23.3851	7.6253	5.9606	6.2844	9.2778	32.0412	19.2035	13.7335	19.4705	11.4684	7.2183	8.206	9.2719	9.1933	17.3193	15.1004	14.474	7.8599	12.1658	17.5527	12.2426	6.0818	12.6241	18.8608	20.423	9.1267	5.3399	7.3224	13.6048		0.385182	12.3077
6.3145	5.1717	10.936	3.949	8.307	20.3977	8.0526	5.1283	5.1868	10.6407	29.9589	10.4804	9.9646	14.9174	14.0981	8.603	9.4798	7.9897	10.376	8.7589	16.0477	12.1162	8.8865	16.6362	13.6132	8.779	5.1503	9.0844	20.2819	19.8563	6.6654	4.9998	8.9036	8.4229		0.392593	10.9648
6.4336	10.3302	7.5295	3.9	6.841	18.2949	10.847	9.2237	5.0352	10.5998	26.9843	18.0388	4.2219	11.3315	15.9948	11.1442	10.0142	8.0913	7.9156	8.6181	19.6407	12.9211	10.0715	13.1531	15.5388	6.9211	4.1779	8.9842	21.9354	14.1662	6.7042	6.6377	9.6636	11.5945		0.399998	11.1232
6.5528	12.1562	7.4199	3.923	7.881	14.734	6.8375	6.1822	5.1309	8.5922	30.7669	14.7939	7.0969	12.6563	16.8316	12.8545	8.5044	13.6329	10.5245	13.9685	14.0372	10.6722	9.4098	12.8752	12.1992	8.7569	4.0397	10.7903	23.7373	19.9869	5.2101	4.3888	8.9149	9.5554		0.407409	11.1837
6.6719	7.4907	7.6258	1.928	3.936	19.1141	10.6282	3.1868	7.5849	9.3374	25.5654	13.1251	7.8381	18.7219	11.7459	3.5099	7.5446	9.6316	10.7021	11.6127	17.8974	10.2609	6.8177	8.473	11.955	5.7912	4.4323	8.6213	21.2872	14.2311	4.6872	4.9362	8.1764	10.9825		0.414813	9.98117
6.7911	4.6307	7.7193	6.69	3.355	18.8633	9.0469	3.1868	4.5268	14.0003	28.2822	9.734	8.3399	12.5087	13.716	6.3703	11.6352	8.1408	9.8906	7.366	18.0988	7.8634	7.0458	17.0838	11.8762	7.0374	6.2681	9.1794	22.6249	10.8465	6.1052	8.2025	12.6351	15.4669		0.422224	10.5557
6.9102	5.5286	5.2866	3.261	5.075	13.2498	18.0244	3.5231	3.4553	11.9198	30.6265	10.6652	14.19	10.2796	7.474	4.9151	6.0208	10.1802	6.6389	8.5182	18.5021	9.4817	12.2918	17.1991	11.0602	5.0027	4.0445	7.2004	15.5666	9.2128	3.3873	3.1011	15.002	10.3322		0.429629	9.70353
7.0293	7.8248	8.2655	5.603	6.466	16.6105	12.7453	2.7492	4.824	8.3269	20.7833	11.9924	5.7722	7.6859	5.2598	6.2403	7.0173	10.5088	10.0036	6.8432	11.5477	8.7344	9.6675	19.5568	14.0557	7.1418	5.0166	7.3236	25.6582	13.2946	6.1415	5.1017	9.3831	9.3046		0.437034	9.61969
7.1485	9.1207	6.0138	2.334	3.695	14.205	8.7513	3.6443	4.068	7.6646	24.2381	8.2995	11.7468	10.7825	7.3284	3.6868	6.5835	7.8386	9.2651	8.6423	11.3893	10.61	11.7979	20.0361	11.0314	6.3652	5.3136	6.3523	16.2753	11.6753	7.7984	5.3085	8.8889	16.6255		0.444445	9.31442
7.2676	4.227	6.162	4.002	5.468	8.4713	9.0701	4.5667	5.3007	7.9732	15.2847	12.7181	6.3962	10.7007	7.9632	4.2616	11.0036	12.7165	9.2809	9.3897	7.6541	12.2518	11.3859	18.3433	13.5068	6.8698	4.2086	8.9953	12.9141	9.3846	6.3484	3.8356	8.4535	11.3553		0.45185	8.80192
7.3868	8.2255	4.1279	5.228	4.035	7.2711	17.0467	3.4035	5.1239	9.1101	22.6315	6.1427	6.8784	9.5032	3.3892	5.8297	8.712	9.528	7.0019	7.4434	7.8646	13.9246	13.6474	11.6862	12.0771	6.5342	3.6326	8.4028	13.3746	13.4464	7.2386	2.4263	7.2162	7.7923		0.459261	8.48168
7.5059	6.7071	9.1424	2.5	8.633	10.5423	17.2365	3.6777	3.7593	8.9577	13.186	6.5889	8.8517	11.6815	6.9381	6.5742	4.1455	11.8323	9.1784	11.6646	7.6426	15.756	13.5971	19.4743	13.2346	8.4485	2.3379	5.272	10.5706	17.7926	6.2102	3.4959	13.4127	9.1331		0.466666	9.33865
7.625	5.9808	6.2637	2.808	5.018	7.4102	11.13	5.0834	5.8736	8.1056	11.3525	3.3794	10.1866	8.9021	4.8929	2.8909	4.2823	8.4482	10.4282	6.5619	9.1916	16.4622	12.1953	18.5305	9.8795	2.5482	4.7581	5.615	11.433	14.9143	7.9643	3.1861	5.4025	4.6071		0.474071	7.74806
7.7442	5.2975	8.6673	5.915	7.754	8.6177	12.4569	4.9232	4.3091	8.2457	16.3177	6.24	6.4081	5.1972	5.1955	5.9209	3.9207	10.681	8.8083	9.1356	6.2461	9.0765	10.7047	30.8435	4.9528	5.5433	3.9822	8.5089	11.341	17.2807	4.3976	3.5559	7.7454	8.4114		0.481482	8.38186
7.8633	7.9171	8.5045	5.658	5.907	6.6216	8.5611	4.3026	3.5245	4.9855	20.6945	8.9173	5.7223	6.1719	5.6815	6.1701	8.37	7.9342	13.0921	8.0462	8.8687	9.8727	6.4337	26.6394	8.1707	4.9227	3.4712	4.8744	10.9954	16.7606	4.5386	3.2887	5.9775	9.1906		0.488887	8.20566
7.9825	9.9238	8.6153	5.432	4.858	4.7336	10.3869	4.4417	4.4613	6.8343	21.1207	4.1385	6.6277	8.9386	5.3484	6.8113	9.5069	8.0011	11.4676	7.8534	15.1671	7.1925	6.0539	16.1961	8.2686	6.2845	5.4622	10.6554	9.4228	15.3332	3.8646	2.4368	6.5155	11.2405		0.496298	8.29075
8.1016	10.179	9.5077	3.446	8.809	3.8369	12.9154	2.3005	3.5629	5.4082	24.7219	3.674	5.446	7.8751	6.1186	7.9935	7.2594	8.6294	5.5246	6.3582	19.004	7.1314	5.8042	18.6643	6.9379	3.1348	4.5295	9.2377	11.5197	16.3326	5.3759	2.6167	6.4457	12.1722		0.503702	8.25675
8.2207	8.9764	6.7822	3.63	7.909	5.8504	13.87	3.0867	2.1751	10.9145	17.9381	3.3996	4.0815	5.9664	8.6867	5.963	5.2776	11.7371	7.6103	14.3774	7.8596	8.8808	12.1163	17.9482	9.755	3.3878	4.6701	8.4326	9.929	16.2664	4.5996	5.4354	6.351	7.4686		0.511107	8.22219
8.3399	9.0785	7.5969	2.847	9.835	7.025	9.6467	7.3064	3.4626	8.6199	16.9891	5.2038	5.7407	10.7639	5.4877	4.2578	4.5034	9.8353	5.229	11.1993	5.0327	8.1567	3.5812	18.5482	6.9154	5.1023	2.2691	5.602	4.5967	15.8237	4.7612	2.2448	7.2513	8.2795		0.518518	7.35736
8.459	9.5836	5.4186	2.371	4.289	10.1747	6.7893	2.1597	2.1831	6.8759	12.6389	3.4749	6.3179	8.085	8.9029	5.4398	2.6867	7.0826	4.7215	8.5336	5.4753	8.026	6.4995	13.3949	7.4258	4.979	3.2873	5.6166	6.9041	15.411	4.6821	7.2428	2.6218	6.3938		0.525923	6.53602
8.5782	9.5638	7.6058	3.75	9.904	8.967	7.1703	5.7763	3.5246	4.8947	15.2805	4.3285	3.8936	3.6114	8.6824	6.5008	5.309	8.2196	3.0727	5.8133	5.784	6.8513	7.5071	8.9678	6.5314	5.8102	4.146	7.7477	10.328	14.2357	2.1368	2.0307	5.7014	8.7276		0.533334	6.73861
8.6973	6.8538	7.6847	4.069	5.467	9.5798	8.9291	6.7248	3.7534	6.04	15.6436	3.9505	2.501	5.3141	7.8457	3.9418	4.8771	11.9869	5.441	8.3246	4.6077	11.3452	6.0299	8.5107	9.0847	4.971	3.2209	5.2187	8.5724	15.5255	3.4807	2.8835	9.8706	4.3299		0.540739	6.86604
8.8165	15.1937	7.5509	2.986	4.124	10.0321	9.2173	4.7595	3.4825	10.1702	17.1484	4.516	2.9922	6.6082	6.2578	6.4638	6.4038	6.2327	8.7	4.3155	6.8227	10.4342	7.16	10.1166	12.1901	6.2907	2.0183	4.0818	6.787	14.6337	3.6391	3.216	7.141	6.2039		0.54815	7.20878
8.9356	12.2209	4.6236	6.068	9.028	12.1369	8.5767	6.894	3.4453	11.2637	24.3257	3.2938	4.3082	8.885	9.0336	7.3996	6.1328	7.5459	5.3378	3.552	9.1171	9.6792	4.2746	6.8641	9.1711	4.1901	4.9627	6.1818	7.4002	18.7137	5.1248	3.6304	3.7259	7.2387		0.555555	7.70745
9.0547	9.0558	4.0314	3.102	5.99	13.5849	6.7781	3.2983	3.7503	7.3704	8.3382	5.57	2.3015	7.7554	3.9533	4.3719	9.3906	7.4039	6.4023	6.2532	12.5676	9.8568	3.9435	7.3866	8.5949	2.7359	3.4871	6.7788	6.0246	23.0151	4.6271	2.7863	6.5178	3.9569		0.56296	6.69638
9.1739	4.5804	4.1734	5.78	4.863	14.4182	4.5281	3.949	3.5885	8.5212	9.2091	2.6832	6.938	12.745	6.3124	9.259	5.5205	8.3359	7.9422	9.758	8.2551	8.3168	13.0441	12.6189	6.6746	4.7455	3.1522	3.1274	6.8141	18.4827	1.9951	5.8658	4.5886	5.9746		0.570371	7.17456
9.293	5.4949	7.9704	5.898	3.9	8.6278	8.2967	4.1787	4.5079	9.0064	9.7559	2.9908	4.8957	7.0199	5.3566	4.8135	8.8653	10.1278	4.4896	6.2994	12.863	11.2565	7.1186	10.6465	8.8077	2.5114	2.2402	2.3218	5.2275	15.3046	4.6677	4.1325	6.0012	7.503		0.577776	6.76053
9.4122	10.8604	5.872	3.787	5.361	10.5022	5.5537	4.3397	3.7724	5.4167	8.4867	4.6354	4.3957	7.9976	8.2688	7.2871	7.1151	4.7886	5.0182	4.1146	9.6053	6.6193	11.7874	6.336	5.785	3.5992	2.1732	4.2585	6.4859	18.5796	3.4971	3.8322	2.67	6.7008		0.585187	6.34856
9.5313	6.2973	7.3718	5.033	6.209	7.4136	7.5738	8.1566	2.6486	7.7268	7.7722	5.5475	2.4666	5.5436	5.4148	5.2189	2.7261	4.1665	4.6182	3.6428	7.528	14.0985	3.9916	7.2842	7.3136	2.2869	4.7259	5.306	4.8342	18.1448	4.945	4.859	3.9132	5.1484		0.592591	6.05839
9.6504	6.2712	6.7579	5.807	5.216	8.3398	7.6377	2.5487	3.0306	8.6977	5.4165	4.64	4.136	7.1624	3.0207	5.3571	2.6858	6.7509	3.7549	6.2479	8.9452	8.0616	7.2654	4.0085	4.8427	4.7969	2.5445	2.6629	7.0254	15.4617	4.3442	4.3047	3.5345	3.397		0.599996	5.59618
9.7696	6.3787	6.1056	2.143	3.141	3.6059	8.0977	2.5911	3.4938	6.1796	6.8452	2.9855	2.5136	7.6271	4.1995	6.463	8.3548	4.4957	2.8771	3.4535	13.3327	5.464	8.5276	11.6073	9.0975	3.5074	3.9705	3.3453	8.6856	15.4516	4.414	3.125	5.8011	4.5544		0.607407	5.83138
9.8887	9.638	10.3236	5.278	5.16	10.783	8.1336	4.4112	6.1011	6.2682	7.406	5.5517	2.6991	4.9523	5.5514	5.7038	4.7849	7.4554	5.2807	4.7324	10.4779	5.2533	4.4012	9.9574	8.0828	3.7923	2.0512	5.3303	9.9293	10.4392	4.4108	4.025	3.0788	3.9378		0.614812	6.22369
10.0079	9.7444	8.9434	4.234	10.766	5.7476	5.6008	6.261	6.6334	6.8791	4.322	3.3939	5.9287	8.5644	8.6961	4.9881	6.1733	5.0631	5.1665	4.4704	9.2388	7.1856	5.291	5.4916	3.1082	2.1139	2.5863	4.0293	5.4552	13.4622	4.2196	5.1953	3.8807	4.4225		0.622223	5.97747
10.127	11.6091	5.7023	1.919	5.847	4.7593	5.7203	6.6869	6.1016	8.6854	4.825	3.0498	4.3704	6.0714	6.694	5.0408	8.2311	6.174	2.4701	4.7424	9.1769	6.4055	8.0829	5.7667	5.0939	3.6749	2.389	2.5276	3.6698	9.4963	3.8237	2.2612	6.3386	5.1067		0.629628	5.53072
10.2462	6.4375	7.831	3.61	4.579	7.1128	6.5076	6.3158	5.1881	6.3977	7.0687	1.823	4.3793	7.0639	3.6133	4.1221	5.8546	7.5324	2.3509	4.0892	4.6814	6.8425	9.9982	6.1647	7.332	3.1751	3.0063	8.1044	6.1315	14.396	2.8015	3.2649	3.647	6.6792		0.637039	5.70005
10.3653	9.1824	7.7078	4.923	5.561	5.9145	7.7758	4.9748	5.3802	11.5597	4.108	2.966	3.5947	3.7647	5.2065	5.156	6.0985	6.4317	5.174	4.1211	5.8295	4.0694	11.4667	5.5024	11.3763	2.6337	2.9497	7.6222	4.947	11.2257	2.439	4.3827	4.2338	3.7771		0.644444	5.81987
10.4844	5.3283	6.9251	3.365	9.583	6.7115	5.7826	2.6061	3.3429	7.1577	8.0797	2.389	3.7374	7.1844	7.0412	5.3749	7.6949	7.3948	4.8661	2.0897	6.5376	4.2851	8.515	7.1505	9.4851	2.9174	2.1785	5.9981	5.4691	9.8671	4.8194	2.5986	5.3578	4.6525		0.651849	5.65109
10.6036	6.2438	8.5872	7.386	5.759	5.0044	6.2425	4.5706	7.4587	5.2253	4.7643	4.916	4.9775	8.8514	7.4692	4.536	6.3397	5.4737	2.2927	3.6774	6.9395	5.3034	7.9588	4.4207	8.2146	2.3391	4.005	3.7493	8.1068	7.3992	4.2625	1.8872	5.8243	2.7993		0.65926	5.545
10.7227	6.2726	5.13	2.427	4.053	8.7891	7.6524	7.9303	5.4089	9.4751	5.5442	1.9182	3.3934	3.9273	3.5534	2.7638	4.7793	7.9043	2.2862	4.4303	8.5928	8.1206	6.3233	6.0542	4.8466	3.5246	5.3602	2.5047	8.9224	7.2036	2.5563	3.0539	4.7432	2.3684		0.666665	5.20647
10.8419	5.1614	10.1467	6.176	6.361	5.9209	10.1946	6.0583	4.8744	7.5562	6.1329	5.5625	3.0844	7.8579	3.1857	4.6706	8.0431	12.1132	3.9602	4.8043	6.5052	5.9951	11.6047	4.0422	7.3656	2.6647	3.5279	2.9895	10.2929	12.8544	4.8193	2.8956	4.9752	6.0023		0.674076	6.31512
10.961	7.1273	7.3758	3.56	4.159	3.5215	8.4742	5.2933	4.1361	3.8423	7.2185	3.753	3.4889	5.6009	4.8619	2.9523	6.9648	5.6542	2.1794	4.2749	3.7874	4.4093	8.0358	7.2249	7.3745	3.569	2.8353	2.1902	6.925	6.1954	3.4505	2.4407	4.8758	4.084		0.68148	4.90412
11.0801	5.9487	4.2474	4.073	5.186	4.8972	8.4255	5.3501	6.7203	6.7822	10.1549	1.9379	4.8101	3.6043	5.9733	3.9853	7.425	7.4331	4.4517	3.8847	3.3563	5.2993	11.238	12.4594	8.4003	8.1366	2.9293	6.5058	6.525	5.6857	5.7841	2.7666	6.1955	5.1206		0.688885	5.9301
11.1993	8.1837	7.7723	5.649	4.92	7.7832	8.5688	8.0958	8.0049	6.2673	11.5965	3.3492	3.3276	6.0577	6.2401	4.0772	8.7212	4.6745	2.1632	6.3972	5.3824	6.9076	11.7876	9.1638	9.1109	4.4252	4.4685	3.2012	7.5209	6.4287	3.8924	2.3869	6.8082	3.1891		0.696296	6.25827
11.3184	8.5071	6.1878	6.053	5.953	3.2301	6.0594	6.064	4.2719	6.7615	8.2662	4.0992	2.8272	4.8675	2.7777	2.584	6.8614	4.437	2.9565	2.9791	3.2384	5.2728	6.4453	6.5221	7.073	5.3156	2.7755	4.2994	7.4245	4.3005	4.2396	3.4438	11.0155	4.7211		0.703701	5.20699
11.4376	6.541	8.0984	3.453	5.153	3.2699	5.8064	6.5706	4.5682	7.4176	9.0209	3.9148	3.0302	5.6243	3.1142	4.2806	5.8652	5.3427	3.1729	7.2715	5.1379	4.9576	2.5386	9.7523	7.5014	5.1481	4.7684	5.203	6.8291	3.6577	4.2623	3.7443	7.0259	4.372		0.711112	5.34588
11.5567	5.638	5.2799	4.779	4.309	6.9791	11.516	7.9003	5.041	9.3482	12.8271	2.8508	2.7458	4.0108	6.5231	7.2715	7.6064	4.416	4.4637	5.1874	6.401	8.8921	8.1902	5.5972	7.5578	2.6571	3.6437	3.6496	9.4614	7.6371	4.5248	2.0003	4.0509	4.833		0.718517	5.99362
11.6758	4.9842	8.4123	5.313	8.435	4.2886	7.1942	4.6908	2.0026	5.809	13.6911	4.5409	3.2355	10.3101	4.2998	6.9976	8.7783	5.6581	2.8027	3.4583	4.9858	9.5389	9.3957	5.2359	7.1626	6.6145	2.9709	7.0887	6.2261	5.572	5.7498	2.9748	6.5945	2.8254		0.725922	5.99508
11.795	8.0767	8.3049	7.535	5.894	4.9287	4.2802	3.1019	3.3121	6.098	13.9854	2.3368	3.6257	9.3418	3.3356	6.5516	9.3808	5.5345	2.1923	5.0825	8.3634	3.397	4.6419	8.9178	3.9569	5.7396	3.5908	4.8886	10.9802	5.3487	5.3083	2.2178	3.7688	5.5565		0.733333	5.74469
11.9141	8.1173	3.4396	7.136	7.405	3.5255	4.9932	5.7831	4.1861	4.9058	10.5139	3.4901	3.3276	6.6657	5.0459	9.7549	6.8604	6.4058	3.4633	3.7935	9.2783	2.9668	7.3033	8.2358	12.3467	5.016	2.57	7.9362	8.9574	6.2799	3.8562	3.6768	5.5913	5.8725		0.740738	6.02121
12.0333	6.3181	6.5786	8.964	7.967	9.6677	9.1298	4.6588	2.6676	3.6763	14.6107	2.8408	5.1083	13.9089	7.1454	5.3118	6.2749	6.6462	2.023	2.8614	8.9694	2.9398	4.0202	10.0167	9.9354	3.648	3.139	2.2907	6.0044	11.6011	6.3154	2.4725	4.4101	5.1868		0.748149	6.28208
12.1524	3.2858	8.2551	7.973	3.882	7.4333	9.2509	6.1778	2.7753	8.6536	6.3514	2.2524	2.5029	6.3936	6.0061	8.1521	6.1878	6.2117	2.7984	3.9459	8.8092	8.6848	5.5611	5.6295	7.3851	6.6128	3.0013	8.3913	9.3233	5.2764	8.9185	3.1267	7.6296	10.8366		0.755554	6.29319
12.2716	3.7542	4.2451	4.585	5.31	5.0612	7.974	3.7401	2.9176	8.0964	7.5007	3.7763	3.0516	4.906	6.8018	5.2419	7.9805	7.8676	3.4575	3.6434	8.4282	7.09	5.4423	7.9978	8.7187	4.0292	3.5837	6.3295	4.6091	6.8717	6.8027	2.1365	5.4867	5.5726		0.762965	5.54575
12.3907	4.4584	6.8998	5.547	5.654	5.4399	3.2552	6.6125	5.7558	9.0752	5.2856	2.4595	3.5702	8.4757	2.9468	7.7454	7.887	4.6804	4.3174	4.4555	8.3936	7.3289	3.4573	7.712	6.7771	5.1993	3.907	8.0882	9.0053	4.1527	7.3172	2.8382	7.0544	7.4608		0.770369	5.85495
12.5098	6.6208	3.0946	3.627	3.769	5.9879	7.074	6.9693	5.6355	8.7545	8.3986	2.3524	3.5642	6.5066	4.7046	8.5224	4.4189	7.36	3.9907	4.2218	4.7304	4.9209	3.9647	9.0728	5.406	4.7978	2.592	4.2025	4.2725	8.3962	6.751	4.024	6.6442	11.1189		0.777774	5.65051
12.629	5.6892	3.7267	7.582	5.005	3.9542	4.23	6.5289	3.4222	9.8569	10.8793	2.6338	2.9604	4.1695	5.4183	5.9837	3.1011	4.25	2.4644	3.3796	6.4771	3.676	4.5473	11.8972	9.2592	6.9973	4.5883	6.0838	4.9713	8.987	7.8489	3.0277	3.1934	3.9874		0.785185	5.47809
12.7481	2.9815	4.1328	3.949	4.284	3.5045	4.4292	6.4986	5.594	5.7745	8.775	3.0752	2.1207	5.2326	3.1442	5.9046	5.8405	5.4227	3.1354	3.5965	9.6422	3.1231	3.6824	7.0735	10.6176	5.8463	3.0226	5.4135	6.3495	9.0401	4.3348	3.6173	7.1754	8.1463		0.79259	5.28728
12.8673	6.1035	6.9438	3.002	3.828	3.5782	4.0816	4.7916	5.5977	8.4332	12.149	5.2658	3.3938	4.4153	5.669	8.4254	4.5356	7.8863	3.6078	6.6906	7.0698	3.2367	4.3119	7.8106	7.0425	7.66	5.7972	4.8177	8.3345	3.9121	7.9491	3.5515	6.5553	4.454		0.800001	5.78488
12.9864	3.9881	2.6162	3.632	3.84	4.6132	5.7492	6.6696	4.6468	7.2062	12.4522	3.1595	6.0818	3.9784	5.7761	4.3222	5.9533	5.719	1.9777	3.5336	7.1244	5.0608	3.2637	4.7704	6.1471	4.5249	4.4711	6.7356	11.3176	6.1845	6.7343	4.3288	4.3554	5.3912		0.807406	5.34318
13.1055	3.8854	3.6303	4.266	2.56	3.3941	1.8994	8.3603	4.5513	6.7418	8.9133	1.9307	3.5145	4.1057	4.7971	6.5138	3.9338	5.9093	4.5015	4.4216	8.4387	2.8324	4.2018	3.193	3.3616	7.4621	6.2573	5.7096	7.5873	5.3257	10.1064	2.5538	6.5601	3.047		0.814811	4.98384
13.2247	4.2077	3.5966	7.584	3.12	2.1181	5.2096	7.6097	7.3188	9.8775	11.6253	2.7206	5.2945	3.7066	3.6365	6.3709	5.5415	5.0137	2.719	5.6251	5.6765	2.7418	5.3306	3.6185	6.6184	9.2633	3.6645	5.284	8.1206	5.8295	5.23	4.9809	7.3326	5.2469		0.822222	5.51012
13.3438	4.7489	3.8107	2.36	5.305	7.5143	4.2428	8.231	5.5423	4.3976	8.692	2.8029	2.135	4.8272	6.1758	5.5224	5.3758	5.0225	3.4856	4.9837	5.0155	5.0165	3.9767	5.0549	5.4539	7.7427	4.1235	7.5267	4.3049	4.5211	6.4634	4.3329	5.7588	5.749		0.829627	5.15806
13.463	8.5501	3.483	5.495	5.642	5.1244	3.3244	8.7127	9.4613	7.3702	12.0767	3.6244	5.9516	5.8855	6.2818	3.8999	6.3918	3.6851	2.2328	3.4897	8.2273	7.0627	4.1227	2.9494	6.939	9.0651	9.2899	8.7991	6.7726	2.9376	8.4555	4.0815	2.193	4.4519		0.837038	5.94029
13.5821	3.2361	3.4385	1.89	4.362	5.1761	2.254	8.9797	5.7573	4.9803	7.6396	4.1485	4.6999	5.7596	6.4171	5.5777	5.8393	4.1839	8.1581	3.9704	6.8716	10.8443	4.936	7.0289	4.6282	5.7652	8.8872	7.2325	4.4031	2.8894	4.9126	6.203	4.7055	1.8939		0.844443	5.38392
13.7012	4.0158	4.3005	3.374	6.349	3.8723	3.8505	3.3757	3.2402	3.7612	7.6882	4.5658	6.7757	7.1741	4.1084	3.7281	4.5358	5.6639	3.5534	4.2464	6.3996	4.6205	4.1467	4.3886	4.971	6.4344	11.2883	7.1642	2.651	4.7745	4.445	4.9588	3.7246	5.1057		0.851847	4.94703
13.8204	3.022	5.0315	2.554	2.355	6.9003	2.2056	7.9016	3.9128	6.6566	4.0742	2.5383	8.3486	7.298	3.3717	3.5867	6.1224	5.3929	3.786	3.5698	7.429	7.7871	5.0515	7.9232	6.0378	4.6063	5.6462	5.7546	2.7923	5.0371	6.1573	4.1983	4.001	3.8891		0.859259	4.99815
13.9395	4.0395	5.2175	3.291	3.97	2.3327	3.0542	6.4309	7.0661	4.3954	6.1041	4.4072	3.9337	3.4189	4.0167	6.6136	4.115	10.3511	3.0592	2.334	9.0999	10.2422	3.1894	4.2874	3.8926	4.4038	9.2317	5.1463	3.2142	4.9993	5.9766	3.6312	3.7352	4.1065		0.866663	4.9487
14.0587	6.7776	4.0574	3.756	2.186	4.5746	4.0189	5.8389	6.3402	6.6659	9.4512	3.9125	4.4033	5.2576	2.4852	3.9453	2.3207	5.7564	7.5334	2.2244	4.7394	5.6862	4.4111	3.3758	6.1573	3.9372	4.9784	3.9867	5.0577	2.0682	4.2876	6.6407	5.9655	3.7982		0.874074	4.74532
14.1778	6.5378	3.1179	4.19	2.987	5.537	2.6194	6.3544	4.603	5.8856	8.3136	2.2835	5.9371	4.6231	3.0972	3.8085	2.9983	5.2628	7.1687	4.7639	7.384	4.357	3.891	3.7892	3.9244	3.7707	5.1857	2.3446	8.1549	5.1504	4.1415	6.5008	5.4114	3.2004		0.881479	4.76651
14.297	3.8619	7.9058	3.263	2.222	4.9767	2.9068	2.1498	6.2857	8.103	4.0754	4.4543	7.6516	7.7196	2.841	4.273	3.7825	4.0647	5.6159	3.6734	6.1586	5.817	3.0867	3.823	3.0517	3.0848	5.2235	4.5634	5.5019	3.5403	2.6885	6.0822	4.7707	6.0711		0.88889	4.64514
14.4161	5.561	4.4114	5.528	2.303	7.8512	5.0563	2.8801	4.339	6.6174	5.1965	2.6388	4.5685	4.2219	2.1766	4.0811	2.1134	2.6895	4.8303	3.7836	6.7557	6.4114	6.7695	3.0114	6.5848	4.1418	2.8394	4.9264	3.7882	4.504	3.3425	8.2149	5.3541	8.7179		0.896295	4.73362
14.5352	2.7007	3.355	3.8	2.055	4.4514	2.91	5.3405	5.0329	3.6983	4.3211	2.59	5.3833	3.6156	3.6501	4.347	3.8476	7.3074	4.19	3.517	5.2458	8.7144	5.182	4.4919	4.8538	5.5976	5.8337	6.6532	4.5201	4.9701	3.6115	8.1637	7.6252	6.8513		0.9037	4.80082
14.6544	4.8688	5.8192	2.768	3.562	2.9906	4.4052	3.2282	5.8211	3.4945	3.5907	3.6641	9.6521	4.128	4.5906	4.4008	4.1973	6.9888	4.8037	4.2975	4.6139	4.8088	3.7813	5.5097	7.1198	3.7217	4.4031	4.7048	2.0591	4.5237	5.2361	6.0121	3.0689	4.6333		0.911111	4.58992
14.7735	4.8918	2.9913	2.184	4.563	4.4139	2.0668	2.9892	4.8937	4.9208	5.7858	2.6071	4.805	2.1135	2.6703	2.3965	3.6263	6.0555	2.6107	4.1552	7.5388	4.1258	3.9962	3.9474	3.5391	3.1452	5.3423	3.5728	1.9831	1.9642	3.8319	4.0717	3.1924	5.1961		0.918516	3.82386
14.8927	3.5056	5.8998	3.694	6.083	2.9455	3.8483	3.846	4.0827	7.67	7.8749	2.3419	4.7605	2.2137	5.9847	2.6001	4.464	3.7008	4.0111	3.8305	7.3576	6.867	2.8486	2.9707	2.1708	2.4951	7.2118	4.1274	3.8293	4.1803	5.582	9.1056	7.1572	5.9898		0.925927	4.70455
15.0118	3.166	3.9635	4.475	2.731	5.8457	3.9681	3.8581	5.8275	4.9065	4.1954	2.768	6.2873	4.5172	2.0392	3.6082	3.0954	3.8688	2.5852	4.0808	5.2695	5.3032	4.6674	3.2273	4.9328	2.0377	5.8018	2.5727	4.0042	4.3373	6.5843	7.0727	4.311	8.7918		0.933332	4.38487
15.1309	4.9463	4.3087	4.667	2.727	4.7908	6.1065	2.9163	2.6785	5.9046	5.1543	3.6229	7.2529	5.0368	3.5808	3.3195	3.544	2.8237	2.6414	3.8805	4.8142	6.2473	2.4057	3.2405	3.0986	3.8013	3.6976	3.9331	4.0514	4.5441	2.2809	4.5316	5.0465	8.1703		0.940737	4.23532
15.2501	2.3197	4.8661	3.812	2.047	7.562	4.1422	5.7111	3.5518	4.4523	3.9385	6.8898	6.9934	2.4563	3.147	2.0032	2.4958	5.0523	3.3503	3.8747	3.9853	6.4357	3.2065	4.8561	2.6962	5.253	3.6894	2.4348	2.7586	2.6151	2.4812	6.2053	9.5845	9.1433		0.948148	4.36395
15.3692	3.9121	5.906	3.609	3.814	4.5227	5.3012	4.4517	2.8757	5.3853	7.6179	3.9236	6.5726	2.1358	2.3519	3.2165	4.1522	3.359	4.4906	5.9735	6.9794	3.9791	3.3467	3.3759	3.083	3.4336	5.3898	2.7969	3.3059	3.9557	4.2137	3.7721	4.9825	10.5858		0.955552	4.44762
15.4884	5.3884	5.8236	4.306	1.937	3.8141	4.0125	2.9648	3.6985	6.3515	5.9161	3.8768	7.3122	2.1954	2.3749	3.6326	3.0546	1.943	6.0621	3.5515	4.408	5.1921	2.7111	5.4991	8.0819	4.8418	4.3923	2.6613	2.879	3.8791	2.7625	5.7425	11.4833	11.3611		0.962963	4.67002
15.6075	3.6563	7.1979	4.975	3.39	4.951	3.4571	3.0291	2.1575	4.3336	3.0613	5.0357	11.7717	3.4318	2.0598	2.8345	3.332	3.8298	3.5494	3.2743	5.6209	5.5456	4.2429	4.5648	4.7928	2.8184	5.4692	3.8786	2.1237	3.1652	2.3433	4.0883	11.1219	8.7291		0.970368	4.47977
15.7266	4.6305	5.7685	3.838	3.307	3.0664	2.8499	2.4483	2.1588	5.7617	6.893	5.341	8.5393	2.8356	2.2418	3.0086	2.7379	5.3887	4.8609	4.3939	4.4648	3.3413	6.3903	5.4597	7.1296	4.2557	5.6365	2.6435	4.2888	4.0664	3.9926	5.1895	4.6798	7.3858		0.977773	4.51497
15.8458	3.963	3.8691	4.397	4.004	4.5264	4.8929	2.6572	3.3938	7.0126	7.9851	10.3709	5.935	2.1184	2.4757	2.1046	2.8272	2.207	4.318	2.26	3.3914	3.7448	2.9576	4.6781	4.3456	2.2887	5.7842	4.4966	3.3034	3.2582	2.9314	4.6198	7.4473	9.6575		0.985184	4.37038
15.9649	3.6027	3.4945	3.99	5.17	5.4668	4.5893	3.7837	2.2941	4.4281	6.2988	4.9938	4.2334	2.5566	2.5142	4.2893	2.0188	2.4112	4.8742	3.459	4.0679	3.3228	2.8309	4.6389	3.9935	3.0398	6.4405	3.0866	3.9893	5.6101	3.5754	2.5147	4.3327	5.7379		0.992589	3.98938
16.0841	5.0215	3.4741	2.469	3.608	4.8349	6.8169	3.1195	4.501	4.1121	2.3837	7.4481	4.3549	4.3541	2.699	2.5591	3.2615	3.0564	3.8407	4.9053	6.447	3.2	4.6085	5.4225	6.7355	3.3401	3.3339	5.5898	3.1518	2.0617	4.1058	3.0006	3.3905	6.5042		1	4.17308

## Sheet: Image34
X0	Y0	Y1	Y2	Y3	Y4	Y5	Y6	Y7	Y8	Y9	Y10	Y11	Y12	Y13	Y14	Y15	Y16	Y17	Y18	Y19	Y20	Y21	Y22	Y23	Y24	Y25	Y26	Y27		Ap-Basal	Avg intensity
0	15.5011	20.7473	14.348	19.8036	22.7334	25.5375	17.3493	18.4137	20.2069	25.1412	16.5827	22.4572	23.8221	14.8961	18.4726	22.2906	17.5884	47.6522	26.1616	22.0284	22.4048	18.5747	25.3325	26.1685	28.6252	20.1679	20.6684	14.5829		0	21.7235
0.1191	17.1186	21.0117	18.4572	24.4329	20.6337	27.1209	27.3814	22.4693	28.9097	16.7581	16.5761	23.6909	14.1949	17.5556	16.7887	13.9068	14.9633	51.9128	21.9542	18.5458	16.2911	26.9594	21.8755	33.0743	18.7004	21.6888	15.8581	14.2135		0.00644938	21.5373
0.2383	18.123	19.1044	28.0343	19.4699	20.9117	31.1137	23.6955	21.7462	22.6742	17.4486	17.8971	20.9219	21.1374	14.9895	18.5754	15.654	17.0229	40.0332	25.129	24.3079	25.7707	26.5522	22.3001	26.7615	24.4713	22.9624	17.4017	16.5955		0.0129042	22.1716
0.3574	16.1813	37.4315	34.6262	21.4831	20.7612	25.6675	23.0028	21.3884	24.5463	19.1951	21.8813	22.3098	20.1684	16.1058	33.1035	12.3051	19.835	46.1237	28.3375	33.5836	19.3083	25.7237	15.7239	23.6213	20.4967	20.4354	13.7442	16.6084		0.0193535	23.3464
0.4766	18.7877	39.6893	35.9603	20.6678	18.9832	24.7531	25.0811	23.929	15.7832	18.5136	20.2397	16.8388	15.6155	14.0366	40.0592	9.6638	15.1775	44.5404	23.4272	30.7893	20.2101	23.9709	19.0264	27.3195	20.7043	26.7345	20.8469	14.4546		0.0258083	23.0644
0.5957	21.5137	48.3095	32.8919	27.1499	19.722	23.9809	27.716	22.5745	19.4357	16.3563	18.7224	14.9481	17.5138	14.9939	30.3867	12.1081	20.3655	41.6202	30.8773	32.7272	25.564	27.5828	23.2677	19.9694	26.5001	22.5848	16.1666	17.2293		0.0322577	24.0278
0.7148	25.3488	43.5723	37.0311	23.1761	18.8431	25.0944	28.0882	28.7422	22.9105	16.2094	24.6425	22.3512	17.4408	12.4135	30.1084	10.91	17.2261	39.452	28.2248	26.5292	19.3034	22.9017	23.9684	30.275	23.4081	26.9083	16.7479	13.6041		0.0387071	24.1226
0.834	26.0559	52.2831	35.0364	20.4909	24.3063	36.8524	24.4358	30.6536	20.2612	17.0426	20.8536	27.4158	15.0133	15.481	30.7165	11.0427	14.6696	39.1299	26.7952	32.2091	22.0007	25.3092	18.6361	37.0449	24.5882	18.9227	13.2204	18.3622		0.0451619	24.9582
0.9531	33.3224	56.0899	41.9209	22.375	30.11	27.6589	27.6999	34.6253	23.6538	23.2139	16.3047	22.216	20.3776	13.6587	33.0177	13.47	21.0945	43.6525	28.8134	35.3187	20.8177	30.9245	20.9115	28.3421	22.2419	20.7522	13.6694	14.4282		0.0516113	26.4529
1.0723	37.7209	60.9613	42.68	17.6996	33.0443	27.8061	30.9445	31.151	26.2246	20.4189	15.8478	26.159	21.2838	17.4079	35.2	13.3163	16.9891	40.335	30.4268	23.3341	18.6445	32.1694	21.9345	25.8659	20.6722	17.8439	12.358	10.2154		0.0580661	26.0234
1.1914	34.9993	66.077	41.1324	19.7489	33.058	35.163	29.8975	41.4008	28.4032	19.9485	19.4332	23.69	23.5254	12.9746	29.7055	9.0006	22.8757	36.4812	25.7955	23.1793	18.8887	28.4979	23.7593	24.3552	17.437	19.8717	13.01	12.2318		0.0645154	26.2336
1.3106	32.6769	64.1962	43.8045	19.3692	22.8048	35.6135	36.8514	40.356	27.6609	27.855	16.998	30.0038	20.1837	11.6796	28.7828	13.0618	20.2389	43.832	33.4858	28.0282	17.5577	32.3003	27.9663	21.6121	25.0795	22.7824	21.9963	14.1968		0.0709702	27.8919
1.4297	36.8935	56.6088	46.5497	21.1305	22.8475	35.3506	27.8769	41.6223	28.7014	33.8073	24.4734	29.623	20.3759	13.3232	40.4051	11.7361	12.8029	43.7426	27.2509	25.6984	20.1214	32.2107	22.1844	29.202	26.0957	18.1511	15.7249	17.8376		0.0774196	27.941
1.5488	39.8408	62.6273	45.8443	20.2758	24.8924	34.9739	26.0389	43.4485	23.5161	29.2524	21.0506	31.9365	15.5221	14.2554	34.0544	13.7477	13.7792	41.1614	28.3438	34.5593	19.7378	32.8949	23.6791	26.5306	28.3028	18.5952	16.4203	18.7557		0.083869	28.0013
1.668	29.5441	54.6525	35.7143	26.1021	24.0311	32.4716	34.821	44.1393	25.8797	29.8787	19.5897	32.1442	21.0206	11.0322	39.1806	10.8103	13.3157	38.5184	26.8897	21.1379	29.7998	31.6379	21.6534	21.8717	40.5332	21.1388	12.8802	18.9746		0.0903238	27.4773
1.7871	23.6823	58.3605	30.3366	25.7946	34.8362	38.967	30.2427	41.4251	23.446	29.1899	19.7031	34.0135	20.4513	13.2846	36.4635	10.7213	17.9423	41.9321	35.751	27.0724	30.2248	24.1925	23.2026	20.7762	33.9499	22.5195	13.2232	21.4438		0.0967731	27.9696
1.9063	25.8789	49.0957	45.3394	24.9887	34.1249	37.17	29.2732	43.03	42.0621	23.9427	23.4902	40.3568	21.826	16.3199	36.6861	14.7615	21.6547	36.0519	33.436	22.7474	28.9564	30.9328	16.9122	27.5853	33.7633	14.8986	17.4155	15.6757		0.103228	28.8706
2.0254	32.985	44.8953	46.5771	23.9112	32.432	38.8693	27.0601	36.6998	38.8211	29.8955	31.9599	36.8992	20.5903	9.2371	35.2074	18.454	18.8431	30.866	26.6235	23.9433	28.9317	20.5663	17.6986	35.1675	39.4135	21.6746	21.6228	19.3451		0.109677	28.8997
2.1445	36.9119	39.6516	44.1318	26.6128	38.8157	41.935	26.8255	27.4556	38.3506	34.3391	23.0822	32.689	19.4227	17.415	34.1778	11.5188	13.0022	30.8761	23.1732	25.2081	25.7323	18.8557	13.5057	33.5374	50.3731	19.2776	24.2155	12.2117		0.116127	27.9751
2.2637	34.0641	33.6175	43.1948	31.5661	33.1384	38.0865	25.9426	35.4791	34.9429	27.4358	20.7332	31.4117	22.3732	15.8415	34.8878	13.5554	14.4959	30.94	26.1623	24.5629	30.9641	11.8481	9.9233	37.732	49.3336	18.9552	17.8674	8.7351		0.122581	27.0639
2.3828	34.7328	39.0581	41.9573	24.629	27.8644	36.8013	24.9875	35.0799	32.988	34.1533	19.5373	38.0076	20.6102	16.1731	36.9896	13.4989	14.9731	22.8089	22.8751	25.7566	24.0632	10.2856	13.4507	28.8254	47.6937	20.971	22.6009	13.8443		0.129031	26.6149
2.502	30.7149	40.1127	42.9698	21.4014	27.2437	31.7908	23.1729	33.7119	34.6172	35.9345	24.5435	40.424	18.6805	14.159	38.0186	12.0382	17.7371	25.3458	16.5661	24.369	20.3607	12.1585	10.2615	35.1115	59.5159	20.9078	17.6416	11.5159		0.135486	26.4652
2.6211	39.8853	33.0536	38.7113	24.3916	32.6067	36.9399	21.9851	26.7703	33.9007	31.3481	22.6594	33.8827	17.5451	13.7151	38.3708	13.9042	21.4513	22.2403	22.2328	22.1034	19.1999	13.5772	9.9842	31.6111	65.9284	18.7636	19.3476	11.6636		0.141935	26.349
2.7402	35.7887	33.2927	32.2792	29.3072	29.5541	34.4953	21.6405	28.4994	41.6065	22.3532	18.2507	26.1396	15.6708	14.1901	43.0801	17.4565	11.6052	17.7954	15.2778	15.1278	20.5598	15.3995	13.4265	22.6295	58.5947	19.0035	22.7416	10.1076		0.148384	24.4955
2.8594	35.9665	29.4984	28.0613	27.191	36.437	47.4249	28.939	24.2112	41.0611	23.5113	22.5168	31.8674	25.1658	18.9917	36.1833	16.9136	11.7056	19.0686	16.8031	20.2271	14.68	20.799	9.68	19.6998	51.2926	20.7267	23.6436	14.0768		0.154839	25.5837
2.9785	31.826	33.9232	35.2779	35.7629	28.3052	44.2223	26.1858	31.7174	35.4143	24.0377	14.8188	28.4962	18.0096	13.4856	35.0751	12.6662	15.612	16.9554	24.5584	19.097	11.5494	19.2345	13.9567	21.3067	54.0307	20.8316	20.1007	10.1226		0.161289	24.8779
3.0977	37.8195	34.8881	29.7154	27.1634	20.48	43.7491	26.5134	27.3522	36.7124	14.423	17.0938	28.7077	11.1832	16.438	31.5829	16.6577	17.2276	15.4916	27.9503	20.8781	12.9299	16.9767	14.8123	25.022	46.1555	20.9178	22.0516	7.6152		0.167743	23.8753
3.2168	39.8852	32.5522	30.3661	30.9403	27.4906	43.6341	22.4461	17.9396	39.4404	12.4314	18.4329	31.8355	13.017	19.709	35.0057	14.5763	13.1658	19.8196	27.4345	23.1771	16.3285	20.4728	10.8807	21.9659	38.2509	18.1391	26.2084	8.8839		0.174193	24.0868
3.336	41.7224	36.2235	37.4763	23.2748	21.6281	27.7901	28.734	21.1423	39.4796	19.0727	16.5157	29.7243	15.3367	14.5942	29.792	11.8414	14.5438	21.0631	22.2874	22.9612	14.9585	14.882	15.1963	14.8454	24.4949	14.3956	27.6344	9.2787		0.180648	22.5318
3.4551	37.592	35.8834	32.047	28.2262	21.1377	34.1862	27.4493	16.2019	32.7589	18.608	16.1082	31.707	17.4028	9.9192	23.1134	11.1451	14.1957	13.9039	20.4638	17.8182	11.3662	13.2192	17.1311	16.9345	17.9398	13.7527	18.2819	8.9225		0.187097	20.622
3.5742	33.0482	27.6634	24.661	31.7292	26.8149	36.0302	28.3082	17.2346	25.325	15.5978	13.0342	32.3781	17.4952	11.6247	24.2185	13.8457	12.1576	17.5016	17.4401	16.3614	13.7027	14.0854	17.8542	15.5263	13.4487	12.0404	20.4221	6.4156		0.193546	19.8559
3.6934	34.7405	23.0306	36.0566	27.6381	24.8145	34.2835	28.8568	13.7535	24.5929	16.2547	10.9423	29.4045	11.0115	13.3953	24.8694	9.3501	11.5335	13.694	16.0699	15.1682	12.0489	10.3701	12.5052	14.9012	14.3585	14.1683	20.3937	6.2885		0.200001	18.732
3.8125	38.9561	29.2617	31.0751	28.5185	21.3515	32.4691	31.6263	23.8477	24.6881	14.9547	13.0733	30.8599	7.9027	12.2391	18.4119	9.1084	13.4812	14.1051	15.3912	16.0213	12.9608	10.8205	10.4645	9.9212	15.5842	13.5268	16.8123	5.9393		0.20645	18.6919
3.9317	31.2648	26.5403	39.2787	26.7663	19.4717	30.8761	28.0101	16.1284	17.1383	12.6585	12.4445	23.7829	8.4052	11.5257	16.9177	11.4449	9.7465	11.9224	12.6074	16.7752	12.1014	7.8575	9.3436	20.9312	10.404	12.2461	15.569	7.9539		0.212905	17.1469
4.0508	24.7188	31.9205	41.9319	24.9802	22.2647	36.5976	27.1292	18.9334	14.9863	12.3932	15.4905	31.0594	13.2203	13.6159	18.5038	14.4056	9.7039	15.9169	13.162	21.6665	16.2654	7.6851	7.3328	19.8053	9.8978	14.7973	15.6979	8.1475		0.219355	18.6511
4.1699	26.5695	32.5718	31.4674	20.5497	17.636	36.1047	24.1728	17.0611	14.0909	15.8519	16.0369	33.8058	19.5922	9.3113	16.1782	9.3565	12.0306	15.9203	11.7034	18.7099	12.3398	7.9474	13.832	17.6439	9.8142	19.0546	16.1672	5.6672		0.225804	17.8995
4.2891	26.782	25.0408	28.2604	16.4074	16.2432	16.125	17.3562	17.733	14.788	11.116	10.1568	30.1188	13.2388	10.436	14.6481	11.143	9.6568	16.4665	16.1629	13.137	14.3177	8.6518	12.3381	21.4326	8.7205	12.248	20.5435	5.8901		0.232259	15.6843
4.4082	29.475	33.0934	24.4138	20.7153	19.7035	15.6778	14.1374	17.3667	13.8113	11.3007	7.3926	18.5203	18.5831	10.692	17.0156	9.4519	11.1252	14.5812	16.1644	16.5454	14.4999	11.0962	10.633	14.1967	8.0607	8.9037	19.3779	8.4496		0.238708	15.5352
4.5274	30.8838	20.4687	26.6711	19.1949	20.5234	18.6004	20.4606	12.5913	16.6561	9.1903	7.7016	22.6191	9.9912	14.2922	11.9782	15.9313	20.4255	11.6844	11.5715	14.3718	10.9015	9.923	8.562	11.5153	8.16	15.1154	20.8433	10.278		0.245163	15.3966
4.6465	28.2664	17.8757	26.4938	25.0292	17.9194	17.5178	15.3078	18.431	11.029	12.029	10.0454	26.4806	12.2305	13.3888	10.9832	13.6716	11.9165	11.2197	10.9147	16.6728	11.7508	9.3864	8.4561	14.032	9.4197	16.7995	16.2962	7.3872		0.251612	15.034
4.7657	28.6984	20.0889	17.3916	15.7171	22.9161	14.7431	19.9092	14.541	12.6277	9.9978	14.249	24.9207	14.4153	12.76	9.8108	15.9088	11.4251	12.8145	10.3927	16.6577	10.2679	7.0275	9.6237	14.0898	10.8841	8.3363	15.7506	7.0325		0.258067	14.3928
4.8848	33.0974	18.532	19.7924	18.6062	17.4404	15.3176	20.2742	16.0903	14.1062	15.1039	10.9835	22.4421	13.4173	14.1844	12.4385	13.3701	14.0835	11.5831	8.0836	19.9311	6.8956	10.003	11.6869	17.0435	10.5207	9.1836	13.1221	10.0678		0.264517	14.9072
5.0039	20.6586	13.6625	15.6022	18.9074	11.8816	11.1476	17.4361	15.1666	14.0247	13.403	6.6865	19.6689	9.9167	12.4385	9.9325	12.7122	15.5524	14.942	8.0446	16.6628	9.3773	10.0613	10.4826	16.2774	14.9455	13.4211	16.0986	11.1178		0.270966	13.5796
5.1231	24.2038	11.8286	14.3557	23.6514	15.7245	10.4037	10.5939	15.1922	11.2162	12.2183	10.5641	20.0399	14.9342	13.3435	15.7273	9.9074	14.5255	14.4517	8.3832	14.4461	9.3801	10.4629	9.9117	10.7541	11.8584	8.791	20.3736	9.9916		0.277421	13.4727
5.2422	18.3438	12.9744	18.6697	22.3116	11.6778	11.3049	12.3492	13.1228	9.187	7.4947	8.3895	21.6382	10.3663	12.5865	12.2866	9.0118	15.2337	14.9954	9.6791	13.0338	10.8261	10.6	6.7974	11.5436	8.5844	10.5577	15.6411	6.5721		0.28387	12.3493
5.3614	18.7576	12.6812	14.2385	19.6024	9.8289	8.1199	7.5854	13.7779	12.2408	12.42	7.9286	17.4345	13.6799	16.7253	10.6883	10.0295	10.8138	11.9553	10.0156	17.8256	17.6092	9.2288	5.1944	14.2838	12.1171	11.5996	12.509	9.8529		0.290325	12.4551
5.4805	16.6853	13.443	15.7739	15.9215	8.0398	9.5255	6.4724	13.3942	9.2451	11.8066	7.7035	12.9269	12.2237	14.776	13.602	10.1233	12.6693	12.8622	14.5196	15.057	19.3545	9.2682	6.0822	8.6505	15.0413	12.4144	8.9787	11.794		0.296774	12.0841
5.5996	9.8292	12.8725	20.5193	15.0234	11.5555	7.1217	8.7432	9.9492	7.7244	10.0236	9.4187	19.7308	10.8803	9.9854	15.1544	12.5501	12.1428	12.5513	9.579	13.816	12.2122	11.1727	4.2826	7.2338	15.13	12.6951	9.0708	9.0796		0.303224	11.4303
5.7188	16.577	10.3697	14.2665	15.3581	10.3633	9.7821	14.7526	13.8109	6.5164	9.0128	7.7541	17.5094	5.5809	10.9234	10.4034	7.3257	12.1547	13.388	9.4075	12.5631	16.9269	10.7152	6.4938	8.6178	14.9827	8.3517	10.758	6.7626		0.309678	11.1224
5.8379	16.2797	8.5835	12.6757	15.9492	11.145	7.8054	11.9282	15.5118	8.4518	10.9142	6.6565	18.8878	7.256	11.8104	12.0075	8.0218	13.5532	12.8728	12.3073	15.7507	16.0134	7.4194	5.5661	7.8823	12.9054	12.9471	11.6178	7.6539		0.316128	11.4419
5.9571	11.1751	7.0492	9.6072	19.5131	7.1005	10.569	12.7154	8.9666	9.1864	10.8631	7.9182	15.8647	7.1462	7.309	13.4838	11.0708	15.2661	15.8967	13.4668	19.2348	16.6486	6.2393	4.4557	9.0918	15.9446	11.3511	7.7335	7.1291		0.322583	11.1427
6.0762	12.1966	9.6137	11.7559	19.8309	8.1553	9.3069	12.1149	8.4875	8.2203	9.6103	8.1756	17.2166	6.9205	8.1958	15.5134	10.1858	10.6763	13.2631	9.9397	14.7852	14.996	8.3217	6.412	6.0975	11.0219	7.647	8.3596	5.9844		0.329032	10.4644
6.1953	6.4159	8.2072	9.8509	14.483	8.0142	8.9655	12.5648	5.7965	6.2999	14.4486	8.863	13.0986	8.2958	5.9935	9.9079	8.3089	13.8343	10.4295	6.561	10.2889	16.7572	8.2685	4.0538	5.124	11.3068	9.5631	16.2175	4.768		0.335481	9.52453
6.3145	7.8045	12.0047	7.6136	16.3335	7.9549	4.786	13.7892	8.2636	5.2072	13.2416	6.5548	12.327	13.1982	5.57	10.1693	8.0183	15.5334	9.6145	11.974	14.8249	21.4325	9.6726	2.2593	6.6623	10.085	8.2755	11.5914	7.9213		0.341936	10.0958
6.4336	11.7143	9.0685	6.7269	10.2006	7.4326	7.2765	15.0852	7.8067	7.655	15.5806	9.1753	13.6881	11.4371	6.2899	7.4922	11.8431	15.9147	9.589	10.2811	11.8681	16.2226	6.7712	5.1675	5.1152	13.5805	10.1099	11.9748	4.4772		0.348385	9.98373
6.5528	8.209	12.0974	11.1723	12.7804	9.4191	11.0065	13.915	4.6042	5.5536	8.0803	7.9302	13.7354	14.9991	9.1848	7.8614	9.01	13.6502	7.6518	8.2028	11.132	12.7124	5.7476	4.4322	4.4475	9.5221	6.3705	9.9917	5.7098		0.35484	9.25462
6.6719	11.4809	10.295	12.7119	16.3821	5.9915	8.5401	10.7247	4.5532	8.2431	13.3058	8.5128	14.3323	11.6809	11.557	7.0995	9.7904	19.0429	8.7986	9.1479	9.0655	9.326	5.0169	4.9753	6.0378	8.0174	5.3626	7.5557	8.0086		0.36129	9.48416
6.7911	8.2854	5.2446	11.9305	13.7387	4.3577	7.1991	10.6312	5.5755	4.8313	13.0941	4.5568	12.9019	10.918	9.5882	6.2242	7.4293	11.0149	13.4606	9.5379	14.4744	7.8866	4.3922	3.1342	4.1405	8.2463	3.6754	11.2568	5.6751		0.367744	8.33576
6.9102	7.244	6.8739	5.5163	11.8955	7.5463	8.3765	8.7833	5.802	5.7879	13.422	5.5174	11.2336	6.777	6.4137	8.6176	9.6181	10.143	7.9335	7.3394	13.2075	9.3677	5.1154	3.068	3.4876	7.6264	5.98	6.7715	5.8919		0.374194	7.69132
7.0293	8.6317	9.9216	9.6011	8.0151	7.9562	10.0273	6.0148	4.4956	4.84	7.6055	6.0868	12.2873	6.0693	7.1897	11.2297	14.1376	11.3378	11.7341	8.3548	9.5159	12.7008	6.2376	7.3172	5.1702	7.0578	3.8672	7.2188	8.3062		0.380643	8.31885
7.1485	10.093	7.6914	8.1432	6.8469	11.1807	7.2011	5.8567	8.6677	6.0152	8.4298	4.4523	14.7065	7.724	7.8705	8.7968	14.2855	8.0286	11.5254	8.5427	9.5937	10.8853	3.0299	3.6547	6.3634	4.8692	5.5649	8.421	7.5106		0.387098	8.06967
7.2676	7.4705	7.5932	10.3161	12.5129	7.4	7.0682	9.0218	5.3414	9.1096	6.4061	4.7881	6.658	7.9667	9.4496	7.0554	12.8299	12.6062	10.0787	7.1929	8.7909	4.702	4.5748	2.4769	9.6286	4.4088	5.0341	7.43	6.1011		0.393547	7.6433
7.3868	9.1513	7.8966	10.2188	10.2947	6.1211	8.6675	6.0497	4.0582	4.3211	5.0173	7.8137	7.6199	10.1373	9.3912	9.483	11.9146	13.6205	12.3979	5.7024	12.5899	5.8644	5.2299	2.6325	8.4661	4.4376	5.1558	10.4906	5.121		0.400002	7.85231
7.5059	5.9357	9.0343	7.6532	9.333	6.2167	5.6186	12.6761	6.3463	4.0284	4.1406	5.5023	7.5967	4.9081	6.4406	12.2202	11.0861	6.3237	9.5915	4.1789	7.9296	10.3608	3.6801	4.9297	5.1163	4.645	4.584	7.4066	7.0889		0.406452	6.949
7.625	7.5999	7.0468	6.7359	7.0506	6.9638	8.8125	9.8916	5.7267	5.0881	4.9372	9.1882	8.5809	6.2521	6.8543	6.8536	8.8186	10.5583	10.0695	6.2212	7.4541	5.5971	4.6963	2.7118	6.6493	2.9966	5.5206	7.6849	6.9481		0.412901	6.91102
7.7442	11.4106	7.7842	5.4577	6.1757	7.8042	9.1116	8.1115	6.3532	5.8979	7.2551	7.154	7.8306	8.1722	4.2904	8.5108	6.3159	7.9903	7.3493	4.8634	5.7422	5.9514	5.2853	3.4003	6.9797	4.7958	4.3166	7.45	7.1373		0.419356	6.74633
7.8633	7.1645	8.5061	7.5157	5.0422	6.0297	6.6491	9.8463	5.6305	7.2273	3.7636	4.7193	8.0992	8.0671	5.5426	6.0732	10.488	9.3285	6.9839	3.6781	7.949	6.7226	3.0532	3.8984	5.8969	5.5434	3.9389	7.1864	8.1609		0.425805	6.52516
7.9825	7.9875	5.2344	6.0363	4.3675	5.2213	7.5028	6.8822	6.2507	10.7752	3.8283	4.2356	6.0783	7.5206	5.0549	7.4655	10.5653	7.9544	5.7337	5.5943	8.8506	8.2559	3.4926	3.7169	9.9055	5.8801	4.5743	4.1731	7.0254		0.43226	6.4344
8.1016	7.4135	8.1381	4.4346	5.4671	3.6981	6.5208	8.2259	5.1746	6.8472	3.9754	6.4036	8.7743	9.2468	7.9412	7.249	11.1202	6.8351	5.1484	6.1992	7.9609	8.5281	5.8195	3.2751	7.569	5.8638	6.296	4.8934	6.0777		0.438709	6.61059
8.2207	8.9562	5.3918	2.7017	5.193	8.6621	7.6291	8.5804	3.8722	8.5031	4.2578	4.4725	7.0121	3.9466	6.8856	5.5134	7.7341	11.274	6.7865	3.8182	4.4487	6.838	5.9682	3.3308	6.2591	8.166	5.5937	6.6226	7.4008		0.445159	6.27923
8.3399	8.7397	5.3579	3.239	7.2689	4.0367	6.899	11.2604	3.2408	4.8989	4.3178	3.9466	7.2879	5.7212	4.8127	7.516	9.0193	11.0227	3.9662	5.1366	4.4962	6.2255	5.2289	2.8224	3.9108	5.5621	6.8981	8.0022	7.6759		0.451613	6.01823
8.459	9.6073	6.7912	5.0852	8.3769	3.0997	5.9001	9.8288	3.5103	6.936	3.0566	4.7588	6.5769	6.4267	7.2099	6.9651	7.1036	11.5151	4.3806	3.2414	10.0793	8.1973	5.1563	3.7459	6.1611	6.7912	7.7174	8.7006	7.3541		0.458063	6.58119
8.5782	7.4766	6.7898	7.6137	6.1081	4.7936	4.5207	6.068	2.2729	6.2239	3.8665	4.0417	8.5354	4.4823	7.1886	6.4579	6.516	9.4084	5.5759	5.7377	7.1374	6.4824	8.5762	5.3507	11.4287	5.3778	4.1167	10.8756	9.3425		0.464518	6.51306
8.6973	6.1276	5.0784	5.3179	4.8558	4.5837	4.9655	6.2174	4.5839	5.9511	3.731	3.6901	7.3615	3.9838	6.626	5.8184	7.8976	11.8925	5.7022	5.3103	7.1791	6.6713	5.2965	4.024	9.9077	5.4903	5.7254	8.0949	5.6803		0.470967	5.99158
8.8165	6.2518	7.241	4.335	6.4117	3.553	6.1869	4.4548	4.7937	4.9255	3.3388	4.9159	8.4998	4.6444	6.5178	4.7491	7.1606	9.2826	5.5378	3.5052	4.59	6.4864	4.7391	5.5624	7.6156	5.6015	4.7892	6.4254	6.8467		0.477422	5.6772
8.9356	7.2047	3.45	6.0525	7.1008	2.5071	5.625	5.2292	3.6124	6.5581	2.749	3.3119	5.7854	4.5246	5.2275	5.3383	8.7485	5.8967	3.469	5.3117	5.0197	5.0034	6.4552	7.134	6.6123	5.5106	7.3496	5.5857	7.2564		0.483871	5.48676
9.0547	4.5892	5.6348	4.8982	6.9155	3.4414	4.5334	3.5269	3.4846	5.6467	3.8334	3.5146	5.5716	7.4718	8.359	4.694	9.3403	8.1336	3.0118	3.5735	9.1177	7.7822	4.3214	4.764	8.6054	7.2416	3.9084	6.9386	8.121		0.490321	5.74909
9.1739	5.1732	4.6488	5.553	6.6566	4.8412	6.7641	4.9583	4.6503	6.1362	2.1566	3.284	4.5971	8.2867	6.0619	3.7175	7.8455	7.1898	3.1493	4.2934	9.7555	7.4474	3.7726	2.4632	9.2713	7.5263	3.92	5.1479	5.6195		0.496775	5.53169
9.293	6.7947	3.2741	5.8772	7.855	3.3203	10.1825	6.3471	3.692	6.103	2.1663	3.3867	4.7227	7.4709	5.4281	2.3581	6.3386	7.7515	3.4202	4.4453	11.1682	12.6084	4.2049	3.629	8.1396	4.0587	4.7754	8.6318	3.2278		0.503225	5.7635
9.4122	4.3067	3.8667	4.1637	7.3129	2.8652	5.3743	7.7125	3.4108	4.2673	3.2177	4.3076	6.0305	5.1896	4.3332	2.9742	8.9235	8.2713	3.3039	3.3264	10.0012	7.9881	5.7102	3.2242	9.2108	6.7645	3.8681	10.3685	9.4109		0.509679	5.70373
9.5313	5.881	4.5385	6.7544	10.2561	2.9897	5.8111	5.6596	3.706	4.7803	2.0478	3.4707	3.4836	7.3501	5.4808	5.0474	8.0818	7.3794	6.4866	3.1973	7.7775	6.823	3.7674	2.927	6.4899	6.4592	3.1615	6.1771	8.6968		0.516129	5.52434
9.6504	5.5541	6.9622	4.1051	4.6969	2.69	3.0961	10.2886	4.0441	4.1308	3.3989	3.0448	6.1032	5.7346	4.652	5.1807	4.5378	10.3969	3.9514	2.9509	7.8799	4.8903	5.79	3.2786	8.8111	3.9268	4.58	4.7118	9.5761		0.522578	5.32013
9.7696	3.0476	8.1536	5.4151	6.272	4.5481	3.5068	6.9528	5.1098	3.0724	2.4036	3.0268	6.6248	4.7524	5.3741	3.6906	5.8263	12.2689	3.8996	2.047	6.5669	5.5083	8.952	4.3032	5.332	4.067	5.3388	3.5042	7.5392		0.529033	5.25371
9.8887	3.3996	5.9161	7.8195	6.5292	2.1895	3.8545	10.7488	2.9672	4.9113	2.559	5.6447	6.7893	3.795	3.5739	3.2659	4.0347	5.3641	5.8949	2.5237	8.3936	9.5605	6.911	3.8161	4.3842	4.2473	8.0116	4.2109	5.2136		0.535482	5.2332
10.0079	3.1874	6.5171	5.7679	4.2351	1.9872	4.4622	7.9632	3.3322	4.2878	2.4481	3.1646	7.9275	6.0502	4.5683	6.2081	5.8976	8.2103	3.4067	4.9403	9.4276	8.8243	5.5172	5.1668	4.4191	4.0755	6.9897	9.1299	9.2125		0.541937	5.61873
10.127	2.9465	6.3539	7.5153	4.6735	3.0283	4.9465	5.6374	3.7126	5.2433	3.0855	3.3661	6.6585	4.6344	5.1973	6.7823	8.087	5.1881	2.4042	2.5973	5.9836	6.6502	5.2069	3.9958	3.97	4.5414	5.3758	5.0645	9.0975		0.548387	5.06942
10.2462	4.0982	3.6389	6.0774	6.1101	2.5848	2.9092	4.2636	6.6547	5.019	2.9775	3.1837	3.8629	6.1679	7.1922	4.6491	7.3885	5.7903	3.4195	3.278	7.1948	7.4161	6.0441	4.159	6.5072	7.4806	6.8381	5.7135	14.0506		0.554841	5.52391
10.3653	3.897	6.5822	9.1078	5.5197	2.4804	2.6289	5.9417	7.0001	4.0094	2.7849	2.8167	4.1133	7.2513	6.78	3.8727	6.9875	5.3076	5.5278	4.035	5.9262	10.2058	6.8156	4.1988	7.155	7.909	4.5876	7.3306	9.9295		0.561291	5.73936
10.4844	3.7677	7.1731	7.0453	3.1182	4.2354	2.8924	7.4059	4.2596	3.2203	2.7341	3.9298	5.9649	4.689	3.7598	2.7643	4.3686	9.532	3.8191	3.3128	11.161	8.8431	10.5234	3.632	6.3104	6.6256	5.1289	4.7898	7.7887		0.56774	5.45697
10.6036	4.354	5.8981	5.2764	6.0019	3.6354	4.497	5.7365	3.0652	4.2348	2.7288	4.7892	6.9501	3.7353	4.4708	2.3486	4.9243	5.3315	2.1715	2.316	7.1224	6.0533	6.659	3.7751	5.486	4.5873	3.7414	4.7871	9.0127		0.574195	4.77463
10.7227	6.236	5.4413	5.4905	3.4019	4.5584	3.1526	4.445	4.3315	3.4236	2.8336	4.234	4.3087	3.9049	5.1092	2.9372	5.4226	8.4815	2.7434	3.1373	7.4098	5.9915	5.7494	4.3021	4.6734	4.2688	5.6372	5.8968	9.4004		0.580644	4.89009
10.8419	7.0919	2.8411	5.9637	3.4736	3.7208	2.271	7.8621	2.3838	3.5412	2.9935	4.2721	6.6953	4.1676	7.1698	3.6188	3.259	6.8892	3.6696	4.3493	6.7125	8.1015	5.8816	4.2636	3.5884	4.7797	3.7801	7.1672	7.1139		0.587099	4.91507
10.961	4.0068	5.0819	5.9617	5.468	4.918	2.5065	4.697	4.424	6.6331	4.3072	4.5628	5.9259	4.184	4.1435	3.3826	2.8673	5.3823	4.4737	6.4637	11.742	9.1604	8.5887	4.9092	4.8049	5.2562	5.4	7.1069	5.0492		0.593548	5.40741
11.0801	3.4502	4.0282	5.0861	4.1145	2.9882	3.1305	3.814	5.2399	4.5765	2.7355	5.3879	3.6719	3.7793	4.8811	4.4635	7.3952	5.1764	5.243	4.6782	12.252	6.9101	7.2879	4.3464	4.118	5.6516	4.549	5.1507	5.7307		0.599998	4.99416
11.1993	3.7032	3.2829	6.206	3.4026	3.1298	5.4026	3.1245	4.2681	4.2827	3.081	4.8715	3.8305	3.5749	3.8501	2.2859	5.241	4.3637	5.2337	4.2171	9.3618	10.1983	8.1112	2.4959	3.2323	6.5337	3.7866	3.9747	4.6171		0.606453	4.63084
11.3184	5.3881	6.3917	4.5278	4.9725	3.4349	3.9008	3.7005	2.913	5.5729	2.6255	3.778	4.4855	7.6196	7.0323	3.9209	5.3206	5.7438	3.4211	3.765	8.4735	12.6616	5.8835	2.3661	4.3115	5.7075	5.2009	6.1822	6.3851		0.612902	5.20309
11.4376	5.1529	5.0348	6.2206	4.8098	2.4073	2.8414	3.2154	5.3592	5.1411	5.263	6.2488	4.6015	5.9658	5.0726	2.8253	5.1064	5.1684	3.9813	5.362	5.7617	7.6119	5.352	2.5139	3.6291	4.6698	4.1839	5.4639	6.111		0.619357	4.8241
11.5567	5.5707	2.8374	4.2132	5.2586	3.1987	3.6637	4.0497	3.7437	3.5309	3.338	5.7498	5.3623	3.9388	4.9192	3.3147	5.6317	6.9248	5.6478	5.4004	6.7227	9.6494	6.2684	3.9709	3.1202	4.7615	5.5334	7.6974	5.5242		0.625806	4.98365
11.6758	4.5967	3.4542	6.4164	5.7811	3.4773	2.3774	3.8425	3.017	2.9339	3.1569	2.2292	7.9462	3.8619	3.269	3.6006	6.1781	3.8548	3.1659	4.5066	6.3563	11.2573	4.0065	4.6985	5.6694	5.9702	6.0639	5.0307	8.2364		0.632256	4.81982
11.795	5.0535	2.8552	2.9863	3.8764	2.5237	2.4927	4.0979	3.407	3.7069	2.65	4.2794	5.1251	8.9547	3.3941	2.1091	5.1239	5.2639	5.8135	6.1496	6.6501	6.2235	4.5731	3.5862	5.3227	5.436	6.0456	6.1381	9.5556		0.63871	4.76406
11.9141	5.0634	4.222	5.6668	3.6287	2.1584	2.5544	3.9106	2.2874	3.4749	1.9802	7.3798	6.3065	4.0402	2.5224	2.3	3.7146	6.8951	4.2342	6.3053	6.0254	7.1316	6.116	3.8541	7.5466	5.0711	8.1096	5.721	8.4086		0.64516	4.8796
12.0333	5.0672	3.0739	3.7508	4.3383	2.3076	3.2161	5.483	4.4765	2.9499	1.9037	7.1818	6.4763	3.6813	3.9385	3.319	3.8884	5.3564	4.1716	5.7272	5.6081	6.5646	4.2404	4.3757	7.0536	5.7555	9.8322	5.887	8.1341		0.651615	4.91995
12.1524	3.611	3.3168	5.2124	2.6847	3.7583	4.407	3.817	2.7182	2.8606	2.6134	3.9257	4.9487	5.5658	6.2247	3.2613	3.5577	8.6707	3.12	4.0748	7.9425	8.8346	4.988	4.393	8.9104	8.7421	10.583	3.4086	10.4586		0.658064	5.23606
12.2716	4.3899	4.4904	3.398	4.3179	2.8281	4.5727	3.4573	2.1235	3.97	3.1701	5.7864	4.3838	5.7348	3.5106	4.003	4.0851	6.9993	3.0633	4.7593	6.2336	6.1997	4.4832	3.9354	8.9114	8.0155	8.5538	5.3739	8.9896		0.664519	4.9907
12.3907	4.7022	3.8974	4.235	4.7979	3.8742	3.039	4.9399	2.1761	4.7892	2.8935	4.0194	5.6268	4.6525	5.5855	2.1249	4.6016	5.3655	5.0782	4.0674	5.9385	6.783	4.2867	5.0237	6.9535	7.1641	9.3787	5.1832	13.5892		0.670968	5.17024
12.5098	5.5797	6.649	3.9788	4.6197	2.73	4.2005	6.1032	3.2112	2.9084	3.046	5.7232	5.5982	5.2619	5.9853	3.3623	4.3826	7.4527	4.8376	2.1789	6.6745	5.139	2.9403	4.2229	7.1676	9.0243	7.9239	3.0687	8.5759		0.677417	5.09094
12.629	3.6825	4.1266	3.7076	4.4622	2.1953	4.0261	4.4854	4.7263	5.6634	2.6079	5.9458	4.3627	4.3949	8.1919	3.8218	5.3599	5.5694	5.9689	3.8554	8.0355	3.9684	3.2578	4.1075	7.0138	8.9654	5.2118	4.2897	4.3854		0.683872	4.87105
12.7481	4.4917	3.0951	3.8127	5.409	1.9579	4.993	3.7403	2.7368	5.8814	2.943	3.19	5.6591	3.2028	7.5861	6.3352	3.433	3.7701	5.493	3.6507	7.2367	5.4352	3.7224	6.5504	6.0836	5.5344	3.7144	4.3942	6.5559		0.690322	4.66457
12.8673	4.0851	2.9663	3.4756	5.8415	2.6913	4.9121	4.2852	4.5446	5.7176	3.0537	3.576	7.885	4.6351	6.6757	5.3728	3.526	7.6042	3.9655	3.3522	7.9352	5.0634	4.2905	6.394	9.9077	4.4441	8.0091	5.1129	6.3795		0.696776	5.20364
12.9864	4.4596	3.7649	3.7011	4.8233	2.3974	4.4705	5.7055	4.6754	6.4715	4.0995	2.7345	7.1765	5.8141	6.7186	2.9444	6.8388	6.6009	4.3638	3.2873	8.1141	7.7258	5.3391	6.437	11.2045	5.0025	6.8603	5.1749	8.2492		0.703226	5.54125
13.1055	6.1476	4.3004	4.2352	4.6919	2.6892	2.8133	3.0013	3.0798	3.957	2.8368	6.3093	3.6363	4.0615	7.5417	3.4801	5.234	5.1228	5.8259	3.967	8.0751	4.9665	6.7337	4.5261	8.1108	6.3021	8.3332	4.972	4.5575		0.709675	4.98243
13.2247	6.0285	4.6466	6.1095	4.0604	2.1509	4.8665	5.5421	4.2459	3.0034	3.5154	5.1339	6.5251	4.3007	7.1636	2.494	7.4896	6.8868	4.6326	4.5989	8.9983	9.5445	8.4354	6.7214	5.3428	5.9602	6.385	6.2237	6.1359		0.71613	5.6122
13.3438	5.7853	5.7699	6.4438	3.3125	3.5985	3.0869	5.9198	2.5566	5.1079	4.2349	2.8536	7.3838	3.3183	6.8365	4.4752	5.8154	4.3658	2.7292	6.6673	9.2848	6.8184	7.6223	6.0384	4.984	5.6154	6.3601	5.2808	12.9176		0.722579	5.54225
13.463	4.5954	6.2879	4.5696	3.5137	2.8654	3.5426	7.7027	3.3089	6.2667	2.7083	2.6627	4.557	5.2607	6.8435	4.6458	7.5959	7.2487	3.1496	4.5586	11.1832	5.692	7.4998	8.7735	7.1783	5.8911	7.0753	5.6838	12.7765		0.729034	5.84419
13.5821	4.0919	3.9082	4.9047	3.652	5.2617	5.5208	7.1656	4.1179	4.1737	2.7766	3.4908	3.7866	2.3752	11.6989	3.458	6.3021	4.846	4.6778	4.0961	9.2909	5.3893	5.6444	9.1268	6.5583	4.4064	4.358	5.1716	10.1864		0.735483	5.37274
13.7012	6.8706	4.9202	2.7683	4.2412	5.0086	5.6158	7.2342	3.9437	3.8884	4.16	5.0121	3.9481	3.8071	5.2829	3.9228	4.4423	4.0377	4.0998	3.0783	9.1475	8.0851	8.3628	5.4003	3.4736	5.0592	5.0868	7.7188	9.4159		0.741933	5.28686
13.8204	3.2479	4.5279	2.6729	3.1534	3.689	7.2062	5.8331	4.196	5.8695	2.5945	4.9423	3.4769	6.3955	5.5533	4.9525	8.6243	3.5785	5.193	4.5976	9.6672	5.3724	9.2299	6.6334	5.5758	6.2624	3.8458	6.4137	10.2387		0.748388	5.4837
13.9395	3.3373	4.9099	4.2339	4.8779	3.8427	5.0451	5.9625	3.1085	6.892	2.8519	7.0901	3.6664	4.2818	4.41	4.0341	6.3482	4.8589	4.4642	5.9047	7.6051	4.6147	8.2223	6.4921	4.6414	3.0249	6.0834	5.7406	9.1109		0.754837	5.20198
14.0587	5.9591	3.2378	5.8359	4.7731	4.0847	6.2391	4.4488	3.9959	5.5839	2.9341	7.4644	5.2018	3.15	5.1268	3.3713	5.4496	5.9731	2.4403	4.7102	9.2856	4.23	7.7165	8.9715	2.6329	5.6037	8.6039	4.7831	10.5454		0.761292	5.44116
14.1778	4.2202	2.8662	5.5319	4.8901	3.3242	5.7054	5.6321	4.9341	4.6838	4.5925	5.3196	7.1731	2.7657	8.2526	4.73	7.487	4.9961	3.3207	6.8855	14.243	3.655	9.5829	9.1923	4.2759	5.9439	4.6373	4.8041	12.2235		0.767741	5.92388
14.297	5.0589	3.4601	4.9745	7.3245	2.1048	5.7951	5.9602	4.6561	4.9829	2.6115	5.7324	4.0493	2.7698	8.0411	4.4274	5.6867	5.8828	6.6975	10.8139	10.3276	4.4565	7.2067	9.6423	4.4778	5.4188	5.1102	5.406	11.0505		0.774196	5.86164
14.4161	3.3224	3.5451	6.792	6.8677	2.744	7.5245	7.8869	6.9943	4.003	5.1222	5.2822	3.6694	4.5821	6.8554	2.7544	8.7313	4.9774	7.1375	10.3589	7.1185	4.0973	7.1873	4.6484	5.2578	4.5075	4.8431	4.5525	9.2408		0.780645	5.73585
14.5352	3.5749	4.1586	8.1424	3.7994	4.0829	8.2087	5.7953	7.42	5.9269	7.2911	4.0894	6.9857	6.1369	7.0589	3.8457	8.5961	4.4482	6.0037	5.825	5.2528	6.5731	4.493	3.3051	5.7237	3.5156	3.0953	4.1	8.7467		0.787095	5.5784
14.6544	4.0894	3.7505	5.9666	5.2693	4.3002	7.6769	4.6411	6.6118	5.8777	7.0947	7.5167	5.6282	9.4298	7.439	2.8532	10.7756	5.4516	7.4552	7.7172	7.291	8.8126	9.4048	2.8802	3.2628	2.8465	3.7967	4.0974	5.5568		0.79355	5.98191
14.7735	4.504	4.3713	5.9043	6.8996	3.6693	6.8848	5.4548	8.0502	4.6347	3.6408	8.0231	5.0994	6.6763	10.63	5.24	13.007	4.5262	8.2046	6.6814	5.3272	7.6625	8.6527	5.8864	4.0538	2.9682	2.553	5.1881	5.8304		0.799999	6.07943
14.8927	6.9476	4.7084	6.3695	8.7042	3.3382	7.7627	3.3131	4.7133	3.7012	4.9909	5.0009	5.0008	6.4727	8.4427	3.5827	7.0559	4.8342	8.6209	6.3945	5.1134	4.6968	6.9918	5.3096	3.2444	4.5916	3.4781	3.4484	7.58		0.806454	5.51459
15.0118	6.1337	4.3486	5.0251	5.8708	6.9998	7.5058	5.1268	6.0105	2.7815	6.2831	6.975	5.1323	6.1459	6.3138	6.2358	8.5463	7.6286	11.0823	7.6616	4.8437	4.2822	7.9076	5.8996	3.7324	2.7476	3.4267	2.2942	6.3958		0.812903	5.83347
15.1309	3.9497	6.7034	6.9906	8.1038	5.6332	7.0469	2.6063	8.4915	4.1969	7.1268	10.2597	5.6656	7.9924	6.0095	5.3711	7.7551	10.9776	6.6058	10.545	3.9607	4.9686	7.3419	4.1294	2.5492	1.9472	2.4198	3.0015	4.6612		0.819352	5.96466
15.2501	3.8137	6.2092	5.638	8.3253	6.11	7.1367	2.1	6.5751	3.4278	9.8025	8.7493	5.9738	6.2787	6.7577	7.6294	9.2289	10.0483	8.5296	7.4992	7.992	5.6791	5.9827	4.5933	2.5228	1.867	1.8819	2.5978	4.8332		0.825807	5.99225
15.3692	4.7053	5.3474	5.6687	5.2159	4.3494	6.0067	2.844	8.8917	2.7567	6.4056	9.1577	8.7849	7.1168	10.4239	9.9455	10.0546	8.7646	6.6868	8.6504	5.1847	5.5173	3.7889	4.5263	2.0318	1.9558	2.0221	4.2812	4.1121		0.832257	5.89989
15.4884	3.521	4.2085	4.4904	7.1164	7.3622	3.8204	3.2328	8.8209	3.2662	4.6643	6.4307	6.3989	4.1368	9.9858	5.7128	7.6084	7.3565	3.7964	8.4529	4.153	4.3342	4.3981	3.3193	2.0938	3.8467	4.6305	2.4143	3.1621		0.838711	5.09765
15.6075	4.129	8.4538	7.2463	9.412	5.7725	5.4429	4.886	5.9076	4.1269	3.9136	9.9571	7.9907	4.7595	9.7645	3.677	9.2396	9.0977	5.8881	7.7271	7.6545	5.2764	4.6701	2.3885	2.5668	3.3528	2.8577	2.3317	1.9983		0.845161	5.73174
15.7266	3.598	4.7657	5.0435	6.8555	5.4866	9.0288	3.0573	5.3803	2.7897	6.1325	11.4767	5.9745	5.5512	6.1305	6.2545	6.9111	12.2401	6.798	10.0533	5.3195	6.0926	3.2437	2.5179	2.9231	2.1418	2.9464	2.7021	2.3032		0.85161	5.48993
15.8458	4.7104	2.945	4.9704	6.4627	7.6211	7.325	6.6564	6.2289	5.7082	6.9181	8.2549	8.9529	3.9242	8.7516	8.1801	6.5877	9.8044	10.3127	7.1418	5.4452	3.0232	2.889	3.1215	3.5464	2.4621	2.0129	2.9483	2.8665		0.858065	5.70613
15.9649	3.8102	4.2076	3.989	4.7783	8.448	5.7909	3.8778	4.0769	3.9009	4.331	7.7211	12.8233	5.8709	7.181	9.8323	4.8502	8.6694	7.9753	11.8474	2.8217	2.5892	2.1223	3.1036	1.9865	1.9517	1.8722	3.4283	2.9085		0.864514	5.24162
16.0841	5.4995	4.4319	4.8124	5.0439	8.3717	3.8339	3.7643	4.3306	2.184	6.2343	5.309	7.6771	4.6582	8.2059	5.9953	4.169	12.5123	7.3601	9.8483	2.6998	3.0422	3.5604	2.5832	2.3117	2.2212	2.4543	2.5533	3.5006		0.870969	4.9703
16.2032	5.8355	3.8256	5.1621	3.5664	4.6963	3.7334	4.3189	2.7415	2.5968	6.0654	9.0693	8.8247	4.3737	8.0804	9.2583	6.3073	10.6591	8.842	9.04	1.8559	1.9959	3.1033	2.2863	2.0935	2.6152	5.1547	2.4393	1.8423		0.877419	5.01368
16.3224	4.9714	4.5662	4.4981	5.0393	4.9111	3.5898	2.1046	2.472	2.4965	3.7568	6.4534	7.2739	3.5475	5.7368	14.2827	5.6829	8.3965	9.5641	6.7539	2.835	3.3174	2.9659	2.186	2.0178	2.5065	2.8632	4.0811	1.9467		0.883873	4.67204
16.4415	2.407	4.1443	4.0606	5.8625	8.5025	2.4679	2.0967	1.9947	1.7964	5.1211	4.9276	5.7078	6.3338	4.4775	10.087	10.0665	10.3413	9.1625	4.5822	3.2872	4.5839	3.9795	2.3496	2.6385	2.4498	3.9837	2.5791	3.1414		0.890323	4.75474
16.5606	5.7979	3.6018	3.2318	7.7666	5.8706	2.2236	2.1111	2.125	2.9738	6.6614	3.0026	4.7857	8.7857	7.0146	9.7684	7.1392	12.0638	6.3855	6.0889	2.7181	4.007	3.5002	2.2401	2.8327	2.8428	2.3644	1.9877	2.9678		0.896772	4.74496
16.6798	5.3654	3.125	4.0598	6.9427	5.1251	2.2371	3.7614	3.2962	2.4619	4.8494	4.1306	5.5198	4.59	6.2229	11.9645	4.9397	15.1747	9.8701	5.1235	3.237	2.0041	2.2791	2.3815	2.0217	2.3355	2.032	1.9605	2.5928		0.903227	4.62871
16.7989	6.7805	4.2209	4.7598	6.1664	4.0847	2.3314	2.8656	5.4638	2.901	3.7618	3.0451	7.9238	5.6363	9.1821	11.6159	4.1143	7.8537	11.3665	5.3479	2.6265	2.7584	2.9535	2.9009	2.0589	2.4827	1.9783	2.0521	2.0848		0.909676	4.68991
16.9181	4.1728	3.2643	6.2342	6.7112	3.5323	2.176	2.6155	3.3815	1.8837	4.0044	4.3392	4.2222	5.2037	6.1511	12.8027	4.1746	10.3342	9.7412	2.5113	2.427	2.8791	1.9909	3.3134	2.1049	2.0623	2.3958	1.8444	2.6723		0.916131	4.25522
17.0372	3.3917	4.225	6.8816	5.7598	2.4927	3.0979	2.2018	2.8629	2.3207	2.9007	3.4383	5.5392	4.4801	3.3322	8.6646	7.0309	7.0911	15.6783	4.1516	2.1379	2.2668	2.6142	5.1572	2.2089	3.1878	2.181	1.9186	2.6297		0.92258	4.28011
17.1563	3.154	5.6519	5.7573	6.7307	2.8516	2.8781	2.2311	3.1749	2.0946	2.7595	2.5769	4.5927	4.9657	3.3617	8.8326	7.3054	7.5806	10.0399	7.9633	2.1286	2.1626	2.5847	3.2241	2.0025	3.6114	1.9433	1.968	2.218		0.92903	4.1552
17.2755	5.0341	4.1166	4.5019	9.0937	3.5271	1.9273	2.2008	2.1437	2.5545	2.4351	4.7353	4.4856	2.9752	3.2226	6.2676	8.9723	7.0579	10.9612	6.8454	3.1957	2.1456	2.2778	2.2014	1.9558	2.088	2.4717	2.8257	3.0228		0.935485	4.1158
17.3946	3.5575	4.3634	4.782	5.6573	3.9765	1.9795	2.0396	2.0676	2.9978	3.2714	2.2755	2.5268	2.6476	5.1893	7.2098	4.8679	4.2578	8.3957	6.522	2.184	2.0047	2.6075	2.1395	2.0527	2.0558	2.0899	2.7677	2.8814		0.941934	3.54886
17.5138	4.9118	3.2879	5.023	3.5033	2.3111	2.0684	2.1113	2.3252	3.7054	2.1973	1.9357	2.7771	3.5013	2.3694	8.4105	4.4134	5.9602	10.8967	4.7642	1.9507	2.369	2.7317	3.4379	1.9377	1.9029	2.4988	3.8124	1.9517		0.948389	3.53807
17.6329	3.2402	4.5511	4.5689	6.4649	2.3826	2.9899	2.6768	2.2876	2.1216	2.11	3.9544	2.4337	5.4843	3.4952	6.5246	4.095	5.0754	6.2993	2.7931	1.8431	2.8533	1.916	2.949	2.547	2.0982	2.6897	2.9812	2.0698		0.954838	3.41057
17.7521	2.9337	6.0681	2.9286	3.9381	2.1872	2.7293	2.1502	2.3662	2.9609	2.5824	2.6131	1.9776	4.5589	4.5233	6.9787	7.2283	7.8324	6.4027	5.1754	2.9503	2.2582	2.1752	2.0346	2.2586	1.9767	1.8774	2.9289	1.8515		0.961293	3.51595
17.8712	2.0558	3.448	2.9897	5.3606	2.0271	2.0063	2.8875	2.0872	2.3742	3.4008	2.5903	2.0779	3.4733	3.8507	5.6619	8.75	8.049	7.5039	4.3976	3.2569	1.9614	2.9871	2.5448	1.9638	2.1361	2.029	2.5313	2.3746		0.967742	3.45631
17.9903	2.0642	4.426	4.2044	4.9775	2.1654	2.3028	2.0681	2.3264	2.18	2.4671	2.3811	3.9184	3.9312	4.8678	4.5305	8.7716	4.1083	6.3794	2.3876	2.7184	2.4583	2.918	2.3509	2.5422	2.2465	2.1368	2.2772	2.8285		0.974192	3.31909
18.1095	2.3254	3.3948	3.6897	4.3398	3.1247	2.5327	2.0773	2.4239	1.8992	2.0847	2.4449	2.6971	3.0077	2.5271	3.8901	4.6723	5.2081	7.6025	2.6428	2.5778	1.9781	2.0189	2.1064	2.6472	2.0822	2.9608	1.9891	2.2324		0.980646	2.97063
18.2286	2.6217	2.5617	5.9795	7.7644	2.0684	2.5443	2.0832	2.123	1.9763	2.1192	2.2026	2.1244	2.0935	2.9994	2.7506	6.8986	4.5525	7.2927	2.3093	1.9846	1.9838	2.1112	2.476	2.4312	2.7449	2.152	2.2023	2.1857		0.987096	3.04775
18.3478	2.003	4.5276	5.758	6.891	2.4041	2.602	2.1192	2.6822	1.9501	2.6085	2.6841	3.4825	2.0317	2.8493	2.3617	3.7388	3.9713	5.7075	2.9178	2.5147	1.8309	2.3692	3.8763	2.1428	2.1685	3.3001	2.9813	2.635		0.993551	3.11104
18.4669	2.1338	3.6751	5.1723	5.6113	2.9095	2.118	1.9936	2.1553	2.278	2.4612	3.9011	2.4433	4.8986	3.4799	3.2176	3.8326	2.7271	6.209	2.1856	2.8766	2.4738	2.0191	3.1826	2.8904	2.04	1.9155	2.8638	3.5273		1	3.114

## Sheet: Image33
X0	Y0	Y1	Y2	Y3	Y4	Y5	Y6	Y7	Y8	Y9	Y10	Y11	Y12	Y13	Y14	Y15	Y16	Y17		Ap-Basal	Avg intensity
0	28.587	24.1525	34.584	23.2921	33.4118	28.9545	29.982	27.7232	15.5197	21.4753	20.8466	22.7646	24.0519	19.0164	14.3187	17.5537	17.1563	9.1578		0	22.9193
0.1191	23.8389	22.3153	22.073	30.8323	30.3257	26.8127	29.8638	26.0335	24.9333	19.878	27.1386	21.5519	15.3989	18.6839	14.8398	22.6739	15.2737	7.741		0.00900588	22.2338
0.2383	36.2929	16.9098	24.568	28.4065	29.0472	32.7536	26.1281	37.6899	27.706	18.394	23.4547	22.5871	18.9621	18.8331	17.4084	28.3973	18.2926	7.1496		0.0180193	24.0545
0.3574	33.9873	30.8176	30.01	32.895	32.4428	34.1078	15.2805	31.6739	21.4252	19.8988	30.9546	19.7405	27.8493	21.4177	10.1728	28.8664	21.0177	10.928		0.0270252	25.1937
0.4766	28.9881	21.5278	33.302	39.8446	31.7386	32.3626	23.8429	29.4273	27.6577	21.1793	31.2353	24.3925	25.8292	32.2225	15.1326	28.599	14.5055	10.7707		0.0360386	26.2532
0.5957	40.6373	23.3399	31.627	50.3016	35.548	31.8469	21.6584	33.7826	26.107	31.1084	23.8377	25.3793	24.0767	24.1063	9.6457	40.686	18.6607	10.5658		0.0450445	27.9397
0.7148	33.2023	35.4475	43.484	53.1155	37.7353	28.5381	24.9577	37.7593	25.7974	23.4589	37.5568	31.377	21.8465	27.2877	9.1367	26.9448	24.3254	11.2858		0.0540504	29.6254
0.834	44.7038	31.6441	57.772	58.7212	35.0496	29.6552	24.1508	33.589	32.1852	22.6085	31.3105	27.5331	25.3976	24.0876	9.2017	33.2647	23.5754	17.2657		0.0630638	31.2064
0.9531	44.5878	48.4075	67.581	58.7739	37.6376	33.7838	24.1102	39.1542	27.2501	16.8313	36.5033	28.1663	26.236	23.6218	16.5041	33.8277	20.7016	15.0317		0.0720697	33.2617
1.0723	44.773	56.5644	77.56	69.2939	55.3179	35.5723	40.052	49.7291	27.7054	24.5937	33.5038	35.9218	30.7826	32.9182	15.7578	31.9615	15.4378	15.1702		0.0810831	38.4786
1.1914	56.0003	59.6784	64.408	77.341	51.4628	31.4354	45.9788	39.14	28.5781	20.7443	33.6755	28.9729	28.5103	28.9475	12.0962	30.2198	29.7367	17.447		0.090089	38.0207
1.3106	55.621	70.5962	87.619	75.1186	48.202	33.8881	40.6466	41.2907	20.9952	24.1894	28.619	38.1879	47.6035	28.8041	21.5414	34.8631	25.4139	13.8885		0.0991024	40.9493
1.4297	81.5842	85.73	103.693	79.9981	51.6001	32.3514	45.5523	35.3391	26.4378	23.6106	33.3842	35.973	57.9587	35.8516	23.2536	32.6698	23.9855	21.5484		0.108108	46.1401
1.5488	76.6916	74.1037	92.849	81.8541	40.4748	25.5428	48.8147	34.399	40.7772	20.3688	44.0721	44.635	51.3922	37.4526	22.4874	32.7549	30.3693	19.1723		0.117114	45.4562
1.668	68.1945	77.3043	83.26	75.8339	50.0158	39.4961	49.0206	47.3756	22.6853	24.2502	42.4576	37.5218	56.9072	34.3041	11.6791	33.6948	31.2296	26.7337		0.126128	45.1091
1.7871	80.6652	79.9276	87.638	82.3128	42.4797	42.0579	63.2035	26.3286	39.7463	24.7577	43.032	40.0598	67.3172	32.6243	23.8068	40.6357	32.255	26.4057		0.135134	48.6252
1.9063	86.5056	83.5403	86.971	82.7452	44.3245	47.218	43.9553	25.8876	30.0499	24.9686	37.1816	41.7604	60.0922	36.4121	19.4146	29.0066	21.2963	21.3575		0.144147	45.7049
2.0254	70.0213	80.4144	83.328	62.9425	38.1089	43.2497	55.6454	36.9104	39.005	28.2883	37.6559	39.0102	57.9838	35.2491	23.1959	28.117	20.5014	18.6254		0.153153	44.3474
2.1445	54.9907	85.1209	74.929	69.4219	30.0549	40.6209	57.8772	29.0618	34.8171	27.9487	44.5491	46.5355	51.5197	48.8027	13.2245	18.6725	20.1133	21.696		0.162159	42.7754
2.2637	59.3599	64.3531	74.568	63.0405	25.2133	40.2012	35.1118	32.985	39.9951	29.3363	32.9187	39.9838	49.9205	46.9898	17.4425	11.8917	16.1974	18.0789		0.171172	38.7549
2.3828	57.803	71.0877	44.04	55.6315	21.0923	34.1304	45.0377	32.4522	35.4758	35.8767	32.4675	40.1876	56.0222	40.7247	21.6738	19.5252	13.644	13.0845		0.180178	37.2198
2.502	56.9406	71.7505	29.373	59.5699	29.1911	33.0117	42.13	32.8331	39.6209	35.9356	29.9305	39.9486	45.9679	52.0149	14.7245	14.382	22.1953	13.3342		0.189191	36.8252
2.6211	65.0153	77.4404	30.883	55.2502	21.2888	28.6914	34.3992	28.7404	41.0915	35.021	31.1757	34.5435	33.8306	41.9031	23.7992	16.7891	16.7618	16.7646		0.198197	35.1883
2.7402	64.2015	74.9786	24.186	51.4305	22.5944	30.2243	24.0953	29.4848	32.2065	33.4558	30.5447	32.6863	44.0443	39.2866	16.3356	18.2347	16.2796	12.1472		0.207203	33.1343
2.8594	57.386	61.8489	15.199	44.941	18.2057	24.7512	33.2605	26.0231	30.7982	23.7354	32.9853	41.9685	43.2662	36.9318	18.4549	13.1734	14.83	16.1229		0.216217	30.7712
2.9785	65.1679	46.7957	24.111	47.7703	16.7839	27.1514	22.9926	24.0361	35.7926	22.6633	38.3615	28.9656	37.7357	44.0644	20.6999	15.435	15.6366	9.7669		0.225223	30.2184
3.0977	61.6017	44.6114	18.937	32.3751	17.1301	19.2035	31.4702	19.0423	31.6298	22.8441	29.9111	24.8671	26.1418	30.4427	18.6482	10.5616	10.0969	10.5403		0.234236	25.5586
3.2168	56.8452	35.5927	14.962	33.7946	16.2604	29.1125	19.5828	28.5416	38.5945	21.2159	29.0037	24.6505	29.9178	31.6046	25.8075	10.9769	9.2404	7.4052		0.243242	25.7283
3.336	57.5798	36.8798	15.929	29.0146	20.8743	17.8644	23.1584	18.6674	32.6672	23.4629	29.73	22.6148	21.9514	29.9873	23.6738	6.4749	14.2535	8.1159		0.252255	24.05
3.4551	52.2055	32.6535	18.386	28.23	16.8756	14.8528	23.6167	24.8892	28.7892	22.5359	27.2845	16.0648	21.8565	28.7225	20.2971	4.057	10.5335	5.6263		0.261261	22.082
3.5742	45.5775	27.5712	11.846	23.5225	30.369	9.1552	27.3857	20.0386	32.2504	15.3971	25.8586	15.0135	26.3163	18.9312	11.5528	6.1677	7.6344	6.239		0.270267	20.0459
3.6934	39.3924	24.2547	12.523	24.3275	32.7189	9.5422	30.9729	23.9402	33.73	14.2729	35.139	15.7227	25.9798	14.9018	16.3496	5.8056	17.6075	6.0499		0.27928	21.2906
3.8125	34.324	20.7666	14.547	22.3485	29.0323	12.0192	28.7353	14.3513	25.585	16.2307	18.7665	18.1874	17.2484	16.9413	13.8468	7.5544	7.6721	9.8811		0.288286	18.2243
3.9317	31.4661	22.5648	16.191	20.265	24.2532	15.6133	29.1607	14.0546	24.5687	17.292	14.8267	11.6242	16.4183	12.5679	16.4011	6.5365	9.8041	7.3721		0.2973	17.2767
4.0508	25.0715	12.2397	7.108	19.5034	25.1116	9.1875	26.3511	14.0748	14.5004	19.7784	21.6686	21.1127	18.8777	13.0279	10.1182	10.0025	7.6606	4.8516		0.306306	15.5692
4.1699	22.7575	14.8434	8.208	14.4384	20.0304	12.1352	23.7167	12.5906	19.0804	15.3313	25.7959	17.6839	13.9637	9.1778	15.115	12.4595	5.5721	7.4527		0.315312	15.0196
4.2891	16.519	16.9972	11.656	19.9443	21.5206	9.5116	27.6339	12.397	12.347	17.1308	16.5346	13.9181	12.3136	11.8101	14.1489	8.7853	7.8245	6.7867		0.324325	14.3211
4.4082	22.2246	12.3638	15.417	19.3089	18.0586	10.523	13.9756	12.446	15.2103	19.7657	20.7345	10.348	8.2297	11.2984	12.0455	7.7923	6.5441	3.9616		0.333331	13.3471
4.5274	14.7717	12.3708	16.298	17.8804	16.7096	11.1015	15.5835	12.5409	11.2361	13.3045	17.681	9.0367	13.6513	8.8457	17.0009	12.073	8.7972	5.433		0.342344	13.0175
4.6465	14.6826	12.4513	14.094	20.8735	21.194	10.571	10.8497	5.9747	10.2163	10.4216	13.8523	14.9738	10.1901	8.6111	11.4019	11.5499	10.2505	3.4746		0.35135	11.9796
4.7657	15.4336	11.7162	20.27	20.2932	15.5373	12.0138	9.6582	11.8072	11.2536	10.1312	18.8254	14.5622	11.8576	14.2197	7.2458	15.0229	5.2167	5.3945		0.360364	12.8033
4.8848	19.9527	9.9232	12.724	19.8683	7.8223	7.6969	10.6028	9.1244	7.7473	8.5616	16.9164	6.3902	15.582	6.1611	9.9005	13.1908	7.3373	4.4382		0.369369	10.7744
5.0039	15.6332	11.5399	14.449	15.7171	9.0297	12.8097	7.9353	7.1336	10.2538	9.3934	13.0435	9.2896	12.6925	10.566	9.0168	11.9844	4.521	5.1251		0.378375	10.563
5.1231	12.224	10.616	15.219	12.695	11.6437	12.6221	12.606	10.9766	11.1855	5.6188	11.4253	7.6013	12.0872	7.9502	11.4404	8.5346	6.5696	5.1064		0.387389	10.3401
5.2422	12.3743	13.7375	12.568	17.944	8.562	9.0542	11.5422	8.263	6.2257	8.9241	14.0348	9.8418	10.5806	10.7795	6.6101	13.3345	4.8806	2.2885		0.396395	10.0859
5.3614	14.1122	10.4852	9.918	15.7237	15.0211	12.1262	10.1386	8.347	8.2097	6.3262	13.6525	11.7005	13.2236	10.0194	8.9895	8.8293	6.6771	2.6502		0.405408	10.3417
5.4805	11.4299	8.536	22.344	10.5358	9.7719	7.5263	6.5255	5.7268	10.3897	4.1296	13.7224	13.8419	9.7597	9.2842	7.2737	6.1798	5.1538	5.0896		0.414414	9.29003
5.5996	6.6967	8.7237	12.418	9.1759	9.4296	10.3018	7.4514	7.8667	8.2669	6.0195	15.8226	7.2903	11.8896	8.2588	8.3619	4.5445	5.6674	5.2451		0.42342	8.52391
5.7188	6.5138	9.8887	19.667	6.3992	7.5625	8.686	9.2632	4.7712	8.1863	8.2274	14.3614	11.9695	8.4095	8.2952	7.7991	9.7062	8.2354	2.8151		0.432433	8.93093
5.8379	4.5732	9.41	21.663	6.2733	9.2246	9.6135	6.9089	5.208	5.1397	5.5893	20.9699	10.7316	10.0123	5.6899	10.1534	10.2711	7.176	3.9256		0.441439	9.02963
5.9571	8.409	8.4598	21.311	11.6348	8.2046	12.272	3.804	5.3828	7.312	8.3818	11.5515	12.1292	9.0437	8.58	6.4269	9.7043	7.3722	2.8201		0.450453	9.04443
6.0762	5.8791	9.5222	13.098	8.1076	10.0287	10.7454	5.7652	5.927	2.9856	5.6167	11.3561	11.1434	7.2033	6.1446	8.4222	10.3015	7.2387	5.8345		0.459458	8.07332
6.1953	4.087	3.3703	7.306	9.0695	9.015	13.3902	3.3252	6.1758	6.8805	5.7567	10.4688	8.5083	7.628	9.3069	6.1775	7.8109	7.4488	3.9929		0.468464	7.20657
6.3145	3.9095	8.307	5.702	8.3118	11.4742	8.3411	6.6359	6.7065	5.7728	7.7971	12.4325	7.4543	4.0375	5.3356	7.8334	6.7929	5.8667	1.8094		0.477478	6.91779
6.4336	4.3694	8.7722	9.8	5.5067	7.1561	8.9351	3.5392	8.7485	3.8218	5.9545	8.4594	6.0357	8.2846	10.2771	7.8469	11.9139	6.3721	3.1958		0.486484	7.16606
6.5528	5.4438	3.735	8.933	4.764	9.3665	10.8359	4.3015	6.0438	4.6151	7.8657	15.051	7.8402	4.3344	9.6291	4.298	17.6055	3.5303	2.7763		0.495497	7.27606
6.6719	4.4877	7.858	10.124	4.1398	8.6564	9.1771	4.5131	4.8668	7.7079	5.0539	11.8429	8.9471	4.7608	10.1689	4.2909	6.136	6.9898	5.8053		0.504503	6.97369
6.7911	2.7447	6.2585	9.045	7.2371	6.4511	8.6733	6.5839	4.4373	7.9268	5.2608	7.9154	6.4781	8.7926	5.9167	5.8489	9.001	7.5101	2.4162		0.513516	6.58319
6.9102	3.6869	6.1888	6.699	7.1953	8.2687	8.0085	10.0426	4.8986	4.9969	8.3369	9.8624	7.2489	9.2193	7.0487	3.9552	4.9392	8.0277	3.2628		0.522522	6.77147
7.0293	4.6342	7.9912	6.909	4.1171	9.6214	11.3777	6.3785	5.0029	5.7355	5.6264	12.412	9.0736	5.5807	6.639	8.0763	5.455	9.7699	2.8801		0.531528	7.07114
7.1485	3.8985	8.4368	6.16	5.248	8.0316	5.7243	7.2976	4.8184	5.9545	6.9039	13.8863	10.1836	6.1134	7.0661	5.8177	6.989	3.5684	2.9831		0.540542	6.61562
7.2676	5.1069	3.4464	5.365	5.3715	7.382	6.2503	5.54	4.1582	4.7327	6.9557	6.7238	6.0037	3.6638	6.2478	6.6499	7.4508	4.1391	4.6851		0.549547	5.54848
7.3868	3.6478	4.1408	6.192	4.6718	10.3479	10.426	2.9097	5.7862	6.1437	5.1162	8.4962	8.355	6.7208	7.8733	4.9948	11.6475	5.4462	2.6874		0.558561	6.42241
7.5059	3.9314	12.1669	3.99	6.6382	11.2956	7.6672	4.4236	5.2852	6.5266	7.0369	9.1656	6.2127	7.4945	8.2056	5.4264	6.6564	3.2101	3.6052		0.567567	6.60767
7.625	6.0239	11.7561	4.539	3.2646	11.2891	9.0634	7.1692	8.8578	6.4109	6.0498	7.395	5.0082	5.4688	6.2597	4.78	10.6594	5.4214	4.4849		0.576573	6.8834
7.7442	2.9348	5.6386	4.595	8.0539	16.901	7.0487	3.6321	6.1925	8.2866	4.8887	3.535	7.6238	5.9107	4.0441	3.9882	11.4509	2.9218	3.0473		0.585586	6.14965
7.8633	2.1748	6.093	3.816	2.7723	15.8774	11.3666	4.9452	7.9396	9.8317	9.9343	5.296	6.3462	4.758	4.4983	4.2503	10.8807	6.7849	4.8037		0.594592	6.79828
7.9825	3.6291	6.0957	3.912	3.6054	9.6255	7.8654	5.2038	9.6916	5.2037	6.0001	8.425	6.3607	8.7766	3.9779	6.255	11.0236	5.0468	4.0238		0.603605	6.37343
8.1016	2.0443	6.4953	3.751	3.5341	12.6982	11.4774	9.1681	5.6823	4.8447	6.9086	6.0793	9.7496	5.0736	6.6321	7.71	11.4767	7.9247	5.1159		0.612611	7.02033
8.2207	2.8026	7.2718	3.324	3.7689	4.9241	5.5459	4.3016	4.8323	5.914	8.3108	3.8544	8.2908	5.7715	3.5828	6.9578	7.238	4.023	4.5677		0.621617	5.29344
8.3399	3.2243	6.5669	3.828	3.6708	6.029	8.8554	4.8596	7.5198	4.6494	11.1996	6.1697	4.9123	6.7673	6.8761	6.6082	8.0704	4.3254	2.3928		0.630631	5.91806
8.459	1.9391	6.1454	3.206	4.213	5.894	8.6865	3.2674	5.5958	6.6284	6.0723	9.1738	5.7435	4.0649	6.6705	6.6757	5.2466	4.0002	2.5222		0.639636	5.31918
8.5782	2.3094	7.996	4.769	4.2979	3.7487	6.947	6.7023	8.5796	4.4071	8.4024	5.0026	5.2302	2.7321	5.2945	7.7121	7.9277	3.724	3.4754		0.64865	5.51433
8.6973	2.8439	11.5737	6.26	2.9503	3.9826	8.2921	3.9295	5.1843	2.7775	7.7105	5.261	8.2165	2.6031	5.8197	7.2225	5.954	4.9484	2.482		0.657656	5.44509
8.8165	3.1894	10.5512	4.813	5.2536	7.3553	7.8171	4.2523	4.5089	4.6934	5.1519	10.0695	5.2443	7.1358	7.9165	3.9899	8.1457	4.4746	5.783		0.666669	6.1303
8.9356	2.5907	6.2334	3.046	2.5277	3.5587	6.5193	4.5649	6.503	10.2369	5.679	3.8481	5.1809	3.398	5.9446	6.0073	4.7124	3.1692	5.0934		0.675675	4.93408
9.0547	2.9857	6.7306	3.133	3.5468	7.1795	7.7907	2.2952	5.5375	5.6755	6.0208	3.5209	6.091	3.0403	6.9576	4.302	6.0267	3.3832	2.2099		0.684681	4.80149
9.1739	2.5975	7.3441	2.555	3.343	5.0782	7.4858	3.9352	7.629	2.988	5.0016	6.4872	5.931	6.5241	6.7036	7.3557	4.9215	3.4219	2.9402		0.693694	5.12459
9.293	2.338	7.2021	3.995	2.6703	7.5478	6.3274	3.8747	6.7582	5.0218	6.1879	6.6959	4.5947	3.0154	5.4902	4.2248	4.8473	4.212	3.058		0.7027	4.89231
9.4122	3.9227	3.7939	5.376	2.0133	9.1749	7.1178	2.6174	4.2883	8.8831	4.3268	6.7683	4.3505	3.6776	9.9115	7.6532	4.0537	2.8652	4.8937		0.711714	5.31599
9.5313	2.7673	3.9938	4.046	3.0907	6.4696	7.2216	3.0287	7.2465	2.6125	5.8231	4.0513	4.9266	4.8001	7.3945	8.1572	5.0732	2.7392	2.1407		0.72072	4.75459
9.6504	3.3616	6.4865	2.877	4.3219	8.7651	10.2078	2.1027	3.718	4.8966	4.6418	8.4404	6.8845	2.188	11.4732	5.8334	2.6614	2.2371	2.443		0.729725	5.19667
9.7696	5.7477	4.533	6.242	4.421	7.0736	4.9801	4.2391	4.3281	7.3193	3.5264	6.3734	2.5988	5.7244	4.5838	8.5283	2.5088	3.4461	3.2898		0.738739	4.97021
9.8887	3.713	3.463	5.023	2.6542	7.8521	4.4086	5.0569	4.5082	6.1925	6.9181	8.5214	3.74	3.3749	7.001	7.1165	3.5502	2.4529	3.82		0.747745	4.96481
10.0079	4.3127	5.3845	5.664	3.6919	11.756	3.4911	3.9219	4.8181	3.0103	7.8193	4.5745	4.388	5.7598	5.9562	7.6491	3.1878	3.4774	3.1678		0.756758	5.1128
10.127	3.7452	3.3517	6.249	4.1538	13.8486	4.908	6.2113	7.5058	5.3766	6.1938	6.0015	3.7383	4.7976	9.3499	6.3885	2.865	3.296	4.3742		0.765764	5.68638
10.2462	4.2449	6.5725	3.396	4.1085	21.4023	3.7339	6.3781	9.5872	3.453	4.5427	6.265	3.0297	4.1052	4.2388	6.1992	3.3608	2.1499	2.9478		0.774777	5.53975
10.3653	3.5419	2.9756	5.153	4.2431	14.96	9.7345	5.9235	8.1055	4.6173	4.6341	8.0766	2.5897	3.2837	7.4562	6.347	2.8176	3.4479	3.2532		0.783783	5.62002
10.4844	2.5007	7.6988	5.236	4.2998	7.1898	4.0971	8.8027	7.272	3.8078	4.0023	3.8656	4.6352	3.3301	8.3845	5.887	2.8924	4.3183	3.3516		0.792789	5.08732
10.6036	2.8131	9.4885	8.241	3.9888	8.3144	4.0509	3.8461	6.3084	7.4895	3.6884	3.2985	2.4318	3.4546	7.7524	5.1241	2.9239	3.266	2.254		0.801803	4.92969
10.7227	3.9746	7.3266	7.14	3.2123	9.4552	7.2469	4.8263	5.1135	4.3035	6.6277	5.2972	3.3744	4.2076	5.7692	6.2399	2.0009	2.6902	2.2189		0.810809	5.05694
10.8419	2.5277	7.008	4.48	6.0354	12.4521	7.126	6.5502	4.4023	7.1781	4.4017	5.5444	3.4103	3.9075	8.6444	5.9598	3.8966	4.3615	3.6062		0.819822	5.63846
10.961	4.0677	7.5625	6.329	4.2674	11.502	8.9226	4.4249	2.6586	5.2535	5.0145	5.5839	4.5697	4.0886	8.7874	8.5501	2.7461	3.3298	2.7756		0.828828	5.57966
11.0801	4.6022	6.2451	8.998	5.5527	11.4709	8.0062	5.7477	6.1462	4.1134	6.3546	6.195	4.3636	4.2538	7.5053	4.6419	2.8484	3.7639	1.9256		0.837834	5.70747
11.1993	3.3263	7.1988	7.83	3.2145	8.3822	6.6019	4.3921	5.5724	4.7425	4.9681	5.661	4.3493	5.944	7.4921	4.1119	4.4832	2.3993	2.4323		0.846847	5.17233
11.3184	2.3586	6.3036	9.557	4.5369	5.9037	3.1796	6.5818	7.4497	5.8601	7.5682	7.8667	4.8902	3.6496	4.0625	4.047	2.5785	2.959	2.4003		0.855853	5.09739
11.4376	2.879	5.4871	8.446	4.8738	6.4129	9.3451	5.1977	5.5133	7.5479	3.7001	2.665	3.2062	3.285	4.0196	6.0578	3.6651	3.4004	1.9169		0.864866	4.86772
11.5567	3.2217	5.8488	9.794	4.0048	7.4226	11.1421	5.5189	3.686	5.5717	6.4464	5.3762	5.9884	1.9728	6.3474	4.3001	5.5996	3.5647	2.1454		0.873872	5.44176
11.6758	5.3846	4.3076	11.982	3.1377	10.1811	5.4239	2.8405	8.0853	5.5001	4.2565	3.6691	3.1393	3.1169	5.7834	3.6177	3.8832	2.3598	2.0237		0.882878	4.92736
11.795	3.2265	2.9125	9.876	5.9724	7.6823	5.377	5.2375	4.6315	3.5333	5.3164	3.4085	3.606	3.9301	4.7102	3.068	4.3334	2.9033	3.8656		0.891892	4.64392
11.9141	6.7908	4.1903	13.998	5.6871	8.7659	9.3751	5.6916	5.6603	2.5573	5.7555	2.0401	3.2938	3.0617	3.8545	4.2161	3.9475	2.8292	2.4598		0.900898	5.23192
12.0333	4.7042	3.9428	9.328	4.9772	8.3693	5.4498	5.5141	3.4433	4.6495	9.6898	4.3049	4.162	5.1659	7.2664	4.5982	4.4052	4.8763	2.91		0.909911	5.43094
12.1524	4.2557	2.5677	5.811	4.2576	5.7292	6.2887	6.559	3.8293	2.8551	6.2753	3.6148	4.2101	5.47	4.4961	2.0364	4.2972	4.5828	2.7945		0.918917	4.44058
12.2716	2.2348	3.3622	3.786	7.1147	3.6915	5.293	4.3696	4.3585	5.8628	7.8852	3.9368	3.1951	5.555	4.0767	1.9691	3.9105	2.2566	2.6391		0.92793	4.19429
12.3907	2.4772	5.1506	4.243	7.9206	7.4152	6.298	4.5351	4.1325	3.4628	4.0677	5.3576	4.3147	4.1091	5.8594	3.2943	2.7617	1.891	2.1312		0.936936	4.41232
12.5098	2.2672	7.1206	5.698	4.759	6.4764	5.5171	9.1051	3.0801	6.4806	3.3814	5.0488	6.1775	4.6488	2.8969	5.3635	6.9583	3.9933	2.7588		0.945942	5.09619
12.629	2.7474	4.8549	4.725	6.7775	6.5788	6.6296	7.9447	4.2153	4.2995	6.6016	4.0601	2.3591	6.8156	4.8099	5.0132	2.364	3.1816	4.0784		0.954955	4.89201
12.7481	1.8201	2.2704	3.06	8.7765	3.7911	8.2583	6.1885	6.4164	4.8863	2.8714	4.5553	1.9555	3.3981	3.2574	4.5419	3.0195	2.7349	3.2567		0.963961	4.16991
12.8673	2.0945	2.7483	2.144	13.2564	2.7243	3.5809	4.6177	2.4082	3.0407	5.1481	4.9981	3.7705	7.7165	3.7992	4.5257	3.6413	3.6215	2.4163		0.972975	4.23623
12.9864	2.2971	2.2211	3.119	10.7708	5.952	4.5496	3.4865	5.0906	4.4762	6.321	7.2157	3.8707	7.4931	4.1124	4.3191	2.0588	5.2184	3.2618		0.981981	4.76855
13.1055	2.7394	2.1627	2.589	4.8543	4.6666	2.686	4.3228	3.0748	4.1268	4.2813	4.1269	3.3887	7.5283	3.0444	3.4763	2.1338	2.0929	4.0567		0.990987	3.63065
13.2247	2.7413	2.1091	3.354	9.3246	2.336	2.4556	3.732	4.5843	4.649	4.1985	4.0525	2.2698	4.4584	3.4957	3.212	2.7348	2.6963	5.0983		1	3.75012

## Sheet: Image31
X0	Y0	Y1	Y2	Y3	Y4	Y5	Y6	Y7	Y8	Y9	Y10	Y11	Y12	Y13	Y14	Y15	Y16	Y17	Y18	Y19	Y20	Y21	Y22	Y23	Y24	Y25	Y26	Y27		Ap-Basal	Avg intensity
0	56.5574	78.9111	71.216	50.4027	49.465	35.0349	51.1131	60.0152	54.2208	55.115	52.9614	50.4016	164.247	89.199	87.636	76.6154	54.2243	57.6832	49.2479	52.9965	55.7283	32.9267	35.6566	29.8225	33.7103	29.4549	35.7775	37.8379		0	56.7206
0.11914	62.1062	73.2457	83.865	64.103	40.0792	35.7578	43.0043	53.2861	62.2477	53.386	39.8059	44.296	170.124	123.658	80.56	76.2478	56.05	62.0084	43.5696	40.6915	60.8723	33.9138	39.3537	31.6279	34.2778	33.0846	42.1988	39.5966		0.0120481	57.9649
0.23828	53.5356	66.6898	104.07	60.5725	49.5155	42.6069	46.9257	68.0662	58.3341	51.2044	41.0893	44.2252	173.617	144.125	88.128	77.0294	57.6534	72.2225	64.5434	38.7736	58.7623	37.1486	41.1433	28.4917	38.778	29.9782	43.7025	36.218		0.0240961	61.3268
0.35742	52.9229	63.7164	74.628	58.2857	67.2527	49.8876	63.3526	59.0071	65.1394	39.1228	46.4961	52.0686	163.759	173.508	107.141	53.9245	58.0814	65.8184	72.4339	41.4818	73.26	35.3751	55.9885	32.2519	45.2629	36.1336	42.2163	37.2092		0.0361442	63.7759
0.47657	50.3008	73.876	90.213	55.7519	78.0568	58.2666	69.4199	63.6449	59.99	49.1749	41.3169	51.1166	163.04	178.081	113.189	60.1147	64.0432	86.8561	73.1581	45.9304	69.4444	44.9426	69.2559	35.3565	48.1818	42.7017	47.5537	49.4824		0.0481932	69.0164
0.59571	44.4862	78.9052	74.06	57.3245	80.3584	50.3827	56.6923	68.2947	50.1449	50.8862	31.5435	57.2486	159.615	170.291	143.526	75.2635	55.8178	89.1772	74.5228	51.4951	63.9853	46.6664	73.7109	31.219	48.0591	49.6104	52.5415	66.8002		0.0602413	69.7367
0.71485	47.7353	67.6622	78.679	63.5258	68.3794	63.6559	60.4292	75.2835	64.0414	54.9664	35.3125	59.6104	143.953	181.835	131.643	79.7041	70.318	90.5382	68.0025	44.9472	72.7994	50.1752	70.5851	38.5794	44.1882	37.0383	58.1513	51.7703		0.0722894	70.4825
0.83399	42.755	73.6535	65.63	65.8999	65.9659	69.0751	48.2521	60.1631	72.485	51.2159	25.0481	62.9871	151.14	165.209	121.58	85.0868	62.2879	100.203	73.0513	66.5745	61.7504	37.4947	85.2903	40.311	42.5487	40.343	45.9491	69.2967		0.0843374	69.6874
0.95313	53.8008	65.4131	52.001	65.4264	64.8909	44.1339	50.6968	64.5671	69.5983	43.4649	32.4033	57.3083	162.116	169.811	130.348	67.5944	54.2931	85.0939	69.143	70.6018	60.8785	33.1557	77.168	40.3301	52.8351	40.1008	50.877	53.2589		0.0963855	67.1896
1.07227	53.2699	83.9445	64.106	52.6553	60.9082	45.915	47.9661	73.5274	72.9108	45.1203	26.824	48.914	145.023	174.083	136.095	58.1648	61.3207	82.6584	81.9195	65.5484	54.6655	43.7142	79.8746	47.1777	57.5378	39.1029	51.6424	64.1038		0.108434	68.5248
1.19141	59.7522	78.7989	63.119	45.6712	57.0723	46.2127	65.8213	79.5801	64.1904	27.6328	25.4213	44.8408	133.917	173.322	150.353	59.505	48.6841	87.7281	84.2722	68.839	48.5178	46.298	70.758	48.0658	59.7709	49.992	55.5956	62.2354		0.120482	68.0702
1.31055	60.2133	71.4365	50.006	60.9536	56.1872	51.2178	51.9465	61.6251	77.9088	38.4278	16.2142	44.3014	131.935	176.826	156.882	49.5796	51.0717	85.6198	83.4047	64.0414	50.0021	29.6621	75.5976	43.5124	53.7619	46.6611	49.253	51.4133		0.13253	65.7022
1.4297	63.8458	67.0633	58.994	57.9924	50.0223	54.4088	48.1296	65.7305	60.3913	38.9176	21.1616	45.2279	127.9	179.007	158.405	52.3114	57.4665	84.7071	92.6914	76.4158	53.3878	26.2607	71.7855	43.7809	44.409	41.8416	56.1394	53.8641		0.144579	66.1521
1.54884	57.917	70.9995	75.526	70.2363	52.9122	54.504	54.2852	66.1554	66.3768	21.6129	26.8016	46.2091	156.276	163.959	139.353	61.8587	58.3945	75.7587	102.524	71.1805	49.9619	27.8793	70.5207	40.1147	40.6287	50.3842	54.8517	60.0554		0.156627	67.4013
1.66798	57.2278	61.9548	61.447	81.5898	54.4477	54.3018	63.339	56.8297	56.3696	27.1217	23.2622	48.461	150.979	168.032	154.143	64.021	52.0667	65.1036	85.8153	84.7469	54.4687	27.0638	61.9185	47.6006	49.901	50.3526	56.0479	52.855		0.168675	66.8381
1.78712	35.5821	64.6574	70.571	74.5275	58.3607	36.9841	55.0428	64.1183	53.4379	26.9354	20.6069	43.9199	165.982	147.957	164.29	61.0025	47.9553	69.7626	98.8985	70.6816	52.7774	36.4316	75.3394	52.2471	47.0862	44.0204	56.7204	59.4981		0.180723	66.2641
1.90626	25.2952	50.6933	56.051	67.15	54.5005	30.5019	53.9172	57.0156	68.3416	31.9653	31.9905	39.3408	167.741	145.946	170.444	80.3527	49.566	69.1631	93.1049	83.4289	50.2705	27.4051	77.3248	64.4688	49.9572	28.1021	51.3546	55.093		0.192771	65.3745
2.0254	22.8966	50.2293	60.962	60.462	47.0185	39.1496	53.2897	52.9114	75.3431	29.9709	30.5934	38.4346	159.136	146.133	196.63	87.6064	53.1764	69.0528	94.7522	93.323	52.7839	33.9296	71.6218	49.0581	48.4829	24.9122	48.1186	46.1116		0.204819	65.5746
2.14454	16.6888	54.4358	56.603	72.0582	76.2208	40.3632	41.2843	67.8895	71.0622	27.9007	31.7925	39.7665	152.365	167.128	190.488	95.9668	49.1898	74.0747	82.354	88.6001	42.1523	30.6895	88.0894	57.224	49.0935	24.2217	57.7592	47.3976		0.216867	67.6021
2.26368	25.7534	44.9686	51.849	52.0074	81.0246	35.6269	44.5287	57.9385	75.1374	23.136	27.2696	48.1288	158.954	150.358	190.819	111.619	60.0231	71.2333	87.8642	84.5146	46.1519	26.5205	100.669	63.3227	60.8201	14.8534	56.9653	48.7498		0.228915	67.886
2.38283	26.1136	32.5637	42.286	51.4581	76.6396	41.5745	40.9132	59.0519	67.1861	20.3964	21.9532	49.0031	143.287	147.447	194.758	113.802	51.7417	80.4555	88.833	79.3811	39.5886	24.8274	86.5154	52.218	69.9358	20.089	59.181	43.3019		0.240964	65.1608
2.50197	24.5175	41.2195	43.914	68.3731	71.2266	49.1957	27.7352	46.1283	59.991	32.6434	22.0386	57.8814	129.661	155.168	180.917	105.485	44.0295	74.5415	92.1316	76.159	45.0676	19.2117	66.8693	56.3401	67.877	24.2841	47.505	45.8873		0.253012	63.4285
2.62111	25.0673	35.7827	47.344	50.7209	77.2038	40.1339	39.3624	44.9642	66.4217	34.9874	34.3443	43.7686	126.278	146.493	184.28	107.629	53.8069	57.5492	75.6187	64.4256	37.4541	30.947	55.185	65.9063	58.8554	26.8348	45.6927	49.0928		0.26506	61.6482
2.74025	23.7112	24.4732	36.854	48.8556	67.8744	43.338	26.2501	55.2799	66.998	27.374	31.4822	52.455	111.067	171.949	177.022	74.6279	48.9006	56.1289	88.5383	64.8527	33.7926	24.9083	58.5725	88.3323	56.2877	34.4862	50.529	53.7959		0.277108	60.6692
2.85939	27.8288	27.7963	39.788	48.779	77.6923	35.6157	20.0087	47.9919	65.2922	30.1108	40.8951	63.0419	97.158	172.806	191.874	94.5074	52.5782	65.055	87.8023	68.1555	38.6495	26.5729	58.7293	81.3084	58.2997	29.7753	41.2572	71.7918		0.289156	62.8986
2.97853	22.9365	21.8883	41.314	61.3167	82.8254	26.5745	18.9818	45.3612	63.5876	27.8819	46.999	49.779	64.991	164.708	177.607	97.0762	42.0945	61.3973	85.9733	63.1682	36.6308	30.7168	52.3355	68.827	48.1287	22.1703	48.326	69.9032		0.301205	58.6964
3.09767	23.2753	28.35	36.506	57.729	56.5029	23.5237	17.6394	35.6843	41.735	30.6025	38.5123	43.225	74.841	164.695	159.557	93.4491	40.2271	64.5461	85.6311	56.9128	31.6731	31.6363	40.88	73.1018	44.4046	25.8878	46.3489	72.4098		0.313253	54.9817
3.21681	18.9011	26.4249	35.386	57.6003	51.7597	22.5791	17.5055	30.9124	60.0253	32.7184	38.4947	54.3972	71.669	153.781	155.049	100.499	50.9679	63.2252	79.0268	47.4518	26.8481	25.7896	33.9405	60.1163	56.4581	25.4108	50.6769	50.4217		0.325301	53.5013
3.33596	18.14	18.9141	34.997	54.4706	57.6532	22.2537	18.2157	28.1979	61.2268	30.4814	49.6568	49.2403	66.871	135.108	144.165	107.899	37.4632	69.0079	87.0681	43.3746	40.2162	21.6088	39.2414	44.5777	53.9519	32.5007	59.8121	54.0132		0.33735	52.8688
3.4551	23.7363	26.0156	25.755	56.25	48.9968	22.1697	13.4429	26.4205	68.0951	32.1022	59.5957	46.9927	69.505	134.563	115.958	100.242	36.63	62.1377	73.2896	51.9425	33.6466	20.9513	43.4131	50.1251	46.0431	31.2956	48.1194	59.5568		0.349398	50.964
3.57424	25.4359	18.8176	25.916	56.5997	45.2798	18.2745	12.5875	27.3538	56.5359	37.2405	55.9032	58.6826	47.681	126.389	106.814	126.332	27.2134	58.7569	86.7282	38.0955	21.1658	25.9257	38.8404	53.3773	37.8554	35.9482	42.0979	49.7841		0.361446	48.6297
3.69338	28.8256	16.327	19.463	63.6606	39.4755	11.3754	21.8555	26.9978	57.865	34.1942	57.8421	62.1676	45.916	112.948	99.107	107.697	30.2496	45.8394	78.2018	34.8523	28.148	25.3492	37.2336	59.8652	42.1735	34.1399	49.8463	44.3264		0.373494	46.9979
3.81252	25.1613	15.977	18.853	58.5621	41.5637	10.5065	22.8125	21.9859	47.2095	57.5014	42.2073	66.525	35.009	100.786	98.321	89.2691	43.6003	38.0816	66.2047	28.8927	21.0268	24.4433	38.1531	39.3394	33.2884	32.0949	37.4922	32.289		0.385542	42.3985
3.93166	19.2548	14.5575	18.187	54.3667	49.5477	8.0501	12.6585	22.1729	40.8976	53.319	45.1253	60.3291	34.701	80.552	77.379	72.3856	36.8621	46.0748	51.2156	30.5542	21.7923	21.82	35.4752	32.9839	49.9945	34.4389	39.0479	24.0549		0.39759	38.8499
4.0508	16.3405	17.8162	20.736	58.0099	48.1987	12.7343	23.1568	23.3709	36.3522	51.8706	39.9172	68.4727	31.768	78.412	69.618	62.4703	33.0166	43.4136	45.6601	25.014	16.8908	18.9778	37.112	32.8116	47.1801	28.2698	37.5272	27.3042		0.409638	37.5865
4.16994	15.9608	20.0845	15.273	47.6368	40.1161	11.4761	17.0555	26.1823	48.37	49.2053	37.3402	52.7849	31.064	65.301	63.001	71.1377	28.916	45.0802	39.5529	32.1129	14.2612	12.9582	40.0208	25.9533	49.6643	18.2359	37.4793	26.7343		0.421686	35.1057
4.28909	9.436	17.8549	15.164	50.9231	26.5154	10.0595	15.2969	24.6292	65.7827	55.3069	43.1972	57.5719	22.427	54.701	69.962	87.9409	32.2757	32.9154	46.0736	30.2368	17.4539	20.4898	34.5232	30.0953	30.5471	24.2242	33.1246	38.1787		0.433735	35.6038
4.40823	8.5528	19.9061	18.512	39.9777	34.7146	10.4607	11.9679	31.213	57.1414	49.3724	49.9891	43.9586	24.806	58.017	64.973	95.86	21.6081	43.3432	30.2222	20.979	17.7486	19.6204	28.1462	37.2315	31.7094	28.5226	28.2084	30.7667		0.445783	34.1975
4.52737	11.8535	15.1785	21.115	41.9161	23.5086	4.9236	14.3205	42.9002	54.2995	44.1726	60.4151	50.0301	27.548	54.85	56.628	92.1566	24.6068	37.5964	32.778	18.9749	25.3981	12.0269	29.7988	34.7435	32.0423	32.4603	25.3689	39.485		0.457831	34.3249
4.64651	9.744	14.3091	15.538	43.7359	29.4526	4.4374	11.6039	39.2997	53.862	53.6407	88.1959	51.6096	16.571	40.219	45.613	89.8694	23.708	32.4706	26.2803	19.4577	19.9859	7.8803	24.1807	36.1904	21.8471	26.8876	30.2991	45.506		0.469879	32.9427
4.76565	10.2264	10.4527	15.403	40.866	22.7208	9.4513	6.5533	33.8432	69.265	54.3203	92.5439	52.3245	11.92	25.671	52.144	83.2957	32.2228	34.7417	21.6719	24.6708	19.4185	8.2211	25.5442	42.6886	19.5082	25.8477	35.4867	46.2658		0.481927	33.1175
4.88479	12.1704	10.3262	11.253	45.3001	17.1932	7.6864	7.9132	33.93	46.6845	54.5979	88.4373	62.8946	12.41	24.001	58.759	77.2261	43.0059	29.8045	20.859	15.3402	17.1579	10.4595	24.8662	26.7688	19.3297	43.1654	35.3274	50.2182		0.493975	32.3959
5.00393	10.336	13.5837	10.852	44.1565	16.6965	8.0273	8.0465	24.4336	55.5704	59.0195	51.6868	75.0365	15.016	26.048	53.652	87.6367	31.6859	35.9991	20.9368	15.8494	15.071	14.0341	23.5213	20.6087	13.503	35.1757	32.1319	39.2349		0.506024	30.6268
5.12308	11.1408	17.1171	17.141	41.7771	13.2986	7.317	7.2332	29.2755	57.1856	48.4195	42.2242	80.4025	9.932	19.872	48.448	68.5633	25.1441	24.8198	28.7056	16.9745	25.6335	13.2687	31.9484	26.3629	12.3051	25.3151	23.4924	34.478		0.518073	28.8498
5.24222	12.5846	15.6825	17.401	51.0496	15.9167	8.3104	5.7054	30.2085	45.7157	37.3359	43.4899	65.4015	17.289	19.91	44.429	53.6394	22.3117	20.5826	15.6905	16.2085	20.3562	12.2616	39.6228	18.5502	9.7643	32.6673	31.9143	32.1913		0.530121	27.0068
5.36136	12.7496	17.8558	17.556	57.1626	20.7144	7.3018	9.4758	22.7491	49.5324	36.857	51.4725	70.5285	14.192	13.845	43.074	67.6792	30.3408	28.6314	20.6463	14.8026	18.6793	16.9659	28.7089	12.4538	8.6866	31.1772	27.887	43.8735		0.542169	28.4143
5.4805	12.5179	14.1171	21.282	49.6551	20.5143	4.5073	8.3904	21.5038	44.6573	40.8634	66.3012	61.7555	17.182	23.084	35.58	61.9048	31.7981	34.3323	20.7391	13.3117	17.2828	18.376	28.3518	15.8592	11.9574	25.9242	35.5555	43.3266		0.554217	28.594
5.59964	6.6793	16.4622	17.333	46.656	18.8216	5.6416	8.4789	36.3774	37.1909	37.9609	70.2566	62.6558	13.656	14.712	36.868	58.9062	41.9779	26.5381	17.2199	13.8104	17.6053	20.5407	24.2542	15.4669	9.3172	25.7381	25.8291	37.0329		0.566265	27.2853
5.71878	16.0579	13.8963	10.732	48.8522	18.9553	8.6122	8.1965	37.0591	38.5801	30.731	71.6218	39.1785	20.46	21.182	47.889	71.3503	41.0636	25.4436	12.219	13.8358	24.4297	17.0565	28.9288	16.0069	6.7811	21.1772	23.4747	44.1373		0.578313	27.7824
5.83792	12.1834	15.933	12.187	53.1054	25.943	7.976	8.5592	31.2062	32.0735	19.8108	60.0828	35.2293	16.015	12.757	44.396	67.9917	31.6619	23.6429	18.7	10.7904	13.4875	19.9123	26.6539	14.1434	6.0155	16.5247	26.452	42.1501		0.590361	25.1994
5.95706	12.8093	13.1894	19.709	45.4753	25.9344	6.3858	4.1703	31.2424	40.7125	23.0609	57.2559	32.9367	17.031	5.537	56.983	69.7359	36.3273	24.9428	19.23	8.7169	12.8033	20.1592	29.3253	15.4711	6.2024	11.5277	23.2915	38.9739		0.602409	25.3264
6.07621	11.4153	13.8126	17.977	29.8966	29.3379	8.4234	5.328	42.745	38.7625	18.9185	37.0035	38.6586	15.651	13.242	46.043	68.4453	42.3544	18.5779	27.0896	3.5536	21.1719	21.2464	22.1376	18.0833	7.4122	13.0796	29.57	34.027		0.614458	24.7844
6.19535	16.0858	13.9642	14.583	32.6541	30.0714	4.7064	4.4928	37.0428	48.0089	17.1519	37.7366	41.4238	14.465	15.853	59.996	55.7159	51.7053	21.0117	23.4845	4.9822	27.5763	20.6095	30.9604	11.7268	6.7522	8.2496	26.9233	32.177		0.626506	25.3611
6.31449	17.0408	9.7852	15.359	41.0082	28.1846	2.9577	3.1281	34.2281	40.0505	21.3907	33.5704	39.1823	16.119	12.276	60.578	71.3151	44.1253	26.1544	19.6659	4.9643	23.2664	25.7166	29.2609	8.4565	5.5686	8.6836	25.9187	32.228		0.638554	25.0065
6.43363	17.5683	11.1304	10.621	33.2681	23.8178	3.7835	6.1327	24.0362	36.6613	23.6101	39.2452	43.4528	17.847	8.054	67.302	87.9105	43.1853	18.5684	11.4019	5.8032	21.1244	27.3849	32.2032	10.8963	6.5266	8.1419	18.1625	33.6383		0.650602	24.6956
6.55277	19.5886	13.1753	13.679	38.8571	19.3679	4.76	6.5416	27.7665	40.8682	32.6481	59.6226	48.9275	18.993	12.949	69.03	114.905	45.7456	32.6554	17.6643	6.1201	22.2145	21.7021	36.5271	5.3932	6.1283	7.3232	12.9999	36.6695		0.66265	28.3151
6.67191	20.5089	11.2754	14.587	29.0917	30.5991	4.2583	6.1759	31.7372	40.827	34.3509	43.0154	68.0722	35.125	8.109	67.85	120.697	41.2293	24.6108	21.0713	6.0543	22.0684	17.211	25.649	10.063	7.234	7.4758	11.3347	19.982		0.674698	27.8666
6.79105	19.7191	8.4531	7.757	32.4268	42.8227	4.2264	8.4593	30.0317	34.2834	30.0409	31.315	80.0212	53.298	9.527	81.57	120.748	53.9948	28.2315	16.0859	5.4274	17.6325	18.2407	29.2571	8.0017	7.1362	5.8892	16.2356	32.7376		0.686746	29.7703
6.91019	13.0046	14.4051	8.282	43.3582	38.5983	5.9347	4.0427	30.2789	41.7795	30.8013	34.0559	88.4795	61.77	6.397	85.36	115.972	49.5635	33.4239	15.1902	4.1732	18.9399	19.3717	26.8023	7.812	5.8524	6.5099	18.0259	27.5678		0.698794	30.5626
7.02934	15.7577	12.1966	13.842	27.6762	31.8806	5.7155	6.8011	32.6943	54.2483	23.2979	31.1998	83.4782	54.055	8.541	72.24	114.88	41.273	34.9206	12.0795	3.8262	19.8952	20.259	25.9049	7.5748	5.4806	7.5987	11.7687	30.4217		0.710844	28.911
7.14848	16.7783	13.2178	12.473	40.7807	37.8518	4.7367	3.941	28.4683	45.8477	29.2296	31.6121	76.9789	46.881	6.001	65.969	99.47	28.5797	40.1913	18.1349	8.1263	20.6321	21.0925	32.4268	4.5496	7.0358	8.589	12.3762	31.6739		0.722892	28.3445
7.26762	27.0083	17.0551	16.112	37.2473	34.1823	5.2554	3.0614	36.3166	45.7194	24.2807	49.4983	62.3202	41.64	8.065	82.43	91.0048	25.5143	32.8573	15.1433	3.3831	17.1114	26.9811	37.0425	5.9955	6.4393	4.4221	9.8803	58.4183		0.73494	29.4423
7.38676	15.4335	18.4942	19.104	38.2399	31.1693	5.5062	7.0576	32.3803	41.0302	27.9256	38.5989	82.3872	43.455	9.545	77.744	100.334	36.8678	46.617	18.4908	5.6497	14.3574	30.0882	35.0812	7.2945	3.2916	5.5818	11.1861	49.8101		0.746988	30.4543
7.5059	13.8948	19.7262	15.01	26.0936	50.8492	4.1279	8.3342	33.8581	47.52	21.5321	53.5569	84.9415	37.915	9.368	75.357	84.2626	31.0367	37.1049	22.1272	6.0916	17.5413	32.7363	31.9467	6.722	4.0885	4.0146	8.8395	56.0944		0.759036	30.1675
7.62504	16.7397	17.0574	20.409	30.0148	47.9704	3.506	7.5729	32.3275	44.923	18.0299	62.0804	79.2074	40.286	9.004	78.376	95.6139	30.2442	50.1255	19.224	6.0912	14.3602	30.7676	21.8391	8.4526	7.1785	3.5295	9.344	55.3346		0.771084	30.7003
7.74418	12.2732	14.4612	26.136	31.9327	46.4507	5.2551	8.2746	31.299	48.7035	20.4944	70.886	73.4513	38.889	6.317	65.947	82.9136	33.9555	58.0318	15.6153	5.6032	12.1432	32.9056	26.4177	11.1908	6.0168	5.0229	8.2981	47.6895		0.783132	30.2348
7.86332	15.4494	19.1801	15.776	35.4932	41.0942	4.1376	9.9236	39.1685	37.4023	20.7335	54.6515	70.3872	48.115	5.554	56.416	94.344	27.9049	55.2623	11.1999	4.5247	11.8721	35.123	27.8017	9.283	5.6344	6.9475	10.6784	61.7732		0.79518	29.8511
7.98247	12.4058	25.3928	24.205	46.3154	33.7886	3.0876	2.9638	38.6401	26.8332	22.2775	27.8936	76.6145	44.157	7.004	48.594	103.891	32.5289	42.3746	12.1682	5.116	7.8949	38.6789	25.0312	13.7047	4.7622	3.0886	9.3785	54.19		0.807229	28.3207
8.10161	13.7616	19.5329	23.395	45.2343	30.2533	5.7552	4.997	21.1664	27.4034	26.0719	19.1391	71.6931	49.937	9.783	65.123	97.5668	20.8905	49.2735	14.3864	5.9793	12.1469	33.6985	22.0335	20.0757	4.7203	3.8705	16.1007	63.3048		0.819277	28.4748
8.22075	13.764	24.3453	20.158	39.0405	28.8083	8.2369	6.5045	31.9519	27.1425	23.1973	19.7677	68.0305	58.674	10.08	53.183	84.9046	18.0553	36.4863	19.8611	4.8016	8.3842	36.8762	22.4674	18.7175	3.3233	4.4651	17.3658	71.4936		0.831325	27.8602
8.33989	14.1222	21.1686	16.696	29.5747	33.9861	5.5824	4.9282	32.0921	24.727	13.1604	21.9445	51.9277	61.897	8.546	47.118	87.3425	20.184	40.1855	26.6281	6.0042	13.4963	23.8619	26.1298	18.9903	4.7685	6.0429	16.6453	79.5539		0.843373	27.0466
8.45903	16.4774	19.4752	14.601	29.2863	40.8233	5.2992	4.1357	29.9715	32.882	14.1795	16.9382	41.6357	91.238	9.278	66.309	85.7271	28.8283	36.6527	20.6907	13.408	14.4557	28.1094	34.6728	23.9287	7.5283	3.8653	12.0879	66.0787		0.855421	28.8773
8.57817	14.2096	21.4182	12.048	22.3597	37.4424	4.6829	6.5346	32.9894	28.3549	11.8137	11.9774	27.187	93.942	9.183	47.269	67.5067	25.9733	32.2386	22.962	13.5152	9.1623	25.1494	30.7892	25.1043	4.1866	5.1557	23.5295	54.175		0.867469	25.745
8.69731	9.9851	15.8231	11.138	22.5478	45.3494	6.701	10.5455	30.7188	23.501	10.6973	9.4702	32.9845	94.827	7.8	38.333	67.5432	34.3689	32.2576	18.7286	10.64	7.0423	32.5994	32.5206	24.0238	7.9623	4.1607	18.7652	49.8683		0.879517	25.3894
8.81645	9.4436	14.9478	8.052	21.6317	34.9413	6.4021	9.3865	41.6273	33.5804	6.0151	5.5684	21.0355	88.067	5.004	39.278	70.8006	50.0281	27.7082	17.0655	15.3528	6.2378	27.3105	33.3883	24.4171	3.8238	6.8177	24.8619	50.4153		0.891565	25.1146
8.9356	11.6848	15.9768	11.047	16.687	32.6395	6.0046	9.1433	31.1972	38.1895	7.5126	5.9613	15.4305	82.686	11.338	46.918	56.5912	47.1385	27.9937	16.4743	11.4761	9.771	19.2191	23.5634	18.425	3.7505	5.5297	22.3505	43.9407		0.903615	23.1657
9.05474	8.1485	13.8789	8.232	14.3386	31.8908	12.0327	15.7759	33.2609	37.1467	7.7428	3.2641	12.5379	69.428	12.571	62.646	61.1632	47.4993	30.8264	14.4939	14.1763	12.6923	27.5432	24.4748	20.9458	7.4921	3.0523	34.5332	34.4632		0.915663	24.1518
9.17388	11.3027	14.9064	5.085	10.8076	37.8874	9.4657	13.8732	25.8319	38.081	9.0395	4.5803	6.3287	66.387	13.177	55.032	50.5784	64.9022	34.0198	15.4	8.7899	11.3007	23.6364	32.0942	23.2941	2.8664	4.5825	26.427	32.9271		0.927711	23.3073
9.29302	15.7068	15.7497	5.452	15.6624	28.104	9.1568	16.3224	22.0962	33.2529	7.7393	4.8293	12.2298	68.139	11.906	54.267	67.4279	57.0794	24.2717	18.0274	7.7186	12.7315	29.3695	42.5821	22.8674	4.1553	3.8816	18.0617	25.1334		0.939759	23.3543
9.41216	13.3414	8.3535	4.45	7.6928	23.3814	12.955	18.7629	23.8184	27.5618	5.4931	5.1872	6.0761	61.799	15.061	49.116	64.3906	63.8316	32.8632	20.7122	8.8124	13.6191	21.822	42.9807	22.6413	2.8072	4.9138	13.4315	21.2019		0.951807	22.0385
9.5313	13.4736	7.2158	4.835	7.3438	12.4038	11.0012	23.2684	20.3605	23.025	5.4478	4.1017	6.3189	59.558	23.326	59.075	65.829	62.3599	40.6691	15.4758	6.0818	18.2664	23.2759	45.0805	20.0325	2.9788	5.2931	11.6663	19.6515		0.963855	22.0505
9.65044	14.9597	3.8247	4.715	3.042	7.3394	9.9782	30.1506	17.7401	24.4966	5.7164	4.3554	3.2219	52.463	14.235	49.076	68.3737	47.9292	38.4365	14.3602	5.9555	13.5756	19.3099	63.8563	19.3985	4.3394	3.9881	8.3434	14.2631		0.975903	20.2658
9.76959	9.205	2.526	3.077	3.1604	5.139	11.1059	27.2597	19.2818	21.7067	3.9507	2.6836	3.275	43.217	12.884	45.221	47.9208	51.4441	48.6856	13.7324	6.6972	19.1672	21.476	64.452	21.1018	3.0026	3.0799	5.7646	14.6366		0.987952	19.1019
9.88873	7.0944	2.3773	2.832	2.2297	5.5873	11.2794	16.914	16.009	21.1936	3.0387	2.4706	3.6642	38.311	18.963	54.725	36.8367	55.2754	38.3645	25.4952	7.2883	17.9041	15.1092	64.8287	23.7612	3.6389	2.2642	5.8848	13.9251		1	18.4738

## Sheet: Image30
X0	Y0	Y1	Y2	Y3	Y4	Y5	Y6	Y7	Y8	Y9	Y10	Y11	Y12	Y13	Y14	Y15	Y16	Y17	Y18	Y19	Y20	Y21		Ap-Basal	Avg intensity
0	13.1554	9.7777	14.1023	13.0451	10.0008	8.2496	13.5415	9.5981	14.8726	14.0994	21.0172	16.0143	14.8666	16.5404	14.1504	12.8749	11.566	8.9588	14.3802	17.7978	10.4006	11.2648		0	13.1943
0.1191	19.574	9.3508	10.0924	12.5752	10.5231	13.2759	13.2113	12.5795	15.5328	13.6095	13.9878	13.8991	11.2011	12.8871	10.7675	14.7165	16.9098	13.9223	14.2633	14.2137	7.6329	13.5308		0.00952054	13.1026
0.2383	19.3798	12.2801	12.0284	8.0433	11.3603	10.3263	13.6181	15.7116	7.3765	11.1392	21.2278	12.9098	15.4856	25.4723	14.9192	19.4882	16.1483	8.3127	11.6467	13.9565	8.1643	8.8687		0.0190491	13.5393
0.3574	19.255	9.9003	12.0948	12.0977	14.2575	14.0075	15.8335	10.9932	8.8935	10.0487	21.9783	16.0853	20.4696	29.0162	10.7052	13.651	22.2375	13.2412	12.6834	15.7984	14.5017	15.0698		0.0285696	15.1281
0.4766	22.4293	12.0583	11.6742	9.4165	10.5663	13.9332	12.8129	12.4998	12.1529	9.2108	16.0233	21.0609	28.1762	28.1994	14.0112	12.472	15.7704	16.8595	11.1864	21.2832	14.1271	10.2591		0.0380981	15.281
0.5957	22.5294	10.1041	15.9586	9.721	5.1282	14.0023	15.0267	7.7739	10.6527	8.6879	17.3609	23.7097	23.3887	31.7564	14.4549	11.6675	25.4569	12.6987	13.9828	16.3957	9.6364	9.5732		0.0476187	14.9848
0.7148	13.3654	12.4237	17.6519	11.8507	7.6261	15.2644	9.5862	9.5404	11.0423	13.8378	20.9861	26.3645	23.5025	36.9651	9.8685	9.2972	16.0164	17.0186	15.4896	23.6213	12.5802	8.7609		0.0571392	15.5754
0.834	10.6494	13.656	16.2895	12.8468	9.8735	9.9265	16.1943	9.6839	9.9598	18.6303	28.5532	32.3827	26.4967	20.4553	14.1879	11.8033	19.5934	15.8697	9.0969	13.5261	13.3799	10.6161		0.0666677	15.6214
0.9531	9.2294	9.9719	14.4141	14.2146	8.5151	9.1659	8.0858	6.7307	10.1547	13.7764	34.6799	32.4976	26.9733	22.9528	13.7607	11.1177	14.7356	15.4559	13.7406	12.4692	7.7964	8.8243		0.0761883	14.5119
1.0723	8.6705	11.2456	14.7463	7.9811	6.6601	12.4341	11.4192	8.5002	7.8893	18.8231	30.3852	35.3807	34.1804	24.026	11.2335	8.113	9.9249	9.8253	14.5354	9.3889	12.9054	12.7212		0.0857168	14.5904
1.1914	9.6498	16.9694	17.0776	13.4085	6.3011	9.9879	9.1595	11.5902	10.0701	19.7103	29.6738	35.8108	23.0375	22.8607	14.2658	12.2117	13.2563	12.7238	9.1837	9.8429	13.8255	10.0275		0.0952373	15.0293
1.3106	12.4076	13.3195	16.9386	14.1515	10.1189	13.8714	5.8576	14.2947	13.5721	25.4613	21.1924	28.0386	20.1718	24.0343	23.7174	8.6277	10.999	5.0195	15.8705	9.784	10.1085	7.3616		0.104766	14.769
1.4297	10.6436	8.1888	9.0914	11.0206	5.388	12.3456	8.2572	15.7681	18.5599	25.3177	21.7203	28.9178	15.932	18.4125	29.181	8.6956	9.8036	8.4083	14.806	12.9715	12.0674	7.5422		0.114286	14.229
1.5488	11.9654	16.3283	14.9482	8.6896	5.5093	13.7254	9.9472	10.014	16.1371	23.515	13.6115	26.4323	16.4971	18.0923	21.039	8.5874	9.4764	12.2536	9.231	7.2965	10.5938	9.1106		0.123807	13.3182
1.668	9.6491	14.6126	19.174	12.1466	9.1343	10.9262	9.3771	14.5067	10.7005	20.5513	15.4003	22.515	9.0704	16.2761	24.3827	13.7781	10.6003	8.2371	12.5998	13.9627	11.0192	7.0526		0.133335	13.4397
1.7871	10.6645	12.8808	21.7543	13.7554	6.5196	10.822	10.019	12.5402	9.5259	20.6038	18.1733	23.2045	17.7555	17.5624	16.4314	7.742	12.4677	6.0693	12.458	10.8498	8.3025	6.2589		0.142856	13.0164
1.9063	12.735	10.3934	27.9739	6.2762	6.3412	9.1187	8.376	8.0475	16.7868	21.6627	9.8222	15.8365	16.3428	16.5515	12.9758	7.5746	12.0536	7.7225	16.3001	14.1564	11.6779	6.0995		0.152385	12.492
2.0254	13.2129	16.3262	16.677	11.2143	8.6211	5.6207	14.2337	6.5621	12.3983	24.0821	10.2218	17.9121	14.5809	15.8657	14.8876	12.1323	17.8384	8.3363	15.5497	13.181	12.6912	7.224		0.161905	13.1532
2.1445	11.4982	8.6067	18.6628	8.3288	9.943	8.9474	9.6744	11.8081	16.8646	22.2071	9.9211	19.6626	17.2834	17.64	16.8017	11.8873	16.2859	10.8584	16.0474	7.8374	6.3717	6.89		0.171426	12.9104
2.2637	15.3499	13.6307	15.4913	10.9751	5.9738	13.2147	6.81	7.506	8.6808	22.2461	9.4586	13.6846	15.5108	26.9605	14.3702	9.231	10.2192	8.5578	19.665	9.4666	12.9892	12.1381		0.180954	12.8241
2.3828	11.6951	13.0636	11.848	10.2168	8.1438	5.9716	5.8206	11.521	12.1836	18.2291	10.6789	16.6224	10.5116	22.6061	20.9267	10.5411	10.9087	5.6503	24.5623	7.6373	4.8519	5.9665		0.190475	11.8253
2.502	11.21	10.9643	19.0116	14.5598	7.3518	7.1986	7.0171	11.3666	11.1505	14.542	12.5105	15.021	14.0193	9.8379	18.0612	12.6396	13.2798	9.3931	16.6046	11.0431	7.0531	11.6739		0.200003	12.0686
2.6211	16.1534	16.4368	14.5906	12.6309	7.9402	6.4569	9.3763	12.1853	11.8698	11.2979	4.902	12.8173	12.4091	15.666	12.6899	10.7708	16.5534	12.9265	23.2238	10.1157	9.5805	7.1223		0.209524	12.1689
2.7402	11.8753	19.4583	8.6102	13.5285	8.5972	9.9871	10.0126	8.7985	8.4753	11.0527	9.7599	20.5739	11.7148	13.3422	9.7553	8.2454	8.1	5.8366	19.2184	10.4801	9.747	4.975		0.219044	11.0066
2.8594	10.8604	17.2786	10.7587	7.9091	6.3065	6.2268	7.7796	9.4414	16.6585	7.2882	11.699	21.2387	9.6467	10.2534	8.3068	7.3998	12.583	11.1978	13.9281	6.8298	4.2828	4.6448		0.228573	10.1145
2.9785	8.6607	23.6152	5.4292	8.2687	5.181	8.3257	10.5329	9.4265	21.5842	8.3565	7.7888	9.813	10.599	11.0455	9.139	14.8293	10.3762	13.9007	9.0683	6.057	7.0154	6.6205		0.238093	10.2561
3.0977	11.4122	17.9742	5.0262	12.5341	4.5192	7.318	8.4477	14.5134	12.5358	12.63	9.4342	16.8687	9.2751	8.8137	9.6781	10.267	12.4064	15.6632	10.22	10.9184	5.8789	5.9358		0.247622	10.5577
3.2168	11.6708	18.4808	6.4505	12.643	4.9586	4.8189	7.3975	10.5461	9.8687	10.2104	9.9895	19.3008	13.1224	10.3884	14.5242	9.9262	11.2242	9.2411	13.6618	6.6911	9.5023	7.8711		0.257142	10.5677
3.336	11.0219	20.0745	6.3097	8.3443	10.2259	4.8553	5.2529	7.7005	7.3373	8.5471	11.0136	13.1633	14.4101	8.8408	13.9696	9.8728	14.0542	8.4195	16.5421	5.794	10.7485	3.6755		0.266671	10.0079
3.4551	12.5947	11.087	8.0034	9.7681	14.5874	6.3565	6.5334	8.8069	11.1077	7.6192	19.0864	14.1007	19.0996	11.3327	13.9534	11.8077	16.0055	10.4427	6.5134	17.3253	7.908	7.4861		0.276191	11.433
3.5742	9.7767	13.3611	5.8263	7.9953	13.1387	4.5757	5.7049	12.3907	7.3484	9.6206	17.3697	13.3954	17.9642	13.0482	11.9871	10.9306	8.7785	10.9494	10.6013	10.3295	4.6598	9.0784		0.285712	10.4014
3.6934	8.422	10.2536	8.8269	8.9794	9.8872	5.7353	10.9488	7.7579	10.0199	11.3639	23.7364	12.4192	20.2858	15.9729	14.0719	9.8599	9.351	10.3563	8.9862	10.3128	2.0099	10.4336		0.295241	10.9087
3.8125	13.5211	7.9438	5.5628	9.1173	10.2901	3.6097	9.7788	12.1959	6.3812	8.2004	17.0172	14.372	23.3616	14.512	6.4351	8.371	11.0387	13.5574	12.5577	11.4817	3.2235	6.9963		0.304761	10.433
3.9317	4.9552	7.784	4.5965	10.9432	7.8753	3.2692	9.3843	10.3485	8.1516	8.4674	22.5099	12.3066	14.2734	8.7833	7.1733	8.3715	8.0514	15.791	10.9087	12.7734	11.0538	8.7746		0.31429	9.843
4.0508	10.5042	7.0547	4.0932	9.3809	8.8766	4.4536	6.9549	8.4042	10.1703	7.7961	22.1779	8.9762	16.5581	9.3996	15.2538	8.9231	8.3326	8.3223	12.2952	8.1067	6.6159	4.9478		0.32381	9.43627
4.1699	6.8699	10.3554	8.0839	7.2056	10.8984	6.4272	6.354	7.104	13.6572	8.119	12.9449	16.5723	18.8522	14.2582	9.2149	7.1917	7.3136	9.8791	13.0412	9.3303	6.9239	6.2668		0.333331	9.85744
4.2891	11.5269	10.1434	9.19	11.1968	9.5777	4.6079	7.8575	3.8956	14.4916	6.1397	19.4502	14.3947	16.5589	15.6342	7.5909	7.6716	7.9786	11.9639	13.7068	11.8939	6.5046	6.5386		0.342859	10.387
4.4082	10.3624	8.5708	10.4716	12.1017	9.4758	6.1848	9.8787	6.5325	11.4166	10.7533	17.317	9.9091	19.4853	12.3328	14.9541	8.4892	12.2443	11.9164	6.5478	5.4373	3.0359	6.7624		0.35238	10.19
4.5274	8.2712	6.9762	9.4494	6.1392	8.8671	5.8397	7.291	8.5307	12.8497	3.7403	11.7376	10.1357	15.3002	11.9854	6.9439	7.0667	10.5442	16.1546	9.9261	8.8998	7.2361	5.525		0.361908	9.06408
4.6465	8.054	9.2936	8.7102	6.6031	11.1345	8.8718	8.4981	7.286	13.2219	8.347	14.0471	9.0321	14.5853	11.3327	10.7331	5.8942	6.4857	7.8129	9.1862	4.0634	5.945	5.5025		0.371429	8.84729
4.7657	9.1266	7.3139	11.0596	7.6847	14.3038	8.1274	10.5541	4.5753	7.5098	8.0494	16.791	14.7829	14.777	17.1667	11.9268	5.7063	7.7639	8.937	7.119	3.0247	9.726	9.4623		0.380957	9.79492
4.8848	5.6516	8.1027	5.5996	8.0571	10.1057	8.1876	13.0863	8.8989	6.6989	4.9713	12.1554	17.417	14.8451	13.5011	9.4686	9.0617	10.6518	11.9704	8.1994	4.2591	3.6316	6.7871		0.390478	9.15036
5.0039	6.5305	7.182	8.5464	11.2957	12.9199	5.8815	6.8087	7.5426	12.515	6.3481	12.8401	15.145	12.9767	15.185	12.8457	7.2793	13.2329	9.2296	11.2731	4.1998	4.0701	7.5578		0.399998	9.60934
5.1231	6.0792	6.2134	10.8798	7.6404	12.4531	3.3484	9.042	6.9503	8.9345	6.9217	15.6785	11.345	11.1639	15.9926	8.8181	3.2825	11.3185	7.5824	6.5855	3.791	6.8205	6.6748		0.409527	8.52346
5.2422	7.2715	4.7664	5.3281	10.996	9.5322	6.2021	9.9249	7.6577	7.68	5.5589	14.0303	12.4218	11.0916	14.236	7.8032	5.358	7.157	5.4568	8.7612	5.4278	2.8182	7.2896		0.419047	8.03497
5.3614	4.3806	8.197	7.3214	13.7664	9.5564	5.699	13.1251	4.8432	5.9315	4.3018	15.2698	8.5293	9.874	16.9187	9.0687	4.8417	7.0096	4.6382	7.7891	3.4984	7.3964	3.8459		0.428576	7.99101
5.4805	4.7181	7.0026	10.0841	10.6274	7.3076	7.913	9.5151	4.4056	3.741	6.3153	9.8785	13.3046	13.1675	15.7965	8.5342	4.0268	6.2998	5.0857	9.0355	2.1353	4.6477	7.7427		0.438097	7.78566
5.5996	3.1475	7.0752	8.1579	10.8838	7.8883	5.3323	9.9463	9.3084	4.0941	3.4999	7.9949	6.7719	16.4032	19.808	14.5641	3.7639	9.8582	3.4863	9.855	6.1612	5.1492	5.9309		0.447617	8.14002
5.7188	5.8507	9.1082	9.259	10.5268	3.6404	12.9369	10.583	7.4337	4.083	5.588	10.9276	9.2794	12.4676	16.3187	7.4924	2.7568	8.6264	2.6609	6.4667	4.6351	4.8997	5.612		0.457146	7.77968
5.8379	7.0655	11	11.1384	5.8573	6.3255	8.0804	5.8186	8.4981	4.6961	5.4295	6.5541	5.3542	9.5824	12.7269	10.5261	2.4399	9.6294	2.5247	4.2416	7.0733	4.098	5.3393		0.466666	6.99997
5.9571	3.749	8.456	9.6154	7.5851	5.9101	12.3053	6.8565	8.883	2.8175	4.6429	6.6418	10.2465	7.4002	5.9011	10.2171	2.5105	7.9432	5.1684	3.7402	5.9708	4.1354	10.5662		0.476195	6.87555
6.0762	7.8909	6.3894	7.3108	6.4933	5.4349	8.1369	5.1753	11.6525	2.9587	2.635	12.1102	10.449	4.2445	9.8169	8.0569	3.745	7.0422	4.0058	4.513	8.4952	4.5028	2.9909		0.485715	6.54773
6.1953	6.0288	4.5742	4.8428	8.9881	3.9743	5.6592	3.6014	4.9542	2.1718	2.4812	6.3228	8.9595	9.996	4.9289	8.8721	5.1542	7.273	4.0452	6.7088	4.4802	4.2561	3.0776		0.495236	5.51593
6.3145	6.7102	8.0187	3.9255	10.364	4.6453	8.753	5.6041	7.7444	5.5255	3.7107	5.3929	8.4126	5.5802	9.06	4.8796	2.8234	9.0854	1.9231	8.3416	3.4225	3.2946	5.609		0.504764	6.03756
6.4336	12.1476	5.272	6.2741	9.0492	2.2972	6.4193	9.2547	4.8416	2.0517	2.7192	8.347	10.2169	4.2131	15.118	6.0569	2.0577	7.4709	3.5688	12.1393	7.8753	2.9098	6.6203		0.514285	6.67821
6.5528	9.8323	3.934	4.8269	6.1583	2.6044	9.3598	5.5377	9.1655	3.7062	2.7118	6.3867	6.397	6.2393	12.2615	6.8996	2.5109	5.0798	1.9852	12.7515	2.5694	5.9901	3.3809		0.523813	5.92222
6.6719	9.3404	8.0658	10.4661	6.9672	3.2704	5.4453	6.0468	5.8063	2.4468	2.3324	8.7295	8.5427	8.5837	12.3029	4.0433	3.9766	4.961	6.1802	11.8118	5.8682	3.4464	6.2247		0.533334	6.58448
6.7911	6.4351	7.1873	8.6192	6.9345	3.1356	6.4468	5.1198	5.538	3.2616	6.6563	6.2971	10.0826	9.6732	11.9588	3.6486	1.9951	4.9672	3.4378	10.6543	5.0766	7.8845	5.2655		0.542862	6.37616
6.9102	4.4761	4.5599	9.4017	6.2873	5.0079	9.0669	8.6292	4.3328	3.1133	2.8069	7.0196	5.9195	7.9522	7.519	3.328	5.1431	4.0506	2.9796	5.7855	4.6348	6.1136	5.5337		0.552383	5.62096
7.0293	3.5322	7.7355	4.6936	4.9221	5.1191	5.7056	10.367	4.5445	4.2449	4.5631	4.7726	6.2888	6.7055	10.0736	3.7856	3.6331	4.0622	1.9067	12.0035	2.8898	4.6155	3.3758		0.561903	5.43365
7.1485	5.0109	5.7414	5.042	10.098	2.5222	5.135	8.7468	5.1719	3.1507	6.019	8.3961	11.3647	5.046	10.6746	4.8025	3.2454	4.1416	3.2812	6.1065	4.7256	5.3564	3.2653		0.571432	5.77472
7.2676	5.6132	5.1125	5.1754	7.566	5.4217	5.0813	7.0627	6.0006	3.4229	3.3802	9.7751	9.8386	6.0396	16.8385	4.5919	4.9087	4.2845	2.7388	6.3023	4.227	2.7286	2.2023		0.580953	5.83238
7.3868	4.69	9.0286	8.8282	4.9344	5.055	4.4567	2.6324	8.7382	2.0861	4.5173	5.0767	10.2517	3.7703	15.6339	3.9363	2.1274	4.9512	2.215	5.9472	6.2475	4.7637	2.4535		0.590481	5.56097
7.5059	2.2747	6.4254	8.2424	7.6327	3.2034	6.423	4.7875	6.6863	2.7266	3.2101	6.3845	14.7256	11.8159	13.0629	4.4346	3.3458	3.5796	2.2526	6.6415	4.7032	6.7441	4.0566		0.600002	6.06177
7.625	5.9214	5.0674	3.7722	3.9607	4.2364	3.04	3.0161	9.0285	2.9788	3.3806	5.806	10.0753	4.5031	4.7564	5.9474	4.2304	4.7776	2.0114	4.103	4.5362	4.0731	3.1241		0.609522	4.6521
7.7442	3.8709	6.1829	6.6352	7.6414	2.4	2.2427	2.3799	4.9172	2.3575	4.9912	11.5795	10.7246	6.0734	8.2443	4.5465	2.2546	5.0281	5.2217	6.8532	4.5161	6.368	2.9169		0.619051	5.36117
7.8633	6.781	6.1698	6.3246	6.8517	3.1463	2.8223	3.5464	6.9379	2.836	4.1315	7.4873	11.7286	6.0809	9.6335	4.904	2.5207	3.2702	2.1397	4.5677	2.2208	6.7009	2.2949		0.628571	5.14076
7.9825	4.8486	4.131	4.0662	2.9133	4.3006	2.7128	3.5913	8.9318	3.2469	2.9971	7.0304	16.6576	4.8931	7.6742	5.9808	2.5266	2.7661	2.4541	5.9417	3.5563	4.1452	2.4362		0.6381	4.90009
8.1016	7.6067	4.764	4.1425	5.7259	4.1817	4.6873	3.0911	8.2769	4.5561	2.7431	6.2734	19.9564	3.7365	11.2557	4.2669	2.246	2.7581	2.3147	5.4242	4.0023	4.702	2.2045		0.64762	5.40527
8.2207	4.871	3.6153	4.8803	6.8878	4.4792	3.6727	4.5818	9.9983	2.8598	2.9658	8.8118	17.2128	5.8533	10.8234	4.8652	3.1986	2.2043	1.9834	3.1235	3.9768	4.8239	2.5314		0.657141	5.37365
8.3399	7.6187	3.3813	6.8841	6.8616	3.5568	3.1625	4.0098	7.0575	4.4988	3.7219	10.1412	9.4645	3.5033	9.431	2.5395	2.0799	9.6868	2.6789	3.3434	5.2291	6.1558	2.4164		0.666669	5.3374
8.459	4.5344	3.1555	3.8181	4.0745	4.8254	5.3488	4.9616	10.1905	3.0231	3.8175	3.9959	12.4833	6.0075	15.3057	3.7828	4.86	7.9238	2.248	3.0663	5.2817	4.2861	2.7891		0.67619	5.44453
8.5782	5.9023	5.7786	3.9465	4.4061	4.1788	3.1674	3.8141	10.3728	2.3899	2.5968	3.2908	11.9535	5.8748	10.1958	2.3411	2.2933	4.2068	1.9878	2.8483	4.379	8.3323	3.7717		0.685718	4.91039
8.6973	8.3225	7.2419	6.2809	5.7078	4.4307	1.9738	6.3225	6.8707	3.6339	3.2812	7.0657	8.9212	9.9761	10.5958	6.2996	3.4339	3.9561	2.3681	4.2926	4.6796	2.5934	3.1568		0.695239	5.5184
8.8165	4.7936	4.7454	7.6914	7.3384	2.6844	1.9485	4.2417	11.0291	3.4609	3.1382	7.3393	7.2594	7.0443	11.7781	3.1142	2.0527	6.9525	5.5066	2.5767	3.2585	4.1488	2.0211		0.704767	5.18745
8.9356	6.6335	8.0129	4.0539	7.7922	2.7592	2.0329	6.2952	8.8495	4.5036	4.7637	5.8942	9.4849	5.8313	6.694	3.4538	2.9872	5.9937	1.8633	2.676	4.0759	4.2615	5.6445		0.714288	5.20713
9.0547	3.6978	5.1868	4.9788	8.4441	4.0277	3.0552	6.4968	8.8071	3.6214	4.3386	5.3159	9.4144	8.3137	9.7507	2.743	2.7337	8.7533	2.0727	3.826	8.9345	2.652	3.2343		0.723809	5.47266
9.1739	5.9237	5.3519	3.1174	6.0948	2.606	3.6865	7.2001	5.3177	3.7613	3.438	4.8276	5.5832	5.9736	8.7618	4.8528	2.8103	6.0674	3.5369	3.5605	3.2186	4.8454	4.7465		0.733337	4.78555
9.293	4.6098	7.8037	10.2501	4.3079	3.6607	4.6014	6.1646	6.912	2.1201	3.4038	5.6267	8.691	6.0647	9.4999	3.8341	1.9699	5.4577	4.2854	4.7166	3.1447	5.0237	2.4321		0.742858	5.20821
9.4122	3.972	8.4448	6.8149	6.1266	2.0722	4.5958	4.3541	5.8615	2.9783	4.3322	3.942	6.9204	4.5433	18.4453	4.3321	2.3989	9.9112	2.8994	6.4967	3.4837	4.7182	1.9628		0.752386	5.43665
9.5313	9.4498	6.728	4.51	3.6491	5.2576	3.3848	4.7255	11.5232	3.5697	3.1614	3.64	5.2168	7.1671	19.7341	4.5456	3.8178	5.0388	3.8843	3.3888	3.2889	4.6717	3.5346		0.761907	5.63125
9.6504	3.9754	10.9247	3.9809	5.9172	2.1478	2.0163	3.9075	7.6176	2.8938	4.9735	4.2348	5.6197	11.6297	20.6581	4.8329	2.8486	5.6838	2.1234	3.0389	3.9193	2.8458	3.0552		0.771427	5.40204
9.7696	4.8019	8.5932	2.7102	8.6228	2.4312	6.6268	4.6639	9.9555	1.9804	2.3097	3.646	4.9446	5.8484	32.6181	3.9351	2.2227	5.7181	2.2187	3.4871	4.0055	3.3244	4.3601		0.780956	5.86475
9.8887	6.9347	7.3199	3.8277	7.0512	5.4849	3.6292	4.3358	6.6192	2.0902	3.2647	7.1416	8.406	5.5581	21.1988	4.5209	1.8677	3.1124	1.9885	3.2058	4.1738	5.592	3.1295		0.790476	5.47512
10.0079	6.829	7.0214	6.1664	7.1218	3.618	8.9445	5.9263	3.591	2.7819	3.5973	3.9928	11.593	6.1687	18.1707	3.0024	2.9198	6.9532	3.3853	2.7175	2.4277	3.3291	3.8356		0.800005	5.64061
10.127	7.8322	4.9369	3.7065	6.216	5.7529	6.0467	4.3608	4.804	1.8999	3.8265	5.5416	5.6209	3.7496	17.7411	4.322	2.0369	9.4897	4.5716	5.7595	6.2622	8.51	2.4237		0.809525	5.70051
10.2462	4.0703	9.5161	5.4417	8.3639	3.5053	6.1457	4.1409	5.2217	2.0921	4.964	3.4438	6.9741	6.932	14.9127	4.9819	4.7085	7.8898	3.4504	3.394	3.3269	3.5	4.3085		0.819054	5.51292
10.3653	8.887	7.3348	6.5155	7.8243	3.6909	4.6916	5.9351	5.4866	3.1199	3.3892	4.7429	6.2232	11.2702	14.4117	5.9566	4.333	5.7655	5.2413	2.2173	7.221	3.1507	5.005		0.828574	6.01879
10.4844	9.1777	3.0892	5.6843	8.3354	6.4751	7.2947	9.7476	5.4748	3.1647	2.8504	9.0999	9.6084	9.9221	11.1589	2.6425	5.288	4.6103	3.4007	2.8214	8.4693	2.2583	4.2448		0.838095	6.12811
10.6036	4.3791	6.3507	2.4558	7.2587	4.4796	4.7086	3.0699	5.1041	2.6312	2.6046	6.3055	9.8927	6.4138	11.1337	2.669	2.1873	7.4603	3.4794	2.5213	9.2488	5.1767	2.6733		0.847623	5.10019
10.7227	7.2558	4.666	3.2609	9.3816	4.8018	5.46	5.6135	3.1527	1.9901	2.1384	5.6552	6.4767	7.279	7.2578	4.831	2.407	3.9683	2.9986	2.9817	3.9741	4.302	5.0979		0.857144	4.77046
10.8419	6.211	7.6016	7.7301	6.2502	3.5029	5.1579	5.3291	4.4174	1.7604	2.5838	2.4526	7.8583	8.7953	6.2208	3.4699	1.7444	3.9374	5.7044	4.3884	6.0958	5.1578	3.4519		0.866673	4.99188
10.961	2.1527	5.1727	2.7902	6.7729	3.6496	5.8765	3.886	8.1456	4.9574	4.6793	6.1255	5.4443	6.7381	5.4628	5.4773	3.4289	4.1696	3.9478	3.1598	4.0953	6.0398	3.3859		0.876193	4.79809
11.0801	5.3532	6.3228	3.3963	6.6557	5.2939	7.02	6.9654	7.2598	4.4633	3.5238	5.3544	3.2631	7.9745	4.8266	3.3448	3.743	7.304	3.9865	1.9213	4.4147	2.6846	4.0277		0.885714	4.95906
11.1993	6.5562	6.848	4.4569	6.9527	5.036	6.9988	2.6759	3.5767	2.5097	4.0219	3.9187	5.2298	4.8038	7.0047	5.3255	4.0447	9.0141	2.2535	4.3876	4.2832	4.0869	3.6535		0.895242	4.89267
11.3184	6.1073	7.0922	5.3922	5.7186	3.586	7.4077	3.2468	5.8542	3.3278	2.8837	10.0649	4.9781	9.4743	6.3998	2.4376	3.3119	13.323	2.7709	3.3733	5.8344	5.914	6.4666		0.904763	5.68024
11.4376	3.149	4.2988	3.0998	4.3136	6.7324	8.6397	4.2054	3.9544	3.0408	3.1121	7.6271	5.7949	8.1479	3.5545	3.9563	2.3859	13.4095	2.79	4.4714	5.9032	3.7663	5.0731		0.914291	5.06482
11.5567	4.9927	8.1238	2.998	4.8957	3.2891	3.6128	3.7047	4.1064	2.1158	4.0534	5.3135	7.0669	7.1792	10.5548	4.5538	3.8444	10.8769	4.7825	1.9256	5.1865	3.0643	3.1703		0.923812	4.97323
11.6758	3.2163	8.009	6.2113	6.7464	4.1013	2.8442	3.3664	1.9157	3.3091	6.1641	4.1686	10.3632	5.8981	5.7014	3.9376	3.7271	5.2222	5.3307	2.9256	2.7969	3.8958	3.3617		0.933332	4.69149
11.795	3.012	5.3299	4.5688	4.1704	3.9493	5.2746	2.2798	5.1106	5.1303	5.693	4.492	5.322	5.2459	5.1409	5.2341	2.9131	9.5594	4.6747	3.4766	4.7181	5.8774	3.3354		0.942861	4.75038
11.9141	3.4938	5.2159	5.0443	7.4315	5.5415	7.2594	2.939	4.3882	10.5526	4.8238	6.7178	6.5288	6.3094	5.3955	5.4896	2.1183	3.0582	2.6783	3.3309	5.8999	5.1095	2.559		0.952381	5.08569
12.0333	3.1273	4.9588	5.6489	2.6282	9.1206	6.0254	3.0541	3.3783	9.2748	5.3662	4.812	5.7792	2.7093	3.1358	2.0965	3.289	6.1962	4.997	3.8828	2.3645	3.5978	2.2007		0.96191	4.43834
12.1524	1.869	6.9567	5.864	8.1397	4.0611	3.5422	1.9765	3.7275	3.3015	6.5783	4.7326	3.9181	4.2197	3.2534	6.6955	4.1316	5.1159	3.3963	4.5687	5.2725	5.7219	2.0716		0.97143	4.5052
12.2716	3.0111	3.7364	2.5689	3.9457	3.0496	2.9967	4.1685	2.2374	4.6631	3.6005	3.6957	4.301	5.7405	4.7883	3.7983	4.7048	4.672	2.4467	2.797	5.085	4.558	3.6028		0.980959	3.82582
12.3907	2.3418	6.387	5.1362	3.9713	6.0707	4.0771	3.1826	2.6101	3.481	4.1686	2.6944	3.4066	3.8754	2.5801	2.4278	5.4145	5.3558	3.1878	6.439	3.5407	3.7437	4.9407		0.990479	4.04695
12.5098	3.9499	4.3504	11.2637	4.574	4.0374	3.203	3.4905	2.1285	2.3204	6.6828	3.2291	2.894	5.3733	4.0484	3.4826	5.0211	8.703	5.3663	4.3915	4.4036	5.0283	4.4565		1	4.65447

## Sheet: Image29
X0	Y0	Y1	Y2	Y3	Y4	Y5	Y6	Y7	Y8	Y9	Y10	Y11	Y12	Y13	Y14	Y15	Y16	Y17	Y18	Y19	Y20	Y21	Y22	Y23	Y24	Y25		Ap-Basal	Avg intensity
0	24.7457	31.7318	26.0953	45.189	44.9359	44.4862	52.1527	45.28	36.654	49.014	44.338	42.2948	49.1156	44.7583	43.498	32.6773	39.1107	37.0626	36.2017	32.9183	36.4743	42.2348	41.4017	39.4506	40.1234	36.641		0	39.9456
0.1191	28.3489	36.1786	35.9279	39.0473	40.7781	40.2126	45.1339	50.7673	49.941	68.1678	50.3691	43.8777	49.3489	41.7671	45.052	43.9159	43.843	38.5208	39.8022	34.4881	33.1647	38.1799	28.5105	38.9742	40.6235	33.5417		0.0109852	41.4801
0.2383	28.3931	24.2831	28.8001	26.5197	48.1798	41.6664	43.9067	65.7627	51.443	81.6292	49.6289	47.9033	60.8523	56.8997	52.667	48.5154	31.2165	38.5397	46.9894	31.3085	40.5121	36.1434	28.7543	42.1382	30.7528	28.8534		0.0219795	42.7792
0.3574	28.1976	25.1108	22.5676	27.4276	55.6722	43.8328	47.7937	64.3604	55.858	80.5431	57.1658	44.8904	65.3733	61.4774	62.344	51.8484	43.6734	41.7782	48.512	30.0904	36.7009	29.7078	30.7501	36.0923	38.5768	28.0759		0.0329647	44.5547
0.4766	23.2901	29.1143	22.2678	22.9069	66.3981	53.5317	63.009	69.1578	58.148	90.9089	55.9239	40.0725	60.6806	77.87	72.725	68.8578	50.0354	35.0959	49.022	45.3888	41.1021	34.4304	34.508	47.7817	35.4596	27.1898		0.0439591	49.0337
0.5957	27.963	31.6908	21.669	18.6943	62.6227	53.1462	73.5476	78.2666	75.449	92.6905	50.59	40.432	63.1559	92.7148	94.752	70.2057	44.385	36.2451	48.7753	39.0437	40.9499	32.6754	33.3397	56.4312	43.1934	26.4376		0.0549442	51.8872
0.7148	28.0749	26.7968	23.2338	17.2779	59.6175	45.1194	63.9	95.5041	86.428	90.2416	51.3119	49.3515	55.8434	84.7433	117.812	71.2747	35.6313	38.1206	46.5118	39.5984	44.1279	43.4288	29.4672	56.244	41.53	29.7112		0.0659294	52.727
0.834	28.1544	21.8099	22.0975	20.9343	47.5155	47.3903	75.3291	86.8872	80.692	76.2687	60.4695	45.7904	68.3104	90.8385	114.103	84.3358	45.7641	38.2507	45.8027	42.4789	51.7643	34.5407	35.3887	71.5669	52.3449	36.7681		0.0769238	54.8306
0.9531	17.3042	26.8903	16.594	14.9231	52.6907	52.3772	80.5062	81.0961	77.735	72.4568	48.3528	48.22	62.1733	86.9467	96.339	70.8193	41.7755	32.9332	40.9401	38.5389	54.0954	49.6	35.7808	72.5214	58.5737	33.4628		0.0879089	52.4479
1.0723	22.2273	25.3017	23.3883	16.9891	54.2359	48.5263	74.2922	80.3944	75.579	61.316	48.2444	41.5834	67.5457	88.8547	115.323	62.8025	41.6161	32.6639	41.7889	34.1184	56.6787	47.816	36.5848	77.6269	58.6468	31.0919		0.0989033	52.5091
1.1914	24.8293	20.8762	28.6676	19.0807	45.0966	41.1906	70.5356	57.1192	96.585	58.2797	36.0913	34.6999	61.1448	89.7422	124.091	65.3769	48.9544	32.0755	36.0229	36.2198	49.5389	44.7671	32.6369	63.635	51.7961	31.2014		0.109888	50.0098
1.3106	20.8941	22.78	23.8679	17.55	53.4349	45.1913	69.5974	51.5153	102.651	54.5412	29.7413	34.1949	60.0796	76.5165	128.327	80.1075	50.5034	32.9134	37.7705	33.2421	54.4297	45.0271	40.243	65.3976	49.3592	30.4853		0.120883	50.3985
1.4297	21.5378	24.0378	18.6137	17.4923	53.2995	42.0687	79.9318	54.8852	92.481	54.956	22.1456	35.1864	45.6562	67.8101	108.47	70.7415	37.5612	34.164	36.3943	29.7847	47.2148	37.4833	41.8874	68.2533	60.3261	30.8958		0.131868	47.4338
1.5488	20.442	21.6774	20.7575	20.0919	48.0304	36.5428	65.6804	45.1662	100.498	40.0695	20.3374	40.4948	43.7064	71.538	109.798	71.9383	24.1803	31.5239	27.4637	30.2497	55.9061	30.1402	39.9319	74.7373	49.7812	31.0992		0.142853	45.0686
1.668	20.0676	21.5051	18.075	17.3698	43.4079	45.4816	75.6847	46.4073	94.074	28.0411	20.2717	41.5194	39.0245	84.0512	126.925	60.949	30.1154	32.1503	25.4593	37.9774	43.6824	29.4886	29.6706	71.0741	54.142	33.8507		0.153848	45.0179
1.7871	17.6845	20.1745	21.3042	17.6643	33.7187	44.7247	73.5674	40.6372	74.898	19.1338	14.8356	32.6994	39.7865	62.6925	113.174	56.2592	28.8419	29.3239	28.0083	35.1001	37.5842	32.0568	33.9729	72.8694	60.3267	30.2024		0.164833	41.2016
1.9063	17.1333	20.3191	22.6384	22.1924	32.9951	41.8924	64.7044	36.0127	65.885	12.1861	9.3184	27.8283	32.7803	62.2858	112.918	48.7293	27.8477	25.2173	29.7165	32.0711	37.3455	28.5149	28.0447	74.7329	55.1836	38.1637		0.175827	38.7176
2.0254	19.6546	19.2033	20.5588	23.4231	25.2551	38.4402	60.3756	23.7681	56.45	12.8483	8.9471	20.1091	36.5933	60.5464	118.077	42.2608	19.549	24.8123	27.9177	22.6283	35.1238	20.6183	28.555	77.6014	59.4156	41.6457		0.186812	36.3222
2.1445	11.2209	27.1043	25.595	18.0553	26.1625	28.0143	46.5621	21.0699	38.318	7.2085	7.8194	13.1601	27.9335	65.2773	117.784	36.3297	17.8969	15.2993	23.601	20.932	35.9133	13.5218	28.2416	77.7989	60.7056	29.4135		0.197797	32.3438
2.2637	15.4161	27.5507	22.9095	19.4815	20.4604	21.2359	41.4798	20.6335	36.729	7.5403	7.8854	15.9892	26.8423	58.5651	115.374	30.9559	18.5831	15.8231	26.1929	19.4188	28.3183	17.5261	22.3478	60.0055	60.3558	30.3167		0.208792	30.3053
2.3828	15.2599	24.1441	21.4041	15.6073	14.4593	22.7608	35.6753	18.8896	39.709	11.1352	5.8794	18.9235	28.7469	45.7117	110.859	36.7459	18.8978	15.5685	22.3022	23.3094	31.9355	12.5437	19.2087	66.1899	57.7996	35.6974		0.219777	29.5909
2.502	13.1455	23.7451	20.6624	20.3092	18.4667	24.4474	36.8299	20.9743	40.208	7.9933	9.8844	15.7219	27.7939	45.8113	103.192	20.9793	11.8675	17.2094	18.3292	21.2145	39.3447	15.0282	15.281	60.3685	57.9595	35.6772		0.230771	28.5556
2.6211	10.9982	14.2894	24.5895	15.0975	14.7985	26.3554	32.9072	17.5178	26.588	8.907	7.8855	14.6534	40.3279	40.2906	97.275	22.4737	13.0195	9.2429	15.6622	16.383	30.0783	14.6633	13.9598	50.3353	53.0306	31.6159		0.241757	25.4979
2.7402	15.7049	19.928	14.9795	14.1179	10.492	30.7123	27.1496	17.7205	17.565	6.5473	7.3541	14.9628	33.3782	32.7803	88.029	27.4687	16.5735	10.5757	12.6109	21.2346	23.8704	20.7918	11.8286	47.3439	40.1477	33.177		0.252742	23.7325
2.8594	15.3382	16.6384	16.5959	11.4909	7.5227	29.6203	25.7282	18.1003	16.109	4.7937	10.5248	12.3511	30.4912	28.4956	76.586	35.212	14.0675	9.655	9.5285	12.3742	24.5499	16.5103	14.8957	45.676	46.8146	26.2284		0.263736	22.1499
2.9785	15.9126	15.186	10.886	7.8905	7.4019	30.1506	26.1309	18.5005	18.145	5.5622	9.1458	15.0902	31.0555	30.1903	73.207	30.9482	10.2139	13.2024	10.7347	14.7456	18.0689	12.3796	15.4363	31.4699	51.9175	29.2021		0.274721	21.2605
3.0977	14.6994	13.6381	6.8884	8.8652	6.8955	32.0317	17.2863	17.4293	20.768	8.3718	6.5878	21.7396	35.9974	21.9438	79.206	29.2454	23.2373	18.3944	15.8517	12.5134	20.0356	17.3841	15.5459	35.4398	50.4076	27.3264		0.285716	22.2204
3.2168	13.552	12.5215	8.62	11.0243	9.7647	30.5297	18.3415	18.4145	22.841	7.992	4.173	16.2512	38.7937	23.284	55.6	28.7174	19.5215	12.9303	12.3556	5.8632	14.2429	24.8671	15.6301	23.4539	40.5091	21.3195		0.296701	19.6582
3.336	12.5832	7.9869	6.4741	8.8865	8.4651	27.5562	21.9512	20.2252	22.989	8.8728	4.0781	23.6178	36.0852	17.9875	52.402	21.2616	22.0246	14.763	18.8983	8.1606	9.8842	17.8061	17.1446	15.3617	36.4324	16.5277		0.307695	18.401
3.4551	17.0215	7.0731	6.5278	10.2329	12.6642	24.0325	19.2962	18.9059	20.682	5.2657	4.8613	22.2412	31.9769	14.8856	52.074	15.8856	15.3427	16.6273	17.2002	6.3603	11.4549	19.1836	14.7717	13.3646	36.5474	15.4264		0.31868	17.3041
3.5742	16.4053	6.6257	7.1012	11.2522	11.8266	21.7378	23.5691	17.6251	17.289	4.9066	4.3795	25.7881	28.0613	19.2442	41.073	16.2073	16.4231	19.1003	19.0805	7.3338	4.8848	18.9482	12.0256	14.9688	32.6112	13.2942		0.329665	16.6062
3.6934	13.6803	7.5088	5.4552	10.689	12.5178	20.5848	21.4351	18.2195	18.997	6.5592	4.0208	21.1027	22.8486	18.6399	24.898	13.6227	12.0846	11.7816	19.4099	9.5818	6.3702	18.9802	11.4447	13.1463	35.2123	13.9797		0.34066	15.1066
3.8125	10.3394	9.5796	7.7221	12.746	16.282	21.1991	20.3074	17.3644	21.316	3.7333	2.7219	20.7962	24.6321	18.6779	25.836	9.9644	18.217	13.4146	19.301	6.2765	6.8361	21.7976	8.0979	7.5859	37.2269	16.6529		0.351645	15.3317
3.9317	10.3803	4.9079	4.6497	9.9544	14.3977	14.9607	23.6641	23.3378	23.89	4.2185	4.0146	16.6665	23.5521	23.5199	18.843	9.059	23.3253	12.1251	16.2204	9.2413	6.5652	19.8582	10.0465	6.7508	35.9855	8.9141		0.362639	14.5788
4.0508	9.2389	5.8611	5.1382	9.186	11.6402	20.227	28.3459	17.7649	16.265	3.7781	6.3948	13.4034	27.2305	28.599	14.822	8.8924	17.7669	9.3893	16.841	17.4188	8.1679	20.1901	10.0478	6.9864	28.9584	12.3247		0.373625	14.4184
4.1699	12.9525	5.0829	4.7136	13.273	11.729	14.4664	30.0974	13.7232	16.901	8.72	3.5048	7.6445	24.6983	22.3933	21.221	5.883	15.3439	8.0178	14.1484	14.7294	4.97	26.3417	9.1481	7.1472	22.0929	11.3788		0.38461	13.4739
4.2891	9.4822	3.847	7.6435	17.7063	9.9698	10.5744	26.215	15.0746	21.009	7.1671	3.9598	9.8999	18.6342	28.9025	17.061	6.4557	15.3552	9.6643	14.7104	13.3742	5.3378	22.3713	8.7583	7.8354	20.5778	11.4109		0.395604	13.1922
4.4082	8.5947	3.9065	3.3047	17.0477	8.4767	13.6997	24.3319	10.783	16.425	6.4113	3.981	8.725	14.1544	27.23	16.851	5.5739	16.1553	3.3886	17.8555	9.6019	6.9841	20.2623	6.5186	8.0619	15.9398	10.5352		0.406589	11.7231
4.5274	9.6307	3.9003	3.3566	18.003	8.596	16.0902	22.4218	10.6581	17.935	3.3691	3.0212	12.5882	14.7752	28.2815	17.582	6.0523	20.8791	3.6902	12.2449	6.5643	4.4628	16.543	6.127	7.8012	18.2859	11.9509		0.417584	11.7235
4.6465	7.3849	3.6026	2.8463	15.9767	5.5667	13.1708	16.8482	9.6549	18.51	4.1662	4.1343	13.953	14.8953	25.2499	19.756	7.4334	17.4113	5.3273	11.7928	7.0282	3.8754	22.0875	9.9974	6.2559	16.8791	14.6151		0.428569	11.4777
4.7657	6.1473	3.5758	4.6784	11.6392	6.2277	9.5686	23.3129	9.8608	24.989	5.622	3.801	11.5259	12.8195	17.8427	17.03	8.2677	17.2177	10.4769	12.2118	10.059	2.9154	19.0367	8.5221	4.1766	18.1025	15.2151		0.439563	11.3401
4.8848	7.031	3.6372	3.5927	9.6222	6.8825	13.3094	25.6987	10.8287	24.348	7.5982	5.2926	10.1273	13.9168	13.5511	17.954	6.5949	14.0076	7.8303	11.2686	10.1151	4.5807	16.6362	9.66	3.0607	15.6752	11.0534		0.450548	10.9182
5.0039	5.1193	2.8624	3.6962	7.8125	7.3283	6.4561	34.0229	7.9885	33.081	6.1581	3.9471	14.1612	9.1191	17.8887	16.615	7.6414	15.2455	8.2348	7.6482	11.4129	5.4902	13.0388	8.338	3.2782	15.6805	9.7125		0.461533	10.8453
5.1231	5.1144	2.4537	4.7481	9.8238	9.3198	9.6321	26.2126	8.4505	31.349	4.807	3.1293	11.2154	9.3919	15.7225	21.212	7.9302	14.297	8.0914	11.1602	12.3619	3.4532	12.4782	8.5765	3.8049	19.101	12.6755		0.472528	11.0197
5.2422	5.1321	3.1327	5.1343	5.6842	9.239	13.0557	21.0817	6.8407	31.933	4.7521	4.7836	12.5067	7.0115	18.0562	19.297	6.8196	13.3432	8.1141	10.6676	11.5407	3.801	13.3583	6.4449	4.1226	14.4332	10.8683		0.483513	10.429
5.3614	7.673	5.0892	2.2761	10.0876	11.1059	10.7134	21.7383	9.5021	31.557	5.0349	4.4846	12.436	10.0959	12.4261	18.599	6.5023	10.2921	12.3713	8.1728	10.3789	3.2076	13.8732	6.6348	3.1502	11.0792	12.8907		0.494507	10.4374
5.4805	5.4655	4.295	3.1686	10.8387	8.9015	10.5321	17.9673	9.4	34.736	3.8608	5.0666	7.6713	8.5823	13.5124	21.87	4.7149	13.4643	9.7257	5.3643	9.5703	3.3881	14.2576	7.4969	3.1977	14.3156	16.3017		0.505493	10.2948
5.5996	6.3498	3.3013	4.2794	10.5011	9.7704	12.1546	10.4597	6.6846	24.734	6.5714	5.7284	9.7255	7.2269	13.1531	15.127	4.2664	11.668	5.2954	6.0977	12.8759	5.2972	13.2736	9.3134	7.3569	13.9335	11.6409		0.516478	9.49177
5.7188	7.062	2.9349	3.1443	11.7598	9.2009	11.0585	10.4814	7.3538	28.935	4.7304	8.7198	9.3971	11.0463	18.5413	14.76	4.2795	10.6222	7.0991	6.7178	17.1888	4.1762	14.4411	15.6834	5.2443	12.3428	9.283		0.527472	10.2386
5.8379	3.8116	3.5185	3.3687	12.0716	10.988	13.2149	8.7447	8.2045	30.779	4.3637	6.7544	10.1658	10.0735	17.2119	11.562	7.6317	12.2149	5.7231	6.5484	15.544	3.5431	14.2749	18.5041	4.0674	15.3199	9.6643		0.538457	10.3026
5.9571	6.1461	5.2939	2.2542	14.1017	8.9937	11.2967	6.7911	9.3396	28.307	5.5419	5.5622	11.9794	6.556	17.96	12.526	7.6136	12.5607	7.2066	5.5594	15.8877	2.9459	7.4131	15.7401	5.1982	15.1074	10.1187		0.549452	9.92311
6.0762	7.8451	4.5358	1.9773	9.7109	9.3662	10.2453	9.3928	7.6722	21.87	6.1359	5.8951	13.2162	8.7267	16.1715	9.202	8.498	7.2475	8.6484	5.769	13.6907	3.6265	9.4494	14.5188	4.287	10.2363	7.3052		0.560437	9.04768
6.1953	6.583	4.3582	3.5049	4.9062	9.1713	6.4487	12.3563	9.2663	16.911	6.3473	8.643	12.636	9.4018	15.4001	12.167	7.1694	5.709	14.194	3.9884	11.4056	2.8633	6.9583	16.4205	3.5278	8.7632	9.7125		0.571422	8.8005
6.3145	5.4315	4.2768	2.216	10.0626	6.8682	5.1488	6.7251	20.4278	18.259	3.7567	9.7055	13.6695	7.3426	13.4065	10.194	8.4596	7.0301	12.137	5.453	10.9122	4.553	6.0657	11.4655	4.8099	6.2631	14.1882		0.582416	8.80107
6.4336	5.4664	3.1561	2.6581	7.7243	12.4242	8.5186	5.2291	23.34	13.057	4.1955	7.1749	11.9847	7.0755	14.2092	7.699	9.5383	8.3717	8.7015	4.8122	6.8463	3.0652	5.9043	9.9846	3.5487	8.4742	11.0043		0.593402	8.23707
6.5528	6.2762	6.0766	2.1246	5.1985	8.8955	8.0397	7.8776	20.4222	12.218	8.2322	8.9142	9.8914	8.2344	12.1579	7.368	8.1992	8.6426	7.5195	4.6067	7.5557	3.8654	7.6188	7.0365	2.9344	7.1686	8.661		0.604396	7.9129
6.6719	3.5381	2.8945	2.5975	3.5492	7.9061	6.9508	9.0112	21.5406	9.053	9.5213	4.5359	7.362	7.0572	10.1153	8.082	6.6504	5.4269	8.3782	4.1794	4.0132	2.9765	5.5805	8.691	3.2244	8.9689	9.7508		0.615381	6.98288
6.7911	3.5931	2.1003	3.0799	3.9095	10.4648	5.5715	10.63	18.7911	9.908	9.4934	5.6723	4.6552	8.8596	8.9017	6.886	6.3327	9.0998	8.0348	4.9315	4.5965	2.1996	5.866	10.464	3.9832	8.8938	11.2924		0.626375	7.23887
6.9102	5.7628	2.7683	3.7381	4.9873	12.449	6.0144	7.4746	13.8701	8.041	10.2269	10.3981	7.2329	6.5264	9.6291	8.395	6.018	7.846	8.0791	5.873	9.9243	2.0589	4.7611	6.8694	4.7736	6.4809	11.2809		0.637361	7.36458
7.0293	3.8278	3.0838	5.175	4.6568	10.2091	5.8369	11.4682	10.7086	11.469	12.3728	11.9384	8.9887	9.4885	6.5867	5.701	7.2456	5.4265	8.4661	7.4114	11.1841	3.0503	6.4883	7.313	5.4104	12.1434	8.3303		0.648346	7.84541
7.1485	5.0921	4.9409	2.2248	3.9355	10.7475	6.9771	8.8615	7.7726	9.849	11.4451	10.6077	4.6575	6.338	9.7097	4.191	4.8622	6.6248	7.339	3.6532	8.8754	3.2899	6.1773	6.6662	2.9103	10.5732	9.1829		0.65934	6.82709
7.2676	4.0198	3.9447	1.9192	6.4584	9.9921	9.6419	7.0088	9.8447	9.539	11.6329	8.2863	4.6037	8.6649	10.7432	6.371	4.5003	8.5946	9.1328	5.4723	8.1373	3.4261	8.7862	6.8528	3.9705	10.2747	12.3385		0.670325	7.46757
7.3868	3.4834	3.6183	2.493	7.1111	8.4738	6.0798	9.0846	7.9883	13.257	19.8719	12.7025	6.4724	9.6806	7.3081	6.906	4.3422	5.3055	7.0126	6.7863	11.5597	3.0941	4.254	4.6976	4.5155	7.292	13.1734		0.68132	7.56014
7.5059	5.4642	3.736	1.963	6.6868	6.7058	4.4478	5.8235	7.9302	12.905	18.5126	10.4316	7.4244	7.9811	8.8283	4.249	5.0123	5.4709	3.0597	4.809	12.8464	3.0452	6.5967	4.6978	2.7288	9.9565	11.6576		0.692305	7.03732
7.625	5.9421	3.0127	2.5863	8.8746	6.5385	6.9599	6.7642	7.0118	14.429	15.2114	5.0405	6.7204	4.3288	8.8066	6.226	4.4019	2.9143	4.55	5.5746	15.1946	4.1518	7.105	4.7543	3.8704	8.1058	12.0945		0.70329	6.96808
7.7442	5.5978	3.0563	2.7609	8.4624	6.9712	8.0758	3.582	5.3715	13.17	11.0789	5.7137	6.0908	5.8575	3.9561	3.439	3.0835	2.8141	3.742	4.3266	14.8524	3.3966	5.5135	4.8314	5.0235	10.0122	8.4567		0.714284	6.12448
7.8633	5.2695	3.4851	2.4765	8.9952	8.4026	7.5507	7.0817	5.2185	8.95	12.2225	5.8236	5.4732	9.4234	5.0142	3.578	4.4318	2.9944	5.6808	3.5795	16.4559	3.9638	6.9889	5.3143	2.8686	8.7321	9.4961		0.72527	6.51811
7.9825	3.9134	3.4269	3.0334	7.75	10.3863	4.8532	9.1159	7.4649	6.851	9.6107	6.9054	4.6147	4.8172	3.5495	4.071	3.6281	3.4462	3.4548	3.741	11.3827	3.1641	6.9656	7.1011	3.1682	11.105	6.2101		0.736264	5.91271
8.1016	4.2964	3.9377	3.0432	6.7099	5.3109	5.0652	6.0944	5.1569	5.989	9.8649	6.6503	5.8238	3.799	2.4191	2.248	2.3375	2.738	4.9721	4.2417	11.6989	2.8917	4.7133	4.0757	3.081	14.7593	4.1428		0.747249	5.2331
8.2207	4.5456	4.7755	3.9205	6.251	4.1374	6.4068	6.4138	5.1092	5.665	6.5615	5.7076	6.5077	3.5913	3.3592	2.172	2.2636	3.4522	3.7636	4.6398	9.7301	3.1683	5.3779	6.0004	3.5849	11.6565	4.5481		0.758234	5.12729
8.3399	4.6222	4.6425	3.7563	4.2015	6.1638	6.7706	8.4946	4.508	6.939	3.347	5.9192	4.3509	3.0335	4.3037	2.391	2.5239	2.4789	4.1014	3.8032	7.6685	2.9238	5.9429	6.5171	4.0055	13.2235	4.0433		0.769229	5.02599
8.459	3.8681	3.6146	3.7593	6.4861	5.0629	4.3765	6.9978	3.1399	5.428	2.1116	2.8095	4.1366	2.8024	3.1604	3.95	3.0776	2.5586	4.8905	2.008	7.585	3.7994	6.5016	4.99	5.605	17.0025	6.4732		0.780214	4.85366
8.5782	7.6382	3.3517	2.4661	6.2574	4.142	5.5376	9.7079	3.9819	4.99	2.3011	3.3802	3.4704	3.2615	2.9116	2.199	2.9514	3.6962	2.1101	3.2043	6.6444	3.8448	10.1158	5.2805	3.9384	10.342	5.8723		0.791208	4.75372
8.6973	5.3589	3.6469	2.0664	5.3022	9.3883	5.5145	7.1741	2.5918	2.845	2.8324	4.121	2.6144	3.994	2.6659	2.37	2.2923	2.4915	2.0532	3.7681	6.6123	3.1755	11.0536	4.5611	3.4035	8.0555	4.6728		0.802193	4.40866
8.8165	3.1524	2.9733	2.6224	6.3926	5.9913	5.9292	9.3225	4.6796	2.325	1.9439	2.664	2.9583	5.4287	3.6001	3.099	2.0729	2.1618	3.464	2.4897	5.3281	5.2082	8.5182	5.1251	4.1397	7.8886	5.0417		0.813188	4.40463
8.9356	4.0095	2.3976	3.5841	8.7421	6.4971	7.026	6.0856	2.4548	2.372	1.9584	3.3162	2.1756	3.9958	2.7872	2.388	2.1975	2.5944	3.508	1.9858	4.4542	5.2852	7.5179	5.9254	3.9353	10.3433	3.1098		0.824173	4.25565
9.0547	6.7363	3.4213	2.3067	6.7731	3.8259	4.812	2.4621	2.6094	2.724	1.9359	5.1526	2.2613	3.1819	2.6721	2.138	1.8882	2.5489	3.4053	2.2752	5.863	4.2856	9.1672	5.7566	3.4953	7.3438	3.4729		0.835158	3.94287
9.1739	5.8899	2.1555	3.2097	8.5888	4.1933	3.018	4.6884	3.2966	2.632	2.2939	3.7006	2.4903	3.3923	3.8318	2.077	1.9991	3.0377	3.0736	1.8861	5.8297	3.6819	9.5537	7.511	3.7224	12.9021	4.2658		0.846152	4.34312
9.293	3.3901	1.873	4.3324	6.3895	3.0986	3.6273	4.6849	2.1625	2.932	2.4674	4.068	2.0538	2.4016	3.2784	1.881	1.9335	3.2927	2.2525	2.5922	3.8251	4.1651	9.1273	9.3981	3.3086	12.3978	5.9548		0.857138	4.11108
9.4122	4.7651	3.4948	3.5532	5.9093	3.025	3.8994	3.2797	3.2431	2.491	2.5059	2.4359	2.7824	3.085	2.9384	1.852	2.0682	2.8425	1.8214	1.8716	3.7465	6.9171	9.633	6.2241	2.3207	11.9392	5.5853		0.868132	4.00884
9.5313	6.0863	3.5151	2.9391	3.4486	4.1167	3.3763	3.3379	2.1383	3.292	2.3448	1.9757	2.353	3.8532	2.1555	1.906	2.5842	3.2517	1.8299	2.9024	2.9455	5.0711	6.5611	6.3287	1.9576	12.7975	5.5544		0.879117	3.79318
9.6504	6.6041	2.3889	4.3719	4.3645	4.8667	2.2894	2.5969	2.5328	3.395	2.0839	2.8888	1.955	2.6956	1.861	2.518	3.2598	1.9122	1.9002	2.237	2.6961	2.7438	7.6003	6.6853	2.7819	11.1124	7.2767		0.890102	3.75455
9.7696	3.6134	2.9051	5.1498	6.5837	4.5045	1.9843	2.5059	2.9624	3.323	2.9707	1.9531	2.0337	2.9541	1.9351	2.623	3.1806	1.7217	2.2985	2.4211	3.3486	3.1227	5.702	14.407	4.2065	10.7235	8.2901		0.901097	4.1317
9.8887	3.1062	5.5599	3.4478	2.9145	5.9357	2.6879	2.4176	3.1112	2.014	2.5215	2.6551	1.8396	2.3542	2.1903	2.066	2.7281	2.4022	2.4855	2.6164	2.5458	3.4992	3.6659	11.6446	3.2088	11.6276	8.3303		0.912082	3.82984
10.0079	2.9108	4.3058	2.6116	1.9505	2.9738	3.0233	1.9241	3.1172	1.826	3.0195	2.805	1.902	2.2977	2.3712	2.036	3.0952	1.8833	1.8813	2.5569	3.5875	4.0472	3.2206	7.8488	2.4545	8.197	6.7858		0.923076	3.2551
10.127	2.5327	3.2892	2.4065	1.9272	3.3057	2.1972	3.2901	2.775	2.372	1.9374	3.3796	1.925	1.9219	1.9876	2.523	3.3901	2.0298	2.6609	1.9917	4.0589	3.0473	2.6779	10.2853	2.8951	7.9115	7.3386		0.934061	3.30989
10.2462	4.586	2.9268	2.5693	2.1511	3.1644	2.106	2.7899	2.0187	2.473	1.9955	2.658	2.1281	1.95	1.9315	2.573	1.7968	2.0679	2.2335	2.3768	2.9538	2.0764	3.7873	7.5665	2.6095	9.5193	6.8287		0.945056	3.14761
10.3653	3.5387	4.0629	2.2525	3.0456	3.138	2.3411	2.2693	2.2701	2.063	2.7446	2.0452	2.8577	1.8715	1.8207	2.104	2.0267	1.9607	1.8812	3.6394	3.012	2.5972	3.4053	7.6461	3.6327	8.2161	9.3592		0.956041	3.30006
10.4844	3.1185	3.4788	2.1558	2.0509	1.9568	2.3689	2.9515	2.0909	2.094	2.0663	2.8315	2.0552	1.9842	1.8616	2.315	2.3853	2.2362	1.9298	2.2159	2.3592	1.9411	2.4165	4.3597	5.2436	10.4228	4.9575		0.967026	2.91721
10.6036	2.5222	2.4211	2.3062	1.7877	2.0817	1.9986	2.7518	2.1052	1.909	2.6367	2.8439	1.9969	1.933	1.8171	2.346	2.5537	2.6022	2.3956	2.2701	1.9459	2.0451	2.8726	5.421	4.611	8.4022	4.3582		0.97802	2.80518
10.7227	2.7414	3.1774	2.6038	1.7917	2.2643	2.1534	2.4846	2.0125	1.835	3.2806	2.3183	1.9184	2.5802	1.8847	2.735	2.3922	1.9391	3.402	2.8098	1.9287	2.2501	2.7608	4.3262	2.7909	8.4649	6.6111		0.989006	2.9022
10.8419	3.968	2.1244	2.0594	2.3504	1.7428	2.0944	1.8747	1.9532	2.537	2.7592	2.2848	2.2748	2.4576	2.0458	1.963	1.9369	2.0055	2.6287	2.3829	1.9216	2.705	2.0932	2.2925	3.3853	6.5278	6.6522		1	2.65466

[truncated: 2 more sheets: Image28, Sheet1]
