# Supplementary material for: Crumbs organizes the transport machinery by regulating apical levels of PI(4,5)P2 in Drosophila
Source: eLife. 2019 Nov 7;8:e50900. doi: 10.7554/eLife.50900 (PMC6881148; doi:10.7554/eLife.50900)
Supplement: Figure 6—source data 7. [file elife-50900-fig6-data7.xlsx]

## Sheet: Image3 (2)
X0	Y0	Y1	Y2	Y3	Y4	Y5	Y6	Y7	Y8	Y9	Y10	Y11	Y12	Y13	Y14	Y15	Y16	Y17	Y18	Y19	Y20	Y21	Y22	Y23	Y24	Y25	Y26	Y27	Y28	Y29		Ap-basal	Avg intensity
0	42.5061	34.2344	32.009	37.2363	46.7795	32.352	36.386	56.646	60.362	38.7905	35.054	33	41.34	38.454	28.783	30.835	37.019	36.451	38.879	27.803	34.536	49.899	28.54	14.9	18.929	52.243	33.975	88.699	45.565	20.644		0	38.4283
0.119	41.2102	36.1925	33.1791	47.409	45.9017	33.433	34.25	68.2244	60.448	45.5302	44.697	26.901	40.353	46.382	32.055	29.357	40.423	40.106	44.213	23.51	35.386	45.841	31.521	16.794	23.892	59.964	41.375	93.61	46.587	21.972		0.0044235	41.0239
0.2381	46.8481	36.6259	32.9743	49.7792	45.9704	34.667	49.635	62.8433	62.401	52.7919	38.846	28.045	50.646	55.805	37.769	33.78	52.902	46.702	43.7	27.771	36.5	46.329	32.262	18.053	31.234	66.833	43.301	93.643	47.079	25.56		0.00885071	44.3765
0.3571	51.2149	37.7204	38.0125	45.3477	56.8434	47.095	50.438	61.9459	65.793	44.2666	36.163	31.18	54.116	54.937	38.073	36.867	54.692	57.809	51.607	29.72	44.648	49.927	28.683	23.185	33.429	67.379	52.104	105.405	47.422	23.788		0.0132742	47.327
0.4761	42.6257	37.8353	37.1492	45.9843	57.7163	53.748	53.274	62.3216	69.927	48.1215	37.395	33.799	60.832	58.787	42.81	35.864	65.009	62.412	61.03	27.591	41.748	51.066	34.713	33.163	40.649	74.122	61.794	113.742	48.768	23.344		0.0176977	50.578
0.5952	48.8822	48.5723	37.0653	51.2775	60.5351	52.136	52.165	73.9267	76.615	47.087	38.475	33.073	57.114	68.669	49.77	35.174	66.712	79.202	72.74	28.683	53.795	46.947	32.688	41.694	50.401	78.255	64.904	108.917	47.3	21.931		0.0221249	54.1569
0.7142	47.9876	44.4396	42.7294	47.7947	60.3494	64.058	60.67	67.7035	78.138	57.8371	46.108	31.495	70.67	69.184	53.307	38.333	71.941	85.752	73.152	31.835	60.019	44.186	37.837	61.377	69.934	93.141	65.124	104.02	51.356	27.678		0.0265484	58.6052
0.8332	48.1152	43.7943	44.6708	45.9487	64.185	69.095	66.376	63.3174	91.391	58.1569	56.856	33.001	62.895	78.087	69.856	45.763	81.25	95.551	71.882	35.659	62.051	51.968	42.841	83.305	78.031	94.879	72.409	105.137	54.692	32.021		0.0309719	63.4395
0.9523	53.5815	48.8916	46.6378	52.4299	65.4611	68.971	67.956	72.662	83.653	60.7699	52.824	36.12	74.56	80.567	64.651	48.313	92.523	92.28	73.175	41.951	76.256	47.918	50.6	87.959	97.264	98.178	75.327	99.037	58.793	34.716		0.0353991	66.8009
1.0713	53.5433	53.3375	46.1963	49.4018	66.3922	68.207	69.562	79.6393	89.367	72.5306	62.75	39.002	84.184	92.099	67.172	58.463	103.462	98.049	79.01	35.356	76.811	53.435	64.236	95.621	100.062	96.527	75.254	105.732	56.7	38.33		0.0398226	71.0144
1.1903	58.3745	52.7013	50.1854	52.5711	66.3684	75.078	71.346	75.3673	93.284	65.7426	68.827	38.901	87.897	93.732	62.652	60.661	100.851	115.447	81.747	39.038	80.331	56.487	56.788	98.912	108.16	98.328	69.862	101.499	56.47	32.038		0.0442461	72.3216
1.3094	57.5133	57.8975	47.7775	49.3607	70.0434	82.47	74.437	85.2078	94.082	57.404	76.306	33.354	95.053	93.859	73.434	60.124	103.324	126.634	84.901	43.995	93.16	57.419	59.582	107.338	110.542	97.035	74.552	111.303	57.561	36.348		0.0486733	75.7339
1.4284	62.3778	59.9769	51.9046	48.5682	75.7033	83.544	73.35	86.3111	98.851	59.7194	82.597	41.214	103.183	100.719	73.749	64.821	103.323	126.829	91.767	45.392	93.68	66.927	71.604	118.243	125.491	92.983	88.347	110.671	56.532	44.381		0.0530968	80.092
1.5474	66.0108	62.3924	54.2743	53.8034	78.1282	81.142	78.604	76.2306	93.178	70.9244	79.251	45.236	89.773	97.236	86.295	73.515	109.096	126.252	79.091	46.342	88.745	61.282	80.194	127.53	138.926	105.706	82.922	113.488	55.618	45.297		0.0575203	81.5494
1.6665	66.3338	70.7543	58.0128	52.3423	75.4723	74.442	85.532	84.342	90.595	73.1457	81.028	44.574	97.166	98.017	85.221	78.89	114.865	127.726	79.251	51.783	90.852	70.914	84.886	137.066	146.068	106.39	87.518	104.745	67.913	50.534		0.0619475	84.546
1.7855	57.4941	68.1512	49.7096	55.5784	77.9169	77.95	94.361	80.3919	95.536	78.7125	86.575	45.481	104.888	107.456	88.715	77.073	119.391	132.142	83.076	61.104	103.706	82.23	85.103	131.378	147.932	106.418	94.84	100.736	82.245	52.996		0.066371	87.6429
1.9046	63.4216	71.3962	58.6112	60.8199	73.9532	86.257	85.694	94.8402	102.604	78.0412	99.625	46.359	115.93	111.037	98.077	82.492	110.888	136.331	96.15	68.491	96.432	82.88	83.776	145.844	152.385	103.646	97.188	103.769	79.34	57.118		0.0707982	91.4466
2.0236	64.8771	63.1654	51.7613	57.3876	85.1811	92.01	97.465	94.6389	97.581	80.6469	98.354	48.99	120.147	109.546	92.926	73.822	118.082	133.776	98.347	70.36	108.448	78.849	87.894	143.167	147.428	98.695	111.469	104.96	78.102	62.753		0.0752217	92.361
2.1426	64.8185	73.3068	57.8877	61.5552	87.4447	82.575	91.641	90.2391	110.084	73.4224	94.423	49.289	118.418	102.475	104.236	75.844	121.026	129.687	90.099	81.18	110.181	91.692	85.324	141.296	160.014	100.072	113.907	103.741	91.474	65.383		0.0796452	94.0912
2.2617	66.7205	72.9657	59.8966	64.1119	92.7869	94.833	87.171	97.1049	102.522	80.666	94.704	49.483	112.128	99.506	109.414	89.452	121.946	134.005	93.877	93.069	104.239	95.798	90.924	151.862	149.11	97.121	111.799	100.662	83.715	72.47		0.0840724	95.8021
2.3807	63.8268	67.4487	56.3213	56.7786	82.1127	90.189	94.482	100.537	110.129	73.9033	100.07	53.601	112.561	103.161	115.905	78.35	117.876	129.458	98.034	98.343	114.119	104.723	93.171	151.83	142.604	98.58	108.728	93.791	96.362	80.007		0.0884959	96.2334
2.4997	72.7452	69.6692	63.5461	64.293	88.7318	89.529	97.024	96.5924	106.813	71.3892	107.745	58.401	109.409	110.977	106.524	89.569	112.937	129.832	93.619	97.295	116.495	100.333	105.344	143.116	158.034	95.157	128.342	102.078	96.158	87.648		0.0929194	98.9782
2.6188	73.3872	68.7406	60.6553	63.5814	89.6482	93.442	83.653	92.6642	119.898	77.8892	89.818	59.662	110.285	107.023	116.829	101.7	119.76	136.847	110.82	98.485	123.554	117.251	114.157	141.843	160.137	99.605	120.511	105.123	100.965	93.628		0.0973466	101.719
2.7378	72.5231	71.8018	73.7012	64.9161	85.9326	87.911	86.081	98.7002	108.671	79.1342	115.61	58.638	111.904	106.729	111.927	106.567	120.412	151.344	118.784	99.759	129.007	111.802	123.952	138.892	176.324	108.622	118.004	103.99	102.753	99.475		0.10177	104.796
2.8568	70.6757	80.0996	64.8877	60.5802	95.1717	88.541	92.252	102.645	101.336	81.6071	112.494	64.642	108.07	115.804	117.71	103.739	111.517	141.617	112.148	105.555	126.82	110.287	117.956	156.473	162.389	107.742	122.218	104.873	93.445	111.434		0.106194	104.824
2.9759	74.3269	80.992	65.18	60.3866	92.5871	90.526	93.355	100.287	106.645	74.2803	109.64	74.623	106.57	115.4	118.868	98.451	119.756	138.114	103.356	112.109	120.927	112.604	124.44	151.967	162.105	98.196	127.822	106.48	98.889	113.425		0.110621	105.077
3.0949	71.5982	78.2574	64.9454	63.223	80.0159	84.843	96.202	110.672	105.953	73.5167	110.051	77.822	109.628	102.557	114.713	91.439	129.237	125.475	110.694	119.535	124.544	106.989	112.117	138.36	149.628	99.743	127.758	99.409	106.313	123.354		0.115044	103.62
3.2139	78.6181	81.5392	66.6054	69.3548	91.7282	92.829	102.868	112.747	106.536	84.3829	107.43	82.028	109.125	106.782	115.432	114.156	117.663	129.947	116.067	112.689	128.528	118.621	125.281	142.509	146.811	103.185	128.392	94.153	99.672	124.643		0.119468	107.011
3.333	78.4729	80.5105	67.9626	66.9608	80.8671	93.441	97.527	102.423	95.587	81.6718	108.168	73.907	108.947	113.603	118.923	107.127	132.147	132.735	113.941	120.232	120.222	115.869	134.473	151.395	148.176	100.1	117.579	90.254	108.978	139.924		0.123895	106.737
3.452	87.3473	82.2664	73.0382	63.0818	70.2365	90.165	94.508	94.8422	101.223	78.8017	105.016	75.604	118.045	123.038	119.453	101.196	131.268	132.313	128.123	118.413	108.084	112.185	136.434	151.47	138.05	94.039	108.295	87.636	107.255	143.702		0.128319	105.838
3.571	72.362	75.4444	70.75	69.7445	78.7075	89.386	104.479	99.5271	106.113	80.5593	112.704	76.701	113.478	117.334	123.335	98.448	128.062	135.669	120.07	114.873	122.43	110.29	139.998	143.857	142.929	96.081	104.952	80.202	103.813	144.922		0.132742	105.907
3.6901	89.8231	81.4189	68.4985	53.0915	81.9244	100.597	90.703	96.9973	99.035	84.1563	102.565	81.138	115.207	109.816	122.711	112.249	122.855	141.561	122.876	112.133	125.039	104.168	144.398	157.86	146.073	89.278	108.84	84.133	111.5	151.845		0.137169	107.083
3.8091	89.9768	82.2885	77.3941	58.1743	84.0805	105.793	96.414	102.858	97.258	84.2699	101.963	91.124	114.524	110.723	125.235	114.715	124.719	134.268	131.662	123.701	129.11	103.847	143.308	156.651	156.647	81.552	113.257	92.65	120.619	153.092		0.141593	110.062
3.9281	86.62	74.5927	71.7862	59.7535	93.7493	100.374	94.367	99.1877	91.561	79.7281	101.188	90.173	109.911	117.05	121.237	108.563	124.498	139.423	121.482	128.624	116.907	107.989	138.532	141.295	160.343	81.627	105.481	96.008	130.93	155.341		0.146016	108.277
4.0472	85.3454	85.3763	75.5932	60.9984	87.9889	93.091	98.996	106.323	103.504	71.6825	96.947	90.922	112.254	119.01	124.182	112.804	132.625	131.255	121.383	126.42	125.046	93.811	141.389	146.066	157.45	85.991	108.386	82.868	131.771	152.181		0.150443	108.722
4.1662	98.3525	76.6195	84.2624	62.6492	85.4771	80.039	102.686	103.499	103.452	70.6814	101.596	88.057	109.557	108.092	108.625	112.045	126.592	130.897	124.051	119.399	130.189	86.48	144.42	143.527	155.068	76.02	110.343	84.545	150.79	159.49		0.154867	107.917
4.2852	96.3021	82.1548	74.6741	62.5716	79.1069	87.391	100.93	94.4076	112.728	72.1964	101.65	93.957	119.211	95.841	115.817	101.161	132.796	127.13	123.276	114.284	131.935	90.579	151.583	136.129	139.161	69.998	113.145	79.991	143.655	170.708		0.15929	107.149
4.4043	83.8246	87.828	73.0018	66.9096	71.9724	88.162	100.42	97.8799	113.343	70.3572	100.28	93.097	110.61	110.626	122.371	110.713	129.51	130.26	126.215	112.362	126.505	98.555	144.174	138.988	138.248	70.519	111.646	70.29	142.235	164.499		0.163718	106.847
4.5233	88.1599	79.2906	74.8634	65.2683	82.9896	94.284	101.239	94.2763	104.905	78.6511	101.167	99.628	104.382	117.313	115.308	117.927	139.421	142.235	128.157	120.319	112.368	89.966	141.964	134.165	135.345	63.522	108.437	80.518	154.111	173.722		0.168141	108.13
4.6423	93.0669	75.7282	71.5712	58.0356	78.3736	91.976	94.141	97.0391	97.223	70.842	99.848	96.466	107.125	114.028	113.096	115.715	124.112	151.18	118.452	115.335	116.576	92.197	147.56	140.22	134.382	61.729	118.729	78.257	152.519	169.768		0.172565	106.51
4.7614	83.4149	79.7787	82.5959	58.6327	78.4824	94.168	101.16	97.2999	113.84	70.8885	106.974	100.501	110.638	117.402	116.646	116.937	125.672	140.787	120.957	112.314	116.18	86.966	142.37	147.034	136.142	56.156	115.083	78.609	161.279	172.62		0.176992	108.051
4.8804	77.471	74.4209	72.8111	59.8844	81.9445	87.86	96.373	98.1283	100.414	69.7146	111.697	95.241	107.529	115.669	116.636	120.178	126.829	140.068	115.727	115.089	113.421	90.201	135.142	140.828	136.886	57.442	123.323	78.984	151.815	172.717		0.181415	106.148
4.9995	80.2566	82.4798	73.3818	59.6344	75.5942	89.359	104.995	96.8002	98.625	76.7448	112.923	110.893	101.411	112.152	114.742	114.569	116.136	135.656	106.86	119.617	114.049	88.529	130.561	140.359	144.763	60.281	117.624	81.552	154.766	175.02		0.185843	106.344
5.1185	82.0239	92.2004	67.8433	61.9793	85.5838	94.198	98.21	99.8126	101.041	68.224	109.52	110.409	111.054	115.793	109.068	113.49	116.747	135.914	126.319	124.628	116.838	82.897	125.255	143.408	137.678	58.119	117.962	77.029	155.327	163.514		0.190266	106.736
5.2375	91.9975	86.1634	80.5466	68.1837	77.8866	96.661	98.369	91.3343	102.572	62.8462	109.527	100.476	109.4	105.067	104.984	102.672	116.271	138.691	123.44	129.047	118.482	79.612	129.431	146.929	145.683	59.609	109.53	81.858	152.402	175.084		0.19469	106.492
5.3566	77.7976	89.6705	73.8195	63.3605	75.9642	97.899	108.028	97.3743	96.364	64.5898	102.452	97.172	97.852	105.023	107.081	113.078	129.623	138.178	116.382	127.674	121.773	79.341	138.04	152.923	147.044	49.941	107.265	91.105	155.719	166.2		0.199117	106.291
5.4756	86.0452	86.5462	71.1282	63.9466	68.904	92.685	103.279	101.073	90.2	68.033	102.302	95.987	97.144	111.081	111.475	102.442	130.71	129.448	120.146	132.157	118.154	92.69	129.372	142.741	152.045	57.412	116.325	100.858	145.266	166.776		0.20354	106.212
5.5946	85.9619	83.8156	75.9255	55.874	71.7065	90.195	95.502	88.7678	82.043	61.8322	106.379	96.134	102.767	100.402	106.789	100.78	126.052	141.597	109.479	139.39	116.363	82.139	132.907	141.768	146.101	55.965	122.232	86.642	144.404	161.503		0.207964	103.714
5.7137	85.0739	80.9433	79.8728	55.9283	82.9846	88.991	95.671	85.5709	78.024	59.8336	103.039	93.479	98.667	106.391	123.939	93.699	131.454	130.727	110.029	136.314	114.638	75.98	139.446	152.656	143.463	61.106	111.479	92.075	139.755	161.731		0.212391	103.765
5.8327	79.442	78.7933	77.4003	64.6249	67.277	90.698	102.005	87.4844	88.905	64.1285	103.341	94.291	106.932	111.076	117.541	90.339	123.314	130.158	111.052	132.57	112.95	76.344	140.712	144.711	144.964	68.452	116.318	98.603	144.901	153.661		0.216814	104.1
5.9517	84.7873	86.4366	71.6588	60.5603	64.6358	94.888	96.074	94.285	98.99	64.2754	104.435	92.743	109.946	109.077	126.933	91.122	115.805	126.56	105.071	130.653	124.083	82.419	141.077	138.028	137.296	70.717	108.552	100.385	146.071	138.774		0.221238	103.878
6.0708	83.6977	88.9983	69.0965	66.2372	68.2169	106.883	105.11	94.3005	102.955	65.2855	110.819	94.047	108.874	113.916	116.193	83.907	119.94	136.048	99.855	128.912	111.42	73.676	138.434	144.152	128.998	68.476	103.812	105.779	149.329	143.572		0.225665	104.365
6.1898	83.9311	79.1194	72.9879	63.8424	67.0592	99.644	103.954	85.9804	90.446	76.2184	109.248	80.753	95.474	114.937	106.872	89.025	115.911	144.095	105.45	122.915	113.334	71.289	131.707	133.597	145.776	72.446	98.154	114.919	152.935	148.56		0.230089	103.019
6.3088	85.0898	92.2798	67.7017	52.9131	60.616	101.818	105.989	84.6868	93.692	83.0908	105.755	89.251	94.31	108.084	111.564	78.955	117.729	141.637	99.14	119.605	98.358	73.624	134.127	138.5	141.88	84.334	97.665	132.858	157.321	151.982		0.234512	103.485
6.4279	89.0738	88.2015	78.4134	61.6664	53.6407	89.426	104.759	77.1542	87.633	79.4798	106.373	90.838	96.021	125.13	112.657	93.03	112.861	145.594	97.869	122.925	115.032	73.827	129.27	147.664	148.307	84.95	99.385	128.726	149.919	153.781		0.238939	104.787
6.5469	92.4511	89.7264	76.3038	57.6638	50.3908	99.065	112.255	80.0836	97.292	75.8407	95.266	85.878	92.173	115.928	124.989	89.506	110.592	134.618	100.001	113.22	111.402	68.79	120.234	144.385	140.719	82.593	83.019	125.315	154.901	143.553		0.243363	102.272
6.6659	79.3047	88.1758	72.7713	44.4023	53.7182	102.331	92.039	73.7049	97.983	72.2443	95.139	87.45	87.973	109.665	118.551	86.506	118.729	140.266	99.101	108.116	106.297	59.391	118.587	152.787	146.469	97.68	87.461	141.368	165.821	130.387		0.247786	101.147
6.785	84.547	89.1387	73.5129	45.764	45.8055	103.078	95.624	89.8191	88.462	74.5031	94.228	96.128	78.108	105.659	112.716	91.645	114.649	145.273	103.795	108.973	99.876	58.133	121.568	143.088	139.469	100.287	97.204	135.901	151.743	141.662		0.252214	101.012
6.904	82.7004	76.6929	84.0955	46.7008	51.1134	97.445	98.897	78.8283	95.098	80.3038	91.39	80.582	78.764	99.769	122.188	84.677	108.878	142.747	109.391	108.972	105.456	52.636	117.845	148.442	140.661	108.511	98.957	143.484	160.016	154.128		0.256637	101.646
7.023	82.349	81.6589	78.0379	54.5595	48.8508	97.65	96.911	77.7032	89.907	74.5472	90.451	79.601	85.862	104.266	121.106	89.617	107.2	151.9	115.948	104.2	97.839	60.965	116.522	149.295	140.278	108.84	100.945	153.895	152.36	149.17		0.261061	102.081
7.1421	76.4624	101.797	63.6715	48.8447	46.208	97.103	96.628	68.3692	94.431	74.1334	92.273	79.681	84.58	95.958	121.515	85.026	104.731	144.251	110.094	100.137	93.808	51.76	114.44	134.261	136.049	117.246	96.886	154.128	147.155	137.496		0.265488	98.9708
7.2611	82.4995	92.8798	69.9772	49.7982	47.9507	104.648	98.537	76.09	95.236	78.2068	92.193	78.858	93.093	102.807	129.811	84.067	101.216	134.916	117.529	103.961	97.215	48.235	119.337	140.64	135.287	109.227	113.385	151.256	134.017	147.8		0.269911	101.022
7.3801	81.9547	82.0279	60.3718	47.1477	43.6779	102.054	98.191	83.1583	87.54	72.0131	89.152	78.126	92.627	101.112	128.295	81.373	107.326	141.168	115.802	96.149	98.078	48.03	117.657	136.588	134.266	127.226	114.562	146.918	150.588	141.686		0.274335	100.162
7.4992	81.9414	89.0674	67.3149	50.3637	41.1619	100.259	96.611	75.6422	92.306	73.9912	98.3	78.274	80.814	92.284	118.206	82.252	106.052	143.083	116.584	97.398	95.063	44.16	109.688	140.563	134.874	127.33	116.658	155.184	144.895	125.596		0.278762	99.1972
7.6182	89.8196	85.6548	67.0714	45.1615	43.0784	96.563	94.957	69.7393	87.663	67.859	88.132	75.721	84.101	102.175	111.92	83.48	119.283	143.3	111.945	100.085	95.67	45.864	101.233	143.81	129.635	124.522	121.414	163.669	136.773	123.914		0.283186	98.4738
7.7372	87.5301	88.4605	65.4414	45.0848	44.5458	104.182	87.969	67.0066	87.82	69.6442	87.509	77.165	78.724	97.667	117.885	84.161	117.325	143.57	117.758	98.142	94.64	43.435	96.562	139.988	133.174	116.022	114.106	161.131	131.689	122.189		0.287609	97.3509
7.8563	85.2415	88.5608	68.0289	50.0626	39.134	106.494	95.345	70.0535	87.802	79.2504	93.552	66.671	77.619	90.753	117.912	97.794	108.931	148.825	112.08	103.319	85.137	43.371	100.37	135.322	128.862	113.554	119.41	165.864	124.495	130.026		0.292036	97.7947
7.9753	75.4886	83.4424	71.0782	50.8487	37.8931	99.224	98.95	74.9036	89.32	78.0869	91.216	61.068	77.682	89.484	97.763	85.653	110.151	144.259	106.858	105.448	83.647	47.062	98.584	139.615	129.264	118.749	124.043	172.924	132.512	127.429		0.29646	96.7549
8.0943	78.7556	81.3607	62.7527	54.4733	37.1488	101.273	91.754	77.9255	87.825	83.9943	87.153	58.708	82.611	90.038	108.561	97.523	115.184	141.228	111.941	99.342	87.509	39.785	101.104	133.622	126.49	115.926	133.463	168.213	118.675	129.348		0.300883	96.7896
8.2134	77.1738	87.2455	64.87	53.8262	35.4701	99.985	87.133	74.2943	87.698	75.4765	85.993	57.472	83.155	92.261	105.049	93.892	115.228	130.333	100.97	98.563	93.737	41.633	109.585	122.613	134.04	112.747	141.541	163.743	120.139	124.744		0.30531	95.687
8.3324	81.2355	99.2685	62.4127	56.8332	34.8126	99.782	88.728	74.2226	88.027	67.1381	90.435	59.071	82.391	96.608	113.134	91.591	113.621	135.942	98.78	94.244	80.802	35.362	112.444	124.71	124.315	115.177	137.805	144.157	127.864	123.975		0.309734	95.1629
8.4515	74.0842	87.6135	72.5654	49.2507	35.8564	98.108	92.326	70.9882	89.755	71.958	80.513	62.691	75.559	85.914	110.009	92.649	110.67	123.522	109.104	94.228	84.358	31.096	119.918	126.312	120.282	115.816	137.881	145.378	130.922	124.458		0.314161	94.1262
8.5705	77.2396	84.8026	64.3882	56.7025	35.7339	101.054	92.126	67.5074	97.328	69.433	84.242	62.305	76.509	94.473	106.015	90.43	109.521	134.73	102.325	91.891	84.806	27.092	108.827	112.383	122.927	119.593	130.63	147.733	130.281	125.94		0.318585	93.6323
8.6895	77.5315	84.1871	61.1684	62.8592	41.6777	101.343	90.659	72.9819	91.083	68.4841	78.374	62.269	77.29	93.855	103.84	92.666	117.195	133.77	87.15	95.328	74.675	29.873	113.277	111.71	115.539	123.84	137.075	127.05	128.205	120.851		0.323008	92.5269
8.8086	73.3916	80.0171	62.3035	57.1715	42.8275	105.326	98.526	71.0502	92.068	65.2511	85.73	55.378	81.328	91.358	108.404	83.131	120.693	137.236	87.431	94.111	71.981	27.399	107.918	116.018	115.704	116.865	130.068	118.72	127.982	116.374		0.327435	91.392
8.9276	75.371	87.2969	61.5286	64.5684	44.2336	102.017	97.963	68.8192	87.865	69.4931	82.541	50.885	87.42	87.538	101.358	81.971	120.68	135.398	91.808	86.941	67.136	22.294	99.167	112.511	115.558	115.04	124.747	126.468	109.141	116.822		0.331859	89.8193
9.0466	79.3419	82.4189	63.3462	62.5098	46.0919	94.723	90.815	63.1101	94.191	72.2437	77.954	48.415	86.954	98.479	112.919	85.816	122.692	127.08	93.602	92.988	67.484	21.551	95.145	115.225	110.409	123.836	124.483	122.932	113.135	117.08		0.336282	90.2323
9.1657	81.3756	85.2971	60.5309	66.7219	48.6163	87.702	83.833	65.7095	84.185	69.6621	81.474	47.515	80.158	100.658	112.195	74.659	118.855	133.706	89.998	89.092	63.217	16.092	96.595	111.142	120.962	124.549	121.98	120.754	116.847	111.128		0.34071	88.8403
9.2847	86.3308	76.9066	60.0254	72.1205	51.9555	88.77	78.474	67.5489	86.453	75.356	79.584	42.015	80.631	95.03	113.425	70.171	117.38	125.286	84.819	80.045	58.436	15.897	83.883	125.875	119.824	112.685	109.949	118.532	110.864	108.155		0.345133	86.5476
9.4037	80.7776	66.0514	54.0986	69.0594	46.9148	87.764	77.218	67.6891	90.936	67.8183	75.424	49.836	92.536	85.14	108.6	79.824	124.288	130.211	86.53	77.488	57.335	12.064	72.373	122.432	119.666	105.587	111.33	112.648	107.118	102.019		0.349557	84.6925
9.5228	75.2688	66.4531	58.0747	70.5209	51.3161	92.228	83.194	62.7512	85.603	68.0358	67.955	44.564	83.862	95.587	103.642	75.11	115.542	131.076	84.316	77.597	50.478	10.3	81.331	115.102	127.678	108.183	110.657	111.7	113.981	101.278		0.353984	84.1128
9.6418	77.33	62.7187	57.6386	69.3324	60.5629	88.419	82.082	67.3784	86.408	72.2851	77.484	40.756	82.252	83.445	106.865	79.419	113.336	122.012	90.236	81.812	47.041	8.088	80.772	113.211	121.426	113.782	115.768	105.071	101.469	91.654		0.358407	83.3351
9.7608	71.6568	69.9307	60.5489	71.9436	67.6567	95.413	73.718	67.2545	86.55	79.4126	72.265	39.169	84.866	83.833	93.371	71.423	116.203	130.872	76.747	66.876	43.352	10.384	78.937	98.491	132.121	118.509	100.744	103.099	103.975	101.31		0.362831	82.3544
9.8799	68.0508	69.4457	59.8522	66.0864	70.1603	99.864	72.566	67.9771	84.759	63.156	68.147	35.589	76.808	78.59	91.79	75.462	109.081	129.344	75.325	71.556	50.234	13.014	79.052	105.176	128.772	100.526	105.31	98.368	105.018	103.129		0.367258	80.7403
9.9989	66.3495	72.1947	63.7479	61.3906	71.869	92.561	80.794	59.6273	85.433	68.9524	67.292	36.302	78.695	84.343	88.612	74.391	109.817	129.57	78.177	62.7	41.449	11.414	68.348	113.767	118.584	100.959	103.799	101.153	104.122	92.295		0.371681	79.6236
10.1179	61.1009	69.4674	60.0596	68.6432	75.6233	82.967	76.177	58.2598	76.499	68.4615	72.481	39.764	69.717	78.376	84.075	78.378	100.201	118.89	76.628	53.954	33.479	13.211	71.92	113.119	117.413	97.165	94.992	103.685	102.026	86.507		0.376105	76.7747
10.237	64.3599	62.4959	57.6101	69.4506	75.0966	76.767	79.741	56.8033	72.213	67.5804	62.725	38.189	64.966	73.294	83.967	79.213	100.583	117.44	73.573	51.386	34.203	7.563	71.759	100.728	109.389	90.793	93.21	103.426	100.835	82.103		0.380532	74.0488
10.356	57.2556	54.1987	55.635	65.1122	77.6979	81.22	79.348	59.4795	74.901	69.6165	74.017	34.995	63.401	78.659	77.318	78.485	105.607	118.133	64.511	49.207	36.751	11.595	59.155	100.076	104.821	98.145	90.859	103.54	94.949	85.398		0.384956	73.4695
10.475	63.8889	63.877	55.3968	65.5549	81.6484	88.728	77.496	51.0083	77.262	77.284	64.706	33.279	62.19	68.062	89.343	74.906	105.264	118.579	76.717	46.275	26.608	10.243	56.919	114.909	112.563	99.5	78.478	102.652	90.36	80.36		0.389379	73.8019
10.5941	54.1341	61.9337	51.2658	56.8515	90.2307	84.074	73.297	47.0981	79.441	73.2202	60.439	27.847	63.829	66.119	82.337	66.751	96.002	108.688	65.361	49.189	30.905	10.888	42.813	113.431	103.545	91.386	88.101	106.161	93.935	72.225		0.393806	70.3833
10.7131	54.1591	62.3146	45.7093	50.1299	84.4126	91.231	68.66	46.8686	79.831	64.8134	62.608	32.906	59.367	68.75	79.408	69.494	90.8	106.531	64.465	51.695	29.551	10.704	42.544	108.208	101.16	87.157	78.7	101.729	93.234	76.74		0.39823	68.796
10.8321	53.0858	59.5894	43.3144	57.5167	76.82	85.994	66.699	47.6227	78.211	63.2799	56.934	29.827	48.42	68.387	76.446	66.359	82.521	104.451	67.344	46.637	25.657	12.35	28.479	106.561	109.086	94.152	77.465	106.001	85.97	68.908		0.402653	66.4696
10.9512	53.0544	67.8041	37.7029	56.9185	78.6129	80.221	59.205	46.8853	75.849	65.1218	53.452	30.809	41.596	72.268	79.119	57.183	91.521	114.146	61.442	45.945	30.956	10.965	24.347	92.906	105.621	84.674	77.894	100.313	83.379	68.414		0.407081	64.9442
11.0702	54.5175	56.4007	39.2701	55.5704	78.2307	71.569	52.718	46.9173	73.998	65.3583	55.529	33.048	38.195	66.505	67.55	59.095	86.329	106.028	52.968	38.326	33.958	11.294	22.458	99.47	89.209	81.935	72.661	106.379	84.798	63.646		0.411504	62.131
11.1892	51.0401	60.5715	39.7042	50.4034	76.0164	78.663	50.117	39.4748	70.855	50.8308	55.501	27.433	40.416	57.597	72.133	54.394	90.785	102.001	55.351	39.833	32.702	10.488	21.998	91.903	93.836	72.341	80.289	98.948	77.347	63.17		0.415928	60.2047
11.3083	49.0036	62.7308	35.3172	53.7253	65.3251	64.551	47.296	35.8141	65.979	57.1499	56.243	28.152	36.523	54.755	84.645	44.463	88.594	109.644	49.221	37.087	33.424	8.421	14.264	90.226	89.225	64.716	80.512	100.503	80.549	59.758		0.420355	58.2606
11.4273	45.3368	49.5911	35.2877	56.7095	62.2691	72.763	43.06	33.7549	66.557	52.5903	52.88	29.376	35.067	54.961	73.936	50.102	86.975	102.266	47.656	42.682	26.021	9.52	17.075	92.75	82.851	70.044	69.567	99.794	86.236	59.095		0.424778	56.8924
11.5463	46.7554	48.8784	33.574	48.8239	57.3399	67.439	42.296	35.114	64.76	46.7701	44.631	25.717	30.037	51.79	66.521	48.843	75.979	90.416	49.14	39.406	28.605	8.107	14.93	82.706	80.928	59.518	80.662	108.842	91.764	61.006		0.429202	54.3766
11.6654	48.4188	48.2666	33.296	43.1791	62.4394	62.73	38.2	34.6654	56.834	46.7535	48.712	28.553	34.291	47.669	66.7	51.199	80.47	92.719	45.122	32.642	27.926	8.648	13.48	73.458	81.902	59.607	77.334	101.364	83.395	53.488		0.433629	52.7821
11.7844	36.3312	46.1777	28.0685	44.0252	56.6033	55.15	37.356	39.4814	54.823	42.5868	49.598	26.052	28.941	42.542	67.857	39.147	76.408	90.367	39.699	33.059	27.036	9.978	13.451	73.228	78.756	64.586	75.788	93.52	74.064	47.904		0.438052	49.7528
11.9035	39.0449	38.7992	30.8134	44.6505	63.8039	58.343	43.181	39.4795	47.955	46.3133	50.977	24.033	27.584	40.818	62.279	48.237	66.132	88.484	37.432	35.194	26.386	7.492	11.911	74.559	72.232	61.515	77.14	91.174	74.043	47.02		0.44248	49.2342
12.0225	33.9102	38.31	29.1985	44.0881	52.4214	59.606	38.569	36.5679	42.165	46.5877	47.754	23.372	28.129	39.081	55.863	41.384	67.144	82.054	38.739	36.992	24.931	6.943	13.03	67.967	67.486	59.593	71.85	90.58	62.584	47.348		0.446903	46.4749
12.1415	30.9507	35.7331	36.45	45.1914	47.0217	51.425	32.818	34.271	35.298	35.2707	46.697	24.209	24.957	33.926	55.692	31.337	60.652	77.445	35.841	40.828	23.071	8.532	10.287	61.486	59.904	57.512	69.833	97.302	55.048	50.079		0.451327	43.6356
12.2606	26.7851	34.9808	34.2679	37.2436	49.8608	49.338	31.478	32.0474	36.446	38.5181	37.926	21.577	24.614	37.08	59.654	37.166	56.991	75.296	32.153	40.38	32.764	7.92	14.864	66.3	54.135	48.13	73.459	91.764	52.752	44.444		0.455754	42.6778
12.3796	24.8194	30.966	32.7282	44.8125	47.954	44.803	32.594	32.8611	31.776	31.3799	34.921	22.743	25.492	38.031	51.888	38.061	51.686	77.785	29.059	36.131	29.463	9.602	10.919	62.447	58.194	48.794	64.55	89.999	55.814	39.831		0.460177	41.0035
12.4986	24.8023	31.191	31.7713	40.7979	43.7196	43.282	34.82	28.9424	32.799	31.0047	32.682	19.838	24.797	31.24	48.657	32.48	49.869	71.44	28.73	33.477	25.164	8.264	13.687	55.471	57.025	51.75	66.154	92.179	43.056	41.358		0.464601	39.0149
12.6177	23.4977	35.8971	31.8487	36.5343	48.6104	42.597	27.139	33.3251	29.794	29.5154	28.247	21.457	21.471	38.915	50.599	33.808	46.404	68.427	29.218	35.459	28.071	6.592	10.728	59.115	55.235	54.067	72.245	87.417	45.828	48.501		0.469028	39.3521
12.7367	24.3837	34.9167	30.0467	37.9034	44.1919	31.914	30.721	30.2654	31.049	28.3581	24.796	19.02	22.443	36.354	40.856	37.049	46.731	61.941	28.813	33.12	26.094	8.371	9.738	52.326	52.93	48.185	72.794	87.598	43.666	40.381		0.473452	37.2319
12.8557	24.5512	25.357	27.6137	30.249	40.2447	30.693	27.808	35.3423	28.028	28.141	32.578	18.363	21.446	35.182	34.302	33.532	43.177	50.597	33.166	33.584	26.282	6.409	12.277	42.356	49.327	50.193	68.777	87.202	44.791	38.942		0.477875	35.3504
12.9748	24.668	28.5139	24.1101	29.4721	38.343	30.11	28.686	33.3816	32.861	22.5626	35.036	16.951	21.108	32.438	42.759	31.484	42.306	45.704	35.032	28.565	24.685	4.65	11.832	42.843	49.994	46.765	68.352	81.855	43.904	38.699		0.482302	34.589
13.0938	22.6285	24.1295	29.5176	31.7459	38.4262	27.553	25.756	37.8693	33.827	24.0305	30.471	16.643	23.114	35.039	39.153	32.536	43.153	39.045	30.702	31.293	21.936	7.338	10.723	38.635	53.854	40.493	71.605	76.577	42.312	41.029		0.486726	34.0378
13.2128	21.0986	25.7906	23.7193	27.7089	35.73	29.642	28.918	25.9105	26.109	22.1729	25.162	17.636	20.891	30.816	34.531	26.964	32.537	32.508	36.759	33.504	24.863	5.62	11.107	38.87	51.631	42.984	62.25	85.815	29.071	45.941		0.491149	31.8753
13.3319	19.9006	22.1212	23.9774	31.975	32.6551	30.872	28.119	30.7398	23.886	25.6352	24.836	15.646	20.446	29.428	27.761	27.514	36.347	29.295	35.213	30.87	24.949	6.611	12.532	41.433	51.184	33.324	59.484	82.945	37.486	38.808		0.495577	31.1998
13.4509	18.6343	28.2091	21.7888	29.2987	30.7011	28.234	33.252	33.7977	24.726	22.9791	22.94	15.166	17.446	30.128	25.23	29.991	35.614	27.791	37.116	31.389	26.577	6.238	13.509	40.683	46.605	37.343	57.197	71.993	35.773	40.351		0.5	30.69
13.5699	22.8405	24.5157	20.2676	27.0868	34.6049	26.597	28.673	31.4225	25.422	26.571	22.481	17.593	18.522	29.367	28.865	30.697	34.093	29.896	31.058	35.669	25.125	7.476	7.55	42.296	41.119	36.229	51.494	66.23	34.018	39.205		0.504423	29.8995
13.689	24.9768	30.4528	21.9192	25.399	27.5853	23.326	25.517	34.5217	26.259	23.8486	15.714	15.226	16.845	30.101	26.926	29.524	28.742	29.895	29.319	27.344	24.148	7.813	8.928	39.104	45.062	30.957	53.275	64.872	37.554	41.759		0.508851	28.8971
13.808	20.3835	27.164	25.3993	27.3458	26.3228	27.534	24.969	29.6465	24.753	21.9884	21.561	17.097	17.329	30.075	32.846	33.301	32.959	23.382	28.858	27.41	22.817	4.697	8.397	38.101	47.402	32.799	45.008	62.729	35.309	44.256		0.513274	28.728
13.927	18.2627	27.5268	20.2344	26.7616	30.0876	21.526	26.148	32.3546	23.402	22.0829	23.628	14.237	13.624	31.597	35.871	22.067	34.919	26.009	29.326	31.512	21.903	3.343	11.195	30.416	37.289	33.591	43.73	51.175	32.422	43.922		0.517698	27.3388
14.0461	22.2968	25.3483	25.1253	30.4579	24.2725	21.834	28.81	30.4772	23.61	22.0674	24.959	13.617	12.08	25.644	30.171	27.963	31.368	25.578	27	37.506	20.065	7.216	7.929	31.446	31.438	31.973	36.346	39.616	29.129	49.981		0.522125	26.5108
14.1651	21.9073	24.6345	23.6819	27.1682	26.0437	18.714	35.007	33.9151	25.505	20.692	20.436	13.165	12.347	27.266	31.419	32.126	28.6	29.135	33.39	38.035	20.005	5.948	8.648	31.358	35.689	37.364	36.857	37.281	35.974	39.121		0.526548	27.0478
14.2841	20.2138	22.6822	24.5172	35.9571	26.5543	27.925	33.217	33.4247	30.03	23.1274	22.422	12.872	14.927	32.676	28.903	32.723	30.069	33.701	28.318	35.146	24.136	4.816	7.737	28.338	38.17	32.625	36.175	30.067	29.464	44.199		0.530972	27.5044
14.4032	18.3855	25.967	21.5592	28.1447	23.1747	31.278	32.77	30.0031	23.856	28.678	22.945	12.319	14.286	30.427	25.865	32.805	25.119	30.473	29.279	34.292	19.59	5.925	9.312	26.353	40.682	29.809	31.589	29.863	25.307	43.341		0.535399	26.1132
14.5222	16.4052	26.5108	25.5599	28.9502	21.6275	19.148	28.551	32.3269	25.753	23.4084	20.795	17.169	14.032	25.235	28.105	28.992	32.339	23.985	29.804	30.744	18.135	8.455	7.63	33.006	38.104	32.513	28.334	28.902	22.258	37.413		0.539823	25.1397
14.6412	14.4871	17.7019	22.8758	24.9875	22.674	22.723	26.517	30.555	28.471	19.7487	21.164	13.137	12.033	24.545	26.02	31.537	27.709	31.307	30.541	29.971	17.267	6.085	11.086	25.652	38.689	28.836	21.054	27.523	23.855	38.075		0.544246	23.8942
14.7603	17.6675	14.5929	21.3189	28.2461	25.2164	23.235	28.384	33.7385	28.569	20.5871	24.545	12.165	12.146	28.622	26.73	30.253	30.217	28.276	30.497	31.733	19.305	6.585	8.361	27.522	40.95	29.158	25.04	19.2	24.104	35.107		0.548673	24.4024
14.8793	9.699	12.2983	20.9557	26.0656	21.8487	27.23	27.784	26.8431	27.633	26.5336	22.805	14.787	14.149	23.289	29.636	27.245	30.832	32.622	23.795	33.788	19.735	7.175	7.389	30.763	32.094	29.956	20.03	19.977	24.421	38.398		0.553097	23.6592
14.9984	12.6068	15.3374	23.5538	25.5939	23.5951	23.692	23.29	28.5653	29.389	28.9234	20.833	15.839	10.919	23.951	22.096	28.088	33.159	34.923	29.597	27.615	19.989	6.814	8.01	31.068	33.805	30.509	19.611	16.349	21.139	42.852		0.557524	23.7238
15.1174	9.3233	16.4064	17.1149	25.7585	26.2235	19.149	23.897	28.808	27.434	24.3139	16.653	12.353	13.263	24.292	25.473	30.342	28.835	34.138	32.195	28.659	18.424	5.858	9.207	27.999	36.842	29.715	18.453	18.411	20.703	41.842		0.561948	23.0695
15.2364	9.9651	14.635	18.0837	24.8325	21.5118	19.586	26.035	25.3333	24.443	23.558	19.309	12.644	13.354	25.608	25.762	29.21	25.967	37.216	30.297	28.563	19.973	6.725	9.995	27.09	34.846	26.36	16.789	15.939	20.747	36.255		0.566371	22.3544
15.3555	12.5035	11.4292	15.9964	18.6418	25.1117	24.718	25.479	28.5754	23.917	24.8444	18.628	12.18	12.782	25.177	26.914	25.56	30.022	29.935	27.863	28.126	16.86	5.703	8.825	27.549	27.168	28.504	12.646	13.497	23.127	46.305		0.570798	21.9529
15.4745	7.9507	10.4918	15.6716	18.9908	25.4207	23.212	26.194	31.8858	32.072	21.6646	22.755	14.537	16.098	23.159	26.201	26.33	33.464	31.031	32.395	25.885	14.652	8.294	6.766	28.642	26.851	30.231	14.77	14.741	22.724	40.726		0.575222	22.4602
15.5935	9.5488	11.1771	15.7025	28.2537	24.2673	26.88	24.579	27.1742	32.951	23.1005	22.05	15.048	13.984	29.922	22.767	29.978	32.979	30.974	28.894	27.23	15.847	9.09	9.353	24.359	26.973	28.521	10.947	13.735	22.763	27.875		0.579645	22.2308
15.7126	8.17	12.6496	18.9929	24.7271	22.7667	24.96	26.809	25.834	29.497	23.6586	19.564	10.659	14.554	27.476	22.215	30.834	32.782	29.361	26.245	25.178	19.928	8.098	9.56	31.321	30.07	23.036	12.395	15.181	20.471	32.32		0.584072	21.9771
15.8316	7.7691	7.8739	14.9562	19.9675	21.7493	32.183	24.126	26.5349	24.068	25.7627	24.487	10.741	14.369	24.016	21.889	34.71	28.503	26.098	29.523	30.268	16.949	7.877	9.79	30.439	33.107	25.523	10.91	10.778	22.253	25.32		0.588496	21.418
15.9506	11.0219	8.5379	11.349	23.0523	17.9305	22.84	29.52	28.6953	23.979	20.3289	20.495	11.131	13.775	20.17	24.346	29.543	27.216	32.306	31.447	30.296	17.678	6.193	11.338	23.619	33.538	26.427	9.312	11.641	16.703	28.298		0.592919	20.7576
16.0697	7.8609	7.6304	14.7038	22.4932	19.8105	26.343	26.261	25.3205	23.583	20.8663	22.186	11.805	10.055	22.314	28.929	29.208	26.122	31.08	29.139	30.423	18.778	7.807	8.401	28.86	32.943	26.946	8.178	13.251	19.649	27.355		0.597347	20.9434
16.1887	8.1672	10.1887	16.3138	25.079	20.0608	24.184	24.734	21.2561	23.887	22.0884	20.468	13.288	13.499	21.819	22.989	27.828	27.437	32.013	28.359	26.956	14.767	7.686	9.376	22.266	26.362	21.59	10.023	12.229	16.364	26.036		0.60177	19.9105
16.3077	6.5096	7.825	18.3368	21.9316	21.8147	21.513	22.314	24.5171	24.824	25.2115	20.662	12.67	16.802	16.956	25.015	23.911	26.919	31.252	34.043	26.441	18.088	7.004	11.044	21.233	21.551	23.91	8.268	12.822	17.274	25.862		0.606194	19.8841
16.4268	7.5606	9.4839	15.5726	20.2255	25.3442	22.775	26.223	23.0763	27.449	21.5453	22.657	9.233	14.031	21.803	26.903	25.955	24.912	34.275	35.065	26.504	16.837	6.551	9.245	24.626	23.579	22.484	12.572	11.325	15.176	25.585		0.610621	20.2858
16.5458	7.5556	8.1257	12.2914	16.6012	23.2701	23.968	32.483	19.8574	28.569	22.3428	24.447	12.983	15.879	26.303	29.808	24.728	28.969	30.759	27.802	29.349	18.93	8.669	9.558	25.93	25.593	21.254	9.308	11.731	15.75	24.742		0.615044	20.5852
16.6648	7.6439	8.1423	13.8866	18.775	22.7717	20.945	27.901	24.1208	20.038	26.8914	21.095	12.422	10.993	25.337	28.384	18.497	31.48	26.7	21.296	28.661	14.28	7.603	7.315	23.866	24.236	19.084	12.416	11.352	13.001	24.293		0.619468	19.1142
16.7839	7.6588	10.5352	13.7615	18.1679	23.3091	22.543	28.384	29.5925	23.565	23.6303	19.743	15.435	13.088	28.565	24.153	22.693	26.313	27.739	25.766	25.698	17.853	8.256	6.448	23.594	24.858	19.324	7.899	10.446	16.701	24.771		0.623895	19.683
16.9029	7.7988	6.718	18.1176	18.9417	22.8174	27.992	28.774	25.7592	29.054	18.6337	19.623	14.136	12.482	18.793	29.432	25.184	25.947	28.079	28.919	28.651	17.671	9.22	9.007	23.022	25.692	22.037	10.04	10.514	18.674	24.743		0.628319	20.2157
17.0219	6.6116	6.6139	16.8268	22.9204	23.0207	23.533	27.789	28.4649	22.847	22.8035	20.925	11.22	11.927	22.096	29.801	26.14	27.256	31.175	27.639	23.766	11.857	8.802	7.923	26.344	27.006	21.044	9.218	9.945	17.709	24.693		0.632742	19.9306
17.141	6.6253	6.4987	15.6564	19.4763	23.9479	27.514	27.308	24.4921	24.493	25.616	21.543	12.292	11.013	24.074	24.389	23.844	27.012	26.017	25.604	27.753	16.191	8.695	8.875	26.816	24.511	21.293	7.623	9.92	18.854	24.47		0.637169	19.7472
17.26	5.7745	8.8626	13.5246	22.3681	26.2694	19.769	32.514	28.6617	23.337	28.3138	19.131	12.321	13.802	24.247	22.601	22.609	26.289	32.787	28.799	26.852	15.019	9.828	9.739	26.238	26.765	22.117	5.683	9.553	15.319	22.881		0.641593	20.0658
17.379	5.5512	10.0561	15.781	23.8793	23.0814	18.269	29.271	26.8679	23.121	27.0642	20.535	10.304	15.296	23.682	25.111	28.595	25.669	26.861	24.352	28.063	16.524	8.773	8.01	24.26	29.171	22.66	7.302	10.361	18.457	24.544		0.646016	20.0491
17.4981	7.1818	8.1725	13.3525	21.1622	22.3007	24.415	32.129	25.841	24.518	19.6959	18.601	14.719	17.564	22.005	27.963	26.192	23.315	27.057	26.55	25.004	14.44	8.304	8.704	19.518	25.148	21.359	7.76	10.054	16.849	17.998		0.650443	19.2624
17.6171	6.1318	7.7138	12.1968	16.6376	25.4536	27.401	29.117	25.8286	23.386	20.7428	21.12	15.113	16.162	25.422	26.913	26.327	28.299	30.99	20.692	25.799	12.04	7.309	10.483	19.388	25.858	19.237	7.208	9.56	18.083	15.21		0.654867	19.1941
17.7361	6.7616	7.7514	11.6965	16.8628	18.804	18.096	25.84	28.2833	23.873	18.3609	21.6	14.83	16.794	26.734	25.02	25.586	28.97	25.365	22.067	20.983	12.313	7.943	10.974	17.848	24.007	14.86	7.722	8.037	18.96	14.28		0.65929	18.0407
17.8552	4.4476	6.7579	14.523	19.4368	22.5205	21.274	31.742	25.0813	23.254	22.2121	19.382	13.603	13.378	25.721	26.703	23.844	29.646	22.737	29.985	19.436	13.84	7.491	10.036	16.556	23.837	22.945	9.284	10.606	15.914	16.065		0.663718	18.7419
17.9742	5.8059	5.5908	15.3206	20.7114	20.1787	15.987	31.752	24.4224	24.729	19.1075	20.226	12.791	14.602	28.634	25.53	30.769	23.085	28.703	28.36	23.93	14.412	9.988	8.546	16.472	21.283	20.046	7.833	8.759	16.035	16.022		0.668141	18.6544
18.0932	6.8154	8.144	13.6496	21.4891	17.4782	21.671	28.639	26.3545	23.69	19.9144	17.166	16.302	13.29	24.869	22.414	28.196	22.478	25.801	24.084	24.253	13.115	8.616	13.174	23.925	23.92	18.138	5.898	8.117	17.383	15.049		0.672565	18.4678
18.2123	5.6812	8.2983	14.3097	21.4639	19.8272	23.649	24.974	24.9907	17.955	19.7518	18.093	13.36	14.524	22.165	24.596	26.189	27.794	24.669	27.775	23.459	12.697	8.855	8.618	25.38	26.721	16.802	6.836	8.165	14.033	15.248		0.676992	18.2293
18.3313	4.3983	6.6213	12.7197	21.7022	21.0233	25.629	25.584	27.4871	19.144	18.4069	24.897	17.317	19.171	23.149	24.032	25.341	29.964	24.524	20.123	20.818	11.624	10.564	9.155	22.602	24.144	19.037	6.835	8.693	17.75	17.675		0.681415	18.671
18.4504	5.343	9.1728	11.7477	18.5106	20.747	25.439	25.899	25.9728	21.111	20.5847	26.422	18.568	20.252	24.518	22.599	27.342	25.073	29.136	24.098	21.26	13.776	10.985	10.301	20.813	23.246	15.836	6.61	7.127	17.489	14.438		0.685843	18.8139
18.5694	4.5765	10.4454	17.0844	19.8266	22.3667	26.611	24.675	28.3354	23.596	24.2322	24.862	17.23	16.208	25.499	22.409	25.241	21.54	28.641	28.582	22.765	12.944	15.993	8.922	23.791	24.177	12.674	4.574	8.655	16.901	16.242		0.690266	19.32
18.6884	5.5495	7.7467	14.8089	22.9911	20.2496	25.862	24.478	24.1192	20.033	25.2326	19.92	19.054	19.709	22.115	21.586	27.806	23.333	25.264	30.486	23.765	14.34	15.649	13.508	22.833	22.181	13.573	5.187	7.979	13.848	11.556		0.69469	18.8254
18.8075	5.9417	8.4078	14.0721	22.7237	21.7664	22.698	22.903	24.0616	21.293	22.9145	24.564	17.672	24.731	23.166	26.789	22.841	26.103	23.654	21.953	25.9	12.801	15.073	8.455	24.91	22.426	13.844	6.537	9.946	14.308	11.871		0.699117	18.8109
18.9265	6.7884	8.308	17.1029	19.6108	22.3301	23.782	25.3	25.2492	23.581	21.4423	21.186	18.908	19.558	22.302	21.169	24.611	23.669	28.853	19.355	21.402	14.862	14.495	11.751	28.911	23.185	13.614	5.17	7.799	10.474	13.151		0.70354	18.5973
19.0455	6.9535	8.4117	12.0409	20.8603	22.127	24.761	23.952	24.5364	19.496	28.0558	19.877	16.325	18.993	24.515	18.548	22.52	21.298	25.83	25.675	25.725	13.273	14.735	13.194	26.753	23.361	11.199	4.854	5.56	10.482	12.565		0.707964	18.2159
19.1646	4.3676	6.1942	10.8141	24.3546	21.4815	27.939	20.582	27.5917	23.811	22.3135	19.698	21.612	20.041	20.853	23.055	21.761	24.922	24.09	26.667	27.549	12.699	16.271	12.23	26.828	18.469	8.212	4.228	8.441	12.572	12.883		0.712391	18.4177
19.2836	5.3684	7.0524	11.2833	16.9705	19.5027	22.573	26.954	22.0703	24.536	22.5896	18.771	23.496	24.446	26.248	23.168	19.935	21.981	22.838	24.309	23.906	14.647	13.672	11.393	27.417	21.817	11.472	4.291	7.221	11.347	11.893		0.716814	18.1056
19.4026	6.9011	7.7963	12.5551	16.9515	24.5195	21.846	19.727	22.637	28.148	18.602	19.742	20.789	22.433	24.343	22.667	25.997	21.864	26.242	24.09	22.411	12.653	14.589	14.133	26.273	20.723	10.458	5.483	7.05	13.427	12.573		0.721238	18.2541
19.5217	6.5714	8.7681	15.707	18.7175	22.3594	20.376	24.013	21.7133	24.894	26.6862	19.687	21.177	19.799	24.788	23.575	26.035	21.314	30.447	22.202	24.351	13.223	10.588	12.262	25.898	21.051	13.191	6.191	7.474	9.795	11.593		0.725665	18.4816
19.6407	8.1388	7.4207	16.3725	17.9391	23.0462	16.36	22.278	22.4047	26.386	23.3665	19.189	16.954	26.269	21.892	19.9	20.437	23.828	30.087	28.086	24.967	14.51	15.143	14.921	29.043	20.013	10.434	6.814	6.949	12.118	11.37		0.730089	18.5545
19.7597	8.8241	7.3599	13.9699	18.4856	24.4451	22.11	24.832	22.3176	26.784	22.387	21.271	17.958	21.688	22.71	20.176	23.142	21.837	24.718	27.235	23.413	13.388	12.958	13.217	31.887	20.36	10.135	4.591	6.391	13.256	15.783		0.734512	18.5876
19.8788	6.1503	6.1239	14.7305	16.3639	25.8728	27.495	25.587	27.8264	22.987	21.7087	24.465	27.973	20.967	22.299	22.468	19.237	22.147	25.16	22.074	22.524	16.066	13.678	16.852	29.751	20.143	9.952	3.465	6.623	11.974	11.684		0.738939	18.8116
19.9978	5.7581	7.857	15.7078	20.932	20.881	20.794	28.807	28.6699	25.93	23.0165	24.919	22.536	24.851	20.18	25.858	22.58	26.831	20.086	20.812	20.634	15.212	10.995	16.923	27.813	24.246	10.914	5.626	8.884	12.434	10.305		0.743363	19.0331
20.1168	5.3644	8.3416	13.3871	19.6657	20.7251	21.268	30.838	28.6738	35.109	16.251	18.78	25.482	22.524	24.499	24.753	23.413	19.984	19.187	23.511	20.047	16.247	12.274	18.423	22.463	21.994	10.437	5.131	6.432	10.383	12.142		0.747786	18.591
20.2359	6.2429	7.1452	12.1612	19.2091	25.6805	20.247	30.066	28.4273	30.605	16.6273	18.923	22.307	30.695	24.142	20.88	23.595	20.19	23.326	23.446	19.301	10.793	11.397	17.155	24.288	22.017	12.865	3.067	7.091	11.28	14.118		0.752214	18.5763
20.3549	7.8113	7.2051	12.4552	20.2168	19.2991	26.62	27.221	25.8356	31.561	18.3253	21.138	21.854	21.272	28.3	24.517	24.675	22.396	24.863	18.939	19.756	14.16	11.392	15.557	23.37	19.614	10.272	5.766	4.845	11.827	12.116		0.756637	18.4393
20.4739	6.2555	7.4583	10.2265	20.0137	17.1254	24.097	26.214	26.6999	24.392	25.6295	22.128	20.328	24.298	24.906	22.874	21.848	24.575	21.448	20.533	19.184	17.412	10.242	18.678	25.946	20.172	10.189	6.896	7.001	11.671	8.379		0.761061	18.2273
20.593	5.6703	10.722	16.3461	23.1234	21.4797	27.128	30.991	30.5476	21.664	24.5629	21.103	21.383	22.625	21.696	21.732	20.807	22.415	25.67	21.504	20.889	13.32	10.083	16.599	24.162	19.972	9.182	5.295	7.216	9.931	10.977		0.765488	18.6265
20.712	5.8364	8.4865	13.3746	19.2884	19.7805	21.625	34.817	29.3933	26.741	21.3984	24.741	22.806	23.961	15.409	26.062	21.498	23.157	26.031	18.742	19.309	12.744	10.226	17.333	19.188	18.493	8.787	4.807	3.785	9.864	10.078		0.769911	17.9254
20.831	7.1866	6.4079	15.2855	20.2095	18.8269	23.04	29.166	29.129	24.6	24.9324	23.675	21.597	19.759	17.204	23.977	18.371	23.055	19.854	25.573	15.166	15.4	10.869	15.677	20.449	18.65	7.478	4.781	6.89	9.89	10.077		0.774335	17.5725
20.9501	8.2536	9.569	15.4046	23.0668	19.3088	21.956	28.106	30.9182	26.476	19.3361	24.333	18.659	22.65	18.749	21.511	20.56	19.181	19.221	20.605	19.396	18.271	9.297	15.945	18.302	19.156	9.347	5.782	6.69	13.489	7.897		0.778762	17.7145
21.0691	7.2848	5.8558	17.8826	19.9198	25.3935	23.807	29.606	26.702	25.44	17.3658	19.817	19.535	19.965	19.456	21.463	23.177	26.616	20.437	24.915	19.674	14.667	7.132	16.938	18.929	20.344	7.267	5.755	5.63	11.338	8.07		0.783186	17.6794
21.1881	5.0875	6.4496	20.1354	20.429	23.1196	22.328	33.063	31.1334	24.686	19.8003	26.16	20.43	22.766	26.478	19.641	23.207	21.245	29.313	26.834	17.085	15.626	7.185	17.969	19.327	22.078	6.825	4.965	6.224	6.587	9.122		0.787609	18.51
21.3072	7.3568	7.3823	19.299	20.6313	20.3161	19.98	26.331	23.9593	28.442	16.0971	25.879	19.08	21.186	23.359	21.596	26.985	23.493	21.356	22.936	16.104	11.55	10.522	14.596	20.261	19.977	8.923	4.119	7.379	11.134	7.641		0.792036	17.5957
21.4262	6.2438	8.582	17.2075	21.9635	26.0475	21.654	26.328	23.2862	28.432	17.9398	24.744	23.779	19.537	21.808	19.281	21.634	24.626	25.04	25.95	14.359	15.56	8.002	15.251	18.097	17.245	6.798	5.591	8.096	10.652	7.607		0.79646	17.7114
21.5452	7.5299	7.6877	17.9411	22.2853	19.91	24.16	23.488	19.6191	23.623	19.6034	25.834	24.793	21.541	21.928	22.641	22.311	21.532	21.182	22.864	16.741	14.975	7.72	19.348	20.078	16.768	7.089	4.854	6.876	9.816	8.034		0.800883	17.4257
21.6643	5.3622	5.6213	21.6086	22.579	20.9017	24.569	24.787	26.5099	23.945	23.0416	23.392	24.749	18.606	22.458	24.748	23.877	29.055	23.094	21.127	17.382	15.52	7.474	14.651	17.012	20.337	5.506	4.242	6.836	9.913	8.136		0.80531	17.9013
21.7833	8.3819	7.0317	18.6112	17.2161	22.4783	21.578	25.347	26.4481	26.073	21.215	28.369	22.176	20.747	22.597	20.167	24.262	24.425	21.132	23.847	14.79	16.788	6.853	12.668	17.732	21.251	5.103	3.906	6.733	10.215	5.673		0.809734	17.4605
21.9024	7.4859	10.2689	19.8826	19.1087	20.9624	24.027	23.47	25.9581	23.121	19.7468	22.58	23.86	22.41	24.574	18.265	22.602	19.879	18.913	23.144	17.692	18.885	7.463	15.191	16.662	18.008	7.463	6.126	4.782	7.915	5.483		0.814161	17.1976
22.0214	8.2429	8.5031	21.0631	19.4749	21.5394	25.103	22.191	25.1661	26.973	20.9459	24.502	20.08	26.134	21.638	16.209	23.015	22.482	23.62	21.348	17.416	17.577	9.22	12.408	16.825	15.877	7.328	6.503	5.075	7.747	6.267		0.818585	17.3491
22.1404	6.9268	6.9334	26.5231	18.9858	23.9354	20.813	32.843	31.4256	23.374	19.1389	24.344	20.628	21.206	22.971	19.301	19.706	20.758	21.051	17.199	15.421	15.212	9.134	13.082	20.52	17.285	5.918	4.507	7.058	7.218	6.777		0.823008	17.3398
22.2595	8.3787	8.1653	24.6903	20.1658	19.3451	19.258	31.396	26.0054	22.345	20.1006	23.661	20.594	18.397	19.74	18.609	25.22	17.104	23.368	18.221	16.451	15.237	8.498	13.307	20.034	17.317	4.729	3.754	7.756	7.574	6.795		0.827435	16.8739
22.3785	7.3369	6.0398	20.6433	18.5803	17.456	17.902	25.656	33.4138	20.109	24.2535	23.639	20.182	16.783	19.91	19.188	20.731	20.033	24.188	26.97	11.168	13.093	6.951	16.585	18.01	20.663	5.454	3.092	4.765	7.384	7.497		0.831859	16.5892
22.4975	9.9703	5.0973	21.075	20.7917	20.8016	24.287	24.673	29.5323	28.431	22.5451	24.095	19.343	18.795	26.919	20.345	23.471	22.771	22.989	25.271	11.242	13.549	6.655	13.254	14.938	18.195	6.072	5.233	4.501	6.239	5.519		0.836282	17.22
22.6166	12.0522	8.7223	22.6593	19.3387	22.2459	24.692	23.372	28.2422	24.91	18.5817	22.736	20.06	18.407	22.348	17.706	22.048	23.353	24.364	22.884	13.207	13.927	6.962	11.99	16.106	17.502	8.544	5.84	5.756	8.812	9.478		0.84071	17.2282
22.7356	7.8154	8.2804	23.0134	19.7539	18.6012	23.864	25.005	26.7968	27.187	18.8142	23.508	27.387	19.674	23.295	17.546	21.039	23.679	27.232	23.171	15.301	13.363	6.599	13.002	17.85	15.327	7.334	6.961	7.286	10.36	7.816		0.845133	17.562
22.8546	9.082	6.6361	18.0513	25.8968	23.0296	27.977	20.311	23.9446	22.211	18.3588	25.446	22.683	21.326	17.421	18.766	23.293	26.346	24.44	21.984	14.394	12.701	6.155	10.855	21.292	17.838	8.307	5.652	8.931	11.438	5.413		0.849557	17.3393
22.9737	8.3894	6.9587	25.4427	19.841	25.2162	27.473	24.485	27.3404	31.75	21.7836	24.25	20.355	20.843	20.863	20.912	22.106	22.691	22.086	16.352	12.855	15.73	6.291	11.76	20.444	19.845	7.675	4.764	7.044	8.728	5.494		0.853984	17.6589
23.0927	8.83	7.8164	25.6279	16.4316	22.8333	26.921	24.845	28.9727	24.315	25.1013	25.687	21.67	18.457	19.51	20.995	22.185	19.583	21.86	20.415	12.34	13.593	6.786	11.745	18.178	21.182	6.241	7.973	8.765	6.39	4.828		0.858407	17.3359
23.2117	10.3818	10.3661	21.3193	17.8269	24.6906	26.27	24.801	31.9818	20.146	21.3638	23.746	19.003	20.141	16.38	21.157	20.09	16.266	19.174	16.959	11.508	17.373	6.614	11.893	17.166	17.676	6.22	4.36	5.827	5.25	5.811		0.862831	16.392
23.3308	12.3038	9.8437	17.9019	19.1592	21.3957	29.114	21.412	28.5207	18.167	21.6372	22.926	22.437	15.66	20.783	19.265	16.647	22.006	20.961	18.615	13.855	11.608	6.095	13.004	19.477	21.357	7.461	5.092	7.581	4.439	4.948		0.867258	16.4557
23.4498	10.5142	9.651	19.3116	25.9414	21.7003	27.398	21.45	25.4282	24.038	22.2329	24.135	21.893	18.735	20.715	19.224	20.858	21.908	21.542	17.733	9.729	11.446	8.91	9.899	23.207	14.838	7.604	5.536	9.255	5.768	4.778		0.871681	16.846
23.5688	13.2602	11.6138	20.2257	20.3546	21.0147	33.723	25.499	27.7504	27.751	16.8055	28.899	23.291	13.9	17.869	18.216	22.131	18.756	22.328	16.334	8.047	11.109	6.75	9.858	15.967	16.189	6.551	6.242	6.623	7.115	5.568		0.876105	16.658
23.6879	15.8001	9.9826	23.7229	20.542	24.1682	25.54	22.84	24.4482	23.962	19.2617	19.529	23.564	16.08	19.107	15.62	22.671	21.18	22.672	15.031	12.592	10.557	6.249	8.654	14.328	16.53	7.252	4.743	4.649	5.048	4.99		0.880532	16.0438
23.8069	15.9416	10.8077	21.0709	20.6147	21.4274	29.605	23.612	24.61	25.458	16.7722	21.948	23.022	17.371	21.195	16.614	19.351	19.23	18.245	15.819	9.095	10.785	7.161	8.667	16.127	19.429	8.769	5.899	7.287	4.205	4.413		0.884956	16.1517
23.9259	14.2758	13.1769	24.5474	21.9298	21.931	23.056	21.204	20.8896	21.192	20.9573	18.301	24.692	17.468	23.904	17.166	18.081	18.296	20.652	17.077	10.155	13.212	6.128	8.651	12.822	16.001	8.445	6.416	5.792	5.499	4.247		0.889379	15.8722
24.045	16.4066	13.3555	24.1348	20.3295	22.8527	23.397	25.317	22.0539	21.026	23.8869	20.644	20.377	16.38	22.843	16.82	16.714	20.621	17.883	16.108	11.946	10.523	9.328	9.04	14.957	11.824	7.652	5.348	7.253	4.83	3.098		0.893806	15.8983
24.164	15.0086	16.3186	23.3919	22.4062	16.7459	25.968	21.895	30.4955	23.553	20.4568	27.292	18.063	13.446	20.672	19.324	15.704	18.505	17.464	14.641	10.764	10.027	11.48	8.452	13.19	11.538	7.726	5.106	7.767	3.931	3.664		0.89823	15.8332
24.283	17.8968	14.868	22.7266	18.862	19.2375	23.929	22.322	31.2791	24.976	21.3371	22.118	22.014	14.006	20.968	16.436	16.352	19.991	18.6	18.908	10.066	9.419	6.968	8.838	12.493	13.956	9.456	5.498	7.871	4.593	4.861		0.902653	16.0282
24.4021	17.3031	17.9451	19.3248	22.9141	24.423	23.952	26.277	23.8558	25.957	17.054	19.59	23.53	12.653	23.989	17.626	19.667	19.135	16.591	15.386	6.479	8.212	6.62	10.328	10.754	13.265	7.241	4.61	7.813	4.603	6.648		0.907081	15.7915
24.5211	22.18	19.8725	17.5354	20.4717	25.1201	21.983	18.099	28.5514	24.435	17.069	20.715	25.778	14.74	21.366	21.869	15.161	20.389	19.242	15.249	7.432	8.053	7.197	9.455	10.612	11.196	6.904	6.933	7.437	5.098	4.182		0.911504	15.8108
24.6401	22.2003	18.5269	17.2086	19.5012	20.7385	23.484	20.466	26.4421	18.546	16.4504	24.405	20.277	14.912	18.928	17.643	17.95	23.495	16.581	12.982	9.86	9.209	6.885	8.724	13.193	10.83	7.434	7.164	6.892	4.511	3.858		0.915928	15.3099
24.7592	23.9479	24.1159	14.8049	19.4983	23.4234	20.708	20.933	26.8271	23.526	17.7285	24.018	23.817	13.23	15.343	16.512	18.631	20.445	19.559	11.404	7.878	7.225	6.789	7.559	15.427	13.215	5.983	4.473	9.299	5.618	4.899		0.920355	15.5612
24.8782	24.9278	27.2544	12.6296	21.9598	28.7205	19.965	11.97	25.4074	20.506	15.9418	21.012	21.516	17.732	17.69	14.142	15.755	18.987	18.371	13.4	8.536	8.207	10.25	5.025	13.588	13.764	10.405	5.589	6.483	3.829	4.32		0.924778	15.2628
24.9972	26.8153	23.6128	11.6852	23.8563	26.9527	21.794	15.327	25.4959	23.927	11.412	22.271	19.236	16.419	17.213	15.791	13.346	23.724	19.901	12.129	7.751	9.734	8.725	5.874	12.143	11.617	12.693	5.835	6.447	3.403	4.666		0.929202	15.3265
25.1163	26.2684	22.9544	12.5325	23.5558	28.3459	24.622	11.473	24.3661	22.179	13.2796	25.67	19.111	15.313	15.651	19.384	14.839	18.644	18.798	11.069	7.746	10.172	4.207	7.507	11.886	10.494	9.756	4.693	6.808	5.495	3.902		0.933629	15.0241
25.2353	25.7622	22.1768	8.7572	26.0748	25.4159	26.075	7.406	22.8672	21.25	16.9495	21.306	21.959	13.457	14.793	16.049	14.354	20.078	18.139	9.531	6.921	8.024	6.277	8.864	11.684	14.3	8.081	6.635	6.074	4.557	4.896		0.938052	14.6238
25.3544	22.4176	18.452	9.4594	18.7212	25.1843	20.831	6.596	27.974	21.703	15.587	21.012	25.38	13.42	14.148	15.345	12.245	21.805	15.544	12.67	9.219	8.485	6.697	6.414	16.217	12.28	6.782	6.339	5.461	3.574	5.615		0.94248	14.1859
25.4734	22.8489	20.4923	8.8183	21.7536	26.3155	20.123	6.304	27.5839	23.277	15.6086	19.653	22.859	11.731	13.046	15.301	11.185	20.168	19.714	10.945	7.144	9.604	7.805	7.395	13.094	10.969	6.113	4.876	6.252	3.476	6.009		0.946903	14.0155
25.5924	20.61	21.2697	6.9389	18.0971	23.9888	20.209	3.926	28.1412	20.496	10.2062	19.021	14.689	11.463	13.34	13.393	11.313	19.697	17.986	9.241	9.953	8.816	8.041	6.945	7.619	12.318	7.847	7.642	4.342	4.192	3.542		0.951327	12.8428
25.7115	19.7405	20.3277	5.1484	19.7965	18.9246	16.049	3.909	24.4716	17.871	10.6918	17.734	14.158	10.594	12.283	17.199	12.212	18.204	16.229	8.499	8.69	6.376	8.388	7.482	7.176	12.251	6.002	5.884	3.888	4.944	5.227		0.955754	12.0117
25.8305	23.9624	22.1347	4.5526	16.0728	23.8876	12.601	4.046	24.6104	17.469	6.8509	17.083	12.325	8.283	12.905	13.877	9.804	19.735	16.424	7.693	7.867	5.824	5.869	8.418	8.382	9.146	7.892	5.297	5.22	4.78	3.414		0.960177	11.5475
25.9495	20.621	20.3472	2.7769	18.9142	21.0673	10.253	2.987	26.48	16.658	8.2514	13.293	13.639	5.679	13.028	12.197	7.181	18.983	15.357	7.608	6.842	5.992	5.443	6.092	8.652	8.315	4.961	5.768	5.531	3.112	4.342		0.964601	10.679
26.0686	18.2272	17.1101	3.0149	16.8766	20.3958	8.873	3.381	20.8407	14.213	7.1308	11.951	12.033	9.034	10.864	15.434	10.046	14.46	17.421	9.156	8.814	8.758	5.115	5.238	6.651	9.757	6.683	6.496	4.761	3.127	4.212		0.969028	10.3358
26.1876	16.1692	16.4395	1.5373	20.957	17.5995	8.43	2.064	19.1921	13.807	5.9716	11.049	10.397	7.442	13.359	13.981	9.072	15.78	13.324	9.824	5.678	6.208	6.698	7.042	8.822	9.135	8.003	6.508	4.591	4.264	3.388		0.973452	9.89107
26.3066	14.2189	11.8429	2.2821	19.3088	15.4125	6.796	2.99	21.0326	10.318	2.7534	11.177	8.663	5.302	11.094	12.485	7.776	15.434	15.217	7.869	4.566	6.161	5.695	5.855	7.478	9.1	7.068	5.934	3.919	2.191	4.394		0.977875	8.81111
26.4257	14.6748	14.3635	2.7276	20.5639	14.8768	5.121	1.026	24.5825	12.95	5.8393	10.668	7.228	7.114	9.449	7.955	8.871	17.841	17.446	8.415	6.041	6.998	4.466	7.822	6.261	9.143	7.494	6.132	5.021	3.095	4.663		0.982302	9.29495
26.5447	16.1016	11.029	2.6427	14.0827	15.0595	4.096	3.03	21.3629	9.643	3.1481	7.694	9.325	8.685	9.698	9.722	8.924	16.068	14.31	7.584	6.638	7.138	4.615	5.144	5.46	6.737	7.031	4.759	4.324	3.898	4.017		0.986726	8.39888
26.6637	12.0767	8.0904	2.6895	15.0222	12.7582	3.066	1.897	17.8288	9.388	3.1347	7.722	10.229	6.419	12.057	8.243	7.415	12.252	12.432	6.021	10.551	7.594	5.616	5.604	6.282	10.215	5.057	5.749	4.243	3.473	4.452		0.991149	7.91925
26.7828	8.8181	8.2092	1.1652	11.7243	8.4141	2.687	2.749	15.6622	9.646	1.972	5.263	10.207	7.41	10.564	9.991	9.536	14.676	14.318	6.84	5.637	7.222	6.747	5.48	7.555	7.415	6.254	6.218	4.853	3.378	3.691		0.995577	7.47674
26.9018	11.6988	4.9902	0.9415	7.8147	9.4136	2.366	2.53	14.7268	8.911	1.5166	5.334	10.069	6.859	10.084	8.719	7.012	14.551	11.267	9.457	6.157	6.852	8.569	7.212	7.253	8.683	3.583	5.363	3.929	4.433	3.179		1	7.11581

## Sheet: Image1 (2)
X0	Y0	Y1	Y2	Y3	Y4	Y5	Y6	Y7	Y8	Y9	Y10	Y11	Y12	Y13	Y14	Y15	Y16	Y17	Y18	Y19	Y20	Y21	Y22	Y23	Y24	Y25	Y26	Y27	Y28	Y29	Y30	Y31		Ap-basal	Avg intensity
0	46.143	30.098	48.45	33.22	40.602	35.507	25.579	26.939	29.346	24.682	35.951	30.241	29.577	44.104	32.783	36.974	31.399	33.564	40.161	40.837	30.262	34.573	26.682	27.997	28.804	26.267	30.955	29.503	24.277	33.343	34.556	24.773		0	32.7547
0.119	47.082	36.678	50.185	42.957	48.582	39.921	36.9	30.089	35.994	29.201	45.581	32.874	37.199	47.14	34.187	40.565	40.916	44.406	47.892	44.016	32.586	45.347	33.376	29.383	31.04	33.652	33.192	38.055	28.782	33.394	35.992	27.785		0.00568016	37.9672
0.2381	49.906	45.949	57.241	53.146	52.073	42.253	41.846	33.718	35.703	36.718	56.241	45.675	46.699	51.217	35.367	39.48	44.65	53.454	50.282	54.799	42.794	49.398	37.337	35.733	35.029	30.88	38.093	39.337	37.737	38.12	35.468	31.748		0.0113651	43.0653
0.3571	61.352	55.384	60.47	61.25	56.521	52.781	48.862	36.106	36.543	52.644	63.448	52.071	50.496	56.876	36.309	42.946	53.795	57.506	53.821	64.615	50.482	52.431	40.517	41.341	39.973	35.549	39.713	51.428	40.145	45.108	39.826	32.153		0.0170453	48.8269
0.4761	64.465	69.182	76.537	63.794	60.842	65.424	59.278	42.156	44.845	60.555	71.254	57.331	49.954	70.718	48.561	51.967	57.056	63.755	61.89	71.238	61.064	56.069	49.159	40.5	40.659	46.647	45.293	62.729	46.531	58.944	45.29	39.576		0.0227254	56.352
0.5952	83.49	77.485	89.454	81.889	74.55	73.945	60.269	48.576	49.848	67.25	84.554	68.938	55.723	84.071	53.784	56.469	67.337	74.088	68.646	86.58	65.781	68.938	51.823	52.01	49.609	55.518	43.854	67.851	51.653	61.483	49.648	39.541		0.0284104	64.5205
0.7142	95.237	99.879	94.677	95.333	93.569	87.552	80.935	62.876	69.038	80.479	115.993	78.511	74.005	106.962	55.461	70.641	84.9	97.163	81.501	105.719	78.182	85.504	59.317	59.258	55.317	60.299	55.795	83.231	58.636	68.609	61.621	41.29		0.0340905	78.0466
0.8332	119.452	115.939	109.384	112.599	100.336	104.828	96.775	75.306	71.392	93.762	120.285	100.067	91.449	116.932	57.137	83.545	103.599	119.131	101.515	117.958	94.044	102.203	75.79	80.117	69.386	75.977	66.175	93.678	69.537	78.503	72.406	57.284		0.0397707	92.0778
0.9523	134.925	126.787	130.686	134.9	126.228	123.264	122.822	103.245	103.213	110.963	131.439	104.604	108.338	130.597	72.856	87.202	130.556	135.42	115.888	134.038	109.892	123.142	97.939	96.51	80.764	93.491	73.445	95.454	83.361	84.038	80.346	66.894		0.0454556	107.914
1.0713	159.582	148.388	151.734	159.803	141.863	158.147	133.584	115.67	124.35	122.019	140.261	116.03	122.858	143.747	80.261	114.84	134.337	130.973	120.229	159.997	124.689	126.999	105.188	106.377	82.707	97.476	85.273	102.503	81.745	81.407	89.078	73.927		0.0511358	119.876
1.1903	168.539	169.392	165.799	175.135	152.308	190.235	151.759	127.928	138.632	134.081	159.87	133.738	141.991	148.278	93.856	96.52	142.206	134.526	137.918	170.113	159.178	141.328	109.04	104.152	93.537	96.563	91.239	103.406	87.068	85.75	97.185	88.397		0.056816	130.927
1.3094	194.89	174.77	185.352	178.92	187.78	202.915	158.284	146.491	149.196	151.277	169.525	155.752	160.36	155.951	106.585	103.382	144.874	147.129	155.815	162.241	161.422	147.325	132.499	118.394	98.46	105.925	95.646	108.657	88.094	96.311	106.83	103.982		0.0625009	142.345
1.4284	203.061	187.161	204.187	186.973	187.093	199.273	164.272	158.601	162.647	161.059	173.441	161.217	157.89	167.262	113.227	105.998	139.319	137.268	145.447	176.819	146.54	152.427	140.934	124.214	94.547	105.487	101.131	120.344	99.928	99.269	106.882	121.101		0.0681811	147.032
1.5474	207.771	183.247	202.382	195.177	177.076	198.471	169.006	171.106	163.146	166.244	176.315	169.186	166.09	168.233	113.352	97.563	144.081	145.188	157.472	183.621	148.252	156.513	149.936	118.779	108.732	107.645	120.758	127.299	115.197	114.309	127.683	137.054		0.0738612	152.715
1.6665	198.874	177.431	198.979	192.034	183.23	191.165	160.817	163.712	170.592	164.276	187.217	180.539	167.396	143.375	109.471	92.038	132.575	142.595	159.622	182.24	133.736	149.216	152.985	136.938	106.452	120.67	123.368	140.353	118.023	129.769	139.701	149.227		0.0795462	153.082
1.7855	200.262	176.743	202.316	203.51	174.728	188.669	156.273	171.21	167.121	164.593	194.351	190.951	158.061	139.36	112.512	95.746	135.503	137.527	148.362	176.47	140.623	144.413	161.598	134.085	114.366	131.058	132.789	141.689	119.917	122.003	147.857	149.066		0.0852263	154.179
1.9046	189.133	182.344	195.786	192.694	175.445	186.064	145.727	173.137	164.849	168.461	190.919	195.714	163.85	144.335	106.916	95.672	139.605	122.268	155.145	166.389	132.872	144.325	172.409	133.537	119.58	127.45	138.664	142.149	130.513	149.625	150.188	149.682		0.0909113	154.545
2.0236	181.408	183.599	205.844	189.934	175.548	187.177	137.301	175.378	166.729	167.16	192.455	181.18	171.274	136.374	103.862	93.097	133.252	130.329	160.636	170.624	135.819	132.185	162.331	133.695	116.521	132.4	138.959	136.981	132.275	157.641	146.984	150.629		0.0965914	153.737
2.1426	162.525	175.67	210.32	188.48	167.607	191.281	142.608	172.453	166.208	163.893	186.73	189.372	167.948	146.105	104.228	101.385	122.135	126.548	159.095	177.766	134.712	136.899	161.998	145.831	116.562	137.683	142.152	142.228	145.071	150.119	140.541	152.063		0.102272	154.007
2.2617	162.312	174.649	210.54	183.905	172.552	196.577	136.283	171.243	180.893	170.559	180.705	190.586	163.873	139.43	98.789	104.922	115.528	131.534	161.499	177.362	129.677	144.697	174.317	137.894	120.274	145.592	143.981	129.171	137.528	145.566	141.001	152.849		0.107957	153.947
2.3807	166.47	171.502	211.398	186.464	175.938	196.459	139.273	178.563	180.806	166.439	181.95	181.86	169.129	124.44	98.99	97.686	109.611	128.872	149.479	177.245	119.536	149.06	169.444	146.613	117.014	141.947	148.019	138.325	139.058	147.291	157.34	149.306		0.113637	153.61
2.4997	159.615	169.139	201.033	180.724	169.805	176.925	136.159	169.459	175.115	168.661	185.138	183.665	169.262	117.683	94.479	91.988	115.86	121.207	137.175	178.189	125.252	147.309	171.897	137.525	120.003	153.517	150.639	148.678	144.464	147.469	161.026	139.407		0.119317	151.515
2.6188	156.635	173.559	205.348	186.33	180.769	174.92	127.335	169.756	178.191	156.494	173.533	187.623	165.441	126.315	94.966	88.325	116.276	123.85	131.307	175.632	118.311	133.448	169.453	140.923	123.334	141.255	146.738	140.821	148.863	150.089	151.96	143.494		0.125002	150.04
2.7378	155.337	173.54	205.833	186.457	173.497	172.541	124.512	165.501	177.943	152.566	170.528	184.228	158.064	122.944	94.81	83.728	117.923	134.177	124.595	183.965	111.583	126.432	159.543	141.114	120.922	141.762	154.381	134.793	147.207	143.027	151.863	130.26		0.130682	147.674
2.8568	149.376	158.209	209.732	179.357	169.999	163.698	120.484	161.548	174.362	154.906	169.615	182.045	168.129	121.986	100.062	83.057	120.332	120.341	134.211	185.098	113.747	131.454	167.003	140.241	122.998	143.621	155.155	134.481	138.453	145.474	154.901	130.722		0.136362	147.025
2.9759	147.676	157.074	195.419	163.982	176.489	164.841	126.059	160.746	174.647	155.349	159.753	171.85	171.417	108.354	96.612	83.892	116.943	117.528	130.042	177.546	117.737	132.395	164.74	129.175	133.824	134.768	165.399	131.821	139.616	148.362	134.51	117.519		0.142047	143.94
3.0949	145.74	163.549	192.328	172.592	159.044	150.871	118.112	156.63	167.119	143.967	159.737	173.197	159.25	106.473	95.868	81.38	106.604	117.654	116.335	177.739	100.244	131.681	162.492	128.139	126.295	133.923	162.565	128.879	137.575	148.022	144.112	106.812		0.147727	139.842
3.2139	129.595	165.207	196.43	158.953	156.338	165.309	114.63	151.73	161.372	136.329	162.714	180.609	154.656	109.384	92.215	75.053	107.264	114.152	113.224	172.521	99.941	127.348	163.106	127.01	126.096	139.576	163.822	134.735	146.78	138.047	138.087	109.397		0.153407	138.488
3.333	125.722	163.289	194.049	158.632	137.406	155.156	112.303	148.816	156.992	135.923	162.257	174.872	148.937	103.65	90.406	70.151	98.359	123.467	112.37	179.022	101.127	120.204	148.144	123.109	131.043	135.03	160.312	128.759	146.271	142.787	136.315	109.435		0.159092	135.447
3.452	126.111	144.843	186.984	165.709	139.302	142.74	121.797	157.581	152.133	132.435	155.382	166.916	150.485	96.981	88.046	68.634	107.055	111.306	102.694	183.807	91.952	113.843	150.948	118.278	119.339	131.945	155.977	129.858	140.956	147.696	130.461	93.928		0.164772	132.066
3.571	124.205	170.064	172.17	152.808	135.914	132.98	115.099	157.955	162.539	126.33	155.836	171.605	147.996	100.421	75.821	68.632	110.589	108.818	101.149	178.527	83.952	119.257	147.679	111.15	114.833	134.688	153.153	124.366	129.244	141.504	130.424	100.021		0.170453	129.992
3.6901	123.734	167.902	169.911	143.478	138.23	125.615	110.159	161.06	157.891	115.737	149.22	176.472	146.818	95.6	82.43	69.291	105.519	109.505	106.931	179.874	83.664	103.547	122.157	105.803	114.82	132.81	150.054	112.594	117.626	139.06	124.328	94.047		0.176138	126.121
3.8091	119.622	161.526	174.082	138.082	129.813	120.56	96.9	164.673	155.248	119.071	151.739	177.16	135.37	94.975	70.757	63.138	91.968	99.185	107.737	160.102	84.494	103.852	124.072	97.259	126.027	122.89	145.932	114.681	125.777	139.398	128.021	90.223		0.181818	122.948
3.9281	124.135	155.12	162.708	134.515	124.424	121.005	95.512	154.701	140.984	108.894	145.746	174.511	127.417	92.259	72.91	58.479	89.85	101.526	109.268	154.535	77.213	99.79	140.013	86.33	120	116.872	149.849	107.371	117.875	142.886	129.245	92.446		0.187498	119.637
4.0472	110.965	152.252	148.829	119.603	123.056	121.11	94.52	158.709	139.641	106.504	145.276	172.893	122.092	95.973	65.799	52.537	89.641	95.231	88.835	153.071	70.448	95.567	135.563	89.779	118.86	127.829	146.772	106.586	118.668	138.478	127.307	84.322		0.193183	116.147
4.1662	102.514	145.002	147.756	111.095	108.774	121.765	86.303	140.509	136.977	103.87	150.344	164.081	114.87	89.771	67.257	53.345	88.166	94.256	81.729	140.566	70.563	98.874	133.306	85.612	118.088	137.293	148.718	99.312	114.103	133.604	121.891	81.939		0.198863	112.258
4.2852	95.722	148.308	141.632	106.745	101.77	118.837	90.935	128.588	128.822	105.879	146.231	154.286	107.638	81.012	65.146	49.055	87.46	92.712	80.8	158.489	63.14	99.884	120.835	81.147	118.051	130.67	142.585	98.517	109.639	135.995	127.084	81.502		0.204543	109.347
4.4043	93.724	149.89	131.632	92.591	94.155	104.555	78.858	121.096	121.693	99.177	136.1	154.184	102.719	75.213	64.196	47.923	82.257	80.665	75.913	156.847	60.191	97.018	116.839	86.985	114.885	114.461	133.23	94.626	98.387	129.054	128.042	71.387		0.210228	103.39
4.5233	98.439	155.989	126.249	88.892	77.197	94.54	83.103	126.861	120.742	97.19	136.574	158.869	102.56	72.42	61.435	53.516	80.132	75.732	73.596	144.32	65.106	84.889	103.693	88.176	119.039	124.037	150.799	98.343	106.678	124.429	122.503	70.706		0.215908	102.711
4.6423	93.902	144.993	115.785	71.248	68.169	84.954	83.972	128.693	115.643	97.715	127.414	156.251	100.478	74.787	60.109	53.187	74.866	78.219	74.408	132.487	72.771	93.883	102.88	85.402	112.155	126.724	148.547	93.266	92.171	117.444	123.223	75.996		0.221588	99.4294
4.7614	82.552	119.801	106.021	75.815	63.534	66.269	83.673	125.642	106.207	86.185	117.513	131.438	97.725	72.821	66.793	40.221	66.386	72.534	68.211	137.798	78.259	90.239	100.158	84.212	102.186	116.151	143.234	83.456	94.282	123.358	108.313	66.894		0.227273	93.0588
4.8804	77.268	124.803	103.149	67.383	63.931	69.655	75.347	124.325	102.134	77.177	109.449	126.305	100.885	69.815	61.921	39.248	63.64	71.913	60.654	130.516	68.656	85.607	95.551	83.198	106.824	109.799	144.49	82.866	88.238	110.196	107.893	61.739		0.232954	89.518
4.9995	86.772	118.334	99.184	68.223	65.445	57.467	68.227	112.251	94.056	71.735	104.224	112.266	91.023	54.789	57.246	41.241	70.35	67.523	67.316	127.68	62.561	79.005	94.885	73.459	104.226	93.346	143.674	84.033	87.369	104.187	98.849	58.09		0.238638	84.9699
5.1185	79.758	110.9	86.965	63.263	60.037	55.686	74.957	109.593	88.783	72.128	102.178	101.949	86.603	58.596	55.233	35.775	65.363	60.659	66.467	120.356	61.898	87.11	89.023	60.528	110.065	93.487	133.886	72.152	81.676	95.226	97.307	69.07		0.244319	81.4587
5.2375	73.821	110.151	85.217	56.195	53.969	49.042	76.758	109.444	89.376	62.028	92.643	95.698	80.384	56.238	57.236	39.265	59.257	54.763	63.449	115.539	58.428	84.131	79.248	57.375	113.469	76.597	132.9	67.995	72.432	83.588	96.747	62.486		0.249999	77.0584
5.3566	71.142	96.171	76.194	58.167	47.463	46.094	71.241	102.053	69.768	70.219	102.755	81.255	81.013	49.851	56.496	39.728	54.555	54.478	61.921	106.454	47.474	79.336	74.843	67.216	105.91	73.827	129.896	63.308	69.451	87.766	94.938	63.392		0.255684	73.5742
5.4756	76.62	84.693	65.452	60.917	50.536	47.293	68.388	98.229	67.495	64.95	104.405	69.295	80.167	45.339	45.937	38.614	51.834	55.121	56.148	97.362	55.166	83.047	79.497	58.709	102.594	77.563	119.711	62.533	60.336	73.725	90.332	49.481		0.261364	70.0465
5.5946	68.929	73.062	60.169	54.064	54.344	51.258	67.92	100.954	62.551	57.053	99.303	64.586	74.463	45.143	46.66	36.397	50.806	49.503	50.206	90.779	52.178	69.565	79.829	57.672	103.495	71.944	122.522	59.44	67.446	72.875	93.614	51.487		0.267044	67.5068
5.7137	61.346	68.39	61.793	54.006	56.954	48.933	62.379	86.87	64.633	53.821	93.404	64.634	69.108	50.012	47.999	31.677	50.286	41.755	53.211	87.731	47.004	66.173	74.541	63.529	82.809	67.484	100.039	58.522	65.762	67.887	96.143	53.329		0.272729	64.1301
5.8327	57.066	59.428	55.759	53.842	57.921	46.738	55.71	83.812	60.319	52.409	94.397	55.742	71.355	46.504	46.514	35.049	37.66	43.878	56.193	84.478	45.971	67.731	72.891	59.708	80.235	59.739	91.984	58.225	55.785	64.551	80.873	50.261		0.278409	60.7103
5.9517	56.039	52.504	48.812	50.741	57.203	54.22	55.436	92.537	67.387	59.917	84.668	51.725	70.039	37.144	47.267	41.017	36.325	46.581	52.644	82.203	45.535	63.378	66.098	59.206	81.868	59.284	78.372	54.328	51.474	58.549	75.128	52.621		0.284089	59.0703
6.0708	50.442	58.882	45.633	57.168	63.626	54.266	63.144	80.597	61.654	55.795	82.34	48.625	59.19	39.638	39.206	36.886	36.866	41.71	45.555	74.838	44.458	58.651	72.733	49.832	76.517	57.272	66.699	50.089	50.376	56.474	67.189	55.02		0.289774	56.2928
6.1898	46.45	56.128	44.896	56.283	59.099	52.22	61.068	78.123	56.361	53.321	84.594	51.569	53.84	38.127	37.336	29.319	36.592	37.997	49.903	73.327	39.072	49.839	64.512	50.724	75.509	61.508	52.161	50.972	53.252	57.74	72.186	53.47		0.295454	54.2968
6.3088	47.603	56.958	50.364	48.057	53.337	51.633	61.923	73.716	54.069	56.147	86.882	52.519	50.811	31.196	37.25	30.569	38.408	36.634	38.119	79.927	39.64	54.336	60.208	54.173	63.132	53.087	52.856	49.681	43.635	54.328	68.389	58.384		0.301135	52.7491
6.4279	46.048	50.693	42.553	48.5	51.042	49.715	59.285	77.866	62.514	55.612	77.741	53.997	54.314	30.763	31.595	30.982	38.182	37.923	35.948	72.066	40.33	50.947	59.843	46.949	58.797	53.137	58.151	40.999	45.892	52.136	61.374	51.469		0.30682	50.8551
6.5469	42.891	44.492	33.21	47.899	47.942	50.294	58.157	76.348	61.536	48.812	66.577	55.269	50.083	33.897	30.099	31.909	31.998	36.755	39.245	69.075	33.366	42.545	53.479	46.874	62.739	56.439	53.447	43.365	47.922	55.565	60.337	44.547		0.3125	48.6598
6.6659	49.068	40.037	32.001	45.982	47.957	56.34	48.852	80.304	57.039	49.414	65.509	40.558	53.74	32.448	29.562	26.198	32.807	33.099	38.535	67.893	42.271	43.689	55.402	50.774	58.056	59.485	47.457	45.758	46.652	53.588	60.915	49.601		0.31818	48.156
6.785	44.931	43.271	36.95	39.828	50.923	53.957	58.41	76.825	53.233	46.308	62.436	46.904	52.363	30.64	27.386	24.331	29.664	30.435	36.331	66.298	42.388	42.857	54.614	51.997	53.601	60.38	45.732	43.382	42.868	49.438	60.275	47.783		0.323865	47.0856
6.904	51.598	50.622	33.743	38.665	48.111	56.87	54.887	60.982	46.098	46.351	71.561	51.615	46.145	25.863	31.062	29.241	29.788	31.19	39.361	63.063	38.997	42.66	46.778	49.047	60.614	55.874	46.221	38.888	39.349	40.408	64.131	42.51		0.329545	46.0092
7.023	45.358	44.953	38.988	40.271	52.234	61.062	49.685	60.675	49.197	43.317	60.652	52.546	45.772	27.458	34.519	27.855	25.826	33.405	35.495	60.487	44.242	39.545	45.318	46.575	50.047	50.876	50.77	38.977	37.268	44.735	55.896	46.41		0.335225	45.0129
7.1421	44.921	40.874	37.981	39.227	50.753	60.033	49.129	69.293	45.211	44.982	63.282	55.543	48.679	26.388	34.503	24.85	30.231	32.526	33.355	59.656	42.292	42.501	45.956	51.474	44.293	54.469	47.9	39.781	37.924	43.46	50.529	44.976		0.34091	44.9054
7.2611	52.742	42.53	42.563	43.173	48.234	51.107	41.763	59.137	40.178	45.84	61.382	52.633	48.474	34.047	33.074	21.683	24.476	35.32	34.428	60.108	38.417	38.959	45.08	41.656	43.597	52.859	52.981	38.376	38.409	49.357	49.401	47.461		0.34659	44.0452
7.3801	52.716	39.119	35.521	47.077	52.691	48.418	43.981	56.778	37.192	49.981	55.382	50.658	43.229	27.042	34.161	18.499	28.522	33.542	36.411	59.679	37.758	38.494	36.086	45.345	49.313	53.899	53.099	39.858	38.731	42.652	53.199	50.521		0.35227	43.4236
7.4992	45.652	36.559	37.418	40.995	49.913	49.241	50.782	57.859	40.275	51.087	50.119	48.569	45.284	28.303	40.304	22.934	31.132	32.376	38.926	53.035	36.177	40.764	37.484	44.415	48.788	56.45	53.119	36.109	36.535	41.878	46.378	51.275		0.357955	43.1292
7.6182	44.791	41.176	38.513	36.221	41.994	47.866	48.945	56.044	37.589	40.481	54.749	47.732	49.277	29.733	34.889	24.964	31.738	28.567	36.931	54.478	38.199	35.476	45.531	48.26	43.833	62.3	52.122	37.854	36.66	36.949	46.383	42.851		0.363635	42.2843
7.7372	40.086	44.289	40.751	33.141	45.82	45.602	48.379	49.203	40.249	41.328	59.041	52.989	43.915	27.936	25.505	23.413	30.129	29.262	38.783	63.81	36.911	37.768	39.976	43.073	38.495	51.176	51.4	33.936	34.32	34.015	49.008	42.393		0.369316	41.1282
7.8563	42.145	49.681	39.849	33.139	44.907	42.75	45.019	55.279	45.94	47.507	52.033	50.444	40.833	27.324	29.802	23.452	29.378	29.386	34.869	55.763	39.142	38.691	35.714	44.297	47.593	49.828	49.104	39.233	39.099	35.305	37.793	34.818		0.375001	40.9412
7.9753	37.754	43.952	36.056	37.369	52.206	45.786	44.289	60.518	42.897	45.137	50.135	53.631	43.411	27.711	35.304	19.267	27.94	26.042	32.145	47.963	33.923	45.511	34.953	38.489	46.514	54.085	44.063	36.232	42.993	41.49	34.72	37.335		0.380681	40.6194
8.0943	39.137	48.245	34.359	38.894	43.348	43.158	49.657	52.39	44.454	46.899	54.78	52.372	43.1	28.408	27.752	21.642	21.313	31.078	33.419	49.97	37.205	40.528	35.151	34.804	46.118	55.418	49.246	36.496	48.426	44.985	39.658	37.662		0.386361	40.9397
8.2134	34.99	46.482	35.097	31.01	44.402	45.8	48.321	52.539	44.671	49.441	52.014	53.472	41.786	32.643	32.328	24.254	23.487	27.875	37.196	49.968	35.429	39.1	40.662	44.259	44.525	56.363	48.505	37.166	45.01	42.452	41.821	34.533		0.392046	41.175
8.3324	44.096	40.693	37.549	32.559	42.735	47.549	44.885	51.648	43.99	48.739	44.163	56.16	42.344	33.374	28.051	24.619	25.83	24.687	39.655	49.082	31.21	34.326	37.13	41.742	39.288	45.738	45.25	39.4	45.718	42.719	38.897	33.955		0.397726	39.9307
8.4515	38.983	48.504	38.277	32.27	38.32	47.256	49.307	50.321	42.839	49.04	43.33	48.128	43.042	32.123	27.786	25.722	25.636	21.419	34.078	54.256	32.75	37.822	33.786	39.17	38.37	44.097	35.067	37.023	50.215	44.445	36.397	39.59		0.403411	39.3553
8.5705	38.699	42.586	40.099	30.6	38.948	45.035	48.704	42.05	46.221	43.169	47.479	46.009	45.976	35.624	30.372	22.744	20.913	24.084	29.429	49.789	30.324	38.721	37.85	44.945	36.231	40.553	30.242	40.068	54.984	43.278	37.744	42.619		0.409091	38.9403
8.6895	40.358	40.283	35.633	32.537	34.862	46.315	49.703	51.481	40.804	42.034	40.023	43.777	40.521	37.578	32.279	18.636	24.04	27.78	32.587	42.607	32.887	36.818	37.239	40.509	42.042	45.617	36.348	37.374	47.979	38.861	35.325	32.685		0.414771	38.0476
8.8086	37.397	45.346	32.89	28.745	34.691	46.233	45.355	46.655	45.223	39.268	43.04	46.386	41.122	35.074	39.819	22.173	24.338	31.802	28.318	43.63	33.593	35.304	34.05	39.064	38.706	38.142	38.053	38.707	49.685	39.506	32.104	33.878		0.420456	37.7593
8.9276	35.865	42.508	34.957	24.505	31.703	44.932	43.874	46.891	46.335	38.948	37.988	45.374	46.254	34.538	35.504	21.663	23.916	26.264	30.986	43.865	30.668	33.858	36.268	40.537	42.552	38.684	34.325	34.858	46.879	45.272	36.589	29.93		0.426136	37.1028
9.0466	35.299	37.493	33.27	26.781	32.406	50.496	50.125	44.763	42.649	42.67	34.538	47.491	50.093	35.347	30.875	24.898	24.279	26.662	30.933	39.251	30.449	33.033	42.762	39.108	42.059	34.542	37.798	31.579	57.53	51.921	37.893	31.955		0.431817	37.8421
9.1657	39.075	41.781	29.101	25.319	31.303	45.715	49.285	43.784	43.622	45.274	43.127	45.895	53.619	35.612	31.479	20.594	24.16	27.329	35.304	36.23	41.061	36.217	39.587	35.499	37.807	31.25	36.099	30.547	47.642	48.316	36.605	32.8		0.437501	37.5324
9.2847	36.786	36.519	23.857	23.185	27.232	42.819	47.582	46.294	42.408	40.53	42.25	43.907	50.792	38.032	33.618	22.257	25.135	22.43	39.255	38.821	43.185	32.214	38.145	34.454	39.582	32.763	34.298	36.109	52.635	50.679	37.267	36.056		0.443182	37.2218
9.4037	38.948	40.058	27.148	21.888	29.116	45.83	48.55	52.564	40.826	37.371	34.205	43.263	49.45	44.352	35.268	22.355	24.504	28.447	32.624	37.641	39.582	27.156	44.226	39.289	37.42	36.102	34.684	34.727	45.729	50.436	38.06	31.081		0.448862	37.2781
9.5228	35.429	39.219	28.846	25.339	32.696	42.087	50.907	42.42	38.96	37.518	34.299	43.118	49.527	40.413	31.927	20.423	21.178	25.958	26.376	33.678	37.266	25.509	37.252	39.616	36.208	26.601	31.999	36.141	41.222	48.789	39.182	35.808		0.454547	35.4972
9.6418	32.354	42.847	21.592	20.51	28.399	42.071	46.245	43.904	38.802	37.981	40.412	43.111	49.401	37.749	31.915	24.745	25.615	26.78	28.982	31.697	37.399	31.173	39.374	38.082	33.797	27.835	32.384	32.409	49.714	44.826	41.276	35.023		0.460227	35.5751
9.7608	33.427	44.097	22.588	22.069	32.537	43.615	48.845	40.166	32.512	31.246	40.936	36.295	56.579	36.894	31.5	23.723	26.153	26.499	30.061	29.776	36.262	30.207	39.128	37.355	29.742	26.946	32.88	35.653	42.882	46.204	41.533	31.391		0.465907	34.9907
9.8799	37.823	38.408	26.5	21.066	34.89	39.813	46.837	38.741	33.463	30.419	44.064	36.337	49.45	30.403	29.421	20.651	23.436	27.278	30.718	28.841	29.17	33.436	31.96	37.246	28.097	26.287	35.836	35.515	48.343	43.861	42.777	33.654		0.471592	34.2107
9.9989	33.739	36.489	28.541	18.383	35.318	40.376	46.114	40.094	30.74	28.035	38.548	40.08	53.333	33.72	27.669	24.918	22.84	29.099	28.374	32.819	39.716	31.231	35.82	36.544	28.707	22.527	39.403	36.907	44.518	45.609	44.248	37.818		0.477272	34.7587
10.1179	35.422	37.584	21.664	18.629	31.503	43.962	43.37	44.868	28.827	38.299	42.693	36.693	46.773	32.822	28.622	21.353	24.499	25.127	32.999	32.002	34.025	31.317	37.37	36.15	32.043	23.411	37.167	39.73	45.923	48.266	43.166	34.63		0.482952	34.7159
10.237	36.774	35.622	20.631	15.889	30.846	39.736	48.123	40.92	20.76	31.154	45.775	32.87	51.179	36.021	26.237	25.512	27.837	24.782	28.031	30.352	29.014	31.267	36.631	40.265	32.111	21.939	38.875	33.932	37.429	43.649	44.417	32.643		0.488637	33.4757
10.356	34.796	29.408	18.527	20.653	28.368	38.22	41.342	44.012	22.145	28.782	43.108	34.692	52.047	28.23	25.798	24.832	23.03	28.537	24.456	29.972	30.043	35.974	39.445	37.243	26.399	20.847	33.694	35.885	31.657	41.367	44.855	34.865		0.494317	32.2884
10.475	36.291	31.939	17.996	17.036	29.261	37.948	41.94	45.055	24.642	31.029	40.496	38.125	52.969	29.573	27.131	22.004	22.762	26.054	26.741	30.766	29.604	36.351	35.662	32.553	22.504	20.898	41.447	34.724	33.252	43.334	39.888	33.797		0.499998	32.3054
10.5941	37.497	31.352	16.129	17.287	33.017	40.823	48.693	42.83	23.778	31.95	42.05	33.122	51.335	33.636	26.104	23.944	22.094	21.936	30.263	31.096	31.112	32.912	34.508	31.052	23.858	20.18	33.748	34.336	31.636	43.087	42.187	31.724		0.505683	32.1649
10.7131	40.033	32.298	17.414	20.41	30.891	37.951	44.892	37.432	24.313	28.735	40.739	31.525	51.171	36.088	29.505	25.276	24.451	24.808	28.854	31.605	31.669	31.233	32.779	37.293	26.347	20.04	38.178	36.369	31.008	36.578	42.754	29.249		0.511363	32.2465
10.8321	37.471	33.553	15.6	14.971	30.054	37.082	42.113	38.652	21.885	25.185	44.047	33.364	42.961	36.041	26.221	27.564	23.592	20.62	27.368	30.802	31.19	31.114	36.853	36.598	22.829	19.61	35.603	30.663	34.131	37.079	42.804	30.943		0.517043	31.2051
10.9512	43.004	30.236	14.895	19.281	28.012	40.314	37.429	40.095	21.542	28.178	40.812	33.557	48.05	34.926	26.577	26.504	17.586	17.604	29.442	34.799	30.463	30.742	33.937	33.266	24.505	17.842	39.151	31.545	38.233	36.299	41.894	31.53		0.522728	31.3203
11.0702	40.307	29.24	16.992	19.39	28.757	37.344	42.258	36.225	21.538	31.225	43.964	31.002	42.371	34.037	26.32	24.452	23.081	20.295	28.27	37.566	33.777	29.651	38.927	29.861	21.185	17.993	33.599	33.205	35.566	32.012	38.758	35.616		0.528408	31.087
11.1892	43.336	30.112	21.664	21.034	24.688	33.576	34.89	36.694	21.096	28.996	40.961	33.774	40.426	34.769	28.633	26.901	20.31	20.221	24.384	31.297	28.152	33.453	33.607	31.191	22.494	21.523	37.927	36.037	34.68	29.111	47.54	33.689		0.534088	30.8489
11.3083	43.173	32.09	17.175	20.548	33.404	38.134	37.316	33.445	21.393	37.705	35.364	34.587	43.631	32.248	27.477	27.679	19.939	20.031	26.026	33.494	30.788	31.042	30.891	26.566	23.524	18.741	32.294	33.287	34.733	35.168	44.423	30.844		0.539773	30.8487
11.4273	42.551	31.426	17.191	16.888	28.251	33.313	33.65	29.283	23.746	32.198	33.326	32.237	41.112	29.861	31.356	21.515	22.919	21.861	30.189	32.573	35.732	25.406	30.492	30.638	19.56	18.499	33.652	36.647	31.028	29.18	39.099	32.807		0.545453	29.6308
11.5463	38.571	30.317	16.749	15.306	28.146	32.976	41.547	27.4	27.193	34.607	34.03	29.422	39.63	28.903	29.299	24.473	20.282	19.985	28.873	29.459	36.823	28.544	29.778	32.691	18.311	18.786	32.936	31.383	35.699	24.534	37.47	25.563		0.551133	29.0527
11.6654	38.135	33.828	16.064	17.965	24.636	35.287	47.563	27.714	27.501	29.188	36.822	33.61	44.373	26.968	30.179	25.955	22.025	19.977	29.334	32.225	33.41	30.109	30.541	29.989	20.254	16.617	35.815	28.832	37.603	29.737	43.013	33.103		0.556818	30.2616
11.7844	40.431	32.45	17.33	16.662	27.295	32.258	42.403	26.172	25.054	27.338	36.357	34.213	42.803	30.917	26.635	24.911	18.919	17.331	31.115	34.266	35.546	28.513	31.477	30.034	17.126	16.904	33.094	33.105	33.22	35.364	37.533	28.595		0.562499	29.5428
11.9035	46.807	32.906	15.144	12.655	25.423	37.09	38.48	26.101	23.14	25.871	42.214	34.265	38.139	29.558	27.124	23.201	20.475	15.075	30.89	33.202	33.621	26.704	29.326	29.489	21.735	19.419	32.309	30.365	33.895	31.9	39.683	27.789		0.568183	29.1873
12.0225	42.027	28.169	17.247	10.28	27.172	39.725	39.342	24.515	24.249	28.204	30.121	30.711	38.313	26.177	29.231	24.039	20.29	16.166	32.312	32.938	37.579	31.806	32.374	36.233	18.453	17.527	26.66	30.697	37.809	27.756	34.405	29.716		0.573864	28.8201
12.1415	39.696	27.462	19.154	14.91	27.646	38.445	36.526	21.328	23.663	33.243	36.699	33.85	38.236	25.703	32.948	23.948	19.857	19.077	32.143	30.522	33.867	28.653	31.615	27.76	17.724	19.969	28.04	31.273	34.613	24.396	30.761	21.788		0.579544	28.2973
12.2606	37.465	30.394	16.937	16.962	23.831	39.141	38.503	26.992	21.154	28.773	36.125	32.842	50.825	31.972	28.857	25.476	17.276	17.729	29.221	26.116	29.728	27.185	28.138	33.451	21.289	15.862	28.057	34.297	35.451	25.954	35.28	23.607		0.585229	28.5903
12.3796	40.166	32.39	14.671	12.794	26.439	37.314	40.631	24.461	19.744	27.614	33.952	35.171	41.979	35.174	29.462	27.09	19.784	13.836	27.237	29.168	36.366	27.506	26.783	29.134	20.577	13.436	25.402	31.063	39.731	39.045	31.843	24.719		0.590909	28.5838
12.4986	45.75	37.3	17.604	12.695	23.656	31.29	38.344	30.432	26.133	26.916	38.16	37.659	40.186	30.266	25.525	30.701	20.128	15.622	33.099	30.359	36.567	30.702	26.805	24.122	21.099	16.751	22.245	33.586	29.131	33.783	33.702	24.547		0.596589	28.902
12.6177	47.883	30.621	17.789	12.185	28.596	30.032	38.872	27.593	22.339	28.282	34.706	45.75	41.845	27.429	26.927	28.047	21.486	18.354	30.988	33.373	34.268	30.386	27.31	27.374	17.847	15.192	21.42	33.924	25.926	29.202	29.338	29.736		0.602274	28.5944
12.7367	34.181	30.96	15.257	9.661	24.461	35.32	41.257	24.248	20.203	31.849	36.534	41.702	39.702	32.8	26.267	24.593	19.784	17.302	31.506	33.54	31.654	31.755	28.614	28.167	12.976	12.189	23.398	26.638	29.58	28.274	34.915	23.541		0.607954	27.5884
12.8557	31.32	34.194	15.187	11.835	27.036	36.82	43.081	23.164	21.042	30.827	38.207	32.915	41.274	30.484	27.812	26.386	18.806	15.662	30.716	34.187	33.772	33.161	26.866	33.943	17.478	14.825	21.784	34.449	32.088	28.17	39.246	22.732		0.613634	28.4209
12.9748	38.447	30.224	18.488	11.572	26.306	37.078	41.356	27.785	21.821	30.197	33.208	39.39	42.872	22.914	26.3	24.569	18.439	14.065	36.013	38.053	36.347	25.577	28.12	32.912	17.31	13.518	19.187	31.378	31.941	37.975	35.373	19.814		0.619319	28.3922
13.0938	44.697	32.098	18.076	13.208	22.522	35.88	38.551	24.684	20.767	27.141	40.963	42.199	37.597	23.19	24.417	31.326	18.083	13.899	29.334	33.922	27.842	36.044	25.654	28.263	18.171	14.267	20.561	32.722	34.564	31.368	37.774	20.168		0.624999	28.1235
13.2128	45.622	29.905	19.601	12.579	27.367	35.209	40.151	26.408	18.664	27.199	35.486	38.899	37.898	26.351	25.886	26.866	18.526	17.199	30.214	34.879	27.525	32.253	30.391	25.566	16.609	15.943	18.711	35.716	32.226	33.496	31.189	23.028		0.63068	28.0488
13.3319	45.079	34.548	21.602	11.411	31.265	33.992	38.073	22.682	21.162	23.208	34.661	36.632	39.084	29.856	28.875	23.682	16.648	15.65	31.115	39.389	27.712	29.367	29.317	29.447	17.839	13.678	16.341	33.934	31.63	34.162	36.697	21.481		0.636365	28.1318
13.4509	40.134	26.932	24.907	10.115	26.122	37.139	34.727	23.009	17.9	25.798	33.445	34.287	38.336	26.262	21.485	27.761	18.614	15.664	30.839	32.557	29.092	29.658	34.486	32.703	20.55	11.79	20.548	33.25	32.025	31.226	40.268	27.961		0.642045	27.7997
13.5699	39.789	28.905	16.222	13.462	27.108	40.479	37.176	23.898	20.662	36.889	26.939	34.566	32.456	32.302	21.986	24.116	17.466	16.253	27.296	32.785	31.542	28.062	36.446	29.376	15.933	12.113	19.423	37.638	34.8	25.701	40.709	21.714		0.647725	27.6316
13.689	35.704	29.758	23.378	11.72	28.452	42.906	34.98	24.689	20.848	27.213	36.485	37.35	39.406	30.509	22.277	23.293	18.616	13.385	25.971	30.882	31.685	30.325	30.803	24.829	11.999	9.736	19.879	34.284	34.596	26.937	40.343	19.452		0.65341	27.2716
13.808	39.173	32.655	18.976	10.154	26.384	39.928	32.858	24.902	21.073	23.845	31.928	38.872	41.446	29.047	28.525	20.899	19.136	13.789	28.296	30.085	22.414	31.525	30.9	28.396	12.834	8.529	20.196	29.779	33.159	30.651	42.403	20.916		0.65909	26.9898
13.927	40.97	27.395	22.444	12.12	25.138	37.385	29.697	21.797	23.932	26.988	32.529	33.495	52.337	30.981	28.956	24.597	20.926	11.801	27.097	26.876	25.188	29.027	31.049	32.405	16.653	11.219	18.807	30.71	33.181	37.914	39.132	21.722		0.66477	27.6396
14.0461	41.532	29.597	16.819	16.176	26.51	48.847	30.311	25.366	20.102	27.342	34.208	29.125	45.717	31.351	33.582	24.247	15.22	14.97	28.131	30.369	29.862	29.066	33.005	29.682	17.251	10.42	14.13	29.988	35.335	31.829	42.231	22.086		0.670455	27.9502
14.1651	49.304	31.623	23.234	14.323	28.524	41.568	30.305	21.576	17.05	22.671	31.722	34.997	52.218	31.591	29.423	22.548	19.118	14.626	22.705	28.568	27.885	29.001	35.032	25.311	12.598	10.874	20.687	34.835	36.77	33.756	38.95	16.736		0.676135	27.8165
14.2841	55.539	32.167	25.893	18.532	29.766	44.494	30.574	22.786	15.562	29.394	36.845	40.761	46.103	37.267	26.516	22.844	22.523	13.083	23.573	29.609	27.368	27.91	39.013	29.71	18.32	11.218	18.157	33.641	33.797	33.834	31.547	14.314		0.681815	28.8331
14.4032	46.536	28.848	22.508	21.141	29.593	42.054	32.904	23.619	18.773	28.163	36.263	35.178	46.438	40.947	28.269	22.487	15.26	17.011	25.576	26.183	24.42	24.216	31.875	31.673	16.239	11.578	17.863	30.546	33.811	30.853	32.274	18.968		0.6875	27.8771
14.5222	42.362	31.678	22.615	17.236	28.807	33.585	34.967	28.768	19.605	29.223	35.752	38.983	46.081	33.882	29.068	25.411	18.526	12.154	18.808	27.503	27.018	26.402	31.319	31.671	16.303	11.589	16.775	30.927	32.465	31.796	34.426	23.001		0.69318	27.7721
14.6412	42.793	30.753	25.358	21.082	30.715	37.26	34.999	24.823	20.91	21.425	35.305	38.945	50.554	28.962	32.008	23.802	16.279	13.464	22.866	29.209	34.258	24.653	28.189	28.16	19.012	12.858	14.124	35.768	33.632	36.619	37.036	17.998		0.698861	28.2443
14.7603	46.779	32.43	21.064	24.162	29.104	32.255	35.259	25.045	23.553	25.404	36.086	32.618	43.281	32.617	26.256	22.66	17.979	12.847	24.037	28.564	33.1	27.236	31.231	30.9	17.391	10.612	16.125	34.436	31.03	35.163	36.091	17.191		0.704546	27.8908
14.8793	46.235	37.218	20.813	18.792	28.511	35.807	34.393	23.471	18.748	25.554	36.97	37.538	39.894	32.018	22.194	24.526	19.144	15.15	24.821	32.558	33.303	25.575	36.654	30.007	16.787	9.428	16.898	31.89	31.498	35.686	38.54	17.747		0.710226	28.074
14.9984	44.763	34.549	19.601	24.275	31.047	35.304	34.241	23.297	19.126	28.284	34.826	35.357	32.656	32.644	25.106	22.388	21.12	13.728	24.311	30.56	32.152	23.395	30.255	36.324	15.755	9.381	17.819	36.765	34.226	33.786	35.019	16.974		0.715911	27.7823
15.1174	44.333	32.695	19.754	22.167	30.836	30.727	35.803	24.882	21.63	26.133	31.538	33.626	36.072	32.53	29.521	27.451	22.626	17.785	28.922	28.312	34.948	26.407	26.918	36.992	17.545	9.214	16.205	35.891	28.237	32.133	41.694	18.416		0.721591	28.1857
15.2364	35.367	34.013	19.813	25.037	26.961	36.382	31.82	27.02	26.584	25.652	33.51	29.88	34.375	32.035	29.688	21.322	17.819	14.963	26.457	33.035	38.523	25.441	28.698	29.987	11.61	13.063	21.505	29.478	33.028	37.485	37.459	19.332		0.727271	27.7294
15.3555	40.169	32.515	18.142	20.862	33.728	34.958	32.772	23.695	21.689	28.738	36.538	32.824	37.022	34.76	30.729	20.276	17.257	14.33	24.164	27.927	33.362	27.337	27.585	32.302	15.443	12.12	21.669	28.316	32.496	33.972	33.663	18.476		0.732956	27.4949
15.4745	38.894	33.124	17.833	19.33	29.681	34.991	29.615	28.621	20.631	28.926	32.509	31.737	36.929	37.891	26.415	28.651	19.018	17.104	19.131	29.035	34.579	26.667	32.816	30.9	14.474	15.288	19.685	30.583	36.241	37.228	30.389	21.771		0.738636	27.834
15.5935	35.057	32.813	17.592	23.786	31.757	41.501	37.619	23.912	23.864	26.627	28.479	35.579	37.572	30.869	30.012	26.281	22.795	18.404	23.978	30.267	39.747	25.165	30.795	23.194	15.607	11.643	19.345	31.523	36.933	31.495	33.069	20.599		0.744316	28.0587
15.7126	39.754	33.596	15.465	21.022	38.072	34.573	35.646	23.152	24.254	27.609	34.29	33.011	35.076	30.322	27.905	23.15	23.785	21.648	25.234	27.989	36.158	30.245	32.595	28.042	15.245	13.959	17.673	29.807	32.339	36.413	32.064	22.718		0.750001	28.2128
15.8316	36.234	32.598	20.341	21.777	36.395	35.162	36.251	24.732	24.327	26.695	30.42	35.899	35.57	28.681	21.264	24.752	23.454	18.972	24.963	27.576	34.335	28.816	27.386	26.825	15.258	14.133	22.181	30.643	38.994	43.539	32.212	24.034		0.755681	28.2631
15.9506	34.984	36.095	19.054	19.765	35.279	34.829	35.185	31.372	22.262	27.148	30.381	34.477	31.087	27.887	23.835	23.681	21.28	18.74	22.417	24.117	31.575	27.037	29.756	36.149	18.417	15.532	20.384	33.142	31.426	37.904	35.29	20.994		0.761362	27.8588
16.0697	37.169	37.418	19.37	25.489	39.171	36.43	33.232	29.414	21.936	22.386	37.209	34.866	31.959	32.125	27.654	23.819	24.83	19.099	27.668	27.467	40.714	26.888	29.551	34.187	20.5	19.605	23.18	28.57	36.24	37.047	33.714	17.752		0.767046	29.2706
16.1887	37.952	37.453	22.505	26.96	44.216	37.081	36.707	23.343	23.476	25.737	34.483	36.087	35.818	31.326	25.857	25.102	22.266	21.317	22.405	29.336	38.209	27.642	30.449	30.821	14.384	18.256	17.305	35.037	39.915	35.843	33.522	18.686		0.772727	29.3592
16.3077	34.261	44.215	23.267	25.708	40.81	41.44	37.224	26.597	21.623	26.322	36.795	35.339	31.341	27.705	27.107	27.219	23.004	20.237	26.669	29.077	33.038	30.623	27.536	28.918	15.417	14.298	19.846	39.091	39.126	36.307	35.762	18.744		0.778407	29.5208
16.4268	40.558	44.031	21.692	27.479	42.803	41.499	35.982	31.506	20.613	25.258	40.901	35.477	39.051	27.563	28.86	23.08	21.356	16.044	26.824	24.25	33.726	30.637	27.134	28.968	19.751	16.465	19.724	40.382	39.618	36.825	32.389	21.244		0.784092	30.0528
16.5458	42.497	41.703	27.161	24.125	46.142	38.692	35.836	25.73	24.451	30.229	31.704	36.061	40.744	30.147	25.571	24.71	19.414	19.84	26.534	23.898	30.494	33.01	27.768	26.517	17.031	18.22	19.572	33.203	33.201	33.759	29.835	20.85		0.789772	29.3328
16.6648	36.467	42.665	22.594	27.183	43.174	36.085	39.878	27.634	20.718	26.733	33.995	37.729	33.91	26.952	33.063	24.253	22.786	21.952	26.186	25.359	31.742	34.953	29.943	26.556	17.444	18.043	22.429	29.434	37.475	33.564	28.155	22.326		0.795452	29.4181
16.7839	39.043	46.962	24.353	24.271	37.707	33.744	40.503	29.518	22.399	30.25	38.953	36.071	35.244	32.856	31.247	28.138	17.131	18.706	27.31	32.382	28.619	36.537	28.911	28.384	15.072	17.448	24.536	35.624	36.466	34.556	30.241	26.405		0.801137	30.2996
16.9029	35.416	39.165	24.108	23.701	37.589	37.047	48.408	35.058	21.863	29.196	39.44	37.359	37.152	35.011	29.56	21.997	17.849	24.551	25.07	29.019	30.39	36.279	29.331	31.908	18.799	16.263	25.609	35.668	30.78	29.546	31.583	25.604		0.806817	30.3225
17.0219	35.933	37.43	23.478	23.113	36.692	30.936	52.066	31.009	23.16	26.772	35.174	39.401	36.548	27.161	28.484	22.627	22.838	19.991	29.027	30.892	32.348	34.976	35.115	32.691	22.287	16.309	27.579	30.226	31.592	32.411	28.483	21.778		0.812497	29.954
17.141	32.979	30.814	22.173	24.665	36.03	34.22	45.097	34.784	27.733	28.12	35.573	35.045	36.531	28.29	32.418	28.388	22.135	17.807	31.673	30.59	25.085	31.456	28.837	31.29	20.145	22.975	31.054	38.949	38.307	34.756	32.819	23.48		0.818182	30.4443
17.26	32.936	35.782	22.556	25.366	36.621	30.902	45.104	30.877	23.734	31.854	34.793	36.211	34.637	27.627	27.656	29.805	25.35	19.393	26.77	33.55	37.282	35.864	32.492	30.089	18.742	19.135	34.165	35.342	35.137	36.867	32.226	21.888		0.823862	30.6485
17.379	37.348	30.81	21.347	32.563	36.613	31.545	46.543	36.531	26.097	30.047	39.174	36.518	38.391	29.658	27.368	29.435	24.003	20.66	29.382	28	29.832	35.871	30.802	31.48	21.036	19.215	31.527	31.998	33.533	34.244	28.832	20.878		0.829543	30.665
17.4981	37.694	35.38	25.149	35.207	33.021	40.74	44.888	40.733	31.626	39.021	36.2	32.587	28.991	25.337	23.935	25.068	23.587	23.686	29.847	31.212	26.56	34.16	31.204	31.32	20.371	19.195	33.298	33.49	32.135	32.869	35.014	27.126		0.835228	31.2703
17.6171	34.664	36.131	36.761	33.371	35.717	32.933	40.603	42.473	30.365	37.023	32.053	30.407	31.879	24.676	25.784	27.278	23.782	17.945	32.777	32.527	26.928	34.372	32.155	36.286	15.208	18.493	34.162	34.742	33.752	34.777	32.249	31.574		0.840908	31.3702
17.7361	35.173	28.686	36.919	30.162	38.445	34.588	45.177	41.117	36.618	39.192	38.513	35.426	30.385	27.247	25.978	27.831	24.255	21.126	28.133	31.501	24.602	33.523	33.189	40.413	21.469	19.528	34.917	37.432	35.601	38.005	32.73	22.208		0.846588	32.1903
17.8552	38.822	24.262	34.633	35.356	35.188	35.078	42.386	42.079	36.5	39.163	36.982	33.637	37.06	29.704	23.378	29.532	30.753	26.792	32.943	37.024	29.308	39.575	26.747	38.272	21.148	17.931	33.241	39.161	32.082	36.628	30.981	24.125		0.852273	32.8272
17.9742	33.311	28.038	38.354	37.655	37.74	35.479	41.415	48.145	39.272	37.066	38.899	30.923	27.72	22.066	23.502	31.124	25.925	25.488	30.584	37.143	27.845	42.198	30.973	33.189	22.646	21.28	39.748	31.903	30.62	34.519	30.424	23.58		0.857953	32.4617
18.0932	36.069	26.659	37.978	37.361	36.664	32.299	39.81	38.279	39.087	39.425	33.696	30.141	26.822	19.614	22.683	26.033	27.499	26.553	25.919	30.608	31.472	40.574	35.534	34.017	20.524	25.351	37.102	31.84	29.604	33.406	29.98	24.519		0.863633	31.4726
18.2123	29.601	26.452	32.639	43.325	34.641	28.556	40.68	43.002	33.212	41.277	38.27	29.057	31.256	24.188	29.287	27.137	32.377	28.225	35.762	32.062	24.51	36.42	34.355	39.643	21.025	27.022	35.266	38.013	31.427	35.277	29.608	24.409		0.869318	32.4369
18.3313	29.18	35.831	37.191	36.728	32.507	33.7	40.903	43.814	36.552	43.849	34.396	37.112	27.727	24.759	25.911	26.4	31.071	27.988	33.22	33.162	27.475	38.634	38.648	35.649	25.909	25.542	37.965	34.352	30.1	36.133	28.428	26.953		0.874998	33.0559
18.4504	30.842	39.537	42.103	38.187	32.324	26.079	33.839	47.435	37.474	41.293	40.424	30.376	28.765	22.892	21.97	27.124	31.654	23.634	38.258	33.697	23.102	38.523	33.708	41.489	27.238	19.465	39.094	42.633	26.804	37.721	25.222	33.912		0.880683	33.0256
18.5694	27.712	32.302	40.828	40.78	35.311	30.522	25.841	46.676	43.867	35.52	37.997	35.313	31.16	24.451	22.207	27.295	30.576	27.111	33.063	35.181	22.185	39.909	33.468	41.855	26.179	27.926	35.891	36.328	25.944	40.897	30.259	34.804		0.886363	33.1049
18.6884	28.463	26.968	35.511	40.945	28.78	29.742	27.905	42.326	42.009	34.704	34.828	31.515	29.243	23.027	22.351	27.312	27.072	23.917	31.306	32.601	25.931	37.484	37.609	41.485	29.301	29.143	38.479	35.92	30.118	41.78	34.076	32.161		0.892043	32.3129
18.8075	31.434	30.104	35.696	43.67	33.416	30.08	31.77	40.385	42.206	39.113	35.077	34.08	31.819	21.611	22.505	29.438	31.188	29.713	27.742	30.912	22.876	37.125	29.108	38.729	26.151	27.172	41.34	32.753	28.872	38.187	34.434	34.198		0.897728	32.5907
18.9265	32.349	28.747	35.513	39.261	31.33	24.586	33.384	36.453	38.05	43.504	36.004	31.565	34.401	16.708	19.415	29.929	33.463	31.761	32.051	29.038	25.5	34.178	29.065	37.321	31.586	32.058	36.35	32.868	29.635	32.755	35.013	30.852		0.903409	32.0217
19.0455	26.319	23.935	30.418	33.072	28.656	24.972	27.662	41.148	34.802	41.829	29.555	39.203	38.812	13.068	19.548	21.796	31.424	28.08	35.198	24.108	28.316	37.031	31.459	42.252	35.372	34.876	38.746	30.647	32.745	40.41	32.576	29.887		0.909089	31.4976
19.1646	22.74	26.205	28.006	35.232	24.655	25.364	28.064	35.42	33.339	41.939	29.429	37.086	39.196	14.278	15.395	21.551	30.374	30.634	34.064	25.141	23.92	33.711	33.898	39.847	37.515	39.281	39.372	27.973	30.482	34.652	29.838	32.39		0.914774	30.656
19.2836	17.914	30.778	28.526	30.765	25.662	27.347	30.155	31.185	30.084	35.502	35.944	37.194	35.399	12.161	16.757	23.371	29.437	31.993	32.452	31.134	24.69	40.823	29.986	38.738	30.984	34.643	39.547	35.173	33.913	28.731	29.127	33.379		0.920454	30.4217
19.4026	18.816	26.826	23.95	28.754	32.535	22.584	30.371	32.104	37.953	37.494	41.223	37.179	34.639	9.073	15.162	24.981	28.951	30.701	31.292	29.059	22.714	37.792	32.121	36.166	29.046	37.928	42.713	35.797	33.876	31.523	31.508	33.207		0.926134	30.5637
19.5217	23.666	17.035	24.422	30.491	27.025	20.157	21.074	32.148	38.153	35.591	39.234	36.621	36.75	9.543	10.191	23.597	29.408	28.793	33.995	29.527	25.657	39.267	34.189	35.409	29.388	35.101	39.095	34.825	32.541	30.013	35.675	30.962		0.931819	29.6732
19.6407	18.579	15.918	29.507	31.725	21.574	18.248	15.783	28.592	40.159	31.12	37.242	35.291	29.306	5.302	10.911	28.159	29.273	33.241	34.683	33.69	23.032	35.594	36.674	35.908	35.347	35.24	42.569	34.475	28.407	30.421	30.387	32.52		0.937499	29.0274
19.7597	13.219	16.883	29.13	30.071	23.24	11.589	17.696	27.777	31.167	30.864	38.959	30.947	32.945	5.426	9.211	24.958	28.771	29.123	27.081	28.605	21.88	37.47	35.154	38.766	37.811	41.413	45.114	27.435	31.124	28.504	29.14	28.804		0.943179	27.8212
19.8788	14.509	14.969	25.564	26.199	15.784	8.451	13.124	26.054	33.54	34.858	35.705	36.193	30.666	4.204	9.891	21.715	26.039	30.715	32.458	30.785	23.353	40.185	37.468	31.883	41.408	40.387	45.132	30.581	32.891	27.162	29.122	25.068		0.948864	27.377
19.9978	11.667	11.14	26.246	23.327	10.693	7.52	10.207	29.112	31.953	39.342	34.568	37.156	26.484	4.341	10.419	19.603	29.389	32.102	30.942	34.717	28.606	40.257	30.917	32.521	38.478	42.408	38.595	33.614	30.708	26.316	26.027	31.968		0.954544	26.917
20.1168	12.358	8.557	20.208	20.445	8.872	7.49	9.128	27.204	27.63	33.857	35.942	35.924	19.968	4.432	9.329	21.82	24.946	26.708	32.355	31.222	25.709	37.401	31.225	32.827	36.212	38.803	42.801	33.855	27.646	25.722	34.379	31.61		0.960225	25.5183
20.2359	9.226	11.184	17.432	15.115	6.078	6.399	8.348	27.486	29.307	33.173	41.032	33.464	20.97	4.46	6.249	18.776	25.938	25.59	35.95	33.401	30.084	36.284	35.98	34.391	42.934	33.968	49.833	31.673	35.072	27.518	28.42	32.529		0.965909	25.8832
20.3549	8.05	11.698	13.529	9.736	5.871	4.532	7.131	24.58	32.454	30.764	41.588	28.536	15.563	4.885	6.281	18.572	21.292	28.707	31.944	32.715	32.297	41.847	32.215	37.907	38.092	36.647	47.138	28.755	31.009	26.898	39.336	34.389		0.97159	25.1549
20.4739	9.897	9.758	14.568	5.86	4.242	3.53	6.003	19.435	29.342	29.848	35.992	29.895	15.86	4.42	3.888	12.543	20.722	25.227	30.336	33.297	32.693	41.479	29.507	37.68	36	40.286	41.573	30.362	24.874	25.463	36.876	35.072		0.97727	23.6415
20.593	9.952	6.652	10.488	4.28	3.52	3.761	4.85	16.97	26.589	29.202	33.013	29.309	10.095	3.136	3.064	8.716	22.068	26.588	29.295	30.517	33.05	36.057	31.361	32.274	33.045	40.203	38.931	28.294	24.333	17.86	32.1	34.833		0.982955	21.7002
20.712	7.024	10.298	9.32	6.862	3.652	1.89	3.915	14.264	24.506	28.391	34.151	25.082	9.056	2.829	3.338	11.094	25.932	27.853	30.923	32.428	35.696	39.071	30.014	29.513	37.545	33.725	41.756	27.26	27.948	20.553	35.443	33.598		0.988635	22.0291
20.831	8.286	8.202	8.219	3.28	3.362	5.69	3.167	10.396	19.625	31.188	28.568	25.967	10.107	3.31	2.272	7.677	21.124	21.433	28.725	33.782	33.909	38.437	30.159	34.525	32.275	36.311	38.92	36.3	25.476	26.227	37.349	39.692		0.994315	21.6862
20.9501	6.659	9.095	6.949	2.731	2.701	3.533	3.864	7.629	17.177	21.323	30.594	28.241	8.864	3.623	3.471	5.2	19.272	27.032	28.879	33.147	36.962	34.808	27.559	33.514	32.625	35.687	36.162	35.008	21.704	25.085	33.957	37.256		1	20.6347

## Sheet: Image34
X0	Y0	Y1	Y2	Y3	Y4	Y5	Y6	Y7	Y8	Y9	Y10	Y11	Y12	Y13	Y14	Y15	Y16	Y17	Y18	Y19	Y20	Y21	Y22	Y23	Y24	Y25	Y26	Y27	Y28	Y29	Y30	Y31		Ap-basal	Avg intensity
0	51.81	69.482	47.17	49.788	44.404	77.193	72.001	42.163	30.044	50.181	49.765	42.961	22.545	20.29	25.62	29.55	31.518	26.651	31.749	43.737	27.203	22.153	25.591	23.205	29.387	22.68	17.201	18.99	20.267	21.912	22.248	17.109		0	35.2052
0.119	48.797	56.315	43.711	41.121	45.261	67.416	78.271	52.981	34.477	52.167	48.974	47.495	28.435	23.044	26.573	29.917	29.088	35.915	34.701	43.759	33.567	22.574	31.136	32.487	32.531	25.997	19.81	24.295	23.174	31.575	20.541	19.315		0.00571264	37.0444
0.2381	61.329	61.731	45.253	48.994	48.555	76.504	88.008	59.551	34.437	44.636	54.703	49.439	29.371	22.822	24.562	29.046	30.188	33.051	46.519	48.135	32.72	24.61	30.968	39.341	29.648	18.244	27.548	20.315	20.522	36.924	20.584	17.784		0.0114301	39.2513
0.3571	54.403	57.591	48.393	52.231	52.084	81.981	83.002	52.994	33.767	44.621	63.759	50.766	32.746	28.116	26.747	31.524	29.184	35.258	47.198	55.187	37.563	22.167	27.397	42.462	35.074	34.09	30.771	20.598	19.87	35.731	28.78	18.821		0.0171427	41.0899
0.4761	61.153	60.626	41.762	57.898	55.653	81.899	94.665	59.359	34.014	48.671	66.704	59.06	36.901	34.742	32.319	27.498	35.32	34.522	46.555	57.529	45.7	27.977	42.681	51.227	35.682	32.663	36.528	20.363	23.583	42.021	19.203	27.956		0.0228554	44.7636
0.5952	69.053	70.089	46.935	72.844	62.232	85.666	101.213	59.939	33.31	50.512	65.233	61.693	41.398	36.595	34.229	33.335	35.469	37.13	49.002	71.417	41.065	33.582	46.33	59.391	52.644	47.409	39.475	28.059	29.79	46.636	24.143	29.748		0.0285728	49.8614
0.7142	88.786	89.586	57.642	99.546	69.267	93.633	106.154	66.729	33.714	45.749	85.268	74.981	51.032	43.189	39.079	29.609	38.75	42.629	57.762	82.911	59.48	36.866	49.511	69.001	63.459	66.044	43.149	29.593	29.427	71.267	32.59	38.017		0.0342854	58.8881
0.8332	128.598	127.766	71.744	134.118	74.822	96.845	121.858	91.495	36.534	49.303	91.758	89.831	43.127	51.032	50.936	30.635	43.156	39.525	60.757	77.899	57.293	36.709	72.932	86.32	66.859	80.64	49.075	37.053	29.431	67.616	33.553	48.25		0.0399981	68.0459
0.9523	158.622	166.901	98.311	146.076	73.744	92.288	132.252	91.774	42.341	66.939	112.848	105.579	49.812	60.538	56.352	33.141	48.283	48.934	72.529	97.201	68.788	51.497	76.272	116.398	93.128	92.915	69.793	46.811	35.059	78.48	45.706	54.507		0.0457155	80.7443
1.0713	154.908	173.669	126.831	175.1	88.074	95.383	143.447	114.365	55.304	68.841	133.221	117.491	67.666	84.322	70.534	34.883	41.449	48.593	83.932	101.062	85.574	61.721	94.24	125.19	104.823	123.486	83.376	54.086	44.636	97.399	60.255	62.778		0.0514282	93.02
1.1903	169.83	187.54	144.609	189.066	89.485	107.25	138.274	128.69	65.817	85.954	162.294	147.053	63.897	107.207	103.672	45.698	56.749	61.049	77.634	124.542	97.899	67.792	121.2	157.872	126.698	142.594	113.889	68.853	49.384	104.755	70.887	84.218		0.0571408	108.198
1.3094	187.705	188.266	166.017	186.857	90.611	99.666	148.046	134.483	67.577	106.029	198.211	183.911	80.627	123.38	132.042	48.524	55.51	61.671	87.218	121.192	114.05	84.311	133.478	187.701	160.14	163.524	132.606	87.617	54.258	116.253	86.47	110.627		0.0628582	121.831
1.4284	188.58	201.865	164.46	202.342	105.088	98.835	153.887	156.788	67.103	123.981	216.044	193.851	94.524	151.871	152.481	60.141	71.099	82.584	98.382	154.796	137.326	115.844	155.613	211.634	159.133	172.67	167.619	114.505	64.754	161.14	114.499	143.15		0.0685709	139.268
1.5474	196.389	192.443	171.163	217.548	118.966	99.979	160.595	158.431	90.587	161.465	222.644	208.736	107.964	159.682	183.248	79.163	94.957	88.926	121.251	165.469	146.778	121.28	182.725	222.024	171.063	189.578	177.36	138.202	91.382	181.966	129.147	158.975		0.0742835	153.44
1.6665	195.92	189.296	189.688	214.194	123.156	111.098	163.304	168.102	103.243	181.694	233.079	223.037	120.179	172.328	198.419	96.701	113.586	102.285	130.696	178.994	167.336	150.498	196.377	227.227	182.796	186.265	208.022	168.782	103.479	182.752	143.529	161.75		0.080001	165.244
1.7855	205.704	206.252	196.306	217.845	139.083	124.406	173.411	168.887	112.869	218.675	236.218	220.962	136.633	202.378	199.226	139.573	144.391	104.784	134.571	191.136	176.412	170.957	211.204	227.579	180.68	185.604	216.587	195.675	132.86	187.067	176.404	193.952		0.0857136	179.009
1.9046	206.732	207.222	197.912	213.684	141.347	131.816	162.587	166.68	116.629	223.338	228.935	233.032	148.828	209.826	200.594	149.557	155.12	126.644	151.597	203.861	196.57	190.766	223.595	231.017	190.625	183.845	208.535	214.996	153.613	193.515	174.199	199.085		0.091431	185.509
2.0236	220.737	213.321	190.194	225.839	165.155	124.896	175.812	169.788	142.057	241.593	241.911	240.993	155.218	206.549	208.183	176.637	179.376	145.911	158.922	203.497	198.752	206.414	221.753	232.186	199.393	195.117	212.537	227.286	157.307	193.091	188.762	209.6		0.0971437	194.65
2.1426	216.412	216.265	195.791	227.039	161.437	130.382	180.877	162.365	166.864	239.379	231.248	232.616	170.954	205.714	209.395	199.086	195.398	144.116	162.528	216.806	218.247	208.024	229.567	231.334	195.934	192.945	215.523	234.277	163.139	204.853	197.379	203.339		0.102856	198.726
2.2617	208.221	218.687	200.448	215.63	168.674	144.413	198.628	176.268	173.143	242.891	238.74	236.473	187.058	205.109	228.211	204.586	208.652	182.051	184.558	215.022	208.098	212.66	222.647	226.26	192.474	195.172	219.258	223.273	171.825	209.737	197.553	209.957		0.108574	203.949
2.3807	218.1	214.482	204.711	221.663	161.436	141.102	191.494	173.929	202.582	235.521	241.121	235.08	202.567	211.413	227.322	203.924	209.831	189.905	185.194	221.387	200.4	215.142	223.171	227.19	198.672	195.655	212.507	233.484	176.057	193.125	196.05	212.97		0.114286	205.537
2.4997	222.595	217.647	208.353	225.266	173.067	151.871	204.547	187.061	190.418	242.362	238.122	241.311	202.596	206.468	214.474	218.741	217.755	204.01	201.759	222.57	204.527	227.516	224.853	228.624	200.731	202.011	218.507	209.702	167.38	197.109	197.074	202.578		0.119999	208.488
2.6188	222.079	222.965	209.418	225.817	192.858	159.683	203.912	186.538	211.78	237.948	240.085	231.4	208.824	223.25	217.034	229.475	209.992	215.679	207.829	221.057	186.354	227.505	221.034	221.653	192.302	216.098	220.442	222.392	173.99	192.178	205.407	212.304		0.125716	211.54
2.7378	225.897	221.192	221.747	220.095	187.035	156.549	205.372	184.662	208.053	242.685	237.774	228.875	215.802	206.897	212.944	219.818	204.278	205.961	224.591	225.787	178.827	220.075	220.223	221.536	189.095	205.474	233.966	218.062	181.482	206.992	190.395	196.472		0.131429	209.957
2.8568	224.871	225.395	223.563	227.877	191.965	154.862	209.167	191.895	227.026	247.397	242.248	227.075	217.265	217.681	226.405	224.297	197.122	218.348	210.271	216.23	174.29	217.068	222.235	235.834	185.303	208.53	226.645	213.969	181.215	206.484	192.335	192.27		0.137142	211.786
2.9759	227.097	228.159	214.106	234.728	196.596	163.641	210.744	197.248	219.178	246.305	236.5	223.491	218.207	215.703	220.352	213.013	199.604	206.221	211.368	203.368	162.235	217.875	211.699	220.375	179.865	213.778	217.525	226.661	174.793	195.889	196.135	192.475		0.142859	209.217
3.0949	229.565	220.31	220.321	234.942	197.091	182.153	214.429	210.973	211.337	241.517	242.36	225.714	211.406	214.558	219.573	217.645	182.974	206.532	204.763	208.059	157.787	205.219	212.706	230.97	182.535	202.542	214.091	223.575	156.877	211.011	181.746	184.067		0.148572	208.105
3.2139	228.748	218.306	230.222	234.346	223.912	189.091	216.365	204.337	214.802	239.838	242.487	212.179	205.256	210.301	219.533	213.421	167.662	199.277	204.336	221.256	147.756	211.822	219.355	231.362	179.219	209.138	222.18	220.564	161.715	193.891	194.984	186.095		0.154284	208.555
3.333	234.667	229.781	229.785	238.455	216.144	194.565	220.398	200.087	223.115	235.531	225.742	220.047	196.868	199.914	226.29	210.222	164.888	209.83	188.196	207.803	158.35	203.233	208.272	214.18	156.134	203.863	206.175	229.348	152.81	206.413	190.941	180.014		0.160002	205.689
3.452	228.176	209.996	235.439	234.771	222.182	191.856	222.818	206.455	232.529	225.912	235.332	217.342	204.376	215.643	216.435	213.004	153.953	180.488	175.837	201.235	150.465	208.204	198.799	223.997	172.062	202.324	203.175	224.043	146.445	195.877	210.11	188.324		0.165715	204.613
3.571	227.703	218.096	234.001	232.254	227.452	212.823	215.121	214.784	226.252	234.046	225.72	214.258	193.658	207.028	226.337	205.481	151.042	197.355	190.903	197.665	148.781	173.267	200.564	211.862	167.785	204.891	216.356	217.484	139.064	195.873	200.285	183.647		0.171427	203.495
3.6901	234.654	209.222	223.126	231.432	225.665	197.294	218.592	226.434	226.695	243.661	230.572	206.643	186.162	203.907	222.072	198.763	139.46	195.351	174.977	204.777	126.034	190.688	211.226	205.948	183.161	195.607	200.734	216.302	139.019	183.289	214.657	178.614		0.177145	201.398
3.8091	226.699	217.455	224.245	235.277	210.225	197.215	220.5	225.928	214.226	239.674	226.396	203.06	187.583	203.784	219.237	191.203	144.134	178.541	172.226	201.374	127.829	185.954	211.952	196.362	183.833	209.451	198.385	210.607	135.454	195.3	200.603	171.842		0.182857	198.955
3.9281	230.194	213.397	224.571	234.091	213.767	213.615	219.529	227.038	216.053	232.687	233.837	189.866	200.502	204.089	205.635	190.735	140.525	194.465	167.223	197.25	129.03	172.775	203.922	202.955	159.386	204.541	188.357	204.102	141.201	185.896	209.974	178.252		0.18857	197.796
4.0472	224.288	198.694	232.524	232.323	205.405	204.752	218.393	229.399	215.077	226.448	222.28	196.103	196.635	197.856	198.591	178.037	142.921	169.152	160.132	180.161	120.446	171.505	196.441	199.493	159.776	205.436	191.705	203.477	123.953	180.128	202.555	167.114		0.194287	192.225
4.1662	228.443	205.263	231.501	241.113	196.604	200.166	219.532	203.922	203.1	224.083	228.059	186.556	177.208	188.006	192.856	181.412	132.44	185.065	164.851	180.49	107.656	159.317	204.234	185.211	139.73	195.447	195.865	207.68	112.506	186.523	199.142	175.207		0.2	188.725
4.2852	230.604	206.926	230.152	235.444	197.254	196.989	211.017	219.856	195.724	210.446	226.66	179.926	164.323	202.932	193.025	177.247	133.352	179.331	147.199	173.687	124.41	151.29	195.365	192.11	148.121	207.144	178.142	199.435	109.49	171.461	194.318	168.938		0.205713	186.01
4.4043	218.58	206.658	229.217	231.52	188.894	188.137	202.576	213.61	199.51	223.693	231.707	189.802	164.424	209.992	208.318	176.225	133.367	161.517	158.836	157.459	107.028	134.868	178.802	189.554	127.486	191.041	185.848	202.13	100.12	156.416	198.654	178.262		0.21143	182.633
4.5233	226.844	192.641	220.966	230.906	204.331	171.806	179.749	199.946	204.372	225.611	225.913	186.005	151.012	189.869	187.283	166.404	114.355	184.323	157.534	156.323	115.546	128.686	163.996	180.735	127.613	196.668	175.593	196.843	101.804	157.979	199.65	183.356		0.217143	178.271
4.6423	214.921	204.052	223.295	223.118	198.165	169.363	198.638	203.065	191.636	208.954	232.872	197.783	150.286	183.517	175.565	180.362	124.078	158.776	144.98	159.247	101.386	128.393	151.876	170.107	118.353	187.145	177.714	203.203	90.295	170.914	191.21	171.309		0.222855	175.143
4.7614	225.541	201.949	207.301	234.652	194.411	172.332	200.68	206.801	192.98	204.228	230.469	186.872	149.716	182.342	189.678	184.207	135.407	163.285	140.678	152.938	97.588	136.279	164.589	190.594	117.542	174.367	182.804	189.9	90.429	165.957	198.371	177.299		0.228573	176.318
4.8804	216.831	213.526	214.499	223.363	186.893	176.871	209.503	213.675	183.167	208.928	234.103	190	136.852	182.111	173.363	170.691	123.082	153.522	121.849	144.613	85.871	139.136	135.584	180.164	106.801	178.24	168.209	180.478	81.305	160.385	184.184	170.092		0.234285	170.247
4.9995	221.058	197.629	197.45	219.662	197.837	162.509	204.449	204.81	182.276	213.447	222.576	185.44	123.31	167.549	178.642	157.735	112.049	145.409	131.367	140.356	78.604	115.727	147.397	180.385	101.558	165.511	169.147	189.967	69.688	156.39	175.044	158.127		0.240003	164.785
5.1185	216.945	191.335	211.375	215.869	200.092	153.374	217.072	190.079	179.147	209.657	215.639	177.026	129.178	180.222	182.639	172.41	105.693	155.33	111.648	130.51	67.166	106.527	140.627	155.621	91.571	167.638	166.553	153.589	59.965	142.493	182.826	167.324		0.245716	160.848
5.2375	215.344	178.883	207.288	210.181	180.658	158.484	217.591	199.632	184.731	198.01	203.545	170.784	124.228	178.056	180.768	158.48	94.384	129.91	106.733	118.744	80.322	108.323	137.103	147.943	94.244	148.858	141.663	160.036	70.462	132.726	160.298	141.669		0.251428	154.378
5.3566	204.386	182.232	203.45	201.903	169.254	146.744	195.716	200.402	183.667	201.226	206.937	163.932	127.639	157.635	183.71	151.499	97.812	131.056	102.305	106.564	74.495	97.598	133.635	147.38	85.338	128.983	143.156	161.854	61.969	128.43	150.6	152.505		0.257146	149.5
5.4756	197.24	160.875	207.392	210.249	187.666	139.99	187.399	176.548	169.07	205.74	201.001	165.114	124.35	156.573	153.384	148.28	77.115	118.544	84.051	101.866	75.399	98.924	127.404	138.572	86.839	118.76	138.124	133.796	68.093	129.738	151.777	161.154		0.262858	143.782
5.5946	196.469	161.866	187.092	192.433	175.707	141.4	171.511	184.964	173.543	195.923	184.871	167.392	111.758	152.877	141.717	142.487	87.174	106.1	75.011	101.227	80.564	86.306	120.349	123.127	75.08	111.86	119.275	129.507	59.124	117.653	149.185	141.956		0.268571	136.422
5.7137	198.678	167.255	198.695	192.639	174.595	135.844	163.951	178.254	174.337	198.811	142.781	159.318	115.363	159.34	129.596	131.867	77.192	97.824	79.04	86.277	70.264	88.946	111.581	107.423	69.264	106.501	114.823	109.419	51.448	118.574	141.814	152.991		0.274288	131.397
5.8327	193.684	156.687	182.079	194.421	183.69	127.736	150.425	174.074	159.485	197.458	140.621	134.007	114.168	136.232	114.017	136.407	82.905	88.328	62.555	75.443	67.517	94.236	112.352	112.841	70.538	90.822	112.045	113.534	57.423	115.462	139.317	144.089		0.280001	126.081
5.9517	195.708	166.12	204.103	183.751	176.424	114.614	153.742	168.93	163.367	191.03	114.58	116.998	106.958	123.347	94.812	137.727	60.763	74.277	70.066	87.641	73.52	80.816	107.895	104.138	66.63	84.783	93.633	100.816	52.345	93.297	135.632	143.541		0.285714	120.063
6.0708	184.348	179.263	182.192	184.174	181.035	113.855	136.983	154.945	167.001	182.934	105.973	112.111	109.074	139.598	92.76	117.152	58.762	72.204	69.871	84.324	78.148	77.64	101.493	83.738	59.394	82.367	78.35	84.509	53.525	87.486	115.249	154.847		0.291431	115.166
6.1898	181.268	163.652	186.401	182.21	186.511	102.288	143.093	158.677	140.835	181.663	106.8	109.617	107.296	144.306	93.68	101.655	62.919	57.246	64.394	74.941	78.295	72.121	91.779	90.38	75.618	83.584	82.121	72.036	51.802	84.337	110.613	149.06		0.297144	112.225
6.3088	173.501	163.907	168.075	178.667	173.388	95.783	135.929	178.148	156.105	159.26	93.161	100.385	98.507	127.236	96.876	98.758	59.767	57.085	64.126	77.038	73.328	63.549	92.427	86.482	71.746	79.339	85.042	68.411	59.244	89.601	93.137	152.672		0.302856	108.459
6.4279	170.845	169.122	168.56	162.205	171.62	82.319	133.913	165.165	135.008	170.087	89.297	89.904	80.42	127.126	81.346	94.106	58.631	58.072	57.724	70.539	66.692	70.417	83.534	79.59	63.435	72.639	74.732	71.527	51.529	90.927	95.72	142.39		0.308574	103.098
6.5469	171.492	171.1	163.427	152.035	168.256	86.473	117.307	156.914	136.898	144.098	93.228	87.934	81.631	122.1	85.364	89.575	62.195	52.84	66.878	72.797	73.629	73.644	82.147	74.61	57.166	74.975	77.201	65.658	62.818	76.492	88.775	142.978		0.314286	101.02
6.6659	163.56	174.571	160.26	153.148	165.57	103.24	112.789	141.177	130.424	152.432	72.827	84.522	66.166	122.405	83.067	81.584	49.135	55.21	69.893	67.804	67.705	61.522	72.493	71.453	62.538	68.327	81.082	55.169	47.909	75.426	84.024	146.508		0.319999	96.9981
6.785	148.258	180.746	141.835	151.364	158.974	87.307	111.736	132.528	109.181	134.59	76.677	82.502	66.998	112.304	94.779	71.986	63.5	56.967	54.048	72.887	73.404	58.881	69.073	75.167	63.966	83.844	65.798	49.092	47.743	79.523	79.217	127.626		0.325716	93.2032
6.904	133.72	172.734	132.031	132.588	171.38	68.632	96.904	158.01	98.801	120.144	77.984	78.403	61.189	98.872	81.183	77.905	56.152	58.784	69.007	64.612	61.386	71.215	63.19	65.932	56.387	65.303	69.917	57.62	52.005	88.135	83.835	119.033		0.331429	89.4685
7.023	124.782	180.379	105.32	121.578	155.383	73.583	93.412	134.332	93.051	106.819	72.954	70.951	61.88	85.328	95.199	71.204	60.066	63.456	63.947	68.749	69.711	61.817	55.498	62.431	53.421	64.352	70.646	67.89	50.445	87.638	78.941	105.67		0.337142	85.3385
7.1421	123.245	175.352	103.119	109.735	155.122	66.109	98.458	132.831	68.003	103.729	84.151	74.418	67.677	90.345	86.382	68.019	53.597	66.249	56.88	59.179	62.261	61.568	52.022	60.357	52.331	70.058	56.423	59.537	57.79	83.559	75.37	116.447		0.342859	82.8226
7.2611	127.652	163.22	72.639	95.271	128.604	62.562	84.823	130.665	82.011	94.714	91.127	70.415	62.362	77.728	91.534	70.048	66.976	65.404	57.467	60.799	64.628	56.206	54.214	52.7	55.281	66.932	68.93	52.325	46.139	74.694	68.543	104.864		0.348572	78.7962
7.3801	130.878	150.732	81.368	101.701	151.369	80.385	87.575	109.616	69.815	85.913	75.616	67.909	59.285	79.554	81.461	68.616	50.829	65.464	61.866	53.398	65.958	61.962	50.063	55.704	55.823	61.366	72.932	60.124	58.524	71.98	71.894	96.942		0.354284	78.0194
7.4992	113.345	174.625	86.744	91.846	139.818	62.101	80.207	108.891	69.224	68.263	86.193	56.055	53.395	66.092	84.817	57.371	62.62	58.611	65.89	61.901	58.99	63.713	54.935	60.391	49.872	57.163	66.029	49.277	50.614	76.176	54.822	93.239		0.360002	74.4759
7.6182	93.599	142.433	79.311	82.449	125.534	59.428	76.183	95.341	66.018	80.289	84.237	65.487	47.385	63.558	81.734	67.16	59.562	71.88	69.945	54.163	65.789	55.916	55.35	61.264	53.987	62.636	67.723	62.046	51.462	59.166	55.963	92.26		0.365715	72.1643
7.7372	87.99	133.802	81.521	84.792	124.222	54.555	68.235	102.237	62.851	77.918	84.924	54.862	58.161	60.34	69.38	65.379	57.773	65.768	67.066	64.998	63.559	53.88	57.941	58.081	54.304	57.854	50.874	62.511	51.486	57.395	52.306	85.194		0.371427	69.755
7.8563	81.548	125.122	74.274	76.825	119.23	57.908	71.324	83.154	56.949	72.389	79.081	48.306	56.525	64.073	76.841	56.784	53.109	59.512	73.435	56.941	63.853	56.898	54.943	59.012	66.457	63.072	63.993	53.529	49.802	54.457	61.674	76.477		0.377145	67.7343
7.9753	68.932	117.329	73.423	75.195	103.118	56.661	66.042	90.699	59.323	73.164	72.749	47.408	58.013	65.469	76.215	64.085	51.54	57.489	70.381	49.653	61.027	52.493	68.484	47.884	59.387	59.017	58.89	56.375	49.503	49.126	55.009	67.513		0.382857	65.0499
8.0943	74.537	90.303	70.567	84.425	106.943	56.833	68.175	91.839	53.331	74.335	68.308	50.756	58.444	52.683	70.44	61.051	43.657	69.019	62.661	57.918	60.526	59.648	69.191	58.593	57.539	54.402	47.973	56.606	46.099	50.364	63.277	64.623		0.38857	64.2208
8.2134	75.255	102.709	74.564	80.444	95.053	59.125	63.915	87.739	61.891	63.247	67.305	46.259	56.332	54.319	71.593	64.072	60.239	81.003	66.771	50.049	63.032	47.702	57.065	57.038	41.83	57.582	48.996	63.236	42.922	52.858	50.25	53.066		0.394287	63.0457
8.3324	70.494	91.161	77.173	75.833	96.308	56.799	65.185	91.568	58.037	65.961	77.955	46.215	59.162	49.351	64.55	73.915	54.496	70.976	61.232	52.256	51.108	49.942	64.812	50.933	49.629	54.25	50.323	51.849	49.957	48.213	50.834	47.959		0.4	61.8261
8.4515	65.481	76.858	83.663	77.132	84.219	58.413	66.273	84.504	51.518	61.665	64.734	47.264	54.522	49.288	71.898	77.073	63.937	84.42	63.127	57.11	59.094	49.947	64.343	56.163	54.546	48.182	49.754	46.244	39.976	40.134	51.458	55.171		0.405717	61.191
8.5705	67.19	68.644	75.298	68.096	87.075	66.635	76.151	81.373	43.152	69.864	62.373	47.535	57.168	52.618	71.96	54.63	53.821	81.01	57.253	46.121	47.289	47.514	62.241	60.999	48.872	37.334	48.029	47.68	45.332	36.983	48.273	49.317		0.41143	58.3697
8.6895	64.756	63.651	78.358	80.46	81.017	53.756	61.232	90.6	51.916	51.358	71.509	60.401	59.438	42.049	77.018	52.13	58.308	81.929	54.728	45.063	44.299	43.855	65.249	53.932	54.95	41.597	40.858	43.185	46.85	39.118	43.285	40.914		0.417143	57.4303
8.8086	73.883	76.88	71.207	79.222	90.455	60.582	66.232	89.044	56.11	59.35	65.631	53.421	58.182	37.282	65.829	64.755	49.614	84.164	54.267	46.291	46.093	41.812	63.303	52.248	55.744	39.313	37.522	45.077	50.212	37.135	50.795	41.654		0.42286	58.2284
8.9276	71.754	68.127	79.035	63.723	93.776	53.17	67.295	89.184	64.105	60.651	61.85	46.484	55.302	50.339	61.879	64.948	50.81	95.079	52.647	51.392	46.083	42.168	59.81	54.63	50.691	43.598	40.077	40.903	48.637	34.946	45.78	47.878		0.428573	58.0235
9.0466	66.388	67.902	66.864	67.198	96.124	53.395	59.001	91.116	60.403	61.293	66.149	53.344	51.978	48.934	56.745	65.397	43.555	79.921	44.733	48.249	44.194	38.659	51.448	53.95	45.707	38.741	33.867	36.717	46.574	40.297	41.634	47.45		0.434285	55.2477
9.1657	70.568	63.743	75.543	68.422	95.025	51.177	66.459	82.105	60.637	59.563	71.823	57.108	49.238	46.308	55.603	68.456	52.399	74.635	49.13	52.658	46.933	33.934	47.214	44.929	48.955	40.023	38.483	35.408	51.57	34.371	51.352	38.901		0.440003	55.7085
9.2847	75.646	61.417	68.421	66.117	82.623	59.594	75.677	77.148	57.598	64.855	66.44	49.907	61.259	47.893	52.264	55.398	42.888	74.702	44.897	46.579	44.299	35.748	48.805	62.897	44.51	32.989	42.071	47.196	47.295	35.908	43.765	41.702		0.445716	54.9534
9.4037	66.335	73.926	73.36	72.447	88.642	55.208	66.293	78.773	55.105	45.591	61.891	51.009	57.538	58.439	48.889	55.856	42.126	68.472	44.131	47.424	43.228	32.536	40.461	50.152	46.526	33.757	36.898	39.769	44.886	33.255	45.228	45.571		0.451428	53.2413
9.5228	75.883	77.206	63.061	65.314	86.551	57.72	68.277	76.249	52.936	59.996	59.615	55.226	65.618	51.102	47.215	50.388	45.42	69.885	45.007	56.245	44.663	30.025	41.269	45.003	41.153	30.493	38.964	44.654	42.512	28.077	35.776	41.758		0.457146	52.9144
9.6418	65.567	67.262	53.902	66.382	78.531	53.998	56.265	64.203	50.028	44.986	56.818	54.116	60.852	46.635	42.973	52.823	54.996	60.41	47.446	57.869	45.192	31.958	32.013	39.611	45.684	28.939	34.107	39.712	42.214	35.37	43.42	43.093		0.462858	49.918
9.7608	60.448	73.373	61.577	60.961	77.48	59.487	58.958	61.825	63.382	47.715	59.257	52.873	56.991	48.634	34.431	45.019	51.366	65.006	55.344	49.738	32.412	29.465	34.784	48.786	55.416	35.559	33.007	42.929	42.537	33.603	38.701	49.11		0.468571	50.6304
9.8799	62.882	81.787	53.7	53.633	71.946	53.342	71.137	58.462	61.856	44.298	48.754	52.681	54.75	51.396	41.372	46.68	52.672	52.702	52.638	52.517	36.176	28.936	27.223	46.48	44.612	29.299	29.554	47.899	46.584	26.021	36.439	49.112		0.474288	48.9856
9.9989	62.305	78.184	55.97	63.905	66.006	57.296	57.414	59.066	55.094	36.859	39.948	51.575	55.267	47.033	32.447	44.451	54.114	60.069	48.636	51.888	44.931	23.387	27.993	43.354	41.128	25.873	29.18	39.683	43.388	32.027	27.203	46.408		0.480001	46.9401
10.1179	57.243	85.924	56.917	65.46	70.819	58.4	73.053	55.309	59.706	43.102	45.905	52.6	60.609	49.051	39.323	49.119	46.948	55.177	50.908	46.719	34.668	27.455	29.663	47.685	44.965	26.262	24.525	42.327	37.033	28.078	32.197	46.644		0.485714	48.2436
10.237	56.806	87.465	53.019	65.354	69.188	55.611	64.558	49.907	59.547	46.595	40.94	44.471	49.175	51.302	41.913	46.227	51.044	49.533	49.369	43.972	41.294	31.214	29.773	43.353	46.534	27.417	24.595	51.401	45.785	30.739	26.286	46.443		0.491431	47.5259
10.356	66.113	85.017	51.822	55.712	62.197	45.094	58.852	62.16	56.588	45.402	41.268	51.688	60.713	39.794	33.297	45.029	54.428	49.215	50.593	39.96	32.513	24.252	26.286	47.41	49.518	26.294	32.151	44.867	40.155	27.815	25.615	56.239		0.497144	46.5018
10.475	56.552	82.331	46.21	61.161	62.555	45.69	57.544	50.258	53.336	46.121	38.32	53.375	41.868	43.312	30.903	48.915	47.799	49.361	45.458	44.537	34.614	26.066	28.158	41.825	45.478	28.271	25.422	47.439	40.207	21.118	24.459	46.911		0.502856	44.2367
10.5941	52.235	82.029	46.416	51.475	52.55	44.955	49.323	55.526	51.436	43.125	41.076	60.408	54.435	35.739	36.546	51.596	44.545	54.965	50.075	50.187	41.573	30.768	23.119	40.806	42.745	28.61	29.184	56.489	42.289	23.097	23.915	41.595		0.508574	44.776
10.7131	61.477	75.737	46.483	49.214	51.089	49.709	56.189	53.039	48.645	33.093	36.144	58.407	43.648	38.957	38.505	47.114	46.19	50.714	54.66	47.149	32.095	30.082	26.082	49.052	37.744	23.739	25.558	39.145	41.326	22.872	20.269	39.839		0.514286	42.9364
10.8321	61.3	69.604	40.476	58.295	52.377	48.76	58.461	53.689	49.748	42.588	38.554	62.517	47.075	30.414	30.964	47.048	45.488	48.322	47.611	43.439	35.157	22.071	22.037	33.587	40.071	20.123	28.824	41.144	44.696	26.37	25.221	40.976		0.519999	42.4065
10.9512	67.145	65.55	43.482	43.983	51.312	41.735	48.788	51.913	53.987	37.405	35.267	49.304	49.075	28.036	25.591	44.099	49.801	54.453	57.821	47.611	33.267	19.483	25.547	36.117	41.074	23.879	26.942	44.449	44.949	24.027	24.212	37.549		0.525716	41.4954
11.0702	52.858	69.682	37.822	44.826	51.118	51.045	47.563	45.004	47.338	38.538	30.07	42.539	41.727	26.237	29.695	44.104	47.165	52.458	43.642	40.856	33.046	22.678	19.345	33.47	41.042	23.531	27.343	44.17	41.638	21.313	20.814	32.839		0.531429	38.9224
11.1892	58.907	65.774	42.756	48.112	50.664	58.688	53.522	58.517	49.035	37.594	31.279	42.943	50.564	32.31	30.505	47.785	48.815	51.314	53.054	40.976	28.435	22.102	20.367	37.493	43.392	19.906	26.231	39.98	46.224	21.903	21.363	35.331		0.537142	41.12
11.3083	61.085	75.216	41.705	44.71	47.493	65.415	51.994	45.554	48.485	40.142	39.154	47.2	48.622	31.645	28.458	40.907	46.315	48.942	50	39.395	36.151	26.899	25.641	35.347	38.787	19.828	23.135	38.313	41.04	24.179	17.561	24.127		0.542859	40.4202
11.4273	58.873	58.456	33.094	38.275	52.92	47.283	57.956	51.802	44.787	34.418	28.569	50.025	57.587	27.062	26.357	45.887	46.715	48.863	47.894	40.477	36.973	23.301	20.608	27.489	42.826	20.56	20.696	45.767	44.164	22.576	22.19	27.565		0.548572	39.1255
11.5463	58.383	56.522	41.141	44.609	60.522	55.31	63.12	52.956	43.414	40.792	29.788	44.983	54.98	27.907	24.33	40.97	45.732	46.284	52.868	43.068	34.282	19.169	22.313	34.721	41.909	16.253	24.965	37.373	42.084	22.971	20.689	26.369		0.554284	39.7118
11.6654	56.793	47.628	34.211	41.332	58.009	58.595	52.449	47.856	47.831	35.773	26.153	41.909	50.969	29.297	20.643	38.025	49.278	45.029	55.331	42.069	29.601	25.161	21.828	32.874	35.864	18.737	23.708	37.639	42.153	22.539	23.47	26.536		0.560002	38.1028
11.7844	59.89	44.615	31.165	41.134	52.046	56.814	53.825	52.215	46.665	32.884	33.136	40.294	51.517	23.673	25.408	40.986	51.76	46.206	51.567	50.709	32.826	21.207	24.529	39.253	29.587	17.826	23.448	38.494	30.812	24.598	16.646	24.287		0.565715	37.8132
11.9035	49.117	41.248	34.859	40.494	47.619	50.441	57.528	50.762	48.586	32.079	35.346	45.235	47.794	27.505	32.958	42.486	41.181	40.42	56.4	45.853	28.863	18.054	25.398	42.375	32.982	17.257	19.256	27.008	41.091	24.014	20.523	23.515		0.571432	37.1327
12.0225	55.96	53.203	30.951	44.81	44.499	55.339	56.794	45.155	50.608	27.167	30.012	48.483	47.069	21.361	29.184	44.563	51.938	44.718	51.24	44.787	31.298	15.139	22.06	35.589	31.907	17.473	26.719	39.414	39.255	26.684	18.025	25.747		0.577145	37.7235
12.1415	56.207	48.983	26.052	42.177	52.19	58.225	53.976	55.516	51.145	26.551	25.882	41.535	46.918	19.944	19.122	41.305	45.886	45.835	54.325	56.677	35.242	16.63	21.276	39.919	33.403	13.96	21.715	27.646	40.68	18.901	14.821	24.14		0.582857	36.7745
12.2606	59.066	46.976	31.121	44.799	51.427	64.261	50.823	52.235	51.456	27.548	27.111	43.041	46.525	26.849	21.368	38.889	42.67	48.022	48.348	40.035	33.385	16.733	19.806	43.271	33.91	22.233	21.296	37.578	39.991	24.759	19.378	25.874		0.588575	37.5245
12.3796	53.668	44.944	29.689	33.247	42.071	64.013	55.33	63.039	47.256	31.037	26.859	45.277	49.744	28.055	23.694	41.899	41.959	48.047	49.799	41.496	30.102	14.245	19.671	36.534	32.818	16.491	22.366	32.034	35.783	24.781	19.345	26.462		0.594287	36.6173
12.4986	49.402	39.605	33.248	43.121	49.573	52.95	52.371	47.989	42.101	29.579	26.42	39.703	46.405	27.08	25.535	36.27	53.18	56.657	47.202	45.852	35.97	14.926	13.967	34.123	32.552	14.447	25.356	29.959	41.916	22.052	21.853	22.548		0.6	36.0598
12.6177	58.979	44.313	27.458	45.065	50.876	58.523	55.246	48.52	46.214	29.905	21.092	36.477	47.536	25.762	20.107	33.796	51.696	38.272	50.752	47.97	31.016	14.282	21.086	36.763	23.99	17.109	18.312	34.723	38.002	19.67	16.542	20.445		0.605717	35.3281
12.7367	51.564	40.702	22.192	36.321	46.472	45.546	46.768	46.485	52.175	32.85	26.732	35.261	48.708	28.018	20.51	33.605	52.221	40.837	57.276	38.035	32.664	12.315	17.42	35.157	25.568	17.551	24.403	32.625	32.53	23.902	14.156	22.014		0.61143	34.1432
12.8557	64.989	41.534	29.696	30.548	55.521	48.484	52.042	37.683	50.786	38.062	22.959	37.772	56.232	27.225	22.24	35.975	45.624	44.557	60.466	47.929	28.718	11.74	15.285	31.979	26.213	15.392	20.335	34.514	40.492	24.145	15.412	18.678		0.617143	35.4133
12.9748	47.165	35.796	27.665	26.268	56.753	53.021	55.074	35.035	48.178	41.524	24.766	37.387	57.622	27.08	22.262	32.559	42.934	45.387	58.917	48.442	29.266	15.382	13.717	31.518	33.412	16.82	24.451	33.03	40.399	20.925	16.082	22.296		0.62286	35.0354
13.0938	57.495	35.721	24.23	32.457	54.594	50.676	49.869	47.778	50.1	29.563	27.458	41.763	56.303	24.18	19.63	32.083	41.231	40.654	44.641	45.624	30.901	15.112	16.143	24.036	24.69	19.799	28.115	34.162	32.205	19.13	13.083	19.844		0.628573	33.8522
13.2128	58.355	32.685	21.65	36.085	68.641	55.896	46.102	34.769	46.965	35.342	24.148	43.476	59.042	28.003	19.795	37.931	39.033	42.454	47.802	44.616	33.215	16.486	14.784	33.64	26.921	17.632	25.779	33.975	39.396	19.387	12.214	18.249		0.634285	34.8271
13.3319	50.93	40.278	27.759	35.666	62.854	54.377	53.837	35.477	47.834	27.635	22.161	40.236	56.649	24.176	24.978	41.27	48.411	42.53	49.91	43.9	32.856	14.04	15.296	33.732	32.086	20.508	20.42	32.261	39.22	17.761	13.098	18.32		0.640003	35.0146
13.4509	55.837	42.151	24.683	30.673	60.15	50.396	46.516	39.422	43.88	29.894	24.18	36.332	54.769	24.881	21.987	33.428	50.249	41.983	52.15	44.139	24.741	10.711	13.294	30.98	27.152	16.572	20.57	38.078	41.491	18.264	10.249	17.518		0.645716	33.6662
13.5699	55.599	33.869	25.702	33.736	67.441	49.934	39.152	39.716	50.671	34.971	27.522	45.818	52.854	23.712	17.725	32.104	47.851	39.37	42.163	44.997	35.785	16.039	13.284	33.034	27.508	9.51	21.838	33.674	41.985	20.183	11.061	19.771		0.651428	34.0181
13.689	57.675	27.509	22.877	36.622	54.132	49.177	49.127	43.562	50.734	26.271	26.99	40.131	53.9	20.525	21.759	34.5	53.229	38.755	43.777	40.926	34.738	11.727	12.868	36.577	29.475	18.623	27.809	36.794	45.609	24.63	10.823	19.772		0.657146	34.4257
13.808	52.097	29.928	26.467	28.223	59.068	54.112	39.08	44.392	46.983	28.391	24.028	44.113	46.978	22.075	22.506	37.013	54.121	38.907	39.553	34.787	35.248	15.076	13.397	39.215	32.416	17.837	22.989	37.29	51.038	23.719	7.977	15.448		0.662858	33.8898
13.927	65.528	27.809	20.577	29.634	57.931	51.182	44.36	39.475	45.1	31.493	25.523	52.585	47.084	26.755	17.355	31.047	50.566	40.696	40.592	37.329	30.686	14.638	14.918	36.811	32.547	22.559	25.735	34.031	47.228	20.718	11.737	15.278		0.668571	34.0471
14.0461	50.769	35.92	23.475	30.135	62.658	46.186	40.54	36.001	46.783	37.587	26.248	48.228	54.232	24.634	15.44	27.488	48.044	45.235	41.415	39.196	29.577	16.907	12.706	32.981	30.672	18.699	24.96	36.045	45.794	17.684	14.849	18.419		0.674288	33.7346
14.1651	59.169	34.422	28.22	33.251	46.963	56.12	42.782	41.287	48.412	30.49	30.507	44.068	46.158	24.505	25.78	29.995	52.309	34.079	43.266	39.762	30.77	13.221	11.684	33.943	28.202	19.099	26.298	41.754	53.68	23.229	12.104	18.306		0.680001	34.4948
14.2841	54.458	25.185	25.256	28.884	51.818	43.588	43.666	46.665	56.619	31.077	27.021	47.185	48.801	31.143	26.25	28.364	49.993	44.119	43.937	39.624	35.962	14.429	15.366	27.915	35.919	24.121	22.81	34.253	47.971	19.404	11.309	15.959		0.685714	34.346
14.4032	52.235	32.999	27.644	34.387	53.17	48.253	50.905	48.423	51.79	29.268	29.412	48.749	46.655	22.392	19.194	34.323	40.673	38.698	48.494	43.883	34.61	15.123	13.865	26.914	31.515	13.615	24.03	40.3	43.127	22.711	12.002	14.025		0.691431	34.1683
14.5222	67.358	32.772	25.607	30.512	59.136	51.197	40.076	38.824	48.119	28.843	33.27	50.366	45.901	29.35	15.404	32.529	45.711	39.423	48.756	49.352	38.168	15.316	13.986	38.012	32.167	18.279	21.728	33.933	45.896	22.488	13.316	17.327		0.697144	35.0976
14.6412	59.99	27.841	24.333	32.189	50.627	51.264	45.6	36.116	56.131	38.345	32.617	55.458	51.22	26.387	23.835	34.212	45.347	32.457	53.22	41.724	39.273	14.347	18.901	33.768	31.85	21.791	18.64	34.468	38.28	24.127	17.184	15.632		0.702856	35.2242
14.7603	61.296	28.653	28.207	33.404	54.513	51.548	48.715	35.416	56.465	35.204	31.307	61.691	51.25	30.677	24.152	30.99	41.981	40.885	56.149	42.881	42.762	19.933	13.394	21.307	28.525	19.208	25.884	43.955	40.095	21.774	13.615	17.966		0.708574	36.0563
14.8793	53.285	24.655	22.796	30.226	45.129	42.117	40.526	43.161	44.576	36.492	29.583	55.75	48.85	22.004	21.975	32.19	45.455	46.386	45.305	42.598	48.515	19.209	14.071	33.745	37.026	20.454	23.738	41.791	37.522	23.543	12.973	17.46		0.714286	34.4721
14.9984	55.275	34.801	27.401	35.767	52.105	48.15	53.955	45.138	46.919	29.145	34.327	59.185	46.043	34.627	23.331	31.689	47.883	44.317	45.96	46.08	35.236	22.545	16.84	31.904	27.777	17.639	26.524	40.442	44.602	23.217	9.491	16.994		0.720004	36.1034
15.1174	48.446	29.237	23.279	32.525	57.586	47.796	46.147	45.239	42.521	36.855	39.59	47.698	55.821	28.543	21.672	39.079	49.717	43.152	58.039	37.833	37.795	22.008	17.39	30.62	33.178	19.988	24.501	45.724	38.42	20.342	15.681	21.739		0.725716	36.1925
15.2364	65.142	33.745	26.084	33.591	50.483	47.692	42.783	46.441	54.413	44.058	32.996	50.48	50.355	29.196	23.9	30.188	45.422	40.868	47.888	38.993	41.554	22.429	19.424	37.217	30.221	25.764	24.31	37.139	33.007	26.268	13.385	14.556		0.731429	36.2498
15.3555	65.276	27.336	26.018	30.754	40.158	46.759	51.746	41.879	44.914	43.129	25.288	54.238	50.224	34.374	22.661	33.856	45.782	47.656	44.497	47.486	32.799	23.346	20.605	36.631	30.236	24.124	22.944	45.205	44.153	27.865	10.074	16.88		0.737147	36.2154
15.4745	54.302	30.382	26.692	30.747	51.223	47.525	49.391	44.071	46.622	40.405	34.761	50.173	45.279	36.189	27.129	39.521	39.89	51.295	54.454	50.976	41.703	18.935	17.552	35.595	33.758	23.678	28.41	53.255	41.807	28.328	14.498	17.032		0.742859	37.6743
15.5935	49.148	34.517	22.412	29.085	50.429	42.356	43.335	48.855	49.577	41.799	36.862	54.975	50.897	31.981	27.125	39.712	39.917	45.325	49.306	39.66	50.614	28.302	17.2	34.971	30.994	24.904	26.429	44.465	40.818	26.729	13.974	16.343		0.748572	36.9693
15.7126	49.963	27.827	24.293	38.328	48.703	48.197	50.548	41.803	38.848	41.264	33.874	50.189	47.568	33.736	32.208	38.533	39.283	44.285	52.981	47.707	48.052	23.129	18.41	41.05	32.48	24.064	28.027	43.632	37.57	27.431	14.209	15.917		0.754289	37.0034
15.8316	52.105	32.335	26.358	38.823	49.356	42.326	47.183	39.506	43.259	40.37	40.046	54.484	44.093	33.679	29.049	37.528	34.783	46.696	50.207	41.078	47.771	20.643	17.183	34.677	36.742	24.051	26.173	42.298	43.999	29.639	16.596	18.865		0.760002	36.9344
15.9506	45.105	37.729	27.325	42.84	44.973	36.654	52.872	43.984	47.614	41.842	36.437	52.386	47.082	34.39	27.365	42.198	40.277	44.165	47.469	46.565	50.725	21.313	21.028	40.006	26.954	23.988	34.442	41.449	39.85	30.817	22.022	21.126		0.765715	37.906
16.0697	51.864	32.639	27.575	39.666	46.421	42.008	45.329	49.432	44.393	42.224	37.295	56.893	44.356	35.533	27.425	47.313	45.942	51.271	42.249	40.471	52.048	21.95	19.375	37.882	26.372	23.181	40.024	41.941	41.393	24.223	18.499	18.18		0.771432	37.9802
16.1887	53.095	27.648	30.654	41.258	46.174	46.119	43.278	44.231	47.555	43.596	42.758	53.476	48.31	40.974	29.549	36.655	37.503	48.086	40.211	51.809	51.674	17.776	18.268	35.772	36.512	30.821	38.286	38.473	48.513	27.965	23.361	27.415		0.777145	38.993
16.3077	45.603	36.852	32.052	33.409	47.068	48.607	47.73	41.621	48.438	43.236	39.809	42.843	56.219	39.511	30.897	51.229	40.692	54.338	39.611	40.789	51.57	24.663	24.906	45.875	34.739	27.934	46.443	43.881	52.088	32.87	19.578	22.687		0.782857	40.2434
16.4268	48.871	31.6	28.627	34.44	47.106	45.3	42.356	47.48	36.632	34.518	41.504	47.817	40.773	37.219	29.135	49.501	36.833	52.129	48.625	40.929	56.826	20.74	19.739	39.904	36.417	27.107	47.141	42.98	47.771	32.474	23.55	24.798		0.788575	38.7763
16.5458	46.991	39.78	28.845	44.516	50.298	41.717	41.861	44.444	44.086	40.88	35.99	47.822	40.295	46.754	32.7	46.968	32.487	53.536	40.295	41.328	53.736	23.435	15.179	41.232	29.19	28.66	45.886	49.308	45.473	33.931	30.655	24.49		0.794287	39.4615
16.6648	50.667	29.248	28.304	36.737	49.481	44.185	50.625	45.07	48.668	36.857	33.02	49.938	37.93	39.806	32.199	47.348	42.334	45.215	47.68	38.851	47.489	24.241	21.032	35.898	35.421	27.769	46.859	39.911	51.231	31.608	23.638	30.396		0.8	39.0517
16.7839	54.573	37.97	30.271	43.108	52.225	47.079	50.128	43.263	42.802	40.576	38.941	49.921	46.134	39.588	45.638	51.387	34.431	53.051	43.244	44.756	50.653	28.544	24.969	36.337	33.738	28.957	57.179	43.443	47.5	38.383	23.1	23.427		0.805717	41.4161
16.9029	44.934	38.853	29.367	43.425	54.764	45.205	38.514	42.053	40.85	40.635	35.498	54.589	40.93	46.229	35.885	52.098	38.068	50.886	44.066	36.55	48.786	23.995	23.228	40.963	27.792	32.793	51.6	51.275	52.256	41.528	25.041	23.526		0.81143	40.5057
17.0219	48.275	41.96	34.541	36.61	48.474	50.517	41.737	40.855	41.177	43.239	45.521	51.379	40.993	49.232	33.204	49.26	35.059	43.287	39.604	38.447	44.886	27.752	22.836	42.057	30.253	30.95	44.281	50.442	45.298	38.814	20.228	26.909		0.817143	39.9399
17.141	50.965	33.301	27.973	50.348	53.94	49.84	38.972	43.423	43.49	40.549	44.914	47.608	43.408	41.115	38.31	58.379	35.081	44.848	39.345	44.904	56.591	27.661	27.048	37.551	35.895	31.439	46.292	50.367	43.98	42.628	22.378	24.304		0.82286	41.1515
17.26	58.317	37.442	37.655	46.304	46.936	46.762	48.202	46.874	45.362	39.016	40.68	49.276	43.337	45.151	36.043	52.119	37.364	41.412	40.618	34.355	39.228	26.862	24.275	44.189	44.293	31.821	47.187	48.302	46.191	34.104	20.059	25.956		0.828573	40.8029
17.379	61.124	43.756	34.084	49.777	40.644	44.045	39.027	45.006	51.489	35.283	38.287	43.825	46.85	43.612	44.26	52.211	42.71	39.506	41.892	43.373	46.383	27.31	33.613	40.05	38.149	37.037	47.43	49.366	42.194	40.126	25.851	25.528		0.834285	41.6812
17.4981	63.055	44.22	33.505	47.005	47.022	41.737	50.519	36.196	37.362	36.745	31.884	36.368	43.465	49.383	38.847	45.56	33.216	42.464	43.474	41.799	43.934	28.683	26.969	37.22	47.462	42.21	49.239	41.123	41.629	40.374	27.518	27.857		0.840003	40.5639
17.6171	55.864	48.321	36.541	52.059	48.549	43.877	46.434	42.688	35.869	38.175	38.091	38.606	39.049	49.889	49.601	45.187	33.711	36.429	35.271	38.874	43.492	36.366	30.717	34.66	38.57	36.657	42.459	47.941	44.335	33.173	30.422	25.009		0.845716	40.5277
17.7361	62.114	45.384	44.165	49.869	49.485	39.481	42.498	43.463	27.724	35.952	43.01	42.323	49.207	40.193	39.866	44.886	30.972	41.013	32.549	32.107	40.353	43.252	32.49	39.067	43.952	43.219	41.07	36.438	40.076	34.294	31.346	24.413		0.851428	40.1947
17.8552	50.071	43.314	46.641	55.24	45.887	37.045	45.774	42.718	31.535	29.755	40.458	43.341	48.397	47.834	37.684	47.397	28.505	43.712	35.162	30.775	33.902	39.215	34.274	36.55	41.952	39.179	34.542	39.19	42.208	36.4	23.971	36.158		0.857146	39.6496
17.9742	56.725	46.24	44.04	53.33	47.875	40.571	42.607	45.581	21.104	26.963	43.488	39.813	41.337	52.771	44.54	49.015	28.534	31.612	32.873	26.038	38.243	43.953	31.162	35.165	46.453	30.861	42.565	41.372	33.57	37.425	26.897	37.096		0.862858	39.3693
18.0932	60.567	55.626	37.317	52.632	44.859	39.324	43.039	37.75	22.571	27.985	38.293	39.752	40.132	44.482	39.879	48.771	21.823	34.467	29.506	28.195	31.146	42.19	43.334	46.133	40.001	31.041	41.631	39.113	42.593	35.555	30.685	40.806		0.868571	39.0999
18.2123	55.43	44.655	46.763	57.573	40.511	46.466	39.049	33.047	18.385	18.588	30.715	39.291	42.326	50.783	43.347	48.832	24.762	26.778	20.518	24.337	36.105	43.836	40.784	44.041	39.217	38.657	39.958	41.399	40.209	35.068	42.429	35.34		0.874288	38.4125
18.3313	51.563	39.358	53.303	59.49	50.097	35.222	41.919	39.601	15.146	17.842	22.087	33.912	35.261	51.705	36.129	52.848	22.3	26.396	21.432	20.945	37.911	39.317	48.188	41.17	37.643	36.399	49.583	48.759	35.297	35.734	37.663	47.733		0.880001	38.186
18.4504	56.398	48.705	48.009	48.489	47.162	41.093	36.244	34.652	10.665	15.925	18.907	38.742	46.524	53.261	41.911	53.886	12.802	24.109	19.993	19.37	30.447	45.464	52.776	35.784	42.151	42.352	39.094	42.817	41.814	35.961	31.703	41.824		0.885718	37.4698
18.5694	56.844	44.322	43.008	50.821	51.927	40.77	35.646	36.539	6.329	9.339	17.597	36.734	36.94	45.739	50.791	49.016	17.141	17.526	15.658	17.616	26.828	41.465	43.981	43.349	48.756	42.339	43.702	30.35	39.453	30.574	35.563	39.557		0.891431	35.8194
18.6884	62.562	42.875	44.171	57.498	36.998	40.993	32.263	27.554	6.675	7.954	9.872	24.865	38.513	41.049	42.753	37.336	12.072	17.125	13.046	13.646	29.144	46.779	47.085	49.835	39.124	40.476	36.989	30.671	38.211	35.388	44.638	42.29		0.897144	34.0766
18.8075	63.25	42.116	54.569	58.315	37.761	36.751	35.1	27.49	4.884	8.851	10.244	22.677	33.534	42.443	41.921	46.578	7.659	14.946	14.446	10.53	28.127	53.961	40.215	50.054	38.635	38.927	39.278	36.318	36.12	32.742	40.327	43.453		0.902861	34.1319
18.9265	61.7	48.78	43.567	48.06	32.587	39.551	27.794	18.837	6.723	4.741	5.425	16.819	26.797	45.895	38.776	45.018	8.82	9.211	7.599	7.137	16.119	49.492	44.562	41.439	39.231	42.263	34.69	34.934	32.476	29.361	35.222	38.854		0.908574	30.7025
19.0455	59.394	46.448	39.58	50.088	34.537	34.81	31.414	13.12	3.261	4.968	5.386	10.465	24.098	44.257	37.124	35.456	4.586	11.64	9.102	4.089	18.642	47.032	50.866	36.897	37.35	42.396	27.331	36.061	25.868	30.033	32.985	38.534		0.914286	28.9943
19.1646	64.909	43.378	39.868	48.386	32.955	31.944	26.141	14.738	4.931	4.205	4.515	10.356	17.17	35.6	38.004	35.057	6.175	7.896	9.652	4.325	16.528	49.117	42.921	43.033	40.393	35.225	29.837	30.728	23.125	24.607	41.426	44.146		0.920004	28.1653
19.2836	51.686	52.911	43.359	45.588	31.286	33.059	19.591	10.666	1.964	3.861	4.909	7.051	12.157	25.69	35.327	34.113	3.762	7.621	5.324	5.239	10.496	38.583	48.745	37.215	39.248	28.122	29.276	24.201	16.602	18.248	36.685	41.299		0.925716	25.1214
19.4026	42.858	49.18	36.757	45.584	29.21	28.78	14.866	8.107	1.929	2.215	3.407	7.537	9.404	26.406	35.537	24.387	4.368	7.169	4.802	2.363	5.165	42.102	50.642	35.398	37.365	28.432	22.513	17.84	11.684	15.938	41.154	31.551		0.931429	22.6453
19.5217	37.529	50.158	38.385	31.844	22.644	20.701	9.176	3.242	1.317	4.769	3.532	3.424	6.042	21.635	34.86	26	4.519	4.897	2.429	2.117	2.924	43.482	39.624	37.888	36.864	32.743	19.07	20.093	10.864	10.219	37.337	36.259		0.937147	20.5183
19.6407	43.363	53.577	43.37	33.489	23.54	19.776	10.321	3.059	1.937	3.237	1.81	3.993	5.032	18.845	25.419	24.863	2.384	1.963	3.874	3.029	4.956	43.71	40.827	41.333	28.238	36.126	12.549	12.731	6.114	4.929	35.003	32.721		0.942859	19.5662
19.7597	39.064	48.1	37.001	36.996	18.509	15.316	6.7	6.62	2.995	2.136	2.422	3.74	2.71	9.505	22.279	21.82	1.611	3.85	4.793	1.782	2.908	43.662	46.712	29.757	19.876	16.585	12.547	8.934	5.152	4.519	28.469	24.082		0.948572	16.5985
19.8788	35.65	42.611	31.734	31.108	14.566	9.73	6.103	3.486	1.094	0.988	1.711	3.452	2.201	7.931	20.67	16.103	1.582	3.14	1.232	1.935	2.004	39.276	42.827	34.729	19.279	20.995	8.968	5.207	2.696	4.181	22.895	22.163		0.954289	14.4452
19.9978	32.047	39.557	26.907	18.611	9.247	9.29	4.696	4.471	3.216	1.589	2.069	1.368	2.688	3.815	10.952	8.758	0.918	2.759	1.38	0.844	3.09	38.603	33.697	30.713	16.339	17.974	5.532	3.973	4.496	2.575	19.934	19.988		0.960002	11.9405
20.1168	30.806	41.081	23.767	15.871	10.675	9.383	2.76	2.648	0.531	1.009	2.092	1.576	2.843	2.865	11.086	10.111	2.977	2.125	0.683	2.575	1.248	37.121	34.388	30.208	12.058	8.921	3.069	4.059	3.855	3.885	16.914	13.79		0.965715	10.8431
20.2359	22.568	30.644	13.338	10.915	5.538	6.243	4.14	2.062	0.664	0.539	1.501	2.2	1.328	2.88	6.276	4.889	0.547	1.892	4.11	1.903	1.589	25.683	27.726	27.967	5.053	4.948	5.315	2.097	2.565	4.882	16.056	9.386		0.971432	8.04513
20.3549	20.477	23.115	12.192	10.156	4.302	6.789	1.944	1.93	2.017	2.333	1.702	2.073	1.63	2.335	4.811	3.127	1.436	1.894	0.976	0.725	2.734	21.899	32.019	28.138	6.305	4.507	3.203	2.384	2.361	1.78	9.376	5.996		0.977145	7.08331
20.4739	17.408	25.615	9.885	7.638	6.053	3.938	1.84	1.032	1.398	1.833	0.741	0.911	1.41	4.487	5.502	3.697	1.534	1.487	1.071	0.299	3.025	15.581	28.499	22.732	5.714	3.173	3.385	4.056	1.271	2.264	8.389	7.074		0.982857	6.34194
20.593	13.81	19.493	4.832	6.452	4.72	1.916	1.964	0.902	0.554	0.601	1.904	1.429	1.568	1.24	2.954	7.551	0.873	2.193	1.954	1.076	0.977	10.333	25.948	11.058	4.959	4.464	2.4	3.116	2.309	2.406	5.714	5.963		0.988575	4.92603
20.712	14.486	15.788	3.614	6.642	5.408	5.184	1.962	2.053	0.872	1.288	1.144	0.307	2.387	0.701	3.77	2.916	0.602	1.353	3.598	0.918	2.471	9.543	21.521	11.009	1.729	5.607	1.642	3.094	1.359	1.892	4.506	5.566		0.994287	4.52913
20.831	14.229	8.573	5.157	2.609	4.48	2.892	0.724	0.579	0.025	0.437	1.079	1.507	1.352	0.656	0.893	3.634	0.523	0.453	1.142	0.871	0.957	8.485	15.073	6.085	2.905	3.457	3.431	2.235	0.235	2.449	3.311	5.061		1	3.29684

## Sheet: Image33
X0	Y0	Y1	Y2	Y3	Y4	Y5	Y6	Y7	Y8	Y9	Y10	Y11	Y12	Y13	Y14	Y15	Y16	Y17	Y18	Y19	Y20	Y21	Y22	Y23	Y24	Y25	Y26	Y27	Y28	Y29	Y30		Ap-basal	Avg intensity
0	52.141	69.933	74.848	46.231	95.052	66.513	33.313	30.122	49.64	47.081	61.099	37.857	47.702	32.789	34.638	42.154	52.32	18.842	25.479	22.19	23.647	21.467	52.497	54.687	38.777	56.027	22.251	26.259	42.84	37.395	37.162		0	43.6436
0.119	59.454	101.154	87.613	56.603	109.329	77.901	38.755	39.449	48.634	63.509	82.715	39.487	59.146	34.127	46.291	51.243	64.533	22.814	28.213	20.698	26.896	28.238	69.857	60.163	48.382	51.041	32.444	39.891	45.152	39.242	45.825		0.00653405	52.2193
0.2381	61.282	98.311	105.133	72.78	106.788	99.573	43.206	47.321	66.518	74.718	103.59	48.883	77.732	53.411	55.792	60.876	86.684	21.927	31.803	30.692	38.878	32.649	72.626	67.486	53.809	57.448	33.042	46.417	46.547	30.719	40.47		0.0130736	60.2294
0.3571	76.944	116.568	124.923	88.52	122.459	114.831	48.427	48.444	88.484	83.091	134.187	60.915	96.549	50.301	68.564	71.083	107.272	30.987	39.223	32.284	34.865	34.389	86.344	80.927	73.552	70.476	36.639	59.846	62.399	42.428	38.322		0.0196076	71.7498
0.4761	87.538	119.177	145.076	111.946	136.433	139.919	61.736	58.633	89.742	107.064	153.467	69.319	123.739	68.015	67.009	75.684	152.006	33.548	42.157	41.072	45.913	39.671	82.685	89.645	77.367	77.342	41.728	71.351	66.09	41.938	46.009		0.0261417	82.678
0.5952	87.267	129.908	160.607	115.708	140.446	141.534	67.706	68.157	115.933	123.541	178.342	87.092	157.808	85.733	79.788	83.554	186.449	41.985	51.961	58.994	62.001	43.106	89.371	76.724	95.364	93.871	44.19	74.701	77.838	46.728	48.434		0.0326812	94.0271
0.7142	98.454	139.825	184.933	148.877	157.384	157.743	76.798	86.646	126.386	153.517	189.294	107.662	193.163	104.938	89.561	103.651	190.187	60.331	71.076	67.382	66.544	50.95	110.642	90.069	117.083	111.977	58.187	95.114	85.652	68.507	62.391		0.0392153	110.481
0.8332	107.264	142.807	187.811	169.302	169.877	185.418	92.931	100.663	151.193	175.491	199.82	141.235	199.452	130.499	87.262	125.423	200.977	66.173	76.703	68.195	89.489	71.143	122.764	97.793	133.584	132.101	64.976	108.87	91.433	76.152	73.671		0.0457493	123.886
0.9523	108.194	159.502	208.413	177.01	182.531	194.578	98.471	123.558	170.811	200.229	204.783	157.354	210.256	157.708	117.873	138.378	210.551	84.704	92.093	82.425	101.391	68.229	132.303	111.344	146.922	144.438	77.69	139.143	96.571	86.095	96.439		0.0522888	138.064
1.0713	120.834	155.905	213.781	194.082	182.908	203.42	126.545	139.045	186.737	201.424	198.16	157.734	217.203	183.815	123.846	151.726	203.542	99.197	106.264	101.43	116.548	76.773	160.944	107.584	161.206	152.991	99.811	164.386	122.611	92.713	133.032		0.0588229	150.2
1.1903	133.052	164.368	211.816	200.416	194.795	218.237	147.992	154.786	202.501	197.001	197.461	187.052	227.479	197.698	134.988	160.442	208.623	126.978	133.685	105.633	131.882	80.545	174.026	117.534	170.825	164.092	101.882	189.863	146.373	100.195	175.101		0.0653569	163.139
1.3094	146.257	170.029	222.372	194.755	190.359	221.909	170.962	170.759	191.989	196.462	188.571	199.134	233.495	184.569	162.538	168.783	219.061	138.728	133.66	126.018	140.874	97.301	189.612	133.488	170.803	171.972	125.902	191.877	141.745	106.767	188.038		0.0718965	170.606
1.4284	159.814	164.623	221.455	218.674	188.245	218.781	185.257	194.835	192.327	193.049	200.211	193.568	223.234	183.593	170.828	183.027	213.362	143.731	158.801	131.984	146.93	101.615	192.795	136.951	185.567	177.288	138.186	202.41	156.721	125.175	198.603		0.0784305	177.472
1.5474	152.876	154.419	223.749	209.318	190.897	230.057	209.446	205.323	181.841	190.445	204.206	186.91	217.943	168.995	180.636	173.284	218.967	166.041	164.594	144.447	154.811	122.329	195.699	140.559	183.254	181.565	156.287	208.168	177.381	131.966	204.727		0.0849646	181.65
1.6665	148.381	155.337	224.179	213.539	181.79	224.12	212.49	196.643	166.408	189.213	198.775	196.499	219.31	150.451	190.398	174.351	215.467	174.879	170.41	155.277	163.27	131.716	193.67	150.114	185.155	176.059	168.184	214.385	167.951	128.56	208.736		0.0915041	182.12
1.7855	169.434	160.149	227.772	213.474	192.147	219.3	218.615	194.539	166.41	182.475	194.939	208.131	221.956	150.192	198.316	176.493	212.54	159.672	183.777	163.056	165.541	133.207	206.112	175.972	183.522	190.788	161.746	206.994	188.436	132.191	219.16		0.0980381	186.357
1.9046	170.064	161.624	222.33	213.844	196.805	220.403	228.362	182.711	140.385	168.201	188.742	216.601	221.591	137.797	189.888	163.808	219.472	169.604	203.366	160.602	170.78	146.739	203.972	174.022	182.734	183.015	191.169	201.183	189.951	143.333	209.769		0.104578	186.222
2.0236	176.077	151.774	218.498	214.562	194.643	223.971	227.272	194.438	130.885	169.276	166.284	220.003	216.535	153.944	185.331	169.323	208.717	183.538	205.627	162.085	177.378	157.056	221.339	173.077	191.726	186.473	198.217	216.176	192.067	139.327	214.617		0.111112	188.395
2.1426	171.885	145.698	220.181	196.59	181.797	225.191	227.587	187.696	114.017	161.002	168.789	204.596	220.587	142.746	178.887	159.554	193.191	184.381	207.426	186.648	186.97	164.122	204.426	173.537	183.236	176.109	198.378	212.193	197.884	131.91	219.512		0.117646	184.733
2.2617	167.873	133.312	231.316	197.445	199.529	207.244	225.61	190.437	111.099	169.643	158.01	202.799	216.88	128.702	162.225	155.154	195.473	193.483	200.354	179.963	191.125	163.609	196.256	182.851	177.428	183.841	201.843	217.332	200.424	142.864	221.315		0.124185	184.046
2.3807	164.576	125.126	224.511	180.635	185.165	214.247	217.136	178.657	92.552	162.661	161.639	194.407	208.493	127.216	161.118	150.081	189.904	193.711	210.26	192.818	194.492	167.706	209.682	173.821	185.129	185.111	202.684	206.394	203.686	139.124	219.736		0.130719	181.37
2.4997	167.016	118.798	218.963	174.026	185.806	213.075	205.188	157.772	91.898	148.117	139.191	183.828	211.227	133.846	158.687	142.913	192.258	191.624	213.604	183.112	187.885	172.731	205.153	178.11	169.808	202.146	193.376	216.024	184.247	150.333	211.63		0.137253	177.497
2.6188	168.353	113.898	215.254	171.659	197.472	206.448	202.397	185.043	85.791	140.512	130.489	184.766	209.272	116.713	168.509	132.962	176.721	180.126	221.338	191.181	192.476	163.858	210.575	176.573	176.032	195.963	188.339	201.781	186.052	153.117	198.668		0.143793	175.559
2.7378	163.316	97.086	213.173	181.672	191.816	198.836	196.364	164.33	82.026	140.942	127.744	188.408	208.374	102.556	158.981	120.696	148.749	176.951	211.662	177.307	191.793	163.935	205.494	174.919	179.52	200.384	193.928	208.208	181.57	149.226	196.453		0.150327	170.852
2.8568	163.298	97.739	204.513	192.591	187.934	187.955	188.894	155.746	93.016	138.608	132.028	176.81	210.41	104.95	151.312	107.295	150.314	177.033	215.544	182.002	194.206	171.067	214.643	172.316	162.64	197.605	209.433	213.248	202.627	170.178	175.472		0.156861	171.014
2.9759	149.548	91.992	181.614	176.747	191.83	186.307	187.709	161.029	96.02	134.398	123.131	177.285	205.667	99.064	148.152	116.222	136.353	180.535	213.773	195.847	207.755	184.692	213.663	165.701	169.673	198.162	198.931	207.238	172.987	160.754	159.958		0.163401	167.508
3.0949	162.845	98.827	157.034	174.397	187.663	196.771	167.31	149.093	81.478	136.274	137.232	179.85	198.537	101.537	121.595	106.187	138.15	175.759	207.84	198.504	208.318	176.459	213.569	163.445	162.109	205.529	199.108	214.758	180.14	172.199	158.831		0.169935	165.527
3.2139	154.148	86.934	156.22	173.578	176.983	181.308	177.18	136.326	90.3	131.539	132.002	168.102	205.028	92.606	117.709	98.847	118.887	161.918	217.068	193.261	199.158	172.315	204.687	158.111	146.026	190.071	197.374	203.566	171.275	164.067	128.698		0.176469	158.235
3.333	146.354	77.324	148.943	177.028	176.472	167.759	178.686	132.085	83.334	134.436	128.395	142.652	192.02	94.455	95.287	97.426	108.222	169.959	216.195	189.083	198.229	170.118	204.066	150.393	155.486	198.436	199.613	185.801	177.247	154.313	111.883		0.183008	153.603
3.452	141.425	73.472	123.745	167.38	170.618	168.088	171.538	125.235	90.644	143.66	123.472	134.737	195.621	87.071	93.28	92.356	101.198	156.748	196.971	178.591	194.933	160.281	203.005	141.34	141.793	186.659	196.387	182.605	164.745	167.205	104.736		0.189542	147.727
3.571	132.626	63.379	114.727	155.119	150.619	159.398	180.472	116.399	90.703	135.56	122.175	129.76	190.453	88.754	101.93	90.09	106.914	153.745	200.565	179.108	194.589	153.779	200.179	135.351	142.821	174.482	201.149	180.218	168.717	156.139	97.399		0.196076	144.107
3.6901	124.96	65.274	123.511	127.944	150.807	144.616	157.024	116.296	87.024	130.687	124.445	107.765	188.307	92.226	93.068	94.441	85.904	149.671	202.837	173.294	182.369	163.437	207.13	118.901	135.837	170.329	196.188	191.584	169.894	155.555	90.177		0.202616	139.403
3.8091	108.853	69.831	110.048	130.28	143.437	136.25	152.686	108.001	83.63	133.566	122.397	106.912	205.006	82.849	84.644	95.179	102.597	129.273	196.349	175.945	174.341	152.279	206.421	112.663	147.496	155.809	193.694	176.447	167.971	152.429	89.158		0.20915	135.692
3.9281	102.23	61.083	97.365	113.984	133.105	128.889	145.423	100.134	83.116	115.068	97.096	99.761	192.708	90.037	94.639	88.488	101.535	114.138	187.082	170.111	158.389	142.942	183.379	111.042	122.353	145.158	189.676	178.617	175.037	149.308	88.116		0.215684	127.742
4.0472	99.3	72.241	83.702	108.123	124.419	119.678	125.637	94.882	80.219	113.461	95.637	82.469	193.869	86.765	84.255	81.268	98.245	115.332	200.667	170.633	160.863	137.643	181.533	106.956	122.778	144.333	181.547	167.974	172.533	147.772	90.858		0.222223	124.051
4.1662	87.819	78.521	88.343	102.233	126.008	112.468	112.555	87.826	92.712	112.339	97.26	89.809	176.654	87.23	89.171	82.622	110.612	107.949	191.875	153.081	162.915	146.385	178.517	102.326	120.258	120.13	191.825	157.175	165.307	141.29	93.945		0.228757	121.521
4.2852	75.909	84.09	93.276	103.156	108.191	109.968	102.789	82.26	99.703	116.259	83.041	87.253	177.816	80.586	97.997	80.227	91.509	104.185	190.367	164.1	157.867	135.873	163.919	92.117	114.537	100.669	184.232	136.827	168.553	137.434	82.135		0.235292	116.35
4.4043	78.469	87.165	90.391	96.152	110.425	93.266	105.112	80.616	101.426	111.995	86.737	76.779	170.29	83.776	88.579	81.02	91.349	90.912	187.343	166.102	164.718	131.992	160.279	93.513	102.526	95.954	172.792	131.098	170.208	132.917	92.722		0.241831	113.762
4.5233	70.625	85.224	78.719	78.077	100.782	98.499	106.015	73.807	108.466	115.607	90.909	91.989	158.73	94.58	86.769	71.971	86.332	92.53	186.335	150.185	156.823	126.412	147.266	91.472	97.494	102.082	171.587	119.297	158.047	130.058	84.7		0.248365	110.045
4.6423	79.806	84.056	80.901	78.501	94.252	91.711	99.414	82.661	94.22	114.166	81.754	84.981	135.07	78.013	82.61	72.091	89.768	90.218	180.315	144.176	139.191	129.596	152.103	84.708	98.279	97.655	171.045	107.81	162.775	124.558	85.232		0.254899	106.182
4.7614	64.304	80.496	87.396	79.248	84.932	93.04	112.116	70.398	94.665	107.88	84.755	82.746	125.485	80.456	72.458	72.929	73.199	86.733	172.939	119.712	140.127	144.08	141.431	75.54	91.54	96.91	146.975	115.806	156.565	117.968	89.384		0.261439	102.007
4.8804	62.693	69.238	81.941	79.376	83.229	82.144	96.063	69.71	84.789	92.166	75.204	87.786	118	86.698	74.184	78.781	75.321	92.686	171.552	127.393	145.433	144.482	133.252	82.136	87.223	96.167	130.822	117.104	166.501	115.525	84.591		0.267973	99.7481
4.9995	58.734	59.52	80.038	75.152	84.626	89.838	94.461	70.673	84.1	96.449	69.904	83.016	97.168	81.47	70.513	69.864	73.079	85.579	168.003	122.234	146.131	143.504	127.519	83.619	87.217	93.627	123.47	121.386	153.212	119.113	81.469		0.274512	96.6028
5.1185	66.655	66.398	83.292	76.257	81.037	75.784	88.94	65.862	89.1	94.897	61.45	83.009	91.276	70.162	76.499	71.076	77.19	77.727	165.896	109.925	141.156	136.022	130.707	84.693	81.914	90.535	111.563	100.108	143.248	116.935	80.548		0.281046	93.2213
5.2375	60.728	68.579	84.478	72.639	85.698	76.779	87.473	65.678	85.314	90.845	59.678	93.964	82.151	65.091	66.494	73.594	70.915	69.664	158.143	103.781	136.995	137.277	123.115	81.953	73.113	81.498	98.978	95.145	143.886	116.793	81.99		0.28758	90.0784
5.3566	59.344	55.983	77.615	57.299	79.043	75.175	84.218	63.494	80.378	82.108	67.659	95.623	84.191	62.918	65.562	70.008	69.222	68.164	153.606	101.353	136.789	145.181	126.599	78.771	66.748	82.912	91.599	83.634	131.053	119.05	90.174		0.29412	87.2733
5.4756	69.396	54.798	77.186	61.729	86.301	78.911	83.456	65.967	69.424	91.524	64.581	89.175	78.592	72.505	68.712	67.417	75.482	79.581	155.824	98.022	115.935	134.835	127.244	75.147	72.676	78.555	84.489	79.43	123.358	107.262	89.566		0.300654	86.3574
5.5946	68.77	61.625	76.125	63.896	88.442	62.366	81.753	72.212	69.886	75.081	61.805	100.332	70.601	72.561	61.738	69.717	78.294	77.616	146.671	86.904	114.796	135.275	108.508	74.838	71.058	70.959	74.133	86.485	121.93	98.559	94.653		0.307188	83.7932
5.7137	70.148	55.112	81.763	64.739	83.145	64.547	77.964	61.401	56.349	65.852	69.558	95.509	67.732	66.092	59.855	59.002	71.153	77.156	141.585	94.355	112.655	125.252	118.051	82.466	57.613	80.099	67.332	76.303	111.977	92.536	107.917		0.313728	81.1361
5.8327	62.48	63.362	77.393	56.288	77.286	67.213	79.075	64.577	48.822	57.774	62.814	87.278	67.627	62.726	62.11	64.293	68.782	76.886	127.439	91.345	111.461	115.732	111.103	70.048	61.581	71.043	70.347	72.218	106.258	81.119	115.031		0.320262	77.7907
5.9517	62.287	52.795	74.752	55.079	63.706	60.897	67.306	59.507	46.57	48.329	59.449	75.462	63.007	55.276	59.697	65.101	76.54	67.748	112.948	94.981	101.959	111.211	111.091	71.592	63.365	68.653	63.396	67.656	101.141	89.004	110.895		0.326796	73.5935
6.0708	74.505	60.698	58.404	50.891	63.701	65.199	65.84	66.505	35.03	43.966	65.032	84.692	56.589	53.459	55.231	54.034	73.551	74.345	108.748	75.823	100.61	105.749	101.229	76.473	58.068	66.091	67.273	67.784	96.659	88.787	109.2		0.333335	71.7473
6.1898	61.86	53.012	66.592	56.351	61.383	55.867	64.992	67.913	35.938	46.157	52.826	78.22	56.066	56.676	51.22	58.158	77.308	75.332	103.382	85.163	95.551	93.148	102.554	82.686	56.071	62.972	64.05	78.763	90.963	80.034	77.44		0.339869	69.3112
6.3088	70.335	57.351	57.392	52.408	57.65	61.495	65.598	59.272	34.819	45.35	57.471	73.561	58.975	55.375	50.204	60.969	74.367	81.942	90.105	80.378	92.833	90.038	102.798	84.848	58.021	62.262	71.701	68.903	92.009	78.27	82.971		0.346403	68.6991
6.4279	72.923	54.498	58.255	61.281	53.704	64.662	63.038	56.025	35.5	42.064	57.033	68.6	62.076	55.912	50.294	59.684	78.426	83.974	90.661	65.091	89.871	79.868	105.38	77.137	68.489	69.17	68.549	72.475	83.852	73.202	69.86		0.352943	67.4695
6.5469	73.131	56.502	60.863	50.979	53.968	67.957	60.789	64.001	27.385	35.763	55.996	60.641	63.568	49.643	39.835	57.119	95.517	77.087	80.366	75.292	72.374	85.377	104.067	81.763	71.481	68.442	70.692	76.104	86.15	79.157	59.254		0.359477	66.4924
6.6659	63.548	56.234	51.984	49.326	61.999	65.815	60.367	64.465	29.893	35.63	61.969	64.713	57.093	44.308	39.7	54.018	89.685	83.692	76.261	62.132	68.166	82.458	106.101	77.654	77.06	69.211	70.8	62.163	72.642	76.927	58.153		0.366011	64.328
6.785	64.78	45.207	44.869	51.135	57.48	66.342	54.267	65.269	27.938	33.582	59.821	66.696	66.096	44.232	38.559	55.019	88.066	82.275	76.649	67.847	70.979	79.846	97.307	75.038	68.659	57.609	77.381	68.244	69.162	65.53	52.596		0.37255	62.5316
6.904	72.389	45.535	45.25	45.59	56.331	71.459	63.35	63.169	29.085	30.303	60.855	68.161	67.286	43.756	38.771	55.331	85.168	86.059	71.897	60.29	63.737	68.054	96.143	70.818	70.442	72.412	64.274	78.611	62.515	70.855	48.196		0.379084	62.132
7.023	72.374	39.822	43.496	61.069	57.828	72.768	53.571	48.135	29.264	27.523	55.863	69.376	66.691	36.703	33.355	50.699	90.488	85.061	77.597	62.305	57.619	72.478	97.585	63.368	71.47	70.296	74.403	76.238	59.501	73.014	39.306		0.385619	60.9441
7.1421	70.944	37.01	38.276	58.837	55.731	73.629	53.756	52.949	23.745	24.776	62.402	66.238	60.815	36.831	41.194	57.827	92.876	85.553	83.859	54.116	60.854	72.151	76.738	69.102	72.379	64.799	65.516	61.011	59.589	64.611	45.239		0.392158	59.463
7.2611	77.323	35.943	40.592	57.884	52.236	72.64	51.862	42.054	25.313	28.534	63.291	70.171	57.529	33.675	36.084	54.722	84.902	80.812	78.559	58.797	56.785	61.78	81.468	70.092	63.549	76.5	58.176	59.512	58.378	72.205	41.071		0.398692	58.1432
7.3801	75.273	32.495	40.881	59.347	53.378	75.907	52.668	47.406	25.16	28.709	59.198	66.178	61.187	35.518	39.109	50.567	74.427	72.353	74.955	55.911	56.895	67.45	78.921	70.141	70.981	63.428	69.448	72.753	57.346	76.764	40.103		0.405226	58.2212
7.4992	76.184	35.655	34.961	58.055	56.351	71.04	65.598	57.823	25.053	26.834	67.85	61.229	56.252	33.206	34.052	53.824	61.228	63.738	71.433	49.621	70.628	64.174	71.954	55.898	68.015	60.064	68.574	65.468	58.899	63.611	30.334		0.411766	56.0518
7.6182	68.17	27.927	31.618	62.196	52.678	72.895	57.841	47.62	24.984	25.703	68.196	58.964	62.602	31.032	39.054	51.731	57.709	54.559	76.565	47.297	67.022	61.492	68.927	65.494	60.714	64.83	59.814	58.267	57.384	58.499	32.218		0.4183	54.0001
7.7372	61.427	37.698	31.718	50.348	49.089	73.812	55.365	49.832	22.971	27.06	55.919	65.049	50.867	29.393	31.096	43.708	52.627	63.515	73.96	48.584	67.134	60.524	70.861	61.544	56.757	68.853	59.151	52.722	54.828	64.948	32.459		0.424834	52.3813
7.8563	61.245	25.175	29.431	54.896	50.331	70.353	65.342	43.682	23.354	20.163	61.345	60.681	49.697	27.871	31.603	47.847	56.121	65.133	80.096	41.937	75.449	62.587	69.521	64.089	63.69	57.924	58.489	46.165	56.026	53.242	28.145		0.431373	51.6655
7.9753	54.482	27.315	29.327	54.907	53.2	77.011	66.196	41.32	23.357	22.633	59.345	62.765	49.983	25.034	34.722	44.678	52.31	61.836	73.564	40.376	71.899	66.184	65.655	61.209	53.521	58.676	62.792	42.913	49.845	62.77	26.587		0.437907	50.852
8.0943	51.186	29.094	29.11	56.944	47.853	70.096	57.436	41.258	25.589	21.972	48.256	63.863	43.117	19.196	35.658	48.162	48.959	60.4	77.664	34.915	68.326	59.059	72.05	60.974	56.108	59.36	63.103	42.906	52.7	49.6	26.429		0.444441	49.0756
8.2134	47.76	25.504	30.496	62.158	52.298	63.57	67.642	44.303	20.073	19.233	45.8	66.307	45.466	24.99	30.023	49.071	43.607	52.679	73.372	34.908	57.712	56.612	65.675	49.072	53.442	57.897	59.387	41.571	66.008	56.344	26.535		0.450981	48.0489
8.3324	43.912	26.629	33.256	59.056	48.917	60.728	63.65	42.259	21.84	18.55	45.384	63.199	43.086	19.266	32.21	39.201	41.355	57.62	62.183	35.633	65.128	54.663	71.335	52.078	47.877	57.719	61.733	37.463	61.317	61.808	30.975		0.457515	47.0977
8.4515	48.401	28.466	21.821	54.592	53.598	68.995	61.408	47.546	18.069	18.454	49.825	65.084	43.804	18.256	29.223	40.945	37.631	59.555	65.067	35.096	58.487	46.957	61.271	48.939	51.703	56.832	53.597	36.084	58.834	62.046	29.412		0.464055	46.129
8.5705	51.713	21.532	26.833	57.024	50.468	59.327	52.497	41.382	15.089	17.501	48.418	60.842	44.946	21.012	35.132	36.843	37.09	54.178	61.532	30.568	71.858	56.915	52.652	44.829	52.324	55.082	63.93	35.473	58.883	64.512	28.654		0.470589	45.4529
8.6895	44.328	23.747	29.288	52.539	48.577	64.095	63.777	43.492	19.186	15.815	45.727	61.092	48.401	21.628	29.373	44.858	41.822	55.485	61.799	30.999	78.218	55.72	52.276	45.854	50.035	59.236	55.317	42.537	61.19	60.574	30.608		0.477123	46.374
8.8086	44.679	23.565	32.943	55.961	50.734	62.985	52.746	44.571	19.61	15.776	38.431	61.761	47.89	18.008	32.501	40.869	39.32	60.613	57.45	30.372	76.658	58.558	60.815	48.296	49.226	59.651	56.382	41.368	59.743	58.164	25.252		0.483662	45.9645
8.9276	36.358	20.32	27.387	47.22	53.581	69.673	60.77	45.636	21.851	15.813	39.201	60.635	45.723	21.517	28.689	41.146	37.205	54.227	56.31	33.194	77.806	52.649	57.138	50.944	51.919	51.531	44.949	29.852	50.311	54.004	26.111		0.490196	43.9894
9.0466	39.078	21.352	29.578	52.172	54.605	63.129	54.714	39.687	17.719	14.371	46.76	56.387	37.714	27.82	28.145	52.753	31.149	48.055	52.342	25.272	80.835	50.572	50.235	50.062	49.997	54.597	49.241	41.344	55.92	45.64	21.99		0.49673	43.3302
9.1657	46.21	21.166	28.008	50.625	52.543	62.832	62.944	47.66	20.616	16.529	40.861	57.818	38.181	29.781	30.732	44.448	31.696	53.756	48.632	26.67	73.823	49.267	46.452	49.017	48.246	50.1	51.17	37.704	57.764	44.884	27.89		0.50327	43.4847
9.2847	38.129	20.474	22.414	43.248	55.723	65.802	52.982	45.295	15.892	17.467	43.283	61.298	38.312	25.862	29.478	38.101	31.281	53.913	37.669	22.8	82.053	45.555	48.76	41.74	47.963	52.704	45.515	36.998	57.462	49.963	28.27		0.509804	41.8195
9.4037	45.413	18.729	26.72	36.805	57.1	54.938	52.392	41.283	17.638	17.233	44.744	58.484	47.132	23.185	32.232	36.97	34.044	48.4	45.778	25.234	68.077	54.567	39.748	39.075	53.585	61.346	37.781	36.324	59.004	45.46	22.051		0.516338	41.3378
9.5228	43.098	19.665	24.024	36.532	54.797	57.62	46.769	46.745	14.86	18.446	41.079	62.918	40.873	18.384	34.067	35.091	34.457	46.326	49.16	24.386	59.081	49.624	45.375	46.85	50.039	63.789	42.307	33.323	50.256	44.84	25.651		0.522877	40.6591
9.6418	34.418	22.79	19.931	34.595	52.05	59.382	49.586	45.011	14.262	12.836	41.141	59.783	46.937	21.046	33.171	38.227	35.732	47.142	49.861	23.01	53.985	49.26	51.422	59.368	46.316	54.615	35.597	38.847	57.434	46.944	19.355		0.529411	40.4534
9.7608	28.868	18.322	25.859	38.855	57.333	57.277	55.342	43.104	14.389	14.971	36.623	52.588	43.935	20.3	29.565	39.865	34.124	47.264	42.606	22.86	50.982	46.798	51.219	48.81	51.525	60.928	35.747	39.601	49.507	45.146	23.56		0.535945	39.6088
9.8799	37.348	20.046	19.401	34.839	52.462	55.739	49.54	39.459	16.086	15	34.256	57.688	44.206	22.875	23.189	40.472	32.57	46.702	46.491	27.891	47.759	41.978	42.813	49.411	55.092	67.209	37.049	40.287	59.709	34.185	20.825		0.542485	39.1154
9.9989	33.932	18.837	18.02	38.187	49.834	60.832	52.179	38.592	16.971	17.987	39.252	52.936	50.302	19.596	28.501	42.227	29.843	44.385	45.592	34.086	50.87	43.4	44.899	46.09	51.699	65.339	39.377	31.266	49.868	33.082	21.741		0.549019	39.0233
10.1179	33.025	19.109	23.749	40.223	57.71	57.363	56.664	42.495	17.316	21.734	45.97	52.618	49.996	19.101	30.927	38.098	32.714	40.198	41.69	26.806	49.251	45.339	51.487	47.084	55.305	59.36	39.066	34.294	52.464	34.918	16.792		0.555553	39.7699
10.237	40.291	14.404	20.206	39.435	58.517	58.335	54.243	36.234	13.709	17.159	41.656	58.454	51.329	13.912	29.792	39.629	36.152	35.026	45.054	26.325	51.092	46.95	44.252	39.987	46.787	58.364	42.986	37.832	47.79	28.696	14.526		0.562093	38.3588
10.356	43.337	12.908	22.213	38.676	57.1	62.418	56.392	35.558	13.369	18.809	41.748	54.999	48.591	16.086	27.446	39.864	31.787	47.025	40.353	28.241	49.952	50.508	40.952	44.897	44.816	61.599	34.901	31.968	49.01	30.877	16.054		0.568627	38.4663
10.475	39.001	19.545	24.796	43.01	63.383	54.26	58.588	43.564	18.293	18.744	45.161	41.461	55.973	18.584	31.354	43.755	34.068	42.121	39.989	28.499	54.651	44.073	43.715	37.906	44.758	56.641	39.008	33.426	49.43	29.947	13.417		0.575161	39.0684
10.5941	43.206	17.436	19.663	38.192	59.622	48.036	61.466	42.482	17.927	19.093	44.246	42.711	50.941	18.045	27.232	35.963	33.742	44.184	36.996	26.727	43.594	39.043	50.777	41.209	52.585	61.492	39.957	29.503	44.369	35.752	16.863		0.5817	38.163
10.7131	43.506	15.852	22.134	38.612	60.544	49.266	66.671	43.965	19.854	15.522	42.997	42.87	47.462	20.397	36.13	40.127	31.169	41.15	39.685	23.115	45.013	42.971	47.006	41.634	54.802	58.385	40.667	31.658	46.144	28.543	15.974		0.588234	38.5105
10.8321	35.847	17.722	20.433	42.555	46.993	42.382	62.214	42.134	22.577	20.399	44.849	34.883	44.914	21.852	28.71	40.674	25.305	41.366	41.918	23.688	46.654	47.164	51.605	40.609	52.328	57.149	37.489	37.196	51.276	30.083	17.899		0.594768	37.7699
10.9512	40.373	19.595	18.73	41.236	47.874	45.04	60.239	39.137	20.753	19.669	49.678	42.912	48.985	22.54	28.508	46.311	27.345	39.45	38.326	29.472	47.333	51.967	54.647	36.375	50.359	49.212	32.632	34.618	46.759	26.89	18.608		0.601308	37.9217
11.0702	39.806	20.604	20.048	38.685	47.254	44.484	55.141	38.455	23.876	19.685	49.905	38.86	43.612	25.707	34.197	40.157	30.618	48.121	41.523	24.432	40.574	56.679	46.276	43.005	56.501	51.284	37.563	30.324	55.644	26.612	16.088		0.607842	38.249
11.1892	40.406	19.197	17.153	42.004	39.256	44.118	60.843	40.991	24.871	29.306	47.101	40.06	39.162	21.872	33.204	46.438	25.093	50.762	38.396	24.455	41.07	55.215	37.656	37.196	46.609	49.087	38.173	36.47	57.767	25.449	14.497		0.614376	37.5444
11.3083	36.321	20.678	20.578	39.95	43.957	45.581	63.506	42.534	26.577	22.266	47.098	44.022	41.156	21.295	34.568	38.116	27.068	50.873	39.691	26.909	40.523	49.332	44.499	33.092	53.923	51.303	41.781	33.147	58.61	25.086	17.538		0.620916	38.1154
11.4273	35.558	16.595	20.61	39.998	50.956	48.313	65.056	41.585	24.75	26.178	41.828	42.465	47.604	17.712	26.447	31.041	31.396	47.766	38.916	27.721	44.693	47.899	47.795	35.607	52.623	50.927	31.822	30.485	58.264	24.381	20.457		0.62745	37.6596
11.5463	34.14	20.793	19.537	41.998	51.258	50.335	66.02	40.778	23.187	25.484	47.136	38.905	52.003	15.801	33.784	37.215	31.696	45.041	42.389	27.546	48.833	56.75	41.656	34.506	49.627	51.282	30.267	34.272	64.26	25.527	20.91		0.633984	38.8044
11.6654	40.735	21.162	16.997	46.136	46.352	51.372	62.452	43.677	24.253	25.045	43.795	49.511	50.287	18.136	34.855	36.57	29.993	43.473	34.901	25.926	45.234	53.058	47.583	36.761	51.799	50.962	31.59	29.14	67.123	27.725	20.186		0.640523	38.9287
11.7844	36.675	18.944	18.352	38.688	51.256	42.702	62.519	45.676	22.989	22.764	40.473	51.754	46.38	25.983	32.339	37.457	33.617	46.985	35.375	33.137	41.611	51.507	42.927	39.483	59.663	47.255	29.333	26.1	57.268	28.943	18.783		0.647057	38.2883
11.9035	43.274	24.58	17.725	30.684	46.738	45.93	58.163	48.673	29.99	23.168	40.262	55.552	54.269	22.133	32.927	41.8	31.17	43.47	41.706	28.9	40.989	55.064	37.958	30.415	60.06	41.579	31.425	29.944	57.997	31.771	15.221		0.653597	38.5012
12.0225	43.3	21.046	20.62	40.742	58.842	46.755	52.46	50.755	29.487	23.861	41.285	59.541	55.896	28.538	28.6	36.801	35.147	43.545	38.341	27.902	41.436	58.759	44.013	32.791	53.759	46.876	31.549	30.263	61.073	28.058	17.923		0.660131	39.6763
12.1415	42.925	27.307	20.434	35.745	49.29	48.571	51.108	47.203	29.965	26.802	53.235	50.186	53.361	22.88	38.354	43.67	36.188	41.135	37.623	28.563	44.255	54.149	43.567	36.569	51.02	39.196	35.03	35.225	52.955	23.925	17.787		0.666665	39.2975
12.2606	37.356	24.223	22.129	38.832	54.309	45.807	58.189	45.92	25.627	23.387	39.292	48.572	49.36	25.24	37.89	42.689	32.385	39.252	33.535	29.363	36.831	48.84	43.696	32.721	50.38	42.749	33.552	35.036	56.705	20.948	17.055		0.673204	37.8023
12.3796	39.28	26.75	24.265	38.764	54.304	43.489	49.111	46.049	27.598	21.82	41.281	57.588	49.99	27.309	35.557	36.484	35.044	33.076	35.237	27.004	42.405	44.628	41.846	35.417	48.326	40.819	32.012	30.132	59.647	22.446	20.089		0.679738	37.6699
12.4986	39.742	23.775	21.663	45.63	53.776	44.267	49.824	53.114	27.787	27.049	41.287	59.787	52.44	28.45	36.763	41.176	33.767	36.189	31.458	30.984	39.166	39.929	40.676	37.059	47.764	39.888	32.31	32.826	59.748	26.319	23.071		0.686272	38.635
12.6177	39.902	32.113	26.212	42.826	53.778	40.863	43.302	51.274	22.391	26.455	37.62	50.912	50.228	28.14	43.273	35.45	35.61	37.689	40.321	33.718	38.565	43.462	39.476	39.781	52.661	46.025	35.703	37.799	59.802	23.84	26.111		0.692812	39.2033
12.7367	45.722	24.432	25.199	41.384	56.133	47.91	45.935	44.373	25.437	29.53	40.732	57.296	53.539	28.968	40.069	35.948	38.486	44.679	41.394	30.738	42.625	45.588	36.644	38.784	55.301	47.631	33.623	33.529	62.757	23.145	21.178		0.699346	39.9584
12.8557	49.56	24.739	28.841	41.293	52.928	47.23	41.823	46.503	27.631	24.936	52.6	65.874	50.571	34.173	41.811	39.764	38.864	36.451	36.537	31.125	52.569	47.236	33.268	41.476	62.3	46.457	38.581	41.106	64.007	19.743	24.326		0.70588	41.4298
12.9748	46.078	29.984	30.105	41.658	47.164	43.142	48.818	48.574	20.417	27.038	52.675	54.038	49.181	33.121	44.397	44.297	48.07	34.912	33.218	29.916	56.971	45.467	29.177	34.036	57.056	44.341	27.489	42.71	54.808	23.73	25.761		0.71242	40.2693
13.0938	42.715	30.763	32.108	49.656	52.759	44.381	42.127	43.895	27.635	23.602	49.653	57.831	41.719	29.199	43.837	43.931	42.665	39.659	33.982	30.324	42.96	46.931	26.425	33.559	51.986	35.546	30.129	38.922	51.117	19.72	23.54		0.718954	38.8154
13.2128	48.122	27.505	25.51	49.519	50.827	37.755	45.101	53.878	29.433	27.951	56.157	57.364	49.082	35.124	49.568	42.573	38.434	41.316	39.357	32.628	49.107	47.109	35.234	33.978	64.313	40.355	34.142	40.548	61.542	21.873	29.952		0.725488	41.7857
13.3319	54.734	28.132	23.763	51.865	44.276	36.563	45.654	55.732	28.155	27.965	61.97	51.991	50.829	32.602	57.872	40.864	41.096	40.656	41.411	27.228	43.873	48.015	33.463	35.562	58.892	37.637	36.708	48.292	59.691	22.547	30.419		0.732027	41.8857
13.4509	54.248	29.799	31.469	48.302	39.262	36.337	41.426	49.334	26.058	29.503	55.88	54.649	48.704	35.396	56.895	43.69	47.964	37.669	40.579	29.295	47.106	45	31.123	36.584	61.545	43.494	36.009	35.572	67.875	20.747	34.029		0.738561	41.7917
13.5699	57.597	35.147	27.92	43.812	45.254	39.133	37.147	54.414	32.783	30.747	55.922	52.601	45.175	35.717	54.707	48.815	43.996	45.288	40.709	28.131	51.337	46.752	35.054	35.95	60.684	47.877	37.729	36.056	56.62	19.513	29.314		0.745095	42.3194
13.689	60.202	35.458	24.108	44.183	41.851	36.071	38.629	55.275	32.684	35.75	61.277	55.102	48.212	36.299	55.693	39.318	34.79	42.492	43.977	27.793	52.163	39.79	37.346	33.834	51.417	46.005	34.997	41.738	53.485	25.087	34.716		0.751635	41.9272
13.808	57.326	27.894	26.321	47.737	37.488	29.851	44.039	59.569	30.038	31.422	62.495	47.348	50.247	40.902	53.584	40.059	46.953	41.112	36.55	28.279	46.624	42.284	28.485	28.915	43.739	45.287	34.76	36.593	61.176	21.808	41.107		0.758169	40.9675
13.927	65.033	34.321	33.154	52.566	43.625	28.951	36.737	62.577	30.502	35.316	61.864	57.339	47.825	44.312	63.656	44.661	41.22	42.384	44.621	30.495	43.626	41.224	29.123	34.462	43.779	40.008	34.032	38.42	56.426	31.743	42.266		0.764703	43.1054
14.0461	62.27	28.384	32.756	60.744	42.298	24.181	33.107	57.913	36.829	37.455	61.617	54.476	46.315	39.3	64.761	45.94	38.24	41.298	44.724	31.594	47.155	41.854	31.586	41.31	44.623	43.595	39.26	35.469	51.41	32.816	43.216		0.771243	43.1128
14.1651	57.451	34.507	27.856	55.03	41.822	23.257	35.486	60.783	40.323	38.499	61.737	54.973	52.197	42.805	67.97	45.149	44.894	43.117	45.708	36.207	47.475	43.919	37.918	41.808	42.352	45.43	37.503	38.415	48.407	32.707	48.675		0.777777	44.3348
14.2841	57.982	35.796	32.101	55.221	40.489	24.463	35.349	54.575	40.986	40.867	61.626	50.784	58.426	42.32	64.569	38.79	43.868	39.019	46.335	32.765	42.514	44.222	37.019	37.773	40.871	45.211	33.599	34.996	53.225	30.266	54.061		0.784311	43.5512
14.4032	65.161	33.908	33.429	54.569	35.307	25.11	33.07	49.374	52.146	50.458	60.421	52.208	58.408	46.668	49.498	50.168	42.547	43.468	56.904	39.576	36.684	40.367	37.216	36.598	48.054	46.262	38.719	44.909	45.145	31.079	53.883		0.79085	44.8811
14.5222	53.095	35.354	27.919	47.445	34.972	24.246	32.153	49.713	44.549	53.398	52.782	50.578	54.244	57.527	56.605	47.887	47.163	42.55	50.718	43.161	39.554	43.857	36.255	38.827	44.049	48.372	36.135	35.876	52.847	30.026	57.828		0.797384	44.1834
14.6412	53.943	36.652	31.191	48.712	39.107	19.545	29.146	53.805	47.579	49.145	46.273	49.888	66.323	51.984	61.295	49.945	46.636	36.725	49.517	40.29	40.553	49.068	38.942	39.181	42.343	54.289	43.713	43.721	51.746	34.228	62.677		0.803918	45.4246
14.7603	60.403	35.338	24.606	49.889	33.01	21.413	26.885	53.054	44.963	58.805	49.561	44.994	56.784	58.492	58.553	60.507	46.934	44.882	45.348	53.414	41.525	41.554	40.34	44.686	44.673	49.165	45.66	48.42	41.937	32.295	60.601		0.810458	45.7642
14.8793	57.928	39.128	36.806	48.627	28.849	19.761	24.664	53.89	41.629	58.716	42.003	46.772	59.771	53.974	56.451	55.137	46.608	40.694	50.524	50.34	40.005	49.094	44.051	40.99	44.219	44.624	41.688	41.327	47.039	32.582	60.08		0.816992	45.0958
14.9984	53.69	38.97	33.316	49.994	32.257	25.301	23.368	47.423	42.826	53.129	49.18	47.846	62.127	47.178	56.798	53.247	47.417	38.58	45.14	56.895	33.697	43.74	40.791	44.181	48.551	50.832	45.636	42.199	42.747	40.579	60.365		0.823531	45.0968
15.1174	49.518	42.278	30.79	47.658	38.542	24.546	20.849	46.64	41.728	46.52	47.029	56.514	61.451	51.635	50.823	56.489	47.907	48.127	41.746	47.559	39.258	39.864	43.358	39.043	50.117	47.3	44.434	48.715	44.108	41.396	61.239		0.830065	45.0704
15.2364	51.988	48.724	30.481	47.452	33.338	20.395	21.217	30.368	46.124	51.595	46.832	52.38	48.308	63.454	54.315	53.535	46.778	49.741	38.397	44.029	38.191	42.419	40.706	42.083	46.399	42.582	48.382	49.991	52.098	41.388	60.56		0.836599	44.6532
15.3555	49.962	48.967	39.134	45.077	28.785	23.86	21.831	29.67	41.629	50.662	48.06	44.007	56.946	56.472	55.805	64.339	44.851	42.829	43.402	47.439	31.513	47.703	43.598	42.983	46.656	44.197	49.255	47.148	52.459	40.894	58.417		0.843139	44.7919
15.4745	50.282	46.082	42.161	41.77	31.176	21.654	20.933	26.857	40.86	56.09	44.254	46.872	47.756	60.804	46.989	57.513	47.096	45.577	47.674	57.512	35.517	42.794	46.092	36.9	47.454	49.174	51.832	47.861	46.759	40.271	50.422		0.849673	44.3545
15.5935	49.159	48.96	36.911	37.899	28.718	22.946	20.41	23.928	36.096	49.289	48.584	44.464	46.827	59.57	45.831	54.183	44.914	48.011	47.685	53.212	35.26	41.45	39.263	39.629	42.77	43.606	51.496	42.763	52.737	47.589	47.396		0.856207	42.9534
15.7126	47.602	52.577	45.133	38.348	37.625	20.403	17.497	22.974	35.965	51.968	43.396	42.139	51.498	64.507	43.841	50.03	47.183	53.803	42.775	49.907	38.731	51.368	36.862	32.492	46.014	33.906	52.661	42.985	44.644	42.347	41.649		0.862747	42.6719
15.8316	53.642	52.529	50.1	39.899	38.844	18.773	20.22	23.161	32.596	51.532	37.088	41.656	47.7	61.173	49.943	48.663	48.445	49.458	39.637	57.497	36.946	39.299	42.308	30.742	42.126	37.278	53.914	42.326	46.793	41.384	38.984		0.869281	42.4083
15.9506	38.839	57.509	58.142	33.088	41.388	18.885	18.919	24.146	29.236	38.348	38.104	35.235	49.685	62.05	38.248	50.929	43.656	52.44	49.467	51.422	40.583	42.047	39.01	30.839	51.594	41.667	51.941	37.127	47.532	38.336	33.569		0.875815	41.4187
16.0697	48.619	63.097	58.218	38.845	38.124	17.224	22.056	18.293	28.045	43.093	34.178	34.597	35.199	63.325	40.121	46.517	45.701	45.345	48.641	58.297	38.206	37.429	28.815	34.78	48.297	36.453	48.893	39.73	51.785	37.818	26.65		0.882354	40.5287
16.1887	52.005	57.918	52.365	33.085	32.714	19.3	15.06	22.486	21.676	41.417	38.84	36.693	34.403	54.703	40.519	45.935	44.563	49.477	44.562	57.208	36.051	35.743	37.078	37.642	54.353	38.108	50.947	47.722	47.406	38.033	27.147		0.888888	40.1664
16.3077	43.976	60.917	55.552	35.478	36.469	17.351	16.937	20.776	22.302	39.58	38.212	41.592	35.196	52.41	43.464	46.576	38.042	50.522	43.378	50.021	34.771	35.653	27.881	30.289	45.492	45.49	46.155	50.932	56.364	32.533	17.149		0.895422	39.0794
16.4268	44.193	64.648	52.591	33.158	32.572	20.521	22.104	20.384	21.061	30.332	25.472	31.754	39.887	52.718	44.559	42.326	44.964	47.123	48.684	53.383	40.23	36.249	30.159	30.791	46.908	42.042	46.119	51.223	50.049	30.835	18.971		0.901962	38.581
16.5458	42.291	58.932	53.207	31.207	35.74	19.67	22.522	16.401	26.241	22.35	22.111	31.341	34.978	52.536	34.699	41.686	44.51	44.782	37.729	48.732	32.654	35.126	27.87	34.261	49.535	38.701	46.534	46.231	43.099	32.049	15.599		0.908496	36.2363
16.6648	43.059	64.878	50.696	27.354	38.141	18.984	19.061	21.425	21.571	19.082	16.547	28.141	37.91	43.704	39.259	40.169	37.075	40.055	44.393	47.359	27.806	34.49	27.719	30.779	51.505	40.876	38.813	34.481	38.57	27.98	16.394		0.91503	34.4605
16.7839	38.579	53.832	48.15	31.576	26.194	19.479	20.495	13.424	20.389	17.504	21.808	25.282	31.424	53.715	36.577	38.753	32.866	42.48	43.306	42.953	27.735	37.229	29.344	31.734	45.383	46.408	34.443	34.315	41.518	20.698	8.054		0.921569	32.7628
16.9029	43.279	47.989	42.154	28.467	26.598	18.236	16.968	16.639	22.502	18.129	23.096	21.364	34.089	46.09	40.167	32.343	28.839	39.452	38.365	40.563	22.434	32.972	26.331	27.237	43.342	42.484	39.426	32.53	37.441	22.386	8.189		0.928104	30.971
17.0219	41.754	57.1	38.035	22.393	25.903	16.579	20.646	13.102	19.447	19.427	25.524	21.515	27.682	44.301	33.171	28.828	27.662	43.623	43.505	31.168	20.061	29.576	24.836	26.937	42.428	41.24	37.158	27.575	35.687	19.581	7.426		0.934638	29.4797
17.141	39.266	60.731	40.009	24.462	25.172	12.303	18.842	15.969	17.97	25.58	21.039	19.003	29.884	41.45	35.389	28.152	22.767	43.86	38.569	34.878	18.252	32.747	20.535	28.586	41.027	43.616	26.656	21.318	37.528	15.49	7.893		0.941177	28.6756
17.26	43.699	48.388	31.591	25.297	17.13	19.259	19.398	13.533	17.071	26.318	24.961	20.338	27.764	30.808	27.012	27.985	18.256	41.323	38.306	35.64	10.722	28.133	26.956	22.948	38.383	38.043	18.43	25.483	33.835	12.588	6.004		0.947711	26.3097
17.379	43.246	41.765	31.077	28.354	15.219	18.863	22.431	14.498	15.828	28.522	23.299	21.363	19.918	30.176	23.515	22.401	20.115	40.953	41.418	30.33	11.594	19.858	18.845	19.446	33.249	34.784	21.336	17.57	29.012	9.48	7.542		0.954245	24.3873
17.4981	41.909	42.402	30.044	23.251	11.324	14.152	20.611	11.6	16.519	20.648	25.317	19.937	18.283	26.696	21.783	21.434	16.149	38.755	44.423	26.874	11.623	19.398	12.987	18.891	35.125	26.028	17.973	14.875	21.674	9.05	7.828		0.960785	22.1795
17.6171	44.248	33.198	25.936	20.984	12.505	16.617	19.956	18.884	16.968	22.346	22.042	23.337	17.527	21.044	19.557	16.945	13.146	37.586	38.281	18.604	8.447	19.785	14.14	18.087	35.407	29.649	14.297	15.227	18.575	9.874	4.351		0.967319	20.8887
17.7361	46.381	31.413	23.948	21.159	13.252	20.496	18.597	13.348	22.558	23.914	25.423	23.389	14.933	18.349	15.611	13.769	12.632	37.561	38.852	20.153	9.129	15.67	12.226	16.626	30.375	20.48	11.257	11.17	15.035	8.116	3.973		0.973853	19.6708
17.8552	38.62	27.471	29.557	25.244	10.797	17.105	20.458	14.181	23.04	26.147	21.027	23.065	15.548	17.625	14.146	11.965	14.052	28.511	33.033	14.983	7.984	13.815	9.807	22.916	27.169	14.064	10.732	10.352	11.258	9.965	5.897		0.980392	18.4043
17.9742	34.415	15.535	28.161	26.927	12.67	22.129	20.277	14.802	21.56	24.502	23.254	25.71	13.31	18.168	13.88	8.854	8.558	33.19	33.726	15.546	8.144	13.309	8.302	16.94	19.913	12.693	8.099	7.924	14.124	4.397	4.175		0.986926	17.1998
18.0932	30.129	21.489	31.94	23.989	7.613	21.37	17.172	12.018	16.37	24.763	20.731	20.681	13.134	12.818	11.725	12.047	8.819	36.539	25.324	12.966	7.335	12.205	7.322	13.735	21.444	10.731	7.673	8.429	10.642	6.859	3.904		0.99346	15.8683
18.2123	25.429	20.421	27.039	20.46	9.932	14.877	14.154	10.379	16.878	26.5	18.758	21.975	14.246	11.754	10.87	9.625	6.925	34.939	21.936	11.757	6.748	9.52	8.467	17.01	13.948	9.207	5.474	7.948	8.673	8.393	2.134		1	14.3992

## Sheet: Image32
X0	Y0	Y1	Y2	Y3	Y4	Y5	Y6	Y7	Y8	Y9	Y10	Y11	Y12	Y13	Y14	Y15	Y16	Y17	Y18	Y19	Y20	Y21	Y22	Y23	Y24	Y25	Y26	Y27	Y28	Y29	Y30	Y31		Ap-basal	Avg intensity
0	71.061	62.14	30.711	34.005	110.397	89.352	57.749	48.896	67.388	52.196	26.805	28.23	23.969	31.867	46.122	37.303	54.776	82.81	53.931	33.536	39.077	28.029	51.618	23.759	33.264	53.112	29.46	46.229	48.197	58.511	63.418	64.727		0	49.4577
0.119	71.591	55.809	50.904	34.712	113.847	94.637	60.968	63.418	100.315	50.89	26.226	39.324	31.713	36.163	46.846	51.653	53.988	99.845	55.858	48.327	36.585	29.15	61.096	30.918	42.19	55.778	40.198	52.181	54.997	69.367	67.137	86.376		0.0067548	56.6565
0.2381	75.166	74.011	72.158	39.507	113.077	98.278	60.191	74.615	132.948	62.214	35.322	44.725	41.178	37.166	51.697	50.926	56.67	105.941	62.128	55.728	38.233	31.016	68.659	37.837	55.939	65.755	43.419	58.298	59.019	80.119	69.243	97.786		0.0135153	64.0303
0.3571	80.345	86.63	85.278	42.579	113.953	109.633	64.916	88.406	174.102	78.24	34.348	50.359	55.792	47.31	59.923	56.879	66.346	145.45	67.874	69.621	40.57	43.266	77.009	38.311	66.249	66.858	55.018	69.07	70.799	105.598	70.894	116.509		0.0202701	74.9417
0.4761	81.985	114.427	113.607	45.508	123.677	109.439	69.026	110.685	194.995	100.241	36.634	61.28	65.234	57.566	60.88	63.004	77.282	172.926	78.39	83.93	38.46	57.475	101.059	47.666	87.056	87.059	61.276	74.291	73.936	123.956	68.619	127.918		0.0270249	86.5465
0.5952	101.019	143.624	138.41	55.703	132.701	114.499	77.13	128.683	207.664	157.498	36.357	75.219	107.952	73.16	65.544	63.07	86.104	185.657	92.434	91.284	40.516	63.035	119.648	57.781	117.044	124.64	78.166	85.188	100.507	139.55	69.585	136.179		0.0337854	102.048
0.7142	106.812	169.565	141.052	75.219	150.346	124.754	86.249	149.428	220.067	171.754	43.669	85.479	154.095	79.877	70.648	73.266	100.489	197.307	116.845	103.948	52.925	89.645	140.031	62.054	140.212	152.422	84.068	94.959	130.876	164.463	74.833	163.147		0.0405402	117.828
0.8332	108.612	184.409	159.815	90.501	157.41	116.896	90.965	158.738	221.015	200.632	54.456	104.394	190.26	105.449	81.447	79.918	122.569	198.4	140.812	129.914	63.161	119.92	145.505	71.695	154.132	161.825	92.077	107.747	144.352	172.377	91.537	176.797		0.047295	131.179
0.9523	118.718	197.297	173.042	116.124	168.314	139.432	108.269	177.361	224.212	230.394	70.802	127.19	201.213	115.643	97.63	88.839	144.647	187.38	164.061	148.91	71.868	147.994	166.467	83.888	165.844	175.422	119.707	116.785	173.42	185.874	112.236	170.017		0.0540554	146.531
1.0713	121.333	221.326	188.079	119.347	178.507	143.926	136.318	189.936	228.393	224.852	99.896	137.062	220.544	137.997	93.002	106.249	151.259	182.933	178.976	169.077	87.437	167.482	168.553	77.467	177.06	187.322	136.055	128.29	202.144	190.36	121.343	170.626		0.0608102	157.598
1.1903	134.661	227.318	188.412	127.595	186.029	154.013	126.173	201.298	234.609	222.776	113.086	157.941	231.519	149.14	94.738	111.363	148.079	169.792	171.821	173.424	113.25	186.824	169.953	97.999	183.448	188.207	151.275	122.331	207.573	184.08	129.514	171.228		0.067565	163.421
1.3094	141.537	232.412	203.537	152.661	197.402	161.815	139.344	211.399	233.281	222.858	138.261	179.061	239.603	154.623	122.917	118.136	159.164	153.546	174.422	182.745	121.482	187.052	168.771	100.783	186.502	189.891	146.846	140.473	212.49	185.603	134.35	161.809		0.0743255	170.462
1.4284	153.563	228.173	210.313	160.492	199.744	177.755	154.156	215.341	220.731	224.604	164.314	187.539	240.687	169.519	131.603	137.633	148.878	149.948	172.527	184.914	136.584	182.76	157.981	110.363	184.945	182.405	140.298	149.769	202.052	169.352	150.172	153.888		0.0810803	173.531
1.5474	170.129	228.767	204.271	172.925	200.69	179.999	175.478	221.845	225.743	219.504	182.971	205.908	244.175	191.188	138.601	143.761	142.146	128.635	174.303	189.468	159.235	181.283	145.158	115.881	177.862	173.396	152.569	161.65	188.147	171.334	160.345	150.9		0.0878351	177.446
1.6665	187.578	234.552	216.686	163.782	205.924	200.301	167.63	224.733	229.823	229.205	203.597	216.236	246.668	202.075	163.144	164.468	151.425	115.459	168.546	185.85	179.212	168.104	140.322	150.243	169.337	159.645	164.827	169.793	179.096	171.432	167.97	155.561		0.0945956	182.913
1.7855	200.3	233.728	220.458	170.038	201.569	209.419	172.561	225.798	221.484	227.435	214.7	221.866	248.031	220.47	160.909	169.08	121.452	116.883	158.682	182.395	188.928	164.231	134.32	153.721	171.251	163.55	157.502	170.148	168.101	156.199	165.694	155.678		0.10135	182.706
1.9046	203.922	233.581	223.5	177.877	199.369	216.088	190.926	234.586	225.439	216.607	222.367	233.679	247.58	217.974	186.003	187.217	113.975	107.849	167.107	178.434	190.381	148.809	119.065	169.848	160.49	159.705	167.423	182.145	154.357	142.731	164.428	153.445		0.108111	184.278
2.0236	214.852	234.349	239.115	195.105	199.642	229.645	197.773	233.927	227.633	220.991	221.958	225.547	243.95	220.253	192.148	210.417	114.437	104.097	151.694	166.693	183.86	147.22	123.092	171.464	165.443	149.041	173.928	180.393	155.961	133.334	163.918	161.483		0.114866	186.043
2.1426	216.763	226.927	232.85	189.45	201.728	232.348	199.137	227.855	228.401	208.471	213.373	235.268	237.464	225.395	190.703	218.922	100.266	101.855	147.927	162.467	201.945	134.351	118.695	168.236	146.39	131.701	178.063	188.528	147.249	138.277	171.086	165.117		0.12162	183.975
2.2617	221.356	222.13	233.454	201.816	201.577	223.687	207.826	234.226	227.322	204.903	209.336	239.254	240.147	226.678	188.881	230.363	102.553	99.498	140.584	146.134	191.53	129.049	108.844	164.842	133.018	128.204	183.557	184.84	137.45	126.405	176.112	166.694		0.128381	182.258
2.3807	234.461	227.45	237.075	206.077	198.278	222.682	208.274	223.286	223.014	188.175	203.457	240.019	246.508	220.587	202.831	221.833	100.372	106.792	126.668	138.894	196.951	134.736	101.697	174.36	125.03	133.479	179.88	178.689	122.931	119.544	176.645	153.52		0.135136	180.444
2.4997	234.149	223.071	236.95	201.396	208.551	219.136	210.48	223.308	220.961	169.755	188.067	233.998	245.639	218.075	198.546	215.633	101.927	108.474	113.32	142.182	195.688	121.643	107.923	182.64	126.33	121.995	168.632	193.245	125.005	106.51	176.955	151.4		0.141891	177.862
2.6188	232.001	220.37	237.565	210.61	200.88	218.286	216.555	209.375	214.825	152.877	185.711	232.148	243.408	221.15	199.385	196.948	105.846	107.624	109.924	113.285	190.202	113.677	106.17	174.258	118.235	122.391	175.719	190.414	120.255	110.971	177.894	149.687		0.148651	174.333
2.7378	236.096	220.931	234.73	220.422	192.892	217.971	217.937	184.823	208.071	151.185	174.013	225.315	239.455	216.42	204.273	181.598	91.515	97.693	104.011	122.806	173.236	110.62	112.942	162.493	112.343	122.508	164.138	177.615	117.515	118.945	169.908	130.49		0.155406	169.216
2.8568	237.949	218.38	237.332	217.167	203.886	217.267	211.845	169.448	190.531	134.236	167.519	216.799	238.588	205.557	198.372	168.682	88.963	89.459	92.966	134.415	175.531	110.334	110.297	152.34	105.389	123.543	147.342	180.749	119.127	109.584	176.999	124.808		0.162161	164.856
2.9759	238.705	210.651	233.275	220.724	201.39	209.956	187.564	154.779	170.321	117.825	159.458	208.505	234.18	203.645	189.485	149.599	99.679	90.888	96.525	130.786	167.055	99.929	117.206	139.984	116.754	106.263	139.118	167.959	114.895	99.455	159.517	116.979		0.168921	157.908
3.0949	237.039	204.988	224.741	217.288	202.816	211.262	196.125	144.28	153.34	115.397	143.931	197.144	227.705	199.124	176.375	141.764	94.642	83.375	94.43	126.62	158.809	98.344	117.72	137.964	105.943	106.559	142.704	164.084	106.54	100.459	145.972	112.198		0.175676	152.803
3.2139	230.626	191.481	220.915	219.958	195.564	210.372	185.838	126.611	149.105	119.709	133.846	187.807	221.369	188.177	182.336	125.226	93.655	77.297	95.457	131.65	173.896	95.564	115.399	142.56	108.525	97.853	144.017	168.602	111.361	97.339	131.111	115.385		0.182431	149.644
3.333	230.009	197.735	207.515	207.375	189.678	208.265	177.028	119.307	124.767	110.965	132.432	183.759	213.781	165.886	171.545	123.775	91.456	76.011	109.134	129.98	167.264	94.416	103.16	129	113.008	93.897	135.177	171.497	106.244	93.506	111.042	124.528		0.189191	144.161
3.452	234.916	186.656	208.263	188.566	184.981	211.473	154.089	107.985	102.635	95.029	130.342	174.476	205.088	165.179	161.308	120.084	80.734	79.359	103.291	125.254	167.662	99.729	102.394	141.637	110.588	95.139	136.62	165.035	117.837	83.693	104.834	109.679		0.195946	139.205
3.571	231.084	173.275	194.826	185.091	177.25	200.249	147.318	115.909	98.054	98.902	127.627	170.886	195.564	140.77	166.987	104.647	84.021	74.716	106.811	107.931	173.499	89.984	105.72	144.82	115.624	105.918	134.495	171.58	120.934	84.93	99.842	100.002		0.202701	135.915
3.6901	220.839	170.2	198.625	166.726	174.544	192.487	129.5	108.485	88.612	94.698	128.455	161.282	186.813	129.829	145.943	107.187	94.261	79.159	111.497	98.032	162.817	107.423	103.771	148.28	103.104	96.224	146.481	154.513	111.296	85.926	102.118	100.686		0.209461	131.557
3.8091	221.237	171.062	199.977	158.786	172.324	180.84	121.711	102.683	88.711	90.831	120.402	159.896	187.015	125.726	145.24	97.855	86.493	88.824	106.28	110.402	141.439	90.506	109.156	137.247	105.229	90.013	140.458	141.742	99.465	81.198	97.724	108.755		0.216216	127.476
3.9281	217.361	158.685	203.37	142.181	150.979	173.313	117.384	100.33	96.958	102.833	107.814	172.56	174.252	118.184	132.472	99.479	82.074	76.908	93.055	106.025	132.688	87.94	101.461	132.797	100.555	87.762	132.817	151.235	99.989	78.004	100.28	120.625		0.222971	123.512
4.0472	205.043	160.157	184.95	135.721	153.122	164.153	106.825	105.949	85.701	102.723	103.384	162.942	162.305	127.267	119.035	100.096	90.239	80.587	99.503	109.188	129.843	89.021	106.939	117.506	94.393	88.563	122.58	130.905	102.415	82.376	91.997	116.382		0.229731	119.744
4.1662	190.315	161.885	188.787	119.351	145.998	153.425	106.596	105.443	93.228	99.272	92.861	155.496	158.449	119.141	102.228	95.383	92.593	83.286	92.901	116.042	121.317	83.389	99.738	128.497	98.521	75.291	129.454	134.283	102.525	89.137	92.693	105.984		0.236486	116.672
4.2852	164.411	161.592	185.535	105.988	141.835	155.775	96.13	103.513	87.922	97.965	92.209	160.165	135.965	118.978	105.433	93.458	103.813	82.196	93.566	122.728	116.261	91.538	102.608	121.446	97.589	77.422	128.173	135.269	109.914	88.451	93.543	104.31		0.243241	114.866
4.4043	158.885	151.135	167.285	92.444	119.145	139.558	108.115	104.651	86.282	99.702	85.197	149.897	129.402	108.488	104.052	98.442	96.325	81.465	104.011	116.995	112.245	86.186	106.259	105.279	106.106	78.543	126.175	122.222	112.056	95.365	99.982	96.425		0.250001	110.885
4.5233	151.944	146.101	158.022	95.756	112.835	117.234	116.888	99.643	79.293	99.017	83.361	142.68	117.559	112.314	100.352	90.878	91.259	80.939	98.858	122.337	102.953	88.943	111.095	116.933	97.57	78.813	127.611	114.844	108.282	99.844	103.5	99.316		0.256756	108.343
4.6423	132.905	143.728	143.836	99.498	103.587	118.752	105.673	107.43	80.692	92.922	75.071	127.702	106.722	110.861	96.114	95.057	100.998	80.496	99.337	109.327	100.795	85.457	111.675	118.493	102.726	88.724	121.206	107.527	113.704	115.972	100.646	90.559		0.263511	105.881
4.7614	129.391	147.58	143.304	91.084	96.18	105.139	108.045	103.962	80.199	83.684	78.072	123.932	105.531	105.495	91.209	84.269	87.604	81.945	108.793	105.327	102.502	79.483	99.313	120.215	92.02	85.028	119.873	105.942	117.65	120.471	101.437	83.933		0.270271	102.769
4.8804	131.741	129.788	129.226	91.915	83.693	103.207	103.853	104.688	79.83	78.329	75.127	119.97	103.77	106.621	98.186	88.297	91.994	74.743	98.724	101.277	106.325	80.641	109.393	111.1	95.467	91.668	124.582	109.036	117.423	114.63	95.051	76.348		0.277026	100.833
4.9995	112.695	130.76	140.813	82.515	82.666	89.845	95.44	100.871	69.989	66.638	68.342	99.59	100.215	97.461	91.567	94.108	88.551	84.945	104.643	87.83	108.844	83.218	103.688	109.557	88.684	80.544	122.727	100.254	109.616	112.808	92.728	75.427		0.283787	96.1743
5.1185	100.912	115.284	139.329	74.006	79.957	73.114	94.619	87.922	57.846	67.989	71.042	96.41	95.732	88.726	100.699	96.054	85.682	81.384	100.964	77.853	101.433	78.082	103.714	107.87	94.199	84.137	123.536	105.417	107.72	102.951	89.685	67.409		0.290542	92.2399
5.2375	84.205	100.408	124.862	81.519	71.888	81.943	90.819	89.438	55.956	65.925	71.543	90.718	85.193	77.617	94.259	108.04	84.062	74.865	105.351	77.368	90.315	83.039	95.749	106.587	87.27	88.97	128.102	104.108	113.701	101.052	94.41	77.214		0.297296	90.203
5.3566	85.13	99.864	133.89	80.352	71.102	79.214	82.667	88.027	56.224	65.353	71.287	86.206	82.134	81.004	91.94	111.204	91.252	73.256	98.579	80.141	93.145	86.239	91.942	103.831	85.868	78.804	119.537	104.69	117.569	105.243	88.698	68.236		0.304057	89.1446
5.4756	87.141	92.667	139.062	76.34	70.003	72.503	78.299	85.166	49.551	54.647	76.838	83.942	81.004	82.581	89.404	105.402	85.983	71.964	100.218	80.637	93.305	89.511	93.725	90.626	88.797	76.315	123.198	109.169	120.495	102.27	88.196	61.974		0.310812	87.5292
5.5946	79.92	82.017	127.713	72.969	65.418	67.779	78.749	77.96	45.208	56.867	83.239	76.281	70.924	76.22	76.506	92.868	81.585	57.849	103.732	77.414	90.735	87.678	90.966	80.003	99.738	79.686	115.649	107.813	112.203	100.345	80.926	55.259		0.317566	82.8818
5.7137	72.346	96.365	133.636	76.985	63.147	61.623	72.753	69.411	42.704	52.23	79.145	73.376	72.996	75.543	77.098	91.355	85.143	58.997	90.339	82.115	90.019	94.855	93.637	85.113	94.907	76.98	101.209	95.314	104.473	86.891	86.469	52.649		0.324327	80.932
5.8327	76.386	90.39	140.595	74.785	61.492	62.37	61.838	76.057	45.043	49.357	74.807	80.827	69.236	72.102	78.137	90.203	79.769	51.423	86.91	79.567	88.495	95.972	91.431	84.083	83.504	74.652	100.48	102.3	112.789	97.279	89.169	54.018		0.331082	80.4833
5.9517	74.937	80.359	144.426	70.533	66.965	62.845	69.504	68.071	40.825	39.128	72.894	78.68	69.204	69.01	72.917	86.834	77.253	49.024	83.178	78.056	87.04	94.509	88.14	73.187	77.169	69.132	107.942	105.644	117.587	99.014	80.646	47.535		0.337837	78.1934
6.0708	75.712	85.92	143.354	73.379	67.691	63.009	66.134	65.233	35.205	42.671	70.177	87.195	73.31	62.566	71.214	95.755	70.413	56.747	84.743	85.128	85.862	90.553	100.529	82.782	74.589	58.406	106.836	105.952	132.351	96.173	88.95	39.003		0.344597	79.2982
6.1898	83.516	82.462	157.591	77.429	60.759	64.48	63.398	60.671	35.032	36.538	68.921	103.287	77.425	69.022	75.07	85.512	78.099	41.548	72.151	76.112	88.426	88.658	92.444	89.597	58.043	59.068	118.432	106.342	117.637	84.951	80.044	37.875		0.351352	77.8294
6.3088	77.577	75.122	161.463	77.841	64.304	69.248	66.142	59.316	30.635	36.346	59.547	95.086	80.255	66.088	73.32	92.833	77.763	42.174	75.316	78.894	81.68	83.097	82.744	89.918	55.031	60.588	119.834	97.331	104.829	82.107	77.925	30.574		0.358107	75.779
6.4279	74.435	70.391	152.101	72.611	65.083	72.607	63.176	54.88	33.117	35.929	58.782	83.527	79.97	68.355	81.765	98.441	73.772	44.445	75.982	78.871	80.178	79.353	82.33	79.848	60.069	58.186	122.912	94.631	97.838	78.691	77.746	35.25		0.364867	74.5397
6.5469	85.072	64.294	146.525	67.096	55.854	79.603	58.085	51.297	25.658	35.477	51.567	77.791	89.364	67.29	81.439	94.25	69.496	44.059	60.351	75.578	82.385	81.671	88.848	83.288	67.85	51.449	118.714	107.395	102.373	82.46	77.467	37.982		0.371622	73.8134
6.6659	72.397	72.665	137.53	68.6	62.8	82.216	54.488	56.44	23.209	39.451	50.439	72.541	84.174	68.954	80.369	83.638	59.094	42.927	61.412	79.014	85.566	84.12	77.577	85.88	62.861	50.191	110.234	98.827	107.413	80.441	75.515	37.258		0.378377	72.1325
6.785	79.054	69.892	139.033	59.849	70.252	72.358	60.637	55.972	27.836	34.198	52.035	78.072	84.935	61.736	75.664	84.876	65.732	41.728	63.009	70.304	79.492	70.364	82.158	91.772	60.658	47.059	109.13	93.549	98.477	69.113	72.095	32.442		0.385137	70.4213
6.904	83.631	70.133	130.69	65.825	62.571	77.64	62.826	52.288	29.478	32.831	49.982	75.981	84.334	64.955	73.767	87.19	57.494	39.875	60.69	68.035	82.159	66.429	88.017	83.652	55.069	52.035	106.579	95.8	92.945	72.82	62.717	33.317		0.391892	69.4298
7.023	88.768	68.221	132.665	69.598	64.44	82.465	55.427	43.48	27.586	28.555	48.82	72.461	85.782	64.557	72.982	73.621	50.05	37.889	60.071	71.472	86.986	66.534	88.008	86.953	51.569	47.056	97.289	84.55	79.106	78.894	69.342	30.396		0.398647	67.6748
7.1421	65.433	66.839	115.323	72.087	64.826	97.297	53.371	40.078	22.839	27.584	51.946	66.37	83.409	68.302	73.105	76.87	49.522	35.768	54.55	69.541	86.734	65.386	85.404	86.062	46.329	43.039	90.033	84.351	76.01	80.159	61.8	29.471		0.405407	65.3074
7.2611	73.089	66.448	105.439	71.375	60.455	79.481	55.583	42.617	26.869	26.776	48.281	66.021	79.9	64.208	79.147	66.31	48.054	33.532	50.555	73.821	79.656	74.503	80.891	90.545	44.396	39.025	87.769	91.072	68.855	72.382	59.718	24.593		0.412162	63.4802
7.3801	79.912	68.205	95.023	60.351	59.061	75.369	53.974	46.141	23.004	25.057	40.774	73.03	77.879	60.596	75.178	71.639	42.522	33.23	53.292	63.597	68.616	76.058	71.04	87.501	44.475	39.617	85.215	86.152	79.606	74.647	57.42	24.753		0.418917	61.6542
7.4992	84.854	65.686	91.638	64.268	56.351	73.633	49.766	52.626	25.948	21.31	48.162	78.481	76.177	54.927	79.004	78.903	37.998	33.009	50.189	63.026	70.251	85.534	68.731	87.287	42.295	43.536	82.636	87.534	77.932	69.608	52.553	25.426		0.425677	61.8525
7.6182	73.569	70.256	77.807	61.687	58.108	82.826	50.013	49.72	24.347	25.424	53.106	80.085	66.424	55.522	74.615	66.978	42.7	30.047	52.799	64.806	72.262	86.155	74.25	83.759	43.499	40.433	75.099	76.049	64.157	72.296	49.662	24.954		0.432432	60.1067
7.7372	62.809	75.731	77.034	60.122	57.856	77.862	55.296	41.008	20.924	22.108	41.994	74.824	63.076	55.178	80.011	64.947	42.205	30.821	52.158	64.005	77.463	83.603	78.002	84.878	37.979	45.088	77.555	88.469	64.493	78.964	46.401	24.7		0.439187	59.6114
7.8563	67.008	78.914	74.719	63.01	57.235	76.483	52.232	36.048	24.062	20.291	47.559	64.71	60.596	62.292	79.496	68.226	34.08	28.383	51.571	67.832	67.295	86.85	76.666	78.424	40.263	39.564	76.713	81.372	69.923	78.778	50.061	22.918		0.445947	58.8617
7.9753	62.489	81.616	67.894	66.343	53.291	69.937	51.752	44.194	20.632	20.064	49.233	63.03	62.97	68.546	73.874	61.726	33.485	26.685	48.49	74.731	77.104	80.059	69.068	72.36	44.772	39.783	61.901	77.132	64.657	80.209	47.867	20.577		0.452702	57.3897
8.0943	63.666	71.158	65.519	67.502	56.243	70.529	48.167	47.757	21.143	22.852	46.925	66.474	58.738	60.303	69.993	65.026	29.948	25.584	59.04	63.312	70.636	73.461	69.901	81.458	38.362	35.529	68.533	67.232	62.589	86.742	47.795	25.006		0.459457	56.4726
8.2134	64.394	65.851	63.349	64.217	57.873	69.837	56.677	36.188	15.793	22.08	46.972	70.491	61.525	61.331	70.466	63.343	35.487	23.271	50.856	66.977	71.706	64.656	67.308	87.035	35.359	34.814	60.982	69.948	71.545	75.691	48.211	24.534		0.466217	55.5865
8.3324	65.756	63.291	62.276	64.105	57.993	64.075	56.581	36.827	19.29	21.512	43.322	64.427	56.865	56.396	71.433	54.943	32.452	23.735	48.755	69.888	68.33	63.368	70.745	74.831	35.805	36.473	64.698	74.273	80.873	78.663	41.884	20.386		0.472972	54.5078
8.4515	50.641	63.869	60.55	60.499	62.971	65.262	48.608	38.476	18.554	17.903	38.456	55.986	55.506	60.802	64.639	57.114	33.652	28.139	39.207	63.334	70.652	62.327	71.32	70.354	33.832	42.887	56.266	78.981	72.5	70.935	35.711	24.453		0.479733	52.3246
8.5705	59.502	61.174	62.623	69.744	55.218	59.281	51.148	37.664	16.612	18.92	38.426	59.371	52.12	60.215	75.757	55.693	29.368	26.842	45.431	72.295	66.541	61.895	64.944	82.167	31.329	39.378	60.283	70.804	75.573	79.85	32.101	22.077		0.486488	52.9483
8.6895	60.766	62.903	60.654	65.112	48.847	54.722	50.851	37.034	21.994	19.16	42.46	61.27	51.189	61.872	67.106	57.177	31.26	25.052	45.067	73.391	65.421	63.728	67.04	81.333	42.096	34.729	56.871	69.816	80.033	72.364	32.762	21.087		0.493242	52.6615
8.8086	55.682	59.156	54.205	53.153	60.085	51.392	43.792	34.439	20.847	18.631	44.425	54.639	45.159	57.722	63.804	51.946	31.113	23.689	37.061	69.035	61.304	60.584	61.111	77.421	38.866	38.352	54.408	63.124	70.227	73.149	33.917	22.207		0.500003	49.5202
8.9276	63.058	64.786	58.751	48.218	55.249	51.405	45.141	34.555	17.112	18.954	31.616	48.845	52.834	56.199	69.916	58.909	26.332	22.595	38.701	64.03	71.991	61.22	63.234	71.125	39.82	38.862	56.849	71.078	68.902	81.193	31.335	17.712		0.506758	50.0165
9.0466	59.349	59.997	68.473	52.653	52.464	44.987	48.91	29.212	20.247	20.676	34.464	46.46	40.507	58.55	66.58	62.862	27.594	25.189	42.93	59.489	67.425	60.684	61.151	74.721	36.575	38.947	59.782	70.186	66.719	75.941	28.379	15.371		0.513512	49.2961
9.1657	63.246	58.797	59.389	57.419	53.379	46.241	54.411	33.82	17.442	17.425	35.319	42.36	36.051	58.894	58.671	55.142	24.591	26.511	43.007	59.394	69.922	56.855	69.764	72.466	38.48	30.282	53.518	68.96	62.012	71.72	27.138	15.002		0.520273	48.0509
9.2847	62.616	59.311	56.899	57.127	49.423	48.079	49.066	34.953	17.629	16.241	38.544	48.81	39.327	56.04	59.542	56.593	28.246	23.369	41.273	56.678	71.271	55.638	60.1	73.222	36.112	28.108	53.096	68.984	72.299	73.694	35.089	17.291		0.527028	48.2709
9.4037	57.069	59.235	59.479	60.906	51.816	46.705	48.991	29.405	13.189	18.267	35.392	38.232	40.401	56.167	55.898	59.373	21.901	18.247	42.547	57.109	72.633	57.488	63.904	75.654	36.133	32.799	55.73	78.712	77.84	77.465	35.849	16.375		0.533783	48.466
9.5228	53.486	60.026	48.215	53.674	48.237	42.785	42.101	28.277	16.844	18.31	34.033	42.51	35.567	44.774	53.721	52.882	19.217	21.711	36.683	61.292	67.183	53.932	74.45	79.903	37.525	32.887	52.617	73.715	71.833	81.91	30.125	15.073		0.540543	46.4218
9.6418	48.38	53.021	55.528	54.949	46.116	45.125	45.466	30.093	17.957	19.233	31.893	43.834	35.467	50.068	54.487	54.466	27.116	20.613	36.778	54.765	67.183	54.642	81.012	78.822	38.026	32.03	50.79	75.888	77.532	72.165	27.076	16.959		0.547298	46.7963
9.7608	49.257	44.497	61.456	51.88	41.649	45.355	48.171	27.438	15.83	17.574	41.045	43.716	40.33	49.971	56.539	45.66	31.309	20.864	38.932	58.055	65.633	49.97	72.803	80.879	36.972	32.393	59.748	74.679	82.056	72.478	26.869	16.287		0.554053	46.8842
9.8799	50.782	46.404	58.902	53.982	49.551	46.485	50.007	31.518	14.161	16.868	42.611	38.46	36.806	44.677	52.428	49.316	27.876	19.9	36.9	57.02	68.707	49.638	72.431	80.676	35.673	37.777	53.337	67.783	81.603	76.93	20.815	16.109		0.560813	46.4417
9.9989	55.212	55.068	57.046	55.574	50.351	45.934	43.815	33.785	17.703	16.88	37.291	35.366	39.075	41.253	52.313	63.741	20.229	19.847	32.741	57.875	63.861	53.4	71.778	71.58	30.859	35.615	51.874	72.878	80.022	77.186	23.661	16.219		0.567568	46.251
10.1179	61.18	53.581	58.731	56.629	47.043	45.373	43.961	32.872	16.679	17.441	34.378	31.579	36.185	51.707	51.927	61.416	20.576	21.365	31.831	63.842	62.906	56.856	68.972	77.152	35.149	32.493	51.54	71.699	73.347	75.785	21.814	19.873		0.574323	46.4338
10.237	50.921	54.749	59.395	49.656	41.04	50.395	40.44	29.668	14.697	17.34	41.399	31.486	33.621	44.545	47.425	59.88	20.634	23.487	32.886	62.361	57.694	52.764	66.187	84.858	36.628	36.744	57.651	71.275	79.254	65.376	22.89	16.067		0.581083	45.4192
10.356	50.63	51.644	62.459	54.231	41.877	57.766	44.329	29.705	17.681	15.789	40.924	29.5	30.72	41.194	63.207	53.289	24.35	21.172	37.945	62.567	57.343	50.614	66.875	86.84	32.405	35.295	66.233	68.232	76.86	68.213	25.067	15.385		0.587838	46.2607
10.475	55.375	49.961	57.969	55.474	48.376	57.5	41.346	32.935	17.958	12.983	41.064	30.506	35.37	44.091	60.027	48.789	23.6	18.085	39.566	67.069	58.45	51.757	66.438	87.16	39.628	30.779	64.016	72.044	75.268	76.632	28.608	13.955		0.594593	46.9618
10.5941	54.658	61.078	56.783	58.454	42.442	52.473	43.594	28.802	17.383	14.006	34.659	31.064	32.508	48.874	51.876	49.027	22.641	20.177	44.132	63.071	66.431	60.996	70.474	82.638	38.231	35.242	71.197	66.133	79.397	68.693	21.88	16.767		0.601353	47.0557
10.7131	54.66	58.502	51.575	54.637	44.704	51.522	42.295	24.935	17.738	16.923	36.019	27.926	33.094	48.584	58.908	60.214	22.383	20.656	34.231	60.69	65.778	56.946	63.069	80.793	36.604	34.191	72.058	60.375	82.292	67.869	21.367	16.705		0.608108	46.1951
10.8321	62.64	59.04	58.268	50.097	46.534	44.949	53.969	28.477	18.258	17.119	34.678	34.06	33.615	50.545	59.065	63.858	20.712	21.911	46.696	63.844	62.229	59.584	70.518	80.487	31.799	31.235	66.308	61.652	76.354	61.03	23.657	14.991		0.614863	47.1306
10.9512	64.209	54.815	58.341	48.048	47.279	49.934	54.915	26.373	18.035	16.644	33.102	30.004	30.51	46.332	59.956	54.161	22.699	24.378	44.509	64.12	62.337	56.465	62.316	70.797	41.181	28.795	65.792	61.864	69.587	60.634	23.907	16.372		0.621623	45.8878
11.0702	65.928	53.434	62.169	48.119	41.355	49.426	48.438	22.726	17.987	19.099	36.47	33.293	30.514	47.767	55.642	55.39	19.815	20.417	42.626	66.09	54.464	54.171	61.184	69.38	36.44	33.084	54.044	69.998	65.059	58.325	25.644	16.312		0.628378	44.8378
11.1892	67.898	51.216	66.531	52.045	37.452	52.437	39.525	28.217	15.22	16.995	36.695	35.608	28.886	48.235	55.868	56.203	20.402	22.832	47.528	67.767	59.88	60.563	71.585	71.336	35.256	35.566	60.632	64.455	69.329	59.914	23.891	17.428		0.635133	46.1686
11.3083	69.83	58.111	60.461	55.028	42.585	51.819	46.931	26.444	13.604	17.589	36.998	31.601	31.646	48.211	59.447	52.14	25.739	24.479	38.883	67.002	61.639	56.175	64.607	58.252	32.536	36.722	64.473	58.512	66.399	59.357	23.366	13.738		0.641893	45.4476
11.4273	74.178	56.673	59.954	54.824	45.805	45.254	45.118	23.751	15.927	15.572	37.107	35.806	27.72	49.016	55.037	45.844	24.568	23.934	41.078	64.989	68.62	60.427	66.11	67	30.296	39.082	65.71	63.722	73.604	54.486	22.018	12.351		0.648648	45.7994
11.5463	68.163	55.435	64.105	48.157	45.029	48.684	45.347	31.325	16.275	16.963	32.408	33.21	22.656	50.574	48.235	51.643	22.744	29.944	45.527	69.528	66.915	54.881	69.873	62.721	33.509	40.173	63.22	66.76	73.465	52.926	20.635	16.592		0.655403	45.8632
11.6654	67.388	53.705	63.184	48.482	42.11	47.43	53.964	34.076	14.886	14.839	36.23	27.476	23.585	46.723	51.611	52.383	22.406	25.395	52.638	70.669	70.608	53.894	73.439	59.918	34.932	37.528	68.53	61.744	70.236	54.444	19.847	11.8		0.662163	45.8156
11.7844	70.326	56.976	50.927	46.643	44.567	53.936	42.983	34.025	15.507	20.721	36.435	27.437	25.76	47.021	55.458	47.505	20.421	22.659	53.008	62.211	68.967	50.311	67.237	58.267	39.208	34.301	62.155	64.864	75.775	60.522	24.3	18.059		0.668918	45.5779
11.9035	62.524	55.001	60.259	53.82	41.831	63.866	50.066	36.751	16.902	22.701	31.466	25.492	24.505	51.24	62.421	50.683	20.973	29.799	57.406	64.328	69.516	52.714	75.242	66.24	33.177	39.684	72.725	69.863	69.5	60.162	18.739	24.298		0.675679	47.9342
12.0225	62.765	54.11	58.489	49.884	41.72	55.363	59.854	30.524	16.62	22.824	30.989	32.117	24.446	52.286	56.552	48.136	21.8	30.785	50.53	62.35	64.952	54.176	65.527	58.106	33.612	44.833	66.324	69.932	69.842	68.378	23.597	26.938		0.682434	47.1363
12.1415	52.069	45.953	55.993	61.166	42.156	55.998	60.738	32.339	15.494	23.093	29.323	29.331	27.048	48.502	56.257	51.424	21.802	25.605	55.413	59.52	67.942	53.145	69.66	59.645	32.57	44.987	67.79	69.832	61.653	60.357	20.863	23.351		0.689188	46.2818
12.2606	58.992	52.477	56.625	65.565	40.51	53.854	49.614	36.124	13.022	17.536	33.281	31.097	24.882	46.778	47.165	48.311	28.451	24.591	54.742	59.426	65.798	54.597	76.249	56.179	36.097	42.894	73.077	64.862	64.14	59.236	22.342	27.902		0.695949	46.4505
12.3796	64.788	56.779	48.209	57.607	42.577	49.498	55.396	35.562	15.687	18.199	29.374	27.117	24.999	45.314	49.772	52.519	26.389	28.657	54.179	59.899	61.164	57.839	81.794	54.118	34.106	46.614	70.961	64.342	56.906	60.639	22.786	21.436		0.702704	46.1008
12.4986	59.565	52.908	50.095	49.465	42.441	55.201	62.128	39.156	20.33	20.456	36.471	27.501	25.203	41.632	49.111	51.5	25.389	30.552	57.47	56.838	61.931	56.866	79.021	52.953	40.773	50.073	80.901	69.89	65.388	64.097	20.217	23.514		0.709458	47.4699
12.6177	63.416	58.258	55.804	53.453	38.367	52.002	57.556	38.047	17.79	17.072	36.026	24.475	27.644	46.418	50.736	47.739	26.989	26.614	56.824	56.251	59.421	59.747	74.558	61.256	44.64	52.738	76.08	61.611	68.208	65.056	26.02	25.82		0.716219	47.7074
12.7367	61.413	48.381	53.359	56.229	42.259	54.65	50.863	38.84	15.957	17.769	33.558	28.142	27.822	40.854	49.268	51.611	25.095	28.119	63.076	55.06	55.945	60.593	81.567	60.426	44.016	58.987	67.967	58.613	68.248	54.471	27.619	25.692		0.722974	47.0772
12.8557	58.374	54.046	53.496	55.174	41.032	53.334	59.125	45.299	12.437	20.756	32.62	34.341	28.144	43.581	50.479	53.902	24.836	32.585	62.783	52.625	55.302	60.225	66.97	64.372	40.703	57.721	65.183	55.79	67.056	59.416	23.296	23.325		0.729729	47.1353
12.9748	60.686	53.522	44.795	56.755	40.992	49.195	57.317	45.142	14.953	23.281	37.582	38.412	29.47	38.312	49.152	56.155	31.817	32.729	62.059	69.326	55.9	65.432	68.044	65.795	41.3	67.332	76.733	58.326	63.362	58.025	26.044	22.709		0.736489	48.7704
13.0938	53.815	52.502	43.894	54.013	44.159	45.531	46.444	41.257	17.42	16.653	38.359	37.21	28.228	38.977	50.002	56.698	31.96	32.768	64.793	54.392	61.663	70.113	72.602	70.571	37.25	64.837	75.624	56.897	55.739	68.059	23.814	26.45		0.743244	47.8967
13.2128	48.099	57.566	46.462	53.704	41.2	52.769	52.11	42.218	19.027	19.541	41.238	38.812	27.121	39.584	49.392	59.345	33.929	33.328	67.532	56.503	59.267	64.305	73.34	60.909	44.582	63.628	62.888	69.03	60.251	57.909	29.748	34.547		0.749999	48.7464
13.3319	53.191	58.404	49.105	61.971	42.463	52.489	45.866	44.576	16.81	17.681	41.252	37.568	27.776	47.311	45.711	52.092	32.411	34.108	69.429	57.818	57.924	73.891	78.22	64.789	55.269	55.354	68.073	71.771	64.403	54.767	30.607	32.149		0.756759	49.8515
13.4509	49.293	66.231	54.302	48.97	46.263	53.083	50.267	38.94	17.796	19.134	38.486	31.847	28.829	49.723	37.873	48.101	35.018	38.783	63.601	58.419	55.32	73.764	68.555	61.472	59.84	67.387	77.532	73.219	61.242	57.949	29.684	31.286		0.763514	49.7565
13.5699	54.979	58.16	48.036	53.777	43.503	51.866	50.645	41.055	18.832	19.814	39.942	33.376	29.421	42.099	43.272	50.926	37.65	38.929	67.102	54.972	54.021	71.831	68.708	54.874	50.656	62.739	82.483	77.727	63.275	58.756	32.623	27.389		0.770269	49.4824
13.689	55.745	58.767	50.965	57.72	43.913	51.901	50.685	44.092	20.917	20.741	39.496	35.834	28.397	40.957	42.18	54.417	43.57	43.275	65.327	56.429	65.816	70.605	69.721	61.667	60.271	64.124	79.872	68.862	56.843	61.533	31.887	37.045		0.777029	51.0492
13.808	55.673	58.629	56.518	56.051	52.004	54.612	48.054	38.902	23.134	25.066	39.022	43.092	27.859	48.371	49.456	58.912	43.583	45.796	68.777	50.623	62.051	71.96	71.681	61.831	63.304	73.629	73.312	72.97	58.647	55.305	29.482	40.165		0.783784	52.4522
13.927	57.389	53.079	58.518	55.404	47.266	50.325	48.201	39.123	20.564	27.879	39.902	37.279	29.611	51.808	45.819	60.553	42.547	47.057	66.059	47.089	61.57	63.809	79.995	58.29	58.92	69.125	69.669	69.146	56.299	56.891	27.276	41.685		0.790539	51.1921
14.0461	48.955	50.964	58.151	59.704	44.834	47.66	51.451	43.334	24.846	22.009	43.879	48.09	22.75	52.882	45.236	66.789	42.321	47.718	67.646	63.329	68.744	70.279	71.596	56.163	61.657	64.1	67.022	66.315	58.78	65.311	27.574	42.884		0.797299	52.2804
14.1651	53.301	52.289	62.289	63.943	46.646	44.788	43.317	47.778	25.508	28.293	41.559	47.279	24.234	56.113	48.706	66.714	47.229	48.905	66.211	66.771	63.578	65.866	70.999	66.066	55.617	67.626	63.245	71.192	53.402	65.251	31.173	48.062		0.804054	53.2484
14.2841	58.882	53.328	62.332	60.527	56.343	53.435	41.132	48.846	28.263	27.071	47.775	39.231	34.58	58.656	43.125	65.404	51.157	53.08	56.548	73.078	68.239	64.784	78.537	70.958	58.2	77.793	64.226	77.842	54.904	70.88	32.287	55.484		0.810809	55.8415
14.4032	60.006	46.839	64.488	60.645	51.107	53.392	38.624	44.393	25.67	28.002	39.238	43.562	32.128	58.962	47.851	63.674	43.339	49.781	62.211	68.315	62.26	70.321	82.463	62.341	59.536	74.634	54.048	66.884	52.381	64.551	32.458	68.18		0.817569	54.1339
14.5222	50.883	46.173	62.748	51.484	49.338	46.943	46.868	47.671	28.072	36.009	44.019	49.148	32.059	61.283	45.3	57.013	43.916	52.01	53.263	72.088	59.838	61.153	79.937	65.752	59.561	78.353	64.227	66.503	53.464	64.311	27.973	69.617		0.824324	53.968
14.6412	50.182	50.034	64.915	54.144	52.208	40.336	45.662	51.064	31.201	34.926	41.979	44.605	31.096	57.918	43.39	60.867	47.887	48.543	55.143	70.788	69.19	63.069	77.127	66.838	70.458	77.981	66.729	63.933	59.812	73.301	29.23	68.904		0.831079	55.1081
14.7603	47.367	51.462	68.257	56.329	45.198	47.292	52.423	52.738	30.596	34.545	48.573	46.169	29.257	60.463	51.771	59.004	48.76	44.921	56.016	72.433	64.001	56.111	75.898	80.132	72.168	72.641	72.134	63.663	58.528	74.345	39.866	68.294		0.837839	56.2923
14.8793	52.861	50.363	67.139	58.324	50.166	50.744	47.26	53.048	34.429	34.315	47.133	42.193	28.713	52.12	46.839	60.294	39.434	44.819	55.857	70.804	65.733	53.302	75.108	74.457	64.936	71.538	69.737	62.128	51.759	82.872	39.676	65.267		0.844594	55.1052
14.9984	48.611	43.415	67.488	63	41.768	48.754	52.983	57.156	36.854	37.441	46.917	38.094	34.262	53.137	44.04	55.441	40.669	48.025	49.787	68.178	70.052	58.016	81.706	67.624	67.35	68.729	77.751	61.818	57.352	74.198	45.489	71.645		0.851355	55.5547
15.1174	39.772	44.863	73.108	62.357	40.219	55.211	45.363	55.413	32.23	38.749	51.841	50.197	35.157	55.808	42.473	52.47	34.427	41.514	50.506	71.723	68.037	59.754	75.692	66.583	66.015	64.744	65.972	58.966	71.374	78.847	42.524	76.691		0.858109	55.2688
15.2364	36.009	37.899	59.689	58.819	34.319	48.217	44.456	55.562	32.749	38.659	51.803	52.391	38.854	49.343	45.781	47.044	39.815	34.508	53.788	70.868	63.711	51.685	79.924	65.232	71.713	56.09	74.473	49.694	61.86	75.041	40.781	64.879		0.864864	52.6767
15.3555	39.097	33.194	57.063	56.272	35.735	42.957	43.849	50.35	37.203	37.626	48.946	50.642	39.711	44.436	52.362	47.402	40.994	37.542	45.301	61.271	66.708	51.295	79.899	67.662	73.734	53.549	70.502	51.332	60.003	63.106	41.397	62.527		0.871625	51.3646
15.4745	32.715	37.388	54.529	60.865	38.093	47.034	43.251	48.994	35.976	45.936	50.348	46.784	53.019	40.914	43.017	43.244	39.613	36.83	42.313	71.449	62.387	53.288	72.93	69.145	75.77	59.851	71.668	57.69	63.928	59.692	43.935	59.087		0.87838	51.9276
15.5935	26.151	42.083	50.65	53.219	42.171	48.194	39.69	50.791	43.256	39.332	50.956	47.14	52.613	37.778	42.217	42.951	32.988	37.161	44.449	73.322	60.456	56.932	67.219	68.985	71.308	56.562	64.886	54.027	66.438	63.861	43.421	56.612		0.885134	50.8693
15.7126	25.192	48.597	54.102	45.89	32.094	40.18	42.892	50.784	37.508	32.38	48.856	53.47	52.799	45.896	44.256	43.484	31.279	32.982	47.562	59.85	52.867	55.941	66.618	71.485	65.132	51.624	54.423	51.766	73.25	65.205	42.949	54.376		0.891895	49.2403
15.8316	25.742	43.795	55.623	51.19	31.951	37.985	43.694	42.466	40.282	34.833	54.367	48.024	55.524	43.041	42.22	37.823	31.289	28.757	43.951	51.532	54.693	59.086	64.172	76.375	59.377	56.299	54.272	58.428	69.778	67.927	38.862	47.778		0.89865	48.473
15.9506	17.182	45.415	43.208	54.033	30.796	42.446	36.832	49.007	39.904	44.353	43.293	50.972	57.806	39.252	35.728	32.6	27.156	24.783	42.904	51.832	56.886	54.409	55.95	75.047	63.777	54.418	59.154	57.944	67.866	58.186	45.667	42.629		0.905404	46.9198
16.0697	16.264	44.796	49.145	51.733	31.107	39.833	34.647	45.882	42.821	47.61	46.596	48.498	54.558	32.557	32.947	29.551	25.524	18.876	40.141	39.926	57.503	55.704	58.18	80.237	65.204	49.492	58.119	61.485	66.687	54.763	36.816	28.73		0.912165	45.1854
16.1887	13.484	35.7	42.555	40.399	32.063	42.082	31.697	45.551	44.131	45.598	43.929	50.8	50.73	36.678	35.937	33.285	23.228	14.915	35.834	36.33	50.976	55.189	54.3	81.272	57.446	54.205	50.539	54.715	67.06	47.891	34.768	25.808		0.91892	42.7842
16.3077	15.552	37.753	37.394	48.12	26.778	38.408	34.834	40.854	43.811	41.722	43.262	50.028	41.727	37.519	34.056	26.548	21.311	14.282	35.248	39.637	55.769	52.609	53.482	84.697	57.742	58.524	50.943	64.882	71.396	45.751	31.675	23.467		0.925674	42.4932
16.4268	13.773	27.203	49.675	43.979	27.588	35.627	29.257	36.769	41.247	41.334	41.399	50.022	41.224	28.912	33.28	26.14	18.863	15.48	28.524	32.261	51.496	53.913	52.096	81.643	52.117	56.778	45.726	52.675	61.018	49.795	29.412	13.911		0.932435	39.473
16.5458	18.337	24.152	40.644	42.606	22.047	30.593	29.053	42.836	39.809	42.775	34.549	44.881	40.317	24.78	24.045	27.191	16.657	12.871	27.856	33.338	49.831	46.488	47.335	76.949	57.59	53.338	50.998	44.816	53.667	50.881	23.415	12.771		0.93919	37.1067
16.6648	16.853	21.968	33.38	42.732	27.199	29.342	24.686	34.611	38.267	44.119	31.362	41.246	39.228	27.941	24.002	23.353	15.85	9.749	27.283	30.326	51.472	45.046	50.108	77.308	56.618	50.438	54.003	44.293	61.833	55.107	18.887	9.25		0.945945	36.1831
16.7839	17.633	15.891	34.608	35.467	23.077	22.899	26.856	30.78	31.345	39.705	32.437	36.502	35.761	26.359	20.922	20.81	14.316	11.773	25.154	29.833	45.715	48.173	45.896	68.881	54.315	50.698	47.141	39.513	59.117	53.481	16.146	6.697		0.952705	33.3719
16.9029	17.978	14.359	31.151	31.059	20.972	23.021	21.976	30.998	32.335	42.527	28.546	41.933	37.221	20.797	15.482	19.072	14.02	9.77	19.475	27.477	42.716	49.304	48.82	60.229	57.311	54.355	41.696	30.141	45.571	46.01	13.312	6.361		0.95946	31.1248
17.0219	14.029	14.085	25.626	25.004	26.275	22.443	23.215	25.793	31.804	39.192	28.013	36.06	35.276	22.634	13.359	19.429	10.921	11.543	20.595	22.122	41.077	45.569	52.135	62.069	50.798	45.713	40.636	20.584	42.451	32.462	12.064	5.773		0.966215	28.7109
17.141	14.625	17.485	21.628	21.111	20.869	23.218	16.827	21.668	28.578	36.461	31.459	31.95	31.579	24.924	13.126	20.466	11.353	9.672	18.766	23.168	38.701	39.78	50.965	56.066	37.975	39.792	33.109	19.099	44.507	24.475	11.803	4.305		0.972975	26.2347
17.26	15.114	20.045	16.906	17.775	18.389	21.693	19.492	19.454	25.827	30.465	25.08	36.625	36.721	17.531	15.776	17.874	9.97	8.599	16.778	21.289	36.733	39.446	46.843	54.856	35.963	46.348	28.871	12.049	38.062	15.301	7.483	3.435		0.97973	24.2748
17.379	15.81	16.393	13.431	21.888	24.745	23.474	18.3	20.24	27.894	27.871	27.628	26.669	36.79	15.037	14.583	15.236	10.249	7.911	15.02	19.67	35.896	39.831	35.322	45.14	37.146	43.872	21.369	9.828	33.678	13.027	7.644	4.045		0.986485	22.6762
17.4981	14.95	16.251	13.142	23.226	22.301	21.388	19.061	16.146	18.687	25.357	21.74	26.526	35.486	13.136	13.657	15.777	8.614	6.516	12.898	18.951	31.27	34.557	35.767	45.32	25.072	38.212	16.219	9.545	24.652	11.164	6.074	2.301		0.993245	20.1238
17.6171	14.627	18.409	11.352	20.394	28.16	16.871	24.47	15.849	16.843	14.836	16.729	26.372	32.913	12.64	13.837	16.942	12.12	6.32	15.586	16.474	30.19	33.846	42.34	42.25	20.043	32.288	9.445	9.318	16.895	8.107	3.395	3.019		1	18.84

## Sheet: Image3
X0	Y0	Y1	Y2	Y3	Y4	Y5	Y6	Y7	Y8	Y9	Y10	Y11	Y12	Y13	Y14	Y15	Y16	Y17	Y18	Y19	Y20	Y21	Y22		Ap-basal	Avg intensity
0	64.886	60.352	56.833	109.556	70.845	70.733	51.856	99.349	58.124	96.253	91.571	88.494	126.15	95.863	100.288	130.248	129.41	173.096	193.159	39.182	59.977	30.3	48.286		0	88.9048
0.119	81.515	65.056	62.266	132.531	82.089	88.785	56.514	102.129	69.969	112.931	108.889	104.914	131.261	116.386	105.13	135.16	135.54	181.892	209.209	56.874	76.76	36.612	62.573		0.00757354	100.652
0.2381	74.497	72.134	66.089	160.078	93.807	100.028	69.705	95.392	68.352	139.017	123.954	98.864	162.874	143.095	130.718	143.758	152.952	198.311	205.912	63.743	79.253	40.811	79.484		0.0151534	111.427
0.3571	76.52	81.115	78.652	179.517	110.262	127.77	96.767	90.904	70.903	149.421	127.911	110.117	173.298	153.309	157.614	141.108	158.334	209.66	206.913	70.389	87.693	50.605	82.837		0.022727	121.375
0.4761	95.923	92.76	94.793	182.593	136.774	156.675	124.034	114.624	82.45	164.859	158.551	139.76	179.561	155.634	175.361	142.92	162.779	222.284	210.182	93.37	92.762	47.479	93.232		0.0303005	135.624
0.5952	98.395	99.793	106.921	202.951	152.922	185.426	147.324	113.239	98.366	173.865	181.539	155.137	175.512	153.612	168.805	154.17	176.914	218.775	209.662	122.953	100.207	56.619	105.334		0.0378804	146.019
0.7142	128.951	100.867	125.541	219.248	167.516	201.056	171.925	140.614	104.773	179.268	203.254	165.759	193.264	168.448	179.927	165.186	191.02	219.961	206.514	132.832	114.897	72.06	122.219		0.045454	159.787
0.8332	132.082	108.185	118.395	220.469	195.817	213.078	194.828	143.138	121.174	195.632	216.693	190.744	200.713	186.426	162.084	196.265	197.319	228.67	197.657	158.111	145.319	86.218	131.115		0.0530275	171.31
0.9523	158.13	104.999	134.874	224.686	185.617	226.865	222.658	154.384	139.023	211.855	227.022	211.641	209.344	197.427	157.553	210.913	206.488	226.252	204.353	188.4	170.106	102.911	141.077		0.0606074	183.329
1.0713	165.265	124.922	130.297	234.111	196.952	239.124	237.266	179.368	167.736	223.12	233.178	221.952	209.525	188.782	164.469	210.35	213.814	224.163	203.838	183.435	180.534	106.351	142.641		0.068181	190.487
1.1903	187.351	133.642	146.368	221.109	204.792	238.404	243.838	192.716	180.823	231.315	234.948	228.107	219.561	194.259	171.224	220.682	214.269	223.33	187.248	200.896	185.572	123.899	159.996		0.0757545	197.58
1.3094	192.138	149.229	158.396	218.586	205.535	235.727	240.819	212.322	212.336	233.211	236.216	232.334	218.294	194.693	169.322	216.043	225.224	201.681	192.877	195.033	191.748	143.796	178.378		0.0833344	202.345
1.4284	208.897	151.964	169.614	206.345	206.253	238.836	244.046	210.413	226.293	238.954	241.162	243.6	216.127	202.731	184.954	206.895	216.389	196.141	188.732	199.654	193.166	133.375	168.676		0.0909079	204.053
1.5474	213.543	152.472	171.682	198.571	208.19	237.614	241.504	218.862	236.503	237.276	239.331	240.237	218.084	202.137	178.321	213.665	214.849	194.451	181.107	208.944	195.206	149.359	174.596		0.0984815	205.5
1.6665	224.814	171.326	176.653	189.402	213.862	232.107	238.013	222.737	237.76	238.009	243.562	240.945	202.328	198.783	198.584	219.117	217.507	186.045	189.569	220.234	193.393	155.344	178.153		0.106061	208.185
1.7855	219.048	179.305	176.276	189.571	204.594	227.273	243.221	219.297	240.948	240.754	233.956	245.475	214.226	193.241	181.386	213.668	212.963	186.445	170.636	219.534	193.992	154.321	181.621		0.113635	206.163
1.9046	224.349	189.117	170.694	195.346	203.708	231.264	230.718	221.556	244.208	235.823	238.774	247.692	213.038	196.261	194.675	207.141	202.29	176.377	142.38	212.468	208.936	171.5	189.062		0.121215	206.408
2.0236	241.043	201.739	190.406	203.126	200.103	236.779	232.608	215.578	237.538	228.566	239.442	246.277	196.368	176.062	177.963	195.559	207.404	155.563	148.019	199.445	192.802	180.576	198.924		0.128788	204.43
2.1426	236.224	211.489	187.182	189.611	184.869	222.895	240.404	217.475	232.911	225.07	243.063	251.496	178.281	172.912	181.525	182.787	200.858	160.503	134.43	192.676	192.836	195.902	176.107		0.136362	200.5
2.2617	237.239	207.606	193.349	185.339	188.123	226.217	239.953	196.856	227.665	218.413	245.859	250.168	175.087	177.187	164.458	178.576	197.328	151.618	135.894	184.54	184.566	213.042	164.55		0.143942	197.549
2.3807	238.171	217.553	203.087	169.099	179.689	219.065	233.735	203.62	219.734	216.028	244.094	246.008	180.586	169.375	169.81	183.323	201.847	141.538	138.427	170.651	183.198	205.971	172.189		0.151515	195.948
2.4997	231.999	206.652	201.512	166.752	164.82	221.386	233.799	173.277	221.838	202.993	246.922	244.78	157.63	161.83	173.902	172.287	198.591	151.013	135.838	174.133	175.8	198.896	170.532		0.159089	190.747
2.6188	233.595	211.785	206.922	147.077	155.358	226.923	232.564	155.814	223.667	198.052	245.555	244.379	154.998	166.572	156.514	164.979	200.785	134.125	124.469	184.99	169.35	212.85	170.063		0.166669	187.886
2.7378	233.221	214.919	207.043	133.077	143.294	222.211	222.922	171.194	216.581	183.824	233.765	233.66	150.936	159.524	147.788	174.965	189.535	138.083	113.687	184.252	169.724	202.347	157.136		0.174242	182.769
2.8568	228.846	216.227	204.727	130.068	140.128	214.515	211.139	164.479	194.444	166.484	230.945	226.141	147.643	153.403	142.18	188.082	195.791	138.562	120.033	187.462	170.592	194.221	138.956		0.181816	178.481
2.9759	227.412	222.505	204.309	128.626	143.999	194.607	204.669	154.539	184.973	170.854	230.721	220.373	132.671	148.495	132.571	193.775	173.442	138.346	108.21	178.056	169.749	195.057	139.183		0.189396	173.789
3.0949	219.148	219.734	196.281	106.548	132.506	193.182	212.32	143.987	178.279	156.292	218.96	202.883	124.781	139.093	124.813	177.545	153.293	149.758	110.786	174.263	163.547	184.105	137.553		0.196969	166.072
3.2139	223.902	214.425	205.335	97.345	124.999	173.317	219.104	141.613	159.928	146.934	217.471	208.228	120.762	109.593	145.174	169.668	151.167	146.966	110.916	152.759	159.53	177.718	131.818		0.204543	161.247
3.333	225.416	217.472	192.116	96.336	128.058	177.955	211.866	146.355	151.3	140.435	205.336	202.921	127.424	120.33	150.186	152.997	155.992	131.862	117.47	151.962	167.953	158.429	119.918		0.212123	158.7
3.452	228.344	221.332	186.965	93.339	117.376	172.269	210.436	142.583	133.821	126.641	185.135	183.806	122.613	107.744	131.263	151.821	147.358	130.282	113.216	151.811	170.767	173.797	131.337		0.219696	153.655
3.571	221.64	210.689	175.468	96.903	113.584	144.056	186.52	145.202	143.287	113.669	179.109	166.975	120.989	99.297	144.259	157.64	155.988	125.119	114.961	162.755	168.165	162.771	139.866		0.22727	149.953
3.6901	209.438	210.341	167.803	98.719	115.816	140.742	186.415	123.584	126.886	98.503	172.143	145.348	114.681	103.604	138.484	139.27	143.775	126.728	108.037	152.324	164.309	144.556	127.479		0.23485	141.695
3.8091	208.768	205.871	170.744	105.227	109.734	131.188	171.603	123.577	122.552	101.233	159.255	146.669	112.321	101.159	145.342	138.213	150.099	131.301	118.642	141.602	167.339	141.875	135.051		0.242423	140.842
3.9281	206.122	205.554	171.722	88.027	109.596	128.355	143.892	120.844	115.281	92.884	163.097	137.693	125.637	106.297	130.161	157.661	147.181	116.214	114.355	145.194	150.512	151.179	127.308		0.249997	137.164
4.0472	180.77	201.434	151.997	68.083	113.023	117.619	152.825	112.261	127.054	102.223	161.518	139.309	107.329	93.203	116.72	135.184	142.393	119.096	113.239	146.245	132.058	150.406	132.354		0.257577	131.145
4.1662	181.17	208.188	149.025	70.321	110.663	116.895	132.642	100.074	121.586	98.38	158.298	112.891	110.284	90.246	127.825	145.314	135.977	118.849	116.132	149.109	127.668	141.711	124.924		0.26515	128.181
4.2852	174.64	198.144	130.941	63.118	114.139	106.116	121.858	99.115	119.376	97.472	156.197	113.448	99.323	96.353	117.846	148.301	137.658	121.171	111.398	148.793	120.962	141.107	138.557		0.272724	125.045
4.4043	155.591	182.788	128.146	68.157	118.425	103.871	121.479	96.991	111.161	96.892	144.68	104.191	110.312	91.575	119.374	148.715	137.132	110.699	109.171	151.06	118.917	141.318	139.181		0.280304	122.166
4.5233	144.12	175.836	122.657	75.873	119.658	100.838	116.281	87.595	105.552	98.806	149.859	93.465	122.212	98.687	123.868	151.63	130.652	112.457	101.045	156.527	119.013	138.32	131.929		0.287877	120.734
4.6423	124.319	170.984	103.646	67.911	126.463	107.15	110.458	100.256	103.307	101.247	142.212	103.941	113.351	100.812	132.747	131.176	135.104	115.899	108.421	152.737	127.77	135.548	134.045		0.295451	119.544
4.7614	118.866	161.444	110.274	74.183	134.541	89.093	109.832	96.487	111.583	98.96	125.989	93.374	101.667	96.329	141.59	131.866	140.683	113.507	109.243	154.099	112.514	148.579	128.439		0.303031	117.528
4.8804	108.363	150.09	98.303	75.014	141.936	94.454	103.668	85.103	102.4	89.576	116.786	85.558	94.592	89.283	145.149	128.306	139.03	101.441	101.351	147.425	110.543	154.195	125.58		0.310604	112.528
4.9995	92.767	129.955	96.788	75.45	128.891	85.428	96.656	72.815	105.004	87.57	105.788	90.617	109.685	96.851	149.13	127.954	131.168	97.243	103.055	129.004	93.211	155.783	128.585		0.318184	108.235
5.1185	71.605	117.022	96.692	81.09	125.253	87.662	99.09	78.979	90.475	99.092	110.833	92.514	103.475	102.921	152.996	122.141	122.797	97.274	102.772	136.814	106.025	142.767	120.383		0.325758	106.986
5.2375	65.463	124.037	102.595	82.518	123.682	88.205	99.946	71.247	88.469	92.183	106.898	98.323	106.214	96.565	143.17	111.69	110.869	97.061	100.236	153.496	93.019	157.544	117.003		0.333331	105.671
5.3566	68.018	104.151	93.264	75.454	123.743	90.392	88.525	68.703	80.229	100.009	108.102	97.203	105.409	98.835	146.561	125.395	115.775	100.538	97.063	154.836	102.873	163.082	122.131		0.340911	105.665
5.4756	64.843	82.676	89.498	79.353	132.872	96.782	79.914	59.479	82.72	90.599	95.218	90.387	109.096	106.475	139.525	109.053	124.814	91.348	102.457	151.384	102.078	148.626	110.785		0.348485	101.738
5.5946	52.305	82.413	87.23	85.685	117.574	92.581	81.833	59.58	83.856	91.253	97.847	85.503	108.401	102.392	126.206	109.046	127.361	98.911	99.953	141.793	103.416	160.699	112.843		0.356058	100.377
5.7137	46.467	78.915	86.413	81.09	107.71	92.464	88.3	56.953	80.498	100.116	84.032	81.26	111.488	113.208	119.811	114.56	130.02	101.626	100.631	144.63	112.733	154.884	107.596		0.363638	99.8002
5.8327	44.393	63.061	85.151	77.972	102.108	95.487	77.408	64.749	72.16	93.246	92.683	89.201	105.549	99.218	111.351	105.765	124.381	111.933	93.966	149.895	110.548	157.683	102.674		0.371212	96.9818
5.9517	49.662	54.315	83.402	81.412	88.921	85.389	73.521	63.083	68.858	85.659	94.598	85.657	106.403	97.448	112.367	115.09	118.616	101.101	106.079	145.741	114.907	154.156	100.58		0.378785	95.0854
6.0708	49.345	68.46	79.218	81.232	93.164	96.331	66.858	67.306	81.967	85.665	88.561	91.975	107.197	110.693	111.62	125.248	105.332	99.532	91.464	144.828	100.764	157.62	101.534		0.386365	95.9093
6.1898	47.908	59.507	68.851	71.27	84.164	82.124	71.768	53.56	72.286	81.949	84.233	87.784	109.331	106.801	103.115	116.786	106.419	103.159	88.291	125.828	104.526	151.256	97.611		0.393939	90.3707
6.3088	37.564	57.455	67.601	60.102	76.216	83.852	73.55	59.857	67.154	75.919	80.415	89.769	108.894	95.201	98	111.748	101.899	99.172	96.843	111.759	91.247	151.387	101.828		0.401512	86.8449
6.4279	38.123	61.086	72.258	66.545	74.053	67.781	78.477	51.761	70.841	71.005	82.235	88.621	96.796	88.507	84.922	97.862	95.368	103.671	95.157	116.403	85.931	145.214	103.067		0.409092	84.1602
6.5469	36.653	65.789	62.789	59.743	77.836	74.584	71.359	54.414	68.2	69.896	84.491	91.578	92.313	81.415	85.863	88.967	98.041	102.061	99.221	110.569	83.198	132.846	104.827		0.416666	82.4632
6.6659	36.429	59.144	63.968	48.735	65.959	71.658	67.649	51.493	57.271	61.883	88.282	92.72	94.591	76.622	97.601	99.864	99.001	97.257	90.996	116.935	70.216	134.291	95.664		0.424239	79.923
6.785	43.956	56.121	65.312	54.115	61.483	76.164	73.937	59.387	58.398	63.434	81.093	93.265	87.667	80.097	78.806	96.916	104.35	102.732	96.438	107.731	56.591	133.142	103.709		0.431819	79.7758
6.904	45.985	53.759	65.503	44.225	64.394	70.952	69.908	48.206	53.591	63.465	80.438	86.934	74.412	80.054	78.841	103.918	103.036	104.536	89.382	109.406	52.878	114.525	109.265		0.439393	76.8527
7.023	38.916	48.121	63.78	51.102	53.372	58.548	68.764	52.575	46.692	52.157	77.206	88.673	69.859	92.567	64.965	99.894	102.404	103.712	87.461	101.038	42.13	109.008	117.136		0.446966	73.4817
7.1421	39.225	47.331	63.248	52.26	49.818	66.066	72.262	45.654	48.17	54.137	75.773	88.209	76.186	80.929	72.341	96.822	98.052	96.646	84.435	88.117	53.004	102.601	115.17		0.454546	72.4546
7.2611	44.804	52.013	68.612	50.836	50.113	62.879	64.825	48.445	50.187	52.028	74.609	80.612	63.247	84.185	73.452	85.908	94.206	99.855	81.426	97.285	49.447	91.847	111.968		0.46212	70.9908
7.3801	41.913	45.877	70.033	54.899	49.287	60.642	53.578	56.438	49.282	47.179	62.523	94.341	67.562	89.921	79.552	89.092	97.15	102.276	83.396	100.107	39.847	96.923	103.56		0.469693	71.1034
7.4992	39.224	42.249	58.635	55.207	48.478	55.055	57.903	47.669	45.514	49.409	67.962	89.689	69.472	82.304	71.032	96.922	88.208	100.895	89.148	93.356	45.664	99.506	116.735		0.477273	70.0103
7.6182	45.229	41.783	59.763	50.033	42.185	57.157	50.344	45.111	51.476	48.493	70.018	73.384	67.999	92.3	73.302	98.679	90.91	91.1	93.535	96.856	43.213	97.238	109.548		0.484847	69.1155
7.7372	37.809	43.359	57.789	54.204	42.695	52.131	51.234	44.082	43.24	47.014	62.282	87.469	64.653	88.239	64.923	89.515	88.357	92.664	90.171	88.243	41.519	98.757	102.573		0.49242	66.6488
7.8563	36.625	42.994	50.543	50.058	37.92	56.61	54.36	47.064	45.445	53.588	55.503	78.76	66.948	85.294	63.411	91.703	93.586	94.658	84.255	86.121	40.684	90.364	107.694		0.5	65.8343
7.9753	38.453	42.065	47.173	46.412	33.21	54.987	57.115	46.464	40.702	63.835	54.654	79.095	72.648	70.192	62.722	84.109	84.175	94.212	88.554	85.358	33.335	87.641	108.071		0.507574	64.1383
8.0943	43.608	45.534	45.024	43.835	36.716	50.298	58.16	49.544	44.948	53.931	45.542	77.664	76.586	73.868	62.579	84.753	85.916	86.312	82.408	88.723	39.939	83.541	108.05		0.515147	63.8034
8.2134	44.737	40.024	49.961	45.061	34.615	56.327	57.018	45.506	46.556	50.566	48.802	70.867	70.35	70.632	56.961	96.401	94.741	86.015	85.113	80.633	44.786	71.84	108.699		0.522727	63.3135
8.3324	37.147	42.938	59.933	38.608	35.35	53.253	44.036	42.548	44.44	44.309	48.378	73.337	70.086	71.473	63.48	100.58	78.513	85.98	92.095	71.271	42.358	80.615	94.562		0.530301	61.5343
8.4515	34.215	42.809	48.751	38.128	37.42	53.251	47.063	41.382	46.657	47.413	43.813	76.629	64.931	68.964	56.799	88.841	91.34	88.657	77.44	80.725	30.041	82.114	104.454		0.53788	60.5147
8.5705	38.614	36.965	42.372	37.885	29.217	44.163	46.426	42.301	41.263	50.327	41.544	61.326	63.02	68.16	56.426	81.387	84.136	84.575	81.395	67.418	33.422	81.622	105.403		0.545454	57.3638
8.6895	34.6	38.428	41.232	39.021	32.296	40.99	49.408	46.495	46.202	46.811	35.169	63.778	78.603	65.95	53.033	91.253	75.472	74.769	77.916	68.811	31.707	69.795	107.956		0.553028	56.9433
8.8086	30.615	37.327	45.269	29.402	24.857	48.963	43.438	42.438	47	39.397	29.871	75.005	64.036	65.742	57.031	83.592	80.398	90.002	80.378	62.583	36.908	79.759	114.355		0.560607	56.8855
8.9276	32.959	40.686	49.59	35.385	27.279	39.513	38.642	40.235	41.211	36.97	28.784	73.017	66.481	66.26	60.445	84.267	86.291	80.958	81.887	58.345	39.103	83.662	106.065		0.568181	56.4363
9.0466	32.704	37.526	54	27.457	26.031	46.632	42.159	39.782	42.011	32.171	26.196	67.518	66.033	58.588	46.459	73.647	82.537	80.263	84.947	53.819	28.916	78.732	98.509		0.575754	53.332
9.1657	31.229	42.483	44.857	31.254	22.507	47.409	39.098	39.604	37.418	29.202	31.337	58.186	67.258	55.537	46.502	72.697	95.421	90.879	77.525	49.462	29.651	67.671	101.087		0.583334	52.5337
9.2847	31.098	41.103	37.44	30.711	25.391	42.074	43.251	37.919	34.316	30.476	31.807	62.066	63.476	49.163	45.541	71.069	90.11	94.099	90.627	60.572	36.805	72.763	96.287		0.590908	52.9637
9.4037	35.964	43.036	46.566	31.721	21.145	39.788	40.98	37.471	32.691	30.471	27.685	59.088	68.054	52.442	44.762	69.454	87.248	88.906	81.903	56.223	28.118	75.869	99.928		0.598481	52.1527
9.5228	36.238	47.696	36.604	26.287	23.735	44.113	37.253	37.506	42.716	33.712	24.336	52.49	62.364	54.933	36.054	68.486	85.939	90.715	89.574	53.265	33.45	66.97	97.431		0.606061	51.3855
9.6418	33.59	39.281	29.339	28.574	22.722	34.855	34.461	36	39.793	24.24	29.213	54.1	68.633	60.81	41.311	66.206	91.959	88.895	100.291	43.78	33.929	67.407	99.941		0.613635	50.8404
9.7608	27.036	39.19	33.327	25.691	20.937	33.786	37.348	39.747	35.827	29.034	34.736	53.703	57.381	58.063	33.936	63.079	87.085	79.021	97.376	44.875	34.334	74.027	103.199		0.621208	49.6843
9.8799	29.389	41.388	31.769	24.829	18.662	38.629	31.047	34.308	35.544	29.507	30.451	48.97	56.35	51.832	39.399	72.738	84.041	80.635	99.533	48.99	33.276	62.072	87.289		0.628788	48.289
9.9989	29.684	43.617	29.236	20.795	17.192	36.312	29.552	30.654	28.303	22.737	27.477	61.038	56.633	53.359	36.745	75.055	76.912	66.041	91.202	43.761	28.998	65.798	89.745		0.636362	46.1237
10.1179	26.656	44.083	31.84	24.735	18.087	30.988	27.217	31.721	31.255	25.245	28.907	51.906	48.062	55.32	41.906	65.944	86.082	74.497	94.894	49.44	24.056	63.158	98.15		0.643935	46.7021
10.237	27.113	37.134	25.505	23.222	15.319	33.239	31.149	30.039	30.838	26.437	21.891	51.232	58.05	56.693	36.773	68.549	81.618	79.464	90.828	38.851	24.18	61.651	81.981		0.651515	44.859
10.356	32.316	35.066	28.405	20.634	17.59	32.797	27.434	27.387	32.066	26.21	25.941	45.493	53.939	61.947	42.364	72.051	90.493	84.96	96.288	39.573	24.827	58.909	88.064		0.659089	46.2937
10.475	28.504	29.033	30.288	19.418	14.109	34.164	26.664	26.287	30.557	23.433	26.162	46.513	57.991	72.815	42.347	80.226	87.731	81.444	99.471	39.407	20.639	62.276	83.866		0.666662	46.2324
10.5941	27.061	33.421	29.6	19.784	15.972	30.521	29.303	25.138	31.074	24.794	24.302	53.578	63.203	58.465	45.042	76.873	87.462	82.28	89.351	37.777	21.162	58.93	88.233		0.674242	45.7968
10.7131	37.968	28.59	24.212	16.893	11.208	29.892	28.981	26.683	30.514	26.043	21.46	50.431	58.133	58.168	46.14	84.277	76.961	81.833	91.47	39.983	23.772	64.431	84.308		0.681816	45.3196
10.8321	34.154	32.255	30.262	20.726	15.006	27.455	30.08	28.168	32.296	20.053	28.188	49.814	53.046	46.745	40.408	86.05	75.105	80.182	88.319	37.688	21.123	58.874	85.556		0.689389	44.4153
10.9512	26.704	30.86	27.898	19.955	15.304	24.66	28.369	34.378	27.957	28.441	24.117	52.172	58.368	47.347	48.343	78.256	82.798	91.255	85.649	34.548	20.406	61.659	86.248		0.696969	45.0301
11.0702	35.344	29.571	24.663	18.633	17.324	20.887	32.062	31.653	26.542	19.629	21.71	57.914	50.925	50.304	42.782	73.258	79.958	88.788	82.093	28.573	19.719	58.81	90.792		0.704543	43.5623
11.1892	32.517	28.339	21.131	21.264	11.712	23.539	34.152	28.578	26.717	22.075	23.642	49.037	54.682	44.564	41.523	79.71	78.526	93.53	81.524	40.212	21.242	60.8	95.969		0.712116	44.1298
11.3083	25.925	27.411	27.326	19.024	14.115	23.568	32.457	25.58	27.101	23.703	28.179	58.205	51.124	49.768	48.564	71.323	82.337	87.809	74.89	37.149	24.752	50.604	95.713		0.719696	43.7664
11.4273	25.902	24.481	26.639	19.781	14.65	24.571	24.63	22.741	26.341	24.905	29.092	50.283	45.336	44.055	45.564	74.178	90.933	100.725	76.886	36.218	23.359	51.317	95.802		0.72727	43.4082
11.5463	26.919	19.351	21.833	14.903	13.292	22.729	29.484	21.883	24.486	26.448	21.211	49.569	48.607	44.622	54.446	70.345	83.39	85.713	71.102	38.906	25.654	54.909	97.737		0.734843	42.0669
11.6654	23.455	21.637	23.365	16.365	13.041	24.98	28.694	24.425	23.949	23.193	24.022	53.919	47.045	39.976	52.737	75.306	95.93	93.065	68.629	41.109	26.18	55.447	96.329		0.742423	43.1651
11.7844	24.819	22.987	25.417	20.197	11.434	20.438	26.601	26.23	20.196	24.882	28.035	48.677	47.168	46.543	52.191	70.519	83.385	85.203	75.09	31.095	21.986	49.782	91.96		0.749997	41.5146
11.9035	28.881	14.898	22.068	13.615	10.671	19.648	20.476	20.595	24.21	16.801	27.119	46.048	48.765	43.859	53.013	70.159	80.123	79.466	82.442	33.183	18.518	47.933	86.463		0.757577	39.5197
12.0225	24.584	19.124	17.393	13.184	12.338	14.416	19.896	22.467	25.007	21.591	23.753	45.622	51.177	53.526	52.099	80.902	88.445	96.95	76.031	30.842	18.17	54.235	85.323		0.76515	41.1772
12.1415	24.083	18.571	20.08	14.424	11.667	16.758	20.031	22.837	19.214	21.815	25.817	44.682	53.281	47.772	56.952	79.719	97.059	107.5	71.623	35.488	19.309	55.857	93.15		0.772724	42.5082
12.2606	23.101	22.443	23.157	15.245	11.728	18.578	19.291	23.385	18.626	21.659	21.948	48.199	54.415	53.576	58.696	79.851	91.916	105.258	73.792	32.232	23.395	58.241	89.84		0.780304	42.9814
12.3796	19.323	19.766	22.575	14.873	9.24	17.877	20.069	19.172	18.675	19.951	27.037	47.428	50.278	60.599	57.85	68.187	83.977	99.299	77.874	34.832	23.312	50.87	82.923		0.787877	41.1299
12.4986	23.59	16.563	20.047	16.438	10.814	19.329	21.211	23.55	17.987	18.326	24.519	43.737	50.846	55.148	51.152	65.609	86.927	94.596	86.803	31.007	21.27	53.791	72.853		0.795451	40.2658
12.6177	19.617	18.556	18.383	14.337	10.374	18.823	17.365	18.787	22.187	19.063	24.322	40.392	49.122	53.303	50.66	64.054	86.747	90.509	76.832	40.829	23.492	45.194	88.612		0.803031	39.633
12.7367	20.005	16.228	19.791	10.258	8.168	17.833	13.564	17.65	19.775	23.308	20.556	43.329	54.34	61.262	50.712	66.609	89.829	84.353	78.478	30.684	24.419	49.723	95.367		0.810604	39.8366
12.8557	18.239	15.524	17.146	9.414	9.89	15.604	11.941	18.079	17.115	18.242	24.257	38.486	53.259	70.056	47.898	72.56	74.905	93.401	82.933	33.066	27.893	59.737	92.902		0.818178	40.1107
12.9748	17.779	16.704	16.054	12.647	10.52	16.335	15.311	18.778	16.53	21.096	25.587	45.212	49.907	63.445	47.796	69.702	72.34	101.362	76.323	33.1	25.576	54.924	91.819		0.825758	39.9499
13.0938	16.059	14.782	18.381	18.951	6.923	12.947	13.243	13.252	17.483	16.96	20.011	38.154	50.952	57.885	46.157	63.347	80.824	95.94	83.212	37.42	23.414	60.815	98.362		0.833331	39.3684
13.2128	16.913	16.017	17.682	12.319	7.403	16.859	14.157	12.94	23.342	17.467	18.84	43.488	52.964	50.331	47.557	70.658	80.69	95.059	72.355	41.098	21.344	52.463	102.628		0.840905	39.3293
13.3319	14.548	16.298	17.158	13.329	8.947	14.283	10.836	14.16	16.621	19.799	23.092	34.19	54.308	57.191	58.841	65.136	85.366	88.892	79.652	31.248	22.159	53.802	94.576		0.848485	38.8883
13.4509	16.875	15.091	17.786	13.876	7.46	13.095	13.82	11.732	16.95	18.391	20.408	34.961	48.551	51.124	51.749	74.63	78.25	89.008	90.24	37.391	23.185	58.994	98.317		0.856058	39.2123
13.5699	18.048	13.884	14.382	11.227	7.215	14.38	13.785	13.362	18.924	18.524	22.207	37.33	51.392	54.716	61.771	67.908	89.649	79.487	81.249	36.475	19.198	57.93	86.622		0.863632	38.6811
13.689	18.608	14.597	14.383	9.126	9.264	12.981	14.016	14.912	13.735	17.935	20.019	36.691	46.644	45.453	56.647	74.094	80.881	78.925	90.535	36.461	21.354	58.732	84.67		0.871212	37.8549
13.808	17.487	15.404	15.466	13.577	7.8	14.702	11.012	9.836	14.218	17.343	21.261	36.034	43.711	52.847	59.933	75.92	86.838	73.549	92.731	35.388	22.844	60.04	82.824		0.878785	38.2941
13.927	13.34	13.856	12.927	12.599	10.407	10.753	10.79	8.86	12.147	13.873	21.737	30.568	46.137	54.239	70.891	82.924	87.269	72.943	86.13	41.059	22.269	60.885	84.765		0.886359	38.3203
14.0461	13.074	12.067	17.725	10.309	8.524	8.217	9.775	11.312	14.766	15.117	22.784	33.834	49.771	61.746	58.032	84.123	98.147	65.364	85.941	34.812	18.744	62.281	63.831		0.893939	37.4042
14.1651	15.878	16.357	16.061	13.539	5.467	10.402	10.402	10.95	13.753	15.518	21.808	30.277	49.415	53.393	62.001	86.802	94.094	63.138	91.866	28.772	26.112	65.932	61.599		0.901512	37.545
14.2841	15.962	16.559	13.967	10.575	7.528	8.93	11.5	9.726	11.479	12.609	18.092	27.259	47.258	53.092	62.014	85.574	91.525	64.019	87.587	30.426	26.022	69.848	63.242		0.909086	36.7301
14.4032	12.738	14.518	13.547	11.046	6.841	10.772	10.173	10.624	10.315	12.71	16.824	30.622	47.61	53.586	55.396	92.49	89.518	54.986	79.321	36.142	30.236	70.641	61.074		0.916666	36.1622
14.5222	12.938	14.836	13.674	9.141	6.177	11.01	9.269	9.837	11.455	14.098	17.31	24.081	47.288	50.798	67.596	99.958	96.867	64.442	76.201	46.021	34.781	77.851	44.746		0.924239	37.4076
14.6412	12.186	14.621	12.706	9.394	8.495	10.147	9.916	8.596	9.836	15.768	16.449	24.425	45.035	59.387	69.976	90.681	104.326	63.132	75.912	38.147	27.099	80.989	39.069		0.931813	36.7953
14.7603	10.512	13.943	13.206	9.065	6.87	12.019	9.361	9.438	11.263	11.165	18.499	23.132	49.365	53.192	61.776	90.126	78.724	58.458	80.541	38.915	32.262	83.132	31.937		0.939393	35.0827
14.8793	9.998	12.694	14.077	12.047	9.338	9.95	12.963	8.362	8.064	14.683	17.146	24.88	52.853	59.665	57.449	91.486	79.762	48.973	68.849	34.134	30.683	81.613	33.357		0.946966	34.4794
14.9984	9.149	15.116	9.574	10.498	10.283	8.942	8.386	8.618	10.888	14.089	18.872	22.22	45.511	60.296	67.12	86.758	84.524	45.429	64.464	38.209	29.746	80.39	26.029		0.954546	33.7005
15.1174	12	15.329	10.051	8.177	6.482	8.842	8.224	9.411	8.438	13.304	15.211	22.684	49.358	62.81	61.803	85.749	75.289	37.614	65.974	43.988	31.011	84.941	17.789		0.96212	32.8034
15.2364	9.545	13.488	11.953	10.676	5.178	11.8	7.361	7.227	7.347	9.987	15.657	24.192	47.733	52.088	60.674	80.226	74.156	32.746	60.173	44.771	34.362	93.574	22.537		0.969693	32.0631
15.3555	10.828	12.593	11.578	11.805	7.233	11.773	7.298	6.762	9.493	8.361	15.157	29.213	45.301	55.384	62.705	80.791	80.291	27.549	57.817	48.23	35.892	91.339	15.949		0.977273	32.3192
15.4745	9.646	11.785	10.255	8.927	8.484	8.007	6.653	5.941	9.963	9.99	16.583	25.947	47.679	59.103	54.938	74.326	70.832	26.524	52.063	43.579	32.898	87.776	15.14		0.984847	30.306
15.5935	7.934	13.136	12.19	9.227	7.219	8.081	7.106	7.011	8.548	8.534	17.105	22.816	49.095	55.599	58.286	67.353	71.278	23.929	51.67	43.026	32.141	85.871	11.519		0.99242	29.5076
15.7126	9.503	10.493	10.664	8.351	7.932	9.191	3.789	4.172	5.807	8.742	15.978	18.904	39.388	61.651	59.883	74.899	67.637	20.91	49.451	54.081	32.872	88.13	7.912		1	29.1452

## Sheet: Image2
X0	Y0	Y1	Y2	Y3	Y4	Y5	Y6	Y7	Y8	Y9	Y10	Y11	Y12	Y13	Y14	Y15	Y16	Y17	Y18	Y19	Y20	Y21	Y22	Y23	Y24	Y25		Ap-basal	Avg intensity
0	24.031	83.924	31.325	68.242	60.369	121.754	106.515	83.752	72.703	148.101	114.569	86.607	51.376	37.943	42.038	20.342	21.911	44.87	55.717	18.967	23.214	32.294	35.812	26.106	15.068	22.746		0	55.7806
0.119	35.611	87.337	37.706	69.347	63.608	122.754	117.974	97.864	74.441	159.48	125.384	89.315	56.373	45.833	51.784	24.516	21.63	59.039	64.32	22.623	27.759	38.795	43.459	25.646	18.819	25.868		0.00507467	61.8187
0.2381	32.507	99.306	49.868	75.1	66.58	126.582	126.679	102.445	79.644	162.672	122.669	101.924	60.695	48.865	68.309	28.044	20.56	68.586	78.468	30.718	30.061	41.978	53.273	36.399	19.915	26.076		0.0101536	67.6124
0.3571	36.879	98.253	66.344	75.43	67.284	127.36	135.169	115.466	86.366	174.129	137.499	112.796	62.426	52.431	81.267	42.968	24.343	76.862	95.882	39.255	39.994	44.467	51.262	34.323	25.958	28.391		0.0152283	74.3386
0.4761	49.929	109.042	72.785	81.557	67.78	148.287	148.746	120.163	87.749	172.271	137.713	119.22	60.244	58.696	87.436	51.453	30.927	83.171	103.754	52.155	43.816	46.539	70.042	35.418	30.938	32.947		0.0203029	80.8761
0.5952	67.775	131.081	75.813	87.764	77.917	158.353	163.612	121.823	90.365	181.776	151.807	130.205	62.725	70.423	95.799	62.944	39.33	77.222	109.425	56.377	51.249	54.447	67.835	44.484	32.93	44.911		0.0253819	88.7843
0.7142	81.781	139.575	84.124	86.878	65.606	174.187	159.948	130.077	96.337	175.189	153.581	142.807	71.079	84.988	110.468	80.787	45.119	77.224	120.632	62.88	53.427	65.143	68.645	54.8	39.542	45.109		0.0304565	94.9974
0.8332	97.846	147.209	87.327	83.421	67.514	179.96	158.504	142.705	92.995	184.218	157.058	136.794	85.627	85.652	114.048	98.144	52.354	82.185	121.998	67.853	58.379	73.935	72.476	64.589	48.776	51.663		0.0355312	100.509
0.9523	110.013	145.541	106.593	92.853	71.137	182.201	169.388	126.968	101.531	190.094	157.791	145.704	91.393	89.737	127.402	118.585	55.415	83.736	119.83	80.884	71.127	80.146	80.033	70.73	57.609	57.295		0.0406102	107.067
1.0713	140.048	152.017	100.166	100.375	71.262	187.438	168.324	138.185	108.481	185.344	159.132	155.956	96.548	107.159	132.959	123.302	67.748	90.172	109.532	91.955	76.582	86.172	84.585	75.279	66.816	58.278		0.0456848	112.839
1.1903	162.417	167.118	118.095	89.616	84.142	196.918	179.708	139.306	104.203	188.25	159.693	162.175	99.768	116.363	150.278	128.589	70.03	101.828	123.228	102.763	76.812	100.022	89.601	80.88	73.551	70.824		0.0507595	120.622
1.3094	181.737	158.73	132.698	97.028	88.854	193.536	180.693	148.236	107.451	181.044	152.007	152.688	115.977	120.634	157.346	131.335	90.381	102.04	123.001	106.182	80.87	107.696	92.008	79.303	83.269	74.477		0.0558384	124.585
1.4284	194.511	169.622	140.466	99.839	84.293	203.727	171.239	144.422	107.26	179.226	163.502	161.018	106.324	129.558	157.786	143.536	81.395	111.998	112.146	114.064	81.981	135.223	99.634	84.724	97.32	80.622		0.0609131	129.055
1.5474	195.396	167.505	159.565	100.363	89.591	196.331	171.113	151.086	116.16	182.327	172.817	164.927	116.682	142.718	169.311	152.357	89.438	102.322	119.638	122.592	91.731	140.87	112.162	103.506	118.694	93.663		0.0659878	136.264
1.6665	187.561	157.829	163.531	91.48	95.336	204.502	170.167	152.246	116.81	186.265	160.202	164.444	116.927	137.984	172.033	151.445	97.44	99.766	131.981	125.343	90.019	155.482	115.005	111.954	123.959	110.964		0.0710667	138.103
1.7855	186.841	167.822	168.664	94.587	101.486	209.708	184.304	155.798	110.644	191.618	161.315	165.455	121.16	144.815	184.169	152.996	97.689	109.553	131.506	117.54	87.524	160.624	124.365	115.135	123.897	120.291		0.0761414	141.904
1.9046	183.053	172.675	175.599	92.765	108.436	209.2	180.309	160.776	104.832	190.048	160.852	160.114	127.642	152.861	184.022	152.332	104.761	118.738	144.219	118.421	91.591	165.597	150.356	113.749	127.993	135.375		0.0812203	145.628
2.0236	190.555	174.082	177.86	88.883	115.176	215.494	180.619	167.577	107.973	191.17	173.628	172.26	135.861	171.685	190.531	147.083	106.377	125.375	139.398	125.643	91.594	175.645	153.16	135.284	131.832	147.854		0.086295	151.254
2.1426	198.501	182.586	183.281	102.853	127.087	218.259	172.554	162.414	109.135	185.647	179.379	167.928	137.42	169.156	197.912	156.691	120.721	124.936	147.793	122.062	97.021	195.648	148.46	164.098	144.409	147.143		0.0913696	156.273
2.2617	199.607	200.75	176.769	104.607	132.153	216.229	180.019	154.302	110.995	194.83	182.148	174.14	136.867	180.489	188.938	162.732	132.358	123.918	144.785	124.887	99.091	186.264	164.192	174.174	156.247	150.47		0.0964486	159.691
2.3807	200.099	190.027	175.097	106.475	141.238	218.389	180.502	147.193	110.387	190.954	178.236	167.529	146.933	189.511	200.755	177.801	126.721	126.625	157.254	120.735	102.01	197.76	159.035	174.562	160.969	168.712		0.101523	162.135
2.4997	201.138	194.514	179.022	110.601	149.582	210.919	181.239	146.23	101.927	177.642	168.288	171.423	151.669	186.209	192.197	182.178	127.095	122.625	156.055	119.071	100.691	197.933	170.231	178.419	179.44	179.409		0.106598	162.913
2.6188	201.979	197.191	185.035	112.843	147.95	218.28	193.463	145.23	100.89	179.791	178.371	166.488	160.87	176.048	193.976	185.087	126.467	134.485	163.82	122.447	92.199	196.762	184.391	187.799	179.022	183.941		0.111677	165.955
2.7378	208.446	196.195	190.081	114.634	148.962	212.541	192.493	155.114	111.06	172.95	185.784	168.837	165.726	176.836	192.875	173.7	143.204	128.829	173.612	124.193	102.397	195.719	179.446	182.672	178.264	175.04		0.116752	167.293
2.8568	214.519	191.153	189.716	121.673	148.237	206.019	193.034	151.295	101.205	169.095	191.13	161.048	165.657	163.368	204.018	161.982	142.418	143.087	162.774	124.38	108.952	191.332	175.317	180.841	190.256	197.17		0.121826	167.295
2.9759	200.321	196.688	182.493	125.774	155.14	204.025	203.662	148.306	122.57	170.769	182.986	153.984	168.445	162.163	199.319	173.931	146.666	141.972	154.488	120.861	104.513	196.555	189.871	194.085	186.708	207.493		0.126905	168.992
3.0949	195.373	191.983	179.359	125.075	148.324	210.988	202.936	147.738	123.714	173.613	181.655	143.507	171.538	168.819	200.22	176.402	159.214	143.472	158.873	117.334	98.155	193.914	185.12	207.942	199.517	207.992		0.13198	169.722
3.2139	193.085	180.776	183.173	117.743	149.585	214.666	196.298	142.139	129.27	167.649	174.58	149.027	163.23	177.197	200.2	168.134	149.714	143.558	155.235	120.696	96.241	180.107	171.79	198.793	197.152	201.896		0.137054	166.228
3.333	192.413	187.334	179.5	112.172	154.657	207.463	199.695	142.734	130.517	172.159	178.905	149.887	157.086	175.592	200.646	168.812	134.671	140.577	157.127	125.292	106.561	181.812	180.938	198.579	201.086	210.383		0.142133	167.177
3.452	200.296	190.107	161.78	110.056	170.306	215.102	197.854	145.65	139.933	173.133	178.254	135.764	158.982	176.018	196.801	168.982	138.023	149.096	175.768	126.402	108.105	170.732	191.264	209.848	206.283	206.415		0.147208	169.267
3.571	206.73	189.51	165.83	108.63	168.897	222.94	198.667	147.738	140.758	168.74	183.184	130.69	161.41	168.817	202.162	170.374	146.647	152.803	161.455	117.153	108.812	167.841	184.872	208.309	204.863	208.354		0.152283	169.084
3.6901	215.293	200.91	156.249	109.478	171.614	212.235	201.044	146.809	139.06	158.557	185.192	140.683	173.964	175.935	205.853	169.486	141.305	145.341	166.476	119.268	114.844	170.898	181.678	207.567	207.913	207.387		0.157362	170.194
3.8091	205.231	202.812	162.042	103.45	174.585	217.59	206.882	155.591	136.167	156.2	182.859	133.039	156.59	171.445	194.95	176.485	136.411	143.565	181.507	131.392	113.007	171.796	194.662	214.164	204.77	192.202		0.162436	169.977
3.9281	205.303	198.96	158.399	110.711	178.996	215.803	196.101	151.248	138.217	142.11	180.169	126.991	156.709	158.031	200.745	172.988	127.5	159.162	175.265	135.982	109.89	170.33	184.396	209.833	211.48	184.256		0.167511	167.676
4.0472	204.599	195.528	155.497	104.401	176.102	208.898	183.052	148.131	150.902	142.331	170.962	131.414	150.843	170.319	198.883	172.888	130.085	160.528	172.494	137.822	109.264	166.666	183.353	215.154	214.327	183.772		0.17259	166.854
4.1662	210.904	184.4	160.515	112.209	165.885	203.189	182.966	147.709	146.84	128.94	174.205	127.941	148.224	170.777	195.873	169.788	131.262	160.94	191.913	137.539	103.863	154.939	185.24	210.915	206.797	178.794		0.177665	165.099
4.2852	213.649	185.459	154.223	106.065	169.423	206.159	181.069	143.959	147.464	125.253	181.534	126.149	154.954	171.253	197.061	177.404	127.504	167.202	190.717	155.907	93.064	152.839	188.937	220.677	205.499	176.583		0.182739	166.154
4.4043	216.03	180.088	156.058	104.351	168.873	205.099	176.149	140.169	149.51	121.904	183.779	111.063	144.536	170.624	186.299	177.995	122.468	161.792	175.473	155.656	96.257	151.043	187.464	214.084	208.177	176.756		0.187818	163.142
4.5233	208.403	164.272	150.803	110.92	177.142	202.663	165.638	155.486	149.99	118.365	185.503	113.814	142.72	160.647	182.241	163.094	128.501	172.545	180.339	152.75	102.24	155.567	169.46	204.383	203.422	185.058		0.192893	161.768
4.6423	199.691	160.503	145.533	116.148	181.07	202.141	161.001	150.542	156.866	119.855	174.441	116.403	148.44	163.625	193.648	166.554	129.021	167.822	186.978	148.328	90.542	167.704	165.207	196.06	200.22	178.257		0.197968	161.023
4.7614	206.077	166.802	144.031	111.755	176.624	201.085	158.148	136.901	154.105	110.762	156.563	113.827	147.575	157.924	184.746	153.63	135.231	169.987	179.431	145.116	86.546	162.049	164.607	197.611	207.907	175.392		0.203047	157.863
4.8804	208.105	160.309	148.956	117.787	182.808	199.383	156.726	138.612	149.245	113.541	161.963	106.885	142.804	154.817	182.221	147.128	138.039	164.724	179.5	142.14	81.977	162.661	151.364	192.987	197.249	170.057		0.208121	155.846
4.9995	200.461	153.173	149.823	114.401	188.39	188.704	161.746	132.349	141.086	120.555	171.856	104.352	149.291	144.85	177.51	149.587	133.57	163.848	184.059	143.268	101.192	161.349	150.405	189.881	198.597	161.774		0.2132	155.234
5.1185	203.026	144.559	134.194	120.689	189.257	184.034	163.114	121.195	147.94	130.886	169.966	98.68	133.592	146.326	174.17	163.383	126.687	169.54	195.685	134.752	99.85	149.952	147.466	187.774	203.877	158.704		0.218275	153.819
5.2375	205.841	135.26	144.905	113.905	173.922	187.866	163.275	112.457	140.547	130.203	155.246	97.233	131.323	132.815	177.933	167.459	125.841	178.804	191.401	127.905	103.256	131.554	143.092	166.86	204.527	148.459		0.223349	149.688
5.3566	201.312	145.022	135.619	112.728	185.537	188.71	160.198	101.474	137.951	129.476	149.638	92.977	136.973	132.484	179.024	159.311	124.387	173.92	187.096	131.021	101.691	135.052	146.806	170.67	191.839	148.849		0.228428	148.453
5.4756	202.224	135.143	136.452	102.491	178.743	175.92	157.98	104.32	140.346	135.452	132.73	84.989	139.546	137.767	182.737	163.075	125.742	179.963	195.155	124.591	103.471	134.559	156.491	170.234	179.786	158.224		0.233503	147.62
5.5946	195.336	133.07	123.913	99.048	180.973	171.949	152.27	105.912	128.704	126.794	143.724	82.843	125.724	137.378	178.323	167.107	119.637	178.654	198.493	110.416	92.712	119.239	154.371	169.506	185.473	154.42		0.238578	143.692
5.7137	195.338	143.253	127.293	99.966	178.036	178.041	143.372	117.365	136.913	125.724	136.929	90.357	124.658	142.511	175.068	164.183	125.252	178.574	192.595	121.477	99.615	130.131	154.936	163.194	186.152	147.801		0.243657	145.336
5.8327	201.489	145.966	122.651	102.7	183.179	160.686	144.85	109.093	124.601	120.305	137.764	85.132	127.621	141.737	168.441	172.751	132.692	173.476	190.17	121.092	105.331	126.45	142.894	166.423	191.085	155.633		0.248731	144.393
5.9517	202.063	138.832	121.828	106.7	190.323	155.059	139.448	104.927	120.68	116.597	138.349	86.314	127.238	141.107	167.252	175.382	126.162	175.267	180.112	118.209	103.885	115.409	135.982	153.144	177.141	168.88		0.253806	141.78
6.0708	191.297	142.696	123.015	111.595	181.093	162.623	132.655	114.232	115.296	118.598	119.917	85.105	138.652	129.751	166.574	178.203	135.284	169.93	195.739	113.643	111.617	114.846	144.797	160.307	185.633	168.178		0.258885	142.741
6.1898	188.083	141.072	120.921	118.449	172.578	161.036	123.986	109.636	110.305	119.661	113.465	84.184	135.352	126.677	164.081	172.662	139.198	164.608	188.428	107.713	115.071	115.646	138.17	149.785	180.773	153.624		0.26396	139.045
6.3088	190.476	140.306	113.245	115.668	161.396	149.392	121.753	112.648	108.494	113.564	109.838	83.297	127.86	122.223	172.706	171.691	122.378	169.134	188.919	111.601	112.239	114.042	137.015	141.374	171.072	145.385		0.269034	135.681
6.4279	181.522	138.439	108.088	108.184	163.486	140.333	120.379	124.808	103.042	106.283	105.657	82.49	131.586	121.035	165.075	163.346	131.67	171.548	184.2	112.244	117.535	103.909	128.851	138.405	169.848	143.335		0.274113	133.281
6.5469	176.951	127.444	98.461	106.829	159.514	135.014	116.501	119.66	106.332	101.297	107.786	73.306	131.392	113.514	175.938	164.31	137.937	173.873	179.964	117.31	121.343	97.04	129.45	132.804	164.862	133.339		0.279188	130.853
6.6659	172.54	125.594	99.974	98.23	150.207	139.363	117.625	124.944	95.472	110.578	96.485	63.165	118.431	111.837	170.904	167.43	128.488	168.311	190.206	101.229	119.292	96.773	123.806	122.121	170.718	120.135		0.284263	127.071
6.785	165.492	119.075	98.901	99.06	151.093	133.3	120.773	113.744	99.129	101.887	90.52	68.885	129.642	112.788	170.989	168.048	130.103	167.487	183.523	106.81	112.516	95.188	120.223	120.429	157.808	124.884		0.289341	125.473
6.904	155.843	115.388	103.482	97.266	155.235	117.103	119.162	126.815	95.881	111.235	87.584	72.185	135.211	107.131	166.255	164.58	137.078	177.879	188.57	104.561	118.637	93.819	108.967	117.024	151.167	109.935		0.294416	124.538
7.023	154.86	106.91	107.769	91.994	144.313	116.046	119.194	122.22	98.393	107.58	86.942	70.801	122.123	105.787	164.028	169.312	138.565	179.521	180.595	97.331	124.405	91.393	110.754	121.764	139.398	97.702		0.299491	121.912
7.1421	150.83	104.888	108.418	88.705	133.853	107.187	112.758	107.044	105.023	98.607	87.65	77.997	107.949	105.311	154.898	162.48	136.805	161.381	193.37	94.873	123.064	98.165	104.629	116.347	133.191	92.678		0.30457	118.004
7.2611	143.697	120.023	108.191	94.043	128.287	106.268	108.476	89.851	104.994	94.542	89.952	82.073	107.907	106.018	148.78	147.015	137.17	172.911	200.068	102.633	121.502	89.349	106.818	110.864	129.285	89.939		0.309644	116.948
7.3801	139.522	107.657	102.079	95.224	109.368	89.298	104.775	92.46	91.551	94.078	89.879	89.433	108.713	104.46	135.735	147.234	122.729	179.305	191.294	111.023	114.872	88.818	100.869	104.384	128.462	84.784		0.314719	112.616
7.4992	141.311	97.865	108.266	90.646	101.388	89.801	92.735	102.9	102.209	98.29	84.862	87.079	106.305	97.08	134.062	154.619	125.865	174.684	186.649	109.699	123.812	84.979	101.706	109.258	120.052	73.785		0.319798	111.535
7.6182	129.482	101.559	101.644	96.664	100.967	102.481	91.52	91.786	93.708	101.378	85.059	95.332	98.263	100.119	141.684	146.213	125.456	184.673	177.794	105.478	126.997	75.051	96.548	116.272	102.768	70.781		0.324873	109.988
7.7372	119.369	114.498	105.381	92.795	112.649	86.702	93.974	95.348	84.226	98.319	88.156	90.563	101.568	101.543	138.376	142.415	114.571	186.852	185.534	107.465	116.023	80.363	97.103	103.732	100.355	71.391		0.329947	108.818
7.8563	116.125	106.967	103.622	88.341	106.121	90.542	89.015	87.158	89.462	103.342	87.774	90.855	96.193	104.831	143.133	142.278	111.427	188.386	192.098	111.228	113.531	82.614	98.052	108.967	97.553	70.367		0.335026	108.461
7.9753	110.709	99.407	98.688	82.516	97.96	94.317	87.985	83.937	86.414	107.151	86.958	95.734	87.034	91.949	143.685	139.018	116.152	188.793	187.367	104.27	122.929	78.73	94.247	107.184	93.415	68.796		0.340101	105.975
8.0943	105.241	102.475	111.063	80.558	106.89	97.72	88.044	89.062	81.376	106.556	78.032	98.955	96.659	94.673	132.774	131.254	121.208	186.669	168.393	105.991	121.85	73.199	91.476	100.637	82.977	68.407		0.345176	104.698
8.2134	94.138	103.281	100.82	76.159	104.937	99.359	81.275	91.806	86.921	102.028	88.806	106.869	94.367	89.555	133.801	127.696	113.039	183.612	166.124	111.407	110.366	66.091	92.738	109.003	76.425	67.248		0.350255	102.995
8.3324	96.469	102.666	99.451	80.39	98.568	92.196	77.91	82.453	91.15	104.7	92.018	109.272	89.98	100.627	133.072	113.118	102.417	180.511	186.147	107.244	111.415	66.109	86.206	106.222	80.33	72.145		0.355329	102.415
8.4515	90.208	100.956	95.073	77.195	94.663	87.069	81.558	85.236	79.834	112.712	98.878	106.768	94.078	92.641	123.838	110.751	103.344	183.061	176.25	109.912	114.024	69.711	88.282	98.451	75.495	64.67		0.360408	100.564
8.5705	85.856	101.276	93.945	78.107	93.772	92.6	84.435	80.787	74.764	114.069	97.227	105.742	100.652	87.71	114.513	112.387	111	172.591	172.503	118.901	114.378	69.316	86.018	101.918	69.925	68.564		0.365483	100.114
8.6895	88.178	96.354	99.748	79.391	86.866	86.752	80.293	75.466	70.684	109.219	99.079	111.631	88.784	83.91	119.774	107.039	109.411	169.412	175.283	121.998	104.284	67.79	84.145	96.235	70.321	72.724		0.370558	98.2604
8.8086	89.92	101.492	104.083	71.229	78.802	81.475	79.847	74.634	68.843	103.882	108.028	116.344	96.729	84.314	107.305	101.464	106.789	177.197	168.872	124.285	104.373	73.721	81.682	88.861	77.4	70.086		0.375636	97.756
8.9276	88.96	106.653	96.291	68.707	82.599	77.614	76.062	73.753	70.711	97.054	108.327	109.612	90.507	86.127	109.245	107.232	109.307	167.04	175.249	121.657	106.089	78.935	87.706	97.451	63.765	66.582		0.380711	97.0475
9.0466	85.451	102.201	94.247	74.09	85.755	74.068	73.261	69.418	71.116	103.679	109.323	102.873	89.403	82.085	110.075	97.35	99.574	175.81	177.714	113.813	94.475	80.334	93.978	97.174	65.444	69.306		0.385786	95.8468
9.1657	88.003	100.173	90.312	78.113	86.284	72.719	73.372	72.683	57.205	99.502	104.586	101.862	89.045	86.511	112.815	94.533	98.475	155.858	171.81	119.426	100.76	78.979	86.566	96.364	66.192	79.209		0.390865	94.6676
9.2847	99.966	110.811	91.162	69.822	83.942	73.414	71.262	70.693	66.618	97.292	103.993	104.598	79.168	85.385	113.547	87.044	87.762	147.932	182.856	119.914	96.88	77.616	90.791	92.527	68.044	69.218		0.395939	93.933
9.4037	93.909	99.887	90.369	68.126	85.171	73.621	69.916	70.3	64.483	96.561	103.48	109.933	76.875	83.581	117.968	95.148	81.642	156.244	163.168	118.885	89.444	72.266	96.107	89.055	63.028	79.082		0.401014	92.625
9.5228	93.699	89.986	86.643	64.967	79.428	75.397	73.093	69.874	71.279	109.488	111.568	107.311	76.589	80.956	104.07	100.132	82.17	174.481	168.367	112.665	92.76	82.698	108.826	91.744	65.89	77.254		0.406093	94.2821
9.6418	91.035	80.69	95.802	61.551	79.928	71.826	59.738	76.126	72.558	117.899	112.998	105.989	78.054	81.933	96.534	98.39	89.567	173.172	167.037	124.232	82.565	80.567	100.681	88.898	68.805	73.672		0.411168	93.471
9.7608	91.033	78.227	91.609	67.034	81.794	72.948	58.886	78.886	78.633	110.728	98.535	106.598	85.299	78.395	101.329	92.131	86.244	172.539	166.333	129.821	88.518	77.655	109.635	87.764	66.978	68.615		0.416242	93.3141
9.8799	92.213	73.615	91.738	63.257	79.107	73.736	63.868	67.052	72.441	102.604	96.448	109.49	83.329	81.26	103.431	93.404	70.648	172.74	175.262	131.647	87.622	86.999	95.463	87.756	66.891	74.382		0.421321	92.1693
9.9989	92.309	67.354	95.037	58.857	77.554	79.923	65.531	66.579	73.973	110.907	100.784	105.757	79.513	75.089	98.225	91.829	69.575	179.131	177.576	118.403	86.444	98.981	97.201	93.167	66.213	73.809		0.426396	92.297
10.1179	96.419	68.995	88.208	66.069	69.116	70.565	62.863	59.322	71.515	110.133	92.964	113.512	71.755	77.19	99.993	82.09	75.243	185.249	178.217	129.62	85.064	91.918	98.098	78.174	65.103	78.435		0.431471	90.9935
10.237	83.78	73.455	90.034	68.886	70.83	62.506	64.081	61.205	71.768	104.044	91.024	102.637	76.334	82.218	89.8	76.296	72.551	186.614	182.115	125.049	90.996	89.409	100.505	77.37	65.484	72.947		0.43655	89.6899
10.356	90.685	61.989	82.996	66.537	74.267	58.974	60.526	58.435	60.259	110.911	98.934	105.437	74.721	80.049	90.04	78.366	67.448	180.478	187.567	115.084	80.023	79.58	90.357	76.565	61.767	74.142		0.441624	87.1591
10.475	89.26	57.849	75.389	63.878	74.71	57.295	61.828	62.179	57.894	107.041	98.833	105.691	69.871	79.141	92.401	79.869	69.452	167.326	183.183	121.958	81.117	77.681	83.048	91.549	62.282	68.61		0.446699	86.1283
10.5941	85.647	63.836	71.839	58.817	76.211	59.619	57.552	65.843	59.267	106.456	98.359	106.824	68.562	77.851	96.314	71.285	74.644	164.637	176.133	120.182	81.569	78.051	92.284	73.917	63.789	56.245		0.451778	84.8359
10.7131	79.484	56.378	71.045	60.462	88.153	50.465	52.405	62.105	58.786	110.054	97.149	118.157	74.284	78.887	89.575	69.958	67.847	160.179	178.409	109.098	80.294	82.356	87.442	67.789	66.265	63.375		0.456853	83.8616
10.8321	80.647	48.625	77.934	56.584	85.89	50.401	51.664	58.314	61.754	106.282	101.965	109.785	72.659	79.391	85.993	69.609	73.836	146.998	177.197	114.143	80.364	84.391	81.766	67.323	71.6	72.767		0.461927	83.3801
10.9512	79.544	49.059	82.78	55.497	87.499	53.359	49.915	62.586	64.441	107.357	104.38	110.307	64.734	77.949	80.363	69.676	74.39	138.536	171.258	105.609	71.998	80.189	77.507	71.519	64.601	70.193		0.467006	81.7402
11.0702	81.852	49.611	76.288	60.095	83.593	52.078	47.27	59.231	65.777	106.796	101.165	114.689	65.156	77.681	80.306	67.983	74.208	132.441	162.526	100.289	69.645	76.091	77.313	74.082	66.073	69.895		0.472081	80.4667
11.1892	67.812	59.445	73.484	63.919	67.511	43.411	47.203	60.847	61.708	102.678	106.575	111.023	67.385	79.508	78.121	70.527	73.197	126.637	159.227	101.955	74.375	76.575	68.906	78.935	65.766	72.776		0.477155	79.2118
11.3083	71.779	51.908	80.477	68.416	72.722	51.93	42.576	52.578	60.227	106.49	110.302	109.223	66.732	83.97	70.76	73.955	80.934	118.795	163.334	97.004	78.571	80.79	65.83	80.009	60.137	67.28		0.482234	79.4896
11.4273	76.741	47.21	77.724	64.087	67.475	48.358	35.827	49.448	64.82	106.387	104.897	105.816	79.08	85.412	69.594	70.045	81.863	118.596	159.197	93.819	83.692	68.316	74.508	80.022	62.378	63.285		0.487309	78.4076
11.5463	71.702	50.396	75.745	70.34	60.241	48.773	35.392	43.845	60.101	90.391	108.119	96.555	73.391	77.45	67.835	70.014	89.153	118.084	154.905	102.92	77.708	68.163	76.099	76.455	61.622	57.2		0.492384	76.2538
11.6654	72.682	48.287	75.771	72.044	72.926	40.657	36.37	42.156	59.412	92.809	112.991	95.645	72.424	73.628	65.428	76.584	88.68	119.039	161.652	103.177	70.552	76.742	72.897	74.297	69.5	61.148		0.497463	77.2115
11.7844	68.991	53.778	63.688	67.035	63.613	41.31	35.28	41.071	57.39	90.581	111.929	105.054	71.983	84.151	67.717	69.842	85.15	116.852	159.309	96.542	76.072	75.287	63.823	64.125	65.44	65.276		0.502537	75.4342
11.9035	65.97	48.872	61.649	74.939	69.531	41.432	32.523	43.862	63.107	96.264	112.529	105.194	77.864	83.308	65.467	72.523	79.198	111.799	153.484	100.258	79.288	78.511	57.725	68.441	69.716	55.756		0.507616	75.7388
12.0225	62.159	44.331	70.042	69.42	73.258	37.169	25.763	37.903	62.829	88.384	104.94	94.964	82.143	78.763	71.809	74.318	80.976	129.231	138.371	103.461	75.751	79.35	56.024	79.532	81.759	57.492		0.512691	75.3901
12.1415	58.458	46.036	64.003	68.33	68.654	34.501	27.184	35.317	60.817	90.496	91.736	99.572	81.104	74.297	75.389	74.526	75.034	148.005	137.501	98.7	87.455	64.745	55.107	71.697	71.359	69.211		0.517766	74.2013
12.2606	62.997	45.02	62.077	78.195	69.838	38.637	24.388	30.174	54.064	90.878	97.282	97.623	83.808	68.291	69.983	72.383	77.903	147.134	137.805	102.519	84.979	58.016	63.483	71.546	71.75	68.32		0.522845	74.1959
12.3796	71.226	42.212	65.108	74.325	66.46	38.64	24.012	31.24	55.862	86.241	99.527	88.162	81.311	64.978	69.243	71.845	84.785	140.106	137.606	89.289	82.724	67.904	64.267	70.435	68.49	63.957		0.527919	73.0752
12.4986	70.339	40.265	53.509	70.402	63.452	32.242	21.186	33.128	55.027	97.033	103.087	76.661	78.879	69.516	76.352	74.729	77.507	137.555	127.561	100.85	73.914	64.43	66.361	68.999	67.497	75.263		0.532994	72.144
12.6177	63.714	45.204	47.033	75.93	60.781	32.414	20.36	28.657	59.943	88.616	104.094	84.793	79.97	66.854	74.94	70.795	78.92	135.067	111.692	89.683	74.811	75.114	70.26	67.378	71.129	70.725		0.538073	71.1107
12.7367	60.759	40.657	58.464	71.22	60.154	30.702	22.768	29.682	47.515	86.469	97.379	75.538	75.335	71.624	65.467	70.029	77.119	130.051	104.623	91.334	79.546	71.229	75.291	56.802	66.012	67.964		0.543147	68.6051
12.8557	60.62	40.441	58.943	67.607	62.229	35.201	21.896	22.315	56.556	87.91	91.404	87.988	74.408	77.873	73.809	73.259	71.995	118.264	96.992	82.635	74.134	70.562	67.709	54.054	64.815	66.542		0.548222	67.6985
12.9748	54.666	39.124	55.638	60.248	65.762	33.083	23.537	23.71	54.059	102.091	99.777	74.381	79.688	70.789	74.54	70.155	70.284	126.074	93.007	89.066	77.975	65.927	65.097	66.334	62.046	70.663		0.553301	67.9893
13.0938	51.296	30.848	59.531	73.925	63.765	33.244	24.481	22.256	47.393	98.58	107.492	71.601	74.322	70.181	74.842	71.195	65.146	126.959	95.87	94.477	71.792	71.664	64.74	68.617	66.221	73.557		0.558376	68.2306
13.2128	42.801	31.773	58.714	66.961	64.018	32.087	20.849	24.749	44.53	93.842	110.362	79.811	70.466	79.496	72.769	73.854	62.347	122.178	95.662	96.077	63.243	64.177	70.641	69.458	61.987	66.031		0.56345	66.8801
13.3319	49.562	34.772	55.767	65.378	68.645	30.211	22.659	28.323	45.471	90.64	108.062	68.985	69.028	84.21	65.563	72.313	62.976	120.629	92.608	89.433	61.283	64.664	78.173	58.534	66.525	71.753		0.568529	66.391
13.4509	46.124	34.118	51.83	76.211	65.676	30.983	21.355	24.315	51.528	93.036	113.483	71.182	72.191	82.263	57.489	77.14	61.605	123.031	98.126	88.601	63.258	65.894	70.539	57.49	62.303	75.366		0.573604	66.736
13.5699	41.559	36.722	54.493	64.676	65.229	34.007	21.301	24.393	40.448	94.435	107.835	81.772	76.578	80.005	66.725	67.868	70.66	108.852	85.907	87.335	60.105	66.512	65.263	59.74	65.496	71.024		0.578679	65.3438
13.689	38.596	34.692	52.161	69.345	65.296	32.582	19.242	22.686	46.989	105.059	99.679	68.563	67.548	74.514	62.084	56.147	76.487	85.72	90.442	86.465	64.879	71.551	71.951	66.109	66.248	68.082		0.583758	63.966
13.808	39.181	30.844	56.415	68.846	68.557	33.734	23.581	20.275	48.134	101.071	100.588	71.789	67.753	71.854	58.675	57.569	73.801	94.839	84.629	90.393	64.463	70.957	69.601	68.364	65.097	63.611		0.588832	64.0239
13.927	43.741	32.054	50.37	67.317	75.973	34.684	20.454	19.461	38.556	97.911	98.042	80.964	73.449	71.163	64.713	57.274	80.951	92.291	87.486	92.279	60.01	76.145	64.563	66.854	62.732	67.441		0.593907	64.4953
14.0461	34.083	31.02	50.091	66.383	75.015	26.913	19.747	18.922	49.017	97.33	101.343	76.027	69.274	75.378	61.879	61.222	75.419	81.176	92.73	88.333	61.568	70.708	66.53	67.281	56.841	72.491		0.598986	63.3354
14.1651	34.298	30.952	55.051	72.642	76.647	24.703	18.14	17.887	49.653	90.136	103.21	81.542	72.776	70.616	63.32	51.971	78.7	69.107	90.905	94.58	65.121	78.47	70.132	67.899	57.016	71.074		0.604061	63.7134
14.2841	37.214	31.086	52.417	73.906	70.81	25.533	19.163	18.631	51.645	100.247	86.465	75.806	73.727	74.522	62.485	54.648	76.95	69.005	77.775	93.58	62.425	76.396	70.385	67.614	63.667	64.214		0.609135	62.7045
14.4032	39.49	33.485	53.908	61.542	68.214	29.9	21.838	21.427	50.021	79.448	93.396	72.668	78.107	70.306	56.026	55.093	80.853	64.694	81.551	80.152	61.069	72.257	70.363	69.284	56.074	64.202		0.614214	60.9757
14.5222	38.899	28.454	45.214	70.124	74.733	27.794	20.99	16.842	49.71	77.414	94.611	80.975	74.37	80.87	57.027	56.182	89.185	69.143	76.108	77.803	66.97	76.273	62.657	73.287	58.547	75.827		0.619289	62.308
14.6412	36.089	29.885	53.734	70	77.536	28.388	18.656	16.766	43.54	78.922	90.939	78.535	70.258	81.144	59.293	53.979	77.889	58.79	70.446	81.758	73.041	71.693	64.927	65.646	58.352	76.618		0.624364	61.0317
14.7603	35.623	25.509	50.716	65.606	76.112	29.527	16.121	17.149	49.974	89.321	88.292	77.908	76.885	71.174	54.192	48.379	81.852	53.865	79.889	76.871	73.65	70.719	77.224	69.463	65.965	66.182		0.629442	61.0834
14.8793	36.43	25.282	43.748	63.149	74.233	24.394	15.041	17.975	56.349	90.068	83.353	74.031	69.979	67.564	57.185	49.31	79.662	58.931	75.944	77.307	74.321	73.242	67.457	63.181	59.373	65.786		0.634517	59.3575
14.9984	38.959	27.581	45.253	62.306	83.421	26.324	16.834	15.193	54.654	95.329	86.447	76.538	63.468	78.703	59.53	47.601	74.062	63.451	78.303	77.422	64.471	75.682	61.98	70.483	60.547	63.954		0.639596	60.3268
15.1174	32.886	27.055	42.355	76.575	80.173	29.822	16.038	14.996	54.88	98.854	80.766	82.751	54.281	76.949	57.574	50.288	61.781	56.569	76.131	72.82	67.631	79.16	63.097	62.599	55.097	65.749		0.644671	59.1107
15.2364	33.665	29.057	44.885	74.069	66.534	29.362	14.645	16.724	53.003	100.387	83.874	79.835	62.051	70.688	59.131	53.189	63.832	62.678	78.333	76.998	72.157	73.488	70.032	60.409	56.658	62.184		0.649745	59.5334
15.3555	35.783	31.945	46.506	78.283	70.17	27.983	14.43	20.413	53.305	96.491	86.142	70.965	64.386	61.416	51.834	52.07	67.765	71.259	82.238	67.251	76.306	78.125	60.922	69.079	55.971	67.514		0.654824	59.9443
15.4745	33.862	30.66	49.683	76.149	69.115	23.008	15.996	24.18	52.73	100.976	90.475	73.465	60.416	73.521	54.941	49.148	60.656	62.181	73.001	65.802	64.55	76.849	61.899	71.175	54.625	61.673		0.659899	58.8745
15.5935	38.884	29.939	49.387	80.165	70.256	22.735	14.991	16.772	46.424	107.025	87.776	77.718	66.113	64.499	54.167	42.706	74.994	54.882	71.002	65.928	63.214	86.783	66.634	70.035	62.73	62.305		0.664974	59.5409
15.7126	42.144	29.567	42.257	82.193	62.933	24.045	15.018	15.52	53.593	103.879	82.711	82.084	66.726	66.332	51.341	46.748	70.929	59.802	76.682	61.003	61.832	80.366	60.692	66.86	66.636	70.432		0.670053	59.3202
15.8316	40.44	35.384	43.001	81.815	60.907	25.85	15.443	17.653	49.099	97.888	92.787	80.166	71.554	66.373	53.259	43.136	68.624	55.146	71.855	61.012	66.226	76.35	62.383	68.292	65.379	68.337		0.675127	59.1677
15.9506	35.312	32.931	41.904	80.093	56.288	23.705	13.116	15.576	53.134	96.847	85.847	73.759	69.828	62.861	55.576	49.553	63.197	59.346	75.537	56.511	68.432	73.863	65.459	64.249	56.809	59.372		0.680202	57.2733
16.0697	34.909	34.361	42.432	79.017	67.383	22.758	17.231	13.429	47.313	93.032	87.72	75.638	69.02	71.903	62.48	47.805	57.072	55.394	76.963	58.98	72.799	73.048	61.939	69.856	65.464	60.636		0.685281	58.407
16.1887	38.865	32.099	45.186	76.391	56.678	23.309	14.093	15.022	48.017	94.303	95.104	79.537	65.835	64.798	61.195	42.272	61.956	64.019	71.704	60.488	68.902	75.064	59.415	72.032	60.524	62.428		0.690356	58.0475
16.3077	37.467	38.298	44.968	76.44	68.671	24.038	13.834	14.374	44.363	98.28	83.967	78.936	65.722	68.329	60.624	40.654	72.381	66.513	76.659	63.783	75.207	75.15	65.305	70.52	63.352	54.82		0.69543	59.3329
16.4268	36.118	30.286	47.909	76.004	62.334	20.892	15.645	19.007	49.201	93.136	83.846	81.04	73.484	73.04	60.331	45.739	70.342	62.857	77.331	65.153	74.027	78.647	64.605	64.763	69.119	52.072		0.700509	59.4972
16.5458	36.66	33.279	45.289	74.769	54.262	21.599	14.925	15.791	46.319	80.16	80.992	81.397	67.741	64.152	57.664	56.495	69.98	59.341	83.378	57.937	75.668	75.204	55.935	73.038	67.536	54.99		0.705584	57.8654
16.6648	33.117	33.527	46.553	71.579	55.442	21.789	15.55	14.403	48.188	87.766	80.561	80.129	66.84	60.742	66.675	53.617	71.289	53.067	80.623	58.978	71.121	65.211	53.631	79.5	59.557	55.689		0.710659	57.1209
16.7839	42.018	35.938	49.702	70.155	51.688	23.199	16.39	14.109	42.445	72.846	81.467	74.28	65.591	69.028	60.237	48.117	73.638	54.202	79.482	64.057	65.253	68.293	58.841	82.228	61.745	53.691		0.715737	56.8708
16.9029	39.759	36.364	49.088	71.116	53.221	27.457	16.486	16.687	42.6	76.009	89.308	70.299	68.299	66.373	60.902	48.997	62.252	63.734	69.781	70.568	66.061	63.281	50.593	80.782	71.768	55.368		0.720812	57.1982
17.0219	32.797	32.707	46.569	72.256	49.107	27.309	20.521	14.156	49.161	77.334	83.789	78.928	67.86	70.861	64.374	49.589	58.522	66.627	77.889	69.682	68.435	68.366	58.315	75.415	67.481	51.949		0.725887	57.6923
17.141	37.923	35.143	47.998	64.378	51.013	28.443	19.964	14.262	42.832	80.424	83.442	71.585	64.762	66.321	63.37	47.498	57.333	76.44	83.548	73.898	65.275	69.77	58.541	68.087	60.983	52.613		0.730966	57.1479
17.26	38.289	33.952	50.915	66.541	54.946	30.247	14.236	14.385	41.199	75.845	90.523	69.189	60.874	69.503	71.532	47.888	60.072	74.095	72.749	73.298	69.02	61.894	58.284	71.617	65.031	44.887		0.73604	56.962
17.379	42.572	31.756	51.41	62.362	55.432	32.969	16.173	17.93	37.492	72.051	79.315	65.052	58.76	65.748	69.141	47.051	52.195	67.324	83.372	78.17	65.925	61.439	51.904	71.068	59.773	44.463		0.741115	55.4172
17.4981	40.639	38.796	48.082	60.602	54.461	34.516	16.295	19.525	43.511	72.688	85.267	63.228	58.23	63.214	63.641	51.402	52.319	73.895	88.184	77.842	58.351	59.737	53.872	63.064	59.321	41.362		0.746194	55.4632
17.6171	42.624	39.088	48.006	64.375	56.799	31.564	14.94	17.801	41.805	79.346	91.377	73.4	57.915	68.893	70.775	53.484	56.125	72.298	84.513	81.267	67.313	60.831	58.963	64.005	55.985	39.359		0.751269	57.4173
17.7361	39.574	31.756	54.579	62.933	58.24	35.637	14.597	19.505	46.127	74.164	83.993	69.776	60.215	64.903	68.821	51.939	54.909	67.243	81.637	75.568	64.123	56.245	55.193	69.952	54.46	43.693		0.756343	56.1455
17.8552	37	32.75	48.989	67.723	52.735	31.3	16.072	19.017	39.992	70.14	92.941	66.465	61.826	72.226	61.26	47.85	46.447	72.35	90.179	77.483	58.9	46.309	48.222	67.46	49.601	37.547		0.761422	54.3378
17.9742	41.775	36.432	49.357	66.364	63.548	28.822	11.516	21.706	38.923	76.942	84.483	70.157	53.154	75.851	64.587	50.987	52.341	61.786	95.765	81.771	61.663	46.143	48.114	63.656	58.487	32.36		0.766497	55.2573
18.0932	37.193	33.482	48.023	63.94	59.106	28.896	14.978	16.842	42.179	77.243	85.852	68.662	52.582	72.32	69.185	57.094	53.148	63.222	85.588	74.279	60.353	41.89	47.36	60.582	55.868	25.453		0.771572	53.6662
18.2123	33.436	33.102	51.39	63.24	53.923	39.652	14.92	20.135	41.686	76.143	87.643	72.7	54.155	74.539	66.851	52.738	52.317	59.259	79.153	76.486	57.483	39.04	50.04	54.76	48.002	26.686		0.776651	53.0569
18.3313	37.311	29.435	50.273	59.799	53.992	35.213	13.825	17.757	47.108	79.979	88.164	72.733	48.117	81.562	63.303	49.929	60.135	61.858	86.042	76.784	60.99	40.294	44.407	47.678	51.63	21.091		0.781725	53.0542
18.4504	41.033	34.494	52.394	64.695	54.489	37.983	16.821	15.803	49.601	83.664	91.654	67.866	48.551	62.782	65.249	59.164	56.859	58.751	78.455	76.833	62.54	37.959	38.963	45.117	46.191	17.039		0.786804	52.4981
18.5694	44.387	32.45	42.123	59.212	51.484	43.373	16	17.444	43.024	80.916	89.743	61.264	48.292	76.136	65.749	60.534	54.42	56.628	81.805	75.839	59.911	35.166	35.155	41.986	36.251	18.969		0.791879	51.087
18.6884	39.72	31.375	50.831	61.02	52.964	42.272	14.397	17.933	42.88	82.815	84.623	65.538	46.791	77.481	64.604	55.941	57.889	57.216	80.693	80.87	65.014	26.424	27.221	41.402	34.191	13.327		0.796953	50.5935
18.8075	41.039	34.857	52.204	58.686	52.866	41.481	16.594	20.308	43.18	85.59	89.203	65.093	36.825	76.296	74.149	67.636	67.884	57.428	71.585	88.687	59.416	27.719	27.194	41.582	28.476	13.253		0.802032	51.5089
18.9265	43.311	29.546	51.718	64.241	49.677	42.533	19.29	17.725	39.717	84.917	85.38	64.396	32.529	74.16	64.039	66.258	57.436	55.203	77.873	73.958	55.959	24.192	24.611	37.835	25.245	10.855		0.807107	48.9463
19.0455	43.296	29.201	44.835	65.324	42.992	47.16	16.277	21.94	43.228	75.576	86.726	68.532	31.34	73.121	77.089	58.386	58.375	52.941	75.415	77.122	53.22	13.788	25.599	32.609	23.819	7.631		0.812182	47.9055
19.1646	38.763	32.876	52.023	65.821	42.403	50.362	14.557	18.427	42.674	80.279	85.056	71.011	23.041	76.543	64.316	59.152	55.42	50.168	79.494	73.366	46.617	12.831	24.412	26.332	14.816	8.172		0.817261	46.4974
19.2836	40.293	33.128	54.029	66.425	44.12	45.979	21.065	17.644	40.045	82.607	81.217	69.018	16.08	82.709	71.936	67.228	58.678	54.006	66.608	73.029	43.895	13.455	20.218	21.993	15.178	8.916		0.822335	46.5192
19.4026	36.72	36.094	57.364	69.627	46.204	49.412	16.416	21.151	42.961	81.458	89.091	74.46	9.368	71.706	68.951	70.784	53.049	63.36	64.051	70.053	36.081	15.516	15.796	20.185	12.483	4.128		0.82741	46.018
19.5217	36.05	29.253	58.198	70.184	46.704	51.366	15.141	21.943	37.937	82.218	84.707	77.065	10.205	64.626	66.234	65.564	55.669	67.478	71.253	68.55	28.288	10.66	15.731	15.804	10.611	4.857		0.832489	44.8575
19.6407	39.077	33.317	52.699	70.892	45.421	51.817	15.286	19.07	35.212	85.345	79.799	79.445	7.051	60.776	62.782	64.603	52.227	63.488	73.57	72.024	27.885	11.672	11.562	14.802	9.768	6.135		0.837564	44.0663
19.7597	33.471	36.487	59.168	69.83	41.357	59.795	15.054	18.849	35.207	79.19	74.188	78.904	4.963	65.574	65.362	58.21	59.257	63.749	67.055	69.516	18.741	10.31	14.209	12.359	9.719	4.834		0.842638	43.283
19.8788	34.942	36.005	58.712	70.561	45.944	53.106	16.334	20.087	37.795	77.499	74.745	75.178	5.915	56.126	63.328	68.994	58.358	62.086	66.565	67.411	19.375	7.265	10.956	9.293	5.445	3.446		0.847717	42.5181
19.9978	44.145	34.383	54.251	74.037	45.766	63.222	20.691	23.219	44.378	88.081	69.867	81.654	6.028	57.327	60.138	72.174	62.458	53.698	58.4	67.685	15.35	7.309	9.493	12.066	7.418	4.127		0.852792	43.7448
20.1168	37.604	34.306	63.007	69.25	39.67	61.312	14.221	19.209	45.532	85.649	68.074	71.952	3.662	52.87	64.254	69.481	62.335	50.795	61.065	68.893	11.438	8.434	9.615	8.329	6.193	3.067		0.857867	41.9314
20.2359	44.462	35.818	61.174	62.093	41.635	60.913	17.593	20.422	44.271	82.44	74.888	69.68	4.503	48.497	62.684	60.397	62.063	49.644	52.783	67.921	10.534	6.247	9.87	6.899	5.672	3.405		0.862946	41.0195
20.3549	45.251	33.883	58.535	68.475	40.904	60.311	17.064	18.269	47.764	74.901	72.896	69.302	3.933	52.222	64.26	62.184	59.31	47.558	48.154	53.91	8.194	5.552	6.78	6.618	4.152	2.513		0.86802	39.7267
20.4739	40.325	33.948	53.955	66.085	36.634	61.519	21.834	23.009	46.342	69.37	70.564	72.981	1.746	41.449	65.992	64.603	61.367	44.968	48.191	53.714	7.987	3.622	5.091	6.064	2.678	2.802		0.873095	38.7246
20.593	46.706	33.891	59.258	64.741	37.838	53.698	21.571	24.262	49.866	72.58	69.833	63.677	1.919	41.489	64.716	69.465	66.742	38.451	36.204	51.33	9.361	3.238	6.01	4.836	3.882	1.389		0.878174	38.3443
20.712	42.006	39.755	52.631	51.731	40.588	53.486	23.415	19.383	46.021	71.926	71.286	65.276	1.768	31.052	60.644	65.812	71.244	35.441	25.317	52.167	5.127	5.663	5.61	5.356	4.726	1.326		0.883248	36.4907
20.831	42.61	34.874	50.595	46.342	35.898	54.29	19.83	21.014	50.771	78.996	70.379	72.809	1.738	26.675	68.078	54.15	64.926	26.341	31.188	43.521	3.259	4.199	6.101	3.881	2.952	1.937		0.888323	35.2828
20.9501	37.889	35.399	52.128	51.106	30.25	49.847	23.904	25.758	47.918	77.047	71.365	64.007	1.711	24.441	71.845	52.992	60.105	26.375	27.467	35.008	4.837	3.367	4.295	2.84	2.174	2.032		0.893402	34.081
21.0691	41.965	33.534	55.766	42.763	28.604	51.571	23.519	24.766	51.494	70.16	68.938	58.909	2.083	19.413	61.671	51.015	56.925	27.29	24.46	26.925	2.114	3.987	4.113	2.996	4.182	0.957		0.898477	32.3123
21.1881	35.077	35.817	48.893	45.145	24.403	53.387	21.559	19.718	46.005	70.211	71.871	61.958	1.985	12.342	60.186	62.303	49.99	24.389	16.635	23.033	2.687	1.25	2.48	4.283	2.76	1.024		0.903551	30.7458
21.3072	36.377	38.118	51.496	44.884	19.742	53.091	25.695	25.36	52.648	68.35	72.802	55.412	0.696	10.44	60.29	64.354	59.086	21.198	16.442	21.624	2.974	2.845	3.439	3.418	2.455	0.966		0.90863	31.3155
21.4262	31.755	39.46	52.177	43.012	15.037	52.022	29.531	26.002	53.279	61.466	71.238	53.418	0.381	8.454	60.769	56.794	59.639	17.412	14.272	15.351	3.528	1.903	4.238	2.204	4.162	1.598		0.913705	29.9655
21.5452	28.945	41.347	51.707	40.033	14.079	44.844	25.985	23.851	43.509	58.725	75.982	52.594	1.072	7.176	60.823	68.198	58.899	13.095	12.764	13.638	2.212	1.828	2.43	2.43	3.63	1.499		0.91878	28.896
21.6643	36.188	42.939	55.897	40.102	9.538	46.573	31.825	32.98	46.928	52.574	69.227	55.328	1.209	6.072	60.869	61.982	58.612	12.15	11.671	12.138	2.451	2.652	1.816	2.347	1.756	1.104		0.923859	29.1126
21.7833	33.38	47.718	54.717	35.996	8.755	47.289	31.266	32.027	48.38	53.242	71.014	55.785	0.697	5.335	60.979	55.267	59.565	8.663	11.976	8.397	1.716	2.25	2.359	1.561	2.138	0.922		0.928933	28.5152
21.9024	31.563	46.344	51.279	28.592	7.136	47.314	40.295	28.592	52.59	56.928	60.574	51.73	0.864	3.93	68.157	64.747	55.226	6.821	9.127	10.029	2.113	2.274	1.593	2.649	1.55	0.973		0.934012	28.1919
22.0214	31.308	43.056	55.446	28.255	6.521	47.655	44.171	39.51	45.15	54.666	66.078	51.698	0.734	3.329	55.103	69.519	54.796	7.53	7.427	8.22	0.948	1.841	1.344	1.632	2.068	0.556		0.939087	28.0216
22.1404	28.735	45.969	44.792	27.563	4.814	45.908	44.168	39.364	44.407	53.804	61.895	41.619	0.27	1.887	58.07	62.585	46.353	7.341	6.91	8.347	1.187	1.143	1.198	0.879	0.952	0.274		0.944162	26.1705
22.2595	24.38	40.702	54.452	27.137	2.199	40.515	45.505	40.325	48.295	45.842	56.233	42.356	0.461	1.757	53.593	63.259	42.493	5.608	5.553	5.253	0.897	1.185	2.228	1.066	1.308	0.338		0.949241	25.1131
22.3785	29.827	46.568	50.726	20.178	2.803	34.709	53.957	43.672	42.012	47.936	56.334	42.713	1.708	3.629	59.482	60.342	36.636	4.52	3.061	6.396	2.632	2.544	1.785	2.534	1.297	0.394		0.954315	25.3229
22.4975	24.045	37.147	55.915	14.152	3.566	36.564	51.482	39.02	43.437	39.55	47.935	35.061	0.819	3.852	49.161	60.557	32.672	5.35	4.097	5.398	1.679	1.027	1.273	1.488	1.114	0.913		0.95939	22.9721
22.6166	25.706	39.65	56.28	12.931	3.543	35.409	55.07	47.896	37.187	35.433	41.119	37.68	0.301	2.846	51.158	63.022	30.717	3.559	3.633	3.657	1.713	1.412	1.596	1.869	0.748	0.631		0.964469	22.8756
22.7356	20.591	34.564	54.954	8.178	2.309	33.205	50.276	48.4	38.41	27.314	40.589	30.044	1.036	1.571	53.035	63.621	22.161	1.461	2.829	4.586	2.835	1.787	0.75	0.83	0.731	0.708		0.969543	21.0298
22.8546	19.911	35.657	47.051	6.648	2.988	26.229	49.82	47.014	31.92	30.61	40.641	28.515	1.027	1.268	47.449	53.754	20.434	2.077	3.434	2.51	1.704	1.322	1.344	2.317	0.533	0.91		0.974618	19.5033
22.9737	19.073	35.234	47.069	6.782	2.628	21.549	48.895	50.04	32.741	28.764	27.77	19.305	0.51	0.925	42.499	60.984	15.661	1.813	2.596	3.512	1.133	1.046	0.468	1.492	0.904	0.616		0.979697	18.2311
23.0927	19.553	32.193	44.594	7.624	3.681	22.119	49.115	46.88	30.727	23.66	26.844	20.404	0.179	0.451	36.861	57.717	13.416	1.746	3.699	3.045	0.031	0.836	0.963	0.873	0.193	0.356		0.984772	17.2215
23.2117	17.461	28.896	53.233	4.483	3.844	16.033	44.766	52.862	32.056	21.998	21.553	19.504	0.362	0.517	34.816	47.366	9.204	2.083	2.53	2.743	0.938	1.207	0.752	0.544	1.037	0.689		0.989846	16.2107
23.3308	14.299	28.123	42.091	3.213	3.67	12.819	40.436	52.142	34.326	19.651	21.518	17.306	0.723	0.629	21.767	45.214	4.829	1.55	1.939	2.475	0.947	1.091	0.962	1.933	0.427	0.426		0.994925	14.4041
23.4498	15.291	23.529	36.881	3.134	4.003	8.323	48.649	56.409	27.626	12.96	17.793	13.597	0.578	0.356	16.465	54.232	3.712	2.134	1.925	1.955	1.422	0.512	0.208	1.618	0.446	0.543		1	13.627

## Sheet: Image1
X0	Y0	Y1	Y2	Y3	Y4	Y5	Y6	Y7	Y8	Y9	Y10	Y11	Y12	Y13	Y14	Y15	Y16	Y17	Y18	Y19	Y20	Y21	Y22	Y23	Y24	Y25	Y26	Y27	Y28	Y29	Y30		Ap-basal	Avg intensity
0	60.235	74.513	49.384	49.1648	41.9413	71.9748	73.535	78.065	68.741	55.132	56.786	41.152	47.3773	56.4474	53.6796	49.477	51.907	49.3263	57.6795	66.7889	55.6102	38.379	43.892	56.2128	62.2259	55.2265	64.455	66.5611	58.167	62.7021	55.5556		0	57.1708
0.119	61.09	68.822	47.987	46.8926	42.8308	80.6281	79.469	77.002	67.068	57.614	58.368	45.7161	43.4016	63.3694	48.0177	54.507	56.443	53.6038	66.2118	62.2826	60.9272	42.983	44.3101	56.6398	69.5764	46.5372	68.051	69.731	60.086	71.1957	55.8144		0.0054629	58.9412
0.2381	66.646	74.387	50.497	46.3109	49.2699	80.4972	79.533	77.348	74.62	62.345	52.547	42.8454	46.4745	63.143	49.3098	51.834	60.915	55.5751	64.8425	60.6063	61.4255	39.371	47.5146	58.3685	63.8989	51.3368	64.932	72.6568	57.709	67.1342	54.6796		0.0109304	59.6314
0.3571	73.279	85.285	52.641	45.7394	53.5661	84.4144	75.129	79.507	70.516	64.497	48.399	40.1623	49.3238	68.0721	58.9712	50.247	52.884	47.5955	67.5736	60.9455	65.1961	39.553	48.0694	66.4274	64.792	47.5858	64.982	75.2353	58.152	69.236	58.5523		0.0163933	60.8558
0.4761	72.258	74.169	61.982	50.5974	51.7688	86.3102	86.853	78.013	75.069	66.449	50.574	40.3574	58.865	66.86	59.5731	44.415	50.96	45.5756	60.0335	61.6665	65.6885	41.263	44.4877	67.1595	69.3064	50.1751	66.538	77.4936	61.106	72.2327	62.4079		0.0218562	61.9422
0.5952	74.297	72.944	55.691	54.1214	55.6287	86.5995	97.384	86.555	76.116	65.861	52.758	46.8253	56.4939	72.819	64.3333	51.817	55.365	48.1477	59.5346	65.7461	64.3172	45.833	53.896	67.5538	69.1206	59.7448	67.266	69.9986	59.74	70.6751	63.7504		0.0273237	64.2236
0.7142	81.075	77.609	52.875	58.7352	47.9439	77.8033	96.534	90.746	73.791	65.331	52.598	41.1342	58.2834	83.669	68.1274	56.849	55.936	49.5405	63.3265	62.7171	68.9388	42.312	58.0273	70.7179	73.0923	61.0502	66.663	66.2581	51.781	71.805	76.5573		0.0327866	65.2202
0.8332	80.451	83.449	53.738	60.0152	57.0382	76.7297	86.657	91.434	76.027	75.881	49.668	43.5064	65.0703	80.38	64.9157	55.916	59.181	50.3601	61.8501	59.6476	69.7459	50.797	55.0132	74.3021	74.914	65.7521	61.668	66.4283	56.611	78.6669	81.7835		0.0382495	66.6967
0.9523	81.49	74.051	59.47	59.0999	62.7372	75.8744	83.699	94.268	74.992	74.996	53.069	47.1546	69.3392	76.7397	72.7981	58.1	56.814	54.839	60.7364	64.8446	70.7977	46.563	54.7232	69.9518	80.656	70.2774	65.278	67.2317	52.399	80.7774	80.4127		0.043717	67.5542
1.0713	84.253	74.644	59.005	53.3181	62.8984	68.9828	91.596	90.802	78.914	73.514	58.617	53.348	69.6395	78.0121	72.8489	57.32	58.846	60.1681	65.6046	67.9528	77.5414	45.69	68.2879	86.5907	80.2192	67.5303	62.493	65.7938	60.698	89.2674	88.0829		0.0491799	70.08
1.1903	90.237	77.327	61.715	52.0491	81.1688	65.7103	103.797	90.723	81.845	70.167	62.65	57.3018	90.2114	82.0696	72.8507	65.025	66.051	58.367	70.1197	63.9391	73.0532	48.561	69.0575	93.5701	85.7818	72.6942	64.068	68.3659	62.659	87.2993	87.9323		0.0546428	73.4312
1.3094	85.179	83.755	47.631	60.1086	71.6117	74.9541	107.27	98.499	77.658	72.082	51.132	63.8272	84.0041	82.9677	78.2105	63.986	68.811	58.3233	65.0421	59.86	74.6995	51.885	67.3672	88.4109	82.66	72.6891	66.725	74.9065	59.267	96.3867	95.4979		0.0601103	73.7228
1.4284	79.406	87.59	54.144	64.7287	84.5927	62.8824	105.497	100.225	83.526	74.851	57.028	63.2855	82.9913	85.4828	83.5323	67.609	65.187	58.7617	59.4491	65.3103	77.5886	63.82	69.5114	87.7105	81.2133	71.8306	71.127	68.2062	58.877	91.6636	93.8146		0.0655732	74.8852
1.5474	70.385	100.104	56.787	72.1039	84.7557	68.055	107.261	96.782	82.328	69.561	65.019	64.3075	83.3181	86.5101	78.426	68.183	68.697	56.8201	70.8131	75.1721	71.9916	60.841	65.178	86.0457	82.8265	75.9313	61.595	70.7545	61.656	79.2943	92.8539		0.0710361	75.3018
1.6665	86.249	104.088	66.996	73.3337	88.8924	76.3773	100.611	100.809	85.585	73.267	70.814	68.0949	80.8769	80.8495	76.5374	62.779	67.343	60.2757	74.6523	68.2058	65.2345	60.646	63.9307	83.6103	82.0911	75.3008	66.019	64.7234	64.638	86.9829	97.6742		0.0765036	76.6932
1.7855	86.468	86.896	63.676	70.1368	92.1583	77.434	95.948	112.76	76.333	80.198	65.252	73.3032	76.9136	84.0651	78.4203	55.184	68.315	57.4063	76.393	70.1514	71.1808	64.387	72.5431	75.9069	86.4783	67.9058	68.234	70.1792	65.584	84.6805	92.0003		0.0819665	76.3384
1.9046	90.306	84.325	69.118	69.6717	110.557	77.9573	92.879	103.407	77.121	78.829	76.211	72.976	78.1597	82.5651	81.352	59.988	70.152	61.1229	74.9204	72.0099	72.748	70.339	81.6206	85.4401	82.1126	79.1262	67.926	69.0943	72.552	85.405	93.7481		0.087434	78.8303
2.0236	86.985	90.162	71.857	78.1403	123.121	71.7017	96.676	111.523	85.841	82.298	63.675	82.6349	78.9243	90.7642	78.2361	63.568	65.816	56.5571	81.5097	68.2863	67.1052	73.197	79.1103	85.3984	78.0549	81.5304	62.788	74.4521	71.09	87.3882	83.4941		0.0928969	79.7382
2.1426	79.724	81.458	77.758	82.511	119.442	75.0778	101.168	118.887	76.777	84.5	63.625	79.2403	80.8441	92.2651	84.5366	57.18	64.753	61.7858	86.0433	69.749	74.1019	82.773	73.5129	92.8374	79.9936	87.9664	68.069	73.9897	73.951	88.7997	91.9271		0.0983598	81.4596
2.2617	83.437	84.692	79.455	74.6702	121.373	71.9165	90.594	120.627	78.876	78.56	59.65	76.4865	85.5836	86.5668	91.3385	54.862	68.165	70.8947	83.8543	76.5792	80.8192	75.49	75.4613	95.2741	81.8434	84.0363	71.827	73.7189	77.213	89.0031	84.6383		0.103827	81.5325
2.3807	90.184	89.486	81.146	74.0937	117.266	72.8218	96.012	122.434	80.801	82.126	63.062	76.7783	75.9487	87.674	94.9589	57.936	72.751	79.5375	80.6551	69.6118	80.1946	86.366	76.6105	99.1832	76.7893	79.7566	67.023	74.0576	69.08	102.628	78.7038		0.10929	82.4412
2.4997	95.556	93.828	89.793	80.3276	115.413	72.7296	102.891	126.668	79.904	89.351	67.783	77.8821	73.8707	97.0399	97.5938	66.319	75.231	70.8001	77.38	74.2655	67.238	91.897	77.7087	90.8827	73.7307	79.5438	74.466	77.1739	74.73	101.598	81.3752		0.114753	84.3539
2.6188	100.436	86.234	85.741	82.2049	104.597	74.9107	110.628	124.133	87.278	96.409	73.353	83.9792	88.8612	95.2252	107.718	72.042	78.678	70.2723	80.2972	72.9073	80.7378	109.032	81.9411	88.5369	77.9589	81.2389	68.355	76.3897	72.918	103.121	86.7485		0.120221	87.1898
2.7378	95.091	83.25	93.931	67.5594	100.777	75.6824	117.652	129.036	87.027	96.571	69.43	76.102	95.1732	98.5014	100.629	76.291	76.745	70.495	82.3456	73.2568	83.944	108.437	84.0733	94.365	74.3714	83.4101	78.084	78.9726	67.676	114.61	85.556		0.125683	87.7112
2.8568	108.731	87.654	92.946	73.3658	95.4591	78.1507	120.221	128.396	89.047	102.548	70.5	83.3875	85.8661	90.9313	97.7992	71.497	74.989	70.837	86.1938	66.3337	84.4686	110.349	86.0492	89.534	77.4698	78.2048	86.073	81.5805	71.505	122.366	89.4696		0.131146	88.7717
2.9759	116.099	83.576	96.743	80.1466	86.3912	76.265	129.113	126.261	95.204	106.273	73.825	80.9897	93.5956	94.6114	100.199	72.684	69.297	76.8254	88.0095	77.6925	88.8868	114.711	91.0859	87.0251	82.1515	83.6917	81.432	79.9915	71.839	108.097	92.2568		0.136614	90.4829
3.0949	106.342	90.081	100.486	79.5477	83.1042	76.0803	133.299	121.793	103.951	102.977	72.315	84.7017	86.6813	102.162	100.715	73.877	79.398	81.7441	90.6737	85.3538	83.8505	110.358	85.4486	90.3243	77.1673	87.4778	81.762	79.3704	73.938	113.285	92.6267		0.142077	91.3191
3.2139	99.841	96.631	106.826	79.7234	88.7078	78.8032	143.3	133.446	102.494	91.405	71.206	91.1658	81.7812	94.5628	98.419	74.974	85.923	70.5831	89.7114	90.0676	85.06	112.59	84.8411	82.155	80.8114	94.6974	89.218	81.1387	75.937	118.483	98.46		0.14754	92.6762
3.333	104.478	97.263	104.853	77.179	89.0038	76.4414	148.263	128.178	95.139	94.178	77.835	90.0377	87.0347	96.2186	94.6892	81.329	85.008	78.4908	87.7548	84.9461	91.9616	106.2	94.384	92.2322	91.3118	86.0483	91.046	80.6159	76.273	102.855	103.577		0.153007	93.3814
3.452	116.508	105.943	101.07	87.0809	81.535	92.7172	160.463	124.452	90.118	98.332	68.194	93.1579	90.6176	97.0199	99.681	85.378	89.191	80.7669	89.452	79.0678	88.0814	107.259	85.8759	94.6807	84.7216	87.2637	88.919	81.2099	82.873	109.865	98.7436		0.15847	94.8464
3.571	121.717	117.116	106.081	89.9956	74.0925	88.3683	165.05	127.581	102.283	103.987	75.778	96.2034	89.1349	83.0725	102.867	88.044	85.052	76.4271	87.304	87.5396	84.9783	114.517	76.0652	85.8015	78.7353	89.6335	104.879	82.0582	81.072	115.358	100.883		0.163933	96.183
3.6901	108.134	128.683	113.53	85.8169	78.9427	86.0413	168.508	127.788	95.398	99.22	84.646	95.2229	91.6286	86.9819	97.833	91.624	91.246	86.4208	87.7632	86.5589	95.4954	109.074	80.311	88.1719	80.8994	87.6107	106.923	79.2525	77	111.969	102.613		0.1694	97.1389
3.8091	106.515	118.288	124.587	90.5182	78.3148	93.5605	161.339	131.177	91.849	99.923	84.479	100.794	84.8639	82.2799	93.0858	91.287	89.163	91.9482	93.8849	89.1643	95.4779	104.833	92.7183	89.5626	79.7637	93.11	112.123	87.0805	79.747	105.156	98.4587		0.174863	97.9049
3.9281	111.475	134.193	129.129	88.5995	83.5273	100.058	159.799	121.117	87.778	103.808	82.932	107.132	87.646	86.0999	90.619	96.611	85.425	87.4139	92.9477	80.4087	86.6581	114.085	83.688	90.6333	82.1709	89.0275	114.053	85.1412	86.653	94.978	97.414		0.180326	98.1039
4.0472	113.289	143.21	141.386	92.0706	82.9096	101.388	162.43	118.717	90.996	99.608	90.459	107.049	93.1419	78.1007	85.4074	96.333	92.471	95.1081	94.586	89.6377	92.4812	108.048	80.3537	99.3535	87.5351	90.9542	119.981	84.7853	95.454	98.7422	98.6419		0.185794	100.794
4.1662	110.884	147.297	150.431	87.8388	85.4453	106.272	147.321	120.093	88.477	97.523	90.513	102.304	99.53	81.1026	90.5759	109.322	92.029	104.58	96.0052	91.2966	85.2428	105.702	77.0103	101.723	84.8862	87.5877	117.379	79.1072	96.286	95.5365	94.5159		0.191257	100.768
4.2852	121.938	157.894	154.016	106.385	85.165	106.809	159.734	127.802	84.392	96.975	107.759	91.0404	99.3683	81.3053	88.7769	101.994	99.391	95.965	103.909	94.8152	76.969	114.965	83.4819	96.9465	77.3998	84.3918	115.108	81.109	95.403	89.2893	82.7765		0.19672	102.041
4.4043	139.101	157.774	159.113	101.474	93.7559	105.697	152.72	129.336	80.546	98.688	107.255	91.4307	92.1544	84.2549	79.1963	102.431	107.623	108.21	96.9714	101.353	82.4282	120.887	83.6615	92.0019	82.4012	84.5846	120.885	77.646	102.669	90.9219	82.9493		0.202187	103.552
4.5233	134.224	157.654	157.275	98.4231	97.0064	98.259	148.621	138.891	95.551	104.048	113.049	97.4111	89.8606	84.3715	76.2448	117.624	107.941	110.517	97.9814	97.7375	92.616	115.201	84.5203	84.7962	78.8357	91.2446	117.261	81.0112	107.661	86.3011	78.4286		0.20765	104.534
4.6423	135.443	159.114	154.925	103.288	98.5173	97.6493	140.999	125.455	102.711	105.644	116.036	96.3597	95.3377	79.1023	79.3861	121.725	117.42	96.7751	91.033	98.4678	94.3735	106.178	88.0199	89.6244	79.2629	90.9805	110.673	77.4529	103.971	94.3599	86.6608		0.213113	104.418
4.7614	133.576	162.155	155.099	108.465	100.923	111.953	144.832	127.235	99.554	100.003	129.995	87.8895	91.9777	88.5937	80.3447	112.569	142.27	95.4671	91.6069	89.7943	93.2954	101.14	90.5606	90.889	81.6032	100.835	104.155	78.669	112.074	100.035	87.3364		0.21858	106.287
4.8804	126.128	169.314	148.902	107.471	103.655	116.053	129.744	128.943	91.679	100.807	129.91	96.0538	83.6893	92.11	83.9105	118.58	144.717	106.887	92.5192	91.7954	93.1233	103.01	85.2679	103.947	87.0473	102.06	101.444	78.983	119.522	96.5505	90.8455		0.224043	107.247
4.9995	136.466	166.355	142.828	101.452	98.1544	115.269	132.945	129.66	102.915	109.515	133.242	88.7003	85.9596	90.9583	91.2267	131.316	140.37	119.28	88.631	99.7335	95.7531	105.37	84.4904	95.9754	83.2677	102.194	103.535	76.7566	120.212	98.247	78.977		0.229511	108.057
5.1185	139.255	148.952	135.013	96.9671	113.186	116.426	131.187	125.54	103.372	112.017	133.942	91.7604	86.9697	96.6994	89.1619	124.459	136.744	116.422	91.5617	99.1052	89.6441	98.952	85.3856	94.5555	81.2334	95.6889	106.129	77.6308	115.543	100.908	77.4586		0.234974	106.834
5.2375	146.247	150.412	129.259	95.1358	110.265	112.058	130.268	126.04	97.501	121.085	148.461	98.3278	85.2975	96.3006	92.9088	121.092	144.279	105.971	82.8499	91.3107	84.3571	106.348	85.4009	85.9277	76.3053	95.8095	105.035	79.715	111.149	99.3637	85.5411		0.240436	106.452
5.3566	161.014	137.448	131.358	94.9647	101.71	115.551	129.461	124.449	110.466	116.267	149.12	101.455	89.9413	86.1106	96.3701	135.212	149.712	110.928	77.2081	83.7154	87.1076	101.431	76.4945	82.1971	80.6411	96.6833	102.052	71.611	120.379	107.083	82.741		0.245904	106.803
5.4756	167.778	136.062	129.398	103.645	108.255	118.41	111.931	118.21	118.859	114.49	153.059	101.345	90.7709	91.5284	97.7404	142.424	147.845	119.731	88.2043	85.9438	85.1142	96.998	79.9891	86.6766	89.2191	96.6748	102.08	71.1092	111.303	98.4068	83.3085		0.251367	107.952
5.5946	165.912	133.061	121.315	103.151	103.464	108.31	127.703	114.258	127.825	110.015	158.91	100.474	96.9938	85.6653	96.2327	129.365	156.798	116.653	81.866	84.762	81.4079	99.713	76.8643	88.3594	92.1027	95.816	101.997	67.5398	107.649	83.5748	78.2768		0.25683	106.324
5.7137	171.957	132.435	113.883	102.083	99.1434	117.018	138.294	117.226	121.262	121.459	158.732	112.716	100.938	83.8941	98.2568	121.962	155.103	121.174	75.5751	84.1203	77.4333	96.72	76.2396	86.3963	86.5544	91.0053	88.543	69.0319	102.818	90.2039	87.7511		0.262297	106.449
5.8327	176.99	127.805	108.578	100.052	97.5705	117.301	132.285	115.554	116.055	126.085	146.462	103.805	95.4083	87.3625	97.7172	131.102	153.816	122.838	79.7773	76.4075	71.7574	95.528	76.7987	89.3022	86.1502	97.6605	93.255	68.0194	100.545	86.5449	81.7927		0.26776	105.172
5.9517	173.669	123.183	101.155	93.7402	96.58	122.2	118.127	104.566	116.272	123.054	163.585	105.444	97.8035	77.3161	96.7246	132.251	157.612	133.217	79.9236	78.792	79.1817	98.485	69.146	90.2597	84.3362	79.8674	100.021	66.5918	94.557	85.4791	87.1678		0.273223	104.203
6.0708	166.638	114.513	103.635	92.1603	100.741	114.081	116.096	115.831	121.534	119.449	151.942	116.729	105.164	80.6771	101.465	132.753	157.086	127.26	83.3545	86.2546	73.5139	96.403	75.23	81.8597	89.0865	85.7787	87.106	68.762	90.733	88.2789	88.602		0.278691	104.281
6.1898	166.997	109.596	111.441	86.3584	103.312	112.554	120.061	107.322	104.548	120.924	140.277	111.842	117.208	83.741	103.816	125.034	150.346	126.16	85.6223	79.6068	80.1853	91.159	77.785	80.2344	73.283	82.8118	93.385	66.3033	93.941	89.5657	87.7384		0.284153	102.683
6.3088	167.908	111.138	103.6	87.1362	97.5874	105.093	117.063	116.235	120.703	115.822	134.974	110.374	109.838	81.4974	106.641	127.999	152.126	116.349	80.5096	73.9111	79.1907	101.717	66.1629	81.6425	85.1816	85.7687	95.668	61.0557	95.422	90.8925	82.6084		0.289616	101.994
6.4279	165.438	99.168	98.974	96.0647	93.2678	100.957	129.177	107.022	115.541	109.719	143.61	114.974	94.7542	80.9423	108.64	127.049	142.925	116.261	77.6652	79.4102	78.4584	101.702	70.7312	82.5395	82.8256	82.8071	85.461	68.3416	96.437	82.1049	80.8943		0.295084	100.447
6.5469	163.462	95.06	99.321	96.0535	96.2001	108.177	122.189	103.061	123.476	101.434	134.75	114.812	99.1737	91.7085	109.461	114.703	140.146	120.146	85.4223	70.2719	73.3625	96.11	71.118	89.4376	78.0072	87.2985	82.659	64.4147	89.127	87.9527	83.2173		0.300547	99.7333
6.6659	168.803	96.453	101.675	99.0332	96.8072	108.204	114.338	101.491	120.352	108.152	116.044	119.155	96.8188	88.1723	96.7477	115.661	131.241	112.78	87.0267	69.1188	80.1626	94.347	77.0784	87.4868	81.8049	82.1797	82.632	75.8077	91.773	89.5078	87.002		0.30601	99.2856
6.785	174.182	94.553	101.877	98.5994	96.6245	115.566	124.616	93.668	110.974	104.411	120.274	122.586	107.409	82.8639	109.779	120.28	133.755	116.022	81.3718	76.2085	84.9117	88.603	69.6712	86.3096	82.7221	96.9616	89.994	70.3611	86.689	85.5834	82.0824		0.311477	100.307
6.904	177.092	85.903	108.505	93.7692	84.6924	97.0833	109.691	85.305	99.604	110.167	125.669	118.857	103.496	87.7393	114.344	112.037	136.241	117.345	77.3249	75.9122	79.1992	79.72	76.3625	86.2848	77.3392	85.6196	81.435	68.7212	92.045	80.8703	86.0499		0.31694	97.2395
7.023	165.72	91.32	105.515	91.9109	97.1542	110.051	100.658	76.639	96.601	102.374	120.43	120.554	98.2344	79.2684	121.043	105.218	135.542	120.229	81.8379	60.8225	72.8451	81.2	78.5484	83.9776	79.4293	86.471	85.314	70.8711	86.625	76.3428	93.131		0.322403	95.996
7.1421	161.981	88.779	104.049	102.613	98.2368	105.173	101.431	81.139	101.448	114.98	113.412	127.013	92.3211	80.7867	117.118	94.161	130.923	108.202	70.1533	62.7863	65.0331	84.441	80.7664	80.3651	79.956	90.6598	87.586	75.9397	82.598	78.1013	98.5304		0.32787	95.5059
7.2611	153.755	94.711	109.632	105.613	93.5058	109.821	111.277	81.958	98.64	108.679	114.038	122.688	95.991	81.847	109.329	85.149	124.929	94.6922	69.6812	63.2667	78.9544	86.046	72.8812	76.65	77.5235	103.123	90.233	73.5859	76.936	78.4596	84.051		0.333333	94.4402
7.3801	139.256	93.419	107.736	100.229	100.027	106.155	100.865	71.538	97.183	102.171	117.755	124.201	103.379	67.7349	113.274	79.434	113.516	93.907	73.4032	59.1687	78.7743	90.65	79.2639	76.3413	87.9926	98.2013	82.306	73.5949	76.715	73.4003	82.8891		0.338796	92.4026
7.4992	133.354	95.997	111.355	99.7657	108.589	100.977	96.965	73.863	93.368	96.679	104.35	121.37	94.7031	69.5558	97.5477	77.652	120.902	93.9885	71.3111	57.0034	68.0697	96.604	69.7205	81.8946	85.3648	92.3555	80.151	77.6566	82.518	76.7801	81.5282		0.344264	90.7077
7.6182	135.701	86.748	112.52	97.1896	100.353	106.381	91.323	68.819	87.15	110.544	109.658	123.061	94.0324	77.8695	99.929	78.294	119.332	105.268	70.5968	43.1203	59.5859	81.712	65.309	77.7545	81.2245	99.5325	81.267	67.4936	78.502	76.7056	82.3734		0.349727	89.3339
7.7372	128.975	84.397	103.063	93.4714	91.533	113.304	86.722	70.193	90.528	121.697	95.606	116.058	91.692	76.9091	96.0766	68.904	114.847	112.788	68.0259	44.001	55.6856	89.863	63.369	74.6048	76.3904	98.076	79.815	74.036	85.838	83.6645	83.9331		0.35519	88.1957
7.8563	121.107	96.18	101.021	86.9024	95.351	115.089	92.467	67.486	83.686	131.206	97.279	116.884	91.3298	64.9803	87.8146	62.007	117.257	97.1636	61.8762	45.9183	48.9851	84.004	66.9335	77.8693	74.8569	99.3299	81.952	72.5029	85.192	76.2098	74.3147		0.360657	86.2953
7.9753	124.073	98.693	115.033	93.713	95.1411	108.261	98.402	56.638	79.403	125.162	98.391	106.498	94.6723	60.5777	83.3733	65.443	114.158	106.868	59.0507	45.4134	49.6542	90.556	58.9736	70.8334	78.785	90.6719	86.338	68.7188	81.065	79.6174	79.5043		0.36612	85.9252
8.0943	117.18	98.795	104.345	92.8728	94.3412	111.633	87.57	59.42	71.908	119.989	94.985	101.608	81.0109	56.1398	70.1169	60.357	112.396	108.055	55.102	42.1634	49.6128	95.595	64.7634	72.1205	65.7424	88.4559	88.856	79.8479	78.552	72.1453	71.4057		0.371583	82.8092
8.2134	100.214	98.285	98.628	95.3511	87.3559	113.584	88.494	53.782	68.928	115.735	86.39	101.481	82.9677	53.5841	67.3648	61.81	111.249	97.9381	56.8562	36.515	41.2799	79.687	68.9266	66.7307	66.1835	85.9253	75.079	81.3573	78.618	72.2709	67.05		0.37705	79.3426
8.3324	101.238	99.411	100.399	102.353	94.1821	106.772	89.853	61.872	82.12	107.264	94.838	101.906	92.2736	48.8937	63.23	60.906	108.735	104.423	52.5602	41.6921	38.0603	86.482	61.411	74.8167	68.5665	84.0529	70.721	80.0725	80.322	75.3009	78.036		0.382513	81.0569
8.4515	98.55	96.705	89.755	99.0698	90.1682	112.657	94.543	57.811	80.248	111.398	109.862	107	86.6573	50.6152	71.4574	64.269	116.863	94.908	51.5155	39.539	39.157	82.329	65.3123	74.8644	72.4614	83.4755	77.494	73.5267	82.003	72.8194	69.3843		0.387981	81.1748
8.5705	107.418	108.219	89.668	100.995	88.4515	108.678	89.256	59.85	83.321	108.627	99.842	102.946	78.554	52.3704	61.9519	64.821	109.983	103.905	48.8219	39.9111	40.392	78.953	68.9049	67.4108	66.3407	81.7657	74.843	80.7389	81.496	76.9008	72.9101		0.393444	80.5885
8.6895	114.079	110.731	98.87	107.272	85.6661	105.743	88.252	55.227	80.989	106.856	99.887	92.1883	74.6663	45.4281	64.7308	60.867	104.855	99.5115	46.7514	40.017	38.503	84.828	67.3462	64.7623	62.1688	75.3959	82.771	78.3564	77.461	73.3149	66.6346		0.398907	79.1655
8.8086	108.392	113.709	95.789	96.1761	89.2807	114.078	99.578	46.794	88.707	100.273	101.781	91.3205	75.3395	39.8263	59.4163	72.695	98.032	102.458	47.1094	33.483	36.4356	88.881	71.8625	74.7675	64.7442	78.8359	88.54	77.0678	76.751	73.1562	68.7769		0.404374	79.8083
8.9276	107.62	122.543	112.814	94.9176	88.972	110.514	95.91	57.888	81.196	98.432	90.009	88.9897	77.968	37.9451	57.6206	66.715	96.128	95.5786	49.3885	32.7829	37.8889	84.292	66.9244	75.0991	72.1853	78.9889	90.054	73.1016	71.774	71.9783	63.1269		0.409837	79.0111
9.0466	114.385	118.878	107.736	95.6845	91.1283	109.5	89.476	52.23	85.699	100.402	90.771	87.2531	68.4262	38.5169	50.9964	71.947	95.477	89.9103	41.9825	31.8808	38.6169	82.965	73.0687	77.4162	59.9602	66.1858	84.224	72.8271	69.471	70.8053	55.4086		0.4153	76.8783
9.1657	110.522	114.563	102.881	97.6333	93.0504	98.9686	96.368	51.013	79.518	104.93	104.631	79.3322	75.689	35.7395	50.5982	72.79	93.785	97.1254	42.9797	31.9936	39.1293	81.915	70.7336	65.7671	59.7857	64.4839	76.966	73.1351	70.201	72.623	61.6077		0.420767	76.4664
9.2847	109.274	106.096	103.599	107.029	87.6371	101.197	93.812	46.608	89.169	103.12	100.935	83.5725	74.6407	39.5064	50.0793	77.926	92.647	95.5778	41.5348	32.3975	33.7597	84.026	69.2759	67.425	54.6648	58.2159	80.055	71.789	69.834	64.1096	69.3227		0.42623	76.0915
9.4037	109.419	112.731	105.685	95.1782	86.6636	101.293	92.062	48.31	88.914	96.135	93.399	83.2723	65.6012	35.2747	52.0897	83.155	107.69	95.7654	40.2113	27.4352	30.2197	86.272	70.692	62.2467	49.668	57.7591	73.108	77.7265	68.217	72.0661	74.0714		0.431693	75.5591
9.5228	110.865	106.74	111.881	91.5317	78.3567	78.5601	87.865	54.178	80.519	98.488	87.906	72.7329	68.9983	40.1812	48.9431	84.714	93.129	90.0962	41.604	30.0188	31.3312	81.433	76.5355	60.8251	55.1508	54.2687	79.365	76.0844	76.189	66.9876	72.0915		0.437161	73.7926
9.6418	112.182	112.073	117.86	92.9175	75.7904	85.0842	86.501	50.271	75.337	95.322	84.284	79.4517	68.3257	35.7885	43.4334	88.773	86.299	76.9688	33.8656	31.718	27.5057	86.851	80.3154	66.1306	51.379	52.1533	74.444	78.158	75.87	67.7143	62.3392		0.442623	72.7454
9.7608	100.758	96.474	115.164	91.4452	81.6996	102.213	88.717	54.625	76.241	98.428	85.671	72.2315	60.0977	38.6789	47.4368	88.757	83.036	83.822	38.098	30.7938	25.3193	90.774	81.8067	64.9164	46.3759	56.0036	68.785	82.9725	79.461	72.0541	61.1529		0.448086	73.0325
9.8799	98.275	93.526	127.353	83.211	83.6745	92.8953	78.413	54.211	69.975	98.981	92.667	67.7555	67.89	40.6973	46.4209	86.924	85.93	93.7572	40.278	32.241	30.8919	82.541	81.8371	63.218	42.7518	59.3855	60.171	72.3199	74.484	72.5281	72.7803		0.453554	72.5156
9.9989	98.726	84.031	125.677	84.1336	72.5978	95.5714	79.159	53.773	72.374	97.707	84.184	68.6932	65.7508	36.8949	42.5329	77.426	86.057	95.2802	37.1311	22.8163	28.3585	73.524	73.9412	61.6484	46.3862	57.6762	67.282	75.3731	66.467	73.3637	72.4452		0.459017	70.2252
10.1179	94.223	90.926	116.818	84.574	74.0413	101.726	82.54	55.525	70.662	94.692	92.691	72.349	59.8402	33.8285	39.0626	86.433	84.234	84.5692	32.8754	25.4216	25.2864	73.253	66.8343	61.4953	47.6367	60.5947	74.155	89.8175	64.325	69.5138	63.4426		0.46448	70.1092
10.237	89.646	88.316	97.132	73.6068	75.8183	98.4708	74.375	50.166	74.259	101.598	80.164	69.8199	60.2716	30.0293	38.242	82.668	85.97	77.3947	31.6712	28.8002	32.1192	69.897	64.3778	67.1304	49.9771	55.9897	70.614	82.2846	74.473	75.3512	61.0096		0.469947	68.1175
10.356	87.332	86.214	96.544	76.0263	71.6634	101.497	69.956	55.532	75.922	85.206	75.862	74.9009	63.3516	27.5145	38.3945	75.287	88.899	72.2712	33.8123	26.5846	25.6593	72.63	64.9205	64.9095	44.5751	59.1038	69.062	86.1795	74.691	59.846	62.4763		0.47541	66.6717
10.475	85.528	86.953	87.77	66.8111	64.8359	101.235	65.405	57.453	70.177	83.5	81.383	80.2132	60.2501	34.7391	35.7932	79.746	95.101	78.7853	30.712	25.444	22.7666	72.384	70.4939	54.7823	45.2234	57.0203	70.209	85.9201	67.656	67.359	71.9589		0.480873	66.3745
10.5941	88.554	80.522	90.543	61.6126	75.3304	96.8645	77.845	51.948	59.769	78.868	81.442	70.4925	60.045	32.124	32.7008	84.938	78.19	82.1253	29.7791	24.4993	22.7594	73.418	75.0091	53.986	39.2604	59.111	69.257	80.0142	66.588	66.2522	58.8529		0.48634	64.6032
10.7131	92.029	79.668	76.216	57.3771	68.0676	90.1556	83.275	53.452	77.177	80.619	87.075	77.5467	54.6261	25.2838	39.0512	89.272	78.264	86.3498	37.5248	26.5256	24.7558	73.829	67.2582	50.7422	44.5181	53.5657	80.094	87.7564	69.571	70.0141	52.4941		0.491803	65.6179
10.8321	88.013	84.129	82.538	51.5347	65.1361	82.6282	85.185	54.04	74.799	86.603	85.785	77.1255	48.0141	21.8697	31.0661	80.873	83.888	81.9095	40.6587	21.7898	23.533	73.502	71.041	56.7372	40.324	52.4957	75.358	86.5906	68.594	71.4943	56.4466		0.497266	64.6355
10.9512	97.658	82.46	74.064	50.7148	67.3223	85.5332	81.616	57.06	72.441	86.711	82.727	65.9643	44.491	24.9369	31.3455	77.849	91.55	76.3296	34.9647	23.7899	21.0278	69.735	70.2627	54.1183	45.1874	52.0159	82.101	87.0435	61.095	68.5859	48.7107		0.502734	63.5294
11.0702	87.113	77.073	79.094	49.3984	67.2366	80.8384	99.216	53.149	81.471	87.256	84.892	67.5302	40.5165	22.4332	30.8314	72.362	88.493	75.1653	37.8484	23.3006	19.2105	72.416	68.7558	53.1801	41.6177	55.2841	84.218	81.7911	70.911	80.1438	51.9596		0.508197	64.0228
11.1892	91.089	80.769	75.247	45.7825	59.8626	83.8273	93.073	51.414	75.005	88.231	89.046	72.7336	39.1066	24.2382	28.1112	75.471	96.35	82.1124	35.4056	21.7462	18.2726	70.398	63.9001	46.9324	39.0298	47.8244	92.717	78.3714	69.342	83.0529	52.5505		0.51366	63.581
11.3083	86.692	81.082	69.036	50.6805	67.448	76.7965	104.65	45.609	76.555	82.53	87.783	73.8283	43.6941	22.8817	28.2383	84.861	90.87	72.3443	33.9409	21.6969	18.5079	56.213	58.6538	47.5614	41.074	50.1841	87.337	77.816	67.176	82.6518	48.6669		0.519127	62.4858
11.4273	90.812	85.397	65.51	51.4385	69.6559	81.0239	103.904	45.055	61.982	79.512	97.093	71.3526	39.0211	21.9508	28.5963	72.781	93.607	72.7223	36.6992	21.4193	22.0568	55.025	61.9253	52.6835	35.4597	49.0494	95.405	72.25	70.461	77.77	44.3123		0.52459	62.1268
11.5463	91.761	79.487	65.159	51.0105	66.8307	84.7659	109.191	47.002	57.075	77.286	91.792	69.8788	41.2482	18.9961	31.023	72.819	96.731	81.8068	23.3917	24.7043	21.1336	62.548	59.8663	49.565	42.1133	49.168	92.075	77.4015	69.052	91.4736	41.0333		0.530053	62.4964
11.6654	100.978	74.804	62.028	52.7435	57.8729	97.0284	112.509	47.955	64.686	79.212	90.032	78.5243	36.407	19.7797	30.5971	64.975	85.332	78.5588	29.8131	21.9563	18.4143	62.102	60.4966	48.2796	42.1311	47.8236	92.251	85.3143	69.423	86.2826	44.7795		0.53552	62.6803
11.7844	106.523	82.881	60.767	43.1484	58.3846	109.098	119.011	47.427	62.114	86.386	90.456	73.7195	36.5833	19.8174	28.0607	71.876	94.553	73.8927	28.0868	18.3007	19.9274	57.497	67.044	47.7741	39.0327	46.8563	91.263	72.0992	70.645	83.3589	41.9863		0.540983	62.8571
11.9035	114.224	88.283	53.499	45.0088	64.5486	107.008	112.857	51.308	58.144	91.306	91.048	80.0447	34.3374	16.4752	27.7738	78.129	100.704	84.95	30.0752	21.4919	22.0355	61.281	65.7599	48.3365	43.7296	40.4328	98.746	71.5787	67.943	83.2762	47.6439		0.546451	64.58
12.0225	116.045	80.927	52.737	45.0873	59.1471	106.306	113.247	51.553	47.47	100.975	87.896	79.1088	40.1676	17.7891	29.4224	69.81	94.678	83.6083	33.7576	21.7292	21.05	56.418	70.5705	48.1414	38.3865	40.9027	97.741	67.6826	67.167	86.937	47.9219		0.551914	63.6897
12.1415	114.609	80.602	59.609	39.974	58.0259	97.599	101.549	48.713	50.193	87.781	87.459	85.6314	33.0047	24.0402	29.4182	67.096	92.47	81.5156	32.061	23.5885	20.6356	60.922	59.9203	40.2676	36.5319	49.3636	99.888	69.8762	71.444	84.4425	46.1602		0.557377	62.3997
12.2606	121.116	88.038	60.249	41.5971	57.0148	95.3109	103.004	47.665	58.519	91.958	82.937	77.4427	27.119	24.9094	27.332	71.349	98.339	74.4371	31.7248	21.5205	20.7476	55.207	60.1705	46.4591	40.4243	45.9279	94.079	75.4891	68.723	74.0746	45.8422		0.562844	62.217
12.3796	113.987	80.767	55.903	35.5224	61.6836	95.3544	87.976	51.734	66.256	97.61	82.21	72.6018	31.6215	18.0906	30.5375	62.703	97.841	76.0792	34.4027	16.7502	24.3963	47.87	64.1144	45.6134	44.1179	45.6659	96.582	77.9434	65.306	72.7206	45.0342		0.568307	61.2579
12.4986	123.042	80.356	47.522	40.0822	60.2454	96.2553	86.978	45.475	59.358	93.231	80.433	78.1955	36.8555	21.076	28.5385	62.899	89.526	87.7224	33.319	19.7951	25.531	51.059	63.7142	50.1831	41.4086	45.6449	90.857	74.0085	62.39	80.0787	47.1055		0.57377	61.3834
12.6177	110.647	86.183	60.658	38.2356	59.0585	85.0071	77.948	41.329	57.769	94.256	89.931	79.8183	34.1398	20.2806	27.0669	57.605	99.569	88.5955	35.296	19.989	26.1885	50.743	54.415	42.0344	43.1175	43.1832	83.851	71.1581	65.455	76.5363	45.1523		0.579237	60.1683
12.7367	111.546	77.61	56.303	40.3902	60.7521	85.182	77.551	49.891	64.346	99.363	86.903	79.7403	33.4624	23.5802	28.6499	62.092	99.894	94.5436	30.6054	28.8352	24.3902	50.339	59.3343	49.7045	50.7775	42.3266	91.663	66.5536	67.444	71.6746	42.1853		0.5847	61.5365
12.8557	110.254	73.574	49.217	36.3844	62.6853	91.2534	72.512	48.973	55.838	105.665	92.808	77.8009	35.0742	19.9799	31.5246	65.512	96.796	82.5813	31.7012	17.9517	24.9799	52.368	70.3888	53.7862	46.0827	47.448	85.889	67.8588	59.672	70.9907	48.4269		0.590163	60.838
12.9748	109.55	72.06	50.964	36.3085	60.5153	91.7946	75.381	52.541	50.744	100.566	93.987	84.0969	37.9993	21.2999	29.1314	68.306	97.097	90.6037	35.9654	16.2542	23.9249	62.654	68.9785	49.3614	41.9164	44.7886	76.441	57.3657	59.699	70.707	44.2785		0.595631	60.4929
13.0938	103.524	82.335	56.911	37.1152	55.5728	91.1919	80.034	46.71	55.845	107.824	88.379	73.0742	32.2286	21.0058	30.2382	67.296	95.21	95.1898	33.2164	17.8	19.8008	57.935	58.3098	51.8121	48.2589	42.7718	73.305	60.2068	60.575	70.7079	48.7591		0.601093	60.1014
13.2128	104.433	79.659	52.861	37.0358	52.5111	94.8523	73.262	50.889	58.748	105.773	96.109	71.5184	35.4135	21.8049	29.6731	61.441	89.746	94.4399	30.7118	18.0527	20.2814	56.922	65.1409	49.3509	42.4103	48.3789	70.88	60.5371	62.666	67.3371	48.6911		0.606556	59.7268
13.3319	99.118	82.401	54.879	30.1478	55.2991	93.7956	67.453	51.244	54.552	105.866	107.341	78.547	30.4019	19.667	25.3027	65.73	85.619	91.8849	34.4535	22.534	23.3352	54.24	69.9834	50.6692	48.0964	42.5362	74.52	63.4695	61.45	63.755	47.337		0.612024	59.859
13.4509	95.84	78.879	51.255	32.4143	55.9029	85.512	67.16	55.073	66.094	114.972	104.844	82.545	27.2781	22.0375	31.238	62.626	87.755	87.1769	34.7616	21.4514	23.1912	56.609	72.3088	50.7714	50.923	41.4921	74.702	67.8503	63.037	73.0399	51.5588		0.617487	60.9774
13.5699	90.508	79.54	47.402	32.9429	57.0887	80.8625	73.058	57.067	71.767	105.392	98.448	71.7442	29.3352	22.9332	31.7316	57.244	88.563	88.4421	39.3736	17.6921	24.5854	51.5	65.7852	52.9292	45.8827	53.3623	67.638	67.2774	66.201	59.5173	44.9293		0.62295	59.3788
13.689	78.94	73.753	37.654	32.8354	57.078	84.5331	74.451	62.983	68.275	104.108	90.242	78.794	31.0168	24.8102	32.6678	70.27	91.401	75.3745	35.8864	20.4302	26.6457	56.181	63.1094	60.7316	54.6262	44.3409	72.352	66.7442	68.351	63.1727	48.4387		0.628417	59.6838
13.808	85.383	75.412	47.185	37.5986	57.4336	82.0489	71.904	71.935	57.492	95.265	89.419	86.4378	34.8031	23.6742	25.7031	67.269	83.724	79.2547	35.9109	16.7358	26.0359	55.344	72.0634	70.9816	46.7909	41.8113	72.038	68.3006	67.23	63.7711	41.0288		0.63388	59.6769
13.927	93.733	78.278	45.061	30.3825	54.4739	90.8857	78.976	64.281	62.465	94.233	96.397	84.2429	33.3053	21.5107	34.3099	71.43	92.023	90.4953	41.0832	21.5592	25.9162	47.557	76.7873	54.7128	44.6904	47.4416	68.649	71.1804	71.708	73.2738	45.6266		0.639343	61.5054
14.0461	98.409	61.877	45.335	31.2401	60.93	89.9329	82.974	68.63	68.616	105.084	92.652	79.9892	30.5582	20.1106	30.761	67.499	89.919	79.6867	33.6398	25.8256	29.6867	46.489	73.8531	54.4973	50.7624	45.6667	66.789	77.9439	72.394	62.3157	41.6921		0.64481	60.8309
14.1651	103.308	67.445	48.265	27.5114	60.035	78.2439	76.663	70.627	71.54	95.459	92.531	82.426	35.8825	21.0596	33.3548	64.826	90.159	82.7979	35.6545	17.9611	23.0655	56.691	76.0658	59.7406	49.7176	45.9141	65.709	81.5308	63.733	60.1441	48.5688		0.650273	60.859
14.2841	106.011	65.589	38.152	33.217	57.0398	84.3716	79.655	70.525	71.461	99.024	90.73	79.6172	32.9948	19.9927	30.791	67.816	84.665	86.1074	38.9596	22.3505	23.4889	56.846	73.6513	59.1558	44.7876	48.2221	69.571	77.5764	61.866	66.4769	48.1832		0.655736	60.9321
14.4032	108.573	67.495	40.466	29.2144	55.8258	74.7055	83.576	81.314	68.59	94.115	87.677	76.3941	30.3804	20.2098	34.6832	65.675	83.357	82.8866	42.2367	20.757	27.1373	54.514	73.8379	58.2964	38.7325	48.9372	70.71	70.0779	68.42	59.8218	44.066		0.661204	60.0865
14.5222	109.981	60.636	41.884	29.5324	53.4877	69.4684	81.963	72.076	74.433	89.766	84.228	89.0578	31.181	21.946	34.4512	68.183	93.367	77.6222	41.6043	20.8054	27.0706	54.288	65.9558	64.7342	35.4637	45.1215	65.636	74.3904	64.477	57.0631	44.9009		0.666667	59.5089
14.6412	106.513	57.971	38.313	26.5155	59.2543	76.4083	82.16	71.033	68.823	93.059	88.968	89.6741	33.8296	24.2953	34.8095	65.733	93.139	89.3329	42.1523	27.875	24.3682	54.387	68.761	62.4212	36.2862	46.6534	67.247	79.5614	63.548	55.8761	43.0704		0.67213	60.3883
14.7603	104.268	69.998	41.504	28.5274	55.1702	73.3308	76.75	80.02	72.781	94.167	92.87	83.4151	31.8724	22.5298	34.6862	72.119	83.233	81.8975	48.1671	21.773	23.6367	53.626	65.2237	63.657	43.402	49.4068	71.101	75.8695	62.797	64.892	50.8219		0.677597	61.0811
14.8793	107.369	60.339	40.451	28.7108	51.3545	74.2779	74.053	76.674	68.178	94.68	80.107	79.385	32.0916	22.2622	33.7215	67.572	93.177	81.0955	44.5613	23.8507	30.4062	57.721	65.9934	67.9834	38.551	47.3542	76.071	70.0332	61.997	60.8813	50.7791		0.68306	60.0543
14.9984	95.009	68.288	38.801	26.7907	48.6412	74.0833	66.232	80.943	78.759	92.863	78.903	84.352	32.5	24.1365	29.3496	70.39	92.022	78.3419	47.3598	21.6449	30.6443	63.495	64.5538	67.1418	40.7006	55.0434	72.868	73.6576	57.667	61.0556	51.5171		0.688527	60.2501
15.1174	97.855	62.07	37.876	32.0234	46.8874	75.69	68.28	86.672	66.144	94.077	82.399	80.7404	36.0379	22.4041	34.1542	73.679	87.595	99.0943	46.1304	22.0103	28.3146	61.072	67.251	55.4545	42.7293	56.8753	78.95	69.3429	60.574	68.5511	44.3648		0.69399	60.8161
15.2364	94.872	71.558	38.194	30.5921	41.6929	79.6763	79.09	93.305	68.065	90.69	78.579	89.0505	33.5871	24.5689	33.0238	68.343	85.194	101.026	43.3622	21.9858	31.3299	63.172	69.0835	60.7906	43.5456	54.6146	76.414	78.0176	62.382	62.3947	48.191		0.699453	61.8191
15.3555	84.716	68.032	39.842	27.9033	43.3802	72.4833	68.4	87.819	61.766	80.178	69.865	84.6281	34.039	20.342	35.3047	66.838	80.656	94.7155	49.2144	26.3766	30.4046	60.027	71.4478	63.2597	45.9719	50.688	73.727	83.1569	67.897	62.6517	49.6734		0.704921	59.8517
15.4745	83.54	73.302	42.787	20.9835	34.8252	68.7652	73.517	89.639	64.686	89.766	69.075	87.9447	40.6656	23.0027	34.3609	64.523	83.58	89.3197	55.0024	27.1346	27.7013	55.695	67.9403	65.4663	49.571	56.856	80.552	83.6603	63.097	62.4163	50.0377		0.710384	60.6262
15.5935	86.31	70.462	41.708	28.349	42.1764	67.8926	74.315	83.694	70.646	96.01	75.765	87.8065	37.6346	28.0203	33.5227	67.712	102.259	89.8191	48.1759	26.2892	31.3734	56.439	67.5477	65.7284	50.1269	57.92	82.152	88.1471	53.358	68.0383	49.8679		0.715847	62.2344
15.7126	82.455	73.518	48.218	30.6146	40.0439	65.9563	80.015	83.027	72.814	96.315	79.973	86.0701	41.361	26.6334	32.3835	72.83	99.853	110.089	45.3765	29.7036	29.4586	60.326	70.0674	68.7856	58.6738	53.5932	83.07	70.032	55.697	63.7303	47.7175		0.721314	63.1742
15.8316	86.687	85.437	49.843	26.8889	38.8992	64.6672	74.09	90.134	79.65	94.317	72.915	86.0405	35.18	24.5539	37.2689	72.005	87.168	98.1216	62.2614	26.9452	29.1398	59.091	68.1486	65.8102	56.3492	57.7117	88.702	74.3781	69.341	58.7239	48.9151		0.726777	63.5285
15.9506	83.19	80.504	46.929	31.7698	41.3091	72.7989	81.158	87.857	76.902	92.009	73.034	76.3917	39.3062	24.447	37.5175	80.363	84.625	94.458	53.6268	29.6859	36.2705	57.898	76.4504	68.1872	56.0012	53.9011	83.658	79.7695	68.897	67.5055	51.024		0.73224	64.1111
16.0697	86.875	87.738	49.342	28.5543	42.3281	76.5537	80.877	83.582	71.438	85.419	86.474	84.1492	40.7035	27.0781	38.1236	68.875	77.338	92.4396	61.5083	31.265	32.123	62.578	66.7639	72.8433	47.3184	49.7897	75.525	74.1828	63.84	58.6425	54.4105		0.737707	63.1832
16.1887	93.474	88.628	52.816	27.6345	42.7131	78.6506	80.899	85.064	83.932	84.546	93.23	79.3234	42.0393	30.3669	35.6895	65.678	82.099	101.318	59.3055	35.4461	31.4515	66.327	69.8453	75.7899	55.1552	54.6153	69.029	67.1978	64.33	60.4554	55.7118		0.74317	64.9278
16.3077	101.154	86.773	42.256	32.954	33.5931	75.6376	72.369	78.612	77.308	93.039	85.993	81.5987	42.0171	27.0489	39.1498	68.744	85.271	94.0234	51.5019	28.2574	29.9396	61.345	67.6581	74.2581	65.8712	58.0063	71.93	70.344	61.891	61.3405	57.548		0.748633	63.7882
16.4268	102.485	92.034	47.804	31.8097	36.3151	75.8776	67.97	78.651	78.192	93.887	98.739	83.9485	42.8085	31.6544	34.4594	68.916	86.993	90.6106	51.3152	31.6442	30.4546	59.821	65.2053	75.5736	59.1624	61.9465	76.653	79.0456	59.049	58.4909	58.4485		0.754101	64.8376
16.5458	91.65	105.541	55.179	34.4249	47.2109	75.5472	70.398	78.67	75.055	93.922	99.429	78.0319	40.7509	33.2168	40.5219	71.046	84.741	91.746	54.9636	25.8881	33.0827	58.876	73.8745	72.5413	57.6728	57.3511	71.463	73.6346	68.856	54.2144	58.0122		0.759564	65.4036
16.6648	90.256	106.491	65.455	32.0668	46.5271	82.8213	77.081	74.881	82.662	92.202	99.54	87.3593	39.8534	28.8117	43.6791	70.915	81.618	98.8268	56.3235	26.3463	31.2452	66.071	70.7628	70.7437	51.6644	60.0285	68.847	82.3483	72.585	57.4549	58.527		0.765026	66.903
16.7839	83.446	104.207	58.8	33.747	42.6745	82.6783	83.264	81.019	84.405	92.521	99.898	89.1505	48.7065	32.6491	42.6078	72.06	86.129	94.9074	58.1976	33.7881	36.2726	69.324	72.0776	72.8216	61.4659	55.521	72.562	78.68	71.411	57.8769	65.8394		0.770494	68.3454
16.9029	92.11	113.442	61.34	34.2506	40.9763	78.5904	77.989	80.262	80.573	87.198	93.162	97.5453	49.6433	34.8397	45.2205	67.301	87.713	91.5135	57.6908	30.8679	38.6566	72.68	72.3077	76.9311	65.6277	61.3264	74.94	83.3247	65.001	62.1663	70.8529		0.775957	69.2272
17.0219	90.821	99.047	72.119	31.3914	35.6748	78.7066	82.006	76.227	90.355	95.734	84.073	88.6876	43.8522	36.9324	38.0316	70.205	97.483	97.0177	56.8407	28.8975	35.5082	79.657	77.7296	75.0901	63.407	60.9406	69.481	76.0109	73.986	53.0869	69.6372		0.78142	68.6657
17.141	89.704	97.941	85.669	32.7666	42.1178	86.6079	79.74	80.102	85.415	111.154	90.503	91.8495	47.3999	37.4714	43.1543	75.044	93.249	100.718	55.3573	29.437	33.9484	80.115	71.0982	77.7504	62.8314	60.026	74.149	74.5928	64.546	58.7388	65.4486		0.786887	70.2789
17.26	92.739	98.227	86.275	37.3523	39.202	97.8701	89.935	82.29	81.828	110.055	83.41	95.7895	49.7862	41.0674	45.6819	70.391	80.128	96.7936	65.1257	33.3181	40.7232	88.354	78.7576	72.2633	65.4841	59.5203	69.781	79.2931	68.234	59.3004	67.0981		0.79235	71.8088
17.379	98.345	91.008	88.896	38.5642	42.7506	91.9247	101.532	91.297	85.266	101.078	84.278	96.2427	54.2655	38.1323	44.9782	78.198	82.577	88.3134	62.469	32.1074	37.5462	84.987	71.1929	79.2228	69.0119	64.4967	71.74	84.3132	69.445	70.4328	65.5805		0.797813	72.9094
17.4981	102.268	90.018	92.938	33.4045	44.5231	94.7775	108.2	98.299	82.211	96.236	80.309	122.926	57.6348	45.055	56.6519	76.087	86.895	95.6288	60.5093	39.9878	36.2072	83.41	69.1393	79.4088	83.6125	65.7138	71.47	82.8242	66.869	56.0117	67.6856		0.80328	75.0617
17.6171	89.518	95.244	82.272	34.8668	50.8792	97.4619	119.848	90.768	85.14	112.723	88.18	118.541	53.3133	36.7833	47.5486	77.161	95.59	91.6814	66.9956	39.1653	39.3097	92.041	79.2598	82.6826	77.4171	67.3386	68.2	76.4284	69.492	57.4547	63.3534		0.808743	75.6986
17.7361	100.894	99.278	82.35	41.5803	44.9179	90.6288	124.336	94.104	75.075	103.451	90.072	112.244	57.4449	41.6286	49.9313	85.533	96.379	83.9759	62.7868	42.6202	41.8462	93.739	71.5453	78.3941	71.3419	65.9252	69.059	84.5909	67.613	66.2325	63.8286		0.814206	75.9144
17.8552	89.462	95.907	79.242	43.931	49.6741	86.7059	126.309	105.077	71.579	91.772	86.547	117.742	52.839	50.5237	59.0872	80.907	94.846	77.2668	64.755	41.8285	37.7732	73.693	79.3922	73.3112	73.1787	69.3376	71.202	80.582	70.715	61.8718	62.9702		0.819674	74.8396
17.9742	89.305	118.988	75.339	38.3623	45.3385	91.9261	118.32	101.858	71.591	103.756	76.14	117.093	58.7947	46.722	54.7946	80.478	103.499	72.9223	63.1167	38.644	43.6264	79.84	72.4103	71.8342	74.0128	71.5211	70.749	77.5568	64.977	58.3453	65.3397		0.825137	74.7484
18.0932	102.096	93.066	72.677	47.2617	52.1565	98.0921	117.272	111.038	83.299	85.469	79.396	118.255	58.6982	43.8845	54.1529	92.027	95.802	82.0993	63.8984	41.229	49.6226	81.065	69.0235	69.39	72.8068	65.4779	68.46	77.3268	72.434	62.8804	64.8563		0.8306	75.652
18.2123	102.796	92.682	81.68	45.0635	50.0677	92.952	121.913	108.399	75.652	88.919	82.036	121.916	69.167	38.1571	52.762	92.328	98.51	67.1677	70.1677	49.5253	43.8629	80.732	70.4473	73.9583	73.7161	72.747	72.527	82.762	68.943	60.1332	62.0145		0.836067	76.2485
18.3313	98.237	101.809	77.856	50.4805	51.7316	90.1462	126.112	106.229	77.903	84.658	88.248	122.131	70.8589	42.2083	64.5965	91.708	90.475	73.9336	71.6533	49.3819	44.6275	81.849	60.0164	77.0482	81.6586	73.2831	68.846	84.8418	64.004	67.6244	55.4641		0.84153	77.0845
18.4504	87.847	100.464	77.566	43.6069	49.6013	91.2067	112.333	101.396	80.731	92.954	78.374	116.499	63.2775	47.0057	66.5731	90.191	95.442	86.3173	65.6207	47.6907	49.0829	73.835	68.2856	83.248	78.2563	66.5567	63.155	84.2221	68.306	75.9982	56.138		0.846997	76.1865
18.5694	98.62	97.385	78.543	44.9405	48.5741	91.0472	123.349	112.653	90.581	89.957	70.841	116.247	67.6572	50.9945	68.576	94.069	96.366	86.5249	72.222	52.0141	51.175	79.086	67.888	73.3982	78.3718	66.9286	70.189	78.7267	63.864	69.9024	62.1809		0.85246	77.8346
18.6884	101.996	104.089	79	49.8018	55.9213	89.2124	117.485	116.898	90.281	78.372	73.088	116.498	63.1954	46.3524	71.1945	94.053	85.058	83.9493	63.5643	53.1423	53.9094	79.872	71.4115	76.0399	84.8382	67.1393	61.554	74.644	61.691	79.5801	67.6842		0.857923	77.7908
18.8075	96.116	98.419	77.676	50.5729	47.1862	92.7878	107.085	109.899	98.05	86.095	74.986	114.823	67.9202	53.4105	76.0341	92.039	90.646	92.3839	68.7966	55.663	63.8991	81.719	61.992	80.9449	91.3174	77.6635	57.443	82.4813	67.017	83.6998	64.1717		0.863391	79.4496
18.9265	81.4	82.062	75.949	54.4041	46.7111	80.524	100.507	112.84	96.095	91.338	84.249	113.791	82.4872	59.9849	78.3952	101.019	88.198	93.5882	75.9132	60.2691	68.2082	79.241	64.2971	88.266	86.1743	70.3748	68.931	82.1273	62.89	78.5534	69.0979		0.868854	79.9318
19.0455	75.438	79.742	70.496	59.7869	46.4803	89.8108	84.368	95.617	94.55	86.185	78.367	110.237	67.1954	62.5568	78.2237	100.909	78.353	90.1986	74.0627	58.6926	71.0547	70.56	61.73	97.47	85.6173	79.8014	72.16	83.1028	65.953	84.171	68.289		0.874317	78.1025
19.1646	78.362	76.886	82.124	52.7595	49.8182	88.9318	86.285	98.075	85.761	84.571	78.771	116.067	64.0019	69.6281	85.7954	106.124	78.057	89.5601	76.4966	63.261	61.887	69.813	61.7867	97.1064	89.9669	77.5465	66.755	73.6051	60.544	82.1102	65.1969		0.879784	77.9888
19.2836	76.911	84.71	82.558	62.1271	55.9679	84.0872	89.101	86.538	75.104	83.742	75.968	105.177	69.9495	74.8592	84.2287	104.466	83.665	91.2329	85.7516	57.513	62.9247	61.214	61.6936	94.484	94.9222	69.8876	61.585	71.4474	49.743	84.9991	68.3544		0.885247	77.2552
19.4026	80.872	83.207	79.962	63.0176	61.2354	88.8901	80.793	79.494	74.172	81.792	71.023	101.01	76.423	70.5988	83.3153	108.028	88.117	83.9903	89.1171	57.7328	65.3729	59.078	55.4609	92.1849	99.3862	81.6453	60.806	70.5998	54.612	75.3806	78.8748		0.89071	77.2965
19.5217	77.647	90.89	81.978	62.5287	71.7718	83.1878	76.975	71.837	73.109	81.465	68.835	100.29	72.2319	69.0187	82.692	103.588	82.372	88.8297	82.2009	66.2241	66.0814	58.624	55.5339	100.893	92.008	81.4898	54.071	75.1885	62.124	78.5017	80.2914		0.896177	77.1767
19.6407	65.538	74.931	88.923	70.3061	67.412	92.2545	79.173	76.99	69.228	81.814	68.718	93.3215	80.5889	67.1557	102.763	115.771	91.105	81.8869	77.6713	67.8548	63.7144	60.593	56.2537	105.877	95.022	75.6052	62.829	71.1954	56.533	82.8773	77.9323		0.90164	78.1238
19.7597	82.214	82.762	88.117	72.1927	69.3211	83.9621	73.431	63.409	68.189	73.317	66.759	90.3486	83.1151	79.2588	97.161	113.06	85.303	80.9066	78.0119	65.3712	73.9785	57.455	60.7559	104.597	89.3641	75.263	58.746	75.497	64.856	75.5944	81.6989		0.907103	77.8715
19.8788	69.37	71.975	86.02	80.6936	68.2445	90.944	75.105	66.472	72.519	73.213	70.512	81.2689	78.903	74.8705	97.7474	106.455	85.68	81.6035	81.4168	67.4923	74.4878	50.702	55.7848	101.956	96.4415	81.295	60.206	77.9058	62.598	84.4673	73.2263		0.912571	77.4057
19.9978	57.146	66.818	93.971	86.9061	60.9591	95.4558	71.978	55.394	63.14	61.865	70.668	76.3208	85.1762	71.6273	104.167	98.518	84.152	73.2728	95.1094	62.2837	72.9222	55.217	55.7722	85.3256	101.337	82.7941	64.346	78.1151	65.277	76.2525	73.1654		0.918034	75.6597
20.1168	61.431	70.111	96.066	88.1446	62.3052	90.278	83.162	51.682	57.016	56.057	64.193	69.2505	88.6684	69.1797	103.957	90.063	86.047	82.0339	91.5442	60.4854	68.136	56.725	54.2643	79.6332	105.167	85.1866	59.17	72.2148	62.275	66.347	79.7202		0.923496	74.5327
20.2359	59.027	60.866	97.299	88.8714	72.1078	86.106	67.495	49.633	53.898	58.38	64.014	68.375	84.3842	74.8455	85.939	82.99	88.217	82.0946	81.0099	64.4703	69.9088	50.697	58.134	86.5954	99.4196	81.4753	55.851	64.3865	65.369	60.3888	86.0462		0.928964	72.5256
20.3549	59.191	50.775	89.943	85.6955	84.2035	84.4057	74.42	44.182	46.89	49.304	61.02	70.8829	90.2145	75.8447	85.8384	74.253	84.423	83.1595	81.834	74.9287	66.6352	49.937	56.7045	86.7614	88.863	79.8975	50.773	65.8993	61.906	59.2342	86.2589		0.934427	71.1058
20.4739	57.795	46.985	91.425	100.731	83.692	73.1798	78.773	40.579	45.658	47.826	58.458	68.4701	94.6541	74.7501	90.1568	80.117	90.203	65.7107	87.6441	78.0077	69.0916	45.592	55.7853	82.8852	99.2742	88.239	58.273	69.4211	66.277	56.7365	90.4443		0.93989	72.1559
20.593	53.098	36.846	92.136	91.1176	86.8911	75.6344	64.61	34.154	40.591	48.51	50.682	65.7929	90.7972	84.2751	82.2647	68.464	76.431	74.6812	81.9175	80.1787	75.3934	42.925	57.5769	87.5618	105.813	86.165	55.347	63.6908	59.166	54.2904	91.7611		0.945357	69.6375
20.712	36.924	32.307	88.93	90.6024	77.4511	70.2952	61.174	27.811	42.591	38.346	40.349	65.3119	88.696	67.8237	81.31	62.209	72.433	64.4075	77.2131	69.9291	69.1624	45.97	51.5943	72.9831	105.982	84.2017	55.19	53.5173	51.784	57.6831	92.0869		0.95082	64.3958
20.831	41.65	27.14	82.7	91.4506	89.8848	73.4984	53.052	21.436	36.675	37.192	38.433	66.8009	78.9662	74.8634	76.7175	71.052	62.311	59.7565	67.9154	66.3324	61.7453	41.106	52.2495	88.4913	95.903	78.3668	53.907	52.269	49.094	59.4564	100.384		0.956283	62.929
20.9501	32.134	19.009	75.004	93.0225	92.3224	71.157	46.3	18.732	34.87	35.668	41.892	70.211	80.9994	79.2182	74.223	64.106	59.244	55.7008	75.3136	68.5839	66.575	46.769	43.5004	89.4935	96.9429	75.0692	47.453	50.1363	47.373	57.2155	86.7404		0.961751	61.1284
21.0691	25.771	15.315	76.396	98.265	87.5922	75.1374	41.906	13.778	25.526	26.434	37.388	62.0522	81.5315	76.4829	70.4981	64.779	58.261	58.3591	67.5318	76.0097	63.2311	49.893	43.4533	78.2851	91.5524	78.172	45.976	51.0872	37.439	61.0429	91.5239		0.967213	59.0539
21.1881	21.787	10.773	66.766	96.0403	82.5605	66.3051	29.521	14.213	20.855	20.636	37.064	72.5299	79.4372	73.1528	73.3798	60.842	50.085	62.4088	61.403	65.7177	55.5113	47.139	45.6953	73.214	87.8584	77.0734	54.909	53.051	33.691	56.7774	80.9275		0.972676	55.8492
21.3072	19.951	7.174	62.863	84.2293	88.5738	63.1136	28.052	9.773	23.004	17.907	33.863	63.9618	81.4068	64.9472	63.8184	57.228	51.259	68.1116	70.8434	65.1723	60.3702	35.271	35.1034	85.9326	89.6948	75.4618	42.927	57.6139	39.12	49.8866	80.04		0.978144	54.0862
21.4262	13.979	6.819	57.035	82.2059	88.6333	52.0022	26.338	8.687	14.445	13.559	30.336	49.9573	71.0342	63.3524	48.0439	52.328	43.72	49.8601	71.0094	72.7224	61.8517	34.247	30.139	79.1355	88.6467	72.9317	32.748	48.4933	29.69	41.4347	76.2351		0.983607	48.7619
21.5452	12.052	5.805	48.079	82.0183	84.1026	52.7357	17.988	6.531	11.542	12.835	24.161	45.6406	59.2522	57.4352	43.2953	39.342	36.311	48.953	65.9277	68.0083	57.7792	35.582	28.1732	80.2512	81.0182	72.5056	22.766	56.4355	23.393	40.1048	70.6421		0.98907	44.8602
21.6643	10.236	5.362	39.138	80.5052	91.4325	48.234	12.807	4.475	10.789	9.573	19.734	44.4196	64.8481	42.547	33.0817	37.841	28.516	52.4585	58.3353	61.3635	50.0111	25.858	26.4523	73.9778	77.8653	66.122	16.647	58.2777	18.032	35.3891	64.4146		0.994537	40.9272
21.7833	6.714	3.062	30.66	76.6988	83.8492	38.0646	13.43	4.504	8.34	11.468	18.794	40.2816	57.7217	40.1378	22.1989	23.748	26.658	48.4249	58.7734	65.4474	55.0095	20.648	22.9607	76.3789	70.9498	62.2673	12.082	54.0608	18.028	29.9352	65.7723		1	37.6474

## Sheet: Sheet1
Image1				Image2				Image3				Image32				Image33				Image34				Image1 (2)				Image3 (2)				Distance	Image1	Image2	Image3	Image32	Image33	Image34	Image1 (2)	Image3 (2)
Ap-basal	Avg intensity			Ap-basal	Avg intensity			Ap-basal	Avg intensity			Ap-basal	Avg intensity			Ap-basal	Avg intensity			Ap-basal	Avg intensity			Ap-basal	Avg intensity			Ap-basal	Avg intensity			0	57.1708	55.7806	88.9048	49.4577	43.6436	35.2052	32.7547	38.4283
0	57.1708			0	55.7806			0	88.9048			0	49.4577			0	43.6436			0	35.2052			0	32.7547			0	38.4283			0.05	64.1588	87.7495	129.387	92.1355	86.331	54.7914	68.1401	58.7614
0.0054629	58.9412			0.00507467	61.8187			0.00757354	100.652			0.0067548	56.6565			0.00653405	52.2193			0.00571264	37.0444			0.00568016	37.9672			0.0044235	41.0239			0.1	77.6113	144.489	198.783	172.582	174.721	160.653	149.174	93.5605
0.0109304	59.6314			0.0101536	67.6124			0.0151534	111.427			0.0135153	64.0303			0.0130736	60.2294			0.0114301	39.2513			0.0113651	43.0653			0.00885071	44.3765			0.15	93.3814	167.393	201.833	179.801	180.35	208.57	147.342	106.651
0.0163933	60.8558			0.0152283	74.3386			0.022727	121.375			0.0202701	74.9417			0.0196076	71.7498			0.0171427	41.0899			0.0170453	48.8269			0.0132742	47.327			0.2	99.037	164.975	177.284	149.213	155.891	197.656	122.663	106.902
0.0218562	61.9422			0.0203029	80.8761			0.0303005	135.624			0.0270249	86.5465			0.0261417	82.678			0.0228554	44.7636			0.0227254	56.352			0.0176977	50.578			0.25	106.509	148.586	147.001	120.673	119.418	170.328	89.4632	103.231
0.0273237	64.2236			0.0253819	88.7843			0.0378804	146.019			0.0337854	102.048			0.0326812	94.0271			0.0285728	49.8614			0.0284104	64.5205			0.0221249	54.1569			0.3	103.057	129.86	123.478	98.1984	92.3852	127.011	60.6003	99.113
0.0327866	65.2202			0.0304565	94.9974			0.045454	159.787			0.0405402	117.828			0.0392153	110.481			0.0342854	58.8881			0.0340905	78.0466			0.0265484	58.6052			0.35	93.792	109.115	105.886	81.021	72.8211	89.8627	46.4614	90.5644
0.0382495	66.6967			0.0355312	100.509			0.0530275	171.31	129.387		0.047295	131.179			0.0457493	123.886			0.0399981	68.0459			0.0397707	92.0778			0.0309719	63.4395			0.4	81.7963	97.3229	94.1654	71.1372	61.5319	67.284	41.0559	75.4361
0.043717	67.5542			0.0406102	107.067			0.0606074	183.329			0.0540554	146.531	92.1355		0.0522888	138.064	86.331		0.0457155	80.7443			0.0454556	107.914			0.0353991	66.8009			0.45	75.1214	90.434	78.4445	60.4223	51.725	56.9326	37.4691	54.4263
0.0491799	70.08			0.0456848	112.839			0.068181	190.487			0.0608102	157.598			0.0588229	150.2			0.0514282	93.02	54.7914		0.0511358	119.876	68.1401		0.0398226	71.0144			0.5	66.6538	79.5457	68.9505	53.4316	45.2278	48.4329	33.8317	36.093
0.0546428	73.4312	64.1588		0.0507595	120.622	87.7495		0.0757545	197.58			0.067565	163.421			0.0653569	163.139			0.0571408	108.198			0.056816	130.927			0.0442461	72.3216			0.55	63.1689	72.0149	61.0873	48.0253	40.2234	41.2127	30.78	26.5946
0.0601103	73.7228			0.0558384	124.585			0.0833344	202.345			0.0743255	170.462			0.0718965	170.606			0.0628582	121.831			0.0625009	142.345			0.0486733	75.7339			0.6	61.155	65.3116	53.6699	46.4034	38.3227	37.2788	28.9755	21.8907
0.0655732	74.8852			0.0609131	129.055			0.0909079	204.053			0.0810803	173.531			0.0784305	177.472			0.0685709	139.268			0.0681811	147.032			0.0530968	80.092	58.7614		0.65	60.2776	60.6376	47.7498	45.9163	38.2614	34.4963	27.9343	19.893
0.0710361	75.3018			0.0659878	136.264			0.0984815	205.5			0.0878351	177.446			0.0849646	181.65			0.0742835	153.44			0.0738612	152.715			0.0575203	81.5494			0.7	60.4788	58.829	45.2357	46.471	39.209	34.3809	27.8904	18.6521
0.0765036	76.6932			0.0710667	138.103			0.106061	208.185	198.783		0.0945956	182.913			0.0915041	182.12			0.080001	165.244			0.0795462	153.082			0.0619475	84.546			0.75	63.379	56.9155	43.0085	48.0818	41.2563	36.3263	27.9594	18.5117
0.0819665	76.3384			0.0761414	141.904			0.113635	206.163			0.10135	182.706	172.582		0.0980381	186.357			0.0857136	179.009			0.0852263	154.179			0.066371	87.6429			0.8	69.8449	53.1205	41.0307	51.3516	43.6951	38.6683	29.3891	17.948
0.087434	78.8303			0.0812203	145.628			0.121215	206.408			0.108111	184.278			0.104578	186.222	174.721		0.091431	185.509			0.0909113	154.545			0.0707982	91.4466			0.85	77.8346	45.4356	39.5279	55.1434	44.7225	40.7537	31.0769	17.31
0.0928969	79.7382			0.086295	151.254			0.128788	204.43			0.114866	186.043			0.111112	188.395			0.0971437	194.65			0.0965914	153.737			0.0752217	92.361			0.9	78.124	36.8659	38.0166	50.8425	40.6935	37.3572	32.4981	16.3195
0.0983598	81.4596			0.0913696	156.273			0.136362	200.5			0.12162	183.975			0.117646	184.733			0.102856	198.726	160.653		0.102272	154.007	149.174		0.0796452	94.0912			0.95	72.81	28.0625	35.7654	39.5139	30.4104	22.973	29.3283	14.8868
0.103827	81.5325	77.6113		0.0964486	159.691			0.143942	197.549			0.128381	182.258			0.124185	184.046			0.108574	203.949			0.107957	153.947			0.0840724	95.8021			1	51.6937	18.4528	31.0241	24.5693	18.3729	7.12575	23.281	9.40744
0.10929	82.4412			0.101523	162.135	144.489		0.151515	195.948	201.833		0.135136	180.444			0.130719	181.37			0.114286	205.537			0.113637	153.61			0.0884959	96.2334
0.114753	84.3539			0.106598	162.913			0.159089	190.747			0.141891	177.862			0.137253	177.497			0.119999	208.488			0.119317	151.515			0.0929194	98.9782
0.120221	87.1898			0.111677	165.955			0.166669	187.886			0.148651	174.333			0.143793	175.559			0.125716	211.54			0.125002	150.04			0.0973466	101.719
0.125683	87.7112			0.116752	167.293			0.174242	182.769			0.155406	169.216	179.801		0.150327	170.852	180.35		0.131429	209.957			0.130682	147.674			0.10177	104.796	93.5605
0.131146	88.7717			0.121826	167.295			0.181816	178.481			0.162161	164.856			0.156861	171.014			0.137142	211.786			0.136362	147.025			0.106194	104.824
0.136614	90.4829			0.126905	168.992			0.189396	173.789			0.168921	157.908			0.163401	167.508			0.142859	209.217			0.142047	143.94			0.110621	105.077
0.142077	91.3191			0.13198	169.722			0.196969	166.072			0.175676	152.803			0.169935	165.527			0.148572	208.105			0.147727	139.842			0.115044	103.62
0.14754	92.6762			0.137054	166.228			0.204543	161.247	177.284		0.182431	149.644			0.176469	158.235			0.154284	208.555	208.57		0.153407	138.488	147.342		0.119468	107.011
0.153007	93.3814	93.3814		0.142133	167.177			0.212123	158.7			0.189191	144.161			0.183008	153.603			0.160002	205.689			0.159092	135.447			0.123895	106.737
0.15847	94.8464			0.147208	169.267			0.219696	153.655			0.195946	139.205			0.189542	147.727			0.165715	204.613			0.164772	132.066			0.128319	105.838
0.163933	96.183			0.152283	169.084	167.393		0.22727	149.953			0.202701	135.915	149.213		0.196076	144.107			0.171427	203.495			0.170453	129.992			0.132742	105.907
0.1694	97.1389			0.157362	170.194			0.23485	141.695			0.209461	131.557			0.202616	139.403	155.891		0.177145	201.398			0.176138	126.121			0.137169	107.083
0.174863	97.9049			0.162436	169.977			0.242423	140.842			0.216216	127.476			0.20915	135.692			0.182857	198.955			0.181818	122.948			0.141593	110.062
0.180326	98.1039			0.167511	167.676			0.249997	137.164	147.001		0.222971	123.512			0.215684	127.742			0.18857	197.796			0.187498	119.637			0.146016	108.277
0.185794	100.794			0.17259	166.854			0.257577	131.145			0.229731	119.744			0.222223	124.051			0.194287	192.225			0.193183	116.147			0.150443	108.722	106.651
0.191257	100.768			0.177665	165.099			0.26515	128.181			0.236486	116.672			0.228757	121.521			0.2	188.725			0.198863	112.258			0.154867	107.917
0.19672	102.041			0.182739	166.154			0.272724	125.045			0.243241	114.866			0.235292	116.35			0.205713	186.01	197.656		0.204543	109.347	122.663		0.15929	107.149
0.202187	103.552	99.037		0.187818	163.142			0.280304	122.166			0.250001	110.885	120.673		0.241831	113.762			0.21143	182.633			0.210228	103.39			0.163718	106.847
0.20765	104.534			0.192893	161.768			0.287877	120.734			0.256756	108.343			0.248365	110.045			0.217143	178.271			0.215908	102.711			0.168141	108.13
0.213113	104.418			0.197968	161.023			0.295451	119.544			0.263511	105.881			0.254899	106.182	119.418		0.222855	175.143			0.221588	99.4294			0.172565	106.51
0.21858	106.287			0.203047	157.863	164.975		0.303031	117.528	123.478		0.270271	102.769			0.261439	102.007			0.228573	176.318			0.227273	93.0588			0.176992	108.051
0.224043	107.247			0.208121	155.846			0.310604	112.528			0.277026	100.833			0.267973	99.7481			0.234285	170.247			0.232954	89.518			0.181415	106.148
0.229511	108.057			0.2132	155.234			0.318184	108.235			0.283787	96.1743			0.274512	96.6028			0.240003	164.785			0.238638	84.9699			0.185843	106.344
0.234974	106.834			0.218275	153.819			0.325758	106.986			0.290542	92.2399			0.281046	93.2213			0.245716	160.848			0.244319	81.4587			0.190266	106.736
0.240436	106.452			0.223349	149.688			0.333331	105.671			0.297296	90.203			0.28758	90.0784			0.251428	154.378	170.328		0.249999	77.0584			0.19469	106.492
0.245904	106.803			0.228428	148.453			0.340911	105.665			0.304057	89.1446	98.1984		0.29412	87.2733			0.257146	149.5			0.255684	73.5742	89.4632		0.199117	106.291
0.251367	107.952	106.509		0.233503	147.62			0.348485	101.738			0.310812	87.5292			0.300654	86.3574			0.262858	143.782			0.261364	70.0465			0.20354	106.212	106.902
0.25683	106.324			0.238578	143.692			0.356058	100.377	105.886		0.317566	82.8818			0.307188	83.7932	92.3852		0.268571	136.422			0.267044	67.5068			0.207964	103.714
0.262297	106.449			0.243657	145.336			0.363638	99.8002			0.324327	80.932			0.313728	81.1361			0.274288	131.397			0.272729	64.1301			0.212391	103.765
0.26776	105.172			0.248731	144.393			0.371212	96.9818			0.331082	80.4833			0.320262	77.7907			0.280001	126.081			0.278409	60.7103			0.216814	104.1
0.273223	104.203			0.253806	141.78	148.586		0.378785	95.0854			0.337837	78.1934			0.326796	73.5935			0.285714	120.063			0.284089	59.0703			0.221238	103.878
0.278691	104.281			0.258885	142.741			0.386365	95.9093			0.344597	79.2982			0.333335	71.7473			0.291431	115.166			0.289774	56.2928			0.225665	104.365
0.284153	102.683			0.26396	139.045			0.393939	90.3707			0.351352	77.8294	81.021		0.339869	69.3112			0.297144	112.225			0.295454	54.2968			0.230089	103.019
0.289616	101.994			0.269034	135.681			0.401512	86.8449	94.1654		0.358107	75.779			0.346403	68.6991			0.302856	108.459	127.011		0.301135	52.7491	60.6003		0.234512	103.485
0.295084	100.447			0.274113	133.281			0.409092	84.1602			0.364867	74.5397			0.352943	67.4695	72.8211		0.308574	103.098			0.30682	50.8551			0.238939	104.787
0.300547	99.7333			0.279188	130.853			0.416666	82.4632			0.371622	73.8134			0.359477	66.4924			0.314286	101.02			0.3125	48.6598			0.243363	102.272
0.30601	99.2856	103.057		0.284263	127.071			0.424239	79.923			0.378377	72.1325			0.366011	64.328			0.319999	96.9981			0.31818	48.156			0.247786	101.147
0.311477	100.307			0.289341	125.473			0.431819	79.7758			0.385137	70.4213			0.37255	62.5316			0.325716	93.2032			0.323865	47.0856			0.252214	101.012	103.231
0.31694	97.2395			0.294416	124.538			0.439393	76.8527			0.391892	69.4298			0.379084	62.132			0.331429	89.4685			0.329545	46.0092			0.256637	101.646
0.322403	95.996			0.299491	121.912			0.446966	73.4817			0.398647	67.6748			0.385619	60.9441			0.337142	85.3385			0.335225	45.0129			0.261061	102.081
0.32787	95.5059			0.30457	118.004	129.86		0.454546	72.4546	78.4445		0.405407	65.3074	71.1372		0.392158	59.463			0.342859	82.8226			0.34091	44.9054			0.265488	98.9708
0.333333	94.4402			0.309644	116.948			0.46212	70.9908			0.412162	63.4802			0.398692	58.1432			0.348572	78.7962			0.34659	44.0452			0.269911	101.022
0.338796	92.4026			0.314719	112.616			0.469693	71.1034			0.418917	61.6542			0.405226	58.2212	61.5319		0.354284	78.0194	89.8627		0.35227	43.4236	46.4614		0.274335	100.162
0.344264	90.7077			0.319798	111.535			0.477273	70.0103			0.425677	61.8525			0.411766	56.0518			0.360002	74.4759			0.357955	43.1292			0.278762	99.1972
0.349727	89.3339			0.324873	109.988			0.484847	69.1155			0.432432	60.1067			0.4183	54.0001			0.365715	72.1643			0.363635	42.2843			0.283186	98.4738
0.35519	88.1957	93.792		0.329947	108.818			0.49242	66.6488			0.439187	59.6114			0.424834	52.3813			0.371427	69.755			0.369316	41.1282			0.287609	97.3509
0.360657	86.2953			0.335026	108.461			0.5	65.8343	68.9505		0.445947	58.8617			0.431373	51.6655			0.377145	67.7343			0.375001	40.9412			0.292036	97.7947
0.36612	85.9252			0.340101	105.975			0.507574	64.1383			0.452702	57.3897	60.4223		0.437907	50.852			0.382857	65.0499			0.380681	40.6194			0.29646	96.7549
0.371583	82.8092			0.345176	104.698			0.515147	63.8034			0.459457	56.4726			0.444441	49.0756			0.38857	64.2208			0.386361	40.9397			0.300883	96.7896	99.113
0.37705	79.3426			0.350255	102.995	109.115		0.522727	63.3135			0.466217	55.5865			0.450981	48.0489	51.725		0.394287	63.0457			0.392046	41.175			0.30531	95.687
0.382513	81.0569			0.355329	102.415			0.530301	61.5343			0.472972	54.5078			0.457515	47.0977			0.4	61.8261	67.284		0.397726	39.9307			0.309734	95.1629
0.387981	81.1748			0.360408	100.564			0.53788	60.5147			0.479733	52.3246			0.464055	46.129			0.405717	61.191			0.403411	39.3553	41.0559		0.314161	94.1262
0.393444	80.5885			0.365483	100.114			0.545454	57.3638			0.486488	52.9483			0.470589	45.4529			0.41143	58.3697			0.409091	38.9403			0.318585	93.6323
0.398907	79.1655			0.370558	98.2604			0.553028	56.9433	61.0873		0.493242	52.6615			0.477123	46.374			0.417143	57.4303			0.414771	38.0476			0.323008	92.5269
0.404374	79.8083	81.7963		0.375636	97.756			0.560607	56.8855			0.500003	49.5202	53.4316		0.483662	45.9645			0.42286	58.2284			0.420456	37.7593			0.327435	91.392
0.409837	79.0111			0.380711	97.0475			0.568181	56.4363			0.506758	50.0165			0.490196	43.9894			0.428573	58.0235			0.426136	37.1028			0.331859	89.8193
0.4153	76.8783			0.385786	95.8468			0.575754	53.332			0.513512	49.2961			0.49673	43.3302			0.434285	55.2477			0.431817	37.8421			0.336282	90.2323
0.420767	76.4664			0.390865	94.6676			0.583334	52.5337			0.520273	48.0509			0.50327	43.4847	45.2278		0.440003	55.7085			0.437501	37.5324			0.34071	88.8403
0.42623	76.0915			0.395939	93.933			0.590908	52.9637			0.527028	48.2709			0.509804	41.8195			0.445716	54.9534			0.443182	37.2218			0.345133	86.5476
0.431693	75.5591			0.401014	92.625	97.3229		0.598481	52.1527			0.533783	48.466			0.516338	41.3378			0.451428	53.2413	56.9326		0.448862	37.2781			0.349557	84.6925
0.437161	73.7926			0.406093	94.2821			0.606061	51.3855	53.6699		0.540543	46.4218			0.522877	40.6591			0.457146	52.9144			0.454547	35.4972	37.4691		0.353984	84.1128	90.5644
0.442623	72.7454			0.411168	93.471			0.613635	50.8404			0.547298	46.7963			0.529411	40.4534			0.462858	49.918			0.460227	35.5751			0.358407	83.3351
0.448086	73.0325			0.416242	93.3141			0.621208	49.6843			0.554053	46.8842	48.0253		0.535945	39.6088			0.468571	50.6304			0.465907	34.9907			0.362831	82.3544
0.453554	72.5156	75.1214		0.421321	92.1693			0.628788	48.289			0.560813	46.4417			0.542485	39.1154			0.474288	48.9856			0.471592	34.2107			0.367258	80.7403
0.459017	70.2252			0.426396	92.297			0.636362	46.1237			0.567568	46.251			0.549019	39.0233			0.480001	46.9401			0.477272	34.7587			0.371681	79.6236
0.46448	70.1092			0.431471	90.9935			0.643935	46.7021			0.574323	46.4338			0.555553	39.7699	40.2234		0.485714	48.2436			0.482952	34.7159			0.376105	76.7747
0.469947	68.1175			0.43655	89.6899			0.651515	44.859	47.7498		0.581083	45.4192			0.562093	38.3588			0.491431	47.5259			0.488637	33.4757			0.380532	74.0488
0.47541	66.6717			0.441624	87.1591			0.659089	46.2937			0.587838	46.2607			0.568627	38.4663			0.497144	46.5018			0.494317	32.2884			0.384956	73.4695
0.480873	66.3745			0.446699	86.1283			0.666662	46.2324			0.594593	46.9618			0.575161	39.0684			0.502856	44.2367	48.4329		0.499998	32.3054			0.389379	73.8019
0.48634	64.6032			0.451778	84.8359	90.434		0.674242	45.7968			0.601353	47.0557	46.4034		0.5817	38.163			0.508574	44.776			0.505683	32.1649	33.8317		0.393806	70.3833
0.491803	65.6179			0.456853	83.8616			0.681816	45.3196			0.608108	46.1951			0.588234	38.5105			0.514286	42.9364			0.511363	32.2465			0.39823	68.796
0.497266	64.6355			0.461927	83.3801			0.689389	44.4153			0.614863	47.1306			0.594768	37.7699			0.519999	42.4065			0.517043	31.2051			0.402653	66.4696	75.4361
0.502734	63.5294	66.6538		0.467006	81.7402			0.696969	45.0301			0.621623	45.8878			0.601308	37.9217	38.3227		0.525716	41.4954			0.522728	31.3203			0.407081	64.9442
0.508197	64.0228			0.472081	80.4667			0.704543	43.5623	45.2357		0.628378	44.8378			0.607842	38.249			0.531429	38.9224			0.528408	31.087			0.411504	62.131
0.51366	63.581			0.477155	79.2118			0.712116	44.1298			0.635133	46.1686			0.614376	37.5444			0.537142	41.12			0.534088	30.8489			0.415928	60.2047
0.519127	62.4858			0.482234	79.4896			0.719696	43.7664			0.641893	45.4476			0.620916	38.1154			0.542859	40.4202			0.539773	30.8487			0.420355	58.2606
0.52459	62.1268			0.487309	78.4076			0.72727	43.4082			0.648648	45.7994			0.62745	37.6596			0.548572	39.1255			0.545453	29.6308			0.424778	56.8924
0.530053	62.4964			0.492384	76.2538			0.734843	42.0669			0.655403	45.8632	45.9163		0.633984	38.8044			0.554284	39.7118	41.2127		0.551133	29.0527	30.78		0.429202	54.3766
0.53552	62.6803			0.497463	77.2115			0.742423	43.1651			0.662163	45.8156			0.640523	38.9287			0.560002	38.1028			0.556818	30.2616			0.433629	52.7821
0.540983	62.8571			0.502537	75.4342	79.5457		0.749997	41.5146	43.0085		0.668918	45.5779			0.647057	38.2883			0.565715	37.8132			0.562499	29.5428			0.438052	49.7528
0.546451	64.58			0.507616	75.7388			0.757577	39.5197			0.675679	47.9342			0.653597	38.5012	38.2614		0.571432	37.1327			0.568183	29.1873			0.44248	49.2342
0.551914	63.6897	63.1689		0.512691	75.3901			0.76515	41.1772			0.682434	47.1363			0.660131	39.6763			0.577145	37.7235			0.573864	28.8201			0.446903	46.4749
0.557377	62.3997			0.517766	74.2013			0.772724	42.5082			0.689188	46.2818			0.666665	39.2975			0.582857	36.7745			0.579544	28.2973			0.451327	43.6356	54.4263
0.562844	62.217			0.522845	74.1959			0.780304	42.9814			0.695949	46.4505			0.673204	37.8023			0.588575	37.5245			0.585229	28.5903			0.455754	42.6778
0.568307	61.2579			0.527919	73.0752			0.787877	41.1299			0.702704	46.1008	46.471		0.679738	37.6699			0.594287	36.6173			0.590909	28.5838			0.460177	41.0035
0.57377	61.3834			0.532994	72.144			0.795451	40.2658			0.709458	47.4699			0.686272	38.635			0.6	36.0598			0.596589	28.902			0.464601	39.0149
0.579237	60.1683			0.538073	71.1107			0.803031	39.633	41.0307		0.716219	47.7074			0.692812	39.2033			0.605717	35.3281	37.2788		0.602274	28.5944	28.9755		0.469028	39.3521
0.5847	61.5365			0.543147	68.6051			0.810604	39.8366			0.722974	47.0772			0.699346	39.9584			0.61143	34.1432			0.607954	27.5884			0.473452	37.2319
0.590163	60.838			0.548222	67.6985			0.818178	40.1107			0.729729	47.1353			0.70588	41.4298	39.209		0.617143	35.4133			0.613634	28.4209			0.477875	35.3504
0.595631	60.4929			0.553301	67.9893	72.0149		0.825758	39.9499			0.736489	48.7704			0.71242	40.2693			0.62286	35.0354			0.619319	28.3922			0.482302	34.589
0.601093	60.1014	61.155		0.558376	68.2306			0.833331	39.3684			0.743244	47.8967			0.718954	38.8154			0.628573	33.8522			0.624999	28.1235			0.486726	34.0378
0.606556	59.7268			0.56345	66.8801			0.840905	39.3293			0.749999	48.7464			0.725488	41.7857			0.634285	34.8271			0.63068	28.0488			0.491149	31.8753
0.612024	59.859			0.568529	66.391			0.848485	38.8883			0.756759	49.8515	48.0818		0.732027	41.8857			0.640003	35.0146			0.636365	28.1318			0.495577	31.1998
0.617487	60.9774			0.573604	66.736			0.856058	39.2123	39.5279		0.763514	49.7565			0.738561	41.7917			0.645716	33.6662			0.642045	27.7997			0.5	30.69	36.093
0.62295	59.3788			0.578679	65.3438			0.863632	38.6811			0.770269	49.4824			0.745095	42.3194			0.651428	34.0181	34.4963		0.647725	27.6316			0.504423	29.8995
0.628417	59.6838			0.583758	63.966			0.871212	37.8549			0.777029	51.0492			0.751635	41.9272	41.2563		0.657146	34.4257			0.65341	27.2716	27.9343		0.508851	28.8971
0.63388	59.6769			0.588832	64.0239			0.878785	38.2941			0.783784	52.4522			0.758169	40.9675			0.662858	33.8898			0.65909	26.9898			0.513274	28.728
0.639343	61.5054			0.593907	64.4953			0.886359	38.3203			0.790539	51.1921			0.764703	43.1054			0.668571	34.0471			0.66477	27.6396			0.517698	27.3388
0.64481	60.8309			0.598986	63.3354			0.893939	37.4042			0.797299	52.2804			0.771243	43.1128			0.674288	33.7346			0.670455	27.9502			0.522125	26.5108
0.650273	60.859	60.2776		0.604061	63.7134	65.3116		0.901512	37.545	38.0166		0.804054	53.2484	51.3516		0.777777	44.3348			0.680001	34.4948			0.676135	27.8165			0.526548	27.0478
0.655736	60.9321			0.609135	62.7045			0.909086	36.7301			0.810809	55.8415			0.784311	43.5512			0.685714	34.346			0.681815	28.8331			0.530972	27.5044
0.661204	60.0865			0.614214	60.9757			0.916666	36.1622			0.817569	54.1339			0.79085	44.8811			0.691431	34.1683			0.6875	27.8771			0.535399	26.1132
0.666667	59.5089			0.619289	62.308			0.924239	37.4076			0.824324	53.968			0.797384	44.1834			0.697144	35.0976			0.69318	27.7721			0.539823	25.1397
0.67213	60.3883			0.624364	61.0317			0.931813	36.7953			0.831079	55.1081			0.803918	45.4246	43.6951		0.702856	35.2242	34.3809		0.698861	28.2443			0.544246	23.8942
0.677597	61.0811			0.629442	61.0834			0.939393	35.0827			0.837839	56.2923			0.810458	45.7642			0.708574	36.0563			0.704546	27.8908	27.8904		0.548673	24.4024
0.68306	60.0543			0.634517	59.3575			0.946966	34.4794			0.844594	55.1052			0.816992	45.0958			0.714286	34.4721			0.710226	28.074			0.553097	23.6592	26.5946
0.688527	60.2501			0.639596	60.3268			0.954546	33.7005	35.7654		0.851355	55.5547	55.1434		0.823531	45.0968			0.720004	36.1034			0.715911	27.7823			0.557524	23.7238
0.69399	60.8161			0.644671	59.1107			0.96212	32.8034			0.858109	55.2688			0.830065	45.0704			0.725716	36.1925			0.721591	28.1857			0.561948	23.0695
0.699453	61.8191			0.649745	59.5334			0.969693	32.0631			0.864864	52.6767			0.836599	44.6532			0.731429	36.2498			0.727271	27.7294			0.566371	22.3544
0.704921	59.8517	60.4788		0.654824	59.9443	60.6376		0.977273	32.3192			0.871625	51.3646			0.843139	44.7919			0.737147	36.2154			0.732956	27.4949			0.570798	21.9529
0.710384	60.6262			0.659899	58.8745			0.984847	30.306			0.87838	51.9276			0.849673	44.3545			0.742859	37.6743			0.738636	27.834			0.575222	22.4602
0.715847	62.2344			0.664974	59.5409			0.99242	29.5076			0.885134	50.8693			0.856207	42.9534	44.7225		0.748572	36.9693			0.744316	28.0587			0.579645	22.2308
0.721314	63.1742			0.670053	59.3202			1	29.1452	31.0241		0.891895	49.2403			0.862747	42.6719			0.754289	37.0034	36.3263		0.750001	28.2128			0.584072	21.9771
0.726777	63.5285			0.675127	59.1677							0.89865	48.473			0.869281	42.4083			0.760002	36.9344			0.755681	28.2631	27.9594		0.588496	21.418
0.73224	64.1111			0.680202	57.2733							0.905404	46.9198	50.8425		0.875815	41.4187			0.765715	37.906			0.761362	27.8588			0.592919	20.7576
0.737707	63.1832			0.685281	58.407							0.912165	45.1854			0.882354	40.5287			0.771432	37.9802			0.767046	29.2706			0.597347	20.9434
0.74317	64.9278			0.690356	58.0475							0.91892	42.7842			0.888888	40.1664			0.777145	38.993			0.772727	29.3592			0.60177	19.9105	21.8907
0.748633	63.7882			0.69543	59.3329							0.925674	42.4932			0.895422	39.0794			0.782857	40.2434			0.778407	29.5208			0.606194	19.8841
0.754101	64.8376	63.379		0.700509	59.4972	58.829						0.932435	39.473			0.901962	38.581	40.6935		0.788575	38.7763			0.784092	30.0528			0.610621	20.2858
0.759564	65.4036			0.705584	57.8654							0.93919	37.1067			0.908496	36.2363			0.794287	39.4615			0.789772	29.3328			0.615044	20.5852
0.765026	66.903			0.710659	57.1209							0.945945	36.1831			0.91503	34.4605			0.8	39.0517	38.6683		0.795452	29.4181			0.619468	19.1142
0.770494	68.3454			0.715737	56.8708							0.952705	33.3719	39.5139		0.921569	32.7628			0.805717	41.4161			0.801137	30.2996	29.3891		0.623895	19.683
0.775957	69.2272			0.720812	57.1982							0.95946	31.1248			0.928104	30.971			0.81143	40.5057			0.806817	30.3225			0.628319	20.2157
0.78142	68.6657			0.725887	57.6923							0.966215	28.7109			0.934638	29.4797			0.817143	39.9399			0.812497	29.954			0.632742	19.9306
0.786887	70.2789			0.730966	57.1479							0.972975	26.2347			0.941177	28.6756			0.82286	41.1515			0.818182	30.4443			0.637169	19.7472
0.79235	71.8088			0.73604	56.962							0.97973	24.2748			0.947711	26.3097			0.828573	40.8029			0.823862	30.6485			0.641593	20.0658
0.797813	72.9094			0.741115	55.4172							0.986485	22.6762			0.954245	24.3873	30.4104		0.834285	41.6812			0.829543	30.665			0.646016	20.0491
0.80328	75.0617	69.8449		0.746194	55.4632							0.993245	20.1238			0.960785	22.1795			0.840003	40.5639			0.835228	31.2703			0.650443	19.2624	19.893
0.808743	75.6986			0.751269	57.4173	56.9155						1	18.84	24.5693		0.967319	20.8887			0.845716	40.5277			0.840908	31.3702			0.654867	19.1941
0.814206	75.9144			0.756343	56.1455											0.973853	19.6708			0.851428	40.1947	40.7537		0.846588	32.1903			0.65929	18.0407
0.819674	74.8396			0.761422	54.3378											0.980392	18.4043			0.857146	39.6496			0.852273	32.8272	31.0769		0.663718	18.7419
0.825137	74.7484			0.766497	55.2573											0.986926	17.1998			0.862858	39.3693			0.857953	32.4617			0.668141	18.6544
0.8306	75.652			0.771572	53.6662											0.99346	15.8683			0.868571	39.0999			0.863633	31.4726			0.672565	18.4678
0.836067	76.2485			0.776651	53.0569											1	14.3992	18.3729		0.874288	38.4125			0.869318	32.4369			0.676992	18.2293
0.84153	77.0845			0.781725	53.0542															0.880001	38.186			0.874998	33.0559			0.681415	18.671
0.846997	76.1865			0.786804	52.4981															0.885718	37.4698			0.880683	33.0256			0.685843	18.8139
0.85246	77.8346	77.8346		0.791879	51.087															0.891431	35.8194			0.886363	33.1049			0.690266	19.32
0.857923	77.7908			0.796953	50.5935															0.897144	34.0766			0.892043	32.3129			0.69469	18.8254
0.863391	79.4496			0.802032	51.5089	53.1205														0.902861	34.1319	37.3572		0.897728	32.5907			0.699117	18.8109
0.868854	79.9318			0.807107	48.9463															0.908574	30.7025			0.903409	32.0217	32.4981		0.70354	18.5973	18.6521
0.874317	78.1025			0.812182	47.9055															0.914286	28.9943			0.909089	31.4976			0.707964	18.2159
0.879784	77.9888			0.817261	46.4974															0.920004	28.1653			0.914774	30.656			0.712391	18.4177
0.885247	77.2552			0.822335	46.5192															0.925716	25.1214			0.920454	30.4217			0.716814	18.1056
0.89071	77.2965			0.82741	46.018															0.931429	22.6453			0.926134	30.5637			0.721238	18.2541
0.896177	77.1767			0.832489	44.8575															0.937147	20.5183			0.931819	29.6732			0.725665	18.4816
0.90164	78.1238	78.124		0.837564	44.0663															0.942859	19.5662			0.937499	29.0274			0.730089	18.5545
0.907103	77.8715			0.842638	43.283															0.948572	16.5985			0.943179	27.8212			0.734512	18.5876
0.912571	77.4057			0.847717	42.5181															0.954289	14.4452	22.973		0.948864	27.377			0.738939	18.8116
0.918034	75.6597			0.852792	43.7448	45.4356														0.960002	11.9405			0.954544	26.917	29.3283		0.743363	19.0331
0.923496	74.5327			0.857867	41.9314															0.965715	10.8431			0.960225	25.5183			0.747786	18.591
0.928964	72.5256			0.862946	41.0195															0.971432	8.04513			0.965909	25.8832			0.752214	18.5763	18.5117
0.934427	71.1058			0.86802	39.7267															0.977145	7.08331			0.97159	25.1549			0.756637	18.4393
0.93989	72.1559			0.873095	38.7246															0.982857	6.34194			0.97727	23.6415			0.761061	18.2273
0.945357	69.6375			0.878174	38.3443															0.988575	4.92603			0.982955	21.7002			0.765488	18.6265
0.95082	64.3958	72.81		0.883248	36.4907															0.994287	4.52913			0.988635	22.0291			0.769911	17.9254
0.956283	62.929			0.888323	35.2828															1	3.29684	7.12575		0.994315	21.6862			0.774335	17.5725
0.961751	61.1284			0.893402	34.081																			1	20.6347	23.281		0.778762	17.7145
0.967213	59.0539			0.898477	32.3123																							0.783186	17.6794
0.972676	55.8492			0.903551	30.7458	36.8659																						0.787609	18.51
0.978144	54.0862			0.90863	31.3155																							0.792036	17.5957
0.983607	48.7619			0.913705	29.9655																							0.79646	17.7114
0.98907	44.8602			0.91878	28.896																							0.800883	17.4257	17.948
0.994537	40.9272			0.923859	29.1126																							0.80531	17.9013
1	37.6474	51.6937		0.928933	28.5152																							0.809734	17.4605
				0.934012	28.1919																							0.814161	17.1976
				0.939087	28.0216																							0.818585	17.3491
				0.944162	26.1705																							0.823008	17.3398
				0.949241	25.1131																							0.827435	16.8739
				0.954315	25.3229	28.0625																						0.831859	16.5892
				0.95939	22.9721																							0.836282	17.22
				0.964469	22.8756																							0.84071	17.2282
				0.969543	21.0298																							0.845133	17.562
				0.974618	19.5033																							0.849557	17.3393
				0.979697	18.2311																							0.853984	17.6589	17.31
				0.984772	17.2215																							0.858407	17.3359
				0.989846	16.2107																							0.862831	16.392
				0.994925	14.4041																							0.867258	16.4557
				1	13.627	18.4528																						0.871681	16.846
																												0.876105	16.658
																												0.880532	16.0438
																												0.884956	16.1517
																												0.889379	15.8722
																												0.893806	15.8983
																												0.89823	15.8332
																												0.902653	16.0282	16.3195
																												0.907081	15.7915
																												0.911504	15.8108
																												0.915928	15.3099
																												0.920355	15.5612
																												0.924778	15.2628
																												0.929202	15.3265
																												0.933629	15.0241
																												0.938052	14.6238
																												0.94248	14.1859
																												0.946903	14.0155
																												0.951327	12.8428	14.8868
																												0.955754	12.0117
																												0.960177	11.5475
																												0.964601	10.679
																												0.969028	10.3358
																												0.973452	9.89107
																												0.977875	8.81111
																												0.982302	9.29495
																												0.986726	8.39888
																												0.991149	7.91925
																												0.995577	7.47674
																												1	7.11581	9.40744
