# Supplementary material for: Crumbs organizes the transport machinery by regulating apical levels of PI(4,5)P2 in Drosophila
Source: eLife. 2019 Nov 7;8:e50900. doi: 10.7554/eLife.50900 (PMC6881148; doi:10.7554/eLife.50900)
Supplement: Figure 6—source data 8. [file elife-50900-fig6-data8.xlsx]

## Sheet: Image6 (2)
X0	Y0	Y1	Y2	Y3	Y4	Y5	Y6	Y7	Y8	Y9	Y10	Y11	Y12	Y13	Y14	Y15	Y16	Y17	Y18	Y19	Y20	Y21	Y22	Y23	Y24	Y25	Y26	Y27	Y28	Y29	Y30	Y31		Ap-basal	Avg intensity
0	18.2336	15.4255	20.4237	20.3375	23.6223	32.25	37.5457	44.1776	43.7963	42.037	30.624	48.822	54.7433	50.609	25.0514	30.7364	26.7184	25.8705	29.2093	30.1084	25.2743	28.1181	17.265	26.1233	28.686	32.9289	21.7361	43.1799	63.9541	58.919	16.0869	11.3551		0	31.999
0.119	19.0954	19.5272	19.293	27.8242	31.9592	31.625	38.7808	42.0421	47.8072	37.457	38.1472	51.1144	51.3117	42.868	21.4993	30.0225	22.8257	27.3514	32.3401	26.4597	29.4166	26.8941	17.377	27.0412	31.6782	37.2197	23.7506	42.0034	48.5802	68.898	12.8845	17.48		0.00555395	32.5805
0.2381	26.8422	18.7693	22.7857	27.3801	28.5969	39.351	34.9609	45.3426	42.8672	42.097	39.64	51.8633	54.5375	45.951	27.4941	29.7145	22.955	22.974	31.411	31.9023	32.3643	30.1149	15.684	25.1761	29.932	33.9392	24.3937	39.8551	47.1599	64.016	14.9578	15.8321		0.0111126	33.1519
0.3571	25.4509	26.6101	29.6216	35.146	36.5316	38.127	42.9038	40.6784	40.8306	40.475	47.6333	57.8189	53.7628	51.005	27.8787	34.5731	25.8158	28.0868	33.3075	34.4979	30.0238	35.5757	21.746	36.1962	24.6303	28.8737	28.0924	32.5446	41.5464	58.846	13.0093	16.8534		0.0166665	34.9591
0.4761	31.6194	30.6906	30.015	40.6024	35.3493	36.088	39.117	45.3621	45.431	41.504	52.4053	60.4067	60.6341	53.032	32.4643	32.3216	21.7241	27.5187	34.8051	36.2382	28.8208	38.6111	24.396	31.1535	30.1997	32.8545	18.064	34.1079	45.0451	64.787	12.7837	19.6156		0.0222205	36.4927
0.5952	30.0522	30.917	29.7516	41.1933	38.9362	40.228	42.755	46.5494	42.6712	44.854	58.1411	56.1764	63.2046	52.498	37.331	38.2954	19.1018	29.3156	39.8946	36.707	25.7104	41.7825	20.014	39.9273	36.152	30.7579	19.3091	32.8868	42.6959	65.536	11.8026	16.5141		0.0277791	37.5519
0.7142	31.6882	34.4826	37.3666	40.2491	48.7752	47.618	39.3358	48.98	44.4972	44.193	53.0319	53.9381	51.7606	59.551	39.9629	43.8924	26.3322	32.6755	38.2814	42.886	24.8636	39.1679	19.907	40.4323	32.6521	27.2557	23.4283	31.1929	41.7725	69.391	15.0488	21.2986		0.033333	38.9346
0.8332	32.5169	38.4522	37.3138	49.4127	42.9823	50.9	36.1206	47.7578	48.6517	45.934	50.3788	60.9966	57.9512	60.085	35.6104	42.5279	27.3373	36.3706	36.3077	39.4085	30.86	39.5936	18.613	33.4545	30.3185	29.1567	28.5725	31.1444	42.3742	62.001	20.0713	22.2747		0.038887	39.5453
0.9523	42.5043	37.4966	40.6797	54.4931	43.2006	56.55	47.5265	47.3203	53.8407	47.708	50.0486	66.6161	60.0955	57.754	40.783	46.2795	30.0269	34.9012	43.1196	45.0155	35.2226	35.7489	19.885	43.3672	28.5797	24.4072	28.2346	28.4472	46.7332	62.005	19.9844	23.6843		0.0444456	41.9456
1.0713	41.7612	43.5784	42.2314	53.4134	55.3903	59.973	52.9475	42.0578	45.4698	44.851	56.8196	67.0607	58.275	60.617	42.0285	47.3096	30.0025	40.0009	45.4365	36.5674	40.1915	38.3804	17.691	38.4412	29.3785	30.3657	24.315	25.6047	49.503	64.09	17.7638	24.5777		0.0499995	42.6904
1.1903	44.0588	40.5833	47.3946	53.6797	53.7167	62.37	46.5287	49.279	50.9633	52.165	64.0466	60.107	62.8686	58.077	41.5688	53.5623	35.7937	51.4708	46.419	41.871	32.5178	36.8477	21.243	44.3687	30.724	29.5838	31.5187	30.356	47.4302	60.412	22.9339	24.6098		0.0555535	44.6584
1.3094	50.1342	44.7597	48.0782	61.203	60.0444	62.84	46.81	45.5035	44.1922	50.697	62.151	66.0702	62.2921	65.551	48.8879	60.3989	32.587	59.609	45.1048	50.6429	40.7385	35.0527	20.85	40.9019	42.0586	30.39	33.6126	38.8894	49.4469	60.031	26.8549	33.3725		0.0611121	47.4924
1.4284	52.5262	42.795	43.9674	60.7728	55.9973	68.558	54.7937	54.3092	52.735	51.447	65.6661	57.6644	55.9765	70.813	54.4957	55.6549	44.0513	56.368	50.4603	54.4865	37.6699	34.1976	23.99	47.4436	40.8344	28.6563	34.2457	45.9728	63.175	61.136	23.2787	40.0794		0.066666	49.5068
1.5474	59.3455	48.3543	44.6719	58.3379	54.939	64.469	60.4075	53.9538	50.2547	50.426	69.5026	58.9631	54.0727	73.034	57.8006	65.0899	44.5945	60.1713	51.5366	49.9151	42.3616	35.4165	23.512	49.4566	38.7075	23.6511	55.5502	40.1925	55.3949	66.271	26.8819	39.7217		0.07222	50.8424
1.6665	52.7201	49.563	46.6536	57.964	61.2622	73.239	73.1852	51.0547	56.1096	50.257	57.6501	62.2413	57.3581	67.014	60.7266	61.0224	45.8022	59.4943	53.9147	50.2412	39.4452	37.0915	19.947	47.6381	36.3232	32.9887	49.5519	41.9574	61.0733	64.557	35.0108	35.4299		0.0777786	51.5152
1.7855	48.2263	54.3234	48.4079	58.2017	53.4765	70.5	68.3057	51.0858	62.0594	63.562	56.7311	67.5682	55.436	69.934	65.0892	62.2716	53.5752	67.82	50.2459	47.2958	48.0684	35.4053	19.159	50.0166	37.8423	32.7731	59.0748	47.642	65.8469	69.301	38.3848	41.1172		0.0833326	53.7108
1.9046	50.0907	51.5727	54.6506	63.3813	55.0971	79.512	74.1494	55.7214	68.8713	70.356	55.5281	60.2675	53.935	69.993	66.2794	59.0184	52.1394	69.3456	51.8393	41.2179	43.9552	41.1958	24.189	56.2651	40.0438	32.0031	59.5706	63.1442	70.2769	78.257	43.0191	44.7146		0.0888912	56.2375
2.0236	44.3085	53.1096	53.5165	61.1122	56.6335	78.017	72.2069	55.682	74.2365	64.27	61.979	71.9099	58.0222	64.895	74.17	62.1007	56.6703	62.8648	51.7053	46.8439	45.1118	35.9608	26.051	51.384	46.5686	33.821	64.4971	70.6327	72.2496	71.718	52.73	48.5602		0.0944451	57.6106
2.1426	53.626	50.762	49.2158	59.8962	58.3066	74.003	71.8489	60.6875	69.3491	62.589	58.1162	71.4954	56.3328	69.417	68.0403	63.9132	62.116	61.9699	54.1272	51.2239	48.0438	35.4274	19.224	56.2065	41.9851	41.8797	55.5069	69.0109	73.6139	82.057	51.8957	50.8505		0.0999991	57.898
2.2617	47.7259	58.2367	54.2767	54.844	53.4465	70.615	79.3526	62.4096	63.9487	67.73	56.4155	70.8889	65.432	72.131	79.3508	70.1201	53.1127	65.8007	60.9751	52.5206	40.3226	38.8574	24.182	56.3954	41.948	42.6531	60.5016	68.8651	79.0378	79.436	53.1645	58.3037		0.105558	59.4688
2.3807	43.1915	52.1341	54.3978	59.5641	67.9431	74.303	82.1103	70.9714	65.0762	68.364	63.9147	81.1234	67.7259	74.102	80.4758	66.5663	59.2804	73.4313	57.8661	48.7908	47.9747	41.0037	25.91	59.1021	48.0337	39.8522	56.9869	71.5853	77.0459	100.645	68.6134	60.9402		0.111112	62.782
2.4997	49.5007	52.6831	46.6858	58.8479	64.0774	74.233	64.4311	73.4481	67.9057	58.731	64.8971	82.396	68.7509	81.176	89.4226	63.1661	66.041	77.4991	57.1251	54.8748	42.0955	38.6383	26.016	53.6454	52.3589	50.0796	54.9389	74.3049	77.9538	104.579	71.2603	71.4854		0.116666	63.539
2.6188	55.5347	43.9841	43.4252	53.9276	63.7715	73.594	72.0881	74.9789	76.5389	72.404	61.7725	76.5511	75.5027	86.145	92.1446	68.9755	70.6477	72.9557	56.2533	50.2034	43.736	42.5512	45.602	61.8085	51.6302	53.6731	54.1712	82.8842	81.8505	104.588	73.3095	71.003		0.122224	65.8814
2.7378	46.3713	50.5361	51.2818	60.6401	58.5737	70.986	74.9142	77.9776	77.4424	75.429	70.093	83.0765	79.4092	73.429	93.1046	67.0894	70.6571	84.0186	60.921	63.2554	57.0704	39.0108	43.54	58.2544	57.0063	53.3577	66.4993	86.64	82.0131	113.653	67.8433	78.3842		0.127778	68.515
2.8568	47.1415	44.3621	51.9154	49.6838	57.1819	70.825	74.6367	88.5427	82.1732	72.579	65.7285	87.3134	74.635	71.693	101.979	60.7603	65.9539	79.8419	64.5539	55.5251	60.6364	41.9496	46.771	71.3414	51.3989	56.5573	65.651	76.9083	84.6362	111.231	69.1153	87.3191		0.133332	68.4544
2.9759	43.59	46.2085	49.8363	50.6352	59.1842	65.852	72.9797	87.391	89.3813	82.199	74.3244	80.2203	79.7032	71.346	99.9473	62.9349	69.4951	83.0639	51.4693	50.7107	57.1806	44.1842	50.276	67.8544	49.3318	51.6916	67.9092	76.3639	84.5077	106.451	81.4265	84.4684		0.138891	68.5037
3.0949	50.8747	44.2207	46.3765	56.7608	57.8109	75.178	74.9951	90.4307	91.3762	87.685	79.8564	84.0981	82.206	72.168	102.591	55.5904	72.5918	82.4514	56.5856	51.3305	59.449	53.1084	54.909	69.929	57.9415	57.4658	61.7369	74.9265	86.3146	106.057	79.2531	78.5609		0.144445	70.4634
3.2139	43.0811	48.7084	46.4657	48.3056	57.2677	80.374	76.9478	86.0306	90.7159	84.105	79.3103	82.6196	81.1224	82.518	96.9918	64.6208	80.0977	70.2869	65.1766	56.093	60.9081	55.5248	65.566	73.3981	67.6064	65.7049	63.7206	72.3558	80.2344	86.506	74.0419	88.092		0.149999	71.0781
3.333	41.3408	48.4016	47.1869	51.2373	58.9964	75.932	74.6959	93.2347	88.3541	93.298	76.706	82.5051	80.8059	78.192	89.4178	66.6304	90.4383	88.5116	71.0358	54.3425	68.9448	59.7029	71.757	78.0808	67.3858	54.8201	69.1522	68.0478	78.8471	84.208	91.7872	87.8666		0.155557	72.8707
3.452	42.5083	41.7846	53.4693	54.8221	64.3754	70.333	67.7563	94.8433	89.2344	107.611	84.7472	91.5103	74.5139	74.969	78.6018	61.0502	84.9315	86.4479	73.8534	63.9608	64.9615	70.3992	74.044	69.3321	63.3791	58.0668	68.8195	73.9438	78.6055	94.174	84.5698	91.3847		0.161111	73.5314
3.571	45.9549	52.0984	57.1002	58.2065	68.8301	79.822	69.0811	86.4155	87.392	96.674	73.1824	90.6764	84.6262	80.479	98.2625	62.3368	75.6008	77.8184	70.9886	60.5446	70.4564	68.5402	80.482	73.5964	65.5361	58.0164	66.9506	68.3197	84.3993	79.437	85.9293	97.679		0.166665	74.2323
3.6901	47.7432	60.3089	53.6737	56.1551	69.4539	79.106	69.0442	93.6285	86.8155	100.244	74.7998	81.1578	95.5599	75.342	96.709	68.7731	72.9053	81.2576	73.101	56.6491	67.5755	74.2422	70.35	76.339	64.3309	51.7985	74.9387	73.8552	82.1504	79.583	79.5676	93.3201		0.172224	74.39
3.8091	48.2622	51.364	59.8093	55.6144	67.9783	84.155	73.5052	92.683	90.3626	97.696	88.0876	83.1863	100.487	70.808	89.633	65.9138	70.0745	89.1877	78.7812	63.3429	66.275	78.8321	76.93	81.8474	69.7506	53.2618	79.371	81.018	87.7429	82.891	83.1874	80.3277		0.177778	76.324
3.9281	46.9069	49.2937	54.2349	50.8798	69.8096	83.844	71.1186	92.1536	96.5361	84.462	81.353	90.8656	98.8619	80.761	87.1045	73.0279	73.6674	76.2495	71.5442	53.8659	64.7527	79.5623	75.19	88.3105	72.1512	63.2765	67.3286	81.3913	90.7574	94.836	85.4309	73.313		0.183332	75.7138
4.0472	50.6226	48.1101	57.3155	60.5443	71.69	84.392	67.4581	84.9156	86.5709	80.759	84.2215	97.5139	105.914	89.742	88.8667	80.2768	63.6883	80.6184	72.079	57.9014	60.0814	73.8901	80.138	82.0615	76.5045	57.5767	78.0623	82.2472	90.8013	87.605	79.6612	83.1009		0.18889	76.4041
4.1662	51.9965	53.2969	55.3892	52.2767	74.9581	84.071	78.1715	85.2446	88.6673	87.093	85.0409	91.7429	97.1002	104.003	80.3824	78.5157	77.4467	89.9211	77.9073	64.1397	64.0242	80.4591	86.943	80.9984	77.8239	60.9692	75.164	86.3718	86.9795	76.681	75.377	76.7392		0.194444	77.6842
4.2852	51.268	54.099	57.0649	54.2974	74.5712	95.087	75.371	85.2401	97.7647	83.683	81.5683	89.3248	92.9675	107.526	91.3044	78.6235	76.1791	82.0213	77.247	65.4838	71.6521	73.1862	90.556	85.0912	71.0008	63.3027	85.2477	90.9914	92.6892	82.422	73.0061	74.3075		0.199998	78.8795
4.4043	60.5385	54.378	52.4883	61.7429	79.6182	91.716	76.3722	85.6457	98.5455	72.509	85.1746	99.1273	87.3391	113.042	87.7689	87.2316	81.5152	87.0916	76.7011	66.6412	67.5291	69.357	84.627	81.5859	64.7131	68.5104	80.2656	80.7286	91.863	85.328	88.9149	83.9594		0.205557	79.7678
4.5233	56.8013	53.8704	51.9862	61.098	71.1671	96.787	82.2619	81.8063	94.2947	70.563	81.8636	94.6619	76.1889	110.2	78.9667	91.5249	81.4238	74.7538	86.4961	61.6435	80.6837	74.6059	77.908	74.7192	72.2831	72.1585	81.9541	82.1403	89.0464	85.124	93.5695	84.3021		0.211111	78.9642
4.6423	63.3637	55.0378	52.9519	56.3404	75.5336	94.25	76.3199	79.6322	92.0104	76.385	79.9509	96.3498	85.5987	130.646	76.332	82.6329	79.4941	75.4963	84.964	61.1639	76.357	76.2018	75.865	82.5629	71.8981	77.2958	87.6654	84.8197	99.73	90.068	89.3975	79.915		0.216665	80.1947
4.7614	54.2267	47.2792	56.8382	51.9618	77.3103	93.573	81.2711	72.4353	94.8283	83.1	80.9778	98.4524	85.3346	124.307	81.796	89.8263	82.8895	89.3242	84.0128	51.9026	71.3044	82.2546	92.416	83.818	78.9673	73.9775	72.5652	82.2475	90.4179	91.841	91.4644	84.9488		0.222223	80.5584
4.8804	60.7634	46.0192	50.8717	61.6639	67.5122	102.387	82.1419	74.1757	86.4893	85.003	80.5256	88.2335	86.4002	129.595	85.1228	88.9769	91.8917	90.2352	89.1978	64.4271	79.089	81.6918	88.16	91.0957	87.8609	91.6372	74.2057	76.6927	85.7977	87.436	94.9677	82.0546		0.227777	82.2601
4.9995	54.506	49.3614	51.8823	58.3465	72.4206	93.283	76.0652	83.2034	71.398	90.851	82.9022	84.3948	89.4141	126.071	79.9728	90.9144	87.0878	82.7152	89.5188	64.4353	80.5495	85.6587	83.41	93.2406	78.0588	87.9332	77.3979	77.4687	80.8102	73.044	83.6175	70.6281		0.233336	79.705
5.1185	59.9261	55.0355	50.9542	55.5995	66.5526	106.233	83.9528	84.0444	83.0922	93.51	87.2512	75.2129	86.8484	121.52	80.3834	93.5109	87.5098	82.8556	100.436	72.0025	87.3171	75.4209	88.412	90.5308	80.4257	95.1913	75.2923	80.0839	83.1687	87.489	82.8914	76.4792		0.23889	82.1604
5.2375	63.4259	51.4822	56.6234	54.1309	69.9549	98.051	89.1867	72.9273	84.5685	88.41	89.4382	74.7856	84.9051	115.315	76.9328	90.4127	82.5259	92.8737	91.454	78.8871	85.1627	86.6129	86.617	93.0224	79.066	97.4575	72.1502	80.068	87.5578	78.976	86.057	70.0874		0.244444	81.5352
5.3566	65.0824	53.1942	58.178	52.7597	63.1875	109.608	72.1083	82.6222	80.8527	95.023	83.1971	85.5344	74.0871	114.44	81.529	88.7613	92.2802	92.0136	91.246	79.754	83.8147	86.3343	91.334	94.4331	77.6539	86.5192	73.9784	75.1109	91.625	71.028	85.495	73.2272		0.250002	81.4379
5.4756	62.4113	47.2551	55.0451	52.4628	62.725	105.669	86.6247	79.8726	81.4217	95.514	75.194	86.6819	78.3869	110.81	88.9092	77.4276	81.6609	94.1999	101.252	85.0536	84.0602	78.8408	94.387	94.3518	69.6004	82.3256	85.4269	72.8095	83.0107	84.831	76.704	70.9096		0.255556	80.8074
5.5946	65.8806	47.1293	48.563	57.089	67.1591	111.536	88.7358	87.6709	72.8054	86.289	80.0103	94.2731	78.0267	112.971	89.4691	80.1606	77.7796	92.5805	98.2812	88.1578	82.1978	90.4104	100.114	90.7212	65.4565	99.7941	83.4892	74.0926	77.4366	81.883	67.3963	65.6297		0.26111	81.3497
5.7137	67.7661	50.3533	58.0632	61.7282	77.2214	104.591	82.4534	82.0977	80.0939	83.725	72.6969	95.8605	85.8536	102.374	93.4808	86.1263	86.1985	89.241	102.649	87.8098	78.6603	105.703	96.451	85.5872	64.4944	88.6627	73.2963	62.8258	66.7908	76.86	65.9108	55.4855		0.266669	80.3472
5.8327	66.7007	53.1069	53.3783	53.496	80.3199	107.442	84.8708	81.2091	80.4465	82.382	80.0419	91.0265	79.7776	96.718	91.7668	86.6956	81.4245	100.036	95.3652	91.455	88.5396	96.0219	95.752	78.6815	60.6802	88.4271	88.3054	56.9956	71.1886	81.015	75.9913	63.6238		0.272223	80.715
5.9517	64.6152	55.2753	52.7477	54.8398	82.4468	109.033	76.1772	84.5713	75.7843	83.357	82.2595	98.9883	82.4794	99.181	83.4155	84.9632	90.5128	103.003	93.2833	91.0246	101.429	103.19	92.449	79.2871	60.3613	87.8839	91.7411	70.9879	70.9596	78.476	67.5041	71.7782		0.277777	82.0002
6.0708	62.2876	62.0594	60.0577	67.6129	80.8567	99.736	77.9541	82.6237	72.1298	77.056	82.2424	103.646	72.1878	104.571	83.8618	88.5555	81.685	107.426	98.2466	92.6657	90.4075	93.2969	109.459	79.2509	59.4744	85.7393	83.2331	73.5143	70.1419	73.724	67.4007	69.2358		0.283335	81.6356
6.1898	64.5864	59.2379	63.5017	73.4807	71.042	94.641	80.2784	77.6172	78.256	75.133	80.7249	102.432	84.9324	109.164	84.9102	81.651	81.4056	90.7804	92.4361	90.2747	80.5889	95.5894	100.938	81.0156	60.0693	82.6114	85.0472	75.0315	70.9852	72.801	68.814	71.5696		0.288889	80.6733
6.3088	63.3701	58.7349	57.4458	80.4053	67.6481	96.875	66.0957	81.011	77.3124	69.592	78.6321	104.216	83.3257	115.415	85.7164	80.6756	71.3371	106.009	80.0623	83.7489	92.831	93.6953	102.572	77.7587	65.2469	79.9324	86.367	72.579	70.8937	74.068	62.1762	68.1405		0.294443	79.809
6.4279	61.8365	56.986	52.8474	73.3758	73.4567	88.216	70.1723	84.8396	78.2917	76.329	78.1864	98.7036	81.7014	109.071	80.5408	88.6486	77.5906	101.51	82.4714	82.299	80.3097	87.9523	92.31	71.2048	72.9727	73.4679	77.6496	70.2424	74.0583	68.407	69.2869	75.153		0.300002	78.4403
6.5469	64.9457	61.4417	59.0474	76.9084	68.1518	93.859	72.2957	72.5515	86.635	74.9	79.6893	89.7153	83.4869	99.216	85.6202	85.8153	74.2199	103.361	78.1857	78.3264	88.564	82.0005	100.71	65.448	72.6947	72.0773	75.1331	69.0022	67.6601	66.692	60.576	74.7179		0.305556	77.614
6.6659	63.2488	63.9368	59.244	61.2037	67.4066	93.077	76.301	74.9663	77.144	90.031	69.2763	90.4602	87.4279	99.162	84.8245	82.6562	72.4696	106.864	72.9097	79.4104	95.3165	88.2099	103.454	72.6643	68.6847	74.7197	76.233	66.8415	79.5628	65.624	70.6466	76.0257		0.31111	78.4376
6.785	64.0354	63.9956	52.8434	66.732	73.1894	91.252	78.7803	71.1831	82.662	76.819	68.0084	85.897	84.6451	100.585	87.8953	72.6829	75.1544	98.0329	72.0505	75.2308	94.0883	75.5329	109.162	74.0914	64.5646	68.7624	85.4274	72.4782	75.0816	65.762	68.0728	74.8791		0.316668	77.1743
6.904	68.5401	59.8473	57.1923	64.4144	78.8268	91.01	82.0562	71.7089	79.6902	76.378	63.7763	81.2943	81.837	92.438	86.073	84.7064	82.4601	98.0607	73.3294	73.4479	97.3072	78.3816	101.491	64.9884	61.4434	75.7681	78.9306	69.3501	72.2733	61.105	66.8424	70.7221		0.322222	76.4278
7.023	69.9202	66.2932	57.3163	62.3626	77.9544	79.299	83.1067	66.4631	87.1275	87.585	67.2614	81.6502	93.5392	101.864	89.0494	87.9255	70.5078	91.109	80.4167	72.7878	107.754	78.8151	113.782	62.9242	65.8539	63.3849	76.4834	64.504	75.4889	61.259	70.2761	69.4615		0.327776	77.6102
7.1421	72.1415	69.9745	59.5235	62.5344	85.3245	75.833	74.5532	70.2765	94.1698	74.408	68.4665	88.4093	96.5633	100.138	80.701	81.1135	71.8095	93.4646	72.9837	74.5513	90.9354	76.4947	111.766	63.3169	68.1657	59.6319	71.6245	66.4591	76.6565	61.91	69.5715	73.4462		0.333335	76.7787
7.2611	66.0444	64.0285	55.8313	65.6555	72.7371	80.085	78.2069	67.2055	94.7092	74.863	68.4848	78.8593	89.765	97.079	85.0305	90.4907	81.7306	91.4208	78.5472	76.6907	95.0133	78.1865	104.212	57.7986	71.3576	56.209	66.2219	60.2879	70.8286	62.697	75.7462	65.4954		0.338889	75.6725
7.3801	67.168	56.5234	54.169	58.8796	69.3676	72.263	85.068	71.1344	86.9984	89.621	64.2564	77.8751	91.2047	93.671	85.6752	87.8446	81.6747	84.7913	72.4513	81.3108	95.7807	72.6619	96.661	66.3691	67.2363	55.5593	68.7689	59.7925	70.0996	56.075	68.2393	64.3683		0.344443	74.1737
7.4992	65.7547	65.8985	54.4189	66.1333	80.5394	82.475	84.9987	74.3481	83.235	73.592	72.3579	81.141	95.705	95.486	81.63	84.4526	84.0572	83.0126	67.6412	72.9927	100.243	78.7138	94.83	66.9315	64.7265	60.0538	63.787	77.3559	68.5157	40.632	68.9594	69.136		0.350001	75.1173
7.6182	67.821	65.6347	56.1028	67.8977	76.1224	81.182	85.8848	77.8654	84.3557	73.688	66.8045	77.6642	94.7024	91.193	74.6389	82.9774	91.2455	76.2205	70.0782	67.098	81.1754	68.0325	92.237	61.0921	58.4541	54.479	78.1105	64.8524	62.0083	51.843	75.2097	67.8015		0.355555	73.2648
7.7372	67.7662	68.9234	50.5804	60.6037	90.2452	73.34	77.4886	75.4949	88.1542	82.72	69.5961	80.3501	82.3887	95.052	75.2	69.3609	82.9351	75.1405	72.0743	67.7407	89.3034	75.0038	89.72	61.5541	63.5363	58.1341	76.8609	67.6372	67.8586	50.904	68.3164	64.8683		0.361109	73.0891
7.8563	72.4276	57.842	54.7601	52.7866	80.2479	67.251	83.8711	78.4421	92.7443	75.455	65.3232	74.2407	80.8877	99.924	77.6547	69.1899	83.8688	72.4123	81.7071	69.2651	81.5007	75.6577	85.514	61.904	66.975	71.5521	65.0023	69.2295	58.7353	36.552	69.2724	56.5781		0.366668	71.5242
7.9753	74.8746	61.9765	49.404	52.3023	82.3358	77.844	73.4609	78.9195	92.5806	72.663	69.1772	68.4929	89.9684	95.896	75.6017	71.976	85.1729	64.8331	79.6792	71.0119	78.1796	67.9075	85.408	59.6428	68.8444	68.2552	72.5223	65.2519	64.6278	38.764	63.0804	60.339		0.372222	71.281
8.0943	75.0666	59.999	47.6724	50.1977	76.5793	80.86	73.7217	79.2948	86.8268	78.245	72.9137	76.7398	86.4473	99.455	81.6891	76.9102	89.607	61.7978	77.3952	72.1058	83.8598	73.7726	83.824	58.0097	64.6434	66.2747	79.8505	49.971	55.7802	41.293	66.6512	76.5083		0.377776	71.9988
8.2134	59.7279	62.0301	46.4875	46.1964	68.4595	78.437	78.9987	80.1646	85.0101	78.831	75.871	77.8605	89.6251	95.104	77.7714	80.7279	91.6132	60.7956	79.4832	80.4996	71.8707	76.5097	72.881	60.2346	66.9779	67.528	69.4161	62.3412	49.0833	35.543	66.3232	67.4368		0.383334	70.62
8.3324	68.4429	64.488	51.6519	56.0133	71.2742	66.17	79.5181	84.2254	88.8514	74.416	68.0616	74.1507	80.603	78.988	78.1545	74.304	101.376	52.6481	62.2686	79.3322	75.1597	79.3684	75.321	55.941	63.9269	71.6845	76.6224	67.0389	49.0126	31.314	68.9536	67.9025		0.388888	69.912
8.4515	80.0812	59.275	40.1655	54.7089	72.717	63.621	72.9262	84.3426	86.2284	75.325	78.2926	69.9125	74.9222	73.785	71.9059	77.7236	98.0631	55.4279	76.2687	77.8326	73.7432	79.6384	71.635	53.3203	63.7127	75.0772	69.677	62.9822	58.6863	32.58	62.5169	64.8647		0.394447	69.1237
8.5705	75.1733	60.1695	43.1119	54.3097	69.7333	71.402	66.5619	84.2229	73.275	84.42	80.4502	75.9519	76.7614	69.268	72.4555	73.1435	89.0883	54.8515	78.9815	66.1216	71.3091	81.9422	70.255	57.5156	63.1846	67.9817	69.6419	60.1172	54.8923	27.398	46.3497	69.0515		0.400001	67.4716
8.6895	70.2015	58.2072	53.3308	44.1775	67.5816	76.939	71.8635	72.1278	86.2103	82.145	81.7927	71.1095	84.7687	82.163	71.6242	72.4474	102.427	58.5776	69.972	67.6909	70.7462	77.3061	73.716	65.3537	62.864	73.4105	61.9193	55.4066	43.75	26.28	49.4278	65.9296		0.405555	67.8583
8.8086	71.5039	54.5181	47.7944	44.7093	66.0934	74.821	76.3653	79.4802	78.9633	81.511	82.8806	79.6021	71.9548	73.6	76.7523	83.5691	97.2921	54.2954	70.2464	60.5302	68.4231	81.7024	73.916	58.6969	64.4918	75.9727	61.2564	51.957	50.2027	22.796	49.5136	63.7161		0.411113	67.1602
8.9276	70.9014	55.4498	44.294	43.9389	65.0074	72.81	70.1955	75.7541	77.1432	80.601	75.6335	83.6433	67.6602	77.282	76.2729	82.2266	86.4571	49.3333	69.4713	46.3992	67.0643	79.6124	69.238	62.3717	70.8189	69.0888	57.0549	55.1623	42.9437	22.845	50.1998	61.6732		0.416667	64.9546
9.0466	72.1739	50.2498	47.2003	47.046	73.2927	70.617	66.4822	68.3657	73.1847	77.692	77.3302	73.2843	68.8087	67.298	81.8422	67.7795	95.228	54.2745	68.523	52.9152	52.9425	81.4153	71.556	51.5564	59.706	68.7008	58.3335	47.8583	46.1759	25.808	51.4234	61.9745		0.422221	63.47
9.1657	80.6499	55.6067	56.5099	44.1928	64.782	74.5	73.617	72.0543	71.4783	75.793	83.6667	72.8413	75.8637	73.684	92.305	75.3029	91.7021	54.1525	69.0865	43.4673	49.0632	74.5805	69.357	52.7885	57.4392	64.6629	62.0662	57.1386	40.3422	23.268	51.2216	66.6067		0.42778	64.681
9.2847	71.6974	58.5577	51.5035	39.9901	69.7392	77.075	73.7992	70.7265	75.4813	80.537	87.4376	73.3252	66.5344	84.674	93.0135	76.3261	89.4994	53.5117	54.4446	45.9645	41.8758	78.9076	69.986	59.7269	57.2476	62.4056	72.7713	57.6947	43.3946	23.751	45.4683	62.7378		0.433334	64.6814
9.4037	70.5586	59.7933	49.4994	45.3642	66.6863	74.577	77.4822	64.3964	68.0807	73.615	81.6578	76.2863	67.5041	74.869	93.9302	73.12	82.9657	47.341	58.4237	40.3273	45.6741	80.7289	70.52	52.6067	55.8998	66.6916	72.676	63.6953	40.9582	24.976	50.929	57.3142		0.438888	63.4109
9.5228	65.2385	57.6766	48.942	44.1719	63.4206	84.628	79.6867	73.3724	65.4107	77.346	76.1012	73.5443	69.5236	70.733	98.4097	65.0859	78.4361	42.6124	51.0524	43.1734	41.5989	88.4881	66.043	64.696	53.9662	62.6475	56.7012	76.8799	43.2464	22.944	45.9606	64.1226		0.444447	62.9956
9.6418	59.0817	55.7122	49.4592	38.0097	62.3909	75.514	80.2515	70.5527	61.9057	77.181	73.3606	69.2461	60.827	75.708	96.3048	66.9883	78.9143	41.7269	39.8755	32.3323	38.327	88.1821	66.701	64.788	51.463	62.1742	55.645	68.7863	37.3096	18.964	48.2734	63.5228		0.45	60.2962
9.7608	66.8001	53.1828	44.7518	43.6239	64.1837	70.516	79.319	81.0004	69.9243	78.865	77.474	68.6755	63.5127	77.928	98.8493	62.9821	86.7232	45.096	41.1871	38.6705	38.9492	92.2593	66.063	59.9294	56.2961	60.2199	64.4568	61.9023	41.2551	24.978	53.0044	62.2577		0.455554	62.3386
9.8799	60.4992	51.0126	39.4268	37.6443	62.6437	80.914	76.7388	68.598	66.9346	72.501	77.0746	75.769	67.4014	70.293	100.716	67.9932	81.823	33.2319	41.9855	38.0506	29.6373	89.0844	66.515	57.3772	55.2361	59.0038	59.3821	56.7832	35.2495	23.452	57.6049	53.316		0.461113	59.8091
9.9989	61.6378	57.6851	42.0264	33.2768	58.0063	86.308	77.1369	65.1201	64.2976	71.336	68.5139	70.5178	58.2949	81.288	98.2817	68.6314	81.3058	31.6923	41.0511	33.3355	29.3343	80.9516	62.425	70.7633	57.3281	62.8463	57.9918	53.4418	35.2313	18.255	49.7133	50.0256		0.466667	58.6891
10.1179	64.2753	55.2168	44.2761	32.3492	53.674	80.526	84.7237	71.3069	77.6486	77.956	74.9241	75.6984	63.4302	76.793	106.306	68.6209	81.001	29.9053	35.3577	33.403	25.5789	85.6838	69.181	60.3789	59.0334	55.62	59.7765	53.2361	40.8436	22.111	49.4791	44.6251		0.472221	59.7794
10.237	61.4311	57.0757	35.4961	40.396	57.2473	71.452	78.9905	65.8125	74.5727	67.471	74.6542	77.4869	63.798	80.614	103.477	72.5563	75.3419	34.6445	32.7131	32.2855	26.487	78.7983	71.651	59.1909	61.2081	47.6581	47.7161	55.2636	39.256	21.408	47.3783	49.6454		0.47778	58.2243
10.356	63.6623	64.0328	36.9736	40.2084	54.9693	83.829	86.2943	67.6635	77.4389	70.223	71.2677	69.3696	68.2071	85.161	88.5372	72.6309	67.8967	30.1991	32.3314	24.7019	23.8699	76.3653	64.823	64.0458	57.3485	54.7794	47.5825	55.8301	41.3544	17.899	41.9179	46.4486		0.483333	57.7457
10.475	67.5549	68.9268	36.2422	40.3583	55.06	80.24	87.9018	65.8304	77.5714	65.655	72.9464	66.1545	66.728	86.958	91.2271	77.6919	65.9369	28.9491	29.4752	22.6383	21.9696	70.6025	66.747	63.8071	63.6132	56.8768	50.1931	56.4648	37.9921	13.642	46.7062	53.327		0.488887	57.9996
10.5941	64.1028	79.3293	38.2646	39.5751	48.6824	79.394	89.0647	70.8484	68.9086	67.906	71.697	69.8515	68.4178	75.156	89.1165	81.8287	73.1619	27.9913	29.629	20.8717	27.4385	65.2612	64.908	69.0088	73.6651	47.9017	47.4592	49.4922	28.2583	17.368	50.4108	53.1951		0.494446	57.7551
10.7131	67.7215	78.2409	37.7097	44.3234	52.0551	87.672	92.2428	57.458	67.9235	68.141	63.3921	66.6805	67.9744	73.861	90.6206	79.2403	69.538	25.5391	25.5838	22.7122	24.4151	58.946	66.712	65.5939	68.8524	48.5484	50.5164	46.7755	31.2489	19.166	42.841	51.3509		0.5	56.6749
10.8321	53.3948	80.7481	32.539	46.7649	52.9913	81.398	87.1164	63.6167	67.2071	69.209	71.6429	68.4783	68.6442	75.301	90.1493	89.7742	57.383	24.9757	32.2496	22.1969	25.5952	63.9932	70.216	69.8894	68.2131	44.2501	54.4318	55.0325	27.8203	19.396	39.2158	46.7878		0.505554	56.8944
10.9512	48.135	84.3512	33.6103	38.7993	50.6434	77.94	89.3117	61.6958	68.8754	69.891	67.9857	69.4744	63.1933	80.274	82.7058	84.3396	54.8136	26.6517	33.4808	24.5764	25.6601	58.6897	64.344	63.1557	65.7243	43.4578	57.318	52.0431	28.3437	18.616	41.6832	44.8929		0.511113	55.4587
11.0702	55.7373	73.0136	37.8383	47.5932	50.512	82.805	87.453	67.1059	63.6953	76.233	60.8537	67.741	63.8967	83.087	84.9149	86.8247	59.4194	20.0949	27.3799	24.7786	26.7059	65.8312	71.917	75.0706	66.5104	41.6865	52.6166	54.7294	27.8076	16.802	39.2283	42.9707		0.516667	56.3392
11.1892	58.2101	78.5477	43.1591	43.2272	53.4685	82.973	91.8687	74.4343	53.9989	77.136	59.7574	64.7663	68.8287	83.145	86.1127	78.4205	66.9373	23.1368	30.1193	20.9652	20.978	49.8182	78.235	77.6041	60.1964	43.9697	42.9246	43.907	33.3074	12.164	41.9363	52.5085		0.52222	56.1488
11.3083	47.7769	76.5743	48.8219	41.647	50.6954	77.19	77.732	66.0789	64.1144	75.858	54.8241	65.4947	72.0919	85.705	96.4045	83.2855	60.8922	22.8972	27.5985	16.9937	22.2346	55.6501	72.363	83.61	54.7135	50.0398	47.3361	47.1579	29.0886	12.513	44.2463	54.4723		0.527779	55.8157
11.4273	46.6397	79.4127	39.0176	44.4655	50.8153	74.478	79.3397	57.8379	62.1829	77.931	62.376	60.5135	78.9865	81.694	90.1805	74.3515	53.6139	24.4276	34.7793	19.5476	19.9268	65.6145	71.79	83.0252	47.0483	39.8701	42.1068	44.6476	30.0142	15.351	48.3911	60.0342		0.533333	55.0128
11.5463	49.7074	75.8535	40.5069	49.0185	55.5564	65.725	91.1202	66.6079	57.1024	69.319	60.4007	52.9738	69.5322	91.761	80.4601	76.6402	57.8951	19.7181	24.6481	18.6912	20.3176	66.3658	66.583	71.7448	56.3149	44.3015	49.8666	41.2869	27.8689	14.962	44.8007	42.9122		0.538887	53.7676
11.6654	58.6285	75.5783	46.5556	40.5733	56.6951	68.249	75.6792	63.7064	55.1078	74.714	61.171	58.0786	79.7762	84.438	80.7483	75.2382	65.8201	20.6072	26.6422	23.1023	20.6893	64.8858	75.533	71.3861	51.5539	36.3354	42.881	42.3732	24.4106	17.787	38.0783	48.8229		0.544446	53.9327
11.7844	58.1643	76.4074	49.3083	39.5701	59.5375	63.829	71.3891	61.1061	57.0601	64.71	72.3239	67.4009	75.9483	85.336	82.6956	69.7631	59.3695	23.2697	24.9691	18.7575	18.6771	53.9486	68.706	58.916	48.6741	36.195	37.1996	40.729	27.1209	13.661	36.3554	47.9501		0.55	52.1578
11.9035	70.0253	69.9699	50.4145	51.1567	53.7702	65.95	72.862	59.5793	64.5357	65.703	70.7264	66.458	74.4547	78.688	89.454	74.1443	60.7989	19.0924	25.5173	22.7727	15.6913	51.4831	67.586	59.3758	48.6507	36.695	39.5963	44.5643	28.6798	14.008	41.4923	38.9415		0.555558	52.9012
12.0225	65.2818	77.1778	48.3401	43.341	51.9301	62	65.2971	54.1852	55.038	61.573	63.4055	66.8608	72.0642	68.125	88.4498	71.1272	59.5602	22.8206	24.8436	20.1617	17.1495	48.7336	60.516	56.2382	54.1784	37.0429	35.8893	42.0735	31.2127	14.156	42.0538	49.5833		0.561112	50.9503
12.1415	71.2749	74.0352	49.0064	52.2271	55.2796	69.911	70.9206	50.2715	58.9138	66.339	54.6387	75.3683	71.3116	68.9	93.0705	75.4613	59.116	18.6163	21.6253	16.4819	16.4187	57.9882	64.311	53.9621	48.8881	34.5356	39.3662	41.7447	40.5439	18.708	36.3911	45.5947		0.566666	52.2257
12.2606	73.9268	68.7795	57.1244	54.8047	53.7642	65.505	66.0748	51.1625	58.7755	66.159	62.8268	76.0973	68.4483	72.41	87.1814	80.8493	51.9341	16.8531	24.9224	18.3621	16.7798	55.6609	75.283	55.3482	55.3055	33.7525	40.8363	43.064	37.9302	18.397	54.9156	48.4337		0.572225	53.4896
12.3796	74.6852	72.4379	70.7669	55.094	54.1695	65.698	75.7517	62.6198	58.9742	67.831	72.9934	80.2619	74.1766	64.002	103.02	68.7862	47.0806	16.2003	24.7014	14.985	15.1785	55.5157	70.216	58.2544	51.2505	31.0464	40.2273	38.9524	33.326	15.657	48.5933	47.4848		0.577779	54.0605
12.4986	76.6241	64.9312	65.6416	52.8491	53.6095	68.11	79.1645	54.1047	60.8092	73.378	73.9154	79.1543	72.0441	68.687	92.1337	64.8228	57.5457	18.0127	21.7741	14.5053	15.7495	58.2843	64.32	58.6843	47.5418	32.7077	41.0613	44.5687	33.159	13.179	42.6568	41.6373		0.583333	53.2927
12.6177	84.7191	64.6307	73.6727	45.9573	47.1681	64.749	73.6647	56.0897	58.285	65.471	66.0724	78.1096	67.9604	64.504	92.4669	69.2617	52.2308	17.7396	23.2444	17.9895	16.8788	55.4472	62.8	54.5347	51.1124	32.658	32.2639	41.527	33.4718	15.031	42.4208	38.6148		0.588891	51.8983
12.7367	77.6731	53.157	85.2991	46.9979	50.9306	71.493	65.625	53.2217	61.6564	68.757	67.4755	84.7691	60.5442	64.894	91.6362	66.4718	50.2122	15.7418	22.5273	14.5465	16.6348	59.7813	58.436	54.8449	51.7367	30.7887	29.5115	43.9655	32.8939	18.339	44.5579	37.4313		0.594445	51.6422
12.8557	74.3721	52.4808	79.6833	54.4324	50.2624	64.871	70.326	58.4497	63.4436	66.333	65.9045	80.846	72.6094	62.766	95.0798	66.7041	53.2486	16.58	21.7053	14.0994	11.8713	59.2609	69.613	51.0241	56.2382	25.932	25.5969	42.5264	36.5811	15.681	42.313	34.7847		0.599999	51.7381
12.9748	73.3511	55.7391	93.5631	57.6086	50.7793	62.183	76.2787	68.1675	68.9143	61.845	71.4477	75.9711	77.2241	56.419	82.6531	66.5643	53.2165	15.8086	20.6742	15.3996	16.504	59.0538	67.98	49.1675	49.8212	26.9272	26.9226	45.286	38.2011	14.193	43.611	39.9052		0.605558	52.5431
13.0938	70.8024	54.6994	88.0059	60.5081	48.0274	64.038	68.1366	69.4979	83.17	63.742	64.3101	66.6551	62.5193	64.432	88.2165	60.0259	51.9223	17.0979	19.1304	13.9697	16.102	61.5866	65.398	57.8847	57.8933	28.6013	24.1785	47.1668	34.5892	17.946	35.9481	43.7395		0.611112	52.1857
13.2128	71.3759	46.7602	72.6885	56.5569	50.3754	57.875	62.7087	57.935	81.4677	73.137	56.2982	66.6734	72.3343	62.605	82.2101	67.3384	43.9939	17.1602	19.4736	14.8717	12.8541	50.4357	64.156	60.0944	46.9139	28.4827	26.0437	43.9534	32.0147	18.701	37.6914	43.1194		0.616666	49.9469
13.3319	68.0683	50.3847	80.6187	44.5233	51.3705	65.885	66.2212	64.8119	77.6093	67.57	67.6948	61.1895	59.4527	60.513	89.3667	59.6412	49.5086	14.6247	18.2797	16.6873	13.2868	52.8565	58.103	58.9787	53.1738	31.2376	27.3029	42.959	34.044	20.213	41.5744	39.2445		0.622224	50.2186
13.4509	67.2453	56.0392	82.2628	54.9008	58.45	62.728	61.141	64.0678	87.5719	64.959	74.7168	64.7438	61.0272	62.221	80.0871	69.831	54.062	18.8339	20.0167	17.6794	17.2485	55.0611	55.775	58.8092	52.2019	21.4831	27.4903	39.3237	33.7792	17.49	37.2052	42.6346		0.627778	51.284
13.5699	64.7278	54.738	73.9013	57.7275	53.3918	69.089	60.9207	62.8077	81.094	66.643	66.0074	52.8778	55.8506	62.519	78.4875	63.7044	46.3315	19.7929	19.7059	14.6203	13.7383	55.2724	55.691	56.9635	46.7032	23.4843	27.9598	40.8667	30.0006	15.598	40.8564	34.0821		0.633332	48.9423
13.689	64.7475	55.9636	72.1991	56.07	46.4292	71.398	56.5351	73.1118	82.6952	61.541	59.397	57.8604	59.2522	62.643	72.146	58.6859	53.6221	16.7282	17.4425	16.3423	15.7249	45.4483	44.747	52.2291	44.1648	26.5041	25.8643	40.5103	29.0548	16.553	41.2252	40.9922		0.638891	48.0571
13.808	71.2759	57.282	63.3482	60.4359	55.3324	65.913	65.5785	80.9973	76.0849	67.925	63.7569	54.8886	57.7809	63.263	80.8223	62.822	55.6582	18.2251	14.5684	14.5701	17.3188	48.5024	57.619	59.7357	39.0193	21.4822	24.465	38.4847	31.2392	16.002	37.9029	38.9317		0.644445	49.4135
13.927	67.2103	59.4717	70.0259	50.0147	54.5451	76.767	74.2948	74.7059	80.9737	69.006	61.6587	52.9668	54.2869	61.679	76.8948	53.2217	58.9797	17.0783	16.6558	15.151	15.9755	53.2567	59.737	54.9495	39.3178	22.691	24.0268	41.9029	33.0683	15.125	38.6982	33.8833		0.649999	49.3194
14.0461	65.3892	49.9769	72.6768	43.0475	54.8654	70.069	67.7973	78.9892	80.5311	65.267	56.9748	57.0909	49.3585	64.241	79.9122	63.8909	49.6956	15.1396	16.2776	17.9946	17.5008	54.4012	56.668	58.464	38.9448	18.3153	31.2838	40.3727	38.981	18.089	45.8846	35.4321		0.655557	49.1726
14.1651	62.3386	53.3393	71.0297	45.3123	58.8987	70.451	69.074	79.1296	67.6085	64.999	57.5711	47.8447	54.8549	60.801	66.7353	74.3598	52.7315	16.5195	14.6081	15.0556	16.7937	47.4803	50.965	58.7628	45.3665	19.3009	26.9472	37.3054	38.0557	17.957	47.6889	33.296		0.661111	48.2244
14.2841	52.6398	55.6162	70.6716	51.8983	59.1594	67.747	79.6419	68.062	70.2091	67.033	58.3034	49.3452	56.0507	78.366	71.4514	81.8496	55.1716	17.8229	14.5842	12.1178	11.3808	51.4489	51.166	57.0983	30.356	17.2181	18.3883	42.0035	36.0602	13.937	49.5912	33.8992		0.666665	48.4465
14.4032	55.0812	56.1916	65.3733	54.6809	60.5374	70.01	83.5764	78.8626	54.8204	63.118	56.5043	50.6449	64.8006	75.363	69.9266	82.2558	62.0086	19.4115	19.2653	13.8015	16.0224	54.6679	51.768	47.439	31.6367	15.9162	22.1151	39.7503	25.8853	14.429	53.4234	30.1453		0.672224	48.7323
14.5222	63.3021	60.8025	63.6186	51.1177	70.7576	76.173	80.5456	66.044	63.3801	60.112	57.1108	51.8106	62.686	74.549	81.7188	81.3894	63.125	20.0442	16.7538	16.0322	18.3658	54.0271	51.032	46.7243	36.7884	15.7241	23.4679	41.9059	32.9763	17.628	50.626	35.8614		0.677778	50.1938
14.6412	64.034	55.245	67.265	52.3628	58.6714	66.123	73.8201	61.1401	56.6302	49.75	63.3728	57.8374	64.1005	70.825	73.9982	87.1211	64.7535	18.3692	16.8537	12.6918	16.6632	54.5136	48.031	50.0009	32.6766	14.6146	20.4006	43.8675	36.2862	15.968	46.8352	31.7557		0.683332	48.3306
14.7603	63.8999	49.996	63.3179	61.0395	62.8096	68.422	74.7052	59.9357	50.6779	54.173	69.4157	47.1982	62.5863	72.548	81.632	72.9483	64.3932	18.0586	12.7536	11.5468	13.5708	54.2671	52.396	47.3327	37.1387	16.1996	17.1111	31.6205	32.3033	20.092	43.5454	31.2751		0.68889	47.4659
14.8793	65.8921	57.21	70.1262	62.5935	65.5784	64.539	78.148	59.2853	49.8392	56.405	71.6979	53.272	63.3026	74.899	78.3922	62.0419	72.9165	19.7215	12.4229	13.5843	17.6725	50.5619	48.371	47.3318	40.6799	18.0076	15.0155	38.18	30.6541	18.081	51.617	31.2339		0.694444	48.7273
14.9984	69.8544	58.809	63.5262	60.9422	56.4148	72.415	65.9368	57.9068	55.3947	59.138	72.4154	54.3334	58.3009	82.915	84.8402	71.6336	71.0482	21.9519	13.5043	12.2836	18.1983	60.0955	45.506	44.7541	34.4396	19.9006	18.4897	38.5682	35.3821	17.139	50.1886	31.7212		0.700003	49.3109
15.1174	74.6128	61.216	65.6947	61.9129	63.1254	76.799	67.6475	54.9044	59.5541	55.194	69.7165	53.993	65.0625	82.212	93.6526	79.3142	71.0047	24.8809	14.8651	17.0058	19.1633	47.3227	48.163	45.8736	36.4636	22.3375	18.0987	34.6117	36.7672	17.815	45.2332	27.6962		0.705557	50.3723
15.2364	74.7983	67.8115	73.3382	62.1456	69.3286	63.266	66.6685	62.68	58.327	57.326	80.7766	56.9395	71.0405	87.649	88.3914	67.4884	70.1982	18.8926	15.5708	13.5345	14.1511	60.0625	50.235	48.9325	31.72	19.4526	17.1038	37.8453	35.2523	15.446	44.9743	34.9166		0.711111	51.1332
15.3555	65.515	58.4321	66.6129	53.9934	58.1915	64.972	65.5247	72.1346	63.1543	58.391	78.3667	54.2173	59.5278	76.002	89.1461	68.0203	75.5349	20.8173	16.4366	13.4963	19.0683	54.4016	41.557	50.4287	38.1307	18.5818	20.1562	32.9573	48.027	14.619	36.2035	33.0815		0.716669	49.5531
15.4745	70.1122	60.4253	64.6233	59.7789	49.4849	63.856	65.1961	73.0098	55.6943	61.826	79.3374	62.8981	62.3648	71.86	84.6024	66.9484	70.4851	20.4381	16.0778	13.1925	19.8222	56.5619	44.036	50.2325	31.4948	24.4356	25.0515	40.1311	43.5877	16.245	40.0459	33.1955		0.722223	49.9078
15.5935	77.8553	74.6122	70.8583	64.3676	50.1304	65.578	60.6586	66.7551	56.6588	54.3	71.9857	53.8347	63.7049	73.532	82.3315	62.4488	69.497	21.8976	17.2694	16.7219	18.9351	51.2449	46.102	46.15	41.0854	21.6819	23.6608	37.3488	50.4253	21.592	39.3909	33.803		0.727777	50.2006
15.7126	80.5644	72.6502	71.9442	58.5002	56.1278	65.723	55.7368	67.402	55.9624	54.665	69.4861	63.9788	54.8881	84.087	81.1852	67.2612	62.9515	21.0259	16.1374	18.1082	18.3608	50.6074	43.621	46.109	31.7644	16.8612	25.6785	38.9477	54.8969	23.956	32.94	31.6969		0.733336	49.807
15.8316	68.8383	65.6213	73.7831	61.8388	62.4325	68.578	57.6433	70.526	64.7838	69.12	67.3024	69.8951	56.9117	70.365	80.8131	68.2874	57.5947	23.0941	18.502	18.7866	21.5513	50.5134	45.164	46.4819	31.0425	15.8643	25.9469	36.6395	50.9118	23.571	36.0704	30.3655		0.73889	50.2762
15.9506	63.1862	74.9	79.2337	59.7739	62.1197	74.915	60.7709	74.6708	54.1036	70.666	63.4093	72.64	59.4435	67.168	77.8208	56.3035	59.6063	27.32	14.5286	15.1647	17.4413	56.8974	48.864	45.8423	33.8143	15.5435	20.1025	34.1087	45.4568	22.87	32.0814	24.9323		0.744444	49.5531
16.0697	72.8976	72.6298	81.2008	62.7587	69.0668	72.585	53.6931	62.8402	51.3789	73.114	66.4869	69.0177	48.3952	66.749	84.5664	59.6942	56.1519	23.9204	15.6394	16.3252	17.4245	52.7039	42.128	46.1341	32.187	18.299	24.5203	31.8262	52.1312	19.217	28.0691	31.2819		0.750002	49.2198
16.1887	65.5714	69.9165	74.3863	61.1252	66.3852	75.915	56.2627	59.631	55.9175	69.134	62.0836	66.4309	49.184	69.307	95.0352	58.6576	59.6813	24.5752	13.5388	15.0284	19.9821	47.9524	43.637	45.9055	30.8062	18.3314	25.5709	32.0528	55.9024	16.572	29.8645	25.8908		0.755556	48.7573
16.3077	61.5384	65.5172	76.9577	57.7434	68.4465	86.181	57.0554	63.5427	47.1455	76.679	65.6859	77.3933	56.0445	72.135	101.18	64.3997	57.7565	23.557	15.0621	13.9713	24.0171	62.2401	40.099	45.1935	37.8392	16.4446	23.8965	33.0694	48.9555	26.144	30.503	26.0237		0.76111	50.7006
16.4268	60.3646	60.7264	83.1658	61.0212	67.1981	89.058	64.3455	59.9819	56.0725	84.909	58.2687	72.823	55.1566	67.328	94.2731	56.8508	50.2897	26.4675	13.3588	13.7332	21.5453	49.9971	46.843	50.7285	38.3773	20.0518	20.4472	32.5241	40.5633	29.56	28.797	27.9631		0.766669	50.0872
16.5458	57.2402	62.7936	80.9473	62.3638	62.1655	95.294	59.6041	65.0901	57.3423	80.203	59.4814	64.2325	54.1236	82.031	99.567	70.3632	64.6306	24.3606	16.8561	15.3829	19.0189	50.194	46.36	53.1611	31.0128	16.1385	24.3413	22.5739	46.2607	31.853	27.4669	31.7332		0.772223	51.0683
16.6648	50.8581	61.6844	77.2925	58.2216	72.4262	96.061	61.823	59.7635	61.7131	70.902	55.3883	67.5979	60.1861	82.968	91.0628	66.9584	63.1153	29.3858	15.9719	13.2929	24.1482	50.4799	36.658	49.4431	31.4213	23.5355	20.1252	29.7082	43.513	34.631	29.1709	29.4529		0.777777	50.5925
16.7839	54.0138	59.5954	79.8458	63.3635	65.7298	90.504	59.7642	62.3296	51.0219	68.991	49.0564	74.1572	51.4882	87.116	94.1354	61.0573	66.9367	30.9656	18.4494	12.6703	24.0724	51.5413	37.273	46.1479	30.5454	17.2225	21.5489	34.3669	44.6714	32.777	28.1482	24.9303		0.783335	49.8261
16.9029	54.8035	62.0644	76.1768	55.1176	57.8982	90.429	64.6375	59.8093	58.5342	57.938	53.6615	64.3088	50.4205	82.873	95.1314	63.6127	73.0123	32.2459	20.964	17.9787	25.4056	48.1397	43.665	42.6504	31.27	16.9423	18.8305	32.363	39.0582	39.771	30.7307	20.635		0.788889	49.4087
17.0219	55.3188	54.7295	60.3266	68.741	57.163	82.891	54.9357	57.1584	58.5619	66.715	55.5732	62.2848	53.6345	90.255	94.3655	69.6421	82.5983	31.7614	16.7917	20.1274	24.9881	42.007	40.561	45.7439	34.1978	19.1266	20.2876	31.3037	43.442	48.208	30.3317	21.4311		0.794443	49.8501
17.141	54.4289	52.8663	66.99	64.1296	54.889	76.719	64.4293	60.5109	48.5417	56.499	54.2533	69.3761	45.2553	92.961	83.9148	62.1654	78.3357	38.3986	18.8121	15.8399	31.2252	49.2484	48.129	38.7055	36.7101	21.475	19.6323	32.3097	37.7463	48.434	30.5836	21.5282		0.800002	49.2201
17.26	57.3429	52.1769	62.8362	67.5798	62.0649	69.794	67.2582	64.0852	54.7894	55.316	55.9454	61.5406	52.8251	94.729	81.8639	67.4638	80.7463	39.8688	20.3287	18.9684	29.4729	45.3905	45.658	40.0815	35.391	19.9335	18.9229	35.1775	38.9097	40.184	28.6723	24.4075		0.805556	49.6789
17.379	56.1233	54.8005	56.8244	66.8337	55.9197	69.338	59.2683	59.6675	51.3751	54.368	61.9757	69.5667	55.0755	87.658	81.7835	57.1543	82.4135	44.8012	23.5439	20.2084	26.9371	40.7353	48.608	37.8504	33.8872	19.4337	21.6903	27.0714	40.4199	41.328	28.6971	23.3749		0.81111	48.7104
17.4981	58.4886	55.616	60.163	67.6823	58.1337	63.313	50.3499	55.5394	49.5212	47.532	53.7053	69.6061	54.4065	88.37	71.8826	55.7372	77.3923	44.6708	24.8459	23.4116	26.9228	41.783	43.888	47.3873	35.7551	22.3312	23.5322	27.9023	42.636	41.364	33.951	24.3081		0.816668	48.1915
17.6171	62.7787	60.2138	62.7869	54.5865	61.3549	63.209	57.4105	52.879	56.1259	50.502	60.9898	66.1951	60.2758	89.63	67.0154	60.2335	77.2144	45.3794	24.3099	25.2074	23.3694	35.8193	40.48	39.6513	36.2742	23.4804	21.4147	35.0694	37.6926	40.899	30.8053	19.8349		0.822222	48.2215
17.7361	59.9317	55.044	53.1743	58.6231	65.2493	70.475	54.4513	49.2573	48.9126	59.707	57.0898	62.0364	55.0897	89.244	59.1257	61.1093	76.7821	47.8107	24.9287	23.4021	31.0789	40.7458	47.054	37.2391	29.5975	21.9149	23.9353	34.5879	36.9993	43.826	35.4336	16.6524		0.827776	47.8284
17.8552	71.3425	58.166	55.4155	57.2178	62.4921	60.315	60.7868	50.9668	44.5311	64.348	58.1266	70.1485	62.7326	89.508	63.2887	60.0712	74.4722	48.1645	27.6042	23.9451	30.4487	43.0479	47.357	35.1794	28.8242	19.7606	20.6647	39.3469	44.1206	40.055	32.2412	17.5457		0.833335	48.8198
17.9742	63.3142	61.2975	58.1189	57.764	67.1831	71.687	58.3149	53.1529	47.046	67.507	59.387	63.4378	63.992	85.316	69.2681	57.8233	80.6375	53.0815	25.7604	26.3344	38.9683	52.1358	42.347	38.4949	31.2004	20.1556	26.5696	41.5144	40.1496	45.899	28.4636	20.0432		0.838889	50.5114
18.0932	70.4647	63.7901	61.8435	56.4582	68.8829	69.449	62.5153	47.6851	49.5554	75.201	52.4831	63.1745	55.708	88.496	63.5707	64.2093	76.7952	52.6739	30.5868	29.9661	37.7459	47.0148	46.32	32.5447	28.0425	15.8278	23.319	40.5868	41.0582	42.976	34.1225	17.3358		0.844443	50.3251
18.2123	73.4558	63.3736	67.4375	58.46	66.0281	69.441	60.2611	57.2379	48.4058	71.013	56.5664	64.6302	57.4189	90.484	57.1844	58.708	64.0994	42.6944	27.7121	31.2108	32.0221	47.9243	38.869	28.2536	33.0592	24.0151	21.9125	40.3101	43.2376	43.059	30.9461	14.1481		0.850001	49.4868
18.3313	72.8976	59.105	66.1408	58.0324	66.5921	76.982	60.8466	70.5071	57.3507	79.397	56.0771	66.0577	59.8739	80.994	60.6037	58.0176	54.5899	55.2386	31.519	28.5065	42.9628	44.114	36.893	34.9838	29.4299	24.3265	18.1268	39.4947	51.8088	47.751	33.6119	13.8834		0.855555	51.1474
18.4504	75.3266	71.1236	68.5247	61.5642	74.3443	70.634	65.6359	58.3248	48.9995	70.104	60.7478	55.378	52.8659	82.756	65.0278	56.5924	51.3776	51.0697	32.7362	36.4143	40.0837	40.2126	38.908	30.0184	35.2355	19.4058	20.5948	35.6348	45.2284	42.503	26.0641	22.3499		0.861114	50.1808
18.5694	83.7574	69.3925	69.1543	64.4019	73.9155	72.449	69.1182	62.6884	53.5168	71.643	60.8103	55.4608	52.5743	77.956	63.1724	60.7947	48.3352	46.7318	29.2943	30.5626	43.8507	35.1326	32.319	24.7735	31.5465	21.3947	20.1882	42.3282	35.5405	39.396	23.2789	19.2343		0.866668	49.5223
18.6884	81.7093	66.4661	67.6622	68.0348	78.1668	69.32	55.2616	59.324	44.7635	78.897	54.7704	53.0311	58.7683	80.252	61.5393	58.9822	47.6535	42.5991	28.5998	29.7434	42.667	40.6751	33.88	33.1881	26.9398	19.4572	22.4754	34.1272	35.5487	46.849	21.0823	18.9242		0.872222	48.7924
18.8075	79.6953	68.766	75.952	66.2895	66.361	65.034	58.3935	64.3291	44.069	79.136	63.618	56.8278	59.5645	78.168	57.3886	55.858	41.9327	40.6367	27.6415	31.6835	44.8671	41.2634	27.175	24.2308	26.1499	20.1858	25.8364	32.1975	35.7626	46.105	22.3557	12.6411		0.87778	48.1286
18.9265	76.1524	68.6461	69.6069	65.1628	78.0612	63.701	61.1035	69.1905	49.5781	77.971	60.1943	50.8922	54.6168	74.549	55.5757	48.2095	45.5302	42.8151	29.9168	38.3123	40.2773	36.9879	24.037	27.4321	27.994	21.0118	22.971	44.1202	37.82	46.061	19.3238	14.7521		0.883334	48.2054
19.0455	71.1877	70.7504	64.7148	60.016	66.236	64.586	74.4649	70.2858	57.6552	67.204	57.9026	52.5513	61.0305	73.829	47.7609	51.3917	38.5304	40.6229	29.944	38.5511	39.9202	28.0242	25.551	38.6765	27.8555	18.9998	24.4474	42.9981	38.8228	45.659	18.1414	14.2095		0.888888	47.5788
19.1646	76.0006	71.511	64.2584	64.6037	65.7659	64.219	70.1112	71.4729	49.6778	61.532	60.8481	52.9179	61.5065	74.236	51.8058	49.0955	37.1901	38.945	25.6753	32.5458	39.6631	27.8041	24.136	29.194	24.7749	23.6184	28.0619	41.7805	39.1588	33.657	18.1395	12.5531		0.894447	46.4519
19.2836	75.3993	67.7225	64.3077	72.0837	60.8304	59.995	65.2805	61.2812	49.7571	60.261	53.6259	56.0834	57.029	69.853	48.6538	48.4347	33.3836	31.3943	27.1713	35.8105	35.7812	34.4596	20.779	24.9016	24.0302	23.2045	22.9351	43.7842	38.4818	38.399	15.8776	11.2226		0.900001	44.7567
19.4026	66.6399	66.4536	60.1903	74.4697	56.122	55.465	67.7313	66.4346	46.9369	55.18	56.8525	60.651	64.5821	61.449	50.2266	46.6669	34.7454	36.0375	29.099	36.4732	36.626	31.2102	18.929	23.9486	24.3874	24.4448	25.895	49.4476	32.5657	31.548	16.4016	7.9356		0.905555	44.2421
19.5217	63.2531	61.3907	57.7607	61.6713	51.2502	56.261	67.6117	63.4133	44.9122	48.723	54.2144	55.5637	66.0062	68.128	50.3313	49.168	32.2187	32.3367	28.6424	31.1068	37.479	30.522	16.274	21.441	21.1212	18.887	26.0848	47.7567	31.5887	31.169	18.1742	8.5883		0.911113	42.2828
19.6407	55.5003	63.9458	63.0297	60.5698	46.679	52.068	52.6354	58.3115	41.2355	38.844	52.4225	68.7677	52.0367	62.041	45.6926	50.5596	35.1645	26.646	28.2234	33.6782	32.2677	32.0738	16.98	19.2763	23.4047	20.9419	22.4092	48.2916	30.312	26.273	11.5611	6.519		0.916667	39.9488
19.7597	54.4205	54.1216	53.7537	62.5999	47.0323	44.887	49.7462	54.6556	43.9533	45.664	52.8752	64.8886	59.3497	56.246	48.2374	47.7876	31.8675	24.2648	32.68	34.8477	32.9546	28.7945	17.574	18.6673	26.1294	22.4791	29.8008	39.2479	33.7153	26.778	11.8255	5.1302		0.922221	39.2805
19.8788	52.7621	55.0096	49.9482	62.3348	44.5254	51.957	48.3147	47.3488	39.9197	41.854	45.6733	72.8513	57.2161	53.153	39.4919	44.3386	35.5499	26.0071	22.2547	28.94	36.8316	22.7574	10.958	18.7292	25.7124	24.947	26.7013	43.1342	27.9389	25.035	9.2918	8.5537		0.92778	37.5013
19.9978	54.7049	57.5561	54.0026	60.5839	46.4675	45.624	41.2759	47.2021	40.7606	45.626	52.4031	64.0453	53.2727	43.587	36.1175	40.1818	34.8142	22.9757	25.5453	29.4312	28.7974	20.0723	12.076	17.4636	23.0408	21.0912	27.5996	44.5784	25.0487	22.845	10.503	8.2424		0.933334	36.173
20.1168	54.1022	50.6099	51.3591	56.7113	42.9647	34.346	46.0625	41.9945	37.2235	44.139	50.9883	59.4451	65.482	46.864	35.004	41.944	35.0259	16.7648	20.2776	27.366	24.5847	17.755	12.31	19.0979	20.5007	23.2874	21.941	39.3523	19.337	21.812	8.8226	6.7858		0.938888	34.1957
20.2359	47.9225	48.1617	46.7862	48.3961	46.6668	29.48	45.4062	34.0583	38.1188	44.183	49.0042	60.8982	58.2424	49.87	35.6313	40.3834	30.4317	20.6924	20.3679	22.4948	26.3079	13.8126	10.52	15.8429	22.3026	23.1987	30.479	32.7559	20.0328	21.023	7.7123	6.6528		0.944447	32.7449
20.3549	46.3024	48.0353	49.1012	50.3148	42.1704	20.936	36.4244	29.3201	27.2329	41.329	46.1204	54.4166	67.5824	50.855	28.6571	37.2036	28.823	17.2006	21.052	25.1599	23.1825	12.3636	10.829	21.5382	16.924	21.8886	27.0347	31.0558	17.2949	20.011	6.6049	5.5352		0.95	30.7031
20.4739	47.0071	42.0471	47.6283	44.9887	41.197	21.641	37.5788	25.5946	21.3358	37.837	41.4512	49.3606	62.4633	50.383	26.5273	35.9134	28.8768	12.6705	17.9984	21.0473	19.6554	12.0197	12.835	14.1974	21.9504	16.3082	21.0079	28.7223	17.9455	12.538	8.9198	8.6762		0.955554	28.3851
20.593	44.3481	48.4918	44.7352	44.4246	32.5932	18.227	32.3821	15.6671	14.4273	34.481	38.0494	51.3409	52.1753	39.724	24.9108	32.7538	23.268	16.8172	15.5377	17.621	18.2348	12.5563	12.162	15.4883	23.9771	17.5723	22.8322	24.8902	14.316	13.333	6.6057	7.9229		0.961113	25.9958
20.712	47.1603	44.9863	41.5344	35.1038	33.5542	12.936	25.7217	11.1635	10.3182	34.547	33.336	49.0001	53.7374	37.801	25.0462	34.6678	23.3537	15.6688	14.5749	14.9447	14.7468	9.4919	9.199	15.1697	17.7003	16.5299	22.5106	20.6434	10.86	14.183	10.6746	8.2844		0.966667	24.0359
20.831	46.9635	41.5222	38.8169	35.5271	25.6368	7.772	25.6505	9.1383	10.0486	26.853	20.2706	41.7547	57.3206	30.987	21.9978	31.0398	19.5556	15.8985	14.8826	12.9765	18.2921	8.2653	10.578	15.4745	16.644	15.694	23.9743	22.2164	8.6095	14.277	8.342	6.0771		0.972221	21.9705
20.9501	37.4582	37.933	36.9824	29.6776	21.4416	6.38	21.1812	7.817	5.9188	18.974	17.0866	42.749	54.8892	25.777	20.0511	28.7273	17.4614	16.6931	11.5011	14.6842	12.5728	7.9414	11.083	14.7697	16.5397	13.2032	16.6451	14.7076	12.2891	11.453	7.6453	6.0246		0.97778	19.3206
21.0691	31.3354	33.4437	43.3771	23.4509	20.647	5.459	17.1266	4.6814	3.777	12.88	11.2564	38.9981	47.0355	27.311	18.8176	25.0405	15.2244	17.3093	12.7793	12.2854	12.0592	9.193	11.134	12.5187	21.1135	14.0812	17.2959	18.5977	13.2755	11.903	8.0651	6.6107		0.983333	18.0651
21.1881	29.9098	30.9858	36.1881	28.2494	16.0231	5.656	13.3911	2.958	2.455	9.948	7.481	31.353	44.9444	27.133	17.9991	25.0778	13.8141	16.3478	12.2948	9.4893	11.0432	8.6785	9.028	14.3899	16.504	12.4676	12.4904	19.0021	12.9363	11.449	8.057	6.4216		0.988887	16.3802
21.3072	28.4565	27.3982	31.531	18.5056	17.602	5.205	9.4844	2.8486	1.3744	6.689	6.4227	23.7559	39.1667	19.152	14.2931	19.6518	16.1453	14.4915	10.4241	14.4379	13.035	8.4406	11.519	12.2464	14.5114	13.938	12.4464	14.9659	10.9662	12.514	6.5809	7.8001		0.994446	14.5625
21.4262	27.9042	21.5187	25.7411	13.5421	13.1494	3.795	8.5259	1.6095	1.5281	4.749	4.5967	22.3936	41.7005	17.358	12.269	21.4447	14.8062	14.0372	10.7534	13.002	12.2858	9.1485	8.854	9.3352	16.7745	11.7038	12.0799	15.8583	11.4553	12.828	6.3277	6.5542		1	13.3634

## Sheet: Image5 (2)
X0	Y0	Y1	Y2	Y3	Y4	Y5	Y6	Y7	Y8	Y9	Y10	Y11	Y12	Y13	Y14	Y15	Y16	Y17	Y18	Y19	Y20	Y21	Y22	Y23	Y24	Y25	Y26	Y27	Y28		Ap-basal	Avg intensity
0	45.0153	41.0746	22.1037	19.7847	19.989	24.772	24.991	36.1217	34.7266	42.3639	57.4084	50.8135	38.5529	38.4033	31.4034	33.6055	33.149	45.9712	37.9087	36.0086	35.9911	39.7562	52.578	41.091	45.144	32.6155	26.0174	20.4196	28.544		0	35.7353
0.119	44.5055	44.1935	25.1074	19.463	18.018	26.982	26.005	36.0454	33.2208	44.5229	44.4561	50.5843	34.2621	38.3566	27.9007	35.0028	35.0749	43.8654	39.4508	42.7597	42.3065	38.5768	57.3966	40.767	54.835	37.978	37.8427	17.35	31.8102		0.00520683	36.8496
0.2381	47.2687	50.6329	30.2074	30.6162	27.15	30.356	23.375	37.0479	37.907	44.4848	53.1252	45.1233	39.3218	48.7527	34.379	38.8655	42.7075	39.137	39.3983	42.3573	47.7712	50.3581	51.557	48.574	54.144	39.9955	34.4358	15.8936	26.8879		0.010418	39.7183
0.3571	51.0302	34.7406	37.6852	24.4657	23.095	30.886	22.947	36.6116	38.5858	45.6047	43.8426	48.0728	42.9118	54.8948	41.7926	39.5944	44.6319	43.5776	49.5024	53.5304	35.0152	43.3527	50.4695	57.279	68.159	40.2846	39.0712	15.3958	29.5902		0.0156249	40.9179
0.4761	50.0121	56.6537	38.8718	27.0682	24.571	29.493	34.092	41.2044	43.1891	41.4972	49.0337	52.7875	39.7589	51.3516	46.4316	41.5297	46.9492	40.1855	47.3431	46.8235	47.3716	54.5277	52.7107	51.895	85.828	53.3619	42.2263	32.4987	36.6231		0.0208317	45.0307
0.5952	58.2844	39.2082	37.4123	29.5798	28.249	30.132	31.108	44.0231	47.9607	43.5274	48.2403	50.7255	40.848	55.2474	53.6908	42.7285	51.517	54.5496	50.1474	61.7288	52.4639	58.229	65.2294	61.957	73.593	52.1957	52.5867	24.1132	34.3271		0.0260429	47.3656
0.7142	66.1112	59.1213	49.4408	38.4209	27.927	33.834	38.593	45.089	52.6208	50.7561	63.0818	61.0638	50.4514	61.2291	47.4357	57.3402	49.1909	46.1456	56.6587	61.6273	56.9882	51.351	56.7635	65.65	80.09	67.3872	54.8666	39.2132	36.8688		0.0312497	52.5971
0.8332	65.7748	61.5535	49.9531	36.9011	27.035	43.555	36.92	53.8349	59.2727	46.8596	57.241	51.4145	58.48	63.5912	49.1091	49.0058	51.1499	58.9902	76.9682	63.3282	67.1042	51.9553	70.0616	64.592	87.07	69.5778	66.3706	50.523	37.7023		0.0364566	56.0653
0.9523	66.2886	60.2141	58.4915	43.9844	31.912	45.433	46.941	39.4362	63.5793	48.3369	56.0597	77.4129	62.503	54.0443	53.9022	48.1412	53.8758	59.7947	79.4367	65.3367	79.525	61.9497	68.1134	69.266	102.824	80.9652	67.3318	48.2439	39.6445		0.0416678	59.7582
1.0713	73.081	52.5951	60.1053	40.1345	37.766	47.935	46.176	52.9225	73.6554	50.5965	58.0866	79.117	61.1565	58.0571	51.7357	52.8441	58.6633	62.6685	87.8891	77.0829	74.3024	68.866	80.7762	78.293	89.911	71.8764	78.715	53.1497	40.8753		0.0468746	62.7253
1.1903	78.996	72.9852	66.111	47.1379	38.832	51.944	62.458	50.161	69.9702	56.4635	62.1391	77.883	61.7671	58.4609	62.2347	52.3865	56.582	66.7952	81.0337	73.9587	81.6158	57.273	78.9039	78.111	75.356	65.027	76.0938	68.0922	56.0762		0.0520814	64.9948
1.3094	81.8846	58.8987	57.4012	55.697	40.412	45.989	59.685	54.8197	68.4116	56.219	61.7908	72.7576	73.0527	62.7593	51.0355	46.1007	64.5896	60.1316	80.3518	74.3393	77.8245	65.9494	75.1674	83.058	77.801	69.3483	77.3942	67.6469	56.7115		0.0572926	64.732
1.4284	72.4285	61.2581	65.2406	53.5845	40.216	52.348	66.566	64.4999	78.3908	66.4904	75.18	83.4776	70.6638	66.4721	59.9623	57.3474	62.9335	64.1416	68.8159	72.1817	74.899	69.3414	62.9311	80.014	67.542	68.0178	67.5255	72.1343	68.4888		0.0624995	66.6584
1.5474	75.5266	69.0448	75.9391	65.4941	36.25	53.249	61.408	69.3337	71.1366	70.0865	67.7048	67.5815	61.598	61.4895	49.5812	46.0846	67.64	51.3587	80.0981	66.0563	83.6804	82.2264	63.7825	74.548	67.001	66.8721	59.3294	72.7584	60.0668		0.0677063	65.4112
1.6665	89.4274	71.6359	74.9353	67.7515	51.221	53.672	68.94	72.1334	70.6151	68.2152	75.4585	80.1842	61.5837	65.4416	52.7957	50.5189	60.9198	50.7486	70.881	71.5591	76.4014	76.601	69.0999	75.425	65.878	73.4331	72.1634	76.6034	68.0262		0.0729175	68.3541
1.7855	87.5355	83.2287	81.1312	64.3642	46.81	54.834	71.811	74.5598	78.953	71.3743	70.7656	65.6251	63.7768	68.958	57.8577	50.8237	61.2648	57.8186	72.9734	70.8732	72.9026	68.7483	66.2043	83.116	63.622	61.1142	73.577	72.7343	77.1971		0.0781243	68.7777
1.9046	100.705	80.5999	71.5743	78.142	51.832	59.313	68.136	78.5593	78.5044	84.9701	75.6367	78.7319	67.5615	64.4827	49.4918	52.8687	50.687	65.3351	73.5591	60.744	60.3836	81.9341	66.477	71.087	62.194	58.4205	72.3386	61.5881	71.4572		0.0833355	68.8729
2.0236	96.4006	85.0532	70.7432	71.6686	46.184	52.471	67.242	71.6489	74.3617	70.2465	73.023	75.8914	65.917	53.8333	52.5239	50.2461	56.6357	57.5023	63.3004	62.8849	60.7948	73.9595	70.504	74.855	59.825	57.5392	70.2684	77.1593	78.6647		0.0885424	66.943
2.1426	99.0644	74.2101	75.7569	72.8674	51.234	48.64	64.114	68.923	64.6384	78.0388	76.125	67.6127	81.1305	57.6933	53.4179	59.9652	56.9846	54.8651	70.9534	63.3725	60.3363	70.8514	66.2914	70.072	62.51	64.1463	60.8927	66.0033	67.5644		0.0937492	66.4922
2.2617	94.4476	70.2267	76.2211	62.1397	52.296	46.768	70.803	58.7397	61.7106	68.4408	75.379	71.5329	67.7645	56.268	54.9951	64.9258	53.3712	55.6692	58.4959	58.2697	51.6795	68.0748	74.0797	75.814	74.699	60.868	68.8364	62.318	62.5741		0.0989604	64.7382
2.3807	101.371	64.7308	71.7907	71.8602	51.733	49.839	74.388	71.5592	67.5958	70.7551	76.5958	67.3569	83.5872	61.1924	58.074	57.2064	54.1527	58.1395	62.2319	64.2879	57.6939	63.5116	69.2717	82.37	78.109	66.8454	65.1947	64.5177	70.1278		0.104167	67.4513
2.4997	97.344	67.5502	60.759	67.3181	53.22	56.644	79.671	71.3479	69.2152	79.798	66.8553	74.1917	94.2515	70.5001	56.2075	51.123	56.2953	62.6146	65.5348	57.0506	59.4864	66.099	67.6485	81.014	79.62	62.0629	64.825	62.9585	66.8597		0.109374	67.8643
2.6188	93.8088	70.6443	68.97	65.09	62.108	49.499	78.619	78.7409	56.948	83.4307	88.3343	65.3523	95.428	57.7877	63.3584	50.4711	51.5088	57.2928	59.4201	53.1239	67.4789	64.247	69.0848	82.049	70.244	61.2003	66.902	58.6802	68.8374		0.114585	67.54
2.7378	94.5917	73.224	76.2206	60.3041	50.722	54.572	83.768	79.3039	73.6242	90.0627	78.6846	74.3065	80.931	58.0501	62.9458	70.6471	53.4759	53.3252	60.92	56.1864	63.8596	58.4746	72.5721	77.211	70.428	58.2712	66.6327	75.6361	64.3068		0.119792	68.733
2.8568	89.1754	78.2623	78.6223	67.6298	58.912	58.842	77.1	82.1793	61.9615	96.2754	81.0808	66.3376	92.358	65.9621	68.799	55.0513	61.8198	55.5009	51.261	68.2995	59.2757	66.5007	70.096	82.739	74.464	72.963	74.5319	62.2908	64.397		0.124999	70.4375
2.9759	77.8189	82.7902	70.1763	71.7093	57.422	48.598	88.32	81.0205	64.038	96.5954	68.8085	66.7345	92.3336	55.1137	66.5592	55.4735	53.8537	64.3466	51.5271	65.395	61.3494	69.5726	66.9008	85.516	75.674	69.851	69.1778	65.9629	70.5136		0.13021	69.419
3.0949	78.0691	89.7455	80.9849	62.0726	56.02	54.217	85.334	68.3103	67.8645	87.0913	73.658	70.3432	86.16	62.4823	68.7595	59.9363	54.7623	64.7627	50.3453	54.7374	67.8651	63.4155	69.6883	85.234	69.417	57.524	62.8099	61.82	64.2682		0.135417	68.1965
3.2139	91.7987	86.5629	66.502	63.6266	57.513	60.123	87.793	78.7718	75.2487	89.563	57.0779	76.7648	83.8525	58.5511	66.6032	56.7831	61.863	66.8279	51.5535	73.1958	73.375	63.8195	74.8658	86.63	75.839	71.1941	72.0872	72.5233	71.4969		0.140624	71.4623
3.333	84.6395	86.7949	83.9772	62.2772	59.788	55.543	90.823	74.7902	74.3396	83.7398	63.1277	66.9192	87.3157	63.4232	66.5648	54.7778	57.0471	75.6009	51.5391	74.5383	69.7385	52.9842	96.7678	93.919	72.73	71.2887	69.9314	64.8203	67.2031		0.145835	71.6189
3.452	80.251	83.0379	90.9698	63.3757	56.158	66.362	92.241	68.2737	73.5645	91.5282	57.1028	77.3562	76.2681	66.001	66.4754	62.5686	64.9793	61.8474	49.1216	71.7972	61.2925	59.4839	73.0297	82.041	69.845	71.6565	68.0476	61.3033	66.0327		0.151042	70.0694
3.571	79.3696	74.2583	92.1214	65.9458	55.245	62.478	102.466	72.7129	73.0466	85.8816	63.6956	69.6337	76.8929	66.1624	74.4885	58.3119	66.5383	65.076	59.2249	79.805	65.1667	64.0481	80.1487	88.699	77.125	74.8267	78.2465	62.6026	62.425		0.156249	72.298
3.6901	74.5556	70.6241	87.9052	64.0666	58.105	59.867	98.458	73.9649	75.6596	76.0086	61.6763	73.3769	84.351	71.6377	70.1245	56.5236	58.8479	74.6502	51.6534	90.8995	65.3501	58.2648	74.6675	87.856	75.354	76.7313	76.984	71.268	71.0362		0.16146	72.0851
3.8091	78.591	72.5556	91.365	58.0005	58.822	76.373	112.467	64.5842	75.7873	80.3939	73.2487	64.0694	81.9776	70.8024	60.6067	57.9054	59.5586	62.0443	48.0666	79.8242	62.4715	58.7033	73.3262	89.95	79.429	76.2971	70.4953	62.4612	56.402		0.166667	70.9165
3.9281	84.7976	81.4189	104.494	60.3524	60.384	66.422	103.431	77.0989	72.6072	72.6499	60.4215	65.3504	82.6067	68.4801	66.7001	68.0705	56.2739	68.4926	49.7312	82.2428	57.1608	56.3018	73.3094	95.405	65.729	75.785	62.2573	67.262	53.9316		0.171873	71.0058
4.0472	83.3712	74.9804	112.035	57.9209	66.798	88.353	99.828	75.5563	77.0707	74.9334	62.6204	58.4174	85.8226	64.606	68.014	55.973	64.0152	71.5744	49.6456	69.0298	70.3262	61.2556	74.4472	120.93	75.551	71.2438	79.1917	73.991	59.304		0.177085	74.0278
4.1662	80.251	70.682	80.4262	64.3427	66.854	82.378	98.564	84.8427	66.0963	75.8961	53.8069	59.1897	83.7869	67.9593	56.7426	55.1331	54.8481	69.7207	59.9675	73.1797	60.8084	66.3482	83.1909	89.228	81.848	67.0794	74.8009	64.0712	50.2164		0.182292	70.4227
4.2852	104.168	64.786	81.8945	60.5715	72.914	84.571	105.022	75.8975	69.7366	71.8322	62.7592	68.0048	90.519	68.8523	65.2832	68.3664	61.9435	74.4179	48.9455	76.6188	61.3781	68.1823	76.4965	89.931	66.761	66.7193	83.2234	69.3418	55.4843		0.187498	72.918
4.4043	88.1443	73.4036	81.7678	63.5452	71.32	81.47	88.96	76.144	67.3042	77.7057	69.5704	58.0476	89.212	64.1566	63.9118	57.7019	60.0073	64.2261	56.4647	58.3743	62.0853	57.8311	80.0668	90.288	72.919	70.4059	72.3069	65.5606	55.3596		0.19271	70.2849
4.5233	94.1595	71.7917	96.7186	65.9103	68.687	94.845	71.1	75.717	69.9237	79.1329	61.9282	58.0469	69.7011	73.2315	59.0946	57.0335	57.7356	68.7412	58.0847	61.0351	70.6271	67.9641	77.1687	83.763	68.598	59.3602	73.4361	74.7084	61.1102		0.197916	70.6674
4.6423	94.8271	73.6715	81.837	66.4006	76.896	93.674	85.513	69.3977	70.0708	64.1222	71.4719	52.8066	83.8268	57.9102	54.3153	57.5444	59.7416	61.8752	54.5527	63.823	67.4221	67.416	78.4545	89.223	74.085	66.6882	70.8857	66.4156	51.2857		0.203123	69.8674
4.7614	99.4513	76.0997	86.6406	65.7385	71.161	86.153	91.229	74.598	70.1795	64.3148	68.9117	65.8353	72.6125	60.2762	53.9213	50.0345	52.4585	53.2754	55.7098	55.3185	59.8207	67.9175	72.4975	96.479	63.019	66.6461	74.098	66.5299	47.0819		0.208334	68.552
4.8804	98.6332	73.8258	88.1118	70.4509	79.226	87.013	76.423	71.0184	63.6281	70.5092	69.9254	49.9786	82.3152	67.5583	59.3007	50.9278	60.457	47.0153	48.9799	65.8555	65.5198	74.8601	70.0948	92.777	68.828	65.6184	78.0143	63.827	48.935		0.213541	69.2975
4.9995	113.388	84.784	72.977	70.3118	92.746	92.735	83.389	65.1584	64.1948	66.7973	72.1017	61.955	75.7446	60.6461	54.0278	53.2715	69.0783	61.4006	54.2465	55.5094	75.1318	72.6408	72.7852	99.38	74.738	58.4807	74.4347	58.3088	54.8736		0.218752	71.215
5.1185	109.984	77.8413	81.4472	65.9896	96.63	110.488	83.168	63.111	53.8965	73.1103	69.8114	62.5599	71.1523	59.0533	57.7229	56.4464	67.52	57.7931	69.0515	61.3245	66.4696	70.2005	69.421	93.207	64.806	65.6499	63.6136	55.1506	54.5997		0.223959	70.7317
5.2375	114.436	75.5478	77.6301	67.6449	100.397	83.924	78.609	57.8736	69.9222	61.8585	77.1287	52.4831	68.3289	53.6657	56.5568	52.0235	65.6116	49.8025	53.4014	55.0272	76.6414	70.2024	81.404	93.326	72.389	69.3074	69.2518	57.8326	54.0929		0.229166	69.5283
5.3566	115.084	90.8369	76.6587	67.592	84.977	82.839	83.467	65.4683	60.1688	61.0964	75.4023	58.4995	78.0806	56.436	59.9032	57.552	63.7804	54.0277	61.5656	53.3828	72.7905	67.2014	69.3355	86.617	61.957	65.3153	55.3544	53.8621	57.3779		0.234377	68.8493
5.4756	90.304	96.1553	72.8594	72.5374	90.398	78.993	90.091	62.7953	70.5684	62.3149	69.056	55.2529	63.8789	57.9567	61.8772	56.8832	73.7887	51.6269	62.1342	56.7382	82.6051	78.6977	75.6481	90.374	63.417	65.2637	62.0661	48.4446	57.4566		0.239584	69.6615
5.5946	94.461	87.8443	80.0762	74.2036	85.659	75.985	87.673	66.4334	76.1228	59.6704	77.4762	48.139	71.4981	62.3493	60.4758	59.0835	63.6836	42.8142	55.0933	65.0046	79.0202	71.8364	76.0343	85.128	59.695	63.1159	52.3988	54.3793	52.8286		0.244791	68.558
5.7137	93.6614	86.7448	85.1298	83.1293	82.19	82.115	92.592	75.7894	62.015	53.4206	67.6784	51.8106	54.3696	55.1277	53.0634	55.1083	63.1657	42.57	49.9192	62.0765	89.1023	76.9779	81.0897	68.904	54.68	70.1719	60.5201	42.4977	46.7904		0.250002	66.9797
5.8327	92.2538	82.0362	90.612	75.3258	78.153	88.009	85.965	73.4322	61.05	60.2906	71.3299	52.2209	61.3096	52.9772	61.6782	63.4312	48.8283	39.9055	54.9831	60.0286	89.028	66.0709	71.0402	70.447	64.971	66.6936	53.6675	38.9855	44.8321		0.255209	66.1916
5.9517	99.1195	81.6922	88.9835	79.2792	69.392	91.438	81.281	67.1061	67.8692	54.6029	63.8779	59.1298	57.7841	55.681	58.4467	48.4928	66.0491	42.7397	54.7765	50.1295	73.899	76.0274	69.0999	75.555	66.621	61.2731	45.2741	38.1449	45.444		0.260416	65.1451
6.0708	94.782	89.1908	97.2023	82.4906	76.956	85.696	94.364	66.2005	57.2715	57.3588	65.876	52.7557	68.0477	55.0416	56.2638	56.1459	65.3154	50.4192	54.2574	54.22	77.6024	74.3412	74.9665	64.469	66.752	72.1032	52.7034	38.8975	34.7007		0.265627	66.7721
6.1898	91.7274	91.3715	91.9108	84.4895	72.888	81.284	88.725	66.7215	55.0463	60.3653	66.4422	61.473	55.2925	54.5704	58.3867	50.3375	51.377	45.3862	57.6999	62.6259	72.9359	67.7159	71.4839	68.099	62.225	67.8479	46.3162	27.939	38.9388		0.270834	64.5387
6.3088	87.1592	84.0946	83.9044	69.626	66.862	83.904	102.514	64.1227	56.7593	64.5145	66.2552	58.3997	56.2462	51.6692	54.2236	62.7104	56.4227	43.2014	48.0797	64.4342	63.6166	70.5264	75.6636	63.172	66.137	64.8337	42.401	28.7566	30.671		0.276041	63.1338
6.4279	97.2071	94.6439	80.3555	79.8176	79.952	90.29	91.381	60.7735	54.621	68.2179	73.5509	58.8153	64.3317	51.0755	55.4605	55.9191	58.8552	44.0659	63.4063	70.2531	79.7332	62.4789	75.8236	60.337	63.447	67.6895	40.9482	24.0215	31.8303		0.281252	65.4932
6.5469	89.0439	103.38	78.2373	71.4737	77.271	92.793	96.103	65.7012	51.5464	66.0776	73.8965	57.9485	62.1718	55.3313	52.5864	58.7138	52.9318	52.1408	61.1597	57.1345	67.3612	75.8708	63.6044	63.64	72.385	62.0827	31.2741	23.596	31.959		0.286459	64.3936
6.6659	98.8101	96.933	81.8993	75.3256	78.721	87.321	87.144	58.0281	54.0371	66.22	74.7953	54.5521	59.952	46.0359	61.5666	53.458	50.6541	36.0895	55.3912	60.3238	68.1433	63.8967	67.8171	60.216	60.534	65.6849	32.9663	19.9705	24.2503		0.291666	62.0944
6.785	90.3104	97.7105	78.3704	69.0903	73.823	89.335	96.128	47.2044	61.3141	66.9862	66.2496	48.4178	59.8175	60.9143	66.4195	49.3252	61.1347	41.4519	51.2039	68.1377	75.1519	66.375	68.9714	63.855	69.138	55.4437	33.7025	18.3759	23.6563		0.296877	62.6901
6.904	94.4793	94.5272	66.4188	79.2081	72.286	83.256	90.017	59.7458	57.2825	66.7617	69.41	56.7093	61.0496	65.7986	67.6552	53.7367	53.3989	38.5324	52.212	64.4655	64.0608	62.061	70.2751	47.639	59.85	61.4267	26.4724	19.585	18.0043		0.302084	61.2526
7.023	83.4694	103.137	63.9228	74.7786	72.323	66.744	102.612	53.8569	62.693	68.7416	69.8537	66.8792	60.2155	63.9805	70.1405	57.5966	45.0985	34.9145	43.8857	72.077	68.4219	54.4693	68.1837	64.714	71.297	56.3856	31.5369	12.0088	21.8755		0.30729	61.5798
7.1421	78.0341	82.8676	67.5623	67.9152	72.188	74.141	93.768	56.5069	55.6436	62.5375	72.2772	62.156	65.721	64.7646	60.3998	57.0906	51.336	36.9202	45.9507	71.4472	60.7759	59.071	64.4267	58.585	59.402	67.2424	21.3941	11.1279	14.6692		0.312502	59.1697
7.2611	79.5101	79.637	59.903	70.3103	68.466	81.823	84.96	45.2877	60.1486	63.3422	65.3568	52.8216	59.1444	68.3382	65.874	50.7943	45.5996	33.2387	40.7599	67.9908	68.5568	62.0064	66.7961	55.66	56.3	53.3535	24.9846	14.2058	17.0988		0.317708	57.3196
7.3801	78.0254	77.1287	60.6764	62.1945	60.658	72.623	81.249	58.5477	52.5939	63.535	66.7285	59.7743	69.5167	66.4331	61.2813	58.1954	49.4262	31.9081	47.1887	49.9419	62.1738	55.2514	69.8519	59.558	63.738	59.7714	23.9656	13.0648	17.7951		0.322915	56.993
7.4992	90.6476	64.0868	55.0348	67.8764	72.06	78.7	78.575	44.0798	56.9543	55.9356	59.4596	60.4787	63.7502	66.8129	62.7615	58.5573	42.3301	27.2175	41.2113	61.747	56.4939	63.2642	74.0211	58.118	66.38	53.8226	25.4212	16.0401	18.4568		0.328127	56.5619
7.6182	77.2906	78.1324	59.2315	80.5142	74.223	76.821	69.611	44.4776	39.0993	66.0972	60.8087	52.7647	68.5403	70.9991	54.4047	67.6658	42.2563	26.0859	35.8501	66.2858	65.6532	62.3128	62.9686	56.993	64.193	43.7533	19.3534	7.9089	12.5674		0.333333	55.4091
7.7372	80.5594	76.2165	64.5673	71.1044	78.858	78.182	83.908	41.2199	40.6912	73.6444	64.4785	67.8246	72.8978	67.5313	73.5605	49.1965	44.8957	19.7938	32.4798	53.3841	59.2266	56.7557	60.3076	58.542	65.091	49.476	18.3835	16.6004	13.8945		0.33854	56.3197
7.8563	77.7935	78.0346	55.4589	60.6511	84.326	84.618	70.947	39.1237	40.0533	62.7475	58.1737	68.454	67.8076	66.5302	64.8938	46.8932	33.8928	13.7691	34.0242	48.7383	63.2817	51.4051	59.9708	59.018	56.876	53.9686	17.4768	15.7413	15.2638		0.343751	53.446
7.9753	87.9586	67.6721	59.6212	74.8264	75.181	86.629	65.078	34.6774	38.6584	57.273	56.382	55.3953	60.9458	64.5187	57.308	61.9726	41.2889	20.8584	24.2138	43.5654	63.7137	57.0192	58.3216	58.379	63.569	55.4674	19.0568	10.1233	14.1021		0.348958	52.8888
8.0943	90.4784	68.0933	62.4999	72.049	71.593	79.498	68.535	31.8614	33.3338	58.1668	59.2724	60.0364	71.2963	61.51	58.7765	58.2613	35.2908	19.2224	23.2228	51.0003	63.7679	69.4034	57.5681	69.909	49.969	49.6888	16.5016	12.3822	11.4095		0.354165	52.9171
8.2134	92.6135	64.9046	58.3357	63.3308	77.102	74.307	67.781	29.8967	33.3488	53.4426	52.6082	58.9002	59.4064	67.7373	70.3013	61.9375	28.7639	14.3549	21.5418	43.1291	59.6638	66.1812	56.3373	51.255	53.108	50.6387	13.7244	13.9341	11.5833		0.359376	50.6955
8.3324	76.4985	68.3228	57.6683	73.5512	77.526	78.076	59.897	21.8884	31.7354	61.9509	56.7131	55.1587	68.9149	67.6147	58.7313	60.8979	31.2243	13.7339	19.6775	47.4848	54.9805	68.3134	58.2942	61.147	60.642	48.2521	18.092	17.6806	11.6443		0.364583	51.2521
8.4515	92.9591	70.702	60.441	66.2612	78.373	86.697	66.948	28.7557	28.8482	57.4176	56.5409	60.5899	60.4219	63.2075	70.4639	60.8944	28.3256	15.7117	20.1569	40.1528	66.2169	60.1404	61.2447	64.368	53.386	42.3138	16.1697	11.2035	10.0985		0.369794	51.69
8.5705	89.1258	57.195	61.7054	68.3421	77.569	76.889	59.315	27.75	23.9174	54.1361	53.9701	64.9101	57.4232	66.4281	74.7227	55.5871	23.9819	18.841	15.6902	38.0257	61.3429	62.9158	58.5918	59.885	61.544	49.3129	14.8583	13.2613	8.7056		0.375001	50.2049
8.6895	79.3149	66.6819	58.4153	58.4299	80.464	66.939	56.818	25.7349	30.8374	65.5106	56.2602	78.4791	61.3038	63.7112	56.3446	58.5694	25.0311	14.7355	18.0901	34.8094	63.4218	71.4701	59.2612	59.433	52.324	38.8437	17.4489	10.4642	10.635		0.380208	49.6477
8.8086	82.6001	58.7751	66.2114	66.4758	76.5	66.208	54.123	22.3155	21.5491	64.8864	59.5263	70.4536	63.5888	74.2465	53.2386	60.038	20.9779	15.4924	21.2928	49.1456	57.3029	70.7555	60.874	53.853	53.343	43.2829	18.0219	6.6395	10.42		0.385419	49.7289
8.9276	80.1279	64.7362	61.4492	64.983	101.701	72.638	56.475	21.1957	26.819	51.5548	63.7535	62.4649	62.4072	69.0548	65.3226	47.6839	20.0437	15.9033	21.9435	35.0011	63.1397	76.9631	62.1884	55.105	61.664	38.0941	16.5802	5.8907	9.1518		0.390626	50.1391
9.0466	79.3098	62.9786	64.5143	74.1522	89.448	75.107	45.253	21.2399	20.9335	58.1546	64.6257	69.6686	67.8553	75.3165	60.4885	50.9554	19.6397	12.9874	13.9552	37.7466	65.5012	76.7209	55.5441	59.219	57.492	39.0637	14.8634	8.8571	9.4126		0.395833	50.0346
9.1657	63.3454	53.6341	58.7746	68.182	79.545	77.355	40.187	20.4967	24.7051	55.1779	64.4281	70.777	64.278	72.977	66.1585	51.1678	15.6952	11.5588	14.0999	34.1352	64.969	78.7007	56.8053	56.665	56.863	28.0439	12.5453	8.3753	8.2815		0.401044	47.5147
9.2847	75.2981	54.4636	67.9818	73.2291	74.301	69.863	41.138	21.6015	23.3229	57.2386	65.5201	83.0328	61.5264	66.4459	59.4288	48.4683	17.5752	16.3648	14.3737	34.4515	52.2008	82.6503	57.9333	56.861	55.576	23.3634	16.0745	9.207	5.0792		0.406251	47.7438
9.4037	69.5275	55.6383	66.111	70.7866	86.308	81.597	45.061	23.7451	22.7813	55.3524	63.6734	78.4225	62.2701	63.7184	76.2428	45.5001	13.288	11.2047	15.1226	25.5694	58.2861	69.246	61.1274	64.096	52.438	26.6875	15.7875	9.5931	9.8216		0.411458	48.2415
9.5228	58.7841	44.3467	56.1677	78.0974	85.298	75.934	38.222	17.0182	20.2496	58.2935	51.3676	74.7486	58.8335	70.4501	61.5705	39.8309	15.4142	11.3574	14.9681	35.1868	51.5063	74.3507	51.6113	59.398	59.656	27.7488	13.7411	7.4292	8.3256		0.416669	45.514
9.6418	72.5549	46.7634	61.5822	70.7464	79.801	68.384	36.979	20.4599	20.914	66.6533	71.6359	78.84	65.2991	66.053	63.0626	47.0349	19.2534	17.1702	11.2446	24.6991	51.2631	74.1816	57.7628	54.126	53.101	25.1872	8.3537	7.2039	11.4491		0.421876	46.6124
9.7608	54.7207	44.4484	60.9992	66.7475	71.917	68.887	39.341	22.7206	16.0798	51.4463	67.7243	71.0565	71.7703	59.9839	62.8382	44.3133	15.4026	10.1949	13.4115	27.2571	59.5931	70.5517	50.4566	56.178	55.405	20.9396	12.8926	7.2503	8.103		0.427083	44.2286
9.8799	47.6937	41.8427	56.1681	72.365	78.718	81.352	38.144	20.7184	18.505	60.5689	70.3973	69.2662	62.3129	64.7911	66.0005	42.6868	17.7564	12.0044	11.1548	30.5217	66.1589	67.3474	61.2459	49.311	48.478	24.7958	10.6587	8.5474	9.6654		0.432294	45.144
9.9989	46.1938	38.5308	56.8899	58.0011	77.75	62.687	37.727	15.1302	17.362	57.6465	62.069	69.7854	68.623	58.3187	65.982	42.753	20.9209	14.3582	15.2093	33.6042	55.5394	80.5215	53.3226	57.079	56.076	21.594	11.281	8.2349	11.3759		0.437501	43.9506
10.1179	42.7456	41.975	60.7654	71.4585	81.978	62.852	34.217	17.3591	18.666	55.5553	64.6184	63.0082	53.6437	58.9356	68.2881	40.658	18.386	12.3923	14.2527	36.455	60.3117	72.1474	54.5214	51.787	44.503	22.8914	9.9157	7.4613	6.7211		0.442707	43.0507
10.237	46.5498	34.1374	55.1531	81.9889	74.746	56.383	34.069	14.8311	16.6199	56.7857	58.3985	63.8674	49.4672	51.8906	63.6942	41.3141	13.084	8.5059	18.1025	33.4323	57.6548	69.2913	50.4663	56.069	46.782	20.145	10.0697	6.169	5.9572		0.447919	41.2284
10.356	33.3913	31.1168	58.176	66.9523	69.165	71.661	35.003	10.9318	14.215	57.2785	54.5655	68.8043	49.5007	59.7897	65.7366	43.3885	16.2245	13.2188	16.3825	33.3007	58.6489	77.4442	52.5248	50.927	57.25	23.7632	8.8895	6.1233	4.6298		0.453125	41.6898
10.475	32.9436	35.0044	50.9114	76.6539	75.754	74.159	27.037	18.377	11.7476	47.797	54.046	71.814	61.6154	59.8988	66.6815	40.6863	15.2407	10.1021	15.6773	36.275	58.6446	77.5298	60.4684	56.801	59.677	21.9365	8.7795	9.2619	7.0195		0.458332	42.8462
10.5941	34.6075	31.6641	42.98	69.2068	70.798	65.474	24.131	16.1597	14.759	56.6844	56.1513	57.4812	66.0921	51.7554	70.648	39.8471	15.6552	12.6509	15.2867	31.2467	63.2626	83.8803	55.208	47.417	49.9	24.7337	8.8959	6.3386	10.174		0.463543	41.141
10.7131	29.2785	24.0311	45.0877	69.6215	64.537	69.798	25.97	14.9118	12.9738	53.5669	57.2601	63.1732	54.4321	59.1065	68.2861	35.9495	12.6198	11.4424	17.273	25.8171	63.8769	84.5654	57.2049	52.838	54.221	20.5994	11.8534	8.3439	10.0179		0.46875	40.6433
10.8321	29.6998	29.6904	40.917	54.8629	72.798	70.346	25.118	15.8778	17.01	59.5933	56.8197	72.2098	68.8144	52.4889	72.4531	47.1657	15.4593	8.4076	13.4389	28.1214	67.1776	74.3475	59.0438	54.34	48.01	17.4493	9.1106	7.6954	8.7055		0.473957	41.2818
10.9512	29.3183	24.3264	41.6766	65.3482	63.673	67.67	26.252	15.4896	16.364	55.1641	53.4706	63.2036	59.567	52.6482	71.5752	42.5098	18.6345	9.3431	13.5903	28.4664	59.096	62.8444	58.4802	57.606	44.209	15.9007	11.1447	7.7007	7.2392		0.479168	39.397
11.0702	30.7142	24.2792	40.0079	59.461	55.096	71.213	23.238	16.836	13.0975	49.9024	57.6259	65.8778	62.5109	54.788	55.3786	39.8587	13.393	11.7662	13.4234	30.0444	62.5694	61.0574	60.4379	55.018	49.027	19.5486	10.2141	7.7542	8.733		0.484375	38.7197
11.1892	27.0298	20.9798	33.9232	57.009	62.976	74.029	22.726	13.3365	20.1446	43.82	53.5663	62.1597	62.2078	56.4717	66.504	39.7315	11.4509	8.7522	14.6614	32.7355	57.9267	60.5312	61.6888	53.421	50.442	20.664	10.188	8.4904	5.3141		0.489582	38.3752
11.3083	26.3373	25.2518	31.7431	59.7027	63.766	73.461	23.352	12.7328	16.8733	46.2109	58.116	61.7061	55.378	55.1091	58.2269	35.8782	14.6626	8.8832	12.5949	36.5392	55.8454	60.135	59.9581	53.017	61.036	20.1792	8.9819	7.4629	6.8258		0.494793	38.2747
11.4273	21.352	23.4264	30.5676	55.8015	57.927	67.498	20.437	18.0516	15.2678	47.3524	65.972	52.0109	49.7268	55.0044	54.8593	33.7061	14.1314	11.0386	14.0247	32.3956	57.2146	60.9644	55.6501	56.628	55.551	20.5981	9.4428	11.36	8.7392		0.5	37.1276
11.5463	21.1302	26.5041	23.3841	57.3604	67.063	71.24	19.101	11.1221	16.7465	37.0239	60.791	60.3679	52.4049	59.0108	58.7127	29.3606	9.2649	11.4269	18.0317	25.7043	59.6748	50.1554	57.7606	62.388	48.645	17.4989	8.6253	7.6155	10.1624		0.505207	36.4923
11.6654	29.8206	20.4138	27.5212	51.2428	65.028	70.33	27.356	9.8361	11.7681	39.4859	59.789	72.2822	52.2952	49.5118	57.4961	31.9456	17.5747	10.0222	12.1125	25.1711	66.3796	51.6782	51.3187	53.79	55.265	19.4267	8.6674	7.5076	10.8746		0.510418	36.7555
11.7844	22.8469	21.0715	24.9241	52.8408	65.598	68.145	18.381	15.1035	15.0915	47.1881	56.5048	55.3906	54.1183	51.5345	54.8965	32.951	12.2291	9.2239	14.8943	22.8581	50.4542	54.1707	49.93	74.831	62.842	18.208	9.4053	7.4296	11.7328		0.515625	36.3722
11.9035	22.7033	21.4705	23.8783	54.8627	60.993	66.805	19.449	12.6695	15.153	33.3409	59.8889	58.3725	56.3419	52.8104	50.4277	35.1652	11.436	8.9819	13.7815	24.589	51.2023	51.3988	55.5778	57.054	63.785	19.7332	7.3304	5.2149	12.2896		0.520836	35.4037
12.0225	23.5301	17.7694	25.3544	61.5406	69.707	73.062	20.845	16.461	20.3814	40.8673	67.3963	58.1525	47.3112	52.8083	55.2925	32.0351	16.2583	10.7687	12.7331	27.7528	61.4599	46.3006	52.4797	65.604	58.881	14.7246	8.2425	8.1556	9.1589		0.526043	37.0701
12.1415	21.6075	22.3595	24.8955	52.9596	75.6	67.145	22.067	12.9332	17.6713	42.1422	62.8916	56.2255	61.1089	55.2994	52.0988	33.3648	12.2276	10.8299	13.0687	24.6872	57.7959	49.9578	58.3641	63.253	55.172	21.0463	8.3583	8.2015	11.1841		0.53125	37.0523
12.2606	24.7912	17.7782	20.212	61.3414	70.736	61.39	18.711	11.9567	17.5081	44.5476	57.3855	54.014	62.6486	59.3799	53.7312	33.959	14.7013	9.3675	12.3323	27.0835	55.9211	52.6003	49.083	61.31	62.302	20.9515	9.4029	7.9311	7.7886		0.536461	36.5816
12.3796	20.2148	17.4689	21.4069	55.569	73.527	70.08	20.756	10.3047	15.38	39.4585	69.0643	56.6294	62.9854	65.076	61.371	31.2127	15.2373	10.0828	15.9094	31.9671	48.2199	38.4609	53.3439	66.867	62.098	24.2756	12.4795	8.5794	9.7214		0.541668	37.5085
12.4986	26.5897	17.498	23.0974	62.356	76.699	62.187	20.811	11.1516	15.6813	39.304	69.5698	54.004	68.8079	59.3041	58.7418	35.3642	17.4109	7.7734	11.9746	30.5944	57.6052	42.1088	54.7111	63.18	61.486	21.848	10.4055	8.1424	11.1415		0.546875	37.9155
12.6177	21.7893	21.2902	21.316	59.3813	80.534	62.549	16.406	10.9245	12.1062	38.335	59.3886	59.723	55.1793	56.944	59.0142	37.9165	11.2943	13.79	16.1203	28.4523	48.3362	49.7536	43.856	56.985	57.475	18.7644	10.3653	9.2438	8.4343		0.552086	36.0575
12.7367	23.4688	14.8884	20.0867	61.2158	78.866	60.996	20.331	7.8378	17.1579	45.973	63.0353	54.1416	59.0835	67.7276	50.2668	36.2201	11.6735	12.1911	12.1753	34.8117	51.5097	58.9055	52.0105	57.976	64.007	22.305	10.2353	6.9319	8.3112		0.557293	37.391
12.8557	19.804	16.2599	20.1087	57.1692	75.669	61.207	17.711	15.1173	16.256	48.9479	67.9379	64.6946	68.6794	68.4963	59.3569	29.3649	10.7716	10.337	12.2919	38.667	55.0866	42.2397	49.7608	61.555	56.967	20.6097	6.6372	8.6684	8.5351		0.562499	37.5485
12.9748	24.8615	13.8322	20.3817	59.8419	72.323	59.274	15.984	12.7509	17.6385	43.7734	72.5166	50.3529	57.6324	68.2782	63.4442	33.0306	15.5883	10.3616	12.8325	32.4829	50.4958	44.4442	58.28	57.761	52.086	23.3459	9.2729	9.4119	8.5898		0.567711	36.9265
13.0938	18.3985	17.2772	17.8525	52.5063	76.27	58.391	17.944	16.5807	18.0235	38.764	61.4206	48.8561	66.1821	62.3765	60.2281	36.7155	13.1173	11.8285	13.6408	33.8968	44.4371	52.5103	53.655	61.02	57.214	29.8342	9.3095	7.8948	11.9112		0.572917	36.8295
13.2128	20.4252	18.9472	17.062	58.3111	73.475	62.522	15.254	12.7567	20.5559	43.3758	66.6268	54.0179	63.7674	66.6586	62.0101	37.2681	15.2716	9.6994	14.012	35.707	47.6497	51.5247	53.851	60.6	55.803	24.9757	11.4829	5.6644	11.9746		0.578124	37.6293
13.3319	19.0023	16.3815	23.4033	55.1269	62.108	56.621	14.576	10.9876	18.2777	45.102	66.1031	43.2659	54.8155	72.7862	59.6087	33.8861	13.1724	14.2251	11.2022	35.8252	48.0722	50.677	53.7218	64.149	57.02	26.8396	9.4662	5.337	11.5456		0.583336	36.3209
13.4509	18.8634	13.6448	15.8591	46.152	61.933	55.123	12.619	11.2242	18.4151	37.933	72.593	53.1594	58.5196	69.7945	55.0246	33.9132	14.6642	10.1768	13.7946	40.0956	58.6245	51.6708	45.6545	60.351	62.154	22.3628	13.6305	9.255	12.7735		0.588542	36.2062
13.5699	18.5924	15.8121	18.1208	72.3651	61.692	67.951	18.09	12.8619	23.0796	41.7942	65.6377	57.0192	72.6195	70.2196	59.2512	37.7408	16.9	12.0364	14.3082	39.7166	58.8166	49.3288	51.8373	73.193	58.677	26.4001	15.0928	7.4297	11.9632		0.593749	39.6051
13.689	19.2092	14.7397	16.2208	59.3462	64.868	59.099	19.253	13.9657	20.8897	47.5104	64.9943	52.4058	64.5314	62.7771	62.7234	32.8376	14.1781	11.8569	12.9392	42.3871	56.3652	55.3174	53.6776	75.855	45.776	26.2906	9.555	11.5174	11.1991		0.59896	38.0099
13.808	24.1144	14.4958	20.2732	58.1796	64.61	62.891	17.403	10.5311	21.943	51.2471	68.4579	49.6451	70.2094	68.9326	77.4738	37.6323	12.5787	15.662	10.525	44.2677	59.9886	56.1927	52.6408	61.495	50.634	22.2391	9.5121	6.8139	12.1432		0.604167	39.0597
13.927	19.3402	14.2102	18.3794	57.87	63.047	69.4	18.099	10.1802	22.8498	57.5602	64.5333	58.5306	59.6944	59.1444	71.1891	44.9501	14.0986	12.6599	12.3149	40.6484	56.6987	49.5864	54.9541	69.331	53.297	22.8667	15.0311	9.3605	14.1751		0.609374	39.1035
14.0461	18.3578	16.4792	21.7743	68.2563	67.109	65.161	18.206	11.4382	24.4046	52.0604	69.5518	50.726	62.5413	63.0939	72.9581	34.7638	18.5892	11.4878	11.7597	52.2423	64.5617	51.6647	51.6965	68.846	44.173	28.8182	12.2849	12.9756	14.631		0.614585	40.0211
14.1651	17.6748	13.2341	22.6827	56.1207	66.587	74.168	20.238	9.4115	22.7001	50.118	66.9732	59.3273	64.8987	51.0841	67.1075	38.0023	15.2705	11.784	15.5569	55.5551	59.4633	56.4832	61.2105	71	50.054	31.6114	9.0906	15.3988	11.8284		0.619792	40.1598
14.2841	19.4951	17.0877	17.1093	60.6409	61.843	69.54	16.345	12.8134	19.5649	55.3126	71.0851	56.2846	59.8779	65.9701	76.0449	39.5216	18.1375	10.5827	16.3308	51.9268	61.6417	48.9605	56.4479	67.051	48.141	28.4933	13.3563	12.2315	9.2866		0.624999	40.0387
14.4032	23.8768	16.1614	24.5333	59.0945	58.709	71.522	16.473	12.2867	22.21	47.8249	72.7412	52.513	57.5812	53.2212	67.6983	43.1767	21.5303	14.1762	15.4165	48.4846	61.0941	49.0773	52.5597	62.78	48.525	29.5202	12.5461	13.1411	15.859		0.63021	39.4598
14.5222	20.0948	12.4584	19.1324	55.9153	63.623	72.955	14.293	10.9704	26.0833	48.0514	72.4411	50.7047	63.6156	59.1379	66.6067	45.7526	22.664	12.3434	21.6954	44.3287	69.7472	60.739	52.1796	65.346	56.953	37.151	15.4507	12.6621	13.8681		0.635417	40.9298
14.6412	20.6779	19.1059	19.0629	57.8769	55.065	69.767	15.592	16.2635	32.1075	44.1995	72.7062	51.657	60.6986	47.2214	69.9049	39.7646	18.7255	14.461	18.6786	49.8955	62.685	71.569	51.234	53.202	57.137	35.4899	13.7481	12.7593	14.2624		0.640624	40.1903
14.7603	26.0216	17.9384	23.0628	55.772	66.025	56.928	16.331	12.295	29.7811	49.8541	71.8342	58.624	59.0734	53.969	70.5296	42.1571	22.4715	11.4026	20.6797	52.9156	59.3591	61.8064	61.2161	69.068	59.188	41.4205	14.4015	12.2246	13.1419		0.645835	41.7066
14.8793	20.5331	19.7646	18.918	56.0476	60.331	61.888	14.89	18.579	31.0153	50.2948	75.9823	53.6636	55.0749	49.9928	67.1868	47.2707	22.5955	13.6574	23.3281	50.0349	61.552	71.034	58.4252	59.782	55.047	45.1096	10.2357	12.9197	13.2347		0.651042	41.3237
14.9984	24.7099	16.9028	24.4256	60.7932	56.772	56.488	19.478	17.5805	36.6425	52.3002	74.5053	56.6288	57.5467	60.1884	55.9815	41.1926	22.7656	18.7096	23.7098	51.6393	66.876	62.9827	57.5169	57.124	61.519	42.2586	15.1169	15.4973	16.7628		0.656253	42.2281
15.1174	20.7042	20.5092	23.0083	54.3073	63.355	48.887	15.567	18.0634	30.2298	50.0741	62.3028	50.428	47.9448	61.1704	61.7234	40.926	19.7166	17.9131	24.5763	58.4078	69.5398	58.2922	54.0438	54.589	63.712	39.3673	14.3019	11.7755	16.8142		0.66146	40.4224
15.2364	30.179	21.8894	23.0862	53.3128	66.009	57.765	14.468	15.8744	36.5461	51.9651	64.1077	49.7606	54.2446	54.2806	49.0033	41.8119	27.5635	16.9259	34.7507	57.5572	69.813	63.5039	58.5617	55.621	59.687	43.3142	12.6347	11.9866	20.1915		0.666667	41.9453
15.3555	24.5756	20.5411	25.2573	56.6066	70.876	54.212	18.112	16.7694	39.4991	47.6912	62.1331	51.7871	50.848	52.0903	54.7347	41.6721	28.6642	21.1616	41.5046	57.85	67.9124	57.7383	61.6597	58.298	56.629	45.8069	18.5242	15.9607	21.2046		0.671878	42.7696
15.4745	32.6874	22.6509	27.1559	60.7062	65.186	56.1	17.049	16.275	40.3965	50.3914	64.1528	55.6787	50.5489	54.3513	51.3025	39.9595	28.553	23.2967	28.4287	60.4389	68.0574	60.454	73.7603	52.209	53.593	45.5545	13.152	17.5492	20.532		0.677085	43.1093
15.5935	29.761	22.8927	22.6531	53.003	59.607	60.05	14.372	18.5297	34.0773	53.3956	63.3994	58.4449	52.7946	53.8091	56.2717	48.0597	35.9392	27.0588	34.5288	55.6983	67.3999	60.1624	66.1949	55.896	56.777	47.7242	19.5739	12.6815	22.3545		0.682292	43.5555
15.7126	31.9942	23.1216	28.8095	51.3377	73.23	52.67	19.646	17.8202	39.4528	56.3258	61.4612	53.0702	49.0535	54.6011	58.4779	53.5588	36.8973	24.3838	33.7536	63.1723	68.946	65.397	66.8601	49.127	51.825	49.171	17.409	11.072	26.2515		0.687503	44.4447
15.8316	30.6494	21.6962	25.3093	55.0086	72.471	54.402	18.103	16.5855	35.6742	56.0313	71.4398	48.5469	49.7433	56.5204	59.1033	53.072	35.1572	30.0697	43.8585	70.7624	71.0182	47.7743	68.3264	49.975	52.452	48.6406	22.6767	14.702	28.6741		0.69271	45.1187
15.9506	33.2333	18.6983	31.6765	49.255	72.265	65.885	18.029	22.3441	42.6884	61.201	59.8149	46.7203	53.9534	57.9882	61.3112	52.9092	35.7154	31.7455	34.5019	74.0884	63.7704	53.1004	64.8069	55.137	58.358	47.3053	23.3801	14.0532	29.8703		0.697916	45.9933
16.0697	36.96	20.6539	29.0674	52.9989	66.927	50.219	15.52	23.4327	46.9684	57.1551	67.8247	49.1082	45.4459	62.696	65.1349	56.2505	43.3761	34.185	47.028	55.9182	59.2463	50.1864	63.9745	49.655	59.126	47.0523	32.5953	21.1196	31.3331		0.703128	46.2468
16.1887	36.2807	20.7914	33.8672	54.2013	71.239	56.242	13.94	16.629	51.3556	65.0138	68.0362	48.2915	54.2611	63.0293	62.8918	56.2467	43.6442	40.5083	47.5243	61.093	55.662	56.7471	61.2517	47.742	49.77	47.3953	29.0605	19.0623	37.0208		0.708334	47.1999
16.3077	38.8317	19.4443	29.1306	46.0904	69.868	51.231	17.727	22.5783	50.4646	61.2249	84.4711	60.3218	50.6134	68.5581	69.3319	55.5009	41.2756	36.9916	48.7846	57.828	60.6094	53.942	65.3306	48.76	60.787	50.7317	32.2208	20.4896	35.1607		0.713541	48.5621
16.4268	42.865	20.9511	29.6412	52.0659	63.488	51.615	15.807	22.4169	39.7908	61.872	73.963	53.0855	47.8011	72.0255	72.4791	51.8502	44.9872	45.9024	47.9937	55.8639	56.3215	56.5509	63.1185	52.545	58.348	48.7455	32.8993	20.9194	41.5499		0.718752	48.1884
16.5458	44.4777	22.175	28.7994	50.375	79.688	57.046	20.541	24.0723	42.015	63.4381	78.9952	58.5955	48.1687	68.2484	62.3849	58.5829	50.6993	44.307	49.3863	52.0889	58.0222	59.8802	62.5856	52.955	51.916	45.2857	36.0014	27.6127	38.2776		0.723959	49.5387
16.6648	47.8032	23.9193	32.6774	50.2644	78.056	53.811	23.761	28.5539	46.7557	71.6518	75.4482	47.6478	46.1432	68.899	69.2433	59.4439	47.6751	42.3924	52.7223	57.6944	49.0433	57.3182	61.3433	47.847	56.896	50.7263	36.1348	31.532	41.6878		0.729166	50.2446
16.7839	46.8765	21.947	35.8225	57.3596	87.18	51.172	20.949	33.0349	44.8791	58.974	77.8219	45.3391	48.6794	75.105	70.2085	58.4141	52.4364	48.9218	57.2093	53.5568	49.4483	55.3284	67.8893	45.55	58.036	46.7747	40.4776	33.1293	46.6591		0.734377	51.351
16.9029	40.6137	27.675	30.6398	55.5879	84.596	51.858	23.991	38.5846	45.2845	70.3828	64.83	42.5381	62.2566	85.0792	77.3769	62.1323	46.1039	43.1538	69.5855	49.0546	56.6301	49.3882	60.7214	50.046	63.647	46.0531	40.7485	40.0207	41.4692		0.739584	52.4155
17.0219	48.8744	31.6546	35.0092	51.7179	80.802	54.269	26.822	38.0639	44.5523	64.0465	66.2096	41.9859	52.9389	85.1346	70.8608	58.1989	51.7692	41.6963	70.0431	43.8983	49.035	58.2916	53.0642	51.296	53.594	52.5863	47.8731	38.3507	44.6327		0.744791	51.9749
17.141	45.333	36.0973	37.8595	55.7005	87.999	54.113	27.972	37.1698	48.5258	64.8778	83.9207	47.9387	57.3786	77.7928	69.5259	66.377	58.8425	44.8577	54.8969	46.154	52.058	58.8708	56.32	44.042	53.055	49.6466	42.1375	48.6318	46.593		0.750002	53.6099
17.26	48.8722	38.9051	40.5158	52.3781	86.066	50.372	30.06	50.2509	53.4571	56.4807	71.2677	37.0342	44.6868	77.5501	77.254	65.066	56.5249	44.7063	65.6968	45.2892	47.7759	52.821	56.3321	51.702	62.765	54.589	44.2437	52.7214	50.5754		0.755209	53.9986
17.379	46.9357	37.8274	40.1484	55.5729	77.619	55.207	32.547	51.7251	54.6271	58.7129	75.184	46.1217	46.3652	78.2887	69.4133	54.5014	59.3105	53.3218	69.0956	43.0624	45.8928	55.8554	55.1014	44.715	56.142	54.8773	41.8546	55.1068	53.826		0.760416	54.102
17.4981	47.9085	34.673	38.9175	49.7021	88.046	55.57	38.71	44.2831	52.9933	59.2698	73.54	34.5019	40.1818	70.6457	64.0231	54.699	57.8144	43.4269	71.1922	39.5447	43.9573	53.8055	60.7037	55.622	56.367	57.1501	37.3624	60.6896	47.4905		0.765627	52.8549
17.6171	52.8353	44.7609	46.3597	53.9384	97.799	43.716	35.412	47.0519	61.8799	56.425	67.6584	39.9416	47.1522	76.8071	71.5701	54.5734	53.2058	49.2462	70.1111	39.573	49.063	53.0503	67.1512	47.832	51.762	58.6925	51.6786	56.2143	44.4414		0.770834	54.8242
17.7361	55.8208	31.6958	49.1797	60.6121	80.974	57.856	40.931	54.7158	53.0871	67.3822	55.7608	33.1938	42.4298	66.4948	72.8054	64.862	56.2082	46.3432	80.7417	40.1129	41.0831	48.8299	66.0676	47.818	61.763	59.3329	49.9943	55.2517	57.3691		0.776041	55.1282
17.8552	59.6928	41.3982	43.5689	55.8418	84.217	61.322	41.367	59.2848	51.7235	55.1591	50.5899	35.5383	42.9267	55.6788	67.8507	58.888	53.219	50.1967	79.4554	45.1312	36.2533	42.5076	63.4582	50.496	56.487	60.2512	47.0643	61.5978	50.8766		0.781252	53.8635
17.9742	55.8822	35.0925	48.3826	52.5714	83.558	58.122	48.868	65.1057	51.5382	49.6293	48.2888	33.1357	46.2433	62.1283	61.9487	56.1048	65.1391	43.9829	71.3999	44.6495	36.6585	37.841	71.6615	41.515	53.482	61.0577	48.0176	67.021	60.118		0.786459	53.7636
18.0932	58.965	36.2641	47.1812	55.856	75.065	68.259	60.446	59.9234	50.5579	46.0415	43.959	31.6353	40.7292	49.4872	59.7954	72.2176	50.4246	49.1501	78.6637	38.1059	35.1027	34.23	72.0206	45.146	48.724	58.1034	53.7724	54.0513	52.7125		0.791666	52.641
18.2123	62.5131	43.0907	43.2959	57.6894	75.05	65.958	59.746	55.4407	49.435	50.6103	49.2465	25.9546	40.1848	48.5435	60.3841	61.4382	54.592	42.765	73.8888	36.8624	36.2127	33.435	65.8452	51.997	47.93	60.288	53.5829	60.976	56.4876		0.796877	52.5325
18.3313	71.3007	49.6159	46.3307	66.9598	68.91	62.885	58.105	54.9404	50.6383	54.0206	46.3942	19.0445	29.3269	45.581	66.8177	55.2077	56.0367	47.9957	70.8292	40.4213	35.0108	30.8114	61.9468	46.04	50.917	57.4239	55.8673	65.281	44.9076		0.802084	52.054
18.4504	63.5854	44.0897	51.7145	61.8065	69.614	67.656	63.106	54.356	45.9523	40.8536	40.7749	15.3997	38.2566	46.5188	61.4575	51.4327	51.1726	40.8965	65.4166	36.7075	31.7033	34.8959	63.683	49.414	48.443	54.2107	61.1434	55.6849	44.5952		0.807295	50.1566
18.5694	69.7629	42.138	57.215	68.8904	63.44	75.252	59.246	59.3764	46.9021	55.2019	32.2443	17.0329	37.1258	45.8775	55.0986	57.7032	44.272	51.0011	61.2244	37.8945	32.8912	32.4483	62.2521	54.529	46.528	59.1746	68.2578	60.3049	44.7531		0.812502	51.6565
18.6884	72.1006	50.7977	58.4348	62.7501	61.977	71.713	58.427	65.594	43.0397	42.9937	31.582	10.002	24.2184	41.1951	55.5568	58.8447	50.9694	47.4099	58.0371	35.7124	27.8351	31.4076	54.7657	45.159	43.49	53.1933	65.508	55.3668	37.7553		0.817708	48.8219
18.8075	62.7158	53.1819	46.9122	73.1952	62.472	67.393	60.317	54.2034	41.8002	43.6389	25.9687	6.62	25.1337	36.0225	52.6635	52.8965	43.0633	43.792	53.6054	29.7782	27.6304	23.9776	48.1735	55.61	44.502	55.3572	62.6509	52.9538	38.0175		0.82292	46.3533
18.9265	76.2709	52.7814	49.399	62.8162	62.819	55.859	49.5	43.9954	38.9331	36.9823	21.4756	4.3137	20.9066	28.2018	50.0889	43.573	42.1319	39.2951	46.8367	30.8828	18.0769	24.2782	50.4728	47.106	45.113	59.0613	66.4846	47.3537	32.975		0.828127	43.0339
19.0455	63.7317	59.1598	53.4944	76.4635	62.77	63.695	54.66	50.606	42.8619	33.0221	22.6455	4.0613	14.9611	34.0903	41.4394	47.1157	39.7347	43.1866	37.0147	26.8514	14.9725	16.2493	41.9	52.141	47.124	52.9697	67.7196	43.2934	33.9481		0.833333	42.8235
19.1646	66.7893	58.2273	61.5591	74.0497	53.417	59.119	59.894	49.6555	39.3999	33.7695	14.9222	3.1064	13.8407	32.0877	42.2707	47.2614	36.6377	39.2275	38.1296	22.7797	17.476	13.4024	39.1319	39.977	50.229	51.2897	55.8865	42.5754	30.8061		0.838545	40.9282
19.2836	65.2307	64.5208	50.9499	86.2783	64.418	50.594	59.001	41.736	31.9041	28.1895	9.299	2.5455	11.5925	21.1236	38.1171	40.0569	30.3613	32.9771	33.87	21.3361	18.4258	15.8232	41.3147	42.557	49.698	55.5679	63.9885	37.0173	26.4016		0.843751	39.1343
19.4026	67.7053	58.9361	53.3956	69.7339	52.679	52.728	67.546	43.7444	37.4252	25.2076	7.0938	3.1061	6.7246	24.2277	39.804	34.1411	32.6401	31.5076	25.2739	21.004	10.7479	11.8842	42.0576	40.736	45.401	56.9204	67.6159	39.6735	27.4673		0.848958	37.832
19.5217	70.5927	54.5595	53.6074	76.3784	54.768	46.127	63.932	39.6501	32.7918	18.1461	6.3134	3.683	5.5463	24.6678	38.8003	33.2062	22.1477	27.1323	25.464	19.3938	8.9394	11.895	32.0844	41.465	43.397	55.6015	63.5449	33.9856	17.0746		0.854169	35.3412
19.6407	57.9627	58.2957	63.7594	76.2047	59.528	50.406	65.753	43.2259	27.367	16.5444	2.6264	2.9124	3.9633	13.598	28.3085	22.5373	19.5857	19.0626	22.6879	11.7858	10.4719	10.3402	28.8322	36.766	43.892	44.4302	57.3656	39.8965	14.7913		0.859376	32.8586
19.7597	64.436	78.9734	69.8192	73.0701	49.358	47.418	58.878	47.487	23.1199	10.4701	2.442	1.2985	3.5464	10.6945	22.6708	23.8313	19.6087	18.4395	17.8761	11.5076	5.0036	6.5971	27.9087	38.276	46.464	52.8487	57.1656	33.5223	9.8199		0.864583	32.1569
19.8788	71.9081	72.3293	73.9287	79.2258	49.321	46.051	49.483	48.2815	20.6756	10.2231	1.6982	0.6776	1.8637	10.606	25.5734	21.3403	15.8454	14.4938	15.6746	9.4548	4.2766	3.3834	19.8698	36.955	41.13	53.9597	53.0523	40.3334	6.6212		0.869794	30.9737
19.9978	68.453	74.9549	60.2485	74.5485	45.263	47.165	43.883	44.1728	13.5831	5.94	1.0115	0.699	4.1336	7.388	17.704	19.4021	13.8359	13.8355	11.8494	6.6765	3.1565	4.9665	17.2441	37.275	41.731	52.7775	49.1633	30.3457	5.1733		0.875001	28.1579
20.1168	68.1526	75.1372	70.234	64.0181	42.006	41.428	47.592	40.1503	8.8007	9.0692	0.7661	0.9882	2.5896	7.0417	18.7177	13.9381	7.07	9.2353	10.2251	6.3648	3.3745	2.5384	18.1549	30.629	32.886	50.5599	42.9259	32.4228	3.4581		0.880208	26.2232
20.2359	71.7594	79.1181	82.1756	75.9491	37.048	37.754	38.705	37.1999	4.734	5.2836	1.9003	0.8019	1.7224	2.9273	15.9867	9.4898	9.8569	6.7285	7.1108	7.5026	3.4801	4.4741	16.3295	27.312	30.45	55.4966	37.2722	22.0705	4.0051		0.885419	25.3326
20.3549	67.7083	77.6486	79.7624	62.0698	34.971	32.971	36.319	39.9148	4.3204	4.3461	0.5549	0.6189	2.3149	2.3118	10.7005	7.9818	6.6624	6.7257	9.8912	5.6872	3.6408	2.1055	10.0823	28.07	28.805	50.3596	41.9899	22.3264	2.8115		0.890626	23.5749
20.4739	67.317	80.3358	81.762	47.0032	37.739	33.083	44.158	28.6754	3.391	3.9968	0.3969	0.2499	1.4898	1.3713	7.1241	6.7414	5.0409	4.3368	5.0051	3.2661	1.3111	3.1568	10.6625	22.17	35.223	39.8505	36.0235	20.3756	3.4467		0.895833	21.8863
20.593	76.3375	83.7078	76.3166	52.9237	31.491	19.822	31.235	27.3303	5.3917	2.9187	0.0693	0.8616	1.1934	2.0233	5.234	4.6186	5.0422	5.1277	3.3725	3.8293	2.3184	2.8742	7.9202	21.803	28.8	41.3136	34.4901	14.6298	2.1913		0.901044	20.5237
20.712	70.4671	65.485	82.0267	50.12	21.998	20.284	28.952	12.644	2.2479	1.8746	1.1456	0.9007	1.504	1.7013	4.366	6.288	4.293	2.3297	4.4986	1.7218	1.5983	2.0323	8.9263	20.768	24.726	41.3742	31.5405	12.8868	1.0304		0.906251	18.2666
20.831	70.2864	72.3299	72.4107	52.2808	22.192	24.727	29.22	10.4443	1.951	2.6666	0.7859	0.505	0.876	0.4317	3.9797	2.7533	1.3399	2.6245	1.9598	1.7314	0.318	1.4005	3.2722	16.059	19.892	39.3401	35.5539	9.4222	1.0803		0.911458	17.3046
20.9501	77.1926	83.4025	77.5162	48.363	12.279	15.586	21.996	8.5437	3.0618	1.5152	0.2341	0.1011	0.1246	0.4077	3.3911	3.8607	2.8472	3.3065	3.4997	1.2144	0.1169	1.5014	3.6094	12.124	18.622	36.6984	30.7654	10.6307	1.8227		0.916669	16.7012
21.0691	68.3641	77.1655	78.7099	47.2903	12.297	15.206	14.442	8.0189	2.2977	1.7438	0.6714	0.7704	0.581	1.3061	2.2318	3.1217	3.3043	2.0443	2.1837	1.349	1.6435	0.3402	5.9748	10.836	17.138	32.4702	30.348	8.0273	1.066		0.921876	15.5498
21.1881	83.0695	69.0062	85.8097	44.3231	7.145	7.814	10.653	5.1506	1.2817	0.7834	0.4138	0.4635	1.4496	1.7161	2.3735	2.0734	2.8304	2.6201	3.6375	1.0585	0.6237	1.217	3.3532	7.991	10.031	31.504	26.1596	6.7541	0.8254		0.927083	14.5563
21.3072	67.8582	54.5102	71.5239	36.2992	7.979	7.255	17.247	3.1447	0.9712	0.9928	0.9915	0.2817	1.2648	0.1352	1.1913	1.5265	2.967	0.9099	2.4929	1.9426	1.0719	0.9023	4.0067	4.538	8.855	28.7045	18.9574	5.5223	0.57		0.932294	12.228
21.4262	60.1453	50.4178	65.9305	31.26	5.229	11.714	8.466	3.8582	0.6818	1.6172	0.8454	0.3858	1.5751	0.8092	1.461	1.2342	1.7062	1.2008	1.5658	1.4231	0.6533	0.387	2.1641	4.868	8.107	32.2213	16.8648	2.7685	0.4834		0.937501	11.036
21.5452	67.1427	59.1138	56.5405	19.7166	5.394	8.606	6.078	4.5974	1.1226	1.6413	0.543	0.3313	1.191	1.0494	2.2709	2.581	1.1069	0.3139	0.826	0.7739	0.304	0.6358	1.8911	3.553	4.59	30.6155	12.8642	3.0656	0.8685		0.942707	10.3217
21.6643	67.794	61.6382	58.0977	20.3103	3.845	3.529	5.942	3.5721	1.3591	0.0158	0.3986	0.2245	0.4384	0.7936	2.1957	2.2463	1.5244	0.7273	1.6015	0.0776	0.6911	0.268	2.4668	5.117	3.735	18.3505	12.9569	3.0631	1.9016		0.947919	9.82349
21.7833	67.3328	48.4916	57.9031	16.1632	4.381	6.029	3.205	0.5904	0.558	0.2059	2.165	0.6777	0.0638	0.0651	0.9938	1.2422	0.6432	1.1098	0.9695	0.3428	0.9317	0.6798	0.6787	2.175	1.821	19.435	10.7839	1.407	0.8832		0.953125	8.68718
21.9024	60.6497	55.7373	47.1997	11.2537	1.884	3.386	3.313	1.0072	0.6429	0.4965	0.1095	0.0303	1.4737	0.2296	1.1674	2.2592	2.602	1.5554	1.4997	0.3797	0.6194	0.1512	1.9612	3.2	3.532	15.684	11.2072	4.2118	1.0398		0.958337	8.22356
22.0214	70.5885	55.0463	48.593	5.7645	4.374	3.413	1.69	1.5432	2.0392	1.4854	0.8924	0.1631	0.4151	0.703	0.8247	0.6873	0.6522	1.5951	0.3685	0.8172	0.2884	0.6007	0.7513	1.716	1.814	10.0691	6.6615	2.2135	0.7805		0.963543	7.81209
22.1404	52.5288	58.1485	53.032	7.2215	3.124	3.095	3.575	2.2227	0.1569	0.1628	0.307	0.382	0	0.3376	1.1041	1.4115	0.4695	1.0736	0.8082	0.1831	0.2372	0.4335	1.5622	2.18	3.573	8.4193	4.623	1.0236	0.561		0.96875	7.30885
22.2595	49.4047	56.2279	46.7878	3.4593	1.189	2.366	2.113	1.0629	0.831	0.4283	0.1377	0.0162	0.0002	0.4438	1.2873	0.4881	0.084	0.7868	2.4554	0.1854	0.0718	0.3415	0.4357	1.345	1.822	8.8315	5.3997	0.7019	0.919		0.973961	6.53872
22.3785	52.7539	49.1771	39.6001	3.9903	1.547	1.677	2.386	1.9661	0.7737	0.646	0.412	0.1701	0.8925	0.2234	0.7606	1.504	0.0621	0.7375	0.5797	0.3213	0.0509	0.0723	1.0417	0.455	1.56	4.7783	4.061	0.9741	0.3335		0.979168	5.98301
22.4975	34.7529	50.1356	33.9154	3.074	1.109	1.117	2.097	1.3754	0.4873	0.3246	0.066	0.3693	0.32	0.4444	0.1898	0.7682	0.2147	0.6402	0.7754	0.6694	0.3721	0.3202	0.4851	1.418	1.52	5.3626	5.6251	1.8079	0.3754		0.984375	5.17697
22.6166	30.9967	49.3285	27.6815	2.4961	1.324	0.092	2.271	0.5955	0.7131	0.1291	0.5776	0.1157	0.0116	0.0715	0.1075	1.5226	0.6819	0.0215	0.4807	0.4949	0.0498	0.0532	0.2946	0.619	0.726	6.04	3.6121	1.4142	0.1615		0.989586	4.57529
22.7356	21.2486	41.6419	19.8831	3.822	1.189	1.455	2.038	0.2153	0.059	0.0173	0.1111	0.0608	0.0017	0.5827	0.786	0.0279	0.1035	0.7251	0.3354	0.011	0.4753	0.1314	1.3264	1.385	1.692	2.5968	2.389	1.4424	0.2772		0.994793	3.6562
22.8546	15.4835	32.5787	13.6446	0.7767	1.003	0.971	0.535	0.0208	0.4989	0.4635	1.811e-06	0.0006	0.165	0.3484	0.6864	1.4774	0.2112	0.8178	0.8129	0.5324	0.0758	0.371	0.7749	1.691	1.775	2.0708	1.9042	0.893	0.1673		1	2.78451

## Sheet: Image4 (2)
X0	Y0	Y1	Y2	Y3	Y4	Y5	Y6	Y7	Y8	Y9	Y10	Y11	Y12	Y13	Y14	Y15	Y16	Y17	Y18	Y19	Y20	Y21	Y22	Y23	Y24	Y25	Y26	Y27	Y28	Y29	Y30	Y31	Y32	Y33		Ap-basal	Avg intensity
0	24.989	28.2431	12.3216	12.1118	19.7702	13.4372	20.1462	15.3374	16.8732	14.5271	13.5552	12.325	15.1689	29.1499	21.464	21.7228	21.8406	17.155	11.2264	9.4606	11.0421	11.8747	11.0284	12.3694	10.6218	8.7059	7.864	17.3393	29.5283	27.6479	27.203	20.1559	9.7158	15.3778		0	16.8029
0.119	26.931	29.1047	14.8226	13.5773	19.317	13.7395	28.1199	26.6256	20.3595	17.9826	17.3441	11.4061	18.3529	27.5087	20.8131	19.1937	26.8716	23.7697	16.5006	11.0917	8.6986	15.0988	13.3689	18.1989	12.32	9.7356	11.0585	25.1865	31.6116	28.2501	31.1829	21.803	10.4982	17.1031		0.00561636	19.3396
0.2381	22.152	28.8974	12.8555	19.755	26.2966	19.5128	29.739	19.6824	25.5794	20.1373	17.1343	14.1028	14.7938	36.3861	23.8523	21.4454	29.5116	23.0246	23.4056	13.8807	10.5735	16.9297	15.7245	16.4015	15.2512	9.71	13.2087	26.1672	24.9601	28.4575	25.739	18.4658	10.4049	16.912		0.0112374	20.325
0.3571	17.624	30.8166	23.8171	24.81	24.6012	18.088	40.2148	26.1476	26.1132	24.9297	27.6367	21.9166	15.021	26.6864	31.1418	26.3882	32.0087	26.3672	18.2542	13.7294	15.4224	20.2811	17.0786	17.3976	14.2431	11.9333	11.8153	25.9875	33.0011	25.8437	25.7611	19.9608	11.1683	20.475		0.0168538	22.5495
0.4761	20.01	37.1171	22.9358	21.8604	28.3945	25.7852	39.7125	36.6158	31.3118	27.5971	29.269	22.6764	17.5217	30.0124	31.9955	27.1687	34.4634	33.7882	27.5413	21.707	10.2111	25.5492	22.0273	25.0763	22.5411	9.9438	13.4855	24.8921	31.5675	31.7182	35.2342	22.0909	13.2703	17.4699		0.0224702	25.6636
0.5952	21.437	32.059	20.3714	26.3784	37.1966	28.6275	44.8747	39.0082	36.5279	34.1681	26.2546	23.042	21.5072	27.1502	30.9167	32.8098	42.949	38.1051	32.2943	22.3483	14.0558	18.9539	25.5251	22.2064	24.9681	12.3041	19.5634	28.9816	30.5879	32.0832	32.8873	21.3139	18.3481	18.9612		0.0280912	27.6108
0.7142	22.634	48.8864	29.2753	36.6048	39.7401	37.1033	51.7227	48.7065	47.1454	35.4396	36.5636	24.426	21.309	28.7853	40.6191	38.1682	39.8985	42.4465	37.8951	26.1642	16.6799	25.0334	31.2087	31.8964	23.4645	13.7201	16.7042	26.3597	36.0241	33.3085	36.3642	28.9484	20.2106	13.9825		0.0337076	31.9835
0.8332	25.182	44.9523	34.3714	39.6774	41.1608	38.7623	55.2378	54.5906	65.7925	40.9984	40.3835	31.2247	25.8061	38.8253	40.9538	42.9328	49.3535	48.5993	40.3752	33.4929	17.345	23.6668	30.6417	33.7905	26.4543	21.5535	16.5363	32.0203	39.9613	37.5927	35.4328	28.956	15.3557	20.0994		0.039324	35.6494
0.9523	28.413	57.1414	33.1081	35.8656	52.2641	48.0469	61.1957	68.3899	52.1373	49.8701	45.1992	35.0514	28.9734	41.4044	41.4999	39.4185	52.234	53.6618	45.9623	36.2211	25.3876	32.3225	27.3726	34.4972	26.0108	23.6818	18.6867	30.0079	34.6195	43.9092	34.192	29.6665	17.5934	16.8826		0.044945	38.2614
1.0713	30.766	44.6183	41.3333	58.2986	57.6435	61.9734	61.4619	61.3893	54.8137	55.277	39.9433	44.9084	27.6247	43.3681	40.9684	55.4236	45.2103	66.126	45.0486	42.3164	27.4351	30.1432	36.6522	42.0024	27.8233	23.1932	23.0382	29.8918	34.1028	46.7399	36.9382	36.4766	14.6263	15.2201		0.0505614	41.2587
1.1903	35.034	57.067	41.8237	56.1531	53.1812	64.6567	56.8452	61.6483	64.9803	58.1549	61.6221	43.8594	36.1353	35.6829	43.4156	48.5346	50.7078	60.7062	55.2392	50.9868	36.2818	39.1021	42.6878	53.1924	26.1956	30.0745	19.72	27.1596	36.8323	44.2817	44.818	37.6083	20.4374	19.931		0.0561778	44.5517
1.3094	32.129	55.472	43.4091	69.3541	52.5321	67.3566	58.0007	67.0601	59.1555	57.3612	60.4583	48.6207	35.3185	49.4547	44.0903	66.5412	58.4708	69.3991	65.6379	61.3301	45.9354	40.9501	41.0575	42.3327	39.9959	28.8868	27.8818	22.6207	37.8591	41.7773	35.9445	44.3826	20.3609	21.145		0.0617988	47.4201
1.4284	33.609	67.1334	42.909	70.298	63.2959	90.1783	56.3932	69.884	49.5695	68.9254	55.8629	52.0009	42.457	41.5208	52.5826	57.7684	69.1965	64.9966	73.3728	70.9548	53.1801	48.0092	49.545	43.8057	42.2653	27.2908	28.045	27.0805	33.8638	43.4766	40.1435	49.9093	29.0169	23.9104		0.0674152	50.9544
1.5474	37.748	76.2705	51.5911	73.1881	71.434	67.7798	71.3567	71.3223	65.1752	54.1784	52.689	59.4054	31.2841	54.5823	55.3445	64.8491	61.9243	59.89	75.0247	75.597	59.9543	44.8157	48.7411	53.3923	46.5823	28.5164	26.5154	30.5888	36.6373	50.9231	35.5462	48.2202	20.4469	28.2047		0.0730316	52.6388
1.6665	48.875	77.0849	62.5915	84.5635	62.5714	79.613	59.383	71.6084	55.6799	64.837	56.3484	63.0213	38.8659	65.0774	65.0494	73.1354	62.2978	64.4531	77.1512	89.206	59.4915	45.0873	52.2523	54.8606	47.5467	29.9001	39.8134	30.047	41.4774	43.8754	44.4655	46.557	28.5343	25.951		0.0786526	56.2139
1.7855	56.529	79.6228	62.875	74.2176	66.1565	76.3425	67.1758	65.5443	49.1845	63.3736	59.5227	71.771	44.9453	64.1974	68.9892	72.6948	63.21	67.5999	72.5745	91.424	70.4898	52.0348	64.8929	51.0958	49.5632	38.0475	42.7029	27.0171	41.6816	47.4534	44.6812	56.7191	29.3991	35.4138		0.084269	58.5042
1.9046	52.215	93.0558	65.8224	59.8387	57.4664	74.5872	65.7738	71.0227	58.6481	58.209	55.4886	66.8977	50.9725	68.4967	66.8665	56.129	73.0366	68.3503	69.9465	86.0234	65.4835	53.0502	63.0355	56.6921	52.3898	40.0052	37.21	29.3134	35.2596	53.2413	48.4968	51.9641	35.1932	35.457		0.0898901	58.107
2.0236	56.873	78.6252	59.8982	69.9507	64.5559	74.3621	66.9268	73.3896	48.2516	56.9839	60.6403	69.0137	47.9615	77.2522	61.8022	77.4115	63.8348	63.7667	55.7333	80.3897	65.716	53.5252	57.5407	65.2869	56.2242	45.8723	43.0616	31.3924	38.0176	47.4773	48.2175	55.1213	39.1029	34.0482		0.0955064	58.4773
2.1426	62.974	79.4788	65.6174	67.1813	73.7671	78.7846	70.3081	64.8102	62.7867	51.4529	52.1564	80.8431	51.2131	70.5157	65.439	75.7922	63.1545	69.7443	63.1597	78.7982	69.8698	59.5364	55.5251	63.6873	61.576	47.951	39.2613	43.871	40.0908	51.8585	50.0021	57.9186	35.9145	43.0861		0.101123	60.8272
2.2617	67.06	70.7731	72.1374	75.1643	79.679	80.0195	73.5754	69.348	59.8888	52.4489	48.6255	73.246	61.6922	73.221	58.3221	74.0401	74.4653	55.7574	64.7781	71.8808	67.054	60.857	63.248	59.5033	66.8322	54.1819	49.3884	46.3294	48.3048	54.2286	44.0561	46.329	33.6627	43.725		0.106744	61.583
2.3807	69.854	72.1145	73.4591	68.205	79.5676	99.6607	71.5388	69.415	59.4696	53.4989	50.4675	75.5231	54.7309	84.9598	64.5216	63.7169	75.4366	57.4487	59.9744	65.7292	67.7398	58.27	53.5892	63.0546	58.5936	51.834	54.3201	39.0247	46.8143	46.5565	46.0783	51.7334	38.8184	45.2318		0.11236	61.4985
2.4997	69.016	69.6261	76.4094	72.7173	81.3356	85.4554	84.7483	71.5422	63.9994	54.8587	49.7569	61.1786	58.8371	86.2581	61.3983	78.2207	72.8384	58.5102	58.9236	74.695	66.1934	73.1498	60.4496	51.4494	61.7524	54.149	68.6339	49.264	39.4489	54.8451	57.5107	54.3274	49.7649	57.6184		0.117977	64.3789
2.6188	74.017	83.934	74.8975	74.9807	77.7989	100.677	75.2429	78.5609	61.6079	55.4548	65.1609	67.8482	61.5086	76.0418	64.7453	67.6563	67.3233	72.3058	62.9361	63.6843	71.8484	83.2767	66.0061	53.1717	59.6501	59.4673	57.0281	47.9956	45.1418	49.6521	47.1783	48.0121	43.4483	56.3862		0.123598	65.1366
2.7378	77.565	75.4747	87.1952	71.6206	69.104	86.1571	78.9568	72.5916	54.5363	53.1535	63.0653	52.4765	67.1244	74.2025	60.1122	74.4526	71.0134	57.5342	57.5464	75.5166	63.5156	83.6494	65.2476	54.6375	64.4157	72.6627	61.1264	57.7519	50.2318	53.9725	61.6864	62.3004	47.4241	63.1037		0.129214	65.9154
2.8568	90.266	76.0783	75.7373	78.3483	89.4424	91.1115	74.2217	70.1606	69.1587	53.5391	55.2292	65.4759	72.6524	78.1587	69.7894	70.2731	71.2639	59.7706	66.8237	58.787	64.2873	73.0133	60.7588	57.6349	61.2422	66.7144	63.3468	61.0455	46.7316	63.691	45.8468	59.0119	51.6418	73.4011		0.13483	67.1957
2.9759	89.668	68.4612	80.0333	72.0778	91.7533	95.8428	80.2885	72.5845	56.2931	51.822	53.399	60.2528	75.9419	76.2482	66.6275	72.6748	84.9288	72.6229	75.166	72.5563	73.1921	85.0775	67.406	65.2826	58.1651	68.9795	65.0243	59.3339	42.2948	63.8719	48.1692	55.3969	57.4867	66.6563		0.140451	68.9876
3.0949	100.86	69.2866	82.156	74.7169	88.1986	78.3284	78.0805	77.7386	65.5462	62.0677	61.5718	64.1892	73.6888	80.3852	76.3348	66.3764	68.5324	75.7298	56.2745	72.5516	58.1108	89.3924	70.4696	58.1496	62.6374	65.6875	66.0772	64.3829	44.6905	66.3756	55.1504	64.6914	56.7231	66.531		0.146068	69.4613
3.2139	98.816	68.2827	75.4027	85.7532	89.4884	93.675	79.6238	82.6103	59.0456	62.6254	52.5276	68.1919	56.6622	75.8077	79.4371	64.1996	71.6785	70.0187	56.019	62.2443	59.1577	82.1494	60.3665	63.6902	59.2893	60.6842	69.7743	58.8851	46.0436	55.8697	46.6558	70.4586	59.5473	73.9605		0.151684	68.1954
3.333	103.865	65.3652	87.0492	85.4585	81.3084	81.181	78.1269	91.339	64.1516	64.3211	55.4577	58.6778	62.9312	71.0466	75.7953	58.9665	65.2983	73.3187	56.2904	70.7795	62.8904	78.3299	67.5923	63.8203	58.8642	62.8044	70.7628	51.9606	43.5144	53.5918	54.5676	69.0073	58.67	77.1006		0.157305	68.359
3.452	101.454	73.4133	76.2341	89.0108	83.8463	93.8267	78.4056	84.8901	55.9753	55.6789	61.6036	65.4525	63.4073	83.8469	68.4655	66.3947	62.9754	72.0556	62.0018	70.1847	64.3901	87.1838	66.8036	61.5617	55.1194	64.2837	84.8864	61.2943	47.6335	57.5483	59.3811	65.9084	57.1464	67.8129		0.162922	69.7081
3.571	104.793	51.7381	65.0463	91.8949	82.1844	87.4359	72.4877	76.1505	70.4853	54.0371	59.7906	67.3617	62.5561	83.413	69.1348	65.4889	68.7426	76.3134	62.4587	63.6882	63.8512	81.021	72.9311	63.545	64.6433	65.3069	79.3795	51.8942	46.9268	55.041	55.8828	63.3714	60.137	66.1414		0.168538	68.3904
3.6901	102.808	56.3	77.1835	81.5499	85.1952	90.3431	79.1543	76.4662	74.8468	66.6139	59.8229	71.5619	64.689	78.2148	63.6418	67.0143	76.189	72.6236	73.1542	62.1554	67.7286	85.2817	78.1235	64.6609	56.2572	72.0247	73.4952	60.6598	43.1162	58.8339	61.5806	67.3916	57.2433	59.0531		0.174159	70.1464
3.8091	93.515	66.3515	74.2502	83.2847	90.2875	80.5397	77.5573	72.9572	74.2734	72.8969	58.3542	65.9051	67.2973	82.7465	62.6247	66.8845	74.1258	70.7445	62.058	55.1254	54.9592	76.8377	70.2475	65.4967	62.8245	65.6887	73.5185	64.1457	45.9079	55.7871	67.1306	61.6916	55.7904	72.607		0.179775	68.9533
3.9281	87.627	63.2942	67.5079	84.7993	91.2762	75.9735	84.4017	76.272	73.2014	66.1474	55.8844	61.6671	67.5866	75.7525	70.7552	67.8407	73.4251	74.2792	60.8706	56.8891	69.0975	76.3824	71.2053	59.4147	51.9328	62.2483	73.1063	53.5099	44.4993	56.4592	57.7251	60.3339	68.6436	71.1718		0.185392	67.9759
4.0472	103.902	69.8062	66.9284	69.9145	94.273	86.553	73.5143	71.3691	79.7437	72.055	75.5368	60.2784	68.9415	79.9423	62.7263	77.4602	66.8571	76.4251	57.595	51.9326	62.7041	72.5098	83.3125	62.244	68.1026	61.2318	72.381	57.3924	51.8881	60.7517	62.0831	63.9814	53.1446	61.8079		0.191013	69.3909
4.1662	96.64	65.9324	67.4403	77.7043	89.5409	75.1797	79.3252	69.7818	82.6552	78.2072	74.0877	62.8139	71.4632	88.4977	66.7851	67.5449	74.4918	69.9461	61.1724	49.2173	64.5953	67.7509	73.927	57.0155	64.9091	67.1066	70.9022	56.0501	50.7609	58.537	64.9265	65.5096	54.4457	62.4245		0.196629	69.0379
4.2852	93.925	71.5054	74.0034	83.9157	83.7816	73.8393	72.5271	65.4844	83.0062	84.2311	63.2865	63.3051	69.0159	86.6235	64.9681	72.2099	75.1631	77.518	67.9592	47.942	65.0337	70.302	77.4629	59.0554	60.59	70.2813	85.1792	52.7326	64.0183	62.1768	63.9456	70.1525	60.7099	61.9636		0.202246	70.524
4.4043	81.141	75.5035	75.0758	76.3311	87.5308	77.4728	75.9213	64.1517	81.424	76.4666	67.778	71.771	71.2181	90.8572	69.025	70.8316	76.616	77.3755	62.9418	50.5191	66.6788	78.768	83.504	61.5885	64.4809	65.2036	69.8456	56.3972	68.2655	59.3239	66.2241	59.7708	72.0332	76.7116		0.207867	71.4338
4.5233	82.919	74.005	71.1775	81.8416	86.7285	79.5431	83.7615	61.7095	79.3936	71.899	60.8167	60.5312	80.4027	88.4566	75.7361	61.7526	85.4095	64.455	66.9009	47.2501	71.0118	68.9191	73.505	59.1633	59.9617	78.9931	70.8996	64.2379	65.8527	60.7339	61.8804	76.5795	69.2048	66.1357		0.213483	70.9344
4.6423	76.747	70.0981	70.9943	81.0133	90.0141	72.876	77.674	64.7834	86.8309	72.9467	69.1108	71.3274	68.3213	86.6898	75.7617	81.0163	88.0586	78.0517	62.0141	50.0933	70.3608	70.9776	86.9749	71.8656	67.9596	74.7214	81.1446	72.0749	64.6871	68.9237	61.4361	63.1188	59.7178	68.0722		0.219099	72.837
4.7614	68.514	78.9608	69.2594	87.888	97.4274	75.4778	78.5574	70.9252	84.0493	75.8884	75.3557	55.1634	71.3402	87.1336	70.8439	72.3807	87.4406	74.241	66.5672	46.6692	78.9531	66.3036	77.4473	63.8544	65.1714	73.5759	68.2931	63.9464	68.8413	62.069	60.0695	72.2927	64.2233	69.1378		0.22472	72.0077
4.8804	72.906	79.4911	71.5968	82.0492	83.9302	79.3097	77.369	71.0551	76.4717	76.2166	83.3618	59.3222	71.6053	70.6005	87.2135	77.5876	80.1288	67.9875	55.2528	50.6828	72.8582	70.3059	83.7315	61.8566	68.2335	90.5594	67.7231	74.0779	67.1497	73.1783	70.4988	63.297	67.6915	73.659		0.230337	72.9105
4.9995	74.802	67.5839	65.45	92.8132	86.2598	83.2462	82.8521	77.9717	83.2421	67.8864	67.1397	59.5891	71.3832	79.601	73.5727	76.0177	84.9954	65.013	48.917	49.684	81.0316	70.4626	80.3984	66.4724	65.1672	78.7488	63.6152	69.3619	64.574	68.7502	65.6035	72.5049	59.8776	59.8642		0.235958	71.3074
5.1185	78.057	69.0406	67.8123	79.8542	82.906	70.8269	81.6174	69.75	85.6	72.3123	70.8953	61.0681	74.4565	79.2799	75.0044	72.4186	75.6878	70.7198	49.0387	55.1965	74.1568	70.7583	66.0585	67.005	67.9118	86.6233	60.6968	67.6278	68.0804	64.3909	69.7807	70.1578	58.5996	56.7335		0.241574	70.2977
5.2375	74.489	68.4057	70.389	89.7218	82.7157	74.5749	75.7884	77.0924	71.7863	68.1855	67.947	61.6664	88.1551	79.2118	82.7385	78.0127	80.1358	61.7517	34.4143	52.864	64.2423	73.0804	71.8015	73.6268	64.9534	93.9855	65.2309	66.2308	57.7827	74.0731	70.1045	72.7019	79.3414	59.3572		0.247191	71.3694
5.3566	77.725	84.3977	70.5536	83.0286	89.2325	81.8804	75.0199	65.6687	73.3335	64.9821	64.0956	72.9507	78.6012	65.9607	81.4432	83.3368	81.8551	54.0651	37.6391	38.6286	72.6952	69.6109	66.1675	61.9897	78.2585	84.0278	61.7649	72.0093	65.2981	67.9143	66.3374	71.7176	72.0071	70.9174		0.252812	70.7386
5.4756	76.472	71.5925	69.4121	82.891	83.1913	69.9539	83.9404	67.0035	79.9136	57.6583	66.8507	68.4556	82.8606	68.0812	83.6087	80.7202	75.109	47.755	24.9881	40.9705	63.6334	67.8692	66.7568	77.802	68.8203	92.1981	67.6221	70.6606	66.4967	76.3199	79.5915	76.5563	67.26	65.5213		0.258428	70.2511
5.5946	90.244	78.4899	68.4891	72.9214	81.7126	79.5347	77.5272	66.991	69.6508	65.4323	64.1245	63.1441	79.601	66.8216	80.3426	69.6746	71.4441	51.9746	26.8561	44.4308	64.5486	76.9685	75.2377	60.2872	63.686	99.1997	75.1745	84.2918	64.2188	70.3736	74.5043	72.4022	75.4567	69.3273		0.264044	70.4436
5.7137	80.664	83.118	55.2832	76.369	73.7834	78.3573	63.7313	69.4146	75.2249	56.505	59.696	69.3935	78.3597	70.2983	89.6606	78.7083	69.8474	54.8099	25.1965	34.1715	57.8635	66.6985	84.008	79.0916	66.4773	81.7815	75.2926	85.2711	63.7594	77.8363	81.0496	66.1074	70.2006	61.0763		0.269666	69.3855
5.8327	71.615	85.7187	64.256	81.8391	84.8708	75.1768	76.2194	73.4102	70.8234	53.7814	68.9157	70.5672	83.9127	61.7163	91.9512	73.8435	67.0584	49.0356	20.2094	36.4071	58.9856	64.1114	88.7917	75.4601	66.864	92.2937	72.4813	82.8502	73.0988	69.8854	82.2427	71.0963	67.2165	73.4113		0.275282	70.5917
5.9517	75.519	73.0402	65.0701	71.6465	81.2856	76.8391	74.205	65.9004	84.862	59.9397	47.972	74.8368	89.6032	63.4419	76.6514	78.8123	63.2781	47.6757	25.721	38.1963	61.4897	67.8368	71.134	87.4589	69.1011	87.2396	81.2504	82.5689	62.0927	76.3026	78.7524	66.6631	77.9986	60.8132		0.280898	69.5647
6.0708	75.76	84.3411	66.0416	65.7851	88.5369	70.1452	69.8614	67.9916	74.3287	64.2766	55.5012	79.2955	83.4429	63.7889	83.3372	65.8512	65.4402	48.6187	19.8614	31.2361	54.4606	81.3055	84.9875	95.5196	65.4142	96.4434	82.8319	94.7195	76.3626	79.2701	69.7906	76.4462	73.5429	62.4552		0.286519	71.088
6.1898	66.603	79.9229	66.6774	75.4922	99.0377	73.7225	68.0644	72.0132	73.4537	64.3287	59.257	82.4735	89.7323	68.7484	81.876	65.0818	58.0412	40.0464	20.7325	21.7705	58.6902	84.5766	76.3973	88.2024	64.3225	86.5261	78.2546	77.2343	70.5616	66.0857	68.7531	66.6253	73.3121	60.2809		0.292136	69.0264
6.3088	83.868	80.8454	63.38	63.8091	90.0371	76.6138	65.7365	69.4712	79.6206	70.284	49.8741	76.3358	83.5725	65.4484	84.8749	67.9321	54.8645	33.6012	20.4439	19.9243	52.0737	75.9112	80.7521	88.0745	62.1899	79.8858	93.386	86.804	65.2624	84.5242	67.2631	65.4606	73.5904	58.8542		0.297752	68.6638
6.4279	78.938	80.955	60.7869	72.1156	94.5436	73.692	66.2916	76.257	85.1502	63.8141	58.5109	85.9342	83.1147	62.8831	73.0032	63.4189	50.2424	29.41	15.8021	19.3035	50.3921	75.5365	77.33	87.8089	65.1381	69.0169	91.3172	87.849	59.8523	75.8523	71.0678	74.5182	78.9795	58.1507		0.303373	68.1464
6.5469	82.339	86.4925	55.4882	67.6584	106.158	77.7708	65.1815	67.8735	78.2068	58.6626	53.0032	80.6933	90.4232	61.8492	76.5805	64.2817	61.5225	23.8232	19.084	21.9075	52.1218	81.5608	79.204	87.2197	73.3667	67.8422	87.1777	85.0763	61.172	78.2592	64.7915	78.0724	76.484	71.023		0.308989	68.8933
6.6659	76.753	89.4071	59.1224	71.8742	109.256	87.0719	65.3529	69.9906	79.0649	69.0245	54.0073	90.2525	88.4905	62.7603	85.3016	63.7017	53.7593	29.9293	17.6516	21.1551	49.5547	86.2747	87.4453	81.574	71.7435	67.4413	72.4448	86.2631	59.5637	72.4446	76.1323	69.6882	70.9413	68.9745		0.314606	69.5415
6.785	82.212	72.6497	66.3664	68.9229	99.5944	73.454	75.9863	60.5546	75.9316	65.89	49.5841	89.4743	83.3695	67.0728	73.5688	64.3629	55.6305	23.3435	20.4816	17.6296	44.1203	86.7397	88.2201	77.9957	73.4157	74.6029	88.9268	86.3966	69.1403	79.2507	82.7521	83.7006	70.7624	63.9836		0.320227	69.2967
6.904	89.545	81.6487	59.648	72.8444	103.624	76.3325	72.4372	60.2692	75.8774	55.3626	51.1309	75.3987	82.951	53.3323	72.0129	61.7081	47.5831	21.9422	19.1908	21.6477	45.1194	79.1209	79.1459	74.4472	80.738	69.3242	80.9772	82.5112	75.6059	79.4959	82.3464	76.8393	69.866	74.6295		0.325843	67.7839
7.023	90.38	79.8068	56.5982	67.5616	95.0658	79.9957	74.0951	63.6588	78.096	56.6361	54.8186	81.0775	79.0969	50.954	71.2248	63.1504	44.8815	22.6613	22.937	23.4438	47.6772	81.854	88.4909	77.4347	76.0216	68.5582	73.2842	81.4142	70.6433	72.4594	92.576	64.8944	81.1371	67.4006		0.33146	67.6466
7.1421	103.241	73.5348	66.5951	70.1595	100.996	78.8311	71.2154	62.149	73.5952	61.4099	54.5675	80.3148	74.2998	62.5359	69.6286	62.7236	42.4598	22.1412	17.8002	22.7545	43.96	76.8959	69.8098	74.005	83.8783	72.1238	87.3623	81.5673	61.7591	74.796	74.6561	67.2361	76.6072	63.1387		0.337081	67.022
7.2611	104.514	70.0202	59.7919	65.8902	105.677	79.9489	72.4018	72.352	80.6829	57.895	58.7073	75.0163	66.1356	63.2755	65.3467	62.8835	46.0293	21.0892	17.9383	17.0163	43.2829	68.7832	86.0968	76.8508	76.017	66.9035	88.1255	73.4881	76.993	78.802	70.058	72.563	68.7186	68.0243		0.342697	66.98
7.3801	100.363	73.2962	65.0932	68.5166	105.185	90.9975	66.0303	67.0768	81.566	62.1416	58.7039	59.4109	68.4407	65.6012	61.6575	67.5151	42.8882	19.1635	17.7155	16.8521	41.3369	78.7678	75.7248	73.2863	71.9338	71.4455	78.8783	72.356	69.5296	75.891	85.8517	63.1088	75.2461	64.3264		0.348313	66.3499
7.4992	107.739	71.4061	60.6799	69.3255	105.19	82.0499	75.0974	75.2387	71.3228	61.15	58.4304	76.4523	69.3608	63.984	64.0785	57.5268	46.0662	21.6322	15.068	20.8608	47.6298	78.4672	80.563	73.6821	83.107	65.9984	81.1597	70.8326	67.1454	67.4333	83.8494	69.8341	73.5821	57.4559		0.353935	66.8647
7.6182	91.234	71.7037	61.2551	66.5026	97.519	79.7983	79.9145	92.534	74.8412	58.0154	64.5384	77.2214	64.8327	66.3894	56.5729	60.3763	33.3759	14.9693	14.8859	17.5804	44.4029	72.7946	68.0592	78.37	82.3826	63.6254	79.8715	73.5808	72.4988	66.1576	79.1631	62.5109	83.8188	73.5675		0.359551	66.0254
7.7372	94.864	68.4759	58.9	64.1193	83.4686	77.674	75.2417	88.9081	63.0318	66.8167	65.3215	77.4745	81.4039	70.3132	67.1026	61.034	40.3032	13.6248	15.9876	14.1788	43.2198	76.2505	66.7781	66.7053	81.1277	55.5399	83.6097	81.8999	63.122	73.4287	80.0942	70.7181	85.1013	68.7746		0.365167	66.0181
7.8563	88.1	67.4279	54.2006	69.7567	98.2748	86.6701	79.1861	103.19	81.2198	58.982	64.8563	64.2723	75.0725	58.5332	64.7778	53.5038	34.4619	15.8746	19.0571	11.1039	38.1925	70.257	68.4464	60.0719	74.9828	64.6679	90.4965	71.8784	62.0271	73.1571	78.4489	64.1005	70.2479	68.2657		0.370788	64.8165
7.9753	95.709	69.5791	65.1954	59.3977	80.4658	72.4802	82.506	96.1863	82.8576	65.923	66.9474	72.2845	65.915	60.8576	71.768	59.6325	32.3254	18.7172	14.3826	15.0471	41.7625	63.9273	67.5777	62.8538	83.2925	64.9768	72.5579	75.9913	75.4997	70.2463	79.4748	61.9026	75.4942	72.485		0.376405	65.1829
8.0943	91.4	65.9613	59.573	55.9809	86.9876	81.1144	75.1134	95.8056	68.4418	60.2733	60.2582	74.1648	67.0763	66.5544	64.2382	68.5477	32.6578	17.0852	12.1355	13.9978	38.0154	67.5443	78.6267	64.5678	80.4773	51.7588	77.3305	73.6605	66.257	68.8263	88.9564	51.8949	76.7049	68.951		0.382021	63.8511
8.2134	79.989	67.6144	64.9916	52.1458	86.7167	68.6251	68.571	102.969	74.5331	67.1934	58.1499	70.0228	62.5127	53.4142	60.6478	65.2939	30.4982	17.2985	16.8616	15.3921	37.8078	73.1396	81.9965	60.9026	84.7602	61.5774	72.8972	66.6109	65.5274	56.7362	84.2248	61.5182	65.5793	62.082		0.387642	62.3177
8.3324	88.322	63.5968	60.2712	55.1684	87.0196	72.6876	76.7991	95.0055	72.7152	69.6927	55.0895	62.9835	70.8526	50.1062	70.9549	63.7382	25.2245	17.2649	14.6799	16.0485	36.733	64.5909	77.6731	59.2613	89.8882	61.4462	71.8832	70.6991	61.191	62.0516	84.3717	56.8557	63.8653	58.1458		0.393258	61.967
8.4515	74.885	59.9129	57.1752	63.5392	82.8047	69.9863	70.8457	92.833	78.5087	75.1556	69.8871	64.5632	73.3431	58.2265	71.3155	63.8073	24.6803	16.2279	17.0806	14.9634	30.3269	64.1325	78.367	73.7567	83.4438	56.7951	72.2139	73.1844	59.3585	63.5048	71.5593	60.8133	58.5988	56.645		0.39888	61.8365
8.5705	77.036	56.3105	57.8366	65.0575	86.0128	66.2211	71.0644	93.2447	86.7222	61.2805	60.5898	52.0528	74.7404	63.453	73.7895	76.7061	25.1951	11.7841	12.7516	16.0253	33.4621	63.5364	81.9881	69.8331	95.5742	55.1976	52.613	62.353	69.3816	76.0155	67.8875	67.2123	57.0309	48.6652		0.404496	61.4301
8.6895	70.937	59.8683	49.2209	58.6116	71.9662	67.3598	72.7303	90.1189	75.9415	56.1515	48.505	54.228	69.4201	54.9561	69.7908	74.0641	26.8287	11.9684	11.9402	13.968	29.8571	61.2494	73.0156	73.9288	87.2218	50.1029	50.8691	67.1619	58.9764	71.4194	84.9534	61.0008	54.808	50.4108		0.410112	58.3397
8.8086	72.725	49.6412	51.1038	52.251	66.4413	69.6122	69.4757	93.2244	64.7522	66.3724	45.8398	50.1048	72.0289	49.8748	71.4181	65.8486	24.2811	14.3725	17.4572	12.5241	31.6087	61.6637	74.0427	67.7885	89.7874	48.8531	49.3449	70.4544	66.1856	67.0811	83.5824	49.0308	60.0634	46.0612		0.415733	57.2029
8.9276	60.739	50.8492	44.9561	56.356	66.9183	74.4667	77.7707	89.6331	70.152	59.4294	38.9339	48.0865	75.2807	72.2146	81.6037	72.303	29.6836	11.4032	17.4598	18.2386	33.8241	56.0685	77.0444	61.4371	79.0857	50.6735	53.4115	58.0262	73.3776	68.3723	75.7595	58.9884	57.3553	36.0312		0.42135	57.5275
9.0466	78.38	55.1024	37.4096	56.3906	65.067	73.3415	70.0307	79.5325	64.765	54.6606	34.7926	51.6148	65.9124	64.0543	76.796	69.8727	20.0051	16.7509	10.6399	13.0026	25.6482	56.7252	70.3334	63.7656	72.2613	46.894	49.4028	69.0966	61.5207	77.0819	82.6098	60.2542	55.1359	42.3275		0.426966	55.6229
9.1657	72.183	46.1556	32.2493	48.0432	57.6591	73.5579	75.5516	73.9162	63.2491	57.8806	28.1431	46.1141	65.6113	74.7663	82.1099	78.9166	24.9717	11.4943	12.1157	17.0616	36.4481	58.5905	74.4794	58.4312	77.8944	50.0975	53.5993	71.8083	68.9171	80.0813	90.6463	55.5261	55.0269	40.3267		0.432587	56.283
9.2847	69.304	44.0303	34.0737	49.2286	68.186	64.8932	74.0623	70.3389	55.0987	44.2285	36.1587	44.0176	55.1852	75.5155	87.2815	68.7906	23.2351	10.6801	9.9772	12.2693	29.3877	51.9471	76.3366	69.6984	69.3477	41.5929	46.9915	62.955	53.5659	73.952	89.0892	53.187	51.1839	40.798		0.438204	53.1349
9.4037	68.219	42.4397	35.3272	47.4135	59.2162	70.951	74.2436	64.7823	56.7066	44.7232	28.496	38.3548	61.9256	76.8561	74.0043	72.5516	25.4974	10.4132	13.0271	16.7019	31.761	59.1988	81.1125	59.2753	61.3305	43.7758	47.8918	62.752	59.3375	79.3293	81.6177	60.9831	47.1987	33.9515		0.44382	52.6872
9.5228	65.488	41.4408	28.2149	39.9293	65.4164	65.817	75.5739	69.2831	47.8859	39.8171	33.1109	33.0197	55.2201	58.5911	77.1422	71.794	30.3102	13.5784	10.9549	16.0438	30.1475	59.6329	76.141	67.9676	60.3567	38.0836	51.4095	64.3748	61.6388	62.7585	90.625	62.8617	48.2382	31.2491		0.449441	51.2975
9.6418	70.103	31.832	25.683	39.6707	62.8732	72.9257	90.2181	65.4488	52.9896	31.167	22.9568	35.0778	56.3164	63.0177	73.8626	69.8486	25.3399	14.0852	13.9069	18.2374	27.2642	50.6128	77.2035	64.5227	64.775	37.8969	44.332	66.8677	58.6399	66.1676	90.0911	58.0642	45.7072	36.5643		0.455057	50.7138
9.7608	66.013	32.1323	21.1931	29.2015	53.1661	79.9612	79.0912	50.5707	47.4528	27.168	28.0344	30.3326	70.8847	64.6539	80.2059	71.9751	21.8302	14.0594	12.6999	15.6031	30.4173	60.1831	58.9516	55.1656	61.7637	46.8861	40.1822	68.804	58.0108	70.369	76.6235	63.1374	43.549	30.5207		0.460674	48.8469
9.8799	64.359	36.2789	24.3458	30.8282	56.3791	75.1947	98.0775	57.9593	47.4812	26.7086	22.9729	36.8582	53.7705	62.8229	91.1835	63.6734	23.1498	15.1202	10.6757	17.1984	24.1897	62.1174	67.4805	60.6567	57.0339	34.2822	43.3059	72.643	64.7854	70.2992	73.1713	54.9077	39.2562	36.0979		0.466295	49.2725
9.9989	62.652	38.9736	20.4165	30.1729	48.1105	66.2318	91.2299	51.0396	46.4301	21.644	24.8664	36.7804	51.7054	61.2171	81.5214	67.8836	19.2742	13.4534	10.6671	13.7078	25.1779	63.4397	69.466	63.1259	60.0444	37.9703	44.8825	74.1572	79.3524	68.7355	83.4798	61.9181	42.8817	31.9548		0.471911	48.9578
10.1179	63.093	32.8158	19.8707	29.7899	52.631	69.6571	84.3088	58.1557	39.9272	23.5261	21.5715	35.1031	47.1572	60.9932	78.1938	67.174	23.3568	15.1201	9.7445	12.5652	27.6482	56.762	66.5391	60.6774	57.2026	37.0088	50.0546	74.5493	74.173	61.5851	80.933	72.3136	47.8879	37.4528		0.477527	48.5159
10.237	68.019	28.8303	21.8232	25.1912	64.7622	62.2738	72.6592	60.2006	37.4085	26.4648	16.6042	28.784	56.8131	55.3612	83.7646	64.2311	27.1881	14.6349	9.7652	11.164	30.1342	58.9887	63.7481	57.8762	45.8556	35.7089	37.6877	59.0406	78.392	66.2158	72.1997	72.8474	48.59	38.2523		0.483149	47.1024
10.356	62.614	30.8693	18.5617	25.3364	64.0008	76.1985	74.1032	56.396	34.7835	27.1139	17.9317	32.5736	49.1752	43.7443	79.9593	62.5718	18.8591	13.2926	8.337	16.0701	31.8943	53.3582	66.3082	61.7493	56.7918	37.0164	33.7724	61.9064	82.4595	64.9347	76.7258	76.5679	48.4665	30.8602		0.488765	46.9207
10.475	72.658	18.5109	17.7956	24.7156	64.0424	77.9378	58.6796	65.8765	35.7577	23.5194	19.2483	31.8375	47.4173	49.4093	83.2561	55.5841	20.8224	13.5619	12.0118	12.8272	29.7763	57.2269	66.9932	59.6581	48.9464	33.575	46.4826	66.1221	74.8239	63.7962	78.1061	73.7959	38.2499	24.3627		0.494381	46.0996
10.5941	71.528	22.6765	23.0154	21.4555	58.9039	71.2558	68.0233	60.3545	35.6716	21.535	20.2235	27.4666	49.0827	49.8276	67.928	50.9237	28.191	11.37	10.3115	8.3469	26.0816	51.6844	71.9584	64.6401	51.8634	44.4406	38.8547	71.4737	83.4286	58.3125	66.8087	67.411	40.9912	34.613		0.500002	45.6074
10.7131	81.268	24.5654	16.9071	21.854	51.9523	68.8756	57.5126	52.2246	32.4656	21.1436	19.2858	22.43	53.2297	55.0617	74.0521	51.232	22.7142	10.693	6.1782	11.3813	28.8849	46.2234	73.8137	66.8763	45.7569	37.6198	33.5115	63.2384	78.4081	63.1093	67.5541	63.6802	38.0348	33.1477		0.505619	43.9672
10.8321	75.963	17.4658	17.4241	21.9552	56.8225	77.8389	59.5798	63.8518	27.5971	21.5465	14.9442	24.9865	51.7716	46.1478	69.9583	59.0163	24.4322	11.5951	11.7089	10.6312	32.3485	65.511	69.7726	69.9081	43.3847	35.5644	32.6783	58.1789	75.4776	51.6917	70.9289	60.3482	32.4393	31.2032		0.511235	43.9609
10.9512	85.925	22.4233	19.7718	22.0054	61.0517	69.873	62.8555	60.0244	26.8761	18.6932	16.9239	28.6439	60.1341	43.1636	76.6818	47.2958	28.9011	10.1166	8.7923	17.0712	22.9222	61.0527	55.4976	75.2079	45.8937	34.6842	44.6858	63.2696	77.2053	56.249	80.7437	60.243	38.9932	23.9608		0.516856	44.9362
11.0702	80.537	21.0249	17.0781	20.0898	59.0817	68.9685	59.7537	55.1853	29.2576	19.6324	21.2331	28.9443	68.3597	49.4565	66.4395	49.0189	21.0506	10.8907	10.6486	10.8584	39.2762	66.9089	59.5543	76.5249	53.1974	34.5347	38.89	57.5521	79.1631	68.501	79.5265	59.5034	39.9519	31.5873		0.522473	45.6524
11.1892	64.983	19.9404	17.8293	18.0799	56.4178	70.3701	59.9799	60.354	27.6037	16.5347	20.1551	28.7038	57.8441	54.0307	51.9512	48.4108	20.9204	10.7607	7.7345	16.1368	32.7699	60.8161	69.6867	70.8776	51.2582	36.1154	34.9261	52.975	80.1344	61.4198	84.5983	61.5866	40.3608	26.048		0.528089	43.8916
11.3083	70.949	20.4856	19.1623	17.2124	47.4188	53.288	60.9389	60.7894	28.2544	18.6121	14.1165	30.3211	62.1786	48.6315	57.6495	50.9856	35.0544	13.1923	9.1759	14.7806	33.1118	63.2437	61.7753	70.7823	50.445	33.7834	31.5363	50.2175	72.225	75.5212	73.2038	63.04	35.0469	27.4132		0.53371	43.3689
11.4273	72.71	18.4629	15.2619	19.032	46.0255	81.3101	58.6391	60.7619	27.1389	16.6051	19.5686	24.8987	65.2852	52.4225	54.7572	57.7918	34.333	13.1888	9.4873	15.8936	32.0223	63.9571	66.7534	69.2426	51.2346	28.3667	28.7768	57.947	86.7152	71.6644	75.011	64.0849	34.8983	26.1334		0.539326	44.7171
11.5463	71.752	21.8947	15.9657	21.6264	41.0596	69.2233	68.2412	59.7947	23.6428	20.2791	22.6448	28.3924	56.8327	55.3984	55.8224	47.6695	28.3656	10.5283	9.117	16.5624	35.3991	56.613	61.8955	69.676	54.5002	29.4086	33.9689	50.7307	69.1218	70.6599	67.279	67.5726	34.9988	35.2106		0.544943	43.5838
11.6654	71.73	19.0705	13.3653	13.1311	47.3534	66.8713	62.3479	51.2802	19.0061	14.2719	15.1326	26.8078	65.9528	53.5281	59.0375	51.4432	31.6891	15.6369	7.7044	15.6579	36.7386	60.0338	62.1931	69.4583	42.1291	27.1251	27.8206	53.6958	74.094	81.6821	74.3662	63.7569	30.5374	23.7701		0.550564	42.6006
11.7844	67.989	15.114	15.3683	15.6547	45.2751	68.6498	58.2639	54.2277	17.3232	14.8086	16.5264	25.2687	69.9046	54.6741	62.8897	52.8629	26.3999	10.6572	9.6418	12.6541	39.6625	67.5893	67.4254	72.2702	41.0932	30.1598	32.4556	52.8108	70.5191	85.2484	72.9978	78.9296	33.8806	22.6062		0.55618	43.5824
11.9035	61.089	14.7597	15.0909	13.3598	48.2809	65.9712	53.522	44.0022	23.5865	18.8473	17.6433	24.3987	62.7537	58.0003	67.0252	55.6861	28.227	15.407	9.1346	11.3823	38.024	80.6282	59.071	64.7789	39.3214	25.6161	34.7959	46.3774	64.1642	83.6971	72.4468	85.6213	30.467	29.1893		0.561801	43.0108
12.0225	51.84	14.6755	12.0537	17.6042	42.8517	75.6312	63.1213	45.9495	17.7468	16.0683	15.8295	24.9047	59.538	64.2297	61.4729	48.0286	30.6343	17.2397	9.5299	14.9015	46.5069	81.544	58.5566	74.8953	47.0255	28.853	32.7152	55.0997	70.7733	82.4909	72.7106	83.3967	26.5751	27.4124		0.567418	43.8943
12.1415	58.694	15.306	13.6424	16.6384	38.4076	74.0497	63.3042	50.4215	21.1091	20.0858	16.3935	25.503	63.7118	59.0876	56.1068	55.8788	32.3153	12.4573	12.9373	16.2814	51.5491	69.5128	58.5098	75.5286	41.3635	34.914	30.91	51.3928	62.3885	84.6308	71.2593	86.0271	32.6669	22.756		0.573034	43.9924
12.2606	55.175	14.1429	14.8347	19.2433	37.8216	66.5387	53.9505	52.1992	19.5188	14.1787	18.6184	28.2746	57.3908	53.2152	56.7512	57.6143	33.0634	13.4701	12.1379	15.3973	50.0309	56.0915	56.8394	66.8301	38.2166	29.5772	38.7135	53.5745	67.9572	79.8683	60.9938	93.2445	37.9782	22.178		0.578655	42.5185
12.3796	51.719	18.286	11.4283	17.2465	48.6011	68.0008	64.1803	45.5235	20.9194	17.5494	15.5226	24.8422	58.6097	56.6196	60.5528	54.1414	35.727	15.0693	10.9346	12.9896	44.5278	64.5818	55.4044	64.701	29.7773	26.1837	40.2861	46.4797	70.4042	77.7934	67.9744	80.2184	31.729	20.8144		0.584271	42.0394
12.4986	55.849	15.5751	13.6698	15.0316	54.4503	77.0365	66.5029	44.0765	19.5037	11.6901	18.6949	25.008	61.8104	61.9828	52.3742	52.4227	39.9015	13.2513	12.393	19.1152	46.9011	69.674	56.6505	74.4042	30.9708	27.5589	34.1972	47.8608	67.3353	73.4731	75.1892	90.9188	27.9318	15.5863		0.589888	43.2056
12.6177	56.245	20.0154	12.0157	16.9567	53.582	66.0367	60.6088	47.6938	18.3061	17.3452	12.2061	26.2974	62.8767	64.128	62.0383	57.1509	32.7879	13.3325	14.0348	21.6784	54.4338	75.1393	62.6231	58.5234	42.5125	30.2266	37.5683	48.4293	62.6241	73.64	83.9522	89.7714	28.7795	22.2362		0.595509	44.2881
12.7367	49.079	16.7904	17.0593	16.9539	51.5938	66.1259	71.486	46.456	18.3532	16.0929	13.7707	24.7494	56.5455	70.251	53.6812	48.1367	39.6059	14.1904	20.0948	19.7754	46.7155	69.8838	55.8078	69.0473	37.2913	30.0021	36.4277	57.1067	71.2972	80.5666	68.4346	87.109	46.0126	24.5969		0.601125	44.4438
12.8557	51.861	15.6156	16.5368	12.3331	55.3122	69.693	65.7142	56.9023	16.8895	15.4455	17.0932	24.8169	53.5162	74.8348	59.9519	61.7686	41.2304	15.0266	12.4522	14.3206	47.3718	65.4501	57.7109	66.5169	36.3571	33.242	35.5466	48.9567	61.5248	67.1325	71.4913	81.6486	46.6406	20.2641		0.606742	43.8579
12.9748	54.573	20.7853	12.8959	16.6135	57.2446	83.1059	68.9853	51.2007	18.514	14.8607	15.9737	26.8668	50.4269	78.7436	65.9596	65.7959	42.4648	19.1286	12.5218	13.3357	56.1188	68.8658	57.3011	59.4671	37.0858	25.6022	44.2617	51.2082	66.0659	67.648	62.3834	81.329	33.8451	22.4196		0.612363	44.8117
13.0938	51.002	17.7151	9.5155	16.8647	57.4215	75.3359	64.3717	44.1967	20.503	13.4838	15.3426	30.7446	56.2236	71.4341	62.2798	55.1668	45.2569	15.4424	13.2014	17.0482	53.2457	61.8928	47.0872	70.6785	41.1323	26.85	42.4607	59.8654	65.9894	60.3633	69.7599	76.3804	36.4593	18.9145		0.617979	43.6362
13.2128	51.728	16.6388	11.2149	12.9004	47.1496	78.5331	69.7993	39.4833	17.7878	14.3167	10.5789	30.4008	53.341	73.6457	57.7886	59.3582	40.976	17.0877	12.7052	15.2477	58.355	59.3964	55.133	66.9155	37.7069	28.7903	49.1384	55.9905	67.0601	57.1474	62.5009	67.0962	38.0965	20.2657		0.623595	42.7728
13.3319	53.256	16.6944	12.0546	15.6693	47.3119	74.441	67.3881	49.8972	12.7572	19.6127	14.0507	33.4067	45.9967	75.7798	58.7435	64.9264	47.9478	16.7239	11.7058	16.9712	45.4523	49.8279	56.967	57.2608	42.8664	29.6725	45.4397	48.7137	63.9095	60.1445	66.4986	67.2391	30.3455	18.6598		0.629216	42.3039
13.4509	46.538	13.8437	13.1542	13.813	46.4114	80.1454	70.1708	42.3618	14.8885	17.3552	14.4258	29.1086	43.4676	81.2983	62.1437	57.6635	52.0476	15.386	12.693	21.9905	49.9726	58.3032	57.3166	65.071	40.3047	30.4188	52.1022	50.8761	65.5914	55.0052	70.9741	70.822	35.5017	14.513		0.634833	43.1082
13.5699	47.959	19.9539	11.4861	11.2193	55.6092	69.6943	74.0503	45.5642	16.2091	12.6628	13.8838	28.0078	49.7279	67.9012	56.1258	69.2457	50.6873	16.5725	11.8007	26.6425	56.935	60.0956	61.8873	67.1284	45.4428	30.1442	48.6115	52.3029	73.725	54.1639	64.7712	70.1313	33.1879	21.2947		0.640449	43.9654
13.689	36.582	16.4638	9.4562	16.37	42.4348	67.1449	61.333	48.0171	19.5296	16.5807	12.4269	36.1108	62.8851	76.8392	56.0233	48.1484	48.6234	17.6535	17.2594	19.5377	46.2378	60.9472	58.8214	68.1239	46.5067	34.623	50.5198	53.6672	72.1578	56.6122	55.6657	54.1792	34.8362	18.1374		0.64607	42.3663
13.808	45.085	16.4147	11.6982	16.7005	47.6045	69.044	65.929	46.8929	21.5872	11.8353	12.9548	38.0317	61.0539	79.0928	52.3299	55.2026	46.9388	22.2202	15.1421	22.0543	49.2022	55.1761	55.9163	65.3678	57.7435	31.3187	42.5616	52.0112	73.2145	57.0702	52.6909	52.6478	36.9802	15.2136		0.651687	42.792
13.927	52.074	20.4429	11.7021	11.4854	38.2721	67.1705	65.3679	39.157	19.2674	12.2093	14.1112	40.5663	51.4407	79.2033	58.5539	54.0425	56.7027	21.2757	14.5052	28.8059	50.6618	51.0281	51.5392	64.4356	54.4315	31.2654	54.4221	55.6899	73.2779	55.3232	66.5573	55.6241	41.4771	15.956		0.657303	43.4719
14.0461	43.639	13.6438	10.8163	15.2234	45.2517	66.8863	66.4721	41.3073	16.3133	16.8503	16.6358	39.9769	45.7138	75.7364	54.9374	51.1892	45.8509	16.0275	14.9267	35.014	54.9855	42.9888	66.8376	61.5736	56.7286	40.3068	52.8138	55.0969	83.6781	61.359	63.2753	50.4808	33.2359	20.3754		0.662924	43.4161
14.1651	52.619	22.5626	12.0799	17.4596	34.6562	64.0754	64.8813	45.7684	17.9595	12.7584	17.7192	31.9062	60.5435	74.1461	58.7722	51.975	52.756	24.2556	13.9696	36.9746	50.4287	50.2616	64.1063	70.0729	52.0882	39.2523	57.8974	56.063	99.8164	64.9477	65.4692	54.1218	29.2583	21.0207		0.66854	45.3718
14.2841	50.906	18.8737	12.6459	16.0528	38.9729	58.4622	54.1512	42.7456	16.3818	15.3033	13.8802	38.7443	44.3196	80.2108	53.7569	46.638	48.0368	26.0545	16.9882	41.7846	51.7781	51.8875	61.5339	66.617	56.2839	48.4489	49.9743	60.852	91.8227	57.2502	65.0288	53.7813	39.8586	22.8566		0.674157	44.4966
14.4032	57.717	20.4212	10.7463	15.1157	46.8004	64.0782	62.1793	53.8485	17.6957	17.3802	15.7631	40.9182	49.9559	64.2631	56.2355	52.4966	52.9298	31.0836	17.1616	46.4137	59.7087	51.2414	70.9325	67.4816	61.9408	50.1819	48.9093	57.2061	99.5876	62.4638	52.2174	52.3745	36.1379	17.6267		0.679778	46.5063
14.5222	50.755	18.7381	9.4837	14.0849	38.7591	65.3845	56.6466	45.4611	12.6774	13.4223	13.428	33.1467	49.792	67.7547	51.6157	53.8815	57.096	32.1764	21.2996	55.1332	52.4787	55.2542	64.5815	72.191	63.1238	53.0685	48.3207	58.0912	95.9081	65.1363	64.1935	53.0426	39.4578	26.9695		0.685394	46.2516
14.6412	58.8	18.1203	10.5361	14.1911	45.5492	65.3784	56.0941	34.4661	15.4943	12.7225	14.8471	37.1937	47.4653	61.9255	64.8556	51.2773	50.1733	35.2811	21.2432	50.4049	58.2862	51.8032	67.8887	75.8269	71.8351	47.5102	51.8619	64.7761	83.1264	62.8972	63.4696	53.3584	42.2879	23.1993		0.691011	46.5925
14.7603	54.699	16.4829	11.1033	12.9629	46.0862	53.8071	63.1734	41.4232	15.1796	13.5958	13.7022	33.5776	52.5641	56.5387	59.9229	63.3508	44.7602	33.5297	24.7669	50.9907	55.3311	46.9968	57.7975	78.3666	64.185	54.0607	51.3614	53.8589	79.734	64.5178	60.2959	52.4692	42.3748	24.4616		0.696632	45.5303
14.8793	60.427	24.9375	14.5113	13.7977	40.4014	75.2732	66.9713	35.5118	14.6428	12.3237	13.706	37.3319	51.4615	57.7233	47.5598	51.1749	55.0063	40.7691	31.7065	44.8001	52.8271	48.4226	56.2504	79.4346	73.8584	44.0669	49.5734	64.957	71.2827	78.9447	57.1863	54.2383	42.5369	22.3333		0.702248	46.6456
14.9984	65.899	16.3706	16.5206	9.6885	45.7737	74.3314	58.7291	41.45	18.4632	14.2607	16.1103	38.3525	52.5286	56.2005	51.7946	55.5329	42.9632	47.1775	38.4586	54.3688	48.1549	45.73	77.9919	81.924	67.1702	56.4765	48.1914	59.4864	75.5192	77.4287	60.8899	54.3903	43.7291	22.9705		0.707869	48.089
15.1174	69.036	18.61	8.8539	14.9267	51.0854	77.5524	61.866	39.0736	19.7024	12.7361	15.1396	34.2806	57.6172	49.489	53.9337	65.373	57.9989	40.0646	42.0709	50.3351	48.4206	65.0913	72.008	80.0255	63.4023	50.403	62.2157	59.5385	65.5712	80.9553	69.1477	57.6517	41.8894	25.752		0.713485	49.4652
15.2364	63.791	20.6729	13.0184	15.0951	45.2141	71.9144	66.5554	45.4164	16.7231	14.6344	12.6286	37.2621	54.7497	52.6479	62.0664	54.0549	42.8522	40.328	40.2448	50.4551	52.981	60.8005	61.0533	72.7491	64.5807	51.1519	53.3735	61.4903	63.7218	80.3144	73.0273	56.8434	46.0341	32.0384		0.719102	48.5437
15.3555	53.962	27.9298	10.7776	17.0461	44.5345	77.2659	66.9727	43.5381	13.9318	16.7379	15.2902	41.651	54.5108	50.1923	49.8218	59.6637	42.0329	41.2998	48.8666	41.7888	49.4826	47.8594	57.0198	68.1576	68.2537	54.2892	50.8308	58.1045	70.7554	77.5609	71.7625	53.0451	47.4688	22.4582		0.724723	47.496
15.4745	55.712	24.0915	14.4834	15.3428	48.0419	71.0497	61.4733	47.272	15.4345	14.5059	18.0847	40.283	58.9149	47.4599	59.4428	51.3574	42.1287	47.4999	44.8984	44.8472	41.8511	51.1964	64.1588	77.5491	68.4887	57.7078	53.3615	53.8909	65.928	81.4546	71.0638	59.439	51.1071	27.9075		0.730339	48.4538
15.5935	69.856	19.9598	12.6792	14.5596	45.338	78.526	69.2755	47.3495	20.4067	12.6427	22.6924	37.251	68.2931	45.4519	48.5633	49.9162	36.7734	47.1763	41.0049	43.2275	47.7016	61.1611	55.3233	67.8244	69.2709	59.5654	53.9768	67.4238	64.8102	69.5191	73.0293	58.3166	41.1502	33.1359		0.735956	48.6221
15.7126	67.271	26.7533	14.1469	13.6575	45.5457	79.4915	66.8532	53.2767	20.4771	15.7316	18.7032	40.0024	67.3352	47.2041	51.1275	47.72	36.3675	41.3451	41.4583	46.7372	43.632	53.1642	64.5828	63.8728	63.9778	48.2179	62.2407	66.644	51.8898	84.2529	66.7651	47.4114	54.2247	30.3329		0.741577	48.3063
15.8316	54.936	30.0612	15.108	15.1992	48.5956	79.2553	65.6694	59.493	18.4873	14.5789	16.4981	46.2817	67.3487	41.6659	46.068	49.3544	40.0721	41.0335	43.9345	43.3609	37.6393	54.678	52.9671	63.6677	52.3645	56.7272	60.2854	69.5712	61.7673	71.4647	65.3456	57.1622	50.5503	39.9464		0.747193	47.9747
15.9506	51.633	28.618	15.6026	14.7274	54.6748	69.1427	67.4128	50.2898	15.7006	13.2177	14.8936	46.2891	72.1355	37.9327	48.2225	41.0475	37.2914	42.0591	51.2576	45.1815	45.1499	61.3135	58.3083	65.9148	61.4276	57.1217	64.479	66.1178	63.2153	68.6517	73.8458	61.5408	47.5513	29.2875		0.752809	48.2722
16.0697	60.297	27.497	13.8899	15.6266	52.7272	75.0739	72.1593	58.0198	20.8206	17.6238	19.1322	48.0597	74.1959	33.7141	32.251	36.3837	32.0352	35.376	45.2522	38.8472	46.1985	56.4563	68.892	69.7576	59.8758	66.7809	77.0983	69.6176	53.8606	68.2371	60.0731	70.3016	47.5135	32.271		0.75843	48.7034
16.1887	54.718	32.3486	13.7314	15.9986	60.0407	72.6906	65.4266	61.813	21.8953	13.2306	16.6266	53.7259	73.6217	29.1932	28.435	29.2952	26.9298	43.3274	44.582	37.3921	41.1381	54.2928	64.0964	59.443	62.5639	65.668	61.4872	74.2974	50.6581	75.967	69.7623	61.2398	55.3569	35.6609		0.764047	47.8428
16.3077	58.809	40.8022	13.6275	17.2848	68.0138	76.1188	61.8039	58.2182	20.2688	12.9241	21.2793	55.9293	72.2864	23.9906	33.7915	23.0013	18.5658	35.5408	28.7692	43.8146	47.8543	53.243	61.3201	58.3282	62.3751	58.02	70.8114	85.9704	56.4528	75.0544	70.9858	73.4292	55.1245	30.234		0.769663	48.3542
16.4268	57.223	39.8067	15.4419	14.6852	65.9491	70.7146	71.2825	61.2297	18.804	15.7997	23.3107	60.8108	70.3095	24.5135	25.1298	18.1098	19.1171	29.2202	26.0283	41.4241	42.347	44.3545	68.5941	69.8751	49.8686	51.8944	60.699	77.0469	60.4681	59.9295	74.4793	61.9166	55.5217	25.1982		0.775284	46.2089
16.5458	61.895	37.535	18.6359	13.2392	73.6616	62.7154	64.1149	49.0113	21.1984	22.0424	21.7364	54.7102	68.6654	17.2402	16.0982	14.7478	11.8073	16.9269	25.0611	35.6831	41.2237	54.9222	70.8767	60.9734	56.2562	65.5629	59.4294	75.1575	54.1561	72.9349	67.3969	65.981	52.6317	33.6769		0.780901	45.2325
16.6648	46.981	39.1683	15.8526	17.4187	73.6635	70.6701	72.0865	51.2233	21.5081	15.3852	25.2859	51.573	71.4019	10.9613	17.5351	15.1196	8.5809	11.1962	16.1376	43.5432	31.7514	51.2918	67.618	55.666	59.9646	64.5386	76.3419	74.9021	53.3552	70.6214	57.7571	56.75	72.86	33.2219		0.786517	44.7627
16.7839	60.339	42.7039	17.4404	20.8355	67.5755	72.9409	60.5565	51.9145	20.0772	13.212	21.3541	54.8836	68.6221	13.2347	12.0723	12.053	8.0782	10.2535	8.9769	34.1104	31.3901	33.8405	65.1449	66.0683	66.0136	74.9579	69.6541	68.1725	51.2127	64.8038	62.3817	68.7424	65.9596	36.1819		0.792138	43.9929
16.9029	65.05	57.682	17.9904	20.6262	67.5618	70.7166	58.281	55.7208	22.1469	18.4954	30.1447	51.7436	75.7881	9.7499	10.0111	4.789	6.2693	6.693	9.9953	30.5685	26.9439	45.9667	76.6524	56.4651	58.2467	79.0736	64.134	62.1753	47.4315	61.1807	60.9201	62.4693	66.4684	42.7818		0.797754	44.1451
17.0219	59.919	52.0354	13.8632	26.3614	65.7062	67.1449	71.3326	54.6464	20.7874	13.9136	29.2625	54.2656	66.8089	6.742	8.3331	5.818	5.3371	5.7182	8.2954	16.1549	16.7897	42.8053	76.5034	56.5589	55.2757	87.0206	60.6265	68.5781	55.1661	68.3649	64.4493	65.2426	71.0699	40.1807		0.803371	43.5611
17.141	53.457	46.3847	17.2147	24.4366	73.5707	63.2826	58.1413	45.2549	23.9144	14.3636	35.7812	48.757	59.4778	5.6587	7.3725	4.7328	5.0581	4.4105	3.8626	10.944	15.0365	42.3509	70.756	53.3718	49.8203	86.6028	67.4535	52.6224	57.4181	69.706	55.8222	68.6364	66.6971	43.1531		0.808992	41.3389
17.26	58.282	54.3571	17.9675	27.6055	73.7991	68.2742	58.8507	50.7667	24.6811	19.099	42.9751	55.8785	60.3675	5.9238	6.2567	5.2586	3.5244	2.6695	4.3195	11.1426	11.6942	45.2129	80.9339	57.5893	61.7581	89.1721	55.7318	59.2669	51.0259	75.2657	54.0809	62.2116	66.5958	41.543		0.814608	43.0612
17.379	54.88	57.8707	25.2862	27.4139	63.2711	64.9829	52.7231	47.0119	28.5489	17.4535	45.4888	49.5408	56.9628	4.0551	4.8677	2.6498	4.464	4.4075	2.5101	6.3374	7.1163	37.7466	75.9899	63.2881	57.5173	95.1584	51.8817	52.6098	55.8094	79.3441	67.7499	65.577	63.3233	40.9211		0.820225	42.1988
17.4981	55.215	62.6776	17.8898	32.1461	65.3411	66.7736	56.7915	45.8315	26.8191	17.6483	46.0001	43.3885	54.3638	2.7952	6.5305	4.6446	3.5383	3.2318	3.6047	7.6708	4.7756	31.9987	64.1904	50.1092	62.0643	90.6225	65.2665	49.8725	60.7943	75.7686	60.8236	59.7864	68.7381	41.2637		0.825846	41.4405
17.6171	54.458	59.7295	19.4466	34.7134	67.8521	65.5503	47.9368	54.2486	32.7002	17.6332	50.7825	51.1263	38.9764	3.1561	5.3059	3.1719	5.1362	1.9282	2.5165	5.3135	5.9801	28.5757	79.2754	48.6511	78.9643	87.1417	50.8789	39.2201	56.1507	76.2527	57.8083	60.4035	60.6139	42.9147		0.831462	41.0151
17.7361	52.598	65.2749	24.5622	35.2284	65.9855	65.9598	54.7989	59.2738	32.8099	21.4209	62.9341	56.2928	41.5908	2.4054	3.63	4.9396	5.11	2.3197	1.9582	5.0105	4.0451	16.3279	72.539	52.8724	67.5373	89.7661	54.1513	42.7571	47.8129	71.6999	62.4172	56.2903	61.8379	46.8849		0.837078	41.5013
17.8552	55.196	54.6232	30.198	38.5504	66.2914	62.8523	56.1798	56.8492	30.3575	21.6406	61.7708	50.1153	37.2186	3.84	1.532	3.3646	2.3424	3.2193	2.2754	4.2595	2.6333	16.5625	76.064	58.7709	61.7003	73.3351	49.0207	50.8234	57.8553	80.3998	57.6281	63.4566	63.5123	47.679		0.842699	41.2388
17.9742	53.862	62.5348	32.4844	41.2185	69.5784	59.3207	55.2741	62.1996	32.5022	31.0119	70.1084	46.4903	32.3548	3.3947	1.9062	3.4468	4.2322	3.5197	3.5683	2.5242	2.2475	13.6456	75.1626	63.3504	67.2627	95.5347	41.3653	37.9196	56.0124	78.373	65.1148	58.1098	59.6683	41.2221		0.848316	41.9565
18.0932	56.043	61.2256	30.1253	42.3021	67.6679	70.2872	67.9461	60.7852	34.5476	30.7933	55.7385	53.6079	27.4966	2.5309	4.9109	1.5361	2.7392	2.5257	2.3768	3.5083	2.1683	7.3013	58.888	56.5157	64.7645	83.7741	38.7716	37.5828	54.215	78.4879	66.8257	60.0469	72.4964	42.251		0.853932	41.2583
18.2123	50.695	67.2949	31.298	36.0476	73.8965	71.6096	66.7333	67.4178	45.7229	33.8151	61.3966	48.5827	18.6974	2.3318	5.0448	2.8046	2.1147	2.3705	1.4799	1.5447	2.2485	6.5478	53.5719	56.6613	60.924	79.2543	34.0864	29.756	55.4722	93.6166	60.8807	49.4001	63.8411	47.2117		0.859553	40.7168
18.3313	46.717	63.4409	38.6115	47.9477	68.5841	74.6659	73.1449	71.837	51.4455	38.4241	53.572	51.2663	15.65	3.5155	2.8972	1.3932	2.1115	1.5974	1.7648	2.164	2.5759	4.8312	50.002	45.5596	57.5333	64.4867	29.1921	22.1209	57.4013	72.3878	51.8044	54.1741	63.4499	42.6857		0.86517	39.0869
18.4504	47.027	55.6171	38.7019	44.9899	83.5329	58.062	67.5346	73.1207	39.8791	46.0687	54.0355	49.6879	9.6573	1.73	1.9377	0.9238	1.126	2.5884	1.7206	2.3855	1.6195	2.8089	49.9767	50.9303	64.6936	64.7616	20.3174	16.1269	61.153	84.6468	53.261	49.1374	64.2762	44.8967		0.870791	38.498
18.5694	45.218	51.8891	42.1474	52.7391	85.856	64.1999	69.832	61.3145	43.9774	44.69	56.539	46.4801	10.0751	1.7856	1.6253	1.6976	1.9923	2.0574	1.7762	2.0202	1.42	3.2458	41.638	55.8957	56.0688	58.7618	15.4871	7.036	59.277	74.1479	52.859	51.9437	62.1592	38.472		0.876407	37.2448
18.6884	35.045	44.0641	47.7544	54.0601	77.0773	72.8758	76.1798	70.4529	42.2266	53.2668	53.8753	50.5364	8.4604	1.5658	1.0335	1.9023	3.6154	1.5755	2.2282	1.442	3.1448	4.1866	44.8053	48.6473	59.4893	52.2498	11.4042	10.7566	50.0295	79.2317	56.2959	59.318	54.3624	45.1108		0.882023	37.5962
18.8075	37.064	41.9949	48.7362	48.3802	78.4388	63.0652	71.082	79.6441	38.3366	48.9796	53.0985	53.9768	8.8479	2.336	1.1708	2.5644	1.8	1.5484	2.7876	1.1971	1.403	2.8196	35.0239	54.1977	60.4959	55.6564	9.3604	8.389	52.3419	71.9293	63.0903	53.4783	39.9137	43.9328		0.887644	36.3847
18.9265	31.932	35.7133	51.7408	68.1147	78.5573	45.967	71.9362	64.7762	39.3833	48.1911	57.1632	45.0155	6.5297	1.4841	1.641	3.2472	2.3597	3.5531	2.1314	2.8627	3.6635	2.4774	36.5736	49.736	49.3169	53.8911	7.5582	4.2859	54.3367	72.2486	58.2913	55.1331	42.9097	41.209		0.893261	35.1156
19.0455	27.608	33.9728	52.4692	56.0364	77.7914	46.2605	78.982	64.554	41.5257	55.2721	41.6683	46.2836	6.1375	2.8134	1.1824	1.7153	1.3441	1.2738	2.063	3.1199	3.0698	1.8238	33.9524	56.181	51.911	44.7164	9.3046	5.3023	50.1706	74.7918	64.5136	54.5838	48.0444	44.5504		0.898877	34.8526
19.1646	24.895	27.1075	46.8556	56.5641	65.4033	56.2424	57.9184	65.0781	46.5313	47.4325	48.4524	38.9913	5.5438	2.1549	2.3103	2.3648	2.3413	1.5784	1.4412	1.3856	1.1307	3.677	35.506	47.6186	54.6879	41.8826	6.1664	6.0702	50.9933	71.2347	56.3162	53.8618	55.7279	42.3806		0.904498	33.1719
19.2836	18.88	22.7256	49.7703	52.5181	64.8287	46.3048	59.4665	59.1913	47.2991	45.1168	47.8605	33.1112	5.2337	4.2625	2.8822	1.8441	2.1522	2.2655	2.5978	1.9658	1.2844	2.6376	24.874	46.454	50.7529	33.1734	7.0938	3.2282	49.138	53.0874	53.489	54.3607	48.2262	48.159		0.910115	30.7716
19.4026	15.801	17.4186	51.2376	60.8246	54.3865	38.1344	52.6199	56.7639	53.0429	56.1848	46.7627	27.2479	5.0383	2.8569	1.0772	2.1391	1.1472	1.1169	1.8047	0.8267	1.1582	2.5891	21.6239	45.5691	40.8438	33.6549	2.7788	2.592	45.3485	63.8165	53.7734	53.2514	50.3898	36.7305		0.915731	29.428
19.5217	11.431	11.2117	52.7259	61.7211	65.7233	38.9954	50.4347	51.0887	44.385	42.241	42.6084	23.0989	3.749	1.5547	2.1001	2.972	2.2249	0.7231	1.0132	2.1168	1.2897	2.3395	16.7085	50.9828	47.3392	29.1873	3.3065	2.9928	43.4503	55.6408	57.6277	58.1162	41.7883	39.9718		0.921352	28.3194
19.6407	7.167	7.0185	55.052	61.8088	52.6122	30.3475	44.3527	48.5548	46.8169	38.0294	46.727	15.0206	2.4215	3.1443	1.5193	0.9671	3.9371	1.4648	1.6138	2.0851	1.5247	1.6366	10.8202	38.5388	38.3291	22.9381	2.052	1.6625	43.3466	60.2286	54.2298	56.6423	47.5544	36.8935		0.926968	26.0899
19.7597	8.884	7.9424	54.2956	55.3903	61.895	25.4696	44.5494	50.733	45.0296	48.1111	39.2478	12.6883	2.4801	2.4198	2.4021	1.9119	1.7774	1.3663	0.7873	1.7299	0.6499	2.0873	5.218	33.3539	34.7481	16.3831	4.9036	2.4997	44.4551	58.6874	63.291	55.2384	45.5015	38.6686		0.932585	25.7293
19.8788	5.8	4.6918	34.7434	59.0349	57.0804	20.4323	33.6472	46.5441	49.5498	39.9036	39.091	11.4854	3.1553	1.5266	2.437	1.1854	1.884	2.7245	2.8284	2.2016	1.2532	3.9483	7.5553	27.8962	22.3592	9.0819	2.9453	2.7069	34.7519	50.0507	57.4799	52.8349	48.9927	42.6316		0.938206	23.0716
19.9978	6.834	6.1178	46.0948	59.5302	61.7319	11.2857	29.8184	40.5874	43.3818	33.4563	32.1041	8.7379	2.2438	2.2823	1.237	1.9636	3.1847	2.3792	3.1527	2.7035	0.8531	1.0682	6.6094	16.7659	22.0541	9.7644	2.0862	2.5382	32.326	45.582	50.8419	48.9883	42.8362	45.1635		0.943822	21.3619
20.1168	5.109	4.445	40.4883	56.8998	48.2794	5.891	19.7504	34.7173	41.0748	40.7318	27.54	6.5434	3.0506	2.8478	1.058	3.5915	1.2007	1.8422	1.7223	0.9017	1.2095	2.6896	6.2799	21.263	12.4735	8.8144	2.3872	2.9415	23.2003	57.5241	58.6139	49.5088	41.0114	39.5302		0.949439	19.8568
20.2359	3.716	4.7982	38.9073	66.0062	52.3263	7.3312	14.0736	32.3983	42.3124	37.6587	27.1835	6.0306	0.8775	2.5923	2.2305	3.3528	1.0599	3.8846	3.5474	1.2542	0.3859	1.6895	3.3262	8.083	14.3841	7.2956	2.3335	2.7806	19.2447	54.0561	49.8304	50.2125	42.0739	39.0263		0.95506	19.0078
20.3549	5.136	1.5357	42.9578	52.1503	44.0944	4.2771	10.4457	22.141	39.8882	32.0421	19.9047	3.8308	3.0041	1.868	1.4703	1.6345	1.5397	2.2885	1.4502	3.2954	0.868	1.0801	3.6933	8.759	7.3397	4.7898	2.0921	2.3889	16.3118	50.012	43.9926	50.883	39.6793	31.5595		0.960676	16.4236
20.4739	2.928	5.8514	45.8935	55.2432	47.5589	5.9355	5.7355	12.8058	38.4015	26.5557	15.4511	4.7858	2.1522	5.0153	0.2033	1.0283	1.3046	2.8827	1.6802	0.9293	2.3299	2.8512	3.1009	7.5944	5.8866	4.121	2.7494	1.1234	11.6592	39.7561	51.9128	35.1455	36.0863	26.7086		0.966292	15.099
20.593	1.686	3.6201	26.9281	50.6149	48.9798	2.7344	6.9229	8.1088	29.5061	20.5882	12.3385	7.1205	3.7097	2.8633	1.351	1.8528	1.1339	1.9176	2.41	1.5377	1.6258	1.3257	3.534	4.4468	7.0989	4.6169	3.408	3.926	9.736	28.762	49.1107	39.7279	35.9214	27.4374		0.971913	13.4295
20.712	4.007	2.4338	23.7397	52.8654	39.6917	1.9969	4.741	9.7916	21.0134	11.4754	7.475	4.5339	2.5158	2.2544	2.7055	2.2545	1.5815	1.2832	1.8022	1.5011	1.4714	1.3457	1.8122	5.1119	4.5038	3.9091	2.3236	3.2866	7.5808	33.5082	47.906	35.6604	35.3087	20.6655		0.97753	11.884
20.831	3.569	2.0478	20.7779	48.236	34.8162	2.3811	5.7369	8.2135	20.2851	9.339	9.5633	2.5183	2.0344	3.6927	1.9546	2.4416	2.3731	2.2181	0.9155	0.3883	2.5893	1.1902	2.8078	4.3709	3.7702	2.2614	1.1834	1.5546	7.0107	21.8422	38.5092	29.2255	35.049	18.2505		0.983146	10.3858
20.9501	2.854	3.7572	14.9195	39.5776	21.1439	2.6596	4.5042	5.8159	10.3702	7.1244	5.4815	3.5861	3.3592	3.0014	2.7933	2.0083	4.2905	1.0773	2.1638	1.5942	1.7003	1.9781	1.2361	3.4051	2.2853	2.5153	2.6228	2.1253	4.0045	19.3221	32.4032	26.5058	22.1763	15.8286		0.988767	8.24091
21.0691	2.158	3.2007	7.8539	42.2369	15.062	3.5888	2.3276	7.1846	7.9429	5.4812	7.8911	3.9227	1.2743	3.1576	1.3574	1.0533	1.8323	2.2902	1.7699	2.8735	1.7672	1.2947	2.1664	2.3802	4.8291	1.8078	2.3222	2.1902	4.3523	10.9228	23.2961	21.6666	22.7728	13.4234		0.994384	7.04855
21.1881	4.006	1.8621	5.4913	39.0481	15.2116	1.6391	1.0518	4.1618	8.0716	8.2856	5.0947	2.6103	1.9276	3.2911	2.3772	0.9344	3.3043	1.0418	1.2466	1.2153	1.4494	1.593	1.5175	4.393	3.0122	4.0189	2.3183	1.4495	2.9879	9.8033	15.9316	12.1866	16.0461	7.8377		1	5.77698

## Sheet: Image31
X0	Y0	Y1	Y2	Y3	Y4	Y5	Y6	Y7	Y8	Y9	Y10	Y11	Y12	Y13	Y14	Y15	Y16	Y17	Y18	Y19	Y20	Y21	Y22	Y23	Y24	Y25		Ap-basal	Avg intensity
0	28.976	22.779	29.982	16.89	20.89	20.623	32.156	17.611	40.532	40.354	28.493	33.646	34.564	26.3262	20.7759	21.9754	31.066	42.1434	26.3261	32.3594	45.536	60.947	49.404	54.723	42.496	74.063		0	34.4476
0.119	24.486	32.245	33.756	20.706	22.307	23.576	36.488	19.637	40.983	46.108	30.394	26.724	43.778	24.4502	22.3211	20.5878	27.512	37.1441	29.3894	34.1133	45.158	59.461	53.648	52.443	51.52	63.908		0.00653405	35.494
0.2381	31.253	32.216	34.301	19.401	24.649	32.165	37.354	19.495	41.448	58.02	38.353	35.794	53.681	24.2395	29.3022	19.5433	31.09	43.3783	27.8346	34.5919	40.578	59.42	49.868	52.858	54.644	61.715		0.0130736	37.969
0.3571	28.03	29.562	41.856	18.434	25.553	36.841	35.66	19.017	41.499	71.081	44.755	40.796	56.261	28.2246	26.4876	25.4658	31.108	41.6202	34.5089	35.7104	42.779	50.626	45.414	47.131	55.783	57.914		0.0196076	38.9276
0.4761	30.626	31.963	46.007	19.581	33.589	40.504	41.21	24.172	47.178	76.273	50.735	47.046	56.634	29.5022	26.4377	27.4712	30.313	40.6617	27.0841	41.8335	51.728	45.925	48.506	44.141	58.621	61.898		0.0261417	41.5246
0.5952	29.982	41.574	54.084	22.271	38.243	44.104	49.614	30.948	50.981	89.83	56.408	49.31	58.008	26.8496	33.5933	36.1194	22.798	47.5763	33.9016	41.942	58.231	51.664	51.808	47.896	58.616	62.157		0.0326812	45.7119
0.7142	30.891	42.65	64.938	27.02	40.519	45.673	59.271	36.445	50.977	102.325	65.906	51.549	52.439	34.8942	42.421	39.4644	23.803	43.7286	43.0947	48.2914	59.233	57.734	61.149	52.127	59.633	61.266		0.0392153	49.9016
0.8332	38.592	49.01	77.91	30.302	65.472	53.537	49.762	51.19	62.932	121.459	59.482	57.07	46.297	40.9243	45.4712	42.34	28.654	43.5044	46.4177	52.1414	65.848	59.674	54.021	51.812	55.966	52.307		0.0457493	53.9268
0.9523	49.38	56.6	96.313	42.994	89.747	57.96	45.843	61.724	65.893	124.796	63.035	66.023	40.943	43.0082	47.3666	47.4648	26.592	48.721	56.0972	45.2636	81.941	62.768	53.859	52.108	50.015	63.362		0.0522888	59.2237
1.0713	57.816	79.876	107.534	57.565	129.749	64.83	58.549	77.276	75.277	135.053	69.828	72.012	42.629	53.9432	49.1839	52.9578	30.003	55.1459	61.4499	46.6955	81.515	68.892	54.054	56.046	54.729	73.203		0.0588229	67.9159
1.1903	61.217	98.262	120.542	69.818	169.044	63.544	66.544	99.365	89.52	142.852	67.028	77.049	39.845	58.1122	49.3256	58.7434	27.932	59.0228	72.526	53.44	91.186	69.203	54.042	55.207	58.913	81.309		0.0653569	75.1382
1.3094	57.377	117.471	139.009	79.22	176.169	71.742	69.603	121.241	83.802	151.69	72.098	90.361	42.75	53.9627	50.808	56.1352	29.099	62.2457	91.4659	57.3614	113.169	69.152	62.357	58.546	56.413	96.178		0.0718965	81.901
1.4284	65.489	129.015	159.714	89.406	164.402	71.476	69.073	148.308	105.972	142.02	76.211	96.894	41.414	56.4996	58.5954	49.6964	30.561	66.1539	96.6815	62.4926	123.83	70.753	68.773	68.571	61.2	113.637		0.0784305	87.9553
1.5474	80.466	135.178	166.584	84.503	145.934	65.113	66.308	166.635	111.223	152.566	93.833	104.437	35.995	56.414	68.4617	51.0839	33.614	75.5302	92.4836	66.369	123.682	71.051	73.414	62.893	62.934	123.317		0.0849646	91.1547
1.6665	82.676	138.259	160.945	72.694	135.632	59.474	67.541	164.426	117.942	139.285	93.582	105.053	43.902	62.6945	77.0018	54.7651	33.061	74.8402	88.4078	75.41	116.191	65.607	71.576	67.945	68.053	126.032		0.0915041	90.8844
1.7855	95.297	146.146	162.921	66.8	139.657	63.347	87.362	158.348	130.996	119.412	104.667	120.729	46.282	61.5208	81.2832	52.697	43.936	78.8112	88.8717	83.9443	113.515	69.585	80.433	75.513	89.034	132.197		0.0980381	95.8964
1.9046	103.275	145.724	151.987	68.887	129.343	58.849	91.151	146.541	149.056	109.203	117.92	119.53	49.158	66.9036	93.3257	50.8949	53.688	85.1788	82.8063	83.7183	115.757	68.987	81.113	69.017	97.461	133.867		0.104578	97.0516
2.0236	105.113	130.414	141.245	81.883	125.922	55.525	95.72	135.707	163.26	115.891	122.206	134.779	51.968	68.6164	88.0602	57.9755	62.628	97.351	95.6576	98.8621	121.241	68.146	79.445	66.268	111.636	147.005		0.111112	100.866
2.1426	107.87	127.342	141.729	94.261	124.544	61.335	105.698	136.54	151.567	125.907	117.429	117.156	57.01	66.0018	100.174	70.009	87.782	108.211	98.1588	91.6219	107.514	68.387	74.26	71.453	122.335	146.03		0.117646	103.089
2.2617	110.171	120.88	143.19	105.049	121.974	62.384	124.041	123.877	142.27	123.303	131.542	110.186	52.505	74.9949	105.056	70.4759	93.483	103.07	89.3644	80.5888	109.364	69.829	78.193	83.922	133.249	129.557		0.124185	103.558
2.3807	112.814	109.551	138.164	108.936	116.335	58.126	139.647	118.11	143.553	113.919	128.606	130.991	67.49	76.148	100.735	72.2858	100.749	86.1481	83.2965	92.7279	99.998	78.397	77.397	86.034	141.732	131.459		0.130719	104.36
2.4997	114.821	102.785	136.94	106.946	107.003	67.283	149.422	101.771	145.199	114.939	127.568	126.93	75.704	90.5401	104.357	78.9765	104.158	79.7662	72.2852	89.8184	89.255	97.269	82.539	91.608	142.004	124.818		0.137253	104.796
2.6188	122.793	100.819	129.928	112.96	95.874	75.827	159.164	106.024	152.868	99.107	125.976	120.844	70.313	90.1251	92.4943	75.7989	109.673	83.8914	74.4088	94.7655	84.016	97.396	87.353	95.682	123.741	125.436		0.143793	104.126
2.7378	129.678	100.323	120.611	114.409	101.233	78.312	158.508	99.512	141.535	95.232	123.42	124.074	76.408	103.144	101.099	78.9438	115.616	83.6306	77.6026	93.2873	85.075	98.91	94.885	94.377	113.436	127.131		0.150327	105.015
2.8568	134.281	102.053	144.952	106.869	103.341	79.53	172.933	89.004	124.718	100.494	108.04	123.379	83.829	104.241	88.0016	77.6506	118.957	76.3556	71.2142	98.448	77.796	94.29	87.412	108.692	106.488	120.927		0.156861	103.996
2.9759	139.823	97.706	142.891	115.399	97.639	78.776	180.098	84.668	121.599	102.832	113.906	117.952	75.789	100.822	80.5313	73.8878	125.154	72.3926	64.6255	84.9063	86.382	96.555	79.322	122.175	115.36	118.928		0.163401	103.466
3.0949	145.529	110.828	143.498	122.499	105.121	85.328	167.156	82.325	116.542	103.353	110.451	122.261	92.558	96.4851	87.0542	74.4463	119.782	74.6447	66.5799	77.6962	81.868	86.686	77.267	126.031	98.836	116.395		0.169935	103.508
3.2139	139.108	96.671	142.62	133.928	103.332	90.118	173.067	97.827	102.436	112.667	108.558	122.515	92.85	103.33	82.7815	80.901	116.393	71.8546	71.6391	77.5013	91.561	84.029	85.222	127.975	104.522	116.565		0.176469	104.999
3.333	131.711	98.177	142.814	136.719	96.224	94.499	164.943	98.701	92.384	115.653	118.52	109.687	93.11	103.21	80.6543	72.4076	112.31	73.2603	74.207	81.0646	88.783	87.636	88.503	131.403	105.096	111.565		0.183008	103.971
3.452	138.618	95.774	143.944	142.245	89.572	98.927	144.94	95.599	92.026	133.703	125.743	105.287	101.176	99.5544	97.0044	76.405	114.42	75.9685	77.0419	87.9411	83.507	96.887	95.03	137.419	106.306	108.028		0.189542	106.272
3.571	127.465	100.769	145.325	139.322	85.558	97.697	125.52	94.087	98.364	136.622	126.86	100.396	111.509	103.1	90.9388	77.2288	120.29	71.6196	75.3949	85.4119	77.799	100.625	94.592	128.972	97.186	105.078		0.196076	104.528
3.6901	118.651	104.887	137.216	146.161	80.572	106.594	117.994	85.516	101.897	138.761	129.931	88.208	107.786	100.724	84.2365	74.1065	110.477	74.6838	76.992	90.476	83.814	103.314	93.837	116.575	93.411	107.739		0.202616	102.868
3.8091	110.283	99.287	139.475	135.641	86.827	121.628	104.976	83.924	93.163	138.832	121.38	94.541	117.644	104.67	84.6748	78.733	108.934	69.3587	87.303	83.4187	89.384	108.16	107.164	114.687	103.044	107.591		0.20915	103.643
3.9281	100.147	102.837	134.276	133.244	84.639	130.78	103.203	83.856	96.485	141.151	130.158	82.2	118.926	96.2011	88.7001	69.8455	103.972	70.1448	76.9732	89.5643	96.593	97.269	103.869	101.556	94.948	108.663		0.215684	101.546
4.0472	98.84	110.506	130.375	139.203	80.841	140.378	105.662	82.65	91.128	139.894	134.033	88.619	129.362	86.6668	76.1563	78.1915	98.756	68.9161	69.4368	98.5062	96.54	99.192	92.617	100.468	88.484	109.093		0.222223	101.327
4.1662	105.664	103.985	129.609	144.034	91.71	144.402	98.339	92.986	87.108	132.366	121.707	93.715	129.782	83.2219	73.0935	76.8167	96.611	76.8861	68.5372	93.1514	88.713	97.427	94.325	103.26	88.509	98.829		0.228757	100.569
4.2852	105.115	114.913	130.556	146.793	96.365	149.433	101.541	98.339	93.221	135.706	114.354	86.998	119.204	87.9113	76.1837	80.5985	96.035	75.1325	74.429	92.5793	96.294	90.092	96.027	105.451	82.964	95.393		0.235292	101.601
4.4043	99.266	103.161	127.878	137.698	96.221	156.541	99.429	93.888	89.255	135.335	111.656	88.91	127.01	90.4854	77.628	76.4994	87.81	77.8586	70.9188	91.7909	95.121	95.247	96.35	105.817	84.799	97.655		0.241831	100.547
4.5233	102.428	99.106	120.898	149.586	96.804	172.129	95.642	102.801	87.907	132.413	110.427	93.139	116.358	87.2049	74.1103	82.0982	91.477	72.9661	70.4317	89.5967	93.389	108.967	93.371	112.342	71.968	94.871		0.248365	100.863
4.6423	111.128	116.759	111.034	146.919	103.507	162.256	98.824	100.631	94.142	128.542	117.785	90.494	118.6	92.9475	76.3175	83.5994	75.59	76.1246	73.3528	89.6645	93.109	111.468	94.571	104.295	78.77	90.223		0.254899	101.564
4.7614	112.01	108	113.622	145.998	100.907	160.065	86.326	102.571	100.576	128.078	112.585	85.668	118.358	88.0272	76.393	83.975	71.406	84.6848	72.679	78.6774	86.712	110.579	97.506	98.738	76.445	80.151		0.261439	99.2591
4.8804	100.669	103.244	108.717	150.521	102.758	173.067	91.122	111.493	101.734	121.32	104.501	86.356	132.252	91.4585	77.3555	85.5629	75.617	72.2166	67.7213	80.5009	89.08	117.619	91.924	101.907	74.03	78.599		0.267973	99.6671
4.9995	92.013	103.957	102.182	150.02	102.665	168.053	95.58	105.585	93.484	117.42	96.621	88.701	137.152	99.1077	79.6957	90.0251	89.31	72.063	66.536	80.2807	82.592	121.001	98.621	102.756	74.19	70.459		0.274512	99.2335
5.1185	93.84	107.862	108.554	151.276	105.698	163.474	99.353	101.194	94.197	113.289	106.59	94.525	114.805	98.0698	76.3131	87.1633	84.571	76.8496	81.7408	72.633	82.442	128.435	91.308	106.639	74.848	74.072		0.281046	99.6054
5.2375	99.23	102.873	98.878	137.928	115.075	153.296	87.702	102.155	98.699	111.042	111.657	83.85	116.406	97.0616	77.292	83.3291	88.984	65.4091	79.1964	79.5439	83.781	129.241	87.998	95.793	75.889	72.985		0.28758	97.5113
5.3566	103.375	101.015	99.342	141.399	115.105	144.362	91.534	97.707	113.265	108.747	103.599	81.749	114.559	90.1217	78.9639	80.3701	90.649	68.3145	78.7303	81.8566	84.779	124.308	98.867	88.395	73.77	71.965		0.29412	97.1865
5.4756	101.621	96.412	99.724	136.777	106.576	132.424	103.62	100.318	119.842	95.746	112.52	82.015	110.578	96.8034	73.0373	83.5524	95.763	70.9485	69.5645	76.0036	86.804	116.024	79.634	86.928	79.967	75.172		0.300654	95.7067
5.5946	93.802	89.392	104.995	129.996	103.537	129.892	101.702	107.779	110.784	98.054	101.629	74.754	114.467	83.465	67.9913	74.3865	95.532	65.8501	66.4285	80.7422	92.082	116.716	85.611	75.304	78.774	70.819		0.307188	92.8648
5.7137	85.668	79.971	99.422	119.418	97.182	116.576	101.294	101.61	123.355	93.205	98.472	65.1	113.858	91.2408	70.7486	77.6859	86.013	61.8776	77.7738	69.1196	82.154	116.298	86.723	73.785	74.946	71.566		0.313728	89.8101
5.8327	93.44	95.112	93.799	114.639	100.021	103.161	99.943	98.689	128.148	95.709	99.239	67.977	98.355	91.4383	77.0925	73.5879	83.312	64.8498	69.8927	68.4468	87.57	118.085	94.156	72.178	82.63	68.967		0.320262	90.0168
5.9517	97.544	88.339	88.646	105.204	114.019	103.245	102.833	94.234	117.907	86.541	93.904	78.616	99.038	92.6985	70.3075	80.3559	86.802	67.7522	65.5976	68.8277	83.033	108.175	91.822	78.431	74.598	73.791		0.326796	88.9331
6.0708	92.907	84.734	93.617	104.931	102.576	100.165	98.68	90.907	114.539	94.685	89.765	70.719	101.643	104.389	73.0305	70.9042	79.072	76.2473	69.8544	70.1078	70.966	97.264	81.133	70.67	80.922	65.608		0.333335	86.5399
6.1898	95.964	83.846	79.685	110.063	105.657	100.371	92.768	93.426	122.133	95.033	84.448	71.26	99.674	98.1815	71.2372	68.2059	71.004	75.375	61.3794	69.5158	72.147	90.248	82.715	70.569	72.365	66.146		0.339869	84.7468
6.3088	96.204	91.812	87.361	115.834	99.386	96.245	94.428	96.882	127.33	90.782	89.219	75.605	100.844	100.102	67.5443	70.8125	82.849	76.1756	58.9123	60.9287	73.766	80.73	88.386	84.571	81.143	77.629		0.346403	87.1339
6.4279	96.935	98.353	87.436	108.241	103.277	92.171	103.321	91.742	125.165	78.576	91.642	67.137	86.326	102.876	74.7658	68.5369	79.276	82.7701	60.6571	59.3772	78.856	68.157	81.597	88.343	68.853	79.676		0.352943	85.5409
6.5469	94.725	98.921	89.464	101.076	110.494	85.707	110.346	91.543	116.482	77.741	96.357	73.179	90.692	95.6987	71.78	70.5115	74.709	82.2811	54.4969	62.4929	82.841	69.243	81.213	75.707	70.256	76.388		0.359477	84.7825
6.6659	87.821	91.226	86.542	97.255	110.8	92.89	101.563	85.287	114.168	73.462	89.696	68.226	78.415	92.9541	65.6511	65.6224	72.793	79.1625	54.6115	67.4299	90.014	76.329	78.026	75.002	72.045	76.11		0.366011	82.427
6.785	87.862	88.66	83.777	99.994	109.611	89.2	99.284	83.291	100.43	82.304	76.819	66.215	79.677	98.7789	67.8384	62.4839	65.946	78.4444	59.0969	64.1206	80.418	67.784	78.461	72.002	69.72	78.696		0.37255	80.4198
6.904	85.788	75.57	96.461	93.237	97.59	89.994	101.582	80.264	93.915	76.069	71.24	69.405	75.022	96.254	65.9054	67.8928	76.784	81.3101	63.3421	67.391	83.475	63.385	86.675	86.894	74.334	74.824		0.379084	80.5617
7.023	89.205	82.568	95.456	88.165	91.778	99.113	106.121	83.545	95.522	73.637	67.789	74.483	80.206	98.8817	66.4101	65.8554	78.168	69.6701	67.0059	71.9027	74.61	63.399	72.712	83.607	81.236	82.652		0.385619	80.9115
7.1421	77.542	81.225	85.009	92.536	98.05	103.484	104.081	74.431	89.869	69.847	62.514	72.699	77.646	90.9803	70.0366	70.2636	79.076	64.8643	51.1475	60.3292	76.338	66.343	68.538	89.49	86.489	83.321		0.392158	78.6981
7.2611	78.724	76.319	88.319	82.141	92.549	106.463	91.159	80.495	86.22	71.767	68.475	72.602	63.855	82.8088	77.2258	75.2528	87.884	76.7915	49.9487	64.0069	69.53	61.063	62.185	82.556	89.906	80.095		0.398692	77.6285
7.3801	86.167	69.505	87.044	85.469	89.259	95.178	89.87	76.894	78.284	72.586	62.74	76.602	60.212	83.4874	74.675	71.0916	81.105	73.8197	51.9371	64.5532	68.942	65.237	70	81.206	78.721	79.44		0.405226	75.924
7.4992	90.427	69.566	82.475	95.109	106.893	97.129	87.684	75.958	70.903	74.687	56.828	74.207	58.392	75.6429	79.5745	70.854	75.165	73.0763	48.3038	62.4076	74.744	66.902	68.125	76.476	88.204	79.113		0.411766	76.1095
7.6182	79.346	75.859	81.191	85.705	94.999	106.66	89.873	80.085	60.034	75.085	52.407	67.356	60.388	80.1938	70.4023	69.3754	80.831	68.4841	42.4671	54.74	62.766	65.56	70.18	72.632	92.843	78.953		0.4183	73.7852
7.7372	78.81	70.506	71.286	85.625	89.917	95.317	82.783	72.108	66.749	78.923	59.253	68.812	68.901	77.0827	69.5501	73.9956	71.521	72.083	46.1278	59.2731	67.816	69.542	76.166	74.856	87.333	72.734		0.424834	73.3489
7.8563	85.496	75.265	64.912	89.541	87.842	98.496	92.942	80.817	54.488	75.79	62.48	72.416	73.71	69.8468	71.7893	72.6952	72.464	75.385	44.7149	56.2911	61.365	66.135	68.205	69.225	76.24	68.23		0.431373	72.5685
7.9753	83.505	69.845	65.427	89.205	84.036	89.363	87.596	64.871	48.202	71.297	65.947	70.883	62.102	74.9106	72.4601	77.4258	63.367	75.1522	40.8114	57.8681	66.003	66.024	67.833	65.228	70.262	59.099		0.437907	69.5663
8.0943	88.993	57.986	63.01	89.183	79.306	88.103	87.683	63.558	45.623	72.105	60.088	73.308	60.128	76.3365	69.0936	81.8657	65.347	75.4953	39.4824	53.998	61.871	61.244	64.204	54.71	66.834	65.678		0.444441	67.8936
8.2134	102.4	58.431	53.038	91.799	77.954	93.009	84.984	58.762	36.133	66.632	54.112	63.922	66.011	79.6148	68.6657	76.1964	67.351	64.8102	34.0041	53.7609	57.398	61.655	67.319	62.902	64.149	68.547		0.450981	66.6754
8.3324	100.652	52.521	48.667	87.186	82.154	71.124	88.681	51.382	34.688	68.684	52.477	55.454	66.153	62.3066	71.1279	71.3043	61.219	61.8509	33.3735	52.2085	55.188	55.367	55.057	60.734	70.325	62.278		0.457515	62.7755
8.4515	103.587	54.3	44.014	83.722	75.248	72.74	83.188	48	35.14	69.899	51.407	58.162	69.795	61.3253	71.1703	65.0699	64.441	64.9287	28.4889	50.6748	57.081	67.177	57.655	55.372	65.941	60.93		0.464055	62.2868
8.5705	101.424	50.551	40.932	84.01	78.297	71.044	88.653	54.489	37.524	71.572	54.828	49.951	70.44	64.6204	68.3722	66.4692	68.665	57.7613	24.6155	53.0921	49.206	56.138	66.392	51.931	63.075	57.978		0.470589	61.6166
8.6895	108.836	48.856	44.852	86.403	88.611	67.726	87.961	46.95	36.449	68.798	50.569	48.005	67.487	60.8801	71.0855	66.5788	73.698	56.9869	23.9522	45.7271	55.145	59.853	60.856	64.411	65.355	60.36		0.477123	62.1689
8.8086	100.283	47.558	45.145	79.957	86.389	73	91.863	37.435	32.027	73.117	50.112	50.153	71.682	67.4539	70.3709	62.7282	72.319	51.599	26.619	51.3854	57.665	67.544	57.446	63.335	62.208	61.416		0.483662	61.9542
8.9276	95.412	47.484	37.027	83.756	84.971	72.193	87.956	39.522	31.432	72.488	48.734	46.071	76.565	67.3843	66.2825	64.3649	78.199	46.3866	25.629	50.0793	58.033	68.372	55.633	58.529	73.042	64.14		0.490196	61.5264
9.0466	96.293	41.711	35.772	77.354	85.758	76.51	83.876	38.033	31.526	66.903	45.134	43.936	65.342	66.528	60.0069	70.0625	78.794	43.2505	30.0225	46.3146	58.356	71.99	51.46	58.144	70.208	60.972		0.49673	59.7791
9.1657	94.924	43.523	32.153	74.792	86.196	70.42	82.859	40.936	31.096	66.11	45.804	42.785	62.99	70.2864	68.2482	58.9973	75.519	44.9883	28.3686	44.1716	61.922	59.304	48.931	49.941	68.284	60.999		0.50327	58.2519
9.2847	99.036	38.708	31.685	67.816	79.819	69.816	81.058	37.941	29.822	59.93	48.19	40.722	66.504	67.639	62.0401	55.6107	77.031	42.6821	22.9705	46.1389	62.441	60.666	55.139	59.732	61.514	65.127		0.509804	57.2992
9.4037	95.193	33.883	36.038	76.877	83.75	64.24	82.773	36.245	32.944	68.556	41.476	35.701	73.383	72.9909	56.753	54.4166	65.138	42.4413	24.3343	41.224	60.301	66.564	51.863	60.72	71.199	65.612		0.516338	57.4852
9.5228	87.634	38.282	33.06	72.276	82.227	67.121	84.566	32.846	23.989	67.727	44.284	35.306	72.094	73.5378	53.5564	50.7477	60.229	40.6616	26.4151	39.462	55.284	55.675	55.53	62.084	67.942	64.677		0.522877	55.6621
9.6418	86.365	35.349	27.817	86.66	86.621	73.663	92.216	33.535	26.505	63.639	40.549	32.727	73.504	75.5403	63.4447	46.56	61.31	41.7184	22.9934	36.1425	54.396	59.12	48.762	59.477	72.9	63.944		0.529411	56.3638
9.7608	77.765	31.019	32.168	75.226	93.26	71.248	91.542	30.22	26.111	55.144	45.779	30.941	65.231	69.4363	55.1687	48.7641	58.092	41.4095	22.6678	38.7443	49.425	59.95	48.485	69.554	67.215	62.866		0.535945	54.5166
9.8799	74.726	28.215	29.954	70.159	97.046	75.126	95.124	29.201	23.745	60.05	41.58	33.182	72.323	67.5579	52.0788	44.2168	59.023	38.8904	24.5263	33.4025	51.999	63.424	48.432	67.877	67.864	63.127		0.542485	54.3404
9.9989	76.977	33.182	32.361	72.322	90.348	82.23	82.441	31.793	26.355	60.789	49.814	33.709	79.365	67.5779	61.9418	43.5685	53.974	42.3986	21.1451	29.8192	52.992	64.422	50.651	67.672	66.127	68.097		0.549019	55.4643
10.1179	77.942	34.263	29.307	70.936	93.268	80.831	87.533	34.597	23.566	51.282	47.817	38.307	77.101	72.8509	55.6228	47.244	54.889	32.8203	21.7282	29.8249	48.159	60.468	50.63	65.015	71.637	69.807		0.555553	54.9018
10.237	75.827	31.405	26.247	69.027	95.916	78.459	77.893	28.714	25.795	53.677	49.164	31.913	71.305	68.0982	54.5467	48.3882	53.018	33.3272	18.772	31.1773	44.966	63.056	44.459	54.616	65.107	72.234		0.562093	52.5811
10.356	76.164	27.503	21.686	74.77	89.696	76.508	87.895	26.886	24.796	49.926	48.347	29.17	65.59	66.0172	55.741	52.7128	58.629	35.2563	17.0115	27.9386	43.337	57.078	48.117	49.59	60.698	68.745		0.568627	51.5311
10.475	83.261	29.103	24.608	72.505	85.2	84.188	84.063	30.241	26.659	51.279	45.669	29.14	71.966	68.7172	54.3826	55.6224	54.774	36.8006	17.1445	25.4459	39.439	53.367	58.125	50.164	67.959	67.914		0.575161	52.6053
10.5941	81.343	31.531	25.827	71.105	86.223	71.037	79.927	31.192	21.839	47.926	44.524	28.61	80.962	76.2956	51.9602	47.8459	51.476	32.0442	14.9299	28.5479	46.904	58.112	51.527	53.112	72.465	65.474		0.5817	52.0285
10.7131	86.3	29.39	24.102	71.555	92.549	73.95	77.812	28.425	20.109	52.186	49.683	30.227	71.804	68.6002	47.9885	45.9852	55.364	33.5099	15.5346	24.6607	47.479	58.097	56.489	52.099	67.323	64.602		0.588234	51.7625
10.8321	80.701	30.03	23.243	74.197	86.451	80.314	68.996	26.342	14.475	46.755	49.16	34.558	57.932	61.0352	54.0553	40.8026	49.967	37.8515	19.0146	27.52	48.173	55.53	53.165	52.156	69.841	66.792		0.594768	50.3484
10.9512	79.593	24.984	22.927	75.384	85.001	85.073	74.606	25.203	17.393	53.147	41.787	33.075	62.715	73.1041	54.0423	41.4595	56.784	34.682	14.6274	25.3514	46.594	58.582	55.443	48.97	67.468	55.626		0.601308	50.5239
11.0702	72.563	28.9	21.605	75.081	90.941	73.423	77.006	24.363	24.048	48.301	45.161	32.147	54.898	75.6368	52.1754	44.6059	56.852	35.1566	15.4351	22.3221	42.52	54.559	47.587	50.817	72.617	54.703		0.607842	49.7471
11.1892	64.52	26.831	20.833	67.221	83.617	77.087	79.253	24.507	20.204	50.942	58.938	30.239	59.791	68.5723	49.9654	46.1995	56.998	32.1969	15.2097	20.1224	47.045	48.926	46.569	45.211	68.657	48.545		0.614376	48.3923
11.3083	72.684	26.668	22.697	71.474	74.922	75.973	76.604	26.226	18.096	51.776	50.429	28.884	65.348	70.5352	48.4452	49.1721	62.058	29.7852	13.0707	24.2384	54.681	47.596	43.637	48.458	57.342	46.213		0.620916	48.3466
11.4273	79.879	28.532	23.764	69.928	77.544	82.172	72.094	28.586	19.59	57.756	56.099	28.626	56.219	73.9287	53.6867	42.3177	55.387	30.1538	16.8738	22.4441	51.036	49.465	45.851	46.779	57.32	49.254		0.62745	49.0495
11.5463	78.913	28.902	23.831	61.577	95.342	71.819	68.316	27.823	18.59	59.662	59.666	33.737	56.478	65.738	47.4326	44.9568	58.118	30.7957	14.0546	19.1024	51.879	50.448	44.705	55.872	59.532	50.78		0.633984	49.1565
11.6654	68.311	25.612	23.514	65.155	87.847	76.299	60.713	30.786	18.864	67.766	53.926	34.451	55.97	60.6317	51.2011	46.2931	57.142	30.1428	13.6558	19.5927	55.372	42.526	44.327	54.257	52.203	41.131		0.640523	47.6034
11.7844	62.98	23.63	22.971	57.319	78.359	71.687	71.15	30.143	20.329	53.764	61.22	35.142	64.882	60.5421	45.7211	42.834	67.754	29.8698	17.9101	20.3289	50.959	46.322	38.87	52.547	50.69	36.284		0.647057	46.7003
11.9035	62.555	30.895	22.636	61.677	79.905	78.566	79.013	28.785	15.955	60.419	54.372	30.23	57.157	63.151	45.7915	43.2473	64.124	32.8765	15.8868	19.4177	48.219	47.121	43.606	55.049	47.977	33.954		0.653597	47.0225
12.0225	66.625	30.629	23.863	60.181	86.945	66.48	77.273	28.171	17.153	66.689	54.142	37.45	61.097	59.1421	49.9924	40.9098	64.239	28.4526	14.7776	20.4758	52.026	39.372	50.513	49.509	46.204	37.557		0.660131	47.3026
12.1415	55.046	28.342	21.333	56.311	84.086	71.193	76.902	30.996	17.719	63.111	55.975	32.394	49.795	62.5884	47.9039	40.3603	54.365	28.7543	14.2328	20.4634	44.495	42.6	52.64	47.419	50.365	37.095		0.666665	45.634
12.2606	62.008	27.443	17.837	55.646	79.581	76.996	73.703	28.882	15.713	64.127	53.78	34.618	61.079	70.6173	55.3832	44.4535	57.899	32.6693	14.5619	23.2314	39.986	41.183	52.422	49.766	45.99	32.928		0.673204	46.6348
12.3796	65.948	24.516	18.065	57.104	84.603	75.13	75.147	21.447	16.08	52.593	57.528	28.521	57.809	62.2061	59.3482	42.855	67.39	29.5707	13.4645	22.8298	42.313	43.335	59.028	40.307	42.7	27.146		0.679738	45.6532
12.4986	61.52	30.628	21.916	54.89	77.461	71.368	78.469	27.744	19.689	50.523	55.844	29.639	55.979	57.9498	57.4308	52.679	61.927	33.1726	13.2136	21.1155	38.489	46.048	58.097	35.912	42.933	25.409		0.686272	45.3864
12.6177	67.132	27.305	25.122	54.815	79.132	71.556	79.564	26.187	18.492	53.924	60.402	32.416	58.708	57.024	50.2558	48.0878	61.634	34.2468	13.3891	20.4523	40.582	38.365	53.485	46.015	40.454	17.606		0.692812	45.2443
12.7367	64.638	30.748	20.542	59.528	81.369	70.553	86.007	32.352	20.359	49.029	51.573	34.906	61.316	52.4367	51.7359	46.1419	58.429	34.2234	9.1326	18.6622	40.187	42.084	55.442	39.934	33.073	11.619		0.699346	44.4623
12.8557	59.41	24.867	21.49	55.929	80.328	65.996	84.26	28.474	20.844	46.906	59.23	36.23	59.913	60.6035	48.2925	54.3875	65.475	29.8843	9.4718	17.1054	36.628	41.027	54.371	36.238	35.863	8.54		0.70588	43.914
12.9748	71.049	28.785	22.62	50.936	82.423	67.542	85.336	26.71	19.252	47.29	56.66	33.671	62.74	59.4487	50.3432	40.1825	56.037	29.2489	11.4594	17.3032	36.595	42.72	51.118	32.888	32.809	7.706		0.71242	43.1874
13.0938	83.433	27.782	22.802	57.942	84.413	71.299	83.147	24.9	21.083	53.555	55.625	29.248	64.767	63.4495	54.6201	41.0797	48.167	33.6925	12.7954	22.0551	29.929	38.631	42.472	30.258	27.646	5.087		0.718954	43.4569
13.2128	79.364	25.458	23.244	55.447	80.556	67.518	88.706	28.916	19.488	50.456	59.874	37.889	56.095	55.8896	50.1695	44.1472	57.047	32.8083	16.3658	22.8159	30.121	35.158	47.963	35.346	30.167	2.938		0.725488	43.6134
13.3319	69.625	30.334	21.759	53.556	74.431	70.513	78.518	25.054	18.287	60.721	66.796	35.618	58.345	49.6344	49.2233	48.9265	51.618	27.9061	15.9774	18.0811	33.91	33.245	44.786	30.049	28.213	3.781		0.732027	42.2657
13.4509	65.107	28.133	23.075	60.658	73.012	61.525	70.979	25.091	17.356	56.957	67.688	34.114	47.284	46.0626	51.6753	43.0019	52.195	28.3769	14.32	19.432	37.647	40.044	38.672	34.165	23.614	4.904		0.738561	40.965
13.5699	69.512	23.194	25.938	64.138	68.917	62.285	65.88	23.68	17.86	52.878	57.967	33.054	47.007	46.1743	56.3592	46.882	50.616	32.7441	16.015	18.0506	36.122	42.643	38.256	35.58	16.789	4.042		0.745095	40.484
13.689	64.128	23.995	29.421	63.773	66.382	60.289	76.843	27.742	20.8	62.574	65.39	36.264	49.343	48.3538	42.8557	47.0194	46.32	31.7174	13.7107	20.3404	38.346	33.174	29.321	30.613	17.476	5.277		0.751635	40.4411
13.808	66.54	27.975	27.415	66.29	65.616	64.269	71.776	33.246	20.553	58.992	67.968	33.487	47.116	50.1483	47.3365	46.6794	51.427	28.0539	10.59	20.8916	36.176	31.435	28.589	27.111	21.884	4.811		0.758169	40.6298
13.927	60.545	30.545	24.296	58.267	70.552	64.662	70.073	26.048	22.191	64.344	65.691	34.082	48.515	50.8337	48.3606	47.4693	48.88	30.6429	14.2084	21.065	35.548	32.966	25.539	25.528	18.874	4.394		0.764703	40.1585
14.0461	62.163	24.082	30.238	60.846	73.709	69.284	70.598	28.627	19.577	62.118	61.959	37.433	40.387	58.6079	46.4637	45.9985	51.942	28.5103	16.7529	23.4088	37.377	29.425	27.32	27.814	12.522	5.618		0.771243	40.4916
14.1651	59.457	27.623	34.075	58.668	68.564	68.846	73.697	27.582	21.598	61.663	66.37	35.128	50.38	46.5163	45.7043	45.6975	61.496	29.7644	19.6729	24.2796	37.881	33.102	29.112	26.403	7.923	4.866		0.777777	41.0027
14.2841	57.087	30.002	33.08	62.509	63.029	69.989	75.496	27.204	21.841	61.644	56.844	42.926	45.773	45.7046	41.7639	45.3881	58.986	30.6447	16.2301	19.5159	37.074	33.226	18.94	17.675	6.232	9.012		0.784311	39.5314
14.4032	62.078	28.294	31.073	67.068	64.742	77.694	74.298	29.365	19.532	54.252	54.856	42.598	41.532	45.4698	42.2189	49.8532	56.524	30.9675	16.5189	19.2881	37.07	33.006	22.904	22.709	7.844	8.833		0.79085	40.0226
14.5222	58.11	29.983	25.007	60.14	63.582	68.782	79.071	29.206	25.379	61.244	51.876	42.527	40.877	45.5616	45.8241	52.0904	49.186	35.4416	21.2128	23.2561	34.421	29.274	23.716	22.591	7.108	5.694		0.797384	39.66
14.6412	52.168	38.717	30.057	62.526	60.781	72.178	79.054	32.518	26.337	63.245	60.913	43.732	44.211	53.252	38.3848	57.7299	54.982	32.1045	17.5349	23.6866	33.494	29.966	23.142	19.287	5.135	6.684		0.803918	40.8392
14.7603	54.037	32.102	28.995	57.822	62.65	58.82	88.919	39.842	25.279	58.644	60.239	47.545	51.049	58.6919	39.9131	54.1665	59.743	35.1432	16.7031	20.5225	37.359	28.708	23.206	12.869	6.178	8.245		0.810458	41.0535
14.8793	48.623	29.96	31.307	61.032	61.627	65.899	75.749	34.103	26.307	60.747	57.053	48.069	50.077	50.1283	40.4403	54.1162	54.3	35.5943	14.6115	18.3621	28.983	33.336	19.897	11.364	6.699	7.339		0.816992	39.4509
14.9984	54.118	32.85	29.687	62.404	69.136	64.716	73.099	32.273	20.583	66.294	57.155	47.11	56.917	47.5328	35.6805	46.1593	51.981	31.0716	16.0107	18.0077	27.697	30.693	19.614	9.932	5.919	6.64		0.823531	38.9723
15.1174	46.692	31.641	27.946	59.231	65.312	54.372	78.935	30.804	25.321	61.29	55.666	44.045	60.76	49.5064	39.9801	50.8163	54.085	34.6404	14.4274	24.4065	28.695	29.91	20.907	11.105	3.61	7.125		0.830065	38.8934
15.2364	48.727	35.378	34.209	58.619	68.655	56.556	75.626	39.279	29.574	53.298	65.141	47.42	52.747	54.8143	38.8351	51.2857	58.627	34.4864	16.5529	25.1356	26.386	28.126	17.477	8.46	3.422	7.154		0.836599	39.8458
15.3555	52.492	31.665	35.646	55.542	76.9	54.861	71.731	37.883	30.114	58.067	69.166	54.73	54.211	56.3994	32.3225	54.6277	56.371	37.8212	16.5868	21.1983	28.874	26.52	12.759	9.512	6.602	7.577		0.843139	40.3915
15.4745	48.621	37.444	30.27	51.509	81.939	55.543	56.489	34.405	32.345	53.947	69.606	49.656	62.051	55.3864	41.4776	53.2267	41.681	38.9098	18.7517	21.6851	24.408	22.498	12.607	6.29	5.84	7.591		0.849673	39.0068
15.5935	51.808	41.861	29.78	49.482	73.307	57.103	58.874	35.205	25.735	48.967	61.23	52.745	57.783	55.5789	37.795	47.1042	46.928	37.4987	16.9467	23.3868	23.903	22.341	13.182	8.023	6.306	8.75		0.856207	38.1394
15.7126	48.243	34.962	32.415	54.437	83.706	54.596	56.357	37.871	33.289	43.679	58.462	48.025	56.773	58.674	35.6521	44.6265	47.088	33.6812	18.0119	20.4572	28.997	18.867	13.232	7.398	7.685	7.439		0.862747	37.8701
15.8316	44.423	36.297	40.535	60.891	78.647	52.86	54.002	39.233	32.305	47.966	52.021	41.679	54.525	51.893	35.4461	49.8006	50.361	33.1707	17.2332	20.3029	25.636	15.261	12.223	8.697	8.988	9.529		0.869281	37.4587
15.9506	46.557	43.602	47.252	52.93	72.266	48.482	62.643	41.693	31.438	37.145	49.701	42.724	49.169	53.9326	34.6093	43.1751	43.009	30.8924	18.4455	15.758	25.139	14.562	8.39	7.199	9.569	9.836		0.875815	36.1584
16.0697	51.197	44.867	42.968	46.595	72.927	56.814	64.611	43.714	39.734	37.683	54.274	44.678	48.952	50.249	34.2117	40.3187	40.511	26.5626	19.8078	18.6927	20.17	16.161	8.094	6.691	8.309	8.603		0.882354	36.4383
16.1887	48.554	32.499	37.273	52.469	67.539	53.844	54.671	42.1	51.355	44.526	48.895	33.773	40.702	48.2509	31.5453	38.869	41.283	27.8479	16.9017	24.7062	20.399	11.905	8.555	9.999	7.181	12.05		0.888888	34.9113
16.3077	52.692	37.97	45.407	53.921	67.157	51.317	69.269	38.469	50.338	36.51	43.548	40.719	42.738	43.2134	35.3334	37.6419	40.326	24.9433	16.7657	17.4342	21.074	13.803	7.895	8.3	5.157	8.631		0.895422	35.022
16.4268	47.131	34.748	42.325	53.965	71.908	48.335	60.618	42.046	44.32	39.849	41.123	37.884	40.791	45.3042	26.9542	37.558	40.253	29.6827	19.3195	15.1184	17.926	11.472	9.092	7.369	4.478	9.593		0.901962	33.814
16.5458	43.018	33.866	46.314	56.172	61.664	46.991	57.439	45.287	45.417	37.385	37.497	29.264	42.476	44.2636	24.9876	32.7578	37.085	31.3765	19.5475	17.6571	19.202	12.961	8.988	6.31	6.831	11.299		0.908496	32.9252
16.6648	46.764	30.283	42.479	54.844	52.702	42.79	66.313	43.758	43.444	35.021	38.634	30.116	46.251	42.2638	31.1216	36.0809	40.49	23.1522	18.6719	16.1566	17.395	17.288	8.015	7.12	10.088	12.656		0.91503	32.8422
16.7839	48.661	41.16	38.355	46.995	52.478	39.963	59.196	40.586	43.449	36.011	35.219	27.255	40.562	45.6064	27.4108	35.1488	33.242	18.7769	16.3703	16.1169	18.312	15.021	7.519	4.418	11.149	10.367		0.921569	31.1288
16.9029	47.505	34.606	37.873	47.509	56.685	44.941	63.58	46.236	44.035	32.962	29.759	30.953	36.318	45.9697	26.1836	38.3486	36.274	20.6963	16.6059	14.7416	19.103	9.103	6.176	5.728	10.784	9.21		0.928104	31.2264
17.0219	41.334	27.296	31.559	44.874	57.534	39.035	59.141	44.588	39.453	29.901	34.106	29.039	36.073	47.8895	29.6842	35.9852	36.614	22.91	15.7763	16.8871	14.435	9.129	7.557	5.097	7.391	6.376		0.934638	29.6025
17.141	42.05	21.021	29.466	42.466	53.44	29.789	53.533	36.08	36.127	28.384	27.535	26.649	36.096	41.4077	30.802	36.6527	39.302	23.8052	19.3894	12.4054	13.761	10.304	6.749	7.654	7.371	8.63		0.941177	27.7257
17.26	38.291	27.728	26.645	44.412	55.861	30.017	51.107	34.959	34.837	26.233	23.066	24.338	36.007	41.0251	23.9396	37.5044	35.4	21.9943	19.1743	12.6698	12.313	11.484	7.427	6.299	9.088	9.79		0.947711	26.985
17.379	28.589	24.183	24.831	39.041	60.792	26.887	42.644	36.34	28.543	24.257	21.231	21.294	30.815	37.8764	24.4486	33.3417	30.811	21.0285	17.8096	13.7391	11.368	7.823	6.367	8.246	9.104	11.144		0.954245	24.7136
17.4981	25.938	22.267	21.954	37.397	65.771	24.666	38.422	34.204	28.225	22.602	13.559	20.443	26.878	37.7707	27.3708	32.7359	30.743	17.0851	16.7681	14.2572	13.073	12.114	6.937	5.098	10.42	11.417		0.960785	23.7737
17.6171	26.909	20.206	21.95	33.688	61.078	23.939	39.3	33.86	21.466	20.433	17.432	18.689	29.769	29.9343	27.5334	26.5811	32.781	13.4647	18.3718	11.8996	13.214	8.738	8.45	6.81	9.014	9.04		0.967319	22.4827
17.7361	23.701	27.049	23.544	33.767	63.469	22.13	34.206	33.511	25.205	18.701	18.615	14.459	25.695	28.1558	21.605	33.639	27.606	13.6988	14.4037	13.6708	8.715	5.832	7.304	6.295	9.418	11.095		0.973853	21.7496
17.8552	24.197	25.486	20.306	29.743	52.052	19.547	29.636	23.568	21.57	14.964	15.897	14.192	21.89	23.6492	23.5666	31.8458	23.236	12.2816	13.3886	12.3571	8.722	10.681	9.581	7.075	9.097	10.722		0.980392	19.5866
17.9742	24.5	21.65	14.225	30.94	48.57	17.228	28.899	25.2	19.671	14.099	13.61	12.646	16.439	25.7137	20.4936	25.4558	22.928	13.5502	14.3365	13.7629	10.593	11.119	10.175	9.812	9.472	8.936		0.986926	18.6163
18.0932	26.145	23.328	20.717	27.16	45.306	16.87	28.136	27.867	21.483	13.74	16.825	12.394	17.279	22.3802	19.6066	28.2225	22.627	12.5671	14.0355	15.1034	14.162	6.819	9.86	7.902	8.16	9.978		0.99346	18.7951
18.2123	25.189	20.402	17.393	21.016	40.506	17.508	26.249	28.248	21.299	12.272	15.387	12.298	16.999	21.8324	19.1559	26.2046	24.213	14.6003	11.7833	8.0336	13.027	10.036	8.421	8.185	7.791	10.629		1	17.6415

## Sheet: Image30
X0	Y0	Y1	Y2	Y3	Y4	Y5	Y6	Y7	Y8	Y9	Y10	Y11	Y12	Y13	Y14	Y15	Y16	Y17	Y18	Y19	Y20	Y21	Y22	Y23	Y24	Y25		Ap-basal	Avg intensity
0	61.828	104.665	91.159	77.888	56.288	51.586	49.184	33.521	39.948	38.196	41.27	53.904	65.869	68.663	77.926	94.611	83.134	69.651	60.113	43.2992	67.1306	84.2429	72.229	70.361	39.919	75.0646		0	64.2942
0.119	61.128	113.417	88.133	81.77	49.942	47.808	50.743	35.816	42.235	38.721	58.546	59.087	64.72	77.138	85.763	100.4	87.192	85.687	65.398	53.7848	73.296	91.0879	77.609	68.742	45.991	92.8634		0.00917162	69.1161
0.2381	61.307	113.336	95.239	69.289	53.309	43.19	61.628	41.372	47.251	40.739	56.48	60.698	68.087	86.899	105.604	111.338	108.562	86.756	77.398	58.0346	78.9334	84.8751	86.866	75.803	41.869	91.3255		0.018351	73.3149
0.3571	65.56	112.95	104.319	75.168	56.564	51.7	67.656	46.129	49.216	41.897	65.833	59.649	76.6	106.768	115.737	125.655	115.163	91.722	83.613	70.6909	77.184	86.1537	95.883	76.675	50.182	101.335		0.0275226	79.6155
0.4761	62.221	107.904	106.391	76.682	60.846	54.355	73.347	43.475	56.743	52.276	74.584	67.549	80.396	119.392	119.253	143.59	116.649	99.393	88.869	71.8839	73.2621	91.3806	96.416	75.274	56.763	117.458		0.0366942	84.0905
0.5952	69.825	123.504	107.254	73.378	60.508	51.916	76.462	56.76	56.676	48.798	92.317	76.055	98.484	156.085	133.727	177.458	118.729	117.289	104.424	78.637	80.479	89.906	91.409	72.616	59.692	118.797		0.0458735	91.9687
0.7142	73.171	124.503	115.323	84.387	69.308	62.085	90.851	61.272	69.776	53.536	91.037	83.148	101.637	183.386	146.781	179.285	145.516	110.776	104.874	92.3727	70.5432	88.7219	101.483	80.952	67.822	115.655		0.0550452	98.777
0.8332	75.481	126.901	119.72	93.351	72.057	65.871	92.45	72.755	84.592	65.266	98.718	85.638	102.009	184.322	152.397	175.191	161.145	123.934	114.692	90.7835	82.5761	87.2557	99.588	74.359	74.773	122.282		0.0642168	103.773
0.9523	76.427	123.868	118.997	90.891	82.666	63.922	83.292	75.404	96.665	65.998	98.253	90.184	120.574	191.637	173.381	182.725	156.62	137.337	123.819	98.352	69.627	84.3577	92.633	83.137	74.525	112.107		0.0733961	106.438
1.0713	82.043	122.646	123.953	92.25	83.372	75.681	94.401	73.602	101.107	74.745	114.745	92.811	129.212	184.365	168.685	179.692	148.01	132.476	135.395	102.028	71.1968	86.8113	100.529	79.691	85.229	97.4034		0.0825677	108.926
1.1903	75.584	127.966	127.503	111.271	84.643	74.254	99.872	85.039	101.734	90.623	110.327	98.244	123.994	168.494	153.327	162.847	132.162	133.316	127.597	98.211	73.9572	91.424	90.441	96.566	88.346	89.7986		0.0917394	108.367
1.3094	95.517	131.482	121.621	103.424	83.057	71.485	102.923	87.306	116.154	103.019	103.056	100.057	113.661	152.574	140.807	138.947	113.932	136.819	129.09	88.2362	73.1403	82.158	87.383	101.347	80.761	78.9434		0.100919	105.265
1.4284	91.051	122.261	118.25	97.898	74.618	78.79	104.117	89.91	125.178	119.791	92.569	118.833	110.431	155.74	119.591	128.613	105.76	148.252	119.197	100.132	77.4638	87.5815	89.307	99.031	92.884	89.1213		0.11009	106.014
1.5474	92.31	125.403	125.118	101.697	87.433	85.662	101.59	88.123	126.592	124.298	91.483	117.641	115.092	155.771	107.473	124.79	101.146	153.634	122.659	97.7845	78.0733	96.3352	96.333	96.024	85.5	84.5339		0.119262	107.019
1.6665	105.661	115.974	116.155	99.372	89.36	99.508	105.194	90.701	124.011	137.809	80.796	117.992	105.697	138.176	108.695	120.603	103.203	153.466	124.595	105.762	83.1888	89.8332	98.164	99.163	91.583	86.091		0.128441	107.337
1.7855	102.33	116.981	115.551	88.778	91.378	105.394	107.06	89.032	134.084	141.176	80.415	107.7	101.973	115.386	102.376	119.39	94.281	138.218	125.053	101.912	89.767	94.0976	104.149	101.057	95.208	75.8978		0.137613	105.332
1.9046	108.549	114.362	115.636	92.558	105.84	122.016	100.312	89.088	130.787	135.595	86.424	113.033	101.23	112.54	100.875	121.645	87.665	129.658	130.933	94.9178	85.8849	90.7776	107.543	111.643	84.539	80.7461		0.146792	105.954
2.0236	100.322	113.015	106.404	87.725	110.293	132.855	93.465	89.045	120.262	131.032	79.796	108.054	99.876	106.999	103.266	133.953	86.626	131.72	122.207	91.5531	82.5952	99.1206	112.699	116.616	91.397	78.74		0.155964	104.986
2.1426	92.485	104.92	98.236	88.613	115.583	135.265	92.911	76.813	125.441	114.799	77.368	103.887	88.101	114.261	99.56	129.466	92.384	126.651	118.952	93.2596	92.2537	108.224	114.91	126.424	93.145	82.3637		0.165135	104.088
2.2617	88.274	91.076	90.33	91.843	112.213	142.586	87.193	81.023	131.959	113.526	81.832	108.233	77.949	120.555	101.786	132.959	103.513	111.073	122.609	80.2978	90.6125	118.56	133	132.136	99.619	89.2544		0.174315	105.154
2.3807	89.911	87.184	95.701	86.814	100.218	132.792	91.345	80.384	149.26	109.948	85.319	100.123	80.845	102.247	107.423	124.595	101.9	111.418	115.448	77.6195	84.3943	130.175	137.451	131.699	99.358	100.969		0.183486	104.405
2.4997	84.705	86.142	80.09	92.359	98.302	116.014	72.952	73.663	143.713	115.442	77.917	99.778	81.928	104.042	114.5	115.141	90.338	101.109	119.338	84.6068	83.4742	132.465	136.702	147.414	110.935	104.781		0.192658	102.61
2.6188	82.964	88.373	76.723	91.659	94.491	100.37	78.584	83.275	135.696	121.946	79.226	106.262	79.442	111.684	103.353	103.714	103.305	94.912	116.704	95.3393	86.5908	149.902	146.993	155.774	122.772	110.837		0.201837	104.65
2.7378	81.063	86.488	77.354	102.663	78.582	92.263	75.603	70.035	116.823	100	76.119	116.464	87.99	101.193	100.333	98.447	109.835	88.226	109.421	84.4766	85.6871	156.267	154.973	155.408	134.714	117.411		0.211009	102.225
2.8568	76.436	75.534	78.154	98.641	81.831	86.21	73.894	66.613	111.537	96.774	77.65	124.831	93.047	104.253	103.55	92.553	108.902	96.514	106.135	87.0799	91.9708	162.704	145.519	165.828	128.664	120.56		0.220181	102.13
2.9759	89.615	70.154	82.6	96.083	78.098	84.33	77.087	72.724	103.653	86.198	73.575	146.627	90.391	105.449	107.549	92.644	113.321	84.97	95.818	86.4567	82.9024	164.86	147.947	154.305	134.103	116.876		0.22936	101.474
3.0949	87.897	81.804	91.224	100.084	85.01	83.044	78.095	78.353	100.252	81.115	81.481	143.913	88.706	98.427	97.221	75.736	112.45	77.256	94.1	81.1014	93.5712	163.911	148.093	149.185	123.719	109.031		0.238532	100.184
3.2139	88.39	81.668	83.073	108.507	86.932	79.191	72.952	64.546	91.673	79.977	84.824	159.189	93.666	102.221	86.869	70.5	115.031	77.294	85.05	79.9717	100.228	158.474	143.055	137.013	119.257	108.07		0.247703	98.3701
3.333	93.699	82.329	78.658	121.585	85.953	81.191	74.283	67.864	100.179	82.15	85.952	148.904	96.945	103.912	87.918	70.226	117.26	76.223	83.001	81.5147	99.5494	150.866	143.018	123.535	115.747	109.254		0.256883	98.5276
3.452	104.55	82.014	83.897	130.073	81.449	84.277	82.166	74.877	107.333	85.97	92.3	134.074	97.03	93.465	69.053	60.882	123.221	75.47	84.206	73.3432	111.184	135.438	137.224	128.804	96.587	101.537		0.266054	97.324
3.571	98.541	70.462	97.937	119.354	69.699	88.896	77.74	83.228	110.414	77.146	85.809	120.607	93.772	86.484	64.843	65.235	117.943	78.857	81.599	69.95	101.207	130.081	135.204	123.626	87.617	100.594		0.275226	93.7248
3.6901	115.533	76.261	99.684	122.79	69.832	97.746	76.182	78.964	104.47	86.234	84.832	102.887	88.479	87.289	65.704	63.695	122.792	78.612	92.229	72.9211	103.307	127.119	122.003	121.951	97.235	104.003		0.284405	94.7213
3.8091	127.53	74.784	102.008	127.431	66.007	107.371	78.927	87.619	99.427	75.552	82.507	86.843	84.291	90.225	58.626	63.1	113.369	75.628	82.438	67.6277	109.361	119.084	123.044	123.947	94.628	101.078		0.293577	93.1712
3.9281	116.252	71.921	94.317	114.813	59.516	95.379	72.889	90.589	84.603	76.566	79.063	70.461	84.64	83.356	62.205	57.634	99.795	82.121	85.2	65.4199	116.174	114.479	113.008	120.826	80.323	100.454		0.302748	88.154
4.0472	114.539	62.867	99.761	98.016	62.721	90.416	73.88	94.992	82.674	75.956	82.53	64.758	81.718	87.908	59.817	50.222	92.28	82.069	72.488	62.7074	113.828	112.224	105.688	123.703	88.412	94.7359		0.311928	85.8042
4.1662	130.242	60.333	99.824	106.942	69.594	96.925	73.863	100.188	84.682	70.889	77.112	56.092	84.264	89.895	52.662	50.302	97.378	80.485	73.302	58.1111	111.6	107.266	118.702	112.964	86.669	101.44		0.321099	86.6048
4.2852	137.607	51.492	96.387	110.353	77.679	99.489	68.709	106.529	82.189	73.874	76.145	52.501	76.317	81.624	59.215	50.473	88.749	81.995	70.828	54.0517	111.934	98.5513	116.288	119.596	96.366	93.4928		0.330271	85.8629
4.4043	129.774	54.026	99.251	105.32	82.48	96.807	56.915	108.957	83.496	80.602	68.652	40.762	74.544	87.815	62.327	44.289	85.522	83.588	68.441	40.3639	110.934	96.0242	128.245	115.527	98.628	93.3663		0.33945	84.4868
4.5233	124.752	58.018	95.407	101.088	83.283	96.044	55.379	113.351	88.099	83.436	68.475	39.585	75.789	85.262	60.589	42.012	94.04	74.999	66.239	43.6002	101.509	101.439	114.744	111.438	102.56	97.5356		0.348622	83.7951
4.6423	114.223	57.077	113.342	92.058	79.591	88.289	56.578	120.922	80.051	82.477	69.184	37.622	62.68	87.372	59.376	45.081	90.479	73.092	63.037	51.037	97.0794	108.733	114.726	124.44	114.022	95.3395		0.357794	83.7657
4.7614	86.733	55.142	109.364	92.542	76.978	80.246	56.333	118.88	75.887	81.254	64.536	37.125	57.606	77.433	56.291	39.487	84.538	69.498	67.21	51.1738	97.179	106.347	114.169	114.585	120.69	93.4533		0.366973	80.18
4.8804	73.361	55.998	109.005	90.421	73.293	74.913	54.744	119.269	83.537	89.302	65.261	31.025	57.824	74.142	53.668	41.56	83.24	75.357	65.65	44.6254	93.4552	113.738	105.43	110.787	102.87	99.8717		0.376145	78.5518
4.9995	68.245	46.006	107.715	99.715	69.455	70.007	48.952	128.838	86.427	98.585	61.774	31.963	62.554	74.239	54.283	41.131	91.652	82.238	62.159	45.9312	89.4806	113.865	104.012	105.888	111.231	92.4214		0.385324	78.7987
5.1185	60.92	39.561	103.048	105.542	73.175	65.014	40.423	126.028	99.174	95.082	54.655	29.887	60.457	76.155	56.181	40.556	92.186	85.118	55.309	44.2121	76.0215	108.886	99.06	110.701	113.164	95.6802		0.394495	77.1614
5.2375	54.266	36.737	87.964	96.593	78.467	60.885	41.657	121.051	93.045	96.246	57.605	26.958	61.857	79.861	49.723	49.935	82.939	91.774	47.962	39.8583	85.383	112.015	86.015	96.827	110.892	102.014		0.403667	74.9435
5.3566	47.703	40.402	85.512	111.606	77.03	56.845	40.236	116.882	81.623	90.381	54.333	30.01	59.196	97.515	52.98	47.526	84.474	103.034	46.443	34.4928	88.366	117.05	89.946	98.499	110.259	105.111		0.412846	75.6713
5.4756	42.139	39.563	91.322	107.593	76.774	51.895	43.387	104.532	76.569	86.823	55.242	31.813	64.416	90.908	53.693	40.88	74.637	97.406	42.315	39.3524	80.5846	128.658	95.079	106.071	110.152	97.1664		0.422018	74.1912
5.5946	47.632	38.575	85.894	102.442	74.616	47.368	33.546	98.409	74.683	83.482	48.334	24.06	60.311	88.339	51.443	44.933	76.634	93.925	39.067	43.1359	76.6705	132.665	94.488	105.785	111.001	101.09		0.43119	72.2511
5.7137	38.634	36.836	91.927	99.621	74.048	47.987	27.808	90.738	80.412	87.64	53.485	25.729	60.016	76.037	50.144	41.747	76.948	87.376	36.661	35.0809	77.619	122.328	93.925	108.295	93.14	105.629		0.440369	69.9927
5.8327	32.691	37.943	89.616	97.36	85.025	44.573	33.92	76.188	77.483	88.489	59.256	29.453	63.224	83.337	47.267	44.14	73.437	99.803	42.971	36.1909	85.1949	112.669	88.431	102.619	92.899	105.555		0.449541	70.3744
5.9517	34.369	35.758	89.758	102.313	83.305	43.289	34.028	78.926	83.618	75.916	52.312	32.569	66.437	80.335	42.813	46.89	71.578	88.68	41.177	39.9907	77.4261	122.522	83.087	100.849	98.47	95.9796		0.458712	69.3229
6.0708	38.431	34.204	89.995	105.844	78.194	43.945	32.67	71.505	80.005	72.401	50.372	29.897	72.744	85.583	42.82	51.359	76.284	81.548	36.431	35.8007	74.2905	113.11	83.339	103.518	91.932	99.5418		0.467892	68.2986
6.1898	36.645	34.652	96.101	113.479	77.693	39.883	28.59	80.781	72.663	76.116	61.164	27.957	72.51	92.676	45.17	50.728	80.543	89.363	31.841	32.8053	82.0536	103.959	77.752	98.112	88.696	100.792		0.477063	68.951
6.3088	39.664	36.86	97.149	125.855	74.458	42.344	28.212	72.078	70.665	78.661	57.604	31.655	80.39	79.678	43.328	42.597	74.954	85.485	35.584	37.3059	78.1194	99.2694	72.91	96.664	87.207	106.285		0.486235	68.2685
6.4279	36.614	36.925	93.467	117.429	61.167	36.777	26.475	73.599	79.049	77.951	45.667	30.568	74.708	75.987	42.972	41.109	75.525	74.251	31.752	34.9394	75.233	91.9588	74.594	82.972	95.532	106.346		0.495414	65.1372
6.5469	30.353	37.527	104.508	122.127	61.527	38.936	27.274	83.301	88.018	70.441	46.783	30.623	73.444	81.23	56.588	44.983	82.387	73.646	30.575	35.737	80.67	89.563	73.166	78.421	101.744	111.342		0.504586	67.4967
6.6659	29.722	38.61	118.62	129.941	58.112	32.753	27.508	77.548	88.023	82.064	49.884	28.956	71.737	80.551	56.996	34.159	90.967	76.046	32.711	31.2595	89.4949	83.275	71.765	75.957	105.494	122.055		0.513757	68.6234
6.785	27.101	30.149	118.183	129.856	60.667	28.712	27.059	76.38	84.288	88.036	50.819	33.155	78.641	73.828	51.88	44.292	91.053	66.295	33.436	33.8285	91.1912	79.8256	80.56	71.507	95.582	121.208		0.522937	67.982
6.904	24.524	30.031	116.444	117.182	51.36	26.004	22.18	80.601	73.445	87.493	49.929	31.079	80.793	55.387	49.351	45.844	91.413	65.645	31.322	32.4562	96.2689	89.2271	81.011	67.31	83.952	112.922		0.532108	65.1221
7.023	28.484	33.015	118.598	103.67	61.53	27.903	25.259	89.563	80.677	78.663	50.04	32.694	72.056	60.231	51.758	39.986	99.658	60.293	28.031	33.3094	88.0521	85.9299	91.116	62.302	74.914	108.268		0.54128	64.8462
7.1421	26.12	33.944	117.816	105.11	60.761	27.037	23.325	89.041	87.014	88.204	46.78	27.79	70.714	66.213	47.685	42.016	92.745	67.166	31.357	30.8086	85.6852	86.0139	99.613	48.169	68.124	109.622		0.550459	64.5721
7.2611	24.842	31.365	108.911	93.684	63.622	28.185	25.316	88.87	86.067	91.543	49.038	30.226	74.443	66.493	50.791	40.657	91.968	61.622	29.844	33.6638	83.2177	100.013	94.013	51.019	62.669	103.932		0.559631	64.0775
7.3801	26.594	31.501	95.197	88.87	57.716	29.038	27.403	88.34	86.483	90.015	47.472	30.809	78.176	76.257	46.369	48.533	85.311	57.334	25.188	32.4866	87.2569	97.9525	89.605	45.756	64.457	98.1265		0.568803	62.7787
7.4992	25.739	30.577	90.832	94.28	60.004	29.257	21.086	74.97	91.725	96.302	48.857	26.647	72.567	69.075	37.894	53.536	85.555	60.396	30.065	33.9498	85.4304	98.586	91.147	40.379	50.359	99.1057		0.577982	61.4739
7.6182	26.502	27.485	81.98	88.574	57.232	29.121	22.494	72.012	95.279	108.506	48.145	28.973	69.956	64.188	39.79	58.761	86.667	60.82	26.871	40.9565	77.3209	80.5261	94.914	41.538	49.946	95.9742		0.587154	60.5589
7.7372	26.63	36.612	90.887	91.648	61.084	31.249	27.07	68.925	90.315	103.616	51.919	29.082	68.629	73.577	43.876	63.381	86.641	60.12	28.141	39.1077	78.2493	84.0245	88.336	40.35	45.117	82.3263		0.596325	61.189
7.8563	30.213	30.98	84.411	81.011	62.732	26.758	26.281	65.892	104.513	94.393	51.15	27.79	61.938	71.136	44.192	68.949	93.93	66.67	28.621	37.9166	82.6539	94.6863	82.062	37.986	41.535	86.2027		0.605505	60.9463
7.9753	22.363	33.243	86.347	79.431	56.228	29.67	28.168	58.978	105.777	98.22	49.708	27.827	60.576	67.999	42.493	65.961	94.368	62.219	27.97	34.7505	77.5198	88.3646	86.918	37.297	47.505	87.7901		0.614676	59.9112
8.0943	22.602	30.581	71.776	92.49	54.196	23.054	24.218	67.605	104.908	96.462	56.259	29.155	63.21	60.463	48.212	61.318	94.583	63.028	25.09	33.1917	70.3732	88.3271	79.826	38.429	35.802	76.5229		0.623848	58.1416
8.2134	21.908	29.095	76.91	78.913	55.712	24.067	22.191	71.395	105.31	102.926	53.421	30.966	64.119	58.983	43.426	62.741	87.097	61.263	26.673	30.0485	68.0137	90.9423	73.54	37.771	33.764	71.8992		0.633027	57.0421
8.3324	27.241	30.941	78	86.84	55.29	29.496	23.341	61.711	91.519	93.236	66.652	31.997	70.319	70.875	45.699	69.353	93.251	59.796	34.001	34.9697	71.8621	94.1016	73.43	34.926	39.039	78.1908		0.642199	59.4645
8.4515	28.401	36.27	69.434	75.72	53.182	28.449	27.597	65.249	77.932	82.755	68.903	31.22	68.755	77.85	45.003	68.039	99.203	60.653	35.667	35.9197	63.6898	88.1416	76.045	37.791	41.902	74.0928		0.651378	58.3794
8.5705	28.343	38.613	79.24	77.519	54.446	25.528	31.678	63.488	77.703	89.422	64.231	34.933	66.322	70.969	52.482	48.797	92.078	70.567	28.868	34.7926	64.4422	87.9847	65.024	33.431	36.056	78.1362		0.66055	57.5036
8.6895	29.455	46.991	73.935	77.407	50.524	25.411	30.185	65.243	77.934	81.108	60.541	38.128	75.073	76.86	44.692	53.43	87.052	75.615	24.151	31.8839	75.8369	88.4649	66.389	36.62	41.045	75.3745		0.669721	58.0519
8.8086	33.487	46.295	81.591	75.438	51.983	27.521	28.265	69.639	83.891	77.259	65.841	40.051	73.72	81.581	46.523	54.073	89.472	78.457	22.203	31.7347	66.7166	81.4322	62.696	30.854	34.965	84.648		0.678901	58.4745
8.9276	28.626	48.167	72.225	64.45	56.013	22.369	27.834	64.533	84.928	73.622	59.123	41.047	76.148	80.118	48.619	60.373	78.358	74.498	23.506	33.6309	66.7016	81.8252	55.706	33.34	34.282	76.39		0.688072	56.4013
9.0466	33.712	43.916	78.349	63.997	53.139	24.63	25.827	73.192	75.419	80.464	63.58	37.835	74.132	91.21	51.518	75.927	82.171	77.898	24.145	33.895	64.145	81.3663	49.495	32.625	29.538	78.6567		0.697244	57.7224
9.1657	33.201	50.577	87.916	66.435	58.532	22.403	30.11	77.353	70.388	82.316	64.889	41.16	82.647	89.55	46.379	78.146	77.615	78.809	31.464	32.9134	66.6123	79.3965	51.921	27.229	37.19	87.5342		0.706423	59.7187
9.2847	29.556	57.959	89.224	81.84	52.058	25.95	32.487	79.589	69.55	74.053	73.788	40.958	75.865	94.161	52.393	79.702	85.939	87.718	32.736	35.6529	70.6786	79.5014	56.423	30.324	34.229	89.7233		0.715595	62.0022
9.4037	29.488	56.76	92.09	80.624	56.047	25.192	31.466	85.878	68.66	82.233	76.593	42.977	75.734	101.499	60.014	87.091	81.342	98.545	30.685	33.6684	71.069	80.541	51.179	26.348	33.112	93.2708		0.724766	63.5425
9.5228	35.094	60.44	93.174	82.327	57.959	26.605	31.047	93.206	70.957	87.161	73.217	47.619	76.497	97.715	54.576	78.64	72.756	97.036	32.163	38.2833	73.4298	82.0034	51.804	22.894	30.928	94.2628		0.733946	63.9152
9.6418	35.167	62.006	99.223	91.486	62.293	27.459	33.207	110.461	69.634	85.716	70.059	50.549	83.877	87.522	61.206	83.589	74.059	103.872	32.57	41.1261	74.8075	77.8157	46.787	23.389	28.398	96.3986		0.743117	65.8722
9.7608	33.638	71.162	94.884	95.292	61.702	30.725	31.078	114.963	71.781	77.779	66.478	50.594	86.213	87.917	59.563	85.449	74.74	102.94	36.637	46.4315	81.4539	75.3116	56.323	21.628	28.813	92.9941		0.752289	66.7881
9.8799	36.299	65.386	81.283	94.39	61.091	28.926	34.006	117.409	69.783	74.685	65.525	47.444	82.734	84.024	59.173	92.339	76.499	101.84	34.663	47.9974	80.0486	83.7536	55.353	21.903	33.407	92.9869		0.761468	66.2673
9.9989	32.093	74.758	88.545	107.613	66.421	26.234	39.034	107.29	58.461	84.619	60.003	52.187	78.89	79.525	58.21	89.013	88.164	104.581	34.446	47.6467	73.9668	86.1371	63.076	24.345	27.31	93.4915		0.77064	67.1562
10.1179	34.209	64.403	82.33	109.599	63.88	32.206	43.883	106.722	66.775	85.281	52.237	50.966	82.766	79.942	58.161	76.973	89.709	104.473	40.194	46.5235	83.2101	91.5949	60.837	25.499	27.846	87.5371		0.779812	67.2214
10.237	32.859	66.168	79.349	113.878	70.694	29.866	43.426	111.468	58.53	81.165	49.358	61.49	83.046	70.333	73.656	67.015	87.406	102.956	42.525	52.7944	85.5202	86.1721	54.499	25.57	26.395	93.7484		0.788991	67.3033
10.356	34.998	66.571	81.094	119.894	63.921	28.765	45.894	107.969	62.643	74.851	56.432	62.644	78.582	62.412	80.835	62.372	97.875	97.034	44.92	53.5877	89.6339	80.4271	51.271	19.948	31.256	88.4126		0.798163	67.0862
10.475	40.925	77.071	81.544	108.115	61.245	33.481	49.622	103.021	58.903	67.416	62.521	57.218	66.181	57.463	84.251	61.499	95.224	92.525	49.546	56.2145	103.494	75.5351	52.411	18.27	29.863	91.7385		0.807334	66.7422
10.5941	40.867	74.591	83.874	108.138	62.859	32.198	45.363	105.787	61.609	70.991	55.734	56.365	65.97	61.109	83.023	60.288	97.2	84.317	65.902	57.3489	100.313	75.0361	51.224	20.283	27.826	91.9165		0.816514	66.9282
10.7131	37.429	78.537	97.545	105.002	64.289	33.009	44.092	107.816	59.826	66.152	52.189	62.596	68.107	62.483	89.644	56.932	107.702	77.779	62.659	63.0248	97.6263	78.239	49.196	23.341	32.743	93.3063		0.825685	68.1256
10.8321	34.985	81.492	97.553	92.435	57.319	33.74	50.681	107.052	63.402	63.039	51.175	68.586	65.098	66.566	73.876	51.813	110.887	80.496	70.274	67.6318	97.4359	73.5058	51.734	25.808	30	96.1414		0.834857	67.7972
10.9512	46.033	80.758	83.414	86.656	48.261	36.97	43.825	103.336	55.763	58.957	44.844	62.481	61.094	61.63	68.99	57.069	107.42	86.986	72.121	62.0377	103.031	79.753	47.554	23.203	30.688	97.3833		0.844036	65.7791
11.0702	45.556	80.475	77.952	80.404	52.324	43.021	48.065	89.73	50.566	55.174	45.045	54.808	52.283	53.873	70.204	56.342	97.541	72.19	75.837	65.7839	109.307	76.0533	52.297	24.93	26.856	89.1889		0.853208	63.3002
11.1892	45.88	78.433	76.956	77.457	55.345	44.163	54.246	80.761	51.23	52.749	33.595	54.994	53.069	48.661	70.545	59.87	95.251	76.269	78.101	61.877	114.103	85.0268	51.332	19.907	29.171	90.9204		0.862379	63.0735
11.3083	45.247	90.117	77.245	69.896	50.865	48.62	46.734	73.631	48.962	37.799	26.703	57.896	42.319	41.026	66.883	66.763	86.647	79.853	82.365	63.8534	99.8967	82.4857	43.476	22.128	27.973	87.2491		0.871559	60.2551
11.4273	41.442	90.188	67.607	62.361	57.507	53.283	49.246	65.926	47.526	25.37	17.096	49.852	36.462	37.954	72.244	59.445	76.017	69.176	79.642	61.5038	94.1615	83.4868	50.616	25.61	22.2	88.7512		0.88073	57.1028
11.5463	42.248	90.15	60.834	65.019	52.825	47.844	56.305	62.729	41.028	12.554	11.404	44.404	31.868	30.131	57.885	57.777	69.437	68.872	83.622	61.4555	94.595	78.0106	58.584	25.831	28.088	88.3003		0.889902	54.6846
11.6654	39.022	92.788	59.813	60.362	52.674	46.646	48.618	57.598	33.302	9.232	11.232	35.769	23.607	20.974	57.739	57.655	68.016	65.339	85.234	62.2296	82.1511	82.5094	48.696	26.692	27.838	88.4453		0.899081	51.6993
11.7844	37.015	101.986	56.74	48.079	45.362	46.61	46.867	61.272	16.922	7.938	8.445	34.447	17.97	11.226	50.581	57.581	62.76	69.054	87.788	66.8646	84.3817	90.3447	46.763	25.079	28.928	84.2386		0.908253	49.817
11.9035	37.145	89.946	52.777	51.526	37.897	40.184	48.676	51.47	9.705	6.363	5.057	28.431	16.156	12.663	45.254	44.797	60.895	65.884	80.833	58.8329	83.2953	100.823	47.327	24.37	29.5	84.0645		0.917432	46.6874
12.0225	39.53	85.18	52.065	46.504	30.566	36.501	41.108	47.9	7.094	3.591	3.864	17.96	12.125	8.101	33.903	43.317	54.714	65.079	72.911	62.6368	83.5215	91.4652	50.933	25.226	30.322	77.3031		0.926604	43.2085
12.1415	36.913	74.714	52.495	40.088	30.169	39.285	33.185	40.627	4.582	3.348	2.076	12.511	8.089	8.216	28.569	38.083	50.144	55.856	66.401	70.0144	67.5385	93.3725	57.304	22.99	31.606	68.8253		0.935776	39.8847
12.2606	35.432	67.721	48.482	38.053	25.974	25.635	24.13	33.78	3.512	2.612	1.964	8.592	7.156	5.486	22.23	30.419	47.78	55.746	65.162	71.5244	72.6455	104.881	63.444	32.017	32.327	76.406		0.944955	38.5812
12.3796	25.891	54.538	43.088	31.112	22.564	18.559	15.932	28.026	2.483	3.518	2.584	7.529	6.411	5.057	13.801	20.506	45.855	46.916	61.659	71.3082	69.6347	96.6226	60.881	32.016	26.263	71.4763		0.954126	34.0089
12.4986	26.771	48.422	36.039	23.108	11.535	12.513	12.786	22.291	2.797	1.788	1.894	4.691	5.973	4.859	11.431	17.342	36.923	46.561	61.265	61.0376	68.136	88.8582	68.282	32.34	29.838	75.7468		0.963298	31.278
12.6177	24.295	44.1	27.581	12.083	7.959	9.161	6.265	13.473	3.848	2.299	0.987	3.967	4.321	3.147	10.267	14.436	27.806	36.192	53.627	54.0781	66.4505	87.2978	75.396	30.282	32.107	71.7785		0.972477	27.8155
12.7367	21.263	36.266	25.219	9.992	8.077	7.352	5.219	8.173	2.016	1.316	1.888	3.2	4.386	3.304	8.349	13.071	18.188	31.828	57.048	62.3029	64.5052	83.5461	72.056	29.11	32.692	76.3028		0.981649	26.4104
12.8557	19.423	29.248	19.702	6.652	5.378	5.273	4.289	5.233	2.451	1.429	1.68	3.263	2.951	1.258	5.449	11.417	18.45	25.47	63.036	62.0733	60.0178	73.9598	73.184	36.784	29.892	81.795		0.990821	24.9907
12.9748	17.661	24.293	12.868	4.487	3.582	4.552	3.996	5.879	2.074	1.078	0.931	2.194	1.601	2.351	3.747	10.562	15.563	20.218	42.533	60.5025	55.4545	65.9845	69.665	37.58	32.226	84.7433		1	22.551

## Sheet: Image29
X0	Y0	Y1	Y2	Y3	Y4	Y5	Y6	Y7	Y8	Y9	Y10	Y11	Y12	Y13	Y14	Y15	Y16	Y17	Y18	Y19	Y20	Y21	Y22	Y23	Y24	Y25	Y26	Y27	Y28		Ap-basal	Avg intensity
0	12.8933	15.2777	12.612	17.615	40.1	28.396	35.065	34.191	35.435	31.132	44.401	22.267	13.384	14.88	28.7259	32.027	26.459	28.352	38.414	59.81	59.609	38.646	59.3598	59.5785	41.25	28.492	70.491	87.714	37.276		0	36.3398
0.119	13.61	14.707	16.304	19.89	37.102	27.632	32.364	38.429	43.452	27.193	40.776	16.575	15.806	15.072	24.6415	29.884	24.0926	32.042	39.398	60.494	64.792	39.668	70.7435	61.8507	39.313	36.859	69.165	101.191	46.898		0.00534603	37.9291
0.2381	17.4085	17.9175	19.291	19.818	36.553	31.046	31.991	34.575	37.984	25.087	44.277	27.451	19.136	17.383	29.6658	29.896	27.6979	26.666	44.263	61.81	63.439	46.975	69.4977	57.3793	43.449	34.662	67.862	93.06	52.187		0.0106966	38.9113
0.3571	17.7899	14.9172	19.896	22.106	35.121	28.791	33.246	33.815	30.798	29.312	39.605	22.642	17.102	22.38	23.9101	31.267	24.2374	28.555	54.067	60.532	60.105	38.666	67.6339	61.7961	50.53	41.785	69.125	106.218	48.007		0.0160426	39.1019
0.4761	18.0399	22.6963	15.099	22.282	36.756	25.583	32.531	37.009	39.103	23.2	40.522	25.5	24.877	20.506	29.5087	26.723	26.8773	23.854	47.102	64.458	58.729	50.44	62.5009	64.0236	56.749	47.217	71.879	103.572	66.519		0.0213886	40.8226
0.5952	17.584	21.9474	18.213	17.965	41.493	32.459	33.325	30.949	35.878	22.842	34.74	36.284	23.338	23.217	29.1721	25.219	24.5788	28.994	53.235	61.283	60.704	46.541	72.2609	62.9524	58.566	47.425	68.107	90.921	64.58		0.0267391	40.8543
0.7142	23.7011	19.939	21.75	22.793	38.706	32.376	31.885	31.953	38.741	21.762	39.971	34.709	27.572	20.677	24.3157	29.332	27.2027	32.735	51.272	60.769	63.404	59.304	76.9568	62.6046	67.861	45.677	66.747	99.579	68.409		0.0320852	42.8519
0.8332	18.6747	27.4363	21.082	23.728	35.353	28.37	36.67	33.706	35.667	18.156	40.228	45.126	32.87	24.575	29.268	39.238	29.9493	40.093	50.008	57.484	64.229	51.166	70.673	60.9428	68.439	52.292	83.655	86.547	71.016		0.0374312	44.0221
0.9523	27.3661	29.6162	18.134	20.237	31.338	36.967	35.459	35.782	36.091	23.077	49.744	45.569	38.346	36.329	32.0916	41.768	37.1791	44.092	57.322	49.993	60.679	54.889	73.3149	62.3419	72.545	59.503	78.144	86.853	79.216		0.0427817	46.6892
1.0713	25.0715	36.0991	18.542	24.833	28.975	32.948	36.1	36.553	30.766	24.386	58.154	46.231	37.306	34.925	36.4909	44.426	39.464	40.591	51.073	54.412	54.613	66.251	67.638	65.133	77.095	61.616	75.935	85.536	59.716		0.0481278	46.5821
1.1903	29.1103	34.8242	19.685	25.953	31.519	35.941	36.15	36.915	32.797	23.895	55.834	46.528	42.552	36.114	43.1544	53.841	46.3456	45.524	58.836	58.571	67.622	76.509	67.1781	64.9578	79.027	63.287	70.122	84.135	68.196		0.0534738	49.487
1.3094	29.1189	40.7005	19.103	31.259	32.545	39.999	41.832	38.812	30.748	20.054	68.548	44.859	44.029	40.037	55.045	53.35	58.2337	60.745	55.771	65.538	60.876	78.669	75.9994	70.7487	88.881	63.142	67.408	88.178	61.515		0.0588243	52.6119
1.4284	33.0869	40.5423	21.286	40.449	30.877	44.703	47.428	38.286	33.297	20.166	70.137	57.696	47.752	44.715	57.207	54.552	62.7001	77.046	62.568	55.734	61.224	80.483	74.7108	78.5335	98.113	65.746	68.497	94.991	63.574		0.0641704	56.0724
1.5474	40.6191	37.8912	30.853	28.775	41.75	45.677	49.958	33.986	30.35	22.094	82.091	58.689	47.229	51.44	57.6142	61.902	59.0963	70.884	58.672	58.806	57.815	84.467	81.9231	81.1556	98.853	61.72	71.986	112.733	65.569		0.0695164	58.0896
1.6665	43.4643	40.5038	31.463	38.791	36.647	52.725	50.571	40.685	32.214	18.83	89.802	57.822	47.186	47.522	53.9445	68.171	61.2933	68.995	57.951	66.895	57.379	80.433	76.3339	87.9388	101.26	75.776	72.381	90.11	67.496		0.0748669	59.1236
1.7855	42.2248	47.2509	37.232	37.675	46.758	54	49.743	43.89	30.848	18.118	91.346	73.261	52.692	48.795	62.6884	68.883	70.9054	76.774	75.001	60.949	60.944	82.111	77.0467	84.7859	111.454	80.547	76.296	94.1	67.871		0.0802129	62.9031
1.9046	44.5943	46.6858	33.117	39.82	41.269	52.089	53.03	42.043	27.738	23.547	95.259	72.55	56.592	52.975	62.5589	67.675	67.1304	84.254	70.532	63.544	69.508	77.031	72.3308	89.676	104.876	89.877	89.758	103.486	65.86		0.0855635	64.1175
2.0236	47.1943	49.7837	36.238	37.99	44.798	48.52	47.522	47.363	31.967	21.781	99.26	72.871	60.659	58.494	65.391	68.973	60.2619	86.392	74.23	60.591	78.446	65.217	69.5075	84.9649	106.443	93.519	93.951	106.527	63.938		0.0909095	64.9239
2.1426	49.8408	45.7396	44.138	43.145	44.325	57.853	56.221	40.488	28.049	19.357	89.45	86.476	67.914	61.314	70.9572	67.774	77.8436	81.956	69.235	68.19	71.431	74.53	73.8401	92.3362	114.223	93.376	98.838	99.357	61.443		0.0962555	67.229
2.2617	51.0714	48.0249	56.82	44.45	47.634	64.36	62.804	47.1	29.784	24.036	93.888	77.315	71.017	64.592	61.0855	71.061	72.1014	92.84	78.926	63.16	82.82	80.795	78.3771	95.4375	111.749	103.769	100.897	105.139	69.558		0.101606	70.7108
2.3807	55.0451	46.4024	56.208	54.891	54.107	63.01	59.493	42.656	29.822	27.272	89.728	75.336	71.934	86.169	81.2743	89.842	67.0446	109.646	86.422	73.11	77.992	79.452	66.3615	94.4608	102.719	97.608	107.63	100.19	69.058		0.106952	72.927
2.4997	59.0431	47.7265	52.174	55.866	57.876	62.889	58.727	50.439	33.111	28.408	92.058	83.647	67.917	87.081	73.6871	73.549	76.8707	108.324	101.075	73.896	71.808	73.772	67.1746	81.7397	111.668	103.77	96.095	103.921	70.546		0.112298	73.271
2.6188	63.2001	57.267	57.951	53.918	60.878	69.765	55.753	48.079	31.869	33.966	94.447	85.151	71.395	99.468	72.8804	83.586	76.6866	104.874	86.431	72.109	76.351	89.814	74.4998	88.3238	106.085	106.705	107.815	102.497	63.311		0.117649	75.6923
2.7378	69.3289	59.6319	65.882	65.184	59.325	86.271	64.429	46.034	42.609	35.72	88.301	71.998	75.93	101.908	71.2292	87.144	86.6171	96.819	84.8	81.567	81.295	89.099	71.8563	83.4569	110.278	106.986	105.123	102.75	72.968		0.122995	78.0876
2.8568	68.4651	62.4452	78.819	65.851	64.113	85.013	67.134	55.831	37.624	49.165	97.325	79.5	76.612	108.864	64.6771	93.49	93.1154	105.248	84.598	82.732	87.624	97.655	73.6992	81.9019	122.307	109.03	99.253	106.043	85.694		0.128341	82.201
2.9759	71.3128	60.6893	80.615	64.686	62.272	77.277	65.7	50.963	33.489	50.064	101.544	82.552	73.649	108.647	66.0849	97.517	95.0741	112.324	76.269	86.352	102.117	104.685	75.0205	77.0861	111.193	107.837	100.969	106.867	66.083		0.133691	81.6875
3.0949	65.6356	64.1023	74.086	70.148	65.453	80.874	63.517	47.078	40.296	55.527	95.808	77.66	83.772	98.61	63.7873	86.754	88.136	103.973	84.413	84.856	105.126	104.873	78.2033	75.8602	110.223	122.148	97.338	103.675	86.598		0.139037	82.0183
3.2139	80.9091	63.4234	77.795	79.963	68.274	82.78	59.688	57.317	42	67.184	95.275	67.393	78.929	101.382	75.5142	96.991	81.9055	110.282	75.323	80.289	118.672	106.392	95.9198	90.1277	100.579	127.494	107.489	101.949	85.787		0.144383	85.4147
3.333	73.0214	70.6017	67.608	82.505	61.229	79.107	68.035	54.715	40.529	73.38	99.614	88.97	80.563	102.806	81.9712	88.917	91.7121	99.465	83.104	82.06	110.674	105.53	87.394	78.7586	93.509	124.617	104.019	93.382	85.16		0.149734	84.5847
3.452	70.6394	72.9155	65.258	89.201	68.589	77.241	65.354	57.745	45.229	79.367	103.784	80.564	75.982	97.985	76.4449	89.406	91.9295	112.404	77.468	89.457	109.549	102.107	86.5952	85.1218	104.667	131.468	108.23	105.264	90.837		0.15508	86.5794
3.571	73.5298	66.9383	75.03	90.93	75.101	77.337	67.39	51.862	58.246	89.604	92.215	81.631	84.794	92.861	78.834	88.808	103.909	106.003	78.146	91.409	103.294	100.965	87.1231	82.5421	96.842	128.074	113.282	101.756	91.562		0.160426	87.242
3.6901	83.2951	82.5782	72.425	86.4	66.624	80.009	71.651	63.825	49.951	87	104.292	85.575	76.868	105.878	85.3967	95.279	97.9457	105.457	88.794	90.544	108.405	106.191	77.986	90.5275	90.744	116.356	96.97	93.501	92.276		0.165776	88.0257
3.8091	74.1777	76.4161	73.441	96.953	74.551	68.159	62.318	65.8	50.648	101.057	103.082	92.337	71.119	93.602	76.2176	105.986	96.087	106.9	81.411	93.769	109.585	117.205	72.0579	85.2049	92.992	124.753	101.248	105.474	97.344		0.171122	88.6171
3.9281	73.4933	81.5875	68.857	100.459	64.683	62.168	62.757	66.528	67.063	96.523	121.833	97.415	88.67	93.877	89.6014	106.773	97.5737	112.619	80.441	99.539	107.535	110.19	79.1366	94.2855	92.908	130.133	103.79	101.697	92.724		0.176468	91.2021
4.0472	76.55	85.381	66.062	102.057	65.476	68.026	78.03	65.042	74.785	104.597	125.298	83.134	87.736	102.322	92.2594	107.897	98.7203	118.455	90.73	95.221	96.021	126.938	74.8119	87.1403	91.998	114.057	106.527	100.618	87.206		0.181819	92.1757
4.1662	62.2853	77.8851	66.507	91.882	71.492	68.115	71.328	68.437	80.068	122.479	125.303	92.038	85.016	95.142	88.8134	104.544	92.1511	120.314	98.731	94.018	106.594	100.947	87.7585	84.5676	87.883	118.531	108.618	101.035	93.31		0.187165	91.9239
4.2852	62.7013	75.9784	66.037	98.079	63.168	66.918	68.618	69.97	85.264	123.543	118.297	112.176	87.397	90.391	93.915	102.568	100.481	133.263	90.953	104.721	107.664	107.312	75.1538	78.7037	86.63	107.824	105.439	107.328	96.281		0.192511	92.6474
4.4043	58.0349	75.0508	64.146	97.531	80.104	59.9	84.097	68.956	94.334	119.652	109.583	104.718	79.567	103.979	100.062	108.848	99.7493	120.443	93.954	93.766	98.483	106.802	75.4839	85.3884	98.757	110.985	105.184	111.632	99.397		0.197862	93.3996
4.5233	63.9848	82.9985	65.623	94.325	65.579	70.729	75.843	83.18	102.346	126.736	121.927	103.464	83.318	100.875	104.242	109.441	99.0827	113.809	90.37	93.703	106.343	107.576	76.3768	81.9938	93.786	112.774	117.527	109.823	83.92		0.203208	94.5412
4.6423	59.9775	80.249	71.043	91.021	66.772	68.91	81.308	77.686	111.984	131.396	125.974	112.919	77.921	107.716	103.182	112.769	100.632	117.088	90.535	90.998	119.852	108.222	64.5148	80.7911	102.909	113.203	105.976	96.559	90.91		0.208554	95.2765
4.7614	61.1694	65.2123	72.314	83.864	72.151	79.593	88.362	78.816	120.688	127.828	117.194	100.653	65.794	117.44	98.5885	107.379	97.9753	118.036	89.43	101.492	101.001	114.063	76.8343	75.7072	103.609	110.842	109.363	97.658	83.306		0.213904	94.3573
4.8804	62.326	81.5784	70.943	91.242	70.373	70.416	92.725	73.195	119.404	124.211	125.387	127.362	81.607	120.434	98.9662	108.793	97.3324	112.296	89.918	83.377	106.335	107.347	71.1062	78.5692	109.027	102.079	108.216	96.944	91.73		0.21925	95.6289
4.9995	67.049	74.987	66.444	93.134	68.872	69.83	85.805	73.769	115.474	121.917	112.359	126.28	83.198	112.067	93.608	105.692	111.039	118.23	91.852	80.844	103.933	103.376	85.6926	71.6862	115.104	93.277	121.781	97.161	106.555		0.224601	95.5523
5.1185	60.7432	73.2789	70.616	92.869	65.556	79.156	80.727	69.969	123.326	126.526	101.342	130.847	77.331	113.298	102.54	112.793	100.529	120.228	93.322	87.99	98.947	93.546	82.4379	76.8922	101.877	104.356	120.51	104.149	96.899		0.229947	95.2621
5.2375	67.2678	81.4393	71.668	94.71	79.56	73.207	88.784	78.068	108.831	131.535	96.81	119.344	77.759	108.74	87.8036	101.873	110.137	107.479	93.772	78.777	97.919	102.37	81.0474	85.7655	102.15	108.263	124.263	106.361	97.595		0.235293	95.2861
5.3566	66.0591	72.0401	73.834	98.254	76.521	77.14	72.92	85.023	119.748	135.763	90.011	124.882	83.492	113.06	91.3054	100.297	102.562	118.866	94.755	80.564	102.332	97.716	73.6476	91.672	99.208	95.688	115.041	106.581	102.419		0.240643	95.2207
5.4756	75.3897	71.4592	74.073	91.309	72.678	78.171	74.841	86.597	123.867	118.661	92.307	116.944	83.212	114.789	94.4335	102.067	105.369	119.075	87.937	92.057	98.062	101.636	73.257	86.8277	109.052	103.516	132.307	116.513	99.631		0.245989	96.4151
5.5946	74.7049	73.4225	84.848	88.327	83.76	76.186	77.667	80.637	115.169	131.675	97.904	132.206	83.757	112.197	102.42	94.727	99.1338	104.386	88.181	81.674	83.415	90.208	78.1919	79.6312	109.599	105.047	116.567	115.492	103.461		0.251335	95.3308
5.7137	80.3692	74.4361	82.18	103.048	77.865	81.277	71.571	87.356	117.042	127.828	92.934	113.199	88.391	107.856	92.7723	110.689	94.555	107.614	88.212	73.131	85.391	104.381	86.2604	77.786	115.521	97.858	112.114	122.001	98.704		0.256686	95.598
5.8327	75.7929	72.4873	77.179	94.821	86.514	85.485	78.115	82.069	120.408	129.012	102.595	108.18	97.371	94.195	89.2307	100.243	111.028	107.152	99.206	71.213	79.026	94.089	90.6455	81.454	119.302	98.178	103.371	107.314	106.012		0.262032	95.2306
5.9517	66.7785	66.9288	80.133	100.264	92.293	77.633	81.463	72.974	130.764	127.455	102.531	100.531	97.007	92.551	79.2539	102.784	107.32	106.268	98.055	82.048	77.509	99.097	93.4051	94.2645	109.849	95.481	103.418	103.306	103.379		0.267378	94.6463
6.0708	68.9694	71.3951	92.783	97.758	90.261	86.028	90.864	81.997	125.258	142.227	92.178	88.994	102.423	90.969	82.2687	102.551	92.6016	108.047	88.217	82.299	83.316	87.19	82.1495	86.2094	110.229	102.198	108.198	125.438	105.155		0.272728	95.4542
6.1898	75.3652	69.097	86.596	105.543	85.977	91.541	91.866	85.61	115.869	141.048	100.308	85.665	95.046	77.372	75.6221	103.409	97.6824	100.63	89.484	82.234	74.749	108.13	78.857	83.7449	106.338	108.426	103.243	126.854	104.885		0.278075	94.8687
6.3088	77.8866	70.6003	85.99	98.18	87.877	88.383	73.718	82.917	119.769	138.109	98.483	85.997	108.651	86.169	78.3955	95.361	99.4113	118.276	88.282	85.916	70.17	87.267	82.8415	84.5993	113.603	112.186	109.904	123.029	118.573		0.283421	95.536
6.4279	71.1572	71.5242	86.047	94.185	90.526	75.75	74.137	82.698	133.835	143.416	100.002	91.915	116.857	81.793	74.2008	94.995	113.513	121.451	92.575	89.881	84.357	88.259	103.591	87.0502	100.279	117.947	107.622	120.731	122.655		0.288771	97.6879
6.5469	71.6967	69.9296	90.862	90.3	94.572	75.444	83.955	92.988	117.609	145.884	90.052	90.875	90.785	78.127	71.9159	87.252	121.538	97.688	93.813	83.229	84.353	90.87	101.8	96.2644	100.193	111.828	107.323	120.499	108.751		0.294117	95.1861
6.6659	72.0629	69.377	91.847	94.764	84.083	70.217	80.911	92.022	134.402	126.416	93.539	83.742	99.577	81.231	79.3689	84.459	109.875	101.023	102.372	86.972	72.838	93.106	101.233	85.7767	99.241	97.289	101.625	111.24	112.889		0.299463	93.5689
6.785	67.4917	73.6926	75.929	92.851	91.064	82.15	78.076	85.37	131.234	129.083	92.729	90.73	107.623	83.771	70.4807	76.853	104.278	107.901	95.315	99.708	80.32	95.454	105.317	105.302	82.195	106.129	105.05	120.702	108.696		0.304814	94.6722
6.904	71.0247	72.5641	89.087	98.235	90.626	68.645	83.089	75.323	130.986	131.439	95.937	90.906	95.655	77.886	63.0866	83.427	105.34	115.211	96.199	110.077	68.76	102.446	95.5503	94.3824	100.688	104.685	113.66	109.729	103.83		0.31016	94.4302
7.023	70.0562	64.961	96.352	93.59	84.421	76.697	82.947	86.243	135.136	129.538	87.026	87.71	114.707	80.871	68.2922	77.002	104.387	108.976	103.164	109.821	71.8	92.801	96.912	106.133	103.812	110.019	120.206	106.89	115.002		0.315506	96.0508
7.1421	72.5285	65.3459	101.487	99.375	88.535	76.159	83.797	86.603	141.197	126.34	89.305	81.274	98.542	86.255	70.6075	71.051	105.354	105.412	102.869	114.175	90.595	99.861	90.9076	106.403	95.054	104.696	120.807	110.42	102.012		0.320856	96.1023
7.2611	66.6801	69.1523	107.688	96.727	100.274	62.605	85.789	98.646	137.344	115.294	84.168	91.002	89.735	93.831	78.4564	72.243	105.048	114.434	108.523	116.478	78.558	100.418	88.6812	98.1881	95.399	108.211	102.93	122.239	108.378		0.326202	96.4524
7.3801	61.3063	78.331	99.152	96.763	98.901	63.512	93.868	94.697	142.985	119.613	80.383	87.823	90.929	94.895	73.8721	82.272	97.2058	104.52	95.267	104.139	83.089	94.288	76.6508	93.9388	94.636	101.034	104.85	110.826	111.188		0.331548	94.1702
7.4992	67.4073	67.4701	105.584	97.194	95.084	64.891	91.22	93.195	131.218	109.547	80.291	83.531	92.058	93.051	70.4611	73.873	115.354	114.97	102.225	107.016	81.398	96.274	86.834	96.6745	89.031	97.424	91.674	106.863	125.667		0.336899	94.051
7.6182	62.8903	76.0813	91.202	88.97	92.63	66.62	90.28	85.591	127.107	114.768	78.195	78.974	93.274	94.84	68.8411	75.356	96.8036	115.465	105.834	92.055	78.089	92.289	85.3673	91.6151	83.791	94.664	96.114	109.434	120.365		0.342245	91.2933
7.7372	64.5068	76.2463	98.371	86.243	114.141	63.977	83.757	94.329	123.324	99.785	73.661	79.303	100.362	95.593	53.3327	74.367	97.1161	110.488	98.094	88.306	82.598	93.354	77.8275	95.8697	85.719	78.907	108.049	100.78	127.314		0.347591	90.5421
7.8563	57.5004	72.7121	98.062	98.05	100.064	62.44	81.085	99.411	121.73	95.713	67.132	62.752	94.165	99.245	56.9842	70.634	110.443	102.372	97.432	88.85	76.769	95.799	74.1785	77.6513	88.398	92.49	103.489	106.227	126.52		0.352941	88.9068
7.9753	54.1562	76.6154	93.578	95.671	92.399	61.777	69.523	90.947	117.105	107.41	67.771	54.642	92.541	91.557	50.9229	55.815	98.7511	102.168	95.868	93.395	85.418	99.018	77.8951	72.7774	73.226	87.772	108.901	114.068	129.713		0.358287	86.6
8.0943	57.8796	74.7245	89.197	91.298	102.139	67.253	76.287	98.006	119.188	100.307	69.472	58.669	82.71	96.975	44.8933	46.991	94.7501	104.644	91.702	84.931	81.557	90.727	72.7009	69.8433	77.858	89.881	107.364	100.255	114.985		0.363634	84.7306
8.2134	54.5663	71.8376	82.782	97.281	88.545	61.677	67.739	96.788	118.53	97.121	71.585	65.327	87.831	100.839	36.8415	48.584	85.9108	106.057	88.358	86.702	76.211	87.728	81.7737	65.3541	76.473	80.018	104.097	118.431	121.137		0.368984	83.6595
8.3324	53.6246	83.3851	84.656	84.902	109.878	61.512	75.163	102.562	101.906	97.674	64.609	54.183	88.916	113.792	34.8018	53.274	104.379	98.109	97.376	87.094	80.235	89.243	72.8803	63.2185	83.644	88.306	99.612	112.358	121.513		0.37433	84.9244
8.4515	43.9277	70.0151	82.892	90.562	84.258	73.652	79.313	91.819	114.143	96.841	67.322	61.984	100.738	104.467	31.8228	54.159	87.5586	86.629	100.377	93.534	74.081	89.153	67.4064	55.3003	86.384	84.736	103.261	122.38	124.261		0.379681	83.5509
8.5705	49.0253	70.2427	94.954	86.124	83.179	67.837	70.188	92.345	122.6	105.74	67.547	60.469	82.062	109.675	28.8478	43.935	86.9643	98.188	103.405	95.867	75.544	85.578	67.4469	49.3754	77.785	81.769	93.699	134.612	125.354		0.385027	83.1158
8.6895	39.2237	84.1884	87.871	87.783	84.492	64.479	73.974	96.802	116.459	104.644	64.332	62.056	80.442	104.432	27.6737	40.449	86.2446	93.21	104.762	94.768	77.343	98.96	68.5044	49.4483	75.786	84.668	98.047	114.165	129.037		0.390373	82.5601
8.8086	48.758	74.1048	96.377	86.314	87.334	65.497	69.571	98.793	113.235	101.895	64.832	57.098	96.686	117.375	22.9552	36.884	85.2431	95.615	110.074	85.057	80.534	93.973	71.1049	46.4069	83.377	85.55	88.19	114.666	110.849		0.395723	82.3569
8.9276	46.7817	75.8128	107.99	92.517	79.867	54.496	62.506	117.75	110.53	92.7	70.232	54.782	78.781	118.589	31.2439	37.241	87.861	96.469	110.715	88.203	89.772	87.802	62.4038	44.1587	76.119	90.96	88.544	116.542	118.427		0.401069	82.4068
9.0466	40.5151	78.5788	97.792	88.666	77.241	62.872	66.149	106.583	121.663	91.181	63.739	49.484	82.044	112.866	26.4097	33.385	83.9048	100.036	104.045	84.547	85.592	89.491	63.759	42.5037	79.177	91.289	86.675	104.24	112.821		0.406415	80.25
9.1657	38.5554	77.4131	102.405	98.869	69.857	57.614	59.984	98.161	117.259	91.921	58.447	56.166	77.547	109.561	25.2674	32.405	85.101	93.397	117.796	84.533	79.334	98.992	58.0156	40.7968	72.824	84.454	92.465	118.918	116.924		0.411766	79.827
9.2847	41.3308	70.647	102.396	87.504	81.69	57.257	58.054	95.531	121.581	93.035	63.435	59.628	74.786	119.81	21.2189	33.876	86.1705	80.663	119.832	102.469	83.373	98.521	62.7554	41.2093	60.363	97.109	85.527	122.177	124.097		0.417112	80.8981
9.4037	37.1078	80.9452	106.989	82.055	75.644	59.207	68.17	98.61	111.476	89.251	61.629	52.471	79.835	110.203	23.433	31.539	86.4885	83.993	131.06	102.347	81.123	94.776	58.6528	42.5528	55.909	98.744	94.294	114.342	123.156		0.422458	80.5518
9.5228	37.8698	85.5076	105.532	91.328	65.193	58.664	61.163	96.505	105.234	87.001	67.583	48.333	79.249	104.966	22.3457	25.933	89.8795	91.807	131.134	96.742	75.122	93.326	67.0144	42.4293	60.607	106.12	87.578	129.376	118.531		0.427808	80.4163
9.6418	40.1547	78.1581	108.171	92.179	78.506	57.751	66.295	109.343	106.666	86.78	56.016	49.222	84.643	112.258	19.8036	24.683	81.3409	86.779	120.946	94.028	80.265	97.423	56.3078	33.6278	58.63	102.658	92.841	125.979	125.156		0.433154	80.228
9.7608	34.9913	82.9225	100.359	96.026	77.124	52.457	60.717	114.604	95.238	97.063	67.532	48.813	89.118	109.389	21.947	30.046	91.0069	92.745	123.818	88.73	84.144	92.807	55.7145	28.2454	44.535	103.747	95.639	122.035	115.407		0.4385	79.8938
9.8799	32.604	77.9984	110.44	112.999	74.311	62.504	60.91	125.764	99.597	85.388	59.535	43.435	90.413	102.747	22.6354	26.243	86.5433	84.921	122.23	94.656	90.756	92.422	51.8093	29.5521	57.561	96.047	87.838	107.974	137.283		0.443851	80.2454
9.9989	43.1223	81.9085	108.027	97.158	79.705	57.351	61.08	105.834	103.528	77.585	53.356	44.662	92.118	94.964	23.5928	25.192	83.373	92.755	124.636	97.737	86.004	86.904	55.0536	27.3731	48.431	96.056	89.483	129.418	125.942		0.449197	79.0465
10.1179	35.9238	87.916	106.03	98.146	72.765	56.166	59.001	110.463	106.933	83.193	58.332	43.017	99.468	89.21	17.5656	28.43	84.7602	91.481	128.626	99.502	83.311	88.041	49.5585	30.357	44.939	95.799	99.874	132.374	121.496		0.454543	79.4027
10.237	35.0986	83.0733	102.738	91.62	83.633	48.16	59.437	114.713	97.148	86.163	61.418	37.548	95.372	85.711	21.6671	24.604	80.8365	97.649	133.084	97.346	84.484	89.524	56.9822	29.8492	43.086	95.815	98.452	131.254	118.896		0.459894	78.8056
10.356	33.389	78.4267	104.207	94.446	78.558	58.294	69.195	99.762	96.513	81.684	49.761	39.189	80.237	101.265	23.8745	25.5	81.7317	92.657	126.968	103.911	82.529	80.506	52.0755	29.467	52.566	100.759	94.695	121.351	107.741		0.46524	77.2848
10.475	36.4403	85.2843	99.036	95.86	69.755	55.489	68.176	91.782	90.64	88.845	53.842	44.372	80.731	95.179	22.385	25.991	79.9252	104.67	128.596	105.847	88.736	79.86	53.751	35.0487	50.425	90.568	92.361	120.178	104.417		0.470586	77.179
10.5941	33.715	86.0593	100.89	100.437	68.282	53.101	62.368	108.087	94.26	80.679	46.441	35.397	81.623	92.98	20.1057	22.191	73.5139	104.61	112.707	105.723	87.094	89.752	48.3173	27.1761	43.348	92.11	94.919	120.979	91.159		0.475936	75.1043
10.7131	32.7267	92.36	104.34	97.627	64.961	61.784	69.933	109.825	85.67	72.855	39.68	29.633	79.145	90.174	18.109	18.901	82.9979	92.141	112.347	90.677	81.543	91.581	46.4043	29.6773	37.076	104.073	82.584	124.201	106.708		0.481282	74.1288
10.8321	33.1415	79.9601	107.378	89.63	73.316	61.367	58.835	105.932	85.317	83.611	53.387	32.964	82.891	89.704	22.0314	21.732	76.8897	88.944	107.461	102.487	78.829	77.858	47.8593	25.5974	35.911	100.499	85.89	110.171	100.968		0.486628	73.1228
10.9512	28.9025	84.7863	109.055	95.889	65.295	59.339	57.866	111.187	89.849	89.574	59.332	34.501	91.432	97.163	18.2732	24.914	83.4459	85.118	96.013	88.693	77.103	81.652	42.2845	26.2414	37.39	110.42	86.13	113.556	95.478		0.491979	73.8235
11.0702	27.7861	83.5852	98.974	92.327	74.812	61.089	68.95	114.214	79.934	85.211	51.378	34.238	88.123	102.171	22.515	22.786	70.6067	86.748	103.354	94.772	76.374	83.22	47.8061	24.7797	37.677	99.41	87.931	95.104	93.305		0.497325	72.7304
11.1892	31.6281	82.4221	102.152	94.817	76.378	56.39	64.287	95.487	93.726	82.713	44.993	29.945	73.568	88.944	18.0241	19.892	71.3921	97.349	94.429	98.761	73.773	83.382	45.181	22.4791	33.666	106.852	84.817	90.998	105.95		0.502671	71.1861
11.3083	29.8318	74.8733	102.552	95.443	75.583	57.495	64.189	91.529	87.476	81.273	42.863	32.154	80.785	92.192	17.2171	23.748	70.5135	91.984	104.522	108.101	78.642	87.923	47.2317	31.1351	30.759	100.599	86.078	102.489	104.286		0.508021	72.1885
11.4273	29.8357	82.792	105.338	89.83	69.269	51.946	67.452	94.674	98.753	74.651	42.787	33.154	83.445	91.32	17.1512	19.432	62.8249	94.7	103.192	105.482	78.031	76.722	43.2813	33.172	26.563	103.174	98.362	102.214	100.805		0.513367	71.7363
11.5463	30.7059	78.125	100.258	91.548	75.587	54.492	71.328	92.21	88.179	74.55	40.07	29.962	83.357	85.185	16.252	21.85	62.8237	104.615	96.094	90.075	71.88	81.555	39.3469	25.8928	30.45	111.858	98.095	86.731	89.866		0.518713	69.7566
11.6654	30.4351	78.8185	101.727	92.914	81.024	54.314	66.713	90.356	88.134	73.104	39.886	32.902	77.547	96.474	18.7352	22.25	64.0251	90.722	93.476	87.793	81.514	78.857	38.3736	26.5358	27.862	108.756	91.806	91.817	100.216		0.524064	69.8996
11.7844	28.1957	83.3805	107.581	96.884	82.859	49.404	70.282	88.649	84.072	65.565	45.938	34.145	79.579	99.394	17.973	21.075	59.4073	90.314	99.821	91.986	75.972	67.951	50.6948	27.1798	23.897	115.181	95.636	88.339	86.677		0.52941	69.9321
11.9035	37.0594	83.2	107.298	101.92	85.528	49.948	56.816	85.492	97.828	66.003	33.656	31.679	72.885	101.198	15.3143	22.901	55.508	91.037	102.716	100.169	80.944	69.373	42.8174	29.1462	26.796	96.13	90.462	86.469	88.695		0.53476	69.2755
12.0225	34.5627	83.9629	100.714	86.854	85.88	59.535	62.299	83.977	94.733	71.988	41.22	30.183	75.946	98.911	14.0133	19.445	54.282	98.246	88.982	106.009	81.217	75.847	49.919	27.4222	28.887	104.449	86.272	92.804	87.47		0.540106	69.8631
12.1415	33.1828	85.6715	90.725	97.083	90.809	65.523	62.211	82.312	82.518	62.873	39.974	38.433	74.6	87.332	18.0348	18.681	46.9203	109.777	85.539	95.86	83.53	85.471	44.5136	27.1075	35.98	107.165	93.078	76.766	88.205		0.545453	69.3061
12.2606	32.424	78.0641	91.914	90.938	89.172	55.022	78.101	88.05	78.985	59.971	39.91	30.126	59.002	95.361	21.1565	27.396	49.9812	106.156	101.134	94.776	91.913	83.855	45.7553	22.9615	27.672	112.468	86.52	78.253	91.061		0.550803	69.2448
12.3796	32.9155	81.6494	104.172	81.261	94.847	59.165	63.731	90.471	85.504	60.907	42.788	30.832	52.635	94.592	18.4837	23.631	46.7185	106.975	108.45	93.473	87.093	75.5	42.7282	28.4811	25.725	111.391	83.996	78.365	97.851		0.556149	69.1149
12.4986	31.5247	81.4718	102.013	102.925	97.711	52.407	72.058	97.51	93.369	61.911	41.665	30.764	54.146	91.333	20.8465	19.678	50.9876	104.326	99.987	96.141	91.992	64.439	43.3529	24.8212	28.496	104.585	85.676	83.697	86.216		0.561495	69.519
12.6177	27.7013	79.5264	100.121	97.482	85.153	71.283	65.744	90.115	82.419	67.039	41.982	31.387	54.391	83.32	14.4122	20.589	52.5026	96.456	101.914	94.667	90.792	72.345	45.0582	25.9042	27.139	91.169	84.224	89.318	100.058		0.566846	68.4211
12.7367	36.0518	78.3399	103.032	96.697	90.604	65.426	69.221	85.694	83.386	61.59	39.258	31.685	58.531	80.579	12.8819	17.931	50.9091	93.436	105.37	100.482	87.342	72.856	49.1864	26.9005	26.859	98.55	90.278	81.369	81.193		0.572192	68.1255
12.8557	32.6341	79.612	94.002	99.67	87.767	69.605	72.168	86.391	82.869	58.812	34.789	32.809	63.479	80.146	10.1494	19.651	47.4092	105.924	96.089	88.472	85.389	69.138	44.9748	24.0943	29.014	87.675	76.064	82.313	90.846		0.577538	66.6192
12.9748	32.4232	82.209	96.934	89.291	90.71	67.541	72.569	89.705	90.808	60.766	42.098	28.018	57.678	83.182	12.9289	21.996	51.4411	98.946	110.022	93.832	88.383	73.088	48.5199	22.1353	28.508	87.04	75.074	80.502	93.034		0.582888	67.9097
13.0938	36.1289	89.9951	107.928	108.78	93.999	66.351	62.3	84.179	85.658	62.808	36.673	24.14	58.769	75.129	15.7208	20.346	52.1172	81.694	109.285	86.049	85.982	71.389	47.5682	23.5138	22.449	87.165	89.853	81.468	78.113		0.588234	67.088
13.2128	35.5459	93.9537	106.138	107.775	88.646	60.858	68.716	86.428	89.523	66.236	34.63	32.899	56.036	78.825	17.8343	21.715	49.2182	99.644	112.034	88.558	94.456	74.859	52.2496	22.0543	21.153	74.993	85.844	83.484	88.653		0.59358	68.7227
13.3319	33.431	105.972	96.505	105.162	78.337	70.74	67.051	93.752	79.266	76.025	36.081	26.105	68.063	74.225	14.7858	18.675	45.212	91.802	105.345	84.925	81.935	84.859	52.6258	22.1214	21.242	78.806	80.385	80.656	81.519		0.598931	67.4348
13.4509	39.4072	100.177	91.616	96.226	77.482	72.099	64.666	89.879	76.497	76.667	38.547	33.53	68.847	83.239	15.0705	19.028	48.0842	101.364	94.98	89.034	76.356	89.165	44.5056	24.4006	24.093	80.811	82.079	70.84	81.482		0.604277	67.2473
13.5699	37.2592	101.58	97.241	98.105	77.775	68.741	68.089	85.175	83.862	74.617	30.562	27.662	54.207	84.162	19.6233	18.506	47.3847	92.329	94.528	92.119	76.703	83.668	48.7393	20.2418	27.321	75.676	74.557	82.117	89.706		0.609623	66.6295
13.689	38.1364	92.3885	92.074	96.999	85.54	63.932	64.787	86.227	75.26	84.281	33.171	39.387	57.795	82.726	13.8205	21.498	47.7177	91.443	92.235	94.148	72.871	83.923	46.2869	19.2328	25.633	73.84	83.288	83.454	88.776		0.614973	66.5818
13.808	42.4409	93.7857	87.23	101.549	87.222	62.757	71.197	93.63	92.548	82.328	35.186	34.354	59.583	88.866	12.6924	16.059	36.7987	82.647	86.369	92.228	80.113	83.347	43.4173	23.1747	23.002	66.972	75.558	79.049	86.702		0.620319	66.2347
13.927	33.6338	91.6424	83.467	100.361	86.006	62.265	71.503	93.706	78.276	89.905	29.939	32.45	58.224	92.827	18.5762	18.46	42.6761	81.906	92.556	103.496	73.198	85.368	37.943	20.5524	23.196	71.706	72.744	94.438	86.223		0.625665	66.4567
14.0461	41.2988	89.2536	78.795	92.993	83.008	61.09	64.237	92.25	80.662	80.555	30.365	32.445	57.959	94.061	16.8186	19.686	40.0982	84.295	77.897	92.015	71.276	86.872	38.1271	16.9109	27.424	81.144	69.43	88.731	82.688		0.631016	64.565
14.1651	37.6492	86.3643	83.591	86.81	94.807	62.88	72.892	89.282	77.325	88.717	34.153	32.033	66.665	87.765	16.801	16.723	41.1943	77.491	83.31	90.233	67.577	83.53	47.4968	22.4454	26.339	79.866	71.378	93.574	87.433		0.636362	65.7353
14.2841	44.8509	73.4672	75.173	91.633	79.582	66.626	78.117	91.241	74.696	89.399	41.793	30.205	62.145	87.967	15.2398	18.079	38.6515	78.963	87.354	78.651	65.831	82.382	49.2766	22.7189	22.486	84.917	72.582	85.235	87.864		0.641708	64.7285
14.4032	46.4461	74.9219	80.86	85.451	75.258	55.104	83.664	93.23	74.752	82.881	40.701	30.304	72.482	88.261	16.1305	19.408	40.7805	68.681	85.466	84.74	66.252	77.853	44.0958	18.3878	27.706	86.15	73.825	97.073	95.419		0.647059	65.0443
14.5222	44.179	72.6659	82.768	93.726	69.572	60.138	84.268	93.931	68.18	87.24	38.586	32.434	73.666	82.437	17.5339	23.167	40.377	77.561	86.791	95.84	67.607	84.521	43.522	25.554	25.459	74.322	83.035	88.593	89.541		0.652405	65.766
14.6412	51.8423	71.0884	82.019	99.362	79.053	72.627	82.429	94.698	75.984	88.368	48.869	28.055	69.494	99.87	17.5692	15.477	49.4715	68.83	79.984	97.257	70.725	79.588	48.8764	23.4662	29.595	86.419	85.362	87.821	86.091		0.657751	67.9411
14.7603	52.5058	70.3348	91.29	87.526	86.252	71.386	92.419	84.184	67.854	83.777	48.529	36.468	64.551	100.851	16.1149	18.539	50.3105	82.224	79.731	78.135	63.059	77.819	44.8604	18.0418	21.692	91.993	81.599	91.155	84.864		0.663101	66.8298
14.8793	48.2231	67.4284	86.731	86.953	96.336	71.967	99.867	84.143	72.359	77.586	48.563	32.031	69.131	94.622	20.0128	17.854	49.6941	78.031	87.421	73.636	73.618	71.426	48.548	22.0553	25.524	82.444	75.092	90.632	89.678		0.668447	66.952
14.9984	55.901	68.6358	90.567	81.001	86.59	75.464	102.983	88.492	69.352	71.771	50.573	32.44	58.878	91.128	16.2087	18.59	43.0285	65.559	88.971	73.451	70.235	76.544	51.158	23.2308	24.954	72.529	83.327	88.655	97.013		0.673798	66.1114
15.1174	56.5759	72.6164	93.216	89.387	96.238	69.067	112.356	85.314	75.758	69.789	51.737	34.595	71.245	88.471	20.3575	23.639	50.2907	68.391	89.611	74.126	65.644	68.024	46.3354	21.1392	21.589	83.406	75.609	89.401	95.87		0.679144	67.5792
15.2364	56.368	63.9663	91.336	83.097	95.649	85.831	113.147	88.851	71.343	73.339	62.406	36.979	59.709	91.781	15.412	19.605	56.1766	68.97	88.104	79.656	66.122	71.51	44.726	18.9389	20.958	77.956	73.001	101.55	97.081		0.68449	68.0541
15.3555	59.7324	61.6523	88.104	80.247	94.968	70.997	116.713	89.48	73.941	68.464	59.041	39.888	59.464	102.177	14.415	16.951	62.9367	75.078	81.777	75.122	75.535	76.495	51.9114	16.615	23.239	73.987	82.628	86.054	89.156		0.68984	67.8196
15.4745	57.9155	63.5795	88.369	83.705	97.598	80.456	126.602	94.334	72.983	69.813	64.601	47.888	63.277	96.119	12.7823	20.525	58.8482	71.84	76.346	68.465	69.6	82.187	42.2562	13.7848	22.573	75.766	85.47	95.213	95.371		0.695186	68.9058
15.5935	62.4779	72.4966	83.752	84.714	98.798	78.303	122.006	92.497	75.776	69.822	65.488	37.831	64.948	96.536	17.1414	18.672	61.7436	83.036	79.505	74.984	66.277	74.04	57.0562	21.7788	20.893	77.664	74.876	85.862	97.556		0.700532	69.5355
15.7126	65.0776	68.465	90.608	89.533	95.044	85.342	111.033	91.537	83.516	76.329	77.915	41.559	62.223	95.583	18.453	20.542	67.5402	74.971	68.919	78.049	64.05	85.771	49.9219	18.5883	23.524	74.461	86.936	77.337	94.593		0.705883	70.2559
15.8316	71.8977	66.4468	93.034	84.794	84.218	92.158	118.573	96.557	85.462	71.143	72.041	40.953	70.585	95.751	16.4674	21.876	71.2891	71.059	74.619	67.771	56.683	72.136	48.4116	17.2685	21.294	65.214	80.407	79.813	92.953		0.711229	68.9957
15.9506	64.3826	58.8481	81.225	80.836	88.642	93.419	115.909	88.45	94.685	73.924	82.68	39.781	70.422	100.277	19.6337	24.976	66.4755	73.343	68.512	83.969	65.344	75.475	45.8606	23.8622	25.004	73.764	75.774	82.575	94.778		0.716575	70.0975
16.0697	73.8028	63.4408	85.346	77.804	81.88	106.265	104.386	82.9	85.922	75.05	87.966	45.409	75.984	95.935	18.0267	28.407	66.8156	72.315	67.436	78.023	63.74	70.973	44.8121	23.4165	19.594	73.573	82.198	81.336	95.669		0.721925	69.9457
16.1887	72.8063	62.1116	79.449	85.232	90.586	104.046	96.437	89.016	94.365	71.159	84.468	52.284	80.202	85.152	16.3062	26.665	69.6378	71.839	74.471	85.44	66.215	73.009	52.1966	17.4268	20.634	74.542	84.581	79.386	92.281		0.727272	70.7567
16.3077	66.6567	75.039	71.927	89.499	87.457	109.465	100.17	87.99	94.161	68.261	86.067	54.938	76.47	85.743	16.3596	24.449	73.6908	76.462	71.789	73.263	63.155	76.444	56.6169	22.2825	20.409	69.191	78.138	80.842	103.474		0.732618	71.0486
16.4268	57.304	78.2961	78.764	88.101	84.618	122.405	94.801	89.295	81.87	60.89	84.9	61.726	83.634	95.138	22.4067	29.257	71.6799	66.12	72.937	79.747	66.63	75.218	52.8643	19.0776	21.569	79.468	78.32	86.765	89.506		0.737968	71.4934
16.5458	77.8983	79.4185	86.677	91.877	93.242	111.842	86.404	84.62	84.441	71.611	93.859	65.229	76.008	85.58	19.4036	33.252	64.6062	73.656	81.04	77.018	68.103	73.75	49.1931	17.7009	20.129	74.347	81.426	87.332	104.613		0.743314	72.9061
16.6648	66.5492	91.0832	88.3	83.798	91.177	116.739	89.931	88.086	89.269	74.033	92.843	69.462	90.446	86.449	21.9808	26.381	67.4493	69.943	71.138	78.623	67.429	73.174	55.1573	23.2221	20.088	82.479	72.926	83.346	92.774		0.74866	73.2509
16.7839	72.1573	81.5059	79.132	89.883	88.663	109.912	78.333	81.805	93.1	66.009	89.913	72.156	87.854	85.341	21.0445	30.316	68.8811	73.777	70.633	74.089	71.848	57.5	50.528	22.1304	22.868	81.848	77.914	76.142	96.975		0.754011	71.4572
16.9029	85.879	76.4878	88.43	78.03	94.231	113.641	81.022	85.752	87.268	65.405	86.594	83.079	96.882	89.899	19.3792	23.957	69.8147	78.266	78.075	68.872	70.489	64.216	54.8221	18.6903	20.715	74.098	79.515	73.175	106.937		0.759357	72.8835
17.0219	74.5095	82.0753	91.704	82.532	95.691	117.911	83.918	103.348	74.621	68.232	75.588	69.394	89.791	86.727	22.1416	28.448	66.4409	83.957	61.854	79.037	73.003	65.084	50.5568	17.814	17.136	71.934	69.273	85.307	108.202		0.764703	72.2838
17.141	84.7557	91.5593	81.566	82.016	102.316	105.49	84.018	109.545	76.304	62.421	70.334	81.126	94.682	85.488	18.4358	26.915	65.1751	75.878	63.411	66.064	79.56	67.173	46.5199	25.175	22.13	66.75	71.902	76.698	94.893		0.770053	71.6655
17.26	86.966	78.914	78.49	84.428	95.577	98.268	80.073	103.893	79.715	67.141	75.457	89.771	105.98	94.716	19.5879	27.763	71.0697	73.846	72.313	61.936	78.806	65.931	49.1447	22.642	20.194	69.183	78.217	72.23	100.102		0.775399	72.495
17.379	101.909	86.2562	85.683	89.284	101.473	88.893	81.331	95.038	80.751	68.086	72.375	86.634	99.645	85.326	20.3185	29.88	75.8947	85.345	61.826	67.391	72.35	53.156	60.7303	23.7046	25.543	54.751	73.276	74.125	107.977		0.780745	72.7225
17.4981	89.497	82.8437	88.849	88.069	93.97	82.793	91.788	95.453	86.477	74.36	76.529	89.447	99.698	79.702	19.8209	26.528	66.6993	75.352	59.726	67.492	87.662	57.854	55.0973	21.7664	23.474	58.62	76.418	72.188	108.518		0.786096	72.2997
17.6171	86.6108	81.7346	82.979	89.232	97.602	90.573	89.002	99.482	82.328	73.866	62.872	79.563	98.989	84.115	22.4986	38.989	57.7487	78.27	54.351	62.295	81.079	59.526	60.9572	22.5059	20.755	62.749	80.138	85.392	100.564		0.791442	71.9575
17.7361	74.2851	77.2515	83.209	78.481	95.911	94.371	80.76	95.792	72.88	78.077	66.502	86.555	99.42	83.332	22.8027	31.493	61.8604	88.721	55.051	66.03	74.112	56.661	56.8184	23.6019	21.222	62.559	80.441	83.177	89.653		0.796788	70.3803
17.8552	80.7075	82.5267	78.356	91.48	95.481	81.489	96.679	102.656	79.599	79.337	67.867	82.661	93.812	78.143	19.6013	35.329	57.1227	76.447	62.079	66.588	79.092	55.824	56.5671	23.9761	23.719	63.152	79.273	78.698	98.054		0.802138	71.2523
17.9742	81.3751	80.6207	76.672	81.988	96.287	76.504	92.195	90.196	75.972	75.952	70.304	85.713	95.572	84.154	26.5489	33.019	61.7506	86.776	52.299	66.987	73.265	53.975	51.8993	19.4544	23.354	60.97	90.756	81.956	101.529		0.807484	70.6222
18.0932	72.8784	83.0024	67.001	78.429	107.317	85.004	108.946	100.926	72.813	68.587	68.248	87.958	96.894	75.987	34.4258	35.935	68.131	89.476	58.449	71.646	68.175	55.39	52.6416	26.209	23.796	61.51	83.641	80.004	94.465		0.81283	71.6512
18.2123	82.6155	70.9847	67.541	81.922	95.284	92.178	106.648	85.214	76.033	65.639	59.531	67.488	95.317	82.398	33.8269	33.437	70.0623	89.018	59.072	63.863	61.59	53.652	54.058	26.5937	20.585	60.354	83.81	81.316	99.13		0.818181	69.6262
18.3313	81.2766	78.9669	78.039	86.913	94.591	82.528	103.43	95.019	83.073	75.208	69.228	73.702	81.167	90.353	31.4913	40.53	68.3846	91.075	51.897	65.965	67.168	61.192	55.0705	24.1612	22.191	65.049	77.206	76.476	87.521		0.823527	70.9956
18.4504	71.4045	77.7106	71.359	83.745	84.555	80.948	106.9	89.007	79.988	83.346	70.746	67.333	84.524	86.737	38.6667	42.45	75.4116	87.424	54.569	66.721	60.793	61.438	59.6649	28.1662	25.762	54.813	84.71	75.015	83.238		0.828878	70.2464
18.5694	63.7046	66.9048	63.819	78.17	80.896	83.035	104.895	82.539	97.484	71.823	65.798	60.214	92.133	79.927	40.5722	38.713	75.9523	84.886	51.449	69.244	62.51	58.743	54.3532	24.0858	25.786	50.532	96.96	79.235	93.134		0.834224	68.8792
18.6884	71.348	76.4253	80.265	66.546	81.407	80.684	103.332	86.435	91.546	67.671	50.771	53.929	75.896	79.047	42.406	45.106	83.3726	87.618	58.097	72.4	56	70.28	46.8008	27.5432	22.766	55.114	85.857	85.267	96.562		0.83957	68.9825
18.8075	65.4148	67.9848	70.317	71.499	80.504	80.855	98.178	91.179	91.007	64.251	32.913	55.408	86.487	85.747	44.5577	42.295	92.119	85.603	55.855	73.917	56.097	60.235	48.0108	26.5247	24.159	59.933	87.299	92.065	96.752		0.84492	68.523
18.9265	64.0778	79.959	71.718	68.654	69.927	80.622	91.42	83.251	87.444	69.791	23.836	59.191	76.086	76.664	47.7195	47.865	93.6632	87.252	58.761	67.446	54.179	68.831	50.6551	27.8472	27.433	57.082	72.677	79.45	97.612		0.850266	66.935
19.0455	71.1971	64.9668	68.445	70.757	62.533	71.139	88.854	74.942	97.869	79.768	16.111	59.367	77.222	76.567	53.4441	49.568	96.7764	92.878	61.764	53.54	51.004	67.752	48.8092	25.9853	23.875	61.017	84.286	88.659	98.987		0.855612	66.8304
19.1646	60.6633	71.6169	63.251	61.935	61.169	70.196	87.439	83.226	90.164	69.981	11.24	46.362	67.641	72.821	60.7343	49.794	87.5364	84.803	54.164	52.419	55.207	72.782	45.7978	24.4418	26.394	58.851	86.424	90.491	91.758		0.860963	64.1139
19.2836	62.0687	58.4422	67.453	70.344	62.999	64.259	77.874	98.558	89.786	57.906	9.409	43.416	75.658	75.24	63.5451	53.201	91.0569	83.335	60.997	52.683	46.813	67.464	46.9771	29.7272	27.939	55.507	87.934	93.9	106.013		0.866309	64.845
19.4026	63.1341	61.7068	56.32	68.521	53.168	67.853	78.114	98.447	92.972	65.193	7.995	31.171	64.894	69.304	67.2841	57.029	91.2033	74.942	54.508	59.902	47.988	58.817	49.2863	32.1773	31.613	57.063	82.336	93.137	93.366		0.871655	63.0843
19.5217	64.2847	56.7162	63.527	63.834	47.96	59.603	68.177	95.231	89.923	60.229	6.219	24.928	67.741	70.218	65.0559	63.987	97.579	71.34	57.151	55.386	42.968	56.153	47.9286	33.0967	28.076	59.711	89.873	86.004	100.28		0.877005	61.8338
19.6407	62.388	52.8249	59.76	62.605	48.78	57.75	68.861	95.603	81.296	54.573	5.473	17.537	68.182	65.139	65.0976	67.693	93.0018	72.801	48.609	52.687	46.187	54.205	52.9006	33.2415	31.157	60.764	77.18	97.159	101.019		0.882351	60.4991
19.7597	61.6246	49.0588	62.426	44.659	43.645	51.155	62.48	97.427	75.896	41.203	3.868	9.773	73.272	69.051	61.6712	52.853	85.8717	68.973	49.876	43.78	44.154	46.187	50.6212	34.4147	28.756	56.371	73.326	92.919	104.562		0.887697	56.5474
19.8788	61.1788	55.2825	53.814	43.906	35.788	49.181	64.077	92.8	72.376	36.058	4.738	11.289	57.283	58.585	55.6996	68.473	87.3335	72.898	52.209	41.445	40.114	45.27	48.2448	35.1515	31.734	59.006	64.935	85.537	92.349		0.893048	54.3709
19.9978	59.9573	54.3696	51.781	49.719	31.646	47.953	59.455	91.687	65.725	31.138	3.559	7.5	58.893	50.397	60.6278	66.965	84.1374	70.23	51.907	44.393	40.667	32.897	42.9173	42.7965	24.649	54.653	73.642	93.405	104.91		0.898394	53.5371
20.1168	60.0571	57.0115	58.155	39.776	29.569	43.324	45.034	92.69	61.362	23.86	3.725	5.114	48.875	44.15	54.0319	62.141	81.0295	67.783	44.688	39.049	35.852	45.025	42.9206	43.2142	30.348	51.07	76.459	74.637	100.275		0.90374	50.3871
20.2359	59.5171	49.0988	44.743	39.271	22.432	36.338	49.413	78.019	67.743	12.749	3.609	6.254	48.312	37.511	52.9049	59.249	75.3512	73.127	37.475	35.189	32.35	41.729	39.2743	41.1588	29.668	47.421	69.339	64.453	100.336		0.909091	46.6909
20.3549	63.7854	50.5612	45.41	39.837	18.965	30.797	46.084	92.525	60.384	7.987	4.941	6.327	36.562	37.404	49.9947	55.874	74.2328	68.508	37.723	35.641	33.613	35.744	33.3885	37.7292	26.689	46.837	70.912	68.803	96.706		0.914437	45.3091
20.4739	51.1949	47.7792	39.739	33.436	17.588	25.748	44.558	74.809	46.528	8.087	3.062	4.586	24.248	27.606	47.9356	53.462	72.5386	60.758	40.21	34.358	37.575	31.069	40.9674	43.0332	28.891	56.675	65.924	77.59	88.857		0.919783	42.3729
20.593	57.8015	47.5146	44.814	31.081	20.077	16.459	37.116	65.967	45.988	9.784	3.801	5.409	19.974	22.818	33.0512	50.836	65.2229	53.497	39.642	26.909	26.266	34.15	39.887	43.7309	24.288	50.548	50.94	65.363	92.948		0.925133	38.8236
20.712	51.5059	43.1986	33.264	28.405	18.04	14.319	33.06	60.568	41.126	5.784	2.396	5.796	13.464	24.881	37.2807	42.64	72.9068	51.752	36.25	30.358	32.96	37.186	30.1372	35.2724	27.231	48.41	56.167	69.734	89.555		0.930479	37.0223
20.831	45.7156	36.4023	28.044	21.12	12.756	15.225	31.209	61.07	29.01	4.731	2.955	5.369	14.659	20.574	27.6446	44.86	58.4497	56.847	31.322	36.541	30.016	32.179	35.1125	34.0671	26.557	44.071	48.843	68.342	85.603		0.935825	34.1136
20.9501	47.1454	35.1786	23.286	23.195	9.063	14.862	23.388	49.369	22.914	4.663	3.079	3.026	12.049	18.932	22.4559	47.418	61.5305	56.486	27.421	29.158	30.555	29.282	33.2968	38.1727	27.712	39.847	45.619	69.049	90.867		0.941176	32.38
21.0691	37.0567	29.5552	21.233	23.396	14.113	10.147	20.631	45.403	16.955	6.58	3.4	4.283	10.759	18.303	16.3667	40.621	59.9568	50.129	34.265	25.051	26.627	31.22	31.7844	40.1801	26.121	40.185	39.333	60.169	87.51		0.946522	30.046
21.1881	32.0581	21.3548	14.276	23.071	13.766	9.895	15.614	42.25	13.186	4.458	3.588	3.478	8.28	13.359	18.1991	38.186	53.8468	44.951	26.586	26.649	28.005	29.407	35.1003	30.1529	29.648	35.966	48.521	52.902	80.19		0.951868	27.4808
21.3072	29.1425	18.3801	17.316	12.907	10.647	9.307	10.521	39.558	12.107	5.844	4.32	3.925	7.669	10.299	12.4752	32.821	54.0045	46.052	27.758	24.514	20.028	27.467	33.0058	37.5984	23.507	39.268	46.097	50.679	87.953		0.957218	26.0404
21.4262	19.2202	18.8593	15.075	17.983	12.035	6.952	9.905	30.165	7.876	5.519	3.87	4.511	6.705	11.454	12.4123	28.941	55.0449	50.359	25.882	18.848	21.052	25.06	25.3456	30.7298	24.315	39.526	38.622	47.182	84.083		0.962564	24.0528
21.5452	19.6174	15.2529	12.174	16.176	9.701	7.773	11.827	19.041	8.639	2.791	4.615	3.597	9.167	6.775	10.9429	21.114	48.1563	42.617	21.115	17.104	22.043	31.165	30.4825	22.6215	19.474	31.901	34.402	48.997	82.511		0.96791	21.7859
21.6643	18.1092	14.1986	12.222	8.636	10.538	9.555	10.97	18.095	8.156	3.063	3.307	3.574	6.146	6.443	13.7315	12.061	48.9082	41.918	17.702	14.803	19.578	24.152	24.7724	22.1728	19.693	30.963	30.912	56.115	70.593		0.973261	20.0375
21.7833	18.8017	12.9552	10.347	12.414	12.192	8.976	9.638	14.997	7.424	3.589	2.009	4.121	5.57	5.955	15.1292	15.368	48.9869	41.074	21.917	12.158	18.118	20.089	24.935	20.6908	19.23	27.517	31.488	44.542	71.768		0.978607	19.3793
21.9024	16.6441	13.5532	8.929	12.867	11.483	10.059	6.95	9.566	6.142	2.816	1.693	6.453	3.862	7.227	12.1137	14.813	38.0092	32.138	22.045	12.419	13.573	18.609	24.9095	18.3007	22.817	23.595	28.891	33.756	76.333		0.983957	17.6057
22.0214	16.8951	14.5293	7.269	10.857	13.216	10.327	6.026	8.761	6.448	2.768	3.427	3.975	3.687	10.988	15.3432	12.944	36.3668	25.204	15.48	11.972	11.983	18.804	25.5708	24.719	14.439	18.307	27.417	30.488	74.606		0.989303	16.6489
22.1404	12.9477	11.6057	8.204	11.351	14.539	9.362	6.238	5.28	4.421	2.768	2.644	4.234	5.436	5.908	15.8344	10.892	27.2514	29.658	15.078	13.511	12.139	16.972	18.4791	25.4467	15.54	20.854	24.789	32.997	63.792		0.994649	15.4542
22.2595	14.3669	7.8054	9.377	11.884	11.816	11.684	6.914	6.669	6.144	3.907	2.148	5.367	4.032	3.74	13.0886	13.538	29.8341	26.817	16.249	10.577	10.797	16.175	16.7773	19.0623	14.666	18.607	22.132	28.074	72.893		1	15.0049

## Sheet: Image6
X0	Y0	Y1	Y2	Y3	Y4	Y5	Y6	Y7	Y8	Y9	Y10	Y11	Y12	Y13	Y14	Y15	Y16	Y17	Y18	Y19	Y20	Y21	Y22	Y23	Y24	Y25	Y26	Y27	Y28	Y29	Y30	Y31	Y32		Ap-basal	Avg intensity
0	20.7854	26.8277	30.4164	42.8384	30.2475	23.9448	25.285	31.5161	27.0888	20.123	23.6227	29.32	28.6215	33.677	35.9959	25.334	31.6402	42.622	47.292	62.01	40.875	27.6449	49.114	46.182	51.5954	57.15	40	37.063	45.88	46.967	48.439	37.04	51.83		0	36.9391
0.119	24.5318	29.87	25.8845	41.9534	29.036	25.2541	21.4974	32.371	33.3637	24.0311	24.7951	26.064	28.0397	33.7645	41.0436	28.5408	34.4249	47.455	42.509	69.921	43.793	35.4665	51.58	51.678	59.702	57.812	38.825	39.379	46.512	53.946	48.861	40.291	42.253		0.00526162	38.6197
0.2381	25.876	32.3042	21.5106	47.6598	32.2747	25.5275	24.3353	31.1562	29.8772	23.102	26.041	24.445	31.467	35.0052	41.844	35.3738	35.217	46.768	44.716	74.917	51.77	37.2475	51.985	56.751	64.9326	62.078	43.55	37.834	53.656	49.387	51.26	37.73	45.727		0.0105277	40.4038
0.3571	30.189	34.5264	30.9741	44.8224	39.3883	28.9655	24.4647	25.8518	34.4191	27.5563	25.0961	27.399	38.4814	39.8695	50.2208	43.7899	34.4491	46.518	55.628	79.226	51.068	38.8758	59.316	65.472	75.767	69.777	39.679	36.309	59.589	51.461	53.989	40.169	45.691		0.0157893	43.909
0.4761	28.1201	37.2017	30.2501	50.4386	38.548	43.1537	27.5881	29.5097	28.9159	31.9805	20.3875	27.852	42.5233	41.1005	58.6322	40.5369	36.0685	45.576	65.353	88.125	49.82	39.3201	69.337	74.761	75.4332	68.199	43.224	45.189	55.189	49.95	53.363	46.755	39.826		0.0210509	46.1281
0.5952	34.1556	39.0648	29.6365	46.3109	40.1092	40.9952	34.4098	27.1701	38.7678	32.0601	23.7891	30.738	39.9394	44.9123	56.5857	44.9594	41.0964	50.902	69.453	101.349	57.613	44.2392	65.314	73.01	82.4071	69.936	48.078	51.178	50.316	53.322	50.028	44.967	44.411		0.026317	48.5219
0.7142	31.0789	36.2017	32.4563	44.283	43.9919	44.9937	29.4543	31.4176	48.9946	36.1208	29.1011	32.323	42.9849	47.2421	64.4793	57.145	35.7949	58.807	68.569	91.903	60.397	52.5707	77.586	68.641	92.203	63.4	50.13	46.244	52.979	48.21	55.714	47.926	45.8		0.0315786	50.5801
0.8332	44.0775	34.6612	39.0904	51.7007	47.404	45.1242	32.0685	37.9589	44.9469	37.7141	35.4145	35.096	47.4785	52.5429	73.1261	61.8843	44.0335	62.483	74.551	109.301	67.395	59.628	82.967	65.143	102.988	71.848	53.355	48.35	49.807	52.683	56.562	53.386	46.609		0.0368402	55.1933
0.9523	49.7934	38.6115	40.7018	53.1498	49.5087	52.076	32.2204	41.3466	42.0336	44.678	45.6765	34.589	48.717	57.7526	77.9091	63.4892	55.7198	63.418	79.348	115.49	79.639	59.818	84.492	70.335	100.404	82.867	54.232	54.322	47.432	47.347	61.817	51.831	51.457		0.0421062	58.5522
1.0713	44.8046	39.4728	43.9069	48.6465	57.9434	63.8744	38.6017	43.8829	55.0137	46.2311	40.0646	45.554	56.1003	63.3246	84.8839	77.6404	55.3272	77.851	81.905	110.778	94.287	72.8695	90.363	65.134	104.497	78.925	63.507	58.508	51.579	61.37	56.094	57.396	47.917		0.0473679	62.9774
1.1903	47.4129	41.3239	42.2108	52.4204	56.1364	60.1102	45.3488	49.016	59.1962	47.2007	47.1841	38.401	60.4705	64.2927	77.844	70.5205	58.2956	80.847	83.247	94.189	115.113	77.6929	102.209	71.468	91.1759	79.528	60.272	50.841	49.263	55.334	60.156	52.853	60.761		0.0526295	63.7071
1.3094	44.7452	41.7546	42.261	56.1083	60.4561	58.7367	45.5838	45.1514	52.1642	48.8918	51.0883	42.322	58.4662	67.0233	83.9081	72.7737	61.8426	81.264	93.794	98.617	139.446	80.6632	94.368	64.078	94.8806	90.301	71.035	64.298	49.654	60.43	63.831	56.595	63.844		0.0578955	66.6781
1.4284	42.6173	44.1067	45.7963	61.1994	56.2349	65.8146	44.3931	58.2498	60.0295	57.8921	48.0985	45.232	66.0878	72.6612	79.2205	73.0457	60.8082	79.939	93.737	99.021	142.177	90.7428	109.276	64.168	101.086	84.294	81.043	60.732	47.464	54.542	65.002	57.674	65.362		0.0631572	69.0227
1.5474	41.8089	46.105	48.3173	62.0175	60.7204	62.3946	49.0727	50.0359	58.9077	51.0571	46.0646	46.147	69.3875	76.8887	79.4392	75.6645	59.2146	84.711	101.481	88.832	138.267	89.4625	119.971	64.655	84.4695	95.135	72.195	63.104	48.274	58.679	59.653	48.723	62.742		0.0684188	68.5939
1.6665	44.02	41.2642	50.0151	56.3789	59.4158	63.2148	52.7498	51.311	55.8863	47.9175	53.9123	52.487	65.9992	70.9956	75.5972	71.381	61.7841	98.782	109.498	93.922	129.967	80.7885	132.34	69.015	83.9368	85.863	74.417	57.706	50.881	64.847	65.608	55.19	65.616		0.0736848	69.476
1.7855	44.7083	44.5618	45.7831	57.6888	61.4552	64.9942	50.4615	59.918	59.8627	61.2925	52.1932	61.292	67.8385	71.2339	71.2174	66.4041	71.4124	95.593	97.371	84.844	120.016	77.827	120.846	68.388	75.3195	98.162	76.406	59.01	49.344	54.686	60.865	58.254	68.489		0.0789464	69.0224
1.9046	39.9998	48.8343	50.1372	56.1973	59.6609	70.6441	62.1365	55.1515	65.5686	62.4951	57.4095	59.345	66.2757	71.411	73.4757	68.8873	72.7925	94.963	86.212	79.801	103.219	91.4597	129.282	64.08	78.9758	113.487	78.154	61.403	55.592	57.419	62.299	59.369	64.115		0.0842125	70.3107
2.0236	39.1406	44.6558	53.0725	57.8088	64.5023	67.2983	55.2687	59.234	65.1735	54.1464	62.1636	67.464	67.9122	69.8109	70.4335	73.3393	73.1876	104.06	93	76.129	100.247	95.8565	131.422	71.748	74.4296	106.275	85.999	64.468	58.443	55.387	67.369	52.621	73.805		0.0894741	71.39
2.1426	39.6827	47.7745	56.7286	61.381	62.7029	63.3079	51.0459	59.9177	64.196	58.2304	66.2032	67.786	66.3879	65.1478	73.8702	69.7524	72.6202	111.516	77.872	74.085	94.358	93.7242	124.308	72.235	71.5449	93.99	80.534	61.993	62.582	61.796	64.531	60.193	76.962		0.0947357	70.5745
2.2617	45.6479	49.3399	53.028	68.1037	65.7458	61.327	61.204	63.5596	68.2514	71.1341	62.6598	69.592	62.1459	58.0733	69.8788	69.8571	76.0474	115.534	72.408	69.896	92.525	88.7734	122.899	76.501	74.2727	98.798	77.15	61.286	66.055	54.943	66.961	58.281	80.935		0.100002	71.2974
2.3807	42.8489	52.4744	57.3485	72.017	61.1666	66.5403	54.8867	57.1425	62.1668	67.8216	65.8559	71.43	68.6615	58.3241	63.9969	67.9371	68.9495	107.391	87.79	67.84	90.132	91.6578	118.9	76.402	71.3238	101.001	91.364	67.283	67.409	57.979	68.634	59.737	86.863		0.105263	71.8568
2.4997	48.9204	47.7949	60.7457	62.1841	63.252	68.3974	61.7542	62.2111	58.99	54.3913	67.3668	70.692	65.5528	67.2807	65.4632	67.721	69.9491	106.898	73.965	67.543	90.895	89.4679	115.281	69.549	69.3052	101.508	92.024	70.894	70.039	59.929	72.14	65.666	89.597		0.110525	71.7384
2.6188	45.8445	44.7506	66.8978	60.783	64.9957	65.6296	53.2737	53.5935	60.673	62.8719	64.5739	85.189	70.4408	58.6524	54.7979	67.7833	75.4891	123.603	77.086	61.278	92.108	89.6089	103.293	76.302	71.0232	108.997	90.364	78.19	70.735	62.099	65.6	64.669	93.613		0.115791	72.2669
2.7378	43.58	45.0859	58.9024	55.491	63.3538	66.8064	55.1917	60.6206	58.6758	53.0179	66.0618	97.796	76.2397	60.8631	54.8514	73.2114	73.6063	113.03	71.58	66.57	87.367	81.2831	96.687	83.188	74.1677	96.953	93.81	90.168	77.833	68.433	73.413	67.675	88.154		0.121053	72.5354
2.8568	48.9492	46.1509	54.4497	56.4229	62.3393	65.876	64.7841	46.8415	56.5532	52.4634	70.1628	102.32	81.9553	58.1443	57.5583	72.6907	73.1233	107.543	73.433	64.484	84.439	84.0404	97.346	90.551	74.3066	97.969	92.344	83.412	80.503	55.264	69.101	63.057	104.264		0.126314	72.5104
2.9759	46.8099	47.6384	63.8867	59.8899	60.2795	70.923	56.0309	56.7752	60.0985	52.986	63.2671	88.53	83.273	56.9921	63.2485	72.4171	77.2013	107.062	68.719	73.292	87.302	76.8107	97.231	78.825	78.8806	97.727	96.486	84.039	82.833	66.348	72.263	70.275	118.347		0.13158	73.839
3.0949	48.1092	44.6309	66.5588	61.493	64.816	74.8191	53.485	45.4069	51.785	52.3821	59.9556	92.438	73.4596	51.6923	61.9228	65.2177	78.6168	110.643	68.14	79.848	88.46	77.1601	97.869	82.246	76.1808	106.324	99.977	83.285	83.662	54.238	67.458	74	122.704		0.136842	73.3025
3.2139	44.1769	46.6154	64.3565	58.9889	58.8826	62.611	57.747	47.8968	51.2697	50.3744	52.003	93.257	75.7165	57.3438	71.8958	74.4953	84.136	101.386	67.073	76.951	72.895	75.2014	99.892	70.564	85.1021	105.179	96.166	86.542	87.801	56.642	77.509	76.622	117.608		0.142104	72.8758
3.333	40.5748	43.8258	67.1724	64.5192	62.3996	63.8808	56.9664	47.425	59.4615	58.7589	65.0392	83.265	76.3657	63.6574	66.316	79.9238	80.473	118.995	56.28	70.757	78.704	86.7928	94.78	74.968	79.2259	89.229	99.767	81.556	95.275	62.18	82.875	77.574	125.656		0.14737	74.383
3.452	43.1393	37.6403	65.8332	58.3166	62.7862	64.7328	55.3201	48.7685	53.8174	56.8806	59.4061	80.674	73.5993	56.6956	69.6566	72.5349	86.855	117.033	63.561	68.492	86.414	73.5745	87.821	79.343	85.9636	100.775	97.702	81.949	91.764	68.966	87.247	86.368	134.096		0.152631	74.4765
3.571	44.5204	41.7042	73.3182	64.8285	66.7731	78.132	60.3027	48.4042	52.7612	56.4405	52.9199	77.305	76.0773	54.2446	67.8245	80.6146	77.3404	112.205	57.4	71.273	79.349	71.8156	85.177	79.938	82.3989	111.089	103.366	100.039	83.682	67.643	92.706	92.485	137.632		0.157893	75.8094
3.6901	47.7036	39.6374	78.997	62.6547	67.0057	69.6051	63.7002	49.7849	53.8715	57.0478	62.3983	74.562	63.3377	54.6503	77.9655	78.9534	75.8139	110.558	64.083	62.143	69.422	72.1395	86.365	86.891	84.4898	98.945	97.8	106.88	90.99	71.852	91.538	90.286	140.808		0.163159	75.8448
3.8091	41.3814	39.8268	70.0821	63.268	63.2355	68.5968	64.7308	48.1249	55.9858	54.9313	58.0442	70.176	60.7535	66.9438	78.0287	82.6122	75.5137	103.795	74.717	63.274	66.033	72.1546	94.147	98.839	89.9605	99.547	99.184	105.82	95.113	76.497	92.645	103.722	141.043		0.168421	76.9311
3.9281	39.8937	37.4972	69.677	69.9927	68.7749	69.1909	59.1482	49.9677	51.8302	62.1182	59.1453	78.602	73.0659	65.7591	71.7677	77.4729	79.9587	96.766	71.496	66.314	69.78	74.985	87.111	97.486	76.8715	97.496	100.816	114.761	91.899	83.881	103.416	105.227	134.014		0.173682	77.4601
4.0472	41.5776	44.2266	61.8007	63.8338	67.7745	63.4632	68.8115	51.3473	52.5066	61.1291	63.882	66.413	68.2141	61.9772	73.6012	81.5928	76.0913	85.946	67.605	59.517	72.655	70.3224	89.952	90.951	86.9342	96.876	103.503	117.853	86.253	76.234	101.755	103.721	138.238		0.178948	76.2593
4.1662	41.4071	41.6312	67.8923	61.7435	68.8465	69.9741	74.8359	54.1957	53.621	58.9853	66.0497	69.228	67.876	57.9603	73.3529	77.7762	71.5435	85.815	68.754	62.468	71.138	78.5323	92.582	87.89	85.9307	89.436	108.148	104.544	101.861	73.541	107.546	118.079	140.276		0.18421	77.3776
4.2852	44.6104	40.4739	73.019	55.3715	62.114	67.313	62.142	52.4607	50.605	54.0007	68.0944	66.04	58.4335	60.7634	64.4928	77.4116	74.28	80.011	64.801	66.697	65.107	73.5852	92.325	92.239	86.5985	94.18	101.113	110.289	97.626	79.181	109.948	128.058	133.645		0.189471	75.9706
4.4043	45.2723	39.3533	67.5065	55.5942	64.9763	68.0381	56.2461	56.3182	52.8042	49.7364	64.0364	67.238	61.7978	58.744	62.4121	67.867	75.5021	71.192	81.869	67.412	62.101	76.3499	83.35	94.008	83.0801	98.947	98.993	110.525	95.218	88.098	113.692	123.861	133.278		0.194737	75.6187
4.5233	43.8107	47.7635	61.9521	57.0688	71.5263	68.8005	67.171	53.5309	51.2766	56.8988	66.9828	63.233	62.9084	61.7708	70.7919	63.6458	66.6605	64.49	72.82	68.509	66.159	86.3292	83.018	89.479	82.8916	92.256	91.821	104.638	90.347	98.233	113.02	134.93	137.081		0.199999	76.1156
4.6423	39.4119	50.745	64.3138	53.3809	77.7042	70.7424	53.9937	59.4658	53.8222	52.2585	58.2108	64.096	55.9992	55.0288	76.3029	64.5448	81.8969	66.18	71.474	66.398	81.395	86.59	85.49	92.357	81.158	94.605	93.871	101.831	94.75	109.047	116.677	131.67	141.25		0.205261	77.1715
4.7614	35.6133	47.9504	55.9361	52.3172	76.5252	71.3747	59.3634	55.5211	55.6871	45.4993	61.4043	74.166	61.7515	54.7702	65.636	65.4678	76.293	59.446	62.171	74.097	75.809	80.1179	84.417	96.046	73.0938	90.266	104.003	92.348	99.211	99.95	113.049	116.369	118.907		0.210527	74.3811
4.8804	42.0246	45.6588	56.8443	57.7204	77.8539	66.2699	59.2085	61.8664	52.5736	51.412	53.3359	68.908	65.9912	60.1418	70.1758	64.5527	72.1067	60.431	69.677	75.977	71.698	79.1212	87.697	104.766	74.8767	89.787	105.277	92.608	101.917	100.529	113.101	125.283	121.281		0.215788	75.7779
4.9995	40.9717	38.5385	47.3506	55.24	83.942	69.7306	55.826	61.2938	49.9172	58.8286	51.9803	72.135	67.6728	65.3025	68.8662	62.0516	75.6455	63.45	67.069	75.807	72.709	87.2263	91.481	111.656	79.4562	94.32	106.052	102.773	97.406	101.111	117.925	131.507	126.491		0.221054	77.3252
5.1185	46.0161	45.9108	51.0928	56.8511	85.4348	69.6066	57.1269	58.5018	55.9352	46.7213	50.7018	68.114	60.391	55.7577	66.9824	60.1791	78.6359	61.827	67.041	73.488	73.998	82.0538	85.941	107.055	72.2874	92.65	106.431	100.358	88.938	85.661	120.285	137.464	124.67		0.226316	75.579
5.2375	44.7767	39.3281	53.062	64.241	82.7839	60.3935	49.8708	58.8904	61.9176	48.9944	51.3772	73.511	52.1983	47.8273	64.1027	57.5885	69.9473	55.664	62.383	75.655	73.803	77.6637	70.889	103.22	77.6265	98.295	97.693	95.341	103.574	92.67	110.539	130	139.171		0.231578	74.0908
5.3566	39.6509	47.8254	52.7432	53.4964	78.6307	56.4945	48.0524	56.8825	57.8292	53.4074	56.7673	68.344	59.1478	58.8398	56.9964	65.3651	70.2988	58.526	63.75	64.912	69.645	81.4886	78.15	116.465	83.121	92.477	98.413	92.747	103.202	105.845	113.847	121.447	129.89		0.236844	74.3848
5.4756	47.2181	44.6367	54.1135	54.6813	70.3247	54.4788	40.1988	55.9191	50.593	54.0711	52.2018	56.363	54.9544	61.0016	62.1618	60.4609	70.3783	65.618	55.217	69.187	76.08	74.4132	83.94	121.945	75.0472	87.56	94.007	94.84	98.058	100.058	105.25	119.685	124.08		0.242105	72.3861
5.5946	47.4345	39.5459	48.5222	58.5373	74.7162	52.3892	47.1043	61.0997	46.642	56.2792	60.9148	62.216	51.6034	47.3571	59.0649	64.6567	58.8459	58.383	65.512	70.861	76.713	80.4727	83.303	111.217	79.6581	98.318	92.81	90.45	99.415	102.131	104.03	115.676	124.022		0.247367	72.4212
5.7137	51.7097	38.7564	43.472	53.3829	79.138	58.7803	53.2719	60.3383	52.5769	61.4102	59.4237	69.284	50.0729	50.8937	57.5422	59.9886	59.2608	45.573	66.18	60.718	78.239	70.0554	76.813	107.096	76.2209	100.564	90.654	94.537	101.108	97.018	110.626	119.163	129.449		0.252633	72.2217
5.8327	48.8623	41.6003	43.7612	50.709	77.0679	54.2238	50.6303	55.5198	58.8343	56.7399	50.92	61.249	55.7052	55.9349	60.1671	65.0648	63.914	56.646	64.176	68.266	62.74	75.2495	76.665	99.384	73.879	91.56	92.841	90.333	102.011	99.893	105.751	116.907	131.715		0.257895	71.4824
5.9517	49.9184	51.6395	46.71	54.0262	77.1967	53.0602	41.2946	60.9444	58.6157	59.4066	58.7284	55.526	56.4804	57.2395	65.7624	58.7034	56.607	48.614	54.78	64.217	77.383	71.4893	79.637	110.487	72.0936	88.599	99.06	93.122	103.057	104.076	107.589	112.065	126.719		0.263156	71.9651
6.0708	44.8349	47.6457	44.152	46.3693	71.5593	60.8436	44.361	67.46	61.1762	58.2941	47.6266	56.807	52.1791	49.0049	69.2452	61.5661	61.1714	48.428	61.561	60.03	64.254	68.4974	78.667	111.455	78.1017	86.524	99.089	93.421	109.205	101.753	102.169	106.835	112.803		0.268422	70.5179
6.1898	52.622	49.8625	40.1816	47.912	69.2043	48.6921	44.9529	63.0565	70.3148	60.394	57.261	45.949	48.9126	52.5835	61.86	60.6777	57.2404	46.669	61.131	57.653	58.932	67.0914	69.331	89.375	85.4784	86.949	98.681	100.553	102.436	104.511	99.958	108.833	111.54		0.273684	69.1151
6.3088	50.363	43.4889	41.0799	54.378	64.6851	46.8671	42.878	55.6961	65.3859	55.1905	52.3806	49.109	44.8436	55.7584	59.0047	58.8384	49.4179	49.041	65.144	62.068	64.731	75.525	71.086	95.291	79.7824	90.689	99.702	101.689	102.781	105.582	99.876	108.088	115.046		0.278946	68.9541
6.4279	49.6999	43.7765	39.6101	48.9239	64.3711	43.8094	54.6729	61.5036	62.687	54.9164	53.6321	53.076	49.9747	56.1709	81.2311	66.2597	59.6472	47.188	63.34	49.224	68.604	69.3653	69.309	92.852	76.3148	91.213	105.926	99.307	110.476	100.574	105.714	115.265	111.289		0.284212	70.3007
6.5469	46.0611	39.2222	42.264	47.4303	68.7197	52.2395	50.0684	54.3847	56.515	56.6657	51.4142	50.35	50.5984	55.1817	68.3626	67.8544	66.308	48.524	60.57	50.531	73.479	80.9225	78.352	93.603	78.817	86.08	96.06	105.876	93.109	98.704	102.684	114.656	121.56		0.289473	69.9142
6.6659	43.5736	41.3586	42.7138	51.7048	68.3512	49.2256	40.4945	53.7297	55.4462	60.2506	58.0688	57.597	51.6104	56.753	72.1529	75.8335	66.3917	43.351	54.396	49.317	74.678	73.1466	67.074	92.401	77.9508	84.541	98.26	100.149	112.991	101.007	112.932	113.262	115.38		0.294735	70.1846
6.785	49.1631	39.1919	40.7947	44.8978	47.6381	40.1337	41.0264	53.9131	52.3615	61.6216	54.3347	49.617	49.7216	52.3735	70.5801	70.6374	64.0621	49.395	59.222	58.263	73.114	65.6613	71.275	88.823	81.9608	91.76	95.032	108.976	104.957	114.276	112.145	121.501	114.337		0.300001	69.4778
6.904	46.0308	35.7725	34.927	45.8855	49.264	43.1281	38.0066	54.7006	58.2176	54.1051	55.508	54.171	44.4899	56.2956	63.1438	69.6468	67.4126	53.692	56.368	53.19	72.825	70.1194	67.883	81.221	82.6526	85.394	97.854	112.986	93.634	126.429	115.53	111.364	115.395		0.305263	68.7043
7.023	44.5649	38.6397	33.909	46.4382	49.2526	40.7564	44.0606	48.965	55.2821	57.2746	57.6829	46.847	52.5225	51.8938	64.0326	65.4229	68.7772	52.803	55.568	51.368	68.682	76.0767	76.245	77.882	67.3896	92.613	99.781	113.159	100.55	120.182	121.366	116.465	104.544		0.310524	68.515
7.1421	48.3174	39.9787	36.5245	49.025	48.7853	40.7548	48.2061	43.555	43.9121	54.05	58.0507	48.332	43.9638	53.4257	68.1046	64.8758	66.1103	47.894	51.52	52.985	57.751	76.7874	70.198	75.731	70.6122	85.641	97.597	111.838	96.398	102.995	114.935	110.968	112.499		0.31579	66.434
7.2611	46.0266	37.158	43.6573	44.409	48.333	39.9845	40.6186	40.783	40.7697	56.3279	45.0074	48.782	46.6347	56.6765	76.4326	62.833	61.7082	45.314	46.394	54.593	67.627	67.6093	66.712	81.869	69.0258	89.435	93.512	109.282	81.795	106.225	105.698	111.149	116.978		0.321052	65.1321
7.3801	40.7335	41.941	39.8002	43.2898	56.7209	38.4702	37.222	47.2022	39.6646	48.2878	47.7911	44.97	49.2905	58.0921	69.9913	66.2623	61.3812	44.49	52.246	58.263	58.531	65.0056	66.611	71.482	65.9632	87.445	90.201	117.953	90.76	116.495	110.084	102.193	119.956		0.326313	65.1148
7.4992	43.2937	44.5033	36.0797	43.9085	45.3366	46.5424	36.6387	43.7907	41.4249	44.9752	46.94	37.623	41.3742	53.4555	78.3686	55.8384	61.0798	39.721	48.177	48.05	58.514	72.2521	66.793	69.171	61.632	84.933	84.083	122.473	91.226	111.536	100.897	115.518	118.165		0.331579	63.4641
7.6182	43.4585	47.9161	34.1579	43.3704	39.0709	42.1494	36.3981	40.0313	45.9272	41.9269	52.4831	45.289	44.4232	51.6636	68.0982	63.003	60.4408	41.098	54.33	53.081	57.636	66.2588	63.814	67.201	65.5324	78.311	93.092	124.03	83.246	98.84	103.085	112.233	106.424		0.336841	62.6673
7.7372	40.321	41.1565	34.4531	37.3194	39.339	38.3864	41.509	44.0463	37.9249	42.705	42.9435	46.822	43.4703	43.8698	68.0906	52.3899	60.2706	40.886	50.133	50.631	51.896	55.704	60.756	67.213	61.1092	77.741	89.185	111.88	79.441	98.461	92.518	120.531	105.8		0.342103	59.6637
7.8563	41.8192	35.552	40.6886	35.8616	41.0551	40.5523	33.5785	41.4043	41.3753	42.7468	46.3978	37.954	42.9377	56.1979	60.3625	54.4215	57.9769	44.313	51.611	56.428	52.959	61.0245	63.076	72.197	56.8853	74.505	87.976	111.202	76.82	88.35	97.574	122.728	101.179		0.347369	59.6882
7.9753	43.7836	37.9942	42.4185	36.0125	37.4542	40.7908	37.7304	37.6088	39.8633	47.5588	44.4178	44.394	38.1586	48.6994	57.0932	53.9985	53.765	38.413	54.675	63.546	59.08	54.5993	56.691	61.904	64.0093	77.323	82.593	104.235	74.811	83.478	81.026	120.513	114.2		0.35263	58.5709
8.0943	38.3805	38.2554	31.9065	39.4175	41.9036	32.2785	42.0088	39.8945	39.4002	41.7607	44.2299	43.314	38.1193	50.5707	58.4403	52.5753	50.7757	36.591	59.489	51.71	58.712	51.152	56.553	66.137	65.3029	78.542	80.691	115.903	74.193	74.794	61.167	117.348	104.301		0.357892	56.8429
8.2134	37.7506	42.4951	32.5437	32.7595	35.2242	36.1402	45.9041	34.8618	42.5335	34.0971	50.9474	43.48	43.9122	43.212	54.3167	55.3401	52.1659	35.582	47.501	51.602	56.327	55.6191	56.23	66.352	66.2975	82.002	87.187	95.994	66.928	72.313	68.2	115.712	97.198		0.363158	55.7191
8.3324	37.7632	41.4714	31.3076	31.0998	31.0439	36.3662	37.4537	36.9491	42.111	40.8853	38.1837	44.211	40.1254	47.6606	55.0076	62.3726	50.9834	37.342	47.955	54.183	48.369	56.0147	64.295	60.351	56.2942	85.312	88.172	112.166	71.927	60.7	61.464	116.52	91.605		0.36842	55.0808
8.4515	35.6713	39.1921	35.4561	26.8831	33.7405	34.259	31.7739	32.4355	39.7012	39.7013	35.6949	39.648	35.3105	47.6374	52.2123	55.3052	46.4691	37.835	54.564	54.874	59.661	58.1999	57.408	63.087	52.8986	72.805	85.482	107.629	63.528	52.53	63.475	105.427	98.745		0.373686	53.0073
8.5705	30.5115	36.7507	33.5828	29.6286	29.3637	27.1183	32.3154	31.6429	41.6067	35.8811	43.2934	42.422	37.3513	46.837	44.9493	56.9219	46.6519	43.491	49.246	53.748	49.433	53.5663	56.534	63.165	57.6354	72.499	91.422	110.57	59.624	53.525	52.007	105.13	106.63		0.378947	52.2744
8.6895	33.0409	37.8806	30.94	32.1737	31.9185	27.4632	33.7979	28.0758	38.0974	37.6492	45.6343	40.539	33.2305	43.1583	43.2631	54.8615	44.5376	39.801	56.043	55.645	45.119	52.0422	46.939	62.454	64.7653	75.044	82.047	96.276	58.395	55.102	50.149	106.764	99.064		0.384209	50.967
8.8086	38.0872	38.7274	30.3447	29.513	30.6603	28.6986	29.0752	33.0189	32.5129	30.9754	35.7763	40.665	35.3385	38.0297	41.1565	45.7972	48.7933	29.728	54.17	56.952	45.188	51.0097	56.503	61.866	51.531	66.539	100.351	92.684	49.514	51.676	50.237	101.783	95.731		0.389475	49.1707
8.9276	31.2662	42.8053	27.2783	28.6053	23.8466	24.7308	31.8271	33.8674	34.1941	34.0929	38.0643	36.298	30.9687	40.1718	40.0021	36.3487	46.6759	39.438	52.819	52.678	47.788	49.4495	58.717	69.781	59.6153	73.889	103.475	87.836	55.149	49.175	51.848	108.036	104.748		0.394737	49.8632
9.0466	33.9805	35.6563	31.4058	26.9246	25.5121	27.7992	28.6432	30.9335	27.3311	29.9135	35.5421	37.363	34.0048	33.6958	37.6757	50.7034	48.0967	38.486	50.769	49.422	49.542	51.3425	57.069	65.237	54.6738	92.276	108.297	85.394	55.419	40.897	46.247	98.115	99.368		0.399998	49.0223
9.1657	38.9072	36.6741	36.1597	27.5084	27.6276	25.7846	29.5039	31.0328	30.1973	31.1303	30.1669	34.661	34.3101	36.5381	35.3754	51.3111	49.7812	37.503	47.165	51.658	41.949	51.825	57.162	52.016	59.3231	84.584	103.9	81.288	59.348	42.782	41.826	91.519	106.19		0.405264	48.3851
9.2847	32.7115	41.2865	25.9527	28.5644	25.738	28.8263	25.8091	35.2178	28.4152	26.0226	33.3467	32.989	32.2864	30.8919	34.5536	47.5935	44.953	39.709	46.792	47.003	41.243	50.9851	54.829	50.96	64.4871	88.333	108.289	81.303	46.315	41.011	39.08	92.395	109.79		0.410526	47.2025
9.4037	34.0632	41.8464	28.5507	29.3532	28.9022	29.2846	25.8575	28.1405	29.6194	28.9715	40.0429	32.495	30.5503	36.4633	37.5928	41.275	46.6954	36.422	43.016	48.283	49.981	51.9757	52.022	56.613	55.7557	83.98	109.774	86.109	47.885	42.172	37.452	94.33	101.501		0.415788	47.4841
9.5228	33.7884	36.4739	27.1094	24.0628	28.4896	27.2658	29.2683	31.5682	30.9604	24.8924	34.5387	28.039	29.54	34.7335	35.0685	35.1596	48.294	44.976	44.011	43.555	43.643	53.049	49.734	62.89	60.8486	78.093	106.245	76.59	47.625	38.688	38.888	84.59	104.713		0.421054	45.9815
9.6418	29.4544	37.3222	35.5614	20.6877	23.5984	25.5999	29.1715	34.2742	24.5621	26.6674	34.1624	26.111	31.5668	29.4421	29.3406	33.0934	47.2769	44.06	42.176	44.061	44.941	47.8527	48.541	56.861	55.6656	73.323	101.673	70.019	38.95	36.857	36.545	93.993	103.36		0.426315	44.1446
9.7608	32.1406	31.2965	29.5087	25.5939	24.1623	30.8373	26.589	37.0794	18.615	26.4306	32.2543	33.141	29.3089	24.577	29.3467	36.5841	44.1337	39.947	41.062	41.693	35.398	48.7318	45.063	57.847	49.4505	75.588	98.916	68.392	39.259	35.782	36.055	81.185	101.832		0.431577	42.6606
9.8799	30.1722	36.6541	31.3786	28.1931	22.0975	25.8692	22.6236	35.0876	26.5806	27.8959	31.7282	26.715	28.5372	23.2812	29.6003	37.5532	44.6231	40.136	46.657	41.806	40.408	47.2434	47.304	54.147	62.3348	76.459	80.36	68.315	35.181	31.316	33.524	71.969	96.574		0.436843	41.8886
9.9989	32.0325	33.2811	28.8245	24.8746	20.1354	23.8225	24.954	29.2054	30.1024	19.5248	30.1259	25.208	25.7389	21.3668	27.3573	34.0451	42.767	33.24	40.787	36.165	35.945	41.636	40.246	57.596	53.6612	77.352	85.783	70.269	34.291	33.689	32.476	80.407	97.455		0.442104	40.1323
10.1179	33.0549	36.7225	28.5495	21.1054	25.7204	25.175	21.7009	29.8638	22.6544	22.5941	25.5804	25.942	28.5033	21.8412	27.0315	35.4267	44.7956	34.373	37.095	36.887	32.362	40.5785	42.47	50.924	55.8282	73.978	88.4	67.324	32.365	40.327	29.794	78.78	94.606		0.447366	39.7683
10.237	32.3125	31.7491	23.951	24.0258	21.4516	26.0103	22.13	27.2717	26.4049	19.4914	24.8242	26.035	27.1802	19.7983	25.8504	34.2154	42.9227	40.566	34.905	37.143	29.298	41.6725	47.159	43.156	57.9877	70.348	79.384	75.604	29.341	34.247	27.517	82.191	86.392		0.452632	38.5617
10.356	32.3998	32.0411	24.735	19.1579	23.8839	26.2381	21.9788	22.2678	22.1313	20.112	26.5197	24.129	30.9886	18.8921	27.4683	34.1872	44.6017	33.934	43.502	32.991	29.205	35.3937	37.697	47.193	49.1773	70.105	71.209	67.532	28.469	33.453	26.757	81.353	78.044		0.457894	36.9014
10.475	31.1094	23.7844	21.7681	16.884	21.7005	24.8925	20.215	26.5215	18.9523	18.5731	20.3975	29.894	26.4438	20.5002	24.3822	39.012	45.6907	34.377	38.067	25.175	24.166	32.3038	38.511	55.117	51.2793	60.33	75.889	72.298	35.287	30.145	26.285	79.416	81.512		0.463155	36.0873
10.5941	28.2985	27.4058	22.4443	20.5062	19.6836	23.2893	16.5398	27.2218	18.4804	17.9282	22.3185	22.797	23.6864	19.6455	17.6335	34.396	42.5047	32.493	33.108	23.287	23.246	28.1547	29.588	44.22	53.3895	68.712	69	64.283	29.648	31.627	28.68	77.44	95.53		0.468421	34.4602
10.7131	25.6189	27.3961	23.1057	18.3583	17.8754	22.5602	19.7124	22.1798	19.5658	16.0361	23.607	21.42	26.4877	17.5361	19.6521	34.0675	37.0034	26.522	29.524	24.626	22.296	31.4697	33.853	52.959	55.4646	58.288	81.634	69.568	30.463	26.111	28.11	78.729	84.606		0.473683	34.1335
10.8321	27.1103	28.9437	24.0051	16.4532	17.2103	23.5745	19.1172	25.037	20.4696	18.1788	22.2076	25.041	21.9966	18.7022	14.1269	29.1867	35.9737	29.662	31.6	26.183	19.754	24.7572	33.193	51.692	52.3703	62.838	77.098	71.626	29.829	26.77	30.696	72.848	82.638		0.478945	33.6633
10.9512	25.9715	25.7185	18.5199	13.6944	17.8649	23.04	19.2441	25.5948	17.475	12.4762	18.2008	20.56	19.3656	14.9664	12.4534	27.8841	36.4778	29.195	29.138	24.977	19.571	23.1739	36.043	51.026	45.7542	68.787	64.546	68.79	28.504	28.022	26.078	71.879	81.218		0.484211	31.7033
11.0702	33.0862	22.8737	20.5954	12.9984	19.5552	21.4341	17.5012	20.5909	17.6207	12.7199	16.9543	23.381	22.7406	13.5677	16.3622	23.9817	35.4294	32.185	35.518	24.687	21.524	25.952	35.402	53.747	46.9623	73.024	65.46	62.503	29.873	26.879	26.653	63.597	88.948		0.489472	32.2517
11.1892	30.5327	25.4499	19.6319	14.3595	19.3521	17.1662	15.8345	24.4802	17.9317	12.128	14.0249	23.582	21.3356	10.5047	14.8492	24.8181	35.1163	31.148	36.094	22.417	15.865	21.2385	36.951	53.588	42.8168	63.129	67.997	72.055	31.022	25.1	26.691	72.735	85.55		0.494734	31.6817
11.3083	23.7018	23.8498	17.9689	13.7048	19.6305	17.3912	21.1411	20.3668	15.5281	9.6683	19.3349	24.092	20.1534	11.8417	13.868	26.2499	33.9055	27.198	28.816	19.651	15.291	17.5776	41.299	50.111	51.652	59.675	71.304	73.144	27.777	23.978	20.51	70.304	82.102		0.5	30.6905
11.4273	23.6062	21.5621	13.3378	15.423	20.1897	15.739	17.1256	24.225	17.1663	14.404	18.3654	21.358	21.0003	14.6292	15.7091	24.2922	41.4021	26.119	31.679	22.221	20.243	14.9919	37.738	55.834	46.7126	73.435	69.024	67.346	31.279	23.492	21.24	64.162	82.544		0.505262	31.1393
11.5463	22.4087	27.4141	14.6922	12.8318	17.5447	16.9153	17.7916	22.3271	14.5444	14.7685	17.8164	24.428	23.0921	11.3227	12.0018	24.689	35.5343	28.325	25.152	18.121	16.181	15.9916	37.563	55.873	47.1357	63.861	65.495	66.834	33.464	24.631	21.554	60.894	84.743		0.510523	30.18
11.6654	24.8006	22.9314	20.7649	11.9432	15.1349	15.9783	18.4963	19.2771	19.3531	11.8941	17.7412	20.857	21.2856	13.7261	12.9988	22.2317	34.7226	29.065	33.031	16.767	13.831	15.5769	34.993	50.431	49.1208	59.369	61.486	74.719	31.576	22.547	26.659	57.054	85.49		0.515789	29.8743
11.7844	23.5631	25.3344	17.5053	13.2261	11.496	19.4534	15.0183	19.1637	15.0008	11.8845	17.6368	16.852	16.5333	12.3643	12.8106	20.5346	32.4042	31.162	28.736	12.38	17.774	14.2848	33.035	43.389	47.2131	57.772	71.392	66.746	29.911	19.861	27.168	56.412	88.913		0.521051	28.6949
11.9035	24.1087	21.9874	14.6518	9.0366	12.435	15.4889	14.5555	21.8246	13.3335	10.4661	17.7149	19.941	18.128	13.0701	10.0545	19.1621	36.9321	31.758	29.09	17.307	13.763	15.0731	30.442	39.547	49.6217	58.914	74.313	62.297	28.708	22.063	20.384	47.5	89.122		0.526317	27.9634
12.0225	24.6413	23.8213	14.8411	11.566	16.2891	17.5574	19.0885	23.6041	13.9796	10.0357	15.2736	19.977	17.0953	9.0985	10.3176	18.8327	33.4748	34.298	28.042	16.367	14.763	14.979	29.056	48.574	44.0545	53.11	66.347	68.844	31.454	22.367	18.596	55.205	101.313		0.531579	28.6928
12.1415	22.9105	22.0365	16.1033	13.466	13.2396	15.8212	20.7862	17.2622	14.1297	10.602	14.039	20.231	15.4886	10.6513	10.48	17.4852	28.758	26.324	32.419	13.097	15.353	15.4197	26.085	40.966	49.4219	53.768	70.267	64.408	27.717	17.455	21.491	61.995	93.963		0.53684	27.6861
12.2606	23.3013	19.789	16.1318	11.7585	13.4962	13.1943	18.9699	17.4961	14.9572	9.4692	15.5086	16.615	12.8958	12.6524	9.1397	18.6865	31.8707	27.384	31.345	14.35	14.846	15.393	25.266	40.147	46.3795	61.957	65.263	59.456	27.061	18.382	24.921	62.54	88.671		0.542106	27.2513
12.3796	20.2982	19.1693	20.6465	7.3076	10.7468	13.5467	12.3133	16.4781	15.404	8.3273	13.5689	14.988	16.4912	10.1549	11.0465	19.3005	31.583	23.102	31.72	12.512	14.598	12.9822	26.4	37.986	47.3388	59.392	79.932	58.062	26.617	20.229	21.516	58.842	90.28		0.547368	26.7539
12.4986	24.4472	17.7187	13.001	8.8554	8.674	14.4643	14.6302	20.0429	10.1827	8.1727	13.645	18.521	14.1025	8.5876	11.0765	17.2405	29.1563	25.772	30.603	12	17.709	16.1535	23.74	36.053	45.6947	50.17	58.537	60.162	25.521	21.684	19.939	49.261	87.188		0.552629	25.2335
12.6177	21.3248	21.1156	13.4728	9.5692	9.0508	13.9444	13.8762	17.7076	13.7527	10.3782	15.6144	16.6	16.7075	8.6212	13.3918	16.361	27.2098	26.782	29.503	13.649	15.71	13.7606	24.096	42.705	46.1862	48.561	58.924	55.129	27.865	20.146	22.792	45.344	90.439		0.557896	25.4633
12.7367	22.8209	20.4892	16.9751	9.3605	12.2506	18.0378	15.3666	16.8429	9.5098	10.6144	13.3689	15.742	12.9437	10.019	10.3876	15.2414	29.4222	29.08	27.614	12.986	13.416	11.4164	26.666	40.644	47.5205	57.913	57.278	57.88	30.379	18.611	21.317	46.495	87.764		0.563157	25.6477
12.8557	24.6469	18.5322	13.3211	7.9353	12.8504	15.3529	16.6456	16.8623	13.4054	9.4994	14.4103	14.193	14.4167	9.9469	9.9641	12.144	29.1347	33.754	26.723	16.044	13.168	12.4516	23.47	40.961	49.1531	51.913	64.591	61.294	31.888	18.924	22.036	51.327	85.612		0.568419	25.9567
12.9748	23.8715	19.7418	14.8143	7.1941	9.733	17.3337	14.253	16.6017	10.1185	8.0002	12.6595	12.491	18.3011	7.8021	12.584	14.2927	29.6149	27.778	27.278	13.998	10.995	11.3213	21.101	40.96	45.6814	56.528	57.233	59.638	27.713	17.333	20.017	48.698	91.323		0.573685	25.0607
13.0938	21.8016	16.8146	16.7274	8.1543	9.6529	13.6797	13.6153	16.7136	10.7002	8.4797	10.5861	15.132	14.7513	9.1106	7.8836	12.5997	27.6665	24.344	25.872	14.342	12.225	11.4211	26.446	41.206	49.0269	62.066	49.617	56.978	24.383	19.626	18.046	44.142	91.631		0.578946	24.4073
13.2128	18.7682	19.4939	16.6485	9.3625	9.5174	9.3833	15.9018	17.2528	11.5583	9.5663	8.7796	13.342	14.4727	8.2653	10.6378	12.2802	31.4435	23.082	27.411	12.325	11.458	10.3527	23.866	41.357	37.4691	51.4	52.07	52.547	25.804	15.551	18.24	43.474	85.667		0.584208	23.2954
13.3319	17.4071	18.9072	15.3606	12.1967	10.7965	11.936	10.8884	14.4015	14.3764	9.3894	13.3196	14.634	13.0561	7.0105	10.2264	12.1575	29.5706	26.577	22.49	13.495	11.347	12.9967	20.849	36.184	39.0776	55.143	55.882	50.977	26.233	14.066	20.725	45.337	90.213		0.589474	23.5523
13.4509	17.8309	17.6311	12.8632	8.4033	8.5596	12.4913	12.3703	15.2146	11.2822	8.9879	10.9081	13.003	10.5346	8.5525	7.0742	13.5707	27.0212	20.715	26.204	11.165	13.41	7.061	21.992	33.215	34.4009	53.644	48.048	54.282	28.633	18.113	24.497	49.335	85.519		0.594736	22.6222
13.5699	19.6753	17.5488	13.0309	7.8473	10.2989	14.8571	11.5335	15.1493	14.3734	9.2801	11.8361	14.416	12.2091	8.3811	7.0693	11.4558	27.4852	21.391	23.536	12.803	9.911	9.5551	19.115	32.516	35.1876	58.382	50.516	51.511	31.68	17.641	23.428	49.569	77.496		0.599997	22.748
13.689	17.7496	18.3605	13.1927	8.9376	12.7031	14.7421	12.4149	13.3279	11.702	8.9142	12.5519	14.416	11.9638	6.3915	7.8395	11.5681	21.0461	20.856	19.846	12.289	8.528	9.6265	19.166	31.761	32.6393	52.238	52.278	49.356	29.98	13.762	19.89	43.846	75.163		0.605263	21.4863
13.808	16.6502	16.5278	11.7262	7.6397	9.9223	11.9494	13.4022	14.6713	12.8628	7.426	11.1566	17.549	13.4039	4.998	7.0462	11.2504	25.711	19.153	23.642	10.76	8.008	8.2569	22.012	28.995	40.8144	49.899	48.653	50.036	28.455	18.669	17.909	48.818	76.573		0.610525	21.6529
13.927	18.5213	17.4747	14.5398	4.8746	9.2102	13.0984	13.0289	14.1325	14.7045	7.9705	14.1306	13.91	12.9916	7.2838	9.4798	12.7442	21.1107	18.93	20.669	13.647	9.908	9.5586	27.487	29.141	36.804	49.216	53.695	49.597	21.876	17.176	20.083	47.449	76.444		0.615787	21.8451
14.0461	16.9801	14.7807	11.0475	7.6336	10.5492	14.4235	11.7686	12.8486	19.1007	5.4284	10.9582	10.587	12.0184	6.3982	8.0925	12.1482	22.1085	19.688	24.751	12.743	9.612	7.9338	21.259	29.564	37.7908	46.618	44.309	54.69	23.25	16.538	17.402	44.44	82.023		0.621053	21.1965
14.1651	16.9761	17.8637	8.3198	4.7564	8.5631	9.2177	12.7248	12.1219	14.5519	9.104	10.1218	11.927	11.9841	5.1115	6.9118	9.9731	20.5446	18.704	19.027	9.817	7.987	7.7385	20.324	27.066	28.8104	48.049	39.723	56.178	28.277	17.98	18.171	50.598	69.918		0.626314	19.974
14.2841	15.3788	15.9568	7.7616	6.5003	8.3485	11.3584	10.7968	19.8403	12.4396	8.8503	14.9118	11.236	8.6013	8.5709	7.0771	10.6815	22.2278	17.807	18.569	11.231	7.264	10.0321	16.102	21.871	30.8106	45.113	36.467	59.752	32.037	16.269	17.999	60.368	72.891		0.631576	20.4582
14.4032	15.7551	14.2398	9.8908	8.5752	8.5261	11.3449	10.0326	13.6277	9.8591	9.411	10.7693	11.941	10.8354	8.2614	6.8613	10.9386	20.5736	13.281	21.285	9.125	8.165	11.1086	19.92	20.776	32.6398	45.604	48.231	56.264	31.031	15.071	20.773	60.489	70.452		0.636842	20.4745
14.5222	17.4571	13.6971	11.7367	6.1045	9.7155	10.3926	9.8094	13.7611	12.1509	8.1972	10.151	11.224	14.2996	7.3644	6.4957	8.9986	22.1291	16.729	19.891	14.086	8.509	10.4149	18.262	22.751	33.3118	48.528	41.805	58.169	36.718	19.76	22.139	63.18	71.715		0.642104	21.2016
14.6412	15.5331	14.9019	10.0686	7.4827	9.2988	11.3392	11.1742	11.0583	11.9552	7.9492	11.7113	11.157	11.3914	6.8151	7.1388	10.5417	16.9206	15.812	16.629	10.489	7.13	8.9172	16.302	28.07	30.3182	49.32	45.358	60.892	34.001	20.638	23.474	57.039	77.153		0.647365	20.8479
14.7603	13.1802	12.1761	6.2187	6.181	8.5265	10.2083	11.5263	13.5731	9.1716	8.4278	13.259	12.849	9.6319	8.2147	7.112	11.969	20.4637	18.835	19.688	12.325	8.443	7.7476	17.457	27.533	30.1983	42.943	36.266	54.983	36.637	21.347	21.894	57.514	64.474		0.652631	20.0295
14.8793	13.5977	12.2761	9.9515	5.3465	6.7376	10.5801	10.5823	11.6867	12.8786	9.4506	12.2076	9.7	12.9734	5.8856	7.5594	9.1796	22.0716	17.807	17.726	9.352	8.87	9.5782	14.955	21.287	28.8008	41.315	38.378	65.278	41.354	21.736	18.055	63.409	69.713		0.657893	20.3115
14.9984	13.1263	11.3831	9.1581	9.0475	8.6027	8.1794	9.7884	16.6767	10.2707	8.0361	12.5031	9.008	11.8953	4.83	8.7461	8.8861	20.1606	17.734	16.739	7.646	7.091	9.3562	14.989	29.49	28.7731	43.186	30.866	54.258	36.408	18.646	19.163	59.782	74.923		0.663159	19.6772
15.1174	14.9685	11.2354	10.84	6.7917	7.2174	9.1685	12.0718	13.5966	13.5713	10.3895	12.7054	10.713	10.875	6.3844	8.7886	12.4947	18.5212	19.384	17.284	9.442	7.286	8.545	13.389	28.856	26.9289	43.504	39.301	50.262	39.485	16.935	20.011	55.412	73.8		0.668421	20.0048
15.2364	15.3079	10.9323	11.0263	6.1816	7.1614	8.5021	8.6743	11.6259	11.435	8.9543	10.8719	10.191	9.6552	8.5729	6.4092	12.4071	18.2981	17.181	17.807	9.768	6.898	7.3183	12.068	22.616	26.8107	40.142	31.812	51.569	47.274	19.996	23.104	61.905	73.488		0.673682	19.5747
15.3555	17.4868	10.9409	9.179	7.2266	8.8478	11.3011	9.2796	11.4509	13.5108	13.1039	11.2639	13.258	10.9571	6.0365	6.1073	13.2977	21.2651	14.91	15.571	11.436	6.259	6.6292	14.911	26.856	28.8521	41.495	31.703	51.927	37.002	19.545	23.274	57.199	75.603		0.678948	19.9299
15.4745	14.8725	11.0031	10.0569	8.357	6.487	10.1898	8.531	8.6392	12.8617	9.6987	11.4631	9.83	11.2892	4.955	7.4041	12.9583	17.0808	16.926	16.095	10.66	6.718	7.8076	13.283	19.08	23.4918	40.193	36.497	41.476	37.747	22.827	19.83	60.062	69.15		0.68421	18.7128
15.5935	15.9969	10.9259	9.1399	7.0004	7.941	8.9378	8.7076	9.386	12.6107	8.3341	14.1205	10.655	11.9743	9.1772	8.2128	10.7938	14.0669	14.199	15.951	11.226	6.185	5.6794	13.199	22.398	25.7911	39.317	34.123	49.358	44.165	19.089	23.247	57.59	72.324		0.689471	19.1461
15.7126	13.7517	9.0534	8.6972	5.4682	8.8128	8.6498	8.5044	9.9215	9.1304	10.4721	13.5599	11.88	10.7679	7.2119	8.7984	12.5579	16.3108	13.917	14.913	11.715	7.654	5.1213	10.502	22.467	25.395	37.236	31.07	44.103	34.958	16.893	21.705	58.213	71.61		0.694737	18.2127
15.8316	15.7506	12.0461	7.025	8.6871	5.6378	7.5497	7.4157	8.9202	11.4933	10.7624	12.277	9.925	11.1706	8.4152	7.4421	10.0528	14.6797	18.155	18.128	9.247	6.093	7.4032	15.268	23.979	25.6295	39.527	30.791	44.194	39.759	20.32	23.326	55.895	59.073		0.699999	18.3648
15.9506	14.4466	13.8529	9.2516	6.5238	8.4068	9.9492	8.323	8.5738	9.8273	10.34	9.4494	10.963	8.0174	7.3146	6.7188	10.9481	13.9145	14.024	16.428	10	7.772	7.5855	13.364	25.568	23.4183	35.255	28.008	35.44	45.193	21.431	22.085	64.169	62.02		0.705261	18.1388
16.0697	13.8411	11.3152	9.2781	6.6765	8.0601	10.1839	9.5626	9.39	9.5699	10.8608	10.7461	8.034	9.7268	5.228	6.5011	8.4615	14.0864	14.245	18.392	10.008	8.691	7.8762	14.524	19.107	22.3997	30.232	28.922	41.108	42.002	25.326	19.741	57.397	60.174		0.710527	17.6263
16.1887	12.4969	9.2993	8.877	6.809	7.1282	8.1135	8.8945	10.5179	9.5258	9.7223	12.1357	9.602	7.2816	5.8756	6.0221	8.2739	12.4914	13.699	15.966	9.583	6.528	6.3962	12.664	17.417	22.1607	29.769	35.563	35.734	42.738	20.091	22.021	53.256	48.044		0.715788	16.506
16.3077	12.6166	10.0621	7.2427	7.8474	8.8232	6.8808	6.9079	9.5851	8.4403	10.4664	10.9234	9.543	9.9461	4.2816	8.349	10.0005	13.3683	14.072	14.472	11.521	4.684	8.2564	13.453	18.8	21.2209	31.484	29.566	36.658	41.598	18.999	24.167	53.691	50.856		0.72105	16.6298
16.4268	13.6878	10.4716	7.0115	8.6455	6.7958	6.4092	5.8535	8.8146	8.8683	11.2229	8.0929	9.971	9.1075	6.2107	6.279	8.1584	11.0746	11.625	17.921	9.939	4.158	5.7581	13.289	22.228	20.3714	29.935	33.299	36.175	39.962	22.205	20.012	57.056	45.972		0.726316	16.26
16.5458	13.621	10.0204	6.0009	5.6622	4.1242	6.9655	6.1902	8.1697	8.0048	11.1213	10.3618	9.279	6.7553	7.3422	5.8698	9.7461	14.1369	13.006	14.411	12.662	6.632	6.2971	10.317	22.09	21.309	26.554	29.503	35.531	34.671	25.897	20.553	54.984	45.129		0.731578	15.846
16.6648	14.2021	8.4482	6.9173	5.2232	4.3789	6.6336	6.7906	7.6844	10.7274	9.6661	9.0208	6.703	6.6052	6.4815	8.32	11.3548	14.7369	12.545	9.944	14.232	5.065	7.7037	11.372	17.118	15.2144	28.16	24.228	32.737	31.572	24.575	22.481	59.559	44.011		0.736839	15.2852
16.7839	11.1435	7.2982	7.5839	6.0768	5.7688	7.2803	6.5609	7.5184	10.619	8.7452	9.3206	8.408	6.6814	7.6819	6.4825	9.4891	12.0893	12.473	12.203	12.924	5.788	9.4013	8.731	21.466	19.1071	24.597	24.783	33.264	34.498	18.657	23.641	55.084	36.645		0.742105	14.9094
16.9029	13.0101	9.8843	7.3413	6.715	5.8019	7.7753	4.4811	6.075	9.5275	7.2996	9.0773	6.376	5.7924	6.9772	4.3329	11.9548	12.7233	9.974	10.882	10.234	7.259	8.7461	11.34	20.141	18.2637	28.185	24.229	36.27	36.263	21.502	27.632	53.755	40.825		0.747367	15.1711
17.0219	9.0568	12.3336	8.2329	6.3096	7.2059	6.6831	6.4543	9.6903	8.9618	9.0062	7.6062	7.317	7.9417	6.3891	7.3308	9.4457	11.5194	11.61	9.791	12.645	5.423	7.0381	11.277	15.659	15.8658	26.996	21.921	39.353	35.872	22.908	26.644	61.508	37.909		0.752629	15.2698
17.141	9.5963	9.3192	7.4686	4.5925	7.0268	6.4785	8.1712	7.0159	10.3473	7.9058	7.9256	8.329	9.8228	6.4401	4.1959	10.9823	9.8018	13.946	8.79	10.954	5.323	5.1435	9.033	14.312	16.369	28.604	20.259	37.412	31.402	25.444	30.374	56.011	35.992		0.757895	14.6905
17.26	9.0827	10.0165	5.9704	3.5775	3.4438	6.4607	6.4245	8.2441	9.0067	7.6227	9.9854	7.455	5.5727	6.6654	5.5661	10.4008	9.0682	11.292	8.808	11.901	7.029	7.5191	11.058	17.829	18.3337	27.977	21.396	33.357	29.599	21.32	30.228	50.341	34.757		0.763156	14.1608
17.379	10.6343	7.2719	7.7004	4.8511	4.66	8.7247	7.5543	8.1022	10.0025	8.5366	9.8344	7.504	5.725	6.8605	6.407	6.0504	11.419	11.457	8.637	10.645	7.102	7.6447	9.775	15.447	14.2234	25.911	23.82	28.483	32.415	26.507	33.977	50.33	35.608		0.768418	14.3582
17.4981	10.463	8.9936	6.1576	5.6156	3.4794	6.1236	5.9087	6.3581	9.7572	7.3507	8.3447	6.749	5.3232	6.7623	5.2533	8.0417	9.946	11.175	10.807	11.89	5.561	6.3312	12.243	13.098	12.5832	24.35	23.787	33.384	33.368	24.375	33.279	52.597	30.71		0.773684	13.9444
17.6171	11.4498	9.3507	7.187	3.5758	5.5161	4.5993	5.5694	7.8707	8.0906	8.1	8.2667	9.066	6.1269	6.7821	5.7729	7.2194	10.108	10.56	9.641	9.028	6.957	6.1799	8.392	14.774	17.1557	22.111	17.691	33.708	36.219	25.578	31.437	49.061	36.112		0.778946	13.9168
17.7361	10.923	7.4011	10.1305	6.0512	6.32	5.2622	5.7876	7.3835	5.4486	7.2315	10.5345	7.68	5.4047	6.0544	6.8955	7.6746	11.8968	7.007	7.416	7.592	5.576	6.3872	9.958	12.878	14.2173	18.062	21.593	31.539	30.867	27.249	36.745	53.774	28.042		0.784207	13.5449
17.8552	10.8622	10.9579	6.0327	7.0023	4.5632	4.3139	4.7406	5.2263	7.0768	7.4681	6.8527	4.082	6.3492	6.1634	10.6011	6.1982	8.6889	8.093	9.03	10.275	4.759	7.1109	9.441	11.944	15.2382	16.466	18.274	28.819	27.109	28.349	39.663	49.087	25.45		0.789473	12.9178
17.9742	9.0837	7.5013	5.5155	4.4794	4.6505	4.5052	5.2312	6.1852	9.8702	6.7857	5.9641	4.031	5.6213	5.7898	7.4026	7.8074	9.8164	8.862	8.495	9.805	6.216	7.0139	6.572	14.741	14.2591	20.104	15.428	29.033	34.019	27.837	38.684	44.576	24.945		0.794735	12.7524
18.0932	11.3923	7.0475	4.971	2.9565	4.0305	5.3877	6.328	7.3366	7.3031	8.7149	8.5839	4.29	4.7067	4.1898	5.7557	7.4733	8.0845	9.63	10.849	9.956	8.036	8.123	7.23	15.167	14.4097	20.948	15.585	30.143	34.369	27.602	37.59	41.686	24.142		0.799996	12.849
18.2123	10.142	6.6172	5.9596	2.8057	3.8905	4.1972	6.1805	5.4615	8.0923	9.6475	6.8527	4.241	4.5795	5.4544	7.6251	7.8871	8.7505	8.824	8.996	9.592	6.548	8.3915	7.144	11.29	11.5467	17.578	13.358	28.203	34.617	32.428	31.016	42.28	26.035		0.805263	12.31
18.3313	9.8894	6.3607	5.9929	4.7142	4.6638	4.1997	4.608	4.8481	7.023	7.3708	5.3472	4.317	4.2386	6.1958	6.7372	8.1463	8.4988	7.857	7.619	8.109	5.19	5.068	6.819	9.874	10.7959	16.457	13.192	21.671	28.712	32.01	34.321	40.244	23.449		0.810524	11.3497
18.4504	6.0831	7.1168	7.2473	4.9349	4.0525	4.3356	6.9389	6.8455	8.4985	5.2611	6.1938	5.814	4.3215	6.9182	7.8212	6.7521	5.9796	9.288	8.013	6.471	7.756	5.3274	8.472	8.526	12.1161	16.408	12.969	22.345	28.921	34.696	31.961	30.988	20.456		0.81579	11.2069
18.5694	7.4815	8.3288	9.8609	5.3778	7.2537	3.9393	4.6913	6.2205	6.0444	5.3094	6.6316	3.62	3.2641	6.6808	5.8531	8.6692	4.6772	6.003	8.098	9.124	6.035	6.9258	7.808	12.786	12.4736	16.927	11.833	22.34	27.124	30.025	29.784	32.548	19.186		0.821052	10.9977
18.6884	7.2864	7.7589	8.531	2.5631	5.4653	4.8285	4.058	6.0384	6.7933	8.3547	5.502	6.28	3.4145	4.9034	6.7249	7.617	4.9652	7.017	8.871	8.607	7.536	6.0577	4.809	14.724	14.5373	14.986	14.14	20.334	21.362	29.759	34.844	30.287	23.365		0.826313	10.9794
18.8075	8.4532	5.3867	5.3392	4.3111	4.9315	4.2108	4.2364	4.6781	4.5263	4.8523	7.2805	6.007	4.1075	6.5602	8.3455	5.636	6.8553	6.072	7.443	6.94	7.574	6.6446	5.042	14.646	11.6826	13.942	12.999	20.797	27.326	36.777	32.909	26.443	17.964		0.831579	10.6339
18.9265	9.0052	6.411	4.2611	5.8031	4.5109	2.4943	3.2188	6.5398	5.2521	6.5005	6.572	6.822	3.4924	5.0382	7.1649	6.7089	7.1674	6	7.095	5.775	7.061	6.5769	4.988	12.85	10.1658	11.512	11.982	20.58	24.831	40.241	28.701	27.294	15.774		0.836841	10.2542
19.0455	7.6452	5.2799	3.016	3.4001	2.2531	3.9988	4.8386	4.7627	5.5447	5.6219	5.5567	5.592	5.0166	3.5606	5.2895	7.5298	7.5135	7.125	6.467	8.745	4.544	5.9738	4.398	10.602	12.7779	10.182	10.866	16.342	22.34	32.251	27.438	25.287	18.273		0.842103	9.39489
19.1646	7.4128	8.8246	3.2616	4.5332	3.4326	4.9073	2.8301	3.1367	4.8635	7.4056	4.4083	3.344	4.6615	4.264	6.1313	5.9312	7.2559	7.237	5.866	7.499	7.666	7.5738	5.959	9.092	14.3442	8.546	7.499	16.344	27.738	34.918	26.332	29.003	19.877		0.847369	9.76055
19.2836	5.4356	6.837	3.7685	3.2557	3.1039	3.9985	4.1719	4.2699	3.8219	5.3937	3.4514	2.76	4.3879	5.218	7.7961	6.5874	6.0527	4.525	5.311	6.549	7.394	9.7716	6.381	8.028	10.5855	10.922	8.607	14.138	25.03	31.7	26.184	24.048	16.813		0.85263	8.9787
19.4026	7.5557	3.8694	4.0176	3.1791	2.5745	3.7989	3.3317	5.4338	7.3627	3.4144	4.267	5.775	5.8979	5.417	6.0041	5.315	6.8102	5.726	6.721	8.898	6.949	7.1116	7.164	8.792	7.2844	8.477	8.886	14.781	20.172	32.759	20.818	24.912	16.449		0.857892	8.78558
19.5217	6.4703	4.7731	5.0857	4.6949	1.9402	2.0866	2.368	3.3669	3.047	5.1433	4.5403	3.685	2.5059	3.5132	5.7184	4.671	3.7792	5.007	5.005	6.134	6.908	6.3784	4.344	6.349	9.6165	8.238	7.133	12.768	19.763	32.472	21.737	22.8	14.975		0.863158	7.78839
19.6407	7.2241	5.5626	3.8809	3.2022	4.8652	1.9916	2.4828	3.0981	2.6047	6.0128	4.1093	2.668	3.1108	4.8858	7.0007	6.8929	5.9148	3.84	3.737	5.73	4.251	5.2022	5.661	8.08	5.6358	7.973	8.21	10.073	24.389	33.209	27.73	21.618	11.334		0.86842	7.94486
19.7597	6.2107	3.5374	4.651	4.0256	3.8952	3.6552	3.0485	3.6481	3.7465	5.1379	4.5859	2.987	2.1948	5.4298	6.9564	6.4451	4.5776	4.781	6.392	6.657	3.536	9.66	3.873	6.569	8.7177	9.59	7.12	10.858	21.418	33.741	20.755	25.103	13.086		0.873681	8.07847
19.8788	6.7928	2.9558	4.1393	2.4941	3.7142	3.56	1.7947	3.5182	4.0492	4.3111	4.2884	3.188	3.7998	6.0681	6.7404	6.6007	6.0542	3.959	6.386	7.348	4.697	6.7987	4.023	8.819	9.9789	8.116	7.377	10.536	14.46	26.914	17.598	17.684	10.987		0.878947	7.26517
19.9978	6.9571	5.5727	4.458	2.3153	3.4582	1.6615	1.7214	4.8815	4.1179	4.5471	5.389	1.689	3.8814	5.567	4.1707	6.5092	5.9588	5.214	4.72	4.366	7.473	6.3098	5.615	7.12	10.4135	9.295	6.438	12.147	16.983	31.867	22.686	13.057	11.84		0.884209	7.52728
20.1168	4.497	5.2024	4.0063	3.0614	1.9647	3.0759	2.0686	3.2698	4.5836	4.2886	2.6792	1.47	4.0732	4.3185	5.9606	6.6468	4.3505	3.828	7.012	3.572	6.977	7.4743	4.403	5.951	8.361	7.2	5.781	12.398	15.599	25.703	21.712	12.953	12.055		0.889471	6.86353
20.2359	5.6518	4.4534	4.8579	2.4356	2.9665	2.1816	2.3682	3.2569	3.7621	4.9216	3.1695	3.183	2.7858	4.55	4.5694	5.0952	5.0019	2.666	5.923	6.063	6.96	5.7688	2.976	6.922	8.0593	7.537	5.191	11.894	14.138	23.178	20.01	13.697	8.747		0.894737	6.51335
20.3549	5.2797	5.152	4.4219	1.0974	2.832	1.205	2.4717	3.1766	3.4077	3.8044	4.2225	3.527	1.27	3.8764	4.4768	5.2643	5.5936	3.766	5.963	7.063	5.607	5.9685	3.191	6.971	7.9471	5.206	6.348	13.015	14.001	23.008	17.592	13.791	8.06		0.899998	6.3205
20.4739	5.4348	3.8247	2.0384	2.3703	2.2966	2.0863	1.5169	4.4584	3.272	3.873	3.1131	1.968	2.5224	4.8784	3.3603	4.9188	3.783	4.314	4.016	4.537	3.889	5.722	5.464	4.94	5.3313	4.073	7.44	10.391	13.78	20.485	16.908	9.413	7.557		0.90526	5.57502
20.593	3.8509	3.9868	3.6088	2.7817	1.8886	2.1571	1.981	2.5133	3.5051	6.0077	1.8914	1.345	3.322	2.607	4.1392	4.3965	6.1659	3.196	2.986	3.651	4.731	6.405	3.349	5.679	4.6485	6.27	6.775	6.149	11.767	19.503	13.888	7.815	8.522		0.910526	5.19644
20.712	4.4117	4.2341	2.8557	2.5685	1.4345	3.5128	2.2833	2.543	3.1296	4.5672	2.7695	1.809	1.2239	3.8931	4.2541	4.7898	3.9346	2.037	4.184	5.645	6.836	6.8099	3.801	4.102	5.8024	4.493	4.922	7.333	11.688	21.022	13.065	10.381	9.554		0.915788	5.32999
20.831	4.5627	4.2088	3.4937	2.8447	1.8958	2.5392	1.546	1.4301	2.1871	2.5309	3.3788	1.654	1.8788	2.7447	3.8738	3.8243	5.1881	4.049	3.167	5.814	7.793	5.8755	3.39	6.634	8.3486	4.472	6.876	8.465	10.68	15.554	12.689	11.125	8.331		0.921049	5.24378
20.9501	3.3071	5.5188	2.5058	2.0182	1.591	1.6607	1.7928	1.3096	4.1591	2.7294	4.2969	1.705	1.4906	2.6705	4.6875	3.7512	4.205	1.784	4.322	4.091	7.099	5.1731	2.451	4.86	6.3263	5.263	4.6	6.718	13.782	18.135	12.054	8.779	6.537		0.926315	4.89011
21.0691	3.0798	4.6795	3.4195	1.0127	1.3928	2.0538	1.5698	1.6892	3.2933	2.2166	3.2056	1.454	2.0451	3.3275	3.4146	4.5212	3.9052	3.028	4.54	3.224	7.709	4.3313	3.051	4.35	6.6868	6.076	3.935	7.19	11.427	20.037	11.126	7.649	7.092		0.931577	4.77977
21.1881	6.2178	2.7233	2.6756	1.7417	1.5226	2.1304	2.3778	1.8535	2.7198	3.2707	1.7685	2.105	2.9121	1.5831	3.2912	3.0026	2.2767	3.504	4.089	4.276	5.199	4.9507	5.211	4.4	5.3489	5.165	6.044	6.041	12.303	16.651	10.915	7.02	6.469		0.936838	4.59876
21.3072	5.1126	4.5656	3.29	1.9502	1.8258	1.2346	1.6182	1.2329	3.0737	1.3671	2.5458	2.068	2.2283	3.1638	3.2718	6.3041	2.2371	3.988	3.915	3.076	5.57	3.7623	5.506	4.195	4.8383	5.982	5.356	7.044	7.211	11.379	9.355	6.259	4.028		0.942104	4.19861
21.4262	4.5423	3.8693	3.1688	2.3991	2.0083	2.8135	1.7207	2.6758	1.5867	2.1982	2.2743	2.986	2.2159	3.1964	3.2887	5.4276	3.2896	4.298	4.736	3.849	6.091	5.0346	4.635	5.458	5.4057	5.5	3.285	5.643	7.457	10.327	6.845	6.969	5.306		0.947366	4.25759
21.5452	4.562	3.0522	3.6011	2.862	1.9057	2.4978	1.1206	3.1013	2.1466	1.593	2.6166	1.709	2.0784	4.468	2.7903	4.0387	5.5381	3.338	4.789	2.523	3.154	3.1489	5.752	4.673	4.6242	5.315	5.216	6.704	8.097	11.798	8.478	7.898	6.297		0.952628	4.28747
21.6643	4.2526	3.2007	2.6608	2.3741	1.87	1.6638	1.0245	2.2598	1.5975	1.9408	2.0827	1.951	1.4073	1.9856	2.2058	3.747	3.3794	3.798	5.516	3.934	3.982	3.2847	5.911	3.929	6.3766	8.45	6.373	5.615	7.562	13.851	10.487	5.931	6.275		0.957894	4.26905
21.7833	3.6674	3.0936	2.4831	2.3538	1.6598	1.2004	1.091	1.1866	1.7756	2.1174	1.7474	1.631	1.9579	2.1411	1.8714	2.8943	2.875	2.237	4.543	2.442	5.27	3.2939	4.123	4.39	4.6154	6.37	6.261	6.397	8.651	10.25	6.085	6.023	4.287		0.963155	3.66622
21.9024	3.1917	3.1497	3.3253	1.9096	1.2716	1.5467	1.787	1.2227	2.4649	2.5682	1.5197	1.805	1.4544	2.529	2.3029	1.8469	2.0897	2.331	3.957	3.915	5.523	2.9869	2.906	4.878	5.231	4.505	6.511	4.493	6.098	10.001	7.656	6.467	2.567		0.968421	3.51548
22.0214	3.8227	3.3774	3.3682	1.8949	2.0409	1.7103	1.3263	2.3033	2.1704	1.839	2.8371	1.347	1.777	1.5468	2.6323	3.0902	2.6732	3.461	4.267	2.752	6.911	2.7765	4.015	3.978	4.9831	6.727	5.993	6.744	6.221	9.435	6.558	5.669	6.289		0.973683	3.83444
22.1404	1.5583	3.614	2.0306	2.3293	0.8315	0.9679	0.8147	1.3281	2.3112	0.9544	1.981	0.903	2.2509	3.4248	2.1715	2.0234	3.3958	2.697	3.723	4.109	5.921	4.1254	4.311	3.769	7.2683	5.698	4.901	6.637	6.198	9.253	6.164	4.347	5.81		0.978945	3.57037
22.2595	2.8582	2.82	2.6672	2.6534	1.3781	1.2214	1.6939	1.1103	2.2974	1.6819	2.1108	1.752	1.2762	3.189	1.9996	3.2988	2.0556	3.646	4.605	1.363	4.646	3.3353	2.638	4.412	5.9719	8.63	6.214	4.75	6.419	7.682	6.034	5.594	3.71		0.984211	3.50648
22.3785	2.5656	3.0645	2.892	1.8142	1.4574	1.4915	1.105	1.2536	1.0005	1.5725	1.331	1.564	1.0409	2.2094	3.5665	2.9046	2.0594	3.131	2.51	4.007	4.524	1.6871	3.284	3.059	6.4746	5.555	5.287	6.091	6.642	7.616	9.723	7.647	2.948		0.989472	3.42662
22.4975	2.1291	3.0154	2.8181	1.2353	2.1653	0.4832	1.5883	1.6333	1.7158	2.0637	1.3619	1.394	1.0338	2.0583	3.4805	2.6397	3.5657	1.729	2.793	2.828	4.388	2.7562	3.758	3.875	5.2619	4.33	6.899	6.579	6.71	8.478	6.417	7.841	4.933		0.994734	3.45326
22.6166	1.4956	3.4406	2.7866	1.5497	1.8046	0.9328	1.1275	1.3977	1.7	1.8963	1.1514	1.621	1.0391	1.2072	1.7854	3.8691	2.3808	2.571	3.164	2.2	3.221	3.1292	2.426	4.379	6.8407	5.599	4.938	5.671	7.537	8.914	4.217	4.833	3.948		1	3.17495

## Sheet: Image5
X0	Y0	Y1	Y2	Y3	Y4	Y5	Y6	Y7	Y8	Y9	Y10	Y11	Y12	Y13	Y14	Y15	Y16	Y17	Y18	Y19	Y20	Y21	Y22	Y23	Y24	Y25	Y26	Y27	Y28	Y29	Y30	Y31	Y32	Y33		Ap-basal	Avg intensity
0	39.463	38.166	51.517	41.562	36.4234	41.289	43.61	41.9323	35.535	53.279	70.583	82.623	69.224	53.048	56.502	82.33	86.333	70.434	127.494	146.815	68.054	65.506	51.5373	60.042	74.698	62.522	104.272	82.117	85.507	80.903	142.867	110.863	138.711	99.387		0	73.3867
0.119	39.334	37.661	52.403	44.079	37.8938	42.665	47.824	46.4927	45.922	51.538	85.478	90.644	80.649	62.922	63.038	79.729	92.689	82.381	124.81	157.128	72.462	68.531	51.1789	66.18	75.213	58.089	103.257	91.538	80.495	78.775	145.894	115.755	138.149	128.253		0.00640839	77.6191
0.2381	52.513	39.332	53.368	47.8	37.8931	45.743	48.04	55.3154	50.216	52.421	90.143	86.327	95.351	68.451	69.177	82.896	85.626	87.154	121.221	157.092	83.059	75.967	63.9918	73.934	88.451	60.575	106.711	98.453	78.795	81.542	152.405	137.031	133.467	143.648		0.0128222	82.4738
0.3571	60.83	48.562	59.773	50.216	42.0425	46.004	52.143	54.6932	57.164	56.173	107.562	94.276	102.691	73.791	79.986	88.924	88.001	101.31	125.72	162.309	87.028	86.661	63.339	79.516	103.459	73.523	109.306	112.804	82.647	69.969	157.713	139.432	134.551	163.224		0.0192306	88.6866
0.4761	74.039	59.133	60.821	60.257	48.6323	47.965	62.761	55.5156	59.866	66.417	132.455	113.833	103.291	90.283	89.558	93.158	84.131	117.733	119.273	158.94	92.59	86.621	77.2303	86.475	108.87	83.686	123.63	126.278	84.313	79.653	160.564	154.22	147.855	162.371		0.025639	96.2476
0.5952	103.542	64.537	61.145	67.427	52.6181	52.506	61.44	61.392	59.811	69.152	164.052	124.531	105.396	107.288	111.87	94.399	93.683	127.124	113.133	161.121	105.858	90.601	72.1028	101.781	115.69	84.668	117.363	158.646	90.366	79.148	144.9	164.883	153.296	154.896		0.0320527	102.658
0.7142	127.019	83.143	73.31	67.251	62.975	48.357	75.338	68.3704	67.76	72.672	187.227	129.058	107.08	142.214	148.781	94.974	96.45	164.033	115.925	159.858	100.594	93.359	73.6749	111.22	137.311	95.568	119.401	156.249	90.006	85.378	143.566	184.987	142.671	163.049		0.0384611	111.436
0.8332	148.368	87.785	86.897	79.254	68.4783	45.828	82.814	65.467	76.037	90.268	195.885	136.924	101.94	155.444	169.824	96.813	102.124	185.021	118.061	173.795	108.085	97.343	74.5704	116.627	156.344	109.229	124.895	154.476	102.58	97.974	146.497	187.473	148.851	162.361		0.0448695	119.245
0.9523	161.978	115.027	98.745	74.726	74.9106	57.302	88.151	74.3776	75.756	93.988	187.296	134.438	108.321	155.047	177.019	108.681	99.445	205.41	117.193	163.117	109.937	107.804	82.1702	125.308	175.798	112.084	127.338	159.169	113.47	115.715	146.66	183.928	153.584	154.881		0.0512833	124.67
1.0713	172.179	126.421	118.697	77.99	70.75	60.185	90.419	70.9297	78.132	102.728	175.828	118.005	108.033	174.102	182.338	127.616	101.404	211.954	113.823	157.359	105.359	112.403	87.7593	145.559	178.251	126.575	129.789	155.045	117.73	118.661	151.821	173.531	152.783	151.225		0.0576917	127.805
1.1903	182.367	123.039	122.307	87.324	70.7694	61.313	93.348	72.5173	69.186	105.256	165.091	125.605	107.551	173.764	186.915	128.391	112.223	199.847	125.38	168.005	109.898	113.591	98.6844	167.06	170.613	132.931	133.721	151.332	131.237	127.747	159.316	154.396	158.088	154.006		0.0641001	130.671
1.3094	181.364	138.265	113.39	90.079	84.4366	60.335	100.921	74.8527	68.045	119.274	153.093	119.121	98.337	167.321	184.597	139.356	115.416	193.394	128.876	160.736	120.109	109.278	98.2576	174.684	158.598	143.655	149.853	143.552	130.424	134.073	170.792	156.422	140.087	152.668		0.0705139	131.578
1.4284	203.939	146.561	108.308	84.748	86.8776	74.65	87.378	71.9652	77.517	114.962	147.223	113.04	84.919	167.226	179.627	125.439	117.044	164.032	142.299	157.382	126.448	102.854	97.6549	179.35	148.722	145.079	158.938	131.762	132.443	140.517	167.301	142.31	143.72	159.022		0.0769222	130.331
1.5474	200.218	148.131	107.91	94.499	81.4091	96.45	88.844	71.9286	77.57	110.558	119.313	104.521	85.904	162.071	173.309	130.239	133.118	150.515	161.996	150.043	122.545	110.527	90.63	178.726	137.484	143.884	162.683	121.707	131.815	134.003	171.509	148.399	137.409	163.417		0.0833306	129.508
1.6665	195.19	147.719	104.148	94.951	78.9263	107.771	90.889	76.8011	68.736	99.937	103.754	86.831	89.883	146.13	159.179	116.167	135.753	145.666	181.728	149.148	110.908	112.702	105.622	174.833	125.013	140.114	163.686	121.294	115.702	129.128	175.468	133.866	129.68	159.121		0.0897444	125.778
1.7855	198.37	136.17	100.897	102.516	79.3153	114.277	90.752	77.8456	66.044	99.727	95.411	81.792	88.526	148.753	144.006	109.326	139.777	140.632	177.088	135.315	112.261	108.129	108.33	176.644	118.652	130.89	150.778	120.528	116.313	127.089	175.346	133.337	126.695	159.902		0.0961528	123.277
1.9046	186.451	134.134	98.726	92.21	84.5568	110.489	90.762	77.5958	62.51	102.459	90.147	89.567	98.559	144.496	135.085	106.089	146.097	125.826	157.501	136.556	113.346	112.76	110.191	181.221	116.351	135.023	152.7	124.734	120.193	125.164	170.356	134.938	127.977	169.368		0.102567	122.475
2.0236	183.118	130.566	98.671	82.624	87.1556	110.553	91.094	74.1774	63.468	100.428	87.094	90.123	92.472	124.921	127.606	103.717	144.171	122.79	151.939	126.119	122.497	123.304	109.703	172.528	116.879	121.463	150.356	118.39	105.113	121.504	170.939	124.595	126.657	168.624		0.108975	118.981
2.1426	179.516	114.439	97.935	75.104	80.9624	104.364	96.483	74.1126	67.172	102.297	84.084	89.188	96.369	117.422	109.218	90.395	135.013	126.678	135.303	118.908	119.855	119.803	116.552	169.769	113.432	106.546	145.287	115.691	107.219	127.352	176.524	126.348	123.293	157.326		0.115383	115.293
2.2617	160.975	117.437	97.306	81.828	89.9444	105.521	110.432	71.7879	77.437	108.608	83.158	100.242	84.324	118.706	97.496	83.791	127.492	106.599	136.718	116.212	114.454	124.122	118.867	157.798	111.227	108.555	139.37	111.873	104.734	142.958	179.522	121.851	120.722	150.307		0.121797	114.187
2.3807	167.516	126.966	102.876	76.948	93.0066	100.295	116.361	85.1495	76.691	110.108	83.45	103.553	84.13	116.549	102.443	86.108	119.052	105.532	103.589	110.063	120.225	119.105	109.208	137.997	109.987	109.236	151.137	107.135	114.784	148.183	168.489	112.083	114.425	141.749		0.128206	112.769
2.4997	155.372	110.481	106.444	77.586	86.6715	101.857	121.243	91.6954	83.423	102.538	65.304	98.503	89.383	117.89	98.873	88.658	118.744	108.205	97.148	103.398	109.2	118.524	110.419	145.891	105.9	112.06	144.885	101.556	120.72	134.724	183.14	111.391	123.015	148.178		0.134614	111.559
2.6188	136.012	119.759	99.837	71.318	80.868	102.381	121.656	92.9172	93.258	95.578	76.138	106.07	84.746	111.283	101.394	102.111	116.399	104.582	90.423	97.531	106.77	126.867	112.394	144.284	109.514	110.325	135.829	101.167	125.889	132.728	189.078	104.5	126.146	152.84		0.141028	111.253
2.7378	137.077	116.449	89.608	73.987	78.3395	102.438	122.847	95.6911	94.899	94.658	76.778	93.659	89.491	110.799	99.047	89.967	131.576	105.108	98.901	99.752	111.806	120.387	109.623	127.64	109.167	108.863	131.165	103.905	118.915	123.087	190.162	104.352	125.851	144.427		0.147436	109.718
2.8568	137.813	118.939	79.204	70.539	86.8146	94.414	118.132	96.1133	93.791	80.665	75.84	82.982	82.058	109.947	99.407	90.971	133.428	107.422	91.59	101.407	116.773	118.948	119.608	122.976	100.629	109.211	130.744	102.927	123.135	118.394	187.311	104.283	118.794	161.462		0.153844	108.432
2.9759	131.514	100.497	83.463	70.057	85.8731	90.109	115.544	99.548	101.285	78.187	68.337	76.056	79.382	107.17	100.018	94.044	123.993	109.806	78.47	94.4	128.927	111.706	115.499	126.432	103.203	109.103	113.252	112.24	117.719	124.774	176.768	106.23	113.106	150.838		0.160258	105.81
3.0949	123.179	108.342	80.353	75.835	84.9199	78.315	109.73	104.206	90.531	84.612	67.439	84.751	80.655	102.023	96.514	91.527	127.087	118.777	84.759	105.918	139.667	112.281	110.901	125.131	92.77	101.105	108.998	110.8	105.842	121.453	165.096	123.177	117.94	137.853		0.166667	105.073
3.2139	119.868	102.173	81.884	74.492	76.2613	81.66	114.007	106.057	95.96	80.976	71.825	77.483	79.311	93.649	92.71	88.721	129.688	126.423	86.525	121.079	132.605	108.85	116.223	120.031	101.94	119.83	106.931	109.447	105.331	113.216	158.769	122.288	110.884	138.713		0.173075	104.877
3.333	123.093	105.74	75.34	74.676	76.7998	86.518	114.832	95.2687	98.653	80.598	77.14	79.058	90.108	94.433	100.975	91.355	132.705	117.094	92.334	136.847	143.821	112.387	112.254	121.48	107.896	127.002	117.082	107.833	108.379	115.051	144.014	130.254	114.32	124.064		0.179489	106.747
3.452	104.878	102.033	76.57	73.31	77.6187	96.348	116.555	86.03	102.801	78.108	73.763	81.325	89.709	110.274	94.433	106.272	133.381	116.634	97.099	164.412	157.129	106.208	106.731	120.187	96.932	109.153	115.649	99.887	108.871	120.359	143.151	134.944	127.082	121.802		0.185897	107.342
3.571	105.153	98.467	77.011	83.401	73.3537	94.913	120.19	85.4827	101.377	72.488	65.991	79.925	83.292	116.438	103.009	106.871	131.769	115.352	93.689	173.591	175.887	104.979	107.998	120.669	97.52	108.869	105.082	106.574	109.206	122.139	136.972	136.056	125.081	140.089		0.192306	108.202
3.6901	98.375	90.755	79.451	84.763	74.1355	92.977	123.469	79.5595	103.775	77.988	72.944	79.065	83.19	105.361	111.577	103.99	127.831	112.275	101.962	183.159	177.486	114.22	101.734	112.912	100.387	99.879	103.897	116.381	108.988	106.387	136.041	137.071	99.12	154.595		0.198719	107.521
3.8091	100.949	90.725	84.257	80.978	59.3974	91.285	112.244	77.7415	95.129	77.282	75.963	72.922	93.238	105.014	120.074	112.136	130.53	105.753	89.556	186.857	183.6	115.465	110.143	114.214	108.802	88.197	99.265	116.862	120.471	107.178	132.407	136.261	105.223	151.589		0.205128	107.403
3.9281	90.988	98.529	80.85	83.167	64.265	88.291	119.178	79.3052	100.916	79.768	66.714	67.814	88.264	102.872	127.583	108.542	137.374	107.289	85.471	190.01	187.328	105.638	110.367	119.993	118.029	96.231	100.576	117.486	117.345	110.036	119.291	127.886	100.41	150.921		0.211536	107.315
4.0472	93.826	104.372	83.831	86.36	71.0893	89.408	110.129	79.6435	105.132	80.975	66.807	63.136	82.243	109.535	123.053	104.871	127.617	107.877	87.483	185.679	198.743	114.852	118.802	113.216	109.866	99.108	109.211	103.924	116.027	107.621	110.192	121.054	100.434	159.436		0.21795	107.222
4.1662	94.032	110.979	85.642	84.034	70.7543	83.576	113.762	90.3442	108.477	86.247	72.592	70.172	90.584	108.925	122.928	104.395	126.49	97.662	90.403	184.072	185.894	109.924	126.318	115.358	105.861	97.652	110.651	109.793	115.165	101.257	110.054	125.196	111.498	150.756		0.224358	107.984
4.2852	103.064	111.713	79.187	85.062	65.7411	74.603	104.116	76.3861	111.95	84.513	91.988	78.384	92.149	106.37	114.685	109.087	117.304	97.622	96.93	176.516	180.962	109.298	126.232	110.446	103.362	97.303	95.808	107.252	103.902	107.167	110.562	123.112	103.509	139.848		0.230767	105.769
4.4043	104.76	106.54	79.849	79.066	76.6518	82.488	106.629	88.0765	108.356	83.015	80.525	80.025	84.996	111.649	110.715	104.959	101.494	100.411	98.524	166.883	171.112	125.362	122.864	109.875	114.774	98.777	110.346	99.045	109.867	101.189	110.309	125.045	98.602	142.387		0.237181	105.74
4.5233	89.026	91.064	76.881	74.141	64.2727	80.719	106.857	81.4425	108.181	83.955	82.999	84.297	86.787	104.099	113.164	105.989	104.582	91.765	92.853	156.632	159.276	133.17	130.577	101.726	131.776	113.179	104.163	112.727	116.075	95.676	105.293	111.416	113.672	142.365		0.243589	104.435
4.6423	86.952	90.839	71.747	83.115	62.3022	75.635	99.344	79.5279	102.264	80.83	92.553	82.139	87.832	103.388	108.226	113.6	93.559	92.64	88.523	146.009	157.931	144.714	129.582	103.515	130.656	109.411	109.085	113.07	108.672	97.286	113.404	110.108	116.451	133.376		0.249997	103.479
4.7614	86.908	88.951	68.635	77.657	55.0291	65.974	104.834	88.2129	99.842	76.016	104.743	78.279	94.392	104.635	101.658	116.06	105.558	87.294	95.025	142.796	160.804	153.643	130.162	112.937	120.822	104.435	113.504	111.95	111.744	92.504	107.346	105.503	108.84	132.469		0.256411	103.211
4.8804	94.867	80.135	71.993	67.646	58.0102	65.293	105.804	87.8309	107.71	76.897	100.34	79.209	87.786	95.872	103.078	120.997	102.778	82.666	81.981	136.494	139.212	152.665	129.607	112.253	113.845	108.634	114.063	123.447	109.603	99.176	104.948	103.786	106.618	125.424		0.262819	101.49
4.9995	101.652	83.228	81.188	65.227	59.2105	66.563	100.712	86.5482	101.005	80.554	100.105	77.647	87.242	88.758	106.465	116.909	104.725	80.428	80.227	134.202	128.046	140.063	130.18	111.331	99.911	107.311	106.225	122.4	108.565	91.618	102.826	105.443	98.977	115.31		0.269233	99.1412
5.1185	98.973	81.243	79.659	63.321	52.5801	60.793	98.219	84.4212	107.169	73.281	91.862	72.915	82.82	83.359	94.597	116.074	109.028	77.363	85.548	131.474	130.81	148.229	125.127	106.581	100.091	97.452	101.754	111.975	106.424	94.892	110.408	99.015	105.965	113.608		0.275642	96.9715
5.2375	104.513	76.083	71.807	61.611	62.2926	60.504	92.503	85.9609	103.129	78.769	84.629	69.076	73.589	81.854	89.256	123.806	104.464	78.392	80.616	120.841	116.917	139.541	119.919	114.116	100.418	100.155	107.888	113.96	99.723	95.887	106.68	85.379	99.068	121.764		0.28205	94.8562
5.3566	98.91	79.273	70.957	66.951	54.061	65.075	90.536	81.385	86.114	77.845	85.307	76.703	75.08	78.916	80.875	115.748	108.432	85.253	80.269	122.515	110.884	135.28	119.015	105.134	99.651	99.512	112.274	112.976	100.281	99.113	100.715	91.551	102.375	121.292		0.288464	93.8311
5.4756	101.931	85.623	75.085	64.534	48.0603	62.96	89.53	78.403	82.653	74.563	81.625	78.953	75.498	84.158	80.635	118.547	104.717	89.1	79.713	122.985	108.963	133.984	134.358	116.779	96.784	104.823	116.285	124.311	98.657	93.632	98.748	111.684	102.574	109.764		0.294872	95.0182
5.5946	100.807	75.259	66.341	67.632	55.1884	59.181	84.428	81.3896	80.18	82.318	86.569	72.115	75.914	78.632	79.877	119.252	95.392	92.052	92.698	118.657	111.023	131.189	132.748	116.792	84.952	109.792	122.282	107.137	94.924	91.361	111.892	105.944	95.659	107.073		0.301281	93.725
5.7137	91.603	71.701	65.606	60.057	57.319	53.405	80.846	83.2199	81.348	79.209	75.136	75.116	75.446	73.845	74.759	113.959	96.625	83.202	95.604	107.437	110.307	115.356	118.665	110.483	92.259	105.918	116.489	103.083	102.839	105.558	118.038	94.465	87.941	113.095		0.307694	90.8805
5.8327	86.008	63.526	65.718	63.83	51.4443	51.878	72.581	71.6397	77.688	75.715	62.051	70.576	67.38	75.575	84.389	105.726	91.505	84.064	94.423	103.866	106.164	109.639	113.244	107.592	85.019	107.624	110.605	111.16	107.68	99.812	113.725	102.225	81.828	115.394		0.314103	87.9792
5.9517	93.341	64.254	69.947	64.529	58.6391	46.616	68.172	71.3882	83.165	72.297	65.155	64.615	81.643	80.44	81.168	103.482	89.457	97.68	89.592	128.223	112.991	109.756	105.001	120.727	82.936	103.433	128.759	104.935	94.832	86.878	108.324	96.052	85.548	116.911		0.320511	89.1437
6.0708	84.005	75.206	70.359	75.25	55.5434	46.744	74.186	77.8677	75.552	78.227	68.722	61.038	76.997	77.697	82.959	104.029	95.937	95.191	97.466	118.207	108.709	114.413	101.359	123.916	90.242	108.492	114.107	104.396	102.732	94.297	112.035	99.934	89.621	105.26		0.326925	90.0205
6.1898	88.917	66.658	71.371	74.091	45.1785	54.689	67.198	83.2101	71.944	73.654	64.941	59.087	79.53	83.768	87.675	94.427	80.23	96.525	98.816	104.206	117.617	132.279	104.63	125.398	88.554	97.785	108.178	117.28	104.473	101.312	118.806	106.44	78.557	103.762		0.333333	89.7408
6.3088	76.04	64.362	58.469	72.371	51.3889	54.718	64.391	82.1599	78.789	73.022	64.502	65.512	72.073	86.035	76.716	91.967	94.066	90.386	91.329	109.161	117.694	117.38	93.3982	124.442	94.301	104.371	100.421	108.675	106.014	88.662	111.401	93.665	78.176	106.905		0.339742	87.146
6.4279	69.988	61.596	53.61	67.118	55.5432	52.589	60.107	75.2714	79.649	70.802	76.978	58.07	80.302	82.749	83.525	95.557	97.131	79.565	85.79	112.036	107.693	115.257	100.958	116.468	94.919	113.09	112.98	104.635	109.725	96.262	107.514	92.245	74.784	102.543		0.346156	86.6779
6.5469	67.005	64.017	56.425	56.541	54.7244	52.658	67.264	77.7918	70.38	67.654	66.219	63.314	77.146	78.853	82.085	94.745	88.078	89.401	91.382	114.069	109.086	109.013	99.2044	121.306	95.588	107.69	118.973	99.566	117.647	104.127	98.398	97.135	77.783	101.096		0.352564	86.3637
6.6659	69.982	69.147	56.48	66.781	47.0727	52.009	61.44	72.6557	69.588	68.677	65.728	61.048	68.275	79.029	83.274	95.387	93.321	91.531	89.61	118.937	103.398	110.716	89.9522	127.28	85.723	106.208	110.371	103.551	113.036	95.52	114.759	92.609	73.925	100.556		0.358972	85.517
6.785	76.126	68.964	50.868	63.577	47.222	49.937	58.92	69.4102	68.605	66.955	64.549	59.391	73.587	83.992	79.699	85.56	94.689	84.713	78.274	101.569	95.815	109.922	93.3929	126.583	94.914	106.788	103.513	108.336	117.63	87.616	115.374	98.764	81.624	97.538		0.365386	84.2476
6.904	73.313	60.264	54.358	57.975	41.3033	47.011	54.561	67.1474	57.663	64.393	55.757	66.046	83.946	81.913	83.079	79.407	89.661	87.283	81.891	97.785	91.889	97.195	86.4655	121.264	103.893	115.111	104.136	114.89	117.864	84.597	104.027	102.881	74.683	103.503		0.371794	82.5634
7.023	62.32	57.441	59.127	53.586	41.7113	51.604	58.383	65.9853	67.408	60.652	60.868	63.211	73.309	76.927	86.473	78.61	96.043	78.213	87.12	111.636	86.247	106.469	92.6777	114.274	93.364	103.488	110.012	111.594	120.939	90.06	105.568	100.193	67.472	96.365		0.378203	82.0397
7.1421	63.491	63.506	57.492	56.189	47.4672	45.018	54.263	60.7073	60.731	64.703	68.988	60.34	69.783	83.475	84.897	74.637	87.913	82.951	75.461	103.606	90.431	101.396	84.0229	112.92	97.597	100.775	115.573	107.275	119.605	85.543	86.838	101.294	69.785	89.529		0.384617	80.2412
7.2611	68.017	66.191	51.538	53.247	48.9837	42.122	56.217	57.8085	56.523	58.14	56.259	69.069	72.291	82.773	92.472	65.307	83.673	90.534	70.123	98.596	95.145	97.293	87.2341	111.192	100.44	91.206	104.101	111.11	116.766	76.876	82.061	101.134	74.077	97.709		0.391025	79.0067
7.3801	67.242	70.1	57.011	52.207	41.7804	40.607	54.262	51.5246	64.943	61.361	53.526	70.08	64.17	78.367	95.299	63.166	75.942	80.03	68.249	96.318	89.655	93.21	93.6229	112.769	107.129	91.464	103.154	111.354	123.32	76.143	90.026	93.525	66.887	92.528		0.397433	77.9698
7.4992	65.311	65.183	46.477	50.625	41.6997	42.523	58.609	57.0243	52.11	56.086	53.183	74.906	66.483	86.811	95.966	59.672	74.829	72.298	84.499	104.66	82.259	91.545	95.9112	109.067	108.816	85.736	108.692	106.871	122.642	82.108	100.567	102.718	73.07	78.842		0.403847	78.1706
7.6182	66.069	72.594	40.378	47.379	46.051	36.384	57.159	60.7487	51.924	51.487	59.008	73.561	68.407	84.585	88.936	58.06	65.963	83.735	74.301	93.057	82.366	92.807	85.5227	109.27	107.631	94.06	102.176	96.199	104.226	83.334	98.509	108.189	69.579	88.725		0.410256	76.5406
7.7372	65.861	67.357	44.262	50.635	50.337	43.273	51.27	57.073	55.796	53.688	56.212	68.81	67.513	82.475	82.624	60.284	70.015	83.15	71.061	93.37	76.164	89.334	84.689	113.831	110.127	88.559	90.114	93.653	106.076	84.285	87.649	95.604	67.147	80.986		0.416664	74.8025
7.8563	71.219	61.228	40.971	49.331	50.1383	46.55	44.999	47.3103	52.363	57.111	62.608	67.741	71.538	73.765	81.669	51.869	68.73	85.127	72.823	96.33	74.764	87.312	83.2603	90.141	115.338	76.992	87.562	100.696	93.259	75.531	90.966	90.472	69.682	84.874		0.423078	72.7726
7.9753	67.614	48.675	40.821	45.333	43.4346	43.82	48.841	51.7562	57.788	53.806	65.852	70.179	68.601	76.83	77.778	56.508	63.2	80.087	62.57	95.693	78.278	86.705	80.8476	92.948	109.654	81.435	86.956	100.361	96.405	90.065	85.607	87.934	61.649	69.95		0.429486	71.4112
8.0943	75.673	56.281	38.4	47.274	45.9956	45.497	43.132	48.6093	51.447	49.974	62.514	66.063	61.531	75.899	70.912	59.93	66.345	72.667	56.487	83.369	81.735	87.318	89.655	86.784	103.016	80.691	83.487	91.809	97.82	83.497	91.277	85.992	65.516	75.415		0.435895	70.0592
8.2134	71.058	53.627	33.164	47.302	48.3853	35.977	42.126	47.1667	51.932	42.518	59.24	68.051	66.509	69.986	67.884	42.318	63.717	82.427	56.564	78.885	72.169	85.717	87.6732	86.28	93.753	86.588	91.213	93.924	103.69	76.021	92.014	91.829	63.897	82.196		0.442308	68.7
8.3324	74.623	51.023	28.84	46.818	51.9535	37.479	46.837	44.0275	54.453	47.29	55.815	63.345	70.955	73.778	61.787	38.578	63.921	86.403	66.143	73.718	71.541	89.483	86.5538	90.788	83.521	89.865	91.219	97.684	88.824	68.549	86.762	91.726	60.562	91.989		0.448717	68.4369
8.4515	74.685	43.393	30.616	43.936	43.0356	36.911	36.987	48.4921	51.593	48.591	53.403	62.222	67.515	70.717	60.712	40.954	63.473	83.215	65.681	70.365	66.998	96.341	93.8591	91.152	86.979	78.475	92.258	110.961	94.633	77.644	85.489	88.486	69.414	82.978		0.45513	68.0048
8.5705	67.044	41.014	28.465	41.884	42.6464	31.906	38.21	47.1918	51.841	48.617	49.747	62.378	66.065	68.087	62.901	36.966	69.133	83.661	60.613	76.437	71.07	91.093	95.363	91.401	82.516	68.835	91.782	111.751	81.864	76.295	84.853	88.112	68.54	78.994		0.461539	66.3905
8.6895	63.43	39.782	28.61	47.042	42.7222	36.395	34.286	41.7959	55.674	47.103	60.319	61.523	56.685	74.259	50.465	40.252	63.824	72.28	68.497	71.407	73.401	91.25	101.226	105.611	84.901	65.535	91.567	110.745	86.277	75.233	82.639	87.831	65.825	74.515		0.467947	66.262
8.8086	62.225	41.545	27.384	42.209	47.8671	33.654	36.28	38.7577	56.174	47.284	55.299	52.268	59.911	60.706	51.768	34.775	56.64	69.243	61.629	69.243	72.452	86.888	91.4925	111.633	82.947	57.331	88.309	97.967	79.659	81.061	82.934	88.357	58.214	70.239		0.474361	63.3631
8.9276	61.693	36.81	24.888	46.032	43.2154	34.464	43.659	40.9533	55.972	46.084	44.32	47.496	61.214	70.757	44.472	38.608	60.917	75.696	54.453	75.427	80.003	92.154	98.3142	111.617	76.864	51.748	92.238	91.34	77.748	81.326	88.134	78.012	54.111	73.265		0.480769	63.3531
9.0466	59.287	29.79	26.489	39.568	45.5999	34.282	36.797	45.8558	53.214	48.475	41.217	53.133	60.113	67.909	45.353	36.699	53.443	72.175	52.136	68.799	82.516	97.341	98.2572	111.904	68.301	55.126	77.061	104.265	82.177	83.582	88.474	78.914	54.583	65.934		0.487178	62.3168
9.1657	57.796	31.936	28.654	43.423	42.9289	34.827	38.269	45.5956	53.306	42.373	36.454	52.973	61.421	66.43	39.571	33.152	58.736	64.814	55.387	57.132	88.431	93.326	92.5305	111.578	69.858	44.732	81.367	93.838	71.591	85.683	90.926	82.845	52.208	67.293		0.493592	60.9231
9.2847	63.035	33.232	24.417	41.006	46.1343	38.34	41.878	48.1652	51.105	39.327	37.987	44.772	59.559	69.492	44.37	37.642	60.331	71.124	57.269	54.839	92.358	92.585	84.6684	113.876	72.837	47.389	76.984	95.071	70.576	75.658	88.18	84.345	54.691	66.546		0.5	61.1703
9.4037	59.107	34.528	25.626	41.503	46.3206	34.974	39.777	51.1402	56.787	45.849	36.045	44.438	59.838	70.776	39.039	30.039	59.037	69.014	59.533	55.042	84.999	93.822	92.9334	113.042	72.619	45.183	64.825	93.205	72.291	80.82	97.198	80.577	49.711	67.16		0.506408	60.7882
9.5228	60.896	32.848	24.381	41.626	42.2017	31.946	40.564	43.2287	52.269	44.497	36.459	46.159	59.764	69.141	37.93	31.48	46.683	73.705	59.503	46.481	86.721	97.955	95.7201	116.332	63.317	42.724	67.316	95.893	74.266	75.245	97.034	82.522	48.795	58.993		0.512822	59.5469
9.6418	67.002	29.166	22.77	34.849	38.6971	32.787	35.433	38.9261	55.281	48.682	38.386	47.774	50.945	74.249	40.99	30.201	52.405	73.309	55.706	48.718	88.408	88.016	88.7792	101.824	65.758	39.864	66.995	89.759	69.704	77.077	88.761	75.013	47.184	61.88		0.519231	57.8029
9.7608	58.587	28.229	23.535	36.434	41.6477	37.264	34.688	38.96	55.36	45.879	34.469	41.77	49.801	81.896	39.078	24.613	51.695	78.981	51.533	48.534	89.866	84.703	88.1155	102.819	68.992	40.739	61.981	89.382	69.981	75.912	87.697	81.298	42.017	53.073		0.525639	57.045
9.8799	51.906	24.388	27.368	36.582	45.0938	35.968	38.379	41.8863	54.298	48.421	35.548	50.114	58.085	85.618	34.967	23.489	52.059	76.523	52.011	45.431	79.849	93.059	86.4303	105.755	57.061	36.366	54.798	83.472	72.69	72.916	94.553	80.871	46.258	56.696		0.532053	57.0267
9.9989	51.844	29.234	24.725	37.411	42.2645	35.897	40.423	40.2053	50.564	49.298	36.769	45.809	66.777	74.502	39.102	28.361	56.96	78.683	51.76	43.962	75.649	86.536	78.8237	103.924	51.72	37.41	55.751	79.618	74.017	67.687	92.164	84.1	46.773	52.591		0.538461	56.2151
10.1179	48.426	29.925	21.978	35.545	43.4614	36.168	43.342	42.5095	51.547	43.625	36.702	47.015	60.024	72.316	34.623	30.13	54.89	73.48	47.952	42.802	79.915	83.675	82.5389	103.006	56.925	35.662	53.806	75.56	75.248	67.951	104.747	77.735	40.028	57.452		0.54487	55.6091
10.237	46.992	25.144	20.578	38.066	42.0637	37.431	35.947	38.6129	56.179	43.481	35.555	46.944	50.133	74.932	38.209	28.014	53.084	77.877	49.201	45.039	74.825	81.818	83.6085	100.28	44.864	33.789	50.138	77.131	72.101	70.945	95.96	84.156	41.382	53.293		0.551283	54.3463
10.356	47.69	27.623	19.302	36.774	43.1549	37.546	39.71	41.0724	53.401	59.771	36.057	43.861	56.777	75.195	36.335	29.907	53.618	81.15	50.297	49.506	63.467	92.653	80.1877	110.311	44.214	37.308	52.035	78.03	74.301	73.244	96.51	80.27	38.948	51.061		0.557692	55.6261
10.475	47.952	24.25	20.384	30.824	38.5629	32.655	39.403	42.0391	61.335	48.858	38.447	33.79	60.69	74.404	34.931	27.124	54.828	73.903	45.957	38.905	63.278	99.774	92.0524	98.059	41.01	28.549	49.302	79.889	80.519	65.119	92.027	80.301	44.53	53.013		0.5641	54.0195
10.5941	50.328	21.792	20.338	36.001	36.9457	30.925	40.47	41.7621	54.35	44.58	39.44	35.738	58.936	67.087	33.115	22.257	49.194	79.445	44.682	43.061	69.029	90.139	92.6878	106.154	37.287	31.449	47.722	87.319	81.916	71.018	85.462	86.536	39.701	46.633		0.570514	53.6323
10.7131	50.075	20.265	18.799	33.641	33.2859	30.59	36.196	43.6017	46.722	44.668	35.503	36.458	58.403	69.269	35.433	30.845	55.606	80.568	43.048	41.105	68.422	90.85	85.9992	100.415	42.016	32.9	46.076	79.978	74.674	79.577	83.572	78.743	38.379	54.257		0.576922	52.9394
10.8321	50.836	21.266	18.997	40.158	39.8172	33.218	34.557	47.4679	49.699	48.715	35.428	46.961	61.998	79.171	36.167	24.035	54.23	73.79	40.614	37.413	67.985	90.019	84.9196	100.587	49.256	26.69	42.386	75.558	73.081	80.25	93.751	71.465	44.086	54.734		0.583331	53.8031
10.9512	43.792	20.662	18.719	34.347	47.0588	31.147	40.606	46.2454	47.614	47.161	34.083	41.885	66.709	69.277	29.526	23.43	43.506	74.225	42.757	36.201	66.818	92.962	77.7289	82.906	56.54	23.648	43.577	77.937	75.781	87.868	92.221	77.873	42.364	48.301		0.589744	52.514
11.0702	41.121	19.805	18.89	37.487	44.0299	30.624	34.383	42.6334	49.935	51.653	32.188	45.782	57.909	63.924	40.087	25.353	48.166	72.941	50.548	38.155	72.49	87.673	81.6828	88.904	43.756	24.007	46.168	79.306	66.315	89.12	96.649	81.782	44.675	46.937		0.596153	52.7964
11.1892	41.964	22.683	19.926	43.842	39.5464	32.895	34.953	42.714	54.921	54.789	37.837	39.631	57.001	62.777	34.587	25.52	57.525	76.301	48.867	34.897	72.919	79.629	72.0494	87.381	45.632	21.983	39.541	79.862	64.781	92.309	91.308	81.715	44.899	41.283		0.602561	52.3079
11.3083	40.623	22.79	18.716	40.103	40.3059	30.414	35.305	41.2281	53.048	54.71	31.362	37.78	55.926	62.787	32.254	23.511	57.436	64.541	55.333	38.22	74.506	79.376	81.7427	88.126	37.851	28.739	37.67	82.843	77.519	99.704	96.12	84.877	49.715	46.905		0.608975	53.0025
11.4273	51.049	24.24	16.315	37.296	37.4832	30.176	34.76	41.1695	46.691	49.656	36.525	44.701	54.791	73.339	42.62	18.977	49.883	62.176	52.077	37.725	75.424	79.316	87.2906	79.26	40.389	23.631	37.335	90.973	72.708	110.278	97.708	97.384	46.139	55.077		0.615383	53.9577
11.5463	44.729	25.12	16.529	39.058	43.7656	26.211	33.13	41.1912	43.989	43.422	32.059	40.09	58.405	62.563	40.223	23.62	54.53	66.284	51.06	36.008	73.232	74.503	78.4828	81.697	41.568	22.81	43.168	82.577	68.895	114.854	92.697	95.358	56.543	46.269		0.621792	52.7835
11.6654	39.72	24.83	18.572	36.725	49.2407	31.635	34.859	49.8094	41.17	47.633	36.877	40.853	55.992	71.879	31.398	28.138	57.077	67.547	56.102	34.661	72.044	84.312	77.0187	79.69	43.477	20.917	43.803	83.581	69.732	119.011	91.126	109.316	48.53	47.771		0.628206	54.2661
11.7844	42.049	28.103	19.132	33.572	42.8139	35.178	36.245	44.2438	46.791	48.923	37.659	41.584	63.085	64.912	33.498	27.921	59.689	74.152	57.872	32.933	69.144	87.093	83.0652	79.768	37.027	26.253	38.223	81.045	74.042	119.87	89.051	97.336	63.107	41.216		0.634614	54.6058
11.9035	43.814	25.864	15.401	45.945	43.4406	36.367	40.558	40.2262	39.334	46.778	34.488	45.035	58.606	48.871	35.951	27.038	58.065	74.696	55.201	31.539	73.292	87.418	81.4888	80.753	37.826	23.188	35.09	85.054	66.164	129.206	82.523	108.851	61.036	42.339		0.641028	54.1602
12.0225	46.419	25.571	16.792	43.7	48.309	30.61	39.803	39.514	46.514	42.642	31.728	39.013	54.851	51.406	28.281	26.318	61.135	82.465	58.029	37.115	68.24	81.946	85.4799	86.743	35.392	22.272	35.539	83.042	65.858	129.935	84.815	110.547	53.641	40.228		0.647436	53.938
12.1415	48.185	22.024	16.844	45.433	45.6185	30.304	37.776	46.1043	43.414	41.056	29.695	38.476	51.37	53.936	33.048	22.359	58.204	71.448	60.954	40.078	75.483	86.757	98.135	86.332	36.785	21.71	35.814	87.174	72.576	131.792	91.621	107.976	67.901	48.889		0.653844	55.4492
12.2606	49.261	21.269	18.195	37.497	40.8891	37.135	40.235	50.3983	47.509	43.71	33.082	34.049	57.71	64.352	36.751	25.141	56.751	70.194	59.336	39.896	75.312	86.497	85.1836	74.373	35.569	21.454	39.598	85.2	66.896	117.22	89.634	115.729	63.768	49.602		0.660258	54.9822
12.3796	43.235	25.273	17.113	38.872	55.3429	34.348	38.578	52.013	45.608	45.38	40.661	36.278	64.924	55.767	37.699	21.788	64.528	71.462	62.325	39.513	70.907	78.641	80.9736	83.093	31.773	27.026	36.926	92.351	66.406	125.374	90.433	111.573	64.994	49.6		0.666667	55.9053
12.4986	42.016	19.02	17.712	45.839	52.1268	35.022	34.253	47.1643	41.674	43.523	34.629	46.502	61.836	47.556	39.194	25.193	66.485	73.655	67.456	34.385	74.501	85.414	79.4109	91.924	35.155	22.834	39.008	93.472	77.237	108.004	86.462	107.523	70.112	48.865		0.673075	55.7401
12.6177	42.109	21.34	21.846	45.758	51.2873	38.787	38.998	46.9919	44.393	47.583	34.005	44.373	64.406	53.94	41.076	27.541	60.584	72.047	67.181	40.47	74.408	92.375	85.3795	90.763	38.344	23.125	36.65	85.831	70.841	113.34	90.197	112.898	68.523	45.548		0.679489	56.8511
12.7367	45.65	25.051	20.712	46.116	60.0558	43.761	44.105	44.5857	44.627	50.479	31.157	43.668	61.713	64.09	34.845	25.407	67.016	78.729	68.448	38.324	69.961	88.21	89.1589	87.594	33.989	21.56	38.904	85.916	71.541	108.836	90.485	99.959	69.187	52.797		0.685897	57.254
12.8557	45.721	25.211	21.102	51.473	56.743	45.499	46.346	53.48	48.065	50.295	36.202	43.838	59.377	56.23	31.368	26.372	71.124	78.162	69.981	34.721	69.782	82.798	83.4435	93.995	35.824	21.958	38.174	86.58	78.139	88.764	90.088	105.016	64.193	46.734		0.692306	56.9647
12.9748	47.341	24.534	19.27	53.648	56.6061	40.923	41.423	48.336	46.773	51.76	34.235	50.975	62.349	64.331	33.502	29.406	73.365	79.811	77.078	36.138	65.485	84.595	82.5431	90.617	30.654	21.783	38.294	86.287	79.186	87.092	91.83	105.439	59.771	51.457		0.698719	57.2599
13.0938	50.295	28.728	22.417	54.016	52.2382	43.945	43.696	52.7786	47.712	48.966	37.565	55.279	69.166	63.948	31.566	31.748	82.823	78.347	70.681	43.701	65.96	83.52	82.6061	104.808	32.985	22.608	37.918	78.39	75.277	89.529	96.186	99.006	67.507	45.536		0.705128	58.5721
13.2128	59.15	25.593	22.03	57.578	58.2678	46.936	37.775	50.5957	42.127	46.907	36.863	51.02	60.072	63.26	32.529	28.382	75.582	79.925	79.373	46.856	70.6	78.384	84.6776	103.838	37.453	22.08	39.015	78.431	82.054	77.268	109.548	96.362	67.878	52.552		0.711536	58.8518
13.3319	55.507	26.506	19.955	58.701	61.6683	47.325	37.335	43.4392	48.166	50.017	45.616	52.15	64.55	66.552	31.304	37.327	72.704	81.864	75.905	47.077	69.455	69.875	85.0809	106.539	36.577	24.087	47.469	78.439	76.576	84.763	98.313	99.046	63.482	51.901		0.71795	59.2727
13.4509	52.482	28.682	21.233	59.291	50.2925	46.385	39.763	50.1682	49.654	52.846	38.01	53.787	59.605	62.639	33.656	34.078	76.723	70.633	86.064	43.93	70.036	77.063	69.855	90.462	33.629	23.658	45.912	84.905	75.742	85.782	106.333	91.043	64.762	49.942		0.724358	58.2072
13.5699	57.713	27.61	24.567	54.853	43.4417	42.858	38.232	50.2426	50.587	51.558	42.924	48.558	60.215	62.2	31.866	36.7	85.741	79.827	81.214	42.031	67.157	82.6	78.2251	93.82	40.894	26.774	49.107	80.899	74.891	81.738	88.821	89.31	69.608	52.46		0.730767	58.5071
13.689	63.079	27.703	28.444	55.441	42.026	44.498	41.146	54.8013	53.327	45.489	49.227	58.53	58.401	67	34.09	37.403	72.065	75.388	94.653	40.083	69.931	76.411	73.8078	90.099	43.829	28.129	50.619	82.356	81.081	79.134	91.15	92.534	65.491	58.017		0.737181	59.5701
13.808	62.035	32.933	27.208	63.065	49.9127	43.616	42.958	47.2717	54.302	56.253	56.674	63.207	58.317	70.63	34.728	40.091	84.476	77.671	97.924	45.067	64.235	78.55	71.2692	102.917	44.16	29.806	49.303	79.721	83.385	76.814	91.834	90.409	72.833	60.452		0.743589	61.8832
13.927	57.036	33.83	32.77	63.186	50.3317	39.302	40.199	45.5874	57.188	54.139	44.489	51.237	58.157	69.854	40.813	38.477	80.335	75.961	98.573	48.171	75.572	67.176	79.9832	91.412	38.998	32.564	45.18	85.982	85.657	76.349	93.196	80.353	80.077	65.247		0.749997	61.0995
14.0461	58.331	28.626	27.179	61.35	46.1725	44.952	36.723	54.4969	46.285	50.954	57.769	56.777	59.487	71.314	36.847	36.071	79.922	73.189	96.538	43.079	70.058	63.018	78.8798	87.258	43.783	31.485	51.864	87.671	74.754	79.716	90.778	86.772	79.137	65.439		0.756411	60.4904
14.1651	57.802	30.401	26.42	58.41	47.9342	46.297	37.123	47.4643	43.228	52.871	55.999	55.065	54.868	74.611	35.434	36.129	82.507	90.832	97.474	48.301	63.127	72.932	72.0597	82.804	44.511	37.191	42.369	88.57	80.032	71.821	87.96	93.496	67.697	72.388		0.762819	60.4744
14.2841	54.874	39.493	32.333	63.565	45.698	53.701	38.127	45.1418	47.994	50.935	62.25	57.249	56.105	73.76	35.065	39.937	73.246	82.693	86.3	50.708	70.829	77.835	63.0127	81.531	39	37.823	41.316	86.604	78.673	70.05	84.907	84.509	78.107	66.835		0.769228	60.3002
14.4032	64.329	33.097	35.271	65.268	50.3504	47.962	37.552	49.4839	44.3	53.425	69.688	58.531	65.18	77.07	40.944	42.589	77.467	82.19	86.491	50.069	63.774	68.111	67.6219	84.201	46.73	31.557	50.776	90.836	83.573	73.292	87.053	82.943	85.335	68.417		0.775642	62.2199
14.5222	63.773	34.55	37.731	58.191	56.8982	51.675	52.966	50.0403	52.125	50.571	51.816	50.57	58.203	76.484	39.586	45.402	74.637	75.735	82.955	54.577	70.088	72.225	74.8745	80.833	51.105	30.365	45.278	85.677	81.22	81.989	78.502	95.75	96.334	81.959		0.78205	63.079
14.6412	55.625	37.535	45.937	62.109	50.2994	41.907	52.273	47.0561	48.503	53.892	55.503	53.251	55.458	76.298	48.918	41.405	86.628	79.339	85.586	56.1	79.041	73.323	76.1414	84.397	49.557	30.822	44.695	81.71	83.32	68.923	62.257	96.95	93.923	72.338		0.788458	62.6771
14.7603	65.313	36.199	48.151	63.174	45.7904	45.222	53.736	49.718	46.551	56.616	47.27	49.201	56.805	74.605	43.979	50.722	83.905	79.619	70.19	58.552	78.687	66.349	74.5936	76.995	50.84	39.122	49.968	81.655	81.289	75.394	65.645	102.327	95.614	76.991		0.794872	62.9644
14.8793	64.865	38.066	48.062	66.832	44.645	47.929	53.366	51.335	46.575	52.795	46.125	53.667	56.23	76.489	45.639	43.087	91.864	72.359	72.2	57.223	83.603	69.611	78.8864	80.099	50.131	39.166	52.704	83.248	81.822	59.317	64.77	98.121	107.748	75.538		0.801281	63.3564
14.9984	59.346	44.771	50.463	66.489	52.4849	51.743	54.977	48.5116	52.7	51.661	52.091	49.777	59.752	77.653	46.947	42.586	88.073	91.247	67.084	50.372	78.098	71.674	79.2211	85.792	55.931	40.116	48.922	90.596	79.456	64.224	64.758	94.197	104.333	74.551		0.807694	64.4293
15.1174	57.023	49.622	56.468	57.078	51.8056	53.426	52.519	55.971	51.046	44.967	54.828	48.836	62.333	70.583	42.256	45.598	80.338	77.451	74.752	59.987	83.245	71.07	77.989	87.446	53.451	37.466	52.353	98.7	68.031	53.321	66.455	81.423	105.353	81.03		0.814103	63.6535
15.2364	57.176	48.562	54.389	57.776	46.582	60.917	50.937	60.173	52.656	48.674	44.75	55.09	59.848	71.253	49.21	45.527	81.205	78.17	65.938	62.485	84.189	77.994	83.0692	88.321	46.824	40.622	56.071	99.996	76.033	52.533	65.694	84.948	108.232	80.657		0.820511	64.603
15.3555	50.789	43.667	51.907	52.799	47.4954	67.491	52.054	53.2936	55.365	48.723	48.472	58.996	55.358	66.151	55.225	53.801	87.791	73.095	69.463	70.865	83.046	72.159	79.8582	99.118	55.665	33.093	57.27	86.759	78.662	43.573	69.248	86.575	105.901	82.023		0.826925	64.5809
15.4745	52.213	52.861	55.297	54.964	47.0103	58.47	47.555	62.0069	56.395	46.867	50.895	52.719	59.21	63.39	55.63	50.269	74.276	70.491	70.488	62.079	84.362	79.6	88.2068	103.422	59.505	38.657	59.467	106.491	87.212	44.815	63.764	99.407	104.648	82.46		0.833333	66.0324
15.5935	54.833	52.386	49.03	57.196	55.6777	55.857	50.604	54.7755	58.914	49.156	45.539	48.258	53.844	61.802	62.689	64.053	80.433	63.999	69.85	61.279	87.274	76.084	82.7185	91.89	59.322	44.026	58.749	99.198	83.338	40.141	52.844	81.688	102.243	77.032		0.839742	64.3154
15.7126	60.043	52.346	46.961	51.795	53.9118	60.865	48.092	53.2835	63.532	48.781	51.277	50.786	49.167	56.502	59.551	64.837	77.952	64.919	68.749	69.345	82.325	71.376	88.4693	108.105	58.228	38.868	57.105	90.121	79.482	25.025	49.268	87.07	99.832	73.827		0.846156	63.5823
15.8316	54.406	52.43	46.112	43.289	54.169	61.399	45.731	49.6414	57.912	51.167	48.882	52.711	52.49	55.917	62.637	59.119	76.681	62.651	75.702	73.285	86.998	77.739	88.6636	96.501	64.608	41.113	64.419	90.662	88.479	23.872	47.36	88.912	97.17	70.988		0.852564	63.6416
15.9506	51.459	50.43	51.607	52.878	49.2409	57.805	51.787	69.3621	60.41	47.073	50.702	63.339	52.423	46.461	67.277	66.109	70.399	72.508	78.99	74.877	87.64	77.414	91.434	98.856	61.66	42.105	69.369	87.761	85.058	16.555	38.775	78.522	94.741	72.533		0.858972	64.34
16.0697	48.336	58.943	47.743	52.24	57.7673	59.597	47.831	67.1467	62.486	43.45	48.242	63.727	54.489	52.31	71.602	65.549	66.633	69.474	70.508	80.754	76.469	82.192	84.4613	89.84	59.734	45.809	68.699	102.404	62.689	14.019	31.758	78.167	98.574	77.354		0.865386	63.5587
16.1887	46.271	55.952	41.664	51.69	55.5186	56.97	46.093	64.4017	59.057	45.331	50.513	49.704	49.482	47.379	69.022	60.472	70.318	75.464	60.477	84.917	72.514	75.498	86.9942	85.336	61.307	39.94	61.488	86.837	75.953	13.142	32.209	70.904	86.765	69.737		0.871794	60.5683
16.3077	45.024	55.851	43.607	45.821	48.5383	45.649	49.234	58.1359	57.838	43.831	51.062	44.868	47.249	52.419	74.732	56.621	77.414	65.756	57.129	87.833	79.494	71.863	81.0545	85.127	58.227	47.248	69.48	84.293	71.022	10.748	23.556	76.005	98.347	77.396		0.878203	60.0727
16.4268	50.271	45.511	43.075	44.757	49.7279	48.803	47.515	65.4639	51.21	44.156	47.046	51.386	47.296	49.666	86.126	57.708	62.454	61.897	60.415	95.296	75.73	81.317	80.7141	86.297	63.98	62.734	70.438	83.21	68.173	8.57	17.785	64.028	82.149	68.336		0.884617	59.5071
16.5458	50.092	50.161	26.105	37.227	43.6537	42.712	43.716	62.173	50.925	39.768	50.139	48.507	41.159	55.54	82.834	56.078	61.676	63.2	49.283	83.588	73.584	80.561	81.3544	77.124	71.802	60.155	69.402	76.369	64.723	5.244	15.468	57.06	87.497	67.697		0.891025	56.664
16.6648	48.33	47.71	24.769	30.856	37.1776	46.785	46.654	48.5689	54.769	38.04	45.22	53.84	37.855	47.928	82.08	58.378	60.791	55.521	39.657	81.798	73.248	79.492	88.2228	85.709	71.962	64.396	71.408	70.268	61.161	3.176	10.699	43.477	82.228	78.586		0.897433	55.0224
16.7839	46.027	43.939	18.97	27.965	31.3661	41.309	41.859	52.2845	44.693	40.903	37.97	48.862	38.28	42.161	73.925	61.88	52.769	49.567	35.017	84.692	73.814	79.725	86.0643	79.725	67.901	62.506	75.369	73.071	52.392	3.075	8.004	32.332	75.69	65.29		0.903847	51.4528
16.9029	34.953	42.832	10.062	22.431	22.6332	41.29	43.215	59.204	48.832	34.217	37.961	47.524	34.075	48.032	74.857	71.998	52.517	41.65	24.914	81.903	66.971	70.627	87.898	78.713	75.399	72.501	73.023	65.084	46.61	3.476	6.881	28.464	67.355	63.025		0.910256	49.4449
17.0219	24.92	46.269	7.498	18.136	17.5255	39.641	45.408	52.3523	54.862	33.582	38.205	40.692	26.226	39.634	88.612	58.143	41.167	34.629	22.024	87.536	63.949	73.217	85.6501	76.389	71.006	68.106	62.167	64.552	39.678	4.714	5.826	22.879	63.688	58.385		0.916664	46.3902
17.141	21.506	41.978	6.023	12.291	16.1555	34.789	43.443	49.4827	44.96	23.769	34.306	41.777	23.677	40.502	75.492	58.596	34.702	28.878	14.672	83.023	52.453	75.858	83.1261	78.827	71.878	78.693	53.399	64.463	31.302	4.362	5.85	16.568	60.083	61.371		0.923078	43.184
17.26	19.824	31.751	4.873	7.739	8.5737	34.667	40.558	51.983	41.819	24.567	33.742	34.73	21.338	35.145	76.172	57.505	29.795	22.097	6.829	84.236	44.79	68.022	86.731	76.02	58.854	74.557	48.354	67.643	21.321	3.264	4.954	14.071	57.504	61.476		0.929486	39.8678
17.379	12.194	24.401	3.918	4.84	5.7697	29.38	40.618	46.6962	47.739	21.686	29.307	30.468	14.917	30.774	74.418	53.607	19.248	18.978	4.681	80.967	35.43	65.159	77.6602	76.099	50.279	76.201	37.182	63.435	19.302	2.442	4.373	9.073	43.153	56.342		0.935895	35.6099
17.4981	8.486	15.453	2.955	3.811	3.5405	21.886	34.708	43.2796	41.292	18.25	27.717	26.626	15.065	24.914	63.966	52.456	17.266	11.612	4.013	65.622	30.308	70.043	78.7666	64.544	53.919	69.498	28.858	58.655	16.174	3.131	4.501	8.141	40.28	49.085		0.942308	31.73
17.6171	4.456	11.915	3.95	4.116	2.116	13.604	39.94	37.5336	46.363	15.736	28.157	24.602	13.039	15.711	54.947	52.508	9.963	7.746	3.545	63.296	18.823	68.603	73.4229	52.54	51.937	66.883	24.155	51.199	8.186	3.321	4.706	6.115	32.862	47.89		0.948717	28.3496
17.7361	4.373	7.592	4.008	3.796	2.5637	10.911	32.144	36.5109	47.624	12.483	21.991	24.823	6.783	12.891	60.941	44.072	11.286	6.167	3.652	58.307	15.082	63.333	77.6882	40.23	46.806	46.687	12.35	48.921	7.55	1.917	3.683	5.247	21.909	42.756		0.955125	24.9141
17.8552	5.297	3.45	3.491	2.41	1.6935	9.275	32.524	29.1699	40.442	11.079	23.896	15.771	6.09	8.675	54.696	36.942	8.591	5.004	3.911	50.663	12.069	61.377	72.1609	37.101	34.274	29.89	9.171	44.162	4.418	2.076	3.582	4.487	16.342	31.2		0.961539	21.0406
17.9742	3.875	3.261	1.113	1.575	1.7799	4.083	29.278	30.4572	36.012	8.44	23.561	15.778	6.511	7.731	51.962	27.025	6.152	3.234	2.644	44.987	6.49	46.118	68.495	23.916	24.832	21.949	7.39	38.923	4.482	1.249	2.3	3.849	10.248	26.151		0.967947	17.525
18.0932	2.164	3.816	1.257	1.46	2.4121	4.203	25.63	31.2979	30.428	5.294	16.716	13.79	4.938	5.322	46.969	18.123	7.438	4.449	1.671	40.751	7.779	44.531	64.8224	16.999	16.295	11.508	5.722	29.957	3.407	0.859	2.7	4.725	8.438	17.867		0.974356	14.8158
18.2123	1.714	3.598	1.86	1.956	1.7009	2.785	17.187	26.8844	27.843	7.46	13.898	10.443	5.628	3.398	38.999	14.676	4.289	2.93	1.069	25.669	6.668	41.29	63.9698	9.709	11.618	8.509	5.93	18.599	3.27	1.08	3.058	4.345	5.095	18.785		0.980769	12.2327
18.3313	1.219	3.125	2.594	1.283	1.6324	2.449	15.531	15.9871	21.142	4.278	11.603	7.969	2.408	2.371	29.842	10.412	2.42	1.66	1.774	16.14	4.097	34.414	51.864	7.232	9.411	7.084	4.714	18.429	2.949	0.749	1.826	3.343	3.024	14.579		0.987178	9.39866
18.4504	1.919	3.012	1.588	1.931	2.0377	2.339	9.43	11.2353	19.443	4.534	9.444	5.285	2.75	1.694	24.788	4.154	2.113	2.045	0.71	12.626	4.328	26.867	46.7736	5.901	6.674	5.31	3.656	10.896	1.981	0.585	1.254	2.279	4.575	9.69		0.993592	7.46611
18.5694	1.25	1.547	1.287	1.465	1.5171	1.948	8.459	10.9927	11.008	4.456	5.179	3.529	2.376	4.785	16.182	5.923	1.412	1.261	0.629	7.412	3.368	17.252	45.1827	6.27	9.213	3.612	4.413	8.877	3.06	1.52	0.962	1.759	5.451	8.148		1	6.22663

## Sheet: Image4
X0	Y0	Y1	Y2	Y3	Y4	Y5	Y6	Y7	Y8	Y9	Y10	Y11	Y12	Y13	Y14	Y15	Y16	Y17	Y18	Y19	Y20	Y21	Y22	Y23	Y24	Y25	Y26		Ap-basal	Avg intensity
0	74.517	39.815	40.818	52.722	36.779	17.243	53.668	68.576	49.764	77.085	80.54	53.388	43.098	48.506	41.871	42.881	45.2107	59.978	62.7291	51.907	63.85	44.4681	39.183	73.573	70.329	50.982	62.192		0	53.5434
0.119	91.759	40.341	52.427	68.764	38.216	27.988	61.78	58.009	51.821	80.516	74.75	55.428	56.16	45.402	49.725	45.3812	42.7797	66.49	65.0947	58.879	66.403	48.4578	40.152	75.244	71.598	52.175	61.8		0.00735081	57.3163
0.2381	93.464	45.479	73.782	72.737	47.653	28.356	64.939	64.981	61.731	85.671	74.456	52.335	63.151	49.244	55.46	50.2388	49.5934	82.942	74.0648	60.765	60.51	46.1778	45.5	77.593	78.583	57.01	62.292		0.0147078	62.1744
0.3571	96.234	54.493	94.826	84.267	62.323	31.825	72.677	68.943	70.103	95.668	79.757	58.701	78.304	50.569	48.494	54.1042	51.5453	96.033	87.4416	64.626	54.455	57.6714	52.106	80.22	81.79	53.466	58.999		0.0220586	68.1349
0.4761	100.93	63.44	119.038	100.93	70.929	34.335	80.978	72.765	80.979	111.349	83.443	71.489	86.219	59.722	60.941	56.7522	56.2136	122.516	102.391	63.333	51.298	59.7975	54.023	80.77	90.019	59.903	58.855		0.0294094	76.0503
0.5952	99.063	69.629	132.104	120.936	69.515	43.843	79.79	80.086	97.408	148.401	89.86	76.324	97.488	63.679	71.577	65.4216	63.3028	138.912	109.421	64.224	62.258	70.8319	61.835	89.466	98.616	64.522	61.121		0.0367664	84.8013
0.7142	104.269	74.498	145.174	118.431	77.507	52.499	92.332	81.293	101.609	175.392	87.105	84.792	123.661	86.093	83.461	71.153	73.5828	158.223	111.163	62.153	64.922	75.1008	66.919	92.625	109.43	72.338	72.508		0.0441172	93.2679
0.8332	113.156	106.581	157.471	120.359	90.163	66.753	100.028	95.248	119.833	189.3	90.496	96.791	131.321	106.943	100.818	76.9383	72.3982	169.617	113.947	68.287	66.39	81.9055	80.153	102.703	115.47	73.576	77.124		0.051468	103.103
0.9523	126.061	133.769	186.321	126.735	98.042	64.443	105.75	102.819	129.656	208.178	102.984	97.681	132.332	123.57	90.434	83.6351	82.9475	168.47	108.113	72.404	69.444	92.1914	87.549	114.785	130.356	78.241	93.153		0.058825	111.484
1.0713	129.073	161.187	222.924	127.435	101.693	80.991	108.76	107.763	144.897	207.343	115.171	104.1	141.608	133.547	85.266	93.9959	99.8517	163.172	108.073	71.795	77.019	96.6641	91.831	122.501	145.39	82.095	103.036		0.0661758	119.525
1.1903	115.912	175.642	237.834	129.433	101.59	96.114	108.115	120.554	138.289	188.636	105.553	107.861	131.664	152.868	88.759	99.7249	123.724	165.875	113.439	70.952	84.162	93.2091	96.684	126.129	161.46	84	116.892		0.0735266	123.521
1.3094	103.474	190.933	249.92	128.474	97.216	100.885	126.537	130.478	132.077	183.299	130.188	104.357	129.705	157.486	93.814	93.3471	118.13	145.502	114.379	82.442	102.943	107.504	101.802	122.063	160.399	92.74	121.132		0.0808836	126.712
1.4284	94.468	198.583	249.411	128.678	94.729	112.556	137.886	113.272	139.201	183.992	152.446	104.288	125.77	146.023	91.539	98.4859	113.485	133.849	105.058	88.627	118.46	108.999	105.053	118.987	166.066	90.769	140.753		0.0882344	128.201
1.5474	101.997	212.316	244.59	133.643	100.687	139.599	147.253	111.412	141.618	161.507	156.662	113.456	130.038	138.018	91.512	103.551	110.714	141.551	101.213	98.003	126.581	113.691	108.738	131.214	164.959	93.037	160.749		0.0955852	132.53
1.6665	100.4	204.957	242.963	128.176	107.716	157.281	148.363	127.422	146.08	151.264	153.157	112.979	126.017	119.426	84.598	100.025	107.174	155.271	95.9575	102.358	125.209	104.859	113.69	123.03	153.261	91.383	167.428		0.102942	131.498
1.7855	106.613	200.265	228.805	121.262	110.967	153.413	154.057	128.856	148.744	136.156	152.535	107.024	114.226	110.01	90.11	102.419	115.387	134.233	87.0122	111.875	131.555	99.1361	130.181	118.922	126.883	112.35	175.841		0.110293	129.957
1.9046	134.148	206.616	221.758	131.951	91.563	147.191	173.123	128.083	149.56	127.089	147.402	98.539	104.967	109.859	91.683	103.313	114.266	132.699	89.1591	121.802	124.68	98.1318	117.665	110.892	124.618	109.206	160.376		0.11765	128.531
2.0236	133.901	192.234	210.048	134.068	95.872	149.522	180.659	137.275	143.267	120.777	146.786	102.003	106.161	114.355	91.586	99.26	99.2914	130.301	85.2902	124.109	111.206	100.098	127.541	104.511	117.964	115.857	147.318		0.125001	126.713
2.1426	139.543	173.782	192.156	141.801	108.372	144.379	187.124	142.605	147.223	116.508	142.434	110.444	102.612	112.706	92.284	105.101	85.0566	128.756	88.0904	140.222	114.679	99.3524	116.868	93.69	113.966	126.667	155.147		0.132352	126.725
2.2617	137.02	148.049	180.555	156.652	106.168	156.52	177.458	159.315	154.829	116.122	132.724	111.267	104.767	116.148	106.668	106.099	83.3446	115.267	90.8203	133.366	115.722	105.209	122.863	94.352	94.685	128.693	144.321		0.139709	125.889
2.3807	148.735	142.107	170.932	167.326	113.543	167.68	187.715	167.112	158.102	107.584	128.535	104.761	102.725	110.661	109.264	100.128	94.6157	112.473	83.6068	119.022	105.465	87.8439	115.287	98.913	87.047	136.617	135.722		0.147059	124.575
2.4997	161.577	147.586	165.155	174.613	105.506	163.365	185.251	166.783	137.247	113.887	110.399	108.094	98.128	116.454	105.615	86.7685	92.7469	111.255	83.393	127.716	94.505	86.3332	107.329	93.484	85.287	128.519	119.866		0.15441	121.365
2.6188	163.053	126.701	148.901	169.876	110.975	154.446	185.824	183.617	145	110.776	108.013	110.691	93.768	109.705	104.915	103.17	92.6204	103.829	86.4973	129.638	91.476	98.8371	107.543	83.554	84.972	121.778	117.742		0.161767	120.293
2.7378	158.681	121.599	144.897	172.459	112.111	153.437	186.615	178.711	134.95	130.244	105.995	121.613	94.652	100.092	124.486	104.339	94.8106	109.45	84.6363	114.373	83.928	90.809	104.762	86.345	77.565	133.738	106.138		0.169118	119.683
2.8568	179.165	113.452	135.585	175.027	109.036	154.07	191.805	180.635	125.927	130.462	100.605	140.264	86.003	103.068	133.626	97.967	95.508	110.586	85.1462	111.456	79.688	78.3321	104.844	87.775	78.311	129.66	102.53		0.176469	119.279
2.9759	169.63	116.059	123.885	157.648	103.414	142.054	181.27	166.182	122.215	130.268	104.941	132.888	88.711	96.12	143.819	94.1647	95.0243	109.236	76.3054	109.337	75.717	79.1039	104.08	81.06	83.249	116.709	110.212		0.183826	115.307
3.0949	172.227	111.917	128.64	166.307	103.917	146.996	180.829	153.654	114.834	129.951	95.97	119.029	84.545	102.557	152.658	99.4607	102.978	92.312	76.1215	110.433	74.769	66.2868	104.726	84.053	78.385	107.604	98.164		0.191177	113.308
3.2139	151.036	109.641	126.214	156.514	104.358	153.127	176.076	144.459	112.381	122.656	95.373	116.1	86.06	106.941	156.573	91.9293	89.9096	94.866	73.4267	117.986	73.183	70.2775	96.532	74.175	80.56	103.437	100.275		0.198527	110.521
3.333	146.745	100.392	118.707	145.6	114.214	130.952	177.248	135.012	112.725	134.392	107.943	115.311	78.217	88.477	157.357	90.2995	96.0104	96.488	80.6102	112.937	75.591	72.6581	88.813	81.751	72.568	100.454	108.457		0.205884	108.886
3.452	136.895	92.958	110.748	153.759	113.98	120.762	178.954	120.176	103.824	112.35	97.975	109.177	82.447	85.193	153.219	98.3957	92.8728	90.658	77.0458	107.843	70.824	82.1261	87.742	77.682	76.682	99.118	102.443		0.213235	105.031
3.571	135.007	109.662	109.024	152.779	112.928	128.553	153.445	103.767	98.202	112.844	96.166	103.308	75.822	88.751	163.96	87.6411	94.6669	94.895	76.4996	113.146	83.019	79.8422	87.471	74.654	71.681	107.74	104.307		0.220586	104.436
3.6901	146.469	116.723	115.21	136.56	100.811	131.445	149.882	112.942	93.837	103.395	89.043	91.749	91.379	93.295	156.571	92.3864	89.4912	82.445	79.6962	109.949	79.547	78.583	86.986	65.911	77.407	112.33	108.104		0.227943	103.413
3.8091	137.822	99.127	104.889	134.591	97.734	119.089	144.926	123.94	99.589	104.501	93.756	91.078	88.986	87.274	140.85	88.5637	93.6039	75.802	79.8542	102.055	67.575	83.0437	88.877	61.499	79.913	111.765	103.474		0.235294	100.155
3.9281	145.563	107.654	112.118	138.121	95.764	105.302	130.874	108.978	89.506	107.261	92.061	86.799	80.18	89.719	139.443	85.1158	97.4854	69.26	67.272	95.949	66.376	75.1521	88.013	64.502	72.668	105.538	112.251		0.242645	97.3676
4.0472	139.53	106.434	114.755	140.202	92.471	101.173	125.28	108.794	83.444	108.025	100.343	89.751	79.688	91.72	146.781	93.4659	82.8741	72.424	79.559	88.75	66.704	78.6191	82.747	76.376	81.661	118.673	112.354		0.250002	98.6147
4.1662	144.028	110.595	106.509	132.489	99.195	104.905	119.925	111.168	88.969	106.04	103.585	91.756	84.793	82.583	133.07	95.6226	76.6465	67.886	77.9702	87.252	63.022	89.7925	74.281	71.858	86.384	120.955	119.682		0.257352	98.1838
4.2852	140.464	121.367	102.442	130.931	96.596	107.099	114.167	109.145	93.516	105.421	100.173	104.742	87.143	85.609	121.455	88.0153	87.3657	74.639	74.6218	83.025	64.705	89.7872	73.796	65.407	89.411	118.293	123.499		0.264703	98.2531
4.4043	134.081	120.734	111.078	127.634	101.059	102.294	103.954	111.145	87.925	119.567	94.697	104.059	93.447	89.286	120.236	91.7324	86.9535	70.153	66.8376	87.397	69.208	87.7841	72.011	65.071	91.5	111.382	134.976		0.27206	98.3778
4.5233	122.445	115.437	104.073	131.577	102.156	99.64	103.861	122.097	85.147	113.369	89.34	101.268	88.408	95.014	92.503	91.8415	78.4549	71.81	76.2988	83.364	71.132	88.1269	71.358	64.423	80.04	108.867	129.159		0.279411	95.6004
4.6423	134.063	108.265	110.181	124.929	107.343	94.626	106.365	117.056	90.189	116.842	85.392	114.156	87.681	92.802	103.283	91.9313	74.2274	70.022	83.1893	87.425	71.796	90.6346	71.931	57.004	88.377	105.764	140.562		0.286762	97.2606
4.7614	131.507	109.198	107.044	125.25	113.225	102.207	105.104	123.289	92.445	98.097	88.607	101.088	89.456	90.327	93.641	85.0245	75.4095	74.391	83.2569	81.006	73.106	96.9514	67.734	59.296	88.891	90.079	132.293		0.294119	95.4786
4.8804	113.061	108.505	107.752	113.414	106.811	100.855	96.691	123.698	104.97	97.496	102.509	103.448	85.93	90.35	102.437	84.315	75.8441	69.953	76.3238	71.66	69.748	91.0422	73.163	61.99	86.18	96.8	125.729		0.30147	94.0991
4.9995	111.717	104.669	111.307	114.113	105.227	91.728	86.233	103.195	92.801	100.866	99.731	97.996	88.641	90.259	100.7	83.9424	76.0666	66.529	72.4693	75.189	59.69	98.3272	66.5	66.379	83.562	88.884	123.879		0.308827	91.1334
5.1185	114.066	104.207	106.503	107.182	112.685	96.523	94.164	103.341	94.864	104.35	102.712	86.93	98.105	100.453	94.698	85.0311	77.7399	69.869	72.2741	68.369	73.754	99.9148	61.922	69.249	84.989	84.677	117.549		0.316177	92.0786
5.2375	109.691	108.162	106.825	106.484	103.463	95.841	98.769	103.512	98.987	92.357	100.971	82.226	92.635	98.034	83.424	84.846	72.6559	65.57	78.8742	64.249	68.695	95.4311	65.339	65.443	83.725	86.074	117.075		0.323528	89.9762
5.3566	119.647	103.238	107.106	95.129	108.227	81.169	88.616	108.554	111.271	100.006	96.786	80.801	90.582	95.164	80.204	88.8382	72.4135	65.984	84.8392	56.175	67.891	93.1142	62.494	73.883	83.204	79.493	97.144		0.330885	88.5916
5.4756	123.832	108.784	101.732	92.041	104.914	79.526	86.212	107.475	107.028	97.039	102.597	85.965	91.291	88.801	73.644	83.2824	67.5897	68.517	84.2068	57.79	74.128	79.1859	60.898	58.852	76.525	82.252	93.421		0.338236	86.5751
5.5946	112.393	106.812	105.905	103.246	109.583	72.877	83.598	92.905	99.57	91.885	85.897	83.47	101.219	95.546	81.145	72.4438	72.783	69.778	91.7813	57.041	63.779	83.559	59.94	55.403	76.085	79.571	88.384		0.345587	85.0592
5.7137	117.559	108.81	91.806	108.491	102.54	72.583	82.987	87.409	100.384	92.883	92.862	83.194	89.854	89.273	76.57	73.7273	75.1654	68.582	102.945	63.955	72.57	70.3515	68.273	59.231	81.65	82.843	86.158		0.352944	85.2836
5.8327	129.512	113.788	98.728	109.861	99.642	73.018	81.151	90.988	105.664	98.502	87.906	78.583	82.004	80.747	76.354	80.1236	68.3939	71.35	91.7549	64.626	70.11	75.3304	61.289	51.538	81.102	81.139	87.454		0.360295	84.8392
5.9517	129.503	108.249	95.994	98.843	104.396	64.42	78.05	78.746	107.402	84.807	100.421	71.126	82.392	69.921	75.296	83.5566	76.6624	72.431	80.8354	61.195	62.654	76.638	65.285	57.984	78.911	83.589	83.098		0.367645	82.6817
6.0708	113.5	109.021	104.615	96.888	97.641	70.175	85.757	92.451	99.449	72.244	90.727	77.916	80.77	78.163	79.395	71.0476	65.5901	78.321	86.0193	65.277	69.208	60.0874	67.634	58.33	69.341	79.03	70.235		0.375002	81.0679
6.1898	113.871	101.604	98.37	99.77	101.738	79.768	96.208	84.996	109.857	66.651	81.152	67.464	87.982	69.904	79.633	78.6665	72.5231	66.486	79.7789	63.254	65.507	59.4804	65.247	57.155	71.987	75.699	69.272		0.382353	80.149
6.3088	114.854	114.663	103.205	98.875	101.064	75.759	87.692	80.904	109.488	62.474	69.378	70.617	79.879	68.327	69.37	71.129	70.6143	69.551	84.8509	59.062	66.743	62.2489	66.632	55.609	66.165	70.443	64.288		0.389704	78.292
6.4279	105.163	113.578	105.55	110.436	104.598	74.115	91.202	84.777	98.851	63.498	68.811	71.837	67.342	70.678	71.949	70.4525	62.6768	65.593	75.5414	62.52	68.583	59.4332	64.803	59.814	65.272	71.506	67.515		0.397061	77.6331
6.5469	104.376	101.553	106.351	106.955	89.19	71.65	87.4	77.886	97.953	57.161	66.302	73.216	74.226	65.579	80.331	77.3566	70.3282	64.569	75.123	64.207	58.381	60.1073	60.154	58.045	72.886	77.745	66.317		0.404412	76.4944
6.6659	104.331	100.344	107.067	104.471	88.866	78.813	96.739	80.652	89.257	49.307	62.845	68.395	63.684	68.275	72.608	76.2132	75.3613	65.653	72.6121	60.052	61.345	44.4933	66.892	65.575	63.558	78.537	64.768		0.411763	75.2116
6.785	98.633	87.131	104.697	101.763	89.624	72.527	89.225	73.437	85.681	49.75	64.994	71.705	64.281	68.024	71.936	78.6817	69.419	67.11	72.6231	59.855	69.151	43.5177	69.958	59.757	65.073	72.649	61.633		0.41912	73.4384
6.904	97.344	85.212	97.492	106.924	88.729	75.569	90.228	75.534	86.511	43.304	66.651	66.51	58.492	67.587	72.607	80.8133	59.0889	56.86	73.8385	62.264	61.116	50.6383	63.391	60.093	56.006	69.426	61.04		0.42647	71.6026
7.023	94.259	83.777	99.58	99.505	92.575	83.841	95.974	74.582	86.198	45.258	57.578	67.986	60.832	70.647	80.291	80.2725	66.5135	58.839	62.9449	61.957	62.883	53.2618	59.214	58.903	72.098	61.682	63.99		0.433821	72.4238
7.1421	97.49	85.256	102.819	92.613	89.589	87.505	95.949	76.376	83.897	44.359	55.566	83.348	64.145	71.437	81.123	82.9982	64.418	56.964	64.0842	60.861	64.771	44.1516	63.431	54.42	64.48	67.035	57.741		0.441178	72.4751
7.2611	87.471	71.412	108.093	83.668	89.706	96.68	88.361	76.157	88.051	42.905	52.956	76.204	68.822	72.177	80.307	77.7834	63.9507	58.428	70.0107	61.404	62.258	43.6183	65.251	55.188	61.039	67.941	54.868		0.448529	71.2856
7.3801	81.205	77.948	108.446	90.024	96.251	90.431	90.456	68.877	86.815	40.409	56.755	84.098	55.742	67.312	82.009	78.6557	70.0808	51.329	63.0524	56.014	60.922	43.852	66.654	61.94	60.014	65.071	56.761		0.45588	70.7824
7.4992	85.806	67.963	99.06	87.954	92.617	83.605	100.31	77.799	84.527	43.809	50.108	81.254	56.915	68.086	79.619	76.9765	66.0945	56.576	60.1267	60.313	58.634	42.7766	62.519	63.209	52.634	53.402	57.247		0.463237	69.257
7.6182	78.968	68.933	104.094	92.679	98.628	78.857	92.367	75.714	81.22	41.491	48.098	85.802	58.355	68.984	72.171	74.2584	64.4159	59.938	58.9997	60.808	52.887	36.6898	62.922	63.539	49.418	50.195	56.726		0.470588	68.0429
7.7372	77.867	65.938	109.342	91.434	100.612	83.6	76.077	75.048	83.837	35.839	46.857	75.929	64.511	69.626	79.49	71.1532	67.5547	60.538	56.1239	65.139	46.63	37.7403	59.92	65.347	55.217	54.382	53.384		0.477938	67.7458
7.8563	82.905	61.938	106.489	98.171	96.811	83.462	76.156	76.991	79.118	32.676	52.38	82.429	59.932	76.142	74.567	66.5477	65.268	59.992	56.1538	53.381	41.163	36.9508	53.141	62.745	54.032	54.863	62.414		0.485295	66.9192
7.9753	77.169	65.916	94.242	85.159	96.032	77.374	81.788	79.534	74.265	28.213	49.478	77.269	52.437	72.301	81.732	59.9022	60.2313	56.78	49.6833	54.134	46.098	37.9492	57.392	65.238	53.319	50.985	59.682		0.492646	64.6038
8.0943	79.409	60.73	98.172	91.778	104.727	70.7	89.679	83.902	66.323	35.889	53.497	74.263	47.237	66.689	76.517	69.5705	67.8363	53.301	52.4296	49.992	47.091	36.1907	51.149	68.677	50.76	51.145	56.41		0.499997	64.9653
8.2134	71.216	63.413	93.899	87	103.793	75.53	84.322	74.317	69.015	29.896	51.66	71.43	46.324	69.046	70.809	65.1885	70.2242	52	40.8141	53.7	42.112	27.1223	52.145	64.631	40.411	53.786	59.204		0.507354	62.3336
8.3324	66.935	62.306	99.073	87.244	108.056	71.202	78.626	74.662	72.351	34.105	42.764	63.891	44.271	67.425	75.994	64.3389	69.0382	58.331	43.0771	54.023	38.912	28.2604	50.72	67.99	40.583	61.513	56.202		0.514705	62.2924
8.4515	79.516	61.059	91.956	97.513	113.099	66.592	82.024	66.395	69.579	32.367	43.024	66.038	47.198	68.255	81.956	60.7981	65.0308	53.237	44.7725	55.509	38.674	31.3428	49.832	68.661	41.324	58.047	62.534		0.522062	62.8272
8.5705	63.905	55.492	90.826	92.429	117.726	77.027	93.672	71.669	71.432	33.453	41.886	62.46	51.126	55.299	80.925	62.9262	63.8666	55.847	52.564	57.018	39.855	30.0161	53.208	62.608	44.405	53.943	57		0.529412	62.6883
8.6895	66.881	59.617	91.05	83.845	111.98	71.268	88.948	69.26	59.928	27.216	47.101	60.947	44.722	60.11	76.436	67.4964	69.523	54.586	50.5065	53.132	34.95	28.6408	52.534	66.065	47.137	58.694	63.678		0.536763	61.713
8.8086	72.411	54.904	87.55	89.266	114.671	68.831	88.082	72.566	64.703	28.106	45.393	61.744	43.322	57.509	86.496	73.4142	67.0297	56.16	44.7937	52.736	37.216	25.7778	48.236	72.368	42.011	59.368	62.107		0.54412	62.1026
8.9276	72.913	55.647	85.871	98.977	112.14	71.006	86.772	70.374	64.026	34.046	41.545	67.697	51.484	62.813	73.109	71.975	61.6794	50.069	43.3264	54.419	38.284	28.4544	47.681	70.963	43.907	52.832	59.26		0.551471	61.8989
9.0466	63.788	49.383	80.131	104.159	96.936	72.27	95.525	70.152	63.626	28.385	43.714	69.137	50.425	61.983	76.681	69.2269	64.8647	52.313	47.8217	53.223	31.811	27.7895	43.84	72.85	46.401	60.341	62.418		0.558822	61.4517
9.1657	60.024	46.196	80.048	93.086	86.228	72.261	92.693	71.482	56.692	25.136	44.002	64.595	52.939	52.964	73.852	63.5192	66.286	53.429	48.2866	48.608	27.47	24.0834	44.94	65.765	43.669	65.211	66.375		0.566179	58.883
9.2847	61.065	45.983	76.506	86.449	87.315	69.243	90.232	72.813	65.172	28.378	41.491	59.515	56.92	57.423	72.793	60.38	68.2572	56.02	45.0263	56.267	31.361	21.2379	42.132	64.548	41.282	53.924	61.057		0.57353	58.2515
9.4037	56.852	44.152	72.745	96.565	87.563	77.05	88.254	73.535	60.209	26.924	41.259	62.612	56.473	64.08	69.676	75.9901	66.531	51.116	45.869	58.871	31.567	21.4499	46.368	55.535	49.812	53.667	56.737		0.58088	58.943
9.5228	60.515	48.165	73.289	94.508	79.27	69.049	90.173	80.225	66.463	24.332	37.263	63.741	58.713	64.448	66.583	73.6952	73.8949	46.691	43.3234	46.736	29.83	20.6753	48.558	62.924	44.538	54.722	60.952		0.588237	58.6399
9.6418	59.91	45.488	72.354	105.347	82.191	84.521	86.308	83.362	60.288	27.855	37.226	64.524	55.445	63.274	70.758	82.5349	79.3916	47.185	38.5704	52.06	25.85	25.8054	44.243	65.089	47.407	56.621	63.279		0.595588	60.2551
9.7608	56.133	41.976	70.303	96.719	82.225	81.99	87.619	75.694	60.526	27.05	39.419	64.758	53.964	58.852	68.038	90.4232	65.4353	52.466	43.2313	55.248	26.936	23.6013	50.272	64.151	47.081	53.915	58.949		0.602939	59.1472
9.8799	52.183	43.251	69.776	97.837	76.059	75.267	85.403	79.011	66.051	22.91	37.187	67.476	52.466	61.426	64.408	91.1924	73.4343	42.741	52.7116	53.297	26.437	25.6853	44.94	62.114	42.592	48.645	64.358		0.610296	58.4762
9.9989	54.672	43.093	69.628	87.91	77.714	82.818	82.927	86.625	67.542	21.677	39.548	66.705	52.675	67.982	58.87	89.2291	72.725	44.793	44.6464	48.403	24.343	24.309	46.169	62.168	44.344	53.473	58.641		0.617647	58.2826
10.1179	57.114	45.711	63.757	85.501	87.305	86.536	81.619	89.797	79.376	26.8	40.877	68.682	49.108	64.495	56.878	82.1168	66.5733	50.588	43.1189	50.129	29.869	21.4067	42.342	64.842	51.25	56.924	69.282		0.624998	59.7036
10.237	53.036	37.74	67.679	91.599	88.153	82.142	69.328	83.138	83.716	25.452	40.428	78.504	56.736	62.724	60.291	79.6885	60.8767	49.531	43.7288	46.127	30.041	23.1764	48.665	65.998	42.49	54.241	70.027		0.632355	59.0836
10.356	54.019	37.636	66.326	96.934	88.795	81.867	82.289	81.66	77.117	23.316	38.878	64.822	54.975	63.369	57.584	75.4209	61.9718	43.477	44.2653	52.619	26.465	23.3708	45.743	59.876	46.883	54.964	72.018		0.639705	58.3948
10.475	56.477	36.842	65.622	94.536	88.023	72.629	85.946	78.034	81.065	27.613	46.533	74.004	56.05	55.884	64.977	70.8264	65.6275	41.096	45.6643	50.668	24.446	22.5765	49.053	65.866	48.822	56.116	77.888		0.647056	59.3661
10.5941	55.597	43.448	70.098	92.55	91.345	88.988	82.01	78.426	70.437	24.788	41.031	74.267	60.225	57.726	63.598	71.4295	63.3383	36.69	44.6008	51.361	28.122	22.3183	51.416	70.979	50.475	46.484	75.709		0.654413	59.5354
10.7131	53.751	41.109	66.386	87.764	85.518	85.245	84.391	76.526	74.898	26.078	39.336	79.277	61.131	60.011	67.875	66.0807	74.5924	32.706	47.7653	47.214	26.049	22.4455	47.91	61.815	48.611	60.835	74.368		0.661764	59.2477
10.8321	49.788	43.888	66.951	84.877	81.008	89.965	87.13	71.904	73.627	24.091	42.214	79.833	55.423	70.025	67.852	67.3926	67.0859	37.231	44.1903	47.951	29.139	20.0711	53.513	66.184	47.973	53.312	85.938		0.669115	59.5762
10.9512	53.962	40.123	71.034	90.728	90.617	92.72	91.686	74.392	76.004	27.023	49.914	80.757	56.085	70.235	66.696	68.407	63.5394	43.937	42.9266	55.792	23.439	21.423	51.67	62.614	42.275	59.546	82.964		0.676472	61.13
11.0702	51.42	40.936	76.677	84.117	93.579	92.067	82.28	77.205	88.015	27.514	47.066	86.379	65.119	66.636	71.254	68.1498	55.6188	37.58	40.7159	49.289	23.917	24.6025	50.331	64.088	51.72	67.79	87.012		0.683823	61.8918
11.1892	50.134	41.325	68.209	81.295	90.807	90.411	84.771	71.393	95.374	27.754	45.588	74.713	62.742	68.651	76.627	63.9324	64.115	41.856	44.0365	47.914	24.398	21.5056	58.751	60.201	47.961	70.375	86		0.691173	61.5126
11.3083	52.954	46.499	69.002	85.385	97.014	87.288	80.812	74.028	94.483	31.417	47.876	66.538	68.023	70.338	73.228	65.2817	66.7957	47.754	47.5179	52.093	25.348	21.1856	57.701	66.18	52.8	65.539	82.353		0.69853	62.7938
11.4273	54.439	49.596	75.033	88.437	96.371	92.89	88.872	72.67	103.815	34.266	54.252	66.693	74.458	66.394	68.328	67.0631	63.5953	44.334	42.7347	52.361	24.815	21.9219	54.508	68.437	51.905	61.019	83.372		0.705881	63.7993
11.5463	55.473	45.21	94.251	86.918	96.978	100.443	85.14	77.046	99.719	33.967	56.448	79.184	81.481	76.221	59.866	64.4683	63.4164	45.992	40.7902	56.298	26.472	22.2084	57.492	70.806	56.619	62.958	83.218		0.713232	65.892
11.6654	64.724	43.371	89.079	87.081	101.622	91.319	80.813	74.903	104.593	34.176	54.386	70.082	85.896	84.84	72.295	66.0208	51.3509	46.659	39.1516	47.079	21.389	25.8749	49.309	72.026	62.179	68.099	82.385		0.720589	65.5816
11.7844	57.589	39.608	92.708	99.344	99.464	86.649	89.405	79.748	96.001	35.206	56.253	72.796	82.632	73.996	66.55	58.0289	58.9519	51.457	39.1576	47.079	23.185	24.6629	52.581	67.261	53.191	61.437	68.116		0.72794	64.1873
11.9035	62.553	47.854	83.492	87.918	91.257	88.971	95.927	80.653	94.725	32.944	57.774	66.998	87.384	66.942	65.633	55.7635	58.5212	52.878	34.4364	48.99	24.464	24.3005	50.488	70.197	56.71	58.639	73.812		0.735297	63.712
12.0225	60.54	41.873	78.098	85.838	98.062	91.529	100.888	81.858	97.723	33.354	64.984	74.864	80.654	71.1	71.947	62.5871	49.3829	46.875	39.1931	48.493	27.103	24.4412	50.234	76.997	53.648	69.584	69.152		0.742648	64.8519
12.1415	63.404	42.019	80.764	82.436	88.045	92.59	87.26	85.912	85.888	39.842	68.453	63.957	81.868	68.691	72.987	59.6149	49.2858	46.244	38.7229	47.259	26.175	23.9063	54.718	77.573	62.003	66.388	75.08		0.749998	64.1143
12.2606	57.789	44.063	86.237	81.884	84.577	76.875	84.894	90.057	82.811	36.814	68.88	70.841	82.569	69.398	58.476	53.8212	48.7976	46.804	40.4198	47.232	26.391	24.6558	56.844	71.464	72.422	63.614	75.696		0.757355	63.1232
12.3796	66.928	44.851	78.79	83.127	80.628	73.721	79.439	80.533	75.332	42.691	71.44	70.879	85.319	78.504	61.223	55.1847	50.2361	46.046	45.9152	50.073	23.438	28.1759	66.634	69.11	73.367	64.789	68.655		0.764706	63.5196
12.4986	66.023	45.803	85.381	85.089	78.452	75.71	78.943	89.402	73.65	40.85	70.925	75.622	83.554	78.937	63.012	59.4795	51.8912	47.81	41.3132	46.984	22.533	23.7442	63.022	69.858	74.583	60.276	70.986		0.772057	63.8457
12.6177	77.031	48.865	83.368	88.91	82.137	84.665	77.376	84.633	69.624	44.278	73.353	77.886	77.393	87.453	63.031	61.2006	53.8488	58.722	43.8942	54.007	22.813	23.8788	58.945	69.049	77.14	58.098	67.539		0.779414	65.5236
12.7367	68.079	55.046	79.858	76.502	75.903	74.933	68.466	90.307	62.844	50.437	70.643	70.223	74.791	79.324	63.811	52.5013	51.4294	55.079	51.2971	54.69	24.927	27.8235	61.705	63.014	84.44	48.538	73.163		0.786765	63.325
12.8557	79.691	50.26	71.84	72.369	62.203	59.52	67.812	80.298	65.347	54.813	70.139	67.45	78.656	77.987	59.497	54.1163	49.8077	55.583	47.7906	49.452	26.043	31.8206	63.648	54.541	93.801	51.156	80.37		0.794116	62.0745
12.9748	83.467	51.349	71.716	74.001	60.66	66.554	55.957	67.537	58.309	50.238	66.71	65.846	70.097	72.618	61.775	52.2484	51.6516	46.443	40.8229	44.203	29.424	24.1178	56.398	51.587	86.903	52.656	64.986		0.801473	58.4546
13.0938	88.506	56.896	72.415	73.165	63.142	67.363	60.78	72.688	53.438	54.54	64.737	59.855	67.461	70.967	72.231	60.58	50.029	45.343	36.9485	44.714	27.116	26.6714	62.539	55.556	84.778	49.638	57.539		0.808823	59.2458
13.2128	90.76	56.468	76.907	68.329	70.772	65.862	54.147	71.062	50.309	58.057	50.396	58.568	74.692	68.717	75.06	64.1231	57.6946	46.308	42.6919	46.959	29.139	28.4053	64.991	51.805	82.651	38.524	47.65		0.816174	58.9277
13.3319	90.462	56.373	85.587	63.203	66.39	59.327	54.267	70.9	48.37	54.323	54.796	52.381	71.572	68.755	73.87	57.7079	54.0204	51.846	44.8826	45.756	36.51	35.9346	53.88	47.874	76.127	36.763	37.59		0.823531	57.3877
13.4509	88.72	62.407	82.296	63.904	59.553	56.037	41.314	60.694	45.955	54.727	45.517	48.448	74.546	73.566	66.077	57.8633	53.1291	48.067	42.8849	48.829	39.894	35.7186	58.759	50.142	69.035	38.072	30.725		0.830882	55.44
13.5699	83.776	61.845	84.081	57.903	63.12	52.284	41.969	64.998	43.422	46.986	32.441	43.866	72.37	65.688	67.607	60.4539	53.0428	49.728	45.9656	45.72	38.091	38.0523	53.169	49.868	62.206	30.684	23.451		0.838233	53.0662
13.689	96.081	63.663	72.167	67.732	61.432	55.464	34.818	54.278	38.3	32.607	22.271	34.318	66.366	66.433	70.996	62.8268	52.4232	47.058	44.0944	45.35	42.35	38.9572	50.361	43.059	55.344	23.374	20.471		0.84559	50.4665
13.808	94.475	73.414	78.612	60.16	55.67	43.868	23.75	50.594	23.629	30.171	18.056	27.308	57.899	70.749	73.357	56.084	49.796	50.115	44.6258	45.45	40.33	38.678	51.058	41.184	53.296	21.779	19.545		0.852941	47.9131
13.927	98.56	77.13	83.543	57.426	51.93	42.598	20.552	38.712	17.153	24.984	16	22.474	63.724	67.742	74.832	53.0794	58.3246	51.347	47.6682	37.484	39.807	45.1129	51.528	39.218	47.405	16.011	16.956		0.860291	46.7149
14.0461	108.329	70.207	72.909	46.575	48.283	41.058	17.842	28.41	12.624	14.452	16.6	17.773	53.779	66.904	72.606	63.8603	52.369	51.707	44.5942	36.292	40.819	44.8427	41.417	32.643	43.075	15.629	12.922		0.867648	43.2786
14.1651	111.274	78.277	76.624	45.29	36.745	35.436	12.633	23.874	12.722	11.015	13.135	15.591	56.03	57.181	69.238	69.4705	50.5745	51.162	39.6768	35.39	36.174	38.0543	31.858	31.277	26.636	12.758	8.772		0.874999	40.2544
14.2841	118.409	78.309	76.916	39.624	40.48	22.923	10.927	14.28	8.352	12.081	11.67	9.829	46.932	58.388	64.696	77.3109	55.1131	47.063	36.0525	31.981	34.191	34.4001	23.864	19.845	20.017	8.906	7.55		0.88235	37.4115
14.4032	111.673	76.039	64.65	38.887	33.331	18.492	9.682	12.608	8.391	10.993	10.021	6.18	49.666	52.023	65.863	66.2674	57.0711	54.084	39.0699	30.894	29.014	23.4404	17.308	11.592	15.869	10.975	7.059		0.889707	34.4868
14.5222	111.924	70.763	66.002	27.069	30.567	14.236	8.325	9.68	6.54	9.451	7.759	6.932	43.999	53.047	75.546	66.9461	49.1199	53.764	33.8909	29.919	25.007	19.0417	8.996	11.364	10.295	10.854	8.051		0.897058	32.1885
14.6412	106.801	78.741	65.111	21.014	19.515	12.432	4.74	8.939	9.422	10.153	8.025	11.032	33.234	49.64	73.551	70.3414	54.5809	60.689	29.7952	31.023	22.283	17.5536	9.596	8.619	7.909	7.9	9.622		0.904409	31.1949
14.7603	94.961	74.254	47.572	16.825	14.133	9.752	8.267	10.677	10.306	8.505	10.118	8.116	27.412	46.988	68.186	64.0316	48.4718	44.558	32.4482	29.902	21.685	21.3953	7.864	7.055	5.747	6.067	5.647		0.911766	27.8127
14.8793	91.874	71.127	42.091	14.113	13.215	9.467	5.736	10.851	8.805	6.912	9.211	6.489	21.31	41.999	65.341	64.4159	48.8841	47.555	28.7707	26.77	26.324	24.3053	6.358	4.717	4.038	8.586	5.455		0.919116	26.4711
14.9984	75.933	67.844	32.798	7.669	12.762	10.186	6.89	7.641	7.507	9.007	9.424	6.865	17.414	29.677	53.796	67.6075	50.109	45.484	26.231	26.368	36.14	24.3577	6.056	3.091	5.376	6.625	4.761		0.926473	24.3563
15.1174	74.654	62.878	22.66	8.153	9.349	5.709	6.755	11.584	9.273	8.229	7.378	7.973	13.741	23.312	46.437	65.841	56.4173	43.772	30.3239	22.449	32.716	27.8334	7.33	4.347	3.797	4.382	4.935		0.933824	23.0455
15.2364	73.673	64.356	14.462	9.696	8.853	8.71	5.905	8.065	8.453	6.603	7.62	7.435	10.238	17.279	43.893	60.4898	57.5122	34.96	28.1121	24.742	30.596	25.8613	4.864	3.403	3.679	4.28	4.271		0.941175	21.4078
15.3555	66.799	47.896	11.853	8.704	7.526	7.765	4.727	7.668	6.001	7.305	8.189	5.206	8.805	15.974	36.838	52.1698	54.9986	29.471	27.2916	26.894	26.991	27.5571	5.119	2.905	4.389	3.907	6.334		0.948532	19.2327
15.4745	58.286	52.278	11.046	6.923	7.493	7.637	6.634	5.448	6.873	7.722	8.576	8.84	8.068	12.843	31.583	64.3348	49.8873	30.843	24.3869	31.41	27.713	31.9774	5.8	3.429	3.386	3.426	4.85		0.955883	19.322
15.5935	63.172	45.141	7.858	7.349	7.645	9.045	7.916	7.365	8.969	8.611	9.286	7.804	5.501	9.609	28.295	60.8753	48.4393	24.093	26.0839	35.812	22.77	32.7516	5.737	3.712	4.39	4.168	5.993		0.963234	18.8293
15.7126	56.113	41.545	6.612	8.26	7.813	8.195	5.439	7.246	8.68	8.476	7.652	11.171	7.567	6.452	22.648	54.7308	54.1709	29.655	25.9805	33.277	21.56	33.0771	6.017	5.238	3.303	4.932	6.053		0.970591	18.2172
15.8316	51.113	29.427	4.118	6.108	6.041	8.773	6.231	3.407	10.712	8.486	7.434	8.921	7.319	7.375	16.949	51.2005	48.2375	20.848	28.5558	31.655	27.232	31.5395	8.803	3.859	2.751	4.643	5.407		0.977941	16.5609
15.9506	48.255	18.296	4.087	5.59	6.956	8.54	6.463	7.307	10.97	8.734	9.179	6.499	7.536	7.464	14.166	46.9124	49.0661	22.193	30.1856	25.248	31.988	27.2157	6.759	3.63	4.01	2.552	6.119		0.985292	15.7748
16.0697	34.354	9.187	6.996	8.05	7.534	5.732	5.788	6.243	7.594	8.211	7.698	7.841	7.979	8.635	8.457	38.0746	43.3918	23.685	29.2638	24.33	32.098	24.1127	8.758	4.189	3.615	2.048	7.242		0.992649	14.1151
16.1887	21.158	7.812	8.093	7.422	5.512	6.817	5.166	7.6	11.111	8.993	6.734	8.11	9.658	8.801	9.889	35.2674	37.6755	19.664	30.7632	24.667	30.467	22.1853	9.683	3.358	2.647	3.231	7.927		1	13.3486

## Sheet: Sheet1
Image4				Image5				Image6				Image29				Image30				Image31				Image4 (2)				Image5 (2)				Image6 (2)					Distance	Image4	Image5	Image6	Image29	Image30	Image31	Image4 (2)	Image5 (2)	Image6 (2)
Ap-basal	Avg intensity			Ap-basal	Avg intensity			Ap-basal	Avg intensity			Ap-basal	Avg intensity			Ap-basal	Avg intensity			Ap-basal	Avg intensity			Ap-basal	Avg intensity			Ap-basal	Avg intensity			Ap-basal	Avg intensity				0	53.5434	73.3867	36.9391	36.3398	64.2942	34.4476	16.8029	35.7353	31.999
0	53.5434			0	73.3867			0	36.9391			0	36.3398			0	64.2942			0	34.4476			0	16.8029			0	35.7353			0	31.999				0.05	74.7989	97.3803	49.5938	42.1447	80.1681	44.1252	27.9444	49.2507	37.6827
0.00735081	57.3163			0.00640839	77.6191			0.00526162	38.6197			0.00534603	37.9291			0.00917162	69.1161			0.00653405	35.494			0.00561636	19.3396			0.00520683	36.8496			0.00555395	32.5805				0.1	124.782	127.678	69.5962	61.7535	106.554	85.9872	54.1883	66.8431	53.8092
0.0147078	62.1744			0.0128222	82.4738			0.0105277	40.4038			0.0106966	38.9113			0.018351	73.3149			0.0130736	37.969			0.0112374	20.325			0.010418	39.7183			0.0111126	33.1519				0.15	126.251	112.774	72.9785	80.2464	106.107	103.687	65.8169	69.4823	68.0097
0.0220586	68.1349			0.0192306	88.6866			0.0157893	43.909			0.0160426	39.1019			0.0275226	79.6155			0.0196076	38.9276			0.0168538	22.5495			0.0156249	40.9179			0.0166665	34.9591				0.2	115.325	106.622	76.3764	91.0861	104.181	104.201	69.1651	71.4493	76.3252
0.0294094	76.0503			0.025639	96.2476			0.0210509	46.1281			0.0213886	40.8226			0.0366942	84.0905			0.0261417	41.5246			0.0224702	25.6636			0.0208317	45.0307			0.0222205	36.4927				0.25	101.503	105.992	74.574	95.37	100.485	101.458	71.5374	69.2637	80.852
0.0367664	84.8013			0.0320527	102.658			0.026317	48.5219			0.0267391	40.8543			0.0458735	91.9687			0.0326812	45.7119			0.0280912	27.6108			0.0260429	47.3656			0.0277791	37.5519				0.3	96.7505	97.2805	70.2124	95.2449	93.4191	97.6293	69.6846	64.1705	80.642
0.0441172	93.2679			0.0384611	111.436			0.0315786	50.5801			0.0320852	42.8519			0.0550452	98.777	80.1681		0.0392153	49.9016			0.0337076	31.9835			0.0312497	52.5971			0.033333	38.9346				0.35	88.3854	88.494	63.7954	93.5555	85.0533	87.5316	67.8198	56.2605	76.5562
0.051468	103.103	74.7989		0.0448695	119.245			0.0368402	55.1933			0.0374312	44.0221			0.0642168	103.773			0.0457493	53.9268			0.039324	35.6494			0.0364566	56.0653			0.038887	39.5453				0.4	80.1653	81.2195	52.0333	83.7672	77.9271	80.1691	63.7162	50.1008	70.9206
0.058825	111.484			0.0512833	124.67	97.3803		0.0421062	58.5522			0.0427817	46.6892			0.0733961	106.438			0.0522888	59.2237	44.1252		0.044945	38.2614			0.0416678	59.7582			0.0444456	41.9456				0.45	72.4599	71.341	43.0916	80.076	71.9673	71.421	54.7566	44.7404	64.3898
0.0661758	119.525			0.0576917	127.805			0.0473679	62.9774			0.0481278	46.5821			0.0825677	108.926			0.0588229	67.9159			0.0505614	41.2587	27.9444		0.0468746	62.7253			0.0499995	42.6904				0.5	66.9223	63.397	33.5081	74.5554	67.6304	61.2949	47.6654	39.7563	58.7795
0.0735266	123.521			0.0641001	130.671			0.0526295	63.7071	49.5938		0.0534738	49.487	42.1447		0.0917394	108.367			0.0653569	75.1382			0.0561778	44.5517			0.0520814	64.9948	49.2507		0.0555535	44.6584	37.6827			0.55	62.2651	57.2975	28.347	69.8768	66.2291	55.7542	44.0754	36.7209	55.0094
0.0808836	126.712			0.0705139	131.578			0.0578955	66.6781			0.0588243	52.6119			0.100919	105.265	106.554		0.0718965	81.901			0.0617988	47.4201			0.0572926	64.732			0.0611121	47.4924				0.6	59.3673	53.4549	24.306	68.0202	61.3893	51.6258	43.4417	37.5527	52.4267
0.0882344	128.201			0.0769222	130.331			0.0631572	69.0227			0.0641704	56.0724			0.11009	106.014			0.0784305	87.9553			0.0674152	50.9544			0.0624995	66.6584			0.066666	49.5068				0.65	58.9775	54.0204	20.9166	65.7491	58.5878	48.2523	43.2905	40.3259	49.8378
0.0955852	132.53			0.0833306	129.508			0.0684188	68.5939			0.0695164	58.0896			0.119262	107.019			0.0849646	91.1547			0.0730316	52.6388			0.0677063	65.4112			0.07222	50.8424				0.7	61.4216	56.6912	19.326	67.9984	57.9787	45.529	45.3647	43.5834	48.679
0.102942	131.498	124.782		0.0897444	125.778			0.0736848	69.476			0.0748669	59.1236			0.128441	107.337			0.0915041	90.8844			0.0786526	56.2139			0.0729175	68.3541			0.0777786	51.5152				0.75	64.7232	59.6274	16.1642	71.1057	64.424	42.059	48.3581	50.7083	50.0026
0.110293	129.957			0.0961528	123.277			0.0789464	69.0224			0.0802129	62.9031			0.137613	105.332			0.0980381	95.8964			0.084269	58.5042			0.0781243	68.7777			0.0833326	53.7108				0.8	62.838	61.9452	13.6817	71.9933	66.9628	40.292	45.8671	53.5293	49.9457
0.11765	128.531			0.102567	122.475	127.678		0.0842125	70.3107			0.0855635	64.1175			0.146792	105.954			0.104578	97.0516	85.9872		0.0898901	58.107			0.0833355	68.8729			0.0888912	56.2375				0.85	54.6353	64.3548	10.5866	69.3292	66.386	39.4692	41.6677	43.6082	49.086
0.125001	126.713			0.108975	118.981			0.0894741	71.39			0.0909095	64.9239			0.155964	104.986	106.107		0.111112	100.866			0.0955064	58.4773			0.0885424	66.943			0.0944451	57.6106				0.9	37.9328	58.8983	7.45412	58.8021	56.1054	35.9533	36.9631	26.8542	48.3071
0.132352	126.725			0.115383	115.293			0.0947357	70.5745			0.0962555	67.229			0.165135	104.088			0.117646	103.089			0.101123	60.8272	54.1883		0.0937492	66.4922			0.0999991	57.898				0.95	23.0926	37.4363	4.83575	37.1377	40.4741	29.6437	24.8485	13.4475	37.4524
0.139709	125.889			0.121797	114.187			0.100002	71.2974	69.5962		0.101606	70.7108	61.7535		0.174315	105.154			0.124185	103.558			0.106744	61.583			0.0989604	64.7382			0.105558	59.4688	53.8092			1	16.141	12.6722	3.60187	19.5566	26.6091	20.3779	11.036	5.78435	20.231
0.147059	124.575			0.128206	112.769			0.105263	71.8568			0.106952	72.927			0.183486	104.405			0.130719	104.36			0.11236	61.4985			0.104167	67.4513	66.8431		0.111112	62.782
0.15441	121.365	126.251		0.134614	111.559			0.110525	71.7384			0.112298	73.271			0.192658	102.61			0.137253	104.796			0.117977	64.3789			0.109374	67.8643			0.116666	63.539
0.161767	120.293			0.141028	111.253			0.115791	72.2669			0.117649	75.6923			0.201837	104.65	104.181		0.143793	104.126			0.123598	65.1366			0.114585	67.54			0.122224	65.8814
0.169118	119.683			0.147436	109.718			0.121053	72.5354			0.122995	78.0876			0.211009	102.225			0.150327	105.015	103.687		0.129214	65.9154			0.119792	68.733			0.127778	68.515
0.176469	119.279			0.153844	108.432	112.774		0.126314	72.5104			0.128341	82.201			0.220181	102.13			0.156861	103.996			0.13483	67.1957			0.124999	70.4375			0.133332	68.4544
0.183826	115.307			0.160258	105.81			0.13158	73.839			0.133691	81.6875			0.22936	101.474			0.163401	103.466			0.140451	68.9876			0.13021	69.419			0.138891	68.5037
0.191177	113.308			0.166667	105.073			0.136842	73.3025			0.139037	82.0183			0.238532	100.184			0.169935	103.508			0.146068	69.4613			0.135417	68.1965			0.144445	70.4634
0.198527	110.521			0.173075	104.877			0.142104	72.8758			0.144383	85.4147			0.247703	98.3701			0.176469	104.999			0.151684	68.1954	65.8169		0.140624	71.4623			0.149999	71.0781
0.205884	108.886	115.325		0.179489	106.747			0.14737	74.383			0.149734	84.5847			0.256883	98.5276	100.485		0.183008	103.971			0.157305	68.359			0.145835	71.6189			0.155557	72.8707	68.0097
0.213235	105.031			0.185897	107.342			0.152631	74.4765	72.9785		0.15508	86.5794	80.2464		0.266054	97.324			0.189542	106.272			0.162922	69.7081			0.151042	70.0694	69.4823		0.161111	73.5314
0.220586	104.436			0.192306	108.202			0.157893	75.8094			0.160426	87.242			0.275226	93.7248			0.196076	104.528			0.168538	68.3904			0.156249	72.298			0.166665	74.2323
0.227943	103.413			0.198719	107.521			0.163159	75.8448			0.165776	88.0257			0.284405	94.7213			0.202616	102.868	104.201		0.174159	70.1464			0.16146	72.0851			0.172224	74.39
0.235294	100.155			0.205128	107.403	106.622		0.168421	76.9311			0.171122	88.6171			0.293577	93.1712			0.20915	103.643			0.179775	68.9533			0.166667	70.9165			0.177778	76.324
0.242645	97.3676			0.211536	107.315			0.173682	77.4601			0.176468	91.2021			0.302748	88.154	93.4191		0.215684	101.546			0.185392	67.9759			0.171873	71.0058			0.183332	75.7138
0.250002	98.6147	101.503		0.21795	107.222			0.178948	76.2593			0.181819	92.1757			0.311928	85.8042			0.222223	101.327			0.191013	69.3909			0.177085	74.0278			0.18889	76.4041
0.257352	98.1838			0.224358	107.984			0.18421	77.3776			0.187165	91.9239			0.321099	86.6048			0.228757	100.569			0.196629	69.0379			0.182292	70.4227			0.194444	77.6842
0.264703	98.2531			0.230767	105.769			0.189471	75.9706			0.192511	92.6474			0.330271	85.8629			0.235292	101.601			0.202246	70.524	69.1651		0.187498	72.918			0.199998	78.8795
0.27206	98.3778			0.237181	105.74			0.194737	75.6187			0.197862	93.3996			0.33945	84.4868			0.241831	100.547			0.207867	71.4338			0.19271	70.2849			0.205557	79.7678	76.3252
0.279411	95.6004			0.243589	104.435			0.199999	76.1156	76.3764		0.203208	94.5412	91.0861		0.348622	83.7951			0.248365	100.863			0.213483	70.9344			0.197916	70.6674			0.211111	78.9642
0.286762	97.2606			0.249997	103.479	105.992		0.205261	77.1715			0.208554	95.2765			0.357794	83.7657	85.0533		0.254899	101.564	101.458		0.219099	72.837			0.203123	69.8674	71.4493		0.216665	80.1947
0.294119	95.4786			0.256411	103.211			0.210527	74.3811			0.213904	94.3573			0.366973	80.18			0.261439	99.2591			0.22472	72.0077			0.208334	68.552			0.222223	80.5584
0.30147	94.0991	96.7505		0.262819	101.49			0.215788	75.7779			0.21925	95.6289			0.376145	78.5518			0.267973	99.6671			0.230337	72.9105			0.213541	69.2975			0.227777	82.2601
0.308827	91.1334			0.269233	99.1412			0.221054	77.3252			0.224601	95.5523			0.385324	78.7987			0.274512	99.2335			0.235958	71.3074			0.218752	71.215			0.233336	79.705
0.316177	92.0786			0.275642	96.9715			0.226316	75.579			0.229947	95.2621			0.394495	77.1614			0.281046	99.6054			0.241574	70.2977			0.223959	70.7317			0.23889	82.1604
0.323528	89.9762			0.28205	94.8562			0.231578	74.0908			0.235293	95.2861			0.403667	74.9435	77.9271		0.28758	97.5113			0.247191	71.3694			0.229166	69.5283			0.244444	81.5352
0.330885	88.5916			0.288464	93.8311			0.236844	74.3848			0.240643	95.2207			0.412846	75.6713			0.29412	97.1865			0.252812	70.7386	71.5374		0.234377	68.8493			0.250002	81.4379	80.852
0.338236	86.5751			0.294872	95.0182			0.242105	72.3861			0.245989	96.4151			0.422018	74.1912			0.300654	95.7067			0.258428	70.2511			0.239584	69.6615			0.255556	80.8074
0.345587	85.0592			0.301281	93.725	97.2805		0.247367	72.4212			0.251335	95.3308	95.37		0.43119	72.2511			0.307188	92.8648	97.6293		0.264044	70.4436			0.244791	68.558			0.26111	81.3497
0.352944	85.2836	88.3854		0.307694	90.8805			0.252633	72.2217	74.574		0.256686	95.598			0.440369	69.9927			0.313728	89.8101			0.269666	69.3855			0.250002	66.9797	69.2637		0.266669	80.3472
0.360295	84.8392			0.314103	87.9792			0.257895	71.4824			0.262032	95.2306			0.449541	70.3744			0.320262	90.0168			0.275282	70.5917			0.255209	66.1916			0.272223	80.715
0.367645	82.6817			0.320511	89.1437			0.263156	71.9651			0.267378	94.6463			0.458712	69.3229	71.9673		0.326796	88.9331			0.280898	69.5647			0.260416	65.1451			0.277777	82.0002
0.375002	81.0679			0.326925	90.0205			0.268422	70.5179			0.272728	95.4542			0.467892	68.2986			0.333335	86.5399			0.286519	71.088			0.265627	66.7721			0.283335	81.6356
0.382353	80.149			0.333333	89.7408			0.273684	69.1151			0.278075	94.8687			0.477063	68.951			0.339869	84.7468			0.292136	69.0264			0.270834	64.5387			0.288889	80.6733
0.389704	78.292			0.339742	87.146			0.278946	68.9541			0.283421	95.536			0.486235	68.2685			0.346403	87.1339			0.297752	68.6638			0.276041	63.1338			0.294443	79.809
0.397061	77.6331			0.346156	86.6779			0.284212	70.3007			0.288771	97.6879			0.495414	65.1372			0.352943	85.5409	87.5316		0.303373	68.1464	69.6846		0.281252	65.4932			0.300002	78.4403	80.642
0.404412	76.4944	80.1653		0.352564	86.3637	88.494		0.289473	69.9142			0.294117	95.1861			0.504586	67.4967	67.6304		0.359477	84.7825			0.308989	68.8933			0.286459	64.3936			0.305556	77.614
0.411763	75.2116			0.358972	85.517			0.294735	70.1846			0.299463	93.5689			0.513757	68.6234			0.366011	82.427			0.314606	69.5415			0.291666	62.0944			0.31111	78.4376
0.41912	73.4384			0.365386	84.2476			0.300001	69.4778	70.2124		0.304814	94.6722	95.2449		0.522937	67.982			0.37255	80.4198			0.320227	69.2967			0.296877	62.6901			0.316668	77.1743
0.42647	71.6026			0.371794	82.5634			0.305263	68.7043			0.31016	94.4302			0.532108	65.1221			0.379084	80.5617			0.325843	67.7839			0.302084	61.2526	64.1705		0.322222	76.4278
0.433821	72.4238			0.378203	82.0397			0.310524	68.515			0.315506	96.0508			0.54128	64.8462			0.385619	80.9115			0.33146	67.6466			0.30729	61.5798			0.327776	77.6102
0.441178	72.4751			0.384617	80.2412			0.31579	66.434			0.320856	96.1023			0.550459	64.5721	66.2291		0.392158	78.6981			0.337081	67.022			0.312502	59.1697			0.333335	76.7787
0.448529	71.2856			0.391025	79.0067			0.321052	65.1321			0.326202	96.4524			0.559631	64.0775			0.398692	77.6285			0.342697	66.98			0.317708	57.3196			0.338889	75.6725
0.45588	70.7824	72.4599		0.397433	77.9698			0.326313	65.1148			0.331548	94.1702			0.568803	62.7787			0.405226	75.924	80.1691		0.348313	66.3499			0.322915	56.993			0.344443	74.1737
0.463237	69.257			0.403847	78.1706	81.2195		0.331579	63.4641			0.336899	94.051			0.577982	61.4739			0.411766	76.1095			0.353935	66.8647	67.8198		0.328127	56.5619			0.350001	75.1173	76.5562
0.470588	68.0429			0.410256	76.5406			0.336841	62.6673			0.342245	91.2933			0.587154	60.5589			0.4183	73.7852			0.359551	66.0254			0.333333	55.4091			0.355555	73.2648
0.477938	67.7458			0.416664	74.8025			0.342103	59.6637			0.347591	90.5421			0.596325	61.189			0.424834	73.3489			0.365167	66.0181			0.33854	56.3197			0.361109	73.0891
0.485295	66.9192			0.423078	72.7726			0.347369	59.6882			0.352941	88.9068	93.5555		0.605505	60.9463	61.3893		0.431373	72.5685			0.370788	64.8165			0.343751	53.446			0.366668	71.5242
0.492646	64.6038			0.429486	71.4112			0.35263	58.5709	63.7954		0.358287	86.6			0.614676	59.9112			0.437907	69.5663			0.376405	65.1829			0.348958	52.8888			0.372222	71.281
0.499997	64.9653	66.9223		0.435895	70.0592			0.357892	56.8429			0.363634	84.7306			0.623848	58.1416			0.444441	67.8936			0.382021	63.8511			0.354165	52.9171	56.2605		0.377776	71.9988
0.507354	62.3336			0.442308	68.7			0.363158	55.7191			0.368984	83.6595			0.633027	57.0421			0.450981	66.6754	71.421		0.387642	62.3177			0.359376	50.6955			0.383334	70.62
0.514705	62.2924			0.448717	68.4369			0.36842	55.0808			0.37433	84.9244			0.642199	59.4645			0.457515	62.7755			0.393258	61.967			0.364583	51.2521			0.388888	69.912
0.522062	62.8272			0.45513	68.0048	71.341		0.373686	53.0073			0.379681	83.5509			0.651378	58.3794	58.5878		0.464055	62.2868			0.39888	61.8365			0.369794	51.69			0.394447	69.1237
0.529412	62.6883			0.461539	66.3905			0.378947	52.2744			0.385027	83.1158			0.66055	57.5036			0.470589	61.6166			0.404496	61.4301	63.7162		0.375001	50.2049			0.400001	67.4716	70.9206
0.536763	61.713			0.467947	66.262			0.384209	50.967			0.390373	82.5601			0.669721	58.0519			0.477123	62.1689			0.410112	58.3397			0.380208	49.6477			0.405555	67.8583
0.54412	62.1026			0.474361	63.3631			0.389475	49.1707			0.395723	82.3569			0.678901	58.4745			0.483662	61.9542			0.415733	57.2029			0.385419	49.7289			0.411113	67.1602
0.551471	61.8989	62.2651		0.480769	63.3531			0.394737	49.8632			0.401069	82.4068	83.7672		0.688072	56.4013			0.490196	61.5264			0.42135	57.5275			0.390626	50.1391			0.416667	64.9546
0.558822	61.4517			0.487178	62.3168			0.399998	49.0223			0.406415	80.25			0.697244	57.7224			0.49673	59.7791			0.426966	55.6229			0.395833	50.0346			0.422221	63.47
0.566179	58.883			0.493592	60.9231			0.405264	48.3851	52.0333		0.411766	79.827			0.706423	59.7187	57.9787		0.50327	58.2519	61.2949		0.432587	56.283			0.401044	47.5147	50.1008		0.42778	64.681
0.57353	58.2515			0.5	61.1703	63.397		0.410526	47.2025			0.417112	80.8981			0.715595	62.0022			0.509804	57.2992			0.438204	53.1349			0.406251	47.7438			0.433334	64.6814
0.58088	58.943			0.506408	60.7882			0.415788	47.4841			0.422458	80.5518			0.724766	63.5425			0.516338	57.4852			0.44382	52.6872			0.411458	48.2415			0.438888	63.4109
0.588237	58.6399			0.512822	59.5469			0.421054	45.9815			0.427808	80.4163			0.733946	63.9152			0.522877	55.6621			0.449441	51.2975			0.416669	45.514			0.444447	62.9956
0.595588	60.2551			0.519231	57.8029			0.426315	44.1446			0.433154	80.228			0.743117	65.8722			0.529411	56.3638			0.455057	50.7138	54.7566		0.421876	46.6124			0.45	60.2962	64.3898
0.602939	59.1472	59.3673		0.525639	57.045			0.431577	42.6606			0.4385	79.8938			0.752289	66.7881	64.424		0.535945	54.5166			0.460674	48.8469			0.427083	44.2286			0.455554	62.3386
0.610296	58.4762			0.532053	57.0267			0.436843	41.8886			0.443851	80.2454			0.761468	66.2673			0.542485	54.3404			0.466295	49.2725			0.432294	45.144			0.461113	59.8091
0.617647	58.2826			0.538461	56.2151			0.442104	40.1323			0.449197	79.0465			0.77064	67.1562			0.549019	55.4643			0.471911	48.9578			0.437501	43.9506			0.466667	58.6891
0.624998	59.7036			0.54487	55.6091			0.447366	39.7683			0.454543	79.4027	80.076		0.779812	67.2214			0.555553	54.9018	55.7542		0.477527	48.5159			0.442707	43.0507			0.472221	59.7794
0.632355	59.0836			0.551283	54.3463	57.2975		0.452632	38.5617	43.0916		0.459894	78.8056			0.788991	67.3033			0.562093	52.5811			0.483149	47.1024			0.447919	41.2284			0.47778	58.2243
0.639705	58.3948			0.557692	55.6261			0.457894	36.9014			0.46524	77.2848			0.798163	67.0862			0.568627	51.5311			0.488765	46.9207			0.453125	41.6898	44.7404		0.483333	57.7457
0.647056	59.3661			0.5641	54.0195			0.463155	36.0873			0.470586	77.179			0.807334	66.7422	66.9628		0.575161	52.6053			0.494381	46.0996			0.458332	42.8462			0.488887	57.9996
0.654413	59.5354	58.9775		0.570514	53.6323			0.468421	34.4602			0.475936	75.1043			0.816514	66.9282			0.5817	52.0285			0.500002	45.6074	47.6654		0.463543	41.141			0.494446	57.7551
0.661764	59.2477			0.576922	52.9394			0.473683	34.1335			0.481282	74.1288			0.825685	68.1256			0.588234	51.7625			0.505619	43.9672			0.46875	40.6433			0.5	56.6749	58.7795
0.669115	59.5762			0.583331	53.8031			0.478945	33.6633			0.486628	73.1228			0.834857	67.7972			0.594768	50.3484			0.511235	43.9609			0.473957	41.2818			0.505554	56.8944
0.676472	61.13			0.589744	52.514			0.484211	31.7033			0.491979	73.8235			0.844036	65.7791			0.601308	50.5239	51.6258		0.516856	44.9362			0.479168	39.397			0.511113	55.4587
0.683823	61.8918			0.596153	52.7964			0.489472	32.2517			0.497325	72.7304			0.853208	63.3002	66.386		0.607842	49.7471			0.522473	45.6524			0.484375	38.7197			0.516667	56.3392
0.691173	61.5126			0.602561	52.3079	53.4549		0.494734	31.6817			0.502671	71.1861			0.862379	63.0735			0.614376	48.3923			0.528089	43.8916			0.489582	38.3752			0.52222	56.1488
0.69853	62.7938			0.608975	53.0025			0.5	30.6905	33.5081		0.508021	72.1885	74.5554		0.871559	60.2551			0.620916	48.3466			0.53371	43.3689			0.494793	38.2747			0.527779	55.8157
0.705881	63.7993	61.4216		0.615383	53.9577			0.505262	31.1393			0.513367	71.7363			0.88073	57.1028			0.62745	49.0495			0.539326	44.7171			0.5	37.1276	39.7563		0.533333	55.0128
0.713232	65.892			0.621792	52.7835			0.510523	30.18			0.518713	69.7566			0.889902	54.6846			0.633984	49.1565			0.544943	43.5838			0.505207	36.4923			0.538887	53.7676
0.720589	65.5816			0.628206	54.2661			0.515789	29.8743			0.524064	69.8996			0.899081	51.6993			0.640523	47.6034			0.550564	42.6006	44.0754		0.510418	36.7555			0.544446	53.9327
0.72794	64.1873			0.634614	54.6058			0.521051	28.6949			0.52941	69.9321			0.908253	49.817	56.1054		0.647057	46.7003			0.55618	43.5824			0.515625	36.3722			0.55	52.1578
0.735297	63.712			0.641028	54.1602			0.526317	27.9634			0.53476	69.2755			0.917432	46.6874			0.653597	47.0225	48.2523		0.561801	43.0108			0.520836	35.4037			0.555558	52.9012	55.0094
0.742648	64.8519			0.647436	53.938			0.531579	28.6928			0.540106	69.8631			0.926604	43.2085			0.660131	47.3026			0.567418	43.8943			0.526043	37.0701			0.561112	50.9503
0.749998	64.1143	64.7232		0.653844	55.4492	54.0204		0.53684	27.6861			0.545453	69.3061			0.935776	39.8847			0.666665	45.634			0.573034	43.9924			0.53125	37.0523			0.566666	52.2257
0.757355	63.1232			0.660258	54.9822			0.542106	27.2513			0.550803	69.2448	69.8768		0.944955	38.5812			0.673204	46.6348			0.578655	42.5185			0.536461	36.5816			0.572225	53.4896
0.764706	63.5196			0.666667	55.9053			0.547368	26.7539			0.556149	69.1149			0.954126	34.0089	40.4741		0.679738	45.6532			0.584271	42.0394			0.541668	37.5085			0.577779	54.0605
0.772057	63.8457			0.673075	55.7401			0.552629	25.2335	28.347		0.561495	69.519			0.963298	31.278			0.686272	45.3864			0.589888	43.2056			0.546875	37.9155			0.583333	53.2927
0.779414	65.5236			0.679489	56.8511			0.557896	25.4633			0.566846	68.4211			0.972477	27.8155			0.692812	45.2443			0.595509	44.2881			0.552086	36.0575	36.7209		0.588891	51.8983
0.786765	63.325			0.685897	57.254			0.563157	25.6477			0.572192	68.1255			0.981649	26.4104			0.699346	44.4623			0.601125	44.4438	43.4417		0.557293	37.391			0.594445	51.6422
0.794116	62.0745			0.692306	56.9647			0.568419	25.9567			0.577538	66.6192			0.990821	24.9907			0.70588	43.914	45.529		0.606742	43.8579			0.562499	37.5485			0.599999	51.7381
0.801473	58.4546	62.838		0.698719	57.2599			0.573685	25.0607			0.582888	67.9097			1	22.551	26.6091		0.71242	43.1874			0.612363	44.8117			0.567711	36.9265			0.605558	52.5431	52.4267
0.808823	59.2458			0.705128	58.5721	56.6912		0.578946	24.4073			0.588234	67.088							0.718954	43.4569			0.617979	43.6362			0.572917	36.8295			0.611112	52.1857
0.816174	58.9277			0.711536	58.8518			0.584208	23.2954			0.59358	68.7227							0.725488	43.6134			0.623595	42.7728			0.578124	37.6293			0.616666	49.9469
0.823531	57.3877			0.71795	59.2727			0.589474	23.5523			0.598931	67.4348							0.732027	42.2657			0.629216	42.3039			0.583336	36.3209			0.622224	50.2186
0.830882	55.44			0.724358	58.2072			0.594736	22.6222			0.604277	67.2473	68.0202						0.738561	40.965			0.634833	43.1082			0.588542	36.2062			0.627778	51.284
0.838233	53.0662			0.730767	58.5071			0.599997	22.748	24.306		0.609623	66.6295							0.745095	40.484			0.640449	43.9654			0.593749	39.6051			0.633332	48.9423
0.84559	50.4665			0.737181	59.5701			0.605263	21.4863			0.614973	66.5818							0.751635	40.4411	42.059		0.64607	42.3663			0.59896	38.0099			0.638891	48.0571
0.852941	47.9131	54.6353		0.743589	61.8832			0.610525	21.6529			0.620319	66.2347							0.758169	40.6298			0.651687	42.792	43.2905		0.604167	39.0597	37.5527		0.644445	49.4135
0.860291	46.7149			0.749997	61.0995	59.6274		0.615787	21.8451			0.625665	66.4567							0.764703	40.1585			0.657303	43.4719			0.609374	39.1035			0.649999	49.3194
0.867648	43.2786			0.756411	60.4904			0.621053	21.1965			0.631016	64.565							0.771243	40.4916			0.662924	43.4161			0.614585	40.0211			0.655557	49.1726	49.8378
0.874999	40.2544			0.762819	60.4744			0.626314	19.974			0.636362	65.7353							0.777777	41.0027			0.66854	45.3718			0.619792	40.1598			0.661111	48.2244
0.88235	37.4115			0.769228	60.3002			0.631576	20.4582			0.641708	64.7285							0.784311	39.5314			0.674157	44.4966			0.624999	40.0387			0.666665	48.4465
0.889707	34.4868			0.775642	62.2199			0.636842	20.4745			0.647059	65.0443							0.79085	40.0226			0.679778	46.5063			0.63021	39.4598			0.672224	48.7323
0.897058	32.1885			0.78205	63.079			0.642104	21.2016			0.652405	65.766	65.7491						0.797384	39.66			0.685394	46.2516			0.635417	40.9298			0.677778	50.1938
0.904409	31.1949	37.9328		0.788458	62.6771			0.647365	20.8479			0.657751	67.9411							0.803918	40.8392	40.292		0.691011	46.5925			0.640624	40.1903			0.683332	48.3306
0.911766	27.8127			0.794872	62.9644			0.652631	20.0295	20.9166		0.663101	66.8298							0.810458	41.0535			0.696632	45.5303			0.645835	41.7066			0.68889	47.4659
[truncated: 68 more rows]
