# Supplementary material for: Crumbs organizes the transport machinery by regulating apical levels of PI(4,5)P2 in Drosophila
Source: eLife. 2019 Nov 7;8:e50900. doi: 10.7554/eLife.50900 (PMC6881148; doi:10.7554/eLife.50900)
Supplement: Figure 6—source data 9. [file elife-50900-fig6-data9.xlsx]

## Sheet: Image46
X0	Y0	Y1	Y2	Y3	Y4	Y5	Y6	Y7	Y8	Y9	Y10	Y11	Y12	Y13	Y14	Y15	Y16	Y17	Y18	Y19	Y20	Y21	Y22	Y23	Y24	Y25	Y26	Y27	Y28	Y29	Y30	Y31		Ap-basal	Avg intensity
0	75.1	36.932	38.234	47.354	48.117	47.719	19.687	34.073	44.543	36.918	17.195	15.353	20.93	21.046	29.792	30.765	25.32	30.213	26.679	56.448	28.627	25.925	34.386	35.396	31.457	28.431	19.782	23.669	47.446	36.411	24.422	27.096		0	33.2958
0.119	70.482	47.189	39.303	52.242	49.063	39.452	22.291	37.116	50.227	58.94	21.392	23.14	20.459	27.033	40.258	32.447	24.821	36.952	38.013	55.102	34.465	28.332	42.65	31.186	42.439	32.962	21.707	27.1	45.16	44.125	28.139	35.064		0.00512672	37.4766
0.2381	74.797	54.015	42.27	51.911	56.383	43.137	27.678	48.858	49.402	64.395	23.735	24.548	20.416	25.847	32.945	36.945	27.356	46.308	31.519	65.691	37.408	31.864	44.06	39.52	35.01	31.776	26.127	29.995	49.926	49.876	25.291	34.891		0.0102578	40.1219
0.3571	85.705	54.735	37.742	61.209	66.565	42.85	33.724	56.454	55.847	82.574	23.946	30.945	24.088	27.288	48.456	45.745	35.206	44.763	40.648	63.204	37.136	38.146	47.603	43.109	51.613	42.519	31.788	38.164	54.778	66.321	34.421	47.583		0.0153845	46.7148
0.4761	97.523	76.492	44.537	60.289	57.805	46.961	39.219	53.786	59.419	99.802	30.113	37.858	27.794	23.648	61.416	52.95	35.374	60.946	42.787	71.741	50.356	42.491	51.274	48.157	49.656	47.368	34.227	47.408	57.121	84.464	38.176	62.139		0.0205112	52.9155
0.5952	95.595	84.939	43.416	59.039	73.484	53.453	53.375	54.042	65.645	108.424	35.624	53.839	32.832	33.867	74.76	54.583	34.635	63.286	46.65	77.711	52.17	39.623	57.028	65.347	63.623	49.113	40.689	55.854	73.052	106.008	60.032	78.267		0.0256422	60.6252
0.7142	108.319	105.789	55.877	68.831	78.931	51.312	54.663	66.493	73.695	118.172	46.816	63.693	41.796	35.113	75.697	54.044	38.092	74.199	61.093	75.847	57.608	43.131	65.695	84.157	73.711	64.661	56.601	54.924	92.953	137.376	73.145	106.68		0.030769	70.5973
0.8332	119.545	118.247	63.335	77.991	92.269	50.792	68.345	67.916	79.507	126.211	53.761	80.348	43.209	37.873	80.587	65.508	41.879	82.072	67.949	85.532	55.019	48.637	90.579	109.522	85.626	61.404	59.972	59.967	109.414	146.967	87.364	127.842		0.0358957	79.5372
0.9523	134.992	132.785	96.017	90.412	110.106	62.286	87.567	72.662	84.099	126.695	68.549	99.756	66.076	53.27	95.712	73.759	49.985	96.367	95.487	99.922	66.336	51.233	95.653	133.234	102.948	84.446	77.237	57.318	118.269	158.44	117.93	144.717		0.0410267	93.8833
1.0713	128.105	143.126	112.128	86.796	130.594	67.991	116.01	92.303	83.619	136.256	78.101	111.675	85.306	64.204	120.023	82.014	53.462	112.765	113.307	107.811	77.047	56.69	114.566	151.107	121.914	109.006	80.606	60.7	126.99	179.977	141.556	162.855		0.0461534	106.519
1.1903	149.51	161.354	128.541	101.61	134.141	75.183	135.512	94.875	85.977	141.129	88.756	111.848	102.318	86.847	124.304	91.208	58.581	129.583	134.128	106.699	75.838	66.113	128.955	175.132	142.729	119.122	94.41	63.661	132.287	194.047	155.77	168.975		0.0512802	117.473
1.3094	139.843	173.647	138.41	106.997	151.854	90.216	156.705	108.562	101.457	135.234	91.534	129.234	123.357	102.881	139.016	98.972	66.854	161.05	159.558	114.685	82.511	66.659	137.571	179.715	171.821	115.202	89.438	71.487	157.678	192.611	165.322	163.533		0.0564112	127.613
1.4284	148.754	172.873	150.939	108.942	159.449	102.033	179.949	130.479	105.317	155.871	96.402	135.837	131.199	108.951	147.81	103.128	76.77	177.356	189.751	113.686	85.806	73.078	140.112	180.465	169.351	140.128	99.102	77.383	178.192	191.428	178.993	171.226		0.0615379	136.899
1.5474	163.744	186.618	159.821	113.37	153.986	109.287	193.606	132.798	97.681	160.588	105.361	132.92	146.498	128.188	150.7	112.956	76.326	182.542	201.186	119.069	105.555	80.094	149.951	175.635	181.411	147.825	88.396	83.646	163.64	203.875	185.267	179.343		0.0666647	142.871
1.6665	178.593	192.982	166.742	115.276	162.43	113.362	191.432	146.553	105.249	150.469	114.291	138.898	161.452	121.139	161.471	124.746	92.171	196.745	210.869	130.976	113.514	80.395	153.975	177.496	168.614	144.708	99.507	96.533	169.928	186.035	184.671	178.358		0.0717957	147.799
1.7855	162.366	197.055	172.669	118.102	154.558	122.703	206.723	154.433	106.634	148.265	122.744	144.268	158.543	136.334	166.148	128.814	83.507	207.905	217.311	139.719	117.645	85.75	159.055	169.049	174.74	143.591	102.249	102.479	182.899	191.392	187.864	168.678		0.0769224	151.068
1.9046	164.359	194.086	177.217	133.687	160.489	126.826	211.092	158.649	110.039	164.596	122.501	145.026	153.321	143.63	168.766	144.058	96.717	213.705	213.197	141.12	125.444	92.411	153.1	173.635	170.16	150.329	102.262	102.858	192.923	197.473	190.374	173.233		0.0820534	155.228
2.0236	172.402	185.192	186.975	123.451	165.346	120.508	206.246	168.148	118.873	162.458	131.332	153.652	160.341	148.712	178.369	149.481	95.397	221.598	209.49	142.278	117.479	91.231	155.275	179.069	168.812	157.919	101.665	106.616	187.212	187.516	191.062	159.408		0.0871802	156.36
2.1426	163.049	197.589	184.295	138.576	170.081	124.098	204.399	176.631	133.039	158.357	136.015	155.263	182.287	149.875	186.274	159.797	113.576	220.688	203.978	151.168	120.867	84.965	172.545	180.789	168.126	150.504	118.383	101.262	179.805	191.039	193.197	157.029		0.0923069	160.236
2.2617	179.668	186.079	182.35	142.324	185.826	129.492	211.021	183.548	126.101	149.795	137.67	164.167	191.654	157.121	167.837	160.901	125.784	212.601	195.72	157.31	125.32	90.066	159.296	165.046	174.083	135.688	122.458	106.122	165.455	182.306	186.44	158.207		0.0974379	159.92
2.3807	188.276	183.824	192.847	143.767	186.261	138.871	212.555	181.512	122.733	149.656	128.402	171.205	183.378	154.726	175.169	168.875	126.459	209.964	182.992	149.242	140.557	92.169	154.145	162.771	159.347	132.769	127.103	114.099	177.773	166.282	181.308	135.619		0.102565	159.208
2.4997	190.779	190.042	185.617	148.362	187.853	151.457	212.984	191.142	123.566	163.268	128.385	174.626	179.697	165.934	183.197	171.739	131.736	214.383	177.713	157.56	123.671	93.198	143.783	165.803	165.831	121.902	138.628	103.818	177.007	167.066	185.527	145.302		0.107691	161.299
2.6188	187.286	188.257	184.467	164.294	191.24	152.083	199.262	195.991	135.57	158.418	142.39	177.905	184.603	159.519	180.565	166.323	146.7	206.129	173.115	156.106	131.649	101.605	141.724	173.014	163.453	109.952	142.587	124.814	169.743	166.13	179.575	128.223		0.112822	161.959
2.7378	193.173	187.079	184.841	161.856	199.785	152.924	206.537	185.238	137.273	152.653	154.824	174.504	177.878	172.051	173.637	176.779	159.79	204.13	157.924	160.05	144.818	107.453	155.347	167.081	170.437	111.807	147.239	134.656	158.867	163.342	182.934	131.057		0.117949	163.999
2.8568	201.987	175.935	187.752	168.425	207.551	149.91	208.407	186.559	145.413	151.636	149.504	173.412	169.048	159.747	182.105	175.265	166.795	201.74	148.264	154.56	147.609	111.849	160.987	152.146	156.029	94.762	157.367	133.234	154.555	159.811	179.888	135.902		0.123076	162.755
2.9759	199.088	173.386	187.74	173.192	204.494	159.594	205.951	182.941	153.345	154.38	131.197	180.182	176.552	165.153	184.943	185.251	179.57	187.553	138.991	167.968	165.604	108.206	160.467	150.514	149.889	94.723	170.463	131.956	151.851	165.323	171.917	124.436		0.128207	163.651
3.0949	191.25	173.943	191.173	184.613	204.159	180.343	207.353	172.959	135.429	158.862	139.862	174.333	180.571	158.096	168.655	178.826	177.271	183.086	127.431	169.629	165.064	121.844	154.222	144.875	142.975	98.538	156.084	130.907	151.643	168.875	167.826	113.724		0.133334	161.701
3.2139	190.65	182.526	200.434	180.019	201.883	178.293	211.923	179.948	146.361	153.991	157.636	160.397	158.649	152.387	178.039	168.513	181.87	178.225	137.941	165.9	182.051	123.684	148.956	139.802	136.416	87.9	157.081	139.162	150.597	176.139	158.906	116.049		0.13846	161.948
3.333	189.835	177.949	204.81	177.316	200.262	181.372	209.746	185.499	147.482	157.344	131.888	169.193	157.022	144.296	161.622	176.33	175.823	161.586	131.562	171.969	176.043	123.438	139.617	149.149	137.68	75.588	156.26	147.847	148.963	165.579	165.745	116.936		0.143591	159.867
3.452	187.163	182.227	197.839	185.383	197.06	181.758	206.439	165.212	138.521	143.017	149.562	162.526	159.24	146.763	143.244	180.799	177.492	172.035	112.035	176.929	186.223	131.116	126.177	135.044	127.331	66.739	149.196	155.193	152.221	169.726	169.714	99.93		0.148718	157.308
3.571	183.299	172.315	190.688	191.685	202.136	191.188	204.685	164.943	143.026	143.957	144.546	153.023	154.89	141.823	147.704	178.91	162.713	162.735	104.842	175.536	193.721	132.007	127.529	133.341	113.484	67.936	149.244	169.582	153.609	165.678	148.586	99.218		0.153845	155.268
3.6901	186.595	160.83	191.456	192.543	198.126	164.569	197.079	168.449	147.516	158.023	124.14	154.137	170.15	134.97	135.92	172.357	163.221	159.29	107.515	169.243	191.997	137.425	129.763	134.066	92.035	64.937	149.834	152.096	134.948	150.521	149.851	98.277		0.158976	151.309
3.8091	179.022	169.185	201.026	182.814	192.13	190.209	199.024	171.963	133.44	145.614	103.213	157.369	165.894	136.02	133.364	174.557	149.45	168.74	100.338	170.106	185.359	141.202	121.431	122.433	96.116	64.287	140.166	152.775	131.068	137.861	148.692	94.902		0.164103	148.743
3.9281	182.259	166.045	187.75	181.061	183.537	192.687	201.036	165.659	137.167	148.077	100.858	154.177	166.052	132.287	129.974	159.792	156.5	167.116	93.925	160.059	184.86	129.542	125.553	120.981	81.843	67.458	143.03	154.517	125.601	125.289	139.882	89.658		0.169229	145.445
4.0472	184.852	174.048	191.048	179.977	187.345	188.102	200.703	172.58	142.398	151.566	102.548	137.538	165.771	128.299	123.864	157.239	126.41	152.616	87.974	166.944	185.527	128.546	125.154	121.94	86.584	59.526	134.077	157.727	118.52	131.63	140.331	80.555		0.17436	143.498
4.1662	171.216	164.691	186.828	166.626	184.075	184.293	189.131	158.809	138.706	141.629	93.871	145.672	167.214	114.923	113.177	148.307	130.727	162.928	89.296	173.994	185.622	142.632	114.592	110.271	75.084	62.714	120.138	147.413	108.554	124.753	126.563	76.648		0.179487	138.159
4.2852	171.948	159.293	177.368	167.928	187.742	186.478	186.986	154.752	136.474	141.285	95.848	140.124	161.009	118.161	122.129	146.432	118.656	168.221	82.998	163.222	188.778	134.905	114.503	115.297	79.914	58.575	103.07	148.538	111.145	122.259	121.471	73.868		0.184614	136.231
4.4043	178.074	172.418	175.808	163.603	185.672	180.754	190.228	156.741	145.381	136.449	78.452	135.141	160.634	116.557	125.532	146.029	117.305	169.293	88.149	157.142	182.377	137.187	112.457	108.181	77.02	56.439	109.496	149.012	99.495	123.334	122.286	63.868		0.189745	135.016
4.5233	161.895	179.574	185.015	164.072	183.89	170.9	183.846	154.974	129.217	135.867	79.004	135.566	160.712	119.296	109.998	142.951	111.05	159.914	73.725	151.932	169.201	129.408	109.995	115.311	78.418	63.201	105.474	141.968	106.045	119.192	110.174	67.066		0.194872	131.527
4.6423	172.254	173.289	179.082	175.423	188.114	164.336	179.468	156.309	130.535	126.029	87.348	122.459	149.03	116.743	109.989	132.094	110.689	148.602	66.367	144.219	182.766	138.8	112.89	120.299	67.258	61.153	103.643	125.414	102.467	113.625	103.42	73.76		0.199998	129.309
4.7614	160.493	164.412	177.121	159.682	188.065	157.372	193.954	161.146	139.376	129.488	77.425	133.047	144.284	105.802	106.736	123.953	92.431	144.074	59.499	140.99	177.061	125.929	98.031	104.929	67.512	57.872	114.153	126.309	92.174	96.77	97.61	71.391		0.205129	124.659
4.8804	154.406	150.167	161.867	166.272	191.974	166.237	198.611	160.707	141.838	136.634	77.52	123.971	143.007	99.853	99.475	118.573	95.821	133.049	60.688	134.596	174.485	121.717	87.804	101.39	61.684	47.43	107.102	121.271	93.121	104.746	96.261	68.862		0.210256	121.911
4.9995	157.477	146.198	168.147	148.201	192.183	147.602	175.644	159.739	126.378	134.481	78.818	125.292	129.859	95.096	101.106	116.339	99.213	131.915	64.402	118.041	175.916	124.774	93.123	99.818	64.359	46.712	103.275	116.988	82.948	99.018	97.447	63.441		0.215387	118.248
5.1185	164.708	144.833	173.533	151.989	184.877	160.421	180.437	160.076	114.937	120.988	82.016	122.452	137.166	102.381	88.953	119.133	100.869	124.002	59.4	124.159	183.86	117.422	102.45	86.195	58.679	44.692	103.791	104.385	78.517	94.477	87.176	66.576		0.220514	117.048
5.2375	169.991	114.652	172.066	143.97	182.11	158.749	180.913	155.248	121.276	117.537	78.554	115.211	141.348	98.705	86.943	110.588	99.726	114.773	54.748	99.154	173.416	115.237	88.544	91.163	56.481	42.298	98.615	107.775	72.814	91.697	82.465	63.181		0.225641	112.498
5.3566	164.129	120.04	174.402	145.854	167.099	161.061	172.423	153.571	126.256	114.565	62.974	111.714	131.248	96.519	88.192	99.868	95.548	110.413	55.956	86.864	160.354	115.351	81.23	88.405	50.006	37.64	90.491	104.961	64.164	95.901	86.583	60.508		0.230772	108.572
5.4756	145.175	115.105	187.748	150.192	166.834	148.35	165.784	144.883	112.559	99.11	60.39	115.23	134.783	78.434	84.352	103.602	94.626	105.022	50.085	97.678	149.162	112.394	84.326	90.175	54.359	38.635	90.208	90.448	58.241	89.595	80.855	64.55		0.235898	105.09
5.5946	142.605	122.349	183.807	144.434	167.62	147.16	159.483	141.882	110.114	98.006	59.855	116.586	125.339	89.264	78.688	101.435	99.297	92.945	52.665	93.818	156.821	111.161	86.402	75.901	46.422	41.775	79.803	91.144	63.269	85.252	67.253	51.36		0.241025	102.622
5.7137	146.292	100.995	175.75	151.913	150.957	147.347	159.2	139.803	108.553	90.992	61.533	110.929	127.889	75.32	67.904	97.397	86.372	90.196	51.184	89.217	143.262	112.033	82.326	72.07	44.415	37.65	75.542	88.015	53.043	88.223	65.499	52.669		0.246156	98.2653
5.8327	133.775	111.852	166.539	142.984	162.484	137.337	158.364	131.362	103.45	83.358	60.754	108.061	114.975	77.912	63.757	88.979	94.945	79.057	49.269	82.857	147.282	99.877	80.882	73.555	37.765	40.886	74.252	89.126	48.703	85.6	65.97	57.632		0.251283	95.425
5.9517	137.396	103.794	162.974	122.741	163.887	132.53	164.915	142.175	103.34	83.05	56.283	102.212	123.608	78.817	62.342	87.513	80.366	76.481	49.629	79.18	142.962	89.611	75.544	80.063	40.456	40.779	75.728	89.547	47.794	71.139	56.142	54.592		0.256409	93.0497
6.0708	134.609	97.438	153.789	146.387	154.527	119.84	155.892	133.301	96.249	93.506	58.526	96.507	110.444	80.938	59.987	90.184	81.982	78.48	48.183	65.788	128.725	96.591	67.471	68.76	42.173	41.325	78.757	88.346	45.19	62.763	58.211	40.81		0.261541	89.865
6.1898	124.06	88.401	156.649	125.611	154.225	125.636	155.089	127.21	84.171	79.293	49.905	100.658	99.171	71.344	56.736	83.735	94.774	70.211	42.837	74.331	126.526	85.505	59.446	67.555	52.512	44.258	71.415	75.038	48.889	59.282	52.6	44.753		0.266667	85.9946
6.3088	121.495	83.683	157.596	134.721	156.23	115.126	145.032	126.126	78.273	79.447	47.631	93.434	96.868	76.609	52.708	70.948	94.822	69.92	41.27	66.966	125.211	87.669	61.341	61.958	41.561	39.961	64.471	83.322	41.215	59.823	57.815	43.054		0.271794	83.6346
6.4279	121.65	78.421	164.257	140.256	148.731	113.419	144.012	128.474	66.839	77.092	50.329	100.255	101.468	71.557	47.27	79.096	88.604	65.756	48.632	64.429	122.948	86.791	62.852	58.492	43.797	38.552	69.73	72.678	38.202	54.777	56.305	44.013		0.276925	82.8026
6.5469	113.631	80.946	168.75	115.848	142.422	97.616	152.905	116.457	68.474	76.033	53.59	93.819	97.828	64.486	47.777	73.936	97.827	71.112	44.771	68.847	114.198	87.04	60.359	62.427	42.653	39.111	55.214	58.784	37.229	47.625	43.588	37.166		0.282052	79.1397
6.6659	119.166	76.376	162.208	110.929	139.78	104.184	145.409	106.648	65.967	73.921	52.077	76.932	105.753	63.399	45.099	73.201	89.785	76.715	48.416	70.939	106.835	83.375	54.873	56.363	36.531	35.938	47.185	62.295	38.023	43.37	48.983	33.518		0.287178	76.6935
6.785	123.449	73.398	162.652	96.051	151.922	102.333	143.355	99.352	66.516	66.785	47.454	74.287	90.999	52.377	40.233	78.649	91.19	71.57	52.132	74.954	99.164	88.592	52.323	52.915	40.34	33.03	48.293	63.495	37.103	46.951	41.986	37.115		0.292309	75.0302
6.904	102.675	74.995	156.748	105.717	146.135	97.541	145.229	101.369	72.225	72.027	43.51	73.112	89.604	68.928	38.042	73.219	88.497	66.935	42.687	69.398	90.793	89.035	50.397	57.951	40.182	36.221	45.773	54.274	31.994	41.557	42.884	35.151		0.297436	73.2752
7.023	95.661	71.713	155.499	97.959	142.255	107.508	128.415	97.236	61.79	64.91	38.085	77.329	85.748	60.283	42.669	72.523	90.993	63.852	42.106	70.341	83.487	79.507	50.507	53.928	35.03	32.67	44.516	55.545	31.554	40.262	41.318	37.452		0.302563	70.3953
7.1421	94.481	76.355	140.771	93.93	153.345	106.585	131.465	99.507	64.848	66.965	46.51	72.807	85.755	51.108	41.746	71.006	89.112	62.067	41.457	70.172	72.1	90.736	51.444	55.63	34.203	31.416	43.783	52.746	26.448	41.404	41.4	39.447		0.307694	70.0234
7.2611	88.04	79.591	140.794	96.518	146.47	95.564	124.953	104.864	63.512	54.522	43.547	68.91	79.75	48.585	40.571	73.046	95.249	59.736	40.03	62.044	67.223	87.602	45.169	59.35	33.177	37.452	44.622	49.356	30.315	37.406	39.953	36.453		0.312821	67.9492
7.3801	76.389	74.747	143.553	96.646	146.64	89.731	111.832	91.867	58.923	49.452	44.588	74.032	78.688	46.816	45.109	65.968	88.926	56.169	32.538	71.326	75.574	75.829	50.818	50.541	32.292	30.001	39.93	53.817	32.303	37.892	32.508	38.058		0.317947	65.422
7.4992	65.236	78.016	131.761	91.69	141.262	93.376	126.413	95.209	59.624	49.081	38.219	67.824	75.915	46.84	39.786	61.465	89.512	48.014	36.855	61.804	71.328	77.329	42.017	57.152	27.621	32.111	44.096	50.214	30.564	34.265	38.406	33.531		0.323078	63.6418
7.6182	69.5	83.666	128.389	79.484	131.992	98.693	108.13	81.537	66.207	50.118	35.371	64.578	77.175	47.271	45.159	66.466	82.748	49.013	39.294	60.917	66.482	71.48	40.596	55.18	27.174	30.809	43.834	48.593	26.623	28.737	33.621	34.384		0.328205	61.6632
7.7372	54.298	82.473	122.452	83.413	121.738	91.998	108.245	84.424	55.281	47.772	35.706	52.599	69.846	45.444	48.858	63.289	69.218	49.177	43.95	63.837	70.124	70.996	40.189	56.063	30.413	32.979	39.75	42.109	23.843	34.847	32.374	30.95		0.333332	59.333
7.8563	56.206	85.987	124.408	83.982	125.542	90.749	115.702	85.105	54.898	46.823	34.229	52.338	65.153	39.741	56.465	74.565	76.683	43.281	40.458	58.02	64.292	61.365	36.245	49.983	24.459	32.143	40.022	38.932	25.958	28.034	39.324	33.59		0.338463	58.8963
7.9753	58.138	75.011	122.906	88.86	117.923	81.487	112.979	79.036	50.274	45.28	32.223	49.798	64.259	40.252	57.647	67.653	73.677	37.609	38.542	56.094	61.572	67.09	38.274	60.864	24.033	26.999	37.036	44.43	30.486	25.483	36.904	27.65		0.34359	57.2022
8.0943	63.729	79.025	123.771	90.563	125.365	75.841	109.492	82.098	52.591	46.48	30.322	42.35	58.415	47.028	55.375	65.237	72.271	36.553	38.671	59.634	57.792	63.026	38.032	55.466	29.609	30.258	35.893	47.448	28.552	27.967	25.824	30.045		0.348716	57.0226
8.2134	60.05	68.379	106.941	79.769	114.259	78.022	111.665	81.464	49.825	41.682	27.508	39.414	52.05	41.948	50.295	63.851	66.399	37.768	36.318	61.77	61.025	57.038	29.882	42.155	27.33	30.626	37.486	38.538	20.376	26.881	27.451	28.56		0.353847	53.0227
8.3324	57.929	70.405	102.016	76.713	91.794	81.31	107.227	90.517	50.557	42.76	38.048	43.183	60.997	45.848	51.122	58.86	61.154	34.367	36.458	56.284	59.898	54.605	31.941	46.386	27.37	23.792	34.906	44.1	17.135	26.699	33.575	28.11		0.358974	52.6896
8.4515	59.956	66.521	89.245	78.752	76.949	87.089	113.605	86.488	48.83	42.708	33.782	35.854	57.076	37.32	47.119	55.227	64.618	39.729	36.325	50.906	57.808	52.008	33.898	40.498	26.837	25.069	36.251	38.911	19.943	19.974	26.348	25.266		0.364105	50.3409
8.5705	57.815	67.867	93.63	72.432	87.557	83.108	117.706	78.41	42.917	46.74	34.245	33.198	59.224	40.657	44.393	61.859	64.991	33.54	32.854	50.273	61.956	54.219	30.868	42.689	28.112	29.696	33.756	36.823	16.529	24.151	23.118	27.377		0.369232	50.3972
8.6895	53.566	60.804	88.979	73.502	79.529	74.54	108.618	89.041	44.853	43.405	32.301	31.831	49.139	41.817	45.841	63.488	69.532	37.48	34.268	55.171	47.282	61.674	35.998	37.482	26.528	28.767	32.162	30.844	11.018	21.461	29.896	30.102		0.374359	49.0912
8.8086	51.296	61.654	93.275	70.134	70.688	74.487	113.508	83.372	40.637	36.152	32.491	32.544	49.633	38.645	58.86	64.618	69.363	37.383	31.55	53.063	47.309	49.272	28.602	39.765	20.91	23.98	34.811	36.068	13.965	18.057	33.011	27.401		0.37949	48.0158
8.9276	55.387	48.88	83.209	60.022	61.206	77.982	109.568	80.741	39.659	32.342	29.538	23.173	47.782	36.428	48.442	64.598	69.081	35.291	29.675	50.44	52.649	51.9	27.975	34.035	26.028	26.419	34.852	29.831	13.976	16.301	33.056	30.288		0.384616	45.6486
9.0466	54.829	55.176	71.193	71.474	64.2	74.181	106.778	83.587	40.69	38.295	21.433	22.94	45.32	30.144	43.617	64.667	76.808	34.015	28.907	50.727	50.688	48.359	27.17	30.747	25.201	24.906	32.264	26.612	13.218	13.076	35.727	26.458		0.389743	44.794
9.1657	47.804	52.304	67.719	65.029	63.261	72.681	105.055	80.976	36.11	32.72	20.107	23.535	40.507	29.854	45.039	55.163	76.567	33.513	27.411	44.552	50.532	43.649	27.23	29.596	26.022	29.04	36.158	35.161	11.768	14.55	30.185	22.286		0.394874	43.0026
9.2847	58.873	52.335	66.119	71.245	56.422	60.782	101.372	80.762	39.96	37.794	22.402	22.494	44.157	35.659	39.092	57.087	55.244	34.823	25.142	43.16	42.425	45.678	23.779	30.762	24.556	28.528	35.286	36.367	12.768	14.047	26.641	25.531		0.400001	42.2279
9.4037	44.222	52.724	63.947	61.683	60.395	66.135	100.098	67.447	38.473	33.768	26.162	22.393	39.229	39.349	39.061	53.344	62.813	35.401	27.419	49.786	47.461	42.145	23.895	31.099	27.319	28.403	31.764	35.59	13.112	13.703	27.187	24.226		0.405128	41.5548
9.5228	48.7	46.362	58.028	55.406	63.802	65.519	93.36	68.421	35.666	33.372	22.986	23.691	38.465	35.692	39.599	50.255	59.643	34.161	26.164	41.681	48.921	47.651	21.504	32.92	28.014	29.096	29.636	35.414	9.979	15.322	26.822	22.534		0.410259	40.2746
9.6418	43.943	47.35	64.305	59.302	55.762	58.422	97.495	62.844	36.376	38.885	24.693	20.188	33.95	32.942	32.084	41.341	68.658	36.997	27.948	45.833	49.405	42.155	23.821	30.941	26.511	27.368	24.945	33.983	9.306	12.731	22.099	27.146		0.415385	39.3665
9.7608	49.463	45.348	61.821	59.376	51.849	48.494	100.524	69.208	37.142	38.286	22.486	14.897	36.83	33.584	33.775	34.974	51.441	33.797	26.015	42.795	47.84	37.617	29.14	29.006	27.66	27.918	27.659	35.698	12.124	13.464	21.161	30.85		0.420512	38.5076
9.8799	44.231	43.891	52.305	55.281	52.251	52.956	87.682	69.647	35.907	30.47	20.021	17.853	34.08	31.875	36.07	39.918	55.075	33.236	22.735	39.011	49.488	39.221	25.66	26.807	28.518	21.488	25.116	35.104	12.191	10.729	23.945	34.548		0.425643	37.1034
9.9989	41.66	45.977	60.936	50.628	48.766	52.379	88.986	67.898	32.667	27.741	16.625	19.461	32.974	36.438	35.913	38.084	52.653	29.852	27.052	40.056	46.544	43.919	21.317	23.904	28.217	23.608	28.17	30.869	10.975	10.803	23.141	24.446		0.43077	36.3331
10.1179	39.358	40.326	56.738	49.077	50.729	49.255	88.817	65.567	31.12	32.892	22.507	19.868	35.257	31.94	40.536	35.748	44.466	29.096	27.112	39.049	44.856	42.335	22.956	27.086	27.855	26.024	28.634	36.298	9.007	10.171	20.872	28.455		0.435897	36.0627
10.237	37.159	38.872	59.572	49.094	47.951	48.743	82.247	50.332	31.695	30.076	18.882	17.709	31.411	29.673	40.08	37.94	47.19	29.409	26.052	40.961	48.415	37.024	23.389	23.566	21.38	24.027	24.981	34.313	8.828	10.871	21.165	24.179		0.441028	34.2871
10.356	39.834	41.402	50.541	47.597	52.293	47.893	76.274	48.877	32.891	28.794	22.515	18.778	39.858	29.756	42.355	42.901	43.539	31.591	24.275	44.265	40.358	44.548	20.433	23.535	21.057	18.358	28.286	36.502	9.535	10.189	22.423	24.847		0.446154	34.5719
10.475	38.394	41.816	55.325	52.372	53.293	45.056	76.831	50.202	37.203	31.07	21.956	16.15	31.306	30.547	42.961	39.976	37.306	30.296	25.721	47.176	46.791	49.838	17.436	24.165	24.054	24.466	28.818	31.61	8.234	9.58	24.987	19.995		0.451281	34.8416
10.5941	36.59	48.86	52.242	53.558	48.255	41.378	68.814	43.54	32.467	33.02	15.671	14.777	31.65	35.546	44.666	36.775	41.904	30.658	26.638	51.32	42.361	36.133	17.149	21.303	23.645	21.061	25.192	28.869	9.971	9.943	21.327	19.065		0.456412	33.2609
10.7131	39.884	45.624	54.694	63.812	48.064	41.575	57.663	44.932	32.653	33.09	16.211	11.637	29.478	32.383	40.523	33.872	38.335	25.287	28.357	43.829	40.603	32.409	17.683	17.173	22.735	18.126	28.667	31.624	6.449	8.34	24.504	23.419		0.461539	32.3011
10.8321	38.731	43.159	58.06	56.707	53.284	41.756	58.561	37.836	28.556	34.834	13.968	12.134	27.535	27.402	40.313	38.223	38.925	24.219	23.655	43.51	37.708	40.714	17.666	18.721	22.044	20.642	23.901	29.981	6.435	9.603	23.253	24.052		0.466666	31.7527
10.9512	38.695	47.571	67.492	66.301	47.174	43.64	56.835	34.527	28.822	26.738	13.192	12.622	25.002	29.497	33.672	35.362	42.499	31.588	21.105	40.084	39.726	39.95	18.421	19.796	19.144	18.461	28.165	29.477	8.468	12.051	18.873	24.186		0.471797	31.848
11.0702	38.695	48.974	49.762	59.225	44.838	39.082	46.516	36.548	30.301	28.121	12.709	14.077	27.712	29.036	35.312	34.18	32.721	34.448	24.659	42.97	38.37	35.318	17.617	20.907	21.36	25.815	28.473	27.321	9.363	9.952	17.408	21.208		0.476923	30.7187
11.1892	40.219	46.185	54.839	54.714	38.14	33.759	44.216	29.173	30.18	28.355	12.77	12.641	31.383	25.174	32.913	33.378	35.247	30.505	23.456	41.885	36.274	41.517	16.525	21.949	20.045	21.366	28.142	28.639	8.049	7.297	24.163	21.182		0.48205	29.8212
11.3083	43.931	49.711	51.114	53.028	44.185	39.244	44.391	27.045	28.316	28.887	12.528	12.296	30.704	23.429	28.125	27.539	33.244	29.884	21.382	43.308	41.364	36.204	11.928	17.974	20.134	16.933	24.539	23.524	8.324	7.875	22.849	20.585		0.487181	28.8914
11.4273	34.867	43.392	51.01	54.166	42.277	38.486	40.122	31.182	26.912	24.647	11.462	12.234	29.533	24.699	31.97	28.3	24.28	28.918	23.509	37.714	40.226	29.765	12.496	15.752	20.698	18.792	21.031	18.406	8.404	8.633	19.899	23.581		0.492308	27.4176
11.5463	39.347	39.461	50.187	53.143	38.42	32.559	36.755	27.403	27.282	30.662	12.888	12.192	26.607	23.138	22.903	18.778	27.107	27.79	20.119	40.636	44.632	28.971	14.012	19.325	22.633	15.234	21.813	21.71	8.373	6.628	23.067	21.638		0.497434	26.7317
11.6654	40.102	40.044	52.28	52.279	38.253	30.678	30.948	22.242	29.279	32.177	12.564	13.599	22.809	25.19	29.036	21.811	29.459	27.246	20.403	39.882	42.864	35.66	16.551	19.141	20.581	17.901	20.308	17.127	7.664	6.167	16.272	18.759		0.502566	26.5399
11.7844	41.095	38.578	54.749	51.798	41.409	31.097	30.894	25.877	25.186	22.097	12.1	13.209	21.515	27.839	33.728	21.852	31.911	26.986	22.06	38.798	37.386	29.095	14.059	18.871	20.941	17.337	20.077	14.278	7.817	9.143	15.387	22.344		0.507692	26.2348
11.9035	40.678	40.448	52.987	40.843	41.447	34.39	25.416	23.021	26.395	26.31	9.207	14.605	17.444	29.544	30.13	25.374	31.048	25.098	19.788	35.174	39.593	31.629	12.475	16.43	21.068	18.887	19.884	20.461	9.628	5.693	22.567	21.345		0.512823	25.9065
12.0225	38.907	43.628	41.197	54.01	35.831	28.497	19.614	21.598	23.194	26.571	9.828	12.209	17.83	23.893	29.044	23.273	29.582	26.463	23.351	37.869	38.616	28.288	13.704	15.186	20.358	15.392	18.067	18.452	7.797	5.07	18.887	19.329		0.51795	24.548
12.1415	39.438	37.211	43.827	39.88	42.073	29.726	22.759	23.112	25.583	25.25	13.506	12.749	19.784	24.163	29.559	25.151	32.032	25.65	17.668	28.766	38.167	22.979	15.715	15.25	16.69	15.992	16.875	17.759	6.782	7.034	14.293	18.124		0.523077	23.8608
12.2606	36.276	33.978	40.667	41.65	41.322	31.247	18.895	18.609	23.213	20.203	9.101	12.109	20.78	30.608	27.336	22.407	27.974	27.034	15.111	29.038	41.13	27.183	19.682	16.684	18.038	17.248	19.221	16.37	8.148	5.655	18.441	19.298		0.528208	23.583
12.3796	38.284	35.036	40.184	42.682	36.2	24.005	24.744	21.037	26.363	21.291	10.281	10.289	23.804	24.156	30.246	31.123	27.032	19.628	17.525	30.168	34.595	24.042	13.873	16.699	20.379	14.419	19.165	14.143	7.433	8.069	14.605	21.688		0.533334	23.2246
12.4986	42.29	39.315	35.514	38.657	33.672	26.321	23.084	20.731	24.586	23.759	10.216	10.842	22.524	27.314	25.888	21.226	26.802	21.32	15.726	29.144	39.402	20.879	13.284	19.462	19.5	15.902	19.384	13.846	7.505	7.233	16.78	18.728		0.538461	22.8386
12.6177	36.162	37.073	45.113	41.734	37.948	27.802	21.273	18.401	26.103	21.858	12.683	10.242	23.392	35.06	25.345	22.831	28.043	23.6	17.823	30.464	35.419	21.587	17.002	16.763	20.406	18.426	15.432	12.753	6.544	7.993	18.165	18.797		0.543592	23.5074
12.7367	42.263	39.495	37.449	48.182	39.075	23.331	23.339	20.679	27.416	20.77	12.695	7.707	20.683	30.544	19.165	27.523	29.569	23.455	14.317	28.724	30.824	18.985	14.688	14.361	17.479	15.942	19.976	16.839	7.34	8.265	15.3	17.769		0.548719	22.9422
12.8557	42.419	31.925	35.367	39.147	31.19	23.999	16.979	14.426	25.581	21.458	9.972	10.736	21.629	31.498	20.906	23.319	30.501	23.082	15.586	26.09	35.617	19.239	20.227	15.126	19.155	16.421	17.593	16.163	7.842	9.214	13.78	20.365		0.553846	22.0797
12.9748	35.757	35.681	38.176	34.49	32.642	24.856	21.728	17.149	28.701	20.023	11.138	13.634	18.497	32.96	19.156	24.407	21.957	20.321	15.372	23.49	31.964	20.243	14.785	16.925	14.702	14.678	19.656	11.976	6.65	7.934	18.498	24.695		0.558977	21.6513
13.0938	34.468	29.516	34.919	33.924	33.186	23.079	20.422	15.61	28.622	19.564	12.007	11.478	19.851	31.283	19.352	19.137	24.538	17.618	14.135	22.313	28.434	18.754	13.019	20.854	14.212	14.082	22.045	13.033	7.172	7.14	15.793	20.497		0.564103	20.6268
13.2128	39.252	31.993	35.563	33.41	37.119	25.15	18.43	14.567	28.718	22.985	9.448	10.63	19.448	26.486	17.615	22.757	21.046	17.323	18.047	21.625	29.679	15.453	14.864	16.28	15.777	15.762	19.088	11.815	7.743	10.016	15.833	17.407		0.56923	20.6665
13.3319	34.062	29.962	31.702	32.107	34.96	26.061	14.116	15.494	23.551	22.655	11.457	8.242	17.87	29.566	17.789	19.621	19.127	19.286	15.071	22.337	30.626	16.471	13.934	22.96	18.739	17.243	22.006	16.027	9.955	10.651	15.578	15.482		0.574361	20.4596
13.4509	40.348	29.764	34.896	32.426	36.768	25.987	17.748	16.808	24.458	17.833	11.791	9.999	18.838	23.272	19.221	17.401	20.167	13.4	14.322	20.37	27.125	19.8	15.642	20.836	15.515	15.079	17.417	12.673	7.682	6.659	18.293	14.198		0.579488	19.898
13.5699	34.629	28.369	27.88	36.032	30.219	27.296	17.365	12.754	20.927	16.633	10.077	9.908	22.748	19.437	18.103	16.012	18.922	19.24	12.536	25.014	26.038	21.762	15.867	18.683	17.406	14.876	20.793	11.063	8.83	7.33	15.642	15.686		0.584615	19.3149
13.689	32.967	31.916	33.66	37.299	38.66	25.323	14.887	12.827	22.237	18.324	8.601	7.99	16.581	20.694	14.197	15.27	20.778	17.547	13.351	22.848	26.35	20.814	13.242	14.24	17.787	14.473	17.69	10.157	6.025	7.49	21.038	12.316		0.589746	18.9868
13.808	32.137	31.482	33.922	30.061	36.066	23.839	18.938	14.341	23.903	22.766	10.059	8.349	16.611	20.601	18.979	19.526	15.749	16.764	14.516	17.903	26.205	18.306	14.379	16.695	14.553	14.263	16.786	12.005	7.299	6.406	16.627	12.413		0.594872	18.8265
13.927	37.764	40.913	31.8	33.414	37.685	25.858	14.497	13.924	22.795	19.286	7.494	10.209	18.956	20.198	17.494	18.092	18.989	14.151	16.75	19.19	26.874	17.429	16.391	15.776	13.02	11.966	18.645	12.661	8.681	8.726	17.051	16.446		0.599999	19.4727
14.0461	38.892	35.862	30.926	32.63	39.148	21.911	11.01	13.304	23.888	18.549	8.7	8.741	18.292	20.232	13.815	14.747	15.861	18.63	13.572	21.818	27.66	14.533	17.639	16.292	15.556	16.834	18.683	16.016	9.552	6.27	17.328	14.378		0.60513	19.1022
14.1651	38.183	36.266	45.009	37.392	35.53	18.344	14.02	9.863	23.021	12.318	9.46	10.892	19.572	20.57	14.102	14.662	16.329	14.033	14.014	21.654	24.508	17.616	19.187	16.507	13.653	16.648	14.929	9.395	8.186	8.923	15.394	18.213		0.610257	19.0123
14.2841	38.197	36.121	45.937	38.138	32.442	22.047	14.308	10.993	21.332	19.089	9.912	12.628	17.78	20.645	16.605	16.438	17.534	12.613	18.471	22.934	27.37	15.972	16.382	18.575	14.844	14.803	16.755	11.662	7.833	9.226	15.708	14.045		0.615384	19.6043
14.4032	43.23	39.413	43.084	32.426	30.4	22.791	15.678	9.999	21.692	15.893	14.343	10.968	20.396	21.78	16.098	16.333	15.766	13.065	18.236	21.812	25.3	17.727	14.366	17.476	17.535	14.137	17.4	12.234	8.67	8.646	15.326	11.946		0.620515	19.5052
14.5222	35.257	39.256	44.815	32.338	26.479	22.481	13.495	12.103	23.908	12.848	6.424	9.128	17.946	20.887	18.303	18.253	20.409	13.622	14.688	20.156	20.623	18.806	14.019	16.999	11.436	15.69	16.732	10.722	8.912	9.674	16.837	12.875		0.625641	18.6288
14.6412	40.38	29.488	39.008	33.618	29.556	21.302	12.834	9.123	19.611	17.924	6.042	9.091	16.344	19.179	16.087	15.998	19.984	17.043	11.916	25.169	26.476	21.373	18.411	13.717	13.931	12.692	17.98	13.449	8.325	9.652	12.877	13.487		0.630768	18.5021
14.7603	44.745	39.841	36.514	30.115	28.209	22.717	12.619	9.576	21.011	15.883	8.904	7.876	14.12	18.141	12.178	12.31	17.755	17.793	19.958	19.72	24.604	18.866	15.242	12.069	13.314	11.025	10.809	12.183	7.153	9.98	10.791	14.025		0.635899	17.8139
14.8793	43.569	38.677	34.212	31.068	27.582	21.925	13.422	9.245	20.853	14.19	7.657	7.019	18.341	18.425	14.441	11.593	19.952	20.006	14.55	23.278	26.784	21.224	16.717	14.203	16.714	12.974	13.88	10.623	6.703	11.165	11.114	12.76		0.641026	18.2771
14.9984	35.928	30.251	35.633	33.374	27.36	17.213	14.09	7.372	21.202	13.958	7.739	9.496	19.848	21.468	19.121	13.162	16.177	16.873	11.297	22.098	27.049	15.996	14.986	13.268	12.992	13.473	14.196	10.766	6.857	11.701	13.863	16.664		0.646157	17.671
15.1174	35.676	35.335	30.604	30.22	31.688	18.094	10.796	11.637	16.843	16.516	8.339	9.004	13.917	19.098	15.392	14.296	14.428	15.519	13.678	20.953	22.21	21.278	15.142	11.681	14.002	13.669	14.583	7.874	7.626	10.137	12.661	14.332		0.651284	17.1009
15.2364	35.18	30.632	29.996	30.125	31.761	19.982	10.702	9.086	19.647	16.702	8.955	7.914	17.029	15.941	12.466	14.872	16.176	13.696	11.173	19.007	22.442	16.167	14.937	10.655	11.805	9.042	12.303	9.634	10.032	9.411	12.29	9.514		0.65641	16.2273
15.3555	39.248	36.102	26.953	23.328	29.918	18.105	10.753	8.976	17.108	16.21	7.075	11.255	17.665	20.159	11.502	15.03	17.592	10.745	11.866	17.037	17.323	15.741	15.438	14.775	14.106	11.553	18.04	8.774	11.278	9.593	14.776	11.048		0.661541	16.5335
15.4745	41.145	25.704	24.347	24.392	31.802	21.225	9.54	10.656	17.058	16.523	6.506	12.473	17.264	14.695	12.333	16.462	16.328	15.505	12.288	17.035	23.498	15.762	14.786	16.788	15.857	8.634	13.097	8.271	10.722	8.391	12.255	8.442		0.666668	16.2432
15.5935	34.406	24.968	27.983	22.623	32.28	22.04	9.319	9.336	18.618	17.016	6.699	8.39	15.951	14.483	12.285	15.131	19.009	16.268	16.507	20.27	22.871	17.009	12.791	16.675	11.292	9.64	15.751	10.182	9.877	8.584	10.372	11.778		0.671795	16.2626
15.7126	32.811	35.681	27.558	21.453	32.665	20.541	12.302	9.94	19.988	14.188	9.009	10.182	12.866	14.142	12.347	15.274	18.708	13.155	13.369	18.153	26.255	18.18	11.26	13.955	10.531	12.976	16.336	9.269	11.029	10.66	10.474	13.914		0.676926	16.5366
15.8316	28.44	33.55	24.995	25.407	33.725	19.449	8.728	7.895	18.769	15.352	9.811	9.762	16.475	11.869	14.64	14.575	16.352	14.071	13.55	15.656	23.989	16.596	14.127	13.51	17.814	10.953	11.519	10.454	10.009	10.985	8.195	12.233		0.682053	16.0455
15.9506	30.096	32.131	28.097	31.728	29.856	16.077	9.538	7.715	14.89	14.247	9.797	9.781	14.828	12.802	12.389	15.137	17.967	14.404	13.996	15.367	21.232	19.462	13.821	12.863	12.215	15.763	15.155	12.023	10.29	8.992	13.04	12.191		0.687179	16.1841
16.0697	31.871	29.992	28.959	26.155	30.43	21.727	8.159	7.196	18.839	15.087	9.487	10.178	14.878	14.575	14.302	11.171	15.131	15.309	14.046	12.741	24.165	16.637	12.06	11.917	9.451	13.419	12.888	9.296	9.237	8.756	10.934	13.621		0.69231	15.7067
16.1887	32.776	34.424	22.415	24.791	33.59	23.276	10.171	6.774	15.541	19.516	11.593	10.071	13.963	15.191	14.576	11.992	16.131	14.72	10.736	15.603	17.322	26.233	12.652	13.166	9.688	10.131	12.43	9.708	8.491	13.482	11.643	10.057		0.697437	16.0267
16.3077	29.427	30.958	23.767	25.337	31.897	21.555	10.012	9.248	16.183	15.95	9.196	11.06	16.199	13.273	13.537	12.507	17.816	13.395	11.689	16.364	17.287	20.193	12.038	14.172	10.312	10.842	12.969	10.967	8.223	11.169	10.211	10.124		0.702564	15.5587
16.4268	27.242	34.217	21.859	26.374	28.876	23.181	6.553	8.581	13.936	14.12	6.978	9.529	17.114	12.241	12.153	10.54	11.661	11.406	7.534	15.55	18.088	18.64	11.259	16.219	6.705	11.708	11.716	9.801	8.643	11.441	10.292	9.16		0.707695	14.4787
16.5458	27.013	33.199	26.468	27.469	30.432	21.981	9.171	9.173	16.411	11.836	7.92	11.613	15.633	15.78	13.552	14.012	13.478	10.719	8.465	11.864	16.619	20.86	11.097	13.9	10.096	9.883	15.35	11.513	8.822	11.412	10.693	8.344		0.712822	15.1493
16.6648	33.326	33.883	28.861	27.146	29.363	17.83	8.624	8.891	15.482	13.699	6.506	13.301	15.873	11.828	11.227	13.188	13.356	13.412	12.221	11.367	17.393	17.776	9.246	10.593	12.216	11.964	13.807	8.773	11.502	6.968	11.764	9.515		0.717948	15.0282
16.7839	34.245	34.846	33.332	29.374	29.708	18.342	9.566	9.856	15.545	14.915	5.621	11.356	14.05	9.208	13.543	12.562	12.342	10.077	11.411	14.499	16.953	18.389	12.999	10.108	12.697	8.422	12.856	10.988	9.245	8.996	11.129	10.364		0.723079	15.2358
16.9029	28.668	25.115	26.521	36.704	27.075	17.316	9.531	8.068	15.623	12.104	8.019	9.64	11.577	10.889	12.916	8.234	13.39	10.295	7.772	10.847	18.444	17.651	13.919	11.405	12.262	7.845	11.831	8.841	10.439	10.245	8.686	7.224		0.728206	14.0343
17.0219	29.312	25.365	22.855	29.85	26.256	16.321	9.94	9.914	15.653	12.636	8.207	8.278	12.47	9.224	14.315	11.357	13.474	11.451	8.925	13.857	21.121	13.363	11.997	11.461	11.079	7.977	10.552	8.477	7.116	9.96	11.164	7.387		0.733333	13.7911
17.141	26.182	22.131	23.839	24.235	29.184	15.978	10.157	7.552	16.349	9.309	5.352	12.142	12.026	9.348	9.1	10.402	12.956	9.842	7.013	16.077	23.147	16.784	9.341	11.908	11.226	6.837	10.199	9.089	8.173	8.593	7.741	8.894		0.738464	13.1596
17.26	27.374	28.357	24.268	33.879	29.078	15.532	8.878	9.063	13.109	9.049	9.632	11.4	10.793	7.468	11.7	12.367	9.751	9.489	8.344	12.726	19.034	15.37	9.768	10.58	10.37	12.13	12.138	9.786	8.907	7.223	4.717	10.059		0.743591	13.5106
17.379	23.609	25.906	20.006	33.473	31.586	16.197	11.299	10.205	10.015	11.818	11.681	12.422	10.205	9.045	11.137	10.224	10.984	8.345	8.432	15.148	17.75	16.138	9.968	9.42	13.672	7.737	9.541	9.57	6.16	3.725	4.721	8.946		0.748717	13.0964
17.4981	29.4	29.145	22.5	33.183	25.95	16.722	8.936	8.585	11.833	9.608	8.592	9.853	9.914	10.665	7.203	8.831	12.788	8.777	9.29	9.554	20.832	17.552	11.21	11.751	10.005	7.574	8.977	10.556	7.848	6.634	8.181	9.181		0.753848	13.1759
17.6171	30.529	23.542	18.932	34.447	29.287	18.289	10.912	8.512	12.454	7.073	9.815	8.576	10.955	14.231	8.434	9.89	14.177	9.685	10.592	9.343	19.477	17.208	8.544	9.573	8.228	6.385	10.238	8.107	5.906	7.994	6.805	9.583		0.758975	13.0538
17.7361	26.49	23.512	21.43	31.837	30.492	18.15	10.009	6.702	9.928	10.664	7.988	10.866	7.592	9.958	8.713	12.323	10.556	9.489	9.695	12.774	17.759	15.932	10.72	10.564	11.132	6.511	11.063	9.897	6.967	9.961	7.439	8.637		0.764102	12.9922
17.8552	30.056	25.829	26.229	28.225	25.202	19.952	14.438	9.319	15.293	9.466	8.182	13.78	10.285	8.538	12.134	11.153	11.19	7.349	8.204	15.223	16.99	14.138	11.575	11.024	8.751	6.843	6.965	9.508	5.755	11.329	7.679	7.73		0.769233	13.3854
17.9742	29.023	30.478	21.598	34.228	22.533	19.984	10.388	9.441	14.475	9.78	6.642	8.721	11.593	8.615	6.953	10.112	11.447	8.416	7.654	12.641	15.062	11.563	9.112	4.895	8.99	9.834	11.958	10.943	8.115	8.529	8.172	7.626		0.774359	12.7975
18.0932	25.065	28.993	22.764	32.343	21.898	18.505	8.421	7.591	12.104	7.146	9.818	9.366	9.346	7.793	8.436	9.542	9.963	9.459	6.605	8.579	18.267	15.287	8.721	5.914	8.945	8.915	8.816	10.794	7.244	6.379	8.902	8.308		0.779486	12.1947
18.2123	26.364	32.323	22.221	37.16	25	13.864	10.7	6.983	15.304	10.769	10.621	10.362	7.817	8.033	5.908	9.953	11.879	9.328	5.658	12.034	14.113	16.694	9.108	8.313	7.148	6.808	7.992	9.21	4.617	6.251	6.885	7.823		0.784617	12.4138
18.3313	24.293	30.558	18.76	34.98	24.958	15.21	10.99	5.948	14.761	12.442	6.881	9.378	10.322	9.616	9.066	8.97	11.482	8.599	5.77	14.985	13.318	15.857	7.824	8.826	7.222	6.799	8.151	10.447	3.895	7.04	4.971	8.795		0.789744	12.2223
18.4504	28.566	32.28	21.024	34.574	19.44	15.72	7.866	9.003	15.118	6.537	8.249	7.382	9.396	9.476	9.028	9.996	13.692	7.083	6.9	13.826	12.227	15.178	7.057	8.065	10.287	6.583	6.786	9.437	4.571	6.558	6.002	9.609		0.794875	12.1099
18.5694	29.591	29.305	24.571	28.907	23.757	11.542	8.854	8.334	10.849	7.774	8.189	8.214	5.937	8.756	7.024	9.468	7.843	9.787	7.387	11.633	16.032	9.924	6.48	7.446	7.923	6.11	9.505	7.889	7.136	5.365	5.312	8.56		0.800002	11.4189
18.6884	30.371	27.956	21.215	28.904	28.376	16.732	10.477	6.487	11.437	9.277	8.012	6.763	8.61	7.581	9.512	9.566	9.352	7.585	6.13	13.031	17.165	13.236	7.628	9.296	7.288	6.083	7.515	9.197	7.775	6.957	7.899	6.06		0.805128	11.9835
18.8075	31.217	32.539	22.36	35.023	23.414	13.471	11.111	7.113	12.053	8.176	9.127	6.283	9.105	6.997	6.407	8.66	9.139	5.723	7.845	8.967	16.015	13.206	10.359	6.613	7.766	5.32	7.183	9.992	6.022	5.358	7.293	6.72		0.810259	11.768
18.9265	26.279	29.051	24.349	26.277	30.047	12.019	9.745	8.463	8.701	6.563	11.375	9.894	9.764	10.179	8.039	5.994	6.87	5.763	7.236	9.913	16.948	11.85	9.501	9.101	6.242	4.956	7.614	7.458	4.006	6.684	8.118	6.906		0.815386	11.4345
19.0455	24.922	24.459	25.807	24.397	23.386	14.253	9.931	8.16	12.303	10.27	11.425	6.755	9.256	7.198	5.963	9.245	7.367	11.37	8.462	9.034	12.733	9.252	7.994	8.138	5.103	5.724	8.375	8.159	4.402	5.146	7.177	5.202		0.820513	10.9802
19.1646	29.671	24.413	26.477	25.075	23.319	10.033	9.282	7.061	9.476	10.471	9.621	7.206	6.568	7.365	7.018	8.402	7.507	6.686	5.074	6.38	10.814	10.089	5.338	6.815	4.604	7.733	8.353	7.9	6.006	4.203	5.305	6.521		0.825644	10.3371
19.2836	24.613	25.957	24.157	21.227	21.583	11.195	8.885	8.966	7.363	6.254	7.977	5.409	9.505	8.364	6.125	6.266	8.855	5.134	8.958	8.493	14.15	9.839	7.778	8.547	5.598	6.513	5.521	7.21	7.029	4.858	8.428	6.19		0.830771	10.2171
19.4026	26.186	26.21	25.415	18.84	18.595	11.83	8.849	10.02	6.166	6.655	9.196	6.796	6.209	7.174	7.083	7.359	10.198	8.158	6.891	8.434	10.671	12.795	7.922	5.699	6.634	5.453	4.899	6.55	3.64	6.206	7.044	5.811		0.835897	9.98713
19.5217	23.451	28.096	25.239	20.541	20.425	12.405	7.516	7.507	8.514	6.595	5.901	5.225	7.179	8.409	6.756	7.181	8.08	4.315	6.995	10.813	8.151	10.737	7.158	6.644	4.203	5.986	5.33	8.447	3.677	6.434	5.678	6.423		0.841028	9.68784
19.6407	23.745	27.962	20.938	20.821	15.628	12.847	7.752	8.177	9.416	7.255	6.194	4.313	6.084	7.484	6.387	8.354	5.739	4.264	5.41	7.633	8.33	10.508	6.529	5.923	5.23	5.867	5.771	6.922	5.425	3.873	4.908	5.662		0.846155	9.10472
19.7597	23.487	24.048	23.576	18.888	18.48	12.559	9.214	10.889	10.41	5.942	6.927	7.137	5.9	6.687	5.564	8.727	6.352	4.427	6.735	5.654	9.402	9.691	5.345	5.7	8.937	7.126	5.494	6.096	5.215	3.056	5.158	4.991		0.851282	9.30669
19.8788	28.793	29.214	29.849	20.853	18.965	10.437	7.267	7.572	10.961	5.522	6.809	4.412	6.258	4.315	4.21	5.853	4.893	6.962	4.285	8.725	9.504	10.328	4.204	5.947	5.758	5.961	5.476	6.565	3.747	3.873	5.945	3.746		0.856413	9.28778
19.9978	27.117	27.094	28.529	16.327	18.432	9.298	7.638	4.107	6.687	4.138	7.077	4.982	6.823	5.678	4.394	6.059	8.094	4.589	5.429	5.721	11.362	10.279	7.182	4.517	4.828	5.152	5.872	7.777	2.972	4.873	3.015	5.167		0.86154	8.78778
20.1168	24.059	27.365	23.41	19.497	18.632	10.138	7.884	6.255	7.532	4.592	5.105	3.982	5.676	5.943	3.905	5.516	7.67	6.085	5.385	9.08	8.681	9.319	5.599	4.501	4.384	4.14	5.168	5.342	4.411	6.721	3.466	4.84		0.866666	8.57134
20.2359	23.402	24.495	24.057	17.434	18.155	10.532	7.732	8.446	5.072	6.965	5.947	5.153	5.074	4.329	4.181	6.026	7.104	6.549	4.157	7.111	7.8	8.174	6.587	4.333	3.275	3.792	7.014	3.832	5.771	6.653	5.123	4.767		0.871797	8.40756
20.3549	22.002	22.321	18.213	15.062	20.263	8.762	8.408	5.958	6.758	6.248	6.248	6.165	6.963	5.503	3.872	7.174	4.668	5.301	5.153	6.29	8.875	8.732	4.582	5.204	4.985	3.399	6.726	4.399	5.736	5.887	6.043	5.217		0.876924	8.15991
20.4739	19.404	23.893	21.548	18.024	19.415	8.326	7.456	4.929	5.152	6.742	5.875	4.523	4.826	5.753	4.142	7.135	4.908	3.778	4.774	5.655	9.982	11.024	7.906	4.916	6.021	5.326	5.098	5.628	3.585	5.93	3.129	3.964		0.882051	8.08647
20.593	21.725	19.461	20.038	14.972	18.104	7.224	10.999	6.526	5.868	6.92	5.108	3.403	7.514	5.292	4.568	7.822	5.829	4.836	5.131	8.573	8.807	9.643	5.178	4.708	5.791	6.964	4.107	4.5	4.077	4.693	4.032	3.683		0.887182	8.003
20.712	20.06	21.967	19.103	18.715	17.418	7.757	9.395	8.548	5.602	4.247	7.351	5.074	7.934	6.926	3.226	5.295	4.892	5.594	5.85	4.532	9.349	8.204	6.417	6.056	4.826	6.895	5.491	3.615	6.661	3.653	4.585	4.473		0.892309	8.11597
20.831	26.413	21.189	16.302	15.741	16.524	6.591	7.773	5.275	5.75	6.628	7.415	5.412	4.666	5.521	5.345	6.748	4.621	4.784	4.864	7.271	8.385	8.127	6.546	4.802	4.471	5.102	4.058	3.981	4.914	5.716	3.465	3.341		0.897435	7.74191
20.9501	21.517	24.621	21.332	18.041	13.351	6.569	7.101	5.955	4.029	4.623	4.938	6.004	4.855	7.306	4.212	7.281	4.696	4.479	4.65	7.132	10.032	8.969	4.798	4.371	5.153	5.584	3.591	5.7	5.081	3.068	3.524	2.702		0.902566	7.66453
21.0691	20.489	19.092	18.907	20.662	17.8	8.822	9.897	5.338	6.36	4.385	6.743	4.903	5.121	5.523	6.69	7.025	3.439	3.491	5.519	4.353	7.568	5.719	5.078	6.384	3.887	4.839	3.652	3.485	3.8	4.586	2.706	3.833		0.907693	7.503
21.1881	23.226	20.6	22.282	18.483	17.466	7.728	10.734	4.771	6.546	4.014	5.399	5.713	3.408	4.442	3.463	4.945	3.795	5.134	3.565	3.947	5.695	6.87	5.314	4.31	3.384	5.553	5.644	4.178	4.384	2.493	4.155	4.38		0.91282	7.37566
21.3072	19.732	25.077	24.403	14.425	14.501	7.871	8.802	5.144	8.045	3.935	5.003	4.892	5.082	2.582	5.046	5.065	5.297	6.87	5.224	6.123	5.312	8.944	6.958	4.062	5.36	3.383	4.463	5.28	3.283	3.852	2.282	6.229		0.917951	7.57897
21.4262	20.038	19.86	23.166	12.735	12.371	4.881	9.32	4.233	4.035	6.076	6.606	3.119	4.65	3.009	4.276	4.694	5.124	5.67	5.196	4.347	9.029	6.857	4.973	6.261	6.318	5.6	5.665	3.625	5.116	4.151	4.3	6.797		0.923078	7.25306
21.5452	20.355	17.415	16.976	15.782	11.092	7.818	8.427	5.25	6.114	6.35	4.532	3.158	7.075	3.432	3.985	3.254	4.24	4.387	4.649	3.839	6.837	6.912	5.556	5.119	5.139	7.072	4.541	3.858	2.119	5.531	3.988	7.248		0.928204	6.93906
21.6643	19.631	14.459	16.893	16.796	10.762	5.741	6.444	7.37	6.731	4.672	4.359	3.587	6.445	5.081	5.263	5.201	3.803	3.912	3.579	5.483	6.336	6.237	7.019	5.247	5.768	5.396	3.585	3.969	2.968	5.128	5.583	4.512		0.933335	6.81125
21.7833	17.193	17.465	17.281	15.882	10.984	6.47	7.451	5.14	6.346	5.796	3.238	4.523	5.151	6.401	3.539	3.888	3.47	5.362	3.533	6.433	6.343	8.471	5.277	2.652	6.998	4.632	4.083	3.472	4.715	3.805	6.705	4.895		0.938462	6.79981
21.9024	17.293	16.011	19.953	14.413	10.364	5.876	8.567	4.513	7.361	6.295	2.512	3.468	4.514	3.452	4.685	3.908	4.429	4.099	3.142	3.79	7.018	5.81	5.03	5.435	4.968	5.322	6.811	3.763	2.751	3.266	4.627	3.108		0.943593	6.45481
22.0214	14.475	16.313	18.172	14.377	12.646	4.185	7.786	5.231	3.864	5.854	2.694	4.851	3.12	4.274	4.653	4.052	3.952	3.162	4.648	5.429	7.194	5.855	3.96	5.02	5.701	4.047	5.084	3.31	3.616	3.4	4.417	3.093		0.94872	6.20109
22.1404	14.079	14.893	19.225	11.69	10.272	4.95	7.178	5.626	5.156	5.727	3.847	4.925	4.21	3.9	4.41	4.198	6.098	5.312	6.19	5.633	6.761	4.825	4.639	4.432	5.22	5.137	5.681	3.549	3.418	5.552	4.179	2.216		0.953847	6.34775
22.2595	11.965	13.313	16.826	11.178	10.624	5.504	6.938	3.895	6.183	5.301	4.79	3.15	2.838	5.122	3.492	3.577	5.026	5.14	3.634	5.232	5.214	6.529	4.416	3.331	3.973	5.248	4.048	4.159	2.13	2.47	5.136	2.961		0.958978	5.72947
22.3785	10.85	10.916	16.878	12.146	8.354	7.268	6.68	3.673	6.416	3.982	5.007	4.048	3.27	4.832	5.888	4.031	4.402	6.843	2.512	5.035	4.246	4.677	6.67	3.442	4.883	3.998	3.56	3.444	2.657	3.687	3.287	2.858		0.964104	5.63875
22.4975	12.153	11.113	16.465	9.274	6.907	7.428	8.038	4.495	4.812	6.048	4.442	3.385	2.631	5.599	4.261	3.89	4.779	4.166	4.589	6.154	4.987	5.856	2.193	4.308	4.478	3.664	3.815	3.662	2.466	4.937	3.877	4.345		0.969231	5.60053
22.6166	11.446	10.149	14.613	10.255	8.044	4.906	5.608	4.849	4.886	4.102	4.208	4.37	2.461	4.752	4.301	4.478	5.179	3.999	5.486	3.174	3.783	6.563	2.764	5.359	3.436	2.178	2.946	3.384	4.384	4.479	5.459	6.28		0.974362	5.38378
22.7356	9.494	10.681	14.274	11.82	9.094	6.104	5.907	4.597	5.356	5.029	5.27	3.509	4.674	4.591	6.284	5.016	3.825	5.547	3.632	4.054	5.436	7.159	5.294	4.087	3.347	4.319	4.247	2.606	4.363	3.574	4.029	4.689		0.979489	5.68462
22.8546	5.978	8.838	14.82	5.93	6.72	6.673	7.346	3.199	4.43	3.554	4.105	4.723	3.688	6.58	4.197	3.605	5.159	5.972	4.976	5.622	4.491	4.353	4.523	4.919	1.633	4.404	5.544	3.55	3.896	2.79	2.67	4.665		0.984616	5.11103
22.9737	5.51	13.006	12.128	7.709	6.493	5.381	8.419	4.347	3.966	3.103	5.934	3.338	3.619	4.805	5.556	6.273	5.238	3.692	3.439	3.702	5.158	6.635	5.871	5.033	3.184	3.454	5.589	2.735	2.877	3.541	1.207	5.018		0.989747	5.18625
23.0927	7.001	10.884	14.171	6.871	8.268	5.21	7.084	3.934	4.75	3.294	4.286	3.46	3.587	5.008	3.573	4.481	5.255	4.942	2.327	4.39	6.555	4.766	4.503	4.087	5.121	5.838	3.141	2.635	3.413	3.149	3.236	4.608		0.994873	5.11962
23.2117	6.143	10.847	15.508	5.736	7.983	8.126	4.677	2.85	4.52	3.728	5.276	3.473	4.989	4.994	3.847	4.846	5.396	4.406	3.05	3.024	3.752	3.249	4.6	4.544	4.971	5.244	1.981	2.772	2.912	1.645	4.111	4.165		1	4.91766

## Sheet: Image45
X0	Y0	Y1	Y2	Y3	Y4	Y5	Y6	Y7	Y8	Y9	Y10	Y11	Y12	Y13	Y14	Y15	Y16	Y17	Y18	Y19	Y20	Y21	Y22	Y23	Y24	Y25	Y26	Y27		Ap-basal	Avg intensity
0	25.963	14.231	8.738	12.054	12.704	12.027	11.796	35.524	16.345	21.607	20.042	75.543	37.271	28.495	16.825	28.289	36.232	25.928	18.094	12.882	15.876	21.074	27.1618	19.265	21.5444	17.8777	15.5933	12.361		0	22.1908
0.119	22.875	11.504	9.17	11.585	13.438	10.372	15.299	41.439	19.943	27.572	21.312	85.372	47.142	31.538	20.058	30.163	40.587	21.87	25.381	15.411	15.829	23.481	25.0442	18.575	23.0686	28.2275	14.7943	12.282		0.00490055	24.4047
0.2381	27.508	17.003	15.55	15.238	16.098	12.289	16.72	38.819	23.492	35.54	26.409	98.322	53.961	45.191	21.631	34.337	42.228	33.014	23.959	22.347	15.083	27.534	26.0006	25.291	25.4912	18.4205	12.2814	14.883		0.00980521	28.0229
0.3571	33.323	16.966	13.597	18.557	20.213	12.968	22.098	49.267	31.322	45.964	30.616	103.054	62.051	45.535	30.058	35.091	56.599	34.686	34.667	24.212	21.208	22.834	32.7654	33.519	26.333	27.5236	13.3067	22.581		0.0147058	32.8898
0.4761	32.65	21.756	20.513	20.462	18.093	17.663	26.735	49.851	51.859	55.966	39.723	113.974	76.062	48.643	26.854	45.763	55.645	38.462	48.899	43.178	20.618	19.186	23.7693	33.613	26.7002	27.1063	18.7702	24.163		0.0196063	37.3813
0.5952	33.734	22.598	23.86	27.14	26.199	19.701	39.791	59.817	60.593	70.11	52.706	121.917	94.877	52.762	33.243	56.406	55.823	47.752	57.982	53.008	20.308	28.343	24.2687	36.371	26.2272	24.6353	17.894	22.001		0.024511	43.2167
0.7142	38.708	19.043	19.533	25.421	26.498	41.919	53.42	46.887	87.17	95.985	65.133	115.982	93.38	49.356	38.68	45.325	59.391	46.454	66.118	76.93	24.933	22.449	25.2267	32.287	38.0498	31.5206	16.0105	23.798		0.0294115	47.3431
0.8332	53.154	29.289	30.356	35.071	36.361	80.69	74.295	57.053	106.918	104.712	79.302	106.269	115.888	65.541	41.778	52.063	59.717	56.803	67.852	98.721	31.827	26.83	29.8019	41.163	40.5165	35.6103	19.4804	27.981		0.0343121	57.323
0.9523	47.81	32.13	28.211	37.558	49.157	109.756	101.983	62.451	115.578	123.877	94.236	117.26	117.64	75.128	40.424	63.645	59.964	48.322	85.562	122.73	40.951	24.288	26.86	48.466	41.4898	34.2162	20.8825	39.626		0.0392167	64.6501
1.0713	58.616	36.279	32.2	44.951	52.735	136.83	111.09	69.636	121.088	137.639	105.102	117.763	139.793	78.773	49.51	59.521	61.785	49.324	99.12	126.332	53.496	24.971	29.9362	45.478	42.3431	43.1939	25.5037	35.288		0.0441173	71.0106
1.1903	64.461	39.939	29.864	60.142	54.049	151.978	134.201	66.314	118.544	164.245	94.959	109.292	143.751	86.546	50.374	60.478	71.426	50.7	104.574	122.211	55.432	25.767	27.7575	60.241	46.6538	46.4946	25.0604	38.289		0.0490178	75.1337
1.3094	78.703	55.418	34.713	67.515	61.447	155.015	141.386	85.203	133.389	167.926	116.95	121.568	143.717	94.419	47.131	71.166	68.302	44.402	104.271	132.176	72.432	26.935	31.5412	59.121	60.0851	59.766	24.8327	40.941		0.0539225	82.1597
1.4284	77.839	51.89	38.127	64.678	71.117	161.103	131.602	95.932	138.423	167.57	122.161	108.126	153.401	98.097	63.515	75.068	70.196	45.189	122.236	134.386	78.701	24.726	24.8312	56.056	56.9469	48.824	33.2848	44.192		0.058823	84.2221
1.5474	76.92	54.221	41.087	76.879	74.588	185.623	168.069	96.067	135.774	173.747	130.822	109.634	157.819	107.3	66.815	64.92	73.737	43.786	116.867	133.528	81.087	15.243	34.9814	56.133	67.8887	65.5625	33.1791	44.318		0.0637236	88.807
1.6665	69.656	68.325	49.056	87.606	84.57	171.154	156.977	106.593	141.453	163.988	138.4	120.737	155.394	109.625	62.834	67.477	78.819	41.388	134.073	152.253	96.555	25.214	32.5052	59.329	65.0432	70.9977	32.9725	54.718		0.0686283	92.7754
1.7855	68.972	64.541	50.463	92.157	108.731	175.488	161.422	108.833	154.919	174.844	139.288	149.082	146.742	113.06	66.243	56.399	79.088	49.162	120.144	148.669	111.44	27.366	40.5267	60.972	62.7914	70.3792	32.0359	60.593		0.0735288	96.2268
1.9046	64.126	78.092	49.11	97.507	105.989	174.314	160.88	110.841	142.827	170.898	149.188	135.715	153.651	110.254	72.046	54.458	78.466	39.551	126.962	142.173	112.526	32.106	47.7426	67.75	69.3175	68.1302	28.8921	76.708		0.0784335	97.1507
2.0236	61.539	80.958	54.484	109.647	112.682	186.368	159.48	110.761	155.92	150.237	143.533	143.433	164.11	112.846	85.899	58.51	64.831	43.432	135.009	147.18	127.825	32.621	52.8422	62.342	70.6837	70.3796	48.8882	81.522		0.083334	100.999
2.1426	80.706	87.288	51.085	100.291	103.527	178.389	158.707	109.297	164.59	175.559	162.607	153.488	181.989	117.362	80.373	70.475	75.016	58.971	143.715	144.243	120.137	37.899	61.0536	67.357	80.4489	70.0572	49.0493	75.339		0.0882346	105.679
2.2617	90.736	90.718	52.267	112.713	126.274	180.606	152.087	127.824	162.961	168.748	141.248	153.88	180.855	116.249	88.711	63.532	77.479	62.774	149.981	147.656	120.98	42.672	54.3191	65.922	71.0752	73.6507	45.8704	75.617		0.0931392	107.05
2.3807	97.332	91.275	55.975	115.079	125.841	183.618	154.697	120.788	166.624	167.657	135.972	133.18	172.626	124.388	85.282	64.75	82.28	73.072	133.188	133.679	138.255	45.161	72.1477	65.719	79.5411	71.61	47.7704	90.015		0.0980398	108.126
2.4997	90.474	99.926	52.017	114.148	126.876	159.238	163.008	118.859	159.335	160.56	150.444	143.31	189.173	135.688	90.473	64.853	76.558	81.716	148.979	146.098	151.653	62.327	66.0629	76.627	81.3757	70.3158	60.8208	103.432		0.10294	112.298
2.6188	97.307	103.936	59.61	116.557	130.825	173.888	160.244	130.674	164.855	160.917	144.938	135.011	184.29	141.67	90.812	79.695	76.996	77.202	135.741	136.769	142.986	64.965	67.7754	65.179	78.1003	69.382	61.0929	101.511		0.107845	112.605
2.7378	111.959	102.158	66.869	122.795	133.496	189.525	157.057	120.854	164.66	159.046	140.48	127.981	183.861	120.589	109.499	72.397	82.727	87.065	153.173	143.927	140.857	69.01	77.4825	77.465	97.6214	81.614	60.4727	108.15		0.112746	116.528
2.8568	112.237	95.892	61.963	120.671	127.08	186.028	163.274	128.214	170.849	157.395	151.043	122.55	174.579	120.305	110.387	79.221	92.787	91.47	156.986	143.323	161.79	82.944	72.93	73.673	91.5197	76.0285	61.1889	112.327		0.117646	117.809
2.9759	111.279	97.744	66.533	128.305	136.918	183.081	167.709	119.917	171.908	160.813	153.005	122.219	176.007	102.584	103.725	81.897	118.795	91.642	165.192	136.132	148.456	104.501	87.4881	71.613	98.2811	75.642	69.6208	122.109		0.122551	120.468
3.0949	132.133	100.728	81.195	131.998	134.733	191.912	166.451	136.835	168.428	161.752	138.182	126.463	173.03	121.235	102.536	85.881	122.677	84.091	154.39	140.893	156.643	98.256	86.1965	87.43	95.4432	72.8664	58.4591	118.417		0.127451	122.473
3.2139	133.116	94.209	72.133	117.975	142.404	186.79	169.583	139.856	170.664	154.655	140.714	123.093	171.716	114.725	100.762	100.325	121.069	83.924	162.18	149.929	149.456	98.614	78.0058	79.905	91.2918	85.4905	54.4331	109.498		0.132352	121.304
3.333	127.626	113.79	81.702	121.845	124.036	184.152	181.374	128.81	156.616	146.626	150.963	114.914	168.951	110.789	99.481	102.62	131.143	79.095	159.684	147.765	145.819	97.514	76.7125	71.843	98.8519	71.3829	57.6803	127.903		0.137257	120.703
3.452	135.595	108.77	84.185	120.591	132.998	181.673	173.957	120.74	155.644	143.405	150.773	118.429	159.614	115.073	117.481	95.341	123.763	89.281	159.466	156.925	158.902	112.946	83.7981	80.997	95.2653	69.8277	62.8676	113.332		0.142157	122.201
3.571	141.544	108.589	92.924	133.206	137.312	187.232	182.718	121.734	161.352	155.288	155.409	115.758	165.56	118.315	111.498	102.815	120.597	87.78	168.416	139.06	145.294	123.375	84.9363	83.021	102.266	78.5393	70.8695	120.084		0.147058	125.553
3.6901	138.197	121.795	79.485	121.607	123.469	194.305	184.006	129.149	168.981	150.999	161.971	119.764	158.953	112.035	103.439	103.795	115.734	93.397	153.016	140.09	150.826	117.166	84.0414	89.918	88.0331	79.6267	68.8802	116.434		0.151962	123.897
3.8091	136.933	110.51	97.078	124.219	137.433	188.002	185.382	123.349	168.455	165.915	153.316	117.354	148.807	125.33	111.124	77.139	121.469	112.016	155.735	142.002	159.269	129.675	87.7909	85.262	90.2133	73.8484	71.0604	129.176		0.156863	125.995
3.9281	141.977	116.835	101.599	135.563	130.268	178.223	187.575	132.355	172.931	165.439	158.905	104.148	148.292	115.948	122.137	83.403	126.476	116.303	124.852	134.962	151.179	134.272	86.3375	88.666	86.6421	79.3522	72.3069	114.514		0.161763	125.409
4.0472	123.503	122.002	103.859	120.144	116.143	179.716	175.886	125.353	160.44	161.03	149.898	108.769	143.435	128.712	105.339	76.283	118.167	121.204	141.553	138.59	134.371	143.645	84.7103	97.534	86.1976	72.2211	69.7296	106.766		0.166668	121.971
4.1662	121.167	130.738	109.188	135.991	122.911	192.892	181.413	121.176	161.268	158.478	139.827	102.987	147.873	132.64	108.489	71.33	124.316	132.157	119.667	131.178	149.352	133.467	88.8025	99.198	93.7369	74.3083	58.0879	110.665		0.171569	123.332
4.2852	117.198	143.461	123.284	124.736	114.92	185.329	187.046	123.716	140.223	164.772	128.751	98.699	144.975	136.747	103.237	65.534	120.501	136.897	105.041	144.68	132.743	141.364	95.1704	103.337	92.0986	72.5417	60.4421	112.164		0.176469	122.129
4.4043	118.416	148.069	125.831	128.073	116.852	171.226	179.459	121.758	145.071	162.004	116.706	88.237	136.679	134.655	90.332	70.146	104.366	131.693	118.231	121.695	126.558	138.432	87.4682	116.451	84.0553	77.4633	58.1286	113.585		0.181374	118.987
4.5233	111.556	140.21	125.519	129.005	129.379	179.895	182.516	123.738	145.204	161.475	117.017	81.92	136.637	111.585	89.241	77.719	120.634	130.936	103.27	123.136	121.437	120.743	85.0309	108.726	90.2972	71.347	63.8072	114.942		0.186274	117.747
4.6423	96.348	144.16	130.233	120.072	137.838	184.627	174.12	115.873	140.869	153.061	120.452	82.637	143.378	125.891	87.734	74.542	115.139	127.849	102.516	114.586	122.451	134.376	88.5921	104.02	83.0651	81.6702	57.8779	115.876		0.191175	117.138
4.7614	116.246	146.716	149.993	114.006	106.504	177.193	175.229	107.136	124.18	151.229	115.437	75.106	140.252	121.609	85.632	61.865	115.653	127.732	99.709	112.393	118.786	128.342	64.5653	113.725	84.3795	68.0705	59.7334	118.025		0.19608	113.552
4.8804	110.89	167.802	148.488	111.241	117.026	176.233	167.798	104.21	118.42	142.691	116.165	61.286	139.2	117.532	88.061	68.092	99.415	129.463	90.681	122.472	110.175	110.477	68.8951	105.078	82.6637	63.1467	56.7974	121.726		0.20098	111.29
4.9995	106.758	146.534	148.581	116.54	111.143	177.293	169.975	97.14	112.711	141.734	117.541	76.048	134.736	116.591	81.461	63.605	85.378	129.427	89.762	113.577	111.629	119.981	74.5944	108.534	79.7527	63.9537	59.3745	130.268		0.205885	110.165
5.1185	101.61	155.437	152.83	124.237	121.038	177.196	159.169	87.887	111.284	133.651	114.308	69.055	130.409	109.848	85.073	62.787	85.696	114.176	74.963	124.277	101.836	111.801	71.4331	104.684	77.1807	64.9958	58.2229	118.598		0.210785	107.274
5.2375	92.911	154.987	152.177	102.723	115.376	184.638	165.999	82.695	104.065	142.169	118.724	63.573	143.261	100.778	86.284	71.667	84.468	105.091	81.206	104.856	99.251	111.106	66.3323	99.326	78.9519	65.5666	55.984	112.115		0.215686	105.224
5.3566	108.147	158.559	146.159	109.821	120.023	176.062	162.834	75.142	114.704	131.291	121.87	56.518	120.151	113.438	88.243	60.416	92.014	106.338	75.823	105.953	102.012	102.681	71.1753	101.158	83.6483	66.3152	51.5301	110.089		0.220591	104.718
5.4756	88.611	146.083	148.16	109.439	124.757	175.785	164.86	81.694	110.251	139.966	117.653	61.696	114.24	95.199	89.303	66.361	88.27	91.918	78.499	109.171	96.203	104.668	71.3761	93.262	88.8655	59.9645	56.6003	98.5		0.225491	102.548
5.5946	105.937	133.966	131.534	100.89	123.083	180.858	163.664	78.972	105.911	135.467	100.786	55.358	125.557	93.131	81.386	72.183	84.745	93.496	75.869	103.043	90.338	108.628	65.7267	86.73	77.4002	62.3272	52.2246	99.526		0.230392	99.5977
5.7137	97.906	127.899	140.82	99.744	120.551	173.49	174.812	81.6	108.286	134.083	107.369	59.715	114.588	90.834	82.493	65.886	86.799	94.937	87.648	94.159	76.391	117.981	63.1244	105.16	80.0755	58.1849	53.0046	96.671		0.235296	99.7933
5.8327	86.714	145.065	142.154	93.735	129.472	187.042	174.643	64.961	103.606	138.091	110.44	56.444	110.604	88.741	83.034	69.923	75.68	88.938	79.319	99.572	89.695	101.7	62.767	86.329	67.7979	51.3297	56.8347	85.629		0.240197	97.5093
5.9517	93.355	150.771	135.722	105.38	115.084	174.359	168.953	65.741	107.992	132.148	113.731	57.489	108.198	81.537	81.179	71.838	69.231	90.971	79.111	87.686	81.163	104.588	63.26	78.537	81.2721	60.5249	62.6388	87.33		0.245097	96.7782
6.0708	106.83	133.695	135.023	87.331	108.333	181.418	163.104	74.87	96.178	136.17	107.82	56.513	106.484	81.891	81.987	67.031	67.353	90.074	73.042	98.966	85.702	99.493	57.9849	92.249	75.0064	59.5629	58.7635	77.152		0.250002	95.001
6.1898	82.315	135.708	125.036	92.613	109.006	177.953	153.635	69.224	104.408	125.079	106.57	48.397	97.927	89.4	72.074	73.326	76.725	77.432	66.727	95.89	81.691	96.595	66.1901	76.79	75.4874	60.3599	62.8445	78.062		0.254903	92.0523
6.3088	84.014	119.585	126.748	85.845	111.453	183.336	165.396	69.393	96.691	127.96	114.417	51.898	94.874	79.413	76.979	72.476	76.219	66.519	74.963	97.519	80.996	85.558	57.815	67.858	66.7968	53.4853	55.3163	67.708		0.259803	89.6868
6.4279	83.395	118.331	114.523	99.043	98.523	182.702	158.755	72.256	94.522	131.857	110.426	45.148	83.191	78.641	60.417	69.459	62.574	69.662	78.91	86.208	71.748	93.49	59.8186	72.545	67.0396	55.9924	60.8427	54.813		0.264708	86.9583
6.5469	76.805	109.49	105.029	80.334	107.101	174.488	158.135	63.342	89.809	131.3	112.036	43.781	68.579	83.702	66.723	73.113	54.331	65.282	78.761	82.796	66.85	90.043	57.4635	72.357	64.8656	52.2923	55.2996	60.633		0.269608	83.7408
6.6659	83.116	116.91	103.92	81.023	115.184	167.045	148.12	68.433	88.427	118.227	108.706	44.536	69.083	81.559	68.426	72.708	65.16	69.86	78.191	80.476	70.248	87.502	58.8552	61.933	60.7935	61.0982	54.3948	50.314		0.274509	83.366
6.785	84.19	119.84	91.085	76.642	106.858	174.592	154.874	72.845	95.282	123.482	96.188	53.943	61.671	91.167	64.1	66.483	49.617	72.634	76.402	72.005	65.91	83.085	58.0068	65.633	66.3791	59.94	49.6295	45.993		0.279414	82.0884
6.904	78.281	119.038	99.202	71.626	85.656	171.324	137.078	71.968	101.462	115.738	96.317	45.255	65.737	86.837	60.826	60.967	61.267	73.485	72.839	66.123	68.958	78.425	53.8925	57.219	59.9013	53.3789	48.4433	51.692		0.284314	79.0334
7.023	88.799	127.992	102.022	74.87	86.555	162.958	133.745	70.424	94.225	123.797	100.64	57.326	74.834	78.245	63.901	55.042	62.655	68.068	77.344	64.627	79.588	68.408	63.6283	56.853	58.1781	58.8372	55.3503	49.999		0.289215	80.6754
7.1421	82.634	118.398	78.2	71.999	92.393	160.272	131.003	67.078	92.482	111.763	91.417	51.277	62.984	80.993	66.116	64.357	56.549	74.812	68.663	81.659	58.098	69.145	57.6489	57.335	60.5198	70.4773	45.6776	53.311		0.294119	77.7593
7.2611	86.665	119.71	96.232	73.456	83.655	146.501	125.863	65.434	86.868	111.053	84.876	43.327	68.444	73.288	55.811	61.857	57.605	65.752	76.134	82.947	62.389	64.442	49.6838	53.592	51.2157	65.0757	43.7347	55.495		0.29902	75.3966
7.3801	70.1	109.914	80.011	75.141	90.332	153.317	122.104	61.882	85.302	104.67	92.706	48.388	63.592	87.845	61.524	56.968	57.901	67.245	67.687	67.392	65.642	51.844	55.6069	54.838	53.4933	59.4471	38.4865	51.826		0.30392	73.4002
7.4992	78.004	88.973	86.015	76.429	86.913	160.222	109.786	63.608	91.171	102.08	90.949	50.292	65.704	78.835	65.491	68.882	49.431	62.914	67.042	71.685	70.54	56.597	55.6116	55.484	52.8135	63.1881	38.5795	51.472		0.308825	73.5254
7.6182	84.92	95.91	86.886	90.573	74.081	160.873	102.777	64.136	92.47	100.404	88.438	47.402	61.603	85.513	53.04	66.447	52.137	66.512	77.219	69.214	65.527	66.229	48.8653	59.941	49.869	66.3021	49.746	55.239		0.313726	74.3669
7.7372	82.144	93.912	92.512	71.491	84.643	171.13	101.827	56.545	81.978	95.836	64.617	51.693	58.227	67.326	57.384	56.169	46.411	65.963	81.816	80.315	51.361	68.284	55.6747	61.852	63.2572	59.3719	51.2401	60.126		0.318626	72.6109
7.8563	82.073	87.623	84.636	67.956	77.326	160.182	115.495	60.567	85.106	89.496	75.652	45.265	64.187	74.852	61.097	62.512	51.669	68.115	79.228	77.099	59.388	57.43	55.8669	61.358	51.4868	56.4861	58.38	56.685		0.323531	72.4006
7.9753	74.618	86.757	86.527	71.79	73.681	159.59	105.741	53.468	78.881	80.271	72.768	50.016	66.776	69.202	62.104	65.045	60.484	69.134	73.625	78.39	61.667	73.651	58.5731	62.371	52.1142	54.6544	42.7553	61.532		0.328431	71.6495
8.0943	77.234	81.99	81.148	69.301	80.939	151.501	112.132	49.321	77.576	68.425	80.65	41.378	71.235	75.261	62.704	70.706	61.228	68.335	85.159	63.66	56.514	64.027	55.4212	64.056	45.9431	57.4493	52.0352	66.817		0.333332	71.1481
8.2134	74.362	81.206	72.269	64.145	80.629	154.271	107.26	53.06	85.644	76.731	69.891	44.547	60.366	82.747	64.502	57.314	57.36	66.331	66.191	66.65	60.273	60.067	57.2133	71.776	51.4074	54.0036	52.7072	69.889		0.338237	70.1004
8.3324	72.083	77.134	73.137	69.679	75.311	156.15	100.338	48.871	75.207	75.234	65.685	50.48	58.502	89.037	55.264	60.99	56.531	61.27	66.658	71.473	65.114	61.107	53.2337	66.669	51.2884	50.537	47.493	54.796		0.343137	68.1883
8.4515	67.942	71.402	66.801	70.732	67.629	142.406	90.128	38.699	76.596	67.91	67.436	47.292	57.406	81.404	58.666	59.688	48.015	62.664	70.859	69.009	65.286	67.726	51.3657	62.91	50.4352	43.9982	46.5784	68.291		0.348042	65.6884
8.5705	70.566	72.819	63.404	72.736	73.162	144.85	87.613	55.064	75.12	64.161	60.583	45.134	60.666	82.713	58.035	52.385	45.204	63.785	67.063	65.043	50.959	56.408	59.4582	63.831	54.2524	45.3935	52.3324	52.873		0.352942	64.8433
8.6895	80.224	80.676	65.269	78.216	72.971	146.873	93.077	55.679	75.048	60.741	54.369	48.359	61.693	79.9	54.015	56.478	58.715	63.086	76.433	64.985	53.12	58.134	50.9118	68.324	43.6621	50.8823	51.2773	60.614		0.357843	66.5619
8.8086	71.233	72.422	57.023	81.044	75.046	149.482	76.762	52.971	79.404	67.87	60.038	45.49	54.572	78.119	54.426	55.425	50.416	48.041	68.993	56.508	50.231	62.499	54.2989	49.921	49.3789	45.7996	49.6565	45.829		0.362748	62.9607
8.9276	67.361	74.355	68.687	71.021	73.112	145.681	78.699	57.252	75.109	65.749	62.274	45.767	59.723	72.792	49.775	49.523	56.555	61.315	69.516	58.03	63.345	60.356	54.6874	65.088	49.3488	46.2264	56.2835	54.539		0.367648	64.7204
9.0466	75.253	73.482	62.814	68.596	74.481	124.159	100.959	54.25	67.965	70.858	58.769	51.937	74.888	66.805	47.892	55.493	59.917	57.503	66.011	54.983	49.714	57.416	46.7845	65.876	42.9072	50.146	56.1464	54.546		0.372549	63.9483
9.1657	69.408	73.877	64.137	80.111	64.174	116.875	89.177	52.743	74.346	71.437	62.997	59.793	56.544	70.706	51.884	62.44	59.699	59.607	64.7	56.246	43.719	60.412	51.5508	68.018	50.24	48.6723	56.9353	58.595		0.377453	64.2516
9.2847	73.268	64.817	60.648	71.797	79.239	99.207	87.159	48.936	76.588	56.134	60.886	56.34	69.26	60.66	53.379	57.243	51.104	48.035	71.667	53.006	50.754	53.756	44.4011	67.225	44.3147	55.7451	60.0032	57.094		0.382354	61.8809
9.4037	75.27	65.57	66.293	88.964	73.306	95.387	78.428	40.738	79.372	65.055	61.913	58.279	66.536	63.799	49.033	52.15	57.174	58.391	61.704	54.59	50.87	54.27	49.1414	70.861	52.0782	56.8332	51.9597	54.062		0.387254	62.5724
9.5228	71.885	60.203	73.02	72.351	65.474	86.004	95.495	46.816	79.836	64.85	53.62	57.416	67.2	52.682	54.927	54.229	62.768	58.652	56.923	50.703	50.747	54.622	48.9033	55.871	41.7553	54.8351	52.8628	71.136		0.392159	61.2781
9.6418	65.102	64.738	64.662	72.992	74.45	82.025	81.67	45.915	72.963	59.803	56.912	61.924	68.755	62.616	51.781	53.99	55.909	50.35	67.282	44.911	44.833	54.066	54.7156	56.823	41.1537	52.7259	46.7049	61.434		0.39706	59.6859
9.7608	63.127	56.898	70.388	65.281	70.078	77.427	83.284	47.746	70.004	63.888	50.808	61.607	55.926	57.015	59.461	50.961	61.388	51.616	57.504	49.546	42.806	55.835	53.9158	56.076	44.4145	59.919	47.1153	48.614		0.40196	58.3089
9.8799	58.788	51.672	58.638	69.883	62.418	87.102	82.391	52.635	81.81	60.6	64.973	53.037	65.297	58.018	54.092	45.829	52.712	44.151	59.913	46.888	42.795	43.075	49.8278	60.983	42.6165	50.7513	42.6194	58.621		0.406865	57.2191
9.9989	69.792	64.959	59.755	67.087	53.162	71.141	94.038	53.563	74.85	57.148	51.005	53.651	61.761	47.423	58.503	53.833	59.699	42.87	50.159	48.418	43.629	45.448	60.5449	59.585	51.2136	54.8987	40.3048	62.773		0.411765	57.5434
10.1179	69.722	55.229	61.58	72.987	59.371	72.788	94.451	47.407	76.699	52.574	56.948	44.286	51.545	56.377	51.652	48.786	62.204	47.514	58.649	54.242	33.97	53.898	50.3825	68.185	49.0166	60.8726	44.7491	55.313		0.416666	57.5499
10.237	63.111	59.235	69.838	76.643	55.298	72.248	78.595	44.253	73.548	63.883	50.22	49.215	53.05	55.612	57.687	50.51	50.405	39.27	56.226	46.413	43.697	41.634	50.0421	69.967	47.4311	56.399	45.4328	57.079		0.421571	56.3194
10.356	58.769	51.964	61.078	72.509	56.227	71.975	89.274	49.416	59.81	53.556	55.863	58.714	51.273	57.865	55.449	53.662	53.088	41.966	59.169	47.636	40.778	45.982	51.3412	67.978	51.6551	50.5633	43.8437	52.305		0.426471	55.8468
10.475	62.095	54.555	60.793	74.397	52.082	81.557	83.798	47.202	64.056	60.316	68.106	63.052	51.472	56.594	54.038	48.15	62.004	45.079	58.185	51.945	35.881	40.195	50.5116	80.776	52.5861	67.5593	48.8406	56.176		0.431372	58.2858
10.5941	69.192	54.319	61.857	73.754	62.415	64.65	84.563	50.984	68.818	56.787	68.998	60.293	47.087	56.141	60.233	45.518	60.978	48.214	53.43	45.367	37.272	44.389	51.9483	69.334	54.4386	65.135	55.8214	56.599		0.436276	58.162
10.7131	66.349	41.57	67.327	59.789	50.887	69.86	85.921	50.187	65.469	58.691	62.356	55.313	49.66	52.607	55.75	43.702	61.028	43.877	53.381	48.097	38.435	33.93	56.759	75.634	55.925	61.5264	51.59	56.107		0.441177	56.1331
10.8321	73.725	47.63	63.481	71.183	63.643	62.939	82.751	44.758	63.949	60.686	61.147	51.436	48.302	49.802	59.387	47.062	59.553	46.666	51.767	50.244	35.649	43.712	44.7075	68.701	50.1314	52.7943	50.9777	61.569		0.446078	56.0126
10.9512	74.676	44.669	58.537	69.472	67.415	58.758	70.353	51.787	57.642	65.776	56.194	53.327	53.756	54.438	54.643	46.975	56.212	53.723	59.471	52.437	31.385	33.131	57.5006	68.944	60.543	49.0814	44.8606	57.086		0.450982	55.814
11.0702	71.304	40.264	64.457	72.581	63.037	56.29	77.292	43.702	60.311	61.63	58.347	55.512	50.202	54.312	57.976	34.531	56.488	52.152	58.704	36.005	31.789	27.897	53.1113	69.483	50.8968	48.3515	48.3236	64.902		0.455883	54.2804
11.1892	78.696	36.045	57.09	71.644	63.328	60.042	79.113	51.986	57.284	52.813	68.51	58.709	54.655	45.357	55.671	44.675	57.209	46.817	59.818	45.692	26.812	35.284	49.8243	75.807	56.2903	50.3959	48.7787	61.901		0.460783	55.366
11.3083	73.111	39.957	53.859	64.054	66.277	52.905	79.672	48.697	56.689	54.011	55.201	60.942	51.2	48.586	55.497	36.434	54.055	53.784	55.993	41.739	28.678	29.624	44.2782	71.534	45.0696	58.221	48.9074	61.004		0.465688	53.2135
11.4273	78.509	40.148	51.1	66.068	60.825	68.078	69.548	55.266	55.298	37.248	48.28	54.12	57.524	57.65	59.137	39.94	51.572	56.399	56.339	40.593	27.134	24.701	48.0209	81.034	43.385	58.7897	49.0025	61.789		0.470588	53.4821
11.5463	64.693	41.02	60.105	50.395	60.416	64.369	78.711	40.865	60.255	42.913	47.774	51.471	46.079	57.771	49.723	39.957	48.164	54.532	62.48	49.739	25.903	30.669	55.5884	79.877	47.0471	50.5157	41.9621	63.479		0.475489	52.374
11.6654	71.151	35.819	45.6	61.266	66.611	73.748	73.303	42.364	62.627	46.215	51.225	53.201	55.574	58.428	50.011	40.809	43.91	49.414	62.595	42.461	23.312	27.132	57.4464	75.864	54.9624	48.3571	47.0683	56.527		0.480394	52.75
11.7844	67.145	35.458	41.054	55.908	58.418	68.736	65.781	41.583	57.949	40.592	49.34	46.887	46.708	57.899	44.898	37.865	49.405	53.839	58.561	43.841	28.179	23.957	50.4834	78.486	48.8238	51.4649	49.7245	61.243		0.485294	50.5082
11.9035	65.764	38.264	38.318	67.072	74.158	73.487	62.926	47.064	56.044	43.732	45.342	60.45	50.379	62.206	47.534	37.131	45.173	58	55.88	41.401	21.853	29.121	51.1742	67.341	54.0029	49.2478	44.9888	66.736		0.490199	51.9568
12.0225	68.477	32.437	41.652	81.895	73.312	74.57	70.261	39.954	50.2	45.586	49.773	53.839	46.028	58.312	41.118	35.198	53.076	54.471	55.645	37.753	18.188	30.291	52.9925	78.67	49.2371	49.2065	46.4208	56.782		0.495099	51.6195
12.1415	69.276	28.021	38.719	70.106	68.584	77.162	60.711	42.727	56.622	33.757	50.159	54.097	48.918	67.471	49.021	37.798	52.077	53.165	52.796	34.582	17.756	23.638	58.3306	78.768	51.8517	58.4923	50.4165	63.728		0.5	51.7411
12.2606	64.724	25.12	33.977	62.214	69.827	63.635	71.285	42.899	54.943	37.488	48.087	55.148	51.268	68.76	43.757	36.088	45.375	55.056	57.559	30.842	20.709	27.07	50.8646	72.618	45.7674	48.0903	53.74	69.972		0.504905	50.2458
12.3796	65.22	30.967	34.749	67.563	67.871	64.368	69.055	48.93	59.778	41.296	44.477	53.14	49.959	69.768	47.565	42.569	42.912	54.131	58.887	34.245	20.753	24.772	51.1719	79.798	40.9448	48.8698	47.3912	59.252		0.509805	50.7287
12.4986	64.102	27.203	33.448	74.498	67.106	65.175	62.964	52.353	58.626	36.45	49.959	51.473	51.889	63.144	44.811	40.524	50.378	57.891	49.644	32.761	15.546	20.059	53.2108	80.7	44.7971	49.1456	49.3969	54.583		0.514706	50.0656
12.6177	62.411	24.753	35.216	69.334	69.308	64.977	70.619	46.203	59.465	40.346	49.679	50.768	53.585	71.372	49.3	40.351	45.938	54.682	50.892	35.367	17.311	24.493	47.5989	75.118	44.1579	59.294	45.4047	58.168		0.51961	50.5754
12.7367	61.391	30.116	25.465	65.432	75.093	59.292	65.762	49.535	57.574	36.778	42.539	48.462	51.756	78.19	47.215	36.96	43.994	56.037	51.52	33.617	17.15	22.117	46.8789	75.225	43.4353	53.0195	41.0581	50.446		0.524511	48.7878
12.8557	65.098	30.964	34.265	57.374	66.141	68.025	60.65	39.724	59.312	39.221	42.949	59.381	45.047	64.075	42.59	42.719	45.444	54.611	58.856	28.237	16.376	26.061	51.2495	75.021	45.5261	55.7144	47.0519	63.26		0.529412	49.4622
12.9748	65.3	26.824	30.306	64.218	63.573	70.966	68.727	42.699	64.585	38.642	46.499	47.529	58.012	65.401	42.749	38.628	45.422	54.151	49.669	28.288	13.346	21.406	45.3391	70.864	40.1713	59.291	49.6061	56.95		0.534316	48.8986
13.0938	60.693	31.07	30.75	64.662	72.852	70.506	68.971	49.699	58.772	40.725	44.578	46.473	48.569	74.188	52.708	41.342	37.752	52.111	50.78	28.896	16.327	20.203	56.9441	60.245	42.6528	48.0255	49.6121	56.681		0.539217	49.171
13.2128	56.953	27.594	32.001	70.2	78.322	70.834	68.793	42.403	62.609	41.644	39.128	49.993	46.397	71.485	50.21	44.84	45.322	56.356	59.409	33.852	14.234	16.841	50.9589	56.787	44.0728	49.7931	48.7982	63.346		0.544117	49.7563
13.3319	57.346	26.648	30.91	63.568	66.137	62.86	70.318	48.607	69.064	35.902	43.499	44.382	48.765	61.748	53.629	48.892	46.506	58.144	63.513	27.18	17.807	18.624	56.6245	62.372	40.9823	44.6241	47.1605	62.094		0.549022	49.2109
13.4509	58.93	25.41	32.28	70.303	65.266	61.286	80.273	47.287	60.764	36.733	48.858	48.901	43.087	60.002	60.302	41.714	37.138	49.358	59.337	27.535	17.704	21.854	52.658	61.722	47.3653	54.3906	43.9625	51.625		0.553922	48.7873
13.5699	65.931	24.785	24.88	70.173	57.067	55.594	67.657	50.325	70.131	41.298	45.685	42.362	46.225	58.449	63.572	38.573	45.583	50.157	56.044	28.642	13.666	24.234	61.7555	53.412	40.2171	56.3114	54.1286	52.62		0.558823	48.5528
13.689	55.337	23.034	19.709	55.949	72.042	55.138	62.692	46.66	67.431	35.993	46.383	45.798	45.712	59.266	68.16	45.518	49.458	52.726	55.171	33.201	15.219	20.675	52.3412	64.411	46.0826	56.1935	46.9562	58.709		0.563728	48.4273
13.808	49.537	22.367	24.684	61.068	70.873	53.534	60.102	48.632	73.918	41.032	42.539	30.862	44.98	51.089	59.641	40.66	42.736	51.054	58.916	36.164	16.164	24.094	64.4581	58.67	50.7979	64.4316	41.4785	60.268		0.568628	48.0268
13.927	53.557	24.173	23.09	69.646	67.144	57.485	71.427	41.95	75.085	42.804	50.121	41.905	54.913	56.975	62.439	44.871	45.268	60.972	57.053	38.313	13.758	16.816	55.5733	52.608	49.6436	53.4022	52.7495	55.709		0.573529	49.6232
14.0461	48.801	23.966	25.665	68.858	64.93	54.689	66.554	41.857	65.192	36.848	46.853	41.418	48.361	50.027	67.266	43.367	47.582	57.242	57.975	32.652	13.262	23.02	54.2919	61.755	58.6888	56.4535	47.5029	46.37		0.578433	48.266
14.1651	44.701	21.712	25.786	63.59	67.266	51.547	57.075	49.691	62.844	34.909	48.267	34.067	49.114	56.248	68.464	35.4	44.552	56.09	70.6	34.117	12.933	23.371	52.2737	53.336	61.5615	65.6874	54.3877	53.479		0.583334	48.3239
14.2841	47.993	25.793	24.95	70.213	66.158	55.924	75.012	50.56	58.511	43.166	46.187	41.742	54.629	49.15	65.071	45.927	44.2	56.238	59.417	29.844	16.882	14.538	55.8891	58.59	56.0195	56.3802	48.673	48.336		0.588235	48.7855
14.4032	53.527	25.089	30.959	67.584	70.148	53.194	74.491	48.62	60.205	35.706	44.245	39.809	55.499	55.904	67.773	55.769	30.816	58.756	70.907	31.418	12.424	23.733	53.5868	58.603	54.915	50.6424	42.2887	51.89		0.593139	49.2322
14.5222	62.356	18.964	25.808	58.756	68.465	56.94	61.803	46.276	66.899	43.968	39.431	36.545	57.154	54.863	76.543	43.371	38.258	61.476	67.018	31.899	14.661	16.117	45.7582	53.456	50.0736	55.003	43.0469	51.728		0.59804	48.0942
14.6412	57.847	21.007	29.332	67.514	65.11	52.547	66.818	49.202	65.372	41.906	41.047	29.745	52.968	62.184	67.911	45.839	39.057	69.047	65.295	32.898	14.809	16.532	51.2965	59.503	54.2111	71.7597	44.7644	47.013		0.60294	49.3762
14.7603	60.18	19.843	28.187	66.027	66.482	61.31	66.416	48.571	69.094	38.975	39.415	39.949	58.255	53.069	70.315	51.276	33.09	65.615	68.804	31.285	12.784	18.989	50.2554	71.905	57.1715	52.7195	44.9067	49.519		0.607845	49.8003
14.8793	55.407	22.866	27.065	52.91	68.216	56.605	51.47	39.114	73.233	44.308	41.36	34.04	53.975	50.434	58.183	48.912	43.086	59.804	62.16	32.345	10.54	22.635	43.528	71.124	58.2183	56.6114	42.5009	59.299		0.612746	47.8553
14.9984	57.982	24.118	31.071	56.367	61.945	64.537	58.089	45.379	69.793	43.511	45.387	39.866	53.156	57.48	67.957	48.637	33.107	64.912	66.076	27.859	12.591	18.908	43.2799	59.76	63.6682	50.3692	45.2545	58.14		0.61765	48.9
15.1174	60.715	28.058	26.605	62.076	60.455	57.031	62.707	45.083	66.976	44.663	47.091	41.119	54.222	57.515	59.193	52.249	41.059	69.181	65.216	28.302	15.861	25.017	40.8612	55.03	57.5831	52.4644	44.5988	47.843		0.622551	48.8848
15.2364	44.868	20.06	25.777	58.236	68.66	63.24	56.311	52.675	70.295	38.052	43.564	34.709	57.04	52.819	71.253	52.618	31.955	65.516	73.242	27.54	14.488	18.446	48.2615	65.649	57.3951	52.0521	56.4598	47.421		0.627451	48.8787
15.3555	47.53	22.819	25.682	57.088	68.767	61.158	53.925	45.015	64.497	40.77	45.828	44.245	49.748	58.714	75.746	54.363	30.243	63.921	68.565	29.059	16.641	21.952	51.2374	62.317	55.8403	54.238	54.3908	50.743		0.632356	49.1087
15.4745	56.512	24.237	24.108	57.464	69.201	59.907	44.874	40.184	64.058	49.773	46.115	39.812	52.934	54.007	72.524	52.626	34.382	58.747	53.305	27.217	13.991	20.826	51.9661	69.227	62.3022	55.3136	55.7898	42.388		0.637257	48.3497
15.5935	47.302	21.391	27.14	54.813	70.858	69.911	49.028	50.357	61.988	46.444	36.113	39.497	57.81	53.282	63.892	52.896	36.179	62.738	56.791	24.672	17.945	24.193	49.0014	68.408	61.5764	48.5346	56.4886	45.824		0.642157	48.3955
15.7126	52.055	31.274	24.635	58.587	75.717	80.117	51.977	41.402	61.847	40.337	44.835	43.833	53.568	54.552	65.68	47.325	42.745	59.338	53.649	25.616	16.316	23.04	48.2051	72.033	56.7344	53.7491	56.2193	51.233		0.647062	49.5221
15.8316	45.68	24.37	34.747	62.183	72.407	62.558	51.652	38.978	56.021	42.788	51.043	42.265	48.922	55.88	62.108	58.476	37.29	56.1	60.846	32.059	17.207	26.439	45.3517	69.783	64.1068	58.9551	42.5133	41.98		0.651962	48.6682
15.9506	50.384	28.856	33.091	53.237	60.804	65.293	46.936	43.011	52.858	46.65	45.719	44.598	60.16	59.601	62.078	44.648	39.484	57.475	56.554	29.52	15.496	19.254	43.8067	77.779	64.8121	58.6341	47.2662	38.066		0.656863	48.074
16.0697	45.948	25.84	33.551	51.915	71.836	66.37	41.451	37.144	53.045	48.273	46.391	48.956	52.769	58.237	52.795	54.39	46.964	52.459	51.337	28.758	14.392	20.599	44.5476	76.374	58.5411	51.4174	40.9353	46.31		0.661767	47.1981
16.1887	60.019	25.587	29.88	54.38	75.919	70.126	49.277	42.61	56.751	50.712	40.049	44.728	49.362	54.43	45.395	50.203	44.007	60.391	59.011	27.341	17.203	20.537	50.0699	73.731	55.5073	56.8082	45.2284	48.329		0.666668	48.4854
16.3077	55.556	31.23	38.711	52.549	73.591	64.183	45.254	47.991	49.07	51.023	40.277	40.822	44.771	60.058	48.596	47.89	40.783	70.086	52.257	28.63	18.804	22.446	44.5434	73.661	62.7146	60.1945	36.0614	51.218		0.671569	48.3204
16.4268	59.779	27.028	41.379	68.635	87.226	58.337	39.99	40.616	57.536	53.121	37.287	43.668	45.203	56.411	51.704	48.418	44.957	53.657	51.925	34.883	18.293	19.887	41.0372	70.338	65.2177	52.8381	41.0884	37.272		0.676473	48.1333
16.5458	54.241	29.438	40.556	65.744	83.952	57.571	40.494	38.312	46.555	48.806	48.453	49.289	44.767	50.861	55.485	53.788	43.307	63.878	53.083	33.108	21.291	17.506	50.5763	66.694	61.0858	58.2727	46.7086	48.161		0.681374	48.9994
16.6648	53.254	28.937	47.144	64.924	79.458	54.579	40.721	35.916	44.385	45.175	46.091	41.682	48.472	49.049	48.873	43.781	42.491	65.544	42.414	27.631	22.876	24.933	47.2351	67.837	69.56	56.1034	47.7865	52.556		0.686274	47.836
16.7839	50.302	32.897	47.749	66.567	82.956	58.141	45.119	43.188	45.104	39.396	40.051	44.293	48.416	57.78	41.383	43.526	39.959	59.209	45.506	36.038	15.93	22.642	45.2798	62.034	68.3137	52.5736	40.4092	44.271		0.691179	47.1083
16.9029	54.148	32.485	56.665	70.084	70.157	71.173	41.56	50.203	51.501	49.191	44.596	42.104	43.363	51.174	48.55	46.152	42.206	56.725	53.093	39.653	19.699	24.716	51.4904	65.118	73.6845	59.8598	48.223	41.75		0.69608	49.9758
17.0219	49.258	34.154	52.319	69.268	74.238	61.193	39.325	39.774	49.065	50.809	46.893	49.173	42.656	58.381	40.915	43.443	39.134	58.853	65.172	36.905	20.138	29.559	45.1044	63.005	71.938	56.1815	37.5952	42.275		0.70098	48.8116
17.141	48.324	37.846	54.352	68.69	72.144	62.704	41.014	46.534	39.974	49.381	49.902	47.757	41.513	56.065	41.906	39.946	45.55	54.577	62.243	39.394	18.048	22.477	51.0671	63.354	66.9629	56.3419	48.0719	41.121		0.705885	48.8307
17.26	51.097	45.638	56.148	71.967	73.889	61.792	43.17	49.958	39.942	56.684	53.662	49.485	32.55	50.833	44.983	38.601	45.479	61.439	53.89	41.593	19.565	25.814	50.781	59.253	64.7691	52.7003	41.4376	51.899		0.710785	49.6078
17.379	50.275	42.9	58.994	76.482	75.168	65.305	43.071	45.405	46.959	52.304	46.308	47.963	37.015	47.37	45.211	40.354	49.687	60.458	50.762	46.993	19.949	28.819	49.6788	62.742	72.7976	47.0542	47.6491	54.169		0.715686	50.423
17.4981	54.716	48	63.28	71.119	63.112	63.849	45.583	49.114	47.582	57.623	45.646	42.228	39.278	53.102	42.021	39.924	42.173	56.413	53.663	42.497	13.07	32.507	47.4066	57.826	74.8628	55.858	49.0918	45.767		0.720591	49.904
17.6171	52.824	57.187	58.958	75.833	62.149	66.122	45.807	47.162	42.087	47.261	40.924	44.038	48.057	54.501	40.615	45.838	54.348	64.008	59.847	43.702	21.88	29.338	50.773	68.952	81.7429	51.6547	58.2363	43.407		0.725491	52.0447
17.7361	59.232	60.121	67.972	78.936	64.032	58.213	42.603	46.429	48.742	52.896	40.846	38.741	44.306	53.67	49.827	47.127	46.89	59.651	57.495	43.513	18.558	26.082	49.7629	65.437	71.7599	48.9533	50.3218	44.713		0.730392	51.3154
17.8552	63.146	50.149	68.464	79.002	67.105	72.29	35.916	48.667	40.641	48.388	42.487	38.248	44.348	49.501	33.961	44.906	49.884	69.783	60.359	46.703	17.657	34.445	48.7656	55.949	66.8773	50.5332	52.4401	51.969		0.735296	51.1637
17.9742	66.813	48.232	67.699	88.065	79.895	73.117	43.498	49.745	47.437	62.89	54.069	43.596	43.867	56.971	52.703	37.75	49.601	73.26	54.093	42.511	23.596	36.39	50.362	56.25	60.4191	52.0809	49.3689	54.721		0.740197	54.25
18.0932	67.142	60.157	61.14	80.002	72.809	72.272	45.912	56.236	43.66	62.881	51.331	50.462	48.865	63.759	49.742	50.537	39.848	68.771	56.051	45.764	22.238	33.572	50.0052	58.622	69.061	52.8641	51.0775	65.772		0.745097	55.3769
18.2123	73.501	66.14	63.73	73.655	64.95	72.179	53.827	52.77	41.043	75.643	61.597	47.772	53.507	56.36	46.412	43.029	44.382	64.955	50.203	55.502	23.648	35.229	49.8533	62.969	62.4647	47.0701	48.6361	51.473		0.750002	55.0893
18.3313	79.592	61.962	75.69	77.49	74.644	78.493	53.165	48.658	39.677	59.604	57.232	42.611	54.925	65.658	53.365	41.788	42.601	65.529	56.578	55.485	28.084	34.441	51.5792	62.612	63.1616	50.0203	54.1764	54.509		0.754903	56.5475
18.4504	80.854	69.89	80.875	81.004	69.629	73.698	50.482	54.145	42.123	62.108	53.331	47.885	55.904	69.365	47.286	48.786	42.89	65.205	59.384	63.025	32.074	48.206	46.7899	62.143	64.1396	49.5019	61.3353	59.7		0.759807	58.6342
18.5694	82.47	63.653	74.122	89.629	79.863	72.942	51.176	52.951	41.409	65.669	59.7	51.178	55.358	65.991	54.778	44.481	39.697	59.234	54.287	56.871	30.463	44.594	44.7283	63.821	61.4063	54.8609	51.7405	50.542		0.764708	57.772
18.6884	90.958	69.073	73.26	80.882	73.591	81.089	41.246	54.151	50.008	70.846	53.626	45.414	65.662	59.168	53.025	39.672	43.403	60.126	56.867	64.526	33.908	50.638	55.759	72.091	60.6431	45.8789	61.2613	50.215		0.769608	59.1781
18.8075	89.897	77.188	66.443	77.272	65.785	81.664	48.346	49.384	45.059	63.876	55.956	49.154	56.117	63.185	54.714	44.394	39.833	68.518	55.447	63.637	34.832	50.387	60.1277	64.699	70.7044	49.9844	50.3921	53.483		0.774513	58.9457
18.9265	87.02	82.513	71.118	78.132	66.742	82.038	57.592	57	40.134	53.104	54.274	56.297	55.266	62.424	62.3	43.188	37.1	59.592	53.972	62.305	37.037	48.587	50.6584	62.712	68.4394	52.8945	47.6426	45.123		0.779414	58.4002
19.0455	89.228	76.257	72.738	75.132	63.464	71.965	62.201	52.533	43.157	57.854	60.824	51.699	56.303	60.315	52.142	43.233	42.147	56.994	57.566	68.95	37.385	50.549	50.8327	59.251	65.3422	49.8383	50.4885	49.29		0.784314	58.1314
19.1646	91.979	63.75	63.63	77.276	64.547	72.888	55.821	51.184	45.302	57.234	59.462	48.039	52.403	69.798	51.703	43.674	38.381	61.679	63.166	72.142	40.214	49.104	55.0683	71.445	63.6015	53.8742	49.3146	47.235		0.789219	58.3541
19.2836	83.478	62.012	69.116	75.067	50.768	85.011	51.843	50.823	47.178	68.02	57.627	55.472	52.769	59.425	50.96	40.458	36.726	55.103	62.225	74.138	51.926	56.196	48.752	67.721	56.9033	47.7333	37.8669	48.535		0.794119	57.2804
19.4026	75.937	65.055	71.64	68.015	59.911	78.219	60.328	58.04	46.317	52.599	49.208	53.734	46.057	71.834	52.182	35.035	49.205	68.178	55.153	70.947	50.676	56.966	50.1634	66.153	61.9748	59.287	39.0212	43.105		0.79902	57.6764
19.5217	77.932	58.712	69.678	73.388	67.448	79.644	70.821	52.331	53.419	64.354	50.999	62.236	56.761	64.242	56.683	47.639	49.66	58.452	59.595	61.306	39.345	54.159	53.7881	58.043	62.1267	54.0722	44.1797	48.066		0.803925	58.8957
19.6407	76.068	56.565	65.99	70.28	66.228	78.845	66.619	50.22	48.085	65.05	54.206	58.667	57.244	77.607	50.28	42.09	49.58	58.053	64.106	62.153	37.696	51.378	50.4152	56.345	67.2551	61.8296	40.069	49.169		0.808825	58.289
19.7597	80.917	60.822	73.995	66.419	68.037	80.096	61.747	62.823	50.269	49.254	54.546	66.702	52.803	69.288	56.474	50.284	54.789	54.22	63.802	57.124	52.81	51.292	49.9598	57.319	72.4396	51.3657	28.2935	36.679		0.813726	58.3775
19.8788	77.668	53.797	66.667	62.92	71.197	66.436	60.284	61.703	54.885	59.623	48.66	64.17	42.764	60.741	54.811	48.589	56.814	71.558	68.527	60.432	54.17	48.314	44.6863	50.652	65.4916	47.5687	32.4521	44.847		0.81863	57.1581
19.9978	71.014	50.709	67.779	70.982	75.619	76.76	65.62	58.997	48.288	56.721	47.198	61.453	46.342	60.844	55.201	43.237	52.168	61.708	61.782	64.184	58.659	53.343	43.67	50.203	66.1774	49.772	27.0152	41.962		0.823531	56.6931
20.1168	66.994	44.928	73.972	60.227	75.659	77.178	63.664	58.181	49.779	58.89	48.833	54.659	42.9	64.046	51.623	41.187	54.336	67.239	66.922	67.443	53.966	59.56	48.7594	50.385	67.1304	47.7895	27.4713	37.378		0.828431	56.4678
20.2359	82.131	53.337	77.433	65.059	76.13	74.209	54.367	61.564	51.288	62.207	47.634	54.532	43.688	69.224	51.839	52.511	54.785	61.666	71.769	71.138	66.042	58.457	42.6743	58.262	68.1564	46.5744	25.6902	46.544		0.833336	58.8897
20.3549	74.745	50.323	76.867	74.885	77.321	80.92	62.245	60.009	46.713	66.599	50.803	54.966	40.264	63.522	46.737	47.325	54.829	61.318	61.587	63.966	69.569	53.226	50.8242	50.994	59.1745	51.5315	16.0736	41.989		0.838237	57.4759
20.4739	82.565	50.503	69.326	65.219	89.574	87.089	70.733	53.84	43.683	59.441	49.938	56.921	41.419	66.307	50.429	60.691	55.693	57.455	63.285	69.362	60.963	57.091	41.1704	49.125	63.3905	46.2793	16.2812	33.495		0.843137	57.5453
20.593	84.891	50.935	76.383	65.106	86.768	80.748	64.082	62.996	48.539	56.083	44.331	60.73	56.779	74.687	48.646	49.891	54.214	53.496	56.989	69.985	67.657	59.492	43.3619	50.103	57.6999	47.8297	13.0024	35.651		0.848042	57.8956
20.712	68.855	61.742	78.598	73.529	74.213	86.534	68.214	60.131	41.021	66.16	54.54	50.144	49.752	59.708	49.253	59.59	50.445	58.316	55.75	71.601	64.124	53.946	40.397	52.467	56.6692	44.8405	11.4556	33.756		0.852942	56.9911
20.831	61.466	56.895	72.026	73.834	76.336	78.107	60.332	60.045	49.103	60.455	54.118	53.78	57.237	60.275	52.448	63.538	53.136	61.348	55.71	73.671	69.458	49.217	48.3106	52.734	53.2713	45.9273	12.2471	26.641		0.857843	56.8452
20.9501	63.911	52.114	71.792	62.934	69.556	65.028	62.79	70.877	52.584	54.334	47.749	56.357	54.531	47.506	52.911	51.938	55.506	69.905	53.654	70.986	68.026	58.277	43.7923	59.325	54.0188	44.6792	6.4172	26.806		0.862748	55.2966
21.0691	60.686	60.612	62.444	59.886	62.655	76.874	69.093	66.678	43.661	54.517	52.357	49.086	52.974	57.855	42.253	57.375	57.973	67.904	54.901	68.64	68.203	54.343	39.796	47.976	48.9294	36.9837	5.5865	34.739		0.867648	54.1065
21.1881	63.314	55.831	67.811	58.506	75.414	78.857	77.982	69.345	48.696	56.787	48.384	59.754	54.745	56.249	45.758	52.436	55.551	68.939	49.707	60.856	63.6	46.135	41.0017	55.41	52.7953	35.9904	6.7326	21.707		0.872549	54.5819
21.3072	59.41	49.394	62.602	60.421	65.382	78.843	69.009	69.204	50.448	55.372	49.062	57.325	59.037	54.601	47.814	56.247	54.2	63.698	50.619	67.845	60.119	41.208	46.2533	49.989	46.5191	31.8888	6.0602	18.714		0.877453	52.903
21.4262	59.141	55.61	64.781	63.715	70.951	76.728	65.445	68.146	54.647	63.863	50.968	60.722	55.308	53.009	51.924	60.815	65.196	69.137	49.538	63.493	64.784	43.908	30.0182	52.43	45.4065	35.9685	5.7995	13.629		0.882354	54.11
21.5452	49.291	51.035	57.099	56.825	68.892	83.137	67.416	55.921	53.692	61.829	58.509	61.172	54.863	52.509	45.559	48.812	54.994	81.275	42.61	66.528	79.491	39.846	31.5252	43.263	44.3964	27.9881	4.1499	17.001		0.887254	52.1296
21.6643	54.2	53.967	57.703	69.222	66.378	71.111	67.334	61.654	54.138	64.197	52.49	57.092	57.709	50.327	40.188	56.795	54.26	79.201	41.451	61.447	67.038	42.753	37.0087	35.599	36.9743	26.2344	3.1891	12.472		0.892159	51.1476
21.7833	48.942	48.831	57.085	56.608	57.112	74.682	63.901	70.211	51.027	59.627	56.443	52.194	59.314	46.798	45.485	54.049	61.456	77.607	37.765	54.783	68.805	36.099	36.8929	41.916	45.5745	24.1915	2.8748	10.758		0.89706	50.0368
21.9024	46.757	57.312	54.746	48.918	57.598	71.55	61.223	64.525	45.903	66.216	55.995	53.11	63.361	56.829	48.351	49.081	52.927	65.877	29.391	55.69	63.403	28.32	27.4163	38.278	33.6217	14.1084	3.0859	6.672		0.901964	47.1523
22.0214	46.774	58.686	56.687	55.826	61.267	73.314	64.885	72.319	50.665	56.244	51.723	55.99	65.005	50.717	46.118	42.888	46.9	62.844	31.838	46.838	59.171	23.584	19.6577	37.731	38.1222	14.2298	3.2769	4.395		0.906865	46.3463
22.1404	57.154	50.764	60.506	50.413	58.993	69.12	68.069	61.875	41.871	73.668	52.622	48.389	71.013	55.755	40.015	49.121	54.781	54.009	26.445	54.323	53.18	17.41	22.7175	36.741	35.6284	11.7172	2.9597	5.604		0.911765	45.888
22.2595	50.661	55.708	68.068	50.212	42.803	76.71	71.966	48.885	45.634	59.469	57.781	53.091	73.495	56.828	50.867	40.778	51.37	66.807	19.193	50.592	61.91	14.94	15.4286	38.363	29.8827	13.0587	1.2969	5.184		0.91667	45.3922
22.3785	46.79	64.994	57.386	54.635	49.621	72.912	74.678	55.005	42.15	54.369	50.112	50.219	69.819	51.3	43.124	32.028	50.318	50.718	13.746	50.557	42.247	10.026	17.8179	32.221	32.9403	6.0612	1.4758	2.763		0.921571	42.144
22.4975	39.106	60.889	61.369	50.517	44.38	81.091	76.424	46.354	54.231	68.792	47.515	49.361	68.968	55.546	37.717	28.807	45.409	50.83	7.426	42.107	38.419	7.282	8.9919	25.45	20.2102	6.5571	2.0299	3.367		0.926471	40.3266
22.6166	34.87	53.175	58.589	52.175	43.686	81.995	88.915	37.306	47.093	64.604	50.601	55.262	65.568	47.28	43.49	28.055	40.535	57.327	6.462	38.589	32.052	3.693	5.2746	25.322	20.4568	8.229	2.4271	2.459		0.931376	39.1247
22.7356	29.178	49.634	54.596	45.032	45.602	79.293	70.998	38.005	50.481	63.149	52.291	59.449	71.927	45.686	44.002	24.556	47.673	49.509	10.117	41.162	28.039	3.072	6.0935	22.957	17.3044	5.2044	3.2123	1.404		0.936276	37.8438
22.8546	29.664	46.983	57.658	37.614	38.129	75.195	81.741	36.894	51.176	66.992	50.203	46.288	73.774	48.124	36.487	19.826	41.118	53.623	7.734	29.411	27.389	4.537	3.8418	20.694	16.5172	4.945	2.077	1.146		0.941177	36.0636
22.9737	23.083	43.19	45.369	40.688	45.725	66.439	70.691	25.951	47.331	58.194	43.606	48.692	63.56	46.151	31.941	11.786	29.88	49.279	5.721	24.515	16.736	3.328	4.5515	21.623	11.7398	4.6818	2.0392	2.323		0.946082	31.7434
23.0927	14.126	49.074	46.797	36.284	32.109	62.651	63.958	26.685	47.781	63.193	48.421	50.998	57.544	46.32	26.686	13.359	30.583	42.348	4.05	21	9.048	3.662	4.3866	11.424	9.6504	2.4945	2.5128	2.029		0.950982	29.6134
23.2117	15.715	45.197	44.433	31.945	32.008	58.909	63.256	14.682	41.723	59.812	55.71	40.454	67.286	43.406	32.442	9.61	20.274	39.263	5.317	10.945	7.5	4.306	2.6916	15.367	7.4421	3.3992	2.2848	0.93		0.955883	27.7253
23.3308	9.03	46.051	44.084	25.1	36.936	63.149	62.233	15.888	47.752	62.721	48.67	50.103	67.917	38.885	20.499	8.544	18.882	41.264	3.37	10.644	6.431	4.155	4.244	5.212	5.6959	4.1263	2.3155	2.416		0.960787	27.0113
23.4498	6.014	38.166	45.265	15.704	35.148	55.985	53.754	13.395	41.146	56.843	61.752	42.224	67.897	48.353	18.835	7.743	10.06	33.21	3.093	8.552	5.612	4.706	4.544	5.781	4.2235	1.3847	1.6822	2.298		0.965688	24.7632
23.5688	6.454	36.1	38.513	9.433	25.818	56.757	52.49	9.01	42.65	53.003	59.282	41.923	64.707	57.847	16.294	9.931	12.118	18.972	5.42	5.854	4.311	5.349	2.8031	2.714	3.8572	1.8887	1.2979	0.88		0.970588	23.0599
23.6879	3.622	33.199	39.999	6.265	19.555	57.379	56.9	4.877	43.086	50.457	49.45	29.214	64.759	49.59	13.156	6.419	12.516	17.915	3.778	8.32	2.414	3.009	2.7772	5.105	3.0668	1.9921	0.913	2.371		0.975493	21.1466
23.8069	4.931	23.455	28.925	6.289	19.055	50.593	51.311	7.748	41.584	58.547	48.793	31.416	63.128	51.69	9.227	4.007	8.75	17.949	5.478	5.724	5.135	3.403	4.101	6.628	2.931	2.5464	0.472	1.419		0.980394	20.187
23.9259	3.435	23.324	19.841	3.88	12.447	43.131	45.468	8.343	35.303	49.036	56.23	31.414	59.194	43.331	9.467	4.146	6.51	13.867	6.329	6.949	5.678	1.612	2.6717	7.271	3.5718	1.1197	0.805	1.542		0.985294	18.0684
24.045	5.9	16.955	17.693	5.933	8.483	42.559	37.431	5.559	36.481	47.71	51.967	26.313	64.14	47.523	5.365	4.528	7.027	11.821	5.628	5.013	2.43	4.181	2.4326	3.442	3.6123	1.2701	2.1401	0.92		0.990199	16.9449
24.164	3.254	12.556	12.077	5.787	5.011	40.148	33.744	6.087	47.485	44.969	53.011	15.86	57.505	46.041	10.532	5.686	7.815	9.279	5.345	6.478	3.086	2.468	1.8042	4.177	4.9023	1.509	2.8383	0.671		0.995099	16.0759
24.283	4.303	8.979	7.229	5.892	5.031	41.623	29.304	4.604	37.791	50.113	58.304	12.663	46.219	41.337	7.3	2.406	6.078	6.713	8.041	4.325	1.819	3.752	3.2675	5.012	2.7575	1.7952	1.5384	0.702		1	14.6035

## Sheet: Image44
X0	Y0	Y1	Y2	Y3	Y4	Y5	Y6	Y7	Y8	Y9	Y10	Y11	Y12	Y13	Y14	Y15	Y16	Y17	Y18	Y19	Y20	Y21	Y22	Y23	Y24	Y25	Y26	Y27	Y28	Y29	Y30	Y31		Ap-basal	Avg intensity
0	43.729	53.369	53.16	39.338	49.326	54.128	46.288	31.75	37.753	43.858	34.865	56.379	51.116	26.319	38.469	45.273	50.651	43.355	19.198	38.634	81.709	73.964	73.778	41.247	46.893	46.5764	57.856	68.293	46.1133	72.3328	45.6893	14.0271		0	47.6699
0.119	43.633	49.94	50.195	40.465	49.229	58.187	53.246	36.689	37.13	36.329	41.264	50.859	47.768	31.233	33.203	43.85	47.021	46.54	28.343	36.046	113.812	74.863	63.375	41.368	53.129	53.5599	59.501	70.671	50.9703	81.6763	41.0119	16.9014		0.00540383	49.4378
0.2381	51.356	54.417	64.824	44.382	55.928	64.224	52.384	36.137	40.231	42.857	49.527	59.365	61.879	34.856	41.265	44.506	56.459	48.35	31.384	38.862	130.693	89.392	79.671	58.751	56.734	45.8585	60.135	81.325	48.9825	81.4961	50.576	16.7808		0.0108122	55.4246
0.3571	52.234	59.533	65.394	41.768	57.201	76.536	55.741	36.05	42.15	40.535	48.317	64.706	53.127	42.323	38.636	51.155	74.749	66.575	34.636	49.365	142.473	86.856	71.937	63.237	72.573	58.5263	57.174	91.77	51.3293	70.4781	50.5006	17.9253		0.016216	58.9222
0.4761	51.697	46.596	77.813	53.461	57.449	87.298	69.264	48.688	39.648	36.31	49.846	78.933	54.926	39.398	37.319	43.375	74.785	76.68	38.209	51.589	151.268	96.757	88.583	70.522	76.189	54.2529	63.563	103.525	46.5415	77.4867	57.1371	17.3129		0.0216199	63.0132
0.5952	61.025	54.426	76.622	60.867	69.079	80.819	60.462	55.203	53.674	36.895	52.305	64.928	66.591	47.62	53.532	52.399	71.693	86.504	50.846	59.546	146.005	98.769	79.158	74.738	85.394	56.0191	71.588	98.494	68.6706	83.5235	54.6076	20.852		0.0270283	67.2767
0.7142	85.092	56.442	100.004	71.191	71.11	92.284	61.337	48.802	67.935	41.738	52.937	92.439	79.157	69.386	73.024	51.433	85.631	92.939	51.251	66.695	157.71	102.447	81.899	93.718	106.719	67.3225	72.154	106.901	58.663	79.1138	58.1597	17.2174		0.0324321	75.4016
0.8332	118.284	51.153	101.931	72.402	78.275	115.388	72.62	62.366	86.381	45.306	54.663	86.574	66.877	82.892	97.1	57.75	83.55	98.519	53.824	83.895	170.351	107.797	88.576	103.792	107.091	71.5725	83.236	93.816	59.7579	73.4521	69.0307	21.753		0.0378359	81.8742
0.9523	142.136	59.281	111.775	82.694	68.183	107.146	73.035	72.681	114.558	44.264	67.839	73.632	79.936	98.489	134.337	58.438	93.043	113.192	72.361	98.149	162.176	103.927	91.513	102.346	97.878	80.9575	87.435	107.437	47.7678	75.9318	54.5077	24.1127		0.0432443	87.5362
1.0713	162.57	71.14	128.464	94.544	76.971	102.153	77.936	80.029	150.219	51.183	63.272	92.245	74.942	114.641	170.11	56.735	97.989	126.03	78.94	100.678	173.884	107.227	101.113	99.058	112.533	76.7433	94.869	118.215	60.8959	72.3305	59.9009	31.5739		0.0486481	96.223
1.1903	185.235	66.681	132.619	95.774	86.483	117.277	81.885	98.195	175.755	54.959	77.466	92.741	87.232	129.762	180.188	60.721	108.348	121.453	78.476	113.496	164.752	109.724	100.512	108.277	125.65	76.6813	96.545	124.886	56.3934	83.7294	57.4419	34.7593		0.054052	102.628
1.3094	199.188	74.234	149.669	102.952	87.137	128.032	76.664	111.303	204.501	69.74	80.803	113.763	81.425	134.062	181.238	85.308	119.027	124.868	89.059	122.217	170.813	124.518	102.874	116.853	124.305	75.9665	101.063	118.588	56.5691	92.029	64.7732	37.9868		0.0594603	110.048
1.4284	216.938	93.58	144.052	109.65	91.451	136.142	87.925	131.002	225.486	80.308	72.733	106.99	85.668	161.017	195.691	94.369	128.38	135.492	98.161	141.125	170.492	124.118	110.94	127.025	125.772	76.9811	109.031	125.585	52.8184	82.3492	68.2235	41.4483		0.0648642	117.217
1.5474	225.752	90.507	159.484	120.915	93.767	148.46	100.945	156.878	230.428	88.029	88.413	99.216	92.5	171.994	184.206	97.698	126.074	136.626	89.613	152.312	167.984	130.235	113.025	132.831	148.623	73.3014	129.38	131.689	66.0054	80.9683	66.6609	51.2315		0.070268	123.305
1.6665	221.629	109.311	174.751	134.402	91.901	153.872	95.084	172.144	234.266	104.224	93.248	104.039	100.283	180.877	202.367	97.698	126.183	144.213	103.672	152.051	173.596	121.384	106.586	124.948	130.172	76.1661	112.151	129.384	59.068	75.1166	73.2231	52.0574		0.0756764	125.94
1.7855	224.429	124.755	170.611	163.337	103.82	157.206	109.504	183.302	228.965	122.771	93.657	102.96	93.668	197.318	204.038	103.166	135.415	147.748	106.325	165.719	174.966	129.541	113.649	131.668	126.847	83.0759	117.664	142.3	55.7167	78.7085	75.3011	52.1763		0.0810802	131.885
1.9046	225.251	148.841	178.827	151.203	111.337	166.392	107.071	184.46	228.749	145.346	81.415	112.556	98.572	192.606	204.62	103.036	152.21	153.404	107.754	154.366	184.869	132.641	112.378	123.58	138.11	86.5557	111.746	128.792	58.0048	83.3298	80.7449	59.2988		0.0864886	134.627
2.0236	222.256	154.867	181.294	164.675	107.786	176.112	114.361	196.13	223.722	149.152	87.232	128.97	110.646	197.727	195.163	120.404	140.328	143.964	103.775	162.106	168.417	141.429	118.317	139.234	139.699	83.6508	120.231	136.867	74.2645	81.3565	75.4474	63.3925		0.0918924	138.218
2.1426	219.197	169.934	194.423	180.005	111.402	179.34	117.306	208.854	226.302	173.686	88.94	134.953	95.849	195.281	196.203	120.618	140.86	162.078	113.84	163.762	171.398	137.764	117.015	135.77	141.116	99.8864	132.549	152.148	63.8118	86.6424	76.1703	75.0376		0.0972963	143.192
2.2617	223.905	186.645	181.328	193.648	114.564	170.815	109.239	194.976	221.636	170.635	100.241	128.221	104.165	205.449	200.326	114.258	149.387	154.668	109.235	171.368	174.443	132.305	119.535	127.703	129.811	93.8214	131.232	140.401	78.9297	70.4066	77.8765	60.8392		0.102705	141.938
2.3807	232.971	174.213	193.829	192.86	113.556	171.853	117.902	209.28	206.363	187.733	96.606	124.168	104.19	200.563	194.393	126.027	153.755	160.706	116.225	156.264	159.824	134.819	116.893	117.467	133.345	93.7136	136.309	139.019	67.3899	80.0006	71.9617	59.4712		0.108108	141.99
2.4997	221.694	191.288	205.149	201.547	128.657	175.658	112.437	193.492	211.295	193.634	105.45	148.839	115.463	198.479	202.123	129.829	153.405	170.867	112.055	167.009	166.945	128.985	116.649	125.465	131.971	93.1699	134.924	140.21	67.9222	71.1407	72.6297	67.3594		0.113512	145.492
2.6188	224.419	198.185	200.214	204.359	138.078	182.283	112.445	193.037	206.984	192.301	101.413	145.009	105.124	207.027	201.048	120.975	143.49	178.685	134.008	163.688	177.234	129.89	103.79	139.824	134.824	92.1943	127.121	137.641	72.5116	75.2788	76.9162	69.5949		0.118921	146.55
2.7378	214.798	212.394	193.544	208.019	142.763	160.744	123.736	195.001	204.275	191.218	112.334	138.937	110.42	196.582	201.952	139.153	157.309	174.087	116.791	180.432	167.844	140.268	102.446	133.191	124.443	97.0428	119.742	143.566	62.7987	68.4846	73.4173	64.2159		0.124325	145.998
2.8568	225.415	200.043	195.314	214.598	134.177	168.761	125.812	180.013	203.548	195.507	113.314	139.58	115.624	188.665	209.345	133.349	142.704	180.567	133.002	177.57	157.341	119.271	99.451	132.902	131.757	85.4911	117.27	139.21	70.4579	74.6159	72.8183	58.619		0.129728	144.879
2.9759	222.383	202.716	202.268	205.973	133.753	160.462	125.754	188.747	195.624	187.554	109.274	153.816	106.383	197.951	201.957	140.574	157.847	168.917	136.055	174.28	167.518	108.687	87.783	130.347	121.854	96.5344	118.131	135.691	62.0986	77.698	82.9865	64.7559		0.135137	144.574
3.0949	213.866	209.187	211.589	207.025	145.792	176.862	130.089	200.986	192.479	186.518	138.542	149.297	113.99	197.214	179.625	144.076	153.749	172.512	137.601	181.522	150.614	114.767	86.353	134.235	151.888	89.4145	126.448	121.533	60.8782	78.1638	79.04	57.8872		0.140541	146.679
3.2139	210.827	208.326	203.018	201.886	145.914	169.921	143.983	199.005	201.206	181.991	132.48	149.599	113.501	187.549	202.199	149.876	147.81	174.33	144.847	186.482	154.962	105.502	76.867	143.867	136.784	82.8594	123.617	114.203	73.8738	71.3549	83.0726	54.8		0.145944	146.141
3.333	214.028	180.45	202.559	204.893	166.109	175.574	151.842	188.539	186.641	183.34	140.999	155.951	104.543	183.411	185.263	136.881	139.487	169.679	135.959	191.476	137.386	109.075	72.141	134.312	130.847	90.6789	135.501	110.33	70.9285	65.9986	83.7621	57.3501		0.151353	143.623
3.452	211.322	197.744	202.735	210.226	166.823	166.728	165.597	202.661	190.821	171.492	135.974	158.206	97.224	195.987	195.618	142.507	142.525	178.722	134.157	179.445	161.53	104.532	78.757	129.47	128.222	92.2073	131.407	114.263	68.9559	73.1832	87.9361	62.0283		0.156757	146.219
3.571	203.528	184.89	195.577	204.131	178.804	166.731	149.816	193.652	188.899	170.868	136.668	161.356	99.698	188.309	197.497	147.81	145.803	181.298	137.588	180.847	153.944	100.441	80.514	143.263	142.277	91.9831	136.553	116.906	74.9563	76.5433	80.1937	65.8201		0.16216	146.161
3.6901	203.94	187.732	200.923	204.576	176.849	168.757	161.957	191.027	196.13	173.327	145.667	171.319	107.299	177.244	194.235	138.888	154.313	173.403	147.661	179.91	165.143	117.656	79.25	136.848	118.316	88.5818	132.983	130.722	74.4835	71.1939	67.9525	58.4889		0.167569	146.774
3.8091	193.735	187.151	191.591	197.472	186.447	177.768	153.761	198.052	186.454	181.776	142.629	160.725	114.8	179.105	182.174	142.739	150.139	174.657	143.858	184.26	154.144	119.465	74.21	130.382	116.526	91.7691	125.984	111.747	66.169	73.6183	73.2701	62.3862		0.172973	144.655
3.9281	199.571	184.096	198.701	207.343	180.81	170.621	172.798	189.72	193.31	179.67	141.893	152.456	115.017	175.776	182.164	146.886	145.514	170.743	143.362	174.336	147.512	120.271	75.469	134.767	122.016	89.4448	114.57	124.605	63.3743	71.7892	74.6503	53.1018		0.178376	144.261
4.0472	192.07	174.559	200.273	204.029	182.937	176.707	163.68	175.693	176.947	177.985	151.438	150.096	107.821	172.933	158.973	130.161	149.76	188.254	135.55	164.028	146.553	121.867	73.165	131.321	112.411	86.3989	125.11	124.831	62.9995	68.3186	77.0078	59.2906		0.183785	141.349
4.1662	198.814	162.298	192.818	202.488	176.506	183.402	178.263	165.526	197.169	183.435	145.043	170.599	115.14	179.965	163.613	122.116	163.599	194.059	138.755	168.184	153.852	107.819	79.148	119.155	115.161	79.3621	125.169	118.77	65.3041	64.2984	60.9253	62.3097		0.189189	142.283
4.2852	196.289	170.977	191.719	208.926	179.633	173.982	172.399	161.461	189.554	168.507	147.184	171.141	111.601	171.354	163.839	119.88	161.463	192.166	132.515	167.621	143.453	114.008	77.692	113.103	114.41	85.0532	118.524	126.986	63.2645	63.5796	72.0037	61.1964		0.194593	140.796
4.4043	191.297	165.911	183.811	202.917	181.045	181.72	158.955	156.316	187.413	169.76	141.108	162.751	116.597	176.358	156.994	124.768	171.719	194.714	138.81	150.602	129.219	104.943	67.211	114.522	93.679	77.2855	108.696	118.554	52.7663	69.6684	73.9583	59.3212		0.200001	136.981
4.5233	176.361	154.486	183.08	194.635	190.358	189.167	164.269	153.347	177.595	172.81	130.423	156.666	109.527	165.885	171	111.493	172.488	186.115	145.639	142.073	148.172	103.283	70.995	103.679	109.962	71.258	118.352	133.385	58.4107	73.3444	64.7154	50.4954		0.205405	136.046
4.6423	179.032	162.831	187.516	192.856	182.014	177.528	171.936	153.58	180.964	170.238	138.046	140.435	116.463	162.089	167	118.54	170.889	177.324	132.646	162.277	145.931	99.109	57.933	103.428	106.62	59.5516	103.495	121.314	57.8764	74.0085	67.4548	49.2695		0.210809	134.069
4.7614	192.791	164.661	178.885	191.215	193.963	179.514	151.801	142.986	174.169	167.68	129.769	154.373	129.386	150.078	151.59	123.525	154.5	171.847	130.167	143.55	148.032	93.453	62.313	100.652	95.039	59.8678	103.599	117.265	52.9264	75.0259	65.7482	50.7901		0.216217	131.286
4.8804	182.377	170.053	183.817	193.267	188.178	184.228	165.991	156.76	183.338	158.949	120.831	155.25	120.132	154.037	147.041	115.433	146.13	168.919	123.742	134.729	140.43	82.782	55.46	90.521	116.094	59.2853	98.563	121.625	42.9629	74.7646	68.6611	49.4263		0.221621	129.806
4.9995	173.04	160.035	188.489	188.716	177.066	175.158	171.664	156.023	175.717	152.673	125.109	151.278	130.633	151.759	151.848	111.362	162.473	157.855	126.402	130.072	138.016	77.45	51.298	90.018	104.144	54.433	88.561	106.978	52.375	76.5121	70.9969	47.2406		0.227029	127.356
5.1185	179.957	146.691	187.289	167.457	180.624	182.329	148.85	132.21	176.571	159.689	125.867	164.818	118.27	138.117	136.987	122.866	155.353	150.443	115.431	133.79	111.762	80.512	57.268	95.046	104.331	60.6787	86.471	109.062	55.1143	71.9998	70.6191	58.1966		0.232433	124.521
5.2375	171.51	145.861	185.999	178.15	180.443	178.267	140.096	138.729	186.21	155.822	127.779	167.016	124.848	145.931	136.694	109.592	141.17	146.957	102.168	116.498	124.588	76.519	50.407	80.903	98.895	56.0288	86.304	104.499	41.1712	67.6892	79.5219	56.6029		0.237837	121.965
5.3566	171.47	144.76	178.896	182.943	171.526	180.844	143.137	148.229	159.633	153.494	142.319	166.41	135.981	138.304	131.871	122.15	141.92	150.719	103.457	112.797	114.688	66.236	48.334	87.124	106.095	57.792	78.057	105.758	47.8774	68.0771	76.1212	52.0223		0.243245	121.533
5.4756	173.35	143.159	178.4	178.948	171.608	178.277	136.216	128.713	160.544	155.241	140.172	147.37	128.781	140.318	137.768	119.925	142.355	156.619	102.677	99.658	108.188	67.474	46.111	63.338	103.803	50.3005	67.232	102.867	49.134	65.9056	68.6743	54.5356		0.248649	117.739
5.5946	173.319	138.949	169.899	185.425	176.1	188.575	131.338	123.486	155.389	143.267	138.33	146.292	136.124	145.47	132.192	100.575	144.144	150.052	97.071	109.019	106.552	60.53	45.705	63.749	98.226	57.6968	68.241	87.758	44.7712	62.8576	73.1316	50.6575		0.254053	115.778
5.7137	167.758	139.295	176.951	191.59	163.675	165.843	115.554	127.561	155.176	142.765	138.207	149.637	132.979	137.789	136.101	97.343	141.345	154.732	97.126	104.36	95.742	56.867	44.288	62.79	104.036	53.8382	60.166	80.824	45.7733	59.9147	72.7335	43.8046		0.259461	113.018
5.8327	168.263	140.944	187.682	180.865	167.259	166.594	120.48	120.281	152.41	152.614	132.492	160.707	124.825	135.493	127.399	93.442	149.997	150.119	85.056	101.087	95.777	51.533	47.041	63.05	96.104	57.7762	51.19	78.965	41.4025	64.4985	67.3474	44.9591		0.264865	111.802
5.9517	163.056	159.684	169.613	184.205	165.73	172.643	113.863	124.387	143.255	149.593	107.035	171.618	130.549	128.385	120.012	85.836	159.214	153.018	81.623	87.716	96.314	48.546	43.183	59.444	96.741	56.4765	62.169	68	42.8629	52.9572	66.6187	51.4748		0.270269	109.869
6.0708	157.253	139.372	180.471	187.662	162.589	159.255	114.058	120.798	145.786	143.909	110.922	164.886	133.071	131.05	104.862	79.724	143.884	137.149	82.362	96.25	98.371	51.779	49.508	54.866	97.364	54.3136	60.002	72.096	38.3742	59.2718	73.5701	50.603		0.275677	107.982
6.1898	147.955	134.373	170.079	178.614	171.438	151.787	101.005	123.444	139.032	136.385	108.671	161.973	120.193	131.342	107.456	85.876	142.076	136.94	88.044	89.77	82.837	40.079	45.719	62.055	96.892	56.0348	62.061	67.408	32.4881	52.3482	69.2239	51.0341		0.281081	104.52
6.3088	138.929	125.48	174.807	187.849	162.724	153.584	94.757	108.785	121.65	132.28	114.824	154.768	123.695	146.498	97.637	70.875	140.668	144.909	74.778	90.689	79.892	44.893	52.417	49.23	96.095	47.5071	50.38	64.348	34.3082	51.4779	69.2732	47.6119		0.286485	101.488
6.4279	143.51	115.505	179.384	190.959	164.352	127.76	94.016	119.73	126.855	128.001	107.384	156.251	123.888	129.032	99.909	64.255	135.945	137.866	69.109	73.596	75.828	44.968	46.075	54.74	91.166	53.9746	55.948	63.012	39.3027	41.5067	69.8025	52.7712		0.291893	99.2626
6.5469	132.235	115.319	161.473	175.778	166.643	124.691	98.423	108.044	126.872	127.612	118.02	155.996	132.652	133.443	97.291	67.819	134.13	117.623	74.395	56.559	67.753	39.595	38.173	52.171	94.842	54.6288	44.734	74.467	39.378	40.8509	60.9373	40.8124		0.297297	96.0425
6.6659	139.107	102.628	155.555	174.146	153.598	122.718	86.423	92.852	112.898	122.032	106.434	142.555	112.917	125.085	94.089	70.938	138.084	110.945	68.965	69.225	63.328	38.834	38.656	47.717	88.932	48.0708	46.87	63.312	34.6586	42.1039	62.4509	49.8828		0.302701	91.4378
6.785	126.952	95.39	166.255	178.502	164.071	104.359	75.132	105.809	106.806	113.461	115.301	151.067	108.183	133.467	90.618	64.442	120.44	112.087	79.023	63.385	65.792	35.919	40.152	51.061	89.588	52.4458	46.296	57.245	37.1958	41.5555	69.9545	48.2296		0.308109	90.9433
6.904	114.81	106.684	164.426	174.223	159.576	109.376	82.914	107.102	98.79	122.266	118.787	126.848	110.059	104.36	83.493	66.324	117.178	109.097	70.252	57.983	59.204	31.243	43.853	59.152	81.703	48.632	47.086	57.148	36.744	36.3149	71.5152	46.2971		0.313513	88.2325
7.023	117.213	93.573	158.761	172.026	152.456	106.763	88.437	111.727	97.982	109.791	107.262	119.692	107.37	108.263	76.768	57.13	122.546	113.817	56.73	48.369	47.552	39.266	42.379	49.979	78.117	52.5205	45.366	51.554	39.6116	29.0395	65.464	45.2237		0.318917	84.7734
7.1421	110.662	93.858	159.324	162.076	146.519	107.871	87.014	109.328	93.181	104.356	103.674	120.032	108.977	96.066	69.578	54.392	116.746	111.153	66.411	55.654	36.403	33.47	45.085	48.631	77.208	53.2804	45.345	72.174	37.2287	32.4573	66.2399	42.0736		0.324325	83.3271
7.2611	99.141	91.659	143.32	171.491	148.898	89.065	93.916	98.673	87.458	94.835	110.416	126.741	116.053	97.167	67.636	48.678	117.658	110.089	70.351	49.182	47.836	36.382	35.642	50.277	76.22	39.0249	46.652	54.517	28.0268	32.7778	67.6908	45.9201		0.329729	81.0435
7.3801	100.261	84.934	146.18	146.636	145.681	92.907	100.07	95.847	80.02	101.51	107.643	121.355	108.961	84.283	67.826	49.509	110.134	103.792	59.683	46.192	40.771	36.373	33.844	44.487	64.462	44.1052	47.178	61.822	33.3111	35.6993	60.2664	36.7093		0.335133	77.8891
7.4992	104.106	69.588	147.335	145.947	145.558	92.304	86.818	87.82	81.92	90.119	110.175	107.216	109.244	80.819	59.091	49.711	108.475	109.268	55.162	45.149	47.763	33.763	31.749	48.386	66.355	45.2997	50.092	59.58	30.4352	31.6467	53.4558	40.9608		0.340541	75.791
7.6182	91.832	71.343	154.898	148.022	141.921	90.506	80.538	87.945	69.855	89.328	99.054	92.978	103.591	86.947	54.853	47.285	100.509	109.667	54.36	44.435	43.587	33.781	30.727	45.88	59.715	47.3263	57.764	54.671	39.7828	31.4393	53.1989	33.6736		0.345945	73.4817
7.7372	71.312	63.387	129.696	140.948	136.539	91.04	91.402	77.666	72.919	84.218	98.858	86.542	102.351	87.161	50.158	51.479	83.155	105.725	57.01	50.892	44.616	31.87	25.116	49.109	68.683	44.8398	55.14	64.777	32.5061	30.7488	58.3499	36.5991		0.351349	71.0879
7.8563	84.404	63.699	145.796	137.119	121.614	85.083	81.827	75.135	66.977	78.836	93.537	80.128	104.476	77.322	51.925	44.654	71.892	91.722	55.807	42.134	42.514	41.097	25.155	41.133	64.199	49.2729	65.754	65.017	37.4015	31.0997	63.1952	41.7777		0.356758	69.4282
7.9753	74.493	66.16	143.555	133.199	119.659	76.502	88.078	69.699	63.913	86.436	80.258	73.168	97.022	58.063	47.876	46.072	75.35	89.032	50.289	42.399	39.505	32.109	32.81	41.921	53.783	47.209	54.551	50.957	34.138	28.5498	51.2481	45.7857		0.362161	65.4309
8.0943	84.002	67.743	143.921	130.501	127.633	78.5	77.062	65.846	58.028	79.087	77.73	64.077	101.5	60.425	55.041	54.762	68.954	101.963	52.325	38.794	41.651	35.862	31.886	46.612	48.097	52.5077	70.436	54.029	30.7736	32.7249	44.8938	39.4893		0.367565	66.1518
8.2134	67.404	57.862	129.342	124.746	121.23	82.398	85.456	63.781	65.606	86.124	69.781	58.781	95.958	61.645	55.394	50.784	59.822	76.531	60.411	46.998	39.73	41.624	30.916	39.73	47.151	45.7032	72.996	56.205	38.1737	31.2689	45.5969	35.6706		0.372974	63.9006
8.3324	67.735	60.157	116.854	113.924	106.098	75.819	81.862	60.732	60.124	85.158	52.007	55.064	89.993	60.141	54.908	45.987	55.263	85.681	55.56	41.429	41.306	36.969	23.395	37.932	41.739	47.105	64.047	41.91	36.4574	23.5329	41.4838	32.6022		0.378377	59.1555
8.4515	72.139	58.324	128.237	119.784	91.845	75.515	86.021	50.029	63.037	83.807	67.676	52.564	79.625	57.523	57.607	49.728	58.533	79.539	54.416	36.157	35.365	39.039	30.189	39.03	38.284	50.1766	66.528	44.733	36.6188	38.0395	46.5481	39.504		0.383786	60.1925
8.5705	59.739	56.673	136.411	111.227	91.472	70.189	80.388	55.842	54.571	84.256	66.976	54.385	93.842	59.309	46.489	59.222	58.16	67.342	54.762	47.59	39.396	34.264	30.494	35.643	37.781	53.0155	58.148	42.576	35.2841	38.5915	33.5165	37.6746		0.38919	58.9134
8.6895	61.565	58.876	120.878	107.476	77.302	76.028	62	55.537	50.407	80.592	61.55	51.932	85.379	52.925	47.245	52.659	60.835	63.123	50.477	41.232	38.094	40.371	27.931	37.777	38.998	54.4637	55.388	37.627	40.6859	38	40.0884	28.1937		0.394593	56.1136
8.8086	62.635	54.79	122.887	99.932	76.236	62.221	64.889	48.856	52.423	85.319	61.62	43.471	72.296	60.671	51.39	51.589	55.819	62.978	46.955	44.237	38.969	36.592	27.305	32.264	35.083	52.0776	54.292	38.217	32.6928	39.6117	36.6571	28.871		0.400002	54.1827
8.9276	56.679	57.313	108.424	97.298	66.554	69.885	62.177	47.748	61.611	79.744	64.063	45.662	73.327	57.47	54.871	61.837	54.383	54.4	59.062	36.483	36.995	33.549	24.994	31.814	36.735	55.0645	59.095	46.033	32.8467	31.3477	35.6766	33.7396		0.405406	53.965
9.0466	49.159	55.165	100.406	76.537	75.733	69.43	51.428	52.664	58.276	86.54	59.968	57.093	74.586	55.035	51.543	53.16	51.007	53.495	45.808	35.776	41.378	33.698	17.688	41.83	37.842	46.6869	59.965	46.353	31.8813	32.983	31.062	35.0431		0.410809	52.1631
9.1657	50.699	63.138	112.072	83.757	63.411	63.522	60.629	49.846	57.073	77.595	54.321	49.265	72.446	61.687	50.124	47.573	44.518	57.979	35.25	34.766	37.971	36.543	25.81	30.468	38.601	42.4059	64.105	42.424	31.1493	36.4618	41.0562	33.7762		0.416218	51.5763
9.2847	53.864	57.152	107.432	81.529	62.058	60.771	63.213	44.645	56.902	74.175	50.318	50.342	80.083	55.218	47.315	52.252	56.326	47.153	43.22	37.669	30.359	32.91	21.833	38.004	38.881	49.4133	57.682	40.522	35.3458	36.3705	34.6903	30.5371		0.421622	50.8808
9.4037	48.319	54.715	105.028	74.125	63.093	64.997	59.68	49.415	57.767	80.242	51.905	48.795	74.125	51.838	43.457	54.554	47.059	54.681	48.329	32.003	43.194	32.748	20.984	41.815	39.625	46.2951	50.621	44.05	30.6895	34.6831	35.3016	34.503		0.427026	50.5824
9.5228	55.61	60.121	99.624	76.586	59.94	60.281	55.225	51.75	56.949	63.798	49.065	49.935	66.317	53.744	39.361	50.069	49.231	45.295	42.411	32.195	38.948	36.107	22.861	34.92	35.494	45.6369	58.034	41.075	30.0143	30.2492	31.496	38.9995		0.432434	48.7919
9.6418	47.51	61.699	97.239	62.435	51.865	61.511	57.325	59.305	60.518	62.91	48.203	53.001	55.981	59.653	45.131	49.041	46.095	46.757	42.996	36.145	39.838	33.817	22.91	37.146	33.907	44.6363	54.664	41.539	38.3329	27.4763	36.2903	29.5935		0.437838	48.2959
9.7608	48.349	62.427	91.073	58.23	49.194	58.692	52.345	61.396	62.714	67.674	48.677	52.06	55.3	54.757	39.187	49.956	41.734	49.414	44.353	39.089	34.486	29.68	19.358	34.969	37.782	40.8189	57.306	45.077	36.2272	29.5932	34.8458	25.6466		0.443242	47.2628
9.8799	44.484	55.469	85.757	59.441	48.319	59.345	56.642	58.402	56.065	73.437	49.356	48.247	54.924	53.452	36.07	44.273	37.212	42.474	43.364	38.805	35.398	31.17	18.008	27.143	34.986	47.3166	51.946	40.386	37.1466	31.5714	33.1326	31.3306		0.44865	45.7835
9.9989	45.839	55.245	80.445	49.546	49.347	54.912	45.028	50.659	54.163	64.095	45.226	54.306	55.673	50.257	43.543	45.524	44.195	38.973	40.673	30.029	37.158	31.816	18.38	32.443	35.85	49.3743	46.799	42.359	37.1735	27.6005	30.4802	23.0485		0.454054	44.0675
10.1179	44.071	54.045	82.534	51.563	50.458	51.592	51.547	49.702	53.635	62.926	53.493	59.725	53.645	53.491	39.446	50.87	51.575	45.562	46.337	34.732	33.245	32.226	14.541	32.447	34.969	44.2269	42.489	45.264	32.9336	26.6613	29.9073	27.9325		0.459458	44.931
10.237	42.548	54.9	72.932	43.953	46.918	53.095	47.073	48.016	53.649	60.748	44.607	56.754	55.03	46.779	45.572	43.121	43.236	47.096	43.796	38.617	33.396	31.844	18.626	27.203	39.792	41.6559	41.167	41.487	37.7187	24.334	33.2355	30.4447		0.464866	43.417
10.356	48.67	54.662	75.898	56.869	36.412	51.57	45.914	42.753	57.511	57.779	49.672	51.581	51.417	49.059	39.66	45.863	38.837	46.301	37.342	33.054	29.589	25.12	19.474	32.083	35.9	40.1864	46.469	41.275	34.9369	26.4732	38.5718	27.4701		0.47027	42.7616
10.475	40.803	55.453	65.743	49.158	46.369	43.304	45.886	41.582	52.769	62.365	43.161	54.048	44.983	52.171	43.718	44.855	39.841	54.829	42.957	25.305	29.333	35.775	18.554	31.968	35.928	32.5264	37.691	38.185	32.1343	28.3695	42.7684	33.0657		0.475674	42.0499
10.5941	41.93	46.445	53.815	59.21	41.737	48.959	47.634	30.404	50.751	48.499	48.281	54.679	49.841	47.184	43.038	35.649	34.599	45.233	42.837	27.711	35.376	32.6	19.3	32.496	42.11	36.0202	39.984	34.902	35.4187	31.327	39.8174	29.9313		0.481082	40.8662
10.7131	47.521	42.534	51.465	55.625	48.716	48.659	46.895	27.732	50.073	58.447	43.862	49.466	49.12	48.612	39.826	35.348	43.31	37.518	32.98	27.702	29.293	28.709	16.59	31.633	40.957	38.5759	34.786	46.456	35.5371	26.6891	38.2441	27.8543		0.486486	40.023
10.8321	45.027	47.852	57.779	48.8	46.705	38.316	51.553	31.542	43.809	47.049	45.345	49.924	48.464	48.285	35.339	37.592	44.494	36.188	30.84	30.118	24.883	29.795	20.899	32.694	36.937	36.6292	29.343	35.063	29.95	23.3083	37.6989	32.5457		0.49189	38.5865
10.9512	38.821	49.475	54.351	50.793	44.626	44.447	49.601	23.285	39.044	49.563	37.998	51.092	50.913	50.61	42.458	32.022	40.895	43.478	38.036	31.145	35.492	28.925	17.701	30.616	38.168	31.4095	34.029	33.855	38.6753	31.6632	39.006	28.2325		0.497298	39.0758
11.0702	42.467	51.636	50.368	53.494	44.185	40.282	50.679	26.996	40.224	55.051	45.966	47.2	42.631	43.295	40.363	42.005	46.539	36.298	29.349	23.922	23.914	22.942	17.749	35.953	40.37	32.0043	28.066	37.644	36.4296	25.1882	37.9283	31.8126		0.502702	38.2172
11.1892	43.974	48.885	52.243	45.783	44.412	46.873	49.349	23.727	34.702	55.823	42.672	43.851	54.438	38.11	39.675	41.038	37.446	36.999	30.991	25.926	26.098	25.584	16.45	37.111	38.079	33.0464	30.441	40.405	38.4952	29.529	42.6229	29.6425		0.508106	38.2632
11.3083	42.096	48.743	41.82	54.914	44.152	47.339	45.386	19.381	24.386	53.041	48.632	48.719	55.369	38.635	35.032	39.763	47.636	33.952	31.019	24.021	24.494	27.414	19.003	37.043	35.688	29.553	31.206	37.424	43.0404	30.7037	42.0609	32.4742		0.513514	37.9419
11.4273	38.359	43.103	48.004	48.79	37.607	48.951	50.472	20.997	28.48	49.874	45.883	45.46	49.026	40.492	32.88	40.266	42.165	34.477	28.794	24.578	21.116	28.208	18.095	32.018	33.837	26.7915	31.654	35.856	37.1381	26.4372	31.5944	23.8566		0.518918	35.7894
11.5463	38.074	44.669	50.102	35.913	41.706	49.756	51.527	22.601	28.317	49.421	38.544	46.689	48.087	43.055	37.459	32.183	38.13	36.348	24.557	25.295	25.958	25.371	15.541	32.551	45.311	24.6956	38.545	31.707	41.7837	25.9952	36.6382	25.6814		0.524322	36.0066
11.6654	32.329	41.181	48.166	38.571	46.691	52.827	45.135	21.613	23.349	47.171	42.077	42.7	45.875	33.829	35.912	32.193	41.406	33.709	25.618	25.132	27.241	28.015	16.873	34.368	40.873	30.071	33.847	38.474	36.7286	29.5079	38.1812	30.347		0.52973	35.6253
11.7844	38.961	49.458	47.858	31.296	42.439	48.146	49.068	23.335	20.247	49.006	40.294	52.729	47	37.593	32.042	34.956	42.153	31.598	25.3	18.018	25.155	20.869	16.325	27.721	32.825	27.1285	27.845	36.938	41.7582	25.7966	33.1508	27.1382		0.535134	34.5046
11.9035	38.548	50.547	46.808	38.611	40.176	52.476	45.804	19.361	20.389	50.474	50.927	45.296	50.3	34.54	36.685	38.318	38.62	41.572	27.77	21.718	27.217	26.909	15.542	29.688	32.942	23.3487	28.189	42.351	37.4888	31.0921	32.6815	33.0698		0.540542	35.9206
12.0225	32.92	58.48	43.678	34.074	37.12	43.532	44.556	18.87	19.901	45.181	44.621	45.787	45.958	35.692	34.007	34.21	44.161	37.53	25.996	22.26	28.091	27.886	14.609	29.951	34.348	23.8857	25.6	37.422	34.8329	33.9687	35.8593	36.191		0.545946	34.7243
12.1415	28.891	53.058	46.541	31.483	40.159	48.202	44.613	23.532	17.707	44.727	42.912	50.084	51.918	32.54	37.786	34.172	34.335	39.416	21.713	19.29	27.173	23.343	13.173	27.295	33.5	26.7736	24.15	36.058	36.8535	32.3566	31.926	28.4001		0.55135	33.8775
12.2606	37.777	43.911	43.562	35.049	29.22	41.988	43.442	18.919	23.676	47.247	42.355	42.593	48.908	36.441	30.623	39.367	34.818	40.808	24.658	18.277	24.606	27.289	12.388	28.5	38.962	24.537	26.08	39.354	37.7205	37.8315	32.9762	37.1235		0.556758	34.094
12.3796	40.274	51.841	41.94	32.785	29.115	48.18	48.015	19.463	17.679	40.401	45.341	50.86	40.657	26.645	33.121	31.872	33.652	44.513	22.339	16.722	23.219	29.964	16.441	29.753	40.571	24.8788	21.75	39.458	33.1615	34.4769	32.3044	27.8937		0.562162	33.4152
12.4986	31.877	50.753	42.129	35.783	29.423	40.623	47.421	14.933	14.961	38.086	40.652	41.621	48.478	32.211	33.657	39.342	33.818	46.605	21.906	18.355	23.249	24.98	13.224	28.145	37.94	29.1967	24.86	40.695	31.6783	36.4643	30.9227	30.1362		0.567566	32.9414
12.6177	35.928	47.591	44.178	28.813	24.962	45.866	48.924	14.654	18.846	39.282	40.709	51.954	49.497	30.414	34.685	34.99	37.26	35.172	24.029	19.849	24.941	30.736	16.844	31.34	39.528	21.4793	25.652	39.287	38.8555	39.7232	28.2759	32.4838		0.572974	33.6484
12.7367	30.704	44.572	37.634	29.339	26.853	44.34	42.874	12.766	16.862	41.541	41.415	42.374	42.067	25.877	28.16	30.83	32.772	46.55	20.605	22.682	22.694	25.943	15.601	31.668	44.825	19.6287	25.815	40.06	32.7064	43.9321	30.3215	36.4359		0.578378	32.2015
12.8557	36.422	56.933	45.024	27.45	26.069	45.061	42.896	15.485	21.553	41.528	41.888	38.9	48.528	29.889	30.341	34.195	44.3	38.719	17.114	25.766	25.98	27.077	16.148	21.523	43.422	24.1291	23.117	37.158	32.4853	40.665	34.1379	31.6927		0.583782	33.2999
12.9748	33.41	58.393	39.075	26.311	19.955	46.801	46.158	18.834	17.132	43.115	39.391	41.383	40.904	27.81	30.211	40.357	39.907	45.724	22.871	21.272	27.366	23.753	13.674	26.741	42.016	22.9011	19.466	46.706	31.5609	52.3217	33.4994	38.678		0.589191	33.678
13.0938	31.634	48.773	41.129	27.406	22.043	46.993	43.055	13.877	23.606	40.039	40.14	51.774	34.018	27.41	26.111	27.317	41.482	41.247	24.44	22.055	25.487	29.105	11.661	25.757	38.043	19.6441	16.107	37.614	43.1791	45.201	31.1875	34.8058		0.594594	32.2606
13.2128	34.224	53.695	38.772	26.356	25.696	48.856	47.883	11.411	14.093	34.92	44.089	47.914	43.492	23.392	25.292	31.59	45.763	41.939	23.999	18.898	26.442	27.46	13.528	25.889	35.863	19.0437	19.696	35.512	39.805	52.7347	35.0823	37.8521		0.599998	32.8494
13.3319	36.172	52.136	35.594	21.651	18.631	48.527	44.472	12.333	15.046	38.345	41.875	45.428	32.59	20.094	30.537	26.555	35.952	45.314	23.053	18.375	23.972	21.038	13.752	26.075	28.774	19.3507	19.062	33.031	35.2729	45.8466	35.5983	31.6764		0.605407	30.504
13.4509	32.614	53.915	40.9	23.992	22.677	43.902	39.141	12.384	18.981	34.505	43.106	49.344	34.721	21.324	22.27	24.138	39.138	45.344	19.157	20.082	17.538	24.835	12.666	19.715	31.688	17.5618	20.24	44.948	34.6904	46.5273	34.1327	35.8755		0.61081	30.6891
13.5699	35.093	63.128	40.627	19.681	19.837	34.715	36.824	14.829	18.375	35.461	40.906	46.593	42.07	21.377	25.528	26.24	43.083	40.222	17.939	20.526	22.363	24.465	15.953	20.23	39.555	18.152	20.139	50.449	32.9423	45.6974	38.4331	35.5458		0.616214	31.4681
13.689	34.412	55.752	41.284	16.308	19.932	42.084	37.764	13.887	11.841	38.552	49.035	48.87	45.38	19.611	23.233	28.514	33.557	44.153	19.129	17.916	22.57	18.323	16.795	23.131	33.064	17.1511	21.762	41.774	32.3435	39.5179	41.5883	32.5146		0.621623	30.6796
13.808	31.396	56.783	41.202	17.817	21.707	38.915	37.611	11.891	15.209	39.088	43.611	47.815	46.926	20.592	21.728	20.237	42.77	39.961	21.393	23.245	23.251	20.74	17.076	23.208	31.76	18.6386	17.103	42.86	38.8837	39.5187	37.4572	31.6869		0.627026	30.69
13.927	29.44	46.776	42.529	18.824	20.311	36.39	43.67	14.927	18.405	29.179	40.031	40.409	39.709	18.51	23.268	33.223	39.587	43.675	22.801	18.133	19.939	17.914	13.701	19.337	26.143	16.6341	21.441	40.016	35.6368	46.0389	37.2065	30.9143		0.63243	29.5225
14.0461	39.069	53.355	42.941	17.191	20.449	39.998	35.018	17.261	16.129	27.457	45.228	45.139	50.448	21.076	22.165	29.864	41.014	45.837	19.006	26.196	26.029	17.099	12.683	26.793	33.243	18.1041	16.997	41.044	36.0217	43.1938	49.4552	32.3103		0.637839	31.4942
14.1651	29.702	49.687	36.133	18.683	22.919	41.897	39.341	11.972	15.259	29.312	44.283	43.952	43.092	21.94	20.43	23.686	41.76	35.479	19.396	17.471	22.941	22.509	15.733	23.738	32.369	18.6653	18.773	45.694	42.3444	33.3229	47.054	37.7773		0.643242	30.2286
14.2841	30.763	53.641	39.881	17.087	19.904	43.837	32.246	12.285	10.883	26.172	41.178	42.933	44.677	20.804	22.237	29.702	43.272	34.598	21.187	17.305	25.377	17.038	15.35	25.192	31.671	22.7112	19.485	45.215	32.8991	41.5434	46.6009	33.9086		0.648646	30.0495
14.4032	32.665	45.984	39.925	14.241	17.403	32.376	31.983	10.759	11.166	28.934	36.083	51.05	43.668	20.382	22.052	37.665	34.613	33.755	21.245	16.024	27.143	20.783	16.166	28.816	34.134	13.5978	19.69	41.26	40.9306	43.7433	41.0768	41.4305		0.654055	29.7108
14.5222	38.733	44.907	43.7	19.701	22.11	42.895	32.513	14.931	14.693	26.398	45.164	44.835	40.391	21.145	28.741	32.969	37.375	32.98	19.609	21.427	28.594	20.114	16.888	25.502	29.139	16.5487	19.419	45.119	38.9045	41.6244	45.1646	30.5214		0.659459	30.7111
14.6412	34.653	50.433	41.831	13.905	18.025	39.868	41.061	18.559	7.9	27.305	47.138	45.532	50.527	21.685	22.49	37.167	35.361	34.713	20.539	16.325	25.37	19.882	16.2	27.985	34.097	17.5584	21.273	44.594	34.23	44.1954	48.9684	35.0586		0.664862	31.0759
14.7603	37.533	43.277	40.708	17.444	15.785	35.645	35.161	11.342	13.966	21.656	43.981	40.171	43.414	22.466	25.341	34.092	35.049	37.239	21.131	16.328	26.988	19.443	20.136	34.057	27.124	16.9288	16.402	39.774	34.0468	35.8081	50.504	31.643		0.670271	29.5182
14.8793	36.539	40.178	48.217	18.697	18.57	38.207	31.343	14.02	12.683	24.004	49.307	48.554	49.659	22.394	21.366	33.331	35.944	37.239	24.84	17.258	25.315	17.19	17.911	31.442	28.688	18.9833	19.836	47.567	39.412	43.0278	41.926	34.6627		0.675675	30.8847
14.9984	39.653	49.956	45.082	17.273	17.032	35.389	34.259	13.703	8.383	27.327	50.11	42.572	44.683	19.662	19.868	33.55	38.312	37.097	18.427	21.512	25.834	23.207	13.004	27.073	29.59	16.4493	17.758	45.132	43.5861	41.1587	38.9259	41.6527		0.681083	30.5381
15.1174	39.852	46.182	41.951	20.716	17.686	30.952	33.523	15.613	13.587	26.919	44.296	45.037	41.77	23.367	24.842	31.105	35.104	38.207	17.991	24.75	23.998	23.818	18.036	29.604	27	15.8167	20.175	36.33	44.3186	35.749	41.604	37.6512		0.686487	30.236
15.2364	37.08	52.109	46.404	14.773	16.564	30.415	30.752	19.813	17.197	25.997	45.738	36.877	42.878	23.218	21.696	32.452	38.305	39.088	22.475	20.827	28.181	18.172	16.503	31.041	36.076	14.3006	14.092	37.575	47.126	42.2323	47.2794	36.7206		0.691891	30.7487
15.3555	31.922	47.105	43.464	13.706	14.715	36.547	36.313	16.409	10.309	29.151	52.88	40.342	47.381	20.373	25.344	36.741	35.531	37.502	21.682	19.946	28.26	20.363	18.106	27.87	26.138	17.1827	19.779	47.438	45.3501	43.2897	42.2016	36.8819		0.697299	30.9445
15.4745	36.628	47.413	38.19	15.943	15.805	38.083	31.803	21.94	12.646	23.862	47.919	38.021	46.092	28.912	19.74	28.094	39.852	42.457	19.722	21.375	25.338	16.227	17.396	30.222	21.46	15.5648	19.171	37.136	40.4377	37.0883	40.8582	36.1314		0.702703	29.7352
15.5935	41.447	44.473	36.539	12.615	17.249	33.421	37.616	16.164	8.961	27.746	57.633	45.133	39.27	30.815	29.071	27.91	37.89	34.15	16.978	17.053	23.027	21.696	17.503	28.933	28.538	19.195	18.243	42.92	41.463	42.4593	43.8103	41.422		0.708107	30.667
15.7126	48.395	44.867	40.018	13.88	18.722	29.265	33.17	18.947	12.101	32.071	51.049	47.183	43.655	26.644	26.163	35.059	39.296	32.684	20.452	18.928	24.826	19.964	19.089	29.127	27.267	16.1614	16.005	39.515	45.894	39.5721	42.6722	36.3164		0.713515	30.9049
15.8316	39.787	46.653	33.956	14.846	18.093	29.371	33.858	19.996	9.762	32.535	53.53	33.038	42.467	28.569	19.143	30.889	35.63	31.29	20.234	19.659	27.317	24.758	20.333	34.233	24.839	18.504	20.09	43.835	38.059	41.794	41.5539	37.9823		0.718919	30.2064
15.9506	47.372	47.971	38.427	19.886	15.724	32.149	33.542	18.338	11.118	27.971	39.947	33.346	44.189	23.799	26.862	25.39	28.417	41.986	20.728	22.72	30.268	20.16	18.605	28.594	36.308	19.0358	19.497	42.402	42.3601	38.1265	38.4174	35.0313		0.724323	30.2715
16.0697	42.458	47.297	31.9	16.737	17.019	23.044	32.1	19.523	11.918	29.799	40.716	42.339	43.594	24.375	24.682	30.14	30.033	39.097	21.274	26.171	26.072	20.534	17.561	34.684	26.958	13.5631	19.033	38.668	39.0532	41.8011	41.1747	35.7882		0.729731	29.6596
16.1887	37.505	44.408	39.814	22.793	13.718	28.995	33.834	17.96	10.174	26.407	44.618	38.999	44.134	28.299	26.45	31.477	36.236	36.393	23.277	25.856	32.775	21.372	16.751	34.359	29.517	16.4999	18.41	40.988	36.8133	38.3806	31.6695	34.1703		0.735135	30.0954
16.3077	41.818	38.794	43.908	20.144	14.261	26.62	34.156	19.263	13.343	26.714	47.081	34.732	40.908	28.728	28.031	31.548	37.117	38.855	17.723	28.045	32.623	23.675	15.689	35.38	26.878	19.4783	18.819	48.263	37.2422	42.1367	45.5792	41.1369		0.740539	31.209
16.4268	38.585	47.833	35.053	18.016	13.999	32.675	33.883	20.918	14.401	30.946	53.228	43.058	36.469	26.655	22.251	30.017	36.52	34.346	20.06	29.89	33.991	20.638	17.135	29.783	28.064	19.8217	22.799	40.559	41.5685	43.2271	42.3482	33.8622		0.745947	31.0187
16.5458	40.946	53.871	34.341	14.34	15.222	28.386	33.282	20.766	19.114	27.128	43.606	33.42	32.594	27.661	23.071	29.685	35.836	28.084	24.022	25.31	30.367	19.76	16.343	34.09	30.566	19.2747	20.121	53.247	41.9026	41.582	34.7624	34.9632		0.751351	30.2395
16.6648	47.494	48.012	43.803	17.883	14.264	20.413	40.726	22.197	16.914	33.142	44.281	38.451	37.913	27.163	23.14	27.222	30.817	31.746	27.005	29.535	29.148	25.915	21.27	37.084	26.23	18.0189	16.256	44.673	39.7587	41.3551	40.3077	37.132		0.756755	31.2272
16.7839	42.489	50.605	45.646	18.308	10.342	29.118	29.237	21.788	18.148	31.808	41.067	45.262	30.125	30.438	27.058	33.875	37.276	32.819	21.44	30.785	33.27	21.911	23.647	34.392	25.142	22.4281	19.915	49.916	40.5007	44.3417	43.9948	34.9895		0.762163	31.9401
16.9029	44.051	52.286	40.009	16.63	18.343	24.573	35.671	20.757	17.412	28.273	43.28	35.801	40.121	32.552	24.18	37.163	32.426	36.499	23.367	34.652	33.413	23.827	20.082	37.646	26.257	17.6483	24.8	49.317	36.4129	52.5586	46.2993	45.2666		0.767567	32.8617
17.0219	43.415	49.908	40.916	16.521	12.812	29.378	40.611	16.301	18.18	31.484	50.071	34.027	38.634	27.399	24.976	41.078	41.856	33.202	20.875	29.111	33.817	24.623	26.404	39.049	21.875	15.7658	19.669	54.129	46.739	41.3501	40.7124	41.0327		0.772971	32.685
17.141	45.476	50.291	41.784	24.032	13.936	33.107	32.557	18.927	19.906	32.755	40.3	37.68	41.016	33.452	23.408	36.162	35.155	31.469	21.9	30.126	34.177	26.656	26.93	37.027	24.102	18.6184	20.886	38.901	45.9881	44.1073	42.932	40.2562		0.778379	32.6256
17.26	48.272	44.209	38.531	19.526	11.697	33.322	37.44	21.588	18.863	35.363	45.316	35.751	42.953	35.196	25.151	37.396	34.598	39.155	24.633	37.738	31.029	22.365	28.536	34.452	25.234	22.9095	26.235	47.807	39.3583	51.1984	48.9472	41.1245		0.783783	33.9342
17.379	48.053	47.568	44.493	20.686	17.269	30.313	35.234	24.184	18.65	31.116	42.856	36.095	50.366	32.066	26.594	34.5	36.807	45.311	27.475	35.837	32.612	33.701	29.422	41.929	27.726	19.8255	21.587	37.753	35.8698	42.5576	49.3853	42.067		0.789187	34.3721
17.4981	43.974	47.077	36.82	22.767	14.879	32.686	43.289	22.128	21.761	33.561	43.104	30.174	49.125	33.416	29.334	41.608	31.009	35.439	24.968	42.711	33.147	29.267	29.637	39.405	25.982	15.734	18.498	40.744	36.1541	44.1003	43.6989	38.1444		0.794595	33.5732
17.6171	45.783	44.671	38.643	21.147	18.397	38.219	39.117	22.827	20.311	34.225	41.946	43.013	41.775	37.191	31.835	42.561	33.271	36.742	36.324	30.417	29.483	26.463	28.932	46.438	26.615	21.2423	25.904	50.088	33.0719	49.0123	44.2197	40.2841		0.799999	35.0053
17.7361	52.507	43.351	44.7	21.517	18.766	37.279	36.692	25.13	20.521	34.067	37.903	38.84	43.985	32.863	25.746	43.433	37.638	42.264	33.418	40.188	36.893	27.786	33.209	50.551	34.662	23.9753	22.413	47.953	38.0231	45.135	42.4377	36.0533		0.805403	35.9344
17.8552	53.09	51.348	41.263	18.438	17.095	35.591	39.097	23.272	21.23	33.588	44.02	33.352	43.064	35.526	30.153	37.523	42.866	41.062	32.542	42.286	35.631	32.298	29.154	47.662	24.534	19.1937	31.779	52.353	33.4861	45.5042	43.6592	37.5902		0.810811	35.9141
17.9742	47.985	49.097	35.645	18.816	14.089	36.608	39.433	24.635	16.897	37.41	44.282	35.794	40.628	30.406	26.56	41.818	38.97	40.877	33.838	40.722	31.242	31.949	29.417	44.946	26.754	23.8036	29.018	54.551	42.8571	41.8478	52.4678	36.4852		0.816215	35.6203
18.0932	53.859	46.377	32.643	15.593	19.966	45.831	36.096	36.658	18.43	39.258	36.384	33.831	40.835	32.456	35.343	36.162	35.029	40.762	29.851	38.862	37.316	30.613	38.211	46.05	27.578	20.1935	29.867	49.867	37.1117	44.4125	41.8937	40.1625		0.821619	35.8594
18.2123	53.451	46.994	40.526	22.87	16.388	42.938	42.871	33.477	15.339	36.045	35.306	37.036	45.402	40.813	24.206	38.16	31.932	43.75	30.631	48.501	34.536	32.989	37.177	44.375	29.735	21.4677	32.803	47.705	48.1581	41.0328	34.497	34.3567		0.827027	36.4209
18.3313	56.865	46.344	35.987	19.818	17.465	36.867	42.238	26.338	16.63	34.029	33.51	34.379	53.155	37.343	35.125	36.088	33.969	44.314	31.36	47.896	33.762	37.476	33.174	45.272	33.105	17.9166	26.891	51.53	40.695	40.0776	43.929	45.7172		0.832431	36.5395
18.4504	49.622	44.967	41.09	24.461	18.197	40.229	44.434	27.769	16.648	34.493	33.858	34.498	50.559	36.118	38.663	34.298	40.111	35.639	40.395	45.105	34.473	37.359	36.784	45.318	28.995	24.4964	34.109	51.803	36.3857	41.4647	40.9741	43.5758		0.83784	37.0904
18.5694	55.457	46.084	45.842	24.875	19.422	42.388	41.311	29.987	24.914	37.72	36.1	33.133	53.656	39.368	31.562	35.029	40.373	41.326	29.418	44.934	39.012	43.139	38.585	42.401	30.463	21.9618	28.824	43.706	40.1942	42.4623	43.0744	42.3337		0.843243	37.783
18.6884	58.163	51.552	46.576	24.406	16.948	40.349	45.822	31.862	18.87	41.086	35.528	33.031	58.404	42.135	36.312	39.028	35.409	45.016	37.128	48.769	39.206	42.271	36.082	40.35	32.877	23.9242	35.8	38.139	41.1993	43.5056	41.8346	46.358		0.848647	38.9981
18.8075	56.791	46.876	44.781	23.548	18.119	43.112	47.836	33.286	18.166	37.88	38.015	33.835	50.734	40.48	28.226	37.158	36.236	39.803	33.489	43.531	43.503	35.764	33.034	42.831	29.757	21.2206	38.038	41.558	36.2594	35.5244	34.9879	39.7113		0.854056	37.0028
18.9265	49.128	40.099	44.164	24.604	20.284	41.95	36.988	38.205	15.449	33.305	42.215	36.998	42.046	34.283	28.714	41.215	33.455	42.207	36.152	45.037	39.251	37.784	40.162	45.484	28.032	26.7777	41.58	33.366	34.4123	35.3864	35.8882	39.1135		0.859459	36.3667
19.0455	54.286	36.546	47.999	21.255	20.232	42.39	41.196	44.446	20.65	32.148	31.125	40.319	41.975	35.925	28.825	45.227	34.632	42.542	35.889	39.303	37.744	36.416	39.729	41.214	26.885	23.4163	43.724	39.253	35.8116	37.3075	38.537	40.2378		0.864863	36.787
19.1646	56.439	43.796	41.449	25.894	21.199	42.068	45.492	30.181	23.481	39.107	32.959	36.584	39.991	38.287	32.769	36.9	36.715	39.601	39.976	45.873	41.779	51.881	36.93	49.597	29.17	22.2839	44.8	37.516	37.4429	39.8902	33.2238	43.6577		0.870272	38.0291
19.2836	48.221	44.258	51.425	24.528	17.67	42.445	45.369	42.545	18.587	33.956	33.206	41.171	41.247	38.161	37.641	37.197	33.878	46.035	33.555	42.57	38.34	44.088	34.939	38.805	28.269	30.0762	43.863	36.183	31.1747	39.6571	36.5513	36.0868		0.875675	37.2406
19.4026	53.516	42.48	53.117	25.832	18.873	37.417	46.754	39.498	26.015	34.127	31.609	33.857	43.628	46.314	34.763	43.599	38.012	44.222	46.523	40.252	42.123	47.114	33.174	41.215	32.548	29.6698	41.977	43.172	32.5805	32.6915	40.1724	42.4921		0.881079	38.7293
19.5217	44.404	40.977	42.201	30.781	19.253	41.585	52.547	43.989	26.195	38.189	29.875	30.658	39.841	36.768	31.012	40.822	36.46	40.792	34.226	36.852	38.374	46.439	42.753	37.097	30.253	37.8263	38.926	38.258	28.95	34.3046	42.6875	39.7158		0.886488	37.2816
19.6407	49.474	31.797	39.938	33.662	21.873	48.251	45.38	39.745	32.651	37.704	30.74	37.27	41.651	40.735	38.48	34.044	28.445	35.561	46.262	45.219	39.779	39.416	42.208	38.655	30.168	35.4345	39.615	32.572	24.3785	31.9203	33.5701	37.6727		0.891892	37.0085
19.7597	50.763	40.087	38.515	27.717	24.099	42.131	44.12	38.583	30.584	40.58	33.593	33.025	45.884	37.717	29.22	31.494	25.445	38.589	27.319	45.172	28.32	40.137	39.263	35.447	25.38	48.6678	49.61	33.296	24.5803	31.3468	37.8774	39.3536		0.897295	36.1849
19.8788	47.848	36.884	39.408	32.716	28.892	47.134	38.214	40.777	31.611	39.587	32.011	36.41	36.344	38.596	37.736	39.586	30.9	38.406	38.826	44.417	39.863	42.077	35.849	36.205	31.714	51.182	44.929	30.246	20.4426	27.6477	31.9746	42.8753		0.902704	37.2284
19.9978	50.613	32.189	34.904	33.575	27.094	47.485	40.886	40.499	34.658	46.849	32.38	30.527	35.214	37.072	37.431	38.357	34.843	40.73	34.744	38.917	33.666	43.024	40.216	42.079	29.981	65.5766	42.76	27.334	16.649	17.8989	28.084	40.0712		0.908108	36.7596
20.1168	47.982	28.356	31.965	35.147	18.616	50.439	43.809	35.233	37.6	44.871	30.702	39.233	44.719	32.833	38.686	39.394	32.396	36.292	36.017	31.968	38.474	41.947	42.278	33.988	33.75	54.5572	39.884	22.217	16.0101	21.3387	30.5167	39.2746		0.913511	35.9529
20.2359	43.141	26.846	29.444	26.004	23.255	41.737	49.653	34.549	35.35	43.067	26.328	33.262	40.53	36.063	37.224	38.941	32.958	37.494	35.444	36.773	40.581	36.366	47.815	35.926	31.867	56.3323	43.831	14.909	11.5174	15.6183	22.5005	41.0313		0.91892	34.5737
20.3549	42.28	18.641	30.435	34.849	26.229	45.594	42.001	32.43	33.344	33.745	25.553	37.167	38.947	31.009	37.438	40.73	31.676	37.432	32.049	37.335	31.467	36.126	43.896	37.536	33.272	45.1939	45.066	12.092	10.086	12.8644	22.9424	37.6968		0.924324	33.0351
20.4739	49.323	19.936	31.576	39.352	25.207	43.55	39.852	24.657	35.589	36.386	20.167	35.693	43.817	35.052	31.948	33.327	34.53	35.961	34.61	32.009	31.711	38.337	39.647	37.87	37.571	49.976	39.979	12.409	7.4388	12.6553	23.1122	35.6928		0.929727	32.7794
20.593	41.794	10.458	27.202	34.848	32.078	48.068	36.773	23.457	33.026	34.486	22.711	28.786	41.991	38.259	35.972	33.733	27.455	37.837	39.403	29.592	31.956	36.175	44.44	33.876	34.309	44.8577	44.282	10.214	6.5985	8.124	18.0633	30.4199		0.935136	31.2889
20.712	35.317	7.169	24.217	44.946	27.651	42.12	33.342	16.73	44.298	34.585	18.826	30.057	43.776	37.668	33.182	34.767	28.796	32.228	30.379	32.124	37.746	34.319	42.689	35.726	38.571	50.2733	37.009	4.624	5.1836	5.9699	20.5317	29.5863		0.94054	30.4502
20.831	33.067	4.31	27.573	35.084	30.936	39.14	28.182	13.521	32.104	30.19	13.078	34.924	39.787	36.797	30.736	30.815	27.2	35.918	38.983	30.482	34.775	36.613	35.178	36.399	40.051	41.8067	35.31	3.736	3.2396	5.1151	13.2078	28.2336		0.945943	28.3279
20.9501	33.519	8.588	22.844	41.552	32.753	38.787	34.088	10.696	30.688	28.978	10.965	30.703	35.994	30.111	36.871	31.763	32.018	27.132	34.167	25.107	31.394	32.338	37.759	38.691	38.29	45.1522	29.462	5.2	3.3196	2.9825	10.5618	20.3127		0.951352	27.2746
21.0691	23.411	3.728	14.955	41.104	32.243	42.978	29.766	12.386	32.297	32.206	8.116	20.434	30.541	38.677	32.024	34.983	32.656	27.246	31.303	27.81	33.452	27.081	36.126	38.396	43.126	41.3025	25.495	3.524	2.4968	1.6148	7.6932	17.4915		0.956756	25.8332
21.1881	18.12	4.213	11.861	36.12	38.404	36.349	25.602	6.839	28.477	26.531	8.95	19.717	36.845	30.533	32.766	34.778	29.145	33.495	30.675	25.611	34.68	32.066	36.352	38.657	40.452	44.325	30.336	2.033	3.3841	3.1044	6.2602	16.3663		0.96216	25.0952
21.3072	15.195	2.844	7.006	33.528	34.699	43.574	19.539	3.226	26.317	23.301	6.22	15.767	33.064	29.244	31.28	29.926	35.429	31.071	39.052	22.791	37.2	31.829	39.017	35.566	38.502	39.6956	28.286	2.172	2.2389	1.4525	5.7936	16.5725		0.967568	23.7937
21.4262	6.657	1.242	3.527	33.928	33.381	37.83	20.625	5.689	20.739	17.345	4.285	23.67	32.976	25.715	32.18	31.326	23.475	25.492	37.081	26.619	35.312	34.067	31.33	44.477	39.807	41.6057	18.155	2.082	0.7334	3.0794	3.2721	12.3757		0.972972	22.1899
21.5452	5.344	3.245	3.964	29.75	32.782	36.005	12.735	3.518	15.135	16.515	3.159	17.121	26.535	35.678	28.553	32.029	27.192	26.884	30.597	20.817	29.28	21.817	34.07	38.837	42.104	36.405	18.066	1.948	0.169	2.3525	3.3045	8.5183		0.978376	20.1384
21.6643	4.928	1.419	4.096	24.169	26.709	33.659	8.951	1.543	14.081	12.993	3.823	16.264	31.076	22.175	35.387	23.913	24.122	23.203	30.844	20.543	31.014	26.053	31.994	43.944	38.686	32.9068	13.692	1.093	1.9965	2.579	3.6459	4.5801		0.983784	18.6276
21.7833	3.928	1.334	2.037	24.258	24.89	30.985	10.832	2.449	7.697	12.43	1.273	11.169	29.101	24.5	28	25.942	25.881	20.447	29.767	16.265	33.321	27.633	35.129	49.592	40.222	35.8949	11.054	1.907	0.9569	1.2905	3.5685	2.1456		0.989188	17.9969
21.9024	3.241	1.503	4.484	19.533	21.887	29.896	7.622	1.535	9.47	8.753	1.546	9.235	24.224	27.103	27.816	20.709	22.171	15.479	30.941	18.153	29.228	31.222	33.993	50.405	47.895	25.9102	7.217	2.308	2.0796	1.3467	0.7352	3.3956		0.994596	16.9074
22.0214	2.838	1.456	2.348	12.562	21.493	24.006	7.282	2.41	6.314	4.177	2.439	8.174	17.298	18.704	29.355	22.474	17.025	12.685	27.664	17.895	35.983	24.351	35.615	51.107	43.838	30.155	3.338	1.063	1.096	1.1996	0.9157	2.1806		1	15.295

## Sheet: Image9
X0	Y0	Y1	Y2	Y3	Y4	Y5	Y6	Y7	Y8	Y9	Y10	Y11	Y12	Y13	Y14	Y15	Y16	Y17	Y18	Y19	Y20	Y21	Y22	Y23	Y24	Y25	Y26	Y27	Y28		Ap-basal	Avg intensity
0	155.111	55.444	47	33.389	42.611	51.278	42	45.056	42.278	34.444	45.167	37.667	58.944	55.944	43	81.056	90.444	66.778	69.278	63.889	47	46.389	36.944	51.444	43.056	59.444	52.667	69.389	66.5		0	56.3314
0.119	169.611	59.056	47.611	36.5	46.611	57.833	51.778	41	38.944	37.611	48.778	48.778	63.833	58.111	55.944	86	91	75.056	77.111	82.889	49.111	51.889	50.667	58.889	47.167	72.111	48.556	90.333	72.722		0.00680074	62.6034
0.2381	171.833	56.722	54	42.222	47.111	62.722	58	51.722	43.056	43.167	50.167	53.611	81.167	71.278	57.389	100.556	82.833	76.722	76.722	91.611	65.833	68.833	71	65.056	57.278	78.944	48.333	89.444	70.556		0.0136072	68.5479
0.3571	187.778	74.167	71.833	46.444	55.722	81.5	61.389	56.5	50.556	46.5	55.167	58.444	77.944	82.222	58.278	104.611	105.5	88.944	108.111	101	86.056	72.111	86.389	73.667	55.278	90	72.278	109.444	85.944		0.0204079	79.4406
0.4761	185.222	88.778	80.111	47.833	55.667	95.944	83.167	68.333	41.278	51.5	72.333	74.5	95.167	91.944	67.222	102.389	96.389	122.611	106.889	119.056	93.778	94.667	92.389	90.944	65.444	101.889	72	106	98.5		0.0272087	88.3429
0.5952	189.778	97.778	92	48.333	79.611	108.722	77.833	69.389	55.778	51.056	82.778	88	104.778	100.222	76.778	137.111	113.889	137.944	128.056	142.556	102.833	124.889	113.111	119.611	82.889	101.389	79.056	127.722	110.722		0.0340151	101.538
0.7142	203.278	96.889	124.944	51.556	83.889	118.5	95.444	82.167	55.167	59	101.722	106.056	122	113.889	77.444	142.667	114.5	141.389	146.333	160.056	130.778	139.889	117.444	132.5	79.444	110.444	101.167	151.056	137.778		0.0408159	113.703
0.8332	196.944	116.5	123.556	66.611	103.667	137.222	112.611	90.389	76.222	77.833	117.389	135.222	137.111	129.778	105.167	146.333	120.556	158.056	163.5	185.5	150.667	173.278	143.278	143.944	101.444	128.611	114.222	173.056	151.667		0.0476166	130.356
0.9523	204.111	144.222	154.5	80.944	117.111	149.333	129.611	119.111	79.056	79.167	125.056	170.444	159.556	161.056	125.333	154.111	131.278	161.111	186.556	206.667	175.111	178.944	165.389	181.222	115.778	137.778	126.278	184.389	174.722		0.0544231	147.515
1.0713	194.722	164.833	168.833	87.778	140.5	181.333	137.056	131.5	107.111	79.944	154.444	180.944	191.5	173.778	128.333	165.5	141.278	175.778	185.833	215	197.611	171.889	157.222	191.056	139.778	144.222	167.222	204.722	211.833		0.0612238	161.778
1.1903	205.5	181.333	171.222	94.944	165.5	192.167	161.611	157.889	105.333	116.833	175.333	211.444	208.222	200.556	156.333	179.333	144.056	181.667	185.833	235.944	204.944	181.389	161.611	188.167	141.167	148.444	184.944	216.444	207.611		0.0680245	174.682
1.3094	208.556	194.889	193.222	110.889	185.833	209.333	168.444	179.056	139.111	146.5	204.278	230.944	227.833	220.611	175.056	158.056	169.056	194.222	200.111	230.944	205.111	179.167	171.5	202.556	166.556	186.333	201.944	224.167	221.389		0.074831	189.851
1.4284	202.278	191.278	211.889	136.944	216.5	218.056	190.944	217.944	180	185.389	212.222	228.778	222.167	220.889	195.167	191.944	184.056	193	203.778	227.556	222.5	182.167	173.333	203.5	180.444	178.556	198.111	239.667	229.278		0.0816317	201.322
1.5474	186.389	196.444	225.389	145.278	225.056	232	225.444	227.722	209.722	220.333	224.611	234.056	225.167	216.722	206.111	192.778	185.333	214.389	214	222.5	223.778	172.944	174.278	186.944	178.333	180.444	196.667	226.944	225.611		0.0884325	206.737
1.6665	197.5	211.5	236.667	174.278	231.944	231.167	228.278	235.889	204.889	227.222	231.5	223.667	226.056	208.5	216.389	199.444	210.556	222.778	200.778	222.667	215.444	179.667	175.778	206.444	178.778	185.667	194.444	227.778	220.444		0.0952389	211.245
1.7855	190.444	229.833	241.389	178.556	235.444	225	228.278	235.5	222.5	227.444	230	226.444	208	195.833	212.5	193.556	198.278	226.667	196.111	217.611	222.611	195.778	155.944	197.333	189.444	175.278	197	227.444	225.611		0.10204	210.546
1.9046	166.778	234.944	246.278	197.167	227.444	213.833	223.111	231.167	229.611	222.5	221.944	209.889	183.167	192.444	210.556	194.833	201.333	225.667	183.056	204.222	224.611	174.167	161.5	201	180.111	182.722	194	215.111	220.944		0.108846	206.004
2.0236	181.667	238.333	244.111	201.556	221.056	212	221.278	225.222	236.833	229.444	217.611	185.222	173.056	186.167	211.722	197	200.833	224.833	162	202.944	226.556	198.111	148	193.056	182.167	193.444	177.667	212.667	218.222		0.115647	204.234
2.1426	170.222	231.5	247.222	206.389	212.667	205.444	192.111	218.944	236.944	230.5	215.611	183.222	147.389	169.167	200.778	171.222	202.444	223.111	152.889	207	212.611	182.556	156.667	207.444	171	185.667	176.278	213.944	222.111		0.122448	198.381
2.2617	172.444	231.889	231.389	210.556	196.611	190.167	181.833	197.056	232.111	221.333	218	169.556	142.667	156.722	200.444	172.111	193.278	228.5	139.5	198.278	210.278	159.667	148.056	193.056	166.389	181.722	175.167	201.222	213.889		0.129254	190.824
2.3807	162.556	220.944	229.389	200.833	172.722	179.389	188.111	185.611	237.056	215.389	209.667	149.056	122.944	154.667	191.778	175.056	197.556	199.611	133.111	182.778	201.722	170.056	139.889	186.389	165.444	179.556	161	193.722	197.5		0.136055	182.879
2.4997	153.222	204.611	223.833	191.944	151.944	174.556	185.611	183.111	246.167	217.833	205.111	143.333	118.556	140.5	176.167	175.889	187.167	201	125.111	163.667	205.222	165.222	123.778	181.5	150.611	176.444	148	186.667	193.333		0.142856	175.866
2.6188	146.611	205.889	220.222	164.333	150.444	163.056	181.667	184.333	236.556	213.611	186.444	132.056	111.611	142.444	185.667	162.833	172.5	183.944	122.5	152.722	198.667	146.556	139.278	190.944	146.5	182.667	152.722	201.056	187.556		0.149662	171.22
2.7378	147.667	194.056	200.611	173.333	123.889	159.5	194.056	188.444	233.889	210.722	193.889	118.556	114.778	122.833	172.444	163.722	171.556	177.5	123.167	132.167	206.778	153.5	124.333	171.5	151.056	185.944	143.889	201.667	182.889		0.156463	166.839
2.8568	152.111	185	220.111	161.556	117.722	147.778	199.778	175.111	223.667	200.944	173.722	117.5	103	134.611	180.778	155.278	163.5	176.111	120.944	126.833	206.056	148.667	120.556	175.5	140.889	182.722	137.444	179.111	185.278		0.163263	162.492
2.9759	151.333	181	210.222	170	119.556	147.056	193.611	157.611	218.833	190.944	177	113.722	110.667	135.833	162.278	152.333	160.278	171.389	102.222	121	190.556	141.167	116.278	181.611	134.444	173.889	129	180.389	187.389		0.17007	157.987
3.0949	132.667	176.611	215.389	174.389	122.722	150.833	178.611	151.778	210.444	177.778	158.222	118.5	119.222	127.667	158.722	146	161.167	156.889	113.222	113.056	184	137.167	118.222	185.611	135.667	169.278	114.389	160.778	183.944		0.176871	153.55
3.2139	135.944	157.611	216.556	152.222	119.111	149.056	193.167	146.833	206	171.222	170.444	118.611	116.556	120.778	165.056	140.333	173.833	158.833	91.889	115.833	184.667	138.278	114.944	182.667	129.056	173.556	102.056	167	176.611		0.183671	151.335
3.333	130.444	148.111	229.167	144.222	113.5	136.944	189.333	144.167	200.611	147.5	157.556	117	105.778	101.444	138.722	132.722	161.667	148.833	89.111	111.389	183.611	131.944	115.5	184.333	123.333	158.333	87.722	141.111	172.056		0.190478	142.971
3.452	115	136.667	217.944	148.5	109.333	147.278	180.389	142.722	166.778	123.167	162.389	119	96.444	98.944	143.722	131	155.222	153.722	84.333	117.5	165.944	120.056	120.333	176	125.222	158.833	86.722	130.667	149		0.197279	137.339
3.571	106	154	222.722	124	125.722	153.722	163.889	135.556	168.278	119.889	154.833	113.889	89.111	108.389	126.167	127.5	152.222	143.667	81.444	107.778	161.444	131.111	122.167	161.833	125.944	126.056	102.944	107.222	148		0.204079	133.293
3.6901	108.556	151.5	212.778	133	111.278	132.222	172.889	131.611	163.944	119.444	156.556	106.111	80.278	115.278	119.167	109.889	143.833	139.778	94.333	114.944	162.889	118	118.222	169.778	112.556	115.222	103.889	104.556	143.722		0.210886	129.87
3.8091	102.167	145.667	193.944	123	114.611	136.889	158.444	115.778	153.111	108.167	150.444	86.944	83.667	103.444	110.278	127.5	140.611	130.111	75.944	114.667	142.111	125.333	134.222	160.389	115.889	111.389	92.944	94.944	141.5		0.217686	123.935
3.9281	94.444	149.222	179.278	118.444	120.944	128.389	143.111	115.389	144.944	101.056	153.722	83.278	89.056	107.778	115.556	122.389	127.889	132.556	88.556	107.444	146.889	122.722	111.611	147.611	104.333	113.222	99.833	93.667	127.111		0.224487	120.36
4.0472	104.056	146.222	160.722	123.778	117.444	132.444	145.667	114.722	142.111	123.222	147.833	95.444	85.611	105.611	103.111	114.556	125.944	114.278	89.333	103.833	128.833	109.222	119.278	118.222	111.722	119.889	86.833	103.278	124.667		0.231294	117.858
4.1662	94.444	152.944	134.5	105.389	118.667	131.111	134.667	101.556	122.778	107.833	141.722	89.111	87.278	116.167	119.5	108.944	104.833	109.444	82.778	108.222	124.611	94.167	114.667	137.833	93.111	116.444	87.5	98	108		0.238094	111.939
4.2852	109.5	144.222	131.667	116	106.778	118.222	133.889	105.222	114.389	121.611	157.333	92.778	83.611	101.056	108.833	110.389	109.389	108.722	89.389	113.167	118.556	95.944	110.611	129.556	106.611	104.722	86.167	88.611	101.444		0.244895	110.979
4.4043	107.278	143.056	126.722	104.389	102.556	121.056	114.111	100.444	110.111	123.111	153.667	83.722	84.722	111.389	110.222	104.444	106.778	118.222	88.278	107.833	107.167	83.333	103.056	123.556	101.444	90.611	82.611	92.167	106.389		0.251702	107.326
4.5233	119.167	144.389	127.722	100.222	102.722	109.167	115.778	95.278	112.5	106.5	168.944	90	84.389	98.722	102	85.556	103.722	110.889	76.111	110.667	111.056	94.556	92	117.056	106	104.056	85.722	90.889	107.778		0.258502	105.985
4.6423	115.111	139.667	119.611	93.5	108.111	112.778	124.389	112.167	87.556	102.889	152.444	99.778	87.667	107.611	93.833	84.278	107.167	92.389	73.556	101.389	94.278	89	114.167	116.222	108.333	98	77.556	87.889	111.389		0.265303	103.887
4.7614	103.611	127.056	125.667	79	106.111	116.5	111.111	97.833	87.222	100.5	157.667	95	80.889	103.111	95.778	81.111	100.333	111.111	79.722	98.222	96.833	90.222	99.944	118.111	110.278	107.722	79.778	81.833	102.167		0.27211	101.533
4.8804	114.389	134.944	107.5	80.778	124	111.278	105.833	96.389	96.556	86.833	142.944	86.944	74.056	106.278	111.944	74.278	83.056	97.222	78.556	104.889	96.778	83.667	93.889	124.889	121	97.722	83.222	74.444	92.5		0.27891	99.5441
4.9995	121.444	132.722	107.833	102	114.167	100.333	109.556	105.333	85.611	101.389	125.278	102.333	81.556	104.111	102.444	73	97.556	111.667	86.333	90.833	98.722	91.5	94.333	103.556	121.278	104.056	82	81.222	104.778		0.285717	101.274
5.1185	119.333	121.333	116.5	80.667	109.333	116.056	125.778	114.222	96.611	98.111	130.667	103.556	90.5	98.111	109.5	83.5	84.5	116.222	94.611	98.611	94.667	79.944	98.222	91.333	119.5	109.278	71.056	80.111	89.444		0.292517	101.423
5.2375	117.056	118.778	89.444	85.444	101.056	107.111	115.444	112.389	96.111	101.222	118.222	101.778	93.333	104.056	100.5	77.722	82.889	138.944	71.611	91.5	106.667	87.5	101.5	97.056	127.611	101.556	78.889	81.222	82.611		0.299318	99.6283
5.3566	122	108.556	97.222	81.611	107.167	118.722	112.778	108.222	80.278	86.778	116.444	104.889	91.056	115.333	98	84.5	83.944	120.722	77.889	91.278	97.444	80	87	93.444	130.889	114.167	72.778	71.111	79.778		0.306125	97.7241
5.4756	118.222	109.056	108.222	82.889	102.333	108.389	105.944	112.944	86.111	87.278	122.056	124.111	82.278	108.167	100.722	67.056	82.611	121.5	81.778	84.056	104.833	88.667	92.722	86.167	129.333	105.722	59.722	76.5	87.889		0.312925	97.4923
5.5946	104.222	106.389	96.889	76	95.111	103.778	117.5	100.833	92.222	88.167	105.556	111.5	84.667	123.5	101	72.722	79.667	120.889	69.556	81.5	102.778	88.167	90.944	90.944	116.056	103.167	73.167	64.278	80.333		0.319726	94.5346
5.7137	116.278	108.778	100.389	82.278	95.833	97.278	118.5	97.944	89.5	95.833	106.722	121.278	76.667	115.444	93.333	72.611	80.389	93.333	71.389	63.778	102	79.722	79.611	81.611	133.833	95.722	75.889	67.667	71.5		0.326533	92.59
5.8327	113.889	116.222	98.5	88.5	94.833	96.444	99.056	107.389	90	80.889	110	126.444	79.111	107.444	100.944	79.222	77.667	101	77	80.611	97.167	71.111	77.944	93.278	113.278	108.5	75.833	61.111	80.667		0.333333	93.2432
5.9517	127.944	110.722	96	77.722	90.778	101.167	106.167	97.389	103.833	82.333	94.056	116.833	77	101.278	86.222	77.556	77.056	95.833	73.889	70.611	89.167	84.278	82.278	78.444	119.222	105.722	70.556	65.833	78.222		0.340134	90.9693
6.0708	121.278	115.389	108.5	75.222	78	100.333	95.222	92.389	84.778	74	104.056	107.389	85.5	85.5	91.111	87.167	71.444	77.389	62.833	60	87.222	69.778	73.167	88.333	107	96.056	69.333	68.611	79.833		0.346941	86.7873
6.1898	111.5	112.833	111.167	71.222	68.722	100.389	102	97.444	94.667	77.778	89.833	112.389	70.167	87	84.944	80.944	77.333	86.722	69.944	69.389	84.278	75.833	73.222	79.944	113.278	96.222	65.167	65	83.056		0.353741	86.634
6.3088	107.167	116.333	100	72.056	81.389	91.222	97.222	82.167	92.833	59.667	92.722	98.889	71.833	86.556	83.056	90.167	75.889	62.389	61.722	74.5	84.833	70.389	77.722	74.444	107.222	101.167	74.389	61.833	83.222		0.360542	83.8966
6.4279	94.556	118.944	107.222	79	66.833	96.833	86.5	88.889	85.611	73.889	89	103.222	73.667	91.944	85.167	86.667	77.056	60.722	59.444	71.167	85.167	55.111	76.389	69.833	100.667	102.944	74.722	61.222	86.889		0.367348	83.0785
6.5469	108.611	103.444	93.167	78.667	69.278	104.056	96.667	88.278	78.944	74.389	86.778	96.889	78.333	80.667	89.889	77.833	78.722	61.5	46.389	73.722	72.389	66.556	72.333	80.556	89.444	101.056	80.944	70.889	86.944		0.374149	82.3219
6.6659	92.167	98.333	92.556	69.444	63.667	85	91	79.611	81.222	67.778	81.833	102	68.278	75.5	79.5	91	84.722	57.556	44.167	74.278	78.944	57.167	70.389	77.611	95.556	112.056	81.722	69.667	76.278		0.38095	79.2759
6.785	82.944	98.222	98.167	68.722	53	95.889	76.167	71.667	70.722	67.611	87.944	108.944	65.667	85.111	77.667	86.333	79.556	53.5	56.722	76.667	81.278	61.167	70.556	81.444	81.556	98.278	72.333	71	83.833		0.387756	78.023
6.904	90.111	94.111	104.5	71.889	53	97.111	94.333	80.444	77.389	53	68.778	103.889	68.556	78.389	75.389	77.833	88	46.778	48.889	81.278	67.833	68.111	71.278	89.556	82.889	97.333	78.444	73.667	85		0.394557	78.1992
7.023	81.611	95.389	90.5	61.5	53.667	90.722	88.444	77.222	70.5	56.611	68.556	104.944	61.167	81.667	84.444	83.833	83.278	46.778	34.667	74.778	74.722	67.833	71.944	73.278	78.944	98.056	69.222	74.611	71.278		0.401358	74.8333
7.1421	84.778	95.167	95	72.222	47.611	82.944	80.556	65.944	68.889	57.667	61.889	92.444	54.222	67.778	76.722	86	84.722	42.722	32.833	68	73.667	64.833	71.667	81.556	79.278	112.667	56.556	85.056	77.389		0.408164	73.1303
7.2611	85.056	91.722	91.444	70.111	48.667	88.167	83.444	73.167	62.444	51.111	72.167	109.889	52.889	67.556	68.611	78.778	88.333	43.222	48	70.056	75	56.611	69.111	69.833	71	106.778	72.5	81.889	79.833		0.414965	73.3582
7.3801	87.611	100.722	89.056	51.111	55.667	73.889	86.333	68.833	62.944	48.167	77.167	94.889	45	60.667	72.333	78.167	81.111	32.444	36.056	72.889	70.611	57.056	69.778	68	83.389	87.778	67.278	67.889	75.556		0.421766	69.7376
7.4992	65.056	100.778	99.167	65.056	48.778	78.111	93.222	59.167	68	51.667	69.389	97.333	53.611	57.111	81.833	83.556	85.667	40.333	42.556	61.444	69.222	70.222	69.167	67.5	89.5	97.056	82.556	82	74.167		0.428572	72.525
7.6182	87.111	102.889	99.778	54.333	55.278	82.889	71.5	68.278	62.333	49	58.5	81	46	53.556	69.111	84	68.833	38.333	35.167	56.556	65.389	63.722	67.222	68.278	78.5	96.944	72.167	78.778	69.056		0.435373	68.4311
7.7372	70.111	103.889	97.611	63.556	56.278	69.333	75.556	65.944	51.833	50	60.167	84.5	43.056	45.889	82.333	75.889	69.444	41.833	38.444	62.611	68.889	55.056	62.5	66.722	83.278	101.611	74.389	83.444	83.944		0.442174	68.5555
7.8563	72.333	90.278	81.333	56.167	53.167	77.222	76.5	58.611	56.389	42.333	66.556	84.611	47.056	40.556	82.778	89.889	73.056	30.333	32.444	43.5	76.722	52.333	59.444	64.889	77	100.833	71.389	86.833	78		0.44898	66.295
7.9753	75.389	102.5	100.611	60.667	56.944	75.611	76.167	48.333	54.222	48.111	63.667	72.778	43.556	55.611	68.333	80	79.056	29.056	33.444	54.444	63.278	52.111	68.389	65.444	74	87.667	74.667	77.111	78.278		0.455781	66.1878
8.0943	81.333	87.778	94	51.722	52.667	76.111	77.278	66.444	60.944	43.111	61.444	82.389	45.667	49.333	68	76.333	67.056	35.944	30.944	48.667	74.444	52	56.722	71.222	77.611	79.278	72.944	92.778	72.556		0.462582	65.749
8.2134	70.333	74.167	97.556	54.556	49.278	66	86.889	57.944	50.444	43.278	72.556	73.5	45.889	45.944	82.556	79.944	66.778	27.444	22.889	48	57.333	65.5	53.722	86.389	76.111	74.444	74.111	86.611	68.667		0.469388	64.0977
8.3324	86.833	85.667	93.389	52.333	50.389	76.389	69.833	60.667	51.444	48.167	54.944	73.167	44.167	61.944	72	75.111	72.333	38.778	28.944	45.333	61.556	61.056	57.389	76.167	71.944	76.778	67	84.056	61.167		0.476189	64.1016
8.4515	79.056	87.833	94.056	46.389	50.278	57.944	74.333	60.333	49.833	40.833	66.722	67.278	46.389	54.778	78.556	80.278	72.444	35.833	35.944	56.167	61.222	54.5	56.111	67.389	69.611	70.5	72.222	89.889	57.944		0.482995	63.2643
8.5705	94.5	73.944	81.444	58.889	45.111	71	67.111	55.556	47.333	42.778	59.333	64.5	49.444	54.944	71	84.722	70.389	28.333	32.389	40.278	68.444	46.278	47	77.5	72	78.333	65.111	74.833	64.889		0.489796	61.634
8.6895	84.667	78.222	89.556	55.278	49.278	68.222	66.056	61.278	37.444	42.056	63.444	64	52.556	49.722	76.889	75.611	76.167	30.833	27.722	46.278	70.444	48	58.722	80.5	66.611	74.5	65.167	80.833	66.722		0.496597	62.3027
8.8086	80.278	83.556	98.833	46.722	48.722	61.389	65.667	67.778	41.333	44.611	62.278	56.667	51.056	56.667	72.167	71.667	80.389	33.556	27.556	33.056	59.833	48.611	47.278	84.278	64.167	59.056	57.556	75.611	59.944		0.503403	60.0097
8.9276	80.889	75.778	87.389	49.222	46.167	70.167	71.222	66.167	49.111	40.444	55.833	64.889	49.056	60.278	75.722	59.056	65.5	35.833	22.222	42.833	62.389	38.5	52.5	70.5	60.111	74.722	68.944	77.278	67.111		0.510204	59.9942
9.0466	94.444	84.278	74.056	57.944	52.111	73.444	64.056	61.444	48.889	46.278	63.389	62.111	41.333	53.722	79.222	70.167	70.167	31.722	29.667	37.222	64.222	41.389	49.278	68.056	57.611	68.056	72.389	73.556	60.278		0.517005	60.3621
9.1657	89.833	61.333	73	54.889	48.944	70.333	72.222	71.944	36.167	44.444	52.611	57.667	43.833	55.611	67.278	73.833	68	29.167	21.167	37.222	68.111	35.222	55.056	64.833	53.389	70.833	68.833	69.833	72.444		0.523811	58.2087
9.2847	86.889	68.833	71.5	53.889	52.611	62.111	68.111	77.5	49.778	36.889	52.389	59.944	51.444	55.833	69.444	68.833	71.389	30.444	22.889	46.167	65.556	41.889	43.944	60.944	54.389	63.889	60	69.556	69.222		0.530612	58.1474
9.4037	75.389	73.722	57.333	55.778	48.667	64.556	69.833	75.611	39.111	35.833	53.111	52.667	47.778	46.833	79.389	61.056	61.889	26.5	23.667	44.333	68.778	42.667	47.667	65.389	52	69.444	64.611	67	65.667		0.537413	56.4234
9.5228	87.944	76.278	61.611	50.944	44.778	59.389	68.222	70.444	41.667	36.278	63.444	53.167	44.222	55.5	66.556	65.167	74.333	25.833	23.167	45.111	60.556	39.722	47.222	69.944	45	63.167	62.222	62.333	64.333		0.544219	56.157
9.6418	90.278	71.333	64.278	54.556	51.056	66.778	65.944	67.556	43.5	37.278	55.556	51.556	51.556	53.278	58.778	65.333	65.722	24.5	21.667	36.278	59.167	33.889	50.444	62.556	53.444	67.833	70.056	61.056	62.278		0.55102	55.776
9.7608	88.389	71.444	67.167	55.667	49.111	64.389	72.833	72.167	38.889	36.722	59.278	61.444	45.778	49.389	70.333	66.667	63.278	31.333	29.556	31	71.389	37	45.778	65.389	47.389	64.056	61.889	58.556	59.167		0.557821	56.3947
9.8799	87.056	71.833	59.278	44.778	41.5	69.167	61.278	81.944	34.833	36.778	53.722	61.944	47.278	50.667	67.5	60.111	61.167	28.056	24.944	34.556	60.833	34.833	45.444	73.278	47.444	68.333	65.444	67.611	56.889		0.564627	55.1207
9.9989	100.278	85.611	71.611	48.056	45.111	63.056	68.167	77.5	40.778	36.556	53.944	52.222	45.667	55.444	66	72.389	65.556	31.278	21.611	37.278	55.667	37.722	43.167	64.778	41.722	61.556	60.056	60.111	53		0.571428	55.7204
10.1179	101.056	70.222	66.667	52	50.722	75.333	72.389	88.444	46.944	32.556	56.389	65.333	46.333	57.611	69.889	64.111	56.444	33.667	25.611	32.5	61.444	47.944	41.333	66.278	42.611	51.556	62.278	73.722	60.722		0.578228	57.6589
10.237	94.611	75.667	56.556	49.111	39.722	75.833	71.889	80.222	39.556	36.222	55.222	55.889	42.778	53.556	68.556	70	60.389	19.167	26.056	37	61.833	40.611	36.833	60.722	32	50.278	58.333	60.278	64.833		0.585035	54.2663
10.356	85.444	80.278	75.944	46.722	47.833	96	69.111	73.833	38.5	34.167	47.444	70.278	45.944	52.556	71.556	78.833	61.222	28.056	26.944	32.778	64.167	37.333	33.667	71.5	46.389	54.667	72.167	61.056	73.667		0.591836	57.864
10.475	91.556	86.056	73.111	43.444	45.944	91.556	68.611	76.778	50.444	36.667	54.444	61.667	45.5	51.889	73.444	61.778	55.722	26.111	20.889	30.222	69.833	35.556	43.444	73.5	41	47.889	69.444	55.167	66.944		0.598636	56.8486
10.5941	86.944	76.111	59.778	47.444	55.056	92.444	63.611	67.389	39.778	35.111	56.389	72.333	49	47.222	67.278	61.778	60.389	27.5	19.611	35.667	63.333	36.556	34.444	65.833	37.5	54.556	66.722	54.611	60.667		0.605443	55.0019
10.7131	87.056	84.722	57.611	51.444	43.389	84.667	60.889	63.944	38.056	28	58.889	65.333	56.833	51.722	64.722	71.556	56.444	24.722	23.5	34.389	58.167	43.833	28.889	57.556	46.278	53.222	69.333	72.667	58.944		0.612244	55.0613
10.8321	86.611	86.556	70.056	47.667	51.333	81.333	68.389	73.5	36.333	30.444	48.111	72.944	54.167	55.111	65.278	71.222	64.944	35.111	28.333	28.444	63.556	34.833	31.333	67.111	32.111	55.833	80.889	66.333	75.611		0.619044	57.362
10.9512	93.556	80.889	66.889	47.111	52.667	75.889	80	68.056	46.056	30.556	53.778	64.444	57.667	61.722	65.722	66.222	58.889	25.778	21.222	43.944	57.889	35.611	38.667	63.5	41.111	47.167	69.444	55.889	62.889		0.625851	56.3181
11.0702	93.5	82.778	62.556	54.389	57.667	97.556	80.5	61.278	45.278	31.778	57.278	71.056	59.222	57.667	63.722	62.111	64	32.556	21.167	42.778	62.556	30.778	28.111	62	38.667	49.111	63.333	59.944	67.222		0.632652	57.2607
11.1892	83.5	87.278	67.889	48.778	57.278	89.333	85.056	65.333	42.5	31.722	47.944	73.833	61.389	57.278	68.556	63.667	54	36.833	26.611	32.389	69.056	41.5	33.167	64.667	39.444	49.944	66.444	61.667	67		0.639452	57.7261
11.3083	87.833	71.111	69	54.111	61.111	97.222	98.778	60.556	47.833	34.111	49.833	67.111	59.722	66.333	69.667	68.278	58.833	29.167	24.222	31.889	65.278	36.444	36.833	68.389	38.833	37.5	67.111	53.944	72.333		0.646259	58.0478
11.4273	87.278	81.833	65	51.778	55.833	85.944	78.778	66.889	43.778	44.778	55.944	66.833	73.611	62.278	60.222	57.056	67.944	36.444	25.222	33.444	62.833	41.111	24.222	67.333	39.5	39	69.278	64.722	73.111		0.653059	57.9999
11.5463	93.111	74.278	66.167	57.5	49.167	76.889	94.5	58.333	53.167	43.167	52.722	68.667	71.167	68	57.111	60.333	65.5	34.889	27.333	39.722	64.556	46.444	30.667	67.111	43.444	48.111	66.611	59.611	65.5		0.65986	58.751
11.6654	95.556	65.944	64.056	51.278	58.722	80.111	77.722	52.167	39.667	40.889	41.389	58.889	80.944	59.111	65.167	58	68.111	39.222	21.556	35.111	60.444	44	32.944	60.278	38.778	41.444	64	51.333	68.167		0.666667	55.6897
11.7844	77.167	70.667	63.556	56.278	55.056	75.056	72.389	55.944	47.167	47.056	45.611	71.667	79.333	60.944	61.667	59	61.944	40.333	21.389	41.333	69.667	34	34.056	66.889	37.944	39.722	67.167	58.611	68.444		0.673467	56.5537
11.9035	88.167	61.278	61.278	58.389	57.111	80.833	73.667	66.722	50.667	41.556	48.944	72.389	76.056	45.333	66.889	53	63.167	40.389	29.889	36.833	73.389	41.111	31.667	61.778	44.833	35.389	74.889	64.333	62.667		0.680274	57.3315
12.0225	78.333	73.056	53.444	61.111	47.611	68.778	73.722	60.389	38.056	47.167	46.611	69	85.944	57.444	60.556	57.778	69.333	37.889	28.944	40.611	60.889	37.167	35.444	59.833	37.056	40.889	61	57.833	65.667		0.687075	55.5709
12.1415	72.389	69.167	50.167	63.611	59.167	86	77.5	63.111	42.167	44.278	47.111	65.833	78.111	54.722	57.722	61	68.889	35.778	29.833	41.889	62.056	44.111	30.5	69.111	33.5	40.889	69.444	60.222	57.611		0.693875	56.41
12.2606	80.778	64.222	64.056	62.056	68.778	60.111	67.611	63.778	44	36.611	62.389	74.722	74.889	54.778	67.611	65.944	78.722	44.167	34.278	46.056	66.556	46.667	28.889	73.778	36.389	30.389	62.667	55.778	65.222		0.700682	57.9963
12.3796	81.056	72.444	70.722	59.056	62.111	62.111	66.389	62.722	45.833	41.556	57.556	71.611	77.444	57.889	47.667	60.778	79.389	40.278	30.278	35.278	57.778	44.389	33.444	58.167	38.944	35.722	62.722	52.389	70.944		0.707483	56.4368
12.4986	70.889	64.944	61.667	56.5	64.611	67.667	73.167	67.111	43.278	41.5	60.222	74.389	74.5	65.944	56.333	61.667	65.611	52.333	32.167	41.944	60.278	39.611	31.278	62.222	41.333	43.278	64.444	49.5	63.333		0.714283	56.9559
12.6177	76.5	72.667	53.667	59.889	55.333	59.833	66.111	74.556	46.944	48.111	59.389	76.944	63.333	68.722	62.444	62.833	68.611	51.167	28.5	42.222	67.722	46.667	35.167	71.667	46.389	38.222	71.333	59.111	72.333		0.72109	58.8409
12.7367	66.333	77.111	58.667	54.778	63	71.556	77.889	60.333	50.278	39.944	55.667	71.444	70.722	62.889	56.944	65.944	76.611	52.278	29.667	44.278	74.222	47.5	38.889	63.333	40	46.611	69.556	59	65.833		0.72789	59.0096
12.8557	68	86.667	51.889	57.444	69.111	68.944	61.389	61.889	46.778	53	60.167	67.667	65.889	65.889	60.5	61.111	71.833	56.833	32.056	50.833	64.278	50.111	42.778	65.722	37.389	41.722	55.889	58.111	71.111		0.734691	58.7931
12.9748	63.944	68.278	68.222	62.833	60.833	62.556	69.111	62.944	54.611	42.944	61.167	60.389	68.5	71.611	65.667	58.167	84.667	52.778	37.722	47.444	68.5	41.611	38.611	67.667	45	38.944	54.667	45.833	74.389		0.741498	58.6072
13.0938	69.889	80.556	66.111	64.889	56.5	62.889	67.556	70.667	62.611	56.389	59.222	68.278	57.444	63.056	58.667	62.167	68.944	60.833	38.611	45.222	66.389	47.333	36.833	62.944	45.333	36.056	58.944	61.833	74.056		0.748298	59.6628
13.2128	72.611	82.556	57.944	55.5	62.722	63.5	63	63.5	63.333	48.833	56.833	67.611	59.278	69.556	67.333	64.889	66.389	68.5	33.611	45.389	68.389	45.444	39.333	69.5	41.389	43.889	45.556	59.722	67.5		0.755099	59.09
13.3319	70.667	70.778	56.778	62.389	63.389	63.5	73.167	66.056	52.667	53.278	67.556	70.278	63.778	63.722	62.944	59.833	72.389	67.056	32.778	45.5	68.278	53.389	43.667	72.278	37.222	44.833	48.556	54.833	74.278		0.761906	59.8564
13.4509	66.167	80.667	58.222	66.278	61	62	72.111	70	57.778	64.722	66.222	67.333	76.389	74.278	67.278	63.056	69.722	63.833	37	45.889	72.611	50.944	40.444	65.5	45.333	39.667	45	63.333	52.722		0.768706	60.8793
13.5699	66.944	73.278	49.056	53.611	69.611	61.056	67.833	70.167	46.778	67.056	55.778	72.778	63.667	71.611	65.556	59.444	72.111	71.667	37.444	43.833	72	56	42.778	62.444	40.278	44.111	51.389	64.278	66.722		0.775507	59.9751
13.689	66.944	81.667	64.111	68.333	62.056	56.667	71.333	75.278	52.111	59.222	57.722	66.444	80.778	77.556	69.944	44.389	50	63	34.833	46.556	79.389	56.778	41.611	65.556	41.278	39.444	54.167	66.111	57.889		0.782314	60.3851
13.808	59.889	76.944	63.333	64.222	68.444	52.944	56	68.056	50	68.056	60.167	66.722	65.333	78.222	62.222	53.444	55.389	66.778	31.833	47.5	71.5	58.056	42.722	56.611	47	53.444	52.944	57.444	72.611		0.789114	59.5803
13.927	61	71.889	47.444	58.611	68.333	59.389	65.722	58.889	49.833	63.111	67.444	69.889	80.167	82.5	54.444	54.833	60.111	64.722	37.944	58.556	72.889	61	41.111	60.444	43.944	44.778	52.611	68.056	56.944		0.795915	59.883
14.0461	61.667	79.667	61.889	57.667	72.556	65.778	72.667	68.111	52.389	63.056	63.333	71.5	79.111	85.889	61.333	57.5	64.333	69.389	43.278	61.944	80.111	57.444	34.722	48.556	47.667	41	62.111	62.222	70.944		0.802721	62.6839
14.1651	69.611	76.611	55.5	56.611	68.611	60.833	54.222	72.722	52.111	60.556	73.944	66.5	81.833	88.556	71.556	62.889	69.167	74.222	42.111	48.556	75.778	58.5	36.444	63.5	43.889	42.611	64.556	71.222	48.444		0.809522	62.4712
14.2841	68.667	77.889	58.389	52.222	72.722	57.722	66.444	77.167	56.556	71.167	65.5	80.222	78.667	80.5	57.889	54.611	64.333	73.611	49.389	58	79.167	56.556	47.889	61.944	38.778	50.111	63.667	66	60.278		0.816323	63.6571
14.4032	74.833	74.056	51.222	49.833	57.556	53.667	65.889	75.944	56.833	65.611	68.889	79.056	73.111	70.833	66.333	51.389	62.056	66.667	50.278	54.722	80.944	62.167	48.167	57.222	41.889	42.556	70.056	69.667	57.889		0.823129	62.046
14.5222	56.889	66.333	59.778	44.278	44.889	59.722	69.333	66.722	58.222	70.833	62.611	89.389	73.611	70.5	66.611	45.5	69.444	70.944	56.778	61.889	77.444	54.278	44.111	63.833	43.056	41.333	75	69	59.333		0.82993	61.7815
14.6412	69.167	68	45.278	51.556	55.056	56.222	70.5	92.833	55.556	65.222	64.444	89.722	95.111	76.611	68.056	39.444	59.833	75.056	55.667	67.333	76.944	62.5	44.333	65.111	55.611	45.056	70.722	63.611	68.167		0.836731	64.5766
14.7603	68.778	73.389	39.556	54.056	51.944	52.222	61.278	69.389	56.111	60.722	61.333	68.611	92.611	72.611	68.611	37.389	57	68.833	59.722	56.278	69.611	58.778	54.611	60.889	45.056	44.944	65.944	63.944	65.778		0.843537	60.6896
14.8793	63.444	57.889	46.556	52.889	41.167	49.722	57.833	67.556	52	68	66.667	66.222	82.778	67.167	52	38.111	62.611	57.111	56.722	58.833	70.889	66.833	43.833	52.389	48.389	46.722	64.556	66.611	68.278		0.850338	58.4061
14.9984	63.444	66.833	47.5	40.778	40.333	42.111	57.944	72.778	64	63.778	61	71.778	74.278	69.889	59.444	24.944	47.611	55.278	59.222	59.889	78.389	57.333	43.722	65.5	48.278	44.722	66.167	61.611	70.333		0.857144	57.8927
15.1174	60.778	56.944	38.333	41.444	31.611	50.611	59.944	71.444	57.722	63.444	50.333	66.722	71.444	65.778	48.389	26.944	56.5	58.389	67.111	62.278	75.5	63.444	53.333	64.389	56.278	46.389	58.556	74.444	69.667		0.863945	57.5229
15.2364	60.722	44.889	31	31.389	25	33.556	59.5	55.611	57.611	60.056	46.389	70.611	72.5	69.778	64.444	20.667	42.667	60.778	69.778	60.667	82	71	47.333	62.056	42.833	43.222	63.167	70.222	80.056		0.870746	55.1552
15.3555	60.889	51.333	28.5	26.222	16	39.444	50.389	65.111	63.944	58.944	54.722	66	62.667	64.778	54.944	12.944	37.778	42.389	70.778	62.667	71.889	69.611	57.667	58.167	56.222	50.944	66.333	64.778	79.889		0.877552	53.998
15.4745	43.944	41.722	27.333	22.611	14.611	28.167	40	63.056	52.278	52.278	47.5	59.722	66.5	66.722	50.722	11.667	25.889	40.778	64.111	67.056	74.333	66.222	52.444	68.444	53.667	54.556	61.833	68.722	80.278		0.884353	50.5919
15.5935	52.889	36.667	17.5	14.944	12.167	28.111	41.222	49.778	51.5	50.889	51.889	60.222	68.056	75.056	42.167	10.278	18	43.944	52.5	67.056	52.667	67.889	57.111	51.222	50.222	45.667	70.722	66.667	83.167		0.891154	47.9369
15.7126	59	35.944	17.611	13.944	5	24.444	35.889	57.556	48.5	47.889	50.556	54.278	63.167	58.333	39.389	11.833	10.111	46.333	60.833	67.833	61.333	67.111	60.222	77.056	49.722	54	76.889	64.722	72.278		0.89796	47.9923
15.8316	34.944	32.333	16.056	6.889	9	18.222	25.222	44.111	53.389	34.833	51.167	60.611	63.722	50.444	34	4.833	8.444	40.722	65.278	59.056	58	67.944	55.111	61.722	53.667	48	62.778	70.389	67.889		0.904761	43.4061
15.9506	39.222	31.056	14.444	7.5	5.444	12.444	18.278	39.111	42.222	36.278	45.278	56.111	63.833	53.333	20.833	5.778	5.389	35.667	56.056	59.5	60.944	63.444	66.167	67.889	52.389	46.778	63.722	58.722	61.111		0.911562	40.998
16.0697	35.5	25.222	10.889	6.056	3.278	10.278	14.611	37.333	43.778	28.111	45.278	57.722	64.944	57.833	20.556	3.111	4.556	24.278	56.278	52.889	54	63.444	70.667	63.333	53.111	54.667	66.333	69.111	72.444		0.918368	40.3314
16.1887	27.167	17.778	10.889	7.056	4.556	8	8.722	24.778	33.278	21.056	41.722	55.778	49.667	50.944	15.722	2.111	5.778	14.444	59.556	45	48.333	56.056	79.056	49.5	53	58.222	60.722	71.389	67.111		0.925169	36.1169
16.3077	16.389	14.722	6.389	6.889	2.222	5.222	7.556	20.833	34.5	13.944	37.611	52.111	57	45.833	9.278	3.222	1.778	14.167	58.056	51.889	56.722	62.944	71.5	69.444	63.611	50.944	59.778	68.222	59.778		0.93197	35.2605
16.4268	20.389	9.5	6.722	2.722	5.167	3.889	4.611	8.444	27.444	9.833	31.944	44.611	45.556	40.167	8.778	1.556	2.167	9.444	65.167	46.833	51.944	59.389	66.333	68.5	68.667	62.111	52.833	74.611	67.5		0.938776	33.339
16.5458	24.556	11.5	4.667	2.778	2.333	2.556	4.167	7.111	18.167	5.778	20.889	38.611	40.667	29.444	7	3.778	3.5	5.667	58.944	52.5	38.722	63.111	82.389	61.444	57.056	57.278	54.889	76.056	58.278		0.945577	30.8219
16.6648	20	8.833	4.5	2.611	2.167	2.722	3.556	5.5	16.667	2.667	9.556	31.056	33.389	30	7.5	2.556	2.889	5.944	49.556	49.222	44.611	55.611	82.667	58.611	59.278	56.444	53.444	69	66.056		0.952378	28.8487
16.7839	11.389	6.5	5.444	3.556	3.056	3.333	1.222	3.333	10.944	4.056	7.611	31.056	25.611	21.722	4.833	3.278	1	6.278	42.111	47.5	32.833	47.444	80.056	61.333	82.833	62.667	57.611	67.333	54.722		0.959184	27.2643
16.9029	9.722	5	2.667	2.333	2.833	2.611	3.722	4.222	8.333	2.556	5.556	17	17.944	13.056	5	0.944	1.444	3.111	32.556	44.389	29.333	50.111	67.556	59.278	72.444	71.444	60.111	75.444	55.667		0.965985	25.0478
17.0219	6	5.667	3.389	1.222	2.833	2	2.889	3.722	5.389	1.222	4.667	19.389	17.056	11.278	3.333	1.222	2.111	2.278	21.722	42.611	24	50.667	62.111	61.944	77.222	70.944	62.222	70.556	63.556		0.972786	24.249
17.141	9.056	4.222	3	1.833	1	2.444	1	2.222	6.167	2.556	4.111	11.889	12.944	9.167	3.667	1.444	0.778	1.722	12.778	36.167	14	54.889	59.222	68.667	77.222	68.056	63.944	70.667	57.889		0.979592	22.8525
17.26	9.667	4.667	1.556	1.333	0.111	0.056	1.667	2.722	3.444	0.722	3.056	9.222	9.389	9.111	4.667	1.278	2.278	0.889	9.222	40.889	13.833	49.5	57.5	59	77.278	70.111	67.111	69.5	60.167		0.986393	22.0671
17.379	5.444	3.389	1.778	1.333	1.5	1.278	1.667	2.778	4.556	0.722	3.5	6.5	7.611	3.889	3.056	0.278	1.056	1.389	5.111	23.056	7.667	31.056	59.222	62.556	73.889	81.667	72.333	74.833	55.278		0.993194	20.6342
17.4981	7.556	2.667	0.944	1	1.056	0.611	1.833	2.111	2.722	2.667	3.167	9.778	7	5.444	2.111	1.278	0.278	1.722	6.444	15.722	5.722	28.556	63.167	61.556	77.389	92.556	87.5	68.778	57.5		1	21.3391

## Sheet: Image8
X0	Y0	Y1	Y2	Y3	Y4	Y5	Y6	Y7	Y8	Y9	Y10	Y11	Y12	Y13	Y14	Y15	Y16	Y17	Y18	Y19	Y20	Y21	Y22	Y23	Y24	Y25	Y26	Y27		Ap-basal	Avg intensity
0	127.791	95.736	79.975	94.609	86.028	83.285	48.434	69.144	59.458	71.268	44.304	54.616	56.28	32.329	39.615	36.262	43.919	32.288	35.459	30.368	49.037	52.979	46.645	42.313	45.511	49.949	75.107	110.732		0	60.48
0.119	121.281	103.988	83.837	95.156	87.857	66.693	54.211	74.52	62.397	72.997	43.824	66.53	61.762	39.482	42.731	38.806	41.168	38.674	36.452	39.975	62.142	57.977	52.479	39.218	50.794	58.662	82.661	122.589		0.00826205	64.2451
0.2381	120.676	111.005	91.368	84.15	87.091	67.727	63.1	85.65	69.955	82.72	48.312	75.043	61.284	35.699	46.584	45.797	52.599	47.913	42.748	49.769	66.604	73.212	52.671	42.971	58.691	69.827	93.166	134.336		0.016531	70.0239
0.3571	131.71	115.531	99.642	86.118	103.211	69.868	65.658	92.354	72.754	99.228	53.312	71.801	66.452	43.32	61.891	47.434	47.959	51.77	49.374	64.271	75.884	89.412	54.2	50.327	73.176	70.641	103.097	139.238		0.0247931	76.7726
0.4761	138.699	106.383	103.839	83.296	108.65	72.715	70.847	101.621	77.743	110.996	58.698	69.446	66.042	43.935	66.543	46.999	58.178	54.239	55.734	72.448	84.144	103.154	58.082	56.281	77.174	81.481	117.395	139.001		0.0330552	81.563
0.5952	144.151	125.615	101.222	83.324	103.317	89.797	70.107	106.486	76.686	125.68	66.494	77.533	69.072	45.677	72.016	56.986	64.343	65.863	58.301	87.448	89.215	101.28	70.864	70.129	87.482	86.596	127.689	138.233		0.0413242	87.9145
0.7142	143.572	127.939	106.478	92.848	112.264	93.632	71.855	113.363	83.538	123.203	67.199	81.343	74.351	52.635	76.303	56.601	64.744	71.408	75.201	108.71	106.763	126.823	69.375	79.699	98.199	103.924	137.161	133.786		0.0495862	94.747
0.8332	144.185	128.233	106.277	98.932	121.959	97.627	87.604	114.108	88.106	141.293	70.072	74.003	86.072	57.273	73.854	63.805	68.557	73.266	79.96	130.169	119.346	132.4	79.417	81.105	105.619	111.615	142.317	142.695		0.0578483	100.71
0.9523	156.284	134.839	112.393	107.304	129.962	111.488	99.613	117.263	104.013	134.268	73.896	87.212	87.335	65.015	82.927	62.945	77.857	81.617	85.529	138.37	118.665	139.744	88.161	83.321	117.807	106.916	145.507	135.814		0.0661173	106.645
1.0713	163.763	120.271	116.796	109.567	133.828	125.47	95.482	132.854	110.274	132.501	84.852	92.014	89.258	77.813	92.099	65.396	85.3	103.663	97.269	137.795	118.096	121.388	91.648	96.628	125.842	132.849	144.261	124.202		0.0743793	111.471
1.1903	182.424	137.679	120.673	121.057	134.385	144.246	91.589	138.595	113.838	137.87	86.572	102.999	94.149	82.515	87.819	77.068	97.3	118.572	99.875	143.216	110.875	116.056	100.354	103.301	136.758	127.716	156.014	124.352		0.0826414	117.424
1.3094	173.655	137.007	121.329	130.69	138.244	144.693	108.264	138.249	116.212	150.641	98.005	117.2	99.671	92.903	88.168	76.939	113.993	138.118	122.262	142.593	105.289	124.01	120.168	112.704	141.134	140.835	144.985	114.961		0.0909104	123.319
1.4284	168.52	135.77	121.866	130.099	126.089	151.359	128.399	130.561	120.274	161.982	102.369	108.313	102.685	102.461	102.722	76.24	124.632	139.02	123.279	137.733	97.477	114.119	134.407	106.276	144.608	150.009	142.468	118.647		0.0991724	125.085
1.5474	164.887	134.952	112.947	129.145	117.078	152.149	126.235	130.715	141.824	146.207	102.258	108.41	108.989	101.427	99.048	89.818	143.332	141.507	111.757	124.642	95.879	107.751	133.17	113.86	141.532	157.967	136.478	120.21		0.107434	124.792
1.6665	152.01	143.182	109.667	120.239	118.641	138.283	138.162	143.846	146.098	148.389	113.76	118.036	121.902	107.925	106.471	95.835	147.541	139.033	106.467	103.757	90.885	109.371	140.542	113.602	133.717	169.093	121.892	121.845		0.115703	125.721
1.7855	132.273	150.106	113.943	120.866	119.567	123.8	137.343	148.087	146.114	149.666	113.009	113.76	113.755	119.759	90.623	101.692	148.749	138.534	98.871	98.431	95.115	108.895	131.789	110.526	124.046	172.926	117.177	123.255		0.123966	123.667
1.9046	128.983	147.738	103.763	111.208	120.193	107.445	147.029	155.445	163.673	131.993	104.88	108.67	118.981	99.94	100.009	109.023	143.467	135.519	98.599	96.461	88.208	112.833	115.454	115.081	125.018	165.214	115.711	103.536		0.132235	120.503
2.0236	112.948	142.011	109.682	111.797	115.854	108.798	149.513	158.571	153.468	145.52	103.318	121.939	122.484	104.176	84.622	91.404	139.577	130.324	90.469	94.99	90.004	125.338	122.695	111.427	129.109	166.138	116.356	102.141		0.140497	119.81
2.1426	114.732	125.538	100.881	115.085	119.173	110.18	150.093	165.85	160.527	134.568	109.685	113.352	107.89	108.745	79.819	97.484	137.716	116.127	85.231	87.207	96.556	126	114.61	112.824	117.639	152.234	116.183	106.569		0.148759	117.232
2.2617	116.656	117.161	89.198	108.936	121.594	102.202	138.438	160.294	160.502	118.698	107.071	116.621	98.355	108.625	80.525	95.452	132.255	107.997	84.664	90.785	89.364	117.09	110.102	115.878	123.034	148.323	100.212	115.529		0.157028	113.413
2.3807	118.303	123.679	90.468	117.337	123.141	107.144	119.534	163.328	155.467	111.402	98.097	124.008	97.759	92.723	80.95	92.713	119.792	106.541	89.173	100.523	93.719	117.369	112.496	110.847	127.755	140.279	105.563	115.512		0.16529	112.701
2.4997	107.433	117.846	89.893	117.971	123.133	103.191	116.371	164.224	171.232	117.88	95.897	117.02	90.504	106.46	76.111	89.944	114.859	106.255	82.761	105.606	93.234	130.53	120.864	107.942	119.412	138.014	111.281	118.144		0.173552	112.643
2.6188	118.271	107.677	92.176	114.075	123.67	113.137	102.193	161.614	154.471	111.441	95.522	116.022	92.779	96.059	77.351	89.878	98.538	104.478	78.815	101.213	90.973	127.035	120.107	111.59	117.345	133.555	105.618	121.672		0.181821	109.903
2.7378	110.732	119.398	90.418	110.064	124.575	110.177	93.974	136.804	137.647	107.128	96.03	117.668	94.849	99.417	87.79	81.107	82.704	99.131	75.028	105.795	95.476	134.797	109.028	105.223	111.818	121.574	106.031	120.016		0.190083	106.586
2.8568	101.125	118.038	93.384	116.315	126.687	107.762	103.854	128.627	110.933	100.99	94.367	109.292	91.574	110.216	80.242	79.281	81.164	103.233	73.463	111.448	87.958	139.016	108.719	98.08	110.988	120.6	108.284	114.513		0.198345	104.648
2.9759	98.301	119.579	98.383	125.256	143.361	105.114	93.371	119.013	114.724	100.013	83.38	107.822	87.825	109.83	83.089	86.465	80.632	98.376	66.456	112.771	94.341	127.64	114.893	100.54	112.112	119.389	116.481	111.529		0.206614	104.667
3.0949	103.295	118.73	97.067	133.276	136.388	102.546	86.297	119.91	113.451	100.806	88.686	108.186	90.355	116.008	102.327	86.485	82.843	91.436	74.402	118.024	92.824	137.062	105.863	93.361	103.136	113.041	131.147	110.701		0.214876	105.63
3.2139	102.408	119.007	100.913	128.848	137.261	106.55	87.015	107.247	107.729	98.043	94.328	105.6	93.912	105.796	100.404	81.431	89.47	87.614	74.98	122.621	99.294	131.997	124.003	94.443	97.249	112.884	133.461	116.97		0.223138	105.767
3.333	106.582	115.079	107.61	127.808	133.112	104.504	85.342	89.771	99.812	101.702	96.669	105.819	96.555	111.555	98.164	73.748	89.091	84.792	62.691	120.215	97.537	129.117	121.087	100.641	104.117	118.052	132.766	112.184		0.231407	104.504
3.452	114.281	124.866	100.887	126.133	132.582	103.039	84.056	103.091	89.623	102.714	88.019	93.802	89.853	112.023	104.25	80.406	96.875	84.093	54.556	114.788	99.281	129.437	121.217	97.399	104.322	102.436	124.101	113.28		0.239669	103.265
3.571	112.346	123.491	110.228	124.937	134.348	101.878	93.546	90.517	85.6	97.114	101.369	93.855	99.012	117.417	97.198	83.292	93.916	74.89	47.028	110.961	108.837	139.168	126.503	105.827	103.638	100.919	124.88	119.427		0.247931	104.362
3.6901	122.774	119.64	126.185	121.778	130.014	107.309	87.491	97.552	93.537	103.615	106.413	88.599	99.493	115.77	109.744	92.684	101.326	57.529	44.295	111.076	108.177	124.914	119.294	110.954	105.522	93.64	120.074	119.977		0.2562	104.978
3.8091	120.469	116.303	128.887	122.902	124.303	115.195	94.816	97.859	81.542	99.365	96.555	92.577	94.316	109.885	103.443	99.613	99.258	57.493	42.028	109.48	105.417	128.51	126.671	119.392	108.717	99.422	124.404	118.215		0.264462	104.894
3.9281	118.222	124.578	130.017	114.867	121.535	108.35	107.091	103.255	81.629	100.982	97.482	85.745	94.15	103.629	111.22	99.879	92.825	53.32	37.293	116.548	110.024	136.882	124.905	119.815	103.293	89.369	130.409	109.891		0.272724	104.543
4.0472	116.86	121.699	129.976	112.47	117.161	112.647	104.871	95.828	78.55	95.268	88.648	83.498	97.267	101.692	114.418	92.088	90.033	40.172	34.567	108.884	111.366	125.418	133.68	123.179	102.343	95.733	125.856	117.203		0.280993	102.549
4.1662	114.435	130.323	114.098	112.706	119.533	118.906	101.064	93.008	82.99	99.327	93.735	95.449	98.232	100.616	107.924	102.51	100.605	46.049	36.288	107.377	95.546	132.345	129.859	119.143	96.488	93.443	123.597	122.154		0.289255	103.134
4.2852	123.377	129.234	110.424	101.117	126.416	124.592	102.036	88.774	89.325	89.796	87.22	91.471	102.788	100.898	103.717	99.423	100.122	39.823	28.268	99.367	108.813	135.412	116.821	119.302	96.287	93.872	113.319	122.83		0.297517	101.602
4.4043	115.603	123.163	106.756	98.555	128.852	121.435	107.836	87.447	87.41	94.437	86.335	81.058	98.722	106.071	108.737	98.342	96.202	33.733	27.909	91.262	113.612	131.048	117.21	134.265	87.748	91.782	128.601	119.713		0.305786	100.852
4.5233	117.356	115.722	112.917	100.636	118.112	117.201	119.935	91.402	82.205	95.239	88.031	91.061	105.165	101.866	114.927	106.951	91.026	30.012	27.436	87.231	113.57	120.417	124.03	130.883	88.879	94.42	109.997	127.796		0.314048	100.872
4.6423	117.358	112.073	120.03	113.936	130.929	112.968	112.259	90.737	90.625	105.353	93.539	88.386	111.044	97.613	108.86	110.556	90.509	36.232	34.517	79.21	113.681	117.165	118.913	126.37	86.046	95.08	102.256	122.256		0.32231	101.375
4.7614	111.304	113.293	123.93	107.887	118.682	120.936	112.185	89.12	93.068	114.57	84.727	91.48	119.964	106.82	106.665	115.08	87.375	36.106	29.237	82.065	114.473	110.04	111.418	129.222	92.719	89.334	103.568	125.013		0.330579	101.439
4.8804	114.688	129.388	120.85	106.249	117.998	115.719	118.016	86.822	83.644	105.14	88.54	86.099	103.662	124.37	116.955	116.863	71.284	32.578	24.524	70.734	118.137	104.388	121.015	138.178	86.983	89.021	101.11	120.116		0.338841	100.467
4.9995	104.435	122.86	126.622	108.684	118.954	105.563	109.955	75.008	74.832	102.462	84.309	100.812	105.903	126.976	116.844	120.376	74.655	29.947	22.617	68.149	124.291	102.081	119.762	138.182	89.875	86.745	90.161	113.592		0.34711	98.7376
5.1185	101.387	123.222	123.68	108.695	113.302	112.025	109.418	72.897	82.336	107.836	90.42	95.537	106.248	115.69	106.459	124.424	68.979	30.377	23.541	69.955	126.962	116.425	112.183	127.784	88.577	98.996	99.439	116.74		0.355372	99.0548
5.2375	98.307	117.032	134.175	112.725	102.093	112.452	103.632	74.471	78.905	112.295	88.819	95.388	95.931	129.89	111.444	115.006	70.546	30.301	26.909	63.041	127.091	129.801	109.802	134.047	92.462	99.892	104.676	114.968		0.363634	99.5036
5.3566	98.647	121.207	123.095	120.411	109.199	102.798	99.218	76.692	84.544	111.145	89.322	102.907	99.67	126.535	107.421	115.436	65.426	26.295	22.494	64.799	117.571	124.012	111.634	127.604	84.664	92.862	99.797	114.965		0.371903	97.8704
5.4756	87.897	118.965	134.84	121.106	103.551	106.007	87.088	71.353	76.426	106.599	106.681	106.207	98.397	140.036	111.806	111.797	64.287	24.717	15.885	56.712	115.254	124.086	118.781	119.356	88.158	88.332	89.544	117.116		0.380166	96.8209
5.5946	89.067	118.506	134.397	113.25	92.016	100.87	82.235	68.717	83.512	114.846	93.632	110.982	93.214	133.779	117.83	114.799	61.655	26.381	17.322	55.724	119.495	127.162	118.522	120.726	83.027	91.235	86.862	119.895		0.388428	96.0592
5.7137	93.983	111.235	141.098	122.776	95.639	105.598	73.876	71.778	76.837	108.576	92.614	116.812	105.003	139.847	115.025	109.206	65.453	29.853	17.932	56.256	126.389	122.505	119.868	110.439	76.511	94.356	76.999	114.347		0.396697	96.1004
5.8327	93.342	112.485	139.875	127.553	107.558	99.002	81.819	71.667	75.88	107.962	91.101	105.814	98.448	132.321	114.002	103.141	58.857	28.607	16.745	54.986	125.569	118.884	117.649	119.045	67.86	71.868	67.674	111.897		0.404959	93.629
5.9517	94.074	117.953	144.047	113.507	101.896	96.188	79.44	57.935	68.346	112.783	102.411	106.78	101.693	124.393	126.636	103.539	55.013	25.944	15.439	51.382	123.357	124.67	120.122	119.395	66.518	65.628	58.817	107.43		0.413221	92.3334
6.0708	100.031	103.777	150.925	119.019	105.063	101.302	74.784	61.046	66.101	120.441	94.882	113.702	102.781	118.716	127.284	98.316	50.542	23.923	14.451	50.877	122.343	126.502	123.239	112.232	65.217	50.562	54.87	112.845		0.42149	91.6348
6.1898	105.906	98.561	144.35	123.562	106.482	85.394	69.92	58.582	69.34	120.125	98.284	111.485	105.319	120.629	122.016	96.256	51.48	23.9	16.032	41.856	115.143	127.236	118.218	107.727	61.338	49.335	50.909	127.065		0.429752	90.2304
6.3088	99.144	101.744	146.93	123.201	111.472	93.869	63.49	59.73	73.015	127.229	101.069	117.641	107.316	123.683	125.815	89.642	47.526	24.873	16.958	44.138	120.779	126.789	126.589	102.203	58.566	41.93	45.669	120.331		0.438014	90.7622
6.4279	104.126	99.613	138.233	123.544	110.771	89.997	58.096	57.06	71.193	119.623	100.935	111.441	107.646	124.163	118.355	86.564	48.211	21.278	18.952	49.662	117.102	127.144	127.049	102.736	59.416	36.896	44.075	114.176		0.446283	88.8592
6.5469	106.305	104.637	156.088	131.11	117.974	101.195	46.068	59.975	66.242	127.328	95.181	111.141	121.462	117.433	104.643	96.013	46.144	21.759	14.732	46.169	114.913	128.333	116.711	105.43	52.298	38.824	34.297	124.246		0.454545	89.5232
6.6659	102.167	112.043	147.734	146.41	122.111	107.046	53.513	59.269	66.454	116.985	91.93	110.214	126.187	128.731	109.636	87.602	42.299	24.269	14.653	44.311	111.389	136.792	107.39	112.161	48.079	36.12	38.45	116.13		0.462807	90.0027
6.785	98.94	108.716	135.771	130.75	127.948	107.317	49.207	57.978	69.36	122.579	99.474	112.572	119.767	124.023	111.93	97.667	43.381	22.614	16.97	41.93	106.647	129.761	107.463	112.683	43.85	29.349	36.009	117.516		0.471076	88.649
6.904	103.17	113.953	142.505	133.088	143.802	98.894	48.481	51.659	68.52	121.743	90.61	113.657	125.52	124.921	108.28	96.661	38.899	22.218	13.439	40.794	106.694	123.764	99.674	111.397	49.458	26.356	35.272	118.323		0.479338	88.2769
7.023	110.63	100.329	138.091	140.149	144.466	101.199	43.21	54.399	67.179	116.374	98.134	105.751	122.896	121.518	105.896	96.052	39.823	22.695	15.349	38.534	107.926	128.974	98.439	110.509	44.17	25.833	31.655	115.878		0.4876	87.3592
7.1421	113.175	104.317	127.258	136.178	145.168	106.289	54.194	51.788	67.484	127.805	100.369	109.584	120.095	122.264	102.257	92.908	42.047	18.685	14.343	39.878	103.812	127.279	101.947	116.698	36.772	28.375	28.249	121.628		0.495869	87.8873
7.2611	120.49	99.363	123.824	120.873	124.509	97.033	49.846	49.009	69.562	116.901	101.968	103.962	122.482	123.203	105.567	104.57	39.558	20.884	15.629	42.633	100.402	126.89	96.399	104.38	31.393	28.042	28.838	116.536		0.504131	85.1695
7.3801	124.084	105.462	130.546	126.235	129.915	102.721	49.954	56.718	64.928	110.981	97.231	91.204	123.853	128.005	100.582	99.263	33.92	19.836	18.069	40.814	96.755	115.018	91.803	104.111	39.461	29.23	31.073	121.731		0.512393	85.1251
7.4992	121.42	105.879	128.616	120.769	128.799	97.999	43.461	44.115	64.437	114.048	97.81	104.293	123.511	123.562	95.632	96.148	33.799	18.099	16.56	36.317	102.818	115.187	101.569	93.385	34.759	26.711	28.804	117.369		0.520662	83.4242
7.6182	119.301	109.933	132.561	104.103	120.936	102.968	43.903	45.122	74.13	104.604	105.838	107.72	110.774	132.474	102.866	103.468	37.734	21.483	17.656	33.149	90.444	117.038	91.547	107.187	30.815	23.579	26.241	123.346		0.528924	83.6043
7.7372	130.068	102.98	119.695	110.606	138.08	106.806	39.927	45.463	74.468	111.043	103.541	106.6	96.705	126.32	101.281	100.691	36.386	17.123	16.234	31.044	85.634	114.052	97.93	121.059	28.988	25.233	29.076	122.776		0.537186	83.5646
7.8563	145.942	106.857	119.231	106.575	126.884	102.079	48.982	44.412	67.653	111.387	103.58	112.719	95.338	125.962	88.321	102.102	38.059	22.271	18.363	27.085	85.565	116.846	96.633	110.954	34.082	25.248	25.249	112.777		0.545455	82.8984
7.9753	133.161	101.863	119.068	108.975	126.031	96.765	47.528	43.679	60.183	105.708	109.615	109.825	94.443	126.852	80.775	104.338	37.646	21.352	18.345	35.624	76.932	108.584	108.826	104.69	32.286	23.133	26.147	107.047		0.553717	81.0508
8.0943	134.465	112.005	114.13	106.365	128.786	99.855	48.357	44.337	58.414	105.659	107.451	100.253	102.535	121.672	92.539	95.9	35.458	22.638	14.744	33.65	89.684	105.582	99.788	112.061	28.156	24.821	30.169	93.86		0.561979	80.8334
8.2134	128.17	112.283	118.199	108.828	121.956	100.61	46.32	44.41	60.573	110.57	102.053	99.791	83.155	122.378	94.504	97.644	38.905	23.163	22.25	26.456	82.01	105.099	95.98	113.687	26.41	20.579	26.457	94.9375		0.570248	79.5492
8.3324	128.792	109.218	108.755	108.443	107.712	103.324	38.325	36.002	58.302	114.39	92.532	100.446	90.562	112.554	93.366	95.985	45.336	19.287	20.683	32.65	93.364	105.13	103.312	101.784	25.873	19.619	21.166	83.2449		0.57851	77.5056
8.4515	124.012	100.158	109.717	105.167	113.222	91.343	41.384	37.195	56.532	110.716	99.986	85.31	92.55	114.518	104.646	92.866	42.047	20.543	20.431	30.53	98.395	104.727	109.24	99.345	29.808	20.512	22.161	85.4419		0.586779	77.2322
8.5705	116.102	92.901	114.267	102.868	111.38	97.347	42.301	39.718	54.307	112.631	99.86	91.256	99.845	106.68	103.952	103.091	41.521	21.189	17.234	29.769	93.018	100.755	102.904	99.799	24.509	15.764	20.461	77.6666		0.595041	76.182
8.6895	108.322	97.26	107.557	108.227	114.212	101.058	39.554	43.357	55.159	122.096	100.429	90.002	99.716	111.074	111.355	91.478	43.538	22.582	23.848	29.737	94.424	98.197	103.271	83.416	25.965	16.665	22.889	70.7299		0.603303	76.2899
8.8086	110.534	107.598	110.442	109.125	112.116	95.994	43.396	38.78	61.142	129.123	99.702	95.154	99.088	117.642	116.249	92.342	47.393	22.611	22.675	34.962	94.488	102.86	112.993	92.292	26.095	18.305	18.49	67.3915		0.611572	78.5351
8.9276	116.249	110.679	119.023	112.558	106.035	96.186	40.704	37.858	63.439	125.213	107.364	101.716	105.803	120.099	118.29	88.057	51.348	23.24	25.481	30.671	101.533	96.307	113.466	95.503	27.503	17.44	18.084	62.5275		0.619834	79.7277
9.0466	115.004	107.389	114.131	104.607	104.087	103.784	43.769	37.681	58.889	127.364	95.155	106.865	95.858	119.997	124.495	90.761	54.094	22.923	18.522	35.137	99.527	92.701	118.435	94.626	27.39	15.114	21.771	57.9553		0.628097	78.8583
9.1657	98.869	114.058	117.364	113.12	108.019	114.091	41.858	39.439	64.667	129.776	97.912	104.809	107.096	125.493	117.227	98.416	56.334	26.525	20.708	31.501	111.816	96.967	109.222	93.734	23.546	18.87	20.432	58.4433		0.636366	80.7254
9.2847	108.441	121.522	123.844	117.422	126.126	102.146	39.735	40.42	68.748	129.74	100.058	112.655	107.776	114.599	128.268	103.024	65.513	23.811	21.21	32.695	116.696	100.89	113.207	83.141	23.347	14.88	18.146	53.4287		0.644628	82.5532
9.4037	124.273	109.74	123.138	115.598	135.523	113.703	39.243	37.703	70.238	128.067	90.109	124.244	104.634	119.347	137.559	110.934	70.087	18.636	18.923	36.087	121.302	94.011	118.854	87.996	26.104	13.876	17.524	54.6392		0.65289	84.3604
9.5228	122.224	102.258	125.741	109.52	129.168	109.049	44.72	35.683	70.928	132.473	96.883	134.7	103.02	115.14	136.025	112.277	72.752	24.793	17.108	34.816	120.834	96.654	123.674	85.039	26.008	15.48	14.007	59.6254		0.661159	84.6643
9.6418	130.496	109.478	132.804	110.655	135.868	116.654	42.166	39.032	72.892	128.345	103.798	133.175	111.686	112.179	127.548	103.436	82.67	23.748	23.162	40.28	137.542	90.253	129.257	74.363	22.374	14.581	18.492	52.0382		0.669421	86.3919
9.7608	121.52	102.609	133.363	112.421	136.425	114.65	43.919	41.298	79.37	112.816	95.764	139.167	114.901	111.757	130.611	96.604	85.242	26.471	22.798	42.252	148.745	96.371	129.657	75.617	20.276	18.466	14.019	56.2496		0.677683	86.5485
9.8799	128.618	108.852	129.882	112.55	127.473	116.572	44.452	38.586	72.481	125.669	98.191	140.797	106.015	108.007	136.143	97.696	93.328	24.431	26.311	42.12	145.247	93.159	126.812	78.358	20.55	17.082	13.861	60.7948		0.685952	86.9299
9.9989	121.554	110.819	122.107	114.468	129.15	120.154	46.603	39.494	71.676	120.381	97.575	136.794	111.473	111.261	129.947	92.76	86.635	26.424	20.313	48.445	151.327	94.382	122.379	81.216	21.338	14.802	13.248	55.9219		0.694214	86.166
10.1179	115.873	106.252	117.978	107.454	124.752	110.497	48.419	32.579	74.921	118.604	98.575	143.407	104.463	101.817	126.912	96.655	97.296	27.936	19.587	43.684	150.984	101.687	132.911	77.936	22.99	18.713	17.238	62.6965		0.702476	85.8149
10.237	118.837	107.525	116.043	114.35	123.533	106.939	49.993	32.206	76.556	115.037	98.651	150.999	97.577	92.821	134.548	92.613	95.272	31.655	23.86	49.507	148.798	102.058	122.21	74.304	22.331	16.357	13.701	52.6007		0.710745	85.0315
10.356	116.557	115.147	117.585	108.855	120.897	115.28	49.201	41.033	94.759	101.14	94.365	147.512	99.518	92.484	128.435	91.187	101.225	29.284	24.793	53.137	141.793	105.343	109.474	65.46	22.552	16.85	14.986	61.2114		0.719007	85.0023
10.475	112.301	123.429	109.664	98.463	104.175	115.214	49.761	40.233	90.593	109.148	97.662	142.807	97.321	110.634	123.209	93.254	99.253	29.221	23.201	64.608	151.486	116.2	112.975	73.248	22.179	19.305	14.434	62.9201		0.727269	85.9606
10.5941	109.13	117.459	110.765	97.826	112.918	110.139	54.777	38.793	103.161	97.536	93.722	137.73	112.741	111.879	124.343	89.066	104.284	35.247	23.817	72.776	142.034	108.164	104.347	74.081	21.945	14.742	14.193	55.6615		0.735538	85.4742
10.7131	114.143	121.537	110.191	91.446	110.977	122.966	56.473	51.116	95.793	89.541	102.342	137.034	98.909	107.482	121.331	87.527	110.756	39.457	23.656	70.995	127.445	108.01	96.452	74.287	25.491	16.777	11.958	51.4181		0.7438	84.8396
10.8321	117.764	122.042	114.795	92.467	102.577	115.738	55.194	43.797	102.27	82.049	102.8	127.33	93.671	103.96	109.577	90.305	97.55	44.264	25.797	76.091	121.803	107.015	89.131	72.704	22.72	15.454	13.787	58.2145		0.752062	82.8881
10.9512	111.392	115.981	100.776	91.245	101.321	112.691	55.664	43.913	85.219	92.875	100.635	135.796	103.171	107.466	112.151	83.053	93.072	50.928	23.363	83.764	114.735	103.418	89.32	79.349	26.028	14.07	13.949	64.527		0.760331	82.4954
11.0702	126.353	118.877	111.786	92.708	104.495	122.613	63.915	45.75	100.954	95.829	116.297	148.958	102.612	104.951	108.218	84.385	105.335	60.186	28.888	80.992	109.498	100.839	99.735	80.439	24.789	12.738	13.362	62.1898		0.768593	86.7033
11.1892	124.248	117.749	111.534	88.904	111.509	114.228	70.319	48.723	107.168	95.107	111.779	150.959	103.803	97.483	100.616	97.9	103.072	74.483	31.706	81.458	99.46	94.152	98.522	72.663	22.788	20.088	10.497	63.3036		0.776855	86.5793
11.3083	135.467	120.141	110.876	85.415	117.631	117.395	67.105	54.319	107.555	94.298	111.659	152.754	106.523	96.128	105.284	88.163	93.174	77.217	38.092	84.711	94.017	95.812	102.479	76.846	24.5	21.155	11.663	65.5773		0.785124	87.7127
11.4273	133.953	118.078	102.12	88.848	116.097	113.986	64.939	53.877	106.739	102.701	119.627	164.445	104.117	99.418	115.711	83.16	89.278	85.288	44.013	77.428	84.456	99.561	102.382	82.69	25.676	21.239	14.704	64.5481		0.793386	88.5385
11.5463	131.473	119.017	104.662	90.345	107.999	117.237	68.042	52.475	113.005	108.294	114.244	150.807	118.231	106.83	113.235	83.242	93.471	79.262	49.159	75.534	83.39	94.935	104.184	78.591	23.119	20.204	17.113	51.5238		0.801648	88.2009
11.6654	133.327	120.576	116.006	85.376	114.1	116.175	75.092	53.379	113.69	110.279	117.273	147.823	111.956	110.553	108.578	79.673	95.437	70.033	55.333	78.742	84.131	78.175	110.407	83.274	27.254	20.739	16.613	47.3665		0.809917	88.62
11.7844	127.326	110.809	113.123	90.457	114.749	117.084	78.41	56.565	110.961	111.361	113.944	156.719	110.212	111.978	101.357	76.129	91.846	72.085	51.669	70.81	83.901	82.121	99.501	76.585	29.361	18.729	15.472	55.5446		0.818179	87.4575
11.9035	126.645	120.591	110.41	86.325	111.844	115.031	82.643	55.707	110.222	112.169	109.711	157.636	119.365	121.847	108.305	75.875	82.435	80.679	56.456	69.181	73.601	88.39	103.011	86.053	27.738	20.637	17.801	53.624		0.826448	88.7119
12.0225	119.432	116.96	99.315	93.386	109.919	109.269	80.803	61.122	101.834	105.995	102.184	155.432	111.059	109.311	102.585	81.241	84.759	69.957	61.646	72.492	73.213	83.871	106.215	88.562	28.101	20.88	20.636	52.4182		0.83471	86.5213
12.1415	110.914	118.179	105.205	96.875	114.316	109.339	75.374	65.567	104.957	117.494	118.154	159.106	99.223	122.11	104.864	89.172	75.996	69.257	58.911	69.336	75.401	81.225	114.955	82.121	25.539	20.589	16.25	58.1182		0.842972	87.8053
12.2606	112.049	114.322	94.612	105.99	117.246	108.839	75.918	66.668	104.336	103.648	118.155	145.183	103.613	120.121	102.792	74.325	75.551	61.646	51.142	69.017	61.505	87.631	105.692	88.862	30.915	19.657	19.741	60.2733		0.851241	85.6946
12.3796	113.724	109.654	94.042	92.506	107.866	109.307	78.473	71.224	91.719	108.92	110.462	140.053	99.91	119.835	92.033	68.622	68.573	52.324	41.283	55.044	55.928	83.325	109.141	90.723	34.271	18.818	20.073	65.2327		0.859503	82.2531
12.4986	114.728	106.918	88.05	79.544	116.129	92.415	81.018	70.327	77.671	111.044	116.865	123.377	89.877	115.343	90.473	71.563	61.504	48.031	29.656	49.679	48.546	80.602	118.863	90.869	35.061	19.637	16.151	65.1724		0.867765	78.8969
12.6177	116.89	112.356	88.237	89.007	103.263	93.457	77.227	75.223	78.039	112.373	111.072	127.284	86.566	96.819	92.066	65.418	51.283	43.476	22.745	44.637	45.448	71.132	109.344	100.525	35.449	22.651	18.976	67.6114		0.876034	77.0919
12.7367	108.316	111.79	94.245	84.39	90.94	80.199	86.36	73.581	76.633	111.046	106.956	114.605	78.674	85.53	82.914	62.336	38.871	33.833	15.407	32.253	32.336	85.721	105.002	103.128	38.987	22.046	15.242	72.9486		0.884297	73.0103
12.8557	113.097	103.887	77.704	82.844	82.554	76.189	85.449	75.577	77.847	104.946	99.745	90.391	72.677	80.907	80.72	53.55	28.819	23.194	11.133	19.204	20.391	86.445	99.685	102.439	41.234	20.246	18.895	83.581		0.892559	68.3339
12.9748	106.891	94.048	76.18	74.62	68.952	69.294	93.482	82.077	82.843	95.867	90.585	82.331	59.793	80.737	75.883	45.197	20.646	15.799	8.251	13.107	16.838	66.409	99.921	118.233	41.838	25.985	22.474	91.106		0.900828	64.9781
13.0938	121.642	97.51	73.944	56.987	63.992	71.01	86.293	83.45	87.423	94.191	96.688	68.304	39.688	67.324	69.925	33.542	12.738	9.109	8.346	7.973	17.364	58.567	92.414	114.39	43.243	23.593	21.726	96.1901		0.90909	61.3416
13.2128	114.863	77.865	70.262	58.737	65.342	69.987	81.41	85.646	94.128	92.291	85.346	60.617	38.423	53.213	66.408	21.153	8.143	6.253	6.741	10.612	13.115	50.832	89.302	107.31	48.593	19.662	18.225	107.145		0.917352	57.9151
13.3319	107.691	80.735	54.99	47.501	56.205	70.552	84.823	83.934	84.375	93.81	76.411	51.911	22.907	42.43	64.535	14.122	7.722	4.63	4.209	6.53	10.826	47.606	75.171	116.592	54.836	21.561	20.22	107.379		0.925621	54.0791
13.4509	87.177	72.569	46.751	40.037	51.425	65.791	78.68	95.927	86.314	86.719	69.491	41.67	16.846	32.207	46.948	9.697	4.868	4.623	3.528	4.559	8.252	36.567	78.77	110.625	59.349	25.555	17.721	110.644		0.933883	49.7611
13.5699	78.527	65.978	33.88	34.458	41.024	56.646	66.753	89.575	79.376	85.727	60.452	24.566	10.414	26.044	33.822	8.758	3.461	3.728	2.573	4.843	5.751	26.309	81.367	112.489	65.296	27.279	24.473	111.231		0.942145	45.1714
13.689	76.07	57.878	33.495	25.977	35.867	56.939	62.119	91.796	75.06	79.744	54.821	24.883	10.132	17.854	25.572	5.703	1.842	3.753	2.602	5.432	4.461	23.301	69.95	104.445	72.192	23.796	26.707	117.423		0.950414	42.4934
13.808	81.921	49.046	23.826	17.149	25.029	40.942	57.423	84.907	65.652	79.433	46.892	16.167	10.545	15.66	16.632	4.234	2.54	3.424	1.723	3.104	5.924	14.898	55.813	106.272	78.585	20.944	25.879	119.251		0.958676	38.3505
13.927	66.215	43.873	15.257	12.085	18.105	30.274	61.206	87.554	71.205	73.817	48.016	11.625	10.661	11.317	11.696	5.205	2.687	2.934	1.995	2.76	5.18	14.179	52.6	90.939	84.667	21.826	29.539	113.28		0.966938	35.7392
14.0461	62.456	36.117	11.579	8.333	12.963	27.095	69.168	82.17	64.128	52.735	33.841	9.524	5.523	10.04	8.818	4.991	2.014	3.124	2.173	2.324	3.72	9.928	43.696	74.987	91.099	22.5	33.632	93.5338		0.975207	31.5076
14.1651	58.162	18.503	13.182	7.48	9.797	18.666	70.632	73.274	61.964	45.855	21.737	7.5	4.798	7.468	7.597	5.198	2.164	2.696	1.892	2.492	2.768	7.109	33.759	61.458	95.355	23.541	38.475	85.6621		0.983469	28.1851
14.2841	43.85	13.803	8.644	5.211	6.692	10.708	57.958	81.801	59.386	29.317	13.79	5.783	4.302	6.563	5.144	3.125	0.866	1.904	1.839	2.323	4.045	6.795	23.214	40.335	85.011	28.812	48.545	82.8454		0.991731	24.379
14.4032	43.797	11.756	8.79	5.144	5.768	9.713	54.864	79.049	53.677	18.58	12.976	4.796	3.793	5.108	5.44	2.127	2.884	1.15	0.788	1.169	1.529	6.83	20.97	26.511	78.435	29.414	53.472	78.1572		1	22.3817

## Sheet: Image7
X0	Y0	Y1	Y2	Y3	Y4	Y5	Y6	Y7	Y8	Y9	Y10	Y11	Y12	Y13	Y14	Y15	Y16	Y17	Y18	Y19	Y20	Y21	Y22	Y23	Y24	Y25	Y26	Y27	Y28	Y29	Y30	Y31		Ap-basal	Avg intensity
0	72.393	68.307	71.532	84.162	89.56	80.967	104.966	63.699	64.192	78.357	141.353	144.259	117.996	91.05	75.68	54.991	65.487	58.8	61.603	42.031	31.183	38.202	40.024	41.96	38.295	46.533	39.832	45.977	49.612	36.104	41.807	69.456		0	67.1991
0.119	91.231	87.729	81.859	98.305	108.803	90.048	109.365	86.713	74.719	93.731	133.151	149.094	121.746	107.725	78.126	65.446	73.223	62.441	63.326	46.392	35.192	46.337	42.56	39.053	49.509	50.612	44.385	55.076	53.922	41.513	49.639	72.684		0.00694242	75.1142
0.2381	94.933	108.057	91.735	104.097	102.962	99.79	133.612	100.213	74.963	99.888	134.74	143.204	140.83	112.448	87.093	78.517	92.612	79.882	76.702	58.594	46.931	49.891	49.584	39.914	48.536	53.036	60.799	62.545	68.573	49.918	55.285	75.395		0.0138907	83.6025
0.3571	109.433	131.446	123.401	125.889	112.75	111.562	150.009	107.074	94.071	95.512	147.163	139.327	140.325	121.107	102.718	92.124	94.232	88.913	82.893	65.427	55.214	59.287	59.484	46.791	59.613	59.582	63.009	69.841	71.21	53.51	67.556	93.551		0.0208331	93.5632
0.4761	124.974	158.998	143.483	152.703	135.864	146.41	176.263	137.051	134.994	105.638	155.47	146.127	135.282	124.622	132.177	111.637	106.931	93.923	93.528	63.706	64.191	75.927	70.852	57.927	67.804	73.469	68.311	75.849	75.889	63.114	78.685	108.846		0.0277755	108.145
0.5952	148.326	206.918	188.914	191.048	163.594	175.544	223.362	163.042	156.928	110.652	172.91	157.166	154.413	136.954	154.681	116.172	125.658	100.936	110.233	74.983	74.165	74.553	81.45	67.395	78.363	72.228	82.454	94.396	98.782	70.718	84.743	113.804		0.0347238	125.796
0.7142	178.411	222.1	225.153	208.058	153.346	188.481	233.241	198.697	177.808	125.847	193.049	157.601	147.893	152.624	178.73	132.051	135.319	125.735	136.877	97.41	85.157	92.19	86.771	77.06	90.402	80.159	97.007	121.088	106.891	76.799	103.717	129.729		0.0416662	141.106
0.8332	199.84	236.947	241.841	220.018	175.348	223.264	238.965	208.59	195.564	136.388	208.389	166.893	169.117	170.862	208.532	169.019	148.314	142.497	152.485	93.348	96.809	101.362	96.686	89.481	110.49	92.893	125.111	142.997	118.611	82.847	120.205	144.664		0.0486086	157.137
0.9523	206.305	244.539	247.656	231.299	213.264	239.066	239.188	224.606	216.972	144.798	213.184	178.612	167.806	189.768	236.315	185.568	172.721	152.753	160.138	100.831	115.739	138.856	100.452	108.273	152.011	121.108	151.053	171.276	136.429	107.486	136.43	159.372		0.0555569	173.871
1.0713	220.421	242.468	251.92	234.497	217.118	243.88	235.124	227.555	225.947	164.64	214.357	180.89	165.562	217.846	244.286	210.87	193.71	169.446	164.014	129.093	143.012	162.884	118.265	108.161	172.447	138.868	172.2	180.284	152.344	115.876	148.246	164.097		0.0624993	185.323
1.1903	219.688	246.614	250.195	236.499	217.331	250.346	236.843	233.852	225.752	177.189	213.907	187.938	184.649	220.327	247.882	214.409	198.181	186.319	168.396	127.894	153.209	186.783	156.496	116.37	180.919	159.087	187.89	198.111	173.86	137.488	156.741	169.297		0.0694417	194.389
1.3094	215.284	244.453	250.269	228.667	218.946	251.32	241.919	239.213	230.192	188.61	223.573	199.055	179.069	228.696	247.866	236.538	201.759	197.971	192.977	142.123	170.417	191.671	181.315	130.155	204.326	167.512	205.009	204.139	185.856	156.277	177.113	163.543		0.0763899	202.995
1.4284	217.472	239.048	249.783	229.141	205.761	249.809	236.886	234.864	232.121	190.666	225.001	211.422	190.691	222.222	243.619	239.12	205.571	203.213	193.383	160.161	179.266	197.689	193.799	148.086	206.348	175.051	211.133	213.545	192.392	169.962	175.688	166.543		0.0833324	206.546
1.5474	218.499	242.755	249.509	226.693	202.613	248.517	228.933	233.564	223.923	193.816	228.804	215.461	194.796	223.567	242.523	244.79	206.391	205.411	200.598	171.906	189.084	194.454	188.588	156.139	220.014	195.537	219.331	216.772	202.277	178.002	183.235	169.566		0.0902748	209.877
1.6665	206.567	246.432	243.817	219.137	197.783	244.273	227.373	227.001	225.116	189.591	245.315	227.003	199.813	220.651	243.113	243.245	211.504	208.388	206.188	173.873	201.569	204.63	189.658	166.895	219.445	197.533	227.506	222.545	204.178	190.695	176.837	166.141		0.097223	211.682
1.7855	218.425	242.013	244.732	210.834	190.046	247.281	235.355	226.912	222.436	191.201	243.665	230.513	201.262	220.671	233.086	243.235	216.144	213.571	207.8	180.016	200.599	193.225	192.504	173.651	225.58	200.418	230.068	222.335	206.799	197.663	176.407	157.287		0.104165	212.367
1.9046	219.873	238.324	243.973	203.945	176.232	243.114	225.47	226.815	222.907	186.176	245.365	226.102	196.462	225.679	232.691	237.348	207.48	214.874	213.308	174.82	197.872	190.805	186.335	189.585	235.639	202.668	227.17	227.259	201.821	189.62	174.14	160.528		0.111114	210.763
2.0236	210.226	234.254	241.691	197.158	185.323	234.392	224.598	215.065	215.271	172.847	247.225	219.654	185.159	211.3	240.486	235.437	208.981	221.357	224.408	183.001	202.756	189.671	190.628	198.421	235.709	210.269	230.158	222.339	207.784	184.623	171.915	140.975		0.118056	209.159
2.1426	202.883	236.346	242.425	190.786	189.712	228.68	214.427	209.967	208.973	168.59	248.33	215.71	188.326	203.447	232.776	227.304	219.198	210.288	221.639	176.864	198.121	198.906	180.575	196.287	227.753	218.143	221.492	216.451	212.805	187.92	164.699	141.228		0.124999	206.283
2.2617	195.851	235.396	235.534	180.829	182.533	227.435	207.562	216.39	208.72	171.331	244.648	211.738	190.612	206.338	223.7	227.542	212.967	200.026	218.824	182.377	205.943	193.242	180.198	187.92	230.35	215.879	228.492	210.522	205.743	170.72	171.962	138.383		0.131947	203.741
2.3807	189.641	229.934	236.449	181.489	180.144	219.9	209.25	215.704	211.791	151.982	243.725	217.814	178.503	186.785	217.184	232.23	197.222	200.254	219.999	177.092	199.082	200.881	182.413	200.747	237.238	211.81	231.426	211.477	192.516	168.041	165.218	131.308		0.138889	200.914
2.4997	185.2	230.287	239.367	176.701	186.46	219.441	209.794	219.58	205.865	144.893	247.813	208.371	177.305	172.068	214.603	236.117	194.197	194.073	211.986	188.35	213.392	193.051	182.054	193.567	233.864	210.282	222.285	220.067	181.002	158.992	156.504	123.602		0.145832	198.473
2.6188	165.073	219.854	233.992	179.175	179.019	217.217	202.282	222.157	201.56	140.422	246.417	188.243	176.031	157.976	207.878	231.129	198.609	189.546	213.18	180.78	205.325	191.283	181.077	188.598	231.599	206.125	224.922	227.413	161.385	147.653	153.139	112.203		0.15278	193.164
2.7378	165.015	220.323	229.853	181.38	175.606	213.479	206.14	228.053	193.173	141.69	247.845	191.817	184.514	126.177	200.967	220.812	193.104	178.758	211.487	177.23	197.191	188.019	172.897	185.344	224.416	195.095	222.394	212.94	152.629	139.589	133.76	103.931		0.159722	187.988
2.8568	169.22	217.093	235.784	189.824	181.163	213.624	213.326	222.065	190.777	130.983	236.039	182.911	163.612	125.35	190.088	213.214	186.216	166.707	216.042	181.095	196.393	189.728	160.55	180.147	220.24	196.305	219.417	211.235	148.927	137.247	142.813	107.193		0.166665	185.479
2.9759	156.935	205.412	226.106	173.953	182.914	212.683	206.325	226.809	175.553	134.448	230.49	181.157	169.961	121.231	189.332	201.951	175.803	160.318	213.452	175.156	205.844	191.576	146.811	170.034	215.072	191.944	214.288	215.974	134.016	113.944	119.971	102.436		0.173613	179.434
3.0949	142.769	197.505	225.039	164.196	176.625	207.254	206.099	228.234	152.242	134.536	224.294	166.637	170.359	100.459	182.903	185.803	178.955	156.201	211.107	171.243	195.742	169.408	135.516	169	215.055	193.241	200.938	202.125	127.267	109.246	109.87	105.354		0.180555	172.351
3.2139	147.398	202.546	220.829	163.053	169.512	193.78	212.028	218.341	148.117	128.427	208.822	165.393	163.593	100.654	162.464	176.186	160.919	145.689	203.318	163.099	192.483	156.435	133.305	163.284	214.792	182.779	194.523	195.749	121.134	109.277	107.233	88.775		0.187498	166.061
3.333	137.331	197.85	221.235	159.296	160.714	176.338	206.775	205.084	145.274	126.825	212.014	157.114	146.084	87.797	146.22	166.133	158.675	131.412	204.808	155.533	190.343	151.086	130.55	155.767	211.199	183.215	185.337	192.661	106.214	109.504	106.537	90.47		0.194446	159.856
3.452	133.466	190.434	208.116	137.407	154.197	183.938	207.844	190.472	125.761	128.605	212.119	144.736	130.99	84.434	133.928	158.203	138.931	126.491	206.778	151.847	190.265	138.793	108.414	153.967	204.574	173.986	176.9	187.044	93.716	104.665	101.44	90.964		0.201388	152.295
3.571	113.159	190.677	208.223	134.421	154.181	185.844	191.042	164.935	132.899	123.526	196.966	127.005	114.335	81.446	135.472	151.654	128.994	122.435	194.631	154.541	192.411	141.374	95.529	155.414	211.575	161.2	174.709	162.371	90.401	108.447	105.435	90.927		0.208331	146.756
3.6901	124.483	188.387	196.545	124.581	138.147	179.119	172.124	145.364	129.014	134.506	190.424	111.547	102.693	81.66	124.259	131.684	117.153	126.525	195.118	145.953	182.603	132.361	92.526	133.878	189.497	153.72	154.043	160.113	97.75	107.208	103.137	87.816		0.215279	139.186
3.8091	121.208	187.175	192.649	109.901	138.498	159.671	174.823	129.195	116.15	116.953	182.189	112.581	107.219	75.752	118.987	133.752	112.818	126.172	185.977	147.571	174.594	117.588	78.431	140.984	192.783	139.85	146.634	148.478	88.681	109.417	96.696	89.169		0.222222	133.517
3.9281	124.589	175.889	191.203	110.279	130.77	159.092	155.682	115.436	105.102	117.128	178.356	109.3	94.346	77.043	117.791	110.574	101.617	115.308	174.848	146.804	174.023	100.437	68.639	126.654	192.087	146.403	139.69	123.446	88.25	102.897	94.543	93.107		0.229164	126.917
4.0472	125.208	188.755	192.293	107.473	116.513	142.016	139.924	97.374	122.543	107.559	188.744	94.909	85.956	87.062	110.627	108.113	95.189	111.896	160.985	145.864	174.243	105.828	69.679	116.792	191.379	126.385	126.146	115.472	83.819	121.947	100.232	83.111		0.236112	123.251
4.1662	113.108	204.977	191.096	101.296	113.049	126.94	130.949	95.682	121.501	93.164	174.547	96.879	80.237	88.935	98.741	101.035	95.191	110.405	138	131.446	160.273	94.309	61.615	113.212	180.87	121.517	124.37	116.934	81.993	108.891	90.851	91.988		0.243055	117.313
4.2852	110.376	190.798	177.359	91.25	99.787	126.646	125.187	95.172	115.019	79.177	168.013	91.309	87.51	85.081	87.299	87.96	92.72	99.434	131.167	127.776	144.732	85.154	53.572	110.639	159.419	117.197	112.127	110.449	74.282	105.523	91.4	80.78		0.249997	109.822
4.4043	111.038	186.663	169.234	86.924	94.201	121.114	118.808	100.853	112.535	84.982	158.38	85.523	86.634	77.216	89.767	79.683	90.222	104.977	122.575	125.533	138.337	77.862	55.359	108.855	165.751	106.908	98.168	107.981	75.152	107.918	94.402	86.563		0.256945	107.191
4.5233	93.61	184.985	168.493	90.149	84.596	116.058	116.479	88	99.164	85.851	129.363	87.321	82.016	74.747	87.364	81.72	77.252	102.42	106.559	114.073	120.047	74.534	59.708	108.085	151.093	109.529	82.514	97.56	84.838	115.346	96.717	85.205		0.263888	101.731
4.6423	99.044	174.079	161.535	81.029	78.39	100.801	108.142	85.858	97.143	81.355	126.108	82.12	79.661	74.41	89.364	76.794	82.812	88.117	102.829	106.454	121.436	68.437	60.226	100.372	141.181	102.351	89.823	93.353	86.771	101.171	99.472	81.843		0.27083	97.5775
4.7614	96.744	172.027	153.835	81.15	84.426	88.204	101.251	93.561	99.732	73.681	114.333	84.183	88.529	78.602	89.504	80.49	93.266	95.431	94.511	104.35	110.971	63.482	60.156	96.79	108.887	98.597	87.916	92.144	84.516	94.595	96.312	93.814		0.277778	95.4997
4.8804	98.688	157.058	154.442	76.522	75.201	90.027	90.151	92.888	96.04	62.963	108.763	80.754	81.607	71.401	87.24	80.851	82.06	107.166	79.664	91.803	102.85	56.705	67.332	88.016	96.086	100.553	89.088	87.652	84.227	94.826	97.236	101.462		0.284721	91.6038
4.9995	93.602	147.5	150.591	82.001	73.256	95.854	79.796	82.934	93.452	63.608	104.941	78.436	86.807	77.749	80.711	79.164	72.166	102.691	72.375	98.742	97.045	60.81	69.987	83.957	90.77	89.952	93.04	86.125	80.388	84.026	90.544	87.813		0.291669	88.4635
5.1185	83.862	131.745	140.262	78.412	73.705	93.842	82.226	77.503	100.876	67.451	108.438	75.472	78.88	75.554	77.471	96.008	75.17	105.147	75.77	100.184	95.367	57.566	70.754	75.325	101.416	84.784	92.638	81.361	84.19	84.765	79.523	95.21		0.298612	87.5274
5.2375	77.54	121.14	127.172	78.899	68.914	98.858	77.053	80.89	97.644	67.965	109.504	68.695	80.27	72.76	67.169	96.1	79.233	84.117	69.594	89.78	85.761	54.827	72.014	73.786	86.465	91.902	84.774	90.683	84.226	82.361	79.345	97.764		0.305554	84.2877
5.3566	79.735	108.386	119.039	83.578	72.182	98.92	74.693	84.778	95.712	67.496	99.525	76.213	80.216	69.923	78.062	91.11	79.086	84.377	80.201	91.563	74.616	62.673	73.484	62.954	86.881	91.803	85.471	83.8	83.257	82.37	77.114	99.342		0.312502	83.705
5.4756	71.43	100.301	103.491	94.498	64.466	104.611	72.304	83.439	88.383	68.031	95.615	84.012	72.128	67.863	77.588	88.467	81.016	84.075	75.785	85.905	70.235	73.484	76.028	71.975	82.412	86.368	87.949	86.037	84.803	83.515	78.982	99.535		0.319445	82.6478
5.5946	74.764	103.091	102.776	90.418	70.153	110.865	67.71	85.884	92.468	58.924	89.098	88.121	75.953	67.417	64.478	101.075	82.179	83.447	73.107	90.695	66.773	70.879	72.417	70.106	82.947	89.175	87.566	76.618	86.433	88.176	81.537	94.268		0.326387	82.4849
5.7137	67.849	87.977	90.072	91.832	67.372	113.478	60.581	79.601	87.073	62.337	84.348	91.549	74.327	65.747	59.651	82.802	79.523	88.918	73.663	93.001	66.397	73.581	75.19	67.795	71.304	94.536	85.845	74.503	89.77	90.615	78.931	89.348		0.333335	79.9849
5.8327	69.395	99.068	86.667	89.487	65.545	112.798	66.518	91.616	95.829	64.541	84.831	90.207	72.588	73.044	68.53	84.346	74.169	90.714	66.877	85.578	67.064	68.325	75.864	66.442	77.236	95.642	86.113	81.341	79.797	81.419	81.215	91.35		0.340278	80.7549
5.9517	72.164	99.826	82.851	85.133	76.695	111.915	64.445	94.488	84.018	70.324	88.281	85.275	60.12	71.475	72.207	80.734	75.613	93.891	76.384	76.136	70.347	71.02	83.287	63.587	72.451	96.499	88.73	82.648	88.622	87.18	84.56	90.754		0.34722	81.3019
6.0708	71.013	86.24	77.089	91.808	73.297	118.755	59.708	85.251	84.081	78.252	74.213	76.486	63.596	69.565	58.28	73.353	80.918	90.959	75.23	73.43	69.276	78.811	79.756	66.996	67.137	94.585	86.578	75.393	80.627	81.665	80.668	78.158		0.354168	78.1617
6.1898	68.142	84.086	79.035	83.488	77.559	107.557	55.88	92.417	74.968	78.059	66.415	81.224	61.633	70.928	54.222	69.078	77.793	86.961	80.428	73.227	61.366	74.718	101.093	68.069	62.995	88.079	88.319	72.662	77.849	83.625	82.158	91.485		0.361111	77.3599
6.3088	72.023	92.286	68.128	83.751	80.007	106.032	49.35	75.803	72.43	79.817	67.634	82.281	61.995	74.268	55.284	69.818	74.546	98.192	82.645	73.62	69.656	76.394	99.803	63.352	67.232	85.933	88.609	74.526	75.438	83.035	84.918	97.575		0.368053	77.6994
6.4279	68.227	89.486	78.545	79.066	81.915	104.99	59.392	77.026	62.155	76.147	80.815	84.066	56.856	78.595	63.094	70.343	69.183	90.645	77.53	74.265	77.151	92.508	101.566	64.435	70.382	91.627	84.337	81.23	73.52	83.836	87.482	70.564		0.375001	78.1556
6.5469	69.55	91.905	82.628	84.166	75.798	90.042	49.711	75.44	59.659	80.443	77.543	82.671	58.674	66.948	55.9	60.613	72.107	87.143	82.233	65.455	74.515	98.859	91.311	68.756	67.125	97.052	82.645	74.376	72.502	86.444	87.067	79.822		0.381944	76.5345
6.6659	71.554	77.459	77.22	87.666	73.19	91.331	45.776	73.71	62.344	75.628	72.619	70.65	64.304	68.886	49.876	60.384	68.365	77.426	94.01	63.001	79.61	112.313	96.017	74.208	59.027	102.471	78.303	74.366	88.603	82.525	87.306	75.653		0.388886	76.1188
6.785	72.726	85.341	79.332	89.524	74.31	76.154	49.09	58.83	61.593	80.852	68.48	80.089	54.336	74.855	57.985	62.575	65.713	72.669	87.832	56.868	70.621	91.731	99.059	66.064	65.728	101.234	66.962	74.762	87.193	82.979	80.822	74.45		0.395835	74.0862
6.904	65.768	94.011	78.58	89.085	67.948	66.573	44.223	50.652	58.852	92.124	74.349	76.5	55.898	79.877	59.785	70.285	61.991	76.291	74.336	56.574	85.856	103.292	90.177	69.882	66.336	100.767	76.828	80.612	86.088	76.92	80.483	71.715		0.402777	74.4581
7.023	66.218	93.985	72.869	81.657	65.953	56.502	41.424	48.492	56.3	82.949	72.808	76.347	60.079	78.701	55.972	67.7	55.294	73.909	71.951	61.602	81.192	111.958	87.175	76.97	67.577	94.693	80	82.06	90.498	78.599	77.883	63.691		0.409719	72.9065
7.1421	65.811	97.186	77.462	85.237	71.298	63.785	37.73	47.971	65.592	86.416	62.268	75.764	64.021	75.211	48.458	73.918	58.228	74.685	84.074	64.021	79.18	114.658	86.675	73.272	71.68	89.061	72.578	90.43	95.604	76.516	82.17	72.44		0.416668	74.4813
7.2611	59.514	90.044	85.95	82.588	75.182	58.074	32.93	46.694	64.519	89.96	57.946	73.283	61.39	80.594	47.467	77.548	61.567	80.428	87.624	59.215	68.614	104.918	78.29	73.103	68.098	76.024	69.753	88.615	97.858	72.599	86.2	74.381		0.42361	72.8428
7.3801	54.915	106.202	95.554	83.049	82.234	60.841	36.551	46.609	63.828	81.989	56.931	78.975	68.507	77.1	48.149	85.91	59.438	83.076	76.123	57.842	72.881	104.048	78.713	71.909	64.478	74	72.483	91.105	95.946	68.956	69.399	73.617		0.430552	73.1674
7.4992	58.145	98.916	78.447	77.753	76.102	58.281	36.687	42.599	64.996	92.796	61.367	75.342	66.156	83.845	47.113	80.006	60.535	78.581	69.208	53.809	70.365	91.63	80.565	75.372	69.144	90.695	79.173	99.957	107.472	64.485	74.503	75.845		0.437501	73.1216
7.6182	63.652	105.113	74.747	75.908	79.551	52.386	38.869	42.476	67.964	92.391	58.667	73.111	61.691	79.527	45.983	71.547	57.3	70.972	82.881	61.497	74.782	95.342	78.576	68.826	62.257	80.474	71.953	106.127	107.736	70.682	80.108	75.667		0.444443	72.7738
7.7372	47.334	91.779	76.453	82.361	66.825	49.412	38.234	43.313	69.944	92.963	49.931	90.515	74.993	77.089	47.277	73.531	60.739	65.524	81.353	57.544	70.263	92.922	72.992	61.849	70.86	82.12	69.208	102.799	98.513	73.718	69.195	69.786		0.451386	70.9793
7.8563	49.816	90.15	79.545	75.44	71.437	52.539	29.169	37.204	61.73	91.303	55.999	79.61	72.413	72.976	51.104	71.664	67.275	67.833	80.682	58.275	58.609	89.142	69.024	63.076	70.536	87.201	61.048	94.776	100.453	70.389	67.848	65.425		0.458334	69.1778
7.9753	52.423	88.378	75.777	78.199	64.873	54.797	28.594	39.711	67.886	80.84	60.234	76.754	68.555	71.885	53.849	65.674	60.682	62.654	83.611	54.663	55.506	79.907	66.162	58.081	63.035	78.197	69.861	86.979	99.303	67.634	63.765	61.774		0.465276	66.8826
8.0943	52.56	92.29	84.371	74.907	71.339	54.53	30.225	41.034	64.14	90.306	56.467	69.768	79.026	68.172	61.451	60.261	61.955	61.456	77.913	61.442	66.815	67.421	63.8	60.532	66.476	71.496	74.348	86.643	96.145	60.627	61.796	75.556		0.472219	67.6646
8.2134	53.069	86.894	82.189	72.264	69.913	52.457	31.283	44.213	56.833	89.05	57.517	70.457	77.681	61.898	57.794	54.704	60.436	61.446	72.006	64.765	64.365	66.389	57.094	58.666	68.003	63.782	63.558	90.232	106.153	61.352	61.832	81.833		0.479167	66.254
8.3324	54.916	78.901	95.908	66.732	69.665	53.712	28.904	41.443	55.165	77.059	61.357	69.009	65.331	51.32	54.782	51.212	63.726	68.612	65.453	55.677	70.026	66.704	52.146	60.754	64.296	69.179	68.47	89.194	106.999	62.238	58.094	89.406		0.486109	65.1997
8.4515	49.078	72.771	87.13	76.198	67.31	48.658	33.428	40.36	59.136	83.013	63.074	74.576	64.342	58.348	57.342	54.706	57.124	64.413	64.048	57.83	69.616	74.086	53.601	62.61	65.603	65.673	66.306	77.116	103.171	58.04	48.942	79.741		0.493058	64.2934
8.5705	47.486	81.51	82.967	68.088	73.265	55.899	32.162	37.867	64.36	91.238	62.475	65.821	57.716	63.425	53.357	50.823	53.707	65.201	71.439	54.872	71.118	63.651	47.503	62.131	64.528	58.287	66.116	82.296	121.938	62.97	52.227	75.788		0.5	64.4447
8.6895	53.669	82.683	93.833	64.845	68.097	58.735	28.715	37.105	60.78	90.731	57.529	74.361	68.592	52.927	59.306	48.691	62.868	55.714	70.835	65.859	78.536	56.855	43.126	71.89	59.357	57.863	65.307	78.839	98.384	60.527	60.721	86.061		0.506942	64.7919
8.8086	45.063	89.296	91.06	77.569	72.08	50.851	28.654	34.571	59.965	84.658	53.805	78.17	62.976	59.974	57.718	53.975	58.295	57.142	62.092	65.848	72.076	57.96	49.82	58.151	69.225	69.763	70.23	67.762	87.248	52.611	61.631	81.178		0.513891	63.7943
8.9276	43.688	88.668	86.743	75.535	69.587	51.11	33.482	35.444	63.645	85.825	57.42	80.946	62.514	67.027	52.142	50.317	56.544	64.286	66.276	61.194	76.201	61.699	48.439	54.882	60.601	69.903	79.037	61.272	94.89	54.145	57.087	73.837		0.520833	63.8871
9.0466	44.364	85.104	81.786	80.638	73.442	47.767	33.331	39.058	65.472	74.709	63.21	86.492	57.861	57.386	50.604	48.577	53.433	63.443	62.364	63.955	71.309	62.206	44.316	50.658	64.341	70.806	73.794	58.999	91.702	64.632	61.891	68.097		0.527776	62.9921
9.1657	46.791	85.035	84.872	76.393	81.459	52.043	33.065	40.283	72.745	64.478	59.098	75.011	57.991	51.481	52.917	47.866	60.666	55.746	56.946	61.911	66.775	51.01	45.2	52.322	63.089	64.394	71.911	64.284	78.991	56.492	60.741	74.72		0.534724	61.4602
9.2847	51.102	97.049	92.825	73.58	86.192	42.985	32.487	35.165	71.136	67.546	55.471	86.099	62.244	59.721	55.979	53.75	63.866	52.051	59.207	62.942	62.367	50.183	40.716	46.791	65.528	61.981	68.618	65.011	77.7	59.891	64.506	67.812		0.541666	62.2657
9.4037	52.641	94.649	84.923	82.855	86.364	45.792	31.746	32.207	75.78	70.266	50.579	85.819	62.73	65.507	63.771	60.327	58.468	56.033	61.346	64.382	69.219	56.774	41.938	52.194	63.423	60.814	70.699	67.357	76.82	63.104	61.261	67.907		0.548609	63.678
9.5228	46.639	100.262	77.249	79.465	76.319	49.647	29.252	30.054	73.841	61.557	60.001	89.811	70.333	64.169	66.18	57.169	58.117	55.509	63.68	55.059	66.683	59.073	40.309	43.958	69.136	65.206	60.505	69.892	67.851	65.635	63.802	61.263		0.555557	62.4258
9.6418	42.417	99.604	80.115	75.989	78.935	50.519	24.577	43.548	73.464	65.664	52.891	89.999	74.266	57.062	63.44	52.481	60.224	52.449	78.228	64.141	70.487	56.622	36.805	45.976	73.801	61.472	61.998	72.875	60.616	56.707	62.576	57.841		0.562499	62.4309
9.7608	45.369	107.748	82.984	77.996	68.899	45.324	26.512	37.805	69.039	62.102	47.897	84.838	84.582	62.881	59.523	60.873	63.351	52.802	74.245	58.304	62.124	53.233	39.556	50.129	75.859	57.819	62.964	70.727	68.548	63.633	57.807	57.177		0.569442	62.2703
9.8799	46.079	103.621	80.735	69.104	66.276	52.161	29.025	30.548	58.438	69.154	50.292	88.035	81.741	71.213	54.649	53.194	64.659	53.607	79.543	57.029	59.645	61.037	44.497	51.878	75.239	73.374	57.841	76.965	55.502	59.867	53.766	58.202		0.57639	62.0911
9.9989	53.34	95.529	84.234	74.59	65.154	55.353	30.813	40.961	65.039	62.322	48.747	86.66	74.405	74.726	57.427	57.408	59.799	48.369	83.208	56.602	65.528	58.378	48.103	51.452	70.904	67.883	64.908	80.426	61.464	59.678	61.952	60.39		0.583332	63.3047
10.1179	53.878	91.813	82.67	67.528	62.643	54.209	27.97	35.585	61.659	58.507	47.497	89.767	65.307	76.171	68.357	60.185	66.567	44.939	85.947	51.589	65.436	56.611	51.927	47.519	70.578	62.015	68.9	78.541	73.849	54.463	61.952	64.205		0.590275	62.7745
10.237	51.821	99.273	81.754	68.193	54.117	49.535	28.06	32.335	58.287	60.487	40.228	78.847	66.764	76.625	71.983	62.004	62.442	52.519	99.408	50.063	64.54	58.981	55.975	49.187	77.907	59.18	62.725	82.387	71.656	56.181	60.35	65.986		0.597223	62.8062
10.356	49.915	100.62	80.434	66.896	62.421	45.792	30.165	43.045	59.736	60.923	43.06	79.435	68.198	68.715	68.893	63.291	64.149	50.609	97.74	53.229	61.002	62.604	49.342	53.236	76.078	64.996	62.056	74.949	73.267	55.316	61.612	64.487		0.604165	63.0066
10.475	56.618	104.13	76.329	66.434	63.632	51.392	33.118	41.891	59.811	62.349	47.321	77.979	58.625	83.24	63.257	67.242	63.233	52.026	88.366	57.848	59.24	57.066	48.73	58.161	79.216	63.952	62.317	83.625	75.565	63.121	71.752	64.67		0.611108	64.4455
10.5941	57.884	98.117	74.032	65.466	59.142	53.469	34.16	42.502	50.321	65.304	52.443	68.025	63.256	84.975	64.162	58.964	59.798	47.205	79.536	53.391	64.163	57.327	53.697	52.277	76.22	62.1	65.883	84.841	86.24	62.326	69.022	70.33		0.618056	63.6431
10.7131	66.907	92.997	72.27	65.644	60.021	47.234	32.969	40.402	49.408	59.898	48.417	69.582	58.7	76.378	61.62	66.383	66.938	43.751	70.747	55.196	60.46	59.005	51.864	58.775	72.588	69.285	57.854	86.171	78.736	57.626	67.232	69.157		0.624999	62.3192
10.8321	62.143	96.45	71.569	67.371	56.671	43.923	36.562	42.738	54.365	52.817	43.731	74.251	57.265	81.206	61.076	63.814	66.622	42.396	78.21	60.998	63.344	62.909	48.383	52.5	67.06	70.006	63.436	85.47	82.357	57.952	73.692	70.84		0.631941	62.879
10.9512	59.521	97.67	71.133	65.208	53.933	48.948	32.638	43.294	58.337	54.25	40.918	66.39	60.112	82.247	57.151	68.635	62.268	47.318	67.897	58.639	65.658	54.923	43.336	56.861	62.822	71.266	70.85	78.47	84.84	63.056	69.681	70.673		0.638889	62.1545
11.0702	63.82	85.793	68.983	63.711	59.354	48.541	33.915	38.556	59.493	48.396	52.14	73.42	56.241	84.795	60.723	65.822	61.046	45.854	73.76	57.008	73.807	64.134	40.295	59.461	56.994	74.125	63.695	78.234	93.88	65.332	75.004	65.3		0.645832	62.8635
11.1892	60.282	87.977	69.237	66.904	64.527	46.045	33.249	42.075	56.264	50.17	54.905	77.296	61.793	93.364	63.223	64.412	60.457	40.635	75.507	58.35	68.236	72.505	48.672	53.408	60.475	60.806	64.636	81.126	84.444	60.289	76.334	66.042		0.652774	63.2389
11.3083	59.673	95.446	76.601	62.7	66.696	52.45	33.587	44.617	59.859	53.703	50.902	73.224	62.21	85.647	59.344	71.622	69.471	46.85	70.275	57.682	66.734	77.765	49.282	53.908	62.493	64.553	59.431	82.112	80.797	56.885	72.444	64.449		0.659722	63.8566
11.4273	59.847	88.367	76.691	62.856	64.473	47.477	30.914	47.581	67.305	51.075	53.137	69.816	63.534	94.954	54.388	70.664	74.445	50.921	66.043	58.215	57.802	83.287	49.196	57.901	57.297	72.601	59.992	74.96	69.817	56.071	70.988	62.708		0.666665	63.2913
11.5463	63.329	82.745	78.021	59.093	69.814	48.563	37.331	50.271	58.501	58.229	52.185	68.613	64.979	92.156	66.911	69.833	75.564	46.25	65.402	60.003	65.559	82.852	48.647	53.278	57.373	69.704	60.596	82.285	76.077	67.213	68.809	66.487		0.673607	64.5835
11.6654	64.525	92.145	71.793	65.945	69.47	47.639	42.742	47.798	68.011	57.974	50.655	69.189	63.725	95.995	66.859	72.576	82.002	56.778	61.117	52.671	62.622	78.158	51.141	56.256	53.222	62.959	58.402	79.218	80.57	71.053	73.406	67.077		0.680555	65.4279
11.7844	68.455	83.355	68.845	69.144	72.671	50.212	41.337	48.116	67.692	60.769	54.241	67.829	63.383	88.773	59.7	73.478	77.108	59.696	59.952	53.239	64.293	68.514	56.966	54.767	59.469	72.866	54.277	87.025	79.934	64.03	67.593	64.405		0.687498	65.0667
11.9035	70.552	77.768	73.791	63.759	72.618	48.422	42.694	47.232	68.791	53.275	56.093	65.647	75.251	73.181	59.568	67.457	85.283	61.545	58.124	63.809	59.09	74.533	52.45	62.329	56.969	73.333	49.978	80.702	81.952	60.444	67.348	62.785		0.694446	64.5867
12.0225	66.851	82.549	77.319	65.004	70.712	56.049	43.056	50.903	63.366	58.156	59.143	71.124	71.041	64.403	58.446	65.328	70.082	64.415	57.396	55.106	64.828	69.289	51.854	62.51	54.413	81.177	49.62	84.575	86.04	60.158	75.005	68.504		0.701388	64.9507
12.1415	67.808	84.67	67.603	61.514	69.174	64.307	40.601	56.194	66.22	48.632	54.297	75.295	78.003	61.083	48.393	75.664	74.639	66.02	57.691	52.636	60.854	75.737	49.985	53.924	60.262	76.421	50.482	78.606	79.582	59.31	74.001	64.175		0.708331	64.1807
12.2606	82.14	78.09	59.771	62.683	82.242	63.99	39.439	54.694	77.909	63.956	50.702	86.392	77.162	60.583	60.478	74.614	77.035	67.159	62.023	60.189	61.163	75.576	56.07	62.41	56.628	68.537	56.307	75.783	80.982	52.132	66.24	56.555		0.715279	65.9261
12.3796	89.974	77.648	62.739	58.722	79.109	60.989	47.735	55.856	75.823	62.863	58.988	71.586	76.512	58.085	60.551	69.41	74.44	65.805	61.53	59.048	63.58	62.345	56.222	56.935	55.518	80.946	55.936	89.37	80.272	57.673	74.467	54.619		0.722222	66.103
12.4986	89.886	76.272	70.397	61.973	81.097	65.786	47.05	63.523	71.359	61.248	58.155	66.652	75.603	63.404	59.241	70.513	67.624	66	71.94	69.958	61.625	58.868	53.427	59.447	55.726	73.901	55.302	83.999	75.304	57.604	66.432	54.932		0.729164	66.0703
12.6177	102.83	76.603	59.152	56.751	73.504	70.951	52.409	59.284	76.478	62.75	52.48	61.509	75.385	61.929	64.105	69.381	73.704	68.124	65.649	73.808	60.859	62.016	57.253	53.855	57.783	69.731	53.285	83.139	72.575	58.417	63.178	59.329		0.736112	65.8814
12.7367	82.667	76.892	61.755	61.389	60.958	66.396	60.419	59.078	70.762	59.221	56.899	58.202	78.538	62.451	60.276	68.444	63.296	69.264	60.216	67.481	69.784	69.879	53.91	54.298	63.314	73.112	55.554	89.199	69.598	67.588	61.858	55.36		0.743055	65.2518
12.8557	90.892	84.629	66.778	54.928	63.388	72.842	49.326	56.116	74.061	54.941	52.652	64.347	72.869	63.165	64.454	67.954	61.565	77.413	53.167	65.516	59.065	63.635	50.546	54.073	59.913	73.239	52.709	87.343	67.765	62.208	64.58	59.193		0.749997	64.5398
12.9748	81.691	76.357	63.168	54.683	58.17	67.781	51.825	55.038	77.254	59.062	50.399	56.95	76.069	61.622	68.17	66.446	56.677	73.453	56.55	60.463	53.868	59.084	54.359	53.249	60.515	84.737	54.385	80.042	65.055	53.971	60.3	56.292		0.756945	62.7402
13.0938	77.679	79.987	61.196	50.851	55.882	66.194	55.127	45.962	73.888	64.16	49.328	59.641	78.293	60.378	66.636	63.055	53.837	82.372	54.831	63.643	54.171	68.516	48.919	56.065	60.252	78.459	56.691	82.572	63.839	60.913	64.067	57.681		0.763888	62.9714
13.2128	78.549	82.106	63.034	55.123	56.706	66.911	52.891	58.681	67.581	69.558	57.374	57.983	82.244	69.119	60.552	64.382	53.868	81.784	59.693	62.84	57.086	66.345	52.299	54.52	61.191	68.892	55.331	77.975	68.009	61.311	64.756	58.746		0.77083	63.9825
13.3319	79.298	66.443	62.65	59.495	64.453	72.202	58.983	60.812	70.357	74.591	54.724	51.79	73.493	67.404	62.395	65.004	53.928	81.762	58.844	63.071	51.547	71.176	49.396	62.882	68.967	72.883	55.159	74.323	66.952	63.212	66.323	59.301		0.777778	64.4944
13.4509	84.187	70.073	60.045	48.18	63.377	67.726	68.594	70.458	68.299	75.517	55.89	47.986	65.794	67.316	58.668	60.854	58.728	80.716	57.046	59.664	56.715	84.254	48.016	62.838	69.607	65.382	60.277	77.986	70.393	60.8	63.935	59.46		0.784721	64.6494
13.5699	69.955	71.681	65.917	49.771	54.831	62.493	61.869	62.76	62.616	77.707	52.284	51.731	60.386	68.9	60.628	67.446	55.116	78.973	55.486	56.961	53.876	72.386	49.413	68.658	67.096	68.158	56.347	81.291	61.633	62.356	61.953	54.072		0.791663	62.6484
13.689	59.249	58.955	67.73	50.885	63.968	68.697	67.765	66.444	70.84	78.184	51.815	56.569	63.892	73.522	61.475	55.225	57.368	78.624	55.104	58.852	54.497	73.043	52.12	64.722	65.674	71.729	58.734	74.426	69.482	70.581	56.4	64.68		0.798612	63.7891
13.808	73.939	71.902	63.469	40.912	58.12	73.518	68.415	68.344	74.86	75.282	46.742	47.358	69.604	72.542	61.834	62.183	57.704	77.701	58.444	63.005	57.804	73.208	52.538	69.058	63.001	67.352	54.363	73.064	67.713	64.484	57.197	55.388		0.805554	63.7828
13.927	70.636	72.892	61.183	49.151	50.061	67.908	65.392	69.843	77.847	74.401	50.66	47.434	64.511	68.678	55.353	61.394	54.063	66.223	54.187	53.581	59.089	75.544	49.51	70.28	61.172	61.375	53.416	62.979	66.932	60.268	55.945	65.63		0.812496	61.7981
14.0461	73.34	67.628	55.133	40.495	46.031	60.865	64.508	60.198	73.66	62.381	47.8	46.292	51.431	66.626	56.979	54.584	54.683	70.387	61.649	46.87	65.387	76.532	54	65.56	66.491	56.453	53.704	67.494	67.752	70.128	67.084	61.6		0.819445	60.4289
14.1651	72.282	68.565	57.459	44.252	49.59	48.357	57.826	65.369	70.53	60.958	53.984	48.225	50.752	71.973	51.799	54.759	53.339	71.596	55.615	45.049	66.261	81.325	54.733	70.731	70.571	60.28	57.433	69.25	71.838	59.813	62.492	57.801		0.826387	60.4627
14.2841	72.963	68.789	50.838	44.129	57.729	46.909	59.919	63.039	60.603	53.19	48.782	44.707	54.135	67.623	51.053	57.978	49.63	66.043	51.839	46.572	66.832	76.772	54.608	70.366	64.297	53.291	53.254	64.916	63.008	59.335	63.76	59.971		0.833329	58.34
14.4032	58.808	64.062	51.445	45.964	46.519	43.36	58.484	52.442	57.774	45.664	42.649	51.211	53.262	59.381	52.305	52.454	47.192	70.899	64.855	55.227	57.385	68.85	52.006	70.489	63.157	62.446	46.596	61.009	59.752	69.109	73.352	67.444		0.840278	57.0485
14.5222	59.93	51.57	50.682	47.111	40.738	42.237	54.584	46.687	56.814	42.923	47.809	47.122	58.256	59.667	52.534	45.976	44.876	68.437	56.912	47.346	66.571	64.025	62.268	73.11	71.807	65.949	43.968	70.877	62.77	65.697	74.474	69.222		0.84722	56.6547
14.6412	56.592	58.352	45.49	41.194	33.073	37.222	49.603	49.849	47.881	40.194	40.594	44.588	45.458	53.9	51.693	46.587	42.71	59.742	48.17	50.606	60.462	64.597	66.578	67.82	61.436	66.951	49.297	70.367	58.568	65.855	72.425	64.46		0.854163	53.5098
14.7603	53.783	54.668	42.019	34.332	29.966	36.316	42.595	49.421	46.235	37.021	40.738	39.216	45.149	47.162	49.444	43.734	48.88	54.308	49.141	53.864	55.49	64.728	67.21	63.096	62.757	65.838	53.211	74.308	60.793	67.405	71.873	57.844		0.861111	51.9545
14.8793	49.351	54.327	42.347	30.994	26.274	30.054	45.035	48.826	40.822	36.304	39.104	34.141	38.261	36.921	53.956	39.458	45.335	49.363	58.953	57.044	60.453	72.584	59.766	70.911	59.353	62.619	45.549	63.199	64.92	66.315	70.15	57.082		0.868053	50.3053
14.9984	50.361	54.377	39.107	28.371	26.548	25.747	40.146	46.038	37.596	32.075	33.706	32.121	33.648	30.732	43.568	52.352	43.061	50.845	53.502	49.646	60.236	73.009	56.383	63.965	62.573	69.906	52.83	71.456	62.398	74.604	71.314	57.256		0.875001	49.3587
15.1174	42.467	54.495	31.9	27.037	27.604	24.153	29.278	49.674	36.697	30.503	33.818	27.821	24.222	21.666	34.791	48.071	40.332	56.464	49.265	45.62	60.491	64.847	51.794	60.895	57.642	65.55	45.059	69.591	56.664	66.039	72.227	53.068		0.881944	45.617
15.2364	42.927	56.804	28.559	23.944	23.942	22.627	23.644	36.739	38.781	28.749	23.336	18.509	16.327	13.794	33.249	49.984	37.794	49.008	42.407	47.73	69.946	63.454	51.4	65.905	53.748	60.063	45.769	69.256	61.219	70.162	66.634	51.351		0.888886	43.3675
15.3555	42.187	52.023	29.025	23.24	26.46	23.459	17.901	33.606	29.509	28.357	17.118	10.425	10.225	11.54	20.474	36.491	39.062	45.589	44.292	50.049	57.854	62.746	54.932	60.238	53.109	57.343	54.637	63.704	62.557	67.786	61.419	51.402		0.895835	40.5862
15.4745	35.894	47.291	32.702	25.199	30.087	21.173	15.312	30.567	28.261	26.424	12.289	7.775	8.015	5.615	12.295	34.034	43.101	46.004	53.066	42.319	55.205	63.583	58.193	49.252	54.449	56.312	51.222	55.821	54.982	67.921	60.997	46.52		0.902777	38.4963
15.5935	35.165	45.733	40.544	26.459	20.82	22.525	13.647	23.867	23.565	21.264	6.988	6.599	7.107	5.599	8.755	23.273	37.218	45.263	44.695	46.098	55.078	49.483	50.953	55.261	50.288	59.604	51.219	54.363	64.454	63.685	68.661	46.134		0.909719	36.699
15.7126	26.459	41.729	32.076	29.547	21.106	17.188	13.458	16.73	18.778	15.501	8.439	8.723	6.222	6.731	6.157	14.097	30.598	43.97	42.75	46.951	55.142	45.238	46.834	52.569	51.707	50.772	52.624	54.495	50.443	57.771	69.168	46.974		0.916668	33.7796
15.8316	23.591	35.068	26.863	25.309	21.394	18.547	14.758	14.269	14.996	9.435	5.78	6.091	5.019	7.047	8.213	11.181	22.724	51.35	45.582	52.519	51.596	46.065	42.339	63.319	51.589	52.797	53.223	59.041	57.571	57.084	69.66	45.277		0.92361	33.4155
15.9506	18.239	26.55	28.154	20.627	26.868	16.233	11.537	18.722	11.917	8.092	4.437	3.776	3.663	6.907	5.688	6.978	19.792	46.966	44.315	43.478	58.474	40.45	36.413	51.226	46.583	49.656	45.809	57.096	50.719	63.124	70.548	45.313		0.930552	30.8859
16.0697	13.914	29.173	29.197	21.106	23.067	14.382	13.572	16.138	12.777	8.677	3.301	5.325	4.13	4.436	6.758	7.839	13.836	46.224	41.339	44.272	51.144	29.41	34.241	44.478	42.59	46.088	45.094	53.397	43.31	51.163	60.094	43.92		0.937501	28.2623
16.1887	18.907	21.792	23.79	19.389	19.819	16.408	16.724	10.959	9.437	7.044	5.902	7.655	3.831	4.141	5.477	6.517	9.876	41.838	42.666	49.277	48.415	26.568	24.476	45.798	45.185	51.038	46.225	45.704	43.586	51.199	52.991	40.656		0.944443	26.9778
16.3077	20.154	23.642	24.54	20.121	20.178	17.933	16.268	11.543	9.095	5.868	6.966	4.467	3.394	3.552	4.067	7.587	8.247	39.412	46.197	43.933	49.745	21.507	21.367	47.526	42.737	46.239	42.093	47.485	35.927	47.521	53.17	31.167		0.951386	25.739
16.4268	18.612	24.781	23.868	23.951	23.449	16.634	15.084	14.457	10.454	5.793	6.095	4.539	5.62	4.107	4.489	6.417	7.189	37.136	44.405	45.88	39.084	17.002	14.651	37.577	37.784	38.571	35.644	44.797	34.478	37.954	41.622	30.015		0.958334	23.5043
16.5458	20.717	27.449	26.051	19.975	20.374	22.732	12.684	16.015	7.137	7.334	5.556	6.531	5.655	4.384	3.462	6.306	8.653	23.991	43.604	41.178	37.609	15.631	11.34	31.637	31.765	34.966	39.28	36.469	28.78	40.383	35.937	20.942		0.965276	21.704
16.6648	19.949	22.165	30.815	16.525	24.097	16.314	15.135	14.835	8.195	9.171	5.332	4.644	3.908	4.517	3.5	2.958	8.333	17.215	47.408	43.582	30.827	9.441	8.817	25.629	32.164	27.804	33.924	33.42	29.237	37.378	30.154	18.378		0.972219	19.8678
16.7839	17.988	28.498	28.346	16.998	23.671	16.735	15.16	14.238	10.061	8.741	6.153	4.946	4.147	3.996	2.166	4.829	8.123	14.648	47.299	40.097	24.78	10.218	8.988	22.474	24.317	21.204	22.603	25.673	22.317	30.265	23.974	14.096		0.979167	17.7422
16.9029	20.733	23.289	24.208	16.436	23.534	16.51	13.587	12.341	8.434	10.424	3.999	4.172	4.396	5.389	3.083	6.877	5.513	14.649	37.325	31.795	19.41	9.194	6.914	16.686	18.248	17.322	18.5	20.729	19.356	24.957	18.144	8.788		0.986109	15.1544
17.0219	21.839	27.227	24.623	19.524	23.571	16.048	11.393	11.332	7.103	11.258	7.092	3.39	4.495	5.725	3.33	6.702	6.096	9.473	32.495	27.082	14.396	7.446	6.576	10.663	10.815	8.823	12.456	15.98	16.143	13.157	13.538	7.943		0.993052	13.0542
17.141	22.525	23.832	25.366	22.458	26.519	13.411	14.898	11.776	11.014	12.344	4.85	6.964	5.53	3.368	1.669	7.187	6.097	8.945	26.904	25.208	14.956	6.919	6.389	8.367	6.364	5.594	6.429	10.591	11.034	10.06	11.442	5.986		1	12.0311

## Sheet: Sheet1
Image7				Image8				Image9				Image44				Image45				Image46						Distance	Image7	Image8	Image9	Image44	Image45	Image46
Ap-basal	Avg intensity			Ap-basal	Avg intensity			Ap-basal	Avg intensity			Ap-basal	Avg intensity			Ap-basal	Avg intensity			Ap-basal	Avg intensity					0	67.1991	60.48	56.3314	47.6699	22.1908	33.2958
0	67.1991			0	60.48			0	56.3314			0	47.6699			0	22.1908			0	33.2958					0.05	113.948	79.557	94.2644	71.4007	48.8105	67.1963
0.00694242	75.1142			0.00826205	64.2451			0.00680074	62.6034			0.00540383	49.4378			0.00490055	24.4047			0.00512672	37.4766					0.1	203.311	118.123	193.737	129.597	99.3334	149.72
0.0138907	83.6025			0.016531	70.0239			0.0136072	68.5479			0.0108122	55.4246			0.00980521	28.0229			0.0102578	40.1219					0.15	203.214	120.058	187.031	143.623	120.354	160.975
0.0208331	93.5632			0.0247931	76.7726			0.0204079	79.4406			0.016216	58.9222			0.0147058	32.8898			0.0153845	46.7148					0.2	171.923	108.525	148.424	143.276	119.755	139.915
0.0277755	108.145			0.0330552	81.563			0.0272087	88.3429			0.0216199	63.0132			0.0196063	37.3813			0.0205112	52.9155					0.25	125.494	104.751	117.467	126.01	101.861	110.434
0.0347238	125.796			0.0413242	87.9145			0.0340151	101.538			0.0270283	67.2767			0.024511	43.2167			0.0256422	60.6252					0.3	92.3844	102.929	101.375	103.936	81.2105	80.988
0.0416662	141.106			0.0495862	94.747			0.0408159	113.703			0.0324321	75.4016			0.0294115	47.3431			0.030769	70.5973					0.35	81.2916	100.324	91.7501	80.7299	70.4522	61.4176
0.0486086	157.137			0.0578483	100.71	79.557		0.0476166	130.356			0.0378359	81.8742			0.0343121	57.323			0.0358957	79.5372					0.4	75.9149	96.6639	79.9469	60.7434	62.6169	47.3564
0.0555569	173.871	113.948		0.0661173	106.645			0.0544231	147.515	94.2644		0.0432443	87.5362			0.0392167	64.6501			0.0410267	93.8833					0.45	72.8944	90.5572	69.7776	48.8227	56.8886	37.2903
0.0624993	185.323			0.0743793	111.471			0.0612238	161.778			0.0486481	96.223			0.0441173	71.0106			0.0461534	106.519					0.5	66.2738	87.8908	63.0227	41.1031	52.7292	29.9283
0.0694417	194.389			0.0826414	117.424			0.0680245	174.682			0.054052	102.628	71.4007		0.0490178	75.1337			0.0512802	117.473	67.1963				0.55	63.1619	83.2779	57.867	35.8504	49.6082	23.8726
0.0763899	202.995			0.0909104	123.319			0.074831	189.851			0.0594603	110.048			0.0539225	82.1597	48.8105		0.0564112	127.613					0.6	62.6692	77.9321	56.1094	33.1543	48.6708	19.9892
0.0833324	206.546			0.0991724	125.085			0.0816317	201.322			0.0648642	117.217			0.058823	84.2221			0.0615379	136.899					0.65	63.0777	80.7934	57.1108	30.5036	48.8363	18.5218
0.0902748	209.877			0.107434	124.792	118.123		0.0884325	206.737			0.070268	123.305			0.0637236	88.807			0.0666647	142.871					0.7	64.5376	86.0859	56.9004	30.488	48.2942	16.1325
0.097223	211.682			0.115703	125.721			0.0952389	211.245			0.0756764	125.94			0.0686283	92.7754			0.0717957	147.799					0.75	65.0866	84.866	58.4245	30.4747	51.8005	14.066
0.104165	212.367	203.311		0.123966	123.667			0.10204	210.546	193.737		0.0810802	131.885			0.0735288	96.2268			0.0769224	151.068					0.8	63.7597	86.705	60.4633	33.4159	58.1651	12.5098
0.111114	210.763			0.132235	120.503			0.108846	206.004			0.0864886	134.627			0.0784335	97.1507			0.0820534	155.228					0.85	58.3204	87.4684	61.9469	36.8032	57.5783	10.4807
0.118056	209.159			0.140497	119.81			0.115647	204.234			0.0918924	138.218			0.083334	100.999			0.0871802	156.36					0.9	45.6694	74.094	51.812	37.2062	52.831	8.28262
0.124999	206.283			0.148759	117.232			0.122448	198.381			0.0972963	143.192			0.0882346	105.679			0.0923069	160.236					0.95	30.8227	51.7936	35.1024	32.2714	39.4486	6.92645
0.131947	203.741			0.157028	113.413	120.058		0.129254	190.824			0.102705	141.938	129.597		0.0931392	107.05			0.0974379	159.92					1	17.5797	30.0905	23.3506	20.653	20.9586	5.37464
0.138889	200.914			0.16529	112.701			0.136055	182.879			0.108108	141.99			0.0980398	108.126			0.102565	159.208	149.72
0.145832	198.473			0.173552	112.643			0.142856	175.866			0.113512	145.492			0.10294	112.298	99.3334		0.107691	161.299
0.15278	193.164	203.214		0.181821	109.903			0.149662	171.22			0.118921	146.55			0.107845	112.605			0.112822	161.959
0.159722	187.988			0.190083	106.586			0.156463	166.839	187.031		0.124325	145.998			0.112746	116.528			0.117949	163.999
0.166665	185.479			0.198345	104.648			0.163263	162.492			0.129728	144.879			0.117646	117.809			0.123076	162.755
0.173613	179.434			0.206614	104.667	108.525		0.17007	157.987			0.135137	144.574			0.122551	120.468			0.128207	163.651
0.180555	172.351			0.214876	105.63			0.176871	153.55			0.140541	146.679			0.127451	122.473			0.133334	161.701
0.187498	166.061			0.223138	105.767			0.183671	151.335			0.145944	146.141			0.132352	121.304			0.13846	161.948
0.194446	159.856			0.231407	104.504			0.190478	142.971			0.151353	143.623	143.623		0.137257	120.703			0.143591	159.867
0.201388	152.295	171.923		0.239669	103.265			0.197279	137.339			0.156757	146.219			0.142157	122.201			0.148718	157.308
0.208331	146.756			0.247931	104.362			0.204079	133.293	148.424		0.16216	146.161			0.147058	125.553			0.153845	155.268	160.975
0.215279	139.186			0.2562	104.978	104.751		0.210886	129.87			0.167569	146.774			0.151962	123.897	120.354		0.158976	151.309
0.222222	133.517			0.264462	104.894			0.217686	123.935			0.172973	144.655			0.156863	125.995			0.164103	148.743
0.229164	126.917			0.272724	104.543			0.224487	120.36			0.178376	144.261			0.161763	125.409			0.169229	145.445
0.236112	123.251			0.280993	102.549			0.231294	117.858			0.183785	141.349			0.166668	121.971			0.17436	143.498
0.243055	117.313			0.289255	103.134			0.238094	111.939			0.189189	142.283			0.171569	123.332			0.179487	138.159
0.249997	109.822			0.297517	101.602			0.244895	110.979			0.194593	140.796			0.176469	122.129			0.184614	136.231
0.256945	107.191	125.494		0.305786	100.852	102.929		0.251702	107.326	117.467		0.200001	136.981	143.276		0.181374	118.987			0.189745	135.016
0.263888	101.731			0.314048	100.872			0.258502	105.985			0.205405	136.046			0.186274	117.747			0.194872	131.527
0.27083	97.5775			0.32231	101.375			0.265303	103.887			0.210809	134.069			0.191175	117.138			0.199998	129.309	139.915
0.277778	95.4997			0.330579	101.439			0.27211	101.533			0.216217	131.286			0.19608	113.552			0.205129	124.659
0.284721	91.6038			0.338841	100.467			0.27891	99.5441			0.221621	129.806			0.20098	111.29	119.755		0.210256	121.911
0.291669	88.4635			0.34711	98.7376			0.285717	101.274			0.227029	127.356			0.205885	110.165			0.215387	118.248
0.298612	87.5274			0.355372	99.0548	100.324		0.292517	101.423			0.232433	124.521			0.210785	107.274			0.220514	117.048
0.305554	84.2877	92.3844		0.363634	99.5036			0.299318	99.6283			0.237837	121.965			0.215686	105.224			0.225641	112.498
0.312502	83.705			0.371903	97.8704			0.306125	97.7241	101.375		0.243245	121.533			0.220591	104.718			0.230772	108.572
0.319445	82.6478			0.380166	96.8209			0.312925	97.4923			0.248649	117.739			0.225491	102.548			0.235898	105.09
0.326387	82.4849			0.388428	96.0592			0.319726	94.5346			0.254053	115.778	126.01		0.230392	99.5977			0.241025	102.622
0.333335	79.9849			0.396697	96.1004			0.326533	92.59			0.259461	113.018			0.235296	99.7933			0.246156	98.2653
0.340278	80.7549			0.404959	93.629	96.6639		0.333333	93.2432			0.264865	111.802			0.240197	97.5093			0.251283	95.425	110.434
0.34722	81.3019			0.413221	92.3334			0.340134	90.9693			0.270269	109.869			0.245097	96.7782			0.256409	93.0497
0.354168	78.1617	81.2916		0.42149	91.6348			0.346941	86.7873			0.275677	107.982			0.250002	95.001	101.861		0.261541	89.865
0.361111	77.3599			0.429752	90.2304			0.353741	86.634	91.7501		0.281081	104.52			0.254903	92.0523			0.266667	85.9946
0.368053	77.6994			0.438014	90.7622			0.360542	83.8966			0.286485	101.488			0.259803	89.6868			0.271794	83.6346
0.375001	78.1556			0.446283	88.8592			0.367348	83.0785			0.291893	99.2626			0.264708	86.9583			0.276925	82.8026
0.381944	76.5345			0.454545	89.5232	90.5572		0.374149	82.3219			0.297297	96.0425			0.269608	83.7408			0.282052	79.1397
0.388886	76.1188			0.462807	90.0027			0.38095	79.2759			0.302701	91.4378	103.936		0.274509	83.366			0.287178	76.6935
0.395835	74.0862			0.471076	88.649			0.387756	78.023			0.308109	90.9433			0.279414	82.0884			0.292309	75.0302
0.402777	74.4581			0.479338	88.2769			0.394557	78.1992			0.313513	88.2325			0.284314	79.0334			0.297436	73.2752
0.409719	72.9065	75.9149		0.4876	87.3592			0.401358	74.8333	79.9469		0.318917	84.7734			0.289215	80.6754			0.302563	70.3953	80.988
0.416668	74.4813			0.495869	87.8873			0.408164	73.1303			0.324325	83.3271			0.294119	77.7593			0.307694	70.0234
0.42361	72.8428			0.504131	85.1695	87.8908		0.414965	73.3582			0.329729	81.0435			0.29902	75.3966			0.312821	67.9492
0.430552	73.1674			0.512393	85.1251			0.421766	69.7376			0.335133	77.8891			0.30392	73.4002	81.2105		0.317947	65.422
0.437501	73.1216			0.520662	83.4242			0.428572	72.525			0.340541	75.791			0.308825	73.5254			0.323078	63.6418
0.444443	72.7738			0.528924	83.6043			0.435373	68.4311			0.345945	73.4817			0.313726	74.3669			0.328205	61.6632
0.451386	70.9793	72.8944		0.537186	83.5646			0.442174	68.5555			0.351349	71.0879	80.7299		0.318626	72.6109			0.333332	59.333
0.458334	69.1778			0.545455	82.8984			0.44898	66.295			0.356758	69.4282			0.323531	72.4006			0.338463	58.8963
0.465276	66.8826			0.553717	81.0508	83.2779		0.455781	66.1878	69.7776		0.362161	65.4309			0.328431	71.6495			0.34359	57.2022
0.472219	67.6646			0.561979	80.8334			0.462582	65.749			0.367565	66.1518			0.333332	71.1481			0.348716	57.0226
0.479167	66.254			0.570248	79.5492			0.469388	64.0977			0.372974	63.9006			0.338237	70.1004			0.353847	53.0227	61.4176
0.486109	65.1997			0.57851	77.5056			0.476189	64.1016			0.378377	59.1555			0.343137	68.1883			0.358974	52.6896
0.493058	64.2934			0.586779	77.2322			0.482995	63.2643			0.383786	60.1925			0.348042	65.6884			0.364105	50.3409
0.5	64.4447	66.2738		0.595041	76.182			0.489796	61.634			0.38919	58.9134			0.352942	64.8433	70.4522		0.369232	50.3972
0.506942	64.7919			0.603303	76.2899	77.9321		0.496597	62.3027			0.394593	56.1136			0.357843	66.5619			0.374359	49.0912
0.513891	63.7943			0.611572	78.5351			0.503403	60.0097	63.0227		0.400002	54.1827			0.362748	62.9607			0.37949	48.0158
0.520833	63.8871			0.619834	79.7277			0.510204	59.9942			0.405406	53.965	60.7434		0.367648	64.7204			0.384616	45.6486
0.527776	62.9921			0.628097	78.8583			0.517005	60.3621			0.410809	52.1631			0.372549	63.9483			0.389743	44.794
0.534724	61.4602			0.636366	80.7254			0.523811	58.2087			0.416218	51.5763			0.377453	64.2516			0.394874	43.0026
0.541666	62.2657			0.644628	82.5532			0.530612	58.1474			0.421622	50.8808			0.382354	61.8809			0.400001	42.2279	47.3564
0.548609	63.678			0.65289	84.3604	80.7934		0.537413	56.4234			0.427026	50.5824			0.387254	62.5724			0.405128	41.5548
0.555557	62.4258	63.1619		0.661159	84.6643			0.544219	56.157			0.432434	48.7919			0.392159	61.2781			0.410259	40.2746
0.562499	62.4309			0.669421	86.3919			0.55102	55.776	57.867		0.437838	48.2959			0.39706	59.6859			0.415385	39.3665
0.569442	62.2703			0.677683	86.5485			0.557821	56.3947			0.443242	47.2628			0.40196	58.3089	62.6169		0.420512	38.5076
0.57639	62.0911			0.685952	86.9299			0.564627	55.1207			0.44865	45.7835			0.406865	57.2191			0.425643	37.1034
0.583332	63.3047			0.694214	86.166			0.571428	55.7204			0.454054	44.0675	48.8227		0.411765	57.5434			0.43077	36.3331
0.590275	62.7745			0.702476	85.8149	86.0859		0.578228	57.6589			0.459458	44.931			0.416666	57.5499			0.435897	36.0627
0.597223	62.8062			0.710745	85.0315			0.585035	54.2663			0.464866	43.417			0.421571	56.3194			0.441028	34.2871
0.604165	63.0066	62.6692		0.719007	85.0023			0.591836	57.864			0.47027	42.7616			0.426471	55.8468			0.446154	34.5719
0.611108	64.4455			0.727269	85.9606			0.598636	56.8486			0.475674	42.0499			0.431372	58.2858			0.451281	34.8416	37.2903
0.618056	63.6431			0.735538	85.4742			0.605443	55.0019	56.1094		0.481082	40.8662			0.436276	58.162			0.456412	33.2609
0.624999	62.3192			0.7438	84.8396			0.612244	55.0613			0.486486	40.023			0.441177	56.1331			0.461539	32.3011
0.631941	62.879			0.752062	82.8881	84.866		0.619044	57.362			0.49189	38.5865			0.446078	56.0126			0.466666	31.7527
0.638889	62.1545			0.760331	82.4954			0.625851	56.3181			0.497298	39.0758			0.450982	55.814	56.8886		0.471797	31.848
0.645832	62.8635			0.768593	86.7033			0.632652	57.2607			0.502702	38.2172	41.1031		0.455883	54.2804			0.476923	30.7187
0.652774	63.2389	63.0777		0.776855	86.5793			0.639452	57.7261			0.508106	38.2632			0.460783	55.366			0.48205	29.8212
0.659722	63.8566			0.785124	87.7127			0.646259	58.0478			0.513514	37.9419			0.465688	53.2135			0.487181	28.8914
0.666665	63.2913			0.793386	88.5385			0.653059	57.9999	57.1108		0.518918	35.7894			0.470588	53.4821			0.492308	27.4176
0.673607	64.5835			0.801648	88.2009	86.705		0.65986	58.751			0.524322	36.0066			0.475489	52.374			0.497434	26.7317
0.680555	65.4279			0.809917	88.62			0.666667	55.6897			0.52973	35.6253			0.480394	52.75			0.502566	26.5399	29.9283
0.687498	65.0667			0.818179	87.4575			0.673467	56.5537			0.535134	34.5046			0.485294	50.5082			0.507692	26.2348
0.694446	64.5867			0.826448	88.7119			0.680274	57.3315			0.540542	35.9206			0.490199	51.9568			0.512823	25.9065
0.701388	64.9507	64.5376		0.83471	86.5213			0.687075	55.5709			0.545946	34.7243			0.495099	51.6195			0.51795	24.548
0.708331	64.1807			0.842972	87.8053			0.693875	56.41			0.55135	33.8775	35.8504		0.5	51.7411	52.7292		0.523077	23.8608
0.715279	65.9261			0.851241	85.6946	87.4684		0.700682	57.9963	56.9004		0.556758	34.094			0.504905	50.2458			0.528208	23.583
0.722222	66.103			0.859503	82.2531			0.707483	56.4368			0.562162	33.4152			0.509805	50.7287			0.533334	23.2246
0.729164	66.0703			0.867765	78.8969			0.714283	56.9559			0.567566	32.9414			0.514706	50.0656			0.538461	22.8386
0.736112	65.8814			0.876034	77.0919			0.72109	58.8409			0.572974	33.6484			0.51961	50.5754			0.543592	23.5074
0.743055	65.2518			0.884297	73.0103			0.72789	59.0096			0.578378	32.2015			0.524511	48.7878			0.548719	22.9422
0.749997	64.5398			0.892559	68.3339			0.734691	58.7931			0.583782	33.2999			0.529412	49.4622			0.553846	22.0797	23.8726
0.756945	62.7402	65.0866		0.900828	64.9781	74.094		0.741498	58.6072			0.589191	33.678			0.534316	48.8986			0.558977	21.6513
0.763888	62.9714			0.90909	61.3416			0.748298	59.6628			0.594594	32.2606			0.539217	49.171			0.564103	20.6268
0.77083	63.9825			0.917352	57.9151			0.755099	59.09	58.4245		0.599998	32.8494	33.1543		0.544117	49.7563			0.56923	20.6665
0.777778	64.4944			0.925621	54.0791			0.761906	59.8564			0.605407	30.504			0.549022	49.2109			0.574361	20.4596
0.784721	64.6494			0.933883	49.7611			0.768706	60.8793			0.61081	30.6891			0.553922	48.7873	49.6082		0.579488	19.898
0.791663	62.6484			0.942145	45.1714			0.775507	59.9751			0.616214	31.4681			0.558823	48.5528			0.584615	19.3149
0.798612	63.7891			0.950414	42.4934	51.7936		0.782314	60.3851			0.621623	30.6796			0.563728	48.4273			0.589746	18.9868
0.805554	63.7828	63.7597		0.958676	38.3505			0.789114	59.5803			0.627026	30.69			0.568628	48.0268			0.594872	18.8265
0.812496	61.7981			0.966938	35.7392			0.795915	59.883			0.63243	29.5225			0.573529	49.6232			0.599999	19.4727	19.9892
0.819445	60.4289			0.975207	31.5076			0.802721	62.6839	60.4633		0.637839	31.4942			0.578433	48.266			0.60513	19.1022
0.826387	60.4627			0.983469	28.1851			0.809522	62.4712			0.643242	30.2286			0.583334	48.3239			0.610257	19.0123
0.833329	58.34			0.991731	24.379			0.816323	63.6571			0.648646	30.0495			0.588235	48.7855			0.615384	19.6043
0.840278	57.0485			1	22.3817	30.0905		0.823129	62.046			0.654055	29.7108	30.5036		0.593139	49.2322			0.620515	19.5052
0.84722	56.6547							0.82993	61.7815			0.659459	30.7111			0.59804	48.0942			0.625641	18.6288
0.854163	53.5098	58.3204						0.836731	64.5766			0.664862	31.0759			0.60294	49.3762	48.6708		0.630768	18.5021
0.861111	51.9545							0.843537	60.6896			0.670271	29.5182			0.607845	49.8003			0.635899	17.8139
0.868053	50.3053							0.850338	58.4061	61.9469		0.675675	30.8847			0.612746	47.8553			0.641026	18.2771
0.875001	49.3587							0.857144	57.8927			0.681083	30.5381			0.61765	48.9			0.646157	17.671
0.881944	45.617							0.863945	57.5229			0.686487	30.236			0.622551	48.8848			0.651284	17.1009	18.5218
0.888886	43.3675							0.870746	55.1552			0.691891	30.7487			0.627451	48.8787			0.65641	16.2273
0.895835	40.5862							0.877552	53.998			0.697299	30.9445			0.632356	49.1087			0.661541	16.5335
0.902777	38.4963	45.6694						0.884353	50.5919			0.702703	29.7352	30.488		0.637257	48.3497			0.666668	16.2432
0.909719	36.699							0.891154	47.9369			0.708107	30.667			0.642157	48.3955			0.671795	16.2626
0.916668	33.7796							0.89796	47.9923			0.713515	30.9049			0.647062	49.5221			0.676926	16.5366
0.92361	33.4155							0.904761	43.4061	51.812		0.718919	30.2064			0.651962	48.6682	48.8363		0.682053	16.0455
0.930552	30.8859							0.911562	40.998			0.724323	30.2715			0.656863	48.074			0.687179	16.1841
0.937501	28.2623							0.918368	40.3314			0.729731	29.6596			0.661767	47.1981			0.69231	15.7067
0.944443	26.9778							0.925169	36.1169			0.735135	30.0954			0.666668	48.4854			0.697437	16.0267
0.951386	25.739	30.8227						0.93197	35.2605			0.740539	31.209			0.671569	48.3204			0.702564	15.5587	16.1325
0.958334	23.5043							0.938776	33.339			0.745947	31.0187			0.676473	48.1333			0.707695	14.4787
0.965276	21.704							0.945577	30.8219			0.751351	30.2395	30.4747		0.681374	48.9994			0.712822	15.1493
0.972219	19.8678							0.952378	28.8487	35.1024		0.756755	31.2272			0.686274	47.836			0.717948	15.0282
0.979167	17.7422							0.959184	27.2643			0.762163	31.9401			0.691179	47.1083			0.723079	15.2358
0.986109	15.1544							0.965985	25.0478			0.767567	32.8617			0.69608	49.9758			0.728206	14.0343
0.993052	13.0542							0.972786	24.249			0.772971	32.685			0.70098	48.8116	48.2942		0.733333	13.7911
1	12.0311	17.5797						0.979592	22.8525			0.778379	32.6256			0.705885	48.8307			0.738464	13.1596
								0.986393	22.0671			0.783783	33.9342			0.710785	49.6078			0.743591	13.5106
								0.993194	20.6342			0.789187	34.3721			0.715686	50.423			0.748717	13.0964
								1	21.3391	23.3506		0.794595	33.5732			0.720591	49.904			0.753848	13.1759	14.066
												0.799999	35.0053			0.725491	52.0447			0.758975	13.0538
												0.805403	35.9344	33.4159		0.730392	51.3154			0.764102	12.9922
												0.810811	35.9141			0.735296	51.1637			0.769233	13.3854
												0.816215	35.6203			0.740197	54.25			0.774359	12.7975
												0.821619	35.8594			0.745097	55.3769			0.779486	12.1947
												0.827027	36.4209			0.750002	55.0893	51.8005		0.784617	12.4138
												0.832431	36.5395			0.754903	56.5475			0.789744	12.2223
												0.83784	37.0904			0.759807	58.6342			0.794875	12.1099
												0.843243	37.783			0.764708	57.772			0.800002	11.4189	12.5098
												0.848647	38.9981			0.769608	59.1781			0.805128	11.9835
												0.854056	37.0028	36.8032		0.774513	58.9457			0.810259	11.768
												0.859459	36.3667			0.779414	58.4002			0.815386	11.4345
												0.864863	36.787			0.784314	58.1314			0.820513	10.9802
												0.870272	38.0291			0.789219	58.3541			0.825644	10.3371
												0.875675	37.2406			0.794119	57.2804			0.830771	10.2171
												0.881079	38.7293			0.79902	57.6764			0.835897	9.98713
												0.886488	37.2816			0.803925	58.8957	58.1651		0.841028	9.68784
												0.891892	37.0085			0.808825	58.289			0.846155	9.10472
												0.897295	36.1849			0.813726	58.3775			0.851282	9.30669	10.4807
												0.902704	37.2284	37.2062		0.81863	57.1581			0.856413	9.28778
												0.908108	36.7596			0.823531	56.6931			0.86154	8.78778
												0.913511	35.9529			0.828431	56.4678			0.866666	8.57134
												0.91892	34.5737			0.833336	58.8897			0.871797	8.40756
												0.924324	33.0351			0.838237	57.4759			0.876924	8.15991
												0.929727	32.7794			0.843137	57.5453			0.882051	8.08647
												0.935136	31.2889			0.848042	57.8956			0.887182	8.003
												0.94054	30.4502			0.852942	56.9911	57.5783		0.892309	8.11597
												0.945943	28.3279			0.857843	56.8452			0.897435	7.74191
												0.951352	27.2746	32.2714		0.862748	55.2966			0.902566	7.66453	8.28262
												0.956756	25.8332			0.867648	54.1065			0.907693	7.503
												0.96216	25.0952			0.872549	54.5819			0.91282	7.37566
												0.967568	23.7937			0.877453	52.903			0.917951	7.57897
												0.972972	22.1899			0.882354	54.11			0.923078	7.25306
												0.978376	20.1384			0.887254	52.1296			0.928204	6.93906
												0.983784	18.6276			0.892159	51.1476			0.933335	6.81125
												0.989188	17.9969			0.89706	50.0368			0.938462	6.79981
												0.994596	16.9074			0.901964	47.1523	52.831		0.943593	6.45481
												1	15.295	20.653		0.906865	46.3463			0.94872	6.20109
																0.911765	45.888			0.953847	6.34775	6.92645
																0.91667	45.3922			0.958978	5.72947
																0.921571	42.144			0.964104	5.63875
																0.926471	40.3266			0.969231	5.60053
																0.931376	39.1247			0.974362	5.38378
																0.936276	37.8438			0.979489	5.68462
																0.941177	36.0636			0.984616	5.11103
																0.946082	31.7434			0.989747	5.18625
																0.950982	29.6134	39.4486		0.994873	5.11962
																0.955883	27.7253			1	4.91766	5.37464
																0.960787	27.0113
																0.965688	24.7632
																0.970588	23.0599
																0.975493	21.1466
																0.980394	20.187
																0.985294	18.0684
																0.990199	16.9449
																0.995099	16.0759
																1	14.6035	20.9586
