# Supplementary material for: Crumbs organizes the transport machinery by regulating apical levels of PI(4,5)P2 in Drosophila
Source: eLife. 2019 Nov 7;8:e50900. doi: 10.7554/eLife.50900 (PMC6881148; doi:10.7554/eLife.50900)
Supplement: Figure 6—source data 10. [file elife-50900-fig6-data10.xlsx]

## Sheet: Image8
X0	Y0	Y1	Y2	Y3	Y4	Y5	Y6	Y7	Y8	Y9	Y10	Y11	Y12	Y13	Y14	Y15	Y16	Y17	Y18	Y19	Y20	Y21	Y22	Y23	Y24	Y25	Y26	Y27	Y28	Y29	Y30		Ap-Basal	Avg intensity
0	51.814	44.969	61.285	39.375	52.369	72.754	59.919	74.037	84.539	53.119	39.944	54.75	39.206	40.734	48.142	62.844	64.71	58.36	55.309	65.957	42.585	43.324	57.596	62.05	69.235	53.223	45.091	61.263	50.088	62.871	46.0966		0	55.4051
0.119	52.749	61.46	71.769	43.82	56.359	82.547	63.172	78.566	88.914	57.735	43.382	59.7	40.489	45.03	53.592	72.411	72.397	63.384	59.286	77.242	48.584	56.173	60.361	74.529	93.073	62.421	53.586	66.122	61.134	64.638	45.134		0.00499855	62.2503
0.2381	60.574	70.713	85.062	49.163	57.811	86.867	75.315	86.617	94.7	61.883	53.524	73.628	48.057	51.552	61.519	92.546	84.021	84.221	67.015	80.329	51.786	66.562	65.515	78.768	98.848	66.348	61.756	83.213	63.653	57.756	51.787		0.0100013	70.0358
0.3571	67.943	76.395	91.953	58.901	66.954	95.041	84.001	98.47	109.235	78.786	65.49	85.304	60.271	57.917	71.844	93.087	86.416	87.868	87.083	89.942	66.256	67.789	66.37	90.989	100.171	59.133	59.112	98.907	62.669	63.59	64.3822		0.0149999	77.8151
0.4761	90.287	93.678	105.426	70.944	73.692	104.63	91.83	103.09	127.164	90.257	76.837	106.119	69.274	59.718	86.441	104.546	106.437	94.565	98.67	94.549	74.527	90.239	69.166	104.765	111.597	65.724	60.744	109.909	74.273	67.869	62.5636		0.0199984	88.372
0.5952	106.263	109.453	116.918	79.124	88.851	118.537	109.048	120.772	157.17	102.84	106.995	131.798	92.244	70.508	99.402	123.501	124.039	115.196	106.817	103.131	91.824	96.712	80.403	116.774	123.941	72.134	78.452	116.209	72.771	81.187	56.5576		0.0250012	102.244
0.7142	116.406	134.587	137.946	91.803	99.468	139.907	114.785	135.86	174.376	117.036	115.208	151.059	113.993	82.597	110.78	136.661	136.27	128.888	108.618	126.524	114.269	99.36	88.833	124.11	142.561	76.758	93.909	125.937	76.121	82.324	52.8658		0.0299997	114.51
0.8332	140.448	165.008	158.922	113.515	113.152	153.285	128.709	148.849	194.259	140.276	127.117	186.731	145.744	99.837	126.412	156.404	137.133	137.964	124.348	134.034	131.193	118.387	92.377	133.237	149.776	87.982	107.699	126.187	91.117	96.03	52.6231		0.0349983	129.637
0.9523	167.335	202.21	187.728	133.224	137.069	159.696	143.851	162.912	205.05	162.289	150.87	219.045	175.032	118.814	139.112	177.047	147.391	147.221	139.398	137.236	140.783	132.472	103.483	154.364	167.995	91.6	117.256	135.796	99.798	94.207	56.2751		0.040001	145.373
1.0713	194.619	228.775	225.752	152.294	158.706	179.678	169.779	176.691	225.417	189.646	167.769	232.649	209.513	140.424	156.73	193.578	149.22	168.551	145.706	153.23	142.736	130.228	124.874	163.942	182.159	97.816	125.622	138.67	107.527	101.542	57.2552		0.0449996	161.003
1.1903	205.921	239.94	247.343	173.838	155.229	195.167	201.711	198.586	232.226	221.695	196.068	242.256	230.024	151.113	183.499	219.603	182.709	188.255	155.185	160.422	147.313	144.55	141.074	165.796	188.678	111.313	141.799	145.471	109.766	109.267	62.1507		0.0499981	175.741
1.3094	219.526	248.77	251.41	184.796	167.724	203.94	221.189	221.303	242.894	240.016	212.703	248.093	243.126	178.605	195.442	226.128	201.07	209.756	170.345	169.382	143.705	147.353	137.025	179.635	196.045	105.394	158.131	156.229	116.097	110.921	71.6111		0.0550009	186.399
1.4284	236.716	251.338	252.746	203.591	180.055	224.327	237.609	231.931	245.887	243.464	221.848	246.487	247.77	183.964	221.901	231.211	220.912	227.999	181.949	161.672	145.847	138.842	151.996	189.565	185.885	112.705	166.924	165.817	126.629	117.645	75.1264		0.0599994	194.528
1.5474	250.259	251.762	253.546	216.708	185.006	236.769	248.573	235.183	248.179	249.044	230.909	248.176	250.137	197.048	232.746	236.321	231.667	228.176	190.546	154.303	152.044	150.258	171.209	188.907	201.606	123.133	183.41	174.108	125.729	113.671	88.7869		0.064998	201.546
1.6665	252.255	253.393	250.95	230.93	202.261	239.91	250.168	243.779	250.252	251.324	230.37	246.761	251.31	206.741	234.718	241.951	236.054	225.788	187.785	152.524	146.348	147.336	174.115	188.996	204.585	127.336	193.355	174.186	129.804	123.818	88.4008		0.0700007	204.436
1.7855	253.466	254.359	251.261	243.093	216.716	245.14	252.91	250.065	248.094	247.656	225.739	246.029	248.728	218.854	236.661	244.326	230.444	221.92	193.883	158.444	149.775	138.853	188.065	184.069	203.258	122.947	198.262	190.451	144.725	125.472	81.9989		0.0749993	206.957
1.9046	251.912	254.804	248.609	251.104	225.586	250.364	251.989	246.968	249.903	249.085	224.064	245.201	248.937	220.66	243.52	245.828	238.242	213.318	184.251	165.982	143.059	157.571	187.673	187.766	205.104	136.12	196.682	183.507	154.832	130.159	79.7508		0.080002	208.792
2.0236	251.13	253.527	247.596	253.552	232.29	250.754	251.647	248.666	249.627	247.393	226.901	240.297	251.834	231.134	242.021	249.042	233.001	210.928	185.595	163.975	144.679	155.205	177.094	192.232	206.891	153.38	201.352	195.042	143.462	115.844	85.3603		0.0850006	209.402
2.1426	251.794	253.649	248.932	252.759	238.261	253.68	248.223	246.907	244.721	247.47	219.121	241.385	248.185	233.847	243.616	242.606	229.62	208.51	182.279	163.461	147.917	147.603	164.723	196.928	195.684	162.485	199.006	203.961	139.221	114.581	81.5327		0.0899991	208.151
2.2617	254.176	251.928	246.58	251.737	248.928	253.586	245.133	243.708	241.368	242.268	219.516	243.906	241.612	232.331	244.347	246	225.319	208.951	181.488	169.302	138.856	143.412	164.492	179.432	195.584	160.382	206.97	201.506	143.823	125.144	83.249		0.0950019	207.582
2.3807	253.66	254.256	249.342	250.713	248.845	253.002	244.195	240.752	243.031	239.497	219.482	237.019	243.064	233.949	248.509	242.57	232.569	202.558	184.292	165.109	158.764	149.815	172.76	174.954	188.578	159.187	206.181	205.2	149.519	125.515	87.8363		0.1	208.539
2.4997	252.465	253.782	252.708	251.343	248.04	252.954	237.173	240.435	241.066	240.474	215.857	237.722	242.864	231.578	244.983	241.429	237.917	179.448	186.006	156.289	148.226	154.018	165.672	174.577	181.157	152.941	205.863	201.786	155.561	112.826	87.8883		0.104999	205.969
2.6188	251.996	253.693	251.46	251.902	247.826	252.962	236.687	232.963	237.247	235.168	226.751	239.469	243.858	236.794	243.506	240.059	236.624	173.703	179.045	166.32	145.349	160.34	153.725	177.526	189.527	158.02	206.256	194.337	155.832	117.556	89.3121		0.110002	205.994
2.7378	251.508	253.506	248.736	251.681	247.835	254.513	235.881	235.832	235.497	228.359	225.531	238.041	242.173	234.52	242.158	237.571	228.532	168.691	178.067	170.306	145.039	150.354	157.519	179.446	178.322	160.145	210.641	197.581	166.16	101.342	94.2272		0.115	204.829
2.8568	250.797	252.077	252.09	248.354	247.713	252.543	221.647	231.084	238.068	232.503	209.15	233.485	242.051	234.067	239.611	236.93	230.531	165.572	168.048	166.545	132.121	143.477	162.645	168.916	173.089	171.015	203.52	203.594	158.262	108.882	95.7535		0.119999	202.392
2.9759	252.271	252.873	250.831	248.346	249.633	253.601	213.28	231.593	240.595	230.437	202.054	229.67	244.25	235.348	239.512	229.938	227.327	169.819	169.041	163.743	124.425	137.091	161.435	166.143	174.264	165.876	201.968	197.862	179.614	122.268	95.3547		0.125002	201.95
3.0949	250.079	252.756	250.301	247.418	248.359	252.894	213.597	230.99	242.042	237.209	200.816	218.81	244.865	234.015	227.895	224.757	223.931	167.889	153.456	167.08	133.998	145.464	160.1	157.08	169.688	161.46	202.171	193.238	179.604	124.544	99.7682		0.13	200.525
3.2139	246.18	249.744	249.165	246.455	244.776	253.901	216.458	229.687	236.105	240.241	203.63	220.455	245.852	236.105	223.671	216.923	224.957	165.795	155.093	167.628	134.047	139.094	147.18	163.352	160.095	143.906	204.583	192.031	172.019	121.602	106.447		0.134999	198.619
3.333	248.64	248.164	250.357	248.071	238.765	253.472	202.545	220.864	231.833	236.979	192.877	219.499	246.876	231.399	226.584	216.401	219.291	159.178	142.856	160.85	121.205	137.731	137.08	160.585	149.768	152.308	206.703	187.832	162.304	115.122	100.986		0.140001	194.423
3.452	242.707	249.582	250.673	242.846	239.43	250.708	199.56	224.376	231.166	228.691	201.273	212.132	244.798	226.679	227.872	225.744	210.461	163.263	143.11	159.981	116.437	132.451	136.8	155.328	151.489	130.497	211.961	166.854	163.033	111.408	102.406		0.145	192.055
3.571	240.617	243.455	250.473	234.06	241.657	249.648	197.451	223.666	232.423	230.981	196.443	207.382	241.834	216.106	224.377	231.863	198.229	149.839	130.718	158.529	108.398	117.983	146.096	148.575	142.567	131.343	202.962	168.072	170.319	103.585	106.971		0.149999	188.601
3.6901	238.291	245.713	248.357	236.064	240.767	248.188	192.366	221.474	222.799	226.152	185.326	210.541	240.181	217.285	214.275	231.442	202.588	148.561	125.894	150.304	117.331	104.841	133.594	139.643	135.313	123.513	194.362	187.653	170.292	94.824	109.178		0.155001	185.713
3.8091	236.213	246.398	248.311	237.514	237.414	248.16	190.624	221.549	230.164	231.238	186.468	213.038	235.268	221.235	213.889	213.48	204.72	142.364	132.242	140.254	114.322	111.447	130.603	134.368	130.015	115.835	201.489	173.333	153.94	100.412	108.745		0.16	184.034
3.9281	229.396	246.288	247.879	232.227	241.257	250.465	183.115	210.878	224.558	230.7	192.048	201.57	240.695	213.582	211.364	214.389	207.479	136.056	123.321	127.594	87.015	82.453	135.029	127.847	115.616	129.789	193.048	185.542	145.957	88.456	109.946		0.164998	179.534
4.0472	231.836	248.403	250.15	223.969	233.108	246.561	188.428	204.734	219.442	230.824	186.895	199.23	237.358	215.255	218.63	207.036	193.646	138.533	128.114	125.987	84.453	81.784	126.266	136.555	104.191	128.774	195.541	183.467	141.416	99.068	120.708		0.170001	178.399
4.1662	237.969	245.514	248.309	218.228	227.88	241.206	186.502	200.831	220.427	224.135	176.998	202.858	237.151	211.572	212.968	204.793	181.483	137.081	123.985	115.604	79.229	95.737	133.208	129.089	95.973	123.684	176.533	188.932	151.606	99.103	111.279		0.175	175.48
4.2852	235.924	246.194	247.598	210.502	230.803	239.575	176.774	188.84	220.865	221.507	177.667	200.569	233.75	205.819	208.882	194.686	177.267	132.588	111.106	104.016	84.436	91.85	124.413	112.508	86.419	111.173	181.635	183.068	153.23	98.161	106.493		0.179998	170.913
4.4043	227.606	236.901	244.255	201.931	223.929	241.7	174.24	184.13	214.787	222.738	168.72	183.097	230.311	196.488	200.349	186.395	173.581	124.669	103.3	104.343	67.393	80.147	119.183	113.021	80.283	103.468	183.233	180.109	150.424	81.257	105.887		0.185001	164.77
4.5233	229.901	237.132	246.742	196.841	212.923	235.088	169.056	174.881	210.905	211.228	163.299	177.973	228.263	201.031	193.812	172.901	170.393	131.658	103.653	84.075	54.281	77.004	121.497	110.171	78.359	103.785	179.679	186.811	136.761	83.021	108.585		0.19	161.023
4.6423	223.647	227.647	246.358	195.286	212.901	233.325	151.679	156.344	207.432	199.938	153.265	178.809	227.41	193.961	183.876	158.009	156.195	121.31	93.885	84.741	51.848	68.046	116.089	102.441	73.569	106.455	182.195	175.69	146.828	85.531	96.1096		0.194998	155.188
4.7614	211.569	229.977	239.181	173.661	208.699	234.057	145.632	152.46	199.446	199.224	157.774	179.139	220.831	192.725	179.518	136.23	156.303	119.064	90.26	86.869	43.19	66.581	115.942	105.241	78.277	89.485	177.686	179.728	136.485	76.178	96.7532		0.200001	150.909
4.8804	208.826	219.215	241.663	173.835	205.354	228.564	151.698	156.022	174.123	195.533	145.649	169.492	221.819	184.076	183.663	135.243	144.629	124.63	84.362	79.316	39.609	70.07	112.359	91.262	78.15	75.135	176.525	182.801	147.326	81.331	107.942		0.204999	148.072
4.9995	213.225	216.34	232.485	166.529	203.766	227.022	148.925	148.963	173.658	183.799	152.419	156.083	217.027	178.338	172.05	128.572	136.846	117.954	84.329	75.754	39.682	67.738	107.156	79.272	75.591	77.193	175.822	168.349	144.985	76.919	103.344		0.210002	143.553
5.1185	205.389	212.913	227.276	150.817	189.032	224.039	136.99	119.579	161.89	187.314	137.233	154.052	211.492	180.013	168.576	118.907	149.027	113.217	78.335	78.717	35.96	55.245	95.652	84.695	71.521	67.865	156.606	151.255	134.549	81.238	99.2223		0.215001	136.73
5.2375	188.112	205.333	231.801	143.522	184.498	222.327	131.629	119.676	149.905	165.771	124.232	141.105	199.232	167.587	165.771	118.703	125.659	110.48	81.858	66.424	43.084	59.431	89.787	77.185	80.983	62.308	162.001	156.716	118.761	90.112	98.1707		0.219999	131.683
5.3566	167.756	198.601	224.372	139.155	183.575	217.107	130.907	116.461	142.129	154.71	125.349	141.712	191.99	149.267	155.766	125.812	133.525	101.79	81.455	60.029	46.071	45.141	83.534	74.338	65.854	60.774	152.787	163.083	111.923	79.072	90.865		0.225002	126.287
5.4756	157.423	213.782	216.036	134.389	159.035	220.992	133.174	102.864	131.934	158.092	120.326	147.556	181.22	142.421	145.495	116.177	122.007	88.42	72.792	55.473	46.063	50.524	82.646	74.548	60.606	61.417	156.702	168.618	102.764	77.93	98.3649		0.230001	122.574
5.5946	147.871	205.343	205.175	119.092	153.923	209.033	112.329	96.413	118.325	152.149	121.638	142.185	176.265	125.055	119.947	118.129	109.765	98.007	70.188	53.654	49.515	56.419	77.105	68.165	59.043	56.857	143.628	153.686	111.549	85.6	99.1866		0.234999	116.621
5.7137	139.404	198.726	199.502	121.637	146.436	194.618	116.797	101.632	117.545	155.664	122.83	132.449	178.218	116.205	116.349	114.696	103.869	90.159	69.512	50.691	39.635	52.146	74.784	64.997	50.793	54.232	153.265	141.52	108.096	81.881	104.739		0.240002	113.323
5.8327	129.878	195.131	193.997	100.82	130.053	186.802	107.668	90.712	109.653	152.576	116.961	129.108	168.568	115.87	122.462	107.736	100.764	87.386	72.268	61.148	40.757	48.49	76.566	59.804	50.751	56.741	163.326	139.928	97.411	78.298	95.3344		0.245	109.257
5.9517	112.598	187.07	199.497	96.255	112.602	181.739	107.432	104.509	111.945	145.205	106.804	120.761	169.444	114.116	118.548	98.447	97.78	79.855	63.441	54.86	47.003	49.259	72.658	56.417	45.344	57.486	154.095	123.529	94.395	84.882	101.566		0.249999	105.469
6.0708	100.95	175.177	186.193	99.838	116.681	158.928	108.534	93.302	98.922	134.985	122.494	110.608	153.44	114.141	102.593	104.374	107.566	75.755	63.982	49.165	47.913	52.935	59.575	47.912	43.901	59.074	152.636	105.148	92.743	81.539	97.98		0.255002	100.612
6.1898	87.598	164.139	168.243	87.649	113.983	153.708	98.982	77.062	93.404	133.825	115.307	111.135	135.428	102.012	97.128	107.22	94.346	82.086	63.002	56.46	45.516	47.063	57.938	52.359	46.807	54.413	142.867	103.559	95.804	86.799	91.7518		0.26	95.7288
6.3088	93.35	159.839	152.533	92.911	108.169	154.19	102.568	78.37	94.159	138.646	104.16	94.015	134.221	96.737	95.444	98.468	94.034	81.102	65.255	54.149	48.185	48.889	53.263	49.238	49.743	53.884	141.733	95.795	92.915	80.27	92.0678		0.264999	93.4936
6.4279	95.091	141.787	148.318	86.447	107.498	146.449	94.924	79.064	82.621	125.276	103.588	99.086	122.943	88.984	80.688	91.21	80.872	83.064	64.536	58.167	55.19	47.978	48.883	49.29	49.861	58.896	142.111	82.7	87.785	73.51	81.4972		0.270002	88.9779
6.5469	88.152	142.446	140.95	80.033	101.481	132.205	88.887	80.585	82.674	129.232	117.289	98.321	127.508	96.751	72.776	93.039	81.691	76.223	57.214	50.994	43.431	54.006	52.709	48.021	48.025	61.081	135.053	86.046	82.39	77.945	92.7748		0.275	87.7398
6.6659	102.696	126.358	124.538	89.604	101.277	132.783	86.089	73.307	73.314	124.724	104.517	91.408	114.874	94.204	67.207	89.437	78.688	80.231	57.193	52.721	45.21	52.808	51.754	45.21	45.801	53.278	123.153	74.342	82.919	82.993	97.5804		0.279999	84.5232
6.785	101.129	123.126	114.02	81.377	113.89	120.466	85.306	59.661	57.172	118.668	94.292	96.688	100.179	98.156	62.631	89.912	76.764	77.498	62.163	48.681	45.116	51.809	53.774	42.263	37.193	58.197	120.918	73.281	87.647	67.682	90.9127		0.285001	80.9862
6.904	105.146	120.379	109.009	88.825	111.822	120.679	85.352	64.732	63.03	104.777	91.644	82.414	105.146	97.792	54.43	88.551	71.166	72.162	65.507	47.738	44.751	45.638	43.013	34.804	41.319	55.792	123.984	68.557	76.396	65.362	86.6852		0.29	78.6001
7.023	108.842	116.045	96.086	80.535	109.071	114.314	82.068	64.823	58.529	96.169	92.625	90.274	99.759	86.362	51.491	80.374	61.253	72.962	52.387	55.187	43.297	47.978	46.353	42.747	37.679	49.521	127.993	71.243	68.026	64.577	84.8551		0.294999	75.9169
7.1421	109.095	104.929	96.035	83.401	106.628	112.349	80.317	64.948	57.694	98.208	85.521	82.161	101.723	78.603	54.703	75.568	57.754	61.309	57.428	48.839	44.397	43.749	46.232	37.856	41.806	51.652	113.815	67.147	72.089	64.767	85.1679		0.300001	73.7384
7.2611	100.674	108.197	85.395	82.48	98.984	110.165	78.375	74.894	59.191	92.648	87.84	81.214	98.363	81.784	58.223	77.034	59.413	64.941	59.995	39.676	42.376	39.803	41.545	37.581	42.587	55.412	106.403	61.663	63.774	61.99	82.6274		0.305	72.1048
7.3801	97.712	95.211	81.513	77.498	97.721	110.49	76.573	65.117	62.871	91.731	84.784	79.235	100.214	75.316	54.817	76.816	52.717	51.715	52.118	45.138	47.953	46.565	40.782	38.55	43.154	53.99	96.68	57.115	69.29	67.819	98.011		0.309998	70.6199
7.4992	97.642	98.466	81.078	73.171	101.686	103.465	69.409	72.708	67.272	91.744	77.624	67.997	97.079	68.01	52.556	69.242	43.222	52.429	53.811	42.072	44.375	46.994	36.128	40.328	39.406	57.245	98.259	59.668	68.149	66.567	80.4452		0.315001	68.3306
7.6182	82.474	90.81	71.907	78.891	104.433	99.722	69.909	71.676	74.49	90	75.611	75.246	101.023	71.447	46.936	79.128	46.077	60.823	51.074	42.686	43.823	47.688	37.98	38.334	39.906	55.575	91.012	60.282	65.571	55.739	79.9532		0.32	67.7492
7.7372	86.04	79.605	66.083	77.106	92.632	89.433	61.632	59.682	70.344	86.834	84.227	75.017	93.7	72.578	49.506	77.52	49.455	61.384	41.591	46.81	46.907	39.953	36.563	37.703	40.202	45.835	92.081	55.224	59.831	60.657	81.4476		0.324998	65.0833
7.8563	79.528	85.546	69.137	80.274	99.64	84.3	62.418	72.098	77.931	76.198	81.354	72.22	96.208	72.552	50.071	70.154	46.491	58.915	43.706	45.341	39.355	39.27	39.551	40.033	39.589	42.763	78.713	57.822	65	53.773	79.9681		0.330001	64.5135
7.9753	73.214	91.002	73.648	80.8	96.991	81.145	56.509	75.612	74.469	83.079	79.354	66.856	104.414	74.296	44.624	72.671	48.385	57.006	44.543	44.967	41.602	39.233	36.042	43.287	33.289	49.729	76.101	54.531	53.528	61.169	70.8146		0.335	63.9649
8.0943	72.273	91.614	68.666	80.88	88.769	75.035	61.312	82.651	78.832	79.775	83.952	68.425	97.901	79.652	43.883	59.976	48.811	53.422	50.94	38.125	39.007	39.869	42.004	46.044	38.075	44.402	82.88	49.713	56.761	48.492	63.1231		0.339998	63.073
8.2134	72.136	91.093	67.519	81.136	91.768	64.501	60.813	75.848	70.224	69.17	81.244	65.579	86.587	75.068	45.821	56.793	41.695	50.393	48.459	44.037	45.379	40.106	40.946	44.268	38.047	42.512	78.055	44.921	52.992	58.32	66.8949		0.345001	61.0427
8.3324	73.942	96.315	59.753	85.705	81.991	68.661	62.201	70.653	68.217	65.661	72.544	62.306	88.177	71.491	51.013	65.889	52.083	49.164	48.516	47.179	43.504	35.163	36.765	39.153	35.676	47.682	67.478	49.479	54.21	50.876	66.8526		0.349999	60.2677
8.4515	73.244	86.855	54.535	81.879	82.509	66.14	55.738	72.29	68.498	67.22	72.613	70.981	88.002	65.853	52.613	64.81	49.997	49.934	47.623	50.207	40.791	35.26	36.914	43.45	33.09	49.157	71.911	51.306	55.152	58.75	56.1629		0.355002	59.7898
8.5705	69.41	96.911	59.086	83.704	74.834	61.216	57.343	75.166	68.393	56.422	66.409	57.671	89.765	62.407	46.514	60.851	44.234	52.02	45.383	51.179	35.722	34.163	35.416	37.934	34.963	46.463	70.889	53.961	54.691	52.25	58.2494		0.360001	57.8587
8.6895	62.824	97.44	62.195	82.794	77.733	66.964	49.045	72.774	67.059	60.078	69.133	59.329	81.429	61.375	48.233	61.613	39.949	52.743	51.842	44.436	35.568	32.937	34.845	34.918	35.578	37.912	69.664	47.082	52.301	57.341	55.3152		0.364999	56.8532
8.8086	62.409	100.231	61.951	74.105	90.478	58.995	60.391	80.054	61.767	51.514	66.626	59.34	80.87	50.922	54.279	61.672	44.397	55.026	48.207	41.556	40.737	33.011	37.042	35.392	35.508	40.781	64.403	45.216	50.885	54.709	53.9813		0.370002	56.6598
8.9276	61.846	94.994	62.587	75.985	87.973	61.182	57.167	64.103	56.331	55.798	64.038	65.313	76.282	65.726	56.249	55.564	48.51	61.569	43.161	46.841	35.21	35.388	40.239	35.83	38.058	44.065	57.549	40.726	54.586	56.458	58.2781		0.375001	56.697
9.0466	56.996	93.71	58.937	69.016	74.91	63.899	56.435	65.381	57.594	60.318	58.849	60.204	72.905	57.926	53.332	63.585	48.36	55.122	43.155	46.377	37.909	35.633	32.804	29.737	42.64	45.531	56.461	40.749	49.202	57.268	54.4986		0.379999	54.8208
9.1657	57.224	89.311	60.815	77.056	86.203	60.318	51.022	58.231	53.235	57.43	61.297	57.847	81.706	53.979	51.796	56.981	55.198	59.647	41.474	42.643	40.328	30.605	37.459	40.54	42.658	45.221	49.034	45.776	49.807	45.76	53.9486		0.385002	54.6629
9.2847	59.104	73.205	55.37	74.565	84.706	70.305	54.624	56.416	44.9	54.283	59.16	57.723	73.104	49.622	59.927	60.896	49.824	57.586	43.436	49.036	40.431	31.836	35.502	39.987	43.958	45.379	45.431	43.057	46.133	51.336	55.4205		0.39	53.7504
9.4037	63.437	76.616	55.81	70.651	80.319	69.432	55.991	51.728	46.488	58.312	63.515	54.175	71.73	46.774	52.773	52.323	50.075	60.468	43.51	48.144	38.804	32.274	40.274	34.241	40.83	49.508	54.38	43.372	46.394	43.288	55.9524		0.394999	53.277
9.5228	70.68	74.85	63.936	73.434	83.932	77.424	56.599	48.588	36.961	50.654	57.882	58.923	74.418	52.234	46.714	53.906	49.476	60.408	44.048	56.256	35.742	32.817	37.494	37.812	38.518	44.693	61.127	41	37.992	43.115	50.2862		0.400002	53.2877
9.6418	79.037	77.36	55.085	65.189	68.637	77.799	59.632	54.046	42.033	48.431	57.114	60.217	70.069	43.194	50.636	56.323	51.025	60.747	41.641	50.659	38.736	34.051	35.001	34.524	37.903	48.7	56.075	47.886	44.524	42.951	53.1735		0.405	52.9806
9.7608	75.354	66.919	58.425	67.57	71.411	69.838	56.821	59.782	42.399	40.177	57.635	57.535	73.484	48.229	53.512	54.445	43.808	55.417	45.875	45.742	41.167	35.271	34.307	32.61	41.847	52.484	54.575	38.248	48.253	42.883	54.3096		0.409999	52.2688
9.8799	74.291	61.711	65.5	68.741	72.56	74.1	64.486	55.282	43.357	41.86	61.864	58.365	72.433	56.158	61.238	49.191	42.797	54.307	44.818	47.961	41.012	35.699	39.337	35.096	35.841	57.597	55.182	41.445	42.871	39.215	43.2996		0.415002	52.8263
9.9989	64.361	59.236	61.477	64.351	74.403	76.35	56.511	59.299	38.426	39.047	46.611	61.957	68.656	52.598	54.248	39.237	40.603	56.076	44.244	46.626	32.273	37.205	35.372	32.864	36.794	50.474	49.802	45.159	42.296	41.583	43.4051		0.42	50.0498
10.1179	61.079	59.424	61.285	62.833	73.44	76.327	59.568	58.211	33.445	35.364	50.589	65.266	74.989	50.923	56.151	40.648	38.353	56.644	44.249	39.644	34.198	34.755	30.293	31.535	33.153	39.343	51.82	46.737	52.862	43.2	42.0525		0.424999	49.6252
10.237	61.051	56.489	70.136	65.095	73.18	82.662	63.769	57.733	39.619	45.146	47.268	66.522	64.253	52.779	58.773	39.461	46.391	54.145	44.219	36.601	32.01	34.317	40.328	38.902	35.28	45.124	54.291	40.852	50.817	45.254	45.2144		0.430001	51.2155
10.356	64.214	58.379	74.55	66.073	57.469	79.233	69.622	56.543	34.273	37.534	50.102	58.574	78.613	43.768	62.269	39.188	41.599	59.456	38.597	41.958	34.058	35.074	33.273	39.972	30.54	48.377	53.326	40.003	45.727	46.865	41.1477		0.435	50.3347
10.475	50.789	59.063	68.897	57.957	57.528	85.525	68.256	61.714	45.658	39.743	45.515	63.863	73.205	53.579	53.135	34.653	35.484	53.818	37.135	36.202	37.111	36.544	29.697	40.765	31.428	48.775	50.79	41.371	50.223	47.451	44.3667		0.439998	49.6852
10.5941	51.714	52.657	60.338	55.822	63	91.791	61.498	54.367	39.294	40.283	48.168	65.323	72.672	50.447	54.531	28.631	24.935	52.318	35.767	43.642	43.738	33.668	32.69	37.253	34.441	44.167	47.647	40.696	45.889	47.712	38.8701		0.445001	48.1926
10.7131	46.859	53.973	63.425	57.899	63.829	81.123	67.924	52.564	37.107	38.08	39.257	60.197	72.461	47.606	51.475	28.668	33.196	47.963	41.886	37.144	33.347	37.29	31.172	40.476	34.836	38.895	50.172	36.824	41.656	41.484	42.8986		0.45	46.8286
10.8321	50.112	52.611	58.285	57.717	57.657	87.975	65.144	63.747	40.462	33.213	43.07	60.704	70.595	49.215	60.963	25.753	27.266	45.841	35.672	35.402	36.235	38.121	33.118	35.452	32.066	44.654	51.803	41.273	46.425	43.362	36.6925		0.454998	47.1163
10.9512	43.661	46.181	57.677	58.026	57.615	84.604	76.207	70.683	41.926	38.123	37.612	61.428	71.642	45.753	65.982	27.171	26.289	45.249	41.014	36.851	30.63	35.202	30.114	42.709	31.508	47.527	45.757	41.666	45.875	46.084	44.1468		0.460001	47.5778
11.0702	42.832	45.163	59.096	54.157	61.308	82.624	61.93	62.279	43.308	41.946	35.927	54.867	69.232	55.347	48.384	22.892	30.388	47.147	42.077	34.539	28.878	33.109	34.409	44.191	32.338	38.946	46.3	43.063	41.661	42.733	41.2657		0.465	45.8818
11.1892	35.68	46.343	59.251	66.098	55.025	80.371	62.866	54.976	37.302	34.61	47.967	61.378	73.545	45.98	47.681	23.058	28.984	44.011	43.293	37.464	33.058	35.614	36.256	51.885	30.306	36.119	41.022	39.928	40.196	42.67	35.7646		0.469998	45.442
11.3083	33.323	36.548	56.29	59.294	51.035	79.213	69.537	55.04	41.406	29.119	40.085	54.648	67.079	41.827	52.375	26.594	24.343	45.82	42.434	40.798	37.306	31.68	33.365	39.337	29.455	44.514	35.764	40.692	40.87	46.72	33.872		0.475001	43.8833
11.4273	36.411	35.253	53.265	55.493	53.801	73.806	71.242	51.291	39.663	31.215	34.227	60.77	65.817	46.524	48.96	22.138	25.892	47.073	40.275	40.698	33.37	31.138	32.515	43.543	30.588	41.872	37.454	45.515	40.686	44.555	35.4136		0.479999	43.5633
11.5463	35.168	37.811	59.286	56.771	54.078	72.166	64.408	53.362	38.398	29.457	35.571	58.224	71.224	46.848	44.333	19.383	23.409	45.162	43.283	38.973	34.46	30.526	33.121	38.828	27.093	35.646	33.071	43.688	43.006	45.249	38.072		0.484998	42.9056
11.6654	34.504	29.439	58.168	59.511	55.02	72.986	73.828	42.819	39.302	31.623	35.865	54.722	64.95	46.959	48.992	20.501	22.839	40.534	40.793	38.256	32.828	27.11	31.807	32.535	31.472	40.163	40.534	47.627	39.225	48.497	38.4023		0.490001	42.6391
11.7844	31.033	27.211	44.193	58.113	52.279	70.931	70.121	48.806	36.711	32.498	39.688	57.787	62.098	52.011	47.2	21.84	22.348	33.182	39.93	37.851	29.216	30.006	37.152	34.124	32.391	30.275	39.842	44.979	33.415	47.425	44.1971		0.494999	41.5759
11.9035	33.248	33.505	38.053	58.861	54.752	67.121	64.9	49.721	37.913	34.298	42.672	53.394	62.836	55.369	44.49	18.335	23.389	37.679	39.337	30.974	29.938	25.324	41.579	37.104	29.82	33.299	39.266	46.817	27.226	47.068	43.1196		0.500002	41.3357
12.0225	35.869	35.939	43.691	66.533	53.145	62.877	65.345	58.123	33.016	28.769	34.066	46.804	70.154	47.677	42.659	19.542	21.549	40.794	42.951	38.36	28.881	27.855	32.101	38.957	33.63	30.139	36.978	47.598	30.362	47.814	37.4707		0.505001	41.279
12.1415	32.377	33.315	44.663	69.352	53.603	62.21	62.605	48.76	29.254	27.627	35.629	47.8	70.443	49.386	46.915	18.779	17.594	33.138	38.225	34.853	25.293	29.961	26.541	33.906	31.006	39.882	35.418	38.818	36.096	44.952	38.7502		0.509999	39.9081
12.2606	33.302	34.139	44.764	64.422	51.982	62.356	59.564	47.105	27.425	30.337	38.083	50.557	66.738	50.248	45.823	20.477	22.023	32.92	41.854	25.617	25.756	31.722	28.866	37.189	32.365	37.955	32.246	36.198	34.468	50.575	34.4129		0.515002	39.7254
12.3796	40.649	31.414	38.729	70.202	46.772	66.811	53.906	49.111	31.052	28.221	37.283	54.495	68.961	52.273	54.93	20.884	18.993	36.459	43.853	30.767	25.811	30.84	32.395	39.663	32.124	37.49	33.277	33.089	28.991	42.033	33.6165		0.520001	40.1643
12.4986	39.824	30.083	35.527	62.331	39.984	56.609	60.483	53.192	27.836	29.84	37.636	50.414	71.099	48.389	59.66	22.51	17.712	36.969	40.842	45.077	25.967	30.78	28.7	35.6	30.734	33.042	32.892	39.161	35.89	37.594	35.8478		0.524999	39.7492
12.6177	37.68	34.175	41.731	59.786	42.915	55.514	62.58	48.046	23.78	27.624	40.132	51.802	71.289	50.457	57.797	20.945	20.666	35.031	37.962	44.073	29.734	31.549	33.517	36.122	28.829	34.013	34.201	31.717	35.466	42.977	35.1393		0.530002	39.9113
12.7367	39.769	27.433	37.627	61.16	39.343	52.027	56.302	47.856	26.703	31.357	34.387	53.862	74.693	49.145	50.853	20.159	18.678	36.763	35.614	32.06	27.461	35.109	30.853	33.575	35.584	38.982	35.022	33.13	42.106	41.693	29.4503		0.535	38.9921
12.8557	42.38	36.159	36.959	61.167	46.452	50.752	59.667	46.197	26.59	25.513	36.235	53.835	65.86	54.773	47.882	17.254	17.849	35.957	31.84	39.477	25.133	32.888	25.375	34.368	36.125	40.025	31.159	31.956	35.467	40.666	36.5768		0.539999	38.7915
12.9748	39.354	35.915	38.956	56.831	46.894	54.09	50.275	44.679	26.137	31.476	35.538	46.185	66.029	52.439	48.264	16.982	19.424	32.206	35.408	39.847	24.711	31.509	27.106	34.02	38.255	33.667	29.002	32.807	32.979	39.506	34.028		0.545002	37.8877
13.0938	35.885	32.772	40.552	57.164	46.083	49.462	48.851	40.432	28.84	26.252	36.076	52.574	69.586	49.632	43.655	17.88	17.638	31.618	43.465	33.39	29.149	27.033	30.862	34.526	29.44	32.308	28.852	26.88	38.671	37.144	36.9383		0.55	37.2132
13.2128	28.575	26.166	41.912	54.125	46.483	51.552	55.115	41.581	27.172	26.208	35.57	53.666	63.113	55.668	49.076	19.484	16.094	34.263	35.24	39.844	27.777	27.924	26.55	35.141	33.337	35.928	27.175	25.756	38.138	39.24	36.6243		0.554999	37.2418
13.3319	26.723	24.847	44.033	59.279	42.871	47.502	51.026	38.459	28.922	26.261	31.074	52.954	62.521	47.789	43.727	17.74	18.12	27.823	35.293	38.44	29.666	21.718	32.517	37.692	34.524	36.602	29.982	29.674	38.736	40.958	36.3227		0.560002	36.5741
13.4509	30.256	28.312	51.473	54.993	41.658	46.121	45.108	51.511	28.318	26.983	32.565	60.124	67.285	51.505	43.751	17.684	18.325	31.055	35.133	37.916	26.287	24.249	31.777	37.691	29.637	31.159	29.376	29.972	41.001	37.879	37.6929		0.565	37.316
13.5699	24.482	28.576	42.545	63.929	40.3	45.972	52.53	52.979	30.734	25.167	27.034	57.227	64.196	46.005	46.539	20.689	20.836	34.605	33.344	46.806	25.542	29.865	31.916	37.775	35.937	30.745	33.687	26.737	45.576	40.79	38.2758		0.569999	38.1078
13.689	28.005	29.859	39.506	60.143	43.476	40.548	49.255	49.619	32.86	28.636	30.19	52.316	58.848	44.818	44.733	16.914	16.027	31.491	38.893	45.227	25.486	26.4	31.93	32.53	35.239	27.639	34.559	31.336	41.654	37.148	38.2315		0.575001	36.8876
13.808	24.482	25.449	36.114	61.962	37.618	41.185	44.462	46.273	33.097	29.171	34.436	56.209	55.879	53.281	45.495	18.609	17.009	31.876	38.208	46.726	23.886	23.88	27.949	39.977	32.293	32.231	32.127	28.632	35.03	38.849	41.8004		0.58	36.5869
13.927	27.547	27.574	32.544	59.862	45.292	37.474	46.841	61.08	32.498	29.025	36.83	55.544	58.949	58.362	45.916	19.983	16.599	33.486	39.744	40.511	30.185	25.478	32.006	36.176	32.454	31.103	31.272	24.239	38.48	38.438	37.1999		0.584998	37.5062
14.0461	30.619	24.582	32.537	50.783	38.957	38.702	55.33	49.88	35.993	27.89	34.188	56.391	51.831	50.805	44.032	15.002	20.093	34.714	42.435	44.238	25.593	25.907	28.928	33.562	33.098	32.808	28.165	27.939	32.162	38.166	33.333		0.590001	36.0859
14.1651	30.959	23.696	30.846	56.005	38.803	40.943	47.685	43.726	43.337	28.378	27.447	52.801	56.819	46.14	38.936	18.161	20.883	30.298	41.212	43.378	23.258	27.729	30.129	35.348	35.521	31.675	33.334	28.62	35.916	44.886	35.7417		0.595	36.2132
14.2841	29.455	23.351	33.292	61.479	38.056	41.197	55.291	49.741	44.182	27.002	31.523	45.968	60.345	46.004	42.157	22.624	15.554	29.545	36.468	41.659	21.626	26.003	26.268	36.892	30.525	27.015	28.622	27.776	36.675	37.956	32.4475		0.599998	35.7
14.4032	32.172	23.939	35.699	53.876	29.774	41.304	62.276	55.652	46.805	27.094	32.543	46.913	53.075	47.697	42.514	17.37	14.812	27.686	39.32	38.023	24.127	27.017	25.42	37.28	29.349	31.983	29.804	30.232	32.286	37.983	29.0308		0.605001	35.5824
14.5222	33.519	24.68	31.84	47.357	34.852	39.954	58.26	45.685	37.702	26.467	28.705	45.737	55.057	47.917	38.885	21.128	21.652	28.391	39.717	42.528	22.04	25.5	32.758	44.305	35.106	31.107	26.819	32.217	30.513	38.327	35.6485		0.61	35.625
14.6412	28.687	24.777	35.431	48.67	36.419	35.004	53.016	48.959	41.932	24.135	27.595	41.76	50.535	50.153	40.981	20.158	19.169	28.262	35.568	40.869	23.701	23.86	28.15	39.479	28.942	38.358	29.033	31.173	41.481	32.643	41.9224		0.614998	35.1878
14.7603	26.277	18.403	38.941	63.089	36.896	33.857	45.743	47.979	51.011	25.286	33.435	46.765	47.635	49.145	42.567	20.822	20.221	29.927	39.058	39.154	25.738	21.242	25.08	39.692	30.413	29.923	28.259	26.278	32.981	37.97	43.3071		0.620001	35.3901
14.8793	27.631	22.565	37.413	52.387	37.138	32.196	49.855	50.891	44.097	26.778	38.1	42.978	48.801	48.022	42.776	25.642	14.993	35.571	43.003	42.193	27.187	29.139	28.043	31.761	28.709	27.301	27.046	30.349	32.274	35.185	46.195		0.624999	35.6845
14.9984	29.503	22.357	27.408	53.016	37.19	31.735	50.665	53.466	42.406	28.378	38.271	47.074	46.502	46.433	44.9	22.038	18.139	26.055	43.278	39.971	29.911	26.717	32.188	36.245	30.128	25.536	24.107	26.661	36.362	38.921	46.3683		0.630002	35.5461
15.1174	31.117	17.087	30.69	53.167	41.517	32.21	47.529	45.933	37.696	30.31	35.809	43.153	48.88	48.466	50.798	19.674	18.362	35.952	38.654	34.969	29.39	20.098	28.016	38.564	30.425	26.116	27.07	23.473	30.709	41.865	43.7262		0.635001	34.8847
15.2364	28.653	22.826	28.492	51.676	39.325	39.708	47.086	46.863	38.938	26.683	40.483	43.689	54.071	52.471	40.334	20.523	21.262	33.127	39.722	32.039	29.21	24.183	31.355	31.751	32.086	25.198	23.891	24.609	28.142	37.062	42.0827		0.639999	34.7594
15.3555	27.41	20.996	32.399	49.529	35.819	33.839	46.35	51.402	36.591	21.695	41.565	42.777	55.999	53.051	39.154	20.693	16.714	36.323	36.046	34.201	23.401	22.445	24.361	33.499	28.598	26.839	24.911	27.199	28.277	40.193	41.3377		0.645002	33.9875
15.4745	26.501	21.284	26.45	48.254	36.414	31.485	43.197	43.789	42.993	28.342	43.605	46.354	56.269	45.244	42.708	16.614	17.482	33.374	38.145	35.28	28.07	25.895	28.202	33.62	31.019	27.38	26.536	28.12	33.183	40.316	36.0322		0.650001	34.2631
15.5935	30.02	21.851	27.269	47.445	43.041	28.679	40.577	47.384	38.585	33.839	40.071	39.381	53.242	48.051	43.254	25.782	16.554	38.335	43.82	38.19	27.593	27.908	26.285	32.364	33.083	24.869	27.498	23.519	32.708	34.864	34.2307		0.654999	34.5255
15.7126	31.655	25.134	23.7	43.926	43.757	30.955	45.44	44.52	39.989	33.966	49.259	42.692	56.786	47.424	42.283	24.263	20.864	27.783	36.695	30.507	29.38	23.033	30.218	31.438	29.543	26.505	22.782	22.901	30.541	37.023	40.939		0.660002	34.3839
15.8316	31.595	24.329	26.142	45.366	47.569	30.12	48.089	49.352	41.844	33.237	43.231	41.793	51.404	48.667	43.656	21.884	22.314	27.013	38.347	34.476	31.211	22.268	28.544	30.723	27.93	23.345	23.434	24.913	27.044	44.419	38.2756		0.665	34.5979
15.9506	34.629	27.439	31.052	46.738	41.987	26.307	41.654	57.981	44.857	27.733	43.765	44.001	55.223	53.129	41.644	21.15	19.847	32.004	39.105	32.142	27.261	26.019	28.732	34.926	30.461	28.559	22.653	22.398	30.01	40.746	35.0628		0.669999	35.136
16.0697	29.154	26.781	33.82	42.514	36.03	30.831	34.141	58.414	41.417	27.397	36.549	41.601	53.891	50.964	44.531	22.538	22.098	33.065	34.066	36.943	26.059	23.715	27.398	30.652	25.832	30.066	21.674	27.721	28.214	43.385	37.5789		0.675002	34.1626
16.1887	32.138	20.478	31.367	44.439	40.107	29.421	33.05	55.95	40.034	29.741	39.929	46.963	54.105	51.619	39.819	19.002	21.143	30.84	36.304	37.683	27.716	23.354	27.23	29.161	28.349	30.041	20.298	29.265	31.51	40.961	42.7052		0.68	34.3459
16.3077	31.573	25.109	29.448	42.744	44.135	29.342	31.027	48.939	38.221	24.668	40.756	43.908	53.886	53.509	37.04	22.322	18.539	28.982	37.131	29.693	30.728	23.311	26.861	28.158	33.996	31.055	25.119	29.171	37.641	39.899	33.6915		0.684999	33.8904
16.4268	31.62	26.558	32.265	53.27	42.057	30.809	36.895	43.535	41.105	24.617	42.441	44.181	63.18	47.909	37.067	19.644	25.786	30.432	41.848	34.602	27.917	22.242	29.951	29.615	30.597	33.217	28.545	26.754	36.214	38.246	30.8014		0.690002	34.9652
16.5458	34.193	24.238	31.06	51.102	45.513	33.6	35.696	39.227	39.994	24.329	45.661	38.858	52.8	43.488	41.589	23.263	24.26	33.774	39.48	35.067	29.143	27.722	27.011	30.421	27.535	36.265	26.872	31.764	40.437	40.724	39.8074		0.695	35.3191
16.6648	35.868	29.943	30.211	47.47	38.299	30.222	36.216	43.222	43.403	26.188	46.04	41.337	48.779	39.422	37.102	23.91	23.496	32.532	43.735	36.381	20.2	23.872	27.46	27.659	23.965	36.033	27.804	32.491	35.928	36.695	36.2391		0.699999	34.262
16.7839	37.962	23.955	30.643	50.968	40.275	36.33	38.04	37.04	48.362	30.395	41.054	44.337	51.176	46.376	40.884	23.395	20.001	32.549	40.393	41.72	27.361	24.373	24.059	24.5	27.047	28.315	28.719	35.034	33.021	30.521	32.0056		0.705001	34.5423
16.9029	32.493	21.207	32.739	55.547	41.903	34.766	39.514	34.15	45.448	31.01	44.913	47.477	56.031	47.684	38.432	23.073	25.606	33.299	40.187	35.637	32.127	26.864	23.092	24.881	31.793	29.21	25.916	32.616	35.694	35.416	30.6713		0.71	35.1418
17.0219	34.474	31.532	32.402	50.021	42.378	38.977	36.967	39.207	45.044	30.626	44.598	46.119	58.382	42.993	37.468	25.267	19.937	36.243	37.238	34.316	34.245	27.008	23.928	29.015	31.576	29.707	28.601	27.317	35.22	33.855	30.1312		0.714999	35.3159
17.141	28.488	33.351	33.163	49.215	46.036	38.302	41.4	41.22	45.574	34.125	46.93	36.57	48.326	41.792	38.69	23.41	20.245	29.968	38.596	35.716	26.095	27.86	23.785	28.114	29.896	34.405	28.087	27.622	31.801	31.261	31.6749		0.720001	34.5715
17.26	34.151	28.834	33.582	46.852	45.1	33.661	42.363	36.874	46.762	32.154	43.609	42.063	46.397	37.114	34.967	19.377	23.284	27.683	38.398	34.188	27.041	27.997	26.787	26.809	31.767	38.95	31.581	26.471	33.352	31.451	32.6823		0.725	34.2678
17.379	33.977	34.487	30.063	40.979	50.868	34.152	36.711	41.654	36.507	36.243	48.895	44.117	46.797	43.718	39.074	26.106	23.251	37.053	41.155	30.918	28.903	29.376	25.565	24.056	34.135	32.523	35.539	22.204	35.521	31.901	34.9574		0.729998	35.2066
17.4981	36.38	31.495	34.898	53.174	44.627	35.494	34.063	40.467	48.123	35.842	49.612	37.555	45.611	45.491	37.528	25.394	19.539	36.655	41.021	30.922	26.677	31.685	29.116	25.962	32.535	31.55	33.674	23.898	37.445	31.909	33.2137		0.735001	35.5341
17.6171	32.175	28.157	34.618	54.777	40.153	31.169	33.758	37.847	44.637	37.471	42.378	40.717	45.421	37.447	39.105	25.281	20.964	39.065	41.695	34.882	27.279	29.984	23.141	27.684	30.618	26.959	32.482	27.066	37.321	34.398	36.8084		0.74	34.6922
17.7361	36.18	31.189	35.081	46.133	45.821	31.023	31.169	42.803	38.785	39.366	40.003	38.419	47.799	41.703	44.209	31.302	22.424	37.118	41.01	34.177	23.931	28.273	21.611	27.536	32.185	26.785	33.918	24.88	28.787	36.438	29.7843		0.744998	34.511
17.8552	37.828	29.263	34.294	57.699	47.897	35.257	37.174	46.206	46.213	45.235	40.879	35.786	44.215	38.179	41.314	28.602	22.352	30.919	36.582	32.21	28.155	24.642	24.391	29.249	33.687	29.263	34.748	26.876	33.462	34.887	35.3613		0.750001	35.575
17.9742	39.153	31.713	38.884	54.478	47.26	33.086	36.692	49.381	46.86	41.254	41.062	33.795	37.952	44.171	39.588	29.643	26.357	31.394	36.023	32.198	29.845	26.637	26.728	27.162	29.965	29.99	37.504	30.604	35.556	33.059	32.6511		0.755	35.8273
18.0932	39.828	24.05	35.92	49.874	47.289	32.42	29.338	48.097	44.724	40.764	40.471	32.298	44.958	42.185	36.332	30.795	26.888	27.82	38.738	36.346	29.689	25.667	25.602	28.995	29.97	26.637	35.168	30.856	34.9	34.448	27.0922		0.759998	34.7793
18.2123	34.695	28.791	38.69	55.268	52.007	33.326	30.754	40.903	45.93	37.954	45.413	33.617	46.429	34.265	39.004	29.314	30.939	28.008	38.486	33.546	30.741	25.689	24.861	31.39	26.721	28.422	37.312	29.081	30.101	32.34	29.0277		0.765001	34.9363
18.3313	36.785	28.259	40.333	54.304	54.054	31.162	30.845	41.676	47.073	41.153	42.053	36.087	47.001	39.036	34.776	34.615	35.068	34.65	42.478	33.334	30.868	27.111	24.451	26.19	27.898	23.673	33.402	27.509	36.386	30.781	35.0301		0.769999	35.7433
18.4504	38.14	29.329	40.911	52.871	52.334	33.246	38.329	41.608	44.757	39.117	38.217	35.633	38.564	40.5	31.744	41.511	30.223	27.1	39.836	30.822	33.416	28.928	27.207	26.371	27.195	27.638	34.708	24.132	34.243	33.621	36.0144		0.775002	35.4279
18.5694	38.833	35.042	43.301	47.356	43.823	31.064	30.739	40.454	41.77	39.737	34.907	35.127	41.864	39.627	34.888	37.004	25.168	32.309	37.183	30.614	28.144	26.037	23.103	24.428	26.323	28.814	31.785	25.148	39.053	36.301	31.6913		0.780001	34.2464
18.6884	38.796	41.086	39.336	48.366	48.756	31.423	25.978	37.821	38.994	39.639	31.94	40.516	43.868	43.378	37.166	40.82	32.264	33.98	39.911	29.028	32.313	27.286	21.909	23.818	26.879	29.643	32.24	26.95	30.816	34.409	31.1029		0.784999	34.8526
18.8075	42.62	40.899	50.782	44.454	46.329	28.97	35.342	34.917	42.517	40.355	34.183	46.344	43.558	38.662	39.191	40.748	27.905	34.325	34.097	34.668	30.554	28.812	22.328	20.568	30.074	26.337	26.107	27.412	34.721	29.769	33.4993		0.790002	35.1951
18.9265	47.228	42.367	49.204	43.311	54.186	30.912	36.247	43.371	33.863	44.267	39.235	38.869	38.308	39.873	34.637	43.946	27.956	32.903	41.865	32.432	29.434	29.563	21.025	23.909	30.169	31.62	29.684	25.043	37.691	34.913	36.642		0.795001	36.2798
19.0455	40.44	51.046	51.879	38.713	56.371	39.723	36.137	41.201	39.667	37.622	39.155	40.413	33.493	40.63	33.343	43.461	32.623	29.014	39.596	35.715	31.142	27.677	26.394	22.2	33.454	32.811	32.765	25.574	35.354	29.473	35.0957		0.799999	36.522
19.1646	45.087	46.596	49.863	39.248	52.341	34.9	36.56	42.289	37.085	41.773	42.254	43.749	38.59	38.533	32.504	41.939	36.502	34.598	41.056	26.679	38.369	26.897	25.898	23.98	31.328	32.1	29.402	26.625	28.815	30.055	30.3103		0.805002	36.3202
19.2836	39.785	44.423	59.877	48.665	51.752	32.374	36.288	34.202	38.314	39.216	38.513	35.926	38.637	40.521	34.256	45.183	28.594	33.081	36.96	30.07	36.879	23.958	29.975	26.471	26.727	35.347	31.448	23.969	33.238	36.55	31.4219		0.81	36.2136
19.4026	41.519	46.796	55.366	42.136	51.544	35.005	41.698	38.045	38.251	35.265	34.355	37.665	39.586	32.897	32.953	47.538	37.2	32.381	34.513	28.881	33.774	29.214	21.249	23.08	25.991	30.034	30.585	29.868	28.398	34.97	35.5162		0.814999	35.6862
19.5217	37.542	44.047	61.931	45.277	49.159	37.296	36.553	38.497	34.37	43.103	36.172	42.423	32.789	38.626	34.269	45.506	39.17	36.811	29.56	27.881	29.658	30.749	25.999	21.975	25.18	31.796	28.315	25.022	28.48	27.258	26.686		0.820002	35.229
19.6407	41.026	42.987	56.661	42.254	45.764	29.876	36.717	41.88	35.461	41.153	36.354	35.087	35.175	35.15	33.941	39.244	33.228	41.197	31.684	27.612	32.647	29.916	20.702	23.712	25.603	30.449	29.107	24.496	29.412	26.884	30.672		0.825	34.3887
19.7597	44.57	49.191	52.938	49.885	51.769	35.743	36.71	40.672	35.378	31.926	33.77	36.804	36.236	38.509	31.903	36.448	36.393	39.489	31.399	30.299	34.839	29.773	19.963	24.083	20.034	32.946	31.923	27.306	32.862	29.783	28.6402		0.829999	35.2317
19.8788	43.053	48.685	47.016	49.736	47.673	33.729	36.295	43.878	34.124	33.776	35.649	35.863	31.904	37.565	29.204	37.357	36.7	36.568	32.46	27.941	31.33	28.356	20.516	21.753	24.77	33.426	25.598	25.729	33.028	32.014	28.9185		0.835002	34.3424
19.9978	41.332	45.975	52.871	46.156	45.057	41.87	34.757	39.671	34.202	33.869	36.458	30.969	34.271	35.893	28.858	44.02	33.975	36.91	28.425	28.001	30.026	25.041	22.475	23.998	32.644	32.248	24.789	31.753	35.183	31.55	29.6131		0.84	34.6084
20.1168	35.996	43.382	50.1	40.759	41.965	34.417	38.789	38.915	35.733	33.256	33.726	34.242	38.386	34.299	28.256	35.458	30.667	35.78	26.059	24.698	32.157	28.227	23.683	22.059	26.417	26.608	30.294	32.955	32.632	34.367	32.4176		0.844999	33.4419
20.2359	37.566	43.621	41.206	44.068	43.235	34.384	39.116	45.685	41.208	36.213	32.734	30.915	32.47	32.938	27.944	39.155	30.384	32.412	26.338	30.489	30.763	25.76	15.178	19.068	26.652	30.816	28.435	31.54	34.186	31.048	26.588		0.850001	32.9715
20.3549	35.185	43.147	44.309	42.362	42.941	36.159	43.965	42.963	36.248	35.358	35.377	31.825	39.044	28.705	29.634	36.619	31.535	38.231	24.081	29.125	29.944	27.532	20.564	24.649	31.419	26.909	27.895	29.441	37.499	32.674	26.9828		0.855	33.6233
20.4739	36.995	38.712	43.422	41.726	51.834	36.078	41.29	37.057	33.826	32.93	30.578	30.345	38.921	32.792	28.597	41.492	27.964	27.592	32.081	25.768	28.911	23.65	21.06	24.584	29.66	29.595	29.319	27.521	33.594	33.036	30.2159		0.859999	32.9402
20.593	37.376	47.797	40.071	43.465	48.47	43.555	36.539	39.809	33.543	36.338	31.901	28.285	29.484	25.828	23.247	34.473	31.885	27.806	27.093	19.835	24.598	25.619	19.196	25.213	28.693	32.118	27.971	30.836	33.453	27.591	31.4412		0.865001	32.0493
20.712	33.813	45.21	39.631	49.04	48.633	45.35	37.328	38.266	28.344	32.006	32.246	29.704	33.48	25.621	21.419	32.867	31.19	25.022	22.61	25.419	28.248	26.537	21.695	26.643	33.677	34.92	25.976	27.514	32.287	28.256	28.4972		0.87	31.9822
20.831	34.078	43.504	40.863	44.659	42.201	40.207	36.476	43.362	30.487	33.538	29.476	21.988	33.602	20.983	20.351	30.436	31.663	33.864	24.492	23.246	20.244	24.063	21.402	20.077	30.287	30.249	25.006	29.148	33.815	27.915	24.8757		0.874998	30.5341
20.9501	35.903	43.325	33.983	42.86	48.078	36.207	36.372	45.104	25.88	31.469	30.871	21.742	32.101	22.452	20.029	21.626	25.78	25.797	20.467	23.162	25.096	21.318	19.98	20.571	37.279	25.533	26.72	31.066	32.499	32.146	29.3197		0.880001	29.8302
21.0691	28.619	41.902	33.087	40.359	45.091	35.806	38.829	36.473	26.297	32.264	25.555	20.606	29.068	23.81	17.375	20.157	25.707	20.909	19.507	20.759	26.548	24.626	18.846	20.886	31.987	27.217	28.412	23.935	29.308	28.249	29.9309		0.885	28.1331
21.1881	30.684	41.732	36.051	43.725	41.466	41.157	31.135	35.054	23.479	31.934	24.27	22.011	28.629	25.304	12.325	20.019	25.838	21.408	21.622	17.49	26.78	22.794	19.558	19.728	29.063	25.254	26.639	30.7	26.45	30.563	27.5169		0.889998	27.7542
21.3072	27.18	40.533	35.461	35.61	40.927	41.559	35.997	35.381	27.416	31.19	22.801	19.646	24.274	23.597	13.899	21.4	22.264	21.861	17.416	16.207	22.863	27.089	19.889	17.958	35.545	30.409	32.72	26.995	27.766	30.901	28.1398		0.895001	27.5772
21.4262	23.777	35.475	33.858	34.132	39.069	43.597	34.652	34.448	26.173	32.856	24.135	19.286	23.36	21.188	14.658	16.711	22.862	22.421	18.018	11.094	29.126	25.675	13.536	20.804	37.907	29.628	30.667	26.338	29.788	30.408	26.9447		0.9	26.8578
21.5452	21.417	35.446	32.654	29.83	34.195	39.246	31.477	28.115	25.71	25.817	17.179	19.609	21.051	19.689	17.914	18.08	20.978	20.844	17.076	9.895	28.066	24.024	19.06	16.795	31.524	25.956	28.889	28.152	29.707	31.014	28.3818		0.904998	25.09
21.6643	19.778	31.719	27.158	30.065	37.126	39.093	32.664	32.341	28.369	24.056	16.231	17.613	22.431	19.942	14.821	13.438	18.073	20.419	12.673	10.828	23.207	26.007	14.934	20.047	35.163	26.757	30.489	23.794	31.583	32.31	31.1756		0.910001	24.655
21.7833	19.79	29.143	29.144	32.539	37.929	37.303	32.713	31.312	30.928	22.103	17.533	19.064	23.685	21.313	14.621	17.281	20.392	12.805	8.464	9.851	19.878	24.243	14.925	19.606	30.01	29.155	29.21	21.055	33.512	32.718	27.6684		0.914999	24.1901
21.9024	15.694	29.641	26.583	27.647	36.718	38.917	28.854	32.228	33.264	24.627	18.878	18.311	23.031	19.639	16.539	15.64	18.73	12.553	8.805	8.489	20.871	23.521	14.379	18.47	31.389	26.485	29.07	26.092	30.26	27.447	27.9956		0.920002	23.5731
22.0214	13.9	28.545	25.302	28.734	32.014	40.557	30.445	27.518	25.451	25.573	19.836	18.731	21.281	19.112	16.986	15.126	18.237	9.184	8.232	7.676	23.218	22.857	11.974	20.155	34.881	27.157	25.909	26.938	29.732	28.605	28.5915		0.925001	22.9825
22.1404	9.852	19.811	21.706	28.142	27.623	35.687	27.979	27.949	21.068	26.892	14.394	15.682	18.937	18.206	19.315	13.646	14.922	10.911	10.106	7.952	21.173	20.671	15.026	19.412	38.999	29.812	29.763	25.165	29.104	29.866	31.9866		0.929999	21.9922
22.2595	14.052	20.763	18.569	27.384	24.239	33.026	32.407	28.769	26.262	20.334	13.294	13.978	13.638	18.35	18.921	14.187	16.64	12.869	8.305	6.355	23.28	19.676	9.74	19.922	33.99	28.987	33.74	26.531	28.681	26.091	26.4405		0.935002	21.2716
22.3785	13.346	19.454	15.988	25.824	23.895	38.766	27.067	28.636	21.357	17.783	13.935	13.346	17.913	19.504	15.319	18.398	16.274	11.911	9.464	9.807	21.69	20.641	8.7	22.218	28.302	30.699	31.796	23.623	27.404	28.487	27.0468		0.940001	20.9224
22.4975	15.417	18.228	14.819	23.84	32.001	32.71	25.089	23.922	21.616	13.035	13.527	13.436	19.802	15.974	12.276	18.784	16.004	14.958	8.002	9.666	21.502	20.463	8.268	19.078	29.014	29.106	31.509	22.074	30.536	28.077	23.3296		0.944999	20.1956
22.6166	12.32	12.994	12.986	22.993	28.248	35.108	31.679	24.064	20.088	15.245	15.058	13.863	16.455	16.1	13.904	16.81	19.374	13.351	9.761	8.898	19.714	19.275	7.235	18.203	28.358	26.38	32.204	22.223	29.795	30.253	23.848		0.950002	19.8964
22.7356	14.371	11.98	16.925	22.964	22.003	34.214	23.058	22.58	15.332	15.819	13.158	10.855	13.481	21.494	18.143	18.767	18.36	11.824	11.488	9.362	15.978	16.798	6.329	16.051	22.862	25.279	31.732	31.261	31.007	24.175	25.8848		0.955	19.1463
22.8546	14.508	11.248	12.339	22.861	20.317	29.938	23.596	19.753	16.255	15.041	11.577	13.502	14.146	19.063	17.213	18.365	13.045	14.48	10.416	8.754	14.01	17.415	8.55	19.732	22.907	27.746	28.281	25.583	26.687	27.01	30.224		0.959999	18.5343
22.9737	15.159	11.841	8.026	19.28	21.471	22.311	23.684	20.44	14.593	13.219	14.301	9.886	18.804	14.885	16.694	17.165	15.861	12.069	8.998	10.615	14.497	13.525	8.185	20.664	22.837	28.998	28.517	27.158	29.217	27.849	28.1682		0.965002	18.0296
23.0927	16.472	6.699	9.567	17.753	22.777	27.991	22.414	19.73	15.272	11.388	14.271	11.346	17.134	17.847	15.987	12.174	17.474	11.139	8.152	9.378	8.481	10.159	7.015	21.455	20.605	25.258	29.667	25.623	30.348	31.142	21.6609		0.97	17.3025
23.2117	11.925	7.9	8.696	15.838	20.521	24.176	19.366	17.856	14.158	10.726	13.383	11.489	15.556	15.251	11.979	13.927	15.375	13.915	8.81	8.013	11.493	11.811	6.394	14.603	24.259	21.15	31.397	24.178	26.448	26.587	21.0774		0.974999	16.0728
23.3308	14.085	8.047	7.511	18.675	19.108	27.262	19.436	16.838	12.287	10.863	12.081	12.51	17.428	16.835	15.652	14.843	15.522	13.108	11.568	8.152	11.558	12.245	6.727	13.94	26.361	24.449	26.297	29.66	29.257	28.147	25.915		0.980002	16.9796
23.4498	11.045	9.843	8.059	14.259	21.471	25.764	15.125	17.113	13.092	11.879	15.281	11.276	12.891	19.812	17.018	16.768	14.574	13.622	10.076	11.008	9.845	10.75	8.089	17.481	23.405	22.135	27.174	26.45	30.678	25.085	24.7686		0.985	16.6399
23.5688	13.928	9.015	10.521	15.29	17.976	23.409	21.644	18.274	14.894	10.257	11.816	12.283	15.584	16.855	16.386	13.071	14.888	11.869	10.537	10.099	10.718	12.609	8.625	17.099	21.043	29.271	28.774	28.676	30.022	26.862	30.5232		0.989999	17.1877
23.6879	11.944	11.406	12.845	16.308	21.909	19.301	22.438	13.352	12.206	8.569	11.538	10.785	13.981	15.379	16.388	12.502	15.117	13.868	11.313	11.684	11.562	11.4	7.082	15.188	26.118	27.052	27.43	25.915	29.69	25.786	24.0083		0.995001	16.5827
23.8069	11.966	11.537	12.862	16.451	22.44	15.219	20.346	15.501	8.816	9.458	12.911	10.114	15.059	16.222	17.507	13.892	17.218	14.557	10.536	10.631	11.966	12.054	6.983	12.227	23.19	19.504	27.267	23.568	29.019	26.353	21.0739		1	16.0144

## Sheet: Image7
X0	Y0	Y1	Y2	Y3	Y4	Y5	Y6	Y7	Y8	Y9	Y10	Y11	Y12	Y13	Y14	Y15	Y16	Y17	Y18	Y19	Y20	Y21	Y22	Y23	Y24	Y25		Ap-Basal	Avg intensity
0	79.775	57.807	59.712	96.518	88.599	84.325	77.3487	82.155	66.4331	55.5556	51.4356	50.1282	46.4289	36.3501	40.5933	32.415	33.7191	42.9059	27.382	26.8083	34.4036	29.036	37.8556	36.442	51.574	58.617		0	53.2432
0.119	81.301	63.792	61.796	91.685	94.149	104.957	77.8237	91.181	66.6109	63.6452	49.3499	49.6096	41.4453	37.8324	41.927	34.446	38.9383	38.5749	24.561	27.823	34.3745	33.901	36.4139	42.104	61.2296	59.976		0.00657706	55.748
0.2381	77.477	66.5	59.325	94.585	90.558	107.252	84.4444	92.839	69.4697	64.0304	48.1459	53.2426	50.983	41.8478	46.8046	38.868	42.0166	44.0791	31.732	28.8477	37.5974	41.997	37.4239	45.216	58.5524	66.7622		0.0131596	58.4845
0.3571	79.585	77.738	66.937	110.084	97.847	113.629	85.1756	100.357	69.9361	62.0991	53.3703	52.4441	50.9887	38.7427	52.0425	41.207	44.3342	45.2843	34.008	32.0836	44.1349	38.367	42.5589	48.331	73.408	75.8875		0.0197367	62.7146
0.4761	88.591	74.149	76.434	99.342	99.316	117.233	95.5582	96.463	65.5796	61.6859	50.1913	56.3334	47.8134	40.3375	51.761	44.816	45.7875	47.5914	38.646	35.874	43.376	39.214	42.8642	45.298	69.8605	88.1302		0.0263138	63.9325
0.5952	82.997	72.067	71.293	95.803	103.673	114.397	97.988	95.643	67.8182	64.0636	54.1861	63.3919	52.4529	44.33	61.8025	52.915	47.7853	52.7092	39.776	38.644	48.896	59.773	43.7167	46.956	72.4705	99.2757		0.0328963	67.1086
0.7142	91.787	82.781	63.346	108.682	114.379	120.357	106.866	100.955	74.8903	67.3721	56.1601	65.1848	51.7412	48.5812	69.7976	66.719	55.8895	57.5054	49.084	43.8614	54.0359	55.863	52.2653	46.961	72.7654	98.1352		0.0394734	72.1525
0.8332	99.541	93.203	79.287	105.497	112.097	128.638	91.9311	106.234	78.0886	65.2716	59.0665	71.7968	53.367	58.7558	71.7098	73.78	59.0266	58.5373	45.156	44.1175	53.3465	69.139	55.7791	59.504	82.932	104.884		0.0460504	76.1802
0.9523	113.45	104.094	93.069	112.913	118.289	129.492	100.867	103.098	83.3001	66.7929	56.9714	81.266	54.9734	62.3379	65.8063	85.294	58.1278	70.8795	48.118	40.3553	62.49	68.015	61.7983	61.218	85.4312	99.8755		0.052633	80.3201
1.0713	122.068	109.004	108.026	107.009	117.133	132.883	109.525	113.176	73.8431	74.818	67.4349	79.2638	66.9517	71.7194	83.2775	88.67	63.8596	72.9918	57.975	49.7981	60.1453	69.054	64.1191	70.859	96.6209	102.975		0.0592101	85.8923
1.1903	123.504	125.072	117.523	117.205	126.916	140.174	113.523	120.819	91.5014	73.8045	70.783	78.664	70.9658	69.9969	79.7391	92.004	61.3564	71.9882	52.711	58.998	60.7923	69.891	69.4894	78.146	99.6221	104.635		0.0657871	89.9932
1.3094	127.816	132.44	138.069	122.468	145.055	136.143	115.073	120.067	93.1267	86.7241	76.5627	86.1661	71.4885	68.5995	81.2582	81.872	61.1797	66.0135	58.595	62.283	75.1143	75.987	77.0958	77.617	91.9248	100.053		0.0723697	93.4151
1.4284	130.994	151.538	152.067	125.239	126.696	135.096	116.691	116.078	99.5286	85.2295	82.7425	92.574	70.4461	74.26	79.3602	95.266	69.7934	63.089	68.256	66.1867	72.0572	69.206	83.7848	102.24	92.6559	109.01		0.0789468	97.3109
1.5474	140.913	164.292	170.222	124.918	117.65	130.033	115.488	134.181	107.575	86.4382	81.5722	92.7918	68.9971	83.6336	83.8407	105.847	84.1971	73.0162	71.201	80.3193	73.6253	77.78	75.9186	91.315	102.309	124.563		0.0855238	102.409
1.6665	146.375	166.668	185.318	143.451	110.101	119.786	122.008	134.327	105.565	92.9542	78.2668	86.4753	74.4072	94.8267	88.9034	114.004	82.9175	71.2314	75.701	74.3242	74.9501	88.756	80.3657	110.041	98.2425	106.753		0.0921064	104.874
1.7855	139.222	165.583	190.498	137.709	110.902	107.714	120.123	150.597	107.99	94.7294	83.5409	90.221	77.231	89.0648	79.632	121.957	84.9715	74.0288	78.249	79.5384	80.3299	88.366	94.3974	107.466	88.3973	113.462		0.0986835	105.997
1.9046	123.768	166.452	194.108	121.161	110.595	109.883	121.5	146.29	110.239	94.4443	91.0851	95.1488	90.8199	80.2673	91.7051	114.772	93.1352	75.458	88.487	79.096	90.7258	89.335	91.1618	111.861	92.5855	110.228		0.105266	107.089
2.0236	126.313	158.057	191.181	140.371	100.228	109.922	124.338	141.776	110.466	89.2644	93.0989	95.3077	73.7335	86.5834	91.9407	120.92	98.4949	67.3664	83.822	78.7257	85.703	86.925	86.7554	109.556	89.2526	107.69		0.111843	105.684
2.1426	127.248	150.927	178.612	154.401	109.127	96.359	124.386	138.871	114.497	100.437	94.1014	92.1291	76.561	95.644	98.1431	133.758	99.116	66.7781	74.865	81.2624	87.2244	89.275	91.8676	106.111	83.2735	101.602		0.11842	106.407
2.2617	118.827	150.748	193.303	152.601	104.019	111.843	116.648	143.184	101.791	96.9534	96.6967	93.0048	68.7199	87.7492	98.8222	118.666	87.581	72.401	79.508	77.1359	73.7109	88.611	88.6826	105.051	84.5666	92.3518		0.125003	103.968
2.3807	127.45	151.152	189.022	150.592	97.541	104.704	115.569	137.475	104.245	89.2146	82.8402	98.3259	80.9536	82.499	81.785	113.067	85.1288	67.0662	83.651	76.1308	77.5675	83.342	91.208	99.46	79.8002	90.139		0.13158	101.536
2.4997	134.798	137.925	177.664	151.26	107.848	92.73	114.844	142.494	100.937	102.24	88.7451	92.6877	77.6492	87.1281	90.0516	113.11	80.9748	67.4601	84.31	69.5474	84.5759	91.089	91.5451	92.638	81.9054	79.8544		0.138157	101.385
2.6188	129.487	149.233	174.134	135.842	106.451	98.855	106.489	142.786	97.2613	105.629	97.9581	88.5739	76.9418	83.7972	89.5342	105.284	77.8426	71.1391	79.428	78.5572	77.6284	90.889	83.7289	92.166	72.784	80.6209		0.144739	99.7323
2.7378	130.504	142.321	167.13	133.782	107.831	92.687	102.057	135.466	90.8512	90.0883	91.1882	96.3617	81.1651	90.7232	91.492	102.972	80.5548	70.5975	78.033	78.6769	79.8919	105.39	83.5832	87.932	73.7969	77.9745		0.151317	98.5789
2.8568	141.904	135.744	168.331	130.621	103.501	91.559	101.665	141.506	89.8866	85.6448	100.118	87.6295	75.37	88.6766	92.9855	93.391	86.4126	65.953	84.96	73.5609	72.6032	94.005	81.9233	84.608	75.9767	78.2987		0.157894	97.186
2.9759	147.121	132.386	148.925	127.468	107.771	91.67	104.306	136.482	95.8137	80.7115	93.3505	88.0132	85.7423	78.2399	96.6004	89.021	82.3561	67.4031	79.311	72.6667	76.9508	88.007	78.045	80.191	73.198	69.5421		0.164476	95.0497
3.0949	138.196	127.329	129.663	140.085	106.966	91.028	104.449	133.798	93.9073	83.1457	87.0047	94.8464	77.7048	80.8475	102.945	80.259	78.6117	79.7335	85.116	79.9125	78.5489	91.588	76.8801	80.295	76.2839	71.4787		0.171053	95.024
3.2139	145.653	140.919	133.096	137.671	113.477	95.344	102.991	129.055	102.663	78.7275	79.7578	93.3007	82.3946	92.7571	91.949	92.78	81.5793	67.2519	92.57	83.0071	87.2539	87.309	66.3359	77.263	72.6639	69.5056		0.17763	96.0491
3.333	149.391	148.875	118.724	115.266	111.406	98.741	93.0918	130.041	111.37	76.1538	88.1407	87.1257	77.5269	84.5813	93.1369	90.462	73.7768	67.8193	91.643	82.5207	84.6952	83.328	70.9997	81.648	69.7884	69.017		0.184213	94.2026
3.452	151.567	145.409	106.599	104.151	112.94	93.13	95.1561	127.915	100.449	76.6704	92.6099	88.6511	82.3676	91.2303	96.792	86.272	76.0893	72.6729	100.041	90.9805	89.1155	80.314	69.9876	83.699	72.2059	70.1824		0.19079	94.5076
3.571	141.676	140.613	101.422	109.217	105.954	94.626	92.4133	118.125	91.925	67.3208	80.8896	75.6891	80.378	86.2503	98.7358	85.867	74.1136	75.2358	88.929	87.4893	94.0541	79.981	64.8551	81.249	65.256	65.4762		0.197367	90.2977
3.6901	145.518	142.098	95.533	115.788	100.626	92.028	90.5165	99.825	94.3569	71.29	80.5014	77.6923	93.5386	83.4893	103.08	94.666	77.8867	81.5277	89.854	92.8974	83.5569	75.533	61.9517	76.905	69.2174	67.2261		0.20395	90.6578
3.8091	146.817	147.227	89.107	112.312	112.38	91.998	92.4295	107.009	88.1639	70.7821	79.4606	82.7065	92.8539	82.1624	101.244	83.444	77.2784	78.495	85.65	88.3608	74.6506	79.773	61.5086	79.376	65.5444	59.015		0.210527	89.6057
3.9281	146.343	136.446	89.649	99.41	106.674	102.468	101.854	101.378	97.4337	69.4018	80.9696	82.2049	93.0408	79.6083	96.6249	83.294	69.9893	74.7991	78.364	85.0292	77.0575	81.674	61.6645	80.326	68.6824	60.8849		0.217104	88.6643
4.0472	153.338	121.06	95.86	103.694	107.117	99.846	106.139	89.583	89.0162	73.313	84.4832	80.9672	97.4405	78.5476	88.979	84.917	76.607	88.2794	75.033	99.8423	80.0701	67.211	70.3889	70.363	71.4584	59.4705		0.223686	88.9625
4.1662	144.739	122.082	86.98	101.642	108.914	102.514	110.079	95.059	85.0658	68.9433	90.505	87.2891	89.4372	97.7598	84.6477	78.038	76.8018	87.7866	77.988	101.727	86.0673	70.299	70.744	65.339	73.7689	66.751		0.230263	89.6526
4.2852	144.773	118.053	98.655	103.725	103.452	103.986	111.394	91.523	80.9753	67.1296	84.008	78.5517	91.5072	93.4336	92.1757	94.203	74.6897	95.4481	84.571	91.6926	78.4675	66.337	69.7135	68.674	74.0593	60.5253		0.23684	89.2971
4.4043	139.518	110.687	96.733	103.792	95.076	105.377	108.692	86.527	91.7797	58.4159	74.3745	79.0426	97.8834	92.2564	84.4456	84.361	76.0508	92.9651	85.737	85.6572	76.439	72.694	70.9591	63.716	78.9006	63.4093		0.243423	87.5188
4.5233	143.25	115.216	100.062	95.424	94.826	104.182	114.737	94.698	84.108	59.4117	80.4497	85.5874	87.1812	92.7414	73.2455	92.809	80.7175	92.0499	82.714	82.0627	74.1601	79.043	66.1426	77.719	77.9597	63.8198		0.25	88.243
4.6423	126.6	96.592	99.934	99.341	101.299	118.92	110.23	95.317	82.3251	68.547	72.9187	76.4948	90.7038	92.3479	76.9366	95.917	88.018	74.5128	97.184	84.0778	76.3762	72.523	57.9213	80.975	84.5326	63.2007		0.256577	87.8364
4.7614	111.679	87.543	100.06	96.741	100.42	114.8	112.341	89.158	87.5726	76.9824	76.35	78.8687	84.9543	91.5071	75.8316	90.662	85.6831	81.8497	98.665	83.7738	71.4482	75.785	70.266	73.569	81.5776	59.1506		0.26316	86.8169
4.8804	115.591	106.883	94.613	113.545	93.691	119.967	116.676	102.87	84.5534	70.7029	76.514	88.2756	87.4283	93.7589	73.5994	95.266	75.1903	92.9293	92.112	88.1706	69.7286	82.763	66.8092	74.547	80.4098	61.1113		0.269737	89.1425
4.9995	98.366	105.257	100.569	113.251	86.302	117.328	105.791	102.303	91.5178	78.9193	84.227	93.4083	87.6281	81.8352	73.9298	93.218	83.7561	95.9475	96.552	82.53	72.3561	78.855	67.4031	76.197	77.7563	60.4538		0.276319	88.6791
5.1185	93.589	98.746	94.559	107.444	85.768	119.175	102.115	93.511	85.6361	72.1936	80.7375	84.7029	83.6976	89.2012	80.4276	93.808	91.4964	82.4921	106.841	78.3549	75.3615	82.176	68.3982	72.895	85.1929	64.6049		0.282896	87.4279
5.2375	95.839	109.947	93.593	101.526	76.909	112.228	103.334	104.535	79.6569	79.3909	75.9523	82.2947	85.8408	87.7486	68.3215	83.347	89.3103	90.2334	107.073	73.4098	82.2464	84.465	68.0731	81.93	76.1253	66.2867		0.289473	86.9083
5.3566	95.556	96.996	101.814	97.921	75.041	110.503	105.001	103.03	77.2307	84.7705	73.7616	80.1927	95.604	86.2542	77.4607	76.211	85.8282	90.3112	103.789	81.166	83.2697	75.926	72.7465	79.153	73.1236	58.893		0.296056	86.2136
5.4756	96.352	94.079	105.776	95.134	75.68	108.655	100.158	109.824	84.5037	83.8866	76.6369	91.2532	99.5751	88.3363	71.372	73.537	91.0598	82.8625	101.098	70.2633	85.414	74.337	75.4538	75.797	72.1466	60.2107		0.302633	86.2847
5.5946	91.141	87.26	96.444	93.951	67.39	106.897	108.704	106.059	86.1616	82.5253	79.3737	81.1956	98.052	87.526	80.7072	73.35	87.5323	75.0762	94.752	71.4158	83.5187	70.685	72.5644	73.947	70.2318	67.434		0.30921	84.3806
5.7137	92.415	90.862	99.433	89.627	72.021	102.02	109.749	103.766	82.0586	88.0258	69.4919	76.0426	102.415	85.7737	81.4264	79.359	93.6742	74.2299	91.171	68.7844	82.7646	69.686	72.6704	76.74	76.409	66.9333		0.315793	84.5211
5.8327	90.979	92.735	103.76	101.138	66.406	92.266	106.832	99.424	84.7814	94.5766	82.1703	75.4364	107.334	88.5913	74.3988	73.278	88.4828	78.3608	96.431	72.8132	75.202	71.849	70.1139	83.837	68.0599	64.069		0.32237	84.7433
5.9517	92.745	82.579	103.087	108.842	49.564	89.312	100.232	94.724	80.01	91.1385	83.2426	80.7677	106.234	84.1761	80.6639	75.778	87.3153	77.3503	91.306	80.9319	89.2248	77.726	75.0464	79.95	72.411	72.5489		0.328947	84.881
6.0708	90.188	80.59	99.85	103.556	49.091	96.207	92.0661	94.215	74.3178	79.4834	86.3533	75.5789	103.908	93.5362	75.1119	73.295	84.6106	74.5516	82.942	87.8962	86.1639	74.149	73.8781	77.027	72.8688	68.8927		0.335529	82.7049
6.1898	80.887	84.171	109.45	102.371	44.815	99.218	98.6868	97.081	75.1805	87.1937	76.7291	72.3999	107.062	89.0009	84.3229	75.486	79.5414	67.484	80.175	82.9679	70.0398	76.363	80.5725	68.996	66.0083	69.939		0.342106	81.7747
6.3088	75.697	80.757	102.997	92.122	42.163	83.525	82.9275	86.1	77.2942	87.4726	72.4683	70.7186	100.791	95.5982	93.3775	71.717	75.4958	79.2328	74.902	78.6565	69.7026	76.003	69.4925	73.313	64.8276	76.7768		0.348683	79.005
6.4279	81.535	83.883	101.793	91.169	42.864	81.338	86.9341	88.674	91.4235	84.5112	73.8936	64.2161	96.3598	94.4998	95.9847	75.719	63.9566	79.0016	74.708	78.6026	79.9032	66.888	75.2804	67.062	59.2139	72.7714		0.355266	78.9302
6.5469	72.525	82.762	112.271	81.88	39.261	73.789	88.767	83.332	88.2812	78.9664	75.1529	51.5417	99.4832	95.0251	97.9414	71.781	64.2712	79.2968	69.62	78.8196	77.1939	67.838	70.0613	69.528	62.0847	76.1951		0.361843	77.218
6.6659	87.826	86.977	109.833	73.389	40.074	72.035	89.9524	79.194	95.8502	81.1012	79.0634	51.8675	88.1958	95.9383	100.431	84.115	77.7912	76.9592	67.913	85.0816	73.0279	63.083	73.4279	62.378	61.2744	72.0828		0.36842	78.0332
6.785	83.674	81.031	105.782	67.828	32.828	64.797	79.429	80.944	96.6144	73.0946	79.3603	52.5401	91.8493	102.203	100.205	68.617	79.6627	76.2057	70.689	88.9025	65.6027	68.321	74.0797	65.372	58.1881	74.7266		0.375003	76.2518
6.904	88.956	83.913	113.745	61.692	29.983	60.316	78.7327	76.748	95.2637	83.0284	78.6862	46.0619	88.7025	93.3688	106.222	72.67	71.1092	80.5301	74.857	92.9408	73.2554	65.915	67.5221	64.338	58.5578	68.7666		0.38158	75.9954
7.023	83.217	91.79	111.452	56.122	32.435	55.856	73.6192	70.025	87.22	83.1369	71.693	50.8412	79.3319	91.5641	117.649	78.925	73.0287	81.9389	67.379	94.4602	76.1168	77.17	61.8175	63.1	69.0673	60.5022		0.388157	75.3637
7.1421	84.664	83.208	117.737	52.849	29.086	51.081	70.8112	70.826	82.193	82.3488	68.1699	47.9013	64.9717	86.6047	100.65	81.033	74.6276	79.4772	79.656	90.4115	76.1815	73.949	64.6704	63.56	77.4388	64.761		0.394739	73.8026
7.2611	82.067	88.357	108.975	51.081	27.817	41.007	74.1668	71.406	83.9014	76.9685	54.2773	38.2749	68.6099	91.565	96.5932	76.823	66.6037	73.0355	84.925	86.9187	74.8029	69.401	71.2047	67.023	62.867	76.8896		0.401317	71.7523
7.3801	81.258	83.574	101.948	46.897	30.098	42.805	64.1684	80.722	91.0515	74.0896	56.0997	37.5093	66.9688	87.866	101.867	74.944	69.4735	72.7898	72.557	81.2363	76.8333	74.986	68.8699	73.657	70.0588	73.0785		0.407894	71.3618
7.4992	82.292	83.731	95.912	45.303	27.46	39.768	69.7081	74.528	83.836	73.8232	50.5748	38.9069	66.3494	83.6782	91.543	73.163	73.0949	69.9948	80.52	76.7426	83.9801	73.709	67.425	78.016	71.932	63.6773		0.414476	69.9872
7.6182	84.649	82.332	83.36	39.066	21.411	40.266	65.3784	74.859	88.9738	70.0537	47.4993	33.4217	60.3999	87.4803	96.3118	77.915	72.743	56.7942	82.853	70.8504	86.8245	64.9	58.1813	78.045	74.9666	66.1212		0.421053	67.9099
7.7372	106.315	81.25	77.184	33.645	28.338	40.575	76.9868	76.488	84.5742	69.7153	50.7103	36.5736	47.7995	83.1933	89.4819	74.391	64.8713	48.1338	68.137	70.852	84.5492	61.471	60.4504	71.826	74.4031	74.4177		0.42763	66.782
7.8563	111.682	81.776	78.723	35.601	30.735	39.377	63.8119	82.001	82.9607	66.3441	54.3526	29.1789	53.2169	93.3997	93.3451	73.382	65.5703	45.0564	67.19	70.3935	82.4714	67.449	67.3961	78.027	71.1445	82.3072		0.434213	67.9574
7.9753	116.894	82.228	76.434	39.973	27.802	36.864	67.024	85.923	90.87	64.2105	42.103	31.7507	48.5837	84.6494	102.689	82.815	78.536	52.6017	72.926	69.7465	93.8515	59.081	66.9658	73.39	70.5213	85.2293		0.44079	69.3716
8.0943	98.907	85.907	71.482	41.515	28.086	38.394	64.3769	76.884	88.81	63.1586	45.9999	30.6396	46.2269	80.8875	94.7363	75.222	66.0525	53.9064	70.58	66.048	95.4573	64.153	68.8461	84.565	73.8111	81.3943		0.447367	67.5402
8.2134	105.924	83.674	69.54	35.125	33.927	33.899	71.5279	86.078	82.1885	66.8796	42.8865	28.6421	43.4883	83.724	81.4125	71.605	67.0928	53.9984	70.024	68.5159	90.7698	63.191	71.7562	88.506	73.1261	76.0343		0.45395	67.0591
8.3324	103.489	88.716	68.91	34.089	26.961	37.591	64.7056	81.989	75.8663	68.195	39.3025	28.3146	42.7516	76.8746	88.3461	67.365	60.4291	43.794	65.85	69.8308	82.9812	55.891	69.2732	82.174	69.6157	82.085		0.460527	64.4381
8.4515	101.1	99.492	63.142	34.105	20.291	35.83	76.971	83.407	78.3694	68.8009	37.8503	27.4811	42.3979	76.3284	85.438	67.593	57.9349	40.9679	58.71	67.8529	78.3436	57.755	66.3409	76.982	65.9397	79.8858		0.467109	63.435
8.5705	101.838	98.103	58.038	30.556	21.841	28.548	66.0974	89.692	66.8465	68.76	30.2363	28.8167	41.6104	66.7262	81.8842	71.839	59.0781	40.9963	56.234	66.9277	77.8512	63.053	81.0678	77.896	70.4118	86.7728		0.473686	62.7585
8.6895	93.976	94.763	60.721	33.438	24.366	33.844	62.3004	84.271	67.6535	68.5143	33.7124	28.9799	35.1388	76.8953	85.2477	71.013	65.1137	35.1456	61.668	62.9336	74.8352	63.278	90.7593	79.35	69.0762	86.9987		0.480263	63.2305
8.8086	101.57	93.454	62.98	32.773	23.554	32.581	68.1822	84.871	73.8665	72.4783	34.2541	25.3312	31.7371	88.0185	87.9419	67.067	58.0332	33.5644	54.459	66.2778	70.174	65.961	91.7925	84.143	62.6312	89.2429		0.486846	63.7284
8.9276	87.843	87.333	62.922	31.869	23.021	29.813	71.9822	99.782	67.1162	69.6786	32.2397	21.8814	31.6681	85.4644	86.7623	67.773	58.8157	37.1517	56.589	57.612	70.8247	69.359	82.4457	78.636	68.6849	83.0578		0.493423	62.3202
9.0466	80.395	87.99	59.085	27.812	24.141	31.766	62.0388	85.945	75.2655	67.099	28.9442	22.3587	31.4796	87.2626	83.2929	67.845	63.6721	38.9663	54.949	49.7093	69.7292	76.556	80.1286	73.919	73.2219	77.7287		0.5	60.8192
9.1657	82.833	88.68	60.772	28.426	20.096	28.802	62.0253	88.057	75.2845	71.0907	29.3129	23.9066	33.2069	85.4622	85.2824	73.797	64.9813	28.5357	53.571	64.6657	66.7707	73.314	78.1161	67.322	60.7581	83.1721		0.506583	60.7016
9.2847	89.688	75.469	58.24	24.651	22.742	25.934	71.9047	82.545	76.817	61.0246	31.6299	21.662	26.8408	90.5873	80.4251	73.245	62.6758	29.6042	46.618	68.6646	63.0369	72.541	82.7281	72.037	65.752	85.1116		0.51316	60.0836
9.4037	96.831	78.891	56.661	22.484	19.143	24.876	72.4635	86.072	81.3009	61.648	28.2991	24.6227	23.6889	86.8969	79.3727	67.924	62.1657	32.2387	45.641	65.7165	59.2304	77.418	77.6778	70.43	59.283	74.2167		0.519737	59.0459
9.5228	97.61	82.593	59.833	27.881	17.383	26.706	66.426	89.887	78.3387	56.9502	33.0442	23.8574	21.7881	86.1393	77.485	67.391	60.2068	30.9954	49.374	68.2931	72.2626	82.213	77.9159	59.676	62.0504	75.2599		0.526319	59.6754
9.6418	88.156	82.925	56.181	26.156	22.008	20.88	59.496	79.081	81.2661	50.6757	28.4172	17.5867	23.7007	77.3356	73.6373	62.861	51.1074	28.7124	42.819	70.7722	67.6694	80.858	72.4137	66.658	68.2192	67.064		0.532896	56.4099
9.7608	87.586	82.59	60.596	32.717	18.441	28.473	58.7142	83.371	87.1082	56.3344	29.4814	17.9356	28.8235	68.403	70.0971	68.479	59.4151	26.396	43.85	69.366	74.6794	77.902	68.627	63.539	70.7696	69.401		0.539473	57.8114
9.8799	82.107	94.417	59.297	26.578	17.567	26.039	67.9847	73.837	84.8153	62.375	30.314	20.6824	25.2545	67.3525	66.8674	71.3	58.6173	28.4166	39.301	58.3268	82.4805	75.049	70.2842	58.313	76.1367	64.1138		0.546056	57.2241
9.9989	87.845	96.65	59.815	27.221	14.858	23.917	64.6435	77.811	81.1674	58.8104	33.1458	16.5631	23.2551	67.7883	74.7083	71.793	60.0643	28.4882	44.553	53.2794	68.7742	67.901	63.0855	52.771	77.0839	76.4152		0.552633	56.6311
10.1179	97.78	90.326	61.555	26.873	23.248	23.061	63.9677	77.103	80.4362	60.4368	29.1556	19.8894	21.8877	66.6911	71.9684	66.327	60.9779	24.7925	35.789	49.0044	81.0026	75.696	57.5155	51.278	72.1892	76.1925		0.55921	56.3517
10.237	92.541	86.811	63.12	23.046	17.735	20.737	70.9722	74.65	85.632	60.6657	26.115	15.9766	26.1111	56.7852	61.7409	73.778	58.7271	23.3819	43.611	46.4315	74.6656	74.558	63.4691	52.165	63.9248	71.1534		0.565793	54.9425
10.356	90.893	81.579	57.18	22.387	15.357	26.835	64.497	78.375	82.1523	55.2513	23.8781	15.0199	21.8848	58.8323	65.769	66.992	54.404	23.1709	46.724	54.7029	79.4927	87.027	63.4303	53.141	76.5514	73.0096		0.57237	55.3283
10.475	102.473	95.545	60.321	26.48	15.125	26.638	76.9334	81.696	83.229	71.2496	26.1266	17.01	21.7138	57.5631	63.8683	77.542	58.9247	20.2471	53.105	49.1784	79.026	74.953	60.2661	56.319	82.4111	83.2917		0.578947	58.5091
10.5941	105.526	93.43	57.474	22.669	15.543	24.331	67.5582	85.329	69.3868	71.6685	30.7821	12.6411	24.9448	61.402	63.4747	73.044	52.9604	19.244	42.541	49.9688	78.2278	72.596	67.7922	57.928	76.199	79.2888		0.585529	56.7673
10.7131	108.874	89.908	53.942	24.701	14.34	24.368	62.2173	76.625	74.7713	69.2402	25.1867	16.2606	24.0256	55.2635	58.3638	70.538	57.6942	25.1855	42.421	44.5476	79.6864	77.457	68.9472	57.302	75.6514	76.5011		0.592106	55.9238
10.8321	107.868	88.219	55.543	27.347	18.838	27.637	59.6075	73.278	76.8887	75.3976	26.3937	19.2782	21.9916	54.3075	60.864	66.19	53.8058	20.3538	40.767	45.0804	81.6292	73.432	74.2186	58.943	80.1968	70.4373		0.598683	56.0966
10.9512	111.124	87.599	58.274	23.64	19.403	22.626	55.408	75.857	75.9988	71.5996	24.5547	14.4051	24.2151	55.4504	65.7014	63.913	55.9623	21.0354	39.282	46.4393	72.2663	63.938	69.3149	56.974	69.4999	65.4536		0.605266	54.2283
11.0702	111.841	84.994	60.327	19.766	16.143	26.248	61.4018	70.995	74.5782	64.8254	24.1731	11.7505	21.3917	59.1118	80.6364	71.07	43.7819	21.9576	43.079	42.5346	64.6803	74.344	74.617	63.474	71.6986	72.2072		0.611843	55.0626
11.1892	111.857	87.807	56.373	21.119	15.124	26.029	56.722	71.644	67.6388	68.8726	23.4996	12.9584	22.0256	59.9748	69.4756	69.199	46.4071	17.6448	48.476	47.43	62.6936	79.001	74.5243	74.656	66.9392	82.0798		0.61842	55.3912
11.3083	110.828	78.162	60.084	26.645	15.056	23.759	43.9663	82.15	71.5772	69.5726	27.7851	14.9821	23.8832	57.1115	72.0773	67.426	49.3715	26.3757	43.51	43.3685	66.54	73.408	75.6412	68.631	65.8392	89.7183		0.625003	55.6719
11.4273	107.076	90.33	56.003	26.233	16.184	22.782	48.7424	72.668	69.8154	65.9489	24.7097	16.5917	23.2529	60.7245	72.0423	67.639	45.3812	24.6791	49.947	41.9166	79.5062	79.181	74.4377	76.265	62.6272	80.8128		0.63158	55.9806
11.5463	109.441	79.76	56.599	24.517	15.663	24.768	51.6486	72.791	70.9972	62.221	22.7802	15.5104	19.6578	57.2968	76.5823	63.947	45.7444	21.3928	50.239	44.2778	66.4837	78.763	69.4345	82.296	60.7491	80.6519		0.638157	54.7774
11.6654	107.247	84.051	68.528	28.077	18.524	25.032	57.2329	67.837	76.4337	67.8535	20.3674	17.2689	20.9378	58.4232	79.1261	63.848	49.8615	24.7159	44.156	38.2599	68.5508	79.173	80.8832	86.563	50.7513	86.5234		0.644739	56.5471
11.7844	105.74	92.724	68.938	25.976	20.059	24.35	53.9778	62.497	68.7583	66.593	21.9659	15.6136	22.7592	55.8201	70.2369	61.874	44.6107	26.0609	42.88	45.9509	58.4974	76.802	77.9111	90.197	55.6223	85.3002		0.651317	55.4506
11.9035	98.832	97.766	54.145	32.264	17.465	25.547	57.6481	59.074	68.4543	59.646	24.0534	19.4606	21.4626	51.0121	66.1114	68.962	42.275	23.8761	49.633	45.3833	58.3355	85.047	78.9246	91.642	54.2822	77.5515		0.657899	54.9559
12.0225	99.553	100.074	64.947	29.153	14.302	26.825	61.7152	71.845	85.7735	57.2467	20.5872	15.2327	19.4756	54.8409	66.1921	61.668	44.0693	29.5223	44.768	43.9422	67.1098	88.392	71.4245	88.425	55.8556	79.4162		0.664476	56.2445
12.1415	109.867	105.486	62.063	22.921	20.575	22.098	72.8018	66.102	85.7909	58.7788	20.7272	13.2285	21.6213	56.4125	66.4695	60.413	45.0712	33.048	47.411	44.0476	66.7221	90.214	87.1947	86.409	52.1984	80.3971		0.671053	57.618
12.2606	98.245	98.165	64.482	27.269	16.503	20.961	63.2853	73.82	73.1989	59.0157	22.0253	15.4512	22.9499	52.7801	63.8638	67.636	47.2951	30.8925	46.82	49.3886	65.7681	80.376	90.1805	94.678	46.4799	77.8495		0.677636	56.5146
12.3796	96.312	100.002	67.785	28.159	16.801	24.463	64.9137	73.69	75.2587	65.2182	18.0536	16.8496	24.7287	49.5223	59.7041	67.851	52.9663	25.119	48.306	45.4053	69.4632	70.968	82.5388	89.778	53.3916	83.2171		0.684213	56.5564
12.4986	92.216	101.321	74.837	31.473	19.302	24.128	56.8855	77.192	81.5599	55.9672	19.1756	13.2931	23.1512	49.7612	67.9272	71.864	50.7553	28.3355	46.853	42.8155	69.7544	82.74	83.486	84.003	52.9664	78.6205		0.69079	56.9378
12.6177	94.766	112.324	71.731	32.546	19.401	24.94	57.7378	77.136	86.6296	64.7726	25.4142	15.1252	21.4148	50.4857	70.507	75.552	46.8871	28.8292	48.074	46.1357	67.8454	80.901	80.278	87.374	47.3314	88.1936		0.697372	58.5512
12.7367	89.11	112.252	71.615	31.349	22.457	23.713	60.5698	82.271	79.3195	69.5474	20.7021	16.8703	21.77	52.4081	74.1855	72.443	58.9247	29.7903	55.404	52.2817	69.1165	72.844	71.2635	91.939	41.8815	99.2449		0.70395	59.3566
12.8557	95.451	111.969	80.72	31.719	21.307	24.168	56.6431	78.12	85.2443	67.7688	20.847	18.3858	22.1483	55.8859	83.2454	75.721	62.8952	29.8845	54.233	47.3175	63.0342	85.135	73.693	87.753	45.712	104.627		0.710527	60.9088
12.9748	90.853	104.145	78.781	31.47	18.873	24.807	61.5537	75.318	93.8988	67.5642	21.3856	18.0069	23.013	57.8193	85.1811	73.527	64.3218	28.9943	49.146	53.0804	66.052	83.116	69.3891	86.479	45.2133	97.1556		0.717109	60.3517
13.0938	103.818	100.213	75.937	33.272	21.884	23.134	61.9437	74.729	81.327	60.2608	18.7074	14.0695	20.1519	54.3215	79.3559	72.406	66.4981	33.1782	52.287	53.2846	69.4887	87.635	75.9663	83.765	34.0002	94.4404		0.723686	59.4644
13.2128	94.43	98.42	87.124	38.46	21.181	22.096	59.6653	72.515	78.0218	61.9561	25.1733	14.6182	24.1618	51.1183	75.48	92.853	67.4264	31.3228	56.038	58.9923	71.5011	83.125	74.5908	76.71	39.2633	95.639		0.730263	60.457
13.3319	102.393	99.561	77.044	37.071	25.166	22.28	54.2188	83.614	82.9364	73.7543	19.4646	14.3464	23.4248	56.4445	73.5605	78.334	68.9628	28.8031	52.912	56.2219	78.8108	83.627	65.0275	78.137	41.119	96.9188		0.736846	60.5444
13.4509	105.103	100.485	78.062	43.556	23.79	25.392	50.2447	84.661	83.6747	69.0714	22.6337	14.4641	19.1489	59.3082	73.2989	70.024	75.9644	26.0674	49.314	64.4019	74.3907	77.525	68.4513	71.96	40.3545	93.8574		0.743423	60.2002
13.5699	108.255	107.009	83.073	40.84	26.517	25.528	54.4303	86.557	83.5006	74.0195	24.456	14.1895	19.8566	53.9969	80.1264	70.883	71.3424	30.3162	48.065	68.6674	73.9923	79.395	63.7482	67.342	39.0483	86.948		0.75	60.8501
13.689	106.008	99.275	84.781	40.486	24.962	29.467	52.6075	94.929	87.5283	70.6945	21.9329	17.576	20.7343	58.5206	73.9291	80.109	69.2092	34.332	54.91	62.142	74.9772	78.395	63.3737	82.607	38.8202	75.8081		0.756583	61.4659
13.808	103.617	88.779	75.409	43.027	27.399	29.226	56.9849	87.998	84.3953	77.1894	27.2519	16.0147	22.3399	66.0641	74.1199	78.684	76.4945	36.7163	53.166	69.5032	80.3442	84.833	68.4014	80.433	41.1713	78.1667		0.76316	62.6049
13.927	117.238	94.012	71.708	49.8	29.057	27.117	57.7785	87.378	85.5051	76.9446	26.9057	18.3272	23.4135	59.4286	73.7719	72.062	75.4118	38.3411	54.097	78.2806	66.8023	73.086	63.6162	74.466	46.688	81.5608		0.769737	62.4153
14.0461	111.784	93.845	81.131	52.801	30.039	31.747	66.4938	95.96	87.9363	67.6504	20.6145	20.9661	21.7149	61.1796	72.3574	70.377	70.154	40.913	57.917	74.9643	74.5535	77.276	76.5881	80.151	38.1952	74.3108		0.776319	63.5238
14.1651	104.864	90.083	92.177	51.015	26.823	31.715	63.8738	86.356	85.5408	70.5636	23.6616	19.728	21.021	61.6349	69.7911	73.164	76.9497	46.4893	70.436	83.7314	82.9605	72.44	73.8366	80.605	33.4821	71.8604		0.782896	64.0309
14.2841	113.237	91.565	93.272	54.738	29.83	31.334	60.8588	89.702	84.6151	65.9506	24.8796	21.1504	23.005	55.4812	64.9304	71.724	70.3408	57.8653	67.771	76.5301	82.4348	80.891	77.2939	78.281	32.4661	71.4114		0.789473	64.2907
14.4032	112.172	94.417	100.023	55.948	30.041	34.864	63.3875	82.318	80.5339	65.4415	24.4682	18.2151	22.9773	58.1066	64.4586	74.251	72.333	58.7713	67.176	76.1228	74.3157	89.186	74.1653	68.8	37.2705	63.6137		0.796056	63.976
14.5222	99.694	89.7	85.162	66.287	26.923	31.848	69.8274	83.015	87.405	67.6155	28.4913	15.9282	23.1062	59.8164	65.3809	76.492	78.3053	55.9659	66.787	83.7265	72.1725	86.243	64.1712	68.245	42.0568	63.7646		0.802633	63.7742
14.6412	106.161	89.785	93.504	82.643	36.401	32.373	68.8859	83.88	71.0398	63.0597	26.5067	18.5927	22.3515	71.2897	70.5979	78.565	72.6142	56.2878	74.105	84.9701	64.3349	81.078	70.4002	70.953	43.1959	66.4142		0.80921	65.3842
14.7603	96.975	84.589	88.098	78.035	37.518	33.962	64.3002	83.465	76.2587	72.4601	31.4094	19.7206	25.256	74.1109	61.2599	72.798	66.7157	54.7143	79.14	83.9209	62.7318	91.777	65.4726	75.895	39.8615	70.0842		0.815793	65.0203
14.8793	100.716	91.671	99.294	78.502	37.807	43.982	66.563	83.562	86.071	72.0145	37.9323	22.0709	28.5484	71.2949	63.8246	76.17	72.3283	56.5115	75.813	80.0495	65.7096	90.909	67.8537	72.783	36.8684	70.2242		0.82237	67.2721
14.9984	92.183	85.824	104.456	85.601	45.476	41.591	67.6183	69.684	78.4248	76.4401	31.7024	22.0589	26.4592	71.5071	70.1528	79.025	70.2563	60.0095	80.457	89.0585	71.5505	94.928	69.1197	70.943	44.2922	74.6543		0.828952	68.2105
15.1174	95.873	87.44	106.784	85.441	54.371	44.448	75.8698	66.739	78.6581	75.4291	42.7121	25.5643	29.1829	68.3563	62.0471	83.39	63.9694	62.9456	80.612	89.6962	71.6043	96.748	68.0344	74.768	46.3021	67.7088		0.835529	69.4113
15.2364	93.565	92.056	99.724	81.952	62.356	43.722	71.1541	74.086	83.4414	76.6548	48.5108	24.7191	33.6653	75.0068	62.3636	86.209	64.2497	62.8264	75.765	79.6119	73.7338	100.151	70.1133	83.473	58.5606	71.8717		0.842106	71.1362
15.3555	97.18	94.063	96.301	83.01	64.596	49.29	71.3434	74.909	89.9755	69.9267	48.206	20.1538	31.2326	76.0317	60.5249	81.83	67.4066	59.6134	82.723	77.6746	73.3051	105.671	76.3825	76.833	60.8326	76.657		0.848689	71.7566
15.4745	95.196	90.28	105.759	80.415	80.167	49.932	69.6084	75.71	91.7817	77.2542	47.7345	28.1256	33.8698	70.2287	60.9453	82.647	71.5818	68.673	65.952	79.2011	77.8584	101.897	75.1824	80.005	67.2427	81.5483		0.855266	73.4152
15.5935	98.987	89.722	105.465	97.135	87.929	62.184	78.8497	73.471	92.0405	87.8557	51.5901	28.6312	34.1871	75.9329	57.1454	84.373	69.2075	73.8512	63.806	74.0115	69.7619	104.225	67.8498	90.208	67.4588	73.6309		0.861843	75.3657
15.7126	95.751	95.933	101.156	101.628	96.946	71.2	68.1372	71.978	91.8695	85.5519	61.214	28.5732	39.6021	76.7033	62.7657	83.351	67.1605	70.4438	61.217	71.1528	73.0973	91.714	79.7068	84.733	72.0305	93.3902		0.868426	76.8079
15.8316	85.255	99.787	95.837	100.756	101.256	74.086	74.7872	69.965	91.0361	84.5188	57.2552	30.5683	43.0743	76.5573	61.9991	82.157	63.5122	60.1226	60.262	63.3016	74.7567	94.589	78.4837	83.198	76.7162	85.7776		0.875003	75.7544
15.9506	82.723	103.298	96.932	113.889	108.422	83.288	74.9183	72.474	87.8709	85.7885	59.7843	30.909	41.1726	76.3808	52.0918	74.476	62.9207	51.7042	71.456	63.8528	68.4625	91.875	76.542	80.954	79.7444	81.1159		0.88158	75.8864
16.0697	72.344	103.229	102.298	104.904	107.915	80.451	75.3816	61.336	81.3848	88.0432	67.4465	35.9306	37.8676	74.4833	57.2394	84.227	51.9925	48.4053	62.723	58.4523	63.4156	84.084	69.9009	83.478	80.6014	81.9466		0.888162	73.8262
16.1887	68.195	99.344	95.838	114.978	105.346	78.933	71.9617	61.831	83.8679	75.3613	64.3187	42.0113	43.2657	80.5323	60.6492	71.168	40.4198	45.3199	56.74	57.5428	59.9338	71.367	66.1105	71.681	74.093	79.2634		0.894739	70.772
16.3077	66.467	104.375	89.196	119.942	104.235	85.73	76.5094	58.58	81.9318	77.9908	65.2762	46.1269	48.6113	83.4304	50.1381	67.574	36.8993	41.1075	43.298	59.7894	61.6553	72.334	59.0342	75.919	65.5887	83.8071		0.901317	70.2133
16.4268	59.421	106.022	86.218	123.335	92.648	79.566	80.717	56.389	71.4639	75.7968	62.6985	51.9798	52.1735	77.0373	51.8476	58.951	46.9382	43.233	42.716	53.3482	52.7247	60.287	56.8086	72.129	62.212	83.3081		0.907899	67.6911
16.5458	51.071	102.388	93.091	122.157	87.088	77.523	74.4668	54.547	62.758	74.2952	68.3203	53.1928	52.3258	74.2772	52.1749	59.368	35.8176	27.9133	39.525	58.1014	58.6413	56.223	56.8297	68.51	65.1187	91.5137		0.914476	66.0476
16.6648	38.967	87.785	87.165	116.592	89.989	82.859	62.4382	58.747	67.0214	76.1594	78.2996	60.8309	58.9337	78.6445	53.2049	53.886	23.0441	20.3222	32.416	47.5276	52.1267	59.852	59.1794	69.583	65.7562	83.9201		0.921053	64.0481
16.7839	35.776	86.91	83.053	106.529	86.308	84.59	65.8854	63.079	66.1872	62.7355	68.1457	65.3804	60.663	75.8515	51.595	49.41	20.7689	16.5518	31.385	38.2284	46.0449	55.431	55.8442	60.583	62.4451	77.2535		0.927636	60.6398
16.9029	31.534	74.941	77.922	106.699	77.463	86.19	74.3691	65.502	63.7462	48.5661	63.4027	61.5321	57.6466	73.9292	45.8701	39.206	17.1803	12.8505	25.492	38.9324	44.5976	48.026	58.1108	57.443	64.4934	72.8833		0.934213	57.2511
17.0219	29.425	63.847	90.308	94.033	77.51	83.008	66.7911	60.609	60.6592	44.3924	60.0382	63.0606	57.4683	65.5735	47.5013	30.551	14.3493	12.3293	14.129	34.7101	35.9163	40.566	45.7513	54.329	58.7656	64.4073		0.94079	52.6934
17.141	24.027	49.877	98.523	88.44	73.15	77.507	66.0857	58.133	54.5094	42.7557	59.0863	61.5937	58.945	52.7106	46.3148	24.023	11.107	11.7147	12.072	22.1803	38.4696	33.466	40.3085	47.046	55.5861	72.7193		0.947372	49.2443
17.26	18.554	48.559	82.916	82.788	60.968	64.362	63.4708	60.31	53.7778	40.0074	54.4098	58.8192	54.3811	59.3856	49.2036	20.755	10.8503	7.1269	8.144	15.9459	23.3163	31.189	35.9887	38.999	52.6758	77.7764		0.95395	45.18
17.379	14.208	40.665	78.131	80.539	63.971	69.346	59.38	55.659	41.5912	39.9018	52.3313	53.6688	44.9065	54.7759	45.2481	16.239	8.9208	7.1864	6.18	9.8794	17.6768	21.526	29.9287	35.035	54.1184	76.6738		0.960527	41.4495
17.4981	18.144	32.701	78.688	71.74	59.076	70.179	68.4004	52.164	36.951	27.7875	46.2408	52.8066	36.1669	46.9293	47.0807	12.061	8.6902	6.789	6.482	9.5724	14.5308	22.12	27.8867	33.348	62.9732	72.5719		0.967109	39.3108
17.6171	10.568	27.833	67.119	71.5	62.782	74.003	62.8443	49.248	33.8098	23.6175	38.0972	41.2237	32.5674	43.6865	39.3634	11.651	5.0863	4.7768	7.431	7.1101	9.9241	13.601	20.7311	24.426	52.0833	85.9712		0.973686	35.4252
17.7361	11.774	23.754	62.577	72.831	56.912	69.292	56.4184	43.277	28.4718	26.1956	28.6336	27.2242	27.8073	31.3117	43.2439	7.915	6.8864	4.8198	2.447	5.3242	8.1858	11.175	15.5431	18.352	45.1306	93.1448		0.980263	31.871
17.8552	8.606	20.62	57.579	76.487	37.777	66.577	50.5713	39.451	21.2316	23.6247	25.5223	21.9115	17.62	29.4434	36.3093	10.365	5.7633	5.205	2.319	3.1218	8.4091	8.324	11.201	12.665	42.6929	97.86		0.986846	28.5099
17.9742	7.957	12.824	49.699	73.914	34.852	52.464	45.8266	31.699	18.3541	13.6773	20.6464	13.2601	9.128	23.822	32.9577	7.09	3.3455	3.9106	3.34	3.927	4.6759	7.021	8.2219	10.461	37.245	108.869		0.993423	24.5842
18.0932	6.869	10.717	37.37	66.643	27.979	46.512	40.5692	24.083	15.6372	10.6431	12.7499	8.6808	7.5459	16.3505	24.5331	5.933	3.7525	4.6872	2.859	4.001	4.3017	4.98	6.6855	7.086	33.2848	101.783		1	20.6245

## Sheet: Image6
X0	Y0	Y1	Y2	Y3	Y4	Y5	Y6	Y7	Y8	Y9	Y10	Y11	Y12	Y13	Y14	Y15	Y16	Y17	Y18	Y19	Y20	Y21	Y22	Y23	Y24	Y25	Y26	Y27	Y28	Y29	Y30	Y31	Y32		Ap-Basal	Avg intensity
0	34.366	20.486	20.846	36.199	34.932	42.529	54.974	70.057	69.82	56.944	53.582	85.615	51.773	48.127	29.089	57.856	49.153	30.747	39.792	43.548	46.042	47.801	58.809	43.834	45.027	52.026	67.576	40.04	40.996	42.898	36.6	41.779	24.567		0	46.013
0.119	39.793	20.325	18.13	39.344	34.871	46.573	62.094	86.264	57.742	65.681	61.211	80.018	47.103	45.856	44.141	70.441	49.345	33.06	44.576	48.455	46.601	56.354	61.102	51.418	50.602	64.627	84.57	46.128	45.78	52.674	44.276	35.004	32.145		0.00574546	50.4941
0.2381	41.048	26.684	20.561	46.06	41.886	55.135	65.567	95.57	76.135	70.173	60.274	93.225	50.987	58.217	45.548	72.017	63.996	33.191	60.266	47.841	41.062	70.629	74.956	56.006	51.6	64.589	100.42	55.194	55.371	56.406	45.018	60.151	33.886		0.0114958	57.2627
0.3571	40.898	30.259	21.533	45.704	40.442	60.475	74.713	93.548	79.701	83.499	77.384	108.18	62.55	68.766	50.862	76.073	70.757	39.944	49.27	56.662	60.79	68.287	76.911	53.857	60.486	65.631	103.821	71.232	67.843	78.057	55.147	57.575	34.562		0.0172412	63.1945
0.4761	42.086	24.483	26.19	62.603	46.409	67.679	78.117	98.372	83.133	88.932	84.415	110.687	68.963	79.026	67.697	101.034	60.924	55.722	69.867	73.81	47.622	77.908	94.182	70.091	70.686	66.851	114.587	73.688	75.112	92.584	58.716	63.205	55.767		0.0229867	71.2469
0.5952	52.304	36.714	34.637	74.557	62.391	73.255	87.01	101.574	86.802	107.005	83.116	115.688	74.121	78.432	77.053	97.14	81.207	62.733	78.148	84.018	66.2	79.402	100.124	84.862	85.718	87.48	119.194	78.894	97.598	91.487	72.061	95.884	56.812		0.028737	80.7158
0.7142	61.454	35.738	36.839	83.883	67.415	87.836	92.865	116.38	101.699	123.565	93.362	128.896	86.98	91.807	107.09	108.882	82.615	71.823	97.493	98.427	74.82	79.433	112.719	96.848	98.103	89.607	137.715	95.049	101.703	118.616	85.614	110.179	66.984		0.0344824	92.1951
0.8332	68.966	42.433	41.893	115.103	85.293	91.054	113.323	137.986	107.786	130.788	101.532	140.169	71.342	110.767	120.089	123.083	97.591	83.256	125.263	105.36	89.34	88.609	127.519	110.841	100.397	105.337	149.374	105.297	107.063	127.633	115.83	126.542	93.193		0.0402279	104.85
0.9523	72.892	54.679	47.794	129.468	95.524	123.36	136.739	138.864	116.7	133.417	123.867	148.637	78.167	107.507	150.901	147.176	108.627	102.352	146.702	97.643	101.506	107.545	142.291	130.095	119.574	107.881	181.822	103.5	129.627	144.587	142.454	142.041	139.496		0.0459782	119.801
1.0713	77.064	66.481	57.02	143.969	118.17	136.715	158.442	165.303	133.583	173.31	118.831	155.262	81.365	130.025	161.197	163.725	108.444	118.381	179.27	128.253	108.188	102.927	135.006	138.427	139.526	130.428	198.093	115.629	142.341	183.031	152.377	164.769	138.594		0.0517236	134.065
1.1903	67.527	101.019	74.971	167.88	151.59	155.367	175.589	174.354	143.699	183.652	135.763	153.874	101.878	145.447	177.712	174.45	133.495	141.312	187.658	154.455	117.313	127.421	157.107	140.559	168.547	133.722	200.57	135.27	156.726	196.514	169.856	177.743	177.384		0.0574691	150.316
1.3094	97.368	136.301	88.64	185.488	183.414	192.931	193.424	185.431	152.373	159.78	145.311	172.347	104.876	147.416	178.26	191.798	121.803	163.489	204.644	164.984	124.421	130.33	171.897	156.328	178.285	139.003	221.569	131.394	147.9	212.533	190.52	188.055	188.24		0.0632194	162.138
1.4284	118.314	152.085	118.706	186.272	204.834	203.176	212.137	191.719	152.889	184.363	163.082	179.607	112.348	155.836	178.446	199.524	143.799	170.698	216.114	183.455	142.019	139.682	191.006	162.752	179.867	164.596	206.327	134.7	168.319	205.348	184.822	186.964	205.842		0.0689649	172.717
1.5474	147.747	183.786	129.496	213.608	216.78	201.612	227.002	203.139	162.038	209.121	175.47	183.832	122.123	170.308	172.386	212.503	169.511	169.631	215.705	190.988	161.968	145.316	188.067	174.968	193.29	178.06	199.944	143.035	172.101	213.581	178.62	192.633	199.802		0.0747103	182.369
1.6665	162.364	199.52	151.396	209.444	220.634	214.677	234.436	213.036	166.315	209.512	189.726	195.683	132.125	173.625	175.292	207.302	180.342	186.29	216.402	199.724	155.78	155.488	203.57	181.982	203.368	178.287	206.102	147.324	190.265	217.877	176.663	183.222	212.945		0.0804606	189.416
1.7855	194.092	201.522	172.33	210.382	216.304	212.779	233.303	208.968	183.209	220.537	204.471	192.84	131.554	183.219	173.942	204.539	191.702	175.1	221.813	207.253	165.615	167.331	191.94	176.931	209.491	188.067	200.296	144.854	177.843	217.174	175.582	173.349	215.66		0.0862061	192.242
1.9046	193.423	216.076	187.017	223.909	216.602	211.994	238.14	224.067	183.717	224.52	196.54	209.6	147.016	192.371	171.947	206.545	198.329	181.545	227.321	196.115	182.778	160.947	192.502	178.231	204.162	179.072	189.055	143.072	177.484	196.084	172.555	194.688	205.181		0.0919564	194.624
2.0236	206.437	226.337	202.386	214.659	221.467	200.78	236.504	204.511	192.097	226.613	195.957	204.926	155.317	176.535	182.367	210.136	201.849	183.08	224.216	210.178	176.772	171.655	191.818	185.707	207.932	165.486	192.3	141.048	179.947	186.319	182.996	169.573	212.655		0.0977018	195.168
2.1426	208.337	233.823	204.714	212.485	215.439	186.642	227.47	207.677	194.006	220.267	211.449	210.094	160.141	180.543	168.397	200.191	198.186	190.983	226.154	208.306	183.602	171.706	199.189	188.545	196.341	184.43	185.878	136.858	181.316	191.354	168.883	167.802	212.122		0.103447	194.949
2.2617	209.746	225.392	213.224	219.943	215.713	201.65	221.51	206.171	213.119	229.504	218.655	202.118	180.169	185.469	167.465	209.453	208.217	192.825	218.871	207.852	179.305	176.193	196.586	196.971	196.195	165.178	181.791	151.768	149.596	183.688	171.12	167.143	209.588		0.109198	196.127
2.3807	231.334	234.556	213.334	214.008	223.165	209.273	217.631	202.819	213.514	229.076	215.661	189.243	180.875	168.312	173.95	205.084	195.557	191.618	224.931	202.108	168.704	168.336	198.991	186.155	186.791	164.228	184.265	124.272	173.923	185.12	148.304	166.541	207.778		0.114943	193.923
2.4997	225.721	225.461	195.623	210.569	219.324	207.943	214.061	187.118	201.537	225.045	218.506	203.218	184.469	165.525	167.071	212.06	212.143	194.792	221.835	201.709	189.262	152.089	188.421	196.284	196.455	150.07	175.099	133.717	163.062	174.902	147.533	166.969	210.337		0.120688	192.058
2.6188	216.37	225.681	197.034	206.481	210.289	204.584	218.853	190.151	215.341	218.375	219.028	204.804	174.16	173.68	157.995	194.568	211.029	187.192	205.269	197.786	179.436	171.512	197.782	193.674	181.331	156.566	183.154	132.563	152.056	150.599	156.661	161.582	212.098		0.126439	189.627
2.7378	214.704	242.354	197.133	209.583	225.527	208.27	234.563	184.346	210.5	213.357	214.075	205.868	183.631	155.692	154.101	198.566	182.432	192.842	186.652	194.284	176.441	152.888	192.093	185.8	175.873	158.879	176.639	141.973	162.422	137.596	158.869	165.087	208.222		0.132184	187.917
2.8568	225.168	228.88	209.134	213.904	219.208	197.409	219.918	189.992	202.105	219.975	226.635	191.316	166.291	170.516	165.169	204.069	199.916	186.399	184.132	196.963	172.522	148.374	183.755	190.616	170.228	164.116	167.64	120.407	146.94	126.336	153.813	149.228	195.007		0.13793	185.033
2.9759	237.161	226.772	212.444	215.601	219.553	192.876	208.787	183.685	206.813	225.042	225.983	188.529	187.244	159.343	153.746	202.478	176.174	173.408	182.944	179.07	173.923	136.648	188.354	192.65	159.839	161.078	159.732	119.938	148.729	113.025	144.184	163.869	195.331		0.14368	182.271
3.0949	232.305	230.478	209.973	213.516	223.173	187.662	202.793	182.109	198.846	218.084	226.477	178.261	182.511	162.831	163.484	190.097	175.31	162.319	166.523	179.799	173.789	131.688	177.28	194.434	172.239	170.737	138.219	106.279	144.108	110.757	149.449	151.779	180.002		0.149425	178.403
3.2139	239.216	233.828	205.041	199.406	228.515	189.409	185.251	192.845	191.416	214.129	231.122	182.136	179.662	160.105	164.871	208.334	175.016	159.355	167.551	174.383	173.826	130.354	180.8	189.535	183.054	171.038	143.301	89.147	129.715	103.482	133.29	141.372	173.019		0.155171	176.47
3.333	232.223	235.854	204.999	213.138	229.051	196.656	191.738	180.95	184.793	212.873	223.942	183.154	172.464	155.545	163.458	195.376	191.723	166.336	162.965	184.86	173.708	127.506	178.796	189.566	170.945	168.728	147.595	80.867	125.893	96.469	127.624	159.695	163.299		0.160921	175.539
3.452	231.267	234.74	199.875	205.336	237.937	186.533	182.701	174.588	184.75	203.046	222.069	180.86	173.307	167.83	165.578	194.224	176.838	153.808	165.492	159.87	177.336	122.52	188.452	185.225	170.686	184.469	119.284	79.016	114.99	88.608	139.633	153.543	159.256		0.166667	172.232
3.571	233.286	234.292	209.303	212.957	232.69	203.526	170.624	180.718	190.545	214.575	206.585	176.288	176.053	161.545	170.314	191.762	171.849	149.554	150.109	163.369	170.662	112.757	200.048	180.532	159.896	179.16	119.009	79.353	124.557	84.426	133.767	144.25	142.168		0.172412	170.622
3.6901	234.413	238.815	209.55	216.089	230.755	174.181	181.21	182.036	175.216	195.57	199.46	182.317	182.565	148.101	155.007	193.892	171.19	151.515	156.61	162.268	163.346	115.572	179.242	175.558	155.264	166.324	114.958	66.34	131.944	89.268	111.111	147.639	157.574		0.178162	167.118
3.8091	241.105	235.446	186.076	213.688	219.953	183.172	182.588	171.888	163.882	209.05	189.179	172.008	177.674	159.636	164.772	189.208	169.912	149.288	161.15	153.719	169.785	110.176	171.119	186.294	161.465	162.267	106.558	70.67	137.778	71.263	118.635	144.447	122.715		0.183908	164.441
3.9281	237.059	243.372	186.608	212.812	227.099	170.948	171.1	174.422	166.576	197.67	187.303	187.894	189.88	158.07	171.396	192.245	170.274	142.15	160.846	139.176	171.619	114.855	159.022	183.801	171.025	163.796	92.529	67.506	134.167	69.434	102.796	124.88	116.725		0.189653	162.396
4.0472	229.652	229.205	190.475	214.856	205.558	152.259	154.937	163.24	178.983	198.535	199.159	171.128	185.756	149.253	160.27	176.987	154.931	139.076	141.76	145.342	145	106.246	162.409	166.624	156.993	151.987	111.677	75.747	133.58	63.751	90.823	135.493	116.458		0.195404	156.308
4.1662	222.222	225.817	196.56	210.68	206.718	165.697	169.199	161.272	179.304	209.188	179.483	191.031	178.156	146.28	169.941	174.923	158.897	134.811	132.985	123.362	158.646	94.674	149.25	186.441	154.677	165.903	100.269	69.831	152.018	63.121	97.343	124.387	94.855		0.201149	155.998
4.2852	216.18	230.108	196.539	210.813	199.845	158.642	151.821	171.998	173.412	189.431	181.73	186.497	177.67	119.084	158.883	181.738	146.375	134.283	127.054	114.079	149.561	99.77	148.891	166.398	164.956	143.689	95.269	70.217	121.366	66.303	80.551	118.276	86.681		0.206895	149.64
4.4043	213.671	222.75	189.133	214.138	196.115	166.213	155.671	153.721	163.019	208.22	183.852	167.772	161.72	129.183	144.71	173.959	140.738	123.894	137.746	118.023	140.346	92.305	124.846	163.451	147.666	145.011	108.672	87.718	120.295	65.414	77.749	115.443	79.651		0.212645	146.449
4.5233	199.429	217.438	176.225	192.289	186.282	157.344	152.912	169.84	163.13	183.626	169.858	182.128	165.206	116.899	167.486	165.402	137.002	115.634	122.004	114.566	148.951	82.356	132.081	155.532	151.404	135.68	98.329	74.324	121.341	73.631	70.417	121.075	80.134		0.21839	142.423
4.6423	201.333	214.801	181.931	186.775	187.239	157.835	149.721	132.647	155.847	195.189	176.612	181.092	154.866	120.421	167.854	181.971	128.032	128.145	106.605	115.656	147.73	87.458	115.859	159.99	134.228	139.725	102.615	68.99	118.783	65.222	75.395	113.88	65.396		0.224136	139.995
4.7614	200.429	211.959	176.922	193.092	183.196	144.287	148.189	125.422	164.254	182.882	172.151	165.886	152.064	104.328	169.041	173.489	138.512	114.864	97.131	109.8	134.541	84.763	112.395	156.594	131.558	129.96	95.656	61.011	107.481	64.541	67.993	90.057	60.57		0.229886	134.091
4.8804	204.016	206.352	165.773	179.621	164.337	147.093	121.997	130.985	151.816	203.825	180.521	173.913	146.752	101.207	156.867	167.536	124.119	107.073	89.901	105.894	137.71	80.406	103.624	157.635	124.019	123.096	90.666	63.613	101.64	67.338	56.732	85.689	57.818		0.235632	129.684
4.9995	188.177	198.699	165.144	173.055	175.397	145.982	117.068	129.296	143.826	200.597	164.177	162.236	141.287	94.486	155.676	172.694	131.558	101.477	89.122	108.882	146.461	78.022	107.398	159.009	108.463	135.356	75.165	61.489	89.498	66.636	62.271	72.392	63.741		0.241382	126.81
5.1185	187.938	204.1	167.06	171.523	167.21	138.311	98.504	123.099	142.551	206.141	149.474	164.187	140.987	101.648	143.654	169.538	137.324	90.726	91.732	104.342	138.28	74.309	109.956	145.008	112.141	122.709	73.239	64.351	80.135	57.072	51.513	76.68	56.496		0.247127	123.089
5.2375	185.281	186.246	162.971	179.021	162.345	140.722	99.917	118.844	145.003	198.036	159.538	158.287	144.383	92.787	165.027	160.294	133.109	97.676	88.308	102.422	127.242	83.627	93.542	170.251	107.585	113.142	65.631	57.924	92.678	53.68	53.252	65.255	58.876		0.252873	121.906
5.3566	183.749	193.224	158.551	164.826	168.075	126.999	81.022	132.32	142.849	195.195	166.884	163.22	147.06	77.205	146.351	159.472	126.96	88.821	82.914	107.567	131.932	78.295	87.781	131.426	98.665	103.362	68.113	68.362	79.309	63.212	49.68	64.07	43.487		0.258623	117.605
5.4756	191.482	186.905	160.815	170.659	157.381	123.388	76.39	119.509	155.738	182.488	163.834	160.44	148.206	82.749	157.032	150.607	115.005	90.561	81.898	116.595	119.826	71.744	87.241	142.409	101.142	92.479	77.514	67.808	76.504	65.651	55.155	61.766	48.013		0.264368	116.937
5.5946	183.052	185.662	155.882	159.324	168.08	126.796	91.765	116.267	153.043	191.897	168.117	183.726	142.558	91.814	136.5	153.808	104.785	84.96	88.309	113.789	99.265	82.333	79.483	135.839	90.948	97.696	65.764	62.384	74.992	60.606	51.389	62.223	49.277		0.270114	115.525
5.7137	173.972	166.372	146.374	140.481	169.482	119.567	88.109	108.006	143.156	182.079	168.184	173.777	138.106	96.361	131.179	152.161	114.983	84.591	84.508	128.848	105.448	74.66	88.42	133.363	82.71	97.55	65.818	62.983	66.601	67.939	61.149	57.718	50.248		0.275864	112.876
5.8327	171.047	166.969	130.098	137.815	170.978	124.981	73.951	93.433	133.665	180.078	187.048	166.672	140.454	83.643	130.227	159.038	106.815	81.654	70.76	112.076	96.484	81.098	81.802	132.962	82.65	89.663	73.562	74.712	64.885	69.288	52.241	53.913	48.694		0.28161	109.799
5.9517	174.801	160.841	137.867	141.165	166.853	103.309	79.908	88.317	130.418	164.384	172.192	173.431	154.701	72.627	118.858	143.326	101.967	92.647	70.883	108.45	109.741	76.722	66.75	131.298	83.189	89.432	74.485	59.72	63.15	66.662	54.661	53.961	43.882		0.287355	106.988
6.0708	171.881	150.098	124.778	119.879	149.466	110.109	79.159	97.524	122.527	177.577	164.878	168.667	149.88	70.703	120.143	138.793	99.694	78.904	79.013	107.631	101.968	73.917	70.112	113.945	88.202	72.775	68.646	65.974	80.078	69.929	52.676	51.806	45.642		0.293105	104.151
6.1898	153.001	136.712	129.938	116.148	131.32	109.621	81.121	94.902	117.668	162.792	150.85	175.265	150.148	64.334	111.087	138.604	100.17	78.033	67.196	94.263	96.204	74.205	68.967	119.472	87.031	86.378	67.541	61.603	67.234	71.408	52.8	52.836	43.744		0.298851	100.382
6.3088	160.501	141.7	132.829	125.156	115.54	93.326	77.691	90.136	104.503	156.261	162.053	181.969	152.665	79.705	104.97	127.519	91.533	75.038	70.333	100.319	84.503	82.658	77.895	105.337	78.942	89.479	66.668	59.064	61.757	67.394	57.457	46.098	42.987		0.304596	98.9087
6.4279	139.625	139.245	132.784	107.835	99.008	108.771	83.626	83.465	91.674	158.557	151.727	176.717	162.138	70.254	91.529	121.288	88.296	77.718	87.757	87.009	73.711	68.812	69.415	98.673	82.718	79.773	70.502	60.545	71.462	79.954	60.239	53.421	40.982		0.310347	96.0373
6.5469	123.328	132.206	138.362	118.305	87.128	109.819	80.876	76.35	92.263	150.305	155.006	169.884	157.537	73.814	85.367	129.755	73.529	88.943	72.587	91.506	76.59	65.362	72.434	88.83	85.302	87.702	65.085	64.814	65.401	70.74	55.17	46.67	41.029		0.316092	93.6969
6.6659	121.353	125.671	147.968	118.169	77.322	112.483	69.961	72.602	80.252	148.102	152.291	179.471	159.198	75.941	91.289	105.267	80.622	91.613	71.632	75.14	74.869	78.549	54.57	82.995	73.626	82.8	68.138	56.599	70.117	80.793	57.722	45.607	37.47		0.321838	91.5213
6.785	125.235	133.792	135.71	111.883	91.502	108.691	75.073	81.146	82.358	139.535	156.69	162.553	162.034	70.036	83.402	114.298	89.516	85.176	65.314	66.448	80.094	76.649	64.876	75.56	89.936	74.233	63.132	59.727	66.402	77.84	56.61	44.734	39.304		0.327588	91.1966
6.904	120.833	113.311	126.983	100.739	86.146	100.054	63.779	78.133	76.795	136.657	154.603	163.003	146.373	71.932	73.014	112.875	83.546	70.985	67.468	70.868	78.622	61.731	50.494	85.834	89.065	82.938	64.302	52.335	60.309	87.363	64.606	39.08	41.165		0.333333	87.1497
7.023	110.63	101.933	138.333	107.558	73.35	93.925	65.845	70.246	78.17	140.192	143.6	152.867	123.969	67.454	67.583	94.584	81.844	59.651	56.515	64.561	81.112	70.018	62.923	73.242	77.072	67.82	53.696	51.175	62.318	70.156	51.643	49.784	41.191		0.339079	81.9685
7.1421	113.507	87.519	127.799	101.326	76.79	86.828	58.813	66.507	80.619	130.118	144.725	147.18	122.772	79.399	72.946	100.752	80.2	68.179	56.71	51.966	76.604	61.671	59.812	69.903	78.709	73.036	54.372	52.238	59.367	68.031	61.599	39.073	42.885		0.344829	80.3623
7.2611	120.469	99.275	118.03	95.382	79.917	93.693	70.17	63.571	90.324	131.244	135.867	142.568	111.971	63.496	65.799	104.66	91.963	67.187	53.559	54.43	76.412	72.608	52.206	67.804	84.212	72.627	55.615	62.977	57.625	67.516	59.202	46.11	40.677		0.350575	80.8838
7.3801	103.269	88.912	111.268	97.279	72.384	79.348	70.473	55.084	80.884	131.623	138.359	133.445	90.095	60.724	68.62	109.621	76.282	76.151	36.67	58.98	75.698	61.064	59.024	67.556	88.989	72.632	56.512	64.062	60.238	54.889	60.433	38.862	37.223		0.35632	76.8683
7.4992	99.608	84.409	122.598	90.174	69.464	71.368	74.735	62.445	78.321	121.433	134.51	125.578	88.676	62.545	70.592	103.14	80.332	70.873	37.56	60.954	72.101	67.933	59.651	75.152	89.876	71.86	55.124	58.206	73.484	51.197	55.006	43.055	40.307		0.36207	76.4323
7.6182	104.575	79.554	89.008	82.547	72.666	65.642	56.426	57.625	79.178	129.048	136.551	125.901	84.235	63.119	69.426	106.643	87.741	65.446	32.385	50.717	71.074	56.321	57.584	76.468	75.817	68.453	53.501	69.098	62.844	54.982	61.207	40.882	40.627		0.367816	73.5543
7.7372	93.86	79.755	85.712	92.783	72.78	55.188	64.661	51.179	69.555	133.356	127.2	113.526	68.338	64.284	75.21	96.804	78.727	63.676	36.685	56.06	76.597	59.186	65.133	80.443	77.747	62.341	66.242	61.505	65.031	46.594	63.92	39.155	37.275		0.373561	72.1366
7.8563	99.283	84.253	75.128	76.009	72.16	51.454	61.728	63.045	71.869	129.014	125.854	127.392	75.684	64.81	67.604	81.793	76.067	58.201	34.579	48.121	71.419	58.852	60.89	67.616	69.693	68.696	68.107	66.528	56.411	50.903	59.297	36.785	34.85		0.379312	70.1241
7.9753	104.916	80.536	82.981	66.12	59.486	41.982	57.276	50.98	61.992	127.118	113.451	109.552	74.264	55.572	70.852	81.136	87.988	57.987	33.926	46.244	66.514	69.346	58.601	76.079	61.568	69.921	63.695	59.436	54.118	41.934	58.378	39.416	34.149		0.385057	67.1974
8.0943	105.3	80.45	79.971	62.496	59.495	50.045	67.566	57.181	71.311	115.131	95.62	111.905	69.295	60.671	75.697	76.405	77.868	54.153	30.51	38.143	77.586	73.892	54.656	69.797	64.728	70.88	47.124	56.325	56.142	50.091	52.537	33.608	31.024		0.390802	65.988
8.2134	84.388	90.96	75.229	66.643	55.129	44.881	61.164	52.68	70.376	112.332	110.234	100.91	66.984	57.049	71.46	77.21	64.224	61.798	26.906	38.48	75.065	63.266	50.362	60.585	64.046	72.097	52.268	54.127	54.506	42.316	57.165	42.47	29.796		0.396553	63.8517
8.3324	100.194	89.573	73.157	69.339	63.204	43.908	61.417	46.009	67.279	124.854	100.549	112.281	71.44	50.056	80.585	67.237	63.399	62.795	34.628	39.834	78.309	66.117	56.007	60.431	61.709	67.612	56.554	52.723	49.785	39.352	57.655	32.144	30.467		0.402298	64.5637
8.4515	103.304	93.965	92.585	57.309	54.463	45.602	59.695	43.017	70.626	105.92	97.851	83.258	56.647	56.808	76.874	64.714	65.419	51.669	30.743	43.611	80.263	60.119	54.158	65.793	57.81	71.647	54.163	56.514	68.803	39.003	44.135	26.447	26.585		0.408048	62.4097
8.5705	97.706	78.482	72.942	67.659	37.233	46.123	62.6	41.519	69.765	118.336	105.3	81.943	64.969	46.679	80.166	56.5	63.107	51.616	31.199	34.325	74.545	69.962	54.557	62.506	62.937	64.861	48.475	61.101	57.026	38.827	49.07	33.57	32.475		0.413794	61.154
8.6895	90.297	87.335	73.118	56.603	44.358	40.439	60.468	38.019	58.227	111.716	90.899	74.627	55.101	55.25	86.581	61.959	58.469	59.871	27.222	37.758	67.659	74.262	49.816	70.117	58.63	66.483	60.763	54.852	60.166	36.27	44.877	34.423	29.654		0.419539	59.8875
8.8086	88.278	92.919	82.651	60.707	34.897	47.179	53.96	46.129	56.297	101.019	83.67	70.954	62.989	51.637	77.966	44.378	62.133	57.356	25.632	33.59	62.711	60.317	54.438	59.137	56.536	76.814	57.204	61.109	55.47	33.005	36.783	35.963	31.07		0.42529	58.0272
8.9276	86.871	95.505	80.5	49.626	37.006	45.15	53.212	42.001	63.923	99.048	93.531	71.26	54.972	47.26	77.526	42.35	48.674	53.949	28.432	30.669	63.865	68.074	55.665	61.159	52.075	72.432	63.328	53.908	55.207	33.038	41.095	23.965	25.268		0.431035	56.6832
9.0466	83.927	102.682	67.773	52.798	41.32	47.257	50.125	50.665	59.4	90.741	87.508	74.122	59.997	42.322	81.542	47.697	52.219	57.469	23.598	27.987	67.067	69.281	50.764	51.606	50.347	79.48	47.895	54.103	57.419	24.49	35.135	33.473	29.79		0.436781	56.1212
9.1657	77.126	91.83	74.395	55.721	32.16	42.45	57.838	51.73	56.844	99.948	83.56	63.394	57.541	45.23	80.229	52.899	42.448	47.554	26.994	29.562	64.508	61.346	49.81	57.059	57.625	61.955	64.512	47.358	55.289	33.678	28.416	33.274	25.059		0.442531	54.8285
9.2847	82.014	85.623	64.703	59.219	37.627	50.151	54.364	39.864	59.124	97.644	81.952	69.129	67.144	58.012	82.107	41.198	41.477	41.491	23.02	28.681	56.146	57.065	49.225	69.171	50.555	64.707	53.107	54.681	67.505	31.133	33.124	34.137	30.139		0.448276	55.0072
9.4037	79.863	105.633	71.245	57.63	37.736	48.925	58.653	43.188	50.262	102.384	75.619	60.909	53.375	49.422	85.813	42.782	44.138	37.127	24.599	24.744	55.468	51.761	54.528	57.342	66.034	63.32	63.966	49.721	54.12	25.271	31.386	25.442	30.754		0.454022	54.0352
9.5228	70.913	94.108	68.779	58.324	39.126	45.485	57.179	46.81	52.358	93.185	70.829	58.109	62.339	48.962	70.22	41.67	41.923	39.844	29.8	29.698	64.943	57.044	64.594	63.086	55.223	54.254	62.488	39.673	59.425	20.235	21.187	31.74	27.836		0.459772	52.7694
9.6418	81.931	96.836	78.211	56.757	41.947	44.217	53.298	49.117	55.139	91.254	72.897	64.316	61.818	50.196	58.714	45.81	45.361	44.479	25.872	26.848	64.715	50.513	66.7	62.992	62.376	51.265	75.108	47.774	54.712	24.261	23.752	30.506	23.028		0.465518	54.0218
9.7608	83.631	93.749	71.812	56.44	36.787	39.467	52.945	47.155	55.49	78.215	85.439	58.689	63.376	55.007	53.772	43.912	43.986	52.661	23.225	27.228	56.447	49.572	74.411	64.542	63.688	58.231	60.871	46.347	48.34	27.081	28.906	25.762	24.886		0.471263	53.093
9.8799	80.67	80.296	68.017	45.003	36.641	40.779	60.755	44.078	53.827	75.74	71.389	60.103	60.228	56.896	55.481	40.139	47.906	36.188	19.559	33.49	57.357	47.942	59.163	61.453	64.177	51.629	60.177	48.775	49.903	21.189	31.681	29.646	27.304		0.477013	50.8358
9.9989	81.324	87.697	63.61	49.662	31.315	41.995	51.755	51.216	52.33	77.177	70.993	54.785	64.677	53.901	45.845	40.437	42.081	38.749	24.998	29.068	52.12	49.628	68.131	62.366	57.502	59.67	67.158	53.908	54.372	29.267	29.529	29.796	25.022		0.482759	51.2753
10.1179	90.193	78.404	81.962	49.69	34.028	41.596	57.802	51.221	49.103	72.04	80.137	59.056	47.262	52.915	52.08	46.084	33.202	39.119	22.31	27.281	57.022	50.942	75.451	68.137	57.717	53.2	65.098	48.298	45.432	22.995	20.346	25.659	24.947		0.488504	50.9312
10.237	77.611	76.989	76.642	55.306	38.115	39.688	60.902	53.673	53.487	68.927	68.706	54.758	56.661	60.153	56.311	35.282	38.023	39.435	27.06	24.957	45.423	56.724	68.409	53.945	60.222	53.155	61.359	47.763	43.062	22.443	31.85	26.607	26.48		0.494255	50.3069
10.356	83.288	82.626	72.561	49.438	42.834	39.423	56.786	55.063	53.075	67.196	68.383	53.108	56.648	54.526	61.709	39.752	33.376	32.119	22.27	29.485	60.312	49.587	72.907	60.297	55.01	57.572	61.438	49.637	39.04	22.856	27.007	27.204	25.671		0.5	50.3698
10.475	80.733	80.917	60.739	61.653	37.497	39.889	54.334	51.098	54.555	61.239	65.904	59.96	46.054	51.723	56.453	41.153	34.088	36.039	25.276	33.508	64.031	44.54	62.966	56.42	57.645	46.959	54.574	45.164	34.8	23.907	27.982	22.458	24.44		0.505745	48.4454
10.5941	70.279	74.868	65.018	50.987	36.127	44.758	51.614	52.751	54.038	62.977	66.639	55.874	44.055	49.723	56.781	38.078	40.257	36.872	21.08	27.151	52.334	47.592	62.406	57.152	64.956	51.713	53.598	41.06	39.198	28.966	21.759	28.476	22.031		0.511496	47.6112
10.7131	74.375	69.661	70.705	54.509	33.473	48.396	48.415	52.955	40.858	58.076	62.441	49.392	47.505	51.969	47.74	38.85	41.898	38.473	19.475	28.869	47.162	55.784	55.133	61.838	49.309	40.48	57.664	47.951	37.924	25.339	25.602	25.685	25.819		0.517241	46.4765
10.8321	68.498	57.922	63.326	46.973	40.311	39.114	47.093	56.237	52.052	59.111	62.892	56.582	44.825	52.525	51.962	38.734	33.371	36.058	17.777	24.431	48.61	63.562	60.76	53.502	50.054	47.706	54.644	58.888	40.436	22.506	25.293	24.18	24.125		0.522987	46.1836
10.9512	70.113	64.395	67.133	53.191	29.474	35.473	51.411	55.756	50.432	61.447	54.51	53.522	45.253	46.576	52.146	41.392	39.301	38.809	17.902	26.252	45.499	56.718	58.871	58.948	47.361	39.141	53.813	47.93	35.795	27.845	25.548	25.279	20.729		0.528737	45.3929
11.0702	63.126	68.572	61.78	46.202	35.261	40.889	45.591	40.386	46.952	61.16	58.823	56.769	43.423	44.378	51.322	39.368	41.466	36.215	17.391	25.147	56.578	56.149	59.798	54.259	51.326	50.599	56.496	47.201	40.143	15.101	22.948	30.353	21.403		0.534482	45.0477
11.1892	72.726	63.51	67.989	52.176	36.702	37.958	57.939	50.535	55.943	55.94	55.838	56.461	47.083	52.065	42.943	33.616	37.968	41.71	22.247	22.23	56.301	48.275	58.332	57.87	53.69	54.105	57.078	45.036	34.241	21.83	26.197	26.98	16.471		0.540228	46.0602
11.3083	71.275	69.111	61.655	48.007	38.169	39.636	48.438	44.852	47.255	50.559	72.098	51.784	50.696	45.816	48.97	36.359	35.11	32.137	21.788	22.436	59.548	51.131	56.974	56.263	53.313	60.201	48.207	43.624	36.673	15.039	26.094	40.198	20.231		0.545978	45.5651
11.4273	77.38	74.138	57.314	50.698	28.856	44.641	49.828	43.08	55.323	52.332	63.488	59.724	57.472	44.321	62.602	38.754	41.271	37.612	18.819	21.673	50.987	48.413	75.021	53.26	52.867	45.635	44.932	44.122	35.668	17.519	22.689	24.486	20.09		0.551724	45.9095
11.5463	68.554	66.935	52.945	55.107	37.763	41.902	49.225	55.569	49.416	49.745	57.109	49.71	54.493	37.313	53.009	35.822	45.122	33.534	18.605	24.351	60.867	61.638	66.679	57.648	50.925	44.974	48.938	42.835	30.045	17.759	33.304	25.595	27.472		0.557469	45.6033
11.6654	73.011	72.514	60.374	49.707	33.615	45.25	47.718	49.238	56.12	63.949	64.127	59.156	51.53	52.393	41.322	33.089	45.046	36.629	22.959	21.279	68.088	42.258	54.702	56.691	44.758	42.256	59.198	42.847	29.533	14.419	23.898	28.723	22.536		0.563219	45.7252
11.7844	62.086	71.438	57.055	51.847	38.63	40.962	49.956	44.124	57.157	56.134	55.619	47.687	52.716	39.883	46.865	46.315	43.193	29.999	23.773	23.147	59.556	61.038	50.152	52.837	47.628	56.99	50.304	41.441	31.22	16.556	23.288	25.247	18.585		0.568965	44.6493
11.9035	60.692	66.573	67.3	52.065	36.052	40.528	45.395	47.635	56.998	62.966	55.106	55.109	53.732	44.918	57.83	39.307	47.384	32.553	13.77	24.001	63.561	47.943	62.473	56.739	51.183	49.607	53.056	51.029	30.876	11.543	26.959	26.401	18.069		0.574715	45.738
12.0225	64.361	63.217	60.316	49.473	37.355	35.613	57.537	46.234	56.81	65.439	49.867	47.268	55.331	48.205	55.83	40.237	53.57	33.499	16.903	28.397	60.775	60.459	56.125	52.713	53.177	47.261	62.474	50.229	34.18	10.875	17.928	20.361	20.815		0.580461	45.8435
12.1415	63.216	66.665	57.316	51.554	37.78	43.135	46.582	42.839	60.216	52.695	55.597	48.876	47.788	45.947	51.809	40.473	48.975	33.551	19.537	19.704	56.852	53.178	46.839	58.431	43.994	63.121	56.758	46.083	34.24	14.167	18.446	24.165	22.632		0.586206	44.6412
12.2606	64.951	74.225	54.508	53.935	31.64	43.894	55.48	51.666	55.263	55.841	51.629	49.45	54.408	44.182	58.517	41.1	41.536	33.491	16.819	23.369	59.056	57.058	46.064	63.598	42.573	50.157	48.899	44.515	25.766	15.448	21.034	27.301	20.795		0.591956	44.793
12.3796	63.12	61.722	62.592	53.347	38.746	37.673	46.92	46.505	61.254	46.743	59.155	54.28	52.219	38.483	62.663	37.358	43.453	38.977	15.595	20.938	46.273	62.365	50.286	58.711	55.468	53.231	49.175	39.056	28.348	14.301	19.51	23.65	21.287		0.597702	44.3456
12.4986	61.608	77.768	58.291	54.711	43.516	51.867	48.717	38.667	56.077	55.907	48.161	43.272	51.312	34.58	58.27	42.978	42.809	31.701	18.545	18.206	52.101	59.641	55.308	58.383	39.586	50.608	47.106	43.278	29.201	9.995	24.874	18.369	23.061		0.603447	43.8932
12.6177	59.317	74.381	56.866	54.39	28.396	50.41	57.788	41.051	54.147	51.477	52.18	43.49	50.797	48.468	52.384	37.477	48.412	36.617	15.632	22.914	51.5	58.405	60.467	61.477	49.099	51.732	46.324	56.676	27.457	13.838	22.141	25.249	15.351		0.609198	44.7367
12.7367	57.565	75.173	52.445	70.366	42.804	50.509	48.211	46.2	42.845	43.515	54.191	42.272	50.827	41.688	44.217	34.656	46.838	36.418	18.527	21.298	47.44	61.323	51.59	51.413	44.649	57.958	41.686	44.448	32.39	14.709	23.659	23.045	19.45		0.614943	43.4644
12.8557	66.074	61.503	61.044	52.276	39.165	56.864	40.79	45.685	48.015	60.015	48.179	42.066	43.639	43.788	56.754	45.596	55.759	26.065	20.253	17.683	47.995	55.507	50.476	58.226	41.135	54.293	48.982	53.35	29.76	12.98	18.445	19.823	17.287		0.620688	43.6204
12.9748	53.487	59.9	67.574	54.97	46.977	53.447	43.586	49.573	48.926	52.551	47.53	43.843	49.731	44.033	46.887	38.631	46.387	39.744	21.88	21.645	53.901	56.35	53.437	58.722	46.211	57.943	49.16	53.395	26.91	17.216	18.259	20.858	20.737		0.626439	44.3758
13.0938	62.349	57.971	65.405	56.035	42.602	57.044	53.641	49.186	49.481	56.082	44.416	40.769	47.993	41.294	51.561	44.864	46.07	29.548	16.37	22.44	52.31	59.815	48.783	56.487	43.911	57.939	50.288	49.022	33.259	12.866	19.839	19.326	17.163		0.632184	44.1251
13.2128	53.226	57.275	68.983	57.86	44.045	46.06	46.889	44.592	50.841	61.532	54.948	43.126	46.495	43.508	53.103	34.101	45.219	33.92	20.774	25.232	42.104	56.803	54.769	56.475	38.256	51.911	47.806	43.422	30.3	14.641	22.625	17.774	14.821		0.63793	43.1344
13.3319	49.314	66.412	60.323	61.645	39.574	48.61	53.228	43.458	49.225	54.203	45.468	48.549	44.268	43.413	46.851	45.114	46.367	31.562	17.299	18.916	52.493	59.631	50.647	54.654	43.404	58.793	44.729	43.528	22.178	10.667	22.201	18.287	18.493		0.64368	42.8335
13.4509	62.8	60.071	68.15	59.131	45.511	43.027	53.114	46.133	50.962	59.547	49.832	44.613	44.569	46.817	46.336	44.708	31.626	32.286	24.116	20.975	56.185	60.979	47.906	47.055	42.11	41.69	39.551	50.102	28.221	13.737	18.085	22.847	20.481		0.649425	43.1295
13.5699	62.471	62.98	61.05	63.828	48.654	42.273	53.946	44.138	52.632	60.366	45.537	45.93	49.966	46.803	50.151	50.383	35.372	33.469	21.368	22.249	47.605	69.361	47.451	50.194	42.178	47.466	41.383	57.695	34.139	14.536	17.496	26.319	17.183		0.655171	44.4416
13.689	62.323	58.874	60.68	63.367	42.94	47.362	56.504	42.334	48.182	57.71	41.947	40.99	37.836	50.542	55.942	45.092	37.233	29.951	14.217	29.715	44.33	66.317	48.13	57.563	39.802	45.743	38.881	62.251	27.461	15.272	17.636	19.368	18.721		0.660921	43.1884
13.808	58.79	63.229	65.097	58.472	40.065	46.717	49.233	45.896	48.475	52.096	44.934	41.434	48.503	44.685	50.7	49.323	43.878	37.722	17.53	26.79	47.527	56.585	47.064	61.428	46.357	44.739	40.771	51.854	25.052	15.457	25.263	21.39	16.806		0.666667	43.4504
13.927	69.83	54.173	66.636	69.868	40.817	44.764	49.894	50.68	55.175	52.042	50.509	50.823	49.603	49.695	47.774	40.162	39.464	34.285	20.928	30.896	44.487	71.056	52.563	55.79	48.098	40.229	53.167	42.447	27.791	14.936	21.886	19.257	16.634		0.672412	44.7382
14.0461	59.299	53.726	59.976	60.656	39.233	53.451	53.591	47.411	54.299	43.888	47.314	51.279	44.381	43.387	50.004	40.72	47.225	30.813	21.008	21.708	49.466	63.831	45.886	59.642	43.67	43.718	51.981	45.263	29.397	16.721	20.823	21.878	13.205		0.678162	43.2985
14.1651	61.264	49.357	61.764	51.108	42.019	46.281	49.818	41.528	50.539	56.034	54.203	46.388	49.886	46.693	50.393	42.119	39.467	37.498	22.775	26.933	46.025	63.459	48.389	57.411	45.142	46.168	49.203	47.772	27.439	17.571	25.437	20.154	11.668		0.683908	43.3911
14.2841	55.196	55.397	61.663	63.728	46.603	54.616	45.625	32.322	58.318	50.582	45.026	47.101	44.288	42.811	53.424	55.103	51.459	44.997	18.371	31.223	48.505	60.915	43.284	53.329	39.729	40.064	47.526	50.551	27.598	17.455	20.277	22.233	16.124		0.689653	43.8013
14.4032	66.132	66.779	52.364	59.5	42.853	46.844	55.681	42.286	53.159	42.735	42.233	51.337	46.714	48.319	55.707	42.457	40.195	38.831	21.877	29.17	46.646	66.109	48.901	58.046	48.194	50.768	45.861	48.698	21.267	15.515	25.895	18.102	14.799		0.695404	44.0598
14.5222	66.272	52.618	61.631	62.808	56.256	50.797	47.949	42.404	56.523	46.326	48.287	45.953	41.243	45.17	50.59	51.058	41.545	40.603	22.694	25.484	41.221	57.101	41.014	58.638	46.793	51.515	52.803	40.963	31.947	17.857	20.601	22.092	12.064		0.701149	43.9642
14.6412	61.84	55.421	63.095	55.58	42.819	51.339	51.684	44.137	51.384	44.404	40.802	49.988	50.903	41.539	59.185	50.706	43.324	39.849	19.936	26.653	45.402	62.695	52.88	66.191	45.736	52.584	47.696	47.435	23.157	15.456	26.543	18.684	14.657		0.706895	44.3547
14.7603	63.411	55.664	57.164	61.592	44.354	49.067	47.104	39.78	52.577	57.226	47.079	45.581	46.608	41.871	50.571	40.485	44.273	47.423	23.35	26.565	50.265	57.992	58.357	66.42	45.805	58.588	42.102	49.673	28.489	16.874	23.899	23.893	16.396		0.712645	44.8636
14.8793	64.777	46.671	65.48	57.955	49.973	53.109	49.473	42.692	52.366	44.002	42.903	44.129	48.943	40.69	51.186	43.648	41.458	41.653	23.051	29.941	44.14	54.892	47.093	60.01	35.87	47.713	43.894	47.618	24.402	21.96	28.161	22.927	13.79		0.71839	43.2294
14.9984	67.343	49.704	64.682	51.999	49.39	43.777	42.325	41.587	49.908	43.272	48.955	42.173	45.189	44.371	48.533	46.44	43.002	44.034	25.33	29.944	46.86	54.306	58.061	61.808	44.844	50.427	48.158	46.294	23.854	22.997	26.43	22.175	16.268		0.724141	43.7709
15.1174	70.247	61.586	65.787	48.638	47.557	48.424	48.558	47.993	56.818	43.716	46.747	47.48	38.764	40.594	60.854	44.534	36.764	48.48	30.462	26.501	43.784	58.557	51.703	63.762	42.27	60.076	45.849	54.217	31.038	19.412	29.658	16.634	16.908		0.729886	45.284
15.2364	63.848	59.376	59.254	49.55	42.109	52.341	46.136	37.212	41.997	50.452	44.325	48.309	42.822	39.212	48.294	38.628	38.358	46.022	20.341	29.106	41.589	55.268	51.125	53.849	48.899	48.245	50.155	45.144	23.7	21.54	27.095	20.794	12.358		0.735632	42.3471
15.3555	57.429	58.705	58.126	46.916	52.553	38.592	46.367	40.812	50.47	43.704	39.766	47.521	45.692	43.893	48.792	45.617	46.408	47.723	28.208	32.831	46.77	47.822	49.36	61.666	54.079	46.354	50.235	42.293	28.916	20.183	26.345	19.553	12.304		0.741382	43.2123
15.4745	63.681	58.456	63.498	45.261	42.179	41.824	42.054	43.054	54.847	50.309	38.953	45.101	53.773	45.309	42.702	43.176	40.836	50.893	18.181	30.468	47.749	52.749	50.249	59.388	48.894	53.268	43.294	52.587	24.532	21.492	32.436	22.367	17.272		0.747127	43.6616
15.5935	62.983	60.549	59.783	53.132	48.927	41.774	40.319	35.805	46.189	46.261	47.394	51.997	44.831	44.271	47.763	39.559	37.135	42.989	27.063	30.939	45.015	60.054	48.59	55.831	44.881	47.67	43.974	59.953	22.637	22.371	29.638	16.274	10.956		0.752873	42.9548
15.7126	52.123	46.982	62.894	50.301	49.111	51.95	42.253	37.567	50.166	47.402	39.825	46.105	50.918	44.029	50.059	41.146	42.12	46.336	28.683	36.902	54.385	51.171	50.996	59.282	48.147	50.874	45.804	49.527	27.287	22.347	31.42	18.579	13.669		0.758623	43.6473
15.8316	58.557	50.407	60.831	47.415	47.055	48.214	49.394	40.162	43.695	50.481	40.709	49.585	47.938	46.686	47.819	39.566	45.978	46.512	21.663	31.714	52.738	47.967	45.953	59.569	40.33	50.963	44.512	45.885	29.903	19.599	27.342	18.088	15.908		0.764368	42.8224
15.9506	72.683	50.423	52.572	47.179	48.642	45.62	37.729	37.92	47.204	50.519	36.325	43.467	45.807	46.086	51.305	41.271	43.747	51.591	24.466	38	50.469	51.781	57.369	46.168	43.248	43.444	52.171	51.255	25.824	18.853	30.758	18.243	14.012		0.770114	42.9137
16.0697	53.965	55.174	51.949	50.887	50.136	44.376	39.124	36.254	44.456	44.214	34.385	48.818	49.845	45.917	51.538	40.57	40.967	46.735	20.457	33.875	65.464	52.98	50.414	52.821	42.809	42.843	47.845	55.91	27.661	20.708	28.517	20.079	14.32		0.775864	42.6065
16.1887	56.91	55.54	46.471	44.856	45.007	42.992	38.614	35.721	45.715	43.638	41.084	48.512	49.346	52.614	43.131	41.131	38.859	53.082	35.737	37.46	52.776	42.082	51.436	56.095	46.348	43.951	46.55	51.246	25.77	21.731	24.812	19.81	14.831		0.78161	42.2381
16.3077	63.329	52.981	52.851	37.129	45.761	40.228	37.4	30.964	45.152	43.454	45.054	45.682	45.81	47.857	52.43	47.729	43.152	53.722	32.991	35.43	63.878	55.159	45.033	49.541	45.168	41.666	45.191	61.357	24.149	21.991	24.517	16.421	11.997		0.787355	42.581
16.4268	66.353	49.388	44.447	38.729	40.685	38.187	34.898	27.215	46.608	45.58	42.778	42.368	44.674	48.063	49.379	36.235	36.06	59.056	38.191	37.712	46.074	43.519	47.24	51.016	40.504	42.471	44.826	45.295	26.124	23.897	26.447	13.178	11.841		0.793105	40.2739
16.5458	58.655	59.364	56.249	29.675	43.373	33.214	31.744	26.405	41.504	42.999	44.642	52.402	49.808	36.904	49.105	36.695	39.392	53.66	41.612	33.94	60.888	41.671	40.691	47.784	42.356	49.21	46.2	52.049	26.831	19.655	23.969	11.975	12.007		0.798851	40.5039
16.6648	57.181	52.439	52.204	31.743	43.533	35.549	34.857	20.326	42.671	49.999	46.642	48.547	45.712	43.037	47.943	36.202	34.863	60.88	44.393	37.63	50.264	43.042	37.78	53.082	43.892	41.589	47.886	55.222	33.587	22.894	26.987	15.948	11.272		0.804596	40.9029
16.7839	50.653	49.155	47.815	28.775	37.832	29.494	29.94	19.134	38.489	41.834	46.871	45.075	46.61	53.155	37.953	42.187	38.709	58.607	42.223	41.454	58.996	45.314	45.313	55.346	45.776	40.074	46.949	58.471	30.964	27.955	21.16	21.782	11.799		0.810347	40.4807
16.9029	53.371	45.222	47.01	20.321	36.231	34.959	31.692	19.375	35.861	44.361	45.997	41.539	47.783	42.283	44.32	37.687	43.121	50.814	52.591	47.331	58.539	48.889	46.687	48.54	40.484	44.3	51.619	57.782	30.64	29.842	24.168	18.265	12.772		0.816092	40.4362
17.0219	56.292	51.214	43.693	19.285	26.884	26.351	24.179	13.356	44.7	46.815	42.178	48.88	47.362	47.197	44	34.611	39.569	61.192	50.25	43.289	57.856	51.537	46.496	56.115	38.761	38.35	49.002	53.52	33.392	28.825	27.168	15.716	13.235		0.821838	40.0385
17.141	45.63	52.621	40.805	14.278	23.265	25.073	21.385	12.248	38.876	46.155	43.207	45.842	47.813	38.268	42.267	40.971	44.33	54.487	49.287	44.978	58.902	44.827	42.786	55.341	43.954	49.13	47.892	47.624	29.884	34.53	28.621	16.167	11.35		0.827588	38.8725
17.26	55.531	50.444	46.867	15.632	23.811	21.227	22.265	14.941	39.536	39.635	45.589	46.289	41.551	40.127	35.278	36.029	45.96	64.227	41.504	41.7	61.245	43.141	47.942	53.677	49.227	35.234	43.99	54.591	33.244	38.667	33.009	15.647	13.046		0.833333	39.1152
17.379	48.043	40.891	34.321	14.3	13.938	21.022	20.584	8.664	38.883	41.665	47.548	37.52	50.036	44.202	37.408	40.286	40.548	60.642	46.394	43.829	59.752	44.115	50.687	49.672	35.949	46.368	46.837	54.599	35.686	39.6	31.725	13.338	6.6		0.839079	37.747
17.4981	46.169	43.228	29.203	11.995	14.034	16.454	20.069	9.49	42.132	44.234	42.217	36.82	49.284	46.075	39.313	36.538	31.974	61.384	53.053	52.611	62.402	41.147	56.3	52.748	43.435	49.95	46.168	52.265	30.661	39.042	24.054	15.196	9.1		0.844829	37.8408
17.6171	44.741	41.295	25.756	9.373	13.1	12.844	18.93	9.272	34.685	47.683	46.669	40.421	53.587	41.824	41.465	32.881	38.621	55.862	46.838	51.936	61.834	45.711	55.114	47.064	38.492	43.055	44.73	46.077	33.187	50.01	22.546	11.059	7.161		0.850575	36.7825
17.7361	42.225	30.745	26.673	9.114	10.826	13.154	16.445	6.083	36.662	44.802	38.303	38.948	48.442	35.906	41.785	39.681	47.016	53.908	53.409	49.141	49.011	41.249	49.293	65.616	37.799	45.551	41.796	46.698	39.547	46.183	26.004	14.36	5.643		0.85632	36.1218
17.8552	35.36	22.742	19.981	4.653	11.549	9.252	11.52	7.229	29.642	41.273	46.197	45.144	46.46	38.183	38.183	37.981	32.193	50.373	59.674	51.433	51.303	41.805	55.222	54.503	39.404	52.769	56.169	50.046	42.45	48.462	26.848	13.504	8.446		0.86207	35.7562
17.9742	34.824	25.714	16.633	4.103	9.25	9.359	11.019	7.408	35.115	38.74	43.476	48.002	42.071	42.628	37.915	34.855	36.125	51.8	54.91	52.539	59.549	45.627	52.688	57.151	37.392	44.619	54.483	48.996	39.243	42.254	25.406	12.746	6.285		0.867816	35.2402
18.0932	27.867	20.831	13.706	5.482	6.809	8.738	8.497	6.693	28.542	43.064	51.468	41.406	43.806	36.387	36.405	37.535	30.269	53.565	50.885	52.868	40.941	42.47	53.965	52.958	34.232	50.124	49.819	60.618	43.757	42.542	32.659	15.85	7.773		0.873561	34.3191
18.2123	24.151	15.92	9.355	3.317	6.342	5.032	7.71	6.805	28.224	40.584	45.469	44.316	49.699	33.179	32.335	31.488	33.373	45.028	52.815	44.711	56.083	41.682	52.189	47.72	41.469	44.871	47.461	50.123	49.175	39.38	20.85	13.011	7.805		0.879312	32.4749
18.3313	18.813	11.836	10.46	7.475	5.56	5.761	7.663	4.801	22.51	43.15	42.732	46.504	42.438	33.626	31.344	39.045	34.762	48.391	50.394	43.317	49.818	41.753	50.644	46.346	38.779	47.13	43.267	54.841	50.548	48.095	23.782	10.974	6.367		0.885057	32.2099
18.4504	14.675	12.218	9.122	3.644	6.508	5.242	5.533	4.475	24.608	42.566	43.085	41.132	41.233	26.71	34.301	36.878	39.64	45.869	51.766	47.259	47.718	40.813	48.872	55.936	39.348	44.722	49.408	53.793	51.805	43.567	24.979	7.812	10.181		0.890807	31.9824
18.5694	11.482	9.496	4.943	3.664	1.844	3.274	3.587	4.4	20.253	49.325	39.858	47.499	45.383	32.415	32.22	29.745	37.05	50.337	48.173	41.952	44.868	50.794	52.178	50.151	31.599	40.828	47.944	54.692	53.745	46.717	26.529	10.093	8.844		0.896553	31.3904
18.6884	8.606	6.574	6.115	1.926	4.807	4.703	3.844	3.412	21.126	42.171	38.25	42.666	33.897	31.735	31.292	26.942	31.519	50.434	46.363	56	44.85	42.365	51.839	47.189	30.281	35.76	50.951	45.347	53.352	39.173	25.575	9.486	6.149		0.902298	29.5363
18.8075	8.906	5.628	4.754	1.82	3.021	2.874	4.832	5.494	19.878	42.326	39.279	40.757	44.663	34.357	35.763	28.085	28.762	45.727	39.416	45.638	47.679	47.385	49.825	55.548	32.1	37.24	43.872	54.593	49.89	45.226	26.33	12.973	8.998		0.908048	30.1103
18.9265	7.395	4.138	3.035	2.412	0.914	1.723	3.699	3.967	13.926	41.802	47.299	40.429	31.986	23.509	27.727	29.158	21.59	38.296	39.788	40.558	47.503	42.5	49.403	48.584	23.396	34.24	46.609	60.53	47.915	44.022	22.918	6.538	6.092		0.913794	27.3818
19.0455	7.781	4.874	2.375	2.193	2.744	3.186	2.931	3.823	8.989	37.049	45.159	37.827	38.253	23.354	30.595	24.147	24.49	32.983	39.668	46.031	43.39	43.687	50.679	46.841	31.029	30.951	38.916	45.841	50.903	34.195	19.555	11.09	3.582		0.919539	26.3367
19.1646	4.978	2.378	6.382	0.579	1.304	3.035	0.824	2.644	10.609	39.867	48.505	33.916	38.654	26.977	29.141	31.506	22.958	34.191	32.406	45	39.637	42.964	47.49	44.566	36.07	35.28	46.699	51.476	48.793	33.453	21.991	6.585	6.537		0.92529	26.5877
19.2836	3.539	2.926	2.605	2.824	1.601	1.753	1.919	2.73	8.48	37.946	43.172	35.728	32.171	22.862	27.597	25.432	20.688	28.876	27.904	40.956	51.017	39.43	41.112	46.992	26.221	32.375	44.004	50.304	53.01	27.628	16.634	5.572	4.979		0.931035	24.5754
19.4026	3.22	2.799	2.759	1.469	3.895	2.849	2.078	2.19	7.872	32.869	36.257	37.697	34.017	19.759	28.52	20.431	19.872	22.454	17.265	37.837	47.447	37.791	40.23	46.008	27.506	29.348	45.064	57.22	44.198	35.224	19.635	6.953	4.299		0.936781	23.5464
19.5217	1.88	1.913	3.039	0.426	0.912	1.577	2.024	1.611	7.948	35.235	47.287	33.133	31.132	20.033	26.063	24.603	18.738	14.901	8.498	29.434	43.261	37.994	39.663	38.166	20.991	29.867	41.168	56.257	54.492	27.572	16.956	5.688	5.583		0.942531	22.062
19.6407	1.742	1.176	1.409	1.249	0.314	1.833	3.265	3.024	5.985	30.002	38.784	41.576	34.261	16.106	21.421	14.009	15.252	11.829	9.135	29.739	38.2	33.072	37.941	39.348	26.358	24.769	42.335	48.636	46.147	24.665	12.037	2.32	5.257		0.948276	20.0968
19.7597	2.475	3.205	2.365	0.944	1.626	0.885	1.66	2.799	7.835	32.834	43.656	31.807	22.691	17.753	22.382	16.023	13.28	5.018	6.437	25.787	42.051	36.315	42.241	47.189	27.685	28.132	40.999	46.749	49.57	30.401	12.468	2.836	3.762		0.954022	20.3594
19.8788	1.026	3.68	2.03	1.383	2.095	0.653	2.305	0.844	4.293	21.896	35.691	36.857	25.46	19.246	20.305	14.907	13.57	5.252	4.392	23.801	46.142	26.647	36.884	40.088	23.099	30.321	38.212	45.522	45.506	22.331	7.787	3.432	2.175		0.959772	18.4192
19.9978	2.752	1.259	2.392	0.304	1.443	0.533	1.358	1.357	3.848	19.625	38.58	32.28	19.625	13.471	19.664	14.345	10.581	5.068	3.14	10.557	43.619	32.983	33.708	36.995	22.148	21.055	33.341	41.268	46.318	24.223	7.798	1.97	2.064		0.965518	16.6567
20.1168	2.887	1.653	2.529	1.528	1.327	1.397	0.665	2.115	3.46	24.207	42.199	26.4	18.711	13.781	21.555	10.896	9.652	3.014	3.113	8.44	39.174	26.622	28.92	47.457	17.876	17.56	30.671	47.934	35.047	23.52	7.818	2.705	1.941		0.971263	15.9628
20.2359	1.016	2.636	0.59	0.248	2.69	1.677	1.324	0.55	2.652	20.96	42.358	30.517	15.155	13.3	18.595	6.084	6.722	4.041	2.387	4.234	36.879	25.936	22.241	40.199	15.749	10.442	32.355	38.602	47.475	20.493	8.439	3.911	4.394		0.977013	14.6925
20.3549	2.546	1.851	1.346	0.391	0.811	0.398	1.395	1.431	1.38	23.005	44.946	23.339	17.083	9.802	16.53	6.166	5.471	2.636	0.927	5.368	31.132	22.911	26.027	34.227	16.364	16.878	34.38	36.982	44.783	12.677	3.764	2.33	3.425		0.982759	13.7182
20.4739	1.89	1.48	1.778	0.957	1.264	0.867	1.036	0.861	3.843	16.963	41.705	32.105	16.409	9.107	16.78	4.202	6.324	1.154	2.955	6.156	25.705	23.15	23.169	36.73	14.337	10.751	27.928	44.572	40.876	9.359	4.766	2.707	3.655		0.988504	13.1982
20.593	1.849	1.147	0.577	0.04	1.662	0.463	1.993	1.142	2.582	14.036	38.172	29.738	9.93	6.968	12.369	5.719	3.769	0.963	2.514	2.775	24.073	18.626	24.617	36.23	15.361	10.51	35.731	35.363	34.646	7.026	3.148	1.126	2.639		0.994255	11.7425
20.712	2.112	2.312	0.815	0.354	1.51	0.498	1.02	0.775	2.295	12.731	35.206	26.611	10.482	5.092	11.074	3.213	1.617	1.025	2.303	0.894	18.076	13.367	16.893	30.379	17.136	7.167	19.752	40.903	36.677	6.897	5.527	0.909	2.558		1	10.2479

## Sheet: Image3
X0	Y0	Y1	Y2	Y3	Y4	Y5	Y6	Y7	Y8	Y9	Y10	Y11	Y12	Y13	Y14	Y15	Y16	Y17	Y18	Y19	Y20	Y21	Y22	Y23	Y24	Y25	Y26	Y27	Y28	Y29	Y30		Ap-Basal	Avg intensity
0	68.162	64.709	74.245	93.335	66.607	80.499	92.789	90.745	75.761	78.714	66.899	74.031	74.679	79.854	66.287	104.896	106.204	79.372	65.481	87.239	137.37	99.94	95.63	111.124	92.305	67.364	56.485	59.283	134.774	116.464	120.625		0	86.512
0.119	67.478	73.376	87.624	102.648	77.194	89.679	100.208	94.003	81.594	88.299	82.234	90.86	100.388	103.49	75.523	131.97	120.085	82.561	75.424	91.969	150.155	98.912	104.332	108.977	108.783	76.41	54.264	57.663	142.339	118.196	131.74		0.00602236	95.7541
0.2381	81.203	67.466	101.966	114.815	90.549	94.858	109.019	98.727	85.818	114.714	101.087	108.617	133.922	113.753	84.952	155.511	132.346	89.397	81.387	98.744	174.44	98.488	101.397	133.197	126.18	83.575	62.599	61.128	150.791	128.128	153.729		0.0120498	107.5
0.3571	83.785	73.581	110.395	142.076	100.103	106.085	117.281	111.31	98.71	131.609	132.693	126.904	154.63	114.836	98.048	162.14	145.577	97.174	93.105	100.937	176.679	115.433	120.522	141.537	118.239	104.392	85.797	68.067	169.215	145.474	163.87		0.0180721	119.684
0.4761	93.206	83.079	123.728	147.172	104	118.364	134.8	129.068	109.192	152.444	159.835	155.863	178.68	135.49	114.014	198.024	156.919	106.465	115.237	107.736	193.105	139.627	134.035	147.569	134.657	118.972	99.363	78.695	177.632	153.407	168.745		0.0240945	134.488
0.5952	102.412	102.748	138.845	163.095	131.378	132.866	147.103	141.587	134.514	184.311	201.167	176.713	200.477	153.953	142.294	207.789	172.922	125.747	142.911	127.281	202.633	156.955	133.895	162.881	161.218	127.517	121.29	92.383	190.827	169.976	180.171		0.0301219	152.576
0.7142	124.854	120.315	156.825	181.729	157.258	163.242	172.217	152.064	174.768	213.401	234.714	209.98	211.161	170.497	165.025	219.597	206.501	152.069	168.104	141.476	220.378	163.576	148.5	164.567	171.661	165.196	147.134	101.616	204.698	187.24	186.367		0.0361443	172.798
0.8332	141.221	134.07	171.057	199.313	168.259	189.752	178.467	170.537	199.333	236.897	242.981	235.107	218.119	175.953	180.186	231.634	218.956	170.362	192.836	150.045	230.904	189.195	176.833	169.264	188.236	190.064	160.053	111.16	217.75	203.054	198.725		0.0421666	188.398
0.9523	153.59	147.244	200.435	211.846	181.673	185.199	189.652	188.061	223.438	245.552	251.146	245.291	220.644	191.392	207.902	241.115	235.555	203.574	212.211	181.628	241.731	199.599	187.536	183.988	204.654	207.117	175.113	124.329	219.062	220.013	198.369		0.0481941	202.537
1.0713	158.14	156.02	204.504	216.312	211.656	206.029	203.325	209.711	235.001	249.13	254.651	248.987	232.973	209.567	222.017	246.348	242.462	228.438	233.829	209.582	245.093	213.628	199.306	197.129	223.702	227.552	187.061	149.743	220.047	228.14	201.046		0.0542164	215.198
1.1903	186.241	176.489	216.775	232.539	218.86	210.06	220.978	221.033	238.168	251.864	254.932	246.701	238.235	221.442	233.549	248.361	243.35	237.536	242.377	223.441	246.713	221.784	202.293	213.626	232.883	246.129	214.717	150.304	227.591	231.371	209.347		0.0602388	224.506
1.3094	199.689	201.051	212.529	239.264	224.194	217.938	227.901	235.223	247.334	252.183	254.964	250.36	234.702	223.743	242.705	249.34	242.473	243.678	248.356	227.052	244.823	227.076	204.968	228.265	240.32	248.174	227.02	167.277	229.575	241.256	222.652		0.0662662	230.841
1.4284	209.977	212.638	221.974	247.111	232.233	231.324	240.931	242.869	248.98	253.174	254.919	251.192	241.36	228.756	245.93	247.39	244.556	246.366	250.625	232.548	248.142	234.504	220.597	235.658	242.993	245.099	239.674	177.591	233.626	246.146	228.632		0.0722885	236.694
1.5474	217.238	226.2	225.742	247.676	239.805	240.464	244.138	249.274	250.346	254.503	253.76	250.146	238.42	234.703	246.741	250.152	245.457	248.587	250.847	239.057	248.809	231.463	231.665	239.748	245.684	248.405	244.041	194.14	230.672	241.795	240.769		0.0783109	240.337
1.6665	217.617	230.687	230.441	250.204	247	240.411	245.896	251.269	251.517	255	253.904	249.593	237.592	240.435	247.6	248.341	245.741	247.705	245.889	247.197	251.444	236.56	233.921	245.265	249.065	249.221	249.027	210.191	231.263	238.588	241.93		0.0843383	242.597
1.7855	212.4	240.714	230.968	250.168	242.882	250.574	252.614	249.817	250.121	254.611	254.944	251.456	243.992	239.508	245.975	253.602	243.705	249.326	246.522	245.773	251.608	243.115	235.091	245.505	252.699	247.182	250.474	226.603	228.842	237.549	243.338		0.0903607	244.248
1.9046	235.476	240.901	240.349	249.449	247.746	252.092	253.974	249.867	252.065	254.623	254.076	253.297	245.016	237.219	246.293	253.899	239.006	248.336	248.538	240.883	250.721	247.951	233.681	246.457	251.936	248.966	248.868	229.035	231.437	239.672	245.554		0.0963881	245.722
2.0236	235.914	244.724	241.528	249.562	251.729	253.987	254.048	250.18	252.619	254.427	252.655	253.432	244.526	235.346	246.651	252.568	239.513	250.791	248.251	241.733	250.823	245.23	237.294	246.007	254.584	248.687	248.525	232.319	238.208	237.915	247.201		0.10241	246.483
2.1426	232.651	243.523	241.791	248.052	254.066	254.971	253.747	251.349	252.456	254.629	253.403	251.592	246.095	242.126	243.606	252.66	240.82	248.344	246.325	246.053	251.646	248.262	238.289	249.002	253.395	248.011	247.012	231.88	242.579	237.917	251.653		0.108433	247.029
2.2617	239.837	247.326	244.186	251.615	252.224	254.794	253.668	247.422	251.797	254.948	252.996	249.476	247.048	239.742	246.806	252.311	236.166	247.239	245.624	245.27	253.917	248.983	244.771	247.629	253.56	248.747	247.799	237.098	247.775	245.794	245.176		0.11446	247.798
2.3807	243.408	246.988	240.974	253.167	252.091	254.778	254.652	245.019	250.974	254.663	250.885	250.64	240.167	235.942	242.756	250.788	231.034	248.279	246.203	249.157	253.407	244.806	236.516	248.159	253.774	246.577	246.78	245.265	240.677	242.771	245.524		0.120483	246.672
2.4997	241.004	235.256	240.051	252.221	252.708	253.485	253.159	249.519	247.856	254.662	254.116	248.48	244.368	234.426	243.424	249.978	231.25	242.547	244.009	244.462	252.549	246.595	243.793	248.522	252.011	246.609	247.586	244.153	240.832	236.146	250.933		0.126505	246.023
2.6188	236.397	239.138	239.922	252.391	251.326	251.429	253.099	249.486	242.169	254.712	251.831	251.002	246.81	242.974	245.156	250.2	230.407	242.094	239.543	241.164	252.73	245.616	245.004	249.554	249.115	246.992	248.105	245.836	240.972	239.514	249.588		0.132532	245.944
2.7378	239.191	240.881	243.388	249.573	250.752	251.539	253.02	246.367	244.148	254.474	253.356	246.851	245.8	246.646	244.501	248.314	230.549	245.401	246.105	240.165	252.214	245.577	244.533	249.635	249.245	246.729	248.749	246.459	239.812	242.675	248.439		0.138555	246.293
2.8568	238.086	241.391	244.841	253.869	253.457	250.773	251.022	247.142	244.47	252.141	250.68	249.558	245.601	244.78	245.891	245.128	227.395	239.196	246.583	242.805	252.005	244.593	243.092	250.852	252.164	246.666	251.58	251.83	240.907	237.333	249.28		0.144577	246.294
2.9759	237.259	240.689	244.657	252.844	251.767	250.83	252.36	246.257	244.126	251.357	251.611	246.918	246.882	243.553	248.085	242.102	224.484	240.18	240.121	237.984	251.139	248.549	243.116	249.451	251.095	243.166	252.74	249.775	240.039	246.673	251.945		0.150605	245.863
3.0949	234.328	241.684	241.107	252.48	247.562	249.698	253.25	247.287	244.399	247.298	251.259	248.497	241.495	245.741	240.066	241.502	224.285	238.646	238.453	240.648	248.106	248.305	241.972	248.906	249.888	238.317	252.525	249.426	239.675	246.175	249.774		0.156627	244.605
3.2139	234.092	238.941	242.404	252.355	250.053	246.988	254.327	243.646	243.239	249.979	247.187	248.422	242.501	248.053	239.246	243.826	215.382	239.694	239.484	236.659	247.315	244.558	247.058	249.902	251.345	236.319	252.601	250.172	238.552	243.954	244.883		0.162649	243.972
3.333	229.29	232.831	244.678	252.27	250.95	248.102	252.42	240.682	237.565	248.061	251.087	245.09	243.091	242.008	238.897	235.851	213.49	239.824	238.63	236.815	246.776	246.999	248.318	251.829	249.847	229.519	250.995	249.879	241.477	250.604	248.98		0.168677	243.124
3.452	231.482	239.351	249.298	253.106	247.649	245.719	247.449	240.692	225.921	248.177	251.04	242.009	245.426	236.63	240.314	236.428	213.634	234.625	241.024	233.959	248.581	246.857	247.746	254.02	250.298	230.237	250.737	252.073	234.841	251.096	246.84		0.174699	242.492
3.571	226.288	233.175	246.837	248.707	244.654	240.318	249.476	238.714	223.727	245.51	245.243	240.499	241.047	240.676	235.735	237.849	210.682	235.212	233.906	234.685	247.536	240.316	243.961	253.165	250.866	232.436	250.555	251.661	239.253	251.208	245.296		0.180721	240.619
3.6901	230.352	228.995	247.84	249.814	249.482	241.22	249.967	237.466	222.359	245.639	244.287	237.07	245.548	235.306	236.394	232.192	210.998	232.121	235.956	231.332	245.845	243.604	242.415	249.84	250.102	230.972	249.347	251.189	236.95	249.125	245.539		0.186749	239.976
3.8091	230.531	224.518	246.67	251.775	245.961	232.158	252.315	230.901	218.444	240.407	246.473	239.665	242.939	231.982	234.612	230.839	214.164	231.365	227.761	232.727	243.024	240.99	245.895	248.972	249.406	235.184	250.052	251.09	229.059	248.106	238.836		0.192771	238.285
3.9281	227.916	227.473	250.776	243.222	248.532	236.114	249.523	231.413	220.05	232.516	242.622	231.074	231.573	230.511	227.856	225.586	214.549	229.796	227.635	235.26	235.103	243.637	243.168	250.355	247.934	236.651	245.732	252.669	227.233	247.183	231.914		0.198794	236.309
4.0472	215.183	236.995	249.831	247.35	247.685	244.798	249.243	233.875	223.857	231.343	240.761	224.36	240.946	229.879	229.463	219.434	215.471	224.986	220.143	228.24	237.251	244.475	241.263	250.997	248.057	242.143	244.366	252.644	215.197	246.194	231.899		0.204821	235.753
4.1662	212.952	233.502	253.028	247.479	252.222	243.786	249.533	231.14	205.8	219.292	240.897	225.343	238.261	234.199	228.562	213.046	215.165	216.634	212.321	227.175	234.006	238.533	238.457	253.851	246.177	244.101	242.61	250.762	206.571	240.207	220.818		0.210843	232.788
4.2852	213.497	232.554	249.488	246.525	251.477	241.922	247.809	221.284	196.773	210.005	230.823	219.571	240.202	235.029	216.844	213.841	212.592	216.651	214.6	229.809	229.945	233.406	233.121	252.543	243.447	246.13	239.068	243.451	212.282	240.404	213.785		0.216866	229.964
4.4043	214.142	231.883	247.378	250.857	250.858	237.664	245.286	196.12	191.183	198.235	221.128	219.526	240.01	232.347	218.037	201.869	210.855	210.695	214.878	225.326	229.753	231.096	232.962	251.731	244.241	246.174	240.186	242.217	215.015	242.774	197.183		0.222893	226.826
4.5233	214.904	224.692	247.661	247.159	253.395	236.843	241.641	203.222	175.912	193.069	218.918	213.259	238.782	232.089	217.63	203.003	219.952	205.754	215.65	224.955	237.211	219.66	221.158	254.328	242.287	243.465	230.856	239.054	208.347	226.321	197.958		0.228915	224.166
4.6423	206.516	218.22	250.247	247.305	247.406	234.98	239.625	196.555	155.101	192.869	209.548	211.909	242.039	230.648	214.662	212.785	213.647	208.717	218.465	213.933	231.537	219.196	213.762	253.314	242.108	243.466	222.191	235.381	210.128	225.413	198.741		0.234938	221.304
4.7614	196.714	210.864	250.011	247.791	243.298	232.201	229.934	184.489	145.104	184.369	197.768	210.468	241.443	235.792	215.3	210.332	215.08	191.281	210.321	207.425	227.265	213.983	199.044	251.672	242.602	242.042	212.717	232.019	208.613	216.226	193.518		0.240965	216.119
4.8804	201.178	211.995	249.081	246.442	239.925	236.908	218.092	165.465	133.59	167.59	189.972	201.606	236.633	220.552	215.998	204.69	210.793	184.292	201.028	213.446	224.261	206.389	182.905	252.986	241.273	241.647	212.969	229.759	190.015	199.061	195.832		0.246988	210.528
4.9995	194.478	205.155	250.423	246.578	238.524	232.843	212.144	150.094	116.221	159.375	179.581	198.73	231.478	216.895	206.979	202.292	218.134	188.038	196.681	204.324	214.479	203.481	177.695	251.879	234.406	237.889	204.636	223.172	176.971	193.036	192.955		0.253015	205.147
5.1185	175.218	207.225	251.836	245.254	237.904	230.279	206.892	143.68	108.032	159.557	177.092	195.392	227.074	212.215	200.922	208.27	217.675	186.373	194.658	192.487	206.107	181.553	180.056	249.087	229.576	232.646	197.099	222.548	168.275	183.571	188.18		0.259037	200.54
5.2375	182.097	203.658	251.338	244.39	230.992	228.892	189.095	137.419	103.187	142.433	166.834	189.628	217.248	200.196	185.448	202.606	222.56	169.748	188.658	186.797	201.276	170.449	181.457	250.551	231.699	231.127	194.206	227.884	149.292	167.023	171.542		0.26506	194.185
5.3566	177.611	194.152	251.142	244.742	231.562	229.65	192.266	124.655	105.091	139.004	160.536	185.257	204.553	204.664	172.442	181.581	216.472	174.222	185.388	175.078	201.357	163.324	167.079	249.644	230.846	228.359	185.448	216.174	139.437	154.858	168.167		0.271087	188.863
5.4756	160.427	196.484	250.561	240.587	227.69	222.553	194.03	107.385	100.304	126.448	154.799	179.666	199.33	192.451	166.754	177.864	212.984	173.638	178.705	162.683	199.595	159.734	155.054	242.545	232.255	227.304	185.703	218.082	122.288	138.699	160.691		0.277109	182.816
5.5946	150.145	199.812	250.085	239.752	212.059	212.959	184.638	99.053	97.328	114.127	138.065	176.838	201.049	192.47	160.817	155.744	203.979	165.625	181.96	154.866	184.337	143.429	146.379	228.361	227.138	215.795	181.533	218.056	119.277	131.378	150.695		0.283132	175.411
5.7137	130.004	201.353	250.94	242.537	213.203	211.869	177.06	86.694	90.237	115.349	150.079	173.061	203.946	181.707	157.591	132.304	191.055	159.136	174.123	154.595	176.96	131.093	139.034	222.054	215.867	204.913	164.961	212.271	118.544	137.216	144.012		0.289159	169.799
5.8327	115.308	200.666	250.281	240.7	204.175	211.59	167.344	79.951	80.608	107.456	159.046	167.831	203.108	168.656	142.759	130.862	196.288	169.771	172.788	147.238	166.631	128.378	124.292	207.646	209.088	195.998	163.982	212.777	112.085	131.416	138.795		0.295182	164.759
5.9517	97.76	195.819	250.215	231.175	199.151	196.781	155.621	76.959	82.477	105.41	154.545	176.237	191.926	154.849	127.937	123.483	195.659	151.688	158.605	146.637	164.344	124.028	119.816	198.322	198.58	183.718	167.685	195.847	108.339	133.79	136.539		0.301204	158.192
6.0708	89.822	203.221	244.988	231.477	195.341	189.244	156.381	62.603	80.025	98.919	138.839	166.733	180.29	135.946	122.257	102.853	197.809	130.157	147.679	144.096	152.519	125.034	107.516	190.449	196.855	160.306	156.688	196.052	106.059	143.702	137.528		0.307231	151.335
6.1898	79.353	214.654	244.2	227.811	180.946	179.545	141.81	57.109	68.625	93.815	138.294	170.045	169.553	121.469	129.196	105.245	187.91	118.521	139.275	138.196	143.049	125.003	106.776	184.451	207.61	154.552	165.024	197.749	114.922	146.065	142.562		0.313254	148.172
6.3088	72.691	204.306	242.298	212.15	172.585	153.564	114.628	57.804	68.346	87.991	125.68	162.932	166.831	103.497	111.359	106.292	191.375	115.023	134.701	134.163	128.045	122.729	104.508	170.804	198.813	144.369	165.427	189.25	113.825	139.353	146.025		0.319276	140.689
6.4279	73.886	195.649	237.255	196.421	174.409	137.368	99.494	50.29	77.897	84.616	124.476	155.559	170.752	95.142	107.277	91.225	191.913	109.957	128.889	139.42	114.653	113.074	117.112	161.268	185.828	133.394	142.239	190.368	122.47	135.518	136.316		0.325304	135.295
6.5469	59.628	197.974	228.283	183.796	161.69	120.331	91.626	45.612	68.255	89.878	121.325	148.872	172.844	84.843	110.688	93.098	176.8	107.721	127.554	133.529	99.86	117.497	116.266	150.272	174.756	125.592	131.132	195.757	123.734	125.083	127.49		0.331326	129.412
6.6659	55.197	180.995	217.567	175.474	164.544	108.549	77.405	45.289	62.387	82.685	114.987	147.781	171.597	86.201	106.604	102.031	179.778	99.702	119.261	134.582	96.126	112.089	110.088	153.113	165.108	116.189	125.432	190.605	123.196	112.149	128.094		0.337348	124.671
6.785	46.038	162.037	206.915	164.334	144.998	110.982	69.335	35.946	66.194	78.265	104.462	129.755	150.973	80.508	110.528	96.695	174.931	100.814	115.273	131.413	93.379	110.49	113.244	169.362	170.649	102.825	106.695	180.343	125.966	125.052	119.25		0.343376	119.279
6.904	40.594	148.282	185.504	164.308	136.829	113.787	64.115	39.673	65.752	78.408	90.317	124.515	153.466	80.757	106.157	100.451	159.855	94.553	112.526	127.636	82.296	104.708	115.797	176.157	165.405	92.787	104.534	161.654	121.624	107.155	113.217		0.349398	113.962
7.023	42.085	137.724	162.719	153.56	128.551	102.493	55.791	42.512	67.829	80.214	94.584	112.836	149.432	75.626	100.864	103.559	153.605	88.067	110.683	119.562	69.643	101.017	125.557	181.67	161.417	91.385	87.858	150.797	113.058	113.806	101.627		0.35542	109.036
7.1421	39.97	123.209	136.217	142.856	122.568	88.587	44.121	39.444	61.561	85.977	91.208	100.042	152.537	71.365	103.723	98.188	156.202	91.254	103.637	117.163	68.417	114.294	113.646	182.41	156.886	101.967	86.556	142.017	112.972	107.837	105.596		0.361448	105.24
7.2611	37.237	101.629	117.331	132.284	116.65	86.259	43.658	37.903	66.243	79.86	97.589	99.55	128.575	68.912	105.58	95.558	149.008	91.852	95.875	114.354	66.117	106.36	110.675	178.781	154.704	96.787	79.471	132.466	111.954	107.054	105.123		0.36747	100.497
7.3801	35.841	87.323	105.555	121.327	119.812	70.513	39.071	31.43	58.679	83.248	106.133	101.37	120.457	65.028	90.305	91.221	134.938	84.583	106.236	115.625	71.891	105.063	110.411	164.547	157.033	101.091	83.951	124.061	113.577	110.575	98.434		0.373493	97.0751
7.4992	32.667	86.884	99.379	114.473	104.162	67.589	40.054	32.148	61.727	81.603	95.843	99.815	110.42	56.34	85.653	84.443	127.861	94.527	101.358	106.258	70.428	115.73	108.234	161.608	154.585	104.235	77.346	110.773	111.398	106.962	96.717		0.37952	93.5877
7.6182	29.376	74.408	92.855	118.199	93.456	67.554	53.347	40.314	58.493	71.043	87.299	94.945	85.059	61.071	90.067	88.018	115.435	95.84	92.662	105.981	80.059	122.455	128.137	158.22	149.444	107.35	77.786	108.205	103.97	108.192	94.525		0.385542	92.0569
7.7372	28.642	79.088	85.608	113.306	101.141	67.756	53.252	38.393	62.413	74.273	84.876	94.775	86.044	60.661	85.492	91.308	109.781	105.614	87.527	99.522	73.523	133.989	126.683	156.678	160.424	96.561	79.649	110.266	100.173	114.021	90.944		0.391565	92.0124
7.8563	26.885	68.045	82.454	99.222	97.58	65.971	50.585	38.007	63.561	64.921	83.759	87.386	70.085	58.684	72.864	91.045	102.988	112.204	92.277	102.301	70.729	144.078	114.213	153.923	153.295	93.412	81.292	97.905	98.188	119.812	87.748		0.397592	88.5619
7.9753	25.917	72.834	95.099	102.858	94.531	54.186	47.763	35.979	56.814	63.367	74.375	78.615	65.844	60.765	76.58	82.255	100.902	107.493	85.486	102.904	72.496	150.767	102.457	150.525	161.055	84.945	82.869	106.402	93.108	131.989	92.597		0.403614	87.5412
8.0943	23.941	68.637	98.93	89.223	84.325	50.316	47.185	43.082	51.087	67.383	84.263	76.333	51.344	57.088	70.78	81.374	98.296	127.399	79.595	99.718	77.343	135.724	101.057	148.647	165.162	82.166	85.426	102.812	89.972	122.628	75.473		0.409637	85.0551
8.2134	22.044	54.909	94.499	73.854	80.016	49.118	41.221	44.473	52.281	72.615	79.939	77.68	48.992	53.294	62.203	81.919	90.733	137.006	79.097	95.301	73.124	131.54	106.951	147.765	172.579	79.243	74.842	99.612	96.647	114.423	78.043		0.415664	82.773
8.3324	17.027	49.342	99.957	78.178	76.906	50.247	39.429	45.174	54.786	63.262	73.611	80.01	41.723	46.097	56.864	76.38	83.01	133.887	76.54	85.944	67.571	133.904	98.341	150.924	167.925	70.971	79.313	105.29	82.886	111.101	76.992		0.421687	79.7933
8.4515	19.822	46.308	96.669	70.89	85.1	50.912	42.416	49.776	51.486	66.29	69.948	74.417	37.497	40.344	51.979	78.535	79.459	136.956	87.927	78.858	59.87	115.863	98.614	152.214	160.804	76.446	75.066	101.528	75.27	120.181	72.975		0.427714	78.2071
8.5705	20.559	40.534	104.267	68.409	79.218	49.798	36.43	51.393	50.983	67.576	62.69	68.298	35.747	34.935	48.008	74.891	77.85	144.121	89.869	79.34	57.284	117.589	99.744	147.329	161.629	68.903	68.98	93.189	81.435	121.881	79.168		0.433736	76.8402
8.6895	19.876	39.078	112.466	67.936	74.21	48.742	35.205	53.675	58.29	55.719	63.453	51.6	37.447	34.439	44.592	69.088	85.275	133.406	84.701	82.323	54.666	114.28	91.896	120.659	158.554	66.755	64.188	95.728	80.724	117.497	68.413		0.439759	73.7058
8.8086	18.104	40.656	106.132	69.898	80.059	40.188	34.164	56.566	51.847	62.326	54.883	48.179	32.53	29.985	42.574	69.776	81.946	142.616	84.62	71.009	55.476	93.381	97.113	111.944	145.555	65.868	68.866	92.691	76.093	108.436	68.915		0.445786	71.045
8.9276	17.545	33.567	96.432	72.426	89.771	43.557	35.104	52.174	50.475	60.072	58.015	53.379	28.507	28.819	45.745	63.393	72.253	138.4	91.796	66.463	57.612	86.825	104.275	100.188	141.735	67.179	65.081	93.901	80.059	100.174	67.348		0.451808	69.7506
9.0466	17.603	33.004	101.735	63.986	87.545	44.593	32.52	55.993	55.409	67.014	66.08	48.789	24.242	27.388	47.392	68.116	77.234	117.647	90.562	69.787	50.535	86.901	91.439	90.714	141.877	63.628	68.664	104.521	77.899	93.349	77.737		0.457831	69.1582
9.1657	17.617	31.53	93.729	62.995	82.176	43.769	33.186	56.654	53.557	59.647	63.851	51.361	27.917	22.626	45.764	68.828	75.141	115.396	91.564	68.497	51.864	81.234	84.334	83.655	146.937	62.993	63.24	108.926	74.029	83.45	82.121		0.463858	67.3738
9.2847	16.483	25.586	87.075	62.169	89.22	48.981	30.753	51.3	52.582	63.938	58.228	47.99	27.546	21.105	44.864	59.555	78.263	115.415	81.65	63.607	47.039	80.05	74.706	91.463	134.452	70.342	55.395	99.812	74.084	82.018	82.998		0.469881	65.1184
9.4037	19.484	31.161	81.963	55.554	99.723	47.992	34.462	50.071	49.301	64.327	61.367	48.698	27.133	20.964	44.673	61.902	76.155	111.064	91.699	67.682	43.916	74.241	68.842	76.149	143.542	68.662	57.313	93.552	73.618	78.524	84.4		0.475903	64.7785
9.5228	21.461	29.474	83.556	59.988	96.412	50.759	33.486	54.113	48.461	57.282	60.174	46.961	23.826	20.726	40.919	59.447	74.166	96.84	88.456	65.038	48.364	74.667	63.939	71.419	142.234	68.227	58.539	99.831	71.7	77.754	84.624		0.48193	63.6401
9.6418	19.06	25.831	83.324	62.451	91.393	49.058	39.545	47.165	44.669	60.877	59.161	39.916	25.567	22.535	41.174	62.366	74.78	95.431	84.831	67.967	45.812	77.255	66.659	68.311	140.794	62.835	53.895	93.427	77.062	72.705	86.067		0.487953	62.6427
9.7608	17.449	28.641	86.324	57.343	89.832	48.321	39.032	52.053	40.963	60.539	56.461	43.24	26.142	21.04	50.615	58.543	72.288	87.168	83.864	64.031	54.632	73.142	69.196	60.187	146.205	62.64	59.438	82.891	73.966	71.323	78.469		0.493975	61.8057
9.8799	19.024	22.86	90.281	54.556	79.799	53.265	45.746	39.799	46.777	56.557	61.47	39.348	26.236	19.822	43.439	59.999	67.98	83.382	89.634	63.266	54.477	67.914	71.798	63.253	143.389	73.605	62.333	82.126	61.946	80.33	72.151		0.500003	61.1794
9.9989	16.51	24.207	94.933	54.547	74.92	58.383	42.748	38.667	46.355	48.37	58.543	38.595	23.187	19.657	42.336	57.941	70.262	85.844	83.927	64.553	51.953	71.677	69.965	69.847	139.953	69.95	58.091	75.311	56.179	69.716	78.077		0.506025	59.8453
10.1179	17.192	31.138	93.799	63.806	67.532	61.348	40.301	35.765	45.869	52.014	71.748	42.092	20.918	18.848	38.574	55.19	73.542	77.538	73.436	54.059	49.799	73.672	66.921	68.041	141.606	69.736	53.342	78.201	58.247	69.737	82.867		0.512047	59.5767
10.237	12.244	27.234	101.69	63.529	68.168	54.876	43.238	33.244	46.703	49.562	62.332	39.474	19.811	19.528	44.782	57.975	72.962	71.603	73.019	54.085	56.575	72.028	65.928	58.384	143.022	66.151	56.274	79.047	53.546	63.556	81.012		0.518075	58.4381
10.356	13.677	26.443	86.053	62.941	61.709	55.505	44.698	34.363	48.814	50.324	59.054	37.445	20.052	20.404	47.951	56.37	68.239	71.164	75.434	53.505	57.655	76.429	72.995	58.523	133.498	64.449	53.909	69.514	50.26	58.259	70.247		0.524097	56.7704
10.475	15.87	28.084	84.12	68.303	62.556	56.153	44.81	39.386	52.015	49.495	60.397	35.422	19.922	18.443	47.569	47.784	63.567	67.798	60.522	57.322	56.983	68.971	68.857	61.412	126.405	56.692	53.397	71.808	50.452	49.942	66.851		0.530119	55.2035
10.5941	15.548	25.891	74.299	66.558	65.555	52.313	45.554	38.851	55.413	49.845	62.193	39.343	18.956	16.561	44.007	41.755	60.254	70.415	57.364	61.556	54.824	67.772	61.254	62.978	133.661	65.041	54.81	63.765	51.313	48.188	69.618		0.536147	54.6921
10.7131	11.291	25.231	72.89	72.955	60.01	52.65	40.647	34.909	58.177	50.848	64.255	34.776	18.169	15.716	38.419	41.922	58.453	68.597	59.048	63.39	51.158	69.821	64.635	61.786	141.674	62.886	51.656	65.637	57.285	44.478	63.56		0.542169	54.0945
10.8321	8.429	34.063	76.667	61.347	50.068	50.005	42.949	38.66	56.618	50.453	69.709	36.482	19.273	20.723	38.913	38.546	60.43	60.635	58.328	59.942	61.894	72.958	59.409	63.733	133.516	53.766	59.152	72.986	51.419	46.287	63.379		0.548192	53.8948
10.9512	13.28	26.403	72.776	57.584	54.461	52.339	40.77	33.854	59.543	62.23	61.804	36.425	20.929	17.335	35.231	41.978	52.619	63.7	51.937	59.121	51.378	68.09	54.787	57.829	132.196	60.906	49.187	61.85	52.391	43.075	62.796		0.554219	51.8969
11.0702	15.536	26.391	65.642	63.953	60.762	48.115	41.964	38.555	57.73	59.314	65.922	35.192	16.643	16.434	37.216	43.263	53.471	64.132	46.928	49.395	59.586	63.389	60.848	61.061	147.794	61.808	47.275	60.476	47.006	42.037	59.816		0.560241	52.1824
11.1892	13.739	23.729	61.948	60.541	51.821	49.41	48.591	40.417	62.558	52.591	57.747	31.378	17.662	14.856	33.071	41.307	58.757	55.765	54.305	58.277	60.787	65.177	54.479	56.824	136.355	53.606	54.139	56.878	51.728	42.932	67.496		0.566264	51.2539
11.3083	15.817	26.141	78.116	66.689	45.109	49.152	55.141	46.158	63.68	51.978	62.6	28.715	18.132	14.539	39.531	42.834	52.495	54.38	48.4	58.472	63.238	56.481	55.066	54.749	102.112	56.691	52.36	61.949	52.565	45.151	76.148		0.572291	51.4384
11.4273	14.125	32.841	70.43	60.487	45.517	50.409	51.896	49.223	58.441	48.609	52.414	25.448	17.296	14.609	42.087	42.728	50.144	54.229	45.759	52.679	56.945	59.92	65.962	54.99	98.28	58.657	51.142	63.44	49.808	44.081	71.239		0.578313	50.1237
11.5463	14.314	32.098	59.051	56.246	46.048	46.255	48.244	52.066	61.697	46.794	48.153	32.412	17.449	14.215	32.541	46.322	51.418	50.723	43.847	54.675	56.679	64.934	56.147	59.006	90.735	57.282	49.57	57.96	52.022	39.532	65.238		0.584336	48.5056
11.6654	14.174	26.34	56.526	49.091	45.137	49.383	48.464	50.881	60.408	45.947	45.749	34.048	15.282	15.566	33.54	41.066	55.853	51.105	49.503	50.634	49.059	54.869	59.402	52.376	85.775	54.216	49.202	52.89	48.59	36.709	58.759		0.590363	46.4692
11.7844	15.588	26.606	54.471	43.38	53.171	52.242	49.765	53.437	53.534	48.852	46.318	31.278	14.107	14.072	33.477	46.481	58.009	46.788	42.338	62.888	50.137	52.836	60.557	48.54	76.365	46.326	54.294	56.863	49.841	39.748	54.984		0.596386	46.3643
11.9035	20.095	27.829	57.768	48.772	54.117	53.536	43.103	56.402	55.035	53.642	46.29	30.977	16.209	13.774	35.175	42.825	54.083	43.482	41.659	61.669	54.535	56.809	63.594	48.349	67.07	49.072	46.433	51.963	49.598	32.397	53.651		0.602413	46.1262
12.0225	16.256	24.821	53.532	53.959	44.464	46.927	43.42	53.289	52.566	49.908	42.371	29.331	13.809	16.805	34.947	46.101	48.413	40.453	43.766	70.746	49.683	54.972	61.624	49.308	61.661	48.376	45.352	53.111	46.104	26.137	53.505		0.608435	44.378
12.1415	16.777	26.112	54.558	51.237	45.365	52.511	38.959	58.699	52.109	45.763	47.662	31.044	15.727	11.451	30.377	42.432	43.03	36.11	35.052	60.294	47.712	57.847	60.558	49.522	57.598	50.164	46.985	45.702	44.908	29.399	52.863		0.614458	43.1783
12.2606	16.827	24.482	55.851	49.706	52.356	41.681	38.791	54.646	55.336	48.513	52.473	31.906	13.912	12.581	31.244	45.85	39.109	35.589	36.443	59.964	46.651	56.706	59.11	43.226	55.381	49.143	49.604	51.794	37.014	30.441	53.581		0.620485	42.9004
12.3796	19.723	22.766	57.376	54.871	51.709	46.541	41.248	64.962	52.858	41.348	46.693	29.43	12.009	13.945	30.049	47.806	41.383	33.61	38.514	60.412	46.812	52.677	65.749	43.514	62.105	48.183	53.633	49.599	41.789	30.807	55.077		0.626507	43.7806
12.4986	17.768	20.124	60.05	57.245	53.78	45.895	44.026	51.343	48.25	44.399	44.263	27.629	11.418	13.751	31.297	47.611	34.874	36.137	36.36	63.649	47.155	50.948	64.873	51.408	61.412	48.188	51.373	46.182	48.603	34.224	55.681		0.63253	43.5457
12.6177	17.445	21.722	61.574	53.852	51.151	42.431	44.459	49.582	49.398	41.192	47.884	25.461	14.706	15.547	30.738	41.687	32.363	32.952	38.693	57.021	44.74	46.27	71.181	50.608	54.824	53.578	47.894	49.312	47.442	29.739	61.567		0.638557	42.8069
12.7367	23.355	21.102	60.196	52.009	45.353	42.877	41.896	46.854	47.182	32.71	50.229	20.638	12.62	15.019	29.798	39.071	41.874	33.416	36.989	56.695	46.572	48.434	68.388	46.532	60.381	53.654	47.401	51.588	48.891	29.139	57.65		0.64458	42.2101
12.8557	25.686	24.35	56.795	52.879	48.842	37.502	42.444	52.403	53.734	32.812	49.603	19.484	16.832	11.882	34.864	39.417	35.534	32.802	40.717	52.685	48.031	49.261	63.035	52.589	63.163	61.005	53.119	48.599	48.161	30.243	50.817		0.650602	42.8803
12.9748	23.611	24.151	54.708	56.816	47.464	42.788	39.468	47.054	45.981	34.7	42.489	23.863	16.534	13.356	29.536	43.008	37.637	30.189	40.823	52.314	46.937	48.015	60.038	49.432	56.95	52.638	51.775	48.618	49.837	31.761	51.043		0.656629	41.7269
13.0938	25.833	24.289	55.339	59.577	47.854	45.882	36.691	39.924	44.522	36.832	45.653	24.471	13.681	15.206	27.619	51.069	38.786	30.765	40.917	59.221	42.205	51.333	57.773	50.404	63.607	52.577	49.233	49.625	43.112	34.855	53.173		0.662652	42.3235
13.2128	22.817	23.804	58.331	56.533	46.73	42.649	46.122	44.604	54.139	39.471	43.76	24.704	16.681	14.726	29.535	42.104	35.005	26.704	35.919	52.157	45.966	51.388	55.525	52.336	69.279	55.839	51.353	49.809	51.125	30.37	49.935		0.668674	42.5619
13.3319	24.58	22.437	54.717	55.12	52.206	45.342	40.517	50.438	55.324	46.178	48.243	27.671	17.062	15.437	31.822	44.487	33.765	27.528	35.528	58.337	43.728	58.753	49.597	45.466	65.196	55.035	47.923	51.167	50.514	27.331	44.811		0.674702	42.7826
13.4509	24.554	22.315	60.571	54.664	46.641	46.856	44.322	49.531	53.818	42.256	47.049	23.396	12.955	15.984	33.751	39.988	31.643	27.932	31.377	57.045	43.357	56.754	51.437	41.804	64.768	46.1	47.243	51.081	46.863	23.748	49.146		0.680724	41.579
13.5699	25.372	25.839	52.862	50.388	45.429	46.44	42.416	54.938	51.739	41.658	36.804	27.473	13.879	11.111	25.879	38.798	34.581	25.007	31.518	59.422	43.673	54.001	41.438	43.443	65.801	41.562	51.888	45.023	53.378	23.458	51.887		0.686746	40.5518
13.689	20.945	26.644	51.808	56.68	41.05	49.226	45.802	49.783	49.223	42.681	39.172	25.642	16.953	12.895	30.545	40.505	38.659	21.168	33.411	55.295	44.476	61.829	45.243	40.812	72.26	42.943	51.949	47.875	46.997	28.29	47.491		0.692774	41.2339
13.808	22.45	30.587	49.364	54.827	42.554	42.338	40.709	48.479	47.852	37.314	53.387	23.079	12.616	12.439	28.985	44.76	38.346	21.781	30.843	57.154	52.822	56.079	38.583	36.985	77.106	39.421	54.621	53.488	55.552	24.287	47.152		0.698796	41.16
13.927	25.847	26.355	42.785	55.822	42.478	45.822	41.341	44.65	43.051	42.247	49.131	30.796	19.113	14.905	32.759	47.475	38.804	20.046	32.166	48.49	45.931	49.389	43.642	42.018	80.288	45.307	53.553	54.355	51.246	27.45	47.797		0.704818	41.4535
14.0461	28.31	24.347	45.938	58.677	46.429	46.347	46.925	46.591	40.157	43.206	43.935	30.4	15.611	16.845	32.456	53.238	38.56	22.57	25.632	41.347	44.846	57.999	34.989	43.499	82.339	44.6	52.309	46.26	51.547	33	45.033		0.710846	41.4175
14.1651	23.235	28.57	42.438	60.648	46.254	46.672	43.575	41.824	43.919	38.135	45.019	27.52	17.661	15.056	40.726	47.342	48.017	27.197	23.894	50.461	46.557	46.605	44.315	43.655	77.483	45.981	51.091	49.27	60.815	26.964	43.728		0.716868	41.7622
14.2841	24.6	24.582	39.222	53.853	46.382	39.706	46.857	38.086	47.841	39.997	44.99	28.988	18.372	15.332	38.563	44.077	40.229	24.078	29.353	51.429	45.309	49.8	42.761	45.767	69.534	43.333	56.448	47.702	50.545	26.171	45.293		0.722891	40.6194
14.4032	22.7	28.525	40.125	60.595	38.561	39.539	46.607	39.371	49.727	40.12	44.453	26.356	17.252	14.896	39.433	46.52	35.398	21.835	25.171	51.631	49.431	52.154	37.453	43.74	54.958	42.616	57.932	38.094	44.899	30.959	47.68		0.728918	39.6365
14.5222	21.606	29.257	42.548	58.552	42.936	46.268	40.579	44.743	45.799	40.971	46.083	26.441	17.066	16.169	41.967	47.455	37.083	25.246	26.295	58.07	53.2	53.534	42.144	45.035	53.446	39.196	54.164	42.853	49.631	28.423	49.311		0.73494	40.841
14.6412	23.572	31.259	45.119	61.992	41.699	47.347	40.95	44.625	51.378	44.545	47.826	33.652	16.462	16.151	48.417	41.632	36.155	21.438	29.082	54.57	54.892	46.949	44.316	42.655	57.158	43.031	51.227	39.654	50.283	30.217	42.839		0.740963	41.3255
14.7603	23.611	34.134	48.382	63.261	47.427	46.832	42.978	42.609	51.081	40.383	51.911	29.216	20.009	15.897	45.317	44.578	35.117	22.333	28.579	47.479	54.507	45.338	38.835	42.26	58.035	39.215	60.58	35.964	51.785	31.649	40.73		0.74699	41.2914
14.8793	20.927	32.037	50.086	57.795	51.272	47.376	49.232	50.664	42.733	40.911	49.322	30.426	16.678	14.909	47.054	41.787	34.07	20.456	29.564	46.117	53.65	42.869	41.125	45.701	43.479	36.101	59.993	43.448	46.516	30.399	38.314		0.753012	40.4842
14.9984	23.002	38.767	50.213	62.502	48.898	48.355	45.823	44.729	41.079	44.516	51.699	35.448	16.009	21.305	61.48	46.801	31.74	21.093	32.51	47.828	58.999	49.035	41.077	38.551	42.167	40.919	56.187	40.968	45.523	33.391	42.899		0.75904	42.0488
15.1174	23.866	30.786	50.714	57.922	47.524	42.39	40.019	47.777	49.309	40.373	45.167	35.796	15.995	15.143	56.194	44.991	33.872	19.574	34.794	53.906	51.659	48.062	37.82	46.82	44.965	43.528	50.914	47.204	47.019	33.444	43.426		0.765062	41.3217
15.2364	25.478	37.17	46.189	51.253	48.512	55.428	39.036	44.318	50.849	48.306	39.442	37.742	22.943	18.463	56.535	41.605	28.944	21.036	30.928	46.713	48.643	52.871	39.151	43.91	50.651	34.439	46.179	52.288	42.748	31.031	40.887		0.771085	41.0867
15.3555	24.472	36.533	56.147	49.348	47.158	49.514	38.84	46.128	47.913	48.861	40.047	33.693	19.785	22.882	61.658	43.535	31.623	22.466	33.592	50.284	53.539	49.338	45.153	46.223	50.066	40.324	47.051	48.451	45.883	33.179	37.787		0.777112	41.983
15.4745	23.525	36.809	53.954	51.185	47.567	50.994	37.479	42.378	44.02	38.791	41.841	33.371	18.696	20.94	64.388	43.486	30.967	19.612	33.196	53.444	47.815	49.482	42.54	49.972	48.492	47.686	52.163	53.108	56.778	28.877	38.134		0.783134	41.99
15.5935	27.309	35.12	53.602	50.945	44.742	47.359	36.587	40.448	44.088	43.366	45.513	33.426	19.41	20.678	56.916	42.262	29.325	20.464	32.827	54.335	48.331	52.229	50.173	54.976	48.837	43.104	47.542	47.743	44.57	32.841	37.749		0.789157	41.5102
15.7126	27.667	35.143	49.554	43.003	35.692	41.714	37.716	38.631	42.172	42.331	40.522	29.911	16.335	23.26	60.675	47.505	28.677	24.45	35.374	49.626	44.444	49.206	57.594	49.449	44.5	41.286	45.45	50.858	43.505	32.537	35.52		0.795184	40.1389
15.8316	23.147	33.745	48.752	45.046	36.122	40.924	40.65	38.676	43.213	42.422	37.527	35.097	17.392	17.692	56.321	49.011	31.264	21.681	35.844	52.527	44.735	41.633	49.799	56.404	50.676	40.32	43.317	57.475	52.804	33.952	35.607		0.801206	40.4444
15.9506	26.527	38.158	52.547	52.026	43.152	40.381	37.143	37.32	40.532	43.612	39.85	32.91	19.125	18.539	55.806	49.566	37.692	18.742	25.453	57.006	38.706	48.01	41.469	52.899	55.27	43.784	42.497	52.468	53.683	31.102	34.696		0.807229	40.6668
16.0697	33.116	41.958	52.309	44.465	37.601	39.812	32.623	36.652	39.227	36.061	40.565	32.483	21.462	22.806	55.206	46.377	34.642	22.793	24.751	50.081	52.092	54.144	47.436	48.118	45.049	43.426	45.955	43.14	49.85	30.293	28.847		0.813256	39.7852
16.1887	28.461	45.269	52.121	48.05	37.8	33.911	29.197	37.382	40.128	36.743	41.771	32.69	22.052	21.278	52.433	48.045	33.482	25.537	26.628	54.912	44.33	55.588	45.008	48.343	52.04	40.779	45.467	47.768	50.696	31.081	34.802		0.819279	40.1223
16.3077	28.375	39.856	52.523	52.539	39.783	29.152	30.484	32.106	39.893	38.244	48.697	34.243	24.398	17.273	47.693	38.47	36.759	28.462	29.311	53.47	45.814	47.116	47.24	46.56	44.86	38.798	43.811	42.569	45.768	33.002	36.419		0.825301	39.1512
16.4268	30.787	39.386	49.444	53.849	41.233	29.914	27.67	30.387	33.085	34.353	49.023	36.251	18.778	19.907	48.683	39.739	41.509	34.175	37.864	52.132	43.489	51.871	40.714	46.231	52.196	41.464	41.038	45.605	51.721	36.939	30.736		0.831328	39.683
16.5458	34.105	45.216	47.987	51.46	35.632	29.546	23.729	24.018	36.085	35.248	52.075	40.579	22.079	19.206	45.893	36.924	38.772	31.077	32.822	47.867	47.15	49.865	39.82	44.841	44.471	43.732	45.387	42.201	49.777	32.028	37.273		0.837351	38.9311
16.6648	35.604	47.31	53.162	54.12	35.005	22.894	22.568	21.001	37.568	34.349	43.955	45.477	23.311	23.535	45.145	41.559	49.203	31.712	33.771	43.163	43.164	45.637	37.623	45.862	47.588	38.019	45.321	41.943	46.026	33.672	36.801		0.843373	38.9054
16.7839	35.056	48.337	51.258	45.316	35.774	17.751	19.272	20.222	29.927	34.815	41.08	48.37	20.83	23.917	45.135	38.82	49.966	29.948	34.273	50.818	41.352	45.897	39.792	51.253	42.859	40.972	38.9	43.187	49.831	32.958	29.776		0.849401	37.9891
16.9029	40.919	43.595	50.523	40.739	26.785	16.708	14.363	16.291	30.169	32.868	43.734	52.69	19.7	25.289	44.322	40.218	47.374	29.05	34.822	49.614	49.253	42.51	40.649	47.149	47.243	40.543	46.707	44.349	45.685	34.064	31.359		0.855423	37.7188
17.0219	41.778	43.533	53.347	45.704	30.946	10.553	12.265	13.544	29.014	31.699	38.108	51.385	21.985	23.295	42.107	36.715	47.565	26.43	34.107	45.665	45.689	41.285	41.131	51.284	51.842	38.397	42.809	41.204	46.78	34.066	34.19		0.861445	37.0459
17.141	40.414	40.446	42.307	38.489	22.656	10.428	10.827	12.389	27.534	31.847	39.144	44.408	24.637	21.818	52.372	37.73	42.307	26.895	36.916	49.771	48.981	41.558	57.576	52.93	50.062	38.325	38.24	46.98	47.653	30.721	35.753		0.867473	36.8424
17.26	44.093	42.994	41.29	31.811	19.363	7.784	11.66	8.97	21.152	33.454	47.691	52.78	24.433	22.862	49.16	37.181	42.824	30.953	35.58	49.075	50.732	46.693	53.371	61.17	46.761	38.788	41.312	43.546	43.976	29.171	38.814		0.873495	37.0788
17.379	44.903	46.829	42.337	31.667	16.76	6.883	7.03	6.073	19.706	31.494	55.484	51.743	21.629	23.962	48.67	36.732	51.269	27.709	36.386	49.349	44.863	42.77	52.488	61.447	41.232	39.73	37.648	42.094	40.412	32.542	38.169		0.879517	36.4519
17.4981	44.402	38.108	41.123	32.211	14.353	5.07	3.45	5.981	16.563	31.207	44.977	53.155	23.947	30.275	50.678	32.757	52.777	27.414	34.532	47.442	34.633	40.223	59.284	49.925	50.963	38.114	32.286	32.928	40.596	26.332	36.932		0.885545	34.6012
17.6171	43.616	41.103	49.236	22.429	10.65	6.499	4.152	3.268	11.2	31.706	43.869	53.61	28.66	28.011	47.562	38.107	46.162	27.158	32.047	44.053	43.392	37.879	59.674	49.115	45.684	31.997	34.413	28.474	39.793	34.496	36.557		0.891567	34.0185
17.7361	37.225	39.62	39.447	16.756	6.619	4.258	4.272	4.605	7.931	24.768	40.046	47.475	37.279	27.296	50.898	35.715	48.56	27.213	31.91	46.832	49.331	35.973	59.915	42.902	43.584	34.961	35.805	34.919	46.248	39.518	36.939		0.89759	33.5103
17.8552	36.859	42.445	36.244	13.283	7.06	4.93	3.289	5.204	5.699	22.633	39.416	42.981	34.484	35.393	48.713	36.904	53.842	27.861	35.313	43.286	43.637	35.679	56.942	42.477	47.912	30.83	37.453	37.6	52.75	35.032	39.543		0.903617	33.4095
17.9742	40.181	36.04	36.212	9.032	5.352	5.59	3.313	4.114	5.563	19.486	39.855	35.916	39.826	33.79	48.622	38.242	49.245	25.008	32.822	45.937	44.325	41.518	57.917	42.063	46.647	30.646	42.352	35.129	45.563	39.566	39.119		0.909639	32.8707
18.0932	42.156	32.139	35.769	7.043	5.545	3.062	5.284	3.215	7.668	14.125	40.48	38.639	40.926	26.611	48.043	38.521	44.966	31.406	31.431	49.884	42.002	39.932	50.538	40.717	47.92	34.12	43.137	32.679	45.146	35.37	48.055		0.915662	32.4687
18.2123	36.181	36.026	27.118	4.767	5.72	2.985	2.3	3.05	3.144	12.786	38.077	41.627	45.202	31.648	48.373	44.68	53.992	28.395	34.455	44.315	47.05	42.53	55.077	41.405	46.32	38.098	38.714	38.453	46.499	34.895	44.276		0.921689	32.8438
18.3313	36.965	36.562	28.957	5.179	5.492	2.746	3.684	3.23	4.274	13.345	40.338	40.254	40.782	38.242	42.237	45.474	49.402	31.203	37.28	45.543	47.442	39.984	50.269	39.757	40.842	35.967	34.012	34.478	38.142	34.941	48.212		0.927711	32.1044
18.4504	37.757	41.768	23.936	4.922	3.884	3.91	2.934	2.07	4.277	9.373	40.054	44.213	33.982	32.215	42.424	41.745	44.438	31.826	31.88	46.69	43.019	31.79	49.438	39.824	44.378	35.649	37.511	34.345	37.735	37.35	55.454		0.933739	31.3158
18.5694	36.844	29.518	16.952	4.325	4.235	3.726	2.486	3.353	2.625	6.484	33.791	30.397	38.839	35.239	41.6	38.324	47.069	31.071	34.027	42.073	39.623	34.591	47.148	38.624	45.655	32.658	33.12	28.147	40.909	40.064	53.708		0.939761	29.5879
18.6884	33.298	22.838	13.262	3.059	4.177	3.327	2.735	2.569	2.137	6.625	32.999	31.434	45.789	32.914	37.541	36.084	38.497	39.454	36.913	42.029	37.956	32.004	48.663	47.208	44.309	29.385	35.108	38.738	44.836	46.7	40.682		0.945784	29.4603
18.8075	24.39	26.823	8.329	1.92	2.772	3.719	3.062	2.447	2.843	9.215	35.022	33.049	37.443	31.512	32.97	40.544	35.488	40.015	39.349	40.234	33.323	37.109	46.209	41.746	48.027	27.806	28.728	36.778	35.61	33.329	40.443		0.951811	27.7501
18.9265	20.056	16.913	7.187	4.167	2.756	2.314	2.305	3.628	3.562	5.14	27.399	30.022	39.385	33.138	31.635	38.216	37.818	46.299	36.069	36.133	31.595	30.948	39.37	36.378	50.648	27.039	29.259	37.71	40.061	39.909	38.928		0.957833	26.6447
19.0455	13.394	17.068	6.489	2.607	3.396	2.959	1.347	3.003	3.225	4.783	25.173	31.788	38.908	34.417	36.956	38.855	34.432	45.232	35.335	36.489	32.586	28.475	37.601	39.56	47.755	26.428	29.96	37.77	35.873	37.226	42.302		0.963856	26.1739
19.1646	13.997	11.172	3.463	3.223	3.768	3.675	1.979	4.81	2.928	3.794	17.842	32.223	35.478	37.133	32.536	30.664	30.982	40.938	32.77	35.796	29.982	33.286	36.597	40.684	36.444	23.083	26.431	38.829	37.457	35.905	46.36		0.969883	24.6525
19.2836	5.956	5.494	4.238	3.122	2.84	3.158	3.074	2.649	5.527	3.756	19.648	30.691	38.827	37.347	31.62	30.163	32.504	34.121	32.403	23.284	26.974	29.774	31.75	38.756	36.863	17.67	20.271	30.696	33.665	35.871	41.366		0.975906	22.3896
19.4026	6.744	4.497	2.846	1.688	3.652	2.388	2.773	2.38	4.24	2.724	16.017	30.873	32.369	39.62	35.713	35.169	29.68	28.631	25.212	22.818	19.141	25.487	30.885	34.354	38.94	16.413	21.707	23.914	32.207	39.774	42.266		0.981928	21.133
19.5217	4.813	4.73	2.6	2.881	3.766	3.285	1.385	2.299	4.029	2.354	15.43	30.342	33.799	36.22	34.457	25.507	29.854	28.872	25.466	24.486	21.794	22.315	22.837	30.857	34.673	10.119	17.803	24.321	26.651	36.266	38.188		0.987955	19.4322
19.6407	5.372	5.255	2.827	1.544	3.258	2.746	2.262	3.983	3.936	2.574	9.804	21.211	33.952	29.664	36.728	26.153	24.737	24.034	21.079	18.159	16.544	23.002	22.066	22.889	31.85	12.465	15.571	28.849	24.403	33.798	33.008		0.993978	17.5395
19.7597	3.586	4.278	3.347	1.296	3.16	1.753	2.433	2.225	1.85	1.403	8.328	20.103	30.651	30.233	37.546	24.07	22.116	26.285	22.658	15.452	14.995	17.974	18.997	23.573	24.675	12.44	12.304	26.092	24.433	31.578	32.914		1	16.2177

## Sheet: Image43
X0	Y0	Y1	Y2	Y3	Y4	Y5	Y6	Y7	Y8	Y9	Y10	Y11	Y12	Y13	Y14	Y15	Y16	Y17	Y18	Y19	Y20	Y21	Y22	Y23	Y24	Y25	Y26	Y27	Y28	Y29	Y30	Y31		Ap-Basal	Avg intensity
0	84.353	59.77	59.958	65.713	44.92	42.251	27.785	40.172	61.672	33.902	36.665	44.118	62.979	54.471	72.53	53.876	60.409	63.727	45.818	40.577	61.266	77.245	48.015	58.423	48.738	37.159	43.421	32.793	31.275	37.572	35.139	49.958		0	50.5209
0.119	90.232	73.574	75.618	76.432	48.239	50.64	35.413	53.988	71.689	39.583	48.481	50.784	64.175	60.158	77.709	73.762	75.58	76.208	59.564	52.828	64.426	85.393	49.842	64.783	55.82	48.882	50.435	39.107	29.165	37.574	35.827	56.275		0.00568016	58.5058
0.2381	114.079	88.597	90.195	93.187	57.795	64.371	38.643	55.945	70.62	42.043	53.077	59.622	81.919	70.999	89.813	85.315	76.375	82.784	55.77	51.061	63.351	80.253	57.512	76.219	63.419	57.775	55.067	42.042	30.23	42.98	45.562	63.468		0.0113651	65.6278
0.3571	121.58	112.917	123.075	130.334	75.043	82.069	50.407	69.618	81.306	45.049	53.533	68.723	81.924	73.95	107.655	86.413	84.37	94.087	57.158	58.084	69.126	95.386	56.54	91.892	78.817	77.418	57.952	44.206	37.117	51.995	43.149	70.848		0.0170453	75.9919
0.4761	143.147	154.576	158.403	163.687	87.794	93.562	63.458	70.796	80.337	51.986	57.558	86.775	100.705	96.412	101.561	104.938	94.232	102.578	59.577	52.339	80.835	106.777	68.21	99.623	81.888	75.428	74.623	51.551	37.223	53.76	50.71	85.211		0.0227254	87.1956
0.5952	170.425	182.773	205.263	188.385	105.28	121.928	64.041	76.319	108.781	58.152	73.421	96.611	125.906	98.493	117.173	113.019	92.945	109.81	66.584	61.624	86.924	118.364	74.841	120.771	89.686	92.101	74.141	55.176	41.87	63.31	61.781	98.665		0.0284104	100.455
0.7142	190.051	221.692	216.48	202.49	133.463	154.494	78.102	108.062	119.905	76.132	83.398	134.933	129.454	117.568	135.69	135.033	109.585	121.198	70.029	75.111	108.429	133.262	86.653	139.609	108.781	115.134	98.431	69.519	50.767	75.234	66.547	120.646		0.0340905	118.309
0.8332	201.062	238.07	230.438	210.484	154.813	166.566	99.338	126.591	128.31	80.632	97.061	178.446	153.481	133.898	145.369	149.185	116.75	128.908	78.985	91.976	108.841	154.255	92.59	168.656	120.057	126.419	112.562	90.106	62.71	89.401	80.127	142.966		0.0397707	133.095
0.9523	205.18	241.2	238.677	217.69	153.134	183.054	112.108	133.447	122.269	83.722	126.427	215.909	178.447	145.513	160.715	172.177	126.101	152.902	87.236	105.487	125.16	156.301	110.929	181.891	136.652	145.946	146.965	99.08	79.464	97.123	80.758	175.876		0.0454556	146.798
1.0713	205.348	242.212	239.668	221.811	164.986	186.546	136.317	147.917	130.594	96.136	149.908	243.1	201.413	179.15	174.255	187.39	155.824	181.811	102.996	121.109	135.648	178.178	129.371	193.292	179.253	173.675	166.191	124.381	95.766	121.521	98.978	185.025		0.0511358	164.055
1.1903	206.579	229.069	230.634	218.733	180.18	194.594	152.602	151.193	153.586	107.513	173.613	245.793	225.404	200.528	195.855	205.575	165.678	190.144	112.888	121.618	137.55	206.003	165.192	199.938	200.652	201.897	189.785	146.972	126.353	151.326	114.952	202.328		0.056816	178.273
1.3094	207.214	232.286	228.442	218.041	187.392	212.752	154.526	173.225	156.491	134.154	197.236	252.157	228.845	213.07	212.869	223.519	188.862	214.556	133.084	151.016	157.659	224.615	171.114	188.74	220.38	217.751	205.59	170.358	154.031	174.839	135.735	218.384		0.0625009	192.467
1.4284	209.352	239.302	230.291	231.419	194.139	205.841	174.446	185.857	161.704	138.167	214.17	250.798	231.916	228.547	220.062	237.255	211.487	230.723	147.53	163.628	177.748	232.344	183.895	204.004	229.765	228.613	205.665	181.681	171.441	184.534	175.106	227.366		0.0681811	203.4
1.5474	207.189	227.881	237.022	222.732	207.856	210.665	198.888	193.864	175.584	148.492	216.22	249.653	236.04	216.513	225.552	240.831	223.055	240.731	162.863	177.807	201.559	221.661	184.803	204.356	229.34	231.711	216.692	191.44	185.185	204.231	201.417	227.709		0.0738612	209.986
1.6665	193.695	224.297	232.461	220.176	206.296	210.839	200.49	200.283	179.161	158.116	215.251	245.149	232.569	226.599	226.987	247.077	239.11	239.651	171.44	201.249	215.479	226.189	176.208	192.19	231.552	230.973	195.708	185.211	183.555	204.639	213.892	226.878		0.0795462	211.043
1.7855	200.629	229.002	235.27	221.07	208.96	209.505	193.962	196.844	180.223	159.913	210.324	244.245	231.806	237.085	230.624	248.714	243.951	239.08	191.754	209.031	221.742	217.403	173.425	192.281	221.804	224.251	168.288	193.175	197.168	204.531	217.147	224.942		0.0852263	211.817
1.9046	192.552	225.559	237.585	218.748	200.274	215.015	199.643	202.819	179.798	156.045	198.915	241.477	227.865	235.054	230.069	251.807	244.077	224.413	208.739	210.426	220.534	204.369	159.781	190.255	222.484	218.41	154.533	181.521	197.229	201.951	213.889	228.126		0.0909113	209.186
2.0236	184.733	223.277	236.391	225.242	191.547	219.403	198.183	216.174	184.701	164.162	190.482	243.547	222.066	236.408	226.507	247.547	247.144	208.175	207.021	194.459	215.854	191.1	163.997	183.783	213.397	205.201	141.77	171.798	185.75	190.783	219.76	216.36		0.0965914	205.21
2.1426	183.049	210.864	239.416	224.027	184.377	220.381	197.776	209.307	186.637	153.846	173.417	240.215	221.269	234.624	222.543	238.914	242.524	206.988	218.506	197.13	212.772	180.626	144.621	176.708	220.452	185.165	133.914	158.621	181.486	173.734	214.285	213.135		0.102272	200.042
2.2617	166.808	210.097	236.387	217.3	181.694	219.444	205.004	204.614	192.464	159.064	157.624	233.941	223.904	224.275	216.259	236.964	237.684	199.69	205.208	187.13	205.148	180.989	125.526	165.433	219.482	164.416	122.6	161.388	182.792	170.55	208.999	214.698		0.107957	194.924
2.3807	168.92	196.189	231.095	216.824	180.115	223.459	199.835	215.387	200.91	162.465	163.574	224.451	216.025	215.423	207.141	224.445	232.294	184.092	193.012	179.381	201.925	167.577	125.459	145.293	216.536	150.155	107.598	166.177	167.422	158.581	190.343	191.699		0.113637	188.244
2.4997	182.791	198.726	233.912	207.549	185.843	226.375	209.65	211.672	196.843	158.297	155.259	219.318	208.78	211.37	201.352	233.685	233.092	186.92	196.272	172.019	197.81	163.717	112.328	126.989	208.04	140.93	104.383	181.002	175.855	157.138	197.362	201.775		0.119317	187.408
2.6188	162.426	201	232.078	198.059	173.669	224.586	208.863	213.728	204.005	154.742	155.068	199.798	202.704	197.389	196.276	211.788	232.528	160.564	195.363	178.692	177.194	155.993	113.259	125.535	196.213	124.022	98.505	171.408	173.39	146.52	190.352	189.64		0.125002	180.167
2.7378	160.438	202.676	225.28	191.522	160.586	216.954	218.531	213.532	197.026	150.535	145.078	178.851	202.563	198.64	193.807	195.725	231.234	156.779	180.995	191.678	182.694	163.747	123.222	115.525	199.171	111.658	95.067	164.479	164.241	128.892	173.953	185.511		0.130682	175.643
2.8568	146.914	195.986	216.69	189.651	147.24	212.672	212.3	215.009	197.149	161.621	142.526	164.33	210.24	202.373	176.7	180.301	211.013	151.138	177.131	200.807	183.096	161.646	117.807	111.262	200.25	103.087	94.149	156.256	154.026	118.583	162.637	187.169		0.136362	170.68
2.9759	152.036	202.008	220.173	190.528	144.35	203.654	215.068	209.785	195.732	156.613	120.701	136.35	193.761	187.384	178.067	164.774	209.302	146.55	159.022	207.974	166.016	150.083	116.025	116.726	190.372	102.577	97.946	147.293	141.338	114.426	153.31	184.417		0.142047	164.824
3.0949	143.836	205.742	211.614	172.235	150.645	198.205	212.402	216.668	177.431	164.844	127.228	109.507	187.416	187.075	161.288	163.783	194.954	135.15	158.309	202.293	169.461	155.45	116.876	109.47	173.07	89.489	101.89	136.887	145.686	88.75	137.928	181.109		0.147727	158.959
3.2139	140.987	203.842	202.459	176.935	155.377	174.823	210.33	207.87	171.457	167.606	117.111	114.438	171.587	185.953	175.617	152.145	178.894	143.428	173.788	196.223	178.849	167.72	120.125	107.751	173.105	92.202	113.789	139.509	142.877	66.969	105.903	172.249		0.153407	156.31
3.333	137.612	212.842	193.725	181.972	152.642	167.098	193.976	208.18	154.61	159.927	119.792	105.519	163.937	176.041	163.125	144.518	177.987	130.184	170.918	197.422	179.332	165.116	125.379	100.759	163.329	101.368	109.518	133.073	135.482	72.26	88.026	165.512		0.159092	151.599
3.452	138.813	209.26	176.999	174.975	141.264	162.683	189.917	213.812	156.463	166.666	117.225	102.833	161.462	184.814	167.809	151.878	175.603	123.384	173.697	190.851	174.77	161.262	105.826	101.361	158.826	103.104	124.716	125.624	150.253	71.686	76.95	145.567		0.164772	149.386
3.571	146.383	208.125	163.818	169.32	128.992	166.863	177.315	215.346	160.008	143.496	103.677	82.493	174.305	172.506	162.475	133.327	162.25	127.528	174.725	187.906	166.718	158.167	98.742	105.405	151.379	99.416	118.442	133.731	143.843	68.56	74.98	125.102		0.170453	143.917
3.6901	144.082	201.352	147.015	150.052	136.376	164.534	162.925	221.027	149.117	129.842	97.671	99.455	167.129	178.675	171.9	134.161	150.224	120.34	183.507	181.305	169.045	154.334	104.654	107.919	134.441	102.357	136.397	127.184	146.726	65.513	69.515	113.966		0.176138	141.336
3.8091	150.1	203.42	124.848	155.204	135.225	148.443	148.138	213.26	134.793	109.578	96.372	100.083	143.549	175.185	159.378	120.117	136.343	126.491	189.593	165.974	162.61	137.108	110.483	105.669	136.914	101.279	143.669	142.439	146.236	61.967	67.383	108.531		0.181818	136.262
3.9281	157.532	193.386	113.427	151.266	142.847	131.382	133.45	205.38	128.919	100.163	109	100.683	142.186	171.745	161.626	120.496	137.468	117.862	168.629	146.704	150.609	125.585	98.599	115.556	131.502	97.436	153.355	135.142	137.98	70.911	63.992	116.246		0.187498	132.221
4.0472	167.1	175.397	106.712	147.864	140.967	110.015	133.978	188.072	126.126	85.449	112.326	93.786	126.523	184.158	150.895	96.055	137.536	125.46	171.209	142.687	151.539	129.547	87.112	137.194	131.916	102.438	167.748	145.265	134.226	58.247	61.618	106.718		0.193183	129.246
4.1662	151.092	185.994	102.012	133.288	137.75	88.132	131.968	168.562	109.753	83.134	129.853	89.787	118.697	178.064	159.102	95.593	148.248	129.02	160.609	136.902	143.526	115.452	92.094	127.76	123.218	107.149	153.279	134.645	133.199	63.404	53.077	98.383		0.198863	124.461
4.2852	149.599	197.717	86.615	125.665	139.437	74.167	125.041	165.681	107.468	83.74	137.243	87.371	113.254	159.165	156.069	90.541	157.44	132.286	156.497	135.536	143.906	109.233	84.301	137.9	124.58	101.504	166.013	134.494	111.932	66.159	51.82	105.083		0.204543	122.421
4.4043	153.815	190.02	82.249	123.466	136.263	79.552	123.971	146.918	112.573	71.529	131.389	89.978	102.365	172.746	150.619	92.146	157.412	138.836	159.916	139.051	147.737	106.521	94.645	121.149	124.669	94.296	159.099	135.278	109.921	55.263	51.749	101.41		0.210228	120.517
4.5233	137.784	177.077	76.834	115.224	122.511	72.422	112.995	140.698	105.997	71.462	124.088	78.943	104.942	167.18	134.66	85.161	146.676	145.08	149.1	128.712	149.505	111.355	84.706	112.998	125.468	101.31	155.278	120.731	130.113	61.616	46.776	109.174		0.215908	115.83
4.6423	141.422	173.181	85.282	119.04	114.492	75.493	106.502	120.532	105.832	79.389	121.817	82.221	105.681	155.782	125.937	86.377	131.469	138.24	137.179	125.175	149.179	111.247	94.154	121.436	114.398	104.339	165.276	108.62	120.252	64.327	50.317	92.392		0.221588	113.343
4.7614	123.086	180.9	81.143	127.973	117.018	71.769	106.822	107.176	103.587	76.908	113.747	83.931	104.708	141.629	127.775	85.853	128.807	139.799	117.151	126.211	145.729	96.867	104.534	121.629	116.842	99.84	151.959	101.403	118.537	56.461	50.969	98.526		0.227273	110.29
4.8804	110.681	187.561	78.279	109.863	108.56	64.423	109.511	98.099	104.427	83.84	120.26	77.953	93.746	122.729	128.406	90.369	131.014	130.293	108.533	118.396	139.175	95.589	99.726	107.453	109.789	99.655	147.575	108.723	114.881	60.585	55.103	87.168		0.232954	106.324
4.9995	107.448	190.599	75.514	114.309	125.711	58.211	93.055	83.561	91.787	90.241	114.65	72.256	91.107	101.989	120.741	103.777	125.619	136.974	111.949	115.841	134.398	89.741	104.466	108.376	101.484	98.836	137.778	102.274	106.421	57.735	48.792	90.968		0.238638	103.331
5.1185	94.228	169.838	75.464	112.98	127.853	61.15	83.78	84.571	80.869	99.907	116.185	77.169	81.153	84.373	103.648	108.96	119.933	125.845	114.87	118.626	131.321	78.228	98.301	100.204	102.466	80.278	133.618	95.829	102.213	61.465	52.479	81.91		0.244319	98.7411
5.2375	96.456	172.03	72.41	110.612	130.904	56.395	94.234	71.075	76.034	91.767	102.296	69.646	82.931	76.702	93.914	99.183	113.137	132.358	106.164	101.365	131.351	83.399	106.263	97.054	92.118	88.245	128.462	92.862	104.606	60.877	57.378	73.624		0.249999	95.8079
5.3566	82.969	162.681	72.974	108.968	124.945	52.405	88.117	71.179	71.257	104.041	103.6	62.591	74.798	81.468	103.661	103.669	121.889	129.794	102.496	109.24	121.346	71.263	105.997	97.459	85.468	83.166	119.616	88.506	109.469	64.812	52.868	67.269		0.255684	93.7494
5.4756	84.493	152.93	72.864	96.342	120.803	46.061	96.97	64.196	70.481	93.066	86.748	68.302	78.172	74.631	107.092	96.179	115.843	110.131	93.238	108.966	117.748	74.508	105.91	88.541	84.825	85.81	119.495	95.926	96.75	66.624	65.395	59.723		0.261364	90.5863
5.5946	84.009	145.927	81.254	91.524	106.943	50.094	99.985	61.049	56.379	91.113	91.485	74.186	65.237	78.239	103.103	104.66	120.342	108.008	85.359	105.974	116.374	78.062	95.435	94.903	84.706	79.151	117.754	92.18	88.933	70.257	62.122	62.756		0.267044	88.9845
5.7137	76.58	143.81	87.268	93.064	95.706	45.986	95.191	61.407	58.108	81.67	83.937	61.363	71.943	68.37	94.087	110.428	110.169	107.555	97.856	108.718	110.998	71.852	96.773	96.998	91.729	74.317	112.512	90.664	96.323	71.442	76.64	64.648		0.272729	87.7535
5.8327	68.597	141.35	86.283	94.984	91.575	56.941	100.189	55.224	53.735	90.274	71.903	64.07	75.539	64.702	100.096	96.746	116.569	93.186	94.208	107.092	121.825	70.876	86.371	87.685	86.181	72.59	109.657	88.765	94.402	70.775	63.387	63.299		0.278409	85.5961
5.9517	57.735	117.708	93.974	78.749	81.382	49.082	103.519	61.203	54.471	90.085	70.656	69.09	82.43	70.363	86.712	102.195	120.124	95.085	85.439	112.999	112.701	73.97	81.357	88.546	91.712	60.279	94.961	88.202	105.448	74.268	63.647	73.721		0.284089	84.1192
6.0708	55.527	107.427	101.841	80.472	76.498	55.457	92.365	54.504	55.172	94.559	62.96	66.309	77.421	71.201	75.634	102.123	122.811	104.239	88.901	103.561	102.976	79.483	82.252	88.329	80.856	58.733	96.596	85.398	100.448	74.638	62.019	63.663		0.289774	82.0117
6.1898	48.337	97.946	91.595	83.706	76.474	59.932	89.162	47.469	52.079	90.329	63.754	65.288	72.57	64.681	68.169	100.659	124.884	91.225	91.038	103.782	97.596	83.634	74.957	81.727	82.1	60.619	82.089	74.693	120.276	93.801	72.352	57.685		0.295454	80.144
6.3088	46.71	78.878	88.953	88.671	77.284	51.187	92.014	55.955	59.151	81.295	65.457	60.847	72.436	63.71	71.69	103.469	124.047	93.401	87.356	105.683	98.224	81.43	75.137	83.463	78.362	61.289	90.655	82.132	116.38	101.139	84.978	64.604		0.301135	80.8121
6.4279	39.191	69.439	91.041	88.467	85.344	51.912	88.621	68.727	54.348	76.26	72.162	60.045	70.099	70.142	58.198	114.768	121.992	91.089	90.105	108.515	106.502	76.859	72.696	98.6	72.149	61.862	92.943	84.981	114.327	94.502	76.515	74.111		0.30682	81.141
6.5469	37.297	58.731	86.564	89.983	96.825	54.537	86.514	63.606	58.451	74.598	66.711	69.934	72.011	74.013	59.955	114.411	119.008	87.545	73.517	108.473	104.426	78.34	70.006	108.138	74.027	52.461	89.106	85.525	108.814	94.014	83.577	74.328		0.3125	80.4827
6.6659	31.637	44.111	83.845	80.136	83.581	56.198	75.035	65.443	55.975	76.754	61.201	72.02	72.815	77.4	59.447	113.991	122.102	94.532	79.994	101.849	108.214	76.908	63.576	100.746	65.212	49.922	98.261	73.713	100.653	90.063	72.636	63.483		0.31818	77.2329
6.785	29.981	43.415	87.072	92.71	89.298	61.55	70.961	60.886	60.735	76.523	64.942	66.841	72.776	69.167	62.099	114.785	136.799	72.068	76.093	101.552	94.537	74.26	66.658	91.551	65.473	48.346	95.848	73.88	102.476	83.954	68.215	64.801		0.323865	76.2579
6.904	27.162	28.857	79.301	87.294	93.167	62.538	71.927	55.251	67.089	70.339	64.948	69.111	61.775	73.319	70.409	108.941	127.226	67.485	70.063	97.006	91.963	75.126	58.742	99.897	68.443	37.989	101.695	83.339	106.434	83.568	69.114	75.638		0.329545	75.1611
7.023	29.62	23.874	84.468	78.029	87.432	57.501	66.909	59.58	73.9	63.946	58.227	69.484	65.37	75.742	63.713	111.903	117.946	71.394	69.517	92.37	102.279	70.447	59.69	95.151	56.471	35.329	87.277	74.57	93.819	81.579	74.728	81.075		0.335225	72.9169
7.1421	22.139	22.786	80.338	92.197	87.647	53.326	68.32	58.738	82.243	66.013	80.915	70.409	63.212	75.897	71.764	109.072	106.827	70.147	67.77	81.865	94.154	60.142	65.36	89.811	54.406	31.061	92.995	70.372	92.074	87.398	61.867	84.999		0.34091	72.3832
7.2611	22.233	23.075	70.949	97.275	89.409	57.733	55.817	55.754	79.13	66.473	73.057	72.873	65.938	75.997	78.76	108.166	115.414	72.587	71.154	87.686	99.033	64.778	66.373	93.496	43.991	32.044	76.328	76.957	82.862	78.706	66.232	77.745		0.34659	71.8133
7.3801	23.164	19.187	78.463	107.309	81.728	58.195	54.393	49.165	65.336	69.427	73.291	75.775	63.156	80.407	72.465	91.221	114.06	61.518	68.433	89.316	92.532	66.403	73.547	72.552	34.48	29.061	63.587	81.329	79.448	82.602	55.525	73.359		0.35227	68.7636
7.4992	22.054	19.636	81.426	103.924	64.415	55.224	59.591	48.183	79.857	73.7	71.876	65.304	62.315	89.063	85.291	95.02	107.487	71.673	62.081	87.309	94.571	56.806	63.099	68.865	34.571	21.742	58.722	76.019	78.226	70.037	59.879	78.938		0.357955	67.7157
7.6182	20.861	20.887	75.535	97.664	68.294	58.442	62.649	49.029	71.18	66.112	71.754	65.168	63.111	78.435	90.597	87.842	104.622	76.479	75.74	81.814	91.565	56.446	64.515	64.909	27.444	22.85	55.321	73.038	76.281	77.041	55.802	82.761		0.363635	66.6934
7.7372	18.608	18.355	61.391	100.256	59.722	61.761	69.606	53.517	57.015	61.067	74.862	71.263	65.018	76.091	84.635	82.268	97.951	72.875	60.86	76.236	93.732	64.52	74.919	53.559	25.149	17.148	50.73	77.263	80.957	69.142	56.743	89.507		0.369316	64.8977
7.8563	19.202	19.476	53.827	94.302	59.336	62.364	77.545	47.448	49.886	63.287	80.203	66.716	66.653	76.734	86.528	100.651	107.303	69.056	62.472	85.864	94.298	55.473	67.628	53.984	22.149	19.553	53.989	66.823	78.107	66.232	51.334	88.904		0.375001	64.604
7.9753	18.577	17.645	44.572	102.984	57.464	55.858	69.867	53.603	48.24	72.492	76.291	64.068	60.447	79.308	83.909	96.803	94.898	65.32	59.612	80.564	83.979	44.484	74.167	52.119	21.154	22.26	51.745	68.199	77.202	64.084	49.383	96.23		0.380681	62.7353
8.0943	13.539	13.696	41.574	83.746	70.836	56.358	74.399	63.532	45.244	58.316	71.526	67.867	53.267	64.127	87.979	94.624	101.695	62.062	61.33	76.403	75.176	49.512	65.76	47.562	20.857	23.013	36.829	69.42	67.75	71.06	49.032	98.443		0.386361	60.5167
8.2134	15.285	17.204	37.28	84.358	60.745	60.98	81.532	55.921	48.326	63.231	70.542	65.563	55.972	65.992	96.478	83.797	97.707	58.829	61.783	82.48	71.929	51.489	74.348	41.873	17.651	15.6	38.647	72.628	72.645	68.722	44.114	96.536		0.392046	60.3183
8.3324	17.795	15.738	40.329	83.536	64.377	62.536	75.699	54.545	42.927	61.816	66.355	71.097	68.923	69.4	98.012	97.379	92.514	60.829	57.3	73.411	72.828	48.137	74.281	45.779	16.394	16.39	35.289	70.152	70.127	58.812	44.934	101.549		0.397726	60.2872
8.4515	14.411	14.359	40.208	82.687	65.635	71.709	75.125	59.924	41.439	62.046	65.633	69.492	61.854	77.228	94.131	80.099	92.012	56.04	59.076	73.679	74.06	45.965	83.942	40.872	11.902	17.729	39.45	69.59	72.086	54.683	48.518	95.193		0.403411	59.7118
8.5705	14.464	12.764	32.937	69.942	66.503	72.898	81.218	70.341	39.323	60.415	69.177	66.021	67.546	68.956	79.76	93.077	99.058	51.922	56.313	76.041	74.538	56.287	79.463	36.985	12.472	15.851	42.566	63.846	67.203	66.361	39.224	109.654		0.409091	59.7852
8.6895	15.659	12.468	28.256	72.913	68.468	60.605	68.749	58.366	37.175	61.309	62.81	70.113	67.484	60.509	77.143	89.522	95.248	53.898	54.535	85.776	73.838	55.006	66.969	41.409	13.332	12.772	29.114	65.45	59.317	62.15	46.019	109.569		0.414771	57.3735
8.8086	16.098	14.408	28.461	68.568	59.533	70.63	65.319	62.319	38.083	63.083	57.239	68.724	68.232	61.781	72.335	73.337	84.683	65.941	58.799	72.198	82.683	48.23	71.29	43.243	15.581	12.263	30.694	73.114	62.472	64.727	52.374	106.396		0.420456	57.2762
8.9276	13.755	16.054	25.072	66.576	56.809	73.409	70.18	61.825	40.063	62.288	54.734	71.73	70.988	71.25	75.965	79.205	86.484	70.879	54.64	69.316	79.437	55.292	83.378	46.048	13.25	14.573	28.642	69.871	62.092	70.892	50.059	101.871		0.426136	58.3321
9.0466	13.146	12.26	28.461	73.708	67.506	74.773	66.675	53.339	37.619	58.962	45.257	63.693	64.876	67.297	69.663	74.813	79.958	70.775	56.123	80.575	78.436	54.722	63.566	38.522	13.132	13.356	28.94	68.515	60.31	70.53	52.376	93.362		0.431817	56.1014
9.1657	12.3	9.841	23.663	67.932	71.574	77.319	65.275	55.325	37.563	55.601	44.52	68.194	49.898	69.648	65.031	79.379	75.527	72.928	59.24	85.294	87.788	58.691	69.111	39.876	13.39	15.11	25.337	76.966	52.861	67.284	52.35	78.557		0.437501	55.7304
9.2847	9.538	14.276	21.512	67.713	74.866	77.889	68.051	56.899	33.289	44.916	47.449	64.082	56.504	64.584	65.224	90.273	73.998	69.964	58.698	88.3	85.35	63.653	69.243	35.201	15.171	10.982	21.888	64.463	62.25	54.976	56.994	80.993		0.443182	55.2872
9.4037	12.654	14.136	18.521	78.556	75.74	63.243	68.472	48.397	32.414	44.678	55.113	78.748	59.255	82.625	55.542	83.83	74.557	76.481	67.488	81.022	83.506	70.767	80.281	37.306	12.258	14.432	27.291	61.169	49.467	57.05	56.193	79.773		0.448862	56.2802
9.5228	12.458	9.61	16.193	80.007	80.578	64.795	64.984	47.227	30.53	42.203	49.92	75.448	63.543	72.882	53.359	75.727	75.77	71.453	73.055	84.93	88.085	58.102	69.123	31.272	13.718	12.257	21.83	62.78	44.148	51.433	56.779	65.078		0.454547	53.7274
9.6418	10.767	9.72	15.821	73.227	77.739	57.917	68.158	44.718	29.354	48.97	45.771	70.16	57.574	81.591	61.902	73.868	82.897	73.318	61.541	79.007	88.505	58.967	68.559	32.864	12.563	13.237	24.035	68.049	55.714	50.603	57.026	63.987		0.460227	53.6915
9.7608	12.415	11.585	14.479	80.512	72.659	64.853	66.244	41.373	36.71	42.713	45.215	76.454	56.34	75.094	55.681	71.482	66.891	67.746	62.581	84.18	80.612	53.054	77.941	32.499	11.255	12.967	21.683	58.332	62.884	41.788	58.281	66.79		0.465907	52.6029
9.8799	9.763	11.746	19.822	74.869	78.061	52.058	70.011	36.094	34.1	36.954	50.064	72.563	48.217	75.319	55.116	72.083	66.17	66.808	65.411	83.028	81.058	52.047	75.582	30.73	14.757	14.978	24.762	53.109	57.556	44.659	54.297	57.187		0.471592	51.2181
9.9989	12.781	11.978	20.428	75.921	69.026	58.01	59.286	39.998	29.711	39.466	41.582	77.797	51.613	73.829	55.465	78.314	70.227	70.859	61.523	91.777	79.815	62.531	65.222	22.807	11.893	13.4	19.792	58.057	73.488	48.088	53.346	52.621		0.477272	51.5828
10.1179	12.145	13.172	19.522	77.515	74.422	60.101	48.362	40.632	35.209	43.68	44.014	72.633	50.146	74.908	54.347	73.414	71.608	71.371	58.286	93.841	82.725	55.822	72.923	22.52	12.225	15.924	22.798	65.179	80.914	51.109	47.341	51.832		0.482952	52.2075
10.237	8.28	9.48	18.744	69.656	78.073	59.756	46.112	39.821	35.002	36.252	44.096	78.335	52.844	66.728	61.289	77.01	78.436	65.457	59.78	92.326	67.289	58.381	72.318	24.603	13.79	14.209	21.621	59.904	91.743	46.944	47.381	52.485		0.488637	51.5045
10.356	7.16	9.765	18.316	77.115	78.575	61.591	49.778	42.158	32.186	41.138	50.628	80.124	58.985	53.125	55.309	71.193	68.006	64.54	62.97	82.44	59.651	56.089	66.834	25.688	9.453	12.104	20.43	60.426	93.204	52.124	47.885	48.448		0.494317	50.5449
10.475	8.898	10.08	15.72	77.331	78.342	62.323	47.112	35.21	33.796	41.931	53.26	73.298	52.399	56.218	52.971	70.645	71.606	52.445	55.683	87.84	65.806	59.658	65.519	21.985	14.248	9.617	20.35	56.091	96.616	45.783	54.909	46.718		0.499998	49.8252
10.5941	9.404	9.607	18.089	72.954	64.603	57.86	45.297	31.521	32.564	43.007	52.633	68.001	52.827	52.563	45.569	64.442	70.994	59.48	59.814	74.914	56.234	63.307	59.193	25.262	10.635	10.193	19.107	56.519	86.324	50.908	56.386	56.338		0.505683	48.0172
10.7131	8.969	9.832	17.427	71.744	67.889	61.061	52.357	31.893	35.605	52.989	43.473	74.048	50.351	59.448	41.051	76.898	75.737	47.278	56.189	83.523	59.356	73.085	55.167	17.987	7.353	7.377	19.971	64.834	84.927	57.432	66.093	50.071		0.511363	49.4192
10.8321	8.673	12.017	14.634	75.941	67.689	68.481	47.842	30.983	44.431	48.955	48.763	65.53	54.236	56.997	51.301	72.676	79.929	47.421	60.697	76.939	61.645	64.62	55.515	20.509	10.127	11.178	22.352	57.442	93.157	56.179	68.919	61.505		0.517043	50.5401
10.9512	8.119	9.922	12.731	66.608	70.187	61.401	41.64	29.991	46.342	56.851	51.218	67.194	44.178	56.008	47.944	65.01	84.228	53.956	58.314	68.226	56.004	65.102	53.819	20.61	9.738	8.636	21.218	68.897	80.819	54.931	68.148	60.816		0.522728	49.0252
11.0702	8.583	10.115	16.421	57.232	72.767	67.628	41.688	31.675	41.658	58.851	55.354	62.889	48.509	51.146	51.346	83.422	80.692	47.391	60.071	78.4	59.59	67.024	56.65	18.095	8.529	8.405	17.162	70.856	76.497	60.271	77.843	68.895		0.528408	50.4892
11.1892	8.379	10.544	14.942	61.093	75.18	81.63	43.792	27.623	35.056	49.706	53.802	54.515	44.382	64.305	49.28	76.233	77.603	49.752	55.782	78.139	60.589	69.924	57.517	20.107	8.543	9.891	23.012	65.567	75.237	54.185	83.077	67.113		0.534088	50.2031
11.3083	8.321	9.141	14.104	69.934	66.816	77.761	46.575	29.469	35.025	52.801	52.309	50.592	53.424	62.783	57.57	75.864	80.979	45.141	56.203	69.424	56.681	67.141	55.245	19.099	9.926	11.865	21.883	67.314	60.799	48.525	84.502	65.474		0.539773	49.4591
11.4273	7.223	8.496	15.767	58.673	60.495	73.945	46.671	29.694	40.872	55.144	56.798	53.706	51.581	73.512	55.692	80.464	77.288	43.041	58.865	69.096	64.838	62.292	54.407	17.863	12.688	12.13	21.162	72.676	68.987	54.11	84.441	65.77		0.545453	50.2621
11.5463	6.533	11.043	14.171	63.709	61.894	70.163	45.827	27.333	51.08	58.816	57.554	48.018	57.379	65.931	49.32	78.749	79.788	46.8	49.802	69.551	61.245	62.86	51.612	21.228	9.899	12.99	19.636	74.482	61.765	55.366	83.673	57.817		0.551133	49.5636
11.6654	4.405	11.021	15.257	56.492	67.96	71.895	49.713	32.251	44.067	52.632	63.826	58.086	52.074	74.334	50.463	79.883	78.202	50.036	56.513	63.11	58.689	62.417	51.283	19.577	9.714	9.983	20.861	73.681	64.872	52.639	73.261	61.602		0.556818	49.7125
11.7844	8.255	7.648	16.164	56.581	72.177	70.73	48.361	31.134	39.948	49.562	65.37	49.526	49.446	64.473	50.318	83.662	71.249	48.615	50.03	57.073	56.423	62.426	47.686	19.92	9.256	12.212	23.285	73.454	57.895	49.602	70.894	58.682		0.562499	47.8768
11.9035	7.173	9.141	15.271	59.144	67.314	72.978	49.326	29.235	36.94	41.921	72.102	60.038	50.361	57.031	45.965	81.143	84.998	46.405	56.958	58.941	53.7	62.964	47.966	16.812	7.336	10.839	17.923	76.931	66.443	52.218	66.437	59.629		0.568183	48.1745
12.0225	10.13	9.835	16.336	56.787	65.133	71.532	46.833	28.804	35.801	49.501	66.825	64.031	49.71	58.925	52.266	72.939	79.321	47.447	58.541	55.602	63.523	58.379	66.441	14.307	10.468	12.121	23.232	76.272	63.293	52.579	66.032	55.406		0.573864	48.6985
12.1415	7.241	9.562	18.073	57.182	63.46	55.537	48.082	30.037	38.358	44.649	64.427	65.159	57.507	54.983	54.814	66.701	84.454	52.431	56.83	66.282	65.879	60.124	57.923	11.905	11.006	8.994	22.899	74.265	57.152	54.259	65.548	61.264		0.579544	48.3433
12.2606	7.715	6.907	14.913	58.739	60.368	53.193	51.715	31.349	33.013	46.671	70.341	68.47	52.792	59.841	59.86	75.81	81.644	48.13	55.454	51.205	65.659	55.644	51.814	14.154	9.353	10.205	22.473	73.023	57.23	53.84	56.789	58.263		0.585229	47.393
12.3796	8.12	8.381	15.513	54.638	70.526	49.114	52.371	25.683	40.505	50.305	67.038	64.967	57.404	62.509	61.011	62.819	87.124	52.651	55.912	52.255	59.413	58.629	56.006	16.651	9.865	7.22	23.392	64.847	55.378	56.07	59.027	52.586		0.590909	47.4353
12.4986	7.154	9.992	15.235	60.711	71.546	55.692	46.386	28.823	37.541	60.482	68.618	70.017	61.646	57.603	65.491	61.834	85.813	54.941	52.679	59.232	66.141	57.955	53.022	16.263	9.841	8.703	23.935	66.413	49.824	56.704	62.983	56.367		0.596589	48.7371
12.6177	6.405	8.915	11.371	58.016	66.848	50.156	41.001	29.187	42.086	56.851	61.969	69.773	54.053	60.406	59.293	60.294	89.833	53.543	60.805	59.212	72.838	61.396	57.583	17.298	12.954	9.161	26.834	71.689	50.669	55.442	66.407	62.723		0.602274	48.9066
12.7367	9.568	7.758	12.31	53.564	60.95	54.74	54.213	25.858	41.064	58.723	50.721	67.603	52.927	61.122	62.56	55.242	89.742	50.638	61.687	65.12	74.615	57.436	62.003	18.398	12.062	8.764	26.423	62.3	49.415	56.337	71.537	64.391		0.607954	48.7435
12.8557	8.325	7.624	18.525	51.852	55.272	47.893	54.039	27.784	43.963	66.53	47.867	64.82	53.879	58.108	60.726	55.483	87.81	47.635	57.182	55.678	67.054	51.793	66.794	18.744	10.531	10.726	23.195	56.445	57.149	54.904	69.861	61.638		0.613634	47.4947
12.9748	8.436	8.662	14.418	66.347	67.865	45.021	60.04	29.179	51.802	63.527	39.806	72.264	49.99	58.832	52.569	48.606	80.175	49.363	57.602	50.923	66.969	58.289	64.113	17.826	11.587	11.361	21.166	56.05	51.696	59.015	73.289	54.766		0.619319	47.5486
13.0938	9.401	10.417	13.254	61.125	57.065	44.639	54.053	36.874	48.533	67.554	41.238	63.676	46.191	59.187	40.176	48.966	71.777	54.783	63.627	56.821	63.238	56.436	64.732	18.047	11.674	13.375	26.474	60.582	49.621	53.611	68.476	51.119		0.624999	46.4607
13.2128	8.48	7.469	13.409	56.276	58.239	41.488	49.7	42.387	57.251	68.872	44.378	70.773	48.625	54.159	52.112	50.763	68.478	50.614	65.342	58.436	66.514	53.971	57.033	14.219	11.339	9.614	19.301	53.097	49.221	60.012	70.653	55.314		0.63068	46.4856
13.3319	9.892	10.11	13.765	56.892	58.023	48.77	49.525	42.83	56.095	68.91	49.788	73.063	48.993	59.158	45.121	48.335	67.528	49.359	62.91	51.771	64.217	46.333	66.922	15.759	13.05	9.153	23.373	57.689	51.074	55.928	60.818	52.183		0.636365	46.4793
13.4509	9.228	9.749	11.397	54.051	46.403	52.067	49.33	45.077	58.117	64.697	40.991	64.757	49.7	60.992	41.479	43.418	63.612	47.845	64.179	52.156	62.139	48.344	68.637	20.674	10.408	9.029	25.529	51.767	57.503	60.327	61.453	49.393		0.642045	45.4515
13.5699	9.889	13.171	12.626	53.419	55.123	53.863	55.371	48.926	68.067	58.241	36.381	66.541	50.575	56.494	43.069	42.487	65.327	50.249	70.572	41.606	66.185	47.818	71.609	18.113	11.306	10.961	27.843	49.247	54.179	64.768	61.798	47.958		0.647725	46.3682
13.689	13.968	11.13	13.409	55.449	53.208	58.038	46.592	42.735	62.127	54.864	40.063	65.995	53.09	55.91	45.172	38.016	58.611	52.139	70.146	47.928	62.698	48.95	68.151	14.067	8.467	10.936	26.267	45.302	48.788	67.189	50.384	50.367		0.65341	45.0049
13.808	11.767	8.468	12.433	61.625	46.54	64.983	48.408	44.948	60.743	48.28	42.513	66.214	54.723	52.127	47.247	45.152	56.544	59.013	70.958	56.746	63.207	43.564	72.371	16.968	13.188	12.034	27.847	43.175	56.407	61.521	54.557	46.252		0.65909	45.9538
13.927	10.338	9.024	13.686	54.581	52.104	60.163	50.407	45.419	54.419	43.623	44.526	68.292	59.867	54.639	48.883	47.623	62.523	54.113	64.454	51.236	64.481	51.824	76.695	14.395	12.951	11.045	30.849	40.525	61.363	55.263	52.599	41.955		0.66477	45.7458
14.0461	12.755	11.566	16.534	56.611	42.173	59.822	49.288	50	59.612	45.941	55.715	63.382	48.787	36.627	43.574	43.543	76.718	57.485	68.458	51.767	60.136	57.526	71.535	13.693	11.737	11.3	28.599	39.038	57.998	59.552	52.159	41.87		0.670455	45.4844
14.1651	14.801	7.874	13.011	59.169	41.235	67.049	49.478	52.71	51.755	48.06	45.192	65.201	51.805	39.773	48.309	56.557	62.422	62.27	72.706	51.882	61.602	59.857	66.199	17.07	13.764	10.803	37.839	46.288	62.95	54.151	48.955	48.846		0.676135	46.5495
14.2841	12.724	7.966	15.637	53.285	47.256	56.716	55.304	50.341	49.394	49.981	47.489	52.105	55.025	39.753	54.451	51.694	55.869	58.518	70.003	52.294	53.649	53.729	70.818	16.694	13.18	8.969	31.261	40.469	67.676	60.085	52.093	40.743		0.681815	45.1616
14.4032	13.58	10.835	18.816	52.572	51.79	59.079	54.048	55.908	52.638	50.771	46.238	57.982	46.24	46.208	48.667	46.458	64.686	52.617	58.068	59.438	54.335	61.232	78.008	17.734	13.229	8.402	34.957	47.581	70.196	50.995	48.437	43.115		0.6875	46.0894
14.5222	15.175	9.006	16.578	49.642	60.877	57.045	58.653	43.294	60.338	54.079	51.853	60.402	43.944	44.792	50.805	42.839	53.347	52.048	51.749	56.277	54.567	68.541	73.412	18.609	14.408	10.148	33.873	44.143	65.408	52.046	44.528	43.073		0.69318	45.4843
14.6412	17.003	9.433	16.714	45.637	58.016	60.955	57.014	50.436	58.036	52.279	39.435	60.591	47.156	42.711	47.92	52.589	61.183	57.072	49.059	56.93	48.186	59.455	57.849	19.604	10.65	13.498	35.69	40.334	58.396	49.534	50.154	40.4		0.698861	44.4975
14.7603	13.92	11.272	18.368	53.773	59.207	64.675	61.887	50.093	48.088	55.535	42.763	55.092	51.558	32.902	46.215	52.56	61.534	51.032	45.021	51.758	52.616	63.628	49.744	13.964	11.831	14.578	49.459	43.742	60.75	52.376	45.69	41.142		0.704546	44.5867
14.8793	16.071	10.999	22.522	51.22	60.545	59.742	53.448	44.125	51.432	59.748	50.13	61.683	45.147	39.169	44.521	52.044	55.291	49.081	49.034	48.727	63.689	62.578	47.472	16.515	11.302	12.149	48.565	40.055	58.108	54.749	50.776	38.274		0.710226	44.6535
14.9984	20.174	13.989	23.473	49.351	56.298	58.819	55.438	44.428	50.799	53.559	48.285	66.377	43.662	39.387	37.77	54.007	56.098	47.053	51.826	50.738	58.312	58.487	56.178	17.67	8.678	12.624	43.332	35.549	57.704	53.759	52.353	40.004		0.715911	44.2557
15.1174	20.752	13.575	20.088	52.187	63.41	58.153	54.452	44.132	60.329	52.077	48.411	65.65	46.315	38.698	48.287	57.161	50.274	52.999	53.77	49.772	62.43	60.081	58.429	16.773	12.449	15.746	45.734	42.133	55.806	51.87	46.341	38.842		0.721591	45.5352
15.2364	16.397	13.741	21.58	51.267	57.195	63.884	54.616	41.882	56.561	55.989	47.955	72.334	45.542	40.751	44.551	62.928	48.746	47.324	57.631	52.053	57.478	59.347	55.68	16.963	12.196	12.259	48.307	35.304	57.974	49.34	47.169	41.492		0.727271	45.2011
15.3555	19.012	11.227	24.253	55.748	61.08	58.4	51.696	37.228	55.972	60.947	49.482	77.178	48.668	37.503	47.396	60.124	55.632	42.606	58.876	57.077	62.007	62.481	53.159	18.716	12.954	15.181	43.012	39.677	54.934	47.277	55.493	39.659		0.732956	46.083
15.4745	18.377	13.119	21.38	54.128	57.412	60.308	52.604	46.119	53.067	64.384	53.337	76.657	50.504	43.181	42.779	61.522	58.847	44.759	57.089	50.69	55.465	53.089	56.985	17.852	11.644	15.406	47.139	40.039	50.298	45.25	55.544	42.973		0.738636	45.9983
15.5935	21.944	11.577	23.149	50.567	56.351	55.386	42.421	43.238	56.454	61.279	50.218	74.7	47.169	46.373	43.344	67.628	52.085	44.72	58.301	61.807	54.283	52.077	56.107	20.957	12.115	14.489	44.66	35.088	53.747	43.118	60.015	50.206		0.744316	45.7992
15.7126	21.387	12.861	25.974	43.277	58.158	56.121	55.834	41.014	57.288	60.121	58.236	75.635	49.371	41.914	39.432	61.597	57.711	40.058	59.856	62.06	56.856	49.534	54.195	20.782	12.889	16.026	46.674	42.033	47.032	46.017	49.249	55.036		0.750001	46.0696
15.8316	25.869	15.567	30.215	46.587	59.774	51.296	47.985	46.775	53.659	62.427	59.99	71.269	41.493	42.722	35.594	55.791	55.391	41.111	49.199	55.291	61.824	51.288	63.187	23.148	9.196	16.981	46.543	39.795	48.698	45.523	51.35	45.75		0.755681	45.3527
15.9506	27.058	14.498	35.788	53.575	63.943	53.246	44.049	41.799	51.894	65.833	59.056	72.662	46.805	44.464	36.222	53.501	55.218	47.507	48.827	52.304	49.189	52.863	66.82	23.022	13.166	15.717	45.485	42.558	55.582	42.239	58.517	47.794		0.761362	46.2875
16.0697	33.253	18.149	37.863	56.835	60.138	56.771	50.246	42.967	56.536	71.529	53.4	73.251	48.505	36.264	35.636	43.586	50.594	48.728	52.176	56.688	59.842	52.774	55.475	25.077	12.88	15.025	44.508	42.501	46.186	44.107	64.809	44.426		0.767046	46.5852
16.1887	31.603	17.183	33.84	45.641	58.237	57.64	54.277	34.382	46.356	63.85	59.191	63.23	47.198	34.039	35.317	46.463	47.891	50.216	50.794	49.207	61.364	51.526	59.834	33.236	14.069	17.464	44.658	49.296	46.259	38.816	59.289	39.435		0.772727	45.0563
16.3077	35.924	19.329	48.914	59.463	57.084	50.628	52.784	39.503	52.902	67.724	61.542	66.386	44.701	33.24	33.012	52.988	45.045	43.385	52.948	48.699	55.597	48.894	67.554	23.312	13.146	18.697	46.171	47.115	52.853	34.123	56.627	41.643		0.778407	45.9979
16.4268	44.234	18.41	51.077	49.9	59.072	54.306	48.505	38.093	52.857	64.284	60.566	70.925	44.071	39.393	29.26	45.852	42.887	43.747	54.14	49.005	54.457	47.391	69.767	25.172	16.074	19.551	48.918	48.308	46.012	37.277	48.435	40.753		0.784092	45.7093
16.5458	38.513	26.568	58.422	51.598	59.168	49.609	43.839	41.27	50.187	73.488	68.544	69.276	41.82	43.442	38.015	47.206	41.629	42.527	50.718	45.181	51.819	48.884	70.415	32.224	14.483	21.205	57.562	50.769	45.457	39.964	48.265	32.671		0.789772	46.7106
16.6648	31.554	29.17	61.344	49.761	68.428	57.406	54.453	39.456	52.726	68.069	75.579	68.032	45.304	39.472	35.341	46.074	40.921	42.419	46.327	43.451	55.092	53.653	68.272	30.055	11.271	20.208	56.068	46.909	44.983	41.245	41.969	29.907		0.795452	46.7162
16.7839	35.345	36.08	70.695	48.937	66.891	60.321	61.337	40.554	46.77	64.822	66.573	57.447	43.917	45.057	36.282	45.386	39.521	46.502	47.817	40.093	49.827	48.068	64.692	31.75	15.095	23.513	59.75	51.444	40.082	38.253	42.53	29.14		0.801137	46.7028
16.9029	39.837	38.231	69.833	49.014	75.567	56.139	57.934	44.547	43.02	57.911	74.937	56.424	34.616	36.958	36.195	48.837	41.763	42.075	45.721	43.22	46.149	49.634	68.236	33.532	12.518	29.995	57.508	50.132	34.617	32.464	40.104	26.725		0.806817	46.0748
17.0219	37.824	37.445	71.606	50.023	69.539	53.856	54.097	42.71	43.519	65.956	88.611	60.279	37.422	37.736	37.42	42.656	35.847	48.466	39.74	41.087	44.036	52.252	64.225	39.781	16.34	29.177	59.053	46.62	34.37	29.893	38.648	28.945		0.812497	46.2243
17.141	38.403	39.104	73.32	58.025	60.003	44.06	62.815	46.197	40.407	59.413	85.299	51.402	34.514	37.598	38.305	36.984	41.015	41.553	39.228	35.346	40.339	44.809	67.333	45.665	19.213	30.687	57.458	47.408	35.561	32.901	37.041	21.965		0.818182	45.1053
17.26	43.188	51.254	88.409	67.81	56.578	46.425	56.435	45.895	45.439	47.945	80.437	47.058	32.044	42.656	35.141	36.443	36.175	38.62	39.132	30.855	40.36	42.491	76.66	43.83	15.412	33.803	58.115	43.206	34.846	31.121	34.466	18.865		0.823862	45.0348
17.379	45.285	48.48	79.2	63.711	58.571	53.79	56.71	46.349	42.051	52.178	87.148	43.192	32.386	30.962	29.242	31.869	37.038	38.038	36.93	30.154	38.89	41.575	73.216	50.046	20.219	39.597	52.461	47.285	32.01	31.973	39.154	16.892		0.829543	44.5813
17.4981	50.864	53.655	73.696	61.242	54.096	42.23	56.032	49.258	45.8	47.218	85.109	40.205	40.017	28.575	27.412	33.457	34.49	36.375	36.313	29.572	41.672	44.026	70.553	46.008	22.352	31.409	57.035	46.705	32.407	31.306	31.556	20.494		0.835228	43.7856
17.6171	55.266	60.49	72.256	67.008	55.169	45.586	63.763	45.352	45.73	53.592	79.28	47.146	39.685	27.248	21.292	29.597	33.674	32.085	41.718	27.759	38.428	40.307	65.94	46.946	23.529	36.924	55.155	47.904	35.541	30.264	30.6	18.853		0.840908	44.1902
17.7361	58.476	60.218	78.906	69.516	51.714	44.562	60.223	50.688	47.855	53.421	83.865	46.146	32.963	25.335	19.888	28.009	28.959	37.703	33.061	24.601	38.06	36.272	59.974	52.103	20.432	43.053	53.047	44.347	31.182	29.849	32.644	15.44		0.846588	43.516
17.8552	59.268	59.561	79.143	71.465	46.385	42.857	54.561	52.803	48.75	59.298	76.385	36.835	35.34	21.898	15.562	23.757	31.351	29.87	31.921	24.052	31.408	35.15	57.259	54.268	24.015	41.891	50.371	46.254	28.357	30.89	32.633	10.706		0.852273	42.0083
17.9742	54.971	71.361	69.721	60.903	44.54	46.769	62.691	50.482	47.779	55.648	73.607	38.732	36.599	22.725	11.476	19.648	35.092	28.302	28.426	17.472	28.127	38.926	58.621	60.577	22.861	39.208	51.686	41.696	27.217	25.905	26.572	18.266		0.857953	41.1439
18.0932	62.428	65.116	65.679	63.106	47.234	44.242	59.793	50.043	42.65	56.859	65.432	32.164	33.946	17.577	9.033	21.241	26.306	30.675	30.937	17.131	26.126	34.303	57.616	56.955	27.356	48.604	45.178	37.123	30.243	23.465	25.606	12.564		0.863633	39.5853
18.2123	65.68	61.55	70.722	53.469	48.224	43.387	63.302	49.277	49.452	62.047	65.589	34.688	35.446	14.072	9.714	18.779	29.37	20.765	30.897	15.853	18.915	31.631	55.894	52.509	32.176	59.873	47.172	37.645	27.021	19.466	22.548	15.314		0.869318	39.4515
18.3313	65.241	64.423	62.753	55.268	49.309	47.787	65.284	47.75	52.129	59.228	57.056	33.791	25.508	13.555	10.493	15.402	24.525	21.645	21.613	13.768	18.795	28.824	51.774	51.128	34.177	53.029	45.127	30.833	22.204	18.804	20.587	17.106		0.874998	37.4661
18.4504	60.194	61.986	59.493	50.852	47.777	44.92	62.108	50.907	48.039	54.925	55.297	30.32	25.546	11.464	7.334	12.082	17.524	17.566	20.069	11.089	16.026	27.904	54.882	53.147	33.745	63.837	47.921	28.541	25.433	18.305	15.297	18.054		0.880683	36.0183
18.5694	57.047	57.26	63.268	45.266	48.161	40.441	52.522	50.945	52.774	51.615	45.855	29.464	19.02	12.106	11.174	12.305	14.934	9.241	19.008	17.217	12.967	21.785	53.258	60.126	36.127	60.034	48.958	27.289	24.143	19.756	19.994	17.024		0.886363	34.7214
18.6884	57.425	57.076	58.236	39.485	51.45	39.983	54.353	48.44	57.2	51.035	53.527	25.511	16.924	13.295	13.78	13.679	12.003	14.301	13.879	18.657	9.514	26.695	49.039	52.778	40.869	58.567	46.13	22.722	21.713	16.052	18.45	18.044		0.892043	34.0879
18.8075	50.138	54.148	52.164	37.453	48.261	39.641	53.906	55.013	61.708	53.565	48.825	25.735	13.418	13.039	15.988	12.239	13.166	10.915	18.17	13.459	12.259	23.289	44.928	54.268	43.293	52.77	45.475	21.686	16.924	18.63	17.073	17.675		0.897728	33.1007
18.9265	47.981	43.518	64.694	43.706	44.831	37.94	52.096	53.908	71.893	52.495	46.072	21.821	11.533	14.354	13.372	11.911	13.192	10.921	17.146	15.034	14.58	15.822	41.035	51.407	41.784	52.448	41.324	24.252	17.007	18.25	16.759	15.296		0.903409	32.4494
19.0455	43.463	40.238	59.028	42.587	50.202	33.755	54.864	56.85	69.545	53.38	34.435	15.174	11.743	17.504	14.698	11.399	15.055	12.299	13.684	16.161	18.087	12.592	35.783	51.529	43.468	50.897	35.76	18.737	18.376	18.039	13.636	16.657		0.909089	31.2383
19.1646	40.65	44.047	54.6	38.977	46.416	26.619	50.62	56.238	72.724	47.622	25.833	14.733	13.743	12.768	15.466	14.1	11.726	13.178	15.064	15.485	20.507	14.431	31.992	49.709	41.892	50.463	36.301	15.884	19.337	16.888	15.083	13.543		0.914774	29.895
19.2836	33.82	43.878	48.505	44.159	50.126	22.959	47.733	68.096	71.267	40.815	26.736	14.878	10.103	14.398	19.959	16.195	16.307	17.961	16.028	19.201	21.606	13.388	27.637	48.085	36.653	46.214	36.262	13.584	16.087	19.479	14.846	17.94		0.920454	29.8408
19.4026	36.462	34.231	47.718	39.451	45.141	21.242	41.358	62.705	72.197	45.892	23.789	10.129	9.427	12.902	17.25	15.73	13.794	13.994	16.292	23.238	22.589	16.323	23.851	47.081	34.848	47.96	35.062	11.484	13.575	22.33	15.403	14.363		0.926134	28.3691
19.5217	35.872	34.606	46.567	34.482	27.658	17.711	37.507	59.081	76.241	47.791	22.107	12.629	10.082	14.255	22.308	15.511	13.47	15.979	18.592	20.462	20.636	11.599	23.66	49.485	42.145	48.543	32.123	8.574	15.477	18.139	15.986	13.047		0.931819	27.5727
19.6407	30.757	29.591	50.05	30.85	28.756	15.617	40.323	61.798	69.562	40.544	16.39	12.788	11.036	11.509	21.958	12.001	15.162	16.366	20.298	16.024	18.191	14.267	20.485	44.735	40.737	42.246	29.931	9.085	18.588	14.67	16.708	15.206		0.937499	26.1322
19.7597	30.211	33.791	45.457	28.157	23.851	10.753	44.837	60.435	65.632	33.505	17.071	12.64	9.07	13.901	20.017	17.158	18.434	16.755	16.616	16.749	17.431	18.138	17.085	39.766	35.236	39.542	28.845	10.642	17.6	17.872	14.707	18.715		0.943179	25.3318
19.8788	32.328	31.373	43.715	34.939	19.369	10.262	38.907	55.36	77.878	33.455	13.971	11.521	7.904	12.059	19.092	18.36	14.168	18.924	14.158	17.446	21.259	18.665	18.072	35.591	35.611	33.275	27.312	9.459	14.723	20.383	13.319	14.903		0.948864	24.6175
19.9978	29.404	28.451	41.475	35.31	14.902	5.382	44.24	61.455	78.592	34.182	10.211	7.903	8.522	10.037	20.198	17.35	13.36	17.196	14.142	18.69	17.058	19.134	15.154	40.425	34.55	36.355	19.154	12.148	17.529	21.028	13.002	13.213		0.954544	24.0547
20.1168	24.201	32.504	38.919	35.136	7.651	5.541	43.573	59.547	58.456	30.113	7.429	10.421	9.037	13.702	21.861	20.161	17.486	19.255	12.8	20.175	17.734	19.567	15.097	30.065	40.084	36.001	14.896	7.332	20.695	18.911	14.485	14.874		0.960225	23.0534
20.2359	27.343	28.723	32.382	30.123	3.485	5.044	45.522	61.71	56.125	29.286	6.796	7.611	8.68	14.307	22.429	22.419	12.984	18.549	15.543	17.723	14.206	25.149	15.462	26.08	36.621	35.8	13.412	5.893	20.706	13.06	13.639	16.761		0.965909	21.9867
20.3549	28.892	30.148	36.592	16.462	4.477	5.836	37.761	56.099	62.389	23.052	8.665	7.226	9.385	10.616	20.881	23.63	15.5	25.595	14.504	18.146	13.108	26.17	16.573	20.797	31.445	32.423	10.284	10.702	18.353	15.983	14.103	14.581		0.97159	21.2618
20.4739	22.751	27.216	28.719	9.356	4.203	4.589	34.155	61.328	53.211	21.409	7.514	6.93	7.504	12.549	19.17	27.052	16.279	23.742	16.695	22.153	15.257	26.587	16.407	16.224	32.993	29.412	11.188	8.611	18.437	16.211	15.767	15.477		0.97727	20.2843
20.593	11.078	23.704	22.041	6.212	6.247	6.125	28.622	69.945	48.004	21.049	8.544	6.744	5.77	13.039	20.288	24.923	18.441	24.614	15.699	24.676	16.524	21.575	12.735	13.12	36.635	20.772	8.844	9.603	20.013	15.513	15.375	16.914		0.982955	19.1684
20.712	4.791	20.377	20.127	6.39	5.764	5.57	24.118	66.563	38.092	19.131	8.799	6.826	8.921	12.764	17.845	23.551	14.599	21.362	16.31	24.422	17.681	23.583	13.166	13.079	30.684	23.772	5.535	8.445	19.436	14.036	13.507	15.374		0.988635	17.6444
20.831	4.958	17.257	17.777	5.253	5.336	6.033	18.877	59.436	31.842	15.648	7.585	4.939	8.637	14.73	18.111	21.649	20.176	21.117	16.404	29.068	17.398	16.844	13.07	11.548	21.29	12.647	6.501	10.335	20.295	14.771	12.895	11.862		0.994315	16.0715
20.9501	4.943	10.968	11.22	5.924	5.944	5.756	18.98	65.65	31.771	13.863	8.754	5.668	8.892	9.977	15.192	21.449	15.055	24.239	15.186	30.786	16.202	19.984	15.116	11.866	16.575	11.101	8.502	11.144	23.987	10.059	12.41	12.359		1	15.6101

## Sheet: Image40
X0	Y0	Y1	Y2	Y3	Y4	Y5	Y6	Y7	Y8	Y9	Y10	Y11	Y12	Y13	Y14	Y15	Y16	Y17	Y18	Y19	Y20	Y21	Y22	Y23	Y24	Y25	Y26	Y27	Y28	Y29	Y30	Y31	Y32		Ap-Basal	Avg intensity
0	27.611	30.5	52.333	63.667	76.333	49.667	32.333	20.333	13.278	22.278	41.278	49.444	27.944	21.944	16.389	20.389	32.222	39.389	36.0556	26.278	18.667	23.5	28.5	27.056	25.889	18.944	30.111	92.167	62.5	25.222	21.7778	23.3889	26.833		0	34.0673
0.119	35.667	32.667	62.611	61.833	80.278	45	32.833	25	18.444	25.222	44.944	52.611	37.778	20.833	13.056	15.556	31.778	38.944	49.8889	27.833	29.5	19.611	27	27.778	23.389	23.556	41.556	103.667	57.222	36.333	28	26.1111	29.389		0.00476053	37.1482
0.2381	36.833	31.333	66.222	71.5	89.722	44.667	32.167	21.111	19.778	24.556	57.222	55.111	37.278	24.222	13.444	20.389	46.222	42	45.2222	35.389	21.111	22.056	32.944	30.056	35.722	29.611	44.556	106.611	67.944	33.5	24.7222	29.3889	32.056		0.00952507	40.1414
0.3571	33.167	32.278	60.833	73	95.778	53.778	44.889	29.222	18.556	28.5	57.833	57.333	43.722	28.389	14.5	26.444	49.444	46.556	53.5	34.389	28.5	28.833	36.278	33.5	40.111	30.056	46.278	103.944	65.444	40	27	30	35.611		0.0142856	43.2626
0.4761	41.389	31.333	64.833	74.722	79.667	61.556	50.778	27.611	21.778	29.833	51.722	66.278	38.278	20.611	24.111	27.333	45.722	52.333	53.8333	49.444	33.778	29.833	47.722	36.333	53.444	29.611	46.056	112.556	81.389	46.889	30.2778	30.7778	28.944		0.0190461	46.0841
0.5952	54.556	33.222	57.278	81.667	86.333	82	51.444	41.444	22.889	36.222	59.056	68.833	39.111	29.944	23.778	31.444	49	44.889	59.4444	51.5	46.611	34.556	52.222	53.056	59.389	36.167	40	117.722	89	44.778	35.6111	29.5	40.722		0.0238107	51.0118
0.7142	55.667	41.444	62.389	74.333	94.056	121.167	61.778	48.556	22.222	44.222	68.667	74	46	34.944	29.111	36.167	53.833	46.778	66.6111	44.833	61.667	51.111	62.056	53.167	86.222	47	57.833	129.667	89.556	50.889	32.6111	42.6667	42.667		0.0285712	58.6028
0.8332	74.5	40.833	66.611	95.389	99.889	123.778	73.167	54.278	32.222	44.833	77.056	76.611	43.722	48.167	44.444	41.444	66.444	62.944	54.9444	55.389	80.833	66.722	78.944	63.556	101.556	65.389	68.111	121.056	93.167	55.056	48.5	32.0556	51.556		0.0333317	66.7626
0.9523	88.944	49.778	65.722	76.222	105.111	156.778	77.556	67.333	33.333	48.278	81.889	76	53	53.611	53.833	41.611	59.333	66.167	65.0556	62.056	89	92.611	89.278	64.111	121.333	63.5	84.722	121.556	98.722	63.167	53.8333	44.0556	40.778		0.0380963	72.9781
1.0713	92.222	46.667	64.111	92.389	92.444	179.889	99.222	85.944	41.556	57.889	89	87.222	60.778	62.167	64.556	53.667	67.167	75.444	69.3889	76.778	98.611	100.611	108.389	73.778	146.333	90.056	84.778	140	108.389	67.222	59.8889	49.6667	57.333		0.0428568	83.1381
1.1903	99.833	49.278	66	105.611	111.722	179.333	109.667	83.389	54.889	70.778	85.778	83.833	63.556	71.5	78.944	57.444	81.889	77.833	66.7778	98.056	123.944	126.222	117.444	87.056	160.389	97.722	103.333	137	131.278	62.333	58.5556	67.5	59.722		0.0476173	91.776
1.3094	115.389	48.278	68.778	101.5	122.389	202.111	117.722	107.778	70.778	90.556	101.944	96.889	66.111	83.944	100.056	76.611	87.722	77.333	63.5	88.722	122.167	138.056	121.833	125.111	157.056	114.111	107.722	133.278	127.278	71.389	61.6667	52.4444	62.056		0.0523819	99.463
1.4284	130.556	53.833	74.833	110.556	124.667	197.389	124.833	139.167	86.444	113.333	125.167	94.833	75.222	98.389	112.667	72.833	108.167	83.833	84.8333	97.278	154.833	146.056	135.222	108.722	172.444	135.278	115.722	122.611	130.389	85.722	66.3889	64.8333	65.5		0.0571424	109.471
1.5474	129	51.556	75.389	109.222	132.722	206.389	129.278	124.389	115.167	132.722	133.389	109.111	94.167	107.667	109.722	95.056	141.833	83.167	84.6111	102.611	159.278	155.278	155.944	117.444	174.611	140.278	123.056	151	145.111	97.944	68	67.5556	64.167		0.0619029	117.783
1.6665	159	54.389	67.889	119.333	128.889	218.222	151.111	130.667	146.056	128.056	141.056	105	98.444	106.5	127.556	101.5	130.722	89.889	95.7778	96.5	171.056	170.389	150	122.944	177.5	165.722	133.056	152.5	144.944	102.222	61.6667	71.6111	66.389		0.0666675	123.835
1.7855	152.722	68.5	64	115.556	139	229.333	154.056	161.333	158.667	152.667	155.5	133.111	89.167	132.5	141.833	104.722	148.167	102.056	108.333	106.333	162.889	168.389	173.5	141.444	178.111	166.222	149.5	163.833	148.778	107.778	63.5556	89.2222	74.333		0.071428	133.488
1.9046	173.778	65.833	62.5	121.722	155.556	212.5	166.056	148.556	186.389	161.167	166.778	135.111	100.111	130.056	166.111	133.611	149.5	120.056	104.389	102.611	169.833	173.444	166.667	158	171.167	175.167	152.611	169.222	145.111	114	56.8889	100.5	76.611		0.0761925	139.14
2.0236	178.5	71.5	72.833	127.833	159.611	220.389	178.278	172.722	182.222	174.389	204.556	161.944	109.5	144.5	156.056	140.222	149.889	116.722	95.3889	113.056	163.778	171.667	176	151.556	174.5	174.389	167.333	160	164.444	132.889	69.9444	87.5556	71.167		0.0809531	145.313
2.1426	191.5	68.889	66.667	127.5	183.222	203.111	175.889	173.111	183.5	191.389	203.5	155.722	120.556	161.944	180.833	156.556	162.167	108.333	107.5	114.667	161.944	179.778	171.167	169	186.944	177.833	174.778	173.833	154.722	133.722	50.7222	94.5	73.056		0.0857136	149.653
2.2617	190.111	68.722	54.778	127.167	191.889	214.5	173.056	168.611	183.944	198.944	213.389	189.278	129.778	157.278	171.111	165.556	173.667	126.111	116.778	123.056	173.611	182	192.611	157.5	179.722	177.389	185.722	179.611	157.056	110.722	52.5	87.2778	78.667		0.0904781	153.094
2.3807	182.722	86.222	67.111	144.778	188.278	209.833	165.833	178.5	184.667	197.389	219.944	184.278	135.444	165.167	163.722	165.167	148.5	130.778	117.389	130.389	161.889	186.889	191.889	159.722	180.056	173.611	176.556	167.5	163.222	102.444	63.2222	95.5	81.944		0.0952387	153.653
2.4997	201.889	100.722	62.944	145.667	185.056	207.111	165.5	172.444	192.056	214.5	227.5	194.889	141.056	174.667	179.167	159.111	143.722	160.944	121.167	132	158.444	183.222	199	168.556	177.222	185.833	193.778	189.389	155.167	118.778	66.1667	92.1667	72.389		0.0999992	158.855
2.6188	192.667	105.778	77.667	148	192.167	200.611	172.111	174.056	176.611	212.833	222.667	207.222	148.278	172.722	181.667	168.611	142.944	152.889	109.389	123.167	152.5	172.278	196.056	160.611	181.167	177.111	205.667	188.5	165.778	127.667	76	80.6667	80.167		0.104764	158.977
2.7378	201.222	115.889	83.722	156.444	198.611	194.611	168.389	147.5	184.444	223.611	217.556	218.556	169.056	184.944	180.667	169.5	139.5	155.333	95.8889	130.167	148	171.833	198.611	161.167	176.556	173.611	198.389	192.333	160.222	125.278	69.2778	82.8889	85.056		0.109524	159.965
2.8568	207.333	133.444	92.833	134.056	194.556	181.5	161.389	146.611	186	221.333	225.556	216.278	162.278	183.556	191.111	165.056	141.889	167.278	90.9444	133.556	147.556	181.444	192.278	162.889	166.556	170.889	215.556	187.389	159.556	126.444	66.9444	84.3333	84.111		0.114285	160.076
2.9759	198.278	121.556	107.056	135.222	199.889	180.444	159.222	155.722	199.167	221.444	220.722	214.889	168.944	174.611	199.111	175.889	140.167	154.444	82.1111	139.167	155.389	175.222	190.944	162.056	165.833	173.889	205.778	197.722	147.944	122.167	73.1667	92.4444	105.611		0.119049	161.098
3.0949	195.5	141.889	120.167	130.833	211.5	191.056	188.389	165.278	194.444	236.611	229.5	214.722	174.222	169.611	179.5	178.278	148.222	145.889	71.2222	141.778	141	184.389	195.833	168.278	153.778	170.333	212.278	184.056	151.667	125.778	89.6667	90.5556	95.556		0.12381	163.387
3.2139	201.167	151.222	126.833	135.111	201.167	198.389	166.722	135.611	173.722	231.778	229	208.556	175	195.778	184.278	182.111	133.556	145.167	78.1111	151.278	150.778	191.278	209.333	172.833	137.444	154.278	203.944	191.444	165	119.5	77	82.4444	94.556		0.12857	162.254
3.333	190.056	159.889	133.944	143.611	203.889	186.944	166.556	150	185.889	232.111	224.5	198	184.889	196.889	184.778	184.944	141	138.556	77.8889	134.444	160.722	187.278	194.611	162.833	143.167	135.5	204.667	205.278	151.222	114.278	84.5	91.8889	96.556		0.133335	162.16
3.452	182.556	150.611	133.556	150.667	190.167	192.444	162.167	123.222	195.5	235.778	213.222	204.278	181.111	203.778	188.167	195.611	157.722	137.167	77.7778	116.222	158.5	186.5	199.556	157.333	130.167	141.167	209.833	193.444	156.222	101.444	79.1667	95.6667	104.667		0.138095	160.769
3.571	175.889	147.889	143.944	139.056	196.889	182.444	173.778	133.167	191.556	235.889	221.111	189.944	190.5	208.5	192.889	181.722	151.278	134.611	70.2222	132.833	151.611	192.833	192.5	159.667	123.333	133.611	210.167	195.833	151.389	108	76.1111	90.5	90.444		0.142856	159.7
3.6901	170.222	136	147.611	155.444	187.611	170.889	161.333	116.556	189.833	231.333	213.222	197.611	183.389	191.778	198.611	198.111	160.778	112.889	74.7778	106.278	151.556	177.444	190.944	160.667	114.611	115.722	209.222	194.389	154.444	105.722	70.8889	112.278	85.278		0.147621	155.983
3.8091	174.056	155.611	148.667	162.111	190.111	174.111	156.5	90	201.722	242.111	210.167	191	182.222	201.111	210.111	209.056	139.667	106.389	73.7222	114.333	149.944	183.444	186.056	162.167	110.556	110.167	207.611	198.5	147.389	99.667	77.1667	107.333	88.556		0.152381	156.404
3.9281	159.5	149.944	156.611	162.5	201.722	170.333	169.389	106.833	183	239.722	223.556	194.056	178.5	205.222	194.111	194.167	154.778	87.556	74.4444	106.167	163.944	181.778	188.5	138.056	110.944	92.611	192.667	198.944	140.778	105.611	75.3889	90.1111	89.444		0.157142	153.966
4.0472	137.889	146.222	147.556	172.5	193.5	170.556	142.222	87.389	176.778	240.333	212.722	192.278	185.556	213.056	204.222	183.167	134.389	93.222	76.1111	107.222	162.556	187.5	191.222	134.556	104.167	82.889	197.778	186.889	141.389	102.611	63.7778	95.8889	83.722		0.161906	150.056
4.1662	126.389	159.111	140.944	180.778	191.111	164.889	166	90.389	180.389	236.667	201.278	172.444	182.667	204.944	200.556	184.556	129.778	96.056	71.3333	107	154.278	172.444	185.278	135.944	116.722	83.778	204.667	177.056	139.389	111	62.5	89.2222	87		0.166667	148.684
4.2852	135.111	168.722	145.611	185.944	197.333	160.944	145.222	79.444	200.722	228.333	200	167.667	177.333	219.667	193.5	188.333	146	77.889	66.5556	109.167	159.222	178.667	163.222	135.611	105.333	73.389	190.778	187.833	122.611	107.556	58.5556	94.9444	79.778		0.171427	147
4.4043	116.722	150.167	145.444	186.222	202.056	147	153.111	67.222	190.667	231.389	195.333	163	168.778	215.444	205.167	183.056	123	79.889	68.1667	104.222	146.389	161.167	174.056	144.111	103.444	73.778	199.833	170.444	125.833	115.667	56.3889	81.6111	83.111		0.176192	143.391
4.5233	102.667	152.611	154.667	189.889	199.5	139.111	141.222	80.556	187.722	235.5	187.389	157.333	165.333	206.278	199.444	176.167	126	67.056	77.3889	105.389	163	168.056	174.222	127.667	100.833	76.389	198.5	166.833	137.556	115.444	51.3333	104.278	82.333		0.180952	142.96
4.6423	103.389	165.889	142.222	192.944	191.056	130.778	131.222	76.389	183.444	234.667	180.556	169.278	167.944	212	201.944	175.389	124.778	64.611	77.1111	99.833	159.389	177.167	171.833	135.778	86.167	73.5	190.667	172.222	128.944	104.278	55.3333	87.8333	86		0.185713	141.047
4.7614	93.722	169.833	143.833	192.278	196.944	128	114.889	64.833	179.222	223.778	182.333	156.944	167.611	213.278	192	173.278	127.667	67.667	69.7778	96.833	150.778	169.778	164.167	139	85	64	194.111	153	137.5	101.944	55.4444	93.1111	86.278		0.190477	137.843
4.8804	88.056	160	155.5	191.833	185.444	120.5	119.556	59.667	177.556	218.111	175	130.056	157.5	211.278	190.444	165.111	122.111	67.722	73.3889	110.556	135.778	185.722	172.111	146.278	83.056	74.444	193.389	144.167	136.444	107	64.8333	101.278	100.167		0.195238	137.093
4.9995	89.778	147.889	161.222	182.944	189.167	111.778	110.944	62.611	164	222	157.111	130.333	137.5	216.556	189.611	168.222	112.722	76.167	63.3889	99.444	148.778	174.611	154.611	143.278	93.444	69.333	174.5	134.556	129.389	114.556	69.5556	96.2222	97.667		0.200002	133.148
5.1185	79.222	135.111	146.944	193.5	184.222	115.056	98.444	57.444	178.444	214.722	162.778	112.278	157.222	208.667	198.444	172.278	109.222	69.611	70.8333	85	137.944	166.167	143.889	145.222	95.722	76.5	185.111	140.667	148.111	99.056	59.3889	89.2222	92.556		0.204763	131.182
5.2375	85.889	151.833	150.056	182.944	190.722	106.167	120.889	66.111	154.722	216.611	157.778	112.222	153.056	215.222	186.722	157.944	100.556	77.889	72.2222	83.333	128.056	170.722	130.222	155.056	82.167	73.778	167.722	121.778	130.278	99.222	71.5556	81.2222	101.944		0.209523	128.988
5.3566	73.167	148.889	155.944	175.778	169.056	116.722	108.611	77.5	139	219.944	164.444	103.778	140.833	205.833	175.611	174.722	90.278	75.333	57.5	65.556	121.833	155.611	137.333	143.556	82.056	85.056	155.944	104.5	131.556	105.722	78.7222	91	86.611		0.214288	124.788
5.4756	83.278	143.167	149.389	159.222	168.889	121	99.389	74.056	129.5	222.778	159.722	82.944	131.833	206.944	184.667	152.667	100.833	73.389	63.5	64.611	118.5	141.222	130.833	154.722	80.5	70.167	136.556	95.278	142.778	105.5	84.6111	87.8889	101.444		0.219049	121.872
5.5946	81.444	135.167	158.611	183.944	144.722	110	98.167	67.167	135.222	218.944	164.389	95.833	121.5	208.611	177.167	164.611	83.556	72.611	58.1667	60.667	108.167	133.722	123.5	158.111	87.111	84.556	138.944	97.444	145.778	102.944	79.6667	93.7222	101.222		0.223809	121.072
5.7137	86.222	149	156.722	190.889	130	103.833	85.833	74.667	122.778	209.167	160.722	87.222	129	203.556	173.333	158.167	90.389	75.944	50.5	65.333	86.556	114.556	113.778	138.278	67.222	73.444	130.444	93.056	131.444	94.444	75.3889	74.4444	80.222		0.228574	114.441
5.8327	87.056	133.5	155	180.056	116.667	105.444	94.889	76.222	124.444	216.611	158.222	75.389	118.611	208.167	186.222	141.944	77.5	63.778	54.1111	54.667	87.056	89.722	120.722	150.111	68.056	76.889	106.556	82.944	134.278	86.167	75.5	70.3333	92.222		0.233334	111.184
5.9517	89.111	133.389	162.722	177.944	124.5	103.333	88.5	77.167	111.667	199.222	174.611	74.667	115.556	201.944	184	135	75.5	72.056	54.0556	57.056	91.111	90.333	111.889	142.722	65.778	85.444	80.444	79.222	128.444	85.556	85.5	72.0556	86.444		0.238095	109.604
6.0708	89.056	117.389	165.667	168.389	116.111	111.222	85.778	66.056	99.889	193.778	149.778	76.889	111.167	207.722	183.111	125.667	65.944	70.667	59.2222	50.889	86	83.333	104.167	150.333	73.222	81.389	83.333	70.333	130.444	81.667	82.9444	71.1111	89.111		0.242859	106.115
6.1898	97.222	131.667	162.667	168.722	106.444	103.611	86.833	66.222	106.667	186	158.222	84.667	96.056	210.222	171.222	111.111	71.222	63.722	52.2222	56.111	78.389	69.278	107.556	135.722	64.5	78.778	71.611	75	119.611	81.167	81.8333	69.6111	84.833		0.24762	103.295
6.3088	93.944	114.722	161.111	149.5	117.167	105.333	90.611	68.889	100.333	183.389	141.5	75.333	109.333	206.833	163.611	112.5	68.889	62.778	52.8333	46.389	69.889	69.056	100.611	156.111	62.778	73.944	67.889	78.889	125.222	81.611	70	68.2778	75.333		0.25238	100.746
6.4279	105	111.833	139.667	139.944	111.833	104.611	92.111	62.5	94.222	173.222	141.778	92.222	110.944	202.222	147.056	114.056	60.444	65.167	48.3889	50.667	64.944	70.389	101.778	144.833	60.167	68.5	69.833	74.5	109.111	82.556	66.2778	76.5556	74.389		0.257145	97.9309
6.5469	84.944	114.333	147.444	144.278	117.278	90.167	84.778	58.722	91.444	157	126.278	77.5	99	192.389	150.444	111.778	72.889	58.556	59.8889	47.944	63.722	53.611	116.556	141.667	69.5	69.056	70.333	70.944	109.333	76.5	65.8889	65.5	80.444		0.261905	95.1548
6.6659	105.722	120.556	142.278	139.667	101.667	89.611	70.278	60.833	90.389	159.722	125.722	75.667	108.833	169.389	133.944	108.389	77.944	66.333	64.8889	54	54.833	51.444	116	142.556	59.333	68.722	65.667	67.167	98.833	61.556	79.2222	66.0556	77.5		0.266666	93.1734
6.785	94.667	109.278	122.333	139.444	93.778	80.167	85.611	60.111	77.389	147.278	127.667	80.778	89.5	162.333	121.056	104.278	83.5	69	56.7778	49.056	45.667	52.611	117.278	142.056	70.278	64.778	64.222	68.667	101.556	73.056	70.3333	70.2222	78.056		0.27143	90.0843
6.904	89.944	111.444	128	135.889	107.056	86.722	80.222	61.611	77.444	125.5	122.167	73.111	87.722	147.333	127.389	96.778	79.833	65.889	54.2222	46.778	48.667	49.333	108.278	131.889	66.444	75.833	70.833	61.333	111.889	71.944	66.1667	64.6111	82.056		0.276191	88.3131
7.023	99.889	115	118.278	139.278	91.722	86.667	81.333	62.111	82.444	143.611	108	83.444	101.833	138.333	110.611	101.389	76.667	64.722	64.1111	47.556	53	53.556	110.056	118.778	68.722	80.889	79.167	59.889	98.056	76.889	62.8333	53.6111	78.222		0.280951	88.202
7.1421	96.389	106.667	103.444	138.778	100.278	78.5	88.944	56.778	72.5	122.444	108.556	85.889	90.889	120.278	98.444	84.667	77	65.111	63	43.333	40.278	46.556	99.222	124.167	71.5	66.222	77.333	73.611	99.5	72.444	64.2778	48.6111	85.167		0.285716	83.963
7.2611	91.111	120.056	106.778	134.056	97.889	74.722	71.722	64.5	76	110.167	99.222	91.056	92.5	122.778	95.944	98.111	84.778	59	49.5	46.278	44.167	44.833	102.167	118.944	77.944	65.944	80.833	48.222	93.778	74.5	51.2222	54.3889	82.889		0.290477	82.6061
7.3801	105.833	104.722	104.056	143.5	98.889	70.056	80.444	57.722	68.722	106.889	100.333	95.5	82.389	101.833	97.056	89.167	94.278	69.5	55.5556	46.056	41.944	48.278	105.556	130.611	72	62.5	88.889	53.5	93.833	74.611	51.7778	49.7778	83.722		0.295237	82.7121
7.4992	99	89.944	90.722	137.722	101.278	67	78.111	53.556	77.444	112.556	98.222	95.611	86.722	83.833	88.889	90.333	96.833	73.222	58	40.833	41.389	48.056	81.944	117.611	81	65.5	100.111	53.111	87.389	81.5	45.1667	55.4444	77.944		0.300002	80.4848
7.6182	108.111	80.111	96.889	128.944	94.722	65.222	70.5	57.5	62.833	100.167	95.444	84.167	89.111	78.611	92.833	67.444	104	63.111	64	55.167	44.833	44.889	101.5	121.111	79.667	63.389	92.111	67.333	80.778	75.611	54.6667	44.1111	69.556		0.304762	78.7407
7.7372	99.778	101.278	86.611	105	103.111	70.833	63.611	44.722	67.5	104.278	93.833	93.167	81.167	77.222	98.944	61.444	108.833	75.222	55	53.722	38.056	46.611	93.167	103.611	78.5	58.5	96.222	57.444	85.833	75.722	48.1111	54.0556	73.111		0.309523	77.4006
7.8563	117.444	88.278	79.111	111.889	92.5	62.5	66.722	54.389	60.5	101.556	95.222	85.333	77.778	78.611	84.056	62.667	109.722	67.667	54.7222	55.111	40.278	54.056	89.833	104.889	76.111	53.889	100.5	64.833	77.722	75.556	44.2222	49.1111	59.556		0.314287	75.6465
7.9753	95.5	88	77.389	119.5	104.611	69.667	65.611	49.389	61.111	113.944	78.889	87.111	82.5	72.778	77.556	51.778	106.167	67.722	51.6667	53.722	39.222	43.444	74.778	101.333	74.222	53.167	99.333	67.167	70.111	70.056	44.1667	56.3889	58.889		0.319048	73.5421
8.0943	103.667	85.111	69.111	135.111	106.833	62.222	65.778	56.333	56.556	101.556	68.333	110.5	77.611	65.5	88.444	58.444	99.944	60.722	48.7778	56.222	41.667	50	72.056	90.667	61.667	64.778	94	75.944	78	71.278	52.3333	55	59.111		0.323808	74.0387
8.2134	99.333	86	72.611	130.667	95.5	61.5	59.389	52.167	58.889	111.889	69.556	98.167	78.944	65.5	77.667	58.278	116.833	70.722	59	51.944	36.167	52.167	75.833	84.722	68.778	65.389	88.444	68.389	70.111	74.278	46.9444	49.6111	57.278		0.328573	73.1111
8.3324	107.111	80.278	77.833	134.333	107.167	54.278	59.944	52.778	57.778	108.333	67.833	104	67.611	70.889	69.056	51.444	104.167	51.556	49.1111	66.111	32.333	53.333	86.278	73.278	54.944	60.222	86.778	58.333	77.278	64.5	36.6667	40.9444	52		0.333333	70.2576
8.4515	99.722	77.722	73.444	121.222	98.611	55.278	53.167	43	56.778	99.722	76.722	104	77.5	63	70.222	48.889	110.944	54	44.0556	61.667	38.667	48.778	83.111	69.556	65.778	50.944	85.111	49.556	78.056	80.111	35.5556	44.7778	45.833		0.338098	68.6515
8.5705	95.056	77	72.389	130.944	103.778	63.167	57.111	47.444	59.5	98.333	75.389	93.889	60.722	58.222	70.056	55.333	94	52.722	49.0556	57.778	34.833	56.611	73.167	75.944	56.222	54.111	91.389	53.833	64.944	71.111	46.2778	45.6111	61.5		0.342858	68.4073
8.6895	94.778	79.556	78.333	125.778	98.222	53	49.167	46.111	62.944	85.833	71.5	83.611	71.556	63.778	82.333	61.333	87.778	60.056	52.1667	69.667	40.944	52.444	74.722	68.278	52.389	58.222	77.833	46.5	72.778	62.5	39.6667	44.1111	69.833		0.347619	67.8097
8.8086	93.056	74	70.222	125.222	88	51.5	53.778	54.111	55.056	92.278	63.333	95.778	77.667	56.222	81.389	58.222	92.722	52.333	44.5556	72.056	36.222	60.167	84.444	69.944	58.333	56.667	88.556	55.889	76.722	54.778	34.4444	48.3333	64.111		0.352383	67.8822
8.9276	92.167	75.333	83.167	97.167	98.111	59.056	58.889	46.056	53.778	88.722	61.556	86.278	78.333	52.667	82.333	46.667	94.222	46.111	50.9444	59.111	46.889	64.667	74.667	91.111	52.278	64.389	91.5	63.278	63.556	53.056	35.8333	47.8889	48.889		0.357144	66.9294
9.0466	85.167	77.833	80.333	103.556	109.667	70.778	56.944	53.222	51.389	83.167	66.833	80.5	77.611	56.944	84.944	55.722	80.889	57.222	49.7222	65.167	40.167	57.722	77.667	87.667	50.889	65.667	92.5	65.333	75.167	51	39.5556	39	50.556		0.361905	67.894
9.1657	101.833	87.833	84.722	92.889	89	64.667	56.778	53.833	50.556	85.778	48.722	74.778	78.222	58.5	94.889	58.944	79	52.222	51.0556	64.833	35.5	64.778	78.389	95.167	50.778	60.056	89.333	68.667	67.722	43.611	43.2778	43.2778	57.056		0.366669	67.4748
9.2847	94.722	94.333	74.278	94.722	96.611	63.056	69.667	51.444	46.278	85.722	63.833	79.889	81.389	58.889	87.167	66.389	86.778	47.5	45.6111	57.333	31.667	55.667	96	82.444	52.667	55.778	91.778	75.056	66.667	36.889	38.2778	47.9444	64.444		0.37143	67.9058
9.4037	84.444	88.722	78.056	98.944	107.111	70.778	59.278	63.667	40.833	88.944	54.278	83.111	87.5	57.722	78.5	65.667	83.889	46.778	48.3333	54.444	33.944	50.5	74.111	85.333	47.889	62.333	94.556	76.944	73.056	31.611	31.7778	44.2778	57.333		0.37619	66.808
9.5228	89.333	82.278	89.722	101.889	102.944	73.278	61.889	63.167	49	87.056	61.778	67.944	71.556	63.222	75.556	68.444	84.5	46.278	54.8889	58.389	38.778	55.056	76.889	74.778	42.667	56.944	94.722	82.778	68.333	36.889	26.0556	43.6111	54.333		0.380955	66.8165
9.6418	84.611	93.222	80.333	113.444	98.722	62.111	58.667	59.611	39.111	91.278	67.167	74.222	68.944	63.111	68.056	75.278	84.278	48.5	51.8333	51.333	38.778	45.944	74.111	97.722	48.056	58.778	81.333	63.444	61.444	35.056	30.7222	34.0556	54.833		0.385715	65.3972
9.7608	76.056	96.556	82.722	105.333	99.944	66.333	51.833	57.667	53.722	89.944	63	77	67	62.778	61.167	79.611	81.667	52	48.6111	61.056	35.889	50.722	76.667	85.556	49.944	61.278	80.444	70.944	55	28.778	29.7222	37.8889	59.778		0.390476	65.3519
9.8799	68.778	82	84.111	101.722	92.444	78.222	46.722	59.333	41.167	99.722	64.167	80.5	64.278	65.444	59.056	80.833	75.722	41.722	50.8889	48.556	36.167	51.222	74.611	91.278	41.389	54	75.222	48.278	55.056	31.444	30.9444	34.2778	57.556		0.39524	62.6313
9.9989	77.222	91.167	85	102.389	97.833	71.333	55.944	61.278	36.167	107.222	67.889	79.556	62.944	61.444	54.833	67.556	72	41.278	53.2222	47.778	36.778	49.333	73.778	75.389	48.222	59.944	71.833	57.222	57.833	30.5	29.7222	41.1111	55.833		0.400001	63.0774
10.1179	79.833	75.278	90.444	94.444	94.278	73.333	38.611	54.278	46.056	108.722	66	81.722	68.611	57.944	52.611	79.333	71.167	45.389	45.8889	45.833	36.333	48.056	76.222	77.833	56.167	56.389	72.111	58.111	51.556	24	25.7222	46.5556	52.611		0.404761	62.1649
10.237	84.889	68.111	78	106.778	92.833	68.556	36	51.444	46.167	111.056	60.389	73	55.222	71	51.944	76.222	76.278	40.778	49.4444	42.611	32.833	49.444	77.222	67.056	45.667	55.444	71.222	55.222	47.111	30.111	31.2778	44.3889	53.833		0.409526	60.6532
10.356	77.778	71.278	85.333	90.611	91.222	61.167	37.722	41.833	45.389	120.444	68	74.167	54.167	71.222	62.722	85	71.833	48.667	51.1111	43.722	37.389	50.944	70.389	71.389	46.889	54.056	74.667	62.111	45.778	26.333	28.5556	40.1111	44.722		0.414286	60.8098
10.475	73.444	68.167	84.444	86.556	74.111	64.556	36.5	35.667	50	128	70.556	68.444	62.833	61.333	63.167	89.278	74.667	49.611	49.6111	48.167	36.944	57.167	63.278	69.111	46.667	50.444	82.278	64.389	41.444	26	28.7222	35.1111	66.611		0.419047	60.8266
10.5941	86.222	73.444	81.667	94.667	78.222	74.667	32	34.444	50.833	120.278	58.333	82.167	62.389	65.556	63.5	87.333	65.389	46.111	46.8889	45.278	37.5	55.722	59.111	53.389	53.333	45.889	74.5	65.611	46.722	26.333	27.5556	43.3889	55.389		0.423811	60.4192
10.7131	78.833	68.111	87.111	86.5	68.944	63.389	28.278	27.833	53.167	117.389	71.722	85.611	64.833	70.111	59.667	86.5	70.722	43.889	57.1111	49.722	41.667	50.944	61.889	67.056	45.056	46.333	64.667	65.722	39.778	25.5	23.1111	39.7778	48		0.428572	59.3619
10.8321	63.611	64.389	83.556	87.611	73.5	71.389	29.722	26.556	47.722	120.611	66.944	75.111	66.5	60.389	58.333	69.444	68.778	55.778	48.5	38.444	41.5	44.444	54.556	59.889	47.833	47.167	76.778	68.778	45.5	28.167	29.7222	46.0556	48.556		0.433333	58.0556
10.9512	63.056	62	88.333	81.5	70.056	61.444	27.056	23.611	53.222	116.056	64.778	70.333	64.611	64.611	56.444	80.833	69.222	44.5	56	48.944	49.889	52.444	55.444	57.5	48.611	49.389	78.833	62.556	40.167	23.167	29.1111	53.7222	60.333		0.438097	58.4175
11.0702	59.111	59.667	95.778	78.111	80.611	63.889	21.944	24.222	54.333	111.722	66.278	80.056	58.722	67.222	63.278	77.444	71.722	52.444	43.5556	48.222	47.278	47.944	54.944	58.5	48.333	55.556	86.833	67.111	39.167	25.5	30.6111	52.6111	57.167		0.442858	59.0875
11.1892	69.944	61.778	104.444	86.222	76.556	59.833	22.389	21.944	61.333	118.889	57.778	75.778	54.611	56.833	73.556	71.444	78.889	45.389	55.4444	45.056	45.944	55	58.833	56.389	51.889	49.167	91.889	67.833	45.5	31.056	27.3889	48.5	57.333		0.447618	60.1464
11.3083	63.667	53.333	99.611	78.889	75.444	66.833	15.722	16.5	53.833	108.667	64.278	82.833	57.889	67.611	68.167	70.222	82.833	49.944	47.5556	45.944	44.722	55	68.389	49.944	44.5	40.944	88.389	60.167	40.833	23.056	27.5	49.2222	62.556		0.452383	58.3333
11.4273	62.833	61.5	100.889	76.222	76.889	58.611	20.5	20.944	51.722	102.667	73	78.944	53.111	47.444	73.222	77.889	70.111	42.611	50.5556	45.333	47.722	56.5	51.5	49.611	44.444	56.778	80.111	74.056	49.667	25.611	35.8889	46.7778	67		0.457143	58.505
11.5463	60.333	59.833	85.778	78	69.611	47.278	19.556	20.667	51.944	94.167	53.333	80.167	47.222	54.389	82.167	60.889	74.333	48.944	46.6111	48.833	46.667	56.833	53.556	37.278	47.556	49.778	88.722	62.722	57.056	22.722	31.6111	40.6667	65		0.461904	55.8855
11.6654	73.778	49.667	97.722	73.167	74.222	51.778	17.167	17.167	56.611	93.722	58.611	75.167	61.889	49.278	70.222	58.444	78.167	43.556	52.7778	40	51.889	57.778	56.722	41.722	41	53.444	83.333	64.889	62.111	20.778	24.2222	47.1111	63.389		0.466668	56.4091
11.7844	63.5	58.944	82.444	68.722	75.944	48.944	14.778	17.556	54.333	104.889	54.833	69.333	60.944	48	82.056	62.056	82.667	43.444	53.1111	41.833	44.167	57.778	50.611	37.222	38	58.611	80.667	55.5	47.444	30.056	28.5	42.2778	67.222		0.471429	55.3451
11.9035	78.389	61.333	97.111	74.833	78.222	55.889	14.833	15.611	51.722	84.833	66.722	66.333	49.278	42.889	75.5	62.556	79.278	47.556	45.8333	47.333	46	54.722	47.056	37.056	41.056	60.722	78.833	58.222	55.444	23.389	30.2222	40.8333	66.889		0.476193	55.6515
12.0225	73.333	60.667	90.222	65.5	75.833	56.278	19.889	13.333	50.389	83.611	52.722	70.944	55.667	54.389	65.278	59.889	77.667	45.333	56.3889	47.667	47.5	64.944	48.333	33.556	43.611	51.889	78.889	53.111	62.833	29.556	31	41.3333	64.778		0.480954	55.3434
12.1415	84.611	48.667	83.778	59.389	76	46.889	12.944	15.111	45.778	79.556	45.611	63	47.444	37.833	68.722	54.833	76.389	47.167	50.3333	45.667	42.222	65.889	54.778	26.722	36.833	52.556	78.667	49.944	55.833	29.333	33.5	39.3333	43.944		0.485714	51.4932
12.2606	78.5	53.611	90.722	75.667	69.333	36.5	20.556	15.5	44.667	70.722	54.167	62.278	52.111	41.5	75.333	55	65.5	46.111	53.3333	46.722	44.944	62.056	55.722	30.5	41.056	52.889	91.833	55.778	55.056	22.833	33.5556	33.3889	53.5		0.490479	52.7559
12.3796	86.833	61.556	103.778	59.222	80.667	41.722	14.333	14.167	35.111	78.056	50.278	63.111	49.667	43.333	71.944	53.5	72.778	50.722	60.6111	33.944	50.667	54.5	52.111	24.333	32.833	53.556	77.667	67.611	52.556	27.556	30.5556	36.3333	43.556		0.495239	52.399
12.4986	71.611	62.889	103.556	61.722	61.167	46.722	20.611	11.944	29.889	79.778	53.278	64.556	44.111	42.667	59.944	56.167	72.778	42.222	54.4444	40.444	41.444	62.611	54.222	22.111	35.722	52.833	80.611	49.667	64.056	28.556	30.8889	42.0556	50.389		0.5	51.3838
12.6177	84.611	60.722	83.778	69.833	63.5	41.778	16.944	11.944	32.722	89.333	53.333	59.722	42.722	41.278	58.278	48.722	66.833	47.5	59.3889	46.5	47.389	46.778	56.167	24.278	30.167	69.5	91.111	54.611	57.5	27.778	32.4444	38.9444	44.389		0.504765	51.5303
12.7367	79.944	47.444	95.833	82.056	57	40	18.389	14.611	30.778	84.778	50.333	56.278	41.167	41.556	64.333	48.111	62.444	41.778	57.0556	41.222	50.944	49.389	52	24.222	27.333	67.833	94	62.667	60.111	28.444	31.3889	38.0556	47.333		0.509525	51.1767
12.8557	78.278	56.667	94.278	71	69.667	41.111	19.167	12.833	24.5	92	53.889	62.667	34.222	45.444	63.556	43.444	57.5	41.833	48.3333	42.056	47.167	54.222	53.444	18.222	25.444	56.333	84.778	63.722	61.556	23.278	31.5556	40.8333	45.222		0.514286	50.2492
12.9748	77.444	51.833	88.278	75.444	72.222	39.889	15.111	11.889	27.722	87.944	50.5	59.611	31.278	38.667	60.167	50.444	54.611	43.722	52.2778	46.278	38.5	59.056	47.556	19.389	28.222	65.778	88.5	63.278	60.778	25.444	31.2778	40.7222	51.167		0.51905	50.1515
13.0938	73.944	47.389	78.722	79.5	58.722	39.833	11.5	15.278	22.222	82.278	46.889	53.556	31.389	31.389	49.389	49.278	44.111	45.222	46.6111	43.056	45.722	48.722	51.111	20.889	23.889	74.222	77.5	54.278	71.556	24.389	35	43.2222	47		0.523811	47.5084
13.2128	77	55.778	76.889	72.167	61.389	32.167	17.944	13.389	20.667	83.389	44.667	57.222	27.278	36.333	40.167	44.889	50.5	39.778	46.8889	38.056	38.389	50.833	58.056	20.056	24.389	61.833	73.667	58.167	76.667	33.611	42	40.6667	48.444		0.528571	47.3738
13.3319	61	49.389	77.111	81.778	49.833	31.389	12.278	10.389	16.5	75.278	49.222	55.944	36.222	31.833	39.389	44	51.278	34.667	51.1111	42.556	35.722	51.778	48.667	15.333	22.778	73.5	75.167	53.333	58.889	29.389	37.4444	41.2222	50.722		0.533336	45.3064
13.4509	61.889	49.611	68.111	88.611	53.944	28.722	13.167	13.889	16.333	89.833	48.333	46.944	30.222	27.222	47.444	46.167	44.722	44.056	38.3889	36.056	36.556	45.389	50.778	16.222	22.889	61.889	73.167	49.333	64.111	29.667	31.7222	43.6111	44.889		0.538096	44.3602
13.5699	52.778	44.889	79.167	81.778	51.444	31.056	14.222	10.667	16.667	84.5	48.111	53.389	28.556	29.444	47.5	47.833	56.278	41.5	41.4444	37.111	43.167	45.667	55.722	18.167	18.222	51.056	67.778	45.778	60.833	33.222	37.5556	44.6111	39.556		0.542857	44.2324
13.689	58.389	54.389	63.611	85.056	62.611	34.833	10.5	11	15.889	69.889	45.833	42.611	28.556	31.111	37.167	51.944	52.5	40.833	52.2222	37.778	44.778	49.889	56.056	15.5	21.944	64.056	62.556	50.389	57.556	25.556	34.3333	42.0556	46.611		0.547621	44.1819
13.808	50.556	50.167	64.833	86.444	55.667	32.222	18.778	10.833	16.778	66.5	45.667	45.611	30.611	27.389	44.333	46.278	50.5	35.222	45.2778	35.5	43.722	45.722	61.944	14.944	14.889	55.611	55.167	47.667	53.444	29.944	33.1667	42.7778	47.444		0.552382	42.5942
13.927	45.722	53.667	69.056	87.889	53.667	33.667	9.056	13.389	16.056	57.167	45.167	38.389	28.889	28.111	38.111	51.778	50.444	34.444	49.1667	30.056	35	55.389	64.167	14.056	23.722	56	57.222	46.778	50.889	31.611	36.7222	40.2778	45.778		0.557142	42.1668
14.0461	47.833	59.722	62.556	100.167	47.222	43.667	13.111	8.889	12.833	61.667	41.222	42	30.278	29.167	38.667	50.444	51.944	36.833	48.8889	32.222	34.333	41.111	53.944	14.778	20.889	59.611	58.722	35.278	50.167	36.889	33.3333	45.5	47		0.561907	42.1481
14.1651	50.389	55.778	61.889	92.444	51.722	37.722	11.389	9.722	13.611	59	57.5	48.722	30.5	26.278	37.444	47.056	58.333	36.889	51.9444	26.611	39.889	41.167	60.167	18	16.278	58.5	62.722	44.056	61.722	28.889	37.6667	44.5	52.611		0.566667	43.367
14.2841	49.778	51.056	65.889	77.167	44.5	35.611	13.611	10.611	14	52.389	50.778	38.778	28.333	27.667	38.222	44	50.5	34.667	53.9444	30.222	32	55.056	60.111	12.5	17.333	51.389	48.333	41.389	47.722	26.889	38.8889	46.8889	55.944		0.571428	40.7929
14.4032	43.333	55.944	57.667	85.444	40.722	26.889	10.167	10.389	10.333	44.667	44.889	32.167	32.667	19.722	41.722	42.833	47	35.611	55.1667	32.389	39.278	40.5	52.444	11.5	15.056	49.278	50.333	38.833	54.667	25.278	37.5	42.2778	53.667		0.576193	38.798
14.5222	46.111	50.278	66	90.389	49.333	31.5	12	12.278	12.944	43.056	44.889	38.167	22.611	30.944	35.611	32.389	47.611	38.556	49.6667	27.667	31.778	31.556	73.944	13.722	17.778	46.167	49.056	44.556	51.389	26.556	33.3333	44.8889	44.278		0.580953	39.1213
14.6412	49.5	44.667	57.667	87.833	44.278	23.111	11.778	9.111	13.889	40.667	43.389	33.222	29	23.056	33.389	43	45.944	37.611	49	24.222	35.389	44.556	58.611	10.333	18.5	44.056	57.444	49.5	41.722	23.222	37.1111	42.3333	49.778		0.585714	38.0876
14.7603	61.833	48.5	53.056	76.833	51.222	28.556	16.944	10.778	16.5	34.667	42.667	37.111	34.111	23.389	29.611	35.778	41.778	39.222	48.2222	27.722	37.056	45	51.944	16.556	14.944	43.556	51.889	49.5	53.167	24.889	32.6111	32.5	46.944		0.590478	38.1532
14.8793	57.444	47.056	48.611	77.111	48.556	25.222	12.056	9.278	14.611	35.556	48.611	35	28.667	24.389	23	33.167	37.278	38.333	55.2222	23.167	33.389	41.222	54.833	12.611	11.333	41.111	54.056	45.667	56.611	31.222	32.6111	41.2778	45.333		0.595239	37.0792
14.9984	57.167	49.389	67.778	64.889	47.667	26.278	14.167	12.111	11.333	42.667	49.5	33	25.556	23.667	34.333	36.833	46.611	47.389	46.1111	25.389	37.056	33.444	53.5	13.667	13.944	35.778	48.833	50.111	59.222	22.222	35.1667	40.3889	42.278		0.600003	37.8014
15.1174	54.222	53.389	54.667	67.556	48.556	28.167	14.833	10	11.167	43.389	46.278	30.944	26.778	19.722	26.444	35.278	39.389	30.722	49.7222	29.722	31.833	33	46.778	12.556	13.611	35.444	54.389	45.222	52.389	29.833	34.3333	43.5	44.889		0.604764	36.3249
15.2364	57.611	51.222	60.333	64.889	52.222	22.722	11.111	5.778	12.611	36.889	42.833	32.944	29.333	14.722	30.5	37.667	36.944	43.333	46.6667	27.167	28.722	33.167	44.056	13.944	16.556	29.722	48.056	37.167	56.111	34.833	34.0556	40.2222	42.222		0.609524	35.6464
15.3555	51.389	56.278	52.111	70.444	52.389	23.111	13.778	7.5	10.667	35.333	52.222	41.667	20.944	18.778	22.222	33.944	46.056	36.722	45.1111	20.722	27.722	39.722	38.944	9.056	14.5	30.278	64.444	38.667	48.611	37.111	32.5556	44.8889	38.889		0.614289	35.6599
15.4745	59.444	58.167	55.111	58.444	44.389	22.611	9.611	8	12.222	34.389	43.278	26.833	17.556	17.222	19.444	32.222	47.444	35.444	40.0556	20.333	28.722	34.444	38	11.167	14.556	30.056	64.167	35.278	46.111	32.5	35.9444	40.6111	45.389		0.619049	33.9141
15.5935	56.722	52.722	57.167	72.667	53.111	22.778	11.833	10.667	14.111	42.667	45.722	31.556	19.167	18.667	24.889	34.556	44.056	44.167	36.3889	22.833	26.556	39.556	31.333	8.278	13.056	25.667	72.5	40.5	45.722	33.167	30	38.1667	40.167		0.62381	35.1853
15.7126	43.667	64.222	48.556	64.333	49.278	25.556	14.278	8.056	11.778	41.056	47.722	32.056	21.389	17.667	21.667	31.667	40.444	32.944	36.8889	19.944	32.778	36.278	41.722	14.167	15.333	23.056	70.889	34.667	37.111	36.167	30	41.2222	35.5		0.628574	34.0018
15.8316	52.5	56	58.444	67.833	48.333	26.667	11.944	8.056	8.778	40.5	32.667	31.667	18.444	17.889	17.333	28.278	34.611	37.167	38.5556	24.111	26.778	37.389	39.167	12.722	10.111	30.389	61.667	39.278	44.056	37.667	30.0556	41.7222	36.889		0.633335	33.5657
15.9506	50	57	60	63.611	47.389	25.889	11.833	8.944	11.444	36.389	47.556	34.611	20.167	19.5	16.833	26.056	41.889	31.889	41.4444	19.722	25.444	36.556	42.778	8.444	11.5	23.444	58.056	42.222	44.389	33.056	30.9444	43.3889	44.889		0.638095	33.8569
16.0697	44.778	58.944	53.389	70.611	43.778	25.056	11.611	9.556	12.111	41.222	50	34.278	20.167	22.833	23.333	25.778	44.167	35.667	43.7778	20.167	30.444	36.389	44.111	11.389	10.111	29.667	62.222	45.667	45.722	33.111	28.9444	46.9444	35.611		0.64286	34.8957
16.1887	51.833	52.111	50	65.889	38.167	26.333	12.333	7.667	11.944	42.111	48.278	33.056	22.889	14.833	19.667	22.556	41.611	29.278	49.3333	15.333	28.167	33.778	36.389	8.611	8.667	34.833	60.222	53.944	45.389	37.944	31.3889	40.6111	36.5		0.647621	33.6869
16.3077	48.833	45.778	46.944	56.722	47.889	29.444	11	12.222	9.5	45.667	43.944	30.333	20.056	21	16.889	25.556	42.5	29.5	52	21.889	28.167	39.056	36.944	13.5	10.444	31.111	59.444	44.778	52.389	35.667	28.6111	44.9444	39.667		0.652381	34.0118
16.4268	53.278	49.667	48.556	57.889	44.722	36.5	12.111	8	11.889	41.5	36.611	43.667	27.333	19.556	18.333	24.722	42.667	34.5	47.1111	22.722	24	33.611	34.944	9.278	9.889	26.389	65.222	42.111	45.667	32.833	29.3889	36.9444	41.333		0.657146	33.7256
16.5458	51.222	52.056	49.667	57.722	46.778	35.444	13.556	6	8.778	44.889	46.722	36	25.667	14.444	18.167	27.056	37.833	31.778	50.0556	22.111	26.944	37.389	31.444	8.222	13.056	25.722	63.944	44.389	49.722	27.5	29.9444	38.6667	32.722		0.661906	33.5034
16.6648	50.444	55.611	47.556	53.778	41.222	31.278	14	10.222	12.833	48.556	41.056	36.111	21.5	14.611	15.333	22.833	43.333	30.389	59.6111	20.222	32.222	41.778	31.722	10.722	9.778	24.5	57.389	39.889	48.333	34.167	34.1667	31.6667	46		0.666667	33.7222
16.7839	48.278	47.222	46.389	51.889	40.444	30.278	10.389	13	10.278	42.056	50.833	40.111	19.5	10.389	18.111	20.944	46.889	32.111	56.8889	18.444	26.556	38.444	29.944	9.111	10.5	30.556	62	48.389	59	33.278	34.7222	31.3333	34.333		0.671431	33.4124
16.9029	47.111	48.333	50.833	55.722	45.389	39	15.667	17.056	9.278	36.778	48.167	39.111	18.111	15.111	17.278	25.5	49.833	30.333	46.1111	18.833	26.556	42.778	24.556	7	11.278	26.056	53.5	46.111	53.722	25.5	29.8333	33.4444	36.389		0.676192	33.0388
17.0219	47.389	49.333	54.556	67.611	48.389	41.722	16	8.833	9.167	36.667	46.556	30.778	20.889	19.333	15.611	22.167	44.389	32.222	44.7778	22	28.333	50.944	27.778	7.333	9.444	26.111	62.667	47.278	60.667	33	33.6667	25.8889	33.444		0.680952	34.0892
17.141	48.833	50.167	56.556	55.444	53.167	41.444	14.556	7.833	10.389	32.778	47	31.111	19.556	16.944	12.444	22.333	34.944	30.278	45.8333	23.667	31.556	44.5	31.667	7.611	10.833	22.278	49.611	42.333	59.611	33.056	27.5	25.5556	41.833		0.685717	32.8249
17.26	45	46.889	56.167	50.889	53.222	39.111	13.167	10.5	11.167	34.889	40.5	34.889	17	20.833	14.778	28.556	35.222	34.556	45.5	20.333	27.444	42.722	19.222	10.278	8.667	20.833	52.611	37.222	54.833	35.5	28.8889	28.9444	42.889		0.690477	32.2189
17.379	55.056	47.333	58.444	58.222	49.444	41.5	13.5	9.222	9.5	32.556	45.5	32.556	23.778	14.111	19.722	22.667	31.611	30	28.9444	20.833	30.556	40.667	22.333	8.111	7.389	25.444	53.278	43.278	50.056	34.167	26.5556	34.7778	33		0.695238	31.9428
17.4981	53.667	48.111	59.944	54.222	38.778	52.333	12.556	8.444	10.111	35.611	50.222	39.556	17.389	16.944	12.556	23.222	37.444	28.278	30.7778	18.333	26.111	37.889	24.556	7.111	12.556	23.889	50.833	40.778	59.778	33.222	33.8333	29.4444	36.222		0.700002	32.2643
17.6171	49.556	52.111	51.444	61.833	46.389	49.889	12.722	11.056	8	31.889	39.333	38.222	22.5	15.833	17.056	31.278	42.278	27.667	32.8333	20.5	32.778	35.889	19.333	9.944	10.722	26.056	55.722	33.444	55.556	37.444	32.2222	34	39.222		0.704763	32.8703
17.7361	53.722	50.444	53.833	55.833	49.611	50.333	10.444	11.444	11.667	24.556	43.667	43.389	18.611	14.389	12.667	20.444	36.444	25	30.6111	20.111	27.056	34.444	22.667	12.333	9.222	21.833	53.833	44.167	51.389	35.611	32.2778	34.0556	32.833		0.709523	31.7861
17.8552	49.889	49.778	60.889	48.833	45.556	54.389	17.833	12.111	8.722	26.833	42.722	31.833	19.333	15.389	13.056	22.278	31	26.833	30	21.167	26.278	44.667	18.889	13.611	8.389	20.278	53.111	43.056	66.444	33.444	35	27.4444	34.389		0.714288	31.9226
17.9742	47.667	47.278	54.611	42.111	44.056	57.889	16.778	12	10.778	27.278	48.111	39.167	21.333	14.833	18.667	20.556	32.278	24.278	28.9444	24.444	26.111	43.444	24.167	9.444	12	19.722	42.278	33.222	56	44.444	34.2778	30.1667	36.111		0.719049	31.6498
18.0932	53.167	46.833	44.056	46.167	41.556	52.778	18.889	11.667	9.333	29.278	45.056	34	20.611	12.778	21.056	22.222	34.667	24.611	30	24.667	30.611	37.944	16.167	13.667	9.722	23.722	54.444	41.722	62.111	33.278	32.4444	29	34.167		0.723809	31.5876
18.2123	62.056	54.889	54.778	50.389	37.167	61.5	18.222	14.278	11	26.833	38.5	35	22.389	11.556	13.833	22.222	30.444	26.556	25.5556	15.722	34.778	36.611	23.278	9.056	8.056	21.889	56.389	38.333	54.833	33.333	31.9444	31.2778	27.333		0.728574	31.5152
18.3313	56.444	49.389	57.444	49.556	39.667	63.111	13.778	13.056	10.5	31.5	41.056	44.167	21.556	15.944	15.667	25.778	33.778	22	26.1667	28.833	30.444	39.167	18.556	10.278	12.5	26.056	47.778	40.667	66	33.111	37.6667	28.5556	29.667		0.733334	32.7223
18.4504	57.111	55.944	57.444	47.389	40.333	51.056	15.833	10.833	9	39.944	38.944	31.222	16.111	17.833	16.389	24.611	28.889	24.167	26.3333	18.889	30.889	41.556	16.944	9.889	8.667	26.056	42.722	38.111	57.611	28.444	31.7222	30.6667	29.944		0.738099	30.9545
18.5694	53.444	56.167	54.444	51.722	37.333	48.722	19.278	10.056	10.444	39.278	42.722	33.389	20.5	13.611	19.611	26.167	25.611	26.167	22.2222	22.667	30	43.611	20.222	10.778	9.944	26.667	50.5	37.889	49.167	35.5	38.4444	36.8889	24.722		0.742859	31.7542
18.6884	58.167	51.444	58.278	55.833	46.833	47.056	16.611	12.889	11.833	37.722	43.778	22.167	19.444	15.722	21.667	26.889	20.889	29	25.4444	21.111	32.833	39.611	20.611	11.444	7.722	24.778	46.722	35.278	61.111	33.667	34.3889	29	24.333		0.74762	31.6447
18.8075	67.167	46.222	53.944	51.944	36.222	34.333	19.889	12.222	9.556	42.111	47.556	33.444	22.056	15.111	14.778	29.333	27	25.389	28.8889	23	32.167	47.833	17.833	8.667	6.667	26.778	47.778	36.944	64.167	36.778	40.6111	30.1667	30.222		0.752384	32.3266
18.9265	58.056	44.222	56.333	45.667	41.444	38	26.667	10.556	11.667	45.278	46.389	30.778	20.889	16.167	22.778	32.222	27	21.333	29.3333	18.167	33.778	52.167	19.722	9.389	9.444	24.056	54.722	38.667	52.556	35.222	49.1667	30.9444	32.778		0.757145	32.8957
19.0455	60.444	48.556	46.944	52.889	30.611	38.722	21.778	14.944	15.5	51.667	45.167	29.722	23.444	12.444	19.889	32.556	26.889	23.611	29.0556	21.889	27.611	44.278	23.111	8.611	10.889	28.444	42.778	35.333	51.222	34.222	40.1111	31.5556	28.611		0.761905	31.9242
19.1646	50.889	48.833	52.556	48.5	34.833	32.111	22.111	14.389	14.278	52.056	50.944	37.222	22.889	13	18.611	31.556	24.222	24.944	28.3333	24.722	28.778	39.556	19.222	9.333	10.667	32.5	49.556	43.778	62.556	27.556	42.6111	33.2222	28.611		0.76667	32.5741
19.2836	63.111	57.333	46.056	49.833	42.667	33.722	24.722	14.389	11.333	46.111	46	33.5	22.5	16.722	16.056	32.111	21.667	22.611	28.9444	23.556	29.667	39.222	13.5	8.556	11	36.222	48.889	32.056	59.5	32.833	50.7778	34.6111	27.5		0.77143	32.6448
19.4026	56.889	43	46	50.333	43.722	36.167	27.278	14.722	10.222	50	36.667	34	25.5	15.056	17.333	25.944	18.722	22.222	33.2222	28	26.278	38.278	21.889	8.889	12.444	30.222	39.944	35.111	61.944	26.056	47.7778	29.6111	27.333		0.776191	31.5387
19.5217	48.444	46.333	47.611	45.667	33.111	37.222	28.444	12.111	15.333	51.167	42.056	36.222	27.833	19.833	17.556	32.389	27.111	22.722	33.6667	25.944	30.389	46	17.833	9.667	10.444	31.944	38.944	39.778	57.833	40.444	40.7222	25.2222	29.611		0.780955	32.4123
19.6407	49.722	48.778	49.5	50.944	37.5	36.111	27.056	15.611	15.611	56.444	43.444	27.278	23.833	15.056	22.611	26.111	29.722	28.444	33.5	24.889	28.944	43.944	18.222	8.722	10.278	28.333	43.056	45.722	64.5	35.333	44.6667	32.2222	33.056		0.785716	33.308
19.7597	48	38.167	53.167	56.556	43.611	39.167	33.556	11.722	5.5	47.778	38.222	38.222	23.333	15.167	24.722	35.556	19.889	28.333	31.4444	32.389	29.833	47.222	13.889	8.667	11.667	29.556	35.944	33.389	51.944	28.778	44.2778	28.3333	27.444		0.790477	31.9832
19.8788	46.5	47.944	46.722	53.611	38.333	38.389	35.389	12.889	14.556	48.667	38.833	37.5	25.333	18.056	18.222	39.944	21	20.333	37.4444	28.278	26.889	43.444	12.722	11.833	12	28.111	43.889	39.056	51.111	35.389	41.7222	28.8333	29.444		0.795241	32.4966
19.9978	37.444	57	46.833	49.889	43.278	38	40.944	12.944	15.611	46.278	41.444	30.444	30.333	16.056	20.833	29.611	21.778	19.611	38.3333	33.722	30.889	38.389	15.444	12.944	10.611	26.167	40.611	38.833	51.778	28.889	35.5	30.0556	37.556		0.800002	32.3652
20.1168	32.889	43.944	59.5	62.889	38.278	40.5	35	10.944	9.167	49.611	33.611	32.278	23.056	15.667	20.611	45.278	17.222	23.944	35.7222	28.389	27.444	37.333	17.722	11.556	11.333	29.222	41.5	32.944	42.056	32.778	39.4444	31.8889	28.056		0.804762	31.569
20.2359	40.389	55.111	58.222	49.444	36.944	46.778	33.556	16.944	11.611	53.333	37.778	34.333	26.333	20.667	17.5	35	22.611	19.278	38	36.889	30.833	53.778	15.389	12.278	14.056	30.667	39.5	33.833	47.833	28.167	40.1667	26.5	31.611		0.809527	33.1919
20.3549	37.667	55.667	59.056	56.667	42.5	50.722	37.278	11.056	16.389	51.722	31.278	32.278	26.944	16.833	19	40.889	18.722	21.444	35.9444	32.389	33.222	44.833	15.778	13.333	15.556	34.222	45.444	32.389	31.944	33.944	44.2778	31.6111	33.111		0.814287	33.4579
20.4739	46.833	51.056	59.556	63.222	41.722	46.611	34.944	18.444	15.556	55.111	42.333	33.111	32.167	20.056	19.556	37.167	17.667	25.889	35.0556	34.944	32.5	51.944	14.333	14.778	9.667	33.333	48.167	39.333	34.111	27	41.5	32.1111	26.5		0.819048	34.4327
20.593	35.556	48	59.389	60.167	39.722	44.5	31.556	21.056	16	48.389	37.444	36.5	30.833	21.5	21.167	38.278	17.778	25.778	43.8889	28.111	30.056	55.278	12.444	16.111	15.611	29.889	47.056	35.722	45.167	22.889	37.3889	27.8889	34.833		0.823812	33.8166
20.712	37.889	49.5	66.333	45.056	34.444	58.722	35.611	21.056	14.722	48.222	36.333	39.056	29.444	15.222	19.778	35.167	15.333	17.667	37.7778	34.167	31.444	58.944	14.111	11.056	15.056	35	47.5	31.111	38.222	30.667	40.4444	28.5556	31.778		0.828573	33.4966
20.831	34.5	45.389	62.833	48.722	29.611	53	35.111	15.833	15.778	42.944	37.889	33.611	40.056	13.556	15.5	42.222	15.444	13.389	32.7222	32.389	31.778	53.667	14.667	9.722	11.778	29.5	42.556	30.944	38.889	36.333	42.4444	31.5	33.556		0.833333	32.3586
20.9501	34.611	40.5	63.278	55.778	40.5	47.944	37.667	23.944	21.222	43.5	36.444	30.444	31.944	19.056	17.333	43.556	18.056	23.444	41.0556	23.722	28.278	48.722	14.167	8.556	13	37.667	44	34.389	34.278	29.556	39.6111	32.7222	35		0.838098	33.1498
21.0691	36.222	41.833	71.389	49.278	36	51.667	33.778	25.556	25.5	44.611	37.167	32.056	33.722	20.833	19.056	41.167	16.389	18.778	32.6111	31.778	30.778	57.444	18.944	11.833	11.722	38	43.833	26.944	32.722	27.667	40.3889	32.9444	37.333		0.842858	33.6347
21.1881	32.167	43.389	65.222	49.056	31.611	44.278	38.056	21.944	25.611	49.111	34.333	36.444	41.444	19.278	19	42.778	9.778	21.778	38.5556	32.222	31.944	60.833	17	10.556	17.5	35.444	48.167	29.5	38.444	32.444	37.3889	40.6667	36.611		0.847619	34.3198
21.3072	32.778	46.056	66.944	45.5	41	54.444	42.222	27.333	33.556	40.556	36.722	34.889	42.5	17.056	16.667	39.111	9.667	20.111	34.2778	37.111	37.611	59.667	14.667	10.833	13.944	33.722	44.667	24.778	32.556	31	44	37.5	41.944		0.852383	34.7088
21.4262	31.889	38.778	64.5	44.389	38.167	48.5	45.556	21.778	29.722	50.778	34	35.556	42.167	23.556	19.556	33.889	9.278	19.611	38.5	29.667	40	54	13.222	11.056	16.611	40.167	43.556	31.278	32.778	30.889	43.8333	43.5556	37.722		0.857144	34.5001
21.5452	28.222	40.222	60.333	48.556	39.944	48.556	46.556	33.056	29	41.278	32.167	33.444	53.944	21.889	19.167	40.667	9.222	18.056	28	32.056	45.444	53.556	15.167	13.944	13.111	33.611	44.5	27	26.389	31.722	39.5	44.7222	45.444		0.861905	34.4983
21.6643	29.944	39.278	61.722	46.389	33.889	48	44.944	36.167	39.5	39.833	37.222	38.111	44.722	20.444	17.389	39.722	6.778	22.5	29.2778	35.667	42.944	58.333	15.444	12.778	13.278	39.944	39.556	21.722	30.444	30.278	40.7778	41.0556	51.944		0.866669	34.8484
21.7833	27.389	33.611	54.833	41.111	32.556	45.278	44.333	33.056	40.556	43.278	31.833	46.889	39.611	24.056	18.611	37.556	5.333	19.5	27.5556	34.611	42.278	57.389	16.333	11.722	20.722	33.333	38.667	28.056	28.167	26.722	41.6111	38.4444	48.944		0.87143	33.7559
21.9024	25.278	40.278	47.722	39.389	36.833	41.111	44.778	35.111	31.833	41.889	34.056	42.222	53.722	22.944	21.944	37.444	4.778	20.389	29.7222	35.667	37.778	60.111	13.167	10.444	14.667	38.833	42.389	29.5	30.333	32.444	35.7222	38.7778	47.889		0.876194	33.9141
22.0214	14.333	34.889	56.167	37.444	31.889	41.722	41.111	36.833	42.944	44.222	29.333	39.167	47.889	22.667	18.056	42.333	4.222	14.111	29.2778	38.5	39.056	67	18.833	12.778	13.444	37.278	37.889	31.889	34.611	33.5	38.6111	41.2222	53.167		0.880955	34.133
22.1404	23.667	36.778	57.333	40.722	24.944	38.889	38.889	44.556	36.944	40.889	26.667	49.5	56.389	26.444	21.389	43.556	6.111	16.833	36.0556	36.333	39.778	60.889	16.611	17.833	16.278	41.389	41.944	37.722	29.556	30.389	31.2778	45.7222	42.278		0.885715	34.9865
22.2595	17.889	25.611	44.889	47.333	23.667	29.611	39.222	40.667	45.944	46.556	29.167	41.278	57.778	25.167	20.056	38.611	5.444	15.278	33.8333	36.333	49.278	61.167	10.111	16.389	11.778	37.222	44.278	22.5	29.278	30	29.3333	45.2222	53		0.89048	33.4512
22.3785	14.944	31.833	53.167	39.333	29.222	33.444	37.889	46.333	43.444	32.444	24.056	38.833	51.111	22.833	20.389	38.278	2.611	12.722	24.1667	34.722	34.5	59.889	13.944	15.056	15.167	35.333	37.667	22	22.222	37.667	27.3333	44.1667	48.278		0.89524	31.6666
22.4975	12.556	24.944	51.222	41.778	20.889	26.056	38.556	47.222	45.611	30.111	16.667	31.722	47.778	24.611	24.889	40.167	3.722	22.278	34	40.444	40.778	69.167	18.611	11.222	19.944	43.5	33.5	20.611	26.444	32.944	35.7778	41.5556	51.722		0.900001	32.4545
22.6166	10.722	22.278	50.278	37.056	21.556	32.333	38.444	39.944	49.611	32.389	17.5	29.5	47.444	34.056	21.778	42.667	3.667	13.056	29.1111	44.833	47.889	70.389	14.5	18.278	23.167	47.778	40.444	22.389	31.167	29.111	25.1111	40.0556	44.889		0.904765	32.527
22.7356	8.889	20.833	48	34	16.778	31.333	42.278	46.333	52.833	31.667	17.389	23.556	39.056	26.833	26.5	33.278	2.944	11.056	27.1111	40.611	37.833	59	18	13.444	21.889	43.222	34.333	13.667	37.556	42.389	28.4444	41.0556	36.889		0.909526	30.5758
22.8546	6.444	15.667	41.667	31.889	20.333	25.056	31	47.056	41.5	36.333	14.111	20.167	41.444	29.444	22.944	26.889	3.278	13.278	28.8333	48.389	47	61.722	11.667	10.556	20.333	47.944	28.722	14.222	28.389	25.722	22.5556	33.4444	47.222		0.914286	28.6431
22.9737	8.5	8.833	33.278	39.556	19.5	28.889	35.556	45.278	38.222	30	14.278	19.611	45.833	34.667	26.833	25.722	2.611	13.667	27.2778	47.056	42.389	62.389	16.5	20.167	25.556	53.056	32	11.333	27.222	41.278	26.0556	35.6111	39.056		0.919051	29.6297
23.0927	7.833	13.722	33.944	34.167	14.944	23.222	42.444	53.556	54.389	26.333	11.444	16.056	29.056	36.389	27.111	26.778	3.389	8.778	29.2222	42.778	42.444	59.111	13.778	20.5	20.444	47.944	26.833	17.167	23.444	32	29.1111	35.8333	35.5		0.923811	28.4747
23.2117	6.833	7.833	22.444	26.278	9.667	20.556	31.056	42.222	54.111	29.5	6.556	12.056	44.444	42.611	27.444	28.833	1.778	9.278	33.3333	44.167	39.611	53.833	17.444	18.944	30.111	48.611	32	7.389	36.722	29.833	28.7222	33.5556	38.556		0.928572	27.7676
23.3308	6.111	8.611	19.778	30.333	9.667	17	32.278	46.889	46.167	31.278	6.889	8.444	37.722	38.611	26.5	20.444	2.778	8.5	29.2778	45.111	41.667	52.5	20.556	27.389	21.167	54.278	25.611	9.667	24.889	35.222	32.2222	33.7222	35.611		0.933337	26.8755
23.4498	4.444	9.056	21.556	35.056	9.444	14.167	29.722	45.5	53.722	26.5	6.389	9.889	36.389	31.556	35.556	23.111	4.667	9.111	30.2222	43.111	35.722	47.5	14.056	26.111	23.056	57.889	26.944	4.889	19.111	35.944	32.4444	33.3333	29.5		0.938097	26.2324
23.5688	4.944	6.111	18.167	30.5	9.389	11.111	30.222	42.833	45	25.611	3.667	9.278	36.222	34.278	34.5	19.333	2.444	7.333	24.3333	38.5	34.556	48.889	15.611	25	26.667	45.222	25.556	6.833	17.333	34.389	27.8889	33	22.167		0.942858	24.1481
23.6879	4.056	3	18.444	27.278	7.833	10.111	26.222	51.444	40.722	30	3.278	8.5	32.278	32.889	37.333	21.333	2.5	9.944	33.3889	33.722	32.389	50.222	14.556	29.778	33.556	40	23.444	5.556	18.778	37.222	26.7778	27.6667	24.111		0.947622	24.1919
23.8069	4.722	6.944	11.222	19.222	7.5	8.389	20.833	46.222	50.611	17	3.556	7.722	32.111	31.556	34.889	21.056	1.167	8.722	31.3333	37.222	38.333	50	19	34.278	34.5	38.056	26.944	5.444	21.167	33.5	28.5556	36.6111	23.167		0.952383	23.9865
23.9259	5.333	6.167	10	26.611	5.889	5.944	19.889	45.5	49.333	19.222	3.333	3.167	33.444	27.889	33.944	22.389	1.167	9	32.8889	39.167	47.444	51.056	18.278	36.444	31	48.167	20.833	1.833	14.111	31.111	25.8333	31.1111	20.056		0.957143	23.5623
24.045	8.167	3.889	10.333	16.722	4.833	7.222	15	44.722	49.111	18.167	4.056	4.778	30.444	36.722	44.056	20.389	1.667	2.056	25.7222	32.278	39.389	40.611	19.5	36.444	31.722	45.944	26.889	4.222	14	30.556	32.8333	27.6111	21.722		0.961908	22.7811
24.164	2.389	5.611	9.611	19.111	4	7.111	14.722	48.444	52.5	13	3.833	4.944	22.722	39.444	45.722	10.667	0.667	6.667	28.4444	32.444	40.833	48.333	22.444	40.611	37.667	32.5	24.278	3.333	11.833	27.056	30.2778	27.1111	18.944		0.966668	22.3416
24.283	4.5	5.111	6.056	11.111	4.333	7.944	11.611	40.056	41.389	9.722	5	5.778	17.056	29.944	43.833	13.5	3.056	4.611	24	29.944	42.111	51.722	20.278	40.833	38.222	31.556	21	2.111	11.389	20.333	31.5	26.4444	14.944		0.971429	20.3333
24.4021	2.5	5.667	6.5	9.944	4.278	7.444	9	34.667	42.556	10.778	2.111	1.944	16.778	28.889	39.389	10.222	2.111	4.778	22.7778	27.722	43.611	44.556	19.056	49.556	35.833	33.444	22.278	2.611	8.667	28	34.5556	25.6111	11.722		0.976193	19.6835
24.5211	4.167	2.889	4.5	11.111	2.5	5.333	7.5	25.056	38	10.389	2.611	5.111	12.111	31.056	42.5	7.333	1.833	5.833	27.0556	34.222	47	48.722	19.167	40.5	35.778	37.111	18.556	2.611	9.611	29.944	37.6111	23.6111	14		0.980954	19.5555
24.6401	1.889	2.111	4.556	10.5	1.833	3.889	8.222	23.278	41.944	6.111	1.944	2.444	6	33.722	39.556	9.778	1.111	4.333	22.6667	30.778	43	45.222	29	44.222	41.611	29.611	13	2.667	5.889	28.556	30	19.6667	9.5		0.985714	18.1397
24.7592	1.111	3.111	6.5	9.833	2.111	2.722	4.889	14.667	34.833	5.944	3.389	4.278	10.389	32.222	44.444	9.278	0.667	4.889	26.6111	32.611	46.222	37.5	22.833	52.444	34.5	34.944	12.722	0.944	5.778	22.667	29.4444	19.9444	11.5		0.990479	17.7558
24.8782	2.278	3.333	2.833	5.778	4	2.222	4.556	17.056	32.444	3.611	2.167	1.556	8.278	31.889	40.611	4.278	0.944	4.389	22.0556	34	49.056	32	20	46.944	38.667	29.944	11.333	3.056	5.833	22.333	29.4444	20.5556	5.611		0.995239	16.4562
24.9972	3.222	1.222	4.111	6.833	1.722	1.944	6.722	13.944	26	6.167	1.333	2.278	4.333	25.389	33.833	4.389	1.389	3.389	23.3333	33.444	39.889	37.278	23.611	52.722	33.722	39.722	6.667	2.278	6	20.111	28.7222	12.8889	9.444		1	15.6986

## Sheet: Image39
X0	Y0	Y1	Y2	Y3	Y4	Y5	Y6	Y7	Y8	Y9	Y10	Y11	Y12	Y13	Y14	Y15	Y16	Y17	Y18	Y19	Y20	Y21	Y22	Y23		Ap-Basal	Avg intensity
0	97.493	91.853	87.159	123.985	102.656	108.911	121.755	103.506	101.7	81.202	89.063	79.752	48.601	52.515	38.6016	53.774	53.552	76.977	81.912	65.201	70.039	93.838	79.958	48.141		0	81.3394
0.119	105.188	92.635	86.711	142.515	105.57	119.972	115.289	108.475	115.221	86.528	83.422	92.101	53.174	65.133	41.2186	63.623	59.65	79.205	83.399	64.388	75.711	94.091	71.189	54.524		0.00510055	85.7889
0.2381	127	93.337	87.383	162.68	117.947	125.463	128.463	115.748	129.983	84.394	91.005	98.109	54.741	80.544	41.5455	68.792	61.091	103.312	101.21	74.278	85.602	106.37	79.65	63.633		0.0102054	95.095
0.3571	133.65	103.443	108.105	175.055	119.846	139.103	131.814	122.222	145.005	89.224	99.924	92.003	52.249	83.111	46.1344	80.121	60.673	103.794	108.201	86.786	94.292	119.688	91.874	74.163		0.0153059	102.52
0.4761	152.033	105.009	105.254	179.706	130.265	132.906	129.1	131.143	140.521	103.966	103.605	92.305	57.969	94.055	50.853	91.271	60.998	116.378	130.713	98.895	104.888	125.921	102.873	88.047		0.0204065	109.528
0.5952	169.993	110.384	105.027	196.06	128.345	126.179	132.103	140.586	147.667	108.448	107.201	91.985	75.685	93.801	57.3214	108.982	81.344	116.591	151.866	111.602	119.726	134.948	103.14	102.602		0.0255113	117.566
0.7142	172.27	125.713	112.371	200.794	138.732	143.995	126.585	142.869	139.851	97.314	115.82	106.779	68.195	83.433	67.435	112.581	88.722	117.971	173.536	120.67	132.104	150.422	111.673	123.924		0.0306119	123.907
0.8332	184.636	141.142	126.685	198.08	136.597	152.572	130.141	161.232	138.303	100.291	108.83	96.962	73.107	70.38	73.6106	124.493	106.846	122.677	182.186	139.811	151.016	174.456	118.449	139.082		0.0357124	131.316
0.9523	181.761	168.647	128.079	197.089	129.416	145.379	138.554	164.267	144.055	108.713	113.975	106.545	75.868	78.221	76.7705	120.903	126.978	132.863	191.766	137.733	171.866	181.448	130.382	159.271		0.0408173	137.94
1.0713	180.199	176.316	144.737	196.903	136.387	136.11	136.831	163.949	143.826	104.66	116.415	101.852	77.38	78.341	90.71	122.028	130.745	143.807	193.346	150.272	188.913	188.736	143.856	175.167		0.0459178	142.562
1.1903	194.858	183.144	147.485	185.76	122.82	141.25	147.036	176.086	144.58	119.16	137.269	103.178	78.563	91.469	95.8108	137.244	145.2	160.213	198.235	162.083	198.33	176.075	159.898	190.195		0.0510184	149.831
1.3094	198.039	190.572	156.362	196.313	129.837	140.88	149.54	163.208	143.328	120.171	130.276	118.667	84.244	95.126	86.0732	138.353	150.376	173.621	204.127	186.053	193.891	163.753	168.857	189.579		0.0561232	152.969
1.4284	197.401	217.982	166.812	186.863	128.019	129.723	158.008	156.43	142.378	121.039	142.001	125.916	88.778	104.27	84.5616	143.473	166.831	173.912	200.233	196.69	188.858	156.739	172.792	189.5		0.0612238	155.8
1.5474	214.489	227.739	168.334	185.401	124.265	120.171	153.753	166.436	148.909	122.235	140.439	133.228	89.096	100.077	95.9745	134.581	166.191	177.36	200.506	196.85	176.146	149.053	181.717	187.276		0.0663243	156.676
1.6665	223.202	234.825	169.121	199.732	114.387	119.568	159.134	163.79	149.2	119.209	128.32	138.607	97.173	102.076	100.783	139.43	158.017	161.565	191.422	207.32	169.512	142.194	182.686	176.153		0.0714292	156.143
1.7855	235.7	233.825	172.788	192.354	114.933	113.637	166.675	173.025	133.559	126.201	135.939	133.643	116.177	113.545	101.104	139.326	165.836	143.242	188.675	200.857	157.972	140.098	177.989	173.845		0.0765297	156.289
1.9046	230.145	221.968	176.665	190.12	116.435	109.834	164.045	178.536	124.747	125.289	126.663	136.075	123.955	116.733	93.393	140.961	164.981	137.874	187.176	206.297	157.917	136.083	169.543	156.064		0.0816346	153.812
2.0236	227.279	206.657	176.817	193.353	119.088	113.146	155.149	169.631	125.593	119.73	128.819	126.189	131.247	106.093	93.6705	148.607	160.536	133.156	180.972	198.341	139.707	126.111	162.583	155.944		0.0867351	149.934
2.1426	224.157	207.973	178.272	189.209	108.318	103.415	162.367	167.616	112.798	126.18	118.142	146.22	133.73	113.807	107.197	148.737	147.631	131.465	175.418	186.03	137.212	127.349	163.135	162.38		0.0918357	149.115
2.2617	226.758	189.322	160.333	182.25	102.795	93.173	136.628	151.821	114.422	122.88	113.414	140.909	133.175	117.197	102.311	141.115	140.795	116.855	157.584	186.419	146.372	121.354	164.103	166.188		0.0969405	142.841
2.3807	222.369	165.022	160.751	171.085	98.782	94.329	132.668	153.538	108.815	111.177	113.732	135.248	135.843	116.675	111.57	147.466	150.703	105.775	155.071	168.695	124.609	111.078	161.751	164.979		0.102041	138.405
2.4997	217.823	163.199	158.546	163.942	94.314	100.238	122.447	146.014	107.738	112.615	106.245	132.7	151.061	114.819	96.9797	153.972	129.882	112.059	143.344	162.787	113.701	106.459	150.159	162.878		0.107142	134.33
2.6188	221.632	156.785	144.015	170.318	103.229	91.726	111.071	148.481	109.104	108.151	108.063	120.531	137.865	117.466	102.779	152.521	111.623	107.912	140.367	160.365	111.602	98.707	145.522	159.27		0.112246	130.796
2.7378	218.759	151.273	156.005	152.481	104.07	97.745	111.439	139.001	96.334	90.762	104.701	116.195	135.457	125.181	91.6332	147.344	106.787	101.075	123.336	148.6	94.9	95.368	148.208	149.588		0.117347	125.26
2.8568	214.854	153.923	149.373	150.273	102.082	94.338	102.364	140.105	92.896	96.688	94.953	110.083	150.175	119.096	102.095	153.443	104.898	94.814	116.937	149.657	85.363	93.279	159.787	148.427		0.122448	124.163
2.9759	216.415	142.122	154.557	149.701	100.596	91.363	94.085	144.295	101.926	84.152	84.309	113.505	151.189	126.847	100.668	134.672	118.113	92.569	109.593	137.261	91.249	91.473	156.313	147.508		0.127552	122.27
3.0949	206.087	147.9	155.418	136.401	97.291	91.749	92.903	128.989	95.868	82.89	89.446	107.074	141.02	123.491	102.075	132.359	106.701	92.361	98.826	135.985	87.88	90.261	162.962	130.648		0.132653	118.191
3.2139	196.349	158.635	137.885	128.445	100.996	81.85	87.595	119.418	88.899	87.337	84.622	107.597	147.146	123.018	108.514	139.715	100.948	99.154	92.18	137.964	83.075	83.527	166.573	123.78		0.137754	116.051
3.333	208.02	152.876	135.999	124.568	98.745	87.086	87.57	115.525	86.132	75.393	85.655	106.878	142.812	118.26	108.369	138.494	93.79	100.044	96.792	121.948	83.889	100.501	171.062	131.607		0.142858	115.501
3.452	195.352	145.603	117.491	136.343	99.697	90.51	101.794	108.096	88.294	69.217	92.217	117.245	142.42	114.003	112.793	127.373	84.487	99.807	83.173	114.231	81.584	97.919	164.179	120.696		0.147959	112.688
3.571	198.849	153.622	114.35	119.659	94.904	86.651	99.261	102.938	90.434	68.962	82.422	110.215	139.111	119.769	119.053	112.276	79.807	93.794	84.556	109.132	75.651	91.183	150.92	113.041		0.153059	108.773
3.6901	194.708	141.356	108.863	120.218	96.537	86.955	104.64	108.085	84.098	59.512	80.452	108.118	142.216	126.64	117.247	107.046	79.398	93.514	87.469	117.96	83.814	87.802	148.101	125.31		0.158164	108.752
3.8091	185.605	134.767	102.174	118.376	102.552	87.289	98.391	102.509	87.48	62.355	79.531	106.456	145.874	132.771	110.079	85.138	86.947	92.618	93.633	110.642	72.311	83.899	137.004	115.235		0.163265	105.568
3.9281	190.345	138.476	99.158	112.122	108.506	83.658	93.657	98.848	90.319	48.531	84.171	115.111	142.606	118.599	110.522	83.499	75.371	93.834	95.332	110.689	73.817	81.005	128.549	112.182		0.168365	103.704
4.0472	185.136	136.861	107.972	112.409	106.229	84.334	97.192	98.4	84.025	48.064	82.006	110.812	148.206	118.818	112.831	83.329	65.72	85.681	91.741	113.24	75.003	79.729	115.574	107.616		0.17347	102.122
4.1662	192.154	134.797	101.121	110.726	97.543	90.468	96.388	90.042	77.942	54.887	85.436	106.521	141.397	115.572	109.706	83.398	80.397	88.032	99.245	116.239	77.457	82.704	119.981	104.522		0.178571	102.361
4.2852	181.841	119.495	95.902	110.553	98.217	76.601	88.536	88.778	71.703	51.59	86.77	113.762	136.44	109.466	116.528	80.992	80.84	94.179	103.315	114.497	76.858	75.173	107.475	104.03		0.183671	99.3142
4.4043	181.958	108.322	91.498	95.118	89.284	88.177	92.401	88.373	79.403	53.119	80.235	112.444	140.271	114.091	115.727	79.686	78.189	91.437	98.456	111.796	69.116	74.528	92.781	92.127		0.188776	96.6057
4.5233	176.82	104.464	93.809	106.084	93.436	88.302	101.087	91.069	76.097	57.393	79.385	113.658	127.887	120.722	103.632	78.673	78.953	87.833	89.095	106.593	74.94	79.067	97.476	88.751		0.193877	96.4678
4.6423	175.396	96.918	88.974	104.8	90.278	82.038	97.538	98.522	75.885	65.985	78.941	107.51	120.55	124.253	103.88	85.975	68.052	89.835	88.352	106.952	80.548	83.191	86.874	93.924		0.198977	95.6321
4.7614	156.998	92.489	93.043	93.68	95.491	77.361	98.611	94.962	75.997	47.9	79.333	104.893	106.589	108.793	101.085	80.809	73.176	84.702	97.825	100.99	76.822	84.774	77.839	94.036		0.204082	91.5916
4.8804	165.911	95.5	93.789	105.491	92.574	78.394	92.679	88.66	76.834	48.061	75.327	106.93	96.928	105.051	102.145	79.955	68.885	76.603	101.42	94.195	67.571	97.47	76.739	86.399		0.209183	90.563
4.9995	169.015	92.621	91.603	93.953	92.536	84.572	98.676	96.697	78.467	46.762	75.684	101.432	97.922	96.359	91.4475	80.41	56.853	70.593	93.672	97.858	66.161	96.202	79.425	97.436		0.214288	89.4315
5.1185	161.385	96.504	92.635	87.807	84.476	90.265	106.562	97.117	77.424	50.503	79.844	102.715	99.204	91.217	85.0544	79.624	64.342	71.109	95.832	93.06	63.351	82.884	82.578	94.436		0.219388	88.747
5.2375	152.765	92.639	98.04	96.962	93.338	86.149	106.501	101.678	85.764	47.762	80.934	107.155	90.622	95.28	86.6284	80.005	62.064	73.967	89.97	79.467	73.417	90.508	86.302	85.267		0.224489	89.2994
5.3566	152.111	99.366	103.959	92.987	97.549	89.509	107.539	95.365	86.351	57.432	75.69	102.336	86.569	95.492	82.3413	92.601	50.626	73.148	94.702	75.821	63.944	83.744	78.761	84.636		0.229593	88.4408
5.4756	137.317	96.577	94.318	98.494	90.147	89.329	103.616	89.073	79.734	45.941	76.577	102.467	80.351	88.437	82.5855	84.633	43.129	70.359	94.822	72.878	76.96	81.384	83.351	97.598		0.234694	85.8366
5.5946	138.236	104.14	84.167	100.862	84.009	85.21	106.056	79.467	73.895	46.717	68.356	96.624	73.73	88.442	86.941	79.074	39.113	70.14	94.318	69.099	70.284	84.09	80.228	88.761		0.239795	82.9983
5.7137	139.923	96.111	82.286	97.5	82.671	79.496	106.575	79.926	75.46	42.755	62.156	84.395	71.655	82.299	86.7749	79.362	42.409	53.671	88.096	71.592	71.202	70.117	93.189	84.048		0.244899	80.1529
5.8327	140.717	107.706	81.723	108.14	87.696	72.603	114.536	75.793	72.412	48.468	64.432	86.938	82.076	86.012	74.704	80.953	41.339	59.436	95.828	75.035	65.74	77.913	81.362	94.418		0.25	82.3325
5.9517	133.313	101.61	92.564	101.298	84.155	77.948	109.933	77.165	73.818	43.572	57.7	80.494	81.827	81.55	77.6756	77.752	32.607	54.321	106.214	73.331	71.206	83.18	77.755	92.869		0.255101	80.9941
6.0708	145.75	106.855	86.318	95.776	76.852	80.685	112.236	78.848	70.412	44.671	53.035	73.011	70.169	79.262	77.0583	84.352	28.376	51.739	96.765	71.305	72.225	82.334	84.387	90.086		0.260205	79.6878
6.1898	144.68	93.085	101.177	97.388	79.903	84.757	96.27	77.454	61.689	47.836	53.086	85.078	73.641	77.68	81.8032	87.461	32.081	57.958	96.555	69.748	77.24	74.434	77.068	93.542		0.265306	80.0673
6.3088	138.545	98.523	88.375	91.172	71.724	80.738	93.154	80.45	62.912	45.085	51.744	70.666	78.635	73.307	76.4852	84.405	34.077	57.094	97.249	71.944	77.558	84.351	72.137	86.938		0.270407	77.8028
6.4279	142.428	100.348	90.083	91.811	78.632	84.463	84.506	88.867	57.399	43.405	53.784	64.82	78.731	68.666	67.2966	73.271	32.776	56.453	100.077	77.92	79.109	78.359	80.585	81.981		0.275511	77.3238
6.5469	129.175	103.766	94.11	91.453	81.201	93.165	100.228	88.716	50.484	41.545	51.162	67.368	71.076	76.516	67.9531	82.121	27.318	48.49	84.216	75.735	71.509	58.722	76.134	86.339		0.280612	75.7709
6.6659	132.353	105.389	94.395	83.09	86.904	85.029	93.68	86.061	57.264	39.995	48.232	75.518	75.221	80.51	68.321	80.98	27.877	47.814	76.654	75.071	72.241	57.147	64.299	85.354		0.285712	74.975
6.785	136.647	108.71	88.878	88.776	81.358	89.17	87.31	86.736	60.753	34.253	39.169	72.274	75.353	80.613	65.2796	79.574	28.883	45.26	85.911	79.47	78.793	67.092	63.84	88.114		0.290817	75.509
6.904	135.379	108.427	96.352	92.452	75.924	99.657	93.356	79.751	60.168	35.171	42.682	63.497	76.422	80.961	63.2183	77.168	27.341	37.785	86.534	82.664	73.504	58.841	72.779	70.569		0.295918	74.6084
7.023	131.77	106.111	95.346	92.295	74.861	80.653	86.828	79.028	55.118	41.961	51.192	51.049	79.614	77.302	59.0546	73.247	25.831	39.659	82.399	86.429	69.264	58.227	70.858	75.171		0.301018	72.6362
7.1421	144.471	102.248	86.059	82.25	86.701	93.159	87.792	81.268	53.62	38.569	48.201	58.457	85.517	72.019	64.1093	68.854	23.948	40.373	80.546	84.503	71.462	56.1	68.666	67.062		0.306123	72.7481
7.2611	145.223	105.816	81.464	83.416	81.826	100.3	92.154	87.677	66.49	35.7	44.142	56.276	71.35	80.274	65.4756	70.812	25.475	38.366	67.007	78.086	70.417	58.046	61.687	66.685		0.311224	72.2569
7.3801	144.122	106.918	89.188	88.523	74.569	106.594	92.749	84.521	64.524	42.289	33.621	58.66	76.519	82.656	55.0059	72.213	25.868	35.607	64.321	88.203	63.795	48.81	66.168	61.882		0.316324	71.9719
7.4992	159.092	105.313	82.888	85.072	72.363	100.639	95.708	93.345	68.268	41.881	36.251	54.226	89.152	83.395	62.0479	69.85	22.015	31.915	68.23	90.767	60.631	49.465	65.987	71.829		0.321429	73.3471
7.6182	162.027	103.194	90.286	83.769	80.243	101.168	88.198	79.831	79.999	43.144	36.373	63.761	86.409	84.845	60.4043	70.451	19.745	29.706	62.627	83.595	69.53	57.051	62.568	64.586		0.32653	73.4796
7.7372	146.129	95.19	89.404	87.892	82.432	97.099	93.967	83.525	72.304	43.434	33.227	63.213	75.788	88.81	63.4091	62.167	25.119	33.024	59.498	88.189	64.701	46.46	61.633	68.23		0.33163	71.8685
7.8563	150.991	106.01	89.717	88.216	71.233	84.317	91.952	88.913	67.34	41.463	34.576	57.989	76.688	87.465	61.4078	60.574	21.757	33.528	62.783	93.328	60.046	56.31	61.923	66.082		0.336735	71.442
7.9753	145.734	99.285	85.768	82.417	75.566	91.863	96.568	85.089	67.664	31.334	35.308	59.021	75.997	66.942	63.3495	59.282	22.087	29.012	60.579	86.189	56.804	48.559	66.758	67.088		0.341836	69.0943
8.0943	140.529	97.467	88.395	92.926	79.913	102.567	100.378	91.505	82.204	37.129	32.412	55.438	77.675	78.536	69.9109	59.684	23.9	28.608	66.079	80.25	55.326	40.853	62.976	65.876		0.346936	71.2724
8.2134	132.735	100.681	94.481	84.542	86.258	90.415	93.671	87.671	76.671	38.571	34.493	55.883	74.769	78.833	65.8989	54.243	20.684	25.656	64.432	83.337	54.329	39.844	61.627	71.477		0.352041	69.6334
8.3324	131.064	87.76	80.678	81.488	83.505	82.731	88.34	93.324	79.733	44.928	37.921	58.012	73.475	62.732	64.3533	54.35	20.631	27.195	75.793	84.876	56.588	45.619	62.527	63.905		0.357142	68.397
8.4515	121.038	88.485	89.921	89.023	87.186	88.988	85.999	86.54	77.426	39.397	34.31	61.742	70.927	60.671	54.7946	54.932	20.13	23.881	72.114	73.846	55.044	47.172	68.668	68.829		0.362246	67.5443
8.5705	119.038	86.732	78.316	90.54	76.524	85.702	100.17	86.013	84.341	39.051	33.135	58.313	74.016	64.078	68.5759	57.158	19.466	24.819	68.314	73.986	53.371	43.982	68.5	62.843		0.367347	67.3743
8.6895	117.278	79.921	88.39	87.904	91.987	85.64	90.185	82.896	77.633	37.693	34.044	57.122	69.358	65.592	65.3462	50.557	18.292	22.835	73.038	75.847	56.48	44.905	67.769	63.212		0.372448	66.8302
8.8086	120.2	89.061	102.291	90.301	91.515	86.033	91.613	81.601	72.518	35.753	33.017	57.731	71.084	67.397	57.3594	45.693	17.609	25.582	75.188	70.32	45.882	46.586	66.939	65.358		0.377552	66.943
8.9276	114.858	82.083	99.872	82.482	84.583	78.091	89.888	77.877	67.02	42.089	41.083	53.757	74.396	60.435	65.9549	45.445	20.29	28.315	78.05	75.858	48.375	42.172	66.503	70.802		0.382653	66.2616
9.0466	113.33	80.806	93.16	87.162	87.968	81.442	85.01	81.178	58.405	39.624	37.436	62.401	69.942	67.03	61.2289	43.16	21.09	26.633	82.952	70.648	43.761	39.35	66.506	67.664		0.387754	65.3286
9.1657	110.604	90.492	100.89	91.421	82.839	77.264	81.082	78.183	58.931	37.678	37.081	59.995	77.749	69.045	62.5331	45.1	16.603	25.692	86.144	77.321	51.227	38.256	71.357	64.296		0.392858	66.3243
9.2847	108.204	85.448	94.493	89.737	86.512	74.294	77.645	75.579	64.08	38.79	35.814	61.261	73.116	72.444	58.0518	37.432	17.493	25.282	74.288	76.393	56.148	46.502	64.631	66.949		0.397959	65.0244
9.4037	111.928	85.224	91.076	87.289	80.656	73.936	71.798	77.548	56.706	41.3	32.848	63.045	58.525	63.782	61.1212	36.898	17.345	24.366	71.729	72.619	55.137	44.801	80.803	66.948		0.403059	63.6428
9.5228	120.373	82.635	95.876	91.678	75.726	72.782	69.927	81.97	56.341	35.841	31.746	58.848	61.784	66.927	62.934	35.676	14.628	26.306	71.467	72.422	48.299	49.153	70.66	62.665		0.408164	63.1943
9.6418	115.589	83.87	94.071	93.821	78.038	80.06	72.739	76.686	54.477	40.604	36.448	55.785	64.332	57.669	63.3389	36.145	14.488	23.965	75.725	73.282	47.966	42.943	73.076	59.873		0.413265	63.1246
9.7608	109.838	81.919	96.969	86.247	80.218	85.78	73.733	78.443	59.267	35.57	34.593	56.336	66.457	65.832	70.4012	38.101	13.465	26.014	76.728	81.646	46.709	52.038	71.708	63.497		0.418365	64.6462
9.8799	107.776	86.418	103.672	96.857	75.937	76.848	67.102	88.151	59.832	39.287	32.251	62.287	63.401	68.499	70.2345	30.602	14.751	21.649	65.541	70.891	47.15	52.751	58.864	61.615		0.42347	63.4319
9.9989	101.336	80.397	93.497	90.942	74.212	74.815	65.668	86.127	54.535	43.973	36.105	59.601	59.598	67.196	68.0553	33.454	16.861	22.971	68.062	74.394	45.411	47.195	64.62	59.61		0.428571	62.0265
10.1179	94.938	82.353	90.4	75.051	77.168	80.383	70.39	86.287	51.727	35.213	36.51	59.231	63.544	65.055	60.6694	32.002	15.61	20.215	70.288	71.374	47.277	44.273	70.435	64.567		0.433671	61.04
10.237	86.526	77.16	80.747	77.681	71.403	77.794	64.422	86.203	57.236	34.944	30.481	58.786	57.496	67.064	61.2486	34.163	13.247	22.515	74.729	71.746	44.788	44.902	69.299	62.597		0.438776	59.4657
10.356	81.673	77.14	82.449	87.736	75.3	77.465	63.037	84.422	57.8	35.056	29.73	60.471	57.555	62.254	62.1355	31.628	14.79	19.435	78.255	73.79	44.994	39.323	62.603	57.169		0.443877	59.0088
10.475	85.448	76.981	69.256	77.628	75.075	72.26	67.395	82.12	56.546	30.24	29.894	52.345	62.531	57.901	60.8989	27.9	13.839	22.848	75.153	78.325	43.671	41.074	65.747	65.872		0.448977	57.9562
10.5941	86.645	72.398	64.168	82.888	75.917	76.871	65.168	82.798	63.307	32.577	33.132	51.602	58.937	57.73	65.4588	25.796	12.823	20.157	69.429	66.4	42.266	45.686	65.693	60.433		0.454082	57.4283
10.7131	82.827	68.873	55.263	81.979	64.227	78.7	66.327	77.789	71.734	29.893	42.679	54.403	61.643	60.954	65.9998	22.142	17.592	26.385	70.102	74.923	33.463	43.016	62.532	60.422		0.459183	57.2445
10.8321	80.039	80.567	55.743	83.762	68.137	78.531	64.391	80.562	63.887	32.193	33.265	55.717	67.534	62.316	60.0041	27.348	13.965	23.439	56.806	63.923	37.663	44.744	58.979	66.323		0.464283	56.6599
10.9512	79.477	73.608	50.71	84.659	71.268	74.515	66.183	85.826	71.081	29.888	27.562	55.709	60.451	72.829	62.066	26.867	13.022	22.256	64.275	59.695	33.006	48.08	58.574	63.282		0.469388	56.4537
11.0702	83.321	67.175	49.827	81.633	72.472	71.133	63.597	78.225	67.164	32.998	27.61	57.075	56.798	65.372	66.378	23.758	12.001	21.155	64.874	55.186	26.799	41.971	56.397	61.112		0.474489	54.3346
11.1892	83.411	66.765	48.308	87.74	71.591	76.196	67.371	70.065	75.503	36.153	28.807	59.642	56.598	66.05	66.8538	24.058	13.221	22.571	59.944	54.638	29.868	47.111	52.445	71.926		0.479589	55.7015
11.3083	83.57	72.28	44.886	82.567	74.375	68.911	73.251	77.67	73.072	36.547	33.031	62.405	62.884	64.015	68.3661	22.502	15.716	21.299	63.036	56.774	35.196	41.185	58.075	63.282		0.484694	56.454
11.4273	87.96	78.767	34.367	82.164	76.205	59.265	67.322	74.381	67.508	32.327	31.67	61.554	62.293	75.17	69.7524	22.516	15.232	25.458	58.136	56.356	31.552	40.912	58.613	64.087		0.489795	55.5653
11.5463	82.46	80.503	33.723	73.199	67.4	73.898	62.426	75.457	62.506	32.709	29.988	56.287	71.456	76.881	64.7024	22.145	13.227	29.336	59.916	58.486	32.837	37.302	58.667	67.056		0.494895	55.107
11.6654	89.76	92.196	40.594	80.583	78.588	68.995	68.349	74.142	64.681	33.969	28.368	57.631	70.624	65.987	60.1341	23.826	13.657	24.787	62.437	56.024	33.051	41.359	59.405	69.807		0.5	56.6231
11.7844	90.614	76.639	39.943	66.567	77.576	78.988	70.046	76.754	62.267	30.898	33.393	63.048	62.889	69.15	62.1188	20.931	12.981	26.511	62.031	56.417	29.405	33.726	53.422	64.672		0.505101	55.0411
11.9035	94.693	66.021	38.648	72.024	75.286	86.609	71.793	77.136	49.838	35.011	37.97	62.662	62.5	70.068	63.976	23.092	9.733	28.458	62.204	58.021	33.977	37.791	56.451	58.389		0.510205	55.5146
12.0225	95.114	77.322	28.048	63.438	74.013	86.144	67.211	75.209	48.805	34.432	35.174	60.288	67.444	76.304	59.2911	24.342	13.227	26.714	56.63	54.68	32.095	36.782	54.436	56.954		0.515306	54.3374
12.1415	83.354	71.669	30.949	65.791	73.394	83.638	67.701	75.978	47.546	30.953	32.647	60.454	71.78	79.456	60.8823	16.851	13.787	23.677	58.144	52.088	26.958	37.79	56.854	61.139		0.520407	53.4783
12.2606	84.209	68.083	30.048	68.195	73.38	83.044	69.727	72.1	47.274	31.082	27.562	59.08	70.835	72.894	64.3753	21.571	15.235	22.553	60.856	50.923	26.236	32.141	60.787	59.607		0.525511	52.9916
12.3796	84.264	63.284	25.447	51.551	79.139	85.723	71.447	71.865	45.871	27.91	35.985	65.541	61.093	65.803	66.3002	23.398	15.581	23.952	62.61	49.257	26.955	29.521	59.79	64.142		0.530612	52.3512
12.4986	83.131	61.619	30.51	49.163	74.379	80.932	72.503	70.358	43.759	29.176	43.395	63.906	61.95	64.049	62.8671	17.42	14.712	28.843	71.035	49.953	33.525	32.808	54.475	52.935		0.535712	51.9751
12.6177	92.861	61.03	24.029	53.601	81.123	95.113	80.2	73.033	49.703	27.34	38.657	59.938	66.854	65.493	64.9579	18.626	14.389	29.049	67.479	50.39	30.528	28.644	54.174	59.31		0.540817	53.6051
12.7367	86.994	54.476	22.979	47.101	80.213	90.141	75.728	67.088	43.143	22.766	41.187	59.876	71.451	69.379	68.6768	19.906	12.803	32.441	68.119	50.926	28.546	28.713	60.628	62.47		0.545918	52.7396
12.8557	75.43	63.694	21.542	41.999	77.318	86.971	69.047	64.364	57.281	19.833	45.061	55.804	71.42	64.518	63.0523	21.588	14.678	30.714	66.501	48.404	25.934	33.921	65.722	58.796		0.551018	51.8163
12.9748	78.56	64.909	22.823	39.039	82.581	97.306	68.007	66.317	47.554	21.435	52.41	54.904	70.016	64.663	60.0032	22.774	14.596	31.635	55.421	48.522	31.157	28.247	71.774	54.639		0.556123	52.0538
13.0938	73.879	66.576	20.026	35.139	83.978	100.936	71.91	64.656	42.202	23.606	49.07	51.755	73.223	69.747	60.397	22.871	11.891	31.402	58.675	46.641	29.47	30.786	65.786	57.401		0.561224	51.751
13.2128	73.569	53.815	22.082	32.468	78.611	94.992	58.647	67.602	42.859	18.476	47.177	53.89	68.825	61.671	53.5316	26.864	10.708	33.337	61.868	41.661	30.184	34.88	61.818	66.021		0.566324	49.8149
13.3319	77.576	60.846	19.784	33.698	80.658	92.558	60.636	64.3	42.476	17.245	51.732	62.022	54.403	65.159	56.5807	28.379	13.173	27.951	55.967	46.377	30.332	36.496	63.276	77.772		0.571429	50.8082
13.4509	77.308	64.479	21.197	32.35	81.788	84.961	63.642	75.496	44.267	16.016	49.681	58.207	58.692	68.616	55.7665	25.822	16.319	25.987	58.154	45.903	30.5	34.143	58.036	71.371		0.57653	50.7792
13.5699	76.391	63.545	20.71	31.967	80.303	76.908	66.301	77.978	40.341	17.814	46.992	56.079	59.318	64.23	57.6177	24.391	14.681	31.563	58.315	50.917	30.645	35.818	58.814	70.57		0.58163	50.5087
13.689	80.021	57.977	20.002	29.816	77.622	69.032	62.178	71.69	36.665	16.513	47.077	58.792	62.092	59.723	60.1416	25.326	15.77	30.39	56.328	48.317	31.012	34.675	52.012	70.011		0.586735	48.8826
13.808	81.895	61.33	19.234	26.322	86.181	74.569	58.926	77.172	39.539	14.767	44.232	67.471	61.026	69.478	63.0144	27.631	15.866	29.075	49.113	48.352	33.808	26.117	53.92	67.958		0.591836	49.8749
13.927	79.389	58.791	15.956	25.699	78.054	67.457	62.365	82.991	38.753	17.567	46.284	60.277	53.306	68.83	67.8272	21.601	17.685	26.247	58.284	50.537	32.637	31.752	56.554	76.277		0.596936	49.7967
14.0461	88.137	63.71	20.495	30.09	75.904	70.915	70.549	81.463	37.98	15.842	43.983	61.726	50.961	69.826	67.8036	24.193	18.293	23.213	61.195	51.042	40.188	35.913	60.883	70.382		0.602041	51.4453
14.1651	89.41	59.343	16.98	26.126	75.842	76.045	69.755	81.913	31.017	11.649	38.855	57.463	48.352	63.094	66.7044	26.216	17.771	30.428	63.34	54.107	40.165	37.341	55.582	68.503		0.607142	50.2501
14.2841	94.599	66.565	18.672	25.085	80.146	77.759	73.686	80.721	28.179	14.231	30.838	61.553	53.593	69.187	70.5168	26.775	16.469	30.698	67.432	51.296	39.999	42.76	62.493	68.499		0.612242	52.1563
14.4032	90.683	58.742	16.98	22.626	80.702	77.884	73.211	77.499	26.16	14.515	24.541	63.98	56.415	72.971	70.2039	25.511	16.068	31.356	58.369	49.234	39.458	43.311	64.745	69.624		0.617347	51.0329
14.5222	93.529	61.872	16.09	25.123	81.65	72.126	65.534	79.595	25.891	14.906	23.757	61.256	54.415	72.779	75.4971	24.184	15.752	29.561	60.55	48.37	34.534	39.48	62.809	68.457		0.622448	50.3215
14.6412	81.588	52.92	21.01	22.351	82.321	74.994	67.258	89.832	26.415	13.815	26.653	55.704	56.048	69.866	67.7153	25.82	17.72	35.872	61.302	51.465	36.482	42.587	66.784	57.925		0.627548	50.1853
14.7603	87.965	57.287	21.758	25.997	74.964	85.065	64.416	75.511	22.395	13.693	24.865	58.156	55.087	68.626	69.7708	28.661	20.451	33.769	65.007	46.978	38.137	38.285	62.128	63.835		0.632653	50.117
14.8793	82.828	55.504	21.798	23.971	74.183	87.398	59.785	67.03	22.011	15.048	24.945	59.026	49.39	66.39	72.3841	22.337	18.583	37.351	65.361	49.677	36.414	43.265	59.959	58.3		0.637754	48.8724
14.9984	80.451	57.451	21.344	20.184	80.991	77.763	59.601	67.447	21.15	14.856	25.072	57.397	58.985	73.274	70.7968	22.636	16.814	44.1	63.461	46.549	38.671	48.588	61.403	57.482		0.642858	49.4361
15.1174	75.164	56.041	21.71	18.991	66.805	78.339	72.769	79.531	20.084	14.431	23.474	62.595	64.249	77.219	65.3824	28.289	18.286	40.166	55.583	49.798	35.733	44.606	56.28	60.693		0.647959	49.4258
15.2364	80.925	49.289	18.555	21.769	69.815	82.179	74.837	76.399	20.972	12.923	18.065	61.177	53.966	72.939	69.2894	28.239	16.32	43.893	58.79	55.22	35.005	46.533	61.865	59.094		0.653059	49.5024
15.3555	74.899	46.653	17.246	20.663	67.329	66.647	77.751	65.227	20.111	12.138	17.287	55.772	52.738	72.446	60.82	27.549	16.068	47.489	63.933	58.569	41.524	43.213	66.594	56.963		0.658164	47.9012
15.4745	83.313	52.457	18.4	21.886	69.665	75.217	84.534	60.745	17.957	9.245	13.69	60.544	48.624	68.502	66.4191	30.72	19.409	39.508	63.181	60.325	42.656	45.822	61.123	67.6		0.663265	49.2309
15.5935	75.343	45.226	16.278	19.346	78.055	72.088	89.389	64.815	22.809	8.888	14.06	61.409	50.755	70.632	67.219	29.415	19.945	48.062	64.211	54.576	42.283	35.759	60.675	64.843		0.668365	49.0034
15.7126	78.137	53.736	16.47	15.827	77.885	64.617	93.963	61.824	21.045	8.722	18.006	63.972	55.526	68.785	61.1479	29.138	21.255	46.848	60.271	51.134	47.071	41.149	62.003	64.495		0.67347	49.2928
15.8316	80.206	56.099	17.068	17.189	73.927	68.249	97.431	57.203	22.462	11.46	15.157	58.882	50.526	65.076	63.8692	31.079	20.002	44.453	60.248	52.269	44.111	44.291	71.726	69.041		0.678571	49.6677
15.9506	74.232	64.273	14.97	18.275	70.616	75.315	109.557	62.684	21.726	10.11	14.529	66.384	51.807	66.766	65.0249	28.709	17.248	50.926	68.712	52.352	45.262	51.833	66.669	68.266		0.683671	51.5102
16.0697	73.353	61.157	14.883	17.217	68.055	81.915	115.153	64.359	21.146	10.486	16.217	67.678	54.482	61.552	62.7297	32.925	16.966	52.104	66.898	51.938	46.47	49.186	72.257	69.145		0.688776	52.0113
16.1887	71.757	63.45	16.831	22	63.627	73.806	125.367	68.132	24.19	11.338	18.924	65.201	53.057	64.994	58.6577	34.789	18.853	48.227	60.834	49.787	45.976	42.444	64.956	61.972		0.693877	51.2154
16.3077	70.042	66.044	16.074	21.463	65.957	84.473	133.488	67.62	22.097	9.716	15.822	55.282	55.14	58.668	60.2616	37.2	19.733	58.588	54.095	53.634	46.406	47.488	59.276	62.363		0.698977	51.7054
16.4268	65.495	56.754	18.555	17.905	65.78	76.09	130.274	71.769	21.265	9.805	10.625	54.418	56.539	55.58	58.4441	40.218	18.628	62.312	60.567	56.175	34.593	45.226	60.184	66.576		0.704082	50.574
16.5458	70.322	65.293	18.513	17.37	58.495	72.143	138.374	70.681	21.336	9.05	15.582	51.584	62.463	52.727	57.6343	40.856	20.354	63.271	65.442	49.283	42.393	48.142	62.164	69.271		0.709183	51.781
16.6648	67.538	68.977	18.114	13.941	58.585	74.367	139.193	65.887	24.311	10.32	13.037	51.09	65.325	60.389	58.9836	42.401	18.943	64.167	66.89	58.608	43.903	47.762	60.403	88.039		0.714283	53.3822
16.7839	70.67	67.811	15.117	16.408	65.699	74.885	131.887	70.822	19.922	10.68	16.652	55.496	62.318	57.035	52.318	47.145	18.258	72.512	69.211	56.89	40.745	42.433	67.044	87.83		0.719388	53.7412
16.9029	75.78	64.565	21.083	20.467	60.077	75.393	131.524	71.38	17.879	8.708	11.268	57.59	70.446	59.947	52.0471	40.817	21.062	59.975	63.923	55.245	43.101	45.59	64.024	87.011		0.724489	53.2876
17.0219	69.042	69.47	17.998	21.726	58.82	76.498	134.033	72.184	24.696	12.084	10.468	58.344	66.823	64.262	58.862	49.003	22.108	68.389	68.533	52.884	38.621	44.106	66.817	76.316		0.729589	54.2536
17.141	76.275	71.688	18.993	14.838	54.527	84.932	131.675	64.615	21.766	11.848	11.109	60.648	59.927	68.473	61.1071	50.45	24.552	67.166	66.216	54.746	43.72	44.514	69.049	78.22		0.734694	54.6273
17.26	77.687	68.787	19.014	16.285	61.1	79.132	117.249	85.79	20.295	7.527	16.86	49.958	62.582	62.819	68.859	54.485	23.347	67.92	61.517	56.391	41.57	50.788	57.19	86.82		0.739795	54.7488
17.379	88.497	68.185	20.721	21.412	55.378	85.934	108.287	70.642	20.398	9.217	14.252	54.065	62.222	68.816	58.4439	50.507	29.496	69.481	62.824	59.051	42.357	54.248	58.546	88.475		0.744895	55.0606
17.4981	74.852	69.764	21.892	17.524	60.63	80.924	108.961	77.996	23.193	10.457	14.368	54.689	60.616	64.384	58.2235	49.526	28.025	60.269	61.498	58.074	48.192	50.895	61.161	88.957		0.75	54.3779
17.6171	81.26	60.768	22.016	18.064	63.184	88.977	95.877	77.967	24.832	7.808	13.924	59.878	53.956	68.027	63.8725	52.602	28.667	59.641	60.747	57.999	47.988	50.91	49.138	87.027		0.755101	53.9637
17.7361	85.964	64.068	24.708	21.439	66.641	100.697	67.537	78.563	24.752	8.744	9.689	66.361	66.569	60.367	65.2632	57.654	28.551	54.061	56.868	61.428	37.389	57.013	63.766	96.239		0.760201	55.1805
17.8552	83.322	60.992	26.513	16.732	60.411	98.699	72.696	73.11	29.43	11.064	12.596	65.668	59.19	60.212	66.5378	51.45	35.51	57.537	53.116	56.914	35.156	51.503	50.74	87.336		0.765306	53.1848
17.9742	82.607	62.633	28.925	21.174	70.254	92.219	69.124	72.042	28.627	7.995	9.575	60.431	63.869	60.43	59.5338	47.003	42.44	57.206	57.583	53.598	41.934	57.354	53.181	79.378		0.770407	53.2965
18.0932	80.594	73.942	29.327	21.725	65.318	97.2	64.06	76.577	32.475	7.792	9.32	73.403	67.163	61.882	58.3474	48.653	40.683	60.219	54.947	57.152	46.144	61.645	54.903	83.033		0.775507	55.271
18.2123	76.008	70.155	28.221	17.456	64.664	108.963	62.881	78.777	26.18	9.296	11.449	74.457	55.429	56.552	58.397	48.025	38.479	55.768	58.889	55.815	47.667	58.192	53.36	89.872		0.780612	54.373
18.3313	77.836	68.395	31.468	19.089	66.585	92.648	59.317	79.973	37.379	9.594	7.696	76.763	68.686	50.982	51.8834	47.818	36.052	54.718	50.968	54.944	51.672	54.535	56.85	85.846		0.785712	53.8207
18.4504	75.075	71.747	31.706	18.217	65.935	93.901	60.086	71.859	38.396	8.923	10.871	72.209	63.824	55.742	48.8848	51.134	47.317	59.092	45.232	60.011	53.6	58.27	61.298	78.507		0.790817	54.2432
18.5694	74.144	72.392	34.816	23.041	68.072	90.686	69.377	72.422	38.665	6.47	14.904	85.327	61.261	59.795	54.0399	53.87	40.647	62.894	50.032	52.651	55.548	62.07	60.981	80.492		0.795918	56.0249
18.6884	71.442	68.442	39.339	21.905	54.887	92.039	68.759	78.458	34.712	7.154	11.134	79.23	66.288	56.461	54.7879	51.074	34.97	54.883	51.337	56.179	58.391	64.325	59.709	72.734		0.801018	54.5267
18.8075	71.661	61.99	45.535	22.16	57.868	86.881	59.826	72.227	40.582	9.615	13.07	86.422	66.835	56.921	52.7425	57.235	43.778	55.84	52.898	57.64	48.498	64.739	53.472	78.394		0.806123	54.8679
18.9265	69.594	76.196	38.772	23.064	62.834	87.26	73.282	79.375	38.718	9.048	14.647	77.851	60.542	57.336	53.6299	43.801	36.753	64.536	54.925	49.852	59.113	57.241	54.095	84.812		0.811224	55.3032
19.0455	79.881	66.298	43.686	19.121	66.463	83.471	66.76	72.353	41.781	8.63	13.584	71.74	69.032	59.041	61.9226	45.812	39.727	63.003	57.411	53.195	57	63.525	56.245	76.647		0.816324	55.6804
19.1646	85.32	65.218	44.247	24.835	53.948	80.723	54.322	81.407	37.883	12.619	11.108	76.45	62.246	61.446	58.0416	53.799	44.221	65.384	50.61	55.697	57.363	68.873	58.689	75.526		0.821429	55.8323
19.2836	83.977	72.841	39.84	26.23	54.409	79.465	63.96	75.874	43.301	9.427	11.874	76.654	59.86	60.817	59.7339	51.433	48.212	64.508	57.195	68.227	59.879	64.96	48.628	72.346		0.82653	56.4021
19.4026	92.01	69.243	43.835	28.929	62.211	79.914	61.911	80.952	38.73	7.991	10.207	75.926	62.751	61.962	63.3186	51.393	41.065	66.121	60.282	67.16	56.36	66.301	61.313	74.349		0.83163	57.6764
19.5217	94.285	82.106	46.901	27.483	61.692	84.105	68.78	77.485	44.438	9.45	14.187	81.832	59.257	60.386	59.1817	51.703	42.567	67.7	59.571	64.087	50.022	68.093	64.555	74.24		0.836735	58.9211
19.6407	101.025	69.338	51.06	37.163	69.359	77.641	72.824	79.04	44.936	12.397	10.51	74.064	61.111	55.597	62.7147	48.906	51.074	60.881	58.677	58.536	45.271	62.655	64.415	78.304		0.841836	58.6458
19.7597	108.501	78.868	52.909	33.584	75.709	74.793	66.306	82.791	47.322	9.542	10.318	72.682	57.181	64.727	60.6483	46.462	49.752	69.006	63.719	67.357	50.378	67.505	58.693	73.275		0.846936	60.0845
19.8788	104.815	83.81	52.98	42.669	67.402	69.782	64.468	76.832	58.496	9.782	13.558	64.834	60.016	74.14	62.9974	52.85	48.754	69.487	57.259	68.789	58.836	63.945	59.922	64.232		0.852041	60.444
19.9978	107.911	72.442	56.796	44.132	69.235	70.803	70.673	82.184	59.108	9.569	12.966	62.479	58.187	68.811	56.2398	49.478	47.127	65.961	62.192	67.657	53.139	62.686	62.69	63.41		0.857142	59.8282
20.1168	122.79	82.799	64.511	49.035	61.566	69.685	73.571	80.174	67.321	11.355	15.348	63.926	54.193	63.97	61.4998	52.447	41.642	59.555	60.963	77.098	50.765	59.573	56.141	53.275		0.862242	60.5501
20.2359	126.747	85.644	67.119	47.461	72.418	78.571	69.374	81.663	68.417	11.723	15.276	62.573	62.366	62.995	66.4602	48.858	49.175	66.034	53.963	77.004	51.852	65.421	60.892	57.807		0.867347	62.9089
20.3549	129.436	81.143	66.337	56.535	75.775	79.123	67.809	81.77	77.116	9.175	18.925	59.028	53.725	60.667	64.8989	50.742	53.888	67.772	55.617	76.392	53.947	55.836	56.203	53.745		0.872448	62.7335
20.4739	142.113	80.609	65.722	59.614	79.487	81.14	65.25	84.597	76.966	13.112	16.474	57.884	55.367	59.524	61.6329	54.067	53.238	72.737	59.407	71.255	57.393	56.997	63.672	53.94		0.877548	64.2582
20.593	126.633	76.469	69.991	64.468	76.889	87.766	64.807	80.636	78.24	15.258	16.139	52.082	54.539	61.273	63.4775	54.384	51.271	73.554	61.475	72.449	52.432	52.851	63.759	51.857		0.882653	63.4458
20.712	132.485	82.552	71.163	81.869	75.38	82.485	64.356	82.735	74.883	13.323	23.429	54.712	61.892	56.643	60.898	58.965	48.581	65.379	64.298	70.473	60.343	62.272	53.981	47.922		0.887754	64.6258
20.831	125.177	81.124	69.787	83.907	81.136	86.447	65.264	84.517	73.231	15.302	26.072	58.821	55.794	65.333	60.7496	52.842	53.037	68.154	58.613	65.291	57.994	59.254	51.185	44.586		0.892854	64.3174
20.9501	117.25	81.169	74.392	86.536	91.339	81.429	74.002	94.84	64.891	16.406	30.005	50.046	55.728	61.459	53.0372	58.074	51.633	64.345	51.382	69.557	68.751	55.426	46.952	41.866		0.897959	64.1881
21.0691	119.863	86.12	82.095	85.443	84.299	86.441	72.753	94.528	76.179	18.763	28.996	53.335	63.805	54.904	61.2718	48.917	47.202	60.14	58.982	62.586	61.159	53.662	41.818	43.85		0.903059	64.463
21.1881	118.375	78.196	76.499	80.925	88.535	90.47	74.03	95.784	73.017	17.079	32.192	56.961	57.191	61.2	56.5675	45.627	42.845	62.775	58.929	62.379	58.467	54.274	41.76	42.489		0.90816	63.6069
21.3072	108.204	80.588	71.316	83.732	79.101	93.698	75.445	98.288	75.046	21.114	33.807	54.045	54.971	57.314	52.3171	47.138	45.387	59.404	57.981	62.96	61.229	49.274	36.735	34.74		0.913265	62.2431
21.4262	100.469	83.077	78.415	99.036	80.107	90.802	73.273	91.448	73.97	24.493	40.061	52.532	55.424	52.965	45.0467	42.42	43.065	57.853	58.395	62.433	61.031	52.309	31.596	34.724		0.918365	61.8727
21.5452	90.509	68.114	71.758	97.069	84.417	88.911	80.362	87.225	73.425	31.818	44.379	57.107	57.054	50.816	49.321	45.681	44.215	56.268	58.385	59.557	63.641	52.566	25.556	31.751		0.923466	61.246
21.6643	91.167	74.11	76.457	92.62	81.276	82.135	64.009	79.978	73.036	34.316	48.568	60.773	58.151	46.306	49.0368	39.83	42.016	54.464	59.654	61.656	62.015	54.771	21.475	24.724		0.928571	59.6893
21.7833	93.37	62.511	76.322	87.35	78.934	77.235	70.168	70.209	71.517	37.775	48.374	56.025	55.336	51.871	51.252	40.339	41.409	48.797	59.885	59.62	60.812	47.522	17.329	21.109		0.933671	57.7113
21.9024	91.111	64.265	63.964	88.535	80.791	85.74	64.636	72.551	82.08	47.969	53.312	57.384	49.651	44.662	59.8138	38.342	38.896	46.901	62.469	61.572	57.067	43.332	15.98	15.597		0.938776	57.7759
22.0214	74.2	65.634	59.694	86.211	91.994	80.503	65.005	76.655	73.695	58.262	57.003	61.674	47.36	47.784	53.5822	36.41	41.785	48.984	64.412	55.801	51.987	45.277	13.455	14.113		0.943877	57.145
22.1404	73.525	64.847	69.806	76.699	83.08	82.921	65.863	72.039	72.423	59.313	56.14	59.908	47.08	44.347	51.651	37.962	49.496	49.313	65.255	58.293	55.074	45.714	11.391	10.349		0.948977	56.7704
22.2595	67.705	62.076	66.737	71.586	78.193	76.984	67.043	65.738	67.307	62.161	58.531	57.973	43.821	42.373	52.5337	37.34	40.744	44.426	73.708	52.012	48.884	38.035	8.558	7.552		0.954082	53.8342
22.3785	71.418	62.817	64.871	59.588	79.486	73.618	63.361	64.89	68.299	59.735	64.178	57.936	38.773	43.18	55.5766	38.404	37.165	41.077	65.113	50.348	43.583	31.695	9.729	5.961		0.959183	52.1167
22.4975	60.609	61.524	65.44	65.157	70.949	67.384	67.005	58.632	59.192	62.39	61.894	50.615	35.98	41.585	53.5232	31.564	32.93	41.934	57.253	51.341	45.993	23.102	7.876	6.978		0.964283	49.2021
22.6166	60.243	53.957	64.429	51.073	63.571	68.969	69.855	54.487	56.206	67.926	59.978	50.247	40.687	41.784	54.3544	22.374	29.1	36.329	57.321	47.85	47.478	20.66	5.362	5.979		0.969388	47.0925
22.7356	61.906	51.403	63.625	40.929	62.267	69.843	68.481	42.711	52.794	56.561	61.693	42.65	37.696	35.739	53.7327	22.198	28.239	38.434	49.562	52.112	37.778	17.351	4.597	6.728		0.974489	44.1262
22.8546	61.956	45.052	55.318	44.11	60.161	64.191	63.487	41.277	43.69	61.509	57.236	39.71	31.834	38.757	54.672	22.351	26.106	25.856	51.349	51.262	35.564	10.519	4.735	8.172		0.979589	41.6198
22.9737	46.37	44.726	56.303	35.002	55.734	57.819	58.779	37.606	42.927	60.285	54.744	30.282	30.574	36.807	54.9407	15.202	25.335	23.455	51.351	46.358	27.199	10.053	5.507	5.327		0.984694	38.0286
23.0927	38.429	39.015	48.605	28.33	39.194	60.286	64.719	29.302	35.431	49.107	45.331	21.432	30.675	35.529	48.371	13.965	20.86	21.756	42.292	40.077	33.061	8.425	3.246	4.063		0.989795	33.3959
23.2117	35.413	33.551	41.659	24.201	34.031	49.518	71.276	26.038	27.781	47.037	41.894	22.56	32.962	29.591	44.9907	14.374	15.5	13.938	36.98	36.554	27.39	5.619	3.392	5.677		0.994895	30.0803
23.3308	31.444	30.037	34.89	22.986	21.918	51.895	65.023	14.908	23.617	42.556	38.853	25.319	25.464	24.053	47.465	13.226	15.025	12.88	42.662	33.232	24.635	6.983	3.507	5.158		1	27.4057

## Sheet: Image12
X0	Y0	Y1	Y2	Y3	Y4	Y5	Y6	Y7	Y8	Y9	Y10	Y11	Y12	Y13	Y14	Y15	Y16	Y17	Y18	Y19	Y20	Y21	Y22		Ap-Basal	Avg intensity
0	34.561	18.342	21.331	22.942	30.781	24.473	24.443	22.468	95.405	99.586	36.892	15.216	16.843	17.404	25.754	19.841	57.125	77.732	28.19	16.223	79.178	164.627	116.7		0	46.3503
0.119	36.949	16.223	23.129	24.97	36.098	20.328	26.01	19.109	99.894	108.843	37.845	15.371	18.517	21.153	30.105	22.488	70.714	69.89	31.618	15.152	84.014	168.394	126.873		0.00523408	48.856
0.2381	37.681	18.784	20.69	29	45.57	17.913	28.899	18.152	109.205	110.198	43.694	15.593	18.097	18.258	36.456	22.569	76.098	79.936	32.645	14.457	73.832	177.279	145.279		0.0104726	51.7515
0.3571	44.349	28.28	20.313	25.269	55.662	25.671	38.126	18.129	121.406	101.384	37.061	22.179	20.105	30.1	36.657	22.091	89.741	89.074	39.56	13.693	74.532	170.632	153.271		0.0157066	55.5341
0.4761	43.399	31.767	23.574	30.634	58.599	28.448	41.977	19.772	127.56	109.047	42.329	21.912	26.604	36.781	46.049	31.845	92.38	95.993	49.141	19.852	76.88	166.102	162.68		0.0209407	60.1446
0.5952	53.653	42.55	22.557	31.604	60.89	29.633	55.91	19.145	139.617	114.856	37.401	21.797	27.925	49.851	48.329	29.769	111.368	102.358	56.815	19.572	76.548	171.197	179.765		0.0261792	65.3526
0.7142	58.326	50.006	21.177	32.978	76.049	34.22	54.953	22.253	122.724	106.156	36.445	24.265	32.037	55.651	55.31	32.513	126.44	114.991	59.743	21.136	64.453	175.381	182.418		0.0314133	67.8098
0.8332	69.63	56.469	30.69	30.551	81.912	42.789	62.953	24.038	126.139	104.945	40.72	21.164	36.967	66.632	58.924	35.499	128.97	126.793	70.386	19.79	72.546	180.746	192.482		0.0366474	73.1189
0.9523	76.51	79.098	34.539	31.049	84.075	56.526	74.289	26.948	127.95	107.704	36.582	21.873	47.965	87.949	62.337	32.434	135.624	133.709	89.68	21.412	71.747	197.826	201.406		0.0418859	79.9666
1.0713	90.636	100.818	32.628	37.184	101.797	67.452	86.485	26.954	133.002	115.742	39.788	23.512	68.355	114.563	66.828	35.216	155.07	128.739	100.743	29.156	71.174	192.617	202.259		0.0471199	87.8573
1.1903	111.9	136.168	44.351	35.552	113.247	62.879	90.167	35.259	134.075	124.741	40.124	26.399	89.992	137.002	73.512	42.248	157.661	143.864	100.263	35.038	74.035	193.392	206.535		0.052354	96.0176
1.3094	134.667	156.689	56.46	44.624	119.313	71.268	110.293	41.949	138.84	126.049	46.31	34.465	117.226	145.257	76.964	42.204	151.22	130.662	100.285	42.727	64.507	188.254	199.798		0.0575925	101.74
1.4284	150.184	175.295	63.333	45.658	141.333	89.198	109.047	52.582	141.111	135.531	51.6	39.239	122.027	161.97	84.027	39.636	152.715	134.719	110.8	51.72	60.095	195.827	211.458		0.0628266	109.526
1.5474	158.417	177.507	77.374	51.675	152.504	101.597	115.769	58.525	138.49	141.308	57.734	44.229	144.607	171.352	104.525	44.561	157.198	156.527	127.493	56.57	65.258	202.143	215.213		0.0680607	118.286
1.6665	188.974	197.93	85.452	59.646	150.421	107.934	124.432	62.532	137.426	146.85	63.151	51.417	157.174	179.22	110.517	46.394	157.943	165.376	135.386	69.597	61.5	206.598	213.509		0.0732991	125.19
1.7855	182.956	208.075	99.364	67.693	170.658	115.688	127.307	69.087	138.605	149.468	65.224	67.388	172.327	187.657	110.772	55.327	163.768	159.1	142.723	78.719	57.496	209.787	220.72		0.0785332	131.3
1.9046	188.961	207.116	131.639	69.165	156.811	135.757	128.853	75.525	145.922	157.712	78.916	71.025	184.834	195.068	126.811	71.754	169.615	175.706	144.716	91.659	55.655	204.479	210.047		0.0837717	138.163
2.0236	187.462	218.373	147.857	82.719	172.844	139.271	139.091	85.154	158.477	164.31	89.679	82.351	196.942	188.893	128.681	70.337	178.723	176.472	140.67	106.338	59.781	214.806	212.237		0.0890058	145.281
2.1426	185.83	221.997	159.001	88.31	180.019	141.114	139.894	93.04	162.094	160.828	98.946	97.554	204.019	192.924	138.891	84.758	176.163	181.112	147.713	127.51	52.566	197.408	211.845		0.0942399	149.719
2.2617	190.855	214.203	165.531	108.116	185.731	152.887	144.129	110.427	161.496	168.668	110.998	110.972	210.463	199.86	146.673	97.989	178.721	189.661	154.618	141.925	56.288	212.103	216.738		0.0994784	157.785
2.3807	205.063	222.684	168.174	110.618	189.577	159.576	152.663	114.633	168.4	175.948	122.582	119.129	213.886	193.386	145.145	114.484	189.422	185.042	159.37	152.176	51.127	204.95	220.228		0.104712	162.533
2.4997	206.555	219.262	172.479	111.919	190.513	166.33	162.813	123.327	160.661	179.433	139.527	116.239	208.507	196.704	142.96	122.696	189.146	182.341	159.637	159.845	55.488	207.689	213.89		0.109947	164.694
2.6188	208.865	216.3	177.686	123.885	200.559	165.83	167.475	139.62	160.347	188.352	148.348	129.839	211.406	197.5	143.42	134.103	199.883	192.86	166.971	161.667	48.519	216.885	214.109		0.115185	170.193
2.7378	210.494	216.882	175.106	130.504	196.281	172.976	170.195	141.042	151.013	205.999	171.991	151.218	211.179	214.971	148.992	144.183	206.27	192.243	179.453	175.555	52.019	214.095	214.781		0.120419	175.976
2.8568	214.917	215.289	180.306	135.108	191.858	181.853	168.903	156.021	162.394	201.107	184.384	153.605	205.571	205.786	154.133	152.291	201.728	201.886	182.664	183.502	63.853	221.158	211.825		0.125653	179.571
2.9759	214.315	222.2	162.352	146.68	197.696	189.335	176.459	155.852	166.211	184.382	174.128	164.992	216.581	202.548	160.209	154.677	193.731	199.173	190.104	187.317	72.904	225.421	218.837		0.130892	181.57
3.0949	208.507	221.234	179.814	153.904	213.11	190.154	192.961	157.512	170.113	186.484	193.455	167.491	219.315	201.874	157.548	163.443	195.822	202.792	200.474	197.85	78.823	227.065	218.863		0.136126	186.896
3.2139	212.222	224.823	177.999	153.502	203.891	193.405	197.062	173.246	183.187	181.773	195.822	177.594	212.729	206.982	149.864	171.757	202.5	201.314	192.562	197.333	92.744	227.969	224.359		0.14136	189.332
3.333	225.414	220.182	173.52	166.513	202.886	195.958	202.816	171.068	178.085	195.639	201.211	183.63	220.393	212.299	143.238	167.349	201.071	200.468	201.258	210.011	103.582	222.117	224.843		0.146598	192.328
3.452	224.134	227.518	170.941	171.007	212.615	203.219	196.886	183.363	185.425	192.471	201.741	171.801	211.165	208.766	151.236	159.791	209.62	202.719	182.382	217.538	110.712	219.789	224.481		0.151832	193.014
3.571	220.132	227.549	172.16	157.653	213.886	197.223	207.463	175.198	178.566	205.621	194.019	187.085	222.07	205.706	145.858	158.207	197.576	203.861	194.466	218.678	124.252	220.086	219.494		0.157066	193.34
3.6901	229.03	225.059	174.118	171.676	209.152	199.964	202.397	176.559	177.44	202.199	195.66	195.801	218.433	196.804	136.425	171.618	206.885	202.58	205.839	225.254	141.416	224.465	226.948		0.162305	196.336
3.8091	232.123	223.509	177.872	179.506	210.667	197.726	193.854	178.085	171.042	202.611	199.757	190.259	217.926	189.28	138.759	171.911	210.083	215.824	209.794	213.592	146.994	222.408	222.848		0.167539	196.367
3.9281	227.831	222.058	180.721	166.682	213.409	209.695	198.342	173.157	177.264	194.374	212.828	186.082	210.575	176.787	134.033	167.727	213.344	217.42	219.886	208.699	148.321	217.632	213.53		0.172773	195.235
4.0472	217.939	209.54	175.303	160.074	214.227	203.319	201.695	175.679	179.989	204.159	188.799	178.74	216.331	182.534	123.091	165.061	202.443	218.079	224.214	209.788	156.987	216.399	217.32		0.178012	193.118
4.1662	213.998	207.51	161.864	162.547	223.354	206.906	198.723	168.349	179.721	206.142	192.277	175.881	211.96	177.801	118.56	176.586	195.71	217.252	218.01	211.754	176.034	215.206	215.056		0.183246	192.661
4.2852	220.797	213.251	157.171	159.928	206.983	209.772	201.82	183.392	177.086	200.305	182.991	180.68	218.142	175.618	116.22	172.978	207.374	211.399	229.807	220.1	185.013	206.686	211.715		0.18848	193.445
4.4043	214.206	209.513	162.878	176.994	216.718	209.144	198.464	180.91	173.333	203.561	172.126	186.416	211.215	168.152	110.619	175.288	205.879	210.53	235.891	218.192	181.558	213.382	207.114		0.193718	193.134
4.5233	225.525	212.932	162.199	166.392	209.033	207.329	196.534	187.831	165.447	202.058	170.318	178.891	215.181	164.193	105.9	162.993	206.567	217.895	232.479	213.262	179.836	221.878	203.117		0.198952	191.643
4.6423	222.643	212.178	148.106	152.164	214.128	209.878	190.708	188.702	162.817	192.801	174.164	180.364	215.121	158.23	99.362	154.146	203.08	217.637	230.485	212.684	175.581	220.585	198.127		0.204186	188.421
4.7614	224.483	215.419	144.43	161.786	214.203	201.243	187.057	185.352	146.953	190.412	168.853	181.032	205.234	165.17	102.035	146.824	192.186	215.755	236.47	219.104	181.693	223.112	198.798		0.209425	187.287
4.8804	223.995	216.285	151.305	157.32	205.344	200.832	190.809	186.366	144.387	188.821	153.77	173.038	208.446	159.092	101.486	150.609	183.156	218.752	231.161	226.233	181.97	217.574	208.622		0.214659	186.06
4.9995	225.046	212.963	157.548	172.998	208.802	211.451	194.689	176.529	137.584	186.174	169.599	166.69	201.294	160.607	103.647	140.571	185.405	221.371	236.469	225.494	186.195	220.65	210.891		0.219897	187.507
5.1185	230.834	204.66	160.431	172.12	204.766	214.771	194.319	178.047	134.615	184.713	167.756	154.68	202.948	157.319	96.812	132.366	163.554	216.621	239.404	213.836	181.365	212.211	205.176		0.225132	183.623
5.2375	221.236	198.677	159.477	169.865	203.633	206.662	200.09	183.902	120.026	188.65	155.941	154.983	207.036	163.283	98.538	129.669	162.987	209.591	230.8	220.757	195.11	200.852	213.408		0.230366	182.399
5.3566	225.618	200.779	163.146	170.484	205.434	209.22	183.909	192.247	127.345	180.983	150.643	157.302	198.29	159.578	95.707	119.816	139.091	208.593	238.721	215.917	187.535	201.647	210.084		0.235604	180.091
5.4756	223.02	203.094	155.901	171.416	208.725	213.715	189.756	187.501	127.146	182.701	144.792	139.034	194.242	156.707	102.484	116.224	130.688	220.542	235.506	209.766	188.915	204.307	201.768		0.240838	178.607
5.5946	219.032	209.687	154.124	168.035	209.975	215.55	190.182	186.855	121.831	170.876	144.802	139.04	191.705	161.684	104.101	114.503	126.117	214.114	231.943	212.632	177.782	200.001	193.342		0.246072	176.431
5.7137	218.9	208.611	163.694	160.417	214.547	202.323	178.892	201.089	110.376	179.405	137.532	140.166	180.939	169.499	106.409	116.465	111.705	210.273	232.868	213.52	192.733	204.325	198.949		0.251311	176.245
5.8327	222.373	205.994	160.277	161.891	216.484	205.834	185.536	197.408	117.087	171.713	127.937	140.25	185.765	174.292	104.679	120.108	98.111	211.076	234.379	210.198	182.846	199.634	200.228		0.256545	175.396
5.9517	214.361	212.317	166.108	159.993	205.442	198.378	175.689	190.873	112.735	157.013	124.748	139.055	181.872	157.001	92.592	119.384	85.573	211.912	228.221	212.703	203.829	218.057	205.726		0.261779	172.764
6.0708	215.251	213.66	160.99	150.977	202.543	206.885	184.066	193.616	103.221	146.259	107.754	135.575	177.572	175.163	105.278	110.242	84.876	213.678	231.774	200.494	192.04	200.843	196.234		0.267017	169.956
6.1898	215.163	213.982	164.459	151.922	214.172	200.347	184.031	193.763	85.914	144.658	108.099	131.594	176.304	168.969	115.509	103.751	80.458	219.891	223.943	184.798	188.774	201.215	197.069		0.272251	168.208
6.3088	217.768	206.042	168.424	147.739	203.064	188.347	193.486	195.844	84.685	131.581	105.279	126.696	155.178	163.76	117.481	116.026	75.693	210.35	229.706	184.519	189.049	204.714	200.96		0.277486	165.93
6.4279	215.419	215.603	156.313	131	204.443	181.34	193.101	200.057	88.085	131.738	95.928	123.079	161.185	149.434	121.368	118.862	82.098	213.257	224.26	193.319	190.041	197.959	200.394		0.282724	164.708
6.5469	214.039	217.541	157.246	134.188	195.971	180.744	193.735	190.426	83.663	119.528	83.527	113.904	162.694	140.071	119.386	111.67	81.325	218.785	217.152	185.22	180.668	191.605	207.652		0.287958	160.902
6.6659	211.506	205.924	163.566	119.164	193.038	180.751	181.572	185.862	83.82	121.478	80.521	101.033	161.941	140.092	128.532	104.832	78.385	217.656	221.987	186.145	189.443	194.344	213.15		0.293192	159.337
6.785	214.714	208.614	154.953	122.48	194.602	192.042	171.418	176.445	87.672	122.689	79.348	101.155	146.791	131.067	129.357	100.093	83.28	224.716	219.273	187.703	190.591	188.726	209.739		0.298431	158.151
6.904	208.069	206.824	146.735	124.833	191.149	200.971	165.658	183.058	82.417	111.409	85.722	110.575	136.746	122.767	128.222	103.535	85.019	221.084	229.335	184.079	184.737	179.704	199.701		0.303665	156.189
7.023	200.427	207.245	155.055	124.436	194.638	202.505	168.844	180.807	81.261	104	78.334	92.662	127.34	116.459	121.033	106.955	68.93	214.792	232.728	182.13	175.598	177.079	185.971		0.308899	152.14
7.1421	191.374	212.37	152.872	115.107	175.226	185.803	165.97	184.23	73.337	107.818	79.114	97.601	128.289	112.854	120.543	102.785	82.47	218.157	233.357	165.22	161.189	186.594	180.04		0.314137	149.231
7.2611	186.224	201.373	165.949	107.716	180.227	185.394	163.68	179.068	72.368	101.008	80.932	88.892	112.668	106.036	111.976	104.102	84.584	214.831	234.428	159.444	163.384	184.877	186.518		0.319371	146.769
7.3801	187.78	202.666	146.697	111.148	188.527	196.243	152.207	167.246	76.762	101.543	79.542	87.717	117.982	94.566	111.609	96.304	79.413	215.206	235.344	167.812	152.08	183.102	175.818		0.324605	144.666
7.4992	185.118	206.872	146.249	113.719	179.304	179.117	157.774	165.359	79.95	93.293	68.515	91.125	100.163	90.691	109.489	102.03	73.94	211.925	224.157	153.659	148.043	202.417	156.989		0.329844	140.865
7.6182	187.315	204.118	136.786	120.608	181.458	170.794	150.888	159.473	75.185	89.704	64.139	82.166	101.081	92.589	98.742	99.641	76.371	210.968	222.552	159.673	150.023	200.093	172.163		0.335078	139.414
7.7372	175.674	195.84	142.863	97.997	166.901	172.052	147.523	175.611	70.454	89.603	61.799	68.572	107.044	84.487	84.607	100.381	78.014	202.987	216.46	150.534	140.422	198.653	159.451		0.340312	134.258
7.8563	175.79	199.907	144.961	101.335	152.855	158.031	137.136	172.085	67.324	88.427	70.559	67.267	97.472	85.45	81.897	97.699	73.018	188.231	210.798	134.39	127.01	190.382	146.502		0.345551	129.066
7.9753	176.324	199.923	134.511	110.47	159.813	144.309	131.223	175.406	76.59	82.603	67.682	77.998	86.713	74.008	77.482	86.545	74.537	175.89	216.591	146.321	121.763	192.291	138.268		0.350785	127.272
8.0943	171.88	199.691	132.183	105.02	144.157	141.65	128.807	162.943	72.072	83.851	66.491	76.052	82.264	78.832	70.04	91.037	81.311	171.913	217.262	135.089	106.654	194.679	135.827		0.356019	123.9
8.2134	161.208	208.968	147.097	105.269	137.482	135.036	116.938	159.75	59.842	82.837	69.289	68.261	79.378	61.812	64.02	89.187	78.174	171.609	216.396	123.383	101.982	189.967	126.667		0.361257	119.763
8.3324	160.055	212.607	148.479	103.068	135.238	135.895	110.047	156.126	58.415	86.435	61.113	71.781	77.386	62.702	63.387	87.948	88.514	161.529	211.004	122.065	97.754	186.462	114.892		0.366491	117.952
8.4515	148.994	198.127	139.27	100.455	122.352	119.507	110.27	141.668	73.987	76.15	59.725	75.077	72.46	64.088	52.114	79.676	80.756	151.285	210.764	126.299	84.261	166.631	108.189		0.37173	111.396
8.5705	145.55	204.229	144.575	91.472	117.557	103.036	93.03	129.827	71.335	69.618	68.376	76.038	72.327	51.89	42.12	73.174	82.186	128.353	207.007	108.554	75.561	152.259	102.373		0.376964	104.802
8.6895	136.353	195.558	153.63	88.184	113.91	98.181	85.565	127.454	61.752	72.463	61.52	75.705	71.602	49.341	43.997	73.87	75.883	139.491	203.566	103.621	79.223	141.878	97.205		0.382198	102.172
8.8086	158.69	201.164	155.381	86.11	102.541	94.684	82.11	131.9	64.394	72.526	65.836	77.397	74.2	44.511	40.318	69.146	72.451	125.15	193.322	101.998	72.068	122.219	92.131		0.387436	100.011
8.9276	146.05	198.129	148.001	94.338	109.959	88.292	86.799	132.704	59.074	75.907	60.756	70.698	72.147	51.972	30.714	71.195	71.737	122.953	194.296	100.354	61.87	113.471	81.156		0.392671	97.5031
9.0466	138.336	192.98	148.513	94.438	103.333	77.447	82.087	111.45	54.647	65.494	60.854	72.881	71.056	46.334	30.577	67.643	78.778	114.524	180.982	98.267	68.051	100.998	75.695		0.397905	92.842
9.1657	147.243	194.674	144.912	92.27	97.994	73.086	70.924	118.657	56.151	65.77	61.652	69.783	76.892	42.859	29.694	62.209	79.85	124.576	167.254	97.487	71.904	101.637	73.206		0.403143	92.2037
9.2847	136.692	198.992	143.722	91.172	96.286	68.209	64.805	116.372	55.972	55.928	64.885	66.241	77.841	38.26	21.877	55.258	69.824	116.2	164.717	84.612	66.811	89.676	65.242		0.408377	87.3737
9.4037	124.646	190.088	135.664	82.477	87.112	63.689	67.087	123.749	58.996	61.345	63.145	68.225	77.653	35.369	22.959	54.968	75.944	105.328	160.714	86.784	58.6	86.278	56.165		0.413611	84.6515
9.5228	123.305	182.721	145.393	99.402	95.302	55.065	67.576	116.802	60.688	64.696	61.116	70.708	72.705	33.512	23.813	53.323	79.194	101.217	159.421	84.495	64.736	85.567	49.662		0.41885	84.8008
9.6418	115.835	171.019	139.05	98.797	102.962	45.954	70.515	123.015	56.939	71.614	61.566	68.409	73.936	33.506	25.725	52.357	81.884	99.879	157.036	83.371	69.039	79.253	44.725		0.424084	83.7559
9.7608	112.068	169.163	124.231	95.325	89.668	48.714	62.884	117.908	63.122	74.896	61.36	64.22	77.011	28.817	25.899	46.643	83.661	92.159	138.334	79.989	63.067	77.952	46.554		0.429318	80.1585
9.8799	103.095	164.938	114.64	99.838	90.814	46.382	57.965	124.354	56.178	78.045	56.173	65.994	69.113	27.735	22.182	44.451	90.624	91.795	141.75	74.503	60.681	79.989	40.388		0.434556	78.3316
9.9989	103.704	137.605	110.856	97.01	94.479	47.415	57.695	124.549	58.086	64.535	60.717	64.007	71.231	25.113	17.418	41.516	84.819	84.147	133.323	76.296	63.318	85.69	39.789		0.43979	75.7964
10.1179	89.73	124.411	94.878	88.31	94.802	38.345	56.064	118.114	61.779	61.139	60.601	72.485	83.648	27.646	21.64	40.618	76.431	82.94	130.278	78.551	57.643	78.89	33.676		0.445025	72.7226
10.237	74.903	101.182	76.918	91.344	100.211	43.618	56.294	111.764	65.09	71.792	69.622	68.314	63.068	27.531	19.289	38.549	70.373	82.307	123.309	86.107	65.125	75.061	37.177		0.450263	70.389
10.356	75.745	82.934	63.581	83.53	103.465	43.071	54.33	117.577	60.9	66.823	68.497	69.571	69.135	27.37	20.097	39.888	73.418	79.436	127.685	80.659	62.646	76.314	34.661		0.455497	68.7536
10.475	84.624	69.081	60.439	88.252	100.159	39.707	54.368	128.721	63.468	67.683	71.295	72.502	68.571	23.61	22.313	32.874	72.405	76.214	119.928	80.376	59.045	74.129	32.72		0.460731	67.9341
10.5941	77.945	63.56	58.425	83.468	89.368	35.434	48.892	127.428	65.126	64.725	76.987	74.566	59.283	26.907	17.226	31.511	72.854	73.784	111.905	80.703	60.982	71.736	28.075		0.46597	65.2561
10.7131	75.381	49.278	55.312	88.904	81.191	34.184	50.597	110.734	66.819	62.205	74.137	69.596	62.712	25.516	17.203	31.773	65.979	82.126	108.004	77.685	68.636	70.015	29.713		0.471204	63.3783
10.8321	61.727	45.118	40.755	72.21	79.627	31.782	52.706	120.701	62.252	61.292	73.881	69.967	56.494	22.731	17.856	32.324	71.791	82.926	105.83	69.474	56.916	73.331	31.444		0.476438	60.5711
10.9512	58.995	40.524	42.431	65.897	81.015	35.182	53.454	130.573	66.172	64.858	69.53	70.499	55.245	24.058	16.14	26.901	80.668	70.282	100.072	67.561	56.052	68.497	27.614		0.481676	59.6617
11.0702	50.77	37.676	43.117	70.477	80.924	38.693	52.088	125.401	63.901	67.966	71.507	73.364	66.036	27.211	15.53	20.613	75.319	72.454	92.877	65.526	64.756	63.268	26.084		0.48691	59.3721
11.1892	41.705	36.128	41.796	62.474	68.436	31.895	52.847	121.8	65.349	59.936	71.753	73.886	63.074	25.387	15.123	22.265	68.436	78.192	88.957	68.651	66.388	59.189	27.803		0.492144	57.0204
11.3083	41.848	33.966	35.626	65.032	69.71	28.731	55.089	121.059	67.297	59.155	64.816	71.767	63.322	22.704	13.723	19.528	73.559	68.533	71.989	75.563	72.338	62.05	25.329		0.497383	55.771
11.4273	47.107	33.591	37.044	62.29	71.113	28.833	54.527	105.634	62.211	54.978	66.69	84.433	66.165	19.548	14.812	19.811	66.798	65.87	76.542	74.626	65.066	61.941	22.269		0.502617	54.8652
11.5463	44.172	29.867	37.473	65.539	63.459	33.308	55.234	96.836	57.726	61.753	68.39	83.513	60.776	20.95	16.581	19.095	71.894	70.821	76.643	72.151	63.358	55.342	22.96		0.507851	54.254
11.6654	32.354	24.274	39.124	64.109	68.164	24.893	60.606	99.831	72.934	61.297	78.034	78.511	62	26.403	14.507	19.997	76.906	72.875	78.262	66.065	60.782	59.663	27.48		0.51309	55.177
11.7844	35.531	22.668	31.4	69.991	72.547	29.48	60.025	86.952	61.242	55.729	70.151	75.686	60.308	24.08	14.805	21.29	72.529	75.348	70.411	62.532	67.685	54.461	29.12		0.518324	53.2161
11.9035	36.903	24.698	34.465	69.978	70.248	26.425	69.477	86.874	57.473	57.503	76.003	78.183	57.777	20.341	11.65	21.861	82.178	81.617	81.109	60.547	70.428	55.94	27.82		0.523562	54.7608
12.0225	36.655	29.527	29.779	68.695	67.591	27.712	71.539	82.898	51.86	59.861	69.851	76.793	60.028	21.016	14.947	19.91	79.87	84.893	74.929	58.377	65.41	59.789	26.952		0.528796	53.8644
12.1415	33.413	26.914	33.589	69.257	78.382	27.574	71.286	77.994	50.401	64.707	71.586	81.128	54.796	20.286	19.405	21.991	68.936	79.75	77.297	63.861	75.719	66.514	25.268		0.53403	54.785
12.2606	33.371	23.992	31.529	71.751	84.889	27.514	78.982	66.104	54.514	64.774	74.657	71.598	60.815	21.753	16.809	19.392	61.017	79.447	74.844	67.195	77.52	58.553	24.373		0.539269	54.1475
12.3796	28.98	22.835	30.239	80.263	75.206	32.505	74.916	69.202	49.486	62.519	72.307	65.27	58.968	21.379	16.92	21.379	71.081	75.005	76.661	62.644	73.24	65.547	25.378		0.544503	53.5622
12.4986	27.384	22.645	29.712	67.243	71.4	31.314	90.247	67.599	48.713	67.418	71.905	68.143	61.793	21.781	16.08	24.555	70.145	68.225	70.823	68.529	73.807	54.768	25.322		0.549737	53.024
12.6177	29.123	24.745	28.141	62.899	77.368	29.646	91.918	56.337	51.96	65.576	65.823	60.179	65.662	23.611	13.064	23.875	69.039	73.012	73.61	71.029	68.79	51.48	30.509		0.554975	52.4955
12.7367	24.049	20.999	27.613	64.859	78.761	29.485	95.21	52.315	44.217	59.037	64.474	59.304	63.021	22.076	16.793	20.678	70.115	82.083	69.548	79.506	74.264	48.16	28.115		0.56021	51.9427
12.8557	24.928	18.909	28.472	62.029	77.937	30.765	94.852	35.848	41.983	58.086	67.78	62.532	64.409	21.109	16.101	18.281	63.668	74.544	70.734	75.604	73.444	52.64	26.451		0.565444	50.4829
12.9748	25.95	18.309	31.309	61.154	70.927	33.424	85	36.469	42.979	56.645	71.505	57.334	73.83	19.957	17.473	15.464	54.91	79.353	68.896	77.034	82.399	60.395	28.457		0.570682	50.8336
13.0938	26.549	15.503	29.252	67.229	63.646	32.53	82.097	34.397	47.753	52.73	66.251	60.519	69.961	22.014	14.098	20.141	60.796	73.331	68.192	71.554	75.433	61.817	27.881		0.575916	49.725
13.2128	23.388	18.181	24.928	60.731	68.355	34.632	89.372	30.942	45.658	51.596	65.714	57.324	64.409	19.649	14.863	16.854	62.522	64.45	68.68	65.973	63.413	49.885	28.774		0.58115	47.404
13.3319	24.05	20.536	25.537	55.104	64.511	39.595	84.431	30.699	45.335	55.337	58.751	60.207	66.131	20.145	11.979	18.298	61.053	68.277	68.273	76.205	60.32	55.226	32.92		0.586389	47.953
13.4509	20.772	16.037	25.355	57.775	65.645	49.476	69.921	27.955	41.433	55.41	56.499	66.018	64.5	20.582	14.017	19.21	56.911	68.474	67.28	71.322	67.977	53.153	33.573		0.591623	47.3607
13.5699	20.59	16.136	25.208	53.067	61.703	47.642	60.212	22.874	39.843	53.704	65.902	66.495	75.99	24.54	14.892	17.175	59.809	73.385	72.277	71.47	66.883	51.623	30.618		0.596857	47.4799
13.689	20.05	19.307	26.086	54.53	65.504	61.214	49.597	24.835	39.89	55.673	68.043	63.928	69.477	23.502	14.334	16.909	61.544	68.296	62.587	69.356	66.779	54.997	29.663		0.602095	47.2218
13.808	20.256	17.58	31.293	58.338	67.298	66.086	44.637	22.327	38.497	53.504	65.424	73.274	67.752	24.06	13.379	13.929	54.708	66.928	68.069	66.125	67.618	55.765	30.943		0.607329	47.2952
13.927	19.533	17.755	26.638	53.005	60.122	66.605	40.19	18.99	39.186	59.968	62.653	77.944	66.602	23.826	11.755	13.422	56.918	63.66	66.848	59.474	69.574	47.221	28.1		0.612564	45.6517
14.0461	18.523	14.174	27.534	47.388	65.083	73.669	38.374	18.817	36.236	60.031	58.047	72.573	64.245	28.499	12.854	15.504	55.942	68.245	70.326	72.214	71.372	52.22	28.448		0.617802	46.5356
14.1651	23.454	17.955	28.328	48.244	59.673	79.196	35.161	17.096	34.594	53.528	61.581	73.438	66.794	27.202	12.652	17.964	57.959	71.121	70.313	69.482	71.359	52.816	30.796		0.623036	46.9872
14.2841	27.235	16.97	29.936	52.83	66.419	76.719	30.721	24.523	33.412	58.094	61.786	67.78	75.337	20.316	13.7	16.65	47.849	67.111	64.884	71.857	75.373	55.707	29.771		0.62827	47.173
14.4032	24.972	16.94	21.761	57.222	56.749	73.221	31.423	23.65	40.828	66.789	63.584	68.699	73.78	25.801	16.134	18.273	50.734	59.572	65.234	68.029	67.659	52.106	27.921		0.633509	46.5687
14.5222	24.676	19.707	20.85	56.339	55.692	63.963	26.779	21.775	36.488	63.118	62.798	80.58	65.113	24.746	15.373	19.086	59.763	63.881	66.607	67.278	66.775	57.291	33.354		0.638743	46.6101
14.6412	24.517	17.011	22.506	59.444	66.151	68.566	22.971	21.445	35.94	64.004	64.448	76.126	71.316	28.57	15.079	20.151	55.891	65.798	62.765	72.25	68.796	64.073	39.466		0.643977	48.1428
14.7603	24.545	17.038	20.707	56.996	60.504	59.553	23.177	20.277	34.256	58.019	65.462	70.292	71.149	26.596	18.067	17.703	57.159	64.383	66.431	67.898	62.151	54.072	39.023		0.649215	45.8895
14.8793	23.884	19.255	19.057	56.521	57.97	54.031	21.186	16.696	34.454	60.408	70.624	61.273	70.685	28.206	16.709	17.021	51.501	61.999	67.277	70.374	64.043	53.498	41.668		0.654449	45.1452
14.9984	21.207	13.709	24.778	61.314	54.895	43.515	21.388	17.491	41.002	59.261	68.333	69.091	82.557	31.768	15.504	20.601	52.662	63.368	68.807	74.191	68.569	52.744	37.265		0.659688	46.2617
15.1174	29.207	15.575	26.964	61.646	57.968	37.452	19.907	15.228	38.912	59.137	71.74	61.83	82.704	34.777	17.5	20.149	56.886	65.626	67.596	79.495	64.524	55.298	43.499		0.664922	47.1139
15.2364	28.993	17.268	21.301	62.083	49.68	43.212	17.541	16.814	38.509	52.014	67.858	60.726	79.525	30.08	19.616	19.623	55.9	67.53	66.139	75.535	62.119	57.013	41.601		0.670156	45.6817
15.3555	30.777	18.394	22.375	56.497	52.284	39.077	16.237	17.856	39.338	56.684	72.017	58.869	82.291	27.416	24.268	19.393	53.203	59.998	58.889	75.593	60.833	60.936	41.463		0.675395	45.4212
15.4745	32.555	17.268	21.182	55.252	56.901	39.075	20.472	22.976	34.829	52.61	67.96	63.823	77.966	30.903	22.869	21.653	53.538	61.965	63.44	64.786	68.152	54.907	48.661		0.680629	45.8149
15.5935	34.528	21.797	19.611	49.062	56.063	36.013	21.144	20.194	34.252	49.108	72.747	60.4	76.388	30.568	20.627	20.614	59.042	62.683	70.595	68.245	62.216	54.59	51.508		0.685863	45.7389
15.7126	29.122	20.028	19.836	53.287	56.722	35.82	20.135	15.726	31.42	56.833	69.711	54.686	68.629	31.16	19.565	19.59	51.51	67.042	68.901	74.025	60.633	55.011	48.142		0.691101	44.6754
15.8316	31.927	20.682	22.595	53.032	49.925	28.495	15.602	17.584	28.557	57.155	77.636	65.687	72.181	33.173	22.118	21.684	50.455	68.477	75.917	71.946	55.124	46.117	43.385		0.696335	44.7589
15.9506	35.856	21.87	23.707	54.947	57.732	28.002	13.973	14.019	33.068	58.09	79.194	58.193	78.251	33.745	21.58	20.393	51.514	67.925	76.732	79.827	60.487	55.651	54.017		0.701569	46.9032
16.0697	36.316	20.784	24.993	59.183	56.981	26.547	16.472	14.771	31.517	57.179	71.055	64.1	70.487	38.957	18.377	22.036	46.139	74.468	74.57	73.771	66.897	52.769	53.039		0.706808	46.583
16.1887	34.214	22.627	21.831	60.121	61.787	23.728	15.618	15.282	33.825	61.642	78.489	68.518	76.533	34.172	18.65	20.657	48.38	68.741	77.112	77.263	66.988	54.864	52.285		0.712042	47.536
16.3077	42.667	22.569	23.143	60.739	57.462	22.168	16.313	15.085	36.049	62.711	78.134	59.705	86.208	39.784	18.434	21.844	40.721	69.316	70.513	72.891	56.97	53.77	51.074		0.717276	46.8813
16.4268	37.356	22.513	22.177	57.114	57.052	28.48	12.454	17.719	37.7	65.051	74.812	70.049	69.289	41.967	19.689	23.568	51.708	58.153	69.192	66.939	63.136	53.322	55.942		0.722514	46.7557
16.5458	42.305	23.998	22.918	56.851	56.995	27.23	17.867	17.205	33.24	65.582	78.219	67.831	76.243	40.597	22.757	20.755	50.01	67.582	65.218	69.691	55.492	55.148	55.198		0.727749	47.3449
16.6648	47.403	22.606	25.531	60.466	55.569	23.687	16.178	15.745	38.157	55.803	84.95	70.808	75.354	45.645	21.411	21.516	52.239	70.782	78.807	58.853	62.328	52.35	59.177		0.732983	48.4941
16.7839	44.454	19.595	27.624	62.845	53.586	21.443	13.333	13.04	43.991	50.885	84.849	78.338	78.535	53.278	21.842	24.443	46.123	69.155	78.315	66.908	52.466	54.413	59.637		0.738221	48.6564
16.9029	42.566	20.945	24.62	68.805	57.31	24.415	14.703	18.109	38.737	65.212	82.927	80.981	77.183	50.302	18.767	19.778	43.434	70.737	84.166	63.62	57.576	59.936	60.098		0.743455	49.7794
17.0219	46.187	26.344	30.464	68.163	60.225	19.841	15.401	13.947	35.549	64.319	81.227	84.382	73.487	56.012	27.808	18.606	53.74	61.385	64.836	65.027	64.525	59.705	59.829		0.748689	50.0439
17.141	54.391	27.855	37.351	75.497	52.947	19.165	16.189	15.198	40.589	57.605	85.553	78.355	78.612	57.902	28.59	22.941	52.097	68.518	68.582	73.53	64.178	58.469	58.256		0.753928	51.8422
17.26	58.647	32.059	37.606	74.757	55.385	19.238	15.063	14.369	44.608	54.102	75.817	71.506	76.074	64.056	28.457	29.256	53.179	78.217	66.131	67.793	59.553	64.833	60.518		0.759162	52.2271
17.379	60.508	29.397	33.253	73.251	63.093	21.204	10.681	14.368	42.74	54.87	77.316	77.66	79.12	69.636	32.03	30.585	51.011	80.114	69.937	69.122	60.585	69.788	50.696		0.764396	53.0854
17.4981	61.362	33.913	37.147	68.423	58.222	22.539	9.63	11.335	39.767	61.776	77.854	76.979	69.291	68.549	30.257	26.293	59.324	82.386	72.424	74.271	67.028	63.32	62.208		0.769634	53.6651
17.6171	64.971	37.278	43.009	77.139	73.193	18.295	10.809	14.06	44.884	62.512	77.658	67.414	71.582	78.83	28.734	29.194	64.8	78.883	74.358	81.747	61.815	57.793	54.84		0.774868	55.3825
17.7361	57.978	40.274	44.992	70.148	62.785	19.074	9.746	18.445	41.391	55.569	73.097	70.369	73.059	87.562	28.687	31.451	69.561	79.028	66.507	76.587	68.51	62.892	52.063		0.780103	54.7728
17.8552	64.217	42.975	48.893	75.557	54.522	19.055	9.41	21.635	48.136	56.949	69.744	70.392	74.709	84.938	33.807	40.126	71.705	76.034	60.942	76.894	59.941	64.673	46.848		0.785341	55.3088
17.9742	66.79	46.649	58.812	82.301	53.352	23.098	11.149	18.594	46.629	72.607	72.642	72.257	66.799	82.035	41.688	37.035	65.601	80.589	63.957	76.691	63.299	60.257	45.684		0.790575	56.892
18.0932	59.182	43.99	64.245	71.721	49.305	21.254	12.693	18.243	52.644	72.564	69.683	65.65	70.304	92.197	50.274	35.552	80.697	92.766	67.431	76.455	66.724	60.01	48.654		0.795809	58.3582
18.2123	71.289	56.324	67.347	79.94	54.456	20.765	12.323	16.542	55.598	79.631	66.206	61.234	79.446	88.739	55.71	38.121	86.63	86.534	64.267	74.576	63.286	61.152	56.841		0.801048	60.7373
18.3313	67.533	57.787	67.951	82.314	56.599	20.343	13.541	16.966	51.136	67.87	71.241	70.179	80.348	87.451	61.398	41.379	82.73	87.823	67.33	73.9	63.59	58.718	54.507		0.806282	60.9841
18.4504	66.961	64.075	73.551	68.788	51.881	21.033	13.29	17.693	57.81	71.867	60.515	62.206	85.252	81.941	67.368	51.302	84.962	88.548	70.731	60.858	58.719	63.421	52.724		0.81152	60.6737
18.5694	80.128	66.605	77.047	75.885	59.168	24.263	16.3	20.659	54.086	64.995	62.199	59.147	81.336	78.559	67.139	51.911	86.326	88.976	63.196	58.605	59.083	58.351	55.35		0.816754	61.2745
18.6884	74.501	73.662	78.306	76.939	56.207	24.32	16.55	20.515	62.459	66.053	73.222	71.858	75.281	71.11	69.148	55.881	87.23	88.968	67.485	62.023	57.976	59.776	60.667		0.821988	63.0494
18.8075	70.934	72.557	81.146	79.653	63.08	24.02	14.617	18.686	59.313	64.805	77.626	75.528	81.581	70.534	68.289	57.691	84.708	89.753	68.449	62.261	56.597	69.602	64.506		0.827227	64.1711
18.9265	71.991	70.168	85.385	80.951	56.943	20.3	12.195	18.709	56.376	61.423	61.106	71.206	80.923	76.012	65.026	61.446	84.526	93.131	69.153	58.375	65.322	66.954	67.887		0.832461	63.283
19.0455	71.245	64.795	74.391	91.162	60.74	22.145	15.216	22.271	61.888	63.174	58.879	71.648	81.602	81.09	80.198	60.872	79.584	88.549	74.754	64.431	64.482	66.892	58.854		0.837695	64.2983
19.1646	68.691	61.272	73.333	82	60.581	26.123	13.753	22.827	55.713	70.491	75.249	74.282	95.275	74.869	86.762	65.009	72.634	84.813	65.557	59.793	53.634	71.127	71.404		0.842934	64.5736
19.2836	66.178	65.514	68.271	78.76	58.81	23.583	14.095	21.236	60.962	58.901	63.032	76.528	83.801	81.399	83.897	75.184	68.698	88.823	70.375	60.666	59.791	67.514	71.928		0.848168	63.8237
19.4026	65.225	72.952	68.213	83.455	64.746	20.93	17.082	20.832	53.697	57.375	66.43	80.84	85.674	76.949	82.016	73.496	63.319	79.822	71.139	50.708	63.635	66.783	68.248		0.853402	63.1985
19.5217	72.408	77.129	66.032	89.215	67.678	25.149	15.115	24.034	57.529	63.405	76.164	88.669	78.991	76.504	85.753	70.527	67.637	79.642	66.456	53.595	61.018	71.7	68.761		0.85864	65.3527
19.6407	69.404	71.857	70.19	87.389	65.279	28.542	16.118	24.84	52.783	57.814	69.737	87.317	81.373	79.744	75.425	69.187	70.552	73.069	75.557	51.743	59.683	72.851	63.035		0.863874	64.0647
19.7597	75.542	70.489	70.222	80.725	62.167	32.245	20.095	30.674	56.783	64.02	63.101	85.429	81.132	75.173	80.728	73.788	65.083	70.277	77.126	53.641	56.094	70.002	66.616		0.869108	64.3979
19.8788	77.589	66.427	77.041	74.395	69.812	28.128	18.847	27.776	58.14	56.702	55.173	79.082	75.819	76.811	66.505	68.438	71.353	77.288	74.311	51.017	57.492	70.033	61.387		0.874347	62.5898
19.9978	81.539	74.054	71.218	74.491	70.771	30.678	20.523	28.372	59.736	49.01	59.194	83.896	75.538	86.757	77.184	78.206	71.342	66.754	76.863	43.634	55.985	67.538	56.894		0.879581	63.486
20.1168	83.503	70.377	73.68	73.787	65.172	33.012	21.312	34.107	57.593	56.307	62.421	85.846	78.821	89.967	68.171	65.701	63.891	66.534	73.673	39.409	53.546	67.066	56.371		0.884815	62.6203
20.2359	82.194	64.122	74.202	66.343	68.335	32.495	21.036	36.676	58.594	53.723	59.425	90.129	64.673	80.57	68.826	66.973	59.025	73.005	70.684	29.534	47.529	69.833	50.602		0.890053	60.3708
20.3549	72.987	71.138	77.936	79.276	69.318	36.72	20.978	41.411	57.257	54.166	59.853	76.325	69.823	84.251	62.05	55.418	56.984	84.132	74.702	32.979	45.422	65.287	46.444		0.895288	60.646
20.4739	79.174	65.479	81.898	80.651	68.066	36.573	22.855	46.732	59.92	62.107	57.581	74.755	61.268	69.651	59.649	47.592	53.845	81.084	72.15	25.757	43.013	64.248	48.74		0.900522	59.2517
20.593	68.919	62.333	83.049	82.35	64.551	32.759	20.884	47.838	57.505	63.06	52.794	74.759	65.161	61.475	51.574	49.282	52.34	81.454	72.718	21.272	35.593	61.662	47.588		0.90576	56.9965
20.712	61.769	62.138	88.57	84.394	75.21	42.078	22.6	47.741	64.212	61.527	51.896	63.835	64.466	50.336	50.136	39.66	50.436	81.456	74.65	13.892	30.093	52.952	44.24		0.910994	55.5777
20.831	65.823	68.66	91.758	74.914	65.055	43.269	23.606	51.361	65.11	57.455	52.942	65.446	51.806	47.563	40.318	25.469	54.666	83.064	70.335	9.342	29.811	58.178	45.748		0.916228	53.9869
20.9501	60.3	68.087	80.618	77.111	62.762	43.916	20.126	48.82	68.781	66.709	49.668	63.592	39.852	42.816	33.238	22.457	44.635	78.199	75.337	8.2	24.347	57.621	41.526		0.921467	51.2486
21.0691	51.092	58.105	82.171	85.658	66.07	50.782	28.436	48.781	65.204	66.596	44.2	56.845	40.502	32.024	22.188	21.778	38.233	75.372	72.817	8.334	25.954	51.086	39.622		0.926701	49.2109
21.1881	39.114	62.658	80.459	85.521	66.831	49.532	35.042	53.384	59.911	65.868	36.656	49.137	32.281	23.503	18.543	15.93	36.344	78.205	66.111	7.335	17.068	41.759	41.194		0.931935	46.1907
21.3072	28.464	56.341	77.862	77.452	64.139	49.544	43.585	53.114	57.508	60.337	30.06	46.657	23.909	16.772	12.779	13.121	33.19	80.854	82.08	7.036	17.76	33.286	39.296		0.937173	43.702
21.4262	25.755	50.225	72.761	63.428	64.273	47.592	48.263	59.229	57.284	56.425	21.325	44.702	19.66	12.591	10.335	7.409	26.167	80.355	74.989	4.847	12.596	30.419	32.798		0.942408	40.149
21.5452	27.605	43.539	66.879	77.168	58.523	53.153	50.114	58.825	53.075	62.859	12.809	33.303	18.141	10.595	8	7.613	25.805	77.352	69.287	5.153	9.298	27.522	26.054		0.947642	38.377
21.6643	21.014	38.276	69.226	78.423	67.933	54.816	57.303	64.927	52.342	55.9	10.144	30.717	15.786	7.275	6.996	5.291	16.618	76.887	63.834	3.327	9.277	21.161	23.68		0.95288	37.0067
21.7833	15.169	32.628	54.287	63.979	64.139	65.305	53.012	68.584	51.766	60.979	4.986	25.852	10.609	5.695	5.658	5.181	13.983	74.944	61.92	3.628	7.668	17.812	18.523		0.958114	34.1873
21.9024	10.275	23.575	46.401	67.817	77.149	71.959	60.45	63.232	45.283	53.922	4.843	20.91	8.435	5.09	4.677	4.865	13.277	69.52	49.94	2.135	4.636	17.229	22.984		0.963353	32.548
22.0214	12.089	16.308	36.617	56.549	69.996	72.835	67.76	59.475	44.311	48.696	3.732	10.013	6.062	4.894	3.859	2.762	7.855	61.272	55.376	2.08	4.913	10.533	15.799		0.968587	29.295
22.1404	9.04	15.589	29.036	52.981	70.076	74.718	67.576	63.422	42.135	53.517	2.851	9.247	4.639	4.598	4.119	3.428	6.216	50.373	41.514	2.615	3.152	7.909	12.773		0.973821	27.4576
22.2595	9.605	12.938	24.085	48.891	77.498	77.349	66.949	63.452	41.677	40.817	2.84	5.902	5.943	4.049	3.383	3.166	5.112	52.009	34.686	1.741	3.451	6.918	11.252		0.979059	26.2484
22.3785	6.446	9.97	19.618	45.074	63.542	77.306	56.091	59.667	28.086	32.985	2.366	6.511	4.469	4.842	3.022	3.924	3.762	37.478	33.414	2.707	5.185	6.576	4.824		0.984293	22.5159
22.4975	6.203	8.818	12.134	38.955	65.663	77.667	62.35	52.453	25.116	29.361	2.576	4.548	3.805	2.455	3.498	3.022	1.831	30.366	23.339	1.518	2.359	4.115	4.443		0.989527	20.2867
22.6166	3.672	11.738	9.046	37.288	61.472	74.097	68.227	50.498	20.022	28.296	2.012	5.066	4.722	3.145	3.701	1.252	3.278	31.455	23.288	1.536	2.323	5.567	4.03		0.994766	19.8144
22.7356	4.13	8.474	8.131	27.513	64.326	72.122	67.097	46.105	16.805	18.094	2.062	4.208	3.304	2.56	2.359	1.8	4.8	20.726	17.468	1.123	2.297	3.72	3.273		1	17.4999

## Sheet: Image11
X0	Y0	Y1	Y2	Y3	Y4	Y5	Y6	Y7	Y8	Y9	Y10	Y11	Y12	Y13	Y14	Y15	Y16	Y17	Y18	Y19	Y20	Y21	Y22		Ap-Basal	Avg intensity
0	39.984	54.152	86.607	63.644	43.822	68.2773	44.5715	62.682	94.228	70.5573	51.4385	75.215	42.081	44.213	47.8142	51.065	42.214	40.098	49.6822	30.282	42.666	53.366	62.973		0	54.8536
0.119	41.671	62.662	77.942	61.708	42.664	86.8519	47.3775	68.35	86.314	70.6055	51.7252	84.108	42.2532	51.092	47.0852	54.306	47.618	43.502	50.9841	31.891	52.545	57.245	58.231		0.00684734	57.3362
0.2381	45.426	66.937	91.988	74.37	44.634	83.2753	48.5153	74.269	90.554	62.8819	57.8228	89.961	52.7015	55.631	50.1381	57.546	52.725	50.013	56.2038	37.791	55.111	59.207	61.895		0.0137004	61.7216
0.3571	52.963	77.518	99.549	76.33	49.722	86.5454	54.0592	73.836	83.6	70.1675	60.8644	99.037	52.3279	54.303	50.3767	61.463	52.543	62.759	58.3894	43.955	59.353	62.643	69.853		0.0205478	65.746
0.4761	57.433	89.329	90.275	84.05	53.072	84.1774	55.3107	75.862	83.569	76.6094	59.2249	103.41	55.4619	59.432	60.6696	70.441	58.008	67.531	68.9586	47.901	65.536	64.774	74.867		0.0273951	69.8218
0.5952	57.362	87.668	97.354	87.802	52.736	86.5643	58.5385	82.913	92.905	72.0425	66.5314	113.186	53.7355	58.878	62.296	74.661	70.885	73.279	81.4998	47.772	62.97	67.798	77.002		0.0342482	73.3208
0.7142	69.21	100.076	94.806	95.522	64.089	84.3635	70.0483	95.95	87.623	71.823	63.1069	111.038	58.1892	58.954	74.5675	99.592	72.44	82.88	89.5752	54.484	75.411	65.513	81.111		0.0410956	79.1466
0.8332	73.141	108.698	94.996	100.59	69.615	94.6421	65.3037	101.012	85.152	75.8779	69.88	123.699	68.8418	70.517	80.7648	122.859	75.809	84.144	93.8137	64.858	87.213	74.231	83.872		0.0479429	85.6317
0.9523	85.327	110.633	94.259	107.472	79.388	102.928	67.3133	109.225	87.307	75.7999	69.9919	125.377	74.0272	73.718	79.575	129.236	80.754	77.56	99.7903	69.589	91.745	72.515	91.79		0.054796	89.3618
1.0713	91.436	108.274	92.886	107.141	89.176	103.673	74.4636	115.961	82.288	70.951	67.3599	125.629	85.009	73.137	88.9944	135.216	92.851	83.464	99.7391	74.381	91.707	80.36	96.851		0.0616434	92.6499
1.1903	98.533	103.944	84.503	110.683	92.52	106.924	85.2523	116.193	77.516	75.3592	68.6693	135.235	91.4084	74.424	91.8343	140.077	97.769	90.897	96.7019	81.601	100.103	72.064	115.535		0.0684907	95.989
1.3094	109.818	104.427	80.637	103.735	108.315	98.6306	76.8835	117.643	83.542	69.0013	70.3202	130.985	94.2363	88.69	101.247	144.788	112.376	90.691	92.3275	81.301	91.791	74.153	125.366		0.0753438	97.8654
1.4284	108.243	99.47	80.401	98.742	119.728	89.3769	86.8566	104.179	91.079	78.3395	78.2151	128.69	92.8016	94.219	103.178	134.597	118.673	89.354	86.419	85.856	94.917	76.765	142.28		0.0821912	99.2339
1.5474	111.194	103.219	90.472	92.13	131.783	99.0713	92.1424	106.416	91.136	79.9767	82.7729	123.695	96.6037	91.836	102.404	146.145	120.454	94.853	78.8486	96.208	99.377	84.711	135.313		0.0890385	102.207
1.6665	115.315	107.222	97.344	86.684	125.098	97.0471	97.881	103.163	88.177	90.2051	82.7249	112.417	88.9303	83.616	88.2569	126.139	129.537	91.19	85.9065	101.769	106.206	93.286	143.86		0.0958916	101.825
1.7855	116.318	103.735	96.694	91.939	126.363	104.207	100.976	95.542	90.914	93.1167	78.8884	111.867	85.1178	92.713	92.5619	113.59	129.397	78.504	84.2352	96.509	107.552	87.881	132.346		0.102739	100.477
1.9046	108.268	97.107	103.219	92.983	125.46	100.484	100.249	92.548	91.911	107.057	82.8592	96.748	90.9257	97.176	91.3681	104.55	122.924	76.352	81.9969	91.05	113.789	94.854	133.585		0.109592	99.8897
2.0236	100.78	98.485	109.56	104.839	123.184	111.821	106.848	86.723	94.954	114.068	80.8896	87.515	86.9125	94.845	88.3745	96.734	111.448	88.118	89.7107	106.448	108.499	89.068	138.679		0.116439	100.805
2.1426	98.367	92.815	121.415	102.579	119.727	108.154	112.678	87.461	96.121	119.356	83.3217	85.292	79.2525	85.998	86.8505	99.276	104.45	91.848	96.2605	99.322	101.851	95.197	141.529		0.123287	100.397
2.2617	101.924	89.698	130.974	86.26	112.369	114.054	104.76	88.284	100.266	109.601	88.5431	85.497	88.5963	87.184	94.2514	90.398	96.98	89.888	98.0702	87.564	96.556	92.608	127.819		0.13014	98.3541
2.3807	108.601	99.483	134.262	89.354	114.426	115.788	112.974	85.091	99.994	110.116	99.8752	89.542	92.8195	89.959	102.126	88.329	94.496	94.332	93.2969	91.337	95.354	98.006	125.558		0.136987	101.092
2.4997	103.498	104.633	134.361	76.978	102.92	112.391	121.687	91.821	105.059	110.167	84.4954	93.332	81.5995	84.397	90.7551	85.105	100.955	97.963	93.0988	95.699	103.954	91.762	120.255		0.143835	99.4298
2.6188	106.454	100.012	131.53	81.206	104.449	108.557	130.72	89.151	110.656	115.126	86.7924	88.177	88.272	94.204	92.9241	85.538	87.286	101.282	89.6463	92.133	106.89	90.083	113.752		0.150688	99.7757
2.7378	112.561	100.082	120.511	85.891	115.848	96.2485	135.697	88.255	120.653	102.436	78.6476	96.169	92.2963	86.279	94.3273	77.491	85.574	109.323	82.966	102.479	105.982	90.055	112.613		0.157535	99.6689
2.8568	101.375	107.818	108.686	81.392	115.077	104.635	128.267	96.701	109.325	100.134	83.0071	86.574	96.7076	77.136	90.688	77.217	84.411	111.504	85.1494	90.657	106.007	89.646	104.449		0.164382	97.2419
2.9759	102.439	107.344	100.392	73.201	122.246	105.994	133.588	98.226	112.124	96.0155	88.2035	80.822	98.0077	81.328	97.3735	75.405	87.016	105.032	88.5913	91.626	115.28	99.626	106.59		0.171235	98.5422
3.0949	96.515	117.89	103.456	88.186	129.056	101.576	133.642	88.796	112.845	97.7344	90.8805	81.921	102.657	93.586	100.364	71.436	79.867	120.895	91.7986	95.713	118.716	104.14	106.283		0.178083	101.215
3.2139	109.061	111.479	97.702	85.718	126.374	100.321	135.241	84.625	106.506	99.1046	87.8885	84.31	106.858	93.427	91.0617	83.889	83.216	119.21	89.4335	99.567	120.594	91.871	100.996		0.18493	100.368
3.333	100.714	107.706	94.608	85.686	125.382	111.71	128.615	83.083	100.914	96.0762	94.481	87.827	107.817	95.319	93.3994	78.494	83.509	116.435	86.3662	96.583	116.672	102.215	87.383		0.191783	99.1736
3.452	105.854	106.343	96.26	86.715	124.255	109.263	116.763	81.194	101.276	104.98	91.2251	85.648	101.279	103.723	86.2579	74.358	83.027	135.14	88.2201	96.49	118.093	102.415	89.929		0.198631	99.5091
3.571	102.337	110.977	95.289	92.928	125.685	107.172	112.746	90.445	94.109	112.021	89.7451	77.051	104.551	102.282	90.9672	74.266	81.714	136.886	89.1192	92.184	122.121	105.32	94.569		0.205478	100.195
3.6901	91.591	106.546	92.879	77.667	113.773	107.006	114.013	80.895	93.79	110.359	85.5019	75.517	93.7008	97.584	87.8468	73.913	83.146	144.189	82.7342	95.753	121.667	116.181	104.829		0.212331	97.8731
3.8091	85.122	111.773	93.687	85.356	100.667	105.756	113.042	78.031	91.958	106.331	84.0706	81.235	100.666	101.668	83.1502	70.169	89.922	132.93	77.6425	99.622	116.226	103.887	100.117		0.219178	96.2186
3.9281	93.554	112.088	96.76	91.921	95.067	89.3727	101.369	83.358	91.724	97.3492	84.5752	77.688	107.967	98.188	77.1108	76.108	92.321	113.773	89.1561	92.968	115.835	103.704	104.964		0.226026	95.0835
4.0472	95.175	115.239	98.06	87.581	101.827	92.786	96.8272	86.549	92.91	95.8787	86.4298	78.824	99.132	91.955	81.7846	83.698	88.445	102.137	95.3961	89.885	118.831	98.12	108.209		0.232879	95.0295
4.1662	97.355	108.971	93.48	88.78	96.189	92.4321	90.3784	80.921	95.857	90.9445	97.0986	71.58	102.182	93.608	84.5148	86.073	85.318	108.307	91.3443	91.976	113.576	96.959	111.411		0.239726	94.3155
4.2852	94.177	105.239	80.499	89.806	98.244	86.4622	91.2516	86.413	90.637	89.4666	95.2071	78.688	101.377	90.838	87.3507	86.738	88.454	102.595	94.8727	95.034	109.45	102.088	112.502		0.246573	93.7995
4.4043	98.195	118.863	84.139	94.28	97.961	90.7011	89.5878	90.215	84.613	86.6368	103.57	77.722	95.0113	90.125	82.5794	86.806	91.585	105.786	98.6481	92.526	106.054	103.666	116.151		0.253427	95.0183
4.5233	95.473	121.389	96.785	93.009	90.9	85.8507	95.021	87.304	86.046	88.5021	103.648	85.939	91.7231	97.501	81.5122	87.132	90.851	104.839	91.8255	101.962	103.161	105.336	120.507		0.260274	95.9225
4.6423	88.8	119.687	97.218	91.949	95.413	92.4479	99.0752	86.403	86.782	83.2174	96.4091	85.512	91.0109	95.581	81.5235	79.848	93.189	98.022	97.1415	92.799	104.218	111.484	127.314		0.267121	95.4367
4.7614	97.93	111.405	93.097	95.555	92.438	98.749	96.2141	89.694	87.031	88.9907	100.247	82.15	88.9095	93.863	79.5272	85.166	93.023	100.223	100.777	88.575	110.69	114.417	105.025		0.273974	95.3781
4.8804	99.278	116.094	98.466	91.91	82.95	99.7316	96.5495	95.928	87.707	87.1437	99.2042	80.988	85.1864	93.311	80.2525	87.212	88.192	98.21	91.7409	95.976	110.263	102.199	112.452		0.280822	94.8237
4.9995	104.451	103.832	96.685	101.487	87.476	109.612	106.316	110.804	101.444	83.5467	105.706	84.161	81.4233	94.326	83.0702	83.309	88.165	87.174	98.8492	102.959	109.981	95.803	113.067		0.287675	97.1151
5.1185	102.386	100.238	91.552	107.981	98.472	103.684	96.9454	101.862	95.202	93.7495	101.122	91.756	78.2224	99.89	77.7361	83.904	88.691	94.668	100.73	96.503	102.884	86.27	114.919		0.294522	96.0594
5.2375	100.421	94.729	101.333	114.687	93.923	100.632	89.7653	105.394	91.101	94.9095	90.3997	89.165	83.5897	88.598	76.8743	81.394	91.251	87.896	96.7646	104.088	114.157	88.904	112.545		0.301369	95.327
5.3566	109.25	92.716	102.284	108.82	96.811	103.006	79.8296	108.757	92.053	89.3912	84.5864	78.327	83.8963	89.22	81.3111	76.804	89.244	87.685	104.829	95.329	97.002	94.854	115.23		0.308223	93.9668
5.4756	107.877	94.364	107.465	107.521	97.121	102.638	87.4805	102.748	86.45	92.6513	81.1303	90.316	83.4707	86.9	89.1786	81.134	87.556	85.902	93.7772	96.933	101.698	91.465	113.872		0.31507	94.3325
5.5946	121.432	87.267	108.727	102.637	98.492	96.3775	98.0374	92.699	97.258	90.7446	91.1862	87.841	82.3373	91.565	83.7884	79.101	89.157	87.524	99.4783	107.664	99.607	103.423	118.851		0.321917	96.3128
5.7137	116.55	87.254	104.348	101.015	103.152	99.7569	101.212	91.984	107.734	92.0833	85.2427	92.421	97.619	87.981	87.4432	83.07	94.018	84.788	98.2313	101.017	107.885	111.685	111.661		0.32877	97.7457
5.8327	115.333	84.437	106.988	96.25	94.814	99.4606	93.9229	97.925	100.921	87.5085	82.3477	91.194	97.4308	97.456	90.1284	73.935	83.797	86.404	92.2485	109.176	95.264	122.088	113.899		0.335618	96.2143
5.9517	117.159	79.157	102.121	93.593	94.224	97.5851	93.2951	98.009	99.59	86.2148	83.4746	91.658	95.3791	89.373	83.993	70.731	97.226	90.085	94.7996	111.812	103.036	111.455	108.353		0.342465	95.3184
6.0708	109.575	89.442	109.33	100.524	85.429	98.4467	101.006	107.577	110.642	96.172	73.1347	92.974	99.4864	89.609	78.7942	72.701	91.488	86.414	97.414	122.799	96.835	123.287	108.129		0.349318	97.4439
6.1898	114.759	89.361	114.729	96.73	88.948	99.5551	93.7225	104.452	114.615	95.4211	82.5726	99.727	98.4211	95.598	78.0288	81.687	78.39	91.369	94.8655	113.313	102.655	130.626	92.29		0.356165	97.9059
6.3088	105.212	77.068	109.743	97.741	99.469	95.6874	108.139	100.904	115.739	101.294	87.0254	99.5	93.0178	89.468	82.9938	76.609	83.007	90.469	94.8788	110.231	95.676	132.699	91.789		0.363013	97.32
6.4279	107.019	85.442	96.257	92.76	108.969	100.063	102.94	105.087	114.217	104.831	81.0554	90.629	91.2677	91.432	80.0506	68.663	91.59	83.664	96.7367	130.908	103.135	129.13	89.22		0.369866	97.6116
6.5469	100.342	86.143	96.122	85.687	100.208	102.308	106.849	97.951	114.753	100.878	90.4879	100.052	91.6582	91.472	83.9904	71.017	93.859	94	93.1226	127.885	112.383	121.423	86.527		0.376713	97.7877
6.6659	110.107	82.518	89.977	82.808	94.99	94.3661	112.33	99.281	109.532	95.1331	79.9553	103.36	97.9479	97.869	74.0909	69.882	79.34	91.35	94.0086	131.436	110.799	104.095	83.853		0.383561	95.1752
6.785	113.775	77.721	81.399	87.887	94.106	86.2911	103.314	90.982	107.125	92.4222	75.7729	102.845	97.1781	92.236	77.5852	67.034	79.762	86.635	92.9861	130.117	99.002	95.473	80.505		0.390414	91.8328
6.904	101.408	76.499	75.508	86.721	98.801	92.1352	97.0163	85.809	95.063	88.4062	80.3733	99.033	99.7534	97.363	72.9793	57.864	72.819	83.663	89.6424	136.663	108.138	91.566	76.495		0.397261	89.7269
7.023	94.076	78.279	73.778	72.171	95.016	89.8601	103.589	85.806	88.28	84.5624	82.4768	99.411	94.4089	100.111	73.4718	61.143	68.17	87.155	89.0098	136.228	110.916	87.3	81.691		0.404108	88.5613
7.1421	83.857	79.239	69.711	68.797	98.677	82.4191	85.8649	80.027	89.369	93.6904	82.6976	103.589	85.6026	96.127	69.1813	60.299	60.851	82.743	95.8784	136.864	99.113	82.644	76.151		0.410962	85.3649
7.2611	81.369	79.482	69.439	68.007	101.754	80.649	93.3106	74.969	94.717	77.359	75.7281	93.661	89.6728	103.35	72.6667	57.844	56.885	82.185	102.583	128.909	104.083	77.478	81.077		0.417809	84.6599
7.3801	87.138	84.721	60.371	61.248	104.936	86.7459	91.7379	76.21	87.526	70.0399	80.1448	89.414	92.606	102.474	75.4714	54.338	49.768	76.333	89.8213	122.181	99.664	73.278	74.812		0.424656	82.2165
7.4992	82.306	92.418	58.405	56.815	97.89	80.8994	93.8025	79.789	79.367	77.8068	84.8336	85.793	95.3462	104.325	71.3605	45.73	50.172	82.533	97.558	109.129	95.407	73.142	67.701		0.431509	80.9795
7.6182	87.492	93.077	57.73	57.004	103.517	78.7049	99.1229	70.576	78.198	78.0832	76.8528	86.956	95.0709	95.327	72.7684	56.443	50.503	86.038	95.7375	105.935	96.255	63.744	57.562		0.438357	80.1173
7.7372	83.421	88.745	52.284	52.9	97.672	80.3555	87.2607	73.074	79.155	79.6215	91.151	77.984	104.61	104.568	73.4409	51.594	41.94	77.645	89.0936	108.638	95.529	56.391	59.598		0.445204	78.5509
7.8563	78.561	90.713	54.973	52.087	101.366	85.2955	88.6742	71.087	81.359	72.5658	97.2568	79.177	97.0539	109.286	70.2123	48.138	41.979	85.077	87.2726	84.021	89.233	53.158	50.78		0.452057	76.9272
7.9753	69.523	91.197	50.899	43.344	97.636	87.2556	89.6008	77.507	91.561	72.9117	86.2383	79.878	94.6404	106.548	70.5191	49.786	40.831	82.921	84.4029	74.382	101.778	53.971	53.632		0.458904	76.1288
8.0943	65.566	91.139	52.667	46.408	95.288	86.6783	85.681	69.437	98.167	68.6087	85.5036	69.73	98.9218	104.299	72.364	39.158	41.444	81.33	88.0776	80.743	102.048	48.563	48.867		0.465752	74.8126
8.2134	62.658	78.185	48.026	43.263	85.71	86.9198	83.0531	61.19	85.661	66.7654	88.2241	63.43	83.8964	87.403	79.3143	42.883	43.939	85.84	85.9177	64.466	101.081	46.332	44.079		0.472605	70.3581
8.3324	63.191	77.911	48.158	36.808	97.353	70.0643	85.4606	68.99	95.361	68.5068	86.854	62.428	88.6062	92.704	77.0291	33.959	38.341	78.436	87.4787	62.505	102.549	49.097	46.975		0.479452	70.3811
8.4515	60.091	83.334	43.836	37.841	84.293	71.1706	79.386	68.871	92.446	68.3753	92.7549	56.188	80.3467	92.245	72.8682	40.561	30.383	86.145	84.9146	62.911	102.969	44.933	44.377		0.486305	68.7496
8.5705	65.231	81.299	41.296	37.614	83.897	68.8826	86.9254	62.314	96.734	57.3483	84.7429	54.287	73.4433	90.324	65.7652	39.402	35.377	79.475	76.1141	56.137	96.689	47.662	38.387		0.493153	66.0586
8.6895	61.223	82.955	39.995	36.528	91.798	68.8186	87.408	62.385	101.893	57.5462	74.5364	47.51	81.2881	82.355	66.3053	33.66	39.093	87.459	70.9041	59.131	105.109	46.413	34.63		0.5	66.041
8.8086	59.256	76.08	45.594	30.389	87.22	65.5336	83.6991	60.768	91.062	58.7235	78.595	42.457	82.5328	87.385	58.9405	31.044	35.733	92.802	68.1636	55.653	114.472	47.102	37.061		0.506853	64.7942
8.9276	50.054	75.14	45.47	31.264	83.423	70.9787	85.3884	57.389	87.985	64.5343	82.2842	41.429	71.3619	89.445	61.5924	34.483	33.946	94.513	61.0506	49.836	111.837	53.161	33.781		0.5137	63.9281
9.0466	54.588	70.774	45.878	26.763	81.619	69.1947	84.5017	55.093	97.198	63.3945	70.3271	35.815	64.7791	92.289	57.2094	33.25	30.368	81.974	68.0215	44.974	105.785	48.099	32.414		0.520548	61.4917
9.1657	50.694	85.595	42.634	21.69	72.825	76.2108	85.9189	58.618	93.189	53.3149	71.244	30.704	66.1516	88.223	63.5192	30.412	27.892	83.582	65.81	48.971	103.208	41.767	31.689		0.527401	60.6027
9.2847	54.341	82.167	40.61	23.46	81.219	74.1784	79.8175	57.88	80.38	51.7692	79.3764	31.901	62.8506	78.447	62.8239	28.837	25.71	76.282	58.747	49.424	100.004	46.795	32.63		0.534248	59.1152
9.4037	52.976	72.855	41.013	18.755	81.8	67.8715	83.0752	57.74	84.143	56.1787	78.7897	29.919	63.6118	87.014	63.2343	40.717	24.667	72.448	61.3029	54.749	102.94	38.71	31.331		0.541096	59.3844
9.5228	57.401	85.205	40.137	22.273	76.824	70.938	85.3841	52.603	68.027	63.7802	67.9361	27.557	59.749	80.934	71.0573	39.757	24.009	75.902	68.4837	52.226	97.008	43.711	25.961		0.547949	58.9941
9.6418	54.863	93.681	36.218	24.476	73.871	76.6277	76.6001	43.115	77.206	58.8681	69.0164	31.487	59.4305	79.546	64.8336	35.02	24.643	73.635	70.509	55.2	91.67	47.793	31.635		0.554796	58.6932
9.7608	51.972	94.276	36.899	24.596	82.13	82.2007	82.7559	46.05	70.055	45.489	62.798	28.785	51.9539	83.3	71.6448	34.282	24.612	72.828	66.175	52.884	99.531	40.784	31.515		0.561643	58.1529
9.8799	54.483	92.534	34.26	30.921	73.546	80.7238	84.4667	46.375	70.215	56.1657	67.4794	29.089	59.2787	82.465	68.7982	30.821	24.003	74.63	61.052	58.793	96.368	40.131	33.095		0.568496	58.6823
9.9989	59.28	85.499	41.938	28.829	77.111	79.2989	70.8487	40.148	76.278	49.3821	67.9459	29.506	54.9734	93.498	77.3253	31.982	20.68	65.438	71.55	51.769	96.202	43.15	31.673		0.575344	58.4481
10.1179	54.849	81.488	38.984	21.915	73.59	85.1492	70.3661	39.345	66.826	49.9735	66.7726	25.149	56.8389	95.64	67.862	34.9	23.263	68.712	78.5691	59.883	77.33	42.99	24.931		0.582191	56.7533
10.237	50.437	82.726	39.622	19.195	66.648	89.1878	62.8044	37.568	57.175	49.2902	67.1999	30.821	57.0226	91.149	67.6948	33.405	21.652	72.028	68.8042	60.563	83.406	37.878	29.48		0.589044	55.4677
10.356	51.181	77.736	33.493	25.321	71.821	89.5995	64.9133	38.179	63.238	55.5776	62.0467	27.652	44.3813	86.732	78.5549	29.854	18.644	67.667	73.3728	53.188	81.272	41.048	28.539		0.595892	54.957
10.475	51.857	78.316	41.305	29.954	69.083	88.0413	63.8105	32.037	61.9	55.2583	57.1809	28.913	45.8993	91.656	67.4466	30.254	21.662	70.645	77.9265	47.928	86.818	39.313	31.959		0.602739	55.181
10.5941	54.321	73.23	41.572	30.206	78.15	81.6163	66.7177	32.037	61.382	45.671	52.1449	31.136	54.1509	85.467	78.6516	34.979	26.025	60.707	74.8714	61.233	78.507	37.677	27.035		0.609592	55.1082
10.7131	56.923	77.88	37.949	25.433	79.206	85.2339	62.6913	28.91	65.811	42.9964	55.7554	32.572	47.1688	88.618	81.1151	34.268	22.178	61.786	78.2935	58.165	76.414	39.482	29.718		0.616439	55.1551
10.8321	54.851	75.932	34.446	27.886	83.087	90.6049	62.5395	28.804	64.085	47.0985	64.5138	29.602	48.6929	80.722	75.0175	29.85	18.903	68.987	83.0235	56.952	79.885	36.044	28.5		0.623287	55.2185
10.9512	60.361	86.077	35.363	30.994	86.805	82.9695	55.7604	31.439	72.469	45.9889	57.5785	20.499	52.5967	85.03	77.9346	29.53	18.43	60.788	82.0351	62.879	80.076	35.127	28.929		0.63014	55.6374
11.0702	64.806	79.442	42.765	31.552	75.487	83.6717	58.2217	30.591	66.573	48.7535	59.3694	23.796	54.9125	88.266	73.1639	30.608	20.413	57.885	92.7979	63.361	73.492	33.152	23.616		0.636987	55.5085
11.1892	64.849	77.595	40.571	32.518	77.254	86.5236	59.5169	25.977	60.742	44.1457	56.2371	27.649	45.4198	83.46	80.8568	36.879	21.277	65.955	96.1074	69.89	75.788	40.542	24.299		0.643835	56.2631
11.3083	67.656	80.202	38.816	35.383	74.136	79.948	64.5708	23.03	53.589	49.2838	48.2612	25.629	38.7629	89.729	75.5479	31.879	24.786	52.531	83.7962	51.673	79.367	34.713	27.863		0.650688	53.5284
11.4273	55.44	73.544	40.676	35.339	70.513	74.5221	59.1624	25.554	61.579	49.8707	56.0641	27.985	45.0088	84.053	73.0052	34.218	20.947	53.925	93.3872	55.691	76.091	40.951	30.66		0.657535	53.8342
11.5463	62.756	70.34	39.727	39.4	80.134	78.8526	58.0618	20.659	61.634	52.1665	58.3775	23.858	44.4099	71.649	69.7321	34.885	18.721	51.542	100.668	57.59	69.662	43.265	29.969		0.664382	53.8287
11.6654	72.044	72.145	41.92	36.488	85.701	80.4442	53.7482	24.218	60.833	50.847	62.031	26.649	40.6632	71.997	71.3038	33.501	23.829	49.856	105.446	56.924	70.701	41.265	31.764		0.671235	54.9704
11.7844	64.906	76.731	43.661	34.813	88.333	73.6641	58.9198	25.735	60.751	55.2809	64.3372	25.253	38.5386	73.898	67.2056	36.6	21.167	47.447	97.8271	66.888	65.927	43.988	35.147		0.678083	55.0878
11.9035	77.397	80.608	43.621	40.046	83.371	83.2502	63.5306	26.185	57.701	53.2826	62.1614	27.39	38.1649	73.9	77.425	37.521	19.51	52.86	95.7977	70.233	71.546	48.72	28.442		0.684936	57.0723
12.0225	78.299	82	44.946	48.267	83.764	79.8554	58.365	24.201	56.469	51.0471	59.0636	23.813	39.369	69.779	75.2033	35.148	26.554	54.045	93.2418	68.986	70.18	47.958	31.576		0.691783	56.6144
12.1415	74.776	90.308	39.078	44.446	89.884	82.4702	52.0106	29.926	60.238	50.2918	50.8297	28.458	37.7057	80.934	75.55	36.538	19.451	57.243	91.5415	71.626	81.772	51.587	35.947		0.698631	57.9396
12.2606	72.862	93.786	43.636	45.865	97.12	75.4127	52.7618	28.392	59.929	60.1117	46.5952	26.598	36.3183	79.422	68.4669	36.795	23.197	52.225	81.0416	73.839	92.103	47.166	32.558		0.705484	57.6609
12.3796	71.035	100.41	46.012	48.451	96.485	80.4049	50.9867	21.827	64.437	57.2854	57.1777	23.678	38.1243	79.508	69.6968	37.707	26.851	50.984	83.949	68.921	87.074	52.759	32.619		0.712331	58.5384
12.4986	71.007	100.573	50.814	52.937	86.27	76.437	50.2056	23.744	49.806	48.0695	49.2204	24.496	38.3414	77.179	74.0683	37.388	30.248	59.056	83.1628	77.909	88.545	53.747	36.15		0.719178	58.2337
12.6177	78.599	104.653	50.389	57.775	87.533	87.0765	54.6649	25.686	52.377	52.5403	49.5093	24.568	37.9745	71.381	72.3503	36.83	22.597	59.879	82.0991	77.382	83.01	54.973	37.383		0.726031	59.1839
12.7367	70.921	96.443	42.981	59.667	86.433	74.5815	61.8036	23.615	50.119	60.2873	49.5939	26.97	34.3937	78.535	66.4313	42.928	26.026	60.333	76.9529	84.521	83.163	53.714	38.585		0.732879	58.6521
12.8557	75.267	102.186	46.451	56.597	86.987	89.4033	60.7994	23.756	54.342	57.9191	46.5487	25.236	42.3207	75.602	69.1741	41.027	29.802	56.135	86.8207	90.019	86.85	60.51	39.465		0.739726	61.0095
12.9748	78.086	96.704	44.405	57.436	83.543	92.2141	54.5276	22.405	52.754	59.8761	50.0289	28.959	40.1165	77.332	70.5706	38.086	27.043	49.713	83.5266	82.903	80.669	60.976	40.156		0.746579	59.6535
13.0938	77.012	105.236	51.567	64.241	67.366	97.1635	60.0338	26.944	68.378	63.1296	51.9117	25.223	36.9471	69.45	73.0825	34.816	35.918	44.242	90.4776	79.035	83.159	60.014	39.542		0.753427	61.0821
13.2128	68.518	96.736	57.971	69.349	74.451	95.4432	64.2528	22.549	62.389	63.1783	49.49	31.128	42.1213	72.235	67.6501	40.006	34.358	63.392	85.4379	76.076	76.22	60.194	39.704		0.760274	61.4282
13.3319	85.384	89.082	57.352	78.958	74.379	98.344	67.2714	23.722	56.704	68.7324	51.2219	29.263	47.737	74.732	74.6872	41.389	31.625	67.277	74.8233	82.48	80.383	63.094	43.606		0.767127	63.576
13.4509	75.638	111.426	70.291	67.279	89.471	104.004	61.7109	23.895	55.909	66.1722	56.4656	26.072	38.3034	78.964	74.252	47.131	37.137	60.606	75.3415	88.898	86.176	61.925	46.721		0.773974	65.3821
13.5699	76.402	103.282	74.629	74.166	78.644	103.966	63.2074	28.98	60.381	73.9455	53.7607	26.944	41.8163	79.062	76.0568	43.44	42.823	61.515	83.7194	93.924	84.992	66.299	48.348		0.780822	66.9697
13.689	68.465	103.52	80.479	76.253	82.945	98.6207	60.6038	28.583	63.887	78.4005	49.6084	29.054	47.9752	76.313	71.2046	41.188	38.596	66.537	80.5619	84.223	80.023	77.899	43.459		0.787675	66.4521
13.808	73.005	97.023	76.726	79.741	73.438	94.3089	63.7289	26.559	65.285	90.3253	51.6007	29.747	43.3287	71.968	63.7231	49.85	50.699	60.471	76.2882	80.834	81.125	80.858	44.528		0.794522	66.3113
13.927	70.456	105.134	82.554	84.228	78.597	103.065	63.092	34.875	70.94	93.0976	52.6105	29.414	46.4551	76.373	68.8339	56.974	55.505	66.413	73.9084	77.682	90.318	87.363	51.352		0.801369	70.4018
14.0461	68.281	89.734	91.831	83.144	84.159	96.0594	65.647	34.239	74.103	106.767	57.8546	30.319	51.3428	79.763	78.5198	53.045	66.205	69.787	72.254	78.637	84.985	96.139	64.229		0.808223	72.915
14.1651	76.796	86.555	99.728	79.61	91.268	90.7684	66.5919	35.492	78.904	104.62	63.2833	32.965	57.9796	70.87	71.905	51.675	68.421	62.469	79.2026	74.845	83.563	95.876	71.838		0.81507	73.7055
14.2841	75.137	84.458	105.81	75.785	81.058	93.7554	65.3358	31.597	82.117	104.233	57.7017	31.737	58.4045	72.913	69.1618	63.09	66.912	56.503	87.29	67.781	77.782	98.492	71.021		0.821917	72.9598
14.4032	74.114	73.521	100.819	78.374	81.346	91.2247	73.5309	40.018	85.171	101.583	60.6386	31.661	61.8382	60.668	77.7513	67.18	72.763	56.107	76.5109	72.748	86.91	95.783	65.763		0.82877	73.3054
14.5222	79.596	68.835	96.569	73.332	76.262	84.1324	78.7427	37.644	87.142	94.0893	68.8575	35.699	60.1997	65.191	76.74	61.573	77.518	67.623	72.5192	74.892	77.647	96.413	71.532		0.835618	73.163
14.6412	77.484	63.842	94.357	81.427	81.071	91.1509	80.4482	40.629	94.51	101.714	73.3148	35.592	64.0818	59.24	84.4384	67.571	68.658	67.902	71.9692	73.792	82.513	98.528	69.765		0.842465	74.9565
14.7603	76.652	66.822	86.845	79.964	76.945	101.212	78.9124	36.5	93.357	94.6524	64.5376	36.097	62.6177	52.6	76.5375	65.988	72.041	61.261	67.9821	78.158	86.839	93.61	74.176		0.849318	73.2307
14.8793	64.956	57.218	80.862	71.63	81.039	96.7951	80.4367	33.709	95.135	102.904	69.3701	34.695	66.9551	58.651	74.8049	64.001	70.072	58.276	63.6396	70.71	76.351	97.09	69.403		0.856165	71.248
14.9984	64.986	53.575	77.939	78.228	82.714	92.6307	83.3096	41.731	91.24	92.5497	77.9634	37.683	74.4628	56.271	75.2085	69.156	64.638	58.361	63.0889	69.771	78.995	91.244	72.412		0.863019	71.659
15.1174	66.586	50.542	78.125	77.739	71.747	84.0358	86.6096	36.583	104.3	96.5492	85.6083	42.849	78.7861	50.45	76.4012	63.112	67.075	65.014	70.9551	69.711	81.49	74.214	67.351		0.869866	71.558
15.2364	76.382	51.943	57.807	73.376	68.351	84.2746	91.0686	42.812	102.431	95.8257	88.6844	43.979	76.0802	47.782	66.6246	65.715	45.903	59.952	64.0519	63.054	84.886	77.107	66.508		0.876713	69.3303
15.3555	70.105	39.68	50.562	70.419	73.4	83.0435	84.6561	42.297	102.231	86.8049	94.1595	50.925	73.0483	45.407	70.1515	72.862	40.893	55.061	53.8201	64.214	67.117	77.592	58.187		0.883566	66.3755
15.4745	64.277	40.238	47.405	69.066	74.579	80.7295	80.9805	47.583	104.022	73.926	83.8711	54.658	70.8747	44.415	70.2225	67.911	27.871	53.959	60.7939	58.119	60.6	75.181	49.204		0.890414	63.4994
15.5935	60.755	34.082	40.476	60.584	63.497	75.4193	96.5217	65.256	95.953	74.3479	90.7748	67.185	71.6863	42.683	61.5702	64.215	27.861	48.466	62.2361	53.7	63.644	76.884	55.144		0.897261	63.1714
15.7126	54.998	27.509	31.079	54.229	61.8	69.5778	97.6326	68.257	89.726	68.8582	83.9662	59.306	74.992	33.076	62.9699	57.763	20.181	44.268	53.7427	43.233	59.477	75.075	42.507		0.904114	58.0097
15.8316	49.506	28.282	29.972	40.821	53.935	69.4232	93.2339	66.808	96.68	69.3008	84.9977	66.383	72.0654	28.952	61.0166	51.717	18.694	41.621	41.5929	43.417	69.347	80.735	43.771		0.910962	56.6205
15.9506	39.191	25.549	23.457	41.112	55.437	72.7307	89.6377	71.86	78.941	73.5347	76.0902	74.068	63.484	21.688	58.8354	37.673	10.968	29.345	33.7112	26.669	59.141	73.89	27.895		0.917809	50.6482
16.0697	36.189	16.791	19.069	31.049	49.446	73.4247	93.9258	59.81	87.103	64.9856	85.023	75.967	65.4286	20.798	59.7626	34.498	10.561	22.613	25.1452	15.754	53.369	78.192	20.075		0.924662	47.7817
16.1887	31.161	10.369	15.611	24.49	48.78	69.0087	85.0341	67.116	76.695	53.5312	80.7631	75.968	63.5504	18.15	49.338	33.699	9.961	19.557	22.4083	14.003	54.655	71.883	16.681		0.931509	44.0179
16.3077	29.702	10.326	9.219	18.573	44.666	70.8959	76.9859	55.173	70.414	61.3917	78.3453	86.748	58.9434	13.768	38.7732	26.691	10.26	15.922	13.8615	11.465	41.762	54.218	16.873		0.938357	39.7816
16.4268	17.322	7.244	9.437	14.232	36.148	72.9433	79.7519	57.563	67.091	58.8179	81.0514	82.659	50.67	11.358	38.4013	24.313	11.274	11.333	9.8968	9.87	41.538	56.165	15.283		0.94521	37.581
16.5458	11.519	7.065	8.812	13.206	32.891	70.8027	89.0797	56.147	68.725	58.756	72.3873	82.502	49.0802	6.161	30.4908	18.911	10.604	12.867	9.841	7.282	36.049	54.583	11.313		0.952057	35.6119
16.6648	11.504	4.539	6.049	8.878	29.778	68.182	77.0323	49.048	63.277	62.3222	83.2095	77.151	42.8635	8.253	23.4543	16.904	8.59	11.033	11.3687	8.74	28.326	47.675	9.446		0.958904	32.9402
16.7839	6.816	3.301	5.626	6.455	25.749	66.4913	68.1854	49.234	58.945	63.2327	70.1648	70.859	40.5838	6.988	14.2029	16.767	9.123	8.947	7.9219	7.958	24.663	44.664	8.714		0.965758	29.8083
16.9029	7.554	1.926	3.069	6.19	18.267	59.8707	69.5147	34.811	52.212	53.5794	67.5956	68.267	35.0236	9.945	13.2792	17.656	9.134	9.873	7.8228	7.903	20.039	30.744	7.373		0.972605	26.5934
17.0219	6.921	2.773	4.578	5.407	13.094	55.9914	70.2915	20.494	47.96	46.0476	67.8895	65.126	28.0974	7.099	13.3071	15.132	10.881	8.087	9.3462	10.899	18.231	23.787	6.86		0.979452	24.2739
17.141	3.579	1.159	1.427	4.717	10.573	50.7609	72.4183	11.403	36.184	36.9907	66.9183	57.494	33.219	5.854	14.3764	16.267	9.905	6.66	9.9284	7.526	13.548	16.803	5.622		0.986305	21.4493
17.26	4.463	1.701	1.455	5.727	9.518	57.3528	65.8621	7.265	29.599	28.4751	56.2969	50.844	27.509	3.807	13.6508	16.947	11.325	7.978	9.5652	8.916	11.46	11.652	7.649		0.993153	19.5225
17.379	3.299	2.31	1.134	2.592	7.773	42.6554	46.2196	5.874	19.099	23.3419	57.2381	44.574	27.0791	5.237	9.5743	13.48	9.983	8.284	9.4299	6.365	12.431	12.087	6.066		1	16.3533

## Sheet: Image10
X0	Y0	Y1	Y2	Y3	Y4	Y5	Y6	Y7	Y8	Y9	Y10	Y11	Y12	Y13	Y14	Y15	Y16	Y17	Y18	Y19	Y20	Y21	Y22	Y23	Y24	Y25	Y26	Y27	Y28		Ap-Basal	Avg intensity
0	36.717	47.647	35.031	34.751	21.887	51.086	28.001	33.4585	42.172	33.68	46.47	49.2679	45.148	36.026	76.541	83.6	83.638	72.547	57.223	44.126	44.774	38.873	29.256	37.805	57.863	79.613	98.956	46.049	50.698		0	49.7553
0.119	35.303	59.182	51.65	34.153	24.06	43.115	33.138	32.6461	39.981	46.398	43.537	49.6272	33.42	32.282	71.809	72.252	74.695	78.207	56.884	47.019	54.095	43.662	42.985	36.281	55.38	87.002	108.801	47.069	46.842		0.00520683	51.0854
0.2381	46.638	57.821	57.628	32.019	30.128	46.109	37.022	39.6998	44.279	48.847	53.356	49.1896	49.151	45.567	67.56	82.753	70.35	87.808	56.358	45.509	50.106	44.816	46.574	45.213	60.22	89.315	112.293	41.799	45.538		0.010418	54.6092
0.3571	52.978	58.791	65.358	54.335	47.695	47.097	33.627	32.8973	56.587	50.697	58.013	48.2247	51.141	48.183	74.786	74.802	76.305	88.104	64.253	59.375	60.238	56.046	48.851	52.825	63.567	81.445	108.091	53.689	47.287		0.0156249	59.1479
0.4761	49.763	61.734	75.87	51.886	51.794	50.962	38.851	42.0035	66.02	57.239	59.369	54.2922	55.325	54.409	85.428	85.792	65.418	89.18	62.266	52.564	64.658	56.107	53.772	45.554	59.528	84.254	95.524	55.403	54.48		0.0208317	61.3602
0.5952	53.53	62.391	108.384	62.424	64.495	49.437	48.17	47.5889	52.474	64.29	70.212	66.9148	63.857	45.776	90.372	82.387	90.379	91.769	73.674	57.76	76.961	66.102	52.988	63.317	65.697	88.658	89.749	58.834	62.228		0.0260429	67.9593
0.7142	48.645	76.281	120.935	68.502	74.576	47.585	50.916	48.8248	61.054	63.665	88.152	66.4227	69.307	55.252	110.217	77.595	83.432	89.86	77.331	64.681	80.255	73.547	69.288	50.728	57.996	86.53	84.812	68.766	54.726		0.0312497	71.3752
0.8332	51.254	88.805	132.447	82.478	75.743	56.517	61.399	51.1604	75.376	66.715	78.52	58.79	68.833	58.685	87.733	77.249	84.343	109.125	72.911	65.667	91.727	83.176	73.472	58.84	58.471	85.386	77.261	73.585	56.872		0.0364566	74.5704
0.9523	49.861	74.387	123.481	76.415	80.618	67.751	72.519	55.5595	75.115	90.099	88.026	89.7149	66.868	68.245	104.181	88.613	94.693	108.32	80.034	76.934	93.732	88.974	80.372	55.849	69.874	81.325	73.124	71.747	67.663		0.0416678	79.7964
1.0713	54.45	79.985	133.318	98.545	104.172	77.683	83.359	56.4768	91.134	83.408	99.185	97.6918	85.117	78.161	113.051	92.839	92.469	104.899	90.612	86.567	105.982	100.991	72.835	65.811	66.936	76.805	66.703	70.744	67.651		0.0468746	86.1235
1.1903	66.383	87.077	125.541	90.729	105.884	100.974	106.566	65.9569	89.663	92.927	98.498	101.659	89.988	84.144	106.034	100.337	105.613	107.363	103.116	110.678	115.541	109.103	83.278	70.102	59.814	75.151	78.926	65.34	79.67		0.0520814	92.2778
1.3094	58.049	80.343	119.146	86.767	101.377	106.391	114.497	68.978	93.96	99.78	107.159	113.466	91.662	94.553	114.096	107.092	135.486	115.13	117.241	120.524	118.106	114.963	87.412	63.144	60.268	69.099	73.18	69.919	78.798		0.0572926	95.8823
1.4284	56.585	86.639	116.425	95.292	111.279	113.036	115.171	69.7848	86.672	95.904	123.32	106.772	104.905	87.628	118.896	113.884	139.045	123.958	140.633	117.74	122.443	121.782	93.976	76.373	63.234	70.075	88.748	77.621	81.441		0.0624995	100.664
1.5474	47.359	87.57	110.703	94.205	103.397	120.14	130.991	66.6768	96.974	110.335	114.074	91.7175	105.482	97.649	115.812	108.204	131.91	130.45	124.449	124.501	117.606	114.129	92.193	74.184	64.384	75.125	93.682	73.117	84.773		0.0677063	100.062
1.6665	50.027	83.835	97.599	103.958	109.917	112.262	144.172	73.1087	98.957	109.918	109.328	88.5458	102.264	95.994	113.793	121.174	135.219	126.181	135.858	119.909	108.544	102.049	102.397	79.088	74.017	78.274	91.361	71.868	99.269		0.0729175	101.341
1.7855	58.322	82.558	89.025	88.833	101.502	92.857	142.145	73.4526	91.745	118.756	112.619	90.2143	104.464	98.602	117.828	124.853	159.802	130.847	120.488	122.931	114.741	99.634	87.516	80.435	65.931	82.905	86.64	82.39	90.052		0.0781243	100.417
1.9046	59.597	84.236	84.632	86.308	111.128	108.783	130.315	71.9624	88.718	116.016	108.518	95.8051	98.423	94.696	127.669	138.425	160.302	127.493	117.86	128.317	103.527	93.358	103.398	71.776	73.672	79.009	76.282	72.092	100.815		0.0833355	100.453
2.0236	60.345	75.438	83.52	82.807	111.433	110.871	127.092	75.3527	92.923	128.615	117.484	76.6497	96.865	113.09	123.675	151.843	167.806	131.505	102.121	126.353	109.871	96.004	115.962	83.048	64.893	72.061	81.314	67.812	108.699		0.0885424	101.912
2.1426	52.279	75.241	84.106	79.761	108.39	104.006	114.513	70.1789	97.912	116.829	118.65	85.6622	91.433	104.965	129.83	160.219	163.09	120.509	118.573	112.307	88.5	82.299	101.816	75.706	78.213	81.469	66.029	73.329	119.1		0.0937492	99.135
2.2617	59.862	83.774	75.973	78.636	114.245	107.008	117.795	66.8682	82.278	135.156	102.628	85.3121	103.117	106.044	110.721	153.148	168.886	134.033	107.732	98.563	85.737	86.274	99.381	101.964	67.039	84.535	86.647	79.297	116.701		0.0989604	99.9777
2.3807	69.639	61.199	67.923	79.623	120.803	103.94	109.643	62.6622	96.93	116.075	103.848	91.9259	112.771	90.989	111.973	170.494	160.491	121.321	107.731	93.01	91.458	77.662	104.742	104.991	77.421	78.928	95.847	80.619	155.633		0.104167	100.7
2.4997	68.336	61.072	74.264	77.393	129.587	97.706	108.759	67.1026	96.956	140.945	97.341	98.2538	98.763	102.174	132.75	173.694	166.326	123.835	98.832	95.162	80.961	82.84	108.207	111.31	90.067	77.04	82.852	88.225	153.091		0.109374	102.891
2.6188	62.77	67.248	72.964	83.644	128.34	81.277	111.077	79.5455	99.932	135.219	98.231	82.3369	98.393	106.748	140.688	188.498	166.633	104.409	103.49	96.319	89.198	93.123	98.737	117.474	82.019	84.094	86.689	94.423	145.641		0.114585	103.419
2.7378	87.271	61.543	75.156	89.829	124.462	92.472	111.099	81.9364	89.108	156.376	94.898	84.0186	80.521	112.617	136.329	197.467	152.677	119.906	102.362	97.533	98.669	81.391	92.638	147.258	96.991	106.552	91.011	85.636	156.846		0.119792	107.054
2.8568	74.512	57.795	76.691	74.233	109.975	87.03	96.74	82.7743	95.232	154.776	85.655	88.6628	88.876	114.2	147.643	194.955	173.232	118.142	94.694	98.617	89.101	79.374	92.113	124.453	113.626	105.998	86.281	95.55	150.891		0.124999	105.235
2.9759	93.933	61.7	74.375	87.662	120.415	81.891	93.868	82.504	120.051	139.102	100.619	92.0708	81.493	110.373	159.582	190.737	174.195	113.477	101.363	87.592	90.238	96.375	98.774	133.604	106.693	94.434	96.575	109.885	157.156		0.13021	108.646
3.0949	106.516	66.45	72.65	80.257	129.534	85.92	95.283	76.1189	127.866	137.236	87.237	89.1885	74.329	97.844	165.042	193.169	162.422	121.656	98.556	83.715	97.655	96.975	100.562	123.767	114.498	90.263	92.637	114.877	145.049		0.135417	107.837
3.2139	110.827	67.527	69.939	77.543	108.309	90.453	94.581	73.6323	132.69	141.707	77.802	92.2134	66.758	107.967	173.915	182.903	150.304	115.004	104.255	88.78	101.258	84.352	89.598	129.408	121.567	101.288	97.14	122.865	152.251		0.140624	107.822
3.333	108.555	59.193	81.113	83.007	110.559	74.264	86.222	80.4358	116.798	129.256	83.563	90.3967	69.489	100.165	175.256	185.68	147.901	109.09	97.911	95.772	91.524	89.008	93.513	128.841	120.161	91.168	97.685	116.271	141.181		0.145835	105.31
3.452	122.7	61.769	81.528	80.069	111.75	71.018	90.202	86.2446	106.657	144.984	94.616	92.6114	76.923	105.614	179.834	190.231	130.591	95.942	89.578	89.589	93.419	88.875	94.406	121.613	123.644	98.551	95.395	119.069	149.147		0.151042	106.433
3.571	130.459	60.341	79.323	90.898	93.412	74.345	99.336	84.7866	114.445	149.889	104.32	107.84	69.734	92.023	179.573	196.804	114.542	97.609	94.051	87.817	83.633	93.05	93.083	136.106	139.983	107.522	99.428	121.594	126.52		0.156249	107.671
3.6901	145.439	56.503	84.503	94.148	90.704	88.92	94.423	93.5871	104.834	158.711	98.88	99.337	72.097	90.477	182.221	177.924	123.722	94.024	94.944	91.882	92.139	88.938	99.01	134.544	136.131	104.671	102.996	124.193	133.757		0.16146	108.747
3.8091	153.279	68.532	85.959	94.935	89.894	79.661	94.013	94.2434	110.721	164.341	91.628	97.7282	73.943	74.748	174.048	173.13	116.191	95.94	92.536	109.999	87.34	83.877	104.459	131.962	140.824	114.997	104.823	137.306	113.567		0.166667	108.78
3.9281	158.863	72.252	88.105	91.465	88.031	96.854	87.141	90.5144	102.005	162.193	89.942	92.6787	67.616	77.769	185.471	150.51	101.135	100.388	92.952	85.002	89.657	94.694	86.838	137.627	141.305	113.152	107.03	137.565	122.23		0.171873	107.275
4.0472	165.115	71.615	78.276	106.513	83.016	88.127	84.941	72.5851	110.705	144.522	93.865	104.685	59.121	90.274	178.575	137.745	98.734	97.5	87.612	86.947	87.515	87.589	93.953	142.488	134.254	115.907	107.824	135.652	120.554		0.177085	105.731
4.1662	176.317	88.249	87.042	100.353	89.771	89.44	83.041	81.4391	106.069	153.954	89.589	90.6912	78.132	72.804	183.276	128.991	108.832	85.809	94.95	105.3	89.302	94.271	106.741	128.948	141.897	120.136	112.056	131.97	131.021		0.182292	108.634
4.2852	180.517	87.464	88.215	95.253	91.005	87.582	94.915	66.5221	101.665	145.694	96.874	107.091	59.993	82.544	175.363	118.036	98.6	85.023	90.449	87.575	90.241	106.858	104.056	139.191	148.773	108.074	110.259	133.215	132.311		0.187498	107.357
4.4043	173.651	83.911	94.394	91.106	93.924	94.686	84.571	75.3265	109.992	149.594	86.292	91.2335	60.32	74.541	166.669	104.067	105.49	109.442	86.844	92.925	101.224	88.402	114.774	127.68	144.719	114.105	123.708	123.648	140.02		0.19271	107.147
4.5233	202.187	100.747	102.208	96.003	96.026	97.073	91.939	69.7503	112.217	147.018	102.409	106.707	71.053	80.035	174.544	99.706	93.757	102.351	96.033	96.655	104.462	89.771	95.32	127.96	144.887	131.167	127.237	133.808	130.697		0.197916	111.163
4.6423	197.606	92.37	103.165	100.676	96.484	88.909	84.815	71.4936	113.061	152.011	97.182	91.9001	75.846	77.101	179.861	92.828	94.374	102.902	88.479	78.958	90.49	102.157	110.511	132.052	158.672	127.716	124.84	145.123	123.416		0.203123	110.172
4.7614	183.238	103.05	101.774	92.901	95.655	88.8	78.107	75.9959	103.324	140.249	89.475	90.8692	81.887	78.657	162.776	89.163	74.901	101.039	95.291	83.554	82.055	109.103	102.228	133.534	136.296	126.249	137.121	145.394	149.856		0.208334	108.019
4.8804	180.072	114.965	92.725	85.856	94.573	88.623	85.468	73.9154	101.302	141.619	86.75	75.3671	69.843	79.46	157.807	97.539	78.883	99.639	81.767	74.419	100.455	92.95	106.182	125.992	138.875	125.764	137.291	147.378	132.977		0.213541	105.809
4.9995	187.459	123.431	96.735	100.755	83.623	89.078	86.522	62.854	95.359	139.091	86.468	76.4115	71.909	80.491	149.481	86.361	85.194	103.445	95.975	80.544	91.297	100.053	114.488	128.413	135.084	122.218	137.17	141.343	132.163		0.218752	106.325
5.1185	192.419	131.708	107.304	99.402	87.87	89.716	89.575	64.0356	86.983	138.687	73.368	74.7983	71.198	87.214	147.363	86.418	85.548	99.073	90.703	87.53	106.475	96.142	118.944	118.889	139.965	132.018	136.213	148.247	127.144		0.223959	107.412
5.2375	185.47	128.858	108.861	106.98	80.643	91.592	83.583	66.5566	93.19	126.664	80.867	76.8726	74.595	91.776	146.389	90.695	92.917	88.421	92.878	82.379	92.429	109.502	113.155	124.429	136.176	139.715	136.336	126.554	142.524		0.229166	107.276
5.3566	171.238	144.152	108.945	102.109	81.072	94.211	77.959	66.9873	100.186	121.23	81.476	79.1439	74.861	85.146	149.452	94.485	88.141	97.502	93.758	99.222	99.085	100.625	122.016	129.253	146.614	133.688	141.708	137.137	124.469		0.234377	108.478
5.4756	164.957	138.272	98.057	101.452	79.146	81.072	81.377	67.5999	83.435	109.568	72.806	85.3322	67.928	94.864	138.671	86.349	78.636	105.238	108.19	83.025	94.175	112.748	111.277	127.945	136.799	134.345	136.015	143.355	132.738		0.239584	105.358
5.5946	167.582	141.912	95.651	105.671	81.48	82.208	74.842	65.7951	89.658	135.017	82.365	88.0927	76.211	102.408	137.396	79.362	92.666	93.325	102.433	91.964	95.899	113.899	101.01	141.615	128.807	109.958	152.389	143.702	131.978		0.244791	107.079
5.7137	149.523	140.069	108.918	106.45	90.023	88.122	79.359	70.2075	93.124	131.485	85.285	82.3388	70.677	98.893	132.985	87.578	86.777	97.944	112.892	87.464	95.884	108.948	90.623	131.415	141.485	117.441	160.511	120.678	129.472		0.250002	106.778
5.8327	135.386	157.964	111.107	89.899	84.117	77.927	82.447	67.192	103.788	132.974	88.892	80.128	65.724	96.431	120.604	86.184	94.693	97.377	113.103	71.108	85.825	119.04	101.019	121.957	130.363	100.574	146.796	142.825	139.524		0.255209	104.999
5.9517	125.704	144.104	105.257	94.014	83.579	82.208	78.765	70.934	99.637	135.87	83.038	91.1695	60.384	99.436	122.537	93.101	102.548	99.92	109.957	73.567	93.777	100.33	101.341	114.108	114.677	109.629	146.455	131.804	129.452		0.260416	103.355
6.0708	109.825	151.997	103.145	96.267	76.493	74.993	87.842	68.7619	111.442	131.203	79.272	90.2237	67.649	98.807	107.405	90.583	110.039	99.593	99.676	70.704	88.217	107.968	111.663	107.291	119.066	105.294	141.321	133.272	125.54		0.265627	102.26
6.1898	122.499	146.135	104.799	88.58	86.523	65.263	91.647	75.5166	101.468	124.788	77.843	88.4607	71.221	88.835	108.879	98.619	105.142	103.953	95.06	78.408	85.517	91.778	102.217	99.987	113.737	93.854	143.946	119.985	123.719		0.270834	99.9441
6.3088	101.761	144.814	111.801	82.741	84.872	79.306	82.618	73.0883	104.139	125.343	85.901	81.4094	65.54	77.678	99.513	98.296	102.115	105.562	101.607	77.615	108.536	96.101	96.829	99.691	106.379	87.842	138.932	115.584	116.392		0.276041	98.345
6.4279	108.028	131.391	95.127	84.908	90.405	87.771	84.349	70.776	98.033	123.963	85.385	95.1202	59.311	88.845	103.91	90.632	104.252	100.989	94.873	75.522	96.628	97.047	89.082	97.676	111.493	92.747	127.68	105.67	134.613		0.281252	97.4561
6.5469	92.456	147.151	101.014	85.82	89.96	78.864	81.733	78.5505	108.403	116.242	97.132	97.6036	67.66	95.936	96.767	82.577	105.739	94.673	86.681	72.008	92.534	86.691	105.067	106.276	115.411	104.66	135.402	113.141	124.712		0.286459	98.6505
6.6659	91.96	130.903	97.524	98.621	84.742	74.244	74.35	75.3685	94.012	121.499	84.758	80.1236	63.757	94.411	107.751	94.526	112.987	94.969	80.386	62.446	91.215	96.443	98.25	113.391	107.24	97.332	135.285	123.469	141.276		0.291666	97.3531
6.785	87.77	129.183	101.208	95.632	99.964	74.902	70.48	78.5293	98.049	111.152	88.355	81.1165	66.33	81.819	106.475	94.938	92.089	105.363	94.108	61.737	92.741	96.414	104.079	111.348	101.49	90.623	133.011	115.571	119.977		0.296877	96.0156
6.904	92.194	127.233	106.365	98.954	96.503	67.046	76.29	66.172	91.569	118.644	85.195	86.5442	76.762	74.537	124.337	89.437	95.822	105.008	77.91	58.892	71.207	91.72	92.81	113.733	102.289	85.978	131.278	119.874	121.912		0.302084	94.6971
7.023	89.617	116.757	109.767	113.524	79.145	71.833	79.571	73.398	90.63	101.386	98.156	98.3028	63.301	82.882	113.68	95.072	94.6	96.885	79.465	62.14	82.665	101.296	92.038	110.999	104.725	90.162	125.08	114.479	139.736		0.30729	95.5618
7.1421	79.957	114.154	125.809	106.163	85.205	78.115	81.046	76.6719	87.161	101.051	93.93	84.2659	67.409	85.536	114.683	92.586	107.275	93.647	73.047	53.308	82.439	84.459	92.794	119.706	103.005	91.018	121.448	123.937	132.081		0.312502	94.8933
7.2611	79.383	109.444	110.878	101.384	95.962	77.869	73.556	68.2107	88.169	97.316	83.874	81.4577	66.473	90.095	92.194	93.687	86.075	79.889	63.713	47.916	77.237	93.126	95.459	117.655	95.363	85.481	114.373	117.411	123.91		0.317708	89.9159
7.3801	77.118	98.393	100.841	94.31	86.283	65.274	79	73.4449	83.976	96.583	82.138	80.3614	71.513	89.323	100.923	83.883	85.9	86.168	63.885	50.497	78.379	96.465	81.176	120.858	100.604	72.216	127.671	107.595	129.712		0.322915	88.4307
7.4992	65.582	113.89	102.23	95.71	86.388	69.779	70.077	73.5094	90.467	103.631	92.992	63.8285	69.067	77.562	85.981	86.359	93.275	89.797	60.524	43.261	69.75	86.098	86.676	128.389	108.597	76.346	124.075	99.294	114.656		0.328127	87.1652
7.6182	73.23	119.623	86.983	101.528	89.119	60.501	64.399	67.0962	85.902	90.268	98.518	89.866	72.616	77.244	92.204	99.521	78.056	95.783	54.909	50.88	60.502	81.902	90.545	116.889	89.108	73.007	121.546	111.291	111.226		0.333333	86.3539
7.7372	70.004	120.256	89.465	111.336	94.968	76.392	62.247	80.0069	89.03	94.814	98.654	85.164	72.688	74.12	89.372	87.201	76.865	85.885	48.931	45.059	56.467	90.053	87.329	107.711	108.909	68.232	116.753	105.64	113.587		0.33854	86.4531
7.8563	65.737	107.801	87.388	91.072	91.446	70.262	68.643	77.2414	93.621	90.33	81.596	82.7312	73.817	71.431	95.14	92.864	84.868	76.536	55.364	32.661	55.505	89.109	93.277	109.6	105.114	70.015	108.17	90.995	112.17		0.343751	83.6036
7.9753	68.873	125.524	82.995	83.31	97.94	65.584	64.766	73.1544	77.513	87.801	93.436	88.2261	58.182	71.718	83.794	93.951	83.739	89.02	52.514	30.826	55.311	82.886	97.844	110.878	113.7	70.972	103.46	102.505	94.772		0.348958	82.9377
8.0943	68.179	118.084	84.426	92.623	90.059	57.723	70.211	65.5312	90.397	91.98	87.81	94.8153	69.09	78.578	84.703	82.373	89.168	73.707	48.758	28.686	35.56	79.737	95.034	102.152	104.929	67.99	93.818	105.531	105.291		0.354165	81.2739
8.2134	59.069	102.323	84.404	97.733	85.632	65.768	66.009	62.6122	94.154	91.154	78.299	83.2037	66.348	69.336	76.128	77.999	82.217	74.453	54.07	28.646	33.028	82.976	90.902	99.273	97.423	70.633	83.331	111.615	110.346		0.359376	78.5891
8.3324	60.394	90.913	90.358	85.572	86.464	47.377	48.133	61.0817	93.082	91.125	97.392	82.5523	59.271	76.04	81.606	74.233	78.006	71.419	42.499	22.84	37.658	83.668	93.727	98.08	100.8	76.22	85.934	105.783	97.976		0.364583	76.5588
8.4515	54.938	91.08	89.044	81.37	87.794	54.459	58.463	69.9607	83.592	83.043	88.902	82.5691	63.484	67.756	80.398	79.534	85.103	84.485	48.413	29.03	36.802	80.885	92.958	84.227	94.582	62.081	85.739	100.987	100.002		0.369794	75.92
8.5705	54.765	83.271	88.656	91.329	83.117	58.618	52.887	61.9909	82.928	84.838	87.061	81.3007	63.319	69.489	79.026	85.924	73.145	77.41	45.786	21.636	32.796	73.697	85.061	88.093	92.325	67.813	74.961	106.728	100.772		0.375001	74.0946
8.6895	56.048	89.135	86.188	69.948	75.2	56.484	65.564	64.6211	98.86	83.753	91.146	86.5663	69.567	75.276	79.616	90.41	75.011	73.76	41.163	20.223	28.122	81.117	98.44	99.061	85.779	70.5	74.281	99.351	108.098		0.380208	75.6306
8.8086	54.241	76.257	75.242	79.421	85.237	56.144	59.99	61.7724	91.912	86.045	88.151	80.326	60.899	73.85	85.404	85.928	76.649	85.612	44.622	23.454	29.74	72.928	95.538	94.662	76.886	64.558	84.783	100.481	98.657		0.385419	74.1169
8.9276	69.309	85.428	80.481	78.064	80.69	80.498	51.187	56.8244	80.403	81.594	94.423	85.7188	68.336	73.939	73.952	80.264	71.691	88.173	37.762	23.277	28.673	73.661	90.215	94.338	65.752	68.285	86.632	114.322	110.988		0.390626	74.9959
9.0466	55.024	83.516	76.379	76.106	79.435	60.198	47.979	53.2483	93.557	80.628	101.879	87.2156	64.842	77.855	88.225	73.311	77.779	82.838	33.182	27.526	30.847	68.561	104.399	97.385	77.575	64.889	83.433	116.236	112.315		0.395833	75.047
9.1657	58.507	84.154	77.412	70.781	79.734	71.666	50.952	60.6023	83.161	69.431	82.382	62.8261	64.685	78.465	80.581	81.825	66.806	78.63	33.78	24.303	27.567	81.276	97.706	103.78	67.81	74.868	77.878	113.509	107.77		0.401044	72.8568
9.2847	47.354	77.649	88.57	76.78	78.938	63.708	55.186	59.8434	89.317	78.083	88.09	65.9989	67.162	71.177	80.104	79.458	86.356	79.364	41.853	23.1	29.962	59.909	92.71	113.678	64.055	68.585	67.481	119.199	103.094		0.406251	72.9919
9.4037	65.452	83.718	80.964	76.209	82.478	65.549	53.506	51.7262	76.973	68.3	98.073	65.6593	63.967	68.49	82.435	76.797	83.424	75.052	32.386	21.54	34.144	60.669	92.631	101.075	70.955	69.26	67.488	119.324	118.438		0.411458	72.6442
9.5228	55.579	81.541	101.344	86.928	79.88	69.596	58.967	57.4939	71.703	71.794	104.036	69.5986	66.621	68.999	69.884	76.384	81.004	68.559	32.466	25.026	20.265	62.542	92.023	104.806	61	75.492	63.856	114.762	91.737		0.416669	71.8582
9.6418	57.11	82.367	92.06	70.69	78.695	68.923	53.542	48.2285	65.936	70.997	92.462	74.8295	55.3	75.884	68.971	79.64	89.131	78.429	30.811	20.145	28.643	59.546	97.35	102.786	62.374	73.144	63.926	101.743	115.159		0.421876	70.9939
9.7608	57.721	72.038	82.828	79.85	62.774	72.426	63.054	50.9627	67.59	76.408	109.924	71.3971	66.255	62.168	69.013	81.439	82.668	91.907	30.004	25.227	23.025	50.615	88.68	103.789	56.879	60.305	59.092	103.792	90.3		0.427083	69.3838
9.8799	51.725	83.009	103.782	70.082	66.919	64.585	50.899	54.7371	69.188	66.63	97.896	58.3426	62.703	72.185	76.223	84.502	93.231	93.081	35.968	26.351	24.813	49.642	96.558	102.629	50.602	61.69	62.205	95.232	106.422		0.432294	70.0632
9.9989	50.468	74.269	100.062	75.888	80.287	60.081	61.16	53.8664	68.522	73.517	75.071	75.8132	62.034	77.433	66.553	71.854	78.952	86.789	28.288	25.471	28.966	44.883	84.221	90.298	54.052	51.434	59.172	94.513	102.94		0.437501	67.4778
10.1179	55.217	78.65	98.697	71.466	69.889	58.722	55.104	50.5645	67.864	67.995	75.635	67.2867	71.065	69.214	72.458	83.916	86.865	95.769	26.791	21.368	17.927	49.903	88.459	79.868	58.116	56.954	60.322	98.862	99.808		0.442707	67.4054
10.237	55.564	81.689	99.375	70.792	70.17	67.831	59.143	61.457	62.99	63.969	82.319	58.537	66.519	69.503	67.752	82.102	71.149	89.473	28.817	19.314	24.981	53.72	79.169	94.656	57.275	53.514	59.555	94.369	95.86		0.447919	66.9505
10.356	52.154	79.293	100.431	77.509	66.309	53.048	68.953	62.2117	71.341	63.205	81.795	62.5002	56.627	70.704	69.941	88.727	87.26	76.119	37.919	18.673	23.427	49.532	95.678	86.072	54.25	52.395	62.962	88.726	109.67		0.453125	67.8425
10.475	53.063	74.611	92.655	77.237	66.653	58.606	56.798	64.5898	61.727	67.567	70.602	62.1893	58.454	62.622	69.279	80.512	90.051	77.901	32.353	19.661	23.78	51.978	96.581	92.112	56.01	46.098	64.061	66.617	102.814		0.458332	65.4201
10.5941	51.892	88.127	102.906	83.843	61.273	55.956	62.906	69.7237	64.071	71.261	85.89	66.8221	62.615	71.361	62.034	78.248	88.801	83.819	22.615	22.889	20.722	48.55	96.532	87.378	55.835	55.463	67.578	83.346	98.246		0.463543	67.9553
10.7131	46.942	70.664	96.384	88.192	66.116	64.355	60.887	63.0857	64.903	67.931	82.854	66.2014	57.936	73.962	62.57	75.388	76.651	66.789	28.156	20.977	23.832	58.306	90.315	85.676	49.875	54.197	78.424	96.613	111.787		0.46875	67.2403
10.8321	45.839	76.059	104.102	94.219	63.585	58.287	60.926	54.2114	74.102	65.776	69.869	66.3727	58.107	69.586	68.921	72.105	82.438	81.375	30.532	15.566	21.351	46.93	87.86	100.152	60.285	60.177	76.744	94.429	99.065		0.473957	67.5507
10.9512	50.96	79.207	100.459	87.848	69.467	50.194	59.656	60.3512	71.127	72.643	81.905	59.7846	57.301	57.49	67.892	87.56	83.348	68.462	27.436	21.263	19.418	52.937	93.762	93.349	59.729	70.467	97.833	93.796	109.25		0.479168	69.1343
11.0702	48.017	71.442	106.648	84.16	77.51	56.228	52.672	72.4124	66.576	67.555	76.429	64.2252	53.418	62.621	74.209	77.159	84.205	73.795	20.593	13.411	18.641	42.798	84.416	95.113	55.689	66.089	97.348	94.416	116.007		0.484375	68.0622
11.1892	51.436	70.9	109.834	93.957	83.09	52.269	58.868	73.4076	73.435	65.617	71.544	65.0305	53.776	66.183	77.72	68.858	91.077	66.539	31.155	17.807	17.619	43.858	85.886	98.088	60.167	71.926	105.118	93.722	102.403		0.489582	69.6997
11.3083	50.323	80.384	102.068	94.316	82.225	56.823	62.101	70.8238	71.654	65.594	82.91	64.3023	61.915	58.972	77.658	79.332	82.28	65.442	29.281	15.81	19.42	45.615	75.316	106.934	65.768	76.349	99.667	87.245	102.139		0.494793	70.092
11.4273	54.115	75.399	96.208	92.049	78.261	60.829	61.854	66.2546	76.749	68.285	77.103	65.2935	58.745	57.861	69.556	82.243	80.955	74.592	31.766	15.91	23.313	48.122	67.328	107.107	61.599	68.153	87.417	93.058	101.087		0.5	69.0073
11.5463	46.677	71.2	106.196	88.203	77.992	61.992	60.273	71.2437	66.355	74.292	75.171	71.0764	70.38	62.929	84.591	71.856	89.67	78.874	30.573	13.665	19.721	41.881	78.083	91.607	65.412	80.339	96.398	97.374	100.519		0.505207	70.5015
11.6654	45.297	65.704	101.689	97.609	78.939	58.521	55.996	65.8577	73.214	64.712	72.351	71.6468	63.291	63.431	74.956	77.234	78.324	82.137	22.301	17.163	21.299	43.85	81.611	103.393	73.621	81.209	89.917	90.666	100.25		0.510418	69.5238
[truncated: 94 more rows]

[truncated: 1 more sheets: Sheet1]
