# Supplementary material for: Crumbs organizes the transport machinery by regulating apical levels of PI(4,5)P2 in Drosophila
Source: eLife. 2019 Nov 7;8:e50900. doi: 10.7554/eLife.50900 (PMC6881148; doi:10.7554/eLife.50900)
Supplement: Figure 6—source data 11. [file elife-50900-fig6-data11.xlsx]

## Sheet: Image42
X0	Y0	Y1	Y2	Y3	Y4	Y5	Y6	Y7	Y8	Y9	Y10	Y11	Y12	Y13	Y14	Y15	Y16	Y17	Y18	Y19	Y20	Y21	Y22	Y23	Y24	Y25	Y26	Y27	Y28	Y29	Y30	Y31		Ap-basal	Avg intensity
0	27.8535	33.8911	32.3025	42.3228	40.5797	28.2686	30.0845	30.8993	37.7228	32.8115	26.6418	43.0417	36.0984	32.9172	33.139	21.7519	29.5479	25.493	36.3855	35.3865	30.0587	29.524	39.4046	37.0076	37.1539	36.7444	46.9677	35.425	32.6667	30.8922	35.5166	41.0843		0	34.0495
0.119	26.6876	39.6943	37.2475	40.1371	44.7907	24.5812	28.4111	37.2529	40.8253	41.0324	31.7346	41.5405	35.0101	31.0117	33.8793	26.7087	35.3052	26.6154	34.0905	33.5799	35.5504	33.422	35.7123	35.9888	38.4053	43.8684	51.8506	35.0937	37.9932	25.5218	40.862	35.8153		0.00961259	35.6319
0.2381	28.0577	36.6875	39.4732	44.5293	42.1393	21.1667	32.8566	45.5348	43.2286	36.3277	31.0655	43.1001	33.2012	33.2422	37.1798	29.7297	30.6268	40.5978	29.3799	38.6506	49.4014	35.3931	40.7266	30.7993	44.6439	42.9319	54.9137	42.8336	34.4138	32.9949	38.8396	39.966		0.0192333	37.6448
0.3571	34.0551	44.8201	36.7977	43.7775	47.1557	30.0364	31.0816	35.4087	41.4393	39.3512	38.1785	43.5018	39.3299	38.0677	37.3832	31.8895	34.0305	40.5727	34.8866	41.2094	46.8245	44.9206	38.9786	38.3534	44.9634	42.5896	48.8156	41.8598	47.838	39.5392	37.0808	34.3383		0.0288458	39.6586
0.4761	31.4356	44.8986	38.2522	45.2968	45.6286	30.4154	34.6699	43.6682	56.5842	38.7851	38.5458	42.7369	41.4656	47.6495	47.6034	35.1891	38.5089	40.5724	36.2979	43.3606	44.4897	44.9495	49.3884	45.7697	48.3664	49.5182	50.4102	41.5924	41.6655	39.2372	39.5998	37.6408		0.0384584	42.3185
0.5952	41.9051	51.3207	42.6687	50.983	53.9178	32.4328	31.9811	46.7311	42.8934	43.6968	33.8418	43.2517	37.924	48.4333	48.9858	38.6853	41.4918	43.3849	44.959	48.3567	55.9847	47.2744	39.5953	41.8389	48.1366	54.2295	56.7469	42.8447	40.7529	35.2933	44.2663	34.9926		0.0480791	44.0563
0.7142	37.3427	57.7874	59.6819	55.7311	51.7769	36.6436	36.5408	52.1706	51.4564	53.5327	38.2619	55.9447	47.3773	46.0266	54.2537	42.5779	34.0135	36.5848	43.5855	46.3294	56.9906	47.284	44.6393	41.2339	50.6885	48.0222	58.695	50.4495	39.39	45.1921	47.0574	36.4445		0.0576917	46.9908
0.8332	43.8147	54.9581	59.8673	52.5456	47.2774	36.6682	50.4725	57.4119	59.3146	51.9534	47.0873	53.8196	47.1064	50.1974	53.4679	42.4838	36.6195	34.6258	46.1634	48.9537	51.975	44.8495	38.702	41.5093	47.0326	51.0736	50.4612	43.2972	40.4228	38.4688	51.4776	36.5263		0.0673043	47.2064
0.9523	50.423	53.2921	60.6259	55.3349	58.4683	37.0842	47.8701	60.9967	57.4479	52.575	40.5244	57.4758	45.2921	46.0925	56.1694	46.9932	40.935	36.3101	45.6432	42.8744	48.1949	47.7107	42.245	37.6992	53.8422	51.8279	47.3538	45.3773	41.4936	39.6657	60.5995	34.3373		0.0769249	48.2117
1.0713	56.7248	56.3806	52.4747	53.9151	64.8453	44.1829	52.7296	68.9729	69.8274	61.4881	43.3297	64.712	45.1709	40.869	59.538	58.9675	42.0611	43.6273	45.6099	50.3189	49.8195	41.0689	45.4706	46.8146	53.8587	55.011	59.1813	48.6895	45.3363	44.0902	56.8695	42.591		0.0865375	52.0171
1.1903	58.7595	55.7026	54.002	58.1872	66.8783	60.3612	55.336	67.0178	71.27	57.5741	47.5185	66.8241	47.0721	45.977	51.6964	58.4591	55.0135	42.4577	40.1193	43.1222	50.3573	45.5531	44.6228	42.0666	53.9117	45.5893	52.8092	45.9446	48.542	43.1563	52.5839	38.4606		0.0961501	52.0921
1.3094	58.178	50.7352	48.785	51.8434	60.4562	57.5565	52.4496	66.0765	66.9225	54.4435	46.7866	56.02	54.9422	45.2834	57.2331	51.9941	49.4091	51.1294	39.2113	40.3452	50.4085	49.6672	45.7326	49.0356	56.2269	44.4044	53.888	42.562	46.9078	47.3941	52.2921	42.407		0.105771	51.2727
1.4284	61.1186	47.084	45.7453	55.2346	64.0642	66.0385	53.1752	66.0563	76.7952	53.3692	49.4395	50.8834	47.9042	45.9373	48.0417	59.731	51.117	61.0254	43.0844	45.3929	48.9376	54.2607	51.263	39.5894	44.9887	40.7049	52.1135	48.0772	44.7813	45.3532	50.2409	31.5521		0.115383	51.3469
1.5474	55.527	45.4392	55.2028	53.3772	63.8564	60.485	58.8427	61.9385	60.7819	58.9698	51.0739	48.0365	47.4659	44.6692	50.1026	54.785	56.7478	56.7183	40.2382	49.9215	46.6563	42.2531	45.2278	45.1063	49.9038	42.7305	49.8206	39.9144	43.8592	46.9749	55.7207	38.16		0.124996	50.6408
1.6665	63.961	40.089	54.7492	59.5746	61.7376	61.9532	48.0312	58.9543	63.9315	68.727	41.5129	54.6732	48.2977	47.6615	50.0407	50.9524	43.9578	52.3337	39.5351	42.7841	47.6882	45.6235	44.6719	34.8099	45.1039	50.5418	50.4337	39.5141	42.6524	38.2612	66.5028	41.0171		0.134617	50.0087
1.7855	56.6639	53.7123	53.7396	54.649	55.2311	58.6895	63.3361	50.8029	56.2447	54.0908	39.9782	52.5211	43.9505	49.1255	49.5089	55.1747	54.5824	50.4611	34.8953	49.2286	47.0803	53.0839	43.0506	36.7618	51.4177	47.7453	41.1739	43.4535	46.6639	52.9495	57.6706	44.4516		0.144229	50.0653
1.9046	51.4388	44.5605	51.5442	53.013	56.2055	55.7679	57.7587	49.421	54.9591	54.0416	37.8498	42.7051	46.7498	47.6305	47.2539	46.8698	49.5812	54.4875	42.6708	48.9689	35.923	50.1192	49.3448	36.6052	53.4159	45.6302	47.9707	48.2573	44.2864	43.8597	54.1201	41.4297		0.15385	48.2637
2.0236	50.466	43.2765	46.0114	46.8459	50.4751	48.4638	62.3234	47.0342	49.3395	56.6461	52.3259	45.7293	44.0038	40.2725	45.0264	55.64	60.2825	57.6908	36.9965	46.2534	42.4751	50.1439	44.3027	34.1053	50.3246	44.6014	44.1391	43.6258	50.4881	53.0869	51.1277	45.0192		0.163462	48.0795
2.1426	50.6399	50.1764	42.6037	43.6794	51.9396	57.6804	71.9109	49.7369	40.8084	53.1511	41.9335	56.1157	43.1895	47.3406	45.4546	50.7571	52.6864	56.1009	44.3068	46.5062	49.1638	50.0731	43.4263	40.5074	42.7235	51.8355	48.2544	40.3608	50.5332	46.1904	55.3254	46.8057		0.173075	48.8099
2.2617	50.4468	51.6876	42.5708	41.2948	54.8399	46.1106	71.1158	54.0367	50.2987	50.8792	49.882	42.9684	39.6403	42.3938	39.0797	54.7518	51.127	45.1642	39.3348	45.224	44.3424	55.9822	42.8925	39.3352	42.9947	48.2302	43.0049	47.0512	41.8051	41.1382	64.0029	40.1624		0.182696	47.3059
2.3807	48.0582	48.9345	41.1838	44.6657	58.6597	47.0859	69.9634	51.6706	47.2743	57.3009	45.6107	38.6306	47.8451	45.0076	44.0204	49.8372	47.5169	42.0741	45.6327	45.4985	47.2159	51.4697	45.9876	40.2739	39.8122	45.3576	45.822	45.6947	45.2691	52.8876	60.7786	44.838		0.192308	47.8712
2.4997	52.0098	44.952	45.3691	48.7128	45.2081	46.218	65.035	47.2088	52.6972	60.2582	41.067	45.7814	41.38	46.8685	42.1939	44.3176	50.2269	42.1641	40.1149	42.0196	44.3126	46.6118	41.3054	36.135	46.4604	37.9854	42.7096	42.3444	45.3885	54.6087	55.4856	42.6595		0.201921	46.2441
2.6188	48.7117	56.2869	39.7156	42.3562	64.6057	45.6609	60.9405	52.701	51.8622	50.8598	47.7039	42.2543	41.6946	44.4488	39.1963	47.3818	45.7912	40.9431	36.0045	40.8568	43.7231	54.6688	54.1785	36.9671	42.9746	39.0129	46.5406	45.6905	44.6863	56.5633	55.2197	43.7065		0.211542	46.9971
2.7378	49.6994	53.703	46.6434	45.4653	59.9179	43.0877	57.5675	49.8476	45.4683	60.4552	43.2825	47.9475	45.5859	42.4048	42.3451	41.9458	46.5825	48.1494	47.7701	44.1519	53.1323	46.0714	51.6073	34.0278	46.838	43.6876	38.7605	50.675	43.1707	56.7997	62.5938	48.6436		0.221154	48.0634
2.8568	47.1471	59.2647	48.1383	47.0256	60.335	39.5191	66.9773	47.6925	43.4194	59.8338	41.1337	41.0773	45.4602	44.5321	42.5576	42.686	45.5438	51.0069	43.6745	41.3237	51.7144	51.0461	61.8462	36.6743	49.0456	45.3618	43.2556	48.4468	52.6731	55.3686	58.8998	46.4989		0.230767	48.7244
2.9759	45.3717	47.8451	46.8534	53.3984	68.394	49.1544	74.0427	52.8843	51.3999	58.5026	38.008	49.6499	43.1801	37.9279	42.9253	41.3507	41.8367	56.4579	46.3852	50.9418	56.6305	45.5715	54.7195	37.5874	45.8518	46.6714	47.0525	50.4995	47.2241	56.1291	57.4258	42.364		0.240387	49.5074
3.0949	51.4972	55.8106	53.2112	50.3145	62.504	46.147	69.7421	57.7845	42.916	49.2537	41.5631	42.4442	42.6963	40.6279	46.8221	42.5778	45.6241	51.8857	42.8489	41.7333	63.5094	49.4174	51.4376	40.115	42.5262	42.0035	56.8556	45.3041	54.0875	60.2814	51.9856	46.7367		0.25	49.4458
3.2139	50.0377	52.0438	52.5443	62.5709	63.4585	45.3607	76.4867	59.0422	50.3727	55.1731	39.9978	49.8837	43.4526	35.9217	43.4655	51.0306	53.4	55.25	43.8109	39.277	61.7234	58.0481	60.4023	39.5961	53.2567	43.2876	53.6696	44.4575	54.3882	57.2833	70.5756	44.8806		0.259613	52.0047
3.333	57.491	44.2982	54.9751	55.6816	60.1139	43.5099	66.9797	63.6675	55.117	65.0007	42.5928	41.6102	47.9869	38.4163	46.7815	46.5593	44.1069	54.7133	40.4959	38.7141	60.076	57.6342	52.8377	40.4772	42.003	44.7473	43.5483	47.1516	53.7305	54.8969	72.4959	39.6551		0.269233	50.5645
3.452	50.861	48.261	60.5735	65.0176	51.9242	50.0795	57.9744	72.8634	50.5186	68.1905	37.1303	46.3597	49.7789	38.1939	44.9077	41.5758	45.4792	48.9225	44.772	40.7994	63.8394	66.5204	53.6603	40.1107	50.925	38.5396	44.8921	49.0811	54.5235	52.9604	71.0602	46.8631		0.278846	51.4737
3.571	51.6253	45.3321	52.4033	59.667	54.4515	52.8201	58.1436	74.5365	49.5626	58.267	42.7994	40.8174	51.1831	39.4827	41.4161	48.5225	46.5587	49.8298	47.6241	41.1946	64.1101	53.3584	59.0527	40.5275	50.494	52.9415	50.5302	54.9539	46.716	57.483	63.6071	48.5349		0.288458	51.5171
3.6901	55.1393	49.6815	62.1668	60.1638	50.014	57.7965	64.3958	72.0997	52.3286	66.2553	45.0032	43.0731	54.9065	42.5241	45.3413	46.2748	43.8874	52.5551	51.7252	38.3007	57.0339	57.1786	58.4081	43.7409	42.4655	57.3499	47.606	51.0764	51.6559	54.2044	66.3743	49.1876		0.298079	52.8098
3.8091	51.542	49.6419	62.8019	64.8497	48.0882	58.0636	57.9435	78.7669	53.2431	61.1016	45.8804	46.2592	56.3536	42.7364	48.2825	46.6809	45.6208	47.666	54.7736	42.6319	58.4763	54.8542	61.2752	47.1633	49.3197	54.9551	46.1523	53.9645	52.9698	56.5842	62.0605	45.47		0.307692	53.3179
3.9281	44.6003	45.3527	64.7173	64.6359	58.0547	58.3038	60.0384	72.1024	54.8275	57.2822	45.5195	45.0178	61.1738	46.4658	56.4791	49.0586	41.3369	50.7364	48.083	43.0489	52.6656	57.8569	57.1319	49.4295	43.2386	54.6311	45.7727	47.5694	54.9182	53.0001	54.158	47.7471		0.317304	52.6548
4.0472	41.6422	47.285	70.8876	67.6232	61.0304	56.5945	56.8365	63.6394	64.8301	51.5442	42.4842	47.0244	57.0595	40.8516	68.6841	52.4011	40.3276	49.6327	41.2593	45.6608	55.5385	53.2694	66.7786	47.178	47.6207	56.433	46.9463	54.9513	48.7192	58.0977	52.606	56.0225		0.326925	53.4831
4.1662	51.5002	47.6206	63.7886	66.879	53.2308	66.9335	53.6887	72.6804	58.0954	58.2538	39.4235	45.8888	69.8752	45.3687	61.4524	58.2534	48.5518	51.4896	42.4731	51.8318	62.9666	56.1961	54.6664	55.464	54.0748	53.7446	48.4203	48.2005	47.9197	56.6212	48.3254	44.6496		0.336538	54.329
4.2852	44.8708	49.4818	60.4079	68.9845	54.1361	57.2613	52.4538	75.6334	60.9385	58.9718	44.7566	44.068	66.7347	46.8117	64.0213	57.2454	49.6914	48.6021	43.546	48.9999	49.504	49.5617	54.1694	52.3462	51.5813	55.3144	44.1673	57.463	43.6042	58.3266	56.4809	56.6804		0.34615	53.963
4.4043	48.4993	45.603	61.7157	67.8961	52.2247	58.9515	48.7837	58.1959	61.1791	65.3264	44.4855	50.9776	64.4026	42.4381	68.5573	60.4809	51.4337	57.3064	45.5181	51.5619	48.7237	50.158	51.6938	58.2579	58.0792	54.5754	47.4889	60.5238	43.011	61.6152	49.4955	53.2053		0.355771	54.4489
4.5233	45.505	48.8789	58.8273	63.5116	57.332	56.3023	48.9036	61.5304	58.5151	53.1294	47.8689	52.8728	73.7254	42.195	58.1564	47.5135	48.0343	46.7207	49.7447	64.3998	42.213	50.9071	53.8957	55.4628	53.9029	45.6525	53.4971	55.26	48.7803	62.5512	45.715	59.5838		0.365383	53.4715
4.6423	50.0237	47.7444	64.5047	62.9487	48.3426	62.0893	58.183	54.1069	55.2171	53.2457	45.0075	51.8111	69.7314	47.4065	55.5978	49.4266	47.0907	55.9636	45.7026	58.4564	46.1582	42.5347	48.6949	63.4986	56.3406	43.2939	45.1351	58.7243	44.1432	53.5504	46.138	52.6659		0.374996	52.6087
4.7614	50.4527	47.291	57.8435	57.6538	50.9849	58.5246	48.8504	50.6976	46.6741	51.3907	41.0323	55.027	64.2888	44.4694	67.0348	54.0954	53.3361	64.6411	36.4946	59.4556	43.7509	46.8411	51.2348	64.1036	61.3725	45.7172	52.4473	56.1932	39.6418	70.5238	50.9291	49.7815		0.384617	52.8992
4.8804	50.4153	49.5447	51.5922	61.3864	47.9897	66.3567	54.2596	39.4425	44.4221	58.5702	50.2248	63.0684	63.4195	39.936	53.7892	68.2266	57.9823	63.5192	44.8658	67.809	43.2267	48.4846	51.7603	60.2971	59.7999	53.0259	47.1105	55.6298	40.5683	63.6494	54.6579	59.3829		0.394229	54.2004
4.9995	46.45	46.5198	49.4691	66.2718	55.4998	60.1758	54.997	41.6455	39.1471	54.2286	49.889	54.4555	67.3766	42.7053	54.4602	60.6845	46.611	62.6092	39.4304	58.5706	39.9096	44.8597	52.4217	62.9297	59.6209	54.5447	45.0376	53.0622	43.4126	61.5023	54.337	52.2383		0.40385	52.346
5.1185	50.7251	39.8044	50.2376	58.8833	52.9149	61.0132	51.0628	37.7085	34.8728	58.3444	51.8432	55.7128	54.3053	47.2682	48.3106	66.6767	52.0518	74.0021	48.2855	61.8672	42.3182	49.3445	55.6996	74.6041	62.5545	45.8779	48.0472	57.4175	43.2797	76.2844	54.5357	56.087		0.413462	53.8106
5.2375	52.5491	46.02	42.2605	69.2148	49.1079	67.2729	49.2342	34.6095	33.4023	60.01	55.3551	60.9045	52.1633	46.2709	54.8495	63.1345	55.1113	64.3713	37.3981	65.2773	43.5429	52.9929	57.3466	65.6681	56.1226	49.303	50.6559	49.7692	47.389	65.7447	55.3645	56.7833		0.423075	53.4125
5.3566	48.0359	49.1047	40.1018	55.7626	40.0373	68.1701	50.6683	31.9103	43.6166	48.4159	49.8695	52.5216	44.4204	41.2279	54.687	56.8867	49.2184	60.7475	39.3123	59.0064	42.8557	49.3457	43.7729	58.0979	54.5535	46.8808	57.9416	52.7741	47.2848	62.9949	56.8228	51.2326		0.432696	50.2587
5.4756	51.2156	47.7961	39.2923	55.9155	51.3749	67.4162	46.0647	25.7517	30.9664	56.8979	47.6709	50.1451	45.2291	37.8707	49.9975	57.851	47.5608	59.9474	41.2443	63.7485	44.0602	59.216	51.1627	60.8852	52.8588	49.9932	56.5857	60.6588	52.7602	58.4764	54.8551	42.5324		0.442308	50.5625
5.5946	50.7719	44.7529	34.7556	51.661	47.1939	72.2562	54.7699	25.3484	32.359	56.0964	52.8151	56.5239	37.8108	42.2929	49.7421	50.0045	50.4327	65.216	38.169	60.6335	34.4772	56.9098	49.3348	53.0362	46.8424	43.1225	56.1431	64.089	58.3982	62.6842	50.7065	42.3436		0.451921	49.7404
5.7137	52.2188	46.0711	29.0038	58.0585	50.6887	67.9352	59.7916	22.6247	27.8987	51.6675	50.4054	57.0416	34.1919	40.6736	46.5647	46.3221	39.9364	56.9509	39.3177	60.3967	32.6643	58.2995	50.7005	54.7095	49.4285	53.6695	60.3016	52.7254	53.8001	58.4356	49.3979	45.0394		0.461542	48.6541
5.8327	55.1424	40.1184	28.5345	53.7185	50.3728	62.3712	53.0376	21.0571	26.4014	49.4191	52.3855	50.0591	29.2361	42.2063	47.2813	41.8305	40.414	57.8363	45.9885	59.6389	35.6917	58.2617	44.4239	55.1926	47.3448	49.1537	61.0389	50.888	54.3703	58.4462	52.2966	45.2973		0.471154	47.483
5.9517	62.1166	44.6974	31.8796	49.2253	48.3658	61.5439	50.7946	23.4212	23.2496	51.3749	46.2733	54.0027	27.9228	38.7636	44.1782	38.8163	46.3893	60.5011	38.8637	59.2156	32.7478	57.497	50.2022	48.8277	45.7789	54.035	60.4036	46.3066	51.4219	53.2801	45.6356	47.1273		0.480767	46.7144
6.0708	64.4478	44.5512	26.9194	47.3211	57.0894	61.8579	43.4221	23.8502	22.1322	50.234	49.6481	49.6442	24.1024	42.3507	40.2835	34.0802	47.0955	61.3383	44.7726	59.568	36.1502	52.352	50.3092	48.5024	45.1028	53.4437	58.0113	47.4316	53.6865	60.1274	47.2501	44.224		0.490387	46.6031
6.1898	61.7659	43.0924	22.8794	41.8126	63.2209	56.6839	45.1521	19.9393	22.5154	49.5761	44.8552	50.0411	24.0421	45.1561	43.4611	30.8855	43.509	59.4546	43.3916	53.5308	32.858	49.5244	48.6754	46.9961	46.386	51.6068	57.5422	41.1062	53.4238	51.7985	49.5022	44.2889		0.5	44.9586
6.3088	65.08	46.4254	21.3905	42.1959	62.412	53.9343	46.1697	25.6493	19.7987	52.7907	46.2658	44.0188	23.7594	38.2038	43.7538	33.0918	41.8103	64.7375	36.7932	57.2848	32.3983	34.8992	54.2089	42.1216	44.1902	44.4626	60.5384	38.4815	51.6474	52.6419	54.5678	36.6391		0.509613	44.1363
6.4279	66.9387	43.5637	19.5881	42.7398	61.8101	50.8068	46.0425	21.4395	23.3727	48.2541	43.1715	44.6659	16.4789	40.6092	47.4649	29.9116	51.6288	60.7959	32.3166	54.9208	29.8705	36.4832	54.5031	40.927	43.7113	40.9834	57.2077	37.1883	54.7481	51.6302	62.5801	38.5161		0.519233	43.5897
6.5469	68.5383	43.7004	25.02	43.2359	59.9559	51.874	35.8573	19.1494	16.5648	54.7464	52.0488	44.4825	17.9633	46.437	45.7886	34.9456	38.8363	63.5973	35.1337	58.1384	27.8798	28.7928	52.5618	42.8769	40.3525	39.8249	51.4768	37.9731	52.0527	46.0338	57.5152	39.8544		0.528846	42.9128
6.6659	62.0891	44.5252	20.5917	39.3765	74.168	45.8025	42.9329	22.0202	17.03	43.5216	43.3023	43.8805	15.3385	43.2636	37.3858	29.3489	45.8331	61.3026	38.785	47.4465	32.3251	31.961	46.6696	42.9892	38.419	33.6594	53.4956	29.4554	50.0476	49.9211	56.8108	40.3196		0.538458	41.3756
6.785	56.2165	44.3377	24.1869	35.0905	72.2062	46.3222	42.1031	18.3295	15.7904	42.1737	53.991	42.3881	16.6083	45.2052	38.0458	28.1149	43.4272	64.8501	30.7839	45.295	26.2231	35.4184	48.5203	35.9171	48.701	39.3726	45.8939	33.4823	45.2322	50.2462	46.3492	41.1395		0.548079	40.6863
6.904	56.6934	53.4391	27.5857	34.8319	76.5584	37.9673	43.0762	22.1707	17.175	41.0249	54.1358	37.2373	14.0804	40.2884	35.6266	22.7359	40.7524	55.8388	33.4776	40.1884	38.0344	31.5578	42.2137	31.3761	43.8787	43.5187	50.416	34.1032	38.6755	41.3977	44.7388	40.4534		0.557692	39.539
7.023	53.2534	46.3737	23.0475	31.1603	76.3924	38.91	42.8596	21.8993	18.5921	45.0776	51.8431	36.5998	18.1998	46.3112	36.2551	22.8149	48.205	46.4156	35.6627	43.9036	25.5125	29.2349	41.8793	29.9633	44.5818	37.6646	48.7838	31.4416	43.0077	49.561	54.7632	43.9824		0.567304	39.5048
7.1421	53.247	46.4113	15.6459	36.718	71.0507	35.4282	46.4502	18.2234	17.1931	40.133	51.2314	38.896	16.7909	42.9658	36.7188	25.152	47.7384	45.9764	30.0829	38.6098	24.1917	29.9859	46.3328	25.8887	38.5926	38.3869	42.033	41.2847	45.0951	47.6827	45.5293	48.6004		0.576925	38.3833
7.2611	54.5217	44.1819	17.9841	33.7326	71.7859	41.4066	41.1453	23.7248	16.7475	37.2411	56.053	34.6465	13.5008	36.0171	37.9555	17.2047	51.1097	44.5565	25.2304	41.4671	24.9212	26.2222	40.8572	32.0715	31.5936	38.0414	47.3785	34.1363	43.6728	43.0227	47.6612	46.9618		0.586538	37.3985
7.3801	46.6863	52.9166	22.2951	31.4619	76.8	39.6969	48.1026	21.418	18.2775	35.1012	51.1362	30.4544	13.4626	36.0783	35.8572	27.6972	52.8419	40.7718	31.2858	46.7425	24.6473	27.1322	46.4381	26.6429	34.0856	42.9471	41.9323	36.1503	36.7741	47.4924	46.4175	47.0116		0.59615	38.0236
7.4992	46.8334	49.6921	23.7402	34.465	64.724	40.8102	49.5487	22.299	18.8457	41.6939	57.0478	33.6075	16.6975	49.8585	37.6061	26.8487	52.6778	45.1971	34.6803	49.623	31.248	31.1102	41.2238	26.912	25.8212	45.6348	36.171	36.1198	35.7527	47.1127	52.1773	44.7274		0.605771	39.0784
7.6182	47.2658	53.3521	17.3487	32.6549	70.6586	46.0426	49.5432	20.6841	16.2397	40.3171	50.1432	41.9414	16.5745	44.3683	33.7713	22.5348	53.4963	43.4257	34.8432	49.6169	26.7693	30.3149	43.1722	27.1009	31.7863	35.3514	42.8088	36.9721	38.1045	42.1701	47.9407	46.556		0.615383	38.5584
7.7372	48.3044	50.9674	19.3139	38.8901	66.9261	38.9074	53.7734	19.9941	17.3593	44.2296	45.2603	38.5312	14.3959	40.7992	36.7048	23.1453	62.3252	41.0078	37.3783	52.9064	29.7792	25.6132	40.9613	21.4475	32.2855	35.4949	42.7396	33.3467	36.8818	40.9269	42.884	44.4938		0.624996	38.0617
7.8563	46.8295	54.6657	19.4284	38.8335	69.3369	41.1715	51.9197	21.8574	13.0159	45.1242	38.9484	31.5561	10.0672	40.4153	39.0757	28.322	56.5444	35.2813	32.0681	42.4547	30.1765	29.074	45.5796	23.8262	27.8565	42.0227	38.0305	39.2103	31.9011	42.6694	42.657	41.6867		0.634617	37.2377
7.9753	45.4284	47.9995	20.3219	44.1096	55.7109	38.953	45.8037	19.6592	16.237	53.7842	41.0651	31.6115	14.0134	46.479	37.7182	25.9787	56.627	41.0253	31.1823	39.6594	28.1177	33.6446	41.9401	23.5141	35.3001	45.3917	32.9879	39.313	37.9582	43.296	46.7962	41.0457		0.644229	37.5835
8.0943	45.4533	47.8172	18.5802	40.3624	48.658	39.6646	57.4097	19.1882	15.742	46.0249	40.8756	29.9644	12.2786	31.9909	36.7056	26.0325	70.9555	43.118	37.2664	43.336	34.8237	26.1859	37.9646	22.9621	33.3678	47.8214	36.2529	39.9018	37.2633	42.4702	45.4624	44.4936		0.653842	37.5123
8.2134	48.6377	48.1336	15.8766	37.6855	50.38	41.3311	57.8786	20.9601	19.9392	45.6092	47.0248	28.2443	16.5243	39.774	36.9565	27.146	68.4535	45.8241	35.0498	41.7326	27.8106	33.452	39.5305	18.8096	33.6633	50.1765	34.3514	39.1056	33.5174	54.7683	49.2207	39.4526		0.663462	38.3444
8.3324	49.4116	46.9801	16.8606	41.6674	50.618	45.8644	55.7637	26.0546	17.7959	49.2352	52.657	28.2988	18.5282	46.6336	36.424	27.3221	69.1151	46.4686	28.6887	33.8424	24.6907	27.1774	43.0155	16.6867	30.2884	42.641	30.3758	37.9307	38.7746	41.338	36.7999	42.7864		0.673075	37.523
8.4515	46.1878	47.9095	19.8815	37.9428	45.2928	47.2642	63.23	19.9851	20.6209	46.1568	52.8737	29.1967	17.4943	44.9808	45.0565	23.5215	72.5251	48.3947	37.0627	38.6466	28.0205	27.9454	40.546	19.6863	23.7993	42.1991	35.237	42.3313	41.9291	53.3373	50.6128	38.9993		0.682696	39.0271
8.5705	45.7085	50.7472	15.1693	47.4735	44.9291	40.4063	71.8766	21.571	21.1624	46.5028	54.529	30.7804	19.8648	52.2116	50.2467	26.7191	71.0231	48.4461	28.5157	41.4484	33.4501	30.6121	43.6852	22.5747	27.6335	43.1935	35.4526	40.4573	34.8479	52.2942	48.2379	41.6309		0.692308	40.1063
8.6895	46.7276	48.4122	13.1575	39.9715	40.9313	51.209	64.2748	19.3279	20.939	53.7503	53.0193	31.5212	17.0009	51.1244	48.1077	31.1631	67.422	48.6512	28.438	47.4648	31.8515	28.6151	45.3223	20.6465	31.9425	43.0105	33.2941	48.5712	39.2099	53.9798	46.0217	39.9066		0.701921	40.1558
8.8086	44.8274	47.2761	19.96	42.494	50.7185	38.9373	69.1613	20.7133	29.034	58.341	68.2304	27.5479	17.7061	61.155	52.1045	29.9062	64.5604	48.5148	32.2201	45.7507	35.5243	26.4297	44.989	17.7099	31.1491	36.5776	37.06	45.7998	36.8731	47.6156	44.1921	48.0053		0.711542	41.2839
8.9276	45.5603	53.7461	19.1702	53.152	47.6637	41.9045	73.0487	22.6197	28.1213	58.4982	62.3117	28.4134	18.9475	59.5396	51.1941	32.7779	63.9857	53.9403	26.2117	45.971	34.3146	24.9928	57.0505	21.7089	28.4926	34.0199	33.6044	51.2589	41.5535	48.5166	49.8157	48.0539		0.721154	42.505
9.0466	45.9525	65.5901	15.1523	52.8983	47.8235	43.4185	72.4985	31.5512	25.7757	56.3829	67.0846	34.1155	14.8564	55.646	57.6359	33.3368	67.905	51.249	30.2793	46.6021	32.4019	25.2899	46.6884	24.2318	27.9997	31.0574	34.0532	50.4515	40.318	44.7134	45.6452	45.0037		0.730767	42.6128
9.1657	52.455	63.1042	20.6116	50.9599	43.9229	54.5181	72.5326	35.1825	29.1739	59.5341	61.196	30.6148	18.0093	51.9577	59.4711	37.8536	66.9941	46.0387	27.0922	41.5503	34.1429	25.9564	46.3937	21.5726	36.1725	33.0859	39.9932	52.332	38.3471	36.6995	48.3441	41.3647		0.740387	43.0368
9.2847	57.7269	65.3917	21.7243	52.417	47.9907	45.3824	71.86	32.2327	27.05	61.6415	66.4775	29.0283	20.4357	49.5614	70.2659	34.2043	66.6593	44.8018	33.2871	42.3855	33.8204	27.2069	44.5468	16.9365	27.9555	33.3842	39.5236	51.0743	37.7236	44.9651	52.4965	51.9646		0.75	43.8163
9.4037	53.776	52.2634	19.576	46.4638	47.6725	48.6282	67.7344	31.7088	32.6636	62.103	60.11	31.5225	23.9531	51.361	65.8971	35.6113	74.7902	53.5409	30.0076	42.8734	33.7398	21.3138	44.7828	18.8172	27.3055	38.6417	39.7039	51.5413	43.8103	44.7084	54.3364	50.2946		0.759613	43.7891
9.5228	49.6386	56.7399	22.3555	47.9695	49.4084	51.3637	74.9411	36.2177	34.2011	65.0094	67.786	33.4032	26.906	58.001	58.5233	35.4374	72.689	49.6382	34.15	35.2027	41.4316	21.4457	56.9517	25.9458	25.5933	32.3868	34.7117	46.9043	58.0518	41.533	51.9924	54.5605		0.769233	45.3466
9.6418	45.6336	59.0753	21.3809	51.8636	50.8067	51.062	62.628	35.8784	32.3928	57.1267	66.2924	34.463	22.3109	49.4261	66.1551	43.8629	70.3294	53.5669	38.373	40.9374	45.7111	22.2955	58.7707	26.7533	25.0944	34.4966	40.1825	44.648	49.6104	38.0881	55.7724	52.8907		0.778846	45.2462
9.7608	48.8614	59.6521	21.4455	52.0195	51.6006	51.8836	63.6353	37.918	37.3931	64.5415	65.3928	37.9806	25.1701	53.2067	76.5573	44.8058	64.3551	49.3407	41.1209	40.8787	50.6561	23.1731	45.2851	21.8686	27.5731	35.0555	42.004	46.9606	59.6769	38.9741	53.5652	56.1632		0.788458	46.5223
9.8799	51.5755	64.2419	21.4464	50.7386	64.6359	54.9211	64.0679	41.5038	46.6076	64.827	64.5546	36.7716	26.9638	53.017	70.6093	53.7623	64.2419	47.5785	43.3209	42.6011	51.5229	33.3708	54.3625	24.4236	28.432	26.4867	43.3554	48.7193	59.6305	40.358	46.8411	49.1404		0.798079	47.9572
9.9989	51.121	57.3038	23.395	47.4655	53.7779	60.3268	59.689	50.0264	45.6069	58.0291	71.5389	40.9665	28.3243	55.3837	63.6728	46.8222	62.1727	49.136	40.6944	47.2542	60.4578	27.6036	56.7185	25.2678	25.7651	34.5416	48.7266	54.8424	64.708	49.819	46.1643	50.8449		0.807692	48.6927
10.1179	56.5935	65.609	25.7822	50.024	63.1004	65.723	58.9753	46.2547	41.1573	63.6971	73.7115	41.3117	34.6809	56.4997	65.9286	49.2268	67.4922	50.3614	45.1957	48.322	56.1149	32.1977	53.9391	30.9158	30.7199	36.1897	44.9775	59.1404	65.9066	47.7773	51.0251	57.0727		0.817304	51.1132
10.237	59.1591	59.0228	26.5623	51.8032	69.631	62.1722	54.1313	58.4573	46.0401	67.9405	74.9388	51.6644	34.2151	55.6777	61.6181	47.6878	64.1451	50.2698	46.8206	46.8823	69.2678	32.0901	46.3444	28.6568	28.891	38.207	47.1741	54.2347	68.2971	47.4502	40.2363	45.5981		0.826925	51.1027
10.356	60.7542	48.649	24.2556	49.7053	65.6754	63.4191	48.0704	54.768	46.4122	63.639	69.7056	51.7878	35.4075	55.14	58.5308	45.0439	65.67	54.7124	48.6335	53.4756	69.6767	34.7884	56.1768	28.2332	32.1998	31.9019	46.7434	52.6729	64.9583	48.5338	45.9013	47.3577		0.836538	50.7062
10.475	61.2841	58.0271	28.8612	44.2978	71.2731	70.0494	44.0532	62.281	57.2869	56.0813	63.0601	57.1036	34.597	54.5491	50.0009	43.613	61.807	58.4269	59.1297	60.5643	57.2717	34.7436	51.9395	31.2854	28.1556	35.3628	44.5632	59.7716	70.6899	41.3017	44.802	48.6202		0.84615	51.4017
10.5941	56.3726	59.9363	36.6991	54.2127	65.9319	62.5662	46.3529	55.9732	50.1838	55.4282	56.9645	59.7252	39.3977	57.2553	57.277	48.6793	54.9897	66.0482	56.2733	50.8146	56.6345	37.5586	52.2284	34.94	30.1353	34.0797	47.4625	58.1671	71.196	50.4045	44.1828	54.7443		0.855771	51.963
10.7131	58.9817	55.7126	27.3907	46.716	61.0089	58.5431	43.5031	55.1184	53.961	57.4636	53.2791	61.978	46.2708	57.3637	49.6555	45.0959	58.0798	63.291	57.1326	48.4677	52.608	38.9305	57.3932	35.6611	35.9637	36.9095	39.0039	53.8174	73.3153	46.2869	39.1429	53.4636		0.865383	50.6722
10.8321	55.5702	49.2202	33.4878	41.5673	55.1707	56.6472	41.6392	54.5561	48.7972	50.5009	52.7701	60.7436	48.3774	55.3084	49.9183	43.6216	52.3496	74.2906	61.5216	50.7665	53.0989	42.7472	58.3968	33.662	33.0069	40.436	46.5105	46.448	63.7333	47.6917	36.5094	47.1909		0.874996	49.5705
10.9512	56.3047	46.781	36.9318	42.3332	41.841	44.5036	35.6957	49.3106	44.383	48.1321	53.7385	61.1984	51.6105	60.1837	45.9243	45.2089	42.6117	74.0319	59.4654	58.0396	53.3359	36.7596	66.278	32.2131	32.3354	41.8167	43.4789	58.6872	60.8812	42.4967	41.7342	41.726		0.884617	48.4366
11.0702	49.107	41.6002	43.8637	37.6891	47.039	45.3102	33.1626	50.9266	51.8802	52.7576	51.3862	66.2342	49.4414	56.7609	50.5344	39.7646	47.4317	85.6011	55.7819	57.3228	44.6855	36.2776	64.6232	43.9139	37.7144	41.2641	50.7152	47.0831	53.4957	47.719	41.0084	46.424		0.894229	49.0162
11.1892	48.0943	41.3357	38.8459	48.1589	38.7717	46.0984	29.087	38.7928	47.8454	45.5469	42.3709	67.8256	57.132	45.9913	46.4158	40.5489	46.788	80.6645	54.3046	58.4336	49.2709	42.0622	64.1001	48.2346	37.847	48.694	49.1869	47.336	51.7846	45.9289	46.5716	44.4543		0.903842	48.0789
11.3083	31.3053	36.9327	35.2776	42.7964	37.6836	47.7046	31.3908	25.177	42.3544	45.2024	48.3267	59.7105	54.6278	50.3294	40.085	35.9853	44.5765	82.946	64.7174	56.7026	43.0985	45.7661	65.6157	39.9036	45.0513	46.1753	49.1649	50.011	49.074	36.3912	42.7196	39.2489		0.913462	45.8141
11.4273	31.1306	40.7354	35.5239	34.2551	40.0902	39.5946	27.3707	17.7299	38.3394	44.9281	44.2716	56.1809	48.568	39.2431	45.7001	39.5956	42.7186	80.7206	50.0003	50.938	45.5671	47.7975	63.0945	45.9509	40.8791	57.2665	52.8062	46.5776	44.5787	31.5599	49.853	50.5153		0.923075	44.5025
11.5463	24.8899	29.8344	35.2729	29.9898	26.5688	31.1977	18.3215	10.0492	30.0225	40.5217	52.8669	54.5721	43.0031	42.4191	41.7846	37.9346	44.6305	72.8449	55.881	62.6443	43.9417	49.8724	58.6979	49.8255	53.9747	63.5332	53.801	46.8636	43.1193	31.6415	37.9783	44.0897		0.932688	42.5809
11.6654	24.9039	22.1898	37.0356	29.2395	19.6081	30.3995	12.6131	9.0454	28.1939	42.4471	47.923	46.5293	45.5913	36.9065	34.1712	34.7393	42.5255	69.7369	63.8645	52.4068	40.893	50.092	58.7729	48.6752	51.938	67.3455	55.6981	41.5169	39.9464	35.1753	31.534	51.8504		0.942308	40.7346
11.7844	16.1072	18.2059	31.0854	16.255	15.47	21.7501	11.3726	8.473	24.7468	43.6727	52.3034	54.2784	35.2011	35.7639	26.0901	26.2822	36.9244	65.9608	55.0525	56.4709	44.928	42.8093	58.361	51.8645	54.066	69.0684	41.4696	46.5261	39.1544	28.1999	27.4075	48.6311		0.951921	37.6235
11.9035	11.4222	11.6924	24.3938	17.097	9.3414	18.81	11.0479	5.4448	15.1973	42.385	42.3641	51.5225	46.4227	39.7198	13.9852	21.8893	33.0029	56.9175	52.6253	49.0572	39.6555	44.7578	48.1127	54.6783	60.2613	65.2187	46.1948	39.1314	35.0809	23.2743	25.5828	49.4027		0.961542	34.5528
12.0225	6.5453	9.4491	14.6406	9.2415	9.4807	15.3967	7.6406	6.3142	10.3446	35.7098	40.1089	52.6915	26.4694	26.8451	7.8925	17.8969	33.3245	55.265	55.2901	35.3513	38.4659	43.2048	47.1774	59.3395	52.5279	60.4156	47.1223	40.2726	31.9511	22.8147	23.2304	46.3612		0.971154	30.8994
12.1415	6.6626	7.4336	8.5355	8.0068	5.6072	13.3857	6.2642	3.7274	6.1925	33.8419	42.4618	43.3279	25.6293	15.6746	4.5023	11.1979	25.9892	45.612	42.7638	41.5975	29.4136	45.9614	49.8119	55.2046	46.3309	62.0269	38.3292	44.2415	29.9317	17.1804	16.3671	34.1142		0.980767	27.104
12.2606	4.0904	3.2038	6.2455	5.8952	5.0521	12.551	6.6241	4.2867	4.0507	23.6616	40.4083	37.2632	16.235	11.6667	3.9907	6.6765	16.5983	45.7112	36.0505	43.6248	20.1946	33.1973	47.2728	62.6323	41.5372	62.1825	39.1668	34.7044	16.5621	13.0631	14.3278	33.3092		0.990387	23.5011
12.3796	4.1283	1.8466	3.7747	4.5586	5.6975	10.2635	3.5276	1.8167	2.4535	19.3309	36.5996	42.9761	11.2958	8.1138	3.6687	6.2217	11.6871	38.6955	40.4758	36.0698	17.2765	34.9439	46.196	59.2916	49.1155	61.9407	37.003	37.4612	12.2636	7.8431	11.6569	21.8917		1	21.5652

## Sheet: Image41
X0	Y0	Y1	Y2	Y3	Y4	Y5	Y6	Y7	Y8	Y9	Y10	Y11	Y12	Y13	Y14	Y15	Y16	Y17	Y18	Y19	Y20	Y21	Y22	Y23	Y24	Y25	Y26	Y27	Y28	Y29	Y30		Ap-basal	Avg intensity
0	17.4409	17.704	20.8909	24.3473	24.8487	20.1939	20.9473	35.2097	22.7474	35.1853	29.5661	25.2439	22.682	19.2997	19.8124	26.9981	16.8089	35.3872	18.1075	24.8495	25.0996	31.8805	34.9401	38.2161	53.9518	46.2019	24.039	31.0836	24.5477	38.3205	65.9502		0	28.7904
0.119	20.2693	19.1416	23.96	25.9761	26.1809	22.4673	22.6688	36.9476	24.0118	38.7844	29.778	25.9409	25.8113	19.4447	19.71	31.3666	18.3438	36.8159	17.5922	27.8891	25.29	34.0187	37.3786	33.1233	47.6264	47.2714	29.7136	30.7178	30.1732	43.6701	63.311		0.0112327	30.174
0.2381	20.0312	17.3928	27.3386	27.7252	31.5285	26.5864	21.8988	37.0423	37.461	42.5917	27.0305	27.4722	27.7002	17.3978	19.6829	27.2064	22.8401	34.4136	12.8485	26.8298	27.8982	44.2561	38.822	39.2809	56.1837	47.4615	36.3047	37.2166	35.9763	53.4133	67.5717		0.0224748	32.8195
0.3571	25.0244	21.6698	31.02	30.1274	31.6378	25.3855	28.6543	47.3652	36.2328	42.356	27.4984	33.4631	32.0113	21.4534	24.9188	37.4528	21.7317	32.049	20.3089	29.7987	30.3538	44.8761	37.8191	45.7197	60.1057	45.234	36.8532	32.4712	34.3508	63.0647	66.3748		0.0337074	35.3994
0.4761	24.5861	29.9416	39.362	29.7739	26.6449	35.2085	31.4273	44.405	42.5236	46.6809	34.9948	39.9303	35.6828	20.1471	22.6099	42.5355	25.4568	36.4157	20.8667	37.0769	45.8039	49.5566	37.2605	49.8636	56.1124	53.4647	43.8271	38.4316	47.2657	75.3997	69.4594		0.0449401	39.765
0.5952	27.0241	38.6082	44.4355	31.8798	28.0967	37.019	29.2082	56.5418	50.9412	50.0976	33.8847	39.221	50.9993	21.8498	29.9614	49.2553	25.3049	40.2425	20.8688	35.3932	42.6256	43.3975	38.4532	43.7964	62.9634	63.251	43.0062	40.0978	50.3332	72.5495	59.9472		0.0561822	41.9759
0.7142	29.5667	46.7253	49.5834	26.1377	31.605	38.245	32.0867	61.794	54.3662	58.6533	42.7641	47.2573	52.9361	21.6273	30.7913	52.155	26.988	43.5243	32.8493	42.1452	44.6277	48.565	36.9082	43.3951	59.9779	59.0103	38.7316	35.619	50.8392	77.1673	60.256		0.0674149	44.4161
0.8332	31.0183	46.0139	51.0952	24.5242	36.4887	50.3454	37.5805	60.7965	55.3509	70.7908	50.8231	54.8772	56.5014	21.6842	35.1859	56.7751	29.2579	46.6377	33.828	47.7302	46.0506	48.9372	48.4627	45.8324	64.2506	57.7419	39.529	42.3395	57.3659	81.2723	51.6397		0.0786475	47.7654
0.9523	33.0819	48.6164	52.3639	29.73	34.3407	60.3286	37.8711	69.6957	55.7784	68.0769	49.3586	54.2184	55.1655	25.1115	34.7339	62.2877	32.9681	47.3281	35.7982	48.5479	48.9369	48.0193	44.1445	40.7137	64.2946	53.8925	41.3626	38.1255	52.4217	70.5699	53.0797		0.0898897	48.0956
1.0713	38.1312	49.1513	45.4184	32.1731	32.703	72.3003	31.4805	66.8856	54.6453	78.6951	58.99	59.4219	65.6948	24.995	39.2588	53.202	39.5202	53.8262	40.5133	56.7605	46.1943	42.0346	41.1555	37.9995	55.2214	48.3705	36.1324	39.2048	53.2834	56.4694	53.2801		0.101122	48.4875
1.1903	34.6452	49.7078	46.9643	28.7199	38.3591	66.7655	36.0809	72.8035	54.9517	75.7768	60.4802	50.865	59.4667	21.9815	45.335	53.5189	41.1321	51.523	49.4556	55.6891	44.9224	44.3909	44.388	45.0462	55.2687	46.8766	37.6554	36.8328	50.2917	54.1706	54.9631		0.112355	48.6783
1.3094	30.8266	51.2522	47.0802	24.9513	39.8365	72.949	42.3967	67.8103	54.6039	65.5602	54.7839	55.41	53.0891	26.087	52.2286	55.7022	32.2542	60.0141	48.6077	61.33	41.9844	40.4715	45.4396	47.5027	54.828	48.7382	41.3412	38.0601	49.2416	53.5565	50.148		0.123597	48.6479
1.4284	29.9172	39.769	49.5961	26.6923	43.7745	64.8763	44.9707	68.406	50.0637	63.912	57.8302	42.9268	48.6534	32.8872	41.2285	50.8635	35.9409	62.7658	49.1026	60.2457	46.0122	36.8873	43.7708	46.2494	49.5684	53.4088	38.8417	40.1017	43.432	53.9356	54.5245		0.13483	47.4566
1.5474	37.1945	45.557	49.6926	28.0632	45.6544	66.2225	45.6435	65.1779	49.9202	66.3167	59.8249	41.9823	43.3745	32.5206	42.2208	52.2102	39.4253	56.8551	48.2599	54.8925	49.88	44.5065	45.06	41.244	44.3823	54.5359	35.8371	36.4249	42.6524	52.0847	52.7969		0.146062	47.4327
1.6665	36.0047	41.0852	45.8542	33.8555	43.8292	66.7932	37.8457	68.6915	45.1603	68.2432	52.1059	45.6299	45.2643	40.2483	45.6571	43.4968	40.4758	57.0487	45.5178	53.6125	51.7521	37.0606	46.5152	45.006	47.1099	48.2456	37.8216	37.1368	45.0344	53.8388	51.9275		0.157305	47.028
1.7855	39.5264	43.907	44.392	33.9696	40.7249	58.9978	37.245	60.588	40.7971	65.5861	47.6107	38.2228	44.462	38.1597	42.7596	48.5053	44.1494	57.226	41.1744	55.0928	51.4955	39.2945	47.1703	52.5007	55.0882	47.3553	36.6323	40.107	50.4953	50.0338	54.0792		0.168537	46.6887
1.9046	40.1834	44.0501	48.3193	38.7934	49.6081	57.3442	37.1141	58.5564	45.4852	65.1453	55.037	39.414	51.252	45.29	39.389	48.1261	47.8011	64.7305	41.3666	53.7	49.6435	39.8661	51.1748	50.7531	56.5155	51.4657	37.7402	41.211	48.2216	46.0412	51.8479		0.179779	48.2318
2.0236	35.4064	43.5022	55.6104	43.0656	53.709	53.9511	40.0807	55.322	37.3172	57.7255	48.7397	43.2391	46.4573	49.4663	41.892	48.8669	39.3026	53.8234	43.6587	54.9538	53.5836	40.8245	50.7035	40.7382	54.1512	49.4066	39.6926	43.7775	46.4699	50.9292	53.2016		0.191012	47.4054
2.1426	38.5347	51.5745	49.4524	40.3413	51.6471	46.1873	41.7851	65.1253	37.7974	54.6842	48.6576	42.3652	45.4245	46.089	42.4039	46.7415	39.7356	53.9466	40.0926	47.0765	61.1778	40.9717	44.923	46.5708	54.0336	47.2819	33.8131	45.8435	51.4599	46.5678	56.9095		0.202245	47.0714
2.2617	46.4748	48.6061	54.7782	42.2055	54.6786	52.534	46.0883	60.3261	44.2719	59.7216	48.4358	44.3944	43.4647	40.1322	45.0934	45.6107	43.6306	58.0301	46.943	50.358	52.3334	41.3901	41.1664	51.8558	51.8269	45.5371	41.793	47.7436	51.8599	49.7042	48.6767		0.213487	48.3763
2.3807	50.0728	45.5986	57.1273	50.9106	52.0507	44.4164	42.8943	67.807	46.9402	60.3879	47.2077	39.887	35.3979	47.5687	47.1194	43.2585	37.6046	57.5535	43.529	51.1338	50.1098	40.5257	41.9808	53.1857	50.9387	48.5061	47.658	52.2056	47.81	50.5491	48.9698		0.224719	48.4163
2.4997	43.177	46.6945	55.7631	43.5322	46.527	45.3742	39.782	65.3038	40.2571	50.3325	47.3243	38.8994	34.4759	48.262	41.7212	42.1962	37.3024	52.7542	49.6351	44.9329	52.2813	47.986	42.4924	45.0966	56.6306	51.5527	42.3838	58.92	42.0761	43.9385	50.7216		0.235952	46.7202
2.6188	49.2947	48.5138	54.8209	46.8167	46.1377	47.6739	39.7293	64.9686	48.4473	49.046	42.7052	44.9291	34.2634	46.4713	41.4716	43.8196	37.5468	48.3936	51.4409	49.7787	50.003	48.5362	43.1698	41.6513	50.6088	42.1975	40.2198	55.2574	44.2042	45.6827	47.8594		0.247194	46.6342
2.7378	53.1929	51.928	53.3373	52.4561	54.0184	56.3542	40.5926	66.4891	49.5903	47.7156	44.2346	51.1702	31.2011	51.3924	47.4113	50.5668	35.6676	44.1872	45.8709	51.0778	52.7195	47.1019	51.8613	39.1566	48.6156	39.9527	41.2524	52.1926	36.6295	44.4172	51.8559		0.258427	47.8777
2.8568	57.4376	57.8643	55.1441	50.7858	46.7902	49.739	43.0119	67.0233	50.2409	52.0538	41.1453	50.6968	35.6709	53.5568	54.8364	49.1414	34.1695	41.7017	45.0606	46.41	45.1549	44.9172	47.9608	44.9578	51.3979	39.3947	44.9242	56.5998	39.044	46.3806	43.7659		0.26966	47.967
2.9759	47.3371	55.7807	56.906	48.3368	47.9372	51.1944	42.8353	65.7867	47.5931	53.4821	49.18	43.0609	40.1578	56.8138	48.7284	50.3647	33.1943	49.6229	45.675	47.9384	45.7579	54.0187	50.0279	48.2882	48.1608	45.9355	50.3662	50.6975	42.7423	49.2234	52.1247		0.280902	49.0087
3.0949	54.7889	48.6049	62.4245	50.7356	43.9686	55.9468	48.549	65.6906	50.5217	51.2637	43.2886	39.3558	38.9394	54.5954	46.7315	52.2541	36.392	46.014	45.2394	51.9557	52.3571	46.7502	47.3436	43.7904	51.0085	47.4326	46.6783	52.1266	40.9357	45.9982	48.7687		0.292134	48.7242
3.2139	54.1532	43.6485	54.2056	53.6147	55.8558	60.2092	44.1294	67.9501	50.2243	50.5532	38.6326	35.3666	43.2371	51.8536	51.0625	46.9734	30.8137	46.9233	44.0577	55.5663	52.8068	45.2765	46.9087	44.0836	51.0232	46.8611	45.8026	48.2126	42.9817	40.3787	53.636		0.303367	48.2904
3.333	53.4543	48.2222	54.0033	51.1245	49.3793	49.3613	41.8816	60.1869	49.8121	52.3782	33.1795	39.6753	46.1653	54.4051	54.4732	55.8239	32.995	47.9448	41.4624	50.0503	55.6381	47.4215	50.2593	51.3751	45.6827	46.921	54.5138	53.8146	48.9556	54.0309	55.6643		0.314609	49.3631
3.452	56.551	54.8183	56.0638	51.6653	55.0599	53.7131	44.2652	57.523	46.6874	49.023	39.9985	39.91	50.7507	49.7554	48.8636	58.8353	36.1951	43.3504	40.0386	52.6032	60.4823	40.3273	46.5138	55.0468	46.453	45.9895	63.7646	54.2312	54.8089	58.2185	46.7873		0.325842	50.2675
3.571	60.7289	54.4876	55.7155	51.3531	49.6713	58.6014	49.4329	60.9899	48.1126	47.1765	40.6726	42.9683	47.3318	39.0969	47.2912	58.6212	34.4329	39.963	43.4543	53.9393	56.2768	42.2061	43.0497	49.9756	45.8729	47.1723	66.0217	56.0904	57.7303	44.024	55.5191		0.337074	49.9348
3.6901	51.1652	48.2303	42.9363	55.4951	51.0697	50.9339	44.5878	57.919	51.3591	54.9648	42.649	45.4916	48.023	45.9463	46.6077	52.8788	33.4737	48.0808	42.4135	56.2846	67.4283	42.3321	48.6783	46.8443	54.798	48.925	67.7289	53.1583	54.5674	47.9492	57.5017		0.348317	50.3362
3.8091	48.939	47.444	48.2327	56.647	44.6494	54.3188	44.8277	59.183	49.0329	54.1389	42.1839	40.7785	52.6711	43.7475	40.9308	49.2658	34.3467	47.0267	44.7539	55.7181	56.0353	39.6753	48.7252	50.4782	58.2507	42.1504	65.0122	52.1741	55.3556	54.6507	53.3671		0.359549	49.5068
3.9281	53.7175	48.9887	48.5287	58.83	46.3741	42.5425	44.8757	52.9594	55.2579	52.4522	44.1715	40.4464	54.753	40.8392	48.2524	46.3942	37.0044	40.5646	47.052	46.3415	53.0348	37.6223	56.1413	51.664	61.0845	45.0423	63.8337	47.3829	55.8617	55.889	57.012		0.370782	49.5134
4.0472	45.9925	54.0532	54.2889	62.9805	42.6056	40.0832	44.7552	49.9082	49.5857	56.1928	47.3258	44.3341	56.3119	43.7052	46.0322	46.4629	29.5639	37.0425	47.9488	51.0833	51.337	41.1894	70.0146	49.9727	53.5889	46.1878	69.3167	47.2272	48.1594	60.1651	52.4565		0.382024	49.6733
4.1662	46.4311	47.8764	52.4996	56.367	47.5017	37.6183	42.4588	52.9136	49.5423	59.5639	46.7573	39.5867	57.1145	44.7774	42.0247	43.2991	24.919	36.548	46.7688	52.8059	45.2092	39.1976	69.0063	49.3869	65.5651	46.8989	62.7468	40.7716	52.0102	61.6181	39.949		0.393257	48.3785
4.2852	44.2379	41.558	50.289	58.0622	48.2701	37.7799	45.2429	49.7768	49.7792	56.3988	50.4777	37.6719	54.2401	43.4114	40.7909	33.9325	27.3749	37.992	43.2077	55.5454	40.6952	40.9472	68.5482	53.2292	69.0217	53.6802	61.2374	32.638	55.2469	50.7275	45.1831		0.404489	47.6514
4.4043	40.9431	38.5916	42.3847	68.8108	43.5386	35.0791	42.1562	52.3274	44.7726	49.4334	50.7293	42.1267	56.9235	40.351	35.1055	33.1226	26.8871	32.8816	48.7595	57.3231	45.4811	39.8759	68.8673	55.9878	63.3959	52.8745	65.0782	38.7139	56.7729	52.5258	38.4425		0.415731	47.1053
4.5233	43.9025	32.1952	41.7447	67.6127	50.7945	35.3609	40.0242	48.5387	46.535	51.9651	52.9115	45.1557	52.6169	34.6286	35.6954	36.7646	25.9361	33.7048	46.7565	56.1357	37.4773	39.0156	68.6238	54.8116	58.2394	41.2698	56.0413	38.0585	59.6741	56.6592	34.3799		0.426964	45.9106
4.6423	39.6544	34.4966	40.6061	72.3838	43.6972	31.2962	39.9339	45.2381	49.3293	54.4019	43.0535	43.3205	52.0099	34.0646	37.5859	39.4536	26.2103	35.4417	47.2437	58.2055	32.3634	42.8022	68.3065	56.5016	56.0341	42.3507	48.0427	40.6531	62.091	52.8303	35.1676		0.438197	45.3152
4.7614	41.6088	37.458	39.6943	66.562	46.0995	27.6297	37.6982	46.5522	46.3425	54.3557	44.549	39.0362	44.5809	33.4782	38.32	34.6043	22.5278	33.4414	48.9484	60.8321	29.3041	41.0812	70.6171	54.8422	63.5943	48.5272	47.239	42.1546	55.2514	48.164	32.5554		0.449439	44.4403
4.8804	38.7592	40.243	34.8602	54.8851	33.5723	26.6145	37.6339	52.2075	46.2559	49.4803	52.999	47.2606	40.2115	30.1185	37.7867	40.1591	24.2919	29.4533	43.2439	61.2272	24.3321	35.9189	62.5115	58.8359	66.4015	50.6083	49.2351	50.7003	54.2308	52.1153	30.6307		0.460672	43.7672
4.9995	44.2874	36.8785	33.2108	65.2448	35.3636	26.0019	38.852	45.9842	54.8628	45.3705	42.4214	49.8674	43.2098	30.4466	36.8679	36.1595	25.5104	27.0417	49.3309	57.6621	25.3845	33.4038	55.7001	58.8558	62.6973	47.6897	43.9288	64.0202	60.1973	44.7814	26.278		0.471914	43.4681
5.1185	46.8076	35.945	36.2848	68.9171	27.9005	24.1142	34.7999	47.8043	60.9871	52.9089	41.495	44.3282	37.373	30.8347	38.6969	37.1061	24.2658	29.866	48.8828	59.8746	26.499	38.4464	59.9578	51.6724	63.5324	40.789	45.3277	49.8283	68.8601	39.0787	29.156		0.483146	43.3013
5.2375	45.1197	35.9455	29.1368	64.1518	28.4637	25.1488	34.6603	45.0582	61.7229	52.0836	40.2317	36.4108	43.6547	30.4249	37.3173	39.8393	30.0746	26.8998	50.901	57.0008	22.9783	43.4315	55.0898	53.4821	62.774	43.9032	41.5771	50.4705	62.5065	42.1593	27.3511		0.494379	42.5797
5.3566	45.6477	39.734	33.3562	67.4179	29.733	26.5685	32.9185	48.1182	58.9911	51.4027	43.2303	36.6232	39.695	29.2518	29.6193	31.6063	29.8752	26.0369	54.2133	54.0871	22.7291	37.7907	55.5352	55.3051	67.9823	47.0046	35.2957	51.099	58.4331	42.9265	26.9955		0.505621	42.233
5.4756	44.1344	36.3102	33.2854	71.6205	32.0323	20.948	33.0171	54.4944	61.9766	45.0386	40.4244	32.5386	40.462	26.2987	32.6518	39.2541	29.7117	32.4721	51.1061	46.005	22.4416	37.5786	53.6134	54.1185	68.1962	43.2454	36.5423	55.0812	56.5965	35.8656	24.8559		0.516854	41.6747
5.5946	43.055	28.9209	27.9408	64.3606	32.6425	21.1318	32.6771	52.9418	67.522	47.2815	37.5856	40.5613	40.6584	24.8132	33.2521	41.9614	31.52	28.0445	58.3107	41.7776	22.3447	38.6114	49.0352	50.2471	70.0146	44.0667	33.421	58.5134	61.6815	36.7027	21.9185		0.528086	41.4037
5.7137	39.8364	33.3547	26.0852	63.2908	31.2039	27.7738	35.0711	50.0173	75.1982	48.876	46.2541	44.7035	47.9374	26.0284	35.1747	43.4504	25.3246	29.4302	49.0221	46.6296	23.5096	39.3979	43.0887	48.7348	64.4411	41.0556	28.0406	57.8323	56.0851	38.2235	22.4276		0.539328	41.5322
5.8327	38.8396	32.3885	26.9153	58.5907	27.012	26.4922	30.7869	51.957	63.7269	48.9315	40.4572	45.9571	42.6916	21.9834	30.6158	41.6699	27.1227	32.2499	51.4466	49.8055	23.9378	38.6392	44.4821	50.7572	67.2193	39.8401	30.626	46.2664	54.3872	38.6014	22.0232		0.550561	40.2071
5.9517	38.7113	26.7138	21.0253	56.7676	26.9509	22.0057	32.9604	50.8608	70.0129	50.368	34.1073	44.6907	42.2321	26.4991	28.5893	37.6646	26.8662	33.0873	47.7691	46.7033	21.6882	34.4254	41.8161	45.9756	56.2851	41.0194	25.7116	48.2372	54.9134	39.896	21.2928		0.561794	38.5757
6.0708	39.0442	24.5182	23.1819	53.6786	27.1891	23.3857	35.5294	47.9159	74.503	54.1559	32.2211	52.8666	41.5319	27.4738	28.6539	43.2695	27.6585	34.3021	48.1067	41.6617	21.2062	36.1558	48.1778	44.3673	56.9983	39.534	27.7699	45.2449	52.7253	34.6885	24.5733		0.573036	39.1061
6.1898	42.2479	27.4441	23.1617	50.2534	28.2427	24.196	34.1225	50.9909	72.7103	58.3433	31.3252	44.5103	50.0391	24.9793	31.5124	43.2332	22.6041	31.2382	45.3723	43.2738	21.863	33.5821	50.6481	30.6133	56.0258	37.7728	26.3177	44.9549	48.2945	41.0677	22.9896		0.584269	38.5139
6.3088	41.1456	26.7512	25.561	44.6149	26.4451	21.6098	33.9874	51.6868	74.152	50.5998	27.1915	41.6852	43.4216	21.1717	27.1241	43.3645	29.2704	33.518	47.8524	35.1111	23.0631	38.3608	41.2964	31.1424	54.0797	31.6334	21.737	43.9744	43.4105	39.7083	23.7049		0.595501	36.7218
6.4279	37.6302	23.6888	25.922	48.2501	28.9534	28.3408	30.7241	51.4227	77.8369	54.8695	31.8274	37.4063	46.6018	24.5744	21.3942	48.5342	27.4233	28.9687	46.8416	37.2716	21.4682	38.2405	37.7861	32.3753	44.8347	37.7406	24.0848	42.8751	42.354	35.4106	23.2006		0.606743	36.7372
6.5469	37.9713	21.3862	25.621	45.8759	28.8172	25.3325	26.6872	44.7854	88.3682	56.5064	26.773	33.7798	49.6007	18.4233	26.7963	50.2434	28.8989	27.6635	45.6226	37.9354	19.3318	38.6247	34.4917	27.4419	41.8234	34.5625	20.8299	39.1149	47.0102	41.8943	23.0923		0.617976	35.9776
6.6659	36.2931	19.1207	23.6095	50.8839	23.9548	21.6045	26.3106	43.8694	75.4837	56.1542	28.5291	35.7101	57.1794	20.3796	25.6664	47.1942	25.0589	30.3667	48.5917	40.5767	24.1554	35.1589	31.4792	26.2132	34.2616	33.4693	23.3716	37.0728	41.3663	43.1229	22.853		0.629209	35.131
6.785	36.7163	19.3158	28.6312	43.8773	25.375	23.0791	31.0315	45.089	67.6004	55.0367	29.5702	35.2263	49.2708	20.4135	25.1202	42.898	29.5601	32.4235	52.1335	36.8426	20.8272	33.1449	30.8892	26.3062	40.5562	31.2247	26.5631	35.0728	40.1079	35.9846	22.5663		0.640451	34.5953
6.904	45.0652	18.2965	24.9783	40.9595	27.2403	26.0215	25.4595	46.0167	65.5716	63.1197	26.3995	35.4206	47.7354	21.671	28.4194	49.6428	28.0928	33.2361	50.8497	29.2033	20.4278	36.2078	30.8834	29.9678	41.7165	35.5747	26.9108	31.8761	40.2522	42.3648	17.8485		0.651683	35.0784
7.023	50.1472	17.5387	26.3815	46.7149	33.5101	22.3267	30.1369	40.3332	67.62	59.5801	32.7607	33.5731	51.8899	21.1469	30.3512	43.9285	26.3108	30.8141	52.0748	32.7748	22.5161	36.5168	31.825	31.9583	38.8207	32.6221	25.5763	30.9192	35.0023	46.3444	17.8405		0.662916	35.4792
7.1421	42.9516	21.4728	29.3883	42.5098	33.2005	20.3804	32.942	42.2909	64.2766	60.485	27.7456	29.4092	52.524	20.4749	28.4519	43.0085	26.6333	28.2607	49.0674	31.7451	22.4152	35.894	35.6098	30.144	33.2412	35.857	23.2967	31.9215	42.6866	39.1612	22.5054		0.674158	34.8371
7.2611	45.4238	21.5798	29.488	44.0436	30.781	23.3737	33.7153	47.1723	63.3651	55.15	26.208	28.6814	48.4195	23.4451	26.4117	49.4387	30.7106	28.598	51.5383	32.1565	18.8143	36.0106	33.2961	31.0649	37.2685	35.9093	26.7784	31.5568	48.0316	39.9792	24.9837		0.685391	35.5933
7.3801	42.247	18.5962	26.7731	41.8126	30.8076	19.227	31.7729	47.6876	63.3638	56.8349	26.9777	34.688	47.0496	22.9519	32.2895	44.6458	29.8538	28.8609	53.247	32.8792	15.5576	37.7715	34.9197	28.9145	32.3576	33.6659	25.2042	35.573	42.9775	41.9492	25.6635		0.696624	35.0684
7.4992	46.3474	22.7717	31.8608	45.2881	35.7085	24.6709	27.3987	47.2147	57.1435	55.6643	24.6717	32.4389	50.525	21.5353	25.6302	51.1551	38.2748	35.3717	54.2158	29.9471	19.5893	36.6926	31.7277	22.8084	35.5995	34.0331	25.0445	39.0836	46.389	44.1414	29.5945		0.707866	36.2109
7.6182	41.9512	23.6342	33.1222	49.6272	37.0909	22.568	27.0205	51.3002	59.2685	51.9555	29.4106	37.291	44.4683	19.4489	23.556	49.5718	38.823	28.8481	56.5316	34.4869	20.5657	38.1605	33.4926	26.3102	29.983	34.2702	23.8174	35.9926	38.6879	37.6836	25.3584		0.719098	35.6225
7.7372	41.9725	21.6651	32.5782	50.6041	36.4211	21.3612	27.1023	54.8663	58.0499	48.8244	33.9476	36.3243	52.1131	20.5088	29.553	55.2339	37.8438	27.579	60.5525	34.0034	21.3173	35.1159	25.6351	28.9969	28.6681	33.5056	20.3057	33.6632	38.2754	40.3345	24.5312		0.730331	35.8533
7.8563	40.7723	23.5557	29.9411	53.2785	33.4911	21.0011	26.4673	54.3379	57.7249	44.9632	36.321	34.9293	53.4988	25.6767	30.7458	65.0835	39.8839	31.7768	63.2859	34.0412	19.1405	35.3175	29.066	24.3669	41.7195	31.9429	25.6982	33.8775	42.9588	48.3725	23.4266		0.741573	37.3117
7.9753	39.7069	25.5324	28.7572	52.3085	34.1842	27.7924	28.8734	66.2635	52.4865	43.5172	35.8371	37.804	51.6709	17.9718	30.3812	60.2135	41.0596	34.4825	60.4137	32.5167	16.6302	29.7906	33.0817	22.9635	36.7989	31.0175	29.509	34.2344	39.4502	48.1266	27.7437		0.752806	37.1329
8.0943	43.9162	25.6851	27.4652	49.7043	34.0019	23.5755	33.2197	64.925	53.6356	45.9165	34.8282	40.5096	55.6729	21.5652	27.7229	68.3082	40.378	34.2056	60.2844	35.4248	18.95	30.1093	39.4238	32.777	36.9013	32.1225	27.5291	32.2483	34.799	48.2243	31.3845		0.764038	38.2392
8.2134	48.7553	24.7124	35.2613	49.726	29.7493	19.4501	37.9595	71.9168	50.1854	49.809	35.9896	34.0136	53.3473	22.9867	27.2838	79.7437	38.0837	37.6605	65.5064	27.0274	20.1586	32.4741	36.5492	29.6466	42.9284	33.2256	25.2622	39.2802	42.3209	43.6244	30.5917		0.775281	39.201
8.3324	44.921	25.3939	39.7989	50.6411	31.7953	19.1376	36.2834	65.9788	56.4065	45.601	37.4101	31.4234	43.0912	26.3733	28.524	74.3061	42.8705	37.9132	63.4341	32.8855	22.3069	27.6629	37.7512	29.9526	37.5437	32.9307	24.4078	41.6401	44.0674	49.5123	27.5194		0.786513	39.0156
8.4515	50.5972	26.2867	47.7598	48.5415	33.7842	18.8287	39.4802	75.7403	57.9953	45.9024	35.9652	33.0497	43.7927	30.2117	35.2689	78.073	48.4984	35.8303	58.8406	31.1695	24.8912	27.7213	41.2433	32.5789	37.3978	36.781	25.7957	40.972	46.4833	56.173	29.1557		0.797755	41.1229
8.5705	44.4205	29.0239	47.925	50.9354	27.9952	21.0007	39.9333	69.9806	54.9479	50.544	36.4055	31.4126	50.2353	27.8042	33.1502	69.1306	45.6906	40.2812	55.593	29.2473	22.89	33.3282	44.2206	35.0916	48.9247	36.9984	26.7763	47.1498	45.4246	56.1761	28.9009		0.808988	41.3399
8.6895	44.3245	24.9515	50.3676	49.8911	34.0755	21.561	38.4413	80.496	65.018	49.0159	34.248	34.7221	58.5654	33.9516	36.143	63.9394	47.1641	35.5195	51.0362	28.7048	22.9195	30.9446	48.8133	33.4196	43.2222	39.1801	24.5959	46.3209	42.439	63.47	30.505		0.820221	42.1925
8.8086	39.4255	30.5531	52.497	39.5219	33.1365	16.9267	38.8185	77.7904	65.1667	47.7452	34.7521	39.7339	51.898	30.4177	34.9903	66.4346	42.2841	38.3093	55.8168	24.681	24.4599	26.1856	48.6706	31.1415	38.2207	35.7877	22.1068	41.0644	46.2279	61.2023	28.9621		0.831463	40.8042
8.9276	40.7852	30.4996	61.1742	46.144	30.4016	20.0354	35.8725	64.8524	60.7507	49.6474	32.8379	30.7331	54.6504	33.7351	33.716	59.0651	40.3378	32.577	48.9569	30.6507	23.4424	30.6574	51.5456	27.529	44.5214	45.9263	19.32	43.9534	51.1644	74.2307	34.8075		0.842695	41.4362
9.0466	44.5848	24.9112	62.7433	41.3144	31.3369	19.9752	40.2859	61.4087	58.5077	46.5942	34.9689	37.1091	55.92	41.3683	36.0179	49.0619	37.9009	35.0367	48.0247	25.238	29.2252	37.0425	47.72	31.893	48.9291	44.8183	26.8128	46.607	53.8114	79.0655	37.8767		0.853928	42.4552
9.1657	37.2155	26.3657	62.6856	46.1531	32.2531	20.646	35.175	56.9899	49.8108	44.0078	33.7164	36.5142	53.4332	37.8211	36.5783	49.9599	34.9582	31.0631	45.8714	24.4049	28.0785	38.3015	53.6573	33.3222	48.8552	42.8341	27.0309	45.0155	53.7774	78.9152	40.2434		0.86517	41.4727
9.2847	38.9418	28.4892	61.9477	38.734	35.9896	23.1679	33.7603	51.3306	53.3182	44.7138	34.6874	34.8216	47.6317	44.5624	33.6089	40.4185	33.9844	28.3654	49.7666	29.7262	29.5729	38.2672	55.6873	35.3313	52.8147	46.1311	29.9439	47.0693	49.9815	75.0098	43.1512		0.876403	41.6428
9.4037	34.7966	32.0823	60.9041	36.3964	35.6444	21.1759	43.3664	47.8158	50.3719	44.8833	33.3724	37.5901	56.6604	42.4582	37.7214	39.9985	28.1177	32.9246	38.2965	24.5616	26.9321	38.2661	46.3063	35.3515	51.3956	48.2103	29.5938	47.0092	53.3439	71.3375	42.0197		0.887636	40.9324
9.5228	34.685	32.1015	60.1072	33.9071	37.1696	30.2867	41.9019	37.8813	52.2504	45.0699	37.6566	37.9811	51.0339	46.6742	36.0117	44.6215	27.7056	29.1761	36.1241	26.7011	24.8865	37.8687	41.6767	32.2121	53.0375	53.9333	31.4666	43.7579	52.1843	74.1062	39.5778		0.898878	40.7663
9.6418	30.763	34.2944	52.4279	36.2768	32.6266	30.1183	44.5822	32.1847	43.8026	47.7123	35.0039	34.315	55.5946	45.7131	35.6737	38.1282	31.9681	22.7261	30.6124	24.6649	18.5841	33.1614	44.7323	34.9688	46.7435	46.8621	30.0244	45.282	49.4443	74.4849	46.4191		0.91011	39.0289
9.7608	30.1949	32.4508	50.2104	31.0318	29.0666	30.2545	34.9139	37.4959	41.3628	49.9398	34.8936	38.9622	56.9466	50.3227	37.4155	36.6882	26.2817	22.2845	27.7235	26.3511	23.6595	43.1587	49.6325	36.7998	50.9511	45.3842	35.4315	41.7916	46.2835	57.5672	46.2195		0.921343	38.7636
9.8799	26.7673	32.8107	48.1528	29.3083	27.2903	31.004	31.6633	34.3441	43.7071	52.8431	37.1834	37.1361	49.9185	52.1073	41.8201	31.4071	26.4924	20.6248	29.709	24.9788	22.0917	42.2893	49.4247	31.1971	47.0964	47.9308	31.0026	44.2126	39.9724	51.3492	42.4166		0.932585	37.363
9.9989	18.4971	29.58	35.2862	24.1787	28.4394	29.3243	22.6799	28.5177	40.0325	48.4236	38.0029	34.1731	49.3028	51.208	34.6111	29.3328	16.4962	15.0061	29.4145	27.0513	19.0074	42.1895	48.3281	34.59	56.3198	50.9141	26.0063	44.6483	40.9692	45.6003	34.2422		0.943818	34.5927
10.1179	16.3022	29.7804	31.59	21.3263	27.0148	21.1933	22.8023	23.2153	38.6883	52.3507	37.8923	43.211	49.4215	51.2483	34.7263	28.0836	10.7493	12.5211	25.3306	26.7037	22.4548	43.1232	53.9562	37.8505	53.2271	50.3676	28.1985	43.9532	35.25	37.4575	36.6863		0.95505	33.7637
10.237	12.5896	22.3349	29.6449	17.5344	19.9526	17.3764	19.8488	23.7391	32.0467	51.1612	36.6488	35.4107	41.1624	48.0915	28.503	26.2718	7.2271	10.2633	20.6019	25.3511	24.8038	44.5219	52.5327	42.0171	56.8864	53.6963	30.5348	43.2896	34.1034	30.5045	34.1955		0.966293	31.3821
10.356	8.5028	28.248	22.3236	10.8081	17.9569	13.8144	18.0626	15.6817	32.7302	48.0786	32.6959	35.3492	39.2268	45.2152	27.6461	17.6154	8.5685	5.2915	18.8891	23.2205	24.3496	42.3543	49.3221	42.165	57.172	51.586	32.0353	45.7118	32.347	26.2988	25.7521		0.977525	29.0006
10.475	4.6445	20.2703	17.1594	7.1509	11.51	9.6963	7.5896	12.1821	30.9745	43.6296	31.5468	32.2378	41.5468	45.1649	17.2814	16.1221	5.3874	5.3759	15.6917	25.2254	25.8925	50.9473	62.5902	48.8731	52.501	58.0366	33.7765	46.702	28.2873	24.8076	21.8869		0.988758	27.5706
10.5941	3.3061	15.8036	18.2053	5.1118	6.8884	5.5624	6.1965	8.1879	27.7928	44.3449	34.7828	29.1526	30.7208	36.1852	11.2575	14.9724	4.3047	5.8776	13.5519	28.9566	26.5215	48.9645	60.7313	44.8986	49.4984	59.0187	35.3847	47.9405	19.5979	19.8235	18.596		1	25.2302

## Sheet: Image40
X0	Y0	Y1	Y2	Y3	Y4	Y5	Y6	Y7	Y8	Y9	Y10	Y11	Y12	Y13	Y14	Y15	Y16	Y17	Y18	Y19	Y20		Ap-basal	Avg intensity
0	16.1739	10.8047	8.5874	14.3177	13.2928	20.6273	15.5452	31.6142	32.9818	30.1979	22.7224	13.7257	21.213	14.785	31.557	41.3791	33.396	40.3198	36.575	45.421	76.666		0	27.2335
0.119	14.3803	9.9681	10.6052	11.9338	14.1648	17.681	18.9986	32.8179	33.5921	27.8468	24.9175	11.9662	20.603	13.857	33.623	56.7331	34.15	33.0007	33.731	41.412	77.116		0.00833094	27.2904
0.2381	15.934	13.4783	9.3489	15.349	22.1846	20.7103	23.1788	37.6734	37.7362	30.2789	33.639	18.7038	20.106	20.801	36.254	55.8579	33.25	34.3089	40.144	49.559	86.334		0.0166689	31.1824
0.3571	18.3598	10.957	7.8713	17.8795	23.3089	20.1748	30.8804	35.3814	44.1245	36.7581	28.8717	19.7513	26.845	26.621	44.54	56.5033	35.836	36.8636	40.142	59.07	82.809		0.0249998	33.5023
0.4761	18.7721	14.4426	8.0107	18.9257	26.1235	23.2227	31.4453	36.2906	44.6625	42.9052	32.9119	22.8319	27.524	29.028	48.929	66.0018	43.528	42.7337	41.358	65.119	80.67		0.0333308	36.4493
0.5952	20.4494	14.4219	9.3837	16.6637	26.9942	25.6649	37.7168	43.1369	52.6791	41.8408	37.4599	23.8979	33.669	31.48	49.069	67.2551	48.351	44.6341	49.432	85.962	86.329		0.0416687	40.3091
0.7142	20.1545	13.8458	12.0231	19.6029	35.7835	29.5873	38.538	44.0644	57.2857	50.1301	39.2525	27.3612	40.544	33.418	60.409	69.0787	51.458	49.0967	47.196	93.28	81.638		0.0499996	43.5118
0.8332	19.9439	17.6117	12.3767	24.7327	37.0141	31.0934	36.1162	54.3003	70.6924	53.1466	39.5508	30.9574	41.782	37.503	66.097	80.2105	56.759	47.634	43.05	92.03	82.919		0.0583306	46.4534
0.9523	22.7177	17.4681	14.789	27.7361	36.0422	37.9322	34.1661	53.2315	76.4791	61.5918	48.9413	38.2653	49.667	45.946	68.509	80.214	68.867	45.633	42.56	94.505	81.039		0.0666685	49.8238
1.0713	26.585	20.6772	14.3027	20.2899	37.178	37.1945	45.3727	55.4035	77.3819	62.3371	43.7556	38.6913	54.669	58.549	65.549	80.1555	75.609	54.0217	55.533	91.798	92.896		0.0749995	52.7595
1.1903	21.7421	23.5139	14.9645	23.4004	49.727	37.4295	44.3737	52.4785	83.7439	60.2663	52.7219	39.328	65.879	63.137	68.657	79.8153	91.159	61.8219	61.349	104.106	91.123		0.0833304	56.7018
1.3094	25.3556	24.8949	15.6776	29.5588	52.1065	43.5142	52.633	56.6564	92.4326	67.5411	57.7258	43.0862	62.913	78.463	77.016	81.9326	99.873	65.6289	69.065	109.53	94.272		0.0916684	61.8989
1.4284	28.4253	28.4805	17.4589	35.3505	55.6843	50.2082	51.3727	59.2101	105.156	75.9462	42.4762	48.3229	71.078	82.698	68.337	68.5557	110.086	65.1047	70.23	109.263	96.043		0.0999993	63.7851
1.5474	30.5139	32.9163	21.1023	31.6896	59.4588	52.6872	50.3705	69.7267	102.026	76.3599	44.3402	56.929	83.753	97.167	77.866	76.44	121.981	68.2683	77.076	111.961	90.76		0.10833	68.2568
1.6665	27.8281	34.4039	18.2037	37.0581	69.8681	49.6395	50.1041	72.7636	93.1005	71.1712	48.6962	59.1036	96.143	101.408	88.224	79.188	127.755	78.484	87.751	102.633	95.594		0.116668	70.9105
1.7855	32.4359	35.9485	20.7921	38.1706	71.4136	52.9679	54.4248	74.9874	88.5346	71.7758	54.2561	64.1535	97.473	99.603	103.735	81.1818	129.537	84.6193	97.291	110.735	96.433		0.124999	74.308
1.9046	34.0215	38.5328	22.2534	49.3049	76.835	54.4271	66.6657	81.2649	96.8598	86.54	54.1118	65.4425	98.053	104.533	102.607	84.4111	122.55	75.0365	96.442	110.253	94.28		0.133337	76.8774
2.0236	38.8864	39.6702	23.2186	50.6736	82.6653	62.3999	61.171	83.9619	102.997	86.5961	68.5492	61.6206	113.652	114.364	102.526	77.7316	131.8	71.7408	95.778	109.664	98.858		0.141668	79.9297
2.1426	32.4327	40.2444	29.6356	51.0424	81.5794	57.4217	60.617	88.9699	96.9657	79.5377	72.3842	65.001	109.967	122.313	98.083	66.4661	133.092	84.5369	100.938	103.814	103.641		0.149999	79.9373
2.2617	33.9129	47.2711	29.9136	51.9407	84.6594	62.7985	57.37	84.5757	95.0553	69.6794	61.2741	73.911	102.174	131.057	98.548	78.0769	121.257	81.2901	96.513	107.247	111.433		0.158337	79.998
2.3807	35.3202	48.0137	26.6768	64.3502	87.0066	66.1838	55.7611	82.24	88.1109	63.2833	70.9588	73.8846	99.364	133.624	99.614	87.3177	122.92	79.847	86.872	122.735	116.102		0.166668	81.4374
2.4997	33.856	48.5993	33.8564	67.0851	83.5041	72.0559	72.2646	76.5216	90.5926	63.8485	78.6565	74.9451	92.68	119.155	97.206	87.7586	122.192	73.5371	93.683	112.906	111.373		0.174999	81.2513
2.6188	38.8888	47.9084	33.481	59.575	92.5215	73.4904	64.1402	84.2093	87.2527	65.6787	68.3615	70.3866	90.584	115.55	89.963	78.1801	118.597	73.0621	89.461	110.196	99.001		0.183337	78.5947
2.7378	39.5734	45.9914	34.8977	60.7645	89.8434	71.2881	63.0311	92.6935	96.1652	60.4927	70.8837	67.0163	92.407	116.347	91.482	84.1582	108.22	70.9338	94.898	112.184	106.409		0.191668	79.5086
2.8568	37.5319	44.8483	33.919	60.7196	88.1998	67.7101	63.5313	86.5707	105.075	65.9852	69.5193	74.3898	90.586	107.69	82.144	78.8795	105.199	69.277	89.225	112.647	108.447		0.199999	78.195
2.9759	38.2366	40.946	36.024	64.0981	98.5684	69.529	70.8331	81.9737	95.3114	59.1519	73.2954	74.1082	81.667	95.346	81.966	74.6566	100.88	62.818	95.066	115.118	108.994		0.208337	77.0756
3.0949	39.3443	40.2713	32.6514	65.6013	93.7403	70.5964	69.3833	90.2832	92.9738	59.8927	63.5222	73.1521	79.791	97.095	85.508	77.7745	97.965	68.1144	105.654	114.722	105.073		0.216667	77.2909
3.2139	37.7073	42.9743	34.0112	56.4009	90.8412	68.1091	61.6225	85.2875	94.5274	63.1342	61.3369	65.1451	74.68	79.112	82.567	75.472	90.202	65.1059	94.808	112.452	115.076		0.224998	73.8368
3.333	37.1019	45.559	34.6054	58.4821	79.4942	63.2856	64.4689	82.2937	96.7802	51.7973	59.1684	69.0194	71.982	75.524	75.415	67.8195	89.798	65.2761	93.282	114.896	97.103		0.233336	71.1025
3.452	31.863	36.8292	28.809	55.9376	78.9287	67.4499	70.8005	72.0906	83.3567	49.4091	58.8627	75.2924	77.877	66.355	75.754	65.2899	88.881	70.8882	92.782	117.702	91.24		0.241667	69.3523
3.571	32.7842	42.7204	33.2487	50.8486	78.5743	71.1686	65.4065	73.4579	84.9973	50.1482	56.0604	76.2367	66.397	63.565	83.085	64.2825	83.623	63.8178	81.844	114.517	94.191		0.249998	68.1416
3.6901	39.7056	43.5878	30.2792	45.9046	85.6056	71.5816	76.8619	73.3616	67.5061	47.925	56.0025	78.4386	63.397	64.592	78.952	64.6628	85.979	62.2768	76.121	112.37	94.538		0.258336	67.6023
3.8091	46.4367	40.7284	30.6606	43.1595	80.9522	69.7117	76.9617	80.3153	70.6892	50.5048	56.5283	83.3248	56.068	60.718	79.689	60.0437	73.959	58.3455	73.731	110.311	96.325		0.266667	66.6268
3.9281	39.8838	38.6472	37.3968	45.2552	77.8512	63.1122	74.4739	76.5636	68.5734	46.4997	57.9011	75.6643	58.879	61.813	76.91	65.0676	79.615	61.2413	71.457	103.261	85.692		0.274998	65.0361
4.0472	36.723	39.7678	40.5307	45.2054	77.4454	57.5227	67.8232	79.1646	69.0657	54.5946	50.9787	70.4595	55.379	60.696	75.223	66.4536	87.92	73.1416	71.967	113.609	89.187		0.283336	65.8504
4.1662	38.2235	35.192	40.4155	50.5842	74.1028	59.2384	64.2752	70.6079	59.5714	49.4936	59.0128	73.48	61.973	61.506	71.302	60.0466	77.101	69.7054	70.873	118.139	82.483		0.291667	64.1584
4.2852	41.3945	37.8216	44.4929	44.3597	67.9622	55.7597	65.2871	65.7825	58.6322	48.4772	51.126	67.4873	59.952	57.175	69.871	51.9098	69.485	62.7433	66.077	105.601	70.838		0.299998	60.1064
4.4043	37.4979	38.7566	40.7457	38.84	64.0039	46.0355	61.9061	71.8227	60.6657	48.3706	56.2356	72.3519	56.329	53.457	63.919	56.1392	63.799	58.486	61.074	106.03	72.583		0.308336	58.5261
4.5233	38.8876	35.9999	42.0111	39.1705	59.903	48.8471	66.083	73.1355	54.0254	47.893	59.8086	78.8786	58.073	54.714	62.512	42.4157	60.239	51.5591	61.716	103.212	64.887		0.316667	57.332
4.6423	39.3144	34.0857	37.6576	40.8051	53.6783	45.7356	65.9958	71.7823	49.286	46.4185	54.0927	66.4259	58.828	61.528	67.454	41.1291	65.02	62.5288	67.251	105.567	68.168		0.324998	57.2739
4.7614	39.3187	37.4019	38.8953	43.9871	42.3743	45.3126	52.7433	73.9436	47.6192	47.8029	52.4166	68.2585	57.42	60.796	58.482	40.1273	60.639	57.606	74.74	98.114	73.903		0.333336	55.8048
4.8804	39.1604	35.0515	44.9303	37.4504	39.8163	37.5586	48.0723	76.3665	55.1578	48.6201	48.4459	67.0998	52.197	61.587	50.744	38.4564	58.461	52.9153	76.047	101.782	69.728		0.341667	54.2689
4.9995	37.5043	35.7793	44.4324	38.0758	39.1356	32.2651	44.3362	76.7499	48.378	44.668	49.8924	66.2441	51.732	53.198	54.079	36.0596	63.057	52.128	83.908	86.722	70.446		0.350005	52.7996
5.1185	36.2867	32.5247	43.3925	37.5761	35.4599	35.0437	43.3283	66.1967	40.2875	46.8619	55.8738	64.3226	47.746	55.058	48.007	29.1391	64.881	52.9371	71.968	84.934	62.865		0.358335	50.2233
5.2375	37.4959	31.8657	39.1189	35.3059	36.3845	32.2071	34.3826	74.3889	36.001	49.3951	47.4734	62.1827	51.759	52.678	43.777	29.482	72.355	53.6441	59.055	79.382	67.234		0.366666	48.8366
5.3566	38.2689	34.308	38.9427	37.4813	29.6943	34.3839	35.0757	65.4196	38.0776	44.417	45.3432	53.916	57.255	46.439	42.989	30.1596	71.004	53.7701	71.963	71.413	59.599		0.375004	47.6152
5.4756	40.0284	37.5237	42.9691	40.6781	35.1233	34.5555	33.6558	55.3427	38.264	43.2646	48.6372	50.9922	56.484	41.882	49.087	26.6308	68.202	52.3338	65.43	61.121	58.545		0.383335	46.7024
5.5946	31.5694	36.9653	40.6207	43.3533	35.6202	33.5243	31.2026	51.2751	36.1805	48.6089	51.2688	47.1714	55.22	42.126	49.248	22.907	64.743	46.2584	67.231	53.017	59.996		0.391666	45.1479
5.7137	31.7032	34.9088	37.3533	36.0334	25.3701	33.2651	34.3445	45.7656	33.0786	46.4411	55.4442	49.0484	53.261	33.976	46.252	25.0666	59.349	39.7266	55.432	48.129	55.971		0.400004	41.9009
5.8327	33.7395	33.8545	38.0676	35.4579	29.7722	28.7881	30.0327	38.2358	35.1831	45.4949	54.7177	43.4442	52.335	35.27	44.323	20.5408	60.465	40.8224	47.796	53.841	50.242		0.408335	40.5916
5.9517	26.382	34.4307	36.8129	39.0082	32.2434	31.133	33.2214	33.9929	38.5889	45.0317	48.1796	41.9401	50.506	32.452	42.724	22.8036	60.503	40.1335	49.79	50.633	45.86		0.416666	39.8271
6.0708	27.3263	33.0129	42.3715	40.7909	32.6517	31.6759	33.1385	35.2893	34.1671	38.7071	49.3228	38.8744	49.098	27.005	54.636	24.0233	59.81	31.4705	48.66	51.629	35.178		0.425004	38.9923
6.1898	27.7772	31.0219	35.0789	35.8561	28.602	31.8442	28.8068	32.2718	29.8479	45.1039	42.2576	31.5957	51.714	24.762	48.541	23.6789	54.375	37.8937	43.159	54.981	37.772		0.433335	36.9972
6.3088	24.1957	34.3892	32.8606	33.7591	24.9372	30.3162	36.6709	33.4187	29.9273	43.6616	41.2144	28.1327	56.053	24.138	54.653	24.8159	51.298	30.812	43.72	57.13	32.513		0.441666	36.6008
6.4279	21.5579	31.6057	36.4637	38.0539	26.0661	40.206	33.7433	28.5604	33.2351	43.6369	46.4466	31.1107	56.399	19.532	49.002	20.7611	52.142	29.5297	35.737	62.575	32.113		0.450004	36.5941
6.5469	20.5364	33.4356	30.419	43.0691	20.3708	35.6869	34.6439	31.8342	35.1979	38.8319	49.9321	29.6954	51.912	23.827	48.521	17.8923	48.309	28.931	33.275	59.552	30.213		0.458335	35.5279
6.6659	20.3737	29.0399	31.0304	40.8956	24.7697	35.0462	34.0991	31.5063	31.1176	39.679	41.6308	28.2211	49.799	23.476	48.128	17.8272	38.123	32.479	28.592	58.461	29.453		0.466666	33.988
6.785	23.031	33.996	29.4289	40.953	25.8363	32.8915	33.1234	25.9258	32.1096	45.3909	35.1322	23.0876	40.415	22.52	54.053	19.4203	41.381	27.4608	29.363	59.703	25.884		0.475004	33.386
6.904	19.1177	31.5857	23.8808	40.8958	27.99	34.1962	26.6102	22.6261	32.2833	44.01	36.9724	22.8717	42.433	19.514	44.907	18.809	37.177	28.1743	28.882	61.39	24.187		0.483335	31.834
7.023	19.3526	30.2762	21.7261	36.0406	21.425	31.1967	30.8023	25.2818	30.8102	37.0716	34.1209	20.9111	43.044	20.192	43.843	16.4398	32.023	30.3088	24.336	53.269	26.234		0.491666	29.9383
7.1421	17.423	30.0982	24.3553	37.647	21.3425	28.2013	31.131	24.8423	28.9502	37.8867	36.7929	17.9017	36.851	16.778	38.985	14.2132	38.301	29.76	24.748	54.331	24.248		0.500004	29.2756
7.2611	21.1389	25.3196	25.519	35.046	22.7432	31.7009	29.5297	27.4777	25.4572	35.7005	38.3443	21.7441	35.024	17.96	41.859	18.0382	35.962	33.7152	27.391	62.068	24.82		0.508334	30.3123
7.3801	18.8836	27.5234	25.0411	41.9246	23.1635	31.3326	30.6249	24.2055	31.9788	39.988	29.1299	22.8905	40.445	19.321	47.162	15.1978	36.338	35.3571	26.301	57.372	19.149		0.516665	30.6347
7.4992	9.8279	26.4238	24.9411	40.1205	18.4459	30.9589	31.8341	27.4511	32.1261	36.6844	35.5226	23.1619	37.187	17.991	42.282	15.9177	38.642	35.7726	23.051	50.15	17.966		0.525003	29.3551
7.6182	10.4126	23.2797	21.9479	31.7507	24.1133	28.7349	32.7427	26.0717	30.407	32.957	33.3791	25.0679	35.29	19.094	47.514	21.2228	38.342	28.3353	20.363	59.237	20.185		0.533334	29.0689
7.7372	14.6193	19.8093	26.3518	37.705	24.0347	29.7104	31.5985	24.5785	33.375	36.3286	31.7048	21.5383	40.588	16.727	51.928	19.5559	36.76	34.042	20.525	56.921	19.82		0.541665	29.9153
7.8563	12.4911	24.9632	30.1513	41.8915	24.2247	29.5379	34.4123	26.7612	21.6253	39.9727	31.1847	23.9863	36.414	20.142	38.921	20.6781	32.198	36.818	17.985	43.453	22.354		0.550003	29.0555
7.9753	10.4689	22.5943	20.9056	41.0607	18.7904	28.4132	33.5658	25.6294	31.3301	42.0536	31.9761	20.9114	43.834	23.247	40.075	16.6801	35.423	32.3572	19.327	47.245	24.138		0.558334	29.0488
8.0943	12.7653	23.1484	21.8115	37.7172	21.7995	25.9525	29.9516	23.6257	33.0134	45.9193	30.3727	19.4617	45.762	18.607	37.54	18.9036	29.697	33.8363	22.125	53.546	18.357		0.566665	28.7577
8.2134	11.6335	22.4333	25.5055	35.5364	24.6729	27.0808	30.737	22.7786	31.8142	45.5637	31.29	21.4003	39.93	18.621	36.519	22.2326	33.071	32.0676	18.558	50.324	19.229		0.575003	28.619
8.3324	9.9206	25.4451	29.2153	43.3797	22.8471	27.4057	31.6646	26.2768	31.4638	41.2916	28.1937	21.0437	38.021	16.624	31.548	21.8318	33.432	33.3022	20.993	47.433	17.147		0.583334	28.499
8.4515	11.8555	25.2987	23.6371	37.9386	23.6017	28.635	34.4316	22.7836	23.6926	43.3833	27.2576	20.0383	49.626	16.225	30.993	23.9046	35.291	37.5754	21.158	47.601	18.943		0.591672	28.7557
8.5705	8.8758	23.2447	20.959	34.0462	25.3211	25.862	32.2638	24.1431	27.5357	47.9306	33.0103	17.1428	47.595	16.939	35.952	23.1474	31.938	41.9306	21.968	53.611	18.823		0.600003	29.1542
8.6895	11.4061	22.9662	26.1474	37.0538	26.2227	29.0664	33.2085	22.4713	26.2319	44.691	32.1751	23.4312	49.73	15.702	34.642	24.8635	34.73	44.0596	23.226	50.5	21.589		0.608334	30.1959
8.8086	12.3263	24.9589	29.5751	34.6269	26.2326	26.0781	37.3198	19.9243	29.7952	47.2002	29.8262	21.5662	51.064	17.08	30.877	24.0446	29.761	44.2767	23.85	44.613	25.421		0.616672	30.0199
8.9276	13.6344	22.5906	22.7403	41.85	22.8571	31.8319	33.4687	18.4696	29.2198	44.3073	27.4631	23.4854	51.654	20.84	32.705	22.4317	31.408	57.2255	25.002	46.176	26.766		0.625003	30.7679
9.0466	15.5497	20.7767	22.4624	39.9565	25.5368	33.1705	30.0479	21.4893	29.0023	42.0715	28.3117	27.835	49.188	17.397	33.689	22.3896	30.353	57.6238	24.305	42.073	24.404		0.633334	30.3635
9.1657	13.8106	23.4884	21.6444	32.5445	24.8849	23.7641	29.1282	19.9329	35.2857	44.823	31.8019	23.756	50.988	22.825	32.488	29.665	31.383	56.4042	21.832	43.338	22.938		0.641672	30.3203
9.2847	11.5077	23.7737	23.9871	36.3735	32.8362	22.3017	31.3821	16.6904	37.6419	45.4482	30.5317	24.4257	45	15.903	29.76	24.8093	28.078	51.4343	24.927	41.406	20.534		0.650002	29.4644
9.4037	11.69	23.9021	21.8624	37.9166	29.2135	26.4901	33.1898	20.7068	36.7777	40.9083	34.0577	25.1114	43.961	17.203	28.326	27.6479	25.69	56.0362	21.692	44.418	22.994		0.658333	29.9902
9.5228	10.9606	27.8444	29.8678	30.9924	31.4881	30.9952	33.8936	20.144	39.1885	45.8747	36.7057	26.7752	51.224	18.972	29.243	28.2611	28.449	52.7032	19.342	45.901	21.857		0.666671	31.4611
9.6418	12.2744	32.5066	27.2424	33.9032	30.1793	35.0396	36.755	20.6792	38.0106	45.6705	39.5984	29.0626	53.852	21.975	32.822	26.835	26.828	57.0599	21.597	42.548	19.682		0.675002	32.5772
9.7608	11.3319	28.8671	29.0045	30.6167	29.1472	33.3321	29.7041	21.3009	38.7192	41.3896	35.8893	25.5961	49.899	22.238	35.066	32.1366	28.126	50.9044	21.485	40.423	23.606		0.683333	31.3706
9.8799	14.5683	31.4744	25.7652	34.6862	32.807	31.5516	30.6579	19.0505	36.8907	43.0722	36.3132	25.7353	42.892	22.557	33.711	31.5793	27.572	45.3666	19.122	40.848	23.201		0.691671	30.9248
9.9989	15.32	32.756	27.8779	28.4252	34.5215	33.0994	36.6537	17.725	33.2435	40.7923	37.3584	25.5163	50.328	21.155	34.073	34.2715	30.115	53.991	22.521	43.09	27.621		0.700002	32.4026
10.1179	16.0512	37.4856	23.5414	28.2215	37.1224	29.7436	36.599	20.8283	38.0153	42.9043	37.6646	28.5167	51.587	22.705	34.059	39.0529	24.797	46.8604	26.268	43.363	34.735		0.708333	33.3391
10.237	16.0025	37.2502	28.7111	33.6502	38.2808	34.4902	35.4578	21.4953	41.8913	45.7392	46.8214	31.7616	47.065	19.575	36.189	42.703	34.733	56.4616	29.428	49.596	33.643		0.716671	36.2355
10.356	18.9062	41.7078	29.3162	32.1606	40.37	33.8544	35.5722	27.1612	37.9402	45.9036	45.0024	36.824	48.682	21.077	41.666	42.3971	35.351	49.6234	31.302	44.401	29.427		0.725002	36.6022
10.475	19.8695	41.1821	32.285	35.3521	39.3935	29.7472	33.4942	23.968	39.9367	45.1323	56.5192	28.4821	49.628	23.501	44.227	53.2153	35.077	51.6458	32.392	55.01	32.338		0.733333	38.2093
10.5941	19.9801	33.6073	30.8759	39.3216	39.6568	33.9771	32.1715	23.039	43.157	42.0001	51.1827	29.6249	45.828	27.98	41.192	57.0962	34.746	47.5292	34.431	53.706	30.603		0.741671	37.7003
10.7131	25.5689	32.437	28.6612	38.6815	46.9449	31.907	25.5575	25.2046	43.0491	47.416	55.5942	32.2236	53.183	29.318	43.847	56.7638	32.129	51.3339	38.569	54.416	30.716		0.750002	39.2153
10.8321	27.5478	40.605	26.7246	37.4985	47.29	26.727	28.4949	22.916	43.7668	45.1795	51.5168	36.2428	55.509	30.122	41.006	59.2904	38.11	49.0461	38.652	55.06	39.614		0.758333	40.0438
10.9512	26.3207	36.4281	28.1823	39.2877	36.8207	33.9256	33.1763	25.6034	41.3806	49.7464	48.7344	33.407	52.301	31.804	44.161	61.5758	40.147	48.7619	39.909	54.07	33.74		0.766671	39.9754
11.0702	30.3325	31.3184	26.7355	44.2442	35.2363	32.6326	30.8451	28.5126	38.7692	52.4444	52.7718	34.5008	51.58	34.891	40.611	65.7944	50.831	50.3043	41.145	55.986	34.777		0.775002	41.1554
11.1892	25.9175	30.568	27.4157	46.3573	34.7124	34.5624	35.5778	30.2661	41.1875	48.4992	55.9144	42.6277	53.364	36.582	39.127	60.3638	42.144	50.0655	42.498	53.418	42.846		0.783333	41.6197
11.3083	27.349	27.987	27.0765	48.6758	37.9259	38.1148	29.153	30.4448	39.3849	50.7579	54.3017	46.2735	57.363	41.219	38.634	58.9891	40.522	58.1418	38.681	51.369	40.191		0.79167	42.0264
11.4273	26.8006	29.7378	25.8044	43.6121	35.3785	34.3468	31.0232	32.1428	38.5734	46.0821	51.499	46.2502	60.792	38.246	42.613	68.9511	47.952	51.7163	42.502	55.126	37.769		0.800001	42.2342
11.5463	27.9898	31.7821	23.6587	37.0301	33.3169	32.8203	36.6305	33.9102	50.1312	54.917	57.3037	52.8385	60.605	43.553	35.455	55.1938	37.738	52.7468	31.942	57.606	36.59		0.808332	42.0837
11.6654	33.0871	23.9448	20.9739	31.3118	27.4438	32.5037	37.8843	39.951	39.5064	48.0682	65.8803	58.9925	67.233	47.179	36.721	62.2884	40.549	48.1701	30.544	58.441	36.136		0.81667	42.229
11.7844	27.5157	21.6194	18.2	30.488	32.6129	31.714	39.9267	41.0728	45.4889	44.9044	59.2949	64.6718	62.18	46.934	46.437	58.3077	49.807	43.6016	27.879	53.393	38.884		0.825001	42.1397
11.9035	24.3011	22.9671	19.2194	32.2299	29.3267	37.7785	35.7927	38.3048	44.0424	43.6224	57.5822	63.4769	71.606	53.291	45.206	60.655	43.534	47.5558	23.213	54.853	39.606		0.833339	42.2935
12.0225	25.8799	19.8458	16.7254	32.3534	29.537	35.8081	42.6833	40.3385	46.2613	45.8456	64.8969	61.9104	58.608	50.382	45.496	56.1447	47.226	47.9843	20.754	56.081	40.561		0.84167	42.1582
12.1415	21.2445	16.4185	12.0345	29.7818	28.5341	40.744	44.4634	41.4053	49.2739	39.599	57.6262	59.4634	60.139	47.686	50.067	51.1088	45.987	44.5904	20.132	51.712	36.793		0.850001	40.4192
12.2606	19.7554	15.0974	6.9312	24.2649	29.755	40.535	47.0965	38.3348	46.2967	36.4142	48.2254	73.038	54.954	56.02	50.746	48.9768	48.068	42.294	19.478	41.685	39.107		0.858339	39.3844
12.3796	18.73	13.9477	8.8456	24.2495	28.076	36.2393	44.098	38.634	44.9498	35.3037	47.9846	65.4713	49.023	56.018	57.518	51.644	40.367	40.675	14.673	44.7	34.839		0.86667	37.9041
12.4986	13.5558	11.6522	8.1678	25.7242	28.693	38.1678	50.5027	40.7658	46.3794	29.0233	49.1282	57.4378	55.599	48.463	48.827	44.4154	45.32	34.0607	13.276	45.227	31.32		0.875001	36.4622
12.6177	10.3241	12.6504	4.976	19.2086	27.5559	34.311	47.7691	47.983	41.7707	25.3792	45.7644	49.812	45.758	54.41	38.93	41.2692	37.732	31.3694	14.818	36.177	33.894		0.883339	33.422
12.7367	9.0407	8.3508	3.905	14.8321	25.4091	29.0433	48.5227	42.4081	44.8623	22.0857	41.9811	46.4342	39.306	53.807	43.027	35.2183	37.141	24.7955	11.012	36.541	28.145		0.89167	30.7556
12.8557	11.5686	6.8484	4.7653	13.7074	20.7691	26.1191	43.8167	40.727	41.6866	20.9545	39.1863	40.554	36.699	48.782	39.43	30.6031	35.497	25.9052	9.401	35.414	26.238		0.900001	28.5082
12.9748	6.7429	5.5046	6.0944	11.83	18.7291	23.5762	41.5115	48.1265	41.2374	20.9628	37.049	37.458	27.728	48.584	37.492	30.0126	35.908	18.8105	7.536	38.729	26.119		0.908339	27.1305
13.0938	7.5692	5.7499	3.7866	8.6876	15.36	25.5388	37.8963	44.4129	43.4308	11.962	29.8006	35.3688	23.205	37.783	32.582	26.192	31.515	16.8805	8.41	38.348	26.634		0.91667	24.3387
13.2128	6.2216	3.939	3.6269	8.5659	14.1296	24.8285	35.3063	43.1009	34.9603	8.0762	29.0146	36.1003	20.08	34.664	27.026	24.6195	25.885	14.8045	7.084	23.07	20.369		0.925001	21.213
13.3319	6.0063	3.4672	3.3151	7.4052	10.432	26.5151	34.5151	40.6553	26.9163	5.9398	21.8146	28.1832	14.552	30.578	25.783	19.3872	18.244	11.9041	8.351	18.172	19.534		0.933338	18.1748
13.4509	6.7507	3.5854	2.3959	6.0785	11.1346	24.2577	29.4716	37.9036	27.6316	4.6163	18.6707	21.2015	10.971	21.803	23.035	17.5763	18.883	11.1791	4.404	18.354	22.159		0.941669	16.2887
13.5699	6.2613	2.5145	1.9556	5.4441	5.6909	22.2198	28.9592	41.9749	24.6117	3.8251	13.3702	13.483	10.23	18.739	19.065	13.1283	16.602	12.1621	2.665	16.248	20.442		0.95	14.2663
13.689	3.7943	3.3441	3.4604	5.0262	3.2042	21.1388	27.8074	32.2216	24.0815	2.8724	11.9359	9.7688	7.377	10.836	14.701	10.5798	17.113	9.472	4.238	14.038	19.686		0.958338	12.2236
13.808	3.7662	3.711	1.6614	3.4967	4.1868	18.454	24.3204	31.4893	22.7747	2.5182	6.0967	9.9711	7.848	8.826	10.813	7.9791	14.997	9.3206	4.49	12.078	12.658		0.966669	10.5455
13.927	3.2754	2.2013	1.2565	2.1331	5.141	13.2231	19.091	34.9547	22.774	2.1304	6.2092	7.6434	4.949	7.63	11.362	8.2755	9.955	5.9419	3.397	11.456	13.504		0.975	9.35731
14.0461	3.0052	1.6114	2.1815	3.6458	2.9685	8.1067	16.663	31.702	25.166	1.1889	2.461	5.1907	2.905	6.932	8.276	6.0571	9.162	4.7441	3.04	10.568	11.949		0.983338	7.97733
14.1651	2.7938	1.1875	1.3683	3.9225	2.6187	8.292	13.8746	26.7935	19.0751	0.8846	2.8251	4.7933	3.505	3.438	6.698	5.0992	8.824	3.2917	2.276	6.895	12.56		0.991669	6.71504
14.2841	1.0918	2.5297	1.4284	2.8799	3.2919	6.6396	8.1357	23.0408	15.3233	1.6767	2.6209	5.2321	3.497	2.598	3.043	4.6778	6.947	3.1163	2.831	5.82	10.772		1	5.58061

## Sheet: Image39
X0	Y0	Y1	Y2	Y3	Y4	Y5	Y6	Y7	Y8	Y9	Y10	Y11	Y12	Y13	Y14	Y15	Y16	Y17	Y18	Y19	Y20	Y21	Y22	Y23	Y24	Y25	Y26	Y27	Y28		Ap-basal	Avg intensity
0	26.7887	25.2071	31.1603	29.814	31.822	31.5265	48.2376	42.1834	33.3986	28.1059	24.3306	20.2029	27.432	43.9803	43.376	25.116	34.5376	48.756	39.3226	24.3891	38.1634	55.5141	53.956	21.395	38.3469	30.0677	28.3545	27.3637	45.883		0	34.439
0.119	28.7976	25.3432	31.2976	39.305	26.7461	37.8577	35.648	46.6838	29.4501	27.2287	27.9031	24.7944	26.731	45.5706	47.916	26.054	36.314	45.7257	39.4844	31.5888	40.5637	56.335	49.13	21.897	34.885	29.9573	32.361	26.0029	52.1021		0.0067548	35.2991
0.2381	33.4657	26.9531	28.285	36.186	33.8549	34.5587	39.7819	38.5515	32.3456	29.8025	32.6573	24.7617	26.647	55.9871	65.043	28.772	38.8552	38.3703	48.9373	28.8761	48.2898	69.9397	65.362	20.737	46.3457	24.3688	42.7508	34.2752	51.9637		0.0135153	38.8526
0.3571	31.0912	25.7869	30.461	41.74	31.8605	38.674	42.7621	40.8671	51.3744	45.1356	31.5071	26.2893	30.158	54.8048	64.635	35.292	37.351	40.1107	44.6697	34.1045	39.0977	56.7261	67.595	18.169	36.9736	29.9143	48.1847	36.6494	59.9425		0.0202701	40.4113
0.4761	43.4307	29.0946	34.6757	24.415	35.8866	31.6702	36.6552	44.5025	39.5654	31.9169	33.8214	29.9749	35.254	66.7797	68.181	38.248	42.5533	43.7923	45.5933	41.0455	54.7816	60.9827	57.863	23.661	47.6034	32.5595	43.8133	50.3103	64.152		0.0270249	42.5098
0.5952	48.4291	27.062	31.6099	35.406	24.1201	36.7675	49.7573	38.2152	43.7748	40.6527	37.8972	30.0126	41.646	60.9822	61.163	40.069	40.1965	47.7806	49.4378	44.9041	38.6733	69.034	55.33	25.922	53.1823	45.443	59.2211	54.256	57.5163		0.0337854	44.4297
0.7142	46.3333	34.7342	42.7941	29.853	33.1137	37.9835	53.0393	42.2607	50.2532	36.4888	47.1831	31.0258	44.651	62.1463	66.581	33.722	47.3311	46.7347	46.1289	49.066	48.3263	58.1119	62.643	25.063	69.5168	41.0003	58.028	62.0658	83.5772		0.0405402	47.9226
0.8332	49.7038	37.0018	36.6038	36.055	33.2256	30.749	53.8782	42.5532	42.4911	45.8896	50.2201	30.3788	69.737	67.3133	56.359	38.741	50.9626	49.3789	48.4306	50.8569	50.3895	65.6772	64.309	25.53	73.0587	48.6947	68.869	64.412	74.7402		0.047295	50.2141
0.9523	49.1754	39.0423	48.6377	33.559	26.8882	32.5129	50.8593	39.7247	47.5276	40.4102	51.9352	29.0297	66.564	62.4617	58.792	38.247	51.6218	53.7946	43.0052	46.9681	55.3091	61.0883	56.267	26.297	71.8142	51.6064	69.823	64.4915	65.8323		0.0540554	49.4236
1.0713	54.7946	50.4606	46.8755	36.53	25.9401	32.0942	46.445	42.0991	49.6664	46.3916	55.4611	31.3552	55.766	75.3782	59.552	43.933	56.5099	60.0571	48.8052	38.5541	52.3319	66.6472	61.064	36.134	84.6942	55.9748	81.1185	60.9073	61.7891		0.0608102	52.3217
1.1903	52.9323	40.3414	53.6506	40.534	28.2769	36.0482	49.0884	46.4669	56.9004	59.087	59.6296	40.3839	67.312	63.03	57.379	38.465	63.54	55.8443	56.9427	48.3102	49.7552	70.7938	54.824	35.222	82.3497	53.9369	83.5396	60.8262	76.0292		0.067565	54.5324
1.3094	59.8403	35.9162	52.4142	31.989	26.2454	45.8416	51.841	43.7058	56.8324	57.7882	73.2616	51.4765	63.211	57.9227	57.136	43.123	62.1062	50.5315	56.3671	42.2669	46.1517	65.7752	60.946	39.474	72.5858	55.1945	85.5473	66.4707	71.6827		0.0743255	54.6084
1.4284	54.3636	44.5656	48.3453	31.046	27.6957	54.5518	48.6388	46.7841	69.4508	53.671	69.4182	45.9375	59.663	67.8754	53.196	41.893	65.9423	66.5369	54.2786	46.5938	45.0286	67.0005	61.554	32.642	72.3644	57.6917	91.4086	55.0527	65.8766		0.0810803	55.1402
1.5474	55.3664	47.5493	51.2616	30.82	27.9534	52.9785	47.1213	43.0573	60.4294	51.099	67.7655	48.1829	66.599	59.991	56.153	43.044	62.5393	58.3424	57.6767	47.3868	50.1572	61.0581	62.824	51.369	71.714	57.4448	81.6976	57.8051	77.0896		0.0878351	55.3957
1.6665	49.6479	51.4223	54.4524	26.922	34.9471	56.1553	50.7467	46.5616	68.233	59.1607	60.5963	48.2267	62.63	63.2434	58.955	38.476	78.3524	62.4279	57.3091	44.0955	57.142	58.3282	61.524	45.685	72.0016	72.6254	90.1196	66.7087	72.3012		0.0945956	57.5516
1.7855	44.5973	50.0329	55.0245	28.382	33.8406	71.9011	51.1625	48.9781	60.7962	68.0726	63.0986	47.6448	72.587	66.8218	55.438	40.789	84.0394	58.3187	58.1585	52.3901	47.7138	62.6781	61.3	53.028	63.9935	57.2622	90.1488	69.9209	66.112		0.10135	58.0769
1.9046	55.1026	61.8094	58.9441	30.833	51.3703	67.5223	47.1775	47.2266	58.8095	65.2826	60.7658	53.0772	74.728	60.6817	58.506	54.274	81.9736	59.2573	57.5421	54.8417	48.4752	55.1095	51.452	38.831	68.2286	65.1124	86.0809	71.6332	72.9799		0.108111	59.2286
2.0236	46.4168	53.9782	54.0768	35.64	61.5219	74.5073	57.8258	51.6591	61.7129	65.7422	60.0012	41.4174	81.13	65.2075	69.047	46.748	81.2678	57.1665	61.8551	64.8973	54.5838	65.5972	73.801	49.195	62.6963	67.937	77.1846	68.0356	66.9416		0.114866	61.3031
2.1426	55.4367	61.7396	51.096	34.602	73.5032	79.3234	57.8199	52.5947	69.1368	61.9143	54.856	46.1874	69.299	56.0768	60.782	45.35	94.1931	57.8426	54.2949	55.7388	50.5689	61.2659	61.184	49.295	65.4457	76.722	81.8059	68.535	66.8712		0.12162	61.1545
2.2617	56.6742	54.3682	59.0558	40.389	82.7294	78.6567	61.8624	51.9692	57.7334	60.4522	59.1815	50.8051	77.656	70.0622	57.456	52.62	94.7522	68.7375	59.7428	63.8185	56.3827	62.4929	62.404	55.781	65.9988	77.5311	76.9152	63.9392	54.1953		0.128381	63.2539
2.3807	55.278	58.8359	58.1666	49.466	92.2619	72.884	58.7908	49.6524	60.5757	59.3337	59.2257	48.4866	83.891	68.2496	68.325	52.255	82.859	50.5097	57.7489	57.6464	54.4181	71.5739	62.67	56.184	60.0319	72.022	67.8757	69.4764	59.6075		0.135136	62.7
2.4997	57.695	58.3042	62.8106	73.112	85.6177	59.4663	56.6953	48.8037	59.759	54.2957	53.7649	53.0339	77.89	72.6986	61.092	52.333	90.3781	58.7383	53.6617	69.315	59.905	64.0479	62.229	54.623	63.6317	65.5991	60.7296	74.7246	63.6096		0.141891	63.0539
2.6188	56.0497	59.7148	50.005	76.236	104.118	58.3156	59.43	54.9167	63.318	62.726	53.1611	56.2835	84.591	61.5366	60.586	57.191	95.7257	52.5024	54.792	73.5491	64.436	70.8899	75.244	50.227	70.6162	71.3226	67.9717	73.5858	64.9335		0.148651	65.6543
2.7378	54.4972	68.4908	51.8622	85.356	93.5493	66.9314	64.8486	51.9843	53.1611	47.6556	60.5173	58.1796	87.306	60.1744	59.328	60.602	86.9339	59.7129	49.9028	64.3956	72.5118	58.0752	67.363	45.532	60.9377	57.0172	68.2719	77.13	60.3151		0.155406	63.8808
2.8568	51.7971	84.1984	50.9048	111.052	85.8898	65.5869	56.6194	62.8456	59.9239	54.0471	72.1197	53.237	94.328	67.7759	58.931	60.4	87.1759	61.3962	62.9311	71.0993	65.5762	71.4868	68.659	60.212	62.7381	66.6114	59.4488	86.5948	72.0635		0.162161	68.4707
2.9759	47.5949	70.0835	44.4736	94.286	80.037	59.1736	58.4606	74.0121	65.2932	52.1868	61.4445	59.4941	81.798	62.2711	57.994	57.024	85.2811	71.134	59.1604	73.8695	77.0181	71.0446	77.782	53.152	67.3217	66.4962	59.2302	85.3342	60.3265		0.168921	66.6475
3.0949	52.2427	88.8685	53.3763	97.061	74.8458	64.8425	58.4422	65.3909	64.5476	47.2983	68.5141	62.2038	105.461	70.0379	57.48	59.925	90.9918	76.943	59.8117	77.1709	72.8585	71.3933	78.636	49.736	55.3605	56.3221	67.7967	81.5386	69.6808		0.175676	68.9234
3.2139	51.1551	73.1617	60.3462	95.952	81.5019	61.706	59.671	60.9035	53.1409	47.361	76.8512	78.2986	94.226	71.935	61.191	66.188	87.4597	76.8087	56.561	77.3316	81.351	63.9396	89.377	57.886	68.2219	62.819	66.432	81.1012	71.1149		0.182431	70.1377
3.333	59.7475	73.5989	47.9329	93.485	72.2335	59.4874	53.1381	59.5937	50.8824	51.6662	74.252	66.868	96.549	68.0592	61.298	61.314	70.3204	79.5739	66.561	78.9108	78.2741	67.4878	84.222	64.261	71.2146	67.7774	63.9854	75.0207	63.807		0.189191	68.3283
3.452	55.4072	63.2169	58.629	97.031	77.2528	60.0731	54.471	75.4659	47.3533	50.2171	70.3872	71.5173	97.074	69.8655	67.094	57.531	63.8655	71.5549	68.4135	59.8168	76.3299	63.175	93.309	59.547	65.9125	67.993	72.0221	78.0839	74.1353		0.195946	68.5084
3.571	51.1729	67.8482	63.344	81.139	68.3531	59.8514	62.9261	78.5755	42.7854	50.3988	58.1325	82.1758	96.283	82.4392	58.926	50.085	66.5774	70.2259	63.7999	73.8165	72.8555	65.5895	89.228	71.356	67.9408	77.8398	69.2874	79.6377	74.1188		0.202701	68.852
3.6901	49.9391	79.5346	74.0672	77.212	61.4365	62.7155	63.2374	63.167	43.2144	56.6934	77.9433	83.5796	95.194	66.8515	65.65	54.653	63.5446	66.8038	69.9878	75.4586	90.2833	66.4808	94.51	75.75	64.0285	71.121	65.4434	71.0985	69.639		0.209461	69.6289
3.8091	57.1009	71.3695	68.0831	85.929	68.1588	59.7635	59.9305	86.5788	44.6665	57.7988	73.46	77.708	112.58	72.2776	72.174	54.109	71.0064	71.3022	68.0503	71.6492	72.1971	74.3771	109.763	63.812	69.5685	62.0494	60.9298	62.3095	87.3543		0.216216	71.2433
3.9281	49.8486	80.2648	67.7062	73.558	61.8235	62.7074	66.1855	81.3234	46.4325	57.4745	82.6006	81.0437	92.277	75.5995	68.395	59.417	67.7793	65.7114	62.0803	76.6466	71.0297	69.2851	90.251	80.294	65.4887	62.4001	65.4185	70.7202	77.8722		0.222971	70.0564
4.0472	56.5063	78.2299	83.3015	81.594	49.512	69.9426	61.3529	87.4489	40.3846	63.2818	72.3388	75.7276	90.996	74.1964	71.49	54.816	49.973	73.7136	65.6888	85.4811	69.3099	70.5589	89.749	75.006	57.6548	64.0354	65.6221	61.8411	67.1379		0.229731	69.2031
4.1662	49.9715	70.8619	82.2649	69.92	48.8554	70.0088	55.2439	79.2078	48.0468	59.911	74.9502	74.4654	103.929	82.7002	76.285	55.214	60.0498	66.5275	72.2559	76.841	67.042	71.7702	81.556	71.426	55.2871	60.0193	54.5876	61.8945	71.1945		0.236486	68.0099
4.2852	60.9641	78.3864	83.8841	64.83	41.4909	78.3855	62.8457	81.2032	38.8958	58.0512	66.8963	78.5678	85.394	72.7796	67.103	62.997	49.9592	58.9422	60.1958	79.7142	65.6155	64.8925	82.204	82.936	65.6877	64.1347	60.6126	59.195	69.8144		0.243241	67.1234
4.4043	58.7863	73.8804	93.9122	57.728	29.7915	74.9878	68.5774	90.4144	39.5843	65.6367	68.1502	81.183	80.555	83.3907	59.492	56.989	52.1298	61.5632	60.5599	87.6541	71.0529	67.2502	77.776	86.787	59.7059	55.6073	53.4162	67.1249	68.2278		0.250001	67.3074
4.5233	42.5728	76.2094	72.6683	51.037	30.85	74.4714	55.44	90.2995	45.4058	69.5402	73.9564	81.3071	76.038	91.1447	61.585	69.056	50.5234	71.1271	61.4108	85.2906	69.6289	68.9886	72.913	84.378	48.0052	58.4246	50.6468	55.6795	76.5929		0.256756	66.0411
4.6423	57.7922	80.7437	88.0119	50.438	32.5781	78.4758	56.5055	85.3389	48.1782	68.357	59.614	67.996	75.015	74.3273	70.754	69.998	50.2679	73.881	67.6892	92.4821	71.4604	65.0685	71.304	101.057	39.796	55.2512	41.1078	56.2087	64.4597		0.263511	66.0054
4.7614	63.5983	76.4001	79.8967	41.503	30.0164	73.6383	61.3695	70.4904	34.5589	58.4937	61.5678	76.2191	79.066	87.9621	64.304	78.335	39.7984	71.3812	74.3926	72.9596	67.5396	67.274	79.368	85.805	39.9558	41.0993	36.1744	50.8751	67.5928		0.270271	63.1598
4.8804	61.8641	78.2973	77.8105	36.513	19.2348	80.4885	54.6474	71.7763	38.8088	66.4494	58.0422	71.803	75.66	75.8638	66.406	87.043	46.2349	61.8181	71.1133	70.7576	72.9973	62.4847	74.533	87.068	30.023	56.002	36.6046	50.6439	74.7741		0.277026	62.6125
4.9995	61.273	71.4311	81.8723	38.636	27.8762	78.5706	51.5633	69.5034	43.1658	70.7144	65.7582	74.9792	69.743	69.4769	66.698	89.034	39.2944	61.2361	81.4002	67.7503	65.0787	50.8811	82.397	80.535	31.1311	55.1794	28.1022	61.7292	63.9539		0.283787	62.0332
5.1185	55.489	75.3365	84.9193	34.609	24.7733	63.1572	58.4897	65.7907	43.3582	66.4362	57.0069	97.391	53.576	68.3153	76.236	87.986	42.1699	59.4216	89.6549	69.9059	62.3481	61.9682	72.558	87.174	28.9014	48.8561	30.6769	52.6371	63.7379		0.290542	61.4786
5.2375	48.9593	70.0589	71.7803	35.992	18.8717	68.3439	56.0206	61.5243	32.188	76.7917	56.9863	76.9021	59.748	69.617	78.762	81.358	34.9634	55.3082	79.9513	54.332	60.2245	52.963	71.054	86.133	30.3461	47.8524	25.8852	54.9079	68.3704		0.297296	58.1447
5.3566	52.7118	79.9365	71.3119	29.155	27.9472	68.2508	53.1791	58.3197	33.3522	68.2691	64.6578	79.7349	48.003	78.4219	70.549	98.938	37.6689	69.7789	87.4318	61.6379	62.4041	51.4071	72.153	78.036	30.8394	49.7854	25.8198	56.9869	66.264		0.304057	59.7569
5.4756	57.5366	80.633	72.5279	25.799	22.1883	61.1581	57.3594	63.602	40.0691	61.3338	77.927	73.4277	45.059	78.031	73.634	105.63	38.4127	57.493	77.3626	69.4815	58.9646	50.2046	67.623	76.63	26.519	43.6923	23.7958	64.7092	71.4937		0.310812	59.3896
5.5946	58.6394	68.1695	63.2461	26.694	19.4593	59.5175	57.2483	62.7879	35.1629	64.8224	72.3084	67.7185	43.234	73.9688	78.615	90.356	41.5366	66.2009	86.0458	62.6379	52.4215	46.9296	64.963	71.991	29.7733	48.3457	20.0828	68.5217	64.3821		0.317566	57.4407
5.7137	57.4194	63.1586	62.3403	24.291	17.9815	54.7257	60.7818	57.8696	41.9551	68.8507	72.0428	67.0208	44.78	69.069	78.675	90.914	41.4829	60.1318	90.3788	72.6867	56.4396	58.4452	68.3	65.445	24.4767	29.7803	19.7186	70.109	70.8799		0.324327	57.2465
5.8327	56.2866	73.1504	58.4487	29.928	22.0344	51.9365	51.0463	52.7984	49.6067	67.5404	78.3237	57.8306	46.155	76.0658	82.973	92.807	60.1342	74.4222	81.3389	56.4133	58.3011	45.9015	70.852	66.438	26.9241	26.0627	20.8514	61.5633	74.2706		0.331082	57.6002
5.9517	56.4327	65.1009	59.454	19.646	15.6871	42.5649	55.2345	51.0667	45.8725	76.5726	91.7913	56.5546	37.814	72.4285	87.728	85.851	55.8864	71.8916	78.8815	67.5171	61.4873	48.5598	72.321	65.88	26.1283	26.483	19.8614	63.4994	65.7735		0.337837	56.6886
6.0708	57.3974	69.0503	75.0958	27.402	18.4556	41.9494	47.7433	43.7406	53.0302	80.4241	85.1779	48.7996	36.056	76.1003	90.062	86.324	54.773	55.8566	84.6385	68.3282	61.2238	54.6788	56.882	65.284	18.2149	27.2591	24.0862	72.4149	57.1441		0.344597	56.4687
6.1898	61.9497	76.4041	59.5159	23.576	19.2384	48.8643	55.9922	38.7466	47.9252	87.6147	82.4642	50.6315	35.547	72.6044	92.491	96.137	59.9001	65.4995	93.2089	69.7946	59.1355	42.0876	70.985	52.581	19.1938	27.0673	18.32	70.6848	66.694		0.351352	57.4088
6.3088	58.7408	69.5947	61.8199	17.717	16.4437	39.4307	64.0057	35.8368	59.1678	85.8541	87.8225	45.4201	37.803	78.1314	100.323	89.078	60.6105	52.3511	74.6064	71.4354	58.5363	52.9235	64.589	59.33	22.0107	33.9889	19.8509	66.9077	63.602		0.358107	56.8252
6.4279	72.8975	70.8387	58.1209	23.547	18.3923	30.2691	69.0228	40.0306	53.195	83.7479	82.9526	36.1894	34.885	72.4292	106.541	82.479	53.6521	69.735	82.8422	65.871	60.7938	48.4358	59.799	58.851	20.246	25.3613	18.8276	68.7094	63.4389		0.364867	56.2793
6.5469	77.7164	71.8444	53.2468	22.007	17.6883	39.0359	67.5621	37.8713	55.9324	91.7631	79.2348	47.6668	32.808	64.8715	96.935	88.619	54.9032	62.5679	74.1822	65.0972	50.7378	44.0401	74.655	57.118	20.9058	26.4117	20.0821	72.9095	58.0359		0.371622	56.0845
6.6659	66.2021	63.5819	42.9596	23.18	17.1675	37.0459	68.6201	33.7123	51.2488	98.2173	84.0684	38.2807	32.666	70.0577	97.275	79.561	49.4852	65.8077	84.9985	60.9451	56.3977	57.4453	79.174	52.558	20.2797	24.6317	20.1649	67.732	60.89		0.378377	55.3226
6.785	71.406	69.7914	46.5382	25.034	16.8969	39.4481	67.9517	34.1244	60.0292	91.7398	81.0605	34.4905	27.486	61.4911	96.403	79.481	47.4375	62.8026	73.7366	61.9533	56.7189	53.4854	78.46	54.448	22.4092	28.0245	15.1194	73.34	62.9679		0.385137	54.975
6.904	79.6345	65.8145	41.9109	23.784	18.2493	39.7866	73.8822	27.0145	58.3069	81.4792	72.3188	32.1421	27.549	65.4128	96.513	75.556	55.4814	63.5945	79.1959	71.9611	53.9517	49.4426	78.22	49.006	19.7655	24.8784	16.6671	77.4337	53.3267		0.391892	54.2165
7.023	85.2355	62.5667	49.5956	20.955	13.081	44.4439	71.1279	29.027	62.0067	80.5856	72.4323	35.4945	32.282	53.0562	99.18	72.588	63.8123	63.4526	72.4761	64.2521	58.838	40.5383	69.715	47.03	19.1002	24.1115	17.8564	68.984	64.046		0.398647	53.7197
7.1421	75.7186	69.3806	41.9459	20.305	15.7503	33.7408	83.9834	42.6852	64.4744	69.5653	73.1301	31.6983	28.796	61.0737	99.263	66.907	58.7582	63.9622	70.119	55.5387	59.39	46.1087	72.156	51.496	13.5097	27.6073	17.546	66.9525	58.6424		0.405407	53.1105
7.2611	85.1607	62.5448	41.0575	15.86	14.8985	43.9199	70.1567	38.5741	59.0771	64.1948	69.7546	32.7008	27.54	68.6189	103.22	66.12	52.7566	63.4975	71.4028	62.95	50.137	45.9773	69.669	43.744	17.2329	22.2609	18.404	64.9429	62.1542		0.412162	52.0182
7.3801	77.8237	54.6035	46.7881	19.566	13.3423	43.0908	78.2637	44.3664	71.552	61.4448	73.3812	30.0348	24.847	55.9177	93.252	61.952	60.0882	57.2908	70.5648	66.5738	52.6572	47.6902	71.569	47.923	18.2162	24.7622	15.7803	67.1266	53.9544		0.418917	51.8766
7.4992	70.0212	50.4956	33.8341	16.878	9.1805	39.6376	75.6233	34.9322	75.8332	80.8989	77.2677	33.7937	23.708	70.5352	95.24	57.628	58.8345	58.3189	76.439	59.9627	47.345	47.6477	75.217	47.806	17.3122	26.549	17.594	68.4956	50.4812		0.425677	51.6383
7.6182	78.2219	59.5509	38.7713	20.809	18.3384	34.6916	76.5855	41.6954	59.1951	75.3185	63.8963	25.8982	24.087	62.833	97.908	58.081	57.9783	68.3508	81.4316	62.9799	52.6936	56.8811	66.667	43.203	19.4307	26.6736	20.5862	62.848	46.0132		0.432432	51.7799
7.7372	82.0196	56.5503	32.6745	21.558	12.5993	45.5489	72.4877	51.2263	72.3438	75.66	68.9786	25.598	26.738	60.1683	86.336	61.427	54.6527	56.8606	73.5235	64.1922	51.0214	45.5299	59.693	41.5	19.7774	21.2636	17.5098	70.8019	47.6603		0.439187	50.8931
7.8563	83.8988	55.2284	34.779	22.725	19.422	47.0024	78.1867	45.5159	58.3352	68.3836	77.4692	23.7739	28.968	59.6731	78.121	62.903	51.3007	55.0557	90.529	61.5374	55.7335	52.1521	71.212	47.871	17.9393	23.9008	18.421	66.3957	45.4553		0.445947	51.7893
7.9753	83.5649	47.9279	34.6749	21.064	18.458	40.7738	77.8324	48.6243	62.9471	74.7114	78.1513	24.1455	23.034	62.049	77.789	55.987	54.3496	47.9164	83.1031	62.0495	52.2756	50.3626	73.158	48.657	15.1418	23.2476	18.3414	67.7788	40.6882		0.452702	50.6484
8.0943	78.8409	53.2394	32.0339	15.777	17.158	50.0704	67.584	54.0844	58.1859	74.7121	71.6737	20.318	20.854	64.7346	82.511	55.759	56.5726	48.3695	71.2266	73.4394	60.3956	43.3351	69.152	44.576	18.6409	22.4485	16.8423	59.4744	44.1982		0.459457	49.8692
8.2134	69.303	49.3062	32.5299	15.396	15.0667	50.8403	75.6535	55.4116	54.128	69.3414	69.9821	20.7451	20.569	59.9486	71.487	60.721	47.9286	53.8341	68.9928	55.8078	59.0048	43.3051	72.577	44.71	18.4003	23.9821	19.3272	61.4461	45.4285		0.466217	48.4543
8.3324	77.0439	49.4087	29.5733	15.261	16.9105	45.4565	69.1507	54.3122	57.8154	65.7934	52.3789	16.9627	21.572	57.3357	76.531	62.9	53.9614	49.2303	69.9283	74.6409	61.3171	42.5827	69.607	45.757	18.9272	20.2903	19.4522	52.9868	35.3127		0.472972	47.669
8.4515	75.2712	57.3138	30.6213	17.731	16.1066	49.7066	75.5746	52.6096	58.5976	66.104	65.1306	20.0778	19.342	63.0007	71.01	60.749	43.6643	46.8184	61.2213	80.2038	57.4965	42.387	69.332	48.786	18.6143	21.9192	16.7551	57.8036	41.4256		0.479733	48.4612
8.5705	67.8874	59.3645	34.9043	18.393	15.6244	54.2822	76.9513	54.1793	58.7963	59.3018	64.1415	25.5624	16.786	59.8073	68.169	56.007	43.9752	55.9743	61.9159	68.7418	54.7052	45.6341	78.869	42.839	21.8392	27.7896	19.6108	55.2439	36.3535		0.486488	48.4017
8.6895	74.0313	53.6736	25.1725	18.48	13.9679	56.1337	62.7934	52.9381	63.718	61.1838	50.6329	17.2704	18.464	64.6356	73.933	47.314	46.0547	51.9939	68.7934	83.1308	54.4424	47.9796	68.161	45.789	18.2194	24.9631	18.6805	52.6619	33.8394		0.493242	47.2087
8.8086	76.5542	49.8397	27.418	15.348	14.3319	60.6797	63.2649	57.1969	58.7385	67.4461	58.3515	20.3245	19.049	68.4077	69.263	52.148	51.4689	51.1365	65.3036	75.5163	54.0966	42.1996	74.01	39.692	13.8386	26.1738	18.485	53.3174	41.9931		0.500003	47.7791
8.9276	69.9101	57.8379	28.9852	16.439	14.5549	53.4644	64.3484	56.4919	67.9941	59.1751	55.3152	18.5672	22.651	60.1861	57.216	65.599	44.475	51.2979	57.6433	73.7859	61.1108	42.2121	69.323	42.121	17.3646	28.9939	20.2199	45.1744	46.4684		0.506758	47.2043
9.0466	65.5761	64.7955	31.5578	9.795	13.7796	55.5291	64.5443	59.9781	73.5234	62.5791	44.0483	17.0714	22.718	57.5828	64.926	57.31	50.6423	53.9207	62.1059	83.4753	47.9605	47.6158	73.893	37.388	17.2371	20.3611	18.6519	51.1392	43.6359		0.513512	47.3566
9.1657	64.8331	67.0003	26.0382	14.669	18.4205	54.6797	56.8016	55.054	62.924	71.0703	50.522	22.2551	19.299	60.6431	68.435	55.263	53.9387	48.482	57.389	76.8359	62.4332	50.7963	66.641	41.648	21.8632	28.167	24.9131	49.7616	43.2657		0.520273	48.0704
9.2847	62.8724	66.8656	24.6174	14.395	17.9949	60.7343	65.8622	61.4616	62.3988	58.1248	34.1517	14.5326	20.818	55.2128	61.098	62.044	54.7347	49.6362	59.1676	76.0847	54.3419	49.8114	71.053	41.942	24.6522	33.7515	13.2489	53.9142	43.0678		0.527028	47.1928
9.4037	58.5313	67.655	27.0114	15.612	18.5478	69.8982	65.3529	65.1128	69.1497	68.766	41.5614	15.9787	19.667	54.9331	67.777	60.541	67.4042	60.2359	48.4768	76.4924	51.3833	41.1444	63.531	42.341	23.4421	28.4884	17.6733	46.9756	45.6905		0.533783	48.2543
9.5228	61.5548	68.7372	29.9265	17.169	23.0044	60.814	67.4807	66.5191	68.2044	75.6295	48.0979	20.7304	22.421	56.6949	63.867	61.017	78.4422	44.1499	54.4922	76.2737	57.1775	47.7221	67.412	38.87	23.8493	29.7388	18.01	49.4976	46.8405		0.540543	49.805
9.6418	58.6411	70.2493	31.7756	14.624	17.4849	63.8163	65.8079	59.9874	63.6202	71.329	35.564	17.8325	22.342	62.8706	65.077	66.159	63.9697	44.3853	54.683	69.132	54.4741	45.3479	49.944	43.876	21.8291	27.2822	21.7431	48.0918	44.237		0.547298	47.4543
9.7608	58.573	79.1573	28.1598	17.99	19.914	65.4397	69.5105	60.1971	71.239	69.5918	34.72	16.612	19.102	55.7933	66.373	67.595	62.5824	45.4453	52.678	83.1466	68.7386	58.7777	61.486	38.552	21.796	26.7495	17.9909	53.3194	43.0008		0.554053	49.4562
9.8799	59.6096	68.7571	22.7838	19.337	22.6226	71.0749	66.4151	55.734	70.5943	67.7332	36.02	19.3015	20.007	64.2059	72.896	59.348	69.8631	43.3087	63.0367	76.9128	56.7959	58.8644	54.006	46.887	21.8541	32.3133	24.3513	73.1913	41.4543		0.560813	50.32
9.9989	47.7286	73.3371	20.6921	18.158	16.2349	69.6657	71.2756	55.367	54.5693	70.8085	34.9208	16.7654	22.197	57.0681	71.522	65.92	70.9013	35.9638	56.8724	77.0282	64.0432	64.5984	63.25	38.522	21.8438	30.1189	20.8142	54.9249	46.6427		0.567568	48.6812
10.1179	60.3638	66.0956	25.2364	18.949	24.6556	72.3674	59.9321	47.2594	56.7323	62.3645	29.749	19.0251	17.282	52.4559	70.076	72.126	66.6461	41.9056	65.9309	72.1124	62.9806	65.9554	79.187	40.556	27.2944	32.8649	22.9053	51.5064	49.7467		0.574323	49.4573
10.237	63.9718	70.8556	25.3898	17.079	19.4602	70.5732	62.7061	56.915	61.5375	69.987	35.7088	19.8007	19.413	64.132	62.94	67.291	78.3455	40.4486	65.5845	67.6789	66.3897	80.725	69.895	39.883	20.4663	35.2305	20.0702	67.5239	40.504		0.581083	51.0519
10.356	61.7416	66.1738	28.9675	17.227	24.8698	65.1722	76.4194	51.8614	51.3491	64.9939	23.7205	20.4697	27.311	59.2265	65.351	58.79	67.5097	40.9666	69.6571	70.7531	68.1005	69.5738	67.683	46.205	21.9434	34.9038	21.7474	61.1226	45.886		0.587838	49.9895
10.475	60.2725	74.185	29.5246	17.624	18.0242	70.847	67.3759	52.6074	56.1656	66.6158	26.1989	15.1077	22.363	57.8644	70.005	62.465	66.8572	41.4055	73.469	70.3487	65.0532	73.5485	75.547	44.794	24.812	35.7969	27.4284	61.5977	57.8235		0.594593	51.232
10.5941	50.4356	65.2677	28.9067	13.62	21.7831	71.8316	63.6773	56.1836	51.0376	67.3147	28.4256	19.0514	24.641	70.1408	64.419	57.56	58.221	43.3612	74.1426	66.2666	59.9037	75.6596	64.097	48.911	25.98	40.4984	24.7871	61.0804	54.6917		0.601353	50.0654
10.7131	61.3693	73.7848	30.7695	18.098	21.5704	57.0896	79.6579	60.0583	54.3005	63.7009	28.8292	22.3324	16.188	61.0793	58.19	60.662	52.6632	45.8167	72.8961	86.4352	69.0695	82.0612	70.465	45.621	24.5793	39.081	29.1581	55.8093	59.9594		0.608108	51.7688
10.8321	47.1914	68.0649	25.6577	20.095	17.4668	64.1889	63.9817	59.6522	58.0861	66.8495	26.7521	15.7736	20.405	58.9434	70.154	52.844	64.6061	47.3772	85.2922	67.4761	67.3805	86.9221	63.355	48.046	26.3656	39.1052	23.2443	66.0233	49.3146		0.614863	50.7108
10.9512	57.7123	71.9895	27.2897	14.89	22.113	67.1169	76.112	60.7095	55.1702	66.4845	26.7939	15.5239	22.299	64.4617	66.321	61.643	57.7801	55.2875	88.3788	72.1056	61.4663	72.3028	67.431	44.974	19.9992	40.4405	32.9203	59.4923	51.0927		0.621623	51.7345
11.0702	51.7834	60.1431	23.3602	15.429	20.5085	63.9425	66.1477	61.0873	51.6209	66.963	22.0623	18.0917	22.958	71.6326	61.682	54.433	70.7494	53.7482	73.6681	75.7559	60.1724	79.485	64.584	49.208	25.205	44.718	36.3766	64.394	50.4942		0.628378	51.0484
11.1892	56.9681	67.483	36.7463	21.036	21.4933	66.5799	70.7711	56.5448	60.1075	58.5542	24.2229	19.7167	24.885	77.3317	64.261	59.189	57.9225	52.5363	87.0514	77.3894	65.27	61.9047	70.156	55.136	26.9113	45.6227	31.3329	59.6022	49.143		0.635133	52.6162
11.3083	53.8047	74.1332	28.2795	12.858	33.7154	60.1276	67.3548	61.3982	50.1605	70.6753	22.0539	17.8254	18.996	74.5519	61.36	55.246	63.8125	54.6608	92.7887	80.2484	71.2668	65.6763	68.371	56.119	34.6287	52.2536	29.9662	70.5638	56.51		0.641893	53.7726
11.4273	57.8509	71.2569	27.3521	20.801	30.7379	56.8861	71.5948	62.3033	60.4966	61.0906	22.1638	18.0957	19.25	76.3143	67.059	58.219	60.0434	53.7015	81.1836	85.6482	68.9564	62.5055	67.061	53.126	29.5238	55.548	31.2447	65.546	43.2662		0.648648	53.063
11.5463	55.8283	67.4413	20.7741	21.34	34.9983	49.8834	58.6853	53.7186	58.6679	67.5981	18.9294	16.5032	29.349	75.935	62.895	68.691	69.0602	52.182	93.4736	79.2285	55.9824	68.454	72.868	53.804	27.9795	61.6543	30.2823	64.8486	48.3898		0.655403	53.0843
11.6654	76.6232	62.607	24.0808	21.024	37.1229	61.8181	59.403	63.5136	58.9036	66.2229	20.0728	22.4033	23.553	73.5189	67.04	60.498	80.4142	53.5016	75.857	82.5977	54.4241	67.6715	74.707	52.226	31.416	59.3602	36.037	68.1058	46.869		0.662163	54.5377
11.7844	63.7043	66.3563	30.5828	21.424	44.7975	59.0295	55.434	59.7269	58.4117	64.1335	24.6403	20.371	25.654	75.119	65.875	60.034	78.6061	43.5542	67.1223	75.5011	64.4929	60.6204	77.451	48.518	35.9429	60.0714	34.9701	66.1831	53.2221		0.668918	53.8465
11.9035	65.0992	76.6194	32.4139	23.663	41.799	54.7524	57.4342	55.0116	56.5808	66.5189	20.9232	19.6169	26.294	69.4258	66.668	65.488	66.8615	49.8048	70.3761	94.4326	65.781	62.1912	73.532	53.365	33.2668	58.3424	40.6789	71.0591	53.8295		0.675679	54.8907
12.0225	59.4148	58.737	35.2691	20.307	39.351	52.5285	54.5745	57.4123	53.5473	61.6226	23.6837	19.3477	33.121	67.8813	58.023	64.544	80.2254	48.6089	69.7709	88.8302	62.3177	72.4387	81.072	52.562	41.2057	56.4279	37.5536	63.5693	52.0196		0.682434	53.9989
12.1415	52.71	72.8914	33.2767	21.464	46.2819	57.816	62.2956	51.0551	50.3571	55.2008	15.5154	19.0473	25.266	74.6257	58.728	65.382	76.648	55.7187	74.1732	86.6118	73.2651	74.8815	83.954	46.655	44.7241	59.7375	45.241	66.2649	48.6539		0.689188	55.1187
12.2606	60.4603	65.7154	37.1079	29.336	45.0909	56.8976	66.5874	52.2641	53.8567	50.4712	23.7738	23.183	27.54	70.9661	68.455	70.911	73.268	55.4669	65.6326	82.7941	69.1099	61.0628	87.528	61.088	45.2893	63.6536	43.2423	62.8381	45.61		0.695949	55.8345
12.3796	52.2865	73.5935	32.3478	32.473	50.1162	68.8454	63.5089	62.6501	51.5805	55.532	15.2097	17.566	25.955	67.6421	72.01	76.797	89.0062	63.2744	60.4356	82.6203	70.4289	64.1404	88.945	63.28	61.3006	54.2449	38.0982	65.8027	51.6041		0.702704	57.6309
12.4986	60.9132	72.2146	36.437	40.46	42.2679	62.2138	58.5517	51.3829	55.8503	50.9588	26.5736	22.4941	39.954	57.0964	73.108	79.022	76.8732	61.4185	63.0872	82.8178	72.3981	65.9564	88.703	56.526	58.5465	64.6013	50.4263	60.4986	45.8849		0.709458	57.8357
12.6177	66.5597	64.1149	43.3774	38.316	54.1211	62.7886	61.9186	69.6036	53.2932	47.5923	24.3967	23.539	31.597	64.2394	76.314	68.942	85.6355	76.7181	71.7427	72.1092	63.2854	63.9686	81.12	62.741	66.8707	53.3037	42.2445	61.8312	49.0325		0.716219	58.6661
12.7367	58.1031	67.3253	44.3972	34.818	49.8074	60.2944	65.3163	58.3889	59.1709	51.2955	21.0167	16.0224	30.532	66.4448	69.331	77.337	89.2966	67.3257	58.3614	76.7349	65.4183	54.2042	85.282	56.43	70.41	60.283	47.2877	57.3473	46.913		0.722974	57.4102
12.8557	58.5333	60.549	42.9979	43.998	59.9525	49.2763	66.2518	56.0249	49.3012	55.7332	23.6212	24.3589	39.12	65.9382	68.485	75.941	83.4663	80.1845	67.1881	65.8616	67.8148	65.3634	76.923	59.209	58.6893	62.2781	44.3913	52.6857	53.0972		0.729729	57.8357
12.9748	54.5209	69.5896	51.8541	58.757	60.8462	58.6718	60.1326	53.3247	48.2423	55.5428	25.1687	22.1059	33.95	74.4346	66.45	91.581	84.9093	73.0699	77.0625	63.572	64.8632	67.2175	88.327	66.403	58.609	61.1762	38.625	54.3091	48.6524		0.736489	59.723
13.0938	59.5363	63.4109	56.4144	63.351	73.7175	54.217	56.9339	54.5635	65.9266	47.7779	18.2401	21.0928	34.984	61.8294	76.368	86.907	91.4576	70.7266	80.507	76.535	60.9248	64.5755	72.705	68.781	70.2467	74.9312	50.0163	58.7632	55.5859		0.743244	61.7595
13.2128	55.833	62.0648	48.997	67.161	58.52	51.7032	58.0764	54.9502	67.7001	49.3107	20.501	20.2824	43.735	65.6623	68.822	94.121	88.2338	78.9217	76.2203	68.1087	69.9755	77.3139	70.126	75.019	56.5285	66.8052	52.5986	60.0205	56.4753		0.749999	61.5099
13.3319	65.4881	58.9298	50.0831	68.734	64.7403	55.3363	62.6357	56.0621	68.5915	59.901	23.4599	25.0023	48.354	66.5621	66.728	94.102	86.1835	77.7614	73.2555	72.8356	77.459	69.8334	79.275	89.343	66.8335	66.4006	59.5487	69.8686	68.2647		0.756759	65.2266
13.4509	52.8299	71.89	51.8944	72.897	60.4966	59.8413	69.2115	53.8389	71.9391	52.1482	25.9078	21.0055	47.707	72.623	64.252	81.013	80.8557	77.2509	79.3293	88.2436	70.4746	71.2589	67.779	72.765	54.7046	73.4197	56.5576	69.89	52.8049		0.763514	63.6148
13.5699	61.1939	60.834	58.6663	72.861	70.7561	56.8779	70.0747	64.4297	76.6791	61.792	32.9376	29.1496	48.974	68.1312	68.843	97.621	68.4105	69.804	84.7673	80.883	70.0232	78.0555	78.085	81.969	62.6212	58.7769	49.9253	69.8583	61.7133		0.770269	66.0246
13.689	62.1705	55.4216	52.8075	65.869	76.5057	48.344	63.7406	63.885	75.6013	57.6832	27.4502	26.3033	56.658	68.235	74.925	83.717	74.0055	80.8999	81.4602	71.0817	66.3504	72.337	79.943	94.816	62.1657	68.6433	60.7986	71.6862	55.1066		0.777029	65.4693
13.808	57.1549	49.9839	54.2973	67.515	66.4377	53.9517	76.0448	58.067	86.1369	52.3728	24.0748	29.5182	60.27	73.6337	77.769	82.632	61.9205	70.6428	87.1086	75.2717	70.9824	71.4215	84.897	92.245	72.1743	64.2932	52.8991	71.1603	53.4594		0.783784	65.4598
13.927	53.1834	53.068	57.5154	75.998	74.8602	53.3653	80.892	61.2556	76.838	62.7637	29.8489	27.9434	64.214	86.2893	70.393	88.699	54.8471	67.6595	96.4157	66.8641	73.4608	85.7748	78.571	91.347	71.5547	66.2777	57.9452	72.1461	54.677		0.790539	67.4023
14.0461	44.1832	49.6734	48.7574	69.334	69.4235	68.3004	90.626	52.3244	80.1479	52.8695	29.1894	40.7524	64.175	79.8267	78.543	81.403	42.9987	59.037	87.9637	68.4428	84.3766	88.9627	73.603	99.908	85.8339	70.8702	56.1104	67.406	43.6012		0.797299	66.5049
14.1651	43.1912	45.7158	53.2638	64.789	78.901	59.838	81.8465	60.3701	87.2495	71.434	26.219	33.6789	67.097	78.4235	84.639	77.404	43.5127	54.6068	99.4861	74.2039	72.8898	82.1387	87.666	102.918	76.3524	69.635	56.5026	67.9908	47.573		0.804054	67.2254
14.2841	34.3571	47.9182	58.5343	61.935	80.9586	67.8074	78.9186	79.6623	89.3313	57.3946	27.5745	33.9563	67.161	76.8149	82.616	77.079	30.2735	51.6091	70.1544	79.6537	71.6101	85.5374	78.315	102.816	82.5896	69.75	61.8367	71.1095	43.8398		0.810809	66.2453
14.4032	25.8515	54.3056	57.5825	58.592	80.5368	64.7861	80.979	62.7339	90.6328	55.8908	31.8597	41.9077	62.855	80.7724	78.239	77.351	26.7409	45.4799	87.56	66.6227	71.7418	81.9278	71.807	100.935	84.3506	64.5258	56.2012	46.9694	37.398		0.817569	63.6943
14.5222	24.7644	52.9493	58.3564	60.606	82.2713	71.2654	74.3654	72.3322	83.804	63.3652	34.7445	48.677	76.609	70.1491	85.227	72.792	19.6968	42.7385	83.5974	73.0831	70.461	83.521	89.783	98.984	77.3871	63.3518	57.8661	53.3218	38.5201		0.824324	64.9859
14.6412	18.0367	52.1845	62.3325	65.729	78.866	70.3197	82.5321	67.9805	80.7938	72.0125	31.5672	59.4189	84.705	72.8897	78.582	65.483	4.5643	49.0565	78.6101	70.8858	68.1494	83.7147	87.713	94.935	74.2571	59.6193	49.0941	41.7692	25.8356		0.831079	63.1599
14.7603	16.4649	42.0242	64.006	58.581	82.8697	85.8081	78.1979	76.3707	92.2591	66.8309	44.3416	57.1361	71.302	71.0256	78.092	62.055	8.2512	40.0817	85.7816	67.7107	69.4231	80.9175	86.634	82.761	72.1223	54.4604	49.6731	36.973	29.4241		0.837839	62.4682
14.8793	12.149	48.718	59.9932	63.871	90.9507	84.9149	69.2768	68.892	99.3462	68.2765	39.3969	58.9936	64.615	71.5363	81.204	56.854	3.8656	38.0684	86.2941	74.962	59.6235	93.707	76.968	87.561	67.6546	44.1296	52.5988	34.6393	30.3093		0.844594	61.7024
14.9984	9.823	39.7367	60.9273	62.117	91.3734	73.125	61.1186	79.5667	107.93	79.5887	38.5045	55.0865	68.915	72.1078	70.049	53.93	6.2672	36.5595	81.0202	64.3386	58.1381	96.7171	83.796	81.011	52.0425	35.7863	41.5285	24.725	22.4559		0.851355	58.9064
15.1174	7.35	39.7533	54.0304	67.54	94.1281	80.0991	64.6147	86.3625	97.3096	74.5946	51.1026	70.2714	68.9	58.6365	65.003	50.643	5.0283	35.5709	75.3576	58.1117	60.2787	91.1679	68.498	66.262	53.3393	36.6609	40.0471	17.3012	22.4011		0.858109	57.2539
15.2364	7.1486	32.5133	54.7569	63.653	75.6372	90.2858	52.9509	95.8146	88.0729	72.7944	56.3385	57.8527	66.948	68.0726	76.56	50.951	3.046	36.3579	84.4456	62.2566	62.4309	78.0652	71.898	57.922	47.8471	37.7239	36.4954	12.1087	25.7164		0.864864	56.0919
15.3555	6.1033	28.1113	54.8575	63.137	70.4981	85.3378	54.4514	92.762	101.594	72.938	46.7451	68.267	75.875	66.2005	77.104	42.38	3.1464	27.5621	65.2099	66.4272	59.8151	95.417	67.951	53.37	36.7073	30.8193	32.3197	15.5482	15.1731		0.871625	54.3389
15.4745	3.894	18.5407	48.5811	63.177	60.4094	76.8225	60.1961	85.7178	82.6233	61.9792	62.7373	70.003	80.417	70.0069	71.777	53.996	2.384	19.4824	66.8029	58.8672	46.8697	93.029	58.293	50.224	29.5526	23.8599	22.1289	15.1024	15.684		0.87838	50.7986
15.5935	5.1735	18.667	50.1813	55.926	64.4027	64.8453	65.3789	95.057	83.6424	69.5071	68.1271	58.3296	73.433	67.0338	65.678	58.045	2.31	8.872	68.3505	57.8566	59.8063	91.9138	63.308	46.49	23.3948	13.6498	21.9431	9.7883	8.42		0.885134	49.639
15.7126	2.8638	15.9008	50.2139	70.253	66.1014	65.2607	60.8131	93.241	68.9006	79.1801	66.3524	65.1216	80.844	81.2927	75.343	48.916	0.5817	8.0914	54.5016	60.6306	53.1143	83.0994	60.275	41.574	17.1307	16.3399	19.8179	9.393	9.0071		0.891895	49.1088
15.8316	1.8108	11.1054	57.3893	56.89	61.7934	61.5334	63.7053	105.253	76.8729	77.3482	74.3599	66.6827	66.247	76.5881	63.035	49.376	1.1038	8.586	49.7496	65.4714	43.8187	80.5155	60.282	33.857	13.0091	13.2565	13.9983	10.89	7.98		0.89865	47.3279
15.9506	2.009	8.2796	50.1275	57.395	62.3391	62.7291	52.3003	94.6274	61.8846	65.6383	61.1025	60.9232	67.677	68.623	66.973	51.274	2.3669	3.3264	52.6016	52.2985	44.7172	68.9577	48.888	27.096	9.5485	15.9589	11.3016	5.1665	8.1805		0.905404	42.9073
16.0697	2.455	12.7742	53.5103	49.867	60.8718	54.5752	74.1591	80.0918	53.5193	69.4173	53.5394	60.2226	63.211	65.9306	63.708	42.222	0.7683	4.7486	52.1518	55.0767	51.1649	61.7379	43.792	23.9	7.929	5.1386	8.9006	3.9598	6.9012		0.912165	40.905
16.1887	1.7754	7.2544	41.8915	54.894	57.5094	60.6637	78.4824	67.5891	61.2112	75.896	60.1975	45.7376	58.607	58.3199	54.264	43.531	0.3819	2.7046	40.0082	51.5693	37.5283	57.3449	50.933	16.176	5.7552	7.1816	10.5869	5.3846	4.5708		0.91892	38.55
16.3077	2.1464	6.9579	39.4106	53.455	60.6997	62.8662	59.5786	63.186	58.2913	65.07	60.0171	56.5534	54.683	65.3842	61.114	34.883	0.5464	1.2403	26.8629	47.4125	37.5646	41.0253	40.515	16.783	4.304	10.017	4.8446	2.8432	4.2116		0.925674	35.9471
16.4268	0.2455	6.6071	41.3476	51.54	69.4025	59.2844	74.4977	48.1146	60.0466	64.2735	56.4081	52.226	57.048	62.2968	48.224	41.695	0.6127	1.8821	21.3096	33.1939	28.0827	44.956	37.955	13.94	3.3246	6.0095	6.2009	3.2356	3.1211		0.932435	34.3821
16.5458	1.4805	4.1416	35.8751	54.399	59.5568	59.9256	70.2995	58.4263	60.0539	60.1068	53.4105	42.1368	45.5	52.0143	48.792	31.536	0.6469	0.7707	9.4897	28.3713	20.6299	39.5517	33.189	8.976	4.0404	4.5822	5.8914	1.879	2.5654		0.93919	30.9737
16.6648	0.2063	4.7389	31.0916	61.264	57.7085	59.123	74.4656	64.2792	64.0622	66.1139	59.1881	49.4583	36.676	51.8728	45.868	25.665	0.2017	2.4303	9.8846	19.7721	14.0361	40.4506	30.477	6.59	3.1141	4.2306	6.3175	3.3609	2.3302		0.945945	30.8613
16.7839	1.3271	2.5713	30.126	55.29	57.6255	54.2738	78.4033	42.8674	56.1612	65.503	46.8849	54.4678	30.962	42.7859	43.93	19.297	0.4042	2.0691	5.3783	16.8217	9.8423	36.0531	27.138	5.831	4.2795	4.1619	3.9702	2.551	1.4867		0.952705	27.6711
16.9029	0.4606	1.7052	26.1194	47.012	57.792	63.4591	73.663	44.7364	74.6856	51.0745	46.9076	44.1916	25.191	29.1088	40.408	12.383	0.279	0.3319	6.2358	13.6757	8.9617	21.8601	18.878	3.424	4.1688	5.1792	2.0055	3.6483	2.5032		0.95946	25.1741
17.0219	0.1096	2.6895	22.6057	38.036	70.47	65.8841	67.8725	41.9952	55.4995	50.6904	47.3634	47.3614	15.725	18.0729	30.369	6.236	0.2253	1.9879	4.8981	6.0338	6.3623	18.3935	15.251	4.962	2.2566	2.019	2.9706	1.9269	2.0804		0.966215	22.4258
17.141	0.4906	2.2608	11.3775	35.069	57.9151	52.3869	66.1524	36.33	58.2817	63.2773	49.3421	39.4566	7.72	13.1348	28.969	7.797	0.9365	0.8956	4.4099	8.0702	2.6615	14.6896	12.697	2.69	2.0847	1.9804	1.6247	2.0512	1.4017		0.972975	20.2122
17.26	0.6442	1.3022	8.9559	26.588	45.4542	53.4838	53.2324	33.6528	60.9663	48.71	42.2541	35.786	8.384	7.8611	17.896	4.552	0.0049	0.357	2.8373	3.7634	2.0615	7.2087	7.102	2.09	0.7721	1.7049	0.1955	1.5762	1.9775		0.97973	16.5991
17.379	0.2457	1.9586	6.5288	19.422	38.2047	41.4511	51.2203	32.0005	59.6028	51.7096	41.8814	29.844	3.843	5.7599	13.22	3.238	0.5593	0.4854	2.9639	4.0948	1.5132	5.0414	5.003	4.407	1.1119	1.705	1.1736	1.1286	1.4023		0.986485	14.8524
17.4981	1.1381	1.5081	4.5731	8.813	29.5763	30.3401	50.725	25.075	46.4169	56.9606	50.971	20.5841	3.624	2.9076	11.341	4.106	0.3381	0.255	1.649	3.1339	2.4173	2.9615	7.183	2.744	1.0927	1.5155	2.1476	1.3418	2.0907		0.993245	13.0183
17.6171	0.0313	0.6811	8.7938	7.151	20.4241	25.6492	28.917	15.8934	45.0671	49.2991	39.323	13.2249	2.31	5.0107	3.453	2.679	0.3857	0.9396	1.7095	2.5212	1.4636	4.9064	3.864	1.952	0.0701	1.9618	2.1876	0.4533	1.6677		1	10.0686

## Sheet: Image11
X0	Y0	Y1	Y2	Y3	Y4	Y5	Y6	Y7	Y8	Y9	Y10	Y11	Y12	Y13	Y14	Y15	Y16	Y17	Y18	Y19	Y20	Y21	Y22	Y23	Y24	Y25	Y26	Y27	Y28	Y29	Y30		Ap-basal	Avg intensity
0	67.535	49.68	77.806	55.46	75.375	58.481	73.841	72.897	54.876	50.126	44.789	38.717	57.107	63.104	45.234	37.931	37.829	36.2898	37.908	36.272	39.454	42.189	44.751	41.917	60.748	45.731	33.543	35.855	26.572	26.728	15.866		0	47.8907
0.119	73.615	54.867	84.457	60.248	81.208	64.142	73.039	75.515	60.672	58.572	43.96	47.429	59.843	61.747	59.762	46.099	40.521	37.5382	47.798	43.583	35.76	45.19	47.934	43.591	73.568	52.63	34.745	37.899	36.321	28.877	21.893		0.00729717	52.6782
0.2381	82.517	60.168	98.028	58.193	78.902	71.817	77.189	86.754	69.255	66.667	43.352	56.333	60.846	67.778	55.788	56.853	43.629	40.2955	48.058	48.4	38.226	54.3	48.025	52.694	87.143	54.093	46.631	48.295	44.346	36.626	25.419		0.0146005	58.2781
0.3571	90.304	64.939	114.877	72.823	93.802	76.481	84.658	92.621	76.375	75.617	45.456	59.666	66.921	78.607	55.882	62.768	58.163	42.2497	58.27	53.47	45.126	55.632	57.598	60.214	87.85	63.804	48.823	50.066	46.01	48.037	27.229		0.0218976	64.9787
0.4761	87.185	84.532	127.4	82.753	107.416	92.241	94.148	98.417	95.39	75.176	55.047	60.057	79.462	90.377	62.861	70.254	61.609	39.7976	68.988	57.844	55.325	62.622	61.456	65.764	91.364	68.511	55.052	65.836	58.006	59.701	32.228		0.0291948	73.1232
0.5952	97.967	87.684	151.205	99.023	124.494	92.208	96.791	109.111	106.86	81.246	61.562	69.502	87.771	99.552	83.982	82.024	67.773	47.9217	84.351	60.8	62.8	81.853	78.452	76.102	102.262	73.645	61.32	82.29	64.529	67.222	33.091		0.0364981	83.0772
0.7142	104.353	94.793	169.064	111.023	148.595	102.198	108.539	117.691	106.999	84.758	71.105	82.109	102.942	105.569	85.793	90.747	87.362	56.5944	90.294	68.245	67.644	94.415	94.16	82.015	121.651	79.638	72.19	93.684	69.357	82.83	41.341		0.0437953	93.1516
0.8332	117.087	116.18	182.397	119.488	154.171	120.79	125.524	144.344	120.625	89.776	79.396	94.521	112.605	102.011	92.527	96.311	93.171	65.7535	102.862	74.817	76.089	110.558	115.341	91.075	123.163	80.806	95.653	105.073	79.782	94.046	47.639		0.0510924	103.986
0.9523	108.445	137.843	164.116	132.247	162.076	140.934	139.732	144.603	122.279	98.756	82.03	101.185	131.787	114.521	103.719	99.724	78.972	71.0045	113.834	86.362	90.386	117.387	127.029	113.245	131.655	78.95	115.672	123.131	88.325	95.342	47.997		0.0583957	111.719
1.0713	113.772	139.239	166.856	136.342	178.448	140.021	164.523	153.129	137.244	105.578	86.996	105.638	143.871	117.609	104.129	106.76	89.389	75.7782	118.22	90.094	106.363	121.943	137.83	133.978	137.178	94.266	116.673	139.039	106.675	100.963	59.08		0.0656929	120.246
1.1903	132.855	159.121	162.493	146.999	172.9	140.889	161.065	160.595	155.526	110.865	92.924	113.807	152.992	129.073	115.425	112.014	92.268	83.386	131.206	102.132	124.074	138.542	150.716	153.762	142.407	98.565	131.265	151.778	118.046	105.036	72.958		0.0729901	129.538
1.3094	144.114	164.135	155.783	164.325	161.575	144.175	168.052	146.16	165.606	119.462	99.538	126.823	170.625	139.419	123.955	116.62	94.807	91.0418	127.97	114.973	129.263	142.311	147.747	154.204	150.598	110.25	144.104	158.615	120.685	116.981	96.586		0.0802934	135.823
1.4284	158.425	162.42	153.753	171.018	158.131	128.137	185.601	147.684	160.158	137.002	110.329	136.014	177.431	149.243	133.052	121.25	101.947	99.9334	117.389	127.831	130.232	140.933	148.682	163.262	153.132	125.478	157.81	175.819	133.871	122.884	105.684		0.0875905	141.759
1.5474	182.616	173.252	153.694	176.545	161.461	124.469	189.134	139.618	169.512	139.315	118.227	153.04	175.264	141.256	148.231	135.257	99.669	107.486	130.73	127.637	139	151.396	147.075	169.793	161	123.872	171.294	181.115	143.31	129.128	119.591		0.0948877	147.838
1.6665	186.312	180.53	141.045	187.04	162.376	121.309	183.496	140.342	190.989	147.918	116.96	160.097	158.993	153.918	148.45	138.802	106.699	104.72	133.935	130.903	149.489	137.41	153.209	180.831	170.647	141.583	173.395	180.714	155.324	132.784	122.133		0.102191	151.366
1.7855	187.289	178.193	140.098	185.044	160.835	122.148	166.221	135.344	191.479	159.817	130.341	172.562	152.866	149.433	151.934	136.688	106.137	106.239	136.787	140.028	139.096	136.091	151.032	172.48	172.663	153.785	182.026	186.884	156.862	136.795	128.295		0.109488	152.435
1.9046	200.001	188.525	150.284	178.774	157.223	98.565	168.418	134.508	202.433	163.075	129.806	164.556	147.964	156.402	166.242	131.945	109.356	101.27	131.242	133.544	144.627	126.593	147.909	161.746	173.361	147.262	193.069	187.469	171.474	137.889	150.218		0.116791	153.411
2.0236	208.887	183.264	133.99	170.068	148.983	99.88	149.707	139.547	193.37	175.361	143.127	169.745	148.449	151.466	171.778	128.737	121.947	108.099	126.451	127.946	136.035	120.128	146.099	165.184	176.443	148.383	191.901	203.907	175.846	134.557	160.306		0.124089	153.535
2.1426	208.095	186.22	127.144	162.905	138.533	97.605	150.889	128.396	190.596	174.775	156.496	165.368	153.442	158.111	182.541	133.811	118.234	98.9842	126.047	117.297	138.352	117.937	141.156	175.42	168.859	153.799	193.577	200.006	181.391	141.367	164.921		0.131386	153.299
2.2617	214.041	175.085	125.969	148.745	129.138	91.22	134.019	121.64	187.897	190.625	163.593	156.441	151.601	168.268	174.255	143.665	112.506	89.4459	132.15	118.484	125.368	109.206	137.454	171.537	171.031	149.42	187.443	189.032	184.417	153.646	157.647		0.138689	150.484
2.3807	209.457	170.411	122.345	147.168	128.43	93.475	112.056	111.553	187.95	184.188	159.911	148.429	151.063	152.469	162.477	137.071	117.467	90.5198	121.653	111.63	121.061	116.952	131.537	174.197	170.763	140.557	190.537	196.118	182.852	163.952	148.346		0.145986	146.987
2.4997	215.459	166.105	122.137	139.814	119.675	103.761	121.856	107.865	182.599	188.492	147.855	129.43	150.56	152.02	157.789	135.831	122.881	90.8916	124.411	106.1	109.396	106.634	129.868	163.418	168.99	136.913	192.839	195.134	185.859	161.271	149.625		0.153283	144.693
2.6188	206.844	169.96	108.907	128.035	108	89.848	111.958	102.748	179.415	179.437	155.204	136.634	150.103	145.99	160.666	147.375	121.836	79.7859	122.66	116.562	116.148	97.853	119.813	171.366	161.826	138.697	189.921	195.693	179.321	166.748	144.602		0.160587	142.063
2.7378	186.969	173.663	105.977	109.185	98.757	88.152	104.902	91.219	168.389	175.738	152.219	131.955	132.064	147.01	154.013	146.467	130.08	76.9922	120.228	100.563	104.896	100.757	121.175	168.987	155.714	138.451	182.56	184.996	167.082	169.971	124.594		0.167884	135.927
2.8568	186.426	173.558	102.715	103.496	97.765	89.522	88.34	87.699	163.32	175.57	137.978	132.45	133.756	150.168	154.122	143.368	126.241	65.9827	111.635	99.173	99.328	96.7	112.033	170.622	150.739	128.125	178.495	189.139	165.678	174.088	117.601		0.175181	132.446
2.9759	155.52	177.574	97.029	95.229	87.19	82.083	78.99	84.594	167.301	167.694	132.013	123.097	131.165	141.949	151.536	130.908	122.84	58.488	105.697	90.571	92.585	94.268	107.299	170.712	146.388	132.681	179.079	176.472	158.065	168.651	109.343		0.182484	126.355
3.0949	142.452	183.218	89.012	93.596	74.886	72.671	76.928	78.82	143.025	160.499	124.803	114.856	129.001	144.801	133.508	131.283	123.557	54.7023	99.977	92.272	90.128	90.026	94.127	155.091	145.359	127.176	164.01	170.635	147.444	175.143	114.458		0.189782	120.563
3.2139	118.896	171.328	72.202	84.441	69.488	70.259	65.959	78.972	129.682	164.658	117.577	106.606	122.911	136.925	140.56	135.674	122.335	58.3739	109.953	75.018	84.017	89.282	90.179	145.651	133.767	121.39	159.804	171.757	144.239	165.39	108.811		0.197079	115.036
3.333	119.322	169.441	80.94	68.483	70.054	68.809	65.923	76.055	139.246	165.35	109.105	91.318	118.313	127.575	146.877	125.67	119.909	49.8096	108.559	70.61	82.637	99.298	91	137.979	121.987	112.585	149.058	166.342	129.233	161.216	101.261		0.204382	111.096
3.452	113.234	170.391	73.093	75.859	63.031	74.371	62.661	64.056	135.596	162.217	106.102	78.522	111.231	117.208	131.087	129.314	120.59	43.564	101.266	60.621	79.491	92.718	80.559	136.534	122.499	107.863	146.819	172.345	112.247	164.56	96.486		0.211679	106.65
3.571	106.554	174.36	70.927	67.91	64.361	60.475	55.949	71.428	126.584	159.124	100.935	61.669	114.033	109.559	123.17	120.739	117.753	40.4849	95.087	62.899	67.943	87.375	74.519	125.474	123.816	105.867	150.099	155.424	112.326	150.338	93.507		0.218976	101.635
3.6901	99.314	155.026	64.406	64.233	60.031	61.048	49.834	70.338	121.552	150.689	103.972	52.923	108.332	107.208	108.288	122.314	111.985	44.3304	99.613	55.941	64.49	82.955	78.818	112.427	115.987	105.803	135.562	159.941	107.793	156.611	85.572		0.22628	97.3334
3.8091	87.885	138.6	59.385	57.879	58.059	67.305	59.353	64.319	111.905	144.796	98.856	45.324	104.585	98.036	105.12	113.417	101.452	35.3158	94.353	52.32	66.574	91.385	78.529	102.456	101.272	97.121	146.71	154.313	109.259	153.223	85.257		0.233577	93.044
3.9281	80.473	137.435	63.685	57.909	60.237	68.676	59.098	68.738	93.576	133.588	83.661	41.971	107.931	96.738	107.109	123.441	91.375	33.3518	81.598	39.368	55.1	79.543	69.906	95.604	100.695	92.214	146.158	138.176	106.382	149.78	79.626		0.240874	88.4885
4.0472	68.342	128.675	65.963	57.322	55.59	69.27	52.396	58.51	95.499	123.763	81.401	41.851	95.275	88.846	88.958	120.732	88.943	37.2756	75.177	42.531	58.308	82.576	71.161	86.066	94.424	95.727	143.356	134.057	92.775	147.07	74.777		0.248177	84.407
4.1662	68.382	130.441	61.792	58.679	54.83	71.686	49.266	62.511	99.778	118.25	71.341	32.924	92.431	81.178	83.677	121.399	91.813	35.1854	73.921	40.805	61.453	68.838	65.068	75.276	85.834	89.986	135.143	136.676	85.907	141.234	73.985		0.255474	81.2803
4.2852	61.494	119.205	64.351	63.051	55.799	66.155	51.479	63.282	82.303	113.637	59.824	34.224	82.717	70.046	73.645	121.294	84.677	28.4318	69.922	45.386	51.702	69.653	57.626	65.708	77.813	82.164	132.9	116.086	84.783	145.406	67.895		0.262772	76.2148
4.4043	67.359	113.72	62.422	59.97	59.368	64.63	57.463	59.312	67.711	97.679	60.565	43.196	86.116	77.377	69.98	120.589	84.459	32.806	65.936	50.865	49.456	63.612	56.101	53.685	72.028	78.389	129.707	112.771	71.81	134.025	74.636		0.270075	74.1207
4.5233	70.065	105.566	62.007	54.002	50.648	65.551	56.966	65.097	69.868	90.932	50.334	40.132	79.544	71.378	66.771	110.931	74.53	32.9582	59.292	42.821	45.383	61.059	56.186	53.676	55.625	82.727	124.072	96.491	65.036	135.767	69.985		0.277372	69.8516
4.6423	68.248	113.774	61.171	56.235	52.486	63.037	55.035	59.288	57.27	89.544	56.419	38.759	72.961	54.561	62.551	101.138	67.095	30.2377	53.287	42.108	44.269	64.066	52.321	48.946	59.927	77.116	107.626	86.596	60.171	133.372	66.272		0.284669	66.3189
4.7614	57.005	101.03	58.876	53.708	51.466	64.564	59.248	62.521	65.121	77.336	54.953	40.105	65.875	57.075	47.869	92.281	61.499	32.325	53.978	44.68	45.636	54.189	48.858	45.753	58.476	71.287	99.151	83.302	63.514	122.693	67.445		0.291973	63.2845
4.8804	62.689	96.618	61.405	46.415	48.347	75.112	58.437	53.101	61.971	69.821	48.335	40.203	64.546	54.972	45.402	72.139	56.207	30.3879	52.119	36.082	43.97	48.763	53.028	45.693	56.582	60.617	84.362	78.506	53.714	119.214	59.975		0.29927	59.314
4.9995	62.151	86.353	56.666	52.818	46.947	69.765	54	58.422	62.771	63.842	43.547	32.719	61.043	50.669	44.425	56.773	50.945	31.037	45.08	32.83	44.945	43.842	49.815	46.531	57.054	59.748	73.104	70.396	49.624	100.569	59.944		0.306573	55.4315
5.1185	56.321	88.551	54.195	44.82	43.257	77.686	44.361	52.241	63.309	69.973	45.579	37.816	60.527	50.448	43.939	43.541	43.736	30.9202	49.816	36.882	43.668	51.104	46.861	40.909	58.539	58.5	64.219	59.816	50.574	86.084	60.131		0.31387	53.4943
5.2375	61.891	81.276	61.641	44.521	45.176	69.395	44.339	46.427	53.124	70.801	38.017	41.693	57.639	46.441	42.33	42.954	38.724	29.6484	40.709	38.598	38.556	53.253	43.679	41.498	52.259	50.106	52.647	61.255	50.393	102.233	57.343		0.321167	51.5667
5.3566	53.584	67.547	63.67	46.076	43.488	66.744	45.782	53.1	58.092	62.621	39.275	42.849	48.207	42.726	39.723	45.191	40.967	28.5088	43.607	39.735	44.372	45.974	39.222	33.406	51.876	52.067	53.962	59.021	45.044	104.437	51.609		0.328471	50.0801
5.4756	50.767	72.597	55.37	43.927	41.076	71.664	45.946	41.733	48.296	64.27	38.578	42.234	54.763	39.763	36.032	41.906	40.069	25.3511	44.434	33.518	38.491	39.577	43.186	37.093	48.297	55.42	53.596	52.926	47.87	103.399	60.393		0.335768	48.7917
5.5946	52.248	68.028	59.249	40.087	42.819	67.019	49.294	43.76	55.588	62.244	37.812	42.682	57.857	35.938	35.836	36.668	39.359	27.8547	38.483	40.407	36.637	34.901	42.115	40.607	47.304	48.899	46.878	48.088	49.016	87.357	58.278		0.343065	47.5262
5.7137	58.311	55.449	60.491	39.734	42.781	68.122	39.627	37.278	51.972	63.589	37.154	44.867	54.921	34.34	39.078	33.155	40.993	28.1769	44.41	38.62	35.871	42.045	48.648	35.598	37.483	48.927	46.902	47.79	42.61	78.145	49.778		0.350368	46.0279
5.8327	49.333	55.944	62.182	32.489	40.841	65.128	41.762	38.786	56.65	56.057	40.859	35.085	46.622	40.886	36.566	33.545	36.701	27.7052	44.815	35.936	40.458	39.071	46.011	38.862	39.86	47.948	48.026	51.951	45.234	77.444	46.694		0.357665	45.1436
5.9517	61.299	59.419	64.175	37.611	38.133	66.166	37.025	30.735	44.716	50.86	42.807	38.912	43.049	39.666	43.35	32.518	36.875	29.755	41.517	41.758	40.303	39.981	45.026	38.165	40.873	43.894	45.697	40.395	48.277	70.445	50.387		0.364963	44.6384
6.0708	54.287	52.253	56.73	35.696	39.203	71.332	37.831	26.789	47.849	60.258	39.147	46.673	42.264	41.825	45.224	32.214	38.247	29.4739	38.427	47.559	36.766	34.959	43.458	38.119	38.164	34.84	47.322	40.303	47.496	77.768	47.968		0.372266	44.2079
6.1898	54.265	48.594	52.634	25.708	37.629	63.601	37.258	27.75	56.267	68.305	36.784	42.801	41.38	42.109	37.788	31.468	35.205	31.6332	43.244	42.255	35.075	35.247	53.301	41.677	38.303	41.686	47.887	45.153	43.151	71.018	53.438		0.379563	43.9553
6.3088	59.489	50.275	51.834	30.5	38.373	51.24	38.507	23.923	51.058	64.565	42.335	43.443	44.577	32.636	39.24	33.1	39.289	32.6549	53.13	37.731	29.283	40.021	53.225	40.139	39.033	41.576	48.618	40.055	48.127	68.078	56.408		0.38686	43.9504
6.4279	63.153	47.454	55.186	23.05	34.669	57.727	32.933	24.229	54.522	64.094	46.41	37.845	37.611	34.223	41.008	38.948	31.014	31.5021	52.948	44.252	30.43	35.532	51.539	50.323	31.522	40.678	52.806	45.86	47.842	56.953	51.592		0.394163	43.4792
6.5469	64.933	51.903	54.919	18.238	26.867	59.983	33.786	19.815	57.027	58.717	39.656	33.415	43.916	37.789	46.47	39.995	32.981	34.114	46.395	44.611	34.146	33.303	47.216	39.784	33.666	39.335	48.93	44.649	46.413	52.717	42.98		0.401461	42.2151
6.6659	65.825	51.6	49.945	18.716	30.784	60.175	36.06	19.807	51.717	53.698	36.015	33.369	49.335	33.55	41.784	32.082	26.466	30.591	47.652	40.079	28.993	36.88	47.399	47.356	34.947	37.385	49.352	46.543	40.372	57.004	49.144		0.408758	41.4395
6.785	70.529	47.681	48.438	18.579	27.878	61.479	36.314	19.818	51.561	57.56	41.29	37.651	41.024	34.783	37.093	28.066	24.982	34.664	41.898	41.037	36.536	35.724	46.545	52.064	35.29	35.299	50.455	46.765	49.827	48.259	51.002		0.416061	41.6158
6.904	72.7	46.235	37.364	16.671	25.598	57.407	37.754	14.444	53.564	50.826	44.642	32.288	42.516	30.209	38.476	31.142	24.729	28.7965	44.725	37.872	35.31	33.476	53.242	44.104	34.888	34.533	47.152	48.069	41.478	50.729	48.591		0.423358	39.9849
7.023	66.358	52.064	36.371	16.462	24.756	50.346	28.249	19.352	50.605	55.706	42.447	37.338	40.068	27.808	41.034	29.391	26.763	28.6011	41.605	33.134	30.81	32.658	52.898	50.408	34.96	40.119	41.95	44.647	50.212	48.775	49.281		0.430655	39.5218
7.1421	75.614	47.067	38.831	17.522	21.326	44.935	23.051	14.203	56.44	57.385	41.528	36.1	42.347	25.4	45.257	33.851	22.427	31.686	40.708	32.785	29.442	31.191	48.925	45.341	33.975	39.83	50.256	51.209	48.71	45.223	51.283		0.437959	39.479
7.2611	65.322	46.858	36.969	14.827	20.283	47.325	25.044	17.559	62.269	55.093	40.831	40.372	44.369	30.636	39.986	31.985	22.934	29.3979	39.691	41.646	31.502	29.405	43.008	44.502	37.425	40.324	44.428	51.427	39.068	44.137	56		0.445256	39.1814
7.3801	62.264	44.34	39.168	12.926	19.832	48.026	26.84	14.517	59.373	66.669	45.844	44.228	43.603	26.368	37.64	30.749	21.339	30.2552	40.272	42.749	39.305	29.589	46.637	47.284	30.836	46.427	38.576	44.799	41.532	61.214	56.893		0.452553	40.003
7.4992	63.469	43.76	33.342	17.066	20.709	44.792	24.632	16.62	48.104	59.553	39.935	38.924	40.706	30.596	37.431	32.045	20.161	28.1366	38.437	35.838	30.05	28.853	44.803	48.17	33.575	43.02	37.819	40.646	44.274	51.751	51.874		0.459856	37.7126
7.6182	65.664	43.183	30.56	16.719	16.491	45.36	25.055	18.029	53.446	56.295	44.39	33.694	37.909	30.303	31.569	37.329	20.652	27.3986	39.327	36.945	30.08	28.025	44.926	38.966	33.845	47.635	38.453	39.989	44.127	48.346	53.3		0.467154	37.3552
7.7372	61.569	50.158	30.896	13.019	14.887	46.952	20.677	14.04	44.012	56.044	46.5	35.449	37.381	30.573	34.602	31.749	16.331	25.846	37.878	37.52	28.714	30.076	43.313	41.038	36.217	46.471	42.941	49.171	35.956	49.377	54.61		0.474451	36.9022
7.8563	53.504	57.519	31.174	11.303	14.94	52.879	21.949	17.517	43.302	52.674	41.733	31.821	38.943	29.741	32.011	28.261	17.522	30.0084	36.206	36.701	24.773	32.871	44.604	56.026	40.399	43.356	42.246	46.849	40.654	53.636	43.998		0.481754	37.0684
7.9753	54.514	52.661	31.529	15.63	17.87	48.62	22.922	14.663	44.681	52.794	38.445	32.196	38.18	28.989	32.462	25.323	18.097	31.5862	43.473	35.55	23.686	27.232	49.81	52.787	31.251	47.665	46.734	39.103	43.133	46.99	46.924		0.489051	36.629
8.0943	59.473	58.08	31.279	12.705	14.127	52.74	19.757	12.999	42.934	49.785	44.193	35.652	37.377	28.114	30.834	29.058	20.84	26.5851	33.65	36.702	20.702	33.191	50.498	46.379	40.377	42.201	43.822	41.073	44.933	46.305	51.395		0.496348	36.7019
8.2134	61.54	53.863	29.708	13.629	14.645	43.491	19.114	14.524	40.966	52.414	39.871	38.524	37.547	27.229	35.878	27.153	20.984	24.285	40.347	39.566	24.002	31.902	44.36	42.442	43.237	41.545	36.878	43.845	37.458	47.701	47.585		0.503652	36.0075
8.3324	55.899	50.361	27.904	11.603	14.507	42.857	20.673	15.395	37.41	52.854	46.454	38.406	34.822	29.92	35.775	30.6	19.005	24.8034	40.251	39.298	19.768	29.469	42.413	39.049	42.625	40.717	35.787	41.799	43.126	50.537	49.006		0.510949	35.5837
8.4515	53.725	46.781	27.763	12.684	15.342	42.582	18.867	16.246	39.648	47.133	42.735	35.645	37.994	28.548	32.263	32.969	17.233	27.3891	37.088	32.784	18.165	24.196	43.722	36.99	38.03	36.078	36.991	40.511	41.909	48.944	48.882		0.518252	34.1883
8.5705	52.932	39.141	27.569	11.665	13.477	37.744	23.422	14.651	38.441	46.627	40.577	31.471	31.81	32.893	32.153	26.539	22.158	27.4818	37.394	40.535	19.129	28.747	45.493	41.768	42.992	33.907	40.81	40.705	38.913	49.69	49.44		0.525549	34.2024
8.6895	47.396	45.436	34.386	12.13	13.991	38.464	22.51	15.024	37.073	49.546	43.986	39.164	33.41	32.481	31.132	26.101	23.876	20.6671	39.23	38.76	17.043	28.337	47.584	34.354	38.864	29.373	43.106	38.539	36.423	43.207	54.146		0.532846	34.0561
8.8086	48.745	47.116	34.794	13.243	16.318	43.648	20.105	14.733	36.568	48.637	39.057	39.772	33.994	29.166	30.094	22.198	24.69	24.2492	42.125	34.936	16.766	26.883	41.328	34.588	38.559	28.781	44.98	40.442	34.646	39.096	44.059		0.54015	33.365
8.9276	49.325	52.077	27.845	13.014	16.718	44.897	20.073	14.279	34.943	49.283	37.942	42.417	31.75	26.649	29.365	24.269	17.811	29.9384	37.923	35.678	15.312	21.181	41.375	36.73	42.696	30.959	42.687	43.062	38.647	39.594	45.709		0.547447	33.3596
9.0466	47.71	51.597	30.61	11.519	11.097	43.369	18.312	20.074	35.314	43.769	42.01	40.769	34.419	27.22	32.099	21.917	15.879	24.2627	42.088	35.266	16.727	26.866	42.442	37.566	42.723	28.624	37.517	39.46	31.578	35.089	43.723		0.554744	32.6328
9.1657	42.069	51.613	30.568	12.567	12.329	40.764	16.079	17.381	34.929	41.875	44.159	37.58	29.305	29.38	31.292	20.621	12.988	26.2244	41.667	30.497	18.53	24.047	41.36	44.323	38.254	28.509	37.091	40.195	33.047	36.026	44.435		0.562047	31.9259
9.2847	36.908	46.935	30.391	12.148	15.679	47.534	16.259	12.366	36.476	43.197	35.104	39.895	29.874	29.699	32.465	19.295	17.202	24.4147	39.652	26.435	15.697	20.983	40.338	37.827	39.685	27.479	37.827	42.819	35.73	36.917	42.826		0.569345	31.2922
9.4037	42.556	49.899	28.684	11.771	12.624	42.485	19.403	18.261	34.643	40.977	34.141	37.381	29.383	27.619	32.789	19.696	13.344	26.436	40.314	28.967	17.705	23.514	39.735	38.943	44.435	28.195	40.752	40.386	30.998	37.689	44.308		0.576642	31.5495
9.5228	44.832	46.948	34.011	10.839	13.414	47.177	18.992	19.613	33.564	46.889	37.964	39.312	24.541	28.456	31.644	19.423	13.869	23.1454	42.819	31.03	17.464	19.094	43.092	39.209	38.033	26.1	40.553	38.899	33.031	37.148	41.43		0.583945	31.6947
9.6418	42.287	45.546	32.62	9.78	11.483	54.698	15.724	13.479	37.619	42.786	42.543	32.754	33.814	29.264	29.722	15.76	13.184	26.687	46.853	31.053	16.413	23.182	40.095	43.652	44.012	20.457	41.327	37.204	32.174	45.404	37.972		0.591242	31.9209
9.7608	40.955	42.91	37.471	10.045	12.719	45.446	19.934	14.403	38.775	39.103	43.155	42.378	34.254	28.455	32.084	16.272	10.955	25.2356	37.02	29.958	16.301	24.803	42.23	37.876	38.047	22.259	43.07	40.209	34.971	43.589	42.603		0.598539	31.8544
9.8799	40.577	52.065	34.985	11.027	15.495	46.892	21.988	17.755	35.218	41.5	45.177	38.965	31.263	30.273	34.36	19.33	12.002	23.697	42.165	34.63	17.063	22.788	43.762	40.741	35.801	20.907	40.955	37.26	34.343	42.725	38.57		0.605843	32.3961
9.9989	37.071	46.491	36.23	12.299	13.453	48.117	20.746	18.877	29.773	42.851	42.664	33.514	30.797	26.51	35.532	16.764	9.948	26.4695	40.757	26.512	14.567	23.349	38.889	32.797	30.663	24.332	38.304	37.688	36.45	38.286	44.07		0.61314	30.799
10.1179	43.24	41.508	38.949	11.992	13.227	49.494	19.98	12.839	34.701	41.48	39.958	38.46	26.222	31.854	30.787	19.812	12.014	28.4903	37.611	26.958	15.285	17.768	36.722	35.856	33.553	20.09	44.429	36.995	39.071	39.65	36.726		0.620437	30.8297
10.237	44.145	42.893	38.237	11.416	16.082	45.775	19.99	14.978	38.88	48.277	48.857	47.227	27.533	29.495	29.782	19.647	12.118	27.5817	50.206	25.267	18.321	22.425	33.444	36.659	29.138	25.521	44.557	35.068	29.27	40.729	42.477		0.62774	32.1289
10.356	48.002	38.043	32.185	14.13	17.271	45.728	23.036	18.004	39.442	41.305	39.256	42.127	29.127	29.434	26.964	18.603	14.559	23.786	45.783	26.199	17.041	24.182	37.242	37.801	27.601	24.413	45.251	33.642	32.989	40.303	46.71		0.635037	31.618
10.475	46.835	42.188	38.079	15.022	18.193	38.138	19.594	14.752	34.453	47.012	29.878	46.694	32.319	31.574	30.883	19.259	15.754	25.0595	50.409	26.938	13.153	21.307	35.33	36.431	25.054	23.985	47.66	35.231	28.939	33.147	52.198		0.642335	31.4667
10.5941	43.329	45.29	36.959	15.168	15.902	38.79	20.818	14.602	37.052	48.196	37.153	48.767	30.495	37.816	35.632	16.055	12.434	26.3518	50.622	28.925	15.05	23.046	29.397	43.776	26.701	24.941	45.414	38.396	25.115	34.776	47.878		0.649638	32.0918
10.7131	43.474	50.51	43.418	15.218	17.93	42.541	16.214	20.275	38.85	47.057	40.23	45.218	36.732	39.455	32.63	16.409	10.756	23.1281	48.617	23.025	13.614	23.167	35.92	43.085	24.715	23.83	50.946	36.553	23.638	28.412	44.491		0.656935	32.2599
10.8321	47.749	40.105	40.465	11.978	16.698	50.767	18.385	20.366	37.18	47.938	42.937	43.169	32.899	35.304	35.879	15.029	12.377	27.7488	38.712	20.832	16.281	24.996	38.944	47.152	24.017	26.812	52.616	34.692	22.853	31.477	46.888		0.664232	32.3628
10.9512	38.025	37.42	42.736	15.039	14.945	42.893	20.935	23.889	33.866	45.209	35.796	44.373	33.009	35.629	34.759	15.523	11.429	24.7686	37.369	22.649	12.875	23.386	30.37	37.594	26.821	21.341	48.435	36.416	22.916	25.755	51.026		0.671536	30.5547
11.0702	43.709	47.186	42.076	13.023	17.261	51.467	23.151	17.187	38.038	51.12	38.307	43.941	30.746	35.527	34.606	16.103	10.32	24.0367	44.89	24.074	15.687	24.671	34.299	34.888	21.326	23.33	50.1	37.588	24.08	27.993	53.029		0.678833	32.0568
11.1892	41.607	43.821	44.761	12.09	19.864	46.416	20.117	21.234	36.588	54.006	36.084	39.77	34.445	31.241	32.774	13.765	9.566	25.2003	42.523	23.426	13.308	30.999	32.681	33.61	24.054	29.745	53.021	33.42	30.497	32.905	46.255		0.68613	31.9288
11.3083	46.819	41.329	44.669	12.37	16.985	42.991	24.723	19.703	31.759	52.037	35.998	41.34	39.334	34.544	39.684	14.106	8.06	25.4322	39.335	25.548	15.173	28.434	36.943	41.347	28.979	26.629	56.486	36.993	21.608	29.887	46.593		0.693433	32.4464
11.4273	48.13	38.253	50.294	15.74	25.248	51.845	22.8	19.249	33.319	48.258	40.069	46.547	41.169	36.323	37.728	19.747	10.925	31.6116	39.572	23.616	13.191	33.348	37.946	48.559	28.8	28.343	61.042	39.714	24.842	27.873	49.23		0.70073	34.6236
11.5463	48.547	45.968	50.04	13.752	25.162	55.648	19.842	22.439	32.683	40.445	38.399	54.062	42.709	37.437	35.045	19.199	12.58	30.3107	43.424	22.137	15.235	27.18	38.143	44.032	28.841	29.976	56.227	33.365	26.431	22.346	46.318		0.708027	34.1265
11.6654	48.283	54.301	53.381	17.572	27.725	51.058	18.67	19.237	38.523	51.467	42.246	53.021	39.885	41.051	30.848	18.391	14.317	28.8577	47.102	26.522	20.963	28.536	33.623	40.861	30.802	33.371	43.641	38.842	23.622	25.957	35.616		0.715331	34.7836
11.7844	52.562	47.148	54.885	20.584	28.049	49.115	23.704	17.752	36.456	46.941	39.042	48.37	41.58	39.302	30.811	19.299	12.645	25.1512	43.641	24.138	16.81	29.71	34.638	41.716	30.204	39.031	50.355	42.613	20.43	28.813	39.592		0.722628	34.6802
11.9035	52.162	45.599	53.451	20.798	27.531	51.944	21.905	19.588	35.429	41.054	34.874	44.974	34.811	37.239	33.449	14.548	11.879	29.9606	44.23	19.611	17.185	32.029	35.468	37.453	34.437	37.367	54.652	39.91	24.664	33.077	37.311		0.729931	34.1481
12.0225	53.881	44.729	66.637	22.542	35.717	50.339	24.042	21.451	37.315	38.581	37.324	45.063	39.276	39.362	32.903	18.912	13.47	32.7065	42.779	24.199	19.506	33.424	27.137	33.414	31.895	36.77	60.614	38.043	23.643	30.434	44.623		0.737228	35.5075
12.1415	55.675	48.951	59.853	26.593	35.881	53.426	20.13	20.172	40.014	40.677	43.639	40.418	41.381	41.631	26.907	15.41	16.062	33.8398	49.666	27.164	20.669	39.298	37.744	35.574	31.973	42.606	60.122	43.837	25.883	29.776	47.405		0.744526	37.1734
12.2606	62.615	51.661	60.273	25.808	39.134	57.553	18.624	19.285	47.334	41.15	39.66	41.228	42.689	34.414	30.625	14.082	14.81	30.3011	41.759	25.009	18.46	40.083	40.715	34.591	35.509	34.477	56.085	46.051	22.966	30.647	40.193		0.751829	36.7029
12.3796	53.374	49.125	57.353	29.121	41.305	47.826	23.392	21.191	46.574	30.807	38.015	41.724	41.184	39.462	30.33	14.012	14.506	33.588	43.813	23.741	19.288	36.198	37.216	32.074	33.833	32.597	52.303	45.638	21.262	28.825	40.135		0.759126	35.4778
12.4986	52.544	53.246	51.56	31.106	44.333	53.874	21.78	22.364	41.354	35.394	43.453	42.351	40.863	37.539	29.581	15.582	15.141	27.9758	38.185	25.42	22.617	36.709	33.259	29.21	31.476	33.946	56.872	49.411	19.674	32.157	39.731		0.766423	35.7648
12.6177	56.05	48.022	46.938	33.781	43.582	50.969	21.338	22.796	42.339	33.02	43.438	39.347	39.848	35.716	27.771	14.033	16.365	34.0346	39.716	30.662	22.288	36.215	37.283	33.724	32.21	31.077	53.188	45.135	22.667	31.725	39.206		0.773727	35.6285
12.7367	54.866	48.32	46.436	36.984	43.915	51.87	28.701	25.849	38.169	35.36	46.122	43.57	43.894	35.509	30.591	16.006	11.105	37.5324	40.655	28.601	21.751	35.846	35.349	35.714	38.047	37.571	54.975	42.662	23.362	34.496	37.358		0.781024	36.8125
12.8557	58.359	52.389	47.705	39.856	44.319	48.331	31.064	29.104	45.05	34.677	42.932	46.478	39.166	28.011	30.367	16.888	10.962	34.1455	30.853	28.791	19.66	42.914	40.488	30.463	36.239	38.869	52.155	44.279	21.983	35.322	46.796		0.788321	37.0521
12.9748	52.518	49.707	44.154	43.114	43.553	47.16	30.937	30.285	46.181	30.642	36.569	41.542	43.389	30.27	29.325	14.621	12.58	38.3781	33.61	27.838	19.652	39.073	41.823	29.223	26.873	44.624	51.808	44.468	21.458	34.681	42.625		0.795624	36.2155
13.0938	55.744	48.305	42.986	40.652	42.715	46.644	32.845	32.887	48.382	34.789	34.675	40.721	40.164	38.893	26.464	14.706	14.051	36.8523	33.326	30.757	19.465	39.857	45.617	31.737	33.105	42.982	47.838	38.761	23.095	34.631	45.369		0.802921	36.7424
13.2128	61.112	50.778	38.289	41.022	43.425	40.945	33.804	36.633	48.506	32.893	32.199	39.924	46.474	38.383	30.696	13.892	17.169	38.7492	39.818	33.235	20.227	42.901	32.266	27.795	33.828	52.438	49.449	46.238	21.087	31.315	35.855		0.810218	37.1402
13.3319	52.636	50.744	38.221	41.16	39.042	40.697	47.209	37.334	48.024	33.415	43.111	35.807	45.825	32.027	33.42	17.645	15.048	36.5595	35.191	33.768	22.742	38.601	37.342	29.638	39.136	54.349	47.249	50.386	23.365	33.758	41.99		0.817522	37.9174
13.4509	51.507	40.687	44	41.05	45.854	37.791	42.547	43.874	46.772	34.773	38.638	41.073	42.774	29.116	30.959	20.122	16.094	37.2133	30.19	30.773	25.783	44.304	44.952	29.778	41.433	51.585	46.179	45.152	22.915	33.58	49.083		0.824819	38.0823
13.5699	52.32	41.764	39.211	38.345	40.815	38.876	44.629	47.512	42.242	33.725	34.475	37.456	51.899	30.116	27.894	18.037	15.509	43.8403	36.227	33.63	28.925	41.055	40.968	35.856	35.636	55.213	40.572	42.14	24.835	35.654	36.039		0.832116	37.594
13.689	51.731	42.315	41.237	40.462	34.271	32.62	46.819	42.646	40.581	37.805	38.352	37.593	43.147	29.61	31.794	22.817	16.103	40.437	32.55	34.563	35.757	42.051	38.71	40.614	38.071	45.07	40.473	42.848	22.975	31.64	36.788		0.839419	37.1758
13.808	44.059	38.894	35.839	44.388	32.852	38.638	42.071	50.084	37.948	36.868	33.703	32.169	38.334	32.27	26.84	23.937	18.735	43.4607	37.723	35.315	28.557	36.311	33.58	33.369	38.058	45.747	43.956	44.977	24.451	33.767	38.074		0.846717	36.2895
13.927	44.2	33.534	32.785	35.227	32.803	40.833	49.693	48.198	35.905	37.77	28.058	30.122	36.757	31.314	26.532	19.363	20.601	43.4725	43.798	38.42	35.774	39.944	35.513	36.365	39.925	51.963	42.432	43.786	23.333	29.292	44.31		0.854014	36.5169
14.0461	42.348	36.491	31.787	33.83	28.887	35.872	45.966	45.004	28.753	36.374	25.453	26.637	29.85	34.067	26.387	19.123	16.222	43.8516	37.593	34.759	40.056	37.744	37.081	34.171	35.255	44.786	44.359	42.984	24.066	25.787	40.812		0.861317	34.3986
14.1651	44.922	31.225	33.635	26.342	28.911	36.036	45.092	48.953	29.595	28.973	25.26	24.524	31.756	31.143	22.895	22.283	16.589	43.3806	35.508	41.958	36.949	39.263	36.131	33.906	36.372	39.998	40.938	40.034	18.378	30.476	39.105		0.868614	33.5655
14.2841	41.757	33.962	24.466	29.053	23.681	32.615	37.721	43.306	31.4	25.643	20.618	22.967	28.483	29.167	25.507	25.647	19.483	48.0568	35.626	44.395	25.423	38.25	42.477	40.082	39.026	44.103	37.674	34.07	20.423	26.843	30.978		0.875911	32.3517
14.4032	38.754	33.917	18.954	27.903	21.994	34.587	40.97	38.119	28.641	22.683	20.134	19.663	25.903	24.638	26.325	27.409	20.677	36.4064	33.567	39.696	30.442	39.039	36.389	38.636	40.983	37.866	42.356	31.112	21.187	29.389	34.89		0.883215	31.0719
14.5222	35.343	29.393	16.725	20.494	15.927	31.003	42.028	31.165	34.775	21.305	17.774	17.819	23.97	25.205	26.325	27.881	18.667	38.4133	36.493	36.987	29.189	41.068	37.635	39.18	42.051	37.87	41.125	25.128	23.478	29.352	37.96		0.890512	30.0558
14.6412	32.154	30.154	12.793	14.171	11.717	23.734	33.491	25.237	30.91	15.68	12.462	14.984	25.039	27.69	29.455	27.375	21.935	37.9955	32.77	44.324	28.859	40.298	41.53	38.484	34.362	38.369	38.78	22.688	18.586	25.302	26.212		0.897809	27.6626
14.7603	24.168	26.88	9.819	14.51	10.401	21.173	28.881	19.974	25.258	16.981	7.348	10.141	20.733	22.635	27.869	31.864	21.856	38.4109	34.603	47.834	28.899	39.838	38.236	35.882	38.907	34.405	32.102	16.144	18.14	26.813	26.946		0.905112	25.7307
14.8793	21.135	22.293	4.909	13.315	7.119	18.728	25.496	17.684	25.775	14.016	8.318	9.36	15.463	23.1	31.934	31.11	23.069	38.2295	37.496	43.255	25.544	39.786	44.517	41.365	39.853	32.558	34.186	18.169	15.365	28.081	31.268		0.912409	25.2418
14.9984	15.469	22.717	5.101	9.271	5.912	16.102	18.962	12.932	19.84	10.348	6.387	5.592	9.789	21.755	29.852	35.578	25.109	37.1758	35.862	44.112	30.41	38.112	43.753	42.36	41.679	33.392	28.943	17.302	13.917	23.744	25.622		0.919713	23.4548
15.1174	10.077	16.675	5.432	7.119	3.797	12.449	16.329	10.739	19.667	7.944	4.045	6.599	6.178	23.007	27.527	34.985	29.681	32.5694	35.375	36.511	32.086	43.275	43.658	41.585	40.443	28.174	27.007	13.072	13.554	22.349	27.383		0.92701	21.9126
15.2364	5.693	11.889	3.481	6.544	4.765	8.701	15.143	8.919	18.041	7.764	4.356	4.947	5.674	16.76	26.862	37.4	29.722	32.1889	37.112	36.043	32.826	39.927	35.062	40.627	37.657	25.949	27.803	9.885	10.276	22.06	25.468		0.934307	20.3079
15.3555	4.251	11.35	2.628	4.728	4.038	5.739	10.674	7.01	14.802	9.308	3.936	4.84	4.412	17.222	24.032	32.598	29.74	33.9741	30.532	28.636	27.81	37.311	44.652	41.652	37.381	29.193	26.428	9.122	7.506	21.507	20.226		0.94161	18.9432
15.4745	5.429	9.006	3.482	4.53	2.654	3.516	6.702	6.391	8.639	6.104	3.987	2.426	4.38	8.124	21.928	31.354	25.414	34.4798	39.17	32.367	31.646	35.89	41.91	43.239	35.436	30.374	20.799	4.833	8.176	16.288	17.461		0.948908	17.6173
15.5935	3.964	7.149	3.475	3.571	2.025	4.367	6.066	4.681	7.709	5.289	3.851	2.302	3.193	5.089	19.636	31.084	34.04	28.0377	38.076	32.546	30.558	31.627	37.218	42.733	36.27	30.59	15.676	4.378	7.094	17.372	16.963		0.956205	16.6655
15.7126	5.042	4.968	2.861	3.403	3.295	3.98	4.82	4.275	5.72	3.641	2.681	1.844	2.745	2.947	19.774	34.2	28.076	27.2532	38.847	31.713	27.787	33.493	31.924	31.567	34.692	26.878	13.523	5.581	5.063	12.474	13.623		0.963508	15.119
15.8316	6.18	3.91	2.473	2.495	2.81	2.58	4.049	3.05	4.24	3.993	3.143	2.493	2.033	3.706	18.51	35.255	33.564	28.4093	33.913	30.236	29.678	29.713	27.321	37.337	36.549	28.719	14.938	4.091	5.57	15.002	11.233		0.970805	15.0708
15.9506	5.576	2.627	2.425	2.384	2.215	4.477	1.858	4.97	4.241	2.925	3.004	2.998	3.705	2.678	16.244	30.359	32.671	29.2313	32.096	25.624	30.637	33.41	26.674	29.89	30.691	23.911	8.191	2.865	3.984	13.014	8.852		0.978102	13.6912
16.0697	5.357	1.903	1.674	2.628	1.998	2.097	1.89	2.952	3.715	2.329	2.031	2.609	2.418	1.639	12.352	24.225	28.16	29.0288	31.942	30.569	26.514	24.466	29.973	29.426	30.737	24.924	4.985	2.2	4.1	10.717	7.201		0.985406	12.4761
16.1887	5.054	1.663	1.433	3.014	1.098	1.92	2.379	3.266	4.053	2.19	2.359	1.059	2.561	1.79	9.218	21.38	30.381	31.0614	28.294	34.497	23.812	25.47	23.782	39.374	31.933	21.678	7.694	1.422	4.525	13.158	4.902		0.992703	12.4652
16.3077	4.055	1.64	1.367	0.646	2.457	1.927	1.886	2.694	3.584	2.294	1.287	1.037	2.248	1.331	6.585	20.512	24.616	24.0309	30.744	31.234	21.827	20.222	17.173	33.103	26.026	20.697	4.365	2.827	3.445	9.46	7.185		1	10.726

## Sheet: Image10
X0	Y0	Y1	Y2	Y3	Y4	Y5	Y6	Y7	Y8	Y9	Y10	Y11	Y12	Y13	Y14	Y15	Y16	Y17	Y18	Y19	Y20	Y21	Y22	Y23	Y24	Y25	Y26	Y27		Ap-basal	Avg intensity
0	39.191	33.0299	35.9923	29.3984	26.4306	25.0118	31.4273	26.8373	21.6146	21.9126	36.2694	32.6497	23.9772	36.5104	40.1807	35.3445	22.9989	29.8494	22.8015	28.4558	19.2452	20.8248	38.422	25.3657	28.4949	27.5244	28.0707	31.6012		0	29.2654
0.119	39.1435	35.542	31.9133	31.5555	31.8119	25.2886	30.3532	32.1267	23.3626	25.8414	36.021	31.4289	27.6499	42.0892	46.3207	35.6242	26.6296	33.8081	26.4152	23.1775	21.5274	28.0737	40.0399	30.5467	33.0143	30.0466	26.126	36.3717		0.00869311	31.4946
0.2381	40.6152	34.133	32.8853	33.2269	40.6049	30.6895	33.2825	36.2699	24.6438	21.7738	39.1488	39.544	35.3433	43.5619	53.2409	36.8826	25.5578	38.0284	28.6835	26.6867	20.5551	30.0501	41.8632	26.767	38.0922	30.031	28.5346	39.3698		0.0173935	33.9309
0.3571	41.7535	33.7274	35.2653	30.6554	38.3012	29.3301	35.0369	37.4401	31.3467	30.1801	44.6088	34.5389	35.3874	47.9232	46.8133	31.8078	27.6921	39.5774	26.7516	31.1661	24.8098	28.7857	41.199	32.3865	36.6949	29.7925	29.7993	33.8605		0.0260866	34.5226
0.4761	44.3342	32.119	37.861	34.0499	38.539	32.7887	46.2942	34.5744	25.4432	38.459	44.7444	34.1014	35.4321	46.3262	56.5973	29.7164	34.8345	40.3367	28.3252	30.4408	28.0192	31.2871	42.5948	33.2385	39.3178	35.748	37.1962	28.739		0.0347798	36.4807
0.5952	53.1111	32.5928	40.2092	27.5501	34.84	37.6578	43.6616	33.642	29.6873	32.7058	52.7124	41.2951	35.46	46.3319	56.2934	30.3265	41.7109	48.8115	35.225	36.4925	31.3018	32.4588	42.8954	32.7911	36.8773	38.0479	30.6165	34.0727		0.0434802	38.1921
0.7142	55.3574	36.0041	35.7212	32.8051	35.8006	38.7074	51.7053	37.5661	33.7915	37.7895	53.9309	38.6846	28.7579	45.3623	58.9157	31.8945	42.4085	48.5808	42.4501	38.8759	34.5576	42.0323	52.5407	28.5262	33.9358	35.6027	37.2481	37.8799		0.0521733	40.2655
0.8332	53.1805	32.5844	33.9204	41.9323	33.4598	36.6204	48.9954	35.2373	36.6636	40.4873	57.6779	39.5631	41.008	54.2001	58.7167	33.8967	48.7677	52.9131	39.0798	35.0888	36.6828	36.5515	57.461	36.4612	37.4484	37.2131	29.6038	39.5591		0.0608664	41.6062
0.9523	64.0127	35.8898	41.0373	41.4313	35.7892	41.6276	45.438	39.8337	32.2419	48.8742	69.004	45.8285	39.2245	56.3972	59.7909	35.2534	52.3942	62.2581	34.6456	37.1944	30.8594	37.0015	63.8822	42.5439	35.9401	47.9213	35.4107	44.9983		0.0695668	44.883
1.0713	58.0156	35.7969	34.7994	41.0194	39.6021	46.8179	56.5219	43.0707	36.5744	53.9415	74.9429	45.6433	40.0508	57.1981	59.1091	34.9902	56.5324	73.8218	37.8275	46.394	41.9831	41.2016	66.5098	33.7071	41.0887	49.4004	40.5211	44.5603		0.0782599	47.5586
1.1903	61.9347	31.4492	37.7803	44.9659	39.6099	52.97	60.3283	45.5899	40.3507	57.4497	81.771	50.1079	45.9179	57.452	60.9634	38.3337	66.3318	66.3246	47.6965	56.7221	53.1696	52.272	64.842	39.1255	45.7835	52.34	43.6623	41.5801		0.086953	51.3152
1.3094	63.8584	36.146	41.1553	55.4661	34.5879	52.8523	50.3161	57.2613	43.3487	67.5545	78.3242	52.7211	46.3589	61.7978	58.882	43.2318	66.0184	66.7811	36.5925	57.1811	59.3219	50.2498	70.361	38.3068	45.89	56.9741	50.9486	53.4448		0.0956534	53.4262
1.4284	57.1029	38.4836	41.1614	56.7179	38.2106	53.2884	51.3935	59.2934	53.3206	66.5343	73.4168	44.483	52.2407	55.35	59.271	41.6627	62.6481	65.4907	42.7799	56.0855	62.9111	51.6269	59.8952	40.1483	42.2557	64.5799	50.2305	48.608		0.104347	53.1854
1.5474	60.3733	39.4439	34.0849	56.6764	37.3836	50.9159	52.5256	48.8444	53.9026	69.9154	81.7462	59.2928	56.4804	56.7089	56.5623	41.1283	83.0476	61.5167	49.271	65.122	53.0359	42.2836	63.4907	42.1551	46.3023	64.4738	46.8513	57.7585		0.11304	54.6891
1.6665	61.0814	37.6494	35.327	47.7435	31.1703	51.6052	56.3122	53.9195	59.8569	67.6384	81.9516	54.6681	64.3486	55.997	50.1128	50.5867	73.3747	63.1046	52.6172	70.8669	59.2915	48.3862	69.4877	41.5542	44.1225	58.874	49.7427	58.0774		0.12174	55.3381
1.7855	58.6383	33.1515	36.6576	47.7849	34.8532	52.8432	60.3282	51.3384	67.9571	57.0589	73.0399	52.4889	73.7075	58.5634	44.9217	49.99	81.3907	72.616	53.72	60.3811	68.5108	47.7221	60.0974	39.5738	41.341	50.4195	48.0608	53.8355		0.130433	54.6783
1.9046	58.4497	39.5966	43.395	51.9154	34.3042	56.5695	60.3652	48.9599	79.0157	46.7383	64.2148	51.2752	71.8733	57.9615	48.1617	40.6541	81.4819	65.3043	49.03	58.5257	65.3486	42.9724	60.1995	42.4252	41.678	48.9147	54.6689	47.8615		0.139134	53.995
2.0236	59.5414	29.1415	41.696	52.1391	31.9024	59.887	47.3075	56.5515	80.8951	57.6247	65.5848	49.2656	80.6697	63.2734	45.1726	45.8838	84.3863	71.3276	45.0653	48.972	62.7751	44.5861	60.8488	49.2808	41.3264	49.6793	50.7982	47.009		0.147827	54.3782
2.1426	55.5706	46.5775	39.5232	54.3304	40.1922	57.3432	47.5549	48.68	81.1487	52.4386	67.1378	45.8196	76.8288	62.1408	53.4193	45.0697	93.8885	69.4287	47.4425	46.5692	56.0266	47.0362	58.8961	45.0757	45.3349	42.4525	51.9707	42.144		0.15652	54.2872
2.2617	47.5079	38.7221	41.9791	51.531	33.2952	49.6307	46.862	48.5117	84.8428	46.7513	75.8892	46.1679	74.8312	56.8545	50.8586	52.149	98.9651	58.66	42.7169	38.5809	51.5083	42.5197	52.9117	48.9639	46.7504	48.2701	50.7238	43.6384		0.16522	52.5212
2.3807	47.7554	42.0585	39.9017	46.6217	35.8579	50.6033	43.8881	45.4907	68.7467	46.1961	71.4541	46.5925	67.7061	57.5923	47.5293	53.2826	99.6923	62.1049	45.4606	40.1925	42.7456	52.5749	52.5517	54.6243	41.9394	46.2652	47.4597	43.7898		0.173913	51.4528
2.4997	47.9165	37.4057	43.3228	50.9085	36.7727	56.3461	46.5928	45.3866	60.1888	46.8834	68.1257	49.8498	78.4065	65.875	47.5195	51.0407	93.8659	53.1122	41.3216	48.0637	41.084	44.2464	43.7567	48.5138	41.427	39.5364	52.3453	39.6184		0.182606	50.694
2.6188	48.8458	33.6024	46.574	51.47	32.6097	53.9526	43.9767	47.0426	50.0231	45.006	66.2974	45.2108	69.8683	72.9233	53.3871	54.5784	81.1704	46.1992	43.6044	50.6539	38.0918	42.2585	47.5786	42.3075	36.8651	44.0574	51.1204	36.4436		0.191307	49.1328
2.7378	40.442	40.9905	45.9966	56.7763	28.5169	46.7686	43.6611	37.0814	53.2949	44.2149	60.7277	45.583	73.6178	76.4607	51.8237	56.1184	77.3506	52.8362	48.08	60.0043	43.124	40.9455	43.1728	44.8437	30.1647	48.6733	52.7543	36.772		0.2	49.3141
2.8568	38.9173	47.3096	40.979	51.4938	37.4298	48.2684	42.8793	40.3108	49.3613	52.1059	55.3284	46.5688	64.3002	76.2373	49.0382	67.3404	72.5416	51.1651	43.5888	53.2568	43.1475	38.7356	46.5534	44.1881	35.9835	41.4092	46.3001	32.3474		0.208693	48.4673
2.9759	42.9465	36.2173	42.6618	49.2337	36.3024	40.621	37.79	37.8839	47.6485	50.4107	57.533	45.0721	63.9157	64.2864	53.1719	67.308	67.1816	49.4345	40.6324	52.5956	36.3002	41.1981	38.7351	51.5998	32.8166	41.9098	46.1212	33.0243		0.217394	46.5911
3.0949	44.4056	44.4174	45.4988	51.0379	35.1691	48.6584	43.6413	40.1261	40.9844	49.0825	58.7529	44.9129	54.5973	62.0526	45.2239	66.3413	60.212	49.2545	45.8924	48.4897	41.1962	34.2036	39.8897	52.4552	33.7488	43.1285	41.1491	34.4347		0.226087	46.3913
3.2139	43.0629	45.49	52.6224	42.1911	29.3117	44.4545	38.9906	46.4485	46.0732	46.8738	54.7104	47.0921	56.7892	58.4335	47.9711	82.0039	58.7299	50.1203	46.9086	45.3069	43.9925	37.2835	37.114	55.3632	38.0822	39.3831	46.5207	34.0564		0.23478	46.9779
3.333	41.3747	51.755	54.3171	47.5361	37.6169	45.4732	37.3317	41.6722	44.5085	42.6213	55.3642	43.1331	59.3887	61.5317	46.7238	74.7758	56.3482	42.7515	42.2085	34.7704	40.0285	30.0247	32.4542	50.1353	31.9821	36.4562	48.014	34.1773		0.24348	45.1598
3.452	31.6183	57.243	46.7534	39.9797	44.3766	47.8233	38.684	39.1113	45.1406	48.475	52.7126	38.5777	61.0847	58.2553	47.7188	81.7845	57.972	39.0536	43.0383	40.9323	37.4857	33.9178	32.4188	50.115	37.4875	38.1475	39.8967	31.2464		0.252173	45.0375
3.571	39.6049	55.3487	50.6197	33.3874	38.2495	41.7969	38.4964	40.8991	53.2532	55.7644	62.4133	44.4938	63.0861	64.0936	46.6279	75.3233	48.8895	40.5187	34.102	39.8846	41.0891	33.5091	30.9418	51.2792	32.8318	37.0118	36.9378	32.9877		0.260866	45.1229
3.6901	41.8447	51.3391	44.2503	39.6211	35.949	40.9034	38.353	36.3188	52.5835	57.9968	61.554	38.3968	65.4156	60.9072	44.2683	66.8565	46.0927	48.526	38.6053	42.8679	38.9152	36.0027	32.597	53.4324	36.9776	33.4358	41.0744	29.508		0.269567	44.8069
3.8091	37.6326	47.9135	46.6226	36.3748	32.8496	37.8274	43.7957	33.9794	46.9525	53.1749	62.78	46.3179	63.6944	62.5038	43.2254	60.1979	47.3788	41.231	39.0041	45.2533	30.1397	25.5841	36.5471	44.3963	35.9138	32.822	41.9416	34.5951		0.27826	43.2375
3.9281	47.3896	52.6291	44.8734	36.8956	38.7314	41.9037	42.3963	40.2183	47.2674	53.7323	56.0803	37.3498	58.3874	54.5058	43.6576	55.533	42.0394	38.3589	36.7708	41.7211	34.6139	24.6665	32.0042	45.1562	39.7706	38.7818	40.314	37.0815		0.286953	42.9582
4.0472	46.8305	50.0706	40.6004	36.7533	40.8707	47.3918	41.5439	33.0466	43.6574	53.4282	58.4553	35.1304	52.6122	60.3923	50.3753	43.6842	38.9504	43.0917	37.1738	42.5778	37.9485	22.9772	30.41	44.6484	38.8583	30.7533	34.0228	31.937		0.295653	41.7212
4.1662	51.9655	54.0276	36.6209	47.2687	42.0692	42.6428	43.6186	35.9116	47.3316	66.0951	56.1782	41.2915	49.4355	58.3761	43.0996	43.2821	45.786	50.6562	38.5814	34.2184	34.1235	24.2125	33.8757	43.284	38.2138	29.1572	34.2764	34.0294		0.304347	42.8439
4.2852	53.8662	52.3396	40.4865	40.0699	37.582	42.655	37.1813	40.4575	50.2918	56.4738	58.0357	43.6908	53.5581	57.3557	47.3114	40.0782	46.8496	49.7335	36.8594	39.9834	33.9755	24.7418	39.1176	42.9741	37.2546	31.7067	32.5233	36.0096		0.31304	42.9701
4.4043	42.8381	42.2557	40.2159	39.9786	32.896	48.2965	39.0756	39.067	47.2557	60.1856	61.7373	45.0285	49.4135	52.4114	49.5921	44.9903	36.9367	50.2919	56.6086	43.9891	30.2129	26.6078	38.9265	32.4846	42.5453	25.488	33.794	39.4675		0.32174	42.5925
4.5233	44.6031	39.6038	38.8821	48.6872	34.4772	43.0292	47.1889	39.6985	45.8245	57.8433	55.7912	40.532	39.3529	48.7426	47.4874	38.3347	41.3238	48.8276	52.4176	44.2773	31.7113	28.0304	39.16	30.8562	34.0298	31.6665	29.4863	31.0024		0.330433	41.1739
4.6423	43.2476	38.9573	39.5953	42.403	36.9015	42.6042	37.5346	34.6667	51.1484	52.8941	51.5543	48.5578	49.8581	40.4001	43.5971	40.9789	36.7373	52.8643	42.4622	39.2092	37.1154	29.8888	40.7748	38.032	28.888	28.6939	30.2777	35.9926		0.339126	40.5655
4.7614	50.1397	38.1405	38.8885	37.2712	43.7381	37.3906	37.3095	37.1627	45.6241	55.4967	51.8408	49.2978	46.8668	48.0146	41.1398	39.9136	40.16	52.5992	40.06	40.1745	34.9372	31.8342	37.2115	35.6521	33.4653	25.0638	26.2461	35.2804		0.347827	40.39
4.8804	46.3779	39.1143	34.4967	42.1814	37.6114	45.7185	39.5547	35.7525	48.7559	58.0329	59.0086	45.7842	37.4369	39.7592	42.8637	42.4323	39.3519	59.4818	49.2126	35.4508	36.2854	28.0093	40.3327	29.625	30.5476	29.6337	27.452	31.8376		0.35652	40.4322
4.9995	44.7148	40.8737	29.0969	39.9146	41.8658	47.6386	36.1396	27.8342	45.1115	52.7931	59.4389	49.5859	42.5183	42.8634	45.6996	45.8013	35.2492	64.6563	45.4132	32.939	34.7008	22.6077	37.6509	31.5551	26.1222	28.7665	28.1504	35.9942		0.36522	39.8463
5.1185	49.4084	36.612	33.6552	39.8527	36.165	47.0343	31.6823	32.734	47.6315	48.7997	45.169	56.0068	50.0349	37.819	40.0362	51.2411	34.663	55.8058	52.4046	33.3416	28.4162	21.3394	42.5905	25.8585	24.6977	24.8125	25.5401	30.8264		0.373913	38.7207
5.2375	46.4107	33.4491	30.3959	39.8821	31.9115	49.6425	29.0625	29.3115	42.6986	42.8177	42.1636	50.8174	52.6749	33.2846	40.3563	41.1893	34.8973	60.3952	47.2981	38.228	29.5767	21.3243	44.4007	25.1386	27.4151	27.4467	27.163	30.9734		0.382606	37.5116
5.3566	47.0633	39.0523	31.476	34.6902	42.9553	46.5376	29.6973	33.3234	50.0888	47.8189	55.4282	50.218	48.1909	31.3004	36.9656	45.1186	33.72	51.7977	47.3258	30.808	34.6911	25.9456	40.5559	27.8934	20.3387	30.3125	29.1797	35.2142		0.391307	38.4895
5.4756	45.0091	37.8674	35.8473	35.6969	37.614	46.7505	29.9092	35.4015	41.1545	46.4333	50.8911	53.0533	48.0766	35.5528	37.4843	46.2066	36.931	39.7323	51.3419	35.852	32.6547	23.6091	42.0959	22.8456	20.0805	32.598	23.2782	32.7728		0.4	37.7407
5.5946	39.7812	39.992	31.6428	42.8185	38.5976	43.6856	26.6767	34.1491	39.0081	41.2324	47.9626	55.6744	46.9402	33.1312	32.2997	41.0614	38.7187	40.6538	51.6535	30.1996	29.774	18.2502	44.0407	25.1468	24.9479	32.5131	21.2928	30.1351		0.408693	36.4993
5.7137	41.0535	35.2729	36.9473	44.6173	34.9997	44.2201	24.9151	37.8734	39.6006	40.0256	49.1289	63.2843	50.0088	33.7233	31.7723	43.9002	42.5285	34.7247	39.9633	29.2293	25.5225	21.7973	36.595	24.5689	20.3151	30.6673	27.7442	31.2268		0.417394	36.2938
5.8327	39.9587	34.9326	38.2838	42.1571	43.0185	44.512	21.5596	36.9758	36.564	40.3633	45.7433	62.211	55.0527	34.7229	32.5184	50.9149	43.3929	29.8016	44.3626	28.4562	24.8841	16.7433	36.7293	26.1895	20.6877	27.5173	23.1959	25.8239		0.426087	35.974
5.9517	42.9551	31.004	34.0727	38.1181	34.8902	45.8039	21.4054	29.4209	34.0342	39.4404	47.0753	56.9054	56.2918	35.3078	33.2604	51.626	39.7947	26.6034	44.6753	29.3057	22.4665	18.8568	42.8719	28.2488	17.37	29.7606	25.4476	32.4501		0.43478	35.338
6.0708	40.4213	34.2941	30.4462	41.6793	47.9468	33.8616	22.2382	33.0401	38.036	36.9242	53.7616	54.7731	51.6333	34.0715	38.0254	55.3821	43.2797	26.7843	40.8717	22.8213	25.0402	20.2052	43.499	29.4905	22.3397	26.7673	25.0782	29.7236		0.44348	35.8013
6.1898	40.6411	30.1171	31.7162	35.1923	43.2712	36.1949	21.4719	33.3683	32.361	32.2535	58.3516	51.3059	44.1014	35.9492	40.1782	56.8155	43.2456	25.445	33.7784	25.9504	22.7317	18.4384	31.5693	20.7333	18.7974	30.3032	20.9968	28.9667		0.452173	33.7231
6.3088	45.109	29.0278	37.0508	35.5693	40.8938	34.7194	24.6354	31.2081	30.7024	28.5229	60.8909	57.877	47.5511	34.9906	38.9941	57.1961	42.1151	17.2826	33.0242	29.2923	21.6549	19.184	30.1852	20.1606	19.9762	31.0998	21.9032	23.5173		0.460866	33.7262
6.4279	43.2386	25.908	32.5932	43.5075	37.9221	33.3848	21.6542	32.4284	28.1751	30.9202	53.1489	62.8095	46.2879	33.1185	37.3203	54.1039	48.8582	19.9527	29.7559	28.4041	21.6991	19.215	29.4562	28.6299	17.695	32.4207	21.766	29.5762		0.469567	33.7125
6.5469	50.8907	23.0034	34.0578	32.2855	37.0922	32.1405	21.6348	36.0058	28.8905	23.9706	54.3141	60.6803	45.3186	39.3309	35.1379	56.107	47.5459	20.0938	27.2945	27.2459	23.3364	13.8814	22.7243	27.6829	16.2864	28.453	19.6209	23.8612		0.47826	32.4603
6.6659	42.7923	27.2274	32.5507	32.6474	41.5751	35.482	24.4011	37.0964	30.6777	22.2289	54.5358	58.4686	45.3448	35.7808	40.8092	61.6861	44.8466	17.3624	25.4887	25.7224	22.5707	17.8728	23.2399	22.416	16.0037	28.7441	19.5571	21.3255		0.486953	32.4448
6.785	43.9577	31.6857	39.8669	35.359	36.3765	31.3034	24.0125	32.7763	26.3942	27.3916	54.4529	60.4801	44.4128	30.2419	37.8881	56.7018	46.9396	13.7509	29.8202	20.6975	21.6751	14.8998	26.0048	27.3708	17.8299	27.5147	22.2198	22.97		0.495653	32.3212
6.904	40.2661	35.9706	38.8964	36.6211	33.8877	28.947	18.3968	29.904	28.1908	25.4395	52.8612	61.8476	40.4423	28.5247	33.3569	54.133	51.7873	18.4413	24.6072	29.473	19.2383	17.5119	22.8774	26.5163	15.3338	21.843	18.7204	20.6428		0.504347	31.2385
7.023	43.4769	26.9138	37.9764	32.17	32.6213	26.7195	21.0629	29.815	26.587	27.4456	48.4051	63.2989	42.5102	28.1022	37.9662	39.8507	44.1743	17.5005	24.7179	31.2664	17.2145	15.046	23.2891	21.7746	15.5016	21.6081	19.3695	15.4989		0.51304	29.7101
7.1421	37.6027	25.687	40.3409	33.5932	34.9121	28.439	19.925	26.1295	25.6529	26.6272	44.5288	60.6942	39.4465	25.0465	37.3342	41.3015	44.8285	15.2221	26.645	23.1344	15.9546	13.269	19.5107	21.1924	16.4584	18.227	16.308	15.9723		0.52174	28.3566
7.2611	41.7407	24.2432	36.6779	35.1409	37.1007	31.0863	17.5115	27.2337	25.4037	30.4289	53.3558	64.9265	43.4945	22.2922	32.67	41.0158	40.5815	12.9	24.7651	24.7541	20.1824	14.2446	20.4421	24.2552	14.8266	19.6781	16.7337	18.8976		0.530433	29.1637
7.3801	40.8395	24.7432	42.7195	35.2019	34.891	28.5099	16.1868	27.6465	27.8034	26.1443	44.6007	59.6593	38.6284	21.3707	32.6115	41.3374	35.081	15.0752	25.5292	31.4532	16.2267	13.2175	25.0079	22.6397	12.0967	18.083	17.5651	19.3827		0.539126	28.3661
7.4992	40.9295	28.3684	40.1021	31.6364	32.4939	27.9537	20.1309	25.4694	30.9756	22.2747	42.7298	62.8183	33.2035	23.0629	31.92	41.5295	30.9431	17.2742	21.4663	26.6661	18.1432	18.0047	18.7251	19.6487	13.6676	21.3727	15.7355	15.9327		0.547827	27.6135
7.6182	50.6169	36.8322	37.802	35.4832	39.9964	23.1277	15.5997	29.3983	23.2665	20.3095	48.675	57.7991	29.6985	20.444	29.12	36.4555	36.414	15.7182	27.0832	23.3091	15.8197	12.7629	17.9936	20.9731	12.2284	17.6748	16.1104	14.2322		0.55652	27.3194
7.7372	44.3212	35.8658	35.2103	31.6364	39.0049	26.2929	19.9252	24.7431	20.1579	24.924	44.8159	63.2726	31.8714	21.2066	27.1127	45.616	34.512	14.7098	26.1095	24.0168	15.2228	15.2006	19.2713	17.4956	14.7887	20.2006	14.1766	13.5899		0.565213	27.3311
7.8563	41.6989	32.6597	40.9227	32.9723	34.9059	25.6049	18.0715	29.7282	20.9392	24.6138	48.0668	59.7989	32.7399	18.1257	24.3478	44.6707	32.1214	11.4603	22.8787	24.3813	17.9598	14.6899	22.1204	20.6704	14.1238	20.8397	14.1975	14.2451		0.573913	27.127
7.9753	39.909	37.4597	37.272	35.4961	40.9381	21.9924	17.33	36.028	21.7351	25.0753	45.7621	54.6047	34.4304	17.0808	25.7373	44.7047	27.7046	12.8142	25.1787	23.0382	19.085	16.7949	22.3136	19.853	13.0246	17.0672	11.8552	13.3451		0.582606	27.0582
8.0943	40.4087	32.8776	35.065	32.0128	31.4843	21.3136	14.578	35.9106	24.6521	22.2805	54.9892	61.007	37.663	19.0719	31.0168	40.4682	29.1156	12.4041	21.2208	22.0156	15.0521	13.4089	22.7139	19.2263	11.5007	17.8445	15.8164	14.5647		0.5913	26.7744
8.2134	32.9939	31.8599	38.0698	28.654	37.1198	24.1059	13.0584	30.8338	23.448	22.1788	56.4224	67.4187	39.2111	20.166	26.1238	44.5109	23.0101	12.5336	20.9831	22.7015	15.505	14.5138	20.1594	20.6813	10.662	16.1139	19.479	14.7107		0.6	26.6867
8.3324	37.5683	33.584	40.0072	28.5805	35.0817	23.4989	14.0147	35.0695	21.5134	22.9024	59.8827	63.1477	39.1834	21.3541	26.957	40.1044	22.4382	17.2156	23.2318	22.2975	12.4858	13.1984	17.1645	18.4228	15.0255	17.4975	13.6615	14.687		0.608693	26.7777
8.4515	41.0128	38.7219	38.4899	35.9776	34.5053	29.139	15.8971	30.8568	19.3395	25.9414	62.1043	57.9321	41.4319	21.5516	29.1577	36.2314	23.9494	10.7888	21.5866	22.318	14.9139	10.5646	18.3579	19.6675	13.5687	18.7917	12.8518	14.7875		0.617394	27.1585
8.5705	46.2531	36.1617	42.2094	34.7095	33.1797	21.6546	15.4032	34.3098	21.4977	22.0381	63.5596	56.5745	41.7243	20.2999	28.9544	37.6541	24.3058	12.6858	20.9347	22.1974	16.3929	9.8984	17.1493	15.8844	11.2318	18.5378	12.0227	14.5931		0.626087	26.8578
8.6895	38.6267	37.5212	39.8415	35.6999	36.1439	20.3847	14.1446	44.5274	24.2955	20.2949	58.1519	61.545	43.5962	22.5404	27.9932	40.2293	24.8457	11.0282	21.3587	20.1584	14.4894	10.9752	18.1694	18.0994	12.5542	15.412	13.5902	11.5032		0.63478	27.0614
8.8086	43.0162	30.8991	37.5328	33.0698	33.813	21.553	15.9413	42.0512	21.9495	22.2247	63.1029	49.4187	42.6666	17.5571	27.0602	40.1924	20.5001	12.9725	22.4145	16.2584	13.6264	11.2376	19.9343	20.0283	11.3924	17.3129	17.2234	10.4646		0.64348	26.2648
8.9276	45.4349	32.3249	38.1164	29.0067	34.0164	21.1582	13.6639	34.5079	23.0447	23.6263	62.5139	53.8913	43.1157	24.3196	26.6805	43.9988	21.5812	14.0526	18.4331	20.1262	13.1031	10.0512	17.5214	21.4224	9.9931	13.285	17.0138	12.9369		0.652173	26.3907
9.0466	42.4767	29.026	44.7761	30.0896	30.8023	15.8744	13.058	33.4233	22.3728	21.9114	59.0448	50.0965	36.7378	24.456	34.3741	39.2459	19.2372	13.5182	21.3235	19.8136	14.8295	10.537	22.079	14.4064	11.9296	14.4413	13.9794	14.4727		0.660866	25.6548
9.1657	41.7196	33.2003	45.635	27.9044	30.6958	19.8054	20.3411	33.6538	21.2654	23.7734	54.4896	50.5413	35.3024	28.9701	38.7042	45.6776	22.7466	12.2209	24.7537	16.5948	12.3606	9.6495	16.2945	22.2959	12.1957	13.0641	12.7954	11.7468		0.669567	26.3714
9.2847	44.3183	36.2346	39.2592	30.8641	27.9364	18.1339	15.7876	30.3316	31.6107	20.5752	58.3531	45.7451	38.9356	28.6008	37.0236	48.5903	23.5585	12.7716	19.4011	15.8614	11.1086	10.2151	15.0593	21.0367	10.097	14.8518	13.752	10.3919		0.67826	26.0859
9.4037	51.7268	41.0284	44.2755	33.2831	31.3868	20.2022	16.9127	30.1063	29.493	20.5836	49.6738	40.6342	42.568	26.255	38.2718	44.5181	18.4244	12.6059	24.7528	17.7661	11.9441	9.0141	14.8582	17.6168	9.7269	14.8676	12.5533	12.0435		0.686953	26.3248
9.5228	51.759	36.5532	42.224	34.0733	31.8224	18.8981	19.5829	31.7425	28.7739	22.2304	55.6271	47.6167	37.1059	20.3837	43.2809	44.5704	22.9146	17.775	19.9314	16.8908	12.4432	8.831	16.5167	17.1121	11.3243	13.703	15.215	12.2476		0.695653	26.8268
9.6418	51.1165	38.7309	33.9188	30.6324	35.0696	16.5861	18.3762	29.8406	29.8466	31.1253	58.9406	46.9388	44.5418	23.8895	47.8222	42.2014	19.3155	14.3479	22.4229	14.9108	11.9479	9.6437	12.0124	15.9326	12.0795	12.1426	12.6945	13.3218		0.704347	26.7982
9.7608	41.9098	33.6578	38.9118	28.236	40.473	18.9801	14.3719	35.349	33.1097	31.0106	58.3098	52.0237	41.619	25.6194	57.8382	41.7085	21.0159	14.9797	20.5663	14.0072	15.0005	9.0241	12.214	15.9107	11.6243	12.4803	14.7981	14.8709		0.71304	27.4864
9.8799	49.4847	37.704	42.726	29.4143	38.7017	21.8947	22.2097	31.815	37.4417	26.5143	51.1356	49.8895	42.93	30.2543	54.2111	44.7063	20.011	13.6418	18.1321	11.2035	15.269	8.0673	12.8995	14.5348	10.6175	14.0882	15.5349	13.881		0.72174	27.8183
9.9989	50.8163	39.7558	46.6235	30.4806	35.4988	14.7594	20.9084	34.4688	36.0044	30.374	52.1915	48.9705	40.2883	34.2015	57.8901	40.4694	21.7993	12.7642	25.5373	12.7554	17.7518	13.1413	15.6361	15.6694	11.2973	15.2139	16.6931	13.5401		0.730433	28.7679
10.1179	45.8583	36.7616	46.3994	28.0353	35.3162	17.2025	18.6262	35.3692	38.432	28.1251	48.4326	45.6076	40.9982	31.7383	68.0632	41.4936	17.3179	13.3917	23.9591	13.0749	15.75	11.3901	15.6485	15.9176	11.0898	11.1469	14.237	11.7575		0.739126	27.8979
10.237	44.4659	40.4	45.3389	31.5725	41.535	21.0412	20.3762	31.914	38.2363	28.9708	42.9053	46.5787	38.2693	35.8112	67.4912	44.2946	17.2436	14.9189	21.9589	14.0991	13.827	11.5231	11.3849	15.8924	10.7831	11.7935	12.953	10.8645		0.747827	28.0873
10.356	52.3559	42.233	55.524	30.1394	37.0884	17.638	18.6949	37.8112	37.6671	30.1135	48.975	48.7605	45.6514	42.3819	72.2556	37.2537	16.384	12.5941	16.3101	13.8893	12.1549	9.6184	13.6733	13.2934	8.5886	13.3663	10.4352	12.7381		0.75652	28.8425
10.475	56.8356	37.5731	52.0293	31.8842	40.0801	18.6691	18.416	36.2225	35.7945	38.7694	44.9245	48.8416	44.375	40.2113	65.0652	40.1909	20.7656	13.0594	19.1455	10.9437	13.1736	11.4115	9.1636	12.6787	11.3019	11.8316	10.9798	14.339		0.765213	28.8813
10.5941	50.5782	45.8854	36.2125	29.695	39.6325	22.6901	17.3474	34.9213	42.2699	35.6722	40.855	43.4338	44.6637	40.9971	59.7318	39.0373	17.7632	14.956	19.6671	11.1552	10.6635	11.0758	8.3974	10.8386	11.0516	12.9966	17.5814	16.7101		0.773913	28.0886
10.7131	61.5258	45.3053	40.2045	32.6423	42.979	16.269	24.036	35.1793	41.1519	28.8717	42.0669	43.1434	42.6361	44.5595	55.2527	38.8257	15.8996	18.1515	15.3171	13.9487	12.4017	11.6442	12.8809	16.5361	8.9166	10.7037	20.9261	19.0003		0.782606	28.9634
10.8321	59.5376	47.2067	41.3558	31.4993	39.0698	17.4381	25.2066	35.1767	41.4241	35.6352	28.1359	42.9885	42.5148	44.117	45.6608	29.246	15.0919	13.6476	17.1273	10.8845	13.2376	10.9599	13.7249	13.6901	9.3776	10.5538	14.8998	14.4444		0.7913	27.2804
10.9512	58.773	54.1935	39.8318	31.5076	46.6109	22.1462	27.2352	42.3836	39.7483	35.5458	33.214	38.3453	41.407	51.8651	43.9469	42.0072	17.55	12.7831	15.6722	13.8277	11.6013	8.883	9.7069	12.137	10.5241	9.2866	12.4539	13.0812		0.8	28.4382
11.0702	65.2939	53.9236	34.2497	30.5005	45.9435	21.9553	31.3304	41.9826	43.5476	30.3857	31.3463	37.1357	44.7378	50.2889	49.5701	36.5414	16.9292	13.5975	16.8037	12.3395	13.0184	7.7633	10.4938	11.2301	8.9996	6.8596	12.9226	12.5259		0.808693	28.2934
11.1892	57.3972	49.909	40.4486	33.4246	47.617	26.1376	28.0797	38.8485	35.7046	29.0985	22.6653	30.506	40.4322	39.7479	41.125	34.9922	16.2945	10.4471	16.0205	10.6134	13.8976	10.8614	9.2708	9.5656	11.3685	9.6084	13.9135	11.6724		0.817386	26.4167
11.3083	55.5185	46.7078	44.4518	35.8169	48.7944	24.6578	30.9451	45.0874	44.0681	32.0899	16.9794	23.4204	32.5038	43.7703	39.3708	29.7307	18.3609	17.2116	15.2303	11.9069	11.0968	12.5163	9.3866	11.2259	10.1933	10.0075	14.3603	12.6136		0.826087	26.7151
11.4273	55.0123	53.2109	39.9905	39.0787	49.4301	27.4512	32.5469	42.2687	42.577	34.6842	17.2254	16.6177	29.1861	41.5044	42.1453	38.385	18.9734	16.101	18.0437	9.5062	8.8576	12.3669	9.9534	11.3711	7.0178	6.9243	10.3529	10.5009		0.83478	26.4744
11.5463	58.9001	56.4792	43.1114	33.5559	40.8613	23.3796	33.5205	42.5731	35.3687	32.281	16.2549	10.8584	24.8857	32.7087	36.3733	31.6659	18.1517	13.556	16.0862	10.6825	12.6489	10.001	10.1309	9.9188	7.559	6.6043	8.8125	8.6351		0.843473	24.4844
11.6654	47.4722	51.4314	50.8726	36.1412	40.7347	26.9413	36.6586	45.9678	34.4316	25.5806	9.8218	7.912	20.0515	31.2233	33.5016	31.4917	16.9059	15.0816	13.8757	11.1776	13.3069	11.9792	12.3566	10.2125	6.7672	7.422	7.4345	13.1486		0.852173	23.9251
11.7844	47.8991	46.6289	44.55	34.8419	46.3006	26.7641	38.4492	41.4762	38.7763	27.3982	8.1065	6.6972	11.6636	31.0445	39.5129	32.2988	17.8512	9.5692	12.0841	12.5446	14.2144	9.7309	7.9688	10.5009	6.976	7.7157	10.9935	10.4431		0.860866	23.3214
11.9035	37.7652	52.5418	42.4908	34.3889	39.361	35.0062	34.4633	33.9694	37.2733	26.0421	7.5564	4.8431	8.8365	29.434	32.6833	29.0231	19.5512	13.4936	14.619	11.6181	14.3409	9.2903	8.1441	10.5885	8.8411	7.843	10.8443	6.0843		0.869567	22.1763
12.0225	32.2541	48.9464	50.6893	39.8366	36.984	35.2363	33.6523	32.1521	33.8909	24.8044	4.6125	3.4666	4.5434	26.0996	36.0267	27.2917	20.0398	15.3967	11.6159	13.5446	12.1536	10.1127	7.8149	9.1252	9.9342	9.9418	10.8871	8.0235		0.87826	21.7527
12.1415	35.6535	40.3822	48.413	40.3228	37.9388	29.8247	35.6521	32.1645	31.297	18.0468	3.6805	2.5502	3.4827	27.3119	31.7964	32.8213	12.4129	14.149	11.2331	9.451	11.3415	9.0607	12.9926	8.3899	5.1048	10.8286	12.5182	8.299		0.886953	20.6114
12.2606	28.3171	34.6681	41.1386	41.7565	40.7574	35.4982	31.5923	30.7344	29.9405	16.2262	4.2306	1.6917	2.4369	17.4179	26.2733	27.5386	16.6905	14.3376	14.0012	9.182	7.9871	11.3588	11.1875	8.572	6.5615	10.1072	10.5377	8.0781		0.895653	19.2436
12.3796	20.0397	33.6696	50.5914	45.9762	37.3001	34.3556	32.7499	22.1215	20.4221	10.9897	2.9876	1.4578	1.6684	18.0151	23.9492	28.0398	16.1449	11.8322	14.9572	9.1259	9.1357	8.3162	12.8772	10.8148	6.2179	5.2118	8.7204	7.9823		0.904347	18.0597
12.4986	20.2164	32.2014	45.9577	47.8764	37.3098	31.3869	30.7973	18.6343	13.4051	11.239	1.8781	1.6151	1.772	11.0695	21.4946	32.305	13.6845	7.472	13.614	11.449	12.4184	9.1954	9.1195	9.2025	7.1097	7.6859	10.4407	10.1245		0.91304	17.167
12.6177	16.1596	26.8768	43.4175	49.0013	31.8681	37.0135	28.7085	17.793	6.1124	7.8703	3.1764	1.2746	1.8966	7.3159	20.7935	29.4387	14.2082	10.6434	13.1932	10.5131	9.8485	8.6324	9.3772	10.1863	6.9129	5.8316	5.9927	7.7534		0.92174	15.7789
12.7367	11.7714	27.1444	48.1512	47.0489	40.0405	33.0896	26.4004	13.3582	4.7588	4.456	1.6626	0.6634	0.8942	4.8462	13.5888	30.3017	14.1169	12.2703	15.3733	11.1387	7.2833	9.1685	12.8254	9.3446	7.9036	6.9813	9.4826	6.5507		0.930433	15.3791
12.8557	10.5444	26.7138	43.8967	37.6272	37.7752	32.575	19.7107	12.7433	1.5345	3.4516	1.3006	0.452	0.9142	3.2029	12.5659	34.8448	11.3584	11.8763	13.7934	11.5448	10.6767	9.6441	11.5288	7.9782	6.6509	7.3289	7.9919	4.6157		0.939126	14.1015
12.9748	9.0445	23.3809	41.1504	41.9875	38.2565	30.5371	19.765	10.3925	1.7195	2.5715	0.2579	0.2502	0.7755	2.9253	9.6286	37.8379	13.8491	12.672	9.558	9.8042	9.4716	8.6502	11.8615	9.9722	3.9995	7.0811	9.6185	6.165		0.947827	13.6851
13.0938	6.3024	18.1622	39.0876	37.724	29.93	32.4772	16.676	10.6878	1.4223	2.9716	0.0156	0.4797	0.428	1.8167	7.1801	35.8516	11.2118	14.2524	9.9683	8.0463	9.1805	10.8022	8.5983	8.2511	8.7057	7.5923	7.0059	6.9384		0.95652	12.5631
13.2128	7.6917	14.8595	36.5841	32.2138	31.9608	25.5688	8.0697	6.2239	1.0491	1.5969	0.6805	0.3599	0.8896	1.8432	4.7684	29.3007	9.2785	13.5242	7.7361	9.3079	8.6954	9.0619	8.8275	8.8087	7.1659	6.0575	8.8986	5.2973		0.965213	10.94
13.3319	4.2871	15.4138	33.0933	27.5474	30.7972	16.7749	7.6894	6.3503	0.7058	1.8909	0.2489	0.3613	0.3797	1.4218	4.1087	27.1133	7.8228	11.5869	9.0944	10.2505	7.7865	5.9991	8.4418	7.199	5.7718	5.9852	6.6527	7.144		0.973913	9.71138
13.4509	3.0381	11.3558	29.152	29.3548	26.8608	17.6949	4.6094	4.8887	1.6097	1.2676	0.0416	0.5542	0.421	2.2137	2.2354	21.5011	7.9333	11.098	6.4436	10.9059	10.2961	6.8358	8.9576	11.7658	6.9938	5.966	7.2779	6.4214		0.982606	9.20336
13.5699	3.6963	10.3775	23.7728	28.5441	23.6545	13.624	3.2214	2.2155	0.4204	1.3233	0.38	0.611	0.2238	0.4793	2.4695	18.7645	6.3179	10.0904	9.5508	8.8265	8.9531	7.5812	12.0852	9.2931	8.2263	6.8457	6.5106	6.783		0.9913	8.3872
13.689	2.2761	7.9638	18.8077	19.1533	23.5568	9.4241	2.6415	3.3802	0.0907	0.66	0.0314	0.1221	0.3723	0.3792	3.1214	15.1852	5.7948	13.7536	10.3409	7.959	8.5369	7.6305	9.3221	7.5744	5.7877	6.4834	5.2348	7.4955		1	7.25284

## Sheet: Image9 (2)
X0	Y0	Y1	Y2	Y3	Y4	Y5	Y6	Y7	Y8	Y9	Y10	Y11	Y12	Y13	Y14	Y15	Y16	Y17	Y18	Y19	Y20	Y21	Y22	Y23	Y24		Ap-basal	Avg intensity
0	22.1412	15.7094	16.9022	16.8933	17.6287	14.0775	19.707	18.4902	16.2833	12.0899	15.3979	11.6634	15.5519	16.2657	16.8165	16.9982	16.8945	19.2861	18.6704	23.9104	19.4983	21.0692	22.9085	23.5575	18.9417		0	17.8941
0.119	16.6976	17.0191	15.4215	17.8551	14.3965	14.4929	21.2774	21.1731	16.3704	14.168	16.065	16.2375	21.5292	17.4822	18.5665	16.1956	18.5252	18.058	18.517	22.2693	20.542	18.2109	27.1618	24.9703	21.1254		0.00781024	18.5731
0.2381	21.9469	22.287	15.7783	23.6234	13.8062	18.1491	20.0471	19.1609	19.824	14.4098	18.216	14.4985	18.8922	16.8894	21.9632	15.2977	18.1919	24.1389	19.9473	28.9204	18.7094	17.4373	24.4384	26.6189	25.0097		0.0156271	19.9281
0.3571	19.0402	18.4197	19.8301	20.294	16.3014	23.0801	16.5191	20.9179	16.136	16.7629	16.1051	16.9349	19.4151	18.398	14.002	15.5559	19.9251	24.4206	25.1758	22.2336	19.3249	17.7436	26.6237	28.892	22.3151		0.0234373	19.7747
0.4761	23.942	21.048	14.8225	19.0807	17.6103	19.9961	24.7322	26.1387	23.6072	15.0273	17.8638	19.8151	15.4921	18.5455	20.8069	23.5785	21.8256	24.8385	21.2832	13.0615	22.9884	22.3483	24.1528	28.5969	23.4947		0.0312475	20.9879
0.5952	25.9008	20.1276	16.4131	23.8731	18.3272	21.9926	17.4777	25.2231	27.2541	19.5737	22.3803	19.5913	25.5474	27.2248	20.7968	16.9835	22.8585	26.4252	22.4169	19.5492	25.056	22.8082	23.8802	27.6931	29.858		0.0390643	22.7693
0.7142	20.6843	30.7464	20.4146	23.4768	20.1291	22.3651	23.2832	26.0386	20.8385	21.2811	19.9046	23.4714	26.2202	28.7862	23.2278	19.9383	18.8401	29.65	21.9477	26.0187	22.0547	25.558	28.5543	36.4697	30.9899		0.0468746	24.4356
0.8332	24.7637	36.4101	17.4387	19.0297	17.3982	21.3085	23.7086	27.4336	23.4855	19.8903	21.2271	28.0521	23.0958	33.3365	19.8213	22.776	20.5162	30.3174	27.4246	22.3328	23.9401	21.7115	32.4908	42.1763	36.0947		0.0546848	25.4472
0.9523	29.3076	35.8044	17.5741	21.5234	18.125	25.2419	25.0688	33.1534	32.1909	31.1977	20.6933	25.5599	26.707	29.7677	25.6697	20.6171	28.3156	32.0039	25.8164	21.7295	27.649	30.5925	39.558	43.0896	42.6587		0.0625016	28.3846
1.0713	32.4254	37.0214	18.4866	30.0256	22.3775	32.0378	24.8629	32.2562	25.8986	24.4115	23.8108	27.6476	29.3766	29.6122	26.3801	23.8915	20.544	31.2314	26.7457	26.133	34.6298	27.6057	44.4308	43.2333	39.6364		0.0703119	29.3885
1.1903	23.7803	36.6655	21.7163	24.3621	23.8892	27.6059	27.9828	30.9838	23.2304	26.3295	22.6153	22.6183	33.6957	37.7343	27.8998	21.9249	30.9343	37.8028	25.9007	24.0472	29.2595	26.5262	53.6053	43.8189	51.1432		0.0781221	30.2429
1.3094	26.6091	38.6677	26.6089	23.7077	23.0903	29.8676	26.3077	34.1297	31.6031	34.0024	26.0707	26.7853	30.5755	31.674	26.6378	23.2245	29.0615	37.0233	25.7825	27.9009	34.6424	29.7507	51.9001	46.6852	53.6937		0.0859389	31.8401
1.4284	24.2109	38.0365	22.9433	22.6553	27.528	33.1458	21.3098	30.5112	29.9832	37.3042	28.1926	26.1367	36.8126	29.9877	27.0782	22.7999	30.9095	36.3737	32.8256	34.651	33.5202	37.0714	55.3376	44.4934	54.4326		0.0937492	32.73
1.5474	28.0698	28.9436	24.4934	23.1887	20.0392	30.9417	26.8177	31.5923	33.7101	35.3598	31.9796	24.2098	33.5482	33.7779	28.5328	25.3937	32.0661	33.9841	28.8648	35.3413	37.2429	36.7482	51.0403	43.5369	48.7466		0.101559	32.3268
1.6665	32.4904	30.1307	25.9205	23.155	27.6539	24.8796	25.2009	27.7086	31.7359	40.5594	25.424	27.3495	35.4002	30.9438	24.3614	30.6623	34.5292	32.7376	29.1357	33.6003	35.9176	34.8931	44.2853	38.2343	48.0801		0.109376	31.7996
1.7855	35.1897	29.5108	27.1636	23.3436	24.6335	26.3289	22.396	30.4389	33.2004	41.8504	30.32	25.9184	38.3747	36.111	27.2308	29.9161	40.0944	33.4272	38.8193	37.7122	37.5415	38.3822	46.231	38.3534	53.2654		0.117186	33.8301
1.9046	32.5337	34.9014	23.1535	31.4448	25.9702	27.8032	27.2649	26.3536	45.3264	37.3552	28.8719	29.93	35.3356	30.2651	31.6405	28.5084	41.0029	36.9826	37.9208	37.2726	39.7559	42.1465	41.8139	42.5788	45.8754		0.125003	34.4803
2.0236	31.5014	28.551	26.7277	22.9348	30.1021	28.4813	29.3019	32.9058	32.0681	30.0062	35.0422	29.8995	31.8223	31.0673	25.4973	34.3623	48.6221	38.0515	34.8213	33.2355	41.4187	46.4703	43.4208	40.4348	49.5255		0.132814	34.2509
2.1426	35.7894	32.9134	33.6456	25.0733	30.9954	33.5944	33.3371	30.2811	37.9659	32.1306	38.3758	40.1093	33.8641	31.6781	30.9115	31.8809	45.815	38.094	33.23	48.635	37.2052	34.6851	45.2337	39.3857	63.5554		0.140624	36.7354
2.2617	32.6592	33.3393	25.7568	31.3661	32.2282	28.2953	34.1208	31.0249	32.0275	36.797	32.5252	40.4199	38.6444	35.9286	26.7034	33.6363	47.0358	38.8445	40.9788	43.2499	34.7124	31.9	40.0817	50.366	65.0715		0.148441	36.7085
2.3807	27.6027	30.1081	31.1046	28.3285	34.0431	33.9235	35.7103	32.1764	40.8256	39.3824	45.2855	37.8013	36.7048	30.9663	28.1158	33.1151	44.9054	38.7045	40.681	40.8736	35.3151	36.176	44.1176	52.3537	68.7412		0.156251	37.8825
2.4997	34.8266	32.2209	31.723	30.7973	28.0924	27.3568	34.274	33.1568	39.8273	35.2971	44.6767	38.9945	41.6658	28.2464	26.2253	36.6679	45.6294	35.9037	40.9259	39.0439	39.3778	45.8871	45.8196	59.4484	56.0405		0.164061	38.085
2.6188	27.3271	28.3451	28.3095	29.1436	31.9362	24.9347	36.5886	33.5188	34.4821	29.0619	37.7575	35.3603	46.2664	31.4362	35.4643	37.8056	45.2354	30.2295	34.7694	43.8167	37.848	34.681	44.5771	52.7635	54.1877		0.171878	36.2338
2.7378	28.8833	31.3464	32.326	25.9155	31.9149	32.4681	33.0646	32.4637	36.1718	32.2113	34.0869	39.0277	44.2751	36.2755	35.3166	32.4463	48.0382	32.2157	40.1754	45.6941	32.8994	43.4016	52.498	48.4987	51.9677		0.179688	37.3433
2.8568	32.0414	28.8834	34.0713	30.7051	28.2538	27.0208	43.8741	29.3552	41.6138	32.7294	33.9037	34.4621	39.4029	29.062	36.5833	35.2061	40.5031	31.4999	36.9603	42.0245	32.3401	48.9236	44.5382	50.4911	52.9515		0.187498	36.696
2.9759	34.4329	34.7986	38.582	30.2715	30.9675	25.7016	34.5196	32.426	47.3003	30.9939	36.298	29.7169	42.8355	25.6817	33.9957	33.6561	42.3221	36.3272	36.6437	52.865	34.7478	44.2472	51.0396	62.0023	48.6822		0.195315	38.0422
3.0949	33.5598	29.7579	40.0965	31.8906	27.4683	29.7431	33.9129	27.82	39.647	27.3975	37.5795	33.9658	49.999	34.556	38.3606	31.1366	38.321	33.7998	38.3447	46.4273	35.9841	46.8547	48.0973	72.8094	41.5657		0.203125	37.9638
3.2139	35.2891	34.2386	35.548	28.8465	27.5595	30.7799	28.4172	38.4916	36.9941	30.7975	34.252	37.9093	42.9956	36.4382	32.7812	34.8788	37.8037	39.6258	37.6233	50.9279	33.8613	46.0902	40.5721	58.78	34.8047		0.210936	37.0522
3.333	26.615	35.627	33.0591	36.1589	25.7917	31.42	35.1844	41.2417	38.7739	27.4691	34.8856	41.1407	44.5486	38.5572	32.7027	45.3842	36.1542	34.503	40.0652	41.12	31.404	38.2535	41.3161	56.7767	33.0795		0.218752	36.8493
3.452	26.7174	35.911	31.8179	37.45	24.4462	33.111	37.2121	37.0083	36.8795	30.3037	37.8722	38.4994	41.2426	35.9716	35.9028	35.8297	35.6308	28.6271	42.6866	44.489	39.9367	36.6285	46.9826	65.1362	37.7065		0.226563	37.36
3.571	25.4485	34.6753	35.1588	39.3768	28.7586	28.8321	36.2319	40.0563	37.3025	27.9902	41.6796	37.0698	48.6766	45.1394	34.3276	40.5495	32.7443	31.797	34.8782	43.7506	35.5577	47.0895	43.3271	59.0691	43.333		0.234373	38.1128
3.6901	27.6311	34.3678	36.3811	36.7769	30.4579	35.1525	35.7546	34.5443	39.6004	32.9324	33.8317	35.5033	42.5558	39.2353	34.7575	40.9193	34.5088	35.3843	39.9883	47.1163	39.9774	50.0319	42.4957	68.1449	45.349		0.24219	38.9359
3.8091	26.0262	28.9652	29.1171	35.4552	26.3792	28.3524	36.1708	38.9885	36.1172	28.2539	33.4313	32.1479	47.2677	43.0232	39.4117	40.4806	43.8615	29.147	45.5748	43.8241	43.1493	44.1031	45.5281	54.8442	47.3295		0.25	37.878
3.9281	27.8623	35.4228	30.8747	43.9737	27.5377	30.6572	39.3237	33.4982	42.443	30.4787	34.3956	39.0462	41.9968	46.1693	36.3154	34.2628	37.6111	38.5241	43.4457	43.7711	36.2318	49.861	39.4568	53.1291	37.2885		0.25781	38.1431
4.0472	31.4625	34.4828	31.107	40.386	30.2773	28.2994	30.4914	39.7375	36.5073	29.8468	43.9076	39.0311	53.9438	32.685	35.3853	34.9384	33.6126	34.4788	44.5626	32.4362	36.1087	44.0613	42.4304	41.9546	38.7166		0.265627	36.834
4.1662	31.1108	37.7593	30.486	46.0724	33.2996	27.1244	31.1634	37.1044	43.2234	32.6699	49.6722	45.7255	55.5653	44.4271	38.2825	35.6352	34.9085	37.9788	34.0756	44.837	38.2538	48.1474	41.89	44.1908	36.7629		0.273437	39.2146
4.2852	27.0705	45.1276	29.4985	40.3949	27.5219	31.8257	32.7327	49.0366	34.005	34.1777	38.3373	48.4007	48.9712	42.6676	44.9236	37.6571	34.3791	34.1477	38.6438	44.9439	38.5981	50.0165	42.0709	34.1893	40.2347		0.281248	38.7829
4.4043	31.4276	37.7759	29.0741	40.0887	27.9523	32.074	37.2281	46.8476	35.1983	34.569	38.8201	39.3178	54.9011	44.2754	51.6304	34.9984	40.111	40.1859	39.6737	48.7843	42.5913	37.9768	30.9576	32.9693	45.761		0.289064	39.0076
4.5233	29.2526	41.3965	30.9747	36.8305	36.2121	38.0305	29.7191	45.6176	34.2335	33.9066	40.4469	39.3832	53.7871	46.9781	49.7885	26.3598	32.6233	35.0753	36.1705	42.8331	39.9016	43.4311	33.5318	28.1345	38.372		0.296875	37.7196
4.6423	31.7996	42.0893	38.6222	41.7575	25.3613	35.8751	37.3336	47.8487	34.9922	36.5951	36.2021	42.3645	45.2702	48.7051	42.3089	33.2011	41.7532	43.3724	40.8074	35.3109	40.0942	43.4238	34.023	27.8961	39.2116		0.304685	38.6488
4.7614	30.0063	34.6637	26.7738	35.8843	36.124	37.4654	40.8419	42.4318	32.2392	33.0615	41.4466	43.9534	52.8638	43.8718	47.1478	34.8206	38.4823	45.7207	48.4632	31.7221	46.6114	37.7635	30.2272	28.5006	40.2883		0.312502	38.455
4.8804	30.3067	37.4767	33.9392	35.884	24.3321	39.1252	42.343	46.3611	30.4193	36.1265	44.2438	49.9202	47.2574	41.9936	43.1161	32.4532	39.5097	44.7929	50.3796	29.1013	45.3615	38.6616	34.381	29.9236	37.8226		0.320312	38.6093
4.9995	31.8829	45.3104	26.6624	35.6	29.606	40.6696	38.9102	47.8833	33.1448	42.0061	50.0767	56.4655	45.0034	42.6855	48.453	31.606	41.7014	44.6318	50.0002	27.6709	44.8164	39.6358	31.3415	22.8355	34.327		0.328129	39.3171
5.1185	38.3658	40.8839	26.4388	31.698	32.701	42.3428	38.0248	42.6899	32.6383	44.4188	40.5006	57.1104	48.4161	46.8334	46.0605	34.6583	41.1616	48.3026	38.188	24.205	46.5224	47.9888	30.9444	20.052	29.3508		0.335939	38.8199
5.2375	30.4775	36.6345	33.0389	31.908	26.0197	40.3797	40.5976	50.092	35.1566	41.6915	40.4366	56.1612	42.3424	36.4508	47.5691	40.1578	42.8293	49.3278	42.8469	30.7311	34.3149	39.1104	33.4818	24.5115	29.9426		0.343749	38.2484
5.3566	30.5733	41.9609	34.7088	32.814	22.7514	36.6347	34.9019	36.7656	33.0873	46.6201	43.6463	50.3963	39.7287	35.4517	33.8567	34.1092	47.357	40.7523	43.9473	33.8943	32.606	33.815	29.1349	19.376	34.8127		0.351566	36.1481
5.4756	28.0378	47.1713	34.3107	37.6049	25.488	34.4237	38.1267	39.1334	42.4438	39.3714	45.7253	54.2233	41.1081	37.1408	37.055	31.4891	50.3997	47.2736	39.7719	35.9415	35.6215	36.5508	18.6655	18.8083	33.2217		0.359376	37.1643
5.5946	29.7563	44.3241	32.9697	30.6649	25.4707	36.6564	44.4376	30.8696	43.7808	44.1069	48.7904	51.739	41.5655	36.9789	40.5112	35.5149	43.805	48.9547	46.5196	33.745	34.1495	42.2723	26.2117	17.0519	28.4796		0.367186	37.573
5.7137	34.013	42.4015	26.9943	30.8503	23.4398	33.3351	33.5198	36.9258	43.7404	43.374	43.158	52.033	52.5786	35.3033	37.5033	38.0133	42.5039	43.6473	42.539	40.1312	31.4905	34.8981	23.5878	15.5024	31.1034		0.375003	36.5035
5.8327	31.3842	48.0544	32.264	28.6321	27.4758	29.4616	42.2029	33.6797	36.3571	40.4439	40.2706	51.6473	41.8333	30.6274	33.1998	35.6679	40.3447	36.8959	39.8485	33.5203	41.986	34.3786	22.911	18.5743	27.8965		0.382814	35.1823
5.9517	35.9288	43.9781	29.6685	23.6671	22.8775	32.488	40.4387	28.3602	44.912	43.8869	42.9144	50.6251	48.8737	25.5629	40.4247	42.4781	52.1504	44.9228	36.7531	32.8324	31.1598	39.5821	24.1371	18.0166	31.7974		0.390624	36.3375
6.0708	36.7733	40.4803	30.8402	23.2016	25.6189	35.802	38.5602	37.0937	34.541	43.3644	40.7486	51.2527	47.4905	28.0344	32.4629	34.874	47.8102	35.057	37.771	33.3978	30.7355	30.7937	20.8418	20.4109	29.6207		0.398441	34.7031
6.1898	31.384	39.8019	30.0763	23.0351	26.7245	25.9779	38.8933	39.0633	40.7918	47.0433	40.075	53.5691	39.5334	19.7604	34.7207	36.9372	45.5027	35.5414	34.8713	35.0139	39.1259	29.296	20.486	18.6746	32.1151		0.406251	34.3206
6.3088	32.5649	38.1008	24.3496	21.3999	25.9044	28.2704	39.5026	33.4957	31.6119	51.2656	44.3359	53.9263	42.264	23.5302	37.9937	43.7734	40.7433	36.7739	32.6753	42.3275	26.4741	31.9441	20.2964	15.1341	27.6131		0.414061	33.8508
6.4279	36.1587	36.3782	25.6854	31.3536	30.172	21.4185	32.0568	38.0593	31.3718	54.2389	40.0615	47.7403	39.3	17.7091	38.2511	36.4738	39.5556	29.4732	31.6959	40.3305	27.745	30.0665	17.4849	16.7453	27.3283		0.421878	32.6742
6.5469	28.388	30.4718	24.4804	25.5387	22.39	19.9853	28.7626	38.4526	31.3276	59.7985	34.6307	31.974	38.973	18.2899	37.591	38.8943	40.8846	33.7479	31.5609	36.0324	29.1659	28.6953	20.245	14.4687	29.0006		0.429688	30.95
6.6659	29.4421	33.3726	28.0977	22.7362	24.9618	20.4074	35.5294	35.2671	36.0231	58.0394	30.2096	36.898	34.964	14.1587	38.1724	36.3259	40.2543	28.4066	33.7155	47.5904	28.6384	28.8278	16.135	12.5361	26.7986		0.437498	31.1003
6.785	34.3393	31.8948	28.6501	20.4542	27.0503	18.8416	36.0422	38.0246	36.0633	57.782	32.3724	43.9329	40.5877	17.271	32.0991	37.2808	43.2874	31.3947	38.9474	43.2439	27.2116	29.1915	17.2615	15.6709	30.1026		0.445315	32.3599
6.904	28.6317	37.1384	26.6488	32.6959	27.9508	20.0854	29.8157	36.5954	34.4009	52.9103	26.2849	31.3189	38.5905	18.3802	36.9488	34.3022	36.0163	30.5675	30.8929	43.1973	24.0305	28.5327	22.3357	14.5579	30.7804		0.453125	30.9444
7.023	32.1058	30.6897	21.5189	25.2932	28.2749	19.9085	25.4825	40.4159	39.4319	57.5546	32.3575	48.4593	28.7032	16.6082	35.1597	30.2374	32.2287	27.9075	31.3632	47.1759	23.5001	25.1103	21.5043	19.9096	30.9135		0.460936	30.8726
7.1421	30.3129	30.8629	23.5277	22.6816	23.0506	22.1484	29.2774	34.7745	37.5253	54.6155	27.0676	47.8965	31.1663	11.5807	33.9549	32.6847	31.6907	26.661	29.5617	49.4903	23.3002	19.9778	25.1109	20.5238	30.4261		0.468752	29.9948
7.2611	26.1688	27.0167	23.3653	24.0715	27.9469	14.7206	29.342	31.9845	38.8984	43.1765	25.7384	48.7187	35.2509	12.2417	39.8807	32.4238	30.3905	30.0628	27.8968	44.8592	23.8305	25.1538	20.3524	17.8298	27.4441		0.476563	29.1506
7.3801	22.0599	33.833	25.0394	19.8841	21.9435	17.5581	24.4218	28.2058	38.2693	37.013	22.3697	38.0014	34.2083	16.7854	41.1111	31.6574	21.4556	33.7051	34.0026	35.7807	21.9643	24.8773	24.3612	16.2543	27.6209		0.484373	27.6953
7.4992	25.2619	28.1465	25.3315	19.6312	18.2035	15.4832	24.9276	33.0709	33.0329	40.516	26.122	43.6384	31.5826	14.2246	45.3103	30.5412	22.1388	29.2311	24.8959	41.903	23.995	23.1817	19.5831	18.2243	23.5603		0.49219	27.2695
7.6182	19.0307	27.5253	19.5565	23.854	24.7479	19.6311	21.3573	32.9851	28.971	36.1252	24.3469	35.657	20.0448	10.0974	41.6289	28.1337	26.0528	31.1317	26.1702	48.7703	21.7499	20.9687	19.3454	18.5055	24.8279		0.5	26.0486
7.7372	19.2664	26.6311	18.0033	23.0943	24.143	17.285	21.0495	37.4307	32.7807	37.8542	22.0219	38.7576	31.0688	13.887	38.3177	26.9297	16.0776	32.4823	31.4166	44.5034	23.6445	15.0337	23.4292	22.0306	23.8286		0.50781	26.4387
7.8563	22.0876	28.1679	19.7808	20.9952	24.6749	18.7396	31.9975	30.3762	30.0122	36.4921	18.28	34.9688	26.7385	10.0379	33.3575	32.8982	18.8624	31.2404	33.4518	34.1613	20.71	17.6409	23.0867	21.8137	25.883		0.515627	25.8582
7.9753	21.4959	27.104	16.7555	26.6144	21.3091	21.1653	29.4147	36.641	34.2078	35.794	26.3549	33.0488	27.573	12.0748	39.0679	33.7994	21.1012	30.5757	28.5445	41.93	19.7714	18.1473	23.5279	24.3172	16.0579		0.523437	26.6557
8.0943	15.6661	26.9827	19.1515	20.3084	25.9732	22.1835	20.8155	32.316	32.9162	38.7987	19.3027	35.8372	26.9047	15.5536	39.2097	25.7649	19.3615	30.2345	32.3831	41.0978	17.9324	17.8307	21.9379	26.9415	20.5143		0.531248	25.8367
8.2134	15.2856	21.0801	21.0065	25.9178	31.129	23.4361	28.7997	24.5338	33.4483	32.7404	20.412	27.414	21.4762	13.7084	33.4985	24.9203	13.8012	33.9535	25.1325	34.4946	15.2311	17.2302	30.2594	25.4726	20.0917		0.539064	24.5789
8.3324	22.4226	23.6871	18.788	22.5312	31.324	21.4966	29.2414	26.232	28.4062	31.9484	21.7534	32.2554	32.6102	12.4841	39.0235	26.5747	15.2295	43.6994	28.3246	30.3948	18.7595	19.3541	27.1329	26.9088	24.4555		0.546875	26.2015
8.4515	18.0958	25.982	14.898	21.2012	27.4353	18.5786	37.7688	31.8528	30.5298	33.2057	22.6411	33.0028	33.5111	15.0345	26.695	30.5234	15.1436	34.9598	34.7566	31.0297	18.7243	17.9573	22.2151	29.9432	23.0417		0.554691	25.9491
8.5705	18.5577	30.5121	17.2245	21.6067	29.7056	18.0478	27.5853	25.6675	30.4124	35.0893	18.8065	25.073	28.2227	11.2436	37.532	24.6322	13.9386	37.3634	34.9144	28.4281	22.065	19.3488	27.8383	26.5635	24.3899		0.562502	25.3908
8.6895	17.0062	26.2726	17.2308	23.1213	26.777	21.9772	28.2508	31.5922	37.6933	40.5153	20.2497	33.1673	30.5709	17.3181	30.4796	27.5675	15.8031	35.0235	31.7841	22.8948	16.4415	18.0347	23.37	31.4298	25.7862		0.570312	26.0143
8.8086	20.4973	21.5909	16.0207	24.7085	26.6477	15.7865	27.9578	32.5843	32.3999	28.7109	20.5462	28.9575	29.2754	11.3309	28.0182	25.9788	12.4177	32.7458	27.5265	25.2182	21.2663	21.3811	28.4919	44.233	22.7086		0.578129	25.08
8.9276	18.5061	26.7547	15.642	30.1008	27.341	24.3049	26.8221	31.5865	35.8261	32.5911	16.4531	27.9132	33.6866	12.4171	35.5897	19.0092	16.9712	36.4273	30.3334	28.7662	23.1994	18.1334	30.3812	42.8527	24.4572		0.585939	26.6426
9.0466	15.7973	25.1865	14.2026	27.2712	33.1461	18.1674	26.4767	31.9751	38.4773	32.1542	18.2717	29.2892	37.891	15.3547	31.9593	19.1322	17.5551	40.4215	29.7751	25.9923	26.9611	23.0838	36.538	44.5708	28.4999		0.593749	27.526
9.1657	16.3815	28.2925	13.3947	24.8476	22.4652	20.3893	32.1765	31.0431	34.186	26.2286	23.9559	30.7827	34.7893	11.8346	34.3946	22.9692	15.1015	40.5489	34.6881	27.2554	23.1018	22.6606	38.7857	47.9092	24.0162		0.601566	27.2879
9.2847	19.2527	28.3893	13.1693	32.6818	22.4736	22.2817	30.648	30.2442	30.2668	24.2774	21.7559	28.3613	29.3851	11.8859	25.2761	28.4094	13.7428	33.8583	31.3511	35.2455	20.978	24.9472	36.3633	52.1227	26.8949		0.609376	26.9705
9.4037	15.6618	31.8816	18.3091	28.9267	26.2467	16.76	29.0305	31.8752	35.9234	24.0318	24.0932	29.473	34.9104	11.913	31.8733	19.4392	13.4556	31.0223	33.1638	42.5294	22.7516	21.3975	39.4678	46.792	30.5676		0.617186	27.6599
9.5228	16.8633	36.9444	16.7135	27.0303	26.5641	18.957	32.4189	33.3569	36.3511	29.2772	18.5793	37.9318	32.6917	14.679	25.8233	24.587	17.2561	32.8212	34.2244	30.1191	28.3575	24.7519	32.4706	47.9669	38.3986		0.625003	28.6054
9.6418	17.0707	33.0767	13.7694	24.175	28.9821	22.569	26.4403	30.7285	37.5182	26.7023	18.9867	31.827	29.9746	16.1101	30.5243	25.0532	15.276	34.3141	32.8434	33.1559	27.1038	31.8072	33.7748	51.7901	34.4043		0.632814	28.3191
9.7608	13.9487	32.243	17.8788	30.4923	25.3541	22.2856	29.856	26.6482	35.1199	24.6911	23.9303	30.773	27.962	13.7419	31.0434	22.4966	16.765	27.4568	33.8619	32.8531	23.9054	26.1992	32.3266	46.7207	41.1673		0.640624	27.5888
9.8799	16.8777	29.4477	17.1979	32.012	23.8475	23.4597	31.2829	33.4191	34.9978	27.5741	22.6381	34.9793	34.8394	15.6643	31.5838	20.2832	15.0901	32.2236	38.3852	33.0904	25.5138	31.8819	30.7145	52.1802	32.6556		0.648441	28.8736
9.9989	20.2105	33.2005	18.238	32.1601	22.7466	26.582	32.0161	35.0776	29.7131	30.8819	21.7233	36.6567	34.2563	15.3902	27.5977	23.0231	20.5327	26.7259	45.1653	38.4533	30.6713	30.9989	32.7805	46.4088	31.9111		0.656251	29.7249
10.1179	15.4611	38.3235	20.1452	27.9496	22.1681	19.7923	30.6217	34.7448	39.0991	27.9763	23.9935	29.8045	38.9883	14.0664	25.2684	26.5474	19.3166	30.7083	33.6908	40.6053	32.1208	32.3836	29.5688	36.3355	28.482		0.664061	28.7265
10.237	16.3237	30.8617	17.16	27.2302	19.4423	24.13	26.7319	41.5577	37.4497	25.1816	26.9198	36.1226	36.4987	16.7955	36.6628	24.8244	16.6307	33.4284	33.6907	40.1376	31.0745	30.4369	35.9986	36.2502	33.2424		0.671878	29.3913
10.356	16.1885	35.7462	18.7357	26.8535	26.2483	28.4873	26.2763	38.7252	31.9152	30.9276	23.5369	39.8087	36.4207	16.3877	33.973	27.1212	16.334	33.2708	42.1864	42.7953	35.8154	35.9721	27.7747	29.9024	34.0542		0.679688	30.2183
10.475	17.3085	28.6633	18.2457	26.5945	23.3016	23.8609	27.4194	37.5529	38.5159	35.2799	26.8314	30.725	39.1679	17.5272	41.7877	21.7071	16.6	29.9399	41.1728	41.5074	41.7758	39.6597	31.1032	26.8215	28.5204		0.687498	30.0636
10.5941	17.7366	25.9391	17.2959	29.8082	25.3239	34.0298	25.1261	23.1071	40.3707	31.0914	24.4441	31.5819	36.3543	19.9679	36.1709	29.6879	19.9739	31.0468	39.8675	46.052	40.3082	42.922	38.4972	26.8098	30.1842		0.695315	30.5479
10.7131	22.7472	30.3174	23.8982	24.1913	21.8386	30.5233	28.2918	33.0674	43.3068	31.9734	22.8631	28.5129	31.3295	16.9504	35.7315	24.9636	22.2662	36.8413	41.728	50.5579	49.1855	47.1167	34.9615	22.6805	25.1809		0.703125	31.241
10.8321	17.2285	23.63	21.6062	28.7821	19.7404	29.6924	31.3319	38.0277	48.0959	37.1051	22.8079	33.5583	25.9922	19.7961	37.1695	30.5689	15.9159	35.3039	41.0428	44.307	45.4462	41.7059	31.3889	18.284	21.3611		0.710936	30.3956
10.9512	17.7377	28.1338	24.375	27.1361	24.7189	30.8739	28.7402	32.0536	49.9053	32.2126	30.9119	36.1172	32.6034	19.8655	42.358	26.8565	17.2194	37.3558	34.849	45.3948	56.8321	39.5607	22.2763	13.9628	25.1185		0.718752	31.0868
11.0702	19.1932	35.4718	23.2482	26.1675	21.0985	27.5876	30.2517	34.5671	60.6456	40.3886	30.3716	31.9765	33.909	21.0824	38.2724	27.3185	18.4732	39.0542	39.7056	48.7786	54.6028	45.9281	17.8905	13.7527	25.2866		0.726563	32.2009
11.1892	16.6597	30.3171	20.5521	24.3553	15.2141	39.9908	29.4838	34.7958	51.405	42.4702	28.1335	30.6809	37.8136	22.6921	41.3021	32.8342	19.5995	38.0918	42.2566	39.6574	46.3122	45.2705	15.8777	9.9925	23.6325		0.734373	31.1756
11.3083	14.4867	25.0386	26.8881	23.9471	17.3786	37.5501	22.5428	38.7714	56.6552	48.3783	38.4229	36.0267	40.7174	32.315	36.2907	36.3707	17.0429	43.8878	43.3645	48.9164	52.9713	49.8421	15.0701	8.6133	14.5934		0.74219	33.0433
11.4273	21.535	29.5006	23.8852	24.8468	18.1492	31.4066	30.7995	40.5362	48.2042	42.8528	34.9329	37.1237	37.872	23.0662	45.2834	40.2877	16.6831	40.7934	40.3263	41.3235	53.7748	36.9854	9.0242	6.6707	11.092		0.75	31.4782
11.5463	14.8995	28.4727	27.7701	26.0178	13.9269	34.0667	35.0225	37.9924	48.7495	42.164	31.9654	39.292	40.1375	31.9757	46.5139	35.2488	20.9791	44.0374	36.0782	42.459	45.1736	45.8194	10.3042	3.6922	8.116		0.75781	31.635
11.6654	17.4298	39.08	31.3607	24.3797	10.99	33.1634	36.2203	41.1766	45.1275	47.5684	45.3722	36.5296	40.8919	31.1258	43.7035	31.8045	18.0219	42.7654	39.2439	41.9031	46.9986	37.4433	7.1194	7.144	7.9484		0.765627	32.1805
11.7844	19.5905	32.703	30.3594	22.6713	14.5581	34.8268	35.5198	40.8623	41.3637	42.6578	47.4047	40.9389	43.9382	30.0768	48.0305	38.1614	24.3822	44.6327	36.5977	31.0576	46.7561	40.6433	7.8852	6.5665	6.3663		0.773437	32.342
11.9035	18.4729	33.9402	24.1207	23.077	12.7589	36.3899	29.5709	39.8679	45.0469	52.5257	53.0574	33.7871	47.2796	37.8371	40.1609	44.8898	18.3377	43.2753	38.2939	33.0206	38.6209	30.0238	8.2349	6.9063	4.9887		0.781254	31.7794
12.0225	24.0728	33.7802	28.9965	20.1822	12.2921	29.7734	35.3666	34.1892	35.7362	46.2729	52.268	33.0675	52.5145	32.1039	38.189	40.6192	25.1451	45.2361	46.2216	38.3069	31.2018	29.4359	7.4721	5.1763	4.604		0.789064	31.289
12.1415	20.7271	32.7259	30.2922	27.0902	9.2619	26.1079	32.42	32.8892	44.1946	41.6954	53.2748	40.6678	46.4635	40.3663	50.8359	38.805	22.1138	40.9481	35.4515	32.8899	28.145	27.0591	8.1086	7.8534	6.5213		0.796875	31.0763
12.2606	22.1182	34.0246	29.2082	22.4292	8.9088	28.4947	34.3491	34.5995	41.1455	45.3217	47.5564	42.3275	39.2136	37.4533	44.8708	36.1644	21.0762	37.6622	28.1799	34.8957	18.8387	19.8959	7.6834	5.4699	5.9285		0.804691	29.1126
12.3796	23.6141	33.7279	32.3278	23.6736	9.3795	25.1827	36.4295	30.4241	35.5361	37.6597	53.2731	36.4688	32.468	44.9648	42.9419	32.5337	28.2089	36.4988	31.1759	19.2467	15.6691	19.5748	9.788	6.5977	2.1881		0.812502	27.9821
12.4986	30.2521	27.1887	32.7086	21.0522	9.8242	25.668	33.8212	36.011	36.6836	41.0331	43.1433	42.4409	36.1111	47.6025	43.0267	37.0255	23.5646	25.9919	23.4602	22.8122	16.4018	11.5314	7.0747	4.8856	3.3419		0.820312	27.3063
12.6177	33.035	31.9387	27.0708	18.2995	11.0935	26.3687	26.5566	33.5791	34.9569	33.0507	36.3687	50.2675	42.1711	42.9025	50.1112	39.8002	27.8115	25.8541	24.6235	17.9732	10.1285	8.7436	7.3809	6.3951	2.56		0.828129	26.7616
12.7367	28.734	32.1552	26.9759	16.5452	11.1862	24.288	30.3931	34.1461	24.7541	32.0273	33.7465	39.0667	39.1246	50.0476	44.7007	31.3567	33.0169	26.4614	15.6343	15.759	6.4436	9.8277	5.8639	7.0575	5.0183		0.835939	24.9732
12.8557	32.8862	28.6261	26.9783	17.2031	10.5018	23.078	23.7369	29.2079	22.5445	34.6269	38.1882	42.2711	35.1722	49.4477	45.3866	32.8371	35.0193	25.1889	11.6599	9.7654	4.9718	5.9812	11.0773	7.8462	3.8181		0.843749	24.3208
12.9748	36.0005	29.9455	26.842	13.7513	5.4849	23.7699	20.5557	26.3547	22.3277	34.0139	37.2973	44.9479	38.7442	45.8022	40.6917	31.2409	27.1233	18.5826	10.427	6.0787	6.9512	5.2576	6.0844	6.7311	2.6356		0.851566	22.7057
13.0938	32.7608	32.8415	25.1456	11.9213	7.9284	14.6975	25.4273	25.6255	16.9146	34.226	32.339	42.6153	43.5712	40.5733	33.7491	28.9728	27.5874	17.9075	5.3242	4.6333	4.5789	4.3695	6.7329	8.4458	3.8069		0.859376	21.3078
13.2128	38.1248	34.4114	26.7345	9.2173	4.3999	12.9212	18.8592	24.9005	16.1108	27.8996	33.4449	44.9755	36.2785	36.3085	33.6125	23.6067	20.6398	15.5591	5.791	3.3862	4.0533	4.8013	6.9343	6.4235	2.7871		0.867186	19.6873
13.3319	33.9815	31.5348	25.032	8.2607	3.2951	11.0897	17.4969	24.1564	11.7574	26.3287	29.5154	34.6828	29.0201	28.1267	34.8918	25.5234	19.8177	6.7372	4.5331	3.7633	4.4414	3.6249	6.631	9.2498	3.3069		0.875003	17.4719
13.4509	32.7846	29.5811	18.4503	5.9873	4.0817	11.1788	12.7707	17.588	10.7972	18.93	28.5481	50.1025	23.2454	33.4571	36.3925	20.5083	19.8114	5.0536	5.1278	5.683	3.4223	3.7068	8.1809	7.6617	4.2409		0.882814	16.6917
13.5699	27.6647	23.5235	20.7314	3.5846	2.5289	5.6959	9.5265	13.0641	5.9268	14.7156	26.0948	38.7504	29.0611	26.6645	32.0037	15.438	16.7431	6.0552	4.7819	3.934	1.8976	2.3915	6.8108	7.3282	4.2521		0.890624	13.9668
13.689	30.6406	22.592	17.3229	1.6739	1.7343	6.075	8.0595	11.8743	5.103	11.6224	22.2874	44.0274	25.13	27.333	35.0786	20.1951	9.0249	4.8338	2.9856	3.2954	2.5092	2.6877	7.0496	6.922	2.0013		0.898441	13.2824
13.808	26.3533	25.067	17.1874	3.4281	1.9921	5.5705	3.9411	10.2342	6.0281	8.2048	19.3133	31.3553	21.9632	17.3548	33.2704	11.1558	4.493	3.8342	3.193	3.4236	3.0076	4.9638	6.5109	6.7929	2.257		0.906251	11.2358
13.927	28.8916	19.0647	10.8928	2.0513	0.7363	4.7284	4.6293	6.282	3.3248	5.7551	15.2105	29.4521	21.095	14.566	26.2539	10.1363	4.3905	2.8249	2.5617	3.024	2.5995	3.6973	8.5302	6.9603	3.4884		0.914061	9.64588
14.0461	20.6169	17.469	10.6974	2.1444	0.8068	3.2178	3.7894	5.2979	3.4154	1.8076	10.3891	26.0115	20.1093	10.3276	24.1042	6.0795	4.7323	1.9765	3.5808	2.1468	2.6668	5.2974	6.2871	6.2171	2.6402		0.921878	8.07315
14.1651	19.3727	15.0352	9.5961	0.7439	1.9918	2.1898	2.8891	4.0179	4.4557	4.3897	10.8182	28.4011	16.6415	8.9233	18.5783	3.9867	4.7363	2.8899	2.9223	2.8025	3.274	2.7119	8.9026	6.389	4.6994		0.929688	7.65436
14.2841	13.8196	8.4521	7.4455	1.8377	1.5747	2.084	2.6562	7.6268	2.254	4.2565	4.5485	20.7491	14.3247	5.5727	15.6447	6.2809	4.1712	2.9172	3.6953	2.9741	3.9308	4.578	7.4795	5.7224	5.0972		0.937498	6.38774
14.4032	8.6676	9.1306	4.6025	1.278	1.8393	1.0996	4.1593	5.3471	3.5122	2.9399	4.4737	19.747	10.2617	3.913	9.4071	6.3798	3.0393	2.8754	2.4335	3.8968	3.0819	7.3922	6.0972	5.5142	4.2794		0.945315	5.41473
14.5222	6.5205	4.5088	4.6503	0.4426	1.6448	2.3594	2.6504	1.4959	3.9212	1.1835	4.5623	14.109	6.6402	4.5057	6.5665	3.3688	2.8735	3.0188	3.9998	2.084	3.6479	5.5038	8.6126	5.0671	4.7667		0.953125	4.34816
14.6412	4.5851	2.4371	3.1039	1.1203	1.8933	0.9086	1.8023	2.5257	1.1932	4.0472	4.1776	10.89	10.0818	2.6203	6.1013	3.7297	2.5105	3.4794	2.7293	3.1231	4.1335	2.6823	8.4084	6.3925	6.1898		0.960936	4.03465
14.7603	3.9609	1.7077	2.5629	0.844	2.7974	1.9752	4.3328	1.6461	2.5924	2.9429	3.707	6.8184	4.4762	2.9962	6.8141	2.4764	1.3962	2.6769	2.8797	3.5587	3.7003	4.3269	7.7568	5.9296	5.0272		0.968752	3.59612
14.8793	2.9466	1.1273	1.4284	1.0357	1.6121	0.3596	3.2296	2.6509	3.9004	4.0271	3.7787	8.0537	2.8042	3.452	5.1995	2.5017	2.5255	3.3575	4.1953	2.7386	1.7219	3.8734	8.9269	5.2617	3.6621		0.976563	3.37482
14.9984	2.0294	1.9323	1.3783	1.4274	0.7761	2.1828	1.9406	1.1589	4.9635	3.6878	3.1526	3.7572	4.5933	1.8006	7.9466	3.9929	0.8377	3.9214	5.6719	2.1017	2.3178	3.9776	9.4234	4.3677	4.5758		0.98438	3.35661
15.1174	1.6858	1.8209	2.057	1.4665	0.9172	2.0773	1.9053	3.5953	1.9995	3.2948	2.3878	1.8635	4.5525	2.6387	3.8122	2.2615	2.1661	2.1065	3.1328	3.1148	4.064	3.6863	8.8668	4.9769	2.8822		0.99219	2.93329
15.2364	2.2423	1.4598	0.2987	1.2076	0.8612	1.8425	3.0211	2.029	2.7214	3.8633	2.5119	3.5583	2.2285	3.4235	4.8239	1.6395	3.8837	2.0204	3.1931	3.45	3.4666	4.2313	9.5721	7.0303	3.6122		1	3.12769

## Sheet: Image7
X0	Y0	Y1	Y2	Y3	Y4	Y5	Y6	Y7	Y8	Y9	Y10	Y11	Y12	Y13	Y14	Y15	Y16	Y17	Y18	Y19	Y20	Y21	Y22	Y23	Y24	Y25	Y26	Y27	Y28	Y29	Y30	Y31		Ap-basal	Avg intensity
0	41.0748	30.7062	26.882	44.854	34.9267	37.4054	47.0955	31.253	27.0083	32.702	34.8869	44.7729	34.6087	36.5405	33.4451	34.0864	40.0073	36.4553	29.9903	29.8196	24.7362	28.3421	25.7327	18.779	16.6214	25.1945	23.7345	64.5435	35.5384	34.3213	46.3004	38.0172		0	34.0744
0.119	52.4212	32.6629	26.861	57.208	37.0452	39.2149	55.536	42.782	20.5108	30.332	37.6185	44.0765	40.9884	40.0759	39.2986	31.3996	33.5197	39.9021	26.696	31.5667	29.3938	29.7403	28.318	22.4693	16.2744	28.4725	24.6718	60.5299	37.907	36.16	45.8299	40.3013		0.00793418	36.2433
0.2381	56.5946	28.8338	28.367	63.089	42.1911	45.4351	60.3784	58.658	20.8379	33.737	40.5704	46.4139	37.8619	37.51	30.2477	34.5311	35.9334	42.6755	32.8481	42.9579	26.5496	24.7236	28.3805	16.277	17.8707	26.8595	29.5978	59.8266	48.0357	35.2065	48.2923	37.027		0.015875	38.0725
0.3571	60.4415	32.3462	31.127	71.478	42.9514	48.1539	66.0833	57.389	30.0064	43.405	38.1759	51.1183	36.4429	43.0486	33.0913	37.9386	33.8628	36.6786	38.1931	47.0726	37.3779	30.8666	35.2276	23.1749	15.4609	26.4765	29.4706	68.4987	51.8312	38.555	51.7327	38.2768		0.0238092	41.4361
0.4761	64.3857	41.1889	33.355	77.245	48.235	49.5032	75.7312	69.534	30.4568	44.614	47.3194	50.8075	39.2278	46.7798	39.7532	43.2331	37.2258	37.9269	36.7468	48.9279	36.1041	32.7745	35.9506	16.9094	16.3129	26.5868	23.6868	63.9692	54.4209	38.8729	50.6398	42.1585		0.0317434	43.7682
0.5952	75.2288	37.8733	38.206	87.368	52.3822	53.7822	92.6978	80.161	33.1859	47.518	50.9932	57.3591	35.5658	52.3701	40.5565	45.8135	38.1449	43.3082	41.8238	47.1084	41.758	33.5192	36.3361	18.9715	19.6526	29.4428	26.4304	59.9559	48.9119	43.7542	49.2255	48.657		0.0396842	47.1269
0.7142	68.6517	36.795	42.097	104.955	50.4264	53.3951	102.979	94.657	38.9437	49.712	57.7398	47.8038	38.8446	48.7756	41.9395	48.1173	45.7463	45.0327	50.5928	49.1675	36.7964	40.9035	47.9745	18.3838	19.0038	28.1889	27.872	62.7228	56.4999	38.6042	57.6433	48.3634		0.0476184	49.979
0.8332	64.1589	41.2899	52.347	109.753	54.3356	65.1994	108.757	97.109	50.1553	53.007	56.7096	51.4731	47.1431	49.186	44.0846	46.6995	50.4773	43.2452	54.4271	45.8314	44.7831	45.1855	39.9844	26.3382	20.058	33.7799	27.7721	56.0539	51.3132	42.8651	53.5233	48.7197		0.0555526	52.3677
0.9523	65.5738	42.7307	56.659	111.786	55.9463	61.664	112.515	105.175	51.4654	53.597	61.3555	53.4069	51.8072	56.3734	47.5698	51.7338	54.825	49.3111	54.1327	50.3977	53.4138	43.407	47.4062	23.2352	17.7113	28.3512	29.7532	58.2597	55.2502	43.8034	65.1396	60.1902		0.0634934	55.4358
1.0713	64.4403	41.4418	67.368	126.816	69.3096	60.3928	105.129	103.993	60.251	63.813	71.1651	56.3995	54.0588	57.0283	46.6219	46.8955	53.1624	52.0669	59.7787	48.567	50.7691	45.6349	49.7879	22.0883	21.638	27.8612	28.6177	57.5799	52.1101	46.2902	56.3879	53.8366		0.0714276	56.9156
1.1903	68.1574	45.9005	78.749	127.568	65.7941	65.858	103.727	89.729	68.3032	84.043	81.3579	64.8638	55.6866	61.4595	58.7003	47.5374	64.1393	48.5735	67.477	47.9749	55.2303	55.332	52.9788	22.962	25.7114	25.8286	30.6975	61.12	56.9941	43.2262	60.7644	56.0347		0.0793618	60.7025
1.3094	69.7509	42.908	76.788	126.902	73.8577	63.2234	93.6915	93.842	69.7404	83.055	81.8631	63.8257	59.4366	63.7705	61.1267	58.1811	67.9753	49.8462	76.3959	53.4482	52.8394	62.8685	57.7304	26.6341	24.9219	25.5892	31.3302	53.1116	55.2538	45.3282	63.2573	67.6018		0.0873026	62.378
1.4284	62.7986	45.891	78.417	123.524	71.1361	63.6253	93.1301	82.303	80.1121	94.889	72.3567	69.9769	54.2273	59.5528	58.435	54.4437	59.4986	58.7411	73.1135	55.2089	54.858	52.6011	54.4649	26.5088	20.0443	29.6059	33.6558	52.2991	55.0235	44.3548	60.2363	54.6806		0.0952368	60.9286
1.5474	70.8313	49.4998	80.166	104.346	78.6316	60.728	92.6805	76.81	88.9271	102.751	73.447	70.3645	50.3641	59.6847	71.4047	58.4413	52.8862	59.0665	75.8559	57.6141	50.6968	56.9744	53.425	31.6778	27.244	30.4578	35.4053	44.5801	56.9967	49.8286	57.1828	61.8573		0.103171	62.2133
1.6665	77.0933	53.278	90.969	90.055	86.9482	72.9573	88.0408	77.817	96.7607	105.59	76.9085	74.3642	54.2216	49.8829	63.0762	57.4779	62.6687	74.7334	72.3889	60.4706	53.6199	52.8098	56.4207	33.2772	35.9444	33.4142	30.539	49.227	53.3983	52.2869	56.7911	65.0356		0.111112	64.3271
1.7855	70.0268	60.1796	86.125	89.43	83.4303	70.3569	90.2916	75.265	97.0246	112.824	70.8392	71.9666	59.0801	56.1298	59.4028	53.8738	69.063	78.5666	67.0919	50.0991	52.2921	52.6424	53.2822	29.817	31.4198	32.3154	34.7596	56.146	50.1299	48.7569	66.8429	55.5076		0.119046	63.5931
1.9046	81.9432	57.0752	99.678	82.743	98.2909	75.363	75.6222	79.073	88.6232	118.257	74.7743	66.1855	54.5475	60.29	64.6443	60.554	68.1344	83.2232	72.5508	50.6141	55.5185	58.4161	57.3212	31.0853	37.6764	32.7092	37.2745	52.2318	48.7331	50.1256	69.1126	53.3515		0.126987	65.492
2.0236	82.4427	55.7509	99.137	74.586	94.6513	74.8872	83.1884	75.231	84.8954	101.541	67.6391	63.876	54.6963	60.781	62.3217	66.8612	59.3643	79.3531	57.6186	47.745	56.3425	59.977	55.0873	34.634	38.6318	33.0936	38.371	47.6269	56.5879	53.6079	66.8675	59.9469		0.134921	63.9794
2.1426	78.265	59.553	108.397	68.796	96.3476	76.9667	79.7397	76.908	77.8441	93.35	70.5731	76.7679	54.885	54.9823	62.225	64.5993	62.5871	88.828	69.124	53.1282	55.9043	62.5563	57.4063	34.8961	40.426	33.767	33.8211	48.4447	54.2906	55.0349	64.2259	61.5991		0.142855	64.8825
2.2617	74.8453	59.911	116.826	69.567	95.313	80.7887	73.3502	89.385	73.0031	88.415	69.9587	73.0097	59.3954	50.7349	60.2964	53.8494	73.2158	94.0541	62.7812	45.4939	59.9211	52.8059	64.9857	35.8018	40.6549	26.7658	36.8109	47.5066	51.9084	61.2825	63.5717	69.402		0.150796	64.8628
2.3807	71.5596	55.3137	118.363	66.901	101.569	85.0194	75.1818	93.541	60.9776	76.862	59.4587	68.5575	56.493	54.8277	57.4003	59.9393	79.8748	96.7811	59.7744	43.1075	59.4607	55.3266	60.1409	37.2615	34.6358	37.0318	37.6935	52.4387	52.2509	61.4408	62.7554	59.2287		0.15873	64.099
2.4997	72.4661	67.0184	117.345	62.856	89.7322	79.8651	71.4765	91.169	66.183	69.81	61.8084	62.1149	62.2481	50.6558	60.0458	65.9231	75.0698	94.4825	61.1743	47.7106	55.7259	50.613	60.6072	32.9072	43.4343	36.6506	41.9757	55.0476	50.571	60.1112	72.5849	65.0672		0.166664	64.2016
2.6188	72.1443	65.1895	123.084	67.284	84.2846	83.2419	74.1931	85.332	69.1159	65.027	56.7475	65.401	62.6175	47.8643	54.658	60.0034	83.4816	97.9809	62.7352	43.2163	53.3371	48.3377	59.4114	34.6578	53.6923	33.4873	40.9143	46.1709	56.451	60.7371	63.4833	71.4456		0.174605	63.929
2.7378	65.5316	66.5743	121.871	58.568	76.4565	75.0813	69.6381	91.148	57.2762	56.444	55.2132	70.8936	61.1937	45.576	54.6158	58.6133	98.5649	103.556	56.9277	53.1546	48.659	43.9766	53.6642	34.9569	50.838	37.308	42.4774	42.8718	51.4132	69.7252	66.7477	70.4593		0.182539	62.8124
2.8568	69.2032	62.8817	111.592	67.337	69.4525	70.7613	72.5246	79.455	53.8212	53.636	54.6537	67.077	68.6603	52.4855	55.4128	66.5352	87.9405	100.329	56.0734	51.5948	45.5927	44.6256	52.5381	42.875	54.9611	41.3559	43.3783	51.5967	47.6314	75.3299	64.19	66.258		0.190474	62.555
2.9759	62.7832	63.1858	113.235	71.574	76.3706	72.4359	64.8665	85.432	62.9717	52.585	56.9589	62.2167	66.7624	50.5364	57.5213	63.909	81.6634	92.5586	63.0591	51.2301	50.7688	48.8489	47.0461	44.2581	49.2443	45.5921	35.3804	57.7451	53.5177	74.4009	59.7511	68.4286		0.198414	62.7137
3.0949	73.7744	78.5687	120.85	75.46	73.0516	61.7028	66.281	85.025	56.1064	59.996	67.354	70.8982	61.3903	58.7883	56.9556	64.2291	87.8565	92.4308	61.2948	47.9467	51.4453	50.1918	51.7282	45.5035	49.1165	43.1221	35.4499	53.8608	49.6747	71.7215	55.9827	70.9484		0.206349	64.0221
3.2139	79.0833	75.848	116.743	70.069	70.3247	66.6831	65.6251	86.485	53.4148	49.834	62.2339	68.5759	63.2621	55.0081	55.3741	61.0805	82.9595	94.2466	64.7013	43.903	61.0126	50.5124	51.8303	43.9364	54.7379	38.0326	35.3872	54.1017	42.0004	75.2709	59.9347	72.7479		0.214283	63.28
3.333	87.6508	77.4378	111.426	64.722	64.162	66.7008	66.481	91.452	54.0356	50.67	68.2735	68.9098	68.6238	49.7514	55.8637	54.3832	89.1713	96.0597	68.371	47.8948	51.5501	49.0017	52.1139	51.4135	46.9077	34.281	39.6164	51.996	41.9299	74.5617	65.0927	76.8899		0.222224	63.6686
3.452	97.8488	80.3385	119.738	58.781	61.5205	65.0099	72.6695	88.616	53.436	52.756	65.5391	71.458	62.7647	53.7478	55.9515	60.1662	81.4099	88.1511	73.9025	50.8808	57.6664	50.4388	54.9488	52.7932	37.0237	35.4913	40.0722	60.3734	45.8775	74.3836	69.3331	79.5953		0.230158	64.7713
3.571	88.7747	74.5672	124.09	64.275	60.2358	72.8167	71.5967	87.666	50.9869	53.497	64.4787	72.523	60.215	53.8623	55.0645	66.9038	82.7666	74.1315	76.5668	43.998	52.8024	48.8517	41.3699	50.1378	43.6084	37.8202	39.4183	54.3185	46.503	71.8439	57.2749	81.3836		0.238092	63.2609
3.6901	100.155	66.4353	113.662	56.216	52.6531	68.5214	62.4842	79.299	44.4959	56.541	54.5113	67.7352	69.2127	51.5133	57.9427	66.0778	75.3817	70.7849	77.7163	41.4991	49.0827	43.636	37.9209	53.8156	42.7078	40.2344	39.19	52.8199	51.5528	67.94	54.616	87.3343		0.246033	61.0528
3.8091	105.613	66.3435	104.967	52.478	53.7647	76.4931	66.6288	84.138	45.4688	50.491	55.5281	67.3617	60.403	45.6395	55.6418	69.8297	82.1547	66.3755	69.6158	52.0504	54.5926	44.9035	42.2531	60.7446	39.9723	41.6234	40.5751	59.5006	55.7824	74.7179	54.81	80.4986		0.253967	61.905
3.9281	108.485	62.5463	98.787	53.262	62.9497	74.4228	70.721	70.63	44.5904	42.192	57.3625	67.8517	60.3496	46.4551	59.9051	67.1246	82.6891	60.8165	73.951	56.0923	55.4057	48.7523	40.3791	55.7088	43.3043	41.1787	43.7477	61.7866	49.4382	69.3253	52.4799	76.7812		0.261901	61.2335
4.0472	110.276	61.8277	99.801	48.8	52.7012	68.639	70.4746	85.924	46.1531	46.599	50.9073	71.6258	57.9957	57.6383	59.3859	62.6294	88.366	63.7178	82.5672	55.3062	52.5654	59.877	39.7334	51.3555	38.8122	39.8744	41.9578	55.6354	55.3117	75.7769	56.9396	80.8104		0.269842	62.187
4.1662	112.968	56.5907	87.571	45.445	52.1726	72.6339	66.5295	81.411	44.1774	47.443	52.3624	80.3765	61.4001	52.5209	62.8827	68.7283	85.3104	63.9811	83.713	50.194	45.2288	57.0527	41.0915	61.2016	36.154	44.7138	46.112	59.1399	52.2155	75.3531	57.6895	75.4585		0.277776	61.8695
4.2852	101.902	55.3222	78.142	47.356	45.2237	88.7252	74.8754	84.713	39.911	41.59	52.1149	75.8986	57.9947	52.7384	59.4701	70.5187	81.4863	64.4565	82.0544	58.4522	54.6862	49.4691	39.8693	60.1452	36.018	41.8148	42.4278	54.5386	58.8218	67.6055	56.6154	74.862		0.28571	60.9318
4.4043	112.697	53.1367	86.348	51.849	42.0342	89.697	67.7154	87.189	34.6025	41.423	51.2013	76.2565	59.1818	47.0767	63.8091	72.8548	69.8124	53.9077	86.0054	56.1402	49.139	49.6771	38.0557	57.3363	31.2103	34.8897	40.0975	60.4827	52.5404	73.802	57.4545	76.7548		0.293651	60.1368
4.5233	113.502	70.8716	87.421	50.545	48.9493	95.3221	69.4409	83.463	37.7102	44.952	43.4275	79.0348	56.959	51.4993	54.935	61.1777	64.6334	62.0492	87.4488	53.3116	53.7706	46.8738	32.9853	59.002	37.6356	45.5827	37.7462	56.5157	59.4172	76.6206	65.3653	80.8044		0.301586	61.5304
4.6423	112.737	62.5736	83.565	53.08	44.0987	88.5205	72.4653	87.746	31.9411	38.974	46.6897	76.825	57.1446	46.1935	56.2522	58.1842	78.8109	67.3073	78.9368	57.8522	55.2227	50.7461	35.8558	54.5193	33.1037	38.9218	38.0741	54.8108	62.1795	78.9213	58.7929	79.632		0.30952	60.6462
4.7614	101.964	60.2858	71.642	57.57	46.0467	100.516	74.6885	89.201	36.0614	32.945	45.2928	78.3052	63.9586	40.8199	55.7588	69.3227	72.5373	73.7662	71.8319	51.2146	58.7758	49.7648	35.3574	50.1463	31.8158	43.2832	34.4437	58.9403	64.1845	77.3092	65.5182	80.211		0.317461	60.7337
4.8804	92.9417	60.4774	80.345	53.76	40.4798	99.0222	78.9103	88.187	36.8492	33.068	47.8699	78.9422	53.3456	44.3494	57.5117	61.1386	71.3671	72.2346	82.3745	56.1298	53.6568	53.9898	31.1519	41.771	38.0824	40.2133	38.6726	60.0099	59.0859	70.0706	64.6041	74.9465		0.325395	59.8612
4.9995	85.846	60.1472	76.174	60.36	40.6082	107.578	77.5827	89.2	32.9426	34.326	46.83	78.363	57.8471	39.7252	55.8535	61.7404	61.9209	65.2575	81.5987	47.0875	46.0487	51.3737	34.2527	52.6889	37.4153	45.8098	35.8978	60.2684	61.5054	69.0827	62.3171	76.9488		0.333336	59.2062
5.1185	83.5647	54.4426	68.266	63.178	34.9921	109.245	66.8973	80.115	26.9787	32.568	41.5998	77.8783	62.6369	40.486	58.578	63.2708	67.1133	66.2556	78.1435	51.5114	49.473	56.8439	35.0793	42.0674	40.4772	43.5339	40.7285	66.2764	60.5971	72.866	69.3971	81.1057		0.34127	58.9427
5.2375	85.6242	56.4662	63.73	59.104	38.7171	93.2045	60.079	78.653	29.1679	32.481	42.0064	77.4872	67.9095	35.3159	57.1732	58.1331	66.7449	62.4988	76.8687	52.629	48.8639	44.3282	29.7711	47.3387	37.9641	43.3693	39.8824	60.4	63.7952	71.0864	68.9961	76.7685		0.349204	57.0799
5.3566	74.1975	60.1256	66.756	63.668	40.228	83.3734	67.2951	78.557	30.2527	26.999	43.5558	67.9552	62.521	36.9117	59.3107	75.6814	64.7003	66.6649	74.613	57.4078	57.5945	47.1741	32.0195	52.7267	44.2811	48.4722	47.2906	56.8909	60.3524	70.6942	67.6781	76.9815		0.357145	58.2166
5.4756	62.4261	56.9512	70.139	63.979	41.7031	74.0767	75.0852	80.166	27.4812	26.067	47.1833	76.8069	61.0015	42.5289	60.613	74.6189	62.6506	69.2064	67.8583	62.2186	54.9294	51.2579	35.465	45.5435	35.8963	41.532	38.8125	67.7885	54.825	72.415	72.5821	64.511		0.365079	57.4475
5.5946	74.1054	55.22	64.977	51.824	50.5449	76.5921	71.4931	84.341	18.3788	28.119	42.0335	63.7411	55.847	38.1311	55.9274	65.2705	64.9407	69.8676	65.0416	64.7402	52.7254	51.3361	32.6671	48.7263	35.2331	41.9469	41.7853	63.9812	60.595	68.2638	72.1321	71.3851		0.373013	56.3098
5.7137	64.7985	59.9758	70.269	53.75	44.3021	69.0361	68.7458	72.731	21.233	23.798	53.3886	63.8177	61.437	40.0923	53.7397	72.8218	64.7763	76.83	58.7205	57.5347	56.8554	53.2016	30.4637	43.4967	36.4321	40.8525	34.1705	60.8783	63.6563	72.5636	67.3548	69.5184		0.380954	55.6638
5.8327	64.7366	62.9617	66.329	65.184	41.3832	66.6064	70.0466	80.28	26.5509	23.059	49.0476	61.7453	55.7514	40.7855	51.0365	86.6266	67.1889	69.2361	54.5192	54.8589	54.14	49.8939	30.9917	45.2651	32.9542	50.7072	36.8232	62.7872	69.7459	68.9394	71.2466	67.7387		0.388888	56.224
5.9517	66.4498	67.2908	81.058	51.924	46.4767	63.2206	71.5024	84.501	27.4399	26.696	50.817	55.6923	52.4101	47.1946	54.1165	90.3119	62.2572	60.0277	58.0807	57.2669	60.2852	51.8014	27.9717	49.3589	36.2108	45.1775	40.5225	61.7359	63.9838	72.0368	74.8423	63.1029		0.396822	56.9301
6.0708	67.6913	61.2007	69.405	50.26	49.6695	57.4326	70.3109	78.505	23.0879	24.491	53.1908	53.374	61.5535	41.1652	53.8081	84.15	63.8347	63.564	58.6582	56.8057	65.6085	47.5601	28.169	47.351	39.16	39.2052	48.5067	66.7142	63.5672	69.8228	75.9493	61.6272		0.404763	56.1062
6.1898	62.2719	64.0359	69.538	60.258	46.2563	54.2815	69.9505	73.433	23.9978	23.95	47.5555	63.2024	63.1971	42.2901	52.8496	82.689	66.7206	69.7199	57.017	65.2859	63.5322	45.6358	30.4617	50.5197	45.2075	37.8834	38.1816	74.7934	65.0663	69.1953	74.6801	64.4825		0.412697	56.8169
6.3088	66.1991	67.7138	64.158	59.036	43.0664	62.8271	72.4182	84.644	23.043	26.217	46.4712	66.4744	63.2575	38.1227	60.6391	95.3714	71.9815	65.3308	62.7783	62.0214	64.8137	51.0332	26.4356	48.3799	40.3953	37.1305	42.1082	63.0087	67.4751	69.8431	73.4997	67.1167		0.420632	57.9066
6.4279	66.2912	72.4192	71.547	54.261	43.0127	62.1536	58.8336	67.1	22.5992	27.313	46.303	62.7219	54.8417	42.9524	57.851	95.4173	80.3951	72.5053	58.1754	64.1129	65.6387	46.589	28.2496	47.7283	42.1166	36.6295	38.6652	71.527	63.9965	71.0647	72.5244	63.4524		0.428572	57.1559
6.5469	67.4941	68.1936	67.895	53.636	41.7886	57.6035	69.9225	70.149	20.7298	23.582	41.7256	54.2168	52.9702	40.0749	58.8047	98.1934	83.9157	59.0491	53.3855	64.8828	59.1215	42.139	26.0551	49.4686	43.2957	33.298	42.5854	69.5559	74.2432	71.0393	72.1442	65.9439		0.436507	56.1595
6.6659	61.7821	80.7394	69.286	51.088	43.0281	63.4942	74.6539	59.728	24.975	18.422	41.2388	62.7672	47.9372	39.1482	59.04	90.726	87.3993	59.798	61.7533	67.1377	62.7154	45.2518	29.0374	49.9216	39.8059	32.4726	43.4826	67.241	74.1059	78.4288	69.5269	61.8048		0.444441	56.8105
6.785	64.3525	83.7842	70.088	48.867	33.8456	46.7759	68.5608	56.252	23.2682	19.672	42.8044	55.8617	51.3869	43.1474	59.7966	85.8162	81.9259	67.3634	60.9345	64.6272	59.4714	43.357	23.9545	48.9135	39.135	26.2454	44.2133	64.172	76.5764	84.3367	61.0363	59.5136		0.452382	55.0017
6.904	71.2847	89.8826	70.308	46.903	37.3187	55.2978	63.4241	57.381	21.8497	22.742	43.052	64.4017	46.4443	36.5742	59.7368	85.016	80.0105	67.016	62.5003	72.3102	47.0729	44.5848	25.8015	53.7773	41.8276	34.3383	45.5755	60.1982	74.3546	80.1067	63.7811	57.9075		0.460316	55.7119
7.023	63.1362	81.7248	75.72	48.275	36.7141	51.3274	62.9884	58.716	19.1729	21.907	42.261	72.3941	46.1922	38.5385	65.9118	83.1164	92.026	62.3719	60.4265	58.6337	53.31	45.6379	26.7198	42.4923	36.8587	32.2352	47.9658	63.714	74.2456	73.7747	63.311	60.0178		0.46825	55.0574
7.1421	63.4164	88.8731	77.461	41.225	28.5591	46.8673	60.0476	48.75	22.2636	21.336	42.1029	69.6859	47.0324	40.5862	58.8628	93.7794	88.313	64.3649	61.6391	67.2987	66.1394	40.2223	24.4976	44.4928	40.2474	26.4221	48.9373	71.4788	71.5564	72.0021	61.7541	60.6987		0.476191	55.0285
7.2611	66.2398	87.6929	76.981	40.066	30.502	46.9448	61.032	56.311	19.6247	25.62	42.0111	66.1654	47.3553	42.743	63.2432	84.4202	80.1193	60.7707	66.0602	66.0818	59.5736	37.9848	30.5019	44.0765	42.7031	26.4334	45.4725	66.5068	68.343	63.8584	63.3757	60.1907		0.484125	54.3439
7.3801	73.5002	94.2968	74.472	35.494	26.4273	47.8831	66.5202	63.977	20.973	22.86	35.2291	74.1523	52.6424	38.4743	62.1001	81.3161	79.4282	59.7096	61.2619	69.1386	55.4013	41.4264	23.187	44.1149	35.3172	26.5325	42.6584	68.0563	73.1073	72.0994	56.905	65.9358		0.492059	54.5187
7.4992	73.5329	89.8247	73.66	38.212	26.0324	49.4798	65.2683	58.936	19.9467	18.552	35.7568	73.493	49.5148	47.3459	57.8325	79.023	83.0582	61.7332	58.1302	59.0294	47.2159	39.0194	20.719	45.7121	37.5067	27.9386	42.9235	65.407	73.5183	65.8417	56.936	58.7837		0.5	53.1214
7.6182	63.7647	92.5549	66.204	38.725	32.5002	43.2523	62.0946	52.97	20.7202	21.56	29.1852	76.3915	45.3923	37.8365	54.6301	86.3316	76.6572	59.0283	67.8965	55.9885	54.0379	39.0897	20.7899	47.7789	31.7009	32.1808	41.5117	71.054	76.5338	66.8503	55.7476	66.6258		0.507934	52.737
7.7372	65.1905	80.8411	66.417	49.58	33.7562	39.9306	68.6989	56.964	17.8775	23.924	37.4375	80.8443	42.2849	47.1914	60.4842	85.8533	64.5891	55.2176	69.3669	61.0097	53.8033	43.6053	20.7021	45.0622	34.4772	39.7742	39.1684	67.7726	78.1098	60.8945	56.5995	64.1264		0.515868	53.4861
7.8563	61.582	86.7259	77.496	45.619	25.8982	37.6875	70.8779	59.301	19.2322	23.642	42.8669	71.5324	39.1124	48.1992	70.0014	71.897	68.4385	54.305	63.1297	52.7234	43.9909	36.1194	20.2551	43.4554	37.0839	32.3665	35.158	67.9535	69.3652	65.9177	61.9165	64.2017		0.523809	52.1266
7.9753	65.0828	85.783	71.924	45.537	28.2944	41.1288	68.8793	52.57	20.2626	25.112	32.3394	76.8362	41.2948	45.2302	75.0934	74.2553	74.3902	64.4963	66.6361	53.8757	48.5656	38.9918	23.8226	45.0954	37.3095	36.793	39.2165	66.7715	78.0803	67.9169	59.7452	63.116		0.531743	53.5764
8.0943	64.3445	79.8303	73.708	48.365	30.3979	34.7744	76.0059	51.147	23.7857	23.374	32.839	73.7903	40.8148	51.0859	66.8055	80.1571	71.2054	66.3896	63.2549	49.89	61.2349	42.2831	20.2588	45.3933	40.9873	32.9451	40.3172	66.4708	81.3491	63.7704	60.2982	61.9464		0.539678	53.7256
8.2134	61.0774	75.7723	80.371	45.669	29.5988	37.8908	72.5247	56.799	20.1107	23.163	33.6426	64.6581	48.8508	51.3977	66.7174	77.4484	69.7626	65.7852	70.4372	52.5207	57.8168	49.0017	19.8111	49.84	35.9942	26.177	35.5659	73.2841	77.0917	64.3511	66.124	56.8619		0.547618	53.6287
8.3324	64.2893	77.4317	71.598	45.421	26.302	39.8146	69.1318	56.551	20.2068	21.502	36.365	74.1762	47.0416	48.1126	67.2091	75.3568	73.6704	69.2164	72.8669	53.6149	53.6224	49.4438	26.6471	39.0982	36.3448	36.9758	36.9329	67.0574	72.1134	63.9094	64.4379	59.4327		0.555553	53.6217
8.4515	65.4067	79.5546	79.854	41.736	30.9599	37.4615	66.001	54.271	22.082	22.296	34.9477	71.0892	47.1817	42.6665	76.2522	64.5021	66.3707	72.4474	67.8215	60.3459	60.829	45.6235	27.8704	41.0748	35.9679	36.2023	37.1191	73.11	78.5955	69.722	68.836	55.9191		0.563493	54.1912
8.5705	65.3988	71.4561	85.865	50.062	28.3262	35.6947	68.3317	59.366	22.8953	19.641	33.7531	61.8371	43.5004	48.977	79.5216	72.0653	72.1553	82.6928	72.7415	57.0669	59.5746	48.2116	21.6013	60.2379	40.2989	31.3212	36.9863	73.2231	79.1319	68.8548	64.5634	57.5688		0.571428	55.4038
8.6895	60.8517	65.6953	90.75	47.875	26.8401	37.5693	65.5919	57.434	24.2665	20.947	36.4026	67.1536	46.9218	46.2668	68.629	77.5009	75.3276	80.6269	76.5628	57.7908	53.7939	46.1121	26.1659	52.1732	41.859	29.3786	44.6213	73.0387	77.5051	65.3904	71.2108	51.7662		0.579362	55.1256
8.8086	63.2332	69.1355	90.766	56.809	32.8126	35.0213	68.3847	63.074	28.1975	23.709	33.5188	63.5137	52.0724	54.1786	67.6377	72.7382	73.2703	85.192	76.2132	69.5219	59.9113	44.6629	26.6591	54.9141	44.055	27.66	39.8384	83.0969	69.8228	62.9151	69.72	52.0602		0.587303	56.6974
8.9276	59.2532	62.7132	80.933	51.704	30.762	33.9853	57.0183	66.207	26.6627	25.412	32.2773	65.0034	47.0608	56.2533	68.5806	71.1519	79.7075	89.3521	82.0691	64.0933	60.9531	44.2542	28.6756	61.5916	49.6767	29.56	37.3922	69.0373	70.7637	67.5285	71.0198	49.4082		0.595237	55.9394
9.0466	59.5605	62.9202	79.118	53.582	35.6214	30.6629	61.9787	66.999	22.2248	23.431	33.9486	62.974	49.694	49.7267	70.0429	72.4029	82.6348	85.2245	75.3099	57.6129	52.5381	49.1157	27.839	60.7299	44.2942	28.441	30.8773	76.2104	72.0822	73.9397	62.9451	47.1111		0.603171	55.056
9.1657	61.717	79.9861	94.383	51.172	35.2986	36.8524	69.4152	64.746	24.6427	26.209	35.1911	67.2387	47.4368	56.931	68.1313	65.9038	74.105	75.2894	80.533	62.1364	59.116	42.3819	31.453	54.5666	53.522	25.6921	31.7102	73.1976	67.9188	67.3195	66.8772	46.5757		0.611112	56.1765
9.2847	65.3605	77.4205	105.026	53.488	32.4707	33.6119	64.4097	70.188	21.9122	28.538	31.8436	59.3727	53.2019	60.2833	67.4962	69.2401	73.0332	79.9764	81.5716	66.7806	54.3928	40.6972	29.9083	58.5021	55.3271	23.7439	36.4907	82.4712	74.3858	74.8922	71.465	52.2141		0.619046	57.8036
9.4037	65.4072	68.8254	90.779	52.509	38.7393	36.5245	61.5419	64.397	18.9703	22.593	38.7525	51.7861	54.5761	53.6146	75.6142	73.1247	80.2139	75.102	75.4105	59.5466	55.3206	45.282	32.9015	59.2398	56.5158	26.9342	33.9042	78.0161	75.3592	83.3239	67.9267	58.2896		0.62698	57.22
9.5228	63.1133	82.7249	97.276	53.267	36.4728	36.0633	63.4122	67.492	18.039	22.075	41.0799	52.2067	50.4624	58.5609	79.6455	68.811	78.5169	76.0382	76.1222	57.6135	54.6784	43.6739	35.3407	61.2121	62.0055	28.59	35.5863	85.2917	79.2545	76.4281	60.8978	53.7862		0.634921	57.9918
9.6418	65.543	85.697	96.022	55.708	44.384	33.6428	64.4211	75.096	23.8214	24.253	40.6323	62.6991	57.5683	64.3964	78.933	70.9232	77.0751	64.4288	71.3322	64.2036	52.0266	50.4109	36.2261	62.4825	68.5536	27.0319	42.3752	87.251	75.6322	84.7665	64.6235	64.654		0.642855	60.5254
9.7608	69.22	79.1247	89.39	62.677	41.7206	29.706	59.7836	64.244	27.924	25.587	44.4085	58.2349	56.8134	59.8194	74.4729	71.1424	70.3681	66.3808	80.7679	69.5527	54.4756	47.0439	40.1474	58.5677	66.0672	32.6456	40.2559	84.3586	78.6895	88.4719	71.1622	64.7594		0.650789	60.2495
9.8799	63.6374	86.3297	86.757	64.125	34.1975	34.1479	61.2928	63.569	24.6632	26.998	56.6523	57.7223	62.3914	59.503	76.4936	72.0357	73.9369	69.511	72.8893	64.3559	58.6541	46.5552	37.7465	60.4858	63.2636	31.7501	33.5131	82.1123	76.1943	87.6385	74.4688	70.4489		0.65873	60.4388
9.9989	71.3981	82.5563	89.846	55.482	43.8064	33.5587	60.1183	52.007	28.6836	25.579	56.1107	56.08	60.8268	68.9405	71.3676	68.0603	72.2461	66.8194	68.7213	62.9278	62.6847	51.2771	35.847	60.6567	66.2768	30.2109	38.752	91.0375	69.9379	83.7378	72.0973	62.4949		0.666664	60.0046
10.1179	79.8612	72.6239	82.725	54.832	44.9301	34.33	59.9519	58.507	26.226	28.404	56.8066	64.9303	65.507	67.1447	77.6859	68.1656	79.2046	70.9154	66.0822	64.3265	68.0218	47.7313	35.3077	56.0932	65.9785	37.5452	36.5894	81.5346	73.3777	93.3042	75.4483	71.5105		0.674599	61.4251
10.237	75.2866	81.8673	82.669	62.92	45.7684	28.3558	61.309	63.81	30.8724	29.827	55.0249	63.144	69.7402	68.4993	74.789	66.4135	76.0464	70.8723	62.8065	63.1889	63.7118	49.3441	42.931	56.3473	66.3326	34.2538	37.5156	90.0243	73.546	89.451	74.602	65.0227		0.682539	61.7591
10.356	67.4348	78.9185	78.434	60.023	38.9647	32.9602	63.2747	60.774	32.589	33.599	54.8015	53.5389	70.5682	71.2406	70.0595	65.7536	69.7974	70.8883	57.8539	73.7149	58.4201	50.5271	41.9659	60.8989	68.7626	36.277	38.101	94.2048	67.4948	93.8333	81.1116	60.0986		0.690474	61.1526
10.475	62.2209	74.4182	75.054	62.754	47.9488	30.9097	60.2495	64.719	40.3089	35.109	56.309	60.2276	70.6357	66.3753	74.6297	71.2635	70.0616	66.7777	58.5485	72.757	55.5578	58.1733	39.8997	59.5247	72.9624	32.325	39.2439	94.0582	70.3697	81.1022	74.7287	64.4599		0.698408	61.3651
10.5941	66.8105	76.9675	79.73	52.709	41.5517	34.2696	61.1886	66.864	39.2509	32.933	59.6461	58.6839	65.873	64.6137	71.4444	75.4907	76.8192	61.9277	51.11	67.5521	61.4297	55.9102	42.3861	58.8196	77.4983	32.2945	44.7878	89.9525	88.7007	75.3676	74.3823	70.3622		0.706349	61.7915
10.7131	75.875	73.5228	82.132	60.795	38.4233	31.8588	68.9883	66.716	45.7684	32.925	56.9611	54.3729	71.2808	82.4454	73.2143	68.6976	72.57	60.184	57.9491	68.6807	56.3099	58.7846	48.9442	57.661	67.3822	37.902	42.3346	89.9096	73.5139	81.9718	79.6792	69.3215		0.714283	62.7211
10.8321	66.9181	74.3648	77	56.392	40.6411	30.6467	67.7295	67.319	44.2975	29.773	51.6792	61.1206	61.9856	71.7098	69.1223	78.6146	66.6994	62.8222	56.7385	64.8849	59.196	67.0097	52.8628	53.7446	60.1768	32.0132	41.8038	100.722	67.1904	73.9771	85.6225	78.6652		0.722217	61.6701
10.9512	68.4809	68.0179	82.943	57.59	46.8663	32.3927	69.0967	84.357	44.3922	32.726	59.9965	54.3068	64.4528	79.9771	78.5619	78.1389	63.7846	67.6475	53.1147	65.1937	54.9754	58.4558	50.077	54.6876	62.766	28.5843	44.9648	92.993	76.1743	76.7686	78.4984	76.5516		0.730158	62.7354
11.0702	80.0924	75.865	76.1	64.845	52.6019	35.5844	65.7102	72.183	42.114	38.178	59.4018	56.7277	62.3439	83.6783	66.5241	77.4346	69.0226	64.8209	56.9946	64.1648	51.6921	59.4452	50.0128	55.5574	65.9392	30.54	34.8243	93.1317	71.2393	70.4475	80.9291	73.6707		0.738092	62.5568
11.1892	80.1488	74.8699	75.898	61.752	54.9939	32.4378	61.5163	66.236	45.1027	39.661	61.9307	53.5481	52.4691	78.3426	73.9497	76.374	65.7999	62.0555	51.2115	56.8555	54.6921	67.3227	51.8828	54.3198	55.117	34.6569	29.8451	86.803	80.2879	71.3936	85.6485	81.843		0.746026	61.8427
11.3083	77.52	71.1841	77.609	55.81	41.4964	34.0101	63.5206	68.466	51.7169	42.354	56.119	58.359	57.7728	89.7468	84.0996	70.7457	71.139	63.4434	49.9114	56.5393	52.4061	68.6612	51.8341	54.1956	53.3723	32.8349	32.559	92.9852	77.8919	73.8154	71.7591	80.5244		0.753967	62.0126
11.4273	83.4409	67.1054	76.861	66.019	44.0675	36.533	69.5227	61.757	44.8156	47.925	46.3124	67.4925	56.0964	83.0722	73.0332	81.5729	73.3131	65.5386	50.7403	66.1523	62.1598	72.5879	52.7116	52.76	58.8602	34.767	37.3604	91.4574	92.6365	67.4199	68.8647	82.8444		0.761901	63.6188
11.5463	91.3857	62.8508	72.588	71.859	50.1107	37.7607	68.127	69.212	51.4163	44.456	60.9814	78.5387	63.6102	86.8279	83.6313	75.5551	76.8813	59.4496	56.8617	58.4547	58.5595	79.2607	52.9688	55.3573	56.8522	37.1337	42.7984	90.174	83.7141	63.8133	73.0508	89.7085		0.769835	65.7484
11.6654	82.9657	65.0468	66.49	69.412	52.706	35.8784	65.4211	72.64	50.3726	46.524	61.7002	65.1242	63.6703	91.9906	79.4408	77.5905	75.418	69.4876	55.7277	61.3293	55.7203	89.4177	51.521	53.3308	52.5361	43.375	43.3987	85.8015	90.0823	73.7689	67.7093	84.1658		0.777776	65.6176
11.7844	92.9146	61.939	69.429	67.092	57.0421	34.0904	71.128	71.872	49.406	45.474	55.544	78.8343	63.9746	82.3455	72.5088	79.2859	77.6896	76.698	59.8596	65.6734	51.9468	83.722	56.0902	59.4712	49.7515	43.7479	42.3852	87.0836	92.3552	62.2177	67.1869	86.444		0.78571	66.1001
11.9035	89.7932	61.1786	70.874	67.8	57.7987	36.5657	65.9791	65.266	46.0127	47.584	52.8503	91.6786	65.446	86.3765	75.8613	84.3213	74.2688	80.2023	59.7299	61.0733	50.3938	83.033	61.9236	47.7324	54.1468	40.408	43.167	83.4264	89.7451	67.8646	71.4883	77.808		0.793651	65.9937
12.0225	89.5973	63.7101	61.944	63.864	57.7986	39.6428	72.1178	68.006	48.3343	51.004	59.8719	98.3512	67.8717	73.2926	83.8618	79.9044	79.482	75.3159	65.3477	58.1853	49.6656	73.8031	65.2732	55.1007	47.7356	51.1417	40.1025	80.6616	85.1588	64.1781	70.0632	78.9799		0.801586	66.2302
12.1415	96.4818	55.6624	63.164	73.111	59.6089	41.3944	59.5982	62.483	50.5046	49.414	52.8286	99.4991	71.281	71.6695	87.7423	83.2604	75.8808	76.4246	63.3259	55.6466	48.7069	70.74	61.1756	52.9609	46.1987	45.9934	38.5944	84.3941	91.4715	70.2879	64.6064	84.4284		0.80952	65.8919
12.2606	87.7168	56.8061	57.941	64.26	61.166	35.4464	63.8342	62.033	50.611	56.46	59.6149	97.6273	74.7802	75.49	80.6853	76.4874	79.8111	75.2671	56.5989	63.249	47.4963	70.5116	57.1141	50.0886	46.2643	47.9269	42.6268	81.2653	96.4394	80.4047	74.0751	78.3005		0.817461	65.8875
12.3796	82.4985	51.8021	64.53	67.02	64.5824	39.6745	69.1585	64.201	43.7952	51.976	59.2626	93.01	71.756	76.1275	82.7122	77.4596	80.748	70.3883	59.9894	57.2072	50.0903	63.9841	55.4002	50.1108	36.8997	45.7268	39.4799	78.9042	91.716	76.4271	82.1022	84.3618		0.825395	65.0969
12.4986	68.771	58.2458	65.275	62.706	59.2249	42.5043	64.7243	65.978	48.0961	56.534	65.2485	106.236	81.2455	71.1579	82.9843	70.1983	82.8702	70.3208	44.8907	52.773	44.0556	56.9592	55.9448	47.6997	32.5228	45.3573	35.7747	82.2076	85.1049	76.299	70.8417	82.8692		0.833329	63.6132
12.6177	65.6017	59.4755	54.034	71.257	62.487	40.6676	65.2634	56.388	45.6096	48.809	66.0709	106.705	85.3065	70.9637	79.6222	77.9638	70.312	66.2278	38.2109	53.8106	45.8158	55.5367	54.2039	54.2138	28.8715	48.5885	39.8617	90.8226	89.159	67.3843	75.6609	97.127		0.84127	63.501
12.7367	59.5771	51.5548	55.929	66.13	58.9133	39.3439	72.1409	45.951	49.1338	60.268	62.3055	98.3548	86.4493	65.5198	83.8528	74.4596	71.0391	64.3155	33.0171	53.7943	44.4922	51.6835	55.1662	51.0699	24.5974	49.6183	32.1132	74.5556	81.1713	70.1844	75.2077	92.6582		0.849204	61.0802
12.8557	58.0326	51.8395	50.351	65.695	58.5128	42.7051	71.1971	52.51	40.52	64.067	60.2651	91.6266	91.3109	68.8579	87.635	70.9606	71.6325	68.5512	22.2061	40.9991	43.4401	51.7967	44.9823	46.7639	15.2916	56.8985	31.3448	76.4856	79.1761	66.8711	77.3284	84.9488		0.857138	59.5251
12.9748	62.9088	54.2621	60.034	67.638	67.4432	43.8739	63.6572	51.682	40.9407	65.517	56.6342	82.4575	84.6122	68.8932	87.5612	66.0613	69.4925	60.5397	13.9382	34.4352	45.3062	41.8137	46.9701	45.2246	11.6891	48.8174	31.661	59.1687	86.1337	77.5294	76.59	93.3876		0.865079	58.3398
13.0938	53.0472	57.8208	57.918	59.303	69.7898	48.7085	63.3169	48.369	36.9961	63.808	55.4602	66.9557	85.1424	71.6675	92.7345	66.8974	67.455	55.8918	10.4398	32.2106	37.603	38.2037	49.8972	48.9901	9.0997	45.2924	33.3812	60.1308	88.4449	71.1222	82.7037	93.8044		0.873013	56.9564
13.2128	54.6038	61.3073	56.662	63.997	72.2271	58.3105	59.7913	46.57	39.2361	60.735	56.3054	65.3034	90.4309	66.8928	93.6574	66.8943	69.4982	45.2356	7.8351	23.3543	43.9603	34.7095	50.7217	55.0953	8.8697	47.7407	31.1583	56.4347	80.5101	67.8277	82.3117	93.6919		0.880947	56.6212
13.3319	51.4132	61.4921	52.144	52.025	73.4225	61.243	60.1043	40.871	31.6045	59.388	62.941	70.5445	82.6145	63.8151	79.1517	66.5486	59.594	43.4769	6.9102	22.5292	35.3973	35.3476	49.6124	51.6874	5.4721	40.2712	28.4866	58.4401	85.2612	67.5299	78.8327	85.0782		0.888888	53.8516
13.4509	50.6836	49.8003	53.499	50.623	66.7924	68.6332	58.3471	39.13	28.7207	55.811	68.1514	68.7264	70.7229	63.6449	85.0211	62.3937	62.2509	43.9328	6.3596	13.2217	32.6337	31.5545	45.3254	48.7072	5.2711	37.0534	28.9833	55.5118	84.9813	75.4525	84.723	86.498		0.896822	52.5988
13.5699	53.9189	52.1576	49.254	43.153	71.3355	72.9825	54.6777	39.808	28.1831	43.647	65.547	70.3385	75.5201	66.6856	84.6453	66.9528	65.627	38.2174	11.5692	11.0561	29.2939	27.2564	43.5749	43.4178	4.422	36.9558	24.3259	59.8994	81.8189	77.2636	86.4522	82.383		0.904757	51.9481
13.689	50.2044	48.5374	50.106	45.703	63.9765	65.2327	48.2238	42.113	23.7101	40.79	63.442	66.113	65.7883	64.1966	76.7837	68.8429	66.596	30.7062	9.1985	8.6848	23.1481	22.0987	33.5878	45.9599	3.0388	32.9429	25.2493	52.6602	90.0711	61.1421	84.5879	69.6735		0.912697	48.2222
13.808	54.7459	37.6084	39.463	37.568	61.8793	75.2996	50.2438	38.253	17.5048	41.433	63.6907	67.4826	62.8368	57.7151	86.5603	63.6842	59.5024	24.8425	8.4588	6.5328	16.2941	14.2294	26.6872	30.3669	3.8678	29.0138	25.5355	50.4075	79.4457	65.1682	89.7265	72.7896		0.920632	45.5887
13.927	54.0614	36.1508	39.909	32.548	50.1239	83.0506	51.5698	37.931	17.351	41.968	66.167	60.9343	60.013	54.9241	80.7251	56.0708	58.9504	17.4854	9.4477	6.8144	12.283	7.6404	13.5848	27.2113	4.3035	25.988	17.7672	53.5709	74.1357	59.4567	76.1878	77.5208		0.928566	42.6827
14.0461	58.4238	27.4214	32.614	26.323	44.7925	80.0235	51.9483	31.538	11.5522	31.823	62.9852	59.2489	59.679	52.031	75.9637	56.1057	59.7898	15.4037	8.4301	6.9714	7.6221	5.2603	9.8206	15.2751	5.9639	21.5374	19.008	51.6769	75.4688	53.6733	74.9465	73.6563		0.936507	39.593
14.1651	55.3641	22.2085	25.747	23.676	38.8649	70.2507	46.2957	29.05	11.9612	30.122	66.9192	63.1954	49.215	46.2046	67.551	48.4813	56.576	17.6188	6.2809	6.5091	6.4166	6.533	9.335	14.8588	3.2122	18.4664	17.9975	41.4542	74.8612	64.5156	64.5337	78.5318		0.944441	36.9627
14.2841	53.4828	24.0397	24.581	18.699	36.4432	64.6428	51.5415	29.132	8.5083	28.163	56.1725	57.302	43.6638	45.4543	57.5636	46.4941	55.5281	12.6151	7.153	6.3893	8.3751	6.1063	5.0272	10.3523	1.9063	16.7788	17.02	51.2137	82.2025	50.2644	65.4778	72.8301		0.952375	34.8476
14.4032	49.48	20.8307	18.92	15.6	32.7464	62.6279	51.1307	23.736	8.3553	25.784	62.3889	61.7662	57.7265	48.3772	56.5293	37.1767	45.909	11.3942	6.0505	5.2154	6.0657	3.3823	2.6039	5.4466	1.0151	11.0168	13.5027	43.7	78.003	44.1292	65.7246	65.8134		0.960316	32.5671
14.5222	41.0226	17.4	18.891	10.417	29.6166	55.0559	50.7979	13.064	10.6685	19.428	59.9621	52.2843	53.3987	44.5167	58.8342	31.3613	42.5836	7.7652	5.7244	6.1811	4.0854	4.1487	4.0565	5.1846	2.1128	9.4916	11.6083	33.8643	66.1955	38.6994	63.1068	64.4104		0.96825	29.248
14.6412	46.9453	17.7971	9.556	10.103	23.5107	53.7214	53.355	11.808	10.2143	13.858	53.2874	47.6875	42.3317	33.4222	53.5117	27.0907	34.8926	10.6117	7.2657	4.6107	3.0163	3.7308	4.3382	4.13	2.4923	7.7417	8.4583	32.1303	68.8106	38.769	46.3041	64.4425		0.976184	26.5608
14.7603	41.1667	13.8045	10.626	7.436	15.1485	48.0351	49.382	11.625	9.0298	10.844	49.5701	38.394	41.0996	29.3715	40.8107	22.3055	29.7735	9.0686	8.0483	3.821	3.944	4.723	3.0954	4.5842	1.8183	6.4285	9.5758	27.019	53.479	33.3844	46.5082	61.9885		0.984125	23.3096
14.8793	36.4419	13.5537	9.244	4.602	11.7572	38.9742	37.219	7.964	7.7096	11.804	47.4222	37.9319	37.5602	26.4792	38.2745	16.9756	24.2049	6.8802	7.9487	5.5107	5.397	4.3935	2.0944	4.2276	1.19	6.0111	7.3798	24.6491	55.1016	24.5228	40.3511	64.0598		0.992059	20.8699
14.9984	30.4614	9.0835	6.756	5.98	9.3262	34.4129	32.3205	5.15	8.2126	7.923	40.9269	33.3825	33.0576	21.3967	37.6962	15.0771	18.0983	7.1397	7.1828	7.104	3.8709	3.649	2.751	3.3164	1.4408	4.706	7.468	17.0044	49.6293	22.6789	35.2034	60.3447		1	18.211

## Sheet: Image9
X0	Y0	Y1	Y2	Y3	Y4	Y5	Y6	Y7	Y8	Y9	Y10	Y11	Y12	Y13	Y14	Y15	Y16	Y17	Y18	Y19	Y20	Y21	Y22	Y23	Y24	Y25	Y26	Y27		Ap-basal	Avg intensity
0	18.056	23.8889	13.0556	15.9444	24.2222	20.1667	22.3333	22.8333	25.2778	24.1111	28.6111	29.4444	22.6111	28.5556	21.0556	18.2778	27.5	22.7222	27.1111	28.9444	27.6667	21.4444	25.7222	25.6667	20.5	25.2778	28.2222	42.3889		0	24.3433
0.119	23.222	32.8889	10.7778	20.4444	33.3333	26.8333	23.7778	36.4444	30.2778	20.1667	28.0556	34	32.3333	22.5556	27.2778	20.7778	35.2778	20.4444	30.3333	42.7778	28.0556	25.6111	28.4444	24.6111	16.6111	29.2778	25.4444	35.6111		0.00781024	27.3452
0.2381	26	27.4444	16.0556	16.7778	32.6111	26.3333	35.1111	35.7222	28.6667	25.8889	35.6667	35.8889	38.5556	26.3333	24.3333	27.3889	34.2222	31.5556	29.7222	42.6111	32.5	30	26.0556	31.7778	25.0556	30.3333	24.7778	33.5556		0.0156271	29.6766
0.3571	28.389	29.5	19.2778	19.8889	32.3333	29.8889	38.2222	34.8333	43.4444	28.5556	40.3333	53.7222	33.4444	38.5556	34.1111	30.9444	34.8889	27	42.2778	39.8889	35.4444	35.3333	35.9444	37.1667	21.8333	23.5	23.9444	35.4444		0.0234373	33.1468
0.4761	34.278	30.6111	21.5556	21.5556	28.3889	36.0556	50.3889	37.5556	38.6111	31.5	44.1111	48.5556	48.2222	47.0556	33.8889	31.3333	32.7222	30.0556	43.4444	60.4444	30.4444	49	43.1667	40.2778	22.3333	27.5	26	31.2222		0.0312475	36.4385
0.5952	30.722	40.7778	23.6111	29.7778	31.7222	46.3889	48.4444	51.7778	49.8333	42.8889	55.5	44.8889	48.8333	50.0556	39.7778	33.3889	42.2778	38.9444	40.1667	55.5556	43.0556	39.8333	52.0556	42.9444	25.4444	34.9444	22	38.1667		0.0390643	40.8492
0.7142	40.167	39	29.1111	25.7222	41.1667	51.5	52.3889	69.8889	52.9444	46	51.3333	65.4444	53.1667	47.9444	55.6667	31.7778	39.7222	37.1667	48.0556	52.2778	45	49.1111	46.3889	49.5	26.6667	39.8889	33.5556	34.5		0.0468746	44.8234
0.8332	45.556	40.4444	31.1111	27.9444	45.8333	56.3333	56.0556	64.0556	68.2778	57.5556	54.7778	59.8889	56.8333	58.7222	46.2222	43.9444	27.2222	39.5556	58.6667	57.0556	48.3333	55.6667	69.2222	52.7222	32.7778	30.6667	28.1667	26.7222		0.0546848	47.8691
0.9523	45.333	48	42.2222	32.3889	39.8889	72.1111	45.2778	89.1111	79.2778	57	66.2778	64.5556	75.0556	66.7222	63.8889	49.7778	39.6667	53.9444	51.1111	72.8889	52.3333	51.8333	62.2222	52.5	28.5	33.1111	31.5	35.1667		0.0625016	53.6309
1.0713	60.944	47.3889	43.9444	39.6111	53.3333	71.3333	55.3889	83.7222	73.3889	61.6667	54.7222	73.1111	70.6667	63.2222	63.1111	49.9444	36.2778	52.7222	52.3333	71.1667	55.9444	48	75.6111	58.5556	28.6111	36.9444	28	31.4444		0.0703119	55.0397
1.1903	70.167	53.5	54.5	40.8333	55.3333	78.2778	70.8333	74.6667	59.9444	85.6111	62.1667	73.8333	75.3333	73.0556	57.0556	45.0556	37.7222	55.8333	57.3889	56.7778	61.8889	52.5556	66.8889	49.3889	33.7778	41.5	38.6667	38.3889		0.0781221	57.8909
1.3094	67.222	68.6111	67.0556	44.7222	60	82	73.2778	87.3333	72.9444	77.6111	65.4444	73.6667	91.7222	72.2778	55.8889	50.6667	43.1111	44.6667	63.2778	61.5	50.2222	53.1111	69.5556	44.2222	39.1111	38.2222	41.1111	35.1111		0.0859389	60.4881
1.4284	76.333	60.1111	64.8333	50.6667	53.6111	69.5556	88.1667	81.5556	62.0556	75.5	63.2778	71.8889	77.6667	77.1111	60.1111	49.3889	37	54.1667	60.7222	64.1111	61.3333	55	62.4444	63.1667	35.0556	45.1111	32.0556	38.3333		0.0937492	60.369
1.5474	87.444	66.8889	74.3333	49.0556	54.8333	61.7222	82.8333	88.1111	65.5556	79.6667	65.4444	60.7222	71.3889	82.1111	60.6111	54.1667	44.9444	65.3889	71.8889	68.1111	51.7222	51.1111	65.6667	63	40.7778	45.1667	35	44.3333		0.101559	62.5714
1.6665	97.944	74.8889	76.7778	55.6111	54.3889	50.5556	90.1111	83.6111	54.9444	72.3889	77.7222	66.6667	76.1111	79.5556	56.8889	45	47.3333	44.7778	52.9444	75.6111	53.7778	52.8889	53.2778	63.1667	44.1667	46.1667	44.8333	49.9444		0.109376	62.2163
1.7855	100.722	66.6667	80.0556	62.9444	56.5556	70.3889	88.4444	75.1111	54.7778	68.5556	89.1111	67.9444	80.5	80.2778	54.4444	61.4444	46.8889	51	55.6111	72.3889	60.1111	53.2222	47.5	54.7222	44.2778	39.1667	44.7778	45.4444		0.117186	63.3234
1.9046	85.222	75.0556	72.5556	68.7222	52.6667	57.1667	86.7222	73.6111	43.8889	63.2222	89.8333	64.7222	77.7778	59.8333	47.0556	56.6667	55	47.4444	57.2778	73.1111	53.1111	59.8889	53.2222	61.8889	48.3333	34.1667	42.0556	56.1667		0.125003	61.2996
2.0236	104.833	67.3333	81.2222	80.4444	56.2222	51.6111	92.6667	57.2778	50.0556	59.7778	92.7778	60.6111	76.6667	71.3889	55.3889	64.3889	51.7778	51.3333	47.6111	57.4444	53.7778	44.5556	51.8889	52.3333	48	41.5556	54.8889	45.8889		0.132814	61.5615
2.1426	71.611	68.7222	78.1111	79.3889	69.2778	61.3333	77.0556	56.1111	44.9444	62.2778	107.333	70.5	80.9444	62.3889	60.2778	62.1111	53.5556	45.3333	55.1667	61.7778	57.8333	55	44.5556	45	47.2778	37.6667	49.8333	51.1111		0.140624	61.3036
2.2617	81.278	63.9444	74.8333	99	66.6667	60.6111	69.9444	56.2222	49.0556	57.9444	105.278	70.1667	71.6111	53	62.7778	71.6111	48.3889	42.2222	50.4444	51.2222	60.6111	38.5	49.7222	55.5556	44.5556	39.2222	54.2222	46.1667		0.148441	60.5278
2.3807	72.778	69.5	76.8889	100.944	68.5556	58.1667	67.7778	51.6667	53.9444	59.5	100.222	72.5	80.2778	53.7222	64.7222	74.0556	48.7222	52.5	45.9444	52.7778	63.5	44.3889	45.6667	54.7222	50.7778	46.0556	49.5556	55.6111		0.156251	61.9802
2.4997	73.111	65.5	77.6667	87.3333	66.1667	67.2222	67.7222	53.1667	46.2222	55.4444	103.167	62.4444	74.8333	57.8889	52.8889	69.7778	52.9444	51.6667	44.8333	60.7222	55.3333	40.7778	54.7222	54.2778	46.3333	38.4444	52.1667	58.7222		0.164061	60.4107
2.6188	69.278	66.5	84.7222	82.2222	57.0556	61.8889	58.9444	61.6667	46	59.2778	97.3333	63.7222	72	40.6667	55.6111	64.4444	60.3333	42.0556	47.4444	54.8889	53.4444	43.3333	53.5556	52.5	54.1667	39.4444	47	62.8333		0.171878	59.0119
2.7378	65.722	58.0556	74.3889	89.5	52.3889	68.8889	64.6667	57.2778	47.6111	56.1111	88	63.9444	81.3889	51.3889	54.0556	70.1667	62.8333	43.7222	46.8333	47.8333	47.3889	45.7778	54.4444	47.9444	44.1667	45.7222	53.9444	43.2222		0.179688	58.121
2.8568	65.333	61.6111	64.2222	81.0556	47.8333	53.1667	58.6667	64.3333	54.3333	56.6667	83.6111	61.5	61.1111	48.7222	47.3333	64.6667	50.7778	45.6111	51.2778	52	48.6111	45.1667	50.1667	48.1111	51.8333	40.6111	49.9444	53.1667		0.187498	55.7659
2.9759	54.222	58.6667	68.4444	79.9444	59.0556	54.2222	56.7222	58.2222	53.3889	59.5	69.7778	68.9444	60.8889	45.2222	57.3333	63.7222	51.1667	38.0556	41.8889	55.7222	50	46.8889	57	48.3333	57.1111	44.8333	55.1111	68.0556		0.195315	56.5159
3.0949	61.222	58.1111	70.3333	65.1111	55.4444	58.1111	68.8889	55.8889	55.8333	55.2222	77.0556	61.8333	60.8889	48.9444	48.1667	56.5556	47.6667	44.1111	43.5556	59.6111	45.4444	43.2778	48.3333	58.2778	51.3889	42.8333	60.8333	58.5		0.203125	55.7659
3.2139	54.5	55.1111	78.9444	61.3333	54.5556	55	59.6667	62.2778	57.9444	53.5	66	72.6667	71.6111	38.6667	43.4444	62.8889	45.8889	40.6111	42.9444	59.8889	47.6667	49.8889	54	56.5556	60.5556	47.7222	55.3889	76.0556		0.210936	56.6171
3.333	65.056	52.3333	61.5556	66.5	49	60.7222	52.1111	58.5	53.6111	58.5556	63.7778	69	60.6667	52	59.2778	54.9444	54.1667	52.9444	49.6111	60	47.7222	45.1667	44	45.2222	53.2222	47	58.2778	67.0556		0.218752	55.7857
3.452	58.222	51.6667	68.8333	62.4444	60.8333	49.5	57.8889	65.1111	56.2778	66.1111	68.8889	78.2778	71.8333	50.1667	46.8889	50.2222	43.1667	51.2778	41.5556	59.7778	61.9444	41.6111	45.1667	48	60.7778	47.5556	70.4444	64.7778		0.226563	57.1151
3.571	51.5	52.6667	66.7778	61.4444	60.0556	61.1667	54	60	48.1111	63.3333	72.0556	64.8889	60.1111	49.6111	51.7778	65.5556	48.9444	40.6111	47.8889	48.1667	56	51.2778	48	49.1111	52.6111	44.2222	63.2222	72.9444		0.234373	55.9306
3.6901	58.444	46.9444	62.1667	65.6111	58.1667	64.2778	62.6111	59.6667	56.5	56.5556	57.6667	73.2222	51.7778	48.7222	49	62.3889	44.6667	40.8889	56.1667	47.3333	61.5556	43.8889	52.6667	49	52.3889	45	56.2778	70.3889		0.24219	55.498
3.8091	58.167	54.6667	60.3889	55.3889	53.6667	61.6111	68.8333	62.4444	53.6667	59	59.6111	58.5	69.2778	53	51.6111	59.0556	44.1667	45.2222	47.1667	51.9444	53.7778	43.5556	47	57.7222	53.5	55.7778	50.4444	67.1667		0.25	55.5834
3.9281	51.333	47.8333	58.8889	52.2222	55.8333	65.7222	65.7222	53.5556	50.0556	61.9444	50.8889	65.2778	64.6667	47.7222	50.1667	47.8333	53.8889	47.1667	45.8333	50	57.1111	48.8333	42.7222	47.8889	58.1111	32.9444	46.2222	65		0.25781	53.0496
4.0472	54.944	64.3333	62.1667	58.8333	60.1667	63.9444	59.2778	58.7222	62.1667	62.1667	57.1111	59.8889	69.9444	54.2778	44.5	53.3889	52.6111	41.2778	54.4444	45.3333	59.6667	45.8333	49.8889	50.8889	52.2778	46.9444	53.5556	55.9444		0.265627	55.5178
4.1662	54.444	55.6667	70.5556	60.2778	65.1111	65.0556	53.0556	56.0556	60.7222	52.5556	54.6667	53.1667	60.2778	57.1667	52.6111	50.1111	55.8333	44.7222	60.0556	51.0556	71.5556	42.5	60.5556	47.6667	48.8333	39.0556	66.8889	53		0.273437	55.8294
4.2852	50.167	52.5556	58.2222	53.6111	63.3333	55.9444	57	51.0556	65.1667	56.5556	53.2222	61.3889	65.4444	45.7222	54.3333	45.2778	55.2222	49.1667	50.5	57.3333	74.5	46.3889	48.0556	53.8889	52.3333	43.5556	55.9444	67.5556		0.281248	55.123
4.4043	50.111	63.6111	56.0556	53.8333	55.0556	74.5556	52.9444	54.3333	49.6111	54.2778	60.4444	50.8333	60.5	57.2222	61.6667	50.7778	52.3889	47.3889	50.4444	52.7778	65	50.6111	55.7778	49.5556	42.7222	46.3889	55	59.6667		0.289064	54.7698
4.5233	48.222	59.2778	59.6111	54.0556	59.6111	68.2778	56.5556	52.1667	61	52.2778	57.3333	54	64.7222	57.3889	62.1111	38.9444	45.9444	57.7778	56.3889	52.5556	69.2778	53.4444	50.1111	53	56.3889	47.5556	46.1667	50.1667		0.296875	55.1548
4.6423	64.722	64.8889	53.9444	47.0556	66.8889	66.5	53.1111	49.2222	61.5556	58.3889	54.4444	49.3333	54.0556	61.1667	60.3889	45.7778	46.5556	60.2778	62.3889	58.2778	68.3333	53.8333	47.8889	50.8889	51.1111	42.7778	40.2778	62.5		0.304685	55.5913
4.7614	55.389	79.1111	60.2778	45.6111	61.7778	54.8889	58.6667	61	55	65.0556	59.6667	53.7778	58.6667	61.9444	58.1111	46.0556	59.9444	50.2222	55.9444	55.6111	66.5556	48.6111	59.3333	51.6667	58.8889	47.5	49.8333	53.2778		0.312502	56.871
4.8804	64.056	58.2778	53.5	54.0556	50.6111	58.1667	53.2778	51.1667	66.5	52.7778	49.6667	51.3333	57.0556	59.7778	62.9444	48.5556	50.4444	49	46.0556	57.2222	70.1667	55.7778	43.5556	55	55.1111	47.7222	46.1111	47.9444		0.320312	54.1369
4.9995	63.167	62.7222	53.3889	56.6111	50.9444	55.6667	49.6111	41.0556	64.3889	57.3889	55.1667	55.3889	57	71.6111	64.1111	54.9444	48.1667	53.2222	46.8889	48.7778	63.9444	51.5	55.4444	44.7222	60.3333	45.7778	47.8889	58.9444		0.328129	54.9564
5.1185	62.278	70.9444	56.3889	46.7778	50.7778	50.4444	59.6667	44.8889	63.8889	59.3889	53.6111	57.1667	60.7222	61.6111	69.2778	42.2778	54.6667	60.7222	60.0556	53.2778	65	51.6111	52.3333	48.6111	52.8333	47.1111	50.2222	47.6111		0.335939	55.506
5.2375	58.722	50.3333	56.8333	52.2778	49.6111	53.6667	56.8333	50.2778	60.7778	57.4444	51	52.1111	42.8889	49.3889	62.7778	49.2778	48.0556	55.6111	54.4444	54.1667	63.8333	44.6111	51.2222	52.5556	56.5556	50.5	54.6667	52.0556		0.343749	53.3036
5.3566	69.833	66.1667	54	53.6667	48	45.0556	48.6667	42.9444	59.1667	55.4444	56.7222	53.9444	51.9444	57.5	67.1111	51.0556	51.8889	58.8889	59.5	51	56.5556	47.8889	53.8333	49.1667	52.1111	51	48.7778	46.5		0.351566	53.869
5.4756	62.444	55.1667	54.4444	47.1111	41.8889	40.5556	54.9444	47.5	62.8889	48.6111	43.8889	52.9444	38.1111	57.4444	58.4444	52.6667	61.3333	61.9444	50.7778	53.4444	60.7778	44.7778	50.6111	53.9444	47.8889	44.1667	47.3889	44.8333		0.359376	51.4623
5.5946	58.444	54.7222	51.6111	55.7222	46.1667	53.4444	45.7778	48.1667	54.2222	57.5	49.9444	49.5556	54.3333	53.9444	64.8889	47.7222	58.4444	59.4444	54.1111	55.7778	62.5556	58.8889	54.8333	58.8333	50.5556	48	44.7222	45.9444		0.367186	53.5099
5.7137	48.278	65	50.2778	50.0556	43.5	47.3889	47.5556	54.2222	45.8889	45.8333	51.3889	53.5556	45.8333	48.0556	63.5556	43.3889	56.5	58	48.8889	57.4444	52.7778	48.2778	50.2778	51.6111	51.8889	47.7222	37.4444	53.0556		0.375003	50.631
5.8327	49.222	52.8333	57.7778	49.7222	41.5	43.1667	44.9444	47.5	46.2222	53.9444	47.2778	49.2222	49.8333	54.3333	64.2778	48.2222	55.7222	55.3333	51.8889	55.5556	49.5	41.6667	48	54.6667	55.0556	54.7778	49.4444	47.7222		0.382814	50.6905
5.9517	53.833	46.2222	63	48.7222	45.1111	45.1667	55.9444	43.6667	33.8889	43.3889	45.8889	49.6667	42.4444	49.7778	63.8889	49.2778	56.3889	52.1667	46.5	56.0556	50.5556	54.1111	57.8889	60.5	49.3889	45.3889	44.1111	57.8889		0.390624	50.3869
6.0708	47.222	45.9444	58.2222	51.0556	44.2778	44.7778	43.4444	41.5	42.9444	50.7222	45.7222	48.3333	51.2222	51.1667	79.7778	51.2778	57.2778	47.5	48.4444	55.6667	48.5	51.3889	46.1667	54.8333	46.6111	51.8889	41.3889	55.9444		0.398441	50.1151
6.1898	47.889	41	60.8889	54.5556	43	42.7778	39.6111	48.5556	42.7222	47.3889	46	61.7778	55.2778	42.6667	52.5556	43.6111	53.9444	46.1667	44.9444	56.1111	44.1667	48.5556	48.0556	53.7222	51.1111	42.3333	46.7778	59.3333		0.406251	48.7679
6.3088	53.278	34.4444	58.9444	36.2222	43.6111	40.4444	44.2222	43.6667	38.1667	49.1111	52.1111	51.3333	49.2778	37.5556	57.7222	42.5	55.8333	44.6667	47.9444	46.8333	47.2222	58.1667	52.9444	53.1111	40.2778	45.7778	41.5	56.0556		0.414061	47.248
6.4279	46.333	46.3889	55.3333	41.0556	37.8333	39.5556	49.1667	44.5556	40.8889	51.1111	48.4444	52.1111	48.9444	42.8333	64.7778	43.2222	51.7778	41.1111	40.2778	49.9444	43.8889	56.8889	55.1111	50.1111	43.7222	46.6111	48.0556	58.2778		0.421878	47.7976
6.5469	45.5	37.0556	51.2222	46.1111	47.6667	38.6667	48.2222	43.5556	36.3889	54.3333	48.8333	52.4444	45.5	34.6111	63.8889	46.2778	49.6111	38.2222	32.5556	50.9444	44.5556	57.6111	50	48.7778	47.3889	46.8333	45.2222	51.8333		0.429688	46.5655
6.6659	39.333	39.2222	52.3889	45.7222	38.3333	47.7778	46.7222	44.1111	35	54	54.3333	52.0556	41.6667	36.2222	56.1667	40.5	57.3889	41.6667	35.7222	42.6111	40.3889	70	48.2222	43.6667	49.4444	52.1111	42.3889	45.5556		0.437498	46.1686
6.785	44.667	35.2778	49.1111	52.6111	38.4444	38.9444	43.8889	43.8333	32.6111	49.5556	61.4444	53.7778	43	32.9444	61.0556	47.2222	50.8333	36.5	33.1667	52.8333	49.3889	46.1667	53.8333	62	57.0556	50.6667	53.0556	47.8889		0.445315	47.2064
6.904	40.222	29.5	50.0556	49.2222	33.6111	40.2222	51.6111	44.2222	27.5556	58.4444	55.1667	47.2222	46.7778	26.7222	50.5556	41.4444	49.3333	30.2222	31.8333	55.6111	46.0556	47.5	49.1111	46.9444	46.8889	44.1667	52.8889	46.8889		0.453125	44.2857
7.023	45.444	35.4444	38.3333	51	37.7778	36.8333	43.3333	38.0556	33.8889	43.1667	62.8889	46.8333	34.4444	26.6111	49.7778	46.1111	44.1111	35	30.1111	54.6667	42.2778	45.2778	47.8333	39.3889	49.5556	42.7778	43.7222	43.5556		0.460936	42.4365
7.1421	50.722	34.0556	47	48.3333	32.5556	36	49.7222	45.8333	25	52.7222	57.6111	45.5556	31.6111	26.4444	50.6667	47.3333	37.1111	28.6111	22.6667	49.5	49.7222	51.7778	42.7222	46.2778	49.7222	50.1111	43.2222	40.8333		0.468752	42.623
7.2611	40.778	25.3333	44.6111	44.7778	33.3889	34.4444	53.2778	43.8333	23.6667	49.7222	51.8333	54.0556	35.8889	23.6111	46.8889	42.0556	43.6667	33.7222	25.6111	48.5556	64.6667	56.1667	34.1667	42.7222	49.0556	55.1111	42.4444	50.3333		0.476563	42.6568
7.3801	44.833	27	45.6667	44	36.0556	25.1667	47.2222	46.4444	23.2778	52.9444	42.8889	51.2222	30.2778	27.1111	49.6667	41.3889	47.7222	24	28.8889	53	44.6667	52.7222	43.7778	42.1667	53.5556	62	48.4444	47.2222		0.484373	42.2619
7.4992	53.889	26.6667	40.0556	49.4444	34.5556	32.7778	47.8889	31.4444	23.7222	47.7778	49.3889	47.6667	31.2778	22.9444	49.6667	40.3889	46.6111	25.5556	20.4444	56.8333	52.4444	49.8333	30.5556	44.8889	44.3333	46.3333	53.2778	49.8889		0.49219	41.0913
7.6182	46.389	24.6667	36.6111	44.5	27.9444	33.5	42.7778	32.4444	22.1667	46.3333	50	46.3889	26.2778	21.5	47.8889	39.7222	52.1667	32.2778	25.0556	63.8333	51.2778	49.7222	32.2222	42.8889	47.0556	46.8333	51.6667	59.9444		0.5	40.8591
7.7372	51.167	25.5556	38.3889	39.2222	23.5556	35.2778	43.3333	35.2222	19.8889	46.3889	54.3889	49.5556	28.3889	21.8889	50.2222	43.8333	41.9444	32.5556	24.7222	46.3889	48.7778	45.3333	31.2778	44.1667	47.0556	44.7778	52.1111	48.6111		0.50781	39.7857
7.8563	51.556	23.5	37.5	41.6111	26.5	44.1111	53.7778	29.2222	15.7222	47.3889	46.4444	51.7778	28.9444	23.5556	40.9444	45.9444	47.6667	27.6667	25.1667	50.1667	54.3889	49	35.6111	45.4444	46.0556	42.8333	46.5556	44.5		0.515627	40.127
7.9753	52.111	27.2778	32.0556	48.7222	27.4444	40.4444	41.1111	33.5	16.3889	42.8333	41.9444	42.4444	28.8889	22.1111	45.2778	52.7778	40.2778	29.7778	30.4444	43.6111	55.3889	57.3333	33.5556	40.5556	46	42.2778	50.9444	45.6667		0.523437	39.6845
8.0943	56.278	21.6667	34	38.7222	29.7222	40.6667	52.2778	29.5	17.7222	39.8889	41.3889	41.7778	23	20.1111	36.7222	50.5	41.0556	28.4444	22.8889	47.1667	50.5556	45.7778	26.2222	37.2222	48.9444	49	56.3333	45.3889		0.531248	38.3195
8.2134	38.556	23.0556	39.8333	48.2222	20.7778	40.7778	47.6667	28.8889	20.6111	37.5	44.9444	36.2778	21.6111	23.1111	33.2778	45.5	41.3889	28.5	25.4444	43.3889	52.6111	42.1667	28.9444	37.8889	55.1667	37.0556	48.7778	38.5		0.539064	36.8016
8.3324	47.889	23	39.3333	50.5	23.2222	37.8333	49.2778	31.3333	17.5556	35.5	38.5556	43.2778	21.4444	18.7222	38.8889	51.6667	38.4444	25.4444	26.1667	44.5556	55.1111	39.4444	27.0556	36.3333	55.6111	38	39.1111	46.3333		0.546875	37.129
8.4515	45.056	20.8889	35.6667	44.3889	27.6111	39.7222	47.5556	32.6111	17.6667	47.2222	44.8333	41.5556	20.3333	16.8333	38.0556	58.9444	38.5	26.6667	20.9444	33.9444	59.8889	33.7778	28.7778	34.6667	53.8333	37.8333	44.7222	41.1667		0.554691	36.9167
8.5705	44.778	24.0556	39.7222	44.1667	24.2222	45.3889	49.6111	33.1111	21.0556	44.6667	39.2222	44.1111	21.8889	13.1111	43.1667	51.3889	51.9444	20.2778	20.2778	42.7222	55.2222	39.4444	27.3889	31.1111	54	42	39.3333	40.8889		0.562502	37.4385
8.6895	39.722	21.8889	37.4444	47.5556	15.3889	38.7778	54.9444	27.9444	21.1667	37	48.2778	39.4444	22.2222	16.0556	40.2222	48.5556	42.5	25.7778	19.8333	33.8333	63.1667	37.1667	31.8889	36	49.7778	42.1111	41.0556	44.2222		0.570312	36.5694
8.8086	51.778	22.3333	39.0556	42.8333	22.7222	37.2778	61.9444	29.8333	18.1111	47.1667	41.3333	41.2778	24.2222	11.2778	40.6667	50.1667	43.7222	25.6111	20.8889	32.1667	55.5	31.6667	29.1111	37.2222	49.8889	35.2222	36.5556	36.8889		0.578129	36.3016
8.9276	40.056	22.7222	38.2778	47.4444	29	41.6111	51	33.8889	21.1667	42.1111	44.7778	37.9444	22.1667	14.3333	41.6111	53.6111	42.3333	19	23.5	38.9444	39.6111	42.3333	23.7778	30.2778	48.1111	39.0556	39.0556	37.1667		0.585939	35.8889
9.0466	43.389	25.7778	34.5	50.3889	22.3333	36.3333	56.3889	32.8889	18.1111	43.8889	39.1667	40.3333	23.7222	16.7222	41.3333	56.3889	55.7222	25.3333	24.0556	35.7778	50.7778	37.9444	26.4444	34	44.3333	36.7778	37.1667	39.6111		0.593749	36.7718
9.1657	50.556	19.5	36.1111	40	25.0556	39.7778	50.0556	30.5	13.0556	39.8889	42.7222	37.8333	24.2222	14.7778	32.2778	49.6667	41.1667	23.7778	20.5556	32.1111	41.5556	42.5556	19.3333	30.5	44.7222	39.7222	41.5	39.5556		0.601566	34.3949
9.2847	40.722	22.1111	36.0556	48.1667	34.5556	33.2778	52.6111	28.5	15.6111	48.1667	36.2778	37.2778	21.3333	12.0556	39.0556	51.7778	47.6111	19.2778	18.3889	36.7222	46.8333	31.1667	21.2222	43.3889	35.0556	35.8889	36.4444	43.1111		0.609376	34.7381
9.4037	51.556	27.6111	43.7778	41	35.3333	35.3333	49.8889	30.4444	19.5	39.8889	39.0556	38.4444	17.5556	13.1111	37.5	49.2222	40.7222	23.1667	22.5	35.9444	44.1111	34.0556	21.9444	30.2222	36.7222	42.3889	42.7222	48.4444		0.617186	35.4345
9.5228	50.111	23.6111	34.7222	40.8333	29.6111	39.7778	46.3889	34.1111	24.7222	38.2778	44	39.6667	19.1111	15.2778	31.6667	47.8333	37.8889	24.9444	19	36.8889	42.3333	41.5	18.4444	27.8889	36.3889	39.2222	41.7222	40.8889		0.625003	34.5298
9.6418	43.444	23.5	40.1667	53.5556	30.8333	30.6111	45.0556	31.1111	17.1667	39.4444	48	40.1111	21.7222	13.3333	33.3333	57	38.3889	21	17.6667	36.3333	41.7222	34.0556	19	31	38.5556	38.7778	42.3889	36.1111		0.632814	34.4067
9.7608	48.556	17.4444	37.8333	46.2222	33.0556	33	51.8889	28.2222	19.2222	41.3333	44.9444	47.1111	22.4444	16.8889	33.2778	50.6667	42.1111	20.8333	18.7222	41.1111	48.3333	34.8889	24	26.0556	39.7778	34.7778	42	38.2222		0.640624	35.1052
9.8799	46.611	27.7222	37.2778	38.1667	35	37.8889	49.0556	34	20.5	37.8333	42.8889	48.6667	18.6111	14.7778	35.2222	49.7222	40.7778	25.6111	17.6111	34.1111	45.2778	28.5	21.6667	27.9444	30.8333	41.0556	36.6667	35.4444		0.648441	34.2659
9.9989	44.5	23.3889	33.3889	49.1111	38.1667	30.4444	46.2778	30.3333	23.8333	38	51.3333	45.3889	15.2222	15.1111	35.3333	48.8333	33.9444	29	20.5	27.4444	48.8889	33.3889	18.7222	30	46.3889	40.9444	38.7778	36.9444		0.656251	34.7718
10.1179	55.389	26.3333	32.2778	42.3333	30.8333	32.1667	45.2222	31.6667	20.2222	38	43.0556	46.5556	20.8333	14.9444	31.1111	48.5556	38.6111	22.5556	18.0556	35.6667	50.9444	33.7222	21	28.8333	41.5556	41.7222	39.2778	40.4444		0.664061	34.7103
10.237	46.5	25.6111	46.3889	49.5556	33.9444	33.2222	52.7778	26.2222	17.5	34.1667	58.9444	42.6111	18.6111	17.0556	33.5556	39.6111	35.6111	22.4444	15.8889	32.3889	55.3889	27.3333	20.5	26.8889	40.3889	37.2222	40.8333	36.1667		0.671878	34.5476
10.356	51.611	24.3333	36.8333	55.1111	34.1667	29.3889	46.7778	35.0556	18.3333	32.5556	50.6667	37.8889	16.8333	18.6667	32.0556	54.5556	31.5	22.2222	18.7222	34.1111	58.8889	33.2778	19.9444	30.8889	41.1667	32.6667	47.5	34.3889		0.679688	35.004
10.475	53.611	23.1111	41.5	51.5556	31.7222	34.7222	55.5556	31.8333	20.4444	26.7222	53.3333	43.2222	17.6111	14.3333	33.5556	46.3333	37.7778	32.1111	14.2222	32.8889	49.2222	27.5	16.6111	28.7222	41.3333	43.7778	43.9444	37.0556		0.687498	35.1547
10.5941	60.556	22.9444	38.7778	51.3333	31.5	32.2778	33.5556	29.2222	20.2222	37.8333	49.1111	45.1667	23.9444	16.2778	33.8889	36.7222	34.1111	26	16.3889	32.8333	47.1667	36.0556	24.8889	26.8889	39.1667	42.8333	42.1667	33.1111		0.695315	34.4623
10.7131	54	22.5	44.2778	48.5556	27.3889	30.2778	43.6111	32.1111	20.1111	33.1111	56.9444	43.9444	22.9444	18.2222	31.1111	46.3333	39.8889	23.3889	25	29.2778	45.8333	31.5556	17.3333	25.4444	43.4444	40.1667	35.7778	32.1111		0.703125	34.4524
10.8321	52.5	23.7222	42.5556	49.3889	38.5556	35	42.8333	35.6111	25.5556	32.7222	50.3333	44.2778	27.6111	15.6111	33.8333	48.1111	33.2778	27.2778	18.2222	30.7778	49.8333	32.6667	22.0556	23.2778	30.1111	47.0556	50.6111	34.3889		0.710936	35.6349
10.9512	44.944	30.3889	47.9444	46.4444	40.5	36.7222	45.7222	29.8333	18.7778	26.4444	51.3333	42.8889	22	13.4444	32.0556	45.8333	35.7222	19.8333	20.8889	32.8889	47.8889	31.7222	18.6111	26.0556	39.0556	40.6111	42.2222	31.3889		0.718752	34.3631
11.0702	51.944	19.4444	45	46.2778	41.1111	35.9444	44.7222	40.8333	23.1667	28.7778	48.7778	44.0556	22.2778	13.4444	34.8333	44.5556	38.2778	23.3333	19.7222	30.6667	47.6111	28.5556	18.2778	24.2778	44.6667	35.5556	36.7778	35.3889		0.726563	34.5813
11.1892	51.056	29.7778	44.7778	47.8889	41.5556	37.6111	40.3889	35.4444	22.6667	34.2222	45.5556	44.3889	28.0556	18.1667	30.2778	49.7778	36.7222	22.0556	19.5556	34.7778	44.2222	26.8333	22.2778	25.5556	37.9444	44.1111	32	36.0556		0.734373	35.133
11.3083	51.944	21.6111	46.7778	44.8889	34.7778	30.4444	39.7778	37.8333	20.6111	34	51.2778	44.9444	26.0556	18	26.1111	43.3333	42.7222	26.3333	26	44.8333	48.8333	25.8889	21.6111	30.3333	37.2778	39.5	34	28.4444		0.74219	34.9345
11.4273	44.611	25.8333	46.6111	47.5556	35.7778	35.7778	38.3889	32.4444	21.5	36.7222	48.3889	41.7222	25.5	16.6667	35.3333	40.7222	44.8889	27.1111	20.3889	35.6111	46.2222	28.6667	20.0556	30.2222	32.3333	41.3333	34.3333	32.3889		0.75	34.5397
11.5463	53.944	29.5556	49.5556	46.0556	36.3333	39.8889	35.2222	36.8889	20.6667	32.7222	49.0556	46.1111	27.4444	17.8333	34.3889	38.3333	45.0556	28.6111	25.1667	46.4444	43.7778	30.7222	22.2778	37.5556	29.8889	38.8333	29.8889	35.8333		0.75781	36.002
11.6654	38.944	33.0556	55.8333	48.2222	33.8333	32.7222	37.7778	45.8889	29.3333	37.4444	51.1667	40.3333	24.3333	18.1111	31	45.1111	45.8889	26.2222	26.1111	44.1111	52.2222	26.8333	21.5556	31.8333	43.2222	48.7222	34.7778	32.2222		0.765627	37.0297
11.7844	35.833	28.7222	48.4444	52.1667	37.3889	31.0556	35.0556	42.2778	28.9444	30	46.5556	45.0556	28.9444	20.1667	33.6667	42.8333	56.6667	28.8333	18.5556	45.8889	61.1111	35.6667	24.2778	34.1111	43.6111	34.2222	27.9444	33.7778		0.773437	36.8492
11.9035	43.056	39.1667	50.3889	53.3889	34.1111	40.3889	44.2222	39.9444	26.6111	30.7222	49.4444	46.2222	23.2778	19.3333	33.8333	42.5	51.4444	27.7778	19.6667	47.5556	47	27.0556	18.6111	30.8889	30.6667	34.8889	37.6667	29.7778		0.781254	36.4147
12.0225	45	31	52.7778	52.9444	39.7222	35.8333	41.9444	38.7778	29.3889	33.7778	44.2778	39.3333	28.2222	22.6667	38.3889	43.0556	58.2778	30.7222	25.1111	51.9444	51.8889	31.3333	19.5	31.5556	36.5	34	40.8333	30.1667		0.789064	37.8194
12.1415	52.222	34.8333	54.1111	57.0556	34.3889	40.5556	39.5556	47.1111	26.1111	30.2778	48.8333	39	22.4444	22	40.2778	47.3333	44	29.1111	20	46.4444	49.3333	33.4444	23.5556	26.6667	43.5	36.6111	36.1111	30.5		0.796875	37.6925
12.2606	43.556	37.8333	56	56.5	41.8333	46.8889	37.1111	47.3889	27.7778	37.9444	43.3333	51.1667	30.3333	20.3333	40.2778	42.1667	46.7778	25	24	50.8333	45.6111	31.4444	15	38	38.1111	34.1667	38.8889	40.6667		0.804691	38.8909
12.3796	38.778	35.5556	56.4444	52.4444	44.2222	38.9444	47.2222	51.3333	30.6111	37.6111	48.5556	39.8889	32.6111	18.5556	40.2778	41.2778	42	27.1111	31.0556	47.9444	47.7778	33.0556	20.8333	45.4444	36.4444	33.9444	32	28.3889		0.812502	38.5833
12.4986	48.5	38.3333	48.6111	50.6111	43.9444	44.6111	42.9444	45.0556	29.5556	44.3889	43.1111	46.9444	39.2222	20.2222	51.2222	42.2222	46.5556	21.2778	26.3333	47.9444	44.1667	36.6667	21.4444	50.2778	41.1667	39.6111	37.2222	33.6111		0.820312	40.2063
12.6177	40.722	44.1667	55.4444	57.2778	44.1111	45.9444	51.6111	52.5	25.9444	36.9444	54.3333	42	31.4444	25.7778	54.5	38.7222	42.3889	28	21.7222	41.9444	40.6111	40.1111	21.6111	41	39	31.8333	36.4444	37.0556		0.828129	40.1131
12.7367	47.611	44.1111	54.0556	58.3333	45.6667	41.3333	47.1111	54.1667	32.4444	42.6111	50.5	50.5556	32.8333	20.6111	51.7778	44.2222	51	39.8333	21.1667	56.0556	47.2778	38.5556	21.5556	46.6667	40.7778	32.6667	36.8333	25.3333		0.835939	41.9881
12.8557	45.056	42.2222	42	55.2222	49.0556	49.3333	55.1111	43.8889	36.8889	39.8889	48.0556	43.7222	39.4444	27.5	50	34.6667	47.2778	34	28.2778	43.5	50.7222	32.7222	21.2778	45	41.3333	32.3333	40.0556	35.7222		0.843749	41.2242
12.9748	48.278	45.8333	47.3889	60.9444	46.5556	46.1667	48.8889	52.8333	34.3333	48.4444	42.2222	47.7778	42.7778	23.7222	61.8333	39.7778	45.5	35.0556	29.9444	40.7222	50.5556	29.3333	32.1111	42.2222	43.7222	28.8889	34.8333	32.4444		0.851566	42.254
13.0938	42.833	50.7222	45.0556	55.0556	44	49.3333	47.7222	47.7778	37.7778	50.5556	44.5556	54.4444	34.8333	21.4444	58.3889	33.6111	43.5	42.0556	32.1111	33.8333	49.0556	35.3333	23.7778	45	37	28.3333	36.3889	31.3889		0.859376	41.2817
13.2128	39.056	44	44.0556	50.4444	49.7778	50.7778	47.1667	51.8889	39.4444	50.7778	46.2222	50.5556	41.1111	26.8333	56.2778	38.6111	42.8333	36.7778	28.4444	36.9444	54.3333	36.1667	24.5556	50.7222	38.7222	30	34	34.6111		0.867186	41.9683
13.3319	48.889	46.9444	46.7222	46.2222	44.3333	52.3333	53.3333	45.7778	37.4444	53.2222	41.6111	47.1667	43.4444	29.4444	60.7222	41.2778	42	44.6667	32.3333	45.9444	48.2778	25.6111	31.3889	38.9444	43.5	29.0556	37.8889	31.6111		0.875003	42.504
13.4509	38.944	46.4444	34.1111	43	58	47.2222	51	49.6111	41	41.5	52.0556	38.3889	44.6667	33.3333	68.5556	41.5556	41.0556	44.8889	28.0556	37.5556	50.6667	34.5556	24.8333	52.1667	36.2222	30.9444	30.3333	29.6667		0.882814	41.7976
13.5699	33.444	43.6111	39.8333	35.1667	45.5556	53.1667	41.3333	55.9444	47.2222	54.1667	50.1667	47.1667	44.3889	37.5556	56.5	42.8889	49.9444	50.5	37.8889	40.8889	53.0556	29.2778	25.4444	45.7222	43.3333	24.2222	31.2778	26.7222		0.890624	42.371
13.689	32.389	39.6667	40.5	42.3889	49.0556	51.2778	57.5556	50.5	49.8889	49.7778	37.4444	44.2222	47.3889	37.3333	65.2222	34.2222	49.6111	40.1667	39.2222	41.4444	51.4444	37.6667	30.1667	39.2778	37.5	24.8333	25.9444	26.3889		0.898441	41.875
13.808	21.944	46.3889	33.7222	33.6667	48.2222	64.2222	43.7778	47.1667	50.6111	40.7778	45	51.8333	46	36	73	38.5556	42.7222	50	40	42.7222	47.6667	41.3333	28.8889	38.7222	43	23.1111	29	21.4444		0.906251	41.7678
13.927	16.611	34.6111	30.5556	36.1667	52.1667	63.1111	48.2222	54.7778	50.3333	52.1667	44.3333	44.7222	43.1111	35.6667	58	33	43	51.0556	38.3889	39.4444	43.1667	34.7778	34.8889	38.6667	36	22	27.1667	24.4444		0.914061	40.377
14.0461	14.556	34.8333	30.7778	34.3889	55.0556	62	38.8333	38.3889	45.3333	45.8333	39.1111	38	41.2778	31.7778	51.3333	28.3333	41.6111	49.3333	43.4444	43.5	39.4444	45.1111	30.0556	38.1111	34.8333	33.5	21	22.7222		0.921878	38.3036
14.1651	7.778	38.8333	25.8333	29.8333	56.4444	55.8333	42.3889	41.2222	48.7778	41.4444	42.8333	36.5556	44.4444	38.0556	45.8889	41.5	39.1667	43.5556	42.5	36.8333	42.8333	39.0556	33.6111	28.4444	34.3333	21.4444	24.8333	30.5556		0.929688	37.6726
14.2841	7.722	25	21.8333	30.2222	48.5556	57.6111	37	45.3333	41.7778	53.6667	41.8889	37.7222	42.7222	38.7222	47.8333	35.3889	32.3333	39.7222	43.3333	34.0556	42.6111	48.6111	38.6111	43.7778	29.7222	26.3333	14.8333	20.5		0.937498	36.6944
14.4032	3.556	29.8889	14.6111	25.7778	37.7222	50.1667	31.5	35.8889	38.8889	43.3333	38.7222	42.7778	44.1111	40.3333	39.8889	34.0556	35.6111	37	39.3333	32.1667	40.1111	45.5	39.3889	39	32.8889	16.4444	14.5556	19.7222		0.945315	33.6766
14.5222	5.222	23.1111	7.6111	21.1667	41.2222	47.7778	27.2778	34.7222	39.8889	43.5556	35.3333	35.0556	38.6111	32.3333	41.6111	30.2778	33.0556	33.9444	49.7778	43.3889	29.1667	38.8889	34.4444	22.3333	29.2778	18.2778	16.7222	13.2222		0.953125	30.9742
14.6412	2.611	14.5	6.2222	17	43.4444	47.4444	25.1111	33.5556	33.8333	46.2778	38.3333	31.1111	35.8333	32.6667	34.7222	25.0556	27.7222	37.4444	41.8333	50	30.2778	40.7778	32.1667	30.9444	27	11.2778	11.6667	17.6667		0.960936	29.5178
14.7603	2.889	9.4444	7.3333	13.7222	36.3889	40.7222	27.8889	23.7222	39	39.3889	29.8889	34.0556	34.1111	40.5556	35.6667	23	24.2778	41.6111	36.5556	47.3333	32.7778	45.6111	27.1111	22.3889	23.7778	15.1667	13.8333	14.6111		0.968752	27.9583
14.8793	1.222	7.0556	9.5	13	41.7778	36.6111	23.1667	23.8889	38.8333	34.2778	25.4444	25.8333	27.3333	26.7778	31.8333	19	22.8333	37.1667	36.1667	44.1111	31.5	47.0556	36.2778	25.6667	25.5556	11.9444	16.0556	9.6667		0.976563	26.0556
14.9984	2.889	4.8333	4.7222	13.3889	32.8889	37.8333	17.7778	20.6111	35.4444	34.5556	26.7778	22.9444	23	29.4444	27.7222	10.8333	17.6667	28.5556	35.3889	29.9444	28.7778	38.4444	29.2222	25.4444	22.3333	12.7222	13.5	21.2778		0.98438	23.1766
15.1174	1.389	3.0556	4.3333	8.5	31.5	38.0556	8	14.1667	28.5	36	23.1667	21	23.4444	19.6667	18.8889	5.8333	12.6111	30.7222	26.5	29.1667	36.7222	33.2778	25	24.1667	25.3889	11.2222	14.7778	24.4444		0.99219	20.6964
15.2364	1.389	3.2778	4.6111	9.5	23.6667	36.2778	10.2778	13.7778	24.4444	28.3889	22.8333	14.8889	14.3333	14.7778	15.6667	4.7778	10.6667	22.1111	22.8333	32.2222	28	31.3333	28.7778	14.6111	12.6667	15.0556	13.8333	18.7778		1	17.6349

## Sheet: Sheet1
Image9				Image7				Image9 (2)				Image10				Image11				Image39				Image40				Image41				Image42					Distance	Image9	Image7	Image9 (2)	Image10	Image11	Image39	Image40	Image41	Image42
Ap-basal	Avg intensity			Ap-basal	Avg intensity			Ap-basal	Avg intensity			Ap-basal	Avg intensity			Ap-basal	Avg intensity			Ap-basal	Avg intensity			Ap-basal	Avg intensity			Ap-basal	Avg intensity			Ap-basal	Avg intensity				0	24.3433	34.0744	17.8941	29.2654	47.8907	34.439	27.2335	28.7904	34.0495
0	24.3433			0	34.0744			0	17.8941			0	29.2654			0	47.8907			0	34.439			0	27.2335			0	28.7904			0	34.0495				0.05	35.5615	42.8835	21.2262	34.8788	72.1455	42.6113	35.7415	34.8207	40.0501
0.00781024	27.3452			0.00793418	36.2433			0.00781024	18.5731			0.00869311	31.4946			0.00729717	52.6782			0.0067548	35.2991			0.00833094	27.2904			0.0112327	30.174			0.00961259	35.6319				0.1	58.3317	59.7623	30.8188	48.6624	134.041	55.3753	58.871	47.1911	50.16
0.0156271	29.6766			0.015875	38.0725			0.0156271	19.9281			0.0173935	33.9309			0.0146005	58.2781			0.0135153	38.8526			0.0166689	31.1824			0.0224748	32.8195			0.0192333	37.6448				0.15	61.7446	64.5228	35.0982	54.561	150.692	62.5286	76.9935	47.8487	50.0651
0.0234373	33.1468			0.0238092	41.4361			0.0234373	19.7747			0.0260866	34.5226			0.0218976	64.9787			0.0202701	40.4113			0.0249998	33.5023			0.0337074	35.3994			0.0288458	39.6586				0.2	57.5985	63.4761	37.394	50.623	126.212	68.5526	79.3437	47.3493	47.6621
0.0312475	36.4385			0.0317434	43.7682			0.0312475	20.9879			0.0347798	36.4807			0.0291948	73.1232			0.0270249	42.5098			0.0333308	36.4493			0.0449401	39.765			0.0384584	42.3185				0.25	56.0883	62.9898	37.698	46.4375	93.2625	68.9389	71.2211	47.6049	48.5476
0.0390643	40.8492			0.0396842	47.1269			0.0390643	22.7693			0.0434802	38.1921			0.0364981	83.0772			0.0337854	44.4297			0.0416687	40.3091			0.0561822	41.9759	34.8207		0.0480791	44.0563				0.3	55.0051	61.3148	38.3358	43.4484	66.3623	62.404	63.384	48.4976	51.948
0.0468746	44.8234			0.0476184	49.979			0.0468746	24.4356			0.0521733	40.2655	34.8788		0.0437953	93.1516			0.0405402	47.9226			0.0499996	43.5118			0.0674149	44.4161			0.0576917	46.9908	40.0501			0.35	54.7738	59.4117	38.2663	41.354	49.5811	57.4633	55.4958	49.8817	53.7758
0.0546848	47.8691	35.5615		0.0555526	52.3677	42.8835		0.0546848	25.4472	21.2262		0.0608664	41.6062			0.0510924	103.986	72.1455		0.047295	50.2141			0.0583306	46.4534	35.7415		0.0786475	47.7654			0.0673043	47.2064				0.4	50.7948	56.6997	35.9692	38.4618	43.9414	55.0667	46.7377	48.8041	53.1052
0.0625016	53.6309			0.0634934	55.4358			0.0625016	28.3846			0.0695668	44.883			0.0583957	111.719			0.0540554	49.4236	42.6113		0.0666685	49.8238			0.0898897	48.0956			0.0769249	48.2117				0.45	46.5453	56.6418	31.9799	35.6049	40.1751	51.5206	38.2672	45.3077	51.557
0.0703119	55.0397			0.0714276	56.9156			0.0703119	29.3885			0.0782599	47.5586			0.0656929	120.246			0.0608102	52.3217			0.0749995	52.7595			0.101122	48.4875	47.1911		0.0865375	52.0171				0.5	41.9881	54.3598	28.5052	32.6506	36.911	48.2633	32.325	42.8955	46.8826
0.0781221	57.8909			0.0793618	60.7025			0.0781221	30.2429			0.086953	51.3152			0.0729901	129.538			0.067565	54.5324			0.0833304	56.7018			0.112355	48.6783			0.0961501	52.0921				0.55	38.3949	53.3608	25.9313	28.4216	33.9126	48.0992	29.7236	41.2045	42.0399
0.0859389	60.4881			0.0873026	62.378			0.0859389	31.8401			0.0956534	53.4262			0.0802934	135.823			0.0743255	54.6084			0.0916684	61.8989			0.123597	48.6479			0.105771	51.2727	50.16			0.6	36.2275	55.4022	26.3236	26.9592	31.8048	50.1139	28.8058	37.9309	38.4777
0.0937492	60.369			0.0952368	60.9286			0.0937492	32.73			0.104347	53.1854	48.6624		0.0875905	141.759			0.0810803	55.1402			0.0999993	63.7851			0.13483	47.4566			0.115383	51.3469				0.65	34.7503	58.3278	28.2489	26.7466	31.5992	52.2248	30.1886	35.1956	37.7907
0.101559	62.5714	58.3317		0.103171	62.2133	59.7623		0.101559	32.3268	30.8188		0.11304	54.6891			0.0948877	147.838			0.0878351	55.3957			0.10833	68.2568	58.871		0.146062	47.4327			0.124996	50.6408				0.7	34.7219	61.1338	30.0314	26.3436	32.3288	55.1225	31.4544	35.4378	39.0313
0.109376	62.2163			0.111112	64.3271			0.109376	31.7996			0.12174	55.3381			0.102191	151.366	134.041		0.0945956	57.5516			0.116668	70.9105			0.157305	47.028	47.8487		0.134617	50.0087				0.75	35.0269	62.2564	31.5736	28.15	35.3032	59.9958	36.8836	36.4801	42.6509
0.117186	63.3234			0.119046	63.5931			0.117186	33.8301			0.130433	54.6783			0.109488	152.435			0.10135	58.0769	55.3753		0.124999	74.308			0.168537	46.6887			0.144229	50.0653				0.8	37.4494	65.5515	31.2966	28.3304	36.2419	65.9573	41.1758	39.7837	46.259
0.125003	61.2996			0.126987	65.492			0.125003	34.4803			0.139134	53.995			0.116791	153.411			0.108111	59.2286			0.133337	76.8774			0.179779	48.2318			0.15385	48.2637	50.0651			0.85	40.7282	63.5137	25.675	26.0515	37.2452	63.0232	41.8872	41.722	50.8299
0.132814	61.5615			0.134921	63.9794			0.132814	34.2509			0.147827	54.3782			0.124089	153.535			0.114866	61.3031			0.141668	79.9297			0.191012	47.4054			0.163462	48.0795				0.9	41.9379	55.0527	16.2348	20.8609	30.691	50.9333	34.4061	40.7686	49.1549
0.140624	61.3036			0.142855	64.8825			0.140624	36.7354			0.15652	54.2872	54.561		0.131386	153.299			0.12162	61.1545			0.149999	79.9373			0.202245	47.0714	47.3493		0.173075	48.8099				0.95	36.2831	41.3161	6.92067	14.7791	20.5919	34.1843	20.2353	36.1207	42.2511
0.148441	60.5278			0.150796	64.8628	64.5228		0.148441	36.7085			0.16522	52.5212			0.138689	150.484			0.128381	63.2539			0.158337	79.998	76.9935		0.213487	48.3763			0.182696	47.3059				1	24.1733	25.1277	3.40386	9.09896	13.258	17.4786	8.73324	28.2959	27.5245
0.156251	61.9802	61.7446		0.15873	64.099			0.156251	37.8825	35.0982		0.173913	51.4528			0.145986	146.987			0.135136	62.7			0.166668	81.4374			0.224719	48.4163			0.192308	47.8712
0.164061	60.4107			0.166664	64.2016			0.164061	38.085			0.182606	50.694			0.153283	144.693	150.692		0.141891	63.0539			0.174999	81.2513			0.235952	46.7202			0.201921	46.2441	47.6621
0.171878	59.0119			0.174605	63.929			0.171878	36.2338			0.191307	49.1328			0.160587	142.063			0.148651	65.6543			0.183337	78.5947			0.247194	46.6342			0.211542	46.9971
0.179688	58.121			0.182539	62.8124			0.179688	37.3433			0.2	49.3141	50.623		0.167884	135.927			0.155406	63.8808	62.5286		0.191668	79.5086			0.258427	47.8777	47.6049		0.221154	48.0634
0.187498	55.7659			0.190474	62.555			0.187498	36.696			0.208693	48.4673			0.175181	132.446			0.162161	68.4707			0.199999	78.195			0.26966	47.967			0.230767	48.7244
0.195315	56.5159			0.198414	62.7137			0.195315	38.0422			0.217394	46.5911			0.182484	126.355			0.168921	66.6475			0.208337	77.0756	79.3437		0.280902	49.0087			0.240387	49.5074
0.203125	55.7659	57.5985		0.206349	64.0221	63.4761		0.203125	37.9638	37.394		0.226087	46.3913			0.189782	120.563			0.175676	68.9234			0.216667	77.2909			0.292134	48.7242			0.25	49.4458	48.5476
0.210936	56.6171			0.214283	63.28			0.210936	37.0522			0.23478	46.9779			0.197079	115.036			0.182431	70.1377			0.224998	73.8368			0.303367	48.2904	48.4976		0.259613	52.0047
0.218752	55.7857			0.222224	63.6686			0.218752	36.8493			0.24348	45.1598			0.204382	111.096	126.212		0.189191	68.3283			0.233336	71.1025			0.314609	49.3631			0.269233	50.5645
0.226563	57.1151			0.230158	64.7713			0.226563	37.36			0.252173	45.0375	46.4375		0.211679	106.65			0.195946	68.5084			0.241667	69.3523			0.325842	50.2675			0.278846	51.4737
0.234373	55.9306			0.238092	63.2609			0.234373	38.1128			0.260866	45.1229			0.218976	101.635			0.202701	68.852	68.5526		0.249998	68.1416			0.337074	49.9348			0.288458	51.5171
0.24219	55.498			0.246033	61.0528			0.24219	38.9359			0.269567	44.8069			0.22628	97.3334			0.209461	69.6289			0.258336	67.6023	71.2211		0.348317	50.3362			0.298079	52.8098
0.25	55.5834	56.0883		0.253967	61.905	62.9898		0.25	37.878	37.698		0.27826	43.2375			0.233577	93.044			0.216216	71.2433			0.266667	66.6268			0.359549	49.5068	49.8817		0.307692	53.3179	51.948
0.25781	53.0496			0.261901	61.2335			0.25781	38.1431			0.286953	42.9582			0.240874	88.4885			0.222971	70.0564			0.274998	65.0361			0.370782	49.5134			0.317304	52.6548
0.265627	55.5178			0.269842	62.187			0.265627	36.834			0.295653	41.7212			0.248177	84.407			0.229731	69.2031			0.283336	65.8504			0.382024	49.6733			0.326925	53.4831
0.273437	55.8294			0.277776	61.8695			0.273437	39.2146			0.304347	42.8439	43.4484		0.255474	81.2803	93.2625		0.236486	68.0099			0.291667	64.1584			0.393257	48.3785			0.336538	54.329
0.281248	55.123			0.28571	60.9318			0.281248	38.7829			0.31304	42.9701			0.262772	76.2148			0.243241	67.1234			0.299998	60.1064			0.404489	47.6514	48.8041		0.34615	53.963
0.289064	54.7698			0.293651	60.1368			0.289064	39.0076			0.32174	42.5925			0.270075	74.1207			0.250001	67.3074	68.9389		0.308336	58.5261	63.384		0.415731	47.1053			0.355771	54.4489	53.7758
0.296875	55.1548			0.301586	61.5304	61.3148		0.296875	37.7196			0.330433	41.1739			0.277372	69.8516			0.256756	66.0411			0.316667	57.332			0.426964	45.9106			0.365383	53.4715
0.304685	55.5913	55.0051		0.30952	60.6462			0.304685	38.6488	38.3358		0.339126	40.5655			0.284669	66.3189			0.263511	66.0054			0.324998	57.2739			0.438197	45.3152			0.374996	52.6087
0.312502	56.871			0.317461	60.7337			0.312502	38.455			0.347827	40.39			0.291973	63.2845			0.270271	63.1598			0.333336	55.8048			0.449439	44.4403			0.384617	52.8992
0.320312	54.1369			0.325395	59.8612			0.320312	38.6093			0.35652	40.4322	41.354		0.29927	59.314			0.277026	62.6125			0.341667	54.2689			0.460672	43.7672	45.3077		0.394229	54.2004
0.328129	54.9564			0.333336	59.2062			0.328129	39.3171			0.36522	39.8463			0.306573	55.4315	66.3623		0.283787	62.0332			0.350005	52.7996	55.4958		0.471914	43.4681			0.40385	52.346	53.1052
0.335939	55.506			0.34127	58.9427			0.335939	38.8199			0.373913	38.7207			0.31387	53.4943			0.290542	61.4786			0.358335	50.2233			0.483146	43.3013			0.413462	53.8106
0.343749	53.3036			0.349204	57.0799	59.4117		0.343749	38.2484			0.382606	37.5116			0.321167	51.5667			0.297296	58.1447			0.366666	48.8366			0.494379	42.5797			0.423075	53.4125
0.351566	53.869	54.7738		0.357145	58.2166			0.351566	36.1481	38.2663		0.391307	38.4895			0.328471	50.0801			0.304057	59.7569	62.404		0.375004	47.6152			0.505621	42.233	42.8955		0.432696	50.2587
0.359376	51.4623			0.365079	57.4475			0.359376	37.1643			0.4	37.7407	38.4618		0.335768	48.7917			0.310812	59.3896			0.383335	46.7024			0.516854	41.6747			0.442308	50.5625
0.367186	53.5099			0.373013	56.3098			0.367186	37.573			0.408693	36.4993			0.343065	47.5262			0.317566	57.4407			0.391666	45.1479			0.528086	41.4037			0.451921	49.7404	51.557
0.375003	50.631			0.380954	55.6638			0.375003	36.5035			0.417394	36.2938			0.350368	46.0279	49.5811		0.324327	57.2465			0.400004	41.9009	46.7377		0.539328	41.5322			0.461542	48.6541
0.382814	50.6905			0.388888	56.224			0.382814	35.1823			0.426087	35.974			0.357665	45.1436			0.331082	57.6002			0.408335	40.5916			0.550561	40.2071	41.2045		0.471154	47.483
0.390624	50.3869			0.396822	56.9301			0.390624	36.3375			0.43478	35.338			0.364963	44.6384			0.337837	56.6886			0.416666	39.8271			0.561794	38.5757			0.480767	46.7144
0.398441	50.1151			0.404763	56.1062	56.6997		0.398441	34.7031			0.44348	35.8013			0.372266	44.2079			0.344597	56.4687			0.425004	38.9923			0.573036	39.1061			0.490387	46.6031
0.406251	48.7679	50.7948		0.412697	56.8169			0.406251	34.3206	35.9692		0.452173	33.7231	35.6049		0.379563	43.9553			0.351352	57.4088	57.4633		0.433335	36.9972			0.584269	38.5139			0.5	44.9586	46.8826
0.414061	47.248			0.420632	57.9066			0.414061	33.8508			0.460866	33.7262			0.38686	43.9504			0.358107	56.8252			0.441666	36.6008			0.595501	36.7218			0.509613	44.1363
0.421878	47.7976			0.428572	57.1559			0.421878	32.6742			0.469567	33.7125			0.394163	43.4792			0.364867	56.2793			0.450004	36.5941	38.2672		0.606743	36.7372	37.9309		0.519233	43.5897
0.429688	46.5655			0.436507	56.1595			0.429688	30.95			0.47826	32.4603			0.401461	42.2151	43.9414		0.371622	56.0845			0.458335	35.5279			0.617976	35.9776			0.528846	42.9128
0.437498	46.1686			0.444441	56.8105			0.437498	31.1003			0.486953	32.4448			0.408758	41.4395			0.378377	55.3226			0.466666	33.988			0.629209	35.131			0.538458	41.3756
0.445315	47.2064			0.452382	55.0017	56.6418		0.445315	32.3599			0.495653	32.3212			0.416061	41.6158			0.385137	54.975			0.475004	33.386			0.640451	34.5953			0.548079	40.6863
0.453125	44.2857	46.5453		0.460316	55.7119			0.453125	30.9444	31.9799		0.504347	31.2385	32.6506		0.423358	39.9849			0.391892	54.2165			0.483335	31.834			0.651683	35.0784	35.1956		0.557692	39.539	42.0399
0.460936	42.4365			0.46825	55.0574			0.460936	30.8726			0.51304	29.7101			0.430655	39.5218			0.398647	53.7197			0.491666	29.9383			0.662916	35.4792			0.567304	39.5048
0.468752	42.623			0.476191	55.0285			0.468752	29.9948			0.52174	28.3566			0.437959	39.479			0.405407	53.1105	55.0667		0.500004	29.2756	32.325		0.674158	34.8371			0.576925	38.3833
0.476563	42.6568			0.484125	54.3439			0.476563	29.1506			0.530433	29.1637			0.445256	39.1814			0.412162	52.0182			0.508334	30.3123			0.685391	35.5933			0.586538	37.3985
0.484373	42.2619			0.492059	54.5187			0.484373	27.6953			0.539126	28.3661			0.452553	40.003	40.1751		0.418917	51.8766			0.516665	30.6347			0.696624	35.0684			0.59615	38.0236
0.49219	41.0913			0.5	53.1214			0.49219	27.2695			0.547827	27.6135			0.459856	37.7126			0.425677	51.6383			0.525003	29.3551			0.707866	36.2109	35.4378		0.605771	39.0784	38.4777
0.5	40.8591	41.9881		0.507934	52.737	54.3598		0.5	26.0486	28.5052		0.55652	27.3194	28.4216		0.467154	37.3552			0.432432	51.7799			0.533334	29.0689			0.719098	35.6225			0.615383	38.5584
0.50781	39.7857			0.515868	53.4861			0.50781	26.4387			0.565213	27.3311			0.474451	36.9022			0.439187	50.8931			0.541665	29.9153			0.730331	35.8533			0.624996	38.0617
0.515627	40.127			0.523809	52.1266			0.515627	25.8582			0.573913	27.127			0.481754	37.0684			0.445947	51.7893			0.550003	29.0555	29.7236		0.741573	37.3117			0.634617	37.2377
0.523437	39.6845			0.531743	53.5764			0.523437	26.6557			0.582606	27.0582			0.489051	36.629			0.452702	50.6484	51.5206		0.558334	29.0488			0.752806	37.1329	36.4801		0.644229	37.5835
0.531248	38.3195			0.539678	53.7256			0.531248	25.8367			0.5913	26.7744			0.496348	36.7019			0.459457	49.8692			0.566665	28.7577			0.764038	38.2392			0.653842	37.5123	37.7907
0.539064	36.8016			0.547618	53.6287			0.539064	24.5789			0.6	26.6867			0.503652	36.0075	36.911		0.466217	48.4543			0.575003	28.619			0.775281	39.201			0.663462	38.3444
0.546875	37.129			0.555553	53.6217	53.3608		0.546875	26.2015			0.608693	26.7777	26.9592		0.510949	35.5837			0.472972	47.669			0.583334	28.499			0.786513	39.0156			0.673075	37.523
0.554691	36.9167	38.3949		0.563493	54.1912			0.554691	25.9491	25.9313		0.617394	27.1585			0.518252	34.1883			0.479733	48.4612			0.591672	28.7557			0.797755	41.1229			0.682696	39.0271
0.562502	37.4385			0.571428	55.4038			0.562502	25.3908			0.626087	26.8578			0.525549	34.2024			0.486488	48.4017			0.600003	29.1542	28.8058		0.808988	41.3399	39.7837		0.692308	40.1063
0.570312	36.5694			0.579362	55.1256			0.570312	26.0143			0.63478	27.0614			0.532846	34.0561			0.493242	47.2087			0.608334	30.1959			0.820221	42.1925			0.701921	40.1558	39.0313
0.578129	36.3016			0.587303	56.6974			0.578129	25.08			0.64348	26.2648			0.54015	33.365			0.500003	47.7791	48.2633		0.616672	30.0199			0.831463	40.8042			0.711542	41.2839
0.585939	35.8889			0.595237	55.9394			0.585939	26.6426			0.652173	26.3907	26.7466		0.547447	33.3596			0.506758	47.2043			0.625003	30.7679			0.842695	41.4362			0.721154	42.505
0.593749	36.7718			0.603171	55.056	55.4022		0.593749	27.526			0.660866	25.6548			0.554744	32.6328	33.9126		0.513512	47.3566			0.633334	30.3635			0.853928	42.4552	41.722		0.730767	42.6128
0.601566	34.3949	36.2275		0.611112	56.1765			0.601566	27.2879	26.3236		0.669567	26.3714			0.562047	31.9259			0.520273	48.0704			0.641672	30.3203			0.86517	41.4727			0.740387	43.0368
0.609376	34.7381			0.619046	57.8036			0.609376	26.9705			0.67826	26.0859			0.569345	31.2922			0.527028	47.1928			0.650002	29.4644	30.1886		0.876403	41.6428			0.75	43.8163	42.6509
0.617186	35.4345			0.62698	57.22			0.617186	27.6599			0.686953	26.3248			0.576642	31.5495			0.533783	48.2543			0.658333	29.9902			0.887636	40.9324			0.759613	43.7891
0.625003	34.5298			0.634921	57.9918			0.625003	28.6054			0.695653	26.8268			0.583945	31.6947			0.540543	49.805			0.666671	31.4611			0.898878	40.7663			0.769233	45.3466
0.632814	34.4067			0.642855	60.5254			0.632814	28.3191			0.704347	26.7982	26.3436		0.591242	31.9209			0.547298	47.4543			0.675002	32.5772			0.91011	39.0289	40.7686		0.778846	45.2462
0.640624	35.1052			0.650789	60.2495	58.3278		0.640624	27.5888			0.71304	27.4864			0.598539	31.8544			0.554053	49.4562	48.0992		0.683333	31.3706			0.921343	38.7636			0.788458	46.5223
0.648441	34.2659			0.65873	60.4388			0.648441	28.8736			0.72174	27.8183			0.605843	32.3961	31.8048		0.560813	50.32			0.691671	30.9248			0.932585	37.363			0.798079	47.9572
0.656251	34.7718	34.7503		0.666664	60.0046			0.656251	29.7249	28.2489		0.730433	28.7679			0.61314	30.799			0.567568	48.6812			0.700002	32.4026	31.4544		0.943818	34.5927			0.807692	48.6927	46.259
0.664061	34.7103			0.674599	61.4251			0.664061	28.7265			0.739126	27.8979			0.620437	30.8297			0.574323	49.4573			0.708333	33.3391			0.95505	33.7637	36.1207		0.817304	51.1132
0.671878	34.5476			0.682539	61.7591			0.671878	29.3913			0.747827	28.0873			0.62774	32.1289			0.581083	51.0519			0.716671	36.2355			0.966293	31.3821			0.826925	51.1027
0.679688	35.004			0.690474	61.1526			0.679688	30.2183			0.75652	28.8425	28.15		0.635037	31.618			0.587838	49.9895			0.725002	36.6022			0.977525	29.0006			0.836538	50.7062
0.687498	35.1547			0.698408	61.3651			0.687498	30.0636			0.765213	28.8813			0.642335	31.4667			0.594593	51.232			0.733333	38.2093			0.988758	27.5706			0.84615	51.4017
0.695315	34.4623			0.706349	61.7915	61.1338		0.695315	30.5479			0.773913	28.0886			0.649638	32.0918			0.601353	50.0654	50.1139		0.741671	37.7003			1	25.2302	28.2959		0.855771	51.963	50.8299
0.703125	34.4524	34.7219		0.714283	62.7211			0.703125	31.241	30.0314		0.782606	28.9634			0.656935	32.2599	31.5992		0.608108	51.7688			0.750002	39.2153	36.8836						0.865383	50.6722
0.710936	35.6349			0.722217	61.6701			0.710936	30.3956			0.7913	27.2804			0.664232	32.3628			0.614863	50.7108			0.758333	40.0438							0.874996	49.5705
0.718752	34.3631			0.730158	62.7354			0.718752	31.0868			0.8	28.4382	28.3304		0.671536	30.5547			0.621623	51.7345			0.766671	39.9754							0.884617	48.4366
0.726563	34.5813			0.738092	62.5568			0.726563	32.2009			0.808693	28.2934			0.678833	32.0568			0.628378	51.0484			0.775002	41.1554							0.894229	49.0162
0.734373	35.133			0.746026	61.8427			0.734373	31.1756			0.817386	26.4167			0.68613	31.9288			0.635133	52.6162			0.783333	41.6197							0.903842	48.0789	49.1549
0.74219	34.9345			0.753967	62.0126	62.2564		0.74219	33.0433			0.826087	26.7151			0.693433	32.4464			0.641893	53.7726			0.79167	42.0264							0.913462	45.8141
0.75	34.5397			0.761901	63.6188			0.75	31.4782			0.83478	26.4744			0.70073	34.6236	32.3288		0.648648	53.063			0.800001	42.2342	41.1758						0.923075	44.5025
0.75781	36.002	35.0269		0.769835	65.7484			0.75781	31.635	31.5736		0.843473	24.4844			0.708027	34.1265			0.655403	53.0843	52.2248		0.808332	42.0837							0.932688	42.5809
0.765627	37.0297			0.777776	65.6176			0.765627	32.1805			0.852173	23.9251	26.0515		0.715331	34.7836			0.662163	54.5377			0.81667	42.229							0.942308	40.7346
0.773437	36.8492			0.78571	66.1001			0.773437	32.342			0.860866	23.3214			0.722628	34.6802			0.668918	53.8465			0.825001	42.1397							0.951921	37.6235	42.2511
0.781254	36.4147			0.793651	65.9937			0.781254	31.7794			0.869567	22.1763			0.729931	34.1481			0.675679	54.8907			0.833339	42.2935							0.961542	34.5528
0.789064	37.8194			0.801586	66.2302	65.5515		0.789064	31.289			0.87826	21.7527			0.737228	35.5075			0.682434	53.9989			0.84167	42.1582							0.971154	30.8994
0.796875	37.6925			0.80952	65.8919			0.796875	31.0763			0.886953	20.6114			0.744526	37.1734			0.689188	55.1187			0.850001	40.4192	41.8872						0.980767	27.104
0.804691	38.8909	37.4494		0.817461	65.8875			0.804691	29.1126	31.2966		0.895653	19.2436			0.751829	36.7029	35.3032		0.695949	55.8345			0.858339	39.3844							0.990387	23.5011
0.812502	38.5833			0.825395	65.0969			0.812502	27.9821			0.904347	18.0597	20.8609		0.759126	35.4778			0.702704	57.6309	55.1225		0.86667	37.9041							1	21.5652	27.5245
0.820312	40.2063			0.833329	63.6132			0.820312	27.3063			0.91304	17.167			0.766423	35.7648			0.709458	57.8357			0.875001	36.4622
0.828129	40.1131			0.84127	63.501			0.828129	26.7616			0.92174	15.7789			0.773727	35.6285			0.716219	58.6661			0.883339	33.422
0.835939	41.9881			0.849204	61.0802			0.835939	24.9732			0.930433	15.3791			0.781024	36.8125			0.722974	57.4102			0.89167	30.7556
0.843749	41.2242			0.857138	59.5251	63.5137		0.843749	24.3208			0.939126	14.1015			0.788321	37.0521			0.729729	57.8357			0.900001	28.5082	34.4061
0.851566	42.254	40.7282		0.865079	58.3398			0.851566	22.7057	25.675		0.947827	13.6851			0.795624	36.2155			0.736489	59.723			0.908339	27.1305
0.859376	41.2817			0.873013	56.9564			0.859376	21.3078			0.95652	12.5631	14.7791		0.802921	36.7424	36.2419		0.743244	61.7595			0.91667	24.3387
0.867186	41.9683			0.880947	56.6212			0.867186	19.6873			0.965213	10.94			0.810218	37.1402			0.749999	61.5099			0.925001	21.213
0.875003	42.504			0.888888	53.8516			0.875003	17.4719			0.973913	9.71138			0.817522	37.9174			0.756759	65.2266	59.9958		0.933338	18.1748
0.882814	41.7976			0.896822	52.5988			0.882814	16.6917			0.982606	9.20336			0.824819	38.0823			0.763514	63.6148			0.941669	16.2887
0.890624	42.371			0.904757	51.9481	55.0527		0.890624	13.9668			0.9913	8.3872			0.832116	37.594			0.770269	66.0246			0.95	14.2663	20.2353
0.898441	41.875			0.912697	48.2222			0.898441	13.2824			1	7.25284	9.09896		0.839419	37.1758			0.777029	65.4693			0.958338	12.2236
0.906251	41.7678	41.9379		0.920632	45.5887			0.906251	11.2358	16.2348						0.846717	36.2895			0.783784	65.4598			0.966669	10.5455
0.914061	40.377			0.928566	42.6827			0.914061	9.64588							0.854014	36.5169	37.2452		0.790539	67.4023			0.975	9.35731
0.921878	38.3036			0.936507	39.593			0.921878	8.07315							0.861317	34.3986			0.797299	66.5049			0.983338	7.97733
0.929688	37.6726			0.944441	36.9627			0.929688	7.65436							0.868614	33.5655			0.804054	67.2254	65.9573		0.991669	6.71504
0.937498	36.6944			0.952375	34.8476	41.3161		0.937498	6.38774							0.875911	32.3517			0.810809	66.2453			1	5.58061	8.73324
0.945315	33.6766			0.960316	32.5671			0.945315	5.41473							0.883215	31.0719			0.817569	63.6943
0.953125	30.9742	36.2831		0.96825	29.248			0.953125	4.34816	6.92067						0.890512	30.0558			0.824324	64.9859
0.960936	29.5178			0.976184	26.5608			0.960936	4.03465							0.897809	27.6626			0.831079	63.1599
0.968752	27.9583			0.984125	23.3096			0.968752	3.59612							0.905112	25.7307	30.691		0.837839	62.4682
0.976563	26.0556			0.992059	20.8699			0.976563	3.37482							0.912409	25.2418			0.844594	61.7024
0.98438	23.1766			1	18.211	25.1277		0.98438	3.35661							0.919713	23.4548			0.851355	58.9064	63.0232
0.99219	20.6964							0.99219	2.93329							0.92701	21.9126			0.858109	57.2539
1	17.6349	24.1733						1	3.12769	3.40386						0.934307	20.3079			0.864864	56.0919
																0.94161	18.9432			0.871625	54.3389
																0.948908	17.6173			0.87838	50.7986
																0.956205	16.6655	20.5919		0.885134	49.639
																0.963508	15.119			0.891895	49.1088
																0.970805	15.0708			0.89865	47.3279
																0.978102	13.6912			0.905404	42.9073	50.9333
																0.985406	12.4761			0.912165	40.905
																0.992703	12.4652			0.91892	38.55
																1	10.726	13.258		0.925674	35.9471
																				0.932435	34.3821
																				0.93919	30.9737
																				0.945945	30.8613
																				0.952705	27.6711	34.1843
																				0.95946	25.1741
																				0.966215	22.4258
																				0.972975	20.2122
																				0.97973	16.5991
																				0.986485	14.8524
																				0.993245	13.0183
																				1	10.0686	17.4786
