# Supplementary material for: Crumbs organizes the transport machinery by regulating apical levels of PI(4,5)P2 in Drosophila
Source: eLife. 2019 Nov 7;8:e50900. doi: 10.7554/eLife.50900 (PMC6881148; doi:10.7554/eLife.50900)
Supplement: Figure 6—source data 12. [file elife-50900-fig6-data12.xlsx]

## Sheet: Image44
X0	Y0	Y1	Y2	Y3	Y4	Y5	Y6	Y7	Y8	Y9	Y10	Y11	Y12	Y13	Y14	Y15	Y16	Y17	Y18	Y19	Y20	Y21	Y22	Y23	Y24		Ap-basal	Avg intensity
0	21.1574	29.5022	36.351	52.4992	66.3249	47.1744	44.2944	42.9624	35.7349	34.6724	25.3105	27.2458	22.7789	34.0897	31.2864	24.9122	39.0013	39.6041	35.725	39.8133	47.6802	45.1577	49.1163	49.0776	49.3714		0	38.8337
0.119	17.7091	29.5229	32.6135	52.0592	65.5168	46.4393	48.0687	40.4131	44.5498	35.8768	28.4821	27.8978	30.5916	41.8604	35.1767	29.4548	42.4436	43.5163	37.3427	43.7273	49.0009	44.5718	42.8278	49.8114	54.0396		0.00840093	40.5406
0.2381	18.2609	30.7622	32.9224	52.3563	70.3884	50.4251	48.8209	51.9591	42.6697	37.2313	33.7745	36.9693	36.92	49.0335	40.971	37.0775	40.1822	43.3877	40.8982	43.6534	52.5266	41.958	44.4197	48.047	50.1086		0.0168089	43.0289
0.3571	18.4518	35.0615	39.8761	48.6269	72.5438	45.3177	42.061	63.1342	47.2388	45.3074	36.5588	36.7771	39.9892	46.555	47.7433	41.2224	43.0878	46.5714	43.1608	48.6149	45.66	53.5729	45.3718	50.6561	60.8098		0.0252098	45.7588
0.4761	21.0461	31.8383	37.7144	42.32	62.8446	51.1978	45.6343	58.1695	50.3627	47.7633	37.4886	40.7209	42.4346	50.2957	52.221	48.3232	39.5342	58.1971	44.1093	49.3026	50.1431	60.4914	44.4754	56.085	56.732		0.0336108	47.1778
0.5952	18.8066	34.1584	36.1943	49.3402	68.6795	56.9509	46.8295	61.0948	55.397	49.7106	39.2848	43.3127	48.3821	55.9949	49.2475	52.6487	42.7375	50.493	43.4018	44.0659	45.4316	63.5798	43.1426	55.1834	52.0608		0.0420188	48.2452
0.7142	19.9715	30.4704	46.8276	57.9097	70.9432	53.4163	40.7956	62.5356	56.1476	50.9702	42.0935	45.4879	49.9848	56.7299	63.6974	46.1052	42.3355	58.6857	48.8648	46.8932	43.1174	66.6249	45.5021	57.8197	59.5718		0.0504197	50.5401
0.8332	25.8825	31.2464	55.4193	51.6499	69.7075	51.2422	40.8171	68.851	66.2316	50.7448	46.388	38.9904	53.764	60.0363	59.3369	53.9543	50.3727	58.7112	45.0767	49.8231	54.1149	67.4228	47.2413	64.3033	61.8502		0.0588206	52.9271
0.9523	26.2715	35.6477	51.6554	53.3976	67.0885	56.2302	42.2736	79.4134	72.4583	52.9389	44.6109	43.1529	67.1769	69.2796	62.3887	57.9836	51.8501	57.2945	49.4397	55.9269	49.1634	61.6565	48.974	63.2974	63.0681		0.0672286	55.3055
1.0713	32.2289	39.1182	56.2637	47.4557	63.0866	60.8796	39.5623	80.945	71.7369	59.6931	54.6668	51.46	79.5576	74.9082	74.9648	55.8206	55.8102	55.6553	52.167	55.8573	49.1903	67.0467	42.9098	63.3114	67.5479		0.0756295	58.0738
1.1903	35.0727	32.9661	55.3722	52.574	68.8642	64.7454	50.032	84.6948	70.7405	60.292	50.2708	58.0182	83.3833	76.0352	77.6171	55.5254	59.9169	62.7338	45.1166	52.9816	48.4705	70.8138	47.0583	65.28	68.8772		0.0840305	59.8981
1.3094	37.287	38.6227	58.1052	49.7057	75.8362	69.8697	38.3906	87.3886	72.7598	58.3731	54.4576	60.6241	92.4869	70.1566	77.0666	57.9833	62.3052	61.6054	42.2943	53.9283	55.6868	70.2196	47.6292	66.489	65.6995		0.0924385	60.9988
1.4284	44.7885	43.2311	51.7317	51.3442	71.1322	81.2614	47.3187	88.8933	79.6327	57.3172	58.3474	60.7698	81.123	62.4318	71.7615	57.0726	73.3095	65.9424	40.3387	57.8628	56.1862	63.555	54.415	55.0215	61.6416		0.100839	61.4572
1.5474	43.2602	38.8172	56.9836	49.8713	65.0438	87.0131	50.5991	90.4709	71.932	55.761	58.1368	67.6206	81.9724	57.1509	65.8397	60.8238	81.1742	67.4323	38.2455	55.5541	56.8298	54.5574	55.6609	64.257	63.5542		0.10924	61.5425
1.6665	38.9213	46.271	54.0018	54.3509	67.9192	86.8701	54.8923	93.0128	73.2573	59.8402	61.9548	64.4755	81.1962	51.2841	63.6857	62.4446	88.9668	70.9597	38.7027	53.5396	49.245	53.3205	53.1659	62.4939	61.64		0.117648	61.8565
1.7855	40.5502	44.9033	51.3293	52.4935	87.6225	82.9139	61.6252	91.5452	70.5663	59.6651	61.3336	59.5706	74.8515	56.956	59.3146	52.1295	84.0838	82.2226	43.147	54.0488	43.5569	63.9672	51.2894	59.5687	77.1153		0.126049	62.6548
1.9046	43.887	52.9852	47.6878	45.8383	75.2496	77.7606	63.5712	92.075	55.7724	61.6359	59.9275	60.6735	62.7478	45.3894	64.4565	44.9589	84.2381	74.059	49.3195	49.2989	48.2213	71.0985	56.9422	64.1066	66.9794		0.134457	60.7552
2.0236	38.5583	42.9765	41.3011	42.6528	81.9038	68.4964	65.2132	72.9797	56.7129	56.5477	58.6015	61.2841	66.4446	49.8111	64.4478	42.3597	79.3388	83.7105	47.7849	47.8515	47.0138	71.597	55.8783	64.894	65.5708		0.142858	58.9572
2.1426	33.8375	48.129	35.0085	47.2614	75.2187	70.4185	67.1041	69.3962	58.8516	59.5246	59.2742	56.1576	57.374	48.1378	67.5579	48.95	75.0379	82.8784	47.8294	53.5172	45.6549	65.7105	53.9639	63.8989	57.8102		0.151259	57.9401
2.2617	34.7608	40.5121	37.7305	43.4586	68.2057	61.8861	61.7339	62.6784	59.4847	59.7519	51.7195	58.6849	55.024	40.1634	71.7589	47.5227	72.8369	84.1471	48.6475	48.2554	44.077	83.8175	51.3324	60.9647	60.0872		0.159667	56.3697
2.3807	35.2546	45.2672	38.1801	43.4638	69.9806	52.8929	58.9598	58.7695	50.0765	53.242	56.1521	53.4081	49.1156	46.3919	60.706	51.7747	76.9452	89.6547	41.8428	47.752	47.4059	93.2515	60.1932	57.3379	65.3575		0.168068	56.135
2.4997	33.8107	43.2909	38.2695	42.378	69.1714	48.2642	51.8217	53.5877	54.1078	53.465	57.2743	50.8176	45.8574	47.5857	62.7897	42.768	69.4179	88.242	43.6246	52.4424	52.1695	96.2706	48.9249	51.0614	50.868		0.176469	53.9312
2.6188	32.0914	41.3179	35.0162	46.7929	63.3938	52.1539	52.4793	47.7065	52.3141	60.8229	49.8897	49.4025	46.3587	49.4371	57.1147	48.1946	60.8888	82.9799	43.0026	52.1721	47.6167	80.5365	44.5925	43.9823	51.4193		0.184877	51.6671
2.7378	30.5857	39.8069	39.8593	41.4546	55.5537	49.3194	48.6514	46.2885	51.8945	55.0859	56.9732	42.7486	45.1714	42.5721	57.1843	42.3988	62.6349	85.9932	40.4362	55.7319	45.6825	65.8655	50.7755	50.0879	60.003		0.193278	50.5104
2.8568	30.6442	33.0275	37.9185	38.8325	56.7398	43.8794	53.9518	44.6111	55.6523	49.009	56.048	38.6073	47.5808	47.2717	53.6836	45.2394	62.1275	85.1762	42.4236	54.7643	50.3805	64.0298	47.2908	42.1141	55.1863		0.201679	49.4476
2.9759	33.2633	29.5542	32.0459	31.8476	49.7289	42.2728	55.0452	39.2547	53.2161	42.9727	51.5128	42.499	45.3669	38.3188	53.7977	43.3157	50.1669	78.7236	46.1479	53.2946	49.6616	70.4652	46.732	40.9796	54.8218		0.210087	47.0002
3.0949	29.0962	36.0146	28.7453	34.0889	47.8727	51.2528	50.4811	40.5665	52.9055	48.0129	54.1426	45.4183	44.8944	32.0005	58.0601	48.6027	54.9062	78.0471	40.8802	56.7954	43.8525	70.0948	47.9361	42.3454	54.9312		0.218488	47.6778
3.2139	28.7016	30.4056	29.4432	39.3563	44.4367	44.8715	53.7199	35.9471	52.1584	48.2991	48.6694	42.8024	46.1256	34.5298	42.6464	46.9624	58.3399	72.4569	42.6339	53.1094	49.9239	78.9541	46.1945	42.7554	52.8525		0.226889	46.6518
3.333	24.8194	27.5239	32.2884	35.2927	37.6157	45.5075	42.8477	38.5773	55.1238	47.9205	50.3661	46.0604	46.5131	30.7511	41.5971	45.3991	58.9863	68.2168	46.3956	53.6528	56.1672	63.0654	39.1299	40.6803	59.7744		0.235297	45.3709
3.452	27.1944	27.1571	31.5337	32.782	44.7854	45.1541	47.4533	41.2838	50.9261	51.0401	50.7611	43.6225	47.1004	33.4159	40.9733	46.4779	57.9066	64.5219	52.5092	53.5757	62.2638	67.8945	35.5568	36.933	53.2574		0.243698	45.8432
3.571	23.7619	24.2464	22.8304	37.4571	46.877	47.4108	52.9889	42.8782	51.3189	54.9806	42.4222	39.1603	43.4552	35.9069	51.4577	44.9304	59.6267	78.099	42.9347	59.3571	55.8794	69.3742	35.4342	39.5094	59.0232		0.252098	46.4528
3.6901	26.5377	29.2177	28.0939	31.1565	40.7123	48.2434	54.5483	37.5028	54.0233	43.6696	41.3395	35.7562	39.2862	33.0161	52.8463	46.7182	58.6251	82.0583	44.2379	56.2473	65.8719	78.2477	40.818	38.0571	58.3158		0.260506	46.6059
3.8091	25.5702	23.8813	26.0643	30.0451	35.4853	47.0335	49.2519	36.1454	49.4915	50.0849	38.3894	38.0081	41.7892	36.1721	50.837	41.4796	51.3462	76.0303	47.1566	46.4987	63.7258	61.7835	39.6518	36.8325	56.2521		0.268907	43.9603
3.9281	25.5973	24.0259	27.3238	26.8035	29.7034	38.2435	45.3087	37.3305	52.1111	46.0315	42.1888	36.6464	40.8739	31.8426	46.4123	47.6328	54.9531	69.9576	44.6866	45.5224	58.7801	61.0436	46.7721	33.1016	58.114		0.277308	42.8403
4.0472	24.5164	24.3997	20.7237	22.8194	31.8951	41.8979	40.9438	33.9939	52.3703	48.8	43.2703	30.0349	42.5283	35.4124	43.2464	44.2182	61.7912	59.5966	43.8116	49.49	65.1818	67.8252	45.5084	41.1653	54.1649		0.285716	42.7842
4.1662	20.5885	22.7001	24.3406	21.882	31.9186	40.8107	41.3844	31.2982	52.0599	40.8479	47.9148	35.5575	43.017	35.7521	38.5881	48.9131	52.3126	60.211	52.9052	47.7668	59.1812	66.1038	41.0933	41.9427	57.2981		0.294117	42.2555
4.2852	25.1266	25.5098	33.374	21.0223	30.264	41.6625	37.4671	36.6048	55.2028	48.1127	45.8354	37.344	41.6284	39.7668	34.6933	49.2631	43.5262	57.2058	47.7495	42.881	56.6717	66.5502	46.8924	35.5535	57.451		0.302518	42.2944
4.4043	23.3289	24.705	26.6447	26.6779	34.1272	46.5299	42.3526	41.1367	49.3743	45.0012	48.3342	32.7773	32.92	37.5009	40.4874	45.9698	52.5961	59.6143	54.0991	43.3643	57.8637	65.6326	45.8115	38.7175	56.9547		0.310926	42.9009
4.5233	27.9701	22.2146	26.3084	23.9802	30.9619	41.7353	40.3518	35.07	55.855	43.1423	46.6158	31.6338	30.2869	37.8105	39.4281	49.6884	48.5622	60.3449	43.8444	43.162	50.2067	64.6338	50.4905	37.6821	55.5762		0.319327	41.5022
4.6423	26.3075	22.0404	24.9692	20.3396	29.0696	46.2344	38.4816	33.5337	51.4247	46.0063	43.9194	36.3214	37.281	38.2526	36.1709	46.5303	51.8392	64.0078	41.4018	44.6237	49.7199	64.5326	51.2786	43.0046	49.4236		0.327728	41.4686
4.7614	22.6799	20.7648	21.2976	19.7555	33.0397	41.9138	40.0126	35.4607	49.8109	39.0901	44.5092	32.7984	32.387	34.0615	37.029	40.9931	45.7957	68.8614	46.1305	48.3463	47.7151	69.9394	43.4535	45.4159	47.4778		0.336136	40.3496
4.8804	22.9665	22.119	25.3358	19.7248	34.5311	45.6937	40.6531	35.3304	40.7012	41.1944	40.371	28.3829	31.9934	41.4875	38.4652	38.443	49.7343	61.9142	43.8723	40.5258	45.48	63.5083	46.4204	39.416	46.2332		0.344537	39.3799
4.9995	20.1801	19.89	24.2002	22.9788	34.0633	38.5817	37.3705	39.0907	42.7279	41.2932	42.1764	33.0882	32.3138	39.4902	45.1393	38.615	49.2809	69.5151	51.677	37.089	43.867	56.5136	52.7559	41.477	44.6032		0.352945	39.9191
5.1185	18.7244	24.7662	22.5995	18.639	36.4711	39.3506	35.8687	37.8786	39.3909	38.4666	38.9764	30.8473	28.6049	40.4699	43.3799	47.2023	48.4984	66.5336	47.6339	41.5495	45.487	54.3663	45.2546	42.6974	41.4052		0.361346	39.0025
5.2375	22.2492	26.1947	22.3488	17.1553	31.0506	37.8156	33.9153	39.4611	39.1685	41.2014	33.3545	36.4699	29.804	41.3892	43.7929	47.415	47.481	66.5534	48.5077	36.7439	43.0218	55.7513	44.268	32.6369	51.0496		0.369747	38.752
5.3566	20.4368	23.8584	23.7525	19.1054	29.6513	40.6717	33.6449	42.1826	41.417	37.6878	32.5161	27.8073	23.1263	36.2404	40.1199	42.6329	45.2936	59.9321	43.2905	35.052	39.7382	57.9505	50.8037	32.6112	45.8205		0.378155	37.0137
5.4756	17.8153	19.9145	19.4829	17.3928	25.4562	39.1415	39.2953	36.2318	44.8458	40.8746	37.2797	32.6093	26.0425	35.8982	39.8304	43.7616	42.1728	56.328	40.6631	30.6024	42.233	58.2955	45.8219	30.7786	44.7882		0.386556	36.3022
5.5946	19.8261	18.506	21.2457	14.6048	26.0711	36.4696	36.9315	37.2265	34.9232	43.2555	28.3621	33.8138	23.0802	39.2357	39.8992	56.9065	48.4791	52.5064	39.7326	34.4006	45.7457	56.1322	45.7715	34.7936	48.7996		0.394957	36.6688
5.7137	18.4624	18.6301	18.9363	15.994	26.3626	35.3699	36.8625	35.9627	32.7804	35.5634	27.5162	27.2381	22.676	33.3207	46.2797	47.6799	45.4641	43.8544	52.9605	33.6447	46.9501	55.969	54.8485	36.1486	38.596		0.403365	35.5228
5.8327	18.2377	17.4019	19.3983	16.3188	27.9129	40.1421	38.562	34.1467	36.3173	35.2815	31.4009	30.8218	25.0187	37.3337	42.3606	47.5442	41.2305	42.448	43.4562	28.4773	48.9131	54.158	60.5828	35.7905	36.0079		0.411766	35.5705
5.9517	18.4938	19.4533	19.1214	11.6804	24.963	38.6259	36.2598	33.6843	32.4447	38.5091	31.9741	30.5317	19.5518	35.8282	35.134	41.8783	53.1363	47.3724	46.9859	31.5148	47.2115	58.0524	48.8065	30.2949	34.5943		0.420166	34.6441
6.0708	15.0365	15.6728	13.7601	12.5103	29.6109	37.9909	32.4345	33.5032	33.678	41.0124	26.8155	28.566	17.7804	34.6697	42.6968	41.19	51.6541	41.1579	50.4453	31.3324	40.6894	65.5654	62.6687	31.3295	32.9092		0.428574	34.5872
6.1898	16.7823	14.9187	18.2099	17.5913	25.0721	40.518	34.8256	32.9816	31.056	35.6772	24.9838	24.4427	17.7229	34.1247	36.0734	43.8327	47.7874	39.6172	47.6191	34.8966	42.4297	60.2609	66.6554	30.694	26.6751		0.436975	33.8179
6.3088	20.4256	13.0184	16.9688	14.7787	23.8558	36.8872	33.7579	29.8881	29.898	33.789	24.38	25.2065	15.3613	28.8945	34.3884	38.1491	48.2298	37.3721	49.2585	34.7581	44.0447	59.7569	67.0363	34.0196	30.3329		0.445376	32.9782
6.4279	15.9611	14.7363	17.7253	15.9215	22.9651	35.2672	38.697	27.4505	29.3214	35.1625	22.6788	21.4876	14.6043	34.2713	33.7043	38.2224	43.7821	37.4357	46.1239	30.7535	43.2208	62.9188	68.5659	31.2925	28.415		0.453784	32.4274
6.5469	18.8817	19.1997	15.7563	11.5553	25.2725	34.1569	28.9449	24.4457	27.3448	37.8174	22.7364	22.0818	19.1405	33.8985	36.978	34.0231	43.4538	36.7702	38.4506	35.3089	39.1887	52.7529	70.0168	29.9352	27.8221		0.462185	31.4373
6.6659	16.7223	13.1055	13.2596	12.9278	23.7834	34.3935	33.5203	22.0828	24.5396	34.7278	24.5402	24.0456	21.592	32.3916	33.585	42.6454	45.2431	37.7909	44.875	33.514	35.3689	50.5206	62.1934	28.8376	23.9991		0.470586	30.8082
6.785	13.1545	13.7677	11.8514	13.2577	18.8576	32.5645	34.4798	28.0889	24.181	29.8255	27.4055	20.6402	17.4707	31.4321	32.529	41.5919	37.8888	36.9819	44.1416	28.4938	35.0581	52.2305	61.9185	27.0205	26.9812		0.478994	29.6725
6.904	12.7061	13.3447	10.1726	12.6926	13.7089	35.0143	35.9217	31.2001	27.3846	28.4045	25.2433	23.0204	18.9325	28.0672	33.0996	38.5255	35.1185	37.3631	44.2574	27.7097	36.4311	57.7735	59.8583	26.7963	25.816		0.487395	29.5425
7.023	15.8298	12.3399	12.8521	11.8251	15.371	32.3878	37.1979	29.3034	29.0519	32.0688	22.9408	28.119	16.1496	29.8262	32.5655	36.7768	34.9294	36.6018	48.6108	22.8908	37.582	54.8003	61.2143	31.0737	24.0996		0.495796	29.8563
7.1421	16.5523	15.8278	14.7907	11.4322	14.8625	31.1022	27.7533	28.35	25.5262	30.3075	21.8636	21.3534	16.3726	24.3987	35.2213	35.1194	34.432	37.2147	46.1265	23.7625	36.142	64.8089	60.3253	25.4015	24.5095		0.504204	28.9423
7.2611	15.3246	13.2321	12.8812	9.0897	15.1495	34.2724	27.6201	25.3186	26.1403	29.8969	17.7497	22.8797	16.4915	24.5451	27.9305	35.0244	31.3232	37.9679	47.8547	23.3307	34.5562	49.2791	56.5561	27.3774	24.7285		0.512605	27.4608
7.3801	17.0225	15.5787	11.6449	11.6015	17.5858	25.5517	32.7874	27.2593	26.4322	25.3806	18.2412	19.9958	15.8853	22.0249	29.9409	34.9147	39.2374	39.2506	44.5698	20.1856	30.673	52.4235	56.0196	31.233	26.2806		0.521006	27.6688
7.4992	12.269	13.9135	11.3266	11.4458	16.401	24.3548	29.8694	22.6493	28.0354	26.1684	18.8608	17.8712	18.8417	25.208	29.9887	36.6976	33.5824	33.9099	49.0097	21.3257	35.8319	55.7434	49.4748	26.579	27.245		0.529414	27.0641
7.6182	12.2065	10.6631	10.1269	8.6187	18.5969	28.034	33.5463	23.0748	24.7251	23.812	22.4319	23.6623	17.5007	22.2105	29.1233	40.6758	35.6683	40.1637	53.1817	23.6191	35.2219	47.6857	46.7274	31.418	27.216		0.537815	27.5964
7.7372	17.1883	17.0327	11.809	11.5543	13.5323	22.0076	30.6213	20.8882	21.1321	24.2138	22.9481	21.9771	17.7049	22.9875	28.7554	38.6172	35.4156	37.5207	54.6228	24.4647	32.4279	47.5522	51.6893	27.4904	26.4918		0.546216	27.2258
7.8563	17.3677	11.5846	13.5372	6.4513	13.6121	32.4064	31.8328	21.2701	25.5	23.2189	23.8637	20.4217	18.3194	24.6322	24.7804	37.5453	33.0342	34.6314	46.0697	17.9524	31.6039	47.7953	47.8153	24.9139	28.5357		0.554624	26.3478
7.9753	15.901	8.9486	12.2834	8.5047	14.173	28.9157	34.3737	21.8965	23.8376	28.0953	22.3888	18.6213	15.8244	27.2438	25.1833	33.3952	27.1157	30.7062	40.0037	19.3973	31.4882	47.9241	42.2614	24.8155	25.1972		0.563025	25.1398
8.0943	12.7258	9.2038	12.8089	10.1801	13.8988	18.2278	28.3293	22.8024	22.4541	25.9226	21.3544	17.0585	14.9986	24.0279	29.1505	37.2315	36.3717	22.9922	39.8713	17.9058	30.1657	49.1384	42.5065	27.2471	27.6012		0.571426	24.567
8.2134	14.9813	12.1644	10.1051	8.4789	13.1204	20.1944	27.8515	26.6029	19.263	23.4749	18.0715	14.6185	16.1479	24.769	28.2727	35.9325	34.4018	29.4445	45.7717	19.8335	30.8494	44.7718	41.6703	26.7149	24.4289		0.579834	24.4774
8.3324	17.0649	11.1718	12.2789	11.4763	11.5658	22.1329	35.2878	23.8345	23.2315	26.8162	19.869	17.0775	13.0078	23.1069	33.1087	33.3064	30.4962	28.5293	46.6332	17.6722	25.5402	40.9473	38.9051	23.429	32.2385		0.588234	24.7491
8.4515	13.6351	10.8257	11.37	6.9644	13.2741	20.2622	25.0377	24.9347	26.0284	26.4518	19.2835	19.1555	12.9468	25.0361	28.1798	27.2785	30.8936	30.1308	47.2878	15.0874	28.5342	41.1564	34.3841	24.4069	33.9183		0.596642	23.8586
8.5705	10.7315	10.9258	10.385	9.1206	13.1452	22.8837	25.5911	25.7778	22.7189	23.863	15.5663	15.0396	14.4456	23.9012	29.3845	31.1766	30.31	35.7643	45.8892	15.3415	32.5746	43.3959	38.244	26.4118	35.3535		0.605043	24.3176
8.6895	10.0576	14.388	12.3234	8.4269	8.2253	22.9875	22.9144	22.3954	23.3962	22.7805	16.3345	18.0374	13.2877	22.1507	29.0768	36.7149	23.6592	32.0147	42.8835	15.7401	36.6829	37.9723	35.9828	21.0294	29.6921		0.613444	23.1662
8.8086	10.9707	10.3302	12.0896	10.2231	10.6335	24.4221	27.4279	22.7793	23.423	22.8558	15.5146	16.954	9.6765	22.2809	24.6019	30.0545	24.5087	26.7368	39.6187	15.9415	40.0124	36.8317	40.4158	22.611	23.549		0.621852	22.5785
8.9276	12.6686	11.5081	10.4619	12.8685	11.4906	22.6824	28.6222	18.9754	20.9279	23.2468	13.5877	15.245	13.9343	22.6338	23.6722	29.1441	24.7643	29.4517	37.0772	15.0985	43.3698	42.4363	37.2395	27.1669	22.8419		0.630253	22.8446
9.0466	12.7166	9.2126	9.5894	11.5187	8.9977	24.0865	28.1069	24.9093	22.0631	22.2373	17.4071	19.0398	10.9025	24.2081	22.0558	26.6286	21.0592	27.0763	34.2428	12.8482	36.1617	49.5834	34.0029	23.1453	26.4983		0.638654	22.3319
9.1657	12.2782	11.4923	8.9773	9.542	8.1449	22.5836	25.6315	21.456	19.3195	20.2955	17.8492	19.4252	13.9895	21.5246	22.3201	32.5088	24.9466	26.0709	35.9872	15.493	35.0283	43.7696	37.0544	23.3249	27.7368		0.647062	22.27
9.2847	13.8147	9.9921	9.6542	8.9268	10.1329	18.6589	26.0673	23.0321	18.3907	24.8895	17.7043	17.3076	11.513	20.8378	24.7278	30.5152	23.6271	25.8497	33.7603	13.5833	34.9496	36.7366	43.7257	21.6223	23.883		0.655463	21.7561
9.4037	10.7329	10.7636	10.9402	8.2871	10.3757	16.339	24.515	31.8472	19.8843	21.8617	18.5987	18.891	12.5905	23.8774	26.4638	28.0039	22.4087	23.7702	32.1882	9.8271	38.326	39.9426	46.1609	25.5042	29.4361		0.663864	22.4614
9.5228	10.2401	15.6069	9.1184	7.249	11.4434	17.77	20.3504	26.4884	23.1104	17.3574	19.1027	14.2989	13.1558	20.0808	22.783	25.7302	23.3309	22.5075	30.0888	12.4922	36.3012	40.4435	43.8179	24.8902	27.3131		0.672272	21.4028
9.6418	12.9635	12.4034	7.7191	8.1988	10.9005	17.2537	20.5326	21.1336	19.1485	18.4134	15.1902	17.3448	14.6995	19.7377	23.4531	28.21	22.6832	29.2419	25.7866	11.3441	28.6391	38.9998	50.4393	28.3848	22.0889		0.680673	20.9964
9.7608	14.7324	10.4394	10.1062	7.3471	9.7507	15.5118	16.8851	19.3295	16.6379	16.0471	14.0825	16.5967	13.8548	24.0021	26.0666	23.0155	24.0304	24.4468	27.013	11.361	27.2538	40.4008	52.1496	27.5765	21.8038		0.689074	20.4176
9.8799	10.0975	8.3202	9.5856	8.1737	7.2133	18.3412	19.6029	20.4478	19.0699	15.0462	19.1907	15.4671	13.4889	24.8063	21.56	19.6728	22.5332	22.318	30.6819	9.1705	25.5767	38.5552	46.1202	28.2356	24.4998		0.697482	19.911
9.9989	9.787	9.9004	8.445	6.7663	10.061	16.5823	21.611	22.3831	18.6807	13.2691	20.3362	16.7578	14.8779	17.9031	20.6901	21.3383	18.5282	22.7091	28.2862	13.4345	22.1862	34.7578	50.9138	28.9754	23.3975		0.705883	19.7031
10.1179	10.1631	11.2883	8.9175	6.9762	8.6595	17.1078	22.201	20.7669	16.0858	17.6624	15.3036	12.9232	14.0265	14.2235	22.2191	24.2721	21.6193	25.2468	25.4058	12.0211	22.0735	42.9015	53.5756	31.3892	19.0929		0.714284	19.8449
10.237	10.2156	9.9709	7.8259	7.7831	7.5837	18.5536	19.5434	20.6284	19.0304	16.1758	12.8197	15.3665	14.5025	18.7576	23.5441	22.6037	19.9197	20.6741	21.7844	12.5091	19.853	42.7478	56.7628	31.5655	19.4629		0.722692	19.6074
10.356	10.1851	10.5316	6.8965	8.0462	8.1082	17.9031	21.1246	22.4584	18.6568	16.7857	15.9058	13.8567	12.0756	19.5597	23.0472	20.6546	15.6004	18.3382	24.7443	14.5582	26.3813	37.318	47.0767	33.7253	14.6746		0.731093	19.1285
10.475	12.6772	11.161	7.3291	9.1051	9.425	20.1283	20.4966	21.601	22.6647	18.868	15.1004	15.8341	12.9916	20.6624	21.7267	21.8153	15.7501	20.6871	29.1967	10.9948	20.6708	43.4727	45.3853	35.2393	19.1894		0.739494	20.0869
10.5941	13.1857	9.0666	6.4655	8.1076	6.7029	14.4958	19.0506	20.3909	18.7034	15.9206	13.6686	14.5314	13.146	14.1329	18.9142	21.8198	20.4579	20.7311	22.4819	11.737	13.9879	42.9085	47.538	35.0955	20.6008		0.747902	18.5536
10.7131	9.3109	11.0045	7.705	6.4029	7.4289	16.7474	22.1043	21.834	18.7973	17.3849	13.4509	10.284	12.6868	15.3397	21.1113	22.5619	20.5637	18.4776	24.1296	9.1755	17.0451	41.1285	46.4442	36.0617	16.8948		0.756302	18.563
10.8321	11.3049	7.7001	6.4536	6.2476	8.943	18.6566	20.6666	19.8029	17.4766	17.49	13.0499	13.8767	15.5601	14.7186	22.3154	20.6668	17.6791	17.5555	21.0312	13.2234	16.7527	42.1084	48.6551	38.8782	16.0774		0.764703	18.6756
10.9512	9.5505	8.3	7.5352	6.2037	7.0509	13.4757	16.6892	15.296	16.5887	11.6368	12.5906	12.1539	11.8207	15.5197	25.8618	18.163	15.5915	16.5018	25.8037	12.2239	16.1408	41.5129	51.5773	42.5302	17.9512		0.773111	17.9308
11.0702	7.8517	9.0242	6.7246	7.274	5.316	14.6279	20.1864	18.4692	17.5997	10.3684	14.2205	9.4659	15.2279	17.7105	20.6994	19.3804	18.8328	14.8251	22.5474	9.6553	16.2854	40.3091	48.8963	42.1206	15.8225		0.781512	17.7376
11.1892	10.7885	6.8652	7.2973	6.0661	5.4499	16.8657	18.1981	21.6964	13.7394	13.3587	13.7852	12.3103	11.2519	18.5812	23.6408	22.0038	16.5223	18.0453	21.2043	12.0115	17.25	41.0435	43.4175	46.6795	21.9021		0.789913	18.399
11.3083	9.9559	7.9022	6.4412	4.9982	6.2734	14.3942	20.7113	12.5692	15.2846	14.4754	13.1993	11.7516	12.1548	19.5517	23.2785	17.4654	20.2934	18.6232	23.4819	10.3948	19.4586	43.0091	48.076	48.9831	22.2945		0.798321	18.6009
11.4273	8.7985	6.77	7.3144	2.4702	8.4016	17.3362	17.0586	12.3987	16.9172	13.2022	14.1309	8.3965	13.6222	19.5651	23.6477	18.8519	19.7908	15.8897	22.537	16.0393	23.504	41.9624	41.2403	54.4677	20.8716		0.806722	18.6074
11.5463	9.3874	7.0426	6.0465	4.1413	5.2924	14.7995	14.0365	14.8552	15.0553	14.2197	16.8403	6.7014	11.6194	16.2631	23.0645	20.8047	16.4845	16.824	22.0446	12.4709	20.5652	42.3674	44.9111	52.5955	19.9208		0.815123	17.9342
11.6654	9.2381	7.5446	5.7854	4.9687	5.8672	11.2076	16.6358	15.3851	11.8508	13.6016	9.2145	9.4981	12.2885	20.3752	19.3938	18.1343	15.469	17.1769	23.0234	14.1771	18.5994	45.6673	43.4469	57.2901	21.2908		0.823531	17.8852
11.7844	6.903	7.3121	4.482	5.129	6.6939	14.9583	17.9261	12.1844	11.6443	11.5061	10.3749	9.0734	8.8653	18.6068	17.1333	23.8471	17.0492	13.2365	22.7808	10.2152	13.0435	45.0028	39.4954	48.7091	20.8094		0.831932	16.6793
11.9035	6.8256	8.545	7.5965	5.5879	6.1746	11.0809	15.3453	13.1656	14.574	9.2616	11.7164	9.3887	13.3848	19.5972	14.3848	20.5757	18.3088	12.2922	22.7269	11.9301	13.719	49.1207	41.0265	53.8284	21.0296		0.84034	17.2475
12.0225	7.4502	9.1848	7.4403	3.8517	5.4339	8.6905	15.2791	12.1428	11.3452	9.5688	10.7839	12.8595	11.4853	16.0054	17.3678	18.1463	20.4521	14.3291	26.1027	10.0736	16.6412	44.0789	50.3643	56.328	22.1691		0.848741	17.503
12.1415	9.6121	5.659	5.0389	4.5233	4.2524	11.6104	15.8537	12.9347	10.8582	8.5396	11.0101	8.3825	9.431	12.7403	20.835	17.758	15.4495	13.5708	20.3319	13.0461	18.3924	46.981	47.0926	52.8899	20.7786		0.857142	16.7029
12.2606	10.0171	7.3154	5.3176	4.6477	4.7531	10.7692	15.6313	10.4965	9.602	8.0555	12.0392	8.4534	11.6567	13.0326	18.0038	19.3586	10.6492	11.2229	22.0488	13.3307	11.425	41.0368	38.7897	46.3661	19.5072		0.86555	15.341
12.3796	8.0793	7.353	4.0214	4.1154	3.8755	9.1178	11.2233	9.9879	10.0552	8.673	8.5409	10.6172	10.7677	14.3616	12.9963	13.5131	12.6116	12.9148	21.1696	10.7659	15.1665	42.6164	36.8457	47.8013	21.5331		0.873951	14.7489
12.4986	7.7193	5.3793	5.1219	4.0124	5.6585	11.5665	11.4335	9.7962	10.5381	9.0068	9.598	11.1081	9.9448	11.0064	15.2545	13.3438	13.1492	9.3948	18.2663	14.5259	13.7192	43.0346	39.2399	46.8691	25.1543		0.882352	14.9537
12.6177	6.943	8.1813	5.5169	4.286	3.906	9.9695	12.1261	9.0168	10.596	7.2164	7.5615	9.052	8.7704	10.841	14.1481	15.7211	13.7068	11.2195	13.595	11.3918	16.169	44.2472	40.8379	48.0307	23.3874		0.89076	14.6575
12.7367	5.7467	7.4833	7.0243	5.2252	3.7609	10.101	14.5534	11.8557	10.6848	7.9914	10.0511	9.8398	9.075	12.1591	13.9075	12.7578	12.0605	10.3522	13.7132	10.2483	15.1471	48.1564	35.6084	48.7684	26.4602		0.899161	14.9093
12.8557	8.1025	6.0164	5.288	4.6042	4.7931	11.2726	12.174	10.6135	8.0517	11.1053	6.9085	10.4691	9.0228	13.3748	12.2664	13.3791	10.3356	10.4868	15.2099	14.2844	19.7436	44.248	41.0678	43.9093	30.535		0.907562	15.0905
12.9748	9.7418	5.5028	5.1176	5.8315	4.3246	7.6412	11.9487	9.4338	9.0282	9.1118	5.9659	8.5038	10.6878	11.4977	11.1541	9.5798	11.0218	9.2988	13.8597	13.4562	19.5272	45.3505	36.0214	43.5534	29.8733		0.91597	14.2813
13.0938	8.407	4.8052	6.812	6.6066	3.2952	7.2532	10.0485	7.3477	7.9231	7.5762	5.7478	12.2219	9.6105	9.5542	12.1106	9.742	7.7206	8.789	15.4607	10.9095	23.874	45.409	36.6301	42.6147	31.3672		0.92437	14.0735
13.2128	6.6034	4.7781	4.6282	6.3422	3.5096	6.4628	12.3213	10.3778	7.0154	8.0491	7.5513	9.8929	11.7493	11.6949	9.8421	9.446	8.3455	7.0039	12.0003	11.4941	22.9922	42.5412	30.6478	42.1788	26.8735		0.932771	13.3737
13.3319	5.4137	6.7047	4.9399	6.8481	3.6911	6.1026	10.6801	8.7986	6.8235	5.7827	8.3273	10.148	8.7617	7.9773	10.9785	8.6175	7.25	9.2749	10.58	12.792	20.4372	40.1218	33.3276	35.8222	32.7054		0.941179	12.9163
13.4509	6.9793	5.7843	3.4495	6.3329	4.6785	6.3889	9.127	6.9654	5.8216	6.0322	5.978	8.4621	7.8602	8.2988	11.4758	8.1607	5.6412	7.0843	10.3186	18.0773	20.1006	38.4951	35.4218	37.6373	36.9532		0.94958	12.861
13.5699	8.2166	5.1224	4.3023	4.3441	3.8009	6.8761	9.054	5.1718	8.1296	7.9505	7.7368	7.8717	6.0251	10.7572	11.0206	12.7659	6.735	7.2365	7.8284	15.4156	17.386	35.9987	37.4343	35.5289	37.6841		0.957981	12.8157
13.689	7.7125	4.2636	3.4026	3.4485	6.1863	7.9164	8.6713	5.2796	6.0638	7.4708	4.6486	7.6717	10.6328	6.9536	9.3798	5.6612	8.3369	5.8952	6.9065	14.6385	21.0632	33.1728	29.2363	42.2026	37.8241		0.966389	12.1856
13.808	5.4628	4.9189	3.9218	7.1819	5.427	5.0265	9.6959	3.7829	7.2569	4.4535	4.7184	7.8067	8.5417	6.9578	7.6921	6.0932	7.0212	6.9042	7.5708	12.0539	21.931	28.2377	31.6884	35.698	37.0423		0.97479	11.4834
13.927	5.0598	3.2195	5.2905	5.4681	4.8973	5.5565	8.6044	4.7289	5.5933	5.0155	5.8437	7.6633	7.8813	7.4704	6.39	6.8894	7.1575	7.1942	8.5196	14.1984	17.4945	25.9189	34.386	30.9418	33.4506		0.983191	10.9933
14.0461	5.7773	5.1348	3.784	4.6524	6.3972	6.0316	8.236	6.004	6.6861	5.7632	6.1177	7.3517	5.1302	8.7522	5.7618	7.3175	7.4379	3.821	8.665	10.1181	16.2094	26.3718	32.8842	33.7577	35.3166		0.991599	10.9392
14.1651	3.577	4.9249	4.639	4.5591	6.0215	4.8507	8.2796	4.841	3.9818	5.5814	4.0109	4.0481	5.4255	8.7809	6.205	7.252	5.5576	6.8185	7.2761	13.5066	15.0272	23.15	27.365	35.8564	41.2503		1	10.5114

## Sheet: Image43
X0	Y0	Y1	Y2	Y3	Y4	Y5	Y6	Y7	Y8	Y9	Y10	Y11	Y12	Y13	Y14	Y15	Y16	Y17	Y18	Y19	Y20	Y21	Y22	Y23	Y24	Y25	Y26	Y27	Y28	Y29		Ap-basal	Avg intensity
0	19.3843	23.0426	18.0684	22.4531	34.4	48.4633	21.3737	41.59	42.0266	38.8066	41.6771	38.0593	56.6021	52.8992	38.672	39.9098	37.5544	35.1678	35.0998	44.0984	39.5661	39.9392	37.4504	24.5675	51.8566	24.0605	33.1519	35.9389	47.1918	20.2558		0	36.1109
0.119	25.9377	21.0766	19.9136	21.5439	41.7625	51.7137	29.0188	41.3833	43.2168	38.8601	40.8002	32.9056	70.2961	59.1579	41.8638	46.0271	39.757	42.612	39.3303	41.2651	37.803	45.6812	33.6889	25.6918	58.7166	31.3203	32.1911	33.3333	58.3748	22.4929		0.0111079	38.9245
0.2381	26.5098	21.3836	21.3997	23.0146	36.7086	54.4638	28.1367	58.0597	49.5038	35.3104	40.0281	39.1297	61.4147	70.576	49.7076	37.0132	42.7483	43.3709	35.917	46.2956	36.683	47.6903	38.0154	37.2907	71.7465	28.3096	29.6026	37.2951	58.0136	30.265		0.0222251	41.1868
0.3571	24.6768	21.7419	19.1197	25.0335	43.1808	53.5624	37.5354	51.4837	53.3225	36.0343	48.2321	30.9306	55.5358	67.7764	38.9087	43.74	42.217	56.0441	43.9133	48.8117	38.1076	44.2759	40.0441	44.4795	62.8341	32.0912	38.8066	39.3876	50.2067	32.2617		0.033333	42.1432
0.4761	28.1825	17.539	26.6188	32.0066	36.646	58.939	39.3083	58.645	49.8106	32.8031	45.6001	35.4774	53.0121	69.6258	43.0359	52.052	37.5177	57.0974	46.5338	52.089	45.668	40.1263	35.3863	38.1974	58.8804	35.853	33.0763	34.9375	52.294	31.5691		0.0444409	42.6176
0.5952	37.879	30.2354	18.9296	38.9949	42.1047	79.8332	38.9977	72.7646	49.1967	38.7372	56.6823	36.0366	48.0594	68.2203	57.5458	47.0863	44.4238	58.4077	42.0387	53.0883	42.253	37.8864	42.4167	46.2399	51.3894	37.7547	35.2992	34.7137	52.6959	41.6482		0.0555581	46.052
0.7142	31.9231	25.597	30.4699	40.2904	41.757	81.3429	34.4469	67.3295	52.4749	32.8162	61.5701	44.1689	53.0003	67.3432	46.0191	42.4859	49.1006	51.2056	45.5756	54.0245	42.3581	44.3226	38.9667	51.0822	42.2551	43.6151	33.1195	37.8594	59.2728	39.8582		0.066666	46.1884
0.8332	32.1551	27.5589	32.7779	36.572	40.568	80.7397	45.5496	76.1226	37.1984	40.1007	52.7543	44.5623	54.589	68.7572	41.0489	44.9258	45.4262	68.4057	49.5551	60.1488	44.2367	42.1164	34.028	47.6946	48.1903	61.5695	38.9212	43.2425	55.5118	40.227		0.0777739	47.8418
0.9523	35.8633	36.9979	31.9019	41.1131	48.1322	86.0407	34.289	76.4501	53.5808	33.6699	57.9852	47.6085	39.456	67.6748	41.17	45.8475	47.7855	59.0069	48.1364	63.6182	43.6929	42.1791	44.7868	48.4745	45.7693	69.0104	33.7611	39.6098	64.4683	45.1206		0.0888912	49.1067
1.0713	39.3715	36.6082	42.6234	45.849	51.4365	98.8509	38.8892	70.7375	48.1985	36.177	65.06	46.7892	48.4158	70.2372	42.6842	49.1839	38.2892	67.6718	40.9195	70.1787	48.7533	47.229	47.4829	50.4595	49.1106	65.7538	40.0133	46.8447	59.3555	45.1343		0.0999991	51.6103
1.1903	47.8643	41.8395	38.1449	45.7286	53.596	98.9646	50.7427	69.1462	48.7894	41.5579	58.9064	44.7963	48.5739	74.7355	34.9715	43.0462	36.9907	55.5898	47.3005	51.3121	41.7559	44.7321	56.3424	49.9607	38.9834	73.7576	33.0622	45.4525	52.7052	45.8011		0.111107	50.505
1.3094	38.65	43.8485	48.0565	45.6476	57.8701	113.217	44.924	54.081	52.1256	40.0731	62.6785	39.7872	38.8171	68.1337	46.438	50.2588	37.3889	50.7149	47.0001	61.9753	41.4344	40.2952	62.8822	50.6115	38.2319	79.4906	35.8282	40.3706	57.8106	40.6		0.122224	50.9747
1.4284	37.5539	62.9778	58.1277	48.754	62.3051	91.0789	42.4371	58.7537	43.5843	38.9928	61.9827	39.2747	40.1356	54.9439	45.879	44.2643	30.6759	31.712	39.6307	65.2511	39.1121	46.8233	76.1994	67.2693	40.6505	80.9077	36.3338	47.6297	48.8408	48.1496		0.133332	51.0077
1.5474	50.1951	51.5212	50.2753	51.2364	71.845	82.4801	45.1217	52.835	46.1082	47.5696	57.891	46.3351	41.3569	66.2961	43.9694	43.8388	36.5272	34.0707	37.3094	51.4057	42.4139	39.7187	54.4182	55.8101	41.4901	66.897	38.3969	49.2882	65.9184	42.4962		0.14444	50.1679
1.6665	42.5958	51.908	55.7725	57.0602	66.886	72.2637	41.7052	44.8052	45.9049	51.9505	52.6943	40.7994	46.9017	59.5739	43.2622	46.6578	36.5369	46.9875	38.8341	62.4147	46.5182	47.0554	51.1799	55.133	33.3662	58.7693	38.0613	57.5601	57.8725	39.2913		0.155557	49.6774
1.7855	45.3844	42.9561	47.4007	56.5631	70.4392	54.4034	50.9832	45.6292	52.7136	40.3362	49.4525	47.3319	46.486	53.1678	46.3725	44.9242	32.1087	38.5686	39.593	66.1712	43.8095	47.1622	47.4695	54.2325	39.4081	55.8211	32.9679	61.4105	55.4038	40.5759		0.166665	48.3082
1.9046	40.7492	42.4148	40.2373	46.406	62.5464	60.3507	45.4531	42.7594	44.8229	46.381	55.0373	35.1878	45.8762	54.6357	46.8396	42.0367	30.5014	36.3903	35.5252	56.4319	39.5698	54.0504	40.1729	54.0713	40.4133	52.8712	32.0981	60.5659	58.7302	39.8431		0.177782	46.099
2.0236	43.4853	48.5204	49.209	54.116	62.9832	48.5983	42.319	45.3088	47.9404	38.9578	56.6556	36.3361	39.9286	48.064	42.2671	39.3081	40.4023	35.1016	32.7938	51.9824	41.0461	49.5381	32.8353	52.2909	40.6126	57.7524	33.8687	63.9612	54.4925	37.1077		0.18889	45.5928
2.1426	39.1866	45.4853	45.3835	54.259	49.6268	46.0067	38.7	49.5236	50.305	37.6522	54.9295	41.9571	46.3246	45.4332	46.5681	37.6998	38.4098	36.8538	40.576	47.7353	44.6508	51.7118	34.0389	46.074	37.6792	50.6625	36.8051	60.5205	60.4643	41.4525		0.199998	45.2225
2.2617	42.608	43.7027	35.2892	51.814	48.1362	45.4172	37.1623	51.5213	49.651	45.8303	50.253	34.7155	36.0193	52.2495	44.9684	31.6315	40.5132	41.6149	39.3397	48.5842	45.0335	52.1787	40.6855	49.002	30.6393	52.0544	37.5149	66.8801	58.4005	45.7599		0.211115	44.9723
2.3807	40.6359	46.5076	37.5512	52.6061	49.6918	51.1952	42.4579	47.1156	50.0646	35.7411	57.9618	37.0865	36.0673	45.6805	42.5262	39.3858	27.1569	36.3296	42.5222	44.8447	38.028	49.5788	40.3974	51.9751	37.9891	55.8841	36.3021	64.2027	57.905	44.7544		0.222223	44.6715
2.4997	45.5208	43.7957	31.6266	58.6508	44.5602	45.8788	43.4767	42.8699	38.6686	38.8319	55.1959	38.3674	36.4487	43.7393	42.5047	36.0546	39.0523	41.5833	40.692	35.4442	38.156	61.9773	46.0772	43.1098	45.9606	62.5509	36.5376	61.7004	55.5429	35.539		0.233331	44.3371
2.6188	35.0004	47.0635	28.6271	53.1632	52.8554	38.6085	42.7167	43.193	47.2883	37.3787	60.5556	34.5078	38.1563	33.6884	40.9902	45.5513	35.3265	34.9007	39.7952	31.7652	36.8907	55.7435	49.9319	40.5711	40.1167	60.3614	40.0572	72.0438	61.6467	39.7412		0.244448	43.9412
2.7378	55.5179	42.0843	35.6552	47.4867	52.4833	51.0066	38.2611	42.1497	38.6529	41.3765	60.3446	43.5783	41.8175	42.8772	39.9558	42.382	36.4783	33.4059	37.3908	34.9301	33.1146	56.0332	52.7162	34.975	37.3666	52.4332	39.2942	73.9837	60.3477	37.2616		0.255556	44.512
2.8568	47.6639	35.5683	34.3686	51.9549	47.8934	42.9073	35.857	44.0189	34.5631	47.9664	49.3998	43.3936	42.1348	39.6702	42.5166	42.8829	40.6444	34.9852	39.6116	33.3002	28.8577	44.9774	40.6797	40.6074	38.6758	59.0017	35.529	71.7641	63.302	38.0572		0.266664	43.0918
2.9759	47.2648	42.9766	34.0769	51.7614	50.4757	36.9213	41.1186	42.6727	34.9257	38.7906	53.8761	45.2817	44.7413	35.5036	37.3456	38.4279	34.5827	40.7834	40.3348	34.9511	31.5873	42.6684	47.7276	35.2628	44.9409	58.7281	39.9993	73.8786	50.1206	38.0077		0.277781	42.9911
3.0949	43.3631	45.2554	36.0392	44.0203	46.9053	39.37	42.5163	34.1605	32.688	44.9503	51.2172	41.6009	30.7014	37.1928	36.3852	35.6051	33.2633	34.8054	36.9608	30.6971	31.1933	40.5683	35.1715	39.1061	47.5059	51.3269	36.7212	68.169	52.1389	44.4626		0.288889	40.802
3.2139	42.0901	34.3536	37.8446	49.895	51.5015	38.5862	36.7971	41.099	31.9053	38.5485	51.2665	39.867	34.8743	32.7285	37.2918	32.4685	32.4338	37.1454	43.9947	30.2781	30.1872	36.1059	31.1641	34.2926	43.0137	49.362	37.6473	62.3939	46.95	46.345		0.299997	39.7477
3.333	41.4252	28.5516	36.2413	52.6296	58.2829	33.383	40.0202	41.4808	35.2041	38.5596	50.3087	40.651	37.0816	34.2191	38.1896	30.8862	31.8284	30.2877	43.4648	33.42	29.0952	33.3614	29.2827	29.9199	44.1756	66.5181	34.9019	57.9565	46.2443	42.4725		0.311114	39.6681
3.452	43.0215	27.734	32.6158	46.7741	47.9114	36.2238	41.2348	41.0758	35.9374	40.3773	56.7944	34.9644	32.6732	30.1022	36.7906	35.402	29.7301	35.1391	33.6781	28.7755	30.2946	32.3465	39.1649	31.4725	35.6505	60.4472	28.0635	67.4174	41.6235	43.1587		0.322222	38.5532
3.571	48.1225	31.7315	37.5308	44.2947	50.3715	42.6139	41.7901	46.607	47.0474	34.3312	64.0441	34.1494	38.0777	35.259	43.0507	35.4314	27.4078	29.5157	33.966	32.5703	30.7185	36.8754	34.6432	27.46	39.8052	59.539	34.2019	62.2979	35.8557	42.6476		0.33333	40.0652
3.6901	44.6387	30.1928	33.5599	39.6912	50.2276	40.4224	37.9476	31.6044	41.7272	40.8492	56.4102	33.2228	35.8846	26.8967	42.9028	30.9594	29.8808	38.4589	36.229	29.0967	31.8411	34.8068	35.47	28.0618	37.2191	62.8915	32.0942	62.4229	43.0522	43.1263		0.344447	38.7263
3.8091	48.3579	36.7668	32.0878	40.2632	45.0673	51.3174	41.8931	32.775	45.3855	38.3077	54.9891	35.6239	30.5909	31.0194	41.3952	37.0683	28.3912	31.9869	28.7166	28.5713	30.3514	30.9519	31.8859	26.6305	37.3631	53.447	32.123	53.0261	41.6526	49.3989		0.355555	38.2468
3.9281	44.8955	30.3743	36.6955	38.8572	47.1259	45.2212	33.6319	30.8407	44.2675	48.5151	56.8529	35.744	34.6465	33.4908	44.0188	31.0406	35.5836	44.0333	29.5464	27.7614	29.7944	35.2288	27.6298	26.2939	37.8916	53.5905	46.3338	60.6304	46.9879	42.7799		0.366663	39.3435
4.0472	43.1889	32.5648	35.7411	43.2318	36.6968	50.5399	37.5861	33.8183	47.504	38.1988	47.3046	34.9338	34.5884	36.1424	50.0798	34.201	32.3057	35.6437	26.3846	29.5606	31.9717	34.1503	32.318	34.0653	41.1775	71.2497	36.0645	58.6575	47.1955	41.6826		0.37778	39.6249
4.1662	43.0567	29.4777	39.6232	36.9345	44.7762	53.9333	27.8362	33.6305	42.6889	42.8521	55.1291	37.376	31.0875	36.3048	42.5339	25.7153	30.6786	29.6332	23.0769	34.7888	30.2651	32.1492	28.6189	23.5976	39.3991	61.0555	37.8264	48.0763	40.5272	39.3112		0.388888	37.3987
4.2852	45.1828	33.7373	37.0651	35.1391	39.7564	55.4642	41.4294	35.7465	45.7789	51.2877	43.7189	34.9249	24.0151	38.2536	40.4146	31.8391	34.1709	29.1876	28.0864	29.3156	29.2511	32.0046	24.4709	22.6949	35.6699	59.4946	35.4572	46.7368	49.6019	39.4748		0.399996	37.6457
4.4043	45.6375	32.8615	31.9482	32.3203	34.8537	42.5469	36.5492	41.9184	43.5177	45.9304	47.6729	33.0502	24.0225	41.2014	33.8882	28.7335	39.9266	31.5777	24.3663	30.0851	31.7861	32.2933	31.3715	22.4064	35.8364	56.5398	31.6119	41.2801	49.7397	40.0139		0.411113	36.5162
4.5233	35.8108	29.1167	31.8787	34.5381	35.6592	52.8673	36.5632	38.9394	43.5289	55.8051	46.8814	33.0468	31.3457	42.2643	39.9537	28.8641	36.7634	32.6986	26.1303	26.8348	33.811	28.3867	24.0171	18.3156	42.321	58.2974	35.0605	31.9388	47.9288	42.5397		0.422221	36.7369
4.6423	43.2342	28.793	37.3869	30.8306	31.8211	50.4609	33.927	32.0451	36.6545	54.0071	47.9799	35.7884	29.0902	38.3412	40.4817	32.362	43.217	25.7844	25.2576	27.4263	33.7281	31.6391	21.9879	20.758	40.4832	55.9199	30.3297	36.1738	37.4619	46.483		0.433329	35.9951
4.7614	45.2621	30.4156	32.0107	37.5045	27.3562	54.7195	34.3505	25.576	36.9981	48.8975	46.592	37.7336	31.2072	42.2236	38.4661	31.2003	39.6492	27.5613	28.756	28.4801	29.869	27.2556	22.0361	21.0124	40.4577	48.122	34.3297	33.5031	43.3002	42.2894		0.444447	35.5712
4.8804	34.0867	34.168	30.255	33.1818	25.4636	55.1593	27.01	33.2031	39.4093	43.3549	43.0177	38.7552	28.558	43.7228	43.9158	31.5122	37.2615	30.1142	24.2107	30.2032	31.2985	34.3881	26.2978	16.7028	34.9687	48.8908	34.0196	35.0104	44.7033	40.8463		0.455554	35.123
4.9995	38.486	30.6231	34.7064	31.0614	26.0102	53.4536	33.5176	38.1485	33.6143	50.174	61.3801	43.3426	28.2713	41.5923	39.1554	29.1712	28.9115	28.4053	23.4295	23.4092	25.0177	35.7789	27.7736	16.0947	41.0953	44.9144	34.9537	39.1447	39.6153	35.2352		0.466672	35.2162
5.1185	32.5789	31.7096	37.2443	28.3348	23.6215	57.8796	27.1781	29.1774	36.8375	51.5637	42.0272	46.684	25.4394	35.4219	37.7214	31.1822	33.7836	30.9894	27.3446	26.0874	32.0054	38.685	22.3528	16.8316	41.3187	43.4901	34.7267	40.6312	38.9145	42.3544		0.47778	34.8039
5.2375	35.2454	37.0982	33.4024	31.5187	23.1374	50.051	31.8903	33.7429	29.2364	49.476	43.2782	50.614	30.1858	34.8137	27.4438	24.779	31.3628	28.9667	39.087	19.1591	27.5707	29.4496	20.871	23.6213	37.3801	44.3966	30.5236	35.8724	43.1846	38.7923		0.488887	33.8717
5.3566	48.3282	38.639	33.566	25.9003	23.4401	49.8746	25.3387	25.6356	30.562	54.0942	46.2515	40.0092	26.6132	32.5979	26.9208	29.7371	34.5328	30.0153	38.3106	27.5766	25.5278	36.9965	26.4474	17.611	38.6417	36.7475	33.4362	42.5013	36.065	39.5471		0.500005	34.0488
5.4756	50.0981	34.3544	34.3724	22.3667	17.671	41.0288	31.5117	28.6931	32.5119	53.8671	43.6888	40.6458	31.2118	37.0836	27.7387	31.4358	31.0225	31.0165	31.1465	22.2576	28.3969	42.9285	27.277	17.5602	41.4586	41.1678	41.8472	37.5811	41.1868	30.9432		0.511113	34.1357
5.5946	51.3837	33.3872	37.3489	29.3691	17.2072	51.8314	27.3043	31.2223	35.5463	48.3762	41.9773	42.0184	31.2889	41.3597	28.7787	32.7994	29.7551	30.2779	32.2117	23.4335	28.8144	44.174	28.2206	17.9079	45.5484	42.1814	41.3519	45.4006	39.1258	35.6874		0.52222	35.5097
5.7137	46.4603	37.9076	39.4234	26.11	17.3509	50.4063	19.1712	26.4022	34.0601	54.6125	37.6757	37.3621	31.8506	36.5519	28.0088	33.9834	24.4561	29.7813	27.5306	28.5215	30.3841	42.9633	22.6844	15.0746	34.9121	36.9329	33.7506	39.5091	44.3146	43.4569		0.533338	33.7203
5.8327	48.3867	39.3738	34.2115	29.7075	20.2289	45.989	30.5001	27.3455	30.4198	58.0155	38.1634	38.1002	26.9808	37.4836	26.5489	34.6978	31.5303	25.7232	34.7651	25.2612	27.5376	42.9175	30.5855	15.7448	39.7331	39.2403	34.1712	35.8357	54.7111	31.3399		0.544446	34.5083
5.9517	50.1757	38.9974	36.4914	24.1158	18.3196	45.657	24.3834	24.7083	33.3948	45.4272	44.3057	35.7318	30.3049	37.5895	36.7637	32.9164	25.5063	28.8955	38.5107	25.6029	27.5473	40.2107	24.2045	17.8262	41.5865	37.2045	32.5917	33.808	42.8367	32.1381		0.555553	33.5917
6.0708	53.7455	44.536	40.6935	25.4672	23.0152	47.9023	28.6194	29.4247	32.0388	41.3752	35.818	35.297	26.9982	36.9949	30.758	34.353	27.7197	27.4677	24.5508	28.0279	23.1011	37.9715	25.867	16.0568	48.2858	37.454	31.8203	28.3776	38.0347	40.3475		0.566671	33.404
6.1898	47.5793	50.954	38.8913	27.2357	23.9042	46.7877	24.6659	30.3472	29.6106	44.3135	38.1017	30.2254	22.2984	39.3479	35.5272	36.9083	26.765	29.2434	33.5136	21.2945	23.043	49.2039	27.2756	17.3645	50.3161	39.124	34.0476	25.7307	45.5549	36.8131		0.577779	34.1996
6.3088	42.9036	46.2835	32.4883	25.097	22.6183	39.5059	23.4569	33.5651	40.2808	52.5926	39.2934	34.2468	23.9181	40.695	38.6166	34.5269	30.0204	30.742	33.0973	15.9299	23.6998	34.2739	28.431	16.0357	56.742	39.1354	33.1384	35.0877	43.6146	35.765		0.588887	34.1934
6.4279	55.2939	44.6393	30.1915	22.3618	27.1581	43.9306	26.6006	26.0966	36.323	50.4287	32.306	28.9916	26.8896	41.0621	34.1697	40.0339	26.2738	26.2348	30.3603	23.0854	21.4627	33.4112	38.0751	19.9502	51.3144	39.3893	34.1323	37.3182	50.2881	35.9519		0.600004	34.4575
6.5469	43.6835	45.291	35.6867	25.9316	25.4014	38.6221	21.5994	27.4728	28.2467	48.2531	41.6782	32.3289	25.8172	44.8757	32.3045	35.4903	26.7051	24.0379	27.7456	24.906	20.8204	38.7667	30.4767	20.7664	45.9259	40.0621	32.5801	38.6799	44.3969	39.6653		0.611112	33.6073
6.6659	45.8936	48.8565	33.9471	19.9253	17.147	40.4863	21.8795	23.673	36.2772	43.4431	35.3851	31.7445	23.8269	49.8779	32.0017	32.9414	25.5126	23.2933	34.4238	24.1509	20.0582	33.9779	33.4668	20.3778	49.9745	36.3213	32.3476	36.642	54.1909	35.7523		0.62222	33.2599
6.785	60.9759	39.5	40.7933	23.2583	24.7443	38.6456	22.1817	31.5143	29.3293	50.1365	33.8559	35.0405	24.9215	45.8339	33.1149	34.0899	20.9974	21.8222	28.8846	17.9736	18.5275	34.9246	25.0141	17.477	51.8777	45.0186	29.4313	37.4095	54.2464	32.0148		0.633337	33.4518
6.904	55.0867	38.3011	43.137	22.4091	21.2743	38.7136	25.2555	31.7021	30.2398	45.0464	31.9693	30.1422	20.5776	49.239	35.2923	31.0565	29.416	21.8369	30.7053	21.0357	23.9103	30.838	29.4467	16.1134	52.2275	40.7181	31.2128	35.7607	47.957	31.0962		0.644445	33.0572
7.023	46.5791	37.5479	44.4157	22.1459	25.936	42.9622	21.896	33.0672	35.7687	42.7354	37.2687	30.4492	30.709	41.7418	31.7382	37.9156	31.5268	21.0681	28.6921	23.6935	20.2647	32.5729	22.5285	17.1136	43.8029	43.7204	32.334	25.0861	50.2369	33.0125		0.655553	32.951
7.1421	46.0806	36.7355	44.9366	24.9689	20.5734	41.8743	22.9892	27.3905	31.2356	50.2135	39.6497	32.885	27.3301	49.7493	29.7421	39.3438	32.5627	26.7313	36.0794	23.1546	21.4287	30.6936	23.4696	18.5429	49.3576	43.9712	29.7962	29.097	50.9718	32.1946		0.66667	33.7916
7.2611	53.4564	38.4024	51.343	32.1965	27.6219	40.8648	21.9066	30.391	30.3335	44.0851	36.1702	31.0073	30.8894	43.5535	36.0552	30.8552	29.2216	29.5441	34.7793	21.1662	27.783	31.4282	25.0013	19.8222	54.8225	48.4716	27.1845	41.537	49.2009	36.1106		0.677778	35.1735
7.3801	40.6589	36.229	56.1098	31.5298	30.4562	40.4025	21.8479	24.6324	29.789	37.7604	34.1134	34.0663	28.2905	33.4208	34.6053	31.3323	34.2696	23.0501	25.3969	29.1698	25.1129	27.821	22.0774	15.9977	46.2163	50.4788	35.1183	38.7887	48.6486	34.073		0.688886	33.3821
7.4992	38.1646	40.464	53.9953	33.1268	25.6633	43.8035	23.0538	27.6865	30.1999	47.9192	39.6241	27.2462	22.9503	39.9806	38.6065	34.2983	34.6241	19.0948	33.6607	24.4189	21.3731	32.6466	16.7824	21.3443	51.5849	53.4563	29.6086	42.2807	48.2429	35.3569		0.700003	34.3753
7.6182	42.3668	32.4531	55.0924	26.0532	23.1841	38.4293	22.5551	25.558	30.4814	45.8869	30.843	33.3867	30.0762	37.6849	36.9105	39.4364	28.2361	27.5184	37.7841	25.5239	21.5004	33.4619	19.5769	19.6203	53.5824	46.5133	29.807	35.7645	46.7393	32.4168		0.711111	33.6148
7.7372	42.5285	31.124	64.8924	22.9071	26.0116	41.4449	21.3708	33.1376	27.9888	55.1496	42.6189	34.6928	26.6793	32.3693	44.5829	38.3523	29.0828	28.6044	35.0877	28.0535	24.377	29.9974	25.8577	22.6568	48.4063	50.9283	33.48	38.2179	49.2835	43.8006		0.722219	35.7895
7.8563	40.0324	33.8394	53.3644	27.041	24.3101	40.2404	28.9966	29.6481	33.1525	46.4867	37.1004	32.2631	37.7048	35.4988	36.7631	40.6626	21.5772	30.9423	25.9907	27.2731	22.9511	28.1494	23.6167	19.6866	50.9339	46.6688	36.5796	31.0494	36.2285	40.8244		0.733336	33.9859
7.9753	40.3774	30.3002	53.2897	28.1888	31.6812	46.2118	26.6206	34.5067	42.4996	41.9931	38.7836	38.5734	29.3192	38.349	47.8853	41.3013	24.9889	33.1465	29.7491	24.1055	25.7658	32.7391	22.27	17.5226	39.8407	39.6837	31.0485	32.0739	39.1122	40.8037		0.744444	34.7577
8.0943	39.1831	28.7547	60.304	22.6558	27.1188	40.8369	28.1398	32.2355	37.8142	46.5304	46.0627	37.9831	28.4585	46.3266	43.6665	43.141	23.5611	28.3119	31.5127	28.4639	25.3658	35.122	18.2675	15.6305	49.2688	41.4179	35.9178	30.0764	39.0244	42.0723		0.755552	35.1075
8.2134	34.1122	31.9226	47.2323	25.1577	29.9498	40.7653	24.8439	31.0774	45.3424	44.0466	50.6177	39.6556	33.0366	50.6506	42.6846	41.3575	22.8409	25.9028	30.9864	31.2951	25.0781	35.9185	23.9184	22.7729	36.3929	55.4692	33.7058	27.439	38.8628	41.1092		0.766669	35.4715
8.3324	39.2715	38.1609	52.1092	24.753	28.9637	39.615	33.8315	28.8229	50.9408	42.2195	48.5083	33.5025	32.3401	47.3983	50.9717	40.0457	24.9624	25.6193	30.0397	33.9427	27.8201	32.5384	23.4585	22.6824	44.8513	57.1656	33.3276	25.68	42.4399	42.7339		0.777777	36.6239
8.4515	40.1479	31.0172	51.6067	21.9781	24.0162	44.7449	37.1277	27.2352	49.7152	50.8832	41.7918	37.7878	29.5406	46.1978	45.9105	39.3856	20.2987	32.0243	29.4057	36.6643	28.2785	39.2906	24.5748	23.0213	38.5138	50.5896	34.2219	33.6145	40.4969	42.8778		0.788894	36.432
8.5705	40.8527	31.7898	41.5345	23.2076	36.2064	51.8531	35.972	32.6956	48.4588	49.9128	48.2313	31.6199	36.2155	40.2487	47.7134	39.5553	22.1971	31.041	34.3634	34.2608	29.6216	38.371	24.7096	24.6973	32.7056	54.826	32.8701	36.605	52.9536	43.4076		0.800002	37.6232
8.6895	35.7256	40.0268	37.8297	19.4021	30.7355	44.7007	38.6141	29.2474	49.753	43.484	49.0606	38.1807	29.9758	42.5635	46.4035	50.7902	21.3484	42.6077	30.4805	36.1576	31.6876	41.9055	24.7911	22.586	34.3259	51.9216	33.6872	39.4431	46.0066	42.5153		0.81111	37.5319
8.8086	40.0443	37.3489	36.7556	25.2805	42.5137	53.9705	41.4309	23.0883	49.1936	39.7499	51.1466	35.7713	37.3354	47.9448	46.5065	46.4623	27.9111	37.4734	33.7525	41.7249	32.0273	39.918	25.0226	25.3304	27.4823	57.1171	36.4042	42.7576	55.8026	37.1121		0.822227	39.146
8.9276	28.9188	40.1596	31.5719	23.976	47.45	44.4609	38.845	29.3711	46.0033	44.2248	57.3684	31.8837	40.2623	50.4088	41.5095	45.6348	23.1695	32.6897	37.121	38.0103	29.554	42.7118	24.7623	21.6038	33.9701	53.37	29.526	48.3488	46.927	48.003		0.833335	38.3939
9.0466	30.2318	40.3715	34.8606	24.3946	43.1121	44.5982	48.3281	35.2747	37.2586	39.6648	60.7255	33.4106	38.85	44.2629	45.1494	44.6039	24.5997	33.8405	33.0734	37.1612	32.318	32.9708	23.0584	23.0641	39.8713	53.3081	27.7349	54.2028	49.7304	45.9127		0.844443	38.5315
9.1657	29.5547	28.6275	31.6886	20.2541	37.4581	45.7205	37.2124	30.9658	43.3227	45.614	59.7702	34.9965	34.0301	43.4563	40.2323	50.7559	26.6235	31.4222	33.7881	36.208	33.5576	39.8417	28.9934	26.6239	35.0752	47.2755	33.5577	59.5121	49.8557	53.4573		0.85556	38.3151
9.2847	25.4195	35.3528	34.7422	24.3409	38.7947	41.6329	41.6246	33.3947	46.6406	38.641	55.1907	33.7406	35.9104	46.1173	37.7557	46.7424	32.2622	36.4729	27.3904	40.6377	32.3169	34.6682	27.3712	27.7768	33.3563	43.8448	32.3727	41.6372	44.142	47.2387		0.866668	37.251
9.4037	22.7833	32.3924	30.2643	19.8609	46.5311	43.3052	40.3349	29.5122	49.5348	40.5043	50.9495	30.6564	34.5961	33.1645	40.8779	43.4055	31.529	41.0006	36.6272	35.974	32.5753	35.5218	22.5826	21.9568	30.3298	36.2165	34.7028	42.9369	46.614	54.3085		0.877776	36.385
9.5228	13.8211	26.2932	28.4907	24.4097	43.8423	41.0627	35.888	38.3512	41.4298	40.484	44.8823	36.7964	36.8092	35.9806	33.0374	43.1442	33.7151	48.501	31.5407	37.2918	30.9223	34.6871	23.0869	28.8514	32.7387	36.418	28.7569	34.071	49.146	46.7028		0.888893	35.3717
9.6418	12.5358	20.203	35.6048	23.0229	32.3626	32.2254	32.132	22.7834	40.9982	36.9893	43.5881	39.1044	33.015	33.9261	32.8262	34.0292	37.3517	39.1493	27.9356	33.5855	24.4414	38.0023	26.5136	24.639	31.1317	43.8939	31.1617	41.7238	43.9347	51.1605		0.900001	33.3324
9.7608	6.9376	20.1283	28.5566	24.1484	38.2551	37.0434	37.0369	30.9117	34.3366	31.2871	38.2967	32.8219	32.7324	43.3408	37.7873	31.862	34.5705	40.3183	25.2427	29.572	23.7434	33.8853	19.8514	24.4926	29.8762	43.1287	28.5355	34.7233	47.1872	55.0841		0.911109	32.5231
9.8799	5.2203	14.0898	27.5709	31.5659	31.5961	33.4076	37.7217	26.0843	34.8417	30.3972	44.7829	35.2468	37.38	38.0268	34.1047	36.7936	34.2337	38.1089	20.7499	25.5135	22.7059	34.3987	27.3317	26.0092	27.2223	45.3961	37.1105	36.0902	41.4073	49.8475		0.922226	32.1652
9.9989	3.2665	10.5709	30.5084	35.724	32.3151	27.2247	26.0319	32.5364	30.9545	34.012	44.0058	29.9506	25.4692	27.2376	30.6092	33.6961	37.211	35.2404	28.4692	25.0428	25.1651	26.813	23.4307	23.9666	21.5419	36.8881	33.0833	35.5451	39.6097	52.1823		0.933334	29.9434
10.1179	1.8433	7.3933	29.801	33.9627	34.2013	27.1842	32.2933	24.7525	31.8925	34.2713	42.0474	34.0169	33.155	28.0395	28.2201	37.0299	34.3995	29.9202	29.9508	21.1009	17.6035	28.1795	27.548	15.7355	16.9632	31.015	31.3331	38.1855	35.9046	53.1147		0.944442	29.0353
10.237	2.4393	5.6226	24.236	37.8866	23.1649	28.641	29.4999	21.6601	34.8556	29.1949	38.3847	31.3156	37.1395	32.0368	31.2573	32.4535	33.2126	24.4526	25.4582	19.2143	18.9395	28.9619	16.9519	12.7937	15.6836	32.2654	36.8713	29.6412	37.5324	48.1706		0.955559	27.3313
10.356	0.797	3.6242	21.4144	35.6557	34.7796	34.0673	28.7344	14.7768	30.3892	27.0263	33.603	25.8317	26.6714	33.8281	34.1749	30.1641	36.8898	30.8673	17.216	18.0216	20.3983	23.8256	19.8205	7.7332	18.0398	32.6615	34.9913	30.3104	33.2203	51.5019		0.966667	26.3679
10.475	1.2906	2.1313	23.2934	41.8791	26.9536	28.8269	19.7015	12.415	38.0123	26.2179	32.0845	26.3304	25.6951	22.3649	34.9259	23.6078	33.8978	20.9195	22.6524	13.4715	12.1178	20.7432	14.9855	8.6636	14.925	21	26.0536	27.6156	33.0287	50.3882		0.977775	23.5398
10.5941	0.8974	2.5214	13.5592	31.0765	25.07	25.7012	17.4156	7.0449	31.4707	32.7286	29.8848	23.2906	27.4698	22.7712	26.5344	21.6334	27.1899	12.3079	19.5901	13.5105	6.6637	20.3971	16.7719	7.6812	7.9852	15.7249	32.1262	25.9586	28.9429	40.7298		0.988892	20.4883
10.7131	0.15	1.5441	10.7664	29.1983	27.9188	28.4921	13.2068	6.679	26.2663	25.3079	29.6888	24.0518	27.8501	10.7653	31.3817	24.3164	17.1219	15.9976	18.0069	11.675	8.7434	18.8838	11.1581	7.3435	7.7636	10.8345	21.5588	17.6905	26.4237	42.4155		1	18.44

## Sheet: Image13
X0	Y0	Y1	Y2	Y3	Y4	Y5	Y6	Y7	Y8	Y9	Y10	Y11	Y12	Y13	Y14	Y15	Y16	Y17	Y18	Y19	Y20	Y21	Y22	Y23	Y24	Y25	Y26		Ap-basal	Avg intensity
0	21.3024	15.1793	18.334	27.0547	46.985	18.121	16.936	16.5243	36.0316	41.009	29.307	36.2941	37.756	43.281	38.0808	43.146	34.5205	20.5565	23.6448	20.318	18.8358	18.9129	15.9064	13.0188	9.2668	7.5455	7.7306		0	25.0222
0.119	22.1641	16.5864	19.5015	32.8061	37.2275	22.751	19.861	16.9698	38.7982	38.669	35.403	40.493	34.312	54.677	47.2119	50.8459	34.2254	19.1038	26.8297	16.5729	17.8965	16.079	13.1249	14.6822	10.62	7.0684	10.7157		0.00793418	26.4887
0.2381	27.0815	17.6055	23.2585	27.3651	38.3765	21.475	27.072	19.5688	37.3269	46.939	45.277	44.7436	42.914	61.525	48.7969	47.4987	33.7861	21.9149	28.5946	22.334	18.6371	21.3081	18.0348	13.7911	9.3531	9.5316	11.2082		0.015875	29.0858
0.3571	31.0745	23.4292	22.1371	30.9732	37.4775	29.676	33.924	23.051	37.1247	47.099	48.294	51.6818	51.102	66.892	64.3555	49.014	37.8933	29.7525	32.3753	20.626	21.6515	18.0855	19.3607	14.6488	11.4477	8.9655	13.6859		0.0238092	32.437
0.4761	27.9848	22.2198	35.8398	32.3285	47.7002	39.174	37.645	31.5534	39.5724	40.52	63.266	50.5876	57.612	80.66	72.671	60.1542	34.803	31.4001	36.0608	28.0436	20.8647	19.043	23.1149	17.351	12.862	15.0073	11.7859		0.0317434	36.6602
0.5952	30.1976	25.1834	37.6538	30.4897	52.9047	44.189	40.703	39.5331	38.4686	47.379	72.273	46.2934	62.956	92.367	77.0094	56.6886	40.3796	29.6633	40.6267	31.0861	20.596	17.4179	26.431	20.4525	13.6562	14.4308	12.2117		0.0396842	39.3052
0.7142	29.828	34.4714	40.6363	35.0919	51.3654	40.608	55.424	45.0252	42.313	52.599	84.096	65.1398	86.738	100.839	84.1552	58.4434	32.9172	37.9795	40.2198	29.1375	23.1629	19.4387	31.6701	25.7176	9.882	10.4147	12.2694		0.0476184	43.6883
0.8332	34.8154	37.7922	45.6529	36.5499	57.2669	49.907	77.708	56.9541	52.1497	55.194	94.093	68.4933	100.631	114.291	81.8173	67.9973	46.2685	45.1335	41.4857	33.3063	23.9827	19.5365	35.5972	23.8713	10.8883	8.4055	11.6269		0.0555526	49.3117
0.9523	25.9471	36.3489	47.6293	40.0493	55.2114	57.969	120.823	81.546	53.1628	65.601	118.29	80.5055	129.755	101.65	76.0131	65.0085	46.0774	49.6326	41.6753	45.0604	24.5148	21.7865	40.8309	18.7737	15.2575	12.8309	10.9206		0.0634934	54.9211
1.0713	31.0527	42.8899	48.0859	45.1615	61.5131	89.264	149.107	75.9208	67.5109	63.564	129.523	92.9917	143.075	110.933	76.6066	66.9801	47.548	63.7681	45.7605	40.6822	27.1873	19.156	37.3319	21.2879	13.4052	11.034	11.0542		0.0714276	60.4591
1.1903	36.0591	44.057	56.899	54.7854	59.6654	109.48	164.875	85.213	73.5614	73.234	136.175	92.1395	157.193	98.74	69.7094	58.9251	55.8873	66.2975	48.4925	36.2925	28.8981	17.1575	31.1862	18.3856	15.2268	13.8095	12.6307		0.0793618	63.5176
1.3094	39.7432	49.3563	57.2343	57.0089	62.5619	140.157	170.417	92.1894	75.9339	86.301	140.992	87.9248	156.858	106.934	61.8965	60.058	58.0865	69.3515	43.2015	38.0427	26.9083	17.1249	23.1866	15.8401	17.9719	16.507	14.9577		0.0873026	66.1757
1.4284	36.2135	52.533	60.3652	56.6251	74.2231	153.878	164.493	89.6869	69.1648	111.531	132.6	78.9209	149.09	103.328	61.9336	54.6396	65.9063	76.633	40.4518	39.0745	24.8736	17.533	18.9152	17.8282	16.7932	16.3886	15.871		0.0952368	66.6479
1.5474	43.1181	54.3526	71.8388	61.436	76.3044	156.45	144.415	83.1569	75.881	110.635	124.478	72.7652	134.374	101.925	59.772	55.1709	66.8578	61.2414	33.5767	28.6579	18.2548	21.4558	18.278	14.6136	16.2045	19.1651	13.2528		0.103171	64.3567
1.6665	45.9602	62.884	61.7815	57.4091	83.725	140.388	133.808	79.3486	75.6824	102.204	125.887	75.6516	125.987	87.318	59.5427	47.6406	51.899	65.8094	36.3023	26.6236	22.6154	21.4761	22.6171	16.9861	17.6983	16.3479	14.8697		0.111112	62.1653
1.7855	49.6725	67.8222	59.3523	55.8837	78.2774	111.649	111.713	80.7887	76.8531	102.459	106.124	65.2739	108.215	69.569	51.9101	51.6274	47.7385	55.6171	31.737	28.2506	22.6612	15.3724	21.7299	15.7969	19.5466	19.0868	15.9618		0.119046	57.0626
1.9046	49.5528	65.5771	56.9173	63.3648	70.7286	97.542	88.27	72.4833	76.1095	91.548	103.151	64.8723	99.929	64.695	46.9789	46.0737	43.835	56.1542	29.1745	25.6687	17.3211	13.3604	15.4592	15.8764	22.4804	18.0693	15.4083		0.126987	52.9852
2.0236	48.7483	54.7299	58.9051	61.7436	75.6958	76.941	80.578	64.9397	85.7636	75.461	93.815	56.8238	92.246	70.793	40.8536	48.0155	42.2338	44.0508	24.369	21.0038	17.0512	22.1665	16.5664	15.8294	21.2853	16.2699	13.3769		0.134921	49.6391
2.1426	48.2028	51.7161	47.7203	59.3792	69.5577	72.476	74.026	72.6821	68.7359	74.922	85.349	60.5936	83.179	65.394	49.4031	46.0269	36.9263	39.3395	24.8006	20.8183	14.9226	13.9522	16.9631	18.8581	16.6935	14.5976	16.1659		0.142855	46.7926
2.2617	54.9331	57.6373	50.737	56.2187	66.2808	65.936	64.618	69.0887	72.0906	68.612	80.439	55.2181	85.344	58.968	51.8129	49.6222	38.17	43.4461	28.2456	18.19	15.0191	16.076	12.4585	13.3459	16.1684	19.471	17.277		0.150796	46.1268
2.3807	60.4005	67.6323	50.078	59.1113	68.2806	64.693	55.897	66.1673	66.5154	69.092	76.318	54.8814	72.543	59.256	42.6633	42.6823	39.4503	44.6773	26.5918	17.0008	11.2579	12.7178	11.5972	10.5769	13.7188	16.4762	17.0394		0.15873	44.345
2.4997	62.3665	62.034	53.3375	61.0604	68.0707	60.215	66.294	62.0594	68.1487	68.106	67.482	51.0142	71.456	54.444	46.85	37.7511	34.8319	41.5174	18.9807	16.8963	10.9108	11.2841	13.0901	10.9016	12.282	14.4396	16.7545		0.166664	43.0585
2.6188	58.1865	70.0996	60.3886	61.2854	60.7325	54.396	61.21	58.9603	72.6006	60.21	65.774	48.155	66.119	53.392	40.9185	39.9652	38.3582	39.1742	23.7769	13.283	13.3159	10.3627	11.5113	13.3745	13.5434	19.4736	13.4657		0.174605	42.2975
2.7378	58.6319	62.5781	57.8361	60.7958	61.5226	57.634	63.575	56.4037	71.0504	60.111	65.67	48.4745	61.405	48.905	41.4151	41.4874	36.9211	31.9289	22.6104	15.2635	14.554	14.0519	12.2548	13.8449	12.6554	15.6672	15.2059		0.182539	41.5724
2.8568	59.5644	63.8458	56.0523	66.1256	67.4234	63.732	66.499	56.7525	63.84	65.18	65.835	46.1585	60.678	54.078	39.5231	43.1771	33.8075	38.1313	20.3232	14.8915	16.0101	12.0151	11.8019	12.4396	14.6596	13.3373	12.9247		0.190474	42.178
2.9759	71.5292	69.0368	59.3206	72.897	56.9449	66.614	63.716	64.8084	68.5028	66.278	65.137	46.9574	47.688	54.656	41.5819	47.3451	31.8772	31.4254	25.0015	15.346	12.8474	13.2275	12.356	11.4961	12.83	14.8977	14.6636		0.198414	42.9252
3.0949	79.5963	61.7308	57.2973	71.0561	57.9787	67.143	70.244	65.1592	67.8112	64.151	60.987	48.2129	46.596	54.595	47.1332	42.3185	38.4467	30.7283	20.4382	15.0234	11.2942	14.3217	15.1096	10.3206	13.6898	15.403	17.7087		0.206349	43.1294
3.2139	90.7434	58.7286	69.0775	66.7138	56.2165	66.608	60.616	59.7928	63.597	67.547	60.633	50.0543	47.487	54.642	47.1684	47.4602	31.3009	31.9408	17.1439	12.5791	12.7272	11.755	11.1148	9.7155	14.8187	14.2013	15.7299		0.214283	42.5968
3.333	92.8594	57.2191	60.9909	72.1826	58.9144	72.859	61.145	55.4499	67.6632	67.174	57.266	52.8039	41.93	55.965	42.584	48.3373	29.7296	29.2055	20.231	16.1541	10.7579	11.3985	13.4171	7.2838	9.461	12.212	14.8269		0.222224	42.223
3.452	85.4294	58.7727	71.3327	73.1711	56.6764	78.635	54.601	65.6914	69.5959	61.189	54.347	47.8181	38.714	52.529	52.2798	45.2877	34.6609	29.9471	17.5398	14.6894	8.5697	10.7548	9.0709	10.0264	11.2065	11.5318	13.6756		0.230158	42.1386
3.571	97.103	62.5397	58.3669	71.0206	51.8744	73.443	53.242	56.2602	68.9621	65.581	44.632	41.1349	39.638	52.1	45.8968	41.9602	36.0995	29.8985	20.074	13.5389	9.1475	11.6867	10.1938	8.3685	9.962	10.3209	15.8848		0.238092	40.7011
3.6901	84.3149	67.4965	63.506	68.7673	53.2931	64.686	59.672	54.2335	63.7848	59.816	48.073	46.4749	46.895	48.678	49.7142	33.998	29.6649	25.2272	15.0191	15.5844	10.1063	9.7545	12.7299	11.8826	9.4906	12.2166	14.6421		0.246033	39.9897
3.8091	77.0479	73.9137	74.6596	76.2481	57.2118	74.055	63.547	51.7899	61.4979	57.192	46.688	47.2486	43.592	45.352	44.4355	34.9282	38.5408	26.5851	17.5386	11.9159	9.4991	12.5129	11.27	11.0758	9.5488	15.476	12.8538		0.253967	40.9713
3.9281	80.644	67.4044	63.3016	66.252	54.0615	69.729	51.683	60.6136	56.4743	53.632	43.511	59.3199	45.825	54.832	43.2947	41.5335	34.5222	23.2437	17.3461	12.9641	10.5312	10.3802	10.2802	10.6926	8.6771	15.1963	14.073		0.261901	40.0007
4.0472	76.5493	68.6312	63.2829	73.8302	62.102	68.187	70.536	56.7488	50.9246	56.159	50.097	64.8194	41.555	55.396	54.4003	36.2441	37.2947	25.3244	17.3707	10.8785	9.8874	8.4137	8.7041	11.9522	11.1474	14.4648	12.6119		0.269842	41.3894
4.1662	65.885	66.0523	68.3204	73.7076	63.6041	60.439	64.445	52.4854	49.1718	58.076	51.697	56.6224	41.944	50.872	48.9024	35.6096	29.9393	25.4193	14.3336	9.3732	9.214	8.3113	8.3491	10.0388	10.6184	9.6648	13.1542		0.277776	39.1204
4.2852	64.4023	65.0368	71.9837	62.6343	67.6542	65.049	59.625	48.223	56.1866	57.313	49.301	64.8238	45.768	47.328	44.9546	29.7418	30.5081	24.2429	17.0886	11.7816	11.0912	8.3987	6.1423	10.1474	9.4728	12.365	12.3782		0.28571	39.0238
4.4043	70.5523	62.5346	69.5556	63.7899	61.7143	57.748	57.338	60.0907	50.2076	51.41	52.917	56.1167	40.315	45.394	44.4889	34.6617	33.2706	25.2812	14.7968	11.6969	8.6131	6.6072	8.1458	7.7789	8.4825	11.7829	12.6955		0.293651	38.0735
4.5233	56.7609	66.216	57.0222	67.0225	65.2268	67.229	62.765	63.0866	51.0751	62.887	55.641	55.639	51.464	48.655	47.133	30.2007	37.3421	26.8151	13.1438	13.386	7.5591	7.4864	8.7636	7.9243	9.3783	9.2234	11.4079		0.301586	39.2761
4.6423	57.1213	60.9094	62.7166	68.4359	74.618	63.623	67.793	60.3223	47.0267	58.04	56.239	55.8875	51.237	50.24	46.396	30.7847	27.9467	21.1315	14.9984	11.6047	7.5996	7.1999	7.8903	8.5443	11.503	10.5576	11.3621		0.30952	38.9529
4.7614	60.2786	63.2583	67.7936	67.83	66.1076	60.048	59.149	52.2906	48.0678	63.861	49.818	57.1972	43.974	46.161	47.7472	29.1387	30.961	18.8414	16.1778	13.4234	9.1298	6.8434	8.1407	7.2533	9.8203	11.1522	12.8374		0.317461	38.0482
4.8804	68.5122	56.5262	58.8208	62.9094	62.3798	64.475	68.078	60.4228	44.9158	58.147	55.764	53.8767	41.266	41.476	49.7627	30.7539	31.4152	17.3072	15.2164	10.1028	8.3998	7.8092	6.4538	6.499	7.1921	9.4854	11.6959		0.325395	37.3949
4.9995	68.6106	61.4273	44.8656	60.3695	62.1627	62.189	69.571	54.7477	47.1569	60.475	48.242	58.4207	38.838	38.465	44.6769	33.0126	28.0826	21.1118	12.3711	10.1725	9.7394	9.8096	7.4791	7.4018	10.3859	7.9922	11.3448		0.333336	36.6341
5.1185	59.0218	57.821	35.4927	61.4938	62.6861	59.021	61.562	54.4881	52.9418	56.575	41.413	52.4272	40.814	48.561	51.0664	31.7528	25.921	23.7373	11.9276	8.5366	10.0477	8.5178	5.4395	8.7578	8.8978	9.3482	9.8565		0.34127	35.4861
5.2375	63.9579	62.8323	36.9175	62.3753	68.1888	62.768	60.851	47.1436	52.3612	57.735	44.266	51.2582	44.737	44.126	43.6303	32.1252	25.5523	17.9893	12.2372	9.8853	8.6582	9.1788	5.6606	8.3927	8.2325	9.3474	12.3195		0.349204	35.6566
5.3566	58.6988	49.0123	33.3831	58.37	63.0047	57.057	59.974	49.0285	49.8206	54.87	56.526	52.5886	51.764	36.553	44.0808	31.0044	22.9086	22.5021	14.5659	8.842	8.7121	7.5637	6.3313	4.7968	7.9744	8.9493	8.5761		0.357145	34.3503
5.4756	67.3147	49.7338	30.6854	58.9706	64.9076	58.171	50.535	49.0789	52.4542	46.44	53.364	49.7493	54.836	41.783	44.536	35.7924	23.3801	21.1763	12.2063	10.3654	7.5677	7.9729	6.6666	5.2935	7.8358	12.1878	12.8196		0.365079	34.6601
5.5946	67.0169	53.9748	29.8187	58.9517	56.5705	54.583	47.615	46.8408	50.9564	49.381	46.172	51.2924	50.466	43.501	42.6461	36.6659	24.5712	17.5903	11.6725	9.9937	5.8466	7.1491	7.323	6.0664	10.8295	10.5553	10.9059		0.373013	33.665
5.7137	62.8005	43.5953	25.2269	56.6711	58.4678	53.415	45.841	48.1551	49.2589	47.075	38.004	49.9218	44.482	38.569	42.0208	33.5866	25.7229	19.5975	12.433	8.6498	7.8401	8.8891	6.0508	6.3757	9.3306	9.2731	9.3014		0.380954	31.8724
5.8327	57.6665	51.3372	22.6056	55.7442	57.2613	51.022	43.551	53.6783	42.2002	46.189	39.027	46.3856	54.36	43.44	45.8092	36.3067	24.3409	18.6025	7.9095	8.3529	5.6329	6.9628	4.0061	5.4109	6.5804	11.1703	9.1462		0.388888	31.6555
5.9517	57.1187	46.7085	22.1599	64.0798	63.0178	51.357	38.903	60.6042	55.5446	39.236	38.814	44.3937	50.253	44.481	39.2406	35.47	21.0863	18.1203	9.6893	6.4991	6.5791	8.0989	6.5584	5.3694	8.7246	9.0143	8.3561		0.396822	31.8325
6.0708	64.0718	48.722	22.1065	64.1564	54.8262	51.61	36.522	63.4441	50.6854	35.312	34.356	48.4617	47.344	38.653	36.3813	35.9239	22.6559	16.5285	10.7754	7.1642	7.7217	5.242	6.1657	4.6317	6.5685	9.3179	7.3449		0.404763	30.9886
6.1898	59.6301	40.1684	23.3494	61.7941	59.0486	52.801	43.471	66.089	51.6255	37.703	37.587	50.974	48.335	33.249	41.8149	32.4271	19.332	21.0262	6.4308	7.2812	4.7524	4.8202	6.426	4.0487	7.6699	7.7599	11.8041		0.412697	31.1636
6.3088	55.9417	44.8712	22.2243	64.7361	57.9273	47.016	38.192	62.3438	61.8226	37.578	36.907	47.7881	47.855	38.592	39.8612	35.2669	21.2298	15.4952	9.1619	8.1489	6.285	5.7985	5.7564	3.5311	6.8396	10.1346	9.4018		0.420632	31.1373
6.4279	57.4032	41.8963	22.1222	61.7286	53.7129	47.26	34.67	68.162	68.1508	38.124	33.812	51.6213	49.576	42.542	35.7018	38.3533	22.0457	15.1843	6.5679	7.7436	9.6752	7.5772	4.9819	4.4429	7.022	7.921	8.1213		0.428572	31.3378
6.5469	65.3426	39.7709	24.581	69.0322	55.875	49.681	37.088	58.218	56.4734	47.882	42	45.4815	44.263	34.289	38.3627	37.7608	19.165	12.9342	7.9305	8.5298	6.0169	6.9491	4.8903	5.9609	9.3123	9.3704	11.1498		0.436507	31.4189
6.6659	71.527	37.4996	19.1604	67.2203	53.1059	39.677	40.207	68.9482	56.8647	36.231	35.831	38.1621	40.569	33.787	35.7293	32.7282	17.7732	18.0858	7.9554	7.0606	5.8692	6.3017	3.3667	4.5275	7.1202	10.1832	12.0078		0.444441	29.9074
6.785	55.6529	45.5286	20.507	71.1186	52.8457	46.382	40.824	69.5148	57.9541	32.153	36.432	44.0848	40.448	31.915	28.7027	30.695	18.2381	16.5943	6.7427	8.2297	6.1871	4.9226	5.095	3.7182	7.9636	8.0898	10.1698		0.452382	29.6559
6.904	54.545	41.8065	19.6471	66.7817	45.1616	45.027	36.241	70.9658	53.2172	37.299	31.402	40.1905	45.064	32.393	29.2148	27.3676	19.5913	17.4866	6.7214	7.0978	6.7272	6.3342	4.1214	6.9349	5.8411	8.711	10.9684		0.460316	28.7726
7.023	61.4284	43.9454	17.957	67.1492	54.5474	47.183	32.927	59.8763	51.8642	31.561	37.577	38.1677	43.649	29.279	32.1819	27.8234	22.0409	17.1817	5.924	4.8946	5.5524	6.8905	3.8267	3.9152	6.2597	8.201	13.6474		0.46825	28.7204
7.1421	69.6491	40.9501	14.8217	64.4956	43.4212	43.354	32.057	57.4556	48.5626	32.148	36.514	36.5183	48.443	29.477	30.3711	26.7067	21.4088	16.0028	5.7988	4.1787	5.5797	5.6048	4.1136	3.604	5.4853	7.5122	11.3022		0.476191	27.6124
7.2611	63.4104	38.4488	18.2439	55.8768	45.7641	47.459	33.785	59.5297	52.1843	35.207	37.788	39.8826	43.684	28.086	27.7701	27.0973	15.5137	16.0018	6.8612	6.8546	6.4346	5.5639	4.0794	4.8045	8.1863	5.0139	8.8686		0.484125	27.4963
7.3801	57.6399	37.7462	17.7811	49.9493	47.7462	44.381	25.881	54.9051	51.2263	28.879	36.114	39.4429	46.773	29.932	28.2578	20.2119	16.5159	13.8254	4.228	5.8347	6.9708	7.5979	5.7414	5.361	7.7733	7.8821	9.2253		0.492059	26.2156
7.4992	59.903	40.774	18.6879	55.7409	51.2349	42.836	31.688	56.1602	46.2357	29.132	35.421	38.4858	52.167	27.386	19.9174	23.2292	19.5212	13.8923	7.0667	4.821	7.2015	6.2419	3.4445	4.0375	6.3763	7.4899	8.1496		0.5	26.5645
7.6182	73.1149	31.8434	16.3226	61.5102	46.1343	39.303	27.025	66.0948	49.7535	30.888	38.501	37.5213	43.57	20.567	20.3665	21.5973	19.3455	15.2774	7.0676	6.445	6.2946	3.7587	4.5739	4.5954	8.6702	9.693	10.3223		0.507934	26.6725
7.7372	69.6208	36.0536	15.3951	51.8332	41.6842	39.23	30.824	47.9134	52.9466	28.629	37.603	42.5129	42.018	23.333	26.5316	26.3749	18.81	13.5566	8.5705	4.1018	5.0601	4.4128	4.5793	5.0641	5.8499	7.6866	10.6235		0.515868	25.9562
7.8563	59.5965	32.8894	16.4814	52.2854	37.5174	44.567	34.392	55.2943	48.3754	34.109	39.42	39.3964	38.16	23.419	24.3832	21.5744	21.0106	16.0876	7.8275	5.7241	5.6051	3.7898	2.2176	3.3071	6.6555	6.812	8.1897		0.523809	25.5218
7.9753	58.1048	31.4209	21.2183	58.6948	38.2276	38.528	30.053	58.052	48.5336	32.678	37.05	34.598	39.4	21.688	23.2791	25.0345	21.6942	13.2445	7.9608	6.1407	4.6326	4.9375	2.8374	4.4668	5.2161	7.4859	9.0269		0.531743	25.3409
8.0943	66.2521	32.0184	13.753	49.9827	37.4964	41.325	27.676	53.7576	54.2224	27.241	35.168	33.4205	49.458	23.008	21.6558	25.3171	15.7774	15.3234	8.7799	4.0842	5.268	4.8428	6.5653	5.138	7.6601	5.5658	7.4149		0.539678	25.1175
8.2134	65.3188	35.1239	11.0072	48.4556	34.2565	42.314	29.124	50.1262	47.8964	29.497	27.298	37.2128	43.538	25.58	19.9034	24.402	19.4952	14.715	6.8748	5.5783	5.2038	5.4943	3.9599	3.5908	7.2253	8.7456	8.5342		0.547618	24.4619
8.3324	70.9422	32.2301	14.6332	49.1462	36.0288	44.557	33.212	47.0485	49.0887	27.547	29.419	32.8482	42.732	19.34	17.0834	26.1265	16.9199	13.4445	5.8688	5.1923	5.0598	4.7522	5.6611	4.687	6.3729	8.2758	7.351		0.555553	24.2803
8.4515	70.0492	31.3379	15.3211	48.9384	38.3023	48.292	36.486	44.8362	41.4171	26.792	26.304	35.403	44.912	23.969	16.3432	22.5931	15.6825	14.1738	7.3725	5.6621	5.2338	4.2065	4.4569	4.3474	6.041	9.0178	9.1339		0.563493	24.3194
8.5705	68.5693	26.5341	13.3494	46.9562	39.0548	36.611	34.399	51.4372	44.8216	27.364	23.544	32.9193	38.883	23.914	17.0472	27.9344	17.0751	12.7301	8.5301	3.226	4.9834	5.0761	3.406	5.7239	5.5124	8.9613	8.8609		0.571428	23.6083
8.6895	75.0173	25.6336	11.1684	45.9937	35.5628	39.885	31.193	44.0434	43.1726	27.307	27.627	34.6197	35.506	16.63	20.3911	23.8075	14.8778	15.4243	6.4274	5.3532	5.1092	4.4522	4.1516	3.4399	5.0349	8.8765	6.9828		0.579362	22.8773
8.8086	68.2031	26.2947	14.4206	45.382	37.3307	41.954	35.574	44.6011	43.3856	23.903	27.144	36.4515	35.463	14.464	17.8211	22.7319	15.2073	12.4732	7.4217	4.3087	6.0572	3.8592	5.0296	3.403	5.5906	7.5377	8.3287		0.587303	22.7534
8.9276	65.8634	29.6847	13.105	47.8461	45.8699	40.381	31.304	41.4397	55.1909	26.978	25.047	30.0828	33.311	17.042	17.728	25.8512	16.1101	12.3277	7.0342	5.4437	2.6826	5.2129	3.6358	3.358	4.4434	6.7756	6.7428		0.595237	22.9812
9.0466	68.5318	31.2365	13.7732	38.4661	45.3604	41.703	27.774	43.8054	56.0183	30.674	20.109	37.0718	35.497	18.079	14.9781	23.2392	18.8071	15.6234	6.7387	6.1874	5.5335	3.4579	3.5292	4.3094	6.1845	6.4822	5.17		0.603171	23.2719
9.1657	59.4271	29.8792	16.4526	45.3623	47.9823	46.565	27.883	46.51	59.1685	26.671	20.85	37.6941	39.206	18.284	11.7016	28.6944	20.3725	13.1791	4.4613	3.9801	6.7603	2.9764	5.0051	3.0427	9.7637	6.1702	6.8286		0.611112	23.8841
9.2847	66.6093	33.6382	10.745	39.677	58.2531	38.957	33.105	46.0137	47.0554	30.66	23.994	40.2446	38.949	16.806	13.6195	29.0738	16.1457	10.6863	5.5331	5.2965	3.6751	4.3031	3.9068	3.302	9.1667	6.5045	8.0479		0.619046	23.8507
9.4037	62.9647	33.4776	12.0074	34.7265	55.1396	39.969	36.532	45.5356	42.9736	29.898	20.376	30.7201	38.113	15.762	11.646	22.4209	14.2054	13.9544	8.8659	4.1058	4.0824	4.7887	3.4489	2.4885	5.0824	7.4666	6.4492		0.62698	22.4889
9.5228	56.673	32.5664	9.8443	37.3892	60.774	36.833	37.286	47.8752	40.2733	32.044	23.921	31.4637	47.119	15.883	13.8091	22.265	19.0336	11.113	5.0502	3.8957	3.8635	2.1219	3.1689	4.3589	3.8571	6.0538	7.1739		0.634921	22.8041
9.6418	54.8721	29.5206	9.5723	34.106	61.7791	35.978	32.642	46.5952	42.1602	31.818	20.646	35.6029	47.923	17.072	9.385	28.1	15.3515	8.4912	5.1188	4.9711	4.2278	2.4049	3.352	3.6319	4.2545	6.0652	6.6021		0.642855	22.3053
9.7608	65.9373	35.6921	13.7381	35.6728	57.5717	37.26	32.446	55.7131	39.8937	29.935	24.332	35.0692	42.644	16.469	13.695	24.4976	14.2218	9.934	4.2811	4.3714	4.0922	2.8762	4.1708	1.6343	6.2283	3.9425	4.0027		0.650789	22.9749
9.8799	51.7933	38.747	15.3037	37.4108	56.98	33.795	31.394	56.5154	42.4095	35.524	18.851	36.2974	44.412	15.457	10.3632	19.7588	18.253	11.3552	8.102	3.8264	3.7758	3.9633	3.2956	4.302	6.5609	5.0863	3.4936		0.65873	22.8528
9.9989	60.4408	39.3084	15.8966	37.5947	55.6888	30.933	36.95	55.1944	39.4541	35.422	23.274	40.7738	42.392	12.886	9.3315	22.6094	19.7232	11.4201	7.2663	5.6439	3.0543	3.7395	3.5919	4.2253	3.4248	4.9942	8.2016		0.666664	23.4605
10.1179	55.1954	36.1204	10.7397	37.0977	54.6545	34.244	38.035	53.5492	40.3155	34.222	20.677	36.5816	35.562	15.641	12.5862	20.2458	13.6678	11.1804	5.7583	6.0396	2.5741	3.4442	3.4247	4.8191	3.3931	4.5875	6.1741		0.674599	22.2418
10.237	60.3988	39.19	14.1154	38.4814	57.4065	34.742	37.991	63.8975	40.7302	34.941	21.639	34.4597	41.687	15.323	7.283	22.8728	13.9734	11.544	4.8947	4.2171	2.3352	3.8544	3.9492	4.1984	4.2545	4.9279	6.3286		0.682539	23.3198
10.356	57.3055	43.2595	11.7763	37.9131	60.4297	37.647	32.964	60.8751	40.5968	36.965	24.429	34.8549	36.285	24.546	10.4564	21.651	16.57	9.8601	4.5745	5.8324	3.4758	3.5636	3.7007	3.7796	4.7255	5.8163	6.8169		0.690474	23.7285
10.475	53.8755	38.4185	16.7782	41.0217	61.8247	35.508	35.704	58.7266	40.4355	36.468	21.231	34.5808	36.859	21.648	13.8366	25.3506	15.4763	12.9131	5.8181	5.3556	5.0676	4.1105	2.6117	4.6176	3.7883	4.6161	7.0134		0.698408	23.8391
10.5941	61.7129	45.0068	17.9429	37.9712	53.8025	34.15	33.217	57.052	32.8569	37.809	18.025	33.8364	50.31	20.408	10.039	23.6117	18.2099	9.1076	6.793	4.3903	2.492	3.2765	2.3981	2.5845	3.2811	3.9624	5.83		0.706349	23.3362
10.7131	58.5349	45.9627	15.9318	39.3443	60.0136	37.335	36.039	51.3848	37.6898	36.157	21.731	33.0254	39.686	19.288	13.174	24.4804	11.9893	7.904	6.0672	3.2696	3.1419	3.0178	2.2175	3.9283	3.7499	5.8711	5.9593		0.714283	23.2183
10.8321	58.5304	50.6905	14.7514	43.7449	62.054	36.654	34.798	57.799	45.6458	37.47	25.184	30.0424	41.691	19.052	11.2115	25.751	16.9361	9.4298	7.8371	5.2235	2.3959	3.675	3.165	3.6353	5.3497	4.7791	7.2304		0.722217	24.6195
10.9512	62.815	48.8748	18.0445	50.0292	60.9561	35.789	40.887	63.1939	44.6522	43.1	25.383	28.6211	40.139	21.129	11.3254	18.8108	16.3936	12.7604	4.9113	4.846	3.1513	3.8462	3.791	3.4638	5.7718	3.3362	5.2151		0.730158	25.231
11.0702	56.4848	57.5768	15.4637	49.9262	60.8453	42.964	37.669	52.5011	40.71	43.636	25.118	30.2167	41.493	21.079	14.0783	18.0819	13.1746	7.3485	4.6726	4.4586	3.2965	3.5308	3.8411	4.0389	5.206	4.7755	7.839		0.738092	24.8158
11.1892	57.3217	69.0741	14.889	48.9595	60.026	46.645	33.171	50.7993	40.9312	41.609	27.688	36.9071	33.337	18.323	11.6182	17.8916	14.2247	7.8117	7.4943	3.8056	4.815	4.3303	2.2779	5.8288	3.6872	5.461	8.3884		0.746026	25.0858
11.3083	46.5633	65.7293	16.522	52.3994	51.478	45.976	37.354	55.4556	41.0325	41.572	26.552	33.0547	32.869	16.42	11.8787	18.5945	13.0256	8.9245	6.0716	4.9313	3.8521	4.9314	1.86	3.7059	3.2943	4.7728	5.7427		0.753967	24.2431
11.4273	57.4089	76.3974	17.6899	50.877	49.6157	54.064	38.446	54.344	43.6115	38.734	27.948	40.5733	35.331	18.054	10.7618	14.8417	17.5318	11.306	7.1368	3.9296	2.5467	4.1076	3.6976	2.7456	2.8551	4.9557	7.6158		0.761901	25.8195
11.5463	51.0285	77.0034	18.7782	51.9986	54.2309	53.761	41.182	59.9908	45.5687	43.853	26.125	31.1597	31.918	19.527	10.2724	17.4101	15.9187	9.7209	5.4564	2.1671	1.3968	2.1178	4.5316	3.3725	4.7744	4.528	4.1323		0.769835	25.6268
11.6654	49.5785	74.1274	15.9052	49.895	47.7457	51.622	42.556	56.196	37.5499	44.396	29.298	37.5268	34.654	18.719	11.7729	17.9099	14.783	9.6098	4.4308	3.9402	1.9554	1.4852	3.45	2.149	3.3678	3.5081	4.5895		0.777776	24.9156
11.7844	54.6077	73.8443	20.2091	53.644	50.3111	52.786	41.926	56.4398	48.0934	41.51	29.939	36.6252	34.025	18.663	10.1826	13.6851	12.7765	7.9234	5.1288	3.1887	3.4231	2.8291	2.695	2.7525	2.3097	5.3054	5.5992		0.78571	25.5712
11.9035	49.5739	79.8591	15.597	41.5767	49.0305	52.824	36.721	59.32	45.6439	45.299	24.936	31.4549	28.155	19.348	10.5934	15.4838	11.209	8.2588	5.2478	4.286	4.094	2.9779	2.2241	3.7126	5.6091	4.231	7.6983		0.793651	24.6283
12.0225	43.3529	71.4524	23.2644	41.1868	41.4517	63.428	39.33	55.6732	58.8974	47.153	29.108	36.9989	35.113	20.582	10.538	16.6049	13.1941	9.2873	6.0235	4.2745	2.9324	4.0291	3.795	2.572	3.7298	3.3798	5.2292		0.801586	25.6512
12.1415	46.5651	74.65	24.4562	46.6418	39.6174	65.227	42.308	51.9906	56.0841	45.721	27.917	38.874	41.751	17.329	11.0789	19.892	15.4635	7.6152	5.5599	3.4598	2.4088	2.4568	1.967	4.5974	4.6879	3.8202	6.0574		0.80952	26.2295
12.2606	52.994	66.9768	29.5936	49.6684	37.6867	58.578	41.35	55.1034	59.0257	48.664	28.014	39.276	33.931	24.21	13.0326	19.7745	12.4682	7.1376	4.7277	2.704	2.453	4.4456	2.1786	2.5024	2.4036	2.8906	4.2888		0.817461	26.1511
12.3796	48.6848	55.2411	32.7738	47.0521	47.7746	69.223	39.306	60.3285	56.3573	50.23	35.31	42.0472	35.726	24.032	13.8971	19.9614	12.7933	6.9601	5.5778	2.3104	5.3137	1.7451	1.7136	2.7692	1.0325	2.5964	4.3063		0.825395	26.8542
12.4986	52.7674	60.7528	33.1196	48.7589	49.1548	62.116	42.933	55.4953	63.1645	55.587	35.002	38.4736	39.582	23.3	10.1227	16.7111	15.7926	8.9659	5.5477	2.6975	2.6604	2.1791	3.1061	2.9238	3.589	2.2054	4.3668		0.833329	27.4472
12.6177	44.3885	59.5313	42.8354	47.2632	53.2178	52.535	41.015	51.4417	60.4667	52.238	33.562	40.6336	38.521	23.178	13.4319	13.403	13.6642	9.3089	5.6596	2.8836	2.4307	3.8528	3.5377	2.7272	2.4209	2.9308	1.9394		0.84127	26.6303
12.7367	36.6425	55.4658	54.576	50.5956	50.9764	56.306	41.502	50.121	65.4244	47.508	35.365	47.2154	34.799	24.408	14.3922	16.5641	12.3444	6.2528	4.469	2.3548	3.4296	3.1739	2.9126	2.4966	2.134	2.4979	3.3699		0.849204	26.9369
12.8557	41.0186	52.6649	46.4141	50.4616	52.5872	53.049	46.006	45.9376	64.4167	49.163	30.828	31.5075	35.609	28.895	15.1275	16.4657	9.597	7.2495	2.739	2.2779	1.7292	1.5104	2.2726	1.9827	3.1155	2.7852	5.1256		0.857138	25.9458
12.9748	27.4164	46.7095	46.0702	54.8828	53.8242	53.029	39.321	40.2851	59.3177	55.134	32.404	35.8119	28.809	30.205	14.108	12.3689	9.4976	8.5368	4.4751	3.7158	1.6038	3.5277	2.5928	2.2856	2.864	2.5857	3.3865		0.865079	24.9914
13.0938	19.9273	45.2811	46.6301	48.9032	49.4258	50.399	37.185	42.6511	56.3509	48.346	32.016	45.9705	34.98	28.636	16.909	15.3764	11.6774	8.6847	3.6271	3.3335	1.427	4.225	1.979	4.016	1.2564	2.5192	4.6571		0.873013	24.6811
13.2128	17.8724	46.107	41.2128	49.9375	46.6796	46.559	34.903	37.6319	53.3659	44.685	33.216	49.4761	27.134	29.104	13.3059	17.4242	10.8995	5.8512	4.0836	2.3774	1.6043	2.5288	4.1588	3.3538	1.6975	2.6285	5.2403		0.880947	23.4459
13.3319	9.2843	44.6396	41.5848	50.3529	47.4158	49.666	41.716	32.5134	39.6361	40.284	33.32	47.7678	26.545	29.505	16.6163	14.9943	8.8458	7.0684	4.0935	2.9112	1.5027	1.6781	2.8341	2.6813	1.6468	4.2929	4.2098		0.888888	22.5039
13.4509	9.1237	41.6146	42.6745	44.5203	46.4209	40.072	39.249	35.2105	40.5728	42.711	30.593	46.0829	24.56	33.881	16.4721	16.7089	12.265	7.3471	3.9233	3.1451	2.2062	1.8951	1.9982	1.9972	1.9493	3.5729	3.4396		0.896822	22.0076
13.5699	5.6101	31.3796	39.5098	47.0335	45.0787	41.37	35.652	36.2087	45.4964	36.566	34.594	42.3843	29.331	40.607	20.0998	20.3445	8.4796	9.1124	5.2214	2.956	1.5759	1.7016	1.6419	1.6887	2.8533	2.3096	3.7861		0.904757	21.9478
13.689	5.4751	29.5364	42.2954	40.5062	42.8021	39.214	34.847	31.9506	41.8109	34.926	37.24	48.3972	28.732	38.836	15.5902	17.3761	7.9902	4.2795	5.1508	1.5498	1.6253	2.0116	1.7312	2.5479	3.4286	2.1998	4.0296		0.912697	20.9659
13.808	4.6532	21.0245	28.9504	34.5956	42.5007	39.115	36.484	30.7983	43.7068	27.634	41.541	40.6202	25.145	32.648	17.9393	19.5313	9.0108	5.4026	3.1197	2.0885	1.2332	1.1839	2.1902	2.1819	2.4204	1.404	3.6359		0.920632	19.2873
13.927	3.6116	15.2806	32.9928	33.279	36.4993	33.18	32.147	28.8517	38.039	34.698	36.203	35.3187	26.351	35.331	20.4439	18.3004	11.3438	5.2002	3.252	1.8274	1.6648	1.205	1.2221	1.4281	2.7164	2.6328	4.0857		0.928566	18.4113
14.0461	2.7884	12.2897	31.1899	28.4489	28.9945	31.149	27.27	23.2877	31.0184	28.43	31.583	32.7752	27.875	37.698	21.9219	19.6928	6.2462	3.9807	3.2043	1.1655	0.8235	1.6891	2.3582	1.9644	3.9933	3.3341	2.8563		0.936507	16.5936
14.1651	1.6917	8.7501	19.2633	27.5776	26.1581	24.27	18.288	22.0159	32.7824	24.339	32.268	31.5385	24.756	33.949	25.7361	22.5213	7.1791	7.009	2.8692	1.5443	1.3489	2.0222	2.0322	0.3929	3.7678	3.4299	3.4192		0.944441	15.2192
14.2841	1.5397	8.46	15.2967	28.473	26.4033	20.006	10.565	14.4662	34.2049	18.78	32.149	29.9302	27.233	30.916	21.9259	14.5426	8.3858	6.1172	2.041	1.1135	1.0122	0.9659	0.7645	2.3719	1.9793	2.0153	3.6987		0.952375	13.5317
14.4032	2.0582	6.9715	15.26	19.6567	21.7923	19.177	7.202	8.9464	31.1916	15.415	27.855	28.0342	21.825	27.342	20.4648	20.2431	8.0336	5.4131	1.4291	1.725	1.1885	1.2985	1.7192	1.7995	2.1053	2.5408	2.0688		0.960316	11.9539
14.5222	0.9698	5.6139	15.0394	17.6648	19.4289	11.973	6.769	7.7377	24.6523	13.272	25.455	20.8752	22.532	26.16	23.5648	16.2428	5.3855	7.0173	1.8833	1.5541	1.2524	1.8843	1.7185	2.5481	2.7106	2.402	2.5117		0.96825	10.697
14.6412	1.1236	5.5966	8.5809	14.6951	22.5451	8.741	3.332	6.2018	21.9727	12.95	23.13	20.578	19.745	15.393	19.4897	18.621	5.2151	5.0527	1.2782	1.3017	1.7058	1.9585	1.4274	3.0996	1.9202	1.747	2.5118		0.976184	9.25606
14.7603	0.513	3.4715	6.2306	14.153	15.0064	8.655	4.612	4.2984	15.4423	5.514	21.24	15.9737	20.437	16.257	18.358	15.3859	3.5762	3.3684	1.2468	1.0065	0.4221	1.2339	2.3102	2.9679	1.0789	1.8966	2.6185		0.984125	7.67681
14.8793	2.1475	4.1526	5.9778	12.673	13.5351	6.808	3.58	2.1086	10.4962	4.191	20.291	10.578	15.477	15.442	14.3455	13.6074	2.6571	2.6418	0.5343	1.3768	1.7613	2.0138	1.0937	1.4563	2.5591	3.0284	2.7279		0.992059	6.56523
14.9984	0.9783	3.2865	7.2067	11.7535	12.6337	6.795	3.616	1.7966	3.5664	2.169	21.119	9.155	13.03	13.017	14.5518	9.8894	2.5945	2.3645	0.4291	2.1807	0.7498	2.0947	1.9463	2.5334	1.9337	2.344	2.3368		1	5.78042

## Sheet: Image12 (2)
X0	Y0	Y1	Y2	Y3	Y4	Y5	Y6	Y7	Y8	Y9	Y10	Y11	Y12	Y13	Y14	Y15	Y16	Y17	Y18	Y19	Y20	Y21	Y22	Y23	Y24	Y25	Y26	Y27	Y28	Y29	Y30		Ap-basal	Avg intensity
0	14.3657	35.3005	37.3302	37.8721	37.0487	49.0079	34.2928	51.0024	46.7319	30.3059	40.2977	40.079	30.3997	32.1034	33.4533	29.474	38.348	39.996	53.8996	36.1153	32.77	29.2588	36.5023	31.894	16.9515	19.5003	17.3144	13.3489	12.9853	13.8134	11.3698		0	31.714
0.119	13.095	37.3074	38.1294	39.4881	42.7729	47.3173	43.7334	65.595	40.2545	35.7199	43.8514	39.995	41.6822	30.6052	30.7166	34.3636	34.378	41.941	42.1292	33.915	36.055	30.7975	50.6927	38.4301	14.9448	14.3633	14.9044	14.6884	11.9297	15.1311	10.4179		0.00854455	33.2047
0.2381	14.5979	35.71	36.1252	38.8252	53.5629	50.511	42.4034	54.4506	36.8172	41.6638	49.6618	49.362	45.8476	39.2177	35.0729	36.1455	36.927	44.411	49.3118	35.2344	45.1164	29.42	49.0582	42.0794	15.7727	23.3286	22.555	15.0997	19.9953	13.5362	11.6189		0.0170963	35.9174
0.3571	15.8111	50.4561	38.0605	54.5784	52.9802	66.3422	47.9929	70.9126	42.7962	45.6877	61.338	55.162	54.0357	36.0782	42.4031	52.9729	38.737	43.33	47.8552	46.2084	42.2699	38.0581	73.1379	33.6429	22.3096	22.8758	23.1944	20.4018	17.3493	16.5513	19.558		0.0256408	41.7125
0.4761	19.5804	38.8701	43.3892	66.2421	59.8693	66.004	53.0393	59.8787	47.2101	55.7098	54.7721	56.093	70.5326	39.7624	36.245	49.0313	48.229	49.283	55.2438	42.462	41.0376	32.7476	69.1661	42.7995	19.162	26.7634	29.8242	22.2928	20.2142	14.4708	18.772		0.0341854	43.5064
0.5952	23.4172	47.9698	42.7025	65.3869	73.1159	82.0772	63.5427	66.9994	47.2855	59.0628	68.3342	74.206	68.0105	36.6249	40.6101	61.5433	64.356	55.657	59.8249	44.4814	36.9039	39.5976	66.7941	44.3249	24.9134	28.6322	30.0423	32.1216	21.7655	25.7468	22.4334		0.0427371	48.9834
0.7142	21.8384	47.7766	41.588	68.9634	82.7178	86.6904	78.0438	67.8397	50.6656	63.7425	65.341	88.735	72.7435	42.8477	50.8812	65.4797	76.905	74.49	60.4179	42.2039	37.8125	40.8547	79.8222	36.6052	20.0012	32.6231	37.0986	37.5505	26.1231	32.4352	26.1342		0.0512817	53.4507
0.8332	24.6248	51.2273	38.221	73.9817	101.614	90.6848	73.8353	69.1203	59.4387	71.8217	74.712	98.225	65.2687	38.3857	44.6749	57.7819	103.11	95.951	62.2542	49.5488	37.66	43.2802	76.4824	39.2053	29.2295	34.5558	43.4013	48.1455	33.6514	40.7256	29.9815		0.0598262	58.0903
0.9523	28.6323	49.4584	38.6942	79.5534	98.3861	85.0834	86.0123	67.75	54.4728	76.2296	63.8439	97.007	61.4218	40.7516	53.7235	51.3245	109.229	108.908	77.8713	44.4788	44.4616	39.7859	74.6731	30.9457	32.0325	40.3759	59.1012	55.2093	38.4384	35.1331	32.8263		0.068378	59.865
1.0713	38.8686	57.6153	43.6754	85.0257	105.3	94.9608	75.7872	69.7707	54.851	84.3431	69.8689	93.551	55.1127	39.9081	54.6649	44.759	110.388	97.832	72.3424	57.6448	39.5043	47.0664	84.0865	27.028	26.5906	36.0265	64.3468	52.0882	47.5573	44.6585	36.9096		0.0769225	61.6817
1.1903	45.7973	63.697	43.3784	88.2426	87.9409	91.6041	84.1806	69.1593	54.7958	87.5457	72.0657	100.695	53.866	48.294	55.6895	54.2973	119.916	102.637	89.3991	43.9657	40.1415	41.8782	80.4723	28.5604	26.8651	40.2945	75.4951	58.0235	48.6624	42.3931	32.1016		0.0854671	63.6147
1.3094	43.5349	73.5728	43.2642	88.9583	91.3322	72.9583	75.8102	77.2198	53.4953	82.589	66.8815	107.572	56.0317	49.3633	56.4801	51.5004	121.536	91.391	89.3751	53.5948	42.1067	46.332	66.1481	24.1327	23.6775	44.4679	85.5982	59.6303	51.7793	42.9723	33.5281		0.0940188	63.4463
1.4284	49.6833	67.9406	53.0754	72.8319	70.9147	63.7673	63.2065	85.2061	61.652	87.6407	78.0584	110.24	58.5217	50.8448	60.0924	45.6746	121.346	89.518	88.1725	50.4295	42.849	40.5101	66.8479	33.4219	23.6305	37.9543	92.6376	67.49	53.9944	43.2612	31.1778		0.102563	63.3094
1.5474	62.799	79.0953	61.3825	64.6576	73.7491	59.7536	67.5893	73.8718	70.641	87.5389	55.7787	98.869	60.508	61.4714	66.1524	46.9377	125.499	75.731	81.1228	50.8579	41.3325	38.4237	61.0662	37.1746	24.9136	46.8055	84.6446	54.3569	46.3277	37.0105	29.9297		0.111108	62.1288
1.6665	62.9175	80.5221	63.2516	65.6972	65.8895	55.7457	49.4032	58.0175	58.4295	90.9596	55.7611	97.57	52.8137	64.0822	81.888	54.6913	130.263	94.088	77.7869	50.3486	38.8234	46.0103	67.5649	35.4543	34.9408	44.2256	85.8742	59.0028	47.2936	32.2162	31.0255		0.11966	62.3406
1.7855	58.601	75.9552	81.2137	62.1485	56.4404	50.5606	56.3335	46.57	68.5919	76.4954	51.7594	101.854	56.1605	65.6238	89.6944	54.2553	123.529	86.856	63.7018	55.6332	44.8184	42.2538	65.8249	36.9569	26.8852	61.8628	72.9334	63.0379	39.634	32.7111	25.5933		0.128204	61.1126
1.9046	70.73	67.515	82.4074	76.393	55.4203	48.1512	50.3048	47.7171	62.8639	67.3703	55.2829	93.148	49.7786	65.2207	85.6722	58.757	112.987	104.332	66.491	53.0616	41.0534	41.2333	65.1196	34.7803	36.4091	74.0485	71.1884	48.2709	39.0169	22.979	27.6628		0.136756	60.4957
2.0236	65.658	71.1523	92.1952	61.3067	59.0581	42.8687	48.4969	52.0233	55.1083	58.6634	50.7216	85.957	53.0059	68.6302	80.377	61.3285	105.073	101.951	61.6082	54.1689	38.3015	46.0149	61.4862	36.2752	28.3163	67.1356	64.075	49.5601	36.091	24.9307	26.2614		0.1453	58.3161
2.1426	61.9213	59.6747	82.5153	61.318	51.9919	36.2255	55.256	47.3472	50.6118	54.7279	49.3689	70.568	53.4275	64.6317	80.1535	61.85	98.357	103.218	59.0913	51.9335	42.9459	52.821	66.5902	38.631	39.0956	70.3164	65.4313	39.5687	37.5305	24.5852	23.3776		0.153845	56.6156
2.2617	66.3569	55.1837	80.6335	55.4777	55.0465	36.9048	47.6135	49.5551	48.2512	53.2071	55.7545	68.139	59.5948	75.0585	84.2357	66.4857	76.886	87.173	57.525	58.0169	35.2136	47.7204	68.0255	35.9882	37.5028	65.2502	65.516	39.4271	34.3173	31.4368	28.0527		0.162397	55.6629
2.3807	60.3783	58.7106	71.9163	64.787	54.1636	45.4728	45.6438	44.6363	44.0052	45.2534	51.038	69.147	54.1918	62.2502	72.3468	71.3296	73.194	91.6	53.0385	48.7467	43.0771	49.1214	61.4131	37.4705	45.651	68.2583	69.506	42.1075	33.6037	24.464	25.3708		0.170941	54.2546
2.4997	64.7728	65.9742	66.046	63.0739	55.9461	34.3759	42.2743	34.0793	42.4981	48.7441	49.8804	69.68	64.899	73.2425	71.7982	76.0842	66.967	100.205	52.5591	49.2059	39.7443	49.9692	50.2044	39.4017	40.68	74.3796	69.7577	36.0857	36.1371	20.6691	28.6924		0.179486	54.1299
2.6188	66.0851	61.3441	58.077	59.7804	56.7751	41.7523	33.5458	35.4416	45.1224	49.0068	46.5613	65.472	61.5669	74.192	63.4526	66.5915	64.404	101.462	53.1494	48.8338	43.261	58.4914	57.548	41.8708	40.2914	57.664	65.1716	31.4281	37.8458	19.596	21.6774		0.188038	52.4988
2.7378	76.1724	48.4418	62.3373	67.132	52.0039	46.9907	40.706	33.9188	32.6082	39.1353	50.8683	67.662	62.4063	56.5347	60.0562	72.077	49.663	103.034	46.4324	46.1968	43.1523	52.1151	53.2001	41.2261	39.3967	45.8079	66.3132	30.6883	30.0522	20.7022	22.0469		0.196582	50.2928
2.8568	76.8252	62.3792	49.9434	73.3211	59.58	35.6918	37.2055	37.8637	42.0699	37.7952	46.528	59.754	52.9035	63.6388	53.8572	56.8996	43.728	95.186	49.4333	66.7494	40.7171	54.1299	49.4645	45.4863	44.3986	45.6786	55.6772	35.8603	32.9294	20.0118	21.2289		0.205127	49.9011
2.9759	69.8895	62.1221	41.021	67.2947	58.0811	43.8448	33.9979	36.4091	35.9602	44.0899	47.9811	46.688	57.9779	59.4532	48.1618	63.5588	52.316	99.977	43.2183	48.5604	37.0565	44.4651	50.1804	35.9976	48.8166	47.3399	52.9157	27.4091	27.7105	23.5555	25.4846		0.213678	47.7914
3.0949	73.6303	62.1245	51.9371	68.4843	51.5058	40.8952	37.8291	38.0096	37.7284	36.8699	47.4261	46.225	58.3794	62.2802	52.8693	54.3836	50.812	88.503	46.2944	54.6617	43.8151	38.7916	42.8852	42.7962	45.4688	51.0194	44.0947	31.1411	25.3717	19.2668	23.5185		0.222223	47.3877
3.2139	75.0159	64.6942	48.9695	58.0579	51.6813	39.5888	39.0555	33.474	37.525	32.2088	53.588	46.862	52.5025	55.9087	47.2787	56.3158	47.19	73.907	42.2588	48.2959	40.9305	39.5343	41.2938	45.1821	32.4398	48.9206	50.0066	28.1933	28.9523	20.3122	23.6042		0.230768	45.2822
3.333	77.3705	61.7355	52.2916	59.714	50.6885	42.2915	32.0216	34.3685	30.9039	39.4992	48.7624	50.725	56.6461	55.9585	41.2908	58.1604	45.801	77.465	41.3121	48.2301	44.6403	46.0206	43.1775	36.3598	48.2179	45.3006	46.3081	29.8787	21.0334	20.4474	17.9281		0.239319	45.308
3.452	75.8386	62.3982	42.1739	54.0191	49.3635	41.931	40.2191	34.9013	44.0307	37.9343	50.2806	45.277	55.18	56.8296	35.4217	45.887	42.645	61.713	48.8731	45.9111	41.8565	36.7454	44.2595	41.6848	47.3075	43.5144	38.0869	27.9501	24.7902	20.5668	18.5629		0.247864	43.7469
3.571	65.1635	61.9205	45.8296	51.6464	52.0349	41.1332	35.3382	32.1616	36.3454	34.5835	44.7518	40.016	66.8421	53.0165	39.8613	47.1639	41.361	66.436	50.4508	37.3361	42.291	40.1211	45.8477	40.5512	42.0705	39.0044	44.248	28.7506	20.9258	25.375	21.4013		0.256408	43.0316
3.6901	76.9469	67.2129	48.1956	53.1975	55.7962	36.8259	34.515	34.9387	37.1572	29.38	46.4742	40.844	56.9562	51.188	37.5779	52.24	38.612	67.445	43.9376	44.6206	40.8437	45.2911	42.6442	34.1944	35.4824	45.4887	43.6254	23.8519	24.8193	16.973	19.7573		0.26496	42.8075
3.8091	80.8711	72.3275	37.3342	49.1299	49.5533	45.8807	33.4152	35.3163	35.5538	38.2846	45.8184	42.389	51.4496	50.8633	39.596	39.4221	42.493	58.703	46.9966	42.9427	45.1248	41.3596	46.5109	43.2689	43.1676	41.0942	36.3557	27.2952	23.9175	18.0354	16.365		0.273505	42.6076
3.9281	83.281	62.1306	43.3966	57.2898	59.5836	35.0345	31.3061	42.5098	34.4032	34.8805	47.584	41.949	53.2838	52.3292	30.2779	45.1281	37.332	56.533	40.9616	38.8165	41.757	43.7707	45.1859	40.0139	41.7388	37.6781	33.3299	27.5907	25.5591	19.2961	19.1122		0.282049	42.0337
4.0472	85.9152	73.7904	46.62	52.639	53.8823	36.646	36.1088	36.0546	31.0415	36.0263	44.1203	37.322	50.9976	44.2053	38.5038	43.0854	33.537	46.659	47.2598	39.342	39.3842	43.0414	35.7399	35.7129	34.7739	33.8415	37.6324	31.6782	26.4226	25.782	18.8493		0.290601	41.1811
4.1662	84.3236	76.0133	50.4888	57.2444	49.4614	33.9891	30.6661	35.8139	34.5374	33.5207	46.6095	39.783	50.079	48.398	41.9348	38.967	38.597	45.772	36.841	40.9893	47.8655	37.9152	39.8503	44.447	32.464	38.427	30.5377	31.8678	23.5992	23.953	21.1473		0.299146	41.4872
4.2852	83.9426	77.4365	40.5255	60.1278	48.8269	33.184	26.2987	41.9292	38.1035	30.2432	43.0763	43.512	48.8639	36.5874	35.3921	38.6672	35.749	39	36.7415	43.135	49.0112	43.3172	38.5236	45.7374	33.8811	32.4334	35.2344	33.892	24.2461	19.734	19.8781		0.30769	40.5558
4.4043	79.7473	68.9834	45.8418	52.2515	41.7146	40.6164	34.4465	33.5478	33.8205	29.5278	35.6421	42.841	40.5395	49.5939	41.719	41.3811	34.127	35.318	37.5647	39.1718	46.3312	36.9568	42.1356	41.164	32.406	37.293	31.3302	32.1105	23.5851	12.7358	19.9149		0.316242	39.1729
4.5233	85.0287	68.1064	38.2145	46.4796	47.5858	38.65	26.7077	35.1498	36.0998	30.473	40.2928	36.071	44.8904	39.8055	37.0787	41.0539	37.901	32.491	41.7801	45.4204	42.1535	47.6414	47.4232	34.8733	37.7402	29.4764	31.4837	30.9676	24.5614	18.9092	22.582		0.324786	39.261
4.6423	83.1333	56.8582	45.3542	52.1258	44.2481	38.6804	27.4119	32.6561	31.0532	29.0443	37.7966	38.868	41.2335	42.9295	47.2759	41.6253	40.102	37.647	39.0952	44.5365	52.8628	38.2857	41.4305	38.355	33.5284	30.5431	39.0782	28.3456	29.8403	21.1832	20.8699		0.333331	39.5483
4.7614	90.7581	66.4768	38.6917	50.6359	56.2202	41.6823	30.6991	31.5416	31.1496	31.3163	34.4262	36.961	42.7078	38.16	41.4503	33.8935	38.074	38.034	39.7925	40.7311	46.3051	33.1211	45.5746	38.0835	31.818	31.221	31.9993	26.1536	28.5526	21.3556	23.4321		0.341883	39.0651
4.8804	88.9306	73.3379	40.0387	51.5507	37.5606	40.5108	28.0419	30.8678	33.6872	24.169	28.8155	38.823	39.4192	43.386	42.9473	41.2509	37.296	31.788	32.6341	34.6886	46.1678	41.0689	40.7541	35.1531	33.6428	28.0049	27.3294	30.6665	24.121	27.8852	19.5653		0.350427	37.8743
4.9995	79.0759	63.9859	36.4844	45.7963	41.2725	33.3159	26.9084	34.2547	31.856	23.1315	25.7854	37.351	43.1361	38.9759	37.8823	34.5495	31.405	35.24	30.757	36.7213	48.7871	40.4574	44.7432	33.0428	28.1395	31.916	32.8182	30.5163	25.6271	24.934	26.374		0.358979	36.6207
5.1185	72.2624	65.1096	40.4081	40.903	39.68	33.9912	30.0268	30.5564	31.2289	26.2503	27.7318	27.964	44.0587	36.7955	39.5421	43.5571	38.463	37.861	35.4129	30.5085	34.9334	39.4671	45.1055	34.8405	36.2128	34.396	31.0504	25.9894	30.4951	27.9045	19.034		0.367524	36.5077
5.2375	86.5758	68.8893	34.5917	43.5096	38.815	33.6716	31.0859	29.5663	34.4241	23.6057	29.1616	29.818	39.1003	38.2316	42.0593	45.4646	42.462	35.5	38.9555	43.2773	37.9968	35.4485	47.4064	38.0348	34.2132	26.4881	35.0205	25.5092	29.6246	27.7817	27.3947		0.376068	37.8608
5.3566	95.1427	67.794	35.4462	42.9925	41.3581	31.8498	28.7591	26.589	33.5743	28.2434	29.5928	37.307	35.4799	37.8333	34.9275	35.6511	44.008	33.983	31.0374	37.5734	37.939	40.4754	45.3427	33.6459	31.0927	30.7453	34.313	29.7179	24.5839	26.5264	19.355		0.38462	36.8671
5.4756	78.251	64.4095	41.5382	45.0772	36.0707	32.9902	25.6102	23.7246	30.9653	25.9179	31.0728	33.151	38.8253	28.5692	42.3588	40.5612	32.779	36.399	45.844	36.9423	40.2375	36.0518	44.1692	34.3267	36.1963	35.7033	34.3788	30.2317	20.5812	20.9188	21.1663		0.393164	36.2909
5.5946	84.9473	65.2119	45.9262	45.151	28.9295	31.7719	27.1551	24.6889	28.7698	27.4795	31.2454	24.436	41.6155	32.1194	31.6198	39.289	44.999	35.064	39.5047	43.1709	43.5821	38.2226	41.5361	38.5035	33.2842	22.5265	28.5833	36.7871	23.816	17	22.7584		0.401709	36.1192
5.7137	89.8631	63.3336	44.6426	48.875	29.1709	33.0234	27.5233	19.9866	28.1305	20.589	32.0025	33.003	38.1513	34.2958	31.8488	34.0266	36.307	40.97	41.457	36.8771	37.4546	33.702	48.0497	40.4037	36.1318	33.6547	30.1334	26.0835	22.6275	22.4022	18.6751		0.410261	35.916
5.8327	82.6518	55.1642	41.963	50.408	33.5276	26.7877	30.7817	19.3548	24.9834	20.3774	30.0386	27.586	38.111	27.8701	31.7226	34.205	34.648	35.772	46.6306	35.1197	38.7918	37.1462	43.7697	36.0044	34.5043	30.2305	25.1225	26.3859	21.5704	16.7001	18.256		0.418805	34.0705
5.9517	77.0467	59.1996	41.7221	45.8495	28.7521	32.6556	29.0759	21.1248	22.3354	23.6612	31.9116	32.398	34.9626	28.3381	38.5525	33.0011	30.645	38.736	46.7793	32.3539	40.4413	32.3323	42.2869	40.0533	35.7477	26.1272	30.421	21.9075	24.9386	20.9667	17.1497		0.42735	34.2411
6.0708	79.9024	64.13	39.9915	44.1334	23.1675	27.4005	26.584	15.4543	24.4862	22.3087	25.631	35.325	32.0541	23.321	29.1322	34.5734	27.286	36.056	45.3039	30.7926	41.2716	36.9754	42.3681	37.1034	26.0224	25.5946	28.309	25.0627	28.0173	19.7185	20.9672		0.435901	32.853
6.1898	80.2605	64.8553	41.7353	43.4268	26.9298	24.1955	28.6941	17.9147	21.9603	26.0807	29.03	31.386	27.8238	27.0812	26.3108	33.7278	24.584	34.728	46.5449	36.5119	42.8517	34.5803	38.4849	37.9252	22.5497	27.5238	24.436	18.2491	26.9501	15.7536	18.6505		0.444446	32.3141
6.3088	79.7194	63.7118	45.5783	44.1747	24.14	24.2409	29.438	16.3306	18.0703	26.3001	23.9698	32.758	31.0999	34.3578	26.1323	29.1984	27.751	28.328	39.3852	31.4194	33.7082	32.2493	33.6892	35.7965	31.1825	24.8986	19.4206	23.641	19.2033	17.987	13.9322		0.452991	31.0262
6.4279	73.0774	70.9346	48.2416	51.8721	27.8584	23.6156	22.1475	22.0619	17.127	26.0671	25.8043	31.208	30.3139	32.4099	25.644	28.5062	29.972	30.779	44.8363	24.6283	34.5356	31.4709	40.9928	35.8173	22.1688	26.4249	21.6435	21.6453	19.1378	13.0683	12.0409		0.461542	31.1629
6.5469	84.7881	70.4541	45.219	50.2976	23.6378	21.5037	22.924	15.1842	23.6038	22.6268	18.0521	36.879	30.2009	27.3785	21.033	25.2211	32.309	28.381	40.1352	33.2594	35.6456	29.6234	35.8478	36.5171	22.4591	25.3961	20.3303	21.0757	24.8522	18.8901	14.1345		0.470087	30.8987
6.6659	69.7446	80.5627	47.2709	50.2905	22.8166	23.663	20.4981	12.384	15.0167	23.7295	20.1675	29.887	34.1845	26.1889	27.2999	27.2733	25.977	27.351	37.3512	39.5149	37.4762	33.0129	33.6237	41.9348	27.8951	28.0503	20.2301	16.9398	18.3678	17.8844	14.2413		0.478631	30.6719
6.785	62.8721	69.0249	50.7205	48.4189	29.2232	22.6755	21.8341	15.0219	16.6245	25.7133	17.448	33.089	34.0245	28.1032	19.6355	25.1214	24.933	27.398	33.1798	31.5534	35.8783	26.8736	33.7773	34.485	28.9462	30.446	28.3407	15.5409	19.7643	17.7128	11.2714		0.487183	29.6662
6.904	75.9981	62.0834	61.2484	52.849	23.4615	24.7811	25.6693	12.2968	17.0503	21.0413	21.1602	35.088	25.7109	29.2641	21.4216	26.3853	23.301	25.496	30.4781	26.2263	30.6636	28.3315	28.4334	40.0968	26.8093	24.8108	23.8481	14.4638	17.9778	14.4622	10.5361		0.495728	29.0788
7.023	74.327	73.5539	58.4313	52.5592	23.7592	19.2469	19.9972	13.2825	17.3683	22.5788	12.7981	31.6	24.9991	25.907	20.8944	24.5869	24.32	22.204	31.1275	30.1389	36.9975	27.5257	36.8724	38.8537	28.831	28.4684	18.4986	12.4777	16.1295	13.7288	13.3487		0.504272	28.8843
7.1421	68.3501	58.9788	63.5766	51.3417	21.3046	17.5161	23.8934	14.9676	16.0764	21.2849	16.5949	32.786	24.1897	25.6527	21.0959	27.3881	23.019	23.262	29.8468	25.3172	33.1924	29.6321	23.8439	35.002	23.5807	27.7406	20.9949	12.241	16.368	14.6579	9.1459		0.512824	27.511
7.2611	71.8677	64.1324	56.495	47.2998	23.6001	18.0786	21.4417	8.1816	14.0169	19.981	20.3229	32.138	23.9027	26.6221	14.6354	28.9408	22.759	25.187	26.6791	29.1541	34.0759	34.4537	24.5861	37.1849	26.4059	25.568	23.362	11.8751	22.0994	14.4022	11.1784		0.521369	27.7622
7.3801	67.5165	60.4044	58.1688	48.3759	23.1987	11.9948	24.7603	10.6652	12.8894	18.0929	20.9837	29.927	29.6606	24.6716	17.2968	19.0893	20.418	22.162	29.4977	21.6158	36.6199	26.696	26.0786	29.7427	24.0544	27.0517	20.2998	12.0124	20.2345	13.863	13.1985		0.529913	26.4916
7.4992	64.2371	68.1602	60.9383	37.045	24.6094	19.0026	23.3056	11.1061	12.951	21.6908	21.6352	23.853	25.9716	24.5389	17.7257	22.8253	21.438	25.299	26.011	22.64	33.0259	27.4448	25.5764	37.0541	22.8178	21.0596	19.9227	8.8774	18.7405	18.2635	8.3322		0.538465	26.3258
7.6182	58.8647	75.2947	53.4607	38.1829	21.4956	14.9496	15.0589	10.8191	10.7546	21.1794	17.8201	22.617	24.4968	17.6157	15.5522	22.4784	24.188	21.955	23.2597	20.9383	34.7242	27.4684	23.643	30.2176	23.023	27.2773	15.2788	10.6404	15.8254	15.9705	9.4902		0.547009	24.6626
7.7372	63.1899	66.7027	53.9618	38.2089	19.21	14.6157	20.3572	13.4884	10.1302	21.2095	17.9499	20.943	22.0318	19.7006	15.3215	23.1291	27.931	22.942	22.3576	16.2079	30.9234	29.053	20.1349	31.2825	25.9543	24.1234	11.0321	11.302	16.3071	15.2624	8.5925		0.555554	24.3083
7.8563	56.445	65.0058	61.1113	37.2211	20.1932	17.9404	21.7989	10.8265	12.7849	15.0098	13.0448	20.434	24.4129	16.6872	15.5166	22.475	24.666	22.623	20.9898	16.119	31.7077	24.7119	19.9133	24.6221	23.4771	25.8066	16.3226	9.6484	21.9988	11.5284	7.6872		0.564106	23.6364
7.9753	58.1964	61.338	61.9459	35.5493	16.8308	14.9263	16.1162	9.6808	14.6927	19.6676	14.5058	21.038	23.5403	15.0751	14.0559	18.1177	18.78	24.499	23.7434	14.1082	25.9459	19.0006	21.7101	27.135	22.9568	25.6432	12.8957	10.3828	19.1824	10.4781	8.6174		0.57265	22.5921
8.0943	50.6067	68.6947	58.7652	41.151	17.2404	12.7083	16.4623	11.118	9.7576	17.3571	17.5227	15.649	24.0346	16.1361	14.7607	20.4784	23.782	19.351	18.0431	11.293	24.4197	21.5641	12.7929	21.7062	26.5898	24.4408	10.679	8.9696	17.941	12.2449	7.2682		0.581195	21.7267
8.2134	58.6359	59.9486	52.1219	42.7176	17.3083	14.822	18.5087	6.8942	10.0772	22.4729	13.946	17.225	21.0513	15.3929	15.6748	18.7316	26.396	16.202	16.9582	11.3609	26.3812	15.7477	13.295	24.0389	20.2812	21.9697	16.1162	9.8671	11.5088	13.9834	9.8047		0.589747	21.2723
8.3324	52.5043	58.9943	56.9954	34.9986	17.7943	10.491	15.7308	11.1374	8.1783	15.9167	13.1274	18.695	21.4318	15.4026	9.8083	19.2407	21.75	20.909	17.6899	16.0193	26.2296	16.6792	14.5385	27.5647	27.6507	23.6053	11.1159	11.2091	15.4492	18.1864	4.65		0.598291	21.0869
8.4515	59.6442	59.3731	51.5609	37.5373	16.1887	12.6552	17.4488	9.0457	10.2979	15.3817	12.514	14.518	18.8934	20.5187	12.6684	18.7262	15.774	16.829	19.0101	13.1693	22.3992	16.3807	12.7932	24.1713	27.7398	19.1066	12.3794	12.1961	14.2791	14.6969	7.0694		0.606843	20.4828
8.5705	50.8595	58.7616	46.8792	35.5354	19.7352	13.6786	17.6836	7.896	11.8088	19.9046	10.9949	13.962	19.4901	16.8505	10.3884	18.3301	18.194	19.476	16.2909	12.7092	22.8481	19.5641	12.008	24.2043	29.4275	20.2157	13.365	10.5657	15.7734	12.7321	6.2544		0.615387	20.206
8.6895	45.7476	65.0667	37.412	34.8457	17.3908	13.8789	21.0579	9.8793	10.7967	14.8524	15.5692	15.489	19.2528	13.1806	8.5564	11.6083	16.929	18.456	12.4072	11.7739	24.1212	13.38	11.6379	25.1568	23.0096	16.1968	8.2418	8.8968	17.381	14.4661	9.6229		0.623932	18.9117
8.8086	48.096	62.7252	44.0011	44.9412	19.284	12.7466	18.0885	7.4965	9.0633	15.9709	13.8435	13.86	16.2911	13.3558	7.6583	17.9219	12.701	19.643	13.0947	11.483	24.3384	14.6885	10.1293	20.6552	23.1885	22.3438	11.4654	9.8994	18.3161	15.6395	8.0034		0.632484	19.3849
8.9276	44.9808	69.2582	48.5526	37.3253	16.237	12.9769	12.6162	10.2952	7.1696	14.7442	15.7672	13.922	17.2452	15.3934	10.9838	14.5504	20.802	16.788	14.7735	10.0164	19.1344	13.0041	9.2015	21.8636	22.314	19.4504	13.035	5.8103	15.2657	11.4657	9.2406		0.641028	18.8446
9.0466	41.8928	60.7803	47.1555	41.7486	15.4368	10.8473	14.2962	9.6783	7.6022	15.5157	16.6751	15.402	14.3235	15.349	9.045	16.4761	13.699	16.561	16.6123	7.4684	18.8955	14.3443	13.262	18.5608	26.894	13.6805	13.9408	9.7434	16.4884	13.7837	7.7234		0.649573	18.5123
9.1657	45.006	69.1104	53.2849	38.0967	12.5423	12.9354	16.7589	8.9691	8.9763	15.321	18.9811	11.285	14.3565	18.7055	9.0047	10.3515	14.561	14.433	13.9585	7.837	23.0937	16.1516	13.1354	22.2691	24.6272	16.1416	11.4419	10.0293	17.3434	15.451	5.8304		0.658125	19.0319
9.2847	44.1843	63.0689	52.5738	40.1786	19.5598	10.6849	16.5857	8.7648	9.7248	14.1315	13.6063	7.714	13.286	15.6621	9.4632	12.6681	14.401	11.017	11.1178	10.0083	20.8661	17.4669	11.9105	24.432	19.8756	18.268	11.0349	9.5988	16.8246	13.2016	10.7204		0.666669	18.471
9.4037	44.8979	64.0045	50.4867	50.3055	15.5936	8.8169	14.3801	9.7489	8.9112	11.9832	10.5639	11.682	11.3736	12.7983	7.0518	12.6245	13.484	15.763	11.0296	8.7817	18.2189	15.3042	10.8072	21.3917	22.6594	17.5333	11.1387	11.047	15.4137	14.8862	5.5684		0.675214	18.0081
9.5228	43.6026	70.4223	51.7433	50.189	16.8304	11.5285	16.1021	8.735	7.7917	11.2062	9.5057	10.347	9.1528	14.8918	9.1179	10.8157	18.166	14.74	8.7341	8.2519	15.9013	17.1825	12.7785	19.7875	23.1142	17.1447	11.4674	8.5837	13.2935	11.2484	8.1213		0.683765	18.0805
9.6418	46.1833	62.9143	55.7768	46.2056	17.8144	10.1912	11.1699	11.2549	5.8331	12.9036	12.5161	8.125	11.6681	13.0666	5.9313	14.3211	12.642	15.15	12.2678	10.4785	14.146	15.139	12.4459	16.445	19.3017	15.9681	12.2556	12.1468	14.8285	11.1591	9.0329		0.69231	17.7188
9.7608	49.6996	55.0897	58.9606	47.9754	18.3627	6.6118	12.3034	8.2132	6.089	11.4532	10.3933	9.053	9.7573	10.9236	6.3164	10.422	12.742	15.573	9.3619	11.5963	11.3377	17.9742	11.1151	17.6243	22.0114	14.5832	9.6912	8.4332	17.9135	15.1488	7.9771		0.700854	17.2486
9.8799	57.4566	50.328	46.6275	52.7851	14.8797	8.0685	11.1923	5.6487	6.949	8.1472	12.2121	7.979	10.6557	15.5256	4.6999	10.9458	13.204	16.284	9.0447	11.6436	13.9846	14.4765	10.861	19.8073	18.9471	15.2237	10.7258	6.8012	16.3855	14.0144	8.7032		0.709406	16.9099
9.9989	51.6797	49.6681	49.1409	52.4872	16.373	10.5144	15.5215	7.9622	7.9484	13.3274	11.6883	13.872	8.8528	14.1385	6.9992	8.0792	12.934	15.221	10.1441	9.1135	20.0617	17.1309	11.7462	19.5292	21.3868	16.96	11.5889	7.8281	11.2271	12.4487	8.3684		0.717951	17.5465
10.1179	46.4502	47.7475	49.182	45.9085	12.7887	9.6926	13.5999	8.5141	7.4028	13.6121	9.9355	8.551	7.7721	9.9931	7.9137	11.9988	12.33	12.19	11.4196	8.5573	15.821	20.503	14.6941	17.2898	20.3363	19.2144	12.6457	11.5044	12.6672	13.9433	4.7926		0.726495	16.741
10.237	50.9409	54.1331	56.9636	57.4536	21.1481	9.2138	14.6955	7.6955	4.8143	12.0923	8.5306	13.755	12.4049	12.0622	5.6647	8.9765	12.348	10.501	11.8827	8.7168	18.1869	15.1072	8.0428	14.7439	19.4782	17.3977	12.6408	9.9916	12.7951	13.6315	7.5671		0.735047	17.5347
10.356	55.1257	52.3565	48.9632	49.7962	14.9412	10.8785	12.7079	8.7377	6.7983	10.0467	8.6938	5.637	10.1421	10.3697	5.8859	8.6033	14.75	11.291	10.2035	7.4117	14.1835	18.4786	11.6744	14.9947	18.2135	20.2076	13.1305	9.5582	10.6959	13.2979	7.0912		0.743592	16.6086
10.475	56.6445	48.665	55.0891	46.328	13.83	7.0666	12.9682	10.7619	7.577	10.5137	6.4663	6.597	13.044	13.5028	6.2139	8.8047	16.388	10.621	10.7581	7.0896	11.1969	18.6786	9.5451	14.6374	20.8447	17.2048	9.5308	10.8818	14.9344	12.7556	6.1014		0.752136	16.6207
10.5941	53.3646	54.1514	48.6949	41.7636	19.5158	10.6471	12.4047	5.8711	6.0374	10.0391	9.7372	8.48	9.4751	11.1178	4.9807	9.687	15.717	10.805	10.2509	8.0545	12.4628	13.6671	8.5143	18.7753	18.6701	14.6676	8.3011	13.2918	13.4976	10.6837	4.4731		0.760688	16.058
10.7131	51.5353	48.9525	49.7121	44.0967	20.5522	11.9607	11.9017	9.2953	8.6689	10.7486	9.2362	7.277	9.3931	9.646	7.1043	9.6815	12.942	9.98	9.3656	12.076	12.1167	17.4575	12.466	14.8414	13.3349	15.3348	11.5401	12.2419	12.466	13.4874	4.7095		0.769232	16.262
10.8321	55.7727	50.2458	48.1274	44.0826	16.5772	7.797	13.3029	6.7466	8.9318	8.6504	12.6315	8.17	9.1481	10.7147	7.4973	10.088	10.87	8.932	9.0329	7.7944	11.9541	18.5319	7.7736	16.4119	15.2844	14.1387	11.1612	9.6254	9.4157	10.8728	6.8971		0.777777	15.7155
10.9512	63.6087	55.821	44.6635	46.7787	17.7351	11.2025	9.4952	6.2325	7.1441	7.9308	8.7377	12.181	11.593	6.7473	6.1183	6.8524	11.635	8.517	9.2854	7.5316	12.9953	17.576	10.1018	18.3703	16.9493	14.1654	9.2266	11.8328	11.9368	11.6241	7.6634		0.786329	16.2017
11.0702	65.206	57.2613	49.0865	39.7811	20.2965	9.2974	11.5029	7.2391	7.6213	9.7515	8.6292	8.334	7.6254	12.5156	5.4709	6.6747	15.025	10.746	10.7725	10.0986	9.982	16.7369	10.462	15.6928	19.2137	14.8215	12.1984	9.4926	16.9119	10.7651	5.8308		0.794873	16.6143
11.1892	62.7011	47.4766	48.4151	44.0932	18.0181	8.1112	13.0177	8.9838	6.2518	10.1577	8.7091	6.678	9.9885	7.2325	8.3996	8.1545	10.71	10.376	9.1316	7.4511	9.3687	13.9251	9.6693	17.0662	11.9639	14.3101	11.3468	14.5151	13.83	9.6156	5.6217		0.803418	15.6545
11.3083	63.9802	49.3948	59.2959	45.4149	13.9958	8.5283	8.8633	8.1245	7.4604	8.3936	8.9035	6.527	6.8858	9.1066	6.422	8.144	13.022	7.446	11.659	6.1062	10.11	11.2839	10.1348	17.283	14.095	13.0774	10.965	10.4546	14.4592	9.1713	5.549		0.81197	15.6212
11.4273	66.647	54.2228	55.9376	39.0274	16.9476	8.1534	9.6636	8.345	6.8986	8.9791	9.8351	6.224	6.4631	9.8001	5.4324	8.5429	12.829	8.764	10.4137	8.8248	11.2595	14.1782	8.0997	16.2769	18.9769	13.9291	15.7199	12.5731	16.4026	10.2589	7.4974		0.820514	16.3588
11.5463	57.7788	54.8038	52.9386	40.9335	18.1351	9.3588	13.5008	6.6302	5.8552	6.6325	9.8204	6.66	6.9122	10.2721	9.0319	6.3373	9.189	9.548	13.0267	5.5377	11.7743	14.0003	9.9977	20.939	18.3774	14.2227	12.8519	12.2241	9.61	7.8233	6.5132		0.829059	15.8463
11.6654	66.8586	47.7011	61.0953	39.9474	20.1638	10.4319	9.4138	8.9083	8.4686	8.2193	8.8662	6.598	8.3357	8.6852	7.879	6.979	10.286	12.07	9.9395	6.3941	13.9329	15.8493	10.2764	17.7199	16.0147	12.99	10.4263	14.3193	12.5202	8.6916	5.3732		0.83761	16.3018
11.7844	60.8259	43.0647	50.5738	34.6749	16.8954	8.2975	14.4734	9.6782	7.1014	9.1874	7.2152	4.859	8.7551	9.5555	4.2888	8.2862	10.591	7.545	5.7649	7.3557	9.336	13.4866	12.0359	15.5838	16.656	11.4907	12.2226	12.133	8.4253	11.2988	5.4753		0.846155	14.7462
11.9035	64.1911	39.6099	49.5018	39.0046	16.1765	10.3265	13.3722	10.0747	5.486	7.6031	9.2194	4.81	5.8512	6.0337	4.5515	6.7869	11.052	7.24	12.0901	9.4342	12.5	13.4337	11.476	12.3195	16.2138	13.3777	10.3682	9.5208	7.6502	11.4397	5.1208		0.854707	14.7044
12.0225	56.8152	45.8446	50.3998	34.4616	18.7684	8.1472	9.275	10.4067	7.4935	5.1042	6.0125	6.503	8.4082	12.6002	5.8664	7.7453	8.779	5.901	8.3742	7.8206	10.867	10.7493	9.3265	16.9837	15.6887	11.7171	8.5142	8.3794	10.2978	8.6294	5.8866		0.863251	14.2505
12.1415	56.5114	33.4608	52.9225	33.3581	17.2535	9.5394	10.9345	8.3936	4.7567	7.5221	7.9601	6.575	6.7729	5.6868	5.4244	6.5322	8.963	7.184	8.2627	7.9898	5.8324	11.9579	10.684	16.4025	16.0311	9.4397	7.3368	10.3743	9.6802	6.2368	5.1116		0.871796	13.39
12.2606	54.7445	36.9167	43.0661	33.5792	14.9408	7.3521	10.903	7.4567	5.3295	9.1461	8.5874	8.095	7.0623	5.9466	4.5525	6.4893	9.078	6.296	8.9427	7.5534	8.5162	15.0375	12.4095	12.2571	13.9939	12.407	8.4663	11.5681	7.6752	9.4359	6.0414		0.880348	13.3499
12.3796	49.7985	26.2181	40.8502	38.3431	21.3187	11.127	8.3803	10.651	6.223	3.9639	8.207	4.937	5.8655	6.7023	5.8115	4.5856	7.646	7.425	6.9229	8.2724	8.4466	8.7215	13.2167	11.543	9.9201	15.4987	8.3813	10.8292	10.0588	7.724	6.157		0.888892	12.7015
12.4986	47.3296	32.4874	40.0083	30.4248	25.6444	9.3374	12.6186	8.8341	5.9907	6.1715	7.2186	6.162	7.3644	6.8048	4.0397	6.263	8.742	4.698	7.8909	7.4823	9.0944	15.1946	11.3889	12.7157	12.8502	14.215	7.8573	8.8475	5.6667	7.9508	6.3741		0.897437	12.828
12.6177	49.2413	20.6423	32.2459	34.1057	23.3562	7.4644	13.1322	7.7904	7.2651	6.4025	7.5265	5.729	7.2608	6.2229	3.5648	7.3761	5.296	5.054	6.6909	6.8891	10.6528	15.6922	10.8887	16.0426	11.5374	12.6342	10.0133	9.8505	6.2039	7.0216	4.9308		0.905988	12.2169
12.7367	46.6783	23.6383	35.2892	29.1728	26.1884	9.4049	13.684	9.1122	7.5734	7.3388	5.7768	4.517	4.8511	5.3449	4.9179	5.3376	7.351	5.288	8.3029	5.2452	9.4306	9.3355	9.6852	14.4037	12.3403	15.3472	5.8839	8.7776	7.1399	7.2275	6.5301		0.914533	11.9714
12.8557	46.4696	24.6811	26.808	31.3074	27.0386	8.0521	8.9677	11.8455	8.9128	5.9252	5.1297	4.244	5.6383	4.6004	7.3861	4.1684	5.322	5.316	4.9873	5.7855	8.7065	11.5186	11.8749	10.9962	10.4969	9.6031	7.3097	7.378	7.5419	5.5305	5.5644		0.923077	11.2615
12.9748	40.7294	16.0256	23.8064	29.8603	26.9746	7.4747	11.3741	7.205	5.7227	5.5036	6.241	7.34	5.1431	6.7209	6.7112	4.369	8.366	4.706	8.1116	6.4661	10.132	14.5901	11.5572	10.0521	11.7321	7.91	6.8993	7.1543	4.7603	6.9321	9.6262		0.931629	10.9741
13.0938	32.2328	11.394	23.1985	30.3565	22.9031	6.9409	9.5007	10.5784	8.0345	7.0021	8.2018	6.345	5.6202	9.5227	7.5903	5.3506	5.124	6.384	6.479	6.0551	10.2764	9.7493	11.6911	9.727	9.3121	9.6874	3.0316	8.0812	8.2098	5.1271	6.8395		0.940174	10.3402
13.2128	29.4327	10.2439	19.4407	23.2697	25.0348	10.6294	11.0375	9.034	6.547	7.0622	4.7931	5.313	7.9214	6.9959	7.3212	4.874	4.01	4.557	5.1803	8.4827	8.6026	11.3768	7.9326	12.8775	11.3682	9.1795	5.8442	8.9833	5.7352	6.922	7.0322		0.948718	9.90434
13.3319	29.0988	7.0871	15.5351	24.2788	20.5435	7.6646	8.3598	9.8043	6.0882	5.6988	6.4754	5.93	6.7914	4.8699	4.6486	4.9541	6.177	6.523	5.5741	5.874	7.6904	11.3961	9.6722	9.4342	10.4538	6.9996	7.5328	8.4403	7.9878	6.9308	6.3385		0.95727	9.18881
13.4509	24.8424	6.742	9.3845	23.398	18.3631	8.3077	11.2408	9.9897	6.4575	5.9512	8.0381	6.238	7.6895	5.3863	5.0121	7.3546	7.082	4.319	8.0782	4.8556	6.859	10.1825	8.169	8.7953	9.7111	7.4596	4.0992	5.5049	3.787	6.3896	5.2638		0.965815	8.54682
13.5699	17.3035	8.09	8.8012	22.8362	24.2691	13.2667	8.4902	7.2797	7.6113	6.8848	5.0965	4.656	8.5114	5.8749	4.6728	4.1481	5.471	4.172	5.8125	7.3309	4.808	8.1294	8.0815	10.392	9.0113	6.9077	4.4399	7.9009	3.3391	5.2598	6.3077		0.974359	8.23084
13.689	11.9995	5.2804	5.8147	17.7016	24.525	12.1429	11.1405	6.1219	5.5622	5.8232	4.1287	6.74	5.2639	7.9789	4.8356	3.6218	6.35	5.808	3.6715	6.7189	6.0748	9.0862	7.9808	8.9817	10.1406	5.0567	4.7579	7.5071	5.1191	6.6229	5.8839		0.982911	7.69164
13.808	11.8607	4.5017	3.8184	15.6707	21.065	9.8911	9.1354	8.9351	6.6981	7.292	3.9561	7.38	5.9347	4.7141	6.8667	4.9623	5.283	2.707	4.8349	5.9901	5.2253	7.8281	8.7687	5.4848	10.9378	6.9861	4.8945	7.7107	3.9765	6.7358	4.3858		0.991455	7.23972
13.927	6.6592	2.0129	3.8751	15.8405	19.7135	9.9265	11.7555	7.5355	6.3834	7.832	6.1644	3.031	4.2961	6.5774	5.6053	4.4296	4.058	3.911	5.0581	8.064	6.841	7.6459	10.7908	7.0873	7.4556	3.4718	6.8354	4.4558	2.6984	5.3614	2.7827		1	6.71468

## Sheet: Image11 (2)
X0	Y0	Y1	Y2	Y3	Y4	Y5	Y6	Y7	Y8	Y9	Y10	Y11	Y12	Y13	Y14	Y15	Y16	Y17	Y18	Y19	Y20	Y21	Y22	Y23	Y24	Y25	Y26	Y27	Y28	Y29		Ap-basal	Avg intensity
0	24.6	25.41	24.46	12.465	22.076	27.247	37.695	22.42	40.999	39.215	37.191	33.093	47.031	22.712	35.7642	45.7577	24.007	35.892	21.676	30.0178	22.316	38.348	30.954	34.321	26.376	44.707	26.851	38.338	34.111	52.79		0	31.9614
0.119	27.845	29.737	34.449	14.7012	28.892	30.376	47.909	26.147	47.104	47.667	38.792	41.013	55.26	25.231	37.8885	58.8762	20.022	38.406	28.841	28.9017	24.58	47.191	41.188	40.456	28.121	52.718	48.003	42.218	41.1888	58.632		0.00876941	37.7451
0.2381	34.073	23.527	37.131	18.7498	33.099	40.561	50.426	33.084	38.187	44.564	42.139	54.73	57.718	30.749	39.4912	50.4474	25.462	53.098	41.084	34.4255	24.058	48.033	47.826	43.174	37.675	53.695	39.119	51.187	40.8145	69.122		0.0175462	41.2483
0.3571	44.431	31.897	37.276	25.0484	57.974	45.431	55.068	35.463	47.822	44.603	43.626	59.259	69.701	36.358	47.9863	68.0209	28.347	78.295	51.95	38.282	30.847	41.349	49.65	45.606	44.877	66.84	51.733	62.817	45.9529	94.601		0.0263156	49.3704
0.4761	46.293	39.654	45.263	29.51	76.506	60.625	65.245	46.528	49.55	42.347	59.98	59.853	64.962	33.628	45.1848	74.7016	26.387	86.093	64.037	36.5556	43.271	52.123	56.345	48.433	42.315	81.121	50.767	71.987	48.6016	107.84		0.035085	55.1902
0.5952	55.357	34.888	53.395	32.2282	80.626	64.96	78.091	62.942	55.187	51.185	57.601	73.232	65.179	42.298	58.6282	79.5042	37.861	118.623	78.986	50.6739	49.198	52.342	56.063	59.09	48.345	100.683	69.757	77.683	45.0058	130.231		0.0438618	63.9948
0.7142	64.977	39.208	61.377	37.7163	111.522	82.49	90.93	77.86	65.591	70.964	66.774	76.415	71.164	46.062	57.4031	91.1083	51.739	142.148	98.776	43.3152	65.787	58.531	70.251	59.059	61.587	111.1	86.76	110.557	43.2402	144.293		0.0526312	75.2902
0.8332	72.998	48.827	69.841	42.8378	132.409	110.31	94.607	77.503	72.088	83.217	67.339	84.539	79.121	52.132	66.8275	81.9946	57.073	150.206	118.79	55.1522	70.918	74.553	85.299	71.497	82.377	163.923	108.142	132.689	53.1749	140.296		0.0614006	86.6894
0.9523	88.713	49.618	83.676	58.1233	134.263	125.386	119.926	91.581	75.825	84.002	89.946	106.874	84.041	67.049	57.7987	90.6172	77.162	178.892	127.272	58.4286	81.08	75.627	110.48	92.604	91.278	171.547	125.81	147.027	57.1687	137.132		0.0701774	97.9649
1.0713	107.57	66.963	98.224	59.5294	148.154	165.464	132.873	111.164	88.641	100.16	106.066	109.554	96.218	78.374	61.9246	100.901	101.879	176.788	121.307	67.2906	106.195	86.9	117.509	100.77	119.083	179.582	142.42	141.847	90.984	156.795		0.0789468	111.371
1.1903	103.454	66.342	106.1	67.5667	154.977	189.058	138.379	118.157	95.697	108.886	112.379	112.379	109.387	91.124	67.5652	96.6878	139.501	185.766	115.431	78.2319	116.629	95.074	137.678	113.225	120.323	177.847	174.131	144.275	91.9776	157.826		0.0877162	119.535
1.3094	120.833	70.718	119.313	69.2728	166.641	218.796	176.333	118.975	102.607	119.96	110.119	136.824	120.825	102.478	66.9405	96.4524	171.156	199.194	115.037	89.0379	135.645	102.936	133.465	124.642	144.161	192.537	181.756	159.147	86.2869	151.811		0.096493	130.13
1.4284	123.272	91.193	122.54	70.3496	168.781	222.696	169.212	120.178	107.49	136.023	126.451	148.006	134.488	126.053	83.3962	85.0373	178.042	208.628	116.419	102.585	132.448	106.052	151.706	127.106	157.899	202.889	187.683	160.944	90.649	142.076		0.105262	136.676
1.5474	120.671	94.69	125.358	71.716	152.712	222.446	156.051	127.631	128.083	161.876	114.518	145.455	136.419	141.914	82.7626	86.9397	170.832	210.492	110.827	103.474	127.091	120.572	155.835	120.484	156.896	200.748	189.361	150.84	84.6997	118.508		0.114032	136.33
1.6665	122.584	101.005	126.972	66.2366	158.833	216.814	162.483	125.486	131.957	188.823	122.997	142.691	142.631	170.095	96.2329	91.7231	175.324	199.768	99.721	96.2808	126.991	113.673	148.491	130.352	155.316	203.533	178.419	156.57	82.8579	116.87		0.122809	138.391
1.7855	120.508	117.366	107.708	54.4575	151.074	215.524	149.627	120.305	133.666	200.032	141.237	132.511	142.575	147.87	101.039	97.3054	162.613	197.87	98.817	104.728	125.091	117.063	148.385	128.978	150.868	213.977	156.916	150.338	76.7959	104.909		0.131578	135.672
1.9046	125.841	107.63	110.295	72.2718	156.278	207.967	153.081	133.29	145.756	201.945	151.918	126.266	114.851	156.252	100.31	97.2495	171.885	202.035	112.738	104.662	128.051	116.312	153.723	136.386	149.702	215.513	152.375	152.271	71.7425	87.207		0.140355	137.193
2.0236	112.892	119.715	95.377	64.9739	148.149	215.722	140.542	138.106	150.486	204.152	149.478	140.256	104.167	143.363	99.182	94.6398	156.532	204.981	107.515	93.1221	127.971	105.959	131.756	127.42	142.611	204.825	144.309	161.811	70.8106	74.765		0.149124	132.52
2.1426	103.764	115.24	85.026	60.5773	133.93	210.229	148.697	142.854	138.477	197.983	153.692	125.051	91.72	129.298	94.2263	90.4422	162.821	199.651	113.715	90.0046	115.227	100.775	144.775	100.502	120.46	203.008	129.692	149.113	53.8392	78.039		0.157894	126.094
2.2617	107.492	116.232	78.307	67.0952	123.715	203.342	140.737	127.948	127.658	199.837	148.905	121.534	96.422	116.207	98.9202	94.5277	154.486	195.967	111.594	92.7638	122.249	88.788	134.72	97.18	119.431	196.705	116.071	141.671	56.0997	57.674		0.16667	121.809
2.3807	108.435	108.895	69.268	66.8588	116.801	188.373	142.881	122.644	123.045	190.234	132.973	106.914	91.723	88.512	107.995	96.6062	144.081	187.404	116.707	88.7688	122.862	77.592	129.101	77.93	123.709	190.131	106.746	142.372	54.1808	54.187		0.17544	115.931
2.4997	100.59	101.682	74.127	67.7811	110.266	207.298	141.182	114.881	113.45	177.655	132.194	109.702	85.819	91.316	101.746	98.773	156.168	183.013	122.352	83.4826	114.67	79.933	135.929	73.91	114.711	161.177	116.623	125.301	51.0093	60.159		0.184209	113.563
2.6188	87.697	100.854	69.712	59.9484	116.086	185.803	143.026	111.709	115.969	158.635	128.679	96.327	82.341	84.821	106.182	98.2582	142.795	180.09	122.302	64.5809	117.129	67.048	128.87	72.301	109.814	139.127	121.17	116.543	56.4958	48.665		0.192986	107.766
2.7378	83.005	96.325	70.493	59.3591	106.645	180.341	121.564	89.624	113.724	153.265	105.898	83.095	80.749	69.371	96.4911	101.888	149.962	169.23	119.269	69.0254	104.827	67.121	130.555	60.31	97.865	114.79	107.945	98.419	62.2416	44.869		0.201755	100.276
2.8568	74.127	95.097	62.327	65.6524	95.503	152.879	114.901	91.315	109.347	144.651	85.629	77.147	66.414	62.875	99.6562	92.3058	142.694	161.601	114.045	74.2148	100.787	60.167	131.101	57.504	90.05	90.145	106.359	91.344	49.3424	42.896		0.210525	93.4026
2.9759	72.999	92.221	62.147	58.5412	87.214	155.899	100.061	83.432	94.637	141.538	88.093	80.656	56.51	54.496	79.2332	85.4672	122.399	155.62	112.543	73.4189	104.74	65.034	125.875	51.211	88.164	81.477	100.772	79.16	52.3587	53.144		0.219302	88.6354
3.0949	58.786	89.209	67.908	60.4093	97.883	152.666	101.799	73.671	80.54	129.152	67.82	64.903	50.344	50.019	82.2956	85.3231	130.662	138.83	111.095	75.67	104.159	65.252	112.528	57.034	87.671	59.168	84.207	76.565	50.3294	48.038		0.228071	83.7979
3.2139	47.426	77.129	59.808	56.656	88.79	135.404	82.551	60.246	75.312	134.367	71.832	56.665	52.24	37.982	83.9799	81.7602	104.286	145.268	108.657	56.5358	95.258	60.134	117.96	47.195	71.981	63.85	67.316	65.157	52.6197	53.606		0.23684	77.0657
3.333	53.901	77.189	53.62	60.1054	71.453	125.841	83.399	48.329	68.948	120.338	68.154	45.946	39.191	39.334	65.25	81.5519	98.892	136.907	97.499	61.2568	104.711	53.995	110.62	42.124	66.695	49.638	66.209	62.688	44.9001	48.728		0.245617	71.5804
3.452	52.773	71.167	60.334	49.867	75.461	108.71	77.297	49.934	62.042	116.086	64.76	50.441	35.489	35.87	64.9683	75.0287	86.62	132.178	107.557	49.7924	95.324	52.562	95.869	50.095	68.168	50.134	64.033	59.527	47.1652	49.568		0.254387	68.6274
3.571	41.693	59.696	51.545	60.1152	63.747	110.146	74.763	50.154	46.404	108.98	57.617	36.418	35.679	46.171	56.695	65.2821	74.899	122.157	107.166	46.9654	95.937	48.376	93.329	46.145	52.007	41.018	61.706	54.034	56.8696	50.085		0.263156	63.86
3.6901	35.365	51.753	52.338	55.6763	60.711	100.7	78.411	49.513	49.957	100.298	65.26	28.788	29.193	38.502	57.7731	67.6148	79.351	121.055	103.238	44.0741	92.079	44.615	67.269	41.78	57.591	45.192	60.792	56.049	68.5915	47.832		0.271933	61.7121
3.8091	36.566	58.768	56.726	60.6878	47.697	88.453	75.205	44.716	52.396	93.547	56.843	35.703	24.347	39.236	51.8026	64.2018	75.782	115.741	92.188	43.2676	83.098	35.561	68.866	41.106	49.326	38.362	58.359	56.862	59.7782	38.688		0.280702	58.1293
3.9281	30.513	47.188	53.268	55.0722	43.365	80.97	70.24	43.536	54.023	77.292	57.688	30.34	29.695	35.005	44.8594	52.243	79.464	99.036	88.129	46.6354	80.398	37.133	61.608	51.204	47.815	28.665	66.835	52.309	47.0386	48.915		0.289472	54.6828
4.0472	28.052	40.573	54.57	59.5634	31.546	72.684	67.222	43.129	44.395	73.718	54.602	33.152	26.589	29.383	44.6593	64.5709	86.894	101.028	88.671	42.6044	66.998	35.632	59.505	47.782	45.234	33.934	71.778	59.228	59.9562	44.989		0.298248	53.7547
4.1662	22.656	41.228	63.443	49.3871	33.912	75.358	66.567	46.718	48.218	59.354	46.426	30.551	25.41	32.065	47.612	65.5822	91.738	99.967	89.069	38.9395	62.086	32.713	61.383	52.387	43.239	37.84	60.883	57.022	58.3132	44.452		0.307018	52.8173
4.2852	23.607	38.287	56.896	50.2071	34.591	64.325	70.829	40.299	43.424	52.975	40.726	26.99	23.658	32.972	33.5074	56.1872	102.104	93.789	87.551	45.2163	57.873	33.923	51.014	48.803	41.023	39.129	53.018	53.821	59.4927	41.374		0.315787	49.9204
4.4043	18.461	32.579	53.568	49.4999	35.206	69.322	63.936	46.154	36.948	50.688	36	23.993	24.321	25.262	38.4016	55.5217	96.809	92.476	87.59	36.9316	55.139	33.08	48.268	57.89	42.242	41.52	50.706	56.878	52.4327	34.108		0.324564	48.1977
4.5233	23.835	34.861	40.405	48.9105	33.176	58.478	71.377	40.544	43.7	46.689	30.269	27.182	21.127	31.454	43.848	48.0506	102.676	101.581	80.668	31.4801	52.207	36.305	46.574	63.17	44.499	33.546	57.714	48.439	56.9581	34.251		0.333333	47.7991
4.6423	21.558	39.799	42.467	52.5336	30.137	58.816	64.227	39.918	45.133	43.865	28.785	30.642	23.894	28.228	44.2171	50.7293	96.414	88.117	75.401	36.6276	47.608	29.729	40.829	52.959	38.262	39.067	58.019	49.954	44.1479	34.082		0.342103	45.8722
4.7614	22.371	41.439	47.831	49.3218	29.642	48.969	64.496	41.03	43.008	38.771	28.656	28.438	18.183	29.675	44.5904	49.3421	91.602	92.671	65.868	40.2006	49.641	35.246	41.709	52.103	32.666	39.168	56.515	43.533	54.4092	25.219		0.35088	44.8771
4.8804	20.293	30.251	49.392	48.9911	34.314	50.362	66.453	34.443	48.888	34.95	30.51	30.766	17.59	26.089	49.0112	50.3154	85.488	75.398	66.248	34.5743	54.441	36.555	32.282	61.152	34.68	29.184	59.875	52.068	55.4121	28.747		0.359649	44.2908
4.9995	19.184	36	48.596	48.6713	26.703	51.798	57.824	36.699	38.315	36.066	37.96	26.044	23.016	23.237	39.7947	42.627	92.712	66.939	64.074	33.4546	43.824	32.231	37.509	63.038	33.339	26.541	57.477	53.475	47.4163	25.366		0.368426	42.331
5.1185	17.308	24.318	53.633	40.1609	29.244	46.421	59.224	42.937	35.036	31.613	36.672	29.862	20.147	26.286	41.4117	48.427	82.135	59.988	54.457	38.6985	52.478	30.595	35.526	56.29	32.429	23.999	56.326	53.265	41.7145	25.841		0.377195	40.8814
5.2375	16.348	29.045	49.231	46.8937	25.207	44.46	62.408	44.124	35.263	31.925	30.838	29.558	19.337	32.193	40.2534	41.7593	80.222	54.828	56.368	33.2708	47.033	31.364	35.772	57.894	23.931	26.327	50.109	55.977	41.489	21.759		0.385965	39.8396
5.3566	20.89	27.008	51.278	43.1593	26.257	37.428	56.331	39.823	31.627	33.543	31.923	29.619	19.183	30.944	42.7945	41.5864	73.24	52.593	44.975	31.7926	44.231	28.535	37.787	43.468	29.464	19.139	55.288	44.316	39.909	24.029		0.394741	37.7387
5.4756	18.874	25.05	51.632	44.4363	22.219	46.647	49.573	38.33	27.371	34.349	29.308	25.485	21.563	26.42	39.76	42.3427	67.612	48.122	40.986	30.3203	33.722	28.05	32.86	56.685	24.594	23.189	49.122	40.113	42.8613	19.643		0.403511	36.0413
5.5946	18.963	26.254	45.566	44.2053	25.794	41.206	59.547	40.884	26.653	30.798	33.593	27.824	23.605	31.417	46.4379	40.108	62.995	58.6	45.827	25.6879	37.211	37.538	32.115	42.513	22.434	23.195	43.345	41.129	39.3196	16.887		0.41228	36.3884
5.7137	17	18.235	47.627	45.3686	26.605	35.705	55.184	38.434	19.036	31.704	31.233	32.08	29.058	34.185	45.0115	42.2011	55.045	49.627	52.195	29.6627	37.857	37.582	32.467	48.219	20.656	14.346	48.276	41.85	40.4897	17.233		0.421057	35.8058
5.8327	15.591	20.647	40.753	45.9419	30.099	36.345	57.257	36.623	23.543	29.673	32.08	31.151	31.301	31.067	41.8404	45.4554	54.655	49.443	43.8	28.7822	35.524	34.297	30.928	38.143	18.05	20.559	51.327	38.414	35.3013	15.81		0.429826	34.8134
5.9517	17.591	24.9	44.795	45.7483	22.118	37.115	46.511	29.645	22.446	30.422	30.712	27.021	23.064	31.169	33.3886	38.8302	44.778	60.224	42.037	31.2718	39.63	38.086	27.282	33.617	15.394	21.602	52.777	45.234	35.1998	20.786		0.438596	33.7798
6.0708	14.411	22.732	42.252	52.3462	23.313	35.101	49.888	40.388	16.783	27.872	35.137	26.242	20.21	34.161	39.8338	40.6626	45.978	47.362	35.729	27.0712	33.392	31.51	25.983	34.032	15.441	20.089	46.758	51.415	35.5771	19.89		0.447372	33.052
6.1898	12.035	22.73	40.73	49.5715	25.516	34.766	45.322	32.751	22.829	34.135	25.979	32.109	23.974	34.234	44.9946	41.4806	39.375	44.933	36.144	29.531	31.746	36.097	29.322	31.608	14.743	21.514	47.128	45.188	30.5965	17.315		0.456142	32.6132
6.3088	14.109	21.586	43.412	53.9187	20.292	30.515	45.076	32.022	20.223	31.753	28.59	28.381	18.716	38.697	48.899	36.0203	45.092	51.192	32.191	29.6654	36.713	35.405	26.843	42.645	16.055	16.545	41.369	41.099	33.1607	13.407		0.464911	32.4531
6.4279	15.248	19.809	41.179	57.2661	21.062	35.535	57.193	33.975	19.227	32.868	24.854	26.071	23.215	32.425	51.2917	37.0382	41.699	40.924	28.655	29.0206	32.312	37.742	33.21	36.988	13.188	15.664	47.552	46.824	32.5724	15.364		0.473688	32.6657
6.5469	14.931	22.702	37.101	50.5421	25.553	28.187	51.293	35.605	25.144	33.405	24.825	25.966	25.009	31.875	43.4376	42.6911	39.068	34.343	32.707	33.379	30.654	36.774	28.649	35.196	16.014	13.548	45.919	40.499	31.9377	16.433		0.482457	31.7796
6.6659	13.205	27.178	42.068	61.7902	22.258	22.106	56.476	38.673	23.164	29.688	28.81	31.532	18.028	34.935	44.9965	36.8015	38.737	32.348	27.271	36.3481	31.146	28.488	28.863	35.628	15.423	12.267	50.069	42.025	27.0004	13.596		0.491227	31.6973
6.785	16.141	24.86	38.947	52.122	22.951	26.555	52.379	36.842	21.202	32.054	27.757	27.595	17.38	35.319	47.9703	42.0443	39.663	36.867	31.03	30.105	27.484	30.403	31.837	34.029	15.7	17.076	49.755	44.684	30.5598	12.257		0.500004	31.7856
6.904	13.516	22.664	35.698	58.4241	17.565	22.519	60.309	40.014	19.635	24.165	27.654	25.809	18.629	33.913	43.888	34.1187	30.923	46.221	24.531	24.9194	24.59	31.579	32.646	27.588	11.357	13.155	40.93	43.562	24.1713	12.136		0.508773	29.561
7.023	11.768	18.583	39.334	47.7176	21.274	26.387	64.095	44.428	24.829	22.883	30.453	28.475	14.621	37.104	48.964	40.3533	32.293	35.262	29.136	28.2717	21.47	23.608	32.569	28.897	15.122	21.699	54.436	39.03	30.816	11.215		0.517543	30.8365
7.1421	14.825	19.182	43.662	49.4508	23.205	24.792	53.087	41.266	19.976	25.737	20.724	30.662	17.444	34.967	41.405	40.0562	40.379	28.764	29.605	36.202	20.648	32.486	31.699	31.305	12.44	14.1	52.583	41.937	25.2414	10.421		0.526319	30.275
7.2611	9.889	18.989	38.409	51.1572	20.681	21.61	58.881	47.639	19.033	23.041	27.633	23.272	17.653	40.245	46.6247	26.5685	39.004	25.958	29.708	24.5665	20.963	32.188	32.185	26.779	12.198	12.143	49.947	38.846	26.402	11.071		0.535089	29.1095
7.3801	12.389	21.227	44.032	39.825	22.906	21.676	54.856	45.667	18.16	28.809	20.397	24.556	19.232	34.208	43.8272	33.9971	34.394	28.842	26.392	37.011	17.871	31.553	29.658	30.059	12.379	11.931	49.32	32.866	19.2958	13.591		0.543858	28.6976
7.4992	14.186	15.389	47.327	50.8508	21.533	22.704	61.651	38.266	13.806	26.707	22.297	23.906	16.809	32.328	44.9457	33.2412	39.18	29.604	23.982	26.4615	18.491	32.364	32.426	26.249	11.569	12.552	49.251	36.093	21.1853	12.121		0.552635	28.5825
7.6182	12.343	17.14	36.667	47.9078	21.81	21.62	62.706	44.174	15.387	23.864	21.542	24.193	17.559	40.812	49.8687	29.079	36.14	32.592	31.63	30.9967	20.782	35.8	31.677	23.412	11.561	15.956	49.568	35.985	22.3804	11.66		0.561404	29.2271
7.7372	10.522	16.173	35.888	45.6771	21.453	20.225	55.213	39.55	15.51	21.089	26.52	24.048	21.732	32.902	40.2505	29.8381	38.685	25.058	27.492	27.9236	18.338	27.576	35.716	23.644	10.867	14.111	43.609	30.157	18.9793	7.894		0.570174	26.888
7.8563	9.064	21.01	32.572	38.6996	25.67	23.229	50.124	38.073	10.977	23.745	22.526	24.915	16.773	35.007	39.3285	24.2576	43.861	27.657	36.148	32.6041	20.8	25.564	29.736	18.423	13.217	13.952	40.188	35.89	20.6822	7.912		0.57895	26.7535
7.9753	11.935	17.503	41.514	38.6995	22.28	24.619	43.211	40.47	13.04	17.745	24.614	19.39	16.778	36.549	40.4967	24.53	39.928	29.91	28.415	26.4701	19.124	33.023	37.645	16.787	9.775	11.892	42.235	29.526	20.4353	8.702		0.58772	26.2414
8.0943	14.178	22.959	36.371	42.0615	20.471	15.703	38.096	32.892	11.973	20.057	20.378	22.277	15.786	32	34.3096	27.296	41.106	29.619	33.561	29.0103	20.665	27.795	33.708	13.434	9.933	14.01	44.957	32.764	18.4702	9.173		0.596489	25.5005
8.2134	11.6	16.28	37.297	36.6805	20.348	18.026	45.021	33.031	8.968	23.982	25.076	21.811	11.856	30.59	32.3661	23.607	42.556	29.347	30.203	27.0871	22.809	28.71	36.508	18.229	11.205	11.169	42.164	38.234	19.6002	9.686		0.605266	25.4682
8.3324	9.614	18.226	31.796	27.4431	24.071	21.765	41.185	35.276	13.106	22.833	20.99	24.999	10.647	29.163	33.4626	26.8656	38.169	28.816	27.596	29.2755	20.052	29.141	38.366	16.512	8.375	8.25	49.127	47.416	19.6648	8.188		0.614035	25.3464
8.4515	14.355	22.41	26.653	34.9972	17.026	21.671	41.399	33.528	13.168	21.398	19.409	25.038	14.824	26.448	34.2478	30.7104	31.94	32.116	34.232	26.27	15.026	24.549	34.526	18.378	9.609	15.164	49.97	34.885	16.6876	12.108		0.622812	25.0914
8.5705	12.037	18.715	32.416	34.0951	16.996	16.637	52.782	30.867	16.472	20.481	21.316	26.934	15.189	26.096	32.9669	26.1177	29.907	28.552	32.663	24.3285	22.455	26.967	32.35	19.222	11.993	17.496	46.795	39.977	16.7979	9.139		0.631582	25.292
8.6895	10.653	17.049	35.717	31.7725	18.661	17.366	51.716	32.031	12.545	20.475	17.815	23.252	14.145	28.555	31.6212	26.5699	31.725	30.016	31.823	33.974	23.095	24.648	28.982	15.064	11.79	12.144	42.194	36.801	19.6811	10.058		0.640351	24.7313
8.8086	10.809	16.969	30.161	29.477	18.29	15.858	47.58	34.837	10.05	19.435	19.271	24.569	13.485	25.775	31.951	32.3203	32.096	31.45	27.707	25.4901	20.896	35.063	29.675	16.867	9.913	14.563	40.767	42.335	15.98	11.195		0.649128	24.4945
8.9276	13.97	22.488	34.856	35.8073	18.494	16.326	49.16	34.013	9.487	20.583	18.628	20.259	17.007	24.908	37.2735	25.3302	34.121	29.896	31.194	29.4698	17.884	25.706	28.02	14.039	12.219	15.085	40.607	36.576	17.2783	5.153		0.657897	24.5279
9.0466	12.73	23.421	26.165	32.9496	18.486	19.272	39.179	30.651	13.877	14.704	20.925	27.124	20.426	21.828	32.9269	28.758	27.656	27.78	26.412	24.1265	20.644	24.382	32.129	13.564	12.245	18.157	53.915	40.993	15.5933	6.748		0.666667	24.2589
9.1657	11.459	25.94	30.074	26.0104	19.041	15.964	40.759	32.989	10.348	16.81	15.618	23.338	15.577	22.841	33.8437	26.9062	34.309	31.217	30.206	27.5979	21.26	27.927	37.383	15.229	8.044	14.919	45.032	48.721	17.2383	11.329		0.675443	24.5977
9.2847	11.853	25.103	26.649	27.5665	18.933	20.77	42.907	31.884	9.024	15.913	16.981	20.452	15.693	23.172	32.0737	24.232	26.623	32.438	26.186	25.5891	19.436	21.914	30.925	11.243	11.401	9.843	44.818	42.829	16.4334	12.727		0.684213	23.1871
9.4037	9.927	17.912	35.649	27.3651	18.51	19.775	41.345	26.033	13.259	17.17	16.734	23.282	11.682	22.938	37.9006	23.5477	30.655	27.426	25.744	24.0524	17.37	22.667	28.689	13.038	11.483	18.234	43.159	41.49	18.9231	10.165		0.692982	23.2042
9.5228	17.527	19.312	28.928	23.3447	23.184	17.749	45.06	26.05	14.84	15.27	16.252	23.285	15.581	19.655	30.3459	22.8516	29.469	24.479	34.288	21.1909	19.741	26.236	18.669	11.48	5.457	18.639	42.051	37.47	19.9859	12.411		0.701759	22.6934
9.6418	13.067	20.65	27.934	24.8714	22.778	20.121	43.758	23.72	11.005	11.906	18.83	21.147	12.206	19.66	31.2613	34.6666	26.192	22.92	33.313	20.1666	18.646	22.794	22.067	13.27	6.668	12.63	43.093	38.594	18.7136	7.816		0.710528	22.1488
9.7608	15.804	18.831	27.322	24.2611	18.486	19.876	52.816	24.488	10.413	13.59	14.311	25.383	16.893	21.438	29.2451	26.5153	25.018	28.756	27.197	24.21	18.99	22.452	32.44	11.944	8.031	16.096	36.168	43.148	16.0555	12.395		0.719298	22.7524
9.8799	15.942	21.174	25.107	23.906	17.295	20.602	47.699	21.703	9.167	14.31	12.442	20.112	13.233	20.045	25.6631	27.2584	28.049	23.708	24.936	22.8004	24.006	20.034	26.851	14.023	7.8	15.214	35.272	37.643	19.6059	14.492		0.728075	21.6698
9.9989	15.616	20.182	26.049	28.5029	25.209	22.385	50.351	23.794	12.675	14.03	14.101	21.365	15.698	19.189	35.9781	34.3314	24.567	25.964	26.221	29.0948	19.488	22.389	23.414	12.453	9.62	12.813	37.125	36.766	18.4713	11.253		0.736844	22.9699
10.1179	17.818	23.916	24.079	23.7041	19.522	18.163	41.25	22.081	10.809	14.127	14.976	19.111	17.377	20.047	33.6153	28.5393	26.984	28.795	28.966	26.7257	18.628	22.36	30.571	11.928	9.096	17.102	34.908	38.99	16.6484	8.969		0.745613	22.3269
10.237	16.621	25.091	18.353	20.6561	27.81	18.025	43.766	23.623	9.722	15.663	11.465	21.64	15.101	20.741	27.1882	34.2303	24.487	25.407	26.861	24.9161	21.275	26.734	23.935	11.706	8.628	16.969	38.227	38.448	16.3052	9.697		0.75439	22.1097
10.356	12.387	23.145	23.487	20.3207	26.523	14.471	49.714	24.573	7.813	11.03	12.803	17.503	16.716	24.976	31.9807	26.2273	23.078	26.419	29.189	24.0018	17.212	23.81	22.147	14.755	8.084	13.363	33.908	37.578	14.9969	13.973		0.76316	21.5395
10.475	14.012	24.846	22.594	18.6324	24.992	16.076	41.461	22.001	9.713	8.261	11.336	23.131	13.797	17.326	27.8745	31.425	26.071	29.533	24.789	22.3153	21.724	21.033	20.983	11.538	9.935	15.125	30.685	34.563	20.9858	9.853		0.771929	20.887
10.5941	16.685	24.217	19.076	18.0334	18.24	17.484	41.175	22.767	10.761	14.425	12.415	19.821	16.169	25.34	26.9166	31.4695	27.741	33.212	21.685	23.2898	17.133	23.318	25.725	12.351	5.908	13.606	34.01	37.78	18.4247	12.72		0.780706	21.3966
10.7131	17.104	26.743	17.742	20.5665	19.72	19.231	31.475	23.728	11.553	12.817	13.538	17.499	16.322	14.006	26.8958	25.8135	28.768	27.071	25.069	26.9779	24.423	27.4	18.284	12.053	10.926	19.604	34.314	33.883	19.7485	13.352		0.789475	21.2209
10.8321	25.201	23.063	17.964	17.3393	25.167	18.553	28.562	19.599	11.501	11.569	11.993	16.085	15.789	15.725	28.4273	26.3744	25.257	21.832	24.484	23.3543	18.175	18.002	23.913	9.356	11.356	17.683	37.014	40.318	23.9136	14.295		0.798245	20.7288
10.9512	23.672	25.094	16.647	17.4705	18.034	16.798	33.855	18.586	8.22	9.296	10.103	15.236	16.245	18.958	24.8672	27.2181	26.38	33.721	22.425	23.9385	21.083	23.568	23.981	10.965	9.16	20.361	34.844	35.257	19.2921	13.308		0.807021	20.6194
11.0702	20.252	25.332	15.825	18.675	17.837	16.986	26.694	17.826	10.528	8.998	10.27	14.248	15.47	15.26	25.5419	28.5758	30.16	36.636	24.178	26.0117	20.543	23.162	22.289	10.104	8.414	21.37	38.093	44.428	23.7093	12.78		0.815791	21.0066
11.1892	20.102	22.37	17.77	15.1159	13.67	14.576	28.126	18.842	10.695	11.82	9.051	12.306	12.236	17.335	21.1335	27.7519	31.133	37.348	23.226	24.2151	19.198	17.481	21.436	9.939	9.594	17.252	36.14	43.516	24.1714	16.195		0.82456	20.1248
11.3083	18.61	22.297	12.824	11.9184	16.092	15.552	28.259	13.23	8.304	12.15	9.988	13.542	13.559	18.273	26.2052	23.2034	30.627	30.72	20.172	24.1986	22.789	20.424	21.647	10.353	9.635	23.995	34.793	37.11	21.0027	16.142		0.833337	19.5872
11.4273	20.823	23.77	16.275	14.9064	11.212	17.277	26.973	12.092	13.669	7.046	10.408	14.249	16.984	20.682	31.3567	25.9448	27.978	39.551	22.109	23.3767	25.34	17.322	23.929	10.916	8.419	19.215	39.023	36.438	23.8091	13.852		0.842106	20.4982
11.5463	23.704	17.862	14.24	11.7905	11.805	17.881	25.779	15.069	8.296	9.189	8.162	11.538	12.43	15.366	26.7703	24.1443	25.396	31.392	22.155	21.5183	22.013	19.446	17.518	12.322	8.584	24.928	27.981	36.79	24.6844	12.502		0.850876	18.7085
11.6654	16.482	16.882	13.629	13.3883	15.01	21.928	23.443	13.994	7.679	7.805	7.341	7.454	11.173	13.174	25.7292	20.322	23.191	34.511	32.402	23.2333	21.266	18.506	24.779	9.557	10.501	23.859	36.127	36.082	22.747	17.564		0.859653	18.992
11.7844	23.193	20.832	10.018	14.5389	12.593	16.769	18.101	9.384	8.734	6.232	6.509	8.093	6.644	14.743	25.3076	27.0154	23.755	29.487	24.281	17.2226	21.885	20.187	24.159	8.878	9.175	24.348	32.352	39.972	26.2046	14.42		0.868422	18.1678
11.9035	19.208	19.555	14.558	15.02	12.075	16.468	16.642	11.543	7.515	3.936	7.311	9.622	14.051	13.266	25.3576	23.2638	23.728	23.956	24.579	18.8795	23.667	15.985	22.845	9.864	11.604	23.223	34.219	27.523	25.5621	18.712		0.877199	17.7913
12.0225	19.472	17.52	12.473	12.9918	11.961	16.284	18.063	10.555	9.642	6.05	6.044	10.258	11.288	12.79	21.3127	24.7355	28.194	28.915	23.697	17.2815	19.039	14.553	21.593	12.07	10.388	22.843	30.308	29.959	27.3405	18.481		0.885968	17.5367
12.1415	22.029	15.196	9.156	10.9784	12.349	16.316	13.411	14.478	7.336	7.578	8.872	5.898	11.482	14.048	26.8736	29.324	21.419	24.449	30.682	19.3476	20.996	15.478	19.798	10.239	15.213	23.161	29.13	29.904	27.269	23.237		0.894738	17.8549
12.2606	18.959	14.78	9.923	10.9984	9.59	11.645	16.001	8.722	10.834	7.581	6.87	7.329	8.583	11.369	17.7782	20.712	20.801	28.874	24.66	17.8935	18.783	14.469	21.498	13.704	10.553	24.489	24.208	26.882	31.3721	26.667		0.903514	16.5509
12.3796	14.625	15.471	8.431	15.795	11.112	14.991	15.671	10.658	6.867	8.783	7.307	10.295	8.554	9.653	19.5722	25.4563	24.97	25.203	30.968	20.2592	21.664	15.944	21.917	14.393	11.631	22.64	25.697	30.209	33.2686	24.913		0.912284	17.5639
12.4986	11.77	11.663	9.862	10.8989	11.857	11.014	11.192	12.49	9.59	6.886	7.591	8.467	7.626	10.437	19.4304	16.5641	23.801	30.178	30.447	17.6278	22.498	13.11	22.393	10.818	11.281	22.272	20.046	23.669	24.4729	27.673		0.921053	15.9208
12.6177	11.401	11.996	10.828	11.8753	14.97	14.05	15.781	10.598	8.551	8.672	6.409	4.702	10.18	9.474	17.4898	19.0263	24.769	26.833	30.006	13.7688	23.968	14.962	20.939	12.101	8.787	20.166	19.344	20.862	26.3555	25.908		0.92983	15.8258
12.7367	12.3	12.563	9.748	13.9538	10.715	11.524	17.61	13.873	7.454	6.431	6.217	9.797	7.562	9.095	15.4288	23.1285	22.615	27.973	29.34	18.1796	26.725	13.334	16.582	8.751	10.331	16.847	19.057	23.955	31.9754	28.598		0.938599	16.0554
12.8557	14.049	13.858	6.569	12.7821	10.804	10.248	16.341	13.16	7.474	6.379	7.069	8.832	6.595	10.18	15.833	20.3357	17.926	24.226	22.833	16.5318	19.685	9.282	17.807	11.933	11.417	18.789	17.767	21.272	27.6166	23.144		0.947369	14.6913
12.9748	11.538	11.527	5.942	9.8739	10.175	12.74	18.309	10.193	6.039	4.681	5.48	8.283	7.323	10.935	12.4826	19.4314	16.155	19.081	22.56	20.5453	20.151	12.32	16.4	11.031	11.619	19.824	18.337	19.402	33.5293	30.453		0.956146	14.5453
13.0938	10.332	7.751	5.533	10.9422	11.429	10.758	22.456	10.61	5.053	4.292	5.422	6.059	6.262	9.333	10.68	21.9547	19.144	16.75	21.382	18.7661	18.299	11.36	15.149	9.503	10.415	15.424	14.308	15.922	31.8127	27.57		0.964915	13.4891
13.2128	9.435	9.229	9.954	10.0636	7.727	11.466	13.074	12.35	4.825	5.537	4.778	6.021	6.924	7.457	11.7109	14.3266	16.417	19.583	18.766	15.2516	21.903	12.308	15.513	11.24	15.221	17.994	20.208	15.188	26.4553	30.832		0.973684	13.3919
13.3319	10.115	9.659	9.407	11.9675	10.854	11.4	20.605	9.784	4.959	2.877	9.227	4.835	7.741	9.928	9.6713	20.2579	13.243	18.555	19.152	10.3138	22.379	10.542	15.003	10.572	10.151	14.679	14.925	14.156	30.0684	34.259		0.982461	13.3762
13.4509	10.308	6.881	6.566	13.1063	9.062	12.663	15.428	8.433	6.865	4.615	8.313	4.753	8.82	8.081	10.1403	16.0876	13.492	16.159	20.193	12.8949	17.037	8.904	14.766	12.937	10.038	9.12	12.975	13.333	23.3084	24.787		0.991231	12.0022
13.5699	7.772	5.247	6.672	11.6614	12.423	10.686	15.513	12.407	6.444	6.102	8.487	5.213	4.364	4.667	10.3074	14.7333	15.548	15.699	17.001	10.4841	16.64	7.925	13.241	11.919	10.02	9.307	18.04	13.798	21.9126	25.881		1	11.6705

## Sheet: Image12
X0	Y0	Y1	Y2	Y3	Y4	Y5	Y6	Y7	Y8	Y9	Y10	Y11	Y12	Y13	Y14	Y15	Y16	Y17	Y18	Y19	Y20	Y21	Y22	Y23	Y24	Y25	Y26		Ap-basal	Avg intensity
0	25.3129	12.3359	12.7424	18.0886	20.4019	14.1359	21.4988	22.8229	21.3431	17.658	11.7916	13.104	15.5272	13.9884	16.0029	25.069	16.2006	41.2054	29.443	19.2881	9.246	11.3546	13.5941	9.2754	7.8849	15.0212	13.3165		0	17.3205
0.119	21.1404	18.4889	16.1321	20.9237	23.756	18.725	15.8474	20.828	27.3002	24.3445	19.2004	12.023	17.7515	12.9937	16.42	24.354	16.3784	51.3889	27.1578	30.0613	9.7853	8.7353	16.834	5.1173	14.9495	11.1067	12.9885		0.00751661	19.0641
0.2381	17.4406	18.821	20.2934	17.301	18.1639	23.6422	18.3959	31.4116	25.554	26.5819	19.3969	14.8392	19.5535	17.0822	12.8779	24.4698	22.0271	48.6018	36.4052	31.4647	14.3426	13.6602	15.336	8.2844	11.1289	15.721	14.103		0.0150395	20.6259
0.3571	19.1805	20.8958	14.9097	19.4647	27.4672	19.5131	16.5546	25.7526	27.7358	29.3182	19.0502	15.391	22.8909	19.7088	18.0984	24.4084	27.3142	64.4187	36.616	33.7488	14.2517	14.1712	16.8469	8.569	14.2901	18.6749	13.2755		0.0225562	22.3154
0.4761	19.5973	20.5612	18.2835	22.2031	20.7254	21.5847	15.0472	23.8052	30.5586	27.7579	19.6838	18.2424	25.2335	20.4877	16.8058	26.1791	29.5499	52.6795	41.5498	44.0372	23.4913	11.898	18.3429	9.2929	16.9926	23.0554	14.6766		0.0300728	23.4194
0.5952	24.0827	16.309	20.4328	19.3378	19.7395	19.623	14.6463	24.8119	30.0289	31.0438	25.6042	24.1867	29.4124	20.1152	20.6116	22.7636	36.5649	59.6336	43.5167	48.3924	18.9784	16.0048	14.4716	11.1156	18.8201	29.3261	16.2104		0.0375957	25.029
0.7142	22.546	18.0564	18.2595	19.3711	26.2901	18.9597	18.2429	32.6986	34.6591	33.9669	21.9899	27.3638	22.667	28.0666	19.1928	24.3403	35.2826	56.3697	38.4523	51.6614	31.7056	16.3419	21.7403	10.5321	25.7688	30.3019	18.7901		0.0451123	26.8006
0.8332	20.3934	18.8268	25.936	21.4146	22.9663	23.6754	15.2061	34.3507	36.6386	31.5444	28.7482	32.4134	33.9029	25.2092	26.1004	27.3772	51.585	61.6372	42.9867	53.6955	26.1921	16.3014	23.102	15.5644	30.0893	27.6698	17.1473		0.0526289	29.2842
0.9523	27.9706	18.086	21.4194	23.4929	24.7755	24.1199	15.1099	32.6744	37.3397	35.6148	32.8493	32.4958	27.5615	25.0349	24.9252	26.7909	45.7553	61.0249	51.0997	60.5558	26.2282	18.453	22.1967	12.9883	22.8844	33.0494	18.7485		0.0601518	29.7498
1.0713	25.63	22.6967	23.8272	29.8469	28.1205	23.6735	20.4956	43.7402	35.3089	33.2803	38.8429	39.6092	39.2124	25.2498	24.4135	20.5289	51.6458	48.2714	41.9804	55.946	29.854	20.794	25.7646	18.5918	26.8811	37.9248	26.2658		0.0676685	31.7925
1.1903	28.563	22.4306	25.8421	27.9719	25.0616	26.9029	22.7179	36.6951	45.8091	35.3646	32.3391	40.4807	37.5344	31.5446	27.7828	25.0708	46.9083	43.9495	45.8008	66.2662	28.6061	17.5917	24.5048	14.4506	29.8223	44.7754	20.2549		0.0751851	32.409
1.3094	22.1821	17.7796	26.1315	27.9726	32.7212	27.7161	24.9037	43.8943	34.6404	36.2363	42.9294	40.4689	29.97	24.4927	27.4878	26.0791	38.3279	48.4824	42.0234	58.0975	29.0238	19.9787	26.3774	22.4877	27.1121	48.9841	28.9936		0.082708	32.4257
1.4284	23.9917	19.4797	24.2724	33.1919	32.5384	33.3601	25.8255	47.0784	36.1479	45.0973	50.3127	42.3871	41.7219	28.0059	23.154	29.9024	46.7893	56.1954	34.8476	56.9807	31.4426	20.7228	30.3086	21.9855	31.6449	48.9041	27.7775		0.0902246	34.9654
1.5474	25.223	17.6526	28.8964	29.2306	31.8564	36.0017	30.3662	44.7359	46.1869	44.6387	45.3564	52.9082	35.5799	26.8711	31.7044	23.5767	41.7945	43.8913	39.7998	51.0645	32.1695	26.5741	19.251	21.4696	36.379	49.0526	32.7763		0.0977412	35.0003
1.6665	24.3647	24.1211	27.9759	31.2373	32.5817	34.1972	32.9802	47.7437	35.0459	46.8788	49.6886	50.1899	43.4399	35.0925	29.9367	26.247	38.8988	49.0743	37.918	52.3395	28.7347	21.1744	32.5038	24.7447	32.1819	46.5499	24.9707		0.105264	35.5856
1.7855	24.7704	19.9279	28.4929	25.0475	31.5489	41.0021	39.9122	45.7741	41.8039	49.2928	52.4815	41.0771	37.6359	40.4548	36.5788	27.891	39.6986	47.9912	45.3219	43.5485	36.6428	29.1913	32.2532	22.514	33.6635	50.5703	29.0142		0.112781	36.8186
1.9046	25.4514	23.2668	26.6312	26.3571	31.077	37.4414	38.4084	45.4112	40.6802	40.3171	59.7486	47.8054	44.933	34.1658	30.1405	25.2848	42.0897	53.9654	41.9406	48.7339	36.3802	25.1385	28.5393	22.721	28.8406	51.7524	27.6347		0.120304	36.4762
2.0236	25.5429	23.527	23.4084	24.955	31.7641	37.5261	36.9512	41.3295	43.6002	48.4051	54.7104	48.7325	40.2926	49.7894	38.8779	21.5262	41.7696	54.0984	40.9292	47.2166	33.6606	26.2392	26.7513	23.195	33.7851	48.8956	27.4144		0.12782	36.8479
2.1426	25.2417	24.6744	34.5139	23.9583	33.5911	42.6782	30.831	37.1883	44.6985	51.43	51.5873	38.0046	41.3108	57.4365	38.4527	30.0764	53.1966	48.9198	39.6336	49.8258	34.4587	21.4584	28.2825	29.7743	36.2654	44.7945	38.4123		0.135337	38.1739
2.2617	26.2928	28.8118	37.4971	27.4025	33.1428	33.4103	29.8129	44.211	41.7727	44.5382	49.2731	46.0189	42.4677	60.9423	41.485	34.5426	45.5715	40.4494	34.6972	43.4811	28.2185	21.4498	34.067	33.0443	29.9827	56.4177	32.4692		0.14286	37.8322
2.3807	32.5186	36.2824	40.0362	26.4511	32.8943	42.0645	35.0884	44.1713	39.4174	39.7472	53.683	49.2407	41.5564	50.1231	38.7828	26.1976	50.1463	44.7355	37.4277	41.2377	36.0238	25.2246	29.019	31.2265	33.413	44.8121	35.2524		0.150376	38.399
2.4997	29.1194	33.3383	36.2347	28.5619	34.0937	39.9551	28.6491	45.291	48.1809	43.5948	51.0568	43.8571	46.2021	65.5077	54.1353	39.8309	38.5113	48.3893	41.3274	45.3558	38.2889	20.8152	30.1469	28.706	31.6534	48.4721	26.9905		0.157893	39.4913
2.6188	32.5061	31.7122	34.9525	24.6148	32.2754	36.093	34.1528	47.0748	46.7098	41.9909	52.5747	38.4749	52.8042	60.2241	46.1939	32.1534	43.1584	38.7347	30.058	44.7478	33.467	24.1924	28.1504	29.4297	30.7387	51.1197	31.1018		0.165416	38.1262
2.7378	31.96	31.8414	35.5011	31.8657	32.5874	35.8624	28.351	44.1055	43.6564	40.7771	42.4927	38.1424	42.2671	49.31	40.6082	37.8466	49.1675	29.4075	40.2238	44.1144	40.6784	22.6885	33.6108	33.6784	38.819	39.5466	31.6878		0.172933	37.437
2.8568	30.124	33.5308	45.4583	31.0329	38.2259	43.3253	31.1429	53.4267	44.5919	42.7507	44.5618	46.31	46.4736	56.7017	49.5357	35.7493	55.1706	32.9518	34.5094	41.2622	33.1749	24.9513	29.1848	28.5595	37.2604	46.9932	32.874		0.180449	39.6235
2.9759	35.0756	34.3597	38.2498	34.0804	33.0235	28.7111	33.9587	39.1502	44.6008	32.5036	40.2198	36.8065	40.7567	56.7167	47.8174	37.6555	54.9979	36.3761	34.8552	43.3731	30.6649	21.9181	27.981	29.8377	34.8762	47.3025	37.4148		0.187972	37.529
3.0949	38.2907	34.1114	45.7319	37.5268	38.6688	37.3774	34.0284	38.7696	45.6475	32.9351	38.0177	26.5202	37.4071	49.7287	47.2023	40.2828	46.8953	39.7201	43.9749	42.8004	32.2836	26.3661	32.0212	36.2649	41.8752	43.0007	33.8585		0.195489	38.5669
3.2139	36.9029	35.36	44.126	30.2398	46.3912	34.5127	28.3874	38.2545	51.5308	36.7931	40.181	37.9625	34.3669	58.5816	43.1727	40.7466	53.6096	33.2305	34.5728	32.5781	32.7399	26.7229	32.5023	34.9879	42.8162	47.0196	26.322		0.203005	38.3189
3.333	37.1869	42.9347	43.4179	37.9684	32.23	44.744	31.0781	38.121	46.3266	30.4922	42.1071	29.4298	38.796	56.8105	41.5569	32.5656	49.1985	39.0454	41.0052	42.2869	34.6787	26.474	25.6629	34.6795	34.4741	52.5437	28.0711		0.210528	38.2921
3.452	36.9861	41.6997	41.4373	33.5136	45.3229	41.9765	34.9214	34.9774	41.558	25.2126	32.6948	29.393	37.9907	54.4189	40.2289	36.345	40.6267	39.1482	33.8092	41.2791	37.1536	29.3183	31.6094	43.0602	29.8493	50.9527	27.3175		0.218045	37.5111
3.571	37.0318	38.6599	47.6219	36.4558	36.446	37.8948	34.27	36.4478	36.4097	32.6301	34.7065	35.154	45.1262	67.3162	40.8777	47.8954	40.6579	35.3704	42.989	44.0291	28.1121	23.7869	39.537	40.9263	31.8693	54.1691	31.4636		0.225562	39.1798
3.6901	46.5225	33.615	36.7852	38.191	39.9222	32.5847	32.0744	29.5021	36.0921	23.6854	38.3938	32.8524	40.4376	53.1559	39.3186	49.9494	36.8725	34.974	41.8459	36.9523	35.643	28.5615	37.2208	39.5881	29.4245	42.0581	30.6587		0.233084	36.9215
3.8091	32.9566	39.4737	39.801	30.3121	44.1858	33.8237	33.1824	33.9744	34.4707	29.7445	42.8894	32.7002	42.8444	40.1222	37.584	54.4855	41.0507	35.0305	37.1025	44.707	35.5599	28.0847	35.2832	40.8238	36.2359	51.2518	28.5951		0.240601	37.6398
3.9281	30.1069	33.9038	35.6581	39.87	35.1997	32.216	22.9224	29.9911	30.3438	30.1851	37.7865	33.0564	38.397	48.6898	37.8265	44.9622	41.2193	31.5159	32.6526	41.5362	36.0935	26.534	39.9318	36.1929	29.3375	47.0259	28.5712		0.248118	35.2491
4.0472	37.4273	33.2963	33.5435	31.7564	36.6358	39.9393	27.6515	26.4566	40.6145	28.9494	31.8265	35.7917	36.2266	50.2748	38.8631	40.3737	41.9634	39.4591	33.7573	37.8945	27.9332	25.04	34.401	37.5351	34.9122	50.6772	30.6333		0.255641	35.6975
4.1662	35.7562	27.4914	26.6096	30.3694	35.6043	30.7425	34.9265	23.8353	29.1492	24.6088	35.0165	37.832	28.1301	40.5838	37.0136	43.8779	40.8452	38.4374	37.6531	38.0112	30.5218	34.8119	27.3069	37.841	28.5064	48.5259	33.7767		0.263157	33.992
4.2852	26.8335	25.409	27.278	26.883	38.2192	27.1942	28.1097	25.8621	31.0438	25.659	34.0601	38.1356	40.3252	43.9686	41.9138	40.468	40.2616	51.1653	38.7666	37.6661	26.9145	30.5531	36.6401	32.2555	31.9025	43.3027	30.1334		0.270674	34.1083
4.4043	31.0961	40.7046	32.7201	36.8233	40.2849	29.7305	29.2128	27.8706	27.5102	26.8277	36.3886	43.5481	41.5561	52.1304	38.9436	33.1283	35.0172	42.6038	35.6863	43.3328	33.0467	26.5129	36.0013	36.7612	33.9052	33.821	31.1632		0.278197	35.4195
4.5233	33.4367	33.5591	30.5946	36.2936	36.4407	37.0231	32.4372	24.0783	36.7355	20.3241	33.0074	38.9662	36.1149	40.6236	26.7413	38.3319	43.2649	44.2323	38.1331	34.2249	31.9701	30.2917	36.9403	32.2678	44.6336	42.9602	35.4226		0.285713	35.15
4.6423	30.5461	33.3427	26.7752	33.4119	39.8137	29.3465	28.4288	24.7385	33.1021	24.2877	30.1387	41.54	38.1286	48.441	32.6517	40.6346	40.6308	52.111	30.3879	36.1663	27.1183	34.9323	39.0107	36.1538	43.0278	37.7551	37.5396		0.29323	35.1912
4.7614	34.7063	27.9571	24.2924	41.4825	50.8547	26.4478	37.6962	28.2401	34.5641	24.9553	33.6006	39.891	39.648	44.0431	34.5627	36.7434	43.3667	46.826	30.201	39.536	33.5394	29.9532	37.3857	37.0609	42.7552	38.4147	29.3699		0.300753	35.8553
4.8804	26.9258	30.9527	29.0706	38.4024	36.7002	33.1999	32.2173	27.6768	34.4235	29.5045	40.8067	36.6812	45.622	32.2675	37.9518	48.8329	39.2205	38.6574	36.1091	35.009	32.9393	33.9746	44.9984	31.9099	38.991	34.7334	28.937		0.30827	35.4339
4.9995	30.6269	29.3784	29.9588	34.4922	41.8616	29.0169	31.9809	31.0844	37.6869	19.0687	35.3637	38.0387	39.9392	43.2161	38.3386	40.2776	46.0574	40.9161	28.9805	40.5823	38.3771	33.3675	39.175	38.1896	37.3834	41.9723	26.8336		0.315792	35.6357
5.1185	27.2766	33.8974	33.0701	35.4812	45.9203	32.5875	37.4373	35.006	35.1563	25.0863	33.7771	37.2427	37.546	32.639	39.0268	36.8479	42.1183	41.4112	29.1588	32.4219	38.6157	35.0754	38.794	36.7866	38.772	35.9914	31.8676		0.323309	35.5189
5.2375	28.4682	26.4457	25.3848	36.8094	44.9839	33.8333	31.9098	31.1811	33.2285	32.6846	38.0162	38.0808	29.16	35.093	34.8025	36.4767	46.7055	38.0616	35.7801	34.9997	38.3332	26.1368	39.2232	38.7286	36.9715	37.7602	29.5536		0.330826	34.7708
5.3566	26.427	24.308	35.1003	35.9456	49.6254	34.8438	33.4396	30.9882	44.5272	32.7192	30.7182	39.4236	35.3052	35.6726	33.7798	40.2646	37.2629	37.6987	36.5288	36.9478	30.8143	36.0486	40.6813	34.2159	36.8888	36.8989	29.3125		0.338349	35.4217
5.4756	29.7633	23.9088	25.0298	39.6783	49.0927	32.0279	40.222	29.3265	33.7869	32.8147	31.8865	32.1745	37.3668	34.6715	37.0153	33.0348	48.5274	43.2367	33.1406	35.4589	36.431	34.9084	43.9117	34.1841	32.5922	31.4327	35.8469		0.345865	35.2397
5.5946	25.0702	24.2011	38.0569	31.872	43.9005	31.4455	34.2821	32.3073	37.7508	27.6032	37.3002	40.1154	36.739	31.1324	39.938	37.9851	45.384	52.8003	31.8643	35.5967	33.1535	36.8573	36.0092	35.3493	42.0301	42.688	40.0303		0.353382	36.3505
5.7137	27.8653	24.1385	28.6144	39.0713	55.0971	30.9398	37.8216	28.7517	36.7448	35.1309	36.3569	42.6571	38.7155	30.8517	31.4933	30.575	47.5061	56.2544	37.5719	28.7576	29.5574	41.109	39.894	31.5946	34.9586	44.661	38.9696		0.360905	36.5059
5.8327	24.8016	22.321	27.0801	33.1125	62.7664	32.7504	35.871	37.3984	38.2822	37.2771	29.5627	33.2511	35.2458	40.4659	39.8351	30.6133	53.6272	50.8614	46.4134	31.2361	30.7991	42.0611	39.9008	34.6589	34.2662	36.7083	33.839		0.368421	36.8521
5.9517	36.6968	26.3939	31.9209	29.4592	61.7199	26.0585	38.3457	34.0359	41.3757	36.3398	32.7532	44.2654	39.6627	31.7735	33.0042	34.6163	44.0988	46.7552	38.8295	28.0689	38.8872	31.5019	43.9571	42.1427	42.1564	34.6964	31.7008		0.375938	37.0821
6.0708	31.6475	26.4133	29.7321	29.5521	50.9969	29.5881	39.2718	40.6155	46.9316	41.997	32.3691	35.5465	37.3359	35.4378	43.4593	29.0769	42.4115	55.5435	37.0458	33.2216	32.9159	34.2967	46.1212	32.7273	35.9787	31.0887	40.9514		0.383461	37.1212
6.1898	30.3389	23.7154	26.5837	32.9423	57.2366	32.3317	34.566	33.4582	51.2331	40.5629	40.9433	40.8222	33.9316	36.7717	43.5939	34.1805	48.6062	44.8563	42.3278	28.0572	33.768	36.9544	40.9011	32.8299	47.6359	36.1748	34.2713		0.390978	37.7628
6.3088	25.4591	22.7311	24.5941	26.4891	50.6529	33.2523	37.4267	35.0403	41.3426	41.8224	37.6365	41.3349	30.598	37.7588	29.8105	36.1515	43.9936	39.1819	33.6841	30.0284	36.0003	32.621	33.8955	30.7565	33.7021	27.2969	37.0344		0.398494	34.4554
6.4279	32.3796	20.0187	27.2605	22.5803	44.6552	33.159	42.4677	44.0523	48.4874	43.7151	32.2443	42.5717	29.6176	32.7036	26.7108	42.4275	43.5776	43.4797	33.1337	30.2203	30.0726	32.5403	30.6916	33.6931	36.577	34.115	37.0066		0.406017	35.1911
6.5469	30.6338	26.1843	23.9349	23.1136	41.8046	35.3758	39.182	33.3722	48.1973	34.0231	36.4105	36.9672	42.5257	30.3189	31.7771	33.6403	47.7069	37.7511	38.4452	28.1338	41.424	35.0588	33.18	36.7004	34.2482	30.744	35.0476		0.413534	35.0334
6.6659	31.1677	31.9727	26.8698	22.5744	41.0491	36.5329	39.858	35.2598	37.4212	37.6457	46.598	39.5262	34.679	35.2976	35.8402	37.006	47.6141	37.908	35.1083	27.8825	36.982	41.194	44.367	33.6532	30.1029	42.6938	40.7508		0.42105	36.5761
6.785	30.7346	21.9827	29.2642	24.7185	43.1589	34.081	32.1174	39.999	32.312	34.62	42.7205	37.1663	39.7937	37.2594	32.5303	45.3755	40.4982	39.0919	31.8721	33.481	35.1204	34.1594	31.6594	34.9444	32.7123	34.3832	40.6108		0.428573	35.0506
6.904	30.1342	27.4122	27.3445	23.3102	29.8522	30.6455	30.3306	45.1683	37.2312	33.2678	35.2612	39.1056	39.6351	35.0187	27.6494	41.6464	42.0069	36.4365	28.26	29.933	37.0947	30.4725	36.3374	31.4837	31.8057	30.291	39.5621		0.43609	33.5814
7.023	34.9251	31.9195	27.8749	28.4722	30.022	38.1005	40.5558	45.0804	35.7174	34.6233	33.653	38.0764	36.2039	45.5722	24.3703	36.423	51.5381	44.7405	34.312	36.2949	43.2751	31.7413	33.4932	28.2102	32.9584	41.9378	39.0059		0.443606	36.2629
7.1421	31.1775	20.7878	18.629	26.3646	24.5683	45.0644	33.9958	42.4288	27.9267	33.6699	38.7237	39.0818	34.9952	39.6012	26.6011	40.1828	43.611	45.8435	26.027	27.8109	38.5674	35.7382	36.1979	27.2481	32.4363	34.8065	35.0335		0.451129	33.597
7.2611	32.5144	22.5533	25.0396	23.9104	32.4633	36.2831	32.3459	32.9944	27.7429	34.4195	35.8927	33.8855	39.3129	44.5767	26.7672	37.0761	43.694	46.3287	34.7282	36.176	44.9118	29.7164	42.9282	30.6969	44.5452	42.7577	34.629		0.458646	35.1441
7.3801	33.4592	20.9778	28.564	29.3235	27.637	37.4943	30.1824	34.9599	27.6525	31.895	33.959	41.5704	40.4708	42.562	24.2019	40.0714	37.9943	33.3083	31.8355	30.8685	45.9271	44.486	39.4025	25.8618	34.7985	32.4268	41.5987		0.466163	34.2033
7.4992	32.5546	21.958	29.4928	25.6475	31.1971	39.5527	29.938	36.4898	30.7366	30.8312	31.4888	32.7797	38.7914	43.4286	19.2193	32.3846	36.2307	34.5475	34.1522	30.7131	47.8486	40.1829	40.6245	33.8233	37.5514	37.2204	41.9393		0.473686	34.1231
7.6182	25.3167	23.4155	25.4777	23.0002	34.1209	39.5692	34.8495	33.5153	23.3645	32.7328	37.42	29.8912	39.1139	46.6007	12.8791	38.9212	32.2804	39.032	31.6413	31.8167	47.6583	35.8253	47.481	34.1816	39.6857	33.7928	31.8997		0.481202	33.5364
7.7372	33.5433	20.3321	26.6004	20.0302	32.1809	39.9175	31.6931	32.8958	35.6436	35.2266	33.1474	32.65	36.3042	39.1094	18.8731	30.431	36.3243	35.5283	31.4386	36.9928	39.8502	33.1833	46.195	35.5407	43.6125	36.7656	33.3214		0.488719	33.6049
7.8563	29.0038	25.6374	19.3619	24.2973	30.3036	50.0258	32.1105	32.2155	37.2779	38.854	29.0043	26.4706	47.0482	46.5847	18.3839	30.4631	38.025	35.0524	28.5021	32.8282	57.0224	39.1023	49.3143	22.393	34.8988	39.2632	39.4132		0.496242	34.5503
7.9753	29.5849	26.2007	18.8925	24.048	34.5525	45.4023	34.8719	35.4596	33.2317	34.1814	27.6843	30.3292	44.5282	47.2107	18.7634	29.9898	34.1093	33.7717	31.0878	25.2831	48.2329	35.7161	39.9316	24.4303	32.9779	32.8466	32.1771		0.503758	32.7961
8.0943	35.448	20.534	20.1053	19.3547	29.1131	46.7483	32.3026	39.4753	30.6527	31.6452	32.5959	32.8832	44.7105	42.5361	21.9138	22.7328	30.0452	36.1151	32.249	30.1726	49.0763	29.0508	49.5019	26.6547	33.3136	27.4706	32.6353		0.511275	32.5569
8.2134	31.504	23.1825	18.8046	22.1367	33.0201	42.8173	32.5042	36.5755	33.0275	37.7494	22.0228	26.8171	41.2696	38.675	13.45	21.7475	31.412	35.3301	30.8653	34.1039	48.2283	37.0525	43.5659	26.6515	31.7529	36.5998	38.8998		0.518798	32.2135
8.3324	30.4191	20.4955	19.711	22.4486	36.0765	35.0509	30.7836	37.1655	37.6166	40.9577	26.1926	25.8992	53.2487	40.6464	16.3263	25.7319	31.8649	34.1865	33.3509	27.3347	45.4839	36.5984	44.1998	25.7882	31.2435	28.9838	40.7673		0.526314	32.5397
8.4515	27.1818	20.7976	17.5351	22.168	33.9562	35.6833	28.575	37.8485	39.2499	31.9907	19.7451	28.4432	45.1335	33.8703	12.6319	26.4643	32.6229	34.5814	29.4659	30.0511	47.2208	35.0521	43.3604	27.8468	31.2279	32.107	37.6066		0.533837	31.2006
8.5705	35.3019	19.1346	22.3893	19.0678	37.146	26.7247	31.4904	46.1898	38.9713	30.0092	26.3552	33.9853	41.8943	38.6965	17.1015	26.0043	30.3585	33.9482	29.6184	22.768	47.5589	32.4086	35.5333	28.2936	31.3547	29.9485	33.2662		0.541354	31.3155
8.6895	25.9466	20.5473	22.839	23.0404	34.55	32.7812	41.016	38.1974	36.784	27.8943	24.031	28.2543	44.2115	29.7827	16.5786	24.773	32.772	31.755	30.0406	34.0592	50.0912	37.0107	36.7831	32.0937	26.0323	25.7592	39.9861		0.548871	31.393
8.8086	25.8539	18.7714	21.3469	20.7401	37.4266	28.3099	34.5532	43.4779	31.3548	26.3969	27.9391	25.4406	40.5145	34.0813	15.5531	23.6525	34.8089	30.1826	32.6377	28.8216	50.0543	37.4456	33.0771	20.9608	25.1173	30.492	40.3796		0.556394	30.3478
8.9276	31.7579	22.5887	20.7807	17.3979	32.5516	25.2815	35.1618	36.8661	43.6142	28.3242	20.5013	29.0033	35.3567	30.0643	14.1919	30.8111	32.8276	30.3122	33.8161	36.9239	41.7087	37.4451	32.3443	26.7654	18.0373	31.2131	37.4671		0.56391	30.1153
9.0466	34.7073	20.3801	24.1621	20.3371	26.6283	28.2759	34.4324	37.4615	41.8947	23.9074	25.4571	32.6382	33.8866	35.2708	11.7351	32.953	34.4075	32.805	27.3279	28.2966	44.8068	35.0186	26.7172	30.4549	25.5754	25.9895	40.1629		0.571427	30.2107
9.1657	28.6546	24.8826	20.4133	15.1513	32.574	28.4917	31.2931	32.5812	38.2904	26.1709	21.6957	27.617	32.8293	24.6819	14.4884	33.5193	32.0199	27.0611	34.6874	33.0924	42.2764	41.7186	31.1468	27.7954	18.4584	23.9076	39.0624		0.57895	29.0578
9.2847	28.9739	26.9096	30.0653	12.9982	36.8893	31.4173	31.4734	36.1638	50.2929	23.3852	17.4726	27.701	37.2485	27.3493	15.9217	28.8883	33.1702	27.073	30.597	37.8142	40.6771	41.4857	30.6776	28.8206	21.5914	20.3144	34.0518		0.586466	29.9786
9.4037	26.454	22.2076	21.6392	12.1528	29.0393	29.3683	36.7684	35.6902	49.4994	22.0916	17.3111	21.439	33.0878	27.2376	17.6392	33.8567	25.0417	35.9097	29.3181	39.38	39.669	33.1189	32.3722	31.1766	17.4709	19.4397	37.177		0.593983	28.7243
9.5228	26.3266	22.0213	20.9278	12.4018	30.4445	28.6858	30.7271	35.0483	41.3289	18.5112	22.8402	25.0865	26.0647	29.149	11.8353	38.5693	31.3281	29.8656	28.9529	40.4671	39.0524	38.2528	28.5673	30.245	16.2781	16.2308	39.7854		0.601506	28.1109
9.6418	28.4307	19.7674	25.7671	11.0383	33.0802	28.5854	29.1497	32.9254	42.4403	13.7023	22.9434	25.3364	25.1133	20.6047	10.5884	36.4825	32.5186	37.908	33.1938	37.2477	38.085	27.6066	33.8161	30.5682	22.3958	20.1472	32.7762		0.609022	27.86
9.7608	26.4008	21.9457	23.0736	13.008	40.6481	30.4183	30.5543	31.6587	37.9008	13.0311	18.7532	26.2705	25.9736	25.2742	13.5757	39.6292	31.3385	32.2544	34.5729	37.522	38.342	29.3623	25.9732	35.9046	14.9668	20.8935	32.0435		0.616539	27.8255
9.8799	26.8442	20.7388	19.9531	13.3442	31.2151	25.7039	35.6329	30.9376	45.0724	13.7048	21.6877	26.7353	31.5958	23.1481	10.4256	37.3437	29.1328	40.0412	38.2925	36.9274	35.2567	27.7681	34.8608	29.4063	13.2071	20.1952	33.0738		0.624062	27.8609
9.9989	21.3353	21.5749	17.1267	10.6725	34.8262	29.6914	43.8206	37.8029	34.5205	14.0314	20.8289	26.1317	29.7241	19.239	15.4671	33.6654	30.0407	33.7737	33.3597	31.9921	36.5021	28.2335	36.2483	26.5966	15.9687	15.3285	36.2935		0.631579	27.2147
10.1179	25.1057	23.0139	17.522	8.5563	26.931	38.5087	44.6274	33.635	44.237	15.4788	20.174	25.6735	31.5801	28.84	10.5467	24.616	31.2855	47.3427	30.178	40.0752	35.1436	24.3664	25.9676	29.3767	14.9689	14.2676	29.455		0.639095	27.462
10.237	20.7339	26.9359	17.609	11.6584	28.8496	29.7566	35.5264	32.0421	26.444	17.299	24.1634	27.3625	30.607	22.7242	12.4504	32.6485	32.8278	40.3821	33.195	32.6631	38.0035	28.8325	27.5826	34.505	14.8569	17.6931	32.7445		0.646618	27.0406
10.356	18.1395	23.6509	20.3535	11.1306	31.3573	32.8808	37.114	34.1116	35.8601	14.3412	25.0398	27.037	30.8017	21.1416	8.6204	32.2129	33.1699	41.2765	36.1642	37.1514	29.4701	23.21	25.4706	30.4661	11.8986	17.4364	33.8063		0.654135	26.7894
10.475	19.4101	22.7398	17.4055	12.3607	26.3773	31.7186	30.9357	37.1142	32.1242	11.2033	23.975	29.7403	29.4406	19.9665	9.1266	27.0739	36.3452	37.2961	30.2088	29.6686	33.3546	30.7205	31.6879	28.5248	14.0417	17.545	33.3754		0.661651	26.0548
10.5941	17.6315	20.5471	20.6616	14.2369	28.8724	37.1264	34.1301	27.4676	27.9085	10.3059	17.8939	32.3013	28.519	19.9688	10.2416	27.3502	38.6166	39.0247	40.1041	32.5774	36.4989	27.9926	24.5264	32.4593	14.0449	12.5521	27.3866		0.669174	25.961
10.7131	12.6546	18.4669	21.6648	12.8953	22.2716	31.9311	33.4267	32.2805	24.79	12.9795	21.5721	32.3837	25.6492	25.3365	10.8448	25.5084	37.7981	48.2644	41.2392	31.715	29.1313	27.9568	26.7874	34.6376	11.2848	11.8928	41.0039		0.676691	26.1617
10.8321	13.083	19.4396	17.4682	10.745	22.1392	27.4073	26.9045	27.8588	29.998	10.6819	26.687	34.4817	31.9918	20.4885	15.2669	28.1876	37.1394	30.9135	38.6834	28.6592	33.3938	27.0668	30.0722	33.2923	11.9153	13.0135	37.0037		0.684208	25.3327
10.9512	16.6031	24.9651	22.5283	14.8454	21.0226	24.0973	20.5165	23.9736	27.0175	11.6791	24.4721	41.1454	29.3225	21.2772	11.8822	23.0303	40.4758	35.253	37.5195	34.8671	29.2029	29.7954	37.6945	32.3924	13.5134	12.6883	34.1911		0.69173	25.7767
11.0702	14.0579	18.8155	12.5425	16.9693	27.5614	31.7168	21.4189	26.604	23.2214	10.4995	26.2836	26.9471	31.0779	19.8856	13.8542	23.4907	38.9728	38.8215	38.6159	31.5374	31.4127	24.4906	34.6015	27.8236	12.5225	14.8289	34.9896		0.699247	24.9468
11.1892	14.42	22.2632	23.0498	20.5237	20.9017	35.3614	30.6009	29.2666	25.5699	10.7241	24.2546	30.7331	37.8954	17.8348	13.1723	26.5312	39.3595	41.4587	41.1323	36.3025	24.3022	27.7419	32.1971	32.6084	13.6574	8.8347	34.8494		0.706764	26.5017
11.3083	14.4334	20.3391	19.6066	18.9277	19.51	33.326	28.433	26.3577	24.2313	10.0705	22.6525	29.2747	34.3473	28.5401	13.2206	27.8916	41.317	36.3817	40.0173	34.2671	29.0758	26.4727	34.626	30.7065	13.8128	11.3858	28.2821		0.714287	25.8336
11.4273	10.6088	21.0555	21.5006	16.007	21.2224	32.7056	20.965	25.5033	29.1377	11.9288	22.3345	34.028	28.1615	22.8547	13.7794	25.1232	46.2681	38.6505	35.9796	38.5296	29.2722	37.4128	32.3497	30.8667	10.6198	17.7415	34.6364		0.721803	26.2683
11.5463	9.5224	23.2984	27.0425	18.7329	20.9686	27.197	25.6586	27.9107	27.9635	10.4814	24.082	24.1583	32.5632	29.403	16.3424	23.407	49.4173	39.7182	40.3994	28.8513	34.9293	38.656	38.497	25.6083	16.0533	12.8134	30.4282		0.72932	26.8187
11.6654	11.1887	22.4688	21.7434	18.1944	26.5983	23.7717	20.3994	25.8113	29.9252	11.7828	20.3415	22.8541	28.6606	22.9984	13.8433	24.9737	41.1234	28.6486	33.8235	36.3915	33.9783	30.4802	45.631	23.7395	11.0362	14.1378	27.1725		0.736843	24.8784
11.7844	11.0386	20.7069	19.5376	14.9706	23.3139	24.9507	23.466	30.1161	28.1219	14.7031	19.0169	31.616	31.204	28.4794	12.2792	26.0542	38.6932	40.2196	40.0774	29.0623	33.2997	32.234	47.2149	28.5584	15.5686	18.1503	32.7635		0.744359	26.4969
11.9035	16.0612	23.0705	32.8543	15.2173	25.7245	28.6311	24.2778	28.6645	23.2054	11.7514	21.7598	33.8418	32.3935	23.1175	10.6508	28.4571	44.8607	36.6798	32.2167	27.5362	29.7308	33.0947	45.5032	30.9407	9.6678	14.1656	33.9524		0.751882	26.5936
12.0225	11.7543	18.0447	26.6494	17.4952	30.563	31.8243	24.7096	25.6072	24.4333	8.3408	24.5137	27.1367	31.4782	19.9549	12.8972	24.7195	45.1954	42.9012	28.9738	34.5889	29.8943	35.9112	51.1263	27.7567	8.5916	13.9869	25.4699		0.759399	26.0933
12.1415	10.7321	22.3164	22.3558	14.856	28.5978	30.9448	25.698	27.0501	25.5507	14.0383	25.5841	34.4842	36.7481	25.2883	14.6762	27.511	39.1414	42.6253	28.698	31.626	32.4178	39.5936	40.4994	33.0191	14.5048	14.6963	37.279		0.766916	27.4271
12.2606	11.3373	20.1462	25.2152	15.1822	31.4074	35.8374	25.7516	30.6593	21.1435	11.6236	22.4121	27.8858	37.212	27.7585	14.7853	25.8289	43.7491	37.765	35.9342	31.0238	30.5898	45.2943	50.1579	29.9687	14.0521	14.7234	38.1539		0.774438	27.9851
12.3796	14.434	22.4528	21.6698	16.64	34.7197	35.0235	23.8963	28.0798	23.4587	10.9971	23.8123	24.9821	30.2934	29.3448	11.8243	24.6573	40.8374	34.9392	37.6758	28.3647	32.7795	34.9493	42.7541	35.969	11.4728	13.4521	29.553		0.781955	26.6308
12.4986	11.2876	22.3045	28.4302	18.1488	30.9957	43.3624	23.0472	31.6354	21.375	13.4983	25.893	33.2886	34.4827	28.9068	14.6677	34.2918	42.8202	41.7137	26.4057	35.4409	29.7493	32.8739	52.1145	25.2385	10.63	14.829	32.7027		0.789472	28.1531
12.6177	15.5907	23.2899	22.3902	14.9784	27.3681	39.0901	30.293	30.837	24.1609	10.4173	26.4195	30.4659	37.349	31.3198	16.8895	35.3841	45.1043	43.1237	33.59	32.4703	27.0425	37.079	46.4174	28.7653	11.7816	13.3536	34.5274		0.796995	28.4999
12.7367	13.8777	22.7527	21.4951	16.67	29.2897	37.7677	28.1526	27.2374	21.1615	12.423	33.686	33.3686	38.2802	24.5745	17.2182	36.4926	37.1309	33.4013	28.3552	36.0456	33.4595	33.9979	48.2899	33.2696	13.7461	16.5912	36.4577		0.804511	28.3405
12.8557	13.3824	26.8738	23.0679	15.0902	32.0411	36.5968	25.9348	34.0493	18.3845	12.5189	32.0018	37.9465	43.4985	29.3315	12.2532	39.5849	44.6227	34.6596	27.4476	33.7318	36.7029	33.6649	43.469	34.0744	17.6434	10.2679	38.5526		0.812028	29.1627
12.9748	10.8586	22.9872	21.9008	20.9435	29.8971	43.6702	23.7099	23.4692	17.5984	9.2868	34.5806	39.7201	34.9888	30.9678	18.0228	36.4137	37.6424	37.3936	29.6465	43.1632	34.6273	33.3272	41.662	31.6195	17.3869	13.4463	39.5596		0.819551	28.833
13.0938	10.8844	27.5629	24.12	13.4529	29.9608	28.8961	22.6171	29.3328	21.5301	11.9529	35.5378	37.791	45.7948	20.9253	14.4727	42.1518	41.8265	37.9022	28.5776	40.6026	32.8442	26.7789	44.1526	32.0717	12.1503	13.5698	33.8518		0.827067	28.1967
13.2128	10.9844	25.0997	19.7698	18.3389	26.4169	30.7001	24.4654	26.292	16.3635	11.8712	33.0092	36.1548	45.839	24.6108	14.2607	29.2644	36.9501	32.0113	35.2443	42.8812	35.9334	28.3145	47.1554	37.2636	16.6857	16.7415	38.5679		0.834584	28.1922
13.3319	10.6982	22.7797	18.9797	17.527	27.1779	34.5551	25.3033	27.6858	19.591	15.8494	41.4215	35.8754	52.2587	24.7008	16.7903	39.9647	41.4365	36.4684	30.663	42.7312	42.4089	25.4948	46.6075	29.6799	20.9244	13.3907	36.697		0.842107	29.543
13.4509	12.4582	29.6061	22.7437	17.9459	27.9276	36.4391	26.9039	20.4552	19.9882	10.7874	36.9853	43.0975	39.9999	24.6171	23.079	32.6491	35.8197	32.3365	32.0748	41.5454	43.4987	34.5808	52.4281	37.4215	26.939	13.3677	27.522		0.849624	29.7488
13.5699	12.5891	26.4541	20.3998	13.3708	26.7707	32.505	32.6609	29.0599	22.5444	15.0566	42.823	46.2578	40.6854	19.8855	16.3939	37.3885	39.7034	31.9311	38.8612	33.4087	41.8951	27.5503	46.5871	41.2059	21.0129	17.9162	36.8528		0.85714	30.0656
13.689	14.8072	18.8198	19.6758	17.1272	33.2126	32.0695	25.181	31.6958	20.362	14.9779	37.7264	37.5187	40.2383	31.7075	18.3367	38.5866	38.4116	42.078	35.0054	36.8228	46.6929	33.6005	49.012	34.1903	19.7909	18.0141	31.4881		0.864663	30.2648
13.808	14.541	23.8433	19.0193	18.154	25.9823	26.2645	27.5566	26.2543	21.9231	17.8036	36.469	42.5002	43.8472	34.0818	16.0055	42.9426	38.3399	37.381	41.5068	42.5205	38.2549	30.9535	48.4449	32.4049	23.566	15.6247	37.2759		0.87218	30.4986
13.927	13.5326	24.4179	19.4975	19.0507	33.3583	25.1736	24.6797	34.4881	14.5921	15.864	40.1829	40.7313	39.5842	33.0401	25.1674	36.5624	43.2937	31.1377	43.1741	40.0245	38.5327	25.986	46.3739	32.0039	24.8945	18.2465	38.2181		0.879696	30.4373
14.0461	13.7414	27.338	17.2027	16.919	30.4527	24.9791	28.7647	28.3423	21.9924	13.0875	34.4172	46.4377	41.8935	34.66	23.3737	33.9872	41.732	28.957	47.1745	35.6367	45.6962	35.753	45.7145	31.4709	25.6963	20.38	39.2781		0.887219	30.9288
14.1651	14.9392	23.3117	18.805	14.4383	29.3318	26.6384	28.8961	28.1287	22.9359	15.9757	26.9429	43.7416	43.1334	40.8912	30.2744	35.5506	47.6915	30.3734	44.0482	39.8382	44.9297	30.2587	45.3941	34.9247	27.1684	15.1558	35.751		0.894736	31.0914
14.2841	14.8638	22.9695	14.7783	11.4341	33.1839	22.9659	22.5839	24.7592	23.0769	17.017	29.077	40.9777	39.7408	35.3125	26.0748	31.1451	44.1031	39.3093	46.9981	36.8871	31.1967	29.0356	47.2361	38.1628	31.7655	17.3698	35.187		0.902252	29.8967
14.4032	11.6945	19.774	20.4097	17.2211	30.3129	18.5167	19.4668	29.869	23.7414	18.1083	29.9141	42.1664	38.6546	40.9015	28.8074	36.8105	38.4438	37.7745	38.5424	42.3122	27.1769	32.7089	35.8216	32.3393	35.0103	19.9175	33.1625		0.909775	29.614
14.5222	14.0129	24.1217	14.8212	13.1868	19.8124	21.16	21.5738	30.4845	30.617	19.9568	27.4739	47.5399	38.4932	36.653	30.1266	31.3183	36.8767	32.0071	43.8948	33.8182	34.3355	29.0891	31.1915	39.3466	42.4662	20.0429	33.6179		0.917292	29.557
14.6412	18.711	16.5244	13.0734	17.2734	19.1771	16.5691	22.6181	29.1284	29.5195	20.806	30.3267	39.4499	38.1012	42.0309	37.2225	31.6671	36.5481	32.9832	45.3282	36.497	30.7017	28.7727	36.0341	32.3859	44.2714	21.4006	41.4256		0.924809	29.9462
14.7603	14.2848	12.6153	15.0361	10.6432	15.2233	14.7169	24.3903	25.6068	25.4713	26.8553	29.1	35.1376	40.6236	41.4504	37.2658	33.0459	39.7819	27.7695	41.5653	32.2606	38.1023	27.299	31.3582	39.5429	48.7275	27.7633	31.7317		0.932332	29.1618
14.8793	15.397	14.9441	14.018	13.3812	14.4376	15.6693	26.2988	22.5082	23.7456	21.3631	26.4112	35.7285	35.9583	33.6392	36.1949	31.0708	35.5064	27.2198	44.6272	37.9303	29.5842	22.3461	35.148	41.8564	38.012	29.4472	30.843		0.939848	27.8995
14.9984	13.799	10.2632	14.1084	8.9725	10.8337	13.0158	27.0359	24.6926	28.006	23.9245	27.8397	36.3978	32.9747	32.203	37.3817	36.1154	28.2695	31.9483	41.4583	32.745	27.2379	28.3229	36.6306	31.2274	39.8685	33.5924	36.2357		0.947371	27.5963
15.1174	15.3483	10.2909	13.7426	8.6855	12.0377	11.7939	21.7151	23.1168	34.1535	29.9057	27.6676	29.1443	31.805	33.7307	34.5734	33.1111	31.52	32.5874	41.3563	37.0629	27.2834	19.2895	33.2093	43.0478	37.6335	31.6656	35.9642		0.954888	27.4608
15.2364	13.1888	16.8105	15.3782	9.0138	10.4356	11.1936	18.4524	27.5997	36.4384	19.3638	23.8442	28.6809	29.8035	28.1316	36.4991	34.7773	28.6542	36.9086	37.6193	34.9725	20.4386	22.8232	31.6636	31.2859	33.5303	31.5874	29.9185		0.962404	25.8894
15.3555	13.5603	10.6767	12.6034	9.4457	7.8255	13.2848	18.6444	26.1997	31.4335	23.633	22.5505	31.0907	29.3911	32.2738	35.7178	26.6875	32.473	21.9972	33.3761	34.2219	21.9498	21.7912	29.1988	29.898	26.9176	34.0327	32.5921		0.969927	24.5728
15.4745	17.704	10.983	11.3887	9.5703	12.5596	8.5438	11.9542	19.6878	31.018	19.304	19.1111	22.2598	32.32	28.2889	34.3368	21.9177	24.466	26.4724	30.1589	41.1585	22.8298	18.5309	18.6196	21.2492	34.0805	27.735	22.2526		0.977444	22.1667
15.5935	13.1969	8.6718	12.3976	6.9457	8.6995	9.9227	9.9905	20.4442	26.3832	15.9189	23.5558	18.2745	23.9311	22.6151	32.5287	24.747	30.9371	28.7129	40.582	29.4723	22.6369	13.3168	16.0554	24.9619	30.7888	31.141	24.8979		0.98496	21.175
15.7126	19.3135	6.6307	11.9452	10.4931	11.6283	11.0999	10.9851	21.0343	27.0384	20.5596	17.4392	16.5043	23.995	24.7165	25.4101	18.8804	18.9364	25.0758	35.1314	34.3461	16.4875	11.9076	14.1679	19.7625	24.125	30.2109	17.0204		0.992483	19.4387
15.8316	17.2832	5.2874	9.6029	7.7807	12.721	7.2873	9.5144	16.1512	22.4455	15.4192	14.3381	14.6324	23.11	21.879	20.2694	19.5484	17.5607	28.0366	34.4784	21.8954	14.3461	6.2464	9.9845	16.4952	25.9367	27.5979	14.841		1	16.8403

## Sheet: Image11
X0	Y0	Y1	Y2	Y3	Y4	Y5	Y6	Y7	Y8	Y9	Y10	Y11	Y12	Y13	Y14	Y15	Y16	Y17	Y18	Y19	Y20	Y21	Y22		Ap-basal	Avg intensity
0	14.1019	6.431	3.4187	9.529	22.0627	13.6938	8.4481	11.616	3.6246	6.0133	13.595	22.2548	9.142	4.9874	8.544	15.9485	14.6089	13.5756	25.1794	10.2362	17.0296	11.8076	9.7659		0	11.9832
0.11903	15.9836	8.7596	2.2387	10.0969	23.6664	12.6965	12.3385	12.4237	5.1841	8.0991	15.5756	27.6968	10.0171	6.2581	10.0529	21.8639	16.7427	18.7395	25.5158	15.7398	16.6108	13.1083	12.7799		0.0129865	14.0082
0.23807	18.003	8.9219	5.532	9.9558	30.6781	16.3219	11.854	13.1841	4.7289	10.4121	18.6964	32.6794	12.4997	6.3063	10.9054	23.3923	20.3295	19.4685	30.7648	18.4267	18.5277	16.3398	12.1058		0.0259741	16.0884
0.3571	15.4932	9.2775	6.9223	11.6496	27.1474	18.2783	16.1466	14.4663	5.1208	9.0274	20.0875	33.5955	14.6647	5.9409	15.083	30.8839	20.4828	23.0257	35.3032	16.0175	20.7197	18.0777	11.788		0.0389606	17.3565
0.47614	18.2459	9.8003	6.1505	15.5619	24.8815	19.6364	18.0118	17.6384	7.0824	7.4816	23.4012	39.8886	18.6911	7.9416	11.1218	34.4519	19.7458	23.8465	42.3612	22.0157	21.7068	19.278	13.4303		0.0519483	19.2335
0.59517	19.9033	10.6193	7.4327	14.646	19.662	20.2856	18.6556	20.2061	5.5325	9.4623	21.7776	31.7358	22.6701	7.7493	11.4915	39.4059	22.012	30.557	45.1986	27.846	26.158	29.0012	16.9779		0.0649348	20.8255
0.71421	17.678	14.364	6.364	14.2684	18.1062	19.8413	19	19.2656	6.6083	8.7191	27.6425	31.8467	25.8954	9.4925	11.8072	42.8998	22.8638	33.3749	40.2016	30.3689	26.4768	26.7877	19.0142		0.0779224	21.4299
0.83324	20.2388	12.9782	8.143	12.6679	20.293	21.5582	23.3888	21.4512	7.862	10.4316	26.4728	34.3053	29.2222	9.8561	12.7238	56.6865	23.2523	40.3405	39.3249	28.4667	26.1797	28.6658	20.7763		0.0909089	23.2733
0.95228	15.9729	13.66	9.146	17.1214	23.1348	20.2206	21.2458	23.5702	8.0763	10.7986	24.8979	36.7345	26.7866	9.9979	16.0911	56.1355	25.2166	38.6769	35.0151	27.9445	30.0308	36.034	19.5644		0.103897	23.7423
1.07131	15.3443	14.3183	9.6766	16.173	27.9408	21.1541	20.716	25.7225	8.0454	12.1101	22.4466	30.143	24.467	9.4314	19.639	51.1349	28.38	44.293	38.1571	29.863	34.6549	39.7615	24.227		0.116883	24.6869
1.19035	14.7361	18.1832	11.4496	12.445	29.8187	23.0295	22.7826	25.5925	9.0782	11.5012	26.6365	24.2024	30.3222	9.9833	17.9107	50.8764	28.0179	40.4168	32.7912	27.8582	37.4498	43.58	27.0353		0.129871	25.0303
1.30938	20.1108	19.1882	12.8249	13.5587	29.7895	22.4448	24.5636	20.5634	9.9026	13.5172	22.9823	35.4701	32.7771	10.2878	19.8407	53.8522	28.5964	40.7301	29.9454	26.523	45.1935	35.6713	23.8202		0.142857	25.7458
1.42841	16.1256	21.2674	14.3468	16.2765	24.8211	22.155	22.8335	18.4449	11.9541	14.5535	29.8316	34.485	32.4056	10.7196	20.9127	58.5907	29.7951	38.4501	29.1995	31.8165	43.4159	42.1228	21.8197		0.155844	26.3627
1.54745	16.3369	19.4082	14.9913	16.0588	26.3912	22.2312	30.5949	22.8178	17.9377	12.4349	24.5427	33.1607	29.5697	12.0959	21.5682	57.451	26.7951	42.6837	33.4539	32.273	42.5134	35.1606	29.7789		0.168831	26.9674
1.66648	17.4357	22.2869	12.9127	18.3504	22.5966	20.3054	24.7759	26.5533	13.4816	16.0569	27.5216	30.4615	36.5659	14.9297	23.0458	49.3437	29.859	40.8764	33.0981	33.1154	39.3727	34.8342	31.3088		0.181818	26.9169
1.78552	17.975	21.049	15.1886	14.6729	23.4621	24.3551	20.158	29.9588	15.1676	14.5404	22.4397	31.3284	34.3118	12.9647	23.0673	50.6242	33.3419	35.6436	34.9836	36.0671	40.5399	40.0624	25.2508		0.194805	26.8327
1.90455	15.8142	21.5784	14.466	12.3787	24.1891	26.1086	23.448	25.254	16.6005	15.2163	25.2745	32.3328	32.2973	14.7967	25.8776	55.3787	36.2667	35.2455	34.4613	34.8893	44.61	37.8376	37.2001		0.207792	27.8923
2.02359	16.3188	21.7472	14.4584	14.7001	25.9959	29.9798	23.818	25.044	17.0698	14.7112	29.0377	38.1677	32.8271	21.0154	27.863	46.8472	39.5427	32.3194	35.2176	39.3605	46.1924	40.8442	41.1004		0.22078	29.3121
2.14262	19.3269	19.2287	13.0169	14.2113	22.0482	24.238	21.1704	25.0793	17.301	16.9167	28.8609	35.5018	33.7533	20.5355	29.2826	51.5553	30.9896	27.5431	36.9104	32.3948	49.8811	37.9689	41.77		0.233766	28.2385
2.26166	21.3642	24.1315	12.1282	10.7995	24.1269	26.9649	24.0049	28.371	16.1139	14.7984	25.9888	35.229	31.665	22.7009	27.9407	50.9078	33.3355	27.9052	35.6456	38.8284	52.5914	37.1137	35.9227		0.246754	28.6338
2.38069	17.6917	25.609	11.7231	11.148	24.903	27.8311	26.318	25.6553	20.0094	19.6383	28.005	38.427	34.4627	26.2416	28.3722	45.8714	34.7241	30.4746	35.4247	44.4373	45.5713	34.3082	42.4704		0.25974	29.5355
2.49973	18.8679	26.0788	10.5083	11.8447	26.6546	24.8141	27.5422	25.5115	18.7025	18.1821	30.4293	34.1449	39.7539	26.5519	28.0657	49.6056	35.4774	31.6196	32.9451	50.1183	45.9247	42.5693	46.2222		0.272728	30.5276
2.61876	21.237	19.697	9.0257	12.1315	22.4722	26.2684	25.5562	23.1621	19.3011	20.0203	25.4558	31.5678	39.6601	27.9794	34.1012	47.1451	38.787	34.1454	40.9227	41.8399	45.7817	43.1818	41.5197		0.285714	30.0417
2.73779	20.3651	23.6082	9.2405	15.9579	28.6015	28.3944	22.2899	24.2078	20.628	24.0784	25.5961	36.4736	36.1923	29.7679	35.3189	46.3092	36.1251	25.97	37.8927	49.1971	51.0317	38.059	38.0677		0.298701	30.5814
2.85683	17.4598	22.1899	10.6864	11.7858	28.7581	28.8368	21.782	24.9572	23.1493	31.2957	27.924	37.4354	37.6769	31.6016	36.8308	44.0327	42.3191	32.7404	42.937	48.0887	54.4367	55.8001	31.1731		0.311688	32.3434
2.97586	20.4198	18.752	7.0374	14.47	24.9838	26.7631	21.9985	26.2343	21.8935	26.8774	27.5481	29.0372	44.8615	31.693	38.9893	46.8166	34.572	28.4621	45.5819	51.6841	57.4795	54.1465	32.8664		0.324675	31.8769
3.0949	21.0134	16.4648	10.8343	13.0215	17.7211	25.5844	22.5378	25.9196	24.623	22.0437	30.9457	34.7248	42.3285	26.4983	37.2896	39.9668	42.5573	28.9017	44.5362	58.172	53.6687	55.3776	32.3304		0.337663	31.6114
3.21393	23.6382	17.2717	10.2747	13.1969	23.5394	23.1203	21.5845	23.5946	24.2828	20.2463	32.7236	29.98	39.8982	26.3442	41.0521	38.5779	36.3639	25.1326	52.327	60.2891	51.8679	59.0395	29.8237		0.350649	31.4856
3.33297	21.0894	16.2988	9.2627	12.2543	24.3428	21.248	23.1891	24.847	25.7819	23.0405	35.1514	33.6403	38.9553	30.6974	42.2915	42.3092	46.1138	29.2441	62.175	56.7877	47.0466	56.7854	37.468		0.363637	33.0444
3.452	23.0317	15.6515	10.9834	13.0998	23.1513	22.5107	25.2294	25.8072	22.5335	26.5292	35.9943	33.3845	42.1099	23.6272	42.7796	44.5582	49.2464	29.61	59.2303	53.4665	48.5055	58.1451	31.4176		0.376623	33.0697
3.57104	22.7949	20.3526	9.9193	10.5036	23.9104	23.7048	23.0484	32.9836	16.9506	20.5728	37.0354	31.9233	34.5591	26.28	43.6639	40.0114	51.7611	22.7367	58.7382	49.3382	42.8207	54.2594	40.4116		0.389611	32.0991
3.69007	24.9934	16.3255	10.7715	13.8312	19.2467	22.0013	19.4114	28.0178	19.841	16.8098	34.1537	33.1247	35.6703	25.4151	42.092	38.9335	54.6481	24.921	59.4477	43.4697	47.2936	47.1445	42.0526		0.402597	31.2877
3.8091	25.6826	12.8824	11.6103	14.3013	19.4724	21.8307	17.0401	25.8719	13.8109	17.3594	30.9553	38.4021	32.0932	28.0513	38.091	40.9361	52.1731	26.465	54.7865	48.9669	45.1403	46.9924	40.9973		0.415584	30.6049
3.92814	26.0827	16.9551	10.7141	11.6155	18.4555	22.8971	18.1064	23.8746	15.927	14.6295	40.2851	35.4146	36.1071	33.1772	36.3267	39.0289	49.8623	26.1219	52.8901	48.2022	45.6408	44.0095	52.2768		0.428571	31.2435
4.04717	22.481	15.1168	11.4773	14.4605	19.6783	19.9335	17.3096	21.9042	13.2528	14.2967	37.409	36.1894	34.3495	28.0995	38.311	40.2075	54.5088	28.1469	50.1337	43.4469	46.8593	43.4979	42.2749		0.441558	30.1454
4.16621	18.5135	18.8349	11.0466	13.715	19.0788	20.0805	16.3033	25.1042	17.8222	13.4117	33.4343	36.2888	40.5327	28.5521	31.2759	42.9984	56.0924	23.3259	46.399	44.1314	41.4277	40.9396	41.143		0.454546	29.5849
4.28524	20.8757	22.098	10.0496	10.8095	23.1093	18.8288	16.0564	23.53	16.1844	11.9303	33.2908	35.8657	39.6362	27.5218	36.5521	36.587	50.6237	23.6671	42.3961	37.7421	45.5937	29.6295	48.003		0.467532	28.7209
4.40428	20.7218	22.0615	12.4245	11.7939	21.9899	14.5873	18.6871	22.4589	12.5012	10.7183	32.2064	36.994	33.348	34.4804	40.325	41.6223	48.7021	24.9594	50.2557	37.9509	42.8672	35.8911	49.5763		0.48052	29.4401
4.52331	23.7371	20.9888	11.8087	10.5425	19.7226	15.9457	19.0732	19.3703	13.4498	9.9755	31.3198	39.7576	31.714	30.3441	39.5432	43.0739	56.7625	25.898	41.3707	36.0207	47.1742	38.8679	44.0603		0.493506	29.1531
4.64235	25.7105	18.6116	11.3781	14.1848	21.3478	17.9898	16.7869	19.9871	11.2807	12.3527	35.6457	39.9565	28.0866	27.2688	41.3285	45.0543	54.3675	28.145	31.9441	33.8206	45.6592	41.3035	41.8843		0.506494	28.8737
4.76138	27.0595	17.0529	10.2396	16.489	18.3536	17.2997	16.4504	23.9777	11.3549	11.7906	32.7261	43.6923	23.2615	22.5222	44.1531	40.5365	53.9895	25.5788	28.553	38.9753	41.2435	33.3843	45.2163		0.51948	27.9957
4.88042	23.9891	22.2242	12.7543	12.549	16.107	14.7075	13.8421	18.3042	9.1382	10.7885	30.7979	43.3825	23.1599	26.8586	43.8682	44.5996	52.4982	25.0192	25.5362	36.4508	45.5208	30.9698	44.3049		0.532468	27.277
4.99945	20.0788	19.9092	14.4459	14.3947	21.0858	12.9974	16.0341	16.2582	10.6304	9.0062	24.905	41.7521	25.3682	30.6889	49.9336	53.2967	44.1693	23.7511	32.4317	38.428	42.838	33.6781	44.7231		0.545454	27.8611
5.11848	21.0678	22.1977	14.5677	15.0458	21.7915	11.5023	17.4141	16.5019	9.4218	12.7896	29.6288	40.4177	24.3815	26.6206	61.4025	51.5002	44.0331	22.4598	33.5758	39.3252	36.0865	33.2581	38.1769		0.558441	27.9638
5.23752	16.4356	21.9326	13.5919	14.4676	22.6467	13.0594	15.7537	16.4518	11.2014	12.7433	26.226	43.885	22.2012	28.8087	55.2442	51.7594	44.1464	20.0581	32.6926	41.7307	40.2773	37.579	41.7354		0.571429	28.0273
5.35655	21.3994	19.299	14.9189	16.7579	24.2913	16.7298	12.4505	19.6743	13.2987	17.3229	24.3601	38.5586	24.3168	29.9068	51.974	59.5514	41.3773	23.5415	28.4265	42.9715	45.6069	36.7962	41.149		0.584415	28.8991
5.47559	24.0585	16.5488	12.2269	18.0783	25.1084	14.2595	17.6312	22.9314	13.6121	13.8632	24.9176	35.9164	24.4963	28.1772	50.8233	63.2313	45.0431	27.743	28.4368	45.4412	39.347	41.1023	40.4303		0.597403	29.2793
5.59462	22.2393	20.197	17.2967	14.5006	25.1486	14.9917	19.3088	18.9437	11.8099	13.5941	25.7195	38.3831	24.0586	25.6548	51.3849	54.676	44.5236	27.8163	29.8485	46.4851	40.6454	36.626	34.9922		0.610389	28.6454
5.71366	23.6887	20.8472	16.5544	17.1215	23.4597	18.7306	14.0147	18.2216	14.7138	13.7196	27.0777	36.238	24.4791	26.8109	59.2511	60.2519	39.2817	31.7174	28.7471	56.1178	41.9933	43.5165	32.4083		0.623377	29.9549
5.83269	19.6982	20.3632	13.4288	20.0725	19.3314	13.0824	16.3196	19.2824	15.1912	16.6876	24.3576	32.7331	28.628	26.3736	51.6423	56.4661	40.1489	31.0444	30.3444	60.2825	37.7337	39.2094	35.1813		0.636363	29.0262
5.95173	24.7277	19.1225	13.9938	20.0201	23.8768	13.0575	21.1618	25.5767	14.1698	17.5665	30.3338	32.8584	32.2546	22.7746	48.4697	58.1937	41.3182	21.5123	32.5214	58.4938	36.5084	33.7091	33.7638		0.649351	29.3907
6.07076	24.8062	18.0701	16.4598	20.7786	20.5496	12.1759	17.8923	21.1101	10.162	16.4793	33.4285	33.4016	27.7918	29.4657	50.3892	57.2893	41.3785	22.6299	31.4316	58.3409	41.2072	41.3572	37.6801		0.662337	29.7511
6.1898	25.7362	19.7252	15.5755	24.4336	23.8791	13.4622	12.8342	22.6397	11.217	15.3932	30.4257	32.38	27.7853	26.2456	53.7806	54.6049	36.6762	23.8862	28.3809	53.4176	38.827	39.5161	31.8462		0.675325	28.8117
6.30883	23.9104	21.9129	14.8163	24.7167	24.5785	11.4731	16.6205	26.5139	8.7124	17.7972	36.2056	33.4001	27.1754	29.568	48.055	51.6649	39.6558	24.604	33.2472	54.1818	44.388	38.8627	33.4678		0.688312	29.8056
6.42786	21.139	21.4714	18.4825	24.8528	24.6444	11.2554	21.3711	28.6723	14.2997	17.6773	30.9283	31.3283	29.4655	27.3843	41.9509	50.5762	43.9644	25.1467	32.7409	51.867	46.0399	44.3184	40.1385		0.701298	30.4224
6.5469	23.2193	16.8732	18.1864	30.4355	22.1006	13.4421	19.3462	28.2568	16.9898	18.8076	31.422	32.824	29.9376	33.6191	44.4973	45.4416	36.8136	27.6106	31.766	50.216	39.6478	44.1742	43.0967		0.714286	30.3793
6.66593	21.2302	16.6486	17.0405	28.1582	22.9889	16.9751	18.4068	27.0318	20.5197	16.9639	30.4059	33.8483	33.7396	31.5873	41.7367	48.3433	36.8098	23.7641	32.1294	46.5138	36.1003	46.4539	43.8887		0.727272	30.0559
6.78497	17.0235	19.0521	15.7098	23.8514	26.229	17.4581	21.8676	29.1562	17.197	18.1099	30.5222	33.4925	35.4828	30.1762	35.1458	45.7116	37.7817	27.4718	32.8582	43.6286	37.9956	47.1577	47.8816		0.74026	30.0418
6.904	15.4006	22.308	12.5692	26.498	25.3494	14.5999	23.3608	29.007	18.6126	18.5979	33.7281	34.547	38.645	32.2774	41.0206	44.9103	37.7241	24.5996	29.7677	47.5319	31.9696	49.8641	42.3029		0.753246	30.2257
7.02304	15.057	16.9448	13.2438	25.4929	27.7405	16.9702	21.6539	32.618	19.5002	20.7336	36.8247	41.4422	40.0536	36.2934	33.1768	41.5982	35.9209	23.2846	30.7549	38.7588	38.9584	47.5088	40.5917		0.766234	30.2227
7.14207	17.4935	16.499	15.4723	26.5145	26.3806	16.3642	19.6282	27.7917	14.7469	17.1148	35.8643	36.7763	37.2465	32.796	33.0461	43.2077	31.7334	22.8204	39.4745	44.6802	42.7308	44.5778	44.5343		0.77922	29.891
7.26111	16.5219	17.3603	16.5725	24.12	30.9983	17.0009	25.2723	23.1824	19.6151	20.2273	44.2941	37.1928	33.5837	27.6222	32.6908	38.6901	36.944	19.6209	36.6186	44.5209	35.9692	42.4713	39.0065		0.792208	29.5694
7.38014	16.3993	17.4427	15.6611	20.2242	30.0985	17.8867	21.9622	28.1679	14.6494	20.0572	40.1616	34.8481	39.9203	23.3742	36.4121	35.1035	30.3272	17.2572	34.0956	45.6388	35.5937	47.4384	35.4907		0.805195	28.6179
7.49918	19.3385	18.0664	14.7838	16.122	29.0156	17.1196	21.492	24.7186	18.5479	18.5615	41.3904	28.5395	35.6254	22.2878	31.5598	37.1517	28.1702	13.2407	29.164	41.0037	38.0837	44.2883	34.9101		0.818182	27.0948
7.61821	16.5162	16.0336	12.1688	15.3083	26.3898	18.7568	21.112	24.8863	19.8044	16.1398	44.4479	21.9649	30.6689	17.9496	29.0045	36.8172	24.8334	11.5172	28.9009	41.8582	48.5438	33.3455	42.9186		0.831169	26.082
7.73724	14.0234	13.9972	14.0167	14.8683	22.3721	15.6475	26.4811	24.8404	17.8867	15.9323	37.9137	23.1961	21.9411	17.6215	25.8316	34.7825	22.4535	9.4487	30.6544	42.0212	43.9766	34.2959	40.5637		0.844155	24.5551
7.85628	15.4406	13.7095	14.4291	13.6939	27.7679	14.0699	20.0754	20.6109	13.2271	18.5827	34.3737	25.1089	21.7908	12.4296	25.9876	34.8061	18.9178	10.4086	29.1386	42.5663	37.1143	37.8335	37.2881		0.857143	23.4509
7.97531	13.3122	15.2287	12.7034	13.2042	26.72	14.9125	20.9458	18.9766	17.6514	14.7037	32.9289	20.3284	19.5786	8.6122	29.0225	30.4476	14.0408	7.6984	29.0023	45.0957	38.3868	35.0232	29.4807		0.870129	22.0872
8.09435	17.1109	12.3169	10.3878	13.3314	25.7265	15.1082	22.1241	20.5119	14.5214	14.4593	27.797	19.2673	13.0736	6.4996	22.1377	28.5311	11.1348	7.2196	23.5893	45.3237	39.0695	33.0879	30.4626		0.883117	20.5562
8.21338	14.1073	14.1144	9.3228	11.1358	27.5536	17.6598	20.9421	19.0124	12.2696	12.1577	20.0973	17.2047	10.9922	4.9256	16.3182	29.34	8.715	5.7256	25.6584	43.8072	32.8807	29.9613	31.8949		0.896103	18.9477
8.33242	11.4145	12.8993	9.75	11.8559	23.7659	14.4735	21.0436	16.0329	12.9533	8.8292	20.8386	11.0875	6.9215	2.9897	19.2122	23.3222	7.1889	5.3131	27.5037	38.6204	33.9548	27.6412	33.9538		0.909091	17.4594
8.45145	10.5669	13.1365	9.1182	10.9487	20.6256	17.1338	18.9045	14.9373	9.4375	6.2096	15.8929	7.4212	3.702	2.9226	13.2651	16.1885	7.2782	4.9088	29.6002	38.9239	31.6315	24.4532	33.0797		0.922078	15.6646
8.57049	9.9767	12.5945	8.8237	10.6816	19.8669	14.8973	16.5558	11.6	4.3891	3.6083	12.0055	5.6056	3.5762	2.3514	10.8882	12.8402	5.6796	4.3491	30.1077	38.2925	28.5824	27.0642	27.6535		0.935065	13.9996
8.68952	11.0243	9.7335	5.2753	9.7537	24.0013	17.6606	15.9447	9.0801	4.9854	3.5716	8.5987	4.9389	1.9364	3.6411	9.8015	13.0447	3.8589	6.203	28.0258	27.7406	24.3903	26.1428	27.6281		0.948052	12.9122
8.80855	12.6514	6.3151	6.2882	10.8712	20.8864	17.1021	15.3317	8.7175	5.8512	1.9922	7.4504	4.6342	2.4123	4.1033	7.5847	10.1919	5.148	7.2496	27.4236	20.1865	21.2772	22.2536	32.8004		0.961038	12.1184
8.92759	11.952	9.6572	8.9758	9.5116	15.8233	19.4741	10.724	7.7654	4.4998	1.7727	5.4702	2.3917	2.6469	3.2968	9.1215	8.4593	6.1734	6.0219	22.3254	19.8273	18.39	18.5386	29.8089		0.974026	10.9838
9.04662	11.3841	10.0124	5.6088	7.6776	16.3864	16.2323	11.3859	6.7979	3.5391	1.237	3.5365	2.425	1.7096	2.2151	5.3509	6.8758	5.4094	6.6804	23.0652	17.0839	18.927	17.4203	33.6304		0.987012	10.1996
9.16566	9.2289	7.5718	5.5233	5.9452	14.4076	14.0749	8.4496	6.4078	4.2047	1.218	1.7476	3.3722	1.9548	3.2703	7.1703	7.4086	5.7657	7.04	17.1712	20.0576	17.2324	16.6504	31.4536		1	9.44898

## Sheet: Image10
X0	Y0	Y1	Y2	Y3	Y4	Y5	Y6	Y7	Y8	Y9	Y10	Y11	Y12	Y13	Y14	Y15	Y16	Y17	Y18	Y19	Y20	Y21	Y22	Y23	Y24	Y25	Y26	Y27		Ap-basal	Avg intensity
0	35.1008	25.9367	17.2298	12.8387	12.9119	15.893	21.584	21.3964	27.3504	27.072	22.1266	25.1232	32.6153	28.2102	20.4009	32.1356	25.1107	30.7673	20.3416	24.604	21.1409	26.1461	26.0861	29.2578	19.4076	21.9138	18.9033	15.7778		0	23.4779
0.119	27.6436	23.8185	24.2432	14.0655	15.5484	18.4018	20.907	21.5532	21.0505	24.4773	30.9351	26.7434	33.7918	33.4193	20.3507	33.2275	30.3774	33.6228	27.7659	28.855	19.6546	25.849	28.9712	37.5237	22.4934	25.5935	18.8728	19.8375		0.00961259	25.3426
0.2381	24.8914	24.9668	24.4511	17.0179	19.5865	25.5989	20.7792	16.2134	30.9597	23.0173	20.569	31.6664	29.4	26.3112	22.9005	36.0246	39.1628	35.3203	27.2688	36.009	17.9998	27.8852	33.4017	53.2883	21.5212	24.4726	21.1648	18.0207		0.0192333	26.781
0.3571	26.1455	32.2319	30.268	14.4104	22.2485	24.4526	25.0032	19.2309	35.0968	26.1816	23.236	30.5859	27.9716	22.6359	20.929	40.1859	46.0007	47.9204	33.5171	36.468	22.3579	28.8383	25.5605	60.4705	26.0413	26.7758	20.7652	19.4339		0.0288458	29.1058
0.4761	33.8539	24.8596	35.6745	19.1114	22.2843	25.5412	26.4234	22.175	40.657	32.0393	28.0973	26.0183	37.0658	28.7414	23.9921	41.1973	40.3682	44.4571	39.7749	39.872	23.9263	30.0642	33.5382	60.9916	25.3496	21.5948	27.4131	22.1189		0.0384584	31.3286
0.5952	33.4814	31.1246	32.1684	23.7704	25.7654	31.9988	24.4917	28.3802	43.8569	34.2276	34.3348	34.8288	38.9316	29.2007	22.6112	44.6993	44.547	45.853	37.2515	40.688	24.2299	31.2774	36.3459	62.4095	27.8062	26.683	29.3413	21.5612		0.0480791	33.6381
0.7142	37.442	33.9404	33.8213	24.9838	31.5232	33.4194	33.2696	28.9231	38.785	32.8186	34.0943	32.6777	34.6044	29.19	25.4626	51.0839	46.3309	47.2113	51.9548	56.106	25.74	26.4868	37.7273	60.4944	30.062	24.1015	30.7496	31.2373		0.0576917	35.8658
0.8332	48.4107	30.569	47.8281	34.9356	41.633	38.4693	31.8298	27.7589	45.4235	29.7315	48.2072	41.9292	37.9521	32.8985	37.0638	50.6883	41.8018	48.754	57.0024	67.117	34.8093	25.3168	41.7914	56.1117	32.4018	27.3558	43.0872	27.8495		0.0673043	40.3117
0.9523	51.6122	29.8492	55.1703	31.4698	42.0176	40.4009	38.0677	28.6196	46.618	35.887	45.9231	47.7262	41.5531	39.9579	41.7088	57.7899	50.0923	53.457	63.813	77.252	34.0687	28.9625	42.5363	52.0932	40.5726	28.5408	49.9442	35.8326		0.0769249	43.9834
1.0713	59.9866	33.8728	66.9953	29.5057	38.002	44.9161	39.4617	30.9589	46.9815	45.2614	45.7544	59.7459	46.5761	38.3283	37.4022	53.4423	51.005	47.6897	67.3027	88.479	38.0536	42.7659	47.1584	42.6948	38.6282	30.3084	42.0763	32.5251		0.0865375	45.9242
1.1903	59.6013	32.0214	65.1401	35.6104	50.936	59.961	42.3489	39.3308	55.6131	37.1502	48.8777	59.6585	48.7717	48.0843	39.6148	49.6163	49.9513	57.0309	71.1084	101.499	35.7534	46.9959	46.4704	37.4783	46.5743	28.4563	46.2267	47.3466		0.0961501	49.5439
1.3094	60.8754	38.0544	60.1145	47.1305	53.5141	57.9702	43.7441	30.1488	56.6269	46.7277	59.566	56.1178	49.2186	51.2192	36.4111	59.1594	57.3594	50.7863	77.4	119.451	47.7852	46.6193	48.19	39.7089	47.128	40.9351	52.0311	44.193		0.105771	52.7924
1.4284	66.9011	31.0138	68.1184	44.1987	66.6806	59.0013	47.9237	36.836	53.269	51.1602	70.5894	54.3582	52.2415	64.9416	41.8922	50.3371	44.1537	62.7181	89.2778	116.946	48.8637	58.6633	47.8536	44.0026	52.9458	38.7076	53.1928	55.8945		0.115383	56.1672
1.5474	58.6211	34.9515	81.1971	41.9525	73.844	51.6126	57.0657	34.782	56.342	51.6587	72.6396	52.3989	56.7891	55.8221	51.0226	37.5804	45.5245	62.524	79.604	111.23	49.3609	44.2911	58.012	58.8539	50.2105	41.6862	66.5528	58.0631		0.124996	56.9355
1.6665	58.3816	40.4371	98.0342	61.4746	90.0546	47.4553	62.2944	38.1486	60.6732	53.0035	78.0935	57.8572	67.9466	55.7374	48.3488	37.0438	41.2504	68.5509	75.7898	105.319	50.7159	44.67	52.2866	51.7419	54.2894	43.1074	55.8593	62.625		0.134617	59.3282
1.7855	59.1052	36.4896	93.3301	60.8467	88.9186	49.0839	63.9138	37.9955	65.5402	58.1272	76.9721	55.4011	71.1695	62.4742	34.9128	36.5173	39.9075	75.6686	68.2119	91.205	46.9542	41.6973	53.5166	52.9618	58.8454	53.4969	56.4783	66.1299		0.144229	59.1383
1.9046	48.0145	36.3858	91.8274	71.5227	88.5556	48.9269	63.4191	32.1894	75.8372	56.4923	80.9914	62.3935	68.7076	62.2563	38.6628	33.2902	40.3386	60.457	58.2152	87.636	52.6096	37.1287	49.5079	62.4186	55.6752	54.2735	47.6901	64.5462		0.15385	58.2132
2.0236	40.5462	39.767	76.5059	75.6047	68.1328	44.7845	74.2837	33.5793	82.3526	52.1704	82.0841	45.9742	80.0619	56.7647	34.28	31.8267	41.4835	62.703	49.3695	83.649	56.8624	42.0623	54.2293	63.2445	58.9433	51.3221	51.134	72.5158		0.163462	57.3656
2.1426	43.7795	39.0759	82.3834	74.2723	62.9828	41.8311	68.4346	33.9225	67.8768	47.465	72.3557	41.5626	76.7775	49.9178	36.7347	33.0719	42.1487	53.3906	44.2172	77.758	49.9265	36.6919	45.941	59.5628	51.1407	59.4319	41.5626	65.9115		0.173075	53.576
2.2617	44.0252	32.1932	80.8813	67.6656	50.698	39.8338	69.3807	37.3338	70.9997	44.4391	61.5212	47.9645	78.9313	41.9384	36.3159	32.7175	47.3874	48.5526	42.5516	66.316	53.4683	28.4359	47.5111	56.9394	52.8257	54.2723	40.483	66.8386		0.182696	51.515
2.3807	45.656	34.8779	75.7276	73.7512	49.2916	36.2568	65.6295	39.4278	65.7751	44.8507	64.7566	38.6325	69.335	43.5468	40.0934	31.7595	36.7041	46.5674	46.9923	64.978	60.28	30.4288	44.6858	65.8017	46.1518	54.4842	41.6033	66.6187		0.192308	50.8809
2.4997	37.234	32.5633	63.9584	65.2654	50.3656	38.7366	61.4318	39.5637	66.0467	44.4034	62.461	40.1529	55.4906	39.5529	41.6618	35.7653	40.3556	48.4106	39.5135	47.245	60.4641	34.9228	45.0747	61.2259	43.1804	53.5933	41.4194	54.693		0.201921	48.0268
2.6188	40.8775	35.6235	79.5719	62.375	46.1494	35.3908	51.4256	39.8345	65.7494	45.5459	66.0067	37.4268	48.5968	44.5876	44.0946	39.6212	36.16	44.1119	44.404	48.716	49.5179	35.6568	36.5681	51.7698	40.7722	50.6523	37.0363	41.6231		0.211542	46.4238
2.7378	40.9262	30.4975	80.4348	54.9488	54.0689	37.5552	47.1456	40.0042	73.7425	43.1228	56.5539	37.7688	37.1203	45.0124	40.4788	42.4298	30.9632	45.851	41.8927	42.049	40.052	37.6369	35.5019	45.439	42.0467	46.7461	35.4299	44.3978		0.221154	44.6363
2.8568	42.3571	27.2034	73.309	57.7479	55.0031	35.4129	48.5336	44.0212	67.9678	51.6642	50.1824	41.0614	33.9689	39.7956	36.556	33.8496	28.6976	40.8732	44.1995	47.415	41.5308	43.6613	37.5882	40.9251	41.9728	54.3615	40.3023	45.385		0.230767	44.4838
2.9759	38.8989	33.6413	77.8492	45.4676	41.9267	32.9242	52.9659	40.5564	55.8855	46.7506	43.0466	41.3394	43.1812	42.9052	33.2582	42.3932	28.827	41.9862	40.7315	39.401	47.8296	49.3252	33.1512	40.2414	42.0212	49.531	33.5002	39.968		0.240387	42.8394
3.0949	39.9333	36.6683	72.2611	45.2403	45.5598	36.5635	46.6395	43.7781	47.9831	53.5077	39.2635	39.8825	32.6146	47.5042	44.852	40.3167	33.0906	49.8328	40.4408	39.005	48.1134	48.0951	29.9245	36.2643	41.3323	50.895	37.4285	37.5563		0.25	43.0195
3.2139	44.7526	31.1759	59.6588	41.0459	45.4043	31.9228	45.8756	39.5875	42.4186	49.1515	46.5421	41.0935	31.2562	48.4113	38.2982	49.8515	38.2906	52.1575	54.5286	40.029	42.1935	48.8098	31.2858	34.7757	43.9217	38.1441	43.2704	29.2117		0.259613	42.2523
3.333	41.6148	33.4538	55.9396	44.7931	39.3011	31.4293	42.4211	41.7543	44.2886	51.0067	39.4156	39.9292	32.7896	46.0598	41.413	47.2646	31.6035	52.8524	45.1133	40.385	53.8781	50.1775	32.9297	35.8394	42.0011	42.9736	41.7277	30.2139		0.269233	41.8775
3.452	39.9956	35.9876	53.5641	41.8783	40.285	40.3818	40.1494	43.3807	39.7817	38.9538	39.1098	39.8043	30.264	50.0077	43.4989	53.8024	26.3092	43.9276	46.3067	37.924	53.9578	48.0225	27.932	29.6891	43.8422	44.2451	38.4131	26.0325		0.278846	40.6231
3.571	38.8198	37.4908	43.0217	37.7298	46.0493	35.121	45.6392	37.842	36.3591	45.5333	40.371	39.029	30.1825	45.7404	38.1473	53.1976	26.4375	45.9041	50.0575	38.864	55.0472	46.9078	26.2199	24.1993	44.1715	34.3047	32.584	29.9606		0.288458	39.4619
3.6901	43.3831	46.0382	46.2566	38.639	43.7924	37.5178	51.0379	35.6657	36.8399	37.8994	35.6549	33.0179	32.3689	42.2522	39.691	53.4582	24.8496	41.2236	48.0187	39.979	53.4353	43.9161	24.714	23.0505	36.2629	37.3655	40.819	24.2959		0.298079	38.9801
3.8091	45.8257	41.6723	54.4591	37.1654	46.1901	37.2462	42.3997	37.3466	35.4654	35.6435	36.5322	41.195	28.7352	43.3912	45.31	55.2086	23.6719	48.3198	46.5229	34.494	44.8062	46.3376	24.5929	21.5378	35.5611	39.9389	35.4317	31.4274		0.307692	39.1582
3.9281	43.8949	33.9842	44.7332	34.4842	47.0967	29.6663	38.9649	34.1556	39.6796	35.9936	41.5142	41.3115	26.8919	35.9097	39.4234	63.7959	24.2552	45.6049	49.5571	37.212	47.3122	53.1754	22.927	18.9199	36.6567	43.4741	38.3392	31.6207		0.317304	38.5912
4.0472	38.1933	36.944	36.4137	39.2633	46.5407	32.1188	40.4652	36.6736	36.8835	31.0471	41.809	45.8222	28.2562	38.7	32.7551	56.9927	23.1824	35.6565	55.2779	36.175	48.213	44.0014	25.7859	23.1774	42.7298	43.4721	32.3579	27.2512		0.326925	37.72
4.1662	39.2265	36.1201	35.8509	39.4437	39.5701	31.8537	38.4099	48.9879	41.0089	32.4767	42.4389	45.9459	31.1591	32.4621	33.4729	48.1487	18.9124	32.7514	44.9988	36.396	51.048	48.1237	24.0243	23.1262	37.8967	42.4424	30.5739	27.3981		0.336538	36.9381
4.2852	41.9315	39.3262	37.2276	41.1281	42.475	32.993	40.1141	43.7756	34.7856	30.2308	43.2635	55.4018	36.0232	30.726	35.8806	53.3003	16.9723	38.0517	42.3301	34.769	53.7109	50.097	20.4697	21.2444	39.6771	39.8838	27.753	23.085		0.34615	37.3795
4.4043	35.6663	29.8551	36.2584	35.5835	36.6569	30.2983	40.2136	49.7218	33.3206	34.8945	45.1246	48.3491	39.3447	34.1016	38.1537	54.5366	22.2978	38.2264	48.6182	37.851	50.0777	40.9083	24.6635	17.4198	37.6468	36.6686	30.5911	24.4508		0.355771	36.8393
4.5233	31.88	29.8839	42.3213	42.5739	36.1615	31.2534	49.8012	50.5213	35.2146	36.1017	45.4663	39.2715	37.9778	35.5313	40.5573	51.2339	22.9231	26.9336	41.9068	34.219	42.6223	51.5934	16.9558	19.077	37.624	40.0733	30.6739	24.367		0.365383	36.5971
4.6423	39.5165	25.8183	38.0337	42.6433	39.5028	28.6454	39.4599	50.5075	31.8733	32.4853	45.215	46.003	44.2458	35.3665	44.4764	58.8488	16.7594	26.5655	49.8145	44.29	42.9367	44.8804	17.597	19.9034	36.2902	41.0526	27.3298	20.0322		0.374996	36.789
4.7614	36.6796	22.5398	30.8315	40.072	40.2789	23.3261	35.3575	53.2328	30.2325	28.8029	41.0721	40.5229	42.3064	35.3694	44.9173	49.6072	22.8125	29.378	48.6878	39.967	44.3676	47.7891	22.8977	16.012	44.1375	43.9578	28.7849	23.9951		0.384617	35.9977
4.8804	32.7604	20.6984	30.2258	43.3505	42.7277	21.2378	36.7208	43.2808	26.9337	31.7553	46.2994	37.9152	46.0425	35.2869	37.6916	45.976	19.3945	29.5876	51.6917	43.018	45.9234	41.8789	19.8319	18.5864	39.2797	56.3245	28.5457	25.1907		0.394229	35.6484
4.9995	36.1967	20.9052	29.1772	40.5017	44.8604	17.2712	34.0223	48.8363	38.4591	39.9997	39.6927	33.7813	43.2245	38.6179	44.488	43.4966	14.5197	20.7409	62.0892	37.067	50.0274	43.5051	24.5486	18.2507	43.2934	53.3062	33.6793	29.788		0.40385	36.5838
5.1185	40.6959	17.3662	28.7935	50.1994	45.8105	17.9647	34.9965	44.0548	30.4441	28.6864	30.4956	32.4777	37.5957	36.4691	44.4948	34.918	20.9108	19.3912	55.774	34.772	49.9235	36.6935	23.9843	15.6931	41.6557	48.6522	43.6549	27.9292		0.413462	34.8035
5.2375	36.6132	22.7813	30.3939	38.3001	40.8735	18.8988	40.6471	40.0904	33.7989	27.5065	35.674	30.1707	40.0899	29.905	40.8259	35.4303	21.751	21.8794	66.3833	31.857	50.6181	36.3203	21.605	15.2	42.4629	53.64	35.8254	25.7439		0.423075	34.4745
5.3566	42.3876	16.5953	23.9928	36.5103	40.0384	19.1125	34.3115	43.5068	28.885	23.8238	40.7509	32.7684	34.307	33.5787	44.2148	31.313	13.843	23.076	60.3023	34.525	58.9888	38.1586	26.0006	13.6406	42.5736	57.7614	31.6502	34.9021		0.432696	34.34
5.4756	38.6233	20.1619	27.2796	35.7731	44.3115	21.1419	35.0342	43.5789	28.4478	27.2539	40.1525	36.6173	29.1042	31.3763	43.5539	30.2242	13.0181	18.5533	70.0846	36.888	60.3702	28.467	22.4864	13.8053	47.3647	57.2392	27.7446	34.7212		0.442308	34.4063
5.5946	32.4259	20.2749	22.9228	33.0326	37.0483	15.7495	35.0665	33.5293	29.9377	38.2498	37.0802	34.9765	37.4955	26.965	44.0614	27.6777	12.7646	19.9948	58.7755	42.669	53.6297	25.9312	18.3377	14.1315	48.3277	59.2315	25.7827	35.5941		0.451921	32.9166
5.7137	47.1294	17.1999	15.9814	29.1464	31.748	16.5155	37.0418	31.6295	24.394	30.8381	36.2144	33.1247	34.0128	23.4849	41.1779	34.0195	11.6847	20.5386	54.0635	38.44	56.8049	27.4055	22.5456	11.5032	45.8038	52.4644	32.7244	38.3659		0.461542	32.0001
5.8327	43.215	17.1338	25.9293	35.0604	28.6608	17.4901	30.1894	30.9003	21.881	33.6468	29.434	28.2531	30.5909	25.221	40.539	31.8429	14.2507	18.6278	54.3588	36.036	61.6976	32.3714	22.8868	15.4784	47.986	56.6263	27.9497	31.9256		0.471154	31.7922
5.9517	36.2804	18.3109	20.7028	32.0395	32.5921	15.6313	29.2308	32.4243	25.9661	32.9853	42.1184	36.9678	25.2163	23.7779	35.0894	31.9441	13.0995	16.9909	42.2486	33.059	55.6385	31.8557	21.9911	16.1882	45.903	56.5628	29.5035	36.3665		0.480767	31.0959
6.0708	31.6008	15.4901	23.1757	32.262	36.2038	17.9521	19.1136	28.3877	23.5144	34.6481	33.0194	29.1181	31.5693	23.1639	36.4425	32.2351	14.1018	20.259	50.6319	37.054	47.9556	27.3122	25.0278	15.478	39.2548	48.0208	28.5009	31.3131		0.490387	29.7431
6.1898	29.3138	14.9959	18.6436	33.6953	28.5273	15.682	23.1994	29.9178	21.6179	31.4716	38.3361	29.1339	27.1094	20.2985	40.7887	30.8795	8.8376	18.6734	45.2829	41.419	59.6785	30.1113	19.858	24.1888	44.7247	54.2172	23.5429	34.875		0.5	29.965
6.3088	33.9723	14.6474	18.8545	30.9921	31.802	13.0834	29.3041	34.3236	21.4437	36.4323	39.9425	28.715	26.2126	19.8457	42.3536	28.5883	12.6958	14.1403	35.7194	39.515	57.594	30.3753	22.1325	18.7068	41.6636	46.6025	25.0496	24.412		0.509613	29.2543
6.4279	25.9554	16.203	22.0035	38.4471	26.4954	12.5569	25.5024	31.1664	29.0237	34.2593	37.7785	28.6924	28.0408	21.9103	45.3738	30.2244	16.56	18.4833	37.5326	40.954	47.6894	33.1639	22.3677	20.4891	40.8758	44.451	20.3409	19.2919		0.519233	29.1369
6.5469	28.9112	13.8231	18.6938	41.7712	26.4725	13.6994	19.431	35.6047	22.8965	29.3031	41.2526	28.8868	27.5436	20.5256	37.9191	28.1183	17.3055	16.3547	33.3615	36.469	48.4737	32.787	25.9998	22.0281	35.8898	38.9586	23.818	21.5458		0.528846	28.1373
6.6659	28.0185	14.4936	17.6347	38.1127	31.867	10.7764	15.6376	33.8379	19.1696	31.931	38.2398	27.8511	21.0138	25.8814	37.5017	27.0451	14.9123	19.4144	32.0576	42.655	49.7674	40.0844	19.2434	23.0268	37.9021	38.7387	23.6079	24.7966		0.538458	28.0435
6.785	30.2265	13.8556	16.6785	41.7365	33.5818	14.6872	17.8713	29.4819	19.4623	34.1433	44.6152	31.5692	17.602	20.3327	32.892	24.8782	11.7773	15.7147	29.0668	45.312	43.73	38.0545	25.7362	27.3832	40.6735	38.6947	25.2087	23.8206		0.548079	28.1709
6.904	28.682	12.7076	23.9807	41.784	23.8354	18.1797	17.4001	32.1693	23.3799	33.2879	41.7662	28.1918	18.6664	21.5108	36.9256	29.763	17.263	15.7612	26.9672	49.111	53.2031	35.7631	21.2586	24.2417	38.0223	36.8872	23.4919	26.4213		0.557692	28.5936
7.023	29.3654	12.9349	18.581	41.8912	26.7845	12.0776	13.4501	31.4688	25.3406	37.0121	42.0485	39.1898	24.7635	23.9986	35.1692	36.783	18.1725	16.5025	35.6446	54.361	50.5853	41.3587	22.2304	18.7093	40.2342	34.2085	32.2496	29.0381		0.567304	30.1483
7.1421	28.9005	9.9344	16.1071	45.0247	25.1871	15.5773	14.4052	29.5543	27.0595	36.0367	42.339	38.5104	18.7381	17.1521	33.7717	36.8062	17.1154	12.3288	35.6844	50.678	52.7349	41.7069	26.7246	31.3016	43.243	40.5714	24.5713	28.6192		0.576925	30.0137
7.2611	32.8423	11.0288	17.4866	45.4684	26.2447	15.2221	16.9745	27.5839	21.6802	27.3156	37.6885	38.9276	21.4725	19.0914	41.1991	35.5986	13.4379	20.3108	33.9115	53.782	46.1825	47.3784	32.8541	30.6286	46.4237	38.488	29.1013	27.9985		0.586538	30.5829
7.3801	31.8073	16.5334	24.0499	43.787	30.209	16.1478	11.482	28.4024	20.3011	32.4738	38.5726	38.0187	23.361	21.1253	37.124	36.5153	15.0378	14.4875	38.5856	48.774	41.0957	46.6652	34.5079	32.7579	46.0721	38.057	34.5055	31.3289		0.59615	31.1352
7.4992	25.2863	12.5663	20.4686	43.1402	34.1548	15.0979	10.8701	30.3689	25.2543	28.9666	38.9618	41.9323	22.9923	21.225	35.2196	30.4818	14.1992	19.5963	42.8923	51.416	34.8078	61.3178	42.1661	35.8359	40.7732	45.975	37.549	32.7285		0.605771	32.0087
7.6182	28.2336	14.7761	16.7071	39.6067	31.6579	9.3895	16.5511	32.8937	30.4516	25.7349	41.1124	43.3679	20.1711	24.2404	40.449	37.3522	18.4374	17.7004	38.5373	50.419	33.8055	53.3017	36.9266	39.1163	41.6378	43.0153	41.0208	37.5723		0.615383	32.2923
7.7372	28.3358	14.3131	16.9256	39.0574	27.6792	10.1293	18.9945	23.829	28.0614	39.2946	41.6055	46.9226	25.0368	23.2157	43.3946	41.7829	19.5084	14.7073	38.9771	56.21	38.0431	53.6191	45.8878	46.5876	41.6989	40.3876	46.6644	35.9809		0.624996	33.8161
7.8563	27.8581	13.3841	16.6183	35.7334	30.7202	14.0045	15.914	26.6434	26.6153	33.0161	45.0273	42.3521	26.9782	26.6305	44.5005	42.0159	18.2357	18.2767	52.2922	44.31	34.9155	62.5965	52.2098	41.1585	47.8156	46.5037	42.0696	38.1292		0.634617	34.5187
7.9753	27.004	13.2576	14.3206	34.7408	35.3236	10.467	13.8682	30.3529	25.5061	27.1376	38.5038	29.7384	22.3454	25.9202	38.3834	41.2379	17.7829	14.1781	50.5434	54.437	32.5342	52.5407	47.7472	45.9625	47.9641	56.0599	42.3556	34.5503		0.644229	33.0273
8.0943	28.7139	14.0303	15.9581	29.0957	31.3453	9.8363	14.2711	29.1344	32.3724	25.6192	42.5499	32.8452	26.491	26.8744	32.7871	41.0392	11.6867	16.2016	54.4317	49.34	35.0401	60.9862	54.1528	48.0612	47.8388	58.5239	47.8266	36.9269		0.653842	34.0707
8.2134	31.0522	13.4767	14.9897	26.7197	30.6561	13.6967	14.1892	26.0793	32.9134	32.1308	43.6105	38.6488	22.7012	32.5855	43.0554	32.1653	14.3166	14.6704	48.6543	46.741	30.7562	59.9069	54.4187	53.7267	41.9226	58.3085	45.8448	32.9875		0.663462	33.9616
8.3324	37.6573	11.9464	16.1472	30.2926	31.8056	14.9404	14.1263	26.8953	29.0775	30.5181	39.8312	35.9397	28.9224	27.1615	40.8219	32.4464	17.1847	19.1934	43.8769	36.714	39.6871	51.3806	49.4256	47.4484	38.9385	59.0484	46.581	34.6181		0.673075	33.3081
8.4515	31.8189	9.0263	16.3862	29.9452	34.2036	13.9523	15.2662	30.8646	34.2338	40.2424	41.6318	37.7272	29.1832	28.9026	42.8338	37.0783	19.6145	22.7408	38.7098	34.941	35.8606	44.5903	48.0046	52.8634	44.2845	54.1956	42.4777	39.5715		0.682696	33.9697
8.5705	36.3649	12.0174	16.5025	30.2724	42.1741	13.2251	10.2484	28.932	37.591	32.2516	37.6139	37.1288	36.437	27.9118	41.2882	35.1284	19.6599	19.6979	36.1334	35.359	35.8457	36.9936	38.6367	45.0961	35.6351	42.0135	36.4667	42.6128		0.692308	32.1156
8.6895	34.4655	13.8058	15.4295	32.0461	35.9957	13.849	13.654	29.5953	29.5097	31.4123	39.0695	27.5704	31.3706	32.1514	41.1159	42.2033	21.9542	20.8836	29.6157	38.573	32.1162	30.6755	40.2633	40.6933	36.6756	39.5655	35.395	38.0224		0.701921	30.9885
8.8086	33.1527	17.0518	16.9657	32.409	36.458	13.622	12.9051	29.079	32.2491	32.4183	34.4951	24.7439	32.3725	31.2838	37.362	36.2136	24.8285	20.1294	33.982	31.763	37.376	28.0854	33.9344	41.611	28.0793	32.0935	29.6713	39.0118		0.711542	29.7624
8.9276	34.3968	18.4945	17.4848	29.0211	36.6184	11.7823	13.788	36.368	38.6318	29.9712	35.839	26.6309	31.4502	29.7162	37.4331	35.8417	26.5275	24.5483	27.8659	27.006	30.1804	22.7997	28.2733	43.3803	28.7617	33.4262	23.8487	34.9736		0.721154	29.1093
9.0466	39.5995	15.9388	14.5676	31.2972	39.8522	12.8743	16.1538	39.506	40.6487	36.3802	38.8984	30.299	33.473	34.4085	36.3948	36.6017	23.1879	23.393	23.9876	26.691	35.667	16.2832	23.8857	35.4744	26.5617	29.6931	17.8876	26.9365		0.730767	28.8051
9.1657	37.1275	22.2497	20.1268	36.4289	42.8646	13.6077	15.2935	33.2266	32.6288	34.0406	34.9206	32.9748	36.0189	32.8689	37.3632	34.563	27.1805	26.2963	18.9235	21.981	34.7365	13.535	23.2129	39.6182	27.9034	28.8476	16.6387	23.5766		0.740387	28.5269
9.2847	28.8775	18.5469	17.4605	32.0248	40.986	16.1946	13.8226	30.1591	31.175	40.5739	35.2296	28.7046	33.435	32.8099	32.1818	35.5385	28.6556	25.5234	20.9115	20.282	31.3943	9.9575	17.1143	37.629	29.3941	19.5549	10.5122	20.4325		0.75	26.3958
9.4037	28.1862	22.4627	19.289	36.4684	45.6235	17.0776	15.21	36.9997	29.6076	35.5076	34.9726	34.4492	37.8716	31.417	29.194	31.2437	23.1099	28.8146	17.181	10.69	28.65	7.7348	12.4552	28.427	30.0478	15.9478	9.1113	19.0138		0.759613	25.5987
9.5228	45.4871	19.4406	20.0807	38.0701	48.166	14.1608	13.9183	38.87	29.396	35.7737	39.6632	40.6314	35.9926	30.4228	23.3213	30.5083	19.6997	24.0827	17.7511	10.831	21.144	3.827	8.3956	23.5704	24.5079	12.2501	5.4901	17.4452		0.769233	24.7463
9.6418	44.1518	26.2068	21.6333	39.5695	43.7463	13.7453	14.3342	37.6468	31.417	35.236	39.8782	37.7665	37.4457	33.5877	25.035	20.8337	10.671	22.322	15.719	7.381	8.7354	5.9692	5.1605	19.3494	14.5952	6.9468	3.4845	14.4288		0.778846	22.7499
9.7608	45.0042	27.8729	25.9334	35.2418	39.1034	13.3739	16.9609	36.9576	27.3965	33.4634	51.0471	32.2948	35.7919	37.5626	20.3714	13.0727	7.3845	13.3639	9.2448	4.572	5.0772	2.9522	2.9923	14.1054	8.6161	4.7843	0.768	15.0487		0.788458	20.7271
9.8799	42.0279	21.1886	26.3434	41.1344	32.6754	15.6599	15.8429	37.8293	31.3185	37.5354	49.2432	32.3464	32.6668	27.6687	15.8623	9.0727	4.5617	9.2002	7.0086	5.796	6.6088	3.266	5.0682	10.209	3.8802	2.9668	2.0793	7.4068		0.798079	19.1595
9.9989	33.4075	20.2979	20.5133	38.3831	35.5679	19.0223	15.5505	35.9436	31.2437	34.0954	47.5449	32.5369	32.1703	29.5338	15.6731	4.7196	4.7795	6.7975	7.0279	4.901	4.8815	1.4845	4.5295	9.7539	4.1822	3.3771	3.1548	7.1532		0.807692	18.1509
10.1179	41.0687	21.7134	28.5507	35.731	33.5283	20.9402	14.0572	40.3168	31.9265	40.905	47.6965	36.4556	31.2471	26.6258	7.1017	4.404	4.6004	5.8285	4.9099	3.478	3.0409	3.8513	2.0917	5.2389	4.215	2.3179	4.4786	8.0198		0.817304	18.3693
10.237	46.0922	19.6094	23.7229	37.4356	30.8037	16.4082	15.9763	38.5215	34.1847	37.8626	48.3286	29.9897	32.7802	20.6807	5.9567	5.2138	1.85	6.1181	2.1794	2.938	2.8448	2.5337	2.7754	6.4289	0.8316	2.2641	2.2941	5.5519		0.826925	17.2206
10.356	47.5827	21.9166	25.1544	34.6049	33.0924	19.8936	16.4219	39.4407	28.7301	36.4207	42.0756	34.0835	31.3374	24.0514	3.5124	3.9493	3.4539	4.6617	0.9716	1.843	1.8976	1.6531	2.3417	3.3398	3.616	1.3856	2.3154	3.4077		0.836538	16.8984
10.475	41.4065	20.3445	25.5009	33.2566	31.652	27.9017	16.6616	32.115	32.0186	40.2988	45.8683	35.2841	27.8988	16.0273	4.4165	1.2164	1.4993	3.6466	3.645	3.754	2.6875	0.7173	1.1652	2.3957	2.6247	1.9455	1.9493	6.0842		0.84615	16.5708
10.5941	41.1348	23.4151	22.3902	34.8878	25.6017	24.1254	13.445	33.4476	30.9793	38.7124	36.0549	35.8275	22.8399	7.8074	2.5242	2.2889	0.9903	1.9522	1.6442	2.178	1.1375	1.5818	1.4478	2.8441	1.0924	1.0232	1.488	4.8261		0.855771	14.9174
10.7131	33.883	17.9229	25.5213	28.4217	30.4587	25.9714	17.5481	28.5355	26.8216	35.1906	35.5542	33.3748	15.7945	5.9173	2.7909	2.6926	0.8736	1.8565	3.1488	4.593	0.5541	0.5794	0.843	3.085	1.0768	1.2988	1.3119	4.7135		0.865383	13.9405
10.8321	30.5123	25.2912	25.4372	28.3476	23.9962	25.1775	16.9925	30.6435	27.5402	31.2072	31.3726	23.3614	17.1997	3.074	2.7433	1.4289	1.8678	2.2171	3.0023	2.677	0.9803	0.4957	0.9228	1.7787	1.1799	0.6572	1.1681	3.8624		0.874996	13.0405
10.9512	39.0166	20.0894	19.8191	22.36	21.2333	25.1219	23.0151	25.4308	28.0056	29.5626	35.6721	24.8812	13.8897	1.508	0.9085	1.5689	1.0618	1.6987	2.0523	1.807	1.2502	0.8126	0.1462	1.2754	1.007	0.7767	2.4143	1.5733		0.884617	12.4271
11.0702	31.2179	20.6748	22.7413	22.0234	16.5103	19.2176	19.5725	23.9195	26.7298	27.0882	30.6501	20.5755	10.6371	1.0821	0.6448	1.2496	0.5064	1.8509	1.334	0.898	1.0385	0.9509	0.9646	1.1291	0.741	0.2742	2.9777	1.9226		0.894229	11.0401
11.1892	28.7977	22.5362	17.3128	23.7594	14.4734	15.0327	21.2743	27.0669	26.7419	24.6524	25.0565	19.0791	8.7255	0.7439	0.9517	0.3618	1.1995	2.1779	0.6036	1.47	0.8927	1.9204	0.7996	1.5039	0.0983	1.2467	0.4281	1.7426		0.903842	10.3803
11.3083	25.8938	23.25	21.5355	19.3142	10.9527	10.9336	18.5079	24.4856	26.3879	22.7915	20.6723	19.0618	5.2801	0.4276	1.5139	0.7239	0.8041	0.8721	2.6772	0.45	1.1533	1.7765	0.1634	1.1694	0.3359	0.7144	0.2744	1.568		0.913462	9.41754
11.4273	23.0154	24.5364	22.3449	17.9608	4.6819	9.6452	13.2535	18.8392	19.9	24.4392	20.9467	9.2901	4.8557	0.2901	1.0246	0.1199	0.1953	1.7128	0.3589	0.41	1.0821	0.1124	0	0.3633	0.4481	0.6149	0.8746	3.0117		0.923075	8.0117
11.5463	26.2394	19.5847	16.761	17.9927	2.7877	6.7888	6.5112	17.1229	19.8207	16.7949	16.5547	8.5032	4.321	0.8393	1.6846	0.6123	0.1762	0.7398	0.7012	0.212	0.7423	0.0816	0.7313	0.737	0.1901	0.3206	1.0634	1.1794		0.932688	6.77836
11.6654	24.95	21.5777	11.2293	13.362	3.0204	4.8416	4.5144	14.9411	17.6437	11.7607	10.8359	5.5617	3.7	2.4282	0.6878	0.3246	0.2011	1.0564	2.5583	0.258	1.1395	0.6365	0.8459	0.5972	0.5648	0.7859	0.3105	0.9585		0.942308	5.76042
11.7844	18.4838	22.9495	7.1217	7.5061	2.0064	4.4705	7.0068	9.7444	13.9263	9.5866	6.9163	3.7212	4.4353	0.8158	0.4069	0.0498	0.0007	1.9366	1.4548	0.943	0.9326	0.4317	0.03	0.6365	0.445	0.8832	0.8883	1.2048		0.951921	4.60481
11.9035	13.1437	18.4115	8.1798	5.2687	1.9607	2.1427	5.3022	4.5433	12.207	12.4247	3.1974	3.3811	1.9998	1.588	0.8738	0.6443	0.4754	0.943	1.0047	0.681	0.4066	0.7544	0.4574	0.8109	1.3619	0.305	0.2519	1.5454		0.961542	3.7238
12.0225	11.575	15.5513	3.8187	3.5752	2.3661	1.7056	6.0758	5.9824	10.3356	7.2605	4.0186	2.3024	1.567	0.2349	0.511	0.373	0.8314	0.0342	0.7762	0.128	0.0709	0.8396	0.1215	1.8681	0.5252	0.1101	0.1098	0.8052		0.971154	2.98119
12.1415	5.3849	8.1695	2.4979	3.1972	1.5699	1.4072	1.829	3.4138	8.7101	6.433	3.4747	1.1693	1.4031	0.7318	0.1175	0.0599	0.2536	0.4501	0.5528	0.308	0.7335	0.6052	0.0585	0.4331	0.2212	0.1656	1.7036	0.9752		0.980767	2.00104
12.2606	6.8311	11.6231	1.2063	3.979	0.8971	0.3636	1.9521	1.947	5.9006	4.5124	1.3502	0.3697	2.263	0.3462	1.5731	0.5267	0.024	0.906	1.0882	0.073	0.651	0.7884	0.793	1.282	0.467	0.5096	0.8024	1.0499		0.990387	1.93128
12.3796	5.0919	6.3854	1.6726	2.7957	1.2206	0.8431	0.9895	3.1821	4.8052	2.623	2.1713	1.6081	1.054	1.6176	0.7544	0.5567	0.3858	0.6838	0.7341	0.26	0.5289	0.047	0.4296	0.5557	0.285	0.3163	0.2424	1.7884		1	1.55815

## Sheet: Image8
X0	Y0	Y1	Y2	Y3	Y4	Y5	Y6	Y7	Y8	Y9	Y10	Y11	Y12	Y13	Y14	Y15	Y16	Y17	Y18	Y19	Y20	Y21	Y22	Y23	Y24	Y25	Y26	Y27	Y28	Y29	Y30		Ap-basal	Avg intensity
0	27.2765	23.1179	18.0031	53.4775	29.6019	23.5161	37.7533	31.9874	33.6379	31.2273	25.0465	25.3606	19.4843	25.9694	16.9916	25.5097	17.0876	24.7633	32.7976	24.6516	33.9689	29.3938	32.1598	26.2248	30.4297	47.8875	40.2142	26.5556	24.622	34.1268	22.0924		0	28.8689
0.119	26.2549	24.3551	17.8093	50.1993	28.1739	23.0218	42.0495	31.8989	32.7613	41.857	24.9387	25.0444	20.1434	30.9625	21.5148	31.8814	24.5452	26.6068	30.0599	22.8438	40.8871	29.6206	34.4001	27.8684	28.2452	44.4936	42.1267	31.7743	25.992	36.3965	30.7595		0.00952107	30.6286
0.2381	29.267	24.3644	20.9878	51.6628	26.3639	27.6123	42.216	30.7119	32.9281	36.3033	26.9026	25.3856	21.6179	37.7919	23.9772	29.9085	26.742	29.7793	30.6644	25.5048	34.7681	30.1311	35.8086	29.8259	33.276	44.9719	41.9818	31.7191	37.1689	36.5276	28.3501		0.0190501	31.7813
0.3571	26.919	27.7823	23.1166	49.0924	25.4743	27.5587	39.2674	38.107	29.7873	34.2778	29.0118	28.4543	25.4432	37.3325	26.9032	35.0938	25.6762	28.9286	33.9281	27.1659	36.3599	42.7698	29.1817	35.7504	33.4835	42.0118	45.5226	38.5818	41.9955	34.7969	29.1215		0.0285712	33.1902
0.4761	31.4375	28.4118	23.3608	50.3186	26.7781	32.289	42.0776	40.3276	32.2886	36.578	31.4753	31.5912	25.9177	43.9388	27.5016	39.2051	33.3726	38.5899	37.2343	28.5448	37.8162	42.9615	40.3488	37.6245	38.5447	45.3875	57.4276	36.7908	44.3574	32.7798	36.3985		0.0380923	36.5057
0.5952	29.2836	27.5767	31.2524	51.7371	30.1918	28.3016	49.6221	39.0266	34.4449	42.0824	38.5864	27.1103	26.6839	44.9607	37.6477	39.0495	31.5487	49.1548	43.5524	37.8787	39.7833	41.9011	49.0857	47.4537	39.4471	54.7057	57.5937	40.5437	48.3991	40.9656	43.4111		0.0476213	40.0962
0.7142	28.3056	30.2629	34.5575	50.6916	36.0032	37.4519	44.9733	41.8893	42.3006	37.3745	42.7769	29.8134	33.4729	44.3925	35.1249	40.6925	31.7546	42.5883	42.1976	37.7111	44.8158	43.7674	45.5033	47.8743	52.8056	56.8143	54.2376	44.5308	42.4862	46.9511	41.1371		0.0571424	41.46
0.8332	31.6848	36.2969	35.3923	60.5386	34.9128	40.7605	47.1983	41.715	40.9091	35.4803	44.0393	36.415	40.0269	54.6404	35.1573	43.7362	42.8727	48.4027	44.9831	38.7855	41.2765	45.7693	49.0035	47.4029	52.6117	56.1909	47.584	48.1134	40.5501	47.231	46.9634		0.0666635	43.7627
0.9523	35.0393	43.9003	38.4139	52.4924	40.3288	38.4178	49.7497	41.2308	38.4828	35.8468	41.0326	37.8079	37.9469	40.8243	37.6362	43.4478	44.4807	43.3384	54.1906	45.2573	42.148	42.3703	46.9477	47.3071	49.7746	51.794	54.642	55.5292	48.4941	48.9822	45.6024		0.0761925	44.3051
1.0713	28.9882	43.4655	49.2596	54.6402	37.0894	42.2257	50.3447	48.6806	49.6114	39.0355	40.1289	33.2759	39.4774	46.7233	51.3867	44.2745	51.0667	50.595	52.4769	44.608	42.5182	45.7528	56.4351	49.1023	54.547	50.9981	58.7968	57.6993	49.2554	51.4175	45.0396		0.0857136	47.0618
1.1903	33.6946	48.6744	45.3382	54.5748	48.533	39.8333	51.7485	46.7409	43.4071	44.0017	49.881	32.5275	51.0802	49.082	45.4916	46.2166	42.4164	55.2399	53.6732	53.5781	42.9085	42.7614	57.7082	47.5529	58.0615	53.3602	51.1221	54.0128	55.2277	48.6359	53.16		0.0952347	48.395
1.3094	31.7988	45.6499	46.4649	56.7769	51.5118	46.5043	58.8685	40.572	49.7296	48.2413	51.5626	39.1896	51.7789	45.2837	50.7891	49.073	58.7667	52.0195	54.7373	56.9522	46.3739	47.1646	53.8979	41.4076	64.8692	51.8746	51.4057	57.3323	61.9518	49.578	59.7432		0.104764	50.7055
1.4284	30.6422	47.297	56.0852	56.2417	55.155	50.2066	58.263	47.2554	56.2675	50.3448	48.6017	48.7159	55.5087	49.7638	45.4516	53.0584	74.4198	50.762	59.7202	44.986	46.9966	46.9527	58.8584	44.8306	65.6826	50.1078	54.375	62.0781	60.1859	50.6964	65.3786		0.114285	53.0609
1.5474	30.3975	48.4137	53.3445	52.6828	71.3484	47.4468	57.867	48.7231	53.4696	45.3312	50.6909	38.9854	47.1013	45.3067	49.8573	55.8287	73.3343	48.7196	58.3457	50.2177	46.0597	50.446	60.7934	49.0434	61.0908	55.7945	53.3287	61.7232	68.1781	55.5487	63.3501		0.123806	53.3151
1.6665	31.347	52.2604	54.8016	55.5872	64.8438	50.3036	61.5	52.0794	50.3432	46.3336	58.134	48.9978	46.7488	45.8919	50.9435	51.5792	78.7465	55.0989	53.8732	49.1751	53.5504	49.4835	52.922	52.9614	55.7823	54.4756	54.916	60.0491	63.7985	65.0631	64.9463		0.133335	54.4044
1.7855	35.475	61.2412	54.3536	52.1088	65.3566	55.1005	53.8827	51.1335	57.9606	45.001	61.3404	48.2634	55.8681	42.6867	60.3217	52.4425	77.2291	52.011	54.5796	53.0734	55.5142	48.474	55.6507	57.4053	56.2036	48.4264	59.3702	64.6913	65.1649	73.4773	56.0559		0.142856	55.802
1.9046	34.87	57.0092	49.5017	52.1827	77.7321	61.7719	51.1432	48.9538	62.4943	50.7243	50.8586	46.0658	51.4567	56.1148	63.1948	52.2406	81.0936	47.7831	55.8828	62.3572	54.4269	54.5624	56.2833	64.9872	56.0079	53.9668	63.3974	70.6067	64.2998	76.4314	60.4255		0.152385	57.7041
2.0236	34.7594	60.2995	40.3464	56.5864	76.8787	55.1499	51.1484	47.5021	66.7672	54.3754	54.2557	47.8021	54.3877	53.7785	55.9654	49.1322	69.7181	43.7408	57.9839	60.7187	61.56	49.8912	57.135	61.0805	50.1941	48.7379	63.7848	64.296	66.8301	75.8336	56.2946		0.161906	56.3527
2.1426	34.1522	67.4846	54.1433	47.6934	97.3487	48.5399	49.5355	49.0465	61.3559	52.5097	53.1932	46.5408	48.6908	55.2397	54.7524	55.1972	63.9737	46.8534	59.2489	60.0462	56.5741	54.5819	54.9458	74.7256	50.9551	51.7156	61.6888	62.8429	68.5906	83.7034	57.9603		0.171427	57.5429
2.2617	34.394	63.4859	55.3799	55.0334	85.4684	49.4892	44.1484	52.0075	62.5955	51.1773	53.6311	40.9427	57.2232	47.5389	60.2653	63.4336	70.3201	46.6198	61.5656	64.2351	59.2661	66.3295	50.2603	68.6039	62.6267	54.2977	61.6462	69.0045	70.7893	72.1579	54.956		0.180956	58.3514
2.3807	38.8621	59.6042	44.1839	55.829	72.5063	44.9722	46.7972	56.4621	72.3463	53.3651	61.7421	46.9657	59.6057	51.4036	64.6817	58.8747	62.0901	48.089	65.3424	56.2985	56.9062	58.4884	51.7354	68.3536	67.8918	50.355	61.6771	65.2872	69.6743	72.0944	61.0512		0.190477	58.1786
2.4997	34.6019	59.6367	40.7431	52.7248	68.3608	38.0661	41.0954	51.072	64.9349	51.5499	53.0801	44.9223	66.4419	49.0415	67.1094	59.6197	61.9412	47.1527	68.6585	59.204	51.4024	67.6406	52.194	67.2906	60.5322	53.1272	47.6456	56.1794	72.2786	67.3979	52.6438		0.199998	55.7513
2.6188	37.7594	53.7266	48.9968	61.1169	70.2883	45.3099	43.4414	53.7511	60.5755	57.4567	54.4119	48.7	67.3888	57.8604	63.4251	65.0603	56.5245	45.3339	75.1688	71.0107	53.1203	75.2365	52.9698	71.8744	65.7735	53.9423	52.7937	56.7052	70.9611	66.6539	49.6473		0.209527	58.2898
2.7378	35.3576	53.0032	43.7941	56.5097	69.6941	45.0756	37.2672	44.8992	53.2919	53.952	48.9836	50.1447	68.1696	56.2228	60.637	55.1107	53.5602	40.6727	77.251	58.978	54.9898	73.2006	56.6338	62.7077	66.1452	49.5126	52.2353	64.623	67.7687	64.7904	53.2841		0.219049	55.757
2.8568	41.0632	57.3033	51.4663	61.2337	60.6439	47.0134	41.0436	51.2781	55.6705	54.3741	51.4059	56.9314	69.7955	53.4779	65.1671	55.6468	52.0211	38.2413	69.8446	59.6978	54.2174	66.6741	49.8511	59.443	65.6877	46.211	56.4638	67.0629	63.6223	69.0318	57.5854		0.22857	56.4248
2.9759	39.7404	62.4452	48.8427	61.5479	48.0374	39.3968	41.852	52.0736	53.0122	55.704	48.841	55.7545	76.6997	55.677	65.1967	65.574	53.7505	49.256	61.2074	66.0622	49.4575	69.0311	58.0008	53.8011	62.6753	53.5077	53.9385	65.9278	61.6094	71.2478	66.1156		0.238099	56.9672
3.0949	42.6148	56.8336	47.0446	67.4717	46.5796	48.5564	43.4894	49.4573	49.8326	59.9891	47.8368	64.7044	67.7852	71.3237	76.6966	63.7295	53.798	58.8675	61.6341	70.37	46.5451	70.7573	54.1554	54.705	60.0546	56.2888	53.8118	73.5575	63.8631	70.3377	67.1924		0.24762	58.7059
3.2139	43.3051	50.6908	49.8514	71.7794	43.7794	45.9375	45.965	41.2828	48.0869	62.2908	49.4222	62.9651	62.3468	71.777	66.8596	57.3456	53.3202	51.2348	67.0157	70.4497	42.7114	69.5226	53.4892	56.7547	68.8763	52.9756	55.1385	65.8639	58.3822	77.2706	63.4017		0.257141	57.4223
3.333	39.8011	50.4888	47.1999	74.0628	45.9317	38.9608	44.222	44.2141	46.0735	60.5552	52.2563	57.9135	58.4502	75.8762	69.9239	55.108	57.6981	54.0307	72.3031	81.1366	47.4275	65.477	55.1673	49.4118	67.7817	59.2247	61.3124	72.1579	58.6673	67.5294	63.1489		0.26667	57.8552
3.452	46.2888	43.4619	45.5066	69.1959	43.9218	42.6107	45.0241	42.696	41.2412	51.4031	52.4842	59.9461	51.2968	72.4652	66.5171	63.2636	49.4159	53.3834	76.2556	67.8437	47.1849	72.2788	56.3655	50.6829	70.444	61.3151	56.6282	72.5436	60.908	71.5295	62.7126		0.276191	56.994
3.571	49.4154	42.8524	40.0595	70.92	47.2972	41.5535	39.7463	36.131	41.6882	48.4412	44.1515	64.256	53.3217	68.3241	64.0532	54.6139	50.4332	47.3195	80.7852	69.9239	45.9512	79.3002	57.7987	52.9185	65.3739	66.8245	55.2768	70.9344	59.2658	72.7591	65.7707		0.285712	56.3697
3.6901	48.6208	42.8155	43.0696	73.8999	47.4762	48.566	39.9339	42.7895	45.8958	52.4972	45.0778	61.3374	51.8747	70.5823	52.3814	67.7849	45.5043	49.8029	73.0306	72.3062	44.0371	72.5405	55.7817	55.4381	64.9125	75.5731	63.5322	77.1517	60.2198	71.2203	63.8421		0.295241	57.4031
3.8091	51.7347	39.5514	43.411	75.968	45.9903	46.6059	39.1851	41.9577	45.5213	55.4103	50.7261	55.411	50.6075	78.2628	49.306	65.727	54.5524	57.7536	69.6426	70.5591	46.7305	72.8588	56.2961	59.0853	64.7773	71.4878	51.4757	83.435	64.3628	75.2524	65.5953		0.304762	58.04
3.9281	54.4096	35.492	43.3089	68.6498	47.9233	43.3079	38.5396	34.4473	45.9095	60.691	43.297	58.3395	53.1469	87.5536	46.7057	65.0091	53.2514	52.2536	63.4244	75.5012	47.9256	77.0987	53.825	52.1594	62.4497	66.6269	51.6286	77.4085	65.3251	63.6407	69.902		0.314283	56.7468
4.0472	50.9848	37.974	36.9009	69.422	44.7079	49.7379	38.5153	35.6357	41.4681	59.3037	53.5815	57.1964	54.8154	83.6686	54.49	66.7169	51.8941	55.1821	71.352	75.2243	39.4435	76.0195	57.7969	44.6009	56.7217	64.39	53.1432	77.0783	74.6784	63.9082	63.6589		0.323812	56.781
4.1662	54.935	45.1698	42.964	54.4207	39.952	47.4393	39.7028	34.3637	43.7762	55.3924	54.2403	52.6696	49.832	69.8054	44.8455	62.3431	56.7608	54.3433	72.6387	68.581	36.0665	74.4241	58.641	47.6532	54.3183	65.172	55.2532	73.4338	73.4791	66.4216	64.2569		0.333333	55.2676
4.2852	54.3139	44.4855	34.7075	67.5237	40.6499	45.8475	34.1265	39.0562	40.9054	51.0654	51.3964	54.7057	49.011	62.9765	45.0222	62.9563	54.9279	57.9798	76.6299	59.2579	34.7905	65.3531	51.4578	48.7555	54.7528	79.2486	55.909	67.9137	69.5009	58.5446	68.9443		0.342854	54.2812
4.4043	54.1413	46.7959	39.5842	67.6971	37.7761	45.4743	36.2807	36.5355	36.6757	55.4868	56.8085	47.3347	52.0771	63.4487	52.4415	61.1629	49.8416	53.9522	73.9149	56.6694	32.9738	71.2781	47.7526	50.5662	63.2938	71.233	58.191	60.3034	71.1105	66.3208	65.2246		0.352383	54.2693
4.5233	47.9712	52.6308	40.7661	68.1229	39.8415	43.5766	31.3299	40.6749	40.0388	51.1027	43.4513	50.0409	53.3949	65.4559	53.0092	60.7127	47.9847	52.5711	74.2359	59.3968	30.4307	71.8358	49.4958	54.8252	59.086	63.7063	53.2836	63.7127	67.2395	70.822	62.4474		0.361905	53.6514
4.6423	48.6956	49.6987	38.8763	68.1957	35.9536	43.1668	36.2956	38.6437	46.002	54.8281	43.7726	46.0082	50.2809	59.7674	49.16	50.7145	55.4279	55.1247	78.4981	52.6347	28.777	78.7459	50.6704	55.4287	56.4966	60.0128	54.1588	52.0178	73.4256	60.3805	49.639		0.371426	52.3064
4.7614	46.9058	48.2988	41.7336	64.6929	33.4413	43.1004	37.2104	37.7402	47.0659	49.8058	40.3105	47.1428	53.4329	56.4962	46.555	47.9956	54.4771	61.1976	79.1175	49.4663	26.9023	81.1444	50.7146	56.058	56.3128	63.5093	56.3496	55.9447	78.1417	60.9749	54.503		0.380955	52.4755
4.8804	53.885	51.2125	48.6299	57.5675	40.8637	37.0279	43.423	38.6395	60.0992	57.2715	44.3178	52.4099	44.0749	61.174	52.9609	52.9524	51.4067	53.1393	76.8069	52.7121	28.2001	67.5003	52.9031	56.3832	60.5115	68.2726	44.6598	48.6288	85.6163	63.4844	60.1865		0.390476	53.7717
4.9995	50.5952	54.4374	47.3571	53.7392	35.0812	40.4147	41.936	40.204	54.0892	54.5473	42.1825	51.9789	40.6828	58.3779	60.0942	54.0785	55.7701	51.4569	73.8755	51.0429	22.4797	64.1324	54.6652	59.3387	57.9599	66.2077	48.5757	48.1296	76.2685	54.2108	48.943		0.400005	52.0275
5.1185	42.5816	60.8699	39.2819	50.2676	43.6299	35.9868	33.2463	38.3823	57.5346	53.7759	39.7672	52.7428	45.585	56.3748	59.1604	56.6579	51.8929	54.0734	69.1784	55.2217	22.7905	59.989	47.4758	56.62	53.6438	62.2933	52.2476	51.0453	78.5888	52.4254	45.4015		0.409526	50.9268
5.2375	41.2219	54.7377	47.7744	46.0356	37.5825	33.7119	37.3643	39.4457	51.1409	45.1176	41.1781	66.1029	48.0498	55.7497	54.7945	60.8341	46.2886	49.8138	73.1148	54.656	29.8574	56.3948	47.5429	54.5415	60.5835	61.4937	44.5888	49.8819	82.3356	59.7428	51.7439		0.419047	51.0781
5.3566	46.1702	51.9443	47.4281	46.55	37.138	30.9759	30.1407	39.8589	55.6248	36.0553	47.866	64.3841	43.6982	54.2032	63.0624	61.3891	57.7339	41.4607	78.2306	56.8497	32.0164	56.4957	55.8864	56.6052	44.9521	58.9828	48.7852	51.427	76.2783	55.474	44.7239		0.428576	50.7223
5.4756	46.8168	39.5411	39.7263	49.401	36.7331	32.1384	32.3197	43.5424	51.0193	37.916	49.1369	52.5989	46.5445	49.6212	61.1411	60.2064	49.7544	37.4549	69.6693	53.7355	31.9165	56.4857	55.3629	57.3441	41.0045	60.1393	41.9187	53.1962	83.0558	55.3124	46.6481		0.438097	49.0775
5.5946	48.6749	43.4489	40.3142	52.6213	42.3313	33.9854	32.1922	37.5187	52.5645	41.7491	46.6313	48.7787	53.746	55.8449	62.0708	54.1605	56.5142	40.3839	59.857	65.6334	31.0181	50.5199	62.3971	58.4114	35.0009	50.78	46.6743	48.0455	82.6552	63.7706	45.8875		0.447618	49.8123
5.7137	43.5478	37.459	38.9484	48.6404	39.5649	28.7317	29.4039	33.402	50.4618	42.3628	45.7013	47.1623	55.6928	51.9349	60.7027	59.553	56.7599	37.8972	55.8664	59.7251	32.0392	43.9642	62.7229	49.2251	34.9207	49.3403	39.0792	48.3307	71.2729	59.4873	46.979		0.457147	47.1252
5.8327	37.4778	28.5856	31.7808	52.0728	40.3764	28.7274	28.4464	36.3277	46.1268	37.8767	52.2298	44.5469	56.3455	49.8743	61.2216	51.8081	54.8999	29.4418	52.9338	56.8702	33.882	44.032	58.8048	57.1552	32.5398	45.408	39.3885	44.3859	82.262	61.6599	37.9852		0.466668	45.6604
5.9517	37.5672	29.5924	32.3328	52.0027	42.7357	26.5769	29.5198	38.8919	48.2174	40.7203	50.0209	51.8629	56.3894	44.3803	57.9269	53.4434	58.2	29.88	56.9222	52.6185	35.8897	44.615	54.1627	53.0474	30.7627	42.7482	36.7952	36.8631	79.6195	69.2441	36.1782		0.476189	45.4751
6.0708	35.8749	28.4271	30.2473	51.4194	45.3707	26.655	28.8611	36.8196	49.653	43.9047	55.5938	58.2087	56.6435	42.2252	64.5651	54.9387	53.8739	28.4779	55.5252	59.5251	35.4264	40.8812	54.253	58.1353	20.3595	46.2724	32.7934	39.8294	73.4247	62.57	34.9014		0.485718	45.3438
6.1898	30.74	23.6287	27.9749	48.2283	42.6562	25.283	28.772	30.8497	49.2073	50.9367	53.0199	55.1271	55.7979	37.4971	58.524	53.3861	58.9208	23.3157	47.7041	55.6605	31.2282	40.1865	56.3867	54.713	20.9609	48.6459	30.9518	40.7213	74.8239	63.0882	37.7429		0.495239	43.7638
6.3088	31.6581	18.2692	27.4816	49.8732	40.2687	23.563	22.7844	36.1165	45.1525	41.9321	50.327	51.7319	47.6694	32.8465	55.8871	54.2164	60.077	25.4174	47.9759	55.2998	37.1014	35.9267	59.7403	58.9081	27.1328	44.3871	30.1718	47.4847	71.5145	61.4879	30.8692		0.504761	42.6862
6.4279	30.3099	18.6204	24.6133	54.7036	35.3232	26.8893	21.5522	38.8469	43.3397	42.9309	51.6444	54.3679	50.4537	29.9452	51.5694	53.1597	56.5964	19.1977	49.1131	53.7747	42.6005	35.5551	57.3638	56.6929	23.3373	39.8006	31.1363	45.4832	66.5725	69.7922	29.8249		0.51429	42.1004
6.5469	31.0953	17.8176	18.4903	55.0755	42.8263	24.1547	16.6619	34.3443	41.9034	37.9376	55.6139	56.8477	46.4333	28.2537	51.9732	56.2376	53.6772	21.3914	50.7041	56.8469	47.0785	32.0409	51.5365	50.7061	20.0827	34.1406	27.8912	49.3274	59.9728	63.7573	28.657		0.523811	40.7573
6.6659	31.3728	21.9611	18.3985	53.0011	36.9637	21.6408	16.2623	34.5856	38.0582	44.079	49.1036	51.3428	47.4165	31.0455	54.4706	52.8561	54.5286	16.7863	44.6086	54.7605	45.1397	31.2128	65.1166	50.1358	22.712	38.6328	27.0531	47.3194	59.199	63.7323	27.5068		0.533332	40.3549
6.785	25.2853	15.8146	18.2677	51.7046	36.2523	24.3987	19.25	32.353	35.9117	45.3533	52.5626	50.2992	39.8054	33.2975	44.8577	53.0999	56.4084	16.9601	44.9068	55.0749	41.76	34.8281	57.2481	42.0322	21.2582	41.1487	29.4744	50.905	60.2406	62.9034	27.5861		0.542861	39.3951
6.904	33.4904	20.8997	17.1459	47.7754	46.1432	20.0608	19.7298	38.73	35.5288	50.4043	48.7926	44.3791	36.205	27.7788	41.1535	57.9069	55.291	18.2257	45.302	48.3359	44.7375	39.8167	52.7904	38.5251	19.9558	39.5859	25.331	55.9396	48.3758	56.479	29.8868		0.552382	38.8614
7.023	30.0026	17.1692	19.9914	50.0734	47.1195	16.8355	19.2345	35.6491	33.6091	47.177	45.8644	47.5445	35.7391	28.955	46.0755	54.5473	55.9134	19.7037	42.0871	47.1779	40.9721	36.8725	50.9122	39.6668	22.503	37.8096	21.5715	54.5481	48.4874	52.57	30.9553		0.561903	37.9786
7.1421	31.5955	13.7512	20.4559	54.0541	41.1964	19.9414	18.1298	39.5881	43.3025	47.8845	43.0713	45.6679	33.7751	27.0121	47.7516	41.7956	52.1995	23.3083	42.5615	51.2795	34.9905	31.4725	46.3169	35.6128	21.8906	35.3711	21.8764	53.0483	53.5604	58.3681	24.2666		0.571432	37.2612
7.2611	23.3338	18.4544	21.5436	50.648	32.4062	21.1317	19.1755	45.5147	41.2958	45.0327	40.7091	47.5309	31.5148	27.4202	50.9146	44.6272	44.8718	15.1544	45.8188	54.6859	41.4291	37.4049	47.8854	32.0322	23.0636	40.1646	26.5232	51.9311	52.2466	50.3435	26.3362		0.580953	37.1337
7.3801	23.7649	17.5306	18.2666	42.4081	45.1407	20.8984	16.7629	42.0202	40.5519	46.302	28.7701	47.1833	29.6033	28.1303	45.415	41.5184	48.0196	12.7515	43.4563	46.0848	34.8671	33.9529	45.1273	28.7093	15.587	37.4283	23.8199	58.2236	52.8713	45.9904	25.9804		0.590474	35.0689
7.4992	21.3138	14.9966	22.1012	42.0374	33.0723	15.5252	21.0217	43.4097	43.7047	47.7151	37.512	46.0863	29.2678	27.3473	47.7147	44.4932	44.9208	15.2791	44.0061	52.7687	38.1043	32.4347	44.4213	31.4035	16.6178	32.7068	31.9237	57.537	54.1626	42.3423	20.8081		0.600003	35.3792
7.6182	23.4195	14.7002	12.8653	40.0362	32.3317	15.042	18.2764	46.5101	45.7024	47.7495	37.164	45.0798	24.7678	25.1552	52.0268	39.8993	42.7626	14.7941	48.9388	48.2456	39.7365	35.7469	45.0824	23.753	17.3548	33.6066	27.3802	49.1602	50.9816	41.9078	19.973		0.609524	34.1984
7.7372	25.6439	13.1225	16.1134	36.5544	33.3909	16.9748	16.0511	46.0075	43.2833	54.8433	29.8588	45.9442	19.9101	24.9809	51.6624	43.185	39.3331	17.8768	47.9861	43.1581	43.4912	36.039	38.2064	23.0196	17.9168	35.5726	27.0769	49.3298	56.2194	39.3022	21.4892		0.619045	33.9853
7.8563	26.0101	18.8644	13.1615	37.0303	25.5807	18.3975	15.6338	42.4204	37.7937	50.8164	31.6135	39.6132	24.1976	23.0356	52.9327	42.381	41.0375	15.3696	37.9609	42.5439	40.2068	38.3772	40.3995	23.0621	16.4223	36.1174	23.0042	48.4893	44.949	40.7247	20.4232		0.628574	32.5345
7.9753	24.378	14.0301	13.3488	33.8091	30.7034	14.0202	15.5168	35.8705	44.222	46.8641	29.7905	48.1145	24.4271	22.6618	45.462	47.4296	36.6428	14.7544	38.509	44.9154	38.853	32.3744	38.1327	23.2064	16.2624	35.1567	23.5767	47.5839	46.2813	40.9041	23.3053		0.638095	31.9712
8.0943	28.2321	14.0436	13.6942	37.6563	27.1701	14.6796	13.34	28.4042	37.5605	47.748	28.9624	44.3964	26.7823	25.1354	55.5858	49.0259	39.9693	16.5473	34.6309	50.9568	41.0783	31.2849	34.391	23.4115	16.4249	34.3027	29.5725	43.5414	47.7417	42.9646	20.8713		0.647617	32.2615
8.2134	27.4861	13.4583	17.2972	37.7129	27.7316	14.6824	13.107	32.2816	34.4248	45.9428	33.0831	39.5025	24.0327	24.5368	49.3893	50.7492	34.4158	15.324	34.8326	51.0298	39.0706	31.0233	41.895	25.7338	17.2731	36.4416	30.009	44.5747	43.5927	42.4466	26.2871		0.657146	32.2377
8.3324	26.0834	15.6676	18.2815	33.8475	26.9789	12.1294	13.1041	30.2351	32.8921	47.3161	39.4366	41.615	22.7892	29.0174	47.776	58.4102	39.1337	11.8339	36.5596	51.5297	48.5099	31.9289	47.9423	23.1392	17.0874	38.8326	26.7403	42.1953	36.2927	42.4424	21.5587		0.666667	32.6228
8.4515	28.419	13.0639	13.9893	34.516	23.8834	14.0696	10.0074	30.2043	31.1435	46.4671	39.8676	38.0952	23.8022	24.9898	45.6319	64.7918	40.4813	13.0061	36.6656	56.6211	40.4201	31.5756	49.5598	24.136	16.4018	40.8565	34.6734	43.2198	37.4127	38.8204	23.1314		0.676196	32.5782
8.5705	26.6224	13.8181	12.7888	35.1695	23.2621	15.1742	13.5526	29.7428	32.1318	45.5097	41.7773	43.4646	25.2642	26.3431	49.4377	63.8059	43.9617	16.2146	29.3297	49.5056	35.8674	31.4783	51.2285	25.0241	15.0549	33.1063	32.1554	40.734	35.5253	40.8006	24.4106		0.685717	32.331
8.6895	29.3441	14.1667	14.5617	29.8858	22.7569	15.8245	12.813	25.9062	33.6749	41.101	37.6945	32.7349	22.6443	23.406	51.0229	69.7946	40.8029	14.332	27.6828	52.5039	39.482	40.3858	53.2684	25.0501	15.5341	35.025	35.4976	41.1137	30.6592	47.3342	23.3857		0.695238	32.2384
8.8086	28.5243	16.0882	13.5056	31.4815	26.3495	13.2635	13.9515	27.0899	30.1794	42.7929	32.9809	28.9991	21.434	19.6893	53.0844	63.4107	34.6234	14.6408	26.856	47.4598	40.3228	39.7552	49.497	30.013	13.2649	37.6123	44.271	49.2436	35.7935	47.8936	26.5943		0.704767	32.2795
8.9276	26.6573	13.5757	18.4183	32.7098	22.6019	13.7547	13.6462	24.4952	28.7341	39.6351	31.7674	32.2941	21.3426	20.5351	57.4143	66.0032	39.5308	20.0201	26.9293	47.9943	43.4024	40.8436	55.3277	27.5748	13.064	40.4159	44.8124	46.4248	33.4058	53.1588	23.4646		0.714288	32.9018
9.0466	24.1539	13.4647	15.6867	30.6036	21.8023	11.717	16.6695	23.9876	29.2091	29.9706	34.8755	34.002	21.2231	23.1643	50.7489	55.0559	37.6031	18.0865	28.2634	49.721	49.0175	43.7795	58.8268	27.4673	14.9307	38.4653	46.353	53.4127	35.4495	47.3984	27.7113		0.723809	32.6716
9.1657	26.4014	12.9809	14.9146	25.1685	16.139	12.6337	12.7254	22.1441	24.2107	35.2608	31.8952	31.4364	22.5083	22.7541	57.6108	52.9166	37.9801	22.8597	31.2877	49.3446	38.7989	43.5759	59.0885	27.349	15.5423	37.8378	47.3687	49.2092	39.8658	44.0196	27.3914		0.733338	32.0393
9.2847	30.8885	12.6437	15.612	29.0663	21.7688	14.1193	14.0725	22.9183	19.9367	37.5292	33.278	33.0678	18.1643	21.7591	58.8987	47.5288	38.7966	21.867	30.217	48.5203	43.7358	49.6153	62.9329	28.2902	15.8791	38.4567	56.1391	45.1612	37.2615	44.44	23.9069		0.742859	32.7894
9.4037	27.8058	14.3062	14.0135	21.8463	21.8148	15.8865	12.1394	21.806	21.6907	30.8072	37.1393	36.1295	15.5504	25.7431	61.2539	55.6411	37.9086	19.5841	33.592	48.8623	43.1247	45.0076	62.0046	27.2396	17.8058	36.9079	70.4317	52.2271	38.4916	43.926	23.8413		0.75238	33.3719
9.5228	26.7425	12.2739	15.9554	26.1463	20.2994	13.4408	12.2765	25.7593	24.3568	32.8195	34.1051	33.3689	18.9315	23.9697	57.448	48.325	43.5504	20.8414	35.2723	48.8784	50.8961	54.326	57.47	29.8966	17.9124	43.4405	62.8737	47.8616	35.8599	42.3549	21.962		0.761909	33.536
9.6418	26.2616	14.0388	16.7727	24.5847	22.9011	15.4965	11.7084	24.6678	22.3435	36.9242	31.3772	34.6742	22.3424	23.9073	58.0134	48.4768	47.293	22.4862	32.9799	58.0129	52.1623	54.329	57.1601	28.0004	21.8776	44.0254	61.1375	46.1929	37.7338	38.8128	26.7907		0.77143	34.306
9.7608	27.9883	11.6437	14.3648	19.3018	18.1485	14.1832	13.76	19.9019	23.9456	39.7751	32.184	30.9906	21.4426	17.1863	56.2228	42.3793	46.1077	20.6864	32.6994	59.4858	55.3563	41.1984	51.1171	28.9867	21.9016	50.8181	68.8478	46.1349	37.7158	43.2286	28.2612		0.780951	33.4182
9.8799	22.3065	13.1479	13.5746	20.0241	23.3926	14.3482	13.7555	17.8032	24.1685	48.011	30.1831	33.0177	17.7619	21.3283	63.6528	39.6779	50.4648	18.1866	37.4419	57.5675	56.8962	52.2686	55.9129	30.0933	21.663	55.0329	66.489	41.913	39.222	48.456	34.9255		0.790481	34.9254
9.9989	23.2951	13.591	11.4053	20.1269	23.5138	15.5097	12.6093	20.1029	23.5007	41.4577	35.3411	30.1622	21.2121	20.3318	54.8353	38.7175	47.1508	22.9899	34.0912	58.6809	59.1417	44.9156	46.4038	29.6731	20.6328	54.7483	64.4286	37.4192	37.5277	53.3012	31.1369		0.800002	33.805
10.1179	20.8357	13.4613	14.1971	14.2263	27.5292	16.2892	12.6042	20.1259	20.6714	40.4078	38.6148	33.5737	25.0713	24.5795	54.4384	46.4581	46.964	22.0586	37.279	62.3893	67.7263	47.8568	51.9554	28.6684	23.7419	50.1429	59.3215	36.9816	46.2008	49.8153	34.2196		0.809523	35.1098
10.237	15.776	13.1035	12.6723	13.3462	23.9923	15.6263	15.4908	20.38	18.7047	47.2349	33.2757	36.7608	21.8891	26.8312	51.0972	45.305	55.3865	21.357	43.1199	61.8227	65.4475	56.4946	46.179	31.3198	28.2606	51.3703	67.5225	37.0322	56.3667	53.3962	29.493		0.819052	36.0018
10.356	20.6208	13.9008	15.5701	12.8512	22.6166	17.0399	11.6177	19.7005	18.8837	37.6015	38.6605	40.2394	25.7638	26.8876	51.1241	38.225	55.4025	23.2673	37.4446	62.5806	63.6912	56.6809	41.4487	33.5357	36.3778	54.3339	58.7695	31.5172	50.1918	51.8032	40.6291		0.828573	35.7735
10.475	18.5207	14.1695	13.8418	9.7774	19.4368	14.5546	11.0637	14.0846	20.7715	36.4382	38.0392	41.5729	17.467	22.7126	55.8215	42.1639	61.4098	26.5483	42.8641	59.0966	71.724	60.221	45.105	34.2678	34.1181	60.2064	63.2912	30.9141	51.9368	57.9245	42.2649		0.838094	36.5267
10.5941	19.0401	12.3683	15.1262	10.347	22.4947	16.6413	12.7947	13.6478	19.5152	35.9806	36.7786	50.0305	22.2745	23.2712	51.4439	48.291	53.7636	27.8585	43.572	49.741	73.8096	63.662	44.0442	38.586	36.9608	58.5659	59.3779	37.5493	55.5024	58.4565	44.2167		0.847623	37.281
10.7131	19.4718	12.0298	15.9764	10.8093	19.2473	15.85	13.1467	13.6823	19.9927	35.5659	41.1381	51.1257	23.9786	20.9549	46.1422	44.7674	43.5351	30.4135	41.9576	49.7352	72.3839	59.0222	46.4	38.5271	41.1664	59.8766	54.5118	37.829	62.7795	49.2263	42.8471		0.857144	36.5836
10.8321	19.4718	12.6576	15.9078	7.6492	19.7396	17.635	11.9134	12.4315	17.5957	31.6412	43.9429	54.9206	20.1228	23.3723	48.0435	41.3216	46.3486	29.3494	44.1758	49.9539	64.4498	62.2168	47.3399	37.3697	45.8644	63.3899	56.0729	37.3855	64.5085	52.1924	39.8282		0.866665	36.7359
10.9512	15.2588	11.6874	20.4611	5.2359	21.5414	15.3291	9.8288	12.1685	21.2699	30.1679	41.8939	54.9433	20.7993	23.8702	39.0175	39.468	49.4707	33.3022	53.0767	46.6444	57.0918	62.1083	52.155	37.23	47.0416	66.1046	49.7648	34.5633	72.0788	50.1105	43.083		0.876194	36.6699
11.0702	16.1419	16.8548	17.2772	5.4667	18.7709	16.0731	11.7179	12.8408	16.2009	35.3369	48.7894	55.3609	21.1634	24.1754	44.6625	42.4665	49.5956	33.3574	62.1959	41.26	51.711	67.9233	62.176	44.1353	50.5854	74.286	51.8952	40.1214	73.5942	43.333	39.1838		0.885715	38.3436
11.1892	14.3464	16.5574	20.7341	6.5402	21.3716	15.2841	10.6711	11.775	16.1551	29.6447	46.375	63.1368	21.9312	27.9291	39.7259	40.2816	47.3766	40.9342	56.4104	48.1944	41.685	63.586	67.8806	55.1561	47.5096	76.9366	49.6351	44.8957	59.6091	48.7233	36.4015		0.895236	38.303
11.3083	14.8239	12.5865	17.7913	5.2661	17.5243	17.8757	10.6698	8.3939	14.7839	33.3634	41.8634	61.0887	24.6141	22.3905	33.8423	43.2213	48.2184	37.6533	53.4944	46.4222	41.0124	62.0292	60.3599	56.6883	52.3349	70.5868	51.1366	41.9142	54.1891	44.4477	41.5155		0.904765	36.842
11.4273	13.3751	10.4857	14.9449	5.4815	17.8939	12.7051	10.1175	7.104	16.8555	29.3662	35.3193	67.8447	22.8165	22.3986	38.9944	39.5731	42.4248	37.349	46.5099	41.4959	42.7704	71.9326	66.5673	56.6082	55.7672	74.4695	47.5313	40.7277	48.6595	36.9685	39.5914		0.914286	35.9564
11.5463	12.1687	7.9734	14.1955	5.0212	15.9579	10.6995	11.3995	7.9912	14.6469	32.0135	34.1704	48.1564	25.7816	25.4707	49.0328	38.4815	42.8996	30.1554	44.4801	45.3969	44.1147	62.2276	66.4595	58.4248	49.223	78.071	41.7442	47.8624	46.8864	35.1734	33.9078		0.923807	34.8448
11.6654	11.4635	7.5643	17.011	3.3356	15.4479	10.4045	7.6853	8.9548	11.7495	28.0594	34.0171	51.2057	26.8315	27.9653	37.6304	38.5074	46.1116	36.5276	47.0828	47.792	38.8695	63.9545	62.1406	62.0792	54.9402	67.12	48.0501	50.0269	47.1922	26.6613	33.7942		0.933337	34.5218
11.7844	10.857	9.1786	12.9765	3.0493	13.182	9.4909	6.8422	7.2375	11.8174	27.0399	28.2278	46.9021	21.8001	29.3868	32.9846	33.3926	48.8787	36.5719	43.9708	41.4446	41.2559	61.4957	47.343	56.06	52.7213	66.1147	41.8961	48.4264	39.2852	28.0528	37.5977		0.942858	32.1123
11.9035	8.0285	9.8864	14.4459	3.3127	15.1312	9.8176	6.7429	6.4871	8.8683	26.535	25.4209	40.6262	22.1322	25.0625	33.855	32.4363	41.4625	31.3115	43.605	34.2332	40.2385	55.5738	45.965	57.1078	55.8394	55.0962	44.2703	47.9586	36.4572	24.9258	37.2035		0.952387	30.3238
12.0225	8.5294	7.8654	12.0465	4.4997	10.7999	8.9903	6.5474	5.7167	6.082	21.6548	27.221	39.4998	21.4443	21.2479	28.1261	35.6042	36.7271	31.8268	40.9027	34.6966	41.7841	54.4575	42.5031	50.1882	60.0116	58.0866	47.5762	50.1813	32.0942	16.7525	28.2739		0.961908	28.7722
12.1415	6.0638	7.0183	8.6613	3.0117	10.9868	5.3756	5.9061	3.9887	5.8494	21.1983	28.0583	36.1532	18.1174	24.4923	26.9706	37.9231	34.4475	32.9335	37.6248	32.3452	37.967	46.1324	43.7053	52.0948	50.772	53.6256	47.9101	45.6417	32.1485	17.8316	25.0707		0.971429	27.0976
12.2606	4.8454	5.1709	6.4996	3.0492	9.8257	5.4193	6.7809	5.7633	6.0191	19.7776	24.6891	28.711	20.5304	19.3419	25.5888	33.2304	33.695	37.92	30.7115	37.5134	38.6554	43.8896	39.1498	44.8838	49.9597	52.5013	42.8542	42.3883	28.5489	14.388	20.305		0.980958	25.2454
12.3796	4.8823	6.5042	7.3803	3.8921	7.7788	6.0166	4.4418	5.5237	5.9874	12.1308	21.1811	21.772	15.7703	16.4665	18.9299	27.0864	29.477	28.531	27.6043	30.5056	34.2838	35.4515	35.6374	49.9608	47.8755	55.6912	45.6546	35.1816	19.2642	9.396	20.3583		0.990479	22.278
12.4986	4.7956	5.6431	8.4656	5.0338	5.7826	8.4156	6.2717	3.9759	3.7534	12.6922	19.4727	23.9959	13.7538	14.4629	18.5785	25.5634	26.6198	22.0912	25.6467	26.691	33.0132	34.7367	41.2462	37.828	51.8051	48.6135	46.0749	33.8429	19.525	8.1273	15.1203		1	21.0206

## Sheet: Image7
X0	Y0	Y1	Y2	Y3	Y4	Y5	Y6	Y7	Y8	Y9	Y10	Y11	Y12	Y13	Y14	Y15	Y16	Y17	Y18	Y19	Y20	Y21	Y22	Y23	Y24	Y25	Y26	Y27	Y28		Ap-basal	Avg intensity
0	25.6296	26.2763	33.6382	39.5661	31.2346	42.9923	59.5743	41.0806	39.6533	28.7349	48.6856	35.3222	37.912	39.646	44.5704	31.6699	24.2435	33.5351	33.5207	32.6234	38.3626	30.8383	31.911	39.3054	33.0988	44.1509	42.0912	41.3059	31.0556		0	36.6286
0.119	23.0373	35.5358	39.107	43.7228	28.4307	36.5155	57.552	46.0354	46.0408	38.0614	42.0824	28.394	38.1972	44.7735	46.7316	27.9952	29.4891	29.3353	34.2542	34.9546	39.2698	38.2883	29.8202	37.054	34.5448	34.2505	52.4518	43.28	35.4949		0.00961259	37.7483
0.2381	26.7128	24.9406	34.1983	42.2442	29.0387	39.269	62.0734	48.1306	40.7976	36.8676	41.2543	32.7117	43.4671	35.3253	55.123	31.356	27.3637	30.8757	33.0558	46.0063	47.5722	41.1916	34.4583	45.3544	33.6606	43.4506	46.1842	40.0841	30.384		0.0192333	38.7294
0.3571	22.5653	34.5087	31.6878	33.7991	46.1855	42.5723	65.6059	50.5004	41.7089	39.6063	46.5691	41.036	37.5419	41.9329	56.984	36.3369	40.0558	35.5353	29.8902	35.5283	42.1195	42.4573	31.6922	42.891	38.1154	48.8044	47.6553	41.7362	35.7058		0.0288458	40.7354
0.4761	22.0834	34.748	44.5418	39.7076	45.7889	40.2759	70.1081	56.6705	45.0354	37.7007	45.6294	39.94	35.5068	47.0665	53.4287	36.6155	35.4426	38.0023	38.428	40.81	38.1623	42.9043	42.5352	49.3089	44.413	44.6795	70.7093	46.0057	34.3708		0.0384584	43.4696
0.5952	21.4266	38.0687	39.2846	39.7841	38.6868	41.4796	71.5322	62.7315	53.8152	44.8219	51.8959	36.701	46.5817	46.0984	59.9173	39.9529	47.2951	46.3209	40.2447	45.0251	47.6888	46.692	43.0009	51.5515	54.9853	68.7311	67.715	47.1969	39.486		0.0480791	47.5418
0.7142	23.9263	39.7582	31.3464	40.2202	45.4552	42.74	71.8577	67.7737	55.6654	52.5302	47.3206	49.6781	44.9463	50.5686	69.5708	42.4263	48.1569	40.5241	44.1819	36.5765	49.8184	37.8688	51.0638	58.847	52.9591	71.5799	75.5768	51.9258	53.1352		0.0576917	49.931
0.8332	23.6446	41.5709	44.6252	36.13	41.3493	49.0344	84.1574	67.047	70.1764	52.3938	50.5767	36.7246	49.7629	53.5766	72.0685	46.9754	52.3944	49.5497	49.6185	39.4306	48.2906	47.0921	49.3078	62.5975	52.5969	67.3859	72.0893	62.8431	51.2278		0.0673043	52.5599
0.9523	26.3737	42.7351	44.3061	33.0814	46.632	47.0091	68.3874	71.1463	77.0731	54.1611	52.8449	48.0717	41.4848	57.588	85.8686	45.599	64.3158	54.883	56.4197	45.5956	50.26	52.1564	46.4068	81.5654	51.2843	72.9821	68.3447	67.7887	58.7529		0.0769249	55.6247
1.0713	28.3891	39.968	38.9526	36.7262	52.102	48.3692	84.8643	59.7965	82.1459	60.6715	57.3135	50.2404	47.3815	59.7067	90.8496	56.0045	61.9525	45.4725	56.1409	46.1137	56.251	50.2249	51.301	78.9438	60.984	74.2068	60.7835	56.0751	58.6924		0.0865375	56.9181
1.1903	31.6197	41.3428	36.068	41.1699	48.2426	49.0407	88.1773	62.1355	78.0369	65.8262	57.6551	60.8847	46.9494	73.4911	89.8927	45.4012	74.8477	57.7288	60.9436	58.4083	68.9524	49.5293	52.0834	81.9199	53.8313	70.3043	71.4566	59.7003	45.3577		0.0961501	59.3447
1.3094	31.015	44.6207	44.0673	38.8284	48.8013	49.0899	73.1985	57.5461	72.3713	58.3966	53.8602	60.3733	39.615	68.6915	78.415	59.955	87.8972	56.3897	66.0576	52.4845	72.8122	52.0393	52.8584	75.9447	68.4434	64.9415	64.0438	63.0778	50.4896		0.105771	58.8388
1.4284	36.9047	41.7282	42.7058	28.3001	56.9649	62.3163	72.2648	63.173	76.9169	54.8218	56.0402	50.6645	44.9635	65.0091	76.2223	52.1955	86.2625	59.0014	60.8814	56.3668	73.4157	54.8119	48.7285	73.6403	79.9728	54.3307	64.4492	57.5957	52.6109		0.115383	58.7331
1.5474	35.8868	51.5621	38.2368	36.4015	56.2827	57.1942	72.134	57.8212	77.865	51.4991	59.5189	59.2436	44.2594	75.5935	65.5722	41.0725	95.4619	64.1405	65.0473	63.3223	87.2353	61.8615	51.5812	73.6656	67.0384	60.7865	65.3993	49.2085	46.5317		0.124996	59.7043
1.6665	46.8396	56.1523	56.0291	32.9575	54.9021	62.6109	48.8738	67.1729	71.7036	64.9648	53.0731	64.3672	50.9041	72.9102	56.0697	49.6124	75.4021	65.1507	53.9458	64.7123	90.9733	52.0605	41.9534	80.2449	71.9719	54.4256	54.5732	51.4378	41.4287		0.134617	58.8767
1.7855	46.9528	57.5928	49.4579	40.1198	52.0177	47.5603	67.4652	61.0114	68.3968	66.0244	55.8522	58.516	47.9276	61.4103	55.3865	42.2054	86.5594	57.7668	53.7534	62.1555	87.9615	51.5985	41.9998	81.3227	65.3296	52.6991	51.7368	49.9428	40.5867		0.144229	57.2865
1.9046	42.391	64.5548	40.9546	48.9402	63.2989	54.4201	66.9182	66.079	62.3246	56.4273	63.1396	63.9519	43.5207	60.0206	59.1943	35.452	77.3566	55.0022	43.5224	57.952	72.4082	53.7467	43.7615	64.3239	63.3965	54.9712	43.1077	38.9243	34.5535		0.15385	54.9867
2.0236	39.0276	77.0077	42.7394	47.2721	58.9641	56.8246	57.4749	59.6884	63.3898	63.8245	55.8219	64.727	56.4283	65.7627	57.838	42.2186	78.5965	53.2051	47.6893	61.1876	89.701	44.3774	39.4317	59.8277	56.9296	54.5262	50.1196	42.5084	43.1464		0.163462	56.2157
2.1426	36.5247	63.9637	50.9683	44.1182	54.3685	48.9466	58.2184	62.2704	65.4341	80.0184	51.3	62.6036	62.6221	64.0496	38.4216	43.3501	82.9503	50.3201	57.1918	64.2322	81.1351	50.8148	37.9406	61.6169	59.7403	53.2499	48.3167	41.9099	36.246		0.173075	55.6153
2.2617	36.1807	72.6909	47.5361	41.2082	53.3121	41.4223	50.3055	56.0018	57.9234	53.7718	50.4895	60.9111	57.8022	50.006	41.8266	40.999	75.2178	47.2588	54.3158	54.0077	90.2434	50.1581	42.0907	67.1708	56.619	55.3728	41.9522	36.1919	36.6947		0.182696	52.4028
2.3807	40.2383	64.3961	45.2504	47.6197	54.206	48.3445	51.4424	61.1865	65.9141	67.9093	53.5442	64.0691	52.8544	51.0816	55.7668	49.8221	70.0289	56.8932	50.7192	57.5061	83.8011	49.7048	48.303	59.6127	47.5919	54.9954	42.807	41.264	37.6447		0.192308	54.2937
2.4997	37.457	70.844	44.0824	48.3933	58.2086	48.6839	61.1576	58.4944	65.5123	68.13	59.3285	64.9126	49.7532	63.9723	53.167	43.0077	61.6224	56.5403	47.4687	63.4261	70.759	55.6031	47.9743	68.744	52.0028	52.2009	40.3343	40.3003	38.5033		0.201921	54.8477
2.6188	44.0445	60.0743	37.0466	44.7616	53.8944	58.9784	55	62.3298	59.3244	60.7094	56.7293	62.0729	59.2695	62.3837	53.0562	44.248	60.9172	41.6544	46.9701	56.8112	67.8381	48.6056	38.8086	51.5573	43.3228	44.2337	40.1399	36.3427	33.3291		0.211542	51.1881
2.7378	41.5919	68.7646	42.24	43.9483	55.1964	56.1158	45.8706	52.2037	51.0089	52.7962	49.9586	56.8851	55.0488	70.4181	56.2311	47.5059	51.3026	45.9498	47.02	55.2464	65.4901	48.6838	41.9729	44.8873	49.4776	41.1643	39.2422	38.5174	30.099		0.221154	49.822
2.8568	34.0855	63.6847	38.0232	55.0419	48.0353	56.6941	53.4062	56.9065	53.9851	59.9095	50.8676	63.482	61.1688	62.9489	58.6345	45.2157	51.4568	44.8692	55.4276	58.9072	65.2925	41.1284	55.6227	57.3056	50.077	34.8882	36.2232	41.3897	31.7228		0.230767	51.2552
2.9759	32.6276	59.2891	36.6995	47.7641	45.5434	56.4393	59.9478	46.7793	49.0823	58.6268	56.7501	57.3102	61.7014	64.4636	54.2991	46.8089	48.28	40.9317	50.4316	56.2489	58.575	50.7533	43.7923	54.8399	44.7556	39.7934	44.2002	39.88	35.942		0.240387	49.7433
3.0949	37.2648	48.8403	32.3611	49.8193	54.9007	50.3861	43.1678	44.4356	53.8962	52.2645	53.2613	64.0841	61.8323	74.7449	54.5643	42.858	57.2759	51.1725	53.6159	51.4192	51.0809	52.1523	48.4411	61.7553	38.6159	39.3641	40.3314	48.3906	35.6992		0.25	49.9309
3.2139	41.0259	53.9228	28.3974	48.3182	57.9687	46.7104	61.7501	55.069	55.6106	54.8535	57.8643	59.2662	54.3995	72.7082	51.244	47.7325	57.6033	51.527	53.433	49.3827	55.3554	47.2558	43.6311	66.1382	50.5674	34.136	33.269	37.615	40.4276		0.259613	50.5925
3.333	42.0341	49.0346	34.4123	53.9879	48.7289	42.6986	50.2223	51.8438	56.9627	60.4083	60.9174	71.0848	42.4898	82.0571	54.9963	39.5681	52.2275	50.8526	51.195	49.5375	50.8354	52.1214	37.2915	62.9966	53.4745	31.8647	41.9839	34.8837	36.1939		0.269233	49.8933
3.452	38.4116	43.4969	31.4689	46.8991	52.7001	46.08	54.1045	47.6559	44.0884	48.9414	56.3949	69.3735	46.8908	73.9974	47.0417	38.5784	58.509	53.9417	40.6082	60.0302	41.5423	46.3646	52.5114	49.3252	58.3097	27.0568	43.5214	42.9789	35.9515		0.278846	48.1646
3.571	41.105	43.172	38.0682	52.9754	48.7485	43.4842	55.4406	51.2338	48.1159	44.5178	51.4128	61.4773	42.1241	78.6818	52.0986	47.6837	53.1025	46.9835	34.9814	41.5201	45.1538	46.1297	42.6471	62.7491	50.8559	31.5586	44.6157	44.6175	42.4902		0.288458	47.8533
3.6901	34.4458	37.5687	36.3425	48.578	43.3435	48.7451	57.1558	47.7208	52.6406	49.0288	55.4146	52.4334	36.5171	84.4622	54.3766	41.6563	55.6194	47.9519	37.9998	53.1495	46.9576	38.1378	43.0017	55.3838	59.8464	33.3643	40.7375	48.4266	39.2586		0.298079	47.5953
3.8091	44.9974	37.8763	30.6563	39.8502	53.707	37.11	57.9073	51.2705	47.4264	44.777	49.504	56.0903	39.5512	69.9407	49.2646	41.1913	47.8317	47.2541	38.8981	44.9251	47.0424	43.89	44.8537	60.2624	64.276	29.5096	55.387	51.6858	40.9792		0.307692	47.1695
3.9281	47.8036	36.7898	32.1636	38.0725	44.651	37.9629	48.7342	48.8092	51.1226	45.0788	63.5254	61.6771	41.6337	68.7782	56.915	38.2824	56.0755	41.5984	31.5348	52.2983	43.8297	39.2417	33.8332	57.0886	58.2957	25.6823	49.1981	41.2039	31.5108		0.317304	45.6342
4.0472	38.2917	40.166	33.3412	32.639	42.3567	43.1533	43.5297	41.6658	41.6917	46.8675	51.9238	55.2863	40.7706	64.4156	46.7638	33.7907	48.8983	47.1272	25.792	53.3238	38.2272	38.0824	43.5648	53.7807	62.0783	22.3787	45.0814	48.9515	35.1515		0.326925	43.4169
4.1662	43.1151	32.2797	29.893	36.1347	44.8502	46.2969	48.7683	39.6378	46.0299	49.1059	59.7807	61.8744	46.1855	73.5694	58.7866	28.9233	50.8952	46.3597	27.314	46.9683	47.2105	34.2613	46.7662	51.5971	54.6119	22.3462	49.7128	45.0375	29.0757		0.336538	44.7375
4.2852	45.3766	30.5843	27.2835	34.0322	40.7137	45.5136	49.6999	37.3273	43.2885	43.4122	52.5757	53.7558	48.8842	53.0146	59.298	28.4269	51.8045	50.8343	25.3197	49.2997	46.7664	38.7566	41.1218	46.6892	54.6058	24.6275	53.1432	50.4532	32.038		0.34615	43.4016
4.4043	36.6078	39.5184	24.9742	41.5117	46.0299	50.1776	48.7639	44.8027	38.726	43.0249	49.3966	51.724	36.7516	59.5767	51.274	34.8133	46.1876	39.4112	25.7191	42.5669	46.9007	35.4328	39.2665	50.3395	53.0513	25.5799	50.5585	52.7076	33.3489		0.355771	42.7153
4.5233	42.2955	30.9642	26.4707	33.0375	35.4722	50.9272	40.1454	38.3307	39.3536	49.7074	46.5173	56.5122	45.4814	49.5873	45.6422	30.1526	46.9302	38.4967	20.8512	37.3844	51.1314	30.9938	42.7192	53.3919	43.164	25.4601	43.5343	50.0547	33.5266		0.365383	40.6288
4.6423	45.2205	37.1351	28.1459	31.9286	45.6315	44.3073	46.6038	34.7941	37.7582	47.6174	41.4398	55.8976	38.1996	40.3207	42.4149	28.1295	40.1491	50.0481	18.7336	36.781	45.9387	32.3861	40.9073	44.9746	36.2012	18.1354	38.0039	51.2486	32.3468		0.374996	39.0138
4.7614	40.1067	43.3814	29.6893	33.4091	37.8528	42.2841	45.9496	37.9492	44.3053	48.9306	42.9757	60.8871	41.6355	47.2913	52.9664	28.4461	36.8502	37.8636	17.2488	39.4509	58.8145	30.6211	44.5882	40.7236	30.8818	20.6568	38.3178	48.0287	29.9843		0.384617	39.7273
4.8804	41.1361	40.1726	27.377	30.4588	49.7291	49.0873	45.065	34.2565	41.6492	50.3852	37.8827	61.1173	32.1279	39.0199	62.6574	28.6297	38.2596	49.5897	19.5966	36.1807	45.4547	30.3019	52.6885	43.048	39.4788	26.273	37.6921	45.8371	33.4752		0.394229	40.2975
4.9995	41.3673	35.5241	24.4062	29.5381	39.2552	48.2574	35.3165	35.9594	45.0462	53.178	34.5555	58.6084	38.5273	33.4113	55.6809	33.8731	36.738	42.957	19.2575	41.3103	41.4722	32.2256	43.2406	28.0923	37.4458	20.1368	34.9678	37.3908	33.5973		0.40385	37.6323
5.1185	38.753	34.9739	28.7075	33.3112	42.5621	50.4102	40.3876	37.4535	41.3824	46.1813	31.6172	50.5535	38.393	38.8054	48.0597	29.9087	35.1776	44.3837	21.4451	32.1493	46.0466	38.9692	53.0897	37.13	36.1118	23.8231	42.0706	37.0481	39.3274		0.413462	38.5597
5.2375	43.8892	31.7594	27.4419	35.9161	41.0783	41.2968	41.5867	42.6879	50.6845	48.8963	32.6247	52.2151	41.2554	32.3834	47.5339	29.4482	29.2284	36.2977	19.3874	36.0731	43.6369	34.6198	40.3391	40.7499	35.7158	24.8674	40.235	42.5914	36.6		0.423075	37.9669
5.3566	36.3047	41.2056	23.9967	32.914	39.725	39.5021	39.4279	34.6761	47.7255	39.9641	34.5288	52.9339	38.0747	37.1156	52.8745	21.6464	35.1503	36.4899	14.6012	34.1644	50.3284	35.6794	43.9046	38.279	39.6296	23.1344	34.1029	29.801	36.1998		0.432696	36.6924
5.4756	34.8587	34.1793	28.1224	36.7702	30.7893	48.4882	42.5542	44.4676	50.3873	42.3549	27.7566	43.4827	33.0727	44.8185	42.1121	22.2187	35.034	37.0888	17.3	31.5227	48.7388	39.7408	38.7004	37.439	47.2716	17.3559	34.3524	36.8575	31.9537		0.442308	36.5444
5.5946	32.0554	35.4416	17.8621	38.0153	41.1201	47.6334	38.0677	41.1908	60.5403	43.7085	27.1399	39.5916	29.5522	37.3064	42.7503	25.1411	34.2727	36.4204	20.449	26.1325	40.0085	36.1087	43.3415	42.1949	45.1657	20.4193	38.4506	42.875	33.1849		0.451921	36.4186
5.7137	30.6034	33.8063	19.3956	36.3029	37.9721	46.4198	30.4491	42.548	59.0781	47.2321	27.6435	46.083	28.9116	41.5426	42.8352	28.8852	36.0381	33.727	15.6231	31.4854	39.1287	38.7543	38.0794	37.9787	42.7049	20.0781	36.681	48.3263	34.8131		0.461542	36.3147
5.8327	32.9919	38.2452	18.8736	37.8811	38.1253	46.0075	27.3882	32.4523	57.3755	53.7532	21.6636	39.279	31.3272	40.6805	38.9426	25.3563	31.8473	39.8827	16.0413	28.1378	40.9028	30.0405	30.8198	40.5355	36.0794	23.7542	48.2228	52.5501	30.2134		0.471154	35.4955
5.9517	30.4569	31.5561	17.1317	29.5779	37.5427	39.2934	27.5154	46.1955	54.1606	50.9722	23.7156	39.6874	37.1929	37.7967	46.3035	29.847	32.302	39.7554	16.2944	29.248	41.7884	42.2234	28.4184	43.4653	36.6631	19.6278	45.5892	52.6959	33.3842		0.480767	35.8759
6.0708	26.4281	33.359	14.9322	27.3791	40.1977	44.835	35.689	38.6806	42.9073	42.5492	19.0108	33.9709	37.7307	41.6276	43.264	25.8296	33.0841	34.4632	18.9041	28.8352	38.7565	36.4045	34.3219	35.1346	33.1901	18.4974	37.9673	53.0242	34.7939		0.490387	33.992
6.1898	30.7465	34.3606	14.5297	29.1356	45.9517	45.128	24.3203	35.5423	45.394	50.0757	24.7388	30.0558	31.1729	46.1098	44.9613	27.6194	31.8933	36.8996	17.4375	30.3974	46.4682	34.0058	34.5643	35.9693	37.1291	19.8178	41.8233	55.7002	30.5173		0.5	34.9126
6.3088	27.1076	30.3881	14.1468	24.1993	49.2014	33.3108	25.7237	36.9556	40.9124	46.7878	24.8158	29.107	25.658	38.0611	38.7218	19.4668	34.8669	34.2655	18.6907	25.4297	50.1131	35.3476	40.4606	36.7077	40.3066	19.634	39.1241	62.3559	35.8702		0.509613	33.7151
6.4279	34.6382	34.9223	14.9621	26.1731	58.808	38.3806	30.1719	30.3803	48.3676	52.1106	24.5587	26.6838	32.0311	42.6205	41.1137	20.6045	32.5671	37.8138	17.6609	28.6603	49.1133	40.5015	35.1594	36.3897	34.12	26.6118	39.9862	43.8747	30.7146		0.519233	34.8173
6.5469	29.9951	37.5221	19.3852	22.6407	55.1217	41.1606	22.0207	37.2203	48.8362	44.5863	21.4043	30.0331	26.8165	41.1205	45.2313	26.7933	41.2616	34.7821	17.8709	29.5592	48.7227	43.1491	39.2315	36.0533	47.6755	24.6454	38.3629	49.3966	34.5285		0.528846	35.694
6.6659	28.5413	36.5073	18.9569	24.2035	50.4462	43.8578	26.7301	39.435	42.6552	50.3025	29.1743	32.6484	32.8046	43.1685	37.1653	22.2798	37.883	38.7982	19.4085	28.7013	50.4993	33.6047	38.014	37.9988	45.5933	23.4693	35.585	42.7261	44.738		0.538458	35.7206
6.785	28.6101	36.8357	16.7893	23.425	49.1644	39.4441	24.9813	28.5664	46.153	46.4297	25.1661	27.0339	24.1922	42.3929	32.4178	23.3163	31.9181	32.1759	15.6589	26.0748	55.8566	38.4325	37.1664	42.2581	46.7419	24.1618	37.9402	45.9519	38.4213		0.548079	34.0578
6.904	29.2779	37.4581	15.5258	25.3276	52.6416	39.3221	24.4548	35.5915	50.2584	50.19	26.1075	23.679	27.2672	47.6843	34.4563	19.9958	32.4413	39.1038	21.4272	28.6091	44.5371	35.406	38.058	38.2044	48.1503	21.0376	39.2328	42.4618	43.1985		0.557692	34.8657
7.023	31.6126	37.3593	18.8971	19.4361	51.024	43.9443	20.818	35.4161	42.481	47.8957	20.9816	24.0305	34.8196	39.6716	36.1678	19.012	28.9747	32.0544	21.5875	24.9516	44.0598	42.554	38.9912	33.8531	52.8921	22.253	38.7658	44.4279	41.8915		0.567304	34.1663
7.1421	27.9905	32.5791	15.4096	19.1367	42.9922	40.3845	20.2441	25.9597	39.6677	50.338	19.3638	28.5106	34.5076	49.378	37.4357	25.355	36.7228	32.291	20.0765	21.2966	54.0567	39.4661	33.2717	36.0659	47.0478	23.4045	26.8208	38.1549	40.7692		0.576925	33.0585
7.2611	35.2278	33.7292	15.9757	23.2162	48.4461	41.3791	19.6022	28.4221	43.7049	41.9226	25.182	21.2136	37.7607	45.6893	32.1647	20.919	29.9279	37.5033	19.5524	22.6955	51.3463	36.1425	33.5711	39.3108	54.4383	22.599	41.2701	43.6384	36.623		0.586538	33.9025
7.3801	26.0996	31.9228	18.1706	20.5885	54.3573	37.0341	19.7519	33.0301	42.1002	45.4134	19.1938	21.2008	37.3165	48.7854	36.383	20.2146	28.4195	39.4021	16.2929	28.1728	53.0218	39.7123	34.9456	42.081	51.9604	27.8549	37.6628	45.1952	42.9461		0.59615	34.4562
7.4992	31.2662	34.7436	15.441	23.9188	45.4312	41.2784	25.6283	29.534	45.3477	46.055	27.2496	24.4557	35.6807	43.9041	32.1898	23.6189	37.6981	29.9955	18.6801	25.0007	45.808	39.0243	46.6169	34.0999	48.9198	23.015	45.0513	41.5204	41.4111		0.605771	34.5719
7.6182	30.2686	36.4093	15.2164	29.1403	47.2164	39.4788	20.2341	29.8926	42.9378	47.7103	27.6553	18.2907	40.1886	35.6023	36.3411	22.4478	27.5855	34.6092	20.1365	24.8571	48.0058	46.1145	37.4524	37.9646	38.5504	30.0312	43.3215	38.3738	40.502		0.615383	34.0184
7.7372	38.0023	31.4138	19.9342	23.0867	45.851	38.4284	20.5249	30.7985	52.9732	46.8208	31.2062	21.5709	38.4188	33.6598	35.8202	17.3418	29.065	33.5174	18.915	21.5713	50.4145	43.0691	34.2784	26.2097	40.217	20.6986	39.7887	38.9346	41.3339		0.624996	33.2367
7.8563	36.1292	29.2931	16.4143	26.4136	43.4906	40.0753	20.8324	25.4701	43.5314	52.3152	24.6808	17.9209	41.5765	42.111	31.6447	22.9657	33.2354	33.6889	20.131	22.4055	48.9103	48.9953	39.4532	39.3563	40.2649	31.5303	39.215	44.2608	42.3985		0.634617	34.4383
7.9753	32.8212	40.236	19.2853	25.3357	47.6992	41.3812	21.5088	25.7631	48.0036	58.7974	20.5115	22.7771	38.1367	41.4627	31.7078	23.6492	31.0794	37.6082	21.2464	32.4479	59.822	39.7665	33.6139	34.7789	41.968	30.3492	38.945	35.6949	36.2824		0.644229	34.92
8.0943	30.5501	32.736	16.5071	21.4979	39.4034	30.0017	18.477	22.8055	52.5371	53.661	24.0759	17.272	33.3705	40.1844	32.8037	19.0646	33.7574	39.5094	23.6501	29.5451	59.9252	41.7961	44.4625	39.6549	36.3648	22.0425	37.745	31.1103	32.0484		0.653842	32.9848
8.2134	31.0529	33.6782	18.4095	25.3332	38.6646	38.7486	16.6059	29.2588	45.6453	50.1047	21.1818	25.3946	39.3606	35.9939	32.1809	19.5013	32.9323	25.1727	22.1394	27.1013	61.8696	44.8431	45.0273	35.0227	40.6157	24.7083	32.0817	32.8449	27.0977		0.663462	32.8473
8.3324	25.1664	40.3204	13.467	27.1892	43.9238	29.9414	18.0003	27.7441	44.4887	51.8642	25.756	23.1377	38.2654	36.2786	29.5184	25.0519	24.5984	31.0042	17.5698	23.8229	65.9591	46.4441	43.7441	42.0681	41.1694	25.777	30.5124	33.2363	29.9343		0.673075	32.9639
8.4515	22.0288	31.0026	17.7499	20.349	39.3754	32.2271	21.5786	21.8401	49.211	50.6756	26.0334	26.0881	49.8459	37.9627	36.5774	18.9726	32.5246	34.3952	23.6555	34.5707	77.5796	49.1681	45.2267	52.1862	44.4025	28.8731	31.8221	34.341	28.545		0.682696	35.1313
8.5705	33.3614	34.4156	13.5716	22.5399	39.8359	34.0226	21.7017	18.4916	43.4131	46.7123	24.9713	24.5445	44.0329	36.8922	24.1809	18.5062	33.1337	37.8219	21.7207	32.9661	63.542	48.7398	59.4338	54.9755	48.7725	35.515	33.2341	35.7863	23.338		0.692308	34.8336
8.6895	36.4328	29.7257	11.7332	29.0048	43.2886	30.7841	16.8131	25.6237	41.1315	41.2661	31.9196	27.3729	44.8617	36.7803	43.8131	22.906	33.2707	32.093	23.2515	31.0941	68.8399	46.7187	63.4171	55.5399	44.6569	35.9254	23.8856	25.4065	17.6584		0.701921	35.0074
8.8086	39.3227	27.7476	17.4824	25.639	41.229	31.7417	18.1641	23.0017	37.7079	43.6601	24.9577	22.1502	47.7019	35.0103	31.5231	24.7292	21.2009	36.2354	21.4575	35.6403	64.5106	49.5811	65.8102	58.719	42.9855	33.7474	22.4646	31.5218	14.7065		0.711542	34.15
8.9276	41.7789	29.4912	14.1299	25.4566	39.5444	30.8077	20.2946	26.2597	42.5414	38.9443	26.4632	26.7632	42.2402	35.4123	36.9471	29.0528	28.4788	46.8437	16.7834	42.6166	79.4382	45.002	63.9715	46.6029	35.0503	38.3532	23.6825	27.3437	21.0873		0.721154	35.2201
9.0466	46.998	32.9468	18.3878	28.8898	38.5931	32.7953	18.6596	25.6984	45.5857	40.5375	26.3431	23.6454	47.4408	36.4099	36.1887	28.1344	27.1134	45.8529	26.8661	37.5744	69.5186	57.3287	52.8828	56.2496	42.0568	38.816	21.0197	33.442	10.5112		0.730767	36.0857
9.1657	35.5182	34.385	14.442	29.2808	37.4758	34.2818	22.7524	27.6306	40.3368	35.9679	29.1267	22.6875	44.2267	35.6968	43.4028	22.1985	28.3063	40.2235	24.8176	44.5745	50.6181	62.0577	53.4049	60.7709	38.0088	43.6343	21.4294	23.9323	7.8089		0.740387	34.793
9.2847	40.8231	32.345	15.3985	30.0947	49.2823	29.7166	20.1935	21.4466	32.6353	41.0112	29.7942	25.2364	47.0646	38.3178	51.1836	26.7227	30.9508	41.9647	21.4671	36.4497	44.4042	51.78	53.1322	49.6303	42.7642	42.1024	23.7656	29.7311	7.2534		0.75	34.7125
9.4037	46.9005	37.1548	17.1258	33.5029	41.2561	29.0345	22.9053	24.0967	42.2669	39.8162	24.2416	30.1533	40.4032	35.2575	34.7996	22.1842	34.3299	43.8038	24.1777	34.263	43.9273	44.8592	52.2607	44.3224	34.468	37.3484	22.9479	24.8646	4.3589		0.759613	33.3459
9.5228	44.643	29.5642	12.4332	37.7741	40.1942	32.2645	19.1946	23.767	41.3619	38.973	29.2195	22.8979	42.4956	45.4149	39.6836	26.3289	34.385	44.3084	18.7572	33.8345	35.1226	49.5141	42.0583	35.7838	36.9413	37.8064	19.1285	19.1281	5.9883		0.769233	32.3782
9.6418	42.4425	28.8606	19.2988	35.9012	39.0339	28.7273	24.0019	22.3243	40.5268	46.4468	28.1582	24.0984	55.2594	44.2026	37.4743	25.202	31.8208	45.8791	28.3031	32.4166	31.3948	35.7073	42.2752	37.1686	42.8721	46.1124	13.184	14.4162	4.0356		0.778846	32.674
9.7608	34.9415	28.1045	16.8247	43.9383	33.8946	36.4612	26.8276	24.5644	42.5826	40.4238	25.7674	26.7691	49.8057	46.6857	38.4002	25.5275	29.0161	47.6252	29.572	37.1435	28.0623	36.9361	33.9153	34.8918	30.4592	40.4381	13.1417	10.2223	3.5417		0.788458	31.6029
9.8799	30.0451	32.9854	19.4692	36.5601	30.4626	33.7951	20.5873	27.5075	45.7883	53.0288	25.2108	24.7789	46.0855	44.9312	41.6938	30.2372	36.5707	48.8904	31.6721	29.3777	33.3075	28.3775	32.6107	26.0114	32.7282	35.9964	9.2816	9.3677	2.292		0.798079	31.0224
9.9989	31.3862	33.4282	15.9502	45.4046	42.9475	34.2858	25.749	22.7451	42.2433	50.167	31.2776	27.7163	52.4355	47.0288	39.0528	27.3855	37.2294	52.2491	31.4311	31.7084	26.6273	30.0809	31.4457	21.9125	26.8136	43.754	7.5623	6.9973	4.3092		0.807692	31.7698
10.1179	25.9594	30.4351	18.8151	38.5779	37.3763	33.0893	21.8546	22.4234	45.565	46.7783	25.7007	27.0823	50.6441	51.8818	37.357	33.1406	39.2266	46.7474	34.9239	30.6856	30.4856	30.254	31.9142	18.6782	21.8399	28.2103	4.7899	5.1471	2.7453		0.817304	30.0803
10.237	35.482	37.9383	15.5898	44.1759	45.608	45.4772	23.3409	24.7069	56.4978	51.4447	19.3077	29.1595	46.1295	48.6172	42.4706	39.4236	38.5886	44.6372	41.158	30.6447	38.3639	33.6926	25.258	15.2443	12.3857	25.9428	5.4609	4.5895	2.6045		0.826925	31.86
10.356	30.7725	34.1688	23.9032	46.1445	45.4922	36.8992	26.468	28.8553	43.6569	44.8082	21.7	25.4435	53.871	51.9268	41.3806	39.9278	41.0518	41.2603	33.0879	35.5673	32.1114	21.1568	27.0498	9.5994	8.9276	15.5849	5.2592	3.7488	1.79		0.836538	30.0556
10.475	27.2715	40.915	19.487	39.8594	46.0073	37.1876	31.6171	27.207	57.7981	43.9637	25.3565	29.5888	55.2079	42.2397	37.5031	48.9734	48.8928	39.735	29.362	31.5544	30.9011	22.8972	23.8303	7.3297	8.8399	8.1717	3.432	5.656	3.6644		0.84615	30.1534
10.5941	33.3897	34.1587	20.2528	44.8151	41.4924	47.3118	34.7596	21.9044	61.6517	45.1965	26.7197	32.0483	51.1634	48.4164	31.2447	39.7762	34.1461	31.5083	32.7281	35.3778	24.0982	24.3736	21.7602	7.4976	7.4204	10.1999	8.5798	3.8876	2.9966		0.855771	29.6164
10.7131	28.1066	36.5093	25.9731	53.107	50.7003	36.466	30.642	23.9571	54.7328	43.1779	26.5037	31.725	53.6639	43.7172	33.43	46.778	43.8968	30.2164	28.5255	26.7613	27.3337	10.0116	18.3938	4.4165	7.207	7.4546	6.5372	2.7187	2.4747		0.865383	28.7979
10.8321	31.4052	36.8601	18.8151	43.5601	51.4443	46.3519	33.2121	30.0597	65.1714	38.5454	33.4578	38.8976	49.445	46.6935	33.1689	48.2347	43.8588	29.3655	21.5956	25.9759	15.8145	8.8636	10.682	6.4758	3.9859	3.7609	4.4738	4.4523	1.556		0.874996	28.4891
10.9512	33.0319	37.2346	23.1969	49.1065	58.626	37.5975	42.0127	29.3499	54.8588	50.9455	25.4274	32.8821	38.8338	44.2126	33.8122	51.6627	30.6292	31.3509	22.7154	21.6614	14.1186	3.9067	8.6935	4.639	3.8621	3.7281	6.4463	3.6192	3.4383		0.884617	27.6414
11.0702	33.1684	28.6075	17.6238	39.1717	62.3299	38.3381	47.1624	38.8489	49.6479	45.6247	28.8214	38.2562	40.4733	40.4363	36.2283	46.7523	25.6381	20.9833	17.7078	18.1625	7.1814	4.8458	5.4349	3.5009	2.7664	2.6395	7.3861	3.3498	1.8768		0.894229	25.9643
11.1892	33.3175	33.2143	21.8415	38.8605	64.1936	41.1686	43.7955	30.0199	51.0975	46.9467	37.3189	38.6098	40.3182	36.9234	30.9247	43.2734	23.8714	18.7597	9.5546	14.3245	7.5927	6.0572	5.4573	3.9697	4.4315	2.1694	5.3207	2.9468	2.1175		0.903842	25.462
11.3083	32.9346	34.3778	23.0319	47.8623	70.2917	37.9755	40.3702	33.1993	41.0308	41.816	34.964	39.9429	33.5151	38.0466	25.448	31.7796	21.6885	17.4036	9.1198	7.6564	4.546	4.4776	8.1912	4.6304	2.5606	1.9723	5.779	4.1061	2.2946		0.913462	24.1728
11.4273	30.1615	30.3467	23.9397	43.4858	79.139	31.6986	44.7617	44.0736	42.5335	47.0733	34.2585	35.8619	35.1918	29.6832	27.1744	28.6358	11.6595	12.4749	6.3208	4.7518	4.0988	3.3086	5.309	1.998	3.5959	2.4186	5.4867	2.1432	1.7455		0.923075	23.2183
11.5463	26.1823	28.6627	24.1539	39.655	73.0463	33.5185	45.9963	38.7918	52.0969	58.3064	35.0729	42.8149	24.0272	35.658	25.8928	22.7609	8.1038	10.3512	6.2236	1.3552	3.5056	2.5481	2.9172	2.4681	3.7389	3.8745	5.5221	4.1361	2.8431		0.932688	22.9043
11.6654	27.7248	30.3404	19.1947	39.2906	96.6768	41.167	45.3696	41.092	50.5232	49.008	46.0945	46.8163	29.7136	36.9654	19.9479	18.1556	5.6444	10.9613	3.7711	1.9025	1.9429	2.502	4.3453	3.6813	2.0507	2.8187	8.1058	3.0355	4.7281		0.942308	23.9162
11.7844	27.628	32.4933	22.6126	28.6572	88.1516	41.4008	42.4546	45.4023	39.2605	49.9284	38.1706	56.6658	35.3705	38.209	14.2743	16.7106	3.4201	6.6291	2.5426	2.1453	1.9265	3.0952	5.4194	2.9851	0.7386	2.2391	5.7832	6.228	4.4974		0.951921	22.9324
11.9035	25.5243	32.4061	19.1057	36.1894	82.2763	36.2706	49.7492	45.2963	41.5223	51.2053	50.6914	47.3556	27.9972	32.8095	12.3022	10.6693	5.3372	3.8849	1.2972	2.133	1.0372	1.7398	2.0264	2.1177	1.2241	5.1972	6.9955	4.5969	2.7309		0.961542	22.1272
12.0225	22.9003	30.4009	20.7734	33.1019	79.7541	40.9812	45.2632	44.6109	45.1529	52.6738	42.784	50.7036	20.5729	29.948	11.0914	11.3967	2.9691	4.2792	2.6101	2.5055	2.0072	2.4524	2.3383	3.5323	2.8878	2.031	7.2123	4.1304	4.234		0.971154	21.562
12.1415	21.0458	35.652	23.6813	32.1172	64.1907	31.5835	45.9747	49.2976	40.4118	45.3936	42.9467	43.323	20.2626	28.5528	9.8786	4.7404	3.5094	2.5263	1.2797	1.8013	2.1711	2.0327	3.4363	2.6707	4.1003	3.6577	5.4491	5.1558	3.0026		0.980767	19.9947
12.2606	23.9751	26.6483	22.2109	27.3205	54.8469	36.8705	40.7758	43.1949	41.9005	45.646	43.9757	53.7271	12.0455	29.1791	7.0507	4.6046	0.9252	2.1884	2.6479	0.434	0.7771	1.0565	2.2081	1.9195	1.3184	2.8985	5.6	5.1068	4.7678		0.990387	18.8214
12.3796	24.482	22.0605	16.8619	27.8971	50.9522	29.3197	50.8379	52.4885	38.7646	50.1344	40.9323	47.9033	8.0161	20.2846	5.3173	5.3121	1.2045	1.6702	0.7428	1.6321	1.1538	1.6821	1.6136	3.6209	4.126	2.7869	5.3671	4.9961	2.7043		1	18.0988

[truncated: 1 more sheets: Sheet1]
