# Supplementary material for: Crumbs organizes the transport machinery by regulating apical levels of PI(4,5)P2 in Drosophila
Source: eLife. 2019 Nov 7;8:e50900. doi: 10.7554/eLife.50900 (PMC6881148; doi:10.7554/eLife.50900)
Supplement: Figure 6—source data 13. [file elife-50900-fig6-data13.xlsx]

## Sheet: Image2 (2)
X0	Y0	Y1	Y2	Y3	Y4	Y5	Y6	Y7	Y8	Y9	Y10	Y11	Y12	Y13	Y14	Y15	Y16	Y17	Y18	Y19	Y20	Y21	Y22	Y23	Y24	Y25	Y26		Ap-basal	Avg intensity
0	49.513	35.292	35.893	41.023	33.4535	42.959	29.702	47.576	49.179	31.277	46.88	49.373	37.589	43.431	34.242	58.8	49.933	45.4	40.908	51.143	39.688	36.661	31.552	21.596	46.0687	38.725	52.1571		0	41.482
0.119	60.161	45.447	40.668	50.165	48.7747	40.912	33.355	57.79	49.873	34.57	44.664	49.704	47.69	48.426	55.537	76.255	67.958	59.703	52.462	51.263	37.17	29.756	44.334	25.991	31.6323	45.908	44.2489		0.00568016	47.2007
0.2381	54.731	59.579	57.524	48.701	49.1736	55.82	41.022	44.677	66.641	36.089	56.174	52.404	47.871	60.801	54.941	68.961	48.188	78.369	57.764	63.361	43.587	47.979	46.569	30.288	34.3959	62.891	61.5502		0.0113651	52.9649
0.3571	78.406	66.93	51.708	75.326	57.9013	60.514	37.274	56.368	64.921	40.904	72.013	71.16	64.773	77.865	53.545	68.443	47.674	75.339	59.442	66.37	27.262	74.827	58.404	42.023	24.3442	80.019	67.7142		0.0170453	60.0544
0.4761	79.824	70.551	66.089	56.36	57.2497	45.921	51.687	67.756	76.386	42.573	65.584	71.725	76.233	71.249	64.783	96.443	67.403	88.394	58.304	77.695	38.267	62.119	64.342	47.828	31.9917	86.989	90.2371		0.0227254	65.7031
0.5952	71.704	63.073	65.85	72.373	59.7352	66.207	48.704	61.834	75.993	48.311	87.122	80.289	80.761	75.984	70.779	88.823	74.038	102.777	71.211	87.539	52.997	78.092	63.153	47.486	57.0795	91.296	81.5929		0.0284104	71.289
0.7142	78.169	93.986	82.902	88.215	65.1679	68.884	49.328	75.82	70.479	52.353	88.274	88.694	64.284	96.573	75.645	93.65	72.222	113.518	80.233	92.108	60.583	89.658	74.926	62.502	55.8592	95.85	93.2117		0.0340905	78.6331
0.8332	85.126	85.502	79.477	91.436	71.7441	75.444	69.101	76.637	83.838	47.664	89.702	100.328	90.257	93.465	89.942	99.316	71.61	106.696	88.773	127.532	61.948	98.025	97.53	62.154	53.9097	109.988	89.7601		0.0397707	85.0706
0.9523	93.441	87.922	102.447	93.273	94.4304	72.413	74.153	96.696	80.389	58.687	89.799	99.462	112.836	110.869	82.614	90.332	101.915	101.959	111.004	112.447	71.93	66.266	84.124	60.379	64.2246	104.848	102.514		0.0454556	89.6805
1.0713	105.189	107.172	93.503	95.86	105.982	91.699	84.909	101.291	103.961	63.646	88.795	91.069	105.336	102.878	106.132	96.942	78.672	116.395	112.414	122.811	72.06	86.561	68.037	57.664	72.4309	110.514	85.9706		0.0511358	93.6257
1.1903	93.583	102.249	90.689	100.734	106.59	80.689	79.969	119.249	112.027	76.24	98.239	97.64	90.574	111.104	95.472	106.929	96.303	124.486	111.905	135.892	83.041	95.482	82.659	58.572	70.4038	117.328	98.377		0.056816	97.6454
1.3094	98.797	122.506	94.426	107.99	96.0598	88.048	101.457	104.628	116.694	75.566	106.896	129.861	111.364	109.917	111.463	114.827	104.962	127.55	124.043	156.697	96.373	101.977	102.235	68.463	91.3287	121.472	97.9573		0.0625009	106.798
1.4284	100.218	122.181	109.048	104.955	106.678	93.364	101.881	138.672	100.936	76.342	115.371	137.97	103.96	99.344	100.746	97.441	107.717	113.038	130.81	131.722	105.598	109.068	89.522	74.518	68.4278	128.263	92.2243		0.0681811	105.926
1.5474	125.605	122.102	112.186	137.953	103.429	111.429	118.692	142.274	127.558	89.727	98.621	133.613	110.639	120.529	121.973	111.527	104.367	116.088	142	136.563	105.314	118.167	95.813	69.852	88.1909	127.928	95.7709		0.0738612	114.367
1.6665	97.648	114.5	110.763	122.268	101.019	92.027	122.18	155.515	132.545	93.985	99.332	136.004	107.067	126.987	115.103	118.763	120.827	115.369	128.851	136.615	98.769	118.325	101.509	72.407	72.658	113.142	82.3113		0.0795462	111.351
1.7855	115.682	121.517	134.312	127.562	76.2168	99.989	119.92	147.338	126.023	85.22	97.637	155.759	114.351	133.846	131.259	112.804	115.527	120.875	119.639	124.951	99.103	125.151	85.133	77.786	76.0428	128.957	85.1798		0.0852263	113.251
1.9046	94.664	99.083	124.439	119.889	86.6009	89.842	121.767	152.311	132.466	108.793	79.265	121.994	128.767	126.731	136.131	124.001	106.569	107.935	149.287	151.839	87.463	137.223	97.16	91.765	91.125	122.178	99.3167		0.0909113	114.393
2.0236	105.514	93.325	114.478	108.659	79.6271	95.252	118.717	134.251	133.365	86.004	98.388	107.487	125.1	120.556	145.255	88.957	100.722	137.01	121.057	132.601	100.076	116.98	110.508	88.95	76.8394	114.799	81.0261		0.0965914	108.722
2.1426	100.03	119.7	125.799	118.345	80.5955	99.802	117.088	153.515	137.476	79.054	81.264	117.079	118.469	130.851	132.282	93.654	99.996	94.004	133.282	145.822	116.025	126.719	95.264	97.15	84.4648	105.817	86.2999		0.102272	110.735
2.2617	107.882	98.566	139.996	105.91	83.3231	86.071	121.898	137.468	125.436	87.839	98.396	107.025	101.012	113.589	114.864	98.782	79.858	109.034	129.635	144.315	106.913	121.866	86.445	88.835	80.5815	113.426	89.1129		0.107957	106.596
2.3807	104.809	94.567	112.808	115.594	78.0588	83.408	138.872	125.08	135.771	96.215	82.333	102.68	108.697	116.708	114.025	106.071	102.422	98.801	134.168	136.131	97.993	132.523	124.964	109.337	72.7687	101.439	99.6049		0.113637	108.365
2.4997	106.36	91.52	116.3	110.578	68.0525	77.781	126.993	140.326	118.884	92.84	106.506	88.84	102.415	118.242	125.047	88.039	89.095	90.308	116.702	151.472	99.204	115.236	103.302	92.076	82.4554	83.808	74.4301		0.119317	102.845
2.6188	95.559	104.568	108.487	100.594	67.1063	64.155	130.723	125.797	108.467	65.525	105.466	99.229	111.641	142.681	122.235	102.479	81.601	93.05	131.209	135.833	101.486	107.222	98.396	92.586	75.9686	113.606	83.9231		0.125002	102.578
2.7378	77.899	105.825	82.065	89.361	61.8065	100.521	122.369	123.978	116.841	88.069	78.724	88.018	104.999	120.721	136.609	95.525	81.74	99.778	128.18	117.71	115.76	114.92	107.714	92.386	72.0671	106.529	86.47		0.130682	100.614
2.8568	66.88	83.67	89.773	83.133	68.6297	81.572	93.223	140.36	98.14	71.235	77.731	89.141	100.918	135.843	105.168	95.245	93.527	93.944	124.675	140.423	91.551	111.267	123.823	92.528	77.144	119.934	97.3736		0.136362	98.0315
2.9759	58.465	84.098	86.035	95.035	56.615	54.584	119.92	138.556	109.825	90.29	83.12	83.809	78.626	126.396	140.456	95.915	89.71	93.57	126.081	145.658	101.357	105.842	114.514	98.998	66.9176	111.397	77.9508		0.142047	97.5459
3.0949	67.514	78.545	96.3	84.668	44.4418	50.878	109.016	141.375	114.536	66.769	74.855	75.992	86.716	126.636	91.34	79.044	86.799	95.969	121.137	125.449	97.991	118.349	99.139	96.351	68.9092	108.045	83.4119		0.147727	92.2287
3.2139	65.755	79.945	90.16	72.388	53.8031	61.608	113.727	127.976	109.136	80.719	60.444	85.737	74.367	111.835	107.458	104.494	83.948	81.462	105.501	128.853	100.874	93.493	106.497	98.468	67.9825	95.781	79.2861		0.153407	90.4332
3.333	63.308	64.425	75.798	73.253	47.5713	61.883	113.041	142.008	123.615	71.458	66.705	73.032	63.429	113.445	114.943	78.535	88.015	81.466	103.769	133.001	87.94	96.72	133.475	82.403	73.511	101.354	81.902		0.159092	89.2595
3.452	63.419	52.622	81.412	78.731	45.8376	50.67	120.033	136.074	124.841	55.219	65.824	66.963	59.773	120.64	119.581	74.677	81.415	71.41	108.984	109.339	106.156	100.061	113.649	92.105	64.2692	108.863	87.0692		0.164772	87.394
3.571	50.283	46.64	54.309	55.233	40.8049	48.69	123.248	110.056	102.654	72.03	73.897	68.792	65.307	108.9	115.891	78.854	71.733	70.949	98.592	120.484	96.468	117.992	114.266	86.407	71.6699	115.82	85.424		0.170453	83.9035
3.6901	62.704	51.02	52.656	60.449	39.1537	54.001	104	128.415	84.905	66.906	66.518	55.103	62.038	101.457	111.285	61.778	89.455	67.468	94.689	100.645	80.162	101.575	105.3	94.763	82.7487	96.273	95.1962		0.176138	80.3949
3.8091	59.154	62.094	45.867	58.565	40.472	44.886	111.654	111.07	90.966	51.844	42.62	62.129	57.308	104.318	98.786	60.305	72.095	67.151	110.123	116.774	92.798	118.784	106.429	84.844	43.2531	95.605	69.728		0.181818	77.023
3.9281	41.219	40.802	48.342	50.673	38.9922	40.464	109.037	116.767	101.981	50.984	54.22	47.856	70.544	104.005	104.941	63.713	59.773	66.478	78.077	108.944	68.673	113.595	111.66	80.166	53.6605	102.598	67.4776		0.187498	73.9127
4.0472	50.638	48.149	52.373	46.284	38.8984	29.855	109.323	121.836	95.542	53.753	51.043	61.434	61.245	95.463	103.81	56.054	67.95	51.809	85.066	104.149	77.382	105.152	117.27	72.907	61.4493	114.225	64.0336		0.193183	73.9664
4.1662	46.056	46.336	45.621	49.39	38.6917	38.911	96.386	107.679	76.825	46.606	43.687	50.646	61.716	117.626	106.835	58.16	64.078	57.864	77.724	117.308	74.955	115.319	94.759	63.06	49.2522	101.713	74.7291		0.198863	71.1827
4.2852	44.346	41.067	59.584	38.801	46.7631	32.938	85.087	115.864	66.705	45.048	58.787	48.556	53.562	95.832	94.979	59.031	83.987	52.214	65.559	102.977	68.825	115.008	120.944	67.506	66.3077	93.706	67.1006		0.204543	70.0402
4.4043	53.383	50.593	53.79	41.445	37.6666	33.936	98.854	112.73	60.121	52.065	32.251	45.429	56.802	88.806	102.034	61.303	54.835	53.874	63.969	88.689	74.634	110.599	105.468	67.571	40.3186	88.088	64.2796		0.210228	66.4272
4.5233	46.279	44.542	50.461	29.689	31.0797	31.149	94.373	115.017	47.493	34.507	29.517	51.719	51.151	84.735	97.659	67.759	70.673	57.287	69.14	115.647	60.06	95.896	88.73	76.81	51.307	92.991	67.1919		0.215908	64.9208
4.6423	59.818	58.569	32.656	50.807	56.1333	33.003	106.937	100.415	58.992	46.395	46.9	39.547	49.583	91.938	66.48	47.475	53.934	62.268	57.06	94.837	60.611	86.763	95.647	58.912	59.7584	84.827	61.9935		0.221588	63.7874
4.7614	48.832	39.051	45.2	37.819	40.9249	41.624	76.524	91.224	51.35	40.379	34.553	48.874	48.657	65.718	94.394	51.366	54.371	55.699	57.694	81.669	68.176	91.562	91.122	58.934	52.4087	95.512	65.4749		0.227273	60.3375
4.8804	39.551	55.274	44.787	23.566	51.0404	39.931	78.083	82.324	52.674	45.913	50.238	38.9	33.619	87.204	85.06	38.121	57.773	53.696	42.229	84.607	56.964	95.875	90.811	55.481	43.055	95.489	49.4758		0.232954	58.2126
4.9995	44.532	50.695	47.246	25.181	38.0309	40.308	63.376	86.349	49.688	40.81	56.867	44.595	40.452	74.322	64.386	39.746	67.219	45.321	43.809	75.834	53.663	111.677	83.265	67.034	42.6846	85.53	54.0152		0.238638	56.9124
5.1185	33.273	36.934	47.795	23.932	26.4739	38.102	63.781	80.495	36.523	56.858	37.199	47.348	35.543	73.01	73.893	46.447	55.887	45.322	48.18	67.581	66.969	98.652	72.188	63.896	41.9243	78.894	63.1941		0.244319	54.085
5.2375	53.642	40.573	59.423	37.263	28.6372	28.492	69.427	86.12	50.465	55.277	42.33	41.963	44.202	65.571	75.519	57.147	50.987	41.174	36.899	75.314	57.269	96.109	68.213	54.197	43.2711	75.139	66.3681		0.249999	55.5923
5.3566	47.509	49.952	47.858	25.448	37.8113	33.404	75.35	69.66	41.588	33.122	30.543	37.173	37.078	67.873	64.979	43.415	43.766	35.24	35.65	59.537	51.576	93.118	52.71	64.343	38.6437	72.564	58.9148		0.255684	49.9565
5.4756	50.766	47.731	28.988	28.825	39.2846	27.64	61.658	58.944	49.958	37.544	30.453	37.085	44.854	70.653	51.425	40.106	47.518	29.827	40.359	47.624	53.007	69.292	67.157	44.06	36.6154	73.074	50.9434		0.261364	46.8663
5.5946	34.62	45.253	41.984	40.444	38.2076	39.311	68.977	64.409	43.637	52.046	35.015	38.27	30.846	62.001	55.945	40.9	50.339	50.644	43.558	60.466	53.329	74.819	53.099	44.995	50.2524	61.108	48.1653		0.267044	48.9867
5.7137	41.682	41.899	58.064	28.077	29.4152	27.457	48.374	55.047	36.015	36.728	36.101	38.622	28.496	58.784	58.904	41.971	30.881	38.22	40.9	65.839	31.171	74.092	50.16	48.491	48.8671	77.455	63.189		0.272729	45.7371
5.8327	55.205	45.631	42.313	25.223	34.9617	37.357	36.12	59.12	42.999	59.233	27.833	30.826	40.046	57.905	59.422	37.177	42.632	23.653	42.29	43.025	37.381	56.047	46.131	56.295	40.6944	49.205	65.8382		0.278409	44.2431
5.9517	44.808	50.727	43.418	32.027	30.9181	34.653	42.048	59.06	35.122	47.651	40.385	37.425	39.989	48.903	48.233	46.933	29.979	45.913	35.654	64.255	55.59	66.627	44.695	50.16	39.5756	49.996	45.5686		0.284089	44.8264
6.0708	56.46	44.937	43.351	20.429	31.1233	45.611	53.58	67.104	32.296	47.754	38.487	41.66	43.843	32.906	50.857	41.168	33.061	40.102	28.026	46.251	55.504	78.508	58.565	53.002	28.4092	58.414	51.339		0.289774	45.2869
6.1898	52.224	38.826	40.74	31.429	33.9393	42.854	44.921	40.501	36.311	34.54	32.041	27.268	29.944	44.783	51.268	35.509	38.968	45.978	47.03	50.89	45.632	67.601	29.546	50.337	36.9389	64.238	55.2313		0.295454	42.5736
6.3088	40.051	38.187	44.314	24.405	36.2436	44.374	46.556	48.535	27.606	43.053	23.032	36.389	35.343	48.225	53.324	35.582	36.512	52.752	33.872	55.018	40.411	53.766	42.594	49.404	34.4716	51.397	56.4402		0.301135	41.9206
6.4279	41.077	41.227	44.036	21.113	38.4309	37.156	52.344	51.033	33.955	47.587	32.073	42.126	24.076	44.896	49.673	35.837	41.56	54.412	37.429	44.709	53.629	46.956	44.907	49.939	32.0868	69.534	63.8852		0.30682	43.544
6.5469	29.554	30.431	46.744	22.936	38.7736	24.516	48.257	56.257	32.101	35.569	30.612	50.876	32.645	33.516	48.296	28.521	50.266	45.271	44.031	42.008	35.035	51.018	48.553	43.344	22.8241	53.836	59.7025		0.3125	40.2035
6.6659	43.996	20.695	40.354	29.177	38.8572	41.667	52.826	41.12	27.044	39.776	29.971	44.264	34.862	26.31	50.343	34.253	48.77	62.191	34.214	35.237	65.733	53.697	46.643	37.202	31.7453	48.719	66.2049		0.31818	41.6989
6.785	42.748	35.839	42.892	36.728	32.3021	50.175	50.092	46.472	35.492	35.504	46.318	32.119	34.601	39.015	41.45	31.705	43.6	43.077	32.475	43.386	46.846	47.451	32.88	42.28	38.6326	53.77	86.9124		0.323865	42.3986
6.904	47.003	38.762	35.481	25.025	21.406	34.603	50.835	47.351	39.344	41.779	31.588	36.259	34.321	39.203	48.699	33.067	34.756	36.478	34.621	47.878	59.449	36.169	50.736	48.943	34.9762	36.764	63.4486		0.329545	40.3313
7.023	39.975	25.599	39.879	33.426	33.4949	38.987	55.224	48.527	34.436	30.702	32.246	46.214	34.391	39	47.296	34.567	32.838	54.741	48.335	36.237	45.302	41.374	41.804	25.554	43.172	58.676	68.8691		0.335225	41.1432
7.1421	45.29	41.242	35.292	40.736	26.8655	36.71	50.284	54.434	40.277	28.91	29.784	29.549	30.606	35.387	48.06	22.6	25.399	61.838	39.148	34.896	42.214	52.378	42.672	41.168	40.9316	31.323	59.1495		0.34091	39.5238
7.2611	36.944	30.854	43.588	31.5	18.4453	33.535	36.406	41.917	50.321	35.352	34.931	39.751	20.778	47.846	48.344	31.728	34.663	46.948	40.903	34.628	56.076	42.931	52.842	38.706	38.206	43.208	53.616		0.34659	39.4432
7.3801	32.583	34.007	37.872	14.946	37.8147	25.729	47.007	51.516	37.622	29.635	34.528	33.195	27.634	56.766	34.808	41.855	35.417	37.318	47.287	38.818	55.205	29.262	51.407	50.504	49.3934	36.864	51.6649		0.35227	39.2836
7.4992	33.138	35.863	25.444	28.522	32.2021	21.768	42.373	41.661	42.749	23.222	37.708	30.407	35.605	39.978	54.718	37.368	30.332	34.919	41.484	34.513	42.61	37.15	32.973	40.368	41.2529	32.431	48.3539		0.357955	36.2634
7.6182	47.968	25.049	38.208	35.223	49.3294	36.975	43.1	39.473	42.202	33.723	41.449	30.788	43.501	37.395	38.926	31.709	24.102	33.744	46.608	37.876	36.833	43.551	42.802	36.86	47.7567	28.044	69.1579		0.363635	39.3464
7.7372	24.271	26.917	38.662	20.281	37.6868	21.567	34.055	44.081	37.525	37.491	40.206	33.488	39.366	35.592	46.399	46.965	42.467	41.136	42.298	46.431	45.899	49.672	43.658	46.833	45.1185	46.661	51.573		0.369316	39.4926
7.8563	24.52	28.758	35.405	27.304	35.9117	33.237	37.298	39.767	35.538	31.466	29.698	37.949	30.731	42.09	47.104	41.339	34.94	28.543	40.842	55.812	45.033	34.983	40.422	52.366	36.9393	39.887	52.5998		0.375001	37.7957
7.9753	29.156	24.374	41.077	30.024	24.3758	34.647	38.58	42.152	37.356	48.45	20.987	35.744	31.027	45.405	41.774	35.842	42.618	24.879	36.086	56.886	40.633	36.053	36.769	39.987	43.1455	37.33	44.1698		0.380681	37.0195
8.0943	20.26	18.443	33.193	21.397	28.198	18.793	34.133	39.974	23.074	38.024	29.823	32.16	27.096	38.897	25.894	40.801	47.22	36.424	33.081	39.356	44.041	45.958	40.568	57.162	43.9501	42.508	51.6207		0.386361	35.2611
8.2134	23.015	22.002	29.101	26.126	31.7387	25.136	33.126	47.714	27.165	36.928	41.857	28.144	25.563	39.514	36.116	32.158	41.777	26.13	38.671	36.616	28.633	42.369	41.589	48.823	43.7362	26.959	52.1582		0.392046	34.5506
8.3324	21.915	28.29	35.423	23.864	35.6049	16.92	37.33	36.662	29.385	36.014	34.91	19.814	28.396	44.484	39.595	34.618	30.345	33.777	42.519	28.623	26.181	39.554	40.554	40.103	49.8307	31.842	58.8897		0.397726	34.2757
8.4515	12.842	21.236	21.95	19.328	38.8884	22.371	32.992	39.014	33.536	34.712	29.132	23.606	28.05	36.213	44.906	45.185	31.707	24.767	39.541	35.33	22.905	31.408	42.594	42.896	39.1068	22.422	50.9466		0.403411	32.1328
8.5705	30.62	19.398	39.927	24.03	27.4657	25.549	33.16	55.198	28.032	37.336	35.087	26.988	30.799	22.207	32.992	24.6	39.685	37.282	32.031	31.713	19.586	39.619	39.76	52.303	44.7927	40.499	51.1841		0.409091	34.1424
8.6895	16.874	22.891	33.556	37.274	27.7521	27.606	44.194	42.016	43.886	33.404	43.463	31.2	36.749	28.538	31.671	29.464	29.178	27.419	35.733	35.39	27.621	32.344	35.256	46.385	42.1936	39.576	44.7991		0.414771	34.3123
8.8086	20.165	31.993	40.84	28.793	27.6409	19.399	29.254	41.711	25.02	31.019	41.961	32.714	28.074	30.287	36.272	46.598	26.528	23.597	43.168	34.89	32.897	34.262	26.39	44.836	41.8198	28.13	40.1179		0.420456	32.9028
8.9276	24.707	27.886	35.43	28.049	33.2116	15.69	40.861	39.068	34.086	32.907	45.5	26.729	33.743	35.211	38.898	35.517	30.28	34.291	37.105	35.39	27.48	39.248	32.111	40.758	37.1641	41.837	29.0674		0.426136	33.7861
9.0466	20.415	24.525	32.656	27.403	29.4866	26.303	42.119	27.856	29.583	38.906	47.736	38.599	37.235	36.468	48.938	33.6	29.978	30.72	39.602	43.539	20.345	31.356	35.119	49.134	38.9795	34.371	36.0128		0.431817	34.4809
9.1657	19.769	27.636	39.321	25.069	17.3467	12.76	41.442	35.413	30.64	31.055	34.515	27.491	37.203	30.091	25.4	22.787	31.539	27.998	29.894	26.315	27.173	26.817	40.169	44.303	28.9879	43.062	56.9456		0.437501	31.1534
9.2847	17.678	20.236	36.599	15.025	28.145	23.291	20.67	27.67	33.615	32.732	46.977	43.076	40.584	31.623	29.749	28.335	33.44	23.214	25.482	31.323	33.905	37.169	44.183	48.733	31.8658	45.119	51.8516		0.443182	32.6774
9.4037	21.433	30.956	39.187	28.285	26.2554	25.455	29.539	28.834	39.88	24.149	34.067	22.556	44.016	35.151	36.129	31.063	26.888	22.687	36.534	18.513	35.876	20.227	44.966	39.357	38.1969	35.603	53.3222		0.448862	32.1898
9.5228	18.46	14.435	24.573	31.731	24.5021	12.792	31.531	35.143	30.899	24.294	31.913	36.702	34.314	34.623	28.385	30.439	21.972	21.679	29.539	25.326	23.472	40.36	27.288	41.567	25.3615	53.165	37.0243		0.454547	29.3144
9.6418	21.248	17.225	22.394	29.181	27.2142	14.055	38.438	26.234	35.892	23.22	31.994	35.076	49.719	28.778	36.378	43.294	18.259	34.895	23.626	25.192	32.485	32.575	33.694	44.904	31.4198	51.776	44.1196		0.460227	31.6032
9.7608	13.856	26.403	25.818	28.954	22.7307	32.574	30.629	26.576	36.746	32.366	20.821	35.46	44.41	35.349	31.963	27.267	18.944	28.954	33.352	25.413	35.165	40.361	39.249	46.17	30.1272	42.888	32.556		0.465907	31.3001
9.8799	11.915	17.213	38.469	28.566	19.5755	23.619	35.076	39.897	34.055	40.847	15.812	32.635	35.219	33.207	25.992	22.192	22.344	23.56	27.953	37.297	36.142	31.948	38.087	30.544	21.1351	52.932	38.2651		0.471592	30.1665
9.9989	18.85	14.445	34.822	28.215	26.3087	20.106	46.013	23.633	35.906	37.848	33.582	39.396	37.11	23.043	29.053	26.004	32.426	26.46	31.602	22.466	46.598	43.073	34.524	30.068	22.8476	46.318	27.7341		0.477272	31.0538
10.1179	18.219	18.913	22.243	27.248	20.9075	24.38	34.899	31.046	45.585	43.274	26.991	37.003	29.399	25.155	36.982	18.285	22.515	26.578	18.292	33.52	35.602	25.756	40.1	34.917	17.8784	43.092	28.1156		0.482952	29.1443
10.237	27.023	18.297	32.506	40.529	26.3584	23.174	30.282	24.986	23.212	43.377	19.262	19.923	26.773	38.245	39.683	24.363	20.609	33.491	21.196	23.339	36.714	32.699	25.499	38.494	31.463	48.881	51.736		0.488637	30.4487
10.356	18.541	16.746	24.299	30.604	25.8662	25.344	35.526	32.36	32.224	37.42	18.996	27.707	33.786	23.521	25.302	37.732	30.59	15.82	20.309	27.588	25.879	38.177	30.543	49.746	36.8012	42.595	32.2727		0.494317	29.4924
10.475	17.397	19.857	37.402	50.395	32.2759	15.84	24.478	33.146	23.953	29.512	35.846	24.992	23.432	23.371	32.343	33.413	17.751	22.831	33.434	12.08	30.259	49.82	41.946	36.45	36.8345	54.958	33.0352		0.499998	30.6315
10.5941	20.356	10.998	23.26	30.709	42.8731	15.643	42.747	38.833	24.332	35.735	22.534	28.654	30.398	25.227	38.534	22.218	20.478	17.175	21.866	26.54	34.628	46.443	54.207	42.708	26.7741	36.228	40.7784		0.505683	30.4028
10.7131	5.807	14.707	23.188	35.084	34.289	20.071	44.115	33.47	21.487	37.928	25.134	23.262	37.038	29.423	33.782	32.65	30.315	18.117	28.718	30.087	31.341	45.821	46.462	31.744	34.6488	39.429	27.583		0.511363	30.2111
10.8321	10.877	9.554	22.814	41.395	30.5863	13.57	27.841	25.177	33.257	37.42	16.869	20.06	36.649	23.957	35.316	23.053	22.309	19.588	36.505	29.669	22.244	44.027	54.122	40.21	43.0504	44.816	38.1697		0.517043	29.7446
10.9512	9.789	11.711	29.265	35.308	27.3966	13.484	29.553	27.55	25.965	21.677	19.4	27.158	31.832	16.221	40.41	23.588	25.111	18.054	26.931	31.896	28.373	27.388	29.951	34.571	33.3279	32.036	40.8255		0.522728	26.6212
11.0702	11.94	15.56	27.193	29.943	32.7528	12.633	31.617	29.408	31.406	18.327	19.466	32.009	26.483	22.497	34.532	21.994	24.616	21.373	23.309	18.664	28.164	39.028	32.09	29.55	33.5042	37.198	35.0296		0.528408	26.6773
11.1892	10.802	15.735	25.443	27.285	31.7828	12.511	22.371	20.063	18.846	15.866	14.863	22.787	14.328	22.415	30.268	28.696	24.774	21.166	22.424	17.432	25.3	29.655	30.41	34.359	35.0653	35.225	34.104		0.534088	23.851
11.3083	20.582	8.347	32.559	33.877	23.3259	16.463	23.976	16.725	23.512	24.347	16.915	23.276	29.713	27.929	20.844	30.044	19.431	20.509	26.757	21.028	39.742	36.581	18.672	47.887	23.244	30.233	39.0157		0.539773	25.7605
11.4273	7.97	20.786	23.042	28.001	15.259	10.398	14.679	29.372	22.539	25.48	15.75	33.691	18.623	30.008	25.515	28.598	21.622	17.645	26.257	23.614	32.775	33.552	22.568	29.244	36.4497	34.496	34.0436		0.545453	24.5177
11.5463	7.227	22.875	25.081	33.167	22.0478	12.314	24.603	33.841	32.976	28.489	15.088	19.179	23.551	35.768	27.541	41.466	23.954	19.247	22.127	31.711	24.817	31.054	23.042	26.95	32.6929	30.256	47.4906		0.551133	26.6132
11.6654	6.056	19.083	27.454	26.13	21.7051	10.982	20.251	20.084	26.41	25.046	25.682	16.755	18.167	30.126	28.285	36.039	19.72	30.909	19.292	34.279	27.75	33.794	27.068	34.348	28.6473	23.367	38.5961		0.556818	25.038
11.7844	7.994	16.055	19.855	27.8	19.0754	11.021	15.527	25.339	25.906	22.276	16.199	33.404	24.303	23.009	18.743	19.482	23.351	23.64	22.662	21.893	34.031	33.899	23.306	28.197	37.234	20.823	26.7888		0.562499	23.0301
11.9035	13.92	13.168	17.024	20.392	21.6251	14.119	17.297	26.034	33.465	31.061	18.714	20.211	18.613	22.518	22.909	29.6	27.781	23.105	26.126	29.569	27.5	28.964	25.26	28.968	44.1071	26.035	24.6022		0.568183	24.1736
12.0225	14.558	16	18.348	29.715	14.2479	6.218	18.458	25.29	18.41	15.385	28.028	18.317	18.417	24.505	30.912	28.874	27.462	19.941	24.009	24.057	26.986	23.569	15.306	21.185	38.6842	30.366	26.0223		0.573864	22.3433
12.1415	16.748	15.718	15.422	27.287	19.658	14.034	9.445	19.041	24.097	11.107	11.014	14.211	16.589	30.513	14.794	24.825	19.082	24.245	24.999	30.23	31.946	28.836	17.548	25.393	34.4259	27.705	27.492		0.579544	21.3483
12.2606	17.713	13.956	21.608	27.221	19.1774	22.885	13.546	23.908	24.506	19.102	16.292	12.623	26.331	27.002	20.171	18.67	17.923	18.118	28.193	40.597	38.72	27.848	22.574	27.083	32.9345	29.895	37.5689		0.585229	23.9321
12.3796	22.979	18.581	21.328	31.681	18.7457	17.994	14.442	20.526	22.535	23.486	22.51	23.514	27.272	24.57	18.306	22.135	24.673	16.184	21.419	22.768	36.476	22.254	30.074	26.683	33.0263	27.426	37.0604		0.590909	24.024
12.4986	10.885	20.536	21.978	23.769	15.9642	15.35	12.407	27.084	23.358	14.1	24.598	25.984	20.976	26.383	13.156	21.516	10.816	13.017	18.904	24.222	34.632	17.229	23.721	25.664	30.518	26.834	27.0967		0.596589	21.137
12.6177	14.471	11.47	13.848	39.649	31.582	12.314	20.223	33.011	26.547	13.363	25.807	31.434	22.95	28.065	21.639	27.342	17.536	18.093	24.903	32.318	34.622	21.807	19.187	23.34	42.4884	35.613	29.2314		0.602274	24.9205
12.7367	15.744	12.509	21.368	28.141	28.0389	15.27	14.722	30.439	23.327	18.91	23.869	16.303	22.523	24.351	18.148	22.111	23.581	21.455	19.162	27.74	37.536	21.461	25.828	24.932	32.2404	31.364	27.8098		0.607954	23.292
12.8557	14.319	13.447	24.969	20.771	36.3308	12.085	21.856	14.615	29.071	18.494	31.356	20.256	26.929	26.825	9.948	30.097	21.636	19.811	28.929	31.795	29.424	16.105	22.559	31.087	32.3349	39.843	25.5322		0.613634	24.0898
12.9748	21.918	17.512	23.501	22.579	31.4902	16.173	16.48	28.899	23.056	20.156	32.036	23.104	24.422	18.646	17.804	28.15	15.468	26.564	23.017	29.158	22.519	30.272	28.476	13.591	31.4665	38.223	32.5018		0.619319	24.3401
13.0938	16.607	7.7	22.644	29.166	26.1239	9.216	11.421	22.1	33.188	20.773	15.724	37.722	34.508	17.979	19.366	29.347	24.596	13.164	11.983	30.033	32.497	28.524	20.337	18.718	47.1941	37.868	26.539		0.624999	23.8903
13.2128	19.967	11.268	24.738	34.216	30.9043	3.361	8.293	20.656	27.205	14.728	13.687	28.265	26.463	27.782	33.18	32.84	22.605	9.572	17.176	24.405	35.279	35.192	15.418	23.389	38.5959	33.64	29.5989		0.63068	23.7935
13.3319	21.788	6.882	24.305	26.32	20.7873	11.176	19.65	31.75	20.206	26.575	32.868	34.259	26.201	32.063	7.041	43.175	20.926	15.501	18.919	27.207	20.487	28.014	23.644	31.878	52.6852	35.865	37.993		0.636365	25.858
13.4509	24.3	12.486	34.052	34.51	25.5913	10.441	8.451	29.264	29.871	26.751	21.548	35.671	25.395	23.969	32.927	39.532	26.769	16.381	14.697	23.398	30.453	19.218	19.122	10.014	41.1694	37.897	23.8793		0.642045	25.1021
13.5699	15.759	12.049	23.603	23.946	25.1571	8.901	8.495	21.322	24.456	20.476	21.451	29.568	29.569	25.771	27.428	44.365	17.948	12.393	19.491	22.086	25.723	23.472	17.921	16.821	41.8838	47.947	37.6005		0.647725	23.9112
13.689	16.168	17.694	30.537	27.738	37.0847	8.609	14.7	14.053	24.041	21.841	28.312	25.76	27.042	22.762	26.111	34.061	24.725	16.045	24.837	24.908	34.236	27.054	27.761	22.883	52.2669	34.959	25.2857		0.65341	25.6102
13.808	17.931	10.836	15.943	47.158	22.0517	12.579	17.579	40.144	22.725	16.979	23.778	26.625	29.141	16.266	23.275	45.535	27.555	17.675	32.072	26.937	22.021	27.139	19.481	26.53	59.8568	40.46	40.8427		0.65909	27.0043
13.927	11.065	13.255	24.756	27.648	25.651	15.874	16.678	42.42	15.187	23.52	20.469	33.467	29.722	23.317	24.876	37.137	16.31	21.167	19.854	31.842	26.263	31.427	22.988	26.41	35.2243	29.26	18.5622		0.66477	24.6055
14.0461	12.066	11.662	16.309	40.616	16.0251	15.377	22.078	31.357	19.242	26.514	36.919	35.701	31.882	16.687	27.762	27.62	25.481	13.249	18.477	19.76	25.017	27.601	18.875	18.348	37.4858	35.253	23.4148		0.670455	24.1029
14.1651	18.273	13.766	35.274	37.303	19.7368	15.86	23.844	24.74	19.007	21.705	32.931	40.843	25.599	26.13	19.086	30.003	34.816	16.549	12.79	18.803	26.038	18.153	35.524	13.903	31.4813	33.922	26.0567		0.676135	24.894
14.2841	18.322	13.648	28.529	34.326	27.7919	19.331	19.883	30.42	20.278	30.153	25.761	40.754	35.488	21.632	24.683	23.662	30.664	13.624	19.353	20.181	19.487	25.638	20.585	13.71	40.871	19.719	25.8906		0.681815	24.6068
14.4032	14.84	13.588	27.092	44.878	23.4861	14.402	17.434	27.378	17.231	34.504	31.968	33.09	25.569	20.483	23.811	24.537	20.206	14.234	11.727	17.666	19.108	26.854	24.408	15.04	37.7577	27.052	34.1355		0.6875	23.7955
14.5222	15.043	12.101	23.966	30.15	24.117	10.265	13.468	29.967	18.196	32.314	31.316	29.847	29.058	27.059	31.103	28.354	24.145	16.776	16.853	26.709	10.671	21.75	23.169	19.528	41.7932	18.572	41.8216		0.69318	24.0041
14.6412	17.458	22.81	24.473	32.573	27.5036	14.576	16.989	25.583	20.839	28.639	26.723	24.787	26.804	18.214	39.49	33.75	22.521	20.367	22.546	15.097	15.738	19.573	34.184	17.094	39.0471	29.878	42.9524		0.698861	25.1929
14.7603	11.317	16.825	30.869	29.025	27.4713	20.147	18.516	23.886	24.073	29.808	29.149	42.21	26.516	23.23	34.803	28.231	33.042	15.031	20.055	24.032	26.43	34.905	26.868	15.814	44.1861	25.615	35.5834		0.704546	26.5792
14.8793	8.07	15.608	26.635	32.158	28.6299	16.247	13.386	33.031	20.214	36.187	35.763	41.852	23.681	18.226	31.996	33.524	28.278	20.826	30.274	21.98	23.243	20.5	19.24	17.849	34.7877	26.214	28.6964		0.710226	25.448
14.9984	14.044	18.951	17.306	34.869	33.3478	19.722	11.394	17.671	30.112	24.784	29.12	25.164	26.684	26.435	30.925	24.88	20.841	19.89	18.388	27.064	24.412	21.523	18.683	17.596	50.1224	26.946	29.9437		0.715911	24.4747
15.1174	25.569	25.918	16.563	19.42	35.2587	21.22	16.405	26.747	28.29	21.617	28.49	35.256	33.134	18.75	27.759	31.75	28.582	19.066	19.758	27.563	18.443	23.856	28.792	29.981	32.8643	17.993	26.6115		0.721591	25.3947
15.2364	14.354	18.948	22.698	15.26	34.189	16.506	20.228	27.178	24.865	21.607	22.817	27.361	30.966	19.111	26.377	27.953	23.955	17.997	25.396	25.644	25.368	22.051	25.866	29.274	38.9292	31.906	35.2183		0.727271	24.8897
15.3555	15.464	30.844	23.885	24.116	33.9399	12.873	6.226	18.989	28.25	22.046	19.549	18.711	38.408	22.085	34.92	15.736	14.758	29.519	16.283	21.8	22.369	22.929	19.533	31.492	30.8062	29.631	28.7509		0.732956	23.4783
15.4745	14.19	22.444	24.453	30.806	27.8565	16.899	7.49	27.18	20.43	20.933	23.475	41.996	32.518	14.786	28.553	29.907	23.937	29.105	13.962	27.942	23.398	23.542	18.181	27.24	30.4799	19.181	20.4667		0.738636	23.7537
15.5935	13.591	23.43	29.014	35.872	18.2302	22.021	18.532	22.323	34.094	29.39	12.952	41.008	16.833	32.336	20.157	21.348	16.682	13.541	15.854	23.07	23.143	19.699	16.789	26.456	40.7665	21.201	28.8359		0.744316	23.5988
15.7126	12.457	16.263	23.491	36.237	29.2314	16.121	22.785	30.003	20.828	32.797	19.497	28.5	30.188	19.474	28.745	19.847	16.173	19.752	26.16	25.067	15.655	25.405	14.719	16.658	39.8002	30.878	28.1918		0.750001	23.8861
15.8316	17.634	11.879	24.198	24.637	22.5281	21.134	14.185	31.744	25.591	30.712	20.757	33.655	25.988	23.478	22.853	26.783	19.169	13.673	15.114	35.915	21.798	21.554	13.044	9.155	32.9865	21.962	41.6997		0.755681	23.1047
15.9506	14.806	10.045	20.877	22.047	29.9889	16.389	10.256	40.322	30.962	25.386	15.584	38.317	29.036	20.629	24.365	31.745	22.857	17.178	20.735	31.806	27.64	36.273	13.675	29.242	30.7762	30.21	23.3329		0.761362	24.6104
16.0697	10.254	13.719	19.614	30.676	46.7643	24.024	12.139	33.151	32.938	37.588	20.936	39.191	18.874	28.213	29.794	21.18	23.621	20.575	16.743	22.354	27.434	28.385	14.085	21.259	32.2396	23.742	35.6856		0.767046	25.377
16.1887	18.6	30.271	16.99	23.939	29.3526	13.834	10.186	20.033	31.002	26.357	19.291	31.62	30.955	19.268	34.949	25.457	21.24	21.67	24.251	33.323	29.047	25.779	17.022	21.584	41.7978	21.233	33.2156		0.772727	24.8988
16.3077	12.014	17.237	16.061	17.609	33.2415	13.413	9.295	16.749	36.677	30.775	24.938	40.807	40.394	28.441	33.365	35.069	21.415	15.974	24.912	29.024	28.071	31.202	15.519	16.031	37.9046	14.219	26.672		0.778407	24.7048
16.4268	16.32	21.953	21.966	22.15	36.8951	21.834	13.136	20.706	20.959	32.706	21.3	36.55	36.083	23.29	30.31	36.041	18.769	13.502	26.254	23.405	19.855	25.546	24.658	19.1	45.965	16.808	20.332		0.784092	24.6812
16.5458	22.18	32.326	23.834	17.908	27.0852	8.842	12.03	19.936	16.8	26.622	17.396	32.537	43.174	24.11	46.283	44.426	30.574	17.684	31.071	38.325	26.653	29.597	20.911	28.79	41.4854	17.91	35.3497		0.789772	27.1792
16.6648	17.894	18.692	28.123	19.056	17.5913	22.715	6.73	17.123	18.111	29.698	24.446	37.961	40.461	39.613	34.052	46.727	23.905	16.387	22.172	43.194	23.39	32.367	17.638	20.826	32.6576	19.747	18.4484		0.795452	25.5454
16.7839	17.959	17.849	24.076	26.895	19.2933	24.544	20.736	22.44	26.338	21.084	27.465	37.445	24.002	25.493	42.479	52.767	21.988	15.349	22.565	28.821	24.807	38.321	19.338	21.289	26.7	28.97	15.3011		0.801137	25.7153
16.9029	17.628	14.981	25.403	18.512	26.3518	16.625	13.608	26.636	24.457	29.591	21.081	28.586	27.66	30.369	39.459	40.612	16.2	10.002	30.265	29.902	29.801	27.792	17.09	21.798	26.4939	30.876	25.6151		0.806817	24.7183
17.0219	17.577	29.814	12.96	23.194	27.6926	10.907	12.229	27.693	24.586	25.897	20.746	37.259	34.534	23.418	40.803	37.639	20.771	8.418	32.088	36.401	22.17	34.123	17.104	16.945	17.0897	39.323	13.6535		0.812497	24.6309
17.141	26.371	24.878	17.21	22.815	31.223	14.934	15.296	37.951	28.877	35.861	20.191	47.503	16.87	29.218	35.176	32.689	20.347	18.493	42.477	29.186	22.336	44.859	17.196	18.265	27.2736	24.826	19.6096		0.818182	26.7382
17.26	20.862	21.456	15.165	18.398	21.2674	20.644	10.722	33.313	23.26	37.859	28.405	31.244	25.306	35.017	25.31	39.886	17.149	17.103	31.809	25.942	23.303	25.344	20.221	16.159	34.6778	26.574	24.7828		0.823862	24.8585
17.379	11.361	19.039	15.576	28.122	24.2559	15.85	9.657	26.297	32.895	23.765	22.244	36.948	27.324	33.424	27.385	34.756	18.724	13.672	52.485	38.491	29.15	23.965	18.766	12.584	24.6251	31.585	17.313		0.829543	24.8244
17.4981	25.724	29.684	19.505	33.817	27.5337	12.309	13.872	37.523	30.267	22.853	26.492	32.6	25.63	23.984	25.006	34.169	20.951	26.685	48.269	32.173	24.075	31.114	22.862	15.472	23.5212	28.886	18.9637		0.835228	26.4422
17.6171	28.159	23.876	27.078	17.246	24.291	21.131	25.697	48.695	35.251	24.98	28.304	42.113	32.209	30.483	19.328	28.513	13.614	22.374	45.073	31.519	23.246	47.68	15.728	13.313	24.5837	23.604	17.652		0.840908	27.2497
17.7361	25.684	19.798	19.663	26.307	27.6341	17.252	13.261	25.477	46.067	28.952	42.78	41.517	32.567	32.649	28.598	31.2	24.928	22.921	48.913	38.408	24.585	44.781	24.476	14.409	25.8646	29.184	25.9071		0.846588	29.029
17.8552	27.991	32.135	19.794	24.938	19.9308	17.612	19.754	41.055	36.364	24.531	31.99	34.494	38.633	29.44	29.243	19.507	24.136	20.986	37.197	26.618	18.997	32.994	14.545	8.518	25.1414	20.11	16.5565		0.852273	25.6745
17.9742	24.914	19.433	26.693	14.668	28.2067	21.252	18.017	32.337	31.179	27.459	36.911	41.866	33.219	29.434	27.734	36.855	24.447	27.459	49.422	30.576	28.494	22.603	25.543	19.263	19.918	29.521	16.4183		0.857953	27.5497
18.0932	34.489	15.651	24.159	30.329	21.3678	16.869	17.616	42.49	30.692	20.423	24.404	46.664	20.679	24.816	27.172	28.084	28.834	26.91	45.937	12.029	28.189	20.434	12.599	14.413	17.6401	37.608	21.9719		0.863633	25.647
18.2123	35.745	18.512	29.664	25.849	16.3541	22.084	19.712	39.898	29.322	19.693	23.622	32.912	28.764	33.072	21.439	20.678	19.451	19.599	35.162	24.227	30.96	30.697	11.091	11.545	34.4691	18.926	23.9856		0.869318	25.0901
18.3313	38.878	23.462	22.477	33.057	29.1855	22.366	26.326	21.433	32.42	25.813	25.915	30.034	34.343	24.003	25.217	17.071	18.056	24.804	41.503	18.283	23.932	36.816	13.518	16.341	42.9297	23.755	34.3978		0.874998	26.9013
18.4504	40.185	20.922	25.64	25.063	36.6891	14.819	40.973	30.546	33.927	23.331	17.333	27.189	25.948	27.388	27.694	18.814	19.487	32.701	25.164	23.205	19.374	29.189	19.526	15.659	19.9882	26.264	20.8841		0.880683	25.4779
18.5694	27.193	20.209	30.646	33.94	29.1546	19.872	32.571	36.896	36.391	30.572	19.345	39.247	22.099	37.467	27.483	28.807	18.775	22.988	22.634	28.73	29.244	29.115	11.588	15.41	20.1693	21.032	24.7191		0.886363	26.5295
18.6884	38.697	29.092	14.631	34.309	43.6836	22.303	35.498	18.847	19.344	26.695	34.295	28.496	26.694	31.499	34.391	24.724	26.55	20.593	23.506	13.711	38.239	30.64	22.07	11.528	28.3236	17.871	13.6323		0.892043	26.2912
18.8075	39.361	24.857	29.786	35.949	20.4397	24.031	47.737	29.196	36.843	31.811	25.59	47.347	23.193	26.855	32.305	35.537	25.721	28.414	15.986	29.895	27.556	36.929	22.708	18.524	26.2194	36.554	19.4807		0.897728	29.5861
18.9265	40.739	27.623	35.757	24.877	25.5278	24.77	38.837	20.011	32.641	31.169	19.55	27.51	23.352	24.433	22.879	36.54	20.497	25.993	25.969	34.386	21.287	18.278	25.459	15.535	41.2074	17.006	24.0423		0.903409	26.8843
19.0455	30.345	22.626	31.986	33.718	29.9608	18.137	49.969	18.574	37.859	28.868	21.235	37.707	23.571	35.476	24.608	19.537	33.924	18.765	21.413	21.9	28.061	40.907	22.961	20.011	28.7052	31.314	19.5654		0.909089	27.8409
19.1646	37.201	28.053	36.171	28.618	31.1413	23.466	42.079	23.516	33.918	21.862	19.452	37.03	22.997	29.811	27.079	28.623	24.503	25.597	22.214	27.187	37.397	27.725	9.433	15.72	40.0023	36.407	20.8407		0.914774	28.0757
19.2836	27.041	26.966	34.89	30.226	22.761	22.813	46.622	25.351	23.811	21.756	21.894	42.15	20.025	35.153	25.443	30.681	28.167	30.323	21.794	34.686	33.422	25.828	13.258	13.062	44.5128	28.014	31.1389		0.920454	28.2144
19.4026	28.889	30.931	36.295	37.588	22.2797	16.373	40.684	20.145	26.44	23.083	17.731	24.353	18.056	27.98	34.54	30.303	33.657	20.2	21.56	32.436	35.735	32.081	19.287	21.304	37.7893	31.943	16.9663		0.926134	27.3566
19.5217	35.073	38.022	29.675	32.485	30.6001	24.558	29.088	27.854	17.812	24.069	17.295	34.894	21.208	45.42	38.952	30.396	32.667	30.417	14.44	28.383	30.053	25.178	28.889	20.77	50.653	27.568	17.6128		0.931819	29.0382
19.6407	38.689	35.048	28.054	32.111	29.417	17.674	33.213	32.731	15.868	22.419	16.636	21.675	21.074	52.676	35.094	22.604	32.354	28.689	19.705	22.229	38.669	22.993	21.532	12.617	29.2765	22.046	15.5381		0.937499	26.6901
19.7597	43.535	30.927	31.174	25.738	24.349	18.572	31.11	29.966	19.803	23.064	17.848	41.745	23.005	35.897	30.739	32.554	29.008	22.947	26.189	21.911	30.186	32.513	16.718	11.595	34.1458	19.933	23.2794		0.943179	26.9797
19.8788	36.784	32.003	23.384	30.12	20.4906	30.664	21.137	34.471	14.04	16.179	18.75	34.934	26.858	41.712	29.756	20.468	40.483	12.014	22.664	29.088	27.194	28.602	21.352	20.001	34.6236	31.761	20.2975		0.948864	26.6604
19.9978	27.34	29.99	23.37	22.426	22.3489	25.952	25.882	26.234	36.154	18.169	17.432	43.026	29.133	48.726	28.02	29.393	39.793	21.1	38.98	15.983	42.328	41.841	23.823	13.227	33.7214	25.82	29.7959		0.954544	28.8892
20.1168	26.425	36.969	24.824	26.263	26.4693	24.154	22.982	23.105	24.527	14.546	19.631	59.281	42.826	40.642	33.472	45.142	34.928	20.416	30.909	25.624	38.745	23.1	15.544	27.319	36.5466	29.711	27.2552		0.960225	29.6799
20.2359	26.069	22.853	30.665	29.678	19.4872	17.829	22.547	33.724	26.076	11.283	15.762	54.558	28.752	42.518	36.767	24.181	40.887	23.1	26.874	18.361	34.364	30.794	20.674	17.692	22.0345	21.361	21.4337		0.965909	26.6787
20.3549	27.311	20.014	14.607	32.952	28.1996	27.034	17.765	23.106	28.261	13.455	15.209	52.779	32.184	29.779	18.639	21.644	33.858	31.529	26.071	16.739	30.075	34.871	19.901	16.817	30.5968	40.192	30.8799		0.97159	26.4618
20.4739	25.33	29.102	24.668	27.554	30.2282	27.565	22.243	24.237	17.993	19.247	16.733	42.951	27.825	36.95	20.029	29.087	35.758	24.093	16.275	15.624	31.905	35.224	24.3	17.736	23.5686	26.439	19.1594		0.97727	25.6231
20.593	25.261	26.112	10.483	18.683	25.1728	20.88	24.18	11.819	16.395	12.85	12.679	49.431	39.834	29.413	29.557	30.894	32.15	33.946	23.366	12.046	24.897	33.263	18.557	20.863	23.5973	27.439	25.2685		0.982955	24.4088
20.712	9.417	24.455	12.787	12.729	19.4926	25.379	32.398	20.487	9.697	18.088	9.601	31.394	30.672	20.874	22.285	19.012	31.331	32.065	18.669	23.463	36.434	36.302	28.812	17.183	28.6923	19.673	24.9366		0.988635	22.827
20.831	12.124	9.596	15.665	20.07	18.4671	22.434	21.483	19.688	13.325	15.627	14.524	34.924	26.663	34.061	27.313	13.14	30.691	29.355	26.627	24.357	24.079	40.349	25.35	21.331	19.9192	19.801	20.6578		0.994315	22.2823
20.9501	11.905	11.48	6.667	13.12	18.3312	17.063	27.008	11.076	11.917	7.174	7.756	32.703	23.566	16.972	11.292	13.947	24.074	35.31	24.876	12.238	37.853	39.254	24.349	18.411	23.5479	28.754	11.0307		1	19.3213

## Sheet: Image1 (2)
X0	Y0	Y1	Y2	Y3	Y4	Y5	Y6	Y7	Y8	Y9	Y10	Y11	Y12	Y13	Y14	Y15	Y16	Y17	Y18	Y19	Y20	Y21	Y22	Y23	Y24	Y25	Y26	Y27	Y28		Ap-basal	Avg intensity
0	43.2742	16.9336	14.1594	21.0938	15.3204	9.174	20.047	31.1627	46.6876	24.3165	15.053	20.677	24.061	22.959	25.7438	43.292	18.558	38.8445	30.9396	24.493	25.2397	20.162	24.1882	35.0772	30.437	23.864	28.1375	10.095	11.009		0	24.6552
0.119	42.0596	11.9585	16.91	26.8457	23.201	21.259	19.355	32.1462	33.521	25.1163	23.5489	21.457	25.7	23.295	36.3217	39.591	53.255	43.2103	56.7981	31.838	22.2833	30.161	38.4006	34.1066	35.9317	19.3592	31.7802	26.182	12.693		0.00540383	29.596
0.2381	57.7039	19.0481	7.7472	28.6756	28.3322	15.773	31.117	36.9865	34.4696	38.2824	27.6868	23.5	37.544	20.486	29.6297	50.198	37.319	40.455	35.4157	42.353	23.276	23.034	35.4808	45.9753	35.1018	27.0026	27.1414	25.097	10.756		0.0108122	30.8823
0.3571	48.6126	26.4645	14.7006	23.128	20.8706	25.148	28.126	19.5977	31.9906	28.8729	27.4098	33.829	53.882	34.822	30.42	59.029	40.913	43.3109	55.3617	42.584	26.3291	33.273	31.9047	48.5698	29.2834	26.0282	27.3132	40.882	18.469		0.016216	33.4871
0.4761	55.9797	29.2516	24.6366	34.5519	24.648	28.4	40.939	25.3211	40.732	31.1817	27.7517	39.549	53.409	35.847	32.0807	53.74	61.349	39.6162	41.0048	36.523	29.6844	32.411	25.1528	54.5902	34.9501	36.2625	42.7688	54.169	17.24		0.0216199	37.3704
0.5952	63.3841	50.4601	8.9928	45.423	19.8723	38.357	56.664	35.5504	49.4149	32.404	39.6168	43.828	53.943	38.476	29.9256	56.534	51.623	47.8918	63.2158	43.553	34.1517	19.122	39.0205	47.5696	40.1135	35.7646	60.1739	47.055	19.838		0.0270283	41.791
0.7142	66.944	39.8153	19.631	46.8136	30.1608	38.618	56.575	31.3377	40.9436	46.2607	24.5872	47.703	67.504	50.493	32.4413	81.055	59.45	55.9684	42.4502	43.331	39.8571	47.292	38.5203	49.3138	48.4288	26.6621	50.3404	59.083	26.064		0.0324321	45.0912
0.8332	85.4937	66.5091	18.7032	41.2777	33.6961	45.306	63.568	40.0852	36.8289	47.9545	34.7295	58.823	90.723	59.5	40.402	64.307	52.12	57.8743	67.2443	63.477	37.8113	30.022	49.9007	46.6027	54.2843	39.1938	62.422	59.933	37.431		0.0378359	51.2491
0.9523	84.5506	57.6532	27.4006	65.6704	30.3976	47.845	69.133	40.4039	41.0343	38.1027	49.739	74.265	95.752	69.275	48.4733	75.323	53.054	53.4865	68.0302	77.679	42.3388	56.275	32.0489	51.853	36.3621	29.8288	69.4308	34.347	38.366		0.0432443	53.7282
1.0713	93.0328	69.5898	24.0548	48.7452	32.9458	53.396	81.963	43.3441	56.5373	31.1622	40.3748	72.781	80.64	76.136	36.8369	71.537	98.886	58.5889	62.3385	58.499	45.5615	38.815	53.8329	58.4449	56.4903	35.2572	78.4505	55.959	53.09		0.0486481	57.4928
1.1903	73.4081	65.3799	21.5064	46.0502	39.5319	62.592	90.35	50.8604	63.8714	50.3348	34.5616	73.903	87.94	72.347	50.628	87.428	71.719	56.9341	61.3602	63.18	62.23	47.368	40.6164	64.8939	49.4337	41.4827	69.7369	72.694	44.241		0.054052	59.1925
1.3094	73.6833	62.9102	18.5583	49.2062	46.2592	49.472	105.601	46.469	51.0353	61.4579	51.0558	72.483	102.612	86.468	56.6906	95.562	61.911	66.7306	73.1793	63.933	63.5785	47.061	44.8698	51.693	49.0413	46.0968	68.799	76.729	71.338		0.0594603	62.5684
1.4284	79.8435	57.9623	27.3063	38.4771	52.1018	67.036	104.263	41.483	53.2619	54.6066	49.9519	97.907	103.309	65.748	53.0237	85.116	92.654	58.9481	76.8521	67.042	57.1383	73.803	41.5511	45.5878	52.9456	34.8181	69.1329	72.045	72.272		0.0648642	63.6616
1.5474	73.3856	82.923	22.9501	47.6514	52.0354	70.06	94.316	49.7747	51.7324	62.025	39.1119	83.9	83.722	80.895	76.5726	89.407	90.245	78.217	73.2266	67.099	65.9692	66.605	43.731	52.19	59.9086	67.422	73.5008	82.106	78.103		0.070268	67.5443
1.6665	76.5647	86.4605	24.0243	59.3444	49.6574	65.144	100.998	58.0259	68.0875	60.9955	58.4548	85.067	96.914	76.519	59.626	87.256	108.827	79.0361	69.8527	71.069	71.6754	74.1	34.1143	54.1611	52.9523	51.1379	82.749	74.426	70.48		0.0756764	69.2317
1.7855	89.4982	46.7995	22.4997	66.819	40.8317	70.656	111.591	76.6665	52.0936	64.0914	48.8519	87.896	91.842	72.973	51.6766	92.822	90.712	70.2071	64.6021	59.063	92.9323	72.958	31.1491	53.5253	68.7491	44.5574	74.3525	80.114	85.667		0.0810802	68.1447
1.9046	77.0746	64.2305	35.865	33.9005	44.9254	76.621	97.07	65.6626	51.9676	60.7975	60.6498	85.891	106.835	99.23	50.5158	92.735	90.183	69.7731	82.2069	65.444	69.087	72.729	43.785	48.9641	53.602	45.531	86.6757	67.182	78.102		0.0864886	68.1806
2.0236	84.8502	75.5715	44.9168	53.8057	48.627	83.369	82.565	77.2921	57.401	57.1582	78.6251	64.997	83.171	89.118	64.2319	82.604	80.393	54.5421	82.9573	68.167	88.3176	89.369	53.7143	59.335	50.4647	72.9717	87.5389	73.782	95.754		0.0918924	71.9176
2.1426	94.8946	89.8683	37.4037	74.4187	41.1881	54.235	111.275	83.3794	49.3443	71.3654	47.3759	94.097	97.214	90.949	77.8726	89.774	103.706	69.7015	77.3095	69.7	88.6152	74.101	38.2026	55.8484	63.0981	72.4466	81.933	96.275	92.708		0.0972963	75.4586
2.2617	51.6689	72.2447	44.509	52.729	43.0282	79.266	90.905	81.7981	60.2293	67.8175	59.8938	100.87	98.144	101.284	62.1414	80.423	86.381	71.6961	70.2962	81.397	74.5217	77.807	64.358	59.7954	46.6065	68.4133	76.4368	97.259	91.279		0.102705	72.8689
2.3807	85.358	88.2485	49.7814	73.1779	60.0161	112.706	77.502	78.2049	52.2619	64.5199	63.6799	96.116	105.786	90.177	74.6378	84.19	86.468	68.9425	59.8561	101.444	74.3718	92.299	39.2373	71.4149	64.073	63.6638	84.447	88.688	101.579		0.108108	77.6844
2.4997	83.3806	64.9076	53.7766	66.7425	54.7565	88.095	93.711	82.4056	54.6541	68.9499	73.6643	80.405	99.575	99.991	72.1696	94.409	75.925	72.8864	79.4545	58.994	78.4161	88.319	38.0733	65.7437	52.0379	52.276	61.3456	93.367	81.573		0.113512	73.4484
2.6188	81.8887	65.313	52.6062	83.4086	67.483	86.08	95.352	77.4649	63.0911	78.8859	57.3759	97.581	100.048	94.035	89.2678	106.139	89.339	66.1759	74.528	65.907	91.4321	99.738	44.5262	40.7968	55.0391	58.7895	81.2959	66.327	93.237		0.118921	76.6604
2.7378	85.8465	75.1017	51.1734	62.4754	54.2731	108.105	110.022	88.2483	66.4064	74.2112	48.4259	68.793	88.845	112.768	64.8635	97.639	83.358	55.5488	65.293	70.134	87.6662	83.505	50.8908	57.728	70.7938	59.9294	72.688	85.362	93.457		0.124325	75.6397
2.8568	79.0863	74.895	56.6841	92.5333	42.8205	98.959	113.419	86.4737	60.7681	59.3998	87.974	88.145	87.19	90.234	79.9859	85.365	99.661	57.4097	78.4199	60.561	78.6382	102.227	50.1456	63.976	53.4981	75.2276	62.6316	76.825	97.245		0.129728	77.2551
2.9759	94.6707	72.7106	47.2832	79.1208	54.0283	91.423	83.205	92.6313	54.2932	65.1956	66.4701	89.889	95.077	95.644	64.4527	95.77	91.058	59.1924	87.8746	75.945	83.0659	77.258	45.4418	56.9821	51.6454	64.385	66.2709	101.153	102.469		0.135137	76.0209
3.0949	81.9763	68.4269	60.2156	83.2166	45.1012	86.937	96.173	75.8108	70.1891	89.0455	75.4821	98.064	100.622	111.614	66.0888	76.803	77.839	76.0411	79.7267	79.441	73.0781	66.912	50.208	55.286	51.5181	43.2469	66.0769	83.305	107.994		0.140541	75.7393
3.2139	79.4663	86.4487	57.6187	73.0459	73.889	87.784	106.157	79.1225	71.4663	71.3917	73.4273	85.605	78.059	108.074	72.626	80.497	62.227	54.4651	82.9074	85.789	91.6963	77.884	48.7637	67.7239	65.0125	67.6148	69.0406	73.01	92.923		0.145944	76.6805
3.333	87.2353	65.8265	83.4566	74.3905	74.7736	90.281	94.484	84.6281	55.3288	72.9827	93.7743	75.879	98.063	92.493	60.3456	75.263	60.132	56.4783	60.0685	82.046	91.0718	71.385	43.7466	76.9149	62.8755	56.5589	70.5129	77.097	95.203		0.151353	75.286
3.452	71.2514	77.7828	57.6522	60.5838	57.1172	85.248	107.697	72.8114	82.7564	68.0964	74.6298	87.88	87.628	103.362	64.5241	71.834	72.503	47.0227	71.0029	64.392	77.4289	71.941	49.6314	57.7864	59.1163	73.1313	42.4262	85.254	91.746		0.156757	72.2151
3.571	64.781	80.9474	78.5676	73.3063	67.9176	82.829	115.096	90.733	78.4002	81.1211	79.7581	78.545	79.426	94.984	61.4181	64.485	70.292	56.9358	67.3261	71.957	84.7358	71.871	44.4958	67.0462	64.5426	69.8293	50.2421	88.402	85.145		0.16216	74.6599
3.6901	76.5024	71.8389	76.3917	60.8479	53.7356	81.759	93.28	86.173	57.4284	74.9734	82.7682	61.114	93.806	90.095	61.1603	57.503	64.823	50.3974	49.2736	69.642	79.5076	78.517	45.5462	74.5296	57.4699	49.0376	62.2206	76.037	84.934		0.167569	69.7004
3.8091	63.4951	82.1477	77.7099	59.3919	66.2049	78.725	98.191	83.8713	60.6383	79.7377	75.1768	85.699	95.573	89.698	59.6147	72.236	81.554	58.4686	66.394	68.412	56.511	67.413	50.383	83.7728	54.5629	38.9239	55.6281	74.982	96.138		0.172973	71.7674
3.9281	92.3064	85.2082	81.2727	63.0633	52.3379	81.576	102.902	76.3993	75.7241	86.062	81.3173	50.339	94.974	83.297	69.8097	48.086	82.554	41.5847	43.7805	85.79	61.9688	80.908	54.362	66.2258	40.1493	65.173	68.5781	67.462	81.351		0.178376	71.1918
4.0472	64.3114	93.7444	58.726	67.5438	75.6289	70.01	97.222	91.6807	71.8331	78.8284	83.1027	64.311	83.567	85.749	67.6883	60.505	76.4	34.2108	57.205	78.917	70.4611	59.556	59.9397	80.0164	49.1713	51.9519	61.8644	50.932	93.232		0.183785	70.2865
4.1662	75.2807	78.6614	58.2404	69.7571	72.2619	63.212	104.362	85.5838	64.2295	76.1992	76.062	53.299	86.109	101.822	56.1186	56.815	63.402	54.5408	37.591	70.23	64.0722	55.368	48.4962	79.5085	62.3596	52.545	35.7254	59.888	94.303		0.189189	67.4498
4.2852	87.92	69.264	69.1903	59.4832	71.038	76.967	69.286	86.7954	70.1921	88.1051	74.2986	52.381	69.612	82.068	58.361	58.937	68.626	71.1634	53.3583	53.458	69.0525	57.458	46.0899	87.8408	60.6005	60.5269	41.7389	48.644	88.845		0.194593	67.2862
4.4043	66.9529	77.9823	74.8545	75.7686	74.531	63.741	84.739	84.1231	61.0769	78.4009	67.3768	48.701	70.734	84.844	53.7497	53.761	73.045	38.7813	47.4945	71.28	75.4057	62.204	37.8645	73.1542	51.487	52.9665	47.5554	39.944	93.304		0.200001	65.0284
4.5233	63.1523	61.04	76.321	69.9765	86.7286	69.41	93.375	84.444	57.8123	66.7137	49.7223	42.832	62.922	86.828	55.9889	56.303	56.046	43.1644	46.0855	51.809	61.5498	67.206	34.0534	69.7146	50.3172	40.5528	52.2123	41.406	87.654		0.205405	61.5635
4.6423	71.0257	63.3509	74.9596	70.8953	71.1744	73.912	84.124	86.3411	48.1691	73.6294	67.3991	49.702	70.119	92.174	48.6915	41.483	55.316	34.3645	35.16	59.24	58.7582	76.341	30.3144	79.867	47.8019	44.1106	33.2853	47.857	86.159		0.210809	61.2319
4.7614	69.3545	66.1873	68.1184	72.8541	69.012	50.813	65.437	71.1701	38.2119	81.9477	73.3327	50.403	63.831	88.258	52.0407	44.214	60.71	47.5466	43.2447	62.397	50.0783	57.792	31.3789	55.0819	61.4307	44.5107	57.7748	55.736	79.918		0.216217	59.7512
4.8804	69.2906	81.9949	71.4323	81.3143	65.1847	61.62	80.526	79.4395	46.3788	78.7609	87.4657	44.462	76.358	81.979	39.8821	42.229	46.2	40.7763	50.2998	43.275	68.6216	78.051	42.592	69.9393	68.7934	46.9714	37.6803	47.368	76.327		0.221621	62.2487
4.9995	74.159	85.236	60.7719	76.9804	71.5409	53.79	65.813	74.9748	41.5519	87.6764	68.8016	45.784	57.58	85.401	48.1304	44.846	48.674	30.8106	30.1223	38.681	56.0111	56.593	32.063	60.7487	35.196	39.1211	54.2901	38.282	63.807		0.227029	56.1185
5.1185	67.7742	72.0212	68.1102	88.0325	59.4817	54.538	81.38	67.2322	50.1189	76.4764	68.2385	29.955	66.319	63.362	47.3607	52.386	43.085	35.5424	47.1409	50.986	60.9702	61.526	42.9062	58.1079	47.3521	35.622	57.2023	43.457	74.724		0.232433	57.6348
5.2375	73.2137	67.0417	65.4645	67.9047	51.5142	43.755	76.883	85.3521	52	71.837	64.0552	33.56	54.947	65.806	52.1096	45.034	40.381	33.5215	42.5052	55.168	68.9662	51.455	23.1236	49.6464	57.055	32.2252	50.861	41.091	58.164		0.237837	54.298
5.3566	65.4937	60.6004	64.5004	76.0448	47.2187	40.726	73.676	65.6157	41.3126	78.413	70.6795	30.995	44.777	62.039	37.6076	59.713	43.848	33.0886	41.7301	50.15	44.7809	69.684	28.1851	46.787	46.6589	44.6587	50.4584	43.032	55.287		0.243245	52.3366
5.4756	67.74	56.6067	61.9142	65.7854	54.0966	58.915	79.945	63.1037	45.4277	67.1224	64.3031	34.295	44.902	45.919	41.7541	36.013	36.65	20.8064	38.0591	53.693	39.6206	57.171	19.2029	58.8161	40.2226	39.1681	53.0093	61.636	66.058		0.248649	50.7571
5.5946	79.8278	67.1739	62.4147	64.5389	60.7899	61.638	79.008	76.2948	37.0768	65.3154	64.9727	26.401	37.727	62.501	31.7721	31.958	43.014	35.0644	44.8559	63.852	57.0144	55.104	33.0728	35.5092	39.6006	22.8193	42.9253	48.892	70.6		0.254053	51.7839
5.7137	64.3843	48.0265	59.3097	92.5861	44.6164	42.87	61.879	57.1763	24.6666	80.4347	62.7375	33.536	39.8	46.403	44.8789	35.625	40.782	31.0396	40.2101	44.989	59.252	58.98	31.2597	50.0306	50.8927	26.388	43.317	41.727	49.156		0.259461	48.5156
5.8327	54.8901	69.1247	61.7302	59.1724	59.3172	51.074	71.644	63.9574	38.2842	78.3842	58.6014	34.896	37.059	52.137	37.0271	24.919	46.52	20.7039	49.9442	36.988	52.0295	49.72	24.2662	44.6365	44.4069	33.1651	32.2684	47.003	44.324		0.264865	47.5239
5.9517	60.657	63.8119	66.5974	74.3532	69.1019	55.123	53.832	73.4941	43.3346	67.3517	67.1457	30.629	43.211	43.365	33.9801	37.314	36.055	25.8173	37.7337	25.54	71.3346	63.199	36.6015	42.4443	42.0513	49.1034	34.299	40.106	49.258		0.270269	49.5464
6.0708	73.903	80.1376	60.4648	60.1677	52.4189	33.548	59.322	68.2614	39.266	57.9139	62.7836	21.4	40.172	41.981	30.1106	42.272	29.491	30.6552	29.394	34.176	56.1285	38.592	14.1255	38.8072	41.4431	43.7257	40.9279	46.27	52.411		0.275677	45.5265
6.1898	58.8453	65.6699	43.7139	50.6207	55.388	46.364	76.731	47.8717	40.1229	76.4714	50.2455	29.11	29.578	54.02	29.0286	27.433	44.566	37.2918	35.3995	34.753	43.6588	47.154	38.2099	37.4073	38.1257	45.755	32.7359	39.053	41.667		0.281081	44.7238
6.3088	57.5348	65.5639	62.9162	83.8263	60.635	41.156	56.333	52.5422	40.4895	53.0687	72.8023	32.318	30.244	45.587	35.5946	37.003	34.682	30.2233	34.0031	39.412	35.0686	53.013	24.667	43.5485	37.3648	29.8376	39.7534	44.356	38.132		0.286485	45.2302
6.4279	61.7896	58.9914	52.3692	68.42	49.8679	45.688	51.8	67.7346	37.4415	54.5015	59.476	38.247	29.671	48.222	36.8032	42.069	30.883	26.6147	26.5782	31.279	47.8631	48.193	22.9963	43.9705	41.7502	23.3519	35.7306	35.541	33.978		0.291893	43.1663
6.5469	49.0364	57.7711	62.4239	64.6166	50.338	35.756	74.041	57.557	28.1208	51.0689	62.3281	22.637	31.588	37.337	33.2339	40.348	36.862	22.9271	37.4583	31.514	48.1884	36.193	23.3996	30.7204	23.9762	29.5288	32.2267	35.048	47.093		0.297297	41.1496
6.6659	53.8007	62.938	45.4135	57.3724	40.9044	36.126	53.011	63.1344	36.7472	39.1962	56.3545	39.239	35.089	42.098	33.3308	36.72	18.42	34.1556	37.3224	45.071	38.2825	47.368	43.6136	34.9509	40.7997	39.2222	29.4548	49.619	46.395		0.302701	42.6259
6.785	43.2361	57.6802	54.8369	52.6639	49.6494	40.773	52.428	48.0912	23.1378	49.1582	45.1774	36.357	40.411	51.048	37.5506	29.201	26.207	23.5053	35.6314	44.9	46.4213	40.687	31.5298	21.3677	35.9057	30.6947	47.3709	53.329	30.333		0.308109	40.6649
6.904	38.3581	58.9956	57.752	46.5399	62.9748	41.325	40.122	49.0027	34.7766	47.0657	44.3521	33.084	48.677	31.709	29.3218	25.965	27.787	20.5181	33.0253	33.145	28.94	30.726	33.9718	37.6649	33.9889	22.8559	39.4475	46.836	32.436		0.313513	38.3229
7.023	45.0066	51.6599	34.0916	40.773	57.2505	21.97	52.763	57.0957	35.7805	59.9694	50.6299	30.185	35.758	45.101	39.816	39.948	27.793	28.516	29.8739	29.15	30.5286	28.284	30.6536	36.8962	30.074	32.9426	34.382	41.358	36.65		0.318917	38.4448
7.1421	34.7513	60.644	40.2974	44.8299	52.8781	35.91	52.535	49.5322	29.7742	53.8838	47.122	36.541	41.627	30.067	26.8106	31.067	21.207	25.7508	26.7034	41.103	36.4362	47.633	24.9861	36.4722	29.1916	25.1546	43.82	42.639	34.098		0.324325	38.0505
7.2611	48.0431	52.4149	38.8083	52.6713	28.8701	18.91	55.497	59.5766	34.2861	55.4627	38.7981	27.986	32.887	29.843	28.309	40.449	29.594	32.2824	37.6607	46.561	39.9134	46.506	27.5642	45.3564	28.2338	40.1749	29.3278	44.554	26.129		0.329729	38.5059
7.3801	50.5306	65.2796	32.925	35.184	55.9606	21.765	41.559	48.0191	33.0607	57.2556	56.0075	41.575	36.972	27.439	22.6794	34.689	41.489	32.7126	29.5971	51.716	23.9215	26.837	22.7723	36.9542	35.3138	36.2432	43.1457	57.718	26.822		0.335133	38.8325
7.4992	31.976	51.5948	31.4033	35.3459	46.8928	30.801	41.166	32.5563	24.6445	44.311	42.4174	34.213	30.978	46.64	44.5352	24.937	34.659	32.2112	20.9587	54.793	27.9148	33.486	23.0311	29.3288	47.7732	41.1825	43.1933	44.617	22.651		0.340541	36.2142
7.6182	37.9029	44.1906	41.364	35.068	50.8995	33.078	36.122	60.6023	31.177	58.3198	49.0377	35.575	39.083	31.739	48.4679	24.668	27.481	33.7063	25.3724	32.179	17.0437	30.293	24.3998	27.9533	39.6446	24.4109	42.5452	36.99	34.307		0.345945	36.3318
7.7372	29.8393	40.4182	36.0192	43.6439	41.0944	20.874	24.304	50.2103	28.2699	53.0513	41.2144	30.496	29.721	24.272	30.7555	24.934	27.178	25.0421	25.8769	59.177	28.4572	28.441	19.3432	28.2193	38.7158	33.9876	47.1608	29.739	30.898		0.351349	33.4949
7.8563	34.6005	51.9093	41.715	39.7646	36.7756	28.24	31.384	54.6217	29.1767	41.88	39.9737	37.408	32.598	35.367	44.4857	31.191	41.128	27.4334	25.5625	33.54	28.7958	34.542	23.4935	29.2815	35.098	27.2912	32.3934	33.905	26.311		0.356758	34.823
7.9753	44.9669	42.7033	37.9641	41.7615	32.3157	33.282	43.772	31.5735	24.6603	44.018	41.4522	27.309	22.068	30.124	46.8556	23.118	23.081	17.8868	22.4231	41.897	25.2532	39.188	31.1293	30.0257	25.7332	36.977	38.4272	20.888	15.523		0.362161	32.2888
8.0943	42.0236	24.9161	38.0142	33.7142	43.2555	23.249	26.409	34.4844	41.9583	34.8791	44.4412	20.179	29.482	36.364	57.7365	28.586	34.524	19.4947	34.8301	38.214	27.3616	25.384	37.0627	28.5231	33.2837	20.1784	37.6624	14.59	25.583		0.367565	32.2891
8.2134	47.7368	32.7537	36.3731	36.9611	48.9887	31.232	24.017	37.046	33.9121	32.6091	42.2127	23.653	18.257	32.987	44.0027	28.456	36.482	21.3165	17.6113	43.198	19.6817	28.489	41.3644	21.3625	35.0042	30.7555	42.1846	24.752	23.88		0.372974	32.32
8.3324	26.8979	37.9288	45.5351	22.5472	26.1285	23.869	24.065	48.0169	34.2687	44.7559	46.2974	22.106	36.299	32.229	41.1525	34.858	32.801	21.1198	23.687	33.87	19.3599	31.026	31.3509	15.8142	32.9939	39.584	37.3794	29.941	22.052		0.378377	31.6529
8.4515	34.3903	32.2105	28.7522	38.4874	45.8945	35.761	31.84	34.4493	38.7972	36.5785	60.7653	22.021	27.694	45.324	41.0865	25.996	53.87	23.3733	26.6752	35.746	26.213	26.8	19.6082	21.4455	36.0955	31.5423	22.4568	15.358	26.471		0.383786	32.6104
8.5705	37.2298	40.8126	24.0557	36.8408	43.0422	26.468	27.482	42.3773	31.1376	37.8127	60.2686	36.366	30.438	45.205	23.2089	20.347	25.651	21.6659	36.2955	35.57	25.7254	34.085	33.3443	32.7835	49.5079	31.9264	29.6441	27.844	22.648		0.38919	33.4408
8.6895	48.9055	39.6092	25.9246	32.2384	36.6006	26.558	26.572	44.2174	31.8337	24.9467	72.429	23.109	34.251	40.592	32.748	17.482	35.989	29.3843	27.3714	37.257	27.9233	28.05	31.4465	26.1659	45.8914	37.2582	36.0601	30.464	18.424		0.394593	33.438
8.8086	37.9393	22.1433	30.0773	35.391	40.274	23.157	26.315	45.5816	17.9083	30.2391	49.3256	30.816	39.002	28.784	38.4049	28.684	25.405	32.8657	22.0015	29.776	22.2025	23.758	16.4638	29.7359	49.6438	21.591	32.748	17.856	16.722		0.400002	29.8211
8.9276	33.9551	21.3026	40.3308	29.5092	35.1456	27.276	20.987	34.2234	33.2215	17.2325	38.9087	22.758	29.028	41.078	29.476	29.661	34.403	20.3039	27.519	39.382	27.2076	29.974	28.5512	38.3238	32.8419	35.7711	34.3794	16.163	14.938		0.405406	29.788
9.0466	25.991	39.8347	26.444	33.1403	41.375	30.097	31.069	30.7483	24.3685	34.5563	38.6067	33.345	33.542	30.424	35.522	21.082	27.781	10.782	30.48	35.805	23.2634	31.885	19.5584	29.889	37.8628	31.4068	41.288	15.646	12.439		0.410809	29.5942
9.1657	35.3175	29.252	17.5154	26.5467	29.6127	38.326	35.028	32.4211	29.7282	28.8653	43.3254	30.7	24.546	20.574	27.3046	30.416	34.035	26.2738	17.4442	34.232	26.5932	24.781	16.2567	17.214	39.0667	29.3318	40.9144	17.566	19.96		0.416218	28.3844
9.2847	44.5601	32.7436	21.6429	23.1562	32.9468	31.556	25.168	28.1035	36.1117	29.9928	39.0372	32.198	31.078	39.638	31.67	22.529	23.22	32.7378	22.0444	28.016	11.4196	33.283	16.9573	17.9636	36.3429	27.5581	38.4838	17.213	18.453		0.421622	28.4767
9.4037	29.4596	33.7428	26.8986	29.8527	36.1383	28.16	35.513	37.2567	46.0583	23.5362	40.8287	25.879	12.913	29.265	22.1415	27.008	20.975	14.9398	17.4129	29.194	24.2856	24.533	31.9134	33.407	43.4379	31.5585	32.9986	27.391	19.387		0.427026	28.8305
9.5228	36.4041	23.9884	16.4676	35.2781	25.9866	38.98	46.851	24.1648	25.6723	13.9672	42.0229	17.781	17.027	22.629	23.8971	13.537	23.368	26.6335	38.4196	37.349	22.1019	24.331	18.8255	41.9758	44.3579	39.0645	29.8793	17.657	24.772		0.432434	28.0479
9.6418	32.1052	41.1934	24.2314	32.9738	34.0125	29.556	37.739	22.9051	28.4256	18.4986	42.7325	26.849	28.951	24.159	24.2099	12.788	28.672	17.9585	30.4222	27.995	31.017	25.28	25.9531	25.6154	31.3726	18.1944	34.4582	11.67	20.306		0.437838	27.2498
9.7608	40.7881	30.2475	23.6323	41.1269	26.0328	18.683	34.41	15.5359	17.1123	26.7888	43.1097	35.341	31.08	29.984	20.8965	20.868	22.947	21.6779	33.4614	21.569	24.3697	23.554	27.7028	16.222	24.3407	37.7055	34.1452	21.997	22.301		0.443242	27.1597
9.8799	40.9642	20.2132	38.6438	28.9851	43.5197	22.109	46.423	32.4069	22.2781	30.49	32.8975	36.649	28.027	24.44	34.4466	15.861	31.991	19.1926	34.726	31.425	23.1411	12.295	20.268	22.4535	35.7994	43.5541	33.0639	16.625	16.641		0.44865	28.9493
9.9989	31.6007	39.672	34.2939	30.1163	32.6772	19.267	38.293	34.2664	20.7915	23.0912	43.2299	27.061	20.567	27.699	24.2689	20	16.888	19.715	18.455	37.127	22.4982	13.924	20.9819	21.8253	47.9415	31.6156	36.969	21.562	16.303		0.454054	27.3345
10.1179	35.638	30.2896	33.2331	27.503	47.1681	33.836	27.506	37.385	25.102	25.0699	31.1612	35.086	25.118	28.433	27.8452	25.083	24.521	25.8695	19.4742	23.063	33.9072	18.476	34.6576	22.0392	31.4632	38.36	28.1857	25.593	22.209		0.459458	29.0785
10.237	33.7354	33.2476	41.1513	25.3297	38.7006	35.395	49.027	29.9842	15.9727	36.0317	33.153	14.402	30.548	21.614	21.2532	31.288	36.475	15.7535	23.089	20.738	15.6442	10.597	27.3791	22.367	28.5288	38.3159	31.1735	15.936	26.409		0.464866	27.6979
10.356	31.4348	43.1233	24.6697	24.054	35.7358	28.561	46.467	36.6987	12.7431	25.3961	33.1034	25.047	29.55	19.02	22.1105	13.295	33.836	15.731	29.4909	24.062	14.7212	12.067	22.9319	31.0626	40.5998	18.1431	41.2794	14.941	16.334		0.47027	26.421
10.475	37.232	31.9442	29.6963	30.5672	42.7331	34.14	30.738	25.0688	11.1236	21.0746	28.898	17.996	30.075	38.617	23.9934	28.651	22.189	18.2092	29.0941	28.603	26.0857	21.683	19.4174	27.0865	30.764	26.0917	30.2246	23.671	15.48		0.475674	26.9361
10.5941	25.0907	24.2255	19.3449	20.3877	28.1728	28.316	35.638	30.0306	16.1665	25.5792	31.8131	25.066	21.059	26.262	21.2738	24.829	32.965	23.0485	22.2774	35.174	21.6067	12.407	28.4284	22.6063	30.1105	33.4287	34.288	23.134	15.32		0.481082	25.45
10.7131	25.9157	35.8038	23.6947	35.5759	47.335	33.327	36.256	30.0478	19.5997	18.5143	49.1267	15.785	32.265	33.533	16.87	26.327	30.816	31.7225	15.8266	28.822	11.2117	10.548	15.381	26.4384	23.3818	26.8188	38.4973	23.143	17.299		0.486486	26.8925
10.8321	19.0897	26.3859	15.9777	42.8744	43.1586	23.494	30.341	24.511	13.0612	28.3983	30.983	22.121	31.005	25.718	21.7507	21.994	27.331	25.8347	21.8871	29.905	15.3002	12.952	21.9085	31.4783	31.0879	32.5171	28.8273	22.619	19.785		0.49189	25.5964
10.9512	31.181	30.4264	9.9533	27.4099	36.6192	24.348	39.191	43.6509	15.7034	20.1531	21.2121	18.641	30.959	26.318	18.0937	19.584	25.903	33.712	20.5094	33.671	12.9333	13.169	25.3643	19.6761	35.9913	25.5396	34.7683	13.019	16.393		0.497298	24.9687
11.0702	36.6806	21.8778	27.7101	20.1123	43.1649	22.304	30.004	28.1693	13.6526	27.8986	35.0312	16.519	29.957	15.925	18.0218	24.682	25.801	23.3679	28.1777	27.584	14.6851	6.51	32.41	15.0851	27.4081	21.5598	32.4041	18.666	16.345		0.502702	24.197
11.1892	20.9519	35.2885	16.1474	25.5197	45.9422	17.44	28.121	22.3875	11.6458	23.1117	38.3102	17.171	33.082	35.566	18.4074	21.22	28.973	16.7497	31.574	36.795	21.1612	15.183	27.3328	18.9281	31.6999	20.0052	29.4294	20.436	16.154		0.508106	24.9908
11.3083	28.9161	24.9202	8.2275	26.5951	32.2987	28.529	30.86	27.1983	13.0641	28.7705	26.7765	15.196	23.66	32.988	30.4857	30.783	25.195	17.914	39.0856	25.938	11.34	10.94	36.3897	23.0371	32.0468	25.1124	40.1288	25.64	36.576		0.513514	26.159
11.4273	36.2639	26.7018	20.5071	18.9224	48.7022	27.057	25.455	20.2897	13.6222	21.0362	30.5363	15.363	16.406	27.469	19.1584	25.615	33.383	30.5587	26.4971	29.994	20.3577	20.851	28.2637	18.4845	25.9089	22.6672	35.2745	21.389	19.543		0.518918	25.0441
11.5463	26.934	20.0686	13.426	16.163	44.4445	19.556	37.445	19.9232	15.4583	32.1587	21.6374	18.909	27.272	24.66	16.6671	30.22	33.2	13.5793	33.2727	32.326	16.2538	15.129	29.6299	22.3019	27.6591	26.3492	32.7555	16.142	16.68		0.524322	24.1456
11.6654	33.1672	13.3743	9.3873	25.6838	29.4771	27.686	31.392	16.2789	17.1918	26.2516	27.3925	23.198	26.986	24.762	19.5584	25.116	23.482	22.1339	17.3017	38.53	14.8769	19.32	20.1567	21.9247	34.1106	33.7492	42.2039	18.356	21.291		0.52973	24.2876
11.7844	37.3572	16.2078	12.3187	25.4745	34.8584	26.588	23.444	19.5237	13.0564	30.1916	20.1109	14.98	19.086	16.566	16.4948	20.731	16.904	18.3738	32.127	27.609	16.4362	22.265	28.845	12.175	33.0014	27.3937	45.0221	28.282	19.358		0.535134	23.2683
11.9035	35.5378	13.3136	15.9452	24.0907	22.2537	21.094	16.068	11.1118	15.3078	31.1761	37.0028	14.677	31.491	19.135	22.3497	29.943	21.92	14.1805	31.8846	25.069	17.2183	21.351	25.8998	24.3702	28.9308	26.7349	30.4906	18.757	21.116		0.540542	23.049
12.0225	26.8936	18.8243	15.1241	15.8357	40.8988	21.31	25.245	12.1479	8.1691	21.0886	37.2587	17.852	17.115	31.993	21.6675	41.129	18.725	26.5019	27.2153	21.591	17.6419	12.606	21.6184	19.4684	40.0551	29.0709	42.0645	22.864	14.737		0.545946	23.6797
12.1415	28.9133	8.9232	13.5326	12.5453	29.2525	22.958	19.897	21.7206	11.1465	17.1941	23.5697	12.26	11.299	27.367	22.948	22.416	22.983	18.8777	28.2639	22.935	11.1206	20.982	19.5196	17.2086	46.5337	26.4348	25.8409	17.451	17.38		0.55135	20.7405
12.2606	29.6769	16.5159	9.3379	19.2173	41.2601	19.663	22.938	9.9968	12.19	24.7606	25.7734	14.307	21.376	29.492	21.5684	35.508	18.338	29.9367	29.1994	17.678	12.8574	9.693	17.8696	16.8445	25.4881	24.7291	27.4245	18.892	19.29		0.556758	21.4421
12.3796	34.4268	7.4958	15.6092	21.5245	29.2903	16.725	20.245	10.6734	12.485	23.6704	30.1063	12.866	17.74	34.115	17.2918	27.933	28.701	21.1016	48.3766	16.624	18.5081	21.926	20.1416	18.121	22.6711	29.0939	35.1698	20.44	9.609		0.562162	22.1614
12.4986	38.9758	14.661	8.4194	22.8778	25.0226	13.498	30.79	10.8846	19.4988	20.316	29.2832	15.609	20.988	23.195	33.7966	34.131	22.872	28.9023	23.2674	15.679	10.585	7.877	15.212	16.5898	28.9619	24.4237	23.8398	17.833	20.005		0.567566	21.3102
12.6177	26.1693	17.8774	4.4285	20.0011	26.3394	16.414	29.432	14.5775	10.0732	17.2776	34.9547	25.072	16.349	17.292	15.0805	36.22	28.489	37.4243	39.4824	31.984	18.937	10.874	23.052	27.9752	32.4374	38.4944	27.7582	18.392	23.63		0.572974	23.672
12.7367	28.3648	13.3818	9.9977	24.1239	19.5562	12.649	21.658	12.995	11.5317	23.8193	27.3775	19.264	18.61	23.692	17.4315	27.443	20.131	25.953	22.77	31.234	11.0081	14.955	22.3406	12.534	29.2488	31.7071	34.4981	19.113	20.106		0.578378	20.9481
12.8557	21.4235	8.4388	12.2342	17.077	29.8387	25.37	25.921	6.6231	13.1967	18.7024	15.7833	22.172	21.562	15.653	14.7281	32.567	35.26	27.9346	27.5184	19.339	15.2225	18.344	23.1796	21.9395	22.2597	34.0447	32.1997	27.576	15.154		0.583782	21.4228
12.9748	27.2615	11.1756	6.968	26.6902	21.7539	18.05	20.88	19.9982	6.2119	17.2794	36.7575	19.345	16.424	18.646	17.8543	29.021	18.624	26.635	28.3227	34.221	13.7487	14.254	22.4508	15.5769	19.5481	19.1216	23.0661	10.671	21.507		0.589191	20.0712
13.0938	12.9736	14.0983	7.3915	19.4715	19.5069	29.006	21.747	10.6742	8.5391	17.5339	27.2362	12.731	17.674	21.745	25.7259	31.172	27.717	28.1523	29.7058	28.062	11.6112	11.421	23.5463	22.9554	25.1034	26.4211	39.1926	19.242	16.928		0.594594	20.9408
13.2128	26.3293	6.7944	9.6454	22.5172	25.107	29.761	19.12	13.3367	11.0041	21.0055	32.4187	12.977	16.127	26.707	19.8165	34.405	27.962	20.333	29.7963	22.012	22.0142	12.996	20.1413	18.8863	29.5628	26.9689	22.7147	17.95	19.866		0.599998	21.3198
13.3319	20.3519	13.6207	5.6848	18.4798	32.3231	31.774	13.418	16.0896	17.4667	21.1815	22.8309	20.187	17.639	34.481	19.8111	20.499	31.075	17.4287	27.9824	30.167	18.7563	14.441	18.8404	23.7919	27.426	32.2027	20.3824	16.763	16.38		0.605407	21.4302
13.4509	17.1527	7.7261	5.698	16.1766	24.8607	32.309	19.916	12.1538	12.9602	14.7078	20.3682	20.913	16.786	33.015	14.8627	16.3	38.631	20.9445	20.2302	18.07	14.5222	11.647	25.532	23.4968	22.1905	19.7768	26.3861	20.961	25.763		0.61081	19.7951
13.5699	13.8861	7.728	6.693	27.5299	27.2429	21.791	21.436	8.1859	8.5948	15.5017	34.5065	21.92	16.2	22.888	23.5284	18.432	27.58	22.8306	27.0068	21.693	14.3766	20.226	34.0029	24.3971	23.3277	30.4776	19.1483	24.756	14.29		0.616214	20.6958
13.689	25.3554	9.0924	6.5182	14.4222	29.5274	18.615	12.029	6.5935	14.2259	28.7504	30.7932	21.381	20.642	22.686	26.0874	23.807	22.259	20.9186	41.5855	17.479	16.6698	21.431	27.781	28.1269	17.5475	30.454	16.3003	21.216	18.677		0.621623	21.068
13.808	21.7785	13.0855	12.864	35.4072	18.361	28.788	24.431	11.9862	14.439	29.1314	34.9016	19.411	18.251	32.018	29.1306	19.851	26.667	28.6585	23.6519	23.771	7.5088	8.806	20.4009	14.3426	24.8761	31.1159	21.5433	18.458	20.777		0.627026	21.8763
13.927	13.5317	12.3971	12.6226	15.787	22.055	26.825	16.955	11.0709	8.571	19.8172	39.496	17.362	26.114	35.861	15.1177	21.035	22.336	22.8687	23.9895	21.993	11.8715	16.639	26.9663	16.56	24.3565	33.0432	26.1509	16.521	18.482		0.63243	20.5654
14.0461	14.7866	10.2649	11.1689	26.8055	22.3612	24.589	21.528	15.0199	9.5496	25.6351	29.2081	12.83	15.071	26.873	17.1067	26.487	22.572	26.9731	24.7101	17.02	8.1157	17.334	17.874	20.6395	29.0234	25.7536	23.7223	20.353	20.908		0.637839	20.1477
14.1651	10.2621	11.7414	12.3006	28.1659	13.3616	23.758	21.959	12.9851	15.3925	17.9251	38.4674	15.379	14.768	27.533	22.9421	25.342	27.901	16.7894	27.0647	27.307	7.6967	20.682	26.0843	21.9804	26.1448	29.5878	40.7197	21.543	15.163		0.643242	21.412
14.2841	18.5344	5.0527	4.2194	30.3024	14.4781	23.531	27.365	13.0209	8.8457	18.833	24.4724	19.129	11.364	28.442	18.3903	15.83	31.044	24.2141	22.3572	28.28	12.3878	14.362	16.6356	21.1385	21.4167	27.6018	27.0023	20.254	24.276		0.648646	19.751
14.4032	15.5758	16.8789	15.0937	22.7902	12.6849	25.497	16.447	5.6626	18.3635	25.196	26.5813	11.716	17.534	33.886	17.5944	20.975	22.787	24.0862	17.6705	22.658	9.7219	16.793	26.1593	29.3449	28.7891	23.3448	46.2723	15.328	25.697		0.654055	21.0734
14.5222	17.296	7.4216	8.3039	26.0439	18.1819	22.953	19.763	10.8531	17.5287	22.5346	18.9415	26.861	17.546	37.522	17.757	14.403	19.946	22.3317	22.6	20.039	13.2471	24.386	23.6706	18.1666	32.9509	24.5114	40.7688	21.505	24.352		0.659459	21.1167
14.6412	15.4417	9.2615	14.2618	22.5873	19.0515	21.448	18.547	14.5514	10.2331	28.6911	28.1593	27.904	16.275	19.416	21.5516	12.363	20.87	28.3088	23.4034	19.395	9.9421	27.513	13.1348	26.6922	34.3386	19.4497	34.3049	15.591	18.959		0.664862	20.4016
14.7603	13.0244	7.8785	10.2827	21.6363	17.6949	14.025	24.778	13.7165	11.4285	16.9084	15.506	31.768	17.945	31.694	24.0392	18.503	16.744	23.4314	24.7136	18.526	17.3277	12.824	12.8454	19.5231	21.1882	27.8255	32.1796	22.441	27.364		0.670271	19.578
14.8793	5.7893	12.9342	11.0525	29.3427	13.132	14.252	21.536	7.0621	14.818	19.0412	23.6578	18.551	20.743	26.591	16.4124	21.515	18.633	24.4896	32.9445	25.702	19.6228	18.556	17.0955	22.556	21.3325	39.9077	27.0645	17.646	21.957		0.675675	20.1358
14.9984	20.231	7.0478	12.5588	16.1732	19.4315	17.312	19.842	11.9439	11.6067	17.6787	23.7831	21.932	17.572	29.692	27.1706	17.312	23.333	10.7304	32.2203	32.886	11.146	16.206	15.586	23.3481	31.8737	27.9987	38.9658	24.386	30.015		0.681083	21.0339
15.1174	10.9701	9.2437	8.9817	17.5694	15.7248	17.679	17.27	16.8415	12.6281	12.2952	18.8401	17.32	19.229	20.112	13.6187	23.155	22.218	21.9761	29.8948	18.814	16.7804	22.763	35.487	27.9739	21.3826	13.0073	44.4008	17.037	19.155		0.686487	19.392
15.2364	15.3797	9.8641	9.517	15.777	13.3926	25.575	16.269	7.7347	12.8943	21.2744	14.1853	27.116	21.101	12.975	20.5488	13.388	20.952	22.0866	32.7209	27.349	12.795	11.312	20.7801	22.7878	31.0678	22.7933	44.9036	11.64	25.978		0.691891	19.4537
15.3555	7.8721	7.7079	8.2443	21.5407	15.7636	20.15	28.71	10.8847	15.4744	20.4633	30.3289	13.762	16.654	17.419	14.3324	19.923	23.099	14.4583	29.5171	27.407	6.0329	17.071	25.3652	22.4341	26.959	23.639	29.6778	17.272	20.446		0.697299	19.0555
15.4745	8.9219	5.4753	10.8567	16.8242	20.1658	14.309	14.861	7.5315	14.7227	22.6709	20.4448	24.646	14.423	12.448	31.8032	32.489	19.9	18.6546	18.354	26.556	6.1033	9.463	26.1724	30.4847	19.6665	18.741	39.3877	22.702	25.814		0.702703	19.1239
15.5935	8.8261	10.0201	10.5028	11.1144	11.6811	29.703	20.48	16.7046	9.0828	19.3233	18.3467	25.223	26.1	35.223	25.1875	27.062	35.59	15.7389	22.9748	28.312	4.6325	28.744	31.2284	16.196	22.536	19.5885	29.7876	26.842	15.014		0.708107	20.7505
15.7126	16.1514	8.4886	13.8176	18.3269	17.7615	22.569	20.508	11.7201	13.8431	20.6068	29.5772	17.993	23.687	30.834	23.898	20.076	16.199	13.2699	24.6132	36.499	10.4212	13.397	21.5831	17.7271	24.749	21.6501	30.6058	21.479	30.829		0.713515	20.4442
15.8316	16.1828	3.8404	14.0844	9.3968	24.0412	19.161	31.555	6.6398	14.0148	33.3887	29.141	23.586	17.8	13.557	23.1426	20.297	22.127	10.8501	27.4849	35.346	12.9158	15.442	18.0796	33.3135	20.4778	16.5994	23.7837	18.586	28.47		0.718919	20.1139
15.9506	15.2919	6.1053	14.1704	25.4812	11.8641	19.795	23.16	9.1089	10.1366	30.0634	21.0091	25.264	21.866	11.201	24.1205	18.727	23.581	19.9461	29.7288	28.192	5.9003	9.307	20.462	28.1691	25.9619	23.6482	33.1701	14.756	25.752		0.724323	19.86
16.0697	18.4263	11.0196	14.2971	25.5202	20.7482	6.463	13.662	14.6396	18.5963	22.3867	19.366	22.918	24.199	19.42	23.4518	23.395	25.474	8.8714	30.4698	22.485	12.9869	15.189	25.1711	30.2477	18.0804	23.7208	37.7773	19.004	28.511		0.729731	20.5689
16.1887	18.1887	3.9546	13.3759	24.2917	23.7619	32.255	18.058	24.3274	17.6737	18.7701	21.936	21.673	20.463	14.581	30.3204	25.888	24.933	18.5077	30.5478	39.67	17.0842	25.234	25.3139	15.3426	30.1389	23.903	39.3897	22.969	30.28		0.735135	23.2011
16.3077	17.7178	8.6578	12.0344	22.7296	14.2652	23.969	26.119	15.6021	21.0633	27.7634	23.6806	24.081	31.169	15.721	20.3632	21.055	22.11	28.9751	33.69	33.223	9.884	22.528	15.6141	19.3213	24.8438	20.5685	50.7196	20.038	35.336		0.740539	22.8566
16.4268	18.1748	10.1402	13.9388	15.1105	17.0359	21.611	20.493	15.4373	16.1114	14.4288	28.6723	19.728	23.511	20.586	26.2308	29.363	21.554	21.5974	33.5285	39.32	15.7116	21.76	23.4942	19.1548	23.7483	23.388	39.8955	26.009	43.789		0.745947	22.8801
16.5458	9.2494	5.0614	7.3469	24.4954	19.2135	22.036	19.009	13.366	19.9794	28.2314	23.3846	29.957	33.807	11.221	24.2144	15.789	21.003	18.1019	22.3886	30.322	15.5989	13.891	18.2818	13.5812	27.6326	19.3052	43.883	16.885	29.456		0.751351	20.5756
16.6648	13.1757	6.2654	7.6539	11.5917	20.8277	28.018	24.87	9.9801	22.2304	20.7596	19.8512	22.6	36.149	15.491	17.6094	17.603	15.931	22.2644	30.3689	40.139	16.7796	24.648	18.6142	20.5849	19.9459	17.9918	40.914	20.216	39.372		0.756755	21.4636
16.7839	13.8182	9.2295	13.3124	15.0846	17.2448	14.762	29.655	8.4366	39.819	17.7358	14.7049	18.901	40.35	17.373	11.0365	27.176	24.552	19.4396	12.5622	23.487	8.7401	23.288	17.5078	24.1369	29.5033	15.5033	34.7885	15.377	27.774		0.762163	20.1827
16.9029	19.9808	17.6323	10.1113	7.3604	19.305	14.377	17.904	20.0278	26.1447	17.1449	18.8577	22.414	26.13	22.077	29.2509	22.834	17.781	28.0636	32.5557	18.491	14.2816	23.192	19.6073	20.2344	25.7992	25.9986	55.0936	24.438	32.999		0.767567	22.4168
17.0219	8.7103	8.4925	10.4076	18.074	24.1294	12.538	21.278	13.146	35.0051	17.8317	17.3893	22.835	17.471	13.546	15.6497	16.985	17.599	14.0839	21.1461	21.742	18.8935	35.182	22.1164	16.8877	19.3982	22.2696	34.3066	30.482	26.908		0.772971	19.8105
17.141	15.5777	8.2578	9.8009	15.0963	21.3484	18.568	26.283	15.9547	33.1701	19.6942	28.0988	26.605	18.971	29.64	18.75	25.204	25.082	27.0714	24.761	18.515	21.9723	26.781	34.5899	30.1221	18.342	22.1585	33.5769	16.721	33.559		0.778379	22.9059
17.26	15.909	8.8881	10.5699	19.8382	28.6484	15.173	32.346	7.5213	27.9943	32.4701	13.6808	24.081	24.008	25.308	29.791	30.803	22.874	18.8997	32.581	26.988	15.0905	24.97	24.7519	29.2578	26.2616	18.5703	33.0749	35.942	26.837		0.783783	23.5562
17.379	23.1634	11.1155	20.5037	19.1467	19.97	16.266	29.776	13.7683	27.3482	29.6296	23.6067	17.253	17.447	23.313	15.0352	27.813	30.761	13.8324	24.4167	20.412	13.9833	23.461	24.3863	17.4228	10.3446	27.8929	31.9782	21.749	22.284		0.789187	21.3131
17.4981	21.357	6.5645	10.6857	20.5954	19.2544	15.01	30.518	14.345	35.4863	31.2908	30.449	17.499	24.855	25.987	14.0009	30.152	21.78	19.4657	15.9527	16.257	23.455	12.103	31.1288	30.2177	19.0945	16.3618	30.9036	29.642	28.401		0.794595	22.166
17.6171	18.4997	12.0813	10.0819	21.2855	25.3937	15.201	19.62	11.8127	40.6334	27.766	26.3755	29.852	21.588	29.724	23.2614	38.109	18.174	8.3016	17.8605	26.934	39.9609	20.9	20.6458	25.2625	25.6576	28.3641	28.8477	15.027	33.82		0.799999	23.4842
17.7361	18.6966	11.5611	14.9948	17.9662	10.7045	10.176	12.878	13.2111	38.9116	19.9449	24.5245	22.894	25.64	31.521	28.4268	39.171	22.031	24.5686	24.1092	16.356	30.0738	19.38	26.9542	34.2032	11.2959	24.9953	40.7967	15.969	22.081		0.805403	22.553
17.8552	14.34	14.5545	8.7657	12.9134	21.5968	10.404	21.504	11.2858	26.6822	21.6712	25.6822	16.284	29.911	15.177	28.6014	28.476	25.663	13.1122	24.2801	21.467	22.4784	22.2	31.4032	27.0823	22.8474	25.3758	32.0732	18.954	19.347		0.810811	21.177
17.9742	13.5763	18.0545	11.6694	24.2572	17.0891	8.579	19.999	13.4775	40.2871	28.4096	24.9521	15.592	27.708	24.172	26.2901	29.945	30.323	18.6912	15.9271	33.002	25.5565	23.178	22.5584	43.8555	19.4308	30.0985	16.5945	26.127	23.268		0.816215	23.1955
18.0932	26.7131	9.5651	10.7074	16.5235	15.1647	22.346	17.192	6.563	24.8654	20.5888	28.3401	20.522	36.389	21.363	23.89	26.813	32.265	13.911	17.887	27.588	24.2676	19.451	19.501	38.9762	20.8201	31.8108	23.6571	20.681	17.138		0.821619	21.9138
18.2123	19.0099	7.4291	16.9492	11.191	15.4906	17.134	18.816	22.0975	24.8526	20.9692	19.1256	28.49	30.414	33.985	20.322	31.644	46.686	22.6879	16.1949	39.38	31.9456	20.244	22.591	33.5901	19.601	19.727	28.7158	19.559	28.865		0.827027	23.714
18.3313	24.4886	16.7967	23.3433	23.1569	23.5639	21.111	19.871	22.2027	26.5335	17.8594	25.0328	19.204	28.639	28.086	17.671	20.376	33.562	22.8727	27.0989	16.372	35.859	29.371	11.1706	36.7938	28.3742	20.1232	22.9112	17.944	22.082		0.832431	23.5335
18.4504	16.9108	5.1491	10.4081	27.2321	21.1653	13.82	13.629	25.1937	13.6183	24.6474	21.2514	22.843	25.958	20.208	17.5219	22.931	32.895	18.7068	20.101	35.181	19.776	27.756	21.6228	18.2338	23.1117	28.0771	29.5183	17.563	25.853		0.83784	21.4097
18.5694	29.0186	17.5295	19.3913	20.2755	16.6277	22.056	14.775	19.5333	22.6095	25.0431	26.7645	26.212	17.586	24.614	6.186	26.305	42.109	19.7992	22.0096	19.371	35.1407	32.18	31.5305	33.2338	21.093	22.7809	25.0242	40.841	19.745		0.843243	24.1167
18.6884	35.0937	20.3323	10.7033	17.3896	28.6346	13.382	11.304	14.7297	29.9714	31.8156	19.472	22.629	15.659	21.096	11.1481	22.156	36.726	13.8989	14.8326	19.308	35.7648	31.112	25.8638	31.0942	25.931	13.9876	23.2561	16.715	24.197		0.848647	22.007
18.8075	23.41	13.716	11.4	12.5642	17.7148	15.318	14.444	10.9253	25.8242	16.5659	22.5598	20.71	21.102	24.424	6.5959	16.562	31.585	11.6613	6.8568	28.204	21.5784	27.455	21.2943	14.9055	22.5854	15.5708	23.6155	25.292	19.255		0.854056	18.7481
18.9265	22.8968	26.8997	7.563	13.4046	13.2573	11.825	18.602	16.1495	22.2146	19.7365	23.5641	28.316	18.098	17.707	6.535	16.414	26.491	12.7897	5.9782	25.025	19.4976	18.352	12.519	11.8329	16.3477	16.2048	16.2043	27.097	16.301		0.859459	17.5111
19.0455	25.5247	21.5627	13.1159	15.0508	18.6661	6.867	16.012	11.9093	25.8189	11.7318	17.5899	29.194	16.911	18.89	8.5217	17.073	33.772	15.4215	7.9032	28.735	25.9872	17.622	30.9738	17.0766	18.6832	10.7736	14.4619	21.246	16.199		0.864863	18.3894
19.1646	36.8279	23.4626	17.6807	11.8118	9.3773	15.542	16.167	11.6625	24.3895	31.4031	24.5361	34.859	8.623	12.487	8.5422	21.531	35.622	2.2838	6.1618	34.703	21.53	26.265	15.8957	19.9421	20.6769	9.9853	6.2527	22.624	16.927		0.870272	18.8887
19.2836	21.0737	22.4373	16.437	19.9064	11.9746	20.903	24.212	13.9871	19.4211	11.2979	22.9396	16.822	8.341	12.727	6.6743	13.491	21.162	7.0502	3.3106	29.137	21.6435	13.892	9.7763	12.6638	30.7168	7.2255	11.741	17.201	3.625		0.875675	15.579
19.4026	21.7886	27.8372	23.5925	24.5646	29.641	20.338	23.619	10.3231	17.7751	23.123	19.2742	21.34	11.091	12.965	1.6638	10.324	24.555	0.8874	2.1836	18.944	25.6826	24.114	17.1481	30.1104	17.3098	3.1643	2.5678	5.648	7.561		0.881079	16.5219
19.5217	25.0027	38.9114	24.7988	13.4376	23.9717	17.273	25.772	13.1843	19.3436	20.2867	18.602	4.73	17.224	9.612	8.5289	5.671	18.481	4.1261	3.5758	23.979	26.633	22.139	17.8909	21.7245	20.9101	4.5057	2.5825	15.789	5.599		0.886488	16.3547
19.6407	27.6455	24.0573	17.5134	24.625	14.3273	17.673	23.239	13.4184	26.1485	10.1014	10.1016	6.792	8.615	9.606	3.7544	11.822	23.301	3.3515	5.0585	23.764	27.6044	19.482	12.6519	21.1182	21.9708	3.5291	3.5366	4.774	7.252		0.891892	14.7184
19.7597	34.166	18.1677	26.6897	25.8947	20.9399	20.234	30.327	18.8103	15.2619	15.8009	21.4396	7.236	10.954	11.869	2.4658	4.819	27.621	8.1487	4.4808	22.296	20.7766	26.417	12.9627	24.3748	17.7977	4.2243	2.8301	7.481	5.28		0.897295	16.1988
19.8788	26.4564	21.1069	22.8539	25.4223	17.8784	14.846	24.727	21.1155	17.4486	17.4349	19.9068	4.653	2.038	4.107	6.5179	2.556	16.39	2.1353	6.4188	19.125	24.6969	22.371	4.6874	11.3857	32.3601	0.035	4.8681	6.853	1.585		0.902704	13.8614
19.9978	17.0633	30.5242	13.5836	17.4669	7.0965	17.28	17.505	21.6448	19.1466	20.074	27.3657	10.589	7.687	1.442	4.3952	1.185	15.739	0.3029	0.4031	13.09	28.535	22.73	7.4074	23.746	29.0461	1.4244	5.3772	1.286	1.956		0.908108	13.279
20.1168	15.0677	26.2153	13.7155	13.2734	19.6058	16.87	20.854	20.1403	20.1444	26.2535	25.8395	4.843	6.607	0.341	13.361	4.317	8.049	3.9186	0.5486	10.831	24.8733	24.751	3.6433	15.93	25.174	1.1948	0.7251	3.829	0.52		0.913511	12.8081
20.2359	20.6311	25.6781	18.64	22.0105	22.1086	19.951	23.959	18.274	17.7144	21.8287	24.5055	4.888	6.414	2.135	2.2444	5.679	8.416	1.8846	3.2724	16.21	8.6949	24.627	5.026	9.9624	20.3354	0.7426	3.3784	2.936	1.296		0.91892	12.5325
20.3549	25.3831	36.3646	10.3226	24.9608	18.9136	12.077	18.711	10.8393	8.7056	22.3336	17.0854	1.255	5.6	3.662	5.0104	2.009	4.896	2.299	5.5948	10.765	12.253	27.654	5.9315	7.5606	13.1703	1.3106	0.3793	4.038	2.616		0.924324	11.0931
20.4739	25.8439	28.5572	18.3149	15.0091	13.6096	13.989	31.461	10.8176	14.7939	16.993	17.0818	5.835	7.987	5.384	5.9918	2.874	11.985	3.0446	1.3852	7.772	24.832	24.249	18.121	11.0755	24.3606	0.5368	0.106	2.682	3.938		0.929727	12.7114
20.593	24.8232	17.7763	20.1674	14.0516	8.1474	12.661	19.352	4.5555	9.1419	9.4734	10.6415	0.16	4.374	2.883	2.6793	4.866	7.626	10.1364	3.5301	5.018	15.6083	25.089	2.8494	11.919	12.9278	2.1205	2.7742	3.554	0.054		0.935136	9.27449
20.712	33.9197	36.2208	16.0125	24.8152	19.2806	4.556	17.677	10.1363	3.8447	14.8995	0.7916	7.022	5.243	0.773	5.7119	4.635	5.155	1.0633	4.7532	8.947	19.638	29.035	3.8085	3.5303	10.0589	1.8805	0.9093	0.528	1.936		0.94054	10.2339
20.831	34.5901	41.8246	8.9736	21.4083	11.5095	2.835	21.706	9.1114	3.6432	5.7653	7.7455	5.33	4.071	5.712	6.0331	2.715	1.39	6.624	2.3388	6.991	26.4552	21.037	8.0264	4.5202	9.1797	1.8527	1.4185	4.696	4.094		0.945943	10.0551
20.9501	18.1433	26.0942	9.3474	19.0607	19.4104	3.039	8.987	3.343	6.6307	7.4572	7.7432	2.353	1.16	6.512	1.4569	4.262	1.912	2.1471	0.0874	3.115	17.1838	27.33	5.106	4.1586	7.0638	3.4552	1.4854	2.279	2.277		0.951352	7.67587
21.0691	20.1896	28.6938	8.2031	21.4643	20.3568	2.113	7.441	3.7177	5.1686	9.7993	3.0981	0.769	0.005	2.104	4.4434	2.081	3.37	0.0009	1.2394	7.487	25.4304	29.876	5.2563	14.2702	5.0379	0.4699	1.5091	1.889	0.414		0.956756	8.13441
21.1881	18.316	19.7992	9.6316	19.5149	10.54	4.784	3.168	3.0485	3.89	9.4235	7.7555	4.003	1.786	3.617	0.3749	6.841	3.023	1.213	3.2411	4.83	28.4215	9.108	4.2853	7.4055	5.6639	4.7767	0.058	1.8	0.014		0.96216	6.90804
21.3072	18.4516	19.0267	9.8193	28.0519	10.7261	1.009	4.411	2.9737	4.017	3.3125	4.8052	1.405	3.409	1.276	2.8594	8.763	4.231	3.4225	4.4682	1.857	15.3758	10.92	4.2838	7.6334	3.6424	2.3852	2.5992	1.519	0		0.967568	6.43634
21.4262	8.3948	17.6802	4.1874	20.0715	5.7794	1.819	11.907	4.4281	6.9475	4.3171	3.4105	5.835	4.871	1.566	3.6829	3.537	7.873	3.2283	5.1112	5.917	10.7234	9.91	1.8544	8.97	7.3936	1.9543	1.2065	1.632	0		0.972972	6.00718
21.5452	7.9501	14.3429	5.3075	15.6699	5.0644	7.243	2.393	4.9409	3.8882	5.6555	1.4288	3.727	2.187	3.552	5.1484	4.474	7.668	1.0664	2.991	5.809	14.8019	5.328	3.6894	8.2244	4.88	0.9462	2.3043	4.027	1.644		0.978376	5.39146
21.6643	1.1563	4.6489	6.5078	7.7346	3.6724	3.829	4.127	4.3785	1.6182	10.2773	6.1544	7.67	2.003	4.447	5.537	3.688	0.72	4.2354	3.785	5.007	7.3807	6.395	0.173	9.1592	4.4961	3.2419	0.1046	1.568	1.776		0.983784	4.32729
21.7833	1.5893	3.905	7.149	8.3889	9.2186	4.831	1.863	0.7616	2.218	6.4156	0.5529	0.474	4.557	2.36	1.2886	2.289	2.935	1.4449	1.7439	1.345	7.466	7.16	5.1116	10.4229	3.8198	0.0283	0.9108	0	0.104		0.989188	3.46047
21.9024	2.1243	6.7795	5.4343	4.5196	11.2699	4.106	6.004	3.2362	5.9087	9.2959	0.9217	1.687	8.439	0.385	3.712	2.278	6.301	4.8562	0.0372	5.254	4.37	4.832	0.4834	8.3454	0.4534	2.3441	2.2683	1.192	3.05		0.994596	4.13407
22.0214	5.8453	5.303	8.7347	8.2387	3.5973	2.921	4.985	6.9071	9.6628	9.6089	5.7568	3.032	5.999	4.926	2.8388	2.208	3.129	0.0879	1.3241	5.568	7.4272	1.911	3.4514	4.9697	0.5713	4.1423	1.9875	1.477	0.038		1	4.3672

## Sheet: Image3
X0	Y0	Y1	Y2	Y3	Y4	Y5	Y6	Y7	Y8	Y9	Y10	Y11	Y12	Y13	Y14	Y15	Y16	Y17	Y18	Y19	Y20	Y21	Y22	Y23	Y24	Y25		Ap-basal	Avg intensity
0	79.2	42	45.156	27.125	50.376	45.819	67.924	48.371	51.766	43.183	43.2914	48.678	40.6273	45.618	21.741	25.947	24.18	19.701	31.088	37.549	47.49	32.512	34.133	43.521	36.582	60.656		0	42.0859
0.119	54.787	53.219	26.489	32.294	64.8	57.668	84.123	62.973	39.428	35.065	36.7355	35.2583	45.8113	64.694	42.905	14.846	28.646	16.834	26.603	47.725	54.042	38.076	42.132	36.429	40.678	80.584		0.00490055	44.7248
0.2381	80.865	78.303	44.093	46.763	58.886	58.501	81.906	53.367	48.516	51.202	35.3625	58.4991	42.6077	53.5	45.145	34.564	25.688	33.831	30.318	45.393	73.614	54.065	57.963	47.886	36.028	72.196		0.00980521	51.887
0.3571	70.376	84.184	51.744	53.535	63.869	57.302	89.78	49.636	61.614	50.018	39.9226	49.4859	49.6873	45.594	50.727	46.184	39.575	29.422	26.811	50.436	62.17	53.296	60.024	44.665	44.43	75.964		0.0147058	53.8635
0.4761	105.135	85.072	47.799	55.986	74.82	56.514	76.801	68.212	62.06	77.658	38.8173	36.9194	48.9692	51.711	46.841	67.759	34.011	30.316	29.799	49.812	57.617	68.561	56.428	38.778	43.113	91.193		0.0196063	57.7193
0.5952	113.606	101.656	72.086	61.369	75.368	74.876	79.998	62.527	67.839	57.936	46.3494	33.0697	55.3746	57.156	64.362	53.204	47.692	34.354	31.52	63.239	65.076	81.148	69.344	47.042	52.29	78.358		0.024511	63.34
0.7142	103.331	110.533	75.513	62.623	90.081	79.43	71.97	84.866	59.334	85.93	48.2433	42.4481	72.2928	61.381	66.496	82.155	71.763	34.403	45.722	70.548	80.674	88.732	61.03	56.199	60.22	76.924		0.0294115	70.8785
0.8332	117.281	123.129	67.12	89.492	96.571	83.504	93.893	84.554	85.169	97.342	63.631	54.1038	64.1748	54.754	61.347	77.497	70.402	54.342	62.533	50.843	86.263	77.981	54.992	47.562	71.323	76.77		0.0343121	75.6374
0.9523	112.33	112.304	108.301	121.016	83.247	90.657	91.025	81.988	95.666	90.663	61.8928	48.245	83.9624	48.612	84.4	79.268	77.741	48.496	58.658	68.295	81.165	118.066	83.891	66.08	75.79	67.991		0.0392167	82.2981
1.0713	127.176	126.811	111.787	122.024	111.298	84.968	117.051	83.319	89.318	105.5	52.2823	63.1136	93.1538	66.658	102.509	108.661	88.737	45.105	67.416	78.475	69.021	96.473	103.693	53.404	55.641	70.137		0.0441173	88.2205
1.1903	118.851	118.375	123.48	106.3	109.375	84.539	95.784	96.517	102.931	111.741	67.1936	77.105	59.5103	66.105	115.085	110.32	112.66	81.218	89.287	100.063	89.071	104.754	98.744	80.426	72.336	88.292		0.0490178	95.387
1.3094	121.361	104.967	108.912	114.7	120.364	85.538	110.585	89.688	98.039	102.854	74.2458	70.9691	89.2779	89.402	107.259	123.151	124.893	92.48	97.511	97.972	110.71	100.484	107.818	71.033	59.903	83.126		0.0539225	98.3555
1.4284	109.132	125.064	115.787	107.213	124.474	92.722	106.738	83.936	98.086	114.108	71.1432	72.6277	84.1185	98.59	120.9	113.26	109.854	88.063	89.08	90.525	101.2	93.271	88.835	78.966	75.237	73.804		0.058823	97.1821
1.5474	127.764	122.01	115.462	133.999	120.389	86.764	97.86	93.343	111.583	126.779	73.2944	85.1269	75.5087	102.412	119.126	102.308	88.173	105.589	95.972	126.126	97.025	120.35	89.74	80.457	89.139	64.862		0.0637236	101.968
1.6665	116.205	107.519	112.089	123.543	117.599	76.107	109.165	83.112	103.406	120.246	73.2741	92.8031	87.7661	96.567	114.524	105.798	113.998	109.883	92.837	110.087	111.055	121.302	116.85	84.02	75.847	90.784		0.0686283	102.553
1.7855	115.941	133.455	112.007	130.606	133.703	75.743	98.902	91.769	111.538	119.362	93.9091	87.8099	80.1307	102.181	110.47	90.977	102.762	100.241	85.13	91.396	100.589	104.862	126.515	89.705	87.177	67.992		0.0735288	101.726
1.9046	115.318	135.394	123.131	134.959	119.378	91.614	91.493	101.272	110.49	94.599	86.9751	96.4037	76.9891	99.01	95.171	94.161	115.418	106.307	94.704	110.082	97.396	140.408	141.006	96.365	83.686	85.374		0.0784335	105.273
2.0236	123.911	147.927	94.288	130.77	112.198	99.771	77.974	107.941	111.593	112.875	89.5967	70.4169	81.0181	112.626	106.573	99.389	112.98	114.181	92.079	111.798	76.221	140.076	136.116	111.506	87.038	75.96		0.083334	105.262
2.1426	111.609	154.322	118.611	130.073	136.662	108.415	103.502	108.482	120.738	116.874	87.2719	88.3509	78.741	105.002	109.416	102.465	122.847	121.603	96.095	91.539	89.634	136.317	134.226	86.665	85.896	102.935		0.0882346	109.55
2.2617	117.982	143.534	81.018	98.529	120.51	116.039	82.669	106.376	94.323	96.683	89.7651	73.6803	78.5303	98.449	94.354	88.395	105.968	132.138	96.495	105.252	69.708	117.665	120.901	96.329	95.763	91.208		0.0931392	100.472
2.3807	98.129	115.721	96.442	100.057	114.875	102.684	71.325	99.35	122.367	97.252	67.7504	85.1722	77.1613	109.824	78.89	70.17	100.097	154.47	83.975	109.171	85.387	117.205	120.631	97.407	88.589	84.614		0.0980398	98.0275
2.4997	106.059	142.235	100.985	103.212	97.51	93.177	74.55	89.738	100.102	89.44	90.4305	69.614	76.4235	86.98	70.812	72.627	95.952	139.061	106.444	104.163	87.897	113.84	123.214	97.823	100.402	88.131		0.10294	96.9547
2.6188	109.238	133.954	85.613	93.741	90.079	99.578	74.918	87.826	95.8	98.709	97.2544	62.4228	88.1301	73.288	66.155	77.465	100.126	151.892	122.458	90.423	73.331	124.239	128.35	82.701	96.206	99.161		0.107845	96.2715
2.7378	98.417	136.414	74.614	78.824	103.284	88.827	66.802	110.749	104.343	91.695	93.6144	66.2299	65.5665	71.661	82.644	56.606	91.642	134.293	109.529	93.969	73.163	123.445	144.49	86.485	83.904	97.388		0.112746	93.4076
2.8568	85.499	120.127	82.4	85.419	99.932	89.895	59.405	81.59	85.221	81.793	86.069	79.8663	65.1128	81.701	73.331	62.886	86.367	146.166	108.761	84.677	82.211	119.44	130.518	85.795	86.673	93.152		0.117646	90.1541
2.9759	98.475	125.163	70.63	66.072	92.501	87.814	73.29	80.728	81.833	59.184	81.8808	38.6317	66.0277	70.957	73.097	59.945	70.647	144.996	99.089	81.684	78.25	106.847	123.771	69.54	91.736	117.599		0.122551	85.0149
3.0949	86.432	91.141	72.883	62.521	79.203	84.822	76.372	63.929	79.151	52.288	70.1543	59.0869	56.749	66.3	62.372	61.247	68.89	137.993	92.326	65.874	73.697	116.81	134.036	65.468	103.673	108.851		0.127451	80.4719
3.2139	76.251	88.214	68.976	79.763	73.134	66.452	60.943	66.484	65.178	61.523	81.872	50.7911	66.1445	59.717	63.573	46.566	70.521	149.677	73.676	88.177	58.12	108.973	124.073	74.343	92.817	82.387		0.132352	76.8594
3.333	76.419	85.602	62.545	51.597	60.654	83.089	56.365	57.145	64.402	68.209	75.7192	53.6707	69.1313	58.186	52.164	51.853	65.296	126.89	78.35	59.314	71.198	107.613	109.584	92.422	95.194	91.89		0.137257	74.0193
3.452	73.25	77.855	59.069	65.034	59.612	79.106	62.509	65.3	73.954	50.912	89.3004	49.2558	66.199	64.401	45.839	55.277	64.58	112.004	68.455	72.549	61.907	104.017	110.872	63.061	81.73	79.921		0.142157	71.3834
3.571	74.657	67.763	57.656	60.743	62.44	68.752	67.637	45.211	44.001	58.916	74.9292	51.2598	48.4853	38.869	48.151	48.789	59.018	111.487	80.497	70.527	49.593	105.633	115.539	92.144	98.544	85.671		0.147058	68.7274
3.6901	62.613	69.072	58.964	50.209	59.931	70.504	49.83	52.07	49.676	61.401	80.5868	56.4007	59.4796	36.288	34.789	51.204	51.102	129.164	56.943	59.678	49.901	105.857	78.758	87.967	68.53	102.604		0.151962	65.1355
3.8091	59.093	54.444	65.908	43.413	52.121	52.986	49.913	34.615	70.977	55.186	56.533	51.9322	64.2666	44.638	39.288	48.401	47.91	106.449	53.632	57.958	47.258	115.791	83.533	86.423	79.223	79.214		0.156863	61.581
3.9281	47.136	55.078	46.799	48.58	37.72	78.737	46.024	33.119	39.845	54.822	66.5591	60.041	61.8752	60.256	37.803	50.679	55.499	123.079	57.491	53.212	52.267	109.635	86.112	78.191	69.318	103.976		0.161763	62.0713
4.0472	51.013	51.097	52.993	40.148	42.617	53.013	47.446	54.554	51.074	62.055	69.8135	50.5624	46.3728	53.611	37.87	43.418	51.653	96.706	62.049	48.54	48.52	86.483	88.778	86.57	59.895	86.446		0.166668	58.5884
4.1662	57.509	46.132	39.37	34.34	54.762	66.865	37.028	40.106	46.199	74.199	54.3793	42.9718	54.3438	45.91	25.895	41.795	44.737	101.358	58.526	49.29	54.103	89.324	65.357	64.591	70.731	74.84		0.171569	55.1793
4.2852	48.039	48.186	60.077	34.828	44.451	51.601	50.408	48.529	48.856	50.557	58.9863	59.2438	48.5977	30.879	30.98	55.913	39.842	85.841	58.49	50.55	54.905	99.744	53.29	77.347	75.368	64.83		0.176469	55.013
4.4043	55.446	51.442	46.69	49.483	50.544	38.476	48.954	38.174	39.175	56.614	60.2913	48.9586	62.9487	65.964	48.152	43.996	48.54	77.974	45.776	47.41	47.412	76.639	65.912	58.734	70.572	77.571		0.181374	54.6865
4.5233	58.63	59.648	32.592	40.541	28.677	43.177	34.118	46.149	30.473	49.956	51.6369	56.304	58.1881	45.918	50.31	33.967	40.219	68.594	55.105	59.889	44.884	71.447	53.735	51.984	65.727	60.539		0.186274	49.708
4.6423	51.327	55.184	40.684	52.81	48.194	47.146	50.356	40.663	50.03	56.091	50.9148	52.3003	47.7972	42.674	42.193	44.635	33.715	61.381	48.56	38.891	35.121	60.801	52.736	57.836	52.743	52.735		0.191175	48.7507
4.7614	35.221	62.868	44.651	68.915	33.527	44.678	31.778	37.885	37.762	66.706	55.1129	62.553	53.1562	48.594	37.1	39.568	24.273	62.505	35.476	47.607	39.099	68.652	59.928	47.775	48.741	44.429		0.19608	47.6369
4.8804	39.213	43.772	55.593	48.611	42.741	44.939	36.814	48.725	44.643	58.697	46.7887	54.3592	55.3776	39.28	34.888	37.328	38.237	66.146	43.387	51.012	45.398	61.344	40.335	57.754	59.872	51.288		0.20098	47.9439
4.9995	31.832	46.349	40.857	46.321	35.574	49.111	40.211	48.548	41.913	60.672	41.6815	51.3796	53.4738	35.74	38.338	30.043	39.979	62.055	39.461	50.255	37.753	44.464	49.007	50.442	71.398	47.151		0.205885	45.5388
5.1185	33.155	49.808	40.696	48.147	44.785	45.885	36.385	45.647	40.684	60.628	46.0135	29.8929	55.5573	38.429	41.842	37.579	40.385	48.982	39.916	41.454	39.417	54.984	35.09	72.63	69.599	62.497		0.210785	46.1572
5.2375	37.795	41.689	37.465	59.388	32.655	48.546	28.3	47.483	45.572	55.111	43.7557	57.9665	54.8436	50.166	40.783	34.678	27.082	49.898	37.304	38.988	30.349	52.806	48.875	62.116	87.944	54.487		0.215686	46.3864
5.3566	36.836	44.185	43.233	40.229	41.355	37.452	48.108	35.39	50.271	65.112	47.775	44.6474	51.8319	47.327	35.519	24.361	30.662	49.594	39.298	44.196	37.919	36.055	46.797	58.821	54.903	56.435		0.220591	44.1659
5.4756	32.682	47.805	47.584	50.582	34.222	43.638	38.752	56.51	44.463	55.676	46.3768	46.7522	57.5945	36.518	48.992	23.207	27.68	62.112	34.538	42.582	32.058	36.301	41.238	50.693	48.873	47.612		0.225491	43.6554
5.5946	41.057	49.248	43.303	46.532	54.913	33.12	49.88	42.106	44.358	58.361	39.2802	56.9513	52.4491	45.876	34.239	31.264	26.2	51.138	40.773	46.765	30.603	38.284	35.497	43.312	56.218	55.886		0.230392	44.139
5.7137	34.746	35.69	36.15	29.124	37.422	32.147	37.255	54.901	58.478	40.376	41.6748	42.2699	49.7865	30.992	35.274	29.399	14.957	70.775	40.376	43.302	36.276	42.828	37.924	63.248	50.526	39.633		0.235296	40.9819
5.8327	42.739	43.759	42.086	53.724	32.419	32.582	34.983	67.655	59.397	49.605	38.6155	37.1041	54.7363	47.439	38.218	33.029	34.4	57.718	25.345	31.384	45.222	25.978	33.605	44.278	53.382	61.661		0.240197	43.1178
5.9517	42.107	38.132	55.879	47.157	37.707	39.274	38.984	56.171	54.356	57.173	39.0869	35.5846	50.8263	35.56	33.744	30.754	21.748	59.696	40.901	42.411	46.13	35.113	26.639	40.109	46.144	56.194		0.245097	42.5993
6.0708	33.87	43.053	59.165	41.165	46.048	30.783	45.15	56.272	60.198	40.823	37.8675	50.8786	39.5572	47.909	44.857	35.849	22.973	61.412	40.505	47.869	44.231	43.159	29.075	39.399	46.426	50.867		0.250002	43.8216
6.1898	41.405	44.933	58.56	45.783	48.85	44.138	41.367	61.364	62.742	47.125	34.0795	43.3871	41.7762	35.414	37.642	24.524	26.95	60.142	31.35	35.506	36.871	42.074	35.237	24.759	39.773	41.593		0.254903	41.821
6.3088	72.395	47.705	52.232	43.528	51.268	35.142	37.521	49.281	49.898	40.52	47.8496	46.0944	34.6613	51.743	29.956	35.448	30.451	51.064	28.307	40.799	32.437	51.997	36.165	56.651	48.305	42.105		0.259803	43.9817
6.4279	44.412	50.367	59.502	29.159	49.697	35.14	47.413	50.591	50.897	44.026	36.3985	58.7043	32.7098	46.068	44.275	31.167	27.68	45.569	25.245	51.997	35.804	46.89	34.551	35.893	44.137	48.142		0.264708	42.5552
6.5469	51.405	41.162	46.474	42.326	51.882	34.366	61.739	58.533	61.287	50.697	42.1098	48.7593	35.3329	36.413	41.787	34.645	33.175	62.702	23.998	36.702	42.815	39.993	34.406	36.399	31.983	34.332		0.269608	42.9009
6.6659	47.995	42.178	44.871	52.201	45.464	28.677	58.441	66.436	64.404	40.454	39.3799	36.7238	43.335	31.641	37.475	23.951	39.885	43.806	35.088	41.041	33.091	31.863	25.442	38.124	32.988	31.237		0.274509	40.6228
6.785	53.944	48.447	61.709	47.165	55.865	29.342	53.41	60.991	56.772	45.27	37.4311	41.0687	47.3466	42.306	58.187	32.659	41.105	51.917	30.043	30.854	39.988	45.718	30.289	41.563	38.632	44.908		0.279414	44.8819
6.904	53.724	44.514	60.701	45.647	54.662	30.585	61.2	57.009	57.195	50.065	41.4358	39.3222	30.7848	43.058	46.313	30.29	47.9	48.258	28.656	44.048	41.107	37.94	13.884	49.89	45.536	39.473		0.284314	43.9691
7.023	45.468	38.908	56.463	46.084	53.86	37.032	52.906	55.684	73.932	42.341	43.7415	19.9324	40.9504	31.384	59.559	25.435	43.911	50.045	22.672	34.709	47.425	33.285	25.546	45.384	36.149	43.288		0.289215	42.5421
7.1421	61.98	42.566	36.054	35.317	49.205	22.674	63.668	58.258	48.18	38.31	27.8611	46.1736	39.6164	32.99	43.767	31.167	40.318	46.895	22.396	55.376	38.725	31.012	25.248	44.29	51.49	42.989		0.294119	41.4049
7.2611	45.62	46.376	51.362	45.019	45.488	36.552	56.513	70.016	63.325	45.936	39.2887	31.9	35.5494	33.431	44.672	21.24	32.43	33.212	37.229	35.208	41.506	35.382	22.3	37.252	62.021	45.29		0.29902	42.0815
7.3801	45.469	39.746	44.926	37	46.619	47.333	47.425	45.429	63.345	47.586	52.2393	49.3379	36.0231	47.28	43.594	27.765	45.141	45.925	18.688	43.674	31.429	40.308	19.249	55.645	43.143	41.892		0.30392	42.5466
7.4992	50.395	42.222	47.74	42.234	46.521	41.062	38.9	64.903	45.898	39.057	41.0001	45.2381	39.49	37.984	46.095	29.402	38.355	43.916	26.156	49.484	25.012	38.992	14.001	42.858	33.587	35.531		0.308825	40.232
7.6182	63.165	43.573	46.318	36.621	45.281	46.124	44.31	55.676	46.559	37.154	38.4512	46.6353	29.794	38.178	38.278	35.661	40.478	28.839	22.961	41.513	40.994	42.456	29.119	41.616	44.823	48.957		0.313726	41.2898
7.7372	52.808	47.817	49.738	32.953	61.817	44.151	59.538	67.357	56.862	44.13	45.451	41.1625	44.7082	39.509	50.967	32.637	39.017	34.15	26.224	32.788	39.697	34.472	21.206	36.209	46.849	63.589		0.318626	44.0695
7.8563	48.835	45.147	39.977	34.816	43.58	42.962	59.423	55.503	44.467	40.93	35.2056	49.1298	37.6462	33.908	48.697	50.16	47.839	46.404	25.43	40.974	39.748	36.637	36.241	37.88	42.625	40.758		0.323531	42.497
7.9753	40.024	42.534	48.995	37.227	45.008	41.412	56.389	63.727	50.906	53.235	41.5408	31.7092	27.1384	37.881	34.04	44.287	50.705	57.753	33.339	38.326	40.102	42.821	23.2	30.724	48.446	46.853		0.328431	42.6278
8.0943	33.044	50.055	37.421	38.603	50.462	53.56	47.08	61.853	54.33	54.619	31.4763	45.7186	28.3491	29.644	29.544	47.787	50.74	43.37	21.062	34.234	35.717	46.58	24.024	34.853	39.891	39.796		0.333332	40.9159
8.2134	32.859	52.032	31.747	44.681	53.615	57.101	50.54	56.444	53.591	38.863	40.1852	42.685	48.2605	31.733	29.531	39.5	39.001	59.933	41.05	49.027	43.594	29.446	27.011	37.443	41.275	44.298		0.338237	42.9018
8.3324	42.058	43.962	42.158	58.186	48.74	38.93	47.932	28.024	45.045	44.939	36.1472	62.4734	33.3541	27.05	34.499	36.5	45.271	51.785	25.807	21.209	30.028	31.817	21.382	46.405	38.658	49.636		0.343137	39.6921
8.4515	30.04	55.147	46.891	41.052	39.408	47.003	49.915	46.307	54.44	56.224	44.0722	51.1395	38.7192	40.206	24.74	33.139	45.096	46.797	28.417	31.013	24.925	37.232	34.806	33.953	32.828	46.56		0.348042	40.7719
8.5705	34.002	35.168	32.891	37.834	32.206	48.651	53.078	48.734	49.285	45.386	34.205	59.9551	39.0421	30.475	30.269	47.625	54.068	44.377	33.225	28.407	31.729	44.131	35.493	45.066	41.868	40.186		0.352942	40.6675
8.6895	28.487	29.414	50.282	50.766	46.423	46.581	65.918	38.711	44.088	49.905	46.7428	43.0106	30.2803	24.85	22.424	46.03	49.347	43.994	24.606	25.822	36.882	22.315	30.189	37.763	39.127	55.789		0.357843	39.6056
8.8086	34.037	23.959	38.924	50.007	49.715	39.022	67.655	30.95	48.95	45.266	35.4572	46.8213	38.0921	41.287	35.159	45.086	42.733	37.277	22.182	28.274	27.876	40.792	26.068	44.819	34.557	31.61		0.362748	38.7144
8.9276	40.997	31.634	44.63	39.92	36.188	47.297	60.796	36.09	50.024	51.364	36.6168	42.0998	38.0394	23.032	37.553	40.847	51.101	36.944	20.564	19.529	40.052	31.847	30.3	34.365	38.785	34.368		0.367648	38.2686
9.0466	35.467	42.296	38.121	41.877	39.077	53.925	52.405	48.985	44.388	39.512	30.5148	45.5566	38.2723	24.331	16.087	34.21	55.419	36.51	23.154	27.991	32.506	26.705	25.138	34.827	50.251	32.262		0.372549	37.2995
9.1657	41.387	47.634	27.045	38.66	35.446	40.31	58.988	36.68	38.374	37.746	31.5151	45.2904	28.1349	27.49	21.614	37.4	57.762	45.605	21.958	34.863	44.763	28.372	37.779	33.104	35.786	28.774		0.377453	37.0185
9.2847	35.72	32.042	43.218	38.888	36.443	41.147	46.714	54.795	42.842	35.031	34.7412	36.7945	39.6064	35.535	14.992	43.097	57.023	37.451	24.211	32.867	23.753	42.874	20.162	31.457	27.398	17.021		0.382354	35.6086
9.4037	41.414	41.786	49.392	41.062	33.982	53.535	50.289	56.268	39.005	30.756	34.3691	38.0816	32.6314	34.33	26.531	42.281	62.834	46.971	17.551	30.516	36.068	39.159	26.897	26.657	37.18	28.062		0.387254	38.3695
9.5228	32.149	44.42	32.569	38.914	38.99	37.556	37.932	46.06	44.968	29.962	27.7551	29.1942	29.9613	15.542	18.234	45.943	60.28	51.897	20.355	34.269	28.188	21.085	18.97	30.752	37.83	21.51		0.392159	33.6648
9.6418	30.861	37.994	46.88	41.147	51.818	40.72	55.974	51.019	55.177	44.484	30.6762	38.9355	34.8528	22.908	21.22	35.629	43.72	30.55	38.411	32.092	26.482	44.942	27.786	23.54	35.157	29.367		0.39706	37.3978
9.7608	37.634	34.603	46.517	37.56	28.47	40.546	42.066	43.715	38.889	36.473	44.4824	38.3663	33.8165	27.783	21.406	30.919	51.04	30.429	21.621	27.421	39.098	25.859	14.943	22.782	20.907	27.42		0.40196	33.2602
9.8799	34.961	28.923	38.328	22.01	42.366	45.807	29.748	38.312	57.734	32.319	27.2692	33.239	27.7725	26.853	17.167	23.863	43.636	35.108	23.25	33.09	24.481	30.609	20.807	32.498	27.737	30.092		0.406865	31.8454
9.9989	31.203	37.387	34.262	32.647	35.662	32.365	53.589	40.644	43.816	39.38	33.3614	36.2001	22.5317	18.665	22.713	27.112	43.31	33.719	27.256	27.502	33.119	30.179	22.033	27.264	24.974	32.131		0.411765	32.424
10.1179	28.155	35.041	37.916	41.295	43.225	39.175	34.524	39.624	44.943	37.205	16.1753	35.3622	37.2803	23.434	13.185	24.594	42.602	16.36	24.428	34.113	26.949	30.337	33.416	23.195	22.268	22.767		0.416666	31.0603
10.237	24.184	35.891	33.931	46.605	53.276	25.911	29.48	31.021	38.938	47.857	26.4374	33.8865	23.296	26.938	17.027	31.833	35.105	35.47	23.26	36.14	30.616	27.142	20.236	15.471	23.743	24.314		0.421571	30.6927
10.356	31.832	32.496	25.962	27.642	38.679	22.056	16.146	27.383	46.681	23.225	26.5338	39.4637	23.8591	14.1	20.633	18.974	44.603	33.178	20.213	11.225	25.451	23.318	20.075	20.671	21.121	20.219		0.426471	25.99
10.475	30.872	41.268	39.411	34.744	28.537	38.605	29.779	35.03	37.022	32.199	23.0701	48.3525	21.0356	24.071	12.235	9.426	24.809	35.03	33.701	24.195	13.422	27.068	18.203	22.903	22.173	19.655		0.431372	27.9545
10.5941	20.825	33.011	40.285	30.702	48.699	21.665	28.978	50.554	54.725	40.559	34.1986	32.4694	15.7813	13.214	12.851	21.916	33.789	32.523	25.771	17.255	20.891	20.411	25.665	25.437	19.247	26.061		0.436276	28.7494
10.7131	27.157	36.636	25.087	36.28	30.709	24.959	32.566	39.714	42.368	46.119	25.0967	42.984	31.3188	21.42	11.235	25.928	32.666	29.126	22.941	18.201	24.93	15.581	23.929	17.752	13.351	24.257		0.441177	27.7812
10.8321	37.222	31.955	33.922	30.659	29.07	28.398	24.474	32.536	47.007	36.147	27.7577	36.781	25.4566	20.539	15.152	24.485	37.453	34.253	19.835	14.364	24.172	29.402	32.672	15.901	13.848	25.119		0.446078	28.0223
10.9512	36.901	30.825	48.063	32.676	29.271	39.136	25.292	37.687	38.998	28.05	37.7852	36.646	22.0797	22.958	11.66	10.29	34.384	29.272	24.5	17.449	14.574	24.683	20.011	24.925	14.541	27.652		0.450982	27.7042
11.0702	25.323	33.684	35.544	31.825	27.242	43.924	30.779	28.97	41.602	33.186	41.8793	38.8407	20.1778	20.489	10.931	16.139	46.114	24.016	17.127	19.571	20.147	15.751	30.05	19.416	15.764	18.63		0.455883	27.197
11.1892	19.232	28.09	33.355	30.014	27.486	42.882	27.158	29.102	49.378	47.386	30.9167	24.1621	32.5835	26.746	21.029	19.78	59.268	18.76	34.193	18.912	24.18	25.889	25.33	18.08	10.285	22.756		0.460783	28.729
11.3083	19.969	35.288	44.278	42.688	28.889	28.223	22.546	30.008	39.963	32.268	52.9666	43.9794	21.2947	13.412	13.409	16.797	54.308	20.256	19.677	18.447	22.86	25.033	28.336	20.08	17.072	21.978		0.465688	28.2318
11.4273	21.135	37.686	38.396	31.633	28.008	36.515	20.902	34.935	50.911	58.252	39.5304	27.378	27.2171	27.804	12.745	10.242	31.834	26.664	25.085	32.563	16.928	17.804	26.018	15.665	21.325	21.694		0.470588	28.4181
11.5463	25.991	30.824	31.832	35.38	36.921	19.045	19.973	38.686	43.009	48.004	34.4794	28.4577	20.8989	9.415	18.232	9.931	34.599	24.781	23.077	15.108	16.498	18.856	15.604	18.687	13.229	18.992		0.475489	25.0196
11.6654	28.672	28.828	37.635	34.777	42.116	30.086	20.701	32.64	52.241	39.278	31.6279	36.1806	23.2359	25.527	15.143	15.069	32.503	20.713	22.188	19.481	19.45	11.967	20.666	18.026	15.207	25.531		0.480394	26.9034
11.7844	29.119	35.867	28.85	31.424	49.266	32.255	27.215	25.526	42.663	50.617	31.9735	35.0321	29.1068	27.167	17.272	15.086	38.545	24.799	21.928	20.691	14.884	23.814	16.579	30.905	17.34	23.894		0.485294	28.5315
11.9035	29.577	18.004	29.141	31.298	49.061	25.724	26.398	24.449	38.053	38.063	25.8604	29.1862	26.1443	17.805	10.073	6.723	27.647	25.104	23.307	16.396	17.455	15.157	24.801	18.195	6.272	22.945		0.490199	23.9553
12.0225	22.506	23.32	26.596	42.86	48.811	24.84	20.091	25.988	43.306	31.835	22.4214	34.4388	25.0631	13.887	14.892	6.64	21.102	24.525	17.52	21.924	19.513	16.005	22.017	16.348	13.709	13.241		0.495099	23.5923
12.1415	19.644	23.284	27.197	26.585	40.144	29.132	32.43	32.581	42.793	32.398	36.436	22.3889	25.8861	18.295	15.233	20.06	19.289	25.333	17.408	10.981	17.657	13.725	21.093	15.877	8.476	12.435		0.5	23.337
12.2606	18.499	36.085	27.214	25.047	45.485	24.904	31.282	13.539	35.055	40.289	21.0591	31.2713	18.3017	10.611	14.803	16.998	28.85	27.096	18.787	24.459	19.809	12.118	15.999	16.059	15.408	16.97		0.504905	23.3076
12.3796	17.922	21.198	31.515	33.118	38.419	28.389	19.308	24.244	28.161	29.662	44.696	25.9151	31.3278	19.243	7.006	21.379	16.203	24.332	16.523	22.843	18.802	12.759	10.367	24.257	11.179	16.497		0.509805	22.8948
12.4986	20.115	24.265	34.545	24.537	45.458	26.263	15.869	18.262	36.321	43.644	32.7676	32.2298	28.7637	13.658	10.996	10.882	27.447	24.867	25.232	14.93	18.308	23.588	29.829	16.231	14.045	12.274		0.514706	24.051
12.6177	24.142	25.888	29.51	35.533	29.078	29.204	17.296	24.616	41.634	37.651	25.7849	30.2885	26.7091	13.516	11.392	9.928	23.681	26.486	19.23	19.309	9.654	27.77	16.493	24.387	8.751	13.005		0.51961	23.1129
12.7367	30.819	36.349	33.286	34.931	35.577	18.962	10.916	19.346	36.523	31.209	20.6611	24.8757	12.8429	20.786	8.939	15.853	9.268	13.359	23.153	20.121	13.294	12.229	19.918	15.325	11.938	17.456		0.524511	21.0745
12.8557	24.128	21.761	26.333	27.1	49.396	11.006	15.205	26.443	33.385	30.159	39.9033	30.3912	21.7155	15.851	10.69	9.946	23.832	16.235	18.469	20.401	15.241	8.189	14.957	5.857	7.868	13.447		0.529412	20.6888
12.9748	22.137	32.502	21.303	29.578	22.15	28.771	20.57	24.524	32.822	37.902	28.4732	26.0719	20.5122	11.974	11.872	5.589	15.305	23.94	10.588	17.395	17.119	12.509	9.345	14.878	6.055	13.601		0.534316	19.9033
13.0938	20.306	34.965	27.165	25.329	20.028	21.842	18.341	24.334	42.985	26.703	27.3029	20.5411	28.4206	13.519	9.382	15.852	22.628	36.346	19.976	18.441	18.18	17.431	23.591	17.372	13.804	9.195		0.539217	22.0761
13.2128	31.611	35.127	24.061	23.3	34.65	29.686	16.342	21.216	36.725	21.53	36.5007	22.6496	26.9366	17.178	12.668	10.138	21.951	17.685	20.905	8.858	16.371	24.78	15.679	21.99	11.906	12.015		0.544117	22.0176
13.3319	25.377	24.653	26.374	29.666	36.41	25.126	11.923	18.466	35.003	26.447	20.5718	20.862	19.65	16.283	9.48	8.607	18.003	20.284	8.328	14.925	11.832	20.069	13.535	10.125	10.511	10.01		0.549022	18.9431
13.4509	24.047	28.164	19.236	36.614	35.8	22.271	11.615	23.485	40.22	39.507	16.5579	31.7152	19.4166	10.013	18.249	10.046	16.6	12.694	17.406	15.374	12.886	15.944	12.346	6.542	7.525	10.405		0.553922	19.7953
13.5699	19.078	25.329	29.279	30.801	29.523	25.345	20.814	12.981	33.815	42.983	20.6736	21.4975	11.1965	15.504	11.68	12.022	25.411	27.657	11.262	15.256	12.234	12.093	10.745	9.001	12.115	10.644		0.558823	19.5746
13.689	23.755	23.677	24.674	24.257	41.821	17.704	11.746	19.544	35.702	33.549	24.9069	21.2611	21.96	6.681	6.455	9.594	25.125	17.395	15.14	10.007	4.198	15.659	7.025	10.496	4.909	13.864		0.563728	18.1194
13.808	24.611	27	14.694	18.635	30.343	21.963	15.469	18.508	35.609	35.666	31.8164	23.1156	20.3295	15.458	7.109	17.273	19.099	18.244	9.87	11.282	11.719	10.117	14.013	9.923	6.932	6.004		0.568628	18.2616
13.927	29.183	27.471	34.599	20.279	25.451	29.586	20.999	20.323	33.912	37.968	34.1564	33.2995	11.7818	17.53	7.467	12.432	26.123	19.911	11.503	11.161	12.363	14.711	7.548	10.713	11.664	6.557		0.573529	20.3343
14.0461	17.505	31.441	17.134	22.856	20.532	28.622	25.626	12.957	24.726	35.281	33.4202	24.2453	28.6373	5.756	15.421	13.051	22.355	22.745	21.237	15.651	9.202	11.913	14.794	16.052	10.733	11.129		0.578433	19.7316
14.1651	22.549	25.304	20.081	30.215	27.598	29.637	13.288	14.722	32.511	38.599	32.7602	26.9248	23.9806	17.948	7.925	11.264	18.574	15.003	11.083	13.867	9.32	12.343	5.058	8.971	6.35	12.099		0.583334	18.7683
14.2841	20.098	22.735	23.991	13.143	28.896	24.943	13.562	13.663	27.43	23.702	30.7126	23.6979	14.4149	10.169	13.748	7.876	19.02	13.737	18.195	11.631	13.355	14.377	11.147	4.25	6.601	5.567		0.588235	16.5639
14.4032	16.03	30.308	24.877	18.304	22.764	31.261	15.275	24.35	25.332	26.965	17.5452	25.9456	15.6128	18.131	8.09	10.622	13.254	13.921	13.247	7.594	14.603	14.167	9.476	10.082	5.811	6.819		0.593139	16.9379
14.5222	22.451	15.981	21.783	27.196	27.248	31.314	16.85	21.685	22.05	23.247	26.9322	18.6393	14.962	14.739	12.196	7.752	15.456	10.348	11.562	5.153	17.626	9.714	9.813	9.804	5.609	6.971		0.59804	16.4262
14.6412	18.219	16.451	31.568	22.119	22.859	17.553	20.287	10.976	27.296	18.531	40.2396	20.6356	23.4309	7.671	12.013	7.961	22.382	18.614	11.68	8.89	10.218	7.423	6.853	1.177	6.591	9.474		0.60294	16.1966
14.7603	13.154	28.252	25.21	31.259	25.2	25.247	17.061	17.266	23.393	20.954	37.1956	26.6973	23.0578	7.377	12.233	6.602	25.129	19.199	4.596	10.46	12.576	5.071	5.931	12.534	2.871	6.413		0.607845	17.113
14.8793	23.021	22.282	19.104	22.673	27.433	22.294	19.142	18.272	33.587	20.325	35.6969	14.1225	17.087	15.396	5.809	22.042	16.142	16.106	18.088	19.572	12.53	15.493	9.129	15.565	6.229	7.094		0.612746	18.2398
14.9984	17.021	17.35	34.496	31.161	26.082	24.065	11.995	22.075	25.06	17.297	30.5381	12.8401	20.9346	17.744	15.274	8.405	16.093	15.307	10.386	10.329	12.71	8.374	15.467	14.288	8.503	7.157		0.61765	17.3443
15.1174	25.15	7.168	25.928	30.796	24.629	27.148	11.307	18.876	28.212	28.555	32.3197	11.5426	13.0768	10.013	6.938	6.537	11.988	11.142	11.513	9.123	8.783	12.423	11.962	11.172	6.854	5.599		0.622551	15.7213
15.2364	15.606	20.803	22.503	19.139	24.737	30.976	18.438	17.62	27.899	27.766	19.8444	22.9688	23.7843	9.717	11.658	9.448	19.812	14.879	4.426	16.533	6.411	11.495	8.961	7.762	11.954	10.035		0.627451	16.7375
15.3555	17.241	20.601	18.307	26.089	24.688	31.761	15.789	23.788	24.327	40.927	27.9468	23.5688	12.0036	14.767	9.058	8.79	12.393	17.488	13.741	8.928	8.23	9.923	14.415	17.369	10.001	4.539		0.632356	17.5646
15.4745	26.594	18.032	32.76	19.35	27.714	18.955	15.908	24.596	20.569	28.118	23.9764	22.1627	10.598	12.982	12.02	12.34	13.456	11.787	16.127	11.2	10.572	16.163	13.198	7.203	8.818	8.63		0.637257	17.0703
15.5935	20.679	23.425	26.506	21.26	21.117	26.681	13.31	12.238	18.638	20.91	20.8376	19.6471	23.5343	20.539	4.468	12.395	26.432	10.439	15.018	7.668	10.871	18.612	14.698	11.848	4.645	5.823		0.642157	16.6246
15.7126	18.244	18.094	27.119	21.251	24.484	28.801	13.383	11.27	15.533	15.577	12.8046	21.2163	13.0724	7.95	10.409	9.101	15.76	13.06	8.918	8.985	12.473	7.63	12.424	5.878	12.49	4.528		0.647062	14.2483
15.8316	19.791	23.517	13.273	18.492	28.124	13.237	9.707	11.637	15.256	14.601	30.2052	17.1819	23.4147	10.439	10.901	13.687	19.108	14.97	6.777	6.924	7.746	12.493	13.335	8.679	6.393	4.623		0.651962	14.4043
15.9506	23.434	16.831	22.314	31.851	29.442	14.428	11.971	9.94	26.881	21.843	30.1464	12.736	21.8157	12.347	5.861	5.151	15.184	13.507	20.596	13.42	3.529	14.431	17.913	8.292	15.252	9.186		0.656863	16.4732
16.0697	20.128	23.798	27.852	25.27	28.109	20.163	14.184	18.8	13.167	24.423	35.1512	22.9206	21.2804	10.741	9.438	9.857	12.563	11.057	15.113	8.825	9.672	8.615	8.913	11.531	14.776	9.533		0.661767	16.7646
16.1887	19.495	18.905	22.456	12.717	16.596	13.997	18.748	16.683	16.402	20.379	22.1371	23.5905	20.9846	11.393	12.017	9.094	5.993	8.775	17.767	6.192	6.528	7.551	6.808	7.752	4.99	9.972		0.666668	13.7662
16.3077	19.08	20.65	33.536	16.196	28.821	17.809	16.206	8.778	17.86	18.534	21.2741	16.7046	19.0865	10.818	14.815	8.873	15.852	5.618	13.798	10.28	7.032	11.586	3.117	13.754	6.205	10.47		0.671569	14.8751
16.4268	25.809	13.367	36.337	33.545	24.387	15.435	12.413	14.599	25.088	17.895	17.8004	14.0924	20.7215	15.462	8.815	11.871	12.068	10.122	20.052	5.55	4.123	11.83	7.606	9.978	0.861	6.54		0.676473	15.2449
16.5458	23.01	18.709	34.443	13.917	15.355	20.83	7.914	16.481	26.526	23.717	29.7036	13.2128	25.3119	12.995	5.396	9.624	14.178	18.353	4.579	7.059	7.896	9.364	6.873	3.669	5.623	10.142		0.681374	14.8031
16.6648	24.316	27.646	24.582	26.106	18.266	22.225	13.679	17.905	19.923	16.113	19.7128	20.2032	11.7515	10.732	12.684	11.419	16.069	8.033	11.889	8.352	5.454	9.185	5.172	7.936	7.821	4.415		0.686274	14.6765
16.7839	40.281	24.5	42.548	13.314	18.382	20.848	10.538	8.524	27.507	15.806	22.6638	10.6249	15.0503	11.615	8.151	6.253	14.969	12.247	10.659	9.693	7.821	3.171	7.739	11.283	2.848	9.069		0.691179	14.8502
16.9029	25.377	22.144	18.902	31.437	27.725	27.464	8.112	17.275	22.185	22.805	20.655	18.2469	22.0895	9.102	7.732	9.447	17.695	10.352	10.483	13.213	6.271	7.346	10.735	4.937	6.214	5.306		0.69608	15.5096
17.0219	20.507	23.765	24.307	22.591	28.626	14.707	12.906	14.625	21.252	19.613	37.6729	21.7383	13.4571	12.778	13.752	9.009	24.534	12.531	8.387	5.161	8.768	7.231	13.273	12.128	10.077	12.764		0.70098	16.3908
17.141	22.235	12.529	45.924	19.323	26.671	21.836	13.76	20.252	18.514	18.102	29.0548	29.0325	27.9278	17.903	11.245	6.636	18.24	10.027	8.468	7.295	9.763	14.773	7.989	14.053	4.247	15.372		0.705885	17.3528
17.26	29.847	23.752	38.842	25.775	19.04	13.499	11.001	12.072	18.625	26.288	20.7364	23.705	15.465	13.167	9.601	7.04	9.384	9.506	11.769	6.563	6.418	8.762	4.484	7.809	4.458	3.879		0.710785	14.6726
17.379	21.468	19.344	35.783	33.254	16.528	18.973	7.9	12.459	27.86	12.546	25.8513	15.9923	21.4173	7.813	11.411	7.364	8.479	20.572	8.436	13.637	12.47	12.971	6.033	14.089	7.957	8.941		0.715686	15.7519
17.4981	22.292	13.72	38.026	28.132	21.257	23.982	21.754	18.803	24.383	25.943	23.1987	21.4149	26.3692	10.025	10.346	6.312	15.578	15.74	10.082	5.881	10.861	4.883	6.345	9.894	3.375	8.454		0.720591	16.425
17.6171	19.963	16.878	38.592	32.29	22.058	16.923	7.457	16.296	19.581	16.195	23.1867	29.9272	16.4573	13.808	7.069	8.319	16.12	15.169	8.533	6.724	3.356	2.484	7.837	12.777	10.067	6.268		0.725491	15.1667
17.7361	25.912	20.318	29.016	26.919	27.891	18.437	14.508	18.502	33.769	11.8	18.2733	23.8108	21.7313	9.162	13.043	9.32	11.373	11.102	9.986	7.628	5.341	6.315	5.118	9.611	9.56	3.253		0.730392	15.45
17.8552	14.802	20.267	34.46	24.778	22.177	18.054	24.549	24.217	21.587	16.61	18.9324	17.5974	18.1695	15.314	9.134	11.719	10.464	8.401	6.713	14.841	16.817	9.677	3.89	7.979	3.883	12.299		0.735296	15.6666
17.9742	19.679	18.27	25.646	24.859	34.748	19.324	16.015	14.899	12.247	19.591	18.2673	12.036	30.3246	16.608	6.994	4.782	15.275	10.76	8.083	5.86	5.924	3.017	4.213	10.964	2.773	3.743		0.740197	14.0347
18.0932	21.608	19.904	42.548	28.324	27.839	17.774	18.262	10.864	23.015	9.975	19.0333	19.1062	31.8292	14.615	12.917	11.687	6.522	3.494	11.893	4.048	9.914	7.989	4.678	6.668	3.428	9.469		0.745097	15.2848
18.2123	27.385	22.778	29.924	20.832	28.844	26.622	13.457	7.903	14.284	13.402	10.2565	16.5648	40.5701	12.912	9.017	18.116	11.35	13.039	5.138	4.748	8.225	5.577	9.724	9.376	6.709	10.096		0.750002	15.2634
18.3313	21.051	27.749	31.079	25.183	37.556	23.302	14.828	16.751	14.391	16.173	17.6236	8.9653	24.6057	17.685	11.097	8.357	9.189	10.176	7.748	1.935	7.717	7.574	2.733	7.982	5.95	5.764		0.754903	14.7371
18.4504	16.865	21.671	31.261	28.641	34.03	30.251	11.443	17.021	13.479	11.255	16.9304	19.3645	24.1879	14.5	6.293	8.883	17.617	6.373	8.861	9.466	9.728	7.433	6.842	6.444	4.136	7.839		0.759807	15.0313
18.5694	24.947	19.347	22.263	28.682	26.6	21.596	19.699	13.769	17.372	19.977	16.3286	17.3436	28.3944	10.269	10.565	7.257	10.552	6.328	10.781	8.507	11.926	5.572	2.053	7.319	13.694	3.695		0.764708	14.8014
18.6884	26.224	21.384	24.343	24.614	16.62	21.415	18.08	11.769	14.522	16.501	25.2584	5.1904	25.327	15.303	7.099	10.601	11.931	7.302	5.645	6.395	6.82	9.775	2.236	8.944	14.321	8.358		0.769608	14.0761
18.8075	28.574	26.498	31.83	20.786	21.304	23.407	29.411	12.864	22.669	10.482	18.5874	9.7011	18.8076	11.536	16.767	11.12	11.528	6.994	10.376	5.007	4.85	16.375	5.113	10.693	6.803	1.45		0.774513	15.1359
18.9265	24.361	20.556	19.668	22.121	21.449	24.263	12.873	10.691	16.779	21.684	25.8254	14.1733	25.2803	9.751	5.3	7.161	14.312	4.827	4.271	9.33	8.696	3.147	8.37	7.06	9.873	2.552		0.779414	13.6298
19.0455	19.596	21.869	31.334	20.017	13.793	13.543	13.931	14.105	21.123	12.239	9.3837	13.2751	17.6189	14.264	9.782	9.457	13.979	6.831	11.206	10.216	5.812	5.739	12.105	14.681	20.059	6.092		0.784314	13.925
19.1646	17.525	20.175	36.144	23.971	21.524	21.817	18.588	15.48	31.18	11.251	11.4677	8.7703	17.9522	17.277	14.852	3.41	13.972	7.392	6.9	9.82	4.918	11.19	12.886	5.801	9.034	5.786		0.789219	14.5801
19.2836	16.593	21.358	19.612	28.248	17.681	14.657	14.143	15.081	28.272	13.259	28.5474	14.1255	14.7615	15.283	4.487	10.615	6.104	5.995	7.888	7.186	6.296	6.77	7.64	8.363	4.208	7.552		0.794119	13.2587
19.4026	20.747	24.139	23.409	20.044	14.85	19.853	16.568	24.268	24.844	20.765	13.7374	26.696	20.3512	15.367	12.657	6.123	8.192	12.048	5.484	7.48	5.783	5.908	8.605	9.511	5.259	3.012		0.79902	14.45
19.5217	14.471	28.835	23.77	21.206	21.904	24.481	13.654	11.994	29.842	15.562	31.4659	14.623	22.9872	13.344	7.673	8.847	12.66	5.313	10.075	8.909	5.665	6.756	3.684	10.643	4.518	4.044		0.803925	14.4972
19.6407	24.671	30.138	19.867	19.06	14.727	19.206	22.004	15.186	21.083	16.487	28.4087	16.8528	10.6944	10.102	8.684	7.361	13.629	9.117	10.03	11.562	6.936	3.37	5.039	15.343	6.842	6.943		0.808825	14.3593
19.7597	18.812	23.091	9.24	11.997	13.183	22.7	11.012	19.263	22.073	13.604	18.2675	10.2986	13.476	6.784	9.986	12.414	6.883	6.515	7.271	4.369	3.736	4.63	13.799	14.895	5.796	10.163		0.813726	12.0868
19.8788	28.506	33.735	21.698	16.834	31.852	14.304	16.886	16.548	18.647	23.334	12.8304	17.2781	20.4216	15.508	8.117	16.861	10.636	6.389	5.154	10.649	6.488	4.82	8.813	9.371	12.37	7.01		0.81863	15.1946
19.9978	16.981	22.108	23.948	23.825	24.42	19.911	16.059	17.426	20.633	7.7	19.8966	14.4497	26.1819	6.082	7.248	15.86	12.525	4.862	6.67	15.492	1.325	10.034	3.06	8.434	4.824	14		0.823531	13.9983
20.1168	13.926	18.519	27.67	22.077	17.55	14.774	25.36	16.593	24.897	18.252	16.4575	16.1411	14.5925	10.532	9.853	16.286	7.562	3.914	6.908	5.567	8.452	6.76	7.366	7.605	5.58	9.948		0.828431	13.5824
20.2359	28.155	19.932	26.084	21.258	16.747	28.671	18.186	15.745	35.883	11.134	16.0722	15.451	18.6233	19.955	10.499	13.374	11.074	10.118	8.147	6.638	10.115	7.544	6.172	8.192	6.877	6.771		0.833336	15.2853
20.3549	37.536	21.043	28.198	24.645	21.013	26.115	6.6	23.953	31.921	18.917	25.6142	18.0957	17.0584	14.423	15.533	15.519	7.581	8.873	5.379	6.54	5.706	3.48	9.57	6.518	6.962	12.485		0.838237	16.1261
20.4739	17.819	12.24	22.105	14.479	29.592	17.999	18.3	20.345	26.883	15.182	18.3088	18.532	13.5451	19.667	11.498	8.238	9.05	6.141	10.936	4.586	5.796	8.493	6.996	8.799	6.98	7.418		0.843137	13.8434
20.593	19.859	18.575	29.549	21.141	28.798	22.814	18.976	19.76	21.899	30.354	15.2412	22.9797	7.442	13.68	11.894	10.013	13.911	3.537	8.154	7.762	7.147	5.323	5.802	8.083	15.898	6.789		0.848042	15.207
20.712	21.646	14.252	31.043	18.684	24.633	22.243	15.447	21.104	25.716	11.925	30.9968	12.9885	15.8036	15.575	14.408	16.114	13.726	3.26	7.205	7.797	5.868	7.712	1.461	8.56	10.121	3.856		0.852942	14.6979
20.831	23.302	19.978	34.843	11.626	27.288	23.805	15.208	20.454	20.363	17.886	9.796	23.7505	13.3884	18.583	12.095	11.694	8.966	3.652	5.142	8.813	2.04	6.386	5.163	7.157	10.609	9.157		0.857843	14.2748
20.9501	20.474	23.544	39.918	12.72	31.021	25.006	19.609	17.448	18.155	22.355	12.0383	11.9784	13.2634	14.523	10.201	10.921	6.55	5.653	9.009	7.332	5.547	7.082	8.778	10.416	2.928	6.515		0.862748	14.3456
21.0691	20.769	12.518	33.117	21.581	25.126	20.662	10.215	20.088	21.869	21.525	12.2011	16.4119	9.8796	10.497	4.961	17.746	5.95	5.38	6.263	3.256	3.687	10.324	2.157	3.032	10.251	2.975		0.867648	12.7862
21.1881	24.07	15.348	35.397	26.694	20.651	25.879	22.723	16.015	19.513	14.418	18.6223	14.4451	8.9662	7.274	13.344	7.807	4.29	11.025	7.451	1.055	4.952	6.825	8.067	8.812	9.412	13.635		0.872549	14.1035
21.3072	18.537	14.854	31.581	27.691	26.244	29.923	12.408	22.305	30.471	17.722	13.2558	19.818	10.663	9.416	8.36	6.462	4.765	2.947	5.979	5.208	3.784	3.341	4.637	6.187	6.96	9.976		0.877453	13.596
21.4262	11.81	10.73	27.312	21.99	18.508	26.215	20.039	22.571	21.154	15.755	14.9727	9.2404	13.4379	12.993	12.046	7.865	2.851	11.075	7.242	4.777	7.613	3.94	5.915	11.445	11.367	5.811		0.882354	13.026
21.5452	18.615	11.355	34.907	15.987	10.937	21.815	18.408	19.352	20.312	21.397	18.5346	12.398	14.4975	13.599	14.374	6.119	4.12	4.15	13.702	5.43	3.8	3.821	4.22	5.215	4.652	9.518		0.887254	12.7398
21.6643	18.056	12.509	29.649	16.046	12.784	14.106	21.882	14.967	16.45	17.765	14.6415	14.0158	13.2965	7.308	7.25	6.038	4.722	2.868	6.946	4.51	7.882	7.996	6.602	8.823	9.155	7.421		0.892159	11.6803
21.7833	12.689	10.211	33.821	21.91	21.129	17.689	13.851	23.677	25.379	17.966	10.9408	13.766	10.1659	9.136	16.623	13.504	3.261	9.453	6.604	6.51	11.557	8.836	12.636	8.336	4.129	6.784		0.89706	13.4832
21.9024	18.456	14.576	25.94	25.426	12.251	18.858	8.093	12.685	19.414	22.455	13.8846	20.3032	18.3271	4.485	12.132	4.173	7.382	5.345	5.273	4.286	6.564	8.046	10.319	3.983	10.596	5.503		0.901964	12.2598
22.0214	16.528	21.511	22.966	11.651	19.093	12.357	19.367	21.774	9.452	24.153	23.0116	11.0789	14.0276	6.263	17.381	5.219	5.704	0.929	6.736	3.479	3.081	5.571	5.009	1.653	18.682	9.862		0.906865	12.1746
22.1404	15.132	15.249	22.556	13.238	18.06	10.495	20.059	12.947	15.094	22.769	14.5627	17.8281	23.5482	7.436	11.937	5.416	3.492	5.804	4.584	4.028	8.278	7.85	3.963	14.672	12.261	7.228		0.911765	12.2495
22.2595	15.467	12.567	25.814	13.889	15.824	19.647	14.794	14.455	23.045	17.422	11.7635	14.2462	12.1002	11.511	6.59	10.251	9.812	1.111	2.406	4.201	7.72	9.412	7.772	4.823	8.987	3.305		0.91667	11.4975
22.3785	12.272	19.289	21.59	14.099	23.227	18.767	21.647	20.888	13.644	8.76	10.568	24.1065	9.6498	12.899	9.714	6.617	7.701	3.431	5.658	7.182	6.612	7.17	7.11	3.471	11.797	9.626		0.921571	12.2114
22.4975	15.095	22.657	19.564	12.98	25.111	20.076	26.295	18.487	13.356	9.943	15.2787	6.131	8.6431	13.488	10.783	2.145	7.189	5.562	8.786	12.51	4.514	9.921	13.178	3.847	10.413	3.964		0.926471	12.3045
22.6166	10.385	22.231	24.098	10.321	14.578	19.374	20.075	20.621	19.113	16.336	15.6132	14.7688	14.0307	7.261	18.263	6.927	5.202	2.573	9.108	9.966	6.358	8.673	4.241	6.044	6.605	4.119		0.931376	12.1879
22.7356	9.675	11.077	21.482	15.174	13.14	18.009	26.648	27.42	27.767	14.471	14.8315	10.1897	11.616	6.329	12.235	7.238	1.124	1.864	7.412	7.811	5.157	0.367	8.331	3.882	14.888	9.829		0.936276	11.8449
22.8546	8.422	24.192	20.276	9.257	11.193	17.432	19.585	23.039	13.855	17.852	15.9632	5.0289	9.4737	4.842	8.768	6.948	4.122	3.418	4.925	14.8	13.172	2.408	9.292	13.1	6.565	9.95		0.941177	11.4569
22.9737	12.761	29.438	27.365	10.16	11.335	18.708	24.894	20.123	19.24	27.57	18.1746	16.9552	5.5343	4.492	6.301	12.613	6.743	5.265	6.222	6.296	3.852	3.4	6.859	4.206	8.923	4.982		0.946082	12.4005
23.0927	11.468	25.529	27.511	18.114	10.587	17.27	16.327	31.483	18.713	7.842	11.2731	18.4671	8.8856	12.616	7.28	10.076	5.117	4.296	4.489	5.85	5.521	4.114	5.355	4.842	8.763	2.593		0.950982	11.707
23.2117	13.385	21.171	41.126	17.385	10.184	21.79	26.135	22.141	12.308	12.542	10.5499	19.3167	4.3375	10.913	7.037	10.676	0.841	5.24	3.768	8.032	8.282	10.197	8.713	2.416	12.551	6.751		0.955883	12.6072
23.3308	7.285	25.605	28.988	16.229	13.233	16.933	28.972	25.515	11.401	7.68	9.4947	18.6277	13.725	11.926	5.543	3.713	4.386	3.904	6.36	1.631	8.207	5.192	7.104	1.836	9.446	15.413		0.960787	11.8596
23.4498	6.67	14.536	35.794	20.519	21.091	18.157	33.059	20.084	11.883	12.913	13.3917	8.4939	6.5841	6.111	10.15	7.146	1.299	5.934	3.482	12.679	5.212	5.419	2.671	6.925	6.22	1.791		0.965688	11.4698
23.5688	8.164	27.689	19.681	11.628	13.537	19.375	39.412	31.136	18.681	14.723	14.2583	13.8782	11.0782	6.427	1.723	3.927	2.166	0.491	12.154	6.875	5.304	5.607	7.013	7.254	10.74	5.657		0.970588	12.253
23.6879	10.493	19.713	24.246	15.206	20.852	28.915	31.248	21.366	15.374	21.408	15.4442	10.7939	12.2128	12.21	3.66	5.931	8.01	4.87	7.268	7.829	7.512	5.323	11.365	2.889	10.323	2.844		0.975493	12.9733
23.8069	10.879	21.736	31.566	22.114	17.908	21.147	20.11	21.163	13.618	16.805	8.9206	6.8183	9.0701	3.806	7.767	7.436	6.053	0.147	12.486	4.048	5.759	7.743	6.595	5.355	11.453	3.974		0.980394	11.7107
23.9259	11.404	20.576	17.848	32.602	10.704	27.94	27.623	20.628	17.99	21.489	11.2218	6.5564	9.278	8.655	3.148	5.17	3.024	7.516	8.775	4.301	13.684	3.686	0.669	4.661	7.466	9.636		0.985294	12.1635
24.045	3.064	19.761	27.382	32.652	20.856	24.33	25.821	16.91	15.957	15.511	12.1466	4.5486	17.5344	5.56	2.851	6.9	2.236	1.46	8.863	6.411	13.467	4.414	3.61	3.736	11.124	5.469		0.990199	12.0221
24.164	4.519	13.494	23.276	20.245	15.445	24.041	19.295	25.27	18.112	10.793	10.7338	6.4128	16.8302	8.009	1.713	4.293	2.919	4.464	6.546	7.111	8.485	3.129	12.847	10.262	1.26	13.46		0.995099	11.2679
24.283	5.462	11.322	40.391	25.258	12.173	21.224	28.534	14.384	11.901	14.232	19.9328	2.9578	9.4393	5.208	2.131	5.571	2.928	2.65	4.671	7.121	5.389	10.25	6.714	5.447	18.466	14.386		1	11.8517

## Sheet: Image2
X0	Y0	Y1	Y2	Y3	Y4	Y5	Y6	Y7	Y8	Y9	Y10	Y11	Y12	Y13	Y14	Y15	Y16	Y17	Y18	Y19	Y20	Y21	Y22	Y23	Y24	Y25	Y26	Y27		Ap-basal	Avg intensity
0	16.5158	27.0056	21.738	23.386	24.2556	33.63	23.817	34.013	28.992	29.409	22.4161	36.4342	29.7131	28.4324	20.633	33.5182	23.2534	36.0467	32.3169	20.436	12.8684	13.687	14.345	61.2122	60.9719	46.0259	38.8112	66.414		0	30.7249
0.119	24.7682	30.322	20.733	19	25.5518	31.527	35.707	30.3845	18.964	32.504	19.9479	38.483	34.9476	35.8137	26.401	26.6528	34.4492	36.4746	21.3856	28.302	13.8151	13.955	21.94	55.0988	62.8178	52.4548	36.8456	82.412		0.00432774	32.5592
0.2381	26.4469	29.4264	29.94	18.176	22.9612	32.328	49.525	36.0757	22.029	43.198	24.9079	52.2005	47.8048	40.1835	24.652	26.7366	61.5728	46.7961	29.9535	30.931	11.8971	14.372	21.712	63.9709	68.7308	40.7288	37.542	100.642		0.00865913	37.6943
0.3571	28.0155	46.8938	29.913	20.277	15.9321	38.026	52.053	46.1618	34.823	54.155	22.7894	36.2702	37.6082	36.4508	29.732	40.2999	51.7231	47.6092	37.8696	35.772	17.061	33.386	20.796	61.6777	76.897	55.6557	46.3246	98.065		0.0129869	41.1513
0.4761	32.3451	54.9079	24.276	33.546	31.5196	48.887	70.409	51.0599	27.01	54.2	35.2121	43.102	32.72	56.9668	37.336	50.4985	64.6041	66.021	55.7729	36.258	14.96	29.694	35.935	69.0209	73.7709	63.8045	51.893	100.931		0.0173146	48.095
0.5952	25.6776	48.7718	36.392	23.851	32.4238	49.975	80.966	57.1456	30.858	54.941	29.5432	62.0509	46.9041	51.5467	43.962	65.0799	74.0217	74.5516	61.1102	34.943	17.5009	45.487	29.315	62.3186	66.7236	49.6938	42.2074	123.545		0.021646	50.7681
0.7142	27.5579	41.2324	47.561	23.179	32.0157	74.065	81.577	48.477	40.706	75.108	40.5822	43.8417	39.3876	52.7062	49.743	57.7396	91.1339	71.6773	59.634	30.51	17.5006	63.145	35.427	70.9861	78.9024	61.0434	49.7795	116.863		0.0259737	54.3601
0.8332	45.4741	38.7777	43.021	25.397	36.8629	99.23	95.523	82.6858	50.745	90.185	42.9594	43.6846	42.3021	70.862	55.336	57.2136	83.9672	74.9446	65.8153	29.911	21.3494	69.221	47.454	66.2919	66.5817	59.8663	47.0874	122.375		0.0303015	59.8259
0.9523	54.4127	52.438	35.17	24.67	41.881	87.574	99.921	79.004	70.941	88.112	37.9065	32.1661	67.3346	66.125	53.675	58.9949	89.4276	69.1088	82.3514	36.068	21.3514	108.661	54.112	89.2243	69.7874	64.3602	57.2207	128.876		0.0346329	65.0312
1.0713	64.0359	61.8343	33.722	34.851	43.3817	81.937	100.652	78.8468	77.721	87.434	34.0235	49.8403	54.8979	60.428	51.604	49.7344	98.3773	80.1217	82.2454	37.268	35.551	111.075	67.524	85.6066	77.5999	74.6984	59.5376	134.962		0.0389606	68.1968
1.1903	61.0627	60.2039	37.651	46.464	51.2893	82.846	102.777	83.8621	91.044	92.518	44.6253	50.3211	66.4954	68.0295	54.017	48.4493	87.9619	91.0034	69.484	38.055	34.4917	108.608	89.356	72.6715	74.1408	56.0926	54.4382	141.141		0.0432884	69.9678
1.3094	77.7263	58.8597	54.435	41.272	60.8434	82.73	92.094	78.7672	87.122	98.559	50.7708	55.7541	57.4157	66.6466	74.485	54.8718	99.4281	93.6538	83.6582	50.636	42.6734	106.209	89.614	73.345	88.0775	77.488	55.3169	123.316		0.0476197	74.1346
1.4284	76.7329	68.6131	49.796	50.585	70.7191	91.338	101.69	80.4857	79.301	106.116	50.2292	50.0401	62.3872	63.6424	80.36	68.0645	79.9168	85.1858	87.6585	51.648	48.7057	115.253	93.826	62.1452	85.49	76.4632	71.4313	123.178		0.0519475	76.1072
1.5474	67.9129	60.5278	47.915	56.531	73.8466	91.362	103.735	98.4637	93.472	120.092	49.0459	51.9959	59.3712	57.5766	87.067	60.5625	91.8157	83.2625	79.903	79.321	57.5255	105.383	112.34	75.3823	72.1168	91.6516	70.5519	124.262		0.0562752	79.3926
1.6665	67.4283	70.0836	61.765	61.861	91.2256	106.212	93.022	91.5842	100.397	113.651	52.2154	54.9948	61.0669	65.1669	81.929	68.7336	84.7759	81.5747	93.9836	81.672	63.8794	105.697	113.831	64.7311	79.1963	76.9187	64.4086	128.686		0.0606066	81.4532
1.7855	85.5917	77.2914	67.275	62.895	76.3525	110.216	114.23	79.3279	103.139	120.503	65.4751	62.587	88.2257	53.885	67.49	66.9332	91.247	84.9812	82.9399	77.104	75.2919	131.363	140.731	69.1027	79.8589	75.6856	67.8136	109.361		0.0649344	85.2463
1.9046	78.7917	81.3825	65.31	81.619	85.4057	92.292	110.947	74.9041	90.258	112.255	63.0292	47.3668	74.1094	53.3409	92.275	78.006	85.4137	75.7411	85.342	90.381	66.332	106.784	119.876	48.845	78.3467	79.1795	71.3872	120.61		0.0692657	82.4832
2.0236	78.6421	77.7263	75.504	90.621	95.3316	96.416	112.504	59.7418	81.01	114.205	69.8593	67.9892	66.0821	74.4691	102.5	58.9682	91.0332	88.8742	78.8716	98.355	49.6689	123.637	115.761	47.1228	78.3608	67.4715	60.3787	99.265		0.0735935	82.8703
2.1426	79.0178	90.3183	66.486	91.477	85.0756	106.658	119.18	76.4968	119.847	116.161	78.8367	61.732	66.8498	55.7199	76.914	63.1631	88.667	80.4956	81.1745	86.38	84.786	130.744	116.719	50.6609	74.577	63.0019	64.4377	95.54		0.0779212	84.6827
2.2617	65.3378	87.9558	63.974	70.54	81.3411	93.097	106.71	59.8429	92.112	105.297	95.6019	65.8379	81.0391	69.5906	93.426	78.1309	83.2192	85.0522	88.2544	83.935	90.4503	131.672	115.411	57.0354	78.1035	65.8156	65.6693	113.464		0.0822526	84.5684
2.3807	79.5036	85.7745	50.64	83.85	94.3889	89.685	107.085	57.59	93.727	122.13	98.2693	49.5756	78.0939	76.5731	109.874	72.9931	72.6022	84.1227	98.275	85.05	93.9454	124.714	115.661	54.0713	82.9444	70.4606	83.8855	98.716		0.0865804	86.2215
2.4997	85.3512	86.475	52.704	99.058	90.9379	95.976	100.642	62.2508	91.196	99.228	79.0664	55.9561	78.5185	78.8852	109.535	83.9271	54.9973	82.8383	77.3434	80.165	93.7536	121.378	113.249	54.4479	81.8741	69.6463	75.123	84.992		0.0909081	83.5541
2.6188	74.7189	101.546	65.272	106.893	89.2008	86.992	96.572	45.2322	105.814	108.322	80.4434	65.6447	71.4544	72.526	109.79	75.301	59.2373	75.7228	53.486	95.973	102.035	109.165	106.051	51.3773	87.1274	64.3941	92.5552	83.111		0.0952395	83.427
2.7378	70.2929	70.282	81.571	101.924	87.6275	81.374	87.439	50.4679	107.241	95.665	71.5465	76.9569	74.1067	70.6073	105.504	82.7751	73.0563	91.3804	93.6386	75.667	94.9237	94.684	112.728	50.3258	74.5926	74.2845	83.1949	81.37		0.0995672	82.6867
2.8568	86.4906	71.2652	72.598	87.833	83.278	77.533	75.662	56.5419	99.013	90.908	65.2052	52.7558	69.3223	50.4265	109.272	73.4726	62.7528	97.1018	67.2711	79.66	93.0302	101.371	106.035	50.233	72.0297	80.6039	95.0937	80.773		0.103895	78.8404
2.9759	82.5653	73.2467	73.238	113.893	81.7819	80.865	92.066	45.7607	103.977	85.578	75.777	39.268	67.1004	57.512	93.243	85.4345	68.8152	70.8421	73.7114	86.307	89.4417	84.859	126.949	45.3488	73.0175	90.4808	76.5054	64.456		0.108226	78.6443
3.0949	73.2601	76.1907	83.602	93.092	72.678	75.333	85.641	48.808	83.95	88.974	66.0091	48.5127	75.7716	61.5972	93.089	68.5348	57.9293	82.9385	50.1993	102.104	94.5193	79.635	100.917	41.2052	61.7434	76.6376	87.8223	82.609		0.112554	75.4751
3.2139	81.1753	67.086	78.505	94.702	66.5823	67.118	81.064	44.5693	93.897	71.165	62.4369	50.4996	64.326	62.2035	98.971	72.8608	58.6283	82.5472	72.4011	85.711	66.374	60.881	91.385	38.3991	53.9145	62.9766	89.0229	65.034		0.116882	70.8727
3.333	73.2832	76.3072	75.203	83.158	76.9303	60.212	74.746	47.3335	86.57	74.433	67.7468	52.3657	52.1187	68.6386	90.35	65.3593	52.0726	70.2023	86.29	87.704	99.4425	57.64	84.16	47.9962	60.5196	82.9886	80.3781	94.314		0.121213	72.4451
3.452	88.6889	79.2115	73.747	93.288	78.6752	59.291	73.055	37.6694	85.093	77.667	61.9486	60.3483	56.053	58.75	81.979	69.5764	59.5633	73.6898	85.7902	94.503	78.5042	64.051	74.253	39.0116	63.6014	76.6405	75.8406	74.861		0.125541	71.2625
3.571	84.5652	72.7508	78.724	71.781	76.3682	61.451	56.582	57.3697	82.4	68.337	62.3502	46.6555	42.2202	55.4745	84.393	77.4411	60.2985	73.189	74.1248	81.087	73.0813	54.53	66.822	60.7159	69.0573	99.5243	87.1913	69.041		0.129869	69.5545
3.6901	73.544	73.0805	72.874	90.663	65.4986	59.091	56.123	39.8529	69.54	73.36	61.3631	49.363	44.4859	53.3251	76.069	72.8244	62.4361	72.3445	88.5307	87.09	90.5801	54.633	58.695	45.5043	55.253	77.3156	86.1728	79.419		0.1342	67.4654
3.8091	65.257	68.843	69.266	80.708	68.3719	45.481	61.121	43.2694	63.165	61.117	50.0312	53.8342	40.059	51.1912	72.774	64.2815	59.4314	69.367	90.2459	102.408	73.644	67.918	43.057	51.0319	46.3567	71.2883	82.0902	57.875		0.138528	63.3387
3.9281	68.5963	70.6291	80.528	80.353	75.7163	41.737	57.07	46.9521	78.048	54.764	59.2302	49.914	41.7253	47.4898	88.911	62.9589	61.7851	72.7873	80.5387	97.268	67.2627	66.916	51.472	62.618	58.8	57.5207	86.9533	74.787		0.142856	65.8333
4.0472	67.9151	75.2631	71.88	76.724	75.1249	45.015	54.382	45.0722	82.207	54.508	50.5275	54.0305	32.6007	50.7593	76.06	63.748	66.4198	74.6532	100.213	89.258	74.3274	75.227	62.332	73.1457	49.6156	62.6525	74.4694	59.891		0.147187	65.6436
4.1662	66.5274	75.6522	81.083	89.374	70.1481	42.575	50.579	44.6545	73.515	53.735	42.4934	53.3416	41.3203	41.7413	74.491	66.6033	57.3006	81.1011	92.6469	80.389	83.9263	50.31	62.263	69.9368	45.5581	89.6554	78.714	53.956		0.151515	64.7711
4.2852	73.1976	78.4162	77.39	64.79	62.9874	41.629	52.261	42.8199	68.512	50.637	52.6642	43.8226	45.7871	49.0044	89.482	65.4645	55.4854	66.1847	97.3656	108.425	83.6705	59.072	59.785	76.1658	52.452	74.1781	72.3013	65.821		0.155842	65.349
4.4043	60.1357	81.3558	73.976	74.183	58.8987	38.476	42.863	34.6424	60.584	54.493	37.6622	41.585	39.6425	56.4068	77.782	62.6272	63.2317	67.7428	74.0887	100.77	88.9567	73.783	60.409	81.4109	42.55	72.7385	93.3901	64.869		0.160174	63.5448
4.5233	58.6034	86.5387	103.525	63.568	60.5641	39.676	46.577	42.7601	49.338	59.394	31.9119	43.3673	34.3905	41.0242	90.471	55.6678	53.4106	71.7396	66.4859	99.987	69.389	77.055	57.172	81.4922	48.2128	72.2652	67.0601	57.517		0.164502	61.7558
4.6423	67.542	82.9523	72.294	76.202	41.2928	33.115	35.49	50.6909	54.686	53.476	39.4534	40.8084	32.1511	33.3286	79.686	60.2361	55.681	61.9803	89.6189	104.431	71.2098	87.198	59.667	84.769	48.4931	69.1988	78.0318	57.445		0.168829	61.4689
4.7614	72.815	77.8882	94.441	69.875	53.2403	38.755	35.405	44.6699	57.439	49.899	45.6326	51.8563	33.0829	43.4379	69.168	61.7826	63.3235	53.317	82.8658	109.696	62.073	82.383	65.536	77.3268	49.3892	78.062	73.7783	50.478		0.173161	62.4149
4.8804	80.4284	64.4775	100.354	66.589	63.9302	28.252	51.173	47.1507	59.531	55.836	39.4321	44.8159	37.1349	44.5743	73.269	64.0725	50.9579	56.8081	85.3395	82.61	66.511	89.216	56.834	77.2452	55.6318	99.2075	74.3973	52.582		0.177488	63.1557
4.9995	61.9513	68.0953	96.902	73.962	57.0374	36.341	38.28	47.2624	36.92	47.896	39.8557	42.4197	37.3151	47.0803	73.176	54.9748	48.4354	63.8945	97.5054	105.632	68.3754	85.903	52.208	99.1595	60.1235	92.6953	86.4276	42.788		0.18182	62.9506
5.1185	58.574	56.3018	83.986	60.789	52.311	48.041	32.297	48.8181	30.332	68.881	50.7955	37.9505	28.3038	50.4279	58.138	64.584	56.8141	49.2246	86.9779	95.568	59.7648	82.326	57.022	79.7942	84.6786	94.4739	77.018	52.719		0.186148	60.9611
5.2375	53.1961	68.5903	74.173	64.61	64.9372	34.807	37.173	61.2868	46.544	49.342	55.579	36.4023	24.9499	48.5771	70.925	73.1428	58.5632	38.905	89.3383	87.584	79.2998	74.538	57.46	84.7696	63.9422	84.2276	65.3618	56.435		0.190475	60.8807
5.3566	52.4031	61.759	78.485	58.637	63.0624	38.314	46.101	52.7276	38.86	49.152	40.1261	44.1139	33.4335	41.986	53.609	56.8823	51.1526	40.3017	104.292	98.549	77.0889	60.174	58.933	69.7266	68.2818	72.6816	67.3289	36.957		0.194807	57.6828
5.4756	49.1111	65.4139	95.34	43.609	57.3475	43.7	51.309	46.927	27.603	53.449	49.7536	37.2239	43.161	45.2759	55.877	68.1603	68.5542	44.5499	74.5973	81.553	74.7408	86.798	48.243	71.8585	72.1587	77.7858	69.9621	24.943		0.199134	58.1788
5.5946	62.6456	77.2808	92.791	43.639	65.7368	32.02	46.105	49.2523	32.293	48.224	42.9785	28.2385	28.3364	50.6044	57.912	65.0956	56.7969	37.5374	74.1811	84.459	80.7394	71.768	42.457	76.2187	69.5026	96.059	60.5882	46.719		0.203462	57.8635
5.7137	59.9761	47.2211	91.152	39.854	64.0416	41.551	44.247	49.7687	38.66	54.34	40.9449	29.8017	28.1606	47.6968	61.393	57.0881	51.8393	48.6009	72.3821	88.699	96.5118	66.212	52.117	73.2507	69.4947	86.4668	66.1997	41.086		0.207794	57.4556
5.8327	85.9987	60.9964	93.054	44.49	58.8968	42.446	47.206	46.877	39.605	45.392	49.0361	38.9846	28.2253	51.5519	64.103	60.9259	60.4713	41.4822	87.183	81.603	90.1753	60.866	53.404	77.1564	60.3606	89.5602	60.1504	47.773		0.212121	59.5705
5.9517	69.4761	61.9651	79.783	49.365	59.9971	39.371	42.975	55.5976	24.918	46.732	49.3051	35.3271	30.0979	40.6721	42.132	57.6296	62.3954	31.4273	87.5726	78.465	78.82	78.376	54.125	71.9643	68.2087	76.2384	56.9765	50.485		0.216449	56.4428
6.0708	73.8611	52.7456	91.901	65.256	43.3477	46.687	52.228	58.8938	32.351	56.04	39.0257	34.4005	51.6553	46.2203	40.924	51.6184	48.8871	39.7362	77.23	67.465	64.3983	63.193	62.273	82.934	61.2812	89.1664	56.8971	40.098		0.22078	56.8112
6.1898	53.0284	68.3466	95.275	64.763	37.5757	51.536	42.801	46.687	38.683	49.543	43.9269	35.6232	34.6157	58.6937	45.667	56.5458	52.5311	44.7136	83.0459	68.64	66.7353	68.345	65.891	73.0072	67.2838	85.7605	49.4059	43.987		0.225108	56.8806
6.3088	53.4784	62.2523	84.408	74.501	39.5726	55.716	43.997	41.7711	35.483	51.628	42.3018	33.0298	36.7458	40.6304	45.626	61.1251	43.5916	55.3326	85.1307	83.227	74.8372	52.496	69.803	83.6423	75.6291	81.996	56.0985	44.202		0.229436	57.4376
6.4279	58.3415	56.5191	89.177	58.364	38.6602	60.549	48.325	56.4699	42.165	54.836	52.486	27.7042	38.7935	45.4079	44.47	56.1415	52.514	49.0454	95.0623	72.154	74.1112	46.291	60.3	74.6212	55.0848	81.8046	69.5014	41.203		0.233767	57.1465
6.5469	59.2284	63.2843	91.113	53.366	46.1631	38.796	44.403	48.3664	36.464	54.571	40.4527	42.5048	36.9839	57.1073	46.437	64.1104	44.9139	55.1021	72.0767	79.181	61.7317	38.603	61.958	84.6206	54.7005	73.9539	65.0114	35.991		0.238095	55.3998
6.6659	55.8367	69.5873	101.326	43.645	41.1069	38.989	46.938	53.1271	38.883	39.857	40.0449	52.8445	41.8586	63.1079	51.163	54.0644	44.2491	38.97	77.4176	62.971	51.5854	45.639	65.29	69.3615	57.4099	70.1115	66.6396	51.41		0.242423	54.7655
6.785	58.3	70.9185	87.91	41.564	33.8495	44.387	36.741	62.2443	39.072	58.393	40.2298	36.6769	37.2933	51.9377	55.254	68.5021	57.4232	45.2612	81.4516	57.665	56.7634	47.987	49.961	68.2745	49.1322	72.5261	53.0472	38.174		0.246754	53.605
6.904	58.3738	72.3063	86.608	44.771	33.8358	47.646	38.089	51.4142	44.636	52.663	46.2245	40.3467	38.0779	56.5616	44.157	47.8814	31.2733	48.5052	82.6136	54.901	48.3911	39.304	54.425	84.0538	67.6281	80.3131	64.4964	40.959		0.251082	53.5877
7.023	53.0559	73.0706	72.504	44.704	37.9529	40.098	39.438	53.9198	35.967	46.536	36.1329	25.739	28.2734	48.0694	56.745	47.3012	43.5942	62.582	77.9595	49.345	59.2733	36.317	40.207	69.0691	87.8419	70.1474	48.967	36.093		0.25541	50.7466
7.1421	57.4899	73.0879	77.35	44.659	42.0846	36.06	41.448	68.356	25.314	39.967	36.2742	35.1063	29.962	48.649	46.346	47.0395	48.6684	51.8935	79.6409	45.789	62.9942	40.336	42.455	62.9413	60.9752	66.584	51.9135	43.998		0.259741	50.2637
7.2611	55.1837	74.8944	82.363	36.807	44.6215	45.835	41.239	54.746	33.455	40.969	30.7787	32.7017	37.786	46.8723	49.409	41.8331	37.9006	53.5627	73.7963	38.085	44.7367	40.659	36.463	86.3652	67.4564	55.8308	58.974	47.356		0.264069	49.6671
7.3801	63.7352	78.1038	76.436	31.284	34.7436	52.463	46.829	51.4022	33.587	39.69	45.1585	36.2207	45.8193	45.271	47.428	37.493	50.0524	56.0499	68.2893	47.897	36.0124	42.602	42.357	73.1951	74.412	70.3183	52.9286	56.324		0.268397	51.2894
7.4992	55.9557	73.5826	72.295	42.484	38.8763	45.877	40.148	42.9554	37.429	32.619	38.2792	29.6878	35.6332	50.7242	47.457	46.2274	43.2836	69.1311	73.0604	37.203	44.6054	33.473	42.13	73.1431	62.4204	60.4262	47.143	51.877		0.272728	48.8617
7.6182	45.1754	87.7165	58.543	41.925	35.1294	40.828	44.812	54.5778	23.754	47.913	38.651	33.3211	34.9548	50.5687	33.314	44.2637	34.1553	70.8374	62.9793	35.089	39.0788	31.6	31.991	64.6078	64.7334	57.0743	63.2221	49.808		0.277056	47.1651
7.7372	48.2096	72.3017	72.28	45.075	46.4347	32.454	34.607	46.3457	31.878	44.2	47.6306	33.0902	20.953	51.2713	36.236	32.663	41.0099	62.3616	66.0509	54.546	48.1877	33.213	41.774	63.5506	61.5641	55.6978	41.7076	41.029		0.281383	46.6544
7.8563	39.9049	63.6623	68.458	39.065	44.6733	40.257	40.538	48.0582	27.811	34.929	36.0293	28.3817	44.7776	43.8734	42.221	34.6917	42.4858	57.3377	70.1112	44.505	53.0484	34.18	41.286	59.909	74.8126	63.4095	48.233	42.661		0.285715	46.7611
7.9753	41.4119	74.0659	62.885	30.315	41.875	43.217	34.979	52.8148	29.009	30.003	38.3912	28.6085	37.8794	49.6542	49.182	35.304	38.2293	66.456	65.0161	52.731	46.4699	25.429	47.289	56.8315	81.4249	66.4409	50.1264	49.86		0.290043	47.3535
8.0943	48.2445	63.0186	67.093	47.229	31.8627	44.607	46.219	46.0655	25.639	41.371	37.8777	38.265	42.6926	49.8547	44.281	41.983	51.3777	63.8932	61.7764	41.331	34.4677	24.858	39.273	47.0789	63.7242	56.6929	58.4345	54.536		0.29437	46.9195
8.2134	44.0274	63.1672	57.385	39.034	43.4166	49.695	38.524	41.1749	34.358	36.349	44.5235	40.985	25.9408	64.7601	38.55	38.1548	45.7977	57.7045	44.6176	38.901	46.0365	40.271	44.001	52.9123	75.528	55.7207	51.869	38.987		0.298702	46.1568
8.3324	44.1473	58.0977	62.222	37.793	43.2103	41.662	37.752	44.3272	26.456	26.114	39.1684	36.615	40.5939	57.0901	40.656	52.0885	47.7527	50.0806	56.6466	51.163	45.5962	38.348	63.385	39.3517	69.4467	68.6394	53.6878	43.398		0.303029	46.9818
8.4515	49.061	58.8355	67.654	30.528	50.6887	37.468	42.44	38.6902	42.085	31.545	33.6222	39.2696	39.5617	63.5608	42.299	31.0409	50.4372	48.1266	41.2527	38.037	42.9442	43.532	42.987	40.3831	66.3897	67.3345	55.1954	45.975		0.307361	45.748
8.5705	45.9527	56.6802	65.687	51.138	53.7881	32.03	36.364	44.8207	38.124	32.246	43.3988	45.6425	31.3522	68.8441	54.016	46.3521	38.4087	51.6513	46.092	35.757	53.8296	35.754	47.588	46.7375	60.7949	66.7696	53.0521	47.826		0.311689	47.5249
8.6895	48.2262	64.5567	63.449	47.092	47.1492	47.948	32.328	38.5892	39.664	30.726	47.2858	48.5219	25.4006	59.5388	39.118	42.2188	42.9267	52.2251	49.4769	49.616	42.7874	37.46	40.693	42.1066	51.2846	48.8829	48.5353	53.723		0.316016	45.7689
8.8086	46.5572	59.7489	66.107	34.863	48.5739	41.97	28.551	47.7322	32.756	29.582	44.904	42.8952	34.0224	53.1272	31.775	34.735	34.7485	52.6504	56.3008	38.795	42.3309	40.234	56.512	46.3423	63.1989	52.937	47.6718	50.911		0.320348	45.019
8.9276	45.0324	63.4928	60.714	34.431	36.8357	38.335	27.322	41.9548	44.161	39.027	36.0804	49.2368	36.0308	35.4989	36.522	27.7399	45.4718	52.0357	62.0435	41.342	58.4773	45.881	53.571	47.5371	68.2314	66.4459	38.2441	41.788		0.324675	45.4815
9.0466	50.3066	42.094	63.014	41.412	39.9547	22.694	26.431	47.2317	47.873	33.184	25.2535	58.7662	37.7832	37.8162	33.908	33.0071	39.5453	36.6804	53.903	48.25	56.7162	53.7	53.223	45.6108	69.5628	58.0464	43.3484	43.769		0.329003	44.3959
9.1657	44.1682	54.3592	58.727	32.841	53.2898	29.031	24.231	39.6839	30.02	30.854	29.2793	41.7073	51.2617	38.3692	30.435	37.5588	37.0055	41.8576	54.9268	53.302	50.8265	40.468	42.638	43.6855	64.9513	43.5911	51.3296	42.49		0.333335	42.6032
9.2847	52.5143	52.8583	56.925	29.03	57.1812	27.923	33.789	35.1512	46.206	29.657	30.6304	42.9048	41.6273	46.5961	30.707	36.3377	54.7949	55.6148	60.3481	63.189	48.803	34.852	64.418	49.5264	61.9566	57.7455	37.3576	45.936		0.337662	45.8779
9.4037	44.0351	47.6873	54.288	27.996	47.0803	35.822	28.096	32.1926	43.098	21.898	20.7176	35.3154	36.067	53.402	40.027	35.6036	42.7012	65.2277	56.0662	47.123	47.111	41.308	54.546	35.1871	60.6456	52.5901	42.9362	58.295		0.34199	43.1094
9.5228	50.7882	50.9779	50.968	39.621	33.9702	30.397	20.985	41.3318	37.52	35.808	26.3039	27.4162	41.4467	48.0559	38.883	44.3532	50.0912	59.5073	53.5704	47.005	48.8255	39.667	56.374	44.8161	62.5328	53.2767	53.7048	52.755		0.346321	44.3197
9.6418	44.9702	46.3287	42.323	39.02	49.9235	24.848	23.414	42.3157	24.672	36.579	28.9015	31.9261	41.0394	63.6267	35.07	33.9198	54.0459	54.7635	51.1924	49.542	37.5562	37.997	46.398	37.4098	69.0006	39.8446	56.9355	52.879		0.350649	42.7301
9.7608	30.1735	56.9913	46.045	33.442	67.4287	28.335	25.888	47.707	43.868	27.574	33.4485	43.0597	44.1886	40.6365	28.802	36.2685	46.531	56.0292	57.1284	47.697	52.9257	39.138	41.191	48.1392	49.4386	41.1867	47.4196	46.596		0.354977	43.117
9.8799	33.7636	43.9357	37.636	31.01	47.92	29.607	34.03	34.4258	28.17	24.838	26.2411	36.214	35.2975	43.7299	30.771	37.871	51.4601	56.3804	51.0896	30.925	40.1624	37.141	53.392	37.0883	57.1753	62.6683	52.0099	46.405		0.359308	40.4056
9.9989	44.5621	52.176	40.444	32.967	37.1567	36.055	46.832	38.566	34.998	29.248	29.1372	33.0228	42.4829	53.8206	25.097	41.2957	49.9217	52.4154	49.3726	36.532	34.7476	35.226	50.254	41.8402	64.3803	50.7321	58.9302	36.903		0.363636	42.1113
10.1179	34.5095	38.6025	46.012	45.2	39.4663	28.609	43.702	40.5808	33.744	31.708	37.6603	32.4646	40.8677	46.2063	35.001	43.2827	66.789	41.6951	39.7708	41.439	38.03	30.682	54.312	51.759	50.9656	44.4456	48.6653	50.792		0.367964	42.0344
10.237	29.5209	38.2983	48.148	59.459	42.1791	43.422	43.546	33.0136	30.258	32.64	37.1019	38.5668	43.1365	40.0615	35.912	37.9593	48.1284	45.5972	47.3786	27.359	43.0866	43.111	45.526	42.2488	42.6911	42.7371	50.5221	39.33		0.372295	41.105
10.356	28.7861	29.7785	47.147	38.428	37.6631	28.441	42.856	38.8606	31.447	50.292	34.4161	42.2174	40.7273	37.5675	44.778	37.3477	48.1314	37.6487	49.4155	36.636	58.8404	35.966	54.684	43.7976	44.0558	51.3575	48.5768	44.214		0.376623	41.5742
10.475	25.6432	46.1721	43.435	29.97	39.5474	29.527	34.834	38.6685	28.606	35.868	33.6036	27.1065	36.9356	43.1957	39.026	59.2392	50.7195	52.1352	42.099	28.181	45.4593	33.529	38.173	50.6464	55.2269	44.244	54.9527	41.965		0.380951	40.311
10.5941	41.6709	38.4294	49.147	47.139	42.5432	25.489	28.653	41.2943	33.351	37.051	34.58	35.7634	34.8627	41.2144	39.407	42.2429	43.1516	55.0107	45.569	46.351	43.5403	35.602	50.201	32.5691	34.2136	43.988	51.8066	48.344		0.385282	40.828
10.7131	36.6606	40.1064	50.527	40.803	39.4518	23.765	19.62	35.498	21.212	26.127	32.881	24.608	32.8071	49.3946	39.641	30.7106	54.9841	40.9192	46.3395	38.116	33.3634	37.517	50.361	38.2806	35.5227	51.4914	48.0788	41.77		0.38961	37.877
10.8321	40.3932	35.7756	37.01	42.318	30.6757	26.845	20.868	34.9065	23.739	49.191	30.5013	33.9101	35.7337	46.8651	35.437	37.454	41.5098	39.1822	36.4287	37.578	23.6286	39.337	46.053	48.5564	41.8359	35.4272	44.1419	45.112		0.393938	37.1576
10.9512	39.4879	28.7028	45.368	46.606	33.1988	24.903	27.316	38.995	14.893	40.772	32.6319	36.5203	44.5566	49.0842	36.472	25.0385	45.1562	38.4693	41.204	35.075	30.8114	37.841	32.701	45.2553	42.1364	32.5847	44.8618	61.493		0.398269	37.5763
11.0702	32.9247	28.1999	38.862	31.993	39.3372	24.603	25.191	38.8925	26.116	35.999	28.2408	36.6722	56.5486	54.4415	34.504	31.5767	47.4522	35.6679	35.9677	21.317	36.7373	38.007	40.603	36.5039	28.0176	31.3552	52.0257	52.636		0.402597	36.4426
11.1892	25.1771	39.0302	30.375	52.711	31.9809	14.524	19.444	45.3306	31.763	24.584	30.9757	26.9235	44.3935	54.71	33.213	39.391	46.2727	39.6483	41.3152	33.667	38.3842	41.96	45.296	44.7549	43.1107	48.9031	32.9624	56.125		0.406924	37.7474
11.3083	35.4881	42.9474	38.808	45.23	30.5484	20.41	21.313	46.6865	30.358	28.336	26.6375	33.9022	30.8688	42.0735	39.535	33.1497	34.222	54.2216	42.3129	38.61	40.0417	42.9	42.678	57.1102	32.481	43.0704	31.6922	60.535		0.411256	38.0774
11.4273	30.7618	36.187	29.326	41.341	31.6377	19.493	11.889	35.75	24.839	28.98	27.9097	25.7469	36.572	38.667	35.299	25.4716	28.1567	67.3229	33.9152	41.543	50.7728	36.177	49.729	47.809	32.7812	50.2988	36.8286	64.908		0.415584	36.4326
11.5463	37.0398	45.6155	41.558	28.217	33.4243	23.515	16.076	43.4123	17.376	29.498	27.5868	28.931	38.686	39.0911	36.561	36.6021	31.2684	69.4726	31.8283	34.532	44.1428	39.524	39.994	43.2299	44.2868	37.9334	40.6126	48.727		0.419911	36.7408
11.6654	35.2432	33.8747	37.59	27.892	39.9117	22.546	14.526	28.5895	22.92	32.108	25.107	24.1627	42.5586	57.0207	32.705	24.042	38.9586	59.4157	39.1542	40.234	41.7314	36.736	51.61	57.2917	34.2558	44.5921	32.224	46.91		0.424243	36.5682
11.7844	26.3521	28.0875	34.15	34.798	38.23	13.218	21.373	36.5451	25.105	34.451	32.1581	20.4773	31.7671	41.9451	34.426	24.4381	48.3552	55.546	30.2386	36.274	35.3513	31.292	46.975	45.6897	37.732	44.3037	31.7625	53.429		0.42857	34.8025
11.9035	35.0012	39.665	37.402	43.893	31.0336	21.834	18.532	27.5077	15.531	38.953	33.2353	19.7845	33.8015	44.1911	22.71	34.2246	36.3512	56.5382	27.2907	39.289	41.6366	38.23	29.252	36.6337	29.9321	42.6136	44.0724	42.522		0.432902	34.345
12.0225	35.9301	37.033	37.342	34.356	37.7647	18.322	17.581	33.0504	21.237	31.037	30.5484	24.8143	31.7817	35.556	30.436	33.5764	35.7483	40.8343	41.6209	49.846	44.4933	42.9	40.967	37.4382	38.7486	39.1779	39.114	41.194		0.43723	35.0874
12.1415	30.2339	30.3581	43.915	43.257	29.912	8.135	17.351	33.6407	22.163	28.061	19.2256	26.1963	37.5062	36.7752	27.614	20.3396	35.4361	42.3316	49.3311	46.615	46.63	41.849	40.552	29.2991	43.6849	35.3298	49.6171	44.689		0.441557	34.2874
12.2606	36.8392	35.8302	39.233	39.684	24.6984	11.11	19.552	29.5545	23.637	30.763	15.446	26.4197	33.6447	32.4159	30.106	31.7962	32.7124	42.3067	50.6806	42.752	40.0646	42.322	48.709	40.5417	46.4301	38.8583	41.827	39.429		0.445889	34.5487
12.3796	24.0987	32.3917	39.354	40.556	45.2474	8.667	9.582	26.1024	22.915	38.067	30.366	23.4783	25.1531	36.2692	32.918	24.7553	25.718	43.5404	42.7872	42.846	43.2597	29.263	41.307	32.1831	43.6229	28.9028	44.9631	34.587		0.450216	32.6036
12.4986	30.6972	31.4839	38.813	36.765	38.6252	5.357	12.402	28.2984	26.736	30.357	17.4583	24.6064	18.478	29.9215	24.925	27.5985	31.0805	41.3475	42.9963	37.632	48.9671	44.988	45.454	34.1166	49.6713	41.8889	40.7913	39.471		0.454544	32.8902
12.6177	27.6528	31.9921	36.378	44.777	34.4874	11.843	13.461	36.2852	17.043	36.48	25.3478	29.2374	32.7252	19.2817	28.798	31.5058	41.9111	33.3424	44.0919	31.899	52.1416	33.157	45.279	44.3655	37.7961	39.0921	32.8508	44.488		0.458876	33.4896
12.7367	31.6994	28.9952	43.284	31.887	30.2891	11.952	10.959	35.0997	25.925	30.146	25.7221	19.1865	34.2298	31.0799	34.392	32.5095	39.8705	31.7413	37.5591	28.92	44.3981	41.934	32.636	54.4403	40.6118	23.0827	37.0101	45.619		0.463203	32.685
12.8557	40.5632	42.3287	41.125	35.33	36.6971	9.873	12.55	26.4989	24.458	30.538	24.8033	18.4085	21.6961	32.6774	29.678	20.162	36.1685	41.6763	53.8941	35.619	36.3217	37.528	31.717	35.4683	32.2612	23.8547	37.7425	52.984		0.467531	32.2365
12.9748	20.8255	27.0308	39.975	41.421	32.8711	11.412	14.685	25.0095	27.478	29.596	30.5684	16.8905	18.7787	29.9173	32.997	36.6638	44.7414	28.9268	43.7138	39.587	27.4632	42.617	31.697	42.4283	28.0572	27.6092	33.062	49.96		0.471862	31.2851
13.0938	22.9254	23.4091	40.333	18.987	21.1601	17.229	10.664	26.9666	17.59	27.928	21.0782	17.4551	26.9924	32.5771	37.033	33.7991	36.6487	45.5598	47.8009	43.292	34.9374	37.612	31.737	36.1273	36.5475	31.3379	33.1949	37.065		0.47619	30.2853
13.2128	23.2608	37.8285	35.011	36.168	31.3785	16.386	12.577	18.5682	24.646	39.15	26.8288	16.1369	24.901	35.4962	37.296	24.4698	44.9379	35.5149	43.412	34.979	40.821	38.949	26.554	37.6326	36.9666	31.7364	33.4012	32.934		0.480518	31.355
13.3319	24.3905	31.7694	43.019	27.748	32.6915	20.09	8.898	25.2046	16.476	33.859	37.5592	12.6116	21.9149	43.1018	35.925	19.7288	30.9323	45.4282	31.1366	40.429	27.7691	42.008	26.506	33.6194	44.1836	32.1462	42.7202	42.602		0.484849	31.231
13.4509	29.0894	35.1621	49.282	31.007	24.1195	20.637	11.9	18.0446	14.485	33.145	33.6808	12.0785	24.3921	42.5666	37.935	29.2206	27.2468	56.1152	41.748	39.369	34.768	48.279	25.37	32.2275	34.1202	27.145	29.3115	47.333		0.489177	31.7778
13.5699	28.693	35.2625	43.74	27.634	23.5688	12.002	13.799	15.6877	23.852	36.455	32.7791	19.9303	28.2717	45.4813	35.686	40.8248	34.2715	43.9934	34.6578	53.271	37.4261	28.125	28.188	47.044	32.4065	38.799	31.1934	42.084		0.493505	32.6831
13.689	24.1016	36.2219	30.561	30.386	28.0317	13.747	9.797	14.336	31.148	24.351	31.1636	21.0497	31.4045	36.4848	21.526	34.6925	41.3901	43.1193	30.6879	35.388	35.65	27.243	24.876	38.5651	28.4855	39.2121	35.5171	29.959		0.497836	29.6105
13.808	23.4016	37.7793	39.491	26.999	20.507	12.112	16.78	26.0088	30.199	27.353	28.6069	17.1642	36.6086	45.4331	24.784	34.6657	32.4069	65.351	28.6928	42.358	27.358	27.449	21.463	38.6216	32.1786	24.0874	39.9152	43.936		0.502164	31.1325
13.927	34.6802	36.1364	43.17	23.259	27.4879	6.756	16.196	23.3368	26.783	24.9	22.3553	17.7432	35.8558	33.8862	38.174	30.3749	20.658	52.0986	35.6535	31.847	36.5265	29.082	34.489	40.7682	25.7756	36.077	38.7355	38.455		0.506492	30.7593
14.0461	28.9985	28.6567	43.596	19.736	27.8192	10.247	14.454	29.0731	23.705	23.629	27.2837	17.1267	27.7255	39.9574	32.158	28.608	19.6273	52.0764	41.1602	46.216	41.4351	24.136	26.214	45.1054	31.4844	41.1131	36.6426	40.218		0.510823	31.0072
14.1651	32.9373	27.5827	31.681	28.476	22.1738	6.991	12.515	22.0672	32.29	23.153	47.4772	21.1731	23.0175	34.7753	36.991	21.628	48.1633	52.0689	32.2189	42.952	33.8484	25.238	31.303	51.3146	32.7941	31.2015	40.9478	43.652		0.515151	31.8083
14.2841	34.4205	31.8323	28.291	34.74	28.774	4.332	17.619	24.9265	28.82	22.143	36.5737	24.8258	27.6311	34.8714	39.013	29.5595	39.3011	53.6764	33.7909	32.844	34.213	30.963	24.944	51.8598	46.7965	38.117	55.1602	39.882		0.519478	33.2115
14.4032	40.6454	31.7613	27.218	25.737	19.1298	13.252	14.903	20.2293	29.489	20.269	38.5732	22.0487	30.4867	25.9818	39.768	30.5222	34.5736	49.246	24.7336	26.549	41.244	23.991	14.641	48.1083	30.3171	36.0199	41.7526	31.183		0.52381	29.7276
14.5222	22.0746	39.9241	29.437	33.175	28.8699	6.505	9.087	21.0609	17.944	17.386	37.0241	17.0207	26.4426	29.6736	34.016	27.0992	35.9178	65.7439	39.0656	38.548	35.6583	31.011	25.667	50.4127	28.8492	36.7741	39.1651	25.675		0.528138	30.3295
14.6412	23.8086	36.4112	33.091	27.943	23.0643	9.069	7.684	14.4421	25.853	20.718	40.4994	12.245	23.1318	36.7059	22.937	26.6821	30.4251	51.569	25.3415	39.24	35.3967	28.768	27.695	55.5978	23.0338	28.83	30.3409	21.789		0.532465	27.9397
14.7603	27.9548	24.346	35.349	28.177	24.1915	10.128	16.521	17.2694	24.509	22.069	40.3425	16.8415	29.6299	38.3409	36.28	35.1073	33.9047	53.2609	24.024	30.129	28.6455	28.413	34.719	60.7168	26.5464	27.075	31.8727	15.797		0.536797	29.3629
14.8793	30.4994	34.4624	26.665	35.149	29.7887	12.708	14.693	15.7908	23.712	20.109	19.8935	22.054	37.8044	44.148	30.473	29.5449	38.5276	39.7513	27.5782	23.896	29.8109	18.483	29.287	69.5592	28.2156	21.0443	36.8616	22.96		0.541124	29.0525
14.9984	34.1895	31.9293	34.956	26.692	23.5959	11.633	13.548	27.1943	32.113	20.556	26.6726	17.434	23.305	48.9103	27.928	24.7282	44.019	50.6401	30.9758	29.394	42.7797	23.833	23.004	51.8636	27.0729	26.8427	45.7013	23.936		0.545456	30.1945
15.1174	22.4629	40.931	30.325	24.048	27.5092	14.832	12.983	26.4849	33.8	20.434	26.3862	26.602	17.7931	43.9352	30.207	29.9985	37.5317	39.233	32.6534	28.662	30.5816	19.302	21.845	47.4377	25.5923	19.3137	50.7544	20.841		0.549784	28.66
15.2364	31.9608	40.5892	28.026	28.979	30.1403	11.809	9.626	33.7432	24.734	27.592	30.7437	20.669	28.6633	40.0457	15.021	33.645	22.1205	40.333	34.5438	27.654	29.5552	15.465	39.054	54.8063	25.8252	21.4472	41.0069	20.884		0.554111	28.8815
15.3555	31.6723	42.8072	37.553	21.99	23.6814	9.702	8.74	21.8995	14.778	18.599	27.1999	19.4835	32.5869	32.2525	24.476	29.3143	28.8183	39.9974	35.1773	38.284	30.3857	11.422	22.014	61.5945	23.604	30.3423	38.6485	21.135		0.558443	27.7914
15.4745	29.2084	30.3955	34.593	19.9	33.3788	11.425	9.225	21.9344	23.779	24.56	19.4486	19.7609	30.2457	30.7064	30.418	28.3077	29.5464	20.0676	32.1009	37.038	32.0536	13.666	24.65	49.8388	30.3178	28.6558	33.8399	12.64		0.56277	26.4893
15.5935	51.9561	27.6031	45.228	22.441	30.1679	12.364	11.794	9.797	23.03	17.891	24.7849	23.9564	33.5859	35.2225	25.977	34.6291	33.8732	29.5423	32.2753	35.327	44.75	25.855	30.367	47.4878	27.726	20.2087	53.5088	14.986		0.567098	29.512
15.7126	38.2032	37.8075	34.437	28.017	25.9399	5.871	9.236	21.7418	21.142	27.334	24.2504	27.2307	31.1355	29.797	22.395	27.4055	27.0444	32.2658	29.4929	35.476	27.3203	24.664	20.57	40.0986	30.2586	27.9182	40.2565	15.839		0.57143	27.2553
15.8316	27.5362	30.0182	19.567	27.975	23.8521	10	14.227	18.5351	17.724	27.236	23.2809	32.2032	32.2025	40.9202	27.976	35.1031	25.2886	23.5958	30.0914	30.015	32.465	18.903	20.095	44.5593	25.7583	30.7226	38.9338	15.557		0.575757	26.5836
15.9506	28.2885	31.0757	34.304	26.098	14.0302	13.348	9.539	23.1293	28.345	23.432	27.3479	32.9515	33.3112	45.0346	25.114	33.1984	34.6489	21.9855	40.4514	36.478	36.5376	18.266	23.724	46.9688	40.4511	21.8863	29.159	12.832		0.580085	28.2834
16.0697	30.6827	35.6434	37.477	32.064	23.0514	7.771	6.845	23.831	32.029	30.434	28.1616	20.4836	31.8676	47.3258	33.107	33.6992	36.0403	26.9771	24.1191	29.832	28.031	20.543	12.596	37.0085	30.8533	27.7065	27.3649	20.414		0.584416	27.7128
16.1887	31.3376	41.3351	35.752	27.306	24.5871	13.463	6.618	23.4223	29.05	30.817	40.3054	18.6496	20.1561	30.6988	26.525	29.723	25.8396	30.7093	28.7511	34.309	32.7698	17.765	16.482	54.4302	35.8208	27.5664	29.8346	16.556		0.588744	27.8779
16.3077	26.1748	40.0896	38.731	28.798	21.1874	7.252	14.705	14.9342	30.065	41.513	35.5769	21.8683	21.78	22.3481	28.647	41.6452	33.1164	24.5537	32.9936	40.27	30.6381	14.681	26.119	41.5654	33.5907	21.1504	27.9987	15.536		0.593072	27.7689
16.4268	29.7338	36.3085	38	33.663	29.6382	10.98	6.262	22.7362	18.048	40.885	31.4524	19.5002	35.9724	35.6615	29.128	30.5838	23.3794	27.8291	37.4494	35.288	31.2732	17.485	15.039	49.0728	31.7758	20.0503	33.8528	12.94		0.597403	27.9996
16.5458	35.8755	27.5496	47.465	26.275	28.4054	8.359	10.34	13.3521	24.837	40.647	25.1722	22.1989	45.3514	38.1999	25.598	36.2022	23.8584	25.4654	30.4755	40.732	27.9767	29.89	19.643	39.1026	30.8087	28.1178	32.0119	13.973		0.601731	28.4958
16.6648	42.2002	21.0927	27.741	27.251	19.0452	7.061	14.794	13.6805	22.999	35.974	26.15	21.6153	36.4208	37.9475	22.174	31.3332	32.5259	29.5385	40.3076	30.288	29.216	18.88	25.369	36.3499	34.7591	37.2749	32.2025	11.547		0.606059	27.3478
16.7839	34.0434	25.2659	40.565	22.984	13.5547	11.048	11.932	11.4841	28.774	26.735	21.2482	21.3191	34.4202	22.6856	24.033	32.8912	15.267	35.5737	43.0526	33.575	21.7448	21.427	19.375	32.9836	18.299	46.2161	31.7453	19.387		0.61039	25.7725
16.9029	24.1266	28.5205	41.455	34.487	12.8933	8.805	7.226	11.0426	29.445	31.497	19.5812	22.6659	35.2705	30.0537	37.691	34.5539	22.3668	25.0538	33.5111	38.022	25.5071	21.191	28.22	30.7826	31.8075	28.9636	38.738	20.844		0.614718	26.9401
17.0219	20.6166	25.7312	38.081	36.894	12.3503	8.09	6.979	19.5867	20.943	33.125	22.6471	25.4269	27.7121	41.7943	25.626	27.3031	29.0771	30.9258	24.3542	45.312	41.2211	28.843	23.433	25.8257	23.4809	25.6493	22.4809	21.239		0.619046	26.241
17.141	28.2199	30.3417	43.08	38.076	16.7989	7.496	8.839	17.3504	23.878	26.561	28.4818	32.8346	41.0807	36.8723	29.931	27.1292	31.2737	40.9765	23.3437	41.364	37.261	33.768	40.153	34.1266	23.8346	21.4553	21.8646	17.724		0.623377	28.7184
17.26	33.3716	35.441	24.372	29.675	17.3884	8.991	16.336	12.0835	26.068	26.567	25.4125	27.4334	45.361	37.0668	16.354	25.7944	33.4136	38.7711	34.3469	29.091	32.0141	28.286	31.633	31.4928	21.2161	36.3773	36.808	23.209		0.627705	28.0134
17.379	28.5226	31.1931	32.222	32.126	22.8617	10.2	11.102	13.5049	21.486	34.203	23.1344	24.7183	44.6624	31.6743	18.6	24.7084	33.7911	27.2777	30.1466	28.736	38.9631	30.63	35.991	27.4279	36.537	35.6816	40.7316	9.108		0.632033	27.855
17.4981	32.9258	33.6607	28.209	35.861	22.599	9.159	15.319	10.433	30.169	28.083	22.8659	32.8196	53.3845	26.0339	25.344	17.183	24.0977	27.4709	38.8975	32.228	34.199	28.418	31.772	34.3277	29.2136	38.8238	27.4687	7.915		0.636364	27.8172
17.6171	20.155	23.3668	35.035	40.134	24.0503	8.118	8.157	20.6529	32.339	17.205	33.0616	13.4602	38.5643	31.2795	22.978	22.555	33.2949	34.5111	44.352	40.236	27.8726	25.911	29.767	27.1171	34.4417	23.8801	26.5733	14.804		0.640692	26.924
17.7361	22.9011	22.1755	42.721	31.411	25.685	7.825	15.181	16.4217	16.713	25.932	35.0073	19.7114	46.3028	30.6868	19.876	30.8517	38.9325	31.6591	41.8828	27.794	31.3074	28.262	36.86	22.3057	43.2809	31.3012	55.4769	14.235		0.645019	29.025
17.8552	21.2019	28.901	37.205	36.716	29.8656	10.292	7.264	16.6949	18.344	24.046	35.1864	16.9868	34.4802	29.3189	21.174	27.9016	33.2058	25.834	42.2114	20.96	27.4765	20.604	43.812	36.3119	44.9839	32.4252	27.105	17.552		0.649351	27.4307
17.9742	19.8455	25.0866	38.913	31.277	29.1927	8.74	6.843	20.1478	21.408	32.769	42.568	17.7518	57.6726	26.8023	26.313	28.1115	25.9065	18.4259	36.6694	27.677	39.1771	31.642	40.351	38.089	43.2777	28.8282	26.672	10.395		0.653679	28.5912
18.0932	28.1215	26.0017	34.471	44.938	27.185	6.458	13.98	20.242	23.252	25.127	31.2148	28.5708	52.0821	29.2954	26.933	31.2851	21.9993	26.7894	42.6361	32.314	30.6326	33.439	45.873	18.7322	28.8541	43.0094	29.761	18.778		0.658006	29.3563
18.2123	17.3037	27.8396	31.524	32.758	30.508	9.11	12.815	14.3968	31.626	27.698	31.0315	25.3158	48.2108	36.3061	28.224	25.326	37.7583	27.3295	41.969	34.343	30.9189	30.878	42.391	25.8532	22.5824	39.0892	38.3725	19.646		0.662338	29.3259
18.3313	16.8242	31.2382	41.931	34.717	25.0939	14.412	12.995	14.1911	23.291	29.695	35.1411	22.7421	44.6888	31.9409	36.271	39.8821	26.6457	30.6744	30.1917	39.632	34.2958	28.681	44.749	28.9727	32.389	34.7244	28.4818	15.232		0.666665	29.633
18.4504	18.8386	37.1478	38.65	33.707	30.6774	11.8	6.764	17.6513	15.988	29.515	22.831	24.072	37.6005	36.0912	27.237	33.2966	26.8023	31.8232	35.4221	43.241	40.148	18.871	42.845	26.7182	25.8852	42.006	32.1848	17.428		0.670997	28.7587
18.5694	21.0572	26.3096	35.867	32.598	33.8155	13.704	7.38	16.5397	17.839	26.305	26.2331	19.8397	43.6821	25.3416	19.135	23.3246	27.9307	26.8482	33.7716	43.426	31.0444	27.412	45.413	28.5725	21.3021	44.1863	24.3356	16.765		0.675325	27.1421
18.6884	17.8347	24.398	29.888	30.643	21.8026	10.996	8.875	15.5305	25.132	22.422	23.451	20.7572	30.8542	27.025	16.534	25.9516	23.234	25.668	33.061	39.462	38.1957	20.131	31.963	35.4548	29.3462	48.2682	33.3395	27.42		0.679652	26.3442
18.8075	22.8679	23.9743	31.455	29.243	26.7815	9.699	14.163	26.3982	14.024	17.331	30.3784	22.7744	33.8218	41.0506	21.747	23.0825	30.1486	23.3722	32.2957	52.855	31.7318	20.204	36.974	28.698	32.1441	47.1322	38.0473	23.762		0.683984	28.077
18.9265	21.1083	30.6259	27.199	19.781	28.2877	21.427	11.994	12.2547	29.598	21.002	27.4121	17.6165	28.9429	44.5642	21.344	26.7004	30.1349	27.87	34.4001	53.465	26.6687	29.692	41.161	23.2517	27.1351	28.3484	46.4241	21.595		0.688311	27.8573
19.0455	23.7386	20.6387	32.62	24.92	25.879	11.837	10.951	17.7357	29.953	13.169	23.7466	25.1916	40.8516	42.8578	17.322	28.0357	29.1958	36.9964	30.3879	42.653	32.8814	23.48	36.713	27.6922	28.2689	28.885	35.8166	24.663		0.692639	27.3957
19.1646	16.5597	24.5278	47.253	26.754	22.3127	13.67	12.182	23.3137	25.063	23.572	26.672	19.7259	51.8341	35.7587	21.259	25.7174	29.6793	24.5462	21.7569	19.335	31.0027	30.969	29.773	35.0728	28.2362	31.6614	52.852	21.703		0.696971	27.5987
19.2836	16.6197	19.2881	30.678	21.118	30.9703	15.698	9.013	17.3908	24.819	18.864	26.7397	20.089	32.1726	37.6275	16.087	23.7156	24.5608	37.554	24.7947	20.88	34.4202	41.179	29.37	42.1326	27.379	25.0984	43.8723	25.527		0.701298	26.3449
19.4026	16.5532	22.2212	43.044	22.961	29.7299	13.497	11.459	21.0265	17.634	23.026	28.1877	21.6934	36.9919	27.4532	16.86	25.644	25.2137	26.0686	22.87	27.306	38.2371	24.159	33.833	30.299	24.1149	24.8846	38.1624	27.432		0.705626	25.7344
19.5217	18.7059	21.8064	36.623	36.47	34.8793	12.11	9.249	17.2624	11.075	34.34	27.3668	29.9421	39.4148	35.8523	16.635	19.593	35.5704	28.5926	22.6912	20.676	37.5991	22.251	48.555	29.7566	33.8496	26.3942	29.4789	20.396		0.709957	27.0406
19.6407	17.9865	18.4659	37.685	32.895	42.5563	12.434	12.334	17.3582	14.4	23.33	31.7558	23.4259	37.8062	46.4107	21.317	24.7567	34.1775	24.0255	25.9351	18.763	28.4296	31.405	45.243	41.7378	34.313	25.6391	39.6177	24.12		0.714285	28.1544
19.7597	21.5689	23.7883	25.252	18.355	54.4749	9.83	11.925	19.2698	14.118	28.441	27.7361	31.1941	18.8827	34.9313	23.822	20.3463	31.8181	23.3592	31.9912	32.45	18.8657	21.741	31.517	47.9104	33.9216	26.7365	36.5648	36.827		0.718613	27.0585
19.8788	29.3636	28.3164	34.275	23.409	47.1617	9.591	16.319	27.9265	17.05	22.938	24.5269	27.2546	40.0226	41.0666	38.017	17.592	28.3243	32.6051	20.0832	27.201	28.6561	31.086	28.567	36.4487	42.9061	21.6119	25.4262	31.934		0.722944	28.56
19.9978	30.1345	29.494	43.157	27.861	45.2168	12.671	9.715	17.8434	13.021	19.886	15.7661	19.8214	34.0735	41.9973	26.409	18.0424	25.8007	31.5097	20.5798	22.655	25.2593	33.738	47.305	30.6305	30.9485	23.5842	27.1964	28.529		0.727272	26.8873
20.1168	29.4858	20.3003	31.431	27.935	21.7863	9.787	6.425	27.5329	13.113	18.782	16.0754	29.5717	31.8164	28.5585	25.959	18.2138	27.7884	24.5191	28.2169	26.127	29.462	25.714	24.315	35.8671	18.9703	29.9658	21.721	29.644		0.7316	24.253
20.2359	33.8303	34.9938	25.235	23.979	22.2191	18.355	14.346	23.9542	21.978	25.838	25.7703	25.9796	27.068	39.6178	21.029	15.045	23.8175	36.3445	28.3722	33.475	28.057	28.569	44.486	41.7525	32.8128	16.9169	24.5632	38.971		0.735931	27.7634
20.3549	39.8244	33.8581	28.202	32.341	16.3554	16.006	18.861	27.8567	20.713	28.794	15.9945	35.4926	29.7456	46.3279	25.272	19.5031	32.3603	37.1552	33.4486	25.278	40.6537	22.021	48.8	38.4892	43.8211	18.0412	18.7561	32.189		0.740259	29.5057
20.4739	23.5343	38.5708	40.984	33.09	17.8962	12.939	10.335	32.4412	25.849	27.919	22.3351	27.7203	33.966	33.3156	24.088	36.175	33.6436	30.2903	38.1482	26.736	24.8274	34.904	37.869	40.4721	47.9829	36.7769	20.6773	22.99		0.744587	29.8741
20.593	22.6495	38.3205	29.43	34.533	21.2932	13.863	11.577	35.3327	32.422	35.607	12.0878	26.7186	30.9839	50.4328	27.382	36.2988	23.5973	29.7422	33.5008	32.837	33.1488	26.384	36.956	49.2987	48.5063	22.4588	26.5395	37.669		0.748918	30.6989
20.712	32.7769	36.2021	34.819	32.692	22.3595	10.788	16.424	27.3719	21.275	30.339	11.3526	29.4986	31.6866	33.7666	31.948	41.3485	21.3789	35.7772	26.3606	30.203	31.4191	29.287	29.037	55.4835	45.6042	32.3559	25.7367	31.419		0.753246	29.9539
20.831	32.2495	42.435	39.162	23.539	20.3286	22.775	15.054	48.8714	28.474	30.967	22.1562	30.9454	30.7932	27.5452	25.307	39.894	23.5154	25.6809	38.0146	37.211	42.2389	19.018	20.91	37.4165	29.3461	40.6515	18.7977	33.765		0.757574	30.2522
20.9501	26.6299	41.4961	53.941	22.804	20.5804	20.54	14.597	30.0562	28.287	26.517	19.2159	22.2819	34.9065	27.7148	19.809	37.6111	30.2093	23.0997	33.6464	43.938	26.6635	20.493	25.919	49.4676	34.5021	26.271	41.3654	32.033		0.761905	29.807
21.0691	33.3313	35.6285	53.265	32.632	24.7959	22.93	12.918	38.0992	15.794	17.196	24.0455	21.9464	25.2174	28.8218	20.013	38.49	28.5401	22.7928	39.1125	37.32	15.6611	19.188	29.6	47.722	23.7151	23.2552	18.9549	22.341		0.766233	27.6188
21.1881	31.4759	36.6209	33.43	24.273	23.7412	13.929	6.552	32.5404	19.139	23.711	30.8897	28.2233	29.6015	36.4531	31.089	40.7544	24.4372	19.5311	44.8673	41.048	29.554	22.385	24.288	37.752	31.0313	29.4267	25.708	31.234		0.77056	28.7031
21.3072	39.7586	40.6453	31.567	29.86	23.5361	19.985	12.229	25.6238	29.282	26.555	38.6909	25.4598	24.7282	31.6573	20.216	35.5678	23.0649	25.3462	40.8432	35.442	22.0918	26.986	24.755	36.1138	33.7503	27.8034	25.8764	34.537		0.774892	28.999
21.4262	30.3533	46.0894	39.3	26.906	20.2762	26.061	13.745	22.4356	28.291	30.115	20.1435	22.613	30.3095	28.1514	21.183	37.0882	33.4067	23.474	48.528	43.868	22.6434	23.869	19.832	46.5603	33.375	25.1166	27.9204	28.869		0.77922	29.3044
21.5452	33.3918	30.8247	37.163	32.2	33.8268	46.708	19.174	24.0003	26.063	21.487	25.4605	31.5316	31.7312	33.7072	21.816	26.5772	37.1523	25.942	47.583	39.08	21.0461	16.84	33.497	42.4503	50.4209	33.9502	35.5421	28.374		0.783547	31.6979
21.6643	36.8486	41.8146	30.303	40.341	25.2965	41.728	15.481	27.8621	25.844	23.669	28.765	27.4589	31.8764	31.7987	12.265	26.4386	38.8853	33.2579	45.7624	37.42	26.7267	15.384	28.395	35.1621	42.0733	34.3712	30.4269	23.967		0.787879	30.7008
21.7833	21.0723	39.2894	35.481	26.93	27.8837	42.88	17.215	34.0315	22.772	22.385	16.0562	23.3391	22.0919	34.46	11.448	35.3305	27.9664	32.5293	34.7896	29.03	19.7239	24.973	31.679	32.2921	38.8495	22.7367	33.0942	26.289		0.792206	28.0935
21.9024	31.7133	35.6221	41.799	23.741	22.369	35.947	15.436	24.709	22.912	20.821	19.7486	26.4802	25.9659	30.6097	18.949	32.152	42.1596	30.4067	32.7938	34.981	30.5528	15.275	26.873	40.2503	34.7854	27.9178	34.114	15.303		0.796538	28.371
22.0214	23.0203	39.0785	36.106	29.569	23.8265	48.431	9.725	27.8217	25.177	26.171	19.3651	24.5517	29.2679	32.5245	18.525	22.7264	34.3953	28.701	27.2079	38.79	27.5164	15.734	24.048	25.4566	39.7931	36.0405	31.1309	18.271		0.800866	27.9633
22.1404	31.5988	31.5913	26.477	27.43	21.7696	48.914	24.721	19.328	31.505	28.421	21.7824	24.8018	25.5184	39.0698	25.014	25.231	27.8051	29.5338	36.7021	32.318	27.9185	22.149	31.545	30.8802	31.8604	32.0431	28.3398	21.493		0.805193	28.7772
22.2595	28.4084	23.5981	19.573	23.538	33.1512	33.44	24.438	30.2823	35.796	26.276	24.0116	28.0695	16.709	22.7783	24.769	33.2053	38.3771	27.646	32.517	40.956	34.7554	24.856	20.055	30.3101	42.7039	37.2725	33.6079	20.327		0.809525	28.9796
22.3785	21.9805	36.3909	27.156	31.143	34.0211	47.789	10.452	28.8876	29.716	33.14	24.4761	23.5753	29.3185	31.8654	35.1	34.1162	32.4127	32.0742	28.3169	32.097	24.1424	22.295	30.123	35.0401	47.3652	27.3709	45.1289	32.433		0.813852	30.9974
22.4975	25.6212	25.0466	28.024	25.159	25.8316	46.815	11.22	23.4939	24.293	32.059	17.6155	26.8147	30.6266	26.8343	32.047	33.5541	35.8842	34.5748	27.8607	41.176	30.6232	28.319	23.497	29.0716	30.787	18.3889	43.2407	21.32		0.81818	28.5642
22.6166	30.1067	29.9369	33.367	27.457	29.6808	40.348	19.578	19.7806	23.179	27.406	22.9862	29.3084	28.7947	30.9085	32.973	30.0813	33.8422	44.6523	35.4281	41.048	27.1038	22.416	27.665	26.2274	29.3414	18.6648	34.3343	36.254		0.822512	29.7453
22.7356	23.2731	29.6527	26.006	41.879	27.8388	37.513	16.161	37.6186	22.594	20.246	33.886	20.121	37.4196	29.5454	33.475	24.9267	36.2452	41.5158	23.1546	20.051	20.9504	32.279	22.584	34.4522	31.2137	15.6254	31.1287	26.342		0.826839	28.4892
22.8546	35.8353	40.7799	33.457	33.629	24.4078	48.639	14.793	36.7776	29.397	21.105	27.036	26.2585	31.8544	29.5788	26.448	24.7555	40.3337	39.06	36.9885	48.545	35.2021	23.171	15.685	27.7717	31.3735	19.0741	23.3187	30.912		0.831167	30.5781
22.9737	20.5357	42.4054	33.582	30.264	18.3483	54.625	22.273	20.5468	38.395	23.104	24.4105	32.6399	37.8211	32.845	34.875	30.4256	48.0179	21.0412	29.5625	50.749	24.0724	22.495	21.518	27.6348	19.9193	22.0356	29.3789	35.103		0.835498	30.308
23.0927	24.751	37.67	29.182	36.408	17.6566	45.526	32.094	23.3044	42.149	12.949	31.7236	26.95	31.7844	41.2226	30.58	15.4265	37.746	30.8132	28.6186	29.99	27.4752	25.986	27.607	50.7475	34.6632	16.6741	25.9437	44.511		0.839826	30.7197
23.2117	26.4338	55.8474	34.799	27.589	27.0899	53.987	32.668	15.2157	39.315	20.744	36.1774	22.386	32.4481	32.8482	24.514	20.2448	43.3486	37.312	39.2382	28.773	25.6423	33.548	21.482	31.362	52.9025	19.7738	29.7318	33.552		0.844154	32.1062
23.3308	24.5156	41.7474	31.445	26.649	27.3588	38.289	25.981	24.4789	22.629	22.203	36.4305	20.168	35.5045	26.6967	25.722	19.3809	25.1059	35.4348	34.7368	20.6	24.1915	30.129	18.061	39.5262	37.8184	24.8448	23.8511	36.669		0.848485	28.5774
23.4498	25.0623	36.2289	31.874	43.25	16.0128	26.57	35.562	15.8754	20.252	23.652	25.9427	29.7637	24.1757	31.7503	21.005	22.2197	22.9608	18.9999	44.7246	31.54	22.2689	30.935	25.895	41.0559	36.0305	31.5136	22.1542	32.853		0.852813	28.2189
23.5688	24.5126	31.5182	23.748	36.271	21.438	30.325	31.437	21.5059	16.949	21.312	33.8125	25.3578	34.2944	30.3595	29.397	25.1277	26.9985	30.0227	44.3499	31.235	14.8722	25.521	20.723	40.2182	38.5637	28.3086	20.5398	24.343		0.857141	27.9665
23.6879	13.8948	24.382	19.684	33.634	31.2745	34.957	26.1	26.9058	20.265	20.648	28.128	30.6945	22.2938	26.2786	22.774	29.1553	32.1119	31.3898	47.3034	28.272	14.6797	20.746	14.824	46.5126	40.7415	34.6754	18.3651	26.104		0.861472	27.3855
23.8069	19.2304	16.8436	30.39	17.604	25.5735	36.8	28.724	25.019	17.744	27.683	23.3752	24.9746	19.2987	29.297	28.77	26.0863	34.0586	30.108	48.2785	27.343	31.3644	33.644	23.422	39.8843	40.5051	23.1947	28.0787	26.946		0.8658	28.0086
23.9259	15.3042	15.621	16.495	25.211	21.8797	31.557	36.083	25.5116	16.586	25.871	26.8821	23.5959	20.7765	23.954	26.825	21.5642	38.1582	28.9866	35.1627	42.824	33.4806	21.873	26.789	33.4669	51.0446	26.5048	31.6445	30.397		0.870128	27.6446
24.045	17.7226	26.704	29.622	31.142	18.4437	29.248	28.268	25.4838	22.841	29.861	28.0929	23.3674	20.1498	23.6517	33.242	18.9419	21.0758	26.4145	32.5698	31.985	40.9772	19.242	22.724	26.4689	42.1432	21.747	27.5402	34.253		0.874459	26.9258
24.164	32.1131	30.9809	30.652	32.995	19.8844	24.981	35.017	18.7671	17.421	15.579	29.2565	31.7614	18.9458	27.9226	29.538	19.9955	36.8227	23.699	36.9281	36.527	26.9312	24.703	16.011	30.2074	37.7347	20.2423	16.7573	33.442		0.878787	26.9934
24.283	24.6556	32.0074	36.554	27.817	25.7105	28.461	21.373	18.5466	19.957	24.92	34.4879	30.0488	24.1668	33.6166	27.17	23.0864	38.9719	14.4104	45.3153	27.419	28.5275	22.995	25.196	21.0889	30.5412	26.2976	12.15	28.129		0.883115	26.915
24.4021	15.7168	33.062	40.29	31.977	21.8633	28.387	27.891	17.9173	29.567	27.512	22.9828	22.9209	31.0409	26.5713	25.914	25.8478	39.4118	29.9959	56.6872	23.895	17.7199	26.52	26.263	17.2435	40.9547	31.7607	24.413	35.728		0.887446	28.5734
24.5211	20.0966	28.8248	37.969	30.56	29.6238	22.897	26.473	18.9189	12.708	25.654	21.6743	29.708	23.9755	19.8287	23.536	31.2174	29.4432	20.9983	47.2819	25.04	29.4269	27.144	20.844	27.6911	26.7275	27.0824	23.1021	38.654		0.891774	26.6822
24.6401	17.7742	28.0408	46.291	21.796	17.1944	21.705	26.631	19.52	23.574	23.296	27.3391	40.223	25.6981	20.9541	24.082	26.9704	35.4255	12.5395	43.7667	25.32	26.504	32.742	26.8	33.2643	39.0388	29.2748	17.6906	32.508		0.896101	27.3558
24.7592	18.9819	32.5795	32.099	25.974	33.5071	21.987	29.144	20.9961	31.612	26.244	28.9123	53.6826	25.635	28.5589	27.439	24.006	36.6693	34.5918	35.3707	25.436	32.3122	29.739	21.172	21.2955	33.7497	42.6784	23.2058	37.18		0.900433	29.8128
24.8782	25.9346	27.0004	20.336	19.171	23.4281	21.947	33.9	18.8433	24.651	23.657	15.2612	41.5786	20.4049	27.5726	15.477	20.5094	29.6948	30.7545	36.7105	33.335	31.028	30.77	32.111	33.0836	28.7084	27.7505	25	40.631		0.904761	27.116
24.9972	23.1904	24.5989	21.828	18.876	22.2803	19.848	35.013	34.1396	29.137	20.896	20.3878	22.3071	32.0091	28.765	19.394	19.2826	30.7607	24.8901	30.8994	23.695	34.8001	32.202	36.959	29.103	29.7304	26.2512	18.9222	37.373		0.909088	26.6978
25.1163	32.1893	24.6091	29.547	12.157	27.764	26.63	30.741	26.8932	25.771	25.24	16.182	33.8267	25.5098	25.1214	18.321	15.9217	25.2002	31.0939	41.3852	25.017	36.5494	29.078	42.847	18.283	34.0637	34.7767	21.3537	33.707		0.91342	27.4921
25.2353	25.199	28.3501	32.104	10.932	23.916	30.351	26.307	17.6772	25.43	20.974	18.3734	35.9438	35.3403	32.0978	21.317	22.8206	22.5129	28.231	40.8509	18.466	24.7065	28.257	40.134	22.0307	24.228	27.3933	22.7171	32.227		0.917747	26.3888
25.3544	23.9545	24.8757	31.508	5.473	18.3451	29.525	18.462	19.4345	19.679	21.675	20.4839	27.769	27.4738	27.5665	24.516	17.2922	24.4759	26.2975	28.4685	23.239	21.0694	29.595	36.072	22.7665	22.9802	32.9274	30.8435	28.367		0.922079	24.4691
25.4734	31.4955	35.664	29.577	6.036	19.3784	27.893	24.768	21.1773	23.5	20.328	18.2224	20.3386	39.3283	26.9846	16.602	8.8536	30.4113	18.4403	35.1227	27.381	31.0218	28.968	38.368	23.8432	23.8524	35.8644	22.6052	37.204		0.926407	25.8296
25.5924	27.7902	35.7143	37.811	6.127	11.9645	26.489	22.248	16.0834	25.22	18.297	11.648	29.9706	19.3497	26.7165	13.338	19.8004	30.4152	23.0177	32.6474	21.918	23.0203	31.048	29.708	37.3747	27.9095	29.9705	21.6834	32.2		0.930734	24.6243
25.7115	26.3599	37.537	24.309	6.782	6.036	28.242	20.868	24.5862	24.588	21.575	10.9627	26.256	20.735	23.889	17.348	19.5177	26.3195	23.6005	25.2939	20.516	28.7399	32.157	16.333	27.542	22.0956	32.4843	31.0872	22.716		0.935066	23.1599
25.8305	27.0869	36.0673	25.271	4.447	2.8852	34.112	12.103	19.3711	14.179	18.808	8.7811	24.1743	22.5157	21.6869	8.871	16.6918	23.5068	21.3924	33.4746	14.597	24.2857	22	22.812	30.7108	28.2155	30.1157	17.672	21.413		0.939393	20.9731
25.9495	22.0145	31.3494	22.523	2.873	5.2425	46.203	22.373	28.9106	19.02	17.693	13.8716	20.1729	21.2068	28.242	8.724	16.0294	26.6492	23.3064	30.9418	22.571	19.091	27.422	27.4	24.0743	27.2147	27.8826	21.3996	24.335		0.943721	22.4549
26.0686	27.4198	38.25	19.65	1.081	7.0638	49.833	27.677	21.1828	15.56	7.962	9.8941	25.6102	20.2025	21.6753	11.078	16.3534	36.3465	13.2351	32.4687	26.46	21.3342	22.481	20.227	31.2762	33.6979	19.9955	20.2941	33.01		0.948053	22.5471
26.1876	19.7134	35.9473	20.139	3.559	4.8156	48.939	27.554	14.3111	21.811	14.45	10.9972	16.8394	31.7915	11.8902	12.328	14.5986	30.1112	21.7422	30.6896	20.159	12.564	18.454	13.568	22.5495	23.9494	29.8312	13.4746	27.268		0.95238	20.5016
26.3066	22.7718	27.8768	17.857	3.024	5.896	36.992	33.18	11.0644	13.912	12.341	6.4155	14.575	26.2936	16.6725	10.872	7.8802	34.9637	17.3508	28.5411	28.308	10.1051	18.448	13.037	29.5137	27.7588	18.9558	15.278	17.649		0.956708	18.8405
26.4257	25.1638	17.7217	14.467	1.969	3.7114	31.751	29.367	13.1606	21.475	6.274	6.7044	13.4073	24.285	10.9299	3.048	9.7517	35.5383	19.0762	20.0053	31.183	9.3911	16.979	14.728	28.1201	22.1494	18.6234	25.2436	25.952		0.961039	17.8634
26.5447	21.5054	19.4908	10.024	0.833	1.2804	36.705	35.198	12.4376	10.45	2.393	6.0246	13.466	20.0704	17.853	4.144	7.6592	26.9187	25.8765	35.4835	17.389	13.1096	18.922	8.252	26.5247	27.5608	18.1797	11.8692	28.522		0.965367	17.0765
26.6637	20.5961	30.2431	8.53	3.169	3.3858	24.514	24.786	10.3261	4.876	6.453	4.0346	15.5184	12.4429	10.4536	6.531	15.7755	23.8916	29.7023	30.0076	21.512	6.3677	12.08	8.584	31.2151	25.883	29.9748	14.3427	26.578		0.969695	16.4919
26.7828	17.1163	21.9788	9.02	2.842	2.0789	16.631	27.211	7.5201	7.168	5.654	0.8831	12.3073	10.87	6.2499	3.626	9.4626	13.3488	24.5921	36.3367	15.034	4.6897	8.588	5.536	20.5135	32.8685	26.8545	16.3123	25.766		0.974026	13.9664
26.9018	11.6243	34.3321	7.791	0.215	1.8397	6.574	16.595	6.5164	4.234	2.289	5.3871	9.9002	15.1538	3.0122	2.867	7.6808	16.1795	30.5052	37.1874	12.373	4.8908	9.151	5.232	22.4742	30.0156	20.0178	17.0215	25.692		0.978354	13.0983
27.0208	9.0308	29.2368	1.634	0.24	0.0873	14.46	13.4	7.1093	3.284	2.09	3.2944	6.6705	11.6167	8.814	4.067	5.6411	27.9099	34.6117	42.8138	11.876	5.8561	4.62	4.82	7.5188	39.0184	26.1719	27.6293	18.881		0.982682	13.3001
27.1399	13.1797	30.4771	1.754	3.233	0.4273	6.859	11.204	4.5053	2.919	1.809	1.1722	4.6755	12.9129	5.9917	6.707	10.0469	25.8124	29.8171	41.7317	19.622	4.7354	4.603	9.076	4.8428	27.6174	21.7535	20.079	27.065		0.987013	12.6653
27.2589	7.7297	21.1152	2.342	5.567	3.3732	7.019	6.847	0.9724	7.402	2.229	2.6811	3.2914	9.9245	7.175	1.914	8.1206	20.1465	29.5872	40.2228	14.176	4.1334	2.666	2.103	6.0827	36.9977	18.742	21.0754	18.028		0.991341	11.1309
27.3779	5.0947	16.6251	3.134	2.415	2.0629	5.232	5.096	2.8196	9.259	3.535	1.9143	3.6049	8.1432	11.2427	0.759	5.5498	19.778	33.9961	40.4778	8.563	4.3302	2.491	3.637	5.0345	24.7277	20.3581	16.2865	18.792		0.995669	10.1771
27.497	6.8806	9.1494	1.315	2.415	3.5618	0.586	5.757	3.2291	5.731	6.256	1.9983	1.664	3.1545	4.0072	3.338	4.1061	13.8763	29.5166	35.1999	5.701	7.0309	7.746	5.123	3.6616	22.4034	23.2364	9.3264	12.523		1	8.51763

## Sheet: Image1
X0	Y0	Y1	Y2	Y3	Y4	Y5	Y6	Y7	Y8	Y9	Y10	Y11	Y12	Y13	Y14	Y15	Y16	Y17	Y18	Y19	Y20		Ap-basal	Avg intensity
0	36.5036	38.1578	55.3683	50.9567	34.971	58.7104	43.3426	57.0424	47.0272	47.0532	30.1792	16.8674	20.3192	24.7705	17.5233	16.7848	16.0199	31.8012	42.4434	40.0272	27.4735		0	35.8735
0.119	43.2343	39.1619	43.2658	60.2419	41.3809	59.5038	41.6672	53.4294	35.0898	50.7336	31.8628	20.1043	31.2836	29.6472	20.5429	20.965	17.0388	47.0654	34.4115	41.7142	23.2027		0.00653405	37.407
0.2381	47.1049	37.9155	48.0755	63.6073	41.9341	56.0057	49.637	53.8194	44.0842	48.1654	40.7985	25.4235	27.1266	29.9257	21.1123	17.4785	19.6551	27.1152	32.2389	35.0339	21.1772		0.0130736	37.4969
0.3571	45.4945	32.4369	64.2143	64.1032	37.2612	50.3016	46.701	42.6617	49.4293	57.6753	42.9866	23.4487	31.083	34.4501	31.2755	21.8157	20.206	31.7115	38.1663	33.7438	26.6789		0.0196076	39.326
0.4761	52.4613	47.5738	62.5344	75.5182	34.8996	46.2307	46.1543	51.7557	52.5419	67.8974	38.3015	24.3741	33.2517	28.8861	36.0232	23.0467	22.2727	34.8208	40.6691	39.4044	36.4955		0.0261417	42.6244
0.5952	41.8046	46.6913	83.9252	65.5005	33.2109	44.9841	37.9691	70.7607	46.953	66.1067	38.9321	30.7611	30.1992	39.5359	34.611	31.8459	26.4586	45.0798	44.727	44.3758	42.7645		0.0326812	45.1046
0.7142	45.7409	45.3546	70.3735	65.1448	22.9818	56.7724	39.117	55.8583	51.1664	68.238	38.8453	30.4923	31.1709	44.2523	36.351	32.934	23.4559	51.0925	39.3787	50.9421	46.0177		0.0392153	45.0324
0.8332	50.4701	50.7936	83.8814	89.4253	34.2985	54.8496	35.1302	57.3741	55.5099	67.8938	49.4593	45.0664	36.4211	53.6596	41.873	46.9823	25.0167	52.2455	53.9774	53.4144	58.6486		0.0457493	52.2091
0.9523	41.0909	45.5899	74.8998	81.5683	31.9731	59.2445	39.6008	60.3407	50.8232	60.3305	54.2076	37.3834	51.8408	43.8439	49.0766	57.7492	31.8995	50.3351	58.4945	55.4349	64.0648		0.0522888	52.371
1.0713	39.4331	47.4889	72.0435	63.0107	33.8237	50.6809	43.5731	53.5782	63.2005	71.7305	62.0374	35.9207	38.7344	41.2137	59.4773	48.3757	24.8753	50.9096	57.9763	55.8961	67.5822		0.0588229	51.5029
1.1903	43.8336	55.6963	76.4059	83.9823	39.3928	61.2276	35.3702	69.4775	51.5132	69.2612	74.6127	39.8158	35.6878	37.2735	57.9017	43.3448	31.1369	56.7564	75.0349	69.6042	74.4777		0.0653569	56.2765
1.3094	51.5364	59.1441	90.8951	86.3406	38.7725	53.8544	52.5932	56.603	54.6539	65.279	67.8624	34.0431	37.0903	41.0791	52.1721	40.1439	25.6702	52.9953	71.1882	66.8776	76.6849		0.0718965	55.9752
1.4284	48.534	65.9428	83.7891	68.0893	46.016	40.2399	48.6263	66.3652	56.4331	67.0583	77.6822	34.9146	31.9068	28.0495	39.9459	35.7213	34.6833	52.5234	54.1537	66.8423	83.5668		0.0784305	53.8611
1.5474	37.9776	58.6315	73.6278	64.5588	38.8526	44.506	40.4554	56.0392	56.8969	69.3641	77.4876	42.6364	23.2026	44.7866	55.2662	40.91	38.7063	49.3788	43.1778	72.4239	77.9998		0.0849646	52.7089
1.6665	43.2665	59.957	66.8678	75.4181	36.3415	40.1683	32.4321	48.3211	53.4233	55.5857	69.3874	33.813	27.3049	34.5217	52.1452	36.6125	41.4989	55.1568	42.2453	86.4438	64.3421		0.0915041	50.2501
1.7855	46.9631	52.2136	67.0699	63.3117	34.6347	45.7476	46.2645	48.4171	71.8199	59.238	61.4559	39.1741	28.5161	35.1123	34.9835	46.0783	48.1942	48.5016	41.4998	83.2781	48.0752		0.0980381	50.0262
1.9046	37.4739	41.6339	72.1128	43.6336	45.3904	42.1966	44.7177	51.9653	68.0722	54.7502	63.4327	44.1666	23.9392	41.7976	35.7069	49.6037	40.5328	42.0298	50.8967	88.9613	47.1621		0.104578	49.056
2.0236	40.452	50.8221	77.5744	52.4432	42.1768	40.2323	42.5857	43.1219	51.7228	47.6162	69.3534	37.337	29.4164	32.3751	31.113	31.4366	35.0264	41.3488	43.3151	73.1931	55.9484		0.111112	46.1243
2.1426	39.2362	54.6935	59.4206	52.5013	43.581	42.4866	42.2894	46.1701	56.5858	50.7312	60.1539	31.4974	26.1226	28.9927	28.2543	22.4852	35.0895	46.6884	44.3941	73.5805	66.0905		0.117646	45.2878
2.2617	49.1218	54.3054	60.6739	58.4974	42.3054	44.268	38.8847	45.0161	44.7522	37.6771	49.3568	28.6821	27.1979	32.5985	35.9513	32.068	42.3559	40.9336	42.3481	66.2627	67.9229		0.124185	44.8181
2.3807	42.7163	50.8825	68.6562	49.1452	38.7874	36.9698	37.8229	42.5268	43.7715	50.0559	54.15	32.1277	35.6718	30.2448	47.2932	33.098	37.1818	56.5093	46.0436	68.5221	71.7952		0.130719	46.3796
2.4997	52.8425	42.4269	67.5698	35.1719	30.908	34.376	42.7225	40.4692	53.2817	42.9846	63.3503	31.1401	33.7739	30.0022	34.2952	35.1066	40.0091	46.3929	46.1026	66.0263	67.244		0.137253	44.5808
2.6188	45.3738	53.54	63.6697	36.0994	43.7122	39.7102	48.5852	45.8152	41.1244	51.4054	55.7597	28.2255	35.7816	32.8903	40.9056	25.3987	37.0792	59.5359	51.7786	62.6111	50.3667		0.143793	45.208
2.7378	40.5559	59.3457	47.0695	38.7192	40.914	45.8773	46.0124	39.4147	32.9848	46.9926	58.7907	40.0792	37.5845	29.7447	52.3578	25.3864	53.2169	51.6912	53.9767	62.8924	58.4318		0.150327	45.8114
2.8568	38.9691	66.5721	50.4635	28.1015	36.5512	35.6286	40.0457	42.7084	40.9753	44.1698	51.0262	30.7966	34.0879	31.3271	47.0283	35.7943	47.774	37.984	52.4968	58.8113	61.3749		0.156861	43.4613
2.9759	44.3462	52.5571	54.9093	37.4397	32.158	27.0889	48.187	31.6157	41.8523	40.7455	43.6611	25.4251	35.2076	36.9102	30.5681	37.3064	39.2495	40.0018	38.2727	60.7446	48.6948		0.163401	40.3306
3.0949	48.6972	38.4644	47.3698	43.0525	45.2113	44.7074	44.803	37.5383	45.9989	37.0317	35.487	30.5898	28.7643	28.8993	40.1764	29.4288	48.5634	35.4968	52.9932	47.0998	45.1901		0.169935	40.7411
3.2139	32.3851	43.3939	54.8333	42.9933	51.3545	44.3404	35.1129	49.4251	36.4494	36.577	35.1966	34.5826	25.3316	27.8093	39.326	35.5091	52.9003	32.4194	51.3316	48.0921	45.5222		0.176469	40.7088
3.333	42.1453	55.3288	48.8088	60.3294	46.0997	33.9256	29.1892	62.0889	36.6412	47.6498	39.6824	34.181	30.4312	34.0147	40.1038	20.1603	49.3593	40.8965	43.9301	60.8994	46.6957		0.183008	42.9791
3.452	29.7142	50.6782	53.9641	45.0094	41.0998	45.5228	27.7121	56.9362	47.4443	39.3196	51.3464	36.2923	32.9913	36.2168	34.6323	26.6597	44.4057	32.8124	48.6883	54.7128	55.1935		0.189542	42.4453
3.571	43.4283	47.7841	55.3934	39.0597	48.9049	55.7267	33.9192	58.3572	41.87	44.296	48.4274	38.5983	33.4933	34.4684	39.7413	24.4881	47.9684	43.6297	43.6186	43.9347	46.9637		0.196076	43.5272
3.6901	58.5698	51.7039	50.7767	49.1071	44.2375	47.0266	36.5924	43.1593	51.5502	39.3168	36.5862	40.6837	39.4332	34.1145	32.9014	36.3084	45.6218	38.9895	50.9921	55.9839	42.1122		0.202616	44.0842
3.8091	44.705	39.0531	47.2192	42.5694	53.7947	47.9293	44.6238	34.084	46.4459	33.6163	34.865	33.9019	35.4751	18.911	27.3624	39.9634	38.4821	33.9975	41.7677	58.4441	48.1654		0.20915	40.256
3.9281	42.9926	50.8028	42.1314	46.1073	62.1838	46.8702	41.2012	49.2375	49.9195	49.4647	32.541	39.9529	33.8297	19.2803	31.646	30.3565	40.0575	36.8825	39.4983	41.2904	44.6973		0.215684	41.4735
4.0472	54.0073	63.4465	41.44	49.3139	48.7922	37.7723	41.7835	30.7151	49.903	48.2767	37.5659	28.6924	31.3766	24.8458	41.5568	32.3676	43.5775	26.8889	39.0939	42.2726	46.2922		0.222223	40.9515
4.1662	56.3279	61.161	37.7141	43.5034	41.7915	43.7587	43.8579	37.0424	46.6118	53.182	33.2647	31.4973	28.5504	32.0104	37.0921	32.3311	41.9462	38.4677	46.1246	43.9884	32.0779		0.228757	41.062
4.2852	41.6704	56.1668	39.6556	52.6797	39.3289	41.2747	41.744	42.2881	42.6162	56.0028	35.701	28.4255	28.9205	30.6464	39.8814	31.3922	36.3097	38.6747	46.1401	36.1982	36.7112		0.235292	40.1156
4.4043	55.1632	49.093	45.2701	39.4963	33.4684	30.8979	40.462	40.921	48.4845	41.4865	32.3804	36.7833	28.6909	32.8579	36.7683	31.815	38.4255	32.8198	52.0249	49.0467	33.4209		0.241831	39.5132
4.5233	41.8253	51.8384	50.7101	44.2238	44.7208	36.5066	44.4866	53.7021	48.2538	50.369	31.6988	34.478	28.8076	39.8853	23.6192	26.8636	43.6846	30.2099	47.3608	42.456	35.6903		0.248365	40.5424
4.6423	53.8165	44.2265	45.9748	33.1824	41.8216	36.2123	41.6953	52.6239	43.9436	46.1903	28.5126	37.8027	25.266	31.9981	37.2193	36.5428	46.9377	32.6039	43.7986	42.5794	37.7747		0.254899	40.0344
4.7614	45.7378	47.7731	39.8535	45.2717	43.0191	38.813	49.728	54.88	47.4261	57.2772	32.1222	38.4828	29.5518	36.3803	48.5643	31.8131	34.6983	37.7581	51.904	30.5566	33.373		0.261439	41.6659
4.8804	38.9349	43.927	41.9736	43.3902	31.8421	34.5567	45.864	47.158	37.9828	47.9106	24.9671	45.9345	35.0186	32.4091	38.457	38.2614	37.8324	34.8645	43.1664	38.3983	30.1397		0.267973	38.7138
4.9995	27.6752	41.2951	41.2659	41.3558	29.776	33.7719	41.6978	48.9971	39.5777	37.62	28.9379	33.3475	39.1632	28.1063	31.1215	42.8871	32.5227	34.8567	29.1597	44.1715	34.2447		0.274512	36.2643
5.1185	33.9304	55.0845	36.7389	40.2265	44.9113	34.4472	47.71	39.0137	49.8153	32.3708	33.7485	39.9907	29.1782	17.9869	27.5846	34.7519	35.7855	43.1039	27.2232	34.049	36.0409		0.281046	36.8425
5.2375	42.1489	47.6547	32.7621	43.6915	42.1479	44.2881	48.6797	37.7172	44.8587	40.3258	22.7054	37.3233	39.8149	20.7864	39.7724	33.2969	32.181	44.6955	34.2753	44.2514	20.5861		0.28758	37.8078
5.3566	48.24	50.9137	40.6845	48.408	53.3351	43.5206	44.725	40.7158	39.7566	33.2469	25.1464	28.5489	33.1683	17.5569	40.992	33.5251	37.3646	31.0432	34.703	44.0864	25.278		0.29412	37.8552
5.4756	35.9758	49.3952	49.3694	53.0061	40.7458	37.7937	36.8416	45.7119	49.4675	54.5957	25.1715	42.3337	26.8021	18.8227	51.382	39.4493	40.2173	38.8905	44.9506	38.4793	36.5625		0.300654	40.7602
5.5946	45.1836	50.8682	38.4348	37.5655	30.2674	41.9806	42.1784	41.0443	43.8488	45.4432	21.7717	50.2335	28.7914	20.0815	31.0298	36.9401	37.9054	37.6151	43.654	44.7772	31.5933		0.307188	38.1528
5.7137	34.8736	56.6949	39.328	30.0126	40.5139	37.4315	32.357	45.799	59.2849	31.7509	27.1849	32.1991	20.1834	16.4365	32.2303	33.0035	34.2351	38.1737	30.5323	43.185	39.4644		0.313728	35.9464
5.8327	34.8595	47.6799	47.3948	27.0043	46.5831	36.4226	32.7322	45.5617	55.6271	34.8574	34.8667	45.4855	18.506	25.4183	18.7874	39.5451	38.2521	44.616	31.6359	41.8152	47.5413		0.320262	37.8663
5.9517	33.941	53.9822	29.6029	33.7878	49.4299	37.8225	41.1556	41.9616	46.7656	30.1866	26.3258	36.187	23.8604	22.0378	25.7338	32.8887	35.3263	49.6903	36.2716	53.7989	35.3003		0.326796	36.9551
6.0708	31.2458	65.6477	33.1887	40.4627	45.9341	45.0834	42.5279	51.8469	67.0426	20.7425	27.1574	39.7094	21.022	15.9794	32.9401	36.5984	35.654	39.6858	28.5091	54.8863	30.553		0.333335	38.4008
6.1898	36.8674	55.1414	36.3914	42.3433	56.3049	37.5589	38.5465	52.4522	56.1543	30.5276	29.9566	31.7428	19.7923	14.6523	27.6902	44.0448	30.6988	39.7479	31.7613	35.998	43.6774		0.339869	37.7167
6.3088	42.1784	48.9653	32.7815	37.2757	47.7273	32.9061	32.7292	50.5056	52.406	31.7401	33.9379	28.514	16.2532	18.3067	38.0411	31.5317	29.3383	42.9543	28.9966	41.1047	26.4664		0.346403	35.46
6.4279	40.6441	45.8508	35.5254	45.2748	40.9171	29.0285	35.3094	43.1613	50.5128	26.3041	23.6103	36.0146	17.8814	18.3974	35.2703	33.4109	27.4389	51.215	37.1929	56.5861	31.7832		0.352943	36.2538
6.5469	44.2258	44.5529	22.87	28.8317	41.7218	36.451	33.7755	51.5065	42.6544	36.3968	28.2889	28.9945	24.875	15.7938	36.4549	38.3303	22.0463	40.2135	37.694	42.9554	28.6663		0.359477	34.6333
6.6659	35.5191	61.0768	35.3838	44.2916	44.9784	33.6778	24.2687	55.0038	44.3578	39.976	33.1757	30.7506	23.8905	15.7368	27.759	31.4277	31.3946	40.9986	30.532	38.3692	27.1064		0.366011	35.6988
6.785	34.2084	43.85	35.972	35.341	27.5615	32.3436	19.5549	36.493	54.7709	41.2823	36.593	27.1034	13.0454	12.7331	24.9394	33.1075	36.4078	31.1072	29.2065	41.282	31.6374		0.37255	32.3114
6.904	30.8193	38.6081	51.3203	45.9547	34.2617	41.7898	29.37	48.5478	52.0381	41.0261	27.2862	25.4923	15.7923	13.3909	21.7354	31.2035	31.2471	37.2987	19.981	41.8069	30.6894		0.379084	33.7933
7.023	39.5415	37.2263	51.8429	39.6313	37.6915	31.7429	27.0457	44.0971	50.5639	26.9996	39.502	29.6518	15.3896	9.1731	22.5379	43.29	26.3975	35.2262	28.1524	37.2466	24.9602		0.385619	33.2338
7.1421	34.9248	37.3721	42.5655	43.8024	36.2119	24.409	32.0429	44.5774	43.4969	36.4037	24.9283	29.8328	13.4503	11.2716	24.2053	40.0181	24.9797	24.6874	33.7367	32.3556	31.4821		0.392158	31.7502
7.2611	34.7414	33.7698	30.0768	48.9634	30.8756	21.6334	27.011	43.1621	43.2877	31.4608	28.2944	32.7948	14.8049	14.8665	27.8067	41.0533	21.6368	26.7983	29.9666	38.6023	33.2627		0.398692	31.1843
7.3801	30.5109	35.8586	33.3989	45.0902	26.6055	36.321	22.3591	42.6591	46.1533	34.0534	35.3686	29.7183	16.0573	15.4679	19.7511	33.4219	30.6004	35.3743	23.0398	26.7193	34.1005		0.405226	31.0776
7.4992	22.572	37.398	32.397	53.1584	29.9308	27.1063	25.9157	32.7365	47.2854	37.711	37.4885	29.6251	17.1328	10.6124	25.6011	37.9912	34.1444	29.1257	25.8476	37.0972	37.9447		0.411766	31.8487
7.6182	26.9843	41.0905	31.0827	44.0523	35.7805	31.056	22.5602	31.7606	53.1248	36.3075	35.7661	39.7819	22.1598	10.859	27.9097	31.7159	24.594	30.8431	25.968	37.3625	37.7337		0.4183	32.3092
7.7372	26.6995	52.1528	38.7815	46.2724	33.2674	24.9263	24.3272	42.168	51.6136	37.7048	34.7006	27.1057	14.2277	15.2893	25.5335	40.9135	24.5512	23.4195	19.2649	38.0636	44.6994		0.424834	32.6515
7.8563	31.3807	48.0743	42.4113	54.2602	32.4083	29.5388	27.0998	34.3013	40.6481	32.6895	32.6571	27.9301	11.2798	16.2049	22.6511	38.508	29.747	36.2781	27.7416	37.6575	31.8437		0.431373	32.6339
7.9753	25.473	46.459	35.5043	35.8006	34.2892	22.696	18.6614	26.0382	39.3745	34.6651	30.7833	36.1358	11.2405	9.9833	18.5041	30.3808	30.5686	34.9139	31.3062	37.6077	40.5643		0.437907	30.0452
8.0943	24.8721	43.9208	40.85	47.0137	29.0801	22.714	18.6853	27.9775	44.2572	36.2427	33.0975	31.0671	15.0405	11.9244	19.8363	30.7377	24.6977	23.7004	29.1518	35.3841	46.1479		0.444441	30.3047
8.2134	26.8435	40.6586	35.4512	38.1105	35.9092	30.176	20.7843	31.881	36.213	34.7363	43.1791	28.0298	20.3378	11.6835	15.7787	31.2415	25.2787	26.1743	30.1487	47.3283	40.0093		0.450981	30.9502
8.3324	21.7513	39.8157	49.8553	39.6542	33.1991	27.4646	20.1893	28.4089	45.7494	26.7858	46.1531	28.3824	15.5114	11.5556	15.0861	29.8378	26.1329	25.7968	30.6073	38.6418	37.5326		0.457515	30.3863
8.4515	20.0558	39.2678	45.437	43.5177	24.1474	19.7494	20.202	29.7806	42.839	28.0234	37.4393	33.4211	19.3226	12.8469	21.7865	24.6475	32.3015	24.8865	25.7928	41.9792	47.2904		0.464055	30.2254
8.5705	22.7438	38.8108	41.91	32.1845	30.5272	21.1581	17.4069	36.105	39.6194	31.5316	31.949	32.0808	17.1403	11.2165	25.377	40.3346	37.3282	29.3902	21.4478	40.1083	38.3126		0.470589	30.3182
8.6895	35.8234	39.3687	41.3039	31.9595	28.6649	27.8354	16.7992	22.1812	31.7976	27.4434	28.1717	19.6953	18.4921	10.2251	20.0305	41.2595	31.5921	26.4244	21.5048	34.0856	34.5603		0.477123	28.058
8.8086	31.1575	39.5633	35.4496	47.6832	27.8921	25.6086	23.5043	32.4718	34.9458	26.1767	41.4859	34.826	13.6284	17.2025	22.4962	32.9821	32.3631	27.4957	22.5479	35.7751	44.6471		0.483662	30.9478
8.9276	32.5758	35.449	40.645	43.0978	23.1117	22.6372	16.9019	38.1473	40.9648	41.1826	42.3638	30.6979	17.2414	11.9582	24.4216	41.9711	35.8102	34.6109	24.9986	41.3242	37.7904		0.490196	32.281
9.0466	25.0305	41.1584	46.1212	41.8534	32.9304	13.6344	17.5535	24.0187	39.1931	23.0381	32.2858	17.8557	12.562	12.0667	24.7747	32.8348	45.683	25.0852	22.3575	42.5223	38.9419		0.49673	29.1191
9.1657	16.4509	47.8615	42.67	34.6439	30.6289	22.1753	27.1833	30.8233	34.8025	32.0858	29.7085	25.5419	17.2605	12.8006	16.9257	33.2565	35.8821	30.7553	26.3529	36.0043	28.3484		0.50327	29.1506
9.2847	24.5044	39.03	48.1912	39.6281	30.2899	23.279	16.2239	24.2804	37.3677	34.0439	24.5864	22.7442	13.7545	7.1216	20.5401	32.9972	38.232	29.3312	29.0339	31.8125	28.8661		0.509804	28.3742
9.4037	20.3742	34.1784	40.4602	37.0025	32.9686	19.6504	14.7402	26.3567	36.8759	27.2325	22.2599	31.5562	11.0034	12.624	18.8113	34.2761	38.1815	20.9826	18.9671	34.4189	34.1495		0.516338	27.0033
9.5228	25.6017	35.9433	40.649	38.2643	29.3442	20.4625	14.7849	28.9229	29.9084	31.7013	30.1855	22.7337	12.9857	14.8781	9.7517	33.1178	39.6688	26.3523	25.7454	39.5542	33.471		0.522877	27.8108
9.6418	22.5047	30.9775	35.6233	40.3019	24.924	25.6579	17.6686	33.1066	36.5873	35.0895	35.3746	20.9571	14.6631	10.7575	17.9325	36.723	34.7915	21.4954	20.3553	44.8867	38.6307		0.529411	28.5242
9.7608	18.3399	31.0498	46.7614	29.2468	22.8969	20.329	8.701	28.8973	33.5591	22.3243	30.7186	20.4138	18.0089	7.6375	18.969	34.0236	37.248	22.0275	24.9512	46.3216	34.0122		0.535945	26.497
9.8799	23.0993	46.8852	49.3019	28.7113	31.7661	23.3412	13.8418	23.3097	45.0121	25.669	24.0415	24.8105	17.5701	11.2027	15.7559	29.1647	37.3361	14.4929	30.5091	41.9666	35.5751		0.542485	28.2554
9.9989	27.1554	47.5442	59.4805	33.9897	16.3721	20.5337	14.3306	28.9767	36.6956	27.8351	22.3427	29.1776	11.7939	8.1045	18.6764	33.9875	38.4463	21.6031	29.445	32.2948	38.2274		0.549019	28.4292
10.1179	19.4649	43.5903	45.0274	28.2158	15.3199	12.2361	17.5792	28.6888	37.7485	29.3334	25.3619	28.3938	11.3359	7.4891	24.6378	25.6239	35.5068	18.6381	29.279	35.5818	33.8564		0.555553	26.329
10.237	17.4974	52.7271	49.3186	35.6429	16.9503	11.9348	10.2315	19.4838	37.56	33.7956	29.9775	21.2498	18.2348	10.8303	17.9678	23.3722	40.9616	21.5988	25.353	25.9718	32.138		0.562093	26.3237
10.356	19.9173	44.0247	43.9086	43.4335	23.6095	14.9674	12.1573	23.8306	44.0037	37.0679	32.1883	22.4967	14.5285	14.4343	15.8473	34.3004	33.6912	25.6996	27.5888	33.9605	25.0959		0.568627	27.9406
10.475	20.3461	41.4617	37.9644	27.0138	23.4425	14.6308	10.2808	26.4067	36.0397	33.6557	35.0057	23.1176	12.3672	16.5574	25.0083	39.2097	37.4818	19.6092	20.0919	36.9784	30.6289		0.575161	27.0142
10.5941	19.0213	43.0983	54.5425	29.1692	20.6359	14.7592	13.1667	31.6049	34.6433	26.94	39.0675	23.6147	12.0689	10.5999	22.3724	46.82	43.6013	18.9209	21.8126	28.7205	41.3315		0.5817	28.4053
10.7131	17.2055	50.5242	43.0363	42.2319	30.1377	13.1588	11.8379	28.6956	40.5158	29.3192	41.9714	28.2132	10.5707	5.4387	17.2852	36.8587	39.9587	19.1217	17.9619	30.4131	37.328		0.588234	28.1802
10.8321	19.9002	37.5156	38.181	26.0637	27.1038	14.4905	11.8672	25.9031	37.4012	31.3778	34.3088	23.3961	15.1091	9.9384	26.4771	35.0389	41.8554	23.8496	21.4642	38.329	41.193		0.594768	27.6554
10.9512	19.148	30.3631	50.1254	30.4584	24.9112	13.1243	18.2813	31.8089	39.05	26.3893	36.6608	14.2882	11.0649	13.5248	24.8217	31.531	37.9116	23.5814	30.4612	36.2477	43.4144		0.601308	27.9604
11.0702	26.2091	34.6876	44.1615	50.654	24.3662	7.9289	12.6667	22.4203	29.682	30.8539	27.307	22.8439	13.1374	10.9196	26.065	34.9768	40.4754	16.813	31.2515	49.4092	30.7176		0.607842	27.9784
11.1892	29.1131	38.8	47.2793	44.0624	23.435	11.4457	14.4571	25.1535	41.1314	33.5294	36.218	21.2544	10.6119	13.4013	26.2628	30.6558	54.2886	15.5476	28.7114	32.0088	33.993		0.614376	29.1124
11.3083	24.7949	45.403	37.3707	35.5843	19.4545	14.3604	22.3043	23.5915	48.0123	23.701	28.2685	25.7137	6.149	14.2161	25.1368	32.1015	44.4456	14.3627	17.4891	30.6636	30.5686		0.620916	26.8425
11.4273	26.8111	43.7331	46.4704	37.1785	31.7809	15.1598	13.9568	24.6302	31.2442	20.3586	24.8075	39.0466	22.5833	11.1389	36.0793	31.0116	40.7606	22.8924	24.1823	25.2814	26.3391		0.62745	28.3546
11.5463	22.2507	44.1288	37.7587	38.6441	22.8954	13.3185	14.5007	18.2435	33.2442	26.6459	25.5483	25.2048	20.695	9.9643	27.5259	35.909	46.6045	20.6999	26.0707	30.702	19.537		0.633984	26.671
11.6654	26.967	47.1599	34.1702	44.419	24.8741	14.9825	14.2814	25.3007	32.2701	27.1018	38.098	18.2335	25.7107	13.8654	23.7769	36.7605	53.533	17.9438	26.3735	35.4628	33.9087		0.640523	29.2949
11.7844	26.2552	36.6495	33.4672	33.9	24.1639	18.0098	16.9797	33.1621	36.2609	25.7077	43.2987	27.6244	9.7049	15.3047	25.1037	39.646	37.4382	18.7706	27.503	46.9403	32.9771		0.647057	28.9937
11.9035	22.3842	39.6087	31.0849	29.0818	20.3322	12.8072	16.2555	26.7115	32.8054	30.7498	35.6636	32.2736	13.6842	10.0307	23.5778	36.4891	28.8204	25.2705	25.3892	46.04	27.9451		0.653597	27.0003
12.0225	33.3186	37.7873	33.4154	32.7121	18.3639	11.5262	8.8749	20.9932	30.1758	31.4134	31.0853	33.3388	11.3865	16.6079	20.8162	44.224	38.9361	25.4634	24.5537	43.0261	34.0073		0.660131	27.7155
12.1415	24.0444	35.4467	34.2049	38.633	23.7456	10.1336	11.7925	34.018	25.6459	23.0524	31.6358	25.9031	15.9048	5.3996	21.8426	41.4346	35.5684	14.709	25.5687	37.4359	35.1783		0.666665	26.2523
12.2606	30.9597	32.3775	33.3283	43.9911	26.7294	11.2906	9.3809	32.4391	31.5456	30.5646	44.646	19.4811	15.1578	13.7156	19.8362	40.0682	32.8921	22.5818	26.0799	44.1206	32.0751		0.673204	28.2505
12.3796	29.3378	42.9726	43.0038	40.4398	19.0274	14.3459	5.7835	34.4652	46.1459	37.8437	39.9047	27.4014	8.5078	8.775	22.6693	35.2842	29.187	26.8131	16.9057	41.8721	28.7724		0.679738	28.5456
12.4986	30.5635	37.9937	47.8612	47.6085	21.9952	13.028	12.7151	27.2085	46.6163	45.8357	36.9386	29.4259	11.813	7.9362	22.505	44.3996	27.1274	28.9296	19.5182	48.4202	33.6452		0.686272	30.5755
12.6177	27.6768	49.1849	34.2249	42.0587	23.1401	10.4839	16.52	27.8348	45.0224	42.8156	45.201	27.0589	13.2216	16.4065	22.0255	45.4784	27.3978	23.1371	34.2799	52.5207	22.9113		0.692812	30.8858
12.7367	23.4588	31.49	30.5708	40.1013	19.4439	15.6061	8.9223	30.5347	37.5998	28.9653	42.8365	31.8005	11.2869	12.3924	17.9156	34.0903	26.8809	18.1071	30.1026	42.0015	19.786		0.699346	26.3759
12.8557	28.676	35.4081	34.4165	38.2416	22.4819	17.0728	10.5538	40.436	32.2833	42.3204	45.2629	35.4835	15.4583	16.7625	25.9727	41.4173	39.895	24.6394	31.3643	37.5347	30.3625		0.70588	30.764
12.9748	26.0834	37.5658	30.9594	34.1431	27.0165	10.6569	15.3663	31.0882	29.2178	36.8982	39.2556	34.0244	6.7342	13.2751	20.4338	40.3391	42.4217	28.0573	33.6135	31.6624	32.9203		0.71242	28.654
13.0938	24.2061	37.3759	26.9087	39.274	22.4268	14.1021	12.5102	34.0655	40.8679	28.4874	37.4974	36.6066	12.5737	10.4528	20.1356	33.8883	33.9983	26.816	28.5555	31.4667	33.3467		0.718954	27.8839
13.2128	30.756	34.4833	28.5705	45.0678	18.076	16.5249	13.343	37.0976	45.2083	30.1905	46.4661	34.5778	8.3739	12.7343	23.9831	43.9314	32.7526	33.5046	24.3615	34.9367	32.2987		0.725488	29.8685
13.3319	33.9805	37.6608	38.2705	40.0231	23.1005	14.9462	7.0241	18.8514	29.0895	33.3083	43.7059	27.5726	14.348	23.4954	16.5853	33.6793	34.6774	29.2687	27.4974	29.348	36.7365		0.732027	28.2462
13.4509	31.1395	43.2993	42.4334	36.1405	22.3809	18.3251	8.5118	24.7481	43.6967	40.0127	47.5347	28.7412	18.7589	13.6598	16.8832	35.6488	33.3589	25.5575	33.0874	29.9462	31.2821		0.738561	29.7689
13.5699	34.1603	42.0184	43.7945	40.6688	22.1507	16.2199	16.4375	24.1371	43.2693	28.9694	48.3253	32.2791	18.113	10.0625	25.0197	34.0689	39.6356	36.5076	40.296	35.9324	33.5873		0.745095	31.6978
13.689	38.1494	36.2261	36.1414	36.7626	19.6272	16.2237	17.2375	24.1517	31.7298	32.3534	59.3006	35.1111	8.8145	12.0613	22.8284	27.5166	35.7199	32.9984	38.9965	28.9584	29.5786		0.751635	29.547
13.808	31.7392	34.1773	40.1566	38.4477	15.5508	17.6939	17.5559	33.2009	44.1058	38.0941	50.9174	28.9238	15.0552	18.4597	28.5066	31.2197	33.8786	31.0815	34.5577	28.3686	25.4818		0.758169	30.3416
13.927	33.6455	36.7367	35.3055	35.5297	16.0543	15.3672	14.1461	31.7482	39.104	33.6801	42.8553	24.9046	19.6322	7.8977	31.357	38.7479	36.7632	26.487	24.4773	28.9216	42.581		0.764703	29.3306
14.0461	27.236	49.4662	42.4421	49.8517	20.0859	9.39	17.8058	37.1622	31.9711	34.9616	42.0133	25.0342	19.315	8.3047	24.8823	24.0562	38.5155	27.8607	21.1636	33.4924	36.1334		0.771243	29.5783
14.1651	25.4872	43.276	43.0745	39.5343	29.7776	16.4299	19.6202	23.9448	51.6394	38.1646	30.623	30.7414	20.0235	15.1301	21.7449	32.5907	35.1021	23.7819	35.5886	30.0581	38.4677		0.777777	30.7048
14.2841	41.4621	36.0454	31.5429	47.4808	19.6244	18.1182	16.4032	34.7951	41.3573	42.3462	29.228	33.4515	19.585	17.985	25.9225	30.185	42.0286	34.3522	29.957	32.0924	30.1942		0.784311	31.1503
14.4032	38.7562	36.6674	31.0029	45.9218	13.5064	15.284	19.6337	24.7189	37.2281	32.0869	31.0962	32.8417	17.9704	16.0696	32.4054	29.9251	33.2748	19.6784	22.0718	33.1502	28.575		0.79085	28.184
14.5222	44.4773	30.9632	30.1311	47.7774	18.8033	12.8546	11.0953	20.9701	45.2718	29.4161	33.2848	36.4143	18.203	15.1271	30.0176	26.489	39.0003	31.1647	23.3396	31.9768	31.65		0.797384	28.9727
14.6412	39.5333	38.4388	40.4309	41.4297	15.9691	13.3805	12.6884	32.7987	41.7186	46.0761	33.3923	33.1087	15.6587	22.4445	26.8978	29.902	43.8378	35.6209	36.14	31.9097	31.2909		0.803918	31.5556
14.7603	47.3368	35.7539	42.1157	35.0188	25.5312	12.8448	12.9269	37.0088	43.6074	38.8309	27.6403	35.1359	22.8137	20.4022	26.2369	39.3891	33.7713	41.6546	24.0792	34.0973	36.3416		0.810458	32.0256
14.8793	47.4998	40.7875	52.1148	43.8897	24.6046	17.6545	19.614	40.3108	43.8929	41.6202	30.1209	48.5082	17.1394	19.6807	27.8156	32.2666	31.7649	41.2795	25.1764	34.3573	40.5652		0.816992	34.3173
14.9984	35.2623	34.721	37.2179	54.9263	21.1003	13.3584	14.6611	33.7205	50.2768	36.9384	35.6331	36.8815	17.5134	19.8655	28.8667	29.4584	25.9646	33.0797	34.5263	34.0099	37.981		0.823531	31.7125
15.1174	46.7443	46.7177	42.771	42.1943	19.5417	11.4256	17.9775	37.2979	47.8491	41.9742	38.3418	33.5363	16.8427	21.4638	25.5734	19.7247	33.9708	37.4203	23.0826	27.6041	39.2155		0.830065	31.9652
15.2364	49.6739	45.5659	32.3166	49.1612	20.8578	12.4075	15.882	39.5598	48.3124	47.4422	44.4262	28.8391	26.665	14.8365	33.4325	27.8052	33.9659	37.3497	24.3512	31.4371	46.0267		0.836599	33.8245
15.3555	36.1814	39.9184	41.7216	45.486	23.3631	11.1035	20.1995	42.9234	44.5768	39.8982	36.4237	37.9132	14.5561	12.5711	36.5559	22.0245	22.4861	34.6658	27.7248	36.9808	46.7359		0.843139	32.0957
15.4745	39.1884	49.7633	49.9903	44.973	26.7775	17.0163	12.7362	42.1621	40.1917	44.8434	37.8122	39.6158	18.2251	17.6325	37.1201	23.326	28.9075	22.7335	23.1092	44.5024	39.2144		0.849673	33.3258
15.5935	39.131	41.4761	49.371	45.4415	21.932	10.2817	18.2174	39.9339	30.6214	39.536	30.5021	29.9859	19.7949	22.7152	40.2917	29.4893	31.3632	31.1026	27.156	34.3476	35.7303		0.856207	31.8296
15.7126	49.4529	46.9562	37.1302	39.4983	21.6844	9.9764	15.4353	32.486	39.182	35.4259	28.1772	37.8242	17.2914	23.4699	38.9851	26.5834	32.475	23.0837	24.4093	43.2383	27.7962		0.862747	30.9791
15.8316	42.7895	42.996	36.3442	44.8584	27.2278	14.4655	14.6567	37.1596	40.7271	31.9078	41.0892	41.731	16.4342	15.1344	43.3507	29.6161	36.4043	29.7416	30.7916	36.6921	31.948		0.869281	32.6698
15.9506	50.2989	50.6559	47.448	48.5101	22.2585	10.954	16.0771	39.9994	36.9394	31.0213	33.001	38.9158	15.9503	17.2372	29.7477	28.4128	34.6091	28.8836	26.8282	50.163	36.1442		0.875815	33.0503
16.0697	43.2675	59.519	33.1356	44.3142	30.1153	13.8081	14.9097	37.5094	28.9278	28.1225	32.4857	42.8055	16.0236	14.6254	25.7165	25.1164	29.9798	32.3999	25.6495	32.0913	35.9286		0.882354	30.7834
16.1887	36.376	48.651	41.6373	52.4198	31.0541	12.6919	13.7088	28.4291	36.8655	30.216	37.8852	33.6548	20.0804	19.5759	27.9427	28.8114	30.204	34.433	24.5833	39.9601	26.7991		0.888888	31.2371
16.3077	44.5773	38.2691	44.6444	59.9837	26.8201	15.8608	22.5341	40.9854	29.4977	21.9494	36.9766	38.9698	26.0451	14.5994	28.7797	26.8378	33.4104	23.9305	24.855	29.7283	34.559		0.895422	31.6102
16.4268	50.9657	41.3778	42.1387	42.6559	33.3127	20.0958	15.6019	43.9454	37.7834	20.5009	32.3868	37.892	22.7608	11.0433	28.8813	30.8378	32.63	25.5002	33.6346	25.6679	41.6197		0.901962	31.9635
16.5458	46.7354	41.9082	41.9784	36.6142	38.7331	29.4552	18.8607	44.4642	39.3058	18.1676	49.2342	43.5925	22.1384	22.2193	20.2422	31.0621	30.031	26.3001	43.328	28.4517	31.2047		0.908496	33.5251
16.6648	48.5943	36.2827	38.7064	36.5771	38.7792	20.0543	10.6793	39.2813	34.7871	15.8438	29.9119	52.0522	36.5197	22.8103	25.103	38.4756	29.6335	34.5799	32.5356	27.2935	30.8935		0.91503	32.3521
16.7839	43.1265	32.5643	40.1337	39.7358	36.1344	14.4309	9.4773	41.966	34.7107	10.9948	25.4126	37.9464	32.718	19.7017	30.4679	31.7218	39.8709	28.0787	32.0459	32.8819	26.3309		0.921569	30.4977
16.9029	39.5086	33.1519	38.7078	28.866	37.3189	10.1189	13.8603	36.1034	35.8802	10.5964	27.4301	43.3394	25.4968	23.3388	25.3596	28.5589	35.8728	26.5063	30.6166	21.5063	35.6645		0.928104	28.943
17.0219	33.2983	31.056	41.7475	45.5845	38.5116	15.8602	22.2057	37.8541	24.1473	11.0778	22.0215	33.6402	34.3568	26.9305	27.7465	29.0564	28.3668	30.8919	35.7241	34.1486	28.9246		0.934638	30.15
17.141	32.7812	42.4963	37.2207	50.4885	31.7633	18.1471	17.8531	26.1422	32.5054	11.4051	21.1845	41.3409	33.0143	34.6116	27.0047	32.8709	43.2608	35.5025	34.8491	41.0391	29.9409		0.941177	32.163
17.26	38.9212	43.5135	30.5909	40.3559	33.9901	10.8843	17.1055	31.4033	24.655	10.563	15.5853	31.9568	38.0957	24.4074	32.3466	36.4546	41.8393	31.8271	28.1622	41.7273	43.5058		0.947711	30.8519
17.379	43.277	42.3884	34.8877	38.8512	42.0775	14.0524	17.33	41.7991	20.3438	10.8454	18.3197	32.6232	30.1441	31.2707	29.8463	33.6334	43.1957	32.8457	31.2774	36.215	37.6443		0.954245	31.5651
17.4981	33.0078	43.6527	34.8928	31.6952	47.032	31.2207	12.7325	39.4918	14.4896	7.6162	19.0185	27.0881	29.2258	30.5845	38.0378	29.6511	29.7099	25.5198	33.687	28.3718	32.9046		0.960785	29.5062
17.6171	26.2468	44.9994	31.2219	28.5983	46.4678	23.5488	17.6194	27.6388	10.8072	12.1083	19.0598	34.5598	39.2104	20.2959	43.3748	35.9524	29.8469	25.0977	21.3579	31.4105	30.9051		0.967319	28.587
17.7361	30.9789	29.6268	38.2559	37.0883	37.1685	15.4639	24.3451	41.466	16.6701	7.8006	11.4537	45.8905	33.0254	28.244	36.6808	29.2238	28.9366	25.9212	29.9848	30.2093	38.2554		0.973853	29.3662
17.8552	27.4905	38.1715	30.9126	34.5585	39.5772	15.5845	23.2686	34.5124	19.1663	7.9896	11.8536	35.2401	28.298	25.0408	37.0669	33.1946	23.9322	34.554	28.7851	30.2723	32.9487		0.980392	28.2104
17.9742	31.4004	39.1234	30.5127	31.4379	40.9385	21.4955	22.8599	34.2967	11.4616	9.5206	11.9202	29.746	26.7527	33.952	47.2602	26.8863	22.816	22.3037	33.855	32.4631	30.9425		0.986926	28.1879
18.0932	30.524	40.321	24.3986	32.2375	40.5358	22.9687	36.2233	30.9072	11.4838	7.1062	9.7208	26.7077	36.0516	30.5065	37.9397	25.882	19.0145	26.1417	22.3326	49.8702	34.3409		0.99346	28.3435
18.2123	23.0007	35.0439	30.3261	35.6656	38.3169	13.8839	25.3939	31.5346	6.485	2.7572	5.4808	21.7289	31.0077	39.9332	29.5319	20.3361	22.2064	19.2798	25.6547	38.9644	25.5039		1	24.8588

## Sheet: Sheet1
Image1				Image2				Image3				Image1 (2)				Image2 (2)					Distance	Image1	Image2	Image3	Image1 (2)	Image2 (2)
Ap-basal	Avg intensity			Ap-basal	Avg intensity			Ap-basal	Avg intensity			Ap-basal	Avg intensity			Ap-basal	Avg intensity				0	35.8735	30.7249	42.0859	24.6552	41.482
0	35.8735			0	30.7249			0	42.0859			0	24.6552			0	41.482				0.05	43.0494	54.509	68.6998	42.2305	68.5704
0.00653405	37.407			0.00432774	32.5592			0.00490055	44.7248			0.00540383	29.596			0.00568016	47.2007				0.1	52.4571	82.9522	101.897	68.8418	109.243
0.0130736	37.4969			0.00865913	37.6943			0.00980521	51.887			0.0108122	30.8823			0.0113651	52.9649				0.15	45.4586	69.5733	80.1445	75.286	99.9152
0.0196076	39.326			0.0129869	41.1513			0.0147058	53.8635			0.016216	33.4871			0.0170453	60.0544				0.2	42.2847	61.3506	54.1159	69.9539	78.5641
0.0261417	42.6244			0.0173146	48.095			0.0196063	57.7193			0.0216199	37.3704			0.0227254	65.7031				0.25	40.4936	56.2821	44.0563	56.7724	58.9146
0.0326812	45.1046			0.021646	50.7681			0.024511	63.34			0.0270283	41.791			0.0284104	71.289				0.3	38.5078	48.2351	42.7487	45.3342	45.0551
0.0392153	45.0324			0.0259737	54.3601			0.0294115	70.8785			0.0324321	45.0912			0.0340905	78.6331				0.35	36.9427	44.7799	41.5665	37.6514	40.8411
0.0457493	52.2091			0.0303015	59.8259			0.0343121	75.6374			0.0378359	51.2491			0.0397707	85.0706				0.4	32.9603	40.045	36.9208	32.2472	36.2375
0.0522888	52.371	43.0494		0.0346329	65.0312			0.0392167	82.2981			0.0432443	53.7282			0.0454556	89.6805				0.45	31.5348	35.5674	29.2224	28.2252	32.7733
0.0588229	51.5029			0.0389606	68.1968			0.0441173	88.2205			0.0486481	57.4928			0.0511358	93.6257	68.5704			0.5	30.0608	31.7218	26.3915	26.3598	30.4715
0.0653569	56.2765			0.0432884	69.9678			0.0490178	95.387			0.054052	59.1925	42.2305		0.056816	97.6454				0.55	27.6529	30.0779	21.6241	23.9294	26.7496
0.0718965	55.9752			0.0476197	74.1346			0.0539225	98.3555	68.6998		0.0594603	62.5684			0.0625009	106.798				0.6	27.64	27.7973	18.0914	21.4765	23.3274
0.0784305	53.8611			0.0519475	76.1072	54.509		0.058823	97.1821			0.0648642	63.6616			0.0681811	105.926				0.65	28.031	27.5564	16.5068	20.7815	24.4319
0.0849646	52.7089			0.0562752	79.3926			0.0637236	101.968			0.070268	67.5443			0.0738612	114.367				0.7	28.6706	27.9849	15.3354	19.9212	24.9761
0.0915041	50.2501			0.0606066	81.4532			0.0686283	102.553			0.0756764	69.2317			0.0795462	111.351				0.75	29.3809	27.957	15.5068	21.2501	24.2254
0.0980381	50.0262			0.0649344	85.2463			0.0735288	101.726			0.0810802	68.1447			0.0852263	113.251				0.8	29.9772	29.2283	14.3748	21.9852	25.339
0.104578	49.056	52.4571		0.0692657	82.4832			0.0784335	105.273			0.0864886	68.1806			0.0909113	114.393				0.85	32.637	29.6718	14.4381	22.2017	26.0184
0.111112	46.1243			0.0735935	82.8703			0.083334	105.262			0.0918924	71.9176			0.0965914	108.722				0.9	31.7562	27.6603	13.2295	16.4471	26.6619
0.117646	45.2878			0.0779212	84.6827			0.0882346	109.55			0.0972963	75.4586			0.102272	110.735	109.243			0.95	31.256	24.3545	12.0035	11.0737	27.7495
0.124185	44.8181			0.0822526	84.5684			0.0931392	100.472			0.102705	72.8689	68.8418		0.107957	106.596				1	28.1514	13.9207	12.0179	5.46294	24.6603
0.130719	46.3796			0.0865804	86.2215			0.0980398	98.0275			0.108108	77.6844			0.113637	108.365
0.137253	44.5808			0.0909081	83.5541			0.10294	96.9547	101.897		0.113512	73.4484			0.119317	102.845
0.143793	45.208			0.0952395	83.427			0.107845	96.2715			0.118921	76.6604			0.125002	102.578
0.150327	45.8114	45.4586		0.0995672	82.6867			0.112746	93.4076			0.124325	75.6397			0.130682	100.614
0.156861	43.4613			0.103895	78.8404	82.9522		0.117646	90.1541			0.129728	77.2551			0.136362	98.0315
0.163401	40.3306			0.108226	78.6443			0.122551	85.0149			0.135137	76.0209			0.142047	97.5459
0.169935	40.7411			0.112554	75.4751			0.127451	80.4719			0.140541	75.7393			0.147727	92.2287
0.176469	40.7088			0.116882	70.8727			0.132352	76.8594			0.145944	76.6805			0.153407	90.4332	99.9152
0.183008	42.9791			0.121213	72.4451			0.137257	74.0193			0.151353	75.286	75.286		0.159092	89.2595
0.189542	42.4453			0.125541	71.2625			0.142157	71.3834			0.156757	72.2151			0.164772	87.394
0.196076	43.5272			0.129869	69.5545			0.147058	68.7274			0.16216	74.6599			0.170453	83.9035
0.202616	44.0842	42.2847		0.1342	67.4654			0.151962	65.1355	80.1445		0.167569	69.7004			0.176138	80.3949
0.20915	40.256			0.138528	63.3387			0.156863	61.581			0.172973	71.7674			0.181818	77.023
0.215684	41.4735			0.142856	65.8333			0.161763	62.0713			0.178376	71.1918			0.187498	73.9127
0.222223	40.9515			0.147187	65.6436			0.166668	58.5884			0.183785	70.2865			0.193183	73.9664
0.228757	41.062			0.151515	64.7711	69.5733		0.171569	55.1793			0.189189	67.4498			0.198863	71.1827
0.235292	40.1156			0.155842	65.349			0.176469	55.013			0.194593	67.2862			0.204543	70.0402	78.5641
0.241831	39.5132			0.160174	63.5448			0.181374	54.6865			0.200001	65.0284	69.9539		0.210228	66.4272
0.248365	40.5424			0.164502	61.7558			0.186274	49.708			0.205405	61.5635			0.215908	64.9208
0.254899	40.0344	40.4936		0.168829	61.4689			0.191175	48.7507			0.210809	61.2319			0.221588	63.7874
0.261439	41.6659			0.173161	62.4149			0.19608	47.6369			0.216217	59.7512			0.227273	60.3375
0.267973	38.7138			0.177488	63.1557			0.20098	47.9439	54.1159		0.221621	62.2487			0.232954	58.2126
0.274512	36.2643			0.18182	62.9506			0.205885	45.5388			0.227029	56.1185			0.238638	56.9124
0.281046	36.8425			0.186148	60.9611			0.210785	46.1572			0.232433	57.6348			0.244319	54.085
0.28758	37.8078			0.190475	60.8807			0.215686	46.3864			0.237837	54.298			0.249999	55.5923
0.29412	37.8552			0.194807	57.6828			0.220591	44.1659			0.243245	52.3366			0.255684	49.9565	58.9146
0.300654	40.7602			0.199134	58.1788			0.225491	43.6554			0.248649	50.7571			0.261364	46.8663
0.307188	38.1528	38.5078		0.203462	57.8635	61.3506		0.230392	44.139			0.254053	51.7839	56.7724		0.267044	48.9867
0.313728	35.9464			0.207794	57.4556			0.235296	40.9819			0.259461	48.5156			0.272729	45.7371
0.320262	37.8663			0.212121	59.5705			0.240197	43.1178			0.264865	47.5239			0.278409	44.2431
0.326796	36.9551			0.216449	56.4428			0.245097	42.5993			0.270269	49.5464			0.284089	44.8264
0.333335	38.4008			0.22078	56.8112			0.250002	43.8216	44.0563		0.275677	45.5265			0.289774	45.2869
0.339869	37.7167			0.225108	56.8806			0.254903	41.821			0.281081	44.7238			0.295454	42.5736
0.346403	35.46			0.229436	57.4376			0.259803	43.9817			0.286485	45.2302			0.301135	41.9206	45.0551
0.352943	36.2538	36.9427		0.233767	57.1465			0.264708	42.5552			0.291893	43.1663			0.30682	43.544
0.359477	34.6333			0.238095	55.3998			0.269608	42.9009			0.297297	41.1496			0.3125	40.2035
0.366011	35.6988			0.242423	54.7655			0.274509	40.6228			0.302701	42.6259	45.3342		0.31818	41.6989
0.37255	32.3114			0.246754	53.605			0.279414	44.8819			0.308109	40.6649			0.323865	42.3986
0.379084	33.7933			0.251082	53.5877	56.2821		0.284314	43.9691			0.313513	38.3229			0.329545	40.3313
0.385619	33.2338			0.25541	50.7466			0.289215	42.5421			0.318917	38.4448			0.335225	41.1432
0.392158	31.7502			0.259741	50.2637			0.294119	41.4049			0.324325	38.0505			0.34091	39.5238
0.398692	31.1843			0.264069	49.6671			0.29902	42.0815			0.329729	38.5059			0.34659	39.4432
0.405226	31.0776	32.9603		0.268397	51.2894			0.30392	42.5466	42.7487		0.335133	38.8325			0.35227	39.2836	40.8411
0.411766	31.8487			0.272728	48.8617			0.308825	40.232			0.340541	36.2142			0.357955	36.2634
0.4183	32.3092			0.277056	47.1651			0.313726	41.2898			0.345945	36.3318			0.363635	39.3464
0.424834	32.6515			0.281383	46.6544			0.318626	44.0695			0.351349	33.4949	37.6514		0.369316	39.4926
0.431373	32.6339			0.285715	46.7611			0.323531	42.497			0.356758	34.823			0.375001	37.7957
0.437907	30.0452			0.290043	47.3535			0.328431	42.6278			0.362161	32.2888			0.380681	37.0195
0.444441	30.3047			0.29437	46.9195			0.333332	40.9159			0.367565	32.2891			0.386361	35.2611
0.450981	30.9502	31.5348		0.298702	46.1568			0.338237	42.9018			0.372974	32.32			0.392046	34.5506
0.457515	30.3863			0.303029	46.9818	48.2351		0.343137	39.6921			0.378377	31.6529			0.397726	34.2757
0.464055	30.2254			0.307361	45.748			0.348042	40.7719			0.383786	32.6104			0.403411	32.1328	36.2375
0.470589	30.3182			0.311689	47.5249			0.352942	40.6675	41.5665		0.38919	33.4408			0.409091	34.1424
0.477123	28.058			0.316016	45.7689			0.357843	39.6056			0.394593	33.438			0.414771	34.3123
0.483662	30.9478			0.320348	45.019			0.362748	38.7144			0.400002	29.8211			0.420456	32.9028
0.490196	32.281			0.324675	45.4815			0.367648	38.2686			0.405406	29.788	32.2472		0.426136	33.7861
0.49673	29.1191			0.329003	44.3959			0.372549	37.2995			0.410809	29.5942			0.431817	34.4809
0.50327	29.1506	30.0608		0.333335	42.6032			0.377453	37.0185			0.416218	28.3844			0.437501	31.1534
0.509804	28.3742			0.337662	45.8779			0.382354	35.6086			0.421622	28.4767			0.443182	32.6774
0.516338	27.0033			0.34199	43.1094			0.387254	38.3695			0.427026	28.8305			0.448862	32.1898
0.522877	27.8108			0.346321	44.3197			0.392159	33.6648			0.432434	28.0479			0.454547	29.3144	32.7733
0.529411	28.5242			0.350649	42.7301	44.7799		0.39706	37.3978			0.437838	27.2498			0.460227	31.6032
0.535945	26.497			0.354977	43.117			0.40196	33.2602	36.9208		0.443242	27.1597			0.465907	31.3001
0.542485	28.2554			0.359308	40.4056			0.406865	31.8454			0.44865	28.9493			0.471592	30.1665
0.549019	28.4292			0.363636	42.1113			0.411765	32.424			0.454054	27.3345	28.2252		0.477272	31.0538
0.555553	26.329	27.6529		0.367964	42.0344			0.416666	31.0603			0.459458	29.0785			0.482952	29.1443
0.562093	26.3237			0.372295	41.105			0.421571	30.6927			0.464866	27.6979			0.488637	30.4487
0.568627	27.9406			0.376623	41.5742			0.426471	25.99			0.47027	26.421			0.494317	29.4924
0.575161	27.0142			0.380951	40.311			0.431372	27.9545			0.475674	26.9361			0.499998	30.6315
0.5817	28.4053			0.385282	40.828			0.436276	28.7494			0.481082	25.45			0.505683	30.4028	30.4715
0.588234	28.1802			0.38961	37.877			0.441177	27.7812			0.486486	26.8925			0.511363	30.2111
0.594768	27.6554			0.393938	37.1576			0.446078	28.0223			0.49189	25.5964			0.517043	29.7446
0.601308	27.9604	27.64		0.398269	37.5763			0.450982	27.7042	29.2224		0.497298	24.9687			0.522728	26.6212
0.607842	27.9784			0.402597	36.4426	40.045		0.455883	27.197			0.502702	24.197	26.3598		0.528408	26.6773
0.614376	29.1124			0.406924	37.7474			0.460783	28.729			0.508106	24.9908			0.534088	23.851
0.620916	26.8425			0.411256	38.0774			0.465688	28.2318			0.513514	26.159			0.539773	25.7605
0.62745	28.3546			0.415584	36.4326			0.470588	28.4181			0.518918	25.0441			0.545453	24.5177
0.633984	26.671			0.419911	36.7408			0.475489	25.0196			0.524322	24.1456			0.551133	26.6132	26.7496
0.640523	29.2949			0.424243	36.5682			0.480394	26.9034			0.52973	24.2876			0.556818	25.038
0.647057	28.9937			0.42857	34.8025			0.485294	28.5315			0.535134	23.2683			0.562499	23.0301
0.653597	27.0003	28.031		0.432902	34.345			0.490199	23.9553			0.540542	23.049			0.568183	24.1736
0.660131	27.7155			0.43723	35.0874			0.495099	23.5923			0.545946	23.6797			0.573864	22.3433
0.666665	26.2523			0.441557	34.2874			0.5	23.337	26.3915		0.55135	20.7405	23.9294		0.579544	21.3483
0.673204	28.2505			0.445889	34.5487			0.504905	23.3076			0.556758	21.4421			0.585229	23.9321
0.679738	28.5456			0.450216	32.6036	35.5674		0.509805	22.8948			0.562162	22.1614			0.590909	24.024
0.686272	30.5755			0.454544	32.8902			0.514706	24.051			0.567566	21.3102			0.596589	21.137
0.692812	30.8858			0.458876	33.4896			0.51961	23.1129			0.572974	23.672			0.602274	24.9205	23.3274
0.699346	26.3759			0.463203	32.685			0.524511	21.0745			0.578378	20.9481			0.607954	23.292
0.70588	30.764	28.6706		0.467531	32.2365			0.529412	20.6888			0.583782	21.4228			0.613634	24.0898
0.71242	28.654			0.471862	31.2851			0.534316	19.9033			0.589191	20.0712			0.619319	24.3401
0.718954	27.8839			0.47619	30.2853			0.539217	22.0761			0.594594	20.9408			0.624999	23.8903
0.725488	29.8685			0.480518	31.355			0.544117	22.0176			0.599998	21.3198	21.4765		0.63068	23.7935
0.732027	28.2462			0.484849	31.231			0.549022	18.9431			0.605407	21.4302			0.636365	25.858
0.738561	29.7689			0.489177	31.7778			0.553922	19.7953	21.6241		0.61081	19.7951			0.642045	25.1021
0.745095	31.6978			0.493505	32.6831			0.558823	19.5746			0.616214	20.6958			0.647725	23.9112
0.751635	29.547	29.3809		0.497836	29.6105			0.563728	18.1194			0.621623	21.068			0.65341	25.6102	24.4319
0.758169	30.3416			0.502164	31.1325	31.7218		0.568628	18.2616			0.627026	21.8763			0.65909	27.0043
0.764703	29.3306			0.506492	30.7593			0.573529	20.3343			0.63243	20.5654			0.66477	24.6055
0.771243	29.5783			0.510823	31.0072			0.578433	19.7316			0.637839	20.1477			0.670455	24.1029
0.777777	30.7048			0.515151	31.8083			0.583334	18.7683			0.643242	21.412			0.676135	24.894
0.784311	31.1503			0.519478	33.2115			0.588235	16.5639			0.648646	19.751			0.681815	24.6068
0.79085	28.184			0.52381	29.7276			0.593139	16.9379			0.654055	21.0734	20.7815		0.6875	23.7955
0.797384	28.9727			0.528138	30.3295			0.59804	16.4262			0.659459	21.1167			0.69318	24.0041
0.803918	31.5556	29.9772		0.532465	27.9397			0.60294	16.1966	18.0914		0.664862	20.4016			0.698861	25.1929
0.810458	32.0256			0.536797	29.3629			0.607845	17.113			0.670271	19.578			0.704546	26.5792	24.9761
0.816992	34.3173			0.541124	29.0525			0.612746	18.2398			0.675675	20.1358			0.710226	25.448
0.823531	31.7125			0.545456	30.1945			0.61765	17.3443			0.681083	21.0339			0.715911	24.4747
0.830065	31.9652			0.549784	28.66			0.622551	15.7213			0.686487	19.392			0.721591	25.3947
0.836599	33.8245			0.554111	28.8815	30.0779		0.627451	16.7375			0.691891	19.4537			0.727271	24.8897
0.843139	32.0957			0.558443	27.7914			0.632356	17.5646			0.697299	19.0555			0.732956	23.4783
0.849673	33.3258			0.56277	26.4893			0.637257	17.0703			0.702703	19.1239	19.9212		0.738636	23.7537
0.856207	31.8296	32.637		0.567098	29.512			0.642157	16.6246			0.708107	20.7505			0.744316	23.5988
0.862747	30.9791			0.57143	27.2553			0.647062	14.2483			0.713515	20.4442			0.750001	23.8861
0.869281	32.6698			0.575757	26.5836			0.651962	14.4043	16.5068		0.718919	20.1139			0.755681	23.1047	24.2254
0.875815	33.0503			0.580085	28.2834			0.656863	16.4732			0.724323	19.86			0.761362	24.6104
0.882354	30.7834			0.584416	27.7128			0.661767	16.7646			0.729731	20.5689			0.767046	25.377
0.888888	31.2371			0.588744	27.8779			0.666668	13.7662			0.735135	23.2011			0.772727	24.8988
0.895422	31.6102			0.593072	27.7689			0.671569	14.8751			0.740539	22.8566			0.778407	24.7048
0.901962	31.9635	31.7562		0.597403	27.9996			0.676473	15.2449			0.745947	22.8801			0.784092	24.6812
0.908496	33.5251			0.601731	28.4958	27.7973		0.681374	14.8031			0.751351	20.5756	21.2501		0.789772	27.1792
0.91503	32.3521			0.606059	27.3478			0.686274	14.6765			0.756755	21.4636			0.795452	25.5454
0.921569	30.4977			0.61039	25.7725			0.691179	14.8502			0.762163	20.1827			0.801137	25.7153	25.339
0.928104	28.943			0.614718	26.9401			0.69608	15.5096			0.767567	22.4168			0.806817	24.7183
0.934638	30.15			0.619046	26.241			0.70098	16.3908	15.3354		0.772971	19.8105			0.812497	24.6309
0.941177	32.163			0.623377	28.7184			0.705885	17.3528			0.778379	22.9059			0.818182	26.7382
0.947711	30.8519			0.627705	28.0134			0.710785	14.6726			0.783783	23.5562			0.823862	24.8585
0.954245	31.5651	31.256		0.632033	27.855			0.715686	15.7519			0.789187	21.3131			0.829543	24.8244
0.960785	29.5062			0.636364	27.8172			0.720591	16.425			0.794595	22.166			0.835228	26.4422
0.967319	28.587			0.640692	26.924			0.725491	15.1667			0.799999	23.4842			0.840908	27.2497
0.973853	29.3662			0.645019	29.025			0.730392	15.45			0.805403	22.553	21.9852		0.846588	29.029
0.980392	28.2104			0.649351	27.4307			0.735296	15.6666			0.810811	21.177			0.852273	25.6745	26.0184
0.986926	28.1879			0.653679	28.5912	27.5564		0.740197	14.0347			0.816215	23.1955			0.857953	27.5497
0.99346	28.3435			0.658006	29.3563			0.745097	15.2848			0.821619	21.9138			0.863633	25.647
1	24.8588	28.1514		0.662338	29.3259			0.750002	15.2634	15.5068		0.827027	23.714			0.869318	25.0901
				0.666665	29.633			0.754903	14.7371			0.832431	23.5335			0.874998	26.9013
				0.670997	28.7587			0.759807	15.0313			0.83784	21.4097			0.880683	25.4779
				0.675325	27.1421			0.764708	14.8014			0.843243	24.1167			0.886363	26.5295
				0.679652	26.3442			0.769608	14.0761			0.848647	22.007			0.892043	26.2912
				0.683984	28.077			0.774513	15.1359			0.854056	18.7481	22.2017		0.897728	29.5861
				0.688311	27.8573			0.779414	13.6298			0.859459	17.5111			0.903409	26.8843	26.6619
				0.692639	27.3957			0.784314	13.925			0.864863	18.3894			0.909089	27.8409
				0.696971	27.5987			0.789219	14.5801			0.870272	18.8887			0.914774	28.0757
				0.701298	26.3449	27.9849		0.794119	13.2587			0.875675	15.579			0.920454	28.2144
				0.705626	25.7344			0.79902	14.45			0.881079	16.5219			0.926134	27.3566
				0.709957	27.0406			0.803925	14.4972	14.3748		0.886488	16.3547			0.931819	29.0382
				0.714285	28.1544			0.808825	14.3593			0.891892	14.7184			0.937499	26.6901
				0.718613	27.0585			0.813726	12.0868			0.897295	16.1988			0.943179	26.9797
				0.722944	28.56			0.81863	15.1946			0.902704	13.8614	16.4471		0.948864	26.6604
				0.727272	26.8873			0.823531	13.9983			0.908108	13.279			0.954544	28.8892	27.7495
				0.7316	24.253			0.828431	13.5824			0.913511	12.8081			0.960225	29.6799
				0.735931	27.7634			0.833336	15.2853			0.91892	12.5325			0.965909	26.6787
				0.740259	29.5057			0.838237	16.1261			0.924324	11.0931			0.97159	26.4618
				0.744587	29.8741			0.843137	13.8434			0.929727	12.7114			0.97727	25.6231
				0.748918	30.6989			0.848042	15.207			0.935136	9.27449			0.982955	24.4088
				0.753246	29.9539	27.957		0.852942	14.6979	14.4381		0.94054	10.2339			0.988635	22.827
				0.757574	30.2522			0.857843	14.2748			0.945943	10.0551			0.994315	22.2823
				0.761905	29.807			0.862748	14.3456			0.951352	7.67587	11.0737		1	19.3213	24.6603
				0.766233	27.6188			0.867648	12.7862			0.956756	8.13441
				0.77056	28.7031			0.872549	14.1035			0.96216	6.90804
				0.774892	28.999			0.877453	13.596			0.967568	6.43634
				0.77922	29.3044			0.882354	13.026			0.972972	6.00718
				0.783547	31.6979			0.887254	12.7398			0.978376	5.39146
				0.787879	30.7008			0.892159	11.6803			0.983784	4.32729
				0.792206	28.0935			0.89706	13.4832			0.989188	3.46047
				0.796538	28.371			0.901964	12.2598	13.2295		0.994596	4.13407
				0.800866	27.9633	29.2283		0.906865	12.1746			1	4.3672	5.46294
				0.805193	28.7772			0.911765	12.2495
				0.809525	28.9796			0.91667	11.4975
				0.813852	30.9974			0.921571	12.2114
				0.81818	28.5642			0.926471	12.3045
				0.822512	29.7453			0.931376	12.1879
				0.826839	28.4892			0.936276	11.8449
				0.831167	30.5781			0.941177	11.4569
				0.835498	30.308			0.946082	12.4005
				0.839826	30.7197			0.950982	11.707	12.0035
				0.844154	32.1062			0.955883	12.6072
				0.848485	28.5774			0.960787	11.8596
				0.852813	28.2189	29.6718		0.965688	11.4698
				0.857141	27.9665			0.970588	12.253
				0.861472	27.3855			0.975493	12.9733
				0.8658	28.0086			0.980394	11.7107
				0.870128	27.6446			0.985294	12.1635
				0.874459	26.9258			0.990199	12.0221
				0.878787	26.9934			0.995099	11.2679
				0.883115	26.915			1	11.8517	12.0179
				0.887446	28.5734
				0.891774	26.6822
				0.896101	27.3558
				0.900433	29.8128	27.6603
				0.904761	27.116
				0.909088	26.6978
				0.91342	27.4921
				0.917747	26.3888
				0.922079	24.4691
				0.926407	25.8296
				0.930734	24.6243
				0.935066	23.1599
				0.939393	20.9731
				0.943721	22.4549
				0.948053	22.5471
				0.95238	20.5016	24.3545
				0.956708	18.8405
				0.961039	17.8634
				0.965367	17.0765
				0.969695	16.4919
				0.974026	13.9664
				0.978354	13.0983
				0.982682	13.3001
				0.987013	12.6653
				0.991341	11.1309
				0.995669	10.1771
				1	8.51763	13.9207
