# Supplementary material for: Crumbs organizes the transport machinery by regulating apical levels of PI(4,5)P2 in Drosophila
Source: eLife. 2019 Nov 7;8:e50900. doi: 10.7554/eLife.50900 (PMC6881148; doi:10.7554/eLife.50900)
Supplement: Figure 6—source data 14. [file elife-50900-fig6-data14.xlsx]

## Sheet: Image5 (2)
X0	Y0	Y1	Y2	Y3	Y4	Y5	Y6	Y7	Y8	Y9	Y10	Y11	Y12	Y13	Y14	Y15	Y16	Y17	Y18	Y19	Y20	Y21	Y22	Y23	Y24	Y25	Y26		Ap-basal	Avg intensity
0	49.0479	30.9525	27.7701	24.0895	29.4196	27.3945	22.5938	26.4163	34.4275	16.5598	9.595	20.0154	28.7569	32.2935	26.8232	17.2693	16.0949	15.3662	14.2949	16.438	23.1191	14.3712	21.9909	13.8509	16.4167	20.5212	16.258		0	22.6721
0.119	31.8393	34.5879	36.9867	26.2637	35.7853	25.3868	18.5856	22.3825	20.2235	18.0749	19.7642	12.2533	35.9404	38.9345	23.0973	30.6129	26.797	18.3148	13.5127	16.4723	22.4686	21.8819	22.5178	17.0066	14.0762	12.0571	21.2347		0.00540383	23.5948
0.2381	39.7956	34.7013	25.0897	28.0327	28.0406	30.0524	17.8533	32.6074	23.9384	19.0381	25.5359	17.6397	40.9782	36.8763	21.058	20.632	16.9404	15.561	25.7425	17.1502	19.8766	36.0399	17.4938	23.7378	13.4253	15.4999	28.6122		0.0108122	24.887
0.3571	27.7439	35.3129	28.5802	26.7307	27.086	21.9253	21.9108	38.2525	27.3024	16.9185	19.5312	14.592	33.7518	53.9471	46.3923	25.4294	23.5304	25.3996	10.5173	13.4274	16.9612	23.776	23.2785	20.975	9.193	14.826	18.8178		0.016216	24.6707
0.4761	36.3593	17.9342	33.0203	31.6064	30.819	38.8472	20.1196	34.2448	23.5305	24.8085	16.6866	25.0319	36.3736	43.3358	36.7038	23.5613	28.2952	24.8447	19.3676	19.4262	18.1856	27.0878	27.6048	23.7528	10.4563	18.5517	17.7973		0.0216199	26.2353
0.5952	28.2848	35.2137	39.5374	34.906	35.4307	24.4159	26.2243	28.1958	30.5672	20.4634	20.0904	30.5707	31.47	30.2784	41.1668	18.7873	19.7687	15.9739	17.3562	17.5777	29.5431	25.1981	26.9956	20.2426	11.11	20.5041	24.0495		0.0270283	26.0712
0.7142	21.5014	38.5928	33.2781	35.5517	37.9652	33.4748	23.7763	27.5361	27.3107	30.5022	23.7371	20.0169	36.4566	28.6113	44.627	25.6517	32.2594	30.4565	28.987	18.7288	26.2818	28.5908	14.8606	19.4302	14.6002	30.5543	21.0279		0.0324321	27.9395
0.8332	27.1473	44.5422	31.8405	39.1393	59.7543	24.1904	20.1974	29.093	32.7301	28.2899	30.4329	15.6878	38.3461	26.7856	41.6523	23.7504	43.0559	26.8924	13.4381	13.8156	18.7427	31.2946	42.3686	17.7993	12.6274	22.073	28.1386		0.0378359	29.0306
0.9523	31.0493	46.2369	26.1602	37.6141	44.6168	23.7065	23.3161	45.2787	34.9242	26.1998	26.4777	27.1953	29.6892	29.6905	54.8612	27.5779	34.7881	22.8463	19.084	14.1813	32.3261	37.07	27.9697	18.4047	21.2882	26.4167	39.2195		0.0432443	30.6737
1.0713	40.7323	33.5908	40.009	42.7739	31.3596	32.3701	27.5225	44.1071	48.1325	36.0064	21.9917	30.6007	36.2214	36.3915	42.4911	35.6774	29.4273	24.6782	24.3335	21.22	42.1946	38.2063	32.438	28.9934	23.4967	17.3894	22.8391		0.0486481	32.785
1.1903	26.2349	32.0138	41.6849	44.7905	26.6934	20.9053	29.0835	39.6517	35.3575	29.4556	26.6259	33.7351	28.5954	29.7828	27.3347	36.3479	45.28	31.5805	19.5501	20.8804	33.3609	44.0988	29.3271	20.3925	24.7304	33.0918	31.8006		0.054052	31.1995
1.3094	37.1156	41.1796	47.008	38.3047	31.2579	28.7036	26.4527	43.9054	36.8881	36.728	34.079	28.6337	31.7292	35.7388	49.6267	30.8666	40.291	31.7981	13.1716	22.6751	36.0891	33.5898	37.2675	35.0581	14.2728	40.296	34.9055		0.0594603	33.9864
1.4284	32.8761	41.5776	44.1903	37.7566	40.2914	31.3264	33.5052	34.5257	41.1627	26.4799	31.4648	23.7402	30.1769	31.7261	40.2486	28.8512	41.059	28.8468	31.0333	24.238	40.9497	42.5382	29.9382	24.5236	11.0609	32.5303	37.5101		0.0648642	33.1158
1.5474	40.0302	45.6668	25.7533	29.5119	31.5369	25.0173	26.9354	41.0772	37.8975	33.7034	24.2296	31.6217	22.1525	29.0634	35.1902	42.7271	47.8785	22.9071	32.9416	32.9277	51.5451	40.7097	41.3866	26.7706	22.8596	30.8958	41.7404		0.070268	33.8769
1.6665	40.8596	35.1833	32.5227	38.116	27.4171	39.8113	24.7834	45.6038	29.2596	31.2084	35.3363	28.4823	28.7675	40.3436	45.3671	40.4885	52.5568	34.2156	29.7223	29.4185	50.9865	37.8233	42.5783	35.6449	22.1856	43.3145	32.5816		0.0756764	36.0955
1.7855	38.9251	32.1742	27.0518	41.9308	36.714	24.1727	33.5042	35.1072	36.6757	20.3545	42.1252	36.6571	29.5539	38.654	33.3929	47.9134	60.0605	45.4551	31.1879	45.5786	50.5312	47.3458	51.6035	34.9204	27.1886	40.0082	41.3338		0.0810802	38.1526
1.9046	34.45	27.9381	31.4275	41.9209	32.8073	36.2643	32.696	29.4574	37.9394	36.7063	34.9614	25.1655	46.0109	42.3318	24.9992	48.3667	53.7984	34.3598	48.9888	33.1133	52.3607	36.1214	34.6381	27.3901	21.0596	47.7706	28.2699		0.0864886	36.3449
2.0236	41.7674	30.6432	38.5448	26.7633	24.8447	25.8493	31.7946	34.1202	48.3972	27.9514	34.2916	25.1379	41.6532	41.4476	48.4202	59.2748	39.6659	30.1396	32.4806	34.1409	38.2277	40.5991	36.4661	30.902	16.181	38.8364	37.0493		0.0918924	35.3922
2.1426	33.8068	30.4685	39.1665	42.4684	25.6853	38.1665	38.6257	34.5301	38.9114	41.2809	44.6068	23.3238	36.8951	58.64	46.212	49.7765	46.8015	48.0992	36.3369	48.5539	47.3175	57.8894	24.6502	27.8203	22.6519	36.1881	33.2896		0.0972963	38.969
2.2617	31.0084	24.1177	41.3202	41.9833	29.43	31.1206	30.4644	20.9351	38.5644	43.4155	44.8247	14.3592	38.019	41.4586	30.9611	37.9445	56.3133	40.9014	42.0656	38.3796	49.0291	38.5996	29.6378	29.9691	28.3005	42.3736	34.0042		0.102705	35.9074
2.3807	36.6609	31.58	30.8	28.6675	38.146	33.3906	46.1764	30.758	38.2573	30.5603	52.7458	34.9878	40.7663	41.2244	28.9267	42.5256	41.5168	37.2132	49.0989	32.5378	36.8643	36.4968	32.9073	31.2201	20.1942	39.8081	29.9288		0.108108	36.0726
2.4997	30.317	38.0211	33.01	45.7994	26.6972	34.332	38.9332	29.0259	40.1408	28.9879	59.4265	27.5332	52.1014	55.0282	44.2497	58.3296	28.5738	38.7302	49.9637	46.4201	52.3161	36.9508	44.5964	29.4838	29.8572	28.1756	36.3799		0.113512	39.3845
2.6188	34.1105	41.4027	50.4625	39.2116	33.8885	38.569	38.6062	28.1159	48.687	25.8937	52.5667	35.643	36.9822	45.5667	39.7346	52.3951	45.5241	32.6798	36.4048	39.805	47.0495	25.9351	30.7551	37.8245	24.9063	29.0149	49.71		0.118921	38.572
2.7378	26.2696	30.8544	24.9731	28.8577	35.1122	37.3305	40.7107	34.8013	27.0534	40.4253	45.9702	31.8626	37.4351	35.94	33.1666	47.8916	54.3175	37.9982	40.8924	42.7535	61.5971	47.5115	37.6478	32.3896	27.2	34.3359	34.5223		0.124325	37.4007
2.8568	36.1827	47.1953	22.8315	33.1079	31.337	35.8851	55.5801	30.3099	36.0955	27.6105	46.7835	32.7091	36.1359	46.4033	36.8519	59.5662	42.5152	42.3017	42.2088	54.6274	51.9227	28.711	28.2545	37.3287	34.7779	29.4516	34.9571		0.129728	38.5793
2.9759	43.2345	35.4294	34.2156	45.4219	28.935	36.5341	46.0354	35.2941	33.9698	21.1182	63.0651	35.8221	44.0241	41.5159	38.9924	49.3308	45.1972	45.0022	45.4906	50.3756	52.6242	35.0427	45.4535	44.4734	32.2668	27.4273	36.9866		0.135137	40.4918
3.0949	30.3171	23.7312	29.1353	36.8328	30.6432	54.0882	40.4608	31.0909	34.6126	38.1965	51.2632	29.7469	34.3468	44.5858	47.6938	54.3934	46.2318	50.1003	35.6252	56.5775	39.2389	38.479	38.789	37.3408	29.0742	34.9298	37.9125		0.140541	39.0903
3.2139	44.4329	35.3092	43.9386	42.8233	49.227	43.0664	32.5916	49.4322	29.9701	32.9293	61.062	42.0558	29.1938	27.29	27.3036	49.6719	62.6237	38.5259	37.5269	52.7465	44.7496	24.5336	40.0578	32.7301	23.6541	39.4575	42.2918		0.145944	39.9702
3.333	40.455	38.6688	43.8099	45.5294	51.493	40.7431	31.0805	45.6691	29.8561	33.5849	36.0557	24.414	35.3528	35.4047	43.8725	55.9153	45.97	45.9467	46.4114	60.3265	48.3216	31.8439	53.9945	32.7977	31.2276	32.2819	41.6502		0.151353	40.8399
3.452	38.5546	41.6425	49.5603	37.5223	42.7239	34.2928	33.6057	39.7214	37.4071	26.5734	53.9701	38.8479	26.1444	41.8003	46.8754	51.6401	37.3386	38.647	42.2702	61.319	58.716	37.7338	37.7655	31.1388	26.3115	38.9848	38.9907		0.156757	40.374
3.571	31.7193	39.3696	47.1928	29.3856	33.8817	44.7612	34.574	36.0524	34.6862	41.0972	53.2061	37.247	24.623	58.8743	49.8641	33.7529	46.534	44.07	39.9027	44.7988	41.43	30.3277	34.1651	23.3512	25.2256	33.7476	39.5985		0.16216	38.2755
3.6901	41.9387	43.9868	43.382	47.2389	20.6194	61.1354	42.2256	43.1874	29.4722	46.2279	60.137	39.2945	33.5699	42.7467	42.5447	49.5466	44.3326	44.0086	43.3837	33.0438	48.9705	38.2543	36.8062	47.794	33.4705	38.6991	31.8388		0.167569	41.7724
3.8091	42.0058	60.5633	50.6718	34.6274	38.7063	51.9341	35.93	43.1515	34.4554	37.2076	45.244	49.4988	47.2562	46.5646	54.6925	40.3888	40.7948	35.3153	41.3386	35.9149	50.5441	29.5839	29.0396	47.625	39.4616	40.0375	38.2093		0.172973	42.2505
3.9281	54.3893	39.1665	45.1151	29.9408	30.7246	41.16	37.2	33.8363	33.7103	37.6538	59.9872	36.8483	39.4248	45.8215	47.1856	36.9934	43.2516	40.0395	47.3706	47.3548	51.1992	47.8887	47.1278	37.9514	45.0509	32.0043	40.3153		0.178376	41.8041
4.0472	43.7496	40.1243	37.8621	31.385	37.316	40.0724	41.109	55.9447	37.5977	32.0507	49.7772	40.1937	42.1337	48.3991	57.1741	50.6883	50.5929	42.7507	49.7702	43.5838	49.7766	30.2814	38.5121	26.3944	37.492	41.4325	33.6802		0.183785	41.8461
4.1662	39.1244	38.1213	45.2999	28.2733	33.5908	37.5098	42.4823	57.9363	42.7579	36.082	53.0923	37.0568	35.0411	47.187	55.3261	50.9664	44.6966	39.244	47.8336	42.1267	56.1006	30.3664	34.4979	40.2503	44.3226	39.3283	30.6984		0.189189	41.8264
4.2852	40.6806	42.889	43.7113	32.7999	34.2601	36.1972	51.8929	31.0757	36.6083	47.8024	44.8064	39.6739	31.8384	48.0002	45.4413	58.6062	40.5227	43.3464	52.0359	45.0054	48.0537	50.1296	42.7976	43.5936	43.4217	42.5868	35.5051		0.194593	42.7142
4.4043	53.0054	46.6256	53.4766	30.1472	26.7554	34.7151	49.9134	54.5891	24.5989	36.7322	63.2348	41.1014	31.2649	22.8614	63.34	48.0002	49.7591	43.629	45.7852	47.3036	44.6294	57.4263	40.3	32.2282	45.404	32.5957	28.5346		0.200001	42.5169
4.5233	55.2806	36.4338	46.1632	45.0249	40.3746	30.7425	38.4826	44.3504	27.3508	44.8726	59.6255	39.6763	46.3471	29.8265	49.5299	44.9481	40.1433	40.6975	47.6422	46.1067	34.7514	51.7508	41.4227	41.3612	39.118	37.6736	40.571		0.205405	42.2321
4.6423	46.1128	46.4135	32.0996	36.773	34.677	53.1608	53.6761	49.439	29.7475	37.7484	67.5044	50.4207	34.4232	34.4877	49.3482	37.2559	41.8529	50.9288	30.016	50.5456	45.7871	34.335	34.7393	32.0908	34.2881	32.8654	36.0667		0.210809	41.3631
4.7614	43.9894	45.0477	33.368	38.0105	42.1799	36.0075	53.9263	47.7601	36.2128	36.1582	57.6871	63.3549	24.2385	24.6104	47.9746	42.6832	43.6746	53.9699	38.1912	43.2589	48.7716	40.2148	33.8712	27.975	41.952	37.282	26.7314		0.216217	41.0778
4.8804	37.1581	34.821	37.1398	35.4289	49.0182	57.9215	38.2494	53.3323	39.2685	39.0788	60.9016	56.8653	41.6909	40.0456	56.6103	45.4671	37.4565	59.7028	41.9428	42.5933	49.9046	37.2699	38.2029	45.9486	38.4579	30.2	31.6802		0.221621	43.5688
4.9995	47.1667	43.6619	33.4667	38.2113	44.1857	45.2675	42.2418	36.9064	27.0988	47.6877	64.7863	46.1263	43.2232	42.3333	50.5143	34.8796	38.4193	51.6826	35.1071	33.9702	48.5955	40.6955	47.0498	29.5961	42.7989	28.4822	28.6811		0.227029	41.2161
5.1185	39.9043	46.5905	35.1251	34.7894	43.2508	41.6586	53.7726	47.0094	28.8485	51.5746	57.242	45.3618	37.713	31.1341	46.4829	45.7339	40.3177	44.7503	43.8894	37.8971	43.7197	46.9753	38.2097	21.8774	36.3671	36.4493	26.8796		0.232433	40.8713
5.2375	35.387	53.5298	61.0839	35.3748	46.8557	44.9481	66.2379	59.9478	37.6491	41.3588	41.631	55.6477	33.4356	35.1655	32.7278	39.2158	37.3381	43.5384	43.1189	43.52	26.2517	28.7681	36.1818	27.8836	39.1471	29.2397	26.0879		0.237837	40.7878
5.3566	30.8342	37.9127	48.1436	35.9141	36.2432	38.6989	58.4492	57.6816	34.5295	44.8925	35.2977	52.4303	45.3667	21.2096	40.1981	44.8481	41.8068	53.3757	51.8637	46.0758	36.5937	49.0656	35.0997	32.8748	43.1606	40.7092	27.3807		0.243245	41.5058
5.4756	53.2947	44.4982	42.3764	29.9955	30.4723	50.2924	55.5714	61.0834	40.3116	47.2762	40.4956	54.1145	43.2897	40.91	49.161	49.9336	35.2402	40.9137	37.45	35.6191	42.371	38.0173	34.614	40.1189	30.3405	40.1208	28.0606		0.248649	42.0719
5.5946	46.146	43.1023	39.1556	28.5063	48.3423	33.9626	44.1621	44.5124	21.8325	36.1562	37.5733	49.9333	40.8297	24.7957	48.0718	44.8807	39.8411	46.3041	46.7223	43.7577	43.6588	58.5532	40.8691	30.8509	30.1733	35.893	42.1287		0.254053	40.3969
5.7137	55.6273	43.8198	39.1153	38.6253	38.5932	47.5005	52.4879	47.2827	24.4801	54.0104	39.1868	43.8393	49.7505	32.8488	58.0203	35.1161	44.4808	36.9818	50.6197	60.1742	32.1828	38.2083	30.6032	35.4728	39.0866	25.9075	36.2671		0.259461	41.8626
5.8327	44.4793	48.0913	36.9302	32.7302	39.1715	40.2111	56.2646	47.0675	34.0204	39.0713	49.7656	50.0045	44.3303	27.7888	44.0946	40.4743	51.5089	20.5743	46.6019	48.2367	27.3815	40.9868	25.3056	35.0432	36.8243	35.5593	32.772		0.264865	39.8256
5.9517	19.5494	42.2082	44.4213	42.0319	54.2949	57.4417	54.4435	53.0065	44.2544	44.5793	40.6799	44.1167	43.8877	32.493	51.649	40.3151	38.764	34.9605	42.6715	45.9637	39.2227	48.8199	34.1951	34.4087	44.1524	40.8491	32.5731		0.270269	42.4427
6.0708	45.6853	40.3033	33.6574	25.5729	37.0654	66.2553	59.0925	59.1902	36.9704	43.525	45.0978	47.5905	36.7775	33.5973	51.5236	44.6758	37.105	35.365	39.9847	55.1319	49.2153	37.6278	30.7443	22.406	36.236	36.0512	33.1759		0.275677	41.4675
6.1898	40.3363	42.1279	30.7584	29.8397	45.5486	54.1796	56.721	53.4777	31.8202	46.7054	48.5016	34.702	39.9304	45.9737	53.6494	38.2339	35.9916	23.3033	36.4591	48.5836	49.5562	42.9759	31.7711	24.1147	32.3207	32.8923	40.2909		0.281081	40.3987
6.3088	35.4482	44.9909	49.3696	26.0674	52.1984	49.5156	39.0943	68.9722	46.322	44.1863	57.1247	40.7192	23.9407	34.263	49.8246	40.7599	41.3015	18.7418	35.6547	52.3367	57.4531	42.0488	34.9823	32.7154	38.3294	35.5709	27.3225		0.286485	41.4539
6.4279	49.5397	49.6695	35.4549	31.1441	51.2072	39.2062	41.0728	56.4079	47.5857	23.1555	61.9686	52.3335	44.5115	31.6877	46.7521	54.9364	37.167	33.9078	42.0292	25.7463	55.2884	39.8588	33.6063	27.7376	30.5753	32.4369	26.3358		0.291893	40.7897
6.5469	39.7256	59.4941	27.1346	20.499	32.2581	43.5884	49.6395	59.486	39.4906	31.603	42.5219	58.2271	31.1153	30.9336	52.3875	44.3825	37.5878	17.2228	35.0385	32.4442	50.0888	40.7599	34.2331	39.1115	36.2399	40.8152	36.416		0.297297	39.3498
6.6659	58.6772	54.0165	31.1133	18.955	40.3854	44.7898	44.9038	54.4408	50.4852	46.2231	45.8645	36.1526	28.838	22.8882	45.7416	43.982	38.6471	36.0477	28.9224	33.356	48.4771	47.2854	45.029	43.4503	34.759	38.6383	35.936		0.302701	40.6669
6.785	45.4691	50.1699	25.7111	22.408	42.2676	55.0404	42.4954	47.4761	49.9183	49.8309	48.7087	41.8744	33.9305	24.9574	32.8391	51.4177	31.8343	34.362	28.7627	54.3916	59.0803	47.3524	37.7579	26.0968	30.8414	35.9748	34.6898		0.308109	40.2096
6.904	57.4483	52.9869	30.6504	24.452	46.8385	64.7312	41.9375	65.7036	42.8501	40.2141	45.9764	49.2754	27.7113	38.0013	55.5547	51.2175	32.0228	19.2817	27.8432	37.4203	43.2221	54.4908	37.3679	22.8224	39.5657	25.1532	37.3857		0.313513	41.1898
7.023	52.7854	48.8055	34.2233	29.2977	27.2617	55.3649	47.8165	50.919	54.4525	53.8364	53.7158	40.5786	25.4922	25.199	43.3663	38.8415	42.7292	26.6488	27.4791	41.9807	53.2784	50.3888	38.9034	21.3295	31.5072	34.8804	35.5856		0.318917	40.2469
7.1421	47.9238	45.122	16.5153	18.0579	34.4023	44.3619	40.4622	39.0856	47.4558	40.5514	61.3285	44.6616	38.3318	23.665	40.3927	32.7746	30.2609	35.3073	34.7152	44.8858	50.2747	56.0198	26.6096	17.1147	33.2418	36.4596	27.9084		0.324325	37.3293
7.2611	63.5695	32.0192	14.4411	21.2265	32.2568	48.8271	25.6171	52.1823	40.1867	73.0355	53.6778	46.9404	28.0505	17.6039	32.5476	38.7214	41.2092	29.9306	31.7008	50.9644	53.3706	41.9132	40.118	25.8124	47.3836	21.1496	24.8059		0.329729	38.1208
7.3801	46.2981	35.6781	16.6087	33.1401	37.0778	47.3613	45.7391	51.1595	44.8115	51.8093	45.1417	44.4806	35.1694	23.0942	37.8322	44.5404	24.8708	32.8126	44.1874	52.0062	37.7068	48.3893	31.1415	13.2016	37.3692	31.1486	42.6116		0.335133	38.3477
7.4992	46.1757	48.0355	23.5398	22.233	34.7386	36.263	42.3277	46.4312	41.2504	45.1017	44.4033	50.9273	36.0367	24.5588	42.8863	51.6557	37.8756	26.2664	42.8475	47.4278	46.0802	40.6054	39.0729	11.4276	49.6453	16.1475	30.0034		0.340541	37.9246
7.6182	54.5892	46.6344	22.0959	15.7624	35.0679	43.5969	38.3569	65.759	43.1513	53.2771	56.3632	54.2356	29.4351	26.1691	38.1949	39.6021	25.9079	27.7196	25.3431	43.8691	54.7463	43.8504	32.7031	9.1168	41.2919	37.8864	24.6484		0.345945	38.125
7.7372	48.3475	41.2904	12.7489	13.696	29.0657	48.7593	44.7836	50.764	44.0649	34.0627	42.5915	55.7694	29.7595	18.5551	46.6367	46.0666	26.4937	39.1394	35.2738	57.3555	26.5603	60.5699	44.0697	21.8512	23.7283	23.6262	31.7313		0.351349	36.9393
7.8563	37.0415	44.7419	16.772	18.4743	28.2691	43.6084	48.5473	57.506	47.8498	44.0379	35.5927	53.307	27.2323	29.2133	29.1207	52.6243	27.5208	22.1382	29.3471	41.3064	38.14	61.7758	36.8042	32.3882	28.332	19.9305	27.8256		0.356758	36.2758
7.9753	55.0514	33.7421	12.8016	19.2947	38.822	35.1055	47.4476	51.9192	32.0056	44.4709	37.1447	56.1552	25.3796	26.7918	24.9297	44.7378	28.2467	35.1985	37.2473	50.8529	41.8305	37.9528	29.9132	15.232	33.7517	26.2508	28.4571		0.362161	35.2123
8.0943	49.8774	46.3288	17.9924	21.0858	49.1828	45.1293	51.3788	51.0538	35.0443	40.9901	45.2046	59.8337	27.8696	21.9326	41.7422	35.1695	32.8969	36.721	34.0481	45.3275	34.5643	45.5521	23.5936	11.2956	24.2711	33.8319	28.4935		0.367565	36.6819
8.2134	47.5313	45.263	18.8863	19.393	36.8846	54.9147	46.6027	40.9769	37.6681	46.6895	42.8419	64.3423	21.5285	23.891	31.4368	33.7154	32.5962	23.2129	26.6977	46.1527	31.6056	50.2263	25.4753	13.1617	38.7438	20.6076	33.1728		0.372974	35.3414
8.3324	46.8107	42.2897	15.8072	22.7101	33.52	46.3166	63.0218	38.6237	36.4983	36.7565	36.6531	66.9902	23.0784	24.7085	28.6988	30.9843	33.5875	28.5952	32.2267	44.6934	31.0341	41.9957	20.8177	16.9573	26.3164	38.8252	35.2298		0.378377	34.9536
8.4515	53.5679	35.131	22.4888	28.3841	51.2667	38.776	60.6404	43.6755	35.0176	45.802	39.0249	59.2941	31.9757	19.5844	23.6303	41.8751	28.5943	36.4672	28.9275	48.9813	29.0414	42.852	21.4421	16.5474	34.8135	28.9754	42.9054		0.383786	36.6549
8.5705	49.3458	37.3216	20.5219	17.2624	40.4407	39.2685	59.7056	46.8428	40.5797	44.5818	38.5002	86.2139	33.3022	19.281	29.4754	35.4331	25.9653	32.5633	27.0325	48.81	27.0156	39.005	35.8153	17.5882	22.2362	20.0583	36.1485		0.38919	35.9376
8.6895	40.0112	42.5791	15.8037	22.63	42.7975	45.9973	34.5396	45.688	31.5423	35.1278	20.4731	91.4568	18.8198	21.6863	20.9488	29.1831	33.511	29.5193	27.8675	59.7596	26.697	45.1948	24.5822	14.4429	30.2215	24.8934	38.7163		0.394593	33.8774
8.8086	59.6628	36.5799	16.2479	21.4387	48.5928	53.6293	50.5336	42.4055	33.7495	39.556	39.6848	71.2318	31.6211	14.8888	26.6743	43.3412	27.8424	23.4261	31.9149	38.5784	45.4173	42.5675	24.0008	21.0956	30.429	33.2514	30.7241		0.400002	36.2624
8.9276	59.4437	32.6975	12.0765	15.4028	39.8363	42.3988	55.9441	46.2456	37.1907	41.0991	38.7878	76.5644	29.4712	15.2485	23.2937	44.2302	34.132	26.1974	41.6076	39.997	37.1453	40.9165	30.6176	22.8851	31.6337	43.1586	22.2226		0.405406	36.3128
9.0466	50.0594	34.4167	11.743	22.2882	58.4946	33.5548	46.2078	43.9114	43.2004	50.3437	36.257	74.4181	22.6354	18.9087	33.1784	40.1825	30.9906	34.422	26.2213	44.3299	37.4239	46.5444	30.2751	17.4901	36.5681	23.7256	23.2274		0.410809	35.9636
9.1657	42.4467	43.5309	15.5641	22.4836	51.9924	45.8968	40.8601	50.4017	25.7021	51.2964	38.0774	75.8281	14.9033	18.2187	26.3946	42.0039	25.9761	26.9504	28.8566	43.32	38.5629	24.4454	30.2608	18.8064	30.163	33.9094	33.6097		0.416218	34.8319
9.2847	46.7132	20.263	13.2745	24.3925	49.2341	43.8582	40.9981	56.5917	42.9574	45.7254	34.4043	63.0859	28.7687	14.6244	32.7916	35.6185	28.4312	24.8803	25.8006	48.8181	39.108	33.1466	25.2757	13.5438	37.4145	30.5117	35.7413		0.421622	34.6657
9.4037	49.1721	30.5802	15.289	22.5158	37.4616	40.7541	35.0573	53.1328	34.6352	33.6086	49.4726	48.6225	24.3742	19.0706	28.8573	34.7786	23.596	25.0047	33.2796	40.6683	42.6739	36.174	23.8857	21.6118	31.2243	31.988	23.8335		0.427026	33.0119
9.5228	50.5854	35.2436	15.326	23.0244	37.4183	50.692	38.78	56.5816	44.6055	33.7484	41.4264	42.5988	35.9668	17.3209	32.614	40.4525	35.5538	20.1988	36.6148	37.7789	31.9956	30.1586	38.0278	21.2172	23.4664	27.8228	30.5257		0.432434	34.435
9.6418	35.3789	30.7765	15.809	19.6362	27.404	23.229	32.2261	56.1474	37.6001	28.4379	41.6066	54.7592	21.5271	18.1272	26.5178	39.4541	29.3623	18.2272	33.0066	28.6877	30.9937	37.029	23.6471	19.7912	25.2931	36.2095	38.0999		0.437838	30.7031
9.7608	43.1988	25.5556	11.6102	18.7601	44.6309	44.0909	41.35	46.3334	47.7363	37.4427	38.2493	36.1086	24.3056	16.832	20.3908	44.1248	38.0613	16.4603	22.7381	40.0124	39.1529	39.0712	22.0113	19.8727	25.3287	28.7145	29.012		0.443242	31.8946
9.8799	46.4235	19.4556	9.5277	13.5968	31.2924	40.7939	45.5283	37.4103	28.3001	50.5251	42.6492	45.2058	18.8989	12.2928	25.0349	41.8358	32.3323	19.388	28.1568	26.5021	34.785	43.6122	26.9498	18.7829	17.9531	32.6015	38.9665		0.44865	30.6963
9.9989	56.0885	23.1435	13.3781	16.8707	25.9326	42.6312	35.2643	56.9811	35.9145	43.1926	40.4311	47.4681	19.4283	24.5442	25.7382	56.8802	42.7007	16.4619	25.609	30.0607	43.0385	44.1582	34.9504	21.7714	26.8284	27.3302	29.0872		0.454054	33.5513
10.1179	46.9184	22.7887	16.8644	18.0592	42.0281	40.2384	44.1905	54.7868	27.5085	37.6285	31.7772	35.8892	24.6978	21.5427	24.9288	40.4016	43.7379	24.125	11.1803	40.9474	36.7217	34.9498	33.7339	16.8496	27.8792	27.9046	24.301		0.459458	31.577
10.237	43.0366	35.6432	8.7089	21.9482	31.8572	40.8074	32.1277	37.1559	29.7804	36.92	39.4147	35.4292	30.8879	21.7353	22.6307	44.6168	45.336	20.205	25.7791	31.6925	38.1418	30.3184	35.963	17.3147	27.4739	27.0247	22.78		0.464866	30.9159
10.356	51.9122	29.9379	15.6828	20.2727	35.1631	47.3607	33.2675	36.1004	39.978	40.6362	46.4619	39.6559	20.0529	20.4606	31.3508	38.5574	43.3633	20.5613	17.2496	24.6164	37.574	30.5546	25.8893	17.5567	26.4141	34.8607	30.5639		0.47027	31.7057
10.475	43.9043	16.1327	11.9317	17.364	25.7585	56.6217	30.8492	38.1073	32.5384	40.4747	37.2738	46.4727	19.3987	21.3456	29.9764	36.8237	35.0261	13.8906	26.7788	23.1609	37.067	32.6208	33.4404	12.7538	21.1549	25.9632	30.9539		0.475674	29.5475
10.5941	38.5505	17.9244	16.4526	13.507	40.2974	37.8482	37.817	31.5625	24.2815	47.0954	42.7415	43.6309	13.2462	17.8901	25.1123	36.7183	38.1279	23.0166	30.403	31.5197	35.3267	35.5164	49.0237	16.0222	30.4209	34.9774	25.769		0.481082	30.9185
10.7131	48.5656	22.6405	17.161	14.8422	32.1256	33.6038	33.6886	52.0251	34.496	47.9068	41.8269	24.4088	12.2382	15.1506	20.0347	48.6652	32.9848	25.1677	31.3279	37.0589	36.487	39.1264	41.338	15.3004	16.5924	23.2097	32.3497		0.486486	30.7527
10.8321	44.2807	32.7091	18.0302	13.4578	49.385	41.2122	28.5119	34.0588	21.7757	33.8896	25.5157	35.4252	20.2408	15.3061	29.8874	47.2308	33.4391	26.0839	23.0981	39.469	30.0996	43.2941	42.9095	16.0089	18.6152	26.3284	25.4637		0.49189	30.2121
10.9512	43.0852	25.4216	15.2621	9.7808	32.2097	41.7225	34.644	41.6794	29.2145	55.2758	34.4409	41.4285	23.2533	23.7244	28.476	42.0011	33.0361	18.4185	17.6618	42.8299	29.8995	51.4493	37.9025	11.3345	21.8886	25.8274	39.0023		0.497298	31.5137
11.0702	51.023	20.0862	16.754	14.0555	39.49	36.5027	32.0662	39.0942	39.7702	36.9976	42.1104	45.652	20.8635	21.4328	25.0742	43.2453	33.4426	20.9689	17.8993	31.4547	35.8386	33.4831	27.0304	13.8403	24.7854	23.8345	24.695		0.502702	30.0552
11.1892	46.2762	16.482	13.2246	15.3101	33.5447	34.6488	44.0426	31.8419	36.4968	35.697	23.7781	34.5133	25.406	29.0511	33.0185	37.88	31.9291	19.1241	22.1771	35.6825	28.9426	33.6555	17.9634	10.2908	22.1936	23.2949	24.9602		0.508106	28.2009
11.3083	37.5652	18.8906	25.801	14.5913	37.1885	37.9977	34.3746	37.7582	40.8112	36.4124	37.9128	40.159	25.8864	17.641	26.6812	31.1494	45.661	24.0917	12.4099	31.3629	36.796	32.7247	30.3805	9.9199	28.9528	26.187	27.2725		0.513514	29.8733
11.4273	40.7131	20.72	16.5279	13.4646	28.3462	36.4622	34.7789	35.9904	35.0983	33.464	34.675	38.8654	26.5098	11.218	23.8551	35.4206	33.1382	22.796	22.2746	23.5853	42.794	41.8308	37.4967	20.0826	29.5514	31.9407	22.1698		0.518918	29.3989
11.5463	44.5206	25.6715	20.3422	25.654	28.798	46.7362	42.8358	36.9207	45.8589	45.5628	29.2327	40.497	26.5048	17.604	18.3715	39.2848	35.3963	24.4633	12.2703	29.3981	33.8982	33.532	33.8232	13.0467	22.1243	26.1918	26.6099		0.524322	30.5611
11.6654	35.1017	27.6406	11.431	22.0981	44.2919	36.2336	32.6821	27.7672	38.5877	35.78	31.1967	24.1444	26.5982	11.5242	26.0812	25.5324	48.4337	24.3919	18.5124	29.1064	29.8618	50.0707	24.0077	13.6597	31.6567	26.0286	29.8093		0.52973	28.9715
11.7844	35.016	38.7612	7.936	8.4758	50.8944	32.8343	32.0362	34.208	31.1181	41.2093	37.8578	43.3309	20.9405	12.0835	12.3006	44.8897	27.6243	21.7342	15.8325	22.1678	23.4519	45.7345	38.4209	17.7947	33.9791	37.4712	29.141		0.535134	29.5276
11.9035	32.1276	23.2807	8.9312	16.7502	26.617	37.1951	35.3189	30.1457	52.4386	37.79	27.106	40.9348	17.5075	8.6175	31.885	30.3625	31.1513	16.7774	21.9301	30.2368	41.8149	30.8095	31.2569	19.8066	31.5154	27.7233	33.4478		0.540542	28.6473
12.0225	37.065	22.3736	16.4893	14.4344	38.5815	33.5418	42.9271	27.8441	32.2514	50.4532	36.36	37.2647	24.5321	15.5214	37.9541	43.2042	35.0223	17.4066	30.1607	23.1074	30.254	37.417	25.3945	14.152	14.7878	27.6648	36.6303		0.545946	29.7332
12.1415	23.4415	35.8923	14.814	9.0745	42.5006	51.9143	33.7655	33.2351	40.9591	43.1218	37.9927	32.0688	25.9849	10.2037	24.6811	30.6548	38.0538	14.2446	18.5143	26.3883	30.2133	27.2882	21.8316	15.5107	19.2783	39.1552	32.9189		0.55135	28.6556
12.2606	39.0092	30.7975	9.3811	14.5259	28.8812	31.7157	40.5396	34.0188	45.6101	46.6496	37.5214	34.5741	23.2079	14.3746	46.3194	32.4316	37.3303	16.2382	18.8269	29.9515	28.8761	26.6439	34.7292	17.2209	9.762	30.5683	25.9463		0.556758	29.0982
12.3796	37.2272	28.1687	18.22	20.2108	33.3121	52.058	40.6149	27.6475	36.4742	40.5799	46.3386	41.9453	28.3089	23.4625	23.691	27.0823	55.4494	18.6762	18.1784	20.7696	30.1081	19.5729	28.576	17.3887	14.8581	32.7021	25.962		0.562162	29.9105
12.4986	34.1435	39.521	17.7959	19.5288	53.9934	37.2446	46.3268	41.8965	33.5456	56.7756	53.1422	39.5045	18.9056	17.9811	29.6138	37.1524	43.7636	34.008	26.0003	31.519	33.7701	27.9307	21.1232	18.5824	17.1072	25.7314	41.0391		0.567566	33.2462
12.6177	21.2849	33.7653	10.0775	13.0788	41.1346	42.612	41.8792	25.7109	33.1918	37.8198	59.2888	43.3406	24.6814	19.139	34.339	29.7221	26.1177	10.7733	22.6332	32.6875	22.3556	34.5595	24.5918	18.2141	26.7972	20.2608	38.7174		0.572974	29.2138
12.7367	38.2004	27.4072	15.4712	14.6242	35.6985	32.2566	31.6205	42.7559	50.0533	28.6758	41.0524	39.0498	21.7454	16.1725	35.7384	30.8265	37.7057	21.2788	18.6322	24.0726	24.3056	36.3589	34.533	17.3573	15.198	22.4243	38.0479		0.578378	29.306
12.8557	40.3918	21.9537	9.9476	17.4689	48.1412	42.501	35.6251	26.0884	20.1828	37.9726	45.0532	39.5235	21.6197	14.2303	31.8575	34.2059	35.6242	17.2919	19.6673	25.8645	40.2677	38.5568	20.7462	15.4362	29.0413	20.7725	22.0941		0.583782	28.5973
12.9748	38.6024	28.7165	14.2025	20.9139	37.3801	39.1243	48.0393	36.7778	40.5146	42.288	48.7049	35.9156	18.5521	16.632	38.1934	45.7488	35.8766	14.8139	20.4122	24.4851	39.3335	30.6316	19.7082	18.7474	21.6334	20.7645	28.1893		0.589191	30.5519
13.0938	40.4276	31.7362	15.0481	11.9293	31.9514	38.8619	44.8138	38.5699	40.4119	36.4557	25.5848	37.9349	17.1278	22.1342	29.5369	41.9847	31.8596	20.5958	20.4177	32.1076	30.0818	27.6534	25.1819	22.4093	25.0416	41.4807	34.8333		0.594594	30.2286
13.2128	48.5472	42.9355	11.1425	10.7987	44.1846	36.327	36.1399	37.5647	50.5823	29.9496	40.8729	47.765	19.6203	20.122	38.1032	31.4915	41.2783	20.6444	31.5017	20.2123	41.0205	43.4975	23.8958	21.9146	18.7062	33.632	31.3002		0.599998	32.3611
13.3319	54.3352	35.2772	13.1957	13.25	39.5601	39.3934	21.9428	31.5946	26.6488	39.5506	40.4251	40.8333	16.0836	10.4572	27.3247	31.4722	41.3353	20.1465	18.7123	19.8851	28.3091	36.9277	26.5099	13.0395	14.857	28.6644	26.7929		0.605407	28.0194
13.4509	46.6666	29.2545	17.4034	19.5755	36.827	50.6058	27.1576	25.9233	29.7426	41.4408	45.2104	50.1617	22.7815	17.3566	18.3921	33.5243	38.5178	32.1033	28.7421	27.0603	31.0731	44.2915	27.0355	24.4912	26.2849	38.5765	41.4251		0.61081	32.2824
13.5699	46.4386	57.9326	14.328	15.5338	29.0303	50.13	38.0423	31.173	24.9656	36.9911	38.6011	39.281	31.1974	37.5321	21.8175	25.408	30.3928	29.2338	23.9504	11.7575	28.5082	28.2441	29.1458	20.6938	24.4976	20.1106	35.9849		0.616214	30.4045
13.689	51.0941	40.4333	10.3005	19.6356	34.9631	24.0926	28.702	31.2713	24.2091	31.9902	33.3242	42.637	29.7308	25.326	32.5402	39.3417	32.4231	15.4007	19.5602	23.9439	26.8605	25.9595	37.4626	21.1183	22.6052	35.8641	33.2744		0.621623	29.4098
13.808	40.0031	32.4488	4.7448	13.117	33.1028	25.037	35.4571	30.7143	32.5395	32.3909	46.1615	29.5349	21.9137	23.0988	27.9121	30.2898	39.7381	23.2009	20.5545	28.311	32.5875	26.6512	37.5051	14.65	22.9806	38.72	26.6664		0.627026	28.5197
13.927	35.1124	36.583	18.8418	13.2165	37.0864	21.5107	31.2	28.2683	17.6761	42.1717	40.1049	49.1614	33.1605	24.2192	25.9004	30.7587	32.4328	22.3316	24.8174	34.2489	30.1497	27.7091	36.6119	36.3033	29.4437	30.864	34.4504		0.63243	30.5309
14.0461	35.9326	37.9899	19.1223	14.0804	36.5888	32.6948	26.7383	35.3925	25.3716	31.7829	34.5664	36.1326	21.9724	27.2692	28.6964	35.5035	25.1659	15.635	16.8848	20.6129	35.8027	23.9596	40.9486	22.2027	27.6805	37.078	31.1973		0.637839	28.7779
14.1651	39.7537	41.5499	28.5808	19.2893	48.7962	31.903	28.5679	21.0872	30.5906	49.0257	24.7589	36.2906	28.8195	32.5935	27.0083	26.3035	24.9034	28.9326	29.0769	23.8568	27.7224	30.6829	36.8545	21.7215	39.2504	39.2043	24.4074		0.643242	31.1678
14.2841	39.5675	31.7146	12.9977	16.9165	42.3089	33.6066	26.0675	29.9012	21.0971	36.7345	37.3414	36.9621	30.5406	18.378	47.4288	34.5466	35.5279	29.1352	30.3649	23.7231	18.9554	26.2683	44.1282	12.6563	39.0009	40.0934	21.8379		0.648646	30.2889
14.4032	49.4141	30.4852	15.2606	17.8086	32.7661	32.6157	35.726	29.7182	42.1753	41.4791	32.0622	36.9825	29.961	28.4991	32.4685	35.7776	35.9038	38.0021	21.7001	18.1614	32.9441	32.9197	35.7776	21.5671	27.3103	35.7908	32.123		0.654055	31.6815
14.5222	40.128	43.5226	19.6064	23.509	27.3008	37.7815	31.7094	41.9515	34.3938	37.7482	33.0754	36.4539	17.9977	13.2186	34.8375	29.9745	32.1214	31.6864	22.7444	26.5001	24.5103	42.5538	31.8253	24.1817	23.2898	26.5211	34.4376		0.659459	30.503
14.6412	40.5942	50.2577	19.0456	15.3281	34.1917	36.0245	22.712	20.1385	41.5964	30.0064	35.6862	33.9901	28.7224	22.0737	39.7194	31.7434	33.9679	26.5615	23.1595	29.0792	33.8715	32.017	41.3248	21.4094	30.196	27.5215	19.654		0.664862	30.3923
14.7603	53.5039	41.8824	20.7448	20.4625	39.0436	25.0342	34.3916	35.7957	31.071	30.4073	31.2737	27.0729	39.4224	19.4925	40.0801	31.912	27.1529	33.2396	19.1386	22.3902	35.3223	26.7551	29.0994	22.5658	34.5094	29.8329	22.6909		0.670271	30.5292
14.8793	37.0821	39.8728	21.21	15.5454	32.178	34.0003	35.3459	39.9342	41.659	30.1732	35.5625	39.4261	23.2657	29.8128	37.9411	33.719	28.9099	32.7221	28.5724	26.0698	35.7492	27.5565	30.3841	25.0611	45.9706	50.6446	27.8297		0.675675	32.8222
14.9984	37.763	34.1965	26.1825	16.1574	33.1497	33.0537	23.9184	27.0634	46.1079	31.2003	37.276	37.4396	26.8293	23.3311	50.7177	33.5943	38.2766	30.8147	22.1601	26.511	29.7086	25.0855	38.1421	12.7138	34.8021	48.7837	20.7021		0.681083	31.3215
15.1174	34.204	39.3898	19.1591	15.4784	45.954	33.851	37.6831	31.9655	40.5626	35.6366	43.0424	41.3085	26.5671	29.4196	36.2005	39.7486	31.233	35.6333	17.7123	19.5156	27.679	42.7068	31.7871	25.7212	35.0429	29.0883	21.0268		0.686487	32.1229
15.2364	38.0653	54.7439	19.1825	28.1223	34.068	30.9203	22.5242	47.7037	48.7018	29.6262	37.3788	32.0265	29.8255	24.9594	39.6325	44.9479	29.2553	39.9475	23.3269	30.9739	34.8645	27.7945	32.5686	28.1787	40.1875	36.697	28.8632		0.691891	33.8921
15.3555	43.1492	32.1654	28.5075	15.0091	25.404	36.2753	39.4589	36.1755	46.9291	17.4896	27.8439	31.2217	34.3689	33.3595	37.9729	35.607	35.5774	34.1336	31.102	36.6497	36.2371	32.7954	30.921	23.8407	36.39	28.7234	26.4846		0.697299	32.3627
15.4745	33.6354	41.8249	23.2528	15.7555	44.2584	38.0779	19.8989	37.6938	52.0287	21.7435	48.7067	42.4334	22.3912	31.2717	39.0975	43.1935	33.3553	26.7243	23.5895	33.241	36.5559	40.3982	35.4327	29.2288	26.6069	23.3807	33.0396		0.702703	33.2154
15.5935	30.7776	41.5084	14.3142	18.8812	30.9151	41.3223	25.9142	31.7728	44.5664	31.3573	42.1227	38.1378	26.2158	33.0377	37.9805	34.1086	48.8494	40.6712	26.9683	32.8175	25.7317	41.305	33.5048	26.9135	40.5594	31.2408	31.1659		0.708107	33.4319
15.7126	35.2746	31.8291	24.1874	18.2391	44.5551	33.2403	34.5366	32.6654	43.4153	33.6972	25.2106	30.0106	33.0438	35.7453	43.4795	42.7533	27.3744	49.4231	30.7112	28.6214	34.4746	35.2524	38.3527	34.4352	32.5322	34.7328	19.6291		0.713515	33.6082
15.8316	31.4341	45.9556	24.1654	27.3978	33.8207	46.6919	37.8128	43.523	33.3838	34.1283	31.5261	34.4667	24.4567	25.4844	40.015	57.2795	28.9147	35.128	34.0351	33.8557	28.8196	23.9387	37.4879	26.6947	42.2891	41.8733	21.6495		0.718919	34.3047
15.9506	37.053	35.1119	24.7194	28.0201	31.5138	30.6636	28.4502	38.2621	32.4944	33.5805	46.5246	22.3798	34.8412	30.7285	44.6389	41.1763	35.9474	40.7125	28.3181	38.3195	29.7512	34.0755	34.4448	26.5886	30.159	39.9773	20.1686		0.724323	33.2823
16.0697	35.0999	39.1028	22.0327	26.5985	41.0381	42.4118	38.3017	35.0668	34.1725	35.2183	46.0143	21.8121	25.1336	33.7076	34.1742	25.5399	28.9883	32.3671	28.8156	45.1337	21.6469	46.2746	36.618	28.0582	24.4719	40.1456	25.7145		0.729731	33.0985
16.1887	50.4781	52.3556	21.4048	22.6917	25.2574	39.8955	35.4578	35.7615	43.251	43.1555	43.5215	39.5574	26.8689	26.0504	33.4319	40.8244	26.6223	28.2987	33.2062	32.9568	37.9694	33.5671	40.8353	34.9386	37.5341	37.5353	33.6143		0.735135	35.446
16.3077	46.815	39.9418	17.8218	26.3934	33.1203	39.0458	23.901	29.0665	30.3979	26.7263	42.041	37.1833	25.5883	34.6069	26.6516	36.497	40.3616	23.2217	21.1867	32.5043	23.2528	28.6139	29.7098	33.7932	33.3528	34.4657	41.2578		0.740539	31.7599
16.4268	40.6327	37.8547	24.2079	20.1779	36.7217	26.7149	29.0157	40.4422	38.0152	34.3763	38.6504	37.9562	29.4512	30.7168	38.646	34.3789	41.7332	30.6377	26.3247	35.6698	20.2726	23.775	29.7952	39.3646	37.5945	30.7538	24.7393		0.745947	32.5414
16.5458	41.9927	41.3558	27.2254	28.0066	40.0715	39.9962	28.2299	40.2416	41.4601	45.7024	50.5769	36.8732	40.1884	40.0634	32.2336	26.7669	43.8067	31.9519	22.1242	23.8434	29.7372	23.6811	22.1516	40.5447	20.2938	26.3524	22.9777		0.751351	33.6463
16.6648	57.9565	32.39	30.5024	15.507	31.9629	42.2713	26.3802	26.4879	23.1785	40.0613	30.1392	33.9348	33.1353	44.1356	26.3561	38.7583	45.974	42.4642	22.4473	50.0806	27.51	24.141	23.1436	42.23	33.8986	28.7023	29.1265		0.756755	33.4398
16.7839	37.2854	54.6904	30.8355	19.4982	27.6086	46.503	22.4435	34.0447	37.5526	27.9539	38.042	34.9854	26.804	35.8549	43.8056	41.7336	45.4828	32.5391	35.1525	42.6753	30.9423	35.358	23.3254	38.9655	28.6289	41.5596	25.3818		0.762163	34.8019
16.9029	34.7278	34.2076	28.6836	18.8435	38.233	29.3515	33.4941	37.4857	34.2839	31.169	23.2425	32.3255	31.6682	39.968	46.6989	41.7722	53.4255	29.8677	45.0051	31.3156	30.1699	29.6635	37.9522	29.8342	32.448	35.4185	25.0955		0.767567	33.9389
17.0219	53.3815	36.5835	28.5288	33.2097	28.4881	32.3407	54.5447	48.1296	36.4635	28.1774	24.1971	33.364	41.6129	41.0651	32.6639	46.6612	36.2042	37.1895	29.2298	40.7944	31.5246	33.2475	23.9667	35.6339	24.5788	25.1523	26.4248		0.772971	34.9392
17.141	41.1507	38.0992	28.5784	35.9608	45.9077	45.1702	36.0551	29.1863	33.4668	39.5603	41.0617	28.869	41.5268	37.3791	36.9663	38.6639	36.8846	28.2522	28.1567	42.118	19.0702	29.2083	32.9052	33.9415	27.8201	39.6575	25.0716		0.778379	34.8403
17.26	45.2919	40.2339	25.7456	37.288	41.1768	35.0308	39.1589	37.897	25.5348	35.8125	27.0881	32.5759	46.4875	29.8474	26.2708	51.3974	35.2872	27.4319	37.4854	36.4044	20.8993	31.1018	30.6793	35.9512	25.2829	31.5243	26.3442		0.783783	33.8974
17.379	42.3359	39.195	49.4943	39.1255	34.3247	48.9764	34.444	36.5259	22.936	33.647	36.9227	36.7362	45.9648	30.3348	26.1437	47.1345	32.7821	37.1731	40.9448	43.4874	22.3065	28.7793	36.2019	28.2763	33.2703	29.0495	32.832		0.789187	35.9017
17.4981	45.0608	39.335	28.8308	31.8691	29.542	35.4052	39.6897	40.4482	32.7197	28.1302	40.3241	49.7856	39.175	49.1584	31.3195	57.499	33.2053	32.8703	30.6072	22.4723	17.346	23.7979	39.9706	31.0103	34.5455	33.4421	27.3433		0.794595	34.9964
17.6171	54.793	38.4823	35.774	55.5097	43.626	45.3116	35.7985	29.2629	35.5387	43.5895	20.4775	34.9226	39.8836	30.6974	35.4441	49.1275	31.6053	32.554	43.1747	24.0275	24.5729	22.8107	25.2018	36.4488	25.2956	22.2406	16.2496		0.799999	34.5341
17.7361	44.8449	32.1673	40.3195	44.3863	23.8164	33.9177	34.687	30.4984	44.4928	37.8483	33.7846	40.1177	34.5543	29.0235	35.9403	40.2921	31.9044	23.8002	29.5979	23.2702	15.4954	10.8704	17.3457	40.9481	35.4302	22.7549	24.3725		0.805403	31.7215
17.8552	34.8175	32.9722	45.5576	47.5605	38.748	45.9163	46.597	31.9661	38.9137	28.3384	24.2085	40.3501	38.6222	29.4986	36.5746	36.4917	40.6203	38.8589	35.2554	27.0733	16.8434	17.163	25.6795	35.3411	26.7258	17.8228	10.9373		0.810811	32.9427
17.9742	39.8723	39.9964	32.5513	57.0525	38.3441	35.4648	44.4437	38.0537	26.8616	38.0458	27.7284	28.4017	42.7785	29.2963	36.2342	30.3174	24.1385	33.4844	34.4586	17.604	16.9558	14.0792	33.2564	44.1816	45.4329	29.4701	13.0933		0.816215	33.0221
18.0932	47.0695	42.1255	41.234	26.3477	40.7016	43.129	46.199	37.1269	29.8783	32.2838	27.353	45.3357	53.0455	30.3042	23.9055	17.2966	20.1625	32.8747	24.2402	17.4461	14.5365	8.6237	28.0225	34.3579	33.5377	17.443	7.382		0.821619	30.4431
18.2123	46.3188	38.1357	39.2446	36.3073	37.3234	37.9275	49.7044	44.3923	30.3152	34.1851	35.0804	29.7466	53.4907	31.5663	35.7601	12.2078	30.0005	17.4171	25.1577	10.3781	7.7639	7.1284	16.2277	37.4065	41.8717	16.7167	7.8944		0.827027	29.9877
18.3313	53.4688	31.5434	42.3356	29.4434	40.2673	53.7169	36.0033	33.7325	39.4624	30.4845	21.2824	14.7069	62.1897	39.7048	43.8334	15.2649	28.1304	20.028	22.684	13.2754	10.9442	7.548	24.5673	36.9104	28.1371	13.5054	8.4004		0.832431	29.6878
18.4504	64.1106	46.0072	51.7863	29.7868	34.8247	48.0888	27.1596	29.5825	40.5083	32.6176	23.5628	30.3745	53.3485	38.5591	31.2213	21.6307	16.1542	14.4481	24.517	11.125	8.7019	7.1101	19.0471	32.2245	24.9403	6.0755	6.8327		0.83784	28.6795
18.5694	49.5705	57.1589	45.7127	32.8231	38.2264	44.9933	35.0721	29.847	34.6663	34.0194	23.8384	25.9403	47.0262	36.2975	24.4032	15.5033	16.2513	7.608	21.2999	6.5361	10.2469	11.7277	19.2497	27.6223	38.5889	11.4388	9.2219		0.843243	27.9589
18.6884	51.3676	39.5422	27.6122	27.599	26.8954	45.2372	33.7959	32.7965	31.1549	30.2524	21.4092	21.2084	36.3988	36.9459	22.9994	17.3815	19.1262	5.8413	13.057	8.7937	4.5894	5.5635	14.4756	23.6242	28.8319	7.6442	5.5659		0.848647	23.6929
18.8075	50.1183	38.8115	39.2922	36.4375	34.4113	39.2366	34.9449	33.916	36.1863	25.1075	10.1057	19.5334	45.4197	38.6043	17.599	10.9846	18.9261	8.861	22.7505	9.1458	7.3231	12.3031	17.3768	33.1797	32.1625	6.9291	3.5528		0.854056	25.3044
18.9265	39.5288	47.8334	51.1891	29.459	27.0981	46.0194	36.9442	24.1315	35.1341	27.3087	5.2863	16.3168	32.6512	33.518	28.0606	4.6533	12.8611	10.7055	15.1389	9.7893	3.2029	9.6643	7.6455	26.6928	28.2555	6.1674	7.7628		0.859459	23.0748
19.0455	31.38	41.9597	44.0603	30.6088	31.0056	36.8501	33.008	30.7331	23.7019	25.1144	10.5549	20.351	38.3069	33.769	14.7844	5.9983	9.8264	8.2151	9.5734	4.6114	5.7678	7.1289	7.3345	16.5196	27.6812	2.1025	7.3884		0.864863	20.6791
19.1646	29.4651	46.7866	43.4538	45.4222	35.7659	30.5619	28.0471	23.497	33.1707	28.2749	11.2212	23.6276	29.9513	29.3741	19.3335	8.518	11.7259	7.4139	10.8164	2.7006	5.4242	2.0628	10.6434	13.1542	25.5014	5.5502	12.3695		0.870272	21.2531
19.2836	41.8272	62.8996	45.575	44.2789	26.6222	37.0539	23.0177	44.2349	37.7852	20.6163	9.4543	10.858	36.6786	26.4148	10.9102	2.5352	12.968	6.8905	10.7053	3.239	4.552	2.6656	12.629	14.846	26.4172	7.2426	4.4634		0.875675	21.7548
19.4026	37.5412	52.1627	24.2299	47.5231	24.1791	20.2252	22.9648	23.8223	45.3128	26.4225	9.1238	15.4794	26.215	28.9337	11.6144	3.8085	12.1692	5.7768	16.1863	5.9647	9.2528	2.255	5.1584	14.9322	22.166	6.3877	3.7353		0.881079	19.3905
19.5217	39.5796	45.153	41.4444	46.242	36.7971	34.9223	15.3957	27.2044	30.6329	20.8183	5.8003	8.8212	38.7077	36.2228	5.5225	3.972	7.3	4.8522	6.696	4.9135	6.7673	10.9249	10.9387	18.7454	22.1886	4.9129	4.7766		0.886488	20.0093
19.6407	38.6275	52.1711	39.4091	48.8397	22.863	17.0114	18.0255	29.7075	34.3373	20.8638	3.6011	11.886	22.6101	27.719	8.7697	1.402	7.8893	7.0322	2.8444	4.067	7.9015	12.1999	7.6452	12.066	14.0796	10.2046	4.294		0.891892	18.0766
19.7597	30.1661	38.0222	29.1386	43.9372	33.056	12.8532	19.3187	32.6194	41.0049	11.9146	6.3311	3.669	23.7373	30.075	5.3536	3.868	7.957	2.6273	3.2384	4.5875	8.0408	3.741	9.0085	7.7799	11.5624	2.6353	7.4773		0.897295	16.0637
19.8788	25.5911	42.5762	41.7657	32.5242	30.6518	23.1732	15.3113	34.3565	37.7875	14.4599	8.802	12.2866	12.7223	19.7573	5.8693	7.5206	2.8231	8.8443	6.2299	2.8143	2.5204	5.2553	8.1969	12.5439	18.5607	11.5701	6.3068		0.902704	16.6971
19.9978	22.6235	34.0166	45.5854	44.6841	20.4644	18.5658	14.6184	22.6483	47.7327	13.8093	5.5303	10.4135	18.6681	15.4246	4.1575	6.2905	6.9301	5.1059	10.9261	0.38	8.9162	7.7754	10.3854	10.4825	3.2215	11.1023	2.9443		0.908108	15.6816
20.1168	22.7674	25.3633	37.7663	35.1896	30.6098	14.7093	17.8865	29.6192	32.4495	16.7305	7.072	7.1512	16.5963	15.1634	5.9377	8.5672	5.4801	2.7271	6.6701	4.248	10.7937	9.3295	4.6771	10.703	8.9783	4.3258	5.6291		0.913511	14.7089
20.2359	17.3044	28.554	44.3218	42.1596	23.9825	11.7271	10.2682	32.4341	42.7531	18.7565	2.4656	6.4532	11.6944	9.776	3.1466	2.5569	6.1039	2.0701	2.8526	3.9556	3.0003	4.1702	6.0291	4.6031	4.9801	12.1399	4.4123		0.91892	13.4323
20.3549	26.6104	20.3024	43.3431	44.4793	15.9185	19.4254	15.3368	14.2179	32.633	11.8741	4.0729	9.576	8.3605	11.3865	3.1131	8.8184	5.7854	5.629	4.5767	5.8598	2.3754	3.9915	9.5687	0.4095	4.3057	8.8946	7.295		0.924324	12.8948
20.4739	16.9183	25.4012	33.1602	48.0403	24.2036	10.207	13.6535	16.302	24.6519	7.1982	6.2919	3.3209	7.7669	10.2098	4.3936	1.9297	4.1412	6.8312	4.4897	4.5873	5.193	5.3911	6.1996	4.9772	9.0637	7.8595	5.9344		0.929727	11.7895
20.593	18.9419	28.0153	35.32	41.4221	18.4162	7.3015	2.8008	13.4687	25.4468	12.066	5.7198	8.9154	12.1371	10.159	3.8251	7.211	3.6093	2.3646	3.9628	1.9795	3.7542	9.4816	6.234	4.8064	9.4412	4.5555	3.2716		0.935136	11.2825
20.712	14.9385	18.6131	28.3947	42.1601	25.144	10.7565	13.1596	12.7154	27.5352	6.2004	3.1855	7.2287	3.3868	3.9067	5.6491	5.629	8.319	2.4683	8.4318	4.5156	5.3108	3.3663	8.4092	2.9764	3.2496	4.8159	6.3368		0.94054	10.6223
20.831	17.8118	18.9412	44.295	43.581	21.6303	8.9887	4.5837	16.2747	35.8263	5.1454	2.5674	8.0887	8.2449	5.0656	3.5505	5.613	2.0531	8.8219	5.9362	4.8746	5.1867	2.4495	7.6754	15.0153	2.6896	4.356	5.6796		0.945943	11.6647
20.9501	9.2729	24.5527	40.6799	46.7868	18.1239	4.8214	8.0865	10.2375	34.0803	5.7338	6.2522	6.7154	4.8785	1.8678	6.7196	5.436	2.5644	5.4842	5.5524	2.4499	2.3824	7.8625	10.3036	10.1381	7.7548	10.4191	4.4667		0.951352	11.2453
21.0691	17.1714	21.7972	38.4855	27.5796	16.7801	4.0467	3.4115	16.0637	37.1609	7.0621	4.3218	5.6133	4.9692	5.1476	6.0763	3.6853	9.9633	5.6666	4.8734	4.766	5.1948	7.1479	4.3295	11.4827	2.5537	5.1176	4.9885		0.956756	10.5725
21.1881	11.16	17.6553	40.1795	28.6151	13.8634	5.2682	5.3128	8.5794	35.5271	8.722	0.9313	6.6921	1.469	2.3777	2.8194	7.0312	2.8062	1.8262	4.1395	10.9669	3.5928	9.5551	4.6054	15.1307	2.48	5.789	4.6244		0.96216	9.69332
21.3072	10.7475	11.5409	21.9227	16.6566	4.8226	4.0511	6.6382	9.165	24.7867	6.9071	2.0473	4.4724	10.4571	3.9159	7.3302	4.4915	6.8888	6.2857	12.668	3.5228	8.2984	2.5666	6.5118	11.5298	4.5916	1.5173	2.7496		0.967568	8.04012
21.4262	5.0298	10.3099	28.7149	13.3479	6.7872	2.8522	8.1626	12.7005	20.5263	2.6497	1.2258	5.9492	8.9881	4.7902	3.9113	3.3287	2.8003	4.2059	7.9572	9.2276	2.7241	3.0555	5.5471	8.3415	5.7991	3.9059	7.4156		0.972972	7.41682
21.5452	4.9946	11.2581	22.8703	26.5707	11.0246	8.3929	4.9181	7.1988	22.6124	6.1512	4.2793	4.936	5.8044	6.2604	2.0622	1.6215	3.0957	7.5017	4.2008	1.6155	6.8101	1.3341	7.7127	10.3603	6.8765	5.191	4.7775		0.978376	7.79376
21.6643	7.0153	13.091	20.4694	12.9202	8.0612	1.3851	3.7749	5.2452	19.1694	3.709	5.5882	3.6153	5.0629	0.5044	1.2523	4.1247	5.0671	3.0893	4.3577	5.209	7.1772	5.8477	8.8316	6.8388	3.3722	7.7394	0.499		0.983784	6.40806
21.7833	8.8356	10.7715	10.7487	15.1416	7.8086	5.945	5.263	7.7427	11.4822	4.9625	2.9082	3.6889	4.742	4.9131	2.5927	4.4013	2.7918	4.3626	5.6654	5.4313	9.3755	3.563	13.1809	9.0768	2.4877	1.7228	8.2822		0.989188	6.58843
21.9024	9.1305	7.6453	19.1922	12.9206	3.4596	3.4669	1.2634	6.5487	6.6728	5.281	6.2454	2.7958	4.0847	4.5091	0.4847	8.5435	4.3177	5.2085	1.6564	5.0658	7.2108	4.3587	7.586	3.2277	5.4734	4.5427	9.2508		0.994596	5.93121
22.0214	3.1816	5.8949	19.594	20.6341	5.6403	4.9599	4.6174	11.0988	7.112	7.9571	0.4354	3.1223	2.5907	3.0625	0.0356	1.552	2.8607	3.2467	0.0677	5.2577	6.2398	6.1794	7.4588	8.3805	2.8796	8.3191	12.3839		1	6.10231

## Sheet: Image4 (2)
X0	Y0	Y1	Y2	Y3	Y4	Y5	Y6	Y7	Y8	Y9	Y10	Y11	Y12	Y13	Y14	Y15	Y16	Y17	Y18	Y19	Y20	Y21	Y22	Y23	Y24	Y25	Y26		Ap-basal	Avg intensity
0	39.0704	26.7999	19.4685	16.9114	17.811	23.9076	15.5057	12.4507	16.2488	10.5091	14.6974	12.8635	15.7018	15.2277	14.8141	17.2009	8.837	22.9788	10.4261	20.0206	12.775	14.8223	5.4811	19.1936	25.3981	23.9529	15.3582		0	17.3493
0.119	45.8491	26.6038	16.4124	17.6192	21.0786	22.1197	17.9122	17.501	16.8917	10.1599	12.895	15.6044	9.7025	12.0393	16.3337	15.5168	13.074	22.5939	13.5945	15.9406	8.4583	17.4088	6.1229	20.9877	23.4868	27.2563	15.7411		0.0061332	17.7372
0.2381	44.8397	25.9176	16.2954	16.8497	21.9825	19.7318	19.6033	14.7244	18.6651	21.1626	11.9067	21.5156	11.2277	9.8661	14.8955	21.8356	15.7115	18.3721	16.3651	13.0481	14.3858	17.566	9.8885	12.5088	28.3988	26.0279	24.7444		0.0122716	18.8162
0.3571	41.1839	28.1313	10.6221	26.0267	25.1565	21.2664	16.2935	15.5198	19.1292	17.3232	14.0539	14.5617	14.1864	14.3324	9.7439	14.1974	12.6753	24.379	17.5031	16.731	17.5651	17.7127	10.6998	23.8023	23.4907	29.6754	25.0023		0.0184047	19.295
0.4761	38.5388	36.0778	15.3952	30.3248	27.2948	24.6913	20.4965	13.6847	14.0233	17.7698	12.273	12.495	14.9271	14.7331	11.4174	14.0893	12.2602	21.477	17.8097	21.544	14.9741	22.3812	15.0628	22.5291	23.339	31.2705	26.3033		0.0245379	20.266
0.5952	35.135	33.1798	20.5007	26.5341	16.0409	14.7825	12.9694	18.7133	16.8237	17.9708	13.3795	10.9277	15.6156	11.2272	20.1948	11.9805	13.1343	18.0155	15.0298	20.7829	17.6756	16.9801	21.0771	17.4973	20.6232	28.4458	30.4057		0.0306763	19.0979
0.7142	30.9708	34.2201	20.8339	32.6384	18.2021	25.8632	13.9843	23.42	20.7294	16.6511	8.7537	16.0812	15.9831	14.811	19.9042	20.2783	17.0488	24.0064	29.1471	17.832	16.6384	16.6256	16.1347	20.8558	27.6178	37.6494	30.393		0.0368095	21.7509
0.8332	38.4407	42.495	24.5871	40.3875	29.287	20.9749	11.7557	19.9641	17.8132	19.9652	11.3847	10.9568	15.4854	18.1396	17.2441	19.0205	17.3539	26.9946	23.8438	12.2733	12.4604	20.6817	18.6778	13.897	35.0587	38.5518	25.6931		0.0429427	22.3477
0.9523	31.536	36.1475	26.8726	31.9079	26.366	28.2424	16.1148	22.2533	21.4947	28.5788	15.5718	18.3515	15.5702	22.166	13.4581	13.5564	18.5198	28.8087	22.7124	17.3321	24.3327	25.7339	16.9459	21.4567	30.5977	38.5453	30.047		0.0490811	23.823
1.0713	25.568	31.2888	20.4788	28.1768	28.0057	16.6025	16.2575	26.4085	20.5879	26.5817	13.6473	20.1664	12.5862	16.8559	18.891	14.77	13.7528	25.5473	22.835	18.8803	18.8204	20.0634	23.6936	20.603	29.049	40.7599	32.9342		0.0552142	22.3634
1.1903	28.2431	32.5681	26.8752	23.1489	37.2707	23.4748	15.1163	26.2148	19.5319	15.8193	12.7338	13.9875	16.854	17.1135	16.2977	21.6716	22.7056	28.4293	29.233	25.2297	24.7261	21.7918	24.0307	21.8977	19.1877	44.6612	42.0718		0.0613474	24.1069
1.3094	35.141	31.3207	28.3903	26.6468	30.8238	27.5275	18.1726	37.8859	15.3431	20.3693	13.776	9.6986	19.5134	18.6056	17.5578	23.1565	19.295	21.5058	31.4525	25.976	27.1936	19.3422	18.3765	21.627	28.2152	32.2961	45.3692		0.0674858	24.614
1.4284	27.1631	41.6028	23.9027	26.1562	26.6063	20.4382	21.2054	34.147	23.1552	31.4868	16.1853	17.394	17.4248	19.5055	19.8204	29.9443	14.1377	24.2635	32.8181	30.2284	27.3103	25.2072	26.3103	25.6098	27.6605	36.5836	23.2021		0.073619	25.5359
1.5474	43.0326	39.9469	31.8759	33.8779	31.201	18.8977	30.7858	39.5994	22.6957	27.3705	20.3841	17.051	18.2307	36.145	21.1436	24.0149	21.3072	36.3636	35.2321	25.9739	24.1943	21.3028	31.1176	25.5663	16.0549	28.1701	23.7501		0.0797522	27.6032
1.6665	45.041	34.5448	29.9897	35.3369	28.674	20.8012	27.6897	30.8188	23.7702	29.1742	9.5129	20.0153	25.0532	30.5845	24.4625	24.9867	22.7637	29.8144	33.6362	20.1322	28.3838	22.1791	28.64	32.9052	25.0421	33.7316	33.2124		0.0858906	27.811
1.7855	32.4488	56.4157	50.1203	30.9545	31.4141	17.7596	34.6358	37.1465	36.8968	30.4229	15.8199	31.8166	31.8317	21.5584	20.2419	29.3073	22.3864	26.551	27.3939	21.0297	26.2674	25.3801	35.7274	31.5172	26.4252	40.241	40.5217		0.0920237	30.8234
1.9046	32.1845	44.0764	44.2732	37.8429	31.6933	13.3732	29.3472	41.513	28.8305	40.1519	19.0996	28.5939	37.4684	29.7714	23.9647	26.9505	20.2387	27.8289	24.5689	19.5984	26.8169	33.2955	39.3765	32.1459	25.442	43.6013	33.2333		0.0981621	30.9363
2.0236	37.909	38.7475	55.4047	36.4075	34.4698	16.7787	31.2472	30.0375	29.5514	31.9137	11.1521	32.9773	31.1899	26.3725	19.0908	28.2821	18.6697	35.3325	26.9441	24.1898	37.5753	31.5308	41.537	25.5513	27.5359	35.7772	38.7433		0.104295	30.9229
2.1426	42.9848	34.7462	50.2984	38.8641	29.2313	16.5023	49.04	38.0276	32.5831	43.8683	20.6275	28.3086	31.2005	34.9626	24.6116	28.0735	20.0431	33.4186	27.6694	22.437	30.1171	36.1555	38.9464	23.4589	30.6334	42.4805	39.8769		0.110428	32.9321
2.2617	49.2491	41.1585	45.3933	40.4102	36.6354	24.085	53.9161	24.8895	34.5849	38.9218	23.5635	30.8416	42.4129	35.5179	26.8895	33.5364	33.4561	30.3811	33.8964	29.1983	37.4274	35.6214	30.9574	30.2287	23.4016	31.6512	44.3141		0.116567	34.9089
2.3807	57.439	38.9642	47.0421	42.4731	37.1721	29.3708	48.332	27.3368	36.0024	49.7229	18.5799	35.8825	44.8521	34.8556	39.1682	40.8945	34.3188	27.3252	31.6078	26.3517	42.8407	35.783	39.1648	34.6135	33.1498	27.5054	37.3301		0.1227	36.9659
2.4997	47.1473	42.3067	49.3778	44.6459	30.2883	22.0786	37.8971	23.4741	38.9146	44.4355	21.76	33.6511	35.3539	28.7013	42.6675	38.5524	44.898	29.3982	30.3467	22.1272	31.5252	56.0597	31.3656	36.6427	30.6472	29.2471	43.629		0.128833	35.82
2.6188	41.3757	44.9034	46.0381	52.0921	27.1585	23.889	45.1065	41.9484	41.4421	35.0846	24.4397	32.6754	38.2365	41.6278	31.9666	29.7013	40.6485	44.6004	36.6329	28.3787	24.1864	37.6096	35.4142	40.0124	23.0625	29.6817	35.6375		0.134972	36.0574
2.7378	42.094	38.7453	48.8718	49.6684	29.8472	28.4538	47.2948	38.5554	46.5952	45.3441	27.0761	32.9405	49.1367	29.9747	26.4531	27.6047	39.4867	35.7097	37.6635	39.8039	30.1013	36.7772	49.2227	34.8357	35.2731	34.0344	29.9875		0.141105	37.4649
2.8568	41.5056	53.0564	53.6755	33.9872	29.2303	36.3547	51.4895	41.2844	44.7721	47.3077	29.157	36.864	38.366	30.709	41.4968	36.2255	41.9778	29.5069	38.9388	46.1897	31.5972	38.7165	43.796	38.7832	32.0529	33.297	39.5705		0.147238	39.2559
2.9759	51.3763	51.9505	54.144	40.9153	35.0527	33.3282	42.0559	42.2828	45.2703	44.3271	31.8646	37.7807	49.8157	38.7717	33.5581	48.5518	48.2097	28.3807	30.7908	28.0307	39.4386	46.7938	38.2176	47.0475	44.4306	39.6777	34.8032		0.153376	40.9951
3.0949	61.4873	45.3229	60.5288	53.1466	26.7121	22.6963	41.9168	44.2302	48.7969	44.4114	40.8369	34.5904	48.509	39.9818	44.5104	34.154	42.0783	48.0348	32.638	37.1901	43.2364	54.0146	36.4323	46.8126	37.8771	35.1745	31.1822		0.15951	42.0927
3.2139	64.3753	40.3175	52.1233	44.3991	26.7054	31.6279	44.0404	32.4338	37.7608	40.3767	45.5343	37.1409	44.1429	49.0594	41.1837	28.1457	35.2889	49.1522	39.1603	43.2601	39.2479	59.4036	42.8179	49.6872	30.3903	38.0419	36.5024		0.165643	41.5674
3.333	61.6483	47.4779	41.7989	47.5961	32.6725	43.9162	43.2776	28.8957	34.3173	46.945	37.2845	41.8712	50.2546	43.3476	41.1186	25.3679	35.1788	50.3753	50.7223	27.1352	34.6187	59.6707	45.8731	39.9089	32.0936	47.3464	37.4292		0.171781	41.783
3.452	54.3743	42.7259	56.9647	43.4029	40.452	29.372	42.5537	27.836	41.4123	38.9301	39.437	42.4505	50.3741	45.5209	45.6379	32.9473	38.854	44.0961	39.5925	33.3274	42.3285	47.5697	47.4509	37.88	38.8314	49.7365	28.3284		0.177914	41.5699
3.571	49.2891	44.4282	60.4637	52.4867	38.6896	30.5181	42.7475	31.1256	32.8619	36.8935	38.6383	42.952	41.4137	57.7877	49.4736	31.6763	48.1684	41.1598	43.4751	49.2665	51.5426	48.9646	46.5458	37.3191	24.0909	43.1712	34.7076		0.184047	42.5873
3.6901	63.2752	37.9722	44.1235	58.8676	43.9829	32.2879	41.1517	31.7125	41.2907	44.1505	42.2574	47.3037	49.2663	58.8727	43.6845	39.7486	39.3967	40.2661	49.5811	39.4095	51.433	52.6061	42.1702	43.4329	35.4151	44.4506	33.6184		0.190186	44.1381
3.8091	64.4598	48.2348	57.8556	55.0342	40.0383	33.4105	41.9232	37.2589	37.5446	50.0419	45.2481	55.991	48.1554	58.7677	40.9797	35.5921	30.4223	50.0662	53.1456	33.5368	44.5853	57.4788	34.8901	28.9678	29.777	52.7077	38.0365		0.196319	44.5981
3.9281	58.7913	54.1652	62.5084	41.3275	36.1158	37.7868	33.5119	36.681	39.4471	50.9586	43.7157	57.2836	39.4961	30.6014	44.4871	51.1167	37.9606	47.7621	41.7443	36.1084	46.1948	54.0645	32.362	24.7948	39.3271	56.6206	27.4429		0.202452	43.051
4.0472	55.0198	51.8676	45.5154	44.5786	44.1113	41.1384	32.9533	39.9284	48.7198	60.3328	40.2952	50.9491	41.038	44.2571	49.6549	38.738	38.7987	43.6067	40.9459	32.8769	47.7963	59.9866	30.6454	29.7592	40.3709	42.6284	36.7191		0.208591	43.453
4.1662	42.6212	61.1213	56.1556	34.9648	35.8442	39.6026	41.0665	39.0904	43.573	60.7915	50.9995	56.516	34.4767	48.3022	46.5011	45.1414	46.9123	39.3711	53.9688	27.2704	44.7161	53.4251	45.7239	38.7242	37.2505	49.6908	42.3345		0.214724	45.0428
4.2852	61.9531	72.625	52.9031	40.296	36.2586	42.8683	41.6678	36.4752	44.7371	50.7997	50.3516	48.4839	51.8528	48.6599	43.3747	49.4224	56.5493	43.8573	56.8757	33.0998	47.8089	47.9167	42.4718	33.4837	47.2586	41.3386	40.4492		0.220857	46.8088
4.4043	65.9162	61.9914	46.3734	42.0112	46.6123	40.6452	42.4156	41.8314	38.672	57.2747	47.458	53.7115	54.7435	50.2175	32.6856	54.537	50.6203	35.6911	42.5991	41.4327	45.5617	55.6485	30.2928	38.5987	44.1077	44.2215	40.0295		0.226995	46.1444
4.5233	57.2033	53.1434	48.5467	40.4387	61.6388	52.1933	40.2563	43.7101	47.0955	49.5169	47.724	43.2325	58.9623	55.308	41.3057	48.1786	48.4767	42.252	68.7096	40.9775	37.8858	61.5119	42.728	53.0084	51.7888	51.14	35.1242		0.233129	48.9651
4.6423	59.4526	57.4545	51.0619	45.2333	58.855	38.6727	37.1161	38.122	59.7482	57.543	46.3265	43.3165	51.5154	50.5885	41.8201	54.5528	35.2329	46.2268	59.4772	32.7539	40.8107	46.6352	42.2756	51.2046	48.6293	51.1352	25.1321		0.239262	47.0701
4.7614	53.1336	70.5348	51.8871	44.0787	47.8359	41.3717	39.5885	48.0312	41.7848	43.1118	40.9706	49.8734	44.7483	40.7205	47.4439	65.293	38.947	46.0879	50.1574	31.5866	44.4732	53.4643	35.7341	30.2452	40.9044	45.4806	30.2547		0.2454	45.1016
4.8804	49.0406	69.1187	62.5242	36.8858	50.4755	41.0997	40.696	46.5635	52.4418	48.2769	46.8935	50.6903	42.3103	45.9067	40.858	54.4645	40.496	40.2963	54.9817	37.2058	41.5587	52.1993	30.9844	39.3243	49.6208	49.7106	34.5983		0.251533	46.2675
4.9995	65.4987	59.421	58.4888	34.2431	58.3075	44.6652	40.4224	52.765	47.7509	52.0893	39.9758	50.2155	34.7474	52.9293	43.288	53.4733	36.5008	50.6167	49.5896	40.0452	39.7226	39.3168	46.1814	30.0441	54.2876	45.5082	34.0411		0.257672	46.4495
5.1185	62.4805	68.0918	55.7064	32.7749	52.8685	48.7029	36.5676	46.8306	39.7466	55.0801	32.646	51.0744	47.6552	51.6828	39.7682	58.8921	39.5456	32.9837	45.5889	31.2994	43.4923	46.7942	37.929	34.7439	40.2806	46.3703	34.2001		0.263805	44.9554
5.2375	67.1336	72.7289	62.7614	38.7137	47.3358	57.7035	43.8088	50.4802	41.9923	52.223	44.9258	56.6642	45.2676	50.2178	41.5144	43.1926	51.5332	41.6027	45.7683	42.6178	55.4904	47.2878	35.2896	33.3834	34.4964	52.4942	45.2909		0.269938	48.2192
5.3566	64.9326	71.565	56.034	49.7458	53.3011	69.4032	57.3441	36.4108	42.9338	42.9898	45.7681	49.7732	45.6443	53.0821	47.5526	46.1704	48.1245	51.8061	40.4262	28.8931	41.9837	59.2048	36.4729	47.2865	57.8265	57.019	46.5998		0.276076	49.9368
5.4756	61.9461	60.1624	62.1215	43.0191	54.545	61.0698	45.1679	32.923	37.9003	46.416	50.9321	55.9796	53.0416	42.4733	49.3098	35.0703	45.6515	49.1876	36.3934	37.6801	45.0146	45.2612	44.4169	51.9458	47.572	62.3163	47.5471		0.28221	48.3357
5.5946	64.0931	60.7511	54.2904	43.9959	58.9211	52.7061	40.8384	47.1393	38.8671	61.1706	48.1283	56.3224	56.216	51.1731	45.0914	33.8021	36.9343	41.0412	34.8054	43.3156	55.8206	38.7941	41.3468	46.834	52.2426	47.8731	41.99		0.288343	47.9446
5.7137	58.6387	60.5007	51.5483	39.6783	47.3042	69.5531	46.0382	48.9442	41.8998	48.4322	49.2954	53.7603	48.9978	42.0692	40.9878	42.85	43.0277	53.3007	33.9664	41.5473	51.057	48.8123	39.3328	47.9327	32.9309	35.3438	32.9545		0.294481	46.3224
5.8327	44.1064	60.1761	39.2285	33.5494	37.7892	51.4391	49.3445	38.8348	42.0913	51.1604	52.3462	42.9972	54.0559	35.7192	55.9845	37.213	41.9233	49.7538	37.8247	34.7934	37.5699	40.9526	50.9367	53.4968	48.0568	50.2735	42.9499		0.300614	44.984
5.9517	44.6809	54.3082	43.8168	34.6584	46.558	47.9176	43.3873	40.4823	43.9441	53.9851	44.3673	37.6532	41.588	40.6074	52.6804	43.2921	41.4023	50.0817	43.0458	39.2103	50.2937	37.5067	49.4698	52.8943	34.8283	39.9167	43.0277		0.306748	44.2816
6.0708	54.2334	72.4673	49.0227	22.9561	55.2813	50.2011	47.9498	43.8666	40.8279	42.1159	37.9335	42.8529	47.8997	50.0726	52.5407	33.7374	41.5986	52.4196	39.7025	33.6063	60.5993	42.799	40.4314	48.0865	31.2601	41.2407	36.389		0.312886	44.8923
6.1898	46.6318	68.2428	37.4217	17.8509	60.6822	54.0754	48.2994	44.0438	37.6969	43.2958	46.9613	40.4777	47.6455	40.3038	51.1542	41.954	50.2123	63.0119	45.9256	40.5745	49.9658	41.6165	48.4422	39.9952	31.9503	41.4833	38.3088		0.319019	45.1194
6.3088	50.2477	60.1273	28.7842	27.8899	50.7803	46.6886	53.0405	52.5059	43.0344	45.1166	39.155	43.4142	46.8508	48.6876	53.4438	36.0836	47.1953	45.474	42.5597	41.4857	45.1109	43.7742	42.5186	32.0079	35.3483	33.5603	32.616		0.325152	43.2408
6.4279	50.0928	60.5103	34.7577	26.0845	47.568	52.1226	57.0861	41.4135	43.8185	38.5765	49.4153	41.5302	41.4651	52.9753	53.1338	45.1926	44.6823	58.7885	35.633	41.4944	45.1271	34.0977	46.3219	36.9947	37.6003	39.3095	38.7486		0.331291	44.2423
6.5469	51.4961	45.616	30.5373	29.6492	64.3591	60.5364	59.9669	45.2566	40.4805	47.1404	43.5274	47.5923	42.3367	55.063	50.9992	41.6783	63.6908	43.955	42.7223	30.6599	41.0144	51.1003	52.1337	37.0393	40.5748	42.9409	48.3913		0.337424	46.3133
6.6659	60.2245	57.1395	29.184	20.4128	55.565	43.7121	54.167	39.7829	43.164	44.1065	48.1957	47.9953	53.6271	49.1327	43.9265	41.1611	56.088	42.9548	41.831	37.542	39.7009	40.0979	41.3705	45.6883	44.8909	37.8886	42.8926		0.343557	44.5349
6.785	57.7649	59.8759	21.4251	21.4102	58.3411	48.051	45.993	40.2207	42.1477	42.2177	48.2249	31.0565	48.9034	33.0643	44.7925	28.0514	52.2255	44.0553	37.9608	45.366	31.8253	33.908	32.7271	50.0156	40.7415	45.3461	41.4151		0.349695	41.7454
6.904	52.018	44.2384	29.5087	14.0852	52.06	50.0166	48.8141	44.8111	40.0239	43.1086	47.0351	23.2485	61.1164	37.1907	48.0682	37.5524	58.6029	50.196	35.2494	44.4061	57.6532	39.0797	38.1228	41.1653	49.5341	41.2543	31.0155		0.355829	42.9324
7.023	58.4273	52.2594	25.6259	23.4502	40.1687	39.0166	50.9478	42.581	37.5412	45.4794	40.9193	35.7129	53.6519	49.4301	42.6814	35.7633	65.8741	52.8265	32.1303	46.6273	38.5633	31.0714	43.0869	35.1636	42.1506	39.6357	30.1308		0.361962	41.8858
7.1421	60.8727	53.0094	26.9928	14.7974	52.2726	33.0363	47.5574	48.0299	33.4933	34.6174	38.5342	35.0896	66.3058	41.5643	51.4369	26.0267	55.6516	53.5304	35.3729	42.8849	36.0033	26.4573	52.1161	39.4498	33.2376	46.8286	44.1267		0.3681	41.8258
7.2611	53.643	49.9062	22.9965	22.2431	43.6178	41.4884	58.4965	32.6815	38.6217	35.4555	38.0781	31.9837	52.9404	37.7788	54.6952	29.385	54.725	38.6713	38.0642	40.1482	44.917	28.9895	42.4053	41.8871	33.4944	40.0722	51.4117		0.374233	40.6962
7.3801	50.2247	55.604	30.3032	23.7345	48.5165	39.2417	53.2485	32.8663	46.0852	37.4203	43.2886	36.6949	54.8335	39.888	49.8267	23.7624	43.8956	37.1005	32.9182	33.2578	37.1643	39.6112	45.9735	41.937	43.3505	22.0325	33.5531		0.380367	39.8642
7.4992	57.3613	60.65	35.7393	21.5718	55.0702	53.4165	47.3537	32.836	45.3392	45.1596	43.9646	35.8218	54.3313	31.6784	46.2849	31.254	42.7717	63.6317	38.4547	30.3193	27.1204	44.0847	47.5098	25.2587	42.4302	37.3241	48.5233		0.386505	42.4171
7.6182	60.7049	48.3445	23.5879	27.558	44.1071	44.2544	62.39	34.8205	36.4518	34.4715	43.1326	27.5057	58.5647	23.2781	50.691	20.2239	45.031	50.4312	33.2187	33.1557	30.3061	40.575	47.0329	35.2299	40.5269	52.8899	48.4074		0.392638	40.6256
7.7372	67.1318	52.5132	20.1006	17.7587	55.4374	52.4394	51.5115	26.6687	37.9526	38.3938	40.0711	32.1941	43.3311	32.8212	50.2431	23.9208	56.4348	53.1386	32.6456	29.1692	41.341	35.6467	35.1353	44.411	30.5844	49.1863	29.9259		0.398771	40.004
7.8563	68.2322	52.5608	21.0393	20.5091	51.8677	57.0959	49.6343	41.0592	43.2226	25.7035	30.6293	40.5295	43.5251	44.21	50.5205	20.4574	43.7464	42.0214	39.9671	36.5073	38.7625	31.2586	38.8235	49.854	40.5894	41.5618	42.0426		0.40491	40.9604
7.9753	59.792	52.0338	21.8572	24.6013	49.8374	52.8662	56.0921	35.4429	50.6495	43.3045	28.4014	42.9222	42.7992	33.2915	51.4074	19.4897	37.9216	41.476	41.0088	38.4845	25.2839	31.7911	35.4968	46.3835	41.6651	53.38	37.1521		0.411043	40.5493
8.0943	57.1922	51.9792	19.9371	25.1898	46.7183	63.3126	46.8774	33.7323	48.1844	41.2575	33.94	56.0696	43.7428	37.1087	44.2802	14.4563	36.7274	50.3435	56.306	37.2498	26.6779	38.2448	40.2672	49.8044	38.36	48.6511	33.394		0.417176	41.4816
8.2134	68.7674	52.7439	28.8463	26.0345	49.7105	61.0082	43.8854	33.1948	54.4971	48.5638	40.9239	45.4709	45.1051	35.6334	28.9553	15.223	41.3015	55.4195	48.3718	40.2159	35.9298	40.9353	36.6767	44.7145	30.6858	42.7595	29.4944		0.423314	41.6692
8.3324	59.1546	43.0165	33.9373	19.7016	52.583	59.5653	34.9507	44.6917	55.1735	56.5129	41.6764	34.687	40.3518	31.8527	29.0094	12.5071	33.6857	61.608	51.3174	34.8782	45.7812	47.9018	31.8485	46.7642	38.5752	39.1801	43.1581		0.429448	41.6322
8.4515	68.2059	48.4725	25.3573	21.6122	42.684	53.977	41.1221	41.5242	58.5499	50.1172	42.1341	38.9337	32.1862	41.9946	33.1304	25.6996	39.7549	62.9101	39.1173	29.8607	37.0024	53.8625	31.8165	55.4534	43.7637	26.3521	32.705		0.435586	41.4185
8.5705	67.8067	54.3531	24.8763	22.2137	53.791	50.0073	37.0282	48.2683	45.5849	33.7288	45.4664	35.7348	27.4414	40.3269	32.3989	24.6558	34.3402	48.5636	39.782	44.0376	41.0817	55.5162	29.2753	52.1109	32.3732	24.0056	35.3848		0.441719	40.0057
8.6895	58.2192	60.262	22.3115	23.5834	61.6724	48.8649	42.0882	46.2419	47.4244	34.8597	47.9841	34.8778	21.2488	25.9093	29.3233	23.0001	35.3232	56.6784	51.3519	47.0276	31.2881	50.9525	29.017	33.7105	34.6227	26.2424	33.8446		0.447852	39.1826
8.8086	66.4834	55.9245	22.3556	20.1085	57.0373	51.5042	45.9375	45.9592	51.9176	29.0285	50.5918	36.3204	18.8257	37.3073	36.4614	19.4334	29.0995	58.3795	54.5993	41.1694	44.8506	51.8206	34.2626	30.7818	37.9777	30.1555	32.1607		0.453991	40.3872
8.9276	48.954	41.0299	14.5935	20.0275	56.3336	51.6404	39.5019	41.2234	34.2075	37.2391	35.3099	37.2217	33.1358	39.1447	33.0449	17.1058	34.5299	48.8982	47.6112	33.8053	35.6741	51.2582	42.5309	33.0234	41.3617	38.0767	21.4663		0.460124	37.3315
9.0466	57.6838	52.6236	20.2519	16.6723	49.966	43.3785	44.3851	46.5129	46.7604	41.0731	45.8686	36.3978	23.4442	29.502	31.5939	21.84	26.7624	52.2536	42.3835	38.6595	33.4215	41.3979	37.4644	33.2071	44.6942	36.5168	31.978		0.466257	38.0257
9.1657	44.0323	59.4796	20.6941	14.9296	52.377	49.3776	40.9705	44.7438	38.6757	30.6802	40.526	29.5956	32.9981	35.0411	31.8402	19.0898	28.6361	52.8382	45.2783	35.8775	34.8531	47.215	32.6015	35.7571	27.4213	39.9649	41.2241		0.472395	37.2859
9.2847	42.0422	50.1891	12.4241	16.681	54.3809	49.4263	39.4063	34.0085	42.2581	33.5033	39.8458	21.5191	35.5199	34.0675	30.4154	18.7628	18.1046	48.429	44.8844	29.5149	28.439	52.5695	37.6485	29.3235	37.0741	42.082	38.8287		0.478529	35.6055
9.4037	45.7337	56.9698	17.7181	30.9243	54.3052	44.3302	41.0302	33.8419	43.3944	34.3008	41.2959	30.4638	47.819	39.0192	27.1017	13.9124	19.3535	42.0152	36.0189	23.9701	31.2546	39.0746	33.1429	18.4166	35.6956	40.3619	25.9411		0.484662	35.0891
9.5228	56.054	45.7303	18.853	27.5402	57.236	46.5322	46.9826	37.1962	35.6486	42.9189	49.8585	45.8539	36.7493	43.4752	27.8598	15.0463	25.7558	37.892	44.1528	22.2366	29.6268	41.1725	38.3729	23.4542	33.1329	37.029	30.3314		0.4908	36.9145
9.6418	50.5774	52.8424	24.1365	23.9537	51.8519	43.1042	51.3661	29.2401	47.6691	44.4924	48.9852	36.7396	21.9335	39.4036	32.0645	15.1772	27.8168	51.3723	47.732	20.4857	28.8806	46.7947	31.1916	25.5722	42.3782	43.905	23.3474		0.496933	37.1487
9.7608	62.3713	52.5155	31.2889	21.2187	50.318	51.2498	44.5577	34.6194	40.6299	32.3407	48.608	44.8925	24.3134	47.298	26.7982	8.7743	21.4472	35.8053	44.0301	14.8611	28.4702	46.4583	27.4867	25.4487	39.4354	34.7818	25.9941		0.503067	35.7783
9.8799	73.7377	49.4675	25.0221	27.8792	35.7968	43.6642	49.2746	40.6509	35.6276	40.336	48.8956	35.2198	33.6915	43.6755	23.8917	18.0492	24.6862	36.7236	33.607	24.9474	32.666	37.7336	30.1228	23.0028	35.82	41.7981	38.3523		0.509205	36.457
9.9989	68.1445	61.6122	20.64	14.6383	38.3507	35.7484	40.5589	50.6412	49.278	42.6112	54.444	40.4283	26.0772	41.0366	19.0431	15.6902	18.3849	37.576	45.9991	30.6793	32.5041	32.993	24.4046	18.0218	30.4362	35.0427	38.294		0.515338	35.677
10.1179	48.8095	53.3447	18.4729	20.6299	28.8655	31.8581	42.8614	40.6821	40.0953	54.7518	52.2737	36.2663	32.1695	44.1327	27.4234	13.0311	21.8	39.8577	36.1188	29.5002	31.6226	39.4588	28.3849	20.4791	33.6943	38.9113	37.6945		0.521471	34.933
10.237	60.4385	49.7303	23.7051	16.2953	37.5603	37.1148	38.3421	35.0126	46.701	46.3763	30.3721	48.2379	27.2617	41.2474	27.1968	12.7502	22.6617	47.0016	38.319	24.1591	25.2046	42.6279	32.9705	20.7388	25.7789	43.3052	38.0948		0.52761	34.7854
10.356	54.996	42.2862	21.9092	19.1872	35.1729	32.2438	31.5687	32.3938	38.3154	43.2798	34.2163	43.4687	26.5434	38.7148	32.5133	17.8724	14.3227	55.5144	30.4437	21.382	30.4435	34.8245	29.1659	27.0663	28.0767	36.5196	35.9757		0.533743	32.9043
10.475	56.9598	37.3994	17.6536	28.1739	34.8544	28.3301	38.1839	43.7928	50.7314	38.7387	35.5042	52.8079	19.5965	41.0676	32.1551	21.9778	14.4402	66.7237	26.4739	19.5216	33.9347	36.8692	26.355	24.3374	31.9447	30.1538	36.9306		0.539876	34.2819
10.5941	49.5987	46.5821	17.6407	25.8962	35.1517	21.7194	35.9025	39.0046	50.9902	29.9711	28.7577	51.1112	27.5133	34.73	23.3097	11.8611	19.1768	63.9586	32.0466	23.7098	32.699	30.2021	20.1889	28.4744	27.2516	35.2749	31.2232		0.546014	32.3684
10.7131	40.9212	45.288	19.0302	32.9068	45.2094	31.6244	40.1888	40.5746	49.0254	24.9698	39.6051	48.7454	29.7023	43.9026	24.0946	10.3424	18.8466	53.4777	27.8888	27.5087	30.7825	36.7313	21.5275	25.2754	21.7773	47.1481	37.907		0.552148	33.889
10.8321	37.2625	33.8556	23.6962	22.7719	47.18	32.9186	34.3944	60.7652	47.6578	17.0758	42.1642	34.1526	34.38	39.4855	17.9583	13.7295	19.5291	52.3813	46.1134	30.9152	23.5627	34.8171	26.5	18.2229	35.2645	40.633	33.5025		0.558281	33.3663
10.9512	42.2549	39.2753	28.3277	16.7593	39.7557	27.9033	40.4959	41.5222	43.6443	24.2241	47.6295	35.5868	37.551	45.2576	21.6952	10.0214	15.3455	47.4384	41.6918	24.7114	36.3322	35.9263	22.6245	20.501	32.1489	27.9646	24.9285		0.564419	32.2784
11.0702	43.536	47.8879	26.2873	22.3697	51.1366	28.8164	39.6111	38.7012	46.184	23.2128	47.7295	39.3886	37.5718	40.4437	37.5788	14.442	20.0592	54.8954	43.9839	21.0198	31.4687	34.0653	29.2714	17.4188	30.1604	28.4539	21.2347		0.570552	33.9603
11.1892	41.8075	47.0587	19.5548	25.064	47.8696	31.2274	33.7906	38.0197	47.5038	16.3659	30.5517	34.1551	33.5826	35.0189	33.4	16.4158	29.0059	39.8474	37.3957	15.2939	28.891	33.9586	34.5296	21.7591	36.494	35.3734	32.539		0.576686	32.462
11.3083	41.0161	51.1044	23.2403	24.4523	39.5154	28.7737	32.2311	32.4924	38.3506	30.3417	43.7316	38.6492	27.7387	32.6042	28.6475	14.8404	19.2836	41.8386	27.0665	25.5332	27.0106	37.5669	26.2279	27.0763	34.3817	38.2744	20.7857		0.582824	31.5843
11.4273	32.2239	50.2439	22.2041	31.8141	41.7098	20.787	26.178	46.7921	30.7095	30.8467	36.5435	42.1398	28.7338	48.0122	22.6344	13.84	21.4411	43.2427	34.5254	25.0946	33.6603	43.9283	33.0688	22.1637	46.2994	27.8758	31.8475		0.588957	32.9096
11.5463	40.0822	42.5211	24.0556	29.3356	35.5654	24.9248	41.5008	43.915	35.2616	27.7106	30.9268	30.0386	43.1308	42.8513	27.886	21.4697	15.6733	40.8739	36.6322	27.3072	40.76	40.5043	35.1903	24.9767	30.2715	33.6755	33.3143		0.59509	33.3465
11.6654	41.2855	43.565	28.7333	28.9648	32.0331	19.9104	43.0744	41.3761	42.5183	39.5651	37.4848	39.3465	46.2534	36.8194	24.3708	18.7418	15.2718	42.3666	32.1884	13.8497	38.0717	43.3874	25.002	22.8663	28.8739	29.5887	35.3033		0.601229	32.9931
11.7844	41.0174	42.7698	28.5305	26.6599	41.6616	28.0855	35.9774	48.0847	38.8535	36.7663	41.8574	56.0194	32.2141	38.1085	26.7252	12.0875	22.3098	33.2707	32.1225	17.8063	25.9569	47.5774	33.6764	25.7942	30.3064	34.1292	32.4672		0.607362	33.7347
11.9035	35.2618	40.5404	28.2575	37.992	42.4341	29.385	36.3249	47.1791	44.4095	39.8546	29.8001	36.9701	40.0513	38.6413	22.7653	9.3623	14.075	29.7554	31.5407	18.2599	37.4755	34.2015	29.5943	20.3438	19.9853	32.428	27.1197		0.6135	31.6299
12.0225	47.0286	40.0585	22.6476	39.9172	28.4311	23.3657	38.0811	42.9753	50.7987	34.2571	37.8939	33.3002	36.8454	36.0503	22.5422	6.9884	19.5083	24.5585	29.2074	23.2783	39.5228	36.1314	28.043	17.3673	25.9372	36.9111	25.5917		0.619633	31.3792
12.1415	40.6314	44.7032	27.3791	36.3922	30.1466	15.6678	33.0874	47.197	51.3242	33.1619	51.8951	57.5631	30.402	40.6488	24.6115	11.9006	21.6445	30.0036	31.088	22.2772	26.3609	39.282	29.6867	18.2593	32.1479	30.8575	33.238		0.625767	33.0206
12.2606	33.3443	51.2561	25.9303	32.6947	29.0144	26.494	28.1505	36.5595	39.8615	40.1901	40.0708	60.6652	37.1952	30.3708	27.303	15.7457	21.7553	31.5183	28.0034	25.132	21.8069	45.5345	31.4486	18.3826	33.7397	31.1537	29.193		0.631905	32.3153
12.3796	32.5701	54.5461	28.3463	39.8249	31.0882	26.0627	24.194	38.2177	34.5122	39.7105	47.2356	43.8346	36.2963	32.0246	45.2818	12.76	23.5401	31.5998	40.6885	19.3518	36.2779	47.4072	19.3407	25.8331	25.5568	28.569	32.8037		0.638038	33.2398
12.4986	48.6652	53.0269	25.7882	41.1246	37.3067	25.4279	33.3395	43.4362	34.6755	31.9167	60.1233	48.6645	29.7302	33.9466	36.1953	18.2886	20.5545	33.7002	33.737	22.106	32.1325	41.0476	32.3593	19.5351	19.1869	27.5323	40.153		0.644171	34.2111
12.6177	53.0714	53.6272	24.0431	30.862	43.5216	36.1433	25.4938	34.2028	30.5479	24.7828	50.8918	54.0541	42.9494	33.8052	35.2035	13.5821	21.9866	30.2003	33.8859	31.049	44.6031	35.7961	31.5927	17.7112	16.1542	39.4967	46.7494		0.65031	34.6669
12.7367	42.7033	41.1919	19.9108	34.3659	34.5897	39.1051	26.8045	36.3241	27.6733	29.0143	44.1336	38.8589	40.6077	39.7866	35.4228	14.5126	18.8538	26.2016	32.5978	26.4442	42.4463	34.8656	21.6313	16.4262	21.9663	40.1866	30.7334		0.656443	31.754
12.8557	42.1753	40.5811	29.0126	37.5376	40.0368	44.0431	17.649	31.1858	32.4987	24.1331	45.101	47.7724	34.425	40.5638	29.8136	17.0426	19.8408	29.8725	27.5281	22.9561	29.941	39.5084	24.7189	23.3097	37.8233	32.3541	27.9703		0.662576	32.1998
12.9748	39.9562	49.8545	35.5963	35.9782	52.2801	39.4752	25.8447	45.1343	36.5351	22.3225	39.2643	51.3891	33.5418	45.0869	37.0519	15.0717	24.1413	36.5663	31.3999	23.919	41.9957	37.1804	20.493	22.1771	26.4256	26.4816	29.9677		0.668715	34.2641
13.0938	46.5428	47.1012	44.8763	24.5329	40.1762	46.2805	24.9949	40.4739	26.86	33.1082	40.9581	43.6057	34.875	43.787	30.9328	15.9557	28.349	31.2989	30.9018	28.0033	33.9371	30.7873	21.9272	19.3379	27.4898	34.5042	35.9996		0.674848	33.6147
13.2128	57.1984	37.7554	34.4889	31.0946	37.2394	26.2209	19.5157	38.5839	32.1823	32.2601	36.4761	44.3976	39.863	33.9137	31.2006	16.3154	19.3531	30.7026	32.2407	28.4122	39.6229	36.2022	31.3737	20.0226	23.0002	42.3579	39.7		0.680981	33.0257
13.3319	55.8774	32.2354	40.3949	39.0361	35.7999	28.5155	30.8359	27.3671	29.0902	22.355	38.7951	51.0321	40.6068	37.5746	39.2132	13.6376	31.4448	35.3244	38.753	30.9063	32.2942	35.5134	26.7323	14.2541	31.0016	43.5462	46.4595		0.687119	34.3925
13.4509	40.5088	33.8467	40.264	43.0776	31.9568	15.6569	31.61	29.6109	39.4645	34.4747	38.3692	40.2785	41.1478	37.0165	29.4654	17.4546	27.6339	31.722	38.8831	29.4429	34.6406	36.271	26.9615	23.7793	26.7722	36.2983	48.8698		0.693252	33.5362
13.5699	42.0807	48.4764	31.1904	37.7909	38.5406	16.2128	31.2682	27.3509	28.019	30.4075	31.7268	36.8881	47.7217	29.1553	26.3767	22.9681	23.2764	39.005	32.187	32.3405	29.8574	42.9555	44.3844	15.5089	25.9163	42.0137	46.9198		0.699386	33.3533
13.689	36.2221	48.3586	37.1296	46.4762	44.0852	18.873	25.4884	30.9326	26.4468	37.6377	40.2749	44.2403	57.9201	33.6142	30.6736	15.2747	21.4138	31.7919	29.8267	45.0957	40.0819	53.7001	34.4033	11.8118	25.5294	45.5246	48.0903		0.705524	35.5895
13.808	43.4611	49.4934	37.9415	42.5359	28.0054	26.314	34.5357	33.6474	36.7897	33.4953	34.5828	28.181	48.1997	35.5145	33.042	18.382	23.9026	35.4954	35.658	42.0003	38.1134	57.0869	35.5455	19.3731	30.6623	35.6096	37.5458		0.711657	35.3746
13.927	41.9918	40.7162	44.7455	35.2851	40.1807	34.9209	33.3384	34.9389	38.9749	22.5047	38.6268	35.6894	53.9971	39.8122	39.7079	14.6178	19.4616	39.7306	30.2881	39.9146	36.2232	43.5831	34.6838	21.4097	40.0119	30.8354	41.1408		0.71779	35.8271
14.0461	36.8372	33.6924	35.1811	32.3247	40.4136	26.683	32.5613	43.27	37.3622	22.6649	41.1228	31.7849	42.8878	34.2053	48.6192	14.1748	31.4384	35.426	33.6994	39.2742	37.2836	41.4086	36.9388	28.0085	18.3148	39.9103	40.0751		0.723929	34.6505
14.1651	37.8123	45.7368	46.4263	34.883	36.8018	28.4984	29.9453	49.8399	42.5137	19.7967	36.1606	34.0755	36.117	31.0855	49.1673	19.3577	36.7343	33.5472	29.7867	39.2774	40.2642	36.3031	48.0296	28.9046	24.1731	39.7528	39.7092		0.730062	36.1
14.2841	40.1736	40.7129	47.5766	30.7538	35.8228	17.3008	36.9617	40.2028	36.8012	25.4516	37.8688	36.6323	36.1529	31.3259	43.5065	21.2574	30.9566	48.9018	32.0952	25.8399	33.894	34.0498	38.6688	19.9673	19.627	38.7285	43.8536		0.736195	34.2624
14.4032	37.0748	41.4376	49.1087	46.5993	42.3156	25.2088	34.9028	39.8467	33.1098	28.745	36.5078	27.0194	35.8985	37.1825	46.7525	18.4187	32.0655	33.5261	37.1332	39.6023	51.1008	44.0381	40.8795	23.8177	24.0639	39.7605	46.9024		0.742334	36.7785
14.5222	41.6775	47.2454	47.4751	44.8082	40.4475	21.3654	38.47	37.6521	34.8248	32.8539	37.9727	37.671	30.2598	40.8599	41.713	23.5894	24.9761	35.4133	31.6366	35.2918	60.8262	37.9849	40.8939	17.4749	18.7556	30.5492	46.4917		0.748467	36.2659
14.6412	43.8106	37.5624	36.8254	45.2758	49.6365	29.2538	32.232	48.1969	34.5832	25.5826	38.6182	33.6219	31.8492	32.4413	52.3236	19.0409	31.0684	35.7043	26.4792	37.4391	52.8174	44.8231	31.9185	26.8869	26.6989	40.478	44.9178		0.7546	36.6698
14.7603	39.8625	31.7348	44.1808	53.6312	54.0575	33.2229	31.1077	49.7335	23.3711	34.8759	42.7452	44.681	29.2894	26.9988	52.6619	20.8261	41.7157	33.8249	29.4016	38.9858	44.6399	39.2839	30.5588	29.9684	36.425	33.8204	43.9854		0.760738	37.6144
14.8793	44.1801	41.3202	41.8978	50.8248	45.3404	29.7655	39.3856	42.8791	28.2716	32.3638	37.0818	37.9355	26.1451	30.9268	50.1778	22.5483	40.9335	32.7509	40.5067	42.6813	36.5688	32.7951	42.0146	32.6105	31.4147	34.0745	40.3465		0.766871	37.3238
14.9984	41.718	33.6807	42.7882	44.3015	56.4259	20.7824	38.1545	44.231	33.4382	40.1354	45.1359	30.7201	26.8666	27.1169	50.8169	21.949	42.5902	34.4391	27.8673	40.3947	33.7118	32.88	51.5467	33.6496	34.1308	34.3323	32.5701		0.77301	36.9027
15.1174	33.6174	36.5887	46.2583	36.5918	53.7192	31.5753	38.6371	42.6952	32.361	37.1341	40.2343	46.6561	25.6007	35.3455	49.2759	21.6163	42.5932	28.818	28.323	36.5861	34.0721	33.2649	33.4957	34.1574	30.027	41.983	43.2394		0.779143	36.8321
15.2364	30.1006	37.5459	39.7962	40.6062	59.4431	29.1602	32.7014	39.8713	33.9883	30.1403	40.2318	49.8429	35.5896	38.449	50.2118	25.3638	36.8414	27.5288	41.3886	41.4617	37.2152	31.8078	29.4141	28.7482	37.93	32.7841	28.9237		0.785276	36.5587
15.3555	36.4771	34.6088	47.4523	43.3851	51.9243	28.7272	32.4834	37.8041	27.2464	43.1354	40.2126	37.8331	26.9814	26.2846	52.7906	36.5768	51.9198	33.4606	34.3588	36.4077	33.0121	33.7582	35.5152	38.9828	38.0662	32.1247	44.774		0.791415	37.6409
15.4745	35.6141	35.5418	45.486	33.8849	51.3051	35.6863	32.5473	36.2791	39.7704	43.8269	38.8635	42.8653	17.2022	31.9343	51.5185	34.6185	43.6124	35.6745	40.6827	29.7012	24.8698	29.3513	48.5418	28.702	29.2635	37.2086	45.1509		0.797548	37.026
15.5935	45.0553	41.9744	35.1078	37.7001	43.9049	41.4511	38.8934	43.4121	37.8441	48.9255	40.4383	42.8414	21.9489	26.2732	56.3019	30.0514	34.6186	34.7618	36.2125	38.335	24.457	32.6813	38.2388	32.8873	30.8059	31.2741	43.0369		0.803681	37.3864
15.7126	45.6315	38.8162	33.7029	29.7047	43.9881	39.8328	46.7871	31.5068	33.457	43.7262	44.047	37.3422	15.8904	28.0829	41.4446	37.0209	30.7027	38.6476	31.8754	34.7653	21.4074	37.767	31.5375	25.4555	35.0504	20.535	37.543		0.809819	34.6766
15.8316	43.4855	39.4601	32.486	35.8908	42.5406	45.2078	40.2417	27.7212	43.8585	45.9649	42.3614	29.9665	16.1385	26.117	36.1874	46.4262	28.3807	29.4359	38.2775	32.7888	30.0262	32.0389	34.0661	32.437	43.6037	33.5878	45.8751		0.815953	36.0953
15.9506	44.8443	43.6943	39.0904	49.2318	41.3385	45.2602	35.4796	40.8296	44.3501	51.3734	42.248	21.2106	11.4628	23.5313	28.1351	62.149	26.5801	19.5917	32.9124	36.6324	27.7209	37.4444	42.8222	33.8776	41.876	33.743	49.3833		0.822086	37.2894
16.0697	48.5696	49.389	36.8551	41.9139	47.3356	48.6983	37.9848	42.0069	41.4598	47.4744	32.7701	14.7956	10.2366	25.0837	23.0393	53.8591	26.7794	25.0017	27.3948	44.8692	24.9432	35.6521	33.4479	31.2728	41.8688	36.0382	44.1048		0.828224	36.0313
16.1887	44.5481	39.9501	26.3904	43.424	43.0684	42.1907	50.4891	43.0564	29.5165	31.8193	42.8254	11.1278	12.1565	23.671	19.3017	37.1234	26.1992	27.8486	31.9902	37.0211	29.0968	34.4505	36.5814	36.2217	41.8266	37.3328	49.7899		0.834357	34.4081
16.3077	43.9961	44.225	31.718	47.1518	41.4115	41.7415	36.3235	38.0819	30.9899	41.5707	48.2437	12.0457	10.4354	20.0527	18.4711	25.1464	23.8998	32.9666	29.7819	41.6659	26.4781	31.7444	37.7252	37.4186	40.0449	30.3489	45.0417		0.84049	33.6563
16.4268	43.5411	44.5405	34.5951	46.2242	47.1625	39.52	51.5973	43.0313	38.6595	38.508	45.9616	9.8229	14.8518	16.5191	20.5678	23.0191	19.4284	21.6516	20.7324	33.812	25.9023	33.8346	26.939	36.6341	26.9666	26.8009	46.8194		0.846629	32.5053
16.5458	41.4375	47.3399	39.1381	46.1259	33.4649	41.9437	54.6943	40.5009	37.1587	36.9148	43.94	12.2851	12.3237	15.3849	15.9318	15.1856	16.6756	17.5534	32.2868	29.8143	25.4451	34.4257	24.6596	42.396	30.9513	16.9217	34.1632		0.852762	31.0764
16.6648	36.8851	50.7978	25.2898	41.9319	45.722	28.8389	45.7742	33.6302	33.6142	35.4679	29.4182	16.7581	9.1768	18.0093	19.9624	17.9799	11.9568	19.0492	30.8889	23.3607	29.3997	28.4129	26.0283	43.8948	35.1713	15.7494	26.2544		0.858895	28.8675
16.7839	41.9966	43.541	34.9091	27.8787	57.6399	39.446	47.2731	30.2425	34.112	39.1825	29.2006	9.9921	12.2057	22.7218	18.2179	11.4367	13.9067	14.4365	24.4805	32.1486	29.1124	27.9038	30.6984	25.9668	38.4344	26.9937	32.5403		0.865034	29.5044
16.9029	44.5461	49.7516	25.1773	40.6144	49.174	36.3186	59.4716	51.1101	37.2987	36.3237	26.4671	8.3854	15.508	13.2568	14.2632	14.6429	15.0536	12.5524	27.8788	42.7848	31.3746	29.5731	36.166	29.3571	41.5851	28.1007	25.8422		0.871167	31.2066
17.0219	38.8332	46.5892	23.4946	29.581	53.1982	33.0382	49.1128	39.8006	33.0952	30.9269	23.5933	7.2849	9.0689	10.8657	17.4697	13.3548	16.4133	11.8345	27.8462	38.1475	18.86	25.5995	35.2831	37.7166	41.6757	21.9705	38.46		0.8773	28.6339
17.141	42.5818	53.384	23.9034	15.7753	52.9333	34.3065	49.8475	37.8081	29.4016	25.0398	15.8587	11.4607	18.4111	12.0764	21.977	9.6985	15.9362	12.6717	22.7021	33.8054	25.7501	34.057	36.451	30.9653	44.7116	33.584	30.4344		0.883438	28.7234
17.26	47.8962	43.2449	22.1282	13.0774	42.0658	26.8582	40.0948	43.0384	23.1116	20.3665	19.2493	10.7244	6.788	13.1622	21.8953	17.9621	15.8552	19.0262	23.2767	35.9421	22.8566	38.2033	32.2499	35.541	38.5329	34.2344	34.8208		0.889572	27.489
17.379	37.2612	43.4533	17.3169	18.9063	34.4542	25.5156	24.6773	41.8017	23.348	28.0816	18.7997	9.1822	11.5458	13.1529	26.7191	22.7269	16.3027	18.4889	17.8413	39.0128	23.2573	26.2369	39.0274	23.2471	39.5978	28.9078	32.4503		0.895705	25.9746
17.4981	43.7997	44.6992	9.8796	12.4123	30.0375	27.2835	30.1578	38.9207	26.1203	21.4206	14.7459	7.674	21.6962	16.8442	26.0911	23.2018	12.9874	11.5343	11.835	33.3463	15.7028	24.6883	23.0766	23.6812	33.7192	27.2629	36.191		0.901843	24.0374
17.6171	35.0804	34.3433	10.668	16.3349	23.7882	14.2801	23.8962	35.4935	17.6482	14.0038	12.6353	8.1015	15.0173	15.3231	16.6379	20.9456	13.0909	16.4314	16.0777	30.1687	13.5059	22.8198	17.1513	36.1537	31.2113	29.6959	33.9533		0.907976	21.2762
17.7361	32.8114	22.1906	10.6684	11.5235	27.0903	9.6516	21.522	28.4912	14.1828	16.2642	11.4488	15.2508	22.4626	22.757	30.6095	24.3523	14.2931	18.243	13.0044	31.5386	15.7799	18.0877	23.9978	31.3138	35.0663	19.8291	21.6853		0.914109	20.8932
17.8552	30.5412	17.4579	10.2873	5.3684	22.3622	14.7409	19.9347	15.3798	18.864	16.0012	5.7071	12.1895	22.2198	20.3573	31.6526	18.351	11.72	14.1147	19.1261	25.0697	9.2941	14.0963	21.1227	31.8933	29.9506	20.1007	20.4001		0.920248	18.4557
17.9742	28.084	13.9667	5.0118	9.0481	14.1923	14.456	17.5656	17.3027	17.2666	17.4994	8.9324	8.2026	12.6308	23.0745	26.149	14.4852	14.7354	11.2605	22.5509	23.8911	11.9078	11.8488	19.5917	33.9493	34.2004	13.0017	27.2208		0.926381	17.4824
18.0932	26.682	19.954	2.6376	8.6127	9.4346	7.2958	9.4462	21.6047	13.7098	15.3782	6.5152	11.287	16.2379	19.8098	27.8379	20.3017	12.6377	13.2403	12.8267	22.9538	12.5448	7.1121	13.8252	30.9133	30.5389	21.5447	17.3541		0.932514	16.0088
18.2123	27.8118	14.3009	5.9058	4.5631	10.981	4.3022	9.3431	16.7611	10.6645	11.7338	8.777	7.488	18.6514	23.6205	25.9251	21.249	10.8119	11.8268	9.8882	19.2752	4.7585	11.5042	18.0701	31.6329	25.4741	21.4501	24.2651		0.938653	15.2235
18.3313	28.0543	12.7169	4.8402	5.7013	11.3832	6.7321	11.6681	7.9642	14.1763	6.6315	7.6139	4.7274	14.8997	15.7051	25.4002	14.9038	11.9905	15.3053	8.3375	19.1116	4.8631	11.7466	14.5771	31.9887	27.9769	15.7792	25.6366		0.944786	14.09
18.4504	22.2799	19.7255	4.5992	5.7325	6.795	5.6237	9.1747	9.4266	6.1061	7.0253	11.4103	7.2162	20.9719	24.9942	26.2123	25.5932	20.7374	17.727	10.2162	18.3837	4.1884	10.3486	13.7801	28.6054	15.0929	17.2535	22.2759		0.950924	14.4998
18.5694	17.4208	13.8869	5.5639	3.9173	11.8264	10.6687	7.9171	5.4823	11.0566	10.8465	7.9593	7.2357	10.5274	29.8313	33.2927	20.8088	16.4314	21.2364	11.9311	15.1238	5.1237	11.8505	7.6686	22.285	9.8645	14.6508	24.711		0.957057	13.6711
18.6884	17.9893	13.0772	6.7355	2.507	8.3567	6.6392	2.2076	11.1192	8.9591	7.9143	4.2672	7.6468	18.5584	34.8449	32.3502	22.3542	10.0313	16.1979	9.4387	11.3779	1.5097	15.1664	9.2517	19.7432	12.1527	15.7835	16.8983		0.963191	12.7066
18.8075	16.9648	13.9586	3.6188	6.2309	7.8544	13.1199	3.8519	10.7695	6.0002	5.0086	8.1574	10.2786	23.5961	23.7882	29.2421	23.5791	7.1958	20.4855	11.7471	10.0413	10.0412	6.9572	9.3499	13.44	9.7567	7.8453	18.0923		0.969329	12.2582
18.9265	21.0164	16.6423	2.9939	5.3232	6.3907	12.2221	2.5888	7.9396	4.9671	4.6279	8.9005	9.2428	25.9751	21.9038	24.6181	22.1629	8.963	18.5417	14.4414	13.516	10.3954	8.5888	7.2797	15.5488	8.2635	8.4195	16.9872		0.975462	12.1652
19.0455	13.4678	11.3239	3.7062	6.4041	2.4297	6.8468	8.1126	8.3274	3.5967	5.816	8.2101	12.7828	22.258	27.4873	26.845	29.2623	12.4535	10.8869	7.2534	9.7682	6.3652	8.385	4.4407	13.0071	7.8617	10.0129	18.7716		0.981595	11.3364
19.1646	7.7744	6.5817	3.7324	4.8031	3.9232	4.4918	10.8703	4.1155	4.8177	7.9246	5.862	12.4494	26.6888	17.3686	22.7026	19.0836	15.3876	13.658	12.912	14.1107	7.1292	5.377	9.4039	14.2836	10.4854	5.4552	12.8877		0.987734	10.5289
19.2836	11.5316	5.6184	0.9145	5.6386	6.6378	6.7608	4.8428	0.9537	2.9389	5.4832	3.8256	15.5952	27.0611	28.946	19.8292	15.6862	12.8591	13.017	14.2239	14.7262	7.4191	16.4259	10.0398	8.2701	15.5663	12.8454	19.7626		0.993867	11.3859
19.4026	10.658	11.7062	2.3018	6.2991	7.3366	4.4391	6.8246	4.6318	5.039	6.0165	6.809	13.5309	25.5027	27.3427	21.5134	17.9025	17.0454	13.9912	7.7748	18.5831	15.6862	12.42	5.0264	7.8911	19.0212	10.1971	15.9333		1	11.9046

## Sheet: Image6
X0	Y0	Y1	Y2	Y3	Y4	Y5	Y6	Y7	Y8	Y9	Y10	Y11	Y12	Y13	Y14	Y15	Y16	Y17	Y18	Y19	Y20	Y21	Y22		Ap-basal	Avg intensity
0	11.7981	10.3295	11.1536	9.9887	7.0453	8.4969	8.9293	12.4031	13.3094	14.7172	15.1089	10.5203	21.5462	26.655	17.7485	20.7794	23.6946	11.8245	19.6607	13.9844	22.0374	16.4937	19.289		0	15.1093
0.119	10.8985	18.066	9.8402	14.2402	17.2899	15.8475	17.9631	8.4822	11.627	21.8843	13.8347	15.7644	21.5925	24.6493	32.4348	17.5721	19.6984	21.3282	16.2767	15.711	20.4434	17.6775	14.4545		0.0103063	17.2859
0.2381	11.5259	15.3512	10.3256	15.5466	18.1329	14.8859	19.5596	12.9615	11.5742	16.3256	19.4584	12.8479	20.3728	24.0715	30.1578	16.764	18.4	16.6056	16.8108	15.9192	20.198	15.7204	23.8436		0.0206213	17.2765
0.3571	17.5944	12.8819	13.9503	18.8006	20.6571	17.3198	15.1931	5.9809	9.3765	3.3048	19.2372	28.3352	18.1389	26.9402	38.5156	18.2129	13.1801	17.0121	26.1817	22.079	24.8944	16.3997	27.5632		0.0309277	18.7717
0.4761	11.9604	27.7305	15.0494	10.7655	21.2635	25.3642	13.6209	15.2977	15.2777	14.4267	21.012	17.2912	24.7908	36.9584	34.1211	22.2662	23.9994	25.9699	26.0225	27.153	35.1034	31.9383	23.9044		0.041234	22.6647
0.5952	21.6173	27.0862	17.2957	13.7441	15.9861	12.8334	14.6321	16.02	22.0661	15.4769	25.0487	19.8702	24.3903	31.5384	29.2483	18.5683	23.0387	22.3814	23.3916	28.3298	23.5326	30.1061	27.2963		0.051549	21.8912
0.7142	13.33	16.9875	9.047	20.5328	17.7606	17.0971	12.5024	15.1904	15.2479	17.1594	12.3794	16.8345	19.0513	36.8115	40.6098	29.2178	27.98	29.307	19.5954	20.0409	37.0562	27.0864	18.8587		0.0618553	21.2906
0.8332	15.7276	19.0159	18.9637	20.7751	15.294	12.5487	18.072	26.161	14.5956	25.7437	14.6094	33.0881	13.9968	34.3706	33.8101	23.2507	13.8621	26.162	24.9097	35.5058	32.2023	28.1623	24.4346		0.0721616	22.8375
0.9523	22.4992	19.1319	19.1432	22.7755	5.8793	9.2848	16.4354	10.6719	11.3449	11.9684	18.7741	20.0572	29.2716	37.9735	44.0717	40.2191	28.758	32.2453	25.8902	26.5783	22.0574	25.6931	28.8714		0.0824766	23.0259
1.0713	28.7932	19.2301	20.0069	16.8971	20.8395	18.8853	16.5164	23.8925	18.3485	12.7892	21.7729	25.3675	25.5226	37.8991	38.9671	29.4509	24.7937	32.4434	29.5828	66.1451	35.717	31.1317	42.9055		0.092783	27.7347
1.1903	22.105	26.7892	10.8834	11.8107	14.8736	15.1826	18.6518	16.6896	19.802	16.9791	14.0923	36.3128	24.5784	26.828	46.2637	39.957	27.2578	37.8337	33.3565	46.1311	31.4739	31.7255	32.1309		0.103089	26.1612
1.3094	16.9806	13.3421	19.8519	20.1657	23.7851	13.42	14.2334	15.2801	20.8157	17.1321	21.244	20.4578	27.6624	30.1183	48.7802	41.3014	29.8021	36.8344	32.4165	48.2348	37.1722	41.4527	37.2716		0.113404	27.2937
1.4284	26.5706	20.2533	21.6257	24.5513	13.7017	23.491	17.6079	23.0587	12.4396	18.8006	16.036	32.692	29.7557	23.7914	23.2153	45.9792	34.4719	25.9939	45.7763	51.2834	29.6028	19.466	29.5797		0.123711	26.5106
1.5474	24.3586	21.8391	23.2178	24.6565	20.2549	16.8806	9.6605	11.765	12.5948	23.9974	23.5308	13.8337	40.6285	17.9412	32.6191	28.5345	28.0133	33.75	39.5225	47.9516	26.1088	39.5563	40.776		0.134017	26.1735
1.6665	41.5092	18.9606	35.0134	13.1882	22.151	19.0986	14.4832	21.6297	19.9202	28.0981	22.3936	19.2613	29.6777	32.0966	33.6931	45.6707	35.9093	38.2067	41.2024	34.3659	34.0566	26.0523	34.3681		0.144332	28.7394
1.7855	21.5345	14.6171	19.9079	20.5506	21.6604	24.4045	19.2359	18.003	12.9824	16.2075	17.3457	28.0577	33.4532	32.8885	34.0275	36.8904	34.4633	39.5101	35.9182	54.4606	36.0199	40.4004	36.6534		0.154638	28.2258
1.9046	29.5898	14.2946	23.8754	18.6499	25.2072	11.2689	12.8437	20.8652	25.0197	26.0777	18.6384	34.9717	23.4226	34.5421	36.5802	31.3653	34.3757	39.2236	30.7111	40.4584	37.3887	30.0232	35.7723		0.164953	27.6159
2.0236	17.5041	22.4733	24.6354	15.7663	15.1126	23.4877	14.4771	17.3354	14.3851	20.1618	24.3553	25.2292	28.0573	33.2305	31.8843	32.5404	34.3158	33.5156	39.7786	50.4934	34.7635	45.0036	24.8631		0.17526	27.103
2.1426	18.9232	28.8834	21.9199	15.0669	16.9215	16.0292	20.1097	17.2687	19.8085	18.5669	26.6477	26.6978	32.5985	32.5359	46.9938	48.5408	30.4111	39.0747	43.1679	46.053	33.5634	39.0584	40.7411		0.185566	29.547
2.2617	22.0787	25.8192	29.3604	24.1515	11.1835	17.224	27.9644	14.2953	13.1685	26.1171	22.8041	28.633	30.9288	37.2079	46.614	37.7609	22.9754	44.265	30.7532	41.35	30.2538	38.8373	28.9778		0.195881	28.3793
2.3807	27.9617	24.884	18.2525	23.3421	19.4586	13.1959	21.0899	11.1349	22.0911	23.8773	21.8005	22.5673	29.5333	33.1518	45.8281	28.445	41.3376	33.8473	35.6167	43.7329	34.1658	28.7191	38.5449		0.206187	27.9382
2.4997	18.7052	29.0761	27.0919	26.6046	6.8566	18.6401	28.1957	10.8103	20.6754	24.0128	20.8547	28.1517	28.8001	20.4373	48.6661	28.8343	36.5218	44.1481	48.5849	48.9179	35.7001	35.2235	30.4669		0.216494	28.9555
2.6188	25.53	23.5554	23.4024	22.058	13.8378	17.7715	19.7569	15.8131	24.5957	21.3615	26.7644	30.4809	30.0467	28.9002	41.5362	44.0948	38.1891	43.6084	30.6264	45.8495	33.4655	29.7397	30.044		0.226809	28.7404
2.7378	32.9926	26.5418	29.7778	26.751	21.0228	20.432	18.1534	24.5192	20.0345	16.2927	23.6708	15.6066	21.3382	36.2223	39.0817	32.4149	31.9045	43.2747	32.8212	36.8752	22.514	26.2449	31.4131		0.237115	27.387
2.8568	28.3358	32.0668	32.9401	25.1193	12.1361	17.3133	18.1785	16.7007	16.7308	18.139	20.9513	29.5486	32.7798	33.3096	54.0038	39.0248	35.9798	32.8482	49.9722	43.8655	31.8599	30.3791	57.5963		0.247421	30.86
2.9759	25.0438	19.158	46.5058	18.482	13.4445	23.9322	25.0128	25.413	16.517	15.0952	30.6678	32.2783	24.2152	35.8892	45.283	36.7404	26.3739	46.3922	33.1085	47.8975	37.3069	43.9053	46.2131		0.257736	31.0815
3.0949	14.8841	29.9716	23.6483	17.0695	23.5221	28.5216	22.7278	18.5264	14.2407	15.4461	29.3783	23.796	34.0938	32.4386	57.1037	43.3503	41.4161	49.672	41.9804	54.7157	23.8569	33.9249	55.2076		0.268043	31.7171
3.2139	19.7524	21.1707	32.7957	23.7281	19.746	31.0222	18.3355	19.285	20.601	10.4914	28.2905	18.7958	34.8137	27.67	38.291	44.9638	35.459	38.6038	30.0163	49.1576	45.2809	27.3068	36.1376		0.278349	29.205
3.333	29.687	24.2349	46.1522	21.3869	12.937	17.7367	18.4176	21.0768	19.4725	22.155	34.605	23.856	20.8574	22.8486	37.4581	28.9002	29.475	36.5104	37.4769	50.8717	29.0478	42.3923	35.8005		0.288664	28.8416
3.452	26.5153	34.231	33.7137	36.0115	18.6389	19.5915	20.482	12.0637	22.5057	25.1656	30.0276	20.0717	28.075	44.5367	37.6534	49.0817	39.3723	68.6628	33.5843	45.7605	25.8586	31.7226	39.9256		0.29897	32.3153
3.571	33.9308	25.4648	13.1871	33.1174	12.4311	21.1762	19.4917	21.2161	14.0901	20.3646	38.1261	21.6303	21.4691	29.6254	39.9221	40.7493	40.9799	58.2793	32.2586	41.6447	33.9393	30.5999	33.996		0.309277	29.4648
3.6901	38.534	28.6628	18.7833	20.1972	13.617	19.5001	18.8481	21.5658	10.6039	18.311	32.1644	19.1946	24.2413	34.9562	37.3463	38.6393	38.2043	52.7654	47.9075	51.5621	31.1076	27.5685	29.526		0.319592	29.2959
3.8091	23.3924	31.9387	33.52	19.6436	11.8172	17.2802	17.4341	19.9349	18.7518	24.3763	23.2967	25.2255	30.9517	31.9542	42.1965	38.9129	39.5667	46.6967	39.1134	55.2967	25.8036	35.6317	35.2556		0.329898	29.9127
3.9281	23.9282	29.2755	27.6959	34.0552	13.4257	19.9611	12.6813	24.473	12.7852	19.7177	29.6225	12.6707	21.9926	34.9889	57.0606	31.2448	61.2741	36.1416	58.2318	57.0121	27.0249	29.0814	42.8169		0.340204	31.1809
4.0472	41.0857	22.0346	16.38	19.186	19.9819	18.4784	22.8765	29.1429	8.545	21.0582	24.305	16.2461	21.1867	42.7295	44.8816	39.2397	47.488	43.8436	34.8325	40.8913	22.7832	22.5427	39.6452		0.350519	28.6689
4.1662	36.9858	21.8686	22.9717	23.2101	12.3555	20.4909	13.7155	26.2796	9.5425	12.8052	29.4883	15.3496	18.8867	42.0959	35.6077	38.0741	45.8769	38.7382	32.7209	38.5303	15.8882	30.1984	37.8146		0.360826	26.9346
4.2852	26.4707	25.2965	30.5876	21.2157	8.1472	17.6005	19.2299	25.8546	11.2151	18.2324	31.7422	17.1418	28.0895	33.6119	26.1479	26.9685	28.0268	45.8574	32.3035	40.9432	26.1748	30.5397	34.2316		0.371132	26.3317
4.4043	26.3096	19.1138	27.9988	33.0502	9.0909	14.5442	24.3928	29.8212	11.8951	13.3514	18.5781	24.175	17.8509	29.2478	36.5338	29.8106	28.1548	46.9125	27.9461	43.1565	35.8845	29.4976	37.8807		0.381447	26.7477
4.5233	23.7088	20.906	35.3699	14.1944	15.2831	16.9554	8.8949	20.0121	17.5956	20.7412	24.7932	22.0909	20.4307	44.071	28.6832	24.2624	26.7578	52.6148	39.9418	29.8769	24.4127	9.0547	38.8489		0.391753	25.1957
4.6423	20.7833	23.7186	41.7023	34.2952	13.1591	18.4573	20.6749	32.5776	10.3586	17.2428	27.5047	20.4968	15.1397	39.5029	40.0121	28.2426	34.3441	35.0904	32.5042	53.2603	25.8852	24.013	25.0659		0.40206	27.5666
4.7614	22.2119	23.2462	39.2033	28.9012	19.1473	21.5832	16.5732	28.6551	14.9261	20.7508	26.4089	22.8942	23.4	38.4044	40.2237	29.6102	27.4892	36.0941	33.1503	48.2098	19.3613	29.7965	38.7855		0.412375	28.2185
4.8804	32.8235	25.2614	30.2375	25.0243	17.1649	17.023	28.5299	30.9611	16.779	13.4226	25.7867	14.8249	14.9452	29.8943	44.6597	28.6287	24.2318	34.4277	50.5079	40.0478	28.4487	26.4978	36.9345		0.422681	27.6984
4.9995	34.5401	17.3947	34.9313	25.9074	13.7479	18.4122	23.0262	26.5248	16.7456	17.6286	32.6799	12.9504	17.3204	35.4876	39.0509	22.3927	38.1157	36.6998	46.2566	51.0391	16.6722	21.6208	40.4362		0.432996	27.8079
5.1185	31.2741	20.5667	31.0602	29.3848	16.0851	23.1182	28.7674	25.502	11.0876	18.3964	15.5141	14.2949	12.7347	27.002	29.2334	22.6594	35.6781	53.1878	41.0054	37.3593	19.103	26.7741	38.1074		0.443302	26.4303
5.2375	29.2935	29.1244	36.3081	22.749	10.8205	21.731	13.5486	18.9462	13.0391	14.2774	24.3519	11.627	14.9216	29.0983	38.6433	18.1505	35.6356	37.4906	47.6903	40.2557	17.0865	24.5043	33.9671		0.453609	25.3592
5.3566	24.095	26.8238	27.0619	22.7544	15.5449	20.3853	19.8437	20.0961	7.8376	16.7237	20.0221	24.8219	17.3943	24.6002	45.8872	28.1227	49.1518	41.4826	46.4616	38.4501	10.8344	22.6289	38.2743		0.463924	26.4912
5.4756	31.8989	24.7253	32.7421	29.6052	17.5851	19.9212	14.2853	18.0347	11.0328	17.3628	26.6708	12.5779	14.3357	23.2127	43.5707	28.4843	38.1125	40.1165	50.7812	43.6758	13.3686	20.2525	42.2201		0.47423	26.7206
5.5946	41.2793	27.5157	40.8026	30.8655	17.1443	24.4553	16.5802	28.9544	16.4901	18.5316	24.5464	16.846	11.9753	22.4752	36.5006	24.4917	40.9813	35.7054	35.9114	36.5614	20.2022	17.9278	28.1271		0.484536	26.7335
5.7137	30.3139	37.7907	35.1481	30.3285	18.4437	13.955	12.9526	14.1159	19.1766	14.5759	20.5024	17.4064	14.7344	26.5132	38.1894	28.5567	40.4988	49.9816	51.7594	38.3149	18.5435	17.656	38.5243		0.494851	27.3036
5.8327	29.2236	29.2976	20.123	36.3599	16.7925	11.2307	15.587	14.6837	15.843	11.4756	26.3288	11.7398	14.5493	19.2497	42.8867	24.9098	41.7075	42.3148	35.0876	34.8012	19.0216	14.7936	36.8884		0.505157	24.5607
5.9517	28.4499	29.5725	17.9274	29.1255	16.5709	10.0633	25.2386	24.0121	18.2712	16.5988	25.2385	17.5172	15.6863	25.1429	33.504	30.8242	35.2174	52.8628	44.477	41.7716	24.7679	23.378	27.6172		0.515464	26.6885
6.0708	28.6411	27.9113	32.7384	21.2834	9.3083	19.0314	16.7886	12.7153	19.2604	15.326	18.2289	16.4298	11.364	40.152	36.2672	29.7179	27.1012	37.59	49.869	34.5166	13.9209	21.0202	41.8012		0.525779	25.2601
6.1898	32.3616	26.5308	24.3374	30.0604	15.1919	9.1621	23.0095	27.2637	9.4867	12.5674	24.5809	16.7811	11.2929	37.1185	33.1667	23.165	31.1551	24.9877	35.1653	37.2175	21.3996	19.1775	32.4999		0.536085	24.2469
6.3088	40.117	21.5343	28.5531	34.5896	13.7727	20.8952	21.964	13.7408	16.8118	9.2424	28.3616	8.4649	16.837	25.0771	26.4166	28.4134	34.4656	36.3218	52.7842	36.8978	27.4421	19.958	24.3064		0.546391	25.5203
6.4279	33.8092	18.9179	25.1914	18.7632	19.624	15.0175	19.0159	23.3462	12.4571	17.0077	30.2496	13.8614	21.099	26.4044	40.3847	27.9382	37.3209	25.2108	36.5306	24.2651	13.5941	19.6306	29.8058		0.556706	23.8889
6.5469	27.854	20.0095	33.5782	20.7207	19.4625	18.5683	16.4733	24.1947	18.5784	13.9223	27.9743	15.5757	27.3121	24.8328	28.4358	30.5363	25.4446	19.9667	42.268	33.1714	21.5603	26.9538	29.1262		0.567013	24.6313
6.6659	31.1888	33.5563	25.1326	13.1594	14.7202	11.6064	18.9963	11.7011	9.9266	21.0995	16.4207	16.8206	23.1739	24.5115	35.0277	20.0249	21.9836	34.4994	51.608	32.6023	14.2037	18.3943	30.91		0.577319	23.0986
6.785	36.5753	31.5638	27.6942	25.7617	16.7106	17.1719	20.5604	15.3315	9.0197	12.2433	18.8878	21.9016	16.0215	33.4116	35.0728	23.5703	26.6693	29.6112	47.7985	36.8487	21.9644	12.0801	25.5811		0.587634	24.437
6.904	29.5857	26.1433	24.6942	18.1891	12.9746	17.6584	18.575	16.4505	5.5202	15.4302	26.1729	14.399	14.5031	19.5321	26.9618	24.0936	33.6312	23.7631	46.4692	26.7335	14.0346	15.9822	28.2553		0.59794	21.7284
7.023	38.831	23.9142	24.0225	25.2038	27.1304	25.4796	17.5453	19.6815	12.6405	24.4254	25.4989	11.2233	22.8825	33.4494	31.2214	22.0457	41.913	38.4469	32.1058	32.2736	19.7589	16.4859	38.3715		0.608247	26.2848
7.1421	24.384	15.6024	29.0327	32.515	17.8606	23.1641	11.9146	16.0074	7.5355	24.4561	34.3994	19.9658	19.5354	41.9374	27.6681	21.3478	31.9081	40.412	37.6489	29.3474	13.3755	17.2828	26.818		0.618562	24.5269
7.2611	21.4284	27.1554	23.1059	28.3395	14.032	16.0442	20.8691	13.4637	11.9281	16.1443	19.0579	15.2763	20.5276	36.3275	28.366	25.2472	30.2049	37.7517	22.5921	26.2613	24.6094	16.3259	41.8806		0.628868	23.3452
7.3801	27.8171	21.4848	32.1898	29.8171	27.2583	22.8017	19.4091	25.6876	11.2705	17.2363	18.748	10.8937	18.6669	33.5685	37.0869	14.8598	27.1778	32.898	36.2271	36.1419	17.5451	20.7141	22.4658		0.639174	24.4333
7.4992	33.7961	15.4913	34.6291	27.9202	13.1306	19.6174	16.038	21.6279	13.338	15.3294	20.4807	15.3036	15.435	31.5906	31.4022	20.5357	23.8882	24.0606	29.3929	23.9715	13.2852	14.6887	32.9897		0.649489	22.0845
7.6182	34.0901	21.6343	31.4494	24.1482	20.0729	19.5689	19.5544	32.4807	16.7735	14.4645	20.6758	16.3226	16.2428	30.8775	50.3027	26.6909	24.355	37.943	28.4087	33.881	20.2577	9.4127	29.6631		0.659796	25.1857
7.7372	31.6236	26.0963	29.2771	18.1169	20.6732	14.2332	12.8484	25.0998	17.5336	16.934	25.0957	15.3435	22.0644	30.8167	28.442	22.2336	28.9429	21.4152	48.9611	40.5275	17.6422	21.0696	30.331		0.670102	24.5792
7.8563	35.4951	17.5031	32.7884	40.8827	18.7211	15.8363	16.9203	26.2312	15.7793	14.7837	35.4973	17.6232	23.4145	41.0631	43.1369	24.6563	27.6589	31.9765	45.8465	22.8129	20.2228	20.2061	26.1633		0.680417	26.7487
7.9753	33.2253	20.5156	34.5431	34.0668	18.5975	17.0785	23.2118	20.3273	10.4362	11.3711	23.9632	21.4966	26.0608	38.4471	30.1024	18.6393	33.2775	17.3557	52.8022	27.0152	15.1447	17.0488	28.0574		0.690723	24.9037
8.0943	36.3005	32.8372	31.0553	23.4883	27.3503	28.9586	20.5132	28.1618	9.8325	18.9394	29.3598	13.7696	19.1595	39.0407	34.3417	19.154	32.6043	42.6704	41.2273	22.3835	15.1887	17.9283	25.2661		0.70103	26.5013
8.2134	23.3531	31.8198	28.7029	33.2723	21.3343	15.1132	18.3935	20.0165	12.6318	14.0373	27.0652	25.7117	18.6016	27.1649	30.8177	21.713	29.5633	30.4822	19.6515	23.8604	13.4842	18.1419	33.9905		0.711345	23.4314
8.3324	26.5144	16.5311	26.8408	27.8815	21.5538	26.0027	22.9533	20.7344	15.193	23.4195	28.1965	15.334	27.91	32.6102	22.7414	22.7962	29.3273	19.1135	27.9133	33.5121	15.0915	19.6823	31.3923		0.721651	24.0541
8.4515	30.4233	18.5126	35.3962	22.7199	25.6129	19.5812	22.2838	14.5868	13.3047	21.7477	24.7701	15.4111	23.2529	29.9015	25.6352	13.5826	30.2942	19.5977	35.5069	30.4626	18.7055	23.4458	29.8434		0.731966	23.6773
8.5705	25.1465	23.8655	30.899	25.3015	25.9132	24.1673	37.3372	21.9356	13.1153	28.812	34.2601	19.6468	27.5284	42.0903	29.1153	19.9028	34.5641	24.2817	40.9345	28.669	13.9878	16.4739	23.8087		0.742272	26.5981
8.6895	31.1203	27.6671	38.6145	25.1647	26.5131	13.442	17.477	25.803	18.0613	25.965	27.5761	20.9873	32.778	33.9411	27.2159	23.8734	28.4593	27.8133	37.1897	25.9204	15.075	24.566	28.4034		0.752579	26.2446
8.8086	33.8047	41.1605	34.9992	32.7507	27.668	19.0444	16.601	25.597	17.3449	27.4135	25.4501	20.7261	26.2145	34.2508	20.0355	19.9123	23.5465	27.6069	28.1611	26.2289	15.1025	11.6409	24.3664		0.762894	25.2011
8.9276	30.3842	27.9399	27.6252	20.5078	27.6853	23.121	18.8058	20.0985	21.4696	27.8664	21.7558	28.6487	18.9025	29.3637	32.3069	18.8314	33.2621	33.774	37.6633	21.5703	15.0113	15.7137	28.41		0.7732	25.2486
9.0466	32.808	35.3921	32.0395	30.6114	28.7271	19.1647	12.1623	22.8912	24.5426	28.8315	31.3762	25.753	34.1348	29.4618	32.003	15.9698	15.5614	21.4621	26.6261	22.6238	21.4264	18.6447	27.8696		0.783506	25.6558
9.1657	30.1069	28.4852	30.4608	23.5492	48.893	20.8175	22.3081	20.2495	27.3588	38.685	23.8531	22.4773	25.4611	44.2328	22.9761	17.1425	31.6605	32.4246	32.6604	28.7733	16.6721	17.4664	34.0885		0.793821	27.861
9.2847	35.0849	35.0821	36.5148	22.2852	38.4311	25.4442	18.0967	13.4379	15.7904	22.7166	24.7764	21.0551	27.4332	29.2764	26.8195	26.1924	22.9723	36.81	22.3136	27.6682	9.5062	25.3957	26.1828		0.804128	25.6211
9.4037	37.8874	23.4496	28.3724	32.9963	40.354	26.363	16.0494	14.0006	20.7589	17.4129	15.2463	25.3994	31.1384	36.555	25.5037	20.7353	23.5096	38.3391	37.0614	26.7756	9.2094	15.9741	30.3028		0.814434	25.7998
9.5228	29.0023	39.9918	26.8012	25.9861	41.2625	26.1394	10.0237	20.4718	18.0265	9.8533	23.768	24.4304	30.7196	27.7433	30.4812	21.078	18.5881	34.3371	44.4421	19.4441	15.9359	12.6625	24.3099		0.824749	25.0217
9.6418	41.6907	33.046	20.8829	21.9711	35.9355	37.4098	8.4881	14.8785	11.1722	11.8715	18.095	21.3119	36.0489	21.7895	39.28	24.4976	17.1553	27.1435	20.811	30.131	8.0388	17.788	35.1012		0.835055	24.1103
9.7608	27.1654	52.7314	22.3339	27.2395	43.741	34.4488	10.0518	13.1046	19.6938	9.1229	16.7103	22.8091	22.7763	22.7074	43.3071	12.5105	29.4903	35.4339	19.2893	21.1323	8.2806	33.8873	24.2636		0.845362	24.8796
9.8799	32.3133	28.6794	24.2509	32.8567	35.2606	26.6253	13.9618	7.3698	15.3142	11.5831	8.7146	14.7316	21.3596	20.7162	20.8705	20.7915	28.477	25.2069	25.1594	28.1469	14.7221	28.7965	36.0268		0.855677	22.6928
9.9989	35.4205	37.8123	29.9805	27.7801	45.8887	25.4989	6.5184	5.3849	9.6136	10.3857	10.6544	22.3153	15.6309	26.235	24.599	26.6192	23.3077	28.9828	28.8539	20.674	17.9481	22.0118	21.2133		0.865983	22.7534
10.1179	32.5783	37.6278	35.5539	17.9358	35.9429	29.2761	4.8665	5.0019	12.2882	0.6633	14.4189	18.7178	17.7598	12.3536	29.7405	26.9924	30.6671	31.9308	31.3248	29.1173	13.4391	34.4168	22.2348		0.876289	22.8195
10.237	19.718	18.3711	29.3293	22.5967	39.7577	22.261	10.1632	4.3262	2.6143	5.3303	4.7311	10.0587	13.2848	17.1772	14.0459	20.0009	19.3119	33.3134	12.3972	24.342	16.5205	29.1225	18.3173		0.886604	17.6996
10.356	19.9558	26.223	19.3026	17.5418	23.0101	19.018	3.2998	8.9507	2.2932	4.7188	3.2339	8.805	6.2717	12.5125	25.5197	18.1593	28.6279	23.3389	21.8535	18.3417	23.4676	39.7076	23.6801		0.896911	17.2971
10.475	29.3171	28.7421	28.1214	17.4625	22.6756	17.6887	4.8687	4.4316	5.3116	3.0278	5.3068	9.6918	6.8082	1.7105	14.5534	16.3572	26.1347	19.0786	20.4083	15.0649	34.2117	32.2784	31.6482		0.907217	17.1696
10.5941	32.6341	14.4898	20.8927	10.2209	18.915	13.6062	2.3654	4.1665	1.7136	4.4582	3.5697	6.3295	0.8678	4.1788	8.9769	25.8589	28.2554	30.0388	18.3103	20.4213	11.4455	25.8985	20.9241		0.917532	14.2843
10.7131	33.7714	35.2517	30.3642	16.7528	11.2118	13.0416	9.4566	6.0325	3.9402	2.9662	1.0564	6.36	9.6062	5.6985	12.2219	27.8164	27.9457	14.6068	19.3329	17.9673	17.8592	22.3041	20.0456		0.927838	15.8961
10.8321	22.7442	17.6599	9.8339	9.7154	12.4779	11.6733	2.9162	6.791	1.4201	6.1983	2.0977	5.8239	1.4767	3.0823	7.2511	19.8365	20.3266	13.109	11.3171	7.2393	14.9296	19.4489	11.4851		0.938145	10.385
10.9512	27.4738	9.687	18.5209	14.1105	6.4625	12.5809	4.7116	6.0327	2.188	2.9011	4.7112	5.6599	2.2476	5.7211	5.5934	17.4776	14.5155	13.841	11.2924	6.7518	14.6098	25.877	8.1309		0.94846	10.4825
11.0702	30.1496	19.8858	21.5505	14.6296	9.6814	5.8344	3.4953	8.5162	4.5229	1.8502	4.7779	4.7645	4.8535	4.0303	4.4083	6.1354	23.3746	7.8345	6.2019	5.9606	13.0473	10.9675	9.0514		0.958766	9.80537
11.1892	33.88	17.1206	10.8748	6.1547	8.5213	3.8269	4.2578	1.8257	9.6813	3.7064	4.1415	1.0549	2.8001	6.3912	1.5072	7.2954	11.6609	7.5312	13.5038	5.3276	3.5529	11.9332	11.0467		0.969072	8.15635
11.3083	18.5171	7.2352	9.9073	7.8092	6.6758	3.0016	4.0323	2.341	2.4269	2.5616	4.4498	2.0532	3.9382	1.0286	5.6919	2.6704	12.7291	5.0253	9.0294	4.9759	6.2736	9.852	8.9857		0.979387	6.13961
11.4273	15.399	5.5215	6.5951	6.7706	3.4988	2.4565	3.1307	5.2157	2.9694	0.5169	2.4277	1.5814	2.7289	1.4392	3.0164	5.4859	12.1269	9.9231	8.8276	2.7675	5.0501	12.9393	11.0578		0.989694	5.71504
11.5463	9.8082	9.5051	12.6537	11.3607	5.4233	1.4798	2.9745	5.2287	3.2482	4.887	2.4147	7.8696	3.6638	4.7781	5.0979	2.8538	6.4075	5.0774	2.5198	1.8149	7.042	16.4132	10.3635		1	6.21241

## Sheet: Image5
X0	Y0	Y1	Y2	Y3	Y4	Y5	Y6	Y7	Y8	Y9	Y10	Y11	Y12	Y13	Y14	Y15	Y16	Y17	Y18	Y19	Y20		Ap-basal	Avg intensity
0	12.4886	14.5035	19.5862	21.0994	25.0759	29.7304	22.5945	24.4501	22.7358	30.5301	19.8094	20.4537	20.6363	18.5322	20.5577	17.7521	23.7424	21.5766	26.5875	18.6063	24.2289		0	21.6799
0.119	20.0802	21.8104	17.1296	20.2346	32.3781	22.4799	15.6171	26.9941	28.3846	24.3439	28.2051	27.6347	20.7455	26.7785	21.2686	25.8047	16.0972	18.5489	19.3697	15.0164	22.002		0.00735081	22.4249
0.2381	19.237	19.3516	16.0233	17.9079	33.8178	26.1174	19.0777	34.1104	31.8048	31.3228	29.2795	24.0322	15.8743	30.5837	22.1662	40.5249	28.4264	21.5048	30.2083	19.4705	24.5198		0.0147078	25.4934
0.3571	25.2061	22.9815	7.7195	19.9156	27.53	22.9024	18.5753	25.8298	24.8074	24.783	34.8095	22.0704	21.6363	30.7613	25.8551	36.6696	30.2291	24.572	27.3452	17.5203	24.0823		0.0220586	24.562
0.4761	23.2241	20.3874	20.0505	31.6317	31.172	30.1761	29.2534	29.6526	18.2801	34.7648	27.0662	33.4216	26.2767	16.3551	37.8463	51.0586	16.7432	25.8813	20.7493	37.6311	19.2571		0.0294094	27.6609
0.5952	25.6787	21.383	27.9729	26.241	26.3459	33.6868	28.1533	28.6909	31.5942	35.113	28.14	26.6833	33.8463	28.0771	23.7812	42.6248	34.091	27.7803	23.2772	33.943	27.1971		0.0367664	29.2524
0.7142	14.8277	22.262	23.0194	29.9626	33.9666	31.9846	31.3096	24.8871	25.39	29.1881	28.1516	27.8032	24.3663	30.125	28.7566	33.3395	30.4881	33.9714	15.3871	30.6007	30.2239		0.0441172	27.6196
0.8332	26.1972	21.1096	27.2856	21.7417	23.8353	30.8236	30.831	33.16	28.8077	37.6114	28.1962	34.1341	35.3258	39.9556	35.2488	37.5211	48.684	44.0865	24.5649	37.8767	39.2679		0.051468	32.6793
0.9523	28.1677	33.4281	24.571	24.2057	19.164	25.0209	23.0483	39.8594	36.8091	34.9329	46.1201	40.9596	28.9829	44.9218	27.8422	43.5445	59.2087	37.6556	38.4849	36.2133	35.1085		0.058825	34.6785
1.0713	31.1493	24.4066	26.4806	26.469	25.0285	23.4217	35.1422	30.0432	41.9561	45.5603	37.3484	41.2945	35.5149	35.8328	45.3017	59.3894	36.2359	38.2131	36.9921	42.9116	33.6793		0.0661758	35.8272
1.1903	27.761	26.323	28.439	36.6885	41.4099	30.4399	39.2685	43.0306	39.1496	47.7348	46.0654	46.238	43.1704	39.8771	43.7241	67.7497	62.2026	51.3532	44.8033	38.8574	46.3843		0.0735266	42.4129
1.3094	21.3482	32.3169	37.2849	32.8333	27.7087	39.4145	29.4499	55.1785	46.603	39.4479	48.7752	54.8839	47.1397	61.5601	48.3373	66.6362	72.7292	56.0054	41.742	55.7219	45.3933		0.0808836	45.7386
1.4284	26.8014	32.2558	23.2356	42.021	38.5536	26.9834	29.0497	40.1342	51.424	54.5272	68.6964	60.1703	57.206	41.9979	57.7024	87.9294	72.6559	59.7053	44.4313	55.8864	56.2586		0.0882344	48.9346
1.5474	18.1674	30.5907	29.155	41.9227	44.7031	35.2844	48.2166	39.1863	52.4547	54.3261	58.5812	56.1255	63.8416	59.1203	67.9631	74.6872	78.6137	73.5255	49.5322	70.2591	54.6448		0.0955852	52.4239
1.6665	21.9609	24.8184	37.9987	25.5104	32.3295	37.1111	39.0134	50.6824	65.761	49.1606	55.3109	82.2162	53.3605	61.1659	66.84	81.9452	85.0708	67.4108	59.1057	64.4279	50.671		0.102942	52.9463
1.7855	25.7717	20.4342	34.1135	36.6128	31.3459	39.6833	39.3132	42.2252	57.2733	56.8033	71.8269	67.5882	58.4098	53.1483	79.5081	82.7751	64.6304	56.8759	58.4613	61.5398	53.6534		0.110293	51.9997
1.9046	33.803	25.5547	33.1685	28.0979	38.0528	28.0008	42.0675	50.486	48.6117	57.8327	64.1979	86.3233	77.3221	68.1695	62.6387	85.5813	72.7666	58.0555	76.4069	80.9172	60.5628		0.11765	56.1246
2.0236	34.1373	22.2532	30.6316	37.1882	37.4121	25.4041	41.9655	52.7509	63.0806	46.8157	58.5695	84.145	61.4355	68.5994	69.7756	77.4441	61.473	50.6789	55.2992	67.1692	63.5787		0.125001	52.848
2.1426	31.2393	17.8702	26.8012	41.8415	48.1419	44.0725	37.3087	57.4082	57.8599	50.9094	50.2632	69.1453	68.3196	61.5158	70.2522	62.8026	71.4583	56.258	45.9559	65.1703	50.6593		0.132352	51.6787
2.2617	24.8941	27.3228	27.0977	30.2239	33.6349	41.1881	41.8609	58.297	42.6258	59.5073	51.4599	63.9872	68.9248	74.9341	67.347	74.2613	72.6322	55.3686	70.6946	80.6081	57.6212		0.139709	53.5472
2.3807	25.4082	24.8952	31.5696	25.0405	37.3926	45.0523	33.6371	46.4228	46.2087	36.0344	62.5678	57.5672	56.8667	63.747	58.2362	66.2301	67.8512	63.2939	53.9583	71.2964	56.2885		0.147059	49.0269
2.4997	27.7028	28.5429	23.8852	31.6502	41.4982	41.2231	30.9075	57.9642	50.9684	37.1939	51.2328	58.0225	51.7024	66.6947	52.6185	60.9169	57.3809	52.7581	63.4421	49.4557	62.5961		0.15441	47.5408
2.6188	23.7433	37.1255	29.2121	26.7198	43.7604	35.0006	38.7772	50.9937	41.9086	45.561	48.926	61.3526	52.2039	63.6587	60.0858	77.9654	61.4656	55.9927	55.8606	53.8166	62.0987		0.161767	48.868
2.7378	31.0201	37.2195	25.5155	33.2397	38.8941	35.4815	46.3525	62.6331	40.2733	51.6477	49.7349	56.2384	51.1737	58.9455	45.1163	68.4615	63.9611	59.5858	53.3936	58.0785	58.9087		0.169118	48.8512
2.8568	39.5161	22.0519	22.75	30.2194	38.9937	38.9001	40.4818	52.987	51.8995	60.6901	40.1067	55.6163	47.3312	52.3047	53.7133	64.7385	66.0567	49.2822	60.1122	52.1564	54.0983		0.176469	47.3336
2.9759	30.2817	24.8136	31.1919	30.4195	34.3766	43.9646	35.0568	43.7023	58.7977	48.6007	33.442	53.0593	57.3146	68.9583	63.0563	57.732	39.9363	63.9962	56.3259	51.4586	84.5111		0.183826	48.1427
3.0949	28.1478	24.8208	28.2795	29.3374	36.2751	37.7056	38.412	46.676	49.7462	55.1328	46.296	55.6277	58.7738	57.457	55.9246	67.4037	46.8349	48.4208	61.2159	46.9168	74.0545		0.191177	47.3076
3.2139	28.7374	16.9748	26.5133	29.9453	29.5642	38.4439	41.843	46.5069	47.5582	55.1582	53.6078	55.4567	76.6245	42.7406	55.2062	49.5635	42.6393	49.3992	43.0657	55.8252	69.9152		0.198527	45.49
3.333	27.8871	31.0826	37.2452	25.9158	34.2438	34.2856	37.4677	50.0897	46.3523	51.7775	58.2929	54.6376	58.1136	60.6538	63.1069	64.8333	56.5805	59.7609	56.6294	36.8876	63.7585		0.205884	48.0763
3.452	31.7699	44.6709	31.2291	33.2375	26.8593	42.4083	49.1602	47.8615	47.3507	63.2239	40.4898	47.4217	64.3021	64.5613	67.9051	35.6425	60.2803	58.8153	56.0885	49.9333	57.9405		0.213235	48.6263
3.571	30.0138	28.7417	38.2457	27.0682	28.5636	44.3989	45.4146	37.9804	44.7252	54.5259	51.7937	49.5888	57.463	66.6028	51.3185	52.1942	75.448	63.4684	52.1139	48.8331	53.4797		0.220586	47.7134
3.6901	31.9834	18.1696	30.8011	29.1474	24.8458	39.6056	48.8245	42.0788	38.7197	57.4602	55.8149	61.921	52.6883	66.7556	55.4906	53.8354	64.1724	59.9594	63.8352	40.8023	44.8091		0.227943	46.7486
3.8091	27.6642	29.389	22.1426	22.0764	32.3705	36.0019	42.9062	35.351	47.3549	61.2854	51.028	52.0506	58.1981	63.7492	51.2498	51.2122	74.9303	67.7854	51.5743	47.4005	46.5025		0.235294	46.2963
3.9281	31.1776	28.5493	22.4364	19.3757	28.8021	34.6065	41.757	49.3299	45.748	59.6554	50.3059	63.3887	62.3415	61.9538	56.4311	53.7149	67.4696	63.1289	66.7833	65.7651	73.7787		0.242645	49.8333
4.0472	42.6073	28.9968	26.6009	27.5995	35.3359	41.5901	39.2657	49.8657	40.9579	64.3424	48.136	60.8863	74.3449	57.0975	42.5596	55.8615	82.1468	44.2147	61.698	47.2978	63.05		0.250002	49.2598
4.1662	43.0341	39.669	23.9927	25.4257	25.1022	35.8192	28.5811	29.8692	51.187	61.9965	47.2887	58.958	69.5261	64.2211	57.7738	56.1454	52.2626	56.58	53.9039	42.8411	64.38		0.257352	47.0742
4.2852	40.5947	35.9378	36.9551	20.1415	25.9236	41.027	29.1652	32.9281	41.2719	45.7391	44.0409	56.9377	44.5491	55.2293	52.1305	59.9258	69.2062	58.3263	75.9203	29.0182	56.3968		0.264703	45.3031
4.4043	30.1198	34.5801	25.0146	25.3328	26.8488	28.6977	29.4196	38.8237	45.5166	45.9981	42.6469	59.3541	61.2965	59.5025	48.3945	53.9606	59.9721	60.7803	81.7511	40.6408	66.1741		0.27206	45.9441
4.5233	34.7891	22.1338	22.584	29.7324	26.6152	33.0472	33.8653	27.9917	37.0526	52.7015	47.7316	62.3353	49.1466	64.9514	57.3681	50.676	56.8333	53.4565	66.2377	45.8584	61.376		0.279411	44.5945
4.6423	38.1724	19.6549	31.5842	26.2257	30.6098	29.1298	26.5265	34.9391	44.6647	51.7337	56.2046	65.5417	73.4661	71.2995	61.9196	61.2653	64.4252	52.2762	71.2017	48.1756	63.3115		0.286762	48.6823
4.7614	39.8591	35.7509	20.4384	32.0181	23.4492	31.5892	39.1886	32.3492	50.1139	56.9181	56.9292	59.0547	65.4818	69.8578	52.3226	40.7705	55.4097	44.1027	71.557	39.5783	76.7311		0.294119	47.3081
4.8804	29.1234	42.6088	26.191	23.682	27.4889	25.8672	34.8253	39.1586	51.63	40.8437	65.8987	59.1687	71.7448	65.5407	60.3863	47.3418	45.4677	34.5348	75.9541	61.5516	55.7299		0.30147	46.8923
4.9995	31.54	41.8641	27.9576	23.6165	31.5887	33.7363	24.3534	35.0278	37.5415	49.2647	43.0166	67.8127	65.8855	67.437	74.3134	64.4998	73.42	49.0864	85.8894	49.8717	55.5952		0.308827	49.2056
5.1185	39.3813	41.3818	33.7335	22.1141	25.0564	31.9506	34.0832	29.7948	61.6757	51.3383	46.5523	61.6178	68.582	72.9	50.9483	46.7593	59.3051	45.1235	80.6227	56.1784	60.4251		0.316177	48.5488
5.2375	27.7142	48.8139	27.4757	24.2724	23.4096	22.99	30.2301	27.1781	44.1449	45.2275	53.8321	59.9279	79.6664	81.5599	69.3158	52.9718	61.078	59.8241	77.534	56.5195	65.0966		0.323528	49.4658
5.3566	27.3679	37.0704	36.305	23.3352	29.6555	25.3016	34.0742	48.397	53.6271	65.6043	57.8222	66.1218	75.965	71.0565	55.7834	45.1494	62.1231	47.942	68.2475	60.7775	56.1059		0.330885	49.8968
5.4756	35.1033	34.9843	27.3887	20.1794	33.1782	32.8993	30.7982	36.1622	37.6378	44.706	52.9261	56.8353	58.3025	79.2577	73.6981	61.9342	75.8029	55.383	63.1302	68.0516	50.9192		0.338236	49.0132
5.5946	26.2215	26.0498	25.2065	26.7942	31.4481	32.3333	52.8349	34.1191	45.7311	54.2371	61.9404	45.5839	60.8351	65.0519	58.7325	57.003	86.3129	43.7129	60.5145	71.9709	49.908		0.345587	48.4067
5.7137	36.4628	27.1601	29.004	27.2799	34.3716	35.7518	33.1566	36.6524	46.6175	53.4991	47.2215	62.1055	53.8273	55.9889	68.6044	58.2838	64.6421	41.9647	48.7513	63.9293	41.8752		0.352944	46.0548
5.8327	37.1953	37.7857	29.0041	19.2413	29.4251	36.4562	46.4538	31.9764	54.7222	63.5948	41.8514	60.3886	48.033	69.9645	62.6228	49.8702	65.488	59.2289	69.3795	61.6463	48.688		0.360295	48.7151
5.9517	30.7458	24.2406	29.2047	20.8374	31.5525	37.5284	39.3479	34.5179	47.5325	56.1484	65.451	69.5082	49.102	67.7922	65.337	61.2223	54.5568	45.3072	58.9133	61.0902	52.7261		0.367645	47.7458
6.0708	35.2445	24.2634	36.9989	24.1521	31.7362	41.9347	27.259	29.5261	47.3538	61.0784	60.9374	58.2782	50.366	66.5198	58.6753	53.9879	53.9459	47.0081	43.9943	65.4764	49.8044		0.375002	46.121
6.1898	23.8623	28.6376	36.8402	25.06	31.5341	34.6427	38.6946	34.2046	60.6406	52.0414	58.2982	65.66	54.4828	69.9872	57.9667	47.4298	50.443	50.0722	42.8145	63.2577	49.1832		0.382353	46.4644
6.3088	14.977	41.4847	44.2794	14.0797	26.3203	31.8811	28.9712	37.6462	45.5676	53.9595	47.7833	63.0702	48.1716	52.2572	75.7568	50.0904	63.242	57.5596	47.4427	60.4463	50.9569		0.389704	45.5211
6.4279	16.6236	33.6409	25.8166	24.666	28.2162	35.4349	33.3812	30.454	61.2439	59.5567	65.447	48.9265	46.6182	46.3663	62.8407	47.3278	66.2048	54.3468	48.5685	54.0113	46.1622		0.397061	44.5645
6.5469	21.152	29.3098	20.9415	25.5928	28.2118	28.5865	34.6672	34.7154	54.3374	53.3699	58.4736	55.7581	29.9358	43.4684	65.8825	44.2702	77.3941	51.3982	46.6513	61.3509	46.3936		0.404412	43.422
6.6659	27.0969	34.7384	25.9557	27.9917	27.9663	26.7877	30.4582	36.7985	57.5043	50.6833	50.5123	37.2287	38.1523	45.8551	60.8742	49.2863	62.8575	55.691	39.3773	53.9494	57.0073		0.411763	42.7034
6.785	21.4377	26.6434	34.9481	25.3532	21.4706	35.0613	43.0232	40.5993	46.9376	57.1217	47.3079	41.8859	43.6969	49.2394	40.7811	50.9801	52.9658	48.6218	43.0428	68.717	51.5502		0.41912	42.4469
6.904	15.2196	29.05	30.0682	21.65	27.924	41.2034	40.0768	46.5573	35.1718	64.4901	47.7935	49.2712	42.1519	44.1631	65.4785	46.0019	65.2701	48.7018	37.3326	55.3667	44.8004		0.42647	42.7497
7.023	22.0803	33.0384	31.5246	20.6139	31.4122	40.5997	35.6826	39.9215	36.9371	64.8291	49.7125	45.1212	36.0595	51.1935	66.4443	49.1318	68.5712	39.9502	45.3639	49.5457	41.1724		0.433821	42.805
7.1421	19.3972	23.0407	27.5477	22.0765	22.3299	45.9086	34.5018	47.6765	45.2224	54.2075	51.0121	48.983	32.1085	71.6089	62.0076	54.7789	68.4224	40.0922	47.5929	59.0409	52.8237		0.441178	44.3038
7.2611	23.0358	11.7577	21.6132	22.7791	18.3832	46.9014	34.1501	39.1785	50.9837	56.4311	70.7384	47.9501	40.7195	58.2246	57.3764	49.9217	71.6395	34.3897	39.6192	48.3189	62.9948		0.448529	43.1956
7.3801	19.9529	20.0317	26.8119	15.8721	34.1563	36.7848	41.4502	41.0111	42.4305	54.6248	52.2159	42.921	40.7165	47.4514	47.5104	58.0416	64.652	45.4005	35.3274	62.751	48.9344		0.45588	41.8594
7.4992	18.6271	28.601	31.4587	21.5158	21.5499	35.2042	29.4049	35.9833	31.8187	60.7164	64.1975	35.2601	34.6879	44.1359	55.1572	49.7808	61.4048	47.9484	47.6757	61.6203	33.3265		0.463237	40.4798
7.6182	18.4472	20.5491	26.0706	22.0067	20.0106	48.375	41.6892	43.0818	37.9766	48.1581	61.7031	26.1312	35.1709	46.3339	71.4374	41.9927	49.6497	58.2902	53.8116	53.2539	44.0835		0.470588	41.344
7.7372	14.6802	10.86	22.6486	30.6983	24.1339	43.0787	27.4405	51.9661	33.7136	43.9123	63.5503	40.5542	39.4652	39.5326	65.1756	42.1912	66.533	53.5157	49.3484	46.7573	49.3543		0.477938	40.91
7.8563	13.0924	16.7288	21.1413	21.7484	24.1491	53.6659	37.0583	33.2105	37.7567	50.9174	72.1273	34.3004	31.6264	60.2842	70.8232	52.6922	50.4939	54.129	43.356	45.0294	50.6478		0.485295	41.6656
7.9753	12.8213	20.184	37.3797	21.0108	28.6066	40.1262	32.8302	48.2925	38.91	51.7059	76.2875	28.3805	37.32	60.5056	65.6709	45.8236	58.4421	39.5464	30.6236	53.5404	38.411		0.492646	41.258
8.0943	20.696	17.0261	24.7513	18.3179	28.1391	46.4112	34.9858	37.8157	30.7454	48.1846	58.2642	40.6438	29.5808	64.3732	57.8209	49.6856	56.1552	38.0563	38.5898	56.5088	42.6887		0.499997	39.9734
8.2134	24.4263	22.005	24.014	19.5351	32.2083	47.4919	37.9952	55.0989	33.1559	54.1941	57.365	34.3025	24.7144	52.9589	71.7168	47.8951	66.4873	56.2155	39.7659	51.3211	42.5256		0.507354	42.6378
8.3324	18.7111	13.5271	27.1964	21.6604	26.6159	43.2206	33.5754	50.4491	31.2015	51.6613	58.4025	32.1817	15.6578	48.0462	57.3274	49.4375	56.7916	64.0022	60.8249	51.8192	40.7281		0.514705	40.6209
8.4515	18.0097	14.822	20.9479	17.6397	27.7454	41.9132	37.2192	43.5202	32.4189	39.3005	52.6681	36.1983	19.1973	45.259	56.5465	46.356	71.0079	45.1139	52.1919	52.2035	40.2759		0.522062	38.5979
8.5705	11.9659	22.3384	29.641	21.2048	35.419	34.9925	39.0896	43.692	39.5327	41.126	49.1491	35.8224	35.6804	45.762	58.5602	40.0681	59.9834	45.7531	49.5819	59.3998	43.6446		0.529412	40.1146
8.6895	19.5566	17.0316	18.5641	27.3394	32.3965	45.4014	43.5004	39.1953	34.4001	59.2238	57.7739	24.7843	29.3047	51.3351	55.0412	38.7254	60.2097	49.6752	45.2421	50.1447	59.366		0.536763	40.8672
8.8086	14.4092	16.3807	16.1707	9.9668	24.4806	31.0949	47.2657	66.9586	25.6239	43.4535	69.8288	37.302	31.5177	50.9223	66.6688	45.654	49.0767	50.9145	45.2196	48.6633	45.3546		0.54412	39.8537
8.9276	11.6063	22.6591	21.7631	27.7829	28.8485	28.7005	42.7438	48.441	26.1079	46.3803	63.9231	29.7128	22.4945	43.4984	74.0084	39.9207	60.854	42.1433	45.9333	60.8682	48.8449		0.551471	39.8683
9.0466	8.462	28.3816	24.2253	20.654	17.4456	41.8938	38.955	41.345	22.5347	38.271	63.2597	29.0351	27.5698	34.0766	47.3932	42.6954	56.7442	53.01	40.0779	56.1457	59.0354		0.558822	37.6767
9.1657	15.2694	18.0293	24.3187	16.8689	31.2333	48.2468	45.9764	50.1921	32.7895	51.2342	60.0887	35.5479	22.0128	42.3196	48.7657	35.8099	57.3982	42.6076	44.4251	66.7176	47.7852		0.566179	39.8875
9.2847	18.0036	19.1786	32.1656	17.2274	26.309	52.5876	45.2035	59.866	34.5528	48.5304	52.7373	46.4279	33.5128	39.253	48.0004	46.6716	58.4773	57.3701	46.1011	73.9393	55.0569		0.57353	43.3892
9.4037	14.8818	14.9805	17.5413	28.5107	36.1956	42.7338	35.8477	42.2058	26.918	54.0959	61.5249	47.234	39.5689	40.5807	43.1424	35.7306	50.802	44.0456	39.304	75.0427	53.0356		0.58088	40.1868
9.5228	15.8061	17.185	23.2888	26.5263	29.1657	41.3806	52.0471	46.0803	31.738	42.7982	50.6483	31.9349	29.3866	39.8749	48.4886	50.4692	55.4502	47.299	41.3441	58.4026	56.6221		0.588237	39.8065
9.6418	12.3274	14.0939	31.1474	27.6874	31.9843	45.6841	39.3571	47.3826	34.4393	45.2041	62.4659	35.9903	30.3661	37.6063	41.8522	58.4818	41.9586	46.2044	47.7582	57.0173	51.8047		0.595588	40.0387
9.7608	10.9902	16.8098	31.9736	11.8366	42.3761	53.5354	42.7485	39.5915	39.6912	42.6607	56.3175	33.5788	27.5502	35.9779	38.7012	63.3516	50.3773	59.749	45.834	52.5713	48.9136		0.602939	40.2446
9.8799	18.638	18.942	25.682	20.3263	30.1852	37.7646	45.7107	37.6875	26.0285	38.105	45.0458	34.3172	26.717	41.3756	46.8988	68.7411	46.8308	39.7191	51.6929	58.079	52.9587		0.610296	38.6403
9.9989	13.3485	12.3129	27.4938	17.8767	33.6442	44.4977	39.6687	47.3562	31.1287	41.2222	60.6476	47.5986	35.5229	42.3016	39.9631	58.3863	51.3419	43.6016	45.9301	59.5141	46.1861		0.617647	39.9783
10.1179	10.8681	11.5	24.5373	21.0413	33.0537	44.9986	30.1251	40.4994	37.3315	42.8366	46.3445	35.9729	23.6027	42.5607	42.0725	55.3852	59.9156	51.8815	55.497	44.6453	46.8896		0.624998	38.1695
10.237	11.7304	16.9105	18.9864	34.0803	38.713	40.0595	41.7041	40.3462	26.2462	43.9655	49.0215	40.0421	28.0208	43.1415	41.1084	46.6945	43.7903	51.9493	38.8482	66.9698	47.7103		0.632355	38.5733
10.356	8.6189	22.4414	33.3246	23.6812	38.3562	43.2977	41.6011	37.7826	32.5978	51.1211	53.3151	23.9632	20.371	47.3671	42.1117	52.883	43.0333	61.062	43.1601	54.6728	46.818		0.639705	39.1229
10.475	15.0401	23.3037	27.8754	18.3487	23.6891	37.1669	29.6295	36.7846	32.2218	47.6145	50.842	25.3718	30.8666	47.8909	34.825	52.4302	52.2882	50.147	36.8422	49.496	59.4479		0.647056	37.2439
10.5941	9.0225	19.4864	27.1386	18.339	28.3958	34.3372	37.3205	32.3419	31.2594	52.3038	51.4325	21.8975	30.1988	38.8561	34.904	49.3476	46.3618	45.6472	53.4645	55.2638	58.4091		0.654413	36.9394
10.7131	13.8231	19.3948	20.0402	28.6124	27.3986	42.1326	33.1501	33.751	29.7803	50.9604	56.9974	32.6651	36.7172	38.0849	28.1998	50.0877	51.8094	44.057	55.8989	49.2913	49.4665		0.661764	37.7295
10.8321	11.2379	15.2367	14.4603	27.1304	27.6044	34.5688	39.2601	38.3536	34.3422	36.9929	44.3452	38.6562	49.0283	44.0237	40.3347	42.9612	51.3472	42.4825	55.9833	46.0889	60.1725		0.669115	37.8386
10.9512	10.3159	9.9743	21.7118	18.8522	35.7009	35.878	52.4121	48.8202	29.1642	41.8175	49.0797	36.0577	32.1192	52.3101	40.3188	45.7377	39.5988	46.1599	68.4103	47.5923	50.684		0.676472	38.7007
11.0702	13.1643	6.7705	23.7215	26.6178	33.3682	38.2926	46.8928	38.7762	34.8283	42.7717	50.2187	31.21	35.0822	43.5845	42.0667	50.7806	54.1696	36.3601	51.9631	44.1585	40.8638		0.683823	37.4125
11.1892	16.5629	19.1153	19.9735	23.8988	42.3474	36.7091	53.5164	48.7809	28.6124	31.9171	53.3257	36.4016	36.2705	37.7745	38.9288	45.6568	56.872	40.6744	53.621	47.6036	48.0037		0.691173	38.8841
11.3083	16.9465	14.6082	28.1144	36.7974	37.394	34.7768	35.8464	49.967	38.6796	26.7435	46.0493	37.0084	22.8323	47.1422	40.1559	40.5621	55.2287	53.4141	48.3686	42.6551	34.2905		0.69853	37.5039
11.4273	15.8988	9.9617	42.3161	31.2279	40.7577	30.1349	39.0262	28.6205	47.4917	24.5619	56.7297	29.762	28.8405	56.1873	44.2183	50.9233	54.9356	58.3131	49.784	54.7722	36.8229		0.705881	39.5851
11.5463	15.3263	14.3581	22.0204	13.1104	36.328	37.0321	46.9965	52.789	37.6238	29.1833	53.201	44.3733	21.4354	53.8267	44.6241	30.7663	58.0694	46.5534	46.284	42.933	37.13		0.713232	37.3316
11.6654	17.7037	11.8355	27.2633	24.8119	45.2316	42.3784	47.2829	35.297	40.5002	32.8568	40.3315	30.617	35.4851	45.7704	40.4209	36.7308	55.2962	49.5632	47.4137	33.0569	55.8806		0.720589	37.8918
11.7844	14.2949	12.9937	21.0297	25.4286	31.7217	40.3107	40.9831	28.6441	51.2097	44.9158	44.6808	42.0649	25.912	49.484	55.3797	39.4404	50.1919	64.405	53.4988	44.8219	52.2241		0.72794	39.6969
11.9035	20.2072	9.1429	21.404	23.2258	30.8352	41.5485	44.761	39.6244	58.5623	46.053	45.9161	49.2938	32.3746	63.4844	47.2808	36.3862	51.8143	52.5344	49.8144	42.449	43.4398		0.735297	40.4834
12.0225	13.8555	10.0398	21.5586	24.187	40.1128	44.3957	48.2087	40.6511	39.5352	51.8379	44.2681	48.0698	28.3188	69.6467	42.6514	44.3109	44.9632	43.9049	64.8579	46.0457	34.8003		0.742648	40.2962
12.1415	15.8081	18.8465	27.0495	35.601	34.8358	25.9834	47.92	35.6896	45.0744	56.6122	50.8861	48.1503	16.8585	54.4453	37.7974	34.9543	55.3986	55.4982	53.883	47.9868	33.87		0.749998	39.6738
12.2606	13.6547	16.1509	27.8704	31.7803	41.5074	46.3766	53.7655	35.536	45.6681	53.6773	47.2809	32.2234	30.7441	45.8344	44.9366	38.0448	63.2187	47.408	57.2153	56.5409	36.683		0.757355	41.2437
12.3796	8.8663	16.9101	21.8017	20.5371	51.9739	49.3645	38.1129	31.9074	53.7733	36.2878	39.6784	45.3936	40.3969	49.4082	53.0497	35.7807	55.0062	42.7287	55.1685	47.5939	30.286		0.764706	39.2393
12.4986	7.2078	21.1426	23.7011	24.7549	44.0941	38.6305	36.0043	32.2634	52.0051	38.9843	31.9755	47.2843	36.281	49.7009	49.931	40.8678	48.7151	35.0566	55.9074	36.7586	36.7782		0.772057	37.5259
12.6177	11.1497	14.3402	19.5025	25.1237	48.2147	47.1571	44.9058	38.7442	39.3339	44.409	37.7106	47.7858	37.1685	53.5097	40.3329	36.3893	49.1712	48.0793	48.678	33.4771	20.8207		0.779414	37.4288
12.7367	13.3043	17.6505	22.4039	30.579	34.9852	37.3778	41.2681	44.8026	37.2388	45.2897	43.042	45.4833	54.8743	45.4804	44.8667	44.6312	41.5159	43.3723	42.7501	30.9147	24.5694		0.786765	37.4476
12.8557	13.0944	16.6638	25.7253	33.9654	34.9374	43.6714	35.8413	39.8126	49.7871	36.1562	44.7677	48.083	52.4715	46.4919	42.3485	44.5107	49.327	47.4615	48.9921	24.788	32.4034		0.794116	38.6333
12.9748	18.9154	19.6933	23.9143	25.5895	50.6495	49.0429	35.9121	38.3	44.2491	58.9042	60.072	61.3696	44.0216	48.7182	55.3159	46.3381	50.1178	42.752	51.8665	45.7745	11.8193		0.801473	42.0636
13.0938	15.0602	20.8689	24.5042	36.7545	51.9045	43.5062	35.3585	35.0171	31.6591	52.5235	50.7285	55.0945	52.0134	63.2862	61.5692	47.5819	60.8637	53.0461	42.1787	23.576	17.0039		0.808823	41.6238
13.2128	14.59	15.6255	26.6751	38.8973	43.3993	36.888	38.1715	34.9958	42.9362	51.6679	63.1656	63.9015	55.9466	85.1057	62.1383	50.5882	43.7818	54.2201	53.4596	30.5765	8.1515		0.816174	43.5658
13.3319	13.397	19.5909	25.7818	38.147	43.6402	40.192	34.352	36.8485	37.0104	56.077	58.126	62.5371	67.0937	72.5703	52.0336	43.4067	49.2011	38.3546	42.2481	24.6301	10.2984		0.823531	41.216
13.4509	15.1828	24.589	41.5207	37.4189	36.8394	32.2428	36.7281	41.9344	41.4199	34.3849	51.426	62.3315	63.9456	67.8454	55.29	42.5642	34.2139	31.251	32.5667	21.2672	10.4884		0.830882	38.831
13.5699	12.807	19.0843	34.2587	36.0128	40.8739	41.9165	32.3433	41.5681	33.1161	31.3995	48.8132	52.158	62.5827	63.7307	47.5117	45.1092	24.7299	33.5488	32.4884	17.9877	9.6305		0.838233	36.27
13.689	12.8325	22.6276	36.929	35.4958	48.3569	30.5128	30.9929	26.6652	28.5386	41.716	52.2436	43.724	56.191	77.879	43.7302	38.0599	40.7865	39.7943	20.7692	20.0521	9.9117		0.84559	36.0861
13.808	14.7537	24.6235	31.6	37.9803	41.6592	40.1877	32.9577	35.0876	24.8035	46.3146	36.4125	42.5304	64.334	59.3058	38.2131	48.7978	35.2091	44.3581	31.3773	14.5084	13.4565		0.852941	36.1177
13.927	19.4236	19.0354	32.6655	30.384	43.7098	36.5586	33.1682	38.7819	38.1322	46.6401	49.4611	52.9121	66.4769	53.2623	28.9573	45.6198	36.4955	24.1155	28.6894	13.6674	5.5223		0.860291	35.4133
14.0461	14.749	18.5332	34.3232	30.0257	47.6527	31.3743	37.8515	39.175	47.9905	36.2865	34.0671	59.7194	66.8388	49.408	37.8753	27.1361	21.1614	33.9665	20.9779	13.5351	7.3138		0.867648	33.8077
14.1651	15.5723	29.9644	33.8102	38.6757	42.0262	21.6196	30.0229	30.7616	46.9737	50.8686	33.9267	53.7347	59.8575	44.9875	31.1066	34.7115	33.8703	12.5756	22.362	14.0824	8.4599		0.874999	32.8557
14.2841	17.227	28.8525	27.6757	33.1291	39.9488	32.5052	37.6157	34.9872	34.4755	39.2907	41.2018	47.4369	53.3868	44.6129	35.7928	30.8433	33.4366	17.759	15.9073	13.7973	14.3162		0.88235	32.1047
14.4032	25.3956	24.002	20.4431	31.5938	39.5456	40.7763	27.854	32.8146	42.8167	36.2026	55.2324	38.6194	62.7168	42.0208	43.3194	30.7297	17.1544	26.4414	19.639	18.0774	9.6757		0.889707	32.6224
14.5222	21.2982	20.4354	26.785	36.4695	48.9241	37.0369	27.9269	21.5948	35.6118	28.6212	38.909	51.4933	57.0535	44.9589	23.2492	27.9646	17.8403	18.4478	14.1467	13.6296	12.7803		0.897058	29.7703
14.6412	24.0886	24.2774	29.3248	35.8312	41.3143	22.9888	27.6115	25.0727	44.3068	38.7235	43.8673	40.2276	45.066	39.4626	29.7806	27.4769	19.3079	16.1047	5.3326	6.8116	9.1788		0.904409	28.3884
14.7603	19.5778	16.9968	25.4593	29.5907	39.9059	29.5116	28.265	33.4659	38.2684	28.5987	48.1527	38.7112	48.7998	49.2815	37.51	16.8635	17.8897	14.9544	9.9977	12.4628	12.4368		0.911766	28.4143
14.8793	13.4589	20.6034	30.6668	28.6809	38.922	24.6973	21.5311	28.9447	30.6974	31.0945	37.4838	35.953	52.9367	41.0825	33.6	18.6415	17.0029	9.5028	8.9636	7.972	9.0768		0.919116	25.7863
14.9984	22.2405	19.1199	17.6854	35.2636	35.628	29.8668	18.6261	31.4909	34.7155	33.4333	54.5035	40.8734	48.9195	37.9682	19.899	12.7861	12.1246	9.1358	9.246	3.4681	7.6019		0.926473	25.457
15.1174	25.941	19.1772	26.2178	27.1302	38.0628	23.1073	16.8975	14.4927	26.4098	35.2915	35.6464	41.3125	31.5166	34.1004	22.5587	17.8048	13.1603	10.2731	8.8839	5.4991	12.3047		0.933824	23.1328
15.2364	30.0038	24.9177	24.7173	25.8489	21.0606	16.9458	16.0091	24.9989	33.2796	21.6483	41.1722	27.7482	41.2995	22.8226	22.8909	15.1271	14.993	16.2579	9.3628	7.774	7.941		0.941175	22.2295
15.3555	16.3459	19.447	29.5058	20.4757	25.4971	13.5107	12.0439	18.709	29.0077	23.259	39.1843	31.5155	38.0372	32.5887	13.4448	11.5123	12.4851	12.069	6.6997	9.588	5.5118		0.948532	20.0209
15.4745	17.5333	23.3291	26.5866	17.084	16.293	11.1413	11.8758	11.7759	24.5354	21.8024	41.9658	47.6262	35.5342	27.6927	12.4731	14.7614	15.4767	9.8401	4.3816	17.6756	3.9927		0.955883	19.6846
15.5935	13.7719	23.0623	21.7706	18.4714	16.9017	9.9479	7.8072	12.7671	38.7717	31.5247	35.0155	47.939	32.7246	29.6294	13.1138	12.4968	6.2694	9.006	5.6504	6.198	6.6927		0.963234	19.0253
15.7126	22.336	26.3437	19.1583	25.9381	14.3036	6.42	4.8888	10.329	32.0082	32.5913	23.7569	44.089	37.8172	19.0688	11.4974	6.8611	9.8817	9.1549	5.4772	7.5171	5.9103		0.970591	17.8737
15.8316	15.8502	16.788	14.0033	10.8482	16.0795	4.0234	7.0212	17.1701	24.9988	46.6477	26.3598	29.4507	33.062	14.632	9.5806	7.0634	11.0125	8.689	3.0304	5.4313	6.1398		0.977941	15.6134
15.9506	17.3874	11.3573	12.8126	13.8712	10.2633	4.7682	11.1841	12.5382	27.2572	34.6224	21.0126	28.0779	38.9867	23.3933	11.0419	6.2223	5.3271	9.5952	6.6603	7.993	6.2908		0.985292	15.2697
16.0697	23.3431	15.5778	13.5704	8.4795	6.3435	6.2996	13.9967	16.646	21.0193	29.1293	20.313	34.0253	32.496	15.4469	8.6706	5.4149	10.4985	8.6557	2.0706	8.66	13.6959		0.992649	14.9692
16.1887	16.8301	11.273	12.0309	9.3027	10.5296	6.306	6.5557	14.3512	14.3342	36.6522	15.2621	31.3607	26.3336	11.0059	5.9689	9.5985	7.8238	3.2062	6.8065	7.7346	6.7246		1	12.8567

## Sheet: Image4
X0	Y0	Y1	Y2	Y3	Y4	Y5	Y6	Y7	Y8	Y9	Y10	Y11	Y12	Y13	Y14	Y15	Y16	Y17	Y18	Y19	Y20		Ap-basal	Avg intensity
0	23.2052	27.1212	31.3674	39.5015	19.665	23.863	43.5621	30.8418	23.5603	21.3079	24.8871	26.5005	19.8876	33.1065	13.7333	25.3033	29.2776	29.6858	30.336	20.6638	26.6974		0	26.8607
0.119	21.7454	30.4069	29.0655	41.6126	23.2794	26.6372	41.789	25.5732	27.7946	19.4278	17.0947	20.2939	17.2067	22.795	16.8897	30.1413	27.3016	20.2739	27.9729	18.3234	25.1258		0.00999706	25.2738
0.2381	27.3962	20.3564	35.2821	31.5207	14.7956	30.1957	33.5797	29.0117	24.5194	30.2814	19.7837	10.9978	22.1372	21.621	19.4386	30.5623	31.0513	28.2232	31.569	15.7956	21.2855		0.0200025	25.2097
0.3571	30.334	29.9214	42.5867	40.7499	24.9506	36.068	35.584	37.3981	25.3136	23.5321	30.6528	12.4401	23.365	23.9448	24.2718	28.1409	34.9173	29.902	22.7896	28.0235	22.5633		0.0299996	28.9262
0.4761	32.2474	39.7123	49.5055	29.6516	33.8518	30.0432	40.7448	36.368	34.9429	23.8488	23.3802	25.0498	23.5494	28.317	38.866	24.7224	32.7005	30.6958	28.4487	19.8901	29.4632		0.0399966	31.2381
0.5952	38.0532	44.8876	42.8864	32.401	37.3179	29.5009	36.1472	31.2412	40.3157	33.9421	31.6281	32.9488	26.1512	22.9157	36.6281	32.3679	30.7926	26.9343	25.3325	32.9448	27.5534		0.0500021	32.9948
0.7142	35.5725	38.8048	41.0623	30.6553	41.8635	37.5833	32.2311	33.1266	41.9674	24.6684	33.6919	29.3147	30.4599	42.362	33.7808	27.6748	26.1883	30.7791	29.118	32.828	30.2735		0.0599992	33.5241
0.8332	31.4118	30.5459	34.7574	38.2747	38.9449	29.0536	28.2953	36.7497	38.4458	29.9711	29.0602	28.1867	18.5662	40.2501	42.4071	25.9969	26.3977	32.2921	22.7644	35.6185	31.5403		0.0699962	31.8824
0.9523	36.6795	32.1176	34.8459	44.5122	44.5208	34.8576	26.3468	36.3779	39.2378	38.8223	33.3162	23.8849	22.0512	33.7031	34.4755	27.9029	35.1096	32.3313	23.0192	35.1875	21.8105		0.0800017	32.91
1.0713	38.3115	37.6941	47.2862	46.6602	35.2944	34.5022	22.2597	29.6858	27.8947	33.5008	28.183	40.0442	30.299	27.5893	37.426	23.5281	40.0462	42.0642	25.5517	34.7182	33.8922		0.0899987	34.1158
1.1903	39.4034	29.5118	44.3871	44.5938	40.3959	39.286	30.7812	37.231	29.2949	24.9097	30.2731	39.128	25.4108	24.4455	40.3268	33.9011	28.1273	35.8287	30.9865	29.4285	36.0115		0.0999958	33.9839
1.3094	34.147	42.1463	44.006	54.5218	40.7703	40.732	30.3547	29.6264	39.1698	35.8893	29.1448	42.8252	21.8824	31.4354	42.8195	26.5603	21.9925	37.5158	32.3581	23.7113	31.8019		0.110001	34.9243
1.4284	32.9737	40.1579	47.1303	60.0347	38.792	33.3112	26.6495	28.7611	46.0593	34.2637	29.6983	42.2428	32.0635	30.927	40.2295	39.5011	34.6425	32.69	29.6574	37.3081	27.7161		0.119998	36.4195
1.5474	27.3885	41.5745	50.7003	58.643	42.5398	35.1809	33.6477	40.0514	50.0761	40.42	28.7163	32.5221	38.1692	39.3381	37.7858	42.5513	35.2731	39.3613	26.4593	26.0373	32.4497		0.129995	38.0422
1.6665	30.4193	33.032	47.4116	52.6534	44.6896	43.0167	37.0252	45.9043	44.4036	29.0606	37.195	34.8712	36.5738	42.7954	37.4263	44.7328	37.2187	52.6178	34.65	34.8375	35.28		0.140001	39.8007
1.7855	30.7518	40.5052	42.4347	43.394	43.5332	39.212	46.6984	44.5111	31.1294	21.1863	32.5181	40.2694	40.4346	44.1497	32.4898	39.2656	31.7342	41.3524	30.7313	28.765	27.4441		0.149998	36.7862
1.9046	28.1654	39.2083	45.3483	48.9429	53.5295	41.0921	35.5699	33.2613	43.6593	36.3034	22.9681	26.0136	36.5215	43.5616	38.3188	33.7405	29.7089	34.5069	35.1007	34.627	31.4635		0.160003	36.7434
2.0236	35.9333	34.8217	52.5246	54.4647	42.5311	49.9059	33.7373	41.2138	36.3868	37.8122	32.7265	36.4592	35.5686	42.9082	32.3729	26.8947	24.5804	48.5139	42.3538	28.9492	37.0279		0.17	38.4613
2.1426	38.3442	46.0799	48.7989	45.7697	33.8095	44.7471	34.5801	50.6049	45.9105	34.8019	41.0056	38.0851	38.8808	47.689	37.7755	29.4853	27.0527	32.5929	39.0382	35.4082	36.8266		0.179997	39.3946
2.2617	46.072	51.9469	45.8831	48.7947	37.2693	35.842	41.9399	43.5547	38.1546	27.815	36.4508	42.3053	37.4058	40.5019	35.5969	31.8324	30.7349	21.2948	30.1951	34.8589	27.4145		0.190003	37.4221
2.3807	48.3959	40.5413	39.6061	46.5895	51.3141	44.2263	29.7143	38.622	33.0174	28.3525	28.9659	40.6401	37.5268	34.2046	30.9594	29.1509	33.8609	24.9139	44.1359	32.7153	31.6046		0.2	36.6218
2.4997	35.7743	45.105	53.9858	66.5631	49.084	50.9855	29.7752	39.4722	40.0754	30.5541	28.8279	36.5854	37.671	41.0104	33.518	35.7763	35.2127	34.1874	44.7083	28.1116	36.8652		0.209997	39.7071
2.6188	38.1468	42.0503	52.2524	62.1216	46.7504	54.5515	25.8507	42.9645	41.9384	36.1688	36.2618	38.4148	35.011	34.2834	38.0238	30.1477	30.1423	34.7583	39.6258	30.2663	38.2649		0.220003	39.4284
2.7378	46.2564	37.1109	53.8361	53.0767	45.7191	46.9324	35.4069	42.18	36.7104	48.9134	33.6463	35.5744	40.5615	33.2063	42.9633	32.5711	24.5078	38.6721	40.592	32.5165	37.001		0.23	39.9026
2.8568	38.6426	41.9167	52.322	55.2705	33.7195	45.7797	41.9154	45.4709	39.8912	38.0985	40.8462	48.2454	43.0575	48.1981	40.2904	39.6328	30.2433	37.8294	37.1314	21.4193	52.07		0.239997	41.5234
2.9759	42.996	38.9306	45.2172	48.8728	41.2606	38.6838	37.1959	49.014	41.8064	37.4762	55.8959	40.5606	43.7899	49.2562	43.6767	38.1464	33.8515	49.0132	39.7855	38.7561	40.7804		0.250002	42.6174
3.0949	37.2013	37.7184	42.2808	54.9557	43.8716	44.6053	46.4494	51.7306	48.518	46.4775	51.9931	50.2787	44.3848	37.634	49.8103	34.3741	45.766	42.5454	33.7389	40.9291	38.3057		0.259999	43.9795
3.2139	33.1088	46.8445	36.2032	58.1392	39.5905	52.8552	40.3823	45.5317	44.5366	42.2036	39.1809	52.3005	40.4878	40.9272	43.6999	32.3297	35.9278	54.252	37.0433	49.5374	34.2957		0.269996	42.8275
3.333	48.464	43.6972	42.2747	54.7754	42.7679	53.3881	38.8617	38.0312	47.9858	44.4382	37.7608	39.32	34.2887	43.5822	35.0617	35.0713	29.9989	42.605	44.2528	47.2493	42.8769		0.280002	42.2263
3.452	48.8254	38.6196	50.7423	53.265	41.8768	49.1279	37.0206	41.526	53.8594	42.7297	37.1651	45.4833	34.3611	47.4007	35.1158	25.6091	35.5396	46.6817	44.1869	53.0249	35.1641		0.289999	42.7298
3.571	60.6769	40.984	52.2558	51.0854	43.3497	46.5206	42.5682	34.2938	45.6226	34.8631	51.9085	37.873	42.7174	52.0857	34.792	35.08	27.0477	53.0725	54.7993	44.7044	34.045		0.299996	43.826
3.6901	51.5603	42.2114	47.2588	48.2091	40.7416	50.6311	32.3293	46.4219	57.2256	43.8966	34.9059	23.279	38.7751	45.6765	41.2946	31.4161	40.5777	39.7588	53.8621	40.0465	39.8433		0.310001	42.3772
3.8091	51.844	32.2987	52.4725	40.9608	32.8054	53.9258	34.1746	40.9868	48.9752	42.2017	36.0179	38.7304	40.9788	51.0429	33.4507	41.5047	33.068	43.4971	53.8243	47.2136	39.106		0.319998	42.3371
3.9281	50.6372	36.8536	45.4965	46.4212	40.1972	44.6398	32.1223	38.5608	54.6301	40.3518	47.1822	44.8512	45.3097	61.3777	42.8612	40.3178	31.454	51.1838	50.4038	32.0305	41.0773		0.329995	43.7124
4.0472	44.111	34.1975	28.228	39.6447	45.0961	50.7228	32.3147	36.0205	40.3807	44.6156	46.5542	35.7343	49.5882	42.5864	42.0789	33.739	51.1805	46.5334	56.6084	35.3428	44.283		0.340001	41.8838
4.1662	56.6523	23.8022	39.8304	54.7359	45.4773	43.3507	36.1291	37.0704	34.8192	54.9363	57.1401	39.9033	41.9764	53.2463	38.5107	32.2844	41.6794	52.1803	46.9673	33.3823	46.5328		0.349998	43.3622
4.2852	54.4132	31.376	48.7001	65.8813	51.7947	39.1684	28.5684	46.5184	42.443	42.5174	49.1802	48.824	43.7251	46.1276	34.7092	36.2997	43.2563	58.8733	39.9367	36.4558	48.9665		0.359995	44.6541
4.4043	56.465	24.7061	38.2718	66.6384	36.4906	53.6601	30.84	38.7025	34.9669	36.6228	47.4822	45.612	49.8684	42.1037	47.8874	37.8819	38.4812	36.3048	54.6646	30.2205	49.8828		0.37	42.7502
4.5233	50.7076	38.0195	50.0728	65.3583	47.2479	55.0595	31.2224	43.6873	37.5654	40.8051	48.9488	45.0851	51.7868	43.0146	49.4539	36.4172	35.6664	38.5651	42.9936	32.1429	50.3075		0.379997	44.4823
4.6423	57.648	31.991	30.8238	62.5062	50.5925	54.2602	27.2936	38.3619	49.7315	54.3067	49.1502	45.1469	49.5924	36.5328	50.5716	36.7413	38.3787	38.9342	43.434	29.7123	48.9984		0.389995	44.0337
4.7614	63.6589	38.3604	32.7111	53.8693	42.2885	48.653	28.9114	34.8268	50.718	49.6741	49.2795	42.2137	39.4483	58.0998	49.8993	38.3577	27.4056	49.7915	37.4027	27.0793	61.941		0.4	44.0281
4.8804	55.6393	40.3517	39.4815	43.6575	39.9548	71.554	16.6149	40.0344	38.6809	57.6372	48.8296	40.3323	43.2543	42.6129	38.5188	23.77	22.6217	51.0179	38.9773	25.3576	52.5271		0.409997	41.4965
4.9995	66.2717	38.6899	35.8938	51.8427	48.7956	47.7514	18.2646	41.0357	37.0518	59.5156	43.5482	39.8375	36.7072	51.735	43.1239	35.028	30.5707	43.0755	44.3936	32.4428	45.0054		0.420003	42.4086
5.1185	61.7427	36.8386	36.2952	55.8375	45.8975	44.8248	21.7943	39.9875	46.5828	50.6919	41.4686	38.0963	45.5728	52.1134	45.2974	36.5246	33.3112	47.3729	42.909	29.6975	48.5765		0.43	42.9254
5.2375	61.9499	34.2101	40.9481	64.9295	32.9233	43.6251	25.8325	35.6779	47.4978	64.7193	51.7852	38.3957	41.663	35.7382	42.9203	45.4917	32.2266	48.1829	36.9033	25.4985	40.5582		0.439997	42.4608
5.3566	52.451	37.2317	35.5273	66.1977	45.742	43.394	19.3138	37.695	38.8954	66.6189	39.5721	40.1747	43.8953	43.0533	44.7327	41.1758	45.6931	56.39	43.7939	16.6916	41.5174		0.450002	42.8456
5.4756	62.5869	34.5469	42.3747	55.1614	55.4607	42.0442	17.384	39.6349	47.0301	59.1257	33.7774	33.3125	45.357	43.4333	51.0803	37.7792	34.6186	55.79	41.3567	21.1564	42.8277		0.459999	42.659
5.5946	72.6317	37.322	45.939	63.5045	54.3229	39.6719	23.15	37.8591	48.8095	65.8636	31.8979	36.0938	47.4873	62.4105	45.0905	36.1646	37.0935	59.1374	46.808	20.3579	39.067		0.469996	45.2706
5.7137	66.9977	41.1674	56.3713	50.5671	40.2194	49.5072	18.7335	29.1556	47.5189	66.6982	37.4876	36.4201	44.308	43.1837	51.9256	33.5985	33.976	48.993	52.0674	21.8815	33.7638		0.480002	43.0734
5.8327	65.7644	37.9447	42.4002	59.8471	41.8411	46.7123	18.2861	37.5982	47.2171	63.565	54.374	40.3971	51.5056	46.3817	56.6083	35.1352	33.507	43.8849	48.1648	12.1448	24.8471		0.489999	43.2441
5.9517	67.6071	37.2943	43.0418	59.9796	48.7491	38.0537	21.5515	42.0075	43.5051	63.1157	41.2186	42.482	49.5072	44.1071	57.901	38.1762	31.818	53.6866	52.2236	20.7892	20.6403		0.499996	43.6883
6.0708	67.4634	48.5553	45.4268	55.7985	55.8006	45.5434	19.9957	35.2973	45.8406	69.4252	37.5862	31.4815	50.9771	34.6355	52.8328	33.5365	35.8483	43.4221	51.1206	19.2957	20.3781		0.510001	42.8696
6.1898	65.2154	36.5664	39.8939	56.0515	55.6746	48.5122	15.9205	30.3162	59.3341	68.0319	44.8502	33.4854	56.6438	34.9615	60.2815	41.1936	42.6123	41.644	47.0995	24.5525	19.4074		0.519998	43.9166
6.3088	62.2796	44.0697	40.3829	64.7361	55.9135	43.893	19.7291	38.3014	66.1738	60.7009	47.147	44.0218	48.0971	36.3257	52.0075	40.6835	31.8053	49.3832	40.6637	21.16	19.9618		0.529995	44.1636
6.4279	61.5386	38.2401	44.0485	54.3918	41.1763	44.9347	16.0839	39.5291	48.9766	63.8523	42.2782	39.9367	52.6223	32.6068	46.2762	49.4883	45.7725	55.21	43.4627	14.2426	20.4604		0.540001	42.6252
6.5469	63.2182	38.1115	37.874	50.5486	44.2905	42.2703	23.6057	29.0527	54.8971	56.5632	44.9195	38.8828	43.8554	42.2705	44.7327	57.4782	44.4833	49.1791	49.4124	22.288	24.1783		0.549998	42.9577
6.6659	54.8959	44.4977	40.2236	51.1173	45.6041	48.9743	20.888	30.5142	48.5586	53.6906	32.2779	37.0988	35.4447	38.8019	50.6688	52.4108	51.7664	48.9746	53.5062	20.6888	26.3534		0.559995	42.236
6.785	50.1827	44.8632	55.1386	43.6873	54.2506	49.6306	22.0784	34.2395	57.3953	50.4491	46.7328	31.2334	48.5887	42.4041	57.6854	51.7495	47.7322	48.0701	51.2315	26.0593	34.3411		0.57	45.1306
6.904	45.5962	41.6302	54.8776	42.0898	70.7261	40.63	26.6813	43.5494	49.3185	51.1526	49.2551	45.3889	38.0728	57.648	45.2062	53.2398	46.4614	51.8023	48.2627	20.577	20.1906		0.579997	44.8741
7.023	49.3406	28.7157	43.8184	51.3499	61.3014	40.2385	24.8611	33.8168	42.8598	48.4339	35.4702	33.3021	57.561	52.2184	39.9593	66.1811	42.9375	52.1612	53.5768	18.7665	21.3245		0.589995	42.7712
7.1421	52.1034	34.1579	50.6156	45.7165	45.9984	37.682	23.7204	37.3384	38.7316	43.1171	30.9324	40.2104	47.4318	48.7735	37.9429	51.7467	44.0724	52.5863	41.7459	19.7707	16.4894		0.6	40.0421
7.2611	53.6865	31.162	56.6003	33.9631	40.1118	38.9612	19.0676	33.9207	44.6176	39.6344	45.6775	50.2181	32.9142	46.9314	33.271	39.6905	41.2274	51.4774	55.8969	17.9103	25.5387		0.609997	39.6418
7.3801	53.7873	41.2374	36.311	37.3085	50.8195	49.7609	28.3646	21.0672	45.7538	39.8177	39.3988	40.5942	40.9077	42.7163	42.1559	45.2999	43.4833	46.5976	60.7269	22.4419	27.4006		0.619994	40.7596
7.4992	52.8279	38.5402	49.0047	47.8662	34.5115	52.1368	24.3519	25.0247	46.5061	53.1642	43.3939	36.6973	38.1493	43.1458	51.3464	37.5075	41.6756	45.5562	65.4651	17.9382	20.5714		0.63	41.2086
7.6182	55.7855	32.1799	49.5407	40.2757	36.5947	41.8341	19.9715	32.5714	34.8852	47.1085	36.9511	46.5543	38.7411	45.4009	40.9183	42.5977	41.6431	34.9383	61.854	15.3922	23.8291		0.639997	39.027
7.7372	58.3202	35.4477	37.383	52.2538	39.5705	39.0239	23.3759	31.2289	39.0599	56.6944	38.3554	48.4957	39.6523	45.34	40.2023	43.1906	40.5876	43.0134	74.9592	20.5153	16.6701		0.649994	41.1114
7.8563	53.5414	39.4727	32.2402	49.4654	37.1074	38.4589	17.1488	26.3483	45.8177	53.989	48.0877	37.4768	31.2697	45.5017	34.0131	37.2375	31.8855	39.3065	54.026	20.5476	19.0432		0.659999	37.7136
7.9753	60.2646	41.6014	48.752	45.9105	42.861	39.1753	25.6313	29.973	51.3389	55.3051	51.8353	33.5245	34.3066	47.9831	48.6023	34.2339	38.8586	33.9142	42.6273	17.6188	22.747		0.669996	40.3364
8.0943	61.2927	41.1861	48.0661	43.0248	46.4512	38.1848	22.2641	30.3734	55.884	41.941	39.6011	41.349	34.4783	38.7682	51.6595	32.8211	37.0707	37.2885	50.8541	24.9496	15.3261		0.679993	39.6588
8.2134	52.7407	32.6694	38.276	46.1979	48.9319	46.904	24.5237	34.7728	62.0335	51.3285	36.4255	45.2776	34.7117	33.6846	46.5228	27.393	25.1915	36.3607	43.5065	33.314	16.1368		0.689999	38.9001
8.3324	51.9504	40.0632	45.4759	49.5966	46.974	40.6315	31.3521	30.5035	65.9127	50.1842	34.802	55.4005	32.9661	33.5723	49.1734	27.9233	33.0396	25.5611	46.5386	29.33	18.8434		0.699996	39.9902
8.4515	49.3309	38.7783	48.4067	48.728	41.5444	48.5724	31.362	33.6588	52.5168	47.5856	34.4772	50.2984	38.0566	25.0013	44.4307	34.0518	44.9876	39.2311	48.028	18.6757	19.8455		0.710001	39.8842
8.5705	42.3154	36.7682	34.816	48.8196	39.2313	61.081	28.5481	26.8015	57.576	36.9215	37.5349	43.4988	36.3638	31.8769	45.7688	37.0821	53.515	38.4227	47.3095	17.4003	16.4707		0.719998	38.9582
8.6895	46.0332	42.7722	55.262	47.1962	50.2198	56.521	23.9543	34.1144	46.3308	38.0954	44.9596	36.3998	40.7852	40.4318	49.0034	45.7865	52.5996	36.3585	44.0543	24.9414	18.1143		0.729995	41.6159
8.8086	45.7769	46.1873	42.7445	56.9153	43.5371	42.724	32.8144	34.3236	57.6088	46.7985	36.0214	41.3108	47.5933	36.9577	45.227	42.965	55.3404	36.4855	34.9399	24.1494	29.4755		0.740001	41.8998
8.9276	39.94	38.9841	40.7803	57.533	46.1302	43.4034	27.0169	31.6443	47.9868	40.6823	38.1781	47.9134	43.2718	30.0368	39.648	46.5026	49.3561	39.8808	45.722	20.5402	24.0483		0.749998	39.9619
9.0466	45.165	50.5972	41.8153	50.6686	41.1132	47.3649	31.855	31.2755	47.3781	42.1047	33.8696	47.771	42.1286	29.2498	42.8515	37.4948	51.1717	53.5649	35.3495	28.557	22.7657		0.759995	40.672
9.1657	48.3987	56.3472	43.6725	51.7031	30.018	51.2189	32.4204	40.4214	38.2967	53.5295	36.9264	53.2007	37.5299	33.1578	45.5617	44.278	43.416	48.6093	38.484	25.3563	21.7325		0.77	41.6323
9.2847	56.7029	47.6536	35.1539	53.243	43.1671	45.5318	27.6596	32.401	32.8095	64.1712	32.7343	49.5012	37.4404	35.7818	46.2981	37.3774	44.1625	46.69	41.4062	20.388	19.9587		0.779997	40.4872
9.4037	51.3827	42.6749	29.4611	49.6233	39.2558	38.975	25.8312	34.0301	38.2854	55.2751	30.8818	50.9334	34.5551	34.0308	40.7625	34.5383	29.8121	53.3254	35.7457	24.9873	18.3341		0.789995	37.7477
9.5228	55.3154	50.8239	39.0157	60.9296	37.3107	38.1435	30.5466	37.8662	46.877	41.1339	36.8243	52.9946	27.1576	37.8444	37.7699	34.849	34.9479	33.1123	25.4206	27.5356	27.6502		0.8	38.7652
9.6418	49.8012	47.517	36.5341	47.7304	47.7631	46.38	32.1077	39.4912	44.7389	46.3444	35.5237	55.2363	29.464	29.7984	33.8899	41.0355	34.861	40.3264	33.9785	24.7431	25.9173		0.809997	39.1991
9.7608	42.0648	38.4354	42.6136	47.7223	35.5988	34.4606	34.02	43.9848	43.3678	42.5657	36.0431	44.6968	38.2921	33.4169	49.6877	36.3996	37.3939	31.8383	29.6311	19.409	27.1762		0.819994	37.5628
9.8799	45.6986	39.1839	40.334	44.8009	36.4908	35.1582	30.285	40.3784	45.3707	47.1114	25.7927	48.473	32.5079	38.0988	38.7098	31.056	28.6746	40.6601	29.6634	32.0946	13.8967		0.83	36.4019
9.9989	38.3598	45.7521	45.6829	42.2552	39.0552	28.8379	36.0865	35.5841	50.5796	42.8207	24.8889	52.5829	40.1608	27.4578	34.3626	36.932	26.0652	41.7329	31.7835	24.4876	25.1186		0.839997	36.6946
10.1179	40.3791	43.5859	43.7488	45.9052	32.8274	39.2501	36.8097	47.1419	35.6273	38.1584	32.9626	45.0496	38.5972	39.6797	37.6417	29.0537	39.0477	36.3103	29.9776	33.3668	19.1192		0.849994	37.3448
10.237	48.8713	36.5089	38.6098	41.2817	29.491	28.8602	39.4251	48.2464	32.5228	28.2757	31.2476	37.7189	33.8331	40.3013	34.0015	28.1633	36.0807	38.7409	33.6063	35.1942	19.4924		0.859999	35.2606
10.356	42.0624	35.2938	43.1115	36.6594	28.3567	37.5536	29.573	35.367	41.3358	35.0197	22.696	42.0884	33.438	27.0626	33.519	40.1338	34.4854	35.9756	26.7111	45.5491	17.6188		0.869996	34.4577
10.475	35.1401	43.8423	29.7228	34.4987	20.6354	21.7725	33.0937	33.7787	31.9031	31.3043	28.7954	38.6794	22.5945	36.1914	39.9203	31.2199	32.1199	30.4307	34.2709	31.0497	18.3705		0.879993	31.3969
10.5941	36.1245	39.4252	31.6756	33.6458	19.822	24.8359	30.7671	43.7044	30.5147	22.9812	34.332	30.0984	29.3911	29.5729	35.9647	31.57	23.9876	34.4537	30.6156	26.8296	22.6865		0.889999	30.619
10.7131	51.2915	32.4635	23.3486	27.4452	19.1225	25.8051	33.4452	34.7498	25.5005	22.7677	22.4644	24.0377	27.5203	36.8158	28.5708	24.7587	30.0186	29.0486	24.7237	29.9531	22.9687		0.899996	28.42
10.8321	44.9748	37.6791	20.4997	19.4318	22.2818	21.6073	19.2997	17.1573	31.8753	27.7789	30.2109	22.3664	33.787	32.4364	18.7396	35.5457	27.7734	26.5515	35.1498	26.99	23.1887		0.909993	27.3964
10.9512	49.4971	36.2862	20.1804	25.3077	15.1208	16.4956	22.423	17.4731	25.7608	19.4022	17.2591	20.797	21.7272	23.0602	21.514	23.286	22.6269	33.7303	14.9466	20.7622	22.7419		0.919998	23.3523
11.0702	45.3706	42.4507	22.0193	21.6292	12.7113	15.95	19.1153	23.0263	17.3614	14.29	12.7743	16.2579	25.1755	32.0994	26.369	20.2206	20.0284	27.7868	12.8508	14.5108	17.5617		0.929995	21.8838
11.1892	45.3932	38.1137	21.355	19.4708	13.2471	12.8711	26.5204	21.203	24.0392	10.563	21.0215	11.8302	23.4282	28.1094	23.9304	21.7129	23.9529	16.9269	16.2242	20.0222	25.4042		0.939992	22.159
11.3083	49.2207	33.0351	14.6447	24.1114	5.9515	9.4594	20.9776	26.9556	17.0998	9.2773	14.1438	12.3704	18.8749	24.8399	20.5278	13.327	22.2074	22.5322	22.5596	29.9275	31.2597		0.949998	21.1097
11.4273	34.4032	29.8614	9.2579	20.6331	9.662	6.1538	22.8589	13.4177	20.2336	8.7243	16.644	9.2543	15.5157	22.4295	12.0266	16.6048	15.9551	24.7321	17.1906	26.0319	26.3603		0.959995	17.9977
11.5463	34.8568	31.4726	11.7126	12.9615	8.7012	7.2177	16.8718	17.1635	13.4771	16.4843	12.0394	15.8274	16.2638	17.2586	17.7237	12.3149	19.6438	16.1005	24.5716	22.8471	21.7012		0.969992	17.4862
11.6654	31.0821	17.5646	17.7917	12.2166	6.129	10.9756	18.3261	11.0637	10.1607	12.785	7.5053	12.7548	17.3883	18.6011	18.679	15.4842	8.8414	15.7202	22.9171	31.6898	22.3533		0.979997	16.1919
11.7844	23.6292	16.4259	12.2663	15.2109	7.3839	10.2892	10.92	12.7482	8.3237	12.3548	5.9724	9.4384	20.0637	20.543	19.3687	10.6696	17.4572	17.1289	18.8917	24.0552	21.331		0.989995	14.9749
11.9035	19.914	11.3428	7.517	11.1938	7.3945	12.669	9.254	10.1867	10.5043	10.5104	4.5814	15.3466	6.4328	14.4815	13.9155	7.0427	14.5709	19.2553	26.8161	26.6273	22.9439		1	13.4524

## Sheet: Sheet1
Image4				Image5				Image6				Image4 (2)				Image5 (2)					Distance	Image4	Image5	Image6	Image4 (2)	Image5 (2)
Ap-basal	Avg intensity			Ap-basal	Avg intensity			Ap-basal	Avg intensity			Ap-basal	Avg intensity			Ap-basal	Avg intensity				0	26.8607	21.6799	15.1093	17.3493	22.6721
0	26.8607			0	21.6799			0	15.1093			0	17.3493			0	22.6721				0.05	28.4172	26.4215	18.8332	20.2847	27.2508
0.00999706	25.2738			0.00735081	22.4249			0.0103063	17.2859			0.0061332	17.7372			0.00540383	23.5948				0.1	33.5568	44.7088	24.21	27.7942	35.7601
0.0200025	25.2097			0.0147078	25.4934			0.0206213	17.2765			0.0122716	18.8162			0.0108122	24.887				0.15	37.7621	51.8237	27.3886	36.8	40.8399
0.0299996	28.9262			0.0220586	24.562			0.0309277	18.7717			0.0184047	19.295			0.016216	24.6707				0.2	37.7286	47.7242	28.1167	42.6734	41.4867
0.0399966	31.2381			0.0294094	27.6609			0.041234	22.6647			0.0245379	20.266			0.0216199	26.2353				0.25	40.6358	48.0796	29.4049	46.1067	41.5092
0.0500021	32.9948	28.4172		0.0367664	29.2524			0.051549	21.8912	18.8332		0.0306763	19.0979			0.0270283	26.0712				0.3	43.1178	46.5426	30.3087	47.1434	40.9175
0.0599992	33.5241			0.0441172	27.6196			0.0618553	21.2906			0.0368095	21.7509			0.0324321	27.9395				0.35	43.0545	48.656	29.7646	44.1447	38.7148
0.0699962	31.8824			0.051468	32.6793	26.4215		0.0721616	22.8375			0.0429427	22.3477			0.0378359	29.0306				0.4	43.8236	46.0791	26.5552	41.0349	35.751
0.0800017	32.91			0.058825	34.6785			0.0824766	23.0259			0.0490811	23.823			0.0432443	30.6737				0.45	42.4274	42.8663	27.1028	40.7908	33.3059
0.0899987	34.1158			0.0661758	35.8272			0.092783	27.7347			0.0552142	22.3634	20.2847		0.0486481	32.785				0.5	43.5871	40.9385	26.3619	36.6474	30.7998
0.0999958	33.9839			0.0735266	42.4129			0.103089	26.1612	24.21		0.0613474	24.1069			0.054052	31.1995	27.2508			0.55	43.1281	40.3658	25.121	34.412	29.2855
0.110001	34.9243	33.5568		0.0808836	45.7386			0.113404	27.2937			0.0674858	24.614			0.0594603	33.9864				0.6	43.2045	40.1757	24.036	32.8626	30.2793
0.119998	36.4195			0.0882344	48.9346			0.123711	26.5106			0.073619	25.5359			0.0648642	33.1158				0.65	39.9103	38.3811	23.9151	33.0247	30.1083
0.129995	38.0422			0.0955852	52.4239			0.134017	26.1735			0.0797522	27.6032			0.070268	33.8769				0.7	39.7539	38.2363	25.6832	33.5255	31.9068
0.140001	39.8007			0.102942	52.9463	44.7088		0.144332	28.7394			0.0858906	27.811			0.0756764	36.0955				0.75	40.6216	39.229	24.8011	35.7411	33.4577
0.149998	36.7862	37.7621		0.110293	51.9997			0.154638	28.2258	27.3886		0.0920237	30.8234			0.0810802	38.1526				0.8	39.6581	39.0832	25.9175	37.1606	34.3011
0.160003	36.7434			0.11765	56.1246			0.164953	27.6159			0.0981621	30.9363			0.0864886	36.3449				0.85	37.0773	39.1015	24.5008	34.4673	29.0799
0.17	38.4613			0.125001	52.848			0.17526	27.103			0.104295	30.9229	27.7942		0.0918924	35.3922				0.9	30.458	32.1375	19.5478	28.0546	19.6666
0.179997	39.3946			0.132352	51.6787			0.185566	29.547			0.110428	32.9321			0.0972963	38.969				0.95	21.3005	23.5322	12.1706	17.2412	12.5913
0.190003	37.4221			0.139709	53.5472			0.195881	28.3793			0.116567	34.9089			0.102705	35.9074	35.7601			1	15.5263	15.9347	6.55585	11.9946	7.61628
0.2	36.6218	37.7286		0.147059	49.0269			0.206187	27.9382	28.1167		0.1227	36.9659			0.108108	36.0726
0.209997	39.7071			0.15441	47.5408	51.8237		0.216494	28.9555			0.128833	35.82			0.113512	39.3845
0.220003	39.4284			0.161767	48.868			0.226809	28.7404			0.134972	36.0574			0.118921	38.572
0.23	39.9026			0.169118	48.8512			0.237115	27.387			0.141105	37.4649			0.124325	37.4007
0.239997	41.5234			0.176469	47.3336			0.247421	30.86			0.147238	39.2559			0.129728	38.5793
0.250002	42.6174	40.6358		0.183826	48.1427			0.257736	31.0815	29.4049		0.153376	40.9951	36.8		0.135137	40.4918
0.259999	43.9795			0.191177	47.3076			0.268043	31.7171			0.15951	42.0927			0.140541	39.0903
0.269996	42.8275			0.198527	45.49			0.278349	29.205			0.165643	41.5674			0.145944	39.9702
0.280002	42.2263			0.205884	48.0763	47.7242		0.288664	28.8416			0.171781	41.783			0.151353	40.8399	40.8399
0.289999	42.7298			0.213235	48.6263			0.29897	32.3153			0.177914	41.5699			0.156757	40.374
0.299996	43.826	43.1178		0.220586	47.7134			0.309277	29.4648	30.3087		0.184047	42.5873			0.16216	38.2755
0.310001	42.3772			0.227943	46.7486			0.319592	29.2959			0.190186	44.1381			0.167569	41.7724
0.319998	42.3371			0.235294	46.2963			0.329898	29.9127			0.196319	44.5981			0.172973	42.2505
0.329995	43.7124			0.242645	49.8333			0.340204	31.1809			0.202452	43.051	42.6734		0.178376	41.8041
0.340001	41.8838			0.250002	49.2598	48.0796		0.350519	28.6689	29.7646		0.208591	43.453			0.183785	41.8461
0.349998	43.3622			0.257352	47.0742			0.360826	26.9346			0.214724	45.0428			0.189189	41.8264
0.359995	44.6541	43.0545		0.264703	45.3031			0.371132	26.3317			0.220857	46.8088			0.194593	42.7142
0.37	42.7502			0.27206	45.9441			0.381447	26.7477			0.226995	46.1444			0.200001	42.5169	41.4867
0.379997	44.4823			0.279411	44.5945			0.391753	25.1957			0.233129	48.9651			0.205405	42.2321
0.389995	44.0337			0.286762	48.6823			0.40206	27.5666	26.5552		0.239262	47.0701			0.210809	41.3631
0.4	44.0281	43.8236		0.294119	47.3081			0.412375	28.2185			0.2454	45.1016			0.216217	41.0778
0.409997	41.4965			0.30147	46.8923	46.5426		0.422681	27.6984			0.251533	46.2675	46.1067		0.221621	43.5688
0.420003	42.4086			0.308827	49.2056			0.432996	27.8079			0.257672	46.4495			0.227029	41.2161
0.43	42.9254			0.316177	48.5488			0.443302	26.4303			0.263805	44.9554			0.232433	40.8713
0.439997	42.4608			0.323528	49.4658			0.453609	25.3592	27.1028		0.269938	48.2192			0.237837	40.7878
0.450002	42.8456	42.4274		0.330885	49.8968			0.463924	26.4912			0.276076	49.9368			0.243245	41.5058
0.459999	42.659			0.338236	49.0132			0.47423	26.7206			0.28221	48.3357			0.248649	42.0719
0.469996	45.2706			0.345587	48.4067			0.484536	26.7335			0.288343	47.9446			0.254053	40.3969	41.5092
0.480002	43.0734			0.352944	46.0548	48.656		0.494851	27.3036			0.294481	46.3224			0.259461	41.8626
0.489999	43.2441			0.360295	48.7151			0.505157	24.5607	26.3619		0.300614	44.984	47.1434		0.264865	39.8256
0.499996	43.6883	43.5871		0.367645	47.7458			0.515464	26.6885			0.306748	44.2816			0.270269	42.4427
0.510001	42.8696			0.375002	46.121			0.525779	25.2601			0.312886	44.8923			0.275677	41.4675
0.519998	43.9166			0.382353	46.4644			0.536085	24.2469			0.319019	45.1194			0.281081	40.3987
0.529995	44.1636			0.389704	45.5211			0.546391	25.5203			0.325152	43.2408			0.286485	41.4539
0.540001	42.6252			0.397061	44.5645			0.556706	23.8889	25.121		0.331291	44.2423			0.291893	40.7897
0.549998	42.9577			0.404412	43.422	46.0791		0.567013	24.6313			0.337424	46.3133			0.297297	39.3498
0.559995	42.236	43.1281		0.411763	42.7034			0.577319	23.0986			0.343557	44.5349			0.302701	40.6669	40.9175
0.57	45.1306			0.41912	42.4469			0.587634	24.437			0.349695	41.7454			0.308109	40.2096
0.579997	44.8741			0.42647	42.7497			0.59794	21.7284			0.355829	42.9324	44.1447		0.313513	41.1898
0.589995	42.7712			0.433821	42.805			0.608247	26.2848	24.036		0.361962	41.8858			0.318917	40.2469
0.6	40.0421	43.2045		0.441178	44.3038			0.618562	24.5269			0.3681	41.8258			0.324325	37.3293
0.609997	39.6418			0.448529	43.1956			0.628868	23.3452			0.374233	40.6962			0.329729	38.1208
0.619994	40.7596			0.45588	41.8594	42.8663		0.639174	24.4333			0.380367	39.8642			0.335133	38.3477
0.63	41.2086			0.463237	40.4798			0.649489	22.0845			0.386505	42.4171			0.340541	37.9246
0.639997	39.027			0.470588	41.344			0.659796	25.1857	23.9151		0.392638	40.6256			0.345945	38.125
0.649994	41.1114			0.477938	40.91			0.670102	24.5792			0.398771	40.004			0.351349	36.9393	38.7148
0.659999	37.7136	39.9103		0.485295	41.6656			0.680417	26.7487			0.40491	40.9604	41.0349		0.356758	36.2758
0.669996	40.3364			0.492646	41.258			0.690723	24.9037			0.411043	40.5493			0.362161	35.2123
0.679993	39.6588			0.499997	39.9734	40.9385		0.70103	26.5013	25.6832		0.417176	41.4816			0.367565	36.6819
0.689999	38.9001			0.507354	42.6378			0.711345	23.4314			0.423314	41.6692			0.372974	35.3414
0.699996	39.9902			0.514705	40.6209			0.721651	24.0541			0.429448	41.6322			0.378377	34.9536
0.710001	39.8842	39.7539		0.522062	38.5979			0.731966	23.6773			0.435586	41.4185			0.383786	36.6549
0.719998	38.9582			0.529412	40.1146			0.742272	26.5981			0.441719	40.0057			0.38919	35.9376
0.729995	41.6159			0.536763	40.8672			0.752579	26.2446	24.8011		0.447852	39.1826			0.394593	33.8774
0.740001	41.8998			0.54412	39.8537			0.762894	25.2011			0.453991	40.3872	40.7908		0.400002	36.2624
0.749998	39.9619			0.551471	39.8683	40.3658		0.7732	25.2486			0.460124	37.3315			0.405406	36.3128	35.751
0.759995	40.672	40.6216		0.558822	37.6767			0.783506	25.6558			0.466257	38.0257			0.410809	35.9636
0.77	41.6323			0.566179	39.8875			0.793821	27.861			0.472395	37.2859			0.416218	34.8319
0.779997	40.4872			0.57353	43.3892			0.804128	25.6211	25.9175		0.478529	35.6055			0.421622	34.6657
0.789995	37.7477			0.58088	40.1868			0.814434	25.7998			0.484662	35.0891			0.427026	33.0119
0.8	38.7652	39.6581		0.588237	39.8065			0.824749	25.0217			0.4908	36.9145			0.432434	34.435
0.809997	39.1991			0.595588	40.0387			0.835055	24.1103			0.496933	37.1487			0.437838	30.7031
0.819994	37.5628			0.602939	40.2446	40.1757		0.845362	24.8796			0.503067	35.7783	36.6474		0.443242	31.8946
0.83	36.4019			0.610296	38.6403			0.855677	22.6928	24.5008		0.509205	36.457			0.44865	30.6963
0.839997	36.6946			0.617647	39.9783			0.865983	22.7534			0.515338	35.677			0.454054	33.5513	33.3059
0.849994	37.3448			0.624998	38.1695			0.876289	22.8195			0.521471	34.933			0.459458	31.577
0.859999	35.2606	37.0773		0.632355	38.5733			0.886604	17.6996			0.52761	34.7854			0.464866	30.9159
0.869996	34.4577			0.639705	39.1229			0.896911	17.2971			0.533743	32.9043			0.47027	31.7057
0.879993	31.3969			0.647056	37.2439			0.907217	17.1696	19.5478		0.539876	34.2819			0.475674	29.5475
0.889999	30.619			0.654413	36.9394	38.3811		0.917532	14.2843			0.546014	32.3684			0.481082	30.9185
0.899996	28.42			0.661764	37.7295			0.927838	15.8961			0.552148	33.889	34.412		0.486486	30.7527
0.909993	27.3964	30.458		0.669115	37.8386			0.938145	10.385			0.558281	33.3663			0.49189	30.2121
0.919998	23.3523			0.676472	38.7007			0.94846	10.4825			0.564419	32.2784			0.497298	31.5137
0.929995	21.8838			0.683823	37.4125			0.958766	9.80537	12.1706		0.570552	33.9603			0.502702	30.0552	30.7998
0.939992	22.159			0.691173	38.8841			0.969072	8.15635			0.576686	32.462			0.508106	28.2009
0.949998	21.1097			0.69853	37.5039			0.979387	6.13961			0.582824	31.5843			0.513514	29.8733
0.959995	17.9977	21.3005		0.705881	39.5851	38.2363		0.989694	5.71504			0.588957	32.9096			0.518918	29.3989
0.969992	17.4862			0.713232	37.3316			1	6.21241	6.55585		0.59509	33.3465			0.524322	30.5611
0.979997	16.1919			0.720589	37.8918							0.601229	32.9931	32.8626		0.52973	28.9715
0.989995	14.9749			0.72794	39.6969							0.607362	33.7347			0.535134	29.5276
1	13.4524	15.5263		0.735297	40.4834							0.6135	31.6299			0.540542	28.6473
				0.742648	40.2962							0.619633	31.3792			0.545946	29.7332
				0.749998	39.6738	39.229						0.625767	33.0206			0.55135	28.6556	29.2855
				0.757355	41.2437							0.631905	32.3153			0.556758	29.0982
				0.764706	39.2393							0.638038	33.2398			0.562162	29.9105
				0.772057	37.5259							0.644171	34.2111			0.567566	33.2462
				0.779414	37.4288							0.65031	34.6669	33.0247		0.572974	29.2138
				0.786765	37.4476							0.656443	31.754			0.578378	29.306
				0.794116	38.6333							0.662576	32.1998			0.583782	28.5973
				0.801473	42.0636	39.0832						0.668715	34.2641			0.589191	30.5519
				0.808823	41.6238							0.674848	33.6147			0.594594	30.2286
				0.816174	43.5658							0.680981	33.0257			0.599998	32.3611	30.2793
				0.823531	41.216							0.687119	34.3925			0.605407	28.0194
				0.830882	38.831							0.693252	33.5362			0.61081	32.2824
				0.838233	36.27							0.699386	33.3533			0.616214	30.4045
				0.84559	36.0861							0.705524	35.5895	33.5255		0.621623	29.4098
				0.852941	36.1177	39.1015						0.711657	35.3746			0.627026	28.5197
				0.860291	35.4133							0.71779	35.8271			0.63243	30.5309
				0.867648	33.8077							0.723929	34.6505			0.637839	28.7779
				0.874999	32.8557							0.730062	36.1			0.643242	31.1678
				0.88235	32.1047							0.736195	34.2624			0.648646	30.2889
				0.889707	32.6224							0.742334	36.7785			0.654055	31.6815	30.1083
				0.897058	29.7703							0.748467	36.2659			0.659459	30.503
				0.904409	28.3884	32.1375						0.7546	36.6698	35.7411		0.664862	30.3923
				0.911766	28.4143							0.760738	37.6144			0.670271	30.5292
				0.919116	25.7863							0.766871	37.3238			0.675675	32.8222
				0.926473	25.457							0.77301	36.9027			0.681083	31.3215
				0.933824	23.1328							0.779143	36.8321			0.686487	32.1229
				0.941175	22.2295							0.785276	36.5587			0.691891	33.8921
				0.948532	20.0209							0.791415	37.6409			0.697299	32.3627
				0.955883	19.6846	23.5322						0.797548	37.026			0.702703	33.2154	31.9068
				0.963234	19.0253							0.803681	37.3864	37.1606		0.708107	33.4319
				0.970591	17.8737							0.809819	34.6766			0.713515	33.6082
				0.977941	15.6134							0.815953	36.0953			0.718919	34.3047
				0.985292	15.2697							0.822086	37.2894			0.724323	33.2823
				0.992649	14.9692							0.828224	36.0313			0.729731	33.0985
				1	12.8567	15.9347						0.834357	34.4081			0.735135	35.446
												0.84049	33.6563			0.740539	31.7599
												0.846629	32.5053			0.745947	32.5414
												0.852762	31.0764	34.4673		0.751351	33.6463	33.4577
												0.858895	28.8675			0.756755	33.4398
												0.865034	29.5044			0.762163	34.8019
												0.871167	31.2066			0.767567	33.9389
												0.8773	28.6339			0.772971	34.9392
												0.883438	28.7234			0.778379	34.8403
												0.889572	27.489			0.783783	33.8974
												0.895705	25.9746			0.789187	35.9017
												0.901843	24.0374	28.0546		0.794595	34.9964
												0.907976	21.2762			0.799999	34.5341
												0.914109	20.8932			0.805403	31.7215	34.3011
												0.920248	18.4557			0.810811	32.9427
												0.926381	17.4824			0.816215	33.0221
												0.932514	16.0088			0.821619	30.4431
												0.938653	15.2235			0.827027	29.9877
												0.944786	14.09			0.832431	29.6878
												0.950924	14.4998	17.2412		0.83784	28.6795
												0.957057	13.6711			0.843243	27.9589
												0.963191	12.7066			0.848647	23.6929
												0.969329	12.2582			0.854056	25.3044	29.0799
												0.975462	12.1652			0.859459	23.0748
												0.981595	11.3364			0.864863	20.6791
												0.987734	10.5289			0.870272	21.2531
												0.993867	11.3859			0.875675	21.7548
												1	11.9046	11.9946		0.881079	19.3905
																0.886488	20.0093
																0.891892	18.0766
																0.897295	16.0637
																0.902704	16.6971	19.6666
																0.908108	15.6816
																0.913511	14.7089
																0.91892	13.4323
																0.924324	12.8948
																0.929727	11.7895
																0.935136	11.2825
																0.94054	10.6223
																0.945943	11.6647
																0.951352	11.2453	12.5913
																0.956756	10.5725
																0.96216	9.69332
																0.967568	8.04012
																0.972972	7.41682
																0.978376	7.79376
																0.983784	6.40806
																0.989188	6.58843
																0.994596	5.93121
																1	6.10231	7.61628
