# Supplementary material for: Crumbs organizes the transport machinery by regulating apical levels of PI(4,5)P2 in Drosophila
Source: eLife. 2019 Nov 7;8:e50900. doi: 10.7554/eLife.50900 (PMC6881148; doi:10.7554/eLife.50900)
Supplement: Figure 6—source data 15. [file elife-50900-fig6-data15.xlsx]

## Sheet: Image13
X0	Y0	Y1	Y2	Y3	Y4	Y5	Y6	Y7	Y8	Y9	Y10	Y11	Y12	Y13	Y14	Y15	Y16	Y17	Y18	Y19	Y20	Y21	Y22	Y23	Y24	Y25	Y26	Y27		Ap-basal	Avg intensity
0	41.717	13.5656	17.0983	20.28	8.7536	4.4469	20.415	12.7009	17.087	14.81	8.6163	6.2496	16.7584	16.768	26.269	22.3166	18.3226	33.1208	33.6195	26.6191	18.251	11.112	15.8563	38.7407	31.9111	17.58	30.9221	30.6843		0	20.5211
0.119	32.762	12.0467	29.6187	14.361	10.725	15.0597	19.4824	8.6331	22.467	17.823	19.9186	17.389	16.2727	22.916	27.995	25.4534	20.4424	28.7432	39.9685	20.9464	17.743	16.937	24.8508	27.9056	22.6574	21.7967	40.3607	28.4092		0.00558497	22.2744
0.2381	49.565	22.7674	16.0631	19.351	8.9222	10.5134	15.8724	13.0911	19.068	14.557	12.6677	22.0978	18.1163	21.787	17.686	20.2048	26.7223	36.4714	22.7032	23.1261	23.649	30.934	14.6284	36.2704	37.2006	20.2846	39.608	20.4246		0.0111746	22.6555
0.3571	46.604	10.5679	38.1157	20.955	9.3198	21.2715	22.7404	5.1506	19.118	17.332	18.7582	16.6722	15.8681	17.723	31.736	25.5725	15.0904	35.2282	36.1327	29.7869	25.631	30.202	25.8954	40.8983	24.6085	22.2546	43.1447	28.9859		0.0167596	24.8344
0.4761	44.999	12.2789	29.768	19.745	10.3814	9.5168	25.2992	12.9619	21.699	13.994	27.3744	43.3877	15.8896	22.983	29.107	24.3144	24.4322	34.4037	49.1045	27.7629	27.165	23.564	19.1748	46.6525	37.4616	27.3322	54.1014	33.1712		0.0223446	27.4295
0.5952	47.514	24.5683	35.3736	16.708	8.6883	13.5284	27.0899	5.973	31.996	9.571	26.1712	51.2987	31.0605	30.12	21.95	34.5572	26.4253	49.0771	40.8497	31.007	28.468	30.313	23.0734	46.6581	45.5456	33.9742	46.5732	32.6233		0.0279342	30.3841
0.7142	65.922	29.3759	48.1865	25.193	16.7559	7.1721	34.031	13.4292	25.758	23.218	33.9897	42.5424	33.8485	25.644	39.043	36.0606	25.7422	38.9328	33.2192	27.3854	37.369	36.598	27.3864	43.7282	44.5222	26.1333	44.4121	38.8448		0.0335192	33.0158
0.8332	53.816	25.645	26.5066	32.902	9.4878	25.7054	33.0078	11.2809	32.322	18.278	36.3082	64.3457	34.998	29.806	38.346	20.5671	21.5085	46.0915	32.5269	25.101	43.026	27.737	25.3521	39.4278	36.6641	28.6301	50.8375	37.8628		0.0391042	32.4317
0.9523	68.194	31.3089	53.3059	21.867	11.2574	28.3711	32.4115	25.5008	34.092	27.727	27.9622	57.9158	32.8481	30.406	43.765	27.9956	25.1224	37.2079	44.8721	24.6333	53.533	49.06	31.2602	56.3489	42.5061	37.3168	50.1986	62.9362		0.0446938	38.2116
1.0713	46.957	38.7897	58.0816	35.162	12.6256	17.0963	43.3146	19.7163	33.435	46.433	43.1272	75.9532	46.864	37.647	39.242	38.8547	21.2198	40.2979	32.5055	33.3159	56.804	44.48	20.4647	46.1619	49.964	36.3124	59.9452	64.5928		0.0502788	40.6915
1.1903	55.754	33.139	49.7181	28.408	20.8772	36.2652	43.9222	12.3194	44.079	33.609	54.8799	54.307	46.2235	34.556	60.924	40.985	31.2298	36.8694	43.1736	34.6971	64.681	62.374	25.7662	42.2096	42.3299	34.589	60.8166	71.7979		0.0558637	42.875
1.3094	61.987	48.3075	56.2654	34.322	23.171	36.0828	37.0449	30.6393	55.221	45.615	74.7668	89.8701	36.4404	37.76	61.663	25.565	36.5009	39.3242	46.7889	40.2873	52.79	57.033	20.9893	45.9468	57.1448	35.5198	64.7274	86.0887		0.0614534	47.7808
1.4284	53.172	55.7759	64.5307	43.68	15.7428	37.1841	45.3121	27.082	77.602	67.457	67.0212	82.5354	47.1443	40.437	86.212	41.1779	30.9377	33.2253	39.3945	50.0844	70.279	91.301	28.7228	46.7497	53.6802	48.9443	69.0835	75.5544		0.0670384	53.2151
1.5474	53.365	46.991	57.1675	50.173	21.081	45.2403	51.3067	25.0345	84.278	85.772	61.8773	62.6026	48.5257	56.734	84.668	28.0216	46.832	36.027	55.3239	39.3202	78.824	85.817	25.2703	50.7163	39.6947	40.1505	61.8737	69.9286		0.0726233	53.3077
1.6665	60.716	57.7935	74.9216	42.4	23.3952	36.459	58.5833	37.6859	107.916	92.527	68.8207	63.3184	66.8207	64.688	108.886	44.4842	38.2155	38.5762	57.3925	41.3992	69.021	90.768	26.1961	52.2138	63.1011	43.7731	65.0281	78.4061		0.078213	59.7681
1.7855	65.633	76.2607	81.3457	48.902	24.0952	59.4799	75.1099	37.0356	119.684	96.141	71.8595	77.6098	55.5584	84.066	109.636	57.8886	29.9884	43.0088	53.7657	49.4883	86.701	91.241	28.4836	56.7992	61.5928	46.7435	72.5567	80.6819		0.083798	65.7627
1.9046	60.22	64.4977	96.2935	48.794	29.24	60.3709	70.558	52.8838	119.503	102.317	68.3259	89.0393	54.0289	75.411	97.993	76.3077	36.3589	55.6493	43.1337	41.6714	82.266	107.684	32.7176	69.7047	58.5111	46.1617	58.1588	96.7842		0.0893876	67.6638
2.0236	75.586	64.8065	68.9634	64.741	28.9361	70.4017	55.7666	63.0796	120.108	113.959	70.4838	78.7975	49.4846	96.583	104.395	60.0784	29.6417	51.7413	43.4043	66.5246	87.077	84.501	33.7731	64.6468	52.1405	53.6864	71.8718	76.0001		0.0949726	67.8992
2.1426	84.798	70.3543	78.2256	51.648	44.5293	70.4282	55.0816	65.3424	128.288	125.106	99.4486	79.9379	69.7334	96.729	90.058	79.4171	51.8549	55.2156	47.5684	51.6055	85.32	100.583	46.7674	57.8716	56.8868	54.5981	62.8227	76.1669		0.100558	72.7281
2.2617	71.673	63.1708	68.5113	48.62	43.0187	79.966	70.4522	59.7955	134.914	136.835	84.4245	78.4029	69.2122	101.04	111.555	69.4196	33.6332	49.9009	42.8289	46.0333	96.712	108.989	54.1532	51.9389	48.6859	64.5263	65.0425	94.8026		0.106147	73.1521
2.3807	77.189	65.0193	82.311	64.938	45.5993	67.9824	73.7455	72.9584	117.42	118.768	75.6666	65.1665	71.4244	98.848	123.306	79.0657	40.5137	47.6944	42.6035	52.0139	99.449	82.378	51.9553	65.4693	62.1243	63.1554	80.1756	76.9058		0.111732	73.7088
2.4997	84.747	63.2502	85.8802	66.807	45.4149	65.483	90.0538	95.2539	108.049	118.467	79.2184	88.1652	85.0867	91.938	122.261	83.3	40.7542	46.9654	56.488	60.1633	99.626	68.145	56.1464	56.6027	70.4508	51.2108	69.9105	78.2808		0.117317	76.0043
2.6188	79.788	64.2826	95.8302	75.468	52.2364	76.4249	78.9969	68.1485	99.503	114.762	96.2463	65.0684	83.0832	101.352	123.364	83.0422	46.8883	54.1808	55.8437	60.6284	102.317	95.543	64.7998	50.1113	59.2954	67.1907	75.6651	72.9018		0.122907	77.2486
2.7378	72.187	68.0776	82.4454	83.023	44.5662	77.7432	83.4939	89.6725	115.369	117.932	81.1805	79.3281	79.4021	80.086	105.018	90.2856	50.6129	47.7484	53.1551	58.0064	95.196	109.575	63.2216	63.807	53.0826	69.7495	60.738	70.9725		0.128492	76.6313
2.8568	66.419	75.1033	87.3251	109.043	51.0166	58.5698	99.6645	93.0021	127.893	112.728	76.6131	73.9314	77.7897	80.249	93.641	74.7142	58.68	52.4166	59.2975	56.2503	91.006	103.063	66.0834	68.5881	61.539	80.8518	76.4811	73.5921		0.134077	78.7697
2.9759	99.566	74.8677	103.865	83.814	43.5488	74.2715	86.1718	90.3998	113.143	120.338	77.1938	53.1704	73.9856	93.95	89.679	93.0116	56.9851	51.3318	59.2441	63.3844	106.056	106.717	76.0093	62.0214	67.5327	59.8281	69.8853	68.8716		0.139666	79.2444
3.0949	71.862	77.881	87.5578	81.005	70.9486	62.1075	85.4612	82.0318	116.54	119.219	77.3939	77.0354	74.93	78.882	99.087	80.6527	57.7481	61.2696	63.2963	77.4762	77.988	105.162	74.3115	57.0835	82.5192	85.6642	60.6471	79.8111		0.145251	79.4847
3.2139	91.094	73.3058	77.348	78.99	54.6326	50.41	94.9989	71.8704	115.452	100.605	63.2107	56.9392	80.1081	79.222	95.078	81.4733	59.2907	51.2356	54.6297	77.1766	104.794	103.538	79.9865	63.3345	64.627	54.3965	53.0976	80.1022		0.150836	75.391
3.333	98.203	64.8997	83.6958	77.458	58.5637	46.4187	87.8482	86.9339	106.362	122.627	67.2709	43.4056	73.2848	87.604	85.206	76.5819	62.4555	52.3476	66.3433	66.611	94.358	89.826	77.3973	78.0807	77.2398	57.7458	48.7256	53.3327		0.156426	74.6724
3.452	108.419	73.6326	79.375	94.087	68.4824	57.8903	86.4924	89.7423	98.437	104.352	76.346	60.8023	67.3394	95.994	90.373	78.0445	63.8118	47.9568	61.4473	93.2531	100.548	77.886	84.8885	57.6642	81.0672	77.968	53.1249	88.174		0.162011	79.2
3.571	90.589	81.8061	85.9971	114.946	60.9937	37.6171	96.7068	74.4103	100.239	98.575	63.5653	50.4334	63.4594	95.882	82.897	68.2636	55.8727	61.5074	64.0987	87.4243	109.571	69.1	82.9075	70.8006	86.5356	64.1631	70.7695	55.1874		0.167596	76.5828
3.6901	94.38	73.3599	94.5703	91.662	68.0808	47.8402	93.3056	83.0597	92.842	94.196	50.2399	53.0577	83.2669	80.392	83.847	39.6645	53.1247	72.7007	48.6691	78.1549	85.603	73.884	74.2634	55.3	78.5007	47.0557	62.3714	73.2348		0.173186	72.3795
3.8091	97.074	88.2917	88.9335	96.355	57.5497	51.4843	83.8067	71.3928	89.107	76.823	52.8676	66.5246	77.7777	75.892	77.91	54.0735	65.9314	72.7756	70.0715	89.7022	72.965	72.066	75.7435	63.3169	78.7088	56.668	50.2738	75.3346		0.178771	73.1936
3.9281	78.199	71.3865	79.7922	103.93	69.5476	60.9537	85.5563	56.7896	94.573	95.815	71.8301	63.318	87.4719	66.201	76.286	33.5247	56.5803	54.0398	78.0269	102.379	80.35	74.6	68.0687	59.5564	74.1355	65.9244	57.3904	45.7156		0.184356	71.8551
4.0472	73.754	96.8392	86.2504	117.898	63.6383	57.87	83.3977	71.9248	65.346	95.851	48.9483	48.8595	76.8135	45.432	79.762	32.8232	60.572	65.8322	57.6646	77.3365	76.926	72.972	70.6009	75.9863	74.8086	59.2301	44.642	63.9086		0.189945	69.496
4.1662	70.539	107.214	85.9291	110.317	57.0508	51.0642	73.5422	69.103	68.734	83.289	64.1147	54.2633	77.8313	56.098	75.032	40.8787	58.2604	81.702	64.7226	82.646	72.56	82.474	66.3721	76.2886	74.5409	57.8467	62.0512	48.0885		0.19553	70.4483
4.2852	81.967	93.5709	85.2461	108.508	68.2335	48.5956	95.8373	59.3998	62.513	81.489	45.2667	70.1566	88.4952	36.858	83.89	40.9485	70.3885	82.6887	71.2522	77.258	71.675	61.498	58.4857	74.3267	82.9846	62.2916	50.8353	57.5933		0.201115	70.4376
4.4043	71.907	91.5022	101.102	109.329	52.9302	61.1885	69.8971	60.6071	63.155	63.555	42.8078	55.6366	76.5764	51.524	65.246	32.8061	46.8757	84.066	69.4255	79.516	82.573	62.966	52.459	67.9812	85.5188	54.898	44.5861	51.186		0.206705	66.1365
4.5233	85.295	83.0371	102.128	93.569	69.4139	55.2919	72.9658	55.01	42.284	63.679	39.6785	50.7116	72.7471	42.947	46.844	37.8274	60.8828	76.9684	65.0519	73.4164	79.744	55.67	51.9311	81.9173	91.5113	55.5785	37.3935	50.5502		0.21229	64.073
4.6423	85.295	69.2963	92.6039	113.612	67.3579	62.9889	69.9795	54.0121	46.645	67.697	37.2891	62.6486	68.0421	59.11	50.481	35.5846	60.6131	74.4259	58.3676	61.9846	80.447	56.633	64.5019	76.041	63.6941	47.2172	32.7902	34.4423		0.217875	62.6357
4.7614	75.393	80.2832	97.2928	113.486	39.8532	47.6712	82.9619	59.1271	54.128	61.465	41.5024	65.931	57.7676	45.974	58.833	38.257	45.9655	87.4266	69.5866	78.6798	67.543	57.409	37.8542	58.8388	91.542	57.1204	41.9854	45.2854		0.223464	62.8273
4.8804	75.497	94.6294	91.4929	98.351	53.057	48.85	66.2875	52.6842	48.747	54.781	52.4704	61.1719	62.3138	37.488	50.169	27.4395	64.3032	69.4863	65.2026	60.7988	70.598	56.008	43.1264	79.7543	66.4743	57.3199	47.6255	37.3015		0.229049	60.4796
4.9995	82.112	81.5253	83.8931	97.846	45.4141	53.5028	73.9011	56.7151	46.834	46.622	50.5993	53.7461	56.9929	44.408	45.053	40.8292	56.9762	73.4341	64.8136	61.6135	65.45	45.389	49.3758	79.1053	67.3644	36.2524	31.2814	29.215		0.234639	57.8666
5.1185	70.934	65.0933	101.168	95.057	56.2786	50.6121	58.6447	59.2741	53.218	53.66	50.7233	58.495	71.1909	39.535	44.525	24.521	42.3108	56.3775	64.3132	54.6767	56.238	48.017	49.3914	68.0037	78.1173	43.9521	30.5731	23.7644		0.240224	56.0237
5.2375	88.637	76.1369	86.4362	80.245	46.7896	37.6551	64.6792	72.0182	41.812	43.444	37.76	51.873	54.6129	44.629	36.684	37.7192	63.6256	53.6272	55.0934	42.851	55.693	35.202	49.9258	48.6211	65.3656	48.8758	24.4858	29.5856		0.245809	52.6458
5.3566	82.473	54.9101	79.4275	91.863	41.9987	52.1887	58.8214	49.6622	28.382	54.336	47.8379	52.7764	47.6888	49.979	27.829	32.165	50.7085	68.7684	64.4509	67.2862	54.529	32.794	32.3924	62.4676	48.1074	45.373	38.6112	31.1064		0.251399	51.7476
5.4756	83.57	56.1927	101.741	90.666	43.137	52.7664	52.0706	50.3927	41.923	50.649	35.0138	46.2517	46.6128	44.146	25.497	24.775	43.9233	64.0048	51.4621	53.5425	64.126	49.571	45.7545	64.3605	47.3576	41.0956	32.338	28.8463		0.256984	51.1353
5.5946	72.112	63.5461	77.0822	99.995	33.5012	58.7626	59.0696	37.7261	42.209	40.979	40.9689	58.6607	43.5334	44.34	28.563	26.1278	49.0943	51.9365	47.2626	65.364	48.516	37.737	44.5238	62.742	51.064	34.1522	15.5515	32.1576		0.262569	48.8314
5.7137	70.619	60.9454	97.3037	97.532	33.5018	33.0522	63.9957	37.3546	44.792	52.916	36.4945	43.7423	43.6762	44.9	27.349	30.5969	49.3277	51.5338	58.6468	49.8213	61.225	33.21	41.9242	58.9686	48.3937	42.3025	41.7047	32.9577		0.268158	49.5995
5.8327	65.166	59.8152	99.2577	87.202	48.9992	41.1279	70.8589	42.9514	42.534	55.176	56.4497	41.3863	38.2151	41.893	30.478	25.5235	62.066	48.1549	44.1177	55.3043	46.272	46.993	35.1774	58.3922	51.7954	45.137	27.7445	24.4248		0.273743	49.7362
5.9517	70.888	58.6962	104.311	85.867	34.5388	35.2455	42.9026	39.4835	27.902	55.153	39.8521	36.5338	51.5863	40.25	24.49	35.5427	52.9149	43.8655	52.5389	59.8285	52.605	25.17	50.4704	70.3913	40.5452	29.1733	14.5229	28.7293		0.279328	46.5714
6.0708	70.083	62.2889	82.9669	73.056	38.4554	36.1553	53.4449	34.3196	27.735	46.573	37.9796	32.4197	47.5321	45.337	32.737	21.6403	48.9711	45.0077	48.3455	43.3277	51.41	32.45	42.5085	46.7492	42.1941	31.5946	30.2104	25.1893		0.284918	43.9529
6.1898	56.702	54.2378	78.7519	63.158	35.2689	44.8185	50.324	33.5287	27.25	40.122	36.1782	50.9705	31.4476	47.022	27.926	25.5671	44.3222	43.3426	38.4245	48.5862	48.349	31.56	37.0438	46.0353	51.4404	35.1032	29.9672	29.4869		0.290503	42.3905
6.3088	58.111	47.8938	74.2493	75.839	25.9483	45.4449	42.1222	34.2493	32.339	45.041	30.8961	33.5208	44.8685	42.253	22.506	26.0642	51.9745	42.8803	40.5262	41.4605	32.225	28.572	35.3068	58.0132	45.5618	26.6025	24.174	31.1148		0.296088	40.7056
6.4279	62.867	52.2204	66.9953	74.373	41.1069	39.124	37.1761	39.3123	25.074	37.979	44.36	36.2294	46.8107	29.924	24.595	36.7904	51.7524	41.3591	37.3507	47.4944	44.402	30.586	40.7156	36.8392	38.462	36.5144	29.5794	32.7929		0.301677	41.5281
6.5469	52.517	58.6031	49.433	52.584	35.466	28.8769	35.4925	33.0313	32.952	42.657	36.5746	50.9005	38.5224	30.476	25.853	32.2718	40.547	39.5864	34.918	36.1851	73.065	34.566	34.3385	39.3243	34.2667	27.9997	40.7521	31.1488		0.307262	39.3896
6.6659	41.352	54.4714	63.9898	60.478	41.6466	32.9186	36.7395	38.6064	39.113	36.925	25.0416	44.7569	38.4554	40.642	18.428	36.09	31.7269	40.5266	39.4784	42.1683	48.034	36.503	32.8837	26.0573	36.2262	31.4602	16.7602	22.1756		0.312847	37.6305
6.785	50.866	48.365	72.4041	63.234	36.5407	37.6704	48.6833	28.0048	41.397	35.03	35.9495	42.9761	39.5184	34.913	26.833	27.2125	47.108	45.2324	46.1987	35.4578	47.391	26.316	35.8804	41.0321	38.6586	28.0856	26.1348	30.7536		0.318437	39.9231
6.904	56.895	45.9144	62.725	60.699	33.4143	31.6716	33.4	31.7719	22.786	39.118	29.5106	40.3898	56.3739	30.997	22.963	37.6519	39.5427	51.6717	36.0718	56.4976	52.61	30.546	35.9926	30.5015	35.1265	19.3575	27.4984	27.4055		0.324022	38.5394
7.023	35.197	56.1852	55.5629	69.343	45.5986	38.4226	25.9892	30.9796	47.348	59.066	32.975	47.8447	45.7089	40.674	18.358	46.8811	36.3917	34.5089	32.7261	46.0213	29.798	38.848	33.3234	28.2622	33.1692	36.0703	25.9351	27.5029		0.329607	39.239
7.1421	34.234	51.1627	55.8359	80.452	47.9092	38.0179	32.5532	33.9989	46.225	44.527	23.3201	47.0979	47.6999	45.294	11.245	39.4004	43.7347	50.6004	29.6031	36.5458	49.279	36.852	25.1115	29.5993	39.9132	26.8373	19.4348	21.3604		0.335197	38.8516
7.2611	44.473	55.5202	69.7971	67.515	48.1103	36.7497	45.7124	35.7304	43.95	38.3	26.3922	54.1377	51.7114	32.051	29.917	39.3264	34.4154	43.6048	36.4376	34.9078	49.922	32.212	37.9767	30.1912	37.8747	37.0264	29.2519	32.4824		0.340782	41.2749
7.3801	40.622	65.0964	60.8909	72.037	49.0295	35.3009	36.7431	36.2745	38.823	44.175	31.9024	50.643	40.3793	26.465	25.319	35.9908	38.6102	54.3393	39.7393	34.0056	40.032	29.28	33.8756	31.9655	42.0022	24.545	22.6591	26.0982		0.346366	39.5301
7.4992	39.38	59.2851	53.825	64.947	45.5048	24.3757	36.7331	29.3013	41.065	41.197	40.0679	55.6807	40.0371	35.478	12.87	43.1214	22.164	49.7716	39.0252	43.2493	53.996	35.268	30.1399	52.4459	38.2552	32.2597	35.0203	21.7413		0.351956	39.8645
7.6182	38.19	56.7723	62.4266	66.75	52.6873	36.5262	44.3029	39.7742	46.777	35.64	29.1761	63.6963	42.5514	22.676	13.882	20.099	30.484	42.0857	40.5605	40.8556	42.782	23.156	31.9527	42.0677	30.5812	19.9655	23.701	27.9322		0.357541	38.1447
7.7372	40.627	67.0587	48.9142	63.31	39.2849	48.0444	42.1309	43.4553	41.778	58.243	44.4325	54.2881	44.0511	29.701	17.609	25.1815	25.0495	29.9534	30.138	38.6353	41.245	24.19	26.2789	31.9812	29.8276	24.1976	22.9837	19.8925		0.363126	37.5887
7.8563	31.617	57.8533	53.8305	53.907	55.033	31.2585	28.5673	44.1343	37.945	54.535	37.2806	57.9394	44.8899	30.258	15.283	27.3556	17.5962	34.3872	34.8033	40.291	32.177	24.312	29.4145	34.6571	28.1192	25.2368	35.0458	22.2775		0.368716	36.4288
7.9753	52.886	61.177	50.6227	54.398	43.1106	34.7053	42.9422	35.3323	41.045	33.285	49.5552	50.9762	36.3738	26.728	23.753	22.737	25.348	41.1915	47.5877	30.0151	32.908	38.193	35.7831	36.5718	27.434	17.5062	31.753	24.543		0.374301	37.4451
8.0943	29.461	55.0743	50.1708	51.315	50.412	30.5062	40.2351	41.1454	35.059	44.895	51.6763	50.9696	38.4906	29.428	18.499	9.89	17.5245	40.9967	32.8459	38.6813	27.659	33.542	26.82	29.7826	35.2477	29.0869	15.2106	27.0591		0.379886	35.0601
8.2134	25.06	50.8026	61.387	44.521	42.6916	31.8748	26.0956	39.5412	36.609	45.352	40.8944	63.9579	35.3464	30.335	19.441	19.3471	25.2434	28.8154	30.8814	33.7252	28.046	32.176	32.4407	38.7241	19.0982	29.9345	29.0573	18.046		0.385475	34.2659
8.3324	28.752	38.7336	59.4502	34.608	43.5395	32.0455	20.0884	44.2232	24.784	22.465	40.2568	48.5578	32.9612	27.713	13.243	26.8878	21.094	30.6259	37.2694	36.2984	25.304	23.784	28.9395	28.8377	23.141	25.4376	22.7083	28.9791		0.39106	31.0974
8.4515	28.443	46.6489	52.3486	40.175	38.6444	38.1827	22.8023	45.4271	31.568	26.98	45.6138	43.125	43.5616	22.365	16.725	15.0975	25.8874	37.9508	22.1103	25.6391	31.048	34.707	30.1061	35.8748	36.9775	21.3789	42.1923	15.9926		0.39665	32.7705
8.5705	34.39	41.0449	64.2571	41.818	42.091	39.2288	20.4344	50.3213	20.358	47.646	62.9813	45.6397	23.6621	26.316	15.361	19.4131	26.2103	23.9239	33.4195	31.9631	19.76	22.717	27.2064	23.5649	28.189	24.9827	20.8447	24.7606		0.402235	32.2323
8.6895	25.188	42.7927	63.3529	43.337	34.0962	26.602	28.5846	50.7449	33.199	27.424	50.8694	60.7236	30.6838	26.435	18.278	18.6244	22.8295	33.0121	25.9675	23.2503	24.418	31.614	31.3949	32.8022	26.9964	19.2192	20.9332	19.4815		0.40782	31.8877
8.8086	51.774	51.4967	58.9084	40.282	49.5758	24.1965	36.9838	39.4261	26.148	23.555	32.1807	40.1881	33.4589	22.518	8.079	10.2296	27.5508	44.0287	36.6238	19.5995	15.581	24.3	20.0225	31.1838	24.9241	33.3131	17.307	18.1319		0.41341	30.7702
8.9276	37.594	49.449	46.5281	30.037	61.019	19.8758	35.6776	55.0034	38.914	20.917	33.8453	44.5368	27.1575	27.894	19.748	4.5895	21.7472	31.6831	33.1406	19.2119	17.471	26.2	24.8056	26.4462	29.7702	26.0016	13.0375	24.9031		0.418995	30.2573
9.0466	40.335	38.0432	49.6743	37.614	56.6964	30.7995	30.5896	48.1289	24.738	21.515	24.1157	49.8984	30.6862	28.318	16.559	20.8734	21.8552	41.85	29.712	34.7241	23.815	21.434	19.7923	17.7015	31.9212	27.3696	13.4753	16.8429		0.424579	30.3242
9.1657	37.226	44.5503	47.2451	38.685	54.0929	27.4735	35.0581	38.7397	23.131	31.138	29.824	40.0293	33.7187	30.956	15.811	15.8051	14.507	33.6752	34.587	39.266	18.482	29.48	27.2524	14.9825	21.8655	12.3084	12.5087	14.1963		0.430169	29.1641
9.2847	29.485	54.2961	50.3203	33.524	42.3508	36.812	31.8768	45.6334	16.421	26.226	32.1463	63.5021	35.9298	19.87	11.173	6.6974	26.5548	36.8003	32.7742	23.1248	12.396	30.361	26.4475	18.8959	27.6627	15.6487	23.9163	24.8534		0.435754	29.8464
9.4037	44.632	42.3257	48.0125	44.874	43.4708	24.3168	23.3784	41.0996	26.156	22.038	27.6774	50.2098	33.602	32.213	13.342	15.805	27.4283	34.645	28.1611	30.3818	12.996	25.032	28.9229	16.5212	23.3194	10.9458	11.3702	33.5855		0.441339	29.1594
9.5228	26.866	45.7347	42.6814	40.336	37.9415	35.3881	27.0959	35.4924	24.353	16.771	23.0301	39.1478	34.9388	21.394	15.165	20.3128	19.8409	30.559	22.6894	37.5648	19.641	20.028	31.4227	26.6121	28.9327	24.7456	22.1938	18.1922		0.446929	28.1811
9.6418	28.147	36.4982	51.2571	29.495	32.3515	23.7935	31.0146	36.2381	15.763	22.557	28.0645	44.2204	34.859	25.658	13.781	16.7433	35.1626	26.3939	29.5396	28.9129	14.043	25.289	20.3568	15.3113	28.9883	19.9397	17.6732	24.1296		0.452514	27.0065
9.7608	41.077	36.5267	43.0605	28.826	30.8276	29.0837	31.9572	37.4583	10.799	26.494	41.9849	54.9352	31.7428	28.205	11.107	12.3578	35.9746	12.8834	30.2619	24.6644	12.207	21.335	30.2249	17.2931	41.894	26.005	26.7395	20.8874		0.458099	28.4576
9.8799	37.315	37.0732	35.984	32.76	28.6197	23.4696	22.946	15.9614	11.172	27.539	41.6145	33.3453	30.1334	26.484	2.906	15.6602	35.9382	23.417	26.9309	24.1058	17.334	15.7	25.3605	27.1994	31.5101	30.5086	18.4748	12.884		0.463688	25.4409
9.9989	37.341	41.9966	24.8705	23.533	28.1203	27.4214	25.1997	29.1119	12.099	22.207	44.9733	37.4489	30.9681	25.413	5.982	17.97	23.0155	27.1031	34.4021	32.9987	16.034	15.477	27.5101	30.3409	25.7374	28.2564	18.1807	13.303		0.469273	25.9648
10.1179	45.948	31.2738	49.0136	34.792	33.8946	22.2678	19.4201	31.5956	7.345	21.276	36.8264	42.5571	19.8317	13.143	8.404	16.5748	27.2696	28.1567	19.3497	23.9365	5.915	23.539	26.7975	15.2591	35.3198	24.1929	18.0214	19.3185		0.474858	25.0443
10.237	45.395	48.9345	49.3462	33.864	18.6191	22.4869	24.7918	21.1179	8.817	21.764	39.5368	44.3296	25.1934	25.473	12.357	9.4908	18.0582	15.8638	31.3413	35.0038	9.195	20.125	24.853	36.4679	27.0471	24.4352	22.5618	19.4632		0.480448	26.2833
10.356	44.947	42.1355	50.2639	43.24	33.181	28.9447	19.1501	24.6513	13.291	23.506	45.8497	49.6499	34.4451	16.117	6.312	10.3059	26.1416	19.329	19.1217	21.8815	8.142	11.104	33.7644	31.496	27.8035	29.9818	17.078	16.8087		0.486033	26.7372
10.475	31.962	35.2491	48.357	38.115	28.8124	30.1037	18.6803	20.6796	10.109	29.332	46.9191	56.2153	29.2186	22.25	8.786	8.446	31.6256	21.2094	16.6382	21.2792	12.643	20.386	20.4058	32.0596	27.7548	24.4293	16.5652	17.7704		0.491618	25.9286
10.5941	33.121	39.3891	46.326	32.134	33.8361	23.9428	20.8054	18.471	10.633	35.135	36.1407	52.507	23.0636	20.807	16.014	20.7715	30.2121	23.2029	18.5977	15.3605	7.885	13.104	23.8909	33.1854	23.1602	24.2436	18.9364	19.9015		0.497208	25.5278
10.7131	44.157	46.086	39.8868	32.744	28.3537	31.6054	20.639	20.4144	14.545	30.959	41.0852	64.6314	33.8882	18.218	12.957	14.4423	33.4247	25.6221	31.6963	10.3924	14.498	12.217	26.1653	33.3634	38.6572	26.4626	13.8259	14.343		0.502792	27.6886
10.8321	27.939	35.5084	28.4368	38.172	39.4509	28.4736	20.9651	28.8415	7.391	17.546	28.0714	48.0971	29.3648	30.166	7.486	11.764	33.7871	17.6784	32.3418	13.3681	10	12.621	24.2132	33.0113	33.8603	17.4233	16.4687	11.4836		0.508377	24.4261
10.9512	29.288	44.1342	31.0501	37.11	39.4317	24.9175	17.4498	11.7948	7.1	20.012	30.7356	57.8954	20.6481	18.488	7.005	12.0305	30.1347	15.189	25.8105	23.0724	5.85	14.92	20.5636	22.1378	39.9519	15.1209	17.0162	17.8353		0.513967	23.4533
11.0702	41.807	37.0697	39.9675	28.633	40.257	21.0767	18.5152	19.3867	7.402	27.171	20.736	42.8936	17.455	18.848	9.903	13.5944	28.0472	21.9131	32.6299	12.9585	9.495	12.058	31.7666	26.1105	28.1468	18.4446	14.9278	14.7047		0.519552	23.4257
11.1892	26.75	44.1999	45.05	39.011	36.7806	22.4127	24.1644	21.5592	14.013	35.258	26.441	51.9868	18.6738	16.544	6.093	9.0485	22.9403	22.4621	22.8664	18.2405	4.687	12.431	28.3726	21.6678	26.8854	23.5908	19.1428	17.5356		0.525137	24.2432
11.3083	28.516	33.629	44.7559	42.622	36.1058	17.323	32.4505	20.4877	9.41	33.028	27.4654	40.2775	12.2685	18.281	7.23	10.0054	27.4911	14.1638	22.1267	14.9858	5.029	15.183	36.3482	29.5339	27.6156	21.5264	8.3064	17.132		0.530727	23.3321
11.4273	37.406	31.662	42.803	33.472	48.6216	18.5015	13.7374	16.6929	5.883	19.46	19.0796	47.6683	22.1429	24.455	9.301	10.3963	34.648	15.7838	28.2284	14.1717	11.272	10.768	31.7148	19.0732	33.123	8.4538	15.2003	19.8029		0.536312	22.9829
11.5463	20.179	40.2016	41.9533	31.627	46.0717	16.1603	23.9222	15.8076	7.003	17.928	21.5381	45.5753	36.0029	16.97	10.357	8.96	29.2288	27.4586	31.3883	13.914	7.955	8.819	26.3804	25.0326	27.6313	21.8398	12.7576	18.9739		0.541897	23.2727
11.6654	35.797	25.5929	41.0762	35.153	36.0538	27.8588	24.4252	15.4085	11.046	22.349	23.2266	50.4724	29.1633	18.974	6.847	7.1752	29.9841	16.5146	25.8058	13.856	8.277	11.801	35.9136	15.8499	18.2289	16.589	14.1803	12.7178		0.547486	22.512
11.7844	44.044	22.1727	37.0567	33.237	48.9116	15.2104	19.3542	13.9598	12.527	9.322	26.9474	41.2884	33.0321	19.804	1.753	5.3303	29.6414	31.7632	18.2508	17.6851	11.276	9.819	35.6922	20.6122	33.0989	13.241	19.1646	19.4308		0.553071	22.9866
11.9035	40.969	28.777	28.7416	38.078	32.8079	22.0275	23.0626	15.69	10.097	18.313	35.8905	51.6486	20.5265	9.043	9.326	11.3816	30.723	22.9612	26.7326	12.9686	5.417	5.564	45.3486	12.535	23.9425	19.1884	10.8078	11.1108		0.558661	22.2743
12.0225	44.609	28.1666	30.1014	31.78	37.0407	23.5451	20.1031	19.2479	6.065	17.498	27.9293	49.3766	19.8087	11.15	6.56	10.5803	27.1892	17.8991	18.8021	14.9087	6.396	6.75	39.1713	19.5213	29.9608	12.7685	17.3769	18.6725		0.564246	21.8921
12.1415	37.498	22.8938	27.1817	41.414	43.3839	10.9649	19.4024	11.702	7.416	13.852	34.8962	54.7318	22.1091	18.059	4.635	9.3198	21.8969	14.0107	20.3295	13.5195	2.846	6.566	34.1645	27.2887	23.9474	22.2652	21.1534	9.6846		0.569831	21.3261
12.2606	40.67	35.5536	30.7601	29.583	30.2873	22.9284	22.3766	13.3648	7.372	25.948	34.7851	42.6359	25.9241	13.83	6.543	6.8136	28.718	19.5214	22.9009	8.2528	9.01	10.534	28.3162	13.5651	27.8287	21.1833	18.448	16.0666		0.575421	21.9186
12.3796	37.496	33.258	41.9483	42.514	29.7906	29.427	18.1247	13.2214	15.303	14.659	24.0154	40.0132	19.9256	15.843	11.774	14.3736	17.6077	26.5662	23.4453	11.8313	8.115	6.111	20.8231	21.3123	26.8838	28.4543	21.9775	15.682		0.581005	22.5177
12.4986	34.306	31.8772	24.8467	30.946	45.7762	28.4637	22.0741	11.6075	13.347	12.927	35.5035	47.1606	22.6148	5.65	5.945	9.3122	23.4577	19.6713	17.6867	20.4692	7.166	11.166	27.3733	19.7982	29.5784	11.4057	16.4595	13.5343		0.58659	21.433
12.6177	32.999	25.8702	41.4544	25.877	38.6608	21.1194	28.2334	12.2285	10.715	16.74	22.3978	42.3898	23.6381	11.9	11.321	7.0845	28.4746	22.0408	15.8819	17.0476	14.732	8.316	27.8001	9.9694	29.0142	28.1305	16.5191	21.4147		0.59218	21.8561
12.7367	37.54	21.8376	30.3248	28.688	37.2968	19.6118	28.3311	9.1863	4.407	17.123	35.8393	35.7657	20.3965	12.829	9.95	10.2992	24.0317	25.0951	25.3794	14.3995	7.372	6.972	17.4719	15.213	35.9714	25.2143	32.1614	7.2058		0.597765	21.2826
12.8557	26.36	32.0383	32.7981	22.403	35.6932	20.0381	37.3396	15.6482	8.408	5.891	34.7702	40.7884	26.5224	10.028	4.904	1.129	35.7826	15.0895	17.7771	14.5627	11.854	6.332	26.462	20.6236	34.9799	22.6795	17.9642	14.9147		0.60335	21.2065
12.9748	22.842	31.4631	32.2193	27.656	37.835	25.9059	33.3209	14.635	8.26	14.307	19.7873	35.1258	31.3314	12.81	6.45	4.2139	24.5209	22.0442	28.6616	10.2614	5.616	11.953	30.1829	19.1463	23.6424	22.3291	21.357	9.7699		0.60894	20.9874
13.0938	30.177	23.9137	25.8454	24.023	23.6546	19.8446	26.212	8.0318	10.424	16.76	16.9763	45.5426	42.0873	13.968	7.455	9.2952	31.9226	22.3546	17.0464	12.1241	7.877	3.256	34.7749	18.9232	28.771	21.2344	27.8035	19.2671		0.614525	21.0559
13.2128	39.213	27.19	39.4518	31.63	23.5491	24.0003	21.3847	16.1974	5.023	14.546	27.784	37.9544	26.7044	17.202	7.532	10.3481	18.7314	11.1465	13.4557	14.5795	2.245	19.445	34.3754	26.9546	32.7562	21.5201	18.2449	11.0445		0.62011	21.2218
13.3319	19.657	20.6131	37.2825	34.171	29.8253	23.608	21.0035	10.7011	9.375	11.112	43.0905	27.6612	33.9862	14.961	10.905	11.3223	19.3512	17.851	13.9154	17.9698	13.807	12.192	15.6696	11.0415	27.1866	10.5146	19.2963	13.792		0.625699	19.7093
13.4509	21.446	28.2356	29.8464	31.948	20.0031	20.313	21.2267	20.297	10.071	10.179	32.4057	30.734	14.9522	17.824	13.202	12.4243	12.9546	23.0845	24.6537	18.7696	3.305	7.475	28.6355	22.094	27.8369	16.1224	18.7752	18.7417		0.631284	19.9127
13.5699	20.918	28.5355	30.7549	31.517	27.1856	22.7083	12.3488	18.5171	8.574	13.9	26.8099	23.5633	30.5282	8.381	5.418	8.4592	20.9337	15.8919	19.7076	13.7379	9.585	5.439	27.2653	20.3611	39.8673	12.6493	11.5213	11.3743		0.636869	18.8019
13.689	22.381	50.0768	35.0579	30.217	24.0115	32.4554	17.1608	29.5987	9.707	11.284	29.1606	42.2653	20.2129	16.128	11.272	7.5828	15.2878	27.9178	20.5376	13.9931	14.457	3.378	24.9956	13.3961	28.8757	17.0026	11.7959	8.2313		0.642459	21.0157
13.808	22.91	34.0358	33.2395	30.19	22.0996	24.5509	17.1112	11.4753	6.278	7.047	23.7396	34.6145	22.2606	8.447	9.389	11.0406	18.5882	22.4022	10.943	14.1083	9.123	2.878	26.8866	26.5787	22.6178	16.27	13.1901	16.1836		0.648044	18.5071
13.927	22.144	40.0623	48.41	23.966	26.7986	25.262	28.2325	15.9027	8.132	19.365	28.5047	44.386	30.1797	15.317	15.749	6.8703	18.06	22.847	14.8415	9.1306	6.299	11.939	27.032	15.3287	28.253	15.1734	16.0225	15.9682		0.653629	21.4349
14.0461	21.604	31.7828	24.8603	19.812	34.35	32.6478	23.3536	13.0524	6.786	11.958	30.2956	38.2683	20.0142	6.163	7.49	11.8289	23.5974	14.0815	14.2123	13.2508	3.395	17.949	31.5162	24.4172	23.0487	19.3995	20.6146	15.6682		0.659218	19.8363
14.1651	23.048	26.1892	32.3843	25.45	32.0841	33.695	21.5109	11.1224	10.735	12.119	29.2185	47.5949	25.3143	11.584	6.759	10.6661	26.0095	19.504	24.1331	9.8149	5.233	8.468	28.9884	29.7495	20.3244	18.2675	24.7473	16.0285		0.664803	21.098
14.2841	21.25	35.6185	31.0522	22.37	33.7309	23.3683	20.3854	13.9108	6.645	16.584	25.5798	40.1526	19.6324	13.637	4.679	9.687	18.6019	25.4409	25.4178	13.0719	6.023	7.011	25.2173	29.1582	22.3268	22.2494	20.7198	7.91		0.670388	20.0511
14.4032	13.129	27.1464	25.6922	31.225	34.2956	24.7186	25.9499	10.2015	6.3	9.971	29.2101	38.4277	32.7658	15.021	8.042	7.7442	22.728	13.9653	16.5386	6.5406	9	8.878	34.9047	27.6476	26.3043	16.7398	22.8814	21.2053		0.675978	20.2562
14.5222	19.791	31.2025	26.0429	31.287	43.5515	34.6516	37.5897	17.9308	9.032	9.713	29.9589	35.2567	14.2072	11.234	9.462	8.3642	17.7237	24.8692	17.8197	13.098	5.754	2.759	19.6394	35.4879	12.2237	15.497	15.4884	12.3055		0.681563	20.0693
14.6412	17.98	28.3333	29.4436	38.116	39.6502	24.3989	23.4938	11.1544	3.851	8.66	37.9416	40.3213	27.8858	13.928	5.424	11.7883	11.7686	21.5072	19.6638	13.602	2.491	8.675	32.1473	34.1571	13.2996	21.7422	22.6034	18.5925		0.687148	20.8079
14.7603	15.623	13.5185	42.4678	18.795	26.2046	24.9589	21.0865	17.2256	6.177	12.693	30.0964	33.4042	27.9797	16.62	6.299	11.1189	13.5285	16.2901	25.2314	21.3906	5.602	5.688	37.3085	35.1051	14.7727	14.221	14.8174	20.8724		0.692738	19.6106
14.8793	7.248	18.407	37.7562	29.164	23.9723	27.5459	29.0214	11.2534	2.054	9.521	23.4402	43.8404	26.4148	7.907	8.79	11.731	31.3442	14.9405	20.9664	12.2738	1.936	7.976	21.3368	21.9092	18.5248	21.1457	23.0708	16.8637		0.698323	18.9412
14.9984	10.815	33.7027	43.3951	28.925	27.4636	26.5526	28.7183	13.215	2.81	7.087	28.2444	37.8828	24.0638	13.504	7.624	9.1192	22.2629	22.5872	15.9242	3.9507	5.773	10.871	26.5355	17.5748	23.3277	22.0493	21.5989	17.3588		0.703912	19.7477
15.1174	11.921	18.7145	37.7565	36.869	22.1108	26.484	33.6317	17.9753	7.158	7.975	23.1065	31.4842	16.8359	17.791	11.141	13.0897	15.3465	26.6841	18.1823	10.4977	5.314	11.287	28.6019	26.467	22.9341	25.1515	8.0686	22.791		0.709497	19.8346
15.2364	14.725	16.5777	37.3918	36.561	27.0134	30.4547	37.862	9.7863	5.147	9.506	31.4247	39.8806	32.0631	15.843	8.246	4.2172	25.3878	17.8791	21.7205	16.7722	4.593	11.156	22.9363	22.3515	28.0664	17.9381	10.0685	20.0438		0.715082	20.5576
15.3555	15.944	12.7051	22.5886	27.14	21.6982	24.6814	27.9262	13.8683	11.47	16.271	36.2804	22.6375	26.8732	11.375	7.429	9.6485	31.4184	27.5043	19.7284	13.0607	6.656	9.859	29.7077	26.5766	12.1694	21.551	14.9119	22.5262		0.720672	19.4359
15.4745	6.763	10.1422	22.5383	31.572	19.513	36.9673	29.2355	18.6534	8.69	22.504	30.7254	31.5882	27.1838	13.537	9.537	2.818	21.2641	26.6286	14.3704	14.5136	11.765	3.793	24.4398	23.2568	18.3841	18.5483	19.5616	15.7588		0.726257	19.0804
15.5935	9.926	16.4451	33.4907	42.958	19.4534	36.3821	31.6001	16.8646	11.346	15.883	23.9006	32.0312	30.4112	12.503	9.86	11.9121	25.1868	27.6719	16.9666	14.5102	8.76	6.529	22.9487	13.4544	21.0148	18.0522	14.6481	20.6665		0.731842	20.192
15.7126	12.443	17.0561	26.3852	41.127	17.5725	25.181	27.3448	18.6832	8.352	12.535	28.8945	36.948	29.2925	18.506	8.057	11.2444	22.7258	18.7964	24.6048	14.3726	10.058	6.702	14.4999	17.3194	15.0115	18.4557	18.0364	11.0613		0.737431	18.9738
15.8316	7.524	22.0522	26.8278	37.469	29.3245	32.5013	33.1779	11.7481	9.533	9.738	24.3212	33.7255	40.289	12.194	10.671	6.619	12.3802	18.3986	13.3953	8.8477	8.394	10.653	10.7375	15.9795	15.7958	15.3287	24.3722	31.1781		0.743016	19.042
15.9506	17.941	15.9889	27.5724	31.736	14.067	22.5134	27.1198	16.1841	6.702	16.053	25.0009	29.1753	30.6925	24.005	7.779	6.2268	22.7265	18.9942	15.5151	9.5242	9.767	9.329	26.1257	19.3797	22.0993	16.2104	18.1738	15.0131		0.748601	18.6291
16.0697	6.553	10.2753	24.3719	40.092	26.5527	31.6646	27.2302	19.3241	12.894	10.545	12.7518	45.7689	41.1522	16.088	17.309	6.9925	19.9393	10.4123	20.2775	13.5819	4.882	8.682	25.2315	21.5844	24.084	21.0966	27.9118	17.9389		0.754191	20.1853
16.1887	10.512	17.766	42.6845	44.028	23.6074	25.2087	20.2642	11.0164	15.388	16.371	17.1183	35.1536	28.5376	21.35	14.326	11.6064	29.181	19.4967	20.1651	12.9713	7.484	11.042	24.2214	21.7031	21.9388	26.8291	14.1354	19.6139		0.759776	20.8471
16.3077	11.574	17.6973	39.3507	49.643	20.3743	25.5788	22.1088	18.0483	8.918	16.49	30.6978	23.0423	39.1698	25.458	7.119	11.0269	31.2054	11.8245	15.3494	19.148	7.697	9.024	29.878	25.0487	24.3413	31.0358	25.8282	12.3966		0.765361	21.7526
16.4268	12.246	12.6687	27.0192	42.6	19.9048	33.5328	19.01	11.0989	8.2	23.442	19.0842	50.0752	31.9164	32.252	16.089	6.707	30.747	12.3405	17.564	8.8959	8.417	10.478	26.1792	18.1002	22.2169	15.7077	25.1883	26.5751		0.770951	21.0091
16.5458	12.9	15.1031	29.7136	42.077	12.3104	26.7056	30.9623	14.1227	8.857	14.172	17.1899	41.1941	19.7326	29.328	14.14	13.6461	26.0765	23.1479	22.7154	15.3036	7.307	10.132	36.782	23.7154	24.5142	25.697	19.2509	17.7853		0.776536	21.2351
16.6648	13.522	15.0782	34.6152	44.084	16.5112	26.0398	37.2324	16.2047	13.87	12.533	23.8423	46.4421	17.8715	30.764	12.273	12.8786	34.6791	22.232	23.5986	8.2045	7.262	3.621	23.6156	23.0479	16.895	14.7261	22.6658	20.2107		0.782121	21.2329
16.7839	10.608	19.7423	37.471	32.2	14.3939	32.0577	21.8155	16.8034	8.973	7.945	18.5811	28.3286	23.3227	34.773	16.927	15.2997	29.6511	24.8456	24.5529	14.0301	11.825	13.323	21.5115	26.6048	19.9984	12.4591	21.6633	17.3351		0.78771	20.6086
16.9029	17.484	12.9636	33.8081	35.198	18.3216	32.836	30.1	22.4183	8.269	11.696	15.7382	28.5509	24.5011	36.799	15.97	16.1552	35.2456	30.4749	15.5538	10.4494	5.897	7.217	24.4851	23.7341	18.5027	16.0992	30.4884	20.4404		0.793295	21.407
17.0219	12.173	12.793	38.1892	39.389	20.8415	21.6259	25.6732	18.3415	8.297	11.473	32.2053	30.133	23.7491	32.051	10.263	16.8654	33.7764	18.0552	13.8112	15.0867	7.926	7.934	28.3707	25.073	23.6891	14.9703	23.5204	17.5002		0.79888	20.8492
17.141	14.165	14.6075	33.834	29.269	13.9448	23.1211	26.6318	14.8684	5.612	16.747	18.731	33.8041	26.4115	27.364	18.097	21.0211	32.6639	20.2884	14.9128	13.3183	2.472	11.87	24.5498	24.034	12.9537	15.5798	16.7153	18.6875		0.80447	19.5098
17.26	10.557	12.0984	30.7161	21.37	20.4884	25.087	30.3106	16.7027	13.351	18.486	24.4207	24.1213	26.3555	30.841	9.87	18.7377	34.6269	15.1773	22.3921	9.1808	1.205	6.897	26.785	25.1885	9.2711	16.0224	27.0869	21.7519		0.810055	19.6107
17.379	6.229	12.5675	36.9639	21.392	26.4718	26.9669	21.0593	31.3916	10.104	27.59	29.473	30.7829	28.5715	19.72	18.856	12.4814	28.5323	18.3344	19.3199	8.144	4.969	13.825	18.8059	20.8793	19.3707	15.1176	22.5134	15.7433		0.81564	20.2206
17.4981	16.581	22.3552	27.9308	31.64	25.42	18.8642	26.8425	24.6123	8.316	25.127	30.9521	35.009	24.051	28.601	10.437	13.4442	21.7119	25.0675	13.2983	9.599	11.424	10.422	24.9904	20.011	9.4321	23.9739	18.0648	13.6199		0.821229	20.4214
17.6171	8.121	12.4153	20.2247	18.576	21.4013	22.8997	22.7188	31.8914	8.259	28.491	24.4413	25.7186	34.89	19.708	12.013	19.7744	28.7301	17.9625	18.4176	9.231	14.421	7.447	25.3961	35.8056	14.0097	20.4721	29.0039	25.665		0.826814	20.6466
17.7361	11.376	23.1261	24.9675	20.949	12.3112	17.4206	28.7884	25.2959	9.752	17.5	27.9906	20.1898	38.5177	18.248	15.931	27.3948	25.0695	17.5147	12.4164	21.6022	6.421	5.207	18.5428	31.8642	14.8965	12.1137	31.1603	21.0888		0.832399	19.9163
17.8552	16.396	22.7579	18.5143	26.144	16.0116	20.1302	27.6088	26.7574	8.989	12.948	17.7418	20.1407	30.1448	25.421	20.242	26.139	38.9525	28.0067	25.5377	19.6142	5.639	4.789	15.8879	21.3264	16.8109	25.3815	23.0418	14.9827		0.837989	20.5735
17.9742	14.291	13.1638	21.4619	20.657	18.0441	17.8566	34.6291	19.7924	20.904	19.075	18.5151	21.0728	39.3928	26.46	29.005	24.3524	28.8539	18.8607	16.0395	9.9898	10.628	10.839	13.2286	14.9789	12.206	29.8125	19.2085	16.281		0.843574	19.9857
18.0932	9.762	12.6734	29.802	26.929	16.397	17.8773	28.2901	16.2733	18.844	29.312	23.5805	17.2836	38.3586	27.027	29.976	16.3164	23.8805	14.2487	24.3316	7.5697	11.073	8.639	25.0104	31.5721	14.5454	21.5235	23.0879	23.637		0.849159	20.9936
18.2123	10.53	14.4845	22.66	10.684	15.3634	16.2216	15.2765	27.9667	25.022	29.94	18.9325	6.992	46.082	21.103	29.592	13.0117	24.1401	18.6126	23.5406	15.9407	2.705	10.671	25.9402	17.4898	13.5669	15.6538	21.2095	7.2361		0.854749	18.5917
18.3313	12.726	14.5921	19.5018	16.383	14.8528	20.8068	20.3062	27.4391	17.259	33.673	24.4785	16.0028	28.3335	16.917	25.594	14.0626	19.5113	26.0844	17.7045	12.0352	6.417	12.097	21.3601	23.6193	13.5775	17.1243	25.3917	17.9032		0.860334	19.1341
18.4504	18.272	17.9642	27.5376	24.663	15.9238	15.8956	19.0565	25.7166	20.774	45.497	26.3048	13.194	25.0853	28.161	24.464	25.3611	16.768	18.8318	27.4314	16.8634	11.459	3.917	17.2119	11.1522	22.569	14.5064	20.6919	21.8182		0.865923	20.6104
18.5694	10.674	30.5775	25.264	31.933	15.8919	30.0571	32.6709	28.9599	21.177	55.582	22.2092	26.1811	21.2054	25.839	38.609	18.0803	23.9773	17.4899	21.4092	16.8589	12.01	6.749	19.736	11.5076	15.7077	16.4366	33.5308	22.3794		0.871508	23.3108
18.6884	12.084	11.7771	30.5745	18.482	19.3822	25.9628	20.325	32.565	24.359	36.244	28.053	31.5959	27.1119	20.04	35.119	17.12	15.1585	16.3755	21.9289	12.0831	5.86	13.465	18.8791	16.8608	11.6182	12.9977	18.3451	19.8455		0.877093	20.5076
18.8075	11.949	16.7315	30.26	20.08	19.7077	23.6721	13.9045	28.4208	15.324	35.618	24.4598	28.0468	26.3399	19.436	36.572	26.9186	6.9811	15.7225	29.0065	13.0031	9.646	19.286	7.3149	16.6237	10.3965	12.4021	30.0079	16.7981		0.882683	20.1653
18.9265	7.317	22.5406	28.9014	14.52	13.9994	18.0377	21.5414	27.4642	7.705	29.901	22.7801	26.883	18.2665	23.294	34.458	29.1655	8.8487	14.8517	27.4558	17.5332	11.456	8.647	13.0537	17.1272	15.4457	11.0156	17.8537	16.669		0.888268	18.8119
19.0455	13.444	13.8839	30.1895	8.085	11.7496	25.3038	25.8162	29.3764	21.491	20.141	11.2975	17.0104	18.3172	20.12	38.377	27.4621	9.5983	14.4148	20.876	15.8593	6.373	15.974	18.4705	13.3835	15.4484	8.9783	29.6704	15.167		0.893853	18.4385
19.1646	24.298	22.8614	34.7517	18.388	20.0162	22.8238	23.6343	21.7558	28.564	38.854	16.7537	30.2831	22.9437	21.95	33.343	26.942	11.129	8.8419	15.4243	10.0207	6.522	10.626	10.6985	12.6141	13.143	11.2237	17.6486	12.4619		0.899442	19.5899
19.2836	13.88	27.1383	34.0485	20.374	13.8338	19.4878	21.1302	28.4847	23.168	26.821	10.9946	22.3223	23.7492	31.913	29.137	19.6388	13.2199	10.0227	14.9518	9.2674	2.41	11.202	21.3669	19.2157	14.3207	10.73	17.6644	10.7239		0.905027	18.6149
19.4026	10.923	16.8879	25.7318	14.023	15.165	17.1621	22.1807	20.0909	18.792	23.691	13.7644	17.0544	23.2086	24.052	23.532	24.0193	11.7657	10.3198	12.1451	11.1495	9.42	12.966	17.5758	24.1088	14.1078	13.6012	17.4536	18.3045		0.910612	17.257
19.5217	13.649	11.6027	35.8952	9.483	8.5645	16.0207	20.8169	21.2512	24.035	32.529	12.5518	16.6001	19.0624	20.511	26.42	13.6961	12.5134	11.3172	7.8632	20.1505	9.985	17.882	12.974	20.4086	23.3371	7.2033	13.6606	15.6668		0.916202	16.9875
19.6407	12.425	19.6096	25.7975	16.133	13.1699	15.4776	13.4606	23.7461	19.675	18.242	17.9434	11.5706	21.6673	16.958	15.472	16.5974	5.6488	4.2786	13.1377	28.715	10.611	24.496	16.4514	22.8909	20.5899	8.6078	15.4583	10.9629		0.921787	16.4212
19.7597	9.634	25.7569	20.2794	15.436	11.0137	15.4943	8.8159	18.1409	22.708	19.209	6.706	8.9014	14.8152	14.507	12.898	6.5776	5.1371	7.5954	18.969	19.0236	19.113	16.598	10.0439	18.2558	19.3438	9.0224	13.7116	29.5707		0.927372	14.9028
19.8788	19.885	14.622	22.9884	15.473	15.6671	6.1319	8.6264	20.0394	19.094	25.286	10.322	4.9456	16.424	9.416	12.962	9.4236	11.9953	6.9109	10.4711	28.4224	13.893	14.415	11.9223	19.5159	16.1537	4.8117	9.8666	13.2386		0.932962	14.033
19.9978	19.052	18.0341	20.7163	11.408	8.3921	9.1504	20.0306	22.8661	21.575	18.855	11.8145	7.0768	10.1729	11.97	6.647	12.4944	7.1853	5.287	11.6701	19.5813	10.958	20.973	10.2683	13.7303	9.2411	13.3942	10.0056	14.9986		0.938547	13.4839
20.1168	9.93	17.5018	17.8547	15.421	5.8782	11.2931	8.0414	17.5335	15.429	9.313	5.4893	13.0792	10.1202	5.581	6.074	4.9631	5.2672	3.7554	15.2043	28.4445	9.442	14.481	12.2036	8.6932	11.4284	6.5018	12.4681	12.7718		0.944132	11.2201
20.2359	18.835	13.8482	18.4415	12.645	7.2613	8.7783	11.1725	23.526	10.1	8.067	4.1373	2.5105	10.082	5.03	7.915	5.0266	2.6796	9.1151	8.4851	17.4095	10.635	20.912	5.6122	10.2606	10.7494	7.2893	10.1667	19.6531		0.949721	10.7266
20.3549	17.215	19.6121	22.7268	7.654	6.8561	2.8061	7.9217	21.7672	13.473	12.598	7.5471	2.4613	5.561	6.683	5.243	1.1485	3.666	10.6874	5.2835	19.8833	20.39	20.75	4.1155	9.9304	6.0527	2.8496	14.6613	14.3385		0.955306	10.4958
20.4739	14.057	18.2127	9.6602	7.48	9.1153	4.8771	9.2984	16.9369	12.43	7.694	1.0074	3.0732	5.1124	4.693	7.091	7.9341	1.7231	1.3758	7.7691	14.3611	21.616	18.318	5.2755	8.9888	7.4811	7.7388	13.5895	15.3083		0.960891	9.36492
20.593	10.573	17.0115	13.4082	8.258	1.6232	5.371	6.7407	15.1684	4.302	7.141	1.2545	1.6133	1.3695	3.508	4.528	2.6553	2.3601	1.2332	11.3682	27.6124	13.245	12.425	3.242	11.9726	6.5549	3.7124	12.3736	9.7935		0.966481	7.87209
20.712	12.379	16.2482	9.6928	8.054	3.3655	2.2281	2.7361	13.3524	5.023	6.17	4.4741	2.4536	1.4886	1.639	2.446	3.6398	1.8268	0.0808	3.2614	10.1461	16.195	9.812	6.9287	8.1506	10.456	6.7498	14.108	16.9921		0.972066	7.14634
20.831	9.45	10.8173	7.0992	3.613	4.1535	2.9512	4.8675	12.9977	4.621	12.526	1.9844	1.7469	1.163	3.688	1.281	7.4234	0.7293	4.5738	4.255	7.689	7.99	10.614	7.9042	5.464	3.87	1.8158	11.9651	16.251		0.977651	6.19658
20.9501	18.899	12.7458	6.3779	8.191	3.023	4.49	6.4923	10.2645	8.986	7.142	2.4678	2.4011	3.7645	1.177	3.006	3.6045	5.5588	4.1176	10.9784	13.5427	9.157	6.167	6.8855	4.4934	8.9144	5.5221	8.9044	18.8868		0.98324	7.36288
21.0691	18.441	13.602	8.8285	2.674	6.2616	1.8631	4.2224	5.9943	7.54	5.358	3.8705	1.4857	6.9956	0.909	2.027	1.0159	3.5568	2.2288	4.2508	3.5927	12.131	1.618	2.1468	7.2944	5.2994	2.5178	4.3215	8.4598		0.988825	5.3038
21.1881	16.719	10.5162	8.2203	2.417	2.7811	4.0009	6.5421	4.7226	2.722	8.37	4.4684	0.5225	5.3129	4.327	0.169	3.7826	0.3901	6.5452	9.542	4.548	7.895	1.851	3.4582	2.7942	4.0205	4.5591	4.1447	9.9869		0.99441	5.1903
21.3072	11.394	13.0475	8.6623	4.733	1.577	2.1841	7.2185	8.1658	5.664	6.359	2.0002	1.9784	3.9271	2.728	1.417	5.7512	1.2241	3.1855	3.9136	5.1926	6.703	3.632	1.5442	3.0192	4.2028	2.7639	0.2464	14.7338		1	4.89886

## Sheet: Image12
X0	Y0	Y1	Y2	Y3	Y4	Y5	Y6	Y7	Y8	Y9	Y10	Y11	Y12	Y13	Y14	Y15	Y16	Y17	Y18	Y19	Y20	Y21	Y22		Ap-basal	Avg intensity
0	20.737	39.276	32.64	16.6502	28.2187	22.478	20.893	12.093	13.03	13.6726	13.022	22.605	21.64	31.798	23.269	22.201	21.474	20.426	20.566	19.841	20.937	10.972	28.243		0	21.5949
0.119	17.497	41.378	31.291	24.2954	21.6556	35.445	18.501	29.383	15.199	12.5159	24.023	20.062	26.658	43.905	24.419	36.622	11.321	25.205	32.879	26.571	14.129	22.546	14.313		0.00609578	24.7745
0.2381	27.89	62.583	23.689	21.7688	21.2476	21.449	15.605	21.486	21.061	16.2962	16.439	27.795	23.843	26.677	15.443	40.139	28.036	18.245	19.787	26.307	15.382	17.712	26.001		0.0121967	24.1253
0.3571	29.459	60.635	38.836	27.4457	23.2354	20.63	23.022	30.091	16.192	9.2895	21.753	27.527	20.089	25.426	24.405	30.65	30.465	23.923	32.987	39.093	22.527	17.782	17.88		0.0182925	26.6671
0.4761	19.137	94.311	35.729	15.4937	25.7264	34.862	20.858	29.693	23.356	13.9149	17.498	28.255	37.039	27.24	24.944	30.918	32.453	21.241	23.539	37.669	29.048	20.848	20.487		0.0243882	28.8809
0.5952	34.906	96.605	38.959	21.8089	30.7824	40.034	29.569	44.318	36.516	23.9179	12.353	28.263	28.736	43.235	17.381	40.46	28.212	18.817	20.203	35.351	28.15	17.578	31.307		0.0304891	32.4984
0.7142	33.031	104.754	50.492	36.5297	30.7709	49.823	37.387	27.601	26.03	24.2005	17.477	42.409	23.734	26.989	29.4	31.48	40.55	21.221	25.786	47.24	19.893	24.481	32.731		0.0365849	34.957
0.8332	41.228	127.929	47.21	29.2168	27.3675	42.447	44.884	30.921	27.429	21.9232	29.13	31.267	43.804	38.34	36.302	43.124	23.872	27.316	31.878	58.422	29.582	25.668	35.004		0.0426807	38.8811
0.9523	36.608	126.632	65.36	26.5239	25.2757	60.39	62.246	53.384	32.596	19.1921	34.546	46.68	41.213	46.491	29.059	48.269	43.635	43.485	40.666	50.507	37.771	28.122	36.098		0.0487816	44.9891
1.0713	54.423	132.055	64.092	39.4916	30.4009	61.641	48.992	60.125	37.992	22.2413	25.333	64.471	46.405	42.597	43.554	71.106	36.258	44.695	45.521	53.462	40.447	19.668	42.363		0.0548774	49.0145
1.1903	79	164.512	97.974	36.204	31.5192	67.349	56.493	63.119	39.676	21.7016	35.975	58.326	67.08	57.019	58.294	79.297	40.62	53.785	44.13	63.213	33.883	19.326	33.002		0.0609732	56.5869
1.3094	84.436	145.651	104.763	43.9175	45.694	74.553	60.303	89.526	39.21	18.9553	25.243	70.76	56.983	67.553	65.85	102.146	65.201	66.036	65.3	55.041	34.268	24.579	36.616		0.0670741	62.7211
1.4284	80.792	150.196	91.143	43.4364	38.1291	96.073	69.684	103.995	45.519	27.133	25.156	80.057	67.397	83.307	92.781	118.087	88.624	90.589	71.793	66.959	33.6	25.056	46.641		0.0731699	71.1368
1.5474	87.856	150.229	99.446	59.0892	61.2515	79.173	89.252	117.544	73.415	31.0674	42.007	99.363	99.022	101.678	85.337	112.044	103.103	93.924	83.176	72.639	46.619	27.12	55.982		0.0792656	81.319
1.6665	118.948	160.101	120.549	51.7363	55.0551	98.489	93.276	126.78	86.409	39.9456	54.349	87.821	91.166	100.591	84.402	127.069	109.862	101.288	80.086	71.638	39.772	39.508	54.86		0.0853665	86.6827
1.7855	127.977	134.938	112.474	73.9255	69.6607	117.844	114.824	125.625	102.319	35.214	46.428	101.713	93.25	93.778	93.98	124.987	108.014	106.042	84.32	72.128	45.007	34.204	59.692		0.0914623	90.3628
1.9046	125.493	137.889	98.16	65.676	76.7019	120.574	138.027	150.139	100.127	50.9655	68.831	84.427	82.144	96.749	80.609	132.097	122.921	116.684	94.486	84.759	43.942	36.879	84.555		0.0975632	95.3407
2.0236	114.738	174.796	121.653	79.283	73.5104	123.256	116.319	141.991	108.624	70.0537	86.391	90.741	89.622	94.199	102.61	120.265	137.03	113.829	123.491	104.209	50.117	26.411	81.394		0.103659	101.936
2.1426	138.25	152.118	117.652	74.3178	79.1979	128.397	145.424	144.741	111.952	59.5142	97.216	86.45	99.195	122.837	110.985	123.947	128.048	96.98	112.499	93.683	54.458	38.252	74.94		0.109755	103.959
2.2617	151.296	147.515	116.371	76.7324	80.0641	143.757	151.144	139.267	97.331	93.9494	96.358	108.36	109.941	111.177	113.181	105.311	125.34	89.348	122.653	99.286	85.463	55.983	79.447		0.115856	108.664
2.3807	137.508	136.076	129.415	86.8858	72.8946	153.073	128.322	126.459	104.311	73.1824	84.547	112.054	83.205	98.981	136.053	128.614	114.156	102.224	131.711	88.026	73.2	48.993	99.127		0.121951	106.479
2.4997	140.287	140.202	134.996	88.1542	77.668	128.269	152.588	122.812	97.638	71.0876	92.91	118.144	92.619	119.013	112.304	131.161	121.506	109.305	117.25	106.162	71.797	43.768	101.123		0.128047	108.294
2.6188	146.919	126.533	140.294	75.241	70.0015	136.416	164.295	114.882	114.164	59.3289	109.104	109.794	109.586	126.721	121.76	102.945	114.383	100.035	120.989	112.485	77.066	52.408	98.519		0.134148	108.864
2.7378	141.374	122.149	146.258	81.4693	86.5349	137.122	152.314	118.811	113.076	67.4753	100.963	114.322	114.474	115.611	112.543	90.239	96.78	89.891	101.479	122.942	98.664	53.885	107.096		0.140244	108.064
2.8568	141.998	110.667	124.747	68.9311	60.8506	120.744	135.858	124.046	95.194	57.905	104.967	118.012	101.361	112.939	95.138	98.533	89.876	79.714	118.017	102.53	99.337	87.937	108.224		0.14634	102.501
2.9759	121.918	111.666	128.251	73.3593	60.8113	102.475	119.369	115.664	102.084	50.6071	87.872	112.048	100.538	106.624	76.19	93.265	73.108	101.761	114.175	98.702	92.791	80.118	107.326		0.152441	96.9879
3.0949	134.231	82.13	120.285	80.6404	49.0396	90.926	115.357	116.519	104.789	38.2739	83.105	114.09	100.576	101.839	87.918	97.813	75.771	66.687	98.092	112.258	108.437	89.33	99.829		0.158536	94.2581
3.2139	139.547	94.41	91.431	66.3209	43.7756	66.637	104.199	104.224	105.84	45.4747	87.834	118.337	106.378	102.002	104.529	73.082	94.541	81.315	108.913	103.48	74.587	83.738	95.703		0.164632	91.1434
3.333	145.172	88.394	98.549	82.2684	40.0927	62.687	91.118	106.526	99.397	43.7208	91.31	118.35	99.968	106.347	87.829	76.879	83.891	64.418	94.473	94.966	98.464	90.378	83.867		0.170733	89.0898
3.452	131.039	108.348	88.489	62.0562	47.0468	65.103	71.193	98.59	77.226	46.1217	89.945	105.911	80.603	103.679	97.838	64.504	82.391	56.682	81.166	105.62	88.364	87.367	98.657		0.176829	84.2582
3.571	107.082	86.7	81.408	67.719	39.8891	64.629	77.705	75.802	86.603	46.026	64.011	96.744	79.859	82.734	84.403	64.081	82.979	36.806	69.559	73.983	83.874	82.329	96.971		0.182925	75.2998
3.6901	100.645	77.636	77.32	59.9179	38.1045	47.035	65.598	62.578	95.504	42.0439	70.615	107.407	78.268	85.054	71.993	52.885	73.614	46.642	62.18	90.066	77.041	88.472	89.941		0.189026	72.1983
3.8091	99.369	74.46	74	50.8716	33.1436	35.62	53.804	51.441	86.063	36.3349	75.717	82.275	73.98	81.675	75.586	59.507	46.806	29.333	57.581	72.455	96.539	80.623	99.869		0.195121	66.3936
3.9281	101.995	81.778	73.037	58.4613	31.071	41.359	45.512	40.372	59.849	45.7444	67.772	95.968	64.971	71.626	83.294	50.441	38.327	34.856	56.296	52.879	101.798	74.517	81.098		0.201217	63.1749
4.0472	93.326	88.76	77.651	50.5824	30.3483	45.462	43.313	41.221	55.657	47.7565	72.939	73.56	64.612	66.388	78.335	55.618	41.32	41.232	51.252	69.039	76.611	104.796	79.355		0.207318	63.0058
4.1662	87.586	73.521	103.603	66.3441	23.7126	38.636	45.415	43.533	47.45	38.071	60.755	67.85	63.742	69.201	81.648	46.266	40.416	42.912	60.009	55.51	82.073	87.98	78.416		0.213414	61.0717
4.2852	74.468	66.527	77.549	55.2787	33.1946	39.476	39.154	50.436	66.937	40.3764	43.643	72.931	64.619	68.585	57.792	37.531	42.702	41.95	48.968	47.274	80.592	66.408	67.71		0.21951	55.8305
4.4043	75.198	79.532	69.467	57.4908	32.4667	28.57	45.696	43.687	57.481	55.193	53.332	76.353	46.962	65.02	62.976	40.376	30.524	28.399	49.486	49.563	71.02	71.048	75.281		0.22561	55.0053
4.5233	62.1	73.309	74.326	49.6642	29.9193	47.394	38.623	41.16	61.4	46.4647	59.615	74.031	56.082	53.656	60.991	55.305	24.154	28.346	45.137	35.247	76.883	55.802	69.094		0.231706	52.9871
4.6423	72.192	59.387	72.312	55.6754	28.5656	47.82	35.903	30.549	44.108	50.8417	62.158	64.719	64.324	62.422	55.561	41.001	32.383	38.492	50.208	46.356	79.83	64.153	49.319		0.237802	52.5339
4.7614	53.655	50.875	72.304	57.2969	21.9198	32.16	33.322	33.941	46.458	55.1903	40.367	50.207	57.68	50.176	40.306	30.06	25.962	48.501	51.931	41.998	78.78	67.957	53.17		0.243903	47.5747
4.8804	65.853	52.456	71.714	39.9956	28.9785	31.229	26.311	37.216	33.639	62.457	50.953	46.892	56.486	40.454	47.062	50.493	28.289	37.799	57.832	45.38	77.887	65.991	45.462		0.249999	47.8621
4.9995	51.083	41.689	55.52	45.5335	25.8156	33.325	50.482	47.293	34.332	55.5367	35.177	52.447	41.547	38.256	27.32	38.39	32.895	40.653	42.675	23.395	43.237	54.851	37.127		0.2561	41.2426
5.1185	46.808	44.637	44.041	45.0182	31.6053	43.652	35.113	42.083	44.605	59.7518	41.735	54.563	40.84	36.56	38.592	44.635	41.809	43.855	42.796	44.269	50.295	52.362	35.225		0.262195	43.6891
5.2375	50.243	37.435	50.792	46.4858	22.7895	39.423	41.382	47.319	43.541	63.4888	36.254	37.022	51.186	40.702	35.772	39.864	43.524	35.095	63.203	41.556	48.973	67.871	51.712		0.268291	45.0275
5.3566	49.152	35.747	42.082	38.6589	24.3213	46.816	61.64	47.133	38.14	42.3585	33.08	29.352	51.829	42.494	24.04	25.823	33.459	38.305	40.622	27.981	38.54	45.995	47.835		0.274392	39.3654
5.4756	41.831	40.52	34.341	39.2868	31.4017	47.476	47.582	44.733	43.237	55.3818	45.099	28.228	32.112	40.223	35.357	20.249	38.87	38.988	32.31	51.569	43.513	55.406	47.589		0.280488	40.6654
5.5946	51.075	52.369	28.692	46.4148	20.9076	48.053	52.254	40.618	36.448	41.7196	28.983	29.588	33.812	38.054	25.872	23.181	45.544	45.17	44.159	46.83	34.427	58.779	40.397		0.286584	39.7107
5.7137	49.318	48.503	32.902	43.2215	20.721	36.868	39.89	42.571	52.097	47.4454	25.203	33.321	25.567	34.932	27.599	28.678	38.847	34.321	38.152	37.588	42.863	50.872	42.889		0.292685	38.016
5.8327	46.963	40.501	28.085	36.1337	29.3737	57.582	56.334	34.057	34.204	53.9299	21.952	36.538	36.693	36.309	34.382	39.498	31.799	44.495	45.91	43.965	29.302	50.903	54.911		0.29878	40.1661
5.9517	70.358	27.098	23.64	57.6072	22.6318	50.704	45.273	32.662	36.194	35.5513	15.68	29.913	41.164	26.5	35.441	34.734	35.981	25.744	47.609	52.207	34.209	42.384	70.422		0.304876	38.8568
6.0708	44.813	46.191	31.185	50.9875	31.6927	40.836	58.114	31.355	23.472	44.4236	28	39.17	22.573	27.05	26.942	31.425	44.034	29.034	34.782	55.635	33.331	51.436	47.433		0.310977	37.9963
6.1898	46.444	37.167	36.996	43.578	33.826	42.46	41.284	45.314	18.249	33.9358	34.994	32.462	20.55	21.908	20.306	32.954	51.322	35.166	40.056	31.07	32.898	60.972	56.631		0.317073	36.9801
6.3088	41.347	42.71	23.513	44.9172	21.0204	53.945	29.055	20.118	28.614	44.3873	22.325	31.379	30.489	21.963	17.207	42.552	47.867	54.121	33.963	43.29	41.85	41.673	53.43		0.323169	36.1624
6.4279	46.852	45.042	26.428	37.5175	26.4964	44.927	27.592	30.475	28.907	47.2567	23.205	33.734	39.268	16.947	22.359	34.46	56.823	38.389	36.911	31.904	43.662	53.158	62.708		0.329269	37.1749
6.5469	46.628	28.396	37.062	44.6723	28.5038	40.041	31.895	28.566	32.587	50.0169	37.343	32.784	19.747	21.795	26.823	42.806	26.635	32.846	32.307	39.674	32.635	62.749	40.916		0.335365	35.5403
6.6659	46.654	29.124	24.116	31.7201	28.4436	47.593	35.247	28.163	44.087	49.8386	27.342	20.973	22.335	16.218	21.979	25.741	37.766	26.291	25.645	39.967	28.883	44.843	43.243		0.341461	32.444
6.785	37.241	28.564	26.091	25.3411	16.4686	46.191	40.277	26.565	28.25	42.2169	16.029	31.076	33.637	23.129	27.214	37.186	36.648	31.563	32.87	27.872	36.018	45.416	33.511		0.347562	31.7119
6.904	42.133	34.786	26.087	19.6442	21.4578	39.212	33.215	25.702	18.93	43.4076	19.346	27.984	36.223	15.379	23.357	33.908	43.559	30.76	36.923	40.432	36.982	40.927	31.153		0.353658	31.3699
7.023	44.498	28.301	15.779	23.3717	17.9463	27.58	41.47	26.592	23.606	52.7721	33.5	21.902	34.984	20.789	33.513	22.224	29.776	27.745	34.539	37.01	26.195	38.188	47.059		0.359754	30.8409
7.1421	39.223	28.116	24.218	23.468	29.9812	41.201	38.514	38.868	27.921	39.4055	28.787	31.247	24.223	10.057	15.94	29.658	32.731	36.458	35.109	25.736	32.165	34.468	48.204		0.365854	31.1173
7.2611	28.744	40.335	10.793	28.6925	32.1554	42.769	44.008	40.966	16.393	38.4861	34.999	40.546	25.773	19.305	31.959	23.05	38.713	27.735	34.071	23.817	35.944	32.399	44.757		0.37195	32.0178
7.3801	43.889	30.818	13.236	33.5924	26.5359	42.531	36.881	40.91	29.046	36.8863	35.125	39.003	26.341	21.123	32.257	21.141	41.801	35.024	35.824	30.745	48.174	33.306	26.325		0.378046	33.0659
7.4992	44.045	26.086	16.056	36.3438	21.1725	32.502	36.894	25.105	24.697	39.2372	22.125	45.319	22.842	19.729	24.188	32.216	35.896	20.026	38.223	28.858	44.641	35.598	37.946		0.384147	30.8585
7.6182	36.899	24.356	24.685	32.0977	26.5606	49.175	36.473	25.809	21.721	39.3941	27.499	33.732	21.599	17.319	28.094	23.216	28.058	29.473	38.222	28.029	49.553	29.725	37.403		0.390243	30.8301
7.7372	31.618	24.836	14.98	30.2601	18.5985	52.289	38.65	25.952	25.952	30.1465	28.722	45.244	25.367	17.44	19.844	16.706	34.412	21.061	39.544	33.784	62.924	19.684	39.273		0.396338	30.3168
7.8563	40.358	14.693	9.4	41.715	23.1446	46.549	40.611	19.023	24.602	34.5714	35.035	29.193	37.77	22.08	24.275	31.026	28.71	29.031	29.985	26.499	39.251	25.431	38.841		0.402439	30.078
7.9753	33.249	11.635	15.24	33.9064	16.6679	28.451	51.52	22.043	17.529	36.9825	35.234	30.938	34.755	23.314	18.371	15.895	25.42	26.473	44.996	21.497	47.316	31.399	42.996		0.408535	28.949
8.0943	47.72	15.768	17.657	45.1023	20.9746	41.903	39.513	22.019	34.313	27.1754	31.232	25.906	30.489	10.784	17.747	23.074	26.678	25.714	30.727	30.758	49.103	23.167	39.085		0.414631	29.4178
8.2134	44.116	24.651	10.319	32.9501	21.9938	50.006	31.428	19.075	17.764	34.6227	22.471	25.816	16.896	17.666	17.225	32.765	25.74	21.869	22.437	32.269	54.095	22.846	30.074		0.420732	27.3519
8.3324	34.448	9.21	12.697	30	27.5463	30.606	48.766	13.802	19.7	38.1332	24.384	30.878	24.751	15.22	15.823	34.269	30.585	33.748	37.477	31.03	53.4	37.531	46.446		0.426828	29.5848
8.4515	33.39	9.285	15.287	36.6127	17.131	28.593	33.015	12.536	14.735	32.761	28.304	26.855	34.808	18.487	17.711	33.091	33.637	26.033	42.925	18.913	50.747	39.039	34.128		0.432928	27.7402
8.5705	32.23	8.633	12.71	36.7423	20.0007	33.405	36.589	17.464	17.853	27.4042	34.542	40.758	35.802	18.873	23.157	28.06	18.488	36.56	41.04	19.217	52.211	32.598	33.841		0.439024	28.6164
8.6895	38.628	8.185	8.099	27.6755	14.7856	30.781	31.713	17.323	18.279	25.3731	26.753	35.309	32.061	11.595	12.961	38.993	25.101	27.994	31.983	28.357	60.333	32.767	29.383		0.44512	26.7144
8.8086	37.474	11.825	6.813	30.1646	19.2901	33.153	19.405	11.127	17.873	40.7608	15.83	29.649	28.375	15.487	14.537	29.918	22.903	28.384	34.082	25.913	48.901	33.485	18.095		0.451221	24.9324
8.9276	27.084	6.844	12.063	14.8498	25.3242	36.539	23.995	16.945	12.12	28.8451	18.968	42.177	21.025	16.196	16.592	27.399	29.934	32.68	32.657	29.811	56.168	24.507	16.311		0.457317	24.7406
9.0466	31.84	10.769	4.612	18.693	17.3051	26.955	20.244	15.539	12.435	28.9159	28.047	40.133	19.473	20.655	9.911	9.467	23.233	31.045	33.912	33.128	53.665	24.324	30.97		0.463413	23.7074
9.1657	35.649	13.275	10.288	20.658	19.476	32.213	23.43	7.863	15.012	37.8948	19.19	37.67	20.39	13.554	9.804	18.699	23.42	21.784	27.461	40.175	48.946	19.048	20.519		0.469513	23.3226
9.2847	27.998	15.758	12.154	14.0051	17.4656	28.079	30.41	14.921	22.793	38.9585	24.367	35.44	20.012	12.053	10.253	22.34	18.394	17.389	29.936	22.767	38.491	23.387	22.631		0.475609	22.6088
9.4037	34.102	9.835	10.674	27.6013	32.1329	22.625	18.794	18.588	14.389	29.0723	26.347	31.9	21.941	12.419	11.346	31.093	23.516	20.299	29.656	33.077	52.012	22.908	19.214		0.481705	24.067
9.5228	24.344	11.366	18.279	14.9633	19.4889	30.773	16.6	16.125	14.372	24.8117	9.247	29.817	24.774	9.153	7.733	21.648	19.581	24.692	31.515	42.867	40.975	25.666	18.931		0.487806	21.6401
9.6418	33.047	7.368	18.066	26.7186	19.8479	28.088	10.679	14.698	19.341	29.4738	12.66	41.821	22.555	7.744	13.522	31.381	18.821	32.134	37.215	21.808	42.532	22.086	12.964		0.493902	22.8074
9.7608	27.718	9.739	12.37	19.1663	24.0449	23.167	14.453	17.534	26.154	30.688	24.3	27.892	26.179	6.685	7.679	25.245	13.636	20.167	24.081	26	47.645	21.029	21.732		0.499997	21.6219
9.8799	39.26	12.97	10.28	13.0237	25.5855	23.84	11.212	19.019	10.916	24.7089	20.826	35.613	20.286	14.033	16.752	22.174	17.882	20.433	28.696	24.862	39.884	17.029	31.647		0.506098	21.7797
9.9989	25.895	11.055	7.842	18.1138	27.7117	31.901	23.069	21.616	9.586	27.7543	20.932	34.669	12.424	7.46	11.837	28.635	27.453	22.148	30.746	31.727	39.312	22.519	23.812		0.512194	22.5312
10.1179	31.051	6.881	3.902	19.3092	23.6397	27.326	25.228	10.173	11.553	17.5228	27.181	24.193	22.344	11.733	12.152	15.605	28.612	23.625	28.732	20.894	31.072	13.658	22.581		0.51829	19.9551
10.237	27.539	7.269	8.892	20.3381	21.8224	19.562	20.895	13.104	11.26	21.3243	23.863	24.085	12.499	4.182	14.525	14.786	20.577	23.97	28.745	31.528	29.267	15.512	29.213		0.524391	19.3373
10.356	28.207	7.211	9.337	15.9198	22.6567	19.524	25.589	10.325	9.559	17.1515	12.195	22.243	21.51	11.668	13.566	16.607	23.08	22.256	21.528	24.147	42.862	19.665	30.75		0.530487	19.459
10.475	19.274	5.433	7.667	13.0965	37.3055	38.025	31.424	10.609	10.515	23.6597	29.57	24.584	19.096	7.644	7.921	18.01	21.408	22.273	18.886	25.259	32.206	12.788	29.949		0.536582	20.2871
10.5941	17.029	3.662	11.179	15.2158	25.9994	17.498	20.284	15.209	13.702	19.506	17.637	30.547	31.194	10.334	11.288	26.81	27.161	16.459	22.086	16.444	41.679	19.005	28.527		0.542683	19.9328
10.7131	30.15	4.128	6.191	19.1651	33.9903	26.389	21.999	9.766	8.88	8.7114	29.27	31.136	25.534	10.4	17.317	25.646	19.909	31.084	21.602	22.98	30.145	25.769	20.038		0.548779	20.8783
10.8321	17.131	4.239	3.789	19.1122	34.9598	21.541	25.195	11.536	13.88	8.8627	32.167	22.764	32.204	12.173	19.534	21.785	23.499	20.938	20.565	20.809	28.903	19.059	22.017		0.554875	19.8549
10.9512	24.028	9.703	10.468	23.1379	23.0826	20.204	29.02	14.556	6.672	14.9449	32.37	23.178	23.271	5.906	8.802	17.331	29.115	24.202	25.977	23.241	32.703	15.531	28.896		0.560976	20.2756
11.0702	19.541	7.173	7.014	11.8953	31.4813	24.078	33.312	12.672	13.614	14.2939	25.759	18.458	33.434	7.487	8.887	18.251	23.279	27.155	25.088	21.793	40.862	16.821	18.372		0.567072	20.0313
11.1892	14.567	7.044	9.818	14.1737	32.2986	26.474	17.228	6.289	9.563	18.4891	23.887	15.634	14.387	11.929	8.898	10.604	26.711	30.15	37.209	30.171	21.903	16.03	17.43		0.573167	18.2995
11.3083	16.979	9.207	4.767	18.9093	31.5808	27.423	14.109	16.102	8.468	14.7268	25.569	21.56	16.056	14.184	4.987	12.008	28.811	26.22	29.369	21.145	35.21	16.954	15.674		0.579268	18.6965
11.4273	20.659	9.398	3.434	18.1257	25.2456	22.29	28.192	10.063	7.92	16.6482	30.339	29.86	19.034	12.994	12.517	19.025	22.506	22.422	28.468	15.886	35.227	12.04	19.549		0.585364	19.2105
11.5463	15.362	11.541	6.515	18.1486	28.9204	18.525	23.268	10.053	9.708	25.5024	26.295	18.696	19.11	13.283	10.833	14.552	24.499	18.248	38.103	22.088	33.105	31.649	27.299		0.59146	20.2306
11.6654	14.847	10.14	9.69	23.7962	29.8686	28.068	18.031	9.138	6.159	19.9957	33.059	21.489	13.938	15.183	4.479	15.13	34.275	11.244	25.618	22.381	25.972	11.555	12.712		0.597561	18.1204
11.7844	22.223	10.72	9.233	14.9716	33.3772	21.666	33.83	13.672	14.947	22.9352	23.703	27.409	10.914	21.769	6.395	10.798	21.084	27.112	30.588	29.056	30.244	19.497	29.732		0.603656	21.125
11.9035	12.127	9.106	8.076	13.3904	25.9279	19.513	15.217	7.93	14.687	12.8217	31.24	26.876	15.558	11.021	7.182	17.089	27.333	19.372	32.418	24.727	27.793	18.772	16.818		0.609757	18.0433
12.0225	13.789	8.041	11.062	20.1176	26.6593	32.109	20.994	11.528	8.224	17.1561	26.928	22.692	20.089	14.139	9.573	6.873	29.022	30.823	23.614	27.591	17.499	13.697	36.631		0.615853	19.5153
12.1415	12.592	6.543	8.93	19.9349	23.1081	28.775	10.517	11.888	4.968	15.5303	20.884	22.053	16.986	24.924	5.776	15.098	24.485	15.094	31.74	22.648	14.541	24.597	22.585		0.621949	17.5738
12.2606	13.634	5.868	6.873	14.0634	22.971	29.508	9.847	9.16	11.742	13.3627	28.422	32.933	29.94	16.381	12.399	22.717	29.534	13.3	19.808	20.985	16.59	21.358	22.862		0.62805	18.446
12.3796	19.244	8.84	6.363	16.291	25.797	16.134	19.041	7.219	8.323	13.3652	35.62	31.689	17.846	12.287	6.927	10.945	31.01	14.672	16.644	28.277	26.494	22.885	19.326		0.634146	18.0539
12.4986	18.429	11.558	7.346	8.2729	25.025	26.492	19.457	13.958	10.041	24.7746	28.417	34.367	32.803	11.556	5.586	16.222	25.052	13.653	18.657	17.711	26.008	19.347	28.363		0.640241	19.265
12.6177	11.213	6.789	4.469	17.1658	32.4407	36.815	15.205	8.606	5.137	19.5356	21.064	33.067	25.685	7.147	5.668	20.355	32.43	20.247	18.466	19.733	23.317	23.481	35.31		0.646342	19.2759
12.7367	20.43	3.338	6.299	23.0026	24.2657	24.318	18.752	12.44	4.6	19.026	30.699	32.17	18.883	20.307	12.104	12.887	28.638	13.146	19.991	32.137	25.21	27.888	33.503		0.652438	20.1754
12.8557	17.264	10.743	6.93	18.882	24.205	20.598	17.656	15.107	8.819	16.1953	33.64	28.023	15.217	13.589	6.717	14.206	26.279	15.883	24.747	22.084	30.022	17.978	30.991		0.658534	18.9468
12.9748	17.736	7.056	6.198	14.4889	18.372	23.31	16.208	8.546	6.217	16.3433	23.014	26.352	16.716	15.061	5.255	16.762	18.768	14.291	26.813	24.491	25.079	13.26	34.11		0.664635	17.1499
13.0938	29.132	3.208	9.253	17.6883	30.382	31.041	26.444	6.554	3.896	25.6226	25.049	23.203	15.519	14.081	6.457	10.385	17.947	19.979	25.887	27.388	29.81	31.458	39.984		0.670731	20.4508
13.2128	21.29	9.806	7.553	14.4836	25.4034	21.851	18.293	16.882	7.641	15.7976	26.134	27.43	19.775	13.702	15.854	9.762	13.233	14.962	31.029	33.927	28.964	23.461	45.918		0.676826	20.137
13.3319	18.969	7.989	3.421	16.7195	29.469	18.244	22.687	14.343	10.089	20.9587	35.95	26.965	17.195	13.225	13.524	9.689	24.483	19.629	26.044	23.392	23.881	21.148	36.504		0.682927	19.7617
13.4509	18.246	10.084	8.627	22.3046	30.2901	25.052	41.039	14.501	13.773	16.0445	17.362	25.285	15.32	17.383	10.706	15.471	17.183	17.872	26.399	27.579	26.366	22.678	27.181		0.689023	20.2933
13.5699	16.98	4.345	3.039	23.9941	21.3232	16.999	24.507	6.882	14.883	23.4635	19.152	27.378	34.138	14.979	9.247	8.302	13.354	19.713	20.173	24.947	30.119	24.034	30.421		0.695119	18.7988
13.689	14.229	6.012	5.624	16.1752	27.3036	15.284	22.047	6.061	12.542	13.826	22.603	28.888	22.581	9.187	10.908	13.255	15.662	21.701	30.85	21.05	27.405	22.241	29.65		0.70122	18.0472
13.808	23.094	9.103	5.171	25.0034	20.2165	19.503	15.41	5.547	5.309	18.6233	22.465	24.398	21.329	15.498	16.435	18.485	20.168	21.73	21.938	23.977	24.204	24.785	26.532		0.707315	18.6489
13.927	27.007	4.703	9.027	9.7662	18.4855	24.298	24.208	11.634	10.758	16.8899	28.691	19.344	17.689	17.575	18.238	12.832	20.636	18.804	15.028	28.167	29.272	24.8	31.297		0.713411	19.0935
14.0461	14.906	5.591	5.698	15.753	22.6256	20.806	21.194	11.814	11.213	17.714	26.154	23.941	25.515	8.194	15.608	13.55	23.188	13.518	16.921	35.004	24.379	25.804	27.972		0.719512	18.5679
14.1651	25.593	3.208	7.856	12.4498	14.616	21.112	22.117	12.079	10.605	19.9922	23.086	32.03	28.857	16.106	10.573	10.402	11.595	22.888	27.051	29.562	14.949	19.413	21.602		0.725608	18.1627
14.2841	20.539	7.497	7.542	13.482	19.7168	22.339	15.262	13.824	8.249	22.1862	20.479	26.397	24.524	15.364	6.316	15.088	28.533	29.082	26.835	23.136	17.917	34.717	43.594		0.731704	20.1139
14.4032	14.091	4.716	2.035	9.4432	16.6758	23.823	27.115	11.593	10.572	16.5694	21.55	17.91	23.677	10.644	2.352	20.882	25.15	23.851	20.569	36.451	23.091	18.314	25.074		0.737805	17.6586
14.5222	18.594	9.338	11.045	6.9523	25.3573	18.252	25.208	6.21	11.273	20.6055	21.591	21.21	30.395	15.122	8.563	13.459	22.312	26.6	13.325	37.792	30.677	20.026	30.401		0.7439	19.3177
14.6412	16.944	10.43	7.864	12.0637	17.6408	25.901	26.167	14.06	6.155	24.2401	19.388	24.434	38.482	13.847	13.16	13.305	28.965	22.832	16.607	24.281	23.529	20.992	38.016		0.749996	19.9697
14.7603	12.785	3.663	11.545	10.8764	18.6382	25.254	24.512	15.053	3.22	22.8035	23.18	32.278	28.671	9.941	11.246	22.759	26.112	37.401	18.924	35.639	28.341	19.888	38.039		0.756097	20.903
14.8793	12.964	7.223	7.837	13.4954	20.0762	27.693	13.004	7.473	12.263	18.4735	15.714	27.368	37.56	13.978	18.197	17.08	26.47	24.101	15.721	19.534	13.786	19.709	25.129		0.762193	18.0369
14.9984	12.594	8.706	8.059	7.5284	14.8411	34.349	21.966	9.045	9.133	22.8998	20.887	25.954	36.313	12.829	8.918	19.837	22.108	22.24	23.174	21.56	27.906	17.289	34.471		0.768294	19.2438
15.1174	21.139	4.741	12.795	10.182	25.42	27.839	18.16	10.714	17.201	25.9331	15.848	34.698	29.413	18.899	13.815	24.674	23.154	22.481	25.809	21.853	18.132	14.235	27.272		0.77439	20.1916
15.2364	12.784	10.537	5.607	11.3434	21.2001	32.331	24.049	8.416	13.74	19.7145	23.484	36.185	27.645	20.161	13.611	20.785	27.9	31.284	22.203	22.312	23.157	16.151	24.387		0.780485	20.3907
15.3555	14.58	7.024	8.117	12.9308	20.3816	23.691	20.822	9.144	10.892	21.4455	29.718	23.926	30.31	14.044	14.799	31.595	13.988	26.444	33.648	17.942	19.716	15.803	37.137		0.786586	19.9173
15.4745	12.359	5.832	7.994	18.3069	23.0424	14.758	21.579	10.308	16.678	12.9262	20.815	28.337	30.714	7.105	10.255	26.736	16.235	28.542	23.901	23.172	20.816	15.185	23.383		0.792682	18.2165
15.5935	4.2	12.791	9.77	13.3263	26.0402	13.998	27.933	11.919	15.036	20.9603	30.671	33.41	33.917	12.643	19.55	32.05	26.507	32.218	18.201	36.662	17.96	13.571	26.879		0.798778	21.3136
15.7126	11.975	8.915	9.133	15.4504	23.1684	21.169	20.442	10.013	9.52	19.0165	35.347	40.149	16.436	16.035	11.084	23.073	15.244	37.559	19.669	29.895	17.036	19.525	29.304		0.804879	19.9634
15.8316	13.844	7.562	7.274	19.8276	20.9952	17.905	23.51	12.64	13.326	18.4311	23.45	26.432	17.101	20.596	14.472	27.477	19.28	33.051	20.612	24.042	19.81	20.664	11.148		0.810974	18.8456
15.9506	9.677	6.73	8.737	16.4586	27.8678	14.771	12.306	13.535	10.973	21.288	32.446	19.219	22.282	28.18	16.836	32.536	30.146	25.336	24.339	31.888	23.321	17.556	15.559		0.81707	20.0864
16.0697	8.802	6.442	12.708	11.0943	23.6571	10.207	17.979	7.499	19.419	20.5632	23.573	22.741	20.457	19.794	10.491	21.51	17.095	24.052	13.12	36.567	20.725	15.65	19.046		0.823171	17.5301
16.1887	18.897	5.92	6.614	22.7797	27.1471	13.575	13.26	11.74	7.317	26.5962	21.922	10.52	24.644	27.235	23.322	28.036	22.706	33.85	24.378	29.493	17.186	18.064	24.016		0.829267	19.966
16.3077	14.988	13.536	10.661	11.0119	24.1898	19.68	4.919	11.233	17.795	21.0069	20.186	10.88	19.753	24.845	10.726	31.931	23.861	36.783	23.026	32.641	30.579	21.047	15.921		0.835363	19.6174
16.4268	9.575	4.372	5.675	19.213	13.6259	13.032	9.845	12.913	17.056	16.9669	17.64	14.051	12.627	35.192	20.247	24.555	24.755	29.72	27.478	22.953	16.593	29.732	13.39		0.841464	17.8786
16.5458	16.535	6.282	6.951	15.3734	24.4508	19.963	11.514	10.706	13.539	14.48	24.585	13.545	14.209	20.111	19.296	25.698	18.463	36.569	18.453	38.081	27.037	16.979	18.76		0.847559	18.7644
16.6648	14.225	12.985	12.565	13.9323	33.2323	16.05	12.534	20.015	19.148	20.2667	20.449	19.217	15.67	16.31	22.747	31.516	23.556	38.474	30.398	24.282	25.919	14.54	19.169		0.853655	20.7478
16.7839	14.787	8.332	8.745	16.9674	22.6088	12.753	12.9	8.775	16.931	13.5556	12.411	11.626	11.954	14.98	25.002	21.921	30.373	23.335	26.766	13.479	22.178	25.336	20.811		0.859756	17.2403
16.9029	18.835	12.932	10.536	20.7777	22.3265	18.158	20.018	17.118	17.767	23.3328	17.527	5.266	13.437	12.521	26.482	27.865	37.019	20.095	28.416	18.147	30.309	16.012	14.272		0.865852	19.5291
17.0219	21.687	13.108	7.732	19.9978	21.606	25.41	21.107	19.336	23.901	22.9479	10.729	12.627	6.797	15.813	26.034	23.258	34.886	21.083	30.753	23.337	25.132	18.738	26.98		0.871948	20.5652
17.141	24.001	12.39	9.305	15.7708	23.3836	15.541	11.351	10.407	15.863	15.8265	18.199	6.238	8.837	8.553	29.628	20.22	24.201	11.307	25.515	10.613	25.143	14.711	16.331		0.878049	16.232
17.26	28.744	7.814	10.804	19.0806	19.5136	13.186	7.587	17.475	29.984	9.3771	8.418	4.328	4.332	6.361	24.475	13.688	17.358	20.979	20.598	11.613	20.858	26.783	14.233		0.884144	15.5474
17.379	11.985	13.775	15.884	24.4268	27.0245	27.465	19.185	12.17	14.812	11.1006	12.046	6.495	8.617	4.417	19.125	11.215	15.344	16.738	17.471	12.143	16.547	20.276	17.202		0.89024	15.455
17.4981	22.454	18.74	14.172	15.6318	20.1122	20.144	4.721	18.791	10.115	8.1906	11.009	6.47	2.533	7.675	9.276	6.414	10.475	20.625	23.584	10.862	21.759	16.684	22.691		0.896341	14.0491
17.6171	21.992	15.14	14.188	10.268	14.2081	19.566	12.176	16.084	14.623	10.3989	11.736	9.925	7.038	7.798	11.226	4.453	10.378	10.834	18.703	6.861	17.401	16.386	17.6		0.902437	12.9993
17.7361	19.469	12.173	10.03	11.8883	21.5075	15.177	16.252	23.149	17.06	6.3595	5.927	10.128	8.204	9.014	3.509	9.032	3.409	14.895	18.925	14.655	12.709	18.741	26.219		0.908533	13.4101
17.8552	15.537	14.183	11.382	22.3523	16.3733	18.934	12.355	21.072	9.077	9.6686	6.926	6.581	4.762	11.932	2.959	6.358	11.849	9.077	13.381	4.587	6.043	15.902	31.451		0.914633	12.2931
17.9742	30.709	11.693	18.987	21.0912	10.3287	12.637	8.62	17.541	14.11	9.5749	1.318	7.945	10.286	9.127	9.224	5.604	5.755	10.001	8.883	3.189	12.317	16.68	27.7		0.920729	12.3183
18.0932	16.755	9.653	11.474	15.0583	12.4226	9.047	7.617	27.687	17.055	6.7145	5.416	9.304	8.275	16.987	4.331	7.9	5.019	14.815	5.206	1.727	10.676	18.761	18.207		0.926825	11.309
18.2123	13.957	6.369	17	11.3882	4.6344	9.159	10.915	14.911	13.373	9.4535	5.131	6.283	13.189	14.901	5.919	7.397	11.221	10.808	7.402	4.397	5.599	11.899	22.052		0.932926	10.3199
18.3313	8.22	5.39	11.782	9.693	4.859	5.098	11.486	12.297	14.143	15.9612	7.496	6.196	10.576	16.518	4.044	7.074	9.259	7.631	8.595	5.042	2.89	11.378	29.303		0.939022	9.77962
18.4504	9.538	4.219	18.647	11.2741	9.0559	7.533	13.301	7.903	15.537	11.7929	8.617	7.019	27.087	22.671	7.804	9.774	10.666	10.261	2.373	1.42	2.384	4.805	19.583		0.945123	10.5767
18.5694	8.452	1.518	8.192	5.2503	5.0467	10.119	7.986	6.3	12.145	14.4795	9.416	14.103	13.095	31.052	4.47	9.875	6.606	9.195	4.233	5.054	3.119	7.388	12.77		0.951218	9.12454
18.6884	13.756	4.367	7.355	5.8437	4.5873	6.273	7.006	17.534	8.14	9.9897	13.566	4.69	6.7	32.849	15.546	6.756	14.051	6.723	6.857	1.445	4.741	4.069	17.862		0.957314	9.59594
18.8075	11.193	3.928	7.425	5.6689	6.405	5.136	6.073	14.365	10.768	12.1564	4.011	18.663	20.502	42.255	15.237	10.498	3.695	6.712	4.365	3.26	3.693	11.756	9.506		0.963415	10.3161
18.9265	3.754	4.071	7.772	6.0163	3.1119	5.348	12.209	7.916	17.788	12.2899	10.279	10.035	19.146	42.576	19.365	6.638	7.539	6.089	3.617	7.347	4.108	2.797	8.726		0.969511	9.93644
19.0455	6.58	0.984	8.355	5.7852	6.3189	4.927	2.697	12.133	20.694	12.7678	10.511	18.056	18.391	30.345	10.534	12.789	13.545	2.016	3.801	0.385	0.227	1.684	4.261		0.975607	9.03421
19.1646	1.53	0.335	1.648	3.0728	7.0449	5.938	7.176	12.085	16.194	18.3971	8.289	12.642	27.528	44.149	21.751	8.436	10.23	4.136	5.287	1.657	1.721	0.945	8.241		0.981708	9.93186
19.2836	3.009	4.087	4.662	9.051	7.8275	4.733	12.879	11.303	15.006	14.3026	13.096	12.387	12.316	49.078	17.827	9.934	8.377	3.618	3.748	0.645	2.886	3.886	1.877		0.987803	9.84935
19.4026	2.405	1.032	4.338	12.9019	6.6664	8.601	10.005	5.083	22.815	15.8005	9.732	18.691	13.819	32.347	25.077	12.632	12.615	8.719	4.777	0.722	1.161	3.713	2.912		0.993899	10.2854
19.5217	2.828	0.702	4.309	7.0334	5.1077	5.361	12.419	3.773	26.067	29.6664	18.238	20.616	15.564	29.754	24.852	14.393	15.579	13.573	1.744	3.059	2.226	0.173	3.306		1	11.3193

## Sheet: Image8
X0	Y0	Y1	Y2	Y3	Y4	Y5	Y6	Y7	Y8	Y9	Y10	Y11	Y12	Y13	Y14	Y15	Y16	Y17	Y18	Y19	Y20	Y21	Y22	Y23	Y24	Y25	Y26		Ap-basal	Avg intensity
0	30.401	25.3003	18.4471	28.9175	39.2856	46.6227	25.9158	37.222	28.7639	22.0852	41.9009	29.7849	29.105	22.1313	24.0674	18.369	20.7094	48.2278	40.9528	35.7805	24.6574	14.2705	14.42	17.0539	16.3382	19.4674	18.0837		0	27.3437
0.119	37.0835	26.5795	16.6642	26.1755	39.7154	45.098	30.9704	22.96	29.1755	20.8477	40.5969	42.7334	30.6697	22.8946	17.2251	30.314	23.2239	44.3022	38.8274	40.0723	17.46	18.0823	14.718	12.0887	17.5789	20.8954	18.5373		0.00492468	27.6107
0.2381	31.7102	30.3955	19.8943	21.4105	54.9252	47.7035	28.1896	37.47	26.9561	22.8566	48.4399	57.7986	30.2086	28.2016	24.0388	23.6545	20.0303	49.0455	52.4039	44.7076	22.0881	30.0836	16.665	16.2709	22.5794	30.6004	24.3858		0.0098535	31.9524
0.3571	27.3121	32.9537	15.2344	19.5702	47.9158	57.8085	34.0373	57.156	36.4996	25.6135	44.9809	57.2023	26.8029	29.4201	36.546	22.3383	15.624	45.6441	50.7896	44.1126	31.5653	28.0748	22.055	15.9125	24.4921	39.1648	24.8221		0.0147782	33.8388
0.4761	34.6215	39.9777	22.5532	18.9462	65.2974	59.214	35.6271	68.542	43.1479	26.6219	41.037	53.7918	38.9069	35.9125	44.6676	20.9838	19.9836	45.1392	44.9597	38.9769	28.0678	20.0974	12.265	19.917	27.1446	30.9153	24.4716		0.0197029	35.6217
0.5952	25.0257	55.9541	19.2701	31.3111	64.0514	50.9682	29.7788	71.673	59.6659	22.9524	42.7969	54.2824	33.6013	38.8523	40.1171	28.792	27.3859	51.0004	55.0099	40.4838	24.6968	30.1856	11.34	19.9068	27.7917	27.9333	24.9746		0.0246317	37.4001
0.7142	27.441	54.0724	32.6925	20.7294	55.6447	53.4858	32.2946	75.263	63.7972	23.6067	49.7553	53.7593	39.7435	45.9438	47.2682	26.9941	27.0315	57.8358	60.2079	49.6271	23.0884	32.8082	10.456	17.1299	26.8479	33.9664	28.9421		0.0295564	39.6457
0.8332	37.825	56.1193	43.9635	22.1071	59.7362	59.7517	37.8982	69.49	64.1386	30.845	44.1213	53.9165	37.6301	41.9827	53.1287	29.0071	26.7625	64.0962	50.9665	37.664	24.6061	33.7476	11.672	25.4942	34.4091	32.0998	33.5171		0.034481	41.3591
0.9523	33.2031	72.2677	37.3502	24.5647	52.328	71.3705	31.6472	76.093	65.6952	40.5109	45.3541	62.4453	33.8542	50.2235	61.1689	33.2285	29.8255	78.0447	54.1512	41.9365	23.7615	42.8175	20.253	24.7705	40.4152	22.5399	21.9432		0.0394099	44.1394
1.0713	29.036	63.5609	43.5339	23.6718	54.0774	67.2788	38.1581	84.945	65.9152	37.4904	48.0955	70.0203	41.1781	53.7577	62.6767	34.7128	31.957	61.0495	48.3949	51.4505	25.0985	42.2562	25.509	22.5294	38.5005	32.1994	34.9652		0.0443345	45.6303
1.1903	28.4648	65.5339	44.9387	26.5552	65.1977	54.5518	37.3134	84.009	80.2778	45.2795	46.1915	52.2335	34.9102	53.5704	63.8182	40.8832	32.0015	61.6861	52.4528	54.1871	29.3875	44.1568	20.625	28.0567	36.248	39.9648	29.6597		0.0492592	46.3761
1.3094	42.5709	71.8586	53.3466	38.4687	65.0743	59.8666	33.7431	73.416	94.9406	44.1671	47.1138	54.3727	34.2703	62.4401	65.0664	31.1741	36.8279	55.4216	58.4002	48.6121	28.9163	42.4176	25.333	37.2313	35.2268	37.9614	37.271		0.054188	48.7226
1.4284	42.7506	59.6325	47.8971	23.9237	72.5212	62.5863	36.0531	74.126	89.9199	44.969	61.0147	76.3226	36.1235	65.3153	70.3633	28.5284	25.583	63.8459	63.2811	42.1017	24.6257	47.2663	38.593	51.4053	38.5702	39.9109	36.0814		0.0591127	50.493
1.5474	33.5956	73.7854	64.8591	29.2767	67.7131	70.5262	49.9655	76.863	91.2518	47.2725	44.3819	71.1191	46.937	69.0878	72.0077	41.3462	28.4127	59.2094	70.9478	43.9495	21.7387	54.3526	45.362	43.3939	28.1655	32.008	45.6902		0.0640374	52.7118
1.6665	41.4243	73.3977	62.1614	31.3779	71.3801	86.0473	46.3935	76.493	86.7439	35.0788	38.7512	85.4803	43.2932	81.1829	56.4828	45.9178	35.1989	58.32	64.7645	64.868	24.7601	57.9586	59.962	55.5234	39.4968	38.2495	45.4291		0.0689662	55.7829
1.7855	39.9729	77.8895	80.7287	25.2537	73.8041	78.2143	41.8421	84.128	96.9546	59.6531	46.218	64.1989	48.2985	72.0006	71.5491	43.3202	31.9891	58.7457	63.7781	60.2667	28.0106	58.1064	73.489	56.8013	39.0511	37.8037	49.5021		0.0738909	57.8359
1.9046	47.2106	72.1258	73.9303	30.5933	75.4564	78.6755	38.9661	70.079	89.587	62.6949	43.621	79.9481	47.1297	69.998	72.579	45.2798	29.6635	63.5084	62.771	58.9819	29.6126	70.714	62.867	63.0151	49.3493	32.8736	53.7681		0.0788197	58.3333
2.0236	36.1292	73.1643	72.4764	30.6196	86.3165	65.765	41.392	83.082	80.2476	47.5296	44.5343	89.6577	55.3132	76.8562	75.4714	41.1088	32.6368	68.2644	66.5167	59.9214	39.7148	60.369	67.602	64.0319	55.5672	39.1599	62.557		0.0837444	59.852
2.1426	49.5454	70.7011	89.1844	33.8246	82.6829	82.8062	33.194	92.853	86.9842	52.3539	39.8078	91.7244	49.3496	96.7218	65.7356	49.5163	33.0427	58.0422	61.5674	61.0162	27.6095	62.8507	72.514	60.0726	50.0552	49.4277	58.6501		0.0886691	61.5494
2.2617	44.8705	71.4409	86.4848	34.4056	78.989	66.3066	34.073	78.201	96.8921	51.9347	42.5646	73.1929	47.2835	85.22	59.7363	50.746	36.7844	69.2662	66.2906	68.95	40.766	70.1724	71.87	73.5158	45.4992	47.1202	66.3938		0.0935979	61.4433
2.3807	51.8645	62.0936	82.6844	27.7362	74.2299	78.8234	45.7888	77.037	94.0575	60.6884	42.076	81.5147	40.1507	85.2355	57.2161	49.2448	25.5852	70.8577	69.9368	53.4075	49.7402	77.0566	78.027	54.7902	51.1634	43.8624	64.978		0.0985226	61.1054
2.4997	57.7074	76.1222	84.2216	38.2619	64.4804	83.1004	46.8674	79.291	96.2429	58.3629	41.796	83.5408	44.0549	96.8326	69.4498	40.6272	32.1818	70.1061	87.0044	58.7914	38.6515	79.3758	71.841	61.221	65.0314	46.3752	76.6104		0.103447	64.7463
2.6188	62.0134	65.0436	80.2472	39.0471	76.762	84.1342	45.8611	79.568	93.0104	51.7503	43.0025	87.4021	46.6181	83.8181	70.8711	52.7244	21.7868	63.7982	74.813	58.2083	42.1575	71.7742	84.159	53.7049	69.1989	64.1954	71.6307		0.108376	64.3445
2.7378	58.2335	74.6003	82.7531	39.9286	77.1989	64.0676	47.7854	93.922	98.7607	55.0895	41.1696	88.5464	57.5959	85.1379	63.983	59.3771	30.5691	58.2343	81.1165	61.007	52.7867	83.2934	79.228	68.1763	71.1495	68.378	77.175		0.113301	67.3801
2.8568	62.9003	74.4728	86.1313	44.3171	75.447	66.6288	47.8498	86.432	84.2457	53.8372	45.6639	85.1042	62.8086	73.7419	69.7469	59.8413	30.0835	65.7688	76.2924	50.6509	53.1507	80.0997	82.513	66.1207	63.0261	64.8401	79.7324		0.118225	66.3499
2.9759	52.5422	80.6229	85.1204	49.1257	66.1546	71.4487	61.2536	76.952	86.4407	60.8117	47.7812	76.4186	53.4077	72.9043	66.2761	46.9534	40.1124	68.8935	91.8142	50.4319	48.0894	65.5715	79.611	64.6213	65.9467	57.7072	79.568		0.123154	65.4289
3.0949	50.266	77.5597	73.9976	49.2981	74.0238	82.8721	60.3368	93.117	100.18	63.3494	56.9038	71.9676	55.4325	82.8053	70.4434	48.1483	46.5292	71.0412	82.191	49.0472	60.3648	71.6511	75.358	56.0177	63.1498	75.8419	63.8836		0.128079	67.6214
3.2139	55.0009	73.6138	72.6095	55.6541	61.4571	82.4157	50.4602	83.427	85.3669	65.1939	45.1104	72.3505	44.3245	78.4379	60.252	53.9727	31.0402	62.1334	78.7319	54.4866	65.1013	74.9999	81.935	56.3401	61.411	92.6424	57.3319		0.133004	65.0297
3.333	46.5263	62.0884	82.5029	57.6141	61.345	84.5157	55.4917	84.655	97.5669	59.1301	45.8162	71.6886	59.958	67.0919	74.7932	55.6956	35.5936	50.911	73.0935	66.7572	59.0646	68.6006	100.497	66.7515	66.8255	70.0608	55.4431		0.137932	65.9288
3.452	50.9076	70.9872	76.9442	63.5609	58.1272	63.3783	45.0474	76.394	84.6663	67.5949	46.7339	81.6105	55.7181	69.2339	58.3125	43.7762	34.0039	52.2274	67.9221	54.4719	68.4174	74.9611	95.504	67.2721	61.7476	71.2744	72.9418		0.142857	64.2125
3.571	71.1217	64.6934	77.3276	62.227	68.0356	54.1663	55.8197	78.062	97.0052	69.2018	48.8353	66.4828	40.5796	84.371	63.6205	53.1427	32.9557	60.0013	58.6183	72.4747	64.2827	71.8386	93.885	73.3088	56.5316	65.5837	59.2011		0.147782	65.3101
3.6901	67.0911	90.0277	85.7443	54.8784	71.0858	53.8452	54.5529	77.447	102.608	54.1219	30.632	65.2061	50.4166	81.2306	71.0161	56.141	39.0644	69.2211	58.5097	55.1847	65.0417	71.6804	74.481	56.3858	54.5722	73.3681	67.8917		0.152711	64.8684
3.8091	69.2615	65.2352	79.792	59.9027	67.987	60.8421	54.5331	75.416	88.1016	66.7224	37.9584	64.1313	56.3714	65.1035	75.3102	65.6619	43.1755	68.5124	69.5531	57.0116	71.7947	74.4213	66.693	53.171	60.227	72.1999	65.2678		0.157635	64.9762
3.9281	67.1648	66.9194	76.1867	65.2648	75.9317	79.399	55.5236	101.757	86.4254	68.6741	40.7628	62.5375	56.2839	72.2957	58.3091	53.2178	43.8116	67.9892	81.1331	52.3727	68.3486	71.4905	70.428	62.4139	66.6431	63.6025	58.6828		0.16256	66.4285
4.0472	78.6535	81.7914	66.9184	46.1453	73.2432	74.9536	52.0019	82.739	81.6004	66.9161	31.7665	69.6958	67.7592	74.4454	53.2923	54.4832	45.3175	52.6466	70.5624	57.8796	59.5614	70.4119	72.437	60.5543	45.0927	58.2315	56.0618		0.167489	63.1541
4.1662	82.947	66.5331	58.2669	50.6434	64.016	77.3433	56.0808	78.128	94.8917	77.7979	37.6657	75.2763	49.2204	70.1685	57.588	43.1553	55.0808	63.4492	71.5598	52.4575	70.0815	76.3214	71.137	61.677	46.3432	64.7646	56.4204		0.172414	64.0376
4.2852	78.7671	59.4793	68.271	58.6561	60.0719	71.003	54.2663	82.16	85.3697	71.0178	42.3732	60.218	49.821	63.5066	47.2384	38.4078	52.3321	59.9297	57.7939	52.1339	61.7836	67.6536	78.107	62.0549	51.9511	49.4273	47.792		0.177338	60.4291
4.4043	70.4655	61.9362	82.0773	52.0197	66.6946	72.5896	62.6275	84.266	73.0694	64.3325	44.3606	57.6676	59.0682	67.167	42.79	43.0682	69.8296	63.2508	63.6043	61.0915	70.5791	59.8887	76.363	54.2305	47.8799	44.9381	59.6791		0.182267	62.0568
4.5233	70.0346	63.4715	75.0209	51.8674	68.6562	68.5988	60.9684	79.091	83.4702	67.0052	53.7846	51.3956	60.104	63.473	41.2502	43.9717	68.2234	72.6076	56.4469	57.755	68.391	63.9234	63.357	44.225	54.3977	40.4999	53.1302		0.187192	60.9304
4.6423	69.8885	62.9111	73.5702	43.0444	66.6904	70.2798	61.8964	69.489	80.8797	66.1939	47.9646	66.261	68.7203	69.8043	47.192	42.869	59.3106	71.2242	60.3116	56.0546	76.2121	45.2053	56.291	45.3827	41.3786	39.5064	58.9704		0.192116	59.9075
4.7614	62.1933	61.3514	83.2713	54.1807	56.7396	64.0027	53.0057	79.665	79.9651	60.2232	52.2792	58.5576	65.5884	66.994	47.1069	46.2513	59.1957	60.8001	72.2013	52.1583	59.1637	51.9385	53.233	53.8389	39.3298	34.4791	48.2193		0.197045	58.3679
4.8804	63.9841	43.6788	93.0637	58.0204	64.6991	68.9635	62.6497	75.255	86.2087	60.0107	58.6077	69.2589	64.5115	60.909	42.3412	58.864	68.2235	61.1301	79.2541	66.6264	56.2896	44.437	51.031	39.7333	41.0483	35.3039	52.4711		0.20197	60.2435
4.9995	55.2514	55.0439	76.7324	46.502	53.2876	68.5622	75.6434	74.185	90.1473	73.0988	62.2934	49.9339	50.5324	63.7196	37.8034	37.2282	48.1021	60.9548	61.259	59.5772	50.5587	36.4796	38.573	34.5345	30.9087	33.9325	44.7336		0.206899	54.4288
5.1185	58.5621	66.2107	84.1159	46.0552	56.9732	78.4417	61.714	72.348	82.4346	54.6886	48.7247	61.3071	59.1024	58.4886	33.4116	36.7908	47.8183	58.1854	56.0972	57.7289	59.8374	32.6668	34.767	50.1299	31.163	38.5445	41.1739		0.211823	54.3512
5.2375	66.8769	50.0483	73.6283	38.0242	60.9913	77.0222	43.0566	72.355	91.9141	63.6202	59.2573	62.176	62.7646	60.6847	44.1624	44.6783	52.8992	60.8852	63.7385	69.3184	49.7637	29.4207	44.273	49.2227	35.7035	48.3491	45.3202		0.216748	56.302
5.3566	65.9933	59.1323	66.694	32.0865	71.0224	77.4197	52.6024	64.45	75.1934	69.3676	55.6137	53.9253	60.2544	53.819	35.2484	42.7697	59.5072	50.8215	77.6109	57.9309	38.3657	26.7099	43.854	41.8625	42.1623	33.4694	45.5503		0.221677	53.831
5.4756	65.6557	55.7333	58.6745	36.3438	69.6576	77.8076	63.8074	54.358	77.3628	65.4944	48.8393	59.7549	64.0272	52.038	34.8692	39.5263	48.5861	52.6537	69.8175	58.0029	39.2184	32.8702	43.355	41.4409	31.0641	42.1097	38.9036		0.226602	52.6656
5.5946	50.7148	68.3802	50.6078	42.8216	67.4273	67.1444	50.764	65.093	72.2229	63.3435	69.8777	53.2097	67.3068	51.9145	35.9913	31.0903	42.7823	62.3532	57.4045	64.8913	32.8452	30.5875	39.072	33.8117	28.081	22.0203	25.9121		0.231526	49.9137
5.7137	59.451	60.6381	50.6707	38.6323	78.8402	61.5383	53.705	62.063	81.5977	75.9332	56.9091	57.18	63.4768	46.7927	46.8559	38.4518	47.412	55.0097	42.479	62.229	33.9739	36.2002	41.85	28.533	28.3003	21.6162	26.8698		0.236455	50.267
5.8327	69.925	55.417	65.3926	30.9583	75.3113	62.8895	43.2627	58.564	63.7537	61.0438	58.7356	60.6299	51.9162	60.969	58.4108	34.5398	42.4188	62.5686	61.0909	63.1758	34.5842	35.0409	29.392	32.7394	20.9961	32.2513	27.1836		0.24138	50.1171
5.9517	70.246	57.304	47.3113	36.6528	62.902	61.3087	45.0364	53.403	71.6847	64.409	67.8502	69.998	51.1755	55.0227	49.2252	40.4653	45.9767	49.2952	60.9425	67.7322	31.9992	34.4326	33.339	41.4501	34.2376	30.9694	31.726		0.246304	50.5961
6.0708	68.1126	55.1496	45.2253	32.6976	58.1889	75.0859	52.1619	53.897	72.5646	69.2177	58.2683	67.6621	54.0948	48.5532	49.3631	49.1878	59.724	53.6811	67.463	54.7281	27.3284	31.7687	38.07	44.9161	36.0675	25.7091	31.5217		0.251233	51.1262
6.1898	61.9812	64.3507	40.3161	29.069	61.8628	78.7419	41.2262	61.354	69.5143	71.0783	43.9812	70.6178	59.7267	61.4969	46.951	37.112	57.5786	53.1519	55.1198	51.0665	25.6544	32.3681	39.416	42.3725	33.9811	31.8715	32.8161		0.256158	50.1769
6.3088	60.5284	56.9874	39.698	33.3555	60.8821	60.0215	35.0663	57.434	69.014	63.264	46.4087	66.409	50.6423	43.1302	48.7781	45.5368	52.1501	49.6573	57.4465	52.7822	21.9158	29.6778	34.298	29.3137	25.5222	40.0906	32.9024		0.261083	46.7746
6.4279	54.441	50.0518	40.3395	30.499	80.9899	67.2383	42.8497	60.995	66.4046	69.2227	52.2209	68.5685	55.0107	36.6333	40.2951	47.611	52.0617	56.1969	57.7696	50.1431	31.8485	26.2043	34.864	32.3392	27.7865	33.7435	30.6969		0.266011	48.038
6.5469	57.9993	41.3103	36.9012	31.9921	62.1192	70.4267	35.2596	58.569	78.0063	71.5931	46.6699	65.2292	48.3826	37.724	45.1771	38.9517	39.4304	53.2275	59.7783	42.8768	33.888	23.5352	38.012	27.2382	27.4267	30.2043	32.9133		0.270936	45.7349
6.6659	47.824	46.9873	44.0655	40.5873	64.3436	72.7138	37.8702	55.545	58.8961	49.6883	47.45	51.6907	49.7372	29.1137	47.966	41.9633	45.306	47.0145	54.1547	42.9312	35.2655	33.2883	39.406	29.583	21.521	26.2953	31.2548		0.275861	44.1653
6.785	49.9624	36.2266	46.9808	30.3546	54.9344	68.3967	33.5364	53.121	73.8764	58.5428	40.5289	63.2311	47.2014	29.7833	47.8648	42.4182	54.6396	49.3956	47.7373	43.8861	28.7487	32.1066	32.547	35.382	20.2617	27.2125	38.1391		0.28079	43.9636
6.904	47.5373	33.0007	31.1083	26.3325	49.2571	48.9763	30.7791	52.796	75.1597	61.1174	47.0823	63.9278	49.3443	21.5575	49.588	45.6845	54.0094	50.6738	57.4542	37.8278	35.0797	19.7199	36.039	30.8167	27.6075	23.347	37.0971		0.285714	42.3304
7.023	54.7754	33.7963	31.096	25.4462	41.8902	44.5412	28.2375	44.378	57.2059	54.9725	50.3708	60.2384	48.7941	24.3411	40.2379	41.0203	46.0957	45.5791	50.096	38.304	31.3472	28.851	27.591	33.0503	27.5869	23.0861	32.6489		0.290639	39.4659
7.1421	52.5824	24.5146	31.5176	26.0207	56.0546	56.0497	25.0229	44.64	55.3086	53.6959	51.1334	43.6316	38.2262	32.1798	49.3735	38.5116	45.6922	48.6692	49.4683	44.4827	36.6375	28.5794	29.826	38.5916	30.3532	22.8882	34.3091		0.295568	40.2948
7.2611	49.3664	30.5151	36.2068	25.0939	52.8563	53.8681	21.3066	41.8	56.5728	52.7539	46.4394	52.1729	34.597	35.5424	50.6299	37.6181	49.4486	39.2158	46.5515	47.4499	36.9554	25.986	45.858	23.2512	17.7336	19.7695	26.608		0.300492	39.1173
7.3801	50.0995	31.5387	31.568	27.1619	47.3756	44.1181	32.353	31.744	49.1693	41.1235	38.4746	58.6239	42.3462	35.0405	52.4837	39.3881	43.3041	39.0628	34.3373	43.6988	37.8116	17.0622	33.395	25.4833	15.8191	26.3304	28.9838		0.305417	36.9591
7.4992	41.7004	37.556	39.866	39.283	56.4207	42.9539	23.0868	41.518	50.2113	37.9496	48.1583	48.6417	41.3781	44.7312	45.9586	42.6921	36.0734	42.6762	37.3022	35.9973	36.8813	25.626	32.298	27.8387	11.871	24.7485	32.9751		0.310346	38.0146
7.6182	43.5291	30.7073	32.5907	32.4244	47.448	44.3738	21.7949	44.931	40.9181	23.131	52.0682	45.0193	28.1794	33.5486	42.4408	37.0692	34.6516	50.6108	42.237	35.6972	24.1077	30.2676	38.588	36.3477	20.5762	24.1472	38.5087		0.315271	36.1449
7.7372	47.4065	36.4142	27.5113	32.9422	39.2574	46.8922	29.9013	28.821	34.5812	28.5112	39.8837	43.8371	22.511	28.9988	33.0138	32.1456	32.1924	46.4651	31.9028	28.4639	29.6711	24.4599	49.654	31.5433	17.3413	35.527	35.814		0.320195	33.9135
7.8563	26.9747	31.8518	35.5604	34.6137	32.6312	40.013	28.3693	30.908	30.4744	32.7678	40.7259	30.2875	23.1365	20.9902	36.0611	32.772	26.0988	40.0118	31.3549	36.3914	37.2831	21.0432	32.559	34.5002	21.438	30.8836	27.7251		0.325124	31.3862
7.9753	30.1155	29.6891	32.3931	33.6801	40.4834	42.4878	28.0065	28.125	32.3199	27.3327	43.3956	39.3868	34.2273	22.6667	38.2316	32.4368	26.4122	29.1362	40.0463	32.6402	36.4224	22.1292	33.354	35.5264	26.8008	25.7686	37.2732		0.330049	32.6106
8.0943	38.9138	24.2826	27.8444	29.3144	30.3355	28.0191	19.3479	29.834	22.0402	22.7583	44.2556	40.7567	21.1683	33.7966	30.4905	40.0451	30.3275	28.9158	31.2135	33.6301	29.4494	24.7779	37.958	30.2284	23.8661	25.235	39.3725		0.334974	30.3029
8.2134	42.9669	32.1573	20.1866	35.4118	14.3202	33.587	28.7925	25.834	27.8006	16.1715	42.3841	40.3742	20.0935	26.8515	31.71	33.0528	29.6582	42.4025	32.0136	31.273	22.6984	23.0552	29.984	31.8261	19.7414	23.4781	45.6124		0.339902	29.7569
8.3324	34.7089	26.9142	24.3625	32.2001	24.1134	33.6081	27.3057	29.213	36.5999	17.4596	37.4711	33.6653	23.7422	30.0743	39.1535	30.1756	19.2568	44.6472	35.073	29.1462	25.4673	22.8334	27.888	29.3273	16.8285	20.7009	43.6781		0.344827	29.4672
8.4515	24.955	25.381	33.1719	32.1524	35.1434	33.9829	22.0406	24.16	35.1533	29.3076	33.785	26.5991	27.8529	27.0338	36.375	33.4188	33.6369	36.942	35.3084	27.6739	22.802	19.1551	26.442	25.0944	19.4042	22.147	29.6543		0.349756	28.8434
8.5705	29.6366	20.0032	27.0767	25.9298	26.8217	33.8337	26.5963	30.001	35.4128	40.8452	31.2563	28.8314	27.2114	35.1619	27.9231	31.5538	42.3645	38.7492	26.0356	28.9189	27.1442	22.3073	32.486	25.9913	20.5653	24.6324	29.2737		0.354681	29.5023
8.6895	33.8845	22.815	32.6953	27.8977	29.2108	25.0539	38.02	40.115	32.2504	32.6772	33.1173	29.2305	24.4929	25.3588	32.7087	22.5529	31.2078	26.0842	31.0496	39.3929	29.0891	20.2981	26.201	37.7071	21.6776	26.8935	23.672		0.359605	29.4575
8.8086	30.4928	28.4626	39.1284	31.6561	25.4825	27.7041	31.2981	38.776	28.1919	31.134	36.2418	25.215	24.6589	28.4546	30.8076	20.5282	37.7514	34.3536	29.0187	40.2777	24.7384	11.7555	31.371	25.0601	17.7133	25.1678	32.0524		0.364534	29.1664
8.9276	25.4566	35.5819	33.7664	28.5705	19.72	30.9911	26.1965	22.946	27.0631	29.0173	25.2764	21.1395	28.0912	30.254	22.6059	30.7238	29.782	28.7073	34.8888	32.9777	23.5331	22.9799	27.123	33.205	21.9219	22.2007	23.1266		0.369459	27.3276
9.0466	36.0689	30.8894	29.6613	29.0797	26.1252	23.9747	24.9499	27.747	38.5383	20.265	31.3145	29.078	30.8049	34.2655	24.8571	22.5943	24.6658	32.4388	29.0956	39.7314	20.4601	16.4926	23.679	30.4926	15.7328	25.3528	30.8312		0.374383	27.7476
9.1657	25.3022	27.6746	28.1135	29.8181	23.5856	34.2021	25.6723	27.674	28.0075	25.5473	30.1898	35.2504	32.3686	31.2058	32.0914	25.5188	30.7656	37.5468	20.6442	37.0884	19.3915	13.2725	25.668	27.3302	20.8411	17.5228	32.7232		0.379312	27.5932
9.2847	31.9786	34.793	24.2351	26.4132	32.6852	32.396	33.8833	20.095	26.4527	27.0334	25.4266	31.0424	33.5625	30.8153	31.9223	23.5303	27.8952	26.134	26.1562	21.9525	23.2171	13.7839	18.893	30.884	24.0008	16.5713	37.3669		0.384237	27.1526
9.4037	37.5393	40.0448	29.7232	21.6681	31.5817	31.4226	34.625	31.437	26.9604	40.1137	30.5786	23.7119	34.622	30.2019	38.8513	22.8778	32.6764	30.7362	34.4883	21.9275	23.3224	12.2169	10.454	19.6637	26.478	18.6143	33.3619		0.389162	28.5148
9.5228	36.9449	29.0026	34.4854	29.2383	37.1263	29.9504	35.8853	29.833	46.4119	28.817	27.6924	22.6627	27.5692	32.063	33.1099	32.754	31.255	24.8632	27.7778	29.9388	25.6122	16.411	10.132	22.7828	18.057	23.4602	21.6575		0.39409	28.3516
9.6418	41.0566	29.989	30.1769	34.7172	21.4577	28.4539	46.1343	28.089	34.4981	34.5737	31.7615	28.2294	23.9477	31.4263	29.0344	34.1999	32.4382	27.9402	19.3741	26.8714	23.111	14.4912	20.499	25.644	26.1781	25.8775	25.5777		0.399015	28.7314
9.7608	33.7818	27.8629	22.8676	34.8582	19.6214	29.4306	39.5478	24.515	27.928	38.1181	52.0864	31.8162	31.371	28.1178	34.4696	33.8333	35.3177	36.8046	31.9931	24.8494	22.4995	15.0108	15.711	30.2466	14.8138	22.0907	29.8578		0.40394	29.2378
9.8799	24.3157	37.7919	25.7692	30.4023	23.3647	29.5215	42.5347	27.678	36.7609	28.8884	34.9608	34.9126	29.8098	33.6804	35.5794	22.7348	20.8416	30.9042	24.4466	22.7747	14.7754	11.9216	13.735	24.5719	24.9302	26.0118	34.473		0.408869	27.7071
9.9989	26.8269	37.0501	27.9059	22.387	24.1041	29.5142	47.9218	19.713	39.8678	30.1634	23.4215	25.0045	31.0107	22.6112	39.3899	19.7607	21.2564	25.9454	20.8749	29.8258	19.4555	11.7533	23.283	21.3702	28.5847	20.9439	26.8078		0.413793	26.5464
10.1179	27.6017	37.3825	33.5827	21.9043	21.9233	37.7878	38.5279	26.362	24.4983	23.6362	28.3894	18.7553	37.5681	29.4724	26.7503	22.2445	28.1609	36.0203	20.5304	35.3112	20.1815	11.8359	22.075	24.9924	15.9041	15.763	25.2988		0.418718	26.3874
10.237	31.4859	40.4167	42.2981	28.595	30.016	31.3468	21.8965	27.675	35.3314	18.7108	28.5898	19.8809	25.5907	26.8025	22.8386	19.63	23.2074	35.4051	30.0012	28.0967	25.1436	12.6604	12.355	24.8731	16.6675	14.4965	25.9258		0.423647	25.9236
10.356	28.9115	42.5223	41.8416	21.3088	27.4021	31.9116	34.3633	32.084	47.7508	26.9044	25.4115	25.8946	20.8932	33.0469	24.3673	16.5355	32.4396	38.2755	22.0652	17.5863	18.1819	17.8349	16.437	25.8971	16.0131	24.372	23.7772		0.428571	27.1863
10.475	26.9589	28.7748	39.1806	29.051	30.7348	27.1712	33.2861	28.828	32.7778	27.298	23.1778	30.1142	41.2861	32.2162	27.6321	22.0072	27.3155	23.9662	20.1915	22.7764	16.4556	15.9458	18.238	24.6166	20.6666	20.0416	25.1457		0.433496	26.5131
10.5941	28.206	37.4103	36.3638	19.6471	16.1503	31.252	24.8003	31.936	27.2882	11.8136	21.7522	25.2014	24.4823	40.7028	26.7314	19.428	28.6936	22.8997	17.2301	25.4381	16.0321	10.2715	16.171	30.8515	19.3399	20.054	25.2218		0.438425	24.2729
10.7131	28.7192	57.3031	27.7608	22.1068	22.2538	41.8896	22.2131	25.6	29.8219	21.6069	19.0744	23.2586	23.8715	38.8942	21.3275	12.0879	23.4604	28.6265	21.6734	18.8525	14.2628	13.8543	11.016	30.5474	19.0482	23.9863	23.4737		0.44335	24.6885
10.8321	21.2915	47.1884	26.2968	23.023	29.5474	29.3836	31.3086	28.962	28.3104	27.0654	20.215	23.2548	29.5289	28.4124	14.0563	15.3999	23.0557	30.4229	21.2513	28.5489	13.6746	10.4317	6.744	26.9598	17.5235	22.076	34.7775		0.448274	24.3967
10.9512	22.053	30.5485	26.2143	20.0963	32.8566	28.7027	22.7505	21.297	36.0387	26.5604	26.9477	21.8648	33.8818	28.3283	15.656	13.893	21.7937	20.8941	19.0971	29.3947	10.5593	9.0547	10.025	17.9004	25.9534	18.6202	21.9038		0.453203	22.6995
11.0702	24.6591	32.9655	21.155	20.3039	30.61	37.3897	24.372	32.091	28.7883	24.4291	28.732	22.099	30.8869	27.8617	19.6278	11.8634	21.8266	37.7408	21.162	29.344	21.3245	14.2232	8.727	16.7231	32.0066	22.7296	29.8729		0.458128	24.945
11.1892	35.8427	24.8197	22.2341	18.5325	22.423	22.7397	30.4803	26.918	25.9426	31.0582	28.5714	25.8761	20.1637	34.2015	18.3959	8.6791	27.2523	24.5108	20.3507	19.5821	23.4006	18.3425	5.822	22.2803	20.6619	20.1043	21.9583		0.463052	23.0053
11.3083	26.253	32.7783	18.6898	17.3929	23.2868	25.8811	30.1205	23.583	26.5895	32.5964	23.5889	19.1306	21.2268	30.9103	13.0761	7.6658	24.0756	24.9137	20.8306	21.6702	11.5024	12.3859	10.386	22.4227	31.6667	21.5227	22.7994		0.467981	22.1091
11.4273	24.7004	36.9947	18.9076	11.7765	21.6868	30.4869	22.9371	22.856	24.868	17.0303	24.9705	22.9372	26.1268	31.5683	14.6913	9.9382	17.7039	26.5727	26.1521	28.9508	15.201	10.9392	13.726	31.7474	24.039	23.1488	32.4176		0.472906	22.7065
11.5463	21.5809	31.4885	18.2432	11.9425	17.4948	31.1362	22.3878	23.17	23.6863	23.8697	27.2105	26.1337	26.9039	26.776	19.2456	8.8399	10.6711	21.1786	25.9644	32.8582	15.1339	12.5606	8.566	21.8454	30.6622	15.7527	21.6008		0.477831	21.3668
11.6654	28.2405	28.9715	18.7843	9.2971	20.3821	28.0601	28.5227	23.728	29.4243	26.8126	29.746	20.638	32.5002	19.2608	16.5145	6.5274	14.4852	23.4375	20.8172	25.4502	10.0056	13.0512	8.903	20.9294	29.9603	19.7743	27.8042		0.482759	21.5566
11.7844	24.6813	18.9864	22.6696	15.0465	24.4619	22.5211	23.7587	26.377	31.6381	21.7811	22.0611	21.5402	21.9462	25.419	10.0442	9.8007	12.2726	31.7663	28.4476	21.5733	15.1867	11.6877	8.336	25.2935	22.8696	35.4305	32.4403		0.487684	21.7792
11.9035	25.9352	25.5105	16.1016	12.6149	37.5897	21.4141	26.9528	31.182	28.5509	25.7306	22.9917	30.6378	20.8003	22.2094	10.8085	8.6116	14.9197	30.8007	30.9207	18.9034	13.5386	10.8992	9.292	31.2099	27.3414	28.1582	22.1145		0.492613	22.4348
12.0225	21.7587	24.7938	15.9346	16.1115	32.3887	24.6911	27.7688	22.348	28.0193	21.4836	18.6269	32.0466	30.707	15.3822	12.1767	9.5975	15.9049	21.5173	24.1474	26.0905	11.7704	6.6355	7.485	20.7081	26.236	37.5615	19.4797		0.497538	21.1619
12.1415	23.0405	38.1022	13.1077	14.1145	28.3746	25.0992	24.5792	15.864	27.3386	14.1701	20.7072	21.592	27.4851	29.507	10.1048	9.8223	10.1615	16.0544	29.8709	23.2952	12.608	6.1737	9.801	20.1931	33.4029	34.8485	28.8975		0.502462	21.0487
12.2606	25.4111	44.0458	15.6965	14.1174	26.7072	24.8922	19.4572	22.156	23.4023	15.3054	28.1462	24.665	32.4931	26.3886	9.0656	5.3195	13.0432	25.0724	29.0486	16.3549	16.2986	5.888	14.206	25.6718	27.7878	32.315	29.3577		0.507391	21.9375
12.3796	18.3636	30.0778	11.1429	13.6026	27.9666	29.5062	27.2085	27.462	31.3094	19.0736	20.2721	26.3008	21.4177	22.9864	11.5956	10.9165	9.2881	28.7013	18.2113	20.4297	16.4349	5.3602	12.51	31.2178	19.8159	34.7626	26.8784		0.512316	21.2153
12.4986	21.4095	25.3046	18.0811	19.591	22.6835	21.7401	24.0107	22.673	29.4837	12.3447	20.6646	22.8444	21.2246	18.1226	12.7395	8.7923	9.7386	27.7449	25.395	29.0195	6.2858	10.1444	7.989	23.7949	25.0777	28.8569	25.6716		0.517241	20.0529
12.6177	23.4737	29.2127	18.579	13.9743	23.7951	19.7132	18.2095	25.069	30.8371	13.8487	28.1303	26.5798	21.7746	29.8865	16.1679	14.1598	10.5862	32.2943	15.6861	27.7314	9.9175	10.7648	9.772	17.5789	30.4497	25.8197	15.7521		0.522169	20.732
12.7367	29.3418	40.8861	17.5308	12.4284	31.0436	24.0807	34.3	22.861	25.6591	12.5154	17.5662	29.2552	14.9091	28.8741	8.9602	10.7519	6.5449	24.0965	23.0735	17.3421	13.1085	12.7325	12.659	15.5825	29.622	25.383	19.8376		0.527094	20.7758
12.8557	27.813	34.2783	18.3243	11.0815	26.6785	27.129	29.8522	20.161	31.6084	26.993	23.2951	30.1218	22.6953	23.8795	10.0242	5.8767	14.3586	21.5201	19.4085	14.1102	9.2108	10.6382	14.311	23.2452	19.7943	28.336	30.9046		0.532019	21.3203
12.9748	30.7773	33.4905	13.1286	14.586	25.9781	24.2856	17.6738	14.608	29.2392	28.9224	17.8966	18.4158	24.5524	20.9249	16.1046	11.9619	10.8666	19.7968	11.9213	25.7203	11.6037	8.6055	11.601	27.7754	19.8781	28.0415	26.6373		0.536948	20.1849
13.0938	21.1918	28.0464	10.5638	12.004	22.5538	20.7438	26.9928	15.334	27.2835	32.4752	26.1672	20.3921	16.0747	21.4086	19.1847	14.2737	7.7062	23.0699	24.2528	17.1258	11.5845	16.3273	11.874	23.4662	14.4304	23.1631	25.0211		0.541872	19.7301
13.2128	21.8317	21.2311	16.518	12.2651	19.6228	17.5766	28.7661	16.291	28.0829	24.1276	17.0994	25.5128	17.4323	21.8245	18.7228	10.2034	10.5029	18.0232	17.3311	18.4443	11.4864	7.9091	15.675	25.8171	18.2038	26.2577	26.1218		0.546797	18.9956
13.3319	29.0161	16.3356	13.841	11.5492	26.1752	30.1461	20.7726	19.079	21.6571	20.6982	17.5412	23.0723	19.1566	23.5713	6.746	17.2576	10.9199	22.8564	12.4037	12.6734	6.0924	13.3381	13.014	26.341	18.3266	25.4457	29.4058		0.551726	18.7938
13.4509	23.4166	27.3748	19.392	13.6271	16.7144	21.1138	21.8859	20.738	17.4511	22.4384	18.7948	16.6186	27.6385	21.6412	8.0875	16.0182	11.5112	26.6962	16.3631	22.4447	12.197	8.0803	10.113	18.8451	18.2855	30.1889	32.6359		0.55665	19.2708
13.5699	21.4681	28.1544	20.3094	8.5531	23.1482	22.1241	24.6574	19.272	21.5026	17.0046	13.5043	22.0096	21.5222	21.1833	10.1451	6.6439	13.2211	21.0285	23.0669	20.5121	13.6412	8.9798	12.2	21.6277	19.0769	24.0309	27.3		0.561575	18.7366
13.689	28.2302	28.7654	13.7506	14.2524	27.6499	28.8927	29.1933	23.687	25.4116	16.8	11.0278	16.7735	20.3312	19.2384	8.4022	8.0733	8.8175	18.636	24.2131	17.9191	12.9014	11.907	10.251	29.3013	21.1556	18.612	16.4669		0.566504	18.9133
13.808	24.1893	33.9013	17.3933	17.0849	29.225	22.1482	29.5278	17.363	24.5431	20.3311	12.9863	19.5531	26.1805	20.1794	8.6359	13.1053	3.3124	21.1748	25.1955	14.1078	16.1068	9.4438	13.963	33.5234	16.4396	18.7047	24.7794		0.571429	19.7444
13.927	25.7093	27.5708	15.7785	17.1157	30.1126	14.8808	36.4458	18.326	20.7703	14.3881	10.0446	29.2498	27.8105	20.0524	16.8909	7.1535	5.6938	19.3437	19.1255	18.8322	11.9356	9.8555	11.789	22.9684	25.7136	27.1383	20.6464		0.576353	19.4571
14.0461	29.5024	22.5868	26.9529	18.3618	23.5367	23.7752	34.0542	16.113	21.0548	12.4669	17.2403	27.0895	23.0069	21.7584	10.0471	5.9818	9.3853	20.7653	13.9811	30.0882	13.367	9.8672	11.082	28.4219	27.4792	19.4029	30.6592		0.581282	20.2973
14.1651	27.3617	31.2308	23.8509	19.6633	26.2189	22.6258	33.4381	21.464	23.6391	10.5943	18.8692	24.9535	21.7588	18.8512	9.6963	9.4756	12.7935	13.6176	16.4362	28.9899	10.1127	11.6498	11.061	27.8382	22.8628	23.0307	24.4035		0.586207	20.2403
14.2841	23.0413	30.765	20.7303	11.5193	25.3519	26.1463	33.7421	25.465	26.2651	10.0029	16.7234	37.5274	26.4383	34.3417	7.9716	12.6795	4.7989	15.6273	18.3273	22.9897	10.477	10.2297	13.291	22.5096	26.0133	15.2599	23.2273		0.591131	20.4245
14.4032	23.1638	28.6437	16.9974	9.5875	25.9664	23.2977	29.5716	21.415	26.3197	8.8619	14.3915	26.6129	32.3476	26.4579	9.5791	7.3852	6.3555	21.6999	21.246	30.6742	12.7976	10.7494	15.17	24.8488	25.9214	14.5338	20.3227		0.59606	19.8118
14.5222	25.3429	26.4951	13.8293	12.5154	23.6099	21.4189	23.1355	23.237	23.0438	17.0675	15.4787	29.5908	24.004	19.3207	8.7072	6.6564	6.9174	20.6011	25.4103	25.7743	13.6084	12.5188	12.256	19.8836	28.1176	20.2243	31.1338		0.600985	19.6259
14.6412	23.5891	24.7451	12.9878	11.17	18.8441	27.42	22.3749	22.856	17.1216	21.8397	14.8867	28.9473	25.3724	16.4645	10.4867	3.7436	7.2452	21.4329	19.9029	20.8892	13.7839	5.8002	8.542	16.0165	27.7471	13.4267	23.5928		0.60591	17.8233
14.7603	30.6326	32.4461	12.9625	15.6319	21.9858	26.2819	31.2402	22.244	25.1156	11.7991	13.0022	20.4553	21.0983	19.3721	9.235	5.4671	11.6276	14.2847	24.0186	19.6575	16.8223	5.6704	5.618	23.1476	25.1384	14.57	21.2389		0.610838	18.5468
14.8793	25.0089	24.9149	19.6057	13.1861	21.7897	24.7612	33.1391	25.956	26.4588	10.085	14.5096	24.7586	29.0925	25.5314	4.881	7.8019	12.8366	12.8098	19.7473	27.9722	22.5191	9.7395	8.962	22.2297	25.4025	14.7	19.0193		0.615763	19.534
14.9984	24.6903	25.9409	14.3608	10.6098	26.7881	39.4942	25.7904	27.326	24.0563	8.6075	11.7765	17.4814	32.9257	16.1624	7.3151	7.62	14.4386	15.3994	18.9798	29.412	24.1705	13.3953	7.998	16.8217	23.0968	19.6348	26.9898		0.620692	19.6771
15.1174	18.9961	24.6578	24.5313	5.5662	23.4082	35.6501	16.8698	22.2	19.2394	16.1205	15.2286	22.7048	30.662	23.2618	4.684	8.9482	7.5304	13.297	29.0282	28.9831	19.815	9.9385	7.558	20.5281	22.1504	22.1581	20.4348		0.625617	19.0426
15.2364	24.384	30.0699	28.7261	6.8244	21.8463	28.773	19.3219	14.626	27.8283	14.2093	12.9653	18.0906	22.3449	14.655	8.4734	10.3927	15.8036	8.8032	21.9051	25.944	36.464	12.7306	15.377	26.7821	21.8106	20.7759	23.6439		0.630541	19.7619
15.3555	28.317	28.2399	21.512	10.6114	22.2861	34.0717	24.8378	14.681	19.0779	12.7161	16.951	16.2952	25.792	22.1358	5.7427	9.807	10.0372	11.6598	21.8326	26.2516	24.5012	11.8102	15.089	24.0783	22.6902	13.4542	18.9101		0.63547	19.0144
15.4745	26.0973	30.7728	27.2492	15.2829	16.7192	27.8866	23.2808	16.669	21.7735	15.9361	18.0423	24.9745	28.7841	26.7834	8.8447	9.2616	11.846	12.973	23.0422	30.2118	17.9704	12.3391	7.261	29.2844	22.4552	11.7068	21.9103		0.640395	19.9762
15.5935	25.0649	24.4618	26.2325	6.2311	20.6085	19.0094	19.7428	18.442	27.6519	9.3453	19.1462	22.0275	25.8189	23.133	5.1396	8.2935	9.5387	14.5883	25.6079	30.5677	35.7366	11.166	11.92	19.5567	21.0166	16.2034	18.94		0.645319	19.0811
15.7126	23.3845	22.3097	18.4211	11.5577	14.5348	20.5769	16.5623	27.057	23.2375	6.8984	15.0507	21.6832	24.3042	28.7853	4.6838	7.2754	7.9095	15.4577	18.1552	26.6537	25.7127	8.9173	13.787	23.6412	16.0497	21.3045	28.3348		0.650248	18.2313
15.8316	22.1973	23.4627	18.099	13.0665	16.6251	23.1045	18.3878	14.568	18.9643	20.7072	23.8299	15.1615	31.7141	23.1637	5.436	8.251	15.2109	15.8321	21.9904	20.0344	17.5516	19.0609	18.127	21.0564	22.9136	18.2765	30.5278		0.655173	19.16
15.9506	27.273	27.2421	26.4308	6.728	19.6153	17.2604	22.2016	23.626	23.7296	20.1351	17.8411	18.5062	26.8422	24.1934	7.0467	8.9232	12.071	18.9519	17.2642	19.0976	17.6784	18.5577	10.64	18.7834	24.6996	21.6939	20.3035		0.660098	19.1606
16.0697	33.6574	22.3267	21.2552	9.1274	19.4097	11.1569	21.8217	9.93	31.3379	19.6782	10.8924	22.4644	21.3347	29.1963	11.7895	9.0887	13.5141	11.3223	23.1502	26.9704	23.7623	13.1648	11.284	15.668	31.5289	20.5792	27.3586		0.665026	19.3618
16.1887	29.0211	34.9331	15.6548	7.4281	22.3675	15.8531	19.6361	13.018	29.7668	19.2689	13.5459	23.2903	22.2645	29.7266	7.2491	12.9597	4.6857	13.1643	21.1883	31.8623	17.2371	11.761	12.415	28.6242	36.291	18.042	19.6697		0.669951	19.6639
16.3077	25.2781	40.7911	25.7638	7.2998	19.5248	15.0709	16.5312	19.019	19.0005	11.1452	15.8	17.3582	26.8659	24.055	12.347	6.4283	4.7453	12.8645	15.0794	27.7866	17.6875	11.0423	12.44	22.3999	28.7826	15.5643	21.3718		0.674876	18.2238
16.4268	29.0602	36.337	28.0844	12.8182	18.0588	7.6348	16.896	19.918	34.5555	12.4913	17.4429	16.8627	30.042	22.2909	7.3102	7.9633	10.8588	16.787	19.6449	21.8416	28.5968	10.0556	7.972	22.8549	17.5911	15.9335	21.8893		0.679805	18.9552
16.5458	34.0722	37.495	22.6025	15.1155	26.1811	12.1562	20.6716	22.318	32.8637	11.7901	13.5231	27.8354	16.2956	27.4121	17.4545	10.3611	11.0914	13.3325	25.0573	29.3821	29.1346	11.6024	10.414	17.4597	26.5563	23.8056	18.3979		0.684729	20.903
16.6648	27.2766	33.5101	23.7839	11.0027	25.1173	17.5839	20.9273	21.344	28.903	11.6531	13.7116	17.0448	14.1225	22.8416	7.6131	12.7069	12.1208	14.1301	22.4467	25.4308	26.0088	12.7495	17.832	24.093	16.0413	19.0731	19.6693		0.689654	19.2125
16.7839	23.0814	29.3428	32.4153	15.0602	22.4596	17.4307	17.6627	18.692	34.9776	21.155	13.4422	20.9732	13.1918	16.5561	8.4472	10.2232	10.0691	15.7071	16.8304	29.9682	18.0364	13.8784	17.284	19.6118	24.8905	14.2668	20.4092		0.694583	19.1134
16.9029	23.4215	26.9715	27.1583	9.8288	20.7277	18.8428	21.762	31.511	33.7672	19.5886	15.3241	23.3963	20.3182	26.3563	11.1408	9.7994	8.1394	7.4299	19.7272	28.7967	24.0684	12.5557	15.083	26.0697	28.5484	17.643	25.6025		0.699508	20.5029
17.0219	26.5412	25.6385	27.8311	13.4094	9.3394	24.8523	26.0675	27.143	31.4977	22.2169	17.3674	25.4306	12.3996	31.8727	8.3204	7.3284	15.4633	13.9298	15.7398	27.7202	20.4493	12.6438	14.187	32.6723	21.4742	26.7652	25.5269		0.704432	20.8825
17.141	27.2711	17.9574	22.9821	9.4167	15.3608	28.6418	26.9652	22.185	21.4631	15.433	12.4678	18.4243	17.3214	30.1524	12.3285	10.3448	11.1646	13.3132	21.1328	29.5377	21.2858	18.4683	17.352	22.5793	27.4902	21.1133	24.8325		0.709361	19.8883
17.26	15.6181	21.2078	21.3363	15.1998	17.6775	27.4698	25.5641	22.433	24.2725	15.8893	12.3064	19.1919	22.6942	25.3898	12.1317	9.2143	13.1853	17.0428	15.5478	26.4707	19.5114	21.4666	16.84	24.3474	26.1043	26.0558	25.3567		0.714286	19.9824
17.379	21.3944	24.1838	23.998	12.1236	18.3999	22.8048	26.9916	27.043	34.9954	18.7482	10.1314	21.4211	23.4356	23.1658	6.8658	5.9812	3.6923	18.6449	13.3058	29.7981	24.7761	19.8774	29.507	19.7794	17.6763	27.9907	20.1387		0.71921	20.2545
17.4981	23.0919	18.6597	28.8406	12.0853	21.3416	23.9654	24.4495	20.401	30.6444	14.2435	13.8393	24.4879	20.8206	22.6205	11.3658	7.9724	7.6223	13.9789	13.3489	22.7918	24.2172	18.3842	27.729	17.454	24.1745	17.7853	15.2742		0.724139	19.3181
17.6171	20.728	18.0653	17.9002	13.3508	17.3545	20.8042	27.2244	20.426	34.3399	15.5389	14.8617	18.699	22.5239	17.0381	12.4713	7.8304	10.755	15.2731	16.8904	21.5671	26.6519	20.5928	35.331	25.0451	25.4256	20.063	22.3219		0.729064	19.9657
17.7361	27.3975	21.4703	25.7029	14.7705	11.6699	28.9783	18.8418	31.241	28.4153	16.1523	14.4213	22.8968	27.8703	17.055	8.9257	12.1954	6.8057	9.6807	16.2442	27.422	25.7464	23.2534	29.84	21.7093	26.9022	28.3403	21.4958		0.733989	20.9424
17.8552	20.8921	30.1688	19.8016	22.4761	9.5216	23.1529	23.0636	33.715	20.3202	14.2297	13.8371	14.966	33.8039	17.7859	10.9647	9.8286	10.8634	7.8627	17.0077	28.6828	27.1573	22.6309	21.019	19.3361	26.7433	16.8597	17.3046		0.738917	19.7776
17.9742	15.4355	26.7557	23.919	17.9103	17.0456	22.2351	19.4238	31.514	26.2268	18.5546	9.6287	21.4672	22.6155	19.8491	8.2639	8.3676	14.2879	8.7164	16.3661	24.5116	23.0859	19.1742	24.919	25.8947	27.6575	21.9328	18.9249		0.743842	19.8031
18.0932	16.8523	25.1444	24.9957	16.6048	20.5498	30.3356	30.3472	28.606	26.3571	21.0865	14.5581	20.9246	26.1389	27.9801	14.5034	3.3127	11.2156	12.4486	22.6341	25.9518	32.1796	16.5541	21.888	22.8697	24.0782	24.1742	17.5327		0.748767	21.475
18.2123	27.0737	22.3062	28.7392	16.3181	23.86	30.9076	22.3067	21.629	24.8631	17.0883	13.5915	24.0078	19.5811	22.4967	17.0478	6.109	7.6259	18.0325	24.374	18.8735	23.3297	15.8697	19.368	21.4865	25.8726	20.2872	19.4965		0.753696	20.4645
18.3313	29.1394	15.4737	33.7997	19.5157	21.607	22.7927	24.1684	20.091	33.6797	20.9707	12.696	16.9325	21.8481	20.2341	16.3264	8.9239	8.0562	16.5078	12.0512	9.6737	28.3061	17.4652	16.423	21.2167	23.7683	17.8137	26.093		0.75862	19.8361
18.4504	17.6023	21.4002	29.6386	17.0482	20.2889	20.2247	25.9518	20.556	29.0062	26.5524	17.0979	20.4242	32.8492	18.6868	15.611	12.322	11.8026	10.9384	11.4376	15.0823	20.4742	18.5138	15.702	21.322	29.2774	14.4352	25.7227		0.763549	19.9988
18.5694	23.8866	19.8695	41.7332	16.7971	21.3554	22.7792	18.3097	28.424	28.8701	25.308	22.725	18.4163	20.7824	20.8477	18.0435	9.0297	13.5991	11.5162	12.4354	18.4564	27.9194	19.5678	10.544	16.7435	17.6288	11.9833	17.4604		0.768474	19.816
18.6884	25.3617	23.8524	44.8295	26.9335	17.6741	20.4848	19.1869	31.453	26.6954	26.4231	17.3786	30.2567	15.1033	26.2351	20.622	8.3827	7.623	12.7227	13.14	14.4283	26.1104	6.3639	10.594	17.115	13.5546	6.1836	12.9765		0.773398	19.3217
18.8075	30.5589	26.202	24.6733	21.8208	15.4249	20.7072	27.0472	16.499	31.4229	20.9961	16.6034	18.3811	28.4461	32.8812	22.7372	6.105	13.3681	19.9615	11.1742	21.1405	29.0823	16.4467	7.747	13.7534	15.1	9.4896	21.111		0.778327	19.9585
18.9265	23.6591	26.4269	23.462	31.9222	13.0472	28.877	28.4721	20.353	28.5139	13.2037	22.4077	22.454	23.0258	23.5832	20.6929	14.0456	10.4327	18.8229	15.3145	16.5022	26.9533	10.373	9.856	12.4656	19.7744	18.9865	18.2327		0.783252	20.0689
19.0455	22.9062	24.4945	18.9206	20.1647	18.6442	20.6929	22.2943	25.905	26.1453	23.0748	20.6188	34.2113	25.443	24.3453	25.0936	6.4676	13.4223	20.1509	25.5995	15.757	29.6878	15.2813	14.866	7.6535	12.7793	16.4462	15.7303		0.788177	20.2517
19.1646	22.4981	25.9357	25.7196	19.0333	29.6695	11.2242	24.9189	15.058	27.4522	26.9173	30.4071	22.447	27.0538	17.5593	29.801	14.1661	10.3723	17.3916	12.1566	18.5226	28.6383	18.9785	16.227	8.3719	3.9632	9.528	20.8211		0.793105	19.8086
19.2836	26.9562	29.4951	26.3979	22.7456	28.6718	25.6413	23.3057	17.174	22.9964	24.625	14.898	22.3113	25.5286	22.0583	25.6057	13.7803	13.1752	14.324	18.4648	18.9616	25.9649	11.3478	16.965	11.2936	6.179	10.8298	16.4039		0.79803	19.8556
19.4026	21.0865	27.4844	23.9355	21.2909	27.831	28.1321	21.7062	19.751	24.7006	26.1825	13.56	21.0547	26.6404	17.2835	19.2235	15.9339	10.3677	17.699	21.9032	21.4865	24.2644	16.0485	3.583	7.6348	9.5827	7.008	15.2487		0.802955	18.912
19.5217	23.0475	19.5146	14.9401	22.1216	25.5771	26.3822	21.8014	20.186	28.6972	31.1905	21.7247	27.3543	23.282	19.7491	10.4732	18.0175	10.5919	21.4278	12.2073	26.5879	18.1037	5.7261	10.692	6.8158	8.6533	9.8501	16.3611		0.807884	18.5584
19.6407	21.5784	28.5438	24.2166	30.8264	24.3767	13.3015	17.7745	29.305	22.3405	26.0231	18.7965	34.0198	30.3833	19.7285	29.7184	13.6226	7.7575	15.0648	12.1381	25.697	15.4101	10.4916	8.655	9.1675	10.4045	17.4201	17.3787		0.812808	19.783
19.7597	30.3486	27.1921	29.7092	28.5328	26.9512	26.0884	25.584	24.109	23.5075	28.2534	25.1891	26.1713	30.5496	22.039	20.7962	18.808	23.1637	19.6756	14.2672	23.6401	12.8501	7.2133	3.642	3.0017	8.3682	12.9256	13.787		0.817733	20.6061
19.8788	27.1208	26.2091	30.8811	28.2041	19.5789	28.7534	26.6807	22.402	29.7076	24.553	23.1784	27.8518	29.8935	17.4394	18.047	24.1666	23.3504	24.8104	15.7752	19.89	10.0846	6.058	3.13	2.0447	7.6845	18.2551	14.5898		0.822662	20.383
19.9978	22.3438	21.3658	23.6271	26.8874	28.5504	23.6599	23.0249	14.493	30.2363	28.6011	21.8219	29.9959	18.5619	15.007	24.894	29.964	16.5972	19.8506	16.8671	24.3322	12.7793	2.9943	2.916	1.7202	10.677	10.5487	14.956		0.827586	19.1583
20.1168	21.3482	23.526	20.2223	31.4382	30.1064	23.188	21.2259	20.538	21.4021	23.3791	20.2957	23.4482	32.7747	12.9157	16.5249	21.0988	21.7601	25.6133	22.7003	23.746	10.2086	1.5536	5.01	2.881	6.1342	14.0718	21.9378		0.832511	19.224
20.2359	20.7449	23.4293	26.7365	29.1398	18.4601	27.9043	28.411	23.265	21.3333	25.7531	27.1806	25.7129	27.922	24.1709	26.1461	19.8772	19.1367	28.0106	24.5918	26.3519	7.1639	1.2765	6.727	3.4563	4.6105	15.9115	20.1966		0.83744	20.5045
20.3549	21.8585	22.9297	26.6901	23.9039	19.9336	24.8139	37.0724	14.554	24.5615	29.7548	21.9146	22.9055	29.9796	29.9882	27.5585	23.9335	18.8391	26.9028	17.7786	20.9555	5.3119	0.4252	7.781	5.6327	6.5306	20.3455	12.9549		0.842365	20.2152
20.4739	17.5947	22.884	34.3813	24.2731	30.5719	32.7068	29.7807	22.846	20.2966	36.208	21.318	23.0901	30.0431	23.1356	26.0681	16.4859	22.3616	31.3137	12.7633	20.0716	4.4635	3.006	5.537	3.8059	7.457	17.6528	14.0756		0.847289	20.5256
20.593	20.4127	23.1543	37.2122	20.9756	27.9493	30.4582	24.9531	24.469	20.4657	26.777	27.3497	23.212	29.0682	27.7234	24.2638	16.6709	20.5592	25.0296	22.4387	17.1651	4.1887	2.4609	1.784	3.3694	9.5139	15.2866	18.0043		0.852218	20.1821
20.712	25.4356	21.3568	38.8169	22.5661	21.5959	27.7168	21.8452	22.525	21.5214	26.2156	22.4407	21.1956	29.2944	26.5476	22.6589	17.7753	21.9768	24.7398	22.842	21.6358	4.5191	6.5388	0.102	5.5745	12.7902	22.1699	18.69		0.857143	20.4106
20.831	22.2614	27.981	32.9586	25.343	33.9712	18.5949	31.2106	21.868	19.1444	22.4131	25.7905	25.1293	21.7797	15.2708	25.5963	27.3321	22.4565	21.048	18.7137	15.3486	3.1393	4.6047	0.993	1.0044	9.8679	19.729	12.4056		0.862068	19.4798
20.9501	28.5197	27.4366	30.2188	25.418	37.7133	24.0668	23.8208	21.456	19.9429	19.7974	33.224	30.4257	17.7497	19.8004	28.8716	19.5448	18.3289	21.2326	14.7059	13.0366	2.7254	3.0935	1.697	4.4603	10.9357	12.6859	14.5595		0.866996	19.4618
21.0691	34.3994	20.1537	30.7752	19.1906	24.7658	26.9423	27.2269	22.225	26.4671	25.1758	18.3038	27.3115	25.7796	28.4667	28.8984	17.4389	24.8129	23.3807	20.538	15.7789	4.4688	1.922	3.529	6.4762	8.5065	12.7634	12.4516		0.871921	19.9314
21.1881	20.5911	18.9359	33.8369	24.238	33.8399	20.4591	32.5666	24.385	27.7617	15.8365	25.3638	25.5812	28.0608	21.5307	26.9165	23.0128	23.3563	19.2115	19.0428	9.6332	5.7106	0.9934	5.785	6.9358	10.1985	16.3422	5.1571		0.876846	19.4549
21.3072	29.6225	21.0262	27.8667	25.3316	28.1864	27.2195	31.9672	28.337	15.1186	26.0339	27.1546	22.3919	21.1358	16.0669	24.1556	17.9973	19.7707	20.9437	21.6967	13.3827	3.4408	4.9952	2.17	5.4029	12.1928	16.8726	11.1381		0.881775	19.3192
21.4262	29.1102	19.6254	34.9123	21.7512	25.9169	21.7149	25.1223	33.702	23.2983	21.7255	25.4777	27.0766	19.2028	18.3399	20.3996	15.0185	21.5732	24.872	18.4332	6.974	3.1339	1.5161	4.314	4.5319	12.2701	15.4055	11.1833		0.886699	18.763
21.5452	22.1595	20.5043	21.1187	15.9191	42.5368	16.9339	20.5081	26.885	25.2794	22.3135	24.8404	22.4531	16.0589	13.084	17.1564	15.3051	32.8354	25.1661	17.6101	4.5654	3.2209	0.3781	3.32	4.3039	8.5106	9.7009	9.9371		0.891624	17.1335
21.6643	18.8372	25.663	20.7572	16.1076	36.4687	22.8073	21.5566	32.946	21.0696	13.128	28.8472	21.0742	26.7522	17.8388	19.6621	26.9762	23.5904	11.8565	13.6544	2.3409	2.619	2.9987	1.303	1.6386	16.4212	16.821	14.9142		0.896553	17.7278
21.7833	20.0471	24.5807	23.5748	11.1199	23.6414	21.6268	20.2021	26.73	20.6892	17.1095	27.1961	23.7721	27.7201	16.4314	22.096	23.0223	25.5178	18.1724	17.2932	7.5233	7.1887	2.9508	2.328	2.0784	14.4607	17.8324	10.8799		0.901477	17.6217
21.9024	36.4433	21.9761	20.4706	8.7749	34.7634	19.9879	23.2654	39.997	24.3991	18.9385	33.8849	20.5903	20.3873	15.8715	24.8538	20.94	28.6284	12.1904	18.3839	5.7604	3.0954	2.7353	6.19	2.3358	13.5334	20.8353	6.542		0.906406	18.7324
22.0214	26.6138	17.4345	21.5459	13.5614	29.216	22.3692	25.9148	31.141	25.3531	19.4571	36.068	29.6214	32.8521	16.8117	28.3838	15.3188	19.7097	15.2857	22.0519	7.2453	1.4192	2.0454	4.345	3.3028	16.9228	15.9379	9.874		0.911331	18.8816
22.1404	24.7267	21.9065	18.6676	8.6854	36.5441	19.7032	18.8448	27.732	21.6301	17.9892	29.9848	28.9781	30.4763	12.0163	26.0266	11.6215	21.7993	26.2274	25.8362	5.0718	1.5331	0.9138	0.475	1.8768	11.7363	18.1498	9.3644		0.916256	17.7229
22.2595	24.9365	18.6806	19.9636	6.9515	38.984	23.6993	13.1029	22.897	20.1059	19.4316	30.6765	21.3359	12.4686	10.4281	20.1247	17.6901	20.8871	17.2188	17.0664	2.8628	0.7525	0.0939	0.436	5.209	7.7645	22.354	6.5996		0.921184	15.6563
22.3785	17.2658	29.8065	16.7664	5.9371	34.383	21.3298	7.4431	19.02	24.6609	18.6223	30.3895	25.3825	20.1652	8.4026	13.5826	11.489	14.1242	21.446	12.4957	1.0694	2.0771	5.7887	1.989	1.9141	7.7061	17.9477	3.5058		0.926109	14.6189
22.4975	27.114	25.6216	12.4885	5.92	34.0682	29.4766	12.4506	19.131	27.8344	20.8729	29.6209	28.3496	22.6923	5.5128	13.118	7.8624	10.9978	25.4905	18.0719	2.2388	3.5532	1.5144	1.701	2.9268	17.8856	11.643	4.3367		0.931034	15.6479
22.6166	27.3773	25.1875	12.2433	4.2833	23.1788	21.3977	5.9802	20.307	22.1709	16.6549	20.9579	25.2655	31.1913	5.6954	9.2139	10.0196	8.968	22.6145	21.7824	4.697	3.0836	1.8245	4.812	6.5177	20.8377	10.0668	9.5883		0.935963	14.6636
22.7356	22.1901	15.9138	11.288	1.4525	31.3888	19.6634	7.5468	14.499	13.5642	16.5259	21.1859	30.1264	25.1415	9.3813	7.0069	5.3468	9.3957	23.2101	17.8482	6.9302	1.6738	3.375	3.294	3.1293	25.0118	9.5439	8.4482		0.940887	13.4845
22.8546	20.2896	17.8544	8.9606	1.2606	27.3353	23.1704	5.2135	14.396	19.1346	19.7337	21.8317	28.9748	24.253	7.9904	7.5232	2.8035	9.0947	26.9746	7.018	1.0378	1.0766	1.3429	1.3	6.3448	16.0329	12.1902	8.9179		0.945812	12.6687
22.9737	18.5315	15.1626	7.4517	0.7615	24.4931	15.2314	5.511	12.295	12.0501	7.2799	27.2336	24.4062	14.5593	7.0083	5.7137	4.9965	10.5878	17.2175	8.054	1.9268	0	0.6633	2.046	4.896	7.6364	13.1786	7.8615		0.950741	10.2501
23.0927	16.9929	21.1874	10.1891	2.5331	19.2873	15.0558	9.5591	15.766	10.8899	6.3292	17.3237	31.7665	10.893	2.7615	6.2556	3.5686	9.5651	19.0963	5.4531	3.801	0.7112	2.199	3.542	4.0974	17.3156	7.0727	6.2245		0.955665	10.3495
23.2117	19.6091	13.4673	8.2219	5.3634	18.5163	23.7584	4.2002	10.18	8.9954	6.6558	28.7492	33.3868	21.1226	0.6862	7.5632	5.9723	5.9004	29.7867	7.223	0.7954	3.1512	1.8625	1.583	7.0934	21.1566	8.4247	4.5712		0.96059	11.4073
23.3308	15.992	11.8422	6.2374	4.3374	18.516	29.5918	7.2089	7.589	10.4364	5.9435	27.4965	21.5409	15.9427	5.6174	2.3394	6.2561	0.4968	23.2015	1.5417	0.6174	1.9141	0.1919	2.269	3.1605	15.5489	9.9997	5.061		0.965519	9.6626
23.4498	19.2705	9.8827	5.0174	3.7532	19.8814	19.4842	6.3897	8.235	8.35	3.9901	20.977	30.9972	13.4489	5.1042	2.7578	2.6968	1.143	11.3599	0.7559	3.0478	2.8061	2.5871	2.471	4.4861	12.1391	10.3774	2.359		0.970444	8.65809
23.5688	16.8808	11.9916	10.0924	2.0197	17.0833	17.7396	6.1599	9.153	5.6366	1.3956	21.1869	19.2096	11.8539	3.7033	1.2611	3.0071	3.547	16.3594	4.1808	3.9232	3.8152	2.2023	2.979	6.1874	15.4667	8.7244	2.8945		0.975368	8.46868
23.6879	18.8546	8.5996	5.9481	4.554	8.7571	23.7727	4.1717	7.798	6.9573	3.6851	13.4897	26.5037	5.2362	1.8317	0.8782	2.5374	3.7923	16.6519	5.7611	1.1667	6.2922	2.2415	5.861	7.216	11.633	6.6176	5.8821		0.980297	8.02557
23.8069	12.1498	8.9629	5.3634	3.0324	14.7891	17.4581	3.9371	1.42	4.3174	2.9751	15.7491	22.8517	9.0079	5.0367	2.07	5.7874	2.8725	10.8735	5.7751	1.8318	3.0677	2.4363	3.79	14.6836	13.0667	9.3619	4.9051		0.985222	7.68786
23.9259	6.9476	6.4831	5.3751	4.8235	9.027	11.4128	6.0211	5.993	3.0494	2.2192	12.898	17.4936	6.7654	5.8833	2.61	5.3403	0.8491	8.2788	3.0582	3.8666	4.5106	1.4792	0.337	11.6362	18.675	8.1036	5.5164		0.990146	6.61678
24.045	14.0782	5.9805	2.6088	2.4579	8.3453	17.4801	5.9542	3.805	6.8136	4.5275	15.243	9.4637	8.1078	4.4032	2.8599	1.7043	0.4017	10.0232	7.521	6.0972	2.5128	11.149	0.628	9.8067	23.3629	7.9493	6.7586		0.995075	7.40901
24.164	8.5746	6.5487	2.6506	4.147	7.648	14.2593	2.2891	4.237	6.1114	5.3672	7.8829	5.7674	5.1399	2.2633	0.3619	2.5293	2.5373	6.0073	3.7523	2.45	1.512	4.3036	3.451	3.9069	16.0529	3.9697	5.0703		1	5.1404

## Sheet: Image7
X0	Y0	Y1	Y2	Y3	Y4	Y5	Y6	Y7	Y8	Y9	Y10	Y11	Y12	Y13	Y14	Y15	Y16	Y17	Y18	Y19	Y20	Y21	Y22	Y23		Ap-basal	Avg intensity
0	20.1539	34.481	33.2595	35.2505	31.4556	35.8542	35.2634	39.6552	35.9399	17.78	28.0261	42.3025	28.247	47.1992	32.1645	30.5462	20.7104	34.8256	15.7548	43.3092	33.1201	36.6651	37.5536	29.5908		0	32.4628
0.119	23.5431	35.818	43.5248	26.4259	37.3253	40.0944	33.6508	50.9547	47.1784	22.9609	27.8809	25.7024	29.4438	44.0391	21.9552	34.6495	31.2122	32.7241	37.5815	35.1087	24.1503	30.1315	32.1191	30.0391		0.00543319	33.2589
0.2381	29.9203	37.354	40.241	18.2025	31.3766	44.2214	36.3445	49.1067	49.9696	24.1894	31.4091	40.6883	31.0062	49.702	38.1621	34.7228	47.6285	30.8216	52.8025	33.2609	28.7376	39.1982	41.7146	52.3701		0.010871	38.0479
0.3571	29.4665	53.144	43.2715	24.6203	44.0326	26.4418	41.5975	45.5524	35.4447	14.3258	39.9737	44.25	28.5583	67.6202	33.7459	35.6239	38.3826	41.1265	52.0672	28.0346	38.3195	42.3923	53.0284	38.7138		0.0163041	39.1556
0.4761	32.3625	60.197	55.6564	23.4076	53.2392	33.07	39.1859	58.6525	54.5264	20.8508	34.5409	35.9962	27.1576	50.9723	29.6781	31.3781	36.5799	51.1201	65.355	33.9663	29.1423	54.7137	49.1581	51.9974		0.0217373	42.2043
0.5952	27.7825	57.574	53.3272	42.1908	55.8945	19.8526	42.9892	43.4988	53.6048	18.4624	41.954	35.3104	26.6931	63.5572	15.5411	30.2021	33.3627	62.5188	66.1424	38.4367	51.2474	51.2812	57.7223	47.7271		0.0271751	43.2031
0.7142	27.0832	62.268	64	47.1951	39.3477	25.0786	58.5874	59.8902	60.5069	33.9799	44.9263	28.8824	34.3953	53.4493	30.6711	21.8707	25.1419	47.5874	72.4546	47.764	30.0647	49.743	50.9744	56.2718		0.0326083	44.6722
0.8332	27.7402	74.241	67.0252	39.9773	49.0068	34.7189	63.6221	48.9337	61.3221	44.0655	45.0965	34.9323	30.3609	57.0186	41.741	23.7726	24.8508	56.0746	70.6073	46.4799	41.5657	39.5489	61.2041	51.9363		0.0380415	47.3268
0.9523	37.1902	84.701	68.7651	31.4144	29.3111	28.0768	59.5721	45.1874	56.9264	46.1583	47.3376	33.4532	32.7538	53.6986	41.1122	20.1461	30.9258	48.8706	76.2815	41.1404	39.2564	44.3598	62.8648	51.5801		0.0434793	46.2952
1.0713	34.7099	92.828	78.4143	19.8181	45.0239	28.4752	67.58	64.3178	59.5036	39.2163	48.1851	44.8133	39.3683	62.3222	39.5139	30.3999	33.8805	58.9055	75.0834	32.8024	48.1832	49.8267	48.3678	58.7236		0.0489124	50.011
1.1903	30.9575	88.247	81.6547	34.2917	46.6264	35.6212	64.3645	49.2042	54.0146	30.1922	48.9691	44.4978	30.0245	85.2656	52.7039	27.0913	31.0063	54.103	82.2073	34.034	38.2403	49.9994	43.6146	55.5418		0.0543456	49.6864
1.3094	29.2982	87.481	65.4893	28.6775	34.2003	36.9451	88.0958	55.3309	52.4531	24.4756	35.5378	62.1601	41.7755	60.0211	43.5781	35.3533	29.6257	75.3112	74.533	42.3753	37.0705	57.2196	56.0008	49.2251		0.0597834	50.0931
1.4284	38.0361	82.551	66.0108	31.6612	35.6058	31.1134	71.1856	58.8725	53.4605	29.0249	46.3368	56.6978	42.932	56.1965	42.6692	24.3673	34.949	61.3818	70.1014	35.0561	31.0001	54.9718	43.8266	42.2128		0.0652166	47.5092
1.5474	35.744	89.834	66.2227	29.3015	32.3034	37.1216	92.1877	65.461	48.8112	38.2733	54.7337	38.173	43.7494	60.9204	38.8911	38.4496	35.5106	53.1698	80.3528	40.9658	42.9289	58.1192	49.6135	57.5979		0.0706498	51.1848
1.6665	49.008	97.36	85.6212	37.91	37.5944	36.2699	93.4981	63.3397	46.8754	36.3959	35.3026	46.1194	33.4562	67.7241	47.7246	39.2463	35.5672	51.2378	80.7138	50.9224	28.69	46.8558	49.9586	73.0398		0.0760876	52.9346
1.7855	36.9922	91.367	74.7111	40.7845	41.7183	38.618	105.195	63.1484	45.875	39.6591	43.1017	44.88	43.1674	79.8364	59.2817	23.1442	50.1464	58.5715	78.4054	47.9287	37.3159	51.9784	48.7379	71.5192		0.0815207	54.8368
1.9046	46.471	89.067	74.2626	38.3929	41.9077	36.711	91.3788	78.8724	49.2658	55.3407	42.172	53.9759	42.5509	71.3816	64.7012	33.8027	33.415	59.4966	82.9512	48.0874	28.6858	47.2124	45.3463	73.4093		0.0869585	55.3691
2.0236	59.7611	102.18	72.4318	33.3849	44.5553	42.4975	92.0733	59.4006	49.771	42.8452	42.0999	42.1603	42.2252	70.8083	50.8406	25.3796	33.9637	55.7927	76.2153	36.3118	37.2797	64.1873	46.9484	68.0295		0.0923917	53.7976
2.1426	73.8499	90.425	80.9004	41.4591	43.8707	44.0329	90.6983	64.368	45.1088	32.7137	34.3367	48.6191	39.8554	78.938	60.2386	34.2933	32.3337	59.9064	60.4914	56.5286	48.8738	55.4337	53.7331	59.607		0.0978249	55.4423
2.2617	74.1592	109.669	73.9201	27.1637	50.86	49.3558	93.0353	75.7367	46.7057	44.1901	47.3898	46.6549	60.0261	61.2714	43.7261	34.5468	36.6931	44.2503	65.252	57.3967	30.3527	60.8032	46.5832	52.5184		0.103263	55.5108
2.3807	62.1561	106.214	77.0866	32.5427	51.747	43.1445	79.5215	83.3436	46.3957	51.2122	54.4313	47.3154	60.5109	55.3651	56.8729	30.1469	49.4403	48.2751	75.5131	58.0629	40.7102	60.0913	67.2588	56.1268		0.108696	58.0619
2.4997	68.6425	90.252	65.1913	35.2197	43.2711	44.2499	69.6484	98.53	48.7438	42.5713	43.5736	60.3526	37.3673	55.5381	61.0259	36.753	45.4231	61.9268	67.7061	44.7482	35.4835	61.8211	56.8133	56.524		0.114129	55.474
2.6188	66.9349	93.302	68.6082	36.1451	37.2418	41.3934	84.117	74.9574	48.9466	49.0537	48.5294	40.0393	52.2885	53.3077	53.7498	37.4192	42.4575	52.8438	66.2719	43.6153	32.8276	69.277	64.1137	61.139		0.119567	54.9408
2.7378	65.8851	113.906	68.4212	38.344	54.2324	56.598	82.1374	67.1361	52.6222	49.9576	44.7937	52.2801	43.9021	57.1834	55.0304	37.8241	32.798	45.8817	63.8356	42.3076	29.5102	51.4429	49.697	63.5891		0.125	54.9715
2.8568	64.3178	109.87	78.2427	43.0974	44.4002	52.2817	72.8992	82.8818	58.6533	46.46	44.5788	46.1131	43.1827	38.3702	37.2921	44.1648	37.6083	52.862	49.5392	55.574	39.2185	47.2078	59.9918	72.076		0.130433	55.0368
2.9759	52.2752	82.122	74.8675	45.0733	52.5297	43.5556	74.9204	74.4456	47.4154	48.1005	42.3686	54.6922	56.8979	51.26	61.4818	37.3482	29.962	55.4011	53.2886	61.6367	35.2343	56.8822	54.9472	58.64		0.135871	54.3894
3.0949	65.938	84.931	65.8214	51.759	41.501	56.6364	71.1885	74.7746	45.5836	32.294	33.1199	42.7182	51.1406	70.4921	49.6119	35.7701	36.2577	58.6004	62.0428	50.0664	35.7451	57.4755	51.2519	51.878		0.141304	53.1916
3.2139	71.4027	93.357	62.3149	35.7018	57.0297	61.3675	63.6969	75.6005	42.7432	50.5381	46.7401	57.5069	47.7633	48.263	56.0433	30.5167	45.7103	64.5633	49.652	53.8946	44.7984	42.0595	39.3259	58.1416		0.146737	54.1138
3.333	79.6326	98.114	72.7399	50.3729	56.7029	55.9949	66.4856	50.8759	61.6553	55.343	50.1482	38.2407	42.682	45.8747	63.0467	26.7526	34.2526	58.0939	54.3879	50.5767	43.155	49.2605	52.2487	65.0127		0.152175	55.0687
3.452	69.9883	80.745	68.4852	43.8758	44.3973	45.0926	52.5491	65.8159	63.7838	48.9626	34.0778	38.326	43.456	66.0605	68.5495	38.0186	42.4503	66.2384	51.6307	50.9416	33.4602	53.715	51.6232	56.1996		0.157608	53.2685
3.571	55.2108	86.952	63.77	41.3959	56.2113	56.0805	44.9394	70.7021	44.7037	32.8772	54.1181	39.4936	48.6438	56.8602	62.8558	33.7	38.5637	65.9562	41.087	40.5533	37.963	48.4677	53.6577	41.8439		0.163041	50.692
3.6901	55.8557	82.796	55.0092	48.6985	69.9424	43.294	32.7968	72.2551	52.2825	44.453	54.7934	45.447	56.0409	58.6634	60.6366	34.0527	38.5736	51.275	59.4683	41.4389	28.9259	57.8407	50.7895	66.4338		0.168479	52.5735
3.8091	77.8019	80.345	71.9638	45.369	50.2324	49.9045	48.2974	64.3127	50.4736	44.3008	44.463	40.7056	63.015	61.5304	46.7417	32.9425	44.9205	62.192	48.6899	36.4641	36.6827	60.1812	49.0906	60.7487		0.173912	52.9737
3.9281	68.4658	75.06	69.1876	35.1203	54.184	41.4687	48.4746	58.2811	53.7548	53.0137	52.4603	43.7252	60.0562	69.4927	52.7874	31.7564	40.5635	52.8685	48.1408	32.2795	31.8246	63.6639	40.3657	52.8448		0.179346	51.2433
4.0472	58.6191	75.593	51.9986	41.4008	48.8505	39.6867	37.7077	62.2868	49.7031	39.9042	41.8896	31.1433	58.5767	67.2444	48.1097	27.4786	44.2909	71.7455	48.1988	29.3339	35.6698	51.2551	40.5722	54.4661		0.184783	48.1552
4.1662	63.3701	69.548	72.3386	42.2536	50.4921	45.0067	48.636	63.0707	53.1737	47.656	34.1021	37.3046	60.3752	63.6416	68.3853	32.4289	48.6541	65.4814	50.3122	52.1877	32.0836	41.1785	38.8982	60.5077		0.190217	51.7119
4.2852	53.7071	83.595	55.5988	34.7082	45.1136	34.4072	41.5362	49.4499	64.2301	48.5533	41.2501	38.2282	56.5808	64.6835	60.5	40.8928	46.251	66.0694	51.7609	33.5941	40.2376	66.7596	51.5981	47.3735		0.19565	50.695
4.4043	55.5177	79.879	59.0513	40.0373	45.8674	42.9436	32.548	50.9641	53.9177	40.0793	34.5339	52.6526	54.037	53.4602	62.47	29.0069	30.3731	73.4538	54.8231	28.0911	27.4403	62.5669	42.5137	60.792		0.201088	48.6258
4.5233	51.1335	54.462	45.4394	39.4226	70.4519	36.3871	36.6746	53.1948	71.0465	48.7013	49.0432	51.5842	57.7665	70.5736	55.319	34.8151	43.5699	61.3746	41.6093	39.1978	37.0525	40.4732	42.9582	47.3685		0.206521	49.1508
4.6423	42.193	53.571	45.6011	35.0979	56.4909	40.2289	36.1483	53.3578	65.4917	51.7431	35.5677	37.1742	48.2471	72.9538	72.2233	41.8298	42.5911	69.57	51.78	33.1511	45.6156	45.9302	52.0915	52.7544		0.211954	49.2251
4.7614	59.308	50.296	42.7245	40.3596	54.3723	33.6672	45.5126	60.8145	45.2622	40.0488	34.0756	38.6473	66.1819	58.6779	49.7471	26.7014	32.6228	64.1281	41.4949	34.5577	33.1727	41.2423	55.1127	59.2215		0.217392	46.1646
4.8804	53.8865	46.548	51.2485	26.9121	35.9156	51.244	45.8687	51.5245	48.0293	45.5834	33.8624	40.4318	50.107	63.1802	48.5454	34.5384	35.2379	47.0546	38.6921	26.3963	30.5763	46.4687	37.4632	68.9794		0.222825	44.0956
4.9995	49.272	60.94	51.4739	31.6958	34.6406	46.6576	30.8415	37.91	35.7624	41.4169	32.5362	54.3169	46.9987	53.5233	55.0438	26.635	35.6273	46.0141	42.9116	43.1747	38.4464	38.0834	36.6094	57.4602		0.228263	42.833
5.1185	62.2765	49.437	29.9191	46.3864	32.4373	47.0717	40.5594	43.8654	43.7389	41.4118	50.596	41.2414	67.1486	52.3732	53.1124	29.8772	38.8695	49.6502	35.2999	34.6351	29.1509	52.9094	41.8253	48.0181		0.233696	44.2421
5.2375	64.0353	60.233	40.1767	46.2736	33.735	43.3363	33.0598	52.6336	48.1412	58.7024	59.1244	39.7293	70.3553	37.0703	41.6072	26.2372	55.1698	39.6557	54.7198	37.7494	40.8302	47.2585	41.0366	52.9898		0.239129	46.8275
5.3566	74.1076	53.964	49.9883	44.9751	36.4574	41.4262	32.5417	42.6429	41.9161	40.1512	50.2239	31.0878	69.9229	39.2869	50.2201	28.2618	45.8783	53.0529	40.5722	32.1855	42.8384	40.9732	49.9353	62.0389		0.244567	45.6104
5.4756	52.3202	53.418	48.2152	41.2381	33.0228	54.7212	34.1381	50.8956	64.74	33.1648	59.411	46.2797	49.7458	45.5045	52.4559	39.715	40.9266	54.1901	43.0379	54.3138	40.1402	49.5692	51.8354	49.1914		0.25	47.5913
5.5946	60.463	61.144	56.2912	33.5262	37.7041	42.6766	23.898	39.6725	46.866	40.6348	66.395	53.2666	57.8056	30.253	44.4223	35.1476	38.7514	45.7086	35.7997	47.5415	46.4651	55.8995	50.7816	58.3015		0.255433	46.2256
5.7137	59.7292	44.071	48.8569	39.9141	31.1484	39.8304	29.5348	40.3566	43.6621	29.7393	45.332	44.3379	43.3545	47.6478	52.1952	32.1868	44.7058	48.7048	44.3771	48.2128	39.6642	47.5521	37.8366	56.5817		0.260871	43.3138
5.8327	63.8506	44.326	36.9297	40.5607	35.0689	41.7205	34.8663	37.7123	40.1256	45.8991	50.5045	41.5807	68.6958	38.0067	32.4879	40.8171	39.881	37.6727	31.6928	43.9069	58.1254	52.0088	47.8389	45.3278		0.266304	43.7336
5.9517	57.2565	45.288	55.3408	46.4315	33.3898	48.5782	39.3582	57.1886	39.8253	45.2328	58.0859	59.842	43.6116	31.5806	44.0147	45.5402	41.5074	43.867	47.244	38.4073	47.3887	36.9545	47.7565	45.0395		0.271737	45.7804
6.0708	44.5772	35.703	52.8127	39.1401	40.9647	30.8487	36.7725	43.2904	55.3972	43.9446	42.2047	36.3746	40.714	41.7708	60.471	43.7917	52.1708	38.1121	37.3648	41.9691	48.8889	31.3079	46.3515	62.7535		0.277175	43.654
6.1898	43.5644	55.955	44.5713	43.9122	34.8744	40.1362	39.1576	35.091	34.577	43.4002	47.397	38.8741	55.5374	32.3102	47.3678	53.1788	31.0878	39.522	43.9816	43.6946	50.5057	40.2866	48.2058	70.425		0.282608	44.0672
6.3088	45.7038	45.848	45.4586	33.415	36.7459	31.3588	35.4159	23.6872	41.2076	33.8702	40.9401	33.6	33.9285	46.3648	38.8182	39.744	33.2017	30.5722	43.4095	48.7306	50.7311	33.6597	40.8399	59.9634		0.288041	39.4673
6.4279	49.5471	45.982	47.536	31.3269	42.7025	30.8597	28.1855	22.4661	35.1926	42.3485	37.2858	45.8474	47.555	41.4619	43.6905	45.6346	38.3874	31.4088	38.5424	51.7895	49.4796	37.0777	55.8619	53.984		0.293479	41.4231
6.5469	41.5129	40.971	38.0579	43.5387	40.9124	26.5363	26.7548	29.8768	35.174	43.431	49.083	40.8076	53.0606	42.4506	39.383	52.857	42.6091	45.6005	42.1504	40.6726	58.0559	33.4356	44.7826	66.9019		0.298912	42.4423
6.6659	49.5342	51.456	40.6076	37.6441	34.7663	43.5959	37.1016	29.323	45.4623	38.958	49.8422	33.7545	36.2873	44.4285	55.9275	63.2933	37.4127	38.2773	42.8541	52.9797	44.8144	35.1426	48.0316	58.0226		0.304346	43.7299
6.785	48.564	33.627	43.7346	33.4758	35.6441	28.3599	35.299	31.2792	44.0385	40.6908	50.7868	44.8439	47.959	37.2436	51.5488	39.2596	49.1502	36.5306	25.9677	41.2399	53.3883	31.677	49.5009	49.6659		0.309783	40.9781
6.904	53.7892	35.858	46.5185	29.0012	35.1477	31.6126	28.8986	37.1467	39.3348	37.6595	46.9263	32.911	41.8927	45.4048	49.6155	46.9375	45.9961	35.9819	26.4901	40.5754	46.134	30.3066	49.2597	51.0098		0.315217	40.1837
7.023	40.7887	36.231	33.6179	36.9375	40.1212	23.6923	31.4186	38.5777	45.4626	47.0548	41.6075	30.2201	44.4152	42.7536	47.7469	36.0411	40.4341	48.5257	33.9511	53.1899	43.8593	34.1097	46.1182	38.3198		0.32065	39.7998
7.1421	38.1584	39.163	30.3328	23.9955	33.5485	41.3386	35.5697	30.8756	34.9853	36.7592	52.5137	37.1694	44.679	40.6736	37.0416	53.2782	54.8137	44.6032	46.8321	48.0194	42.9352	37.4789	42.7133	54.3863		0.326088	40.911
7.2611	45.7171	38.759	35.2577	42.4799	38.5192	42.6837	17.4682	28.9168	36.4577	41.8155	38.886	42.7505	56.4708	33.7293	61.3378	52.0014	49.6477	48.5306	46.548	55.3089	39.348	38.5169	45.2657	59.4534		0.331521	43.1612
7.3801	40.7747	39.529	24.0583	49.6415	37.2167	37.5908	22.8094	33.355	30.2631	34.6126	53.5561	38.173	52.8668	29.4701	42.7698	34.2352	39.8106	48.9477	42.6223	35.8271	45.2668	43.2111	46.3264	51.5932		0.336954	39.772
7.4992	45.1548	34.249	26.5743	36.5065	42.228	31.6475	28.789	42.2748	42.7553	47.7815	64.7245	33.5128	42.0981	29.6833	48.0266	37.2699	42.7203	44.9589	39.0143	38.0048	34.566	45.5852	41.7069	45.733		0.342392	40.2319
7.6182	40.2194	20.002	24.4375	34.4426	43.5538	32.2572	23.3574	31.0178	50.4491	53.6609	52.4377	43.2864	39.1781	29.7192	58.5907	47.5632	39.7247	34.0178	46.1942	47.7076	35.1363	45.8408	41.6322	33.9652		0.347825	39.5163
7.7372	42.4306	25.969	26.4068	43.2689	28.1495	28.9001	31.226	19.4683	49.0622	37.521	54.6407	43.2272	37.2694	30.7954	43.9967	44.691	37.2401	36.1206	41.4973	37.804	37.1802	32.8228	41.4414	37.1216		0.353258	37.0104
7.8563	39.5687	40.943	42.4906	40.3457	34.1214	44.3415	31.3972	30.6492	31.6239	41.4173	54.9135	39.1998	31.7001	34.8493	43.7915	36.1412	51.9299	31.8339	29.3628	27.1904	34.5469	44.1058	39.3484	48.4914		0.358696	38.5126
7.9753	37.1753	31.66	24.3618	44.5361	43.961	38.8497	35.2404	33.3681	39.9968	37.5627	51.3604	40.9413	34.4683	38.6644	51.6903	33.9374	40.7255	37.7663	34.4019	28.1537	28.8124	40.3728	56.3101	46.0741		0.364129	38.7663
8.0943	35.1075	40.988	34.0915	20.3786	31.8712	37.9274	32.9382	36.5632	39.5051	45.18	52.7821	43.0469	51.2317	42.2597	41.5052	34.3771	39.4325	37.6109	29.9207	26.8162	26.5315	40.8925	45.2469	45.6047		0.369562	37.9921
8.2134	40.0842	35.288	35.052	31.8531	40.875	44.4895	40.8082	37.9875	37.9867	47.462	48.191	39.8078	40.997	42.5956	44.2969	35.6016	35.7998	25.0238	34.8	38.5983	26.3937	45.3898	56.7983	35.3378		0.375	39.2299
8.3324	31.1604	33.525	28.1208	30.6789	39.7393	36.947	36.8192	29.9167	26.4541	45.5816	54.0128	42.6096	47.8044	36.4396	43.4809	29.7658	38.0022	22.3605	35.7978	36.7387	23.7455	37.4196	37.6753	25.7196		0.380433	35.4381
8.4515	33.8456	34.733	19.2245	41.3953	30.0042	43.7514	42.9408	24.8277	49.7684	44.0194	42.544	39.3681	31.8788	35.1407	36.8751	37.0531	28.6846	29.5376	25.184	34.1704	27.6552	36.4952	39.6055	32.3163		0.385871	35.0425
8.5705	36.4448	28.401	37.4322	36.3188	31.7373	46.0571	38.9034	26.0017	33.4076	44.4358	54.3336	31.5908	46.9833	26.9853	31.2562	34.2684	34.0541	27.2058	26.4258	40.2087	36.7792	35.045	35.4245	34.7899		0.391304	35.6038
8.6895	32.4379	33.196	45.9662	20.0587	42.0269	34.0096	46.3512	20.6481	27.6143	33.6348	42.9807	32.3278	41.9986	36.0817	36.5644	32.9781	34.9447	36.3155	33.5143	33.5258	40.8102	26.1036	39.4415	30.8213		0.396737	34.7647
8.8086	43.5211	27.96	39.7186	40.3049	31.8644	33.4549	36.9326	26.6264	27.2252	35.393	34.436	41.5507	32.6897	43.5685	36.0919	29.6315	32.102	21.7382	26.5252	52.7618	49.649	28.9607	47.8944	40.0633		0.402175	35.861
8.9276	33.6186	45.203	38.6427	27.3666	46.6341	28.667	21.7946	17.1157	45.1819	29.1606	38.7954	44.5004	36.1838	43.0209	28.4399	36.4447	36.6746	28.2987	24.0438	44.7341	40.9391	38.2239	42.4856	35.3384		0.407608	35.4795
9.0466	43.6241	37.079	31.5767	36.3999	42.2981	32.4356	35.6382	32.58	31.6256	39.0375	41.2091	40.6845	45.179	45.6952	24.6188	32.6366	37.0339	31.6955	26.1824	38.831	37.7748	38.0516	50.8334	45.3585		0.413041	37.42
9.1657	40.8161	48.157	39.152	35.2452	43.5558	26.1602	25.0401	25.2161	47.6259	30.3418	59.2695	50.4519	37.884	36.925	35.7241	37.4986	42.4436	25.961	29.3652	52.8205	36.6171	41.0558	41.4345	37.0494		0.418479	38.5754
9.2847	42.3162	42.577	37.9087	33.168	35.9951	36.32	20.772	23.5553	18.6267	37.8718	60.4781	47.9008	37.4933	32.4413	35.6611	37.5575	48.8643	34.1165	18.9255	34.9553	31.9917	25.6354	47.0072	40.4329		0.423912	35.9405
9.4037	35.2515	39.518	45.7412	35.1325	41.5213	32.5072	29.0777	35.6286	39.3033	50.3688	35.1855	40.4374	40.3703	43.3192	30.7719	33.9444	38.0249	33.6523	41.9119	35.9772	29.386	51.9506	39.5929	30.138		0.429346	37.863
9.5228	34.7553	39.034	29.5911	31.7601	27.8683	32.1366	22.3927	20.2504	21.2367	39.2669	31.539	38.5309	35.0902	32.9693	24.3256	38.6171	43.624	36.2415	38.6709	38.3684	31.9858	38.6792	32.0208	35.9731		0.434783	33.122
9.6418	46.8342	29.832	36.5687	32.6964	46.1325	41.0922	21.0661	25.257	39.761	35.3735	38.919	41.8059	25.7297	32.1107	26.7294	26.1971	31.9085	25.971	29.7427	38.296	31.0414	48.1659	48.9607	35.3697		0.440217	34.8151
9.7608	40.5662	44.577	42.2074	34.256	35.0595	34.6575	28.0305	28.2381	32.4245	37.4447	52.1194	50.8886	46.2116	37.5493	31.593	36.7055	32.1272	22.0594	32.2943	20.8357	41.0458	41.2284	54.1497	35.4333		0.44565	37.1543
9.8799	40.8491	33.196	33.1951	40.3229	31.997	33.6369	24.2428	30.6727	29.1584	34.502	55.865	40.7747	39.3361	42.8661	27.9471	37.1025	28.6582	26.5732	28.251	36.8295	34.1779	43.0021	41.2749	42.0686		0.451088	35.6875
9.9989	38.4344	48.767	22.8585	38.2168	37.8103	35.0718	27.2343	23.5642	26.8183	33.6311	47.7315	35.4235	32.2432	27.0526	34.6126	31.0662	30.5748	25.0872	22.598	43.3847	35.0245	52.365	41.7304	37.8318		0.456521	34.5472
10.1179	47.6465	32.081	39.4507	34.0963	37.9172	32.2245	33.7081	32.5475	38.323	37.096	43.3734	45.2402	41.1746	35.0403	34.1714	51.6471	41.4784	23.0802	29.38	41.5958	24.0894	39.0295	46.8818	32.8433		0.461954	37.2548
10.237	43.1378	22.356	50.5802	25.8659	41.9113	37.7156	26.4302	24.754	38.5302	40.3221	54.2357	26.08	43.9912	34.3765	38.1897	47.0636	39.1504	36.3322	17.0144	34.9122	42.055	39.4588	38.9398	36.0673		0.467392	36.6446
10.356	41.2402	31.346	35.1104	37.3972	38.0121	32.1619	19.89	23.4668	37.9178	50.9259	37.3076	45.6755	35.2749	34.4111	37.1644	41.8639	42.7701	32.3128	21.5553	33.5787	51.3105	50.873	48.1706	40.0663		0.472825	37.4918
10.475	25.5849	33.135	34.2801	37.4346	29.4933	33.0904	25.488	25.927	23.9451	33.4633	54.346	36.4768	34.9542	37.56	33.5571	29.6873	45.7285	26.4008	22.0279	38.171	36.7226	42.8589	43.2975	31.3113		0.478258	33.9559
10.5941	34.2407	41.268	42.3762	37.7829	33.7409	41.668	16.3257	34.0891	32.9714	34.8373	46.8579	40.3739	29.0128	30.5274	50.2414	46.8372	33.2075	29.1246	46.6593	34.3479	38.7527	40.5647	32.2836	51.4526		0.483696	37.481
10.7131	32.6065	38.55	42.8418	31.456	33.3901	36.3892	21.8268	28.733	29.7264	36.4726	40.2494	45.4003	23.154	26.9035	46.2491	58.0618	22.4305	24.5353	22.7181	32.7465	32.8849	37.8737	42.8227	38.687		0.489129	34.4462
10.8321	34.1024	38.341	48.5649	38.5252	29.2172	29.9093	31.2576	31.8327	28.7894	31.117	50.4518	42.0255	37.4223	23.9039	32.6381	42.6715	43.0682	36.3727	25.714	28.1209	36.3197	38.5899	51.3886	41.8666		0.494562	36.3421
10.9512	40.381	30.574	38.2204	37.3426	31.2454	53.9881	22.8768	26.1856	33.0489	45.5882	56.3234	38.0966	44.358	30.0376	34.2651	33.5377	27.5793	29.8486	20.4982	30.2272	35.723	43.4351	47.3914	29.5563		0.5	35.847
11.0702	31.7294	37.762	26.2316	45.3796	30.4392	29.9233	26.0408	30.4697	29.3407	30.5545	56.2335	45.6226	29.8235	29.2905	33.4053	27.6782	33.7626	27.8367	27.1307	24.6093	28.8881	31.4419	47.6873	41.6525		0.505433	33.4556
11.1892	33.4484	41.76	40.8422	40.0782	30.6095	30.3812	25.0905	24.0827	23.1578	25.701	40.8463	43.0584	26.4862	30.0611	41.4068	36.8207	25.7344	22.1458	26.6759	25.423	40.9466	52.3398	52.4762	41.7845		0.510866	34.2232
11.3083	35.3236	40.54	30.9764	35.3189	26.3245	29.4841	20.9427	29.3384	30.3725	42.8993	43.2244	39.103	34.4817	32.5732	30.6747	33.8676	28.7352	24.3644	14.5693	42.5749	27.3501	37.2617	32.4815	43.3932		0.516304	32.7573
11.4273	35.6118	41.449	37.5904	42.5065	38.7822	33.9245	26.3957	30.1201	36.707	36.1613	41.0549	45.1416	32.6984	30.363	31.0309	29.0979	24.8517	24.9781	8.2544	33.5533	20.2054	42.5898	43.5629	55.0679		0.521737	34.2374
11.5463	46.6829	38.109	37.5832	28.8973	34.7108	30.638	19.7109	13.94	42.9025	28.0157	46.9199	47.7903	34.1154	26.4961	26.5706	42.4519	39.6775	32.1488	22.0478	29.1832	34.305	49.9048	49.3444	46.8061		0.527171	35.373
11.6654	29.774	33.913	39.6334	39.9876	21.5943	25.8533	34.4457	26.6789	36.4874	28.584	34.1261	47.0306	31.0878	35.7551	33.6041	29.6711	30.1903	31.7958	19.1854	38.3417	27.5215	53.5154	33.3277	56.6145		0.532608	34.1133
11.7844	36.2757	31.742	23.916	29.2501	38.6845	25.5009	14.8357	17.2891	34.0889	34.813	41.857	45.665	33.9759	36.4824	36.6631	29.5266	38.8781	27.0434	18.8606	36.1729	28.6956	42.2613	31.2687	50.39		0.538041	32.6724
11.9035	46.9487	23.986	30.7633	33.7327	44.4481	30.2714	13.0865	20.5618	31.7325	36.7639	49.9255	36.2839	27.3727	27.3453	42.0459	31.0977	34.8218	20.2772	19.4091	26.7797	31.753	36.8835	41.8723	47.2169		0.543479	32.7241
12.0225	51.4381	38.753	28.6693	36.2656	30.6723	33.7697	28.5046	21.9009	41.2939	27.9971	37.5068	40.8635	26.9607	28.1577	31.9228	27.053	32.4616	22.2778	12.4025	34.7466	30.6607	35.2159	43.4392	42.1696		0.548912	32.7126
12.1415	37.4718	32.055	46.7021	28.338	28.8938	33.9347	33.1386	24.0053	32.0543	30.298	46.0359	28.7647	25.2101	37.8101	41.6249	32.7805	20.766	24.7796	29.4999	36.4583	26.9778	38.373	51.6984	37.9177		0.554346	33.5662
12.2606	39.4455	36.348	39.3131	23.1876	38.7408	31.224	22.4883	18.8674	30.4481	24.9947	36.0589	51.9612	28.6119	34.6001	27.0276	36.2148	25.0734	38.6793	27.359	22.3312	48.6882	39.9841	38.5422	54.2596		0.559783	33.9354
12.3796	37.3129	34.745	40.3866	34.7462	35.5766	34.7639	27.5817	22.4229	31.253	32.855	33.6873	36.9771	38.2328	33.7756	28.7014	19.6351	27.2432	26.0471	19.0628	28.045	29.8352	42.5558	30.6393	44.7286		0.565217	32.1171
12.4986	39.5494	37.488	42.0035	30.8895	31.546	27.2123	24.8799	17.6733	36.6006	24.8079	34.2532	47.7779	21.5119	24.4439	34.028	24.9482	34.3298	21.679	23.2467	33.0468	32.2834	36.5029	35.2973	49.4407		0.57065	31.8933
12.6177	38.6023	33.42	26.9317	41.8588	39.8754	31.1264	22.1626	17.0279	42.6021	37.5415	30.7768	43.9792	32.7025	26.7981	36.5165	23.9482	34.9691	24.2521	22.2256	28.5643	29.5972	36.4992	30.2972	39.1873		0.576088	32.1442
12.7367	40.1855	26.076	23.1972	33.6468	29.4046	21.2051	24.6214	20.41	29.8131	30.1919	31.6805	25.6174	37.9629	28.8931	34.0925	30.1129	44.2801	20.2024	27.3036	23.1605	31.9214	28.539	37.0203	41.9109		0.581521	30.0604
12.8557	37.4899	25.049	36.081	33.7315	27.3419	20.4191	27.5095	25.8551	29.8238	27.8472	39.911	52.3246	34.3682	37.2977	40.6686	21.6854	34.6996	22.8851	28.9492	28.0785	25.8981	26.1173	32.1049	28.4301		0.586954	31.0236
12.9748	33.8119	31.775	37.1184	30.3456	19.3561	29.5794	20.0826	34.9128	28.5547	28.458	35.8664	47.2874	20.8086	35.644	41.2329	34.1896	40.4189	32.3285	28.2382	24.9987	35.5645	42.1813	28.7375	31.8276		0.592392	32.2216
13.0938	32.1967	30.729	49.5677	32.6135	33.3677	24.3061	19.7768	17.5548	42.5973	27.3788	43.6264	40.4214	31.079	27.5951	28.8624	28.7587	35.3198	29.287	26.6446	19.9745	27.9961	42.6493	29.5597	42.2332		0.597825	31.8373
13.2128	28.5691	17.027	46.7809	30.2198	34.7903	36.2957	26.7782	26.3259	44.4473	31.1356	32.3656	37.1066	17.3354	26.9684	31.5756	35.9771	26.3933	34.0766	23.1357	28.5919	32.0073	45.4652	30.713	41.5472		0.603258	31.9012
13.3319	42.8093	40.278	37.4026	28.6946	27.6394	35.5673	20.3016	31.0766	19.1218	25.0673	30.2185	43.3384	10.2856	31.5496	34.2611	27.7573	38.3461	28.1718	24.4161	36.2607	37.0578	35.0959	38.8135	33.3976		0.608696	31.5387
13.4509	44.8499	41.176	39.1014	29.7545	24.6306	29.9435	16.7216	32.9971	22.852	26.6	27.445	34.3145	31.1081	27.6817	38.2813	37.34	44.9356	13.8503	16.3411	33.8142	32.3965	45.3794	32.3862	31.0691		0.614129	31.4571
13.5699	25.2908	27.151	33.0329	30.5628	41.8409	33.2358	27.4145	31.2448	19.1866	26.8238	35.5506	34.5066	24.3262	22.076	30.6632	29.3935	46.2001	14.4695	24.13	19.9834	35.585	43.521	24.6045	33.6269		0.619562	29.7675
13.689	29.8457	32.385	42.7145	45.8241	35.7433	32.7459	13.5256	22.0065	21.5075	26.6895	29.4291	29.5279	25.377	20.1124	34.8088	27.0143	27.8316	18.1723	18.2291	27.6894	41.2656	43.4632	26.3529	34.0202		0.625	29.4284
13.808	42.824	34.789	30.0206	33.2253	38.2886	37.4178	28.0465	33.4153	23.956	28.5145	34.6779	33.1948	38.2332	37.7843	32.4513	21.0774	30.9745	27.545	24.9238	36.0889	31.6386	31.1556	42.0995	43.6047		0.630433	33.1645
13.927	38.5551	39.309	56.91	33.6046	24.7902	34.1095	22.8506	23.6366	30.0368	18.014	32.2022	34.3839	34.6936	30.7448	43.9435	29.9787	26.9284	25.1134	20.1108	27.967	36.6992	50.1763	41.0418	40.3591		0.635866	33.1733
14.0461	34.5343	31.359	48.1861	41.3923	27.47	31.2144	27.7333	20.4175	31.8626	20.5842	31.3383	32.5817	24.3372	31.3692	31.1088	22.468	24.0609	24.0517	28.3478	26.0035	38.1837	42.7929	37.3824	47.3493		0.641304	31.5054
14.1651	54.2435	36.835	42.9415	31.5754	25.5122	30.2921	11.5051	17.8236	31.2221	22.9415	32.252	27.3972	29.3879	23.2738	31.6869	31.7527	28.2412	24.4406	16.8488	26.7187	50.9999	33	25.6847	42.2317		0.646737	30.367
14.2841	46.886	35.34	51.3976	26.7737	24.9976	22.5998	26.8196	23.8602	24.8864	25.1064	20.6954	28.7566	31.0949	36.8961	36.8528	27.5217	36.8806	21.6195	25.1608	21.0803	32.9964	37.363	30.5	34.2262		0.652171	30.4296
14.4032	29.4548	29.326	41.9033	25.4023	25.0457	32.9878	25.8668	23.471	34.2894	18.4532	29.5938	29.491	24.9669	18.7647	36.8726	29.9744	21.2922	29.3227	29.8615	23.3506	39.9133	36.1365	32.8369	37.7317		0.657608	29.4295
14.5222	43.1758	38.892	33.2225	17.0869	32.9707	32.5626	17.234	22.5326	35.8821	23.5876	32.4406	25.3435	33.5936	37.0036	28.4822	25.1651	28.3099	21.8757	31.5941	35.0592	34.9626	41.2331	37.2574	38.7287		0.663041	31.1748
14.6412	33.5844	35.244	19.6329	34.4179	42.054	29.1405	22.7311	25.4611	34.94	39.2035	23.363	19.8883	24.8794	25.7301	29.9004	27.6134	26.5256	27.2889	19.598	39.4595	37.8122	28.8077	40.4237	38.6054		0.668475	30.2627
14.7603	35.3313	40.526	26.1166	32.1849	33.9941	40.2061	31.5295	17.5316	28.5371	26.0391	21.7404	29.2308	26.5196	35.8474	40.9375	33.3246	23.1321	24.4547	31.0115	29.6915	34.8034	27.6019	38.0855	49.5453		0.673912	31.5801
14.8793	29.163	31.029	32.4069	39.6754	31.1344	35.4562	25.4692	24.1836	26.2049	20.3286	35.428	19.628	18.7752	32.7617	27.0518	24.1504	18.521	18.1034	34.2646	16.9023	41.6911	27.31	29.2257	43.3246		0.679346	28.4245
14.9984	33.0816	31.224	45.1554	28.2894	26.3546	26.8315	29.3816	23.1719	29.6822	26.2335	25.2407	27.2697	21.9493	37.0129	36.1678	31.1166	21.3764	16.5855	24.2512	26.4066	36.1671	39.4832	24.4708	34.4072		0.684783	29.2213
15.1174	47.3447	37.239	30.3802	28.051	32.9382	28.5674	23.7635	28.9081	24.1452	18.1155	23.2435	26.3401	27.0693	43.7536	37.0671	27.6807	26.2524	18.5819	22.9004	32.4654	34.1968	32.4363	31.9081	36.5513		0.690217	29.9958
15.2364	35.7055	35.573	37.2779	34.5587	36.535	42.559	14.9091	36.5363	36.3267	23.6857	21.6517	27.6506	32.0321	29.5349	31.9783	23.6544	25.3716	20.7264	20.7735	23.3836	28.4105	31.4535	45.4364	45.4547		0.69565	30.8825
15.3555	40.7203	42.178	28.3644	28.9534	24.3758	30.6175	29.4646	31.2538	35.9153	25.3285	27.6305	20.0966	20.6453	32.3065	35.6971	25.6654	34.7371	25.4122	25.5892	31.1818	33.3839	46.6544	35.0904	42.26		0.701088	31.3968
15.4745	28.0376	32.996	38.3309	31.0716	29.6792	36.933	28.6899	28.2351	31.2229	24.2267	23.2728	22.653	18.7334	36.3427	32.2086	26.5221	40.0014	21.9344	16.9146	24.8391	36.8281	51.4054	43.2953	38.065		0.706521	30.9349
15.5935	34.5698	47.803	28.5878	33.4147	26.154	18.6162	31.0543	27.6439	20.9391	21.6508	29.5444	25.0861	16.31	34.2539	25.1399	23.248	29.1558	13.1507	17.0921	20.3727	39.7288	38.5998	33.1255	44.0751		0.711954	28.3048
15.7126	30.1113	29.689	30.6489	29.9591	30.4921	28.4599	23.8804	31.1286	29.1849	19.6916	28.4805	25.6984	21.1758	21.2411	25.2524	20.4596	31.7008	20.1061	19.3982	26.8146	40.8361	42.4427	40.153	41.8264		0.717392	28.7013
15.8316	29.1803	33.546	33.9431	22.1884	29.0482	32.6544	24.8311	26.6045	38.4197	18.3299	17.3975	35.8597	29.3087	36.4398	18.6781	26.2328	25.0407	22.2453	24.3254	28.7474	32.1443	37	33.9889	31.0622		0.722825	28.634
15.9506	25.7712	32.09	24.5248	22.9179	33.791	39.4814	26.4179	20.4362	35.1751	25.4197	17.8896	31.3583	22.8416	33.2946	26.9773	19.38	20.612	27.3117	31.4635	25.5127	24.3983	17.4088	32.1448	37.2593		0.728258	27.2449
16.0697	27.9605	30.57	25.6746	22.0886	20.4189	34.093	29.825	27.0624	27.9828	26.399	29.4313	29.7026	21.0219	29.8081	23.5319	24.5604	27.8658	27.3624	29.0499	22.4887	38.2808	30.7015	45.6554	45.7608		0.733696	29.054
16.1887	27.0626	25.168	35.1119	24.0455	31.8284	35.276	29.0546	28.5654	36.4538	24.244	28.2595	30.0166	28.5131	30.0882	31.8698	25.2148	21.345	19.8026	19.3954	25.7414	29.4578	26.5155	32.0745	33.5209		0.739129	28.2761
16.3077	27.0967	21.677	31.5216	21.6749	25.2759	39.9181	34.3074	25.2339	15.8556	22.7701	15.4907	20.5364	23.7579	28.2688	35.8577	21.6079	22.2026	19.0088	23.1164	31.796	37.9973	39.7204	26.7859	38.3196		0.744562	27.0749
16.4268	31.9433	29.038	28.1598	30.9065	33.1092	40.0641	35.3057	22.4266	25.9941	24.3398	10.1055	38.3949	21.9241	31.7795	31.7923	32.8804	19.3789	26.322	24.6138	25.8762	23.0926	26.2335	35.6533	46.3698		0.75	28.9877
16.5458	38.3629	26.382	32.4672	35.7389	25.8405	38.8711	28.7511	19.4453	32.3991	20.7227	14.7839	29.5078	27.6106	28.2618	26.758	28.6223	21.6942	18.2659	34.153	32.3637	30.5467	32.4907	30.8914	44.4361		0.755433	29.1403
16.6648	29.5695	27.282	20.844	37.0985	33.5173	36.9246	26.0296	21.7509	38.2102	22.973	23.4376	31.2382	31.6116	31.7099	30.2071	28.2415	24.8251	25.3773	26.2299	27.2163	28.4818	27.5515	35.3084	35.6962		0.760866	29.2222
16.7839	30.8478	26.678	25.5056	28.8982	35.4741	35.1253	39.2514	23.0633	26.157	22.4498	31.0223	31.363	25.5789	33.1482	23.6926	18.2189	17.0273	18.1402	31.1571	28.9199	33.1036	34.4116	33.5745	45.5628		0.766304	29.0988
16.9029	28.4829	33.406	35.3496	34.1111	26.0925	36.9261	38.1359	30.9792	22.7615	24.4421	26.4448	27.5506	23.0482	29.484	19.4486	23.5856	22.3138	27.2277	31.0143	24.0262	27.6613	31.7696	28.9074	33.8547		0.771737	28.626
17.0219	36.4856	37.737	33.3603	21.7384	28.4213	33.3293	34.0107	28.7976	32.7116	23.0122	38.7896	22.0609	19.6956	33.2291	28.5493	20.3171	23.4003	25.0629	20.5091	28.8206	35.5422	22.9257	35.429	40.3876		0.777171	29.3468
17.141	45.015	35.864	35.0442	32.347	30.4265	25.9073	21.8098	35.0825	24.9362	20.7808	37.4242	19.5672	23.6508	27.4904	28.3821	19.779	26.9659	22.5043	17.7425	26.9089	26.2727	21.1603	38.7708	26.7355		0.782608	27.9403
17.26	45.6147	32.323	23.3701	29.7692	33.438	37.8054	29.5256	21.5804	32.5019	31.2624	38.2311	20.6523	22.3291	34.3784	22.8887	24.8873	17.6286	30.2206	28.2498	34.9233	27.3454	36.8072	34.0044	28.9793		0.788041	29.9465
17.379	30.8203	25.764	27.3948	28.5471	21.4791	31.2396	23.0017	25.6131	35.7432	35.5651	35.196	26.6323	25.7614	25.6633	25.2628	25.3277	12.2739	19.1284	25.887	31.1529	29.9666	21.2747	27.4133	33.3828		0.793475	27.0621
17.4981	30.3144	28.454	29.4095	31.1106	32.4949	28.2782	21.7877	32.9822	21.9291	32.3716	34.6684	29.8489	32.2351	28.8665	29.042	23.9132	19.5471	24.2375	38.5699	21.0791	29.4805	32.3828	31.1277	32.4743		0.798912	29.0252
17.6171	37.8145	33.153	19.581	21.3035	27.8834	31.946	35.085	28.1971	20.8303	25.7122	35.0814	32.7184	24.8477	19.4416	20.6145	27.9662	27.9098	22.0271	19.4024	28.6755	24.7801	31.8199	21.2006	36.9011		0.804346	27.2872
17.7361	37.1409	30.578	35.6033	23.0527	27.9586	34.0155	31.4093	37.2834	24.8068	25.6224	26.5768	24.7807	18.8152	24.0501	21.9741	26.0723	18.6578	16.492	29.5441	24.8859	23.9373	39.8699	27.0507	32.4645		0.809779	27.6101
17.8552	34.7781	32.173	29.8784	18.4261	26.42	28.1707	21.7955	21.5501	23.3105	20.3121	16.4094	29.1256	18.6548	32.6269	21.8639	21.4561	25.2841	20.5183	32.0782	25.8723	25.6551	50.994	31.3248	40.4683		0.815217	27.0478
17.9742	34.0296	28.402	32.6208	29.7088	25.9985	20.6108	23.7518	16.761	22.4883	21.103	33.8294	31.5124	14.8743	27.8974	18.703	20.8153	21.2206	16.7644	15.0944	13.2539	25.3452	38.7678	32.0343	37.9451		0.82065	25.1472
18.0932	33.2392	42.474	35.1861	27.0629	25.2958	28.0714	24.0042	36.325	31.1221	18.1961	32.8545	22.4279	20.0371	27.306	24.5052	15.1343	22.0703	11.3861	17.1116	28.4349	17.3042	29.729	27.4825	39.8317		0.826083	26.5247
18.2123	30.9964	30.387	26.0115	27.6381	21.6735	25.3271	21.7932	27.3794	28.7117	19.453	27.363	21.4013	23.6658	22.383	20.8713	28.1472	17.9938	12.6511	27.6469	26.1305	27.3	25.5527	28.4163	31.8892		0.831521	25.0326
18.3313	29.0013	29.867	17.1585	32.1588	26.3008	14.9042	24.1484	32.2885	20.8599	19.6766	20.5803	22.6362	20.6666	29.292	26.8041	14.3969	20.0445	20.9443	28.1323	19.6539	30.2417	30.2545	34.5382	31.692		0.836954	24.8434
18.4504	37.2337	35.229	31.8506	32.0461	40.6808	28.0401	31.6047	22.6391	20.2398	20.1573	23.5176	28.5622	25.2492	12.1646	21.7231	21.5478	19.6808	15.7922	20.0476	22.1415	24.2564	24.3081	25.0986	38.2627		0.842392	25.9197
18.5694	45.0816	34.302	35.2708	17.9966	26.4562	27.32	31.3369	23.7884	26.3788	25.1711	26.2773	18.8089	25.9612	24.6367	26.6498	23.9404	13.834	17.7724	23.4514	17.5539	31.6929	27.816	31.7271	34.1195		0.847825	26.556
18.6884	33.68	35.516	30.5491	23.8686	21.5428	15.1832	32.7826	27.861	13.807	26.2495	19.2257	27.6226	28.2026	16.3681	22.1295	16.552	18.5513	19.4126	19.0114	24.273	30.4318	33.3842	39.6591	38.9022		0.853258	25.6152
18.8075	28.4935	28.705	33.0023	27.4191	27.0124	27.1006	37.7223	26.1018	26.6578	22.2262	34.6594	25.8999	17.0592	26.1658	21.9264	20.536	19.5923	25.2334	24.2293	18.4166	34.6918	25.6547	40.4538	44.3024		0.858696	27.6359
18.9265	25.6979	37.125	34.1761	22.9769	24.5775	30.9738	33.5852	21.1912	29.3974	27.4657	36.5929	29.4883	18.3211	33.5357	19.0373	21.2279	9.0974	14.9809	26.3841	27.7671	34.8303	24.9973	26.4007	45.7112		0.864129	27.3141
19.0455	33.1916	39.656	35.9492	22.2494	20.5112	35.4894	29.8813	28.8016	21.8738	25.4793	15.948	25.7496	21.2439	16.1166	22.7332	15.8136	11.5872	21.2868	16.5578	21.9513	24.4773	33.4921	38.857	33.9287		0.869562	25.5344
19.1646	38.251	32.397	28.828	12.9706	27.5728	22.8221	30.9421	38.6629	21.9852	26.947	36.0762	25.2817	20.6698	21.5156	19.0612	19.0137	20.5492	16.1016	24.7473	26.5088	14.8191	33.8347	39.7691	51.6045		0.875	27.1221
19.2836	28.0584	35.401	24.1639	13.9128	23.8323	18.755	28.0292	35.5694	26.6355	27.1276	37.1218	26.0151	19.6489	23.5625	21.1348	13.7169	12.2454	15.2781	23.4414	31.2933	20.7691	34.3502	25.6351	41.7136		0.880433	25.3088
19.4026	18.5835	31.115	30.0579	36.5203	25.8576	21.2289	35.2057	29.6273	19.7829	21.8151	36.6583	18.585	26.1609	19.8202	14.1309	18.0567	19.4456	15.7027	19.0166	23.5672	23.7428	30.7784	34.918	36.0455		0.885866	25.2676
19.5217	26.8655	33.623	21.5383	23.1087	26.4222	21.8666	28.8923	30.5992	28.3698	28.366	24.7112	23.9438	19.1748	18.9857	18.48	16.7351	22.6987	15.3337	28.3388	27.6556	16.8576	24.691	40.5128	48.2434		0.891304	25.6672
19.6407	31.7033	27.676	22.8106	22.2772	25.8344	25.1601	35.9062	26.1156	28.7014	30.3844	36.3251	34.5776	21.6963	21.6597	18.0679	21.0924	14.1806	19.4603	25.5131	19.8722	19.7559	22.3915	39.6065	36.3332		0.896737	26.1292
19.7597	33.7048	40.927	24.8061	27.64	15.5387	32.5627	36.7033	32.7433	42.6226	26.3368	40.3787	32.8035	18.5437	21.6923	14.0568	17.7939	13.2	20.2948	33.0658	26.7795	15.581	33.3872	38.4995	44.0603		0.902171	28.4884
19.8788	28.5595	30.136	28.5601	31.1022	25.8348	27.9375	43.2037	35.0036	28.5203	22.1589	20.8141	28.0625	21.2858	21.7844	16.7268	20.0221	26.158	20.3262	21.9962	29.515	19.6112	22.2624	43.7888	33.3424		0.907608	26.9464
19.9978	16.6951	21.84	28.7777	15.2343	20.3758	25.9999	28.3854	37.5704	25.7694	25.1147	21.9285	25.3103	27.9466	23.5291	14.5625	16.3683	17.659	16.7524	23.6638	14.0455	27.6354	38.2866	33.6721	29.6249		0.913041	24.0312
20.1168	22.4872	41.118	18.245	29.8708	30.3814	23.6165	37.1145	39.0354	27.6224	28.6158	24.7082	34.5931	19.0327	19.4156	14.3001	17.2914	18.4782	19.4289	16.9279	23.6291	19.461	33.1102	25.3085	42.9064		0.918475	26.1124
20.2359	30.3488	24.175	28.7006	26.5942	30.6097	27.7635	39.7373	26.9511	28.3226	32.5982	25.1418	24.877	18.4499	16.6701	13.9154	18.1344	20.9387	22.7616	16.2998	19.8616	22.7173	29.0624	25.7366	32.8465		0.923912	25.1339
20.3549	32.3865	36.941	21.173	15.4874	19.3698	23.3099	30.542	34.3998	24.7548	23.4434	20.0506	20.9846	16.4443	25.8774	16.9335	15.5388	9.686	17.8004	24.2495	16.241	27.1304	21.7896	26.0496	22.8944		0.929346	22.6449
20.4739	20.9183	30.654	27.1927	15.4801	18.5311	17.8342	23.09	31.7629	25.0092	23.8597	13.1435	31.9358	20.0905	25.081	16.4479	16.9686	8.3987	21.7091	21.9625	25.7433	26.1878	31.6304	28.0684	39.713		0.934779	23.3922
20.593	14.4591	19.027	42.8969	15.8097	14.6029	20.3391	25.4281	41.8489	27.7958	27.5861	24.6225	21.9467	17.249	21.8733	26.1885	13.025	19.2663	14.5095	17.5908	20.1938	21.2402	23.7234	31.6008	46.2222		0.940217	23.7102
20.712	25.458	25.139	20.1092	16.3177	19.1719	24.8577	20.0951	28.3263	31.3871	24.0847	28.0356	19.0531	18.893	16.0903	18.063	13.9933	18.0086	12.0151	12.6663	27.2177	22.188	28.9807	29.3059	24.5173		0.94565	21.8323
20.831	21.999	26.401	21.0253	18.0133	20.6734	23.0783	17.2502	28.7748	24.7348	33.1719	38.0682	25.3972	18.0151	19.3454	9.9206	10.7092	12.1847	14.6638	16.3843	16.308	16.4381	27.2728	35.0435	47.6942		0.951083	22.607
20.9501	15.6755	31.524	22.0084	20.0586	16.0809	14.4387	28.2515	40.922	19.8561	24.1245	21.6322	40.3836	19.3415	19.0971	19.6497	11.9551	15.7664	17.9755	14.4911	11.3834	28.2357	31.1346	28.1961	30.1905		0.956521	22.5989
21.0691	23.6798	33.428	24.8949	20.7199	13.8007	24.7619	25.473	29.4223	23.5629	22.545	30.5458	25.689	15.2179	19.8392	14.9546	7.6177	10.4575	10.2791	15.9768	12.2771	26.5613	26.1688	32.9175	27.8249		0.961954	21.609
21.1881	31.0903	40.613	25.4378	15.3544	14.626	24.4094	28.6372	28.1929	31.6223	21.975	26.6526	24.0967	16.4431	13.8369	9.8475	10.5602	10.4354	16.0883	26.7949	15.5056	17.6846	29.9614	24.1643	42.1926		0.967387	22.7593
21.3072	31.6415	35.728	17.8691	15.3275	9.7093	15.2766	24.6631	31.4735	33.2734	21.4256	22.2817	17.4886	9.6794	17.1727	12.3664	5.163	9.2206	18.2945	15.514	16.8142	23.24	18.5515	26.1957	30.9613		0.972825	19.9721
21.4262	30.961	33.728	24.0672	17.0507	17.854	24.9837	22.5711	28.1113	33.8423	14.5868	19.199	20.2391	15.2559	12.6815	13.2168	9.5604	8.6379	10.585	15.3595	19.4836	21.6346	28.8045	20.5426	35.334		0.978258	20.7621
21.5452	37.2664	22.747	11.1523	20.0132	16.0697	20.7417	21.6115	26.5765	40.0244	24.5963	19.1593	21.2185	16.6092	12.6862	13.0355	10.8232	11.3784	6.9395	15.2016	24.1387	23.3552	24.9646	28.1906	27.3595		0.983691	20.6608
21.6643	37.083	18.973	13.756	17.0247	10.6898	15.6681	20.0843	20.8601	34.8668	15.3215	13.7565	28.4699	12.2736	9.0751	11.6634	9.3169	10.9828	9.2667	16.8389	15.3106	14.9999	19.4233	31.9972	34.8938		0.989129	18.4415
21.7833	23.4132	19.25	20.4609	16.685	17.6898	25.7637	25.7324	21.4409	44.1801	19.594	13.1279	20.1451	14.8292	17.9441	14.9425	11.5695	14.3136	14.0903	22.4704	20.057	18.2764	34.5955	27.4523	34.7065		0.994562	21.3638
21.9024	37.7573	11.198	18.9721	16.6151	11.214	25.5715	17.6873	27.7118	25.527	27.3002	22.9628	20.5246	10.3922	13.3808	14.2165	9.4592	5.7508	8.3621	14.1876	17.3025	15.2526	25.4748	19.4275	44.842		1	19.2121

## Sheet: Sheet1
Image7				Image8				Image12				Image13				Distance	Image7	Image8	Image12	Image13
Ap-basal	Avg intensity			Ap-basal	Avg intensity			Ap-basal	Avg intensity			Ap-basal	Avg intensity			0	32.4628	27.3437	21.5949	20.5211
0	32.4628			0	27.3437			0	21.5949			0	20.5211			0.05	42.3931	38.3034	32.6383	29.245
0.00543319	33.2589			0.00492468	27.6107			0.00609578	24.7745			0.00558497	22.2744			0.1	52.9643	58.3853	80.7608	59.0001
0.010871	38.0479			0.0098535	31.9524			0.0121967	24.1253			0.0111746	22.6555			0.15	55.0687	65.6474	105.477	76.6261
0.0163041	39.1556			0.0147782	33.8388			0.0182925	26.6671			0.0167596	24.8344			0.2	51.1043	62.0532	79.477	73.1406
0.0217373	42.2043			0.0197029	35.6217			0.0243882	28.8809			0.0223446	27.4295			0.25	46.1934	52.3599	54.4839	59.3818
0.0271751	43.2031			0.0246317	37.4001			0.0304891	32.4984			0.0279342	30.3841			0.3	43.3837	44.0062	40.7489	46.0501
0.0326083	44.6722			0.0295564	39.6457			0.0365849	34.957			0.0335192	33.0158			0.35	40.1738	32.4456	34.9225	39.3603
0.0380415	47.3268			0.034481	41.3591			0.0426807	38.8811			0.0391042	32.4317			0.4	36.8012	28.3281	31.1407	35.0037
0.0434793	46.2952			0.0394099	44.1394			0.0487816	44.9891			0.0446938	38.2116			0.45	36.2286	25.6322	27.9134	29.6219
0.0489124	50.011			0.0443345	45.6303			0.0548774	49.0145	32.6383		0.0502788	40.6915	29.245		0.5	36.0012	22.2114	23.0645	26.3415
0.0543456	49.6864	42.3931		0.0492592	46.3761			0.0609732	56.5869			0.0558637	42.875			0.55	33.5835	20.3738	20.4461	23.4038
0.0597834	50.0931			0.054188	48.7226	38.3034		0.0670741	62.7211			0.0614534	47.7808			0.6	31.9038	19.6522	19.4987	21.7452
0.0652166	47.5092			0.0591127	50.493			0.0731699	71.1368			0.0670384	53.2151			0.65	31.2035	19.0689	18.7936	20.2941
0.0706498	51.1848			0.0640374	52.7118			0.0792656	81.319			0.0726233	53.3077			0.7	30.2631	19.5582	19.1982	20.0465
0.0760876	52.9346			0.0689662	55.7829			0.0853665	86.6827			0.078213	59.7681			0.75	28.5792	20.1872	18.9416	19.5479
0.0815207	54.8368			0.0738909	57.8359			0.0914623	90.3628			0.083798	65.7627			0.8	28.6695	19.7828	19.7974	20.9391
0.0869585	55.3691			0.0788197	58.3333			0.0975632	95.3407			0.0893876	67.6638			0.85	25.6152	19.914	19.1795	20.1067
0.0923917	53.7976			0.0837444	59.852			0.103659	101.936	80.7608		0.0949726	67.8992			0.9	26.4964	18.9304	16.4521	19.9093
0.0978249	55.4423			0.0886691	61.5494			0.109755	103.959			0.100558	72.7281	59.0001		0.95	24.0456	15.2327	11.1414	13.9475
0.103263	55.5108	52.9643		0.0935979	61.4433			0.115856	108.664			0.106147	73.1521			1	20.8199	8.34258	10.0336	6.66697
0.108696	58.0619			0.0985226	61.1054			0.121951	106.479			0.111732	73.7088
0.114129	55.474			0.103447	64.7463	58.3853		0.128047	108.294			0.117317	76.0043
0.119567	54.9408			0.108376	64.3445			0.134148	108.864			0.122907	77.2486
0.125	54.9715			0.113301	67.3801			0.140244	108.064			0.128492	76.6313
0.130433	55.0368			0.118225	66.3499			0.14634	102.501			0.134077	78.7697
0.135871	54.3894			0.123154	65.4289			0.152441	96.9879	105.477		0.139666	79.2444
0.141304	53.1916			0.128079	67.6214			0.158536	94.2581			0.145251	79.4847
0.146737	54.1138			0.133004	65.0297			0.164632	91.1434			0.150836	75.391	76.6261
0.152175	55.0687	55.0687		0.137932	65.9288			0.170733	89.0898			0.156426	74.6724
0.157608	53.2685			0.142857	64.2125			0.176829	84.2582			0.162011	79.2
0.163041	50.692			0.147782	65.3101			0.182925	75.2998			0.167596	76.5828
0.168479	52.5735			0.152711	64.8684	65.6474		0.189026	72.1983			0.173186	72.3795
0.173912	52.9737			0.157635	64.9762			0.195121	66.3936			0.178771	73.1936
0.179346	51.2433			0.16256	66.4285			0.201217	63.1749	79.477		0.184356	71.8551
0.184783	48.1552			0.167489	63.1541			0.207318	63.0058			0.189945	69.496
0.190217	51.7119			0.172414	64.0376			0.213414	61.0717			0.19553	70.4483
0.19565	50.695			0.177338	60.4291			0.21951	55.8305			0.201115	70.4376	73.1406
0.201088	48.6258	51.1043		0.182267	62.0568			0.22561	55.0053			0.206705	66.1365
0.206521	49.1508			0.187192	60.9304			0.231706	52.9871			0.21229	64.073
0.211954	49.2251			0.192116	59.9075			0.237802	52.5339			0.217875	62.6357
0.217392	46.1646			0.197045	58.3679			0.243903	47.5747			0.223464	62.8273
0.222825	44.0956			0.20197	60.2435	62.0532		0.249999	47.8621	54.4839		0.229049	60.4796
0.228263	42.833			0.206899	54.4288			0.2561	41.2426			0.234639	57.8666
0.233696	44.2421			0.211823	54.3512			0.262195	43.6891			0.240224	56.0237
0.239129	46.8275			0.216748	56.302			0.268291	45.0275			0.245809	52.6458
0.244567	45.6104			0.221677	53.831			0.274392	39.3654			0.251399	51.7476	59.3818
0.25	47.5913	46.1934		0.226602	52.6656			0.280488	40.6654			0.256984	51.1353
0.255433	46.2256			0.231526	49.9137			0.286584	39.7107			0.262569	48.8314
0.260871	43.3138			0.236455	50.267			0.292685	38.016			0.268158	49.5995
0.266304	43.7336			0.24138	50.1171			0.29878	40.1661			0.273743	49.7362
0.271737	45.7804			0.246304	50.5961			0.304876	38.8568	40.7489		0.279328	46.5714
0.277175	43.654			0.251233	51.1262	52.3599		0.310977	37.9963			0.284918	43.9529
0.282608	44.0672			0.256158	50.1769			0.317073	36.9801			0.290503	42.3905
0.288041	39.4673			0.261083	46.7746			0.323169	36.1624			0.296088	40.7056
0.293479	41.4231			0.266011	48.038			0.329269	37.1749			0.301677	41.5281	46.0501
0.298912	42.4423			0.270936	45.7349			0.335365	35.5403			0.307262	39.3896
0.304346	43.7299	43.3837		0.275861	44.1653			0.341461	32.444			0.312847	37.6305
0.309783	40.9781			0.28079	43.9636			0.347562	31.7119			0.318437	39.9231
0.315217	40.1837			0.285714	42.3304			0.353658	31.3699	34.9225		0.324022	38.5394
0.32065	39.7998			0.290639	39.4659			0.359754	30.8409			0.329607	39.239
0.326088	40.911			0.295568	40.2948			0.365854	31.1173			0.335197	38.8516
0.331521	43.1612			0.300492	39.1173	44.0062		0.37195	32.0178			0.340782	41.2749
0.336954	39.772			0.305417	36.9591			0.378046	33.0659			0.346366	39.5301
0.342392	40.2319			0.310346	38.0146			0.384147	30.8585			0.351956	39.8645	39.3603
0.347825	39.5163			0.315271	36.1449			0.390243	30.8301			0.357541	38.1447
0.353258	37.0104	40.1738		0.320195	33.9135			0.396338	30.3168			0.363126	37.5887
0.358696	38.5126			0.325124	31.3862			0.402439	30.078	31.1407		0.368716	36.4288
0.364129	38.7663			0.330049	32.6106			0.408535	28.949			0.374301	37.4451
0.369562	37.9921			0.334974	30.3029			0.414631	29.4178			0.379886	35.0601
0.375	39.2299			0.339902	29.7569			0.420732	27.3519			0.385475	34.2659
0.380433	35.4381			0.344827	29.4672			0.426828	29.5848			0.39106	31.0974
0.385871	35.0425			0.349756	28.8434			0.432928	27.7402			0.39665	32.7705
0.391304	35.6038			0.354681	29.5023	32.4456		0.439024	28.6164			0.402235	32.2323	35.0037
0.396737	34.7647			0.359605	29.4575			0.44512	26.7144			0.40782	31.8877
0.402175	35.861	36.8012		0.364534	29.1664			0.451221	24.9324	27.9134		0.41341	30.7702
0.407608	35.4795			0.369459	27.3276			0.457317	24.7406			0.418995	30.2573
0.413041	37.42			0.374383	27.7476			0.463413	23.7074			0.424579	30.3242
0.418479	38.5754			0.379312	27.5932			0.469513	23.3226			0.430169	29.1641
0.423912	35.9405			0.384237	27.1526			0.475609	22.6088			0.435754	29.8464
0.429346	37.863			0.389162	28.5148			0.481705	24.067			0.441339	29.1594
0.434783	33.122			0.39409	28.3516			0.487806	21.6401			0.446929	28.1811
0.440217	34.8151			0.399015	28.7314			0.493902	22.8074			0.452514	27.0065	29.6219
0.44565	37.1543			0.40394	29.2378	28.3281		0.499997	21.6219	23.0645		0.458099	28.4576
0.451088	35.6875	36.2286		0.408869	27.7071			0.506098	21.7797			0.463688	25.4409
0.456521	34.5472			0.413793	26.5464			0.512194	22.5312			0.469273	25.9648
0.461954	37.2548			0.418718	26.3874			0.51829	19.9551			0.474858	25.0443
0.467392	36.6446			0.423647	25.9236			0.524391	19.3373			0.480448	26.2833
0.472825	37.4918			0.428571	27.1863			0.530487	19.459			0.486033	26.7372
0.478258	33.9559			0.433496	26.5131			0.536582	20.2871			0.491618	25.9286
0.483696	37.481			0.438425	24.2729			0.542683	19.9328			0.497208	25.5278
0.489129	34.4462			0.44335	24.6885			0.548779	20.8783			0.502792	27.6886	26.3415
0.494562	36.3421			0.448274	24.3967			0.554875	19.8549	20.4461		0.508377	24.4261
0.5	35.847	36.0012		0.453203	22.6995	25.6322		0.560976	20.2756			0.513967	23.4533
0.505433	33.4556			0.458128	24.945			0.567072	20.0313			0.519552	23.4257
0.510866	34.2232			0.463052	23.0053			0.573167	18.2995			0.525137	24.2432
0.516304	32.7573			0.467981	22.1091			0.579268	18.6965			0.530727	23.3321
0.521737	34.2374			0.472906	22.7065			0.585364	19.2105			0.536312	22.9829
0.527171	35.373			0.477831	21.3668			0.59146	20.2306			0.541897	23.2727
0.532608	34.1133			0.482759	21.5566			0.597561	18.1204			0.547486	22.512
0.538041	32.6724			0.487684	21.7792			0.603656	21.125	19.4987		0.553071	22.9866	23.4038
0.543479	32.7241			0.492613	22.4348			0.609757	18.0433			0.558661	22.2743
0.548912	32.7126			0.497538	21.1619			0.615853	19.5153			0.564246	21.8921
0.554346	33.5662	33.5835		0.502462	21.0487	22.2114		0.621949	17.5738			0.569831	21.3261
0.559783	33.9354			0.507391	21.9375			0.62805	18.446			0.575421	21.9186
0.565217	32.1171			0.512316	21.2153			0.634146	18.0539			0.581005	22.5177
0.57065	31.8933			0.517241	20.0529			0.640241	19.265			0.58659	21.433
0.576088	32.1442			0.522169	20.732			0.646342	19.2759			0.59218	21.8561
0.581521	30.0604			0.527094	20.7758			0.652438	20.1754	18.7936		0.597765	21.2826
0.586954	31.0236			0.532019	21.3203			0.658534	18.9468			0.60335	21.2065	21.7452
0.592392	32.2216			0.536948	20.1849			0.664635	17.1499			0.60894	20.9874
0.597825	31.8373			0.541872	19.7301			0.670731	20.4508			0.614525	21.0559
0.603258	31.9012	31.9038		0.546797	18.9956			0.676826	20.137			0.62011	21.2218
0.608696	31.5387			0.551726	18.7938	20.3738		0.682927	19.7617			0.625699	19.7093
0.614129	31.4571			0.55665	19.2708			0.689023	20.2933			0.631284	19.9127
0.619562	29.7675			0.561575	18.7366			0.695119	18.7988			0.636869	18.8019
0.625	29.4284			0.566504	18.9133			0.70122	18.0472	19.1982		0.642459	21.0157
0.630433	33.1645			0.571429	19.7444			0.707315	18.6489			0.648044	18.5071
0.635866	33.1733			0.576353	19.4571			0.713411	19.0935			0.653629	21.4349	20.2941
0.641304	31.5054			0.581282	20.2973			0.719512	18.5679			0.659218	19.8363
0.646737	30.367			0.586207	20.2403			0.725608	18.1627			0.664803	21.098
0.652171	30.4296	31.2035		0.591131	20.4245			0.731704	20.1139			0.670388	20.0511
0.657608	29.4295			0.59606	19.8118			0.737805	17.6586			0.675978	20.2562
0.663041	31.1748			0.600985	19.6259	19.6522		0.7439	19.3177			0.681563	20.0693
0.668475	30.2627			0.60591	17.8233			0.749996	19.9697	18.9416		0.687148	20.8079
0.673912	31.5801			0.610838	18.5468			0.756097	20.903			0.692738	19.6106
0.679346	28.4245			0.615763	19.534			0.762193	18.0369			0.698323	18.9412
0.684783	29.2213			0.620692	19.6771			0.768294	19.2438			0.703912	19.7477	20.0465
0.690217	29.9958			0.625617	19.0426			0.77439	20.1916			0.709497	19.8346
0.69565	30.8825			0.630541	19.7619			0.780485	20.3907			0.715082	20.5576
0.701088	31.3968	30.2631		0.63547	19.0144			0.786586	19.9173			0.720672	19.4359
0.706521	30.9349			0.640395	19.9762			0.792682	18.2165			0.726257	19.0804
0.711954	28.3048			0.645319	19.0811			0.798778	21.3136			0.731842	20.192
0.717392	28.7013			0.650248	18.2313	19.0689		0.804879	19.9634	19.7974		0.737431	18.9738
0.722825	28.634			0.655173	19.16			0.810974	18.8456			0.743016	19.042
0.728258	27.2449			0.660098	19.1606			0.81707	20.0864			0.748601	18.6291
0.733696	29.054			0.665026	19.3618			0.823171	17.5301			0.754191	20.1853	19.5479
0.739129	28.2761			0.669951	19.6639			0.829267	19.966			0.759776	20.8471
0.744562	27.0749			0.674876	18.2238			0.835363	19.6174			0.765361	21.7526
0.75	28.9877	28.5792		0.679805	18.9552			0.841464	17.8786			0.770951	21.0091
0.755433	29.1403			0.684729	20.903			0.847559	18.7644			0.776536	21.2351
0.760866	29.2222			0.689654	19.2125			0.853655	20.7478	19.1795		0.782121	21.2329
0.766304	29.0988			0.694583	19.1134			0.859756	17.2403			0.78771	20.6086
0.771737	28.626			0.699508	20.5029			0.865852	19.5291			0.793295	21.407
0.777171	29.3468			0.704432	20.8825	19.5582		0.871948	20.5652			0.79888	20.8492
0.782608	27.9403			0.709361	19.8883			0.878049	16.232			0.80447	19.5098	20.9391
0.788041	29.9465			0.714286	19.9824			0.884144	15.5474			0.810055	19.6107
0.793475	27.0621			0.71921	20.2545			0.89024	15.455			0.81564	20.2206
0.798912	29.0252			0.724139	19.3181			0.896341	14.0491			0.821229	20.4214
0.804346	27.2872	28.6695		0.729064	19.9657			0.902437	12.9993	16.4521		0.826814	20.6466
0.809779	27.6101			0.733989	20.9424			0.908533	13.4101			0.832399	19.9163
0.815217	27.0478			0.738917	19.7776			0.914633	12.2931			0.837989	20.5735
0.82065	25.1472			0.743842	19.8031			0.920729	12.3183			0.843574	19.9857
0.826083	26.5247			0.748767	21.475			0.926825	11.309			0.849159	20.9936
0.831521	25.0326			0.753696	20.4645	20.1872		0.932926	10.3199			0.854749	18.5917	20.1067
0.836954	24.8434			0.75862	19.8361			0.939022	9.77962			0.860334	19.1341
0.842392	25.9197			0.763549	19.9988			0.945123	10.5767			0.865923	20.6104
0.847825	26.556			0.768474	19.816			0.951218	9.12454	11.1414		0.871508	23.3108
0.853258	25.6152	25.6152		0.773398	19.3217			0.957314	9.59594			0.877093	20.5076
0.858696	27.6359			0.778327	19.9585			0.963415	10.3161			0.882683	20.1653
0.864129	27.3141			0.783252	20.0689			0.969511	9.93644			0.888268	18.8119
0.869562	25.5344			0.788177	20.2517			0.975607	9.03421			0.893853	18.4385
0.875	27.1221			0.793105	19.8086			0.981708	9.93186			0.899442	19.5899
0.880433	25.3088			0.79803	19.8556			0.987803	9.84935			0.905027	18.6149	19.9093
0.885866	25.2676			0.802955	18.912	19.7828		0.993899	10.2854			0.910612	17.257
0.891304	25.6672			0.807884	18.5584			1	11.3193	10.0336		0.916202	16.9875
0.896737	26.1292			0.812808	19.783							0.921787	16.4212
0.902171	28.4884	26.4964		0.817733	20.6061							0.927372	14.9028
0.907608	26.9464			0.822662	20.383							0.932962	14.033
0.913041	24.0312			0.827586	19.1583							0.938547	13.4839
0.918475	26.1124			0.832511	19.224							0.944132	11.2201
0.923912	25.1339			0.83744	20.5045							0.949721	10.7266
0.929346	22.6449			0.842365	20.2152							0.955306	10.4958	13.9475
0.934779	23.3922			0.847289	20.5256							0.960891	9.36492
0.940217	23.7102			0.852218	20.1821	19.914						0.966481	7.87209
0.94565	21.8323			0.857143	20.4106							0.972066	7.14634
0.951083	22.607	24.0456		0.862068	19.4798							0.977651	6.19658
0.956521	22.5989			0.866996	19.4618							0.98324	7.36288
0.961954	21.609			0.871921	19.9314							0.988825	5.3038
0.967387	22.7593			0.876846	19.4549							0.99441	5.1903
0.972825	19.9721			0.881775	19.3192							1	4.89886	6.66697
0.978258	20.7621			0.886699	18.763
0.983691	20.6608			0.891624	17.1335
0.989129	18.4415			0.896553	17.7278
0.994562	21.3638			0.901477	17.6217	18.9304
1	19.2121	20.8199		0.906406	18.7324
				0.911331	18.8816
				0.916256	17.7229
				0.921184	15.6563
				0.926109	14.6189
				0.931034	15.6479
				0.935963	14.6636
				0.940887	13.4845
				0.945812	12.6687
				0.950741	10.2501	15.2327
				0.955665	10.3495
				0.96059	11.4073
				0.965519	9.6626
				0.970444	8.65809
				0.975368	8.46868
				0.980297	8.02557
				0.985222	7.68786
				0.990146	6.61678
				0.995075	7.40901
				1	5.1404	8.34258
