# Supplementary material for: Crumbs organizes the transport machinery by regulating apical levels of PI(4,5)P2 in Drosophila
Source: eLife. 2019 Nov 7;8:e50900. doi: 10.7554/eLife.50900 (PMC6881148; doi:10.7554/eLife.50900)
Supplement: Figure 6—source data 16. [file elife-50900-fig6-data16.xlsx]

## Sheet: Image16
X0	Y0	Y1	Y2	Y3	Y4	Y5	Y6	Y7	Y8	Y9	Y10	Y11	Y12	Y13	Y14	Y15	Y16	Y17	Y18	Y19	Y20	Y21	Y22	Y23	Y24	Y25	Y26	Y27	Y28	Y29		Ap-Basal	Avg intensity
0	14.0332	12.8041	20.2012	12.891	21.1035	13.5793	21.74	24.509	15.438	18.6886	29.5224	29.366	15.053	11.982	18.3566	51.627	30.9194	21.354	20.166	20.05	30.739	22.4353	42.436	43.291	35.24	57.6	36.409	28.604	33.769	36.554		0	26.3487
0.119	19.2554	9.0427	20.2415	11.604	16.8134	8.7072	11.689	28.748	37.248	28.0427	31.8148	21.738	21.265	17.0243	19.3809	47.731	32.518	18.078	20.483	21.409	38.223	28.1705	51.242	34.669	47.053	54.244	29.047	24.588	33.758	36.546		0.00552327	27.3458
0.2381	22.0383	11.4557	13.9675	11.975	14.4612	12.6306	20.948	22.389	30.802	27.49	21.4092	26.927	16.854	23.5657	29.6839	62.845	20.3857	24.334	17.29	25.472	43.059	24.9491	54.723	47.757	46.614	49.821	42.177	26.206	45.512	36.338		0.0110512	29.136
0.3571	16.7392	10.3087	14.5155	23.945	13.627	16.959	23.39	18.059	34.348	20.8009	32.117	26.366	28.945	23.4207	19.2775	46.398	36.7271	30.049	13.124	30.381	39.973	20.3491	35.404	47.631	36.835	66.319	34.95	45.672	48.306	43.05		0.0165745	29.9329
0.4761	12.5507	18.3454	14.7751	16.469	19.2307	14.1016	22.488	34.291	34.536	25.8734	24.6127	30.575	28.615	17.3678	27.0702	50.578	36.2922	37.214	23.211	24.1	45.978	18.4552	38.893	52.441	42.586	50.294	44.623	39.413	64.376	47.883		0.0220977	31.908
0.5952	14.1536	10.4759	16.0093	22.758	16.079	12.9505	17.146	37.571	34.839	27.87	29.3349	42.406	41.253	26.4036	35.4362	48.445	36.0613	29.296	20.77	21.625	51.783	21.3715	41.851	56.12	34.636	56.041	49.7	54.133	77.626	48.782		0.0276256	34.4309
0.7142	8.9709	7.1927	19.3588	13.622	17.9472	12.2595	23.848	36.282	31.477	38.4608	32.2806	36.68	44.161	42.9611	34.2398	57.838	34.8103	36.55	37.571	33.856	45.321	21.4487	63.719	54.755	32.011	62.777	84.757	53.862	63.924	61.129		0.0331489	38.1357
0.8332	16.2043	19.243	23.0202	17.902	14.1445	17.0545	17.725	31.911	39.041	28.8898	34.172	47.123	65.099	55.0183	27.2998	62.091	32.6146	46.727	51.33	29.933	56.203	32.6239	68.694	66.658	57.818	71.906	63.717	69.541	87.773	69.548		0.0386722	44.0342
0.9523	13.4432	19.5736	34.8082	14.632	26.7751	19.4071	28.697	37.554	42.868	37.2929	31.2953	48.538	72.462	57.5826	47.4066	60.363	44.7947	63.67	64.945	24.778	56.059	29.809	64.414	77.851	49.344	86.428	62.17	60.655	85.187	89.496		0.0442001	48.41
1.0713	19.3318	27.0079	50.149	17.909	32.1991	28.6617	33.353	36.333	39.758	30.1823	37.4262	64.925	73.185	71.1859	43.5205	72.034	43.2677	49.748	76.583	47.454	59.566	42.0922	72.273	82.67	55.113	94.02	79.982	83.374	90.359	84.885		0.0497234	54.6183
1.1903	13.3888	31.525	44.276	14.761	43.4184	45.028	31.82	43.639	46.256	45.0337	33.9728	71.834	92.027	70.165	45.8808	75.434	37.2342	45.258	101.281	43.077	59.653	38.4911	73.469	91.928	52.2	106.462	73.051	94.87	109.665	78.649		0.0552466	58.4583
1.3094	24.7933	31.4099	52.6654	27.507	32.6059	41.7617	34.164	45.088	56.439	41.1088	54.1104	69.535	86.042	85.7295	58.2978	81.411	41.5114	56.544	91.182	53.186	53.524	35.3155	87.095	95.113	58.036	92.179	92.749	76.457	86.818	80.558		0.0607746	60.7646
1.4284	31.3141	48.9634	50.1091	29.617	60.2659	52.1409	30.261	58.057	53.014	30.4222	39.0543	81.36	94.455	78.3251	66.6923	61.962	52.3791	57.122	104.961	73.451	82.375	56.9792	80.881	93.087	64.042	103.378	92.286	85.775	84.972	84.754		0.0662978	66.0819
1.5474	32.4023	69.0292	55.2604	37.402	68.5295	47.2495	35.216	69.781	58.03	39.2268	58.543	77.583	77.429	94.2042	80.4061	69.445	52.3436	61.7	88.332	66.269	83.516	73.8661	99.281	86.82	64.186	108.478	110.326	91.06	107.167	88.196		0.0718211	71.7093
1.6665	36.3993	66.3465	62.1977	46.96	73.6276	47.7332	45.006	66.686	57.559	48.4615	57.1991	94.077	101.426	97.5741	83.2301	82.232	59.6062	74.255	99.625	61.996	84.137	44.2428	105.506	99.497	83.65	98.387	108.929	108.977	86.739	118.178		0.077349	76.6813
1.7855	26.3082	72.0835	52.9919	56.738	74.0599	63.9707	36.271	72.161	48.651	57.5185	76.8838	89.341	97.694	89.8581	90.1114	100.907	54.8256	90.051	106.736	81.607	85.381	58.9573	100.62	114.405	76.399	98.745	109.817	109.591	87.593	108.022		0.0828723	79.61
1.9046	31.5701	82.0378	48.413	68.817	67.6792	71.271	46.353	77.271	80.101	46.002	73.4643	94.017	112.798	87.2555	90.3945	101.276	62.5138	97.607	107.871	94.153	90.04	76.5458	97.748	102.852	90.364	116.745	126.069	107.303	103.199	120.288		0.0884002	85.734
2.0236	39.6592	55.1084	70.2126	70.911	52.6276	79.2124	58.505	88.732	71.233	49.3956	72.7309	94.213	93.307	68.142	94.4023	83.221	51.0375	97.799	97.984	101.121	96.602	75.7997	110.536	118.384	92.962	106.806	117.662	115.08	117.892	129.988		0.0939235	85.7089
2.1426	31.1997	61.7169	68.8641	73.837	61.4154	95.3969	71.736	93.636	84.147	61.2397	72.3512	92.515	79.243	82.0156	97.2244	85.827	58.7295	96.141	119.031	102.748	101.47	73.1783	118.181	105.861	106.952	95.18	122.284	110.699	104.151	137.348		0.0994467	88.8106
2.2617	51.8005	81.3652	59.4994	69.682	63.5811	93.1144	55.386	99.422	79.311	61.9913	76.7051	83.713	107.785	83.4479	95.69	104.788	58.6369	94.675	137.078	96.296	108.051	72.8662	98.418	101.633	102.392	99.292	119.622	124.237	93.7	118.88		0.104975	89.7686
2.3807	61.74	69.2527	70.8292	70.886	62.9488	85.4894	66.636	99.425	84.173	68.859	82.7524	90.236	96.834	58.0356	68.6498	104.166	89.9266	102.272	133.087	106.818	93.468	83.4294	110.101	87.612	82.206	109.174	112.654	126.933	99.67	109.003		0.110498	89.5756
2.4997	57.5575	74.2467	65.2449	95.77	74.8658	97.2768	84.711	120.035	95.383	62.7553	72.5227	105.132	111.429	70.8488	97.9971	109.258	90.6876	122.273	120.885	96.164	104.488	82.3281	103.861	103.874	98.599	93.892	119.519	126.74	104.454	114.747		0.116021	95.9182
2.6188	56.4062	78.5348	59.4333	108.968	73.6478	98.9791	99.445	114.109	105.391	55.1779	86.7776	95.462	106.434	67.6079	74.6246	98.545	81.4625	117.513	124.315	92.08	126.055	83.9385	107.697	90.275	115.549	97.605	102.281	125.564	105.232	106.137		0.121549	95.1749
2.7378	40.0207	83.2154	57.2283	95.442	68.6182	87.5939	112.051	117.809	100.024	53.6778	84.121	90.38	97.574	58.1936	83.0081	97.484	97.0485	108.593	117.144	91.874	127.43	78.3412	94.296	84.084	109.438	110.431	106.473	129.377	89.639	99.867		0.127072	92.3492
2.8568	71.4879	64.9651	66.1474	94.004	78.3443	83.6216	72.837	112.419	91.034	44.5694	90.6094	104.805	105.657	56.2661	92.7368	102.232	74.3898	124.558	111.079	101.029	121.015	91.5014	93.781	81.232	114.502	120.838	116.16	113.102	96.095	73.698		0.132596	92.1572
2.9759	62.9743	81.0335	65.0127	96.359	81.8456	86.774	106.635	114.486	82.526	55.4903	96.4252	85.445	95.198	55.0808	89.1085	98.607	76.5316	127.7	111.507	87.114	130.123	81.6075	74.439	94.033	107.724	95.902	119.557	127.134	100.572	82.304		0.138124	92.3083
3.0949	64.6037	73.5103	67.6001	88.733	80.6397	92.3426	100.015	109.738	97.27	56.3579	88.9698	87.728	88.4	45.1589	74.9468	93.251	72.4629	120.184	114.493	81.706	112.238	84.3679	86.598	79.378	80.404	101.067	96.261	116.018	95.461	92.233		0.143647	88.0712
3.2139	67.7414	77.404	58.5244	103.496	95.2484	96.9531	89.607	102.819	110.842	48.3455	98.9799	94.172	87.625	44.7674	96.1266	102.31	75.6777	122.055	120.915	89.602	119.629	67.2453	81.532	86.646	99.387	100.978	96.567	118.088	86.318	67.477		0.14917	90.236
3.333	87.7252	72.3069	73.1948	84.968	85.8653	93.9702	113.799	104.322	83.898	51.0922	99.341	85.338	100.254	46.867	92.0247	100.325	72.6666	112.259	101.514	91.814	126.852	78.0114	93.104	71.789	96.506	94.586	89.96	121.99	96.412	84.256		0.154698	90.2337
3.452	90.6108	67.327	47.3126	106.709	88.9102	91.7144	92.2	117.918	100.522	63.0627	91.5817	74.266	94.453	50.7332	81.3355	87.935	73.2769	126.067	121.578	90.205	119.429	82.4641	83.425	52.238	88.792	106.699	105.667	112.587	81.837	68.49		0.160221	88.6449
3.571	75.3178	62.6214	45.2713	89.067	91.8924	95.3257	101.596	107.017	88.228	64.0347	90.8612	78.595	69.797	36.8952	72.48	106.413	75.9671	115.144	104.706	96.135	122.887	62.306	85.894	59.937	68.338	88.568	78.617	111.603	84.183	73.088		0.165745	83.4262
3.6901	73.5626	62.9623	38.7368	91.747	84.4414	92.0555	98.584	126.336	103.452	53.7046	85.4991	72.702	79.339	47.753	85.2039	103.953	78.1471	112.514	87.059	86.534	125.502	87.0271	81.456	57.259	72.599	94.52	89.629	109.387	83.614	53.231		0.171272	83.9503
3.8091	65.0608	73.3387	44.8496	117.07	94.4289	91.1669	93.191	106.507	75.646	49.8328	90.3899	69.176	73.258	43.2251	71.5179	83.699	65.3893	111.779	95.917	90.329	112.392	69.3272	80.118	66.97	66.751	95.451	84.938	103.356	80.308	72.938		0.176796	81.2774
3.9281	71.1748	71.9428	43.8136	100.822	83.1808	89.9765	73.637	101.314	85.346	54.8525	91.5422	51.483	50.919	40.4663	73.7109	101.364	69.8777	126.508	92.422	65.215	117.606	66.7252	76.639	53.513	66.243	74.706	71.582	117.547	84.512	56.416		0.182319	77.5019
4.0472	78.6172	70.9669	54.2408	91.396	85.9863	73.6711	77.47	89.498	86.48	53.8715	82.1328	54.267	69.602	36.0426	73.5455	120.893	83.0943	111.962	86.389	76.242	115.778	64.7099	81.521	53.599	46.753	76.249	61.661	110.578	84.191	47.865		0.187847	76.6424
4.1662	70.4284	70.791	56.4427	78.224	84.7082	71.6202	77.019	89.473	80.002	62.6626	90.1959	53.978	69.697	40.9947	60.5637	102.791	61.6227	107.571	77.024	83.194	107.286	66.6002	80.179	57.869	58.44	80.933	53.932	101.057	82.129	50.162		0.19337	74.253
4.2852	63.1865	61.1818	37.0954	88.619	85.3688	71.2538	73.192	76.09	81.334	57.5133	71.7532	51.536	58.553	35.354	52.151	95.303	55.7097	101.384	74.794	52.873	90.649	56.8927	73.137	49.934	53.252	90.287	48.505	122.22	92.636	44.881		0.198893	68.888
4.4043	69.7481	47.5318	49.9854	77.507	77.3884	72.5536	74.109	86.716	91.535	67.3215	91.8626	50.436	66.004	31.4673	59.3101	80.671	69.6086	94.473	65.351	54.793	108.1	51.6414	74.777	50.452	43.701	79.992	57.469	88.339	74.51	51.424		0.204421	68.6259
4.5233	61.3869	59.8584	50.826	78.29	74.4567	85.4787	67.225	99.32	93.87	61.3541	97.6242	37.413	53.556	34.5231	71.6931	74.104	63.2168	77.266	51.408	54.207	101.084	47.1185	68.749	40.061	46.391	68.095	63.168	95.539	64.571	52.844		0.209945	66.4899
4.6423	63.2991	68.5776	49.7739	81.261	68.8444	65.0603	70.004	83.224	79.556	49.0369	90.3975	49.597	45.478	41.2122	62.3999	67.358	70.6936	88.323	62.939	51.048	90.387	64.9506	64.003	42.914	48.895	67.952	63.467	86.59	67.991	46.449		0.215468	65.0561
4.7614	66.7289	48.1045	47.9767	83.731	59.4982	62.3709	72.814	86.526	60.95	52.0048	92.8447	45.797	34.479	33.9005	69.6987	60.509	64.2987	83.031	47.885	54.409	92.241	49.833	74.636	33.87	34.308	68.063	56.624	88.656	67.603	35.943		0.220996	60.9778
4.8804	57.8437	46.7856	40.6206	97.078	62.768	57.5801	72.3	87.13	68.2	61.3362	81.4483	55.014	43.661	29.4435	58.0729	69.783	61.0854	76.259	48.852	65.161	82.189	54.8817	61.726	49.081	35.861	64.892	38.302	89.032	58.166	43.428		0.226519	60.5994
4.9995	66.8158	37.4212	52.0086	74.305	50.7979	50.5161	60.994	80.219	69.374	58.6225	79.362	42.067	35.029	29.5935	47.573	66.992	44.6595	70.22	56.041	45.047	59.059	47.7147	47.144	56.795	34.706	58.307	49.602	97.203	64.877	36.67		0.232047	55.6579
5.1185	69.1861	49.229	44.8508	78.463	52.6811	64.9086	51.739	83.881	71.207	45.3409	63.2951	47.769	55.296	35.055	57.3076	58.897	50.8409	55.942	48.387	44.719	82.131	45.7094	38.635	50.415	50.333	61.488	47.209	87.707	50.366	32.338		0.23757	55.8442
5.2375	55.938	51.2479	41.4999	78.8	51.8202	38.6166	64.377	69.289	66.728	36.9883	71.7249	62.042	32.716	38.9593	43.8412	54.69	38.0609	53.898	58.018	47.129	68.704	43.1703	39.889	59.421	46.75	48.594	56.504	73.839	58.94	39.809		0.243094	53.0668
5.3566	65.697	32.9273	26.5999	79.533	49.3546	39.8172	46.59	79.179	60.539	33.5561	59.5039	43.331	21.278	33.777	43.938	43.033	36.3092	65.511	58.611	53.107	55.18	41.6011	36.194	60.006	45.64	35.244	53.624	63.848	41.664	36.964		0.248622	48.0719
5.4756	65.5583	23.7848	33.0079	59.504	42.454	44.7101	54.279	89.982	51.458	37.5102	74.8908	34.056	36.614	40.2055	36.3795	43.207	37.1191	45.178	48.893	43.806	61.904	39.5685	25.274	46.113	52.081	45.233	58.908	75.085	39.073	35.621		0.254145	47.3819
5.5946	70.2347	23.2857	36.0017	61.554	37.7979	38.6816	48.523	86.748	46.968	39.1154	64.1612	46.996	34.055	47.8086	54.037	42.346	42.1406	51.15	38.745	50.84	48.629	37.2538	23.166	54.313	46.007	52.878	46.377	55.411	31.579	37.159		0.259668	46.4654
5.7137	58.1802	23.6674	36.8484	45.34	34.0796	43.6401	45.572	88.149	66.081	42.2896	62.329	38.186	24.524	33.5617	51.2974	43.445	46.9036	60.268	37.772	51.324	49.288	31.7419	41.704	44.898	32.791	38.578	40.332	54.122	41.047	33.782		0.265196	44.7247
5.8327	59.4437	25.6217	38.2648	54.521	39.7636	45.6964	37.705	85.796	52.193	28.6367	57.5008	35.312	18.962	32.2288	41.7043	36.07	35.3119	50.179	41.805	66.702	44.925	41.0101	32.58	42.403	41.72	55.756	50.056	54.247	36.394	31.533		0.270719	43.8014
5.9517	49.3321	23.9611	34.8686	56.575	38.768	41.5107	52.741	73.569	52.811	23.3386	57.6716	40.056	27.48	38.253	42.308	39.261	44.8984	49.441	43.365	68.458	48.096	23.3056	31.439	41.86	39.475	47.758	43.253	48.909	32.431	27.937		0.276243	42.771
6.0708	64.1008	34.1258	29.8665	68.721	49.1732	39.7912	40.33	73.356	49.389	26.2214	68.7048	40.404	26.075	38.8333	39.72	34.862	28.9599	40.625	56.904	52.904	49.49	34.6762	38.634	46.691	43.741	47.516	28.263	58.137	31.977	44.419		0.28177	44.2204
6.1898	56.852	28.1203	16.1976	35.86	27.7673	35.4077	38.022	71.666	45.501	33.2221	54.4839	33.537	26.481	27.3521	32.224	35.659	28.9109	43.314	50.291	36.925	62.316	34.1972	35.909	45.569	51.089	55.574	41.368	58.535	33.313	41.838		0.287294	40.5834
6.3088	48.9729	20.3068	27.9566	50.974	42.1615	60.7287	41.733	73.938	50.424	30.9735	64.4921	38.384	26.421	36.6198	36.4708	31.304	27.913	36.752	44.161	32.734	45.098	29.3427	29.156	41.184	47.551	41.067	35.543	53.037	40.502	51.669		0.292817	41.2523
6.4279	36.1773	22.7446	20.3508	41.24	36.2448	45.8223	48.312	69.213	55.674	43.1073	65.6902	37.047	38.917	36.3859	43.5324	30.023	26.3252	44.631	50.694	53.288	48.397	26.8765	36.424	53.036	47.95	42.28	34.883	48.088	38.581	34.01		0.298345	41.8648
6.5469	47.9858	16.949	18.6187	37.344	32.7766	30.9229	34.882	66.149	41.663	36.2649	40.2653	26.755	38.07	32.4157	31.228	35.234	28.7993	54.921	54.697	52.697	41.634	26.6053	40.79	39.881	50.422	34.37	41.75	38.84	32.742	36.389		0.303868	38.0687
6.6659	43.5051	25.1878	20.2651	42.159	31.9024	47.8447	42.148	68.518	62.313	42.2867	49.7412	33.122	24.889	24.0803	35.3908	30.122	28.4136	35.356	46.19	39.783	36.504	25.0288	39.725	52.837	49.629	28.667	31.413	58.729	27.983	38.896		0.309391	38.7543
6.785	41.7613	28.9453	23.7272	29.23	41.5234	47.2089	45.254	60.768	41.235	35.0838	44.5009	45.599	28.811	27.1937	34.8585	29.652	37.2046	34.128	48.172	44	34.687	22.9134	39.307	46.154	49.901	27.931	24.099	41.674	32.362	50.452		0.314919	37.9446
6.904	47.2529	26.1686	20.2298	26.668	27.0529	36.0135	48.464	63.028	44.754	40.3493	37.404	36.182	32.062	33.7942	26.2213	30.873	29.5787	43.079	40.781	43.715	37.792	28.8695	30.869	48.096	47.57	40.612	31.229	35.642	25.797	63.593		0.320443	37.458
7.023	26.8453	15.8068	26.0053	27.106	35.1338	42.2962	37.214	68.672	46.698	31.9164	28.0614	28.634	33.361	37.6808	35.8184	41.103	26.9877	50.426	56.501	30.852	37.629	21.715	36.428	42.83	42.095	27.305	20.09	26.676	30.323	67.501		0.325966	35.9904
7.1421	37.8597	21.0681	24.6182	33.474	38.0748	33.1201	39.789	57.166	22.153	34.2107	42.6415	27.338	33.983	31.7009	33.9588	42.239	34.6401	34.797	39.536	34.095	30.466	29.1746	42.499	61.937	40.117	25.751	27.391	30.187	46.816	66.635		0.331494	36.5812
7.2611	29.8599	23.2235	28.288	28.077	26.0752	45.5954	32.03	57.313	42.358	32.8417	40.2139	39.828	42.377	31.357	35.346	34.75	32.2711	23.623	36.525	26.636	38.629	21.5591	30.783	53.051	32.663	27.943	23.396	33.404	40.585	51.151		0.337017	34.7251
7.3801	15.8419	24.7979	30.8359	34.073	26.0978	48.0392	36.772	48.996	37.623	28.4594	40.2212	32.751	36.176	31.7978	31.9684	26.98	25.0422	30.744	39.559	27.23	42.828	21.0215	37.29	46.432	37.358	33.875	27.994	27.76	36.837	57.129		0.34254	34.0843
7.4992	25.0811	24.1298	27.6043	27.151	21.0314	38.7673	30.814	44.213	42.981	36.3662	51.101	33.211	38.759	30.2812	37.5307	29.968	20.7232	50.207	42.143	26.338	40.719	27.4701	31.298	40.102	38.028	26.189	23.785	27.156	35.408	75.221		0.348068	34.7926
7.6182	19.541	27.9585	18.9901	23.723	27.0527	47.9993	34.538	38.035	48.299	45.0316	27.244	35.559	31.987	29.6007	21.2557	32.263	36.796	44.399	48.919	30.62	34.85	35.0514	24.944	43.574	55.335	39.258	22.113	36.28	37.795	65.396		0.353592	35.4803
7.7372	24.8011	23.0888	22.1993	25.85	26.9101	47.03	24.742	57.737	42.422	34.3685	40.3773	38.585	26.72	21.1999	28.047	29.718	38.4067	39.136	50.694	32.637	39.209	29.5339	28.757	32.113	45.062	30.62	37.259	28.795	33.42	45.176		0.359115	34.1538
7.8563	19.9423	18.2667	26.597	22.966	24.8333	29.8803	36.271	47.144	29.222	33.7691	30.7155	33.471	29.375	20.7756	36.3346	34.588	33.6772	31.783	47.489	27.189	33.327	26.0001	34.645	39.458	28.928	24.846	36.972	25.937	43.921	46.946		0.364643	31.8423
7.9753	28.7513	20.4158	17.7617	25.036	26.8864	30.2931	33.504	52.762	36.407	30.0238	25.191	40.554	23.606	23.0047	24.1259	22.646	24.4739	43.313	49.563	23.851	39.398	28.5339	36.647	28.453	33.807	23.474	22.379	29.823	44.314	49.658		0.370166	31.2886
8.0943	28.6671	21.2376	15.9287	27.42	27.721	38.7897	17.354	53.164	44.979	29.5093	39.2241	40.038	20.31	24.7924	31.5954	37.571	18.3726	48.475	51.229	28.189	29.93	27.5952	24.919	32.99	32.476	28.258	24.68	31.104	45.56	41.808		0.375689	32.1296
8.2134	24.8687	21.9501	19.1408	30.144	27.0629	39.6076	23.257	46.784	29.545	29.7611	45.2437	28.942	22.267	17.351	29.2547	44.809	28.5004	41.792	47.624	35.111	34.505	22.6766	23.295	28.42	27.469	31.857	29.043	29.65	38.687	30.966		0.381217	30.9862
8.3324	23.7961	12.3127	26.664	37.83	33.8442	40.8115	25.791	34.892	35.391	31.0664	38.4455	25.107	11.702	35.0822	22.7991	26.917	26.2046	46.171	42.273	35.059	23.274	23.5017	26.545	30.714	34.532	29.919	25.531	28.71	35.101	32.548		0.38674	30.0845
8.4515	19.2748	20.584	25.743	28.262	26.8243	38.4386	20.709	45.346	29.969	26.5705	38.3568	31.577	18.02	17.7962	46.2328	20.811	25.0137	50.084	45.08	40.371	49.22	24.8904	27.686	41.68	28.729	30.128	29.548	25.218	38.183	37.975		0.392268	31.6107
8.5705	11.9924	16.3481	22.6764	23.141	34.8142	27.7263	18.673	43.617	31.83	27.4319	34.8834	27.207	21.206	17.1114	28.468	26.568	18.6875	39.158	51.287	38.334	28.858	22.8611	32.732	29.94	23.582	38.43	27.592	23.769	44.019	33.647		0.397792	28.8864
8.6895	19.0598	22.1869	19.2126	14.775	41.2814	24.2264	25.375	41.786	29.21	22.2541	31.2351	27.251	16.013	19.9111	37.0033	26.829	18.2418	53.825	57.572	21.336	38.03	27.1581	26.105	35.902	29.414	30.127	26.947	23.089	49.613	24.685		0.403315	29.3218
8.8086	15.5958	19.0851	24.2157	19.279	30.3874	29.73	28.5	35.967	28.581	38.9019	27.5411	31.807	11.746	23.0532	30.9677	23.292	24.7192	44.244	40.254	33.064	27.689	17.9459	32.098	28.802	30.535	25.409	28.932	20.221	42.803	21.826		0.408843	27.9064
8.9276	14.0998	18.6347	16.6403	13.952	26.969	24.2739	35.502	28.642	38.619	30.199	22.969	25.609	10.617	12.2231	19.4445	26.283	22.4274	32.445	32.718	24.032	22.3	23.8473	29.18	35.336	22.387	27.153	23.088	34.315	33.317	28.151		0.414366	25.1791
9.0466	23.0332	19.5578	18.6708	22.685	32.5662	22.9046	25.101	32.28	33.098	33.7108	24.6589	26.53	14.48	20.1483	27.9367	20.184	20.3782	38.092	38.485	24.529	19.913	22.1881	24.08	24.42	21.966	22.963	24.513	14.221	31.021	24.122		0.419889	24.9479
9.1657	8.9819	29.3604	14.0081	23.365	30.2093	25.4828	17.637	26.896	27.897	27.0328	22.7768	30.134	10.476	11.1947	18.3564	18.371	15.7229	41.028	23.863	23.536	27.327	25.0698	38.878	24.061	15.851	24.21	18.148	22.087	42.854	17.978		0.425417	23.4264
9.2847	22.3596	17.6104	9.4584	25.998	34.1079	20.4949	20.022	28.813	35.059	37.7754	25.0988	19.926	15.149	13.3971	23.0056	24.925	23.9415	43.388	26.244	27.778	22.9	40.4836	28.814	22.872	17.407	26.711	28.175	16.556	24.144	12.905		0.430941	24.5173
9.4037	11.0747	21.7848	18.8387	23.925	33.8111	27.0657	26.51	32.72	18.218	28.5112	15.9659	29.891	18.391	14.3197	25.112	21.207	13.1264	40.614	20.851	20.103	24.664	27.8673	33.099	25.765	17.34	35.018	32.939	26.958	36.199	17.765		0.436464	24.6551
9.5228	15.1611	22.3763	18.6699	29.154	31.0609	16.7208	16.8	27.006	26.552	30.938	21.4331	31.233	13.953	16.5767	19.3446	18.728	14.0598	33.368	21.639	23.205	27.318	21.579	36.5	20.954	14.81	32.537	26.585	23.564	25.32	21.293		0.441992	23.2813
9.6418	21.6566	22.4987	15.5338	28.75	29.2606	24.8847	22.352	36.478	31.084	31.0055	29.0545	18.959	10.454	19.9302	20.5853	20.891	23.2978	25.321	26.355	21.678	17.922	16.388	33.081	20.925	16.334	21.846	22.448	22.795	23.826	9.414		0.447515	22.8336
9.7608	13.523	18.3658	17.9606	19.623	41.0733	19.205	20.959	30.513	28.639	35.873	32.9816	23.052	12.27	9.3191	20.644	24.614	21.9965	30.439	22.289	17.898	25.914	21.8362	26.473	18.291	13.839	17.824	26.564	16.956	19.238	12.408		0.453038	22.0194
9.8799	11.4243	21.8435	16.6889	36.541	31.6398	14.7711	23.167	26.034	27.233	32.952	33.5049	20.079	8.117	12.4568	14.0667	25.9	15.847	33.146	20.785	24.427	18.873	18.674	30.846	24.869	11.165	28.112	36.058	13.753	16.908	14.279		0.458566	22.1387
9.9989	10.8793	16.6273	26.3503	33.832	24.7657	14.1541	22.357	35.121	28.572	33.3749	30.0454	26.255	17.86	8.6855	20.2787	15.67	15.6448	34.138	20.319	13.198	26.575	12.3706	29.225	23.764	11.67	17.971	22.054	22.666	23.191	7.688		0.464089	21.5101
10.1179	13.8768	23.7877	18.5526	25.957	25.7692	12.9516	19.692	27.384	33.306	28.7472	21.8015	19.967	17.239	15.5424	22.9184	18.763	23.3251	48.479	8.356	24.186	21.779	14.7774	34.277	15.552	11.781	23.588	21.189	20.567	15.695	10.256		0.469613	21.3354
10.237	15.4318	16.6302	20.7318	17.863	35.3284	18.7315	24.502	12.41	32.105	30.1843	29.3005	27.033	13.455	12.3776	13.3211	20.574	21.7846	42.355	19.265	14.179	16.811	18.8793	51.639	20.421	11.881	18.423	24.281	27.883	29.324	12.595		0.475141	22.3233
10.356	10.219	23.1824	23.3905	17.5	40.1591	24.7826	12.344	24.845	30.546	37.4283	29.6647	24.676	17.518	11.9052	11.8053	19.022	24.9661	40.25	10.326	11.671	14.237	11.5034	41.269	15.799	5.164	27.97	15.7	21.248	21.658	12.79		0.480664	21.118
10.475	11.731	17.1296	19.8132	14.521	23.5107	27.7168	18.539	24.999	20.46	16.8604	29.3191	24.79	14.505	10.3029	12.8555	17.332	18.3815	32.819	15.884	10.803	23.963	14.3172	31.133	15.69	9.919	37.671	25.297	22.176	26.29	8.962		0.486187	19.923
10.5941	13.4411	12.792	19.3434	12.735	39.5693	23.1213	26.746	20.576	17.926	21.4282	36.0875	27.387	10.291	7.0428	13.1366	15.776	25.9436	36.301	14.611	10.63	22.485	13.955	25.069	11.222	11.979	24.496	15.932	21.416	24.292	14.366		0.491715	19.6699
10.7131	11.3492	22.4867	15.2072	14.352	29.9616	16.937	13.915	21.591	16.8	16.6138	36.2297	20.413	12.717	15.8627	12.6517	17.032	30.8747	31.268	13.819	11.045	21.271	16.1436	23.008	20.868	9.951	18.578	25.016	22.043	17.229	9.548		0.497238	18.8261
10.8321	14.5368	24.2035	19.9284	19.665	27.0345	19.1103	22.952	23.366	17.304	11.5	26.0401	11.967	11.704	13.5133	16.5574	18.319	27.6862	31.866	11.472	14.848	18.91	15.2347	25.721	22.79	15.003	24.972	17.918	20.44	24.053	8.425		0.502762	19.2347
10.9512	24.6658	15.8349	18.5342	23.002	19.5736	19.6544	22.435	22.95	22.034	11.185	26.4966	16.183	10.682	9.8276	27.0956	11.072	23.8433	37.479	19.954	11.615	19.352	21.1768	28.059	15.076	13.673	15.379	27.006	17.618	24.075	10.734		0.50829	19.5422
11.0702	11.0274	19.3887	20.2619	20.136	25.4992	19.3617	28.482	23.612	23.834	18.648	35.2803	17.655	16.678	14.5349	8.5108	18.96	17.8948	38.822	17.306	12.902	18.41	19.7255	39.583	10.327	10.461	14.33	24.634	18.542	21.221	12.704		0.513813	19.9577
11.1892	12.9269	21.2809	13.7686	11.924	29.5697	11.8139	19.006	29.2	21.067	12.2071	30.4792	13.061	14.998	12.6471	14.9209	13.165	24.4262	28.532	17.471	10.957	15.604	21.0443	22.466	16.482	11.169	11.873	21.185	14.343	18.682	9.813		0.519336	17.5361
11.3083	12.3204	14.4132	18.0593	17.34	43.4153	15.3492	27.556	19.403	29.986	24.4641	27.5526	16.325	9.482	12.4209	12.2148	20.676	32.184	31.908	15.852	10.412	10.734	28.8917	21.479	17.047	13.244	9.593	22.581	23.312	13.596	15.366		0.524864	19.5726
11.4273	9.5082	15.921	15.6457	18.996	29.7593	12.8902	11.669	25.651	26.105	22.2547	21.8489	20.007	14.074	7.164	12.5378	13.044	24.3462	34.665	9.071	9.545	12.17	23.6809	26.602	13.159	7.72	13.48	29.8	19.523	28.314	7.369		0.530387	17.884
11.5463	11.7597	13.6234	15.9344	19.725	30.841	20.4402	18.659	25.271	25.308	20.5068	21.218	18.538	9.831	11.2831	18.4636	20.517	23.2553	37.41	18.166	13.598	14.084	23.2749	28.064	15.946	7.956	12.254	23.338	26.646	32.066	8.331		0.535911	19.5436
11.6654	12.8555	18.6914	17.5459	18.139	30.4733	11.7349	28.194	11.703	19.678	16.4633	28.5536	13.799	8.431	16.0161	20.8466	15.374	19.5052	25.663	19.35	6.049	19.158	32.7042	20.217	14.702	10.911	11.393	29.434	18.834	25.153	5.643		0.541438	18.2405
11.7844	12.621	23.544	12.6217	14.562	37.1928	12.9792	30.425	18.025	14.401	19.1696	15.2037	14.751	14.101	15.4262	16.7571	18.385	22.2961	26.855	12.883	7.403	13.802	35.701	18.282	13.669	6.353	13.297	25.739	25.159	21.419	7.14		0.546962	18.0054
11.9035	12.2987	7.4195	15.7799	15.32	29.711	19.0861	38.009	24.847	21.487	15.7384	17.7754	18.717	9.011	7.9848	27.4433	20.541	21.979	28.981	13.338	9.801	11.077	28.4082	24.802	7.962	11.974	8.093	18.721	17.438	13.836	8.316		0.55249	17.5298
12.0225	12.1352	14.7029	24.5461	18.167	19.3702	18.4085	34.327	11.251	20.636	12.9861	14.6962	11.044	4.648	13.4809	12.7943	23.489	24.3122	22.398	6.121	14.983	12.955	22.5948	27.749	16.201	6.8	12.676	16.098	17.141	21.558	8.015		0.558013	16.5428
12.1415	7.4748	12.7232	12.9808	22.77	13.7072	7.3591	18.874	20.706	27.005	20.3215	15.1105	10.609	11.104	9.3597	18.0407	31.84	20.6698	28.695	9.73	11.259	10.438	25.7177	19.202	14.095	13.111	11.093	27.326	15.078	15.01	9.429		0.563536	16.3613
12.2606	7.0114	12.2299	15.9644	12.552	17.1898	20.2369	24.439	18.749	14.607	15.2772	18.0675	9.161	5.854	12.6952	15.3986	19.718	17.3581	25.737	7.059	5.478	14.01	25.6411	20.682	8.722	8.902	12.848	27.268	24.072	12.971	7.915		0.569064	15.2605
12.3796	10.0778	15.7439	13.9682	11.819	16.2725	20.8998	19.428	21.29	30.611	14.4037	7.7386	12.919	8.112	7.0661	16.8339	17.431	27.558	25.976	12.724	12.544	13.876	21.0962	11.477	13.067	4.714	11.662	22.547	22.984	11.874	11.262		0.574587	15.5992
12.4986	8.7987	11.9469	16.1851	12.717	17.8132	11.5468	14.329	21.154	28.668	19.0556	9.029	10.804	7.474	6.8869	22.1923	20.737	24.1938	19.033	13.886	5.502	6.671	20.6105	18.63	16.001	5.545	12.916	29.014	16.766	10.49	8.539		0.580111	14.9045
12.6177	12.739	12.0284	11.5374	10.822	22.8936	16.3629	14.137	18.576	20.017	18.8302	12.4183	4.434	7.019	7.9427	22.0056	17.827	20.2323	25.184	21.194	8.392	12.086	30.0585	19.738	10.339	7.723	7.397	27.569	18.362	13.997	7.288		0.585639	15.305
12.7367	13.7423	9.9558	13.7833	19.892	22.0837	9.6413	11.425	22.178	11.063	17.5528	21.4383	14.514	9.122	15.1529	18.7804	24.501	25.1607	22.286	11.344	7.998	8.627	26.998	13.245	13.141	11.657	15.627	29.064	25.621	14.745	6.188		0.591162	16.2176
12.8557	8.1816	18.6854	18.3889	11.05	18.4755	12.1076	19.15	19.873	17.067	19.3719	15.9971	11.435	17.017	8.7203	15.5935	23.588	19.5721	29.591	18.483	9.912	8.74	21.6207	18.926	6.723	4.987	10.658	28.238	22.239	11.817	8.78		0.596685	15.833
12.9748	6.9341	9.6504	5.7071	11.307	20.1058	8.2392	23.397	33.904	23.438	24.4574	11.4308	11.567	12.587	7.9317	16.9913	21.85	12.5581	30.091	8.071	7.452	12.377	20.9417	20.119	10.405	7.357	11.992	25.837	13.968	15.815	13.045		0.602213	15.3176
13.0938	13.2119	26.0044	14.2863	14.746	23.3525	8.3933	31.991	24.484	23.193	20.7936	18.827	14.954	12.267	9.1323	21.0012	17.679	17.2218	28.127	11.178	7.587	12.215	19.0262	15.778	7.881	5.393	11.749	17.212	20.99	17.255	14.189		0.607736	16.6706
13.2128	14.2866	13.1476	13.002	16.82	18.5557	10.7169	35.763	18.365	24.523	22.0174	18.189	7.444	6.337	6.9767	21.3253	18.066	19.8491	27.22	16.515	8.713	6.355	20.5207	24.965	6.634	15.107	8.284	15.466	19.287	16.523	9.728		0.61326	16.0234
13.3319	9.7053	15.8207	10.8364	6.958	19.4377	9.2188	39.966	19.427	15.1	18.1422	18.5392	9.95	4.361	13.1878	22.3759	21.329	17.3626	33.413	14.198	6.639	11.933	21.6145	19.256	14.291	7.727	11.266	19.363	12.547	14.029	7.658		0.618787	15.5217
13.4509	11.0509	21.996	7.8081	7.275	21.9591	15.1575	34.522	25.652	18.766	24.1033	15.462	8.661	4.233	6.4532	24.6867	12.693	13.1329	26.892	16.536	7.194	15.183	22.7459	22.174	13.234	8.904	5.296	14.694	19.266	13.733	8.975		0.624311	15.6146
13.5699	11.3677	17.8522	12.0482	5.664	32.5498	10.5875	25.528	29.753	20.298	17.4362	19.9739	8.893	5.832	8.4135	18.4873	14.53	13.2035	22.387	12.365	12.413	10.669	19.4648	15.482	11.154	10.704	2.989	16.305	15.183	13.07	8.516		0.629834	14.7707
13.689	8.1034	8.0465	15.5368	7.374	34.0716	13.7041	23.761	19.872	19.504	22.3	18.3534	8.253	5.452	11.5543	17.4321	16.177	23.186	19.369	20.055	10.914	9.075	28.21	23.115	12.107	11.119	9.853	15.193	13.638	10.22	7.997		0.635362	15.4515
13.808	13.3103	10.6174	14.6061	13.747	30.3596	20.1828	17.513	16.82	20.435	21.3203	15.3978	8.003	3.36	9.8875	21.3697	19.134	20.9504	19.92	12.971	6.091	15.188	24.4429	18.881	15.31	8.083	9.484	31.522	19.237	10.864	8.075		0.640885	15.9028
13.927	16.9232	9.3756	14.0195	13.35	27.9431	5.7653	27.365	20.235	29.569	13.5801	22.6969	9.206	7.024	7.2749	33.1719	16.79	21.5711	20.822	5.488	8.015	9.641	19.324	18.122	11.097	10.17	10.037	16.154	15.362	12.809	6.381		0.646408	15.3094
14.0461	9.3109	9.8203	16.8247	11.375	21.8115	14.3165	27.112	16.232	21.121	19.3893	23.385	7.654	5.976	2.0093	25.4225	20.789	18.8673	15.261	4.785	6.882	2.118	26.2376	28.895	6.833	13.754	12.338	20.197	6.167	18.177	11.189		0.651936	14.8083
14.1651	10.3538	10.3468	13.6412	11.933	21.5674	18.154	30.498	23.332	19.767	23.7271	20.27	7.413	5.359	6.8394	29.1525	24.686	19.5703	23.632	12.993	5.557	5.876	23.2465	18.672	12.792	2.474	12.331	22.111	16.428	18.791	17.48		0.65746	16.2998
14.2841	7.4627	9.9763	15.262	12.247	17.4548	19.1455	24.15	18.317	28.798	30.1136	21.6495	9.558	2.391	4.8494	25.069	13.169	28.7947	28.688	8.283	4.714	6.032	26.6386	20.405	10.306	13.23	13.013	21.291	14.372	10.491	7.501		0.662983	15.7791
14.4032	4.6976	14.2189	11.296	7.224	22.6624	21.2324	19.336	16.605	29.542	25.8934	25.2438	4.403	6.33	7.7858	22.6657	16.502	17.7189	23.443	7.361	4.13	6.921	28.1448	16.508	17.695	13.084	12.814	22.041	15.549	23.352	7.796		0.668511	15.7399
14.5222	10.3748	12.5196	8.9619	12.161	17.9786	12.6748	18.27	17.437	18.914	12.7197	18.5467	14.848	6.442	6.6815	22.2589	18.121	19.2699	20.126	12.276	8.846	7.877	31.6241	23.043	13.666	7.069	10.982	19.851	12.305	20.156	5.992		0.674034	14.7331
14.6412	8.3509	6.8971	10.7571	14.662	23.114	21.6003	19.897	20.309	19.692	7.5876	16.7358	10.104	10.338	9.1596	24.1694	20.365	16.2961	29.365	16.867	10.1	7.081	26.3737	21.047	5.855	5.462	12.738	19.123	13.486	9.372	7.796		0.679557	14.8234
14.7603	6.3066	9.8639	13.7048	8.816	21.182	28.9288	17.808	13.548	18.572	19.4996	21.5854	5.46	6.211	10.9366	13.1505	12.064	16.9323	30.697	9.628	6.449	11.831	20.9261	21.086	12.202	5.205	11.867	16.337	22.34	14.355	11.037		0.685085	14.6177
14.8793	10.0476	7.1799	16.5247	16.128	15.3304	33.5832	15.038	18.303	25.66	23.6146	28.1282	20.641	7.956	10.1783	19.7273	21.616	15.5401	19.939	11.57	8.832	5.688	19.1944	17.653	17.174	9.354	5.621	19.313	22.951	14.872	6.463		0.690609	16.1274
14.9984	2.445	9.7369	12.7848	17.613	16.9281	21.8193	16.607	19.029	22.841	18.0217	22.0637	14.502	8.497	9.1544	24.2092	15.362	19.9988	22.077	8.812	9.95	8.354	14.4751	16.169	7.333	6.076	9.864	11.849	19.677	15.859	4.564		0.696136	14.2224
15.1174	7.1035	11.1597	12.192	14.028	19.4979	21.2596	19.632	22.041	21.402	13.7457	23.1528	16.607	6.925	13.1849	18.4444	15.14	25.8619	25.049	10.469	7.165	6.619	19.6049	16.299	5.39	11.865	13.029	19.174	17.737	19.576	10.486		0.70166	15.4613
15.2364	7.577	11.5469	9.8978	8.056	15.3914	29.863	23.529	16.094	18.081	14.4347	19.9633	27.232	7.101	11.2958	20.8818	20.099	14.865	24.63	3.512	7.103	8.552	19.2483	16.175	9.114	5.876	10.503	19.632	9.76	15.513	6.009		0.707183	14.3845
15.3555	6.8483	9.6399	15.4097	13.309	20.8686	21.9907	15.13	17.84	19.16	21.8787	25.071	14.146	8.251	8.2955	14.092	23.032	28.3182	21.303	5.94	7.694	8.539	14.2692	13.023	7.045	3.059	10.828	10.089	6.403	13.893	7.87		0.712711	13.7745
15.4745	4.7146	6.1578	15.1721	19.433	17.7396	23.5371	11.077	23.537	20.063	13.3275	18.5352	8.56	8.175	15.1913	25.926	17.982	14.8174	13.151	11.32	10.54	8.838	15.6988	18.918	8.074	4.303	12.235	13.718	16.401	21.263	7.057		0.718234	14.1821
15.5935	11.3706	5.8919	14.3329	21.178	15.6765	28.5259	11.262	19.606	12.299	17.6552	17.1303	14.783	11.582	5.922	22.4095	17.262	14.1261	19.093	8	10.609	11.914	23.0291	18.266	8.857	3.594	10.504	9.338	20.992	13.089	8.693		0.723757	14.233
15.7126	9.6195	4.8868	14.1625	13.965	15.3052	49.7315	14.425	16.442	15.536	20.4026	21.4734	14.581	8.674	15.8609	21.1726	19.571	21.0473	18.014	6.863	13.855	12.317	14.3212	11.067	11.505	8.859	13.053	13.544	20.854	16.125	8.043		0.729285	15.5092
15.8316	6.6068	6.9436	13.4099	13.703	16.9525	35.8185	14.112	24.676	25.022	19.1053	19.6575	13.723	8.601	13.9413	19.7719	18.169	13.4251	14.018	5.806	12.98	10.961	24.9032	13.107	10.841	13.315	11.47	12.603	15.929	12.93	6.242		0.734809	14.9581
15.9506	6.9195	2.4296	11.7048	15.827	20.9208	19.1563	20.188	20.613	25.039	19.0485	17.0746	17.124	8.291	10.112	27.6064	22.756	18.7575	19.275	6.822	7.849	9.201	20.7852	21.809	11.931	12.83	12.515	8.682	16.592	14.566	6.256		0.740332	15.0894
16.0697	7.7384	14.3934	11.5005	10.926	21.942	27.5163	15.485	20.896	34.818	13.0298	21.3056	10.617	8.255	5.1689	20.6909	7.447	13.1138	11.255	12.857	12.322	12.026	21.3599	11.12	5.323	9.235	12.557	20.082	7.754	15.159	4.799		0.74586	14.0231
16.1887	5.3207	6.7591	7.0895	19.336	21.2149	17.541	16.335	7.964	23.239	19.7065	9.1238	19.734	17.563	4.7806	29.0769	9.092	13.0186	24.153	10.025	10.036	12.677	13.6053	19.519	10.928	14.106	15.043	24.435	16.083	17.684	11.181		0.751383	14.879
16.3077	8.9946	6.8362	9.6215	14.373	14.5576	19.8105	15.303	16.155	31.181	14.6899	20.4302	19.78	11.069	6.4501	18.6969	14.879	17.02	14.33	11.019	8.836	13.083	18.0308	6.802	2.16	5.329	16.02	24.089	17.949	22.172	9.943		0.756906	14.3203
16.4268	6.5239	4.4416	12.839	7.667	25.9082	15.2735	14.344	16.653	40.422	11.8916	12.5848	18.688	6.537	9.7621	20.8742	13.493	20.7633	21.388	7.156	12.622	6.749	18.592	13.241	6.938	3.848	7.154	13.341	22.549	22.016	6.359		0.762434	14.0206
16.5458	9.9364	9.6282	12.7939	18.753	36.1005	26.6515	16.916	14.713	27.233	12.8978	17.2204	17.413	13.773	9.8281	29.4644	21.984	15.2503	34.371	20.54	6.447	11.406	22.9175	11.459	6.801	6.704	17.617	13.658	17.23	22.523	13.54		0.767958	17.1923
16.6648	10.3473	9.4445	8.9422	18.971	22.5958	23.4221	13.858	19.106	25.543	21.4021	22.8561	23.847	7.362	7.6156	32.5465	19.618	19.8438	19.333	12.9	7.784	10.2	16.9202	21.974	5.85	11.191	10.568	21.946	18.665	26.046	8.929		0.773481	16.6542
16.7839	4.7332	7.3647	12.3817	7.59	20.8247	20.7467	18.124	21.631	26.129	19.7954	14.3963	30.423	10.629	18.2089	25.3447	17.068	21.4164	21.224	15.862	2.639	6.237	16.0269	16.249	7.055	7.948	11.771	18.865	17.46	24.798	6.77		0.779009	15.6571
16.9029	7.813	7.3738	16.1056	7.088	32.3817	16.6057	18.722	20.856	28.246	19.1512	18.2108	29.435	11.036	13.4613	23.7849	18.667	20.9557	21.821	10.595	7.729	9.636	22.8215	20.495	8.845	9.495	14.43	13.291	17.328	26.616	10.687		0.784532	16.7894
17.0219	9.7786	5.4468	15.8244	12.715	35.5953	12.25	26.872	28.725	18.854	20.067	16.786	16.69	17.675	8.1814	29.5851	14.342	16.9466	19.452	8.355	8.345	9.036	23.1711	24.672	18.845	15.404	9.139	12.793	22.287	33.093	8.661		0.790055	17.3196
17.141	5.8476	13.1151	10.0413	8.946	25.5244	18.8986	17.565	13.836	24.866	22.2278	16.4334	17.012	16.966	5.1282	23.0575	19.574	15.6951	15.371	10.313	11.213	10.422	32.1429	23.866	8.543	6.66	6.648	15.739	24.088	23.935	7.777		0.795583	15.7151
17.26	8.3173	5.5917	10.2929	12.729	19.2568	8.2392	33.146	14.03	28.584	7.2971	16.494	26.556	16.715	12.8087	13.9578	16.766	21.2603	14.196	10.887	12.303	6.89	17.2925	17.936	12.4	6.321	7.009	14.241	25.417	26.019	7.116		0.801107	15.0023
17.379	10.464	6.6203	7.1569	9.201	17.3165	20.3124	36.841	18.634	36.402	21.6813	26.5714	14.093	15.885	16.3639	25.1888	23.684	17.2809	18.437	12.33	15.528	5.91	19.2234	26.821	12.384	5.233	8.068	9.374	26.315	27.808	7.854		0.80663	17.2994
17.4981	6.9821	7.7922	3.102	9.387	27.5588	17.1618	26.193	8.556	35.472	13.9526	17.2803	13.833	14.505	13.3471	25.0258	17.59	18.7842	19.541	11.984	6.617	6.662	20.5229	14.675	3.126	6.548	12.892	18.361	19.422	32.703	5.334		0.812158	15.1637
17.6171	7.9738	16.5589	8.6468	6.458	10.7337	16.9201	20.798	17.673	25.15	15.3978	21.6059	17.448	19.352	9.1116	25.186	11.382	18.1995	16.593	11.565	12.325	14.929	15.2558	17.419	8.651	6.566	11.74	15.884	24.293	31.95	6.162		0.817681	15.3976
17.7361	5.1509	10.6155	7.2855	12.111	22.3129	17.7135	22.465	11.94	20.224	19.8878	18.8906	20.814	26.913	7.7889	19.6467	12.621	11.7701	27.076	20.351	5.545	11.756	21.2399	20.989	17.57	16.634	12.85	16.749	20.566	31.382	5.275		0.823204	16.5378
17.8552	5.7002	6.0184	3.4671	2.376	16.82	24.9316	15.059	10.276	19.86	16.1823	13.0679	16.941	19.636	11.9212	21.7703	11.467	21.0479	19.716	10.179	9.145	13.078	21.3093	18.363	11.525	10.489	10.501	23.05	21.767	32.108	4.802		0.828732	14.7525
17.9742	5.609	15.9507	12.2944	8.398	18.7148	22.6793	22.584	24.075	21.273	12.307	18.5489	16.778	13.431	13.7631	27.6707	18.47	21.6225	19.6	11.756	14.804	9.467	15.8598	24.911	8.718	13.691	13.576	33.803	17.335	31.217	4.042		0.834255	17.0983
18.0932	3.0499	10.3903	8.0457	9.225	17.1977	13.5995	15.772	14.73	21.515	18.1527	17.3441	19.067	18.384	6.3184	18.3411	21.317	25.6454	22.698	11.407	12.513	13.898	20.5024	32.347	15.812	10.293	10.887	28.988	18.189	31.085	6.99		0.839779	16.4568
18.2123	7.5901	11.6225	9.7386	11.448	25.9863	12.018	18.873	10.48	20.277	24.5456	18.7114	21.441	14.92	13.5126	14.2617	19.069	30.9029	23.834	8.162	8.835	11.772	17.7439	14.542	6.699	10.869	8.412	23.404	19.276	36.896	13.496		0.845307	16.3113
18.3313	10.9274	6.9699	9.2529	11.214	14.1358	14.3058	19.769	15.76	19.004	10.6755	16.1657	18.366	18.257	11.9928	9.7735	16.841	9.8582	29.994	14.469	10.351	10.78	14.9759	12.24	13.95	6.986	11.508	17.649	17.498	35.618	3.073		0.85083	14.412
18.4504	10.5507	8.8683	13.9031	9.211	15.582	20.5944	22.695	9.822	11.434	23.3534	19.5168	22.827	19.703	15.292	19.496	13.586	16.6051	19.861	11.267	13.193	9.558	17.9583	11.727	16.368	13.072	11.239	23.2	14.677	21.853	6.982		0.856358	15.4665
18.5694	5.9032	8.6217	6.691	14.467	14.5028	22.0727	9.486	10.771	9.542	23.2126	8.2457	24.136	19.261	11.3166	10.9057	12.89	16.6891	21.536	18.748	6.656	14.262	15.0952	18	12.067	17.087	6.104	19.074	12.467	33.833	7.044		0.861881	14.3562
18.6884	7.1506	5.9766	6.6904	12.046	14.3722	26.5011	12.604	13.789	9.337	13.8873	14.2941	18.022	16.454	9.3193	8.7722	14.629	17.4286	21.375	15.548	8.774	14.882	24.3976	14.613	25.455	16.682	8.882	17.759	17.528	38.975	5.195		0.867404	15.0446
18.8075	11.698	10.5872	2.9803	6.639	13.1561	17.9091	14.825	16.768	15.008	18.5736	12.0316	26.522	15.971	9.0128	12.1753	24.051	16.4731	21.46	11.897	13.495	14.867	11.7658	14.587	17.315	9.542	5.39	17.307	11.494	24.312	11.416		0.872932	14.3076
18.9265	8.1872	7.0279	8.9879	3.927	17.3721	21.9745	15.211	18.097	16.776	11.4388	14.6327	16.794	14.942	9.0678	11.2844	16.052	14.6873	24.869	10.549	13.689	12.527	16.6328	13.137	32.201	12.54	9.424	14.628	12.941	27.956	12.631		0.878456	14.6728
19.0455	11.7046	3.6374	11.246	16.867	18.7232	26.5284	23.369	11.818	13.074	15.4094	17.3308	19.975	20.487	20.0534	11.4838	17.751	6.231	21.206	8.496	13.48	17.488	13.0139	21.804	19.833	13.969	7.764	13.591	18.038	18.294	12.981		0.883979	15.5216
19.1646	4.5808	5.305	10.0167	12.507	12.6548	20.8208	18.855	20.455	18.005	11.7155	12.0297	15.588	16.659	29.2501	15.1821	18.418	10.5261	26.735	16.462	16.114	17.933	16.8534	13.721	22.538	11.123	11.672	14.52	18.561	10.248	10.257		0.889507	15.3102
19.2836	8.9286	5.7724	11.7069	11.149	11.9597	22.9826	13.488	6.624	15.625	7.686	12.6797	16.051	20.27	15.5118	13.2367	14.448	12.9226	24.653	15.86	14.835	11.39	24.1904	13.983	29.767	18.066	16.18	10.88	6.704	18.617	9.391		0.89503	14.5186
19.4026	9.1776	4.6988	9.8224	12.457	9.0448	27.1867	17.645	15.512	10.487	12.8851	18.1005	15.55	16.468	17.6624	17.9904	8.613	13.4057	21.968	15.126	11.302	15.164	17.1666	15.509	35.071	14.499	16.261	9.001	21.192	15.985	9.504		0.900553	15.1485
19.5217	8.0934	9.121	13.3473	5.139	10.0933	26.1244	19.209	16.355	18.795	9.9845	20.7141	22.928	12.494	19.4478	18.1201	12.778	17.854	16.303	14.161	13.237	14.312	15.5599	22.562	17.848	11.428	11.296	15.706	10.291	20.474	20.413		0.906081	15.473
19.6407	5.9614	12.2062	12.5154	12.481	23.3693	26.6742	20.518	12.527	18.609	9.6824	18.5712	17.954	13.721	15.2842	18.5979	20.871	14.0913	18.352	7.604	13.701	17.788	25.1555	14.339	15.341	13.466	12.179	21.696	11.331	19.155	15.536		0.911604	15.9759
19.7597	8.8812	8.0429	11.4412	7.424	19.6945	20.5984	25.621	14.44	16.34	17.7675	19.878	20.264	12.521	16.7267	16.6784	18.936	12.3367	13.377	10.978	11.699	19.508	22.9759	17.703	14.644	13.9	6.699	13.977	9.163	17.448	14.849		0.917128	15.1504
19.8788	15.0902	10.3572	9.1664	4.831	15.4847	26.8052	16.026	16.393	13.863	15.108	10.2098	12.068	14.346	13.9624	11.4788	24.866	11.1319	16.556	13.872	6.956	11.429	14.347	15.495	15.793	14.577	8.607	15.677	12.584	19.409	19.652		0.922656	14.2047
19.9978	11.1911	12.9275	6.1879	13.211	16.1011	27.9908	15.362	17.475	13.362	9.9967	20.5272	12.729	13.863	17.2229	9.345	27.339	8.1521	19.255	15.098	17.372	13.962	14.1104	11.072	20.973	8.999	14.259	19.865	12.586	14.825	20.238		0.928179	15.1866
20.1168	7.3939	5.3946	8.9146	1.513	9.7798	35.1808	14.456	18.506	17.027	4.4396	20.9885	13.091	13.911	16.5567	16.9997	28.426	5.6377	12.935	19.553	11.284	14.014	18.5863	10.067	22.897	9.4	12.811	29.151	11.267	14.504	15.997		0.933702	14.6894
20.2359	10.5791	15.85	12.625	4.057	16.512	24.2119	12.923	18.763	11.35	6.33	22.7934	11.725	15.353	12.2817	22.0914	22.512	3.9132	15.706	20.199	12.811	21.93	19.5005	16.181	18.087	21.155	11.598	17.545	17.187	16.275	28.137		0.93923	16.0061
20.3549	7.656	6.1791	8.2838	7.477	12.3083	21.3434	16.982	19.266	9.758	14.2779	22.4071	19.599	20.725	13.8879	15.0213	16.378	4.6764	22.651	21.465	11.287	16.112	17.4764	13.045	15.599	11.292	15.564	18.394	21.702	16.344	23.003		0.944753	15.3387
20.4739	10.6715	9.1503	6.6301	2.471	9.2502	19.281	21.316	13.773	17.085	10.6571	16.3759	14.525	22.339	19.5897	17.0413	10.81	6.6936	20.45	18.793	10.77	16.931	22.7526	14.792	13.871	11.198	19.099	14.498	7.782	20.831	18.809		0.950277	14.6079
20.593	7.1537	7.6792	3.4025	4.605	10.0787	10.343	11.962	14.693	13.532	12.2802	8.6861	16.206	18.257	12.8035	11.2267	12.426	2.6926	17.982	17.986	15.357	10.713	23.2871	13.353	11.587	10.801	13.088	16.128	8.969	14.114	17.113		0.955805	12.2835
20.712	6.6709	9.2561	1.061	0.456	2.7644	5.9846	13.615	14.009	8.116	15.1622	13.0158	8.345	11.894	15.7425	7.6217	12.873	3.0566	10.042	19.678	14.827	16.782	16.2682	13.517	10.725	17.15	11.72	18.06	14.024	17.728	15.779		0.961328	11.5315
20.831	8.763	5.1814	4.2877	1.737	5.0385	3.0979	13.297	9.753	13.697	6.2661	10.35	18.506	17.325	8.6793	8.7108	5.61	3.4001	13.662	21.916	17.128	11.381	12.602	10.142	19.382	12.451	15.505	18.919	18.926	24.186	21.088		0.966851	12.0329
20.9501	6.4271	10.4531	3.8519	4.743	5.334	9.5589	8.347	9.959	7.792	11.0102	7.2419	15.63	21.404	23.1156	8.754	6.434	7.6355	8.39	25.896	21.417	10.395	9.7271	10.122	10.674	14.705	25.705	20.891	16.083	15.487	14.126		0.972379	12.377
21.0691	4.8764	13.0752	2.9249	2.631	2.1195	5.7741	9.855	9.323	3.547	7.0153	5.1831	18.474	17.442	23.173	8.3379	0.861	3.3825	8.013	21.131	16.045	24.126	8.6353	13.134	8.997	19.848	26.6	20.412	18.215	16.027	14.895		0.977902	11.8024
21.1881	4.4103	5.251	1.933	0.922	4.2188	4.9069	5.015	11.285	6.488	8.8081	4.5642	22.466	22.441	24.2386	4.843	1.765	2.1515	6.598	14.256	21.481	16.292	15.9009	10.851	6.215	7.532	23.234	13.827	10.674	17.958	21.461		0.983426	10.7329
21.3072	4.1102	4.9484	4.2641	1.744	0.5412	5.4611	5.199	3.522	9.003	7.8158	2.6467	13.781	17.6	21.4014	3.7792	2.548	4.2435	5.464	20.938	24.067	19.527	13.6942	5.495	8.724	13.418	19.61	22.561	11.586	24.642	18.599		0.988953	10.6978
21.4262	4.0154	3.22	2.1508	0.729	1.8905	3.8878	8.498	6.16	3.111	4.7716	8.0598	16.465	21.481	25.1586	2.9772	1.335	1.2175	2.61	17.537	16.299	16.273	5.3725	7.12	15.353	17.308	15.566	17.994	18.02	15.387	26.042		0.994477	10.2003
21.5452	2.3747	6.197	3.2675	2.229	3.3764	1.3667	1.654	6.54	1.883	8.9788	3.9047	8.48	11.115	21.9218	2.902	1.873	2.8651	2.103	21.015	7.857	12.046	2.6759	3.045	7.005	17.056	12.069	29.228	16.527	16.423	15.558		1	8.45122

## Sheet: Image15
X0	Y0	Y1	Y2	Y3	Y4	Y5	Y6	Y7	Y8	Y9	Y10	Y11	Y12	Y13	Y14	Y15	Y16	Y17	Y18	Y19	Y20		Ap-Basal	Avg intensity
0	17.8073	12.2841	23.5798	30.9036	20.2586	24.2974	16.8295	28.1423	12.5906	21.4795	11.0519	12.8751	8.2801	10.9154	10.2342	12.5542	24.5211	17.2289	14.3344	16.6788	14.5326		0	17.2085
0.119	17.1479	11.0082	27.1623	27.3462	29.4491	28.103	20.184	23.8345	13.2973	29.564	9.4742	13.3325	6.8113	6.6591	15.6502	13.8902	16.1084	15.866	14.456	10.8842	17.482		0.0062482	17.51
0.2381	18.6966	14.3039	19.2072	33.2958	28.0979	23.2921	21.3056	32.6235	27.7242	22.5693	11.8343	16.4643	15.0802	6.792	14.3651	14.2733	19.3316	10.0854	19.9501	12.6034	20.9831		0.0125016	19.1847
0.3571	19.8079	15.1812	25.3397	14.2214	32.7893	26.1439	27.0533	21.9305	17.7453	32.2187	16.432	14.1158	12.0683	11.5923	13.7218	11.4821	14.2633	7.9204	14.6658	14.4598	18.4234		0.0187498	18.1703
0.4761	27.5021	17.8063	22.087	22.4052	21.6818	19.2816	20.8974	22.8219	19.5167	26.0387	9.4898	21.6954	19.0676	11.7106	16.5005	19.7878	11.732	17.4687	12.5035	20.6151	14.6781		0.024998	18.8232
0.5952	20.3259	20.1058	29.1985	19.8959	31.5292	22.1716	21.0108	33.3171	34.0056	22.5058	15.1937	21.8536	25.1508	13.9935	16.6861	16.5303	15.5349	14.9773	18.9251	13.1459	27.773		0.0312515	21.611
0.7142	17.4804	16.4527	19.8428	21.7313	17.8565	26.7487	25.9317	39.3508	21.8534	34.4233	13.3036	17.9041	20.3597	14.508	15.5752	11.4449	20.3377	17.7016	20.567	15.7259	24.7515		0.0374997	20.6596
0.8332	23.5169	13.8777	26.5501	25.6786	21.0574	36.611	21.816	30.0119	12.5678	14.3593	16.1841	19.9846	23.0633	12.6705	15.8774	8.2709	24.2545	19.8486	18.9952	34.1413	11.3857		0.0437479	20.5106
0.9523	21.8742	29.8956	29.8508	33.4305	25.5178	21.5286	16.4501	28.7178	25.7666	10.8282	12.8318	18.1785	12.8858	11.3716	14.2029	20.1192	22.5667	23.816	15.1897	14.6748	11.4203		0.0500013	20.0532
1.0713	15.8861	17.7621	33.2603	31.0312	19.4533	49.0346	19.7277	27.6915	20.7939	22.0559	18.7839	20.9136	11.1524	15.7688	17.5076	15.3077	22.3546	21.5605	15.0416	31.0927	21.8244		0.0562495	22.2859
1.1903	14.2798	15.9803	27.5286	21.0145	30.6063	35.6517	30.8493	31.0316	26.6969	18.5208	23.3327	16.8243	17.3475	20.2096	21.6776	14.6141	17.6597	23.8544	24.0359	24.9588	21.4581		0.0624977	22.7682
1.3094	23.4715	19.5302	35.9039	21.4705	30.7341	36.1031	24.6919	22.0501	37.6814	28.2028	26.2101	32.9221	18.2185	19.1994	24.0479	13.6558	20.0507	24.4279	22.3623	13.5066	27.1819		0.0687511	24.8392
1.4284	17.5848	19.8074	29.5907	23.0143	34.8543	31.9454	25.9984	20.5064	24.847	22.559	31.461	32.7432	19.3503	18.2553	23.5095	20.6099	19.5908	24.5787	21.3913	24.793	16.2799		0.0749993	23.9653
1.5474	21.2134	17.7941	27.1441	24.1415	26.9333	53.6871	32.2843	22.6117	21.2589	37.2478	24.8787	34.0172	27.6063	13.7816	21.8595	22.7771	24.9579	22.4844	23.3381	38.6301	17.9262		0.0812475	26.5035
1.6665	21.7589	25.3807	24.5352	22.422	29.8795	44.0573	39.5751	31.3706	23.9584	25.2409	28.0415	21.119	18.6209	16.1292	24.9449	29.9372	34.1833	31.5624	26.8293	33.5612	21.5506		0.087501	27.3647
1.7855	21.0397	22.2443	22.1575	29.2118	37.4486	52.727	41.6492	33.1462	20.8328	19.326	33.7805	27.9897	24.8466	20.7718	25.8612	23.5568	28.0369	31.0812	19.5475	36.1841	18.1779		0.0937492	28.077
1.9046	24.7774	24.1075	19.272	24.251	27.0283	45.761	30.2885	22.2677	23.9858	33.2009	18.8044	32.878	27.2838	30.7444	30.0033	27.2171	25.1306	42.133	22.7754	33.2696	34.2965		0.100003	28.5465
2.0236	22.5957	27.907	19.0566	36.0524	38.8868	38.482	29.8215	22.6206	33.8067	25.323	27.7554	25.9538	22.8311	18.4685	33.7295	37.0835	31.7202	31.1577	23.6293	25.9226	23.9496		0.106251	28.4168
2.1426	33.6437	35.7352	34.289	39.3855	47.3871	38.1009	53.6809	22.0915	29.9969	33.5194	33.1703	25.5409	32.619	24.2951	31.6468	33.3812	24.6446	32.6358	23.5006	47.9981	21.1149		0.112499	33.2561
2.2617	32.1626	35.292	38.4373	51.1631	36.87	21.0841	58.4263	34.9353	31.6434	33.0291	33.739	37.8977	27.4774	19.4947	35.3816	26.7302	30.636	29.1531	24.771	33.0314	28.5399		0.118752	33.3283
2.3807	41.5362	41.1438	22.0618	56.7663	40.7216	31.3755	48.1978	24.4203	37.136	30.2221	28.1735	38.7692	24.4237	30.6196	31.0083	20.5816	29.1131	30.6794	24.2872	24.9765	23.5972		0.125001	32.3719
2.4997	39.3629	32.2355	25.6252	46.2982	40.7198	37.447	54.7891	39.2586	40.8948	24.1458	33.6006	32.6695	30.2436	33.7115	32.914	29.9269	35.8122	30.9724	24.3225	28.9738	25.6034		0.131249	34.2632
2.6188	39.1357	27.8257	31.4012	53.9661	35.5178	37.0012	58.9643	32.8749	53.4042	40.3655	33.2633	33.7934	42.2626	24.0344	34.1656	25.3836	32.773	40.7336	23.9358	38.7652	25.2708		0.137502	36.4209
2.7378	39.2726	43.1479	27.6372	49.0955	36.5447	38.8764	46.1253	36.4118	36.8733	33.4624	37.3891	30.4297	30.6074	39.8526	28.7476	31.4004	34.9008	43.6557	35.9951	31.1582	36.3267		0.14375	36.5672
2.8568	41.119	62.6774	30.0513	37.4926	45.701	42.9352	58.8084	45.8699	56.5883	35.3532	29.4942	42.01	33.6023	33.4361	35.0244	35.1219	26.8881	39.6273	25.5788	29.2674	40.6976		0.149999	39.3974
2.9759	49.687	60.2746	37.6148	33.756	42.7094	37.7716	47.5159	48.9703	47.016	28.3342	35.9936	35.7119	27.6745	38.7965	45.7399	32.2714	39.2867	25.3084	22.174	28.2103	30.4439		0.156252	37.8696
3.0949	41.7072	51.6906	49.3247	37.1558	64.9122	41.5982	51.2139	46.6526	50.2889	34.0038	58.4109	29.7827	47.2711	54.0455	35.737	22.859	30.2543	51.1142	33.1992	34.5496	36.2767		0.1625	42.9547
3.2139	50.4107	37.9456	58.8453	33.7811	57.7328	53.888	31.4318	51.0378	42.8528	37.5022	45.1765	39.1724	36.9627	53.4237	38.3923	35.6503	45.9627	39.6683	29.0412	33.6593	27.7658		0.168749	41.9192
3.333	43.6828	58.6794	60.6136	36.3031	42.0139	50.6231	52.4463	56.7353	38.5685	33.1627	40.0259	41.0963	33.7939	57.6748	50.8144	39.4461	41.3001	35.386	27.4925	27.2952	41.3521		0.175002	43.2622
3.452	48.794	46.4016	60.7122	49.6022	49.781	46.5712	57.6202	50.2146	33.422	29.6464	35.518	37.4378	40.9911	69.5235	42.4562	43.0894	44.369	42.3999	36.1244	36.0654	36.493		0.18125	44.6301
3.571	52.3974	41.1834	44.0488	56.0703	40.3213	46.7165	41.9563	53.8242	40.2099	28.9666	39.3225	51.1262	55.5198	64.9506	51.1049	49.9628	34.5844	42.0939	36.0454	41.2411	43.8075		0.187498	45.4978
3.6901	53.2725	42.9419	51.5437	31.356	27.5821	54.1981	50.2666	62.7947	36.0292	32.5493	44.266	47.1974	35.6779	57.7692	37.9861	43.3829	34.0912	40.4695	35.2096	44.6231	39.4014		0.193752	42.9814
3.8091	45.1619	64.4251	45.1912	45.0272	50.8595	51.3284	45.0552	45.0938	35.9354	32.5883	42.3327	63.1693	45.7997	40.692	38.3992	36.9568	41.2475	51.132	31.548	39.4399	38.9811		0.2	44.3031
3.9281	44.0503	58.7774	51.5026	48.0383	43.7412	60.0062	57.4524	41.9911	42.187	30.1157	41.4613	56.2776	54.1562	51.0242	43.7649	44.0546	47.8964	45.8909	42.9216	47.2615	41.903		0.206248	47.3559
4.0472	49.6164	56.63	47.5544	32.3879	35.5704	58.9211	49.8905	43.4794	37.4823	39.2865	45.8087	50.8692	45.3914	59.9525	51.1592	40.5982	47.0705	54.969	41.6034	40.6071	38.0721		0.212502	46.0438
4.1662	44.2195	59.8752	34.3956	47.8725	56.7299	55.0195	63.547	41.7845	38.0674	26.2435	49.9375	44.7504	34.8447	54.5759	31.0929	39.6026	61.0455	49.3018	45.1183	49.2764	43.9718		0.21875	46.2511
4.2852	35.6821	62.4647	36.6631	35.9802	49.5271	61.8771	63.4429	73.98	46.4741	36.6873	34.3084	47.1228	31.4873	41.7126	34.1756	47.7859	62.4407	52.4346	28.6092	41.0087	52.3769		0.224998	46.4877
4.4043	42.503	58.3365	38.4274	42.7704	58.5752	56.3817	40.9518	47.0273	47.1601	39.3482	31.6409	31.2678	36.7274	51.0513	47.295	44.8271	52.5096	36.7696	38.8676	37.3713	43.0537		0.231251	43.9459
4.5233	46.3247	63.9988	31.1265	46.6522	57.083	54.3195	55.8201	52.885	39.7826	50.7215	30.8707	41.8069	48.2123	50.1751	44.1816	38.3206	56.0442	41.8161	47.9672	36.1578	48.5249		0.2375	46.7996
4.6423	34.1572	66.8748	26.977	48.3646	54.1809	57.6188	55.5273	64.9557	47.9179	45.2309	43.7453	43.1395	43.7907	40.3757	52.3313	36.3638	51.6721	37.3261	33.036	36.3115	48.5884		0.243748	46.1184
4.7614	33.1586	76.3026	42.1372	52.7308	49.9638	62.6341	64.581	68.2124	60.9225	59.3974	40.6763	46.5591	35.7028	50.6446	41.2475	46.8625	57.5526	47.7967	41.011	40.3003	46.9777		0.250001	50.732
4.8804	44.1663	56.9121	50.8459	43.3212	39.4317	72.7402	58.7587	55.9275	53.0335	65.7369	37.2582	51.2361	37.5131	49.101	44.8222	48.1482	62.0071	53.5372	35.1259	46.6516	36.1011		0.25625	49.6369
4.9995	41.2491	66.2607	54.1963	49.8588	53.3655	65.183	61.3369	45.1083	47.3071	58.4814	49.8026	41.2461	37.1011	52.0767	52.5283	45.0721	67.9085	47.6134	22.7887	37.9052	54.866		0.262503	50.0598
5.1185	46.1222	65.0099	48.1012	54.5146	50.0028	52.8118	59.7101	40.8303	48.9609	42.646	59.3716	41.5099	34.3385	48.6853	56.1021	35.9758	54.839	51.1363	39.5582	33.9095	32.6288		0.268751	47.465
5.2375	32.9221	63.3531	46.2173	50.6259	53.0535	43.9721	72.9086	43.2209	44.7971	52.3248	37.4035	56.8388	52.1207	42.0398	56.1672	40.6302	49.4353	41.5253	44.516	39.5085	50.6743		0.274999	48.2979
5.3566	50.4658	58.1266	49.1087	57.8782	58.916	55.0882	57.4212	48.3096	48.3526	53.4359	50.1458	59.6901	52.0737	46.4248	41.0728	40.4279	44.3233	45.1305	30.9864	38.7947	53.516		0.281253	49.509
5.4756	37.6805	63.3232	44.748	57.7612	74.489	50.9083	60.5357	49.993	36.4413	41.1767	50.2083	46.5383	44.7553	36.6316	61.0714	50.0948	40.9702	46.6383	40.5292	40.3349	39.169		0.287501	48.2856
5.5946	46.4437	61.0993	51.9551	49.626	67.7867	46.2149	58.3181	46.262	48.7686	45.4865	40.6895	44.9772	36.3547	36.2886	60.0448	36.245	53.4196	39.0339	50.9762	37.9289	33.2019		0.293749	47.1962
5.7137	35.3897	70.7097	56.1661	55.62	65.0819	56.8428	58.4936	42.1649	41.2313	39.3397	51.8043	48.6527	58.3083	45.147	69.4651	34.2369	51.2048	38.7705	33.1727	46.075	39.1752		0.300003	49.3834
5.8327	47.4763	64.4219	56.8051	49.427	69.5379	49.3933	47.011	32.874	43.8145	56.3717	43.3521	59.1246	44.7747	53.3481	54.014	40.483	37.9846	44.2412	34.085	41.6737	43.8726		0.306251	48.2898
5.9517	43.9139	62.9606	43.572	46.3513	64.4406	55.4049	47.9299	57.3141	43.8883	31.6175	40.8049	53.67	39.7791	43.833	74.5696	56.1477	43.0689	44.8961	48.5319	41.1138	43.5608		0.312499	48.9223
6.0708	47.9729	61.106	54.0461	53.4155	54.9815	61.2015	57.5724	50.5768	33.5881	33.7896	49.9321	45.5024	38.7224	37.205	48.9294	40.4297	40.785	39.4811	46.8114	40.6619	37.7498		0.318752	46.4029
6.1898	65.3784	54.984	42.951	52.1307	42.8778	52.0563	61.3891	48.4318	42.7334	45.5628	45.311	42.3141	39.6066	48.6859	51.4013	37.0972	39.2354	45.051	46.9126	38.4749	42.9941		0.325001	46.9324
6.3088	59.8843	62.2914	42.7122	38.4308	34.9963	63.2464	65.8474	39.0329	36.7117	34.4961	36.0459	44.2302	34.4305	50.0915	58.241	35.4445	48.4776	44.2691	38.7173	39.4851	35.7802		0.331249	44.8982
6.4279	46.1108	61.5879	52.4519	36.9533	40.011	54.7024	54.1866	46.9288	35.5914	53.6775	40.6296	48.5668	43.6298	33.6121	54.229	35.8032	40.4525	56.3438	49.3874	40.5355	25.9037		0.337502	45.2998
6.5469	58.9541	66.2067	49.9085	48.4281	55.4322	42.8962	54.6022	48.0397	36.1013	31.7915	38.3341	52.7034	41.3821	50.2304	48.5233	45.4876	47.78	45.2437	45.7795	42.6357	38.6682		0.34375	47.1014
6.6659	39.7787	64.536	46.4966	44.8605	24.1013	42.7022	73.1802	50.8841	36.0245	36.1851	39.0226	58.0947	43.959	38.9615	55.62	24.227	57.8837	52.6164	37.96	32.6232	31.8143		0.349999	44.3586
6.785	61.0667	56.5362	49.6145	48.0405	42.6725	47.3431	54.0045	47.7349	41.1083	38.8659	38.801	48.4444	44.6264	46.5674	43.2553	35.9714	45.2921	45.5064	41.3171	30.8464	37.8352		0.356252	45.0214
6.904	56.7901	49.3378	67.0841	42.8959	26.1903	33.1728	57.7147	44.3765	41.437	43.2667	42.9982	48.9878	43.9954	47.4659	33.9554	47.1484	42.5523	46.5837	35.9251	31.5625	43.515		0.3625	44.1407
7.023	54.4967	67.1207	43.6029	41.8521	28.293	37.7168	55.4729	38.023	34.3711	45.6168	35.339	45.093	44.794	43.5979	33.9482	30.0033	36.3262	54.3761	40.2473	48.5196	42.5373		0.368749	42.9213
7.1421	61.4675	54.0582	45.6074	35.3851	30.2832	43.2602	70.9682	49.1843	34.7571	54.9906	29.2117	56.5353	50.7503	42.7759	49.4829	27.706	52.8284	45.9943	48.4841	41.9422	56.3234		0.375002	46.7617
7.2611	55.6862	54.9826	44.8206	36.8552	26.3988	44.2389	50.8429	46.3447	36.5088	50.5734	44.3135	41.7308	48.4393	50.9588	47.3772	29.1771	39.0953	48.5752	27.3819	28.3153	36.2372		0.38125	42.3264
7.3801	43.5977	45.591	47.1558	44.7616	34.9222	48.1277	55.8982	48.2055	42.3878	44.6503	48.667	53.2912	45.2699	48.4669	31.7383	36.8542	44.4674	51.562	40.995	36.4708	30.7917		0.387498	43.9939
7.4992	44.1813	36.6205	50.8812	41.256	22.9337	34.4181	47.9791	36.9991	42.758	46.8388	35.4239	50.4692	40.8816	49.5166	33.0534	33.1531	33.9833	53.7666	39.932	37.8868	30.7591		0.393752	40.1758
7.6182	38.4821	53.9825	41.652	42.026	22.0626	39.4789	50.3243	41.0904	31.7836	44.5997	40.8576	59.0774	54.1808	56.7372	30.8431	31.1401	51.928	44.5836	42.6743	37.5655	34.5348		0.4	42.3621
7.7372	46.5079	59.5943	48.5217	46.57	36.7211	43.6265	52.1461	35.9951	41.3	49.4596	53.7327	56.3904	51.8574	70.9067	29.5695	31.2408	35.8076	51.9736	32.5137	42.1616	37.643		0.406248	45.44
7.8563	42.4157	55.9429	52.3227	45.3746	36.0122	32.2583	56.3968	42.3793	35.5196	58.8573	44.139	37.9903	43.8718	69.727	34.9187	36.0437	37.2628	38.6793	33.2987	39.5636	45.8455		0.412502	43.7533
7.9753	24.429	57.6078	51.1612	35.9952	23.8464	25.6345	62.8743	47.3371	35.3062	45.4487	42.9144	48.4338	57.4455	53.2871	36.5878	27.2071	52.2161	44.5043	36.2491	43.6812	32.3766		0.41875	42.1211
8.0943	23.0982	59.386	52.3572	36.6715	20.2394	29.8142	57.0232	44.9316	44.3112	60.0453	50.6042	44.4365	42.1214	50.7708	29.9656	31.8569	38.3887	40.6431	44.8321	41.4555	25.2203		0.424998	41.3416
8.2134	24.5395	36.8296	52.3873	48.3777	29.8979	30.6798	72.486	32.9909	35.0477	57.0388	27.353	51.8243	46.7902	41.8038	33.123	26.0115	48.6222	50.2494	45.1045	50.0926	47.4378		0.431251	42.3185
8.3324	25.7817	35.1076	54.4036	29.2018	24.2939	29.462	67.175	42.9022	50.1982	51.3558	34.8841	39.9792	66.4915	49.2261	45.228	18.6706	52.763	49.6512	49.9999	42.9197	31.5924		0.4375	42.4423
8.4515	26.181	34.9186	49.7357	28.3598	24.3715	29.6001	64.1074	31.4731	38.0232	37.8568	33.181	45.9939	49.5202	55.9519	41.4217	26.7848	48.1065	45.0383	39.809	34.2768	30.2973		0.443753	38.8099
8.5705	23.775	43.964	48.688	33.8667	24.7211	26.09	72.4664	39.1542	54.2654	56.4614	31.4632	38.2955	46.7652	46.3928	36.9494	28.3512	46.4412	51.6379	34.2349	31.3766	23.6319		0.450001	39.952
8.6895	18.1752	54.6697	60.2845	31.1488	31.9545	21.8492	50.7652	51.9397	51.2473	48.5009	31.1634	32.741	50.0876	31.1872	42.0217	38.5723	41.4688	54.0907	30.5976	37.8528	31.2471		0.45625	40.0745
8.8086	26.8339	41.7299	66.725	31.9989	28.2613	22.1594	49.666	42.9636	38.1992	57.6039	34.7433	32.7432	58.0512	45.5278	30.7887	23.4312	42.5645	59.5608	34.6068	22.5405	34.5034		0.462503	39.2954
8.9276	26.8882	49.1033	71.7136	30.009	19.8259	25.9408	52.8634	47.9202	40.6437	55.2392	37.363	35.2872	49.6201	42.208	41.6115	21.6339	31.2849	38.6039	34.3544	40.0551	41.606		0.468751	39.7036
9.0466	22.1373	41.9831	55.3835	29.7619	16.7868	25.6472	57.7733	51.147	41.5549	48.8838	30.1696	40.0567	37.1474	41.9909	32.2526	24.5521	40.3786	54.1924	36.8114	35.4581	36.1286		0.474999	38.1046
9.1657	27.2704	44.413	59.147	34.7212	18.1189	31.1877	39.1862	37.358	38.9535	48.81	44.5059	19.7731	39.4063	64.7117	44.8228	22.564	39.3097	46.0695	35.5043	46.0487	30.1407		0.481253	38.6677
9.2847	24.2538	35.6779	48.2209	30.9427	21.8513	19.0114	43.0638	38.8326	36.6911	48.4987	36.9767	31.2375	38.8938	32.5127	35.3656	31.7167	51.2829	47.9513	38.3717	58.1859	38.3013		0.487501	37.5162
9.4037	22.1091	35.7732	47.4615	41.2746	19.0173	22.6989	55.1536	47.1038	53.2366	37.5669	36.3383	36.2531	33.4124	32.9168	32.8611	36.4728	60.9796	45.0304	32.6633	43.1866	49.0763		0.493749	39.0755
9.5228	27.6204	41.1573	54.5501	30.9022	27.1553	23.5401	27.1424	48.269	41.6369	51.7417	25.833	36.4981	36.2255	53.6187	34.5218	21.8539	41.3117	53.1755	28.394	39.1107	44.763		0.500003	37.5724
9.6418	16.7934	48.5775	37.0336	32.9556	20.7892	20.7783	37.9587	43.1866	56.4258	44.3186	28.2994	30.4641	42.7889	39.7478	27.8726	21.6649	46.1148	53.656	28.216	44.0046	46.5043		0.506251	36.5786
9.7608	13.9248	36.6666	37.4413	31.4441	23.4817	9.8896	36.6822	56.6624	53.0036	39.1204	25.4215	36.8911	52.967	59.8223	24.5569	24.4052	48.4847	43.4059	22.1906	51.0045	41.4833		0.512499	36.6167
9.8799	17.5678	39.545	51.9653	32.6221	14.6922	16.2231	23.3981	46.5724	53.5251	57.701	32.3319	29.2291	42.9255	56.0738	35.6094	19.0615	39.6688	39.674	29.9719	42.5116	45.14		0.518752	36.4766
9.9989	18.1512	51.4784	49.5512	26.995	20.7906	13.0155	45.2821	44.5818	43.9214	39.6035	30.2509	19.7619	47.0523	51.081	34.4551	25.1268	43.7199	45.0624	34.2444	37.1196	39.4667		0.525001	36.2244
10.1179	16.3904	36.452	54.7826	30.3868	17.4778	11.2108	50.8433	44.0497	31.6679	37.6158	33.4768	24.6286	47.4405	48.6678	27.9495	21.2726	53.58	52.3894	32.0981	35.6884	33.4516		0.531249	35.3105
10.237	19.2952	37.5681	48.3688	32.3766	14.4607	14.9978	36.4212	35.5637	28.2739	28.672	15.7797	30.2935	45.6544	50.6007	19.295	27.4812	33.3014	35.9824	27.8736	42.1798	41.535		0.537502	31.7131
10.356	16.2915	25.8534	59.1707	42.2791	10.0794	12.439	38.0276	35.2811	36.7391	44.5085	18.6049	19.9761	37.922	55.8577	39.3289	31.8278	25.2635	51.4348	33.5725	35.3891	38.238		0.54375	33.7183
10.475	19.5508	30.0353	56.8532	47.3925	13.44	28.5069	31.7325	46.6444	37.1375	35.4038	21.8181	37.7406	47.4857	50.657	32.369	29.1953	22.0527	41.6868	28.9717	49.4377	46.4179		0.549999	35.93
10.5941	24.6024	20.86	46.8773	27.7345	15.2433	12.3316	34.3155	40.5617	35.8022	27.5263	28.0264	34.3687	28.8505	49.163	39.4808	24.8856	39.2344	44.1115	26.9521	39.5523	39.0776		0.556252	32.3599
10.7131	11.5409	19.5433	42.5763	23.5535	11.1166	22.7196	33.9139	41.5913	33.9791	40.1069	29.1769	27.6867	30.9853	44.1442	36.8303	40.6398	24.7169	43.4648	31.1463	36.2604	42.7339		0.5625	31.8299
10.8321	18.3154	27.4425	61.9555	23.0606	17.1108	14.6671	21.5979	45.7639	40.1568	30.5623	18.6815	22.5675	36.5954	34.495	44.1164	37.3032	30.2854	41.6487	37.7005	35.1851	44.3512		0.568749	32.5506
10.9512	6.3766	15.7057	59.6963	37.5056	17.5347	12.2634	28.8658	36.7735	37.5654	35.4453	23.0949	25.192	29.327	45.6918	30.7817	29.6003	41.7913	43.3419	29.1661	33.4353	44.2246		0.575002	31.5895
11.0702	12.2256	17.3438	37.812	27.2503	18.0722	12.6479	27.415	28.8375	29.1294	36.1699	18.1542	13.2762	36.5196	52.0284	29.1522	24.798	34.7628	36.9296	37.7852	36.5893	41.1458		0.58125	28.9545
11.1892	9.9184	17.3363	41.0894	31.8799	15.3741	20.9637	26.6081	45.3441	34.6841	39.9006	32.4596	30.3985	40.0695	55.9636	36.0704	34.5004	28.0854	48.8615	18.6305	28.0768	43.4733		0.587498	32.3661
11.3083	10.1224	24.8924	43.2593	37.5229	17.524	9.688	21.7054	35.9633	44.1512	40.6309	21.5132	17.2756	34.7441	36.9718	39.3788	28.8591	44.6104	50.9352	26.4359	22.0156	33.7775		0.593752	30.5703
11.4273	9.5949	17.8215	32.8011	35.3524	16.6523	16.3113	22.439	42.5521	56.303	35.1932	32.6483	27.0298	37.2404	38.7119	34.1558	35.9201	36.7776	34.3167	35.536	35.5245	26.4158		0.6	31.3951
11.5463	10.2849	19.1196	40.6331	36.9899	9.2643	17.2006	21.7161	52.0834	35.0237	30.5884	16.3014	18.0731	35.3467	38.2337	35.6667	27.9929	43.2476	29.6139	29.4331	33.1255	29.0406		0.606248	28.999
11.6654	13.3454	30.3237	45.7377	37.1119	12.6693	10.1336	22.6393	49.3802	48.0917	36.6702	15.424	30.7901	38.4002	53.2078	34.826	17.0061	39.0272	42.8294	37.6416	35.3014	46.5891		0.612502	33.1974
11.7844	12.2489	24.4838	42.5177	29.1438	13.5869	15.55	31.4186	34.2414	49.315	36.5355	17.1647	24.0661	46.2692	40.6744	42.2693	27.7333	41.9836	36.1576	32.2717	51.9413	44.7016		0.61875	33.0607
11.9035	13.0907	24.5159	40.6219	28.9914	13.8865	16.4451	27.0886	52.5301	37.8165	34.2073	24.4457	26.3672	36.6617	38.753	38.7358	36.7464	38.0666	30.3556	24.3978	35.9904	33.9102		0.625003	31.125
12.0225	18.5203	20.183	47.2849	40.7492	14.2722	11.6139	27.3386	40.6817	34.2004	34.2865	24.4691	22.9006	32.766	41.0338	37.5852	41.7694	36.4574	35.5003	33.779	30.2432	38.2557		0.631251	31.6138
12.1415	13.3551	25.2007	39.3116	24.593	19.2515	16.6845	26.8428	46.8499	34.1396	36.8213	24.9482	20.1783	33.3703	31.5193	40.4087	34.1488	40.6785	35.215	27.5213	32.8703	39.112		0.6375	30.62
12.2606	14.2543	22.9707	43.7849	27.3536	14.8401	13.4366	35.6782	45.193	37.553	28.7439	26.929	24.6654	37.4278	33.5052	36.0055	41.3245	21.3719	34.9846	28.2738	35.5259	30.0293		0.643753	30.1834
12.3796	18.152	24.5318	41.1548	27.3875	6.5064	16.8705	20.3316	39.4585	48.8706	35.9004	26.9319	21.9074	43.6596	38.8854	46.1726	35.1595	32.0958	42.6604	41.4943	36.7583	33.695		0.650001	32.3135
12.4986	12.5709	23.4233	42.3366	27.1466	13.7001	16.9149	33.7157	35.7941	36.4876	34.4447	21.2123	26.6175	32.2594	47.1492	36.3444	27.2633	28.7914	44.7903	31.2348	32.1472	38.8778		0.65625	30.6296
12.6177	18.678	22.2917	38.9879	20.4386	19.7327	17.9261	22.4391	29.5023	42.1947	34.4094	27.863	23.5711	30.1536	40.67	35.1706	46.8507	25.6184	40.3358	34.4233	36.4591	27.119		0.662503	30.2302
12.7367	8.496	18.4162	36.044	36.2594	15.7346	20.8358	30.4536	35.4008	46.3051	31.5111	30.1922	16.4177	32.7442	46.2291	27.0106	39.5723	32.9767	21.0116	36.9955	26.9451	37.1546		0.668751	29.8432
12.8557	8.6042	27.1722	50.26	34.2104	12.401	15.8201	28.4762	39.6277	35.3023	34.1877	24.3566	14.3983	46.8723	41.3767	47.0273	39.6409	35.8479	40.2813	23.0029	26.093	29.5303		0.674999	31.1662
12.9748	8.5531	21.8138	50.2597	28.2141	8.178	28.5799	31.9772	34.2565	31.2614	42.8918	23.7419	14.1574	46.3034	44.6587	40.5437	30.6009	29.3187	44.6789	18.6776	33.1174	43.8231		0.681253	31.2194
13.0938	14.0793	25.446	59.6324	36.0601	19.3536	19.1353	33.6423	33.2528	43.3212	30.4447	22.2399	15.7657	38.3352	44.9579	36.8658	38.6152	35.2951	34.5162	17.455	28.8006	39.0009		0.687501	31.7245
13.2128	16.9496	14.9733	37.4314	40.9111	12.8505	21.8742	35.9659	36.7436	39.659	34.0375	26.7249	11.7362	29.6373	36.6397	35.9185	43.5537	32.7009	30.482	18.0123	34.3206	40.2894		0.693749	30.0672
13.3319	20.7025	13.8487	35.5127	42.9973	11.9879	12.3481	30.5952	34.5642	41.3218	35.6335	23.8598	21.0369	26.9422	34.8482	42.3194	51.7873	32.5106	41.6492	21.9198	28.9995	21.8125		0.700003	29.8665
13.4509	15.2269	16.1255	37.8248	42.2036	12.9292	13.0886	24.5439	43.7453	37.54	32.1032	21.6637	20.2246	30.277	31.0801	33.4286	35.6316	25.4723	41.6904	18.656	33.1537	38.8387		0.706251	28.8308
13.5699	9.8086	21.3995	43.525	47.8493	18.5616	16.9768	32.3874	54.3305	36.096	34.7341	32.1299	24.6144	33.3403	26.4506	36.4498	36.214	30.9288	30.4582	24.039	45.7043	30.6227		0.712499	31.7438
13.689	14.056	22.345	36.7445	40.6798	17.0066	10.8954	25.7599	49.868	40.3285	32.013	38.0487	22.3479	42.8831	41.9874	41.3894	31.7191	40.7894	22.1928	33.076	32.7617	46.5651		0.718752	32.5456
13.808	15.275	16.5229	42.1702	41.9451	17.5106	17.1696	28.8214	39.0649	27.9123	34.989	25.6668	17.2342	32.4947	35.396	31.989	20.2228	33.6488	38.1334	19.7797	32.3876	35.634		0.725001	28.7604
13.927	15.8095	21.697	34.7154	30.8834	18.7599	16.0895	29.7322	38.2156	47.3928	36.006	29.5111	23.9753	47.8642	31.5245	33.9663	35.2252	38.6431	37.7867	16.0731	37.4193	27.8066		0.731249	30.9094
14.0461	19.9012	11.6244	35.8411	40.217	22.4722	20.2436	27.2904	45.2984	35.67	37.2891	33.6771	16.007	32.7024	29.6145	40.6074	25.7284	39.8537	29.3344	21.4495	30.117	25.9026		0.737502	29.5639
14.1651	15.6851	20.8161	29.4518	49.44	26.6045	18.1345	33.3028	42.7631	45.6698	36.4953	24.664	20.1458	21.4843	29.2704	37.4431	35.5462	28.2383	37.4455	27.2503	33.1087	26.8072		0.74375	30.4651
14.2841	16.7726	14.763	45.1178	40.2526	28.2917	12.8103	27.0082	44.373	33.1376	39.7373	31.6852	21.9329	35.7416	34.5223	60.7588	35.6004	47.3242	32.9328	22.6823	30.7074	49.363		0.749999	33.596
14.4032	16.2864	31.5778	44.7517	29.0464	30.9385	13.7359	29.2093	28.0976	38.2631	30.2947	30.862	13.4794	42.4401	37.7181	54.0186	29.2859	37.6476	43.2414	20.662	30.9444	30.0306		0.756252	31.5491
14.5222	17.4867	22.0272	43.778	42.1419	21.2727	12.8655	36.0666	33.4797	33.5429	37.7814	32.0694	19.7533	51.8717	31.5653	55.7145	37.4781	32.6227	44.5569	31.0415	29.4108	41.436		0.7625	33.7125
14.6412	11.7154	20.4691	51.3766	38.6	18.4171	21.9776	26.5096	32.861	38.4401	21.3258	27.1012	23.8338	36.8409	28.3903	43.6181	39.5307	27.0569	30.4965	21.6508	30.537	40.4784		0.768749	30.0584
14.7603	13.0883	20.0421	56.0987	28.979	23.1698	23.8006	22.5587	33.4777	32.6042	47.6703	29.6493	17.6966	35.5985	33.2559	41.5759	21.5471	42.8865	34.7502	19.7878	34.0245	37.7704		0.775002	30.9539
14.8793	15.8764	27.3602	39.131	38.4462	23.846	22.8363	29.2495	30.4281	30.9651	32.9568	24.0944	23.1163	42.0179	31.7189	46.9576	24.9085	41.7717	36.0862	18.0388	31.1217	29.434		0.78125	30.4934
14.9984	15.2609	30.3639	33.7611	44.0519	27.5982	22.4036	25.7397	34.4416	41.1115	42.8575	27.2467	25.7149	38.7617	36.8387	45.7526	37.9061	35.3306	28.1817	30.8392	31.6392	44.2565		0.787504	33.3361
15.1174	20.961	28.0977	42.0038	41.1162	26.202	24.1125	35.2558	28.8578	35.0732	45.3045	27.971	20.3687	30.4432	38.5039	39.4041	20.5848	48.6627	36.0377	14.8565	37.5539	32.6163		0.793752	32.0946
15.2364	14.7811	28.2203	31.1265	25.0129	31.821	29.8928	38.3224	27.0286	35.2011	38.8134	32.4244	14.864	39.8824	39.5368	43.8277	32.3187	42.4099	28.1223	14.7963	36.3603	41.5188		0.8	31.7277
15.3555	19.4892	24.5597	48.9077	40.1645	31.8649	29.2875	30.3809	23.5397	37.1192	39.9565	32.3901	26.3501	42.8959	31.6903	37.7774	36.0401	27.0064	28.5027	22.9506	30.5123	37.8814		0.806253	32.3461
15.4745	20.3924	26.2423	34.9884	26.7771	29.8999	35.5421	26.4822	27.4149	33.5613	30.394	24.6442	17.4721	32.1615	31.1466	47.8028	38.6528	37.9963	36.6168	21.7061	33.9074	41.0594		0.812502	31.1838
15.5935	24.446	34.3595	35.8928	48.0988	39.7343	40.4143	25.3287	25.1403	25.5688	51.8402	39.1182	16.8583	36.4187	30.9524	28.4086	32.5926	36.2018	33.2609	44.9179	36.4863	37.8712		0.81875	34.4719
15.7126	19.5521	23.1321	28.1998	32.9938	44.0415	24.8768	26.819	30.5244	31.3932	43.274	31.2715	24.3432	48.6794	20.0077	31.0576	32.7616	36.3455	35.7298	32.685	32.3233	31.9621		0.825003	31.5225
15.8316	24.5445	25.4665	31.509	37.033	35.127	33.6736	36.3193	24.3487	42.4403	38.7387	31.8174	25.7516	60.4387	30.1979	28.3176	28.2341	27.1549	42.187	23.1913	32.2758	27.708		0.831251	32.6893
15.9506	13.2682	17.8665	31.3249	36.5112	43.5315	24.6458	40.7462	29.3054	35.5766	39.9966	29.2777	21.9045	39.6418	32.1331	33.6058	22.4074	36.2357	39.3912	22.3785	25.5819	33.9316		0.8375	30.9172
16.0697	14.8923	36.2845	32.2532	29.5216	42.4964	33.2016	41.2742	28.6732	33.3694	35.6481	21.2843	41.3232	24.9359	24.6764	21.5938	34.1899	23.3671	47.4629	27.5238	25.2024	33.2073		0.843753	31.0658
16.1887	31.0076	35.1496	35.2621	46.6006	34.3799	17.7321	35.3967	40.2444	31.3677	37.5971	29.8489	33.5005	32.7351	31.3691	28.0758	37.4689	27.7561	33.0069	25.5887	44.9172	39.5206		0.850001	33.7393
16.3077	21.3652	32.2923	25.7547	29.9287	37.4272	28.1121	30.4984	27.9664	41.8056	41.1897	28.0353	28.1044	35.4866	33.9628	40.1002	25.2071	30.6571	39.0109	40.3041	30.2414	48.4953		0.85625	33.1403
16.4268	18.639	37.911	41.7961	27.7534	36.1831	38.6618	34.5808	42.0579	46.2342	37.6781	29.2514	24.793	42.9691	35.7174	25.4225	23.319	24.864	42.6576	44.8091	28.3778	40.9825		0.862503	34.5076
16.5458	42.8539	41.8288	42.4895	33.2857	31.9107	39.2816	38.8855	35.2853	41.3212	37.7071	23.209	24.7476	38.375	35.7006	27.3183	22.0267	33.7048	34.6152	37.1346	30.1329	35.2887		0.868751	34.6239
16.6648	41.357	33.4381	34.979	30.6705	34.5932	31.4303	40.8665	49.0636	39.7751	22.4368	27.01	29.9031	35.171	32.9955	42.8212	23.823	27.9673	29.5227	47.7876	36.711	29.475		0.874999	34.3713
16.7839	45.4001	42.1421	50.0952	33.236	26.9511	42.2868	43.4575	30.1439	41.825	30.4665	29.6248	23.5434	37.7103	40.6262	36.282	33.7401	30.3415	40.5285	35.6615	37.036	28.732		0.881253	36.1824
16.9029	41.1156	46.3788	31.3402	36.8324	26.1737	54.6016	29.9944	46.4929	24.7152	37.8058	30.7429	41.112	40.5305	28.8666	45.0764	33.0994	21.2307	28.8799	37.2082	33.2961	32.4472		0.887501	35.6162
17.0219	32.8971	58.5327	33.6829	32.6812	22.6738	42.1553	44.2577	32.4002	20.4788	24.141	34.0816	20.4334	48.3389	35.3084	38.0662	26.4499	36.5165	39.4219	19.6167	35.2615	32.0093		0.893749	33.7812
17.141	25.7518	41.9701	42.9072	28.3783	34.0177	31.6016	34.7003	55.2373	22.4773	31.9839	34.5916	22.4497	39.5119	20.6054	35.1138	43.4749	32.836	32.5408	31.0039	27.615	20.1572		0.900003	32.806
17.26	37.4878	32.7676	39.9663	24.8634	30.7433	36.42	38.5927	44.2464	27.0558	20.6367	32.8827	31.0219	37.5482	17.4234	46.4922	31.3021	26.4847	43.0838	29.2043	32.1846	16.4644		0.906251	32.232
17.379	34.4745	56.5483	43.1412	37.8133	29.9439	40.5772	35.391	42.1353	23.723	13.6773	26.4258	32.6069	41.2842	29.5384	28.3988	34.1179	37.9577	32.8408	41.8996	47.6039	19.4605		0.912499	34.7409
17.4981	32.2885	40.6228	32.3297	42.3833	44.6391	44.2023	41.4179	36.4601	22.4675	26.3658	39.7282	26.7946	30.0689	24.6788	39.5082	30.1825	32.3359	34.5931	32.8426	41.1167	18.0363		0.918752	33.9554
17.6171	39.6802	32.91	41.659	33.6117	38.9325	29.6072	35.072	40.2405	18.4943	5.4266	20.5884	17.7767	21.8179	19.7592	26.9131	33.8253	34.2107	25.1096	30.7206	30.4137	13.924		0.925001	28.1282
17.7361	46.5994	34.4846	46.779	57.3133	45.5498	50.0491	39.998	23.5915	13.2275	7.9962	16.8441	15.318	32.5183	12.4032	26.1966	26.2603	46.7161	27.0661	40.9784	37.7384	7.0441		0.931249	31.1749
17.8552	50.6952	35.62	39.2744	32.342	47.6544	44.0302	38.3591	21.5525	8.8809	13.4202	17.0912	13.3524	19.984	9.5979	21.7971	17.6427	33.1049	19.4591	34.4972	39.9296	9.1391		0.937502	27.0202
17.9742	44.5545	28.2756	35.1886	40.0571	42.0092	40.8612	40.8997	20.006	13.6788	7.8836	21.1747	22.7107	17.7968	12.3219	19.8848	20.3632	28.9011	28.6645	26.7255	20.4381	10.2182		0.94375	25.8388
18.0932	42.6111	27.5432	35.8808	36.2136	25.2383	57.0143	47.2307	20.8794	14.6808	6.8348	17.7329	20.9497	22.1484	14.6028	18.882	29.2414	20.2124	23.4635	16.2898	26.7323	7.0664		0.949999	25.3071
18.2123	39.7222	27.8309	42.4977	38.4044	32.2205	52.1386	38.2154	12.1745	13.0077	4.13	10.2719	19.4279	14.2718	11.2458	14.4447	24.284	30.0317	23.5566	14.1619	23.4965	6.3379		0.956252	23.4225
18.3313	48.655	32.9849	40.2572	43.6659	34.7182	42.8446	21.6022	9.8094	12.5093	6.3284	5.6638	15.9256	10.046	11.7932	12.0784	19.2816	22.0968	20.5733	16.7423	17.3656	4.6501		0.9625	21.4091
18.4504	40.687	24.5142	25.9198	44.6404	34.6532	41.566	39.011	6.5183	13.0455	6.6248	11.9948	8.8819	10.9093	13.4233	22.309	10.6114	18.7033	21.5157	8.5548	15.107	10.0655		0.968754	20.4408
18.5694	32.8455	25.4999	26.2917	33.449	35.8094	32.4805	37.3727	11.5994	9.8329	7.9722	8.1052	12.2591	15.0907	13.8011	28.7171	10.6404	12.0576	13.8136	13.8295	19.6262	11.6041		0.975002	19.6523
18.6884	24.9314	29.4731	37.7197	33.8657	43.4549	52.1892	33.2529	13.3136	10.1236	4.3765	7.6612	9.1466	7.5952	35.2848	34.4421	15.2879	11.1282	8.3916	14.756	16.0377	4.3249		0.98125	21.2741
18.8075	20.535	33.7219	50.3899	27.2071	28.1719	42.8579	32.8204	9.9893	9.9261	7.9362	13.6358	14.1146	6.1136	46.6573	41.2347	9.8279	22.9739	15.4299	17.1389	11.6661	8.9178		0.987504	22.4412
18.9265	14.4188	17.5752	19.782	38.4969	35.6273	46.1002	25.1825	9.0694	17.7973	9.869	13.3133	17.0863	13.0659	37.3979	37.0422	10.6309	7.6902	18.0297	18.9596	19.7966	8.4866		0.993752	20.7342
19.0455	13.661	14.3802	28.4572	37.0253	23.8689	28.0475	25.5008	17.7818	10.4532	3.4912	8.8408	12.7659	7.758	46.4731	39.8787	12.5878	14.7366	14.0737	19.4618	13.4312	10.0315		1	19.1765

## Sheet: Image14
X0	Y0	Y1	Y2	Y3	Y4	Y5	Y6	Y7	Y8	Y9	Y10	Y11	Y12	Y13	Y14	Y15	Y16	Y17	Y18	Y19	Y20	Y21	Y22	Y23	Y24	Y25	Y26	Y27	Y28		Ap-Basal	Avg intensity
0	20.0513	15.863	26.877	44.7844	33.534	34.521	43.389	26.449	21.767	22.101	16.448	23.5437	20.548	30.764	24.439	18.607	16.686	20.43	34.342	14.3591	20.9358	20.085	29.349	21.611	19.3612	30.019	37.042	30.0291	30.8695		0	25.8209
0.119	28.6107	21.952	23.32	43.4944	42.876	38.138	25.288	27.4876	28.293	20.359	20.1	23.9334	15.674	35.068	20.154	15.698	19.487	13.944	35.136	17.9057	19.3453	31.081	23.784	25.01	22.8612	32.65	50.815	33.8198	35.1221		0.00581228	27.2899
0.2381	28.9514	23.462	32.479	48.3619	45.087	33.393	37.493	33.0191	24.124	17.918	19.616	18.4211	20.764	38.557	24.779	22.967	22.102	17.742	35.391	20.1553	24.1642	29.355	22.875	23.43	18.8329	33.405	48.572	36.125	42.0705		0.0116294	29.0901
0.3571	34.8462	26.7	43.637	42.3699	48.252	25.72	37.678	35.522	26.671	15.493	19.564	25.1443	28.301	49.682	32.741	23.931	22.248	30.035	26.266	30.0777	50.6193	46.397	33.357	25.436	19.097	34.925	57.853	40.352	35.8195		0.0174417	33.4047
0.4761	30.3905	27.571	48.454	49.8319	45.676	35.069	41.109	38.8501	24.55	21.306	27.403	31.9776	25.092	38.789	37.858	36.803	20.147	43.857	37.313	29.3333	36.5507	48.388	37.663	34.482	26.0188	36.454	45.268	46.1382	45.2591		0.023254	36.1242
0.5952	37.4368	31.977	62.347	60.597	48.795	40.757	44.418	39.6512	22.522	29.078	26.348	30.0572	32.212	62.878	61.009	48.52	38.028	44.589	47.242	28.2775	41.9405	72.401	58.1	44.953	31.323	35.871	66.146	66.8635	50.2589		0.0290712	44.9861
0.7142	25.9336	33.203	46.761	58.6042	75.275	37.922	47.39	52.5027	38.497	42.217	28.694	32.2854	41.512	70.63	69.922	48.32	49.351	65.354	56.14	36.7101	52.9786	70.727	62.506	42.805	32.79	50.261	74.375	55.3668	46.8559		0.0348834	49.8583
0.8332	20.502	38.195	64.83	68.8151	67.421	44.954	50.959	69.7426	42.733	32.248	44.104	34.9473	34.889	75.227	92.768	71.801	61.94	63.45	81.548	48.8922	50.4765	85.585	72.586	49.099	29.8682	53.551	61.326	55.6357	72.0095		0.0406957	56.5553
0.9523	23.7595	51.328	54.966	92.9503	66.626	47.833	47.9	71.9514	47.52	49.729	41.272	43.2794	54.613	91.901	93.636	93.344	74.331	68.237	102.398	64.7497	53.4985	84.407	77.858	64.083	33.4831	58.907	79.457	61.3481	69.37		0.0465129	64.3012
1.0713	21.9222	53.511	63.451	84.3402	69.411	54.809	70.193	63.8097	65.894	69.032	69.858	65.2495	60.778	98.504	93.646	97.03	93.715	80.671	112.953	75.4842	68.4216	70.939	86.618	75.63	34.2895	53.728	98.408	51.8718	63.8667		0.0523252	71.3115
1.1903	20.6467	68.608	90.102	67.3463	92.799	66.07	61.488	60.5454	78.87	70.92	80.821	62.7168	57.441	115.886	114.583	114.136	76.913	115.379	113.888	74.3187	66.8274	98.261	94.931	77.185	37.1693	70.14	93.244	75.0583	62.6055		0.0581374	78.5827
1.3094	19.6732	66.431	87.979	84.2583	93.013	66.651	59.718	70.8236	75.587	83.388	101.332	72.8539	74.062	107.425	78.432	116.33	109.532	105.384	91.307	95.8751	73.4286	103.337	97.609	92.499	38.9018	81.983	91.172	83.4593	88.7425		0.0639546	83.1444
1.4284	31.3772	59.947	86.724	80.7251	117.392	85.301	73.042	88.6141	95.203	91.485	118.844	94.3696	87.512	109.391	109.062	104.527	102.005	110.551	83.548	85.3869	58.9456	117.463	104.512	105.827	41.4978	77.497	90.437	86.1055	89.873		0.0697669	89.2126
1.5474	41.8199	72.769	103.096	89.3007	102.647	88	96.443	81.6012	93.909	113.457	127.428	92.7547	108.245	107.042	119.207	111.247	93.88	121.285	92.827	77.5422	71.1055	103.497	101.785	100.507	50.1907	94.839	102.416	84.5918	82.1619		0.0755792	93.986
1.6665	39.6632	81.912	106.695	87.4516	104.735	98.506	92.364	70.3278	104.548	110.425	111.982	92.4643	114.984	137.639	104.765	110.437	97.09	126.225	106.702	86.7651	81.3612	106.087	102.713	106.705	60.3582	94.711	104.918	94.0013	89.5167		0.0813963	97.4501
1.7855	48.859	98.408	129.348	106.149	104.196	106.026	111.771	71.0112	109.195	109.615	127.713	94.5816	97.396	104.115	134.792	119.731	103.193	114.357	77.92	81.651	71.2932	110.488	109.91	91.926	67.0228	96.629	99.395	88.8356	98.7776		0.0872086	99.4588
1.9046	42.9879	95.029	112.288	108.312	112.496	104.03	115.749	90.0412	109.432	106.094	129.817	75.1546	94.949	108.501	126.537	115.956	98.614	135.348	92.83	66.5584	53.8361	103.188	101.255	95.981	64.0299	98.214	108.097	99.6633	101.195		0.0930258	98.8339
2.0236	57.0946	85.631	109.963	107.792	110.458	110.24	131.597	93.3404	101.895	92.434	140.226	85.0761	112.17	119.842	144.519	114.411	114.032	124.61	95.412	63.5583	81.7573	113.063	102.852	102.486	70.9157	101.979	106.249	99.1962	96.0241		0.098838	103.063
2.1426	51.6569	109.217	111.473	82.5207	133.327	116.15	130.76	90.1405	97.532	115.423	137.902	88.4796	103.612	107.558	128.645	121.779	123.461	122.299	85.824	61.3694	81.207	107.469	122.635	93.174	90.926	119.436	80.118	82.2117	88.2899		0.10465	102.917
2.2617	62.1712	115.731	109.719	86.3342	118.687	115.802	108.22	71.9542	103.724	106.431	152.543	82.3569	93.473	102.52	127.553	137.775	106.671	115.923	82.643	65.4164	70.484	93.511	114.931	103.974	80.3023	117.563	93.707	95.5081	82.3897		0.110467	100.621
2.3807	55.6606	80.04	101.134	87.0277	121.672	104.909	129.929	80.2096	89.524	88.075	127.544	75.2779	85.711	107.931	116.549	122.216	114.675	121.718	71.7	60.3102	84.2167	109.634	121.794	107.438	83.8603	114.023	86.382	89.8278	69.4446		0.11628	96.8425
2.4997	61.8258	83.108	98.049	79.3895	112.325	110.167	128.706	92.767	82.794	83.657	130.394	63.3919	90.663	119.1	127.634	100.083	123.541	118.106	67.686	61.1896	67.4077	110.07	111.184	117.331	90.6172	100.858	86.165	99.6798	52.882		0.122092	95.5438
2.6188	66.5416	98.175	87.894	79.2799	112.523	122.024	115.408	78.3282	87.229	63.258	146.119	67.5267	72.968	122.397	144.181	117.58	114.393	114.253	91.717	58.3536	92.0654	116.717	114.675	107.754	95.6473	114.972	72.13	97.4519	62.0151		0.127909	97.7095
2.7378	62.958	93.88	53.171	84.8548	117.31	126.454	124.425	79.2097	68.225	67.662	123.501	54.8847	72.33	116.463	121.18	138.507	113.856	104.546	75.21	50.5936	77.3745	113.395	107.123	97.987	96.1289	112.151	64.452	94.7543	70.7982		0.133721	92.5305
2.8568	60.4392	86.933	59.097	79.4934	131.761	103.949	124.571	76.3822	73.699	52.937	121.143	70.197	60.706	104.326	131.978	135.612	126.71	110.169	68.435	49.6748	65.6916	106.243	110.806	94.014	76.4041	113.394	72.131	88.4791	69.4583		0.139534	90.5115
2.9759	75.4178	74.735	61.497	76.8118	113.118	117.51	110.074	78.7618	38.222	50.867	104.543	51.2195	61.418	109.587	120.143	137.597	121.687	104.422	63.746	59.608	75.6257	111.964	113.314	101.938	86.0111	109.459	67.881	81.9322	51.9364		0.145351	87.2775
3.0949	71.3541	85.172	71.453	73.1089	97.103	104.38	123.868	78.2785	50.642	42.684	95.471	49.878	45.052	97.375	136.4	141.627	109.236	102.547	78.354	49.2771	72.5102	107.329	104.487	107.22	69.345	92.294	63.598	88.7987	57.7459		0.151163	85.0548
3.2139	84.4721	76.527	57.474	68.7936	99.522	105.616	104.696	81.1247	54.335	55.605	107.063	53.2988	42.891	109.807	129.838	137.736	118.812	104.594	56.552	64.7895	57.2	116.571	105.139	112.009	64.6353	90.693	63.887	93.4998	49.632		0.156975	85.0625
3.333	82.2696	86.149	47.344	53.6861	96.321	95.013	108.632	87.0807	48.013	47.222	96.185	34.8035	43.763	122.025	129.712	125.302	113.846	101.846	63.363	48.4503	45.1757	109.326	80.066	89.303	72.2297	90.356	56.976	93.5736	47.2318		0.162793	79.8367
3.452	65.8573	69.621	54.047	59.2301	112.575	99.967	98.515	75.7968	50.671	53.412	87.292	31.2972	31.392	119.952	134.401	139.481	116.615	91.681	56.24	38.3994	57.0804	103.303	92.684	97.591	63.7176	80.762	42.631	91.9858	45.141		0.168605	77.9772
3.571	74.8643	78.6	66.477	49.9629	76.013	93.366	92.153	53.2434	37.773	49.001	83.994	46.7953	34.471	102.704	122.663	128.214	119.141	98.514	50.493	47.8246	52.3429	96.376	87.787	91.6	74.292	83.604	35.24	86.1835	44.9563		0.174417	74.4362
3.6901	83.369	75.319	56.33	52.8005	60.469	97.479	93.645	52.3816	54.852	45.717	76.99	48.3693	36.133	72.323	123.235	104.077	142.525	100.534	57.764	47.0757	58.717	92.225	88.434	89.693	81.5056	61.49	33.418	80.5837	39.8974		0.180234	72.6673
3.8091	58.7582	63.247	58.671	48.5799	80.981	92.396	82.194	66.6019	53.278	34.22	65.568	38.3456	38.342	72.225	134.875	121.087	124.429	109.172	59.638	40.9966	46.0346	85.893	76.465	89.279	59.608	60.49	45.637	78.6548	46.0661		0.186047	70.0597
3.9281	67.0547	66.201	49.326	57.5191	67.613	88.613	85.431	65.5452	51.971	41.829	80.015	40.959	37.063	62.862	129.125	98.637	119.027	98.831	68.77	36.8523	42.4059	90.653	99.209	77.071	61.6885	63.41	39.721	86.5876	39.1117		0.191859	69.4173
4.0472	79.1427	59.677	52.48	50.5541	66.441	79.378	70.73	70.4665	56.364	42.931	74.943	30.1739	40.886	60.069	132.734	117.283	126.598	109.066	61.326	43.6905	36.3408	72.513	89.029	68.389	67.1321	52.694	53.846	68.7034	41.9572		0.197676	68.122
4.1662	78.2933	46.979	51.868	47.3592	49.326	66.435	90.08	64.2774	45.626	36.767	86.823	40.0544	35.228	55.823	120.647	119.436	126.087	102.759	51.206	43.8296	31.7897	58.739	78.911	82.672	56.5079	55.065	57.156	68.7663	41.2805		0.203488	65.1652
4.2852	83.6852	49.404	32.897	39.7381	60.796	76.768	74.172	61.4143	43.461	39.718	83.439	30.2682	35.105	45.428	127.707	117.178	114.413	87.177	59.609	40.5073	45.7215	62.687	76.481	65.544	57.2355	61.884	49.275	72.9783	43.9438		0.209301	63.4012
4.4043	89.8454	48.828	40.794	44.5036	76.432	66.663	73.075	67.4761	57.691	36.235	72.9	43.6182	25.895	45.456	136.771	105.43	107.687	95.918	51.846	43.0501	37.9459	51.966	79.225	70.257	56.6588	68.942	46.14	60.8031	33.5103		0.215118	63.2953
4.5233	81.6047	41.898	48.605	56.1691	57.55	53.186	58.844	69.8331	42.878	44.701	69.367	43.2816	27.536	39.512	124.245	84.481	113.381	97.941	58.027	50.5107	35.6465	55.012	79.444	69.725	48.7163	65.221	46.458	70.7896	32.5119		0.22093	60.9336
4.6423	73.6907	39.198	41.221	46.6493	50.14	38.558	69.43	67.4046	50.954	38.491	63.43	38.1218	31.571	41.343	126.724	85.158	109.571	74.168	53.976	40.8968	37.8431	58.148	78.019	78.717	49.9404	68.014	49.59	60.2742	45.5937		0.226742	58.8564
4.7614	84.1952	44.128	31.115	52.5296	53.203	43.971	54.884	52.789	54.009	44.48	64.028	45.5854	30.986	25.307	129.504	102.056	85.377	83.96	53.082	41.7455	30.27	36.596	74.833	68.676	53.86	59.713	44.859	48.6447	29.3793		0.23256	55.9919
4.8804	70.883	43.294	43.011	33.1477	49.993	42.022	48.565	59.8059	44.228	40.216	57.734	39.9479	26.327	27.687	124.102	84.501	87.158	80.206	46.805	46.7634	30.1637	49.756	63.892	63.461	49.2235	65.257	47.179	49.3625	38.0733		0.238372	53.5436
4.9995	67.0189	45.015	37.111	45.4531	51.936	47.874	41.928	52.3644	46.199	46.315	59.678	35.035	34.399	31.386	102.29	71.478	113.43	51.497	48.953	57.4213	32.0221	51.704	65.157	62.191	46.9832	65.037	54.234	57.1738	30.0688		0.244189	53.4949
5.1185	69.4701	52.188	29.008	39.2593	55.345	52.513	35.155	35.3568	44.646	56.339	51.789	35.3337	29.498	32.793	104.99	75.116	88.569	63.385	56.519	45.879	31.5399	31.555	82.203	70.458	56.0269	69.115	47.804	65.3836	44.4549		0.250001	53.5066
5.2375	70.087	69.275	42.313	46.7594	57.607	43.931	47.784	46.1294	40.45	54.732	41.53	38.3574	32.433	23.499	88.658	89.342	89.709	54.278	55.163	33.9778	38.2668	33.842	71.25	59.555	42.2144	62.528	50.336	71.6772	52.3694		0.255813	53.3812
5.3566	64.8254	62.619	34.381	35.3859	53.524	40.554	45.31	49.1516	55.076	42.855	49.555	43.9541	32.744	31.438	63.596	66.454	82.653	48.168	58.619	27.8928	34.6697	34.524	58.622	65.623	41.028	81.931	39.684	68.0872	37.9741		0.261631	50.031
5.4756	55.0466	78.519	51.049	47.7591	55.251	38.67	52.231	40.4689	47.879	32.756	34.208	35.2769	30.446	31.263	78.29	72.512	95.466	54.99	54.79	30.7199	33.9316	29.104	55.883	77.299	54.76	74.899	42.818	65.9575	27.6916		0.267443	51.0322
5.5946	59.3631	71.223	36.867	46.8237	49.061	38.043	40.107	44.7145	47.478	30.736	43.836	29.7096	42.225	25.535	74.017	77.013	67.688	60.26	40.633	38.5594	31.0142	34.037	55.385	66.165	46.9704	63.525	38.326	50.685	31.1524		0.273255	47.6259
5.7137	66.1349	64.545	51.522	46.2479	38.658	31.897	43.991	47.7557	43.679	39.978	54.83	36.9047	28.979	36.889	70.948	61.235	72.758	61.503	43.956	35.087	32.723	45.282	60.434	60.994	51.0881	54.131	42.657	71.2402	39.5118		0.279072	49.502
5.8327	49.3347	57.366	49.46	40.2395	40.149	31.956	56.893	53.9121	31.051	29.482	45.216	28.4315	32.851	45.417	49.507	74.616	66.062	60.134	54.014	39.0319	41.1952	39.09	42.557	46.466	46.0395	50.926	53.139	70.2338	33.2625		0.284885	46.8287
5.9517	54.7493	69.123	44.081	30.3023	35.871	38.489	58.632	44.405	36.999	41.502	33.995	28.7099	21.627	50.902	56.546	66.385	71.981	54.902	46.947	41.9028	35.8864	37.056	36.887	41.425	44.2643	67.276	53.202	75.1118	34.9245		0.290697	46.6926
6.0708	48.5096	71.236	45.061	41.4779	33.258	36.544	55.251	40.8847	47.424	41.688	34.942	26.1331	39.704	41.716	59.774	57.931	57.819	47.948	37.364	32.8397	34.0128	39.036	46.49	29.763	58.8253	73.784	58.477	64.4411	35.7396		0.296514	46.1405
6.1898	58.5081	60.349	38.936	49.3866	38.478	38.147	46.457	37.6224	45.062	25.881	38.107	25.6878	23.81	30.552	61.151	62.315	57.38	61.371	36.163	46.2747	37.5199	52.515	35.375	37.006	51.4467	62.169	56.046	63.2705	40.002		0.302326	45.4134
6.3088	68.2837	56.596	41.36	44.9214	46.577	20.925	52.564	47.066	39.636	37.051	35.034	28.4256	36.767	28.034	46.202	63.456	66.508	45.445	42.677	40.9396	35.8071	36.294	37.673	34.71	43.4963	57.524	63.252	71.5765	25.261		0.308139	44.6228
6.4279	45.4639	70.132	44.236	37.9585	55.906	32.063	53.02	56.1305	29.672	31.112	32.89	26.3497	50.681	31.124	43.096	59.634	51.681	39.42	42.605	41.7531	33.4245	32.913	38.526	34.815	33.8053	43.673	46.437	55.6793	35.7577		0.313956	42.4124
6.5469	50.5295	70.318	44.669	43.3269	48.433	21.932	47.436	56.5515	34.192	29.889	41.199	28.5078	36.462	36.008	40.294	53.321	63.036	42.549	36.184	32.2895	26.5026	43.176	33.594	24.174	41.3833	58.796	54.206	61.379	33.3442		0.319768	42.5408
6.6659	57.0408	49.433	46.094	53.0468	37.832	38.539	39.431	45.1658	23.638	26.185	31.665	30.3353	39.836	19.107	34.971	45.284	60.209	47.828	31.975	39.491	24.0809	26.126	30.01	31.639	43.0835	56.82	56.608	47.0304	43.7157		0.32558	39.8697
6.785	60.6309	54.21	47.725	46.6403	30.678	39.652	31.239	51.3152	28.927	31.06	38.274	30.5055	45.07	38.569	39.859	42.166	70.572	42.119	42.628	41.6863	42.8594	28.395	29.972	42.716	44.8192	53.957	67.315	60.2318	26.1632		0.331398	43.1019
6.904	41.2927	52.561	38.68	46.6998	31.493	27.185	28.504	44.0339	30.79	41.376	30.12	27.445	31.531	32.382	44.498	49.341	61.296	49.339	41.768	36.8241	48.6502	33.466	35.675	39.947	45.312	40.462	56.854	43.2205	36.8925		0.33721	40.2634
7.023	54.2683	48.958	50.832	47.6202	30.674	31.059	28.63	43.2893	27.848	21.978	30.323	22.6975	20.611	34.05	40.671	44.843	49.451	40.969	45.345	35.9394	33.7353	25.791	30.857	46.493	42.3334	50.454	50.403	52.122	40.0013		0.343022	38.6982
7.1421	45.164	55.291	36.689	41.5465	28.684	39.487	42.874	46.1828	27.669	37.436	36.216	24.825	23.447	27.436	42.425	52.102	48.355	45.777	36.034	34.1762	33.4124	21.902	19.406	34.402	53.3708	51.445	52.277	50.998	39.3012		0.348839	38.908
7.2611	54.0646	52.63	33.871	46.434	29.769	26.616	34.826	42.0465	28.244	24.657	31.812	23.3314	34.658	22.49	34.018	44.165	60.274	42.223	40.53	26.7517	31.3743	32.267	18.725	36.174	49.2548	65.99	43.404	46.7263	29.9136		0.354652	37.491
7.3801	39.8337	55.097	38.862	43.2053	30.189	26.845	34.66	43.3343	43.502	20.574	27.875	22.1449	18.114	38.076	37.15	43.82	59.449	38.999	36.478	22.9681	36.4497	30.8	23.391	29.011	43.9124	53.915	59.124	53.0669	19.9926		0.360464	36.9255
7.4992	33.407	51.244	29.919	24.1471	26.333	28.417	34.039	35.3464	30.614	24.23	32.107	18.107	17.475	21.499	41.9	28.189	53.159	37.102	34.412	23.0151	39.6533	20.87	15.345	33.043	43.5203	41.077	50.458	50.1177	31.7214		0.366281	32.7747
7.6182	36.6379	54.196	35.507	37.2146	32.591	36.06	35.563	36.9339	31.894	26.753	27.668	17.581	10.616	28.407	35.799	31.787	55.554	39.022	41.265	17.5306	27.5191	22.274	14.277	33.988	41.3254	49.011	56.942	41.8184	29.1638		0.372093	33.962
7.7372	39.1367	49.617	41.294	35.9053	19.173	40.528	45.813	36.1522	17.675	24.832	35.971	19.292	11.643	25.241	31.376	27.841	45.956	53.399	27.161	22.4494	32.5215	23.188	18.141	38.733	39.9564	52.787	53.559	40.3379	25.6305		0.377906	33.6314
7.8563	46.8652	52.691	32.196	33.7969	23.263	39.842	59.995	33.164	21.804	19.438	37.954	21.8292	12.538	25.816	26.421	21.987	46.897	42.358	36.199	23.5088	36.3802	18.114	14.938	36.478	48.3029	57.8	42.28	47.0226	28.538		0.383723	34.0833
7.9753	53.7193	44.444	36.94	40.5184	23.45	34.322	47.067	31.2052	38.615	18.704	29.614	16.603	19.769	34.619	35.863	33.133	47.979	32.456	38.261	27.4103	37.0677	17.379	13.291	37.523	47.359	54.419	41.666	34.9964	24.0758		0.389535	34.2231
8.0943	35.1015	44.848	37.481	36.3253	30.551	31.882	51.767	41.6055	30.822	18.872	28.457	7.9196	8.725	25.18	23.153	43.758	39.069	46.12	23.996	25.5715	37.3927	18.742	13.605	41.283	44.7882	49.505	54.802	45.7507	29.7112		0.395347	33.3374
8.2134	27.4382	35.221	38.48	44.6034	23.257	27.947	40.862	28.0644	30.506	13.169	26.819	17.4601	13.603	28.659	34.272	31.667	46.24	39.709	23.93	32.5089	38.7832	16.646	15.671	36.814	31.2246	54.158	53.106	51.2598	29.3224		0.401164	32.1173
8.3324	28.1098	27.765	39.11	42.8121	30.599	25.738	42.204	33.0642	23.271	26.421	27.886	10.9851	12.546	34.256	30.331	51.225	44.763	45.904	27.649	37.5818	23.1749	10.394	10.217	28.841	47.3339	50.721	48.414	41.082	19.7988		0.406977	31.7999
8.4515	37.6586	35.298	30.101	39.089	37.007	21.479	35.162	30.8059	28.077	21.63	33.545	10.9381	10.963	19.113	30.203	46.069	47.702	45.741	31.324	22.6858	26.7355	15.522	13.319	29.183	41.7658	48.767	39.914	36.574	28.1937		0.412794	30.8471
8.5705	26.6566	36.843	41.923	41.6788	41.448	25.471	29.837	29.9929	35.421	31.332	26.028	11.2827	10.814	14.967	24.911	43.084	42.336	35.824	28.902	28.2759	32.9206	9.779	15.533	32.13	49.2908	32.735	38.147	35.6428	35.0648		0.418606	30.63
8.6895	26.739	45.998	45.307	47.0764	42.852	25.192	29.151	24.0461	32.024	39.447	12.036	16.9477	8.799	19.779	31.432	49.789	41.787	34.327	20.693	33.5796	42.6103	16.694	9.984	17.631	44.3019	42.224	29.07	37.9165	36.7382		0.424418	31.1783
8.8086	31.1967	36.451	35.805	39.6071	35.843	36.653	32.514	24.5648	33.228	29.211	23.561	18.0835	9.496	13.463	35.234	44.922	38.571	34.732	35.743	29.6538	30.2078	12.773	12.953	25.813	38.0154	50.25	30.892	40.0257	38.2511		0.430236	30.9557
8.9276	27.0344	30.469	33.231	39.4271	32.063	20.049	32.974	29.6166	41.586	24.725	18.245	17.9275	4.709	19.2	32.264	40.71	44.982	26.706	39.974	28.5587	34.727	14.463	11.527	24.356	44.587	43.873	33.258	51.532	35.7438		0.436048	30.2937
9.0466	30.9825	32.216	41.268	37.9558	39.448	18.756	25.201	31.1305	35.183	30.307	20.895	10.4231	8.936	12.789	40.727	43.166	45.452	25	28.321	24.8343	34.6955	11.209	10.199	31.618	39.7769	35.118	34.632	44.0147	40.3867		0.44186	29.8152
9.1657	27.6589	29.978	46.934	39.3863	34.706	26.965	19.695	27.3108	35.851	27.949	26.446	10.2952	18.314	6.23	35.286	24.076	39.426	37.156	33.907	27.105	24.5288	18.412	11.162	19.984	28.4579	49.396	28.161	45.9315	33.3328		0.447677	28.76
9.2847	24.8928	43.791	31.904	44.1768	40.292	22.686	38.063	25.2992	26.415	42.694	27.222	12.4032	11.168	10.766	32.918	41.6	45.143	34.341	37.966	33.7652	20.3893	14.189	9.04	24.485	33.5223	55.423	32.28	30.8795	27.266		0.45349	30.1717
9.4037	26.8777	45.793	29.086	37.0054	28.876	25.23	31.887	31.4168	26.563	26.776	24.021	10.0924	8.461	8.849	28.174	34.452	36.242	36.739	29.828	34.0112	24.7481	12.844	10.95	17.322	34.7132	53.789	21.28	42.8417	39.6928		0.459302	28.2263
9.5228	25.6534	49.021	22.863	40.1404	25.677	28.957	35.663	29.4538	18.961	28.649	13.35	12.7213	8.353	14.519	22.769	33.295	37.459	32.217	41.364	27.3588	24.9146	10.813	7.034	15.391	37.9344	59.118	23.054	28.8909	31.4618		0.465119	27.1399
9.6418	20.6914	51.087	28.939	44.3678	31.529	17.675	36.593	33.0173	20.148	20.821	17.439	16.5018	12.627	13.22	34.535	34.874	37.418	40.726	35.994	22.0745	30.9168	13.759	16.376	12.696	33.9945	60.029	16.111	41.7877	33.7929		0.470931	28.6117
9.7608	23.6066	62.015	32.531	37.8971	23.95	23.664	29.916	36.847	18.572	21.201	28.616	10.6639	12.563	17.389	26.169	30.076	39.223	40.533	42.189	27.8785	22.6241	15.899	11.068	11.758	42.3947	56.551	16.702	37.2196	30.1736		0.476744	28.6169
9.8799	28.5603	44.157	21.793	51.0658	26.146	30.917	28.466	27.9038	24.558	15.133	19.96	8.2453	11.762	11.386	29.897	32.186	35.273	33.055	40.165	26.4503	16.8437	15.753	7.434	13.471	43.9506	31.544	29.318	36.5137	34.43		0.482561	26.7703
9.9989	29.3711	46.875	29.134	33.0584	30.457	31.178	26.459	27.2607	24.642	24.624	13.839	12.5109	12.365	10.912	21.776	24.045	42.821	47.433	36.216	23.5406	19.8022	13.842	10.666	20.047	41.9985	38.739	16.302	38.4289	25.5927		0.488373	26.6874
10.1179	31.8156	47.878	34.816	31.906	39.746	22.664	21.817	28.6029	13.27	21.995	20.648	9.5029	7.277	9.111	32.981	23.019	28.562	33.259	41.032	20.2021	15.8144	10.568	10.925	17.538	32.4995	30.931	17.665	28.1927	31.55		0.494185	24.6823
10.237	22.4773	45.679	21.447	25.899	32.411	18.664	23.65	29.592	20.713	20.67	28.624	12.7056	9.986	13.442	38.357	40.076	27.515	42.736	33.414	30.5458	16.2569	17.964	8.235	10.503	33.7452	33.553	13.577	32.9566	25.859		0.500002	25.2156
10.356	25.9106	43.575	27.069	38.561	27.051	19.532	24.551	23.7462	10.336	19.201	21.62	13.4527	5.823	10.038	29.4	28.213	34.424	34.346	28.504	28.2754	15.9244	10.324	9.311	9.345	38.0922	34.68	21.271	21.3883	33.9697		0.505815	23.7219
10.475	26.578	33.219	26.411	31.1931	27.875	16.9	15.858	23.7046	21.209	19.163	19.657	8.7569	4.034	7.266	27.314	36.656	26.464	34.809	23.569	27.9952	16.2411	10.28	10.132	15.181	37.2471	47.218	19.787	29.0664	34.8299		0.511627	23.4005
10.5941	24.2623	36.741	24.566	41.5856	26.437	28.162	16.846	21.7019	17.577	14.786	29.087	11.8673	8.452	11.216	32.009	31.869	25.858	37.067	23.646	33.8499	11.4644	13.244	8.757	11.629	36.7881	31.06	17.136	26.8334	35.2885		0.517444	23.7857
10.7131	26.0983	41.056	25.649	28.5116	23.686	22.69	9.38	21.2824	9.788	21.061	25.754	12.6811	14.363	12.416	26.582	25.13	20.675	38.189	25.795	29.9158	12.0736	12.087	13.118	7.346	44.3322	32.737	20.739	22.0918	41.1976		0.523256	22.9802
10.8321	20.3778	42.363	19.528	32.5327	21.735	19.934	12.21	23.3055	16.526	13.007	21.723	13.0465	16.448	10.127	23.838	25.557	34.869	19.385	24.615	28.522	18.3674	9.877	6.53	12.205	27.0077	37.475	19.318	21.5092	26.4211		0.529069	21.3228
10.9512	27.3938	37.285	30.619	23.5292	23.041	22.272	17.684	21.1964	18.471	16.432	21.431	11.0586	14.994	12.785	26.544	36.449	19.737	29.167	22.261	38.7992	10.9348	11.889	9.268	8.765	23.1014	28.776	14.13	12.1224	26.2848		0.534886	21.2559
11.0702	23.1922	33.993	27.742	26.024	27	21.714	16.49	21.3023	21.427	20.167	15.49	7.3855	10.365	8.419	25.647	25.16	27.281	25.86	33.071	33.7425	16.7439	9.344	13.73	9.187	25.2908	31.879	15.715	17.3776	31.1062		0.540698	21.443
11.1892	24.6707	36.694	22.964	23.6892	24.912	20.716	11.408	20.2614	17.063	11.946	18.93	7.6323	9.938	10.058	23.128	39.289	19.719	25.045	21.551	32.6708	15.0186	12.815	7.432	15.484	27.4445	32.489	15.588	26.1798	29.6849		0.54651	20.8421
11.3083	30.0271	32.987	22.685	21.0804	28.582	17.919	13.407	26.0059	17.219	15.769	13.152	6.1904	10.272	11.881	27.019	37.3	17.876	21.612	21.607	35.0168	13.2036	9.699	6.02	8.521	18.7884	19.978	22.33	17.8581	35.9978		0.552328	20.0001
11.4273	25.7581	38.281	28.25	33.1789	22.884	24.851	16.35	24.1964	12.861	20.421	14.841	8.3889	9.906	13.487	21.55	27.12	21.059	15.489	16.884	31.0967	10.7838	10.052	10.434	8.612	17.6699	20.813	12.836	15.0263	26.637		0.55814	19.3006
11.5463	23.208	34.255	23.458	29.588	22.12	23.2	19.321	17.7523	20.067	12.311	19.923	7.9998	4.824	8.672	30.277	31.167	32.584	21.892	16.665	19.8915	16.6612	9.838	4.51	15.181	19.6184	23.293	8.504	14.6104	30.9752		0.563952	19.392
11.6654	29.7124	37.032	30.946	28.4009	17.346	16.572	22.296	19.6616	22.836	15.489	17.757	4.5913	2.934	11.741	21.927	30.534	29.993	20.595	18.503	26.2092	17.1329	5.935	8.296	14.765	20.9323	22.277	11.404	15.0213	27.8205		0.569769	19.609
11.7844	25.4575	39.77	33.43	30.0979	32.519	19.031	30.89	30.4616	16.864	12.838	18.394	11.8429	11.467	15.905	17.74	24.954	29.272	35.443	24.878	27.707	16.8406	9.299	11.298	16.433	23.0623	26.121	11.668	8.9481	35.7189		0.575582	22.3569
11.9035	34.7341	33.837	29.548	22.822	29.825	21.729	24.342	21.6603	13.624	12.528	11.887	7.4876	9.246	9.421	25.203	27.89	29.047	33.532	18.255	22.6267	8.4155	8.143	10.77	9.662	32.3831	22.187	18.865	9.0806	23.4607		0.581399	20.0763
12.0225	20.9918	20.31	28.366	27.5714	16.534	11.698	29.711	24.8566	17.019	13.436	13.816	9.2308	6.124	6.678	20.667	18.09	28.092	27.147	22.227	18.1087	23.0507	5.177	10.173	12.843	40.6178	17.805	17.683	12.7677	29.1826		0.587211	18.9646
12.1415	22.602	22.245	24.624	26.6848	29.485	14.083	24.928	26.7678	17.097	10.848	12.798	5.9573	8.684	6.129	17.168	32.074	38.973	23.229	29.519	19.0717	15.3868	5.135	10.627	19.011	26.1106	20.838	14.028	13.3068	28.8951		0.593023	19.5278
12.2606	26.6294	24.491	26.39	20.4514	28.98	12.094	18.409	23.4466	17.364	15.662	13.959	9.0911	7.629	3.817	17.45	34.506	25.333	20.724	27.753	14.1633	12.5127	5.844	5.086	11.509	32.8516	21.384	9.413	10.3184	16.1504		0.59884	17.7039
12.3796	24.5916	35.517	32.598	20.5628	34.584	21.999	16.101	27.1542	25.811	12.004	18.127	11.6915	5.181	3.062	13.827	31.003	23.559	25.373	35.639	17.1926	13.6979	5.212	6.789	14.926	35.1796	15.12	11.413	15.6831	25.1172		0.604653	19.9557
12.4986	22.6862	25.456	33.125	26.9427	34.597	11.398	21.935	23.0328	26.027	13.638	15.028	4.3383	7.655	5.902	17.72	33.72	33.38	21.857	23.06	19.8018	13.0935	8.309	10.727	16.928	32.9374	13.164	8.996	12.99	20.092		0.610465	19.2599
12.6177	19.0407	18.153	25.088	21.8275	30.381	14.245	14.598	20.2789	19.67	6.696	19.759	8.6376	5.74	10.627	15.802	33.025	31.151	33.674	24.848	14.5862	16.0928	10.07	9.493	14.937	36.1101	16.465	16.794	14.426	18.8321		0.616282	18.6568
12.7367	21.2612	23.581	23.049	23.1319	32.014	13.989	13.247	25.7832	11.857	8.056	18.002	10.6942	10.161	12.199	25.086	26.909	21.995	35.623	22.196	13.8387	16.7334	8.157	14.4	5.571	33.5187	19.602	14.172	11.778	24.9795		0.622094	18.6753
12.8557	21.2144	24.254	22.154	27.5689	26.07	16.954	16.413	23.869	19.102	8.222	23.487	7.5394	9.123	5.852	19.93	27.602	20.187	36.749	23.473	15.68	17.3887	13.119	13.243	13.331	42.1261	20.137	12.189	12.336	27.1051		0.627907	19.5317
12.9748	21.1485	26.344	26.41	30.8414	24.436	18.885	15.475	32.2095	18.021	8.755	18.337	9.3065	7.874	10.975	17.843	16.703	24.988	24.631	20.569	16.9861	18.9987	9.881	6.903	12.135	20.9432	11.695	14.467	10.7912	31.9646		0.633724	18.2247
13.0938	20.5937	27.76	15.897	25.1119	32.153	11.852	20.945	27.0448	24.57	11.74	15.427	10.6741	11.704	12.64	23.322	16.265	23.53	23.693	22.86	15.4364	16.6924	10.664	5.098	14.448	26.5314	12.153	14.146	13.1219	33.3297		0.639536	18.6001
13.2128	21.8531	29.954	23.559	25.8803	20.285	16.062	13.335	21.1224	22.11	18.007	16.679	7.3605	11.982	13.062	13.125	23.034	22.955	22.823	27.216	16.9862	23.309	10.448	5.679	10.035	15.2428	14.273	11.092	7.8831	22.1065		0.645348	17.4986
13.3319	22.7846	23.829	24.582	26.3203	24.909	11.123	16.782	29.8793	21.648	12.852	18.564	4.9344	11.095	7.088	19.258	23.822	31.439	19.832	28.93	19.6185	20.4578	12.302	10.413	15.047	21.475	14.701	16.436	14.9017	19.9718		0.651166	18.7929
13.4509	25.2969	15.704	27.191	25.3118	20.332	14.526	12.204	31.7872	18.174	9.813	12.199	4.8524	8.496	8.718	22.104	18.452	23.77	30.797	27.257	19.8912	14.4011	12.232	6.388	10.827	33.3396	9.87	5.461	15.6735	24.7398		0.656978	17.5796
13.5699	27.8569	18.381	25.542	21.9146	19.131	12.764	13.342	23.1065	21.282	16.326	15.992	6.9363	10.55	5.913	17.889	18.244	25.267	34.232	25.66	15.0716	18.9024	9.396	4.532	8.721	37.652	16.458	8.677	14.8512	25.9655		0.66279	17.9502
13.689	32.1619	18.384	24.36	36.4741	18.814	17.924	11.27	21.7909	21.232	11.994	9.958	8.7494	8.828	5.986	11.43	20.279	25.365	37.759	16.627	10.7613	12.38	6.829	7.294	23.613	33.273	13.019	14.857	15.7621	21.8694		0.668607	17.8981
13.808	23.7995	19.867	20.548	27.8302	19.759	17.837	8.099	19.498	20.958	14.072	10.555	8.7535	7.895	10.864	13.766	21.993	22.361	36.212	21.743	23.8851	14.4649	7.514	10.273	13.16	38.3696	13.263	13.312	10.9622	25.6121		0.67442	17.8354
13.927	22.9904	22.438	22.491	23.5914	25.08	17.041	16.978	22.1395	20.134	13.668	19.224	8.5979	7.372	9.343	15.398	22.767	23.445	17.052	22.804	26.8783	15.0683	16.315	6.513	12.801	32.4168	13.478	8.412	15.6052	36.1276		0.680232	18.4886
14.0461	18.1624	31.279	19.616	25.6976	23.105	19.867	22.653	22.805	24.869	10.264	21.766	5.5502	8.296	6.169	21.206	11.678	20.05	31.094	17.644	19.7042	18.2884	12.011	9.823	10.094	33.1628	15.762	12.592	16.7497	16.7943		0.686049	18.1639
14.1651	27.8776	26.016	26.54	26.062	20.269	16.393	12.883	22.8446	20.294	12.842	18.85	8.8716	4.812	6.514	18.784	18.819	15.782	30.019	22.364	21.5646	21.165	11.133	6.961	15.933	26.9977	22.735	13.349	13.2073	17.018		0.691861	18.169
14.2841	21.6349	21.104	21.039	22.7511	30.98	14.558	17.813	15.0867	14.728	16.856	16.728	5.1162	8.137	10.337	18.265	18.397	26.461	22.951	32.813	13.7497	12.1789	10.207	7.956	10.173	27.3482	14.312	11.584	15.0434	23.3165		0.697674	17.2974
14.4032	31.2091	16.218	26.284	25.7811	27.546	23.077	16.943	25.9057	16.145	20.963	20.108	8.9431	8.084	8.179	9.848	26.557	24.005	33.625	20.337	14.6827	15.8924	8.509	10.728	11.613	20.0771	13.426	17.391	12.1789	23.9852		0.703491	18.56
14.5222	29.9713	18.954	21.185	27.0985	19.037	20.673	13.765	27.7635	9.485	14.004	13.026	3.0759	6.449	8.806	17.553	19.894	21.403	27.066	22.905	23.0561	13.2394	10.487	7.117	14.067	34.1915	11.342	21.332	14.1563	28.4223		0.709303	17.9146
14.6412	30.0499	28.628	22.087	22.157	23.04	20.983	17.359	20.7221	10.714	9.751	13.517	9.8823	7.315	7.499	14.018	19.228	19.581	24.842	20.719	14.8588	21.277	5.987	14.928	12.981	32.7071	13.4	11.889	12.7585	19.6636		0.715115	17.329
14.7603	27.5289	28.332	21.586	19.561	28.655	20.688	16.489	27.1897	10.902	12.934	6.808	12.1535	14.15	4.137	16.181	23.411	24.424	27.269	12.421	20.4807	18.8556	8.769	4.157	17.635	28.6072	17.968	6.836	15.3951	25.6854		0.720933	17.9038
14.8793	22.8883	27.686	18.264	18.2918	29.979	12.82	23.747	23.7787	13.844	14.176	11.005	7.071	6.835	3.985	14.534	31.682	23.01	23.732	31.09	24.7801	19.3185	12.875	9.571	14.344	21.457	15.133	8.601	9.4018	20.864		0.726745	17.7505
14.9984	18.6448	34.915	25.686	19.1911	22.612	14.007	18.337	23.1778	18.316	11.521	9.872	6.8207	14.22	8.237	23.644	16.58	20.589	28.628	30.892	29.3942	12.3951	17.367	10.004	15.549	29.1986	14.879	24.385	13.3284	24.9595		0.732562	19.219
15.1174	24.6214	26.398	27.858	23.4292	36.254	11.226	15.419	23.5767	22.446	15.55	9.861	9.596	8.572	8.959	19.828	21.554	17.55	27.282	21.419	14.3522	16.3169	8.235	9.684	13.693	27.6503	12.716	11.602	12.8693	28.1408		0.738374	18.1606
15.2364	27.9094	28.475	23.123	13.6928	24.152	15.836	21.484	19.7678	17.854	16.549	9.606	6.1255	6.141	5.339	20.902	18.846	22.363	26.865	20.72	10.1856	18.4612	7.426	5.552	16.989	25.2703	15.534	15.085	14.745	26.438		0.744187	17.2909
15.3555	24.7541	32.041	32.455	13.1475	22.785	13.48	18.414	14.3867	12.504	13.61	9.301	5.7426	5.606	7.151	12.174	15.126	19.241	24.689	16.991	8.3992	18.3199	11.096	4.417	10.522	20.8982	27.182	14.714	14.545	18.5363		0.750004	15.9389
15.4745	27.3677	21.483	23.168	22.5623	25.331	16.567	18.911	17.7821	12.844	22.715	9.31	6.5352	4.428	8.325	18.059	21.116	20.456	26.787	23.67	15.318	20.774	8.392	8.535	18.828	14.5423	16.108	10.398	15.4484	26.8886		0.755816	17.3327
15.5935	28.6152	18.392	33.622	21.495	33.363	11.681	18.691	18.5579	13.21	15.867	12.477	6.1779	2.454	7.364	27.594	13.519	17.079	24.645	25.511	15.2198	19.2428	9.622	8.9	16.833	21.7313	10.869	17.309	13.6767	28.619		0.761628	17.6668
15.7126	24.9741	18.865	29.718	20.347	34.113	22.462	22.714	16.3954	16.431	11.306	9.677	10.3716	2.033	10.767	20.29	17.576	17.389	35.143	21.802	15.1295	13.3751	8.491	9.77	19.323	22.1156	13.237	13.224	15.533	25.733		0.767445	17.8726
15.8316	24.0511	25.614	24.09	25.0358	28.087	24.838	30.778	15.8085	23.546	7.229	8.654	6.6716	10.745	7.456	27.337	19.733	20.801	33.906	30.326	22.0107	21.5247	5.862	10.042	15.76	23.2901	16.627	11.544	18.8168	30.9346		0.773258	19.6938
15.9506	26.0176	25.143	28.713	29.7174	29.154	25.744	26.895	21.0045	20.852	10.903	11.811	11.1039	7.261	5.649	27.408	21.428	24.695	29.344	24.969	21.9492	16.9482	7.999	7.175	20.269	24.5915	17.141	15.563	23.2374	22.4673		0.77907	20.1777
16.0697	30.6765	25.308	33.853	26.5702	29.711	21.069	14.912	18.0977	20.904	11.105	18.544	10.7595	5.871	10.048	18.403	20.608	26.546	23.576	25.098	16.1996	19.742	13.914	10.1	20.435	26.44	12.06	8.831	19.8989	20.8062		0.784887	19.3133
16.1887	27.2652	12.132	26.679	19.397	20.661	18.14	15.259	15.5971	22.142	17.073	15.981	14.3793	2.573	9.404	11.533	19.324	27.986	17.865	18.502	18.7225	15.5469	18.557	9.019	13.536	28.1645	11.091	9.382	15.5277	23.619		0.790699	17.071
16.3077	25.1319	15.721	29.73	24.9207	20.268	15.904	21.432	12.8893	28.452	17.537	15.063	12.8308	10.825	9.936	9.801	23.183	29.692	27.156	25.243	26.741	11.1846	10.841	13.753	17.147	17.9074	22.102	17.057	25.4123	20.2483		0.796512	19.2451
16.4268	30.0748	26.96	20.788	22.1289	21.336	12.767	12.787	13.8628	19.4	20.682	13.965	12.6742	4.692	7.796	20.576	14.482	20.229	29.868	22.182	24.942	21.4931	14.219	10.144	19.595	17.0856	13.379	18.434	17.412	18.8499		0.802329	18.0277
16.5458	23.5589	16.422	28.993	22.5916	14.659	18.352	13.601	19.3827	26.154	11.143	17.528	6.9314	9.517	3.752	16.673	20.75	28.397	21.16	20.98	27.0763	14.7907	11.849	8.629	27.068	21.7668	15.629	13.39	15.0867	22.0194		0.808141	17.8569
16.6648	18.2444	19.679	22.547	20.5127	24.152	27.845	13.257	24.9084	27.602	19.453	14.026	10.839	3.629	8.668	10.082	18.285	25.049	25.411	18.348	45.5131	21.4207	16.213	11.809	28.616	24.283	21.865	13.899	12.4083	28.0377		0.813953	19.8828
16.7839	22.3576	23.94	19.149	27.1896	22.373	34.25	19.03	29.1619	14.078	19.348	10.898	9.1404	3.777	8.699	12.364	18.215	18.177	26.419	30.56	34.8482	14.7657	16.689	6.17	26.373	22.7728	20.374	13.441	10.7152	23.7925		0.819771	19.2782
16.9029	23.4907	28.686	23.151	30.2375	29.059	29.257	22.312	30.9345	20.093	19.469	14.04	9.0939	1.915	8.632	13.329	13.398	14.836	24.249	27.896	27.4513	11.7001	16.743	8	31.272	28.7924	16.611	13.21	14.4935	31.6968		0.825583	20.1396
17.0219	21.4149	26.378	21.461	24.5127	30.15	33.548	22.823	37.0942	24.141	23.824	16.494	6.9199	5.114	5.739	11.062	18.948	23.903	19.337	20.19	26.4849	15.0057	20.275	13.013	22.502	23.5235	11.595	8.471	13.5748	26.0887		0.831395	19.7789
17.141	21.7363	20.774	19.373	19.4677	27.8	37.157	22.662	33.2943	28.074	31.593	14.219	9.7607	7.994	10.743	17.826	19.671	21.538	20.572	28.147	37.4048	10.644	15.071	9.946	28.13	18.4746	12.38	6.169	15.4131	31.9414		0.837212	20.6199
17.26	17.268	23.729	13.036	22.0648	17.071	44.897	29.787	23.7987	24.032	24.654	10.688	12.2081	7.063	10.241	11.714	13.145	16.77	26.395	19.352	28.0403	15.9899	13.105	11.38	22.743	17.8734	9.776	21.001	12.8843	27.9398		0.843025	18.9188
17.379	22.8851	23.777	28.633	19.431	23.284	35.811	22.547	24.8508	18.456	12.95	11.586	9.0484	7.934	11.342	10.59	25.93	25.533	32.185	24.782	32.4232	14.7136	15.927	18.727	30.153	15.6146	8.297	12.957	13.5896	25.6475		0.848837	19.9864
17.4981	34.6666	25.701	20.352	20.7765	31.491	35.465	14.168	32.7249	15.649	14.067	9.823	11.2564	5.307	11.357	7.517	10.755	19.068	22.434	21.024	32.2969	13.9577	19.97	10.049	23.477	18.343	5.488	8.891	11.4467	19.617		0.854654	18.1772
17.6171	30.848	21.525	13.925	20.5292	23.61	31.752	17.383	21.6736	16.052	15.1	10.672	11.4314	6.058	10.651	11.66	21.386	23.666	23.455	27.704	33.3885	12.0807	21.558	20.463	33.342	14.9935	13.717	11.572	10.3901	23.7449		0.860466	19.1149
17.7361	24.8535	24.212	20.569	21.8175	21.878	26.573	12.907	18.4152	15.906	16.635	6.972	10.8526	10.04	13.23	11.172	22.211	22.366	25.227	24.891	33.4951	17.2095	16.972	18.653	23.218	22.6558	25.389	13.956	12.1067	29.4413		0.866279	19.4422
17.8552	30.6341	21.116	22.709	15.8001	25.94	33.087	6.629	24.8708	19.924	18.205	8.729	15.4375	6.188	12.411	9.798	16.141	14.617	27.571	25.366	28.6188	15.8086	19.368	21.716	29.213	30.0147	15.946	17.829	22.1791	25.3825		0.872096	20.0431
17.9742	36.4487	19.635	21.961	20.3387	38.381	30.293	8.086	18.9313	14.003	18.129	9.042	13.3658	10.263	9.016	14.388	15.302	18.4	25.338	18.913	20.4411	8.1839	18.168	15.208	32.805	26.776	9.716	19.723	12.5996	24.4834		0.877908	18.9082
18.0932	29.3746	18.298	17.936	21.3411	29.172	31.078	13.963	22.9897	10.329	10.854	7.921	5.5783	7.519	4.515	17.06	15.665	12.115	32.872	16.775	25.4855	9.794	14.849	13.702	25.398	36.3195	17.584	17.441	15.9832	28.2983		0.88372	18.2831
18.2123	28.6845	19.426	24.159	21.3176	29.223	36.146	13.674	20.0658	12.099	10.142	12.009	9.5506	8.528	6.994	10.312	22.613	14.148	27.889	27.474	21.2335	22.2522	19.035	15.912	25.594	30.7159	23.822	16.375	16.3753	24.0291		0.889537	19.6482
18.3313	33.5136	18.994	32.971	22.9446	34.884	26.861	20.172	19.7706	22.021	6.689	15.027	7.7194	14.086	10.234	12.374	20.109	23.588	24.466	20.805	24.9907	15.9518	30.224	16.303	19.129	32.9978	17.098	26.975	14.9727	26.971		0.89535	21.1325
18.4504	29.3452	20.265	23.287	19.7102	26.263	23.052	20.694	18.7092	8.212	13.833	11.774	15.6146	7.575	14.206	6.595	33.453	13.984	23.041	18.487	25.7946	24.2654	27.773	14.337	18.72	36.6916	24.351	25.577	22.4945	27.1604		0.901167	20.5264
18.5694	27.9746	13.197	23.702	16.4745	32.583	18.96	24.49	22.4884	14.971	7.425	9.794	9.1058	3.955	14.784	14.709	21.665	15.585	26.253	21.392	26.6367	18.5594	19.164	17.939	21.233	37.4833	23.96	22.342	19.08	25.79		0.906979	19.7136
18.6884	23.4961	15.749	23.81	12.9149	32.772	21.849	27.282	22.3566	9.049	8.455	8.455	6.7519	8.869	10.037	11.226	22.481	18.119	21.303	14.896	26.0325	10.1218	20.471	17.272	14.328	31.1972	20.306	25.715	19.8745	15.3278		0.912791	17.9489
18.8075	28.1323	12.816	24.273	17.54	21.52	22.246	19.7	25.3505	12.732	8.002	12.62	10.4084	11.123	12.574	17.811	20.317	19.376	20.043	12.923	31.0297	18.2784	24.064	19.356	22.497	28.8414	18.64	23.728	21.0704	18.6526		0.918609	19.1609
18.9265	19.4562	32.22	18.783	24.7552	20.078	18.097	25.568	32.3652	19.014	9.152	11.678	9.0526	5.482	13.983	16.533	15.78	24.714	18.998	12.384	27.9552	15.4039	24.694	14.537	24.824	34.8914	26.874	19.96	18.6756	26.7606		0.924421	20.092
19.0455	29.9987	35.384	12.008	16.6505	18.095	19.309	20.287	23.6806	18.176	12.546	14.08	5.3731	5.322	8.179	14.965	15.667	27.076	28.095	7.008	25.5503	18.3958	15.741	15.695	25.495	28.1203	23.285	22.081	23.6464	21.5785		0.930233	19.0168
19.1646	23.1212	26.735	18.699	16.4396	30.097	19.332	25.988	30.2908	24.081	11.153	14.754	8.4691	7.395	10.674	12.083	18.324	16.631	16.708	13.51	23.9574	22.2129	30.706	21.362	27.761	28.5864	27.891	23.525	28.2943	24.7009		0.93605	20.8097
19.2836	28.0426	33.195	26.357	19.6815	36.671	15.899	22.055	24.3147	16.777	9.346	15.553	8.3401	11.712	7.208	24.639	20.446	28.645	21.087	20.431	24.451	31.8821	23.447	22.433	13.074	32.3032	24.585	28.058	28.3267	21.1607		0.941863	22.0731
19.4026	29.4159	31.824	19.305	24.229	30.468	18.458	17.357	17.5305	22.808	12.688	20.047	9.119	13.965	9.253	22.135	20.186	21.025	18.034	23.806	29.2122	33.9828	26.967	21.64	14.575	27.5434	18.312	31.758	20.7517	19.5543		0.947675	21.5845
19.5217	33.0231	20.078	16.497	22.8678	26.007	13.901	17.166	20.5173	19.434	9.581	20.785	14.559	4.974	10.085	17.232	17.93	17.836	15.338	13.277	23.06	26.1322	19.25	20.37	18.157	27.9648	24.837	38.553	32.0939	22.7063		0.953492	20.1453
19.6407	27.5475	32.717	24.558	18.9611	37.81	14.222	14.815	22.9744	23.724	7.68	19.158	6.7442	5.105	9.497	18.974	17.458	12.121	22.119	18.398	18.4685	23.6907	21.024	25.086	18.997	27.1565	22.17	31.309	24.9226	24.3463		0.959304	20.4053
19.7597	30.9791	22.372	17.281	23.1213	31.658	19.635	13.957	21.8932	22.481	13.396	13.331	5.2741	10.378	12.592	19.186	13.146	19.957	26.86	19.543	21.2772	11.8183	17.051	16.379	16.741	23.3599	13.713	37.434	20.9233	25.5909		0.965117	19.3561
19.8788	25.0563	22.427	15.268	36.3065	21.713	12.712	19.156	20.84	26.684	7.406	15.815	11.8271	6.196	10.82	11.001	15.551	29.328	16.282	20.643	35.1811	15.5599	13.284	16.693	18.952	26.255	13.81	32.488	20.8472	9.0902		0.970934	18.8687
19.9978	31.7317	17.946	18.408	31.5562	21.983	22.64	23.38	23.7522	22.329	15.732	8.907	9.9542	8.45	13.691	22.139	26.448	20.968	23.961	16.33	22.5011	21.5334	27.582	15.901	25.32	27.2198	15.198	28.871	19.8666	17.158		0.976746	20.7399
20.1168	21.658	31.966	14.884	30.4402	27.27	17.362	16.562	16.3332	17.714	12.784	18.254	14.3153	16.046	15.97	25.777	27.866	22.236	20.866	27.533	19.9445	36.0415	28.614	23.257	16.181	23.4385	16.927	36.675	25.6858	19.8661		0.982558	22.154
20.2359	24.9526	17.738	13.873	34.1	38.729	21.691	13.897	16.5038	25.227	13.39	13.101	12.9312	8.271	9.486	19.848	14.581	19.914	16.111	17.018	19.6918	19.1143	32.203	16.638	16.993	23.8885	18.219	32.026	14.3442	10.7835		0.988375	19.147
20.3549	22.5368	13.579	18.233	22.3932	23.368	11.08	25.849	10.5267	17.881	18.132	14.79	11.0051	13.312	18.681	13.076	11.193	15.202	21.666	10.066	14.3591	15.0564	23.09	18.552	23.145	26.0498	22.37	17.227	21.5114	12.1746		0.994188	17.4519
20.4739	21.1191	15.604	16.094	20.195	33.972	19.376	18.543	7.3857	18.855	16.807	11.949	7.3559	9.949	11.326	22.668	17.133	14.941	21.427	10.755	16.2586	12.771	18.805	20.405	20.509	15.0921	22.003	11.715	8.0294	13.0204		1	16.347

## Sheet: Image13
X0	Y0	Y1	Y2	Y3	Y4	Y5	Y6	Y7	Y8	Y9	Y10	Y11	Y12	Y13	Y14	Y15	Y16	Y17	Y18	Y19	Y20	Y21	Y22	Y23	Y24	Y25	Y26	Y27	Y28	Y29	Y30		Ap-Basal	Avg intensity
0	34.233	42.2808	43.815	53.996	51.182	31.624	55.745	44.455	48.521	50.984	51.44	46.732	77.577	56.766	45.166	41.775	34.937	36.44	44.221	26.811	29.462	25.821	23.106	46.102	70.596	68.332	63.901	53.974	67.966	65.267	65.645		0	48.3507
0.119	56.54	40.2139	39.104	56.494	65.324	60.238	84.232	63.514	49.268	65.325	53.74	61.326	76.108	61.857	50.313	50.266	37.102	34.56	46.349	29.738	46.136	52.054	31.356	40.171	73.953	82.823	69.436	56.406	81.707	65.572	82.581		0.00709013	56.897
0.2381	40.265	50.2054	52.887	70.18	65.829	52.893	83.011	53.367	60.739	53.981	71.572	56.308	77.323	60.465	40.337	70.884	39.028	51.134	45.971	32.2	58.935	42.921	35.435	49.318	91.112	93.619	69.952	51.368	62.44	78.305	68.103		0.0141862	59.0351
0.3571	64.849	75.5118	54.188	75.524	63.973	69.956	74.322	55.775	69.539	74.369	73.741	78.565	93.81	73.141	82.444	67.89	66.359	66.053	48.652	44.4	55.965	44.978	22.995	62.003	116.774	92.585	68.851	82.034	80.432	69.81	79.819		0.0212763	69.3325
0.4761	53.447	72.432	58.97	81.666	97.741	66.203	80.448	79.676	75.641	87.578	86.622	57.056	96.516	74.665	96.805	98.632	54.014	62.53	76.999	46.248	71.162	55.472	39.65	55.522	110.507	114.587	93.992	72.817	83.359	83.961	97.867		0.0283665	76.864
0.5952	85.387	75.7302	75.619	108.401	85.119	81.179	81.343	80.032	115.419	120.672	100.06	84.772	87.051	91.156	121.329	94.532	48.059	77.656	97.493	48.017	81.455	66.136	43.745	72.168	116.846	116.42	86.653	94.458	54.472	93.89	97.381		0.0354626	86.5371
0.7142	78.86	54.8842	77.159	97.121	81.375	101.618	109.964	99.298	118.543	123.795	124.087	81.431	91.854	112.181	126.328	123.464	64.319	73.89	102.523	56.164	83.529	96.161	43.971	96.863	129.568	136.326	113.945	88.03	80.524	96.908	94.035		0.0425527	95.4425
0.8332	89.824	73.7193	75.083	130.273	99.319	94.9	123.168	115.537	123.632	136.938	127.965	109.118	94.049	116.816	145.55	114.285	87.555	87.552	110.891	58.015	97.263	80.433	57.288	80.636	139.308	109.146	100.835	104.802	64.512	113.85	95.32		0.0496428	101.857
0.9523	72.004	63.5274	88.704	106.379	97.908	106.018	122.404	121.034	112.382	134.758	128.648	121.492	80.12	114.915	136.722	131.737	91.031	76.49	100.505	67.071	112.979	91.269	62.42	92.718	130.562	127.571	112.926	125.934	83.332	108.322	98.199		0.0567389	103.874
1.0713	97.675	66.4309	84.428	110.597	104.449	114.414	115.334	97.494	133.349	134.053	126.393	116.441	103.046	104.885	143.95	156.034	90.467	92.207	132.037	89.763	133.734	112.043	60.462	100.702	126.677	136.319	129.503	125.876	102.619	103.092	96.274		0.063829	110.992
1.1903	87.847	81.7384	94.769	132.094	111.089	100.84	115.983	100.89	141.678	121.094	141.051	121.296	100.748	106.665	151.233	144.14	81.839	95.006	130.749	92.767	111.288	95.303	50.82	98.664	108.224	144.579	125.679	137.768	112.346	117.085	103.734		0.0709192	111.581
1.3094	97.532	93.8196	108.557	97.02	108.263	118.171	104.554	126.385	108.157	134.995	117.968	125.773	97.707	140.59	137.302	138.086	112.025	97.932	135.134	96.081	127.759	110.017	74.32	123.071	111.598	131.737	110.656	137.634	93.711	114.195	110.37		0.0780152	114.23
1.4284	99.294	94.6883	107.315	112.406	91.553	120.447	109.328	98.903	116.188	130.444	127.076	130.272	91.309	113.048	151.612	135.809	78.88	115.436	132.452	110.724	131.698	131.327	66.313	102.946	118.621	112.44	123.832	155.516	102.745	114.864	115.97		0.0851054	114.305
1.5474	92.97	94.5316	112.053	120.767	81.216	121.557	122.457	84.15	114.732	130.509	124.506	113.233	81.327	116.996	144.269	141.991	103.422	111.169	136.194	127.931	142.84	115.007	84.111	125.427	115.119	129.593	105.392	149.735	127.67	109.584	112.591		0.0921955	115.905
1.6665	106.798	99.8524	127.531	97.161	102.573	108.405	103.711	96.811	98.826	126.072	112.248	118.244	76.866	100.623	121.467	129.891	114.917	115.004	145.362	130.607	155.793	125.204	115.938	110.525	119.356	113.723	97.238	148.907	127.66	129.589	115.656		0.0992916	115.889
1.7855	89.473	81.8627	99.171	112.915	93.602	108.3	98.896	80.773	84.159	148.309	124.72	97.513	88.802	100.463	147.456	120.345	114.582	106.688	139.574	123.77	159.74	123.643	121.365	98.412	131.624	116.24	101.055	159.702	126.934	116.753	111.456		0.106382	113.816
1.9046	110.379	86.2012	121.838	100.721	106.099	106.206	101.106	71.242	98.1	137.33	113.852	89.074	59.738	86.445	140.573	120.139	86.33	108.097	117.585	109.1	131.836	117.141	146.213	89.686	117.088	99.529	78.612	152.65	131.597	135.052	103.421		0.113478	108.806
2.0236	99.512	88.1544	102.137	87.888	99.815	99.142	81.366	66.356	94.177	133.981	103.136	68.274	72.558	79.605	117.933	107.476	83.001	107.136	122.497	130.204	132.891	150.134	131.773	85.313	108.471	117.852	61.907	154.147	137.287	113.98	101.217		0.120568	104.494
2.1426	115.587	81.5822	114.769	87.506	95.965	100.032	87.062	62.18	90.733	125.655	96.812	69.803	58.92	94.383	105.421	111.124	68.416	142.369	124.843	129.357	141.155	133.281	137.015	81.661	106.382	124.905	70.199	152.26	136.53	134.711	104.384		0.127658	105.968
2.2617	88.023	76.9862	105.131	75.426	86.86	94.01	66.469	64.234	102.408	129.425	93.969	73.108	45.406	71.034	100.446	103.001	75.961	116.727	119.336	96.21	140.915	132.559	131.259	90.016	87.156	116.01	75.14	155.03	134.927	118.222	103.848		0.134754	99.0081
2.3807	107.14	84.2054	96.05	65.03	82.666	92.552	79.141	53.794	89.647	128.135	100.821	60.375	52.391	65.958	103.265	81.927	71.201	123.882	131.693	126.602	143.611	139.481	140.975	104.642	66.83	106.7	74.639	141.256	134.686	137.349	113.225		0.141844	99.9958
2.4997	101.081	78.5011	78.045	65.873	82.399	94.058	64.186	60.414	83.348	111.274	86.721	52.188	51.359	68.647	92.365	97.24	82.361	120.536	156.559	109.185	112.693	141.111	154.057	88.363	86.41	107.552	69.404	137.337	121.823	129.305	104.36		0.148934	96.4115
2.6188	96.448	62.1371	97.152	71.834	95.949	99.036	72.767	55.69	66.09	116.53	99.331	51.894	46.715	56.768	93.793	73.888	75.21	128.127	135.196	141.711	131.583	140.27	145.153	87.908	67.059	98.224	59.332	136.729	127.647	132.352	91.446		0.15603	95.2893
2.7378	87.389	72.6667	81.716	81.444	83.638	73.329	72.919	66.625	64.552	106.347	83.076	53.518	52.031	56.499	96.548	75.133	70.849	122.498	126.532	120.931	113.733	155.741	137.471	91.981	58.678	84.034	45.11	128.92	124.849	118.293	85.632		0.163121	90.0865
2.8568	101.181	53.5384	81.001	72.726	81.507	83.867	57.835	51.114	70.441	81.018	91.616	51.942	43.399	34.234	73.446	76.886	58.105	147.467	130.346	131.319	100.127	135.421	136.58	65.704	50.338	99.426	47.058	98.769	107.07	121.383	102.198		0.170211	85.0665
2.9759	91.239	66.7508	68.667	71.342	78.452	85.345	49.909	60.828	68.596	88.932	86.226	51.682	55.663	42.995	88.285	64.332	54.359	105.316	132.518	125.852	106.41	135.471	126.289	64.586	63.596	95.973	53.169	116.646	105.867	116.745	72.509		0.177307	83.6952
3.0949	90.178	58.8062	68.562	64.547	61.648	71.281	39.1	48.088	58.326	76.64	73.957	46.606	40.916	44.441	84.153	57.979	44.163	119.073	102.505	98.578	100.73	118.823	146.547	61.057	79.977	70.392	56.631	94.096	107.892	103.87	76.723		0.184397	76.3318
3.2139	84.322	62.551	64.883	59.98	50.429	72.766	46.164	49.778	65.647	74.651	73.326	47.183	42.49	34.144	85.504	65.994	48.105	130.991	117.643	100.846	97.782	125.935	143.31	59.44	44.521	94.898	49.209	99.505	103.456	102.869	83.058		0.191487	76.8187
3.333	88.705	51.7812	56.346	68.73	51.709	65.825	43.318	52.657	71.085	67.857	71.136	53.274	32.793	28.145	89.358	39.359	36.506	115.292	136.875	107.687	79.874	107.961	100.133	68.241	56.911	63.836	56.242	84.602	92.626	89.949	73.964		0.198583	71.0573
3.452	81.836	52.4981	60.823	59.585	66.525	67.301	42.592	50.082	68.144	59.445	65.05	45.199	30.888	36.103	89.964	58.323	43.96	104.801	123.354	87.936	72.353	104.229	96.88	45.558	49.854	69.865	49.153	69.888	107.214	91.247	59.534		0.205673	68.0705
3.571	84.385	68.633	59.037	53.504	62.331	66.936	41.618	64.601	69.971	61.163	65.438	51.024	48.88	34.215	80.368	57.291	39.302	108.723	109.774	88.204	67.465	121.842	109.304	57.528	36.314	67.861	59.842	63.033	105.982	85.848	72.066		0.212763	69.7575
3.6901	71.14	46.0277	54.586	55.96	42.253	45.089	38.755	40.107	84.245	48.809	67.772	33.92	41.526	37.605	80.323	50.03	37.36	85.413	125.831	65.154	49.413	92.087	97.799	48.884	56.874	69.605	51.638	55.066	82.934	64.149	77.65		0.21986	61.226
3.8091	88.525	42.4434	53.549	48.114	40.139	31.78	38.893	45.731	53.019	56.98	64.506	41.457	36.711	43.326	55.071	53.858	46.512	104.963	104.845	75.516	67.542	75.589	103.79	45.181	43.519	76.306	51.277	44.894	105.92	62.112	62.712		0.22695	60.1542
3.9281	72.393	51.5229	50.348	44.205	42.292	45.643	27.749	54.039	69.933	57.012	47.355	42.285	45.242	30.421	61.775	33.757	45.671	98.079	99.364	72.052	55.424	105.25	71.588	63.015	47.684	71.728	43.566	35.442	80.596	52.245	72.237		0.23404	57.7391
4.0472	71.799	47.6778	39.988	41.884	49.83	33.222	35.476	44.552	58.98	53.549	57.777	52.82	28.758	33.924	56.594	70.881	61.353	82.92	91.775	69.045	55.386	106.627	65.248	44.876	55.407	70.607	38.037	39.157	96.271	69.76	47.849		0.241136	57.1623
4.1662	66.254	47.7164	43.687	27.212	34.43	32.972	30.212	60.514	76.744	61.923	58.546	46.276	24.858	36.445	51.307	58.778	47.877	68.248	106.906	88.808	59.056	82.413	71.288	42.692	64.902	57.25	48.547	23.66	80.065	49.643	69.001		0.248226	55.4268
4.2852	77.03	52.569	54.171	26.13	34.794	31.905	31.986	52.074	48.864	52.957	53.108	45.871	47.248	46.886	48.987	56.268	40.461	78.339	93.734	57.398	54.022	71.559	68.254	54.359	52.018	71.916	43.324	34.761	82.078	36.193	63.049		0.255316	53.623
4.4043	65.148	36.6006	39.71	28.251	42.926	32.685	24.161	49.338	49.583	43.937	54.507	41.063	32.521	36.119	49.384	57.015	46.822	57.539	96.162	56.528	42.287	65.805	49.271	34.171	59.042	62.09	45.703	26.761	79.151	42.996	69.898		0.262412	48.9411
4.5233	67.894	29.1138	40.001	24.577	38.122	25.507	38.127	74.458	50.052	42.853	54.11	33.24	24.842	40.383	45.22	62.182	54.622	66.067	93.205	69.913	42.019	59.628	49.372	52.13	50.803	53.099	59.026	40.685	91.604	56.304	55.536		0.269502	51.1192
4.6423	56.699	48.0688	41.788	40.454	42.021	39.659	35.031	44.477	42.917	58.611	39.74	40.819	32.762	45.617	27.691	61.657	44.397	50.721	91.006	51.036	38.946	51.027	71.087	47.548	54.008	56.972	44.016	39.25	84.987	45.101	48.035		0.276592	48.908
4.7614	52.951	29.4249	41.825	39.318	33.745	41.479	45.211	43.644	41.863	63.803	34.61	35.048	18.167	46.303	36.796	48.866	42.036	52.127	84.859	52.279	49.969	33.981	41.582	41.778	46.278	54.311	51.941	41.213	72.361	50.09	51.605		0.283689	45.7892
4.8804	54.712	26.6464	37.64	29.055	42.271	35.771	30.852	32.852	40.888	54.311	38.158	34.122	31.623	40.358	36.733	60.52	49.088	56.836	74.779	53.754	33.714	31.107	43.029	44.774	39.142	65.867	58.946	31.797	75.335	53.303	51.271		0.290779	44.8147
4.9995	57.331	40.3155	42.511	46.052	34.251	32.506	27.562	45.527	47.506	56.554	36.281	35.434	41.66	34.56	28.416	46.202	42.718	58.71	71.112	61.947	44.064	50.731	55.855	50.263	44.303	49.572	53.735	23.921	70.93	44.233	49.532		0.297875	45.945
5.1185	53.738	50.314	33.431	36.792	38.396	47.924	24.756	46.633	30.116	43.841	50.132	48.93	34.627	36.65	27.42	50.988	36.205	57.48	88.225	51.421	48.327	35.692	44.446	48.266	48.184	63.725	34.39	31.971	61.431	47.839	67.457		0.304965	45.7983
5.2375	53.394	42.5287	42.104	31.458	39.468	36.578	46.127	39.005	40.822	45.991	47.055	42.439	24.788	47.324	26.337	45.83	61.891	51.016	69.636	52.863	49.693	32.292	49.265	43.422	42.183	47.797	39.966	48.828	70.658	52.407	46.823		0.312055	45.4835
5.3566	60.549	43.3123	42.246	25.998	29.485	27.304	30.709	28.846	31.928	32.812	37.878	48.392	33.465	45.193	25.547	33.525	45.799	52.498	76.66	48.22	45.637	32.939	42.646	38.481	45.262	57.609	28.026	42.199	69.151	47.893	51.074		0.319151	41.9769
5.4756	73.669	40.3281	34.706	24.657	26.751	28.15	24.57	32.062	33.389	32.18	33.002	58.519	38.212	41.668	30.596	34.301	48.999	59.078	86.995	40.565	40.741	29.565	40.67	46.921	47.757	58.169	30.651	30.062	42.448	65.239	49.443		0.326241	42.0666
5.5946	64.339	46.9762	45.928	25.685	38.924	20.309	37.621	24.854	33.191	30.287	40.664	31.82	26.803	48.783	27.277	42.955	48.539	46.485	79.847	36.984	44.4	20.706	41.949	34.413	44.686	46.8	35.262	42.367	57.781	46.435	38.917		0.333331	40.3867
5.7137	43.266	42.8655	37.903	38.174	33.79	36.198	33.961	44.318	41.422	25.228	24.867	36.518	19.721	48.054	37.427	33.048	60.867	55.423	78.037	48.701	42.862	19.686	32.564	32.831	42.318	46.303	39.589	36.368	44.613	44.642	45.346		0.340427	40.2229
5.8327	44.301	41.2198	40.458	30.642	29.049	38.718	26.8	41.797	22.595	24.052	35.294	42.966	20.426	38.222	18.789	26.373	52.321	60.105	79.96	35.877	49.176	33.226	56.804	39.298	28.714	43.818	38.306	37.573	49.653	43.7	36.095		0.347518	38.9138
5.9517	42.939	42.9964	40.503	30.514	39.187	42.2	36.608	47.337	34.319	29.064	53.499	45.773	41.119	44.339	26.732	35.77	43.131	54.445	59.789	53.367	47.185	32.506	59.903	34.136	36.828	37.909	47.992	46.666	55.709	55.374	42.74		0.354608	43.2445
6.0708	27.239	48.9044	38.995	27.432	40.539	46.505	43.181	27.826	33.874	15.22	42.918	41.67	32.64	38.939	16.676	32.414	33.813	64.721	55.984	41.425	42.007	23.164	43.418	49.325	32.611	51.132	33.449	56.587	43.365	42.752	48.736		0.361704	39.2729
6.1898	29.757	46.9808	41.598	33.184	41.612	29.364	36.316	31.398	31.745	21.264	32.582	51.822	21.871	44.401	10.127	38.89	38.7	70.625	53.75	32.639	47.416	33.058	43.36	42.002	40.865	44.089	36.547	63.968	50.609	40.007	36.078		0.368794	39.246
6.3088	39.65	40.6264	26.913	31.695	45.04	33.058	36.188	28.503	29.384	14.412	14.903	30.359	38.575	40.272	16.074	34.914	43.091	47.207	39.346	40.673	37.818	35.141	55.588	41.58	43.163	30.389	24.827	57.323	52.635	36.661	41.067		0.375884	36.3573
6.4279	28.776	46.4122	35.549	31.377	44.077	29.821	33.631	43.631	44.78	20.092	32.917	53.003	31.793	32.932	23.038	33.979	36.693	66.505	51.249	32.673	41.308	46.267	46.36	33.643	43.13	45.519	32.379	52.509	53.317	29.53	44.962		0.38298	39.4146
6.5469	27.165	47.5939	34.238	26.459	43.876	46.551	36.809	29.181	39.056	18.685	14.31	41.674	29.715	32.928	22.822	31.311	47.187	69.924	45.564	43.233	48.995	42.275	60.332	22.116	34.973	44.718	46.715	49.089	45.772	43.425	38.908		0.39007	38.8903
6.6659	34.922	53.1079	42.295	34.995	53.607	37.985	20.175	33.627	40.451	16.769	23.878	37.659	30.253	48.19	17.484	30.959	41.817	70.571	46.033	35.882	43.869	31.193	51.853	32.066	27.125	31.852	32.133	42.73	40.372	30.593	38.17		0.39716	37.1812
6.785	25.616	62.2044	38.435	27.801	27.211	35.695	23.713	30.824	26.85	17.464	27.623	46.999	33.892	34.662	26.128	34.122	33.709	67.052	50.835	34.703	26.474	40.619	49.043	30.271	29.824	34.457	48.207	63.01	49.834	47.76	57.072		0.404256	38.1326
6.904	24.345	53.2396	33.016	24.2	28.081	37.115	21.107	32.192	25.267	17.201	11.859	42.035	27.47	31.092	24.926	28.054	49.549	54.152	42.928	56.582	36.013	38.771	49.394	20.861	30.382	33.947	44.972	40.839	28.693	41.997	52.067		0.411347	34.9144
7.023	20.459	60.5877	27.616	35.38	26.223	33.761	33.232	24.055	28.372	19.738	21.395	35.552	22.61	19.794	22.883	19.159	34.369	65.346	61.686	50.426	20.441	28.485	56.509	30.739	27.879	25.102	37.017	48.818	31.675	30.667	40.683		0.418437	33.5696
7.1421	18.706	63.6035	31.599	28.877	31.581	23.375	26.169	35.308	18.396	11.829	11.181	24.885	25.38	35.585	24.664	22.747	32.169	60.169	40.032	49.566	19.818	34.637	48.378	33.691	31.328	27.757	32.155	44.863	41.229	40.115	38.467		0.425533	32.5245
7.2611	22.669	69.4908	27.098	33.008	31.609	21.928	29.688	35.563	16.461	19.482	18.827	38.134	24.513	29.225	15.768	28.94	32.668	46.143	45.038	44.051	22.72	33.224	44.218	40.868	29.937	33.719	45.599	43.517	27.556	51.499	48.314		0.432623	33.9185
7.3801	25.425	67.4832	33.203	19.471	34.752	36.812	36.467	19.169	19.012	21.295	17.983	25.449	24.256	34.265	16.998	22.276	42.585	42.779	29.745	47.856	15.702	30.236	47.076	36.309	22.772	33.238	28.583	48.385	24.569	41.809	29.05		0.439713	31.4519
7.4992	19.701	38.6859	28.775	29.613	28.081	31.724	24.56	15.687	19.619	14.943	18.203	26.616	27.197	19.757	21.416	19.948	35.994	66.706	33.594	46.778	13.7	20.444	42.547	35.702	41.723	25.078	32.047	55.76	36.182	43.676	34.364		0.446809	30.6071
7.6182	14.759	46.556	33.613	18.24	31.673	18.916	33.253	27.991	19.537	9.388	18.475	25.866	33.091	17.636	17.452	21.233	30.554	60.152	36.655	44.421	12.512	32.113	42.212	32.106	25.33	43.572	29.762	55.871	48.488	43.406	34.681		0.453899	30.9521
7.7372	16.635	42.1379	33.33	38.473	26.273	39.83	20.081	18.306	20.306	12.249	21.408	28.412	24.301	24.951	23.028	19.234	34.807	61.164	45.715	51.184	22.614	19.122	41.822	28.904	26.319	33.229	28.489	49.366	40.286	34.012	22.248		0.460989	30.5883
7.8563	15.862	54.1013	31.336	33.819	25.2	36.964	30.538	18.821	16.011	15.97	12.551	45.958	25.285	32.566	18.81	15.202	24.326	50.358	37.405	34.08	26.335	21.751	30.702	47.03	39.956	28.993	28.347	43.399	50.796	39.609	23.036		0.468085	30.8102
7.9753	13.895	36.177	31.349	27.588	21.791	36.563	22.238	30.794	14.658	12.362	10.802	38.582	32.588	19.513	16.211	19.785	43.199	35.774	35.291	40.093	8.899	8.21	38.316	45.432	23.773	42.143	31.811	49.14	38.309	50.14	18.324		0.475176	28.8306
8.0943	23.134	30.8573	24.569	17.318	28.354	31.643	31.983	18.721	14.118	10.319	18.946	22.564	30.074	26.212	21.142	12.244	22.694	34.854	38.563	45.509	11.423	7.056	39.891	47.799	34.562	24.56	33.671	41.108	36.061	54.394	23.967		0.482266	27.6874
8.2134	16.818	39.2115	20.5	18.625	22.418	40.039	20.292	16.966	13.366	9.273	15.826	22.854	17.089	14.857	15.417	16.365	33.313	42.813	39.156	33.996	9.429	17.589	28.752	37.197	33.808	26.698	37.776	32.901	44.909	48.523	23.548		0.489362	26.1395
8.3324	23.462	50.5477	39.85	22.622	22.556	38.375	28.184	30.358	17.495	8.08	16.95	36.992	23.115	24.357	14.756	16.224	25.59	56.109	28.305	32.781	21.039	10.056	25.538	40.339	30.121	33.469	30.716	27.983	48.181	58.655	21.79		0.496452	29.1805
8.4515	29.034	39.7529	37.176	31.494	22.33	49.073	30.811	19.702	15.332	9.56	13.975	34.885	20.701	25.487	25.207	14.087	18.457	47.703	34.569	35.959	17.38	15.45	27.869	41.909	18.511	24.939	32.013	37.741	38.876	49.256	22.472		0.503548	28.4423
8.5705	36.343	26.4874	43.358	16.562	25.675	26.823	27.649	27.492	21.46	8.628	11.403	37.193	28.3	29.028	14.024	20.794	22.449	46.164	21.588	42.174	20.382	13.813	27.922	47.021	17.211	27.335	30.03	24.908	36.138	59.926	29.469		0.510638	27.9919
8.6895	17.533	30.6544	41.272	23.742	16.266	40.278	32.625	15.285	18.355	13.987	15.17	27.827	35.627	26.969	15.983	14.998	25.9	46.612	26.461	34.349	22.792	8.129	33.152	37.947	24.291	23.851	23.006	22.992	28.408	36.906	21.297		0.517728	25.8924
8.8086	16.083	41.6523	38.133	24.511	26.152	32.454	27.25	26.943	23.393	20.224	16.92	25.665	19.255	32.838	20.535	14.018	25.79	49.442	28.698	29.247	18.918	19.583	26.095	31.323	22.148	30.253	31.683	26.016	29.721	29.691	30.735		0.524824	26.9474
8.9276	21.173	22.6768	21.51	14.004	18.874	46.507	39.072	14.532	22.84	22.316	10.536	26.784	32.791	32.564	22.633	13.995	18.08	51.867	35.552	29.976	13.593	15.889	17.771	26.541	28.524	28.457	26.999	27.138	40.479	51.398	17.089		0.531915	26.1987
9.0466	13.482	39.0743	37.275	17.137	22.852	36.08	37.48	28.561	12.549	20.699	22.466	20.953	18.653	38.514	12.676	23.454	21.186	38.2	37.47	34.276	13.027	16.705	25.72	28.36	28.929	40.751	25.34	38.292	21.172	41.959	21.813		0.539005	26.9389
9.1657	30.778	42.5527	29.691	16.123	21.859	35.996	29.609	22.68	20.549	11.128	13.49	32.019	22.411	26.764	16.732	15.33	22.259	35.023	44.985	37.239	9.075	14.211	29.293	34.094	23.857	28.016	28.066	36.025	27.606	44.334	21.889		0.546101	26.5704
9.2847	25.54	38.555	28.297	21.304	26.797	25.536	28.16	21.822	19.554	11.405	15.898	38.896	21.729	22.218	17.905	10.4	28.769	58.198	29.077	23.614	8.794	14.548	27.025	38.156	32.502	33.227	27.888	28.568	32.813	34.85	20.209		0.553191	26.2017
9.4037	16.947	28.9672	20.859	23.36	15.69	23.9	23.605	21.626	12.169	16.164	19.209	41.758	27.657	32.578	16.834	13.071	25.628	44.039	30.131	18.917	9.906	15.687	19.929	31.606	31.193	23.469	21.313	30.652	40.673	41.901	24.788		0.560281	24.6525
9.5228	13.424	36.0531	26.178	19.253	25.725	31.123	35.448	17.708	16.15	14.863	23.436	53.43	20.287	27.017	20.827	8.358	19.556	50.658	50.611	21.89	10.509	19.107	23.115	44.954	28.576	21.873	26.227	31.151	33.676	32.776	21.826		0.567377	26.6382
9.6418	19.538	44.3605	16.973	37.149	20.544	42.382	24.257	20.471	14.255	8.214	17.582	39.677	24.602	21.594	8.681	12.535	20.38	24.288	27.283	15.711	8.566	14.635	25.041	38.262	32.694	31.479	34.088	32.151	41.118	54.806	14.876		0.574467	25.4256
9.7608	17.028	32.2475	22.012	28.775	18.198	31.013	19.183	27.544	14.367	18.825	14.579	29.935	20.221	32.929	16.725	18.246	19.371	48.818	30.943	20.158	8.736	17.958	20.34	32.327	29.691	36.437	22.544	28.99	31.27	38.331	19.304		0.581557	24.7434
9.8799	16.169	44.1003	33.394	19.878	11.947	36.007	25.953	29.106	11.481	13.066	13.651	27.511	33.076	19.124	16.482	16.524	24.873	47.526	34.991	22.202	6.806	13.764	17.433	40.384	28.288	31.492	31.146	29.486	27.418	36.784	28.462		0.588653	25.4363
9.9989	19.812	57.6341	31.331	30.399	16.278	28.42	34.032	18.079	6.903	10.219	8.353	23.489	22.058	16.402	21.253	14.869	23.458	35.094	34.546	27.327	6.186	11.449	15.33	39.063	30.76	24.211	32.769	28.374	38.866	35.591	16.26		0.595744	24.4779
10.1179	18.275	49.2018	25.113	26.806	16.204	30.604	24.57	20.091	18.178	8.183	17.257	31.647	21.119	27.025	22.323	9.138	19.576	38.215	30.201	21.636	4.638	7.977	17.666	33.502	32.195	31.852	38.379	33.65	28.023	40.492	16.761		0.602834	24.5322
10.237	23.98	38.6587	32.819	22.632	22.004	28.418	18.265	25.634	14.45	5.215	13.539	25.925	24.836	24.808	9.747	20.225	26.141	42.471	37.431	25.102	6.602	13.003	26.157	28.702	40.177	28.709	31.09	17.275	26.595	31.956	6.876		0.60993	23.853
10.356	19.372	39.1206	29.805	23.329	13.826	33.467	13.532	24.281	13.911	7.563	15.559	13.825	21.131	22.797	23.314	8.583	28.357	27.722	37.832	19.81	6.531	9.21	12.309	22.626	31.566	29.859	40.054	16.431	30.021	40.608	18.851		0.61702	22.4259
10.475	18.173	30.151	28.159	27.873	15.203	29.682	23.027	24.161	11.113	9.406	13.31	23.156	12.009	21.783	27.887	5.702	16.086	30.918	35.419	19.032	7.341	7.679	18.897	26.83	34.836	26.31	30.07	17.409	36.076	41.236	20.047		0.62411	22.2252
10.5941	16.466	27.1111	28.753	17.553	16.362	26.052	24.04	23.36	9.872	8.023	14.125	27.167	19.741	18.442	18.819	11.74	19.29	36.211	29.874	19.852	18.937	14.005	17.132	26.172	33.773	20.028	35.749	17.325	37.48	47.52	15.783		0.631206	22.476
10.7131	23.1	33.5876	21.089	18.918	20.151	21.279	21.478	20.215	8.252	13.663	15.325	20.364	14.707	33.914	13.948	15.923	12.037	28.282	27.8	17.585	10.072	15.737	18.946	27.798	42.586	22.492	31.425	15.028	31.875	44.542	20.364		0.638296	22.0156
10.8321	12.654	24.5315	23.513	20.208	15.185	19.987	16.15	17.916	15.259	7.805	15.388	23.202	21.891	27.547	25.869	19.988	23.305	29.456	40.526	16.544	18.388	11.051	20.995	35.792	32.686	23.45	26.49	16.347	41.32	27.148	16.806		0.645386	22.1741
10.9512	12.697	26.724	36.847	18.604	28.008	22.084	20.529	20.218	15.158	7.231	4.057	22.239	23.815	29.087	28.128	13.585	28.686	44.468	35.106	16.343	12.281	10.513	10.964	31.444	34.302	32.726	27.062	21.845	31.251	25.574	18.95		0.652482	22.9202
11.0702	19.968	35.1992	38.073	24.415	20.229	19.331	33.986	25.376	8.078	6.579	17.598	24.205	17.791	24.618	28.048	12.951	24.659	27.097	36.515	14.057	9.229	8.405	17.03	35.723	40.404	23.908	18.47	13.182	38.472	40.986	17.255		0.659573	23.2851
11.1892	21.505	22.6311	24.067	11.888	24.064	20.686	22.929	17.68	7.969	13.159	18.673	30.072	15.367	43.21	23.522	13.327	15.976	25.011	35.099	17.301	14.709	23.404	12.951	32.984	43.353	20.935	17.152	8.864	28.717	33.259	24.823		0.666663	22.106
11.3083	25.236	20.7801	26.755	20.367	22.788	19.18	29.833	17.859	14.214	18.053	14.013	25.454	24.567	20.222	17.359	12.151	15.52	15.459	24.65	18.534	14.391	6.268	8.294	28.137	32.707	16.472	19.422	14.722	29.261	30.538	14.968		0.673759	19.9411
11.4273	17.34	28.583	27.44	22.068	28.116	27.48	21.808	23.02	17.031	9.576	15.506	32.225	15.829	19.923	17.582	13.83	21.599	32.235	35.315	27.184	12.657	12.828	17.784	21.812	39.004	18.377	21.986	14.786	25.912	28.78	21.877		0.680849	22.2417
11.5463	19.446	29.6409	25.955	9.203	30.851	16.037	33.54	17.817	14.94	13.961	14.95	21.245	25.398	23.686	14.84	17.923	12.838	30.74	28.466	12.901	8.244	7.633	21.335	23.557	36.745	23.351	20.387	22.295	30.22	23.58	18.117		0.687939	20.9626
11.6654	14.678	26.246	21.452	24.318	26.749	19.345	23.031	15.532	12.114	14.64	18.896	25.963	32.209	31.177	17.202	10.063	15.098	37.511	18.715	20.559	7.633	16.177	19.848	28.304	29.853	27.416	21.127	15.777	16.916	26.184	22.067		0.695035	21.1871
11.7844	24.829	24.1718	16.818	23.535	25.998	24.086	19.655	21.356	16.147	11.739	12.843	13.224	27.882	36.012	11.609	13.767	17.347	36.956	20.371	25.964	13.282	10.319	16.691	22.859	17.169	29.717	19.132	19.754	23.62	30.876	22.965		0.702125	20.9901
11.9035	29.719	21.2268	11.503	20.658	24.656	27.273	16.38	13.454	13.468	11.204	12.053	14.577	27.369	50.583	19.166	11.587	16.455	48.398	22.786	22.394	13.09	15.982	14.803	19.315	32.002	29.337	29.978	12.152	21.657	36.04	17.05		0.709221	21.8166
12.0225	26.441	25.9322	20.721	29.635	27.912	24.055	20.207	33.047	15.747	12.845	8.568	25.104	9.924	25.406	12.706	11.383	19.314	34.654	15.909	21.437	18.524	12.249	22.412	25.295	28.302	14.483	20.508	16.599	20.106	18.838	17.456		0.716311	20.5071
12.1415	19.507	18.8119	10.686	18.187	28.731	29.498	18.725	14.656	17.555	13.215	11.761	15.673	23.153	36.264	19.247	14.739	28.185	30.887	22.572	24.59	8.819	21.261	18.476	23.087	26.678	30.049	28.287	28.694	25.47	43.439	19.394		0.723402	22.2676
12.2606	6.99	23.5857	13.316	18.603	17.721	23.988	20.493	11.876	15.327	12.973	14.512	17.886	20.812	30.857	14.372	16.926	26.558	39.211	29.54	22.511	11.228	13.016	22.729	26.398	28.192	27.511	27.683	21.045	25.778	22.913	13.7		0.730498	20.5887
12.3796	26.028	28.9121	19.656	19.911	19.734	21.623	17.071	23.258	12.455	14.084	17.394	23.594	28.285	39.552	15.731	15.126	21.976	37.295	27.237	30.845	9.676	5.724	18.213	30.683	18.846	23.341	42.557	24.166	32.372	30.845	21.2		0.737588	23.1416
12.4986	9.498	24.9441	24.532	18.206	25.339	23.282	24.408	21.554	9.515	12.064	18.814	18.139	20.402	24.367	12.229	8.633	24.771	28.347	36.374	23.41	8.318	13.196	20.691	32.857	27.403	25.387	25.942	20.797	18.003	22.453	13.502		0.744678	20.5606
12.6177	13.76	32.1916	18.595	19.456	17.929	32.219	19.129	20.19	16.506	15.296	22.685	21.534	28.342	25.812	23.083	10.098	21.648	23.494	36.709	24.594	9.127	10.933	11.457	34.604	22.271	28.809	22.419	20.878	22.029	29.055	15.936		0.751774	21.6383
12.7367	18.649	31.4363	19.689	12.647	27.921	14.543	21.738	14.493	23.218	9.559	18.554	25.918	24.197	31.812	16.986	13.082	16.237	34.026	26.432	39.157	9.064	17.409	11.927	21.332	16.306	27.815	26.212	16.444	27.725	30.367	14.55		0.758864	21.2724
12.8557	23.665	21.1089	18.039	18.022	25.732	25.432	17.057	24.57	24.085	10.939	14.376	22.027	28.289	26.5	21.796	15.435	16.038	21.679	36.326	21.203	12.497	18.867	13.349	10.914	23.154	22.139	21.169	17.412	27.898	29.958	19.879		0.765954	20.9534
12.9748	29.68	23.3869	23.438	17.249	21.006	21.364	18.78	11.109	13.968	12.89	15.61	22.813	28.676	27.511	17.405	14.589	32.05	26.495	35.881	28.152	12.079	9.805	16.647	24.023	23.238	19.167	28.908	14.947	18.845	34.527	20.622		0.77305	21.4471
13.0938	16.924	22.2342	14.446	21.477	28.048	21.044	19.949	30.607	12.686	11.903	9.881	25.703	46.636	36.318	30.294	15.886	22.409	21.531	17.839	19.699	7.183	9.118	18.193	12.982	20.802	25.666	23.689	19.989	28.228	24.659	20.76		0.78014	21.1866
13.2128	22.378	31.8226	17.35	11.819	24.51	20.699	11.845	23.989	12.628	12.018	17.248	28.38	30.58	33.332	22.472	19.511	17.679	22.45	20.804	29.182	14.233	20.436	10.794	16.127	16.153	22.196	25.756	22.814	24	39.885	27.35		0.787231	21.6271
13.3319	25.214	21.4309	15.669	21.193	16.741	22.115	14.806	27.491	16.134	8.546	18.307	34.125	31.344	26.059	20.829	10.013	15.712	15.386	22.856	28.741	11.418	13.272	19.868	15.36	17.551	16.764	23.162	14.23	17.035	29.597	21.938		0.794327	19.7712
13.4509	28.854	34.3351	23.66	31.095	32.837	28.144	12.967	24.379	17.156	18.305	8.758	16.447	24.191	21.685	20.858	20.373	29.858	31.79	33.409	26.453	15.476	12.476	10.274	17.231	14.339	28.104	20.618	8.557	20.42	27.047	29.825		0.801417	22.2555
13.5699	23.245	29.5759	26.275	19.056	26.173	21.363	21.223	24.388	30.531	18.31	18.33	22.775	28.234	25.236	24.827	25.079	19.575	26.424	19.322	26.921	16.044	8.484	12.127	13.869	12.849	20.405	19.326	12.505	16.878	29.085	30.967		0.808507	21.5936
13.689	19.482	24.3213	20.365	32.003	27.305	28.768	21.543	30.542	22.905	14.463	14.652	20.172	34.009	14.295	21.835	33.372	29.864	25.103	22.818	19.419	18.656	14.874	17.382	31.206	19.559	20.023	18.781	17.272	22.927	26.533	31.942		0.815603	23.1094
13.808	16.912	25.5743	17.422	23.456	23.024	18.881	21.258	26.914	22.532	16.102	14.637	20.06	33.737	15.622	24.637	25.251	24.974	16.328	19.934	14.93	14.526	10.512	14.897	15.47	12.133	22.716	18.255	13.531	12.754	19.243	32.976		0.822693	19.6516
13.927	20.695	29.4506	19.575	14.015	24.024	24.543	27.276	40.339	20.88	14.271	22.132	13.882	23.936	28.792	18.377	34.769	20.246	36.539	34.385	23.083	9.977	8.004	12.836	23.853	7.882	16.015	17.627	16.32	20.105	38.744	38.08		0.829783	22.6017
14.0461	24.015	14.2562	22.381	26.425	25.496	21.939	23.892	26.404	17.989	13.207	14.339	29.177	24.44	13.255	25.346	27.168	25.22	22.676	26.269	14.624	9.206	6.385	14.776	34.68	12.334	14.811	23.058	22.471	17.37	22.226	31.546		0.836879	20.8833
14.1651	23.448	19.6155	13.741	13.207	34.591	29.935	10.271	26.124	13.942	18.462	17.773	19.198	26.361	14.351	24.524	41.014	21.382	21.995	32.017	31.974	19.015	16.966	20.879	27.196	15.614	22.614	27.998	15.123	22.297	29.338	35.649		0.84397	22.794
14.2841	15.082	22.2748	16.693	15.815	21.659	33.567	21.841	36.495	14.695	23.806	9.632	23.001	34.064	19.308	26.246	27.221	15.651	29.7	32.641	30.525	15.314	20.431	28.941	26.214	12.59	21.009	33.343	17.257	21.176	30.832	31.583		0.85106	23.5034
14.4032	27.968	31.5669	23.024	10.389	32.381	18.614	21.306	34.954	14.344	21.823	17.842	25.483	39.379	29.11	21.595	36.047	33.826	25.918	21.016	17.275	10.553	15.683	17.854	21.398	15.637	19.641	25.854	11.322	16.035	23.496	30.997		0.858156	22.9784
14.5222	16.01	30.4622	8.708	18.077	34.217	12.665	14.689	32.376	18.872	19.272	10.57	17.373	32.545	20.329	38.002	32.785	30.601	13.23	28.643	31.177	17.571	13.765	24.115	14.827	7.985	9.874	12.756	13.643	9.87	25.462	32.64		0.865246	20.7455
14.6412	35.25	17.4001	21.325	25.174	27.576	10.588	13.948	47.393	15.404	26.306	16.298	28.646	24.651	13.509	33.547	31.113	21.477	31.477	22.919	24.852	13.287	12.372	21.61	19.024	10.962	16.724	31.206	10.811	12.957	17.732	31.332		0.872336	22.1571
14.7603	17.897	25.065	25.649	18.944	25.536	23.102	18.329	40.977	24.294	21.793	19.352	21.139	15.938	20.977	32.195	20.37	20.792	15.913	24.468	23.204	18.451	8.382	25.842	14.974	9.686	13.132	19.695	22.297	20.19	19.477	28.666		0.879432	21.1847
14.8793	24.668	24.0073	29.984	17.626	29.194	11.045	14.969	43.149	18.385	18.89	26.653	29.145	22.859	22.086	36.531	16.214	13.369	26.234	29.41	23.896	14.706	11.474	30.089	15.87	12.196	11.859	22.161	11.526	17.539	21.52	26.02		0.886522	21.7185
14.9984	16.088	28.9829	18.343	17.197	20.035	16.431	17.562	25.397	24.809	24.039	20.634	40.826	17.416	20.052	34.895	26.797	18.289	24.744	25.708	16.038	19.356	14.06	30.933	6.055	3.94	30.099	24.833	15.201	10.713	41.538	26.83		0.893618	21.8658
15.1174	13.853	28.7623	16.831	15.277	14.11	13.876	19.252	29.367	18.157	16.307	23.694	16.579	18.804	21.949	36.467	31.053	13.445	34.105	19.979	42.025	14.597	16.946	27.679	12.341	4.799	18.873	36.443	9.197	18.267	23.269	34.821		0.900708	21.3266
15.2364	25.954	20.1466	21.518	12.578	18.204	12.941	12.069	16.058	20.789	11.031	36.834	37.563	21.828	28.757	28.372	25.132	27.503	30.269	19.136	22.12	29.681	14.594	22.895	14.253	13.609	12.312	30.741	15.617	11.772	23.827	28.786		0.907799	21.5126
15.3555	17.722	14.5511	16.063	12.218	14.543	5.346	25.195	15.881	27.853	15.292	40.173	19.402	9.897	26.221	34.691	21.331	16.933	24.381	23.209	15.242	16.552	15.384	22.995	3.864	7.628	15.424	35.875	14.906	18.399	23.077	42.65		0.914895	19.7709
15.4745	20.334	28.4859	23.313	12.145	10.17	7.311	22.88	33.366	23.132	16.793	35.501	22.77	11.9	35.251	37.045	32.336	19.98	39.286	35.323	29.462	17.376	16.429	26.718	8.428	3.298	19.786	36.675	12.95	11.017	15.041	33.422		0.921985	22.5137
15.5935	22.71	17.6197	14.051	4.695	9.132	14.583	20.819	21.486	20.601	11.946	34.701	15.135	6.61	29.813	43.328	29.329	20.134	24.795	15.604	28.13	25.15	10.767	21.01	6.566	3.349	19.945	39.425	22.012	23.328	22.033	39.262		0.929075	20.5829
15.7126	18.53	13.6819	15.572	8.214	3.925	10.872	13.399	15.036	22.803	17.006	37.483	23.511	14.455	33.257	22.544	31.262	31.51	32.796	20.575	29.997	34.082	25.264	21.008	3.169	0.393	14.322	23.201	14.254	8.924	14.178	51.808		0.936171	20.2268
15.8316	17.584	8.5618	23.097	1.873	6.214	1.934	8.449	11.951	31.499	25.361	24.802	23.237	17.962	28.532	31.557	36.062	29.195	40.29	37.607	23.616	25.146	24.758	20.357	4.151	5.816	12.61	29.625	17.964	9.379	29.676	38.793		0.943261	20.8922
15.9506	14.149	11.3708	22.09	7.638	8.038	1.931	11.527	13.605	19.638	11.667	26.169	19.189	12.594	15.874	35.654	34.546	35.347	24.593	16.324	30.723	28.2	28.987	20.063	0.342	0.275	16.603	30.226	10.19	9.354	24.033	35.698		0.950351	18.6012
16.0697	8.573	9.7319	9.352	3.138	10.688	10.09	10.748	9.819	26.158	11.497	21.149	8.567	8.824	10.752	24.756	27.262	48.445	25.244	17.952	11.867	31.504	52.674	14.496	4.078	4.574	8.056	25.329	20.321	13.128	22.736	36.862		0.957447	17.6894
16.1887	13.918	5.6863	12.192	2.311	1.041	1.054	5.226	7.791	15.655	12.237	10.3	16.478	6.349	8.024	34.594	23.515	30.404	25.435	24.863	21.139	31.611	30.458	9.954	4.484	6.973	3.827	21.408	25.866	15.38	14.913	41.817		0.964537	15.642
16.3077	15.932	11.699	9.196	2.783	5.561	3.479	9.878	9.49	9.694	7.696	8.525	3.418	7.691	8.196	30.978	10.971	41.362	20.156	14.356	19.869	25.909	42.121	9.279	4.365	5.846	5.883	30.495	22.483	9.16	28.128	47.785		0.971628	15.5608
16.4268	21.076	8.0919	1.176	3.917	3.517	2.398	3.741	10.28	15.269	11.809	8.74	7.643	6.302	11.446	22.521	18.144	32.673	18.241	10.897	33.046	35.883	18.859	8.268	0.872	3.405	9.248	31.712	24.349	8.174	24.281	32.425		0.978724	14.4646
16.5458	15.003	11.0504	2.451	2.04	1.761	4.611	3.407	7.982	12.292	10.019	16.284	9.345	7.027	4.431	16.771	14.423	21.228	12.521	7.733	31.157	31.54	17.894	9.651	2.644	4.888	4.391	24.85	16.624	9.666	22.142	23.709		0.985814	12.2431
16.6648	10.102	9.0526	3.982	0.954	1.326	1.028	4.538	2.813	8.872	10.232	9.366	7.022	3.589	5.022	15.147	14.832	28.439	11.705	15.121	26.24	28.33	18.121	12.532	1.837	1.445	2.927	27.436	22.507	34.411	23.719	32.138		0.992904	12.735
16.7839	16.702	2.7483	6.662	1.62	0.159	2.477	7.186	3.579	9.743	7.579	7.343	3.38	1.253	10.143	14.065	9.901	18.42	11.807	12.434	25.042	17.484	16.18	5.577	2.142	1.294	5.704	39.878	24.995	18.696	19.071	34.795		1	11.5503

## Sheet: Image12
X0	Y0	Y1	Y2	Y3	Y4	Y5	Y6	Y7	Y8	Y9	Y10	Y11	Y12	Y13	Y14	Y15	Y16	Y17	Y18	Y19	Y20	Y21	Y22	Y23	Y24	Y25	Y26	Y27	Y28	Y29	Y30	Y31		Ap-Basal	Avg intensity
0	31.774	41.986	27.336	46.912	30.491	20.6	50.627	45.514	38.7993	24.939	41.286	42.3129	26.0282	32.7663	14.0746	23.508	21.056	23.608	16.817	16.177	22.4517	20.6624	18.2585	30.307	20.8219	22.2653	50.682	52.5498	46.932	41.5416	29.7438	42.0018		0	31.7134
0.119	40.823	33.335	35.603	38.512	30.444	45.407	55.811	34.386	37.8404	41.935	55.787	55.5395	28.658	27.4503	33.9381	27.549	35.752	14.801	17.771	16.608	17.2795	32.9193	32.3269	41.6258	31.4726	50.7997	43.573	49.3905	47.1333	46.1863	47.5561	41.8474		0.00746053	37.1894
0.2381	42.835	32.181	25.189	43.324	39.438	55.359	49.02	36.488	42.9103	56.711	55.037	59.3323	33.3289	29.4609	29.9856	26.624	22.707	37.629	25.817	32.004	17.4702	33.4623	28.369	30.748	46.9687	59.0206	57.468	54.9922	70.8058	43.7286	47.6677	42.591		0.0149273	40.896
0.3571	48.453	48.798	33.785	44.072	46.837	65.112	66.767	55.904	53.9249	51.905	90.678	67.4281	29.9014	31.4016	32.7263	32.501	41.041	36.849	34.784	35.883	33.5854	31.5149	46.8099	60.2993	51.5698	59.3682	76.66	56.801	56.5362	59.3808	54.9169	47.2628		0.0223879	49.483
0.4761	58.736	54.005	36.605	54.255	50.018	68.599	58.563	74.613	70.0983	70.782	99.49	70.0324	38.087	43.0768	47.1014	57.668	45.159	44.678	45.82	41.532	31.2569	44.0806	43.4558	58.8774	50.9071	50.7262	52.113	73.4617	70.6326	54.5234	58.0783	46.457		0.0298484	55.109
0.5952	69.858	90.093	41.344	58.285	62.866	94.595	77.467	73.725	79.3465	84.253	107.761	73.0044	50.068	43.7947	42.1942	51.376	49.963	50.13	51.776	51.175	41.7218	51.5838	62.4848	62.6129	51.7782	69.2443	51.528	56.7452	55.7374	45.7467	50.1436	56.3914		0.0373152	61.2123
0.7142	88.105	84.645	49.735	66.367	73.379	103.305	92.952	89.54	85.0573	90.757	126.906	83.5948	77.144	75.1042	63.844	75.116	63.806	54.015	68.718	51.85	43.0433	54.6846	61.4469	45.5766	54.2313	51.3097	72.977	55.2821	75.3349	53.9249	49.5192	67.4954		0.0447757	70.2739
0.8332	85.57	88.869	55.876	98.587	92.923	94.376	91.52	113.409	75.9636	91.667	110.729	97.1814	68.2418	63.9929	81.4194	80	71.468	58.892	88.883	52.272	55.2125	55.2141	56.2833	71.8669	80.3635	67.9988	85.267	74.5682	60.308	71.8218	64.3702	57.8163		0.0522363	76.9666
0.9523	106.018	100.781	67.675	86.536	84.983	92.782	80.19	108.133	94.4749	98.336	112.302	96.3883	60.1415	65.9186	77.9573	81.715	101.688	75.546	80.426	67.374	66.9798	75.8884	54.5997	61.8912	75.351	73.5684	100.039	78.7573	70.5206	67.7804	75.2528	67.8901		0.0597031	81.4964
1.0713	109.62	99.819	98.877	106.535	90.993	90.552	109.075	105.009	84.5535	103.769	113.672	89.7561	73.8799	79.4739	84.3584	83.439	123.93	84.232	88.396	80.322	72.0421	83.2985	50.9391	57.2777	76.9145	67.4318	80.455	71.4908	54.2251	71.3239	79.7309	78.1387		0.0671636	85.7353
1.1903	116.278	100.95	106.096	101.275	84.275	100.585	93.216	82.954	90.8386	110.715	130.597	79.9779	82.0473	92.1082	81.9285	102.6	117.513	99.211	103.435	88.697	75.9132	73.7041	70.824	70.0258	57.6309	68.8888	74.687	79.9387	77.0925	73.491	73.1048	83.1483		0.0746242	88.8671
1.3094	117.232	97.232	113.034	97.911	87.148	88.257	109.555	98.19	77.6615	104.801	111.752	98.1191	70.9766	107.069	82.0237	104.235	110.594	111.115	116.005	113.981	100.103	76.323	70.9981	59.8965	70.1321	73.6328	119.042	77.2242	81.2359	54.6241	69.9611	83.1609		0.082091	92.2883
1.4284	108.928	98.697	108.95	111.531	97.674	84.298	94.223	84.121	87.3053	97.274	112.982	93.2596	78.2711	73.935	79.1853	87.856	105.509	110.978	99.448	108.426	89.7345	69.9955	70.944	73.1538	79.6822	76.8905	94.294	87.8855	73.6911	79.162	76.123	82.1102		0.0895515	89.8912
1.5474	116.919	92.716	102.005	99.75	86.027	103.321	88.96	92.126	85.288	101.648	117.528	69.7311	99.2067	73.1515	102.656	96.487	106.751	98.188	91.874	109.556	89.6065	92.3743	83.4593	67.2342	73.1957	78.0508	104.277	87.0279	78.4078	61.6101	90.8464	89.4628		0.097012	91.5451
1.6665	98.195	100.652	103.341	90.665	113.415	100.159	85.537	91.311	77.452	95.836	117.277	73.0419	87.6199	93.2349	93.637	101.753	123.828	115.812	113.491	88.647	81.5021	87.6473	58.3688	67.865	81.0329	72.7947	80.368	99.8265	83.5771	70.7579	78.4971	76.3491		0.104479	90.7341
1.7855	103.478	98.879	101.143	93.849	99.711	86.234	82.122	95.639	84.9788	91.685	123.908	67.0911	77.049	79.4371	87.7532	111.871	118.458	121.543	104.654	110.224	86.7051	103.242	82.0656	73.7297	76.1946	64.5878	93.191	96.208	84.0311	57.7067	81.8935	106.684		0.111939	92.0608
1.9046	104.723	101.018	92.049	95.22	100.923	91.557	95.112	78.392	72.2687	83.016	127.12	80.1568	59.9683	78.501	86.1662	78.605	116.052	110.603	95.335	92.397	91.7456	96.507	86.8551	76.4471	79.2509	80.5557	82.483	84.5933	60.9188	83.3712	69.5744	88.6865		0.119406	88.1304
2.0236	107.622	116.723	111.1	74.266	85.812	95.036	91.912	83.956	83.6497	104.418	107.823	87.646	87.5789	83.0495	84.1281	83.923	118.878	97.387	88.184	100.926	84.3576	91.4746	84.3295	78.0606	97.9636	60.5831	95.205	84.2282	83.5905	80.1731	70.4853	97.3401		0.126867	90.6815
2.1426	99.245	84.27	95.326	92.377	75.003	84.379	105.62	73.584	74.9157	91.306	110.711	78.7486	71.6778	84.0752	72.6022	92.664	109.133	94.243	104.436	98.066	91.411	99.0276	75.9714	70.9504	90.3276	78.6158	97.042	105.628	79.4557	76.8895	83.374	89.7546		0.134327	88.4634
2.2617	90.234	91.576	89.706	82.388	78.801	107.466	95.76	86.423	84.6205	91.762	125.189	85.7577	60.7841	87.4191	65.7583	95.203	117.776	111.206	105.919	114.249	101.679	90.7599	74.3141	69.2237	85.6809	77.2234	98.923	96.0905	70.2786	86.5349	70.5478	80.4309		0.141794	89.6776
2.3807	87.084	87.395	78.353	84.856	102.033	99.681	114.278	89.081	86.3673	81.743	101.618	86.565	84.1115	78.181	85.1693	84.093	103.335	98	87.822	94.957	100.036	80.0124	81.7517	85.0757	80.9024	68.5717	96.045	78.3451	77.9462	79.2314	87.924	90.0825		0.149255	88.1452
2.4997	94.53	97.929	89.961	94.033	79.378	90.416	81.082	86.666	70.3877	85.56	113.029	89.1711	78.2487	86.4895	87.7543	104.421	107.625	93.089	99.808	83.032	88.5762	70.8369	66.5868	74.5711	77.6867	72.9355	94.489	89.858	81.6744	63.3233	72.1988	93.4953		0.156715	86.2138
2.6188	77.963	69.27	66.241	68.248	62.383	85.62	94.251	98.091	67.2943	72.782	103.763	93.8474	90.0925	79.6472	90.854	91.94	91.351	99.049	87.9	93.413	81.5632	80.0112	73.6495	63.7373	83.5097	70.2411	90.191	94.5553	75.103	67.388	74.2553	83.3561		0.164182	81.9238
2.7378	87.036	73.201	93.436	86.313	74.968	90.034	83.518	72.107	61.9261	64.326	95.89	83.7037	87.9562	85.3104	53.6032	90.084	110.451	72.538	99.076	104.783	72.6358	72.4543	74.6165	76.2687	78.7078	71.2724	79.607	88.5153	78.1722	74.6075	71.2479	91.9988		0.171642	81.2614
2.8568	75.195	87.757	77.419	87.192	66.667	79.408	85.141	60.879	56.2423	55.693	103.918	79.705	63.0774	92.3108	73.7933	68.039	92.935	63.099	95.592	85.463	78.5765	71.7655	61.2253	76.3939	79.8933	51.1156	81.73	90.629	68.4971	67.4396	76.9953	87.765		0.179103	76.2985
2.9759	71.636	74.379	80.149	85.593	72.624	100.977	70.08	55.707	49.9752	66.024	107.03	72.648	64.1172	83.0131	63.8551	104.626	105.257	69.088	93.445	84.377	72.5951	57.077	65.9241	67.6338	73.4058	64.0534	97.044	77.1171	67.4818	60.1623	84.2709	95.0309		0.18657	76.7624
3.0949	71.202	69.932	49.861	88.019	51.8	89.741	76.706	52.486	55.3196	56.06	104.805	70.2589	61.1957	74.4782	66.4661	92.41	92.745	64.363	82.637	97.785	85.1691	51.5978	51.3322	63.7704	63.3598	56.626	88.389	64.3963	59.6939	77.833	60.6371	79.4325		0.19403	70.9534
3.2139	61.581	79.398	58.268	54.451	64.615	76.921	62.325	53.502	49.117	46.87	86.067	80.1982	48.2713	78.2684	73.1791	81.641	81.355	67.303	82.711	96.154	86.0936	82.3654	69.1318	75.5798	80.3434	51.5204	70.239	72.1071	81.8446	67.5203	85.0076	89.6253		0.201491	71.6742
3.333	74.448	66.787	74.958	58.886	64.269	79.523	72.609	46.585	41.7428	41.764	91.882	73.9656	42.5853	67.9219	52.8654	84.599	85.207	70.081	95.702	89.432	91.6973	54.3727	59.7388	69.1699	72.5049	51.0532	73.828	57.578	60.7389	83.7062	63.2262	63.3264		0.208958	68.0235
3.452	68.785	64.724	48.927	50.214	61.608	79.864	63.876	63.295	42.6032	51.492	79.99	58.6443	50.2498	70.2725	51.905	72.865	76.872	75.459	92.032	100.341	91.1302	67.3219	76.3887	72.1686	77.7783	45.6541	63.462	68.248	79.4483	70.3571	67.8135	59.6395		0.216418	67.6072
3.571	59.15	65.019	62.077	37.845	66.818	81.452	75.714	44.787	52.9974	48.835	93.771	70.327	43.8966	65.3886	48.2802	78.583	79.918	71.339	74.877	90.551	77.4762	68.4929	70.7665	62.1552	65.4823	43.0024	60.017	59.5898	65.4813	74.9865	61.4261	55.0357		0.223879	64.8606
3.6901	62.163	60.181	59.362	53.522	55.108	65.929	65.863	40.183	50.7306	45.209	81.106	55.1879	31.8664	59.4152	43.8743	71.269	84.428	74.427	62.714	93.158	72.1773	59.9495	74.2076	63.9122	62.7224	47.8481	54.89	48.5309	76.5226	63.3355	51.6945	65.7036		0.231346	61.1622
3.8091	64.518	64.679	65.394	50.655	61.575	69.171	65.75	48.684	41.8556	45.452	81.287	66.3737	40.6128	52.7839	57.7385	75.76	74.704	55.709	65.589	93.089	56.9636	56.9425	62.09	68.7564	57.7655	36.3961	56.53	58.8928	57.4268	64.2824	55.1203	54.6682		0.238806	60.2255
3.9281	73.69	59.504	49.872	44.869	39.781	83.82	71.325	42.777	34.7743	47.541	64.675	70.3683	41.9837	66.0656	56.6945	79.316	63.398	60.158	61.923	92.223	80.1617	48.8217	47.8976	54.6211	50.8275	38.1148	52.97	71.1869	73.7816	67.1829	52.0345	49.476		0.246267	59.1198
4.0472	44.432	41.191	46.746	44.092	42.219	78.979	54.868	53.319	42.1287	55.371	75.102	49.2652	32.3228	65.8482	47.1725	82.599	76.784	46.217	50.666	95.372	83.9718	29.6972	58.2612	53.5029	57.8648	39.5756	35.814	47.7331	68.4159	78.6161	50.1695	47.6649		0.253733	55.4994
4.1662	52.789	39.922	50.089	32.885	50.792	79.333	71.726	40.857	31.4637	49.072	78.676	41.3184	26.6484	60.7117	46.8094	67.728	53.461	52.933	67.053	74.124	70.1094	53.2563	40.4736	55.5921	54.7908	44.5263	47.762	37.0182	59.4788	62.2627	47.7308	52.3273		0.261194	52.9287
4.2852	53.243	30.619	60.146	32.709	41.85	72.533	63.134	43.083	33.9123	49.768	71.141	40.4272	33.2218	53.2276	58.0793	62.514	56.241	52.516	61.859	83.502	61.5003	42.7289	58.1506	45.4192	53.7982	56.0496	36.79	55.37	63.805	62.4179	39.7921	36.8174		0.268654	52.0739
4.4043	46.917	34.114	45.326	34.098	50.569	80.902	61.694	40.839	35.7051	46.91	66.702	52.3932	25.5863	56.7516	43.2638	67.55	51.88	48.67	62.57	86.559	57.3067	34.6487	45.3278	44.1557	66.0955	54.3662	35.505	46.3329	46.3241	53.4715	30.0762	33.3809		0.276121	49.5622
4.5233	51.246	25.453	39.21	33.921	41.552	64.574	59.596	37.448	37.0278	48.315	72.996	40.2174	37.2037	51.5843	52.3621	61.81	55.475	59.449	55.5	73.045	68.1193	34.5018	47.2672	42.0216	78.7295	42.9792	40.297	34.5097	43.6637	43.2085	49.5416	27.0388		0.283582	48.4332
4.6423	60.703	24.045	27.522	34.102	61.281	60.307	68.496	34.201	33.1274	38.714	57.014	40.4299	25.2273	51.3755	43.0455	67.12	40.955	40.888	58.319	65.939	62.7008	43.2297	37.7943	38.3395	67.1401	28.0201	36.081	39.056	55.423	52.6082	50.577	32.3619		0.291042	46.1295
4.7614	52.029	24.558	23.731	32.244	48.061	61.423	59.044	38.393	35.763	35.318	59.044	36.6024	32.0621	44.5947	43.6764	58.495	42.684	42.569	53.826	69.354	48.3317	52.9324	29.8985	42.2672	72.6282	34.6509	32.229	27.0758	48.9977	56.2102	46.7082	25.5476		0.298509	44.0922
4.8804	53.7	30.692	38.558	40.651	51.391	62.54	51.879	36.84	41.3543	27.903	55.343	44.7963	30.8364	38.913	42.7892	64.071	43.326	28.662	45.549	58.312	55.2639	50.0163	30.1337	34.8342	82.4249	37.64	40.806	28.5318	42.9673	48.5157	53.7426	38.1445		0.30597	44.7227
4.9995	45.735	29.492	25.326	37.95	34.669	72.002	50.439	35.694	37.8024	38.65	46.294	33.027	23.8843	47.5419	40.7722	49.437	45.462	37.048	52.953	70.62	62.1096	49.4469	30.3862	44.6637	65.7085	39.4134	39.637	24.3149	46.3898	49.2804	55.4794	25.7413		0.313436	43.3553
5.1185	39.709	28.992	24.107	33.215	29.705	52.86	57.15	34.418	40.6456	35.212	37.215	40.9962	38.1121	33.1045	36.8736	53.394	49.068	40.707	58.589	68.563	36.6898	38.7803	39.5222	33.8539	69.412	37.675	32.902	27.5559	39.8038	34.0685	38.3046	24.5384		0.320897	40.1794
5.2375	48.228	39.696	24.133	33.176	30.883	67.036	52.982	29.223	29.1238	31.929	50	27.3449	31.2599	26.8654	30.411	64.422	45.792	28.603	53.139	52.947	38.4207	43.0783	28.2317	52.8548	61.6364	35.6646	37.31	27.6195	38.1549	41.519	33.7344	30.741		0.328358	39.5675
5.3566	34.51	36.088	29.011	38.694	31.627	65.719	41.373	41.556	28.7747	23.534	39.828	45.8933	39.7301	38.1653	26.2924	38.783	43.634	22.875	56.195	51.052	41.2201	40.3139	37.656	52.417	71.8476	33.3662	30.071	30.0569	37.0781	36.5632	32.7507	27.551		0.335824	38.8821
5.4756	44.585	34.886	26.925	49.131	28.269	41.893	51.011	25.959	43.445	38.263	35.754	42.3342	29.1296	32.0709	33.072	35.581	43.534	42.682	45.331	52.094	33.0204	59.7471	21.1606	47.3081	66.0745	32.0967	28.809	32.9215	64.0257	34.6924	34.0353	23.4344		0.343285	39.1649
5.5946	42.274	28.061	23.636	44.569	27.824	57.678	48.705	31.092	35.295	20.833	30.856	35.4935	39.218	32.5557	27.31	41.69	46.959	35.166	42.349	45.126	30.1281	34.1613	32.1974	47.0575	67.9601	24.1909	31.605	25.692	42.3559	38.3769	32.9779	22.2178		0.350745	36.4253
5.7137	36.322	37.015	24.682	29.139	43.07	50.466	22.693	33.001	38.2959	24.092	34.177	29.0811	38.6219	41.4017	17.3617	42.998	50.082	51.741	39.24	44.567	28.679	40.8267	42.5523	49.6601	74.3401	35.1688	22.749	38.479	39.3558	44.9179	38.1985	18.6694		0.358212	37.5514
5.8327	37.093	31.041	35.614	35.718	35.979	42.61	41.001	38.658	31.1717	29.788	33.113	29.8211	28.1313	33.8224	27.8156	26.447	36.062	44.132	37.665	41.052	24.2825	35.7859	45.9563	43.0704	71.9118	34.7691	27.726	32.5948	36.9193	30.8358	50.2933	17.3472		0.365673	35.8821
5.9517	35.704	27.961	21.956	35.962	25.546	34.575	31.209	35.794	32.0736	42.147	29.075	34.6418	29.7894	31.6451	29.8233	31.677	28.104	43.314	48.113	35.626	23.2052	55.866	35.2769	48.6594	63.9349	32.7948	22.992	31.9401	38.4252	25.2414	28.1963	25.8602		0.373133	34.2853
6.0708	38.244	34.028	12.145	35.106	38.609	34.036	34.106	47.169	38.793	24.887	22.59	26.7387	38.6354	45.0879	24.1705	20.437	39.516	43.234	43.686	18.514	22.7712	38.4322	36.6203	55.4919	60.7449	28.3922	22.514	27.7321	34.4091	30.8573	23.3409	31.4636		0.3806	33.5157
6.1898	42.258	26.42	18.196	24.892	33.184	36.802	64.774	35.048	23.8056	29.479	30.084	40.7933	37.161	50.7764	32.5033	38.557	32.309	53.754	21.638	40.572	24.3056	36.6392	40.7224	46.3206	59.1167	33.0948	27.711	33.4347	30.2875	31.8703	29.4549	20.5434		0.388061	35.2034
6.3088	38.071	36.293	16.326	37.195	41.368	35.815	41.299	27.295	17.1431	30.633	25.423	35.4157	31.8325	66.6472	27.1018	29.816	31.537	40.317	22.108	29.544	21.4364	35.8657	30.2856	55.5955	63.4963	27.2575	21.485	34.6096	25.3197	30.3627	25.2656	29.7793		0.395521	33.1856
6.4279	25.665	26.881	18.64	17.922	28.297	36.099	40.663	41.921	17.9516	26.338	26.108	26.4328	33.9647	47.024	31.9846	23.979	40.732	45.242	22.333	29.159	32.3436	35.552	47.7479	57.1252	53.6706	24.805	28.837	24.4752	34.9165	30.7953	26.6503	27.3556		0.402988	32.2378
6.5469	27.179	37.011	22.674	21.819	32.437	34.697	30.55	40.4	14.2868	29.396	28.184	35.534	44.0409	35.5908	26.1616	32.436	29.627	46.257	22.134	28.774	19.5165	32.9133	48.9683	46.172	49.7544	22.0891	30.077	21.7955	28.062	36.9347	34.9015	28.331		0.410449	31.8345
6.6659	30.301	28.008	13.815	17.441	31.443	33.587	39.805	42.151	19.6751	37.55	43.391	36.3415	56.1947	44.5386	24.4483	27.613	43.203	46.254	33.648	21.771	11.2534	23.1258	28.1982	38.9001	55.5746	27.7496	36.715	21.8144	29.3005	39.2593	40.9423	30.0573		0.417909	32.9397
6.785	32.757	33.658	12.717	22.409	26.677	32.101	34.912	29.958	16.6554	37.289	35.172	34.6787	42.1256	46.4406	25.6099	21.796	42.654	39.807	29.08	32.363	18.6633	32.8361	26.9127	26.056	39.5581	22.2783	29.988	35.1298	25.5619	37.7818	32.9845	21.5052		0.425376	30.5661
6.904	25.335	33.116	16.837	22.14	37.17	23.419	44.077	35.428	15.1453	27.055	25.369	42.219	34.5504	37.8508	34.3576	19.69	39.48	26.731	21.345	30.843	23.3883	23.2966	41.3675	35.8516	33.4338	23.8586	23.562	25.7915	33.4313	41.2895	43.8898	21.178		0.432836	30.078
7.023	34.052	27.824	9.53	31.014	32.819	29.239	41.931	32.671	15.0752	36.837	27.216	36.8776	35.2463	43.5984	18.4123	28.965	33.969	41.064	37.946	26.195	28.9267	19.9761	19.8188	38.4453	44.5062	24.8851	27.697	26.609	26.9876	29.112	38.8516	30.6412		0.440297	30.5293
7.1421	27.587	34.204	22.589	18.772	41.694	24.146	37.022	30.061	9.5602	42.358	26.387	39.0667	44.1848	44.1502	21.8552	28.034	24.562	33.922	25.524	31.171	26.5054	23.2739	18.4222	24.6258	44.122	43.7415	25.179	24.835	30.4097	20.2218	34.862	30.8475		0.447764	29.8092
7.2611	32.273	19.733	13.242	18.132	31.432	21.48	26.38	25.713	16.7703	33.914	28.126	38.5177	33.5587	28.7033	27.04	22.996	41.785	39.19	25.511	31.023	23.4746	25.083	29.689	35.6026	34.7977	34.3329	27.397	17.9821	26.9	35.985	33.2084	26.8376		0.455224	28.3378
7.3801	26.963	24.484	14.913	17.234	24.28	28.86	34.924	19.685	7.7405	24.021	25.569	41.5494	37.397	28.9788	19.9178	31.183	31.851	32.358	24.601	27.436	26.1237	13.845	24.2161	42.9528	31.5947	41.3885	23.7	23.8052	37.0375	28.2621	33.0436	25.3151		0.462685	27.3509
7.4992	21.61	22.543	14.237	20.651	28.597	31.361	32.283	13.749	22.3854	29.282	25.645	30.4749	19.7857	25.4744	21.8236	25.361	31.337	34.821	26.943	22.152	28.0366	21.179	16.7966	42.3569	40.0761	37.8776	30.173	31.482	35.1395	29.5259	29.7605	23.3839		0.470152	27.072
7.6182	33.884	27.232	9.233	16.042	25.954	28.058	36.392	28.657	17.5794	20.784	34.023	45.5516	25.9443	39.0705	18.377	17.363	23.207	47.312	21.976	21.397	18.8114	22.2302	14.5451	50.7905	31.3911	41.8628	24.19	32.7822	39.804	35.6667	29.2943	33.0334		0.477612	28.5137
7.7372	18.485	19.907	16.198	12.611	27.733	33.299	26.115	26.698	9.7495	32.305	33.012	31.6324	31.8236	26.9989	20.6414	27.883	29.059	46.761	28.987	25.181	23.4734	15.8418	17.3588	34.7134	29.2656	45.4414	23.06	26.8781	27.2613	46.6543	29.4735	26.1928		0.485073	27.2092
7.8563	23.77	19.729	7.643	20.734	19.472	25.197	34.906	16.034	10.6827	22.209	32.839	20.4938	32.633	26.6558	12.7735	23.758	23.126	44.354	37.718	18.403	20.9176	17.5371	17.5809	43.2454	38.5294	53.6317	34.132	26.1976	35.9119	39.8784	39.9784	29.9529		0.492539	27.207
7.9753	20.362	43.132	15.4	14.863	29.898	30.114	35.198	25.183	22.0863	13.581	38.039	35.1546	36.5309	31.8879	29.1319	18.785	46.16	42.814	30.376	23.281	21.4532	15.66	17.2941	53.2306	23.7356	48.7005	26.963	26.4756	31.5995	22.2657	35.1754	26.5332		0.5	29.0957
8.0943	16.05	21.854	10.406	9.055	29.502	27.702	29.236	23.62	13.3362	16.588	37.853	27.1111	26.0133	18.0999	22.8286	23.916	43.858	29.009	20.84	20.714	23.8277	12.964	15.768	47.7117	23.571	37.7738	35.129	24.0442	37.7655	29.1866	31.6113	24.8287		0.507461	25.3679
8.2134	20.3	18.357	15.086	22.489	23.519	44.307	29.501	19.101	16.7768	22.289	27.233	38.5723	23.0663	18.9963	18.4172	24.699	32.823	39.605	29.7	24.035	13.6264	11.6878	15.7894	36.1999	22.8124	46.2121	23.962	32.2234	26.0614	31.1771	44.3245	40.3067		0.514927	26.6642
8.3324	26.84	17.093	9.285	20.106	39.161	28.391	23.558	20.629	9.8281	23.23	31.311	34.168	32.9588	24.3359	8.3442	16.266	39.996	39.572	35.627	24.479	14.4573	18.1241	17.2716	42.8589	25.6302	40.5805	30.11	21.8128	28.9942	29.4751	49.7026	35.4253		0.522388	26.8632
8.4515	33.673	13.008	15.186	11.724	21.215	25.897	18.235	18.846	14.2385	14.073	36.968	35.711	29.2086	18.9159	18.1763	15.663	40.702	34.063	25.41	21.018	19.4514	15.2421	13.9167	38.9967	21.0475	30.2668	31.68	16.5007	29.8538	23.2574	32.0786	27.9328		0.529855	23.8174
8.5705	30.523	24.025	13.987	15.411	20.708	24.515	27.046	14.161	23.1026	19.787	26.468	29.2052	22.77	28.5151	15.1882	15.959	36.452	28.8	31.483	30.382	14.6274	22.8627	21.4558	35.8888	26.9609	40.8326	31.335	20.5963	22.4927	37.0342	36.6202	33.0463		0.537315	25.695
8.6895	27.175	23.083	13.128	11.963	26.373	17.751	29.291	18.77	8.9476	12.907	29.127	22.5464	21.2206	25.039	10.0716	13.649	35.283	27.973	19.979	23.88	18.0038	15.2933	10.7613	36.7302	32.3795	27.956	27.998	15.905	24.6993	23.5399	29.7671	35.7164		0.544776	22.4033
8.8086	15.67	17	12.302	16.843	30.322	21.187	24.571	19.407	15.0893	7.891	25.367	19.7917	29.1793	16.2152	22.4597	19.821	28.177	26.7	27.004	26.14	17.0182	15.0717	11.7687	34.1209	28.0017	40.805	41.731	18.3241	23.3221	32.6452	40.4232	39.9821		0.552243	23.886
8.9276	31.041	24.654	9.534	21.435	24.669	24.395	26.007	13.997	15.725	8.693	28.783	25.9633	26.2989	25.1849	17.2601	26.284	26.007	16.667	30.025	21.455	19.2769	10.7868	17.6758	26.1131	37.9862	38.1905	42.33	27.9927	29.3356	33.065	51.7243	28.6863		0.559703	25.2263
9.0466	17.05	25.113	20.933	27.06	26.121	26.699	36.424	16.867	8.2449	14.932	38.192	24.321	30.8076	10.4559	15.9867	20.871	24.034	28.547	24.958	27.221	14.1602	15.39	10.5531	25.0571	25.8724	21.8078	43.181	21.6552	29.4026	37.6422	48.0391	23.7803		0.567164	24.4181
9.1657	22.774	33.047	14.267	17.842	33.71	25.73	31.394	22.815	9.0274	15.039	35.744	28.731	28.5417	21.897	25.3157	22.006	26.071	16.313	17.072	25.108	20.3882	10.3559	16.3079	21.7271	30.708	24.8349	40.906	21.6752	17.2752	32.8984	54.7767	28.1861		0.57463	24.7651
9.2847	26.076	26.873	6.956	25.855	31.724	23.636	33.509	26.826	16.9849	17.419	41.895	26.6741	29.6048	22.4044	9.1813	15.894	22.614	24.321	28.41	18.174	13.1125	11.5604	12.2074	19.5321	28.4194	21.1325	41.399	15.7029	15.2659	28.8561	55.2394	38.762		0.582091	24.2569
9.4037	28.084	16.758	9.097	14.736	32.724	18.594	38.66	20.856	14.2807	21.845	27.922	25.1645	27.4421	15.5948	18.7924	20.031	32.7	21.284	26.818	14.67	19.213	17.1175	15.2351	16.4865	35.9905	24.2099	58.383	16.0976	11.2103	24.935	63.7019	45.7445		0.589551	24.8243
9.5228	34.389	28.615	15.449	4.931	28.835	21.312	35.665	12.352	6.2768	8.665	26.106	20.3707	23.1633	20.6436	24.5169	22.031	16.93	21.058	19.898	21.997	11.7397	20.8383	9.5825	21.0844	34.8121	23.8802	43.496	25.3074	14.9596	29.7003	61.9049	38.2911		0.597018	23.4
9.6418	36.788	19.234	4.783	11.805	28.135	15.452	32.895	20.397	18.0425	9.452	35.114	28.2956	21.668	16.9732	27.7266	12.647	16.519	17.105	33.416	31.881	12.7355	10.3266	11.2733	13.5157	29.7092	32.549	48.698	25.0048	19.9754	32.5386	57.3224	59.4454		0.604479	24.732
9.7608	37.243	22.346	12.851	16.835	28.106	17.329	34.348	12.671	9.5875	16.382	32.461	30.9971	19.7973	21.1252	18.8634	18.833	19.847	18.249	16.227	31.772	5.6973	14.6742	11.7861	27.6093	25.7077	29.5559	42.847	34.7812	16.7878	41.4734	50.6621	45.8143		0.611939	24.4771
9.8799	31.828	20.713	20.205	17.412	34.72	11.487	25.561	23.631	19.9039	10.142	32.404	29.9243	23.6936	11.2796	22.2379	14.672	24.962	9.479	22.271	21.785	8.9577	12.8496	13.4911	23.9102	21.5991	24.2572	60.265	30.054	28.3498	28.2353	66.6121	44.8688		0.619406	24.7425
9.9989	22.379	19.441	9.711	18.642	36.949	8.936	28.875	21.877	15.4803	15.957	18.777	25.1032	30.362	14.593	18.4666	7.296	22.729	19.06	28.073	14.148	11.5644	20.9316	15.0143	21.1526	23.9568	27.7605	49.49	20.6516	21.1884	32.4652	59.4523	40.2317		0.626867	23.1473
10.1179	29.575	11.135	6.277	12.12	22.827	26.472	21.965	22.615	14.0562	16.251	28.131	28.6983	20.4368	34.7966	16.3238	17.786	13.992	21.215	14.142	25.873	18.7026	10.2411	13.0826	24.3883	25.0945	35.5162	36.442	35.7977	18.3294	30.0594	50.9548	19.9298		0.634327	22.6008
10.237	34.551	22.661	9.811	9.627	23.276	17.828	30.142	21.168	10.1884	11.103	25.668	29.6211	22.9493	27.0796	24.5943	17.359	17.071	36.534	18.612	16.676	16.2269	10.2299	7.2705	24.4568	26.387	33.6213	34.794	30.0769	22.0482	25.8953	47.3058	25.5379		0.641794	22.8241
10.356	26.16	13.07	12.244	15.88	29.78	23.784	21.902	22.42	20.1678	4.714	28.331	36.3878	24.8075	32.8939	21.8533	20.876	9.534	24.844	8.096	21.255	11.8309	9.5973	8.0608	25.2319	21.9015	27.8649	54.809	17.4146	35.9553	32.4568	49.4634	26.9679		0.649255	23.1423
10.475	24.71	12.096	13.807	6.1	39.489	21.477	20.609	27.168	14.6833	15.796	20.067	34.0298	37.555	30.9889	16.1603	21.871	19.221	20.702	12.85	32.439	26.8341	13.441	13.307	19.3685	21.2335	30.7842	35.777	28.5582	36.322	29.9786	55.1818	27.0597		0.656715	24.3645
10.5941	31.03	6.414	15.844	5.375	35.934	21.909	19.237	23.474	10.234	17.553	22.875	26.1852	26.0036	29.8586	17.1893	21.169	43.572	13.727	9.457	21.627	23.8928	5.942	24.0976	29.9717	18.6627	30.6717	34.156	21.4618	44.5448	36.2111	47.2963	28.6321		0.664182	23.8815
10.7131	30.275	12.135	19.193	11.434	28.393	20.116	25.795	29.177	8.8565	16.814	23.789	23.9688	11.7855	31.4774	14.0185	18.856	27.162	21.698	14.62	20.206	18.6479	8.3753	9.8596	21.5058	17.3584	46.1884	39.99	21.1277	38.6822	22.5774	52.9406	29.352		0.671642	23.0117
10.8321	28.406	12.925	9.219	9.307	21.022	31.692	26.672	23.129	17.5487	12.267	17.424	23.7497	19.8129	22.0889	13.8517	12.312	27.25	26.452	23.092	22.981	22.096	9.3331	9.5695	23.7607	19.8007	29.2731	31.884	24.4599	41.0862	33.4335	29.4458	29.9431		0.679103	22.0402
10.9512	26.121	18.481	14.485	21.449	24.003	22.798	19.4	28.984	16.5178	10.214	23.537	22.8796	26.0191	23.1727	14.3444	22.267	36.639	26.131	19.158	23.705	14.5047	13.893	6.3808	12.987	12.3882	30.4965	24.977	20.6132	35.6537	26.4016	22.2116	27.2382		0.68657	21.5016
11.0702	27.169	24.567	14.918	16.823	31.562	17.289	33.378	16.998	16.4557	10.05	28.119	12.9888	23.2341	23.9366	14.9365	14.224	36.875	29.042	15.522	22.036	16.2893	7.5134	7.5427	11.7214	20.9873	27.0463	22.811	22.1897	50.0187	21.271	23.6959	31.6875		0.69403	21.6531
11.1892	23.652	23.196	14.456	14.532	24.954	20.22	30.989	19.179	13.0793	10.399	34.712	26.7013	16.5695	25.6789	23.8176	18.751	46.392	30.074	24.679	13.695	12.0575	6.0098	15.6747	14.1075	14.0401	23.9953	44.301	17.0366	42.4679	18.2008	15.4931	18.721		0.701491	21.8072
11.3083	32.055	17.149	16.019	16.803	15.79	25.778	20.178	13.775	9.0196	14.313	23.863	22.6539	17.1423	21.421	17.0924	17.149	42.412	34.039	41.641	17.281	11.1097	14.398	21.1608	28.0927	14.2765	34.0031	20.321	19.7786	48.4569	20.9286	23.7217	18.5775		0.708958	22.2
11.4273	29.163	21.68	16.578	13.164	13.543	18.987	18.085	12.466	10.9367	14.808	21.593	28.4753	23.179	22.2538	14.3685	9.245	43.741	14.381	30.662	19.131	11.8237	11.7256	8.6275	19.1233	17.3643	42.042	32.136	15.1883	49.6271	20.5827	33.5732	20.375		0.716418	21.2072
11.5463	17.549	30.101	12.401	19.832	12.685	24.522	17.876	13.062	14.4745	7.604	21.274	48.2172	18.1101	31.2874	20.3884	14.11	42.266	25.5	21.842	35.389	11.5211	12.2534	14.6746	27.8504	20.521	30.1861	23.19	20.3334	43.7533	14.1079	16.45	25.1247		0.723879	22.1393
11.6654	22.977	43.092	14.251	19.192	26.608	27.362	19.779	14.547	7.1499	13.262	27.817	30.6695	23.0838	33.9089	13.7667	15.821	54.055	26.597	27.083	22.693	15.8212	8.8171	13.1079	22.4808	11.9726	24.4612	23.037	20.5414	41.1697	13.1904	23.0127	13.3466		0.731346	22.3335
11.7844	19.667	30.948	12.369	11.263	16.234	29.217	18.583	11.031	9.6174	8.179	17.738	38.501	17.3849	23.126	15.822	18.376	39.352	30.617	26.306	24.366	14.6547	13.9297	14.8577	28.4879	16.0956	21.8286	18.155	22.6482	48.2486	10.1513	27.2182	18.3985		0.738806	21.0429
11.9035	17.719	25.822	15.929	18.771	30.674	27.478	17.383	12.582	9.9106	12.074	24.153	28.1787	20.5685	37.0148	7.1829	28.589	32.956	36.37	16.997	18.266	14.6826	11.9335	8.6994	37.4623	20.5699	30.1112	14.672	19.8924	42.6477	19.3386	13.3557	9.9012		0.746273	21.3089
12.0225	24.49	30.474	13.531	18.758	22.52	25.167	20.581	13.766	14.35	8.491	27.044	30.4344	18.5225	29.4101	19.1347	17.211	22.962	27.323	23.325	18.248	17.7207	12.4221	6.3288	27.9102	16.3458	29.7669	21.649	19.2087	38.9876	17.0634	15.8243	14.8641		0.753733	20.7448
12.1415	25.658	22.463	10.274	21.592	33.829	21.423	18.566	22.908	14.8886	11.253	32.378	16.7323	10.3039	25.3388	12.9537	19.443	35.433	23.657	25.401	23.966	18.3593	12.4056	7.42	20.4894	28.6175	32.8491	19.088	21.1995	38.4669	17.3569	23.0901	20.9347		0.761194	21.5231
12.2606	23.037	16.743	15.245	15.035	22.978	30.421	8.73	17.877	15.7816	7.885	18.511	30.4573	17.2858	34.9684	8.7284	19.993	27.67	41.063	27.071	27.094	11.8961	13.909	6.2518	23.2752	23.6527	36.7722	18.704	19.3622	21.9751	19.888	13.9727	19.2881		0.768661	20.4851
12.3796	27.6	13.395	23.448	28.125	26.492	20.295	26.828	14.772	12.7552	8.583	20.54	31.9163	13.2538	23.9689	14.1754	17.425	27.23	26.958	26.826	15.329	20.2731	6.9072	13.7746	25.593	26.102	28.3444	14.457	15.8494	30.8748	13.8151	23.164	18.8296		0.776121	20.5594
12.4986	25.934	19.654	9.258	25.896	24.849	21.636	14.243	22.602	9.911	16.083	16.703	31.2608	15.1782	29.9913	9.9608	15.768	22.052	23.039	16.899	17.853	13.0309	6.4034	14.2005	22.0565	28.0363	27.6266	25.128	19.8598	21.0221	15.6479	13.2185	18.0324		0.783582	19.1573
12.6177	26.038	17.407	8.592	23.546	28.061	22.071	23.014	15.331	11.3544	6.51	34.055	36.3799	12.0385	23.5919	17.1321	19.288	16.898	30.949	17.726	23.83	21.503	7.1897	13.6394	18.8415	18.5051	22.9415	30.69	14.9824	28.4157	14.3332	20.9614	11.6326		0.791049	19.9203
12.7367	31.011	14.345	14.137	19.558	25.702	27.723	14.78	19.104	15.954	12.103	18.965	25.1832	13.1768	21.8315	11.552	19.442	27.191	27.214	13.263	21.866	16.3554	11.4831	13.5391	20.04	25.078	29.9221	28.614	25.0963	24.937	20.7709	12.0059	34.4913		0.798509	20.5136
12.8557	15.29	15.196	10.432	17.531	27.512	25.922	18.466	19.822	17.4105	22.317	18.502	20.7445	19.9312	19.3758	13.3027	16.775	30.644	13.576	20.016	31.316	27.2272	14.8242	11.7121	17.9147	26.5932	24.6821	24.632	12.2331	33.0238	22.5832	23.1818	24.6325		0.80597	20.5413
12.9748	25.509	19.887	12.43	22.493	22.196	36.515	20.378	15.793	21.5968	12.521	15.398	21.1934	15.4435	19.8885	18.4872	20.363	30.381	20.497	25.923	19.352	24.08	14.7828	19.9053	32.1862	19.5681	31.1621	27.332	15.0279	22.7777	12.5151	17.8781	23.1823		0.813436	21.1451
13.0938	22.953	19.537	16.96	19.783	25.57	22.122	20.751	15.192	6.3674	9.245	18.777	32.2081	19.8033	20.7239	15.7305	29.014	25.061	25.392	17.276	17.373	12.3734	9.5158	8.1556	28.5211	24.0257	30.9558	24.771	15.5534	26.7211	8.8148	24.4513	10.8801		0.820897	19.5181
13.2128	23.892	21.068	15.404	20.552	33.146	28.221	28.008	15.581	17.1104	10.163	22.145	30.3692	17.0713	13.967	12.9781	18.856	33.158	20.252	19.457	30.743	19.2067	13.1469	11.9789	29.1712	20.6973	19.2771	19.29	21.1249	25.7908	10.1813	28.2154	27.0664		0.828358	21.1653
13.3319	28.805	16.373	11.307	25.083	30.906	28.385	15.199	17.307	11.9525	13.187	25.155	32.9952	13.9546	23.6881	16.856	16.743	24.455	19.242	22.143	13.166	15.2683	12.3377	17.6179	37.9213	21.4108	22.2438	26.487	25.7238	26.7221	21.5838	19.9269	16.9964		0.835824	20.9732
13.4509	25.779	13.092	19.608	22.917	18.189	27.83	13.303	14.19	14.2088	12.876	25.729	20.5379	21.8792	19.1334	10.3269	26.534	19.175	22.364	15.451	22.525	26.832	14.5253	14.2205	29.9344	22.687	30.0651	25.506	19.9291	34.4204	16.0446	18.7157	25.2341		0.843285	20.7426
13.5699	33.308	19.775	18.838	35.43	21.318	23.595	20.966	17.311	15.3521	7.859	19.458	29.255	19.1274	24.6216	14.9875	17.09	35.877	21.903	11.147	17.851	23.5386	8.1826	15.5224	36.4498	29.5395	20.0424	19.439	16.9182	28.8604	25.0474	27.4813	13.7801		0.850745	21.5585
13.689	23.801	28.662	9.431	21.132	19.557	22.222	19.165	16.729	16.8407	17.357	24.069	18.8464	18.5777	23.6391	22.2418	24.701	20.282	22.29	17.592	31.536	22.4848	11.6134	12.1602	29.4327	19.8845	19.5561	15.136	21.9956	15.7604	19.8334	33.0217	18.9596		0.858212	20.5784
13.808	22.975	26.519	14.985	55.302	16.255	17.356	20.26	23.352	16.315	24.602	26.701	40.7171	25.0234	31.1514	10.6294	19.403	19.107	19.501	20.565	34.322	14.4928	15.0525	9.3553	21.3125	20.6842	16.777	17.657	22.937	17.9932	12.1155	33.719	24.3183		0.865673	22.233
13.927	22.062	15.259	17.288	31.914	23.205	25.053	20.717	24.54	8.1122	10.882	13.828	47.1803	20.7209	17.234	11.507	14.043	18.223	20.591	20.229	22.448	16.3362	8.8371	17.5138	17.9264	16.6967	33.8033	24.969	15.9466	21.1133	14.0642	31.767	23.7304		0.873133	20.2419
14.0461	29.889	20.774	30.693	30.133	18.503	27.947	17.825	21.507	11.1761	18.494	15.381	40.444	17.9793	23.6864	21.6608	20.691	15.999	19.163	20.14	20.893	16.2547	17.3278	15.3953	25.9957	20.746	23.6943	15.831	19.1802	16.464	19.3363	24.3126	14.8577		0.8806	21.0117
14.1651	17.085	30.278	18.032	26.839	21.667	25.034	20.936	21.085	17.6558	18.691	11.933	39.5495	16.4334	23.6922	21.4748	24.289	14.636	19.177	23.12	14.425	15.3919	24.7823	15.1076	25.1582	21.8047	28.8443	25.86	19.4867	17.457	13.1916	21.1976	24.8644		0.888061	21.2243
14.2841	18.889	18.537	16.366	20.999	16.825	11.554	21.158	22.159	11.9967	15.04	9.668	27.6743	11.3226	26.5343	24.4999	17.268	16.429	18.384	20.288	20.988	19.5647	16.2389	13.5896	25.1336	14.1202	18.8066	21.436	18.8864	20.6484	15.353	20.1261	29.0699		0.895521	18.736
14.4032	22.833	27.992	16.646	28.216	19.542	19.753	19.52	31.049	12.6725	11.184	20.788	33.7704	14.0746	30.9902	22.615	10.145	12.093	11.875	14.231	20.118	23.1989	12.3433	25.0865	18.189	13.406	28.1445	24.598	20.0417	13.0598	18.5431	15.6037	17.7722		0.902988	19.6905
14.5222	27.126	38.154	34.855	32.436	22.673	11.478	23.386	24.32	17.2325	19.649	15.886	33.0571	11.2626	27.7675	29.6638	8.893	20.058	16.603	16.349	11.52	17.3493	11.9731	16.2813	17.3918	11.7188	23.2252	15.845	14.9337	20.2235	26.7162	24.8996	20.4408		0.910449	20.7302
14.6412	28.124	22.987	34.384	26.938	22.804	21.922	15.457	18.334	8.9141	21.621	10.276	26.9088	14.171	40.4662	19.5629	19.866	9.621	15.619	15.168	8.041	24.0825	19.7413	16.219	23.2584	21.532	25.6048	18.259	17.9475	15.644	22.6934	19.1568	29.3356		0.917909	20.4581
14.7603	18.8	19.754	29.45	27.874	19.194	14.047	18.664	28.313	16.2358	10.994	12.803	19.5666	9.7986	26.113	30.0912	18.222	18.8	21.845	11.877	18.454	14.2472	18.8761	14.7429	21.4956	16.9049	21.5803	18.373	22.3022	12.7596	25.7398	19.9057	23.8138		0.925376	19.4262
14.8793	19.579	22.529	28.422	21.007	15.826	9.889	18.159	25.664	18.2677	16.656	17.061	32.1807	24.9769	21.1391	21.3117	17.928	19.055	24.787	24.247	26.571	24.8764	21.577	13.9391	18.3967	31.6755	20.8227	22.366	25.0465	18.314	31.95	19.9801	18.7832		0.932836	21.6557
14.9984	14.407	25.646	30.338	26.102	15.372	8.335	10.781	17.792	12.9566	17.422	17.647	25.0391	12.1445	22.138	14.3777	15.478	20.461	19.879	16.612	15.409	19.0806	17.1726	14.1907	21.7084	23.6036	18.2702	24.078	16.4359	20.9347	26.4256	16.3716	16.867		0.940303	18.5461
15.1174	16.861	33.549	22.311	15.855	4.18	7.287	15.368	19.988	17.5945	19.502	12.353	18.7333	17.3089	26.0609	16.1081	22.084	23.336	27.758	12.007	20.514	30.8456	14.693	14.3189	27.481	25.1232	19.493	20.538	18.1661	17.4364	27.4108	20.6738	23.04		0.947764	19.6243
15.2364	21.797	25.335	23.846	21.896	9.132	9.408	16.033	11.537	5.7705	22.225	19.389	16.1002	13.3607	12.3865	14.2981	14.159	16.386	21.81	15.322	18.838	31.8334	16.7785	17.3547	21.879	20.9232	27.2165	24.031	17.2647	19.8207	23.5891	23.735	16.3978		0.955224	18.4329
15.3555	18.129	18.07	28.783	16.165	11.494	6.49	10.831	10.604	6.2882	28.46	17.165	11.7588	12.7589	19.2476	14.4201	13.013	18.659	23.243	22.775	20.254	29.7452	16.9245	12.2624	17.5767	20.7392	16.6081	11.867	12.8481	35.2576	13.4108	20.6016	17.272		0.962691	17.3038
15.4745	15.036	19.79	16.655	12.237	7.507	7.752	6.972	4.358	5.0506	14.622	19.998	10.5154	17.3481	22.16	21.8471	9.198	19.779	17.514	11.604	23.579	38.2666	19.5015	10.4418	16.9604	34.0455	20.271	25.243	17.0439	19.866	8.114	15.5667	18.1018		0.970152	16.467
15.5935	21.891	13.666	18.777	12.111	6.132	9.314	5.41	4.954	7.1461	14.037	15.737	13.8242	10.3495	13.861	14.1231	16.038	26.538	16.218	12.398	8.432	25.1501	22.0672	26.1087	23.9407	20.7054	18.5232	22.38	18.4554	27.2091	21.9273	19.3105	7.5553		0.977612	16.0716
15.7126	27.786	19.505	11.234	8.643	10.277	12.004	7.476	6.968	8.1452	18.641	15.434	11.0039	25.9177	28.6379	17.8823	7.391	16.26	11.32	6.607	15.555	32.694	21.8115	28.1206	27.8768	16.375	16.9876	20.98	12.6693	30.6354	22.1974	17.3683	19.7808		0.985079	17.3183
15.8316	18.606	24.899	15.978	7.772	8.488	12.694	3.456	3.581	7.7913	14.255	8.233	8.8757	14.4298	29.2499	17.8178	11.784	11.712	12.651	9.12	19.279	20.4166	30.0217	20.4763	13.2843	24.2101	14.956	20.923	18.6907	34.8055	25.2883	18.8583	21.7982		0.992539	16.3875
15.9506	19.588	25.389	15.776	9.708	4.216	7.58	2.85	6.8	0.6873	5.723	5.909	7.2883	17.1064	17.918	11.0066	11.584	14.798	16.191	10.789	13.664	29.1376	30.0978	23.108	17.307	14.8032	14.7426	12.114	17.0095	40.458	18.0857	16.86	21.1614		1	14.983

## Sheet: Image11
X0	Y0	Y1	Y2	Y3	Y4	Y5	Y6	Y7	Y8	Y9	Y10	Y11	Y12	Y13	Y14	Y15	Y16	Y17	Y18	Y19	Y20	Y21	Y22	Y23	Y24	Y25	Y26	Y27	Y28	Y29	Y30		Ap-Basal	Avg intensity
0	20.5	19.944	26.444	15.667	26.5556	35.8889	21.222	28.556	38.667	19.389	32.278	46.5556	44.333	26	27.278	32.167	27.722	20.167	22.944	21.333	17.722	21.833	18.889	14.444	17.333	21.056	32.5	59.222	15.778	19.167	26		0	26.3727
0.119	32.5556	23.667	32.222	19.889	21.4444	39.7222	30.111	30.611	39.611	29.5	41.167	34.8889	44.778	37.278	35.389	29.611	37.111	41.778	33.611	35.778	26.111	20.944	23.611	17.667	20.833	23	45.389	47	15.167	14.111	26.056		0.0071408	30.6649
0.2381	20.4444	26.278	39.056	24.167	29	29	48.556	40.667	59.944	28.278	46.167	50.4444	47.889	25.778	26.778	31.833	42.889	41.111	37.222	26.667	20.056	28.5	21.611	19.5	23.111	11.389	30.889	43.222	13.111	25.5	23.444		0.0142876	31.6936
0.3571	22.3889	39	35.556	24.056	14.2778	51.5	37.611	36.5	53.389	47.889	45.611	36.5556	44.556	38.667	43.556	46.111	37.167	40.333	39.778	43.667	40.5	21.278	28	26.611	26.222	19.333	55.889	51	17.556	27.778	43.778		0.0214284	36.6488
0.4761	24.3889	25.222	36.889	26.556	26.7778	34.3333	36.667	35.5	60.056	40.833	52.444	43.5556	53.833	40.889	38.889	55.5	39.778	49.389	66.167	50.833	37.167	45.278	27.167	19.111	46.778	27.333	52.722	49.611	13.611	46.889	44.278		0.0285692	40.2724
0.5952	23.9444	34.556	41.611	23.278	32.6111	40.3889	56.667	45.222	69.278	68.611	69.722	53.9444	71.5	56.722	46.111	49.5	54.056	73.111	49.111	45.056	61	38.111	26	40.556	59.611	30.722	46.944	53.944	27.167	40.722	29.389		0.035716	47.0699
0.7142	23.4444	33.444	44.111	42.333	37.2778	48.9444	46.444	63	82.889	56.611	57.222	54.0556	66.278	54.778	62.056	47.167	55.167	59.889	63.222	58.778	61.222	43	38.389	36.611	66.722	49.333	65.611	65.833	26.278	32.722	40.778		0.0428568	51.0842
0.8332	28.2222	44.556	38.056	34.222	36.5556	51.0556	54.889	62.667	82.222	69.778	43.889	78.4444	69.778	87.222	74.167	62.722	94.667	93.444	61.667	75.222	77.556	66.333	52.222	45.667	86.056	69.556	75.333	58.444	22.556	46.778	40.389		0.0499976	60.785
0.9523	38.5	59.056	37.778	24.167	42.3889	59.1667	60.556	62.889	82.722	69.944	68.778	71	84.278	65.389	65.722	78.944	92.167	101.056	65.167	66.667	83.167	90.833	72.778	61.5	92.889	65.167	81	56.111	32.167	50.278	43.556		0.0571444	65.3478
1.0713	33.1667	54.833	45.056	45.333	35.6111	57.3333	74.278	69.722	76.167	82.444	66.278	73.6111	97.722	93.722	63.222	99.389	104.389	117.722	100.056	74.889	106.611	77.833	101.667	66.722	125.944	106.556	85.833	59.056	33.056	61.167	52.833		0.0642852	75.5556
1.1903	49.4444	71.667	52.278	49.444	39.7222	56.5556	72.833	74.889	88.556	91.056	63.944	87.1667	109.389	87.222	102.944	113.167	120.278	112.278	94.333	88.611	122.5	109.333	103.056	83.611	127.944	128	94.389	78.944	36.556	69.833	72.056		0.071426	85.5484
1.3094	32.3889	76.333	61.722	46.056	53.5556	74.4444	109.444	80.667	110.944	115.833	81	90.5556	121.5	112.667	108.833	113.889	132.778	135.778	102.444	91.944	119.833	117.111	106.833	106.167	132.778	122.222	108.111	92.222	57.222	82.333	92.611		0.0785728	96.4587
1.4284	61.0556	93.722	64.722	40.778	54.2778	76	82.722	93.611	103	103.667	82.778	88.8333	127.222	127.722	117.167	116.5	117.722	99.556	85.056	99.056	119.333	109	122.667	120.944	116.778	148.111	123.889	98.944	75.167	104.833	103.722		0.0857136	99.3082
1.5474	51.7222	96.778	80.444	60.667	42.6667	75.8333	82.611	89.167	97.444	125.056	89.944	96.0556	127.111	109.111	123.111	102.167	115.333	136.667	103.944	109.167	129.333	132.222	124	123.222	138.5	168.778	121.556	85.667	80.389	108	89.222		0.0928544	103.738
1.6665	63.2222	117.389	75.944	67.333	70.3333	93.0556	101.056	107.333	115.333	117.944	88.556	88.6111	142.611	144.944	117.889	122.833	139.722	119.944	85.056	106.444	125.167	146.333	130.444	120.889	141	160.556	146.722	126.556	94.944	133.833	106.667		0.100001	113.505
1.7855	72.5	105.722	68.889	103.611	58.7778	82.6111	112.556	89.222	97.167	86.889	85.722	99.2778	131.333	139.778	128.278	114.333	115.278	143.056	108.556	104.278	129.167	136.444	123.778	132.722	140.278	163.222	125.389	110.5	126.056	112.889	102.111		0.107142	111.303
1.9046	80.1111	104.889	90.833	84.389	53.3889	78.2778	105.778	98.944	114.056	113.778	104.833	88.8333	128.5	119.389	125.778	113.944	146.389	140.056	98.111	102.5	152.611	137.389	157.333	129.556	120.667	163.389	113.222	122.944	139.944	126.389	92.722		0.114289	114.482
2.0236	94.8333	122.5	103.389	85.722	58.7778	70.0556	106.056	97.444	99.778	126.611	104.667	92.2778	107.111	133.278	120.056	104.278	106.889	110.278	110.444	135.222	128.389	144.833	157.444	152.056	122	161.944	150	120.778	146.222	104.667	76.389		0.12143	114.658
2.1426	93.7222	117.111	112.278	81.111	56.3333	77.5556	82.056	118	104	95	98.611	98.6667	110	111.556	96.778	117.222	125.722	120.111	95.889	100.333	118.611	128.389	154	142.5	99.556	147.611	136.611	117.278	146.722	74.167	79.944		0.12857	108.305
2.2617	89.8333	128.056	117.667	91.556	72.2222	78.2222	108.278	111.889	111.167	95.056	97.778	91.2222	102.167	122.667	91.667	101.889	125.556	117.222	78.778	121.333	128.944	132.056	142.167	136.056	80.944	154.278	154.389	115.778	144.111	77.111	61.722		0.135717	109.09
2.3807	94.6667	108.944	89.556	92.889	71.6667	82.7222	100.444	108.222	101.056	112.667	90.389	61.6111	74.944	128.944	91.444	104.333	130.722	116.778	85.278	105.278	110.722	134.222	141.111	129	81.556	164.056	160.833	110.667	136.944	83.389	78		0.142858	105.905
2.4997	88.2222	111	107.444	94	66.3333	61.0556	91.667	119.278	97.778	110.056	91.167	75.3333	91.778	107.889	83.389	107.778	109.778	120.167	73.167	96.444	114.556	135.444	138.222	129.611	90.222	178	157.389	106.333	105.056	61.389	86.333		0.149999	103.428
2.6188	100.778	115.722	96.722	100.889	70.5	56.9444	105.778	106	128.611	107.889	90.167	66.0556	73.889	117.222	86.167	84.444	95	92.667	85.167	75.333	111.278	120.056	127.222	124.444	74.222	146.833	156.222	119.278	117	54.667	74.833		0.157146	99.4193
2.7378	66.6111	110.333	120.056	96.833	70.0556	65.0556	70.889	114.556	117.944	98.111	102.5	75.8889	75.667	102.167	83.889	93.5	105.889	81.722	74.722	71.667	122.056	126	125.5	140.167	63.778	173.278	164.167	81.167	76.389	40.222	68.111		0.164286	96.0933
2.8568	81.2222	124.056	111.889	95.556	59.9444	74.6667	86.611	102.222	116.333	101.333	85.5	59.6667	66.722	70.222	81.556	103.833	102.444	84	67.778	67.167	103.444	107.333	135.444	121.389	56.556	167.611	145.611	80.444	79.333	42.722	60.222		0.171427	91.7042
2.9759	88.1667	115.889	107.167	82.389	58.0556	54.2778	93.667	102.056	112.389	97.889	98.222	53.2778	65.889	94.889	60.278	84.278	95.222	73.944	59.444	79.667	101.833	118.111	117.778	122.722	66.944	145.556	147.833	81.111	75.722	47.278	68.111		0.178574	89.3566
3.0949	89.5556	101.167	101.111	89.722	49.2222	48.9444	78.722	123.278	99.722	92.889	69.889	36.1111	80.778	85.333	64.667	75.944	71.167	67.611	52.444	81.611	110.833	133	98.889	114.5	70.278	138.722	152.889	81.444	50.389	33.111	58.111		0.185715	83.9372
3.2139	87	96.056	88.389	69.5	43.5556	51.8889	67.722	103.389	74.111	86.333	77.833	42.0556	72.722	82.333	66.667	85.556	80.444	59.111	67.556	59.222	93.611	119.833	99.444	106.056	48.278	136.389	164	77.167	42.444	37.389	43.333		0.192856	78.3674
3.333	66.9444	101.333	104.722	82.444	36.6111	54.1111	73.167	115.722	97.944	103.444	84.833	35.0556	89.889	61.889	53.889	76.278	61.056	68.278	53.611	51.556	70	123.111	94.944	86.167	48.278	124.333	142.389	55.167	48.056	39.778	52.333		0.200002	76.043
3.452	73	107.222	108	93	49.2222	47.7222	63.5	78.889	77.778	96.5	58.222	49.6111	71.444	83.333	48.056	81	53.778	59.167	67.611	63.167	71.167	85.667	102.389	82.222	59.444	116.889	140.5	62.111	38.5	36.778	45.278		0.207143	73.2635
3.571	77.0556	107.722	95.944	79.056	48.8333	45.5	72.722	73.444	76.278	73	75.611	31.7222	56.667	47.833	42.333	61.333	46.556	59.333	72.611	41.722	94.611	107.111	105.389	76.667	56.833	110.556	142.611	42.722	54.444	35.944	49.111		0.214284	69.7186
3.6901	56.9444	86.111	101.278	56.667	40.1111	41.6111	69.667	82.389	78.056	75.167	69.444	38.7778	42.222	63.333	53.667	58.5	58.722	45.556	52.944	71.944	80.056	87.111	89.556	59.444	45.722	102.722	149.611	65.167	53.611	44.778	32.5		0.221431	66.2384
3.8091	52.2778	108.889	102.778	71.722	43.3333	47.9444	50.778	68.389	73.667	74.056	56	32.5556	53.944	60.056	49.833	60.389	64.389	57.611	57.611	38.833	64.778	73.056	93.778	46.722	47.722	121.611	138.444	72.222	47.611	43.722	51.611		0.228572	65.3656
3.9281	45.1111	104.889	84.333	72.278	29.5556	37.3889	49.556	83.333	70.5	77.333	39.111	33.1111	45.222	40.833	61.444	56.944	49.556	35.389	40.833	47.444	79.778	92.333	90.556	74.222	47.889	96.667	136.833	75.556	48.778	37.389	58.111		0.235712	62.6541
4.0472	28.9444	97.611	108.278	55.333	46.7222	45.5	37.889	62.944	74.889	73.611	29.111	32.3889	45.944	49.278	45.889	42.556	44.056	46	59.222	40.611	56.167	82.778	76.167	74.389	27.889	80.222	113.111	75.333	47.278	34.056	52.611		0.242859	57.638
4.1662	38.1667	91.444	88.944	64.778	39.6111	40.8889	45.278	54	37.056	64.833	40.556	36	46.5	53.889	34.278	50.167	65.056	48.5	52	57	54.833	64.833	75.889	70.167	44.833	77.222	132.278	59.111	46.611	30.167	38.444		0.25	56.2366
4.2852	33.9444	103.111	84.5	60.278	33.5556	47.1111	44.167	58.889	36.889	60.944	33.111	24	46.056	40.556	38.278	55.167	45.722	40.389	52.167	31.611	72.444	70.667	76.167	51.333	51.167	67	121	58.889	28.722	33.5	56.667		0.257141	53.4839
4.4043	33.5	83.389	87.778	52.611	43.6111	49.2222	37.667	57.278	44.056	41.611	30.889	36.7222	33	33.111	47.778	38.944	60.111	33.944	44.667	45	69.389	74.667	63.389	57.722	45	64.5	106.111	51.722	52.333	21.056	45.278		0.264288	51.1631
4.5233	36	75.056	75.167	57.278	37.3333	41.1667	38.222	40.722	36.667	52.333	29.222	29.8333	49.278	42.5	43.944	44.333	64.056	24.389	55.889	45.278	65.667	50.056	64.111	59.278	39.833	69.944	100.167	49.778	33	24.333	57.889		0.271428	49.4427
4.6423	31.2222	84.111	81	47.222	49.2778	33.4444	42.389	60.222	31	44.722	37.111	30	35.778	31.944	44.944	27.167	70.389	32.889	48.389	57.222	70.167	73.056	67.5	51.778	46.889	71.778	107.667	50.611	29.056	24	50.944		0.278569	50.448
4.7614	22.6111	82.944	87.5	34.556	43.7222	49.8889	39	45.833	28.5	40.944	21.278	17.8889	38.111	38.278	27.389	29.667	68	30.667	44.944	54.722	57.722	64.556	66.111	50.222	47.333	57	101.722	53.167	29.944	36.778	50.389		0.285716	47.1416
4.8804	35.4444	84.389	66.889	36.111	44.1111	40.4444	39.5	47	41.722	49.611	24.944	24.1667	23.778	44.222	46.667	27.056	55.222	29.444	48.778	59.944	61.722	56.667	67.167	71.778	45.667	58.722	65.667	54.167	33.167	31.5	46.722		0.292857	47.1739
4.9995	28.1667	61	71.722	29.5	40.1111	42.2222	40.833	56.333	38.556	44.944	24.889	41.5556	29.611	44.556	29.833	31.5	46.444	23	41.222	50.444	49.444	52.222	62.278	51.167	54.778	55.056	78.556	53.056	27.444	36	40		0.300004	44.4014
5.1185	33.1667	78.611	53.167	45.778	39	37.4444	46.611	45.444	38.333	43.056	34.944	29.7778	26.222	38.278	39.056	40.889	57.167	32.5	42.611	53.278	42.556	56.667	51.722	63.833	63.167	38.389	66.444	38.944	39	11	44.167		0.307144	44.233
5.2375	23.3333	74.278	45	52	22.8889	23.4444	49.556	52.722	41.5	48.667	39.167	26.2778	29.5	34.333	49.333	33.111	37.444	28	34.722	38.167	32.889	49.778	46.778	45.056	43.389	45	64.056	46.944	32.222	25.5	61.611		0.314285	41.1828
5.3566	27.8333	51.833	54.778	35.167	37.4444	15.8333	37	51.833	41.944	42.722	30.611	32.7222	26.778	36.444	36.722	32.056	37.056	38.611	31.833	48.389	54.111	59.111	79.333	44.444	41.778	44.5	75.889	45	35.667	24.389	48.5		0.321432	41.9462
5.4756	22.4444	42.667	46.278	22.667	29.0556	20.3333	44.611	51.5	39.722	31.222	24.444	44.3333	16.833	30.389	37.556	33.778	26.333	37.444	30.389	49	47.222	52.222	50.389	54.778	46.889	45.444	62.778	42.5	32.722	29.111	51		0.328573	38.5824
5.5946	19.5	42.167	39.889	31.222	39.8889	25.7222	51.389	40.944	19.444	12.889	25.389	40.7222	17.222	50.778	37.611	48.833	33.722	41	37.222	44.333	55.222	65.222	48.389	60.722	48.333	38.5	72.167	51.889	26.5	16.333	58.556		0.335714	40.0555
5.7137	26.9444	55.056	34.167	27.944	41.8889	30.8889	32	45.944	26.556	18.944	24.722	48.5556	22.222	49.278	41.389	36.611	42.778	25.556	28.111	47.722	37.889	49.389	43.833	31.167	55.111	34.278	62.611	45.222	23.056	18.611	59.667		0.34286	37.681
5.8327	22.5556	41.5	38.611	47.222	25.4444	34.8333	32.444	38.222	35.944	21.889	23	32	17.056	23.667	49.222	48	43.778	42.111	22.722	54.778	26.889	35.444	53.667	40.389	58.944	23.889	44.111	52.278	25.556	16.056	50.889		0.350001	36.2294
5.9517	19.2778	51.278	32.833	41.333	22.5	58.6111	36.889	52.278	26.778	14.667	15.556	34.8333	23.111	38	39.278	39.611	26	22.056	17.056	42.5	43.778	48.444	40.722	29.111	49.889	31.833	56.778	63.333	37.222	18.944	47.056		0.357142	36.1792
6.0708	28.2778	39.722	47.278	41.333	24.2778	44.2778	33.833	36.778	18.611	20.778	15.667	30.2778	23.333	18.889	56.667	29.056	32.5	26.333	26.611	39.278	25.5	47.833	42.111	42.722	62.889	33.167	37.056	58.556	31.611	17.333	52.333		0.364289	34.9964
6.1898	27.3889	35.889	42.278	41.556	22.3333	35.6667	24.444	40.667	37.444	14.667	21.111	31.8333	13.889	40.722	39.444	41.167	34.389	23.444	28.056	36.944	40.833	44.111	50.611	34.056	52.444	44.611	48.056	56.722	29.944	14.333	49.833		0.37143	35.448
6.3088	21.5	45.333	53.556	18.389	25.6667	36.6667	27.722	38.333	31.222	21.389	15.722	25	23.778	27.222	50.056	43.278	16.222	19.667	22.611	38.278	38.167	43.167	43.889	37.278	40.278	25.278	39.778	59.889	29.111	21.056	48.111		0.37857	33.1488
6.4279	29.3889	47.556	31.556	30.389	18.8889	35	34.611	39.5	14.667	20.333	14.5	31.6111	32.444	31.444	74.944	44.222	31.556	25.667	22.667	22.833	40.611	38.333	48.056	44.111	32.444	42.111	49.389	54	19.5	15.333	33.944		0.385717	33.9229
6.5469	29.1667	46.5	43.056	26.778	13.9444	26.5	38.556	39.056	18.167	15.278	18.889	24.6667	33.667	30	70.389	37.833	19.889	22.556	17.278	32.667	26.444	32.889	56.389	38.222	28.389	48.056	48.389	70	24.611	21.167	48.5		0.392858	33.803
6.6659	21	48.389	47.333	21.5	22.0556	29.6111	36.833	38.444	26.889	19.278	13	29.3889	32.611	25.222	40.556	31.278	19.111	11.944	20.222	28.611	43.278	53.778	50.889	48.222	50.944	50.556	42.333	43.944	28.889	20.556	39.389		0.399999	33.4211
6.785	22.2778	49.222	40.333	18.944	23.4444	32.8889	50.5	35.833	27.556	21.056	18.167	20.5	15.778	16.389	52.889	32.056	22.944	14.444	13.444	31	37.111	40.667	65	26.333	39.667	45.889	35.167	60	22.944	12.222	49.556		0.407146	32.0717
6.904	27.2222	39.333	28.167	14.222	26.3333	33.6667	54.722	38.167	24.222	8.111	15.778	13.6667	26.722	24.722	46.222	30.111	16.667	19.278	18.222	20.722	55.667	47.556	50.667	24.556	46.444	44.667	56.167	48.111	20.5	18.111	34.944		0.414286	31.4086
7.023	31.8333	40	31.167	12.889	15.1111	34.5556	44.111	31.278	21.667	14.778	13.444	20.1667	25.778	20.056	38.889	27.611	13.167	17.889	21.111	28.556	36.556	47.611	57.722	22.056	32.167	45.833	30.222	56.333	30.333	11.778	30.944		0.421427	29.2133
7.1421	25.1667	34.389	39.056	20.111	15.3333	26.3333	33.111	54.222	29.333	13.444	13.611	13.9444	36.667	22.556	48.056	35.278	33.444	10.889	21.278	17.944	37.667	31.444	51	23.722	22.889	56.111	45.778	53.722	26	14.389	44.278		0.428574	30.6828
7.2611	34.3889	36.111	40.278	18.944	7.5556	28.0556	38.222	39.111	20.333	13.667	17.389	14.7222	42.111	24.056	36.722	26.389	19.444	16.222	15.611	17.5	57.667	28.167	56.111	26.889	30	56.333	44.5	38.944	26.167	13.111	28.222		0.435715	29.4498
7.3801	29.6667	53.167	26.889	14.722	14.7222	28.7778	33.056	42.5	16.389	9.167	5.611	20.6111	31.056	21.222	29.5	19.278	21	22.444	14.167	17.556	41.222	46.333	35.444	25.667	20.111	47.222	48.667	54.611	35.722	15.389	18.889		0.442856	27.7671
7.4992	27.2778	21.389	58.056	17.556	19.5	31.5556	38	32.667	24	18.889	14.111	21.8333	54.5	28.944	39.5	29.889	16.333	16.222	25.222	33.222	40.111	46.889	41.667	32.556	29.111	42.222	29.778	37.167	25.333	14.111	18.833		0.450002	29.8853
7.6182	32.7778	30.444	47.611	18.722	12.2222	24.9444	31.611	25.833	22.889	12.167	9.556	18.3889	33.111	22.278	25.611	21.333	15.833	9.778	14.167	26.778	34.278	52.222	46.167	28.556	24.944	58.389	52.889	33.278	21.889	14.778	31.722		0.457143	27.586
7.7372	22.8889	31.389	44.667	5.111	17.3889	19	37.611	31.278	20	10.611	8.889	13.5556	58.833	17.889	30.722	23.222	17.444	24.778	19.833	39.222	45.944	35.5	39.222	24.722	35.056	46.611	38	24.056	28.778	23.278	21.889		0.464284	27.6577
7.8563	33.2778	30.944	55.667	10.944	16.4444	28.4444	37.778	23.222	13.167	13.944	10.5	13.1667	34.889	17.722	25.333	7.722	28.389	23.389	14	31.722	52.667	40.5	52.333	24.611	22.111	32.722	34.667	19.611	32	18.611	21.111		0.471431	26.5035
7.9753	27.3333	20.278	42.333	17.111	8.7222	19	32.333	33.556	18.833	15.556	12	22.7222	19.944	10.5	36.444	23	12.889	16.889	16.056	32.611	47.056	37.667	43.5	17.111	17.556	49.667	41.5	24.389	21.444	11.556	20.778		0.478572	24.8495
8.0943	27.2778	23.556	30.722	8.222	11	20.6111	33.5	39.278	25.056	4.944	9.722	10.2222	38.944	15.278	32.333	25.056	15	19.944	19.556	33.611	55.722	35.5	37.278	21.167	24.611	44.222	48.389	36.944	24.444	7.667	27.167		0.485712	26.0305
8.2134	29.6111	23.889	47.667	10.111	8.3333	11.3333	34.056	34.722	20.722	13.556	6.722	16.3333	29.833	20.056	47.167	21.5	15.5	11.111	22.833	29.611	55.444	27.389	60.667	19.333	33.722	29.333	30.333	34.889	22.444	12.944	28.056		0.492859	26.1039
8.3324	29.2222	24.556	39.167	10.889	16.2222	20.3333	30.889	33.167	9.667	3.667	8.667	14.9444	22.056	18.389	46.556	24.778	19.333	4.833	19.5	25.944	57.833	30.222	50.444	19.222	34.222	23.167	40	39.111	35	15.833	28.5		0.5	25.6882
8.4515	28.6667	37.889	30.111	11.111	18.2778	20.3333	22.222	37.278	22.556	7.389	14.833	22.1111	15.111	25.722	37.333	21.389	19.167	16.889	15.333	36.222	54.333	39.111	47.667	19.889	25.611	32.778	58.389	33.056	12.611	12.222	26.333		0.507147	26.5143
8.5705	17.5556	31.222	37.222	14.722	7.7222	6.0556	25.333	32.611	18	7.5	19.5	24.1667	25	20.889	37.333	24.444	11	9.389	18.5	28.333	43.444	36.889	34.833	40.333	18	21.611	24	35.556	8.222	11.389	21.111		0.514288	22.9641
8.6895	22.3333	36	39.333	11.222	9.8889	8.3333	24.333	34.444	22.056	7.611	5.722	22.3333	20	21.722	33.389	22.833	12.222	13.056	13.222	26.278	63.167	37.278	46.778	16.222	28.944	28.889	47.556	26.556	19.556	9.389	22.222		0.521428	24.2867
8.8086	14.2778	31.444	34.167	13.333	15.1667	10.7778	23.333	35.111	26.833	5.722	9.833	10.4444	19.167	18.278	32.611	21.444	22.722	12.944	24.167	30	53.333	32.5	37.389	29.111	25.556	24.556	48.111	20.278	15.111	12.278	42.222		0.528575	24.2652
8.9276	18.0556	27.333	15.778	19.278	8.1667	10.3333	26.667	29.611	10.833	9.222	9.556	16.2778	17.333	12.556	38.444	29.278	22.944	20.111	10.722	33.056	38.833	34.444	37.111	9.111	27.778	22.667	47.833	25.111	14.778	13.278	35		0.535716	22.3064
9.0466	19.9444	29.5	34.278	10	8.7778	18.9444	26.278	36.444	14.778	14.167	7.833	15.8889	18.389	26.333	36.944	17.611	5.444	18.389	19.833	24.111	36.278	30.944	24.833	12.222	19	33.111	38.5	27.389	9.5	5.111	32.444		0.542857	21.7168
9.1657	27.3333	31.889	28	10.833	16.5556	8.6111	29.222	36.889	12.889	9.333	14.889	10.7778	19.056	19.111	39.778	19.278	13	14	15.167	18.167	32.167	36.5	29.389	16.611	13.611	14.722	47.944	27.722	10.722	9.389	26.722		0.550004	21.2993
9.2847	21.6667	25	22.778	8.889	14.5	12.1111	35.667	31.611	18.389	10.167	11.5	12	23.944	20.611	43.167	20.5	15.278	18	14.833	27.333	37.667	33.333	20.167	14.556	16.389	26.333	39.556	20.167	7.222	12.111	33.444		0.557144	21.5771
9.4037	21.6111	37.722	30.722	10.667	13.5	14.1111	29.833	33.5	14.167	13.611	8.778	18.5556	23	16.111	38.611	25.5	18.889	18.278	8.556	9.556	28.833	39.444	31.611	17.5	21.5	29.333	45.444	23.944	12.667	14.167	24.778		0.564285	22.4032
9.5228	14.4444	20.944	28.333	10.722	16.2778	11.6111	22.389	23.944	17.556	7.444	9.722	8.8333	23.667	21.278	25.944	28	16.778	13.833	15	10.222	30.889	43.722	24.833	29.722	24.444	29.333	48.389	21.778	11.778	15.389	24.833		0.571432	21.034
9.6418	24.4444	38.889	21.778	5.444	1.4444	12.0556	38	27.944	19.944	14.667	7.889	11.7222	28.333	26.889	17.778	22.444	27.611	14.056	12.278	16.889	29.556	51.556	33.278	24.889	24.389	37.5	45.389	20.556	13.389	8.111	32.778		0.578573	22.9642
9.7608	24.3333	31.944	22.778	12.056	4.5556	27.5556	25.444	20.444	14.222	6.222	7.5	4.0556	23.111	13.5	42.111	17.556	19.667	13.056	16.5	26	36.278	40.444	30.111	19.111	27.111	43.889	28.5	36.944	13.389	14.167	21.833		0.585714	22.077
9.8799	18.2222	19.667	21.667	9.333	6.1667	13.2222	30	8	21.5	18.056	16.556	11	30.5	20.333	30.5	19.167	15.5	10.333	11.889	6.278	25.944	42.556	36.722	20.778	24.056	39.056	37.278	31.778	13.278	7.111	41.944		0.59286	21.2384
9.9989	18.2778	18.167	24.167	10.611	10.6667	23.6111	27.056	20.667	19.556	11.778	18.722	13.5556	36.222	13.444	31.167	17	18.167	10.611	6.611	17.667	33.833	38.056	22.444	17.278	33.722	37.333	55	20.889	14.778	12.111	52.833		0.600001	22.7742
10.1179	28.0556	29.556	14.278	13.222	2.8333	12.1111	27	21.833	19.556	10.611	5.833	15.6111	30.722	26.278	32.278	18.278	12.056	12.889	10.833	26.333	41.611	47.5	33	26.333	27.667	36.833	40.333	16.222	16.944	10.667	37.333		0.607142	22.7294
10.237	23.6667	20.333	12.111	13.444	14.0556	12.2222	30.889	21.611	18.278	7.778	15.389	11.0556	39.833	22.889	23.222	21.833	26.056	8.778	18.667	12.778	41.111	39.333	25.389	22.111	39.389	37.056	39.556	18.722	8.722	16.5	30.389		0.614289	22.3602
10.356	23.8889	31.056	21.778	12.722	10.4444	14.8333	23.889	24.889	19.444	13.667	7.944	9.8889	36.222	28.278	23.056	18.667	15.222	28.833	10.5	13.944	57.333	32.167	25.833	25.222	19	42.444	52.5	21.167	11.5	11.389	30.778		0.62143	23.1774
10.475	23.4444	18.167	21.722	13.833	6.7778	16.6111	27.611	12.222	10.056	6.5	10	1.6111	40.111	26.611	29.444	15.833	16.944	16.056	17.111	18.556	45.611	28	39.056	15.444	24.722	26.444	41.167	25.944	11.444	12.667	15.889		0.62857	20.5035
10.5941	16.6111	25.389	27.667	6.389	9	13.9444	33.5	14.611	15.278	13.056	9	11.0556	34.944	32.667	28.5	20.167	14.944	15.5	13.778	25.722	29.5	24.222	21.5	27.278	25.5	42.722	42.222	25.889	15.556	9.5	15.556		0.635717	21.328
10.7131	18.2778	24.722	18.667	10.056	6.6111	11.4444	39.667	19.889	17.333	9.944	11.333	9	43.389	22.944	27.111	17.111	9.111	8	11.222	18.167	27.056	39.333	30.056	24	17.111	45.167	26	29.5	15	13.889	29.556		0.642858	20.9893
10.8321	24.8333	21.611	19.111	17.056	8	16.9444	36.5	27.556	12.722	12.056	11.389	7.7778	40.833	26	13.889	23.556	10.833	15.833	20.167	7.889	27.167	35.778	33.889	16.111	25	32.556	31	27.944	8.333	8.222	27.167		0.649999	20.8943
10.9512	14.8889	16.278	14.278	9.611	15.3889	15.2778	39.944	20.611	14.333	12.944	9.111	12.5	30.111	25.167	33.222	13.111	23.944	11.278	16.333	15.778	22.056	53.389	39.111	16.5	20.222	45.389	25.778	25.389	16.056	19	26.278		0.657146	21.7186
11.0702	15.3333	30.167	22.278	10.944	11.2778	9.7222	43.5	17.056	12.056	11.333	15.111	13.1667	35.889	33.333	25.167	14.833	12.389	13.833	22.778	27.333	26.444	33.889	29.444	16.167	14	28.722	22.444	25.889	15.611	15.333	25.667		0.664286	21.0035
11.1892	16	25.333	28.222	6.611	8.8889	15.5	29.722	8.889	12.111	12.778	14.667	11.8333	24.722	24.722	26.833	17.444	15.389	13.167	9.333	20.889	25.278	41.611	25.333	31	22.889	31.833	28.778	25.167	6.556	23.056	22.278		0.671427	20.2204
11.3083	21.2222	39.556	21.278	20.944	22.8333	5.0556	47.056	11.333	9.667	7.833	7.333	13.7222	32.222	33.222	31.444	9.611	31.222	11.944	15.167	21.333	28.833	41.056	34.611	19.722	27.333	35.833	30.667	33.611	11.889	8.889	21.278		0.678574	22.8297
11.4273	16.2222	28.833	27.722	16.778	13.8889	16.5	50.389	9.5	8.722	14.167	12.833	10.0556	28.222	34.222	24.278	22.556	14	22.778	17.167	27.833	23.611	26	22.444	22.667	31.444	48.333	22.167	33	10.222	18.333	31.389		0.685715	22.7831
11.5463	17	41.222	16.833	14.722	10.7222	14.7222	29.889	19	10.5	16.722	8.722	9.7778	27.5	39.333	31.056	22	21.667	19.333	15.889	26.389	25.167	30.833	26.611	21.778	33.444	35.5	19.5	29.778	24	17.889	15.167		0.692856	22.3441
11.6654	17.1111	26.611	20.278	12.278	8.1667	11.7778	33.111	25.389	14.667	12.833	21	13.9444	26.056	25.667	32.278	20.056	17.778	12.611	10.722	21.944	15.5	40.444	24.056	25.611	20.889	34.833	27.556	32.444	13.222	14	16.444		0.700002	20.9445
11.7844	23.6667	29.5	17.833	11.833	4.1667	12.2222	27.056	19.722	6.778	10.778	7.444	10.6667	18.444	18.167	24.944	23.944	13	15	13.222	20.833	24.667	23.444	27.722	20.611	30.111	25.833	39.222	23.889	19.833	13.611	24.167		0.707143	19.43
11.9035	19.8333	26.889	12.278	17	9.8333	12.1111	41.389	17.333	18.833	13.389	9.556	8.1111	23.167	14.5	29.833	30.556	10.778	21.278	10.667	24.056	16	25.944	23.944	28.778	33.333	28.5	27.778	27.611	24.722	15.278	24.056		0.71429	20.8818
12.0225	19.1667	15	22.389	8.444	13.5556	12.6667	13.5	21.722	17.667	16.056	8.111	12.3889	12.278	19.111	22.5	24.833	15.889	9.667	10.389	34.5	22.222	27.833	25.889	32.556	38.056	37.611	27.722	23	14.333	16.944	20.667		0.721431	19.8925
12.1415	18.1111	32.944	19.889	14.056	23	8.1111	25.944	23.833	13.778	20.722	2.056	6.5556	40.778	18.056	26.056	29.389	16.056	12.389	24	18.778	13.611	40.611	33.389	21.167	44.389	22.389	31.556	19.167	17.278	15.611	38.222		0.728572	22.3191
12.2606	9.1667	18.5	20.556	9.056	11.8889	9.2222	23.444	18.333	23.167	13.944	12.722	22.7222	22.222	15.722	28.056	22.333	16.278	12.5	15.333	25.167	26.167	40.333	32.111	42.5	21.333	33.722	46.722	28	18.111	13.278	20.278		0.735718	21.7061
12.3796	28.5556	26	16.167	15.833	12.5556	17.2222	29.722	17.278	19.611	15	16.111	15.2222	20.389	20.944	27.722	18.944	19.278	21.611	30.222	24.944	20.167	36	42.167	29.889	40.056	33.667	33.667	38.833	21.722	13.333	36.389		0.742859	24.491
12.4986	19.5	17.944	22.278	9.056	11.1111	12.4444	24.444	20.889	32.944	7.278	16.444	23.5556	19.889	17.833	23.111	24.333	13.944	12.667	18.944	29.833	33.111	24	32.667	25.833	25.111	30	24.444	27.278	21.278	16.222	34.833		0.75	21.7167
12.6177	17.4444	27.833	26.333	15.278	14.1667	6.8333	22.056	18.444	23.833	17.111	12.5	18.3889	16.778	18.778	18.667	15	26.333	20.778	20.056	33.056	23.167	38	32.889	41.444	20.833	26.778	30.167	31.056	11.111	24.778	37.556		0.757147	22.8208
12.7367	26.8333	26.333	29.111	10.222	14.5	16.8889	14.889	19.889	19.778	12	10.111	15.1667	25.222	18	21.389	17.611	16.722	14.667	31.611	34.889	17.611	45.667	33.833	25	27.222	18.444	29.111	34.278	10.333	13.222	44.944		0.764288	22.4354
12.8557	24.7222	17.389	28.556	18.833	12.2222	10.8333	32.444	22.778	26.944	6.222	8.944	21.1111	16.5	25.444	26.333	19.778	15.389	19.833	39.389	33.167	20.222	37.944	28.278	27.833	24.278	29.556	34.056	39.167	26.333	20.5	52.778		0.771428	24.767
12.9748	22.7778	11.889	24.778	19.278	13.0556	22.7222	22.833	21.056	26.111	5.111	10.222	16.1667	17.889	33.611	19.722	16.333	29.611	21.944	42	36.389	16.833	40.278	23.278	25.556	34.222	25.056	22.333	39.722	19.722	23.833	28.778		0.778575	23.6487
13.0938	16	28.389	30.889	16.222	13.3333	16.8333	19.889	15.278	23.056	9.611	9.444	19.4444	18.278	20.5	18.778	21.667	21.722	10.5	61.778	28.778	23.278	32.5	15.778	22.833	31.833	29.389	22.389	26.222	28.778	19.556	30		0.785716	22.6757
13.2128	13.7222	18.722	30	19.111	8.7222	8.3889	19.333	12.5	34	18.333	17.722	22.5	27.389	25.722	17.944	13.833	16.167	23.722	46.5	35.889	27.944	49.667	25.611	34	42.611	23.667	35.389	41.278	23.944	25.222	32.778		0.792857	25.5591
13.3319	23.1667	21.833	24.444	14.833	18.4444	18.1667	24	22.222	20.944	15.444	12.611	13.0556	15.333	19.889	16.278	12.111	25.778	11.111	51	28.333	29	23.611	12.333	24.278	21.722	24.056	41.778	40	22.667	40.833	42.556		0.800004	23.6075
13.4509	13.1111	20.333	24.278	27.111	17.9444	20	15.444	22.167	29.611	4.389	12.778	19.1667	25.333	27.389	15.167	15.611	31	22.167	42.111	39.5	19.778	28.111	19.556	25	28.444	28.278	34.556	37.611	19.944	37.056	32.222		0.807144	24.3602
13.5699	20.2222	19.944	23.722	24.167	15.7778	20	19.222	13.333	22.5	10.333	15.833	14	32.611	15	24.444	20.278	43.556	23.222	40.611	27.333	19.778	17.389	21.611	21	24.889	26.778	49.556	54.333	25.222	33.889	24.444		0.814285	24.6774
13.689	15.1111	29.444	26.333	24.556	18.3333	30.0556	13.833	13.389	22.722	11.944	12.333	27.9444	25.778	15.222	9.444	24.333	40.111	27.889	28.5	27.389	24.556	13.389	15	20.111	15.278	17	31.056	36.444	25.444	32.722	24.722		0.821432	22.5931
13.808	23.6111	27.389	33.667	29.667	17.4444	23.3333	16.722	22.444	20.278	17.5	18.167	26.7778	48.389	21.333	15	21.556	31.5	26.222	34.167	19	22.333	19.556	23.056	19.556	25.889	16.833	24.667	36.167	23.056	30.389	36.722		0.828573	24.9159
13.927	19.8333	21.667	17.333	16.889	11.7222	26.8889	12.778	20.667	17.667	15.722	9.111	20.5	36.722	13	17.611	24.167	51.722	31.222	37.778	24.722	4.778	13.056	15.444	13	26.333	22.611	24.722	27.889	29.111	38.833	45.889		0.835714	22.8835
14.0461	25.3333	34.667	28.444	10.222	22.1111	31.2778	11.667	24.333	19.611	12.444	19.889	22.7222	23.833	21.611	15.167	22.278	49	33.833	25.722	19.611	9.056	17.444	19	14.889	9.111	23.222	23.167	29.111	22.722	30.167	38		0.84286	22.8924
14.1651	10.4444	19.611	11.056	29.611	7.9444	43.5	8.778	16.167	10.778	13	16.722	26.5556	36.056	9.667	14.444	28.944	40.056	35.611	24.333	10.333	10.778	14.222	10.944	11.333	9.611	18.833	24.722	21.722	25.222	32.833	41.833		0.850001	20.5053
14.2841	14.7222	30.167	23.111	18.111	16.1667	27.2778	13.056	18.722	12.056	20.778	16.5	16.4444	20.889	27.889	22.222	36.333	32.556	29.222	27.222	7.111	7.722	4.333	11.111	5.5	12.111	21.889	22.778	19.222	10.278	31.944	50.611		0.857142	20.2598
14.4032	19.6111	27.056	24.333	22.444	21.7778	32.0556	16.778	19	11.111	13.833	22.778	26.8889	32.778	32.444	9.611	24.722	34.389	16.056	19.556	7.889	6.778	14.333	11.278	11.056	13.056	14.5	16.5	21.167	24.833	29.111	47.222		0.864289	20.8047
14.5222	16.3889	17.222	18.556	13.833	24.5	31.9444	18.722	23.111	16.944	27.444	14.833	36.7222	18.556	25.333	10.444	21.833	18.5	13.889	10.5	12.778	11.556	4.722	14	5	6.222	16.5	14.833	21.389	26	36.222	22.444		0.87143	18.4175
14.6412	15.6667	28.611	22.278	24	19.5	31.1111	12.667	15.944	20.944	24.167	22.944	26.9444	18.889	20.889	11.056	17.333	27.444	15.056	8.444	4.667	5.167	5.222	13.889	12.833	9	13.944	16.778	13.667	17.667	21.889	19		0.87857	17.3423
14.7603	15.1667	25.778	21.278	21.611	21.1111	19.6111	14.611	8.5	16.056	14.167	12.278	18.1111	9.667	21.5	7.778	8.667	10.833	10.944	9.056	2	5.056	0.944	11.5	4.722	6.833	13.333	14.056	16.278	10.444	21.222	15.833		0.885717	13.1918
14.8793	12.0556	25.667	21	17.056	16.2222	21.7222	14.722	18.222	7.833	17.722	19.722	17.7222	8.667	18.722	5.722	15.611	7.611	5.833	5.667	6.111	4.056	7.222	4.556	2.167	5.778	10.278	6.833	8.5	14.611	14.444	6.5		0.892858	11.8889
14.9984	22	33.278	18.222	22.222	20.7778	30.7222	6.333	15.389	14.667	6.889	20.944	6.5	8.944	6.389	7.111	10	7.667	5.944	2.611	4.722	4.778	2.556	4.889	5.056	13.222	6.222	4.778	9.611	17.889	11.611	6		0.900005	11.5466
15.1174	19.6667	21.556	32.389	11.444	16.1111	18.7222	5.444	8.167	4.222	3.778	14.222	4.9444	13.889	6.778	5.444	13.389	3.889	2.389	0.833	7.389	6.056	10.889	1.389	5.611	9.056	5.278	10.111	5.556	14.5	10.833	2.833		0.907146	9.5735
15.2364	24.2222	24.556	30.611	20.889	8.0556	9	10.389	8.778	5.333	10.444	13.667	15	6.333	8.167	3.556	1	5.167	4.833	3.889	2.778	4.111	5.944	2.056	5.833	8	6.5	7.889	6.556	7.444	6.444	3.778		0.914286	9.0717
15.3555	25.9444	21.611	30.444	8.389	5.5	7.4444	8.333	4.611	11.222	4.278	5.333	14.7778	10.389	6.611	0.111	9.444	3.944	4.556	7.167	9.278	4.778	6.389	6.278	6.5	8.056	7.667	4.5	13.333	13.889	6.5	3.833		0.921433	9.06808
15.4745	27.3333	20.778	31.944	11.667	10.3889	17.5556	11.111	7.833	5.278	6.778	10.889	5.5	4.056	3.444	0	10.889	1.944	8.556	2.333	2.944	3.056	8.167	4.556	2.056	4.333	5.444	4.778	8	10.778	3.889	8.333		0.928574	8.53586
15.5935	22.8889	32.389	15.278	8.444	13.4444	7.6111	9.111	9.611	10	8.778	2.167	8.7778	8.278	1.722	10.333	4.167	6.944	2.833	7.556	3.222	4.333	3.556	4.5	5.278	3.556	6.5	7.222	2.833	5.333	7.278	7.056		0.935715	8.09678
15.7126	16.7778	16.833	12.056	7.056	4.7778	10.7778	6.778	8.5	6.5	8.556	13.222	3.5556	5.556	4.222	2.667	5.722	2.111	4.556	0.667	3.5	0.667	5.278	0.667	4.556	10.5	6.889	3.722	4.222	9.278	5.389	8.611		0.942862	6.58613
15.8316	12.7778	12.056	14.556	16.056	3.6667	8.7778	2.611	7.889	3.389	8	2.389	8.1111	0.611	3.278	1.778	5.722	7.556	5.944	7.056	4.278	7.778	4.944	3.667	6.722	3.722	3.5	3.333	5.111	3	1.056	3.444		0.950002	5.89611
15.9506	12.9444	20.333	7.056	7.278	2.8889	7.5	5.611	6.222	4.611	4.667	7.778	3.8333	2.278	8.778	10.111	2.5	4.111	6.444	3.5	2.833	3.667	2.556	7.5	6.278	4.722	4.556	4.667	4	8	4.667	1.111		0.957143	5.90328
16.0697	12.4444	24.056	0.611	1.778	5.8333	13	6	10.5	6.222	8.944	13	3.5556	12.111	5.778	1.333	0.278	2.778	6	2.778	1.111	2.833	4.5	2.278	3.722	3.333	6.278	5.222	5.167	5.111	5.167	4.833		0.96429	6.01791
16.1887	12	6.5	5.778	8.722	2.4444	6.6667	7.944	8.222	7.778	1.778	4.556	2.5556	3.389	3.833	5.778	4.389	9.333	1.722	9.167	5.5	7.611	5.444	2.667	2.611	2.056	7.278	2.667	8.778	1.278	6.556	3		0.971431	5.41941
16.3077	4.2222	14.611	7.333	4.389	4.6111	8.0556	6.833	11.056	4.333	4.333	8	3	1.722	7.111	2.667	4.167	7.111	4	6.056	9.611	2.056	6.111	4.889	1.167	1.833	4.222	6.278	3.611	2.167	2.389	7.611		0.978572	5.34051
16.4268	4.8333	8	1.944	2	6	7.2222	12.833	2.611	4.222	2.111	4	3.1111	5.667	5.778	2.722	4.944	8.778	6.167	6	1.056	3.5	1.556	6	3.667	2.833	1.889	6.889	1.833	1.389	3.944	5.722		0.985718	4.49102
16.5458	2.7222	3.222	4.111	4.778	3.3889	12.9444	7.556	10.222	3.944	2.111	6.278	5.6111	5.056	5.556	3.5	4.167	3.167	1.944	7.722	9	2.389	0.389	0.222	3	1.722	6.833	3.389	1.778	5.222	3.5	4.278		0.992859	4.50718
16.6648	2.7778	6.611	3.111	4.167	8.2222	11.4444	10.5	4.111	2.333	2.611	2.889	2.7778	5.667	0.333	3.5	0.944	6	7	6.833	4	2.389	6.944	4.333	1.278	4.556	0.667	2	1.889	2.167	0.944	4.222		1	4.10391

## Sheet: Image10
X0	Y0	Y1	Y2	Y3	Y4	Y5	Y6	Y7	Y8	Y9	Y10	Y11	Y12	Y13	Y14	Y15	Y16	Y17	Y18	Y19	Y20	Y21	Y22	Y23	Y24	Y25	Y26	Y27	Y28		Ap-Basal	Avg intensity
0	48.071	30.2855	24.9468	16.4483	27.345	21.801	12.1333	15.9121	12.2008	17.9913	15.827	21.902	32.8651	24.882	18.2012	15.2944	28.589	26.164	21.8448	21.7141	32.708	31.488	18.1381	21.759	18.4365	21.7698	16.979	30.616	18.9994		0	22.9418
0.119	46.81	23.8425	26.6132	25.4324	16.983	33.851	20.1226	14.5078	16.4067	29.336	24.24	24.112	28.3084	25.364	26.5458	20.3767	27.31	40.657	29.5926	28.7257	42.242	37.503	13.9462	19.404	32.1532	16.8662	31.209	26.62	16.7722		0.00833094	26.4087
0.2381	61.01	32.568	32.9196	24.6517	24.467	33.23	35.2532	21.0632	13.7681	20.94	28.53	27.9689	24.6634	40.437	37.7999	21.5049	33.341	50.194	30.6287	24.9481	43.459	49.261	27.7722	20.963	29.4764	25.1481	32.858	29.303	27.2301		0.0166689	31.2192
0.3571	59.191	38.9397	37.2147	46.5055	39.978	38.457	25.6068	27.8154	16.0033	30.863	33.644	23.9089	29.4642	46.438	54.4002	32.3414	41.169	61.597	42.5564	35.4459	61.727	64.635	23.2633	23.291	42.9008	27.1355	24.457	26.661	14.5101		0.0249998	36.9007
0.4761	60.161	39.1704	34.1444	41.896	45.468	55.771	23.318	26.4269	27.1149	29.8115	46.373	20.2883	36.4159	41.964	59.8986	38.2129	64.801	76.039	50.9499	48.8838	58.155	68.323	29.5814	47.522	41.3737	29.8414	38.808	39.983	27.5278		0.0333308	43.0422
0.5952	59.992	51.005	36.1062	54.0209	73.525	53.809	33.2159	38.1511	37.6384	39.9061	69.519	33.5348	51.9361	45.452	57.803	52.1542	63.726	86.92	55.3369	81.7238	87.721	80.454	27.3887	45.73	50.7012	39.3895	38.609	48.622	48.1271		0.0416687	53.1799
0.7142	68.476	59.9004	39.6795	60.0454	74.513	70.673	56.9311	30.2083	47.7758	48.7478	58.653	37.4542	61.6037	60.956	62.8548	56.7447	86.927	90.657	52.8854	68.418	84.296	87.094	28.9425	61.155	53.2811	31.0827	32.211	56.331	45.3916		0.0499996	57.7203
0.8332	94.534	65.8759	56.162	82.5589	78.122	53.021	49.9096	45.9353	52.3738	50.5312	77.329	55.862	56.5939	61.692	59.9639	79.6546	106.342	87.156	70.8732	75.5342	101.282	111.94	60.2426	68.857	73.7174	40.2748	40.904	56.107	50.172		0.0583306	67.7076
0.9523	68.737	67.9489	72.0721	90.8982	78.262	76.487	67.387	49.6456	54.0108	61.4933	71.731	68.0204	61.0951	66.399	74.691	67.0887	132.305	99.884	74.0135	86.4953	114.21	99.744	52.2717	74.041	68.1973	71.9139	58.52	72.644	73.049		0.0666685	74.9399
1.0713	62.69	81.3398	60.3233	73.8555	86.993	104.029	71.4601	64.7932	63.7207	55.5616	91.579	58.4549	71.3814	70.86	75.6077	75.7756	126.922	110.685	89.7438	88.4033	100.002	111.02	68.9625	68.525	77.5723	72.2496	82.599	69.93	61.9724		0.0749995	79.2073
1.1903	95.601	80.635	68.5969	85.4918	92.726	92.368	61.4587	56.0611	63.0724	89.3133	86.49	63.257	79.525	82.077	83.8422	68.2901	120.094	122.618	90.4643	97.2251	78.38	108.43	60.7762	97.524	93.7796	75.182	99.168	70.569	78.3239		0.0833304	84.1841
1.3094	104.413	95.0027	65.9468	86.447	103.35	93.072	78.9934	62.1986	54.9504	63.3191	102.884	73.3718	81.4034	108.674	73.033	71.8032	120.687	119.818	93.8918	74.5381	89.434	119.262	60.3083	90.709	78.4802	75.4549	102.28	91.752	91.6056		0.0916684	87.1408
1.4284	100.913	97.1409	74.6188	88.9595	114.614	103.352	78.3093	44.7979	55.293	85.7619	92.84	81.2514	88.5297	90.515	66.533	65.1772	113.353	125.051	72.437	76.1917	101.946	101.981	68.5038	100.72	74.3989	80.4501	95.519	84.107	100.171		0.0999993	87.015
1.5474	92.99	89.0428	57.3523	87.1615	116.279	85.549	73.7025	49.5907	50.9115	94.3234	101.25	94.8641	98.8141	89.488	79.8097	72.2738	120.414	137.166	67.493	72.4511	79.765	111.067	68.5101	114.402	73.5248	69.2841	105.759	101.347	83.6102		0.10833	87.524
1.6665	85.76	93.3073	57.0943	78.888	131.119	81.924	81.9662	49.2205	54.6457	86.3445	115.076	77.9179	87.8244	57.08	70.3122	79.6729	105.965	140.855	68.9231	61.8375	87.567	109.382	67.0413	97.061	83.142	74.6738	102.294	98.806	94.07		0.116668	85.5093
1.7855	67.962	80.4106	45.8607	66.9826	112.137	91.394	75.4014	51.6435	50.3719	85.0462	102.94	89.211	101.285	67.03	75.9484	72.521	120.07	134.7	84.9815	65.3989	89.263	112.092	73.6157	110.146	79.9784	66.8138	82.923	108.903	80.5028		0.124999	84.3287
1.9046	51.54	85.7831	52.6826	60.243	105.952	74.228	71.4451	43.4911	39.1674	65.9448	102.43	83.9808	78.0038	66.402	64.2585	65.8595	122.958	110.799	71.5777	67.6425	81.204	119.006	92.6955	103.674	64.0803	72.318	88.474	100.468	102.324		0.133337	79.608
2.0236	32.966	68.6738	45.3188	54.2846	100.851	68.362	79.1205	49.7343	60.2648	59.5999	100.943	76.0828	87.3262	58.813	82.3654	69.5546	138.229	108.879	88.8001	57.4563	74.237	96.833	99.3225	121.695	77.3653	68.7479	77.081	97.691	90.6626		0.141668	79.009
2.1426	45.326	83.9197	50.5862	61.9932	93.812	83.713	85.6603	47.5722	46.862	67.9015	103.103	84.9446	104.235	55.47	55.9639	75.4161	135.78	109.596	76.6827	57.6894	72.286	114.552	92.5635	103.813	74.8286	48.4596	85.45	90.887	94.2939		0.149999	79.4262
2.2617	28.169	59.9802	58.3242	46.2879	82.758	61.639	70.9809	52.6621	40.405	51.5632	84.529	64.8372	103.121	60.661	65.6133	66.6592	133.865	98.685	75.7942	62.1334	74.328	89.418	82.0718	108.696	59.6628	56.5519	101.358	91.334	94.8414		0.158337	73.3424
2.3807	34.491	58.4689	55.4214	55.7362	79.558	65.536	66.5345	38.1926	40.1966	48.3265	63.482	65.5344	98.7596	60.649	55.5758	59.7252	110.584	91.473	58.3506	54.8719	67.699	101.212	67.4435	101.387	68.3842	47.376	81.676	69.404	87.2834		0.166668	67.3563
2.4997	38.42	64.5417	59.2761	45.3275	74.342	66.059	64.9606	38.7384	55.14	49.1071	83.408	70.2614	82.8151	64.56	67.8744	65.1801	97.53	96.712	46.6698	46.1324	51.542	71.712	50.2469	95.145	48.4149	41.4202	89.015	76.302	76.3251		0.174999	64.7303
2.6188	40.918	42.7661	63.0972	42.4782	79.718	76.973	54.2812	26.5445	44.9848	50.3435	73.217	53.88	75.1167	69.147	56.4627	63.1002	92.262	92.901	55.9154	47.0975	42.839	74.711	48.9946	101.737	65.9503	50.8759	75.227	57.349	86.1869		0.183337	62.244
2.7378	52.122	47.317	80.6609	51.9277	58.727	59.917	47.8348	32.2762	40.9223	60.8956	71.839	63.3349	66.4736	71.733	65.9484	60.9922	83.992	72.667	64.0647	53.3217	31.004	65.112	46.7489	67.342	56.0979	48.2164	78.862	56.308	74.3722		0.191668	59.6907
2.8568	38.7	32.7058	54.0847	49.361	36.187	61.276	46.1955	36.5203	26.4963	50.8832	53.21	58.5851	62.2433	53.533	48.9708	68.2532	72.906	56.519	69.3731	38.6783	41.511	76.83	36.9307	79.213	48.7515	43.1934	56.994	48.142	76.1971		0.199999	52.4981
2.9759	39.52	43.1479	37.8975	57.5869	34.446	57.492	63.1147	38.455	41.416	48.3689	40.119	53.1046	47.3018	57.155	36.0454	52.6814	74.9	68.579	66.3125	37.9827	38.685	71.165	49.545	59.763	55.5299	40.5452	62.797	43.459	56.6951		0.208337	50.8211
3.0949	35.868	45.4704	42.3322	50.3327	34.389	48.989	55.0955	39.6746	36.0331	51.5547	34.185	49.3045	53.95	49.216	41.5682	53.9131	55.016	49.555	58.3486	50.308	37.724	52.882	47.7607	47.186	40.1031	40.6796	46.484	38.979	68.2641		0.216667	46.7299
3.2139	39.421	48.2218	43.7623	48.6044	29.228	49.051	43.0208	34.9413	31.4793	48.9667	30.427	52.2885	56.3181	61.398	39.0582	41.9953	49.768	54.847	62.7492	43.4506	25.295	54.682	46.7248	54.445	42.2169	40.2329	47.319	39.077	56.2602		0.224998	45.3534
3.333	34.246	38.3706	43.1574	52.6741	19.964	44.747	52.0914	37.0263	37.542	53.7349	34.865	44.084	42.1179	61.001	37.9207	41.3356	48.105	45.9	40.6073	39.2471	31.607	52.915	48.7379	56.37	48.7398	27.2894	38.123	29.064	63.7125		0.233336	42.9412
3.452	30.071	39.9088	29.5274	31.8776	12.857	54.171	50.1072	26.4813	46.3989	56.4632	28.402	48.6883	51.7646	52.202	45.0458	35.1364	36.866	42.813	45.3451	48.743	33.248	47.122	37.5996	41.128	45.0773	39.0209	42.237	32.237	40.54		0.241667	40.382
3.571	38.34	42.3771	30.9239	44.1353	21.85	42.064	54.5461	38.0932	54.0977	47.0434	34.743	39.5486	48.3699	51.835	25.9075	39.4488	31.805	39.424	39.0151	30.2573	37.171	51.7	32.6975	40.923	43.1059	32.0202	28.299	40.943	40.2995		0.249998	39.3443
3.6901	37.668	44.4963	32.0814	45.7316	16.896	35.68	47.8812	36.9619	51.2249	47.8046	31.494	48.3744	49.5514	48.573	37.0667	29.5121	31.018	44.541	34.0739	32.1623	41.839	44.864	19.2131	25.276	40.8001	30.1431	28.975	32.277	32.5195		0.258336	37.1965
3.8091	42.644	35.8097	52.2773	31.2349	14.733	25.083	47.4914	32.5798	48.2881	45.202	41.441	32.1152	56.5912	46.441	36.857	35.477	32.962	43.403	37.5785	30.342	65.645	37.794	39.2711	39.306	33.8716	48.2792	31.199	34.57	29.1174		0.266667	38.8829
3.9281	20.573	36.6693	44.2141	31.1348	19.065	21.721	46.5687	23.056	45.87	39.4741	40.969	37.7856	49.7434	47.488	34.247	24.7135	25.224	34.182	21.9632	31.0824	47.019	44.231	34.4096	27.522	51.1194	42.1647	30.485	31.321	28.9703		0.274998	34.9306
4.0472	34.439	32.8626	36.9525	32.5449	15.659	22.827	33.0281	38.3248	35.1201	41.0461	40.57	50.6279	46.5951	36.869	33.9056	20.9803	32.61	36.896	23.2508	27.2052	47.48	33.025	24.1698	30.167	41.9804	32.271	36.141	33.452	28.2409		0.283336	33.7669
4.1662	24.918	29.1976	38.1501	45.7841	23.758	11.388	41.9633	39.1474	41.546	32.1376	43.436	40.0147	35.6716	39.132	27.6697	29.9765	28.93	27.528	19.2031	19.2215	59.469	36.122	24.2397	27.435	44.535	38.4743	24.426	36.85	28.7498		0.291667	33.0715
4.2852	24.601	27.5026	42.6624	33.1513	16.131	18.233	27.0463	17.2379	39.2897	38.3065	48.746	44.7546	42.2288	27.803	28.9769	27.2811	32.294	40.351	26.4078	19.8809	38.167	43.834	26.179	26.043	43.928	44.1406	25.046	36.294	32.0521		0.299998	32.3645
4.4043	29.025	37.5257	40.8154	36.8935	11.779	22.88	40.0516	33.8471	35.9677	30.218	42.248	46.3545	44.6135	22.045	25.9348	25.9735	28.689	19.091	15.3348	13.6788	40.522	42.802	20.7599	38.772	34.9907	31.701	20.542	44.081	32.1143		0.308336	31.3535
4.5233	45.632	39.5152	40.1762	25.9011	11.395	17.625	48.0069	24.97	37.4499	32.718	29.776	50.3966	40.0103	34.853	23.4249	31.5347	41.586	24.56	14.25	16.4294	32.758	40.13	23.004	41.724	29.7459	23.8639	19.686	49.686	35.7076		0.316667	31.9488
4.6423	39.096	45.4375	50.8144	47.8504	16.579	11.379	26.143	32.4981	34.0101	45.8368	27.049	48.2871	39.5506	29.422	25.723	20.8659	27.602	35.036	20.8214	14.6408	29.604	34.905	28.278	26.268	32.996	25.1777	19.582	35.79	29.5784		0.324998	31.0628
4.7614	32.785	39.0336	39.2577	41.3209	15.258	22.135	24.7972	25.6034	31.6542	33.1569	33.331	32.1705	36.5643	24.431	18.4372	27.8905	33.007	32.085	18.9195	19.4113	36.902	30.51	18.5745	19.929	27.4764	21.1087	17.615	43.488	21.1259		0.333336	28.2062
4.8804	21.573	27.3367	43.9841	51.1943	14.484	17.152	35.5361	39.3113	32.5657	43.1948	39.144	37.1924	36.3779	38.873	26.7164	36.1788	30.9	24.751	21.333	21.1444	27.824	27.087	29.4204	25.472	41.8867	19.8853	21.58	25.608	37.1171		0.341667	30.856
4.9995	36.117	28.8317	52.3225	36.4562	16.845	17.348	43.1835	42.173	37.598	25.3232	18.54	42.3304	32.0071	30.865	24.5713	33.1422	25.067	45.498	14.8689	14.3499	33.073	23.412	26.1677	26.909	32.9476	28.8081	15.421	27.5	32.4691		0.350005	29.7981
5.1185	30.183	39.2266	44.7654	32.3646	6.744	16.461	65.9812	32.4233	45.6811	23.205	18.518	36.1439	34.9292	30.444	34.7161	48.9568	29.376	25.483	13.4803	19.9477	38.706	34.972	29.5056	19.554	40.8418	25.0489	17.301	31.26	38.9657		0.358335	31.2133
5.2375	32.583	27.572	39.4952	30.8723	6.06	11.567	61.0821	29.0976	48.1221	20.7147	19.383	39.1331	36.7514	39.309	26.0302	39.4639	21.841	29.156	8.2817	11.6484	39.771	29.684	30.6214	19.525	30.4861	18.7736	12.768	23.957	34.6675		0.366666	28.2213
5.3566	21.747	35.0857	48.6272	21.186	14.598	16.6	48.5057	37.4675	32.7682	15.4213	16.764	45.288	33.5261	32.881	34.4565	25.0866	17.734	25.922	20.446	19.8492	26.994	30.974	27.9214	24.871	36.7018	12.5247	12.271	26.529	30.5633		0.375004	27.3555
5.4756	36.745	31.911	46.9343	18.3477	6.003	5.546	51.1688	38.9013	26.4965	12.6813	24.648	48.0325	20.6527	33.955	35.5157	26.4648	18.474	34.165	17.9286	18.5319	28.238	35.991	34.64	24.615	43.6028	21.4515	18.309	20.414	35.3232		0.383335	28.1272
5.5946	31.099	27.7492	43.4707	26.5426	17.341	13.662	36.5645	31.8101	30.3628	17.3861	13.806	46.4235	21.2251	26.231	22.6866	35.0402	19.99	38.849	16.6326	10.8904	33.917	39.044	26.8304	29.963	32.8368	21.0031	14.854	30.319	26.0567		0.391666	26.9857
5.7137	21.564	32.4632	52.5491	30.3712	7.612	9.071	41.944	27.969	33.604	19.3906	12.843	54.3733	24.434	34.438	31.8246	23.3689	15.094	25.778	11.327	13.0942	33.993	36.918	24.9004	20.924	36.9117	20.4401	13.219	27.514	30.2224		0.400004	26.4881
5.8327	25.237	31.6592	32.0635	33.7339	11.477	15.995	34.8768	26.5408	30.6474	21.095	13.061	43.6091	23.8674	18.264	28.1295	22.7086	20.007	25.362	11.1326	9.8983	37.583	31.317	22.8466	31.396	41.6406	26.2741	8.985	18.195	22.2377		0.408335	24.8221
5.9517	20.79	31.7821	37.0396	24.9503	11.511	18.714	44.6156	28.821	27.1914	17.2037	9.433	42.2511	26.4463	28.586	24.9698	26.2105	24.833	28.929	8.694	10.9335	34.117	26.338	32.6907	36.115	44.321	20.4067	13.204	15.547	28.0812		0.416666	25.6802
6.0708	26.448	23.1949	31.7356	22.9037	7.083	12.827	47.2647	46.3916	37.8389	26.1161	14.405	31.3003	21.9627	41.342	23.3256	23.27	28.403	27.626	14.6029	12.5661	22.998	29.355	39.4396	25.804	32.3941	16.2924	11.862	21.879	24.235		0.425004	25.685
6.1898	33.481	26.0232	41.0331	20.6135	12.198	11.038	32.3791	31.301	30.9684	14.2191	25.105	33.0624	24.3879	24.097	26.0489	22.7803	28.027	38.029	8.5263	14.3795	36.001	31.495	39.5392	27.913	32.6743	13.999	7.666	13.87	19.3034		0.433335	24.8331
6.3088	28.577	22.1627	38.9756	14.3106	6.372	12.229	42.2985	37.7208	40.2185	22.0789	14.416	29.4013	37.0431	19.037	28.2365	25.8524	28.946	19.654	7.8748	8.7769	36.465	42.08	28.2999	30.014	31.2049	15.1502	20.475	16.39	20.3557		0.441666	24.9868
6.4279	35.937	27.1997	40.9852	23.92	10.966	10.063	32.3629	22.8909	33.1827	15.3747	17.956	18.3576	37.6334	29.229	27.5429	24.6223	34.238	22.398	9.7476	7.0884	24.449	39.512	22.0142	23.006	28.1468	14.9054	12.265	18.925	26.2884		0.450004	23.8347
6.5469	25.475	26.2926	49.3522	25.1342	11.418	16.7	38.5714	21.0636	30.7076	16.3304	18.747	27.9396	25.4122	20.309	29.0267	28.5287	24.254	23.864	11.0756	9.3356	25.502	32.873	24.6819	27.351	33.3927	16.248	12.301	20.902	23.4715		0.458335	24.009
6.6659	29.142	31.4867	35.4123	25.7452	7.79	11.762	28.1432	28.5723	39.6582	14.879	9.818	42.0804	27.1813	24.792	23.017	20.323	38.576	14.208	7.7997	9.1234	21.552	40.719	24.234	25.768	25.8568	19.0451	11.173	13	21.5308		0.466666	23.1858
6.785	34.064	32.8497	46.214	22.5636	5.382	10.602	27.5322	24.0226	28.0684	19.853	9.761	32.525	12.4563	28.739	25.6762	14.2022	32.076	17.615	11.7534	11.108	14.129	34.806	30.5551	31.647	28.2913	16.78	10.834	10.122	20.5966		0.475004	22.2353
6.904	29.76	26.7971	41.9084	19.4988	11.427	3.873	23.6851	19.6032	29.4643	28.4157	16.674	31.588	27.7471	24.841	26.3531	28.8349	36.811	22.4	4.7199	10.449	23.906	38.428	23.9079	34.796	21.6473	13.6989	6.967	10.805	11.8955		0.483335	22.4449
7.023	32.407	25.3735	45.3343	13.5588	7.325	6.195	26.8086	21.9295	19.8601	15.0825	10.349	38.986	21.2358	22.05	25.6233	17.9946	17.757	25.251	3.359	11.9817	20.445	36.359	25.9789	35.858	38.7065	16.1786	9.188	14.759	16.7639		0.491666	21.4724
7.1421	30.065	27.0912	31.49	23.9834	14.056	13.351	32.8124	20.5016	17.7368	9.1721	21.067	32.1465	22.1302	24.607	33.7358	21.0034	16.553	18.809	6.2434	15.2132	23.917	35.854	26.9849	32.375	30.4704	17.474	5.631	19.409	12.5033		0.500004	21.9444
7.2611	35.365	22.2132	26.8847	23.5488	5.82	5.075	45.4973	29.1701	20.3663	15.3539	14.686	33.4581	25.5125	19.54	19.8729	15.8425	16.926	20.562	9.7332	14.0049	26.561	33.598	35.6178	38.214	24.3226	22.1282	3.036	12.53	22.6586		0.508334	22.0034
7.3801	36.03	28.9793	22.9367	26.3047	8.87	5.413	31.2024	38.8306	25.409	17.0085	18.731	42.7166	28.683	17.102	25.9033	28.715	20.197	10.851	7.9272	8.6837	26.711	24.7	19.2181	26.77	30.1934	13.1636	6.429	15.1	25.7603		0.516665	22.0186
7.4992	32.516	28.2931	26.0992	24.953	5.319	5.924	26.3092	15.1987	24.2371	9.9296	16.239	35.0968	29.7536	18.633	28.8507	18.5396	23.97	16.315	5.6431	5.4412	21.346	38.682	26.4196	29.645	16.0814	13.9905	6.104	14.721	35.2105		0.525003	20.6711
7.6182	39.91	32.421	27.6841	16.1145	10.136	8.236	29.4266	13.3151	19.8281	9.0114	11.771	27.521	20.7915	33.167	20.7054	24.8166	30.197	18.875	3.9602	8.4361	24.396	21.897	13.6444	18.273	20.431	8.3137	16.387	13.203	24.4794		0.533334	19.5637
7.7372	32.092	30.2006	28.0025	27.0951	11.964	7.521	26.8583	24.6785	22.9122	7.4342	8.728	35.6517	27.1421	20.094	27.7634	32.3735	39.036	16.284	7.63	8.0902	22.576	22.736	18.1131	31.794	21.8011	11.4288	13.894	20.51	20.6412		0.541665	21.5533
7.8563	22.273	22.1166	28.6977	19.9794	7.504	13.928	29.796	25.7766	19.9961	9.6695	10.263	34.1452	17.8303	29.896	23.419	21.4074	32.809	14.039	8.0597	8.256	30.671	36.184	27.9961	30.246	21.5607	9.1899	6.126	15.115	32.5682		0.550003	21.0179
7.9753	45.645	32.8629	26.3135	19.3874	7.682	4.501	32.7566	19.4941	14.8806	16.6618	13.251	28.3145	16.9554	40.313	32.1552	23.9377	30.159	15.896	3.8532	17.7995	27.197	25.532	31.1879	15.353	15.6916	17.7928	10.511	20.926	18.099		0.558334	21.5555
8.0943	39.47	24.8536	36.2413	25.0233	10.584	3.121	34.7688	34.041	20.2844	16.4895	10.865	31.0517	22.0554	40.58	22.8553	12.0494	28.268	4.778	6.4873	14.2985	15.549	23.832	33.5404	26.431	22.7419	10.4812	14.118	30.871	14.5317		0.566665	21.7332
8.2134	33.159	37.5952	30.3417	21.0572	5.739	7.503	31.8958	34.8078	9.4499	9.4021	6.687	33.0612	19.2739	29.338	25.1487	25.4557	18.183	10.978	10.103	7.1405	13.754	25.095	29.1703	36.626	21.132	10.3142	7.53	25.721	11.0988		0.575003	20.2331
8.3324	31.567	31.1575	42.8573	24.2675	4.985	10.69	27.1655	22.5792	24.502	16.6625	11.265	27.0411	23.0372	27.292	31.2319	23.3468	18.311	6.736	5.9981	11.8775	24.506	22.83	34.8749	37.519	21.2823	13.656	17.881	26.847	30.9225		0.583334	22.5134
8.4515	35.219	37.7403	43.5039	19.7428	6.51	6.361	32.8018	24.7942	25.0892	9.3848	13.28	31.1664	18.6323	37.816	32.7928	24.6841	19.658	17.011	8.7946	10.3589	28.149	32.808	29.8893	27.122	16.8714	13.4298	10.958	20.311	31.6001		0.591672	22.9821
8.5705	47.932	25.2759	32.8952	20.6378	12.249	8.062	31.1675	15.0878	17.7852	9.263	18.908	19.7503	14.4808	29.436	24.7112	23.5401	17.452	15.331	17.1275	5.6198	28.45	34.95	32.1731	30.941	20.7565	21.9985	16.003	21.82	18.406		0.600003	21.8004
8.6895	30.372	30.1251	47.7419	12.7993	4.37	13.388	31.055	23.9411	24.6243	8.9928	5.808	25.6473	27.8108	33.828	35.6899	20.7406	13.592	15.316	5.1136	3.9797	31.482	28.322	23.4507	29.002	21.4438	12.3122	13.164	29.307	26.2439		0.608334	21.7125
8.8086	24.951	32.9459	46.5467	26.5982	4.99	11.289	27.9257	23.3147	17.1791	14.5331	14.271	26.8862	30.6898	28.241	23.0899	32.2928	26.065	12.881	5.2866	5.614	35.992	23.942	24.7183	32.011	12.9858	12.08	10	19.761	20.2431		0.616672	21.6319
8.9276	20.012	33.0842	36.2064	14.3295	9.052	5.781	27.3315	25.4433	23.3248	12.8959	11.477	33.9551	30.2904	29.925	18.2124	28.3017	21.395	16.723	11.5684	10.9185	27.101	18.57	28.2764	31.117	10.5805	20.1738	5.28	16.174	24.6745		0.625003	20.7646
9.0466	26.926	25.2825	35.4331	22.5915	7.599	6.353	37.1921	25.9537	25.1719	12.9488	10.016	31.679	24.6816	22.995	24.1307	28.479	21.188	18.462	13.4937	6.6	28.086	27.94	20.1098	46.201	15.3941	14.0322	5.415	20.663	21.7176		0.633334	21.6116
9.1657	40.504	19.5201	32.998	23.2422	8.884	6.37	27.8955	36.233	27.6437	15.7603	9.575	21.9477	28.3081	29.042	31.8546	23.7309	27.723	17.88	6.7762	9.8649	22.527	23.481	23.8957	32.462	15.5016	10.173	10.116	15.779	20.3384		0.641672	21.3802
9.2847	33.069	24.9644	19.6989	22.7839	12.361	11.576	34.3988	40.683	29.1313	7.9136	16.829	31.172	23.6904	23.787	30.8732	14.354	21.656	11.619	11.2631	15.5081	30.967	31.317	28.4184	28.579	11.7991	15.3887	8.102	21.788	30.2735		0.650002	22.2057
9.4037	36.39	46.3506	27.1714	28.1352	18.098	10.559	31.9078	33.7669	29.3646	12.4812	12.125	28.8351	27.0417	25.312	33.7299	24.763	29.789	12.526	11.2424	10.011	33.271	23.945	21.3396	30.067	32.1309	15.7948	10.145	29.86	31.7087		0.658333	24.7539
9.5228	26.697	33.9024	37.3011	18.1062	8.242	10.421	31.5358	31.7445	32.0474	11.4033	17.687	30.7779	29.2308	26.087	22.6076	26.555	20.117	11.4	19.7484	4.7792	29.811	18.004	15.1406	26.408	27.5653	14.197	14.518	20.116	19.7708		0.666671	21.9283
9.6418	18.984	34.4601	30.7607	23.2568	14.555	12.939	16.0935	27.2731	27.9893	10.9099	12.848	28.2202	31.5101	22.709	26.0422	29.072	25.445	8.865	9.6586	18.5157	35.062	15.988	21.8738	33.493	28.8847	19.8555	13.794	22.028	24.8395		0.675002	22.2733
9.7608	27.182	39.609	34.2845	29.5217	12.07	10.782	29.8694	32.9805	17.6634	17.1842	9.179	24.0517	30.0594	26.238	16.6572	23.5834	25.5	8.591	2.6905	16.2224	27.108	22.154	18.4896	28.941	22.9393	18.6349	6.14	26.504	25.9684		0.683333	21.7517
9.8799	36.023	32.111	33.1439	21.9481	12.301	15.191	23.8908	25.9882	21.895	12.5339	14.057	37.6922	41.7018	29.764	20.7214	21.1178	30.343	6.423	7.9688	9.8084	20.431	30.657	10.8337	29.495	23.8066	14.194	10.829	26.172	16.4298		0.691671	21.9818
9.9989	28.726	28.3074	34.9327	19.9952	11.152	18.943	27.3921	30.427	28.23	9.3907	17.01	47.0977	36.0537	29.262	21.5419	27.6005	22.915	15.769	12.9739	4.5347	25.86	33.278	14.7159	31.42	24.2788	18.6635	13.598	23.466	18.4119		0.700002	23.3085
10.1179	32.951	25.7334	41.2036	21.7687	12.692	10.614	28.5196	30.9873	17.7326	11.7851	24.783	36.4937	30.5921	29.975	19.9882	16.3833	29.142	15.821	7.7503	8.7822	22.751	31.901	22.1079	19.111	21.8553	17.7555	19.126	23.534	24.4811		0.708333	22.6318
10.237	33.397	19.0383	48.6542	26.7749	15.238	16.301	29.7963	33.5531	25.7799	18.3539	18.156	41.5257	42.6346	32.732	25.1271	32.1334	26.039	18.538	9.8319	7.1626	22.491	35.106	27.3812	14.9	26.0222	12.6991	13.379	36.817	22.9705		0.716671	25.2598
10.356	30.68	28.6504	33.4404	30.9698	9.046	14.087	22.6357	36.4963	25.7104	11.1796	15.179	36.2387	44.5476	28.054	30.2405	34.359	27.816	11.801	10.8644	4.2442	25.053	25.522	27.8426	22.176	17.4687	10.4202	16.931	19.574	19.1431		0.725002	23.1162
10.475	29.152	17.7855	26.0438	18.7651	18.926	23.63	29.8756	29.0823	25.3283	13.2696	13.137	43.7353	24.2017	24.79	29.9706	32.5608	31.044	14.706	5.7797	16.3008	34.469	19.742	8.2793	22.474	12.6681	18.2189	18.108	26.307	22.2889		0.733333	22.4358
10.5941	37.683	29.8675	38.9518	28.5207	9.362	7.552	54.7982	32.0447	23.7942	7.4846	14.189	41.2083	34.767	30.315	27.0944	28.8846	28.818	19.632	7.0933	7.0511	34.13	27.817	10.4653	28.013	13.3445	23.8506	22.256	28.851	22.8414		0.741671	24.851
10.7131	36.545	23.9622	33.6314	19.5141	9.623	17.818	32.7147	32.9901	31.2449	22.3172	14.099	38.2057	42.5874	20.889	18.4919	24.9321	45.632	20.481	10.6422	11.1696	22.966	23.536	16.7563	23.509	26.0279	13.7813	24.42	21.161	13.8553		0.750002	23.9139
10.8321	33.79	23.1083	35.8218	21.4574	19.995	15.332	36.5068	31.4269	13.0338	23.1819	16.098	24.9479	24.6425	23.764	29.6039	29.1454	38.861	14.089	9.6216	3.3936	29.596	16.805	29.0861	20.956	24.7181	13.3596	33.789	18.381	22.7772		0.758333	23.3548
10.9512	29.832	21.5318	39.5318	36.0802	7.585	9.527	36.7318	32.7674	22.9855	22.241	14.871	27.3668	27.7548	33.019	35.3717	28.8672	29.807	23.887	8.8799	11.5184	20.22	19.336	27.4124	17.509	15.7009	19.4302	23.077	26.199	24.7977		0.766671	23.9255
11.0702	47.585	22.1326	31.0684	30.1601	11.67	19.868	33.8461	35.6168	22.2439	14.708	20.758	49.036	27.4703	31.502	36.0586	30.0332	33.598	23.997	8.7431	10.4668	20.922	32.462	20.6178	23.505	25.0459	16.958	17.336	29.655	20.6223		0.775002	25.7823
11.1892	30.164	32.0805	42.6787	26.3764	22.02	19.13	31.3711	39.5147	18.7617	13.6245	17.41	27.3167	23.3554	23.536	24.7155	18.3219	29.703	18.084	11.8111	8.601	33.752	37.068	22.7217	32.538	23.2294	27.3686	20.001	24.095	30.3838		0.783333	25.1632
11.3083	27.791	24.9391	47.572	39.7636	6.841	12.996	22.9221	31.3315	18.7847	13.0871	22.623	26.1348	26.478	29.374	20.5587	24.3412	27.245	27.695	12.0178	9.3279	38.356	29.049	32.3432	26.357	20.2273	37.6084	24.506	12.934	19.6785		0.79167	24.5822
11.4273	42.12	32.0411	40.4233	49.0239	10.568	18.187	17.8219	36.8708	26.4987	11.5098	20.187	27.329	26.0746	32.962	24.0171	20.2418	18.95	29.493	12.0544	11.8367	35.255	26.745	27.16	33.553	19.5954	21.5418	30.619	20.832	19.3988		0.800001	25.6176
11.5463	22.724	35.3564	42.6198	35.6402	13.513	25.098	30.0269	34.2941	15.6112	15.2042	32.119	43.3624	33.777	32.374	24.7215	21.3361	14.889	29.218	9.4611	12.0323	37.707	18.601	26.0096	32.185	17.2233	23.3787	24.962	16.54	11.1552		0.808332	25.2117
11.6654	39.042	39.9822	44.56	24.636	24.853	24.559	30.1021	39.4005	31.042	9.9147	22.439	30.6828	38.8226	27.418	28.133	24.4045	25.848	18.659	10.2585	9.339	37.853	20.023	26.1878	18.609	19.2832	30.6192	14.97	15.206	18.9284		0.81667	25.7164
11.7844	30.869	35.3466	40.7035	32.0633	27.625	19.158	16.628	40.9239	37.389	25.8419	19.459	23.7914	37.6227	23.932	22.8784	17.6847	20.378	21.093	14.873	13.5939	51.555	28.114	23.6668	40.063	20.1976	32.0639	25.953	17.169	13.3059		0.825001	26.6877
11.9035	42.183	30.2167	35.4385	41.592	17.988	21.763	23.9699	43.3429	28.7011	12.1186	22.267	22.3889	36.6566	33.807	21.356	24.0349	23.867	20.832	9.4298	18.1059	37.736	18.942	20.82	40.702	22.3719	33.2574	17.781	20.833	11.2188		0.833339	25.9904
12.0225	38.135	33.1837	41.0102	29.5567	24.087	28.672	31.3407	38.681	30.1511	16.279	24.341	20.5277	29.8512	28.87	17.272	24.6542	22.316	24.599	16.1757	14.1442	37.58	23.897	17.7495	42.261	28.2586	35.034	27.54	18.864	15.5402		0.84167	26.9163
12.1415	31.276	27.577	45.9492	34.8405	32.158	26.637	28.3615	34.3301	21.2209	18.8251	26.62	26.1726	39.1032	24.52	27.5955	12.9507	31.742	17.974	22.224	20.4985	35.767	22.728	26.0239	34.398	21.0171	21.1665	21.38	16.524	8.2433		0.850001	26.1318
12.2606	30.788	24.4963	44.096	36.1597	26.511	30.927	22.272	48.5079	17.068	21.9308	11.3	36.6088	53.2302	22.46	30.1683	21.5373	18.892	32.602	21.8103	22.4921	44.965	25.948	24.6989	21.59	28.1562	28.2815	18.118	15.37	13.4782		0.858339	27.3953
12.3796	35.197	24.5982	45.4244	39.5237	23.218	24.792	20.9835	37.153	28.9344	15.6456	16.035	25.0438	45.2918	32.366	36.1644	24.589	25.641	29.118	12.3425	24.3896	34.163	29.404	25.0255	22.133	23.5286	22.83	20.311	9.017	17.3173		0.86667	26.5579
12.4986	31.21	17.7655	61.1037	27.1583	30.862	18.202	24.6201	38.2291	39.9292	15.5452	20.258	28.4177	29.1298	29.756	36.245	27.2622	27.022	30.757	8.3806	32.3026	42.298	33.871	33.7903	25.338	39.8409	22.9868	17.794	13.22	17.4255		0.875001	28.3007
12.6177	39.021	28.3964	48.5159	31.0676	31.895	22.688	26.6764	28.6978	19.6046	20.4233	14.677	29.9319	39.5456	25.056	31.228	19.3515	16.186	25.517	22.2328	26.5445	32.009	33.635	24.1842	27.375	50.3537	18.6527	14.271	10.711	7.6469		0.883339	26.4171
12.7367	25.34	27.0992	36.0597	36.7303	30.276	21.731	26.1581	34.1409	26.1624	30.4132	16.684	26.2792	33.7908	20.671	36.1773	17.0928	15.779	33.329	15.7945	21.3674	45.585	26.957	25.9635	23.028	35.8645	25.0187	6.465	17.966	14.5376		0.89167	25.9469
12.8557	19.261	20.3005	31.677	36.3411	16.948	22.969	31.3218	16.985	30.6428	19.1469	17.2	34.1699	38.5656	23.555	42.9062	10.8152	10.499	25.036	26.6234	24.2668	29.473	15.694	20.9811	28.908	28.2984	19.4018	25.621	10.361	12.5925		0.900001	23.8124
12.9748	14.808	22.3782	22.8022	39.9091	25.489	24.181	39.4625	26.8141	20.2995	24.4799	10.258	34.1949	30.4874	26.652	43.8708	25.556	23.603	33.217	20.2279	27.7841	34.353	34.415	24.025	28.921	30.432	28.2903	20.351	6.908	18.5371		0.908339	26.3002
13.0938	8.716	30.9555	16.7344	29.1748	30.085	27.741	31.3702	24.6509	15.1078	25.2327	14.361	31.4976	31.954	32.414	31.9785	17.5088	25.352	26.415	17.4058	34.3927	40.868	32.648	24.6332	22.181	27.6115	22.8022	10.32	8.951	10.0735		0.91667	24.2461
13.2128	20.445	21.2279	25.3196	38.5996	27.009	29.459	28.4331	11.8696	13.1779	20.0096	22.094	17.614	35.5774	21.642	32.5163	13.1527	19.852	34.115	20.4676	31.6964	36.368	18.366	19.6538	19.13	32.3552	27.0801	14.603	13.242	8.8549		0.925001	23.239
13.3319	7.503	16.4855	13.1107	37.4652	26.102	36.615	24.4786	11.2222	13.601	13.0016	14.369	21.2701	33.5168	22.157	27.953	11.7232	27.094	31.463	20.344	30.7473	39.941	18.115	18.9772	29.18	26.5042	21.5034	6.18	6.819	5.9113		0.933338	21.1501
13.4509	6.311	14.5996	12.8024	27.2427	28.401	37.061	24.7136	13.2021	18.7503	9.0366	7.797	17.3315	20.4232	17.418	21.0602	16.8801	26.457	36.795	24.6008	35.1074	30.148	17.809	15.0593	19.458	21.0388	23.3172	9.415	11.301	11.2607		0.941669	19.8206
13.5699	9.508	12.7473	11.0958	25.2762	31.109	30.498	10.3119	4.3499	19.7195	7.9182	8.986	20.5576	25.1779	17.302	19.4049	11.9334	28.765	28.447	19.4694	24.9624	35.783	12.829	16.4038	17.853	21.8476	14.3083	4.942	11.435	11.9861		0.95	17.7561
13.689	7.387	11.0183	13.0222	17.8092	33.57	28.273	15.8503	5.9949	6.9788	10.8165	5.334	14.4876	21.3016	19.577	20.4923	10.3513	25.951	28.679	22.7172	31.2593	18.632	22.14	14.0417	15.939	17.9601	23.0138	7.851	3.365	7.0371		0.958338	16.581
13.808	2.165	13.4949	12.3324	17.1966	28.191	32.006	17.6212	6.4428	10.9995	5.4663	4.418	11.0641	21.716	10.33	16.2928	8.6456	22.834	24.714	16.2877	41.0199	22.362	12.928	15.4599	19.893	16.454	15.725	7.398	2.871	3.5711		0.966669	15.169
13.927	6.124	11.8151	8.4759	18.0741	30.51	23.658	9.1376	8.5593	9.7372	1.5613	3.73	10.0208	9.757	13.282	9.8589	9.1726	19.498	21.958	25.3361	18.9244	22.234	17.256	9.9112	16.302	14.7247	13.3274	8.115	6.656	4.7073		0.975	13.187
14.0461	12.286	9.6533	13.2055	15.9498	19.161	14.863	14.8961	5.246	9.1637	7.1936	1.419	12.6959	14.1367	13.256	13.2779	9.1016	16.789	20.276	15.8947	23.7639	19.782	10.521	5.8165	8.48	8.4207	15.8632	7.82	9.947	4.15		0.983338	12.1734
14.1651	5.997	5.5531	5.5926	16.7558	15.298	17.107	13.5478	3.765	5.2236	3.2572	3.368	9.551	17.0071	5.399	12.6123	11.8795	16.208	25.321	11.6269	18.3017	14.342	11.481	3.6674	8.927	7.869	7.8968	5.171	1.351	5.0667		0.991669	9.97047
14.2841	5.069	1.6064	4.5078	9.4414	18.047	15.168	11.7279	4.1723	5.1136	3.2717	0.563	5.2212	7.0636	4.714	7.3428	1.5249	8.692	21.178	8.3902	22.9722	11.585	6.491	6.7717	6.371	8.4555	10.4244	2.85	2.774	8.0302		1	7.91517

## Sheet: Sheet1
Image10				Image11				Image12				Image13				Image14				Image15				Image16				Distance	Image10	Image11	Image12	Image13	Image14	Image15	Image16
Ap-Basal	Avg intensity			Ap-Basal	Avg intensity			Ap-Basal	Avg intensity			Ap-Basal	Avg intensity			Ap-Basal	Avg intensity			Ap-Basal	Avg intensity			Ap-Basal	Avg intensity			0	22.9418	26.3727	31.7134	48.3507	25.8209	17.2085	26.3487
0	22.9418			0	26.3727			0	31.7134			0	48.3507			0	25.8209			0	17.2085			0	26.3487			0.05	42.3901	43.3266	56.0378	77.5767	43.8742	19.6017	38.4326
0.00833094	26.4087			0.0071408	30.6649			0.00746053	37.1894			0.00709013	56.897			0.00581228	27.2899			0.0062482	17.51			0.00552327	27.3458			0.1	83.3352	95.6858	89.8435	113.817	94.0721	26.0092	78.3188
0.0166689	31.2192			0.0142876	31.6936			0.0149273	40.896			0.0141862	59.0351			0.0116294	29.0901			0.0125016	19.1847			0.0110512	29.136			0.15	80.204	109.596	89.0533	101.425	93.2614	34.2527	91.7805
0.0249998	36.9007			0.0214284	36.6488			0.0223879	49.483			0.0212763	69.3325			0.0174417	33.4047			0.0187498	18.1703			0.0165745	29.9329			0.2	59.5567	87.8459	76.4789	78.7324	73.6382	43.4193	78.1344
0.0333308	43.0422			0.0285692	40.2724			0.0298484	55.109			0.0283665	76.864			0.023254	36.1242			0.024998	18.8232			0.0220977	31.908			0.25	41.9912	63.0748	62.3569	59.2984	57.8779	46.6255	57.0162
0.0416687	53.1799			0.035716	47.0699			0.0373152	61.2123			0.0354626	86.5371			0.0290712	44.9861			0.0312515	21.611			0.0276256	34.4309			0.3	34.0616	47.7148	48.2775	47.3308	48.5164	48.7292	42.6391
0.0499996	57.7203			0.0428568	51.0842			0.0447757	70.2739			0.0425527	95.4425			0.0348834	49.8583			0.0374997	20.6596			0.0331489	38.1357			0.35	30.3744	38.8367	39.3037	41.7564	40.8787	46.3585	36.2012
0.0583306	67.7076	42.3901		0.0499976	60.785			0.0522363	76.9666			0.0496428	101.857			0.0406957	56.5553			0.0437479	20.5106			0.0386722	44.0342			0.4	28.0652	33.8303	34.0516	38.3564	33.8818	43.5152	31.1449
0.0666685	74.9399			0.0571444	65.3478	43.3266		0.0597031	81.4964	56.0378		0.0567389	103.874	77.5767		0.0465129	64.3012			0.0500013	20.0532			0.0442001	48.41			0.45	24.9736	29.4276	30.585	32.5626	30.4946	41.5341	24.3074
0.0749995	79.2073			0.0642852	75.5556			0.0671636	85.7353			0.063829	110.992			0.0523252	71.3115	43.8742		0.0562495	22.2859	19.6017		0.0497234	54.6183			0.5	22.5486	26.1389	27.7414	28.8113	26.9938	38.7513	20.6755
0.0833304	84.1841			0.071426	85.5484			0.0746242	88.8671			0.0709192	111.581			0.0581374	78.5827			0.0624977	22.7682			0.0552466	58.4583	38.4326		0.55	21.138	23.3361	24.9567	26.6774	22.0836	34.992	18.6458
0.0916684	87.1408			0.0785728	96.4587			0.082091	92.2883			0.0780152	114.23			0.0639546	83.1444			0.0687511	24.8392			0.0607746	60.7646			0.6	21.8029	22.0097	24.5175	25.1294	19.6541	31.3223	15.7046
0.0999993	87.015			0.0857136	99.3082			0.0895515	89.8912			0.0851054	114.305			0.0697669	89.2126			0.0749993	23.9653			0.0662978	66.0819			0.65	21.5511	21.7117	23.6141	22.5843	18.655	31.3891	15.5637
0.10833	87.524	83.3352		0.0928544	103.738			0.097012	91.5451			0.0921955	115.905			0.0755792	93.986			0.0812475	26.5035			0.0718211	71.7093			0.7	22.6662	21.4092	22.3159	21.5305	17.9936	30.3975	15.3115
0.116668	85.5093			0.100001	113.505	95.6858		0.104479	90.7341	89.8435		0.0992916	115.889			0.0813963	97.4501			0.087501	27.3647			0.077349	76.6813			0.75	23.7014	21.9754	21.5681	21.5029	17.6489	31.0834	14.5592
0.124999	84.3287			0.107142	111.303			0.111939	92.0608			0.106382	113.816	113.817		0.0872086	99.4588			0.0937492	28.077			0.0828723	79.61			0.8	24.7376	23.8648	20.3857	21.2162	18.6335	31.7407	15.8523
0.133337	79.608			0.114289	114.482			0.119406	88.1304			0.113478	108.806			0.0930258	98.8339			0.100003	28.5465	26.0092		0.0884002	85.734			0.85	26.109	22.6753	20.8116	22.0196	19.4043	32.3418	15.9366
0.141668	79.009			0.12143	114.658			0.126867	90.6815			0.120568	104.494			0.098838	103.063			0.106251	28.4168			0.0939235	85.7089			0.9	26.4051	14.6807	20.5229	21.711	19.6373	34.2651	14.9274
0.149999	79.4262			0.12857	108.305			0.134327	88.4634			0.127658	105.968			0.10465	102.917	94.0721		0.112499	33.2561			0.0994467	88.8106			0.95	22.0854	7.59399	19.8391	20.5858	20.0605	29.4522	15.1814
0.158337	73.3424	80.204		0.135717	109.09			0.141794	89.6776			0.134754	99.0081			0.110467	100.621			0.118752	33.3283			0.104975	89.7686	78.3188		1	12.4993	4.97999	16.4219	14.2693	19.3088	21.0688	11.1233
0.166668	67.3563			0.142858	105.905			0.149255	88.1452			0.141844	99.9958			0.11628	96.8425			0.125001	32.3719			0.110498	89.5756
0.174999	64.7303			0.149999	103.428	109.596		0.156715	86.2138	89.0533		0.148934	96.4115			0.122092	95.5438			0.131249	34.2632			0.116021	95.9182
0.183337	62.244			0.157146	99.4193			0.164182	81.9238			0.15603	95.2893	101.425		0.127909	97.7095			0.137502	36.4209			0.121549	95.1749
0.191668	59.6907			0.164286	96.0933			0.171642	81.2614			0.163121	90.0865			0.133721	92.5305			0.14375	36.5672			0.127072	92.3492
0.199999	52.4981			0.171427	91.7042			0.179103	76.2985			0.170211	85.0665			0.139534	90.5115			0.149999	39.3974	34.2527		0.132596	92.1572
0.208337	50.8211	59.5567		0.178574	89.3566			0.18657	76.7624			0.177307	83.6952			0.145351	87.2775			0.156252	37.8696			0.138124	92.3083
0.216667	46.7299			0.185715	83.9372			0.19403	70.9534			0.184397	76.3318			0.151163	85.0548	93.2614		0.1625	42.9547			0.143647	88.0712
0.224998	45.3534			0.192856	78.3674			0.201491	71.6742	76.4789		0.191487	76.8187			0.156975	85.0625			0.168749	41.9192			0.14917	90.236
0.233336	42.9412			0.200002	76.043	87.8459		0.208958	68.0235			0.198583	71.0573			0.162793	79.8367			0.175002	43.2622			0.154698	90.2337	91.7805
0.241667	40.382			0.207143	73.2635			0.216418	67.6072			0.205673	68.0705	78.7324		0.168605	77.9772			0.18125	44.6301			0.160221	88.6449
0.249998	39.3443			0.214284	69.7186			0.223879	64.8606			0.212763	69.7575			0.174417	74.4362			0.187498	45.4978			0.165745	83.4262
0.258336	37.1965	41.9912		0.221431	66.2384			0.231346	61.1622			0.21986	61.226			0.180234	72.6673			0.193752	42.9814			0.171272	83.9503
0.266667	38.8829			0.228572	65.3656			0.238806	60.2255			0.22695	60.1542			0.186047	70.0597			0.2	44.3031			0.176796	81.2774
0.274998	34.9306			0.235712	62.6541			0.246267	59.1198			0.23404	57.7391			0.191859	69.4173			0.206248	47.3559	43.4193		0.182319	77.5019
0.283336	33.7669			0.242859	57.638			0.253733	55.4994	62.3569		0.241136	57.1623			0.197676	68.122			0.212502	46.0438			0.187847	76.6424
0.291667	33.0715			0.25	56.2366			0.261194	52.9287			0.248226	55.4268			0.203488	65.1652	73.6382		0.21875	46.2511			0.19337	74.253
0.299998	32.3645			0.257141	53.4839	63.0748		0.268654	52.0739			0.255316	53.623	59.2984		0.209301	63.4012			0.224998	46.4877			0.198893	68.888
0.308336	31.3535	34.0616		0.264288	51.1631			0.276121	49.5622			0.262412	48.9411			0.215118	63.2953			0.231251	43.9459			0.204421	68.6259	78.1344
0.316667	31.9488			0.271428	49.4427			0.283582	48.4332			0.269502	51.1192			0.22093	60.9336			0.2375	46.7996			0.209945	66.4899
0.324998	31.0628			0.278569	50.448			0.291042	46.1295			0.276592	48.908			0.226742	58.8564			0.243748	46.1184			0.215468	65.0561
0.333336	28.2062			0.285716	47.1416			0.298509	44.0922			0.283689	45.7892			0.23256	55.9919			0.250001	50.732	46.6255		0.220996	60.9778
0.341667	30.856			0.292857	47.1739			0.30597	44.7227	48.2775		0.290779	44.8147			0.238372	53.5436			0.25625	49.6369			0.226519	60.5994
0.350005	29.7981	30.3744		0.300004	44.4014			0.313436	43.3553			0.297875	45.945			0.244189	53.4949			0.262503	50.0598			0.232047	55.6579
0.358335	31.2133			0.307144	44.233	47.7148		0.320897	40.1794			0.304965	45.7983	47.3308		0.250001	53.5066	57.8779		0.268751	47.465			0.23757	55.8442
0.366666	28.2213			0.314285	41.1828			0.328358	39.5675			0.312055	45.4835			0.255813	53.3812			0.274999	48.2979			0.243094	53.0668
0.375004	27.3555			0.321432	41.9462			0.335824	38.8821			0.319151	41.9769			0.261631	50.031			0.281253	49.509			0.248622	48.0719
0.383335	28.1272			0.328573	38.5824			0.343285	39.1649			0.326241	42.0666			0.267443	51.0322			0.287501	48.2856			0.254145	47.3819	57.0162
0.391666	26.9857			0.335714	40.0555			0.350745	36.4253			0.333331	40.3867			0.273255	47.6259			0.293749	47.1962			0.259668	46.4654
0.400004	26.4881	28.0652		0.34286	37.681			0.358212	37.5514	39.3037		0.340427	40.2229			0.279072	49.502			0.300003	49.3834	48.7292		0.265196	44.7247
0.408335	24.8221			0.350001	36.2294			0.365673	35.8821			0.347518	38.9138			0.284885	46.8287			0.306251	48.2898			0.270719	43.8014
0.416666	25.6802			0.357142	36.1792	38.8367		0.373133	34.2853			0.354608	43.2445	41.7564		0.290697	46.6926			0.312499	48.9223			0.276243	42.771
0.425004	25.685			0.364289	34.9964			0.3806	33.5157			0.361704	39.2729			0.296514	46.1405			0.318752	46.4029			0.28177	44.2204
0.433335	24.8331			0.37143	35.448			0.388061	35.2034			0.368794	39.246			0.302326	45.4134	48.5164		0.325001	46.9324			0.287294	40.5834
0.441666	24.9868			0.37857	33.1488			0.395521	33.1856			0.375884	36.3573			0.308139	44.6228			0.331249	44.8982			0.292817	41.2523
0.450004	23.8347	24.9736		0.385717	33.9229			0.402988	32.2378	34.0516		0.38298	39.4146			0.313956	42.4124			0.337502	45.2998			0.298345	41.8648
0.458335	24.009			0.392858	33.803			0.410449	31.8345			0.39007	38.8903			0.319768	42.5408			0.34375	47.1014			0.303868	38.0687	42.6391
0.466666	23.1858			0.399999	33.4211			0.417909	32.9397			0.39716	37.1812			0.32558	39.8697			0.349999	44.3586			0.309391	38.7543
0.475004	22.2353			0.407146	32.0717	33.8303		0.425376	30.5661			0.404256	38.1326	38.3564		0.331398	43.1019			0.356252	45.0214	46.3585		0.314919	37.9446
0.483335	22.4449			0.414286	31.4086			0.432836	30.078			0.411347	34.9144			0.33721	40.2634			0.3625	44.1407			0.320443	37.458
0.491666	21.4724			0.421427	29.2133			0.440297	30.5293			0.418437	33.5696			0.343022	38.6982			0.368749	42.9213			0.325966	35.9904
0.500004	21.9444	22.5486		0.428574	30.6828			0.447764	29.8092			0.425533	32.5245			0.348839	38.908			0.375002	46.7617			0.331494	36.5812
0.508334	22.0034			0.435715	29.4498			0.455224	28.3378	30.585		0.432623	33.9185			0.354652	37.491	40.8787		0.38125	42.3264			0.337017	34.7251
0.516665	22.0186			0.442856	27.7671			0.462685	27.3509			0.439713	31.4519			0.360464	36.9255			0.387498	43.9939			0.34254	34.0843
0.525003	20.6711			0.450002	29.8853			0.470152	27.072			0.446809	30.6071			0.366281	32.7747			0.393752	40.1758			0.348068	34.7926
0.533334	19.5637			0.457143	27.586	29.4276		0.477612	28.5137			0.453899	30.9521	32.5626		0.372093	33.962			0.4	42.3621			0.353592	35.4803	36.2012
0.541665	21.5533			0.464284	27.6577			0.485073	27.2092			0.460989	30.5883			0.377906	33.6314			0.406248	45.44	43.5152		0.359115	34.1538
0.550003	21.0179	21.138		0.471431	26.5035			0.492539	27.207			0.468085	30.8102			0.383723	34.0833			0.412502	43.7533			0.364643	31.8423
0.558334	21.5555			0.478572	24.8495			0.5	29.0957	27.7414		0.475176	28.8306			0.389535	34.2231			0.41875	42.1211			0.370166	31.2886
0.566665	21.7332			0.485712	26.0305			0.507461	25.3679			0.482266	27.6874			0.395347	33.3374			0.424998	41.3416			0.375689	32.1296
0.575003	20.2331			0.492859	26.1039			0.514927	26.6642			0.489362	26.1395			0.401164	32.1173	33.8818		0.431251	42.3185			0.381217	30.9862
0.583334	22.5134			0.5	25.6882	26.1389		0.522388	26.8632			0.496452	29.1805			0.406977	31.7999			0.4375	42.4423			0.38674	30.0845
0.591672	22.9821			0.507147	26.5143			0.529855	23.8174			0.503548	28.4423	28.8113		0.412794	30.8471			0.443753	38.8099			0.392268	31.6107
0.600003	21.8004	21.8029		0.514288	22.9641			0.537315	25.695			0.510638	27.9919			0.418606	30.63			0.450001	39.952	41.5341		0.397792	28.8864
0.608334	21.7125			0.521428	24.2867			0.544776	22.4033			0.517728	25.8924			0.424418	31.1783			0.45625	40.0745			0.403315	29.3218	31.1449
0.616672	21.6319			0.528575	24.2652			0.552243	23.886	24.9567		0.524824	26.9474			0.430236	30.9557			0.462503	39.2954			0.408843	27.9064
0.625003	20.7646			0.535716	22.3064			0.559703	25.2263			0.531915	26.1987			0.436048	30.2937			0.468751	39.7036			0.414366	25.1791
0.633334	21.6116			0.542857	21.7168			0.567164	24.4181			0.539005	26.9389			0.44186	29.8152			0.474999	38.1046			0.419889	24.9479
0.641672	21.3802			0.550004	21.2993	23.3361		0.57463	24.7651			0.546101	26.5704			0.447677	28.76			0.481253	38.6677			0.425417	23.4264
0.650002	22.2057	21.5511		0.557144	21.5771			0.582091	24.2569			0.553191	26.2017	26.6774		0.45349	30.1717	30.4946		0.487501	37.5162			0.430941	24.5173
0.658333	24.7539			0.564285	22.4032			0.589551	24.8243			0.560281	24.6525			0.459302	28.2263			0.493749	39.0755			0.436464	24.6551
0.666671	21.9283			0.571432	21.034			0.597018	23.4			0.567377	26.6382			0.465119	27.1399			0.500003	37.5724	38.7513		0.441992	23.2813
0.675002	22.2733			0.578573	22.9642			0.604479	24.732	24.5175		0.574467	25.4256			0.470931	28.6117			0.506251	36.5786			0.447515	22.8336
0.683333	21.7517			0.585714	22.077			0.611939	24.4771			0.581557	24.7434			0.476744	28.6169			0.512499	36.6167			0.453038	22.0194	24.3074
0.691671	21.9818			0.59286	21.2384			0.619406	24.7425			0.588653	25.4363			0.482561	26.7703			0.518752	36.4766			0.458566	22.1387
0.700002	23.3085	22.6662		0.600001	22.7742	22.0097		0.626867	23.1473			0.595744	24.4779			0.488373	26.6874			0.525001	36.2244			0.464089	21.5101
0.708333	22.6318			0.607142	22.7294			0.634327	22.6008			0.602834	24.5322	25.1294		0.494185	24.6823			0.531249	35.3105			0.469613	21.3354
0.716671	25.2598			0.614289	22.3602			0.641794	22.8241			0.60993	23.853			0.500002	25.2156	26.9938		0.537502	31.7131			0.475141	22.3233
0.725002	23.1162			0.62143	23.1774			0.649255	23.1423			0.61702	22.4259			0.505815	23.7219			0.54375	33.7183			0.480664	21.118
0.733333	22.4358			0.62857	20.5035			0.656715	24.3645	23.6141		0.62411	22.2252			0.511627	23.4005			0.549999	35.93			0.486187	19.923
0.741671	24.851			0.635717	21.328			0.664182	23.8815			0.631206	22.476			0.517444	23.7857			0.556252	32.3599	34.992		0.491715	19.6699
0.750002	23.9139	23.7014		0.642858	20.9893			0.671642	23.0117			0.638296	22.0156			0.523256	22.9802			0.5625	31.8299			0.497238	18.8261
0.758333	23.3548			0.649999	20.8943	21.7117		0.679103	22.0402			0.645386	22.1741			0.529069	21.3228			0.568749	32.5506			0.502762	19.2347	20.6755
0.766671	23.9255			0.657146	21.7186			0.68657	21.5016			0.652482	22.9202	22.5843		0.534886	21.2559			0.575002	31.5895			0.50829	19.5422
0.775002	25.7823			0.664286	21.0035			0.69403	21.6531			0.659573	23.2851			0.540698	21.443			0.58125	28.9545			0.513813	19.9577
0.783333	25.1632			0.671427	20.2204			0.701491	21.8072	22.3159		0.666663	22.106			0.54651	20.8421			0.587498	32.3661			0.519336	17.5361
0.79167	24.5822			0.678574	22.8297			0.708958	22.2			0.673759	19.9411			0.552328	20.0001	22.0836		0.593752	30.5703			0.524864	19.5726
0.800001	25.6176	24.7376		0.685715	22.7831			0.716418	21.2072			0.680849	22.2417			0.55814	19.3006			0.6	31.3951	31.3223		0.530387	17.884
0.808332	25.2117			0.692856	22.3441			0.723879	22.1393			0.687939	20.9626			0.563952	19.392			0.606248	28.999			0.535911	19.5436
0.81667	25.7164			0.700002	20.9445			0.731346	22.3335			0.695035	21.1871			0.569769	19.609			0.612502	33.1974			0.541438	18.2405
0.825001	26.6877			0.707143	19.43	21.4092		0.738806	21.0429			0.702125	20.9901	21.5305		0.575582	22.3569			0.61875	33.0607			0.546962	18.0054
0.833339	25.9904			0.71429	20.8818			0.746273	21.3089			0.709221	21.8166			0.581399	20.0763			0.625003	31.125			0.55249	17.5298	18.6458
0.84167	26.9163			0.721431	19.8925			0.753733	20.7448	21.5681		0.716311	20.5071			0.587211	18.9646			0.631251	31.6138			0.558013	16.5428
0.850001	26.1318	26.109		0.728572	22.3191			0.761194	21.5231			0.723402	22.2676			0.593023	19.5278			0.6375	30.62			0.563536	16.3613
0.858339	27.3953			0.735718	21.7061			0.768661	20.4851			0.730498	20.5887			0.59884	17.7039			0.643753	30.1834			0.569064	15.2605
0.86667	26.5579			0.742859	24.491			0.776121	20.5594			0.737588	23.1416			0.604653	19.9557	19.6541		0.650001	32.3135	31.3891		0.574587	15.5992
0.875001	28.3007			0.75	21.7167			0.783582	19.1573			0.744678	20.5606			0.610465	19.2599			0.65625	30.6296			0.580111	14.9045
0.883339	26.4171			0.757147	22.8208	21.9754		0.791049	19.9203			0.751774	21.6383	21.5029		0.616282	18.6568			0.662503	30.2302			0.585639	15.305
0.89167	25.9469			0.764288	22.4354			0.798509	20.5136			0.758864	21.2724			0.622094	18.6753			0.668751	29.8432			0.591162	16.2176
0.900001	23.8124	26.4051		0.771428	24.767			0.80597	20.5413	20.3857		0.765954	20.9534			0.627907	19.5317			0.674999	31.1662			0.596685	15.833
0.908339	26.3002			0.778575	23.6487			0.813436	21.1451			0.77305	21.4471			0.633724	18.2247			0.681253	31.2194			0.602213	15.3176	15.7046
0.91667	24.2461			0.785716	22.6757			0.820897	19.5181			0.78014	21.1866			0.639536	18.6001			0.687501	31.7245			0.607736	16.6706
0.925001	23.239			0.792857	25.5591			0.828358	21.1653			0.787231	21.6271			0.645348	17.4986			0.693749	30.0672			0.61326	16.0234
0.933338	21.1501			0.800004	23.6075			0.835824	20.9732			0.794327	19.7712			0.651166	18.7929	18.655		0.700003	29.8665			0.618787	15.5217
0.941669	19.8206			0.807144	24.3602	23.8648		0.843285	20.7426			0.801417	22.2555	21.2162		0.656978	17.5796			0.706251	28.8308	30.3975		0.624311	15.6146
0.95	17.7561	22.0854		0.814285	24.6774			0.850745	21.5585			0.808507	21.5936			0.66279	17.9502			0.712499	31.7438			0.629834	14.7707
0.958338	16.581			0.821432	22.5931			0.858212	20.5784	20.8116		0.815603	23.1094			0.668607	17.8981			0.718752	32.5456			0.635362	15.4515
0.966669	15.169			0.828573	24.9159			0.865673	22.233			0.822693	19.6516			0.67442	17.8354			0.725001	28.7604			0.640885	15.9028
0.975	13.187			0.835714	22.8835			0.873133	20.2419			0.829783	22.6017			0.680232	18.4886			0.731249	30.9094			0.646408	15.3094
0.983338	12.1734			0.84286	22.8924			0.8806	21.0117			0.836879	20.8833			0.686049	18.1639			0.737502	29.5639			0.651936	14.8083	15.5637
0.991669	9.97047			0.850001	20.5053			0.888061	21.2243			0.84397	22.794			0.691861	18.169			0.74375	30.4651			0.65746	16.2998
1	7.91517	12.4993		0.857142	20.2598	22.6753		0.895521	18.736			0.85106	23.5034	22.0196		0.697674	17.2974			0.749999	33.596	31.0834		0.662983	15.7791
				0.864289	20.8047			0.902988	19.6905	20.5229		0.858156	22.9784			0.703491	18.56	17.9936		0.756252	31.5491			0.668511	15.7399
				0.87143	18.4175			0.910449	20.7302			0.865246	20.7455			0.709303	17.9146			0.7625	33.7125			0.674034	14.7331
				0.87857	17.3423			0.917909	20.4581			0.872336	22.1571			0.715115	17.329			0.768749	30.0584			0.679557	14.8234
				0.885717	13.1918			0.925376	19.4262			0.879432	21.1847			0.720933	17.9038			0.775002	30.9539			0.685085	14.6177
				0.892858	11.8889			0.932836	21.6557			0.886522	21.7185			0.726745	17.7505			0.78125	30.4934			0.690609	16.1274
				0.900005	11.5466			0.940303	18.5461			0.893618	21.8658			0.732562	19.219			0.787504	33.3361			0.696136	14.2224
				0.907146	9.5735	14.6807		0.947764	19.6243			0.900708	21.3266	21.711		0.738374	18.1606			0.793752	32.0946			0.70166	15.4613	15.3115
				0.914286	9.0717			0.955224	18.4329	19.8391		0.907799	21.5126			0.744187	17.2909			0.8	31.7277	31.7407		0.707183	14.3845
				0.921433	9.06808			0.962691	17.3038			0.914895	19.7709			0.750004	15.9389			0.806253	32.3461			0.712711	13.7745
				0.928574	8.53586			0.970152	16.467			0.921985	22.5137			0.755816	17.3327	17.6489		0.812502	31.1838			0.718234	14.1821
				0.935715	8.09678			0.977612	16.0716			0.929075	20.5829			0.761628	17.6668			0.81875	34.4719			0.723757	14.233
				0.942862	6.58613			0.985079	17.3183			0.936171	20.2268			0.767445	17.8726			0.825003	31.5225			0.729285	15.5092
				0.950002	5.89611			0.992539	16.3875			0.943261	20.8922			0.773258	19.6938			0.831251	32.6893			0.734809	14.9581
				0.957143	5.90328	7.59399		1	14.983	16.4219		0.950351	18.6012	20.5858		0.77907	20.1777			0.8375	30.9172			0.740332	15.0894
				0.96429	6.01791							0.957447	17.6894			0.784887	19.3133			0.843753	31.0658			0.74586	14.0231
				0.971431	5.41941							0.964537	15.642			0.790699	17.071			0.850001	33.7393			0.751383	14.879	14.5592
				0.978572	5.34051							0.971628	15.5608			0.796512	19.2451			0.85625	33.1403	32.3418		0.756906	14.3203
				0.985718	4.49102							0.978724	14.4646			0.802329	18.0277	18.6335		0.862503	34.5076			0.762434	14.0206
				0.992859	4.50718							0.985814	12.2431			0.808141	17.8569			0.868751	34.6239			0.767958	17.1923
				1	4.10391	4.97999						0.992904	12.735			0.813953	19.8828			0.874999	34.3713			0.773481	16.6542
												1	11.5503	14.2693		0.819771	19.2782			0.881253	36.1824			0.779009	15.6571
																0.825583	20.1396			0.887501	35.6162			0.784532	16.7894
																0.831395	19.7789			0.893749	33.7812			0.790055	17.3196
																0.837212	20.6199			0.900003	32.806			0.795583	15.7151
																0.843025	18.9188			0.906251	32.232	34.2651		0.801107	15.0023	15.8523
																0.848837	19.9864			0.912499	34.7409			0.80663	17.2994
																0.854654	18.1772	19.4043		0.918752	33.9554			0.812158	15.1637
																0.860466	19.1149			0.925001	28.1282			0.817681	15.3976
																0.866279	19.4422			0.931249	31.1749			0.823204	16.5378
																0.872096	20.0431			0.937502	27.0202			0.828732	14.7525
																0.877908	18.9082			0.94375	25.8388			0.834255	17.0983
																0.88372	18.2831			0.949999	25.3071	29.4522		0.839779	16.4568
																0.889537	19.6482			0.956252	23.4225			0.845307	16.3113
																0.89535	21.1325			0.9625	21.4091			0.85083	14.412	15.9366
																0.901167	20.5264	19.6373		0.968754	20.4408			0.856358	15.4665
																0.906979	19.7136			0.975002	19.6523			0.861881	14.3562
																0.912791	17.9489			0.98125	21.2741			0.867404	15.0446
																0.918609	19.1609			0.987504	22.4412			0.872932	14.3076
																0.924421	20.092			0.993752	20.7342			0.878456	14.6728
																0.930233	19.0168			1	19.1765	21.0688		0.883979	15.5216
																0.93605	20.8097							0.889507	15.3102
																0.941863	22.0731							0.89503	14.5186
																0.947675	21.5845							0.900553	15.1485	14.9274
																0.953492	20.1453	20.0605						0.906081	15.473
																0.959304	20.4053							0.911604	15.9759
																0.965117	19.3561							0.917128	15.1504
																0.970934	18.8687							0.922656	14.2047
																0.976746	20.7399							0.928179	15.1866
																0.982558	22.154							0.933702	14.6894
																0.988375	19.147							0.93923	16.0061
																0.994188	17.4519							0.944753	15.3387
																1	16.347	19.3088						0.950277	14.6079	15.1814
																								0.955805	12.2835
																								0.961328	11.5315
																								0.966851	12.0329
																								0.972379	12.377
																								0.977902	11.8024
																								0.983426	10.7329
																								0.988953	10.6978
																								0.994477	10.2003
																								1	8.45122	11.1233
