# Supplementary material for: Crumbs organizes the transport machinery by regulating apical levels of PI(4,5)P2 in Drosophila
Source: eLife. 2019 Nov 7;8:e50900. doi: 10.7554/eLife.50900 (PMC6881148; doi:10.7554/eLife.50900)
Supplement: Figure 6—source data 17. [file elife-50900-fig6-data17.xlsx]

## Sheet: Image7
X0	Y0	Y1	Y2	Y3	Y4	Y5	Y6	Y7	Y8	Y9	Y10	Y11	Y12	Y13	Y14	Y15	Y16	Y17	Y18	Y19	Y20	Y21	Y22	Y23	Y24	Y25		Ap-basal	Avg intensity
0	21.49	19.516	16.3192	17.162	22.812	26.125	25.2919	29.6417	23.8785	55.9376	74.0237	41.8688	44.519	43.8171	32.8846	26.4759	19.8546	34.0269	27.916	32.3011	42.9716	34.1729	15.6577	22.1166	29.9758	25.5607		0	31.0122
0.119	21.435	20.78	10.6954	12.555	20.624	34.387	24.8792	16.5281	24.2358	47.4687	76.7082	41.8575	52.167	55.3136	39.1143	30.3945	23.9433	28.2391	26.772	41.6259	30.8434	29.9548	17.9374	25.9661	19.8093	19.5801		0.00806217	30.5313
0.2381	16.916	19.839	13.209	18.89	28.079	33.592	38.1494	27.5482	27.8742	51.7691	66.8665	38.9103	73.104	56.2208	57.7908	40.2417	20.4268	34.7423	39.791	27.7833	31.8765	28.5196	26.6011	30.9225	38.1185	17.0934		0.0161311	34.8029
0.3571	24.079	25.609	17.4458	17.003	35.549	32.42	34.5356	27.5695	34.3572	46.4683	54.6455	46.6517	61.974	56.5335	48.1399	35.6581	26.109	30.4424	41.254	33.2054	42.3509	22.7796	37.8365	32.3394	43.4214	28.7282		0.0241933	36.0425
0.4761	21.113	22.154	14.8282	22.54	26.585	43.265	48.6336	33.7421	23.3217	55.7732	72.8184	46.8381	86.225	62.1829	56.3727	35.2327	27.0291	42.3578	33.174	48.5177	38.3844	28.424	28.1995	33.5943	33.1522	21.1414		0.0322554	38.6769
0.5952	34.13	26.945	24.8795	29.62	36.005	42.269	63.4553	22.8011	27.32	32.1463	58.6461	43.6566	68.228	68.2121	49.1176	32.2841	23.6666	26.7544	53.344	50.8469	32.3631	32.008	40.1925	30.7685	46.0645	20.4929		0.0403244	39.0853
0.7142	40.262	44.41	31.3886	26.953	34.936	48.712	66.6721	30.7124	29.8611	54.2924	66.2382	57.7349	75.775	64.4944	77.37	48.6324	30.2426	37.7619	48.039	65.7768	31.621	44.5098	31.2831	34.963	42.6174	33.4758		0.0483866	46.1052
0.8332	56.02	52.319	30.7293	41.856	27.559	59.799	64.3309	29.6287	32.0903	55.8059	61.5674	59.3764	67.507	87.8781	67.9677	35.4578	29.1984	36.7694	64.144	53.3608	41.5828	33.3609	47.176	47.2311	44.2357	22.4019		0.0564487	48.0521
0.9523	57.998	75.975	37.2793	36.718	46.596	57.462	61.4493	48.7211	34.6871	44.1499	65.4265	65.2868	75.214	82.2497	82.2587	50.1309	33.7453	45.119	63.177	57.4008	37.5393	35.7697	38.0478	33.4516	52.194	24.0607		0.0645177	51.6195
1.0713	57.37	73.227	44.8163	49.266	39.962	65.562	58.7443	43.3093	34.8759	51.2076	69.8451	72.8414	88.954	78.6657	70.2127	59.2747	27.2823	42.2056	66.877	67.3228	39.7547	49.2325	30.7098	43.5185	54.6478	27.411		0.0725798	54.1191
1.1903	77.741	82.74	41.6084	63.287	49.072	80.934	82.6519	46.4385	26.1801	56.0255	56.7951	60.8619	83.898	81.8435	75.5369	53.302	32.1705	38.4355	70.457	74.9533	52.6827	41.3496	52.6551	43.6422	58.0745	23.9322		0.080642	57.9719
1.3094	84.432	84.96	48.2509	57.577	56.71	78.662	88.0642	44.429	37.8667	59.5375	63.6487	61.9663	88.925	87.886	72.7029	49.8554	25.9574	37.7822	76.028	66.4174	57.4771	49.2037	46.9936	42.7215	67.2012	37.6726		0.0887109	60.4972
1.4284	83.023	95.98	60.3623	65.686	74.495	75.532	79.7953	52.2804	37.8573	44.1138	68.7503	62.1217	85.54	67.1168	77.6837	63.3048	38.2306	52.9987	92.39	71.8466	60.7938	54.0773	42.4369	58.1932	56.3155	38.507		0.0967731	63.8243
1.5474	86.894	85.447	76.4163	73.284	59.169	58.207	65.9123	53.3702	30.6234	53.9457	60.7219	70.1109	98.648	74.8468	74.7905	69.3782	31.0403	39.5838	72.006	80.5067	58.3434	60.0844	34.1339	46.6136	54.687	42.9902		0.104835	61.9906
1.6665	104.769	96.062	72.422	79.449	61.893	67.523	76.1387	48.5509	45.3552	50.6822	66.5724	65.5355	97.85	77.9215	84.3491	80.3025	22.491	53.9006	69.119	70.0218	53.4004	76.742	67.6128	58.3155	69.336	36.515		0.112904	67.4165
1.7855	101.286	86.177	70.6413	72.983	82.425	95.301	90.0333	78.5952	39.2885	50.9039	66.9189	79.9641	75.494	64.5886	97.5596	72.3868	15.9827	55.1947	51.605	64.0967	57.8798	66.3914	65.0002	59.673	63.445	47.8625		0.120966	68.1414
1.9046	107.155	87.287	77.2412	94.625	86.236	77.866	88.2117	67.3469	45.7917	49.9697	87.4078	79.9603	97.117	79.436	78.9052	76.3552	40.1092	53.5984	75.56	74.8128	60.2201	70.0437	69.0391	67.6621	54.8898	41.4723		0.129035	72.6277
2.0236	107.133	112.131	72.7135	103.188	80.605	89.495	78.6725	70.5486	44.1318	55.2432	78.1389	82.9531	90.821	81.7668	76.1452	82.0897	48.3159	64.3474	88.361	76.3277	73.3164	76.0441	83.1596	53.2382	68.9177	53.2323		0.137097	76.5783
2.1426	103.503	107.874	97.855	101.796	105.293	88.118	76.5303	89.9115	56.1224	59.8697	79.6984	75.3738	99.033	84.6359	97.0113	72.6515	59.4155	57.2422	76.288	79.6735	67.0373	96.4948	79.4293	62.4492	73.4861	52.9705		0.14516	80.7601
2.2617	99.613	103.737	79.1096	94.786	99.173	87.692	86.2021	74.0952	60.7787	49.6444	69.2138	95.2165	100.677	83.8783	85.1424	72.685	46.2299	60.5015	88.305	93.998	69.1622	91.5742	60.9615	66.7759	76.2636	58.4586		0.153229	78.9952
2.3807	101.442	94.438	73.5901	80.316	111.335	106.036	91.3733	79.3839	72.4204	62.0067	88.5245	87.2416	103.346	76.8869	74.6877	79.9673	45.702	62.5828	90.702	89.462	66.5347	92.6655	75.0473	67.1268	57.0017	69.9299		0.161291	80.7596
2.4997	108.383	81.662	79.1606	92.039	102.419	93.679	92.4978	80.7891	60.1146	79.6674	76.0306	85.6529	94.38	89.5257	81.5786	66.6817	56.1126	58.184	99.237	84.8534	78.3262	95.5898	78.1776	69.9143	61.1882	66.9343		0.169353	81.2607
2.6188	105.903	77.376	76.4135	90.961	92.071	89.838	93.1442	83.1625	74.8155	62.8869	73.0035	75.2632	92.804	69.6266	89.1316	102.753	58.0176	77.107	113.835	82.4635	75.1376	101.031	87.5475	60.0123	64.1357	53.7063		0.177422	81.621
2.7378	94.882	84.02	70.7254	83.65	88.833	106.838	93.5601	85.8055	67.784	42.6138	74.6218	85.3454	87.938	62.6361	80.8462	77.1545	64.2769	68.0957	99.597	77.646	81.5032	77.3685	64.9919	57.8032	64.6004	81.0959		0.185484	77.8551
2.8568	107.831	73.515	68.4611	92.256	84.918	88.483	104.435	75.9451	80.8607	66.1677	74.7898	80.3084	77.457	75.11	86.5113	81.6786	59.7303	75.5002	106.707	85.9963	86.0957	86.2832	85.1805	56.3944	72.4653	77.589		0.193546	81.1796
2.9759	87.917	73.018	77.7162	106.606	88.203	87.27	90.2519	85.3963	67.6979	68.6718	62.6452	86.3646	101.536	82.8835	93.816	74.002	70.3886	86.2149	102.098	90.8006	93.8547	90.8273	66.181	69.4653	83.3596	75.8275		0.201615	83.1928
3.0949	88.537	85.693	68.7165	83.573	85.359	95.837	88.1645	82.0591	72.7198	57.3789	78.8173	78.866	97.493	77.3531	63.8721	78.3628	64.2262	89.147	110.416	71.6439	94.5836	85.6782	61.7663	71.5778	71.5179	70.4711		0.209677	79.7627
3.2139	95.997	83.984	76.9247	103.536	84.481	94.27	83.3531	80.8835	65.3377	63.7087	62.4895	62.3403	101.592	86.574	71.7096	70.5829	80.0137	74.6369	114.717	91.245	88.0161	93.5055	68.663	73.869	81.0583	70.6294		0.217739	81.6968
3.333	90.029	67.659	69.9194	83.908	83.903	98.321	87.4782	83.5181	54.9395	61.4995	63.5917	74.1453	80.313	90.1227	79.2535	61.5249	85.2584	78.608	94.678	97.4476	87.5141	73.7635	58.7693	50.976	76.2461	84.587		0.225808	77.6144
3.452	85.847	71.442	71.3212	79.35	92.537	89.369	88.791	58.9305	62.2329	58.5971	64.3135	100.527	104.517	71.768	64.6291	56.6183	74.342	91.343	105.228	85.1339	97.6832	85.8099	56.5767	58.2736	84.827	72.5763		0.233871	78.1763
3.571	97.632	70.985	54.0007	80.376	81.105	91.748	96.8617	46.3209	60.3925	57.7784	76.1387	80.5952	105.946	65.6125	83.0858	75.5844	80.2018	75.4318	109.499	78.6707	84.2093	73.9346	55.2801	65.2186	58.6756	73.451		0.241933	76.1052
3.6901	100.653	91.043	62.8176	69.944	71.269	86.207	81.6706	55.5825	53.746	57.016	83.4052	83.9409	83.713	62.7028	82.8174	67.8219	56.9739	83.1158	90.731	103.399	83.9621	78.8717	54.1438	57.2945	69.2214	73.5039		0.250002	74.8295
3.8091	99.174	80.506	51.9333	97.004	82.898	91.882	74.455	61.7514	63.9876	53.7529	88.0522	82.6268	82.61	62.2836	74.8836	52.791	70.3204	88.8664	105.623	85.9142	88.0712	77.9254	59.9817	44.2058	65.647	66.316		0.258064	75.1332
3.9281	98.435	62.824	45.9152	73.44	71.495	89.721	78.5825	64.5504	48.7637	50.6082	64.416	83.7285	81.486	76.3241	65.8414	63.1407	61.4838	90.5575	86.049	74.1808	79.5796	53.4137	44.9954	51.2702	58.7765	69.5288		0.266126	68.8118
4.0472	84.262	64.881	51.2889	76.67	84.841	85.228	64.8635	55.3804	51.1022	44.0463	78.04	72.3904	77.27	73.7166	74.2458	64.4215	49.1678	74.847	110.087	95.9092	84.2255	59.9594	43.4174	49.9224	76.2951	52.3201		0.274195	69.1846
4.1662	92.394	67.313	50.9844	76.258	67.438	80.748	71.0991	55.3794	62.6812	66.8261	72.0527	88.2639	82.626	87.1633	58.7296	52.4746	64.9537	78.7335	96.985	87.224	90.3018	44.0218	31.1382	57.4088	76.482	56.9672		0.282257	69.871
4.2852	92.788	67.317	59.353	78.578	54.448	71.86	84.9291	50.4727	52.1395	67.837	67.0073	76.6868	83.345	86.4341	81.7135	71.1083	60.5081	89.2408	97.869	103.614	87.1262	34.246	35.5354	58.5858	66.9963	48.0048		0.290319	70.2978
4.4043	107.789	48.501	47.0628	69.626	63.696	64.915	82.5087	49.7148	52.0011	66.3604	54.6356	83.0246	54.181	66.4214	87.2298	47.4891	63.9502	85.7618	89.782	97.4921	74.4146	50.1284	32.6143	69.4077	67.3877	54.3157		0.298388	66.5543
4.5233	92.95	47.494	45.211	76.256	68.639	66.735	73.4126	62.2229	53.7103	60.5809	55.7094	85.9516	60.775	68.4305	74.2021	62.4183	57.1996	84.8782	100.882	83.4742	58.1182	28.245	33.6062	53.7647	64.8871	48.8369		0.30645	64.1766
4.6423	99.346	48.306	55.7441	51.775	55.646	76.59	68.7694	41.073	52.8972	47.6886	47.6701	82.0332	65.445	59.4317	55.6344	65.615	44.267	84.3464	88.173	94.0752	69.0501	43.7486	24.3906	58.8928	60.6606	54.0033		0.314513	61.3566
4.7614	81.405	56.452	45.792	64.53	52.211	77.904	85.8857	58.2798	51.2603	60.9946	47.1764	79.0829	64.85	65.3349	57.8469	68.7558	61.2899	73.1062	78.245	86.162	50.0503	34.5058	19.8794	54.7961	66.6185	35.1094		0.322582	60.674
4.8804	78.128	46.36	56.4572	48.662	63.142	79.977	83.7921	48.1989	52.2106	57.4529	48.3688	65.8807	61.037	68.3484	73.9864	50.4709	53.3919	71.9359	69.945	91.1612	53.7734	35.5626	31.9308	51.7455	46.997	44.9301		0.330644	58.9941
4.9995	77.167	47.105	37.5906	43.69	42.493	49.01	74.4061	50.6891	42.8008	45.6798	32.6548	67.409	62.642	69.8126	83.1069	67.3151	67.3157	56.1817	94.475	64.9398	52.6304	42.9687	28.5737	52.6582	58.9552	49.4083		0.338713	56.2184
5.1185	76.318	36.401	42.5537	43.648	46.543	48.879	70.5028	44.0694	28.0969	44.3195	43.7246	62.4319	58.443	58.6988	75.0493	53.4449	63.336	49.409	93.43	93.2116	41.1772	36.1411	31.2491	46.7231	62.9586	37.0649		0.346775	53.3779
5.2375	77.272	41.675	48.7947	35.037	47.786	54.594	79.1732	51.7282	45.3272	51.6431	41.1588	76.8671	69.113	56.0504	67.5646	54.9573	58.1712	72.6874	93.074	92.7827	52.9152	33.6849	27.4886	44.5096	57.5668	39.4285		0.354837	56.5789
5.3566	44.419	47.996	52.6715	43.675	48.2	44.999	80.1796	38.5952	35.0931	40.3773	32.5828	62.3721	56.882	52.169	68.0145	55.6742	46.945	85.5264	110.186	77.8106	59.9632	30.8939	22.2841	44.9571	48.8539	36.4106		0.362906	52.605
5.4756	46.985	45.791	47.8347	42.848	35.479	53.327	58.2533	46.3584	26.4411	50.5987	34.2987	65.0318	53.238	48.2642	79.6697	49.8657	49.5377	72.8837	86.441	80.6316	54.3076	43.4238	26.7994	57.7752	49.5338	53.136		0.370968	52.2598
5.5946	48.673	41.511	48.3247	38.766	37.225	48.721	72.2138	51.7172	20.7586	62.5107	42.0239	51.3834	40.186	49.7054	61.0728	36.6484	48.4767	67.961	76.164	81.9424	40.9075	27.6907	20.134	34.5541	39.3211	35.392		0.37903	47.0763
5.7137	59.404	50.261	53.2822	36.047	34.272	63.203	60.6314	50.7819	37.4759	56.5779	32.9285	55.2007	43.662	33.6399	40.2445	28.9669	36.3501	70.719	81.918	86.8392	47.7199	32.3016	26.4925	45.1261	36.3334	36.6134		0.387099	47.5766
5.8327	54.528	44.542	41.3954	19.863	29.278	51.876	67.2282	33.0664	39.4701	37.8284	39.4733	46.0884	34.333	25.4064	42.0554	29.86	35.9104	68.6634	94.792	83.2393	40.9596	48.3795	34.2426	50.077	33.9897	48.8739		0.395161	45.2084
5.9517	61.943	41.208	39.8736	16.988	21.873	53.089	76.6432	32.8956	38.4605	44.0203	44.3853	53.1743	19.022	27.8639	36.9629	25.0858	26.7578	52.9904	74.856	80.2082	54.0165	34.0879	27.1367	26.6697	32.483	36.7918		0.403224	41.5187
6.0708	48.45	45.255	34.0194	27.948	31.868	37.404	49.3192	35.3846	32.7525	37.4034	33.2647	42.5074	16.165	28.1728	29.5031	32.2271	36.3248	67.3058	108.188	78.3528	64.0484	37.9645	24.6849	29.9364	38.2757	40.2584		0.411292	41.8071
6.1898	53.654	40.053	40.1009	28.33	24.623	57.323	49.3656	26.1024	41.1059	31.9955	37.4162	42.5351	13.866	26.714	33.6209	24.7946	25.0005	68.4018	83.357	82.8111	51.0156	39.314	38.1014	30.2901	32.1275	34.2855		0.419355	40.6271
6.3088	53.327	49.22	30.9411	23.22	30.083	59.8	45.822	24.959	29.0324	30.5764	23.4159	37.2027	12.532	18.1511	26.1538	26.7587	28.0829	55.9854	68.022	81.0224	42.3077	40.6893	27.3972	32.6678	36.7899	39.7984		0.427417	37.4599
6.4279	57.128	44.825	26.7036	26.776	30.636	53.24	35.224	28.9171	24.1962	39.1418	22.7475	33.2237	13.214	14.0601	30.531	19.8085	40.9112	49.9652	74.603	48.3222	52.5609	41.7295	24.7853	35.9487	32.7629	45.6991		0.435486	36.4485
6.5469	45.907	58.034	21.2358	24.345	28.152	57.508	31.2967	21.1392	25.9136	30.093	28.8861	22.7703	11.523	14.9031	23.7458	22.0968	29.2592	39.6144	81.174	63.1314	47.0749	30.1567	21.2556	29.0138	35.9278	28.6585		0.443548	33.5698
6.6659	39.427	45.162	27.0183	29.55	32.559	45.019	32.3707	28.5744	31.1797	31.0909	30.3736	21.9884	8.037	18.1838	25.5095	30.895	45.6497	78.6718	88.374	54.5092	30.8946	27.689	31.8276	21.1168	21.0388	28.4447		0.45161	34.8136
6.785	40.462	45.924	28.7761	20.516	30.638	32.151	38.9683	26.9776	30.4228	28.7603	28.2944	30.6507	15.385	14.9328	22.7283	37.5253	39.4661	58.9747	74.047	51.4261	22.1226	38.5754	37.0561	25.0835	24.1349	32.2335		0.459679	33.7013
6.904	34.93	53.162	31.8819	23.703	20.206	35.991	40.2839	23.4239	25.314	27.8312	22.7439	14.7558	16.227	12.8599	13.4887	20.3171	28.8854	58.7769	79.163	49.0739	13.0122	29.6373	28.8046	27.2392	25.2743	27.8308		0.467741	30.1853
7.023	23.727	62.626	32.9785	23.785	19.81	28.096	31.7164	16.1797	26.8618	22.7452	31.8379	25.5889	15.755	10.3085	17.2724	27.8253	37.1545	63.0209	59.444	48.021	24.8075	25.289	33.9065	42.2326	15.3168	22.3315		0.475803	30.3322
7.1421	17.618	40.995	16.5559	28.021	19.029	38.169	35.6987	15.1928	16.362	37.6287	33.1262	23.4341	11.163	13.3464	25.5956	30.951	54.8836	63.6836	65.586	38.6974	22.1315	22.3131	30.4909	34.6571	25.908	23.8512		0.483872	30.1957
7.2611	15.953	46.904	23.3674	30.073	24.422	37.505	29.6702	24.2692	22.6411	30.9165	21.2411	13.4735	9.705	8.2442	26.816	27.1054	40.1606	62.3677	64.135	49.1003	37.8579	22.6611	28.4931	35.1073	19.2806	23.1669		0.491934	29.7937
7.3801	25.628	45.91	24.8837	14.837	22.073	31.836	29.7303	19.4112	15.8355	27.8109	23.4227	14.0444	15.682	7.2532	14.8846	29.6254	32.927	61.8742	68.472	24.7641	20.2521	19.963	24.2483	27.4712	16.9806	34.01		0.499997	26.6858
7.4992	27.624	45.851	21.6864	20.708	21.804	36.935	35.0959	19.0143	14.6689	35.3604	30.1712	9.1848	14.123	8.3876	16.7047	28.2561	29.3069	53.3908	39.071	35.6341	29.6465	14.5055	29.4671	36.4962	21.8513	29.003		0.508066	27.0749
7.6182	23.598	53.463	20.2866	18.857	22.622	31.512	41.0947	28.3915	25.1501	33.6678	22.8671	20.1967	10.793	5.7786	18.5381	29.0807	35.9771	48.0723	42.859	33.2052	13.3992	19.7568	27.0415	25.9968	23.3755	26.7861		0.516128	27.0141
7.7372	24.468	34.219	20.5372	12.872	19.212	23.459	44.1219	20.6698	27.987	27.7512	16.5597	18.5126	10.006	12.0401	31.1238	25.518	18.9851	46.7829	51.491	29.3247	24.5198	14.1753	21.7917	29.1909	28.3604	24.3859		0.52419	25.3102
7.8563	22.826	48.021	24.0006	17.714	22.18	29.568	24.2549	14.2955	16.8399	23.3153	22.2373	24.5731	10.855	11.1422	22.2407	22.2641	24.5633	30.2989	51.191	24.4736	20.1197	14.9806	18.516	26.9352	29.1641	22.7152		0.532259	23.8187
7.9753	23.52	24.812	32.477	18.008	25.286	26.974	26.2558	20.2126	14.6893	24.1518	22.2331	10.2714	5.085	7.6158	28.3228	31.2346	37.5977	37.1306	51.927	27.3204	30.1222	20.3539	29.6235	23.1624	33.5454	22.9378		0.540321	25.1873
8.0943	24.798	27.624	23.8141	25.536	12.932	26.837	29.7455	36.1812	24.6212	31.2681	16.4318	14.0889	12.032	6.0054	21.8735	20.7956	33.1827	31.3086	53.583	20.7945	23.8661	18.5219	27.8242	27.7204	32.6283	28.5326		0.548383	25.0979
8.2134	15.065	28.428	37.9495	18.751	13.994	21.872	41.0986	25.8761	15.7334	30.0481	14.2043	17.0117	17.531	11.6574	20.1663	24.9725	20.1779	38.5703	47.277	19.6562	21.0397	11.834	27.7596	29.8043	28.9743	18.5836		0.556452	23.7706
8.3324	12.494	28.413	27.7404	25.224	17.338	33.579	48.4208	27.4415	18.3066	20.7934	25.8387	12.5117	14.544	10.6594	18.2053	40.1559	29.5202	31.5477	36.594	27.8095	21.143	15.9748	18.5214	26.5655	23.681	26.8552		0.564514	24.6107
8.4515	17.605	30.711	30.8288	25.897	29.824	26.627	44.3469	16.4652	26.3059	19.7618	22.2365	7.9167	12.144	14.2325	29.5469	24.2807	28.5731	29.734	34.251	29.2263	22.9007	19.218	23.5103	22.1537	18.2463	17.7815		0.572583	24.0125
8.5705	15.513	29.902	36.8041	18.536	23.839	30.478	36.8715	16.2183	22.0853	22.4137	23.2454	6.1653	10.548	10.8512	28.1568	41.8377	34.3487	31.3514	38.869	29.1569	12.2434	20.374	30.6645	25.9356	26.952	21.8587		0.580645	24.8161
8.6895	20.21	16.039	33.7398	26.832	20.403	25.286	39.4318	14.4297	21.5798	23.2749	18.9859	6.6693	10.352	8.0608	28.8978	34.3961	24.754	29.7854	54.405	19.2921	12.9155	16.477	30.5588	27.1495	22.7841	21.849		0.588708	23.4061
8.8086	16.449	26.647	26.8953	23.362	20.129	28.433	26.768	29.0615	22.4169	24.827	21.3739	17.2925	8.136	15.3132	22.515	32.6785	24.1881	27.645	46.241	20.2875	10.9558	9.5861	27.0414	17.3748	17.6634	19.5853		0.596776	22.4179
8.9276	10.588	28.021	22.7286	22.414	19.389	33.598	34.8411	19.3398	20.2233	23.4501	15.8125	9.2754	14.071	17.1559	26.1267	28.5798	22.178	19.9768	37.504	14.664	18.3902	13.9521	23.1527	28.6602	22.957	26.6005		0.604839	22.0634
9.0466	14.332	25.9	23.0774	21.027	21.558	21.649	36.9273	17.4314	20.6909	23.1081	20.9178	9.0584	15.261	15.2904	27.1246	28.099	23.3602	32.1026	39.372	12.5342	11.62	22.5249	32.3291	27.8069	26.6544	20.0302		0.612901	22.6841
9.1657	19.024	24.058	24.6017	12.375	19.46	23	32.7745	37.2326	24.6111	19.0394	21.5772	13.1509	10.787	13.3404	24.1898	35.0162	28.676	31.7183	39.954	12.7164	14.0493	10.7395	19.8453	20.643	17.0898	12.1861		0.62097	21.6098
9.2847	13.164	34.289	20.5907	18.09	14.609	16.715	28.3024	34.5907	20.4156	26.1006	20.9179	18.0258	8.202	5.6738	18.2236	31.6079	24.8675	37.4169	41.782	16.6422	16.2802	16.22	33.305	20.5632	16.2021	24.3595		0.629032	22.1983
9.4037	19.057	23.555	21.3651	14.328	24.558	19.445	22.3556	33.1435	23.7174	18.2303	17.5692	11.446	5.729	15.2975	22.8379	39.0304	18.2555	39.3833	54.049	13.035	23.9716	14.0278	28.2703	34.0888	19.6473	19.915		0.637094	22.9349
9.5228	22.898	30.611	26.3884	12.572	24.945	21.507	31.2843	22.7583	16.9427	23.8852	15.3217	10.0663	9.827	9.8291	29.4423	46.5723	31.4359	23.4367	36.205	12.3997	19.2759	15.3425	14.3162	29.5355	18.1832	24.6932		0.645163	22.2952
9.6418	16.279	21.272	21.9689	14.867	19.811	23.088	25.2377	30.7125	35.4795	18.1202	18.1313	14.7277	12.324	7.1531	30.0677	35.1601	29.4437	32.4776	33.399	11.2115	14.5377	14.5958	28.0961	26.4908	16.0803	28.5912		0.653225	22.2817
9.7608	15.187	22.121	22.063	12.839	23.501	18.679	22.2083	32.5319	23.9319	18.1433	19.2711	11.7988	15.711	11.941	46.3491	28.9058	22.6267	28.9923	32.749	7.3623	6.2749	22.4372	24.1143	39.1762	11.1969	20.6623		0.661287	21.5682
9.8799	13.249	15.19	30.1868	12.865	18.482	21.195	21.1604	24.4555	27.001	18.0706	20.412	12.955	11.526	23.9211	32.3182	35.8356	21.8036	18.5807	26.518	15.4622	10.9761	8.6101	31.6566	32.1089	17.2462	20.6976		0.669356	20.8647
9.9989	15.717	20.931	24.3324	18.439	22.569	28.907	21.0261	34.8548	16.8343	22.8613	23.8954	9.2658	14.019	19.3866	29.7673	36.257	27.569	20.1529	33.961	11.7829	10.0628	13.3766	34.3277	26.5288	24.8144	22.0088		0.677418	22.448
10.1179	11.323	23.835	24.2456	16.993	15.876	24.573	13.7978	29.5272	13.6345	17.7454	28.4291	10.7449	12.789	22.7807	39.3355	29.7331	33.195	19.8912	26.23	5.1041	15.8602	13.5715	34.258	15.9471	15.4876	36.2181		0.685481	21.1971
10.237	17.019	26.086	17.6844	16.288	14.34	31.737	23.3314	28.3619	28.6522	15.9158	23.3143	15.4928	10.231	10.0475	37.935	42.9159	15.8534	26.2803	22.966	17.239	13.6035	18.4167	20.3551	17.0405	21.8963	35.3534		0.69355	21.8599
10.356	14.031	18.167	17.5829	16.594	25.991	24.948	25.7971	20.3051	16.0966	10.0422	24.5004	15.5389	8.987	15.1374	19.7511	39.2711	23.6711	25.4229	19.664	12.519	13.6776	16.2545	24.3527	23.0646	18.4731	33.8421		0.701612	20.1416
10.475	16.032	13.619	18.3072	12.624	17.124	18.825	16.9113	24.8156	10.4061	18.2227	29.5514	11.9429	12.561	18.9069	32.291	40.2159	19.8153	30.6209	25.674	13.5109	11.1681	18.0381	28.5773	14.6878	21.6972	32.7317		0.709674	20.3414
10.5941	13.717	16.292	31.1773	15.41	19.431	22.14	13.2868	18.0934	12.9337	17.3391	29.7146	12.8846	20.229	18.3844	28.0254	35.7138	20.2661	39.597	21.053	7.9623	8.9694	18.4104	28.6512	28.279	17.8161	27.9308		0.717743	20.9118
10.7131	16.778	17.552	36.0244	18.302	21.543	24.854	14.148	32.7258	17.8768	21.9397	33.9606	16.452	14.63	8.9245	18.1605	26.4386	29.5297	35.5571	16.43	11.5082	10.6281	23.2927	26.1242	16.8687	20.6489	29.381		0.725805	21.5492
10.8321	14.446	18.91	20.6219	15.589	26.814	26.121	13.8635	25.1543	24.4511	21.8957	30.98	9.7851	18.142	19.0207	22.8991	16.1263	18.9739	31.8897	26.69	5.6106	12.6279	17.7791	29.0641	25.1947	19.1658	35.0724		0.733867	21.0341
10.9512	8.142	22.715	43.2496	16.792	19.59	19.535	22.4315	21.0337	18.8404	18.7962	18.8939	13.5964	12.819	23.6347	21.5438	21.1909	22.0907	36.5332	12.778	5.2008	12.1804	14.9257	17.3621	31.5644	24.359	28.1293		0.741936	20.3049
11.0702	19.765	16.472	26.3933	12.188	17.311	30.716	18.7376	21.9911	22.6237	16.9056	26.7033	14.1431	18.384	18.4946	29.5393	16.6086	21.2969	25.6268	19.948	15.2084	11.7211	12.34	13.6428	27.7691	28.9718	22.6478		0.749998	20.2365
11.1892	8.093	19.075	19.4785	15.841	23.365	34.66	21.839	36.8669	13.6737	20.962	18.1289	16.6775	14.938	25.3343	15.8853	18.9226	24.5146	29.2642	17.401	13.1814	9.9312	21.4229	15.9616	20.9178	30.8094	30.0611		0.75806	20.6618
11.3083	10.417	21.511	20.0866	23.519	25.863	33.474	15.1857	22.0842	18.2096	22.7787	24.3478	14.8722	22.426	11.4366	12.6975	22.2267	19.1264	23.0232	20.404	6.4168	15.1825	26.6296	16.0253	19.6876	22.4899	18.43		0.766129	19.5596
11.4273	17.761	23.821	21.9636	17.604	20.82	29.122	19.3181	18.4082	16.2843	21.0466	20.5629	18.1926	11.503	32.3925	22.3997	23.0768	18.0664	26.0864	13.322	18.8898	9.5917	16.6186	24.7964	18.5278	18.8032	21.1056		0.774192	20.0032
11.5463	20.599	26.543	34.7617	25.478	21.571	24.434	18.9693	25.8624	15.5225	27.4372	16.1688	17.7532	11.096	32.5004	20.7452	20.3919	19.4223	21.5432	18.959	9.1193	15.9669	25.6294	18.3858	20.951	16.6708	24.252		0.782254	21.1821
11.6654	21.604	30.637	27.4704	11.709	25.105	25.53	20.599	21.0417	16.3501	14.5211	17.6672	15.0911	13.732	20.0165	22.2156	26.6086	15.0729	23.8236	19.308	9.777	12.206	16.0766	16.8154	18.7658	13.512	12.1636		0.790323	18.7469
11.7844	21.912	26.515	24.6233	14.862	18.734	17.473	19.7502	20.6454	18.9503	23.0493	17.0103	20.0278	15.78	26.0592	19.9746	25.9254	27.368	26.1884	26.972	15.6443	11.8248	22.7611	24.8419	25.4172	10.7455	12.7824		0.798385	20.6091
11.9035	16.441	24.594	16.0788	13.927	18.608	24.172	19.2507	11.8151	16.1641	15.7628	23.5588	19.3535	11.974	27.819	16.6661	22.5238	16.7188	19.9605	23.548	13.3322	8.3784	15.3518	25.0396	20.9184	15.928	9.9319		0.806454	17.9929
12.0225	22.09	22.5	21.4189	15.971	19.398	17.791	21.6094	13.4236	26.7092	12.8042	18.4502	21.6498	5.697	17.0962	16.3176	23.044	15.5642	21.7401	22.431	13.1669	17.3635	22.7715	24.2312	18.8185	9.0944	10.6945		0.814516	18.1479
12.1415	22.159	30.206	21.1444	17.233	16.875	19	17.8037	22.2219	19.8226	19.6419	10.6105	20.3295	12.745	19.4413	24.7303	25.1164	19.2674	17.6701	21.096	19.0465	18.9807	14.6829	28.9449	22.6874	16.767	13.4478		0.822578	19.6797
12.2606	24.913	23.682	27.4737	17.855	13.99	9.2	16.6873	23.641	26.1764	18.1195	14.2628	21.8979	15.225	23.8889	20.7433	16.7065	19.0605	16.857	29.66	10.2112	15.9678	21.6973	17.912	9.6408	9.9007	8.5782		0.830647	18.2288
12.3796	21.917	29.735	22.0079	21.739	17.412	15.676	17.1182	18.3977	15.7699	20.9024	14.0366	28.285	6.995	16.3945	22.563	20.4413	22.5356	24.1988	37.47	17.039	16.1952	22.9909	21.7106	12.8637	8.7549	11.9308		0.838709	19.4262
12.4986	30.409	25.524	13.8437	24.41	16.834	14.343	8.557	19.5131	24.9296	15.4742	28.1767	37.4286	13.684	19.3003	13.9966	20.0057	14.2242	14.9974	26.42	15.7439	20.3965	15.2948	21.4053	7.6109	22.3708	13.3272		0.846771	19.1623
12.6177	29.828	16.811	15.4259	13.698	12.698	18.863	17.1159	15.6693	21.8742	18.4315	18.0591	21.299	15.13	17.0198	11.1659	24.3567	14.6607	23.3143	24.776	13.4505	17.4839	29.7366	17.6494	9.2486	16.9014	14.7033		0.85484	18.0527
12.7367	26.453	25.262	18.7194	10.893	12.295	14.638	20.733	5.158	15.5253	18.605	22.1221	14.4572	15.375	19.2177	20.2851	24.5138	19.0268	24.5168	32.94	20.0386	20.1361	36.7995	18.3897	15.3649	13.841	7.4884		0.862903	18.9536
12.8557	18.941	22.214	18.7273	19.394	15.621	13.396	29.6631	14.6507	22.4591	10.741	19.7918	27.1552	15.998	23.2809	18.7914	19.2738	20.4321	17.3995	35.632	18.2299	13.2342	25.6518	15.5834	4.3667	7.6198	5.2489		0.870965	18.2114
12.9748	27.251	19.901	29.2239	15.565	18.104	16.175	20.9311	13.4279	12.0068	10.7608	24.8788	19.8027	11.15	13.9468	21.0047	22.6217	22.0852	23.011	30.652	20.9195	13.4843	20.5773	12.2325	4.771	8.8398	7.1973		0.879034	17.7124
13.0938	17.126	20.698	19.4118	11.896	6.443	13.058	14.8744	9.6409	15.5695	16.1742	24.5029	18.8446	15.23	27.5196	21.147	29.5619	22.4874	17.8108	36.688	22.0741	17.677	23.9882	15.567	8.1418	5.8725	2.7524		0.887096	17.4907
13.2128	25.84	15.172	25.4298	9.99	13.492	13.501	17.6107	6.5789	16.6119	21.4405	15.8877	20.5203	12.185	24.562	28.3045	32.8382	21.9238	19.854	38.453	30.8475	15.2852	13.8805	12.2051	7.7768	7.5327	6.7932		0.895158	18.2506
13.3319	26.187	27.58	22.7646	9.69	11.025	11.227	17.9029	15.2338	10.2926	17.2283	17.7502	10.6627	8.827	28.6937	19.6644	18.5091	21.2867	17.3932	28.532	30.944	17.2741	29.059	12.4321	7.3994	6.3101	3.7072		0.903227	17.2145
13.4509	16.702	25.812	12.2621	18.294	11.611	13.409	20.2874	9.0596	11.2796	13.648	23.9682	7.3665	8.35	23.5107	34.4083	31.7197	18.6349	19.4468	40.295	25.4466	24.1397	25.6029	5.1201	10.6772	4.5872	2.705		0.911289	17.6286
13.5699	19.938	16.689	17.4432	4.037	10.726	11.913	17.5723	11.9194	7.3177	14.374	29.3937	15.5241	8.368	14.5203	19.6996	20.4206	26.1143	13.9845	28.371	27.2308	30.1463	25.5831	9.5573	7.4351	13.104	5.554		0.919351	16.4206
13.689	26.533	17.293	17.7904	9.216	9.175	9.989	13.2803	12.9572	4.0026	12.8952	24.291	11.4341	8.254	14.0234	18.2416	32.5414	17.6958	21.9796	27.672	20.6829	21.4947	31.5708	6.629	4.4293	3.6943	1.9723		0.92742	15.3745
13.808	15.569	17.418	14.1553	10.058	3.221	5.816	9.5038	6.5535	5.0361	11.5926	22.675	12.2579	10.559	16.6545	13.4748	36.9137	27.3047	18.0511	25.64	31.1869	22.9746	25.7038	11.1738	9.82	5.1797	2.7946		0.935482	15.0495
13.927	11.443	15.907	11.2343	5.682	1.798	11.5	9.2394	6.5863	7.1182	13.7892	18.4301	10.3565	7.879	11.5185	12.4275	38.9761	23.4625	26.3116	25.47	22.6105	25.9868	23.3125	14.6347	7.1168	3.9003	3.3788		0.943545	14.2334
14.0461	13.346	16.449	9.6442	6.954	3.181	8.108	11.2934	11.2762	3.2168	12.3385	16.1675	13.2557	9.48	12.276	11.0842	40.7578	26.4525	16.0348	35.123	23.6541	26.7683	14.2997	14.7484	6.2752	6.6937	3.6287		0.951613	14.3272
14.1651	9.34	15.325	14.0566	10.945	10.045	4.341	8.0088	6.8761	9.8094	5.6061	14.4875	15.9164	9.582	13.1335	17.7712	37.8304	30.7466	9.1458	32.125	28.92	11.8176	24.3515	7.5238	6.8466	4.5054	3.6459		0.959676	13.9501
14.2841	14.98	4.977	9.3933	12.674	10.518	7.02	9.845	6.8194	9.0599	5.3702	11.5264	12.2809	7.43	11.3535	14.5467	44.5714	21.2828	20.7527	31.885	12.8461	13.7563	15.4978	17.0179	5.1243	1.8018	2.4766		0.967738	12.8772
14.4032	17.505	10.589	11.839	13.43	12.271	9.576	6.3278	7.5052	8.619	7.8682	16.7103	14.4556	7.861	17.1925	14.9133	38.2179	30.8478	16.6809	24.101	17.5397	11.6083	19.9374	14.8101	5.3564	7.4055	3.3767		0.975807	14.0979
14.5222	15.716	10.871	5.1134	6.846	9.374	10.234	8.5122	7.8426	10.694	3.4913	7.0294	14.2965	9.734	12.4194	11.2907	39.1906	34.2157	16.8306	19.572	19.2376	18.9495	20.5392	12.3904	4.4235	3.2731	2.1763		0.983869	12.8563
14.6412	7.712	8.409	10.8023	12.793	6.93	7.259	5.36	7.4199	7.6823	2.8372	14.2536	11.4441	9.359	12.6051	21.3285	48.7492	27.4328	10.0403	23.419	29.1724	25.6496	27.8264	20.1371	9.1846	1.0927	1.6756		0.991931	14.2529
14.7603	11.986	10.311	8.1151	15.534	2.935	5.307	7.9266	12.0991	5.508	9.1264	12.5757	16.931	8.095	16.8605	23.8087	28.2181	25.6549	15.7903	17.149	15.7533	16.6172	14.8182	19.9735	3.6628	4.7505	2.57		1	12.7722

## Sheet: Image6
X0	Y0	Y1	Y2	Y3	Y4	Y5	Y6	Y7	Y8	Y9	Y10	Y11	Y12	Y13	Y14	Y15	Y16	Y17	Y18	Y19	Y20	Y21	Y22	Y23	Y24	Y25		Ap-basal	Avg intensity
0	28.811	35.01	36.88	15.634	34.425	22.412	24.045	34.277	21.753	19.8568	40.292	62.18	31.113	53.0302	61.715	66.195	70.297	49.9117	86.327	77.7997	94.79	76.476	78.692	113.1	71.72	53.3786		0	52.3123
0.119	29.25	41.145	47.183	28.017	21.939	29.089	24.296	30.481	23.893	33.201	58.802	79.785	46.427	54.2163	51.136	73.923	93.45	58.9579	107.147	86.2401	105.443	89.579	93.353	126.234	90.811	55.7732		0.00900642	60.7604
0.2381	28.759	52.147	44.517	24.763	28.509	25.791	17.795	31.854	29.777	16.2905	70.633	78.82	51.673	60.9744	67.021	66.308	112.256	73.0411	101.107	92.0957	114.254	92.088	84.27	137.143	97.68	61.4297		0.0180204	63.8845
0.3571	33.393	53.454	40.463	35.899	33.22	29.482	30.419	46.022	41.289	23.4243	66.733	79.94	51.896	74.4659	76.218	79.045	109.77	71.6748	86.326	90.8146	139.781	96.479	104.775	128.973	104.641	63.9987		0.0270268	68.946
0.4761	33.102	62.325	53.026	39.586	41.303	35.356	35.788	46.93	52.442	22.549	73.171	98.862	74.94	77.5525	86.537	94.402	125.973	77.879	104.805	94.6737	123.659	126.717	112.326	139.724	120.599	62.0986		0.0360332	77.551
0.5952	39.872	59.995	55.135	51.029	27.443	33.343	50.92	71.769	61.34	32.5073	89.6	121.422	64.783	77.8774	77.337	103.156	122.253	95.5923	117.4	103.696	132.299	134.142	115.707	125.449	137.541	77.2168		0.0450472	83.8009
0.7142	53.094	95.452	70.758	44.758	37.119	48.434	54.962	76.251	75.239	46.1001	111.819	112.582	80.861	75.8874	89.58	101.202	123.84	82.4754	92.419	92.9696	136.487	129.546	113.674	130.199	129.25	85.5953		0.0540536	88.0982
0.8332	52.194	118.266	100.037	50.41	50.749	70.115	53.389	95.254	82.416	64.2916	122.653	108.334	88.84	81.9583	98.501	108.544	128.773	73.1771	105.964	100.094	127.626	124.773	114.535	122.366	142.16	85.4233		0.0630601	95.0324
0.9523	54.888	119.348	98.342	57.075	57.032	78.535	69.304	111.502	100.368	65.2228	99.182	113.709	95.505	93.8464	119.514	111.001	125.402	100.6	98.228	90.3892	116.832	129.787	115.297	112.203	129.522	83.3199		0.072074	97.9213
1.0713	52.347	127.501	94.369	75.771	56.742	95.386	74.237	128.406	98.504	72.2768	131.71	115.571	99.006	95.2645	107.255	125.334	109.92	92.1609	104.735	97.8973	104.931	141.531	104.582	106.488	129.717	86.4951		0.0810805	101.082
1.1903	55.643	128.291	117.814	80.174	79.501	113.482	102.333	111.041	106.519	96.4907	128.086	130.785	88.274	99.141	106.076	114.96	117.111	90.8782	93.492	99.6844	106.511	125.745	106.169	95.519	132.378	87.566		0.0900869	104.372
1.3094	74.674	137.462	143.959	83.591	99.452	114.82	126.593	122.326	115.281	96.102	130.424	116.734	80.645	99.7697	107.934	114.379	107.656	92.7378	104.499	99.9833	85.199	119.585	107.178	92.277	136.339	92.4223		0.0991009	107.77
1.4284	99.852	148.584	127.026	105.001	124.702	133.637	111.79	133.437	111.265	97.6334	132.516	130.481	102.412	95.6325	105.594	133.303	107.606	87.7004	91.049	92.3978	95.411	115.118	113.234	70.518	128.697	80.939		0.108107	110.598
1.5474	106.406	122.253	135.842	121.103	104.69	128.008	116.858	130.89	97.789	98.3232	127.068	114.027	102.054	86.7239	102.211	127.799	99.026	100.92	89.894	86.202	84.95	115.263	123.121	79.879	121.05	75.4893		0.117114	107.609
1.6665	115.218	124.079	134.004	110.221	123.508	121.962	116.609	113.023	115.501	97.628	128.65	112.95	101.569	92.2988	103.026	116.821	91.986	99.0657	97.087	86.1409	83.112	111.996	103.206	77.984	134.618	88.2024		0.126128	107.71
1.7855	128.785	131.157	120.435	101.945	120.384	129.659	122.187	107.509	118.547	99.7684	124.035	110.231	115.938	101.112	89.859	114.963	97.717	103.984	80.655	79.6496	66.596	123.206	97.008	54.624	119.854	78.7335		0.135134	105.329
1.9046	131.776	126.78	126.807	101.322	111.674	131.815	143.579	108.452	122.646	105.545	138.041	112.649	95.413	101.45	96.526	104.512	84.929	98.6138	73.383	67.9353	68.464	125.015	98.758	49.516	118.554	85.4457		0.144148	104.985
2.0236	136.529	112.021	124.265	113.165	118.615	133.287	126.817	114.325	116.357	95.2347	127.364	118.03	89.066	86.6864	91.578	108.595	75.058	90.7195	82.079	84.6429	65.823	127.075	101.609	52.142	120.04	81.1832		0.153155	103.55
2.1426	119.563	118.73	124.568	105.956	126.837	127.044	115.069	100.686	122.195	94.1292	118.179	116.278	80.131	75.3103	104.994	126.966	71.835	103.178	82.529	72.2066	58.951	134.506	92.058	53.673	104.943	93.7865		0.162161	101.704
2.2617	99.666	115.158	118.795	96.539	119.945	109.988	130.398	90.196	106.543	100.374	113.827	106.266	85.305	74.0287	89.105	102.402	70.011	90.3783	75.493	61.5736	63.41	120.809	73.605	33.523	86.036	75.7296		0.171175	92.6578
2.3807	98.479	113.156	119.892	106.977	117.845	117.53	131.162	80.032	118.847	104.362	131.12	103.7	78.782	85.8883	99.473	94.851	60.703	96.4231	76.953	64.4382	51.54	108.552	79.531	47.474	87.479	77.7789		0.180181	94.3449
2.4997	94.121	101.271	116.008	90.506	120.468	120.522	119.906	69.84	96.474	101.751	132.592	97.97	73.454	84.2345	91.743	95.204	63.763	88.0206	83.584	82.4443	64.971	119.706	68.05	64.811	74.913	73.2206		0.189188	91.9057
2.6188	105.664	93.47	104.966	99.423	117.654	111.564	127.117	71.152	87.151	94.3237	120.155	70.493	75.633	74.607	91.164	87.093	57.99	76.8662	63.918	73.575	57.962	117.848	70.168	68.551	74.758	86.5822		0.198202	87.6865
2.7378	83.798	84.132	98.748	84.267	116.391	93.261	117.548	70.428	81.981	85.2149	114.39	83.146	79.362	78.7942	96.787	95.522	45.687	81.6142	73.109	66.4049	63.732	118.815	82.556	53.17	78.357	93.7104		0.207208	85.4202
2.8568	77.024	82.651	109.24	87.273	107.494	98.55	120.813	61.213	95.4	99.2543	99.78	81.383	78.789	70.8042	95.189	102.226	46.01	83.6508	80.007	67.3485	76.032	116.512	84.066	59.333	72.65	73.8089		0.216215	85.6347
2.9759	83.805	81.813	104.709	79.408	105.251	89.451	116.318	57.062	82.349	108.34	83.651	85.417	70.535	71.568	92.859	85.621	52.67	70.9901	97.625	75.5691	71.602	99.752	73.198	41.151	70.834	75.9355		0.225229	81.8263
3.0949	87.295	88.883	90.62	56.945	105.44	78.493	98.488	57.69	86.866	84.8238	90.148	74.692	73.128	71.5866	94.808	77.998	70.623	74.9355	88.47	55.8241	65.976	101.35	66.215	43.001	79.317	67.3392		0.234235	78.1137
3.2139	85.633	80.526	83.85	50.937	98.793	72.458	111.244	52.402	90.11	86.6782	88.103	68.766	62.4	58.6095	87.237	85.303	69.016	59.1809	92.724	53.9898	83.061	99.914	73.879	52.715	59.587	57.6552		0.243241	75.5681
3.333	83.868	73.224	94.251	57.373	101.002	67.245	88.626	41.454	84.413	78.0583	76.89	56.953	57.962	59.5098	74.909	75.352	65.505	55.5447	67.687	61.6013	82.575	104.527	52.394	52.958	66.91	58.5894		0.252255	70.7454
3.452	74.586	77.978	86.223	46.023	97.943	50.847	78.921	58.139	66.551	81.7751	68.836	59.999	47.893	63.3187	62.848	67.172	49.58	62.0031	76.419	64.4262	77.926	96.779	46.826	46.648	67.01	54.6714		0.261262	66.5901
3.571	70.369	79.078	73.76	47.124	86.971	59.888	64.638	51.087	72.92	67.0604	59.763	53.545	44.214	47.1218	70.683	72.895	53.86	59.7995	67.949	69.1838	76.422	99.904	49.228	51.086	69.232	41.6506		0.270268	63.8243
3.6901	68.867	77.721	60.051	42.489	73.657	63.283	65.13	50.41	72.743	62.8352	53.844	30.19	52.181	47.9851	56.684	60.404	49.755	54.5847	83.751	73.9241	78.92	90.189	45.89	50.206	62.179	42.7444		0.279282	60.4084
3.8091	68.531	88.697	64.392	41.135	70.332	51.353	53.627	52.467	61.112	77.0495	57.933	38.487	55.944	48.9826	69.817	67.206	51.636	47.5081	87.454	81.7531	93.801	81.356	46.928	34.146	68.724	43.5749		0.288289	61.6902
3.9281	68.792	72.249	64.465	37.683	68.708	50.042	55.508	54.634	59.707	77.0644	52.763	55.328	50.885	37.4509	72.953	60.907	39.628	46.3855	71.235	66.8343	89.795	82.839	58.679	41.814	58.654	48.4762		0.297295	59.3646
4.0472	69.435	73.291	59.638	37.587	64.828	49.11	51.256	43.289	52.888	80.9783	49.453	49.745	42.48	46.6669	65.058	60.318	39.399	46.2501	67.455	54.4468	82.212	70.656	51.431	56.485	64.764	43.8024		0.306309	56.6509
4.1662	66.249	71.77	57.935	39.827	55.851	49.965	43.284	39.017	50.265	65.035	58.249	44.294	35.358	54.3389	67.264	53.067	44.582	41.6004	50.832	50.3279	82.561	72.202	40.92	53.628	63.033	42.9283		0.315315	53.6301
4.2852	79.502	73.947	53.991	39.57	49.208	64.778	40.458	40.899	30.968	46.1614	67.311	44.455	35.037	59.639	63.243	39.01	40.054	35.4854	45.648	54.1088	85.26	83.309	50.121	48.008	47.524	42.1756		0.324322	52.3027
4.4043	81.39	63.599	50.858	48.328	63.778	56.097	37.823	40.631	45.159	57.848	59.104	47.282	36.204	46.2872	78.722	40.003	44.169	23.4681	48.343	52.5204	97.562	69.094	55.36	45.156	53.655	48.9547		0.333336	53.5152
4.5233	66.492	64.683	43.343	29.734	43.385	48.267	39.514	45.057	46.106	57.4104	73.553	42.641	36.544	51.1086	71.912	35.438	29.217	35.4286	66.196	62.3998	110.94	65.581	49.512	41.283	65.241	52.9003		0.342342	52.8418
4.6423	62.701	71.85	46.162	46.023	44.766	53.813	38.539	41.796	63.689	56.6848	60.505	45.566	38.34	53.6653	60.605	37.193	29.359	31.7813	65.82	56.3888	103.776	68.019	48.503	50.24	70.161	52.9797		0.351349	53.8048
4.7614	73.438	65.224	44.193	44.98	39.197	55.437	40.999	48.727	58.661	64.6738	56.888	30.14	39.351	45.6369	59.709	39.803	42.999	30.4178	66.424	62.6369	98.965	69.936	49.003	45.982	54.833	56.4579		0.360363	53.2582
4.8804	64.9	70.44	37.149	41.314	45.234	47.978	54.751	44.559	56.661	58.0554	54.946	37.702	35.711	41.7859	68.03	36.125	44.646	17.4778	60.308	64.6349	107.458	71.768	51.556	36.731	55.387	51.7349		0.369369	52.194
4.9995	52.643	76.285	25.9	44.052	39.107	47.337	52.068	39.933	54.689	42.946	64.815	43.525	31.214	30.5148	62.402	23.198	37.846	23.0979	51.757	60.1015	81.039	56.801	48.545	35.872	61.948	51.2382		0.378383	47.649
5.1185	47.774	73.507	24.45	42.349	35.803	47.512	43.876	46.057	52.157	44.097	58.897	41.582	36.384	37.3917	52.491	33.82	27.043	17.5693	53.523	68.1229	79.279	46.716	63.809	34.727	51.998	44.1827		0.38739	46.3507
5.2375	54.531	68.452	26.976	39.567	41.867	52.982	43.808	47.94	44.382	52.4301	63.629	52.29	32.413	41.3105	53.832	37.924	33.169	17.4215	54.377	66.6669	78.267	50.857	65.594	26.794	70.447	45.9698		0.396396	48.6114
5.3566	57.638	53.033	41.72	41.94	27.414	39.395	45.093	48.809	40.138	38.5054	60.443	45.054	24.297	29.3667	51.48	30.949	36.744	11.5375	46.887	60.8147	67.525	40.344	60.932	29.231	69.57	50.2728		0.40541	44.1974
5.4756	68.447	44.134	37.405	41.782	41.768	38.322	49.884	64.148	49.544	33.3071	64.338	49.628	20.821	22.9925	48.873	40.116	34.382	20.7024	37.229	70.6334	76.354	46.292	49.496	30.601	72.773	47.3763		0.414416	46.2057
5.5946	68.881	45.629	31.866	42.281	42.09	41.814	60.06	74.033	46.985	25.209	47.877	40.934	21.257	21.0946	44.414	45.338	30.589	13.6395	47.586	74.6862	71.16	28.302	49.097	28.483	70.761	51.9467		0.423423	44.8467
5.7137	68.031	48.936	34.177	30.225	32.433	41.635	42.791	87.485	37.356	26.1232	48.314	42.044	27.741	27.2685	50.079	31.522	36.405	17.646	53.127	65.1892	71.556	35.45	55.229	27.869	57.002	49.408		0.432437	44.0401
5.8327	59.958	43.77	32.296	19.547	22.337	49.331	36.287	98.78	33.495	33.3445	55.257	38.419	29.066	25.7092	43.939	35.39	27.397	19.0926	39.994	59.4674	81.492	43.062	47.48	30.825	55.492	49.5924		0.441443	42.7238
5.9517	63.103	42.395	25.745	27.902	21.612	52.817	40.843	77.105	34.567	25.2861	55.209	36.825	27.955	27.4588	43.155	41.134	21.571	17.112	34.405	63.8639	79.435	38.282	46.767	21.252	74.278	38.4275		0.45045	41.481
6.0708	47.321	39.948	20.971	33.059	17.104	47.434	48.072	81.647	32.261	30.9997	49.909	42.539	28.375	33.8476	30.672	38.204	26.116	18.0194	29.834	60.1774	59.372	36.914	48.111	22.708	76.214	38.878		0.459464	39.9503
6.1898	51.392	50.037	23.321	18.993	16.309	52.508	31.354	64.865	27.938	34.1258	49.735	44.727	34.077	37.1189	33.381	35.805	20.187	17.9962	23.471	52.0479	68.237	40.234	37.926	20.006	62.551	47.8279		0.46847	38.3143
6.3088	57.454	51.072	21.564	23.227	23.356	48.998	30.927	68.475	27.767	33.4567	50.996	33.464	36.514	32.4613	39.402	32.801	22.489	12.7141	27.319	49.6502	58.116	42.83	32.636	22.347	57.063	50.8618		0.477476	37.9985
6.4279	46.854	51.631	29.868	33.632	21.913	40.626	34.304	63.506	30.428	25.5119	39.232	41.586	35.349	31.5808	42.309	32.44	19.619	17.01	21.737	59.1581	56.029	32.342	26.152	24.062	62.849	47.515		0.48649	37.2017
6.5469	53.513	46.187	34.57	36.535	21.073	40.449	29.999	50.883	28.475	22.3286	39.195	29.563	29.453	27.4333	43.818	34.84	21.998	12.4279	14.933	51.8649	61.125	38.219	34.226	25.182	50.997	41.6888		0.495497	35.4222
6.6659	50.426	46.967	32.957	29.595	31.334	38.534	32.357	43.196	22.92	23.6506	40.849	41.791	26.11	21.8054	31.133	38.341	19.421	13.1182	17.98	42.0926	62.711	42.793	28.079	22.43	53.443	50.1179		0.504503	34.7751
6.785	45.544	52.422	17.652	26.787	28.981	51.965	31.758	47.84	27.254	28.4159	45.82	34.74	24.693	30.6217	27.472	32.903	25.222	11.9273	17.961	55.8767	84.425	51.242	34.25	19.407	41.131	41.8928		0.513517	36.0847
6.904	47.413	46.585	20.639	27.983	32.002	45.481	20.178	37.576	26.524	30.2383	29.012	29.086	32.237	28.7967	24.684	40.925	23.044	14.3399	13.699	50.4003	72.349	44.899	31.528	16.298	26.403	43.7239		0.522524	32.9248
7.023	46.025	46.204	17.562	18.896	30.033	39.192	22.699	38.411	26.675	21.3917	32.383	29.998	36.903	27.3831	21.21	33.898	12.701	10.5196	18.141	51.5193	57.11	40.905	22.819	16.368	32.184	43.8102		0.53153	30.5747
7.1421	31.718	53.293	20.847	22.683	30.426	50.387	23.592	36.103	32.168	27.3133	33.5	34.635	24.094	33.9385	24.797	28.857	8.46	8.2718	15.698	46.4351	66.965	42.921	22.783	16.744	33.711	45.4246		0.540544	31.3756
7.2611	37.514	52.231	27.098	18.286	30.606	43.921	20.445	30.353	31.388	14.2541	25.182	27.119	20.505	37.9723	27.476	37.055	19.937	6.691	16.772	44.4212	72.992	42.098	30.197	11.947	32.72	52.9716		0.54955	31.2366
7.3801	39.48	49.817	25.806	25.023	36.174	49.242	28.503	32.215	35.515	15.0184	26.49	33.947	28.327	25.4492	23.824	34.576	18.516	7.9496	17.114	46.3504	69.221	34.504	28.416	12.588	21.995	48.0166		0.558557	31.3107
7.4992	35.324	56.186	19.592	27.025	29.353	43.793	28.92	43.108	27.483	15.9766	31.829	35.514	24.584	33.1782	32.186	33.648	24.222	14.7194	9.014	43.7378	66.271	31.244	31.937	15.332	25.83	39.0402		0.567571	31.5018
7.6182	40.677	59.792	18.106	23.371	39.326	45.501	25.79	31.686	21.321	19.7457	25.643	43.668	27.526	24.3863	28.792	29.363	17.421	12.9636	12.953	40.4933	61.417	21.305	34.153	19.346	22.832	46.8929		0.576577	30.5566
7.7372	43.639	56.014	19.319	20.276	39.364	45.255	23.95	29.281	27.622	25.3204	29.302	42.33	13.289	26.3915	24.587	32.003	11.512	14.6941	23.964	40.3337	54.412	23.833	32.262	11.811	15.328	45.6048		0.585584	29.6807
7.8563	43.651	51.269	22.93	17.59	38.476	52.796	25.186	42.455	28.136	20.3348	30.691	44.517	19.572	32.8163	27.275	38.46	12.804	16.32	15.492	43.4794	64.943	30.195	23.913	10.598	11.642	25.4134		0.594598	30.4213
7.9753	39.155	37.068	27.47	17.65	46.318	39.587	22.581	32.524	21.64	24.154	34.048	40.373	21.766	31.0566	32.835	37.12	14.321	13.622	24.18	41.042	46.218	33.437	26.388	9.341	15.778	42.2003		0.603604	29.6874
8.0943	48.198	34.184	29.092	19.782	38.557	40.888	18.696	28.35	21.693	26.0761	36.354	35.439	20.248	24.4906	30.883	27.6	10.811	7.6099	23.464	62.3391	52.036	35.272	25.345	13.244	14.179	45.04		0.61261	29.6104
8.2134	40.757	35.912	25.824	23.997	35.052	32.459	21.597	29.562	18.827	22.9671	25.488	37.418	21.387	19.9512	25.551	24.371	12.794	13.8337	23.175	50.942	54.462	40.177	22.505	15.726	16.043	43.3682		0.621624	28.2364
8.3324	39.855	34.287	29.163	23.112	32.374	37.819	16.208	29.48	24.896	15.6228	33.045	39.096	20.321	20.1888	24.412	21.5	20.805	12.8618	15.465	49.602	64.471	39.861	20.588	17.82	16.492	34.991		0.630631	28.2437
8.4515	31.397	31.647	31.271	24.917	36.188	27.257	19.731	32.94	31.547	21.3173	38.841	36.652	23.686	16.0872	32.364	24.862	23.998	7.231	20.433	51.5583	58.875	27.968	16.268	10.95	17.049	36.048		0.639645	28.1186
8.5705	31.69	35.617	25.378	16.638	34.011	33.295	19.569	23.744	39.548	23.9176	26.879	27.995	33.321	18.9894	30.482	14.696	14.268	8.7042	17.068	47.562	57.485	22.513	15.464	10.139	19.291	35.5208		0.648651	26.2994
8.6895	39.83	33.812	31.508	28.079	26.252	30.594	19.322	26.286	34.286	29.4568	26.295	28.663	36.668	19.6271	24.74	23.46	13.4	11.897	18.266	57.3026	50.437	30.227	20.132	11.195	18.189	30.0141		0.657658	27.6899
8.8086	36.282	28.584	30.74	21.24	35.868	29.074	23.06	25.814	33.108	30.7448	32.799	35.623	25.608	17.5352	33.743	25.773	13.058	15.8642	19.996	47.0674	58.381	29.409	21.081	9.453	16.117	39.5324		0.666672	28.2906
8.9276	31.021	35.575	26.785	14.751	35.636	32.503	26.902	34.79	34.289	28.4596	28.213	24.185	23.54	13.6775	22.134	25.84	12.741	14.7792	19.163	40.8909	46.102	34.517	25.095	15.497	12.299	36.3841		0.675678	26.7604
9.0466	28.366	45.8	28.271	20.561	32.777	22.951	27.685	32.109	38.676	21.5039	26.885	22.86	29.647	13.9291	25.68	17.99	14.44	4.5329	17.975	46.5744	45.498	35.727	19.426	18.776	15.018	47.2445		0.684685	26.9578
9.1657	28.987	43.919	27.262	18.569	28.586	19.348	24.128	29.194	44.835	36.0131	33.442	24.476	19.168	14.8286	25.931	20.527	13.96	5.2452	18.934	29.218	47.282	31.671	18.329	10.164	21.293	34.2461		0.693699	25.7522
9.2847	31.863	36.339	25.948	18.298	30.121	21.649	25.187	23.661	20.465	29.185	20.671	18.469	21.016	14.1687	25.093	21.011	22.226	7.8726	13.297	28.9121	28.525	29.213	18.129	8.995	15.552	50.8494		0.702705	23.3352
9.4037	27.893	29.053	40.325	13.548	35.456	29.152	33.503	28.04	25.395	31.1169	29.313	22.416	20.638	11.0154	18.412	25.273	9.462	14.5907	12.728	34.0843	34.998	21.335	17.629	12.039	15.939	45.3406		0.711711	24.5652
9.5228	27.779	24.005	37.557	16.75	23.97	36.557	41.175	31.895	27.147	30.6977	30.769	24.715	26.987	22.8229	24.078	21.402	18.267	18.475	12.118	29.5849	31.841	27.7	14.561	7.091	20.545	42.7644		0.720725	25.8175
9.6418	34.858	31.771	35.661	17.6	26.953	21.109	41.8	29.817	28.933	21.175	35.603	26.331	32.113	30.4659	21.473	14.144	17.653	11.8201	15.223	41.6274	38.116	29.42	7.18	8.666	21.132	43.2875		0.729732	26.3051
9.7608	24.946	33.533	34.53	14.817	22.321	15.131	37.864	35.822	32.09	19.1332	37.518	26.287	26.715	24.6629	18.424	20.279	14.206	9.4791	10.865	45.7082	39.2	26.545	16.422	4.68	18.661	45.1824		0.738738	25.1931
9.8799	28.375	25.972	35.595	12.668	25.692	24.673	41.084	27.28	25.648	23.9198	36.412	31.229	36.234	20.0369	17.147	32.276	16.436	11.0222	11.984	45.9739	42.116	19.242	15.248	7.14	20.256	38.2109		0.747752	25.8412
9.9989	33.45	25.535	28.075	14.831	31.981	36.335	32.057	26.716	25.527	22.178	40.132	21.731	33.899	30.1275	21.144	22.801	12.466	20.4558	12.888	37.7369	32.37	21.259	14.751	8.026	20.716	37.0758		0.756759	25.5486
10.1179	31.311	16.031	32.901	13.35	34.207	30.343	43.807	26.539	22.281	33.5399	39.697	20.095	30.784	26.3186	20.244	24.562	22.902	12.186	11.909	30.4512	31.574	23.789	12.581	11.042	18.769	35.4467		0.765765	25.2562
10.237	36.047	22.809	40.313	15.396	23.44	31.832	47.132	16.305	22.337	36.5947	33.712	15.598	32.188	25.7686	27.844	31.61	18.15	16.4571	13.548	31.4257	34.1	20.976	9.771	8.498	16.616	39.8595		0.774779	25.7049
10.356	47.279	21.161	38.652	13.903	28.876	29.641	44.061	21.701	30.782	34.911	28.338	23.194	21.168	30.5666	26.218	33.235	19.708	9.9271	14.755	40.2297	30.662	36.747	17.669	8.063	16.287	29.9862		0.783785	26.8354
10.475	52.08	18.808	38.241	21.628	37.748	31.243	32.5	19.262	28.324	26.665	25.383	26.419	13.218	17.0852	31.78	33.997	13.124	9.5676	18.931	33.2261	17.813	36.509	16.71	15.795	14.231	26.5541		0.792792	25.2632
10.5941	52.81	25.243	33.439	23.584	28.543	33.025	24.162	19.492	16.339	28.2399	35.804	33.983	12.085	20.0279	26.854	46.891	10.746	16.6909	13.401	40.5502	28.138	37.819	14.89	10.722	17.983	28.4308		0.801806	26.1497
10.7131	40.814	25.436	25.522	17.501	35.125	39.009	27.543	17.709	23.37	15.3912	41.946	28.894	18.075	20.253	22.348	57.153	20.424	14.0434	8.375	52.0865	25.629	45.399	9.803	13.214	12.516	24.8575		0.810812	26.2476
10.8321	34.638	19.483	26.09	21.914	41.938	42.912	28.891	23.168	21.984	29.2174	31.094	26.505	19.863	29.1617	21.69	58.336	25.016	20.7695	8.536	44.3655	31.311	28.769	10.829	9.562	22.245	28.5892		0.819819	27.1876
10.9512	35.447	23.351	23.187	19.301	40.446	30.673	18.928	21.728	24.265	26.9524	21.681	30.232	16.173	18.1567	19.606	41.261	24.86	19.4962	14.376	53.8067	27.534	30.294	21.108	9.676	20.89	24.2785		0.828833	25.2964
11.0702	27.385	36.423	22.246	23.056	27.097	31.546	19.722	27.906	19.185	24.8154	30.586	27.956	18.69	19.237	16.371	28.891	19.253	15.2641	10.754	41.687	16.529	26.459	14.776	8.001	18.772	34.622		0.837839	23.355
11.1892	29.577	24.446	16.913	15.47	28.718	43.799	26.172	27.626	24.464	22.8911	25.905	16.616	22.387	18.1303	25.949	30.367	24.829	14.5095	18.123	39.2818	26.083	40.167	13.335	6.819	19.707	37.8037		0.846845	24.6188
11.3083	33.533	15.865	14.919	23.056	40.177	27.522	16.506	16.751	25.749	19.3274	23.256	15.877	27.754	15.1471	29.148	20.247	26.888	12.022	12.495	38.6468	28.544	37.643	13.535	6.643	12.665	33.1758		0.855859	22.5805
11.4273	33.253	20.223	20.389	14.185	34.345	18.505	16.686	19.198	27.071	23.2184	21.449	13.579	20.034	17.3643	21.911	25.433	18.297	16.0168	14.616	38.8816	22.253	29.322	14.342	14.13	12.082	32.1901		0.864866	21.499
11.5463	30.419	22.716	23.247	16.747	29.12	25.137	28	26.94	23.335	29.0163	31.294	14.828	26.716	22.0858	19.512	28.655	24.022	12.8272	19.137	35.5547	23.543	43.775	12.075	12.729	14.391	28.7665		0.873872	24.0226
11.6654	30.929	18.721	25.72	18.043	19.926	20.982	23.122	26.114	25.163	30.6036	25.046	16.238	26.201	23.9709	23.708	28.245	20.924	15.8616	10.663	41.7131	21.878	45.291	17.351	6.778	15.894	40.7513		0.882886	23.8399
11.7844	33.178	17.608	35.308	17.718	32.497	23.864	23.312	17.994	18.643	28.5958	20.805	17.557	26.672	22.3471	31.17	23.423	23.588	17.4276	10.687	31.5397	19.379	29.267	8.85	10.103	16.91	37.5318		0.891893	22.9221
11.9035	35.966	25.786	32.476	28.473	42.659	24.581	28.358	20.32	21.898	29.8821	26.306	20.871	16.484	19.0429	13.406	16.407	25.401	17.4225	13.416	26.6729	24.526	24.282	16.287	13.271	14.343	44.0375		0.900907	23.9452
12.0225	34.256	27.485	13.582	18.39	36.603	23.588	18.916	17.261	18.413	26.1998	28.351	20.078	18.627	20.5191	20.568	24.017	22.198	14.1512	17.865	26.7837	25.72	27.058	20.487	16.418	16.604	44.1634		0.909913	23.0116
12.1415	37.089	13.299	22.721	13.166	36.316	26.297	17.242	13.941	18.203	26.1568	27.659	22.772	16.83	23.3834	24.358	25.76	29.086	12.5266	12.435	31.1406	25.456	22.877	21.857	11.428	9.909	43.3677		0.91892	22.5106
12.2606	43.978	14.679	32.104	23.566	27.182	21.684	26.354	17.72	19.025	32.5495	25.407	30.112	14.61	23.5423	30.167	34.407	30.544	17.5801	19.741	28.9057	18.083	13.744	15.574	10.832	17.084	33.4175		0.927934	23.9458
12.3796	35.349	20.349	22.298	32.693	23.954	15.452	25.684	23.966	29.407	41.0801	31.109	23.946	11.13	20.5876	23.194	34.598	30.672	18.5351	15.848	27.9824	19.662	28.264	20.269	8.852	19.784	32.2485		0.93694	24.4967
12.4986	25.18	20.522	24.956	27.928	24.235	13.508	21.932	14.187	23.083	40.4767	39.871	28.631	11.917	24.4369	26.016	35.311	22.312	15.078	20.282	28.2013	26.062	29.146	22.607	15.446	16.792	41.2686		0.945946	24.5917
12.6177	20.004	18.519	30.072	19.251	32.009	9.832	13.888	14.479	14.271	31.6457	35.453	16.546	11.63	17.4068	24.484	44.176	15.622	13.6255	15.995	25.8075	23.995	29.142	16.399	9.73	20.108	47.679		0.95496	21.9911
12.7367	15.63	19.815	17.612	18.038	21.949	8.532	5.559	11.147	20.933	34.8166	44.673	15.326	16.21	16.3052	20.822	39.914	18.542	22.8746	19.88	20.1584	32.389	26.225	10.867	14.446	11.603	52.1517		0.963967	21.4007
12.8557	17.732	14.723	14.59	16.431	8.333	7.618	5.867	16.708	24.008	37.3315	33.476	17.931	23.069	18.5633	15.575	36.107	17.932	21.5643	22.259	27.8118	29.445	27.787	19.692	10.469	21.303	44.5679		0.972973	21.1882
12.9748	25.862	18.905	13.147	11.079	12.545	8.039	8.186	11.446	18.303	38.838	30.736	14.408	25.111	16.6916	10.907	36.395	17.338	18.3816	26.616	24.0133	27.08	31.866	25.887	11.898	12.484	32.1784		0.981987	20.3208
13.0938	31.294	19.647	20.226	11.001	15.204	11.493	10.52	8.502	15.779	39.8823	29.192	11.306	24.939	21.8396	20.203	32.555	23.777	18.5197	33.455	27.9094	24.687	25.349	24.58	12.803	17.171	28.8862		0.990994	21.5662
13.2128	27.601	10.117	15.787	8.085	14.448	9.81	4.066	5.61	21.553	32.2912	30.584	18.082	18.336	10.8562	25.1	23.312	27.532	17.578	32.953	29.6271	40.659	27.774	19.3	14.504	11.217	31.6927		1	20.326

## Sheet: Image17
X0	Y0	Y1	Y2	Y3	Y4	Y5	Y6	Y7	Y8	Y9	Y10	Y11	Y12	Y13	Y14	Y15	Y16	Y17	Y18	Y19	Y20	Y21	Y22	Y23	Y24	Y25	Y26	Y27	Y28	Y29	Y30		Ap-basal	Avg intensity
0	18.5197	30.3163	31.8301	40.9681	39.6239	41.4328	34.17	28.665	31.401	42.6959	40.5804	49.6775	28.2988	44.6155	49.5956	28.5426	29.2933	39.97	43.497	48.489	40.695	34.974	33.479	41.121	41.921	26.499	34.275	36.159	42.793	42.507	31.884		0	37.048
0.119	35.2743	33.407	51.0075	39.6117	50.396	39.3826	41.186	43.348	46.948	44.5001	44.7716	40.7541	28.6534	38.8476	43.5363	42.7654	43.3282	44.466	54.603	69.485	54.064	39.605	58.25	42.301	60.821	39.436	21.879	47.524	44.824	35.236	32.198		0.00644972	43.6261
0.2381	43.9432	47.7761	46.466	57.6022	59.8568	47.1192	43.186	54.509	42.685	37.9388	67.5202	50.7857	35.3242	59.372	55.8582	41.8929	39.6782	46.512	62.844	60.744	63.986	63.223	42.899	43.342	61.505	51.132	37.285	43.993	43.698	40.264	33.067		0.0129049	49.2261
0.3571	37.7783	31.8703	45.1818	55.3298	62.6198	69.2983	48.964	51.169	66.411	56.4925	62.3974	55.3802	47.9602	48.1224	56.5353	31.3024	53.2267	72.378	68.718	61.367	61.963	62.124	54.316	67.377	55.139	44.501	49.373	52.394	58.103	54.756	34.52		0.0193546	54.099
0.4761	52.3677	35.9043	56.0928	57.0727	60.5852	68.3806	70.033	64.639	75.648	44.6157	49.4691	54.1709	71.2572	58.8912	51.9122	47.8893	40.3909	47.347	72.214	77.476	70.104	86.463	49.307	61.801	57.412	52.541	51.314	52.835	65.282	74.717	37.541		0.0258043	58.5701
0.5952	43.33	52.4805	53.928	67.6475	59.8507	62.9578	67.251	74.465	81.841	53.2752	55.6605	62.4737	60.4538	43.1423	66.176	59.1326	50.7869	71.375	52.019	66.422	76.609	87.862	69.23	89.265	83.986	58.743	76.175	70.572	62.969	74.446	56.229		0.0322595	64.863
0.7142	49.9082	62.2248	48.579	66.3441	61.8707	79.151	64.823	77.365	86.802	75.7208	67.3098	62.9751	61.414	63.9596	64.8635	67.2691	45.3006	85.457	85.773	86.123	94.754	97.858	90.446	90.245	89.949	66.167	67.399	76.976	67.408	82.424	62.834		0.0387092	72.5708
0.8332	50.2021	58.2451	64.8347	66.4911	63.4954	70.0425	79.724	72.23	113.983	56.5299	66.8101	69.0933	49.7133	58.7641	52.6793	68.2733	56.655	77.233	71.156	94.719	112.842	100.752	129.451	110.11	112.25	76.428	64.644	89.291	84.853	90.869	66.463		0.0451589	77.3815
0.9523	47.8293	70.6009	57.8697	79.1978	67.027	87.3064	91.376	94.311	95.753	70.4611	56.0834	75.354	74.8339	57.824	57.2741	61.0562	47.4756	93.9	92.308	133.096	122.06	113.026	122.861	118.502	135.584	64.324	86.93	99.646	75.017	112.672	102.733		0.0516141	85.9449
1.0713	63.5588	60.9771	54.5454	70.5795	63.6859	87.2393	80.073	86.847	110.391	87.1194	62.9087	79.8401	73.7299	65.4301	71.1706	56.8136	62.5398	78.412	110.428	124.555	127.812	115.661	125.303	120.711	122.654	75.795	96.471	123.603	88.225	119.018	119.857		0.0580638	89.8695
1.1903	70.5911	56.8393	70.634	76.2545	72.2757	106.475	82.032	101.041	95.956	81.3638	62.0511	92.5205	72.5749	71.7754	53.1538	70.2031	64.1773	84.098	103.644	108.876	130.865	96.099	130.245	145.983	138.387	88.534	114.805	101.962	102.076	132.42	126.214		0.0645135	93.6815
1.3094	71.5104	48.9499	74.622	74.2356	66.5428	89.3419	98.226	93.351	106.518	68.5147	80.1565	92.9474	94.5686	68.708	63.0208	49.8536	53.483	84.962	125.285	102.629	118.616	124.038	129.672	148.694	146.786	84.133	101.991	124.058	94.907	134.461	124.772		0.0709687	94.8243
1.4284	78.3421	69.844	64.9537	69.8264	73.1482	63.7807	97.353	95.365	98.098	81.1846	80.8869	84.7801	81.0471	65.9097	66.0214	64.025	50.0717	94.045	123.046	118.902	126.983	123.464	109.729	129.663	131.562	83.554	103.048	119.6	122.923	138.956	129.917		0.0774184	94.8397
1.5474	81.9609	55.3039	66.559	90.4682	76.6634	79.2304	99.313	87.311	90.421	81.3138	68.886	86.3352	85.1124	77.6315	69.2588	76.4178	57.4968	112.353	112.514	112.232	121.511	100.631	118.746	135.519	117.425	102.933	134.768	122.691	106.962	140.398	146.428		0.0838681	97.2514
1.6665	81.4516	57.2106	60.2943	64.1265	79.8295	82.1818	92.986	109.445	105.509	82.638	90.2865	86.8906	84.6915	83.2739	74.4883	82.4189	64.847	105.434	128.855	120.075	121.344	102.92	117.066	127.112	139.266	99.647	110.502	126.119	97.077	133.475	149.165		0.0903232	98.7299
1.7855	71.6515	60.0167	68.6836	67.7795	81.0813	91.3796	112.315	98.956	86.336	70.0325	70.9396	79.5359	106.277	74.2374	88.9431	91.5226	49.4679	98.718	122.698	101.225	104.25	100.767	114.469	120.603	110.297	114.667	112.38	116.645	102.11	154.234	132.518		0.096773	95.9592
1.9046	74.1175	71.0219	58.6982	71.7504	68.2274	81.945	94.455	105.546	101.111	72.461	83.6662	83.2251	81.311	80.7499	85.5119	94.7135	43.8813	106.09	120.748	120.92	111.16	97.992	86.237	96.135	121.851	106.225	125.447	139.335	97.204	138.707	137.666		0.103228	95.4229
2.0236	85.4627	55.9088	65.214	65.7112	72.5173	60.3025	83.771	108.969	82.178	72.2697	80.8835	85.3083	83.8023	87.8714	75.4101	97.9809	65.3691	117.552	117.586	115.021	97.2	109.362	91.345	110.091	143.036	107.052	115.172	131.469	101.952	138.232	145.565		0.109678	95.7924
2.1426	68.8086	57.603	60.7918	71.2412	77.5829	75.3095	99.22	102.557	100.371	83.9932	62.0585	87.4066	67.9161	78.5521	70.71	85.1906	62.1063	104.251	110.81	115.633	115.165	89.618	92.652	118.782	115.657	111.229	120.476	128.442	105.377	139.817	145.314		0.116128	94.3433
2.2617	88.6821	72.4434	66.7427	57.0546	84.3365	77.1662	106.608	108.545	99.874	68.514	74.3672	98.8508	91.1267	61.0747	74.4129	73.838	45.1142	113.932	109.809	95.144	104.921	83.814	90.326	104.602	126.72	101.391	122.799	118.064	98.676	129.95	150.855		0.122583	93.5405
2.3807	76.8937	83.7085	60.3257	64.0304	75.4277	77.8582	74.942	109.55	82.636	74.45	68.0983	67.1103	66.6447	79.9134	70.1378	89.1209	50.8652	101.123	109.385	113.887	113.407	86.085	73.67	100.162	107.955	97.547	107.938	111.181	107.243	118.042	136.531		0.129032	88.899
2.4997	68.2398	67.5538	69.2149	55.4806	71.2401	79.1896	82.656	92.447	86.428	92.1437	69.6312	82.2196	55.3369	73.4191	72.3639	83.231	63.7338	110.482	98.448	100.741	106.156	94.116	71.818	102.907	97.778	95.009	101.093	111.553	119.362	94.664	154.483		0.135482	87.8432
2.6188	62.2375	70.2145	60.0941	64.414	73.9305	76.2665	94.321	107.129	90.389	83.9915	70.4344	83.4841	80.7037	64.071	56.9822	88.4508	55.2825	104.303	81.868	93.194	86.248	94.76	86.191	106.515	97.597	89.113	113.011	95.417	105.842	117.228	160.688		0.141937	87.5604
2.7378	75.8413	71.5957	63.5634	57.1127	68.9459	69.0902	98.72	83.947	72.73	68.0226	57.8435	77.6933	84.7761	77.8456	70.7391	75.5701	56.1813	87.628	104.958	102.095	95.283	91.406	70.647	84.81	89.637	86.414	95.078	107.948	103.112	122.272	132.56		0.148387	84.0021
2.8568	91.7652	70.8356	59.6091	66.7528	61.2393	73.3285	84.756	77.366	68.976	94.3369	64.0972	70.1577	67.9836	67.4942	54.0578	79.8237	50.034	90.775	99.663	81.233	96.939	94.968	73.326	107.782	88.696	81.609	101.743	107.614	102.929	112.477	130.413		0.154837	82.9929
2.9759	78.0152	66.2157	64.2248	49.0723	60.0195	83.5412	74.919	76.354	81.474	70.9925	53.5025	71.1019	57.1769	56.1978	54.8721	80.6645	51.2555	85.326	70.158	108.134	89.347	78.905	53.295	77.468	79.325	84.545	95.06	108.726	102.78	93.908	125.151		0.161292	76.8299
3.0949	72.7903	73.6031	59.6795	44.8881	41.5791	66.4501	53.914	82.896	71.411	72.0648	52.8221	56.7046	66.4233	64.4599	49.5632	89.4841	53.3862	97.74	73.635	83.741	66.355	65.901	72.352	90.41	67.655	84.307	106.029	117.276	102.251	112.4	114.146		0.167742	75.0425
3.2139	76.6563	74.9086	49.2386	48.6699	65.385	67.8143	71.211	81.403	77.075	75.011	54.6094	60.9973	62.5428	65.7571	45.3949	80.976	48.5068	88.011	67.154	66.362	75.053	85.39	64.068	83.587	59.118	85.686	87.116	104.274	94.491	94.16	116.438		0.174191	73.4537
3.333	71.2773	90.0703	70.7598	43.2656	60.906	81.0318	55.523	70.928	61.112	63.5786	56.984	55.7459	43.4364	63.083	52.1266	74.2727	55.0261	88.565	75.472	66.316	77.639	62.404	51.176	74.023	63.479	84.702	113.994	85.501	95.603	85.806	121.881		0.180646	71.4738
3.452	66.7905	89.6883	55.2898	53.6532	74.2409	73.7483	75.567	73.481	70.867	54.7007	52.9783	52.5083	47.4772	56.9888	54.8094	65.9302	35.3888	69.829	73.834	58.264	71.114	69.811	48.171	56.717	62.645	81.644	85.411	74.219	90.456	96.523	91.301		0.187096	67.2273
3.571	85.1347	75.505	57.9655	32.3458	57.5642	64.2541	58.164	66.476	70.128	61.5213	54.2742	59.8963	36.7123	46.4405	39.3407	61.7331	54.6084	65.721	73.465	65.277	77.925	56.1	44.788	79.138	45.286	86.503	81.072	80.223	90.465	87.366	86.714		0.193546	64.5841
3.6901	71.9359	78.8659	53.618	37.9668	37.8825	58.5331	60.385	72.07	63.873	70.0288	59.2398	50.2344	46.0968	49.6816	35.2249	59.9364	51.141	61.431	48.518	61.571	71.616	63.647	45.173	67.113	41.355	96.118	68.56	68.919	83.696	77.323	110.453		0.200001	62.0067
3.8091	65.9258	64.1532	54.1225	35.6008	37.2082	67.5061	42.847	67.826	54.174	59.5765	49.1741	57.502	48.364	53.6628	39.6342	46.7787	56.8225	50.255	56.368	56.726	47.428	50.77	45.295	60.601	48.253	73.521	69.538	70.231	62.219	84.946	92.246		0.206451	57.0734
3.9281	63.8825	59.3516	41.1916	33.0905	36.0295	73.1884	44.682	66.574	49.894	46.0584	46.3891	55.1311	38.9312	53.437	27.1495	48.0435	68.3615	49.517	69.004	45.279	63.53	52.326	39.348	52.418	50.617	77.425	52.767	77.675	61.251	67.248	96.551		0.212901	55.0433
4.0472	63.5572	61.5308	48.8705	36.8664	45.4313	49.3908	38.819	72.714	56.282	48.9355	46.0629	46.2219	40.4197	56.4806	27.5032	54.5024	65.1189	34.623	62.788	50.873	46.376	44.449	43.162	46.657	41.059	83.266	46.967	50.205	65.687	70.585	100.169		0.219356	53.083
4.1662	53.6992	75.2264	47.8851	36.8352	43.0364	67.0633	37.318	72.869	49.389	45.6052	56.5999	52.3847	40.9189	51.0673	36.9112	52.3504	40.4281	44.328	42.6	51.791	40.248	28.054	47.845	56.543	44.117	58.776	51.799	62.655	39.233	62.243	81.473		0.225805	50.6868
4.2852	66.8274	58.3683	36.021	33.2198	31.3613	52.6604	43.618	49.818	56.339	50.5654	36.1939	38.2312	50.4237	58.3389	30.8001	44.5248	55.6458	48.064	55.617	53.065	56.513	36.418	36.45	43.235	43.878	45.939	48.408	60.173	58.896	69.655	80.419		0.232255	49.3447
4.4043	57.2532	73.1241	52.1249	38.8644	26.5313	51.2036	28.227	77.893	49.611	35.4437	31.4632	40.2623	33.2867	49.7578	35.3291	36.1416	50.7258	47.197	47.869	51.204	46.647	31.32	52.748	27.806	54.247	58.695	49.695	43.231	60.223	54.761	78.986		0.23871	47.4797
4.5233	56.0439	70.2432	44.1253	35.4963	32.5001	40.7145	32.777	78.883	52.51	42.0028	43.5714	42.6112	39.593	45.9449	41.0893	32.3829	47.3248	30.912	44.081	52.739	55.055	48.639	44.572	32.289	40.232	52.596	43.244	31.084	52.1	49.955	61.156		0.24516	45.6925
4.6423	50.1061	62.2875	53.7698	26.363	29.0071	42.0734	30.462	75.647	41.44	36.966	41.1181	50.5438	30.8365	52.7994	41.9111	28.623	49.895	37.586	37.245	55.846	47.64	37.298	39.024	29.665	36.263	46.313	28.581	38.538	54.645	61.677	67.462		0.25161	43.9236
4.7614	69.0404	58.7615	53.5997	31.1287	17.2025	48.7703	30.432	66.972	31.651	56.3162	31.7683	37.9986	30.9096	43.344	34.127	27.1264	39.7517	37.948	32.191	55.147	48.5	31.349	40.785	30.847	45.437	45.809	30.107	40.354	50.786	81.936	61.394		0.258065	43.2739
4.8804	65.8256	52.3841	38.3147	39.7308	26.4351	37.4588	25.146	79.296	36.235	34.8302	33.5632	49.3916	21.5772	50.6467	33.3852	39.5374	38.2695	33.757	37.764	46.092	50.821	37.641	33.637	32.349	53.979	47.947	30.715	41.934	43.502	66.168	47.498		0.264515	42.1236
4.9995	54.4218	62.775	35.5869	26.601	32.0043	44.741	26.811	68.829	50.334	35.8979	32.0801	41.8254	32.5	35.5164	28.0949	48.6541	45.4165	46.199	37.676	39.851	51.215	45.233	31.047	26.415	36.423	47.414	37.144	54.349	46.998	50.449	81.918		0.27097	43.0458
5.1185	55.9762	53.3559	36.542	23.1452	24.697	45.195	36.146	56.84	43.946	34.8508	47.2496	33.9446	26.03	49.591	40.4484	36.5586	46.7862	39.589	50.218	37.407	56.957	30.648	40.461	19.265	37.071	41.48	51.79	56.355	63.627	49.445	64.791		0.277419	42.9163
5.2375	42.7525	49.2289	47.1468	23.5205	22.2534	49.6683	41.459	51.813	34.462	41.2371	38.866	41.8486	28.6267	43.4679	41.507	46.688	33.6281	29.665	42.781	43.379	33.165	26.042	34.34	22.323	40.595	54.827	37.789	45.26	45.973	36.207	49.673		0.283869	39.3611
5.3566	50.8833	42.5923	46.3344	31.4998	25.8295	44.5686	28.085	56.441	37.11	53.9349	31.1501	34.9583	27.2899	32.9856	43.6924	34.3709	39.6179	41.816	43.933	45.217	29.522	27.987	25.34	18.287	29.767	33.157	39.795	45.752	55.716	44.495	70.47		0.290324	39.1161
5.4756	43.993	33.5664	47.6168	25.6745	17.3385	41.5567	32.773	28.273	23.977	37.4272	34.3619	52.7156	22.8243	30.6531	34.7609	39.5853	46.3405	40.211	47.101	51.79	49.36	25.083	24.937	19.772	57.795	46.052	45.598	49.041	49.722	63.182	51.084		0.296774	39.1666
5.5946	35.9409	38.2143	31.9163	32.8698	29.5861	42.1934	27.57	37.945	39.156	31.274	34.7308	45.3058	20.0643	39.9285	37.5561	41.9913	40.6922	35.29	42.335	49.491	37.453	39.854	20.96	10.304	41.227	32.464	26.738	40.585	40.494	61.005	44.583		0.303224	36.4425
5.7137	41.4943	29.5422	47.7006	33.7209	28.8704	32.0673	30.576	42.204	39.027	42.3711	31.4562	43.2839	31.2251	41.0698	35.1133	32.0863	35.5833	26.922	42.473	35.23	31.746	35.311	25.198	22.476	45.967	38.449	38.677	39.772	50.526	64.375	45.054		0.309679	37.4054
5.8327	35.6931	29.3129	34.342	30.6653	25.1942	39.9298	23.403	38.818	44.174	35.3795	20.7549	45.2537	37.5068	34.4393	42.4432	32.3952	40.6324	37.301	44.999	41.104	40.522	34.682	29.208	27.214	24.588	40.343	24.228	33.116	43.217	60.611	45.77		0.316129	36.04
5.9517	34.6166	28.5867	30.109	30.509	25.2192	25.0998	29.518	34.605	45.912	49.9172	34.1282	47.5789	33.0031	29.4844	36.4958	37.9072	32.6998	31.367	38.629	43.675	34.426	34.925	30.285	15.09	25.813	30.6	30.162	37.731	32.464	61.532	34.753		0.322578	34.4143
6.0708	22.5754	21.7144	40.518	26.5432	18.8908	41.4815	37.532	31.533	40.265	38.0524	31.0067	30.4928	40.2789	35.2714	43.7958	51.252	28.4135	30.713	40.036	34.327	38.134	35.547	26.254	11.323	28.271	43.717	34.387	35.424	30.848	66.289	48.84		0.329034	34.9589
6.1898	29.8886	28.6966	26.8398	24.9803	17.1538	40.4657	31.977	40.943	42.142	32.1522	15.9733	35.5595	34.715	28.2828	36.9978	42.5112	36.6352	34.489	39.611	31.165	33.09	36.683	29.717	13.42	24.207	42.282	31.082	40.617	23.645	56.532	39.299		0.335483	32.9598
6.3088	35.8917	38.3532	21.6529	22.4777	18.8024	31.2122	31.582	30.971	41.685	32.6109	22.0434	36.2134	31.2789	43.2119	40.6556	44.6234	33.4866	37.667	36.05	28.819	26.348	35.519	18.028	13.778	18.657	45.848	29.768	40.628	41.67	38.143	30.517		0.341933	32.1997
6.4279	27.8157	28.6327	39.3422	31.4985	15.9367	35.841	24.68	23.791	44.154	43.301	28.3226	40.377	34.4564	37.0656	27.6395	55.0884	34.3111	37.324	31.702	24.743	36.266	25.629	32.422	12.604	26.606	32.631	28.315	47.892	39.702	37.529	50.786		0.348388	33.4324
6.5469	25.1854	31.0961	22.378	25.1551	22.1669	37.1432	31.927	18.727	51.701	36.5782	25.4249	37.5328	40.6987	28.963	36.6809	52.7014	43.2796	34.093	40.293	36.757	38.028	35.735	37.717	15.682	16.784	33.091	25.581	21.307	26.29	38.215	43.849		0.354838	32.6052
6.6659	17.6439	34.0625	29.8747	32.1077	29.7574	29.7257	31.493	20.07	42.337	35.6815	32.61	44.5729	27.1386	38.8708	28.837	48.1057	47.0021	31.419	39.491	34.333	31.089	38.878	22.986	13.507	31.581	40.912	16.747	40.926	36.727	36.989	40.091		0.361288	33.0828
6.785	28.7082	41.7045	41.8502	24.8837	23.8572	26.6192	36.643	30.575	46.152	56.2881	31.4984	49.0097	31.98	26.2244	33.2079	36.9146	46.0386	29.217	42.859	25.833	35.057	48.354	26.499	12.836	23.956	40.329	22.08	34.063	27.67	27.97	43.038		0.367743	33.9328
6.904	30.4934	34.5634	51.7304	20.5783	13.3193	20.2824	30	25.965	46.616	40.5698	39.046	37.6605	39.4144	32.0496	35.1561	44.7935	47.3521	27.307	37.267	38.28	45.53	54.629	26.31	16.64	19.313	35.174	30.21	37.832	31.377	46.679	35.772		0.374192	34.5777
7.023	45.9108	36.3956	45.5311	24.0654	26.2124	24.9575	35.671	30.061	42.866	34.09	31.1565	42.4105	38.6388	38.5299	41.0056	53.7751	23.1369	28.5	43.858	27.612	41.365	46.008	19.551	9.255	19.833	46.035	30.239	41.084	24.178	31.441	29.099		0.380642	33.9507
7.1421	29.434	29.5948	33.9035	26.5662	16.6731	30.7255	38.525	31.682	30.56	37.0388	36.3366	38.5483	31.1549	22.9631	28.2102	40.3247	22.255	28.631	41.345	30.597	44.735	53.023	26.872	17.487	20.569	48.928	44.13	44.819	33.29	37.729	49.408		0.387097	33.7438
7.2611	28.3828	39.3299	43.4325	13.4539	16.9417	23.683	31.935	30.216	38.153	36.8326	44.686	31.9335	31.11	22.2975	18.7468	38.8233	31.2761	20.259	45.833	19.632	41.478	38.854	25.532	12.357	16.167	51.34	29.573	35.064	25.867	39.906	31.627		0.393547	30.7975
7.3801	38.3582	28.4932	53.3227	22.3697	21.9316	22.8058	29.374	33.012	29.335	39.6167	27.6165	26.1503	37.7692	22.0651	18.4435	31.5057	25.4249	27.123	37.743	23.171	41.751	41.793	21.891	11.222	23.166	22.501	34.61	22.806	36.466	42.605	45.303		0.399997	30.3144
7.4992	32.4018	29.2774	41.873	14.9359	21.0095	27.7578	31.494	24.044	41.036	39.8152	35.3099	27.3675	32.8196	16.3218	29.0595	38.4139	34.5294	41.355	38.124	31.895	47.443	40.085	22.67	11.478	12.254	36.013	23.494	35.742	29.614	37.634	35.763		0.406452	31.001
7.6182	20.5784	31.2458	34.1603	19.9611	20.9765	28.0372	34.79	23.136	32.334	32.1699	26.4607	31.4775	41.6779	35.4672	24.6799	35.9141	31.7438	30.425	29.628	22.786	38.822	29.973	24.65	8.007	20.826	25.716	28.903	44.592	28.836	31.414	45.255		0.412902	29.5046
7.7372	38.912	30.3709	35.911	20.2341	19.4419	27.6204	25.145	19.837	32.003	33.6631	21.0191	15.1016	40.516	22.5484	15.4581	35.072	32.6095	29.644	41.008	33.938	44.871	28.48	15.116	17.205	14.071	28.699	37.84	27.492	29.628	29.804	47.88		0.419351	28.7464
7.8563	14.6855	34.8643	40.6685	12.7348	16.9255	20.4999	24.301	21.089	42.884	24.7509	27.3164	22.7262	29.8724	29.983	22.0245	44.9191	28.2509	23.058	41.03	39.139	39.448	27.236	19.462	14.286	13.822	40.274	27.132	22.476	31.727	27.922	38.473		0.425806	27.8704
7.9753	17.7772	25.0499	38.9948	16.1465	16.6458	22.4521	15.327	16.949	40.113	31.3332	18.6231	16.3375	34.9732	34.4708	30.725	44.956	22.4958	25.548	37.37	31.548	25.596	25.1	17.426	13.655	20.804	41.299	28.112	20.539	32.073	35.106	33.19		0.432256	26.7979
8.0943	20.3621	26.286	42.0305	21.0319	12.7563	20.4941	14.474	20.919	35.36	23.7205	20.948	21.7593	44.8859	36.8354	29.6195	49.9715	34.4447	31.055	30.777	32.971	32.554	31.835	20.354	10.295	13.109	34.655	17.691	22.509	26.37	35.267	36.508		0.438706	27.479
8.2134	31.762	29.9483	42.4734	15.6312	17.5671	18.7713	25.103	18.981	30.745	25.4611	27.6814	23.6858	46.5995	33.3251	28.6212	37.4105	27.9787	29.037	33.504	37.82	24.675	26.097	15.563	9.653	13.215	40.342	22.766	29.427	34.247	29.716	46.082		0.445161	28.19
8.3324	17.9387	38.7899	24.4444	24.0462	12.0812	25.8483	26.221	19.25	37.963	22.3969	24.3731	19.4774	43.9676	32.3176	27.6995	36.6601	26.0781	24.306	24.425	39.47	28.955	31.497	22.148	16.642	15.484	50.322	26.694	32.74	42.423	27.218	28.265		0.451611	28.0691
8.4515	22.0487	26.4056	30.3062	26.6854	20.0049	18.7712	30.566	16.381	30.41	29.9414	18.4904	17.9004	44.4195	27.7631	24.8332	30.2896	19.7034	27.063	25.307	34.835	23.057	28.593	17.917	9.291	9.987	42.225	36.293	25.192	33.375	26.934	40.838		0.458066	26.317
8.5705	23.9258	31.8265	39.5064	17.6583	17.5728	17.0953	30.293	16.47	19.601	23.3414	26.3038	13.3851	32.6241	23.2897	32.2014	25.041	22.7533	29.314	18.224	26.148	26.092	26.717	14.312	15.653	12.029	33.983	21.885	26.365	25.944	41.408	35.416		0.464516	24.7219
8.6895	23.1009	40.9709	44.7598	26.6745	14.2686	13.9929	25.48	22.088	19.13	22.9104	13.4457	18.5616	34.8902	29.5057	19.7928	44.8906	21.1192	23.698	21.623	37.381	30.291	30.58	14.975	5.23	10.598	23.944	31.861	17.569	24.762	26.378	34.212		0.470965	24.7963
8.8086	31.32	19.725	40.827	25.1178	15.8417	15.9485	22.178	11.581	27.201	18.3379	15.1657	16.7252	34.1112	15.9717	31.5812	31.7671	21.4162	30.727	25.341	36.839	36.344	38.039	11.686	17.867	13.556	25.42	31.145	20.335	28.086	19.004	35.966		0.477421	24.6829
8.9276	28.8071	38.2897	46.4555	28.7563	29.5829	22.0094	23.483	17.246	18.451	27.0898	19.1258	14.7896	34.8062	31.1039	13.7182	46.8634	20.6982	29.171	20.525	32.674	38.963	28.462	19.551	14.683	25.326	25.81	33.276	13.047	30.505	38.225	34.388		0.48387	27.2865
9.0466	27.8259	37.743	44.624	28.5368	10.333	15.9992	23.123	14.118	28.527	28.9306	22.6036	17.028	27.9141	24.8275	15.3473	46.8157	25.3818	32.515	29.694	39.487	29.057	32.7	20.973	11.393	15.793	19.845	27.12	18.562	32.192	26.668	24.566		0.49032	25.8143
9.1657	24.6592	37.7383	45.8831	18.6134	13.5461	24.8456	34.256	10.428	13.92	26.1991	13.695	12.8953	24.0441	22.9232	23.3708	33.2658	25.6256	26.445	25.66	28.174	34.231	33.596	9.639	12.363	26.878	34.181	32.23	31.265	36.492	28.898	24.447		0.496775	25.497
9.2847	30.664	25.1746	36.6664	17.0987	13.7933	15.6739	25.916	11.467	20.592	25.3358	19.8331	15.4173	29.025	26.5679	17.5216	37.7086	25.6908	29.34	27.77	18.9	27.805	39.858	15.238	12.502	20.559	38.41	39.617	24.428	38.694	31.978	33.999		0.503225	25.5885
9.4037	28.1296	27.6951	25.7871	23.0467	11.8553	24.6403	25.869	10.776	13.114	24.1016	27.5289	19.0258	29.41	19.1999	19.6163	38.8195	22.803	28.45	14.546	23.26	30.246	49.477	11.979	7.337	15.783	31.119	30.007	22.968	41.412	25.325	20.998		0.509675	24.0105
9.5228	33.4683	16.92	39.7681	21.8777	16.6295	19.1594	18.009	15.366	15.07	12.3773	12.1906	15.2571	25.8093	27.4426	22.269	31.5656	24.7992	25.255	22.148	19.925	28.988	41.095	10.237	11.755	22.096	26.992	34.679	32.23	28.295	22.279	12.91		0.51613	22.802
9.6418	19.3957	26.6464	28.1049	14.8259	7.9839	18.8824	31.074	10.432	19.513	13.5188	14.509	9.2828	29.5305	24.2604	18.6655	27.5094	21.5163	21.091	19.867	31.488	26.535	36.497	11.61	9.589	19.739	30.024	28.657	33.522	36.209	21.871	26.318		0.522579	22.2151
9.7608	19.1998	21.8648	39.7786	21.5943	9.1987	24.5166	25.266	7.087	22.476	15.3602	20.0323	9.5846	31.3247	19.5075	20.0956	25.133	25.6278	29.429	22.74	28.04	28.177	36.023	15.951	7.887	7.559	46.325	28.887	17.184	36.983	31.449	28.934		0.529029	23.3295
9.8799	16.9851	18.7732	27.6076	24.4848	12.9012	24.8052	33.284	15.616	20.438	23.2603	11.4452	12.2166	18.4234	19.7378	22.661	35.818	28.5132	28.799	36.538	18.956	21.918	45.333	23.261	8.83	21.624	36.834	27.973	23.923	41.815	21.487	27.496		0.535484	24.2502
9.9989	17.8117	27.9252	25.2505	20.0809	20.1481	15.4268	21.448	15.141	21.933	20.2336	12.2827	16.9901	23.1506	27.9162	30.8466	18.1891	29.7691	39.347	33.595	21.961	29.629	46.534	20.469	14.847	15.681	36.629	19.788	30.972	30.855	18.867	19.35		0.541934	23.9699
10.1179	10.7078	23.21	23.4823	14.2262	12.3774	15.0296	18.001	3.782	20.049	19.1003	13.9276	12.2955	19.3244	12.0902	27.6222	33.2205	18.7846	21.666	39.718	22.327	17.257	43.792	15.212	17.378	12.567	27.296	26.339	28.41	34.857	35.694	23.598		0.548384	21.3981
10.237	28.0109	19.6366	34.0278	17.976	12.4451	13.5129	36.77	8.214	11.16	20.6956	13.2398	12.6184	22.6777	25.8634	22.026	42.6147	24.3483	24.486	34.24	22.213	34.75	29.336	13.39	19.974	15.495	32.081	28.773	25.59	39.498	14.919	14.435		0.554839	23.0651
10.356	16.6306	27.9961	30.4156	18.5872	14.9815	20.1135	26.899	8.16	12.865	19.0564	8.0519	18.6408	17.0287	14.7105	26.2062	54.7143	24.2696	17.415	29.585	28.021	30.955	38.507	14.193	15.448	14.994	37.095	24.762	21.946	30.588	14.708	16.563		0.561289	22.3905
10.475	18.6388	27.8639	27.4326	20.6511	13.3145	12.6748	30.726	7.424	14.61	20.2182	13.9967	11.2353	29.1234	25.8068	36.8545	42.0686	24.4361	24.281	25.814	40.225	29.723	27.381	13.275	21.699	6.103	37.918	22.789	18.432	35.295	21.57	24.811		0.567738	23.432
10.5941	23.586	12.5348	22.5601	20.6368	14.4637	10.8323	28.8	13.417	14.513	16.9324	13.4919	6.9927	24.8933	17.2834	31.9576	36.9839	23.9453	26.279	21.613	24.622	30.436	29.477	14.086	11.17	13.314	29.886	26.603	21.744	40.574	20.269	34.353		0.574194	21.879
10.7131	31.1917	24.7736	22.8679	24.1265	5.501	13.7049	24.815	9.56	11.024	19.331	18.3598	15.3907	24.879	23.1195	26.7469	28.6694	25.5214	32.415	30.395	20.208	32.468	21.498	11.71	14.058	22.568	30.664	20.153	20.448	36.7	19.874	22.821		0.580643	22.1149
10.8321	19.6156	21.9532	20.3236	9.0207	5.6222	18.4824	30.078	15.599	20.439	27.0847	21.7582	8.9038	25.0688	31.6718	11.3163	54.1698	27.22	25.987	27.195	18.445	32.904	24.087	11.525	14.003	21.738	35.764	23.598	24.527	33.049	24.205	25.763		0.587093	22.9393
10.9512	26.482	19.4295	20.0258	15.9533	15.2007	15.2949	39.956	10.887	14.857	28.6537	17.5551	6.2497	18.6423	33.3573	14.7174	58.323	27.555	23.053	21.071	9.598	27.333	20.175	15.169	11.759	9.755	40.113	32.821	24.179	39.299	24.064	19.511		0.593548	22.6142
11.0702	22.5906	17.8423	14.5078	14.1984	13.8913	14.073	18.336	13.93	13.477	22.132	18.3533	15.4098	24.5463	21.0625	21.3432	38.081	27.1572	17.743	15.881	27.648	25.121	20.068	10.359	15.655	6.505	41.211	22.202	14.759	43.501	19.25	18.529		0.599998	20.3021
11.1892	19.7608	31.2238	18.5061	19.6005	8.2099	14.7298	29.937	8.458	14.811	35.6402	13.9555	14.0801	26.9507	18.2808	28.1008	30.1273	29.4376	25.124	17.289	22.922	24.904	29.58	20.474	16.276	7.755	45.841	25.611	30.59	38.04	27.288	20.064		0.606448	23.0183
11.3083	22.5963	13.876	27.1023	19.4456	14.2021	13.741	29.08	8.677	16.175	24.734	9.9208	13.7913	28.6386	35.2059	21.7913	28.2203	39.658	28.562	19.782	15.135	15.44	25.533	11.363	14.443	9.798	41.566	34.052	19.068	30.18	25.045	22.529		0.612903	21.9146
11.4273	22.8733	20.3682	24.8737	15.7743	9.6781	10.7062	34.553	13.027	10.655	21.7489	15.4713	11.6166	25.9443	38.4409	18.1955	30.4725	43.1924	19.524	19.817	9.465	26.905	23.814	12.533	9.614	20.363	38.007	26.821	17.029	21.27	29.758	18.509		0.619352	21.3232
11.5463	16.5442	18.7105	15.6456	20.4585	10.9466	12.4696	24.362	7.595	14.343	20.7912	21.218	12.7806	13.5943	31.4168	23.9013	17.4094	33.8834	25.107	22.73	15.269	22.472	33.164	13.579	24.446	17.876	34.374	22.845	22.992	37.688	24.437	21.52		0.625802	21.1151
11.6654	22.927	19.5496	15.8822	16.1597	17.6641	10.9716	29.325	18.627	23.381	25.841	16.7211	6.6851	21.1419	25.7351	27.2425	35.639	40.8803	22.018	20.219	19.042	31.247	22.413	15.271	17.589	8.697	33.369	26.942	21.655	30.005	23.461	26.299		0.632257	22.3419
11.7844	13.6858	17.3291	19.9997	23.8429	14.9208	16.1537	20.501	7.506	20.302	28.41	17.6395	12.2681	19.1142	29.5021	21.3382	24.8414	34.9046	32.016	26.045	17.767	31.918	29.864	15.544	15.415	10.403	32.901	33.393	28.434	21.958	28.033	20.932		0.638707	22.1575
11.9035	18.7431	17.3478	19.1376	23.9028	13.0154	16.7628	23.903	8.089	13.821	30.2764	22.125	12.6019	15.8093	31.4391	24.0206	31.7285	31.0276	33.367	28.094	29.374	31.736	21.404	16.029	10.002	12.341	20.679	25.68	21.61	46.555	20.041	28.06		0.645162	22.5394
12.0225	25.7393	13.9497	21.2539	18.5291	11.9283	17.8267	22.836	9.371	20.523	37.9266	22.6696	14.0822	19.0279	37.9404	26.4538	27.7306	23.6255	27.749	21.99	19.936	33.609	16.024	12.067	15.317	11.523	28.197	21.428	14.11	36.936	16.558	13.993		0.651612	21.3178
12.1415	26.241	22.7344	20.622	17.959	10.3628	19.897	25.119	16.23	16.036	27.1132	10.2592	10.6049	29.3194	37.6812	19.2953	22.0779	22.2859	29.356	21.185	26.78	39.001	26.539	18.938	13.393	12.176	25.749	21.039	23.509	35.074	17.511	30.591		0.658062	22.409
12.2606	24.7676	13.9718	18.8993	18.5693	13.1431	15.0206	22.923	11.731	19.555	23.7204	12.6863	14.1462	27.4377	31.3354	18.8726	22.392	37.9425	24.726	26.215	24.251	25.219	19.667	17.315	19.562	14.112	24.25	29.114	20.284	38.193	16.231	23.724		0.664517	21.6122
12.3796	27.2382	23.761	22.4509	11.0991	14.0456	17.0609	20.35	6.407	25.288	43.8298	10.8578	21.196	27.1645	24.3993	20.6406	39.5531	29.3673	13.961	23.911	14.599	24.809	25.654	14.351	17.392	19.048	41.865	28.395	16.11	37.327	20.294	16.256		0.670966	22.5381
12.4986	26.8261	10.6438	28.1817	19.1042	11.7103	20.0953	13.846	8.005	18.195	36.5866	12.958	16.7819	26.5998	30.7748	25.0377	24.0414	37.8477	20.298	27.981	18.66	27.558	20.571	25.523	11.57	23.12	19.582	26.813	27.816	35.921	21.132	14.802		0.677416	22.2123
12.6177	17.4642	24.8816	23.6555	13.9581	16.0724	14.101	16.769	9.763	30.265	30.9556	14.7491	14.1405	24.3009	25.9165	22.8335	34.7389	28.0456	23.51	28.192	23.945	15.603	11.381	16.795	12.701	33.594	27.77	34.765	22.326	33.014	16.454	16.474		0.683871	21.9076
12.7367	15.4451	22.4215	25.9124	12.004	18.9545	19.5134	19.182	9.03	21.041	41.0337	17.7815	18.0722	13.77	26.1882	18.0647	26.542	31.083	21.489	22.59	12.078	12.701	16.531	20.597	15.781	29.411	18.844	31.349	22.593	20.261	9.941	14.705		0.690321	20.1584
12.8557	18.0917	22.6431	23.4179	23.402	28.165	15.6601	20.061	16.206	27.709	37.6317	20.4636	8.1228	12.0125	27.4651	28.5065	34.9605	31.3959	17.089	33.837	15.61	17.455	17.999	13.119	20.966	31.879	20.74	29.817	18.528	30.931	20.36	13.08		0.696771	22.4943
12.9748	15.2356	15.9513	13.7084	18.9609	19.1504	9.7024	14.642	14.627	17.987	28.0422	17.3559	8.7383	13.418	14.9443	31.6767	27.0923	30.1753	27.267	33.113	14.168	15.048	19.676	13.679	21.833	29.044	19.639	24.29	27.151	24.355	21.357	18.105		0.703226	20.0043
13.0938	15.2956	18.8671	15.3523	24.021	14.3603	29.9652	17.572	10.818	14.815	26.7967	14.8256	13.4067	25.0362	23.9992	27.1223	31.9883	28.9253	20.992	18.468	11.833	19.979	21.409	19.492	24.731	35.951	15.049	30.963	22.949	18.866	18.573	20.264		0.709676	21.0544
13.2128	13.3424	8.0701	12.9783	17.2877	19.9413	20.2998	23.178	14.183	21.292	30.21	14.4259	11.3976	21.3986	13.9598	28.1999	30.4833	27.2046	29.13	17.506	16.955	28.444	29.111	15.489	18.245	23.632	17.005	22.471	13.537	24.477	23.365	22.11		0.716125	20.3009
13.3319	21.4674	10.9182	21.24	19.7571	21.8281	16.7741	25.415	12.983	21.345	30.3187	19.264	19.2172	26.8142	25.9054	19.3352	21.4749	29.5856	12.711	21.726	16.478	23.144	26.052	10.887	19.963	26.534	9.951	25.064	36.293	13.594	23.422	4.602		0.722581	20.4537
13.4509	19.7293	14.6824	15.2786	13.7152	18.1331	33.1753	32.953	15.141	22.246	35.3207	16.3344	14.0651	29.1556	26.6773	26.9459	37.906	32.7792	13.042	18.966	13.612	16.156	22.476	9.998	14.833	19.465	20.537	25.455	24.199	18.028	10.133	21.104		0.72903	21.0401
13.5699	15.2771	10.8736	18.1657	15.1523	15.6371	24.1532	28.801	12.319	17.536	40.3606	18.0732	16.9676	29.0811	33.3428	24.3338	34.0012	34.8921	9.864	20.475	11.473	10.142	23.177	13.283	13.238	16.125	19.292	26.173	30.255	18.696	14.118	10.593		0.73548	20.1894
13.689	16.7853	17.7878	14.3205	20.2237	24.5206	25.1242	21.304	14.793	12.291	36.8762	16.7115	9.5799	37.4715	14.4014	24.8427	23.0666	26.1998	12.848	11.567	23.217	10.253	20.758	9.086	7.216	20.253	19.681	25.467	33.076	9.156	14.179	9.339		0.741935	18.787
13.808	13.5957	13.4211	15.4123	21.249	14.8334	17.9434	24.469	15.14	14.401	42.4924	10.6217	13.0781	35.2079	20.9637	14.5975	25.5323	32.7844	21.863	14.921	20.762	14.167	19.513	21.971	12.151	19.17	11.291	32.756	27.972	36.598	15.377	16.11		0.748385	20.3344
13.927	11.9221	11.1876	19.4509	19.5559	13.6732	21.9111	19.752	14.203	22.556	40.0972	8.835	10.7995	29.789	24.8929	39.5079	26.7763	20.0779	12.707	18.701	15.328	9.519	21.355	14.391	15.191	15.78	22.799	30.19	28.569	38.455	19.793	9.553		0.754835	20.2361
14.0461	12.1944	15.7887	17.879	18.4564	15.7056	24.3179	23.62	12.298	18.415	19.5888	19.3314	13.411	19.5069	32.5665	36.8782	28.4695	20.8689	19.028	11.361	19.616	18.899	23.045	8.14	8.389	31.822	14.846	37.982	33.925	26.896	21.621	8.227		0.76129	20.4224
14.1651	14.4052	14.8728	21.8177	21.5049	16.1235	21.8165	15.244	6.535	15.072	28.864	19.5758	11.337	37.8992	23.2501	30.8843	26.1034	20.4222	18.829	16.487	15.234	9.354	11.487	9.536	7.535	23.138	21.099	34.705	31.192	28.714	14.749	14.936		0.767739	19.4427
14.2841	6.4428	13.1359	21.8246	24.494	16.9019	24.2637	28.42	14.648	9.141	45.3595	20.9202	15.8454	24.3506	31.8484	29.2296	21.5314	14.3778	13.6	16.966	15.305	12.642	13.086	11.863	13.191	19.986	26.654	44.944	35.42	27.802	17.252	14.538		0.774189	20.8382
14.4032	9.6266	22.1004	17.9051	16.626	8.154	23.7125	16.392	17.156	15.921	24.1967	10.2413	15.3527	22.6394	14.8328	33.5146	29.7603	20.5168	8.227	18.101	16.775	7.91	6.929	6.619	10.08	12.664	17.189	31.835	24.854	28.442	17.603	8.965		0.780644	17.2529
14.5222	8.2696	15.6363	13.866	20.6093	13.7725	31.5583	15.36	17.26	18.805	33.36	10.7621	13.2047	33.8811	26.4032	24.2355	29.2945	29.9435	7.132	11.797	22.175	12.563	11.733	9.12	13.897	12.879	15.859	25.174	25.007	31.503	16.166	15.205		0.787094	18.9171
14.6412	22.9759	8.8213	12.388	12.3771	23.1676	21.7333	10.182	12.951	10.347	31.7316	13.2929	16.8287	32.2501	19.961	48.8948	22.1378	16.8847	15.412	16.616	19.296	10.787	15.015	13.717	7.426	11.871	13.379	33.879	22.617	23.392	24.477	8.74		0.793544	18.5016
14.7603	15.1197	26.3584	12.6879	14.8905	18.4936	12.1291	16.431	16.63	25.451	45.4419	19.7473	14.5228	28.3913	17.2919	39.4053	22.0125	16.2597	8.6	10.638	18.511	15.823	15.505	18.149	5.973	11.802	19.592	22.747	13.56	32.66	26.595	14.107		0.799999	19.2105
14.8793	12.5415	10.2109	12.9785	18.0529	13.3774	19.5405	11.393	9.983	25.977	40.0936	9.5254	19.1216	16.6754	19.2591	41.482	25.0293	14.3059	17.507	14.47	20.206	20.309	21.969	6.017	6.059	9.419	14.273	22.196	20.25	16.704	31.065	8.855		0.806449	17.7047
14.9984	15.5748	10.8628	17.7851	15.2484	23.377	21.2728	12.224	14.197	14.678	29.5526	17.3983	18.7154	21.1025	25.9371	32.3474	15.8547	11.4165	8.307	13.676	13.04	18.431	26.732	12.794	9.751	3.106	7.054	23.748	19.259	20.27	32.395	10.224		0.812904	17.301
15.1174	19.6398	19.991	13.7635	20.3204	24.8195	23.295	16.814	17.089	20.54	44.9343	16.8214	10.3568	26.119	21.6083	20.7437	10.3794	17.8571	9.22	9.816	10.86	19.071	11.957	10.937	9.561	16.186	7.1	14.772	28.501	29.568	24.716	9.773		0.819354	17.9719
15.2364	22.8617	10.1121	27.8049	16.5667	17.5698	29.3596	18.732	19.782	28.165	36.8935	13.7357	20.8008	26.7098	23.3252	16.4908	13.4179	12.1205	11.997	9.31	9.617	15.283	24.773	13.586	10.083	6.23	6.264	14.675	26.63	26.632	19.718	12.607		0.825803	18.1243
15.3555	20.208	25.043	17.3851	18.3365	20.1551	22.583	21.114	16.385	26.375	35.7904	18.3242	15.6472	25.6662	17.7531	13.6666	9.5574	13.539	7.858	13.043	22.925	19.645	23.332	14.922	8.644	10.241	8.341	13.872	21.002	20.239	38.035	11.673		0.832258	18.4291
15.4745	18.5798	18.1191	9.4761	24.6712	16.5354	21.6016	21.066	14.063	42.808	45.7473	25.5468	17.6768	28.8425	24.4765	16.5654	12.3167	11.017	6.5	11.048	10.89	16.55	18.405	12.849	6.418	7.954	12.498	7.821	25.863	15.293	26.063	12.175		0.838708	18.0463
15.5935	15.0228	19.8015	11.4622	21.1551	20.5826	11.0439	16.303	14.005	25.8	40.4166	23.991	16.4514	20.208	24.6532	10.3866	4.0508	3.2424	16.383	8.337	15.529	17.358	20.758	15.133	19.877	8.478	7.043	13.18	16.996	23.875	28.939	16.119		0.845158	16.9865
15.7126	20.657	20.0547	20.6685	18.5067	27.2649	10.5814	14.214	16.457	23.168	37.2492	14.555	18.097	20.8551	16.9079	9.5172	9.1654	7.2951	6.889	8.085	16.075	14.344	16.234	19.842	15.378	10.716	10.959	14.565	20.105	20.933	23.212	18.274		0.851613	16.8008
15.8316	20.9164	17.4402	15.5898	20.4829	17.0873	11.9066	15.611	22.38	23.911	37.778	26.3758	9.2034	27.4172	21.3376	8.6092	6.7377	9.5018	6.528	9.661	11.777	12.427	17.894	15.05	25.08	5.662	8.444	8.316	14.977	30.044	26.523	13.99		0.858063	16.7309
15.9506	14.0273	22.2266	15.4138	20.4446	20.1391	19.9895	24.87	19.958	25.799	21.4273	18.678	17.0947	20.4819	19.7486	10.0156	10.0344	11.3528	4.408	5.225	13.724	15.439	20.976	26.394	14.581	8.021	5.628	7.41	24.417	23.88	29.435	14.506		0.864512	16.9595
16.0697	19.1215	25.6718	17.3373	24.109	17.1049	20.1236	21.996	25.01	25.549	24.7209	21.6979	16.1616	26.0537	23.1844	11.6894	4.5889	7.6576	9.209	8.317	24.153	13.346	16.199	20.544	19.595	6.214	9.286	5.618	12.899	20.531	22.132	24.218		0.870968	17.5496
16.1887	25.1782	20.0926	17.1723	14.3539	19.3384	21.7655	22.408	14.047	16.53	24.0889	26.5898	15.3005	16.2288	11.282	16.5237	9.2801	10.849	4.808	6.233	17.952	17.054	19.213	27.065	16.55	11.917	3.959	3.754	19.875	20.392	18.764	15.606		0.877417	16.2636
16.3077	20.9144	16.1774	9.4056	22.2681	29.8098	17.6377	21.382	21.637	20.218	24.1337	20.3734	13.3985	21.2038	15.1385	11.7695	9.0317	10.2326	5.117	11.79	13.518	14.498	19.761	18.5	12.605	5.739	10.69	8.073	17.7	23.574	27.779	6.875		0.883867	16.1597
16.4268	21.445	22.71	7.8862	21.4179	19.4586	21.6839	19.925	20.989	20.304	21.1789	18.6671	17.4722	22.541	15.6336	6.2487	8.8057	5.9159	11.486	7.634	13.431	23.887	32.125	14.465	18.476	11.115	13.716	2.808	13.844	22.083	19.705	8.931		0.890322	16.3222
16.5458	20.2594	22.0983	13.1274	27.5681	21.1099	15.9589	21.434	22.402	14.088	21.4757	19.9992	20.0186	22.252	17.0487	3.4593	4.9678	4.4236	4.164	11.757	13.535	29.998	28.092	17.928	14.908	14.008	11.248	10.469	10.498	28.421	14.081	9.179		0.896772	16.4509
16.6648	26.0557	17.711	14.9148	15.6839	25.5797	22.4527	14.951	14.502	26.142	17.55	34.3687	33.2905	19.5057	13.2248	5.931	8.752	11.7975	5.824	11.335	15.696	26.124	29.745	19.014	17.531	7.856	16.93	13.34	12.849	27.418	24.485	12.009		0.903222	18.1474
16.7839	22.1656	13.4276	13.0518	18.0299	11.0401	17.5896	14.951	18.814	16.173	18.5791	41.3917	20.3673	22.463	12.2674	13.8913	11.7291	8.7632	7.259	19.606	13.651	16.613	26.244	23.003	12.049	17.35	16.838	10.609	18.775	16.964	30.168	20.902		0.909677	17.5718
16.9029	15.0053	32.0154	23.0028	22.5675	11.1835	26.2419	13.066	16.063	22.597	19.5254	26.2295	19.3503	13.2353	8.0507	13.1202	15.5485	7.7394	10.213	14.272	16.752	30.359	29.758	22.779	15.992	10.391	13.674	13.277	20.262	17.407	14.78	24.23		0.916126	18.0222
17.0219	19.8571	16.362	20.0454	13.6367	11.8206	17.7928	13.224	17.349	18.605	19.2225	11.623	23.4623	11.6172	5.9225	17.5326	12.8637	14.5088	12.03	11.989	14.694	33.837	21.243	28.432	10.589	10.288	12.976	16.439	23.04	27.218	22.453	25.736		0.922576	17.3035
17.141	17.0811	19.2484	15.9296	13.2979	15.13	22.6599	17.137	23.229	27.961	27.5468	20.0166	22.2225	13.0494	5.662	9.0778	20.0426	18.5571	11.373	12.954	9.025	26.664	34.29	26.786	13.544	10.866	18.661	13.914	29.218	21.492	17.985	24.948		0.929031	18.6958
17.26	10.0964	15.6854	16.454	5.7159	11.7718	9.4717	16.464	24.731	14.224	11.0229	22.1286	17.9471	12.247	14.6654	18.752	8.3072	22.0349	12.225	18.852	10.247	14.303	25.34	28.736	7.935	9.425	19.359	17.549	34.232	23.026	14.947	28.704		0.935481	16.6645
17.379	13.5683	22.3099	28.7237	8.0538	12.1027	18.6117	17.752	26.334	22.76	19.6785	18.7483	17.5651	12.1362	10.1272	19.2841	7.3401	21.4619	7.749	19.956	8.967	15.641	27.22	22.498	16.308	6.933	15.556	13.894	27.66	28.603	14.994	20.567		0.941931	17.5195
17.4981	17.5246	10.8793	17.1877	12.2978	13.2052	16.8641	24.367	20.888	19.829	22.9022	10.1588	7.4847	13.3823	13.806	16.4982	16.107	33.7916	27.604	13.897	11.18	31.697	29.502	17.369	7.729	12.407	18.984	15.034	34.976	18.753	22.695	20.429		0.948386	18.3687
17.6171	8.474	16.7074	17.2858	6.7657	9.5895	20.2315	12.513	22.711	18.408	26.622	11.9733	13.8307	15.4133	9.5378	19.0187	16.2716	31.7468	17.265	12.073	7.075	17.985	28.868	14.456	6.019	7.476	16.822	24.071	34.937	15.73	22.716	24.073		0.954836	16.9892
17.7361	9.7493	17.3433	25.7906	6.7917	7.1999	16.5721	16.029	19.472	20.21	20.3534	7.3937	17.1178	9.1554	7.8527	21.2063	24.6799	33.8308	19.197	11.039	8.15	24.963	22.736	26.365	8.627	6.525	20.631	24.502	33.318	13.528	23.955	31.843		0.961285	17.9396
17.8552	10.2939	15.1011	23.867	5.3074	11.4495	14.4945	19.653	17.154	14.325	17.1273	14.3659	13.2803	10.6512	12.9643	20.0554	23.1933	19.3327	16.301	14.129	12.413	21.71	20.075	15.319	17.117	8.356	19.793	20.027	26.084	14.466	22.964	28.458		0.967741	16.7686
17.9742	18.2577	14.275	21.0754	6.7041	9.6187	15.4848	20.813	18.515	15.179	23.7999	20.0111	11.7099	14.4348	18.8163	15.1505	10.7556	21.0809	11.234	16.673	9.667	15.208	31.826	17.91	6.065	10.246	16.029	22.74	26.401	12.679	14.589	38.905		0.97419	16.963
18.0932	13.2348	22.6415	18.7199	9.25	7.6449	12.5005	25.871	12.305	8.714	23.1285	16.6487	21.4828	19.3064	13.6736	8.7422	16.3528	26.2684	19.417	16.442	9.299	16.391	32.364	14.282	10.799	6.594	21.338	24.732	45.518	11.295	13.668	37.626		0.98064	17.9435
18.2123	13.4931	18.6312	16.7645	7.3753	7.0676	7.0103	12.807	18.071	20.147	14.8065	16.8555	21.3755	20.2824	28.4463	18.1654	14.4324	18.2736	8.428	19.657	7.161	18.737	16.56	13.812	7.466	7.28	11.895	13.295	45.139	6.495	18.024	42.805		0.987095	16.4761
18.3313	14.7686	16.9099	13.0019	8.0273	11.3292	8.4988	14.402	22.341	9.522	13.6254	10.1437	14.1301	19.4231	19.0839	13.7764	11.4466	25.512	15.488	21.695	5.192	11.553	16.113	15.977	3.156	11.029	14.829	7.055	37.673	7.066	16.438	45.09		0.993545	15.2999
18.4504	19.6253	21.4877	21.318	7.1466	11.232	10.6663	9.033	11.404	15.771	9.7896	8.9818	18.8802	18.5432	26.5164	15.606	21.1368	21.8688	23.5	10.354	10.135	16.034	28.808	13.505	14.414	20.107	11.368	8.361	48.701	5.644	9.753	48.862		1	17.3727

## Sheet: Image16
X0	Y0	Y1	Y2	Y3	Y4	Y5	Y6	Y7	Y8	Y9	Y10	Y11	Y12	Y13	Y14	Y15	Y16	Y17	Y18	Y19	Y20	Y21	Y22	Y23	Y24	Y25	Y26		Ap-basal	Avg intensity
0	16.9444	19.1111	40.3333	14.4444	13.1667	21.944	23.5	20.1111	29.5556	37.5	19.778	30.8889	42.0556	30.9444	41.9444	38.6111	26.5	26.7778	51.5	37.3889	40.5	29.7778	29.1667	36.4444	28.5556	23.7778	21.5		0	29.3601
0.119	27.5	19.3889	38.6667	26.4444	20.5	10.444	14.6667	22.4444	38.3889	34.333	26.778	17.8889	49.2222	37.1667	38.4444	32.2778	20.5556	31.5556	48.6667	42.2222	39.7222	19.0556	39.5	41.5556	46.5	24.1111	30.2222		0.00602236	31.0453
0.2381	12.5	30.5	38.8889	33.2222	15.6111	29.889	26.4444	30.3333	34.3889	27.556	27.222	30.5556	40.3333	47.2778	45.2222	41.7778	44.7222	29.3889	55.1111	56.8333	50.0556	36	54.3333	25.5	51.9444	28.7778	32.6111		0.0120498	36.1852
0.3571	33.6111	27.6111	43.2222	34.8889	17.2222	20.611	31.2222	36	30.1667	37.611	38.389	27.6111	34.8333	49.2778	59.4444	59.5	16.3333	30	60.3889	44	53	33.1667	52.7778	33.2222	59.7222	29.7778	32.2778		0.0180721	37.9959
0.4761	22.5556	29.3333	56.3333	47.7222	38.6667	22.556	36.1667	23.1111	49.2778	38.833	44.944	30.8889	63	54.5556	42.3889	32.0556	25.1667	45.4444	63.8333	45.7778	62.8889	40.0556	51.4444	35.6667	68.8889	27.2778	30.3889		0.0240945	41.823
0.5952	44.6667	43.2778	37.8333	35.4444	44.5	29.944	31	39.6667	40.3333	27.944	38.778	34.3333	71.3333	38.1111	43.7222	46.1111	19.2222	63.5556	57.5	46.1667	62.3333	54.4444	55.0556	28.6667	62.8889	36.5556	33.3889		0.0301219	43.214
0.7142	44.3333	33.4444	50.8333	46.1667	46.1111	39.944	30.0556	43.7222	49.9444	50.389	59.889	23.6667	72.8333	64.8889	44.7778	58.2778	38.3889	56.2778	55.8889	62.5556	74.2222	53.5	45.6667	35.1111	79.3333	33.6667	41.2778		0.0361443	49.4506
0.8332	40.8333	47.6111	48.3333	53.7222	54.2222	55.111	32	39.5556	45.5	42.944	73.889	30.8333	58.2222	58.0556	69.6111	47.1667	36.1111	61	60.5	46.5	61.2778	57.9444	55.1667	48.2778	85.9444	48.8333	42.6667		0.0421666	51.9197
0.9523	44.7222	51.6111	53	59.8889	67.7222	64.167	41.2222	37.2778	44.5556	49.389	79.667	36.4444	51.1111	43.5556	68.5556	59.5	45.7222	69.1111	69.0556	42.5	63	65.1667	69.3889	38.5	80.1111	39.7778	52.7222		0.0481941	55.0906
1.0713	35.5	57.6667	68.9444	73.0556	64	67.444	56.6111	38	48.3889	57.389	92.944	39.7222	49.8889	48.7778	74	57.8333	49.1667	65.0556	57.8889	46.9444	54.7778	67.4444	73.0556	38.1111	79.0556	56.4444	48.9444		0.0542164	58.0391
1.1903	61.1111	64.1111	75.5	73.7778	80.0556	69.389	65.6667	39.5556	45.8889	70.389	94.444	38.0556	72.4444	58.3889	76.3333	65.5556	33.0556	76.6111	63.7778	41.7222	62.8889	67.1111	51.3889	27.3889	75.1667	61.2222	66.4444		0.0602388	62.1276
1.3094	53.4444	64.6111	59.2222	78.7222	94.6667	65.667	56.3333	55	55.5556	64.944	100.5	44.3889	71.8889	54.7778	65.1111	39.2778	45	79.3889	86	45.9444	70.3333	76.3333	63.2778	38.8333	82.4444	69.1111	62.0556		0.0662662	64.5494
1.4284	40.2778	69	86.3889	86	65.2222	84.667	87.7222	47.5556	48	80.889	82.944	48.6667	58.8333	66.6667	75.0556	60.5	37.3889	75.5	60.6667	55.4444	61.8889	83.3889	73.5556	40.9444	61.3889	71.3333	58.3333		0.0722885	65.4897
1.5474	47.6111	63.5556	74.2222	95.4444	59.7222	92.833	90.6667	49.0556	55.8333	77.722	93.278	60.1667	49.6111	66	79.2778	72.2778	58.9444	62.3889	59.8333	48	65.3333	51.2778	61.4444	55.3333	78.3333	83.9444	64.3333		0.0783109	67.2757
1.6665	49.5	75.1111	80.3333	81.6111	74.1667	101.389	72	51.0556	57.9444	81.833	100.722	61.2222	66.1111	81.6111	56.8889	87.4444	54.1111	94.6111	63.6667	43.1111	72.3333	74.5	57.1667	51.8333	59.5556	55.4444	74.8889		0.0843383	69.6358
1.7855	47.7778	65.9444	72.1667	97.5	72.5	100.056	82.4444	59.3889	58.9444	90.556	112.333	57.3889	62.8333	61.2222	48	83.6667	43.7778	90.7222	58.5	58.4444	72.7778	60.8889	73.5556	57.2778	73.5556	94.1667	74.3889		0.0903607	71.5103
1.9046	57.0556	92.3889	70.1111	80.8333	74.9444	97.222	86.1111	67.6111	85	81.778	93.167	66.0556	59.1667	76.2222	56.2778	73.7778	53.2222	96.8333	59.8333	43.7778	89.2778	75.0556	67.1667	48.2778	65.9444	71.2778	79.2222		0.0963881	72.8745
2.0236	45.6111	74.0556	76.1111	67.5556	67.8333	110.111	97.2778	70.2778	79.5556	78.5	122.944	71.4444	67.2778	63.8889	67.0556	84.3889	62.9444	69.1667	58.5	55.3889	67.1111	83.4444	73.5556	66.5	81.8333	80.3333	76.1111		0.10241	74.7695
2.1426	53.9444	83.1111	81.5	70.0556	71.6111	101.444	78.3889	88.1111	77.6111	73.389	108.222	86	68.8889	72.3333	72.0556	74.2778	66.2222	78.5	60.5556	47.5556	70.1667	78.8333	64.5556	71.5	72.7778	82.7222	79.5556		0.108433	75.3292
2.2617	55.1111	75.8333	69.1667	78.1111	83.2778	110	84.1111	72.0556	100.667	100.444	103	78.7778	52.1111	74.2222	74.4444	69.2222	77.3333	96.2778	58.3333	50.5	65.7778	80.7778	72	70.7778	83.4444	98.7222	85.0556		0.11446	78.502
2.3807	70.8333	79.3333	65.1667	75.5	61.0556	90.056	78.7778	57.7778	89.4444	72.556	104.5	100	77.4444	85.7222	65.6111	83.1667	65.7778	81.3333	47.8889	66.3889	73.8889	68.6667	72.4444	70.4444	62.7222	97.8333	72.7778		0.120483	75.4486
2.4997	54.1667	73.3889	81.1111	73.1111	64.2778	73.889	86.2778	60.5	85.7222	111.167	98.833	84.3889	67.5	93.5	86.3889	65.6667	89.4444	74.0556	45.8889	68.8889	55.5	64.2222	59.7222	75.6667	78.0556	95.5	88.6667		0.126505	76.1296
2.6188	71.2222	94.9444	69.7222	91.6111	72.2778	84.389	81.3333	63.4444	105.611	95.222	89.611	72.4444	65.9444	92.9444	80	97.6667	70.3333	80.5556	42.3889	58.6111	80.7778	60.2778	73.2778	84.9444	68.7778	73.8333	81.3333		0.132532	77.9074
2.7378	62.8333	83.6667	82.6111	87.2222	53.3333	83.222	67.4444	72.3333	99.6667	92.278	103.167	97.3333	69.8333	90.5556	77.5556	88.5556	77.6667	84.6111	59.4444	67.2222	76.8333	71.6667	83.2778	76.5	76.2222	88.1667	84.2778		0.138555	79.9074
2.8568	59.8889	91.7778	90.0556	83	69.2778	78.778	81.6111	72.5	92.2222	87.389	110.444	90.3889	78.3889	95.3889	67.6667	78.5556	80.3889	73.3889	47.6111	74.8333	69.3333	74.9444	67	77.5	89.5556	61.2222	73.9444		0.144577	78.4095
2.9759	65.6111	76.3889	80.1667	80.7778	62	84.889	62.9444	77.0556	80.3889	74.111	106.611	78.5556	76.9444	70.8333	88.8889	78.1667	73.5556	65.4444	62	78.1111	50.9444	75.5556	53.9444	88.8889	84.0556	82.4444	71.3333		0.150605	75.2078
3.0949	66.8889	89.1667	82.1667	70.1667	79.3333	65.5	72.3889	76.4444	101.389	74.778	104.111	96.8889	65.0556	92.9444	93.5556	93.5556	78.3889	71.5556	44.9444	74.7778	61.8889	62.6667	77.1111	76.0556	75.2778	69.8333	72.1111		0.156627	77.3683
3.2139	70.2222	75.5556	95.2778	69.6111	78.7222	76	67.5556	105.5	86	92.778	93.611	78.5	56.7222	85.8333	80.6667	95.1667	85.7778	73.4444	43.2778	70.6667	68.6111	74.1667	55.3333	72.2778	74.7778	66.8333	72.6111		0.162649	76.5
3.333	75.7778	66.6667	72.2778	72.6667	71.6667	81.167	58.2222	82.5556	92.7778	78.167	105.444	70.8889	65.1111	66.8889	97.0556	98.1111	82.9444	76.5556	56.5	59.2222	58.2778	73.6111	69.5556	67.1111	75.3889	61.5556	62.0556		0.168677	74.0083
3.452	56.0556	80.3333	73.6111	66.3889	83.0556	60.333	85.0556	93.5556	79.5556	66.778	100.556	78.8889	60.6667	62.8333	86.7222	81.8889	95.6111	70.7778	56.6111	65.1111	59.1111	55.2222	74.6667	74.5556	59	53.3333	70.2222		0.174699	72.2408
3.571	55.7778	56	74.0556	59.9444	73.5	62.889	72.2778	76.6111	75	82.944	82.5	79.7222	62.1667	73.8889	85.6111	94.6667	75.5556	64.5	43.5	77.7778	76.4444	75.4444	67.9444	72.3333	61.3889	56.8333	71.2222		0.180721	70.7592
3.6901	64.1111	65.8333	60.1111	66.1667	61.6667	46.444	93	73.5556	88.6667	63.444	85.222	95.0556	73.7222	83.6111	83.5556	97.7222	79.0556	66.8333	63.5556	51	66.4444	65.3333	51.2222	67.2778	73.5556	47.9444	61.7778		0.186749	70.2181
3.8091	71.7222	73	66.5556	66.7778	83.4444	56.167	66.7222	56.4444	84.2222	76.056	96.167	81.7222	65.5	78.8889	83.1111	67.5	72.8889	53.2778	50.3889	78.2778	58.2222	78.7222	54.5	68.7778	78.8333	60.7222	85.2778		0.192771	70.8848
3.9281	56.7222	76.5	69.3889	59.2222	66.7222	63.944	91.2778	75.5556	100.944	74.167	110.778	103.889	73.4444	100	67.9444	89.7222	75.1667	52.5	61.6667	58.6111	54.8333	63.7222	57.2778	68.4444	76.2222	51.8889	62.2778		0.198794	72.6975
4.0472	53.3889	49	57.5	74.5556	68.2778	44.222	93.3889	59.6667	90.1667	69.333	83.333	75.5	51.9444	75.4444	82.1111	90.2778	64.7778	56.5	57.2778	59.4444	58.1667	51.6667	60.2222	49.4444	73.5556	58	48.9444		0.204821	65.0411
4.1662	57.7222	63.7778	69.6111	65.9444	75.0556	37.278	75.4444	50.2778	83.7778	62.778	96	74.6667	46.4444	72.3889	81.0556	69.7778	58.8333	48.7778	61	68.8333	58.9444	58.0556	58.3889	61.9444	76.5	50.3333	49.7222		0.210843	64.1975
4.2852	48.3889	62.4444	83.9444	61.2778	72.7222	48	91.6667	54.6111	89.2778	76.611	92	75.8333	74.1667	72.6111	82.3889	76	56.3333	62.8333	55.6667	70.7778	49.1111	60.3889	48.5	68	69.8333	46.8333	55.4444		0.216866	66.8765
4.4043	44.3333	56.8333	58.2222	59.7222	53.9444	48.222	76.8333	46.3333	86.2222	64.5	94.056	76	59.3333	83.2778	85.5	71	63.1111	48.5	55	67.1111	62.9444	29.6111	52.2222	48.7778	78.3889	49.8889	40.3889		0.222893	61.4918
4.5233	65.4444	64.6111	57.3333	68.7778	58.3889	49.111	81.8889	44.7222	71.4444	54.667	75.556	72.1667	57.5556	49.0556	59.5	102.167	49.4444	55.8889	57.2778	62.1667	46.7778	42.7778	54.3333	55.0556	65.3889	50.4444	41.6667		0.228915	59.7634
4.6423	50.6667	58.7778	64.7222	73.4444	68.8333	48.667	78.0556	49.3333	67.8333	71	80.278	66.7778	57.8333	63.0556	57.8333	70	55.2778	46.3889	49	75.6667	34.6111	34.1667	47.8889	36.3889	68.1667	46.6667	45.3889		0.234938	58.0268
4.7614	51.1667	45.6667	54.1111	69.8889	44	50.611	66.5556	34.8333	69.6667	62.167	87.611	58.0556	64.8889	65.5556	57	76.7778	48.8333	40.6667	44.1667	55.2222	40.3333	41.1667	52.7222	62.4444	78.2778	51.6111	54.0556		0.240965	56.5947
4.8804	48.2222	40.8889	60.8333	50.5	42.3333	53.111	70.0556	57.9444	83.3333	66.722	102.889	45.2222	62.9444	50.1111	56.6667	82.8333	60.5	40.8333	40.9444	56.3333	50.5556	43.5	33.5	69.7222	93.7222	37.5	33.8889		0.246988	56.8745
4.9995	35.1667	47.2222	59.8333	44.2222	31.4444	53.778	57.6667	27.8333	76.4444	59.944	82.389	49.2222	60.9444	53.5	40.1111	64.6111	52.7778	37.2222	41.8889	60	49.3889	34.5556	43.1111	70.7778	67.7222	39.0556	36		0.253015	50.9938
5.1185	44.3889	57.2778	76.1667	43	50.3889	27.611	72.3333	48.3889	71.0556	60.056	92.611	54.6111	49.1111	46.3333	55.2222	48.3889	45.2222	36.1111	49.6667	59.5556	45.7778	40.5	53.2778	54.2222	66.7222	22.1667	44.1667		0.259037	52.3827
5.2375	29.6111	47	71.8889	41.1667	45.8333	36	67.5556	47.6667	62.0556	56.944	88.278	51.5556	63.3889	49.5	44.7778	53.7222	52.0556	46.6111	45.1111	59.8889	43.9444	46.1111	44.5556	69.1667	67.7778	20.6111	54.2222		0.26506	52.1111
5.3566	38.1667	40.6111	70.4444	35.8333	46.8889	36.833	49.5556	39.8889	69.8333	52.778	71.167	41.6111	46.8889	52.3889	55.2778	67.3333	59.6667	51.6667	49.2222	52.8889	41.5556	37.4444	54.5556	54.1111	70.2222	30.4444	38.2778		0.271087	50.2058
5.4756	42.5556	46.0556	70.8333	47.2222	38.1667	43.389	49.8889	40.5	64.7222	48.333	76.833	50.8333	64.5	51.0556	57.1111	63.1111	52.0556	54.8333	37.7778	62.8889	38.8333	34.1111	48	57.2778	80.6111	26.8889	49.0556		0.277109	51.7572
5.5946	34.8333	34.9444	47.6111	50.6111	43.6111	41.167	55.6667	34.3889	65.5556	41.056	63.056	48.9444	54.6667	62.6667	68.9444	54.4444	57.1667	58.3333	52.9444	68.3333	34.1667	42.6111	55	68.1667	62.3889	30.1667	37		0.283132	50.6832
5.7137	49.2778	42.3333	70.3333	53.6111	41	40.222	69.7778	35.6667	71.8333	52.5	63	29.4444	46.6667	43.8333	61.2778	46.2222	47.7778	55.6111	42.6667	59.0556	26.5	47.0556	35.7778	56.6667	66.5	32.8333	58.8889		0.289159	49.8642
5.8327	43.8333	59.1667	51	38.1667	30.6111	54.944	42.7778	26.8333	53.1667	40.722	62	47.3333	55.0556	50.9444	42.6667	52.9444	62.3333	41.6111	40.8333	67.6667	36.3889	32.8333	40.6667	66.8889	68.4444	39.5556	55.3333		0.295182	48.323
5.9517	47.8889	48.7778	55.2222	42.9444	37.6667	58.722	44.4444	39.9444	49.4444	48.389	50.167	29.7778	58.0556	35.8333	51.1111	48.9444	70.8333	30.1667	48.7778	50.3889	36.5556	41.5	39.3889	46.1111	79	42.2778	63.4444		0.301204	47.9918
6.0708	44.7222	48.1111	45.2222	41.9444	25.9444	63.889	51.5	29.5556	43.3889	46.389	56.167	28.7222	49	42.9444	41.3889	48.6111	44.1667	28.1667	56.8889	57.8333	27.8889	37.8333	51.5556	48.2222	81.2778	43.4444	43.8889		0.307231	45.5062
6.1898	61.4444	57.5556	27	48.0556	47.7222	46	48.4444	37	47.6667	45	50.444	36.3889	42.6667	50.7222	69	45.1111	46.6111	15.0556	42.8333	36.4444	32.6667	29.5556	44.6111	46.7222	62.0556	44.3333	56.4444		0.313254	45.0946
6.3088	52.6111	47.5	35.2222	53.1111	40.7222	45.944	47.1111	36.8889	38.3889	47.5	60.278	36.6667	53.6111	60.7778	54.1667	28.2222	60.6111	34.8333	48.3889	38.3333	37.7222	41.1111	35.9444	60.7778	70.1667	57.3333	53.5		0.319276	47.3127
6.4279	32.1111	41.5	36.5	58	39.0556	58.611	32.5	29.1111	61.6667	40.5	77.278	28.2222	47.5	51.7222	49.7222	43.8333	59.4444	36.3889	38.6667	49.9444	46.5	36.6111	52.0556	44.8889	58.9444	40.1667	60.2778		0.325304	46.3601
6.5469	39.2222	29.0556	47.1667	47.8333	30.7778	66.278	35.7778	33.2222	48.6667	45.722	54	37.6667	49.0556	33.8333	50	33.5	75.2222	29.9444	31.8333	44.7778	34.1111	34.3333	40.5556	45.6667	61.7778	54.5	43.5556		0.331326	43.6317
6.6659	46.6667	45.3889	43.4444	55.7778	30.6667	58.611	34.7778	43	56.5556	51.889	52.389	36	39.7778	35.3889	36.1111	50.1667	64.1667	37	31.7778	35.9444	37.3889	51.5	45.0556	51.5	55.1111	50.8333	53.6667		0.337348	45.5761
6.785	44.7778	53.1111	43.7222	56.1111	35.3333	53.167	41.6111	36.2222	50.7222	36.778	63	33.9444	54.7222	48.8333	51.1111	48.0556	48.9444	22.8889	48.1111	34.6111	37.5	38.1667	42.0556	54.5556	46.1111	64.2778	63		0.343376	46.3498
6.904	46.3889	39.8333	43.3889	62	40.7222	54.611	39.0556	40.5556	53.1667	33.278	45.778	37.8333	51.5	43.3889	40.3333	44.1667	59.2778	30.5	42.6667	35.8889	28.2222	31.1111	31.1111	47.8333	45.6111	55.1111	64.3889		0.349398	43.9897
7.023	46.7778	49.4444	40.7778	73.3889	21.4444	39.889	26.8889	41.1667	28.8889	47.444	53.778	34.3889	36.1667	23.5	52.7222	40.5556	37.1667	53.5	35.1667	38.0556	34.7778	34.1667	50.0556	41.6111	45.6111	37.7222	58.6667		0.35542	41.6193
7.1421	38.8889	47.8333	37.6667	71	29.3889	42.556	28.2222	43.7222	41.6667	28.833	47.444	31.2222	26.1111	25.7222	42.0556	41.5	45.1667	48.8333	39.6667	32.1667	26.2222	45.6667	57.8333	59.2222	37.1111	49.3333	49.2778		0.361448	41.2716
7.2611	34.1667	37.3889	70.0556	64.3889	29.8889	64.722	36.1667	36.1667	53.4444	39.611	43.167	44.8333	40.3333	39.1667	44.5556	23.6667	42.5	61.7778	51.1667	37.5556	25.9444	33.3889	35.3889	42.4444	47.3889	43.2222	55.5		0.36747	43.6296
7.3801	36.9444	46.7778	59.8889	75.3889	33.2778	45.833	29.8889	44	34.1111	48.056	52.222	34.1667	36.1111	28	47.1667	48.4444	47.6111	46.7222	40	30.9444	37.0556	32.6111	48.2222	47.9444	56.6111	44.5556	39.2222		0.373493	43.3992
7.4992	38.6667	48	60.5556	62.2778	31.6111	55.056	40.8889	41.3889	38.7222	46.389	31.5	38.8333	29.5556	43.8889	62.1667	32.1111	56.7778	51.6111	41.0556	35.1667	36	33.3333	41.3889	50	50.1111	59.1111	47.0556		0.37952	44.5638
7.6182	42.3333	36.7778	65.7222	67.5556	37.3333	37.833	31.3889	30.8889	34.6111	36.611	35.778	21.5556	45.1667	32.8889	47.8333	35.6667	52.7222	51.7222	33.9444	28.2778	30.1667	33.6111	46.8889	57.6111	41	42.7222	48.1667		0.385542	40.9918
7.7372	28.5556	44.1111	57.1111	57.9444	30.9444	43.722	43.5556	44.8889	27.2778	47.056	33	40.9444	23.7778	41.6667	43.8333	23.8333	59.5	41.4444	32.2222	34.5	37	50.1111	45.9444	54.0556	39.6667	39.7778	64.7778		0.391565	41.8971
7.8563	45.8333	42.8333	25.8333	52.4444	33.8889	29.667	35	55.4444	33.4444	38.667	40.944	18.6667	23.8889	30.5556	43.3333	18.2778	40.2222	27.2222	29.6111	36.4444	34.5	42.5556	53.1111	70.5	45.5	40.5556	35.3333		0.397592	37.9362
7.9753	52.4444	34.5556	40.2778	62.6667	42.2778	43.944	33.1667	54	39.3333	48.222	29.333	14.5556	23.7778	38.2222	33.1111	30.5556	40.4444	46.2778	46.2222	34.7222	39.2222	42.4444	81.0556	49.4444	29.9444	55.4444	50.4444		0.403614	42.0781
8.0943	45.5556	43.4444	20.8333	40.3333	38.8889	40.444	36.2222	57.8333	38.8889	54.5	25.5	26.3333	38.3333	33.4444	37.9444	39.6111	48.8889	36.4444	36.6111	25.4444	32.3333	30.1111	55.2778	52.7222	43.3889	72.8333	41.2778		0.409637	40.4979
8.2134	45.1667	47.6111	38.4444	44.1667	33.1667	30.556	29.5	61.5556	47.6667	37.5	32.333	29.7222	33.1111	38.0556	42.7222	33.1667	44.6667	37.7222	34.7222	31.3889	37.6667	30.6111	64.4444	41.3333	38.7222	62.8889	39.2778		0.415664	40.2922
8.3324	27.9444	43.3889	33.2778	46.7778	36.6667	57.222	34.3889	72.3333	32.7778	36.556	29.056	34.3889	43.1667	43.9444	38.9444	29.3333	60.1111	33.2778	36.1667	24.0556	29.0556	43.5	59.0556	47	46.5556	57.8889	39.0556		0.421687	41.3293
8.4515	56.7222	34.2222	36.7222	41.4444	29.2222	44.5	32.2778	67.6111	42.8889	38.278	43.778	30.8889	34.8889	42.9444	32.6667	40.3889	31.8333	49	35.9444	25.1111	24	32.6111	46	51	32.5556	59	31.0556		0.427714	39.5391
8.5705	34.2222	43.8889	20.5	46.6111	21.0556	38.944	34.1111	59.2778	50.9444	45.611	40.444	44.6667	35.5	43.2222	31.7778	30.3333	56	46.8333	35.6667	23.2778	28.0556	43.8889	59.2778	51.3889	35.3333	76.3333	23.5556		0.433736	40.7675
8.6895	34.1111	42.7778	31.5556	18.5556	18.6667	41.056	29.5	53.0556	38	51.833	33.222	42.7222	49.6667	51.2778	29.7778	21.7222	51.6111	40.9444	34.3333	33.5	23	37.4444	52.6111	54.8889	26.7778	71.7222	28.3889		0.439759	38.6193
8.8086	41.0556	31.6111	26.2778	42.6667	25.9444	41.944	40.1111	66.8333	46.1667	50.889	28.889	38.5	37.4444	34	37.7778	28.7778	66.5	45.4444	34.3333	28.6667	23.7222	31.3889	50.3333	44.2222	43.7222	53.3889	28.2778		0.445786	39.5885
8.9276	36.6111	36.3333	49.7778	32.5556	21.1667	33.944	29.2222	64.7222	31.1111	38.889	32.389	53.4444	46.5556	46.7778	25.2222	13.6111	54.8889	36.2222	20.3889	29.2222	22.7778	38.0556	60.6667	52.6667	28.9444	68.1667	25.6111		0.451808	38.1461
9.0466	41.3889	33.6111	38.7222	23.4444	19.7222	52.444	22.1667	50.1111	37.8333	56.722	30.611	64.1111	41.5	42.0556	28.6111	22.0556	70.7222	22.5556	41.8889	24.4444	30.3889	42.8333	59.9444	40.5	36.8889	46.3333	26.5		0.457831	38.8189
9.1657	46.7778	35	38.8889	33.1111	21.1111	47.056	31.8889	39.5	33.0556	42	23.278	44.2778	45.6667	33.3889	45.3889	31.1667	82.1667	34.6111	34.8333	34.3333	15.9444	29.9444	57.8889	39.3333	30.6111	51.9444	26.5		0.463858	38.1358
9.2847	42.9444	27.3333	24.0556	30.2222	36.1111	34.278	39.7778	27.2778	42.4444	34.667	32.889	48.7222	20.6667	27.3889	32.8333	25.3889	68.7222	25.0556	27.1667	25.6667	26.7778	19.5556	43.3333	45.4444	21.0556	35.6667	33		0.469881	33.2757
9.4037	38.3333	36.7778	38.2778	15.6111	22.6111	47.167	29.8333	35.4444	38.5556	31.111	26	46.2222	39.7222	31.7778	49.8333	28.7778	71	28.1111	26.7222	28.6667	18.5556	30.1111	40	39.3889	30.7222	65.3889	26.7778		0.475903	35.6111
9.5228	44.7222	49.2778	33.7222	15.5556	22.5	29.889	33.7778	23.6111	53.3333	37.611	35.056	54.6667	28.8333	29.0556	36.3333	27.0556	67.7778	23.1667	38.4444	44.6111	18.3333	22.1111	59.0556	61.3889	35.3889	37.5556	24.7222		0.48193	36.5762
9.6418	34.3889	47.5556	35.6111	13	19.9444	44.056	31.3889	32.5556	49	41.889	29.222	50.2778	36.8889	31.9444	30.7222	26.8333	51.6111	34.7222	49.9444	41	26.8889	33.3333	49.0556	47.6667	41.7222	39.8889	27.2222		0.487953	36.9753
9.7608	50.6667	29.4444	38.0556	6.7778	33.7778	54.833	36.6111	29.0556	61.3889	45.611	23.222	39.2778	38.7778	38.0556	38.5556	23.6667	50.1667	29.3889	36.6111	30.4444	25.9444	25.1667	38.1667	42.6667	28.6111	31.7222	26.6667		0.493975	35.3086
9.8799	40.5	48.8333	35.7222	20.1111	39	37.222	40.4444	25.7222	45.7778	36.333	31.611	34.6111	39.1111	23.8889	21	21.5	35.1667	31.5556	43.4444	29.0556	23.7778	27	53.1667	46.9444	32.5556	39.1667	42.9444		0.500003	35.0432
9.9989	30.9444	30.5556	25.6111	27.6667	25.8333	42.667	43.7778	28.7222	39.0556	42.222	33.944	45.8889	25	26.3889	27.5	31.1667	43.5556	35.6667	42.2222	29.2222	13.1111	21.4444	62.5	40.4444	37.2222	24	23.8889		0.506025	33.3416
10.1179	33.5	43.1667	33	20.6667	31.2778	32.722	32.3333	26.3333	45	38.389	31	32.1667	30.0556	25.6111	42.6111	31.3889	45.6111	35.0556	39.6667	47.1667	23.3333	18.6667	45.1111	46.1667	26	23.9444	26.0556		0.512047	33.5556
10.237	35.5556	36.4444	35.7222	26.9444	27.2222	32.778	27.3333	36.2222	40.0556	42.056	20.944	23.6667	28.6667	34.8889	24.7778	18	35.6111	44.8889	30.2778	29	13	21.7222	41.7778	35.0556	28.6667	31.7778	19.1667		0.518075	30.4527
10.356	23.7778	37.3333	25.7222	22.2222	39.6667	41.333	25.3889	18.1111	34.2222	48.667	20.556	23.2778	22.0556	40.5556	33.0556	32.8333	28.7778	36.8333	31.1667	28.3889	27.2778	22.7222	44.2778	39.3889	24.5	27.1111	23.7222		0.524097	30.4794
10.475	39.3333	28.3889	15.8889	22.3333	25.5	23.5	22.8889	33.5	33.8889	46.667	18.833	18.9444	24.6111	24.3333	30.7778	31.0556	37.3889	32.2222	20.6111	29.1111	23.1111	27.6111	56.2222	28.0556	31.6667	26.6667	25.6667		0.530119	28.8436
10.5941	36.8333	33	25	12.8333	20.6111	33.833	22.4444	19.2778	35.5	37.889	37.333	31.1667	28.8889	27.4444	25.1667	33.1667	19.2222	38.9444	20.0556	27.8889	22.3889	16.6667	44	44.4444	29.6667	16.9444	19		0.536147	28.1337
10.7131	25.4444	38.6111	27.4444	24.5556	31.3889	44.167	29.4444	25.4444	24.5	41.778	19.944	15.5556	28.1111	23.6667	21.3333	30.4444	26.4444	42.6667	31.6111	31.9444	23.6667	21.8889	43.0556	34.7778	28.6111	24.4444	25.6111		0.542169	29.1317
10.8321	26.8333	34.1667	29.1667	17.5	18.9444	40.5	36.3889	33.8889	36.9444	58.667	21.778	29.6667	19.2778	25.7222	20.8889	33.5	23.5556	50.5556	16	20.5	33.5	14.6667	39.8889	46.5	35.1111	22.5	23.5		0.548192	30.0041
10.9512	34.7222	31	31.3333	25.7222	16.6667	33	25.4444	18.6111	32.1111	38	34.5	35.2222	14.2778	15.3333	38	42	32.6111	46.1111	17.9444	27.5	22.7778	17.2778	33	39.9444	19.6111	28.7222	17.5		0.554219	28.4794
11.0702	37.9444	27.0556	33	20.2778	20.8889	42.444	31.7222	31.6111	25.1111	47.611	25.833	31	18.6667	16.5	25.1111	27.4444	25.6667	38.4444	14.6667	29.3889	30.1667	16	42	39.0556	25	19.7222	19.2222		0.560241	28.2057
11.1892	29.5556	30.6667	28.1667	19.2222	26.5	35.056	20.6667	21.1111	35.2222	47.444	26.444	26.8333	27.7778	12.9444	34	38.5	26.2778	47.4444	31.8889	21.1111	24.8889	11.7778	43.9444	53.9444	26.8889	19.6111	15.1111		0.566264	29
11.3083	20.1667	32	31.0556	20.7222	19.8889	37.167	24.3333	25.5556	24.0556	43.111	23.333	23.5	17.2778	15.7778	24.8889	21.4444	37.2222	43.0556	26.1111	30.6667	21.1667	15.6667	58.5556	37.4444	35	23.8333	20.0556		0.572291	27.891
11.4273	32.6667	24.0556	34.3889	21.1667	16.3333	35.778	27.6667	12.2778	34.5	51	20.389	24.2222	28.1667	17.4444	17.7778	29.9444	24.5556	37.3333	30.4444	33.0556	16.2222	18.8333	36.3333	34.2222	30.5556	19.6667	15.9444		0.578313	26.8498
11.5463	31.0556	32.2222	20.0556	14.1111	18.2778	26.722	37.5556	22.2778	26.3889	35.722	31.889	35.2778	19.5556	24.1111	20.2222	22.2222	50.1111	38.0556	22.9444	27.8889	34.5556	19.2778	46	38.4444	18.1111	29.7778	15.0556		0.584336	28.07
11.6654	39.5	32.5	19.3889	21.2778	15.8889	29.278	25.6667	26.8333	23.7222	37.222	21.111	39.4444	19.7778	13.2778	29.5	40.1111	41.3889	43.7778	26.3889	30.4444	12.4444	19.5556	56.8889	47.3889	17.8333	31.3889	12.2778		0.590363	28.677
11.7844	31.8333	22	29.6667	18.5	14.8333	30.444	29	15.8889	14.4444	28.556	25.556	41.5	28.7222	14.5	14.2778	30.2222	35.9444	52.1111	29.8333	38.1111	20.5	14.3333	37.3333	41.0556	9.5	44.6667	15.3333		0.596386	26.9877
11.9035	32.1667	34	21.9444	26.5556	9.7222	22.722	29.5	32.9444	33.5556	40.889	31.944	28.6111	17.0556	22.6111	23.1667	27.0556	22.6667	35.2778	28.5556	27.4444	23.1111	14.2778	38	44.3889	35.7778	54.1667	15.1667		0.602413	28.6399
12.0225	31.6111	25	37.6111	23.6111	14.7778	26.611	29.7778	19.9444	20.2778	51.278	30.778	27.1667	29.5	16.6667	30.1667	22.1667	36.5556	38.5556	21.7778	25.5556	22.4444	15.7778	47.1111	32	15	32.8889	8.7778		0.608435	27.1626
12.1415	29.1111	31.0556	39.4444	16.7778	16.5	17.722	37.1111	15.8333	26.0556	42.722	22.333	30.6667	26.3333	20.2222	42.3889	17.3889	19.6111	36.6667	27.0556	37.3889	24.2222	11	49.7778	52.3333	10.8889	25.9444	17.1667		0.614458	27.5452
12.2606	21.2222	48.1667	30.9444	21.0556	11.6667	25	34	34.2222	26.4444	43.778	25.722	30.9444	20.1667	15.5556	29.7222	30.0556	22.8889	21	53.3333	37.2222	18.7222	10	48.5556	40.2778	22.6667	21.1111	18		0.620485	28.2387
12.3796	19.0556	33.0556	37.0556	24	25.4444	29.056	19.9444	19.7778	18.5556	53.944	33.167	29	32.6667	12.9444	16.1667	23.7778	24.8333	23.2778	39.8889	50.0556	18.9444	14.9444	40.5556	49.5556	12.8333	31.7778	9		0.626507	27.5288
12.4986	26.6111	33.8333	29.1111	28.2778	22.7778	22.056	30.3889	22.5	18.3333	56.611	17.722	28.5	33.6667	11.7222	18.8333	29.2778	14.6111	36.6111	37.5	48.7778	13.3333	18.2778	36.2778	46.7222	19.8889	29.5556	15.5556		0.63253	27.679
12.6177	23.5556	42.5	33.6667	14.1667	22	24.722	31.3333	21.7222	18.6111	45	29.889	29.7222	26.5	17	17.5556	35.7778	27.1667	40.1111	32.9444	32.3889	18.7222	21.2778	37	21.3889	22.6667	29.9444	19		0.638557	27.2716
12.7367	42.5	44.5556	29.2778	24.3889	17.1667	19.167	31.2778	31.5	29.2778	46.278	25.333	21.6667	25.7778	13.6667	28.5	25.5556	18.6667	28.3333	35.0556	33.2222	19.1667	17.6667	40.5556	40.5	17.4444	20.6667	19.5556		0.64458	27.6564
12.8557	23.9444	51.9444	21	28.3333	22.7222	25.222	30.1111	28.9444	24.0556	25.833	19.056	36.0556	20.7778	12.1111	19	22.3889	22.8333	53	39	30.3889	21.6667	24.4444	41.2222	33.3333	17.3889	23.7778	15.8333		0.650602	27.1996
12.9748	28.3333	39.1667	21.7778	25.7222	19.9444	23.556	26.9444	25.3889	26.3889	46.556	18.611	26.3889	41.0556	8.9444	22.3333	23.6667	28.8889	22	42.4444	35.6111	17.2778	17.8333	37	33.4444	20.1667	20.0556	9.1111		0.656629	26.2449
13.0938	27.4444	43.6667	24.6111	21.6111	35.8333	29.778	18.8333	20	28.6111	35.722	22.389	26.2778	31.8889	20.4444	17.9444	24.7222	22.8333	24.1111	42.8333	17.3889	18.6111	29.7222	38.5556	30.2222	15.6111	12.1667	16.4444		0.662652	25.8621
13.2128	23.6111	33.2222	25.5	15.3889	33.4444	24.444	32.6667	20.7222	24.5556	38.611	18.944	26.3889	19.7778	8.6667	34.1111	32.1111	25.9444	18.5556	32.1667	32.5	13.8889	20.2778	29.6111	30.1667	15.0556	21.1667	19.8889		0.668674	24.8662
13.3319	36.3333	35.7222	19.3889	11.7778	33	15.667	37.7222	23	16.7222	47.056	22.722	20.8333	17	22	26.1111	26.2778	32.0556	19.1111	35.0556	33.9444	14.1111	14.5	32.5556	31.7778	16	20.1111	19.1667		0.674702	25.1749
13.4509	35.6111	36	22.1667	12.8333	20.3889	24.333	29.6111	30.6111	27.0556	36.333	18.222	29.8333	18.1111	11.7778	25.3889	26.6111	22.8333	24.5556	35.6667	29.0556	17.9444	14.3889	29.5556	26.7778	21.1111	20.3333	16.0556		0.680724	24.5617
13.5699	28.7222	39.3889	36.5	19.6667	23.6667	18.333	30.6111	16.3333	24.5556	28.778	23.056	25.3333	21.4444	13.2778	17.9444	31	21.0556	27.3333	34.7222	19	12.7222	18.9444	32.2778	37.2778	17.5556	20.7222	9.7778		0.686746	24.0741
13.689	24.9444	36.0556	26.4444	14.8333	29.6667	35.889	39.2778	19	20.7778	36	21.333	23	13.5	12.0556	19.8889	33.1667	32.8333	24.7778	32.7778	31.7222	19.1667	29.7778	26.6667	33	14.9444	23.1667	13.8889		0.692774	25.5021
13.808	28.2778	36.1667	32.7778	26.7222	19.5556	25.278	20.4444	15.2778	22.5	21.833	28.056	24.1111	29.5	11.1111	15.5	22.6667	21.1111	44.5	17.3333	40.5	14.3889	21.3889	44.6667	26.9444	26.1111	31.3889	19		0.698796	25.4486
13.927	33.8889	39.1667	37.2778	12.1667	19.8889	28.944	41.5	17.7222	25.6111	26.667	32.389	27.7222	22.6667	12.4444	20.9444	21.7222	21.2778	47.3889	23.9444	29.6111	18.6667	24.1111	34.8333	30.1667	26.6667	24	14.5556		0.704818	26.5165
14.0461	38.7222	46.2222	32.8889	24.1667	27.6111	20.722	37	19.9444	17.2778	34.944	26.611	35.6111	21.8333	15.6111	25.5556	31.5	31	35.5	19.8889	26.2778	9.7778	19.6111	36.9444	25.8889	24.8889	26.3889	13.4444		0.710846	26.8827
14.1651	28.4444	31.7778	26.9444	10.9444	24	23.278	21.6111	25.2222	15.1111	25.556	37.056	20.7222	39.0556	8.7222	24.2778	36.7778	28.3889	53.1111	16.3333	25.2222	22.1667	11.1667	35.8889	29.5	18.0556	19.3333	19.5556		0.716868	25.1194
14.2841	19.3889	23.5556	28.1111	11.8889	20	26.167	28.6111	16.2778	22.4444	23.111	25.667	28.1111	16.7778	13.5	22.9444	42	27.9444	50.7222	30	34.9444	14.5556	21.8889	43.3889	35.2778	14.6111	27.1111	26.8333		0.722891	25.7716
14.4032	23.4444	23.8333	19.8889	28.0556	27.9444	37.056	26.7222	22.7222	18.8889	20.278	35	19.3889	28.7778	22.5	20.0556	20.2778	23.5556	26.6667	33.4444	29.6667	39.3889	22.7222	40.4444	44.6111	30.1111	17.1667	21.3333		0.728918	26.8128
14.5222	32.9444	31.4444	20.8333	30.8889	24.8333	23.667	32.0556	33	32.6111	25.556	20.444	27.0556	29.9444	11.6111	17.5556	24.2778	16.4444	31.8333	36.6111	28.8889	20.7778	22.5556	24.5	35.8889	22.6667	24.6667	8.7778		0.73494	25.642
14.6412	18.7778	27.1667	17.2778	10.3333	34.6111	30.444	33.4444	26.6667	22.1667	22.722	33.278	21.3889	48.7778	15.0556	11.7222	33.6667	23.1667	31.0556	25.7222	48	31.7222	25.5556	32.3889	36	18.2222	30.1667	20.5556		0.740963	27.0391
14.7603	25.3889	14.0556	14.2778	29.9444	31.0556	39.111	20.2778	28.7778	25.7222	20.333	24.556	31.8889	28.4444	10.7778	12.7222	38.3333	26.5	34.0556	26.2222	27.6111	41.6667	20.6667	44.1667	45.4444	28.9444	24.1667	14.2778		0.74699	27.0144
14.8793	28.1667	25.5556	20.6667	21.6667	22	24.667	14.8889	28.8889	18.9444	10.611	26.333	19.5556	30	12.5556	11.5556	33.0556	29.9444	38.8889	16.8889	34.2222	46.3333	15.5556	38.7778	30.5556	22.6667	20.3333	21.0556		0.753012	24.6049
14.9984	25.0556	14.6667	24.6111	23.1111	45.2222	28.222	12.8333	23.9444	19.2222	11	19.944	24.7222	45.8333	9.5	16.6111	27.6111	24.3333	31.2778	25.3333	42.4444	32	12.8889	28.2222	30.6667	26.7222	26.3333	18.1667		0.75904	24.8333
15.1174	27.5556	16	27.9444	19.3333	29.6111	17.778	19.5556	17.6667	16	23	17	14.7778	50.0556	18.1667	14.1667	31.1111	23.8889	23.8333	17.8889	30.7778	24.4444	20.3333	32.2222	30.5556	41.3333	25.6111	19		0.765062	24.0597
15.2364	23.8333	19.2778	22.7778	22.9444	30.6667	33.833	15.9444	27.7222	17.3889	28.722	14.444	28.7778	33.1111	14.5556	20.4444	39.1667	17.5556	28.1111	20.1111	43.5	23.2222	27.0556	35.6111	24.0556	34.5	15	14.8333		0.771085	25.0802
15.3555	14.8889	17.6111	27.0556	19	25.6111	16.444	22.7222	41.8889	14.2778	25.222	26.389	24.8333	42.4444	12.6667	12.9444	31.6111	16.2778	21.2222	30.4444	33.7222	24	29.3333	58.6667	33	24.8889	18.9444	21.5556		0.777112	25.4691
15.4745	21.5556	30.5556	30.9444	26.3333	33.6667	24.111	32.8333	46.0556	20.3889	25.611	25.167	14.3333	38.2778	11.1111	15.6111	40.7778	30.1667	17.5	32.6667	39.8333	22.2222	18.2222	49.7222	27.3333	30.5556	23.4444	12.8889		0.783134	27.4774
15.5935	26.3889	24.1667	31.1667	9	31.6667	29.056	19.9444	19.3889	24.8889	18.556	28.222	24.1111	20	6.6111	16.0556	32.7778	19.7222	19.5	26.0556	34.6111	24.9444	25.6111	47.7222	23.7778	30.8333	20.0556	28		0.789157	24.5494
15.7126	44.6667	23.6667	15.2778	12.6111	31.3333	40.611	24.3333	20.5	18.7222	25.833	17	36.3889	25.3333	14	16.5556	26.6667	16.8889	17.2778	37.8333	34.0556	24.0556	21.6111	86.1667	24.3333	34.2222	20	8.0556		0.795184	26.5926
15.8316	16.5	25.2222	35.3333	29.5556	24	28.722	28	26.1667	17.3889	27.611	21	14.1667	30.2778	7.7778	21.6667	26.8889	14.6667	21.8889	30.6111	46.6667	30.1667	27.1667	63.3889	16.1111	33.3333	24	20.2222		0.801206	26.2407
15.9506	21.7222	30.1111	30.1111	21.3889	19.7778	32.667	32.4444	19.4444	20.7222	26.389	23.278	19.6111	20.3889	7.2778	28.6111	27.6667	15.1667	23.5556	31.8889	38.8889	37	21.8889	51.3333	25.7778	34.2222	24.6667	13.1667		0.807229	25.8951
16.0697	15.2222	30.9444	31.4444	19.5556	9.4444	38.389	23.8889	29.3889	16.9444	23.944	12.778	22	21.5	9.7778	16.1111	30.8333	18.6667	10.7222	29.2222	43.5	26.3889	32.1667	44.0556	21.8889	30.6111	18.2222	14.3889		0.813256	23.7778
16.1887	17.2778	21.8333	23.8889	19.7222	23.3889	27.556	30.3889	12.8333	14	21.167	18.778	26.3333	18.3889	10.3333	26.8333	23.1111	19.2778	17.8889	40.9444	46.7778	30	28.1667	46.1111	24.7778	43.5556	21.6111	10.8333		0.819279	24.6585
16.3077	13.1111	29.4444	22.6667	21.3333	27.2222	28.333	30.5556	14.3333	17.8889	21.444	17.944	26.4444	22.8333	5.9444	26.1111	24.8333	13.8333	15.6667	28.7778	28.2222	35.9444	31.2778	47.8333	23.1111	41.2778	14.8333	19.9444		0.825301	24.1172
16.4268	25.4444	33	20.2222	16.4444	25.2222	33.111	31	13.6667	19.9444	21.722	23.111	25.5	21.5556	13.8889	25.9444	25.1111	23.8333	19.1667	19.0556	23	41.3333	31.9444	28.1111	20	15.0556	23.1111	28.6111		0.831328	24.0041
16.5458	21.0556	11.1111	23.4444	21.7222	22.7778	26	16.8333	14.2778	25.5	23	16.667	22.6667	13.2222	9.0556	21.2778	29.5	20.7222	9.3889	25.2778	32.1667	34	24.4444	45	19.7778	24.8333	19.4444	10.5556		0.837351	21.6194
16.6648	13.5	14.3889	21.0556	21.2778	17.2222	20.778	23.8889	19.0556	6.0556	17.5	19.111	23.3333	21.7222	11.7778	15.2778	20.7778	18.7222	15.6111	35.1667	25	51.5	27.4444	35.4444	27.3333	31	32.8333	26.7222		0.843373	22.7222
16.7839	16.5	19.0556	26.1667	25.2222	22.7778	20.444	20.4444	13.2222	17.7778	16.778	12.389	19.7222	32.7778	18.7222	11.3889	18.9444	26.7222	16	28.9444	27.3889	41.9444	38.2778	45.4444	22.4444	26.6667	27.7778	18.7222		0.849401	23.4321
16.9029	24.2222	22.5	23.5556	12	26.4444	19.222	23.2778	25	16.0556	18.833	20.222	20.1111	19.1111	11.7778	13.6111	21.0556	27.4444	29.6667	25.1667	34.0556	40.2778	13.7222	38.5	21.8333	20.8333	21.2222	20.8333		0.855423	22.6131
17.0219	13.3333	35	18.6111	20.8889	18.4444	13.222	10.6667	20.6111	12.7222	10.167	19.833	16.0556	16.6667	10.4444	15.5	11	30.2222	27.8889	31.3889	24.2778	30	25.3333	39.7778	17.6667	23.5556	22.8333	15.9444		0.861445	20.4465
17.141	16.7778	26.6111	11.5	19.2222	24.5	24.833	14	23.5	12.6111	14.333	21.111	20.2778	27	11	14.0556	21.8889	17.7778	23.3889	29	24.2222	27.5556	21.7778	38.8889	15.5	22.3889	26.2778	15		0.867473	20.9259
17.26	9.6111	15.7222	27.9444	28.5	10.2222	25.722	14.5556	11.2778	21	16.222	16.444	21.8889	21.7222	16.0556	19.2778	19.6667	28.1111	35.1111	23.3889	39.0556	28.4444	21.4444	34.2222	11	21.3333	18.2222	21.2778		0.873495	21.3868
17.379	13.3333	17.6111	41.7222	11.0556	24.3333	20.611	21.3333	15.1111	25.7222	13.5	24.278	20.6667	23.7778	19.5	17.7222	25.6111	30.8333	33.4444	28.2778	40.1111	29.0556	19.9444	53.2222	16.3333	27.1667	26.3889	27.9444		0.879517	24.7634
17.4981	17	21.3889	20.6667	24.5556	20.9444	26.889	20.6111	11.6667	20.7778	14.278	21.444	23.8333	20.7778	16.2222	11.7778	21.6111	34.2222	37.8889	22	26.5	29.2778	24.5556	31.8889	20.6667	21.3333	21.5	21.3889		0.885545	22.4321
17.6171	23.1111	33.5	19.6667	16.7778	11.6667	16.056	14.6111	15.6111	29.4444	13.722	17.444	12.1667	17.2222	15.6667	17.4444	28.1111	32	27.3333	19.3333	29.1667	24.6667	24.1111	39.5556	13.6667	24.7222	31.5	25.1111		0.891567	21.9774
17.7361	16.8889	19.3889	13.3333	15.6111	19.6667	22.389	12.2222	17.9444	26	11.111	18.944	17.2222	31.9444	19.1667	21.8889	27.7778	36.1667	22.5556	23.3889	39.4444	25.8889	11.6667	36.3889	26.6111	29.9444	34.5556	15.7778		0.89759	22.7366
17.8552	26.6111	24.4444	16.3333	8.6111	13.3333	15.5	21.2778	17.2222	22.4444	19.167	13.333	20	22.1667	26.5556	16.1111	17.6111	33.5556	27.3333	30.6111	27	15.1111	25.7778	35.1667	22.4444	23.6111	28.8889	28.5		0.903617	22.1749
17.9742	23.9444	21.6111	13.5556	7.0556	11	21.833	14.5556	12.6111	26.6111	10.167	13.222	27.6111	20.5556	17.9444	24.1111	27.2778	27.0556	19.3333	29.5556	26.7222	17.6667	26.2778	35.1111	31.2778	24.8333	27.9444	28		0.909639	21.7572
18.0932	20.7778	20.1667	16.5	12.7778	9.1111	18.556	15.3889	12.7222	28.8889	11.611	20.444	16.9444	35.1111	30.8333	18.1667	28.7222	23.0556	23.7778	27.6667	30.4444	12.9444	23.7222	29.3889	39.5556	20	27.7778	17.2778		0.915662	21.9383
18.2123	12.8333	16.7222	19.3889	8.3333	11.7778	8.389	9.6111	18.6667	27.2222	22	21	15.8889	30.4444	29.1111	25.2222	25.5556	17.3333	24.7222	19.3333	28.7778	13.6111	18.6667	36.8889	24.2778	15.3333	17.2222	21		0.921689	19.9753
18.3313	21.8333	13.9444	16.5556	11.6111	11.3333	10.222	13.2778	19.9444	19.9444	28.944	24.056	15.5	14.4444	26.6111	24.8333	24.0556	25.7222	14.8333	27.1667	38.7778	17.7222	22.8333	25.8889	31.7778	20.8889	17.6111	21.5		0.927711	20.8086
18.4504	12.2778	19.2222	25.2778	14.3333	10.8889	11.111	16.9444	10.8333	28.3889	18.944	20.444	21.2778	18.1667	8.8889	30.5556	35.8889	24.2778	22.2778	36.5	32	26.2778	23.0556	24.2778	19.0556	18.5	26.3333	17.1667		0.933739	21.2284
18.5694	13.3889	19.6667	18.2778	11.9444	7.3333	12.667	18.8333	14.4444	23.0556	22.611	31.833	22.1111	15.5556	17.8333	29.6111	29.3889	22.7778	12.2222	37.3889	35.9444	18.5	23.6111	24.9444	26.7778	22.8333	23.7778	15.7222		0.939761	21.2243
18.6884	17.2222	22.8333	9.5	16.7222	11.1111	9.722	14.5	17.5	29.7778	22.944	15.333	37.2222	17.2222	11.9444	39	36.5	25.1111	21.5	27.7778	34.7778	17.6667	25.1111	38.2778	18.6111	27.6111	13.1111	17.6667		0.945784	22.0843
18.8075	21.1111	12.5556	13	15	14.2778	12.667	9.6667	13.5556	20.3889	14	14.556	18.3889	14.8889	15.3889	37.5556	27.4444	24.1111	20.3333	27.6111	22.2222	22.2222	26.7778	25.2222	33.8889	25.4444	14.0556	21		0.951811	19.9013
18.9265	9.3333	17.6111	17.5	7.5556	7.9444	12.944	11.7222	14.4444	19.5556	24.5	18.444	30.0556	10.9444	8.3333	30.4444	31.7778	24.5556	19.2222	28.7778	38.3889	15.3333	17.7222	18.5556	26.3333	16	10.5	9.5		0.957833	18.4444
19.0455	16.8889	13.7778	13.7222	12.3889	20	16.278	16.0556	12.4444	27.4444	21.556	17	23	12.5556	18.2222	20.3333	24.4444	28.1111	12.8333	24.2778	21.6667	18.2222	39.3333	22.2778	29.8333	18.5	24.9444	12.3333		0.963856	19.9424
19.1646	14.6667	10.3889	13.7778	20.8889	18.3333	10.556	5.5	16	17.8333	33.667	9.889	23.9444	8.8889	11.7222	24.2778	25.3333	27.4444	12.2778	19.4444	24.3333	29.7778	19.3333	16.8889	19.9444	16.3889	12.1111	13.1111		0.969883	17.6564
19.2836	4.6667	17	14.6111	16.3333	6.5556	14.778	19.1111	17.7222	22.2778	30.333	33.667	13.1111	5.7778	17.3889	14.5	17.9444	20.3333	16.8889	26.5	26	24.3333	27.1667	16.1111	34.0556	19.1111	12.6111	5		0.975906	18.2922
19.4026	13.7222	9.2778	19.6667	11.9444	16.0556	11.167	10.9444	15.3333	26.0556	33.667	19.111	17.9444	9.9444	18.1667	15.6111	15.3333	23.7778	16.6667	18.7222	21.2778	21.6111	22.2222	22.2778	28.6667	21.5556	5.7778	10.0556		0.981928	17.6502
19.5217	12.6111	8.8333	15.2222	11.4444	13.2222	15.722	20.2222	22.1667	25.0556	27.556	18.056	16.4444	5.9444	10.6111	21.0556	13.1667	23.2778	15.5556	18.3889	15.7222	21.5	29.9444	16.2778	27.3333	21.7222	6.7778	10.1667		0.987955	17.1852
19.6407	12	14.1111	15.7778	6.7778	4.6111	11.222	10.6667	16.6111	33.5	26.222	19.333	18.7778	12.8333	14.5	15.8889	10.5	18.7222	13.3889	8.8333	20.6667	11.1667	23.7778	26.3333	16.7222	17.6111	8.1111	5.0556		0.993978	15.323
19.7597	9.1667	12.2778	5.3333	12.7778	14.2778	24.611	12.6667	23.8333	20.7222	22	20.444	25.3889	5.7778	7.2778	13.1667	5.2222	16.5556	17.2222	17.8333	22.0556	18	33.4444	14.6111	27.8333	12.6667	3.6111	1.5556		1	15.5679

## Sheet: Image15
X0	Y0	Y1	Y2	Y3	Y4	Y5	Y6	Y7	Y8	Y9	Y10	Y11	Y12	Y13	Y14	Y15	Y16	Y17	Y18	Y19	Y20	Y21	Y22	Y23	Y24	Y25	Y26	Y27	Y28	Y29	Y30	Y31		Ap-basal	Avg intensity
0	24.7985	26.1738	16.4927	25.2316	19.4672	25.6177	21.964	27.9912	36.3335	43.142	26.1534	37.4531	30.0076	43.8922	22.7457	42.4293	46.3813	39.9313	28.8277	27.3351	18.5995	35.7587	29.1635	37.195	28.0443	27.226	35.258	27.136	30.4821	41.7016	41.8894	28.8564		0	31.0525
0.119	20.1195	15.4238	22.7748	26.4168	19.2876	27.0323	22.4548	33.4294	34.6	51.1355	32.9293	32.9346	34.0109	39.3466	20.6535	36.6076	52.9005	42.0036	17.2178	30.4504	31.5389	41.0855	31.4973	39.163	28.7479	28.4142	28.589	31.164	51.9789	44.9118	39.7283	30.0963		0.0061332	32.4576
0.2381	28.9075	30.1518	12.3529	29.2155	40.4472	24.5836	35.4158	33.0202	31.174	60.0033	41.1766	45.9087	55.9725	51.528	37.8143	38.5578	66.3053	41.5752	25.9002	40.2653	23.0332	43.8071	41.8759	38.747	26.089	17.4506	37.219	36.619	61.0044	53.2642	50.2002	33.001		0.0122716	38.5183
0.3571	30.7502	26.219	21.2011	27.5742	29.3621	25.4907	34.3519	37.6276	34.2823	61.9454	48.6173	38.2271	60.8468	52.1098	32.7847	42.2638	43.4051	52.0224	27.6283	49.6837	34.804	52.3539	40.6861	39.42	33.8542	48.8889	39.5626	37.2	51.6457	51.3897	47.0772	36.9551		0.0184047	40.3197
0.4761	34.0141	42.9553	10.4374	22.3721	27.3907	35.4765	33.173	45.9647	43.7391	47.6818	43.3522	33.4398	60.7285	56.6184	23.6262	55.9914	66.074	48.2577	42.6179	56.4181	46.2555	39.9539	52.3035	32.684	25.8325	51.2388	50.966	52.317	47.7179	47.9278	64.5237	41.0901		0.0245379	43.2231
0.5952	33.9981	28.1552	18.2309	24.3204	31.9685	32.6193	36.8448	47.7747	38.2981	58.6608	44.5444	46.3655	59.7188	64.9616	33.5471	49.1329	63.2797	56.1132	39.7867	54.2243	47.8335	52.2439	55.2877	52.771	22.6672	74.2189	62.7369	61.781	64.4496	82.7992	69.9027	45.5402		0.0306763	48.5868
0.7142	26.7986	37.6736	31.7423	20.0065	42.0251	30.1928	48.232	45.2407	52.583	61.7129	40.8278	37.825	65.2293	47.772	36.0594	51.0907	69.7089	55.5916	48.2053	80.9759	41.576	65.1491	66.8616	68.581	42.8929	67.5859	68.4807	61.705	66.1595	71.9528	80.3808	47.2151		0.0368095	52.4386
0.8332	41.1781	37.7805	20.5322	27.3143	30.0219	19.9951	45.4715	41.1952	40.5197	53.6628	54.7678	48.0084	64.0484	77.1131	55.1055	52.2696	57.976	58.4814	60.8477	70.2998	55.4505	79.1237	71.7048	75.18	41.5523	71.4491	80.0273	75.959	64.5273	59.3272	69.1098	65.5349		0.0429427	55.173
0.9523	28.4251	34.8484	19.6594	21.3948	41.9851	45.0614	47.8452	54.7588	64.5644	55.5898	54.7625	66.6339	54.0401	66.7849	52.1046	55.5302	58.0053	48.2381	48.0774	74.9155	62.8728	90.0984	73.1078	63.735	31.4163	71.7028	75.1788	87.69	81.506	68.6499	72.6576	57.3133		0.0490811	57.1611
1.0713	51.6218	46.9593	34.4074	21.046	42.9569	40.6719	43.0448	61.2399	66.487	66.5558	78.1196	68.9214	64.2049	85.291	57.2263	66.0072	67.6164	50.082	69.616	87.1298	56.0374	98.4058	92.3096	88.344	53.7313	72.1715	77.7764	107.458	76.2478	71.4431	78.2939	66.3426		0.0552142	65.8677
1.1903	47.7311	54.944	33.2782	35.1282	39.4231	47.4028	53.0013	63.1496	73.3167	66.4491	63.178	55.0577	61.9488	79.6276	56.4273	72.3879	72.1215	53.1736	69.7597	64.4583	54.5677	84.1775	80.3124	74.406	64.0159	69.7595	91.734	70.901	69.6967	64.1121	76.5405	78.6574		0.0613474	63.7764
1.3094	56.0232	40.1833	41.2164	27.7435	45.3953	46.4463	53.1994	69.1449	82.3997	70.8073	61.2205	62.7905	66.5787	59.6253	53.9711	74.8271	85.0859	57.2533	64.5956	62.7289	61.3558	87.9344	95.8747	76.796	55.691	86.1337	71.4678	81.13	82.3643	85.1151	97.1694	84.9236		0.0674858	67.0998
1.4284	64.0128	54.9263	45.4631	27.9005	37.2536	50.832	58.6804	69.7272	84.0374	69.4754	54.9121	56.8857	82.8408	71.8662	52.6595	59.7082	81.876	60.5196	83.6341	72.3694	59.1048	76.2285	82.7025	84.838	72.0726	82.3143	84.4552	90.949	63.8947	82.174	86.1007	61.7397		0.073619	67.6923
1.5474	51.2409	48.6208	32.7547	25.8238	30.251	46.1245	59.0452	74.3473	71.7341	71.242	69.6747	55.479	76.98	83.9375	66.0759	91.4952	85.5573	63.5886	61.2358	73.5192	60.1245	84.8735	79.5609	93.028	48.7395	53.2161	82.6295	98.514	79.7675	78.6523	82.5367	64.3204		0.0797522	67.0216
1.6665	75.3805	46.828	29.6768	37.2726	38.9913	45.5334	61.079	56.7343	82.4741	59.6771	62.1793	67.837	66.1402	84.7649	60.0512	71.1456	89.4178	80.6777	65.9312	85.0852	57.4139	76.2023	76.2413	116.191	59.5651	95.0399	68.4431	96.362	64.9725	83.5239	74.5155	63.7262		0.0858906	68.7211
1.7855	49.6443	51.9597	32.5578	44.6853	29.0673	39.7431	64.7052	58.2296	77.5324	86.5166	69.405	59.5871	69.9267	84.1211	44.7762	69.6058	71.3822	72.2314	85.5365	74.8465	58.6332	79.6434	91.6668	92.292	61.7928	75.5528	91.212	87.055	61.6795	66.4559	76.7824	60.3594		0.0920237	66.8495
1.9046	59.9873	51.0891	36.1127	28.4323	40.096	44.7598	69.8445	76.866	93.5713	67.5429	83.7366	54.2169	64.0437	95.1644	60.2088	72.7107	100.7	67.6431	80.2149	86.2783	71.0519	87.2362	76.5582	77.969	65.8729	55.5569	80.0531	78.174	62.4062	77.3992	78.6606	63.8692		0.0981621	69.0008
2.0236	54.0467	56.5124	41.4554	43.4124	36.3389	56.1626	49.9146	59.7045	61.2467	92.7464	62.1833	48.6178	83.2493	75.2468	63.3334	71.5689	80.5249	96.2048	78.8385	80.9909	51.7189	67.6031	64.9648	92.497	55.0429	89.2574	75.2483	87.257	59.6305	70.9917	82.3202	64.751		0.104295	67.2994
2.1426	62.4946	50.0441	32.4691	29.7807	41.6473	63.001	48.2706	77.067	74.8611	68.069	46.8259	45.1037	72.2329	66.5318	76.7229	61.6534	97.3703	57.9583	93.4191	63.8834	61.8803	70.5837	81.3144	86	48.9115	71.8135	86.9535	87.584	58.8046	74.8053	74.0638	74.6175		0.110428	65.8356
2.2617	41.4364	69.0541	45.5145	48.0085	35.4796	46.4538	56.1714	79.2786	67.0678	67.1554	54.883	52.7319	66.2007	83.7423	60.3516	66.0085	82.6561	87.8624	76.2973	85.8371	67.9695	74.9594	99.7882	66.929	74.3533	76.4411	75.3405	82.39	60.5643	94.3199	70.0204	58.8981		0.116567	67.9426
2.3807	54.4544	66.2375	46.3334	31.1556	35.4173	61.6049	61.3647	75.4935	66.2253	72.0191	65.0677	47.4392	77.2708	76.8006	58.1781	55.6024	79.2651	76.1458	75.0129	75.5701	72.1868	92.3839	68.0304	65.956	54.0327	71.4331	69.7065	101.033	63.2336	82.283	74.6826	59.1766		0.1227	66.5874
2.4997	53.4177	77.4969	51.7966	34.2624	30.7307	56.5868	48.4344	55.7943	67.5802	63.9655	55.4123	53.1475	73.6867	61.4719	87.0974	76.3613	67.1136	98.9999	85.6638	70.3601	88.1953	88.8205	61.5149	66.495	52.6096	64.2218	70.5252	70.655	79.2298	78.7873	57.1773	52.6346		0.128833	65.6327
2.6188	53.8456	64.434	58.3451	27.4506	27.381	63.193	54.8663	53.0866	71.9726	61.176	53.9568	55.2564	61.5968	77.7088	69.2534	63.2974	76.3747	89.4363	79.9	76.0648	61.3401	81.1577	78.6425	54.397	54.6711	70.9902	65.0378	99.521	67.5361	75.8002	73.5931	52.9788		0.134972	64.8207
2.7378	60.0435	64.878	53.3968	33.8588	22.0178	51.7706	62.5035	57.0811	64.0465	58.2443	53.578	49.7666	58.2295	68.7443	68.2532	81.5513	75.6696	66.2191	76.9372	67.9522	62.6398	88.9404	76.6413	64.82	56.3065	67.9015	59.8831	97.696	62.4011	60.0818	69.9539	60.1708		0.141105	63.1931
2.8568	53.9853	59.0396	54.7492	38.6216	27.9505	50.9972	57.1316	53.7435	70.3273	49.7461	69.9247	45.0357	69.4749	82.5016	61.131	52.7448	62.1054	77.3638	75.7743	77.5859	69.4746	73.0893	64.7328	71.629	50.4272	54.5201	76.3738	76.566	85.8806	81.0945	61.6499	52.0517		0.147238	62.732
2.9759	48.6463	60.9837	39.1458	35.4675	16.5424	47.4343	57.9343	46.0348	67.4251	58.1985	56.3558	43.5901	63.0913	72.9647	61.93	48.0996	68.5895	57.3092	64.9727	64.5662	87.2807	90.4193	52.5593	56.455	45.0838	70.227	68.637	87.154	77.1378	71.5943	67.76	48.8088		0.153376	59.45
3.0949	49.6998	56.8438	36.8003	44.4644	31.2036	49.1135	50.4369	60.8574	52.0438	46.8146	60.4471	36.6336	42.9342	66.8403	59.7402	67.0985	77.2201	73.9798	73.3124	67.5319	69.0798	78.4004	54.9405	47.489	41.1934	69.2413	89.431	76.894	68.2947	54.6904	59.2857	46.5938		0.15951	58.1109
3.2139	49.3467	55.2875	44.7849	31.076	26.7265	57.396	48.6972	40.4373	60.7051	58.9084	60.6898	44.7938	49.3968	62.4924	66.3584	63.0538	69.0141	62.6918	67.7532	61.838	65.1874	64.3391	54.2389	52.165	58.0509	57.4613	55.3125	87.55	67.8337	59.063	54.3026	54.6547		0.165643	56.6127
3.333	49.0767	56.1468	37.4704	45.6043	24.6612	50.5268	50.0299	48.7331	62.2135	47.9195	66.8159	43.7296	46.7696	87.7261	71.7639	51.067	59.0678	70.1156	87.3924	41.7769	75.7594	78.5247	66.6458	64.906	64.181	57.6987	73.7833	74.425	80.6825	71.8202	44.234	54.1257		0.171781	59.5435
3.452	60.1016	63.3302	44.3828	39.8942	28.4211	40.9961	33.2102	39.9162	48.4667	31.8134	41.4068	35.9869	44.0371	75.9788	62.3678	58.0467	69.9344	53.1654	75.8194	63.9065	87.8178	67.9738	57.5212	60	50.8546	69.7714	74.4915	81.895	55.8442	65.602	57.4059	44.3532		0.177914	55.7723
3.571	53.336	59.5611	48.7496	35.5626	29.8413	54.4374	60.2721	34.3129	45.1157	36.1806	45.7683	47.0637	41.0842	64.704	55.0565	48.7711	66.4557	62.2338	74.6964	63.5147	54.5444	58.1269	49.8888	39.634	58.9888	64.5412	76.1902	68.795	40.4049	38.2311	52.6508	52.6316		0.184047	52.542
3.6901	41.52	57.1305	39.5303	38.3881	21.9379	30.8532	47.8205	50.3205	46.2827	30.3222	39.3526	47.2951	69.2047	89.1287	66.8499	50.6426	61.818	64.6498	64.3588	58.8861	77.5178	74.9532	45.8449	51.92	60.1357	39.194	47.2019	49.327	45.009	53.7972	57.5947	47.9203		0.190186	52.0846
3.8091	42.5229	44.1195	40.1073	47.1211	21.3236	41.5731	41.8906	41.3727	50.3428	33.9889	37.1721	33.1307	51.9556	73.1813	59.7706	52.1785	63.6851	70.5078	92.2668	53.0051	63.3688	66.4792	54.4543	40.048	53.8734	48.7206	46.9496	61.651	42.4223	49.4899	47.8425	49.5573		0.196319	50.5023
3.9281	32.5553	39.0593	43.9276	39.4322	26.0891	36.688	34.9038	40.7837	40.1376	26.9004	51.8988	36.3427	60.767	54.6898	55.339	62.6503	70.2902	41.5929	61.3974	40.7568	63.4403	48.8749	41.5536	52.209	53.0334	49.2731	49.5264	41.518	35.6353	57.6768	60.3368	48.9883		0.202452	46.8209
4.0472	34.1175	40.358	49.1737	32.9223	15.1171	31.1598	30.4458	45.2333	51.3106	29.2748	46.6468	33.6444	47.8342	76.5575	58.8903	48.3612	56.3966	58.9955	46.5304	46.8797	56.0503	66.0983	31.189	38.248	47.8749	38.9918	36.5049	58.273	41.6531	56.4034	38.9136	50.0674		0.208591	45.0037
4.1662	21.5994	24.395	41.1504	48.1055	29.5776	35.9247	48.8074	53.9598	46.5133	47.4579	27.6076	42.1225	39.1363	78.922	44.3642	67.1862	66.1354	55.3412	65.75	58.7765	50.4248	60.681	33.3494	44.801	41.9731	57.5198	56.7033	47.564	36.9236	53.1518	55.2109	57.1534		0.214724	48.0715
4.2852	34.8981	30.924	50.6121	32.4223	21.649	30.1089	35.1393	49.3149	34.6285	35.4208	37.405	50.1102	55.7704	65.6284	69.1368	53.4395	59.8438	64.9868	61.8327	43.0319	56.2392	48.6518	27.5464	46.101	47.3194	49.595	43.5364	39.441	34.407	45.0212	61.7874	49.2676		0.220857	45.788
4.4043	37.1996	26.9141	38.3987	40.3995	24.3686	30.0238	42.6986	26.9545	40.5196	33.9477	29.6109	47.033	39.8758	74.2505	59.3083	40.2483	64.9154	56.2548	67.4502	34.8519	53.8619	44.4457	38.9893	29.961	46.3691	61.9339	51.0005	46.125	43.943	49.0263	68.8277	56.521		0.226995	45.1946
4.5233	34.7114	33.0328	29.9799	35.2196	26.0535	23.1156	30.6414	43.3603	36.5927	38.5783	34.5541	46.1215	40.6439	57.2178	53.3105	51.7853	60.9829	66.1831	52.6816	24.6687	51.6226	56.0236	35.4167	35.513	37.2444	46.3164	38.8099	41.054	37.2703	37.0063	65.2895	70.6718		0.233129	42.8648
4.6423	22.4697	35.7486	54.0068	41.6253	36.1222	23.9731	28.1885	34.1671	39.9101	30.188	31.0832	47.1808	49.0249	56.1447	58.2536	63.0592	63.967	55.3739	57.098	36.4643	52.2756	54.4825	46.7796	43.81	45.4278	39.9953	42.9012	35.729	28.8631	53.6544	69.5726	66.5004		0.239262	45.1263
4.7614	20.5006	22.5384	29.5147	41.5336	31.4461	30.8993	31.362	29.1402	41.1022	37.3025	33.7143	41.1443	46.1638	65.9204	51.3079	66.1527	57.3539	55.7648	56.3718	39.6566	48.231	50.8127	39.7219	43.81	38.0804	33.7843	54.0591	46.812	38.0024	51.8304	66.0118	58.7386		0.2454	43.712
4.8804	24.4718	19.7933	39.1261	38.0413	31.4903	35.4598	34.0284	37.2945	28.2627	35.4909	41.4646	55.8559	31.8758	69.5235	46.0814	49.1504	59.618	53.4433	51.6502	36.1539	48.526	48.9348	37.9251	35.27	33.7495	38.0284	40.4234	40.233	52.7373	45.3089	59.2599	59.132		0.251533	42.4314
4.9995	32.1814	22.032	34.6322	46.5299	27.8963	40.1207	30.7659	32.0645	27.8832	40.3941	47.2878	49.1741	44.3752	51.9828	35.991	49.7112	55.4328	58.4002	74.8956	38.1268	51.6524	50.4627	45.5604	41.867	42.7288	38.2607	52.6905	39.026	41.7048	49.2552	44.8846	83.9175		0.257672	44.434
5.1185	33.6706	17.8922	40.7521	27.1292	39.6474	24.5693	29.7821	30.8016	31.7655	38.1055	31.5458	37.0038	45.0979	55.9806	35.8298	40.4948	46.9975	60.6513	58.0179	41.8402	45.333	44.4579	32.2969	54.152	49.858	36.9941	33.0478	36.209	33.7341	55.8652	63.6686	54.7711		0.263805	40.8738
5.2375	36.8051	27.3125	29.9876	38.2658	10.1207	36.8313	25.1056	24.7145	33.0417	38.1273	35.023	55.3422	55.576	49.5533	31.661	45.3926	39.666	58.5057	56.6996	41.5735	47.2485	53.4783	34.7731	36.441	32.3192	48.1564	60.7173	43.209	39.0764	42.667	41.1893	52.9356		0.269938	40.6724
5.3566	37.0796	27.0997	26.9563	42.1359	24.3443	33.0835	27.7025	33.9473	30.5125	45.9894	46.6126	39.9708	45.4404	45.4344	43.167	57.263	55.5997	44.347	52.3665	35.4964	49.0153	52.4277	42.4258	53.147	30.0349	37.4712	41.115	28.837	46.6764	38.422	56.9644	55.55		0.276076	41.4574
5.4756	42.41	28.9932	42.8211	33.2644	22.3506	34.7575	20.2795	32.843	28.6844	34.4165	56.3596	50.5984	30.4067	60.2319	37.3226	53.9594	57.613	56.4364	59.1043	39.947	45.6399	46.493	44.5281	33.224	23.179	36.3605	30.337	34.862	42.5603	48.3018	58.438	44.572		0.28221	40.978
5.5946	45.2748	35.4967	29.2867	26.2559	31.0807	32.7594	48.3302	41.9842	35.8555	43.3424	45.1286	53.8344	38.7508	54.4827	35.4281	62.5874	51.2544	40.8885	59.4177	32.1576	52.7897	42.1216	46.8637	46.102	33.8407	51.1697	49.5389	35.682	51.8656	36.7283	40.4837	56.7004		0.288343	43.3588
5.7137	45.9436	32.5054	30.0292	40.2967	28.9804	32.2499	30.8773	35.0501	37.4072	44.7982	37.4738	43.2635	38.0771	47.0776	36.5544	39.2057	55.8979	44.941	47.1675	35.6697	50.4582	48.6045	45.6511	29.968	35.0323	45.5635	54.6211	38.596	43.7553	38.4268	47.2701	59.6837		0.294481	41.2843
5.8327	45.6064	14.5801	24.1021	36.3099	14.9961	25.0936	36.429	32.8662	33.8805	42.9903	52.9485	53.5486	42.7999	45.572	27.3423	44.4381	57.2311	52.2598	42.4335	40.218	51.0106	45.7378	48.4671	49.055	25.6817	37.9373	37.818	33.413	40.5482	38.1436	43.5331	51.0517		0.300614	39.6263
5.9517	33.499	26.168	19.7795	26.1035	21.9622	31.1238	25.0818	37.7703	41.8256	33.3488	60.68	53.3613	43.672	37.7583	41.2754	51.809	38.3635	34.4685	46.9751	51.1583	43.4772	36.4123	44.1466	42.655	37.3568	41.7505	43.0869	32.615	36.2343	72.0713	37.5031	73.7525		0.306748	40.5389
6.0708	37.5157	42.437	28.8887	23.347	20.5822	24.9702	39.3933	22.9181	36.9727	29.4235	50.9919	57.894	59.831	48.8465	36.4283	43.8507	43.0836	41.9568	43.3477	50.411	43.3919	64.5141	52.6422	35.41	28.6127	46.0174	42.1695	38.551	31.148	33.1741	39.2193	46.7533		0.312886	40.1467
6.1898	32.1904	24.4203	37.8223	32.8498	27.0439	33.4068	33.172	28.1579	47.3038	32.1546	56.1761	60.8039	46.5722	46.5173	47.8238	49.4965	38.1555	34.5524	45.0007	69.8572	50.1683	38.0914	54.828	44.595	30.3367	45.8233	35.5525	22.815	26.187	44.1218	44.5578	52.4924		0.319019	41.0327
6.3088	29.8845	21.539	28.4129	30.903	24.0512	33.6602	21.0808	35.1242	33.5136	45.9842	49.4314	39.4836	35.4598	48.139	23.1155	69.7669	31.0662	39.5439	46.3912	59.8982	45.9541	59.9356	54.117	42.635	43.9776	46.1272	29.616	29.507	33.7095	57.0245	40.4685	54.6174		0.325152	40.1293
6.4279	32.3667	24.7006	14.818	35.9962	18.8174	34.1949	25.3314	37.1071	32.2603	31.6012	49.2031	38.6168	24.836	45.3829	35.96	51.4606	41.6912	48.0919	37.7721	37.4808	53.3416	44.3859	52.8909	51.093	44.3191	40.2456	35.1309	28.177	32.0291	50.8025	39.4456	57.5984		0.331291	38.3484
6.5469	38.629	22.8464	19.4359	35.591	23.5526	32.4533	42.6776	41.7123	38.7592	34.9055	47.9373	33.15	31.1362	35.9142	27.2713	46.9307	40.0117	52.6624	55.8338	50.4966	42.662	53.5942	47.8214	46.454	37.2162	50.0685	32.5763	20.589	14.4948	39.6862	44.6707	54.4749		0.337424	38.6317
6.6659	38.7569	24.9699	39.3129	25.7218	17.8523	27.3971	29.2481	51.8718	34.2781	26.1852	48.3283	28.8392	33.9174	46.8871	29.6106	47.7179	36.5279	31.8762	34.1448	42.7529	49.021	42.5292	52.6647	49.632	44.0381	51.8898	28.3514	16.418	20.0038	30.0618	36.3707	51.139		0.343557	36.5099
6.785	42.725	24.1907	36.8574	40.3369	22.8898	39.1199	41.6676	43.2536	41.0066	31.0106	44.3927	39.1599	31.5837	35.1238	34.9117	50.7406	43.3911	52.0306	26.8476	31.9743	40.4398	45.7511	41.4488	49.314	35.7546	44.2664	27.2513	16.75	21.1595	33.7205	52.368	50.2227		0.349695	37.8644
6.904	37.4392	19.8644	24.9452	36.0407	34.8111	36.4278	39.3249	43.0704	44.3012	29.5356	35.5864	42.9474	33.1866	31.939	42.3219	43.7177	36.5543	59.131	42.1023	33.7717	49.5781	49.163	37.5723	53.714	31.2777	58.8328	20.971	25.727	23.7709	41.2509	50.3688	35.1604		0.355829	38.2627
7.023	37.7154	29.0274	24.0042	34.6131	31.9591	38.1918	37.2808	49.4668	40.8346	38.3159	39.5137	36.1694	39.1316	37.0572	33.9553	52.7838	38.0545	43.8208	56.313	44.6707	40.73	58.4473	38.9439	54.076	34.7475	46.4111	16.1361	23.641	22.2352	39.139	49.9279	57.9513		0.361962	39.5395
7.1421	35.4601	27.0202	25.2626	42.137	22.9644	33.3343	29.0325	40.2133	44.4455	29.6292	49.0619	50.8285	37.2129	37.537	38.1894	38.1736	50.6147	48.8321	45.2325	33.6668	46.4358	48.7663	49.2736	44.431	38.3083	59.9571	21.0017	19.644	21.2396	29.2758	46.0637	47.3231		0.3681	38.4553
7.2611	35.3365	29.6636	16.3648	31.286	26.6449	34.6128	24.3915	36.7487	35.7417	30.6959	28.324	66.5658	36.1847	40.0363	28.2312	42.2343	57.4621	50.7748	36.1042	24.001	42.1026	49.764	42.6389	51.242	35.4734	45.189	21.9159	13.532	20.5342	34.0443	37.6757	48.8112		0.374233	36.0728
7.3801	35.0911	40.0593	27.5312	18.423	26.0371	46.3904	26.388	37.1806	35.7084	28.5784	37.5885	64.1817	31.6849	53.0614	31.1508	44.3632	47.3036	45.0406	44.9513	35.116	49.6947	30.5626	31.8666	46.925	36.3718	49.4249	22.6739	17.581	16.1124	41.3629	48.8846	39.7427		0.380367	37.0948
7.4992	29.4461	42.5925	23.2467	28.5127	26.9527	45.9895	33.2471	42.4291	31.2352	20.3301	24.3175	54.9294	36.4796	44.9039	26.2112	51.1954	49.6076	52.1392	58.7256	34.9375	47.6947	45.2246	37.8426	39.67	40.7758	38.9465	30.5725	22.098	25.2465	32.7821	57.9409	48.1547		0.386505	38.2618
7.6182	43.495	19.1002	31.7773	17.2718	31.3281	43.3488	27.205	47.315	34.8852	36.9423	30.6151	60.8769	48.2667	42.3768	34.1555	32.242	50.9165	55.3616	34.3086	38.3577	46.22	33.1093	26.7187	38.755	42.4425	45.1661	29.5207	16.089	14.8435	37.144	54.7731	36.0759		0.392638	36.9064
7.7372	30.9897	26.464	35.1787	16.1458	23.3824	36.0465	28.8755	31.8174	37.3572	31.148	38.2622	64.3836	48.6792	28.168	29.8659	33.4482	47.5192	56.7946	44.9468	40.4971	39.2794	44.1259	34.1155	31.087	46.0159	47.1673	36.3187	31.638	30.9923	33.2148	61.7727	33.6568		0.398771	37.4798
7.8563	31.7506	26.461	41.6072	41.4997	33.0279	27.217	38.8011	24.463	34.9027	35.3905	41.1744	57.9825	45.6457	22.0884	50.6635	26.3931	42.2757	46.3964	47.5588	47.9511	62.4407	44.1881	41.4075	32.629	52.0885	51.9483	33.9334	17.947	15.4564	29.0996	44.0679	38.0021		0.40491	38.3268
7.9753	26.0526	37.079	26.1764	32.1676	27.8141	48.1287	30.8112	40.1201	24.4791	33.6585	25.1988	46.3076	35.5424	30.8233	29.5734	49.887	55.6619	37.6624	33.7461	37.4193	59.2663	33.0495	49.2143	36.807	35.9014	49.9766	19.4163	15.465	17.077	32.4502	34.6329	37.4916		0.411043	35.2831
8.0943	41.5224	36.2251	57.2956	32.8039	33.7607	47.6773	30.9959	28.6415	32.6073	29.7298	38.1782	62.686	49.7926	25.2636	36.2904	39.3121	40.4023	38.256	31.0817	50.3656	62.2259	31.4453	45.7477	37.233	36.9447	54.6673	32.7049	21.833	15.2281	32.6445	41.8502	46.5761		0.417176	38.8121
8.2134	39.7981	40.1614	65.9381	31.5676	24.9253	40.1098	35.4391	22.1303	34.6156	34.2657	37.3322	53.7454	41.7746	23.3724	21.7434	32.3149	38.0498	40.805	38.75	38.8324	59.85	38.7494	45.385	38.294	30.6024	49.2982	22.2621	12.358	13.7755	33.0277	37.2228	43.9763		0.423314	36.2648
8.3324	42.165	22.7192	69.4653	44.6221	47.1544	53.1291	27.1169	23.3254	31.9713	32.5142	47.9878	49.3218	46.3244	16.3419	37.3813	33.4118	34.5876	40.2662	26.1996	60.1996	51.4446	32.2009	40.6607	43.019	37.7512	60.7073	16.1303	19.47	12.7719	33.7413	35.0416	26.9972		0.429448	37.3794
8.4515	25.666	30.6006	86.3558	29.3824	32.688	28.3987	38.5479	16.785	23.1123	35.1464	43.579	59.6682	37.9578	25.0541	29.4507	31.3598	36.6313	41.1288	33.3649	47.4778	71.3033	28.809	58.2221	31.852	47.7665	51.4933	33.6027	16.939	11.239	35.8603	21.1525	33.7911		0.435586	36.6996
8.5705	34.0169	26.8296	77.9705	38.9788	31.4697	40.0933	26.2747	43.3067	26.9113	20.4531	57.0363	47.2324	32.8992	16.1067	40.8054	31.5072	37.2991	37.3495	21.7449	29.4076	45.8325	52.5526	52.7223	29.772	44.0257	38.4103	16.4367	17.854	8.0318	30.0955	20.9905	30.5719		0.441719	34.5309
8.6895	37.6379	19.6375	74.1036	35.6155	29.8816	34.5371	35.5184	39.6796	20.0033	31.5913	59.7133	37.6888	14.5191	19.9852	37.7622	49.3982	25.0925	33.2454	24.3717	23.8082	47.0903	38.4585	36.667	20.671	39.4612	39.6344	19.979	6.385	13.8934	22.3507	26.3794	36.4573		0.447852	32.2256
8.8086	28.0698	26.7258	48.703	31.5063	20.2577	26.8827	44.5014	24.863	32.7702	22.8679	46.8408	58.2247	29.9831	13.9572	41.0213	24.0599	39.169	35.7744	27.5656	34.9748	48.9895	28.5016	40.908	32.106	64.0046	41.2731	23.1717	22.716	17.1986	24.9243	34.6413	34.6444		0.453991	33.4937
8.9276	27.6983	24.2798	32.0783	40.1016	16.9062	26.6677	46.4121	15.5499	32.4353	39.9918	45.7831	63.9991	31.2498	19.6051	40.2376	24.6978	41.9405	44.724	25.2683	16.134	35.3861	34.877	44.7821	33.141	65.5358	27.5715	21.3263	23.951	8.6253	26.928	28.9687	28.144		0.460124	32.3437
9.0466	25.245	29.3676	36.2089	39.3934	19.4077	32.2189	35.5507	19.0674	41.8133	38.6222	42.3021	47.1559	19.2611	15.295	36.1741	35.4413	40.3889	43.4233	23.9946	19.7762	30.0132	29.5446	25.2179	16.757	54.2011	25.4838	30.3065	19.215	10.5046	23.6572	24.9515	36.5034		0.466257	30.202
9.1657	19.773	23.5383	24.3343	29.08	23.9044	26.2478	34.2474	37.9193	33.8736	27.4285	38.5499	42.2629	20.7545	19.4008	21.7446	27.0866	38.8696	42.9468	25.8787	23.6594	28.7531	27.4947	42.661	19.152	45.1749	34.356	31.1443	13.243	12.9674	16.3167	24.0727	41.5098		0.472395	28.6983
9.2847	31.2362	20.8502	19.1813	29.4094	19.7207	27.9744	41.7282	28.0157	33.7512	31.276	37.4777	44.8437	18.4885	12.8646	39.7056	21.0515	31.9766	39.4837	14.5868	24.5667	26.0675	20.4014	47.5913	35.187	56.3063	34.3101	14.4246	18.829	13.0795	13.5973	30.4569	34.5723		0.478529	28.5316
9.4037	34.2789	19.0723	30.246	33.3055	20.321	12.7836	40.2494	22.5942	27.2977	28.0187	44.135	42.9658	23.2777	19.2517	38.3444	17.3286	26.7248	34.1259	18.8625	20.7666	10.094	35.3644	35.6969	24.927	46.3814	34.7825	28.9421	13.615	21.7563	19.0774	28.4911	46.5607		0.484662	28.1137
9.5228	19.356	17.9729	30.4102	42.2747	18.678	21.5253	37.7233	23.6409	41.5589	26.7197	38.4076	44.539	14.7166	10.5944	31.83	30.0842	32.4595	34.6709	23.7027	20.3742	24.4712	19.2616	38.1189	27.331	45.1051	24.8983	43.8809	17.956	9.947	21.0247	27.1355	32.8485		0.4908	27.9131
9.6418	22.4584	20.9323	26.2001	35.2156	27.7943	26.3513	48.8294	22.6052	37.8857	15.7511	33.4573	27.325	14.1997	16.2954	24.8354	44.1462	37.2827	33.8766	23.3195	17.2126	24.9463	21.1561	43.8685	18.426	49.5075	29.5584	18.5116	9.986	15.1148	25.308	28.5352	44.6583		0.496933	27.6735
9.7608	24.7283	34.0998	21.0463	25.7604	24.502	30.0547	50.3631	23.586	23.9809	22.5948	40.7547	36.4041	8.5733	10.523	31.3492	38.7865	39.9703	36.4074	26.0975	21.0951	18.5295	19.2348	26.3319	32.719	55.2282	37.3285	27.3315	20.504	4.7345	34.1488	33.0207	39.9183		0.503067	28.7408
9.8799	27.6829	28.7348	24.7604	40.3208	23.2019	27.8564	43.8525	22.4769	44.0966	12.6983	32.0419	44.4838	9.8488	7.9057	20.5042	38.811	25.2135	36.0937	23.1088	19.7041	25.9276	15.8522	35.5372	20.52	50.2078	27.2349	22.4599	14.473	8.9163	13.018	34.9391	31.5571		0.509205	26.6888
9.9989	24.5607	25.6548	28.0896	31.8481	30.9114	18.8493	47.5513	21.5627	26.8413	20.2453	39.9409	32.8447	16.2593	12.0421	23.0865	28.7846	22.9206	46.2107	25.0329	21.2744	24.3962	35.0587	34.4512	30.583	32.3683	43.9744	26.9765	15.351	9.8155	22.6298	43.255	32.8196		0.515338	28.006
10.1179	25.3637	30.0848	18.7358	35.9006	18.3836	27.9544	48.5169	28.3889	27.577	15.6319	40.7832	48.6933	9.0638	15.0196	9.1297	35.4499	30.5276	45.971	20.7708	22.7376	17.7345	33.0406	32.4093	29.27	33.5	58.1661	33.8562	15.207	12.9099	23.6787	32.0727	41.922		0.521471	28.7016
10.237	18.9068	40.2763	14.2154	22.4487	19.0253	23.6115	34.9777	30.2433	29.6853	12.5777	38.4169	36.2562	12.8955	12.6493	19.9931	39.584	37.6723	33.4415	28.0641	14.686	19.7941	31.7028	21.4133	30.527	34.5755	44.244	23.2636	17.55	10.5483	17.4165	42.3759	40.6124		0.52761	26.6766
10.356	11.303	24.9708	35.6807	34.6369	22.7019	18.2507	26.0526	24.5843	33.875	26.6763	24.5973	26.7111	11.9104	11.8371	17.5991	30.5274	26.8676	36.4854	23.6894	15.633	16.314	34.2072	46.3635	34.143	26.2139	37.336	29.8836	11.925	14.9472	15.6535	27.7726	41.4997		0.533743	25.6515
10.475	15.3453	32.7998	19.3978	32.8704	21.8544	34.6142	54.8877	30.0065	19.955	9.6879	39.6312	32.3429	18.6882	15.8635	13.638	26.7842	26.7875	45.0195	13.5467	19.9851	18.8347	34.1475	26.209	33.032	37.8058	43.2029	25.1952	22.862	8.5606	24.1114	35.2638	42.9976		0.539876	27.3728
10.5941	12.4909	32.3534	22.2194	32.1967	20.0333	28.1848	36.8554	33.5204	10.9458	26.8508	25.0591	24.9637	12.8996	16.1643	23.2446	29.1349	28.4211	28.8339	16.8672	21.4421	20.9257	28.5084	43.4818	28.915	31.904	60.2342	36.8193	16.202	15.6887	14.7562	34.7575	37.0953		0.546014	26.624
10.7131	17.2246	23.287	19.3883	22.8583	29.2527	23.1211	47.1407	32.4642	39.2165	31.4201	42.8232	34.4835	12.9745	21.835	13.1773	31.5953	31.6979	59.6019	16.4768	10.7947	17.0198	30.3481	20.5674	25.732	34.0424	59.1909	19.3323	18.444	10.8495	17.5738	23.0096	49.1419		0.552148	27.6902
10.8321	16.7933	24.1004	20.8555	24.0242	13.5703	28.4633	33.5488	20.3141	24.5644	27.9766	27.8898	41.4445	18.7447	9.09	21.3567	35.7895	26.7329	44.642	12.9511	24.0826	20.0543	23.3816	19.4453	22.687	26.7281	48.4681	23.7724	13.104	10.6388	18.7144	33.7489	39.5729		0.558281	24.9141
10.9512	16.993	22.3021	10.2071	33.1084	33.2692	16.2698	28.7997	27.9984	21.0392	33.9282	21.586	48.1656	25.8161	14.2881	18.4231	30.213	24.1063	42.0904	13.9237	22.9223	19.4962	26.6826	26.7823	22.637	34.67	46.3918	27.7446	25.567	8.3962	23.2545	30.9304	30.79		0.564419	25.8998
11.0702	20.1057	23.4239	20.334	28.8894	34.649	23.7653	37.4238	22.9915	23.6284	23.328	21.8898	36.2649	15.8059	10.5555	25.1065	37.2052	33.9583	30.0115	15.8099	17.3346	22.6387	30.5906	30.6778	15.96	43.2857	51.9752	19.8141	21.208	11.2967	12.9489	32.6252	22.0267		0.570552	25.5478
11.1892	25.4719	27.8515	20.7234	14.3492	20.9668	29.5769	42.6207	25.3834	19.7252	18.3466	32.8787	26.331	7.1101	8.4029	21.1385	31.1987	25.9467	35.0286	22.1092	9.6219	21.8624	24.7981	24.1188	12.591	41.3827	54.327	29.4542	15.129	19.6468	20.9892	37.241	43.7421		0.576686	25.3145
11.3083	28.331	22.3056	9.7795	33.1571	25.5128	25.7464	41.7068	35.0362	27.2517	25.3277	37.2873	29.2009	16.166	8.2819	23.162	28.0396	22.9122	22.9552	12.8963	10.8351	20.9022	36.8154	36.2242	17.369	42.4845	67.5399	30.9792	12.158	10.6872	21.224	53.4352	43.5826		0.582824	27.4779
11.4273	8.2974	15.8329	14.7565	32.0245	19.9959	23.4411	40.2164	30.7201	21.6766	24.0304	30.0359	25.8892	17.8297	15.5756	30.0208	34.9969	35.9228	26.5562	26.5427	13.469	17.1712	41.4136	25.1277	27.743	26.9327	46.0968	28.6141	17.31	6.5914	25.7742	42.5805	33.9334		0.588957	25.8475
11.5463	20.314	21.2272	18.3824	25.9673	24.1487	24.2897	49.0121	36.2596	21.1734	31.4946	26.0252	25.0791	13.4028	14.2477	34.7987	30.2318	33.7248	31.0647	22.8479	17.577	28.4688	39.825	19.8369	23.713	39.8463	50.0872	38.5927	10.616	12.6746	19.5443	40.7055	34.3855		0.59509	27.4864
11.6654	21.5862	25.1049	19.5695	26.5593	20.9833	20.0576	46.8675	21.5446	31.9206	22.8945	41.0898	31.4781	18.6891	10.5831	26.7218	43.9349	31.3114	30.152	16.9392	11.495	22.3275	25.9627	27.3756	26.822	28.4383	40.5741	36.2918	14.743	7.9583	21.7299	45.657	46.5829		0.601229	26.9983
11.7844	22.2966	17.523	19.2419	20.7393	22.6455	16.4556	48.9167	40.4653	23.5124	19.3847	40.6504	27.1245	11.1129	7.5128	25.7607	38.4384	28.2043	23.7709	11.1576	18.6777	15.1949	36.1862	20.913	28.061	40.6081	52.1579	41.4852	19.108	12.9007	16.8603	40.2605	40.2791		0.607362	26.4877
11.9035	21.3322	19.0129	19.6576	13.2009	31.6266	14.4466	48.3249	29.8396	30.09	28.4057	22.5914	21.8679	25.1258	4.3596	18.4992	32.5248	32.4068	23.7906	19.1391	20.4142	25.398	41.0607	12.003	26.99	27.8581	58.6841	56.3267	11.548	5.3634	19.5382	42.5827	50.2692		0.6135	26.6962
12.0225	23.9896	13.0577	20.3183	17.782	30.0363	23.8001	30.7185	28.7041	23.6813	29.8216	35.154	28.2706	18.4404	9.863	28.2209	37.0914	38.8348	22.6942	25.9873	9.9718	23.4671	39.8716	9.0863	19.512	35.0041	40.4065	66.9377	14.335	15.9206	14.5966	40.594	60.7194		0.619633	27.4028
12.1415	27.5661	15.3833	21.8962	18.2303	28.3432	28.8884	39.2741	28.631	19.3784	27.0991	36.3756	32.5295	12.3545	7.2729	26.4575	29.7827	32.824	27.6693	11.6653	11.0454	16.6513	37.2243	20.5698	21.44	22.056	34.972	49.8634	15.795	19.1341	20.3905	40.7965	55.0112		0.625767	26.1428
12.2606	18.5795	14.6152	21.8605	20.1516	26.6744	29.3993	38.0795	35.0707	16.618	28.2313	41.1918	30.7537	16.4709	14.8994	20.6518	39.6399	31.2087	27.7445	24.7762	21.5131	16.1007	35.4915	22.1576	28.664	27.7665	37.3182	73.8279	18.422	13.8465	17.6242	35.7881	55.9054		0.631905	28.1576
12.3796	20.3934	12.3621	28.9096	15.5137	20.8889	24.5296	46.1661	31.0947	18.5333	20.0097	33.7497	24.7028	12.8137	14.458	19.0298	26.0625	41.508	27.2259	19.7347	18.6228	17.4787	25.4547	21.0277	33.023	20.4821	35.7553	59.3704	15.122	15.1215	24.8275	46.2192	50.1977		0.638038	26.2621
12.4986	17.5546	16.9399	26.2339	23.7	18.6485	38.3764	39.4351	13.3318	12.6513	36.0861	37.7252	30.1491	7.6933	16.5587	17.4258	31.223	45.7391	38.5346	8.1352	15.4368	18.3627	34.7938	21.4434	44.908	19.7785	36.7642	51.0809	17.054	18.2522	14.6009	66.4159	59.1586		0.644171	27.9435
12.6177	16.6963	18.6887	25.643	19.4862	14.5945	33.2397	36.8654	31.7784	13.2976	31.65	28.9703	32.9666	12.4213	13.6909	26.268	30.4932	33.9089	30.4356	22.1331	20.5063	35.7936	32.3038	26.9028	44.043	17.6118	37.122	50.6417	30.257	15.0209	15.7234	50.1754	42.5373		0.65031	27.8708
12.7367	16.7236	10.3222	27.1286	24.3983	11.7343	22.9915	44.4266	34.06	14.5669	38.2086	39.3676	37.0679	11.0123	5.2843	19.592	34.5631	32.1429	21.2089	14.9842	11.5293	28.9021	31.5649	18.7135	43.539	26.2934	31.9626	55.7791	19.592	13.203	10.4302	50.6574	43.5106		0.656443	26.4207
12.8557	23.5764	16.2991	18.6192	35.3276	18.0821	22.0827	47.6505	40.9598	16.4614	27.8844	38.632	32.4071	17.6036	15.9904	12.3536	41.5211	36.2978	23.4793	26.192	11.6314	31.6882	33.8767	15.8274	49.505	24.3987	36.9226	43.0714	10.44	24.0047	21.9665	47.291	40.5041		0.662576	28.2046
12.9748	27.4242	17.3714	29.6387	22.2073	16.627	30.0875	33.6781	38.4624	16.4742	25.8108	31.2394	21.0389	21.4977	15.3753	24.4085	51.4235	42.199	26.5659	22.5429	15.1241	26.7379	29.3194	19.4847	42.326	33.6077	31.002	32.5189	27.134	21.2925	20.8313	29.8038	36.0055		0.668715	27.4769
13.0938	23.8077	11.4685	36.9319	18.1031	18.4544	30.5805	37.125	31.1812	21.2729	26.5884	36.4274	18.9729	9.9408	11.0152	23.6094	44.895	38.0712	20.4225	18.1163	16.6961	36.3719	16.4759	22.2834	28.199	30.5457	37.3474	23.4266	24.99	6.4251	28.7158	45.5131	49.4803		0.674848	26.358
13.2128	15.1559	11.9001	27.0691	24.8432	21.9267	28.263	41.8383	32.5899	22.7149	34.1278	43.4265	25.7704	15.4256	24.0843	24.4022	32.3235	44.3266	23.5515	16.9141	22.2591	37.2323	28.8328	25.671	39.232	30.0179	33.8281	32.6986	28.425	16.1269	17.0747	35.3242	29.1082		0.680981	27.7026
13.3319	22.4989	11.445	32.1301	28.6843	16.3594	28.2083	29.0692	30.8902	19.5222	41.9284	29.2265	23.544	19.0395	18.4531	24.2252	48.6758	37.0799	28.9783	20.8274	17.6703	38.7706	26.8917	23.5687	48.717	35.283	27.6232	25.5143	19.944	23.9744	20.4984	39.9424	46.207		0.687119	28.2935
13.4509	33.4228	12.5987	30.8551	20.3721	16.8845	32.1764	19.6623	38.9447	33.7982	37.2869	34.0929	26.7857	10.5925	11.242	27.4044	50.3182	43.0834	32.2598	17.7453	22.9829	42.9369	34.1016	30.6291	40.481	23.8057	26.7017	43.8603	22.976	16.7604	22.0714	29.9873	50.123		0.693252	29.2795
13.5699	33.9561	21.9468	23.1321	27.6176	25.4132	25.0881	22.633	41.998	18.9638	34.1942	19.3167	22.2527	17.7683	11.9166	27.234	46.1552	45.8128	32.0071	22.7668	15.4322	37.0667	36.1949	38.4533	44.195	40.8297	29.7579	26.9684	22.784	28.1747	23.2303	47.1465	35.0725		0.699386	29.5462
13.689	35.9182	10.2231	18.4611	16.3117	17.9894	30.758	33.6312	54.2296	28.9148	37.448	28.639	21.9522	12.18	17.6376	20.6642	56.0981	30.5438	27.1267	20.8653	15.4994	32.3617	30.3685	25.4125	38.342	29.9517	40.1934	30.7917	21.551	17.442	28.1668	45.3411	42.2145		0.705524	28.6634
13.808	30.1583	16.3528	19.6116	23.284	19.3419	28.8732	26.5972	38.8448	29.977	53.1584	32.3448	26.971	17.0419	11.5654	20.5972	57.3215	42.6345	35.9079	20.843	11.3616	23.5785	25.9132	27.5971	31.544	35.8577	41.3498	34.7948	36.208	26.8984	26.7151	47.5852	32.2802		0.711657	29.7847
13.927	23.075	21.3529	18.6548	13.4324	24.791	19.8592	33.7689	40.3581	35.6683	32.2659	33.2179	20.7919	20.085	12.189	30.2931	44.1993	28	25.8778	23.4862	15.0932	31.6918	32.41	22.5718	38.533	36.1605	32.6705	27.4608	22.736	16.7135	31.1029	42.8433	25.0032		0.71779	27.3862
14.0461	32.5487	18.1505	25.0067	10.9435	16.5763	28.4841	16.7645	46.884	29.2731	42.3146	31.7444	18.4436	13.796	19.2615	25.5876	50.0288	42.8212	25.868	15.5611	18.6085	37.211	28.7173	36.9589	40.386	31.9405	26.5866	21.0809	34.809	18.9618	24.8216	33.3562	30.9015		0.723929	27.9499
14.1651	23.9338	26.8899	30.6201	23.3875	18.4912	27.7147	26.8677	47.9866	16.2935	34.9046	52.7225	20.7932	18.7899	18.2902	27.1659	37.7211	40.5986	25.1628	15.6623	13.7305	40.6133	31.7356	31.9326	26.507	27.2643	28.3904	21.8165	33.115	19.3674	28.6266	39.6091	25.4437		0.730062	28.1921
14.2841	31.1504	20.8318	36.0176	15.9998	24.8426	28.4083	20.6732	38.925	28.1006	52.9299	34.0688	22.8709	12.3171	12.7172	17.6163	23.8964	47.5976	29.6961	20.2286	21.9867	32.1583	31.4548	28.3945	35.773	30.6785	25.572	30.086	24.725	16.3579	38.6737	34.7109	29.1096		0.736195	28.0803
14.4032	29.0074	25.9092	27.5576	20.4823	21.8807	26.6423	25.6131	42.2966	26.4677	41.7328	30.8664	24.0251	20.8734	11.862	19.3166	42.8139	43.0869	23.6111	14.7871	16.9475	29.0522	27.907	25.78	40.791	28.0685	30.5621	25.5803	32.541	29.8381	25.6794	36.8496	21.5426		0.742334	27.8116
14.5222	38.5616	27.3666	24.1439	25.0308	15.053	24.4111	27.5188	47.2836	27.6443	39.2042	40.3751	16.8031	13.3134	15.0397	14.6887	41.8987	39.9193	28.9297	24.2367	18.0275	44.4277	28.3353	28.0197	40.318	31.314	45.646	27.7353	39.051	16.9022	24.0872	47.211	32.1584		0.748467	29.833
14.6412	31.166	18.733	18.8414	32.7437	35.8566	23.0815	35.7847	27.734	29.873	35.4146	35.4321	20.3572	8.889	17.5744	37.3878	31.2923	45.4051	29.5642	15.2469	18.6665	42.5293	40.473	37.0737	29.39	36.8355	33.6426	24.3179	32.228	24.3306	26.3384	49.4775	33.1638		0.7546	29.9639
14.7603	40.7124	20.3127	38.9675	28.3964	16.9189	31.397	45.4718	45.1423	47.434	36.4729	35.5738	21.2407	15.3794	17.3634	36.5006	45.138	41.1698	19.6013	23.3433	16.0172	34.177	38.0376	18.0748	46.593	24.6786	35.7636	31.487	23.685	17.8825	29.4394	39.1477	21.0351		0.760738	30.7048
14.8793	44.804	16.0303	21.0167	37.3759	23.0582	15.7262	38.6783	59.5591	33.0161	39.6325	34.2139	15.6106	14.5635	17.0263	24.8797	32.8328	49.21	20.9561	14.0274	18.3636	30.2036	35.1801	11.8505	26.551	24.9229	34.7558	29.6969	27.805	19.0248	20.4258	37.1164	35.424		0.766871	28.2356
14.9984	47.6765	24.12	30.5158	34.2182	24.347	23.5056	45.3883	33.1189	34.0206	34.8446	34.3964	23.978	13.6285	11.6163	31.9011	34.7333	41.6615	22.8967	21.031	29.9192	35.5438	44.5198	22.2685	46.244	26.681	52.1709	43.2066	37.977	24.1522	24.9614	29.7923	30.8745		0.77301	31.7472
15.1174	49.8097	24.0306	25.8728	32.7682	22.2518	14.5887	50.998	40.6945	23.5461	32.9112	35.26	17.6333	15.5143	12.0168	21.4511	35.1976	42.6754	21.9242	27.2489	18.2798	36.0193	44.009	19.1888	33.828	18.0054	42.2808	38.9381	38.073	17.4541	22.3446	44.6237	20.5751		0.779143	29.3754
15.2364	40.7049	20.8642	32.8113	26.9812	18.9979	26.4298	52.0909	34.4703	27.7696	37.0486	22.8977	29.7435	9.2939	17.6634	26.0981	46.7262	42.4318	23.9246	20.4552	21.9558	45.6652	43.3798	32.9159	26.294	21.404	34.0731	34.5655	35.802	32.4215	30.775	41.1004	28.5688		0.785276	30.8226
15.3555	29.0758	32.1822	33.3398	40.9098	16.9746	31.0732	41.3214	36.4459	34.6046	41.5532	30.8888	26.6873	18.5604	14.1313	28.0583	51.1094	44.5273	23.1404	23.1895	29.4897	47.611	39.857	27.0242	39.774	41.2904	25.0332	35.0038	45.322	22.5914	29.1618	37.3303	21.9877		0.791415	32.4766
15.4745	29.2031	20.4406	14.1296	21.4328	29.2141	18.3699	47.2329	36.5699	29.5831	32.7078	40.2995	19.9974	8.6761	13.5248	35.5167	52.1526	28.4711	15.0538	11.9382	21.6218	44.1254	34.3638	23.8943	46.646	30.6253	42.3591	47.8946	39.128	33.0878	19.8086	28.8201	38.1313		0.797548	29.8444
15.5935	36.7661	29.2825	20.4065	26.8539	26.5609	17.9738	40.0281	42.3569	20.1548	27.1517	32.8253	20.2484	9.4001	11.4256	43.44	48.9244	36.4343	25.9025	18.428	29.0244	27.402	41.9591	28.2505	33.531	36.3133	25.7313	33.0707	28.291	35.7752	20.2145	32.251	30.8536		0.803681	29.2885
15.7126	25.3653	25.5139	25.1472	14.2772	28.9672	25.7751	37.6061	36.153	27.8878	27.5736	19.096	16.6603	17.2442	12.4685	22.4382	40.972	42.1384	29.1741	21.6955	34.6272	29.859	41.1618	23.4316	43.285	28.9531	26.4707	33.9114	33.017	25.014	22.9327	33.7984	33.9546		0.809819	28.3303
15.8316	25.4112	35.1213	17.9819	22.1116	28.8831	16.064	33.6487	26.3573	27.2003	22.1751	20.5119	23.7539	4.7755	16.8633	46.0818	35.8649	26.899	26.4921	33.1027	33.2245	31.2007	44.4463	27.4972	36.369	28.5358	35.5114	37.4169	31.11	40.4465	21.1603	19.4188	40.5522		0.815953	28.6309
15.9506	18.5843	14.1088	10.7864	22.9534	13.6573	21.8916	35.3155	20.1459	16.1249	36.7574	34.2092	15.7409	10.1435	19.8169	28.3902	47.0908	36.658	32.0034	35.5041	23.312	38.7989	38.2607	22.5956	36.324	19.1821	34.4657	39.1046	19.471	39.6413	24.4593	24.5227	41.8795		0.822086	27.2469
16.0697	24.8708	18.5491	23.4865	20.4341	17.8784	20.5346	30.9268	27.3418	16.4453	31.6291	35.256	15.6095	5.9962	14.4441	20.6836	34.759	40.0565	26.2203	19.0782	38.7492	38.7865	51.7711	29.491	40.296	26.3617	30.787	61.2035	30.07	24.2027	23.1596	27.9661	53.1339		0.828224	28.7556
16.1887	19.2133	30.0457	21.669	31.4848	13.5099	19.898	31.2179	24.5408	22.2378	29.291	29.6553	17.5563	9.6311	16.8051	35.5409	36.1184	27.9889	37.0982	32.3801	27.9439	34.638	50.6813	21.1841	38.62	20.8678	31.1338	40.2775	31.558	33.8697	24.806	16.499	36.409		0.834357	27.9491
16.3077	20.9939	25.3772	20.9888	13.6033	28.9679	22.186	23.7761	30.5765	20.0966	30.4277	24.5015	28.4942	14.9926	15.8829	34.3362	31.2218	27.2213	34.0273	45.7755	35.8489	37.1913	35.6666	32.3677	49.559	15.2835	21.0567	37.0854	29.037	21.8172	19.9271	29.4266	38.8193		0.84049	28.0167
16.4268	24.5165	19.0592	19.1378	21.7238	13.6132	21.605	18.3643	31.5182	36.0894	43.3794	30.2177	22.0787	15.4388	28.1317	20.2981	33.7401	47.554	31.0886	30.6841	39.5133	26.724	56.4934	24.0952	51.514	17.4004	20.4217	30.7056	15.92	38.7459	24.9923	19.2808	27.707		0.846629	28.1798
16.5458	28.4544	27.2675	28.9714	31.5104	19.6841	19.0496	31.1227	25.9629	15.5325	32.3196	27.9312	16.3731	12.2053	15.9238	26.9689	31.5238	24.7502	30.5051	32.1255	32.0998	27.8918	42.6428	20.2543	41.678	14.2439	18.2838	29.6446	19.886	31.7026	25.6828	12.9152	39.145		0.852762	26.0704
16.6648	18.6246	25.9471	14.0319	35.4959	13.3206	39.0747	36.526	21.4978	22.8771	37.9407	27.9064	17.3579	14.1696	15.953	29.7736	34.8266	52.6414	30.7488	19.8555	47.5149	38.3139	56.426	26.3867	39.254	19.1217	14.0967	24.8299	12.571	13.9525	34.7075	14.192	31.2306		0.858895	27.5365
16.7839	16.2282	22.827	22.4691	44.6925	22.726	26.9401	22.7441	23.719	21.7938	41.9408	26.3942	17.827	9.4916	19.2601	19.8984	39.5964	36.6186	41.7498	39.3321	36.1911	29.4958	41.6254	19.9202	36.69	22.4872	13.3591	13.0763	13.991	15.5633	18.3726	15.2688	34.8215		0.865034	25.8472
16.9029	21.1708	22.5407	25.7838	30.7633	27.4635	31.1712	21.5905	28.6082	24.4884	34.1946	28.573	18.4877	9.3939	23.2265	22.2308	32.0055	50.0744	40.284	30.0713	41.9705	17.6053	46.5157	24.7803	24.424	13.1676	5.1684	17.7238	10.299	11.9271	20.5456	15.1013	22.4155		0.871167	24.8052
17.0219	17.689	22.4583	35.4324	31.9059	19.7928	29.2106	14.892	30.6178	21.7222	36.7178	28.9935	15.9734	10.253	13.6557	21.1502	38.2114	47.9748	39.4001	27.2329	33.4617	29.4974	41.1294	29.7945	38.518	8.5973	7.2636	8.4865	5.699	5.9777	13.8196	10.0367	13.101		0.8773	23.3958
17.141	26.1828	26.4434	28.8487	18.1424	17.7622	29.0971	20.0068	31.8779	26.4647	24.7644	22.7899	19.4111	23.3914	11.8244	32.1862	40.5094	39.4266	41.1635	42.9823	29.6304	21.0729	31.0431	25.5122	42.754	9.6575	11.4673	4.6622	7.705	11.7167	12.2319	13.4751	19.0825		0.883438	23.8527
17.26	22.313	19.6694	31.6362	21.4647	25.2956	39.1498	18.5951	27.3783	26.0368	30.0206	31.1281	24.8519	11.4528	16.3309	22.312	28.1791	57.5148	39.3762	29.6054	28.2243	18.5234	27.8447	27.5773	33.802	5.9253	6.3529	11.283	5.023	6.3974	8.0047	5.489	20.7579		0.889572	22.7349
17.379	35.1011	17.1217	34.9751	21.6684	15.9166	27.9374	17.3137	26.8402	23.3321	24.9165	28.8563	27.0352	14.795	15.3184	23.8099	22.6058	56.4029	31.2832	31.9521	38.049	19.2999	23.6875	27.5688	26.157	11.2519	6.7038	6.9561	4.79	5.8186	13.1375	5.4748	12.8874		0.895705	21.8426
17.4981	19.8342	12.8215	27.5037	18.7018	21.4782	27.0142	17.5474	20.5169	24.3678	38.1508	22.835	23.824	14.7594	30.4017	13.4984	35.6616	40.2648	36.367	44.69	43.4832	29.5856	29.3196	17.0173	13.841	6.7482	3.5622	4.0892	6.238	7.7155	9.1674	7.1812	11.6558		0.901843	21.2451
17.6171	17.9403	11.8725	33.5484	29.6774	17.5866	21.8603	14.422	11.2886	18.2714	22.1863	23.5423	32.7226	18.0789	35.0519	31.503	29.9868	39.322	39.8113	32.9095	39.911	19.3955	34.0712	23.0266	20.932	9.5105	3.0715	2.9807	3.476	0.1156	6.1163	5.4364	18.107		0.907976	20.8666
17.7361	16.7327	15.0595	29.2918	26.1808	15.1998	21.7067	6.8377	17.9565	43.0357	23.5689	23.3917	26.9144	17.5691	29.1631	24.1857	30.5032	39.8855	30.4054	43.0808	37.7494	23.5646	33.6388	31.1719	10.527	5.5316	4.2114	1.9496	2.117	2.3288	7.2803	5.0139	5.031		0.914109	20.337
17.8552	20.6031	9.6372	19.6933	24.3821	16.5136	23.2945	16.2439	9.5285	29.7436	25.4071	36.6999	31.0498	28.4187	40.2597	26.0113	30.4941	32.2659	35.8814	29.7674	44.2819	28.4257	38.6302	26.2375	16.758	6.4139	5.8928	4.3169	5.714	2.9803	2.6685	4.1934	7.8732		0.920248	21.2588
17.9742	14.0239	14.1865	17.5851	23.1066	16.2499	26.7616	8.3151	16.0568	15.9805	18.1902	30.8515	31.7262	28.3509	31.2707	22.7471	28.97	48.8831	33.0205	27.6163	24.8267	12.1711	39.2712	19.2069	8.895	4.2055	5.6905	8.4512	3.99	5.9987	4.5054	4.0385	5.4792		0.926381	18.7695
18.0932	23.6775	15.0882	23.3969	11.1254	17.7039	10.158	6.7598	19.934	26.8052	27.2548	33.6737	34.1161	25.6716	32.8656	17.6961	20.203	43.7003	26.2045	18.4875	29.0793	20.7699	22.5815	16.1275	6.597	1.9104	4.5246	5.0359	3.984	2.6278	4.3973	4.3881	4.8869		0.932514	17.5448
18.2123	12.6994	9.5255	20.4064	17.2276	15.4226	13.1006	7.1052	17.5904	26.5923	22.0428	34.7662	38.8473	21.1754	44.3306	20.6528	39.6735	39.0337	31.8246	21.0816	27.5868	26.0426	37.4981	14.6013	6.607	4.3764	3.0175	4.7858	0.227	3.9418	5.9785	7.2106	10.4306		0.938653	18.9188
18.3313	14.6004	28.7029	18.5746	13.5928	16.8956	17.7835	5.2797	18.3106	35.609	28.558	21.8244	34.4263	32.013	49.3983	17.2244	29.8508	28.728	22.2719	28.315	20.1054	27.2305	21.7249	14.7199	7.856	2.5697	2.5004	5.0187	5.48	4.0882	4.9534	2.774	3.3062		0.944786	18.259
18.4504	8.3591	18.7349	30.4725	20.6356	19.0952	20.3437	5.2313	13.3777	29.8963	24.7223	23.2137	35.0105	28.1199	30.2162	19.8526	37.9994	26.6834	29.4797	23.388	28.1819	27.5342	34.0809	11.6083	8.668	2.3118	8.2804	1.364	4.114	1.5065	3.0542	3.8461	4.6577		0.950924	18.2512
18.5694	12.5104	12.7593	20.4243	25.7465	7.5335	10.2309	2.76	17.616	36.49	33.2974	26.4208	36.6057	24.7209	40.2913	24.1968	38.6226	27.3731	26.7475	18.1756	30.4833	26.8309	18.176	9.5622	5.046	2.5687	4.9804	5.5556	4.811	4.821	2.8784	5.3211	4.041		0.957057	17.7374
18.6884	17.2797	11.8735	14.8486	13.7808	15.3835	13.5729	4.7605	17.7595	35.5355	33.0281	27.1713	38.2861	40.9191	35.0626	18.532	17.3845	25.7648	22.5189	24.6177	27.4185	22.5146	15.6045	7.5168	6.656	3.6277	7.8795	2.8766	2.934	1.0575	1.4559	2.4448	4.446		0.963191	16.7035
18.8075	17.0252	9.3065	9.6926	23.9336	16.2683	18.5375	8.7306	14.6964	20.3651	40.5895	15.6503	41.5871	28.4242	38.2721	20.3065	21.8114	25.1405	16.0388	24.0915	13.6091	35.8238	8.3408	4.1686	1.438	1.3799	2.1417	5.5084	0.864	1.4437	6.2643	5.0608	1.2673		0.969329	15.5556
18.9265	9.7729	18.06	13.7416	12.1985	15.3105	11.0472	4.3889	3.6249	21.1002	26.7881	30.9564	25.3446	31.399	24.2032	21.2908	31.9986	14.5405	26.3957	26.2473	23.4951	23.613	8.219	5.2129	7.417	3.2204	2.0682	4.2038	3.289	5.6515	4.9169	4.7871	6.0875		0.975462	14.7059
19.0455	9.4078	7.6643	11.8626	13.0418	23.074	11.4592	2.859	8.3629	28.598	21.3366	25.2623	27.6644	34.1578	23.8582	21.2739	24.6166	31.8815	13.3615	30.0946	10.248	21.3004	7.3465	2.6446	3.563	4.7383	2.782	2.1629	4.811	2.2519	7.8901	2.5226	2.8982		0.981595	13.9061
19.1646	8.8325	4.4516	13.8325	21.6158	21.5276	6.847	4.876	9.2894	26.0432	20.1071	24.5531	14.9574	21.1455	34.2756	17.708	23.8125	30.4076	17.0176	20.6903	10.5198	7.9849	7.7099	7.3196	7.278	8.1062	1.8033	0.4741	1.754	2.4909	1.5702	9.1355	1.1934		0.987734	12.7916
19.2836	8.112	3.9405	8.4446	14.9322	12.6921	5.0505	4.8678	6.8216	22.4571	30.9725	18.8695	13.1532	14.6917	19.7185	11.5915	19.8897	36.1802	16.1398	13.5001	6.5136	3.3766	12.105	6.8151	0.166	1.1477	0.6841	7.1922	2.518	3.6891	3.7653	0.1339	4.285		0.993867	10.4505
19.4026	7.3653	10.0822	5.1329	18.9256	10.9428	5.5205	4.2441	6.5827	17.8048	17.028	17.8575	11.1667	13.4598	11.2018	14.4243	16.1849	26.0119	9.2775	15.9996	6.728	5.3498	10.5232	8.3057	1.58	2.7806	1.0164	3.194	2.006	1.3664	5.4527	2.62	3.3095		1	9.17016

## Sheet: Image14
X0	Y0	Y1	Y2	Y3	Y4	Y5	Y6	Y7	Y8	Y9	Y10	Y11	Y12	Y13	Y14	Y15	Y16	Y17	Y18	Y19	Y20	Y21	Y22	Y23		Ap-basal	Avg intensity
0	32.9697	28.147	27.7157	37.0691	35.5019	49.9488	38.0387	31.6809	47.2295	43.8092	59.9931	37.9908	32.2472	43.6287	31.9183	42.6657	46.9013	23.5569	15.3367	41.1751	51.018	31.967	20.1726	35.5304		0	36.9255
0.119	30.8261	29.0467	33.3377	39.1539	59.1891	47.3641	48.4782	41.3225	44.0689	43.3808	63.5475	41.0493	37.7574	35.6019	32.0202	42.6307	33.449	23.349	19.6526	30.6213	46.494	29.027	24.95	42.0411		0.00617105	38.265
0.2381	30.7753	24.7889	38.4978	46.4183	69.566	65.9223	55.9303	36.7196	58.8645	46.9423	59.5338	42.5307	35.9756	38.58	35.8207	41.5352	38.8039	32.3715	22.2113	42.6146	67.003	38.649	33.3016	35.0727		0.0123473	43.2679
0.3571	37.5619	30.0837	52.7129	56.7348	65.6345	80.1191	52.3294	55.7774	69.0592	33.3369	72.7582	50.9277	49.7726	53.7324	33.6331	53.5877	30.8992	37.892	30.7769	51.2869	79.448	53.065	37.5108	46.7544		0.0185183	50.6414
0.4761	26.0563	32.6447	49.6818	64.7048	66.2656	84.0006	71.6551	44.3984	73.9108	40.647	74.4216	45.8382	50.7986	51.339	39.4001	46.8628	40.4752	39.1046	38.4626	56.6069	74.41	69.626	42.4286	42.0749		0.0246894	52.7423
0.5952	38.2583	33.9889	55.8717	71.0497	81.0704	80.8662	67.0297	49.5649	65.6981	60.7099	77.6338	59.1879	43.7667	52.7369	42.7658	49.625	45.4356	33.7007	48.289	62.9064	78.044	84.914	55.3911	56.2269		0.0308656	58.1138
0.7142	46.8048	41.1203	83.442	62.3032	74.9049	82.3095	72.0887	66.4574	82.5001	61.1722	76.0006	68.9007	48.5393	61.1896	48.3092	52.8753	28.5783	38.7971	41.3579	74.0204	93.455	101.42	66.5666	47.7565		0.0370367	63.3696
0.8332	52.0903	42.7856	89.2313	69.9222	82.2542	89.2182	75.4435	70.9188	81.6619	60.6717	81.9245	68.2244	56.4849	65.1936	58.0116	64.1739	51.8357	44.9969	41.2005	61.4274	95.991	91.152	74.815	59.4439		0.0432077	67.878
0.9523	49.0515	43.7288	76.8694	64.9286	71.7894	100.217	70.8096	62.9173	87.3467	81.7016	80.4409	68.4865	55.8573	57.3533	55.6461	63.3112	53.534	53.5641	53.6032	79.6184	86.987	102.443	72.5449	75.8818		0.0493839	69.5263
1.0713	58.4361	45.6673	73.5809	72.7971	72.4149	92.4863	62.5739	72.3982	84.8954	91.8729	91.4349	67.283	65.2149	63.75	62.5589	57.749	59.4405	54.5202	70.4268	79.3057	98.177	95.823	89.4831	87.4628		0.055555	73.7397
1.1903	50.5287	46.5131	73.645	78.7844	93.1648	97.7039	68.1993	77.5659	79.6844	94.3148	76.4365	70.3444	57.5172	65.6762	61.5849	62.5823	48.7158	48.6464	49.0521	96.0382	109.909	110.191	97.9954	87.6101		0.061726	75.1002
1.3094	42.0718	65.0012	72.4254	78.0372	88.4263	72.425	78.6632	82.8917	79.3246	100.227	63.967	98.0675	58.0259	74.8938	47.4547	64.6093	44.2148	47.4362	67.7813	71.2734	101.171	111.143	87.1398	84.0278		0.0679023	74.1958
1.4284	44.2655	63.5948	87.7786	86.9295	74.3535	88.2352	77.7944	79.7585	76.5424	99.1415	82.5153	106.086	69.9961	59.0503	61.4738	64.597	53.9862	54.0573	72.5922	74.6033	92.347	109.453	83.2798	94.2119		0.0740733	77.3601
1.5474	59.0576	51.7466	86.5356	73.9281	75.8174	74.0604	78.2479	70.3915	69.5466	88.8111	81.2226	101.482	58.1861	62.6869	55.7301	57.9663	59.9119	68.1829	70.6619	75.5596	86.095	115.18	84.671	81.4236		0.0802444	74.4626
1.6665	63.3441	60.2386	82.5952	81.7168	78.3736	87.4145	66.4249	71.3415	54.2524	82.569	69.1775	88.0027	64.559	67.7702	75.1512	58.9605	58.7174	63.5694	68.5614	77.8686	107.532	115.513	83.9859	83.6541		0.0864206	75.4706
1.7855	49.5084	75.3607	66.1889	77.6439	60.1129	87.9521	59.3735	68.0864	59.5997	96.7011	55.3604	84.5971	48.1702	75.8781	60.8826	64.7775	66.7757	62.8609	54.6331	63.6021	96.412	100.491	93.5772	69.6995		0.0925916	70.7602
1.9046	50.8003	63.0031	66.4047	73.9266	58.7573	73.0658	55.2535	62.0734	58.9612	87.6744	55.9493	91.6698	56.3538	77.9555	58.5028	62.9641	73.0853	61.984	63.8175	56.8125	99.023	97.064	96.0278	73.2754		0.0987679	69.7669
2.0236	48.4721	61.3016	59.4517	63.2572	56.1109	72.8446	66.4997	72.7039	58.4584	80.0029	58.2129	105.898	60.4938	82.8459	56.841	69.7204	55.0966	57.7739	69.6512	59.3779	96.05	95.396	85.0356	60.1268		0.104939	68.8176
2.1426	42.7197	57.0333	53.542	57.0302	59.9309	57.9306	69.7289	72.1469	59.7753	95.6538	56.1146	101.283	56.9903	81.8278	47.187	75.9926	65.8989	66.0111	53.2997	60.7028	95.07	105.207	98.4302	62.6392		0.11111	68.8394
2.2617	38.2811	59.7292	53.4804	61.896	61.9175	55.7882	57.6556	82.8662	52.0691	88.1264	54.266	83.7077	49.9402	82.5483	70.6228	82.2641	79.7874	67.9368	43.0726	61.8273	93.885	97.988	90.1193	62.9948		0.117286	68.0321
2.3807	37.5436	45.0748	31.9739	46.4093	75.2157	55.0277	57.3521	85.3413	48.3578	73.3074	50.4634	88.1169	43.4627	92.9879	61.7313	71.1758	82.5736	59.8914	58.0926	50.497	94.651	90.467	82.4446	63.6603		0.123457	64.4091
2.4997	39.3796	43.5968	37.8255	45.4159	54.1312	64.2558	73.5438	82.6453	39.1734	79.3121	41.646	87.8294	44.3898	97.3433	62.0227	64.5588	75.6181	67.4791	47.8038	51.8479	90.217	83.802	71.5274	57.5989		0.129628	62.6235
2.6188	60.0087	54.7165	39.5133	54.0764	46.6109	58.9975	50.7771	76.1485	39.903	82.2935	48.2455	99.6476	50.122	80.8395	72.738	86.6688	76.9459	68.3024	41.3363	51.3919	91.642	79.208	75.4512	48.5046		0.135805	63.9204
2.7378	49.3944	48.1062	34.4946	33.6956	40.1488	65.4208	60.7155	62.9764	38.0833	71.1853	44.227	94.839	43.0449	77.1173	78.2114	83.8155	73.2828	70.0258	39.5098	40.3124	77.853	85.156	79.0663	49.007		0.141976	59.987
2.8568	50.6725	48.9813	35.9014	35.2636	41.9061	63.6061	46.2893	64.2807	40.0532	84.3696	41.2954	87.6762	42.3151	76.4886	81.2441	76.948	73.4665	64.3424	41.8119	39.1274	70.784	69.489	57.2987	30.1689		0.148147	56.8242
2.9759	40.4133	43.8848	37.5255	36.1772	39.2052	50.1768	43.4706	59.9855	43.9772	63.5931	51.5531	88.8214	42.4706	80.6156	75.606	71.0051	77.4898	57.1099	43.9777	30.1842	67.596	60.078	72.7953	30.9742		0.154323	54.5286
3.0949	29.7545	40.204	30.6505	36.9768	42.9631	39.7468	40.1406	59.9007	24.719	65.7451	53.5624	90.6855	37.4102	68.6084	67.2989	74.7326	85.7541	63.2951	43.3718	37.2799	63.143	52.36	63.7288	36.5298		0.160494	52.0234
3.2139	33.0813	33.8302	26.0368	39.4098	36.4982	39.1919	47.0852	49.2301	31.8322	66.3299	50.5766	83.0568	48.8976	63.8799	72.0574	87.9539	83.2337	59.7385	45.753	35.3837	52.603	73.118	48.8945	30.5497		0.166665	51.5926
3.333	35.3404	34.8641	23.0751	40.5541	40.5524	53.5043	42.5557	47.1968	37.7813	78.1142	45.6339	68.1553	41.7398	67.8558	71.5457	82.6966	73.9644	47.7341	51.3689	30.9671	51.999	57.75	55.9707	37.9458		0.172841	50.7861
3.452	41.3381	34.2578	26.1547	43.7288	48.006	58.1246	34.0597	43.8769	32.0623	71.5597	39.3067	68.3985	37.2026	81.0873	78.1204	85.0459	72.5885	47.611	35.3229	33.2282	58.879	65.157	53.9608	37.959		0.179012	51.1265
3.571	36.1632	35.1735	32.6506	43.5251	38.4697	40.5734	46.4711	56.6874	33.7096	53.9344	38.6468	77.3661	37.2384	64.526	66.1771	87.3891	74.723	52.3378	42.788	33.828	31.591	57.372	46.6831	33.6396		0.185183	48.4027
3.6901	35.7466	34.2273	28.0192	38.2559	34.4072	34.5606	41.6099	50.516	32.8529	54.3519	33.3481	72.989	35.4884	67.2494	71.8365	92.3411	76.5511	45.6708	47.3303	24.2382	29.605	66.118	45.3212	31.1377		0.191359	46.8238
3.8091	45.1865	29.472	31.8586	35.3146	27.4644	38.1493	39.4245	47.9994	39.7491	58.3982	34.9602	70.4172	33.8861	70.5651	72.0882	76.1331	95.7542	55.541	45.9462	34.4744	38.122	54.763	40.5217	27.0892		0.197531	47.6366
3.9281	41.302	32.5236	23.0161	33.1024	30.2594	37.0847	31.1551	50.0949	31.2854	46.9032	46.5041	78.2525	33.529	62.866	76.616	88.6294	76.3895	56.6211	37.8076	33.3354	31.13	49.693	41.5085	34.7918		0.203702	46.0167
4.0472	36.4099	31.8016	20.621	25.2731	30.6466	36.116	37.0654	39.0922	20.2644	49.8248	37.8368	69.8626	37.0855	70.5636	64.094	85.3091	76.2395	50.0425	40.3159	30.9029	29.768	42.473	40.8884	17.3633		0.209878	42.4942
4.1662	33.4474	36.2906	27.6127	26.0093	26.8268	37.2241	31.3734	46.5676	20.4366	64.004	31.5826	64.3049	36.349	56.2552	68.7355	86.0904	69.209	49.7704	38.262	27.6407	23.835	40.301	30.2668	26.7693		0.216049	41.6318
4.2852	33.6575	31.2953	26.8566	25.6942	39.1367	35.2253	34.9447	40.7029	25.2135	48.2598	33.0042	66.5628	28.0471	59.9443	56.062	76.8808	74.5071	40.8236	33.946	25.7389	21.917	42.784	31.9472	24.0284		0.22222	39.8825
4.4043	40.9935	33.2606	24.2483	25.7851	46.3386	33.4415	28.9026	43.1069	17.3618	36.5665	25.1509	51.205	29.5924	41.6649	53.7769	83.7252	68.1195	45.7608	40.7684	28.4814	27.351	47.789	34.6433	22.488		0.228396	38.7718
4.5233	27.3977	34.2176	27.2841	30.0914	34.5954	46.6567	27.0899	36.8642	27.0246	50.6191	34.1155	61.5916	33.8584	47.8004	50.9253	99.2854	45.9338	43.9212	37.8017	21.7238	26.654	34.188	31.701	23.6629		0.234567	38.9585
4.6423	27.2128	27.5249	27.327	34.1482	27.3231	39.4075	31.1047	29.3174	33.9412	43.3049	34.5087	50.0529	35.5692	50.1956	49.6994	71.2238	58.8119	34.3146	24.9747	23.0976	25.42	31.652	46.4667	19.8067		0.240738	36.5169
4.7614	30.5772	26.7668	31.4404	30.6638	32.3238	35.6119	28.9076	29.7716	24.7478	47.1527	24.0036	38.7286	27.9709	46.2281	65.3998	64.5948	62.598	33.0941	32.2318	21.6629	24.631	28.77	46.8597	17.2323		0.246914	35.4987
4.8804	21.3538	23.5721	36.7023	18.8912	34.6739	38.4944	27.1496	36.5782	35.9766	44.9577	26.3675	41.2481	31.8611	50.2172	64.5395	68.8674	53.9864	37.0985	33.923	23.578	23.154	29.914	47.9818	21.8179		0.253086	36.371
4.9995	17.229	25.2689	26.1089	28.9852	27.4995	26.0266	31.2796	38.3879	31.135	44.3566	28.6122	46.151	27.9177	52.5274	49.4131	53.2343	46.3258	35.4881	31.2696	31.4024	23.129	28.527	48.0768	17.3054		0.259262	33.9857
5.1185	20.4317	28.9191	29.9564	30.0223	23.2246	19.5571	39.473	31.006	24.1708	43.2613	35.1656	41.8717	28.5811	45.4271	40.7327	58.1449	59.2504	26.3274	32.5385	20.8478	19.367	20.846	37.6254	17.2431		0.265433	32.2496
5.2375	25.4192	34.1338	29.5532	30.0658	23.5227	32.9026	35.4715	26.3409	21.5453	43.2495	31.5558	39.8907	32.946	48.8811	53.0824	74.1224	59.0221	22.8241	26.5282	35.3664	24.752	23.005	25.3215	13.3611		0.271604	33.8693
5.3566	24.435	35.3527	32.772	20.1158	27.9174	25.4763	27.8418	34.7465	30.4552	43.0888	30.7713	46.7399	37.4271	59.193	46.9851	56.6048	42.8398	22.1955	30.6977	25.865	20.204	30.094	34.0609	15.8491		0.27778	33.4054
5.4756	22.9943	25.2751	27.9292	17.8042	33.2948	21.524	41.6371	32.736	25.1191	42.7145	35.4894	44.5671	35.5957	53.3119	43.0611	47.6867	44.7297	30.0839	29.3728	21.0142	32.292	32.834	36.02	12.2472		0.283951	32.8889
5.5946	19.1756	18.2142	29.7464	26.6019	21.01	23.8751	40.1807	34.279	19.3932	30.2883	32.5318	45.82	42.956	48.4748	34.5436	44.4046	44.9639	27.0693	31.0879	18.4518	22.508	34.742	33.7557	11.4842		0.290122	30.6483
5.7137	23.0021	20.7822	27.4629	22.7888	26.9245	27.1228	45.0097	34.4663	28.1534	35.7836	24.4572	42.1692	34.9226	36.6205	33.2376	43.9851	40.2711	17.0491	37.3558	25.2916	25.585	24.695	39.9192	11.9589		0.296298	30.3756
5.8327	27.2979	26.3417	27.1256	26.3238	21.3407	26.5031	44.3571	32.2215	23.5969	33.1407	30.7891	33.2203	35.6134	28.7456	41.2297	38.9551	37.5444	26.5413	36.5765	23.5161	26.631	30.273	32.9065	11.8692		0.302469	30.1108
5.9517	25.1795	23.5388	29.2471	20.178	22.2265	27.3272	46.9896	33.9257	29.4043	31.3233	33.2366	33.7734	38.3648	31.7403	37.873	36.1236	39.7855	31.5951	29.4984	22.2862	35.027	31.118	36.2026	21.0797		0.308641	31.1268
6.0708	18.3962	20.4621	39.9096	16.3714	16.9872	27.5083	35.7333	32.9862	33.284	28.5473	26.7871	34.0858	46.0718	30.4596	25.7122	38.363	33.2686	25.3927	25.3027	20.5977	37.251	28.58	26.6457	23.9767		0.314817	28.8617
6.1898	24.8288	19.3064	35.0286	14.036	18.3497	26.7745	26.4292	36.0164	21.3039	26.4215	33.7218	29.3438	43.8617	35.4482	26.6475	28.7477	26.426	23.9611	34.3646	21.1699	34.222	31.535	23.4317	16.9564		0.320988	27.4305
6.3088	25.4997	18.9105	30.3012	18.871	18.2725	22.9166	28.1043	25.3457	24.0397	26.0755	33.9745	26.8785	35.4473	30.6838	29.1098	29.1457	32.938	29.5837	35.0942	27.5814	30.981	22.528	35.3789	20.8272		0.327159	27.437
6.4279	20.5685	22.4	27.5745	25.9586	15.3746	26.2808	28.8062	33.0722	23.0243	18.1815	42.94	26.7807	36.5097	22.0856	35.1137	27.9445	27.2986	24.9113	33.7612	27.5975	33.737	25.559	35.2488	24.3832		0.333335	27.713
6.5469	22.483	20.613	32.4734	22.1736	20.1035	22.8353	34.7883	30.5585	35.4205	23.9073	39.4357	29.811	27.4811	19.9714	27.8208	27.5583	35.4246	30.162	41.9541	25.2691	41.906	26.062	29.3588	18.2151		0.339506	28.5744
6.6659	13.0181	22.6255	22.7292	25.4782	8.5284	22.5884	27.4757	28.2861	33.3635	19.4545	20.907	22.876	36.7785	21.0534	17.4145	32.8557	32.2863	35.674	38.321	23.3041	39.43	28.888	25.3916	15.6946		0.345677	25.6009
6.785	18.1684	29.9572	25.1667	16.2085	12.7231	27.203	23.378	35.0371	29.8679	26.6498	22.2755	30.3578	26.4964	23.353	24.735	33.0461	32.6278	29.2658	35.4378	24.6837	29.672	29.993	36.3526	17.935		0.351853	26.6913
6.904	16.3117	30.6307	26.5162	18.1025	10.9659	19.6717	28.5501	34.6506	30.6985	32.2827	26.1512	38.0663	24.3455	27.2034	26.5062	30.7471	30.0917	29.0414	37.1932	26.2283	30.605	22.64	38.2065	18.3167		0.358024	27.2385
7.023	24.3373	24.1414	22.4904	17.2153	12.9892	25.4528	27.2292	28.5547	27.5708	34.0417	39.5732	35.3667	33.5517	37.2326	28.4972	38.4709	30.6777	25.5934	34.531	19.4927	28.223	28.55	50.1467	19.4888		0.364195	28.8924
7.1421	21.6444	21.079	34.6727	30.5181	16.7658	30.4255	16.878	35.2941	29.4221	32.1319	30.7866	36.1891	32.4787	22.7605	29.2016	34.8145	26.0455	31.3989	29.6554	19.8246	31.949	30.188	48.0288	20.8211		0.370372	28.8739
7.2611	23.9555	21.1499	27.9282	21.7701	8.2687	16.1492	28.8461	33.3765	24.7483	28.4296	32.9939	39.9156	26.1808	35.1454	32.5219	42.7148	28.7535	25.9306	38.81	16.1367	28.3	32.889	47.0257	18.2614		0.376543	28.3417
7.3801	25.0357	18.2764	26.7493	28.1333	15.5378	24.4356	31.0487	33.5574	24.1472	30.0474	30.5134	27.063	34.2689	24.1061	32.5859	37.7115	28.5185	28.3756	36.9691	14.3978	27.257	38.303	37.7369	22.4172		0.382714	28.2164
7.4992	16.1792	28.492	29.1137	24.4148	22.1265	22.0463	33.5055	33.1378	26.8805	24.6681	39.1544	28.8275	33.3472	30.6218	29.4457	37.9809	18.2721	27.1855	37.1957	10.9326	19.57	34.67	42.8412	21.0186		0.38889	27.9845
7.6182	17.9951	20.5167	27.437	24.3654	11.3095	25.4043	25.1233	31.0417	27.2743	33.5473	25.6578	35.6425	34.4014	38.771	40.8164	38.3692	23.8088	21.121	30.1208	17.6825	15.897	33.086	42.0043	26.2562		0.395061	27.8187
7.7372	15.7732	21.2428	25.0173	20.6706	12.5979	28.4165	20.2481	28.9871	18.0609	31.5204	18.774	33.733	31.1286	41.5597	43.9467	35.2768	28.8254	21.2846	32.5795	19.811	21.377	26.607	36.6499	27.7697		0.401232	26.7441
7.8563	24.4901	20.9371	23.2525	24.2977	13.0591	25.4351	18.4151	23.7317	16.1092	35.0142	25.5778	31.556	35.4351	43.3572	28.5204	32.2468	25.4023	25.9773	33.8282	17.5787	20.1	26.273	31.9986	17.4846		0.407408	25.8366
7.9753	29.4958	22.8338	23.3453	15.99	12.2858	30.7993	20.8759	29.465	15.6162	24.9302	23.0761	17.5987	35.1257	36.2543	28.1732	33.1221	16.6021	31.1731	52.6463	17.3226	16.118	30.329	36.2679	19.8538		0.413579	25.8042
8.0943	19.5284	19.8881	22.7878	12.4518	19.0166	15.1193	25.6997	31.8906	20.6799	21.9252	21.875	25.0442	30.7309	33.8636	32.7922	31.0946	24.9152	22.8685	42.0353	10.3405	19.626	24.715	36.8405	25.4472		0.41975	24.6323
8.2134	16.3825	13.9249	24.6986	15.5626	12.4768	22.6945	30.2155	23.7438	22.6854	29.4075	24.9129	27.8302	33.9756	33.6265	28.4497	27.9255	29.9705	28.9045	31.228	14.0234	10.812	25.188	35.2093	12.7424		0.425927	24.0246
8.3324	24.2637	17.3891	29.678	13.5453	11.0079	17.1942	24.798	37.7035	19.5144	33.8956	31.8283	29.7149	31.6196	42.071	29.9939	34.3877	32.9098	20.9391	30.7692	13.7085	13.422	30.774	41.1	20.3148		0.432098	26.3559
8.4515	14.6451	20.8841	25.4891	13.6028	14.0654	16.1493	17.289	32.1515	24.4659	31.2429	32.6011	22.6653	27.1153	37.4226	31.4117	35.1508	30.6879	15.0114	27.2484	9.7674	13.926	27.761	34.0675	19.9066		0.438274	23.947
8.5705	24.0328	27.0828	33.2459	10.0104	16.4466	22.1728	17.6184	28.251	17.5041	31.1798	21.9949	20.1678	24.9816	34.5093	32.3126	39.6003	35.8444	18.0471	38.525	5.0914	12.4	18.591	35.4046	20.4712		0.444445	24.3952
8.6895	32.6383	14.751	30.8294	6.7393	14.8426	25.2079	26.0424	29.7633	19.9392	26.6749	26.0681	23.0879	27.2954	35.3156	21.9249	36.2548	24.5437	19.9618	41.3704	11.0209	10.762	17.351	39.9213	26.3787		0.450616	24.5285
8.8086	22.2737	29.8631	30.0557	10.2513	9.7233	15.9473	20.1745	26.4156	26.2481	22.9695	28.9746	26.5244	20.784	30.3612	33.5607	28.0784	34.3057	17.3843	35.2716	13.3949	14.073	19.103	27.4217	25.6678		0.456792	23.7011
8.9276	22.9951	25.2738	25.3563	12.0524	6.9781	19.7445	25.6575	21.5742	22.4951	21.3132	35.7571	24.3698	16.5304	34.5406	33.044	25.8436	37.9768	24.0852	19.8233	13.3915	14.212	22.257	29.5055	32.2233		0.462963	23.625
9.0466	16.51	16.5013	22.2771	12.8758	10.6903	27.0708	24.2852	29.6743	22.6111	20.5457	38.5054	26.1069	20.0029	42.6336	31.8611	34.9806	36.7435	23.8151	21.6478	12.4232	8.495	28.829	29.9887	34.1702		0.469134	24.7185
9.1657	30.1247	12.9402	26.1044	12.6227	13.0617	15.9423	27.5128	29.5181	35.9849	17.4374	30.5201	31.4029	22.8391	40.698	32.1022	35.0183	57.8295	23.1377	30.196	9.7113	11.46	28.743	28.6906	29.3198		0.475311	26.3716
9.2847	18.5323	28.1091	32.8785	9.9834	16.3813	11.0216	26.9592	27.1325	36.7731	19.0199	21.8235	27.7823	17.8456	22.74	31.65	25.0445	51.489	17.8332	30.5554	17.9796	7.547	16.821	23.5352	24.9446		0.481482	23.5159
9.4037	20.8665	19.5052	34.7796	10.1396	11.2299	17.8039	26.771	22.5419	35.7056	14.8357	21.8185	33.5521	21.7131	26.4842	33.5231	36.0107	42.4458	21.0919	27.739	10.6182	10.587	20.115	25.401	22.3383		0.487653	23.6507
9.5228	24.0249	17.637	31.3934	13.7488	9.0794	15.2986	33.7647	20.639	20.4447	16.8426	31.0832	25.877	21.8629	35.3737	32.5143	32.9254	42.84	22.355	23.2823	9.2515	8.418	18.951	25.1245	17.9871		0.493829	22.9466
9.6418	26.9279	19.7739	21.0631	8.4423	7.0823	15.8137	37.666	20.8747	26.9866	17.489	36.8171	27.9152	25.1417	42.3751	26.666	26.4069	37.8231	28.6256	21.0684	11.1385	8.92	18.092	20.1854	24.527		0.5	23.2426
9.7608	26.7097	22.7177	25.0706	9.3459	15.0866	18.6992	35.468	36.3896	30.5922	14.4529	32.4445	25.9507	25.8078	32.7178	24.5903	35.431	34.6271	18.6883	32.944	11.4272	8.136	23.409	20.6627	15.5242		0.506171	24.0372
9.8799	23.7587	20.6008	34.1597	12.1086	11.1933	15.5698	27.6234	22.7733	21.6423	20.4068	26.0633	38.0034	28.3023	23.6478	34.1059	33.2255	33.8704	16.5563	37.0265	9.7114	7.3	21.91	19.7606	13.9334		0.512347	23.0522
9.9989	19.3239	25.8252	29.6115	12.2291	11.0014	22.8549	27.0716	25.2386	23.2193	20.2091	27.6628	32.1275	21.9916	16.1875	34.2827	27.7371	25.8177	20.2398	37.5382	9.2351	8.443	26.858	19.2263	19.8063		0.518518	22.6558
10.1179	19.0528	16.9052	32.4368	14.496	11.5779	19.0767	28.526	30.904	15.6853	18.5822	34.3686	33.5289	27.7883	24.4884	23.5616	30.3244	30.121	24.8995	36.3871	6.0391	16.156	22.204	20.6151	20.7167		0.524689	23.2684
10.237	19.5831	18.2273	23.0551	12.8031	8.9884	17.3251	27.4381	22.0887	20.1019	21.897	32.6452	39.2868	20.9724	24.8606	26.5328	33.1658	34.1124	27.0733	25.9503	10.4132	9.614	29.739	25.8467	20.2194		0.530866	22.9975
10.356	21.997	17.6462	27.5573	8.4346	6.3186	21.1208	23.9625	21.463	26.8702	19.611	25.2363	37.916	28.7408	24.4147	22.4115	46.8619	28.4899	25.3696	33.2427	9.8955	11.935	23.018	23.6913	19.5042		0.537037	23.1545
10.475	19.6234	25.6008	19.9911	11.2521	10.2429	14.6739	23.6093	24.2859	27.7536	12.1956	35.6497	27.7093	22.7188	25.4782	19.8602	33.3479	22.3047	23.4161	27.8158	8.6899	14.401	21.84	21.5465	15.7905		0.543208	21.2416
10.5941	28.9329	19.8881	24.5022	11.9007	8.7125	22.2199	23.3781	30.9612	34.0781	21.5092	31.3263	22.0597	20.2725	27.5419	28.3253	31.9679	14.0627	24.6933	31.0826	10.8042	6.917	22.803	12.9907	21.9705		0.549384	22.2042
10.7131	24.0501	22.855	23.5968	11.6224	4.5923	25.1648	19.5774	31.1286	20.4628	19.2693	31.6723	28.9418	27.1031	24.5926	25.2836	33.6779	20.4176	20.6222	34.725	6.8892	7.898	23.639	23.3743	18.2499		0.555555	22.0586
10.8321	28.8689	14.156	19.7249	10.4787	3.4529	22.6838	24.485	39.1859	18.4127	12.3917	28.0205	27.1411	27.3879	28.9765	27.4662	24.5098	21.5009	20.0904	32.0217	11.8354	11.761	36.254	18.4325	18.1922		0.561726	21.9763
10.9512	20.3104	24.7781	21.3687	7.8991	8.027	14.099	27.6197	35.01	13.8625	14.0233	21.4433	29.452	24.639	25.9685	27.7794	24.3188	18.6714	14.4888	32.0041	10.7036	8.721	35.915	17.8409	17.8479		0.567902	20.6996
11.0702	21.7987	28.6675	13.6997	11.6964	11.9057	16.181	29.1389	36.6199	23.6447	12.3307	19.9954	22.1309	23.6442	30.7958	24.5372	29.4626	23.3409	20.9076	19.9188	16.5735	7.346	27.017	15.9193	19.2398		0.574073	21.1047
11.1892	27.635	30.5045	13.7929	12.964	3.4841	12.8144	28.0952	38.8528	22.7808	14.1326	25.2574	16.4048	28.0917	27.9344	26.1329	32.6808	23.4472	18.4972	27.8291	8.5395	14.481	30.977	19.8237	17.8804		0.580244	21.7931
11.3083	28.478	26.4308	16.7075	16.0831	3.9992	20.1047	26.3176	31.3911	15.3246	17.1582	21.2229	13.5394	17.4687	32.1863	26.9883	30.2934	22.5597	18.7518	23.3106	7.3153	7.984	38.598	16.4721	14.9362		0.586421	20.5676
11.4273	39.449	30.997	24.0285	12.9847	6.8833	16.4237	20.6293	33.8294	12.9325	15.8957	23.3993	22.3845	17.7993	34.5427	15.5537	28.2711	23.6657	20.9283	23.1446	7.3741	8.155	34.601	10.75	11.7773		0.592592	20.6833
11.5463	33.6427	22.319	15.3901	9.0341	11.236	16.4681	22.4927	28.6734	19.3826	19.0804	20.8777	29.3904	25.1295	34.4375	17.6478	31.2884	26.9147	29.6587	20.0143	8.9351	9.135	26.382	11.3973	18.1165		0.598763	21.1268
11.6654	35.1835	21.8277	21.4984	11.3285	8.0318	16.3563	29.4725	24.9883	19.1111	28.4769	18.9026	28.5914	26.0344	29.5748	31.2761	30.7651	26.9012	24.7717	19.285	12.7397	5.207	16.409	11.9953	16.7365		0.604939	21.4777
11.7844	31.5559	40.927	21.7899	10.5234	7.7229	20.1286	23.4221	32.0413	17.5264	20.782	23.4258	25.9342	30.0797	27.0557	28.5251	32.672	21.1735	25.7164	16.4338	10.9879	3.259	23.554	18.1127	15.9747		0.61111	22.0552
11.9035	31.2201	33.0309	16.344	7.7904	7.8962	8.4472	22.7789	32.4597	24.511	20.6757	34.1399	25.9118	28.521	27.8061	31.3601	23.4839	24.8715	39.9621	20.8878	13.0693	9.045	18.828	17.6276	21.2687		0.617286	22.5807
12.0225	25.1726	20.5434	13.4378	6.897	6.5821	12.2425	25.8185	34.0494	21.6063	26.2826	27.4707	23.3036	25.7973	26.2036	33.7532	28.5662	21.8001	25.0807	23.3768	14.2794	10.698	21.594	15.1626	33.9888		0.623457	21.8211
12.1415	33.1534	26.318	12.8496	9.3942	6.2162	17.8476	25.8764	29.7872	22.8596	14.3335	23.9242	24.1828	22.4945	27.1896	25.8098	26.4168	31.5506	23.3122	19.3716	11.8458	6.888	12.579	9.7447	26.2168		0.629628	20.4234
12.2606	27.8171	39.7219	19.3836	6.6417	13.1707	11.5881	24.0353	25.2641	26.37	18.5629	31.9926	29.8404	29.9288	24.137	22.0029	28.8698	29.7292	37.4617	22.949	12.1997	5.779	16.499	16.6568	24.3966		0.635805	22.7082
12.3796	31.2892	28.4633	20.5819	12.1087	9.1692	20.8544	25.0287	24.3031	23.1719	21.5299	34.2758	35.7009	30.9461	27.2149	20.5976	20.8809	27.4108	28.8215	19.4365	7.1069	6.468	19.148	18.6317	22.1274		0.641976	22.3028
12.4986	31.2528	32.1653	10.2455	8.8171	11.5064	15.2469	34.577	28.4868	24.3587	17.1517	37.8583	26.437	29.1014	25.9778	24.5172	23.7632	29.5004	16.7671	21.6087	9.3018	7.589	14.185	25.7022	15.8347		0.648147	21.748
12.6177	34.5077	31.947	10.5175	14.5748	15.4191	20.8625	24.1338	28.4744	26.1675	22.1294	31.3233	25.9087	29.116	28.625	21.4434	23.1132	31.4169	25.6339	26.8431	9.3384	6.7	17.85	21.3587	13.9246		0.654323	22.5554
12.7367	33.3473	30.9985	17.6318	10.5746	10.4486	26.9327	29.9987	27.7349	21.5486	15.1526	24.0427	25.8809	18.5558	28.2057	21.5117	26.1362	30.5093	31.7212	37.4522	9.045	7.874	16.478	26.9088	29.1143		0.660494	23.2418
12.8557	23.3795	28.7662	14.4137	13.0081	12.1318	22.2631	38.6042	16.6511	28.3782	15.6689	26.7094	33.095	33.7377	21.3517	27.6847	17.2969	33.8993	29.8421	34.6934	8.0221	4.386	24.722	29.4281	22.1545		0.666665	23.3453
12.9748	19.2925	33.9525	15.3681	5.2051	12.125	25.9952	33.7707	21.0416	20.1227	11.8778	23.4985	33.6246	23.5978	29.8632	29.4201	18.219	34.055	25.7372	29.6147	14.7672	11.982	20.574	22.974	22.4454		0.672841	22.4635
13.0938	26.3008	35.3684	21.6528	9.4262	14.8778	22.5616	19.1608	26.1007	21.1428	12.4537	24.7588	31.6975	22.3643	27.5315	21.9063	20.1485	31.3339	28.3252	36.9551	10.7618	9.412	19.841	20.7931	11.3164		0.679012	21.9246
13.2128	25.4618	28.8558	20.5095	11.464	9.0289	15.9952	36.9805	16.1872	22.7011	19.4891	25.2856	28.5258	28.5854	21.5862	34.0925	18.5076	23.7028	17.6943	30.5553	13.6559	7.835	25.193	19.2066	16.7785		0.685183	21.5782
13.3319	29.732	19.7641	20.6232	8.2971	11.2543	20.3644	23.4463	16.7386	15.1479	18.2979	34.3183	20.0063	35.4956	24.0636	28.4006	23.0068	27.1157	17.1456	31.9612	9.4583	7.47	19.712	25.1696	14.3072		0.691359	20.8874
13.4509	29.8211	34.3187	17.7898	10.7214	12.8298	24.1787	16.2482	22.5088	15.8489	13.8325	32.9012	21.3511	33.0855	35.9248	24.552	31.9231	27.5085	18.2709	34.3616	6.0037	7.266	23.181	27.6352	17.0288		0.697531	22.4621
13.5699	28.6627	40.5063	28.2894	11.7793	6.554	22.7698	29.4747	22.8302	19.9322	10.9972	26.2148	27.883	26.6369	44.1664	25.0306	25.1047	26.4607	24.1978	40.564	8.6061	12.348	31.469	27.3966	16.3101		0.703702	24.341
13.689	27.0855	35.5889	36.5668	11.2619	14.1385	19.3482	24.4026	21.5574	24.7598	6.9964	39.0114	24.6643	27.8175	41.4546	30.554	22.5087	27.6286	24.1773	40.3224	12.1572	12.978	18.755	22.444	15.6897		0.709878	24.2445
13.808	29.6687	23.8476	27.4721	13.6668	15.6566	17.7644	28.5036	22.2289	33.7462	17.4219	36.7833	25.8162	27.4833	39.873	36.0212	21.2618	25.8286	25.5158	39.1869	7.3421	11.917	22.016	19.6995	15.7211		0.716049	24.3518
13.927	19.8139	19.9832	23.8476	13.7869	7.2336	19.9629	21.7586	17.2012	33.4861	14.9062	38.0094	24.5625	34.1087	36.9778	25.0264	21.8596	30.6833	29.9473	31.1793	10.6439	10.477	26.505	24.8229	17.5891		0.72222	23.0988
14.0461	26.858	19.1092	18.6708	11.4961	15.8205	18.582	30.3742	20.8707	41.999	5.2289	39.4633	21.3173	28.561	28.8597	22.3777	27.8143	27.627	28.0434	38.0116	6.1728	9.57	16.658	29.6666	13.0353		0.728396	22.7578
14.1651	20.6228	23.7667	15.2187	6.9032	11.8857	17.8195	28.7834	21.3923	33.2349	13.1833	34.7435	25.249	38.6932	26.0211	23.7241	22.3498	20.5863	36.6959	41.8398	10.1602	8.636	12.856	29.7411	7.9017		0.734567	22.167
14.2841	26.9744	18.5115	16.4618	7.5802	11.6759	20.0358	21.0453	15.3558	48.9089	13.6505	25.6551	25.5791	31.0951	31.9292	28.8646	19.4082	29.3716	23.4805	42.1434	7.896	10.942	22.791	27.4433	14.4507		0.740738	22.5521
14.4032	20.0575	24.3808	18.0565	7.7749	13.8428	24.2824	22.1218	24.2353	37.3159	13.4674	28.5166	23.2515	22.1934	40.1974	23.0717	22.2306	38.4827	24.6568	40.4323	7.5765	11.925	21.921	19.492	12.9371		0.746914	22.6008
14.5222	25.8646	23.2123	18.3897	11.0858	10.6628	25.9798	15.0811	21.2034	24.3559	14.0704	30.7853	20.9547	28.7254	42.1708	28.56	34.4254	25.4396	33.5806	47.5554	8.998	10.025	20.111	11.1744	16.121		0.753086	22.8555
14.6412	26.797	16.9094	18.9001	9.0867	11.8285	21.5039	13.0177	30.3248	32.0302	7.4256	30.6054	21.2608	28.8408	39.019	26.5274	26.6887	28.615	22.9153	34.4486	10.9841	18.715	26.257	12.2556	19.6903		0.759257	22.277
14.7603	29.9057	18.7894	29.1051	12.3088	11.9508	22.3682	15.728	35.103	20.7352	13.1039	34.9161	16.4778	27.8764	45.2331	18.2214	33.5574	28.0486	19.41	37.1981	12.7192	15.95	26.607	10.792	18.138		0.765433	23.0935
14.8793	36.4466	24.0466	25.1087	14.927	15.2775	24.7723	15.2502	24.8165	23.5959	16.4118	26.1378	30.0651	28.3926	43.315	30.7013	28.035	25.4231	28.4389	45.7229	16.3314	11.935	23.585	8.7039	19.3481		0.771604	24.4495
14.9984	34.3699	17.5539	24.4598	12.9913	9.8672	23.8887	16.5018	20.4105	22.7176	19.8768	32.8889	33.3092	24.5719	46.6925	24.2054	27.4059	28.8479	26.4652	41.6176	15.2173	11.998	29.481	13.6858	14.6656		0.77778	23.9037
15.1174	31.6363	21.0195	32.9241	16.5533	9.7542	24.0802	16.1884	15.753	16.7552	25.2626	29.7538	47.4244	29.0656	41.3442	32.4237	34.4282	22.9629	22.2904	59.2761	12.0055	10.857	22.753	16.5887	22.9851		0.783951	25.5869
15.2364	17.4992	20.7967	25.7171	12.664	17.2952	22.8461	14.4884	16.7282	28.935	23.8892	33.0288	38.6265	25.7833	34.0818	29.4389	33.1146	25.3864	28.3507	45.0286	13.3612	8.345	27.029	16.1409	18.4087		0.790122	24.041
15.3555	17.1802	16.4344	29.3556	18.122	23.4788	24.6161	22.9192	21.1554	23.285	22.5435	33.6944	40.9865	26.004	35.952	29.9938	29.4618	24.2274	44.9548	33.7692	12.365	10.483	31.44	23.3643	17.51		0.796298	25.554
15.4745	22.5386	16.3045	33.7655	18.4198	23.5385	32.2869	20.2353	26.4807	26.6642	22.4931	28.4292	30.1261	25.609	40.0326	26.9373	30.7716	23.2132	39.393	35.8024	7.6145	14.212	26.768	27.5262	15.4323		0.802469	25.6081
15.5935	19.2512	14.343	33.4543	12.3665	23.2545	25.1327	11.71	19.988	21.0401	26.9208	22.106	34.3936	17.2202	28.2323	23.6859	45.8158	23.2275	35.6585	35.7944	13.5993	7.969	32.171	26.7073	14.4696		0.808641	23.688
15.7126	20.7157	17.362	26.3248	15.6852	24.302	22.1146	16.9492	17.1083	25.475	21.5528	27.5971	45.9183	16.9665	31.1826	18.141	30.0498	27.1157	35.5564	31.5286	21.1554	9.218	28.207	19.7754	21.0627		0.814817	23.7943
15.8316	15.2472	25.601	29.7424	20.922	19.9007	17.8445	13.8308	21.0328	33.1248	21.5648	29.4772	31.8968	20.1038	36.6933	20.6546	25.0641	29.6444	32.5617	33.4321	11.7556	12.182	31.798	23.1368	19.6569		0.820988	24.0362
15.9506	23.4411	22.0589	19.5965	21.9236	22.3808	23.0591	7.8957	20.016	30.158	21.3313	24.3655	46.2067	29.2845	29.9136	19.2892	23.4446	32.9212	26.5035	36.5146	19.0949	8.474	27.963	26.9758	17.2111		0.827159	24.1676
16.0697	31.1226	17.2815	28.5216	15.0013	29.2766	31.4939	10.6954	25.3568	32.2384	24.331	27.8248	40.9525	31.8504	32.4002	19.9403	35.11	22.0695	28.2912	36.8689	16.3149	11.165	28.605	24.3411	10.6418		0.833335	25.4873
16.1887	29.3416	26.1671	22.1979	19.0617	28.3896	24.1555	9.1085	17.498	22.6909	18.4729	30.2109	33.7301	31.2418	33.7285	26.2976	29.7708	19.2897	24.8611	30.6545	9.8115	22.241	30.454	34.3955	11.9977		0.839506	24.407
16.3077	27.866	19.1584	27.2447	15.37	28.6079	31.5058	11.999	18.5525	28.5653	17.012	32.517	36.3986	28.1083	37.8222	24.4459	39.7462	28.0472	18.6142	29.459	16.0238	19.775	22.993	37.914	17.333		0.845677	25.6283
16.4268	25.1006	14.7656	26.6944	17.191	27.998	32.745	19.881	14.2756	36.3746	14.1493	32.8035	35.7456	20.0192	37.9396	33.8196	39.7555	30.1732	16.1112	31.667	18.9013	15.758	27.029	34.0192	19.0787		0.851853	25.9165
16.5458	22.4288	15.4353	21.2234	22.8809	26.7778	33.9312	21.4995	14.3103	34.4793	14.7889	28.7952	43.7237	22.2559	26.6731	31.9809	40.7976	30.0071	15.1935	34.6783	12.8604	19.186	25.763	30.4054	10.9138		0.858024	25.0412
16.6648	20.7581	15.8131	18.1887	25.8195	24.4259	32.2852	20.4599	17.2977	31.9223	22.6481	23.5592	26.6617	24.2036	29.1056	26.2503	34.0552	29.3111	14.7966	26.2793	15.7648	13.278	29.38	28.8005	13.9694		0.864195	23.5431
16.7839	26.0774	14.7933	23.4721	24.9592	21.7907	25.73	14.4405	9.9089	28.5196	20.3426	22.0694	25.0535	33.8222	26.4679	21.4948	31.2987	24.7074	21.0918	18.8113	19.322	16.811	25.979	32.9492	22.8841		0.870372	23.0332
16.9029	21.4134	25.0837	14.6931	25.2471	27.3132	27.7197	7.8961	19.4162	25.8856	20.908	16.0976	24.1058	27.5402	18.4013	32.441	32.5081	30.4281	21.3737	24.5726	24.618	18.796	21.459	30.011	20.1071		0.876543	23.2515
17.0219	21.514	18.3926	15.9885	28.1317	29.2897	41.7248	15.0581	18.5056	23.6301	22.3738	18.1637	13.301	28.7863	22.3253	28.8659	37.6674	23.6418	20.3299	27.8915	33.1038	18.395	32.478	26.5742	17.0918		0.882714	24.301
17.141	24.1023	10.5286	12.9684	18.8536	19.9979	37.2646	14.6487	27.2401	19.7996	30.3759	23.4397	11.9599	38.1615	23.9766	26.8999	32.6697	23.2745	27.5076	25.3885	34.3812	27.684	36.598	24.3925	13.0834		0.88889	24.3832
17.26	18.7316	7.5624	13.1887	25.4308	16.6261	25.8437	14.8275	21.3101	11.2688	23.7442	17.7913	19.5624	25.0366	22.548	30.7257	30.6962	28.8164	23.2845	27.1788	32.7543	33.554	45.695	21.7644	15.0557		0.895061	23.0416
17.379	24.6014	6.1106	12.4333	33.1471	19.9686	23.1429	14.8709	22.2153	20.4047	13.7575	16.6003	14.3895	22.4109	23.8932	27.3922	28.4806	25.0645	18.3317	21.7044	33.6684	20.14	33.836	23.1973	20.0375		0.901232	21.6583
17.4981	13.2155	5.4502	13.3686	31.1471	35.0533	23.9642	15.8263	27.2288	17.5013	21.5863	19.0693	20.7289	24.4649	23.6738	31.7661	35.7551	23.3859	14.7256	23.4157	30.5226	20.946	29.466	32.3329	20.9666		0.907408	23.1484
17.6171	14.9189	2.9749	5.4926	29.6562	29.6619	18.8287	17.8613	18.1042	14.6659	32.047	16.3578	20.6427	24.4576	14.9879	24.1869	33.882	30.0457	14.6105	22.1611	27.396	19.086	21.902	37.1634	20.2298		0.913579	21.305
17.7361	9.4363	2.0723	11.0625	32.0708	32.9994	17.0809	9.0243	13.9773	15.5285	21.6899	22.9415	17.3601	27.9011	12.9347	27.1784	33.5502	23.4173	18.175	22.7609	30.0052	27.27	20.857	22.8783	20.6007		0.91975	20.5322
17.8552	6.8434	4.5059	4.076	23.7861	26.6946	21.3723	7.0547	16.9141	9.2097	19.8608	20.1929	23.4489	30.9405	15.7319	27.6	26.9097	18.1935	15.0725	36.1133	37.062	31.865	25.739	17.3331	20.1615		0.925927	20.2784
17.9742	3.8611	7.7655	8.666	17.9258	16.6756	23.329	14.7478	22.8609	11.6959	24.1997	14.8518	24.3054	27.1184	14.51	37.091	19.6709	22.0497	12.1276	29.1989	24.9622	16.968	21.106	17.2095	17.3877		0.932098	18.7618
18.0932	4.4014	5.6472	6.8098	11.7814	12.3334	14.1731	12.4543	17.4424	8.6487	31.8944	25.6365	17.5029	27.4513	16.0335	22.9473	21.2412	14.1253	12.3104	31.1816	27.2119	21.715	23.517	16.2769	17.2219		0.938269	17.4983
18.2123	1.9664	2.9424	5.7584	11.1607	11.5831	9.19	8.2618	10.8224	15.8106	28.2672	20.302	21.1358	26.4967	16.5667	21.9143	21.82	17.7285	12.2615	22.1347	20.1059	20.894	18.503	23.1824	24.3895		0.944445	16.3833
18.3313	2.2499	4.4268	3.5601	6.1472	6.1186	7.4566	9.1624	10.863	13.6264	33.7494	16.1066	12.9568	29.0669	13.6523	24.5901	22.3497	16.8215	15.6839	12.3332	22.6173	26.535	21.561	22.1937	23.8584		0.950616	15.737
18.4504	1.5441	4.8954	3.7287	0.9783	2.4208	10.2367	12.8557	7.2988	6.8497	22.2329	13.6404	14.6916	23.6496	12.1226	16.313	17.8894	11.5523	7.8736	17.3836	17.2774	25.971	14.861	19.0447	21.5655		0.956792	12.7865
18.5694	1.8064	2.1205	3.64	3.3342	2.508	7.1984	10.3557	8.282	4.8761	15.9435	10.4976	21.8289	22.1434	13.3041	12.936	18.6169	9.3092	6.7657	12.9024	10.5777	23.446	11.87	22.5761	18.2775		0.962963	11.4632
18.6884	5.3371	4.5591	4.9078	1.3923	4.3226	8.2235	7.976	4.2261	7.2389	13.0563	11.3972	22.2476	14.4806	9.0018	13.7534	16.8439	12.6998	11.208	13.0512	11.677	22.322	8.816	17.419	15.7027		0.969134	10.9108
18.8075	3.4092	2.6304	3.7951	5.8036	4.3128	2.7948	4.5622	4.2988	4.2055	11.813	8.7432	14.495	18.8023	8.4821	14.0948	15.6549	9.7893	10.62	11.8345	15.9322	27.962	12.01	11.2465	20.3623		0.975311	10.3189
18.9265	0.9567	1.4276	1.6213	2.2929	5.3252	2.3109	2.472	8.9798	4.5805	10.527	9.6384	15.9211	17.25	7.8594	9.1111	15.4233	8.9298	8.0264	9.8001	16.0842	17.708	6.079	7.9266	16.9281		0.981482	8.63248
19.0455	5.282	2.2992	5.6451	3.92	3.6488	4.6955	2.4303	5.3201	9.1588	9.2702	4.3376	18.0031	15.6425	10.8321	3.9891	14.5036	8.3614	3.1152	4.484	13.3883	17.447	4.962	8.9564	12.0197		0.987653	7.988
19.1646	2.3893	3.4627	7.3426	6.5534	3.5999	7.46	5.0587	3.0648	2.9169	9.6291	6.8538	21.291	20.8556	6.8346	6.9522	9.7191	9.8231	3.5995	2.4341	5.7898	12.468	5.665	9.9808	15.8664		0.993829	7.90043
19.2836	3.058	3.505	2.5635	8.5293	3.744	6.4817	4.1713	5.3389	3.4097	7.96	2.5764	10.1134	10.7893	4.0377	7.0181	6.7966	10.3408	2.3754	0.8863	5.0937	13.708	9.664	6.1764	14.808		1	6.38106

## Sheet: Sheet1
Image14				Image15				Image16				Image17				Image6				Image7							Distance	Image14	Image15	Image16	Image17	Image6	Image7
Ap-basal	Avg intensity			Ap-basal	Avg intensity			Ap-basal	Avg intensity			Ap-basal	Avg intensity			Ap-basal	Avg intensity			Ap-basal	Avg intensity						0	36.9255	31.0525	29.3601	37.048	52.3123	31.0122
0	36.9255			0	31.0525			0	29.3601			0	37.048			0	52.3123			0	31.0122						0.05	55.447	46.4798	43.4123	60.37	70.7648	38.0385
0.00617105	38.265			0.0061332	32.4576			0.00602236	31.0453			0.00644972	43.6261			0.00900642	60.7604			0.00806217	30.5313						0.1	73.2417	67.1826	68.5291	95.0723	102.796	58.3371
0.0123473	43.2679			0.0122716	38.5183			0.0120498	36.1852			0.0129049	49.2261			0.0180204	63.8845			0.0161311	34.8029						0.15	62.3955	64.5243	77.1052	89.3717	105.837	74.0865
0.0185183	50.6414			0.0184047	40.3197			0.0180721	37.9959			0.0193546	54.099			0.0270268	68.946			0.0241933	36.0425						0.2	49.301	53.9987	72.1909	70.0883	92.2865	80.9781
0.0246894	52.7423			0.0245379	43.2231			0.0240945	41.823			0.0258043	58.5701			0.0360332	77.551			0.0322554	38.6769						0.25	38.2346	44.774	59.3524	50.2909	78.3776	78.0308
0.0308656	58.1138			0.0306763	48.5868			0.0301219	43.214			0.0322595	64.863			0.0450472	83.8009			0.0403244	39.0853						0.3	31.9354	41.5856	50.4149	40.6807	61.4214	68.1493
0.0370367	63.3696			0.0368095	52.4386			0.0361443	49.4506			0.0387092	72.5708			0.0540536	88.0982	70.7648		0.0483866	46.1052						0.35	27.9295	39.0516	45.0489	34.252	53.2189	57.8666
0.0432077	67.878			0.0429427	55.173			0.0421666	51.9197			0.0451589	77.3815			0.0630601	95.0324			0.0564487	48.0521	38.0385					0.4	28.0138	37.7671	41.9709	32.9142	48.7101	47.7075
0.0493839	69.5263			0.0490811	57.1611			0.0481941	55.0906			0.0516141	85.9449	60.37		0.072074	97.9213			0.0645177	51.6195						0.45	24.9406	35.5861	39.8475	28.4573	43.8595	37.4543
0.055555	73.7397	55.447		0.0552142	65.8677	46.4798		0.0542164	58.0391	43.4123		0.0580638	89.8695			0.0810805	101.082			0.0725798	54.1191						0.5	23.9715	29.0271	36.2181	25.5881	37.277	29.0446
0.061726	75.1002			0.0613474	63.7764			0.0602388	62.1276			0.0645135	93.6815			0.0900869	104.372			0.080642	57.9719						0.55	22.7411	27.1764	30.2691	23.1301	32.2512	25.0331
0.0679023	74.1958			0.0674858	67.0998			0.0662662	64.5494			0.0709687	94.8243			0.0991009	107.77			0.0887109	60.4972						0.6	21.1786	26.1858	28.0401	22.3363	30.3696	23.5545
0.0740733	77.3601			0.073619	67.6923			0.0722885	65.4897			0.0774184	94.8397			0.108107	110.598	102.796		0.0967731	63.8243						0.65	22.0244	27.1204	27.5352	21.8157	28.0331	22.334
0.0802444	74.4626			0.0797522	67.0216			0.0783109	67.2757			0.0838681	97.2514			0.117114	107.609			0.104835	61.9906	58.3371					0.7	22.5305	27.9939	25.3612	21.667	26.2192	21.3466
0.0864206	75.4706			0.0858906	68.7211			0.0843383	69.6358			0.0903232	98.7299			0.126128	107.71			0.112904	67.4165						0.75	23.0785	28.6252	26.1109	20.2995	25.5451	20.72
0.0925916	70.7602			0.0920237	66.8495			0.0903607	71.5103			0.096773	95.9592			0.135134	105.329			0.120966	68.1414						0.8	24.3142	30.3119	25.5378	19.0363	25.8419	19.6823
0.0987679	69.7669			0.0981621	69.0008			0.0963881	72.8745			0.103228	95.4229	95.0723		0.144148	104.985			0.129035	72.6277						0.85	24.6407	27.8974	23.6488	17.6657	24.881	18.7829
0.104939	68.8176	73.2417		0.104295	67.2994	67.1826		0.10241	74.7695	68.5291		0.109678	95.7924			0.153155	103.55	105.837		0.137097	76.5783						0.9	23.5316	23.9075	22.1054	16.823	23.2458	17.9722
0.11111	68.8394			0.110428	65.8356			0.108433	75.3292			0.116128	94.3433			0.162161	101.704			0.14516	80.7601						0.95	19.2055	19.2757	21.1147	17.6419	23.4246	15.5056
0.117286	68.0321			0.116567	67.9426			0.11446	78.502			0.122583	93.5405			0.171175	92.6578			0.153229	78.9952	74.0865					1	9.54768	13.8776	17.5077	16.9662	20.9604	13.4677
0.123457	64.4091			0.1227	66.5874			0.120483	75.4486			0.129032	88.899			0.180181	94.3449			0.161291	80.7596
0.129628	62.6235			0.128833	65.6327			0.126505	76.1296			0.135482	87.8432			0.189188	91.9057			0.169353	81.2607
0.135805	63.9204			0.134972	64.8207			0.132532	77.9074			0.141937	87.5604			0.198202	87.6865			0.177422	81.621
0.141976	59.987			0.141105	63.1931			0.138555	79.9074			0.148387	84.0021			0.207208	85.4202	92.2865		0.185484	77.8551
0.148147	56.8242			0.147238	62.732			0.144577	78.4095			0.154837	82.9929	89.3717		0.216215	85.6347			0.193546	81.1796
0.154323	54.5286	62.3955		0.153376	59.45	64.5243		0.150605	75.2078	77.1052		0.161292	76.8299			0.225229	81.8263			0.201615	83.1928	80.9781
0.160494	52.0234			0.15951	58.1109			0.156627	77.3683			0.167742	75.0425			0.234235	78.1137			0.209677	79.7627
0.166665	51.5926			0.165643	56.6127			0.162649	76.5			0.174191	73.4537			0.243241	75.5681			0.217739	81.6968
0.172841	50.7861			0.171781	59.5435			0.168677	74.0083			0.180646	71.4738			0.252255	70.7454	78.3776		0.225808	77.6144
0.179012	51.1265			0.177914	55.7723			0.174699	72.2408			0.187096	67.2273			0.261262	66.5901			0.233871	78.1763
0.185183	48.4027			0.184047	52.542			0.180721	70.7592			0.193546	64.5841			0.270268	63.8243			0.241933	76.1052
0.191359	46.8238			0.190186	52.0846			0.186749	70.2181			0.200001	62.0067	70.0883		0.279282	60.4084			0.250002	74.8295	78.0308
0.197531	47.6366			0.196319	50.5023			0.192771	70.8848			0.206451	57.0734			0.288289	61.6902			0.258064	75.1332
0.203702	46.0167	49.301		0.202452	46.8209	53.9987		0.198794	72.6975			0.212901	55.0433			0.297295	59.3646			0.266126	68.8118
0.209878	42.4942			0.208591	45.0037			0.204821	65.0411	72.1909		0.219356	53.083			0.306309	56.6509	61.4214		0.274195	69.1846
0.216049	41.6318			0.214724	48.0715			0.210843	64.1975			0.225805	50.6868			0.315315	53.6301			0.282257	69.871
0.22222	39.8825			0.220857	45.788			0.216866	66.8765			0.232255	49.3447			0.324322	52.3027			0.290319	70.2978
0.228396	38.7718			0.226995	45.1946			0.222893	61.4918			0.23871	47.4797			0.333336	53.5152			0.298388	66.5543
0.234567	38.9585			0.233129	42.8648			0.228915	59.7634			0.24516	45.6925			0.342342	52.8418			0.30645	64.1766	68.1493
0.240738	36.5169			0.239262	45.1263			0.234938	58.0268			0.25161	43.9236	50.2909		0.351349	53.8048	53.2189		0.314513	61.3566
0.246914	35.4987			0.2454	43.712			0.240965	56.5947			0.258065	43.2739			0.360363	53.2582			0.322582	60.674
0.253086	36.371			0.251533	42.4314	44.774		0.246988	56.8745			0.264515	42.1236			0.369369	52.194			0.330644	58.9941
0.259262	33.9857	38.2346		0.257672	44.434			0.253015	50.9938	59.3524		0.27097	43.0458			0.378383	47.649			0.338713	56.2184
0.265433	32.2496			0.263805	40.8738			0.259037	52.3827			0.277419	42.9163			0.38739	46.3507			0.346775	53.3779
0.271604	33.8693			0.269938	40.6724			0.26506	52.1111			0.283869	39.3611			0.396396	48.6114			0.354837	56.5789	57.8666
0.27778	33.4054			0.276076	41.4574			0.271087	50.2058			0.290324	39.1161			0.40541	44.1974	48.7101		0.362906	52.605
0.283951	32.8889			0.28221	40.978			0.277109	51.7572			0.296774	39.1666			0.414416	46.2057			0.370968	52.2598
0.290122	30.6483			0.288343	43.3588			0.283132	50.6832			0.303224	36.4425	40.6807		0.423423	44.8467			0.37903	47.0763
0.296298	30.3756			0.294481	41.2843			0.289159	49.8642			0.309679	37.4054			0.432437	44.0401			0.387099	47.5766
0.302469	30.1108	31.9354		0.300614	39.6263	41.5856		0.295182	48.323			0.316129	36.04			0.441443	42.7238			0.395161	45.2084
0.308641	31.1268			0.306748	40.5389			0.301204	47.9918	50.4149		0.322578	34.4143			0.45045	41.481	43.8595		0.403224	41.5187	47.7075
0.314817	28.8617			0.312886	40.1467			0.307231	45.5062			0.329034	34.9589			0.459464	39.9503			0.411292	41.8071
0.320988	27.4305			0.319019	41.0327			0.313254	45.0946			0.335483	32.9598			0.46847	38.3143			0.419355	40.6271
0.327159	27.437			0.325152	40.1293			0.319276	47.3127			0.341933	32.1997			0.477476	37.9985			0.427417	37.4599
0.333335	27.713			0.331291	38.3484			0.325304	46.3601			0.348388	33.4324			0.48649	37.2017			0.435486	36.4485
0.339506	28.5744			0.337424	38.6317			0.331326	43.6317			0.354838	32.6052	34.252		0.495497	35.4222			0.443548	33.5698
0.345677	25.6009			0.343557	36.5099			0.337348	45.5761			0.361288	33.0828			0.504503	34.7751	37.277		0.45161	34.8136	37.4543
0.351853	26.6913	27.9295		0.349695	37.8644			0.343376	46.3498			0.367743	33.9328			0.513517	36.0847			0.459679	33.7013
0.358024	27.2385			0.355829	38.2627	39.0516		0.349398	43.9897			0.374192	34.5777			0.522524	32.9248			0.467741	30.1853
0.364195	28.8924			0.361962	39.5395			0.35542	41.6193	45.0489		0.380642	33.9507			0.53153	30.5747			0.475803	30.3322
0.370372	28.8739			0.3681	38.4553			0.361448	41.2716			0.387097	33.7438			0.540544	31.3756			0.483872	30.1957
0.376543	28.3417			0.374233	36.0728			0.36747	43.6296			0.393547	30.7975			0.54955	31.2366			0.491934	29.7937
0.382714	28.2164			0.380367	37.0948			0.373493	43.3992			0.399997	30.3144	32.9142		0.558557	31.3107	32.2512		0.499997	26.6858
0.38889	27.9845			0.386505	38.2618			0.37952	44.5638			0.406452	31.001			0.567571	31.5018			0.508066	27.0749	29.0446
0.395061	27.8187			0.392638	36.9064			0.385542	40.9918			0.412902	29.5046			0.576577	30.5566			0.516128	27.0141
0.401232	26.7441	28.0138		0.398771	37.4798			0.391565	41.8971			0.419351	28.7464			0.585584	29.6807			0.52419	25.3102
0.407408	25.8366			0.40491	38.3268	37.7671		0.397592	37.9362			0.425806	27.8704			0.594598	30.4213			0.532259	23.8187
0.413579	25.8042			0.411043	35.2831			0.403614	42.0781	41.9709		0.432256	26.7979			0.603604	29.6874	30.3696		0.540321	25.1873
0.41975	24.6323			0.417176	38.8121			0.409637	40.4979			0.438706	27.479			0.61261	29.6104			0.548383	25.0979
0.425927	24.0246			0.423314	36.2648			0.415664	40.2922			0.445161	28.19			0.621624	28.2364			0.556452	23.7706	25.0331
0.432098	26.3559			0.429448	37.3794			0.421687	41.3293			0.451611	28.0691	28.4573		0.630631	28.2437			0.564514	24.6107
0.438274	23.947			0.435586	36.6996			0.427714	39.5391			0.458066	26.317			0.639645	28.1186			0.572583	24.0125
0.444445	24.3952			0.441719	34.5309			0.433736	40.7675			0.464516	24.7219			0.648651	26.2994			0.580645	24.8161
0.450616	24.5285	24.9406		0.447852	32.2256			0.439759	38.6193			0.470965	24.7963			0.657658	27.6899	28.0331		0.588708	23.4061
0.456792	23.7011			0.453991	33.4937	35.5861		0.445786	39.5885			0.477421	24.6829			0.666672	28.2906			0.596776	22.4179
0.462963	23.625			0.460124	32.3437			0.451808	38.1461	39.8475		0.48387	27.2865			0.675678	26.7604			0.604839	22.0634	23.5545
0.469134	24.7185			0.466257	30.202			0.457831	38.8189			0.49032	25.8143			0.684685	26.9578			0.612901	22.6841
0.475311	26.3716			0.472395	28.6983			0.463858	38.1358			0.496775	25.497			0.693699	25.7522			0.62097	21.6098
0.481482	23.5159			0.478529	28.5316			0.469881	33.2757			0.503225	25.5885	25.5881		0.702705	23.3352	26.2192		0.629032	22.1983
0.487653	23.6507			0.484662	28.1137			0.475903	35.6111			0.509675	24.0105			0.711711	24.5652			0.637094	22.9349
0.493829	22.9466			0.4908	27.9131			0.48193	36.5762			0.51613	22.802			0.720725	25.8175			0.645163	22.2952
0.5	23.2426	23.9715		0.496933	27.6735			0.487953	36.9753			0.522579	22.2151			0.729732	26.3051			0.653225	22.2817	22.334
0.506171	24.0372			0.503067	28.7408	29.0271		0.493975	35.3086			0.529029	23.3295			0.738738	25.1931			0.661287	21.5682
0.512347	23.0522			0.509205	26.6888			0.500003	35.0432	36.2181		0.535484	24.2502			0.747752	25.8412			0.669356	20.8647
0.518518	22.6558			0.515338	28.006			0.506025	33.3416			0.541934	23.9699			0.756759	25.5486	25.5451		0.677418	22.448
0.524689	23.2684			0.521471	28.7016			0.512047	33.5556			0.548384	21.3981			0.765765	25.2562			0.685481	21.1971
0.530866	22.9975			0.52761	26.6766			0.518075	30.4527			0.554839	23.0651	23.1301		0.774779	25.7049			0.69355	21.8599
0.537037	23.1545			0.533743	25.6515			0.524097	30.4794			0.561289	22.3905			0.783785	26.8354			0.701612	20.1416	21.3466
0.543208	21.2416			0.539876	27.3728			0.530119	28.8436			0.567738	23.432			0.792792	25.2632			0.709674	20.3414
0.549384	22.2042			0.546014	26.624			0.536147	28.1337			0.574194	21.879			0.801806	26.1497	25.8419		0.717743	20.9118
0.555555	22.0586	22.7411		0.552148	27.6902	27.1764		0.542169	29.1317			0.580643	22.1149			0.810812	26.2476			0.725805	21.5492
0.561726	21.9763			0.558281	24.9141			0.548192	30.0041			0.587093	22.9393			0.819819	27.1876			0.733867	21.0341
0.567902	20.6996			0.564419	25.8998			0.554219	28.4794	30.2691		0.593548	22.6142			0.828833	25.2964			0.741936	20.3049
0.574073	21.1047			0.570552	25.5478			0.560241	28.2057			0.599998	20.3021			0.837839	23.355			0.749998	20.2365
0.580244	21.7931			0.576686	25.3145			0.566264	29			0.606448	23.0183	22.3363		0.846845	24.6188			0.75806	20.6618	20.72
0.586421	20.5676			0.582824	27.4779			0.572291	27.891			0.612903	21.9146			0.855859	22.5805	24.881		0.766129	19.5596
0.592592	20.6833			0.588957	25.8475			0.578313	26.8498			0.619352	21.3232			0.864866	21.499			0.774192	20.0032
0.598763	21.1268			0.59509	27.4864			0.584336	28.07			0.625802	21.1151			0.873872	24.0226			0.782254	21.1821
0.604939	21.4777	21.1786		0.601229	26.9983	26.1858		0.590363	28.677			0.632257	22.3419			0.882886	23.8399			0.790323	18.7469
0.61111	22.0552			0.607362	26.4877			0.596386	26.9877			0.638707	22.1575			0.891893	22.9221			0.798385	20.6091
0.617286	22.5807			0.6135	26.6962			0.602413	28.6399	28.0401		0.645162	22.5394			0.900907	23.9452	23.2458		0.806454	17.9929	19.6823
0.623457	21.8211			0.619633	27.4028			0.608435	27.1626			0.651612	21.3178	21.8157		0.909913	23.0116			0.814516	18.1479
0.629628	20.4234			0.625767	26.1428			0.614458	27.5452			0.658062	22.409			0.91892	22.5106			0.822578	19.6797
0.635805	22.7082			0.631905	28.1576			0.620485	28.2387			0.664517	21.6122			0.927934	23.9458			0.830647	18.2288
0.641976	22.3028			0.638038	26.2621			0.626507	27.5288			0.670966	22.5381			0.93694	24.4967			0.838709	19.4262
0.648147	21.748			0.644171	27.9435			0.63253	27.679			0.677416	22.2123			0.945946	24.5917			0.846771	19.1623
0.654323	22.5554	22.0244		0.65031	27.8708	27.1204		0.638557	27.2716			0.683871	21.9076			0.95496	21.9911	23.4246		0.85484	18.0527	18.7829
0.660494	23.2418			0.656443	26.4207			0.64458	27.6564			0.690321	20.1584			0.963967	21.4007			0.862903	18.9536
0.666665	23.3453			0.662576	28.2046			0.650602	27.1996	27.5352		0.696771	22.4943			0.972973	21.1882			0.870965	18.2114
0.672841	22.4635			0.668715	27.4769			0.656629	26.2449			0.703226	20.0043	21.667		0.981987	20.3208			0.879034	17.7124
0.679012	21.9246			0.674848	26.358			0.662652	25.8621			0.709676	21.0544			0.990994	21.5662			0.887096	17.4907
0.685183	21.5782			0.680981	27.7026			0.668674	24.8662			0.716125	20.3009			1	20.326	20.9604		0.895158	18.2506
0.691359	20.8874			0.687119	28.2935			0.674702	25.1749			0.722581	20.4537							0.903227	17.2145	17.9722
0.697531	22.4621			0.693252	29.2795			0.680724	24.5617			0.72903	21.0401							0.911289	17.6286
0.703702	24.341	22.5305		0.699386	29.5462			0.686746	24.0741			0.73548	20.1894							0.919351	16.4206
0.709878	24.2445			0.705524	28.6634	27.9939		0.692774	25.5021			0.741935	18.787							0.92742	15.3745
0.716049	24.3518			0.711657	29.7847			0.698796	25.4486			0.748385	20.3344							0.935482	15.0495
0.72222	23.0988			0.71779	27.3862			0.704818	26.5165	25.3612		0.754835	20.2361	20.2995						0.943545	14.2334
0.728396	22.7578			0.723929	27.9499			0.710846	26.8827			0.76129	20.4224							0.951613	14.3272	15.5057
0.734567	22.167			0.730062	28.1921			0.716868	25.1194			0.767739	19.4427							0.959676	13.9501
0.740738	22.5521			0.736195	28.0803			0.722891	25.7716			0.774189	20.8382							0.967738	12.8772
0.746914	22.6008			0.742334	27.8116			0.728918	26.8128			0.780644	17.2529							0.975807	14.0979
0.753086	22.8555	23.0785		0.748467	29.833			0.73494	25.642			0.787094	18.9171							0.983869	12.8563
0.759257	22.277			0.7546	29.9639	28.6252		0.740963	27.0391			0.793544	18.5016							0.991931	14.2529
0.765433	23.0935			0.760738	30.7048			0.74699	27.0144			0.799999	19.2105							1	12.7722	13.4677
0.771604	24.4495			0.766871	28.2356			0.753012	24.6049	26.1109		0.806449	17.7047	19.0363
0.77778	23.9037			0.77301	31.7472			0.75904	24.8333			0.812904	17.301
0.783951	25.5869			0.779143	29.3754			0.765062	24.0597			0.819354	17.9719
0.790122	24.041			0.785276	30.8226			0.771085	25.0802			0.825803	18.1243
0.796298	25.554			0.791415	32.4766			0.777112	25.4691			0.832258	18.4291
0.802469	25.6081	24.3142		0.797548	29.8444			0.783134	27.4774			0.838708	18.0463
0.808641	23.688			0.803681	29.2885	30.3119		0.789157	24.5494			0.845158	16.9865
0.814817	23.7943			0.809819	28.3303			0.795184	26.5926			0.851613	16.8008	17.6657
0.820988	24.0362			0.815953	28.6309			0.801206	26.2407	25.5378		0.858063	16.7309
0.827159	24.1676			0.822086	27.2469			0.807229	25.8951			0.864512	16.9595
0.833335	25.4873			0.828224	28.7556			0.813256	23.7778			0.870968	17.5496
0.839506	24.407			0.834357	27.9491			0.819279	24.6585			0.877417	16.2636
0.845677	25.6283			0.84049	28.0167			0.825301	24.1172			0.883867	16.1597
0.851853	25.9165	24.6407		0.846629	28.1798			0.831328	24.0041			0.890322	16.3222
0.858024	25.0412			0.852762	26.0704	27.8974		0.837351	21.6194			0.896772	16.4509
0.864195	23.5431			0.858895	27.5365			0.843373	22.7222			0.903222	18.1474	16.823
0.870372	23.0332			0.865034	25.8472			0.849401	23.4321			0.909677	17.5718
0.876543	23.2515			0.871167	24.8052			0.855423	22.6131	23.6488		0.916126	18.0222
0.882714	24.301			0.8773	23.3958			0.861445	20.4465			0.922576	17.3035
0.88889	24.3832			0.883438	23.8527			0.867473	20.9259			0.929031	18.6958
0.895061	23.0416			0.889572	22.7349			0.873495	21.3868			0.935481	16.6645
0.901232	21.6583	23.5316		0.895705	21.8426			0.879517	24.7634			0.941931	17.5195
0.907408	23.1484			0.901843	21.2451	23.9075		0.885545	22.4321			0.948386	18.3687
0.913579	21.305			0.907976	20.8666			0.891567	21.9774			0.954836	16.9892	17.6419
0.91975	20.5322			0.914109	20.337			0.89759	22.7366			0.961285	17.9396
0.925927	20.2784			0.920248	21.2588			0.903617	22.1749	22.1054		0.967741	16.7686
0.932098	18.7618			0.926381	18.7695			0.909639	21.7572			0.97419	16.963
0.938269	17.4983			0.932514	17.5448			0.915662	21.9383			0.98064	17.9435
0.944445	16.3833			0.938653	18.9188			0.921689	19.9753			0.987095	16.4761
0.950616	15.737	19.2055		0.944786	18.259			0.927711	20.8086			0.993545	15.2999
0.956792	12.7865			0.950924	18.2512	19.2757		0.933739	21.2284			1	17.3727	16.9662
0.962963	11.4632			0.957057	17.7374			0.939761	21.2243
0.969134	10.9108			0.963191	16.7035			0.945784	22.0843
0.975311	10.3189			0.969329	15.5556			0.951811	19.9013	21.1147
0.981482	8.63248			0.975462	14.7059			0.957833	18.4444
0.987653	7.988			0.981595	13.9061			0.963856	19.9424
0.993829	7.90043			0.987734	12.7916			0.969883	17.6564
1	6.38106	9.54768		0.993867	10.4505			0.975906	18.2922
				1	9.17016	13.8776		0.981928	17.6502
								0.987955	17.1852
								0.993978	15.323
								1	15.5679	17.5077
