# Supplementary material for: Crumbs organizes the transport machinery by regulating apical levels of PI(4,5)P2 in Drosophila
Source: eLife. 2019 Nov 7;8:e50900. doi: 10.7554/eLife.50900 (PMC6881148; doi:10.7554/eLife.50900)
Supplement: Figure 6—source data 18. [file elife-50900-fig6-data18.xlsx]

## Sheet: Image11
X0	Y0	Y1	Y2	Y3	Y4	Y5	Y6	Y7	Y8	Y9	Y10	Y11	Y12	Y13	Y14	Y15	Y16	Y17	Y18	Y19	Y20	Y21	Y22	Y23	Y24	Y25	Y26	Y27		Ap-Basal	Avg intensity
0	12.3889	17.0556	22.7778	18.5556	32.1667	23.3333	31.3333	28.8333	21.5	33.8333	11	14.5556	15.2778	44.7778	37.4444	43.1667	9.3889	6.2222	22.3333	15.5556	30.5	17.6111	25.8889	14.3889	10.2778	18.2778	15.4444	22.7778		0	22.0238
0.119	12.3889	16.2778	19.0556	23.8889	41.6111	27.5	47.3889	16.3889	31.5	22.4444	8.1111	16.6667	25.3333	42.6111	53.6667	23.5	21.3889	13.4444	11.4444	24.5556	24.0556	16.4444	27.3333	17.1667	17.6111	13.9444	8.1111	21.3889		0.00934308	23.0436
0.2381	29.5	22.8333	15.8333	15.3889	27.3333	25.9444	39.2778	33.6667	31.9444	31.8889	9.7222	21.2778	31.8889	32.5	44.1111	27.5556	16.8889	8.6667	20.6667	30.5	26.3333	38.6667	30.2778	25.0556	21.0556	21.1111	30.2222	27.9444		0.018694	26.3591
0.3571	17.1667	19.3333	17.6667	19.6111	30.3889	33.7778	46.7222	29.2222	25.6667	25.5556	10.3889	18.7222	17.5	27.7778	33.5	23.7222	15.7222	20.2222	12.6111	34.6111	32.3333	35.0556	28	27.7778	23.8889	25.2778	15.8333	25.0556		0.0280371	24.754
0.4761	22.6111	29.3333	25.7778	26.6667	29.5556	28.2222	36.2778	24.8333	44.7778	27.8333	18.1111	20.5556	26	27.9444	42.0556	17.7778	11	11.5	34.3333	34.7222	22.2778	33.0556	26.5556	26.8333	22.0556	15.3333	27.6111	40.2778		0.0373802	26.9246
0.5952	18.2222	31.5556	23.1111	16.2222	29.3889	35.2778	41.9444	41.5556	36.1667	27.1667	17.5	21.0556	15.8333	21.8889	36.4444	16.3889	15	22.7778	23.7222	30.5	25.9444	34.7222	23.7222	27	25	31.6111	23.4444	40.1667		0.0467311	26.9048
0.7142	21.7222	36.5	25.2778	26.6667	35.9444	35.6667	50.3889	31.7778	39.5	48.4444	16.4444	11.6667	18.1111	27.1667	36.1111	22.0556	31	17.5556	24.5556	30.2778	38.6111	36.7222	36.8889	29.9444	21.1111	35.4444	24.6111	44.7778		0.0560742	30.5337
0.8332	33.0556	33	26	13.2778	29.5	41.1111	43.3333	27.2222	34.5556	42.7778	18.2222	23.6111	29.0556	27.2222	42.8889	14	10.8333	19.9444	22.2778	23.7778	28.2222	39.4444	38.1111	22.1111	25	30.4444	32.0556	43.8333		0.0654173	29.1032
0.9523	25.6111	37.2222	32.0556	26.8889	34.8889	45.1667	46.3333	36.1111	37.3333	29.1111	12.7778	24.1111	23.1667	29.8889	44.6667	18.1667	7.7222	18.1111	16.7778	39.2222	45.5556	34.8333	25.3889	36.5	24.1111	34.1111	25.2778	31.4444		0.0747682	30.0913
1.0713	25.2222	31.6667	29.3889	27.1111	41.5556	48.3333	42.7778	31.4444	31.4444	30.6667	19.1667	16.6111	19.8333	21.6111	29.9444	15.3889	21.7222	20.5	31.3889	23.0556	51.9444	34.5	34.0556	30.3889	24.2778	36.5556	27.4444	36.5556		0.0841113	29.8056
1.1903	31.3333	29.0556	22.1111	22.8889	22.8333	40.6667	47.6111	55.0556	42.0556	46.3889	32.8333	25.1111	19.8333	24.3333	42.4444	30.4444	12.1667	24.5556	28.3333	44.1667	51.7778	38.6667	38.4444	41.1667	28.1667	43.3333	24.5	30.1111		0.0934543	33.5853
1.3094	38.3333	46.1111	36.7778	38.2778	45.5	33.6667	54.3333	43.5556	46.6667	53.3333	22.0556	29.5556	28.2222	34.7778	27	21.4444	18.8889	29.8333	31.1667	51.3889	46.3889	35.6667	25.6111	47	38.2778	45.2222	45.3889	24.5556		0.102805	37.1072
1.4284	37.5556	39.5556	34.6111	45	31.1111	52.8333	43.8333	23.1111	44.7222	54.4444	26.6111	32.6111	18	23.6667	36.1111	25.2222	25.7778	25.2778	38.0556	37.7222	42.2222	28.8333	36.7222	34.8333	41.0556	51.5556	43	40.8889		0.112148	36.248
1.5474	36.5	30.6667	41.5	31.2778	38.3889	45.6667	24.7778	42.5	46.2778	46.0556	24.8889	23.6111	16.1111	26.2778	35.4444	34	33.2778	34.5556	20.6111	45.2222	41.6111	38.6667	28	42.0556	41.0556	44.2778	51.7222	30.6667		0.121491	35.5595
1.6665	36.9444	43.7778	36.9444	27.1111	54.3889	44.0556	39.4444	28.2778	52.5	63.2778	37.8889	33	25.2778	23.8889	32.8889	17.4444	22	26.7222	41	45.1667	42.5	29.2222	45.8889	53.2778	29.7778	41.2778	29.9444	47.3333		0.130842	37.5436
1.7855	38.5	48.9444	40.8889	27.3889	37.8889	40.6111	44.8889	32.7778	46.9444	44.2222	26.7222	26.3889	16.1111	25.8889	25.5	30.2222	28.3333	37.9444	24.2222	28.0556	34.2222	30.2778	48.5556	47.5556	34.8889	40.4444	40.1111	34.2778		0.140185	35.0992
1.9046	41.6111	35.8333	46.8333	21.0556	30.6667	50.2222	31.3889	39.6111	56.7222	47.1111	30.3333	30.7222	23.3333	25.4444	36.3889	27.9444	28.6111	31.8333	50.4444	40.6111	43.2778	29.6667	41.2222	44.1667	37.2222	40.3333	51.1111	30.7778		0.149536	37.3036
2.0236	41.2778	40.7222	49.9444	18.5556	40.6111	32.1667	46.7778	29.5556	41.7222	41.9444	28	33.5	12.5556	11.3333	35.0556	31.2778	23.6111	52.8889	36.4444	30.9444	35.2222	32.4444	47.1667	37.3889	27.6667	40.6111	35.3889	42.2222		0.158879	34.8929
2.1426	54.5556	44.8889	43.7778	24	49.5	47.2222	30.1111	34.2778	42.6111	49.8333	20.4444	30	28.6111	23.2222	24.1667	27.4444	26.5556	31.5556	39.8333	34.0556	43	29.4444	42.8889	34.8333	39.1667	51.5	30.8889	34.0556		0.168223	36.1587
2.2617	46.7778	42.6111	48.9444	35.6667	53.1111	42.4444	53.2778	25.7222	45.7778	37.4444	27.6111	35.6111	20.1667	15.3333	21.6667	16.5556	21.8889	48.7778	39.3889	42.3889	45.5	32.8889	45.7778	49.1111	46.5556	40.8333	57.5556	41.8333		0.177573	38.6151
2.3807	51.3889	45.7778	45.3333	40.7778	43.3889	51.7778	48.0556	44.1667	43.7222	47.9444	31.2778	31.6111	17.3889	15.9444	31.0556	33.5556	17.8889	45.8889	46.3889	37.7222	30.1111	43.5	42.5556	40.5556	40.5556	48.5	54.8889	53.1111		0.186917	40.1726
2.4997	45.8889	31.1667	55.2222	31.5	52.8333	41.3333	44.7778	41.8889	42.2778	50.2778	29.5	38.4444	10.4444	22.5	31.7778	26.1111	22.9444	53.8889	45.0556	50.1667	62.8889	34.8889	44.7222	36.6667	27.2222	50.2778	52.8889	53.2222		0.19626	40.3849
2.6188	42.1111	28.9444	48.1111	31.6111	53.3333	43.1111	48.6111	41.6667	54.6667	42.3889	31.3333	41.7778	12.8889	21	27.6667	38.8889	40.2778	47.9444	40.1111	33.4444	34.2222	40.2222	49.6111	34.2222	42.3333	52.1667	44.7222	53.2778		0.205611	40.0238
2.7378	44.1667	47.4444	50.6667	38.1111	46.6111	55.1667	51.3333	40.2222	45	29.4444	45.4444	27	18.5556	24.6667	19.1111	39.9444	29.7222	46.6111	43.2222	45.5556	51.4444	47.9444	52.9444	27.8333	54	51.3889	49.2778	43.3889		0.214954	41.6508
2.8568	46.5	32.7222	40.3889	36.1111	41.2778	43.6111	49.6667	29.7778	68.1111	46	39	24.3889	27.7778	27.0556	35.5	34.0556	44.2778	37.7222	43.3333	42.5556	32.5556	30.7778	53.2222	36.1667	35.8889	48.9444	57.0556	74.0556		0.224297	41.375
2.9759	48.6111	36.5	57.8889	34	33.7222	39.1667	58.8889	36.5	38.6111	51.7778	56.6111	38.0556	24.5	27.7778	43.2778	40.7778	33	52.5556	50.7222	42.8333	40.0556	45.1111	47.7222	33.7222	31.1111	51.3889	38	58		0.233648	42.5317
3.0949	49.6667	37.5	58.2778	31	39.5	44.7222	65.1111	42.2778	55.3889	41.7778	37.3889	31.7222	18.4444	21.2222	29.6667	40.1111	31.2778	37.5556	31.4444	37.5	25.0556	54.4444	57.7778	51.4444	62.5	48.5	48.1667	72.3333		0.242991	42.9206
3.2139	57.8889	37.2222	45.0556	36.6111	48.2222	50.6667	56.5	40.5	36.8333	47.6667	46.8333	27.3889	34.6111	33.1111	28.2222	32.8889	28.6111	45.9444	43.6667	34.5556	39.4444	47.6667	53.1667	32.8333	51.1111	46.8889	43.8889	56.2778		0.252334	42.2956
3.333	45.8889	34.8889	79.5	38.8889	38.1111	41.6667	41.2222	31.2222	46.1667	35	32.4444	23.7222	18.8333	29.3889	32.5556	27.2778	33.1667	60.7222	39.3333	33.8333	38.8889	46.7222	58.8333	57	41.8333	60.4444	52.3889	63.1111		0.261685	42.252
3.452	40.6111	39.7778	61.6111	44.8333	29.5556	30.8333	65.8889	63.2778	49.8333	31.3333	50.8889	27.3889	25.3333	19.9444	22.4444	34.8889	31.7778	39.2778	23.5	37.5556	41.5	56.6111	74.6111	49.1667	37.1667	45	54.2222	73.8333		0.271028	42.9524
3.571	38.1667	35.0556	59.2222	47.6111	35.3889	36.3333	47.5556	41	54.7222	22.1111	52.4444	36.3333	17.6111	27.6111	39.5	46.4444	26.9444	36.2222	28.2222	22.4444	20.6667	61.8333	39.6111	68.5	42.2222	54.1111	44.8889	70.3333		0.280371	41.1825
3.6901	45.4444	30.4444	56.6111	50.4444	26.2778	36	49.1111	31.2778	28.9444	22.6667	48.1667	25.6111	31.3333	17.8889	23.3889	40.2778	30.1667	49.5	34.8333	33.9444	46.1111	53.1111	47.2778	67.5	48.9444	38	48.6111	54.7778		0.289722	39.8809
3.8091	44.8889	26.8889	62.0556	55.3333	39.6667	38.6667	54.0556	41.7778	35.7778	30.8889	45.1111	26	25.1667	34.1111	35.3333	41.6111	34	40.7778	37.0556	43.6667	24.9444	49.3333	41.8333	51.3333	30.7222	39.5	57.6667	48.1111		0.299065	40.5814
3.9281	40.7778	27.7778	59.6111	47.4444	41.4444	44.8333	41.6111	40.2778	39.8333	21.5	55.5	32.6667	37.8333	16.3333	34.0556	45	30.5	41.3889	23.6667	53.2222	43.3333	43.7222	32.0556	58.7778	33.5556	46.8889	57.6667	56.6111		0.308408	40.996
4.0472	44.5556	22	50.7778	46.1111	30.9444	23.6111	46.7222	58.1667	50.5556	28.6111	46	30.8333	41.0556	17.1667	29.4444	26.3889	27.4444	37.5556	31.2222	38.0556	37.4444	61.6111	35.2778	45.7778	31.2222	37.6111	52.2778	63.6667		0.317759	39.004
4.1662	53	28.3889	57.4444	46.5556	20.3889	27.5	42.4444	51.6667	41.7778	24.5	39.7222	24	54.8333	22.3889	31.5556	40.3333	30.3333	45.4444	24.3333	37.6667	37.6111	63.5556	45	51.3333	25.1111	28.5556	58.5556	62.5		0.327102	39.875
4.2852	40	30.1667	66.4444	42.5556	11.6667	35.6111	43.8889	26.1667	63.6111	14.7778	43.2778	27.5556	29.2222	21.3889	27.9444	35.5556	26.8889	27.0556	18.6667	44.0556	28.8889	48.6667	44.7222	32.3889	27.9444	35.3333	40.0556	48.2222		0.336445	35.0972
4.4043	50.3333	32.1667	75.8889	45.7778	18.3889	27.7222	56.9444	31.3889	38.2222	33.4444	25.7778	50.1667	44.8333	16.9444	26.3333	40.5	41.7222	26.9444	22.3333	40.2222	38.7778	51.6667	39.5556	35.2222	20.7222	30.0556	55.9444	45.6111		0.345796	37.9861
4.5233	59.7222	36.6667	49.6667	49.7222	18.1111	40.8889	48.7222	40.5	23	22.5556	32	33.4444	24.1667	23.3889	20	39.4444	56.7222	35.6111	30.8333	25.3333	38.5	71.5	38.0556	41.5556	26.7222	21.6667	47.8333	50.1111		0.355139	37.373
4.6423	56.1111	30.5	50.2222	55.8889	31.3333	31.4444	42.7778	44.5556	31.6667	25	39.4444	29.5556	32.3889	33.4444	36.8333	47.2222	50.5556	45.3889	27	46.5	39.8333	89	33.5556	26.0556	24.8333	24.8333	40.0556	47.8333		0.364482	39.7798
4.7614	43.3889	22.1667	58.5556	41.2222	17.7222	21	42.6667	33.5	26.3333	19.7778	35.3333	38.3333	16.8889	32.7778	27	49.5	41.5	31	22.6111	41.6111	44.4444	74.1667	34.3889	39.8333	21.7222	34.1667	56.8889	48.5556		0.373833	36.3234
4.8804	34.3889	24.6111	53.1667	50.2222	34.3889	22.1667	49.7222	45.8889	27.8333	18.3889	43	30.4444	29.5	23.8889	41.8333	46.7778	54.7778	35.7222	37	49	48.7222	72.8333	44.4444	39.7222	29.2778	34.2778	49.2778	50.7222		0.383176	40.0714
4.9995	42.1111	25.1111	62.5	52.0556	18.3333	24.8889	55.3889	36.6111	28.8889	19.7778	32.3889	29.9444	23.9444	23.5556	58.1111	27.8889	41.4444	36.8889	26.4444	32.4444	36.5	73.9444	34.2778	41.3333	33.8889	31.0556	68.1111	51.8333		0.392527	38.2024
5.1185	43.8889	25.7778	59.5556	57.5	25.2778	22.2222	40.3333	45.1667	26.7778	22.2778	30.8333	23.6111	25.4444	26.8333	43.6111	40.7222	51.5556	29.7222	26.5556	31.7778	35.1667	71.5	48.7222	34.1667	24.2222	26.8889	61.8889	37.5556		0.40187	37.127
5.2375	44.8889	23.1667	59	41	9.6111	40.2222	50.9444	60.2222	32.6667	15.2222	32.1111	28.9444	14.6667	37.8333	47.9444	48.9444	47.8333	43.1111	27.8333	25.6111	37.7778	41.1667	42.5556	40.0556	27.9444	27.1667	82.6667	52.1667		0.411213	38.6885
5.3566	50.8889	30.6111	57.5556	42	13.5	18.6667	58.6667	66.2778	25.6667	18.0556	34.8333	24.8889	21.6111	43.5	52.2778	34.2778	40.3889	39.5556	35.5	36	33.8333	49.7778	50.6111	33.2778	31.2778	21.4444	44.5	71.0556		0.420564	38.5893
5.4756	57.7778	16.3333	55.2778	50.1667	25.2778	40.3889	57.5	53.7222	25.5556	28.8889	44.0556	21.8889	16	38.4444	46.7222	38.3333	27.5556	45.7222	35.4444	15.1111	43.8333	41.6111	43	46.5556	20.2222	33.8333	56.4444	70.3333		0.429907	39.1429
5.5946	43.6111	29.3333	67.8889	36.2222	13.7778	27.7778	55.3333	41.8333	16.2778	23.7222	39.5556	35.5	18	44.8889	41.3889	38.3333	26.3333	33.7778	34.7222	34.2222	35.3333	34	38.7222	27.8333	14.8333	30.6667	58.5	55		0.43925	35.621
5.7137	62.4444	25.2778	51.7222	35.8889	16	21.5	51.3889	46.3333	26.7778	12.5556	44.4444	28.9444	20.2778	28.0556	30.1111	37.8333	32.1111	34	20.7778	29.8889	27.4444	34	41.8333	45.8333	13.6111	17.1667	33.8333	85.3333		0.448601	34.121
5.8327	46.1111	32.6111	43.8889	41.2222	29.7778	20.6667	44.0556	51.5556	18.6111	15.6111	45.7778	42.8889	18.5556	36.5	34.6667	37.8889	40.3889	49.9444	24	14.1667	20.2222	34.3889	30.0556	36.5	20.3889	25.9444	37.5556	69.4444		0.457944	34.4068
5.9517	57.2222	21.3333	61.7222	58.6667	13.9444	33.0556	50.6111	41.9444	30.8333	17.3889	42.1667	45.9444	19.1111	27.1111	17.3889	37.7222	28.3889	48.5556	27.6111	23.2778	23.0556	40.6667	39.6111	41.7222	15.0556	27.1111	40.0556	76		0.467287	35.9742
6.0708	46.1111	23.6667	48.1111	41.6667	20.2778	27.6667	47.6667	36.7222	18.8333	14.2778	53.5556	25.9444	17.2222	33	19.6111	26	30.8333	42.6111	32.5556	28.4444	24.9444	42.6667	26.5	56.8333	16.7778	20.5	35.5	66.6111		0.476638	33.0397
6.1898	49.6111	24.6667	65.7222	60.2222	22.6111	24.6111	36.0556	52.3333	12.4444	19.4444	46.6667	19.8333	6.5556	35.5556	17.7778	28.5556	25.8333	53.3333	26.8333	14.1111	14.2778	21.8889	28.4444	59.4444	24.5	26.8889	47	78.7222		0.485981	33.7123
6.3088	52.7778	25.5	41.3889	54.9444	23.7222	24.9444	41.5	55.7222	18.3889	14.4444	45.5	14.7222	15	27.1111	21.6111	27.7778	23	58	22.2222	30.1111	27.5	27.7222	22.3889	59.1667	14.3333	27.1111	43.7222	67.8333		0.495325	33.1488
6.4279	46	16.2222	47.7222	62.2778	15.2222	20.2222	58.9444	44.9444	15.1111	12.0556	29.3333	22.7222	21.5	37.7778	28.0556	30.5556	43.9444	45.5	24.7222	33.6111	29.6111	40.5556	44	52.7778	20.2222	13.0556	54.8889	74.6667		0.504675	35.2222
6.5469	42.2222	21.3889	63.1667	65.7222	22.1667	28.5556	52.1111	49.5556	18.6667	12.8889	37.6111	23.1667	17.3889	32.7222	18.1667	25.1111	30.1667	43.9444	24.4444	17.8333	19.0556	31.8333	21.6667	65.3333	17.7778	24.5556	42.6111	75.8333		0.514019	33.7738
6.6659	47	17.9444	75.6111	49.7778	13.8333	28.6111	46.7778	61.2778	26	15.8889	43.6111	20	17.1111	40.6111	41.0556	29.1667	25.8333	38.8333	22.2778	20.9444	29.5	32.3889	26.6667	52.6667	20.1111	19.8333	54.5	50.6111		0.523362	34.5873
6.785	37.8333	27.6667	47.8889	51.2778	14.7778	19.5	63.4444	67.6111	24.7222	20.2222	49	33.9444	22.2222	49.9444	23.6667	39.8333	30.6667	44.4444	22.5556	26.2222	38.1111	46.1667	30.9444	43.3889	17.2222	17.2778	55.0556	78.5		0.532713	37.2897
6.904	33.8889	14.9444	48.6111	51.1111	33.5	19.9444	46	56	15.2222	10.3889	46.0556	23.0556	25.8889	21.9444	23.6111	30.7222	28.2778	39	21.5	28.2778	36.7222	39.1667	36.5556	30.7222	19.9444	16.2222	61.4444	56.0556		0.542056	32.6706
7.023	30.5	18.1111	67.4444	56	18.2778	20.6667	75.1111	75.2222	24.5	6.5	64.6111	23.2778	32.7778	27.5	25.7778	33.8333	46.2222	30.3889	22.3333	23.5	32.5	43.2778	36.6111	48	10.3333	7.7222	53.2778	42.6667		0.551399	35.6052
7.1421	37.3889	24.2778	56.3333	46.0556	12.3333	27.3333	60.8889	56	27.3889	14.7778	53.8889	26.7222	42.5556	28.3333	29.7222	41.8889	24.2778	46.7222	18.7222	37.8889	30.1111	30.3889	40.7222	52.3333	26.2778	25.7778	56.4444	53.7778		0.56075	36.7619
7.2611	32.7778	11.3889	33.7222	41.8889	18	21.7778	57.4444	66.3333	12.4444	13.3889	62.6667	28.1111	36.0556	30.6111	32.3333	45.2222	44.8889	45.1111	26.5	36.1111	24.3333	37.8333	34.9444	49.5	20.7222	22.5556	56.8333	66.8889		0.570093	36.0853
7.3801	21.5	19.6667	40.7222	45.3889	17.1667	27	59.5556	64.1667	23.0556	16.3333	57.2778	29.3889	23.6111	23.3889	17.6111	32.3889	34.2222	47.3889	20.7222	17.8333	29.7778	44.8889	26.7778	40.7778	18.9444	18.1667	54.7778	60.9444		0.579436	33.3373
7.4992	39.1111	18.2778	38.2778	50.7778	16.0556	21.3333	58.1111	48.7222	17.4444	14.1667	57.3889	26.5556	32	27.7222	18.3333	44.2222	32.8333	40.1111	17.7222	25.8889	21.1667	42.1111	30.2778	46.0556	12.5	16.4444	48.3333	47.3333		0.588787	32.4742
7.6182	24.2778	15.5	30.8333	54.3889	23.0556	16.0556	56.8333	59.4444	16.3333	16.8333	58.7778	24.9444	33.2778	21.6667	18.6111	44.8889	31.5	37.7778	15.5556	26.8889	25.2778	34.2222	37.1111	33.4444	14.8333	16.8889	59.2222	43.3889		0.59813	31.8512
7.7372	34.7222	17.0556	28.8889	47.9444	13.2778	22.5556	51.5556	61.7778	24.3889	21.6111	58.5	17.8889	24	23.2778	27.3333	40.2222	28.0556	42.4444	16.2778	32.1111	36.3889	40.8333	40.6667	50.2222	16.4444	19.7778	56.2222	58.2222		0.607473	34.0238
7.8563	30	18.5	50.1111	50	21.1111	19.6111	61.1111	45.8333	16.0556	14.5	72.5	27.9444	44.8333	31.6111	27.5556	38.6667	34.0556	50.0556	21.2222	23.1667	20.2222	39.6111	35.1667	56.5556	10.0556	17.5	36	40.1111		0.616824	34.0595
7.9753	33.3889	24.3333	28.8333	65.1667	18.8889	30.1111	37.1111	61.7222	9.5556	23.7778	62.8333	29.9444	29.0556	34.3889	27.6111	26.9444	31.0556	47.9444	18.4444	39.7222	19.4444	44.1667	40.3333	63.1667	16.1667	25.4444	48.7222	40.1111		0.626167	34.9425
8.0943	26.2778	13.9444	48.7222	47.1111	26.5	21.2222	45.8889	58.3889	22.7222	15.8889	57.4444	35.8333	31.0556	27.8889	28.6667	28.5	41.6111	57.5556	20.0556	32.7222	21.2222	45.5	43.1667	74.4444	11.9444	25.2778	44.7222	54.5		0.63551	36.0278
8.2134	30.7222	14.8889	27.9444	42.0556	19.4444	34.1111	58.9444	50.3889	33	12.2222	52.2222	33.1667	27.8889	27.8889	27	27.5556	23.5556	36.5	11	32.7222	19.4444	53.2222	27.5	77.6667	18.6667	18.7222	46.8889	44.5		0.644861	33.2083
8.3324	25.5556	25.3889	44.5	65.6111	19.5556	22.7778	59.6111	50.3333	18.8333	27.5	59.2778	30.6667	25.5556	23.2222	12.6111	25.7778	26.6667	43.7778	15.6667	30.7778	21.7778	49.3889	42.2778	69.7222	9.6667	17.2222	37.3333	47.5556		0.654204	33.879
8.4515	26.5556	13.7222	45.7778	45.9444	18	10.7222	56.1667	39.8889	16.1111	16.3333	70.2778	46.1667	24.8889	22.3333	19	29.5	24.1667	39.7778	11.4444	25.7778	20.2778	46.8889	37.2222	56.7778	17.7222	25.5556	43.1667	34.8889		0.663555	31.6091
8.5705	28.7222	27.6667	55.5556	43.0556	23.9444	36.4444	53.8889	42.2778	22.3889	24.6111	57	43.0556	15.9444	23.9444	18.2778	34.5556	26.0556	34.8889	18.3333	34.3889	31.8333	36.1667	32.0556	52.0556	19	24.9444	53.1667	45.7778		0.672898	34.2857
8.6895	33.9444	21.6111	44.5556	37.5	18.1667	25.0556	62.8889	33.2222	23.7222	21.3889	59.1111	46.3889	25.5	34.7222	24.6667	33.0556	44	33.7222	5.6667	43	30.6111	32.1667	29.3333	63.0556	14.7222	32.8889	41.7778	50.1111		0.682241	34.5198
8.8086	30.1667	19.9444	55.1111	31.2778	24.5	30.6667	50.7778	40.7778	27.4444	24.0556	55	49.8889	37.6667	20.3889	35.5	32.5556	28.8889	63.8889	21.6667	34.1111	37.2222	29.9444	36.4444	55.4444	10.5556	17.7778	43.7222	37.3333		0.691592	35.0972
8.9276	37.5556	16.5	54	52.7778	28.6667	29.3889	52.1667	47.1667	21.0556	19.4444	52.3889	51.1111	22.1111	24	23.6111	32.2778	25.0556	39.0556	16.5	34.1667	43	35.1667	46.7222	58.7778	24.7222	32.2222	52.2222	36.2778		0.700935	36.004
9.0466	26.7222	25.8333	36.2222	37.8333	18.3333	15	46.7222	41.2778	20.1111	18.3333	46.2222	32.5	25.6667	22	11.5556	27.2778	35.6667	64.7778	15.5	46.2778	31.7222	46.2778	42.8333	53.8889	19.8889	24.8889	46.1111	40.3333		0.710278	32.8492
9.1657	30.8889	18.8333	35.0556	47.6667	16.2222	18.9444	47.3333	49.7778	26	16.3333	42.3889	43.9444	29.6111	25.7222	18.2778	27.8333	21.4444	50.8889	17.7778	41.1667	31.5	43.2778	31.7778	49.7222	15.1667	43.4444	58.0556	32.7222		0.719629	33.2778
9.2847	20.0556	27.7222	33.2222	39.7778	15.1111	26.6667	49.3889	42.2778	13.4444	21.3889	37.3889	36.5556	35.1111	24.6111	18.2778	33.3889	27.1667	38.3333	24.5556	24.2778	33.9444	41.0556	30.5	56.2778	14.8333	25.1667	46.5556	30.1667		0.728972	30.9722
9.4037	13.1667	19.7222	28.1667	46.5556	16.2222	12.8889	44.5	40.3889	21.8889	26.5556	44.4444	37.7222	42.8333	21.4444	19.4444	24.2222	26.6111	39.2222	13.2222	30.3889	37.6667	41.7778	34.8889	53.6111	31.5556	32.1667	38.0556	31.6111		0.738315	31.1052
9.5228	22.8889	22.8333	35.5556	56.6667	17.9444	33.9444	42.1667	53.9444	16.1667	19.1667	36.8889	33.5	40	28.4444	22.0556	14.3889	23.2222	44.2222	23.8889	27.2222	39	48.2778	32.9444	47.2222	26	23.9444	40.2778	42.9444		0.747666	32.7044
9.6418	19.7222	10.6667	43.2778	35	16.3333	22.5556	53.6111	49.5	30	12.8889	39.6111	27.8889	33.7778	28.2222	12.0556	26.4444	21.3333	45.7778	14.5	22.7778	40.7222	51.2778	30.6667	43	31.4444	24.8333	34.2222	38.2778		0.757009	30.7282
9.7608	31.9444	20.7222	38.9444	49.1111	15.2778	21.1667	42.7222	47.6111	27.0556	29.2222	44.9444	25.8889	32.3889	30.6667	10.5556	17.1111	21.4444	27.1111	22.1667	30.2222	23.5	39.0556	25.7778	48.7778	24.5556	22.6111	32.8889	36.9444		0.766352	30.0139
9.8799	26.2778	16.7222	40.6667	51.7222	19.6111	27.8889	37.8889	29.6667	22.9444	27.7778	31.7778	26.5	33.4444	28.6111	11.6667	13.2222	15.6111	24.0556	12.3333	27.3333	40.3333	38.5556	33.7222	43.1667	22.5556	27.6667	33.7222	42.8889		0.775703	28.8691
9.9989	18.5	15.7222	36.9444	54.7778	23.3889	18.8889	34.5556	42.2222	23.0556	25.1667	62.9444	24.3889	25	21.5556	10.3333	27.2778	24.1111	16.4444	24.2778	31.7778	23.6111	23	28.5556	31.3333	27.2222	28.7222	48.7778	41.5556		0.785046	29.0754
10.1179	24.3889	16.6667	43.1111	55.3889	22.1667	14.5	48.1667	46.4444	25.7222	15.5556	53.8889	28.0556	27.8889	16.7778	9.6667	27.8333	17.5556	35.7222	12.1111	26.8889	43.6111	20.2778	31.6111	33.1111	27.1111	48.3889	54.5	27.1667		0.794389	30.5099
10.237	33.3333	11.7778	38.3889	43.5	18.8333	14.0556	34.6667	47.7778	26.3889	21	47.6667	23.1667	58.3333	17.3333	24.9444	32.2222	19.8333	36.7222	18	24.3889	39.1111	39.9444	28.7222	31.5556	27.2778	42.2222	52.5556	25.3333		0.80374	31.3948
10.356	30.6111	21.6667	52.3333	39.1111	24.3889	29.3333	41	36.2222	27.4444	21.9444	41.5556	24	53.0556	22.0556	10.1111	29.7778	16.2222	26.2222	26.7778	36.8333	36.3889	45.2222	15.2778	32.5556	25.8333	26.8333	66.1111	25.7778		0.813083	31.5952
10.475	27.7778	21.2222	35.7778	46.1667	19.8889	19.1667	53.7778	48.5	15.3889	19.1667	60.5556	26.3333	38.5	24.9444	18.8889	17.3333	14.3333	37	32.7222	20.3889	41.5556	42.0556	19	19.6111	17	34.6667	53.2222	22.3889		0.822427	30.2619
10.5941	33.6111	21.8333	38.3333	50	23.6667	26.5	57.3889	58.7222	24.0556	22.7778	35.0556	29.3889	30.2778	12.5	12.4444	20.4444	21.2778	37.3333	17.9444	28.3889	29.4444	40.7778	21	22.1667	26.3333	33.9444	35	28.2222		0.831777	29.9583
10.7131	27.8333	31.1111	46.8333	40.7778	20.0556	34.7222	55.3889	34.5	28.1111	22.1111	42.6111	26.7778	36.6667	28.4444	15.7222	23.5556	12.8333	37.9444	23.5556	28.5556	32.5556	25.0556	29.3333	21.8889	23.9444	28.2222	45.7222	18.9444		0.841121	30.1349
10.8321	39.6111	18.1111	35.1667	40.2778	23.9444	25.2222	52.8333	50.2222	16.6667	14.5	49	32	35.5556	17.9444	17.0556	26	22	25.7778	13.2778	33.7222	47.4444	32.6111	23.8333	27.1111	15.8889	34.2778	34.1667	12.8333		0.850464	29.1806
10.9512	30.9444	22.3333	40.3889	53.4444	23.2778	38.3333	46.4444	36.5	22.6667	18.9444	44	22.3889	40.0556	15.7778	12	19.6667	5.1667	40.0556	18.8333	28.2778	27.6111	23.5	18.5556	21.0556	19.1111	26.4444	25.7222	11.6667		0.859815	26.8988
11.0702	35.8333	18.5556	28.1111	40.5556	25.1667	25.7222	48.6667	35.5556	26	29	51.5	29.2778	40.5	35.6667	24.0556	11.6667	16.5556	30.2778	33.0556	22.6111	50.2778	17.3889	23.2778	10.8889	12.9444	15.7778	24.9444	7.3333		0.869158	27.5417
11.1892	33.8889	28.5	42.3889	39.8333	18	40	47.3889	44.5556	20.5	25.7778	62.6667	30.1111	33.3889	28.5556	22.3889	10.5	11.6111	26.7778	31.2222	23.5	38.5556	15.7222	22.5	13.3333	1.7778	13.1111	19.6111	8.8333		0.878501	26.9643
11.3083	40.8333	27.4444	31.3333	51.3889	29.5556	38.4444	42.7778	40	20.8889	37.8889	41.7222	17.2222	30.0556	19.5556	23.8333	14.2778	14.1667	29.3333	34.7778	41.4444	35.1111	24	9	9.1111	6.7778	10.2222	12.7778	7.1111		0.887852	26.4663
11.4273	32.3889	23.7222	35.3889	36.7222	21.2778	46	36.9444	30.9444	27.4444	31.3889	46.8333	26.2778	35.0556	13.6667	10.9444	8.9444	7.3889	13.8333	20.7778	33.5556	28.1667	12.6667	13.3889	8.6667	1.0556	9.6667	14.3333	3.3889		0.897195	22.5298
11.5463	43.7222	32.9444	41.1111	47.1111	21.8889	34.6667	46.6111	32.3889	18.1667	39.4444	36	18.8889	38.8333	11.6667	5.1111	15.1667	8.1111	24.2222	21.5556	41.8333	23.0556	21.9444	7.8889	5	4.7222	8.0556	9.3889	4.1111		0.906538	23.7004
11.6654	39.7222	30	19.4444	52.0556	27.8333	34.7222	60.9444	33.5556	19.1667	38.1667	38.2778	17.9444	26.7778	20.7222	11.8333	6.2778	9.9444	20.0556	26.3333	36.5556	31.9444	18.1111	6.5556	15.3889	6.5	7.0556	10.5556	4.0556		0.915889	23.9464
11.7844	41.0556	12.1667	29.1667	43.2778	18.5	41.5	43.4444	29	37.3889	25.3889	23.3333	16.0556	19.7222	25.7222	12.1111	13.6667	3.6667	14.5556	18	23	28.1111	14.2778	6.8333	1.8889	5.7778	7.3333	5.5	1.3333		0.925232	20.0635
11.9035	46.1667	19.6667	27.9444	42.2222	33.6111	30.5556	42.1111	23.7778	17.8889	25.5	31.6667	12.2222	17.4444	25.7778	26.8889	10.1111	12.3333	8.7222	16.8889	22.8333	20.4444	4.8889	9	2.3889	8.6667	7.6667	7.0556	0.1111		0.934583	19.8056
12.0225	16.5556	23.2222	21.8889	37.7222	27.8333	44.8333	29.2222	14.8333	22.1667	13.9444	19.6111	12.3889	12	15.2778	14	7.5	6.3333	11.6111	14.3889	30.1111	15.7778	5.3333	7.0556	6.6667	2.6111	4.9444	3.9444	4.2222		0.943926	15.9286
12.1415	23	32.3333	22.1667	35.1667	34.2778	31.2222	21.1111	21.5556	15.4444	7.8889	14.5556	8.8889	10.5556	14.9444	12.8333	5.7778	6.1111	7	24.7778	31.0556	20.1667	6.5	4.4444	5.3889	2.0556	1.8889	6.7778	10.1111		0.953269	15.6429
12.2606	26.7222	28.7778	38.6667	16.1111	18.7222	44.2222	24.6111	6.2778	16.7778	6.6111	10.7222	0.6111	18.5	8.7778	11.6111	12	1.9444	7.3889	15.1111	30.3333	15	5.2222	6.2778	3.8889	5.0556	3.6667	3.0556	3.8333		0.96262	13.9464
12.3796	19.2778	28.7222	23.2222	28.2222	22.7222	33.1667	21.3889	17	24.2778	3.6111	17.1111	5.0556	9.8889	5.7222	6.1111	12.6111	6.3333	5.1111	19.5	16.3333	8.5	5.2222	9.6111	7.5	4.6111	3.0556	5.2778	2.5		0.971963	13.2738
12.4986	28.6111	19.3333	20.6111	29.1111	17.5	42.7778	17.4444	13.5	11.1111	10.1667	13.2222	6.1111	4.7778	3.3333	7.5556	10.3333	2.2778	12.8333	6.1111	20.2778	20.2778	7	2.7778	3	0.5	5.4444	4.3333	1.3333		0.981306	12.2024
12.6177	22.0556	15.1667	16.4444	14.4444	8.1667	38.6111	10.3333	7.1111	11.7222	7.5556	9.3333	2.0556	6.6111	11.0556	8.8333	6.3333	5.2778	10.2778	13	17.5	9.6667	3.1111	3.9444	1.7778	1.3889	6.5556	4.4444	6.7778		0.990657	9.98413
12.7367	15.8333	11.2222	12.6111	19.1667	15.1111	21.1111	6.6667	6.6111	13.5	6.8889	18.2222	6.9444	7.1667	3.5556	5.4444	5.2778	6.4444	2.5556	6.7222	15.5556	10.5	4.9444	7	5.2778	3.9444	6.1667	3.7778	4.7778		1	9.03571

## Sheet: Image10
X0	Y0	Y1	Y2	Y3	Y4	Y5	Y6	Y7	Y8	Y9	Y10	Y11	Y12	Y13	Y14	Y15	Y16	Y17	Y18	Y19	Y20	Y21	Y22	Y23	Y24	Y25		Ap-Basal	Avg intensity
0	49.1228	34.665	19.0416	23.5301	21.0341	13.0876	10.727	31.3765	20.0754	33.5191	22.9334	18.9548	21.7668	26.7445	19.2744	29.7175	22.3054	31.7378	21.4928	23.1848	19.6575	12.6993	16.4043	13.0618	19.8422	25.5734		0	23.1358
0.119	46.4496	43.8854	29.3936	27.9783	18.2531	17.1098	12.2982	19.1259	27.8604	25.1435	27.3604	21.311	19.2742	23.6748	16.7011	25.8242	25.6342	23.194	20.9234	18.0316	21.3749	22.7496	11.9917	19.588	14.9622	20.084		0.00892596	23.0837
0.2381	41.8702	28.3492	20.8807	33.8324	15.5198	17.138	17.7697	24.0593	21.4487	27.9503	35.8499	25.6716	26.2928	18.5754	18.3681	22.1501	33.0804	31.8524	27.0348	17.5641	18.9699	17.5856	30.381	21.3872	10.5426	20.6342		0.0178594	24.0292
0.3571	30.7976	43.8291	22.8424	32.3722	23.5218	30.0537	23.5718	25.2277	16.8543	36.4706	33.923	27.1002	17.4007	24.6258	19.2743	27.467	26.3425	24.8661	18.6485	10.7369	18.3004	24.6475	23.7912	14.207	14.4444	31.425		0.0267854	24.7208
0.4761	41.9198	33.2597	30.5588	28.3283	29.9964	20.49	22.2225	26.4176	20.3596	28.7105	31.1461	25.4362	24.121	21.9962	21.1343	28.9738	22.4591	16.5452	22.7712	18.3479	18.1168	14.4803	15.0509	16.6514	13.9405	18.5705		0.0357113	23.5386
0.5952	49.5817	34.6169	38.5454	27.7251	27.2669	34.2998	26.8674	24.1054	22.2086	30.2144	32.2457	17.9808	20.6461	22.597	26.4132	26.7328	18.9608	16.5475	14.093	15.3619	11.8974	22.7647	19.8419	15.9196	30.7672	18.7733		0.0446448	24.8836
0.7142	40.6562	35.8284	40.0073	33.9728	21.8141	27.8875	27.3694	32.6388	25.1588	22.3215	30.4763	16.2001	20.4518	19.5551	18.0122	34.747	13.8933	14.6142	20.1714	18.8462	17.4349	21.8595	14.7424	20.006	31.6866	18.1915		0.0535708	24.5594
0.8332	50.0277	38.4213	42.92	36.3044	28.6888	29.1528	31.0944	29.1371	25.7684	24.528	33.5899	33.3404	19.429	23.614	16.4613	33.8715	27.6144	29.401	19.7012	19.0498	18.9774	34.8077	19.0789	16.6466	19.4221	21.9746		0.0624967	27.8086
0.9523	54.9393	25.3122	33.5335	27.325	20.1299	30.9083	33.0978	19.6306	22.0269	25.2948	35.2636	30.8787	39.1945	25.5998	24.2895	34.5749	21.47	14.4372	16.8765	17.0951	28.6812	22.3453	16.6071	24.941	16.4224	27.0885		0.0714302	26.4601
1.0713	56.9488	33.6072	31.1246	31.5996	27.7336	34.5609	29.9355	30.811	22.0084	26.6123	30.6218	28.361	27.1683	20.0336	35.3209	23.9793	22.1735	19.2714	18.8589	9.9249	30.1982	22.3235	15.2212	15.267	23.7077	25.4794		0.0803561	26.6482
1.1903	67.0145	39.8928	32.5364	24.9683	24.3537	25.5247	29.1846	17.0968	29.97	30.9645	24.1339	29.2556	22.4886	31.8248	25.3158	25.347	19.5298	22.371	20.0138	18.1577	18.2712	26.8805	16.051	25.7786	26.5021	17.5746		0.0892821	26.577
1.3094	62.6377	35.2769	34.0794	47.6942	29.0925	33.1251	33.1081	19.9633	27.0751	34.3366	28.3599	32.726	32.2031	20.7848	25.1204	22.1669	29.4119	15.6769	29.2318	21.1971	27.1391	25.2269	28.9821	23.3374	24.8832	15.1471		0.0982156	29.1532
1.4284	76.7496	49.44	28.1095	35.7714	34.6892	42.5343	33.5137	29.1709	23.3356	27.4765	30.3042	22.6814	34.2707	23.9795	29.5331	25.5091	22.8082	28.5312	20.3897	27.9259	22.0409	33.2088	12.914	16.5719	28.3237	26.7257		0.107142	30.2503
1.5474	72.9915	41.5178	30.1909	40.4133	28.5794	46.1744	34.6245	24.7469	27.9955	29.3987	31.9096	25.8051	23.5073	21.6738	34.1461	15.9458	38.1786	26.0943	18.5408	23.1277	26.8153	30.4121	23.1088	27.3966	21.6979	21.8092		0.116067	30.2616
1.6665	65.5263	44.346	39.109	42.0812	26.6632	30.9145	31.214	27.0719	19.444	31.7841	32.2318	32.5638	34.5679	22.5572	26.3945	26.9433	33.3096	32.4058	16.881	19.3257	24.7681	34.1404	19.704	30.6714	27.3151	19.359		0.125001	30.4343
1.7855	71.4192	43.7808	32.7443	49.3863	32.5051	27.4155	28.5459	33.8445	30.262	35.7318	30.759	30.1704	31.2596	28.7644	30.028	29.6314	26.0966	31.9269	26.629	22.9347	23.4017	23.774	25.6418	21.7761	17.6477	33.0789		0.133927	31.506
1.9046	64.6865	33.6849	34.4926	38.2932	41.0514	40.7769	36.1213	26.8217	30.9303	34.2159	29.9497	39.3049	33.6513	34.3299	25.8948	21.9193	29.7971	29.5351	20.3961	18.4714	25.8137	30.0618	27.3644	33.239	21.4667	37.9104		0.14286	32.3146
2.0236	54.6549	45.2449	32.166	45.9637	37.9354	38.8472	31.6903	25.2649	35.537	44.4639	26.7744	41.8145	25.7756	35.2866	30.6743	34.5104	40.9093	30.5486	22.202	16.5278	17.796	46.4292	18.7913	27.9998	22.0036	29.1636		0.151786	33.0375
2.1426	49.1133	56.8691	29.1218	38.3976	47.5742	36.9636	36.2391	25.2501	36.0965	49.7761	34.993	28.4766	30.0412	34.5527	37.3627	20.4124	33.6468	27.2089	22.3641	21.8448	27.0465	40.4902	27.2845	18.5574	24.6233	25.3603		0.160712	33.0641
2.2617	43.4048	41.9383	63.7824	35.6112	43.2961	46.6113	35.9323	44.0168	32.1156	38.2482	35.0061	38.3829	29.2543	30.7447	35.4717	19.6052	41.8056	32.4114	22.6495	23.3121	33.6695	29.5747	36.0002	33.9853	28.3784	25.7223		0.169646	35.4204
2.3807	31.9443	40.9327	56.9298	58.4544	49.9945	48.1917	48.3408	32.0582	29.7701	34.3376	27.0996	33.4105	28.2409	27.0782	37.8502	30.4383	31.9374	42.4394	27.4867	21.9446	29.7514	21.6028	36.3659	30.3667	20.8595	17.1841		0.178572	34.4235
2.4997	47.882	48.3394	39.2037	62.2696	54.2504	41.9171	47.2627	30.8003	30.4694	49.4393	30.7114	33.7643	42.2177	38.7965	24.1685	40.6188	35.3933	35.0527	28.471	26.6675	23.5524	35.3662	42.0848	36.8722	20.6099	25.7792		0.187498	37.3831
2.6188	40.2229	35.6586	37.9134	58.3945	48.0442	41.1368	43.8642	36.6556	27.5736	54.8115	41.0147	30.9931	42.533	29.6166	31.8957	38.0275	47.3067	31.2515	30.6302	28.3129	25.4558	29.2946	31.7262	35.6408	27.5807	24.4459		0.196431	36.5385
2.7378	44.586	44.9367	42.4389	54.0002	51.4156	46.5013	40.513	41.6466	39.6559	47.0177	35.9837	27.4616	38.7251	31.5	33.7907	28.1656	29.6574	32.0807	21.5375	17.8265	23.7627	34.3307	32.0024	36.5234	45.3523	33.8171		0.205357	36.7396
2.8568	43.3195	53.2529	43.346	49.5452	42.8603	58.8246	51.21	38.7931	40.0498	38.2654	27.851	41.181	44.3237	22.6759	25.3031	29.5283	33.3541	36.9935	23.7229	18.2021	35.3937	43.3296	39.7154	33.1626	35.8979	38.7875		0.214283	38.0342
2.9759	40.9783	35.5073	30.8358	51.2243	59.508	47.4298	38.2286	29.9457	36.6543	52.4209	26.0814	38.8524	35.4037	40.5263	34.277	46.6792	43.9264	32.8139	32.3572	16.8057	38.2825	40.1552	32.3756	30.1374	29.4623	42.1782		0.223216	37.8095
3.0949	49.4216	32.7606	33.9783	49.1458	57.2831	63.8927	42.2054	38.1742	38.4307	43.5126	27.5892	29.6878	41.4445	52.5809	33.9788	41.0016	33.7684	33.4758	34.1636	16.9528	45.733	31.5765	31.1931	32.4569	39.4291	34.961		0.232142	38.7999
3.2139	48.4158	57.2207	37.8239	55.7429	52.2654	69.1888	58.7861	35.8159	38.5731	50.7678	43.5017	38.9509	41.7792	52.0528	42.6414	38.9313	33.1622	21.3084	35.6396	25.5756	38.4529	28.6396	40.9878	39.0603	40.3841	36.8151		0.241068	42.4032
3.333	54.3206	54.8123	34.7515	63.6787	56.664	60.3852	46.568	42.6481	34.7462	44.5231	28.1377	34.981	48.6843	47.6359	38.6311	31.0591	33.454	28.4952	37.5765	28.406	42.2159	38.9904	34.1577	33.1164	29.9139	38.4322		0.250002	41.0379
3.452	46.8604	52.6573	42.9131	63.7697	47.9773	55.3362	44.3285	44.2481	39.3832	43.8596	31.715	41.6725	45.0922	44.4367	52.431	31.9174	33.934	37.0787	30.4684	30.7809	43.4375	48.6214	43.9378	40.4534	25.6603	46.718		0.258928	42.6803
3.571	35.9085	63.4075	43.4004	70.1009	43.7382	49.7122	50.8889	45.2039	46.2101	53.501	47.6687	37.6111	40.019	51.7905	35.4015	39.7448	31.898	37.669	27.0041	22.9589	53.1095	59.7069	37.4606	50.1985	33.5499	35.1688		0.267854	43.9627
3.6901	38.5096	51.9336	50.1189	45.4324	47.4727	55.5727	42.7985	49.6989	49.7226	47.8036	53.9881	44.7662	52.582	34.0275	42.4972	35.9188	34.7044	39.566	41.6083	21.3347	44.9719	49.688	41.3449	40.3156	28.8482	33.5996		0.276787	43.0317
3.8091	39.8393	49.2503	44.3084	44.6372	43.5415	61.0622	41.6415	46.2976	52.6636	44.9532	38.7972	42.1974	50.6038	46.5563	33.8067	35.7606	30.1118	33.8638	35.624	34.4899	40.8362	33.7947	51.2456	40.9988	40.7649	32.7671		0.285713	41.939
3.9281	63.1351	48.1279	38.2093	57.4079	51.9819	56.7043	46.3025	51.9602	53.5711	60.0606	44.4456	39.0364	54.4566	41.6332	52.1421	43.4284	32.2102	36.3574	34.353	31.989	43.4693	36.0328	32.6709	52.4391	39.1438	42.8285		0.294639	45.5422
4.0472	53.4313	54.4743	55.6261	38.8275	47.2241	52.1023	36.2706	42.297	52.1169	57.4869	48.8499	41.7433	49.7234	46.6355	58.2974	45.7534	31.1139	44.8209	39.1724	40.6377	43.1523	30.648	32.2449	44.5925	41.9305	51.8112		0.303573	45.4225
4.1662	60.0182	61.3756	44.7212	48.0953	48.1878	57.7748	34.9497	38.3461	54.9673	60.4512	32.713	46.7877	41.4843	40.7762	48.6998	43.0376	36.0266	51.5043	34.2122	44.7781	40.039	48.9385	48.4815	39.6739	35.6716	38.3838		0.312499	45.3883
4.2852	63.0289	59.2026	53.3855	41.1952	44.9233	44.5427	40.7512	40.4077	44.7677	49.6574	38.709	38.2464	40.7057	40.7451	39.0699	42.6646	34.0024	40.7252	41.0548	39.4171	36.0336	37.8344	33.5931	40.1801	43.1135	48.7183		0.321425	42.9491
4.4043	46.7478	52.1977	48.2056	47.1546	53.6994	51.6364	35.1454	47.1715	48.7669	58.1101	46.1336	58.0494	37.223	42.2073	36.8148	42.2907	42.1071	34.7291	41.1173	37.8982	39.4316	39.2671	51.1392	43.4515	34.6497	41.7881		0.330358	44.5051
4.5233	42.8784	43.9229	42.9543	42.9403	41.0256	50.5799	38.1643	43.5484	57.0263	31.2437	62.5203	48.0344	35.6593	46.9908	50.5983	39.1038	31.0791	33.3029	41.86	52.4089	33.6064	46.5148	45.5054	35.7578	43.3688	38.0881		0.339284	43.0263
4.6423	57.8448	61.9051	41.6829	50.3757	41.2751	52.227	38.9549	45.4402	46.9633	46.769	47.0781	43.3291	49.2095	32.7771	46.2413	45.5082	32.6068	34.9642	51.2058	51.7348	41.1262	37.6073	27.5725	50.2167	59.4054	43.5264		0.34821	45.2903
4.7614	53.4638	67.318	44.8267	41.1452	55.0779	49.7818	46.9543	49.1307	51.1541	46.9399	50.027	46.8942	41.1982	41.4318	42.5852	46.4347	28.582	40.9668	46.5361	49.9638	32.9631	44.1594	35.7876	62.8216	48.4427	43.6421		0.357143	46.4703
4.8804	40.7475	67.8147	51.9551	42.3247	51.7053	47.1014	48.9375	64.004	54.7263	48.6741	49.488	46.5247	49.3238	34.6505	52.8686	53.1274	41.7583	33.6176	48.3542	50.8817	29.1317	45.1958	49.1227	43.3375	41.2235	37.431		0.366069	47.078
4.9995	60.105	71.0124	56.9655	50.0377	43.0426	40.3602	48.3333	49.4016	35.9187	54.2821	38.0716	52.4866	43.4892	39.9511	42.8306	53.4086	42.1035	45.1577	51.0992	47.9457	35.303	44.7813	67.2033	52.6083	36.9974	38.8716		0.375003	47.7603
5.1185	63.0258	76.8604	49.9837	44.106	40.4906	50.4274	27.7588	58.763	41.4922	58.1586	46.855	51.7409	45.2387	34.4571	42.0897	44.2901	45.3112	25.5988	57.6121	48.7377	37.932	45.8805	39.2135	40.2947	30.4568	38.9466		0.383929	45.6047
5.2375	60.4554	66.1264	56.2897	57.1792	40.8584	40.4487	39.8162	61.4431	40.9185	55.0506	36.8217	51.1909	29.5888	32.3684	44.4824	41.6843	41.8636	35.8397	49.8703	44.2372	39.8631	52.0112	39.6894	38.9838	27.8392	42.8393		0.392855	44.9138
5.3566	61.0658	72.2286	39.6006	49.9784	34.2844	43.4634	36.123	62.8413	40.4772	51.0797	37.3565	36.8678	40.4399	23.7394	41.1344	45.0924	34.7926	30.7194	56.5515	41.6254	43.3988	52.3446	37.1632	39.4739	32.3823	28.7578		0.401788	42.807
5.4756	50.3309	68.8167	45.4278	53.607	40.3402	46.9705	47.7868	54.0976	33.9601	36.6622	40.1358	47.465	32.7984	31.8737	55.5217	37.8176	42.0228	41.6436	54.0732	37.5599	51.3725	62.7863	41.7574	38.6627	38.5608	40.0412		0.410714	45.0805
5.5946	37.9431	68.0617	56.1889	47.6188	40.5752	44.1371	45.3116	44.103	45.7016	50.4424	52.4907	39.8678	43.4903	26.2989	46.6557	40.2614	28.6935	43.1786	43.1639	40.0451	39.143	61.467	36.84	46.8987	44.2299	32.3098		0.41964	44.043
5.7137	46.9908	70.1322	45.6614	47.0368	51.4779	40.4743	33.5339	57.5971	30.7208	49.5667	44.7644	46.6778	40.7162	25.277	48.065	49.4329	30.3706	37.0897	48.0426	45.0962	37.7195	66.642	49.9961	57.4302	47.8816	30.7523		0.428574	45.3518
5.8327	54.0135	65.7679	46.5319	47.0597	37.5561	44.1411	35.0858	51.1679	37.0004	42.2759	33.2194	39.803	48.0415	22.1195	41.2264	41.2237	30.2988	44.8755	51.2614	38.5757	39.9602	65.9432	37.7969	54.5325	47.58	37.3835		0.4375	43.6324
5.9517	48.2914	63.4145	46.4438	53.3213	51.2707	45.4251	58.1986	42.3156	35.6391	27.2354	34.3736	47.7644	46.4889	25.5307	39.1214	31.7263	49.1077	39.6146	43.3868	60.7957	41.9581	55.1432	45.609	61.4654	47.5884	51.675		0.446425	45.8809
6.0708	55.9656	71.4123	43.0291	43.9618	46.6361	28.9789	39.3132	43.5737	35.2484	39.6012	43.374	48.0958	35.1102	28.689	30.2959	28.8604	48.0514	37.2285	40.5422	51.9581	52.7197	59.3821	41.4874	59.5282	41.6979	48.832		0.455359	43.9836
6.1898	41.8573	66.4823	54.3725	44.724	50.5616	50.3001	42.4906	43.6514	40.4325	52.1183	39.8675	48.4603	35.35	27.1526	41.0713	30.7584	50.7282	35.6689	34.2192	39.2826	34.7416	57.4516	46.384	56.1266	29.5081	39.9196		0.464285	43.6031
6.3088	38.2501	65.2451	58.3414	43.2498	33.3618	50.4423	37.304	38.9558	24.6804	48.7502	40.9065	61.4811	29.659	24.9327	36.1797	34.9015	38.0694	34.1215	43.5293	55.0121	30.1155	60.6891	46.4967	51.7523	29.871	39.2616		0.473211	42.1369
6.4279	39.8449	55.0003	52.8338	46.3665	28.5374	46.8868	35.9548	52.3525	18.8757	55.0211	41.7062	52.3733	39.9056	25.2783	44.872	35.3778	45.3412	34.4988	34.7115	44.5076	37.9923	62.2316	44.0465	63.9421	57.3715	50.8876		0.482144	44.1045
6.5469	49.7905	65.1839	53.5575	48.9463	34.8119	40.2764	40.7821	55.1872	29.3917	48.0507	55.3052	56.2802	51.1701	19.5346	42.2309	21.8717	55.5023	35.249	48.2323	49.9941	38.8732	57.5057	35.4893	37.2678	42.7663	50.226		0.49107	44.7491
6.6659	36.1814	60.1746	58.435	44.7546	38.3529	46.8318	50.3544	46.9907	25.2416	38.2173	50.6321	61.7752	55.5352	13.4628	32.2391	37.9359	50.7822	39.3094	35.8083	52.1892	34.2797	48.3811	39.236	39.2789	38.3775	40.9416		0.499996	42.9115
6.785	36.3366	65.7103	58.1179	32.8863	40.8524	59.3109	33.9923	47.9111	24.5965	44.0353	38.3687	68.685	49.4468	14.1671	21.0009	24.4867	36.1872	51.5765	27.2693	43.5592	39.5254	54.5652	25.7354	36.1852	42.8365	59.5662		0.50893	41.4197
6.904	15.3531	49.6482	48.6667	31.2622	41.0126	58.345	41.7615	45.5155	31.9529	58.2397	39.9388	80.1811	35.8592	22.3282	26.0057	22.0853	35.914	35.6478	36.8739	46.6458	32.7789	45.4407	29.6957	40.153	40.4884	38.1754		0.517856	39.6142
7.023	21.8594	41.5409	63.7102	42.0821	50.2507	62.8281	41.1945	42.1289	21.977	39.4983	44.404	71.1452	35.282	21.8811	28.4054	19.0555	42.4095	35.665	31.2249	47.9711	38.3129	48.7992	29.2228	46.433	31.2752	53.5138		0.526782	40.4643
7.1421	32.8819	45.807	51.2295	40.1363	37.1164	61.6279	33.6529	41.4803	24.0473	56.4629	51.4572	54.9447	48.412	24.4596	31.2336	13.9051	45.6621	34.622	34.1914	44.2067	34.8648	50.1694	34.8541	53.3029	31.7221	42.4262		0.535715	40.5722
7.2611	28.5085	40.0193	60.5373	33.7174	46.5771	56.3964	31.7964	39.827	27.7087	50.9585	47.6452	64.1308	38.4833	16.0112	25.7375	26.917	48.1533	43.6728	31.2965	41.5328	43.6847	31.7567	35.6675	50.0147	38.1727	46.1669		0.544641	40.1958
7.3801	30.0729	42.0931	59.1096	24.0678	46.0762	64.6362	40.8734	40.5635	20.7264	42.9318	51.2143	51.9403	42.2009	14.6267	32.9202	24.2426	37.7771	55.5808	26.6077	34.4088	36.1539	49.3224	25.7585	43.2865	34.3413	38.225		0.553567	38.8368
7.4992	31.4866	44.9091	49.8391	26.7158	38.5304	59.0448	37.7928	27.959	19.1458	58.7719	59.3243	54.3174	32.8308	23.6319	19.839	26.9289	36.1799	36.7269	17.9124	42.0704	33.2029	43.3369	35.1217	51.1714	39.2785	48.972		0.5625	38.2708
7.6182	24.3418	54.6428	41.6284	31.571	35.5749	62.1367	41.9982	36.2925	21.5132	54.7984	51.6886	56.4899	28.07	12.7334	26.8051	30.5752	41.1679	47.8615	25.7166	41.8795	35.5922	39.4414	27.355	51.2916	40.0325	35.7166		0.571426	38.3429
7.7372	28.168	49.4823	40.308	29.1509	43.9577	70.4743	45.7577	34.3252	23.5195	54.15	50.3926	43.8442	35.7291	13.1857	29.2154	15.4985	30.4029	27.1699	25.2848	45.9667	37.2904	40.1071	26.7023	41.3128	30.6423	37.2492		0.580352	36.5111
7.8563	17.5994	35.9573	44.2227	28.569	47.3221	64.9571	37.5076	28.6614	21.529	59.0068	46.7678	38.578	30.9794	14.7912	36.1392	19.6647	27.911	25.8979	17.6244	38.2861	29.2239	35.6555	26.1741	32.8869	39.3824	42.0102		0.589286	34.1271
7.9753	23.5075	30.1972	41.1364	27.499	54.6271	71.5648	43.272	36.5917	17.3217	45.3734	47.4556	40.0686	30.3642	20.7797	39.9186	13.569	38.1481	33.2889	26.2318	45.6271	32.649	40.0906	28.931	34.9022	36.5688	34.6081		0.598212	35.9343
8.0943	18.6048	31.2708	49.4017	22.9091	37.9545	58.6053	32.359	33.3633	20.0625	47.8469	40.5108	35.3424	32.2249	29.0219	43.4556	21.4171	33.1626	26.9167	28.784	34.5716	34.8182	42.607	19.2574	32.3052	23.2664	33.8804		0.607138	33.2277
8.2134	20.202	30.4733	49.7996	25.5901	39.7519	51.4402	35.1411	32.2268	21.1628	59.1048	38.939	28.2894	22.6865	28.3556	41.7136	25.4678	32.048	42.4	19.7951	30.5669	41.7614	41.9429	17.0807	28.2406	24.0436	28.9125		0.616071	32.9668
8.3324	18.4803	31.9816	46.4896	28.3265	43.8126	53.1105	46.2615	22.5575	25.3773	50.1392	36.6705	42.0162	25.491	23.6141	38.5828	21.7848	31.4595	49.4722	21.4078	30.4218	38.0797	43.1485	25.2225	19.9055	26.9628	38.841		0.624997	33.8314
8.4515	22.4051	30.7818	47.7729	24.98	54.2107	56.216	37.2744	28.2524	34.686	45.8525	37.2439	33.6885	26.7489	21.3968	30.1107	20.6613	29.4444	38.9352	15.3043	24.1504	43.3749	29.5842	28.5076	26.05	34.2554	36.2754		0.633931	33.0063
8.5705	26.8541	24.7339	36.152	32.6334	40.755	59.4121	47.9064	23.6039	26.335	62.9362	41.6901	25.625	26.9234	28.6757	33.7137	12.4988	56.2867	26.5412	23.3842	29.0534	31.4547	33.9068	31.5051	22.1024	36.6367	44.4032		0.642857	34.0663
8.6895	21.5911	26.4544	40.1061	34.746	41.6771	55.6434	37.6255	25.2229	26.5169	46.4234	35.3254	20.4003	27.6963	31.4784	34.1869	17.3833	48.2627	41.2003	20.9998	25.9017	40.9578	46.5866	25.2189	16.6002	23.0526	40.1087		0.651783	32.7449
8.8086	22.2838	23.7185	61.086	29.8797	43.5651	53.8467	46.2481	27.7425	25.5076	48.3494	46.2467	30.8762	28.7645	28.4886	47.0884	16.8784	39.2955	46.7619	23.081	21.2602	36.71	43.6261	27.3374	25.3895	32.9818	33.6006		0.660716	35.0236
8.9276	32.1669	27.6479	39.3169	29.3395	53.9045	46.7753	57.6901	29.1993	21.6667	55.0222	54.8628	23.6731	27.5559	28.2316	36.9217	14.1447	34.1365	31.9725	20.1798	20.3167	28.0213	39.8827	28.0021	23.4517	29.8743	43.3257		0.669642	33.7416
9.0466	17.488	36.7195	38.8112	20.226	57.3246	55.1483	52.0479	30.5906	17.6457	46.7374	45.127	33.3033	28.4428	32.1692	37.0712	12.9149	29.106	36.8904	16.1424	19.4054	38.1352	38.7196	21.7922	21.2248	32.1745	34.1215		0.678568	32.6723
9.1657	17.6122	37.665	30.0801	30.7998	56.627	52.7275	47.7787	26.7877	28.6523	31.4893	43.0682	31.4303	24.0546	30.62	33.3419	19.2798	35.1185	31.1492	12.9818	27.4684	42.7239	34.8293	30.4292	22.3837	28.3754	42.5664		0.687501	32.6939
9.2847	15.06	40.0919	29.1319	30.142	38.4153	55.1369	49.1002	19.1805	21.1952	25.176	43.4106	30.8647	16.2055	34.8902	32.2889	19.414	40.6383	34.0322	22.9612	26.0235	42.5807	36.0595	29.1604	19.1882	23.8065	28.6413		0.696427	30.8768
9.4037	15.5938	31.5976	24.3686	29.429	49.4447	45.1075	49.2312	23.3743	18.6834	33.5967	52.3907	23.1217	32.1756	31.2594	34.7285	25.1977	38.1949	27.652	24.1428	24.6111	32.0384	36.7087	24.1759	25.8062	38.6653	30.9193		0.705353	31.6237
9.5228	27.0989	30.5601	25.8705	35.7911	63.5678	50.442	44.8733	24.9101	13.4442	48.4447	59.6163	15.041	29.3389	29.7807	36.7725	16.3344	41.3198	25.4535	14.4632	18.071	32.0103	31.2712	30.8102	29.3335	33.287	27.0714		0.714287	32.1145
9.6418	22.9925	35.347	30.7378	29.1342	54.5722	61.9504	43.4979	27.7113	26.0642	34.9047	55.9126	27.637	25.3249	33.3694	34.0124	15.7146	44.1984	25.7521	24.1626	19.0543	35.2057	41.8155	30.4467	20.4749	34.8357	30.9177		0.723213	33.298
9.7608	21.5885	27.7596	34.9879	29.4947	45.5064	61.6357	42.7803	21.744	14.7586	39.3508	52.8346	16.6522	24.7212	35.3088	40.513	12.0147	50.0294	23.0113	24.3244	23.3028	29.663	28.9024	26.1543	21.7961	37.2263	35.3391		0.732139	31.5923
9.8799	26.2799	31.7716	34.3815	21.8987	38.7563	43.7634	42.5658	22.0436	18.7543	54.4127	43.8969	31.6159	28.1246	20.862	31.7721	14.1606	30.6459	33.6957	23.17	21.7082	28.8119	33.7983	31.4918	30.2576	34.5827	34.009		0.741072	31.0473
9.9989	28.3812	36.25	37.5339	22.931	41.3537	51.0985	42.8991	24.7918	13.8539	59.3174	46.49	21.519	35.2969	33.1787	19.7435	13.7731	36.9752	40.4178	23.0055	15.6333	25.1791	26.7117	40.1709	24.9502	39.1477	31.0783		0.749998	31.9877
10.1179	19.3951	39.4883	36.7913	30.8785	42.7909	52.8971	45.5698	19.1828	16.2469	66.586	39.9847	20.3111	26.8788	27.9121	23.6484	12.6945	41.1851	21.8846	23.8969	19.396	27.3358	33.9448	28.2345	32.8045	37.1843	23.293		0.758924	31.1698
10.237	28.9174	26.3682	43.7527	23.8948	35.8679	47.3881	53.53	24.5783	16.0293	62.0833	46.8665	20.7997	33.1296	40.6247	30.2747	13.4679	35.4365	35.1862	26.2036	19.9315	33.0271	33.2175	30.67	31.3981	31.1369	21.0207		0.767858	32.4924
10.356	22.7506	33.2371	42.971	18.2801	32.3483	52.5506	35.9996	22.9619	25.7502	61.5655	36.9826	31.6208	25.8067	32.423	28.8984	16.666	23.0626	28.496	20.4674	20.7884	31.0869	32.7052	36.6798	34.5523	33.8705	27.4798		0.776784	31.1539
10.475	23.3561	29.3328	33.2404	18.2313	35.9372	41.4582	44.6166	29.9326	21.3505	56.5703	34.5428	24.3578	23.9727	23.7184	23.1902	15.234	30.0784	38.2627	19.4564	20.5043	30.9311	27.7553	40.2134	30.8125	27.8661	34.936		0.785709	29.9945
10.5941	23.274	37.4212	31.1399	17.5187	28.9166	50.4149	40.3769	31.9777	23.9156	44.176	35.1178	20.2952	27.6381	35.5376	19.2139	12.1662	29.1821	40.7987	21.9513	13.2955	21.2765	19.6314	32.889	25.9418	27.7591	27.6996		0.794643	28.4433
10.7131	36.3339	40.7749	40.034	18.9639	47.8255	39.3576	36.2045	27.3671	14.5629	39.7164	53.4351	19.7049	35.3787	22.8593	14.8413	11.4635	27.6553	29.2216	30.6869	12.8118	24.1344	29.3495	40.2725	27.1513	26.4018	34.4987		0.803569	30.0387
10.8321	39.3974	35.8921	34.8657	34.203	50.1851	49.5842	35.2975	31.5337	28.9964	32.8739	40.2407	27.5557	32.7755	24.1609	19.4358	13.1669	25.5319	36.3716	29.7362	20.0124	25.5682	27.6548	31.6137	26.0921	37.3795	40.5562		0.812495	31.9493
10.9512	31.4405	31.3364	43.7933	17.3016	40.1724	48.8019	36.9863	22.6494	16.6761	32.0424	36.6299	27.5611	20.5101	26.1289	20.4905	14.1952	32.9931	29.6391	30.4943	21.6421	15.9577	35.4658	33.3627	23.2006	39.5353	34.6643		0.821428	29.372
11.0702	30.099	37.2186	34.2167	26.8463	36.9024	40.4333	43.36	17.858	24.0898	31.3095	28.5747	28.3815	24.6132	27.3706	18.5646	19.642	25.6687	34.7379	23.1697	19.9652	21.2807	23.5535	31.3328	32.438	35.8971	38.4679		0.830354	29.0766
11.1892	33.7585	36.7428	34.9511	22.6232	38.914	31.988	41.2654	19.1135	24.7454	34.3776	30.1195	25.3685	19.581	22.4091	19.5464	12.1051	25.0484	38.0915	23.5031	24.4622	24.0133	30.9881	25.875	39.5315	35.5801	25.6961		0.83928	28.4769
11.3083	41.3699	45.257	33.3054	15.3744	41.3888	31.2722	34.041	27.3283	26.6812	29.5604	26.1164	26.5972	26.6541	18.9132	19.9173	12.8355	18.5514	29.4768	30.7359	25.5978	22.5733	33.1243	18.2543	28.6714	49.9794	28.8036		0.848214	28.5531
11.4273	26.3245	48.098	32.4587	23.0194	46.3949	42.909	32.1379	22.5951	28.8268	29.9494	23.5739	28.7349	26.2113	14.3933	13.8309	8.0913	20.4651	27.0939	38.2598	31.9423	30.4826	25.9404	23.9639	32.7883	49.4754	29.2049		0.85714	29.1218
11.5463	29.2865	46.1899	40.8189	22.227	32.6924	33.886	36.8179	23.2576	24.298	42.2593	31.2166	24.8638	18.5112	13.5907	16.3316	6.076	21.9087	24.5067	39.4006	27.8486	26.6287	22.1302	35.0716	38.7165	49.9822	23.1061		0.866066	28.9086
11.6654	17.4514	50.9356	43.8087	25.6885	32.9241	28.6709	27.2157	29.0481	27.3665	35.59	29.0866	28.9573	15.3857	15.4123	13.4615	6.7315	22.997	23.5579	37.7867	27.7883	22.5873	18.6449	36.4252	28.7127	51.6124	30.9028		0.874999	28.0288
11.7844	20.4801	58.0927	34.5526	24.3274	29.3686	31.0781	35.9009	20.5747	34.5633	29.0658	37.7191	14.6569	25.5932	22.9892	21.7316	10.5479	24.2038	22.4337	25.9554	33.031	19.4385	14.3747	27.0717	22.0422	49.9594	29.6667		0.883925	27.67
11.9035	26.85	51.9515	26.9001	23.784	39.9667	22.8042	38.0896	26.559	40.3267	20.9721	29.5792	17.2569	23.421	10.778	21.2068	5.6794	18.5025	21.6124	34.6195	32.5638	13.8423	21.1834	24.9312	17.1183	40.2886	36.6098		0.892858	26.4383
12.0225	29.1977	46.2894	31.0479	26.2535	40.0633	29.2088	39.2361	30.223	30.8788	25.3121	27.9826	18.0369	22.2908	9.449	29.6358	6.665	13.1393	19.0081	33.7171	24.8001	12.6706	17.1964	19.1208	31.9427	66.301	18.5959		0.901784	26.8563
12.1415	25.9809	47.2914	31.028	29.7689	32.9978	22.2652	45.15	29.4207	32.8736	21.7143	35.9785	21.9264	30.352	11.543	21.5801	10.3135	17.8323	21.1228	17.351	19.3952	6.9244	16.6149	22.8031	29.6832	49.4182	21.4799		0.91071	25.8773
12.2606	29.2799	44.2077	23.9775	33.9489	33.038	18.8296	27.8296	31.45	28.5036	18.3454	22.686	18.7605	28.5956	17.1514	16.8666	5.3949	16.0007	13.844	27.4669	21.6848	9.5657	10.3875	20.1458	25.7743	43.5863	26.5385		0.919644	23.61
12.3796	25.3414	41.9685	15.4482	34.1365	30.498	14.904	19.294	26.747	27.9807	13.3087	21.0713	11.9628	24.0626	21.1525	18.6711	3.4232	15.725	29.6698	19.3536	22.9111	10.2373	4.1853	21.7057	35.1144	40.3912	30.5347		0.92857	22.2999
12.4986	31.2329	34.0323	25.505	26.596	24.3643	23.7041	21.8935	27.5118	20.3516	18.4623	32.5782	13.9313	28.2786	16.0038	18.5607	5.0762	17.3004	26.7786	25.1203	20.2466	5.5135	4.224	10.7593	27.5227	34.9187	26.0748		0.937496	21.7901
12.6177	30.3041	32.1608	32.2948	32.5436	29.5198	24.5738	19.0225	23.6409	19.1883	10.8944	29.5474	14.4766	32.2002	13.2084	11.8983	4.2765	16.2167	23.0875	22.4843	12.7165	5.4673	1.8951	8.7064	26.6646	30.9383	29.1573		0.946429	20.6571
12.7367	31.7735	24.2086	33.3331	36.0122	27.1507	15.6991	19.8661	23.5703	19.8151	16.4847	24.2967	14.311	32.1759	12.796	20.5105	6.8155	21.6226	15.7754	17.0236	15.1719	7.4569	2.5711	11.1246	19.2836	17.502	28.1695		0.955355	19.7892
12.8557	24.6691	33.5236	26.7123	36.8287	24.8568	14.2479	12.3256	13.1851	13.2552	26.6941	14.3687	20.2587	32.0548	14.4936	19.5875	5.7915	15.8511	27.5105	10.4259	16.0057	3.2477	3.4471	14.5886	14.1386	13.4019	21.0415		0.964281	18.1735
12.9748	12.0862	26.7565	23.2221	43.724	32.5201	9.8597	12.9566	15.2369	6.1131	18.5478	20.9725	18.3563	35.0589	13.4031	14.0982	9.2795	16.7601	31.9183	16.9834	9.8509	1.9161	3.5023	11.5957	11.1418	8.1198	17.0504		0.973215	16.9627
13.0938	11.8751	23.3888	23.4968	46.8024	33.314	6.3281	16.7346	13.6612	5.777	20.0427	14.8345	13.2877	30.1957	7.121	16.1112	6.7547	13.9254	29.8196	13.6735	5.1811	5.684	3.6806	6.6156	7.3172	7.7848	15.2914		0.982141	15.3346
13.2128	15.1676	17.8799	21.2687	46.5378	24.6001	8.2587	8.8191	14.3528	9.4671	15.2648	12.4289	18.4158	22.1711	14.5712	17.6356	4.9298	16.4454	26.5206	16.3397	12.1934	4.2644	6.1366	2.6364	2.577	1.4332	14.4584		0.991067	14.4144
13.3319	12.0137	27.3417	14.5052	41.1945	22.9377	5.8069	10.2017	10.4796	7.7317	19.0313	21.8352	16.4364	29.428	17.8843	20.8112	8.6782	12.1473	25.2032	21.5719	9.4471	6.0486	1.7808	3.0688	3.5995	1.9756	12.147		1	14.7426

## Sheet: Image9
X0	Y0	Y1	Y2	Y3	Y4	Y5	Y6	Y7	Y8	Y9	Y10	Y11	Y12	Y13	Y14	Y15	Y16	Y17	Y18	Y19	Y20	Y21	Y22	Y23	Y24	Y25	Y26	Y27	Y28	Y29		Ap-Basal	Avg intensity
0	30.0427	30.3357	25.7928	22.8702	23.071	26.5366	31.6714	46.0521	22.6974	17.173	25.7654	25.3387	22.0433	24.4483	15.7326	19.9931	22.223	44.5269	63.3513	40.4321	39.8187	26.658	33.9691	40.566	15.16	25.7334	44.7641	33.0504	19.9489	18.2239		0	29.2663
0.119	34.3326	40.0439	23.7937	31.7334	22.2802	27.1869	28.471	59.956	27.6565	14.4174	19.3523	29.0227	23.4479	25.9108	16.877	24.5571	29.3518	51.0323	62.1999	37.5737	37.1399	27.146	39.6345	47.562	22.851	26.7169	48.403	28.1211	15.9318	19.2635		0.00806217	31.3989
0.2381	37.1013	56.3671	27.0365	22.6043	40.9025	25.7981	44.8531	60.5881	39.3195	13.2328	24.6379	30.8118	28.1479	18.941	15.8042	23.4742	24.9427	79.3983	73.1348	46.8533	37.7491	33.255	33.7401	46.827	20.687	27.5394	46.1552	26.4428	23.9585	21.7537		0.0161311	35.0686
0.3571	35.15	53.7657	30.142	25.0766	36.5838	19.8459	40.2388	42.8742	49.376	17.9495	27.3978	29.1629	21.8604	31.7035	16.2694	22.6003	23.5665	79.2767	78.0347	66.6744	41.0519	30.354	41.0141	51.168	21.621	27.6645	51.5476	26.1961	18.8568	23.1923		0.0241933	36.0072
0.4761	27.8127	57.2411	25.8173	32.388	42.9788	22.9651	32.3732	57.8713	46.2226	14.2537	31.8718	40.9161	35.3313	26.2211	20.5119	26.2539	25.0223	70.7867	78.3121	77.6037	42.4721	37.013	41.0031	64.734	27.564	23.2555	52.9589	32.2028	24.6121	25.8455		0.0322554	38.8139
0.5952	31.7514	54.5762	38.8762	34.569	39.6463	25.6198	27.5258	65.4384	36.258	14.5921	32.7459	44.4931	21.7549	25.8105	13.1477	25.8185	34.6119	74.7317	99.407	64.5029	43.7566	42.043	43.8715	59.181	27.979	46.7732	60.9324	26.5962	27.4099	27.7018		0.0403244	40.4041
0.7142	38.0821	66.8676	41.3417	32.5778	40.2331	21.7017	33.223	62.2636	44.708	15.1132	34.035	44.7132	24.1043	27.4388	10.7339	17.3136	30.6062	85.7984	86.4401	77.6194	37.4632	57.733	45.6887	57.222	34.612	47.1907	64.6421	30.9702	24.8177	31.6479		0.0483866	42.2301
0.8332	47.7306	61.6762	54.7402	39.4332	36.4614	23.9787	36.4372	60.0974	30.1795	20.4185	40.2777	39.7461	38.2911	31.3048	14.7751	30.4722	28.4676	98.825	96.1492	72.1114	35.9944	49.477	48.7814	55.065	38.002	38.442	56.0828	37.4787	28.3392	34.9613		0.0564487	44.1399
0.9523	49.7621	55.8862	57.744	36.8044	51.3597	24.9359	32.8156	45.7683	47.5869	28.0183	41.4699	41.9036	21.6766	25.9272	14.875	29.8617	25.6418	87.2597	89.0171	68.869	37.9712	60.875	39.314	61.25	35.996	37.117	51.0177	44.2658	30.9826	33.8433		0.0645177	43.6605
1.0713	48.3009	48.9218	49.9866	38.95	47.3577	26.0466	46.0616	56.8589	56.3645	38.5159	42.841	39.8321	21.362	21.1436	26.081	31.6801	35.8074	68.8518	83.9516	82.8848	53.8201	63.211	34.1665	46.588	48.433	43.3108	53.1837	42.8743	29.4651	39.8065		0.0725798	45.5553
1.1903	52.2644	52.2848	56.257	44.9249	41.0177	31.6235	40.9267	46.943	55.8763	31.9082	56.3113	38.2403	25.7893	33.6761	21.6807	42.1428	31.5828	69.0973	103.639	78.7577	55.8135	68.518	51.4376	58.751	55.556	49.255	39.5408	42.6971	37.9291	30.2925		0.080642	48.1578
1.3094	63.6803	52.3532	33.857	47.0101	38.1283	26.7049	41.5375	51.8849	44.8614	30.1618	48.8148	43.6736	30.4078	41.8031	15.3741	46.368	32.6466	69.8234	87.4192	72.9187	62.1835	84.336	51.2284	69.97	69.372	43.8452	58.6114	43.0102	44.8249	33.5484		0.0887109	49.3453
1.4284	58.4082	47.5932	34.3097	50.2034	40.8557	29.2962	31.9909	53.3976	45.3751	35.4792	28.2563	39.8687	40.589	41.7071	15.1104	51.8468	43.0837	61.291	92.7253	76.0328	68.7995	88.388	53.117	79.602	62.964	54.9924	52.1467	42.6209	43.1539	40.6136		0.0967731	50.1273
1.5474	58.5737	38.7066	45.8675	58.8352	44.3703	41.647	31.5109	60.0428	57.5721	50.255	30.683	35.103	28.8108	40.2616	22.1443	55.3036	39.8558	48.1381	92.8621	67.0741	72.8983	90.532	57.2473	71.197	73.247	45.2653	48.7857	43.1236	49.5089	47.6751		0.104835	51.5699
1.6665	54.3053	44.9562	46.3949	64.5056	51.6547	42.3517	33.8679	58.8754	58.7849	48.8153	31.2225	40.6671	29.7744	38.5047	21.318	74.6675	40.9728	58.7284	89.9003	72.7199	82.0076	81.329	53.3522	85.147	68.906	48.8162	61.1543	46.0195	61.9753	48.2562		0.112904	54.665
1.7855	50.9682	49.2045	39.1918	66.9055	52.1542	33.323	25.8678	66.0081	57.325	59.3661	37.6344	42.1867	32.6606	37.2015	26.5284	71.3289	37.0995	70.2322	103.945	71.4054	74.6798	89.141	73.3037	83.184	71.606	57.2472	74.5325	55.5148	69.2661	48.2705		0.120966	57.5761
1.9046	57.1216	50.53	47.2733	63.2127	37.0459	41.0461	28.1812	59.8599	53.4074	53.7647	41.3141	35.2373	33.4813	40.6508	24.1862	70.4982	31.4862	68.5874	102.934	77.5198	81.0381	102.234	70.7294	84.104	73.896	50.469	76.7729	55.8042	73.7031	59.2118		0.129035	58.1767
2.0236	42.9825	52.8603	47.9871	79.4338	44.0728	46.2345	23.1662	65.0427	54.1598	57.4939	45.8835	51.9041	40.6923	32.9559	18.4168	61.9222	40.3416	60.3281	97.2766	47.1972	72.5532	101.541	51.4482	76.349	84.129	61.2456	88.8393	66.3089	59.1892	52.4717		0.137097	57.4809
2.1426	33.9259	46.5277	58.4058	69.9716	42.903	46.432	32.3716	61.4125	42.598	55.659	47.6445	57.8806	39.0931	33.6004	27.6536	79.3879	42.6595	63.8257	94.9339	55.6678	77.5475	96.074	58.5899	76.951	89.881	55.2515	108.591	51.1079	47.3669	49.154		0.14516	58.1023
2.2617	38.9948	57.2276	43.3002	61.0769	47.7966	44.9367	34.9736	46.1882	61.9992	75.6743	49.263	52.6884	33.6793	34.8042	24.1293	64.4685	47.1433	60.7221	76.472	56.6242	83.2591	110.849	60.3579	94.014	89.412	56.9049	105.139	45.3513	36.3469	40.9706		0.153229	57.8256
2.3807	39.8125	56.2079	36.2309	59.8851	54.1245	51.0236	32.567	59.6392	62.4641	59.8963	52.8547	59.9178	39.3653	35.6857	32.5165	58.962	40.6915	63.5354	90.5438	50.0788	88	106.134	64.816	65.683	84.838	63.6873	90.6837	50.8432	48.4097	53.0777		0.161291	58.4058
2.4997	46.8714	56.0956	33.7952	51.7567	37.6171	56.6077	28.2091	44.9713	66.1068	61.2912	64.652	49.6349	33.7871	34.9545	40.9141	54.4846	40.1137	62.4864	77.4401	67.2591	86.4936	101.639	68.324	62.026	91.486	64.5066	98.7744	51.7709	51.3923	46.8445		0.169353	57.7435
2.6188	51.3405	57.4716	37.2542	61.9096	34.6416	45.8821	26.1512	61.9204	61.5364	66.8819	65.8506	44.0895	42.2697	40.1449	41.361	52.9289	37.0509	64.3602	73.1688	46.0849	92.1829	122.424	59.4632	67.351	102.03	74.4589	103.561	59.1688	51.8097	46.5739		0.177422	59.7107
2.7378	47.5187	51.6544	38.7291	49.8487	41.2188	57.5228	19.3966	67.8949	52.0221	63.31	57.3251	50.3799	50.4858	37.084	23.9792	56.2931	37.8806	56.9532	68.8949	44.8587	89.4923	108.762	53.7091	65.268	107.373	70.0356	109.939	53.1198	50.1868	54.9974		0.185484	57.8711
2.8568	39.764	38.256	31.993	47.6629	38.4321	53.8761	35.7029	58.3717	47.287	57.5215	56.2211	45.8023	40.8129	35.5745	37.6536	52.9452	32.8231	55.7622	70.7077	34.9088	86.0304	110.916	69.4667	80.316	99.038	56.8449	95.117	53.7473	47.3389	48.0604		0.193546	55.2985
2.9759	38.6909	30.5557	41.1585	51.2834	35.5863	57.4547	44.9827	45.1261	65.1804	54.9746	47.5389	55.2881	47.4558	28.6733	38.4795	55.8018	40.7177	54.7752	83.1581	35.0009	90.415	107.652	69.0666	81.055	108.181	62.6317	87.0162	49.3382	63.583	48.0023		0.201615	57.2941
3.0949	45.1193	38.8672	37.1685	46.8201	46.1663	60.6502	39.4427	55.4077	71.3125	44.9424	54.5005	52.7884	40.1026	28.6054	33.2992	57.7245	32.9731	51.0215	85.4103	47.5445	85.7581	116.566	61.6209	61.782	108.684	68.2609	114.611	52.6384	45.796	39.1728		0.209677	57.4919
3.2139	36.3807	34.7404	31.3829	53.0984	54.7703	62.1353	48.774	54.493	72.3286	48.8372	46.4537	54.5066	42.5936	33.8894	40.7948	55.1919	36.5058	50.7379	83.4156	51.1204	81.1465	118.255	54.1739	74.058	110.366	81.4123	112.315	53.9893	46.2687	41.8218		0.217739	58.8652
3.333	42.5352	36.7357	26.9636	52.8578	49.3514	64.5984	44.2899	33.4631	60.233	54.265	49.0617	57.3914	43.2358	32.4131	32.6184	53.8189	37.9895	70.9022	85.8077	40.5541	75.0391	98.548	58.7006	73.731	115.827	83.3237	100.144	45.0789	52.139	48.8299		0.225808	57.3482
3.452	49.2897	29.7323	32.3284	56.9867	49.7905	53.7988	39.4678	46.6148	47.0606	40.2071	44.1388	38.3062	42.7359	38.1629	38.6449	42.8045	41.645	60.5156	74.503	39.0484	64.5916	90.985	70.8056	80.713	125.599	84.2801	108.471	44.2767	43.5307	60.0969		0.233871	55.971
3.571	57.3137	28.0655	39.8223	53.6726	62.8955	59.2413	34.2963	38.8325	53.1569	50.5412	40.6192	45.5313	50.2532	35.3284	31.5143	49.2131	55.1167	54.587	83.0155	35.4335	72.3934	93.051	68.7132	79.89	110.606	92.4023	106.219	48.693	45.2907	70.6034		0.241933	58.2104
3.6901	43.7103	33.3219	32.805	54.8976	56.1253	62.3436	40.999	49.4103	59.3053	45.8308	40.6137	51.1565	50.9893	31.716	28.1587	55.6285	43.7596	56.6952	65.9871	43.2154	69.374	103.704	70.6738	72.446	92.769	82.307	96.8796	55.0968	38.5153	55.6303		0.250002	56.1355
3.8091	48.4137	33.6084	40.2485	58.0949	61.81	58.1224	45.6647	48.7684	73.3939	42.8493	49.1649	49.5056	53.757	28.8474	38.5872	48.8309	45.4596	57.8552	54.1955	52.6343	74.6573	107.385	53.7282	76.12	89.499	88.493	94.7562	39.2995	43.7657	70.6954		0.258064	57.607
3.9281	48.6704	22.7921	24.1806	56.9475	61.1556	49.2265	39.8291	58.6688	71.2184	50.0742	41.2433	49.5836	48.7885	28.9249	37.5609	52.1666	52.6408	64.8696	60.1003	47.6709	55.2312	88.437	60.6495	92.423	106.372	81.7142	92.2759	53.1724	50.031	61.8189		0.266126	56.9479
4.0472	33.1338	26.7911	28.3622	56.7031	45.1415	59.5741	45.8257	40.2729	64.1999	45.6443	38.9706	45.4682	49.9226	36.099	37.8613	67.0364	44.1274	52.5641	75.5733	48.5073	60.9203	98.252	62.3626	91.8	117.935	74.3059	78.5707	55.615	48.2753	60.9896		0.274195	56.3602
4.1662	44.1987	14.65	31.3878	59.6705	56.6726	60.6558	47.9973	30.289	72.0138	50.3064	44.0928	46.9509	47.9979	35.4508	34.591	58.9489	41.2141	49.6451	63.1393	58.4976	55.21	88.877	64.7897	96.498	114.868	85.7477	96.7369	56.9147	52.1139	44.8446		0.282257	56.8324
4.2852	46.3058	23.6351	19.6592	60.1015	50.4486	51.1869	42.7379	38.7821	79.9628	48.3886	37.9221	43.2883	40.2934	28.5414	31.6974	57.6954	46.3145	50.6164	62.0289	50.5201	57.5241	82.054	53.6937	109.46	110.618	90.0282	91.8155	48.2928	42.839	55.2137		0.290319	55.0555
4.4043	35.0999	25.9974	25.098	67.1276	43.2307	43.7477	49.9579	43.322	77.9842	31.9372	28.2933	46.0689	52.8263	39.2676	47.3907	63.9689	39.761	46.5044	56.5925	46.6238	47.0905	80.448	62.0329	94.656	106.562	93.8484	89.0836	45.3987	49.6117	49.4678		0.298388	54.3
4.5233	37.3993	19.9261	33.218	61.9353	51.3181	56.9268	37.6563	43.0184	77.2322	38.1707	39.3336	58.5399	47.9051	40.4045	42.6391	56.6279	46.6576	57.833	51.7172	35.7998	47.0814	73.608	49.2258	100.857	103.282	68.2381	66.6632	59.4027	42.2312	62.6522		0.30645	53.5833
4.6423	35.6699	14.1522	27.3128	47.7849	56.3558	39.7656	33.2918	47.837	76.8087	38.1277	41.7285	55.0466	50.9997	42.2886	45.0689	42.318	40.3891	47.1733	54.755	45.2633	54.4016	86.248	52.8985	105.688	78.072	79.6847	61.0661	47.1636	46.8442	52.1499		0.314513	51.5451
4.7614	31.7407	12.7288	28.4406	52.1657	43.3445	40.221	44.3491	34.4054	75.4353	34.4486	36.9393	55.871	53.4976	36.6808	39.9324	39.7902	39.1004	64.2974	49.6192	38.9636	65.1659	83.916	62.959	84.636	79.792	73.5248	63.6533	52.5059	49.8656	51.447		0.322582	50.6479
4.8804	31.363	14.968	41.3287	51.9171	35.8826	42.2266	55.7767	48.2774	68.9632	47.0027	38.6331	47.412	46.3856	45.3577	31.9809	41.9436	53.4777	50.1841	44.9271	34.807	58.1797	70.115	42.6399	91.682	85.599	67.742	61.4554	59.7226	56.1442	43.4776		0.330644	50.3191
4.9995	45.9583	18.4881	36.6587	54.5255	30.0896	40.7072	35.9935	46.3426	54.9972	41.1641	42.5091	33.2174	43.965	42.935	31.4423	53.1037	41.6014	48.1008	46.6564	38.0283	62.224	50.69	44.8743	95.288	83.157	68.2747	49.2609	50.2177	56.5123	55.2466		0.338713	48.0743
5.1185	32.9968	27.3094	33.9065	48.8514	31.8722	38.0584	46.2708	45.2127	48.1965	40.5364	40.788	48.1616	48.1915	41.1569	35.0221	49.6811	40.15	46.333	54.5338	46.4868	57.9036	51.089	57.3827	95.26	78.919	74.9879	60.7071	45.2551	47.9069	55.45		0.346775	48.9526
5.2375	31.4527	24.0612	39.7742	48.2241	29.9859	46.734	43.9057	42.1418	58.961	47.0908	29.8858	57.7831	49.1851	41.9802	38.4312	56.9877	38.1512	36.5713	48.6645	41.4041	51.9283	39.004	68.102	90.633	77.531	65.8342	44.4735	46.0539	56.8863	49.789		0.354837	48.0537
5.3566	24.6307	22.4996	33.6131	40.8151	23.1466	49.5188	35.9504	49.9435	53.2901	39.177	30.4556	51.7255	56.6232	49.3315	31.4596	46.49	43.0304	40.1552	48.3842	41.6076	47.6566	51.539	56.2573	83.921	79.135	77.9602	50.0139	55.2756	50.1716	53.0414		0.362906	47.2273
5.4756	27.8321	16.9772	43.4492	48.4846	24.4239	40.4344	46.0798	37.8875	55.3012	41.2595	30.058	42.183	49.7718	44.3638	32.2973	43.3876	48.3927	41.1114	48.4792	39.4935	55.4217	49.603	52.5456	77.63	80.613	70.3607	48.6395	51.8614	45.8659	45.2878		0.370968	45.9832
5.5946	29.186	21.5506	38.8591	35.4879	24.2727	36.9952	39.8737	39.4062	55.6655	39.7827	31.1077	41.3172	48.4367	49.0507	38.5588	38.194	43.6059	44.62	57.5641	41.5746	54.1379	43.354	49.6001	75.727	90.357	67.0571	37.0186	49.7757	47.0487	48.7418		0.37903	45.2642
5.7137	22.6441	20.5001	27.4606	35.5421	23.8745	39.4843	52.747	29.8229	56.2815	50.1139	31.2038	39.189	42.3555	49.62	43.0194	38.7226	44.7064	41.9751	57.7755	37.6339	50.8656	48.211	50.206	69.29	77.26	76.3746	46.5503	45.3242	37.4365	59.1206		0.387099	44.8437
5.8327	22.2721	14.179	30.1531	39.8514	25.7502	33.2897	50.3423	34.3381	50.5226	55.341	42.598	40.9	33.7543	40.7534	37.9484	35.2345	46.4984	38.634	52.2261	40.8638	55.7441	41.447	48.8458	68.542	74.516	66.0491	50.4573	45.8993	41.5005	54.785		0.395161	43.7746
5.9517	30.064	12.2865	34.3917	37.9165	26.8872	43.1454	37.8153	38.5862	53.7458	41.5456	28.3617	35.6595	39.7265	41.2809	47.3134	32.5088	47.0459	46.0172	52.0413	42.2635	54.6234	48.92	47.9129	55.244	92.487	65.4285	62.8521	46.9346	36.2529	54.1462		0.403224	44.4468
6.0708	22.9181	16.1273	33.8124	35.8758	19.3047	37.6472	52.3435	48.0882	49.6579	41.7747	29.9676	38.7666	43.5663	44.384	46.4769	35.107	42.2613	50.074	48.3384	38.5003	44.3948	48.81	50.8217	44.26	71.065	65.8886	64.8385	40.0013	44.4587	57.0623		0.411292	43.5531
6.1898	21.631	20.6844	22.7133	33.2226	22.5084	39.7896	38.3153	39.8705	47.8669	49.6784	31.6978	29.5378	47.1253	40.0807	47.2114	41.1129	44.7885	40.0896	51.8427	47.4414	52.1915	50.779	44.0296	56.207	71.642	71.9613	49.2307	52.5538	40.8019	57.4452		0.419355	43.4683
6.3088	23.6422	12.2625	23.1646	44.338	17.58	30.611	31.7532	40.0731	51.0469	49.4545	28.8951	44.0814	39.4333	50.734	41.5031	42.0323	35.4002	44.0368	35.3114	50.2171	41.5253	38.424	45.2653	56.045	65.195	53.787	56.3432	50.2182	36.6091	48.3516		0.427417	40.9111
6.4279	24.0462	11.1867	29.8468	33.1114	17.4423	33.6378	32.1829	44.0572	55.817	40.2425	30.3154	53.0479	39.7869	54.1621	38.6566	34.6498	32.7156	43.4734	37.1702	35.8501	38.9207	36.053	39.4155	45.24	60.713	63.0931	38.9556	41.4788	32.4048	63.3276		0.435486	39.3667
6.5469	19.4866	18.4057	22.7379	33.6179	15.117	33.074	33.0566	44.8912	50.6752	40.886	35.7819	39.0966	34.4719	46.21	34.7883	44.0728	47.0247	43.083	42.4307	33.6138	39.9106	40.846	43.7365	44.695	51.192	62.7439	43.9776	36.6193	31.5671	61.8923		0.443548	38.9901
6.6659	23.9109	18.2631	25.5968	37.171	13.609	26.0088	38.7495	44.5794	48.9035	51.7725	39.8931	36.7804	44.0658	47.9136	38.8323	46.0684	44.1833	34.6039	40.5496	32.7791	52.1689	42.143	30.9159	29.694	57.641	43.3847	49.8017	62.8329	33.9209	66.6828		0.45161	40.114
6.785	21.599	11.6047	17.9591	34.403	18.8155	25.5219	37.4656	30.5906	52.5642	47.8182	31.3103	37.4918	32.9215	38.6414	36.3541	46.4773	37.7923	33.6314	26.5714	35.9572	55.4943	35.022	30.9704	38.357	50.55	44.9104	68.3588	49.0564	24.4086	54.0997		0.459679	36.8906
6.904	22.2435	8.6535	14.7043	29.5544	17.2058	20.9982	38.3074	36.6186	50.2735	41.2947	29.5429	25.348	46.2699	45.7797	34.3792	48.1644	34.3199	32.5147	20.0835	35.2876	56.4918	27.216	42.3296	42.683	45.39	53.8464	63.4152	53.427	32.4831	57.1842		0.467741	36.867
7.023	26.3087	13.8131	18.6336	47.0951	17.4117	27.9341	40.0842	48.5075	51.9383	35.0803	30.6016	34.0576	38.2941	41.9033	30.528	32.1573	41.8769	37.5692	22.7742	33.0498	53.5128	24.504	53.8093	38.864	36.512	48.3246	54.3467	55.8068	32.4911	44.6074		0.475803	37.0799
7.1421	24.4934	14.8634	21.7139	42.4687	16.0848	20.1954	33.0546	48.1671	49.0805	34.7412	34.1004	39.3862	38.95	56.9798	36.8872	37.593	32.1478	29.5429	26.0388	41.6681	60.944	37.478	44.5686	37.723	38.69	45.6538	64.8776	49.9505	37.5094	45.3583		0.483872	38.0303
7.2611	19.2908	13.676	23.5782	56.0141	17.5682	22.5003	33.0091	39.5595	40.16	44.7379	40.2867	38.0012	40.0883	29.2531	41.5984	41.0025	31.7902	33.973	25.112	28.5516	54.1266	32.22	42.11	36.12	30.363	48.0804	56.6288	41.5016	22.7785	46.9411		0.491934	35.6874
7.3801	26.2628	18.7175	25.7347	47.1506	16.0209	18.279	37.1605	49.347	44.4609	42.06	36.3674	32.3285	35.6599	29.7216	36.8779	37.8861	35.8773	37.7491	23.0393	32.3524	49.2061	35.93	30.581	45.78	34.908	53.1496	59.2329	45.5324	28.4713	46.1142		0.499997	36.3986
7.4992	33.3183	14.6972	21.6502	40.5386	17.6521	27.5841	38.4589	46.752	39.6368	41.4637	36.0471	25.8048	38.6451	22.5471	35.118	41.5525	40.524	33.124	18.3917	39.9127	52.3653	33.247	36.0504	51.72	31.877	40.9015	55.6139	47.7918	26.2932	50.0877		0.508066	35.9789
7.6182	24.7624	15.9515	18.5946	36.8055	18.2214	16.3269	42.3051	62.872	46.0651	45.2309	37.1606	33.3581	50.2384	41.6388	40.271	37.969	45.1756	29.4113	23.7933	29.972	60.331	34.582	38.0487	40.98	23.922	54.7173	53.3385	47.2739	28.8357	49.4527		0.516128	37.5868
7.7372	20.4262	10.6861	18.9461	28.8826	14.1081	15.9804	41.8776	64.6018	50.7716	45.5282	47.7371	38.1364	48.5362	37.3996	41.7187	52.5441	50.2804	21.9055	23.1372	36.1208	62.2127	38.189	34.8198	30.191	25.379	36.8072	44.8444	34.4116	29.0389	50.7803		0.52419	36.5333
7.8563	15.1629	13.0921	13.6604	40.4352	19.3275	19.631	49.1303	57.632	46.8201	50.0008	48.7458	46.8551	43.4509	34.7527	41.584	49.5231	43.492	17.0519	23.813	40.8191	57.368	45.75	34.1239	32.289	22.164	62.2813	56.7979	32.802	28.8947	53.6457		0.532259	38.0365
7.9753	26.3738	18.8177	20.9278	32.7903	15.5189	30.7705	44.125	48.899	31.224	37.3542	55.0616	35.4526	42.1574	37.4212	36.7143	47.5728	43.4871	19.1203	21.166	36.6752	67.6328	31.71	29.4377	22.723	29.948	59.3107	51.1407	33.7027	28.2723	44.6552		0.540321	36.0054
8.0943	17.3244	9.2866	35.3018	37.0648	20.1188	15.8583	46.5023	46.1044	41.9491	41.0644	45.0934	44.8363	41.8534	35.5579	41.5668	44.018	46.3297	19.2593	17.9718	43.0968	58.5598	25.41	30.2688	30.146	21.784	39.9294	48.7474	43.3392	43.7222	44.4576		0.548383	35.8841
8.2134	28.4504	10.3607	27.8075	32.7224	17.8851	16.8374	43.0278	46.2076	50.9027	35.0755	40.5486	43.0551	39.0546	47.6	45.7072	43.4849	51.742	17.6229	22.0973	45.7453	60.7013	40.958	32.2912	24.062	20.672	54.3483	51.5243	41.3296	43.544	31.0457		0.556452	36.8804
8.3324	26.4169	14.0173	24.1059	44.2862	19.9675	23.6317	42.5307	55.4936	39.0996	38.4423	38.425	52.5069	37.1776	48.3563	41.7813	39.5964	53.4421	23.304	11.6397	49.9488	70.8185	29.104	28.288	30.232	13.499	57.8046	57.1829	29.8663	40.949	45.2318		0.564514	37.5715
8.4515	22.617	17.693	28.3345	38.4314	16.3563	17.7665	32.9021	45.0949	44.0794	36.8504	44.7715	47.2035	45.6839	29.2576	48.1773	48.7158	41.8015	18.3279	11.536	38.6462	62.1348	26.88	28.8696	28.119	12.627	37.7201	45.3787	24.607	34.6892	37.6264		0.572583	33.7633
8.5705	20.1463	18.066	31.9127	44.9484	17.1253	22.7911	34.2104	43.4267	43.404	32.6763	41.3526	41.6475	37.7805	33.0164	44.3637	50.357	37.091	14.9266	22.6529	32.4942	65.5749	41.013	26.2343	26.449	14.41	44.2497	35.5064	30.1586	44.2567	39.68		0.580645	34.3974
8.6895	17.2337	14.5815	20.2547	36.4948	13.7941	19.162	36.6509	48.1842	48.1138	39.5403	34.9018	44.8127	36.0949	27.5397	41.541	44.1753	51.2344	14.3255	18.1274	23.1652	64.9445	33.581	33.2073	22.746	18.326	45.9875	39.1561	38.1773	46.9428	38.0576		0.588708	33.7018
8.8086	31.8944	17.7618	25.0391	28.4737	14.7551	16.0156	34.6336	42.4143	55.3132	39.1678	42.1579	33.1189	38.5581	40.3364	46.2094	31.9054	46.4268	19.4178	13.8608	31.8477	61.7795	29.078	26.8967	17.986	13.743	36.5181	48.5743	29.5737	54.3788	42.6669		0.596776	33.6834
8.9276	22.2512	14.0632	29.0645	31.8312	23.796	22.4919	54.583	45.5306	50.1774	40.1077	51.2907	39.9542	46.9536	40.3947	52.7237	32.093	46.461	11.1937	17.569	29.3704	55.1773	26.086	33.5939	17.485	9.374	41.4765	51.6265	33.4478	47.4127	39.3757		0.604839	35.2319
9.0466	21.0258	15.7395	30.9373	32.2635	12.6711	21.5969	43.0543	33.4843	50.8217	34.3894	60.5717	48.6959	41.7398	29.2939	32.0191	44.66	37.6711	19.3188	20.975	29.645	48.694	23.158	39.7549	28.727	12.22	41.185	49.1094	41.1268	41.2591	57.1904		0.612901	34.7666
9.1657	26.7253	15.9977	37.8138	42.7219	16.1054	25.3881	37.4315	38.5358	38.3661	44.1752	62.0638	35.7391	37.4828	28.4186	35.2227	47.0099	41.8265	21.0276	16.9096	24.2418	38.3279	25.286	32.5538	20.04	12.565	35.4135	40.8173	40.5688	49.3008	55.2071		0.62097	34.1094
9.2847	31.295	29.1386	35.8965	32.5671	10.3905	27.0699	46.5851	39.2775	40.1838	31.7246	51.059	48.5154	33.9705	26.6367	25.6131	30.4557	41.0392	12.3472	17.9583	32.1181	39.8864	19.622	30.5938	20.397	12.472	40.6381	46.8186	29.0392	42.4698	40.4243		0.629032	32.2068
9.4037	31.7956	29.2582	27.6136	29.2484	9.7096	21.3232	47.9836	52.1008	37.5483	32.7654	48.313	49.6356	37.9631	24.7611	26.8926	43.475	44.1371	18.0352	11.7852	34.4855	34.0578	24.21	34.1731	15.955	13.453	30.4334	43.0732	26.5327	39.0285	45.7728		0.637094	32.184
9.5228	28.8347	23.7982	24.3802	33.7846	16.4237	20.5056	32.7295	37.1695	55.0525	32.8061	43.8571	43.3237	30.0872	23.7495	32.6704	47.0206	47.6348	20.119	15.3784	43.6334	28.0131	29.777	36.2071	15.343	13.789	26.9351	32.6986	27.4257	46.0833	45.5008		0.645163	31.8244
9.6418	27.0184	13.0434	26.1398	29.3955	16.2561	23.138	44.6375	40.5755	55.0501	34.9901	48.2004	58.8851	29.6705	39.2559	46.9873	42.9109	47.6791	18.2328	14.6698	34.2277	24.8019	20.954	34.147	16.184	18.492	34.9739	38.4812	37.7656	47.0079	42.9608		0.653225	33.5577
9.7608	27.7246	15.2438	29.6808	31.3409	15.8654	21.2376	39.2778	44.3218	46.8594	47.4319	51.0854	43.4559	35.0875	34.5568	41.3953	39.9445	52.7992	14.1594	14.5414	40.5697	31.1292	27.507	36.3804	15.851	10.329	31.8468	37.5604	37.3054	54.5418	30.9398		0.661287	33.3323
9.8799	31.792	15.1181	31.1982	33.5208	14.2566	24.8082	42.1913	40.4914	42.4361	35.906	46.4096	42.3431	34.2467	27.2024	40.4341	39.9718	34.7993	11.0256	13.1399	45.8792	28.8169	28.612	39.9255	14.287	7.163	26.0382	33.4942	31.4092	43.0408	36.3561		0.669356	31.2104
9.9989	33.796	24.299	35.8389	27.2042	23.3686	18.899	49.6436	31.2756	43.1698	43.91	36.7291	43.1876	34.2484	26.5511	33.6768	36.4688	34.1157	16.7279	19.5429	42.258	26.2758	22.059	39.6502	9.645	11.666	25.2235	41.6817	28.7973	31.9878	38.2255		0.677418	31.0041
10.1179	38.5715	23.059	30.5022	39.2231	14.2649	14.083	42.2444	46.2062	45.1453	45.057	34.0284	45.0341	44.0958	25.2629	41.2644	44.3433	28.8216	13.3068	15.5279	41.9628	28.6617	23.224	39.5008	15.55	9.947	25.3147	58.3262	24.6008	50.3782	41.5948		0.685481	32.9701
10.237	35.0262	19.9701	30.6573	30.4845	15.415	19.6179	42.2303	47.8526	50.5063	48.8521	38.5411	47.3283	57.2328	33.5851	28.0719	32.8629	45.4668	13.0858	17.7404	48.1761	33.7118	30.851	33.5107	17.136	9.187	30.7966	50.5346	31.2224	39.9432	45.5164		0.69355	34.1704
10.356	41.1151	27.2302	42.7895	20.2241	16.1358	20.731	41.5708	57.6032	39.6683	45.537	42.4058	49.1326	61.1778	31.3224	27.5646	39.8628	45.4374	14.7812	18.7988	37.2251	37.6875	31.323	36.2857	10.838	11.449	21.4849	44.0762	32.4418	42.4662	50.6096		0.701612	34.6325
10.475	48.3076	28.1701	43.5904	29.7092	5.907	18.8298	34.8598	51.0847	45.17	33.3127	30.2522	44.1471	39.5852	30.0636	28.403	34.9555	32.9291	16.3121	9.3149	44.0519	33.7054	22.808	36.7255	9.705	12.685	17.0819	44.5256	28.606	41.9584	59.0509		0.709674	31.8603
10.5941	51.7229	19.8186	20.9757	32.7086	13.1239	19.4146	41.5764	53.3802	45.9147	39.0949	36.6662	29.0033	45.5354	25.8556	32.5427	45.2378	20.828	17.7631	16.0008	32.3533	30.8641	21.672	31.8084	21.347	11.679	18.8984	46.6347	22.4267	29.3684	52.936		0.717743	30.905
10.7131	60.0715	20.3627	30.6126	34.4784	18.6585	23.389	37.6156	49.3026	46.7494	43.8889	37.5193	37.239	51.2758	31.1908	30.7026	48.9984	39.6173	18.7067	20.9689	30.459	36.4342	22.083	38.4562	16.56	6.397	21.3886	37.1934	27.588	24.0947	42.2066		0.725805	32.807
10.8321	62.262	22.3554	32.9904	40.2422	14.581	21.0721	31.8627	54.0924	44.1375	48.1964	36.9847	39.0999	44.6312	39.7964	31.3668	53.9046	33.993	13.893	19.7102	43.4845	28.8735	33.416	39.9339	20.851	8.195	18.9748	47.8046	32.2525	29.5281	42.6015		0.733867	34.3696
10.9512	49.8925	19.7688	21.6694	27.9644	14.0739	23.086	32.5752	39.4462	35.8991	28.5295	41.6474	30.6903	37.2571	32.2561	30.2238	50.1224	46.2411	11.9003	13.3165	29.204	23.4457	34.626	30.3652	11.777	8.089	20.8887	48.0081	31.5213	35.8046	44.8036		0.741936	30.1698
11.0702	46.9392	27.6574	30.4211	28.0961	14.5209	23.8494	36.6069	42.9498	31.8579	34.2075	42.0944	32.949	36.7671	39.9614	33.1611	36.7237	48.8126	16.1423	9.3583	27.51	35.8738	22.119	33.2812	11.741	8.824	21.3771	47.0783	39.9389	31.8397	43.5083		0.749998	31.2056
11.1892	40.2753	22.4597	27.5124	39.5208	18.0971	19.2732	32.9389	45.8412	35.5265	26.0052	37.3903	35.3954	37.605	42.6546	29.7945	32.7864	56.1147	14.2741	14.4105	30.3712	25.1081	17.315	30.3651	17.03	9.074	22.9844	55.5152	24.7295	39.2624	35.2104		0.75806	30.4947
11.3083	36.9482	32.1538	36.71	31.5024	20.1784	18.7429	31.9553	35.3232	40.336	31.5335	33.0992	39.2777	28.0305	43.4384	26.1066	30.9469	48.9379	8.3963	10.8688	32.9247	18.2274	23.275	27.5077	10.741	6.724	22.2649	37.2838	22.8513	40.6122	49.8905		0.766129	29.2263
11.4273	36.1599	30.298	38.7485	38.3353	13.8621	18.2713	34.836	44.9059	33.6294	32.864	39.9301	30.5109	34.8194	46.328	25.9513	29.7164	52.7163	13.5455	10.7455	34.7282	20.7597	22.418	25.8842	16.123	6.842	25.6816	38.4469	21.8691	38.9085	54.115		0.774192	30.3983
11.5463	40.6434	30.1734	29.8816	44.2295	24.0479	29.463	32.6354	41.4571	47.2007	27.0963	41.9826	32.5246	36.4196	46.8321	25.2855	34.725	47.8532	14.6705	15.7011	28.0569	24.676	20.663	19.7575	15.512	9.848	32.2274	38.8298	26.6816	34.845	62.7934		0.782254	31.8904
11.6654	37.9917	40.5523	28.397	33.1103	21.0536	21.0003	33.5521	42.4973	45.8358	23.1075	45.1617	30.6769	39.5261	50.7645	33.6324	36.2645	48.3431	14.5993	16.9533	26.2266	25.2518	14.224	35.9722	13.964	9.644	27.8076	38.6616	34.4355	37.1236	58.4697		0.790323	32.16
11.7844	34.1356	39.6845	33.5952	30.7563	21.8355	21.1944	51.9445	45.7082	38.8885	35.3892	44.9868	33.7412	43.5488	36.7615	33.3522	43.854	38.8802	10.6972	23.5662	24.1008	17.7769	19.071	25.0994	12.797	7.94	37.0848	41.9685	29.1661	34.0987	44.3578		0.798385	31.866
11.9035	27.8736	29.8448	29.1111	38.76	25.8494	22.4301	51.6251	42.5735	38.6511	35.446	41.203	36.8115	35.7246	33.6036	34.6636	34.7397	44.1139	7.4742	21.1282	23.072	33.8618	26.763	20.2159	19.866	8.131	30.2408	37.0032	33.4365	31.4019	32.2446		0.806454	30.9288
12.0225	35.7428	22.1491	27.9498	43.8909	27.1658	32.3429	37.4359	33.8777	37.0469	37.8891	43.7085	37.5881	28.8687	41.9759	41.2471	39.8249	38.8393	9.068	13.7337	33.2426	24.613	24.712	20.8519	16.381	7.532	45.0729	40.3023	36.2912	45.4006	37.0517		0.814516	32.0599
12.1415	42.3229	30.4341	21.2506	34.4354	18.0717	23.4242	40.6509	45.9786	36.3187	38.3796	43.995	40.5122	35.0908	36.6351	40.8173	46.8049	40.8154	10.4722	19.5702	40.4414	36.6727	24.642	23.7655	14.845	8.953	42.1108	45.3515	40.1777	54.7143	34.5064		0.822578	33.7387
12.2606	43.7529	33.6713	21.1221	30.9749	14.576	30.3164	44.2268	43.6033	42.9239	45.2807	46.9658	47.2669	44.9833	37.4253	36.7376	42.9749	40.514	12.2985	14.4764	28.5284	36.2009	22.844	30.6317	15.675	9.001	35.3304	39.6366	38.6054	39.2461	35.7629		0.830647	33.5184
12.3796	34.7259	29.577	20.0215	33.3272	26.5675	32.0885	45.7856	40.6387	28.5735	44.2895	50.0189	34.7013	38.3006	33.3833	36.2668	32.8039	36.4472	14.1961	20.8841	20.2731	36.1121	22.999	30.8278	15.846	13.023	36.2465	48.1843	34.768	39.7284	39.1389		0.838709	32.3248
12.4986	34.9628	34.6511	27.1844	34.5626	28.2194	28.2163	46.7311	25.3758	33.9915	49.505	46.0481	37.9218	45.4168	51.1105	38.8301	41.0562	47.3786	13.0777	25.4958	25.5188	32.2811	23.369	29.6963	16.357	15.725	35.4221	46.6802	44.8054	38.6657	37.0092		0.846771	34.5088
12.6177	31.2142	23.5515	27.5961	36.8631	32.1326	36.7557	30.0254	43.0779	32.8183	35.6602	33.6238	29.2424	40.2515	57.1283	37.6626	46.9177	34.6261	15.724	24.0172	27.2857	38.1329	33.116	23.4637	20.021	8.8	33.6827	54.9452	48.5247	43.8558	36.817		0.85484	33.9178
12.7367	25.4989	34.0183	28.2245	34.2869	34.6021	27.5591	33.4691	42.9679	32.3292	26.3998	39.2849	42.2529	35.7587	52.8168	47.8929	43.3026	38.0884	18.0541	16.8414	37.9699	38.1323	28.578	18.6886	15.118	13.171	29.8718	50.7313	52.8393	45.8653	35.0613		0.862903	33.9892
12.8557	31.3897	29.9237	17.6579	33.9358	53.5686	32.2694	38.9488	38.5979	31.3826	33.5995	39.9659	33.8933	41.9215	47.2791	48.2413	48.1414	30.8376	15.6064	20.7608	42.5676	37.0262	24.979	24.2573	13.051	11.692	26.572	49.9759	46.7158	48.1201	27.2527		0.870965	34.0044
12.9748	32.6706	31.6382	16.6717	33.6037	41.8251	35.145	40.0822	34.2838	29.183	30.7836	25.2844	27.9535	44.8225	50.4666	30.084	42.8224	35.0609	15.9991	23.0051	37.3046	21.0048	21.008	21.9657	12.651	17.228	32.7177	49.27	43.2688	48.9095	23.0559		0.879034	31.659
13.0938	35.427	32.0811	21.7705	25.8	40.1153	40.1137	37.1146	38.4971	37.2472	20.5638	20.6988	29.7546	40.0993	49.8256	42.8646	54.9047	35.8132	11.5588	19.819	41.3618	19.6502	21.459	23.8751	8.481	12.258	25.1985	49.7749	38.5094	34.6173	27.7334		0.887096	31.2329
13.2128	34.6684	26.2704	21.2998	25.9981	31.3916	43.487	43.0019	39.5189	34.5673	24.76	19.8589	22.3027	43.0672	40.9554	44.3047	45.0707	36.7321	9.0083	22.6744	25.3821	10.9479	21.583	18.4102	10.804	16.802	30.8186	43.1889	36.3593	38.8266	26.4931		0.895158	29.6184
13.3319	38.6957	22.4092	14.4302	34.192	45.3993	45.1226	31.1263	36.413	40.238	31.5503	24.214	24.6798	44.7256	37.9296	39.0262	33.8497	40.4739	12.2509	17.7821	26.9265	7.0606	18.701	30.1589	15.774	10.047	29.6391	37.4086	39.356	47.0185	24.733		0.903227	30.0444
13.4509	33.7761	24.8681	11.0526	26.2965	48.0055	46.4989	28.7608	28.6194	38.7978	30.1014	33.1111	18.8781	41.8748	44.4851	41.1958	31.2529	38.7987	15.2618	20.0382	22.656	8.4289	23.481	27.6002	13.651	15.957	25.0918	49.7643	40.0799	37.5471	19.7455		0.911289	29.5225
13.5699	27.6159	22.2032	7.36	29.0967	46.64	44.3995	29.3486	32.1975	38.4301	24.072	26.9575	13.4743	52.5528	36.2529	27.3846	34.702	41.9762	17.139	16.6397	22.6471	5.5589	20.221	23.6829	12.729	17.666	29.3251	59.0497	42.1427	42.8967	18.8074		0.919351	28.7723
13.689	20.1873	15.9553	11.1628	27.1786	38.399	50.3746	42.1282	35.8739	39.1063	20.1607	35.5689	16.1163	42.9526	28.8107	32.6412	24.2183	39.4807	10.1054	26.041	18.9076	9.4844	17.175	26.4618	17.64	17.156	19.5223	58.2926	50.5797	36.7115	11.5002		0.92742	27.9964
13.808	20.7873	13.4023	7.5939	16.8592	40.909	41.2718	41.4321	30.7823	35.4577	22.8839	25.6776	12.2046	44.4443	37.1278	30.2257	24.1908	27.6385	10.6955	42.7654	16.2208	5.4855	9.828	19.4295	10.465	14.849	26.1039	52.3238	37.5185	28.4179	12.4529		0.935482	25.3148
13.927	23.3203	8.3042	12.5335	10.394	22.4051	48.6736	38.5756	23.0607	33.8408	17.7854	23.3127	8.2671	29.0319	38.8399	21.0563	27.9623	28.4799	15.9944	33.5132	12.1738	3.8698	13.421	20.4489	13.263	9.186	31.2064	54.0016	39.2363	23.1225	10.5301		0.943545	23.1937
14.0461	30.1052	6.1346	7.7975	8.7937	25.7906	58.742	38.3966	24.839	34.6177	20.6991	16.5252	6.2249	38.7043	42.1859	24.3095	20.5283	21.3391	20.8929	23.4629	15.1601	4.179	11.264	25.2587	23.719	8.414	22.9419	31.006	35.2133	20.3266	4.9491		0.951613	22.4174
14.1651	24.7679	4.8114	3.4441	11.3565	20.0655	45.0741	31.0192	28.5783	34.0921	28.6455	17.8735	10.1526	31.8744	46.6766	26.6793	22.7492	23.7724	14.8482	37.453	13.2605	3.1596	10.713	30.1882	25.912	12.296	25.301	47.9498	39.0884	13.2821	7.5476		0.959676	23.0877
14.2841	18.09	6.4797	1.2961	12.0356	18.4346	57.0287	31.1452	25.454	31.3125	18.8915	18.6784	8.0016	29.3995	36.2877	21.8221	21.0515	25.1712	25.3813	36.3801	15.8472	2.4867	8.669	23.5712	18.296	18.048	21.2237	36.1458	43.4635	8.4383	2.5407		0.967738	21.369
14.4032	22.7322	4.187	4.1532	4.5207	21.1045	48.1225	17.6149	25.3269	30.0674	14.4185	15.5167	14.1241	30.6009	31.5785	19.5253	17.8522	36.7883	24.833	36.4668	7.3685	5.8365	10.627	22.5047	17.565	21.08	24.056	31.3633	37.9125	9.6693	5.407		0.975807	20.4308
14.5222	17.6832	4.3824	4.8348	2.7327	10.0533	37.5608	17.4972	28.2865	29.793	19.2257	12.8257	2.7868	29.1707	27.4002	15.6955	12.5839	17.6011	23.4653	31.1526	3.1878	3.5363	8.981	19.1981	24.56	24.146	21.5882	30.9277	34.3324	9.0392	1.7165		0.983869	17.5315
14.6412	7.8047	2.2946	3.1831	3.7054	6.8938	29.007	10.2078	25.8429	28.1034	14.5705	10.1319	6.3346	15.9188	28.9226	10.3797	12.4764	23.769	29.9142	28.0216	3.4026	3.5214	8.323	18.1493	17.722	30.312	17.7563	28.5613	22.2703	7.1309	4.6326		0.991931	15.3088
14.7603	7.8968	4.2388	0.6781	4.6486	16.0891	25.2885	11.9383	28.8415	28.5751	11.8919	5.1559	3.8278	10.8651	31.4943	11.9199	14.8235	18.2951	31.5972	22.0406	4.7195	3.0093	8.084	14.4253	13.779	19.894	11.2623	31.4739	16.6194	7.5127	4.4043		1	14.1763

## Sheet: Image8
X0	Y0	Y1	Y2	Y3	Y4	Y5	Y6	Y7	Y8	Y9	Y10	Y11	Y12	Y13	Y14	Y15	Y16	Y17	Y18	Y19	Y20	Y21	Y22	Y23		Ap-Basal	Avg intensity
0	9.1569	14.0921	15.1743	15.375	15.0818	14.0802	25.5242	18.5471	20.7839	27.0561	13.8086	18.2207	14.2515	14.0525	33.4439	30.2165	32.7876	17.1791	22.8472	33.7678	17.2076	19.8696	18.7701	15.3742		0	19.8612
0.119	12.1607	16.0048	10.3206	17.6161	15.681	15.8026	21.3314	27.3686	30.861	22.9223	19.1179	9.9284	29.6828	21.1521	21.8084	28.277	42.9379	16.6632	26.7829	31.9378	30.041	18.5835	20.9428	13.2873		0.00952107	21.7172
0.2381	17.96	19.0278	16.6741	15.3008	18.29	17.7836	19.3468	26.1439	24.4733	21.7866	18.6384	26.0655	24.2922	24.6383	22.5778	34.2398	35.9179	23.3141	27.3754	26.8338	22.3312	20.8118	21.1907	11.8197		0.0190501	22.3681
0.3571	21.0146	14.529	24.3726	22.7276	14.4904	29.398	18.1657	15.6468	29.9617	26.9327	9.9954	18.2785	14.795	31.2663	30.4087	20.7864	29.6746	26.6212	31.1238	25.1268	33.3482	21.2134	25.5725	14.1803		0.0285712	22.9013
0.4761	14.0492	16.8349	20.101	16.9886	11.2284	20.5664	29.7579	20.8436	24.1637	19.0669	15.0082	19.5273	34.6654	20.8369	25.2836	28.8702	32.9491	26.1884	38.5199	28.4398	33.3767	19.334	28.3946	23.5393		0.0380923	23.6889
0.5952	12.0013	17.069	25.9887	17.6785	14.3185	29.9684	21.5852	25.9046	23.7896	30.1138	18.1333	21.0775	19.4238	24.9931	35.551	32.8853	34.9223	22.2088	25.6796	40.6801	25.7557	37.0488	30.6141	28.8486		0.0476213	25.6766
0.7142	18.4354	15.702	20.3766	17.4606	19.1583	21.3408	27.3633	27.5587	31.0497	37.3543	14.6167	26.9987	29.0476	18.6622	34.4754	37.5661	38.0838	29.1569	26.2464	38.7587	41.683	34.552	36.2068	20.9513		0.0571424	27.6169
0.8332	13.1108	16.4719	22.4734	20.3249	28.2625	31.3694	37.831	30.827	28.0202	30.6704	27.0918	29.0813	31.2532	26.0048	38.2003	29.5784	38.6259	38.9682	22.6588	45.3571	48.8579	42.761	27.959	28.0734		0.0666635	30.5764
0.9523	14.6702	13.0777	29.4142	34.6341	28.4961	35.0838	37.7845	21.2913	22.575	26.5963	22.3238	27.889	22.7478	31.4248	35.3675	29.2162	32.4413	36.3281	24.7626	33.8578	46.3144	36.1489	39.5301	23.4597		0.0761925	29.3931
1.0713	22.2608	23.0289	37.8088	35.3148	21.6849	34.0732	36.6873	31.8825	25.2097	33.975	28.6937	35.7357	34.5479	30.3057	32.7207	43.2399	44.3585	48.4076	29.0423	49.4987	54.7853	27.8885	32.1995	23.7683		0.0857136	34.0466
1.1903	24.4406	16.0383	26.1417	27.5384	28.0683	38.8868	30.4062	34.413	36.4285	28.8069	29.3525	28.6112	30.5827	23.4444	37.0414	36.1771	46.8857	29.6363	35.5544	30.6767	60.0111	37.438	25.0856	34.2685		0.0952347	32.3306
1.3094	23.848	21.2326	23.0902	39.683	22.6684	35.566	27.6558	32.144	23.0853	35.8889	30.2926	33.0536	41.4741	28.8282	61.6971	45.1706	36.6906	44.6489	49.2143	46.0566	63.6554	26.3205	46.0647	38.9059		0.104764	36.539
1.4284	22.6453	12.6047	26.9845	28.4535	13.099	27.2408	28.7056	33.2066	39.7395	25.7199	35.9208	29.4522	41.4355	31.1206	49.4719	47.9117	40.3762	46.5313	33.314	47.2055	48.663	41.6607	35.531	56.91		0.114285	35.1627
1.5474	16.9916	18.1321	24.5336	31.6621	24.5039	36.9844	42.3392	24.0227	29.3836	35.2916	37.3671	37.5975	44.7105	33.8767	68.4277	46.7702	43.3099	62.2978	32.4078	49.3538	54.1293	41.8547	42.8958	52.9842		0.123806	38.8262
1.6665	26.413	17.4501	35.6936	27.3633	34.6294	28.2977	40.6372	24.9176	44.8445	42.119	27.1939	39.9701	46.7988	30.8702	74.8903	39.4685	37.9671	60.3098	47.0303	51.4458	43.4965	49.4845	32.6119	58.0159		0.133335	40.08
1.7855	18.2152	12.7835	29.28	31.8741	19.3171	29.0482	18.7873	28.7997	44.902	44.4769	43.1517	29.9821	43.4918	27.8873	58.4329	41.159	51.0427	54.8181	52.9657	35.2473	59.4573	44.8662	53.7736	43.0347		0.142856	38.1998
1.9046	14.5596	24.3509	29.5726	36.9677	36.2761	24.3107	34.576	27.3976	44.8007	31.4909	57.1696	47.5358	52.2263	38.6003	64.1209	49.3383	50.1823	62.1559	42.9513	40.089	45.0997	32.3755	41.0873	52.5088		0.152385	40.8227
2.0236	19.1581	25.7593	28.5974	26.422	29.9846	35.0529	41.3676	26.1669	45.1811	30.6697	40.3715	43.6695	50.5453	43.1633	68.5381	48.6418	51.0676	66.1431	44.5835	33.4003	60.5997	56.3772	52.9316	28.7248		0.161906	41.5465
2.1426	25.0422	26.6854	22.4075	26.3997	22.6649	22.5582	31.2597	34.5324	38.2575	31.6454	41.3124	42.9623	62.1014	44.8838	70.7238	56.5888	56.1134	64.5834	52.5467	48.6589	47.2862	56.4345	62.5193	50.5847		0.171427	43.2814
2.2617	26.7991	26.8211	25.5734	30.9849	26.4405	21.822	41.7266	25.524	39.0482	39.0323	46.9046	41.3181	51.4689	44.2314	45.0986	37.3733	39.531	48.8052	40.1534	37.6131	31.9368	53.8075	51.1847	46.1053		0.180956	38.3043
2.3807	19.3852	18.3677	31.3508	29.5377	24.2803	30.7603	38.0956	34.3264	39.7583	43.9197	48.7906	37.7019	50.9765	45.8367	56.6665	35.1328	56.746	40.5392	41.706	42.8112	42.3891	40.8481	76.5291	54.3652		0.190477	40.8675
2.4997	23.2538	33.8904	31.6738	21.3354	34.1414	33.6854	24.1427	28.8556	34.1222	45.2981	52.0177	44.4224	51.1547	40.84	63.5326	40.3249	47.1672	55.1331	42.46	49.2607	46.2728	46.7449	45.7887	44.5699		0.199998	40.837
2.6188	15.3547	29.5673	27.0207	25.8346	21.7489	25.1994	29.9369	21.0586	36.1735	38.5278	62.1009	39.8946	44.2147	61.288	55.0484	52.5952	35.8909	45.8677	44.3527	37.0391	30.4365	50.2202	46.0011	45.6594		0.209527	38.3763
2.7378	23.9341	24.0153	28.0018	36.9148	30.2711	33.2442	28.7432	26.1882	46.6622	30.8663	38.1854	46.7339	48.3233	43.9176	48.432	54.7813	46.4465	66.9855	44.5717	30.2295	48.6237	48.1352	61.0017	44.0187		0.219049	40.8011
2.8568	25.2373	36.6325	18.8918	40.9824	24.5255	20.3331	32.2589	25.0923	40.6137	56.0406	49.2277	52.1186	67.4539	41.516	52.9017	50.7289	36.957	62.1388	42.2838	47.8661	39.1625	55.8541	66.7866	52.3885		0.22857	43.2497
2.9759	20.0787	16.4066	21.2755	34.7243	12.2954	27.463	22.7114	31.5867	32.9505	51.6922	49.3114	50.6959	54.4012	52.0905	55.0962	43.8917	51.1327	54.234	51.7506	56.9877	52.4626	48.3419	63.9792	60.5955		0.238099	42.3398
3.0949	23.0256	19.7937	25.7006	22.0546	19.8544	36.0896	26.8938	30.3712	55.5892	43.3642	49.2379	50.7626	52.8188	42.34	51.324	49.0962	45.9657	42.6681	27.9204	47.885	64.9391	47.9794	56.8476	51.2876		0.24762	40.9921
3.2139	29.6132	27.4914	35.1943	28.6897	28.7242	19.5854	19.7989	26.7264	41.4131	39.88	44.7833	43.3341	51.0362	46.642	51.4649	56.927	38.0557	54.2253	33.5378	41.3778	66.1699	49.8283	51.8705	65.6845		0.257141	41.3356
3.333	32.6325	26.3654	24.1341	34.5945	23.55	30.3087	16.5517	37.9957	38.4608	45.4791	50.6608	39.821	44.4521	47.8333	64.0266	56.5481	57.7227	57.9252	31.612	57.9396	40.8772	75.9535	54.8724	64.2361		0.26667	43.9397
3.452	22.825	27.8784	19.5683	26.1262	22.3444	25.759	21.1109	34.5819	30.9584	42.3836	55.2918	46.0153	50.9824	49.4645	60.554	36.3018	43.0872	46.2948	36.9288	62.2476	52.7944	57.5272	61.0049	45.3257		0.276191	40.7232
3.571	31.5773	33.1835	31.3706	22.0921	27.5858	21.4853	19.8779	26.362	28.0723	46.0598	68.1256	42.7973	46.7366	44.8849	51.8179	61.0324	43.4873	55.1905	33.3677	52.8994	62.4586	67.4332	42.059	47.388		0.285712	41.9727
3.6901	32.2607	23.8486	25.9676	22.8852	22.6641	21.9792	25.1851	24.4831	37.3589	52.4742	47.1471	39.5785	39.485	46.8226	47.86	47.8839	43.0196	38.5609	31.9535	46.5754	43.2998	66.4158	45.9312	57.7255		0.295241	38.8069
3.8091	23.88	30.4962	36.1393	21.2409	16.6715	23.7052	21.4256	28.9622	46.5977	50.3316	53.7749	43.1228	47.1701	45.9847	54.0373	63.5125	40.3335	32.9368	29.3897	59.0494	42.0714	67.667	46.78	55.8194		0.304762	40.8792
3.9281	26.8056	26.5879	29.2627	23.8755	24.7908	26.6914	18.6284	22.6089	31.3799	45.3013	57.5992	38.4003	55.0425	45.2203	47.2362	46.4273	62.829	50.8327	36.8555	60.2037	46.2875	58.4218	53.507	51.723		0.314283	41.1049
4.0472	21.2236	23.3453	22.1635	27.2536	18.1956	28.9745	19.3563	23.6532	36.3839	42.1757	40.5748	37.6839	40.8639	57.8733	44.6127	47.6427	39.3269	40.8354	47.6226	56.2687	39.5756	56.6101	63.2691	46.8108		0.323812	38.429
4.1662	24.0333	12.4388	24.4359	26.7215	15.7511	19.1194	19.3054	32.5838	38.9669	48.2725	58.6242	38.5044	48.7787	50.7821	52.8585	47.8465	48.9093	34.278	58.8359	53.486	38.8155	52.5121	56.2261	57.0908		0.333333	39.9657
4.2852	25.4758	40.4499	26.1936	21.5931	22.6021	14.3509	21.7217	25.9134	36.0592	58.1584	61.119	35.523	32.3572	43.6544	62.451	52.596	33.8736	40.71	46.8591	57.9444	41.7349	59.7899	54.3294	54.8473		0.342854	40.4295
4.4043	27.1032	26.4647	38.3174	20.3549	20.3077	23.4478	40.7572	26.7873	24.2872	59.927	53.126	43.4047	52.1409	47.0309	53.5634	49.2252	30.7902	55.8681	37.5144	46.0963	53.4519	48.3747	62.5323	43.5909		0.352383	41.0193
4.5233	19.9359	30.6845	25.2285	14.2527	17.5819	13.567	25.5994	27.596	29.0144	49.9592	48.3938	49.7787	52.2174	41.9361	46.5402	55.8086	31.8208	53.5543	46.8873	48.6609	42.7507	50.2609	55.4209	49.7784		0.361905	38.6345
4.6423	28.754	32.8824	16.6231	20.3926	15.1384	22.0121	21.1041	13.559	31.7695	55.5922	40.25	55.1397	47.2894	31.9762	54.5782	36.0721	39.6889	63.8424	48.3178	37.5923	48.0528	40.6328	53.3493	43.1811		0.371426	37.4079
4.7614	18.6075	35.4488	42.1051	33.4155	22.8568	12.9192	21.8066	28.1044	34.9128	39.604	52.6252	46.8512	51.2215	39.2572	40.0627	36.0589	44.4348	49.7839	36.4806	48.2636	46.6265	43.4954	47.7171	41.3544		0.380955	38.0839
4.8804	31.8474	40.7453	21.7811	17.6716	21.4282	12.8408	18.5237	20.3245	35.3734	41.9376	34.0927	40.3508	59.9484	33.3714	32.8661	45.1393	36.9176	50.4694	45.5562	34.5339	48.7631	33.1935	71.8497	37.9953		0.390476	36.1467
4.9995	29.7955	31.3877	16.4433	20.6697	23.2083	15.8943	23.5624	33.8772	36.1988	32.1443	47.719	38.7681	39.3827	43.0874	38.1319	43.7487	36.0746	40.8667	45.1398	39.4451	33.7541	40.2762	67.9452	60.0039		0.400005	36.5635
5.1185	26.3571	36.3813	19.0489	21.5642	23.6341	15.1266	23.668	28.1922	42.7891	56.1397	36.4317	43.5694	50.3918	43.9933	30.1069	34.5647	45.2691	36.7281	43.6151	63.9256	45.1946	29.6323	40.9524	50.2503		0.409526	36.9803
5.2375	21.1572	39.3047	21.8802	18.9668	21.5755	24.965	25.5871	20.3794	31.2009	42.0981	40.9474	50.0495	31.4291	26.9692	29.5421	35.5612	46.5853	40.7794	41.6277	46.1582	46.7196	40.7146	48.6014	44.6266		0.419047	34.8928
5.3566	24.3045	32.838	27.8523	14.7871	22.188	18.2872	17.5936	28.9258	33.8525	44.9253	33.8262	53.8139	50.209	38.3098	33.3789	26.681	34.6855	45.5317	49.1501	47.5887	41.7348	37.117	72.2888	43.8782		0.428576	36.4062
5.4756	23.2747	30.519	24.0017	22.5382	28.4855	25.8488	30.0891	18.4416	27.6074	34.8375	35.8035	39.2358	44.8666	43.802	31.3383	34.8186	18.34	32.4783	40.1442	49.0633	42.1473	29.1302	61.9213	38.5959		0.438097	33.6387
5.5946	29.1311	30.6467	26.0924	28.6744	22.612	22.9425	20.0996	20.1146	41.8341	38.4846	32.9431	48.5792	54.7387	44.4308	29.8761	43.4088	40.0644	37.6912	39.5209	48.0138	36.7573	28.6681	69.4323	51.942		0.447618	36.9458
5.7137	33.9767	22.7395	28.2994	28.4079	22.0129	24.5101	17.8608	23.8801	39.166	43.3055	35.8573	49.9984	55.2691	36.4936	20.4663	27.1083	43.9544	41.284	44.0675	38.2232	37.0052	28.6504	74.4381	50.9881		0.457147	36.1651
5.8327	27.5894	26.081	25.0684	12.0385	19.4511	15.7049	12.4653	27.2027	31.6289	43.1585	41.4898	50.3328	45.5079	46.4188	14.8601	30.723	35.7106	34.0139	36.7222	46.6963	57.389	22.3424	77.2079	55.6033		0.466668	34.8086
5.9517	33.542	15.7485	26.1368	20.5239	22.9791	10.1005	16.7119	28.7391	33.2221	28.1381	35.6577	33.922	38.3397	31.0497	17.8655	28.9896	34.2293	32.597	44.937	45.569	45.2501	19.6558	50.0133	46.6969		0.476189	30.8589
6.0708	25.0991	11.813	18.4292	25.9326	13.54	11.8148	12.0139	10.7775	25.4133	46.2286	30.9969	31.4673	41.1307	38.9869	23.518	30.1108	40.999	32.1892	43.5643	45.0051	31.5227	31.3375	54.869	50.3345		0.485718	30.2956
6.1898	27.2799	16.5318	15.3238	29.1774	21.1027	12.854	21.595	13.4994	27.8512	34.0767	45.756	27.5837	34.6238	40.6366	25.9971	20.1443	27.379	25.1203	40.7365	55.3563	38.093	22.9622	53.5938	49.0822		0.495239	30.2649
6.3088	23.9714	24.9492	17.6766	18.7101	32.7957	7.5244	18.6851	10.9296	24.7925	41.8683	32.9296	22.5226	29.8497	42.6247	23.8583	28.538	26.3847	37.7952	40.0464	60.1599	47.4311	30.8541	56.8573	70.0794		0.504761	32.1597
6.4279	25.4553	31.7807	11.1646	23.5095	21.2205	8.6874	16.1957	26.2994	30.808	47.7502	23.2697	31.3175	29.1756	42.5193	14.8503	29.2783	46.7291	29.535	33.0576	57.9754	54.4348	25.2442	55.4993	60.5687		0.51429	32.3469
6.5469	29.1878	27.9434	21.8915	15.7576	22.2453	15.8326	11.7979	16.4187	37.6598	42.2617	36.9807	31.0867	30.4261	50.7107	21.0213	24.6568	46.7404	38.5839	26.709	46.4367	39.8206	23.0365	43.3994	50.4834		0.523811	31.2954
6.6659	22.2808	22.9722	29.7779	22.5202	16.1514	11.7899	19.4738	23.3836	25.8001	33.0165	21.4056	24.3468	25.1728	48.8698	14.4407	17.8822	53.067	37.6687	35.5362	56.8716	37.0626	21.82	48.9124	40.724		0.533332	29.6228
6.785	30.5528	25.1946	17.4444	24.9996	17.6377	20.7179	9.7425	24.8361	25.2539	44.3464	38.4544	16.1101	37.3416	33.9998	20.4174	25.9996	47.2562	50.41	38.0049	70.3484	48.7145	30.9736	56.7099	38.1133		0.542861	33.0658
6.904	22.6256	18.9608	12.4733	17.4952	22.4245	19.5146	9.5584	26.8427	27.9694	40.3587	29.1739	26.0825	34.5246	37.0672	14.4843	16.5875	45.1995	41.0269	38.208	51.7363	37.3958	21.921	69.6731	49.8547		0.552382	30.4649
7.023	11.8227	21.1124	10.2511	14.5983	22.2196	15.5546	8.1075	22.6138	28.6771	34.5998	27.9669	28.731	26.0833	52.4171	23.7846	26.4344	37.7599	36.7552	44.4322	62.6381	37.8149	21.0346	40.8448	58.1952		0.561903	29.7687
7.1421	18.1586	15.0139	12.5019	15.55	11.0779	19.1115	13.8798	20.2677	21.2463	39.9829	22.2077	17.2371	33.4875	31.5546	14.7916	19.6067	40.7394	41.7262	21.8398	66.6508	41.4644	25.5212	62.1551	51.0518		0.571432	28.201
7.2611	32.3732	25.2183	13.9557	25.6527	28.4437	20.4871	12.3594	17.5961	33.5654	38.6743	19.5509	17.0451	33.6201	53.1669	24.1931	15.6628	49.3771	31.9121	35.7947	43.7039	52.4322	20.0644	47.7199	50.2477		0.580953	30.9507
7.3801	15.0095	21.3044	13.3477	19.7251	12.3931	9.7925	10.0232	24.4845	30.0441	27.473	20.4622	18.6674	34.6087	32.8047	18.5611	25.5895	43.4417	37.1213	38.1118	55.396	35.621	20.2677	46.3011	48.8375		0.590474	27.4745
7.4992	19.9634	20.5467	12.0667	20.9391	18.3095	18.0249	10.7876	26.8884	25.1719	35.7334	11.6259	8.6146	24.9233	34.4811	24.0194	13.0481	43.356	44.3209	31.2404	55.2383	47.7086	19.2284	36.1982	72.948		0.600003	28.141
7.6182	17.8277	15.4201	13.3212	13.9012	24.6243	16.1738	17.3911	16.6565	27.6553	30.7247	20.3272	24.8171	34.071	37.0742	21.5526	16.7884	32.9277	41.2961	35.79	45.1018	39.1998	15.3842	40.3442	68.8511		0.609524	27.8009
7.7372	19.5962	19.7477	15.4139	24.6059	13.658	7.6251	11.119	14.7575	32.6324	38.2741	21.8838	20.2975	27.9882	38.2973	21.5594	17.7425	44.5538	52.1114	43.538	46.3191	41.0047	18.0599	28.7779	54.6815		0.619045	28.0935
7.8563	20.6193	20.8008	15.7945	18.0559	13.6765	9.489	10.6241	17.8881	41.1381	47.4044	18.224	19.1709	32.8218	32.4339	19.4003	10.39	36.2841	43.6846	57.0879	47.1805	45.2464	9.8475	32.5867	58.4487		0.628574	28.2624
7.9753	21.0073	27.7848	8.4259	16.4763	12.3432	11.0752	12.5319	27.1561	30.6908	37.5529	17.723	13.1116	37.6387	44.8446	20.3688	14.3953	34.4637	32.4637	44.6634	37.5127	38.9816	16.8468	41.574	47.3343		0.638095	26.9569
8.0943	17.4651	19.5877	16.1305	17.4326	15.1376	17.8721	11.4557	11.2681	32.953	31.6125	15.1837	13.9105	27.1652	44.3487	20.8045	14.9468	42.2736	36.1662	25.724	38.6737	32.3801	20.0596	51.4019	62.509		0.647617	26.5193
8.2134	16.2918	16.4215	18.3103	21.2161	18.2144	17.8284	6.5668	15.0473	36.8944	49.5925	16.9001	11.0438	25.0652	43.5267	17.0277	12.1427	29.2344	37.1164	28.8226	34.4685	40.3872	14.7664	39.6741	60.7166		0.657146	26.1365
8.3324	10.6052	16.8639	15.9698	14.9383	13.8248	15.5886	6.3575	20.0617	50.6559	38.7531	20.4745	14.3629	27.4452	48.1812	18.2192	10.0512	30.7237	39.5015	35.4154	32.2217	42.7499	18.6202	29.8753	58.3147		0.666667	26.2406
8.4515	23.9781	18.2685	12.6074	18.8791	16.2746	8.983	11.6291	20.9884	38.4172	27.1624	17.5011	13.3189	32.702	38.8377	19.7109	15.45	36.5958	48.9751	41.0471	29.3549	26.4988	8.9527	22.9745	73.8196		0.676196	25.9553
8.5705	21.8586	31.7789	20.1489	23.5018	24.9716	14.1528	12.3499	23.9142	29.9483	35.8344	19.7753	15.3174	34.2334	46.5916	18.6207	10.161	30.8482	44.0326	40.627	27.0698	41.4156	16.6227	34.4765	44.5446		0.685717	27.6165
8.6895	18.027	14.1195	10.249	23.8786	20.6363	13.3685	12.0316	21.9181	51.1494	28.6634	23.2746	17.7623	31.9369	38.593	25.5545	11.6684	33.4405	44.0024	35.7095	28.1702	33.5612	10.4129	40.2208	43.1639		0.695238	26.313
8.8086	31.0259	23.372	14.7609	19.7363	25.1712	10.672	6.2187	16.6145	41.9222	33.1299	18.0011	18.936	33.539	34.5009	10.5773	21.6774	26.9857	40.6952	35.1842	30.5152	35.4984	16.089	40.1172	50.9296		0.704767	26.4946
8.9276	23.6101	20.6418	23.0053	19.9001	18.1655	12.0045	7.318	20.0138	40.5568	43.929	22.4186	19.4919	24.2472	37.2638	13.7713	17.0482	42.1804	43.9104	31.0274	35.7724	31.1847	14.4366	38.1271	46.3378		0.714288	26.9318
9.0466	29.5054	22.7967	30.4099	20.5248	28.9029	14.4723	7.6612	20.3317	36.5751	50.6296	19.1597	22.1177	40.2782	51.5447	16.6482	18.7738	43.5646	35.3049	36.9909	30.4954	31.1626	21.4399	41.6532	44.3621		0.723809	29.8044
9.1657	17.1391	21.3041	16.7558	23.1066	19.9761	14.4919	6.7911	23.8005	34.2907	52.0028	20.2668	15.3544	39.3474	38.2021	15.8411	15.4058	48.4834	38.4562	37.0661	37.4852	24.7615	20.1029	45.8043	57.7687		0.733338	28.5002
9.2847	27.3873	16.6795	10.7306	15.9587	20.4752	14.3908	14.2321	20.1621	42.049	39.521	23.828	14.7105	22.1607	30.7022	20.8654	24.8835	44.8259	48.8485	29.5246	35.797	30.6075	10.8521	39.2163	42.1576		0.742859	26.6903
9.4037	18.9941	21.9432	16.1039	21.9349	23.319	22.2889	11.044	18.1665	31.5417	33.9225	16.3528	14.4474	37.2785	44.8404	19.1514	14.7344	28.3876	26.4529	20.1802	38.2561	23.6672	14.7802	45.6702	49.1485		0.75238	25.5253
9.5228	25.8482	26.0217	13.5181	13.8992	17.1254	21.1736	5.3179	18.9471	32.9812	39.5993	16.754	22.0271	45.7819	46.9402	16.6587	15.6657	33.5263	39.7455	39.6675	29.7626	25.5793	21.7465	35.1784	41.9369		0.761909	26.8918
9.6418	25.2307	14.2898	10.1133	21.2536	17.8332	20.2991	9.379	16.5481	32.1565	41.794	25.3124	22.7671	46.8185	42.1525	12.0906	16.2686	39.5222	45.611	32.1737	27.0187	40.6688	25.1768	28.1818	45.3134		0.77143	27.4156
9.7608	27.5779	22.3184	15.9133	25.2946	23.3949	22.3254	12.4361	19.4324	20.7721	27.4382	16.5506	23.3819	39.1597	38.0995	24.2562	11.5719	47.5982	46.6938	34.3048	35.4428	37.403	16.4118	28.2729	45.4684		0.780951	27.5633
9.8799	28.2547	10.2755	20.3296	23.8248	12.9316	12.1679	10.257	14.6604	23.756	32.2659	24.3876	26.0264	28.293	40.6877	16.6568	16.5037	31.0817	37.2411	24.7628	29.4168	41.9088	17.4067	19.0452	38.8636		0.790481	24.2086
9.9989	28.6166	25.8155	19.0024	28.4926	9.6816	14.4134	7.7742	16.7649	23.058	35.3446	18.5879	16.2744	37.6311	44.6012	11.8561	15.3099	33.3907	52.1863	48.8048	23.33	40.4282	19.7043	29.5663	30.8981		0.800002	26.3139
10.1179	15.7742	26.0037	25.2859	28.9718	16.9383	14.4497	9.4889	19.2623	25.5657	40.804	27.2039	12.2121	24.7882	53.5046	24.2446	21.4162	45.6866	37.7213	40.5191	37.6109	34.6053	17.1025	34.5448	28.7335		0.809523	27.6016
10.237	22.4966	23.3367	13.6664	23.854	15.4145	16.9768	13.6401	22.1345	24.9097	32.0452	17.0359	24.0633	43.8617	50.8955	31.9703	28.0538	32.0047	38.2855	39.2547	36.3861	40.036	22.2634	38.2208	31.7613		0.819052	28.4403
10.356	29.2658	21.1921	23.1721	22.1309	23.8958	13.3956	8.2901	19.9899	35.4987	27.9814	24.981	26.4395	31.8292	57.3091	32.1023	24.2322	31.584	43.1967	40.652	39.6592	51.5428	16.3866	36.6745	34.3385		0.828573	29.8225
10.475	40.5337	16.5026	18.3197	19.9976	27.3038	13.0708	8.815	17.9673	27.9018	40.7856	20.9354	23.7993	39.9614	48.5986	19.8678	26.8899	38.0973	41.5392	48.9056	43.8187	42.7506	22.3764	33.4837	35.0001		0.838094	29.8842
10.5941	35.6088	18.4092	14.2159	22.3417	18.0559	20.1796	6.1587	23.6369	19.9054	33.6671	31.5281	20.4441	33.1022	43.6034	30.3448	22.1485	35.0032	45.9039	40.2079	32.6228	42.9179	16.8339	33.7575	39.8014		0.847623	28.35
10.7131	33.8774	24.4511	19.5903	24.9375	19.5321	9.1411	15.7384	17.13	35.0454	26.3279	23.1057	12.0245	29.559	41.7758	26.5317	27.0475	38.3313	37.1878	55.53	27.0516	49.6595	21.7537	36.831	35.4892		0.857144	28.6521
10.8321	29.4466	18.567	21.2682	20.1322	29.6089	15.6334	14.0058	21.3016	37.9847	38.4154	15.9978	16.7107	31.7004	47.4966	24.3385	23.2835	38.3118	28.5835	41.259	31.5601	52.0946	25.7793	28.7747	57.4729		0.866665	29.572
10.9512	19.1351	17.7641	25.4618	31.9356	19.9447	15.807	13.8873	26.6083	25.6245	47.7391	29.446	27.7865	41.9535	38.249	28.7207	24.5387	40.6856	20.7172	45.0373	37.5541	31.7439	23.5479	37.682	45.4455		0.876194	29.8756
11.0702	40.0725	17.6864	20.9354	14.439	25.2436	22.4776	9.6518	26.4187	43.1873	40.9408	22.9553	16.5528	34.7255	43.2088	25.1757	38.2136	35.7148	24.5825	41.209	38.0731	42.3404	13.6279	31.0006	38.5655		0.885715	29.4583
11.1892	38.3372	15.7386	14.9747	24.0544	20.692	20.6403	10.5905	29.3267	34.3224	27.9228	34.9612	22.1876	40.6931	43.7124	32.5609	24.9447	46.9229	29.2511	36.103	31.6186	41.5623	26.0688	37.159	28.5364		0.895236	29.7034
11.3083	35.0615	23.9929	13.893	12.4477	23.9997	15.3516	12.5286	23.1076	24.8284	28.1847	26.7002	16.4311	28.4875	37.1447	29.395	24.1967	38.5025	42.5471	48.9178	30.9133	30.3362	26.3472	40.2214	22.4903		0.904765	27.3344
11.4273	18.8593	22.1967	35.5481	23.5135	17.2541	18.4161	18.6403	25.9603	38.969	35.9799	21.3028	19.0309	32.9206	26.5335	30.4462	31.3137	47.5947	37.0524	39.7539	35.7741	34.235	33.5738	41.733	16.8404		0.914286	29.3101
11.5463	6.5063	30.201	33.2124	25.832	20.1488	22.2537	15.9997	22.8515	23.3356	27.8768	18.0872	18.3627	31.3617	35.4483	26.422	35.4484	46.569	29.9261	32.4707	35.6434	44.9818	27.6121	26.7899	19.2434		0.923807	27.3577
11.6654	15.6251	29.5897	21.3701	26.5077	15.4947	28.922	13.7938	21.4423	32.2263	47.7913	28.6269	14.8238	42.4938	28.2812	35.4361	20.4389	45.1543	45.3452	21.8388	36.0753	32.281	29.8445	25.9188	16.4234		0.933337	28.156
11.7844	5.8599	20.946	34.0841	12.0664	11.3341	18.8565	16.1648	19.0803	21.1121	28.3769	51.2729	28.284	28.6608	43.0719	30.5985	49.9098	46.8457	39.5767	31.9044	41.2707	32.6821	37.0208	23.3891	6.9112		0.942858	28.3033
11.9035	6.5945	16.1164	18.3971	29.6231	18.5124	25.0442	20.6894	25.4229	27.5769	30.5341	36.4385	33.0737	29.6299	26.688	28.4606	32.9865	49.7882	37.7898	46.615	39.6085	20.7157	46.3103	19.258	9.2284		0.952387	28.1293
12.0225	6.0208	21.0897	17.9076	18.6358	17.9069	21.7209	22.3477	19.8843	18.8735	21.382	32.9673	55.766	27.9202	37.6842	33.5836	39.9512	37.2825	33.0833	47.9039	23.2809	32.5137	32.3451	18.5909	7.4874		0.961908	26.9221
12.1415	6.3544	25.2725	19.7491	34.9081	13.6363	20.2564	22.1945	23.0396	27.709	22.1789	30.7041	35.3027	34.2654	39.2834	35.8802	46.4811	41.548	38.8021	37.9437	20.5193	19.5269	35.4873	8.6892	8.2182		0.971429	26.9979
12.2606	3.4385	19.1703	26.0905	26.8716	13.0732	22.6884	19.5719	20.7781	17.6977	15.1231	29.4411	32.4082	29.784	28.1608	27.0204	48.602	44.1495	28.7859	23.5069	32.0921	25.8412	27.627	6.2909	7.31		0.980958	23.9801
12.3796	3.1816	12.7763	17.8564	22.7481	8.016	14.3975	25.6158	15.4013	11.8494	23.5604	37.0568	22.0005	23.8305	31.6547	22.79	39.5587	38.8498	37.0304	21.8376	24.5021	15.2824	22.1464	3.6937	5.2588		0.990479	20.8706
12.4986	0.9939	6.649	16.8796	30.0338	16.0838	19.9566	22.4834	13.408	11.0489	25.9349	21.5775	18.6963	29.6995	28.1448	16.8943	43.3778	32.5153	32.3799	36.2692	25.3978	18.9614	13.6551	3.9974	4.5234		1	20.3984

## Sheet: Image21
X0	Y0	Y1	Y2	Y3	Y4	Y5	Y6	Y7	Y8	Y9	Y10	Y11	Y12	Y13	Y14	Y15	Y16	Y17	Y18	Y19	Y20	Y21	Y22	Y23	Y24	Y25	Y26		Ap-Basal	Avg intensity
0	35.8609	25.8321	25.849	32.4075	20.5542	32.6846	26.6172	21.134	9.684	18.9982	17.81	26.1631	12.0948	15.4616	32.5227	24.0329	16.9258	27.7772	27.4047	9.9046	17.0467	20.3349	17.4179	21.1493	20.0413	14.0767	15.7621		0	21.687
0.119	28.8147	27.775	30.7655	29.6201	28.0681	27.8231	29.4233	24.43	18.8109	21.9732	19.8044	20.4691	10.2115	16.381	35.7199	23.8985	21.5604	14.7194	25.6515	19.0974	18.1404	24.4115	19.5888	15.3918	19.8832	13.4766	15.9771		0.0094312	22.2921
0.2381	25.5822	19.2364	20.9491	32.8212	30.7793	27.4661	26.8253	18.1944	28.436	21.2989	21.789	13.7042	15.7381	10.6992	27.6413	22.7049	25.5248	15.358	19.5232	16.8346	23.1303	25.4622	16.2839	16.0712	22.0368	26.0779	17.6425		0.0188703	21.7708
0.3571	38.025	25.2984	22.3343	26.3874	27.9947	24.6424	27.579	29.6767	27.6532	23.6038	23.0302	22.3908	17.6679	10.7589	33.2257	19.25	17.0455	26.2126	24.6704	24.3749	24.5718	16.859	9.3288	17.3469	20.4637	18.8982	15.8953		0.0283015	22.7846
0.4761	34.5699	33.9473	33.539	28.9782	36.9019	23.7817	35.745	30.4773	30.3921	19.9825	14.7418	19.6923	24.967	24.2777	26.1674	19.6787	22.7676	20.5348	22.4724	27.5117	24.7966	17.5722	17.9816	19.4413	15.2426	21.6411	11.8611		0.0377327	24.432
0.5952	46.2993	33.6032	39.0205	33.785	38.0393	31.4495	38.5926	24.31	26.9189	20.9627	23.9024	27.3266	23.8414	21.532	22.245	20.9409	27.3574	20.7534	27.0637	31.3243	14.3253	29.5741	18.1937	29.2463	30.0529	21.0651	17.7573		0.0471718	27.3883
0.7142	42.3931	32.7365	36.4831	38.324	43.2811	27.9931	40.0566	33.3837	31.4971	23.5906	25.9613	26.8827	28.4813	23.3296	22.9336	31.4025	29.9616	31.893	26.1679	29.2696	16.3334	24.0807	17.4903	21.8407	28.1883	18.0108	20.3808		0.056603	28.6054
0.8332	42.2388	26.2436	38.7018	34.863	39.7963	48.4231	32.9764	30.363	31.6498	24.0005	24.8016	20.7525	35.0715	30.7598	31.0587	34.6653	28.1457	26.297	28.9098	34.3609	26.958	28.8193	25.3208	31.2166	31.5551	21.1396	21.6369		0.0660342	30.7676
0.9523	48.2235	35.7126	35.5207	37.8592	52.7613	48.3131	40.3153	40.6868	31.7974	22.6533	20.9003	32.7407	34.2502	30.6945	46.7077	32.0677	21.8356	30.8441	26.7327	32.609	26.1452	20.6581	33.8841	29.2522	26.8828	21.4868	19.4143		0.0754733	32.6277
1.0713	57.5438	43.5281	26.0034	45.5933	45.6172	51.6735	43.8624	28.1501	34.5216	23.036	26.637	32.7747	36.9599	29.7678	38.15	33.6912	29.5624	29.1942	24.2003	34.916	30.259	35.558	28.0083	26.6593	31.5811	22.5382	16.7532		0.0849045	33.583
1.1903	54.7395	32.6879	41.1113	50.7163	52.3542	51.1113	27.2811	28.6277	34.3437	32.9895	24.0057	30.553	37.0269	31.8623	36.7248	41.4839	35.315	40.8854	30.7129	31.519	25.2665	32.6519	39.6684	42.6484	23.7964	27.4927	21.6602		0.0943357	35.5273
1.3094	49.28	41.0698	35.449	50.0798	57.7128	62.9668	34.7395	30.6596	40.483	31.7279	26.8275	33.5501	41.0805	45.0936	31.1996	34.2289	31.0588	38.9881	30.8171	40.0751	30.7121	29.8489	38.7682	45.6303	23.8923	33.035	23.7745		0.103775	37.5092
1.4284	51.0142	46.0012	37.1423	32.7354	58.6867	56.3128	37.7401	37.3144	33.0991	32.0585	25.1714	36.9551	52.1168	45.1698	30.7791	33.6359	38.1008	46.7999	19.7812	30.2325	29.963	26.7796	36.2828	46.1345	36.3609	26.3741	25.8985		0.113206	37.3571
1.5474	56.4376	49.6143	38.4232	39.4843	49.944	49.5323	40.026	33.4903	26.5468	35.6255	33.2275	27.9219	49.4663	50.5051	34.7946	38.9027	31.7487	49.198	34.9085	37.4491	44.3142	32.023	40.3361	45.5531	29.7187	33.0841	29.8584		0.122637	39.3383
1.6665	55.8527	44.1947	43.6306	52.5261	48.6308	59.902	31.479	32.1648	32.5043	43.582	39.4169	32.4357	46.9273	40.7705	35.9154	46.3442	39.5158	41.9635	37.3455	38.0567	43.9746	31.4835	35.8221	41.3248	30.2017	35.2654	40.7552		0.132076	40.8143
1.7855	56.8844	36.0473	36.6681	39.4857	60.7191	76.0091	39.3156	33.5684	46.8282	31.8257	33.204	39.5464	49.1384	31.8463	43.9565	43.1127	37.6369	31.0331	40.5408	36.8675	50.8653	31.2436	48.966	49.4374	25.1818	27.3616	34.3141		0.141508	41.1705
1.9046	58.1137	50.1251	29.2134	48.5372	57.0984	53.1016	35.4302	36.1884	44.2978	25.7878	37.5035	53.7336	48.3743	36.2634	49.1906	41.9566	33.919	38.6727	36.6474	33.0786	51.0237	43.3336	54.6708	46.9539	42.2867	27.3994	32.5514		0.150947	42.4242
2.0236	65.9844	44.5065	34.1558	47.7614	50.4805	48.2064	49.0722	38.5003	41.2374	31.5215	37.1641	43.8608	48.9189	32.4599	44.9435	30.4979	41.2659	37.2536	50.9267	43.1679	53.1732	44.6961	50.2056	37.1047	36.0707	34.6139	41.6777		0.160378	42.9418
2.1426	49.1944	43.8436	33.0158	51.3577	48.4714	52.0408	36.2557	32.639	42.3635	37.9679	52.5541	38.6473	41.993	44.8677	38.5829	50.73	39.9686	39.7307	50.7748	45.0702	57.2991	33.6072	57.1329	46.1062	33.5324	34.4812	42.8486		0.169809	43.5214
2.2617	44.9482	49.823	32.8008	55.2416	35.713	53.3459	38.6067	36.608	24.8457	45.5415	43.1042	40.8452	33.3295	50.2436	38.8531	48.5673	35.4516	39.6413	52.9147	50.3028	62.3393	39.5842	58.9263	45.6897	33.3519	42.1895	52.0468		0.179248	43.8835
2.3807	57.2513	48.2756	39.754	51.39	54.3939	50.8683	42.9833	45.7062	32.8412	35.5622	42.1018	36.4707	42.1731	51.5293	47.6474	43.2282	31.5082	43.9964	53.6899	43.2852	44.4858	45.8607	50.8804	42.4515	44.0188	42.8108	44.6219		0.188679	44.8069
2.4997	55.322	40.7522	39.4499	45.2446	37.4012	46.0721	49.0624	44.311	34.0924	32.6571	37.3051	43.7341	37.9076	45.9969	52.1503	54.9107	28.3332	39.3722	46.4362	40.1433	42.5514	38.6188	49.1631	42.6375	38.8891	36.3273	38.8939		0.198111	42.1384
2.6188	44.7511	44.5064	46.872	41.4713	42.5888	53.0831	49.139	41.9238	45.6728	35.8619	51.7702	46.6047	34.7936	41.3542	50.0265	47.176	38.2801	34.2423	47.6173	43.9792	42.6678	47.3159	50.3774	59.8072	39.7849	33.2516	40.1705		0.20755	44.2626
2.7378	47.5192	46.7737	47.5778	42.0192	43.475	60.0629	48.3495	36.8627	50.9028	35.9915	46.536	45.0289	54.332	45.4925	45.194	40.0616	44.1851	32.5747	34.6024	50.4854	54.6082	43.2938	53.7929	41.7129	38.4128	43.7892	43.8445		0.216981	45.0919
2.8568	51.0097	40.7506	46.3436	49.7815	52.0735	53.8897	35.482	33.8041	47.676	44.1794	35.545	44.686	45.5854	41.3181	44.2582	36.5125	46.2958	42.2938	37.2856	47.062	53.8006	44.7358	48.6499	40.4573	44.5833	44.4229	47.9172		0.226412	44.4592
2.9759	47.9607	41.9438	51.7071	46.6136	56.0128	55.2362	45.9397	35.0838	37.3069	48.6049	40.2186	44.1943	46.7655	45.4208	41.4021	38.4564	38.0861	39.2959	44.4396	42.6776	59.0352	40.3791	29.9002	42.701	35.4989	34.7531	61.4015		0.235851	44.1124
3.0949	54.4386	40.126	40.9087	48.9653	48.8764	52.5939	62.6685	36.9531	43.0398	37.55	57.8302	33.0959	51.9265	42.2995	37.0665	39.4607	34.114	33.3736	54.8361	54.558	59.8567	35.9512	36.6375	39.8759	41.8891	42.8766	59.0166		0.245282	45.2143
3.2139	47.2249	38.9228	37.0911	52.6561	58.8838	42.1367	51.5083	29.3492	34.5393	42.2636	38.421	39.0226	48.199	48.8634	40.6783	32.2311	30.2454	40.7428	48.0336	55.1604	55.3117	44.7534	35.6625	39.5287	42.926	47.2346	54.3132		0.254714	43.552
3.333	62.2768	45.2694	44.2075	40.1073	49.9105	46.3526	52.1174	38.501	37.1397	43.8388	53.8057	44.879	41.1612	45.6707	40.9836	47.4286	32.8083	43.1554	49.0346	54.488	44.5208	47.1802	35.7919	44.8601	49.451	55.6837	43.6496		0.264153	45.7138
3.452	54.0994	43.8935	44.535	44.5439	57.7697	47.2429	52.7244	43.4005	42.6251	47.8833	47.373	44.9374	59.521	49.9301	45.5999	37.0682	39.2127	43.699	38.8883	52.8361	49.7235	46.5362	40.0217	41.1734	62.9524	42.5634	41.3415		0.273584	46.7443
3.571	55.0296	45.2452	42.6742	46.784	46.0776	45.2473	59.0923	56.6305	33.2686	45.5777	58.0153	52.1882	55.8446	47.8904	41.9991	46.3006	36.6987	46.2382	28.1178	45.2964	50.1663	46.4231	33.5756	40.3953	52.1788	41.3505	48.1125		0.283015	46.1636
3.6901	61.8709	49.3451	45.9641	59.2932	53.5301	42.739	54.2647	51.4635	49.6298	46.8834	53.2955	53.6942	42.6592	47.7193	44.4322	42.1547	31.14	35.8643	40.4646	44.5847	60.0201	44.8155	42.8176	48.7316	42.8446	38.2039	54.6263		0.292454	47.5204
3.8091	51.6509	52.1325	55.15	65.4875	54.3481	54.0176	56.8442	45.1712	50.3996	46.8005	32.3736	55.5141	47.6593	29.0867	40.8043	31.6063	40.5205	39.5094	48.6608	39.0394	60.287	45.5705	43.4034	55.6317	41.6889	48.9913	46.2937		0.301885	47.3571
3.9281	48.3026	47.4671	48.616	39.7685	52.2811	38.6718	54.4249	48.8738	43.4782	42.7266	36.8808	48.4288	44.205	42.6852	45.6708	36.7956	40.8161	40.5145	51.0038	39.1325	61.045	46.8637	46.7673	50.2072	44.4862	44.7689	44.4054		0.311317	45.5292
4.0472	50.6894	59.6509	42.7679	46.3871	47.096	36.2932	52.8246	40.8705	39.4313	38.8027	37.2756	43.1034	40.9994	47.0129	38.3072	44.606	35.7597	37.9247	57.2923	46.0553	54.0323	48.8441	43.8647	53.7618	45.1188	44.2204	39.3017		0.320756	44.8998
4.1662	52.9461	58.4617	38.5864	59.4	40.6045	40.2028	45.5137	48.3496	51.3479	51.3871	38.2243	49.1734	38.286	46.0086	49.4992	43.2955	38.511	46.3994	51.2642	35.9616	57.9515	45.8937	49.8517	36.3765	48.682	47.9408	45.4476		0.330187	46.5025
4.2852	47.3101	71.8195	41.6259	60.8779	34.8493	42.6806	45.2949	49.6158	36.1177	51.0976	38.2907	54.4085	43.6144	48.2483	53.3402	49.8143	32.0646	47.2205	57.4345	36.8354	66.6103	50.3731	57.461	45.5442	47.6753	51.5684	43.8344		0.339618	48.3566
4.4043	47.2265	53.9396	37.5465	49.9057	33.1242	42.0344	41.4247	45.583	35.668	52.8589	35.1591	39.1293	51.9165	47.8498	39.9063	43.152	37.8795	58.8408	52.977	35.3987	70.1318	47.868	46.2962	44.1788	49.2061	47.4214	58.0963		0.349057	46.1007
4.5233	45.8739	55.6646	48.2531	46.3897	36.6841	37.4691	60.7385	57.1311	40.7158	56.9475	48.71	40.5284	49.6711	47.5361	37.0344	38.6444	42.8129	63.1193	69.1203	38.529	60.6887	59.1978	55.0964	45.4262	55.0567	41.3367	46.6332		0.358488	49.0744
4.6423	45.8157	60.2522	44.6488	59.5851	35.5999	44.5979	60.5505	42.7474	46.1897	56.9213	46.4733	42.7424	50.787	55.7959	40.9494	42.0385	38.2277	49.6328	71.4467	36.8654	50.5195	60.6101	45.53	47.2547	51.5338	40.5734	52.1823		0.36792	48.8915
4.7614	40.3562	52.8073	45.6173	57.2368	33.2575	45.0604	49.9048	40.2715	46.4803	48.8132	39.2838	43.3591	45.1364	61.9628	50.8839	35.1146	47.4658	47.2996	54.4636	42.3281	38.1286	49.15	61.6773	50.9062	53.2686	46.2293	56.3073		0.377359	47.51
4.8804	50.8297	40.3034	44.1579	59.7761	35.7084	33.5155	48.7337	39.1524	34.0585	40.088	37.7305	52.2433	42.8164	59.7305	46.3116	30.3903	36.5594	44.818	53.656	38.1177	41.0385	62.2108	49.5643	51.157	48.0966	50.5507	55.5449		0.38679	45.4393
4.9995	43.2745	59.5173	37.7493	58.7466	32.2448	30.3811	43.4002	39.213	34.6939	57.2758	42.6592	56.0055	50.2065	57.8799	37.7697	33.3412	41.9823	41.7692	51.5347	40.8344	39.623	62.0617	47.1726	55.2894	50.5736	43.8766	56.7558		0.396229	46.1419
5.1185	31.9192	57.4015	41.7557	55.2443	40.1088	26.0221	40.0354	37.4644	33.4202	47.6534	32.5545	52.0055	56.8012	58.8632	39.45	30.9073	41.2819	55.6352	56.3086	39.8175	52.4591	65.6983	41.1189	65.3809	47.4912	36.8241	56.1441		0.40566	45.9173
5.2375	38.8128	60.0189	37.0165	41.9732	28.4544	20.3891	46.4936	42.7067	39.9734	47.6359	48.6374	46.9181	52.4596	63.0953	35.2415	37.7145	46.3656	51.6037	49.7764	28.774	55.0722	71.1929	44.9575	65.828	61.2409	48.4192	53.9606		0.415091	46.8419
5.3566	35.3083	51.8132	33.794	46.5272	25.695	25.4432	41.2618	54.7708	37.5835	47.8006	46.3942	44.4388	40.6727	50.8487	27.2705	32.9601	49.6379	47.2132	54.6965	35.9768	59.7219	62.8884	50.3839	67.6103	64.0989	41.2782	55.7992		0.424531	45.6255
5.4756	26.3924	58.0191	33.2724	51.6997	35.4777	26.4146	52.4624	50.3123	43.2495	48.3314	48.7015	40.7708	59.1936	55.1805	22.8247	27.4238	46.2831	47.3817	44.4287	33.5412	51.3736	67.8719	58.8531	66.1911	46.7269	39.0932	50.9528		0.433962	45.6453
5.5946	24.9246	54.8857	27.3762	49.6634	28.9845	23.9855	47.7914	63.576	43.2684	49.6344	45.3906	48.2343	48.8392	52.0949	31.342	34.786	37.8317	51.1134	39.14	26.7748	49.397	62.6785	53.4465	63.9004	56.233	54.484	49.7872		0.443393	45.169
5.7137	31.6632	66.715	41.986	46.253	28.078	23.1976	57.5129	45.349	38.4322	51.8137	38.1596	53.6646	50.4305	47.7067	22.9254	32.691	34.4416	43.9962	47.3809	29.8503	44.8274	55.7072	40.6956	73.6882	47.7189	40.3682	55.2526		0.452832	44.0928
5.8327	25.3651	65.124	46.7567	49.1233	29.4102	23.8838	43.9998	42.9713	48.8109	48.3434	32.0498	52.0951	61.1203	57.9615	29.4822	30.4307	34.898	39.4105	42.16	24.7218	52.6688	64.6514	45.2242	70.9963	47.4081	50.5771	46.8039		0.462263	44.6833
5.9517	21.7558	75.275	49.691	38.5816	24.726	24.1886	48.2837	49.8319	40.8055	50.759	36.9361	54.8251	66.2602	53.7592	30.0642	26.2717	34.0665	34.9844	41.9377	28.8852	50.6567	63.8585	60.204	67.9463	47.3994	41.3388	64.2613		0.471695	45.4649
6.0708	31.0619	63.0801	43.8922	35.4538	23.0024	27.1327	54.9607	38.1748	45.2852	55.5267	30.4205	44.151	59.1481	41.2902	30.4572	21.4594	26.1165	43.7951	32.4524	27.763	47.0523	65.3213	60.8929	64.2656	53.402	40.018	55.7725		0.481134	43.0129
6.1898	30.9786	54.0579	45.0751	42.362	20.1174	20.479	58.3611	34.2777	35.127	47.5274	23.6474	26.5437	59.681	35.6235	19.4109	15.4554	18.8743	43.4909	34.7225	18.7374	42.6074	54.4226	51.2975	62.5967	47.0313	38.1899	56.0111		0.490565	38.3965
6.3088	24.3251	47.0549	51.3933	33.8189	20.4293	32.3962	59.6897	42.1157	38.6095	39.7894	28.343	35.8073	62.9247	36.0104	17.0815	26.7228	23.7312	36.6104	46.9803	24.8725	43.7017	51.2953	46.629	72.0305	45.8179	41.9404	56.761		0.499996	40.2549
6.4279	28.0056	47.6865	42.2887	30.4568	17.5296	23.8648	64.2721	46.3517	32.9072	43.5498	30.5683	33.1171	61.5878	44.7777	16.2146	24.3578	25.4123	38.6184	37.1253	22.3252	43.1585	64.5956	50.4026	70.8785	40.8051	36.819	52.9314		0.509435	39.6521
6.5469	32.9257	37.7621	30.1102	44.6364	23.9041	14.6273	56.2407	55.8153	40.8312	43.2798	19.8206	38.0368	64.0287	35.7737	26.4142	20.1256	36.4203	38.1946	33.1478	29.0715	39.6547	56.6637	61.607	73.7451	50.7344	38.8534	48.5202		0.518866	40.4054
6.6659	22.9632	28.0697	28.048	45.6849	22.4274	19.6307	63.1431	45.0331	45.3221	31.3998	22.7831	31.1349	57.5719	34.3279	23.7923	24.6053	32.8717	33.3191	34.2728	44.0348	49.8668	43.5907	53.1038	49.3361	41.5883	50.1779	48.3693		0.528298	38.0174
6.785	25.686	32.0841	37.7206	29.366	18.7717	22.7751	45.5968	52.8006	39.4839	34.9587	25.3434	30.076	57.4808	30.7104	31.3154	24.6727	30.4753	30.1031	31.4995	30.2031	38.8608	53.3876	43.7663	48.396	33.3758	45.4011	49.8453		0.537737	36.0799
6.904	25.3813	40.3573	52.2911	32.863	22.3194	29.4621	53.6429	35.2473	32.8855	34.5738	18.8989	29.2631	60.4723	39.6647	18.9274	20.1113	37.9545	41.5177	35.8913	23.1409	30.7582	51.5793	48.2611	53.7199	40.4902	50.4924	48.1178		0.547168	37.3439
7.023	18.0079	43.2964	35.2739	39.3233	23.6751	19.0604	59.5326	49.3398	39.1393	28.4012	24.1581	35.3996	39.042	55.6229	27.6427	18.2922	29.9825	32.3802	34.9963	28.2484	30.5503	55.9592	46.5008	57.5344	49.93	40.454	42.8963		0.556599	37.2089
7.1421	19.8772	39.5804	34.6761	33.5241	21.3418	23.6078	46.5249	45.7715	41.2944	28.6572	28.2334	36.1622	46.8515	38.7657	20.6795	15.7744	28.2566	43.8615	29.7473	27.0859	30.6429	55.3106	40.2584	61.6616	49.4594	45.8523	49.3584		0.566038	36.4006
7.2611	14.8902	42.0127	47.5181	33.2117	24.0132	15.0148	35.4446	41.7381	39.1088	36.6916	29.4331	32.7239	58.287	39.7114	23.4249	22.6171	28.6983	36.8471	23.7546	22.5384	32.9224	51.434	50.556	54.6232	58.7896	40.6102	46.5511		0.575469	36.4136
7.3801	23.3566	33.7744	43.7739	35.7757	26.1658	20.6188	32.8031	48.1222	32.429	35.0728	23.4657	29.3755	54.0455	42.5821	26.7617	21.8941	27.6368	29.0687	29.5115	23.7201	29.5554	49.1999	44.6561	47.3249	46.0895	50.4907	40.3352		0.584901	35.0965
7.4992	24.8687	33.9602	38.7003	32.5604	14.81	25.1029	40.9821	38.2759	29.4799	28.4585	15.748	32.7961	48.9367	46.7911	25.7159	15.3642	28.5898	32.9173	27.6979	20.4647	35.735	33.3611	46.3934	42.2049	39.1011	40.9995	43.3151		0.59434	32.716
7.6182	15.5017	22.2742	43.2429	28.9066	13.6138	20.9157	42.4495	45.7862	33.9041	34.4472	20.3489	22.0528	35.8941	45.8053	22.4459	12.6967	29.8279	35.5233	29.916	27.6225	43.3822	40.7728	50.8909	53.5935	52.0662	44.088	44.4486		0.603771	33.7932
7.7372	14.6371	28.1386	39.106	36.813	17.0124	18.4196	35.3043	51.1381	41.9624	36.8626	15.4	26.7348	30.3001	51.7986	24.4997	19.0668	27.4551	37.9968	31.4554	22.5639	51.3139	37.8622	40.4942	40.2074	42.6419	37.3855	47.5855		0.613202	33.4873
7.8563	20.3356	41.874	34.9188	28.8157	19.787	21.167	37.7262	51.0083	33.4976	27.4459	19.004	30.1767	38.2515	41.2279	24.5573	20.7844	28.2008	41.5359	26.4519	25.0609	38.4649	37.4862	36.4036	43.3607	46.6446	47.651	58.1811		0.622641	34.0748
7.9753	19.9397	28.5918	37.7142	33.8377	22.421	18.2852	39.8815	40.8952	35.8868	35.1812	20.5528	21.3973	51.1189	38.2583	23.1136	16.5824	30.6245	43.9849	27.2082	21.9172	33.4914	34.67	42.4673	41.7401	61.3335	48.3979	53.9637		0.632072	34.2021
8.0943	22.1061	38.0386	32.1052	26.03	22.2841	18.9871	44.2381	38.1748	39.3515	31.4713	20.3238	22.6899	44.4728	33.9773	26.9041	17.7485	40.7875	38.9529	30.5023	25.1898	36.8743	43.3541	41.9987	43.8033	55.7839	43.42	48.6558		0.641504	34.3787
8.2134	20.2405	42.2391	35.6603	36.9374	22.5607	12.388	49.3415	35.5786	37.6292	28.6828	16.83	23.6669	51.7375	45.4021	26.1757	18.0578	32.7621	32.4606	25.0377	27.1553	40.7338	46.2264	45.6863	47.2229	44.3155	42.2403	50.1596		0.650943	34.7085
8.3324	16.9685	39.3651	38.1987	28.1579	22.8277	18.9578	42.7513	42.4831	43.938	26.9291	22.3783	26.3893	39.2518	37.0022	26.0352	14.1142	28.8892	41.2434	21.038	25.7921	48.1899	50.6609	35.3782	52.3058	45.9564	56.5258	43.3502		0.660374	34.6325
8.4515	16.5755	41.9813	38.1575	38.5458	19.8715	23.3334	49.2873	43.168	36.5466	35.3251	17.5975	26.3644	43.061	39.4568	15.9202	13.9136	30.5114	42.6861	21.1626	18.7672	52.4428	49.4889	33.9826	54.9486	67.5561	46.9578	56.9782		0.669813	36.0958
8.5705	15.4758	34.4251	44.777	42.0457	23.4942	31.2736	52.2722	45.2403	42.871	30.2633	24.3294	32.0995	47.4717	26.0974	26.5964	22.468	33.6244	35.0565	29.6903	21.7235	45.1129	46.1658	34.2308	48.7657	51.376	58.2375	66.5803		0.679244	37.4728
8.6895	18.1938	42.5664	45.3999	40.45	23.8435	17.9046	35.5864	33.8707	49.7138	23.0514	29.5295	21.5577	33.1983	35.5215	18.3959	24.6582	39.7762	42.005	34.2464	18.3731	54.2942	30.8027	37.4307	50.7258	50.4663	44.8957	65.3918		0.688675	35.6241
8.8086	21.0868	51.8408	44.4503	40.5193	21.1295	21.2824	34.9396	48.5467	45.2882	27.51	19.7444	18.3465	30.9743	45.7994	26.1493	19.8161	37.6512	41.6653	28.9342	24.8289	44.3453	31.6421	51.9586	57.1586	45.2074	45.982	69.2932		0.698115	36.8922
8.9276	25.7117	33.1709	43.3183	42.8871	15.9361	25.5076	42.0778	52.1127	43.4243	34.8124	24.7632	27.64	39.3431	44.0139	30.3732	19.4148	35.0532	38.6193	34.4575	20.2839	41.9283	45.2567	49.86	54.062	45.0127	59.2469	68.6876		0.707546	38.4065
9.0466	25.2335	39.065	44.4937	37.379	18.9769	22.5888	38.149	61.4916	37.0876	30.8693	18.8845	26.0365	32.7453	35.1328	27.7204	22.8227	48.5233	38.4985	34.291	27.121	51.2121	48.2329	49.1719	60.3246	65.5937	48.897	83.5694		0.716977	39.7819
9.1657	21.13	51.3866	45.4641	40.3287	17.742	19.9748	37.0066	39.2851	45.1371	28.6897	16.1596	26.7567	28.0375	41.522	24.2342	20.1808	48.158	48.9274	26.1694	22.066	40.6961	30.1902	57.6364	41.3506	46.0636	60.5416	86.8968		0.726416	37.4715
9.2847	23.2426	35.7593	49.7521	35.8769	15.448	20.9826	39.5478	39.9931	44.0808	34.2129	15.5852	27.7482	37.9228	44.3389	27.3235	25.0748	27.0497	53.7181	30.5977	24.5101	46.1965	34.3171	56.316	39.9778	62.9617	62.8015	67.1045		0.735847	37.8682
9.4037	23.8641	33.2621	56.2678	34.7097	22.4377	22.9616	34.7884	37.9027	49.7632	31.9126	24.8785	24.959	37.7268	32.2312	31.6249	19.5938	32.012	43.5515	37.5755	23.8708	45.2776	34.0158	52.1236	52.9388	61.9331	55.5085	71.6727		0.745278	38.1246
9.5228	27.3932	38.5041	42.3798	48.7994	26.2704	16.095	50.8431	42.3195	41.878	28.7359	25.1034	21.8793	40.6875	29.0837	33.7251	21.827	35.8918	44.4579	34.5078	28.7556	41.3592	35.1494	46.6165	50.5322	53.024	40.2286	61.5987		0.754718	37.3202
9.6418	34.9784	49.6734	37.7925	43.7356	21.1286	18.7907	47.9281	46.0946	47.6904	34.8157	26.1122	32.9736	40.0682	39.2174	28.5506	27.3253	43.3835	42.6679	30.2867	21.8678	42.93	43.607	34.125	67.1194	48.8372	44.1776	65.4086		0.764149	39.3069
9.7608	23.8636	37.5382	44.3407	38.6971	24.364	16.9007	45.8856	45.0412	54.9523	36.3481	17.8318	28.6921	32.8124	42.3596	22.6075	21.898	41.7814	48.7255	25.8059	31.2115	53.6338	35.646	49.5902	60.5905	44.0201	44.5313	56.4427		0.77358	38.0041
9.8799	21.9053	31.7257	51.4954	35.3935	32.9049	20.1189	37.4921	54.2039	46.7149	31.0099	21.1971	34.3858	34.7458	39.6019	26.4376	21.3775	42.2585	42.2231	32.5218	26.918	52.2328	48.2478	35.6249	50.2293	39.3795	50.9719	46.4046		0.783019	37.3231
9.9989	30.5287	40.7353	45.395	39.7735	28.6881	19.7989	32.9998	54.7448	36.5813	40.0063	23.5963	35.5768	43.0381	39.8368	34.1257	22.9196	39.8709	48.5629	39.3406	31.2894	49.384	38.9922	38.2551	58.745	41.7848	46.9043	60.4393		0.79245	39.3301
10.1179	28.3686	51.0015	51.554	40.2848	22.0634	27.6162	34.9184	47.003	41.4131	34.4487	22.1511	28.3238	42.2249	45.6295	30.9851	17.5831	43.7843	43.8983	42.3239	29.3385	46.581	32.9006	41.9362	65.5322	38.8292	42.1848	52.714		0.801881	38.7256
10.237	34.5114	50.1796	67.1095	27.4641	33.7979	18.649	35.9514	43.4036	35.9139	34.6057	23.5021	26.0082	36.8091	45.4665	35.1464	20.0383	40.1977	30.711	50.1067	25.3133	54.9613	40.7249	45.0238	56.8904	45.6882	36.2835	45.5622		0.811321	38.5192
10.356	28.0179	33.4167	72.1274	33.1726	30.5739	26.3393	35.0304	40.5418	30.031	40.0618	19.9106	34.4832	41.4442	40.6087	35.9614	27.6537	46.2447	31.6928	37.6335	28.9099	57.629	51.2766	39.9828	40.2997	37.6331	42.4394	41.4889		0.820752	37.9483
10.475	27.3158	35.2828	61.5976	34.0149	30.947	20.8897	42.1106	47.4086	31.1009	43.0444	24.0793	39.6407	45.896	35.77	33.7077	32.1974	62.071	32.3391	32.8325	25.5427	51.044	51.3013	39.1222	50.6294	55.0856	51.8233	51.353		0.830183	40.3018
10.5941	23.3801	37.6519	60.9547	48.7327	28.4791	26.1191	43.3026	48.4662	40.6333	47.9126	23.7868	40.5962	38.5714	36.0345	35.5122	29.8484	42.5465	38.899	38.9584	26.7357	54.4252	47.9072	30.289	43.7223	46.0758	61.0153	50.8792		0.839622	40.4235
10.7131	17.2187	33.8092	62.0977	36.6229	32.4741	24.7551	28.475	43.0168	37.7716	35.6458	25.764	32.5816	36.6034	35.4519	34.0772	37.3885	35.1826	42.0486	32.0542	28.6779	54.5481	52.2707	31.5377	43.4096	40.5327	50.6537	50.6111		0.849053	37.603
10.8321	14.6546	29.1063	55.2723	31.9129	26.5525	28.4694	32.0311	47.0679	38.947	24.0149	22.8249	40.1916	34.5794	36.8222	36.4259	37.6157	30.4872	31.566	34.4217	25.8955	50.3457	52.2029	33.1793	49.4263	44.7776	50.5089	42.904		0.858485	36.3779
10.9512	17.6005	45.2584	48.7375	21.0688	30.0611	24.9558	45.9588	41.4354	42.1888	40.2365	29.197	34.3624	37.2799	39.8748	38.2023	34.8312	49.3907	44.509	44.9066	30.8872	48.0957	61.5626	33.213	51.6504	47.2651	36.7581	31.9855		0.867924	38.9434
11.0702	29.6254	44.1034	47.6954	21.6642	30.2369	23.8807	52.7245	47.3226	32.8659	49.3875	22.2219	39.2666	46.1827	48.7421	41.4081	33.082	48.4446	56.0633	40.0875	37.1738	46.0484	47.2315	47.145	42.1709	29.5847	29.0041	42.1362		0.877355	39.8333
11.1892	38.3892	40.6859	48.2983	36.2336	28.578	21.2513	43.3931	40.3582	39.1381	57.1131	31.5684	50.8022	38.9781	50.4149	45.6053	23.5591	49.2508	44.1853	45.3273	47.9394	41.9904	56.7292	48.4013	35.9534	33.0083	26.3387	34.4459		0.886786	40.6643
11.3083	39.4055	34.2284	54.1597	31.3167	30.7913	24.605	55.1822	48.1432	41.6004	45.2784	28.2133	39.5031	37.445	41.3149	42.4797	29.3686	43.6987	40.3178	32.7374	51.703	42.9608	41.301	45.2956	37.4924	38.0378	22.6876	38.6441		0.896225	39.1819
11.4273	32.0576	36.2232	40.0221	27.4733	27.1963	20.4174	45.1622	50.9702	31.5345	54.2418	27.7172	41.477	31.2093	35.3977	40.918	33.5911	51.1307	47.012	41.284	43.1102	45.6998	54.1515	48.5729	47.0291	39.8485	22.4358	41.4971		0.905656	39.1622
11.5463	24.6941	26.9821	48.2998	22.9141	29.0664	25.045	43.5381	37.9923	32.6095	45.6751	38.6141	35.1622	26.6504	33.9032	44.0479	41.4322	35.5594	43.7175	43.1386	50.6196	40.296	60.9607	61.1464	42.7735	34.6598	30.0781	31.9011		0.915088	38.2029
11.6654	36.2481	35.8717	45.5986	30.7428	23.9867	33.6252	40.1552	36.5084	38.4348	44.4899	41.6954	55.1541	21.616	28.4286	37.8459	43.5422	41.4812	44.9654	51.771	55.7024	40.6729	46.9479	47.2575	36.9178	36.3287	29.1037	25.2577		0.924527	38.9018
11.7844	28.7202	38.0397	44.4134	28.716	21.6606	30.792	36.6865	27.1477	39.9194	43.2103	38.7173	48.6211	25.1295	28.4012	34.9847	37.2736	45.2398	44.2212	50.456	37.6877	38.0447	37.5039	46.3111	43.5347	41.6051	34.7495	30.7898		0.933958	37.1325
11.9035	28.4102	26.1339	37.7973	26.8065	24.2457	35.1966	40.0929	25.907	37.1441	47.4299	41.9003	40.9769	18.9799	27.64	32.1305	41.9526	40.7481	36.5218	47.6631	39.4646	37.4739	35.8791	39.0904	42.5036	36.578	29.0602	23.2505		0.943397	34.851
12.0225	32.51	31.1021	30.0969	14.6304	21.7375	32.8455	34.9247	26.5768	34.0597	34.6655	30.519	41.1498	13.0505	19.0014	27.1608	45.5501	48.4326	31.8852	50.0585	33.4915	20.4388	43.3991	41.4772	34.719	34.2367	28.1435	17.0817		0.952828	31.5905
12.1415	33.5163	28.0503	35.1017	15.6783	17.2726	36.9849	22.8041	16.4988	35.811	42.3029	26.157	49.3562	12.9887	17.1538	20.738	46.5343	22.2493	39.3533	33.8513	23.6257	27.7445	34.3172	29.3324	39.4007	38.071	26.3628	18.5836		0.962259	29.2534
12.2606	33.2513	40.1893	36.8987	15.5545	12.0784	24.5499	18.4566	12.6081	27.9522	24.4148	26.5152	37.9023	17.2305	14.4639	18.2264	42.5085	30.6741	34.4614	29.6332	25.091	24.1385	35.7042	30.9072	30.8399	31.9836	21.2277	15.4346		0.971698	26.4036
12.3796	33.0298	34.241	20.7016	9.56	10.4039	19.9082	23.5108	14.0499	26.7219	18.4703	33.476	31.4686	12.9198	10.3723	12.7152	31.9861	31.1788	30.7563	33.8728	26.347	24.9052	36.239	34.0609	36.1278	29.0152	16.2038	14.7436		0.98113	24.3328
12.4986	37.1802	28.5534	17.7389	13.9379	6.2534	21.1537	8.9855	10.2289	25.7696	13.7906	20.1281	21.1401	7.3345	16.9608	13.6159	28.9436	41.3345	17.6672	23.8676	19.5209	25.5928	26.6319	26.971	40.0844	31.9334	12.5246	9.7992		0.990561	21.0238
12.6177	44.9619	28.6727	35.1481	12.413	6.0571	19.9919	8.9944	10.6097	24.1449	12.7515	15.6722	17.107	11.0436	9.8739	13.7409	27.4802	43.1718	21.9702	13.0449	13.2871	13.2878	23.6159	24.426	25.5227	27.7666	9.6916	11.2792		1	19.4714

## Sheet: Image20
X0	Y0	Y1	Y2	Y3	Y4	Y5	Y6	Y7	Y8	Y9	Y10	Y11	Y12	Y13	Y14	Y15	Y16	Y17	Y18	Y19	Y20		Ap-Basal	Avg intensity
0	2.5982	10.7257	12.7877	19.7575	28.2476	20.0444	35.1748	32.4589	42.3077	41.154	36.8	41.4725	38.4288	99.4623	35.1832	48.9266	31.0916	31.1521	61.4838	51.85	52.9451		0	36.8596
0.119	3.9544	10.1966	22.2565	20.6128	29.8122	17.6294	29.949	44.2247	40.4324	46.875	42.266	49.0452	56.5311	79.6732	43.3775	55.0995	31.9058	27.0475	59.4352	65.2076	41.4997		0.00892596	38.9063
0.2381	7.8558	9.9667	21.5583	19.9562	33.2573	27.0931	34.8578	47.3615	47.1815	62.557	47.905	44.3952	57.5926	79.0331	43.9736	66.2276	47.0124	19.7735	60.9472	65.139	51.7577		0.0178594	42.6382
0.3571	4.0461	9.8569	14.9746	17.5277	28.6905	32.2057	40.6262	44.9474	46.6821	79.72	53.402	46.6229	49.5905	77.2391	48.8657	65.4053	49.4892	25.081	61.9295	51.353	54.7062		0.0267854	42.9982
0.4761	6.8384	9.9172	21.3533	19.4712	48.6489	36.4808	36.9447	50.6083	62.2572	94.339	57.458	57.8888	51.11	81.7333	56.3769	63.0916	46.583	34.3988	61.3284	70.9337	50.8055		0.0357113	48.5032
0.5952	8.132	11.5651	23.3296	30.6778	46.3273	32.3707	42.1248	54.9739	80.7059	112.341	59.968	49.1835	73.2979	63.6355	59.5601	77.2737	48.5213	38.5449	69.0901	72.1634	59.9956		0.0446448	53.0372
0.7142	8.18	15.9405	24.7923	31.5689	44.6988	30.4052	31.1115	53.6992	72.915	121.697	91.915	64.3951	64.2264	53.9003	80.1571	76.113	51.8083	41.8389	90.2809	76.0905	53.7681		0.0535708	56.1668
0.8332	4.1067	13.105	26.3498	28.9376	39.9901	38.198	34.6942	51.8496	83.8584	100.092	109.807	75.3639	64.6111	60.0859	78.4067	73.4797	53.5108	40.2431	88.5727	84.4723	50.4507		0.0624967	57.1517
0.9523	7.0807	14.1565	20.4736	40.4597	55.7746	40.6764	30.4731	50.5845	76.4616	100.491	106.485	89.5458	80.9559	43.6814	67.4432	63.8611	52.8311	51.2797	84.0647	73.8385	51.1594		0.0714302	57.2275
1.0713	14.8381	23.4614	25.1486	29.5408	55.2678	45.7477	32.3684	54.0089	69.3842	93.5	121.59	99.4812	89.8111	54.6348	74.274	70.8791	69.439	46.3121	74.9117	77.9966	59.6258		0.0803561	61.0582
1.1903	9.5448	19.5475	22.1337	33.4502	50.4383	53.2721	33.2964	47.4524	72.2133	83.118	136.003	103.266	91.6056	42.1637	78.9051	67.1895	84.8271	45.647	60.313	63.8832	58.7583		0.0892821	59.8585
1.3094	7.6622	13.5614	18.3622	32.0725	51.0834	49.1081	37.9632	56.5831	72.2559	64.302	144.665	103.246	85.0728	39.6544	68.9142	54.3541	71.1896	48.2361	54.1305	69.0373	53.6474		0.0982156	56.9096
1.4284	8.2339	20.5583	35.3712	38.4201	51.4326	54.1502	34.297	56.0151	52.6949	61.789	107.75	102.692	79.8396	47.294	65.464	42.3945	82.9725	47.3498	46.0759	74.9526	58.5319		0.107142	55.6323
1.5474	6.8956	19.7333	24.7897	26.669	40.4947	46.6829	56.8166	40.2181	57.3113	47.613	96.868	107.506	80.9916	45.0565	61.9588	47.8782	70.0541	47.9582	52.4744	72.4524	53.3967		0.116067	52.5628
1.6665	10.3032	15.6483	22.1081	23.8011	35.9382	52.1081	42.2148	45.5235	53.3857	47.382	88.261	104.416	67.7752	51.2326	55.2102	37.5157	62.9954	46.393	39.5927	75.0359	40.9384		0.125001	48.4657
1.7855	12.7724	27.0084	21.9767	24.4087	38.6978	41.2665	41.0198	49.5195	48.9152	34.191	79.648	85.2436	52.8394	47.5906	65.3086	37.6382	58.0752	44.5044	36.9098	53.1208	38.0663		0.133927	44.701
1.9046	11.4155	22.2335	14.5805	17.8515	29.9475	48.4368	45.353	37.7727	45.5763	38.908	56.192	65.5822	50.0431	42.9036	61.3151	49.2619	51.662	37.9977	40.885	55.7907	41.6413		0.14286	41.2071
2.0236	12.2444	19.2627	23.1077	22.5988	33.8679	33.8237	46.1623	44.0412	46.0938	34.221	66.615	72.3571	41.0062	49.2493	59.8835	44.9389	49.541	66.8155	39.6979	49.5367	44.7806		0.151786	42.8498
2.1426	14.2563	19.2987	27.9738	26.8249	41.1124	30.3947	36.4147	38.6117	51.1638	38.922	56.199	74.2358	46.1488	48.5094	48.6465	41.213	36.7078	37.7739	41.8972	51.3842	42.5591		0.160712	40.488
2.2617	7.6365	17.5527	23.1436	33.3197	41.6503	24.92	29.7686	50.4884	42.6154	37.664	59.591	78.2391	53.2009	43.535	51.8656	31.4112	39.186	35.623	49.2492	43.5105	48.5492		0.169646	40.1295
2.3807	9.78	12.5108	19.1885	25.9358	29.0889	24.0939	33.9417	41.7971	39.5467	32.822	44.045	53.4047	52.9865	36.6554	50.2208	35.782	30.6962	39.3695	48.4582	40.3833	45.7941		0.178572	35.5477
2.4997	16.112	16.0313	11.8311	22.8537	26.4273	27.8471	29.4625	37.6281	34.6166	35.204	37.988	65.4412	56.4409	40.502	44.8988	33.9722	32.2519	41.1656	44.9993	52.406	45.592		0.187498	35.8891
2.6188	18.642	13.8433	20.6483	27.1994	19.2492	31.699	33.6798	32.4697	36.0571	36.472	37.772	81.5141	56.6561	55.4204	41.1041	44.4454	37.0489	40.3258	46.0597	45.248	49.134		0.196431	38.3185
2.7378	15.4158	18.1955	24.4857	26.5707	25.8728	43.3377	35.6004	38.273	26.0994	32.643	35.333	71.3032	49.6503	65.8082	54.9545	47.2348	33.9858	36.5156	41.0251	43.374	47.3974		0.205357	38.7179
2.8568	10.1794	21.187	19.4232	30.7908	23.4358	42.293	29.1994	43.3091	26.5182	33.048	33.655	67.6652	56.3522	78.8279	45.8176	42.3409	25.5646	26.064	37.7476	51.9039	48.7277		0.214283	37.8119
2.9759	9.8582	18.3709	23.7397	30.145	28.6912	35.4171	33.2441	34.1902	38.1294	35.061	44.552	72.4684	52.4128	79.2626	63.2976	44.6367	33.3781	33.993	38.4558	43.4228	43.7235		0.223216	39.831
3.0949	8.92	15.3438	18.7223	22.1752	32.689	43.597	31.5848	37.4895	29.0235	40.401	40.784	69.6261	44.6781	87.4551	43.7284	48.0906	33.0975	33.0701	37.3208	44.3834	43.3886		0.232142	38.3604
3.2139	10.112	18.1421	23.3472	28.8674	30.6177	45.3426	39.1366	24.67	31.0879	38.086	36.148	57.4198	53.9023	76.2817	46.1321	37.0377	29.4091	35.5048	43.3422	42.7227	41.2212		0.241068	37.5491
3.333	14.262	11.255	25.5222	20.0442	36.0264	42.1845	36.1495	21.2389	38.7601	37.631	39.941	51.53	54.5119	74.9288	50.583	41.5722	30.5253	36.0681	37.2955	56.5907	48.1902		0.250002	38.3243
3.452	9.8357	16.1399	17.3876	21.6766	38.6182	45.1803	38.2651	26.5521	35.6128	42.453	50.645	52.6781	62.0271	69.2422	45.1045	40.0116	37.6235	30.6062	39.6602	62.2108	50.1679		0.258928	39.6047
3.571	11.3484	12.9735	13.9263	26.8887	35.0886	34.9162	33.7206	33.975	31.3244	43.084	62.543	60.2115	55.1027	56.5204	47.8915	41.1186	40.0456	28.9447	39.9524	47.0427	31.8095		0.267854	37.5442
3.6901	11.366	15.9114	20.8585	20.184	30.7136	31.1186	32.398	28.5718	42.6679	36.011	44.857	47.0373	44.756	56.6949	49.3574	34.9842	31.4698	34.356	42.2347	44.6446	48.3909		0.276787	35.6468
3.8091	11.3048	20.6605	22.793	32.4827	19.8169	30.8947	39.3115	29.2047	35.0728	38.741	44.956	40.0766	44.3395	38.9009	42.9681	41.312	38.9719	36.2527	47.037	48.5817	54.1678		0.285713	36.0879
3.9281	19.046	15.0127	14.4489	28.0681	28.1189	34.7472	33.7562	25.1768	31.6221	44.123	48.027	39.2163	48.3992	34.8979	41.1884	36.7419	33.3887	33.4714	47.9961	54.0502	46.2455		0.294639	35.1306
4.0472	12.8314	19.5157	25.2105	22.0104	27.9339	33.9773	37.3676	32.4096	35.5446	41.643	44.204	37.96	53.9943	36.0621	50.5495	39.736	32.5404	33.1741	46.1841	61.4041	32.6153		0.303573	36.0413
4.1662	12.0317	23.4538	26.5357	29.4064	34.8408	40.6244	35.0691	34.0611	38.6817	46.732	43.437	44.5848	48.1508	21.4964	46.3968	46.9991	39.1674	39.1903	34.3497	59.5526	36.7337		0.312499	37.2141
4.2852	18.4315	17.5767	20.7642	28.9277	33.0068	38.7942	28.6421	27.3711	44.928	50.779	50.123	35.7639	58.4741	29.0093	44.4477	44.3713	23.5731	44.0431	36.057	59.4257	42.6683		0.321425	37.0085
4.4043	14.4103	12.7926	19.9507	32.705	39.8424	44.6613	35.6135	27.0232	44.363	53.878	66.259	41.6107	43.6847	31.9927	62.3754	45.1512	33.5503	40.7692	41.2989	64.4573	64.964		0.330358	41.0168
4.5233	15.2409	15.7783	15.4222	32.2012	41.4292	43.1473	39.748	31.4046	40.8903	47.942	66.185	36.2377	36.23	28.4223	56.6064	47.188	40.725	27.9817	49.9105	63.4334	62.3123		0.339284	39.9255
4.6423	12.5438	16.8647	24.3821	28.8812	37.0836	40.5856	40.5625	31.8691	43.1293	38.712	50.991	42.8796	48.8175	15.7723	52.258	41.3259	41.0056	40.0688	45.9401	64.9108	54.8582		0.34821	38.7353
4.7614	13.9362	17.1736	16.3363	27.7659	30.07	32.4005	36.3622	31.774	35.074	34.427	51.471	41.245	59.9352	22.0447	58.5768	49.6025	36.3517	40.2283	42.1499	55.797	49.611		0.357143	37.2539
4.8804	13.2508	18.2761	27.5893	28.2217	35.2089	44.1187	27.9011	32.919	46.5705	30.279	73.693	48.086	58.8208	29.4348	61.0765	41.6081	45.4408	34.6997	45.9183	49.0224	44.6306		0.366069	39.846
4.9995	19.1772	13.187	29.2076	30.7655	32.3396	45.549	32.7174	36.8798	41.6935	32.579	71.218	40.8826	57.7038	28.1149	55.41	44.2414	27.2631	35.769	34.864	54.391	62.1951		0.375003	39.3404
5.1185	8.7539	15.321	23.1222	26.7031	31.2257	38.2398	35.4964	32.7545	45.816	25.54	52.479	35.2482	41.2846	29.0491	57.209	38.4618	26.4897	30.8997	48.8845	50.5606	67.8239		0.383929	36.2554
5.2375	11.2491	13.4379	21.233	38.7063	27.6582	40.1738	39.1975	34.2519	44.2677	28.528	57.082	28.8778	35.9469	27.4777	52.9048	38.6969	19.9805	30.5695	46.949	58.1211	64.0348		0.392855	36.1593
5.3566	17.0431	9.8522	31.0972	32.2691	22.8633	40.6927	40.9131	32.3567	36.1127	22.521	51.472	27.5215	32.9244	21.3011	53.1912	33.0995	31.0492	36.3397	43.8623	54.801	55.8239		0.401788	34.6241
5.4756	8.8627	9.8238	42.4023	22.3266	24.116	45.2148	39.2773	34.0031	35.64	20.471	71.15	31.6585	34.2036	23.787	34.9895	37.3406	30.2515	24.7299	44.777	51.2972	49.736		0.410714	34.098
5.5946	17.1258	16.0312	46.3666	28.7171	28.3405	40.7041	42.7747	46.6983	41.1192	22.825	65.671	33.4986	38.7283	20.0562	28.0266	39.4139	19.9522	28.7826	33.1734	46.509	50.7737		0.41964	35.0137
5.7137	10.8762	14.6904	31.1337	31.5951	28.0642	40.2555	46.1426	38.3799	39.1248	37.729	48.037	36.748	32.6691	15.9037	28.139	41.9236	22.7362	27.5963	33.9678	48.9191	49.442		0.428574	33.5273
5.8327	9.2316	12.1281	25.1269	28.0189	22.0909	50.7026	34.8499	33.4482	27.7807	30.247	54.094	38.827	35.4551	17.7038	33.8895	41.8014	23.877	33.5267	33.5225	53.0978	41.6534		0.4375	32.432
5.9517	17.4501	14.3258	28.7666	36.0452	22.0226	50.1516	40.262	24.2454	26.9542	37.445	44.609	36.5739	38.0295	19.0034	35.3753	36.2749	17.4811	29.4048	34.1297	49.1986	43.7256		0.446425	32.4512
6.0708	10.8383	11.2819	28.359	35.0512	26.7389	45.6051	51.8991	26.739	36.8533	34.899	37.868	34.3375	37.6679	18.4201	34.9647	41.949	26.2413	30.3206	34.6089	50.5175	42.0915		0.455359	33.2025
6.1898	7.4382	21.3559	25.22	36.1078	21.8454	34.9868	37.3602	30.0986	38.306	24.862	36.091	27.7991	39.0763	21.1857	31.3594	38.5841	20.3593	23.4548	33.2765	42.5421	41.3317		0.464285	30.1258
6.3088	6.7798	22.8757	23.8572	25.916	28.3407	52.3417	45.4132	25.4051	36.5559	22.582	36.313	46.9223	38.5402	27.3053	28.9135	31.1346	21.0056	30.2862	28.2988	51.5388	38.2514		0.473211	31.837
6.4279	7.3034	14.8897	24.8656	24.5887	20.6139	40.1268	33.9463	32.4665	33.8039	15.598	42.391	39.9867	48.8464	11.4429	32.8664	36.1226	24.9191	26.3999	40.0113	51.6773	40.3224		0.482144	30.628
6.5469	11.9305	14.7752	25.3813	16.0264	21.497	44.7201	42.177	28.9712	29.6163	7.618	41.762	46.8064	35.8354	14.9232	36.8068	30.1926	19.7488	23.1289	34.538	62.7615	37.5675		0.49107	29.8469
6.6659	10.9173	15.1394	33.9283	23.8995	20.5418	37.4746	48.3902	22.6095	27.7408	14.725	45.628	37.2165	33.537	26.2607	38.6567	29.7904	23.7268	24.6455	32.5482	47.0011	44.3693		0.499996	30.4165
6.785	8.2086	9.7593	23.2519	29.0478	22.386	38.2509	40.4275	27.9218	30.9142	15.407	52.437	32.2473	43.2721	22.4389	36.192	40.3845	20.1567	19.8939	37.3747	49.3291	39.072		0.50893	30.3987
6.904	8.479	12.2751	23.2849	21.3135	22.475	51.3293	38.6234	18.5159	18.9016	24.451	49.03	35.8664	30.9758	10.112	35.7286	33.6922	24.1761	12.4808	39.5538	36.3833	29.5228		0.517856	27.4843
7.023	11.4537	10.771	19.1707	27.0358	21.7267	36.03	35.5193	32.9107	26.5784	24.494	57.946	29.242	36.3103	16.0984	33.5467	28.7987	23.2912	21.2556	38.7042	54.0419	32.3544		0.526782	29.3943
7.1421	7.8808	14.4679	13.3405	31.8722	19.4939	30.1343	40.7635	40.7308	23.3528	16.642	42.581	35.0361	32.1145	16.6979	29.2195	34.6171	22.3868	17.3954	35.6696	44.7331	34.7279		0.535715	27.8027
7.2611	6.2782	9.4212	13.9625	31.4234	33.485	32.9265	38.251	26.6121	31.7336	27.071	38.398	47.4979	36.7587	21.6687	32.8066	36.6156	19.7865	20.4043	49.5674	37.572	33.7533		0.544641	29.8092
7.3801	7.4395	12.5067	13.2342	29.8498	25.5558	28.3275	35.8884	33.8232	19.9769	26.922	39.77	39.6975	40.9264	20.648	26.4921	33.6007	17.5309	17.8694	35.5644	45.949	30.6323		0.553567	27.724
7.4992	9.1955	10.9464	12.3583	25.5668	20.7901	30.3041	31.4909	27.3142	29.3164	21.268	36.534	37.9882	36.2676	13.9163	17.2133	23.4433	20.3098	19.6136	26.5039	40.5381	27.6297		0.5625	24.6909
7.6182	8.9141	13.1118	24.3324	27.8137	22.769	26.7926	39.9353	26.4373	30.596	12.231	46.63	44.0772	36.8557	15.1402	25.605	29.8	21.3032	23.7278	32.4688	41.8721	25.334		0.571426	27.4165
7.7372	7.1008	9.774	20.7516	20.7096	24.2977	30.9297	35.6886	34.149	27.6738	15.447	44.574	33.518	28.6149	17.444	27.75	33.6878	15.2904	18.1984	35.5186	38.5334	26.0184		0.580352	25.9843
7.8563	9.5178	14.5236	17.9309	26.0571	18.3123	30.9654	47.7072	26.8154	21.2925	16.293	42.3	28.2245	37.4033	16.2373	22.1602	33.0975	12.6331	22.0407	23.0278	31.6616	28.4619		0.589286	25.0792
7.9753	9.1584	13.6307	20.0061	21.9865	27.0508	27.3533	31.5893	22.8323	23.9739	16.679	41.899	30.2448	31.0813	13.5404	21.4192	30.4475	12.7402	14.7447	31.0879	39.3004	29.0457		0.598212	24.2767
8.0943	10.1421	15.277	15.575	16.6289	23.7862	33.0681	34.7789	20.3102	31.3179	14.492	45.828	31.5359	38.2504	16.3293	18.5208	30.4907	10.2192	11.6481	28.4277	35.4697	27.9796		0.607138	24.2893
8.2134	12.0283	15.1194	20.9895	20.546	28.717	28.123	40.6316	27.3731	30.5693	17.673	28.913	31.5679	36.2687	16.1434	24.1583	32.2897	15.0347	14.2549	27.3584	32.1784	36.369		0.616071	25.5384
8.3324	10.8788	12.1972	27.4194	21.9071	18.1208	33.8429	36.3733	25.1425	25.6231	14.717	32.44	35.3618	35.8362	18.0331	18.3894	26.9468	12.1899	19.6669	28.5256	30.3316	23.0882		0.624997	24.1444
8.4515	10.3165	11.9506	15.9401	23.6815	24.6789	32.7214	30.639	19.4155	29.7042	23.072	32.973	29.7696	28.8882	24.7643	10.6465	34.3364	18.2218	10.7604	26.4463	27.8114	25.9708		0.633931	23.4623
8.5705	10.8204	11.5441	27.7012	22.8112	24.7723	36.1782	29.3672	21.4625	26.4252	22.546	32.425	45.885	36.3122	13.6216	17.9363	38.716	12.8208	18.0238	30.684	39.8729	28.3949		0.642857	26.1105
8.6895	5.7698	10.9065	15.0246	20.1721	22.6926	36.6833	29.754	27.8094	26.1198	13.72	22.35	49.9464	31.4726	19.9323	16.1846	31.563	15.8404	16.3075	25.4868	29.311	18.4856		0.651783	23.1206
8.8086	6.4932	14.6432	12.673	21.7859	29.4261	24.1691	32.173	24.6279	20.3856	9.991	29.022	48.0168	34.8287	18.7632	20.8492	34.3242	14.2638	13.8621	19.4196	30.4893	14.3791		0.660716	22.5993
8.9276	10.9384	12.455	18.9972	15.6048	32.2892	26.3549	33.0414	34.499	21.6175	11.712	27.354	45.8367	32.7196	18.847	19.8131	35.5612	14.4804	21.6221	23.6329	45.0758	16.3002		0.669642	24.7025
9.0466	11.26	13.5413	24.8073	18.3876	23.3898	37.2757	31.2988	21.1377	20.3051	16.706	26.019	31.6304	33.6253	15.3549	16.1105	37.9595	16.5327	18.6035	20.6202	52.4336	24.6973		0.678568	24.3665
9.1657	12.2446	15.4271	23.8535	22.8237	30.476	31.7134	31.3971	24.6529	27.489	18.549	28.541	43.6408	27.254	12.6701	22.8617	37.1267	13.4772	10.7387	27.6818	40.1465	24.7817		0.687501	25.1213
9.2847	8.3605	14.6948	29.8263	26.8676	29.8098	25.3846	26.2595	28.9615	29.0572	14.238	28.52	36.3104	33.6237	13.102	21.7412	28.1993	9.5426	16.7586	30.0269	47.1121	18.709		0.696427	24.6241
9.4037	11.5945	10.5422	15.4608	20.6354	26.4231	28.7522	38.199	28.9141	35.6709	16.237	30.349	43.0921	38.1855	9.5638	27.685	28.6052	8.3151	21.2676	18.6243	55.9479	9.2396		0.705353	24.9193
9.5228	14.7195	10.8103	24.599	21.6086	36.0873	32.665	29.7175	30.5154	28.5799	9.492	30.979	43.5252	30.7574	19.1407	21.6394	29.5384	18.7303	12.1261	18.1133	44.6975	12.7375		0.714287	24.799
9.6418	16.0184	7.3638	16.3813	36.016	33.1545	33.1568	32.0571	29.7324	27.9245	20.74	27.855	51.8563	28.4157	16.8314	13.441	33.2971	22.3837	12.7237	12.519	44.0832	27.0351		0.723213	25.8565
9.7608	7.9105	10.4862	24.1725	31.956	34.4078	29.9554	30.3046	38.792	26.6211	24.42	31.629	41.3928	30.9821	16.849	18.7592	26.9281	17.5926	17.7004	15.2784	52.14	23.1958		0.732139	26.2606
9.8799	7.1391	18.0171	27.0804	26.651	41.1534	24.7563	27.8627	35.0585	37.9895	19.302	34.856	50.2465	34.1005	12.5015	16.0803	31.1335	13.73	15.8355	23.7927	57.1557	21.8539		0.741072	27.4427
9.9989	9.5734	19.5145	19.8552	16.3105	38.2002	30.3127	32.1457	35.7313	22.9746	15.849	22.686	38.1926	30.6686	15.0072	19.3779	49.8573	10.6934	13.4262	19.9546	58.9283	25.1229		0.749998	25.923
10.1179	16.7901	16.3524	26.285	29.4126	32.8953	44.753	37.4742	26.9497	17.8084	11.619	28.493	39.6461	33.3403	20.1363	15.6158	40.0737	8.0875	12.5097	18.7449	46.4143	18.2531		0.758924	25.7931
10.237	8.987	10.9431	19.9235	22.2325	34.8142	35.9574	29.14	31.5702	18.0745	17.486	30.038	41.1335	34.1671	22.2532	17.818	38.7658	6.3764	13.2589	19.8531	37.0546	18.2159		0.767858	24.1935
10.356	11.6904	16.4322	12.8314	27.8751	42.6697	25.7918	31.0262	15.7216	28.9778	23.286	31.161	39.6038	37.793	15.1896	12.398	33.8589	13.3782	15.6126	12.8683	38.8759	18.9856		0.776784	24.0965
10.475	9.5216	15.7451	13.7104	26.7895	33.5542	26.635	33.6435	20.0696	19.6618	15.497	27.292	40.059	30.4485	13.3746	19.137	29.1081	20.7519	14.3858	16.695	31.7744	21.9601		0.785709	22.8483
10.5941	9.8286	11.6089	25.3957	21.3176	36.2142	25.9075	29.3616	30.7523	20.6128	14.569	25.748	35.9979	28.2377	13.1234	20.1554	35.454	10.3938	9.6135	15.7448	29.1071	28.7859		0.794643	22.7586
10.7131	6.7176	12.8248	18.4747	20.8413	29.7132	29.2952	28.8459	27.9736	19.9007	10.764	23.535	27.6294	34.484	15.1176	21.9367	37.2562	11.42	18.5313	19.0085	40.577	21.0965		0.803569	22.664
10.8321	5.9308	17.0897	25.1363	26.4761	28.8106	27.2039	34.7943	29.7766	33.1948	9.688	18.915	31.5092	41.1853	22.4319	18.0206	29.7184	13.3333	14.9298	15.1303	37.8947	24.7382		0.812495	24.0908
10.9512	10.7556	12.7399	18.7141	27.0697	24.6758	32.4759	34.3154	32.9477	22.3139	16.176	19.315	38.5362	40.817	17.6014	17.4406	33.6774	13.5576	11.5638	24.4851	34.2906	25.9862		0.821428	24.2598
11.0702	12.9971	15.838	22.4108	23.0001	25.4089	34.8314	28.608	21.1638	23.5473	18.127	27.25	42.2657	40.9799	22.9817	16.2155	44.215	11.7	10.6768	18.5791	34.4874	18.4531		0.830354	24.4636
11.1892	17.572	16.4444	21.7851	23.5308	25.2189	21.9243	21.4621	20.4041	21.6501	23.938	33.304	35.2935	47.0221	24.3987	18.819	39.5408	13.3423	10.9606	16.5607	27.7704	20.9541		0.83928	23.8998
11.3083	11.643	19.207	25.0617	31.2067	22.6487	22.6136	26.9797	29.5563	29.5575	32.458	36.497	38.455	40.4723	18.3192	16.7559	45.8226	16.4513	6.418	19.036	33.6502	33.4013		0.848214	26.4862
11.4273	15.8176	21.2949	24.6354	30.6306	23.683	31.1234	29.4005	33.5745	31.2088	18.737	38.526	37.0655	32.2554	24.3344	21.9997	37.7285	15.0898	5.0511	18.0721	37.6342	24.729		0.85714	26.3139
11.5463	12.3481	18.1758	22.6853	28.695	32.514	29.2557	28.1994	26.1089	23.9037	21.85	44.207	34.8738	49.352	27.2674	15.0803	44.3939	18.3098	9.5066	18.9507	45.5008	27.8669		0.866066	27.5736
11.6654	6.7954	18.1769	23.3736	35.2507	18.4361	20.7189	21.812	23.1968	31.8396	15.738	27.842	32.4428	62.094	23.2095	24.5455	50.0306	15.6056	10.0487	14.8793	43.9054	25.1219		0.874999	25.9554
11.7844	17.38	20.4404	19.997	35.3166	22.143	24.6997	33.9204	28.4202	25.0353	23.654	26.973	25.8526	55.9034	27.5798	21.2438	45.2093	13.1426	8.9076	12.0977	36.0857	21.7187		0.883925	25.9867
11.9035	15.3578	28.3327	9.6529	17.6712	26.0733	27.7312	38.5097	30.8001	27.8975	23.971	35.877	32.1761	44.7341	20.535	21.6013	42.726	15.2325	8.2468	17.9997	37.8294	20.2327		0.892858	25.8661
12.0225	10.755	32.8987	20.4078	21.3151	20.3551	31.797	37.0078	33.8682	23.3915	20.923	33.545	41.6515	49.3564	25.3688	13.4276	40.3821	13.9217	7.7656	19.7026	37.8266	20.0098		0.901784	26.4608
12.1415	12.3054	25.2182	22.3844	23.4187	22.8292	20.6672	41.8972	30.7207	32.1555	25.202	30.383	34.6458	40.0173	32.8125	22.9023	37.0982	17.892	10.4607	14.4609	36.5433	22.4801		0.91071	26.4997
12.2606	17.8081	19.7233	17.9536	15.4357	22.5806	26.3569	36.7468	38.1651	30.5169	23.372	37.303	36.2501	41.2541	34.1743	13.5564	42.7833	18.3985	12.122	23.951	35.7331	20.6203		0.919644	26.8955
12.3796	23.1844	24.9276	15.5993	20.6892	27.6526	33.7934	36.3531	35.3724	33.1712	24.617	24.232	29.3845	34.9662	30.0555	15.4382	43.0603	22.1586	19.1408	20.3926	36.8185	29.0333		0.92857	27.621
12.4986	15.7609	17.3992	11.5525	26.6755	28.4809	36.439	36.2961	34.2872	32.3114	24.447	20.563	23.3284	24.4227	24.5478	19.4639	28.9743	27.2312	19.2058	22.2859	32.0196	23.7444		0.937496	25.2113
12.6177	13.0416	13.5948	10.1536	26.9047	35.5516	31.2123	30.0275	29.3277	38.4031	22.807	24.561	26.2563	30.5186	19.2156	23.9829	27.7979	28.0721	7.6681	23.2646	22.2487	26.9869		0.946429	24.3617
12.7367	18.8306	15.0832	4.3	22.4938	27.7214	28.4011	32.5386	26.7448	39.4011	20.629	33.456	17.2163	33.3959	17.0431	27.8813	31.9186	31.6796	14.184	17.9237	24.9063	21.7269		0.955355	24.1655
12.8557	26.1678	9.7469	12.6812	19.3916	23.305	19.6063	28.8545	26.8321	36.4904	24.612	30.037	12.4189	25.8974	24.0212	19.4803	35.2567	23.9775	18.9605	18.1476	32.427	24.3188		0.964281	23.4586
12.9748	16.7335	6.9345	8.8314	18.611	18.9513	28.6298	22.5874	26.7899	36.6572	20.115	24.354	23.5158	25.2321	18.0621	21.3882	35.4225	21.2813	13.1993	21.0454	34.1827	29.683		0.973215	22.4861
13.0938	19.5399	7.1955	7.3418	19.5783	21.4935	26.8552	19.8706	31.858	27.9433	24.95	32.595	21.3176	26.5346	14.7267	25.9746	30.5932	24.1805	13.8525	27.6499	37.2666	36.0071		0.982141	23.6821
13.2128	13.9555	6.9098	1.7582	11.9294	31.571	29.9426	20.7883	29.7039	22.3198	20.463	25.965	20.0862	21.844	8.9738	28.8507	32.4205	25.6048	15.7884	20.1755	24.794	39.5944		0.991067	21.5923
13.3319	16.4187	7.4994	3.7516	7.126	19.8062	30.6904	19.7504	35.1288	29.0024	11.582	21.208	16.9282	21.606	8.189	19.8505	27.5941	30.3239	16.2566	22.0542	28.2393	30.5817		1	20.1708

## Sheet: Image19
X0	Y0	Y1	Y2	Y3	Y4	Y5	Y6	Y7	Y8	Y9	Y10	Y11	Y12	Y13	Y14	Y15	Y16	Y17	Y18	Y19	Y20	Y21	Y22	Y23	Y24	Y25		Ap-Basal	Avg intensity
0	41.2027	36.6306	28.4528	27.7575	33.7112	27.613	29.6135	34.9828	35.0461	56.7871	33.9248	39.5225	27.5289	31.3696	25.8839	39.5933	22.7959	25.6408	27.9637	27.068	28.803	26.169	20.1747	25.8167	30.0508	34.7208		0	31.4932
0.119	39.9308	42.2566	19.9826	29.5136	22.2438	37.7599	51.2767	35.0658	43.8405	74.0114	47.1371	34.8648	41.8442	38.964	35.4729	40.1909	32.2289	26.1109	36.5643	32.12	33.31	24.983	23.1335	27.2731	28.5849	46.3625		0.00952107	36.3472
0.2381	37.4177	31.4222	25.9619	29.3589	25.0681	26.6169	43.8176	39.3783	54.0181	67.4018	39.6233	41.1172	40.6383	40.5662	29.0403	38.8725	31.9578	41.9457	45.7228	26.821	42.577	29.854	38.8327	39.3197	32.794	36.7171		0.0190501	37.5716
0.3571	47.8961	36.8098	28.9626	45.413	44.6478	26.6956	30.4557	33.4247	55.0035	66.1336	40.4453	42.3827	37.3502	41.3876	42.1154	36.1631	33.9909	44.2707	47.5361	39.554	48.867	30.907	23.497	30.3807	42.2784	45.4991		0.0285712	40.0795
0.4761	40.595	45.6302	23.5736	39.4478	32.7156	35.5942	35.6055	36.4338	68.324	56.096	45.3849	60.6142	51.7928	45.4491	46.8147	39.0894	31.8188	47.7441	44.5238	42.636	68.053	44.752	30.0459	42.8149	33.4543	36.1407		0.0380923	43.2748
0.5952	54.4225	41.8884	33.1507	42.9398	36.7639	32.4063	37.0185	39.3992	47.8432	67.2517	42.6115	69.2167	57.5203	54.0172	40.432	54.2799	31.4932	49.4673	60.8677	60.888	94.897	59.675	27.0955	38.9741	24.8163	43.6133		0.0476213	47.8057
0.7142	55.9457	37.3297	30.9261	40.8981	40.2452	32.7355	25.7462	38.375	64.8746	81.2458	56.3528	47.1845	49.4053	45.2977	54.9137	53.0773	59.9893	39.7049	50.2747	56.032	123.48	80.105	42.541	43.4081	39.3948	44.5708		0.0571424	51.3098
0.8332	70.1473	47.224	47.5164	34.9428	29.034	38.6866	37.1321	41.1009	63.0501	67.9943	56.1885	54.5243	46.3172	54.1095	71.7728	57.0463	56.4368	54.6792	46.9245	79.8	118.938	98.905	48.0148	43.9686	41.6191	42.7215		0.0666635	55.7229
0.9523	55.5198	52.3952	49.701	47.0853	35.6143	29.489	35.1908	45.3626	61.455	59.9588	49.733	50.5452	40.1985	61.0974	56.3559	67.2963	63.2368	42.5482	48.7544	97.433	122.306	103.429	46.3949	36.6521	41.7883	45.175		0.0761925	55.566
1.0713	58.5275	55.5697	57.4427	41.0873	41.3711	45.4656	30.7766	48.1319	65.0598	64.6695	45.2566	55.9483	51.1762	57.1796	66.9328	58.4974	48.2773	43.3839	57.2015	99.415	107.695	116.196	59.3005	44.947	43.3267	48.7206		0.0857136	58.1368
1.1903	65.8481	44.0899	45.2913	63.178	37.6364	51.3327	40.2959	48.074	51.7067	69.7667	49.3886	50.8572	47.4331	63.6766	80.9578	52.6665	58.9607	57.1229	53.8082	119.581	92.945	90.957	67.4747	46.2825	42.6681	59.8259		0.0952347	59.6856
1.3094	60.1239	43.9443	54.6118	78.3706	57.7228	39.9704	53.7838	55.6482	60.3081	64.8403	37.3177	43.9133	46.3968	52.5586	90.5046	54.7017	45.3844	63.5463	55.1808	96.532	85.031	86.088	71.0337	49.115	56.0151	50.7216		0.104764	59.7448
1.4284	71.9212	37.8907	54.109	61.646	40.6115	50.7779	53.3265	48.1173	52.5847	57.319	59.5097	42.0672	58.3931	48.2814	81.4964	48.6754	32.7098	63.0167	60.3503	93.653	87.58	93.045	59.8774	63.9129	41.7142	44.9684		0.114285	57.9829
1.5474	69.4978	42.1681	44.0868	60.6876	52.0916	43.5939	53.673	50.1119	53.052	47.9636	65.9045	43.8326	56.7659	65.7461	80.1991	49.1686	47.1327	63.8365	53.4471	81.097	90.157	84.583	82.949	82.2865	62.5612	47.2555		0.123806	60.5326
1.6665	57.0575	49.3692	50.5597	69.685	60.7714	63.7338	53.2546	51.8474	68.6222	46.083	66.896	41.9149	52.448	58.8547	73.9868	52.6279	34.3859	57.4851	58.4067	75.878	73.277	76.95	63.6726	68.0492	58.035	40.7369		0.133335	58.638
1.7855	52.678	41.447	46.0146	60.4291	68.0928	63.1618	64.2781	51.8487	57.2809	51.2874	55.5255	52.4295	61.9702	58.3269	61.2928	58.0589	56.161	57.776	63.5637	78.011	60.764	70.642	59.2804	62.1719	64.9243	52.9031		0.142856	58.8584
1.9046	57.9249	49.4366	43.1687	69.2538	66.6257	60.7662	63.9487	58.9905	56.109	54.421	42.9208	64.8653	53.1777	54.3959	67.6994	48.1206	45.9413	48.4814	70.4711	69.922	53.073	72.674	64.8998	60.2544	51.2576	49.6555		0.152385	57.6329
2.0236	53.3961	38.0584	55.4212	53.1418	63.1739	47.9477	74.8755	65.9519	54.9369	60.4794	39.7697	69.4174	50.8293	59.7947	59.42	42.5502	48.3999	54.7422	61.2878	66.819	66.535	53.095	52.2477	52.7056	67.688	52.2099		0.161906	56.3421
2.1426	55.7979	47.0162	51.6628	54.9762	61.3839	51.037	69.95	57.1871	61.82	47.8809	55.085	55.6698	57.6863	56.21	42.8271	60.0597	45.9295	43.9893	51.915	63.609	46.729	52.597	41.066	53.2455	65.443	56.2899		0.171427	54.1178
2.2617	48.0957	41.9145	47.9332	75.0762	59.935	38.915	53.1564	48.7138	62.3219	48.4962	50.2317	37.4224	57.4743	52.9485	44.233	57.8421	53.767	46.7969	54.4378	49.041	62.835	66.275	40.7629	54.8768	67.2999	43.1634		0.180956	52.4602
2.3807	60.886	49.8508	70.1926	60.3381	62.2895	51.9197	47.9377	53.5135	59.1643	42.2033	62.4765	56.908	52.0798	59.5254	43.6237	58.4742	53.2099	54.8857	58.4027	55.002	55.671	43.798	24.5416	47.5584	71.402	53.685		0.190477	54.2131
2.4997	46.0935	40.2118	61.3056	54.3387	72.0452	62.5085	39.754	54.8127	67.5012	56.3608	52.3565	60.4174	63.0045	65.3654	49.678	39.7511	45.6428	50.4308	42.3565	44.351	51.028	64.167	35.3539	56.5605	58.588	52.769		0.199998	53.3366
2.6188	35.9515	44.7498	51.6075	58.4382	72.242	58.4562	52.4919	63.4312	58.2586	46.8005	47.9335	62.3796	50.7871	48.9975	36.2762	44.7289	52.1848	54.0422	55.7026	35.956	48.035	42.894	36.801	40.8971	59.6664	54.0819		0.209527	50.5304
2.7378	44.1443	37.7072	54.6825	46.1685	66.5728	61.2865	37.0765	57.123	46.6105	54.8526	57.9992	77.005	64.992	43.7467	36.4905	48.7474	37.5035	61.0502	56.9282	52.88	38.81	55.247	34.5918	37.5711	53.2634	53.3952		0.219049	50.6325
2.8568	50.8956	37.5112	49.8005	46.2488	53.2509	50.2	50.6053	71.0332	53.9842	52.538	40.593	67.0387	69.355	57.7885	46.8958	43.7039	39.3519	57.6381	51.9336	41.169	42.499	45.228	41.7668	35.6767	61.8091	66.3994		0.22857	50.9582
2.9759	49.3738	31.449	40.579	63.6403	62.7976	44.3637	41.1554	57.5859	56.6664	52.4043	41.7322	59.5131	66.1279	43.1001	40.5144	50.2943	29.2427	67.7616	52.0705	52.466	43.272	56.93	39.7884	43.6907	67.6774	60.8046		0.238099	50.577
3.0949	46.792	32.2815	52.4953	71.3182	61.6555	48.4928	50.159	58.6175	61.87	56.7885	40.1221	55.5002	57.7223	50.049	43.1215	49.3481	55.2662	53.51	72.2184	47.525	53.619	53.22	46.9655	39.2102	51.6844	49.5822		0.24762	52.2744
3.2139	34.1736	36.1338	55.3912	63.7744	67.6902	55.0232	42.1253	55.6979	54.2104	48.6407	42.0373	46.9163	49.124	50.2076	38.6043	37.2426	46.5543	48.7693	58.736	43.197	63.883	47.437	44.8867	31.7177	36.968	50.9283		0.257141	48.0796
3.333	38.1717	42.0988	49.778	48.9147	73.0365	41.034	50.1241	54.7739	51.5169	62.4686	53.0241	46.4043	39.6374	53.8569	47.4662	41.341	50.6415	50.0322	65.1461	46.138	44.965	57.884	43.7098	35.8254	47.2544	49.8497		0.26667	49.4267
3.452	50.9183	34.9001	59.3603	44.1093	73.7146	32.5342	38.4177	58.1937	53.3628	61.599	51.7506	56.6267	47.4779	57.4433	48.5845	34.2681	52.6701	46.2143	71.0828	51.942	50.519	44.09	42.2099	53.8864	46.6118	44.4777		0.276191	50.2679
3.571	42.3685	35.5862	52.7801	65.3738	64.9264	41.5419	38.4579	54.8997	54.9529	60.479	52.9742	54.0182	42.2901	53.1635	57.1728	44.7879	56.7896	45.1049	60.9969	50.136	50.445	47.411	42.8945	44.6136	36.5477	40.0169		0.285712	49.6434
3.6901	49.5346	45.696	52.9357	59.7374	75.2774	49.5635	40.5777	54.1026	64.5807	54.7385	50.2019	65.8495	43.8779	35.9702	43.5947	45.3003	51.4498	54.0534	66.4635	48.318	36.147	35.701	41.8993	23.288	45.5391	52.2921		0.295241	49.4881
3.8091	61.6472	48.1009	41.4717	50.7967	54.4799	34.8467	41.8529	60.2619	59.2448	64.4598	39.1079	54.3796	53.0035	45.0403	33.1654	52.0162	52.4729	52.6311	66.1265	45.23	42.572	33.032	45.4785	38.6385	46.322	45.7426		0.304762	48.5431
3.9281	61.8717	45.3905	38.0243	39.0557	57.8481	33.8037	60.6701	53.5105	49.9139	43.5958	33.2313	60.6404	47.2109	57.3284	43.4038	31.94	42.8176	41.321	64.2703	51.111	39.678	37.439	48.1399	49.9787	42.9991	54.2281		0.314283	47.2855
4.0472	56.0716	41.2947	41.1663	39.7401	45.9555	39.0459	56.9022	46.3926	53.1555	44.231	36.5704	60.2919	51.5487	51.2177	44.5487	43.3439	46.4176	51.2415	55.3087	59.739	47.026	28.175	62.3166	38.946	52.1886	51.4372		0.323812	47.8567
4.1662	50.2549	57.3883	56.7291	51.9618	55.9797	43.5304	58.8535	47.9722	53.9991	41.643	38.2248	60.0562	53.2506	37.4712	55.7408	45.371	53.2555	54.2276	47.4066	46.144	28.755	23.738	46.9789	55.2365	53.6063	52.7586		0.333333	48.8667
4.2852	56.7023	50.9085	38.1704	50.7962	73.7846	42.8104	48.1921	52.1982	51.995	43.9305	30.6227	72.8021	48.6045	44.8178	44.4644	48.5719	58.192	57.1427	41.9883	45.301	23.846	25.479	44.1346	58.4599	51.5228	59.9997		0.342854	48.6707
4.4043	60.5071	54.8379	37.3243	55.2139	60.5858	43.7314	46.0666	49.4952	55.2925	43.2549	38.6409	58.0223	49.7078	50.8922	50.8733	54.7025	52.6076	55.5343	41.5736	47.732	26.841	31.957	36.1018	35.6386	52.3665	56.349		0.352383	47.9173
4.5233	53.4249	46.1561	36.1683	45.0579	50.3229	30.859	38.8714	66.6747	61.2212	40.5439	22.6952	55.1541	58.4025	55.6809	51.7653	44.0549	60.422	48.4859	55.4156	45.039	36.551	29.635	43.6694	47.1946	52.1112	52.5374		0.361905	47.2352
4.6423	45.8891	64.1967	28.6439	42.0074	73.557	46.05	57.3087	74.8932	54.5361	56.3529	33.0921	72.7931	50.1095	62.7747	48.5146	56.1493	49.2543	54.7734	58.6932	45.936	27.079	25.392	45.4514	46.2756	56.2773	47.7516		0.371426	50.9135
4.7614	61.4605	45.4085	39.0996	50.1679	51.4297	43.0168	49.18	76.135	59.4908	56.4977	43.6443	49.4221	51.7373	32.534	46.4547	43.7088	53.0001	49.6028	52.901	41.645	33.319	20.598	44.3528	34.287	50.0884	58.9593		0.380955	47.6208
4.8804	72.9048	32.5145	39.0781	35.5756	69.7593	48.5737	56.1689	72.3802	62.9916	45.9986	28.6163	41.5709	58.6476	50.5414	49.2161	42.2184	60.4986	39.498	54.8316	42.525	24.862	21.253	38.8537	40.2193	46.3289	43.5976		0.390476	46.8932
4.9995	74.2024	37.2137	32.3085	29.2644	65.8546	49.0304	43.5732	67.4379	59.203	58.8986	31.0393	46.3256	65.9156	52.4313	48.4241	28.5425	60.948	55.132	49.5302	41.025	39.583	22.957	51.5105	35.6285	39.6918	38.6824		0.400005	47.0905
5.1185	73.9209	38.7889	26.0038	32.7574	53.9175	42.7575	71.2954	63.4686	62.8033	44.8428	26.1113	42.0161	72.6865	43.4017	43.2382	31.9781	55.1738	38.9045	44.6254	40.247	23.544	24.622	29.8911	38.0677	48.4001	61.4264		0.409526	45.1881
5.2375	60.9593	38.168	22.3875	29.2612	45.9857	70.8152	62.022	67.1844	44.1297	50.0758	25.233	43.3637	52.0771	45.5337	47.6223	27.3941	51.2748	38.0218	45.3013	35.052	21.045	23.361	27.4942	34.555	41.2781	59.3178		0.419047	42.6505
5.3566	76.9753	39.3222	24.6379	31.5768	53.5061	50.2195	71.1075	54.5808	44.8358	43.6691	14.8892	43.9618	63.8007	44.0812	39.2653	37.3266	44.8333	32.179	46.2299	40.339	20.363	29.343	35.3405	40.303	50.6031	51.0396		0.428576	43.2434
5.4756	76.2097	43.8517	27.5993	30.3115	50.2592	48.6073	65.9668	58.0358	43.0669	40.9556	19.0979	47.2507	57.5051	48.1793	36.344	42.3203	50.4378	44.8554	44.7887	44.76	20.799	26.966	39.426	41.1143	48.1814	51.7256		0.438097	44.1775
5.5946	66.6976	33.4934	30.1456	42.8357	56.1991	54.2449	53.4267	61.8383	56.7002	44.625	20.8537	35.2113	57.3095	49.3636	27.9419	32.7428	36.9379	44.3586	37.5376	44.967	25.343	25.463	36.742	39.2217	44.3119	49.7091		0.447618	42.6239
5.7137	52.2409	27.0689	24.698	35.3426	61.4368	57.7855	63.0047	59.3434	46.0326	57.9664	21.4496	38.6359	59.7011	50.2683	40.5512	29.418	40.8509	37.0563	47.9856	33.169	29.05	19.087	39.3819	37.5761	38.9253	34.8131		0.457147	41.6477
5.8327	54.0323	33.1338	21.8202	42.3851	56.3048	54.7062	65.7284	48.0639	48.123	38.6507	10.1552	39.3226	67.2093	43.3231	33.2212	24.316	41.5631	35.3029	32.4617	38.966	22.449	16.652	38.9349	23.8428	30.3025	40.5521		0.466668	38.5201
5.9517	39.8054	43.0181	17.9423	38.4885	57.2924	61.5701	50.315	66.0614	45.784	46.814	22.2008	39.4017	61.4662	45.5988	38.2314	29.3198	33.3158	30.0424	40.5421	37.909	18.002	17.497	40.9729	35.579	34.0661	35.0012		0.476189	39.4707
6.0708	63.5462	32.5626	13.4344	40.4017	47.366	47.7608	42.5076	63.8755	43.5879	46.9845	18.9567	34.5787	75.4155	44.825	37.3328	28.972	46.4069	23.6736	33.267	37.898	17.902	16.034	39.9085	27.9121	39.9615	35.2853		0.485718	38.4753
6.1898	52.7262	32.3746	16.0418	39.4708	47.6025	48.9398	43.0115	41.388	55.877	55.8913	14.2784	38.8086	95.9782	50.9475	40.9005	29.0057	39.32	27.8034	22.5703	34.942	17.57	24.446	41.4764	19.4572	28.0604	23.3839		0.495239	37.7797
6.3088	55.192	44.926	25.2486	30.7139	41.5861	66.4175	50.4299	54.2599	55.9107	35.2915	17.3687	21.9145	78.4904	44.2825	38.3714	19.6197	40.0749	23.9883	39.9379	32.419	21.83	21.737	38.6808	23.3982	37.4472	28.546		0.504761	38.0032
6.4279	35.4462	34.0811	12.2595	23.5581	41.893	47.1372	37.7927	63.9654	69.4718	46.5077	27.5401	26.9763	71.3837	47.5425	32.5275	23.7508	30.9714	24.7814	40.0361	35.438	17.569	14.196	28.722	22.6345	29.519	35.0139		0.51429	35.4121
6.5469	39.7559	31.2188	21.9004	29.5344	54.8338	59.2008	33.287	54.9735	59.5848	38.2446	17.1959	30.9706	60.3859	37.0058	34.3103	30.0453	34.6821	27.6364	34.5428	32.616	20.741	13.801	30.1835	30.8107	32.5915	31.017		0.523811	35.4258
6.6659	56.9342	31.7111	25.212	27.6761	60.472	62.6371	34.2981	46.0196	47.932	46.2944	22.8012	31.8633	59.3157	55.9123	22.6222	27.6429	32.3845	25.8792	30.4639	26.176	17.745	23.598	38.8898	17.1464	32.3186	33.159		0.533332	36.0425
6.785	45.8404	37.8124	25.3109	33.9174	45.4052	54.3477	35.7839	41.7706	46.0199	42.249	20.2725	39.0148	62.7975	47.2569	31.0229	26.6177	42.348	16.4203	39.8255	39.413	21.672	13.045	32.8611	22.0711	29.5328	34.3379		0.542861	35.6526
6.904	44.7124	33.462	20.5485	25.4086	37.3278	37.7011	30.6459	46.7301	45.0154	35.0884	10.2499	29.6177	72.1934	47.3328	34.9599	24.3781	41.2799	24.3822	29.9622	27.736	14.919	22.637	37.9819	26.518	40.4006	35.7555		0.552382	33.7286
7.023	44.0564	28.5007	17.2186	35.3282	43.71	39.5113	38.3674	34.3314	50.9577	24.1952	6.868	35.2162	65.989	35.7893	34.0333	18.9362	31.3703	22.8049	20.398	26.148	15.462	20.319	35.2471	24.708	26.0074	33.6357		0.561903	31.1196
7.1421	33.8266	38.4429	17.5332	34.0883	42.7257	37.941	48.3587	51.5935	51.5801	25.001	13.9349	42.0436	48.3873	37.4582	28.3596	16.3228	26.7389	22.9095	32.4297	20.272	14.29	16.456	31.5924	26.275	33.2025	35.7284		0.571432	31.8266
7.2611	38.0763	25.1166	14.4994	18.3856	41.2694	35.0299	41.2085	33.2557	48.1928	26.8051	16.9163	31.8436	50.1987	41.785	33.8489	25.034	21.2027	18.3976	33.3614	25.784	29.985	18.178	34.3381	24.7065	33.6794	37.404		0.580953	30.7116
7.3801	44.2609	37.831	20.2065	31.703	35.0713	41.1085	52.2578	52.9376	62.4034	33.8519	21.6825	27.1546	58.4672	45.077	38.5423	24.6473	32.5847	26.0387	30.5559	18.418	20.579	14.26	37.2119	25.7795	28.8887	32.8324		0.590474	34.3981
7.4992	26.6033	28.1276	12.799	35.2336	40.8039	51.2884	37.5158	49.9002	47.0306	16.4604	14.0152	36.3563	55.4225	45.9593	31.2915	22.7378	30.7807	32.5127	25.7481	24.387	21.695	9.932	36.9102	30.8747	30.4328	35.6559		0.600003	31.9413
7.6182	29.0879	37.0391	12.9289	31.1796	44.0735	46.3087	34.8731	39.8267	50.9907	29.792	9.9033	29.3393	59.8161	49.3865	36.3646	23.1415	22.862	28.2934	27.5442	28.599	26.933	15.916	30.483	15.3719	34.8826	33.293		0.609524	31.855
7.7372	32.9603	34.2499	18.0978	32.2044	49.5395	47.203	34.1692	47.4283	47.4553	19.6302	16.3547	29.4329	33.087	56.095	34.8068	19.751	28.701	27.1804	37.1719	19.345	26.569	13.757	24.2882	23.6522	24.7873	42.4075		0.619045	31.551
7.8563	33.7654	27.0485	21.0836	23.852	38.2584	47.1707	37.2895	58.0673	53.1908	25.3003	15.2844	39.2164	48.1939	70.0154	26.637	17.4223	18.7485	21.2471	30.4276	27.949	22.333	19.358	26.7071	13.3187	25.5064	30.6776		0.628574	31.4642
7.9753	39.0896	14.3357	17.4087	28.7914	45.4729	39.9902	46.7501	52.2412	54.829	21.0144	10.1098	31.9247	54.2039	79.8261	40.7676	17.9196	30.8044	22.1539	22.0803	26.575	18.296	17.096	32.2173	14.9895	25.3762	45.4492		0.638095	32.6813
8.0943	26.8412	18.5478	17.536	16.5361	34.9858	39.5627	40.2104	44.5366	37.6347	21.7894	26.2867	21.8619	55.9669	63.5059	37.9097	19.0742	35.734	29.5925	29.4691	26.265	14.842	15.693	24.5743	18.2062	23.8618	32.3967		0.647617	29.7469
8.2134	34.6488	27.4252	21.6922	22.3615	41.3975	51.0568	40.2902	49.3534	44.6673	11.3584	23.9022	27.8122	46.0963	64.3903	31.5688	27.2722	30.0405	31.1142	30.0898	26.559	22.802	20.347	17.1235	29.6439	24.1483	43.2729		0.657146	32.3244
8.3324	43.3244	29.8392	12.5053	27.7238	47.099	53.8961	45.8875	41.599	40.1299	20.4156	15.9883	29.627	53.3582	54.0355	35.2228	15.765	29.3837	32.3417	23.0158	30.731	21.871	14.418	10.6585	17.9656	24.8513	42.9975		0.666667	31.3327
8.4515	32.004	16.8242	15.6298	27.277	50.2662	41.5274	38.8209	41.5824	60.0252	21.345	15.7646	30.0401	37.1688	64.1235	27.4287	15.3883	44.0199	23.0877	23.8624	28.301	20.954	22.33	17.1233	18.5856	26.8222	40.3195		0.676196	30.7931
8.5705	34.1637	20.787	12.6576	27.2522	50.7916	37.3723	48.5359	43.9785	49.4034	20.0633	14.5746	27.4145	43.2925	51.8736	29.1854	14.2716	36.6865	28.8014	21.2602	28.765	19.257	14.721	30.5376	18.1717	24.7272	53.6301		0.685717	30.8529
8.6895	36.732	20.8482	17.7141	29.5485	51.2498	41.087	43.2286	50.8651	37.4851	22.1194	14.8707	32.2218	40.5861	58.3606	28.0195	16.7325	30.9885	37.6391	20.4565	23.918	25.152	13.91	20.5917	12.1099	18.9281	44.9692		0.695238	30.3974
8.8086	38.0791	17.5096	13.1321	30.423	46.1128	32.938	40.9314	54.8264	35.9884	21.9642	16.2051	31.3704	48.7528	57.37	28.0425	19.0206	31.6608	30.3761	22.4253	23.139	22.819	21.223	16.0171	12.8889	25.0147	33.3345		0.704767	29.6756
8.9276	39.629	23.6841	13.2917	25.4235	35.1407	30.3605	45.5244	53.0582	35.0809	19.2728	9.5232	31.4185	48.9916	54.547	26.6424	12.544	32.9296	32.4783	23.258	14.995	25.077	26.293	20.7496	26.3487	37.0371	43.7701		0.714288	30.2719
9.0466	57.8219	31.0989	17.9083	19.6946	36.4631	41.1039	39.8295	44.8797	31.1927	22.6518	10.9083	36.0838	47.6701	47.2858	26.5408	21.3675	37.3025	35.721	26.7288	18.021	23.855	14.487	27.0526	22.2534	31.936	39.2813		0.723809	31.1207
9.1657	38.1581	24.1187	20.8836	20.4361	41.0654	41.1745	31.938	40.7984	31.8593	32.8541	18.4018	43.6376	43.6557	43.4272	20.184	18.9729	24.6447	23.242	27.0679	20.309	23.713	33.066	19.8538	16.4351	25.1011	47.9355		0.733338	29.7282
9.2847	43.0903	22.734	25.3838	23.2435	37.0433	43.165	40.4016	36.0796	33.5563	12.7413	12.9189	33.0265	45.9607	45.9818	21.7601	28.8155	27.6142	26.716	20.9247	16.089	17.383	21.49	17.9687	14.4803	23.312	29.0388		0.742859	27.7277
9.4037	38.5304	20.1552	23.8181	26.2449	37.4718	33.6833	43.3911	50.1196	19.9832	19.6773	12.843	36.9085	50.3223	50.279	15.1134	19.5102	26.995	29.7733	38.2568	23.798	28.377	15.692	15.4541	13.6362	26.4173	27.8312		0.75238	28.6262
9.5228	42.6922	26.4803	26.2039	24.0387	42.7607	37.7306	46.8494	39.4323	28.3206	26.945	19.3995	43.9171	53.7558	55.4154	16.9826	17.7248	18.7328	21.6387	35.7249	24.74	14.58	16.897	13.7258	15.132	22.3062	27.5036		0.761909	29.2165
9.6418	42.7984	26.7039	21.9756	31.0527	42.546	34.8055	40.0125	43.4758	29.7705	18.637	19.9602	27.9448	54.5616	53.791	24.0011	19.1172	24.6344	30.3345	25.2251	17.204	14.18	15.259	8.9496	21.3925	17.3465	30.3643		0.77143	28.3094
9.7608	34.6448	26.0991	22.7366	36.2243	45.0498	36.0424	47.284	44.3311	24.3221	16.5704	17.2284	31.244	47.2244	43.5072	26.5643	12.7021	26.2018	38.3262	31.4724	21.431	20.231	10.656	13.6218	14.645	18.7303	20.3389		0.780951	27.9781
9.8799	42.108	27.4328	16.3562	23.7922	43.1846	31.1377	36.2521	45.9884	37.5949	25.1802	14.3787	31.3696	44.4931	35.732	20.7505	20.8936	25.106	32.4044	30.1996	24.158	14.439	14.634	14.3743	17.2108	27.0026	21.3652		0.790481	27.5976
9.9989	45.5205	20.3026	24.0802	21.11	41.8076	31.2052	50.1594	40.5022	34.4891	17.8649	10.6136	29.958	43.5474	34.46	16.3204	16.4999	27.7764	26.1941	15.864	25.68	14.095	24.952	13.0498	10.1698	20.0581	26.2164		0.800002	26.2499
10.1179	44.868	17.2342	17.7096	36.5677	39.9559	24.0075	49.9529	32.359	40.193	19.867	22.2926	35.5552	39.8798	34.2163	28.1756	16.8684	42.649	35.8134	25.9997	12.067	11.472	14.984	8.3533	18.1767	17.6565	17.7638		0.809523	27.1015
10.237	42.188	29.1405	18.1603	22.7593	38.522	29.3574	34.5643	33.9314	40.3888	21.7727	24.8434	32.6868	49.9848	41.8585	30.7934	14.2467	28.8913	33.3102	15.6452	19.508	17.618	15.364	12.0843	28.6295	25.3242	14.5296		0.819052	27.5424
10.356	45.1179	34.8123	11.8855	28.0043	46.7065	33.036	35.4559	44.5048	40.329	21.692	12.9623	35.8006	59.0897	35.6588	31.0614	20.2301	16.7726	27.1069	16.3335	18.21	12.816	19.606	15.6136	13.4942	19.0563	12.0795		0.828573	27.2091
10.475	35.8096	34.6872	15.9475	26.4501	37.2765	37.0953	41.8121	30.1762	30.4889	28.8804	20.1033	29.2313	47.9652	30.4201	26.3443	24.3586	33.1227	32.3882	14.9777	17.502	18.163	18.953	10.4966	19.9143	19.672	8.9635		0.838094	26.5846
10.5941	28.4688	45.8447	16.2927	29.0658	29.0107	35.0543	31.0518	25.5628	24.2808	24.0518	19.409	39.3609	44.7225	39.6245	27.3783	23.762	26.1147	23.3345	33.7441	19.13	17.503	13.579	14.3863	18.7131	19.3771	13.65		0.847623	26.249
10.7131	29.0008	40.636	16.3766	32.6731	42.1462	35.7455	41.0162	21.9762	26.1654	12.5073	22.5972	39.8834	48.3576	29.6752	25.176	31.2042	33.118	19.8052	21.8687	13.455	26.059	22.068	11.8874	13.3447	18.9587	7.4442		0.857144	26.2748
10.8321	21.6154	27.771	23.0115	28.3019	42.5366	32.2733	32.8664	23.9865	29.9254	25.9602	22.0584	33.2835	38.6693	28.9861	25.062	25.2086	27.549	21.4286	22.7633	16.087	20.038	20.635	9.2272	16.7547	17.6494	9.9731		0.866665	24.7547
10.9512	18.9817	36.6502	14.1838	30.732	40.2851	37.4515	39.6408	35.423	35.7824	28.5844	18.4765	36.3119	46.5416	25.2475	27.7738	26.7614	15.1779	24.1873	16.3121	11.758	13.797	14.281	9.7191	15.1236	16.9925	11.1885		0.876194	24.8986
11.0702	21.4794	26.9525	25.1253	32.0465	31.6155	38.4067	36.734	26.6378	37.5119	31.8173	20.5367	36.0867	51.766	26.1559	24.9265	23.2409	25.9464	13.8493	19.2601	10.312	14.1	14.954	10.1985	10.2885	16.4321	10.6045		0.885715	24.4994
11.1892	12.1024	42.8948	22.0018	37.3912	55.3014	31.8812	21.5144	23.2777	41.463	34.5686	18.7136	41.4697	51.8203	37.9031	34.9208	24.2889	15.8986	11.6911	21.0965	12.221	13.968	10.534	16.0375	13.4703	20.4961	16.7683		0.895236	26.2959
11.3083	15.5521	29.9781	24.7692	36.2729	44.0571	27.9407	34.3153	38.7759	48.0433	31.8685	20.0708	51.5426	49.2911	38.6014	39.6653	24.3009	19.2893	15.4652	18.6922	16.448	10.081	18.202	11.1631	9.3522	20.3094	18.015		0.904765	27.387
11.4273	9.8758	32.2535	23.1717	32.9559	40.4851	47.8602	35.1122	36.6983	49.2846	29.7958	24.4207	44.1636	44.2878	32.6664	30.5929	30.2875	24.2612	25.6849	22.7084	11.147	12.39	11.183	10.9611	11.2784	15.8013	16.569		0.914286	27.1499
11.5463	13.8092	26.7632	26.55	32.2417	37.2024	26.1932	18.9671	39.1116	46.3598	31.9952	15.6831	39.5169	41.704	37.7974	50.6548	33.4403	27.0454	14.1582	13.1492	13.579	11.322	7.843	8.9715	11.9789	17.7026	12.6956		0.923807	25.2475
11.6654	10.1977	18.416	35.4434	37.1961	31.8603	20.9748	8.3321	43.5456	57.0431	23.8358	19.949	44.8556	39.4883	31.8644	40.1304	31.9593	25.7182	20.2077	14.2302	14.598	12.302	7.852	4.0584	14.45	9.603	8.4086		0.933337	24.0969
11.7844	8.8843	18.9884	45.9054	36.7837	28.4588	17.4131	15.7583	24.6792	57.055	35.5542	25.1745	35.2593	35.7899	28.5312	45.7118	23.4835	23.3654	19.2114	9.3162	14.343	12.953	11.352	10.5774	12.7372	19.9896	15.7877		0.942858	24.3486
11.9035	13.1003	14.512	30.3179	37.0414	31.7281	18.6729	15.6373	15.5545	50.9467	27.6888	20.9861	33.82	37.8105	37.397	45.4163	33.9967	21.7076	13.3156	12.6067	12.109	12.73	18.435	6.1779	8.2692	19.346	20.6809		0.952387	23.4617
12.0225	7.3545	10.8674	13.9173	26.5247	12.4284	9.4875	17.407	17.5967	45.6508	42.4202	21.8894	36.5667	47.7884	26.6183	33.2947	29.1258	28.3735	17.7032	14.7409	10.28	10.868	13.612	7.2893	5.3844	12.8187	17.8027		0.961908	20.685
12.1415	5.9265	3.2394	11.2382	24.1067	19.6138	9.478	9.721	11.8204	41.7717	32.1776	44.7171	46.4078	49.9612	26.0016	28.6834	24.8089	26.8294	20.8841	9.8047	15.881	19.512	7.884	18.5118	13.5121	9.5011	18.055		0.971429	21.1557
12.2606	3.5736	1.7142	12.4295	19.8474	21.4745	9.3716	6.19	10.9684	39.3814	28.2017	27.1168	40.706	39.0277	20.99	28.102	13.7379	15.7876	15.339	8.85	8.062	4.434	9.704	16.0685	9.2427	12.9432	9.9476		0.980958	16.662
12.3796	1.3475	4.5721	10.344	11.8761	10.0883	9.2691	12.9738	6.8635	36.2868	45.6234	22.2914	33.0189	38.8003	18.6225	38.5074	15.3579	21.2992	8.1009	17.7099	12.45	9.455	9.281	13.0097	6.8857	18.7896	11.5977		0.990479	17.0931
12.4986	3.3148	3.2593	5.6658	14.0032	11.291	4.1648	5.2913	6.6564	33.8311	49.0571	32.6527	37.1901	40.0202	16.778	34.6166	25.0687	17.331	11.6955	18.4531	13.658	10.756	9.915	13.7795	12.0918	14.4197	8.9231		1	17.4571

## Sheet: Image18
X0	Y0	Y1	Y2	Y3	Y4	Y5	Y6	Y7	Y8	Y9	Y10	Y11	Y12	Y13	Y14	Y15	Y16	Y17	Y18	Y19	Y20	Y21	Y22	Y23		Ap-Basal	Avg intensity
0	25.7438	26.3828	15.8549	26.2072	28.0055	30.5401	34.7104	23.2902	32.7713	30.5059	33.8853	42.4195	36.7807	27.6533	41.0478	36.7729	27.8983	24.8356	30.6112	24.3216	38.9484	25.2661	26.8991	33.6517		0	30.2085
0.119	21.2823	15.6622	24.2345	29.5136	30.1315	34.6399	23.7041	29.9814	20.6022	34.9347	30.0734	41.2932	43.3251	47.4222	43.0176	39.4903	21.065	24.8056	23.5965	23.4987	25.1046	22.9402	30.6914	26.2408		0.00925659	29.4688
0.2381	22.3807	15.782	20.4799	29.9613	29.4598	27.6033	29.6591	30.8321	29.5848	31.5004	41.423	52.5102	35.2505	44.7045	35.6666	52.416	21.9318	25.1933	26.6212	16.3704	21.8999	22.5057	30.1064	27.3358		0.018521	30.0491
0.3571	20.2122	20.3588	20.5487	25.2791	23.8493	29.339	25.7753	25.6046	30.7436	32.928	28.9136	51.4217	41.8678	53.675	37.6779	51.2622	27.5595	32.4277	28.3098	17.2497	19.1342	20.9529	30.5257	25.0691		0.0277776	30.0286
0.4761	28.1543	33.1956	10.8895	17.065	19.8436	46.134	25.3556	29.1636	35.4182	37.1123	35.2545	48.8126	41.7828	50.9736	35.6274	48.5612	20.6298	39.9344	33.0063	22.2579	22.002	21.3116	28.9434	29.5602		0.0370342	31.7079
0.5952	17.7155	22.3741	16.351	30.5928	29.3071	34.5958	32.7211	27.9016	21.4466	37.0873	38.1709	53.8611	42.6393	67.1183	58.1233	51.3614	22.0513	39.6276	18.823	23.6705	22.9538	40.4789	17.1877	47.3662		0.0462985	33.8969
0.7142	24.8431	42.5778	24.9927	22.2426	24.8491	33.8557	47.4193	40.1282	26.5161	40.5356	33.3208	57.0642	46.8375	58.3336	44.2961	45.1372	29.632	31.8944	18.7318	24.7368	25.8227	27.8778	35.8578	33.0671		0.0555551	35.0237
0.8332	29.5019	47.5291	31.3292	35.5452	43.2858	30.5624	28.4232	41.8581	37.975	31.2449	38.0884	44.839	49.9012	48.3063	54.9866	38.1121	38.0051	28.2414	20.2241	12.9141	29.9473	38.721	36.8087	40.3814		0.0648117	36.5305
0.9523	22.7274	46.1889	30.3271	42.1053	35.4571	22.839	30.2748	30.7278	29.7857	35.9547	37.4981	46.6316	45.9196	64.1075	50.7368	31.3261	34.1686	31.6772	43.2717	27.3705	19.8571	35.1676	33.0809	33.6054		0.0740761	35.8669
1.0713	30.3075	36.8434	36.8424	34.5404	34.6966	25.4621	37.7176	47.0626	37.1945	41.3149	45.1513	50.9452	42.8705	54.1914	43.698	40.954	40.3036	24.2504	25.2758	27.0501	37.6347	37.9561	31.8946	40.7564		0.0833327	37.7048
1.1903	43.1597	33.258	43.939	40.7968	31.7259	39.7066	33.1318	41.4535	36.2839	57.4553	49.8048	39.5438	50.3204	51.877	44.9071	53.0517	23.912	33.67	21.4998	15.1279	30.9094	40.9576	42.0254	39.6941		0.0925893	39.0921
1.3094	49.1317	32.4389	38.4508	40.4881	42.9414	28.1862	42.3786	36.2488	42.2199	42.0497	55.6995	45.804	36.8009	51.297	47.8541	36.006	41.6953	25.5474	22.449	20.8346	33.9252	30.9952	36.6692	39.6577		0.101854	38.3237
1.4284	57.5691	46.7281	33.7774	42.4866	41.3894	36.9296	36.599	52.2344	46.0694	53.4773	50.5827	50.3042	37.0787	47.6293	54.4161	44.8607	42.8008	38.267	27.3432	22.1115	31.3359	41.3199	39.1228	31.9031		0.11111	41.9307
1.5474	40.9706	43.4555	40.8334	40.7807	34.4019	35.3381	43.04	48.0136	30.7792	47.2947	52.0822	43.6336	43.8062	44.4086	56.1711	43.7312	34.781	44.0428	44.9413	31.4093	45.5277	29.3506	30.5512	30.7192		0.120367	40.836
1.6665	46.7757	37.0802	34.5176	53.9178	26.3856	29.5272	39.3253	41.7643	40.1744	59.8201	53.2374	46.1406	37.1481	49.1398	39.66	44.7658	37.6647	36.5455	26.3288	28.0968	47.9628	40.0787	39.5173	30.0985		0.129631	40.2364
1.7855	60.1519	62.0779	46.4768	41.7849	40.9131	38.4606	25.9713	35.0472	39.1013	58.6299	48.8429	55.0469	38.6195	33.7317	43.3794	43.7847	42.3939	42.1874	40.6791	33.4078	42.8261	30.8813	41.6266	44.6637		0.138888	42.9452
1.9046	58.9649	42.223	24.5749	43.4734	42.3985	34.7653	35.3979	44.8513	41.9546	66.9864	57.757	36.2373	43.4997	56.6718	49.0318	45.2743	32.3714	38.6206	44.6977	39.2774	53.0187	34.7337	41.1506	39.2389		0.148152	43.6321
2.0236	58.8495	50.0891	43.7712	37.8344	57.4688	37.7925	36.2091	44.0233	33.7513	61.857	47.6484	53.2923	35.6088	53.9575	52.7553	58.9493	36.6838	34.977	36.2386	40.8435	54.568	33.5006	37.123	36.2541		0.157409	44.7519
2.1426	51.4294	74.9117	47.1417	37.4554	54.377	37.4848	49.6964	43.3909	48.3132	58.3331	46.6702	61.0806	49.8051	47.8043	52.0635	48.264	29.1745	35.2083	29.4947	42.6058	43.1908	43.2111	36.2606	32.8733		0.166665	45.8434
2.2617	65.897	56.2656	53.3633	42.859	54.0255	38.4917	45.1162	48.2603	47.6518	78.4371	44.2459	57.1801	54.1987	49.8107	56.8888	39.1582	41.1939	42.0574	31.0796	32.8857	46.8279	45.4237	51.4475	33.5926		0.17593	48.1816
2.3807	81.6286	57.9702	49.2174	38.5696	47.8308	33.7458	38.5573	44.7189	49.6032	48.1507	46.6127	62.933	38.4894	44.6114	44.1617	45.1389	38.1805	41.315	40.5472	37.1031	54.7873	33.0682	51.4878	26.6287		0.185186	45.6274
2.4997	58.4627	52.0423	48.5284	48.9044	46.0437	42.9018	65.4802	41.6743	42.0155	57.6411	50.6796	62.768	52.9428	56.0372	40.1695	53.1923	46.6385	40.1569	37.4621	43.4362	44.5929	34.4308	44.0002	38.5664		0.194443	47.8653
2.6188	56.514	46.0024	49.4604	48.8187	38.2296	50.4006	49.544	45.9826	31.205	47.7578	52.1002	75.7982	52.6819	48.544	46.5423	50.6384	44.2831	46.5613	23.5854	54.1835	56.3846	42.3213	39.4101	51.5285		0.203707	47.8532
2.7378	57.7985	47.8851	43.1	45.128	47.4578	50.7968	59.5148	42.7959	54.6274	53.3213	66.0528	61.7334	36.411	58.9905	45.7252	57.3532	54.3782	46.3975	34.9259	45.0706	40.4865	49.0192	35.2509	40.1539		0.212964	48.9323
2.8568	50.7602	52.0522	42.1929	46.0476	53.5544	51.022	57.6344	34.0293	51.0263	58.0492	53.7276	55.1032	53.8715	69.3826	45.5456	50.0709	33.6435	37.6341	37.7797	37.356	37.4574	47.8766	38.3973	39.7169		0.22222	47.2471
2.9759	53.6202	65.0814	50.0978	42.3741	53.1275	50.9947	60.0077	39.0232	52.7487	56.5901	54.8522	51.8221	49.4786	56.8076	55.7504	64.23	28.797	48.6202	35.8913	46.9782	48.2005	51.5303	54.2819	37.6488		0.231485	50.3564
3.0949	57.593	46.0776	37.0486	61.8064	59.1932	43.4753	64.0864	42.1554	55.633	47.2256	47.5566	60.009	37.0948	58.2967	41.3158	55.0217	37.6983	44.1974	37.5349	53.1188	47.6708	39.6419	35.5838	33.052		0.240741	47.587
3.2139	34.4232	41.2107	43.843	41.1574	52.1048	46.6685	65.034	49.1148	55.9284	52.0478	57.561	35.5635	42.1971	71.0662	41.7286	55.7581	35.715	46.9121	51.8517	45.888	47.2926	33.0627	36.3682	41.5235		0.249998	46.8342
3.333	33.3008	54.7538	35.6378	37.7257	47.4736	51.4615	70.6225	57.5204	59.9318	57.503	55.9971	49.4529	61.8847	55.1695	46.0857	53.7666	36.3756	36.3802	38.2745	53.7099	31.5976	56.3388	50.0767	39.2178		0.259262	48.7608
3.452	32.9548	59.2358	32.628	38.1516	57.5325	49.3112	62.4374	55.1388	38.101	55.8521	62.3687	59.029	53.3454	52.82	48.8011	48.0648	38.0319	49.4005	39.7298	29.3231	51.5633	60.64	48.2319	43.316		0.268519	48.5837
3.571	29.9347	50.608	35.8574	37.0396	58.3657	57.7357	48.3987	59.4614	52.6577	43.3028	67.4979	57.4393	52.3833	51.0179	34.8485	66.6645	34.4774	45.8258	34.8749	39.068	53.5183	48.122	38.8419	36.3984		0.277776	47.2642
3.6901	41.9482	47.7144	44.2475	49.4389	45.8692	52.6529	64.3017	64.1399	57.2687	42.282	49.5325	57.4515	48.9538	61.4908	37.1365	60.4815	36.8736	47.5819	54.403	42.8315	49.6431	65.0406	45.5012	51.3342		0.28704	50.755
3.8091	46.8585	42.3141	52.5764	46.4085	47.1723	40.9745	61.8601	61.8553	55.0498	58.7283	58.0117	49.5728	44.2295	51.324	35.923	47.7369	39.5842	43.6203	52.5666	41.8051	42.7478	50.5094	38.7458	40.0527		0.296297	47.9261
3.9281	49.0708	51.7371	33.4846	42.8065	62.9252	43.9464	59.7758	59.7335	62.5659	41.5336	66.7491	63.5378	48.4351	37.104	34.2559	40.3305	29.9156	33.4205	38.1168	37.8281	42.0932	45.9732	46.5094	34.7144		0.305553	46.1068
4.0472	47.6351	58.9219	46.6286	43.2121	52.6844	59.4494	61.3089	50.8181	68.3872	47.3524	51.6	61.2384	48.2089	61.5692	35.8415	54.2582	34.1684	43.5478	39.4352	43.5272	47.2793	46.6471	38.4657	42.7921		0.314818	49.374
4.1662	54.9583	36.3748	52.2589	47.2043	60.3096	52.3894	49.6557	43.1833	53.0794	46.8171	60.2306	62.2412	51.3754	66.2178	35.8424	53.4289	46.6063	49.6132	56.9007	44.3338	50.4982	40.4325	42.4944	34.6948		0.324074	49.6309
4.2852	59.3308	54.8819	58.2127	52.3988	45.68	52.9838	49.7339	55.3411	57.9572	56.0385	56.1413	47.274	51.8257	59.1122	20.5683	38.9927	44.9188	45.4322	43.9544	51.565	40.8416	43.9671	46.3983	53.5255		0.333331	49.4615
4.4043	45.5627	42.5176	42.392	44.2063	47.4951	43.9693	51.1516	64.3652	64.1196	46.2142	58.0925	75.3562	65.7062	54.6024	30.2629	53.0999	41.2528	43.1998	49.9598	36.5734	39.0921	51.3171	40.9383	53.0349		0.342595	49.3534
4.5233	56.5189	42.675	42.3816	38.1885	41.306	49.9868	50.5108	55.7847	54.5478	68.401	54.3994	38.6803	58.1991	51.5852	23.1803	31.8231	35.5092	48.0697	55.3446	32.9671	28.7603	59.7094	52.5179	37.5869		0.351852	46.1931
4.6423	63.5576	44.7449	39.532	40.0567	41.616	54.0225	55.829	54.9309	44.4748	62.0868	68.0236	53.353	52.9238	40.3634	29.47	45.2993	34.3984	36.089	55.128	32.935	53.7312	54.0962	42.9494	29.3975		0.361108	47.042
4.7614	51.5863	41.078	53.7553	35.7521	34.3415	45.4074	60.4161	55.3013	56.9688	57.7436	59.591	53.7496	46.4684	49.7064	29.9831	40.5097	38.3242	40.2969	60.5459	51.4729	36.1196	43.2687	48.5736	58.8223		0.370373	47.9076
4.8804	50.1252	53.1944	47.4855	46.2251	39.6757	49.7341	52.8245	38.4879	57.2149	48.1528	82.8417	54.2225	36.1437	52.3691	30.7867	38.4018	30.6393	46.1487	44.4549	40.3981	58.0952	36.6633	34.63	53.046		0.379629	46.7484
4.9995	51.3029	53.4582	48.3314	34.424	38.839	53.7855	57.4287	40.3271	55.2029	55.8328	70.0534	45.8917	41.8874	43.5735	21.0067	43.4652	43.5205	28.4652	51.1972	47.3542	43.4583	47.3192	53.2776	51.2725		0.388894	46.6948
5.1185	50.0789	48.6146	73.1665	46.6937	32.8534	62.6941	52.0854	46.503	56.2675	57.4679	62.7779	58.7129	44.4928	46.0227	30.5102	38.1276	43.6455	33.5938	53.2452	33.8022	47.3948	54.9673	40.457	45.7211		0.39815	48.329
5.2375	47.6819	51.7169	39.2742	47.215	38.569	73.9497	56.6056	51.1211	54.0861	62.3282	60.1979	50.8296	32.2781	49.4075	19.3354	42.4132	45.5933	33.7788	54.2806	41.9142	43.6273	54.7513	50.4382	43.4551		0.407407	47.702
5.3566	43.9922	45.3432	73.3446	41.2526	35.2216	53.102	51.7906	53.1075	58.3484	45.7945	53.1824	43.3845	50.0045	45.7563	15.457	40.9056	33.4368	29.0835	43.6103	61.1508	41.4261	37.9251	44.8405	59.4238		0.416671	45.8702
5.4756	36.9955	41.6835	44.8518	47.6193	45.9347	59.4619	50.9934	60.2683	54.539	56.5217	55.4386	64.57	35.4819	48.2312	22.4363	36.8496	40.2184	34.3138	30.7194	40.0412	50.9519	41.1204	51.6354	39.9356		0.425928	45.4505
5.5946	55.7838	49.7384	53.5486	35.9855	49.5336	53.236	44.084	50.1375	62.99	42.1877	43.6082	51.8949	35.3046	44.1511	17.9266	29.0773	50.4832	43.5639	41.1606	49.2697	51.9149	49.8977	42.7274	51.6451		0.435184	45.8271
5.7137	66.3434	47.9486	46.3943	40.1769	31.4068	55.8754	51.131	43.5899	55.1779	48.7463	51.1413	33.8157	41.0977	39.725	17.503	45.8617	45.758	30.2017	39.448	51.0859	46.064	35.7393	43.412	44.775		0.444449	43.8508
5.8327	48.1558	52.3815	41.7845	40.6109	43.152	48.7495	51.652	41.6573	54.7774	43.4221	61.9996	46.4157	54.9786	51.1917	16.8747	43.782	32.9899	18.1557	40.0086	37.2162	44.0313	32.1328	42.8568	38.3915		0.453705	42.807
5.9517	49.367	46.1712	42.5984	32.5039	48.2349	53.8191	61.0514	60.8063	52.3519	44.5303	44.4284	33.0743	44.291	45.2941	12.842	35.5163	30.7871	33.0112	35.46	51.639	44.9281	43.4596	43.5887	45.772		0.462962	43.1469
6.0708	47.0202	43.2162	59.2186	29.4846	38.6152	40.314	46.2495	56.4858	53.2921	30.4602	63.3668	46.7594	44.4179	50.1309	22.9228	35.8073	49.0439	32.2625	42.1187	41.6845	32.9279	34.1345	62.2028	23.2462		0.472226	42.7243
6.1898	34.229	37.2638	60.5592	40.9766	44.0495	44.5181	52.2612	70.2607	50.9732	51.5362	44.6804	45.2157	38.0712	37.9006	25.3029	29.3062	48.082	25.6183	35.9819	36.0162	30.8945	33.9387	71.9308	32.1902		0.481483	42.5732
6.3088	55.3611	56.1751	56.5487	37.6564	51.7373	46.1222	56.8586	59.4862	46.8865	41.7852	40.2095	45.9979	39.7883	49.3757	21.2157	34.3364	34.0609	17.9591	28.8573	31.1951	26.2458	39.9416	61.5446	33.1651		0.49074	42.1879
6.4279	46.8803	56.1805	60.6676	23.0395	53.1624	44.7781	74.0984	49.3626	42.8148	46.726	58.6155	49.4757	48.9441	45.1671	27.7941	47.5586	49.1651	20.9721	30.3547	42.6651	38.7521	37.5419	71.5416	37.7445		0.500004	46.0001
6.5469	42.4602	61.6815	53.3361	26.609	49.5709	52.0101	52.3414	54.417	39.5095	38.4049	54.3327	71.367	38.4867	43.8421	20.2631	35.7117	33.1337	18.6469	28.9096	31.666	32.0934	39.4098	68.9317	38.0336		0.50926	42.7154
6.6659	52.5061	58.7436	47.2891	40.7858	44.2111	36.6825	61.4144	45.6872	41.9201	40.7115	34.4489	63.7141	48.5337	40.8644	26.1636	44.769	35.8584	25.5834	20.8172	46.7124	33.3455	41.2407	68.1577	24.985		0.518517	42.7144
6.785	41.2943	40.9073	56.575	39.4928	40.3098	45.009	56.904	32.3595	41.9553	42.1879	44.9023	58.441	48.6598	33.8702	27.2473	36.216	38.1206	23.3237	41.3824	42.2129	34.1525	34.7178	64.7826	37.502		0.527781	41.7719
6.904	41.3882	43.2407	51.4317	37.2756	40.3536	47.3334	56.76	44.0635	32.2546	41.85	51.7165	75.5667	39.5675	40.853	15.826	29.168	42.1402	21.2647	29.3487	47.7469	34.3822	46.5855	68.3389	34.1046		0.537038	42.19
7.023	37.8992	56.9317	53.0951	22.9697	39.1898	59.2527	45.0562	42.5325	41.9458	34.0172	54.9394	68.8457	40.4505	33.4436	20.3374	26.7128	34.2252	19.2896	31.1393	41.7191	32.845	43.0589	79.3012	36.0196		0.546295	41.4674
7.1421	37.3172	47.6439	40.7647	33.5014	41.3041	44.9615	62.633	48.8223	30.0297	35.1542	37.4577	81.8753	44.3018	34.7697	20.9371	27.7035	30.8962	17.4704	26.7681	33.4067	22.2436	49.9721	47.1963	44.726		0.555559	39.244
7.2611	29.38	48.0638	43.7959	39.6842	49.1364	48.1338	48.4984	61.0595	21.909	26.8732	45.0805	57.3197	37.8581	26.4609	21.8206	28.5561	28.0768	17.7252	29.1635	37.8778	26.8851	24.783	57.0896	42.9389		0.564816	37.4238
7.3801	36.9009	54.9818	44.7684	39.0953	69.0219	57.2593	43.3073	33.308	30.6126	22.697	32.1583	61.2209	41.1311	38.1881	22.396	23.3188	28.9837	16.0651	29.0056	29.4982	29.9588	35.7388	49.2439	34.5502		0.574072	37.6421
7.4992	43.6675	55.3426	39.5075	36.9414	59.1487	43.3796	39.4694	44.3154	44.5897	19.5709	38.3985	57.8452	27.7086	46.9968	17.547	24.2346	27.8109	18.3779	29.147	36.5802	18.8868	46.5993	45.7336	45.4868		0.583337	37.8036
7.6182	36.0111	40.5779	36.0609	48.0121	63.0801	32.0411	43.4517	45.6277	32.9523	29.8692	39.9991	64.048	30.5238	33.6168	25.084	16.7092	29.8362	22.2704	20.7741	33.2841	18.0279	45.4428	71.5618	43.7653		0.592593	37.6095
7.7372	50.3441	51.0069	41.4017	45.1126	65.0506	45.8597	44.1175	35.4514	39.4089	23.2034	49.576	59.4916	47.243	34.7667	24.5427	18.7223	24.0302	24.0636	26.5962	35.7906	26.3059	46.6062	61.0594	33.2187		0.60185	39.7071
7.8563	37.5709	59.4993	39.2513	39.0168	56.1657	57.5916	47.9243	36.661	35.1947	45.2041	28.0809	67.5007	51.6934	35.9041	19.0594	15.1133	24.1597	13.6332	23.1214	36.9429	17.0478	40.6503	62.6943	27.2519		0.611114	38.2055
7.9753	40.5921	41.3424	37.2773	48.1762	52.8308	55.4924	34.6377	45.7797	42.0053	39.0319	45.9508	60.5782	55.0515	32.319	20.1297	16.4998	29.3207	24.9451	28.7235	32.7166	12.6105	49.4205	50.7251	23.6876		0.620371	38.3268
8.0943	39.5137	42.8064	33.6702	32.5619	43.9866	50.9735	45.2958	37.9232	31.9434	26.0302	53.9655	46.5013	47.9171	34.0883	20.0073	18.4415	31.3538	15.4144	31.9371	38.7283	20.8331	43.1969	58.079	30.4216		0.629627	36.4829
8.2134	41.3661	39.5527	27.2557	60.0073	60.7474	52.6898	43.2709	26.4977	26.8182	36.1721	49.3456	45.3822	53.3058	52.227	21.4903	34.579	31.5621	13.6106	24.8761	25.2502	15.2786	49.7231	61.8309	29.6143		0.638892	38.4356
8.3324	43.9372	58.0079	34.8041	36.9245	47.6869	40.9232	43.6578	30.2502	34.5492	36.6141	50.1025	60.9207	38.6437	47.4559	24.0866	32.3717	34.9389	18.2167	21.213	33.331	17.0115	26.3008	57.2281	30.7485		0.648148	37.4969
8.4515	43.7424	50.4378	31.7911	35.4259	46.8451	52.6059	35.2497	26.9226	42.2239	30.0262	44.5894	64.8778	39.3926	44.6371	24.1082	24.1129	27.4993	21.5058	18.2069	43.4896	25.535	28.9907	51.9846	18.6946		0.657413	36.3706
8.5705	25.2552	41.8126	46.2671	44.3609	50.7511	55.309	57.6739	51.6729	39.23	26.984	49.0269	63.331	42.0849	46.3055	20.3264	21.6114	27.156	13.276	33.4566	26.8837	14.6329	33.1113	47.2571	33.8929		0.666669	37.9862
8.6895	36.8698	39.98	33.9986	51.1892	46.1888	58.9057	49.8926	38.4262	22.8934	24.5208	46.5155	51.5955	37.9242	36.0789	26.3691	26.6489	33.2053	23.09	34.5722	26.4469	21.2624	21.2891	61.0276	28.9327		0.675926	36.576
8.8086	43.973	49.1501	40.0197	44.7972	45.6805	42.7468	39.9701	37.1355	25.585	32.6815	59.3296	52.0933	38.0158	55.6504	27.7552	24.5389	36.9805	28.5469	26.0969	34.9598	19.2977	47.317	48.0736	24.3432		0.68519	38.5308
8.9276	41.1963	37.1131	33.5952	45.6622	38.2403	46.0691	38.0884	53.744	31.287	23.3934	58.5565	51.1222	35.1423	54.4865	23.8617	22.9985	25.2863	17.9588	41.3611	26.6418	20.0765	34.789	51.0736	32.158		0.694447	36.8292
9.0466	42.1341	39.4819	34.1057	35.4257	38.0664	57.7389	44.4426	43.4942	25.8812	14.5443	55.3492	52.7682	34.8503	62.6648	26.1153	28.9491	31.6767	21.482	20.5901	35.9592	21.9356	29.7356	49.0897	26.747		0.703703	36.3845
9.1657	43.2503	36.5651	40.7701	35.2609	40.5811	51.0615	35.0412	55.2526	32.4836	29.2895	52.7935	58.0021	42.4342	43.7083	31.7867	23.9771	28.4953	27.5835	30.3112	30.6061	21.2713	40.233	48.6106	34.8872		0.712968	38.094
9.2847	45.9849	41.8645	18.6731	35.4944	52.1749	58.2995	61.7169	51.2496	31.6559	26.7957	42.9692	48.6374	45.724	54.4753	23.2657	36.2366	27.1956	15.6538	36.3305	22.1384	16.798	35.0385	32.3639	38.6786		0.722224	37.4756
9.4037	39.5443	56.6788	32.6816	31.0118	66.0372	48.1343	42.3901	54.4551	30.2203	17.7316	48.4324	56.5186	35.8951	42.5703	25.1655	27.1199	27.0772	13.8487	30.8638	22.6106	13.7681	41.5211	46.685	42.0896		0.731481	37.2105
9.5228	47.9181	53.2157	40.1371	32.4836	80.621	52.201	41.5954	65.2188	23.1052	25.1176	37.8734	43.72	40.5234	56.2161	19.8587	42.0913	36.1322	15.4635	31.8179	32.1262	23.2572	35.4489	32.127	32.219		0.740745	39.187
9.6418	50.3283	55.508	42.3334	54.5256	88.8885	50.6255	44.6537	47.6402	21.2564	25.1867	69.8303	38.3309	36.1107	57.3633	27.3699	31.2857	29.9417	16.0248	39.2224	27.6502	24.8471	36.9176	32.3285	34.3991		0.750002	40.9404
9.7608	33.5639	40.8618	35.7911	48.7927	60.7285	42.2374	49.3313	37.5929	29.0109	24.6885	48.4006	52.731	40.0617	42.6294	26.9037	34.3795	32.4381	10.9715	33.1059	34.9822	16.9072	33.6315	35.5244	41.1805		0.759259	36.9353
9.8799	40.8	63.8042	35.1154	51.688	56.9901	30.3713	47.6699	43.7645	41.4774	29.0897	49.636	44.5027	36.617	51.7677	26.1359	32.3411	23.0084	16.8626	44.8432	27.3692	24.3336	40.0045	26.2442	32.0998		0.768523	38.189
9.9989	42.2641	60.6765	37.5354	47.0618	68.7909	42.7938	40.2903	49.6216	29.0959	25.196	53.3556	51.9323	32.8505	50.6796	19.917	34.8902	35.107	15.7753	33.3825	24.6993	15.3748	31.8659	30.7493	36.8452		0.77778	37.948
10.1179	36.4593	47.5719	31.8876	44.5989	73.7074	33.3929	42.4798	46.4071	40.1378	15.6007	51.6411	47.7133	49.01	60.3967	26.187	31.9214	31.6541	22.9136	31.2555	34.13	33.0373	33.3953	36.7931	30.2186		0.787036	38.8546
10.237	56.6386	60.0895	44.6206	48.1272	58.9121	39.2765	41.3171	43.7118	30.6026	26.5691	62.4433	43.7143	35.4698	60.5443	42.525	37.3578	24.9076	32.6072	45.0983	24.5511	24.0651	38.7767	32.8346	37.5358		0.7963	41.3457
10.356	40.5018	67.6193	39.9106	47.3759	58.9643	37.0117	53.6691	49.2695	37.883	23.5415	48.3477	40.5125	41.2886	52.9564	27.824	39.0326	32.52	13.3533	22.3045	31.0466	26.5263	40.8411	32.1575	36.4003		0.805557	39.2024
10.475	36.3053	48.5985	34.8904	51.0051	42.3824	47.0806	48.2733	46.1275	32.0229	29.0482	43.8218	47.6826	40.9215	44.5997	33.0354	43.3684	29.8126	22.4368	47.9417	39.2624	16.6618	39.1752	30.2008	38.6506		0.814814	38.8877
10.5941	58.8357	56.0259	40.5179	39.6491	63.9256	53.6001	30.4191	49.111	27.2502	37.8853	57.2961	40.1328	47.355	62.9542	38.1406	44.2614	32.5894	18.9492	38.9967	31.9244	22.4189	46.2827	35.3501	35.2944		0.824078	42.0486
10.7131	63.5878	58.7116	38.2927	43.1915	47.3953	33.4806	25.1777	43.3398	31.4048	33.3469	61.4459	48.7428	49.1051	56.0007	45.4342	42.6182	19.0839	21.0801	39.0541	25.2937	23.2803	45.1767	30.7547	43.7976		0.833335	40.3665
10.8321	48.6431	61.6057	32.1118	25.9199	38.4036	50.2479	29.8628	38.7547	25.0751	32.2443	49.1633	52.6556	46.4548	55.5271	64.617	41.1164	18.3626	22.8358	22.9843	25.5138	13.0998	46.2936	35.3126	31.7349		0.842591	37.8559
10.9512	43.2919	56.2705	42.281	33.4796	49.1397	38.7978	43.9921	56.884	32.1578	27.4423	46.0239	43.8957	40.5881	44.996	61.6658	33.6449	33.6939	19.0959	30.4102	24.9904	27.1857	39.8049	29.4462	31.711		0.851856	38.7871
11.0702	41.9688	58.346	24.2506	32.7047	44.7313	36.9323	39.2051	47.7547	25.4658	26.7131	48.8482	37.3261	47.8845	50.4236	52.4101	39.7458	25.4043	15.3087	27.1829	36.0166	31.105	41.9273	30.0739	31.0768		0.861112	37.2003
11.1892	43.307	54.9703	40.1063	40.7458	38.8104	34.717	52.2108	53.8186	35.691	24.9283	41.6115	41.6837	37.9263	51.8591	49.0733	41.0704	21.8455	23.0334	28.7529	32.965	19.9468	32.5346	31.5372	26.8783		0.870369	37.501
11.3083	46.8924	48.964	58.5629	42.7753	42.8204	35.4184	51.2948	42.3667	39.7283	45.1159	40.447	38.8495	42.5713	39.9953	58.9554	41.3671	19.7219	33.1269	22.1031	31.1794	32.8571	36.0149	22.8196	31.5652		0.879633	39.3964
11.4273	52.3301	58.6565	44.463	34.8546	42.5225	28.0986	41.3447	62.8233	32.1695	36.2506	38.4482	41.1618	43.2941	29.2021	46.7002	43.1788	37.1386	25.1718	27.8824	31.2521	29.9135	35.372	31.9238	25.1958		0.88889	38.3062
11.5463	55.5665	42.3844	49.1699	39.8834	38.434	24.7098	51.269	51.9227	41.1942	46.371	33.7183	35.6974	42.6271	23.7376	45.2048	34.6232	33.3621	31.8556	31.4712	25.867	27.6027	35.7513	26.0255	22.1094		0.898146	37.1066
11.6654	31.1064	51.5661	41.9773	34.3008	33.6769	25.8041	41.126	39.0346	26.7883	42.429	32.0286	32.1021	26.8259	34.5301	35.9122	35.3574	24.4322	18.7126	23.7102	35.0608	43.5803	52.0599	20.2851	33.1731		0.907411	33.9825
11.7844	40.6306	43.0276	50.1064	32.5779	24.3439	27.4691	39.7819	32.696	31.9461	36.2535	49.5421	30.6492	28.9474	21.3838	30.6382	28.0264	19.8878	35.1288	36.2219	27.8565	29.3736	39.6011	23.8502	28.0837		0.916667	32.8343
11.9035	31.572	49.4466	37.8769	27.5778	35.3489	20.6384	39.8995	37.6574	34.4206	47.3214	42.8221	21.1673	15.2508	19.0896	28.8107	51.3172	34.8389	37.4577	39.6494	19.266	26.7581	32.8148	16.7164	26.0238		0.925932	32.2393
12.0225	29.5547	30.8659	33.4361	31.4219	29.9796	20.2911	37.3115	27.9601	35.9021	47.1521	33.1689	25.6857	12.9584	7.474	12.1514	35.258	29.6144	47.1844	46.3513	24.3949	32.0516	33.5531	20.1733	19.7458		0.935188	29.3183
12.1415	33.8664	33.4599	31.2478	29.0308	39.2683	11.4947	26.8072	33.1556	50.0356	51.214	28.3572	21.6603	14.1343	13.7371	12.7561	35.5028	26.2274	37.9604	38.8027	21.2203	28.9162	24.9478	20.4416	18.9333		0.944445	28.4657
12.2606	32.2074	29.4265	26.205	19.0384	8.1167	14.5476	24.961	32.5871	45.153	60.5852	28.382	18.4171	8.8638	8.7175	10.8527	33.5577	36.4502	23.9528	43.3831	24.0786	34.1938	31.6031	24.2687	16.7228		0.953709	26.5113
12.3796	39.8738	35.839	36.1444	38.6149	12.6761	6.4516	16.3967	35.3898	37.7951	54.1689	20.0051	10.9904	12.9825	7.0822	14.2951	41.2552	29.2256	43.3357	28.0191	29.27	30.0636	14.8753	14.5163	12.6416		0.962966	25.9128
12.4986	32.845	29.4114	40.1943	27.3336	9.3561	4.7181	14.5693	18.2561	36.2124	56.8438	22.3313	6.529	9.3943	10.9283	8.5078	39.3599	29.6401	34.91	32.6733	30.6104	25.0442	8.5329	14.4516	17.2431		0.972222	23.329
12.6177	34.3894	32.0281	48.5107	32.7707	8.6993	4.1536	10.0417	36.563	38.2405	53.3091	20.3554	5.8076	5.7917	6.2065	4.5041	44.8695	23.6352	37.5021	41.9236	33.1539	25.4354	12.9118	8.1435	11.6726		0.981487	24.1925
12.7367	33.7873	28.8454	42.0127	11.8894	1.988	8.2535	6.7068	23.806	32.5663	46.8485	24.7026	6.741	3.7416	3.1391	6.2959	35.0244	35.1727	36.1131	30.3478	31.782	29.0663	14.3931	10.0358	9.4434		0.990743	21.3626
12.8557	26.5754	24.3787	25.1849	19.4127	3.6741	7.4113	9.1023	27.693	21.4126	32.4277	13.7031	8.5755	7.0295	7.8128	1.4836	25.6299	27.1058	27.361	27.145	34.4599	24.7001	7.6335	5.8067	7.6545		1	17.6406

## Sheet: Sheet1
Image18				Image19				Image20				Image21				Image8				Image9				Image10				Image11					Distance	Image18	Image19	Image20	Image21	Image8	Image9	Image10	Image11
Ap-Basal	Avg intensity			Ap-Basal	Avg intensity			Ap-Basal	Avg intensity			Ap-Basal	Avg intensity			Ap-Basal	Avg intensity			Ap-Basal	Avg intensity			Ap-Basal	Avg intensity			Ap-Basal	Avg intensity				0	30.2085	31.4932	36.8596	21.687	19.8612	29.2663	23.1358	22.0238
0	30.2085			0	31.4932			0	36.8596			0	21.687			0	19.8612			0	29.2663			0	23.1358			0	22.0238				0.05	31.4834	41.126	45.5871	24.1372	23.4043	37.1661	23.993	25.792
0.00925659	29.4688			0.00952107	36.3472			0.00892596	38.9063			0.0094312	22.2921			0.00952107	21.7172			0.00806217	31.3989			0.00892596	23.0837			0.00934308	23.0436				0.1	37.5036	57.7712	57.973	34.003	32.5771	48.0694	27.8162	31.9385
0.018521	30.0491			0.0190501	37.5716			0.0178594	42.6382			0.0188703	21.7708			0.0190501	22.3681			0.0161311	35.0686			0.0178594	24.0292			0.018694	26.3591				0.15	42.3887	58.729	45.9573	40.2209	38.6182	57.3044	31.5108	36.1078
0.0277776	30.0286			0.0285712	40.0795			0.0267854	42.9982			0.0283015	22.7846			0.0285712	22.9013			0.0241933	36.0072			0.0267854	24.7208			0.0280371	24.754				0.2	47.0742	54.094	38.1818	43.5924	40.9674	57.7206	35.5949	39.071
0.0370342	31.7079			0.0380923	43.2748			0.0357113	48.5032			0.0377327	24.432			0.0380923	23.6889			0.0322554	38.8139			0.0357113	23.5386			0.0373802	26.9246				0.25	48.2863	50.5044	38.3753	44.486	41.7437	57.337	39.6169	42.1548
0.0462985	33.8969			0.0476213	47.8057			0.0446448	53.0372			0.0471718	27.3883			0.0476213	25.6766			0.0403244	40.4041			0.0446448	24.8836			0.0467311	26.9048				0.3	48.1272	49.4738	36.6759	46.6999	41.2643	55.5132	43.7631	41.3075
0.0555551	35.0237	31.4834		0.0571424	51.3098	41.126		0.0535708	56.1668	45.5871		0.056603	28.6054	24.1372		0.0571424	27.6169	23.4043		0.0483866	42.2301			0.0535708	24.5594	23.993		0.0560742	30.5337	25.792			0.35	48.8026	48.1194	38.5257	46.7438	40.1897	49.5988	44.6049	37.8671
0.0648117	36.5305			0.0666635	55.7229			0.0624967	57.1517			0.0660342	30.7676			0.0666635	30.5764			0.0564487	44.1399	37.1661		0.0624967	27.8086			0.0654173	29.1032				0.4	47.404	47.4902	37.245	46.78	37.3028	45.2566	45.6328	38.3008
0.0740761	35.8669			0.0761925	55.566			0.0714302	57.2275			0.0754733	32.6277			0.0761925	29.3931			0.0645177	43.6605			0.0714302	26.4601			0.0747682	30.0913				0.45	44.7611	42.8686	33.4541	45.4749	35.6097	41.0672	44.662	36.7616
0.0833327	37.7048			0.0857136	58.1368			0.0803561	61.0582			0.0849045	33.583			0.0857136	34.0466			0.0725798	45.5553			0.0803561	26.6482			0.0841113	29.8056				0.5	43.3265	38.4498	30.5421	41.9108	31.6775	36.6737	43.1541	34.2194
0.0925893	39.0921			0.0952347	59.6856			0.0892821	59.8585			0.0943357	35.5273			0.0952347	32.3306			0.080642	48.1578			0.0892821	26.577			0.0934543	33.5853				0.55	42.1718	35.2523	28.4429	37.8111	31.3592	36.8211	39.9366	34.7853
0.101854	38.3237	37.5036		0.104764	59.7448	57.7712		0.0982156	56.9096			0.103775	37.5092	34.003		0.104764	36.539	32.5771		0.0887109	49.3453			0.0982156	29.1532			0.102805	37.1072	31.9385			0.6	38.2383	31.9995	25.2895	34.884	28.9072	34.7249	36.069	34.089
0.11111	41.9307			0.114285	57.9829			0.107142	55.6323	57.973		0.113206	37.3571			0.114285	35.1627			0.0967731	50.1273			0.107142	30.2503	27.8162		0.112148	36.248				0.65	37.5531	31.6038	24.4752	34.1703	27.2949	33.1082	33.3231	34.4234
0.120367	40.836			0.123806	60.5326			0.116067	52.5628			0.122637	39.3383			0.123806	38.8262			0.104835	51.5699	48.0694		0.116067	30.2616			0.121491	35.5595				0.7	37.2613	30.6103	24.3888	36.5207	26.524	32.8867	32.772	34.3032
0.129631	40.2364			0.133335	58.638			0.125001	48.4657			0.132076	40.8143			0.133335	40.08			0.112904	54.665			0.125001	30.4343			0.130842	37.5436				0.75	38.5815	29.4949	26.0125	38.1133	27.4904	31.6874	31.8683	31.9395
0.138888	42.9452			0.142856	58.8584			0.133927	44.701			0.141508	41.1705			0.142856	38.1998			0.120966	57.5761			0.133927	31.506			0.140185	35.0992				0.8	38.7458	27.8703	23.3122	38.538	26.4786	31.0783	30.4246	29.9726
0.148152	43.6321			0.152385	57.6329	58.729		0.14286	41.2071			0.150947	42.4242	40.2209		0.152385	40.8227	38.6182		0.129035	58.1767			0.14286	32.3146			0.149536	37.3036				0.85	39.5891	26.8269	24.919	38.529	28.7918	33.3447	29.4249	30.2262
0.157409	44.7519	42.3887		0.161906	56.3421			0.151786	42.8498	45.9573		0.160378	42.9418			0.161906	41.5465			0.137097	57.4809			0.151786	33.0375	31.5108		0.158879	34.8929	36.1078			0.9	37.2488	25.5671	26.3685	39.5571	29.1887	31.758	27.5804	25.6835
0.166665	45.8434			0.171427	54.1178			0.160712	40.488			0.169809	43.5214			0.171427	43.2814			0.14516	58.1023			0.160712	33.0641			0.168223	36.1587				0.95	29.8738	24.8609	25.7925	36.1357	28.2513	26.2029	22.3373	19.0774
0.17593	48.1816			0.180956	52.4602			0.169646	40.1295			0.179248	43.8835			0.180956	38.3043			0.153229	57.8256	57.3044		0.169646	35.4204			0.177573	38.6151				1	22.4875	18.6106	22.278	24.097	23.8338	18.6507	15.9256	11.6885
0.185186	45.6274			0.190477	54.2131			0.178572	35.5477			0.188679	44.8069			0.190477	40.8675			0.161291	58.4058			0.178572	34.4235			0.186917	40.1726
0.194443	47.8653			0.199998	53.3366	54.094		0.187498	35.8891			0.198111	42.1384			0.199998	40.837	40.9674		0.169353	57.7435			0.187498	37.3831			0.19626	40.3849
0.203707	47.8532	47.0742		0.209527	50.5304			0.196431	38.3185			0.20755	44.2626	43.5924		0.209527	38.3763			0.177422	59.7107			0.196431	36.5385			0.205611	40.0238	39.071
0.212964	48.9323			0.219049	50.6325			0.205357	38.7179	38.1818		0.216981	45.0919			0.219049	40.8011			0.185484	57.8711			0.205357	36.7396	35.5949		0.214954	41.6508
0.22222	47.2471			0.22857	50.9582			0.214283	37.8119			0.226412	44.4592			0.22857	43.2497			0.193546	55.2985			0.214283	38.0342			0.224297	41.375
0.231485	50.3564			0.238099	50.577			0.223216	39.831			0.235851	44.1124			0.238099	42.3398			0.201615	57.2941	57.7206		0.223216	37.8095			0.233648	42.5317
0.240741	47.587			0.24762	52.2744			0.232142	38.3604			0.245282	45.2143			0.24762	40.9921			0.209677	57.4919			0.232142	38.7999			0.242991	42.9206
0.249998	46.8342			0.257141	48.0796	50.5044		0.241068	37.5491			0.254714	43.552	44.486		0.257141	41.3356	41.7437		0.217739	58.8652			0.241068	42.4032			0.252334	42.2956	42.1548
0.259262	48.7608	48.2863		0.26667	49.4267			0.250002	38.3243	38.3753		0.264153	45.7138			0.26667	43.9397			0.225808	57.3482			0.250002	41.0379	39.6169		0.261685	42.252
0.268519	48.5837			0.276191	50.2679			0.258928	39.6047			0.273584	46.7443			0.276191	40.7232			0.233871	55.971			0.258928	42.6803			0.271028	42.9524
0.277776	47.2642			0.285712	49.6434			0.267854	37.5442			0.283015	46.1636			0.285712	41.9727			0.241933	58.2104			0.267854	43.9627			0.280371	41.1825
0.28704	50.755			0.295241	49.4881			0.276787	35.6468			0.292454	47.5204			0.295241	38.8069			0.250002	56.1355	57.337		0.276787	43.0317			0.289722	39.8809
0.296297	47.9261			0.304762	48.5431	49.4738		0.285713	36.0879			0.301885	47.3571	46.6999		0.304762	40.8792	41.2643		0.258064	57.607			0.285713	41.939			0.299065	40.5814
0.305553	46.1068	48.1272		0.314283	47.2855			0.294639	35.1306			0.311317	45.5292			0.314283	41.1049			0.266126	56.9479			0.294639	45.5422			0.308408	40.996	41.3075
0.314818	49.374			0.323812	47.8567			0.303573	36.0413	36.6759		0.320756	44.8998			0.323812	38.429			0.274195	56.3602			0.303573	45.4225	43.7631		0.317759	39.004
0.324074	49.6309			0.333333	48.8667			0.312499	37.2141			0.330187	46.5025			0.333333	39.9657			0.282257	56.8324			0.312499	45.3883			0.327102	39.875
0.333331	49.4615			0.342854	48.6707			0.321425	37.0085			0.339618	48.3566			0.342854	40.4295			0.290319	55.0555			0.321425	42.9491			0.336445	35.0972
0.342595	49.3534			0.352383	47.9173	48.1194		0.330358	41.0168			0.349057	46.1007			0.352383	41.0193	40.1897		0.298388	54.3			0.330358	44.5051			0.345796	37.9861
0.351852	46.1931	48.8026		0.361905	47.2352			0.339284	39.9255			0.358488	49.0744	46.7438		0.361905	38.6345			0.30645	53.5833	55.5132		0.339284	43.0263			0.355139	37.373	37.8671
0.361108	47.042			0.371426	50.9135			0.34821	38.7353			0.36792	48.8915			0.371426	37.4079			0.314513	51.5451			0.34821	45.2903			0.364482	39.7798
0.370373	47.9076			0.380955	47.6208			0.357143	37.2539	38.5257		0.377359	47.51			0.380955	38.0839			0.322582	50.6479			0.357143	46.4703	44.6049		0.373833	36.3234
0.379629	46.7484			0.390476	46.8932			0.366069	39.846			0.38679	45.4393			0.390476	36.1467			0.330644	50.3191			0.366069	47.078			0.383176	40.0714
0.388894	46.6948			0.400005	47.0905			0.375003	39.3404			0.396229	46.1419			0.400005	36.5635			0.338713	48.0743			0.375003	47.7603			0.392527	38.2024
0.39815	48.329			0.409526	45.1881	47.4902		0.383929	36.2554			0.40566	45.9173	46.78		0.409526	36.9803	37.3028		0.346775	48.9526			0.383929	45.6047			0.40187	37.127	38.3008
0.407407	47.702	47.404		0.419047	42.6505			0.392855	36.1593			0.415091	46.8419			0.419047	34.8928			0.354837	48.0537	49.5988		0.392855	44.9138			0.411213	38.6885
0.416671	45.8702			0.428576	43.2434			0.401788	34.6241	37.245		0.424531	45.6255			0.428576	36.4062			0.362906	47.2273			0.401788	42.807	45.6328		0.420564	38.5893
0.425928	45.4505			0.438097	44.1775			0.410714	34.098			0.433962	45.6453			0.438097	33.6387			0.370968	45.9832			0.410714	45.0805			0.429907	39.1429
0.435184	45.8271			0.447618	42.6239			0.41964	35.0137			0.443393	45.169			0.447618	36.9458			0.37903	45.2642			0.41964	44.043			0.43925	35.621
0.444449	43.8508			0.457147	41.6477	42.8686		0.428574	33.5273			0.452832	44.0928	45.4749		0.457147	36.1651	35.6097		0.387099	44.8437			0.428574	45.3518			0.448601	34.121
0.453705	42.807	44.7611		0.466668	38.5201			0.4375	32.432			0.462263	44.6833			0.466668	34.8086			0.395161	43.7746			0.4375	43.6324			0.457944	34.4068	36.7616
0.462962	43.1469			0.476189	39.4707			0.446425	32.4512			0.471695	45.4649			0.476189	30.8589			0.403224	44.4468	45.2566		0.446425	45.8809			0.467287	35.9742
0.472226	42.7243			0.485718	38.4753			0.455359	33.2025	33.4541		0.481134	43.0129			0.485718	30.2956			0.411292	43.5531			0.455359	43.9836	44.662		0.476638	33.0397
0.481483	42.5732			0.495239	37.7797			0.464285	30.1258			0.490565	38.3965			0.495239	30.2649			0.419355	43.4683			0.464285	43.6031			0.485981	33.7123
0.49074	42.1879			0.504761	38.0032	38.4498		0.473211	31.837			0.499996	40.2549			0.504761	32.1597	31.6775		0.427417	40.9111			0.473211	42.1369			0.495325	33.1488
0.500004	46.0001	43.3265		0.51429	35.4121			0.482144	30.628			0.509435	39.6521	41.9108		0.51429	32.3469			0.435486	39.3667			0.482144	44.1045			0.504675	35.2222	34.2194
0.50926	42.7154			0.523811	35.4258			0.49107	29.8469			0.518866	40.4054			0.523811	31.2954			0.443548	38.9901			0.49107	44.7491			0.514019	33.7738
0.518517	42.7144			0.533332	36.0425			0.499996	30.4165			0.528298	38.0174			0.533332	29.6228			0.45161	40.114	41.0672		0.499996	42.9115			0.523362	34.5873
0.527781	41.7719			0.542861	35.6526			0.50893	30.3987	30.5421		0.537737	36.0799			0.542861	33.0658			0.459679	36.8906			0.50893	41.4197	43.1541		0.532713	37.2897
0.537038	42.19			0.552382	33.7286	35.2523		0.517856	27.4843			0.547168	37.3439			0.552382	30.4649	31.3592		0.467741	36.867			0.517856	39.6142			0.542056	32.6706
0.546295	41.4674	42.1718		0.561903	31.1196			0.526782	29.3943			0.556599	37.2089	37.8111		0.561903	29.7687			0.475803	37.0799			0.526782	40.4643			0.551399	35.6052	34.7853
0.555559	39.244			0.571432	31.8266			0.535715	27.8027			0.566038	36.4006			0.571432	28.201			0.483872	38.0303			0.535715	40.5722			0.56075	36.7619
0.564816	37.4238			0.580953	30.7116			0.544641	29.8092			0.575469	36.4136			0.580953	30.9507			0.491934	35.6874			0.544641	40.1958			0.570093	36.0853
0.574072	37.6421			0.590474	34.3981			0.553567	27.724	28.4429		0.584901	35.0965			0.590474	27.4745			0.499997	36.3986			0.553567	38.8368	39.9366		0.579436	33.3373
0.583337	37.8036			0.600003	31.9413	31.9995		0.5625	24.6909			0.59434	32.716			0.600003	28.141	28.9072		0.508066	35.9789	36.6737		0.5625	38.2708			0.588787	32.4742
0.592593	37.6095			0.609524	31.855			0.571426	27.4165			0.603771	33.7932	34.884		0.609524	27.8009			0.516128	37.5868			0.571426	38.3429			0.59813	31.8512
0.60185	39.7071	38.2383		0.619045	31.551			0.580352	25.9843			0.613202	33.4873			0.619045	28.0935			0.52419	36.5333			0.580352	36.5111			0.607473	34.0238	34.089
0.611114	38.2055			0.628574	31.4642			0.589286	25.0792			0.622641	34.0748			0.628574	28.2624			0.532259	38.0365			0.589286	34.1271			0.616824	34.0595
0.620371	38.3268			0.638095	32.6813			0.598212	24.2767			0.632072	34.2021			0.638095	26.9569			0.540321	36.0054			0.598212	35.9343			0.626167	34.9425
0.629627	36.4829			0.647617	29.7469			0.607138	24.2893	25.2895		0.641504	34.3787			0.647617	26.5193			0.548383	35.8841			0.607138	33.2277	36.069		0.63551	36.0278
0.638892	38.4356			0.657146	32.3244	31.6038		0.616071	25.5384			0.650943	34.7085	34.1703		0.657146	26.1365	27.2949		0.556452	36.8804	36.8211		0.616071	32.9668			0.644861	33.2083
0.648148	37.4969			0.666667	31.3327			0.624997	24.1444			0.660374	34.6325			0.666667	26.2406			0.564514	37.5715			0.624997	33.8314			0.654204	33.879	34.4234
0.657413	36.3706	37.5531		0.676196	30.7931			0.633931	23.4623			0.669813	36.0958			0.676196	25.9553			0.572583	33.7633			0.633931	33.0063			0.663555	31.6091
0.666669	37.9862			0.685717	30.8529			0.642857	26.1105			0.679244	37.4728			0.685717	27.6165			0.580645	34.3974			0.642857	34.0663			0.672898	34.2857
0.675926	36.576			0.695238	30.3974			0.651783	23.1206	24.4752		0.688675	35.6241			0.695238	26.313			0.588708	33.7018			0.651783	32.7449	33.3231		0.682241	34.5198
0.68519	38.5308			0.704767	29.6756	30.6103		0.660716	22.5993			0.698115	36.8922			0.704767	26.4946	26.524		0.596776	33.6834			0.660716	35.0236			0.691592	35.0972
0.694447	36.8292			0.714288	30.2719			0.669642	24.7025			0.707546	38.4065	36.5206		0.714288	26.9318			0.604839	35.2319	34.7249		0.669642	33.7416			0.700935	36.004	34.3032
0.703703	36.3845	37.2613		0.723809	31.1207			0.678568	24.3665			0.716977	39.7819			0.723809	29.8044			0.612901	34.7666			0.678568	32.6723			0.710278	32.8492
0.712968	38.094			0.733338	29.7282			0.687501	25.1213			0.726416	37.4715			0.733338	28.5002			0.62097	34.1094			0.687501	32.6939			0.719629	33.2778
0.722224	37.4756			0.742859	27.7277			0.696427	24.6241			0.735847	37.8682			0.742859	26.6903			0.629032	32.2068			0.696427	30.8768			0.728972	30.9722
0.731481	37.2105			0.75238	28.6262	29.4949		0.705353	24.9193	24.3888		0.745278	38.1246			0.75238	25.5253	27.4904		0.637094	32.184			0.705353	31.6237	32.772		0.738315	31.1052
0.740745	39.187			0.761909	29.2165			0.714287	24.799			0.754718	37.3202	38.1133		0.761909	26.8918			0.645163	31.8244			0.714287	32.1145			0.747666	32.7044
0.750002	40.9404	38.5815		0.77143	28.3094			0.723213	25.8565			0.764149	39.3069			0.77143	27.4156			0.653225	33.5577	33.1082		0.723213	33.298			0.757009	30.7282	31.9395
0.759259	36.9353			0.780951	27.9781			0.732139	26.2606			0.77358	38.0041			0.780951	27.5633			0.661287	33.3323			0.732139	31.5923			0.766352	30.0139
0.768523	38.189			0.790481	27.5976			0.741072	27.4427			0.783019	37.3231			0.790481	24.2086			0.669356	31.2104			0.741072	31.0473			0.775703	28.8691
0.77778	37.948			0.800002	26.2499	27.8703		0.749998	25.923			0.79245	39.3301			0.800002	26.3139	26.4786		0.677418	31.0041			0.749998	31.9877			0.785046	29.0754
0.787036	38.8546			0.809523	27.1015			0.758924	25.7931	26.0125		0.801881	38.7256	38.538		0.809523	27.6016			0.685481	32.9701			0.758924	31.1698	31.8683		0.794389	30.5099
0.7963	41.3457			0.819052	27.5424			0.767858	24.1935			0.811321	38.5192			0.819052	28.4403			0.69355	34.1704			0.767858	32.4924			0.80374	31.3948	29.9726
0.805557	39.2024	38.7458		0.828573	27.2091			0.776784	24.0965			0.820752	37.9483			0.828573	29.8225			0.701612	34.6325	32.8867		0.776784	31.1539			0.813083	31.5952
0.814814	38.8877			0.838094	26.5846			0.785709	22.8483			0.830183	40.3018			0.838094	29.8842			0.709674	31.8603			0.785709	29.9945			0.822427	30.2619
0.824078	42.0486			0.847623	26.249			0.794643	22.7586			0.839622	40.4235			0.847623	28.35			0.717743	30.905			0.794643	28.4433			0.831777	29.9583
0.833335	40.3665			0.857144	26.2748	26.8269		0.803569	22.664	23.3122		0.849053	37.603			0.857144	28.6521	28.7918		0.725805	32.807			0.803569	30.0387	30.4246		0.841121	30.1349
0.842591	37.8559			0.866665	24.7547			0.812495	24.0908			0.858485	36.3779	38.529		0.866665	29.572			0.733867	34.3696			0.812495	31.9493			0.850464	29.1806	30.2262
0.851856	38.7871	39.5891		0.876194	24.8986			0.821428	24.2598			0.867924	38.9434			0.876194	29.8756			0.741936	30.1698			0.821428	29.372			0.859815	26.8988
0.861112	37.2003			0.885715	24.4994			0.830354	24.4636			0.877355	39.8333			0.885715	29.4583			0.749998	31.2056			0.830354	29.0766			0.869158	27.5417
0.870369	37.501			0.895236	26.2959			0.83928	23.8998			0.886786	40.6643			0.895236	29.7034			0.75806	30.4947	31.6874		0.83928	28.4769			0.878501	26.9643
0.879633	39.3964			0.904765	27.387	25.5671		0.848214	26.4862			0.896225	39.1819			0.904765	27.3344	29.1887		0.766129	29.2263			0.848214	28.5531			0.887852	26.4663
0.88889	38.3062			0.914286	27.1499			0.85714	26.3139	24.919		0.905656	39.1622	39.5571		0.914286	29.3101			0.774192	30.3983			0.85714	29.1218	29.4249		0.897195	22.5298
0.898146	37.1066			0.923807	25.2475			0.866066	27.5736			0.915088	38.2029			0.923807	27.3577			0.782254	31.8904			0.866066	28.9086			0.906538	23.7004	25.6835
0.907411	33.9825	37.2488		0.933337	24.0969			0.874999	25.9554			0.924527	38.9018			0.933337	28.156			0.790323	32.16			0.874999	28.0288			0.915889	23.9464
0.916667	32.8343			0.942858	24.3486			0.883925	25.9867			0.933958	37.1325			0.942858	28.3033			0.798385	31.866			0.883925	27.67			0.925232	20.0635
0.925932	32.2393			0.952387	23.4617	24.8609		0.892858	25.8661			0.943397	34.851			0.952387	28.1293	28.2513		0.806454	30.9288	31.0783		0.892858	26.4383			0.934583	19.8056
0.935188	29.3183			0.961908	20.685			0.901784	26.4608	26.3685		0.952828	31.5905	36.1357		0.961908	26.9221			0.814516	32.0599			0.901784	26.8563	27.5804		0.943926	15.9286
0.944445	28.4657			0.971429	21.1557			0.91071	26.4997			0.962259	29.2534			0.971429	26.9979			0.822578	33.7387			0.91071	25.8773			0.953269	15.6429	19.0774
0.953709	26.5113	29.8738		0.980958	16.662			0.919644	26.8955			0.971698	26.4036			0.980958	23.9801			0.830647	33.5184			0.919644	23.61			0.96262	13.9464
0.962966	25.9128			0.990479	17.0931			0.92857	27.621			0.98113	24.3328			0.990479	20.8706			0.838709	32.3248			0.92857	22.2999			0.971963	13.2738
0.972222	23.329			1	17.4571	18.6106		0.937496	25.2113			0.990561	21.0238			1	20.3984	23.8338		0.846771	34.5088			0.937496	21.7901			0.981306	12.2024
0.981487	24.1925							0.946429	24.3617			1	19.4714	24.097						0.85484	33.9178	33.3447		0.946429	20.6571			0.990657	9.98413
0.990743	21.3626							0.955355	24.1655	25.7925										0.862903	33.9892			0.955355	19.7892	22.3373		1	9.03571	11.6885
1	17.6406	22.4875						0.964281	23.4586											0.870965	34.0044			0.964281	18.1735
								0.973215	22.4861											0.879034	31.659			0.973215	16.9627
								0.982141	23.6821											0.887096	31.2329			0.982141	15.3346
								0.991067	21.5923											0.895158	29.6184			0.991067	14.4144
								1	20.1708	22.278										0.903227	30.0444	31.758		1	14.7426	15.9256
																				0.911289	29.5225
																				0.919351	28.7723
																				0.92742	27.9964
																				0.935482	25.3148
																				0.943545	23.1937
																				0.951613	22.4174	26.2029
																				0.959676	23.0877
																				0.967738	21.369
																				0.975807	20.4308
																				0.983869	17.5315
																				0.991931	15.3088
																				1	14.1763	18.6507
