# Supplementary material for: Crumbs organizes the transport machinery by regulating apical levels of PI(4,5)P2 in Drosophila
Source: eLife. 2019 Nov 7;8:e50900. doi: 10.7554/eLife.50900 (PMC6881148; doi:10.7554/eLife.50900)
Supplement: Figure 6—source data 19. [file elife-50900-fig6-data19.xlsx]

## Sheet: Sheet1
food (mg) per larvae
	control	crb KD	pten KD	pten KD + crb KD	pi3k KD	pi3k KD + crb KD
Normalized values	0.737346	0.481562	0.885735	0.770799	0.504766	0.485635
	0.464509	0.394312	0.708378	0.69317	0.388274	0.453416
	0.54743	0.47643	0.546311	0.783056	0.573933	0.496374
	0.588479	0.597231	0.694448	1.04675	0.479564	0.619552
	0.562635	0.375909	0.527742	0.452821	0.488991	0.491015
	0.506639	0.302134	0.763305	0.726464	0.466996	0.440855
	0.674626	0.527797	0.868403	0.769998	0.520413	0.362478
	0.595113	0.754578	0.6482	0.78289	0.660022	0.348419
	0.371708	0.253723	0.774543	0.581853	0.514931	0.53327
	0.782464	0.344001	0.717681	0.882283	0.292019	0.553736
