# Supplementary material for: Crumbs organizes the transport machinery by regulating apical levels of PI(4,5)P2 in Drosophila
Source: eLife. 2019 Nov 7;8:e50900. doi: 10.7554/eLife.50900 (PMC6881148; doi:10.7554/eLife.50900)
Supplement: Figure 6—source data 20. [file elife-50900-fig6-data20.xlsx]

## Sheet: For Prism
Experiment 1
	w*;; fkhGAL4/+			w*;UAS-crbRNAi/+; fkhGAL4/+			w*;; fkhGAL4/UAS-ptenRNAi			w*;UAS-crbRNAi/+; fkhGAL4/UAS-ptenRNAi			w*;; fkhGAL4/UAS-pi3kRNAi			w*;UAS-crbRNAi/+; fkhGAL4/UAS-pi3kRNAi
Time (hours after egg laying)	# of pupae found	percentage	accumulative percentage	total count of pupae	percentage	accumulative percentage	total count of pupae	percentage	accumulative percentage	total count of pupae	percentage	accumulative percentage	total count of pupae	percentage	accumulative percentage	total count of pupae	percentage	accumulative percentage
72	0	0	0	0	0	0	0	0	0	0	0	0	0	0	0	0	0	0
94	8	44.4444	44.4444	2	13.3333	13.3333	0	0	0	0	0	0	0	0	0	0	0	0
97	1	5.55556	50	6	40	53.3333	0	0	0	1	9.09091	9.09091	2	15.3846	15.3846	1	12.5	12.5
100	2	11.1111	61.1111	3	20	73.3333	5	41.6667	41.6667	2	18.1818	27.2727	0	0	15.3846	0	0	12.5
102	1	5.55556	66.6667	2	13.3333	86.6667	2	16.6667	58.3333	3	27.2727	54.5455	1	7.69231	23.0769	0	0	12.5
104	3	16.6667	83.3333	1	6.66667	93.3333	1	8.33333	66.6667	3	27.2727	81.8182	2	15.3846	38.4615	2	25	37.5
118	3	16.6667	100	1	6.66667	100	4	33.3333	100	2	18.1818	100	7	53.8462	92.3077	5	62.5	100
121	0	0	100	0	0	100	0	0	100	0	0	100	0	0	92.3077	0	0	100
124	0	0	100	0	0	100	0	0	100	0	0	100	0	0	92.3077	0	0	100
126	0	0	100	0	0	100	0	0	100	0	0	100	0	0	92.3077	0	0	100
128	0	0	100	0	0	100	0	0	100	0	0	100	0	0	92.3077	0	0	100
142	0	0	100	0	0	100	0	0	100	0	0	100	0	0	92.3077	0	0	100
145	0	0	100	0	0	100	0	0	100	0	0	100	1	7.69231	100	0	0	100
total number of animals	18			15			12			11			13			8
Experiment 2
	w*;; fkhGAL4/+			w*;UAS-crbRNAi/+; fkhGAL4/+			w*;; fkhGAL4/UAS-ptenRNAi			w*;UAS-crbRNAi/+; fkhGAL4/UAS-ptenRNAi			w*;; fkhGAL4/UAS-pi3kRNAi			w*;UAS-crbRNAi/+; fkhGAL4/UAS-pi3kRNAi
Time (hours after egg laying)	# of pupae found	percentage	accumulative percentage	total count of pupae	percentage	accumulative percentage	total count of pupae	percentage	accumulative percentage	total count of pupae	percentage	accumulative percentage	total count of pupae	percentage	accumulative percentage	total count of pupae	percentage	accumulative percentage
72	0	0	0	0	0	0	0	0	0	0	0	0	0	0	0	0	0	0
94	3	25	25	4	25	25	0	0	0	1	9.09091	9.09091	0	0	0	0	0	0
97	2	16.6667	41.6667	2	12.5	37.5	2	15.3846	15.3846	2	18.1818	27.2727	0	0	0	1	16.6667	16.6667
100	4	33.3333	75	7	43.75	81.25	1	7.69231	23.0769	2	18.1818	45.4545	0	0	0	0	0	16.6667
102	1	8.33333	83.3333	0	0	81.25	5	38.4615	61.5385	2	18.1818	63.6364	0	0	0	0	0	16.6667
104	1	8.33333	91.6667	2	12.5	93.75	1	7.69231	69.2308	2	18.1818	81.8182	0	0	0	0	0	16.6667
118	1	8.33333	100	1	6.25	100	3	23.0769	92.3077	2	18.1818	100	24	92.3077	92.3077	5	83.3333	100
121	0	0	100	0	0	100	0	0	92.3077	0	0	100	1	3.84615	96.1538	0	0	100
124	0	0	100	0	0	100	0	0	92.3077	0	0	100	1	3.84615	100	0	0	100
126	0	0	100	0	0	100	1	7.69231	100	0	0	100	0	0	100	0	0	100
128	0	0	100	0	0	100	0	0	100	0	0	100	0	0	100	0	0	100
142	0	0	100	0	0	100	0	0	100	0	0	100	0	0	100	0	0	100
145	0	0	100	0	0	100	0	0	100	0	0	100	0	0	100	0	0	100
total number of animals	12			16			13			11			26			6
Experiment 3
	w*;; fkhGAL4/+			w*;UAS-crbRNAi/+; fkhGAL4/+			w*;; fkhGAL4/UAS-ptenRNAi			w*;UAS-crbRNAi/+; fkhGAL4/UAS-ptenRNAi			w*;; fkhGAL4/UAS-pi3kRNAi			w*;UAS-crbRNAi/+; fkhGAL4/UAS-pi3kRNAi
Time (hours after egg laying)	# of pupae found	percentage	accumulative percentage	total count of pupae	percentage	accumulative percentage	total count of pupae	percentage	accumulative percentage	total count of pupae	percentage	accumulative percentage	total count of pupae	percentage	accumulative percentage	total count of pupae	percentage	accumulative percentage
72	0	0	0	0	0	0	0	0	0	0	0	0	0	0	0	0	0	0
94	9	56.25	56.25	11	68.75	68.75	5	45.4545	45.4545	5	50	50	5	45.4545	45.4545	0	0	0
97	3	18.75	75	4	25	93.75	2	18.1818	63.6364	3	30	80	0	0	45.4545	0	0	0
100	2	12.5	87.5	0	0	93.75	2	18.1818	81.8182	2	20	100	2	18.1818	63.6364	1	33.3333	33.3333
102	0	0	87.5	0	0	93.75	1	9.09091	90.9091	0	0	100	2	18.1818	81.8182	0	0	33.3333
104	0	0	87.5	0	0	93.75	0	0	90.9091	0	0	100	0	0	81.8182	0	0	33.3333
118	2	12.5	100	1	6.25	100	1	9.09091	100	0	0	100	2	18.1818	100	1	33.3333	66.6667
121	0	0	100	0	0	100	0	0	100	0	0	100	0	0	100	0	0	66.6667
124	0	0	100	0	0	100	0	0	100	0	0	100	0	0	100	0	0	66.6667
126	0	0	100	0	0	100	0	0	100	0	0	100	0	0	100	0	0	66.6667
128	0	0	100	0	0	100	0	0	100	0	0	100	0	0	100	0	0	66.6667
142	0	0	100	0	0	100	0	0	100	0	0	100	0	0	100	0	0	66.6667
145	0	0	100	0	0	100	0	0	100	0	0	100	0	0	100	1	33.3333	100
total number of animals	16			16			11			10			11			3
Experiment 4
	w*;; fkhGAL4/+			w*;UAS-crbRNAi/+; fkhGAL4/+			w*;; fkhGAL4/UAS-ptenRNAi			w*;UAS-crbRNAi/+; fkhGAL4/UAS-ptenRNAi			w*;; fkhGAL4/UAS-pi3kRNAi			w*;UAS-crbRNAi/+; fkhGAL4/UAS-pi3kRNAi
Time (hours after egg laying)	# of pupae found	percentage	accumulative percentage	total count of pupae	percentage	accumulative percentage	total count of pupae	percentage	accumulative percentage	total count of pupae	percentage	accumulative percentage	total count of pupae	percentage	accumulative percentage	total count of pupae	percentage	accumulative percentage
72	0	0	0	0	0	0	0	0	0	0	0	0	0	0	0	0	0	0
94	11	64.7059	64.7059	10	62.5	62.5	2	22.2222	22.2222	5	41.6667	41.6667	0	0	0	0	0	0
97	2	11.7647	76.4706	2	12.5	75	3	33.3333	55.5556	4	33.3333	75	2	18.1818	18.1818	0	0	0
100	2	11.7647	88.2353	2	12.5	87.5	1	11.1111	66.6667	1	8.33333	83.3333	3	27.2727	45.4545	1	25	25
102	1	5.88235	94.1176	2	12.5	100	1	11.1111	77.7778	1	8.33333	91.6667	3	27.2727	72.7273	2	50	75
104	0	0	94.1176	0	0	100	0	0	77.7778	0	0	91.6667	0	0	72.7273	0	0	75
118	1	5.88235	100	0	0	100	1	11.1111	88.8889	1	8.33333	100	3	27.2727	100	1	25	100
121	0	0	100	0	0	100	0	0	88.8889	0	0	100	0	0	100	0	0	100
124	0	0	100	0	0	100	0	0	88.8889	0	0	100	0	0	100	0	0	100
126	0	0	100	0	0	100	0	0	88.8889	0	0	100	0	0	100	0	0	100
128	0	0	100	0	0	100	0	0	88.8889	0	0	100	0	0	100	0	0	100
142	0	0	100	0	0	100	0	0	88.8889	0	0	100	0	0	100	0	0	100
145	0	0	100	0	0	100	1	11.1111	100	0	0	100	0	0	100	0	0	100
total number of animals	17			16			9			12			11			4
Experiment 5
	w*;; fkhGAL4/+			w*;UAS-crbRNAi/+; fkhGAL4/+			w*;; fkhGAL4/UAS-ptenRNAi			w*;UAS-crbRNAi/+; fkhGAL4/UAS-ptenRNAi			w*;; fkhGAL4/UAS-pi3kRNAi			w*;UAS-crbRNAi/+; fkhGAL4/UAS-pi3kRNAi
Time (hours after egg laying)	# of pupae found	percentage	accumulative percentage	total count of pupae	percentage	accumulative percentage	total count of pupae	percentage	accumulative percentage	total count of pupae	percentage	accumulative percentage	total count of pupae	percentage	accumulative percentage	total count of pupae	percentage	accumulative percentage
72	0	0	0	0	0	0	0	0	0	0	0	0	0	0	0	0	0	0
94	13	32.5	32.5	2	9.09091	9.09091	4	14.2857	14.2857	2	10	10	0	0	0	0	0	0
97	10	25	57.5	2	9.09091	18.1818	8	28.5714	42.8571	1	5	15	5	15.1515	15.1515	0	0	0
100	2	5	62.5	6	27.2727	45.4545	9	32.1429	75	8	40	55	9	27.2727	42.4242	1	2.94118	2.94118
102	4	10	72.5	10	45.4545	90.9091	4	14.2857	89.2857	4	20	75	9	27.2727	69.697	13	38.2353	41.1765
104	3	7.5	80	1	4.54545	95.4545	0	0	89.2857	0	0	75	1	3.0303	72.7273	0	0	41.1765
118	8	20	100	1	4.54545	100	3	10.7143	100	5	25	100	7	21.2121	93.9394	20	58.8235	100
121	0	0	100	0	0	100	0	0	100	0	0	100	1	3.0303	96.9697	0	0	100
124	0	0	100	0	0	100	0	0	100	0	0	100	1	3.0303	100	0	0	100
126	0	0	100	0	0	100	0	0	100	0	0	100	0	0	100	0	0	100
128	0	0	100	0	0	100	0	0	100	0	0	100	0	0	100	0	0	100
142	0	0	100	0	0	100	0	0	100	0	0	100	0	0	100	0	0	100
145	0	0	100	0	0	100	0	0	100	0	0	100	0	0	100	0	0	100
total number of animals	40			22			28			20			33			34
Experiment 6
	w*;; fkhGAL4/+			w*;UAS-crbRNAi/+; fkhGAL4/+			w*;; fkhGAL4/UAS-ptenRNAi			w*;UAS-crbRNAi/+; fkhGAL4/UAS-ptenRNAi			w*;; fkhGAL4/UAS-pi3kRNAi			w*;UAS-crbRNAi/+; fkhGAL4/UAS-pi3kRNAi
Time (hours after egg laying)	# of pupae found	percentage	accumulative percentage	total count of pupae	percentage	accumulative percentage	total count of pupae	percentage	accumulative percentage	total count of pupae	percentage	accumulative percentage	total count of pupae	percentage	accumulative percentage	total count of pupae	percentage	accumulative percentage
72	0	0	0	0	0	0	0	0	0	0	0	0	0	0	0	0	0	0
94	0	0	0	0	0	0	0	0	0	3	16.6667	16.6667	0	0	0	0	0	0
97	0	0	0	6	31.5789	31.5789	0	0	0	5	27.7778	44.4444	0	0	0	0	0	0
100	0	0	0	5	26.3158	57.8947	0	0	0	2	11.1111	55.5556	2	18.1818	18.1818	0	0	0
102	0	0	0	0	0	57.8947	0	0	0	1	5.55556	61.1111	3	27.2727	45.4545	0	0	0
104	0	0	0	1	5.26316	63.1579	0	0	0	1	5.55556	66.6667	5	45.4545	90.9091	0	0	0
118	18	69.2308	69.2308	7	36.8421	100	6	75	75	4	22.2222	88.8889	1	9.09091	100	0	0	0
121	1	3.84615	73.0769	0	0	100	0	0	75	0	0	88.8889	0	0	100	0	0	0
124	2	7.69231	80.7692	0	0	100	0	0	75	0	0	88.8889	0	0	100	0	0	0
126	2	7.69231	88.4615	0	0	100	1	12.5	87.5	1	5.55556	94.4444	0	0	100	0	0	0
128	2	7.69231	96.1538	0	0	100	1	12.5	100	0	0	94.4444	0	0	100	1	33.3333	33.3333
142	1	3.84615	100	0	0	100	0	0	100	1	5.55556	100	0	0	100	2	66.6667	100
145	0	0	100	0	0	100	0	0	100	0	0	100	0	0	100	0	0	100
total number of animals	26			19			8			18			11			3
